# Supplementary material for: Role of Lamin A/C as Candidate Biomarker of Aggressiveness and Tumorigenicity in Glioblastoma Multiforme
Source: MDPI journal article supplement (doi:10.3390/biomedicines9101343), 2021-09-28
Supplement: s1 [file s1]

**Table S3. Gene set enrichment analysis of the core molecular Reactome pathways related to the expression of LMNA in GBM patients from TCGA RNASeq data.**

| NAME                                                                                                      | GS<br> follow link to MSigDB                                                                              | SIZE | ES         | NES        | NOM p-val | FDR q-val   | FWER p-val | RANK AT MAX | LEADING EDGE                     |
|-----------------------------------------------------------------------------------------------------------|-----------------------------------------------------------------------------------------------------------|------|------------|------------|-----------|-------------|------------|-------------|----------------------------------|
| REACTOME_RUNX3 REGULATES RUNX1-MEDIATED                                                                   | REACTOME_RUNX3 REGULATES RUNX1-MEDIATED TRANSCRIPTION                                                     | 3    | 0.9241453  | 0.9241453  | 0         | 0.051445175 | 0.038      | 3716        | tags=100%, list=8%, signal=108%  |
| REACTOME_LOCALIZATION OF THE PINCH-ILK-PARVIN COMPLEX TO FOCAL ADHESIONS                                  | REACTOME_LOCALIZATION OF THE PINCH-ILK-PARVIN COMPLEX TO FOCAL ADHESIONS                                  | 4    | 0.9207737  | 0.9207737  | 0         | 0.02892474  | 0.043      | 3882        | tags=100%, list=8%, signal=109%  |
| REACTOME_LACTOSE                                                                                          | REACTOME_LACTOSE SYNTHESIS                                                                                | 3    | 0.8843185  | 0.8843185  | 9.88E-04  | 0.0647311   | 0.1425     | 5666        | tags=100%, list=12%, signal=113% |
| REACTOME_NEUROPHILIN INTERACTIONS WITH VEGF AND VEGFR                                                     | REACTOME_NEUROPHILIN INTERACTIONS WITH VEGF AND VEGFR                                                     | 4    | 0.86562777 | 0.86562777 | 9.77E-04  | 0.07358983  | 0.2075     | 6582        | tags=100%, list=13%, signal=116% |
| REACTOME_INTERCONVERSION OF POLYAMINES                                                                    | REACTOME_INTERCONVERSION OF POLYAMINES                                                                    | 3    | 0.84733063 | 0.84733063 | 0.0071795 | 0.08763774  | 0.2865     | 7477        | tags=100%, list=15%, signal=118% |
| REACTOME_LYSOSOMAL OLIGOSACCHARIDE CATABOLISM                                                             | REACTOME_LYSOSOMAL OLIGOSACCHARIDE CATABOLISM                                                             | 4    | 0.8390147  | 0.8390147  | 0.0029851 | 0.08392301  | 0.3245     | 7885        | tags=100%, list=16%, signal=119% |
| REACTOME_MET ACTIVATES                                                                                    | REACTOME_MET ACTIVATES STAT3                                                                              | 3    | 0.8215555  | 0.8215555  | 0.0077369 | 0.1000432   | 0.4235     | 8739        | tags=100%, list=18%, signal=122% |
| REACTOME_PTK6 ACTIVATES                                                                                   | REACTOME_PTK6 ACTIVATES STAT3                                                                             | 4    | 0.80690753 | 0.80690753 | 9.93E-04  | 0.11036967  | 0.507      | 9457        | tags=100%, list=19%, signal=124% |
| REACTOME_PTK6 DOWN-REGULATION                                                                             | REACTOME_PTK6 DOWN-REGULATION                                                                             | 3    | 0.8068911  | 0.8068911  | 0.0101317 | 0.09810638  | 0.5075     | 9457        | tags=100%, list=19%, signal=124% |
| REACTOME_CASP8 ACTIVITY IS INHIBITED                                                                      | REACTOME_CASP8 ACTIVITY IS INHIBITED                                                                      | 11   | 0.7955558  | 0.7955558  | 0         | 0.106128596 | 0.5765     | 5567        | tags=91%, list=11%, signal=103%  |
| REACTOME_DIMERIZATION OF PROCASPASE-8                                                                     | REACTOME_DIMERIZATION OF PROCASPASE-8                                                                     | 11   | 0.7955558  | 0.7955558  | 0         | 0.09648054  | 0.5765     | 5567        | tags=91%, list=11%, signal=103%  |
| REACTOME_REGULATION BY C-FLIP                                                                             | REACTOME_REGULATION BY C-FLIP                                                                             | 11   | 0.7955558  | 0.7955558  | 0         | 0.0884405   | 0.5765     | 5567        | tags=91%, list=11%, signal=103%  |
| REACTOME_CROSSLINKING OF COLLAGEN FIBRILS                                                                 | REACTOME_CROSSLINKING OF COLLAGEN FIBRILS                                                                 | 10   | 0.77763253 | 0.77763253 | 0         | 0.10739531  | 0.679      | 1102        | tags=80%, list=2%, signal=82%    |
| REACTOME_RUNX3 REGULATES CDKN1A TRANSCRIPTION                                                             | REACTOME_RUNX3 REGULATES CDKN1A TRANSCRIPTION                                                             | 7    | 0.7736836  | 0.7736836  | 0         | 0.10527642  | 0.697      | 4091        | tags=86%, list=8%, signal=94%    |
| REACTOME_LAMININ                                                                                          | REACTOME_LAMININ INTERACTIONS                                                                             | 23   | 0.7646043  | 0.7646043  | 0         | 0.11314367  | 0.7425     | 5156        | tags=87%, list=11%, signal=97%   |
| REACTOME_ANTAGONISM OF ACTIVIN BY FOLLISTATIN                                                             | REACTOME_ANTAGONISM OF ACTIVIN BY FOLLISTATIN                                                             | 4    | 0.74794227 | 0.74794227 | 0.0059821 | 0.13218437  | 0.818      | 12344       | tags=100%, list=25%, signal=134% |
| REACTOME_INVADOPODIA FORMATION                                                                            | REACTOME_INVADOPODIA FORMATION                                                                            | 4    | 0.7467372  | 0.7467372  | 0.0069307 | 0.12705012  | 0.8245     | 12403       | tags=100%, list=25%, signal=134% |
| REACTOME_PLCG1 EVENTS IN ERBB2 SIGNALING                                                                  | REACTOME_PLCG1 EVENTS IN ERBB2 SIGNALING                                                                  | 4    | 0.7436531  | 0.7436531  | 0.0060484 | 0.124367744 | 0.836      | 12554       | tags=100%, list=26%, signal=134% |
| REACTOME_REGULATION OF CYTOSKELETAL REMODELING AND CELL SPREADING BY IPP COMPLEX COMPONENTS               | REACTOME_REGULATION OF CYTOSKELETAL REMODELING AND CELL SPREADING BY IPP COMPLEX COMPONENTS               | 8    | 0.73836225 | 0.73836225 | 0.001006  | 0.12615298  | 0.85       | 12816       | tags=100%, list=26%, signal=135% |
| REACTOME_CELL-EXTRACELLULAR MATRIX INTERACTIONS                                                           | REACTOME_CELL-EXTRACELLULAR MATRIX INTERACTIONS                                                           | 16   | 0.73343813 | 0.73343813 | 0         | 0.12777638  | 0.8645     | 3882        | tags=81%, list=8%, signal=88%    |
| REACTOME_DEFECTIVE LFNG CAUSES SCDO3                                                                      | REACTOME_DEFECTIVE LFNG CAUSES SCDO3                                                                      | 4    | 0.73131675 | 0.73131675 | 0.0130916 | 0.12502472  | 0.873      | 13158       | tags=100%, list=27%, signal=137% |
| REACTOME_FORMATION OF THE ACTIVE COFACTOR, UDP-GLUCURONATE                                                | REACTOME_FORMATION OF THE ACTIVE COFACTOR, UDP-GLUCURONATE                                                | 3    | 0.7302398  | 0.7302398  | 0.0346275 | 0.120628394 | 0.8755     | 13210       | tags=100%, list=27%, signal=137% |
| REACTOME_IKBKG DEFICIENCY CAUSES ANHIDROTIC ECTODERMAL DYSPLASIA WITH IMMUNODEFICIENCY (EDA-ID) (VIA TLR) | REACTOME_IKBKG DEFICIENCY CAUSES ANHIDROTIC ECTODERMAL DYSPLASIA WITH IMMUNODEFICIENCY (EDA-ID) (VIA TLR) | 8    | 0.7179438  | 0.7179438  | 0         | 0.13657485  | 0.915      | 7695        | tags=88%, list=16%, signal=104%  |

|                                                                                              |                                                                                              |    |            |            |           |            |        |                                        |
|----------------------------------------------------------------------------------------------|----------------------------------------------------------------------------------------------|----|------------|------------|-----------|------------|--------|----------------------------------------|
| REACTOME_ANTIGEN PRESENTATION: FOLDING, ASSEMBLY AND PEPTIDE LOADING OF CLASS I MHC          | REACTOME_ANTIGEN PRESENTATION: FOLDING, ASSEMBLY AND PEPTIDE LOADING OF CLASS I MHC          | 25 | 0.7178913  | 0.7178913  | 0         | 0.13088423 | 0.915  | 5996 tags=84%, list=12%, signal=96%    |
| REACTOME_STAT6-MEDIATED INDUCTION OF CHEMOKINES                                              | REACTOME_STAT6-MEDIATED INDUCTION OF CHEMOKINES                                              | 3  | 0.715943   | 0.715943   | 0.0528893 | 0.12870412 | 0.9195 | 13910 tags=100%, list=28%, signal=140% |
| REACTOME_THE ACTIVATION OF ARYLSULFATASES                                                    | REACTOME_THE ACTIVATION OF ARYLSULFATASES                                                    | 13 | 0.7044138  | 0.7044138  | 0         | 0.1420604  | 0.949  | 10715 tags=92%, list=22%, signal=118%  |
| REACTOME_CONSTITUTIVE SIGNALING BY NOTCH1 T(7;9)(NOTCH1:M1580_K2555)                         | REACTOME_CONSTITUTIVE SIGNALING BY NOTCH1 T(7;9)(NOTCH1:M1580_K2555)                         | 7  | 0.70260227 | 0.70260227 | 0.0019841 | 0.13984948 | 0.953  | 7571 tags=86%, list=15%, signal=101%   |
| TRANSLOCATION MUTANT REACTOME_SIGNALING BY NOTCH1 T(7;9)(NOTCH1:M1580_K2555)                 | TRANSLOCATION MUTANT REACTOME_SIGNALING BY NOTCH1 T(7;9)(NOTCH1:M1580_K2555)                 | 7  | 0.70260227 | 0.70260227 | 0         | 0.13485484 | 0.953  | 7571 tags=86%, list=15%, signal=101%   |
| REACTOME_IRS ACTIVATION                                                                      | REACTOME_IRS ACTIVATION                                                                      | 5  | 0.70194036 | 0.70194036 | 0.0048077 | 0.13139956 | 0.9545 | 4804 tags=80%, list=10%, signal=89%    |
| REACTOME_IKBA VARIANT LEADS TO EDA-ID                                                        | REACTOME_IKBA VARIANT LEADS TO EDA-ID                                                        | 7  | 0.7000695  | 0.7000695  | 0         | 0.12995693 | 0.957  | 7695 tags=86%, list=16%, signal=102%   |
| REACTOME_OXYGEN-DEPENDENT ASPARAGINE HYDROXYLATION OF HYPOXIA-INDUCIBLE FACTOR ALPHA         | REACTOME_OXYGEN-DEPENDENT ASPARAGINE HYDROXYLATION OF HYPOXIA-INDUCIBLE FACTOR ALPHA         | 3  | 0.6993587  | 0.6993587  | 0.0549451 | 0.12683098 | 0.9585 | 14722 tags=100%, list=30%, signal=143% |
| REACTOME_AMINE OXIDASE REACTIONS                                                             | REACTOME_AMINE OXIDASE REACTIONS                                                             | 4  | 0.69797903 | 0.69797903 | 0.0107422 | 0.12487799 | 0.9635 | 2549 tags=75%, list=5%, signal=79%     |
| REACTOME_HYALURONAN BIOSYNTHESIS AND EXPORT                                                  | REACTOME_HYALURONAN BIOSYNTHESIS AND EXPORT                                                  | 5  | 0.69321895 | 0.69321895 | 0.0029383 | 0.12848996 | 0.9695 | 5231 tags=80%, list=11%, signal=90%    |
| REACTOME_MET ACTIVATES PTK2 SIGNALING                                                        | REACTOME_MET ACTIVATES PTK2 SIGNALING                                                        | 18 | 0.6924201  | 0.6924201  | 0         | 0.12614985 | 0.97   | 4191 tags=78%, list=9%, signal=85%     |
| REACTOME_NOSTRIN MEDIATED ENOS TRAFFICKING                                                   | REACTOME_NOSTRIN MEDIATED ENOS TRAFFICKING                                                   | 5  | 0.68703026 | 0.68703026 | 0.0047893 | 0.1307439  | 0.977  | 5534 tags=80%, list=11%, signal=90%    |
| REACTOME_FASL/ CD95L                                                                         | REACTOME_FASL/ CD95L SIGNALING                                                               | 5  | 0.68635625 | 0.68635625 | 0.0121827 | 0.12802182 | 0.977  | 5567 tags=80%, list=11%, signal=90%    |
| REACTOME_RUNX1 REGULATES TRANSCRIPTION OF GENES INVOLVED IN DIFFERENTIATION OF MYELOID CELLS | REACTOME_RUNX1 REGULATES TRANSCRIPTION OF GENES INVOLVED IN DIFFERENTIATION OF MYELOID CELLS | 7  | 0.6803587  | 0.6803587  | 0         | 0.1328533  | 0.983  | 8660 tags=86%, list=18%, signal=104%   |
| REACTOME_ADENOSINE P1 RECEPTORS                                                              | REACTOME_ADENOSINE P1 RECEPTORS                                                              | 3  | 0.6795066  | 0.6795066  | 0.049904  | 0.1306613  | 0.983  | 15694 tags=100%, list=32%, signal=147% |
| REACTOME_TRAIL SIGNALING                                                                     | REACTOME_TRAIL SIGNALING                                                                     | 7  | 0.67476207 | 0.67476207 | 0.0019802 | 0.13421275 | 0.986  | 1939 tags=71%, list=4%, signal=74%     |
| REACTOME_REGULATION OF NECROPTOTIC CELL DEATH                                                | REACTOME_REGULATION OF NECROPTOTIC CELL DEATH                                                | 14 | 0.67219263 | 0.67219263 | 0         | 0.13481751 | 0.987  | 5567 tags=79%, list=11%, signal=89%    |
| REACTOME_CLEC7A/INFLAMMASOME PATHWAY                                                         | REACTOME_CLEC7A/INFLAMMASOME PATHWAY                                                         | 6  | 0.6712964  | 0.6712964  | 0.0059055 | 0.13298735 | 0.9875 | 16098 tags=100%, list=33%, signal=149% |
| REACTOME_ACTIVATION OF REACTOME_BINDING AND ENTRY OF HIV VIRION                              | REACTOME_ACTIVATION OF AKT2 REACTOME_BINDING AND ENTRY OF HIV VIRION                         | 4  | 0.65484774 | 0.65484774 | 0.0451354 | 0.15667795 | 0.9935 | 16902 tags=100%, list=35%, signal=153% |
| REACTOME_METAL SEQUESTRATION BY                                                              | REACTOME_BINDING AND ENTRY OF HIV VIRION                                                     | 4  | 0.6531525  | 0.6531525  | 0.0403226 | 0.15615384 | 0.994  | 16985 tags=100%, list=35%, signal=153% |
| REACTOME_LIGAND-DEPENDENT CASPASE ACTIVATION                                                 | REACTOME_METAL SEQUESTRATION BY ANTIMICROBIAL PROTEINS                                       | 6  | 0.6523418  | 0.6523418  | 0.0020492 | 0.15409464 | 0.994  | 17026 tags=100%, list=35%, signal=153% |
| REACTOME_CHL1                                                                                | REACTOME_LIGAND-DEPENDENT CASPASE ACTIVATION                                                 | 17 | 0.6512181  | 0.6512181  | 0         | 0.15266374 | 0.996  | 5567 tags=76%, list=11%, signal=86%    |
| REACTOME_HDL ASSEMBLY                                                                        | REACTOME_CHL1 INTERACTIONS                                                                   | 9  | 0.6474771  | 0.6474771  | 0         | 0.15614267 | 0.9965 | 6385 tags=78%, list=13%, signal=89%    |
| REACTOME_RUNX1 AND FOXP3 CONTROL THE DEVELOPMENT OF REGULATORY T LYMPHOCYTES (TREGS)         | REACTOME_HDL ASSEMBLY                                                                        | 8  | 0.64580655 | 0.64580655 | 9.90E-04  | 0.15592112 | 0.9965 | 5106 tags=75%, list=10%, signal=84%    |
|                                                                                              | REACTOME_RUNX1 AND FOXP3 CONTROL THE DEVELOPMENT OF REGULATORY T LYMPHOCYTES (TREGS)         | 10 | 0.64033294 | 0.64033294 | 0         | 0.16375242 | 0.997  | 12720 tags=90%, list=26%, signal=122%  |

|                                                                                         |                                                                                         |    |            |            |           |            |        |                                        |
|-----------------------------------------------------------------------------------------|-----------------------------------------------------------------------------------------|----|------------|------------|-----------|------------|--------|----------------------------------------|
| REACTOME_TRAF3 DEFICIENCY - HSE                                                         | REACTOME_TRAF3 DEFICIENCY - HSE                                                         | 3  | 0.63974786 | 0.63974786 | 0.0913605 | 0.16140738 | 0.997  | 1319 tags=67%, list=3%, signal=69%     |
| REACTOME_SODIUM-COUPLED PHOSPHATE COTRANSPORTERS                                        | REACTOME_SODIUM-COUPLED PHOSPHATE COTRANSPORTERS                                        | 5  | 0.63713235 | 0.63713235 | 0.0238342 | 0.1635468  | 0.9975 | 7977 tags=80%, list=16%, signal=96%    |
| REACTOME_PYRIMIDINE BIOSYNTHESIS                                                        | REACTOME_PYRIMIDINE BIOSYNTHESIS                                                        | 3  | 0.6349414  | 0.6349414  | 0.0907217 | 0.16457468 | 0.9985 | 17876 tags=100%, list=37%, signal=157% |
| REACTOME_RIPK1-MEDIATED REGULATED NECROSIS                                              | REACTOME_RIPK1-MEDIATED REGULATED NECROSIS                                              | 16 | 0.63081473 | 0.63081473 | 0         | 0.16914149 | 0.999  | 5845 tags=75%, list=12%, signal=85%    |
| REACTOME_REGULATED NECROSIS                                                             | REACTOME_REGULATED NECROSIS                                                             | 16 | 0.63081473 | 0.63081473 | 0         | 0.16595013 | 0.999  | 5845 tags=75%, list=12%, signal=85%    |
| REACTOME_LOSS OF FUNCTION OF TGFB2 IN CANCER                                            | REACTOME_LOSS OF FUNCTION OF TGFB2 IN CANCER                                            | 4  | 0.6308031  | 0.6308031  | 0.0448654 | 0.16290064 | 0.999  | 5838 tags=75%, list=12%, signal=85%    |
| REACTOME_TGFB1 LBD MUTANTS IN CANCER                                                    | REACTOME_TGFB1 LBD MUTANTS IN CANCER                                                    | 4  | 0.6308031  | 0.6308031  | 0.0469208 | 0.1599388  | 0.999  | 5838 tags=75%, list=12%, signal=85%    |
| REACTOME_TGFB2 KINASE DOMAIN MUTANTS IN CANCER                                          | REACTOME_TGFB2 KINASE DOMAIN MUTANTS IN CANCER                                          | 4  | 0.6308031  | 0.6308031  | 0.0398366 | 0.15708275 | 0.999  | 5838 tags=75%, list=12%, signal=85%    |
| REACTOME_ALTERNATIVE COMPLEMENT ACTIVATION                                              | REACTOME_ALTERNATIVE COMPLEMENT ACTIVATION                                              | 4  | 0.6290926  | 0.6290926  | 0.0443996 | 0.15764348 | 0.999  | 18163 tags=100%, list=37%, signal=159% |
| REACTOME_ANCHORING FIBRIL FORMATION                                                     | REACTOME_ANCHORING FIBRIL FORMATION                                                     | 7  | 0.62876344 | 0.62876344 | 0.004065  | 0.15565756 | 0.999  | 4191 tags=71%, list=9%, signal=78%     |
| REACTOME_TYPE II NA+/PI COTRANSPORTERS                                                  | REACTOME_TYPE II NA+/PI COTRANSPORTERS                                                  | 3  | 0.6280381  | 0.6280381  | 0.123108  | 0.15419634 | 1      | 18214 tags=100%, list=37%, signal=159% |
| REACTOME_ENDOSOMAL/VACUOLAR PATHWAY                                                     | REACTOME_ENDOSOMAL/VACUOLAR PATHWAY                                                     | 12 | 0.62767863 | 0.62767863 | 0         | 0.15198812 | 1      | 5996 tags=75%, list=12%, signal=85%    |
| REACTOME_SYNTHESIS OF PI                                                                | REACTOME_SYNTHESIS OF PI                                                                | 5  | 0.6264502  | 0.6264502  | 0.0172589 | 0.15180609 | 1      | 8500 tags=80%, list=17%, signal=97%    |
| REACTOME_TNFR1-INDUCED PROAPOPTOTIC SIGNALING                                           | REACTOME_TNFR1-INDUCED PROAPOPTOTIC SIGNALING                                           | 13 | 0.624538   | 0.624538   | 0         | 0.15284513 | 1      | 7092 tags=77%, list=14%, signal=90%    |
| REACTOME_MET INTERACTS WITH TNS PROTEINS                                                | REACTOME_MET INTERACTS WITH TNS PROTEINS                                                | 5  | 0.6215686  | 0.6215686  | 0.0184426 | 0.15609622 | 1      | 8739 tags=80%, list=18%, signal=97%    |
| REACTOME_ARL13B-MEDIATED CILIARY TRAFFICKING OF INPP5E                                  | REACTOME_ARL13B-MEDIATED CILIARY TRAFFICKING OF INPP5E                                  | 3  | 0.6188541  | 0.6188541  | 0.1215686 | 0.15885086 | 1      | 2342 tags=67%, list=5%, signal=70%     |
| REACTOME_NR1D1 (REV-ERBA) REPRESSES GENE EXPRESSION                                     | REACTOME_NR1D1 (REV-ERBA) REPRESSES GENE EXPRESSION                                     | 8  | 0.6187675  | 0.6187675  | 0         | 0.15658432 | 1      | 18671 tags=100%, list=38%, signal=162% |
| REACTOME_HHAT G278V ABROGATES PALMITOYLATION OF HH-NP                                   | REACTOME_HHAT G278V ABROGATES PALMITOYLATION OF HH-NP                                   | 3  | 0.61873156 | 0.61873156 | 0.1261445 | 0.15427974 | 1      | 2348 tags=67%, list=5%, signal=70%     |
| REACTOME_PTK6 EXPRESSION                                                                | REACTOME_PTK6 EXPRESSION                                                                | 5  | 0.6069036  | 0.6069036  | 0.031     | 0.1740238  | 1      | 9457 tags=80%, list=19%, signal=99%    |
| REACTOME_DEFECTIVE MISMATCH REPAIR ASSOCIATED                                           | REACTOME_DEFECTIVE MISMATCH REPAIR ASSOCIATED WITH MSH2                                 | 3  | 0.5979331  | 0.5979331  | 0.1539225 | 0.1910249  | 1      | 19688 tags=100%, list=40%, signal=167% |
| REACTOME_SIGNALING BY NOTCH3                                                            | REACTOME_SIGNALING BY NOTCH3                                                            | 11 | 0.59792686 | 0.59792686 | 0         | 0.18826577 | 1      | 6339 tags=73%, list=13%, signal=84%    |
| REACTOME_RUNX1 REGULATES TRANSCRIPTION OF GENES INVOLVED IN WNT SIGNALING               | REACTOME_RUNX1 REGULATES TRANSCRIPTION OF GENES INVOLVED IN WNT SIGNALING               | 6  | 0.5890507  | 0.5890507  | 0.0204082 | 0.20564455 | 1      | 3803 tags=67%, list=8%, signal=72%     |
| REACTOME_CASPASE-MEDIATED CLEAVAGE OF CYTOSKELETAL PROTEINS                             | REACTOME_CASPASE-MEDIATED CLEAVAGE OF CYTOSKELETAL PROTEINS                             | 12 | 0.58889824 | 0.58889824 | 0         | 0.2031457  | 1      | 3814 tags=67%, list=8%, signal=72%     |
| REACTOME_TNF RECEPTOR SUPERFAMILY (TNFSF) MEMBERS MEDIATING NON-CANONICAL NF-KB PATHWAY | REACTOME_TNF RECEPTOR SUPERFAMILY (TNFSF) MEMBERS MEDIATING NON-CANONICAL NF-KB PATHWAY | 17 | 0.58883977 | 0.58883977 | 0         | 0.200477   | 1      | 5740 tags=71%, list=12%, signal=80%    |
| REACTOME_ACTIVATION OF C3 AND C5                                                        | REACTOME_ACTIVATION OF C3 AND C5                                                        | 6  | 0.5861231  | 0.5861231  | 0.0172239 | 0.20382991 | 1      | 20268 tags=100%, list=41%, signal=171% |
| REACTOME_MITOCHONDRIAL ABC TRANSPORTERS                                                 | REACTOME_MITOCHONDRIAL ABC TRANSPORTERS                                                 | 4  | 0.58360225 | 0.58360225 | 0.0777454 | 0.2070922  | 1      | 8149 tags=75%, list=17%, signal=90%    |
| REACTOME_TYPE I HEMIDESMOSOME ASSEMBLY                                                  | REACTOME_TYPE I HEMIDESMOSOME ASSEMBLY                                                  | 9  | 0.5811613  | 0.5811613  | 0.0019084 | 0.21058372 | 1      | 4191 tags=67%, list=9%, signal=73%     |

|                                                                                      |                                                                                            |    |            |            |           |            |   |                                        |
|--------------------------------------------------------------------------------------|--------------------------------------------------------------------------------------------|----|------------|------------|-----------|------------|---|----------------------------------------|
| REACTOME DISSOLUTION OF FIBRIN CLOT                                                  | REACTOME DISSOLUTION OF FIBRIN CLOT                                                        | 13 | 0.5776538  | 0.5776538  | 0         | 0.21647505 | 1 | 1854 tags=62%, list=4%, signal=64%     |
| REACTOME_TRAF3-DEPENDENT IRF ACTIVATION PATHWAY                                      | REACTOME_TRAF3-DEPENDENT IRF ACTIVATION PATHWAY                                            | 14 | 0.5732059  | 0.5732059  | 0         | 0.22429603 | 1 | 13910 tags=86%, list=28%, signal=120%  |
| REACTOME_HDL CLEARANCE                                                               | REACTOME_HDL CLEARANCE                                                                     | 5  | 0.57148695 | 0.57148695 | 0.0432161 | 0.2257464  | 1 | 11191 tags=80%, list=23%, signal=104%  |
| REACTOME_SYNTHESIS OF GDP-MANNOSE                                                    | REACTOME_SYNTHESIS OF GDP-MANNOSE                                                          | 5  | 0.5700163  | 0.5700163  | 0.0406674 | 0.22646251 | 1 | 11263 tags=80%, list=23%, signal=104%  |
| REACTOME_PRE-NOTCH PROCESSING IN THE ENDOPLASMIC RETICULUM                           | REACTOME_PRE-NOTCH PROCESSING IN THE ENDOPLASMIC RETICULUM                                 | 6  | 0.5646596  | 0.5646596  | 0.0179641 | 0.23712938 | 1 | 13158 tags=83%, list=27%, signal=114%  |
| REACTOME_GLI PROTEINS BIND PROMOTERS OF HH RESPONSIVE GENES TO PROMOTE TRANSCRIPTION | REACTOME_GLI PROTEINS BIND PROMOTERS OF HH RESPONSIVE GENES TO PROMOTE TRANSCRIPTION       | 7  | 0.56160384 | 0.56160384 | 0.0114504 | 0.242047   | 1 | 7479 tags=71%, list=15%, signal=84%    |
| REACTOME_NEF MEDIATED DOWNREGULATION OF MHC CLASS I COMPLEX CELL SURFACE EXPRESSION  | REACTOME_NEF MEDIATED DOWNREGULATION OF MHC CLASS I COMPLEX CELL SURFACE EXPRESSION        | 10 | 0.55749154 | 0.55749154 | 0.005     | 0.24987137 | 1 | 21672 tags=100%, list=44%, signal=179% |
| REACTOME_METABOLISM OF VITAMIN K                                                     | REACTOME_METABOLISM OF VITAMIN K                                                           | 3  | 0.5545389  | 0.5545389  | 0.2009756 | 0.2545208  | 1 | 5491 tags=67%, list=11%, signal=75%    |
| REACTOME_GALACTOSE CATABOLISM                                                        | REACTOME_GALACTOSE CATABOLISM                                                              | 6  | 0.55103934 | 0.55103934 | 0.0288557 | 0.26059273 | 1 | 5664 tags=67%, list=12%, signal=75%    |
| REACTOME_LRR FLII-INTERACTING PROTEIN 1 (LRRFIP1) ACTIVATES TYPE I IFN               | REACTOME_LRR FLII-INTERACTING PROTEIN 1 (LRRFIP1) ACTIVATES TYPE I IFN PRODUCTION          | 5  | 0.55085784 | 0.55085784 | 0.0669331 | 0.25799718 | 1 | 12201 tags=80%, list=25%, signal=107%  |
| REACTOME_PLATELET ADHESION TO EXPOSED                                                | REACTOME_PLATELET ADHESION TO EXPOSED COLLAGEN                                             | 12 | 0.55040044 | 0.55040044 | 0         | 0.25621033 | 1 | 9779 tags=75%, list=20%, signal=94%    |
| REACTOME_HS-GAG                                                                      | REACTOME_HS-GAG DEGRADATION                                                                | 21 | 0.5494715  | 0.5494715  | 0         | 0.25570154 | 1 | 5749 tags=67%, list=12%, signal=76%    |
| REACTOME_CHOLESTEROL BIOSYNTHESIS VIA                                                | REACTOME_CHOLESTEROL BIOSYNTHESIS VIA DESMOSTEROL                                          | 4  | 0.5477574  | 0.5477574  | 0.1232742 | 0.25694463 | 1 | 9904 tags=75%, list=20%, signal=94%    |
| REACTOME_CHOLESTEROL BIOSYNTHESIS VIA                                                | REACTOME_CHOLESTEROL BIOSYNTHESIS VIA LATHOSTEROL                                          | 4  | 0.5477574  | 0.5477574  | 0.1436059 | 0.25405762 | 1 | 9904 tags=75%, list=20%, signal=94%    |
| REACTOME_INSULIN-LIKE GROWTH FACTOR-2 MRNA BINDING PROTEINS                          | REACTOME_INSULIN-LIKE GROWTH FACTOR-2 MRNA BINDING PROTEINS (IGF2BPS/IMPS/VICKZS) BIND RNA | 8  | 0.5475366  | 0.5475366  | 0.0091185 | 0.25185776 | 1 | 9917 tags=75%, list=20%, signal=94%    |
| REACTOME_VEGF BINDS TO VEGFR LEADING TO RECEPTOR DIMERIZATION                        | REACTOME_VEGF BINDS TO VEGFR LEADING TO RECEPTOR DIMERIZATION                              | 8  | 0.5467936  | 0.5467936  | 0.014     | 0.2509417  | 1 | 16074 tags=88%, list=33%, signal=130%  |
| REACTOME_VEGF LIGAND-RECEPTOR INTERACTIONS                                           | REACTOME_VEGF LIGAND-RECEPTOR INTERACTIONS                                                 | 8  | 0.5467936  | 0.5467936  | 0.007913  | 0.24821408 | 1 | 16074 tags=88%, list=33%, signal=130%  |
| REACTOME_SEMA3A-PLEXIN REPULSION SIGNALING BY INHIBITING INTEGRIN ADHESION           | REACTOME_SEMA3A-PLEXIN REPULSION SIGNALING BY INHIBITING INTEGRIN ADHESION                 | 14 | 0.5464138  | 0.5464138  | 0         | 0.2464687  | 1 | 4729 tags=64%, list=10%, signal=71%    |
| REACTOME_CROSS-PRESENTATION OF PARTICULATE EXOGENOUS                                 | REACTOME_CROSS-PRESENTATION OF PARTICULATE EXOGENOUS ANTIGENS (PHAGOSOMES)                 | 8  | 0.54639786 | 0.54639786 | 0.0151057 | 0.24391584 | 1 | 22214 tags=100%, list=45%, signal=183% |
| REACTOME_SYNTHESIS OF UDP-N-ACETYL-GLUCOSAMINE                                       | REACTOME_SYNTHESIS OF UDP-N-ACETYL-GLUCOSAMINE                                             | 8  | 0.54611444 | 0.54611444 | 0.0039254 | 0.2419243  | 1 | 3866 tags=63%, list=8%, signal=68%     |
| REACTOME_NEGATIVE REGULATION OF TCF-DEPENDENT SIGNALING BY DVL-                      | REACTOME_NEGATIVE REGULATION OF TCF-DEPENDENT SIGNALING BY DVL-INTERACTING PROTEINS        | 5  | 0.54405636 | 0.54405636 | 0.0705522 | 0.24472003 | 1 | 12534 tags=80%, list=26%, signal=108%  |
| REACTOME_FIBRONECTIN MATRIX FORMATION                                                | REACTOME_FIBRONECTIN MATRIX FORMATION                                                      | 6  | 0.5421918  | 0.5421918  | 0.0223124 | 0.24713701 | 1 | 14258 tags=83%, list=29%, signal=118%  |
| REACTOME_PLC-MEDIATED HYDROLYSIS OF PIP2                                             | REACTOME_PLC-MEDIATED HYDROLYSIS OF PIP2                                                   | 4  | 0.5387758  | 0.5387758  | 0.1233831 | 0.25350112 | 1 | 22585 tags=100%, list=46%, signal=186% |

|                                                                                    |                                                                                    |    |            |            |           |            |   |                                        |
|------------------------------------------------------------------------------------|------------------------------------------------------------------------------------|----|------------|------------|-----------|------------|---|----------------------------------------|
| REACTOME_FORMATION OF ANNULAR GAP JUNCTIONS                                        | REACTOME_FORMATION OF ANNULAR GAP JUNCTIONS                                        | 9  | 0.53672457 | 0.53672457 | 0.0050505 | 0.25611737 | 1 | 11807 tags=78%, list=24%, signal=102%  |
| REACTOME_METALLOTHIONEINS BIND METALS                                              | REACTOME_METALLOTHIONEINS BIND METALS                                              | 11 | 0.5354062  | 0.5354062  | 0.001001  | 0.2569884  | 1 | 13851 tags=82%, list=28%, signal=114%  |
| REACTOME_DEFECTIVE AVP CAUSES NEUROHYPOPHYSEAL DIABETES INSIPIDUS (NDI)            | REACTOME_DEFECTIVE AVP CAUSES NEUROHYPOPHYSEAL DIABETES INSIPIDUS (NDI)            | 4  | 0.53348076 | 0.53348076 | 0.1166501 | 0.25966275 | 1 | 10603 tags=75%, list=22%, signal=96%   |
| REACTOME_CONDENSATION OF PROMETAPHASE                                              | REACTOME_CONDENSATION OF PROMETAPHASE CHROMOSOMES                                  | 11 | 0.5330515  | 0.5330515  | 0.002994  | 0.25841528 | 1 | 22869 tags=100%, list=47%, signal=188% |
| REACTOME_INTERLEUKIN-15 SIGNALING                                                  | REACTOME_INTERLEUKIN-15 SIGNALING                                                  | 6  | 0.5321868  | 0.5321868  | 0.0308642 | 0.25833377 | 1 | 6587 tags=67%, list=13%, signal=77%    |
| REACTOME_COLLAGEN                                                                  | REACTOME_COLLAGEN FORMATION                                                        | 90 | 0.53166467 | 0.53166467 | 0         | 0.25711486 | 1 | 4481 tags=62%, list=9%, signal=68%     |
| REACTOME_TP53 REGULATES TRANSCRIPTION OF DEATH RECEPTORS AND LIGANDS               | REACTOME_TP53 REGULATES TRANSCRIPTION OF DEATH RECEPTORS AND LIGANDS               | 12 | 0.5314809  | 0.5314809  | 0.0020182 | 0.25517616 | 1 | 18866 tags=92%, list=39%, signal=149%  |
| REACTOME_COLLAGEN BIOSYNTHESIS AND MODIFYING ENZYMES                               | REACTOME_COLLAGEN BIOSYNTHESIS AND MODIFYING ENZYMES                               | 67 | 0.5308604  | 0.5308604  | 0         | 0.25447845 | 1 | 2543 tags=58%, list=5%, signal=61%     |
| REACTOME_SCAVENGING BY CLASS F RECEPTORS                                           | REACTOME_SCAVENGING BY CLASS F RECEPTORS                                           | 6  | 0.5283026  | 0.5283026  | 0.0575968 | 0.25876683 | 1 | 14938 tags=83%, list=31%, signal=120%  |
| REACTOME_SYNDECAN INTERACTIONS                                                     | REACTOME_SYNDECAN INTERACTIONS                                                     | 20 | 0.5274083  | 0.5274083  | 0         | 0.2586908  | 1 | 13357 tags=80%, list=27%, signal=110%  |
| REACTOME_FGFR1C AND KLOTHO LIGAND BINDING AND                                      | REACTOME_FGFR1C AND KLOTHO LIGAND BINDING AND ACTIVATION                           | 3  | 0.52694607 | 0.52694607 | 0.2763819 | 0.25742516 | 1 | 6842 tags=67%, list=14%, signal=77%    |
| REACTOME_ELASTIC FIBRE FORMATION                                                   | REACTOME_ELASTIC FIBRE FORMATION                                                   | 41 | 0.5242985  | 0.5242985  | 0         | 0.26189452 | 1 | 8982 tags=71%, list=18%, signal=87%    |
| REACTOME_HYALURONAN METABOLISM                                                     | REACTOME_HYALURONAN METABOLISM                                                     | 17 | 0.5231783  | 0.5231783  | 0         | 0.26245642 | 1 | 8954 tags=71%, list=18%, signal=86%    |
| REACTOME_TERMINAL PATHWAY OF COMPLEMENT                                            | REACTOME_TERMINAL PATHWAY OF COMPLEMENT                                            | 8  | 0.5227113  | 0.5227113  | 0.0132248 | 0.26135218 | 1 | 17253 tags=88%, list=35%, signal=135%  |
| REACTOME_NF-KB ACTIVATION THROUGH FADD/RIP-1 PATHWAY MEDIATED BY CASPASE-8 AND -10 | REACTOME_NF-KB ACTIVATION THROUGH FADD/RIP-1 PATHWAY MEDIATED BY CASPASE-8 AND -10 | 12 | 0.52174366 | 0.52174366 | 0         | 0.26158696 | 1 | 3021 tags=58%, list=6%, signal=62%     |
| REACTOME_COLLAGEN DEGRADATION                                                      | REACTOME_COLLAGEN DEGRADATION                                                      | 40 | 0.52101433 | 0.52101433 | 0         | 0.2612079  | 1 | 10008 tags=73%, list=20%, signal=91%   |
| REACTOME_SYNTHESIS OF LIPOXINS (LX)                                                | REACTOME_SYNTHESIS OF LIPOXINS (LX)                                                | 6  | 0.5184985  | 0.5184985  | 0.0504032 | 0.26547706 | 1 | 15418 tags=83%, list=31%, signal=122%  |
| REACTOME_TRIF-MEDIATED PROGRAMMED CELL DEATH                                       | REACTOME_TRIF-MEDIATED PROGRAMMED CELL DEATH                                       | 10 | 0.517414   | 0.517414   | 0.0042328 | 0.26614916 | 1 | 4048 tags=60%, list=8%, signal=65%     |
| REACTOME_ASSEMBLY OF COLLAGEN FIBRILS AND OTHER MULTIMERIC STRUCTURES              | REACTOME_ASSEMBLY OF COLLAGEN FIBRILS AND OTHER MULTIMERIC STRUCTURES              | 58 | 0.51633745 | 0.51633745 | 0         | 0.26692992 | 1 | 6827 tags=66%, list=14%, signal=76%    |
| REACTOME_SYNTHESIS OF DOLICHYL-PHOSPHATE                                           | REACTOME_SYNTHESIS OF DOLICHYL-PHOSPHATE MANNOSE                                   | 3  | 0.5123566  | 0.5123566  | 0.3123753 | 0.27516922 | 1 | 23878 tags=100%, list=49%, signal=195% |
| REACTOME_A THIRD PROTEOLYTIC CLEAVAGE RELEASES NICD                                | REACTOME_A THIRD PROTEOLYTIC CLEAVAGE RELEASES NICD                                | 9  | 0.5121197  | 0.5121197  | 0.0102145 | 0.27350482 | 1 | 7571 tags=67%, list=15%, signal=79%    |
| REACTOME_NON-INTEGRIN MEMBRANE-ECM INTERACTIONS                                    | REACTOME_NON-INTEGRIN MEMBRANE-ECM INTERACTIONS                                    | 42 | 0.51006347 | 0.51006347 | 0         | 0.27676645 | 1 | 4191 tags=60%, list=9%, signal=65%     |
| REACTOME_PHOSPHORYLATION OF EMI1                                                   | REACTOME_PHOSPHORYLATION OF EMI1                                                   | 6  | 0.50979394 | 0.50979394 | 0.0673171 | 0.2752341  | 1 | 24005 tags=100%, list=49%, signal=196% |
| REACTOME_HISTAMINE                                                                 | REACTOME_HISTAMINE RECEPTORS                                                       | 4  | 0.50797063 | 0.50797063 | 0.1841564 | 0.27786925 | 1 | 11852 tags=75%, list=24%, signal=99%   |
| REACTOME_SIGNALING BY PLASMA MEMBRANE FGFR1                                        | REACTOME_SIGNALING BY PLASMA MEMBRANE FGFR1 FUSIONS                                | 3  | 0.50768626 | 0.50768626 | 0.3306773 | 0.27645156 | 1 | 7785 tags=67%, list=16%, signal=79%    |

|                                                                                                                            |                                                                                                                         |    |            |            |           |            |   |                                       |
|----------------------------------------------------------------------------------------------------------------------------|-------------------------------------------------------------------------------------------------------------------------|----|------------|------------|-----------|------------|---|---------------------------------------|
| REACTOME_SIGNALING BY<br>REACTOME_SIGNALLING TO<br>REACTOME_NEF MEDIATED CD8<br>DOWN-REGULATION                            | REACTOME_SIGNALING BY NOTCH4<br>REACTOME_SIGNALLING TO STAT3<br>REACTOME_NEF MEDIATED CD8 DOWN-<br>REGULATION           | 11 | 0.5069973  | 0.5069973  | 0.0040984 | 0.2760106  | 1 | 6339 tags=64%, list=13%, signal=73%   |
| REACTOME_OPTINEURIN AND<br>MYOSIN PHOSPHATASE<br>NEGATIVELY REGULATE PLK1                                                  | REACTOME_OPTINEURIN AND MYOSIN<br>PHOSPHATASE NEGATIVELY REGULATE<br>PLK1                                               | 3  | 0.50548047 | 0.50548047 | 0.3212928 | 0.27801064 | 1 | 7893 tags=67%, list=16%, signal=79%   |
| REACTOME_ACTIVATION OF<br>PUMA AND TRANSLOCATION TO<br>MITOCHONDRIA                                                        | REACTOME_ACTIVATION OF PUMA AND<br>TRANSLOCATION TO MITOCHONDRIA                                                        | 7  | 0.5049022  | 0.5049022  | 0.0385376 | 0.2773282  | 1 | 10255 tags=71%, list=21%, signal=90%  |
| REACTOME_SLC TRANSPORTER<br>DISORDERS                                                                                      | REACTOME_SLC TRANSPORTER<br>DISORDERS                                                                                   | 3  | 0.5048269  | 0.5048269  | 0.32999   | 0.27537686 | 1 | 7925 tags=67%, list=16%, signal=80%   |
| REACTOME_NGF PROCESSING                                                                                                    | REACTOME_NGF PROCESSING                                                                                                 | 9  | 0.50366545 | 0.50366545 | 0.0129225 | 0.27637482 | 1 | 18866 tags=89%, list=39%, signal=145% |
| REACTOME_MOLECULES<br>ASSOCIATED WITH ELASTIC<br>FIBRES                                                                    | REACTOME_MOLECULES ASSOCIATED<br>WITH ELASTIC FIBRES                                                                    | 7  | 0.49779406 | 0.49779406 | 0.0372984 | 0.29004017 | 1 | 10603 tags=71%, list=22%, signal=91%  |
| REACTOME_GDP-FUCOSE<br>BIOSYNTHESIS                                                                                        | REACTOME_GDP-FUCOSE<br>BIOSYNTHESIS                                                                                     | 4  | 0.49562916 | 0.49562916 | 0.1957619 | 0.2937462  | 1 | 215 tags=50%, list=0%, signal=50%     |
| REACTOME_RECEPTOR-LIGAND<br>BINDING INITIATES THE SECOND<br>PROTEOLYTIC CLEAVAGE OF<br>NOTCH RECEPTOR                      | REACTOME_RECEPTOR-LIGAND<br>BINDING INITIATES THE SECOND<br>PROTEOLYTIC CLEAVAGE OF NOTCH<br>RECEPTOR                   | 30 | 0.4947107  | 0.4947107  | 0         | 0.29394174 | 1 | 11698 tags=73%, list=24%, signal=96%  |
| REACTOME_KERATAN SULFATE<br>DEGRADATION                                                                                    | REACTOME_KERATAN SULFATE<br>DEGRADATION                                                                                 | 6  | 0.48970228 | 0.48970228 | 0.0629302 | 0.3061298  | 1 | 8667 tags=67%, list=18%, signal=81%   |
| REACTOME_PROGRESSIVE<br>TRIMMING OF ALPHA-1,2-LINKED<br>MANNOSE RESIDUES FROM<br>MAN9/8/7GLCNAC2 TO PRODUCE<br>MAN5GLCNAC2 | REACTOME_PROGRESSIVE TRIMMING<br>OF ALPHA-1,2-LINKED MANNOSE<br>RESIDUES FROM MAN9/8/7GLCNAC2 TO<br>PRODUCE MAN5GLCNAC2 | 14 | 0.48835573 | 0.48835573 | 0.0029098 | 0.3076914  | 1 | 7571 tags=64%, list=15%, signal=76%   |
| REACTOME_HYALURONAN<br>UPTAKE AND DEGRADATION                                                                              | REACTOME_HYALURONAN UPTAKE AND<br>DEGRADATION                                                                           | 12 | 0.48701647 | 0.48701647 | 0.0096339 | 0.30922753 | 1 | 4721 tags=58%, list=10%, signal=65%   |
| REACTOME_TRANSPORT AND<br>SYNTHESIS OF PAPS                                                                                | REACTOME_TRANSPORT AND<br>SYNTHESIS OF PAPS                                                                             | 3  | 0.48683333 | 0.48683333 | 0.361658  | 0.3074705  | 1 | 8806 tags=67%, list=18%, signal=81%   |
| REACTOME_WNT5A-DEPENDENT<br>INTERNALIZATION OF FZD2, FZD5<br>AND ROR2                                                      | REACTOME_WNT5A-DEPENDENT<br>INTERNALIZATION OF FZD2, FZD5 AND<br>ROR2                                                   | 12 | 0.48389953 | 0.48389953 | 0.0039254 | 0.31397265 | 1 | 8954 tags=67%, list=18%, signal=82%   |
| REACTOME_RUNX3 REGULATES<br>YAP1-MEDIATED TRANSCRIPTION                                                                    | REACTOME_RUNX3 REGULATES YAP1-<br>MEDIATED TRANSCRIPTION                                                                | 6  | 0.48328537 | 0.48328537 | 0.0782953 | 0.31351948 | 1 | 17142 tags=83%, list=35%, signal=128% |
| REACTOME_REGULATED<br>PROTEOLYSIS OF P75NTR                                                                                | REACTOME_REGULATED PROTEOLYSIS<br>OF P75NTR                                                                             | 13 | 0.48140723 | 0.48140723 | 0.005     | 0.3170939  | 1 | 10332 tags=69%, list=21%, signal=88%  |
| REACTOME_CASPASE<br>ACTIVATION VIA EXTRINSIC<br>APOPTOTIC SIGNALLING                                                       | REACTOME_CASPASE ACTIVATION VIA<br>EXTRINSIC APOPTOTIC SIGNALLING<br>PATHWAY                                            | 22 | 0.48125094 | 0.48125094 | 0         | 0.31534016 | 1 | 5379 tags=59%, list=11%, signal=66%   |
| REACTOME_REGULATION OF<br>GENE EXPRESSION BY HYPOXIA-<br>INDUCIBLE FACTOR                                                  | REACTOME_REGULATION OF GENE<br>EXPRESSION BY HYPOXIA-INDUCIBLE<br>FACTOR                                                | 10 | 0.48055357 | 0.48055357 | 0.0119522 | 0.315104   | 1 | 10749 tags=70%, list=22%, signal=90%  |
| REACTOME_MET PROMOTES<br>CELL MOTILITY                                                                                     | REACTOME_MET PROMOTES CELL<br>MOTILITY                                                                                  | 27 | 0.47914293 | 0.47914293 | 0         | 0.31696254 | 1 | 5567 tags=59%, list=11%, signal=67%   |
| REACTOME_REGULATION OF<br>TNFR1 SIGNALING                                                                                  | REACTOME_REGULATION OF TNFR1<br>SIGNALING                                                                               | 11 | 0.47818175 | 0.47818175 | 0.0089374 | 0.31760788 | 1 | 12201 tags=73%, list=25%, signal=97%  |
| REACTOME_TRANSPORT OF<br>NUCLEOTIDE SUGARS                                                                                 | REACTOME_TRANSPORT OF<br>NUCLEOTIDE SUGARS                                                                              | 29 | 0.47696003 | 0.47696003 | 0         | 0.31914815 | 1 | 8739 tags=66%, list=18%, signal=80%   |
|                                                                                                                            |                                                                                                                         | 33 | 0.4743138  | 0.4743138  | 0         | 0.32475746 | 1 | 10917 tags=70%, list=22%, signal=90%  |
|                                                                                                                            |                                                                                                                         | 9  | 0.47382912 | 0.47382912 | 0.0232558 | 0.32396805 | 1 | 4005 tags=56%, list=8%, signal=60%    |

|                                                                                                |                                                                                                         |    |            |            |           |            |   |                                        |
|------------------------------------------------------------------------------------------------|---------------------------------------------------------------------------------------------------------|----|------------|------------|-----------|------------|---|----------------------------------------|
| REACTOME_PTK6 REGULATES RTKS AND THEIR EFFECTORS AKT1 AND DOK1                                 | REACTOME_PTK6 REGULATES RTKS AND THEIR EFFECTORS AKT1 AND DOK1                                          | 9  | 0.47359535 | 0.47359535 | 0.0328358 | 0.32250014 | 1 | 9457 tags=67%, list=19%, signal=83%    |
| REACTOME_INTERLEUKIN-1 PROCESSING                                                              | REACTOME_INTERLEUKIN-1 PROCESSING                                                                       | 7  | 0.47199643 | 0.47199643 | 0.0482283 | 0.32530847 | 1 | 4871 tags=57%, list=10%, signal=63%    |
| REACTOME_CHONDROITIN SULFATE/DERMATAN SULFATE METABOLISM                                       | REACTOME_CHONDROITIN SULFATE/DERMATAN SULFATE METABOLISM                                                | 50 | 0.47132778 | 0.47132778 | 0         | 0.32508138 | 1 | 6323 tags=60%, list=13%, signal=69%    |
| REACTOME_CHONDROITIN SULFATE BIOSYNTHESIS                                                      | REACTOME_CHONDROITIN SULFATE BIOSYNTHESIS                                                               | 20 | 0.47103894 | 0.47103894 | 0         | 0.32370687 | 1 | 6323 tags=60%, list=13%, signal=69%    |
| REACTOME_SYNTHESIS OF DOLICHYL-PHOSPHATE                                                       | REACTOME_SYNTHESIS OF DOLICHYL-PHOSPHATE                                                                | 6  | 0.46895024 | 0.46895024 | 0.0929773 | 0.3279084  | 1 | 9683 tags=67%, list=20%, signal=83%    |
| REACTOME_RHO GTPASES ACTIVATE IQGAPS                                                           | REACTOME_RHO GTPASES ACTIVATE IQGAPS                                                                    | 11 | 0.46652332 | 0.46652332 | 0.008008  | 0.33355713 | 1 | 3869 tags=55%, list=8%, signal=59%     |
| REACTOME_DEFECTIVE EXT1 CAUSES EXOSTOSES 1, TRPS2 AND CHDS                                     | REACTOME_DEFECTIVE EXT1 CAUSES EXOSTOSES 1, TRPS2 AND CHDS                                              | 12 | 0.46601674 | 0.46601674 | 0.0098328 | 0.33288562 | 1 | 5749 tags=58%, list=12%, signal=66%    |
| REACTOME_DEFECTIVE EXT2 CAUSES EXOSTOSES 2                                                     | REACTOME_DEFECTIVE EXT2 CAUSES EXOSTOSES 2                                                              | 12 | 0.46601674 | 0.46601674 | 0.0051546 | 0.3307099  | 1 | 5749 tags=58%, list=12%, signal=66%    |
| REACTOME_UNWINDING OF DNA                                                                      | REACTOME_UNWINDING OF DNA                                                                               | 12 | 0.46535626 | 0.46535626 | 0.0110442 | 0.33066857 | 1 | 22103 tags=92%, list=45%, signal=167%  |
| REACTOME_G2/M DNA REPLICATION CHECKPOINT                                                       | REACTOME_G2/M DNA REPLICATION CHECKPOINT                                                                | 5  | 0.46343955 | 0.46343955 | 0.1661507 | 0.3346996  | 1 | 26274 tags=100%, list=54%, signal=216% |
| REACTOME_NEF-MEDIATES DOWN MODULATION OF CELL SURFACE RECEPTORS BY RECRUITING THEM TO CLATHRIN | REACTOME_NEF-MEDIATES DOWN MODULATION OF CELL SURFACE RECEPTORS BY RECRUITING THEM TO CLATHRIN ADAPTERS | 21 | 0.46233794 | 0.46233794 | 0         | 0.33592865 | 1 | 21672 tags=90%, list=44%, signal=162%  |
| REACTOME_ATTACHMENT OF GPI ANCHOR TO UPAR                                                      | REACTOME_ATTACHMENT OF GPI ANCHOR TO UPAR                                                               | 7  | 0.460027   | 0.460027   | 0.0694864 | 0.34090436 | 1 | 12452 tags=71%, list=25%, signal=96%   |
| REACTOME_MITOTIC TELOPHASE/CYTOKINESIS                                                         | REACTOME_MITOTIC TELOPHASE/CYTOKINESIS                                                                  | 14 | 0.45912245 | 0.45912245 | 0.0020429 | 0.34138077 | 1 | 22992 tags=93%, list=47%, signal=175%  |
| REACTOME_GAP JUNCTION DEGRADATION                                                              | REACTOME_GAP JUNCTION DEGRADATION                                                                       | 10 | 0.45894188 | 0.45894188 | 0.0149402 | 0.33977878 | 1 | 11807 tags=70%, list=24%, signal=92%   |
| REACTOME_NUCLEOBASE BIOSYNTHESIS                                                               | REACTOME_NUCLEOBASE BIOSYNTHESIS                                                                        | 15 | 0.45829082 | 0.45829082 | 0.004065  | 0.33982414 | 1 | 20002 tags=87%, list=41%, signal=146%  |
| REACTOME_PTK6 PROMOTES HIF1A STABILIZATION                                                     | REACTOME_PTK6 PROMOTES HIF1A STABILIZATION                                                              | 7  | 0.4579436  | 0.4579436  | 0.0733198 | 0.3388057  | 1 | 12554 tags=71%, list=26%, signal=96%   |
| REACTOME_UPTAKE AND FUNCTION OF DIPHTHERIA TOXIN                                               | REACTOME_UPTAKE AND FUNCTION OF DIPHTHERIA TOXIN                                                        | 6  | 0.45740655 | 0.45740655 | 0.1115538 | 0.33833677 | 1 | 18409 tags=83%, list=38%, signal=134%  |
| REACTOME_TRANSCRIPTIONAL ACTIVATION OF CELL CYCLE INHIBITOR P21                                | REACTOME_TRANSCRIPTIONAL ACTIVATION OF CELL CYCLE INHIBITOR P21                                         | 4  | 0.4549233  | 0.4549233  | 0.2941177 | 0.34431326 | 1 | 2208 tags=50%, list=5%, signal=52%     |
| REACTOME_TRANSCRIPTIONAL ACTIVATION OF P53 RESPONSIVE GENES                                    | REACTOME_TRANSCRIPTIONAL ACTIVATION OF P53 RESPONSIVE GENES                                             | 4  | 0.4549233  | 0.4549233  | 0.2621167 | 0.34221378 | 1 | 2208 tags=50%, list=5%, signal=52%     |
| REACTOME_CS/DS                                                                                 | REACTOME_CS/DS DEGRADATION                                                                              | 14 | 0.4535556  | 0.4535556  | 0.0019474 | 0.34450197 | 1 | 5777 tags=57%, list=12%, signal=65%    |
| REACTOME_LOSS OF FUNCTION OF TGFB1 IN CANCER                                                   | REACTOME_LOSS OF FUNCTION OF TGFB1 IN CANCER                                                            | 7  | 0.45224482 | 0.45224482 | 0.0721443 | 0.34651455 | 1 | 5838 tags=57%, list=12%, signal=65%    |
| REACTOME_TGFB1 KD MUTANTS IN CANCER                                                            | REACTOME_TGFB1 KD MUTANTS IN CANCER                                                                     | 7  | 0.45224482 | 0.45224482 | 0.0869565 | 0.3444396  | 1 | 5838 tags=57%, list=12%, signal=65%    |
| REACTOME_PROTON-COUPLED MONOCARBOXYLATE TRANSPORT                                              | REACTOME_PROTON-COUPLED MONOCARBOXYLATE TRANSPORT                                                       | 6  | 0.45046538 | 0.45046538 | 0.1300403 | 0.34823865 | 1 | 10588 tags=67%, list=22%, signal=85%   |

|                                                                                                 |                                                                                                 |    |            |            |           |            |   |                                        |
|-------------------------------------------------------------------------------------------------|-------------------------------------------------------------------------------------------------|----|------------|------------|-----------|------------|---|----------------------------------------|
| REACTOME_VASOPRESSIN-LIKE RECEPTORS                                                             | REACTOME_VASOPRESSIN-LIKE RECEPTORS                                                             | 6  | 0.45015898 | 0.45015898 | 0.1193416 | 0.34712338 | 1 | 10603 tags=67%, list=22%, signal=85%   |
| REACTOME_TRAF6 MEDIATED IRF7 ACTIVATION                                                         | REACTOME_TRAF6 MEDIATED IRF7 ACTIVATION                                                         | 30 | 0.4495079  | 0.4495079  | 0         | 0.34702203 | 1 | 13910 tags=73%, list=28%, signal=102%  |
| REACTOME_ACTIVATION OF SMO                                                                      | REACTOME_ACTIVATION OF SMO                                                                      | 18 | 0.44942603 | 0.44942603 | 0         | 0.34521106 | 1 | 7924 tags=61%, list=16%, signal=73%    |
| REACTOME_PRE-NOTCH PROCESSING IN GOLGI                                                          | REACTOME_PRE-NOTCH PROCESSING IN GOLGI                                                          | 18 | 0.4488744  | 0.4488744  | 0         | 0.34497017 | 1 | 7951 tags=61%, list=16%, signal=73%    |
| REACTOME_ACTIVATION OF NOXA AND TRANSLOCATION TO MITOCHONDRIA                                   | REACTOME_ACTIVATION OF NOXA AND TRANSLOCATION TO MITOCHONDRIA                                   | 5  | 0.44775328 | 0.44775328 | 0.2102102 | 0.3467182  | 1 | 17249 tags=80%, list=35%, signal=123%  |
| REACTOME_NEUROFASCIN INTERACTIONS                                                               | REACTOME_NEUROFASCIN INTERACTIONS                                                               | 7  | 0.44728136 | 0.44728136 | 0.0891473 | 0.34624007 | 1 | 6081 tags=57%, list=12%, signal=65%    |
| REACTOME_RUNX3 REGULATES BCL2L11 (BIM) TRANSCRIPTION                                            | REACTOME_RUNX3 REGULATES BCL2L11 (BIM) TRANSCRIPTION                                            | 5  | 0.4468546  | 0.4468546  | 0.1981707 | 0.34574997 | 1 | 17293 tags=80%, list=35%, signal=124%  |
| REACTOME_RUNX1 REGULATES ESTROGEN RECEPTOR MEDIATED TRANSCRIPTION                               | REACTOME_RUNX1 REGULATES ESTROGEN RECEPTOR MEDIATED TRANSCRIPTION                               | 6  | 0.44685352 | 0.44685352 | 0.1363184 | 0.3437855  | 1 | 2604 tags=50%, list=5%, signal=53%     |
| REACTOME_PYRIMIDINE                                                                             | REACTOME_PYRIMIDINE SALVAGE                                                                     | 11 | 0.4444692  | 0.4444692  | 0.0221519 | 0.34964767 | 1 | 9400 tags=64%, list=19%, signal=79%    |
| REACTOME_G2 PHASE                                                                               | REACTOME_G2 PHASE                                                                               | 5  | 0.443893   | 0.443893   | 0.1941177 | 0.34945968 | 1 | 27231 tags=100%, list=56%, signal=225% |
| REACTOME_PHOSPHORYLATION OF PROTEINS INVOLVED IN THE G2/M TRANSITION BY CYCLIN A:CDC2 COMPLEXES | REACTOME_PHOSPHORYLATION OF PROTEINS INVOLVED IN THE G2/M TRANSITION BY CYCLIN A:CDC2 COMPLEXES | 3  | 0.44387487 | 0.44387487 | 0.4708786 | 0.3475607  | 1 | 27231 tags=100%, list=56%, signal=225% |
| REACTOME_LINOLEIC ACID (LA) METABOLISM                                                          | REACTOME_LINOLEIC ACID (LA) METABOLISM                                                          | 8  | 0.44359592 | 0.44359592 | 0.0629515 | 0.34655014 | 1 | 8885 tags=63%, list=18%, signal=76%    |
| REACTOME_NEF MEDIATED CD4 DOWN-REGULATION                                                       | REACTOME_NEF MEDIATED CD4 DOWN-REGULATION                                                       | 9  | 0.44322112 | 0.44322112 | 0.0303644 | 0.34584716 | 1 | 10944 tags=67%, list=22%, signal=86%   |
| REACTOME_ALKBH3 MEDIATED REVERSAL OF ALKYLATION                                                 | REACTOME_ALKBH3 MEDIATED REVERSAL OF ALKYLATION                                                 | 4  | 0.44191295 | 0.44191295 | 0.2981557 | 0.34800676 | 1 | 2845 tags=50%, list=6%, signal=53%     |
| REACTOME_DISEASES OF MISMATCH REPAIR (MMR)                                                      | REACTOME_DISEASES OF MISMATCH REPAIR (MMR)                                                      | 5  | 0.44180965 | 0.44180965 | 0.2126607 | 0.3464265  | 1 | 7747 tags=60%, list=16%, signal=71%    |
| REACTOME_COLLAGEN CHAIN TRIMERIZATION                                                           | REACTOME_COLLAGEN CHAIN TRIMERIZATION                                                           | 44 | 0.43988362 | 0.43988362 | 0         | 0.35062072 | 1 | 9639 tags=64%, list=20%, signal=79%    |
| REACTOME_DEFECTIVE AMN CAUSES HEREDITARY MEGALOBlastic ANEMIA 1                                 | REACTOME_DEFECTIVE AMN CAUSES HEREDITARY MEGALOBlastic ANEMIA 1                                 | 3  | 0.4381221  | 0.4381221  | 0.4757185 | 0.3544044  | 1 | 11191 tags=67%, list=23%, signal=86%   |
| REACTOME_DEFECTIVE CUBN CAUSES HEREDITARY MEGALOBlastic ANEMIA 1                                | REACTOME_DEFECTIVE CUBN CAUSES HEREDITARY MEGALOBlastic ANEMIA 1                                | 3  | 0.4381221  | 0.4381221  | 0.4856294 | 0.352499   | 1 | 11191 tags=67%, list=23%, signal=86%   |
| REACTOME_UPTAKE AND FUNCTION OF ANTHRAX TOXINS                                                  | REACTOME_UPTAKE AND FUNCTION OF ANTHRAX TOXINS                                                  | 11 | 0.43723795 | 0.43723795 | 0.024558  | 0.35340998 | 1 | 9754 tags=64%, list=20%, signal=79%    |
| REACTOME_FGFR1B LIGAND BINDING AND ACTIVATION                                                   | REACTOME_FGFR1B LIGAND BINDING AND ACTIVATION                                                   | 6  | 0.4371447  | 0.4371447  | 0.1444333 | 0.35182458 | 1 | 19401 tags=83%, list=40%, signal=138%  |
| REACTOME_VLDLR INTERNALISATION AND DEGRADATION                                                  | REACTOME_VLDLR INTERNALISATION AND DEGRADATION                                                  | 12 | 0.43687487 | 0.43687487 | 0.0158259 | 0.35081342 | 1 | 11256 tags=67%, list=23%, signal=87%   |
| REACTOME_PD-1 SIGNALING                                                                         | REACTOME_PD-1 SIGNALING                                                                         | 24 | 0.4342244  | 0.4342244  | 0         | 0.357482   | 1 | 21592 tags=88%, list=44%, signal=156%  |
| REACTOME_BETA-OXIDATION OF PRISTANOYL-COA                                                       | REACTOME_BETA-OXIDATION OF PRISTANOYL-COA                                                       | 9  | 0.4329761  | 0.4329761  | 0.0482546 | 0.35953304 | 1 | 6005 tags=56%, list=12%, signal=63%    |
| REACTOME_TP53 REGULATES TRANSCRIPTION OF GENES INVOLVED IN G1 CELL CYCLE ARREST                 | REACTOME_TP53 REGULATES TRANSCRIPTION OF GENES INVOLVED IN G1 CELL CYCLE ARREST                 | 14 | 0.4323916  | 0.4323916  | 0.00611   | 0.35932982 | 1 | 6813 tags=57%, list=14%, signal=66%    |



|                                                                                              |                                                                                              |     |            |            |           |            |   |                                        |
|----------------------------------------------------------------------------------------------|----------------------------------------------------------------------------------------------|-----|------------|------------|-----------|------------|---|----------------------------------------|
| REACTOME_RESPONSE TO METAL IONS                                                              | REACTOME_RESPONSE TO METAL IONS                                                              | 14  | 0.4315132  | 0.4315132  | 0.0128079 | 0.36021245 | 1 | 13851 tags=71%, list=28%, signal=100%  |
| REACTOME_TNFR1-INDUCED NFKAPPAB SIGNALING PATHWAY                                            | REACTOME_TNFR1-INDUCED NFKAPPAB SIGNALING PATHWAY                                            | 26  | 0.4310995  | 0.4310995  | 0         | 0.35964105 | 1 | 10917 tags=65%, list=22%, signal=84%   |
| REACTOME_COHESIN LOADING ONTO CHROMATIN                                                      | REACTOME_COHESIN LOADING ONTO CHROMATIN                                                      | 10  | 0.4305076  | 0.4305076  | 0.048583  | 0.3596388  | 1 | 22992 tags=90%, list=47%, signal=170%  |
| REACTOME_ENOS ACTIVATION                                                                     | REACTOME_ENOS ACTIVATION                                                                     | 10  | 0.4302727  | 0.4302727  | 0.0389474 | 0.3584809  | 1 | 8314 tags=60%, list=17%, signal=72%    |
| REACTOME_INHIBITION OF TSC COMPLEX FORMATION BY PKB                                          | REACTOME_INHIBITION OF TSC COMPLEX FORMATION BY PKB                                          | 3   | 0.43006825 | 0.43006825 | 0.5300493 | 0.35732195 | 1 | 27907 tags=100%, list=57%, signal=233% |
| REACTOME_SMOOTH MUSCLE CONTRACTION                                                           | REACTOME_SMOOTH MUSCLE CONTRACTION                                                           | 35  | 0.4289393  | 0.4289393  | 0         | 0.35920075 | 1 | 6991 tags=57%, list=14%, signal=67%    |
| REACTOME_PURINE RIBONUCLEOSIDE MONOPHOSPHATE                                                 | REACTOME_PURINE RIBONUCLEOSIDE MONOPHOSPHATE BIOSYNTHESIS                                    | 12  | 0.4249212  | 0.4249212  | 0.0106486 | 0.37033302 | 1 | 20002 tags=83%, list=41%, signal=141%  |
| REACTOME_SPERM MOTILITY AND TAXES                                                            | REACTOME_SPERM MOTILITY AND TAXES                                                            | 9   | 0.42456266 | 0.42456266 | 0.0485537 | 0.36954698 | 1 | 17298 tags=78%, list=35%, signal=120%  |
| REACTOME_RUNX3 REGULATES IMMUNE RESPONSE AND CELL MIGRATION                                  | REACTOME_RUNX3 REGULATES IMMUNE RESPONSE AND CELL MIGRATION                                  | 6   | 0.42414063 | 0.42414063 | 0.170297  | 0.36913863 | 1 | 3716 tags=50%, list=8%, signal=54%     |
| REACTOME_SCAVENGING BY CLASS A RECEPTORS                                                     | REACTOME_SCAVENGING BY CLASS A RECEPTORS                                                     | 19  | 0.42367208 | 0.42367208 | 9.70E-04  | 0.36885548 | 1 | 5033 tags=53%, list=10%, signal=59%    |
| REACTOME_EXTRACELLULAR MATRIX ORGANIZATION                                                   | REACTOME_EXTRACELLULAR MATRIX ORGANIZATION                                                   | 295 | 0.42242044 | 0.42242044 | 0         | 0.37111149 | 1 | 6827 tags=56%, list=14%, signal=65%    |
| REACTOME_PLASMA LIPOPROTEIN ASSEMBLY                                                         | REACTOME_PLASMA LIPOPROTEIN ASSEMBLY                                                         | 19  | 0.42218062 | 0.42218062 | 0         | 0.3701236  | 1 | 5106 tags=53%, list=10%, signal=59%    |
| REACTOME_A TETRASACCHARIDE LINKER SEQUENCE IS REQUIRED FOR                                   | REACTOME_A TETRASACCHARIDE LINKER SEQUENCE IS REQUIRED FOR GAG SYNTHESIS                     | 26  | 0.42068228 | 0.42068228 | 0         | 0.37321317 | 1 | 5777 tags=54%, list=12%, signal=61%    |
| REACTOME_RUNX1 REGULATES TRANSCRIPTION OF GENES INVOLVED IN DIFFERENTIATION OF KERATINOCYTES | REACTOME_RUNX1 REGULATES TRANSCRIPTION OF GENES INVOLVED IN DIFFERENTIATION OF KERATINOCYTES | 8   | 0.4206574  | 0.4206574  | 0.0843965 | 0.37149796 | 1 | 10008 tags=63%, list=20%, signal=79%   |
| REACTOME_N-GLYCAN TRIMMING AND ELONGATION IN                                                 | REACTOME_N-GLYCAN TRIMMING AND ELONGATION IN THE CIS-GOLGI                                   | 5   | 0.42017975 | 0.42017975 | 0.2487258 | 0.37118647 | 1 | 8806 tags=60%, list=18%, signal=73%    |
| REACTOME_PROCESSIVE SYNTHESIS ON THE C-STRAND OF THE TELOMERE                                | REACTOME_PROCESSIVE SYNTHESIS ON THE C-STRAND OF THE TELOMERE                                | 11  | 0.41945317 | 0.41945317 | 0.0156709 | 0.37179115 | 1 | 15076 tags=73%, list=31%, signal=105%  |
| REACTOME_CREB3 FACTORS ACTIVATE GENES                                                        | REACTOME_CREB3 FACTORS ACTIVATE GENES                                                        | 9   | 0.41704342 | 0.41704342 | 0.0732422 | 0.3778764  | 1 | 6785 tags=56%, list=14%, signal=64%    |
| REACTOME_LYSOSOMAL GLYCOGEN CATABOLISM                                                       | REACTOME_LYSOSOMAL GLYCOGEN CATABOLISM                                                       | 3   | 0.41602334 | 0.41602334 | 0.5429418 | 0.37955466 | 1 | 12273 tags=67%, list=25%, signal=89%   |
| REACTOME_MISSPLICED LRP5 MUTANTS HAVE ENHANCED BETA-CATENIN-DEPENDENT SIGNALING              | REACTOME_MISSPLICED LRP5 MUTANTS HAVE ENHANCED BETA-CATENIN-DEPENDENT SIGNALING              | 5   | 0.4157884  | 0.4157884  | 0.2731855 | 0.37856635 | 1 | 9021 tags=60%, list=18%, signal=74%    |
| REACTOME_PTK6 REGULATES RHO GTPASES, RAS GTPASE AND MAP KINASES                              | REACTOME_PTK6 REGULATES RHO GTPASES, RAS GTPASE AND MAP KINASES                              | 18  | 0.41498062 | 0.41498062 | 0.0019704 | 0.37955284 | 1 | 9610 tags=61%, list=20%, signal=76%    |
| REACTOME_GLYCINE                                                                             | REACTOME_GLYCINE DEGRADATION                                                                 | 4   | 0.41497827 | 0.41497827 | 0.3792757 | 0.37778014 | 1 | 16405 tags=75%, list=34%, signal=113%  |
| REACTOME_THE ROLE OF NEF IN HIV-1 REPLICATION AND DISEASE PATHOGENESIS                       | REACTOME_THE ROLE OF NEF IN HIV-1 REPLICATION AND DISEASE PATHOGENESIS                       | 28  | 0.4147578  | 0.4147578  | 0         | 0.37670675 | 1 | 21672 tags=86%, list=44%, signal=154%  |

|                                                                                                                                               |                                                                                                                                               |     |            |            |           |            |   |                                        |
|-----------------------------------------------------------------------------------------------------------------------------------------------|-----------------------------------------------------------------------------------------------------------------------------------------------|-----|------------|------------|-----------|------------|---|----------------------------------------|
| REACTOME_TRANSLOCATION OF ZAP-70 TO IMMUNOLOGICAL SYNAPSE                                                                                     | REACTOME_TRANSLOCATION OF ZAP-70 TO IMMUNOLOGICAL SYNAPSE                                                                                     | 20  | 0.41368884 | 0.41368884 | 9.64E-04  | 0.37880638 | 1 | 28716 tags=100%, list=59%, signal=242% |
| REACTOME_PHOSPHORYLATION OF PROTEINS INVOLVED IN G1/S TRANSITION BY ACTIVE CYCLIN E:CDK2 COMPLEXES                                            | REACTOME_PHOSPHORYLATION OF PROTEINS INVOLVED IN G1/S TRANSITION BY ACTIVE CYCLIN E:CDK2 COMPLEXES                                            | 4   | 0.41162354 | 0.41162354 | 0.4040896 | 0.384208   | 1 | 4328 tags=50%, list=9%, signal=55%     |
| REACTOME_CHREBP ACTIVATES METABOLIC GENE EXPRESSION                                                                                           | REACTOME_CHREBP ACTIVATES METABOLIC GENE EXPRESSION                                                                                           | 8   | 0.41138396 | 0.41138396 | 0.1014199 | 0.3833146  | 1 | 10462 tags=63%, list=21%, signal=79%   |
| REACTOME_ZINC INFLUX INTO CELLS BY THE SLC39 GENE                                                                                             | REACTOME_ZINC INFLUX INTO CELLS BY THE SLC39 GENE FAMILY                                                                                      | 10  | 0.41064242 | 0.41064242 | 0.0460784 | 0.38403845 | 1 | 9275 tags=60%, list=19%, signal=74%    |
| REACTOME_DEFECTIVE B3GALT6 CAUSES EDSP2 AND SEMDHL                                                                                            | REACTOME_DEFECTIVE B3GALT6 CAUSES EDSP2 AND SEMDHL                                                                                            | 19  | 0.40847164 | 0.40847164 | 0         | 0.3895812  | 1 | 5777 tags=53%, list=12%, signal=60%    |
| REACTOME_DEFECTIVE B3GAT3 CAUSES JDSSDHD                                                                                                      | REACTOME_DEFECTIVE B3GAT3 CAUSES JDSSDHD                                                                                                      | 19  | 0.40847164 | 0.40847164 | 0.0031847 | 0.38781038 | 1 | 5777 tags=53%, list=12%, signal=60%    |
| REACTOME_DEFECTIVE B4GALT7 CAUSES EDS, PROGEROID TYPE                                                                                         | REACTOME_DEFECTIVE B4GALT7 CAUSES EDS, PROGEROID TYPE                                                                                         | 19  | 0.40847164 | 0.40847164 | 0.0041494 | 0.38605556 | 1 | 5777 tags=53%, list=12%, signal=60%    |
| REACTOME_RNF MUTANTS SHOW ENHANCED WNT SIGNALING AND PROLIFERATION                                                                            | REACTOME_RNF MUTANTS SHOW ENHANCED WNT SIGNALING AND PROLIFERATION                                                                            | 8   | 0.40787068 | 0.40787068 | 0.1033797 | 0.38637233 | 1 | 10634 tags=63%, list=22%, signal=80%   |
| REACTOME_KERATAN SULFATE/KERATIN METABOLISM                                                                                                   | REACTOME_KERATAN SULFATE/KERATIN METABOLISM                                                                                                   | 33  | 0.40720147 | 0.40720147 | 0         | 0.38688856 | 1 | 6782 tags=55%, list=14%, signal=63%    |
| REACTOME_SMAC BINDS TO IAPs                                                                                                                   | REACTOME_SMAC BINDS TO IAPs                                                                                                                   | 5   | 0.40700573 | 0.40700573 | 0.2781726 | 0.3858096  | 1 | 9451 tags=60%, list=19%, signal=74%    |
| REACTOME_SMAC-MEDIATED APOPTOTIC RESPONSE                                                                                                     | REACTOME_SMAC-MEDIATED APOPTOTIC RESPONSE                                                                                                     | 5   | 0.40700573 | 0.40700573 | 0.2918707 | 0.3840949  | 1 | 9451 tags=60%, list=19%, signal=74%    |
| REACTOME_SMAC-MEDIATED DISSOCIATION OF IAP:CASPASE COMPLEXES                                                                                  | REACTOME_SMAC-MEDIATED DISSOCIATION OF IAP:CASPASE COMPLEXES                                                                                  | 5   | 0.40700573 | 0.40700573 | 0.2821256 | 0.38239536 | 1 | 9451 tags=60%, list=19%, signal=74%    |
| REACTOME_ECM                                                                                                                                  | REACTOME_ECM PROTEOGLYCANS                                                                                                                    | 55  | 0.40599614 | 0.40599614 | 0         | 0.384048   | 1 | 10411 tags=62%, list=21%, signal=78%   |
| REACTOME_LDL CLEARANCE                                                                                                                        | REACTOME_LDL CLEARANCE                                                                                                                        | 19  | 0.40582213 | 0.40582213 | 0         | 0.38292122 | 1 | 13638 tags=68%, list=28%, signal=95%   |
| REACTOME_P75NTR SIGNALS VIA NF-KB                                                                                                             | REACTOME_P75NTR SIGNALS VIA NF-KB                                                                                                             | 16  | 0.40558797 | 0.40558797 | 0.002994  | 0.38202682 | 1 | 10749 tags=63%, list=22%, signal=80%   |
| REACTOME_SCAVENGING BY CLASS H RECEPTORS                                                                                                      | REACTOME_SCAVENGING BY CLASS H RECEPTORS                                                                                                      | 4   | 0.4031474  | 0.4031474  | 0.4414683 | 0.38845712 | 1 | 4743 tags=50%, list=10%, signal=55%    |
| REACTOME_TNFS BIND THEIR PHYSIOLOGICAL RECEPTORS                                                                                              | REACTOME_TNFS BIND THEIR PHYSIOLOGICAL RECEPTORS                                                                                              | 27  | 0.40289223 | 0.40289223 | 0         | 0.387648   | 1 | 3858 tags=48%, list=8%, signal=52%     |
| REACTOME_DEGRADATION OF THE EXTRACELLULAR MATRIX                                                                                              | REACTOME_DEGRADATION OF THE EXTRACELLULAR MATRIX                                                                                              | 111 | 0.4023533  | 0.4023533  | 0         | 0.38771582 | 1 | 6810 tags=54%, list=14%, signal=63%    |
| REACTOME_SIGNAL                                                                                                                               | REACTOME_SIGNAL ATTENUATION                                                                                                                   | 10  | 0.40195078 | 0.40195078 | 0.074331  | 0.38739923 | 1 | 4804 tags=50%, list=10%, signal=55%    |
| REACTOME_HUR (ELAVL1) BINDS AND STABILIZES MRNA                                                                                               | REACTOME_HUR (ELAVL1) BINDS AND STABILIZES MRNA                                                                                               | 10  | 0.40131754 | 0.40131754 | 0.0653218 | 0.3879464  | 1 | 14628 tags=70%, list=30%, signal=100%  |
| REACTOME_HEPARAN SULFATE/HEPARIN (HS-GAG) METABOLISM                                                                                          | REACTOME_HEPARAN SULFATE/HEPARIN (HS-GAG) METABOLISM                                                                                          | 54  | 0.40095806 | 0.40095806 | 0         | 0.38745353 | 1 | 5777 tags=52%, list=12%, signal=59%    |
| REACTOME_TP53 REGULATES TRANSCRIPTION OF SEVERAL ADDITIONAL CELL DEATH GENES WHOSE SPECIFIC ROLES IN P53-DEPENDENT APOPTOSIS REMAIN UNCERTAIN | REACTOME_TP53 REGULATES TRANSCRIPTION OF SEVERAL ADDITIONAL CELL DEATH GENES WHOSE SPECIFIC ROLES IN P53-DEPENDENT APOPTOSIS REMAIN UNCERTAIN | 14  | 0.40051278 | 0.40051278 | 0.0166503 | 0.38729984 | 1 | 18866 tags=79%, list=39%, signal=128%  |

|                                                                             |                                                                                     |     |            |            |           |            |   |                                       |
|-----------------------------------------------------------------------------|-------------------------------------------------------------------------------------|-----|------------|------------|-----------|------------|---|---------------------------------------|
| REACTOME_ATF6 (ATF6-ALPHA) ACTIVATES CHAPERONES                             | REACTOME_ATF6 (ATF6-ALPHA) ACTIVATES CHAPERONES                                     | 11  | 0.39995062 | 0.39995062 | 0.039666  | 0.38758382 | 1 | 7128 tags=55%, list=15%, signal=64%   |
| REACTOME_MISMATCH REPAIR                                                    | REACTOME_MISMATCH REPAIR                                                            | 15  | 0.39878792 | 0.39878792 | 0.0107527 | 0.3899788  | 1 | 16386 tags=73%, list=33%, signal=110% |
| REACTOME_INTEGRIN CELL SURFACE INTERACTIONS                                 | REACTOME_INTEGRIN CELL SURFACE INTERACTIONS                                         | 66  | 0.39807874 | 0.39807874 | 0         | 0.39079052 | 1 | 10951 tags=62%, list=22%, signal=80%  |
| REACTOME_TELOMERE EXTENSION BY TELOMERASE                                   | REACTOME_TELOMERE EXTENSION BY TELOMERASE                                           | 6   | 0.39756057 | 0.39756057 | 0.2270434 | 0.39086103 | 1 | 21339 tags=83%, list=44%, signal=148% |
| REACTOME_TFAP2 (AP-2) FAMILY REGULATES TRANSCRIPTION OF CELL CYCLE FACTORS  | REACTOME_TFAP2 (AP-2) FAMILY REGULATES TRANSCRIPTION OF CELL CYCLE FACTORS          | 5   | 0.39748776 | 0.39748776 | 0.3415113 | 0.3894936  | 1 | 9917 tags=60%, list=20%, signal=75%   |
| REACTOME_CHYLOMICRON ASSEMBLY                                               | REACTOME_CHYLOMICRON ASSEMBLY                                                       | 10  | 0.397273   | 0.397273   | 0.0525803 | 0.38858214 | 1 | 5033 tags=50%, list=10%, signal=56%   |
| REACTOME_DEATH RECEPTOR SIGNALLING                                          | REACTOME_DEATH RECEPTOR SIGNALLING                                                  | 50  | 0.3970009  | 0.3970009  | 0         | 0.3878593  | 1 | 10938 tags=62%, list=22%, signal=80%  |
| REACTOME_ACYL CHAIN REMODELING OF DAG AND TAG                               | REACTOME_ACYL CHAIN REMODELING OF DAG AND TAG                                       | 8   | 0.3965342  | 0.3965342  | 0.1080808 | 0.3879151  | 1 | 11189 tags=63%, list=23%, signal=81%  |
| REACTOME_TFAP2 (AP-2) FAMILY REGULATES TRANSCRIPTION OF OTHER TRANSCRIPTION | REACTOME_TFAP2 (AP-2) FAMILY REGULATES TRANSCRIPTION OF OTHER TRANSCRIPTION FACTORS | 4   | 0.3961061  | 0.3961061  | 0.4540059 | 0.38775325 | 1 | 17329 tags=75%, list=35%, signal=116% |
| REACTOME_NF-KB IS ACTIVATED AND SIGNALS SURVIVAL                            | REACTOME_NF-KB IS ACTIVATED AND SIGNALS SURVIVAL                                    | 13  | 0.3959452  | 0.3959452  | 0.016129  | 0.38674057 | 1 | 10749 tags=62%, list=22%, signal=79%  |
| REACTOME_VEGFR2 MEDIATED VASCULAR PERMEABILITY                              | REACTOME_VEGFR2 MEDIATED VASCULAR PERMEABILITY                                      | 27  | 0.3957532  | 0.3957532  | 9.79E-04  | 0.38583618 | 1 | 16902 tags=74%, list=35%, signal=113% |
| REACTOME_SEMA3A PAK DEPENDENT AXON REPULSION                                | REACTOME_SEMA3A PAK DEPENDENT AXON REPULSION                                        | 16  | 0.39501828 | 0.39501828 | 0.0099206 | 0.38672847 | 1 | 17387 tags=75%, list=36%, signal=116% |
| REACTOME_NOTCH2 ACTIVATION AND TRANSMISSION OF SIGNAL TO THE NUCLEUS        | REACTOME_NOTCH2 ACTIVATION AND TRANSMISSION OF SIGNAL TO THE NUCLEUS                | 21  | 0.3944985  | 0.3944985  | 0.002006  | 0.38689154 | 1 | 6339 tags=52%, list=13%, signal=60%   |
| REACTOME_RUNX3 REGULATES NOTCH SIGNALING                                    | REACTOME_RUNX3 REGULATES NOTCH SIGNALING                                            | 14  | 0.39377135 | 0.39377135 | 0.0153218 | 0.38792565 | 1 | 12201 tags=64%, list=25%, signal=86%  |
| REACTOME_POST-TRANSLATIONAL PROTEIN                                         | REACTOME_POST-TRANSLATIONAL PROTEIN PHOSPHORYLATION                                 | 107 | 0.3937361  | 0.3937361  | 0         | 0.38652247 | 1 | 6846 tags=53%, list=14%, signal=62%   |
| REACTOME_GP1B-IX-V ACTIVATION SIGNALLING                                    | REACTOME_GP1B-IX-V ACTIVATION SIGNALLING                                            | 9   | 0.39278808 | 0.39278808 | 0.1060456 | 0.38822928 | 1 | 13413 tags=67%, list=27%, signal=92%  |
| REACTOME_Glutathione SYNTHESIS AND RECYCLING                                | REACTOME_Glutathione SYNTHESIS AND RECYCLING                                        | 13  | 0.39238912 | 0.39238912 | 0.027027  | 0.38798055 | 1 | 3390 tags=46%, list=7%, signal=50%    |
| REACTOME_REMOVAL OF THE FLAP INTERMEDIATE FROM THE                          | REACTOME_REMOVAL OF THE FLAP INTERMEDIATE FROM THE C-STRAND                         | 10  | 0.3921663  | 0.3921663  | 0.0770732 | 0.3872302  | 1 | 15076 tags=70%, list=31%, signal=101% |
| REACTOME_PROSTANOID LIGAND RECEPTORS                                        | REACTOME_PROSTANOID LIGAND RECEPTORS                                                | 9   | 0.39155114 | 0.39155114 | 0.0922053 | 0.3878809  | 1 | 8033 tags=56%, list=16%, signal=66%   |
| REACTOME_ACTIVATION OF NIMA KINASES NEK9, NEK6, NEK7                        | REACTOME_ACTIVATION OF NIMA KINASES NEK9, NEK6, NEK7                                | 7   | 0.39013037 | 0.39013037 | 0.2099609 | 0.39119905 | 1 | 22869 tags=86%, list=47%, signal=161% |
| REACTOME_REGULATION OF IFNA SIGNALING                                       | REACTOME_REGULATION OF IFNA SIGNALING                                               | 23  | 0.38897777 | 0.38897777 | 0.0020471 | 0.3936926  | 1 | 21411 tags=83%, list=44%, signal=147% |
| REACTOME_CALNEXIN/CALRETICULIN CYCLE                                        | REACTOME_CALNEXIN/CALRETICULIN CYCLE                                                | 26  | 0.38888758 | 0.38888758 | 0         | 0.39250958 | 1 | 7333 tags=54%, list=15%, signal=63%   |
| REACTOME_PLASMA LIPOPROTEIN CLEARANCE                                       | REACTOME_PLASMA LIPOPROTEIN CLEARANCE                                               | 33  | 0.38838252 | 0.38838252 | 0         | 0.39264196 | 1 | 13638 tags=67%, list=28%, signal=92%  |
| REACTOME_MISMATCH REPAIR (MMR) DIRECTED BY MSH2:MSH3 (MUTSBETA)             | REACTOME_MISMATCH REPAIR (MMR) DIRECTED BY MSH2:MSH3 (MUTSBETA)                     | 14  | 0.388225   | 0.388225   | 0.0210843 | 0.39165986 | 1 | 22965 tags=86%, list=47%, signal=161% |

|                                                                               |                                                                               |     |            |            |           |            |   |                                        |
|-------------------------------------------------------------------------------|-------------------------------------------------------------------------------|-----|------------|------------|-----------|------------|---|----------------------------------------|
| REACTOME_MISMATCH REPAIR (MMR) DIRECTED BY MSH2:MSH6 (MUTSALPHA)              | REACTOME_MISMATCH REPAIR (MMR) DIRECTED BY MSH2:MSH6 (MUTSALPHA)              | 14  | 0.388225   | 0.388225   | 0.0221774 | 0.39015925 | 1 | 22965 tags=86%, list=47%, signal=161%  |
| REACTOME_GLYCOSAMINOGLYCAN METABOLISM                                         | REACTOME_GLYCOSAMINOGLYCAN METABOLISM                                         | 122 | 0.3882072  | 0.3882072  | 0         | 0.38870472 | 1 | 6323 tags=52%, list=13%, signal=59%    |
| REACTOME_FATTY ACIDS BOUND TO GPR40 (FFAR1) REGULATE INSULIN SECRETION        | REACTOME_FATTY ACIDS BOUND TO GPR40 (FFAR1) REGULATE INSULIN SECRETION        | 8   | 0.38777906 | 0.38777906 | 0.1324245 | 0.3886077  | 1 | 5497 tags=50%, list=11%, signal=56%    |
| REACTOME_FREE FATTY ACIDS REGULATE INSULIN SECRETION                          | REACTOME_FREE FATTY ACIDS REGULATE INSULIN SECRETION                          | 8   | 0.38777906 | 0.38777906 | 0.1135647 | 0.3871357  | 1 | 5497 tags=50%, list=11%, signal=56%    |
| REACTOME_AKT-MEDIATED INACTIVATION OF FOXO1A                                  | REACTOME_AKT-MEDIATED INACTIVATION OF FOXO1A                                  | 4   | 0.38719594 | 0.38719594 | 0.4888889 | 0.3875344  | 1 | 5524 tags=50%, list=11%, signal=56%    |
| REACTOME_ROLE OF ABL IN ROBO-SLIT SIGNALING                                   | REACTOME_ROLE OF ABL IN ROBO-SLIT SIGNALING                                   | 9   | 0.3861177  | 0.3861177  | 0.097371  | 0.3895573  | 1 | 8299 tags=56%, list=17%, signal=67%    |
| REACTOME_NEGATIVE FEEDBACK REGULATION OF REACTOME_TNF SIGNALING               | REACTOME_NEGATIVE FEEDBACK REGULATION OF MAPK PATHWAY                         | 6   | 0.38469267 | 0.38469267 | 0.2530864 | 0.3928872  | 1 | 21969 tags=83%, list=45%, signal=151%  |
| REACTOME_TNF SIGNALING                                                        | REACTOME_TNF SIGNALING                                                        | 43  | 0.38158178 | 0.38158178 | 0         | 0.40220746 | 1 | 10938 tags=60%, list=22%, signal=78%   |
| REACTOME_SIGNALING BY TGF-BETA RECEPTOR COMPLEX IN CANCER                     | REACTOME_SIGNALING BY TGF-BETA RECEPTOR COMPLEX IN CANCER                     | 8   | 0.38081378 | 0.38081378 | 0.1438776 | 0.40345994 | 1 | 5838 tags=50%, list=12%, signal=57%    |
| REACTOME_SMAD2/3 PHOSPHORYLATION MOTIF MUTANTS IN CANCER                      | REACTOME_SMAD2/3 PHOSPHORYLATION MOTIF MUTANTS IN CANCER                      | 6   | 0.38079822 | 0.38079822 | 0.2864173 | 0.40201548 | 1 | 5838 tags=50%, list=12%, signal=57%    |
| REACTOME_FORMATION OF SENESENCE-ASSOCIATED HETEROCHROMATIN FOCI (SAHF)        | REACTOME_FORMATION OF SENESENCE-ASSOCIATED HETEROCHROMATIN FOCI (SAHF)        | 17  | 0.38059238 | 0.38059238 | 0.0121581 | 0.40121248 | 1 | 13053 tags=65%, list=27%, signal=88%   |
| REACTOME_HEME DEGRADATION                                                     | REACTOME_HEME DEGRADATION                                                     | 5   | 0.3805147  | 0.3805147  | 0.3501027 | 0.39999497 | 1 | 20541 tags=80%, list=42%, signal=138%  |
| REACTOME_TRAF6 MEDIATED NF-KB ACTIVATION                                      | REACTOME_TRAF6 MEDIATED NF-KB ACTIVATION                                      | 26  | 0.38017187 | 0.38017187 | 0         | 0.3997319  | 1 | 3993 tags=46%, list=8%, signal=50%     |
| REACTOME_FORMYL PEPTIDE RECEPTORS BIND FORMYL PEPTIDES AND MANY OTHER LIGANDS | REACTOME_FORMYL PEPTIDE RECEPTORS BIND FORMYL PEPTIDES AND MANY OTHER LIGANDS | 9   | 0.37908417 | 0.37908417 | 0.1151151 | 0.40210247 | 1 | 24965 tags=89%, list=51%, signal=181%  |
| REACTOME_STING MEDIATED INDUCTION OF HOST IMMUNE RESPONSES                    | REACTOME_STING MEDIATED INDUCTION OF HOST IMMUNE RESPONSES                    | 15  | 0.37897176 | 0.37897176 | 0.0219436 | 0.40102565 | 1 | 7563 tags=53%, list=15%, signal=63%    |
| REACTOME_CONSTITUTIVE SIGNALING BY NOTCH1 HD DOMAIN MUTANTS                   | REACTOME_CONSTITUTIVE SIGNALING BY NOTCH1 HD DOMAIN MUTANTS                   | 15  | 0.37880832 | 0.37880832 | 0.0194473 | 0.40010488 | 1 | 7571 tags=53%, list=15%, signal=63%    |
| REACTOME_SIGNALING BY NOTCH1 HD DOMAIN MUTANTS IN CANCER                      | REACTOME_SIGNALING BY NOTCH1 HD DOMAIN MUTANTS IN CANCER                      | 15  | 0.37880832 | 0.37880832 | 0.018664  | 0.39866045 | 1 | 7571 tags=53%, list=15%, signal=63%    |
| REACTOME_MAPK3 (ERK1) ACTIVATION                                              | REACTOME_MAPK3 (ERK1) ACTIVATION                                              | 10  | 0.37853128 | 0.37853128 | 0.083089  | 0.39820364 | 1 | 30433 tags=100%, list=62%, signal=264% |
| REACTOME_MAPK1 (ERK2) ACTIVATION                                              | REACTOME_MAPK1 (ERK2) ACTIVATION                                              | 9   | 0.3785236  | 0.3785236  | 0.1295716 | 0.39680886 | 1 | 30433 tags=100%, list=62%, signal=264% |
| REACTOME_ELECTRIC TRANSMISSION ACROSS GAP JUNCTIONS                           | REACTOME_ELECTRIC TRANSMISSION ACROSS GAP JUNCTIONS                           | 5   | 0.3782067  | 0.3782067  | 0.3721841 | 0.39651802 | 1 | 20654 tags=80%, list=42%, signal=138%  |
| REACTOME_TRANSMISSION ACROSS ELECTRICAL SYNAPSES                              | REACTOME_TRANSMISSION ACROSS ELECTRICAL SYNAPSES                              | 5   | 0.3782067  | 0.3782067  | 0.3892216 | 0.39510694 | 1 | 20654 tags=80%, list=42%, signal=138%  |
| REACTOME_INTERLEUKIN-6 FAMILY SIGNALING                                       | REACTOME_INTERLEUKIN-6 FAMILY SIGNALING                                       | 24  | 0.3782003  | 0.3782003  | 0.0020121 | 0.3937195  | 1 | 5972 tags=50%, list=12%, signal=57%    |

|                                                                                                                             |                                                                                                                                      |     |            |            |           |            |   |                                        |
|-----------------------------------------------------------------------------------------------------------------------------|--------------------------------------------------------------------------------------------------------------------------------------|-----|------------|------------|-----------|------------|---|----------------------------------------|
| REACTOME_REGULATION OF INSULIN-LIKE GROWTH FACTOR (IGF) TRANSPORT AND UPTAKE BY INSULIN-LIKE GROWTH FACTOR BINDING PROTEINS | REACTOME_REGULATION OF INSULIN-LIKE GROWTH FACTOR (IGF) TRANSPORT AND UPTAKE BY INSULIN-LIKE GROWTH FACTOR BINDING PROTEINS (IGFBPS) | 124 | 0.3772498  | 0.3772498  | 0         | 0.39553076 | 1 | 6846 tags=52%, list=14%, signal=60%    |
| REACTOME_DISEASES ASSOCIATED WITH THE TLR                                                                                   | REACTOME_DISEASES ASSOCIATED WITH THE TLR SIGNALING CASCADE                                                                          | 24  | 0.37582582 | 0.37582582 | 0         | 0.39899176 | 1 | 4048 tags=46%, list=8%, signal=50%     |
| REACTOME_DISEASES OF IMMUNE SYSTEM                                                                                          | REACTOME_DISEASES OF IMMUNE SYSTEM                                                                                                   | 24  | 0.37582582 | 0.37582582 | 0         | 0.39759177 | 1 | 4048 tags=46%, list=8%, signal=50%     |
| REACTOME_YAP1- AND WWTR1 (TAZ)-STIMULATED GENE EXPRESSION                                                                   | REACTOME_YAP1- AND WWTR1 (TAZ)-STIMULATED GENE EXPRESSION                                                                            | 29  | 0.37506482 | 0.37506482 | 9.96E-04  | 0.39873588 | 1 | 8660 tags=55%, list=18%, signal=67%    |
| REACTOME_METABOLISM OF INGESTED H2SEO4 AND H2SEO3 INTO H2SE                                                                 | REACTOME_METABOLISM OF INGESTED H2SEO4 AND H2SEO3 INTO H2SE                                                                          | 4   | 0.37404773 | 0.37404773 | 0.523301  | 0.40102962 | 1 | 18409 tags=75%, list=38%, signal=120%  |
| REACTOME_LYSINE CATABOLISM                                                                                                  | REACTOME_LYSINE CATABOLISM                                                                                                           | 12  | 0.37363052 | 0.37363052 | 0.0659341 | 0.40108514 | 1 | 14352 tags=67%, list=29%, signal=94%   |
| REACTOME_NICOTINAMIDE SALVAGING                                                                                             | REACTOME_NICOTINAMIDE SALVAGING                                                                                                      | 19  | 0.37230936 | 0.37230936 | 0.0071356 | 0.4044372  | 1 | 7547 tags=53%, list=15%, signal=62%    |
| REACTOME_MULTIFUNCTIONAL ANION EXCHANGERS                                                                                   | REACTOME_MULTIFUNCTIONAL ANION EXCHANGERS                                                                                            | 9   | 0.37217775 | 0.37217775 | 0.131579  | 0.40350336 | 1 | 14422 tags=67%, list=29%, signal=94%   |
| REACTOME_RSK ACTIVATION                                                                                                     | REACTOME_RSK ACTIVATION                                                                                                              | 6   | 0.37180433 | 0.37180433 | 0.320398  | 0.40332735 | 1 | 22600 tags=83%, list=46%, signal=155%  |
| REACTOME_SODIUM/PROTON EXCHANGERS                                                                                           | REACTOME_SODIUM/PROTON EXCHANGERS                                                                                                    | 9   | 0.3715536  | 0.3715536  | 0.1146045 | 0.40282798 | 1 | 9012 tags=56%, list=18%, signal=68%    |
| REACTOME_IRE1ALPHA ACTIVATES CHAPERONES                                                                                     | REACTOME_IRE1ALPHA ACTIVATES CHAPERONES                                                                                              | 55  | 0.37070313 | 0.37070313 | 0         | 0.4044703  | 1 | 5015 tags=47%, list=10%, signal=53%    |
| REACTOME_ACETYLCHOLINE REGULATES INSULIN SECRETION                                                                          | REACTOME_ACETYLCHOLINE REGULATES INSULIN SECRETION                                                                                   | 10  | 0.3706976  | 0.3706976  | 0.0861723 | 0.40311414 | 1 | 6334 tags=50%, list=13%, signal=57%    |
| REACTOME_REVERSAL OF ALKYLATION DAMAGE BY DNA DIOXYGENASES                                                                  | REACTOME_REVERSAL OF ALKYLATION DAMAGE BY DNA DIOXYGENASES                                                                           | 7   | 0.37050128 | 0.37050128 | 0.2440538 | 0.4024193  | 1 | 2845 tags=43%, list=6%, signal=45%     |
| REACTOME_PHOSPHORYLATION OF CD3 AND TCR ZETA CHAINS                                                                         | REACTOME_PHOSPHORYLATION OF CD3 AND TCR ZETA CHAINS                                                                                  | 23  | 0.37021554 | 0.37021554 | 0.00409   | 0.4020297  | 1 | 28716 tags=96%, list=59%, signal=231%  |
| REACTOME_SEMA4D IN SEMAPHORIN SIGNALING                                                                                     | REACTOME_SEMA4D IN SEMAPHORIN SIGNALING                                                                                              | 27  | 0.3694024  | 0.3694024  | 0.0019305 | 0.4034806  | 1 | 12751 tags=63%, list=26%, signal=85%   |
| REACTOME_THE AIM2 INFLAMMASOME                                                                                              | REACTOME_THE AIM2 INFLAMMASOME                                                                                                       | 3   | 0.36932728 | 0.36932728 | 0.6880642 | 0.4023813  | 1 | 30881 tags=100%, list=63%, signal=271% |
| REACTOME_METABOLISM OF ANGIOTENSINOGEN TO ANGIOTENSINS                                                                      | REACTOME_METABOLISM OF ANGIOTENSINOGEN TO ANGIOTENSINS                                                                               | 16  | 0.3688699  | 0.3688699  | 0.0194872 | 0.40270793 | 1 | 9486 tags=56%, list=19%, signal=70%    |
| REACTOME_MITOCHONDRIAL TRNA AMINOACYLATION                                                                                  | REACTOME_MITOCHONDRIAL TRNA AMINOACYLATION                                                                                           | 21  | 0.368244   | 0.368244   | 0.0077519 | 0.4036165  | 1 | 14619 tags=67%, list=30%, signal=95%   |
| REACTOME_GLYCOSPHINGOLIPID METABOLISM                                                                                       | REACTOME_GLYCOSPHINGOLIPID METABOLISM                                                                                                | 46  | 0.36726105 | 0.36726105 | 0         | 0.40577823 | 1 | 5451 tags=48%, list=11%, signal=54%    |
| REACTOME_MET ACTIVATES RAS SIGNALING                                                                                        | REACTOME_MET ACTIVATES RAS SIGNALING                                                                                                 | 11  | 0.36704218 | 0.36704218 | 0.0506586 | 0.40523508 | 1 | 8739 tags=55%, list=18%, signal=66%    |
| REACTOME_NRCAM                                                                                                              | REACTOME_NRCAM INTERACTIONS                                                                                                          | 7   | 0.36639574 | 0.36639574 | 0.2237903 | 0.4062267  | 1 | 17036 tags=71%, list=35%, signal=110%  |
| REACTOME_PHOSPHATE BOND HYDROLYSIS BY NTPDASE PROTEINS                                                                      | REACTOME_PHOSPHATE BOND HYDROLYSIS BY NTPDASE PROTEINS                                                                               | 8   | 0.36621422 | 0.36621422 | 0.1819106 | 0.4055142  | 1 | 18794 tags=75%, list=38%, signal=122%  |
| REACTOME_N-GLYCAN TRIMMING IN THE ER AND CALNEXIN/CALRETICULIN CYCLE                                                        | REACTOME_N-GLYCAN TRIMMING IN THE ER AND CALNEXIN/CALRETICULIN CYCLE                                                                 | 35  | 0.36212957 | 0.36212957 | 9.93E-04  | 0.41893065 | 1 | 10260 tags=57%, list=21%, signal=72%   |
| REACTOME_CREB PHOSPHORYLATION                                                                                               | REACTOME_CREB PHOSPHORYLATION                                                                                                        | 7   | 0.36100334 | 0.36100334 | 0.2535787 | 0.42165908 | 1 | 3310 tags=43%, list=7%, signal=46%     |

|                                                                                                 |                                                                                                 |     |            |            |           |            |   |                                       |
|-------------------------------------------------------------------------------------------------|-------------------------------------------------------------------------------------------------|-----|------------|------------|-----------|------------|---|---------------------------------------|
| REACTOME_DEX/H-BOX<br>HELICASES ACTIVATE TYPE I IFN<br>AND INFLAMMATORY CYTOKINES<br>PRODUCTION | REACTOME_DEX/H-BOX HELICASES<br>ACTIVATE TYPE I IFN AND<br>INFLAMMATORY CYTOKINES<br>PRODUCTION | 13  | 0.3603986  | 0.3603986  | 0.0510204 | 0.42254743 | 1 | 4956 tags=46%, list=10%, signal=51%   |
| REACTOME_RETROGRADE<br>NEUROTROPHIN SIGNALLING                                                  | REACTOME_RETROGRADE<br>NEUROTROPHIN SIGNALLING                                                  | 14  | 0.3597884  | 0.3597884  | 0.0362538 | 0.42346293 | 1 | 10367 tags=57%, list=21%, signal=72%  |
| REACTOME_DISEASES<br>ASSOCIATED WITH VISUAL<br>TRANSDUCTION                                     | REACTOME_DISEASES ASSOCIATED<br>WITH VISUAL TRANSDUCTION                                        | 7   | 0.35943055 | 0.35943055 | 0.2632114 | 0.42341834 | 1 | 3387 tags=43%, list=7%, signal=46%    |
| REACTOME_RETINOID CYCLE<br>DISEASE EVENTS                                                       | REACTOME_RETINOID CYCLE DISEASE<br>EVENTS                                                       | 7   | 0.35943055 | 0.35943055 | 0.2306911 | 0.42205247 | 1 | 3387 tags=43%, list=7%, signal=46%    |
| REACTOME_PROCESSIVE<br>SYNTHESIS ON THE LAGGING<br>STRAND                                       | REACTOME_PROCESSIVE SYNTHESIS<br>ON THE LAGGING STRAND                                          | 15  | 0.35886282 | 0.35886282 | 0.0319767 | 0.42271984 | 1 | 15076 tags=67%, list=31%, signal=96%  |
| REACTOME_SIGNAL<br>TRANSDUCTION BY L1                                                           | REACTOME_SIGNAL TRANSDUCTION BY<br>L1                                                           | 21  | 0.35877058 | 0.35877058 | 0.0050302 | 0.42170224 | 1 | 12751 tags=62%, list=26%, signal=84%  |
| REACTOME_EICOSANOID LIGAND-<br>BINDING RECEPTORS                                                | REACTOME_EICOSANOID LIGAND-<br>BINDING RECEPTORS                                                | 15  | 0.35672456 | 0.35672456 | 0.0363815 | 0.42784035 | 1 | 8652 tags=53%, list=18%, signal=65%   |
| REACTOME_NICD TRAFFICS TO<br>NUCLEUS                                                            | REACTOME_NICD TRAFFICS TO<br>NUCLEUS                                                            | 13  | 0.35632396 | 0.35632396 | 0.0546341 | 0.42792612 | 1 | 8922 tags=54%, list=18%, signal=66%   |
| REACTOME_NOTCH-HLH<br>TRANSCRIPTION PATHWAY                                                     | REACTOME_NOTCH-HLH<br>TRANSCRIPTION PATHWAY                                                     | 13  | 0.35632396 | 0.35632396 | 0.0608108 | 0.4265676  | 1 | 8922 tags=54%, list=18%, signal=66%   |
| REACTOME_INTERACTION WITH<br>THE ZONA PELLUCIDA                                                 | REACTOME_INTERACTION WITH THE<br>ZONA PELLUCIDA                                                 | 10  | 0.3550097  | 0.3550097  | 0.14      | 0.42982212 | 1 | 26688 tags=90%, list=55%, signal=198% |
| REACTOME_RIP-MEDIATED NFKB<br>ACTIVATION VIA ZBP1                                               | REACTOME_RIP-MEDIATED NFKB<br>ACTIVATION VIA ZBP1                                               | 23  | 0.35338014 | 0.35338014 | 0.0050607 | 0.43449453 | 1 | 3993 tags=43%, list=8%, signal=47%    |
| REACTOME_TERMINATION OF O-<br>GLYCAN BIOSYNTHESIS                                               | REACTOME_TERMINATION OF O-<br>GLYCAN BIOSYNTHESIS                                               | 25  | 0.35332653 | 0.35332653 | 0.0020387 | 0.4333078  | 1 | 8169 tags=52%, list=17%, signal=62%   |
| REACTOME_NOD1/2 SIGNALING<br>PATHWAY                                                            | REACTOME_NOD1/2 SIGNALING<br>PATHWAY                                                            | 31  | 0.35192892 | 0.35192892 | 0         | 0.43715876 | 1 | 11209 tags=58%, list=23%, signal=75%  |
| REACTOME_RUNX3 REGULATES<br>P14-ARF                                                             | REACTOME_RUNX3 REGULATES P14-<br>ARF                                                            | 10  | 0.35087326 | 0.35087326 | 0.1150713 | 0.4396838  | 1 | 12201 tags=60%, list=25%, signal=80%  |
| REACTOME_XBP1(S) ACTIVATES<br>CHAPERONE GENES                                                   | REACTOME_XBP1(S) ACTIVATES<br>CHAPERONE GENES                                                   | 53  | 0.35076934 | 0.35076934 | 0         | 0.43874648 | 1 | 5015 tags=45%, list=10%, signal=50%   |
| REACTOME_PLATELET<br>DEGRANULATION                                                              | REACTOME_PLATELET<br>DEGRANULATION                                                              | 128 | 0.35021618 | 0.35021618 | 0         | 0.43938982 | 1 | 12351 tags=60%, list=25%, signal=80%  |
| REACTOME_NEF AND SIGNAL<br>TRANSDUCTION                                                         | REACTOME_NEF AND SIGNAL<br>TRANSDUCTION                                                         | 8   | 0.34938312 | 0.34938312 | 0.2492401 | 0.44109482 | 1 | 19618 tags=75%, list=40%, signal=125% |
| REACTOME_APOBEC3G<br>MEDIATED RESISTANCE TO HIV-1                                               | REACTOME_APOBEC3G MEDIATED<br>RESISTANCE TO HIV-1 INFECTION                                     | 5   | 0.34932598 | 0.34932598 | 0.4582485 | 0.43997332 | 1 | 12275 tags=60%, list=25%, signal=80%  |
| REACTOME_RUNX1 REGULATES<br>EXPRESSION OF COMPONENTS<br>OF TIGHT JUNCTIONS                      | REACTOME_RUNX1 REGULATES<br>EXPRESSION OF COMPONENTS OF<br>TIGHT JUNCTIONS                      | 5   | 0.34683415 | 0.34683415 | 0.4556098 | 0.4479447  | 1 | 2604 tags=40%, list=5%, signal=42%    |
| REACTOME_RUNX1 REGULATES<br>TRANSCRIPTION OF GENES<br>INVOLVED IN INTERLEUKIN<br>SIGNALING      | REACTOME_RUNX1 REGULATES<br>TRANSCRIPTION OF GENES INVOLVED<br>IN INTERLEUKIN SIGNALING         | 5   | 0.34683415 | 0.34683415 | 0.5       | 0.44657063 | 1 | 2604 tags=40%, list=5%, signal=42%    |
| REACTOME_PHYSIOLOGICAL<br>FACTORS                                                               | REACTOME_PHYSIOLOGICAL FACTORS                                                                  | 12  | 0.34611773 | 0.34611773 | 0.0765358 | 0.44795004 | 1 | 7538 tags=50%, list=15%, signal=59%   |
| REACTOME_ACTIVATION OF<br>MATRIX METALLOPROTEINASES                                             | REACTOME_ACTIVATION OF MATRIX<br>METALLOPROTEINASES                                             | 33  | 0.3459823  | 0.3459823  | 0.0010225 | 0.44709906 | 1 | 6810 tags=48%, list=14%, signal=56%   |
| REACTOME_OVARIAN TUMOR<br>DOMAIN PROTEASES                                                      | REACTOME_OVARIAN TUMOR DOMAIN<br>PROTEASES                                                      | 38  | 0.34594074 | 0.34594074 | 0         | 0.4458941  | 1 | 3690 tags=42%, list=8%, signal=46%    |

|                                                                                       |                                                                                                      |     |            |            |           |            |   |                                        |
|---------------------------------------------------------------------------------------|------------------------------------------------------------------------------------------------------|-----|------------|------------|-----------|------------|---|----------------------------------------|
| REACTOME_ACTIVATION OF IRF3/IRF7 MEDIATED BY TBK1/IKK EPSILON                         | REACTOME_ACTIVATION OF IRF3/IRF7 MEDIATED BY TBK1/IKK EPSILON                                        | 18  | 0.3457311  | 0.3457311  | 0.0243902 | 0.44534117 | 1 | 7559 tags=50%, list=15%, signal=59%    |
| REACTOME_TP53 REGULATES TRANSCRIPTION OF CASPASE ACTIVATORS AND CASPASES              | REACTOME_TP53 REGULATES TRANSCRIPTION OF CASPASE ACTIVATORS AND CASPASES                             | 12  | 0.3454232  | 0.3454232  | 0.0833333 | 0.44519347 | 1 | 7572 tags=50%, list=15%, signal=59%    |
| REACTOME_PENTOSE PHOSPHATE PATHWAY (HEXOSE MONOPHOSPHATE SHUNT)                       | REACTOME_PENTOSE PHOSPHATE PATHWAY (HEXOSE MONOPHOSPHATE SHUNT)                                      | 15  | 0.3442152  | 0.3442152  | 0.0486815 | 0.44852263 | 1 | 6000 tags=47%, list=12%, signal=53%    |
| REACTOME_DISEASES ASSOCIATED WITH GLYCOSAMINOGLYCAN                                   | REACTOME_DISEASES ASSOCIATED WITH GLYCOSAMINOGLYCAN METABOLISM                                       | 26  | 0.34371832 | 0.34371832 | 0.0010163 | 0.44906783 | 1 | 5777 tags=46%, list=12%, signal=52%    |
| REACTOME_DEFECTIVE C1GALT1C1 CAUSES TN POLYAGGLUTINATION                              | REACTOME_DEFECTIVE C1GALT1C1 CAUSES TN POLYAGGLUTINATION SYNDROME (TNPS)                             | 17  | 0.34331393 | 0.34331393 | 0.0240964 | 0.44924432 | 1 | 17758 tags=71%, list=36%, signal=111%  |
| REACTOME_DEFECTIVE GALNT12 CAUSES COLORECTAL CANCER 1 (CRCS1)                         | REACTOME_DEFECTIVE GALNT12 CAUSES COLORECTAL CANCER 1 (CRCS1)                                        | 17  | 0.34331393 | 0.34331393 | 0.0300971 | 0.44790328 | 1 | 17758 tags=71%, list=36%, signal=111%  |
| REACTOME_DEFECTIVE GALNT3 CAUSES FAMILIAL HYPERPHOSPHATEMIC TUMORAL CALCINOSIS (HFTC) | REACTOME_DEFECTIVE GALNT3 CAUSES FAMILIAL HYPERPHOSPHATEMIC TUMORAL CALCINOSIS (HFTC)                | 17  | 0.34331393 | 0.34331393 | 0.0214724 | 0.44657028 | 1 | 17758 tags=71%, list=36%, signal=111%  |
| REACTOME_INTERLEUKIN-10 SIGNALING                                                     | REACTOME_INTERLEUKIN-10 SIGNALING                                                                    | 46  | 0.34318265 | 0.34318265 | 0         | 0.4457489  | 1 | 16209 tags=67%, list=33%, signal=101%  |
| REACTOME_DEREGULATED CDK5 TRIGGERS MULTIPLE NEURODEGENERATIVE PATHWAYS IN ALZHEIMER'S | REACTOME_DEREGULATED CDK5 TRIGGERS MULTIPLE NEURODEGENERATIVE PATHWAYS IN ALZHEIMER'S DISEASE MODELS | 22  | 0.3409848  | 0.3409848  | 0.0112936 | 0.45264742 | 1 | 5567 tags=45%, list=11%, signal=51%    |
| REACTOME_NEURODEGENERATIVE DISEASES                                                   | REACTOME_NEURODEGENERATIVE DISEASES                                                                  | 22  | 0.3409848  | 0.3409848  | 0.0050201 | 0.45131215 | 1 | 5567 tags=45%, list=11%, signal=51%    |
| REACTOME_ZINC                                                                         | REACTOME_ZINC TRANSPORTERS                                                                           | 17  | 0.3400884  | 0.3400884  | 0.0317164 | 0.45329422 | 1 | 9275 tags=53%, list=19%, signal=65%    |
| REACTOME_INTERLEUKIN-9 SIGNALING                                                      | REACTOME_INTERLEUKIN-9 SIGNALING                                                                     | 3   | 0.33973968 | 0.33973968 | 0.7805826 | 0.45340908 | 1 | 16008 tags=67%, list=33%, signal=99%   |
| REACTOME_SIGNALING BY PTK6                                                            | REACTOME_SIGNALING BY PTK6                                                                           | 59  | 0.3393712  | 0.3393712  | 0         | 0.45344183 | 1 | 9959 tags=54%, list=20%, signal=68%    |
| REACTOME_PROTON/OLIGOPEPTIDE COTRANSPORTERS                                           | REACTOME_PROTON/OLIGOPEPTIDE COTRANSPORTERS                                                          | 4   | 0.33852455 | 0.33852455 | 0.626601  | 0.45519406 | 1 | 7907 tags=50%, list=16%, signal=60%    |
| REACTOME_LIGAND-RECEPTOR INTERACTIONS                                                 | REACTOME_LIGAND-RECEPTOR INTERACTIONS                                                                | 8   | 0.33820495 | 0.33820495 | 0.2634731 | 0.45502344 | 1 | 7924 tags=50%, list=16%, signal=60%    |
| REACTOME_HS-GAG                                                                       | REACTOME_HS-GAG BIOSYNTHESIS                                                                         | 31  | 0.3377551  | 0.3377551  | 0.002006  | 0.45540106 | 1 | 4005 tags=42%, list=8%, signal=46%     |
| REACTOME_RESPONSE TO ELEVATED PLATELET CYTOSOLIC CA2+                                 | REACTOME_RESPONSE TO ELEVATED PLATELET CYTOSOLIC CA2+                                                | 133 | 0.33683047 | 0.33683047 | 0         | 0.45763665 | 1 | 7113 tags=48%, list=15%, signal=56%    |
| REACTOME_CELL JUNCTION ORGANIZATION                                                   | REACTOME_CELL JUNCTION ORGANIZATION                                                                  | 87  | 0.33623007 | 0.33623007 | 0         | 0.4585941  | 1 | 13394 tags=61%, list=27%, signal=84%   |
| REACTOME_SYNTHESIS OF EPOXY (EET) AND DIHYDROXYEICOSATRIENOIC ACIDS (DHET)            | REACTOME_SYNTHESIS OF EPOXY (EET) AND DIHYDROXYEICOSATRIENOIC ACIDS (DHET)                           | 8   | 0.335907   | 0.335907   | 0.2512219 | 0.45855284 | 1 | 32519 tags=100%, list=66%, signal=298% |
| REACTOME_LEADING STRAND SYNTHESIS                                                     | REACTOME_LEADING STRAND SYNTHESIS                                                                    | 14  | 0.33503914 | 0.33503914 | 0.0704663 | 0.46068445 | 1 | 15076 tags=64%, list=31%, signal=93%   |
| REACTOME_POLYMERASE SWITCHING                                                         | REACTOME_POLYMERASE SWITCHING                                                                        | 14  | 0.33503914 | 0.33503914 | 0.0549793 | 0.4593682  | 1 | 15076 tags=64%, list=31%, signal=93%   |

|                                                                                        |                                                                                 |    |            |            |           |            |   |                                       |
|----------------------------------------------------------------------------------------|---------------------------------------------------------------------------------|----|------------|------------|-----------|------------|---|---------------------------------------|
| REACTOME_POLYMERASE SWITCHING ON THE C-STRAND OF THE TELOMERE                          | REACTOME_POLYMERASE SWITCHING ON THE C-STRAND OF THE TELOMERE                   | 14 | 0.33503914 | 0.33503914 | 0.0720632 | 0.45805946 | 1 | 15076 tags=64%, list=31%, signal=93%  |
| REACTOME_REMOVAL OF THE FLAP INTERMEDIATE                                              | REACTOME_REMOVAL OF THE FLAP INTERMEDIATE                                       | 14 | 0.33503914 | 0.33503914 | 0.0414079 | 0.45675814 | 1 | 15076 tags=64%, list=31%, signal=93%  |
| REACTOME_ACYL CHAIN REMODELLING OF PI                                                  | REACTOME_ACYL CHAIN REMODELLING OF PI                                           | 17 | 0.33278054 | 0.33278054 | 0.026     | 0.4642657  | 1 | 12513 tags=59%, list=26%, signal=79%  |
| REACTOME_GAP JUNCTION TRAFFICKING                                                      | REACTOME_GAP JUNCTION TRAFFICKING                                               | 28 | 0.33046573 | 0.33046573 | 9.75E-04  | 0.4724442  | 1 | 11807 tags=57%, list=24%, signal=75%  |
| REACTOME_VLDL ASSEMBLY                                                                 | REACTOME_VLDL ASSEMBLY                                                          | 5  | 0.33018792 | 0.33018792 | 0.547379  | 0.4721829  | 1 | 13212 tags=60%, list=27%, signal=82%  |
| REACTOME_TP53 REGULATES TRANSCRIPTION OF CELL DEATH GENES                              | REACTOME_TP53 REGULATES TRANSCRIPTION OF CELL DEATH GENES                       | 44 | 0.3267583  | 0.3267583  | 0         | 0.48499945 | 1 | 9609 tags=52%, list=20%, signal=65%   |
| REACTOME_5-PHOSPHORIBOSE 1-DIPHOSPHATE BIOSYNTHESIS                                    | REACTOME_5-PHOSPHORIBOSE 1-DIPHOSPHATE BIOSYNTHESIS                             | 3  | 0.32643002 | 0.32643002 | 0.8092428 | 0.48495108 | 1 | 338 tags=33%, list=1%, signal=34%     |
| REACTOME_METAL ION SLC TRANSPORTERS                                                    | REACTOME_METAL ION SLC TRANSPORTERS                                             | 26 | 0.32621774 | 0.32621774 | 0.0112016 | 0.48454    | 1 | 10400 tags=54%, list=21%, signal=68%  |
| REACTOME_TP53 REGULATES TRANSCRIPTION OF GENES INVOLVED IN G2 CELL CYCLE ARREST        | REACTOME_TP53 REGULATES TRANSCRIPTION OF GENES INVOLVED IN G2 CELL CYCLE ARREST | 18 | 0.3261941  | 0.3261941  | 0.0241206 | 0.48327252 | 1 | 5795 tags=44%, list=12%, signal=50%   |
| REACTOME_ZBP1(DAI) MEDIATED INDUCTION OF TYPE I IFNS                                   | REACTOME_ZBP1(DAI) MEDIATED INDUCTION OF TYPE I IFNS                            | 27 | 0.32601872 | 0.32601872 | 0.008     | 0.4826433  | 1 | 3993 tags=41%, list=8%, signal=44%    |
| REACTOME_KERATAN SULFATE BIOSYNTHESIS                                                  | REACTOME_KERATAN SULFATE BIOSYNTHESIS                                           | 28 | 0.3259446  | 0.3259446  | 0.007992  | 0.4816153  | 1 | 6782 tags=46%, list=14%, signal=54%   |
| REACTOME_ACTIVATION, MYRISTOLYLATION OF BID AND TRANSLOCATION TO MITOCHONDRIA          | REACTOME_ACTIVATION, MYRISTOLYLATION OF BID AND TRANSLOCATION TO MITOCHONDRIA   | 4  | 0.3257593  | 0.3257593  | 0.6922301 | 0.48105133 | 1 | 8532 tags=50%, list=17%, signal=61%   |
| REACTOME_SIGNALING BY MET                                                              | REACTOME_SIGNALING BY MET                                                       | 67 | 0.3257112  | 0.3257112  | 0         | 0.47992882 | 1 | 5997 tags=45%, list=12%, signal=51%   |
| REACTOME_DISEASES ASSOCIATED WITH O-GLYCOSYLATION OF PROTEINS                          | REACTOME_DISEASES ASSOCIATED WITH O-GLYCOSYLATION OF PROTEINS                   | 59 | 0.3248688  | 0.3248688  | 0         | 0.48215875 | 1 | 13158 tags=59%, list=27%, signal=81%  |
| REACTOME_P130CAS LINKAGE TO MAPK SIGNALING FOR CELL MIGRATION AND GROWTH-CONE COLLAPSE | REACTOME_P130CAS LINKAGE TO MAPK SIGNALING FOR INTEGRINS                        | 15 | 0.32432416 | 0.32432416 | 0.0572597 | 0.48316708 | 1 | 20031 tags=73%, list=41%, signal=124% |
| REACTOME_SEMA4D INDUCED CELL MIGRATION AND GROWTH-CONE COLLAPSE                        | REACTOME_SEMA4D INDUCED CELL MIGRATION AND GROWTH-CONE COLLAPSE                 | 24 | 0.32306078 | 0.32306078 | 0.0154589 | 0.48703265 | 1 | 12751 tags=58%, list=26%, signal=79%  |
| REACTOME_ATF6 (ATF6-ALPHA) ACTIVATES CHAPERONE GENES                                   | REACTOME_ATF6 (ATF6-ALPHA) ACTIVATES CHAPERONE GENES                            | 9  | 0.32244602 | 0.32244602 | 0.229572  | 0.48819318 | 1 | 535 tags=33%, list=1%, signal=34%     |
| REACTOME_CONSTITUTIVE SIGNALING BY EGFRVIII                                            | REACTOME_CONSTITUTIVE SIGNALING BY EGFRVIII                                     | 15 | 0.32221317 | 0.32221317 | 0.0761079 | 0.4878116  | 1 | 7077 tags=47%, list=14%, signal=55%   |
| REACTOME_SIGNALING BY EGFRVIII IN CANCER                                               | REACTOME_SIGNALING BY EGFRVIII IN CANCER                                        | 15 | 0.32221317 | 0.32221317 | 0.0884692 | 0.4864896  | 1 | 7077 tags=47%, list=14%, signal=55%   |
| REACTOME_ACTIVATION OF CASPASES THROUGH APOPTOSOME-MEDIATED CLEAVAGE                   | REACTOME_ACTIVATION OF CASPASES THROUGH APOPTOSOME-MEDIATED CLEAVAGE            | 5  | 0.3221201  | 0.3221201  | 0.5777549 | 0.48554355 | 1 | 3814 tags=40%, list=8%, signal=43%    |
| REACTOME_CYTOCHROME C-MEDIATED APOPTOTIC RESPONSE                                      | REACTOME_CYTOCHROME C-MEDIATED APOPTOTIC RESPONSE                               | 5  | 0.3221201  | 0.3221201  | 0.5888224 | 0.4842348  | 1 | 3814 tags=40%, list=8%, signal=43%    |
| REACTOME_SIGNALING BY HIPPO                                                            | REACTOME_SIGNALING BY HIPPO                                                     | 20 | 0.32204005 | 0.32204005 | 0.0256158 | 0.48329425 | 1 | 16064 tags=65%, list=33%, signal=97%  |
| REACTOME_MET RECEPTOR ACTIVATION                                                       | REACTOME_MET RECEPTOR ACTIVATION                                                | 6  | 0.3215446  | 0.3215446  | 0.4699507 | 0.48419136 | 1 | 8739 tags=50%, list=18%, signal=61%   |
| REACTOME_CHEMOKINE RECEPTORS BIND CHEMOKINES                                           | REACTOME_CHEMOKINE RECEPTORS BIND CHEMOKINES                                    | 48 | 0.32017118 | 0.32017118 | 0         | 0.488584   | 1 | 11880 tags=56%, list=24%, signal=74%  |



|                                                                                    |                                                                                    |     |            |            |           |            |   |                                        |
|------------------------------------------------------------------------------------|------------------------------------------------------------------------------------|-----|------------|------------|-----------|------------|---|----------------------------------------|
| REACTOME_P75NTR RECRUITS SIGNALLING COMPLEXES                                      | REACTOME_P75NTR RECRUITS SIGNALLING COMPLEXES                                      | 13  | 0.31900167 | 0.31900167 | 0.1118744 | 0.4921977  | 1 | 10749 tags=54%, list=22%, signal=69%   |
| REACTOME_RORA ACTIVATES GENE EXPRESSION                                            | REACTOME_RORA ACTIVATES GENE EXPRESSION                                            | 27  | 0.31864506 | 0.31864506 | 0.0049702 | 0.49239174 | 1 | 18862 tags=70%, list=39%, signal=114%  |
| REACTOME_FMO OXIDISES NUCLEOPHILES                                                 | REACTOME_FMO OXIDISES NUCLEOPHILES                                                 | 3   | 0.3183898  | 0.3183898  | 0.8087649 | 0.492166   | 1 | 33375 tags=100%, list=68%, signal=314% |
| REACTOME_TGF-BETA RECEPTOR SIGNALING IN EMT (EPITHELIAL TO MESENCHYMAL TRANSITION) | REACTOME_TGF-BETA RECEPTOR SIGNALING IN EMT (EPITHELIAL TO MESENCHYMAL TRANSITION) | 16  | 0.3183556  | 0.3183556  | 0.0634441 | 0.49099642 | 1 | 5838 tags=44%, list=12%, signal=50%    |
| REACTOME_PRE-NOTCH EXPRESSION AND PROCESSING                                       | REACTOME_PRE-NOTCH EXPRESSION AND PROCESSING                                       | 48  | 0.31807962 | 0.31807962 | 0         | 0.4908356  | 1 | 8922 tags=50%, list=18%, signal=61%    |
| REACTOME_IL-6-TYPE CYTOKINE RECEPTOR LIGAND                                        | REACTOME_IL-6-TYPE CYTOKINE RECEPTOR LIGAND INTERACTIONS                           | 17  | 0.3177586  | 0.3177586  | 0.0471888 | 0.49087837 | 1 | 10368 tags=53%, list=21%, signal=67%   |
| REACTOME_DNA STRAND ELONGATION                                                     | REACTOME_DNA STRAND ELONGATION                                                     | 32  | 0.31729355 | 0.31729355 | 0.004012  | 0.49152935 | 1 | 15076 tags=63%, list=31%, signal=90%   |
| REACTOME_INTERLEUKIN-4 AND 13 SIGNALING                                            | REACTOME_INTERLEUKIN-4 AND 13 SIGNALING                                            | 111 | 0.31725067 | 0.31725067 | 0         | 0.49039626 | 1 | 19349 tags=71%, list=40%, signal=117%  |
| REACTOME_DEFECTS IN COBALAMIN (B12) METABOLISM                                     | REACTOME_DEFECTS IN COBALAMIN (B12) METABOLISM                                     | 11  | 0.31695434 | 0.31695434 | 0.1525424 | 0.49033982 | 1 | 11191 tags=55%, list=23%, signal=71%   |
| REACTOME_DNA DAMAGE REVERSAL                                                       | REACTOME_DNA DAMAGE REVERSAL                                                       | 8   | 0.31692863 | 0.31692863 | 0.3190377 | 0.48916465 | 1 | 2845 tags=38%, list=6%, signal=40%     |
| REACTOME_P75NTR NEGATIVELY REGULATES CELL CYCLE VIA SC1                            | REACTOME_P75NTR NEGATIVELY REGULATES CELL CYCLE VIA SC1                            | 6   | 0.3162306  | 0.3162306  | 0.4829015 | 0.4908527  | 1 | 17160 tags=67%, list=35%, signal=103%  |
| REACTOME_GLYCOGEN                                                                  | REACTOME_GLYCOGEN SYNTHESIS                                                        | 16  | 0.3148966  | 0.3148966  | 0.0800801 | 0.49507472 | 1 | 2947 tags=38%, list=6%, signal=40%     |
| REACTOME_POST-TRANSCRIPTIONAL SILENCING BY SMALL RNAS                              | REACTOME_POST-TRANSCRIPTIONAL SILENCING BY SMALL RNAS                              | 3   | 0.3145773  | 0.3145773  | 0.8481519 | 0.49507976 | 1 | 17240 tags=67%, list=35%, signal=103%  |
| REACTOME_PLASMA LIPOPROTEIN ASSEMBLY, REMODELING, AND CLEARANCE                    | REACTOME_PLASMA LIPOPROTEIN ASSEMBLY, REMODELING, AND CLEARANCE                    | 71  | 0.3134579  | 0.3134579  | 0         | 0.49850306 | 1 | 13638 tags=59%, list=28%, signal=82%   |
| REACTOME_RESOLUTION OF D-LOOP STRUCTURES                                           | REACTOME_RESOLUTION OF D-LOOP STRUCTURES                                           | 32  | 0.31262007 | 0.31262007 | 0.003012  | 0.50095123 | 1 | 18365 tags=69%, list=38%, signal=110%  |
| REACTOME_JOSEPHIN DOMAIN DUBS                                                      | REACTOME_JOSEPHIN DOMAIN DUBS                                                      | 12  | 0.31214637 | 0.31214637 | 0.1538462 | 0.50158936 | 1 | 9201 tags=50%, list=19%, signal=62%    |
| REACTOME_INTERFERON ALPHA/BETA SIGNALING                                           | REACTOME_INTERFERON ALPHA/BETA SIGNALING                                           | 67  | 0.31174183 | 0.31174183 | 0         | 0.50209254 | 1 | 11065 tags=54%, list=23%, signal=69%   |
| REACTOME_PURINE                                                                    | REACTOME_PURINE CATABOLISM                                                         | 18  | 0.3101972  | 0.3101972  | 0.0506823 | 0.5071841  | 1 | 6578 tags=44%, list=13%, signal=51%    |
| REACTOME_GAMMA-CARBOXYLATION, TRANSPORT, AND AMINO-TERMINAL CLEAVAGE OF PROTEINS   | REACTOME_GAMMA-CARBOXYLATION, TRANSPORT, AND AMINO-TERMINAL CLEAVAGE OF PROTEINS   | 11  | 0.30968776 | 0.30968776 | 0.1880597 | 0.5080683  | 1 | 2644 tags=36%, list=5%, signal=38%     |
| REACTOME_LOSS OF FUNCTION OF SMAD2/3 IN CANCER                                     | REACTOME_LOSS OF FUNCTION OF SMAD2/3 IN CANCER                                     | 7   | 0.30936724 | 0.30936724 | 0.4157303 | 0.5081307  | 1 | 5838 tags=43%, list=12%, signal=49%    |
| REACTOME_SMAD2/3 MH2 DOMAIN MUTANTS IN CANCER                                      | REACTOME_SMAD2/3 MH2 DOMAIN MUTANTS IN CANCER                                      | 7   | 0.30936724 | 0.30936724 | 0.4249513 | 0.50684434 | 1 | 5838 tags=43%, list=12%, signal=49%    |
| REACTOME_GROWTH HORMONE RECEPTOR SIGNALING                                         | REACTOME_GROWTH HORMONE RECEPTOR SIGNALING                                         | 22  | 0.30915186 | 0.30915186 | 0.0258373 | 0.5064254  | 1 | 7125 tags=45%, list=15%, signal=53%    |
| REACTOME_PTK6 REGULATES CELL CYCLE                                                 | REACTOME_PTK6 REGULATES CELL CYCLE                                                 | 6   | 0.30687925 | 0.30687925 | 0.5341797 | 0.51457417 | 1 | 9457 tags=50%, list=19%, signal=62%    |
| REACTOME_O-LINKED GLYCOSYLATION OF MUCINS                                          | REACTOME_O-LINKED GLYCOSYLATION OF MUCINS                                          | 65  | 0.30573383 | 0.30573383 | 0         | 0.51821655 | 1 | 12921 tags=57%, list=26%, signal=77%   |

|                                                                                  |                                                                                  |     |            |            |           |            |   |                                       |
|----------------------------------------------------------------------------------|----------------------------------------------------------------------------------|-----|------------|------------|-----------|------------|---|---------------------------------------|
| REACTOME_CYTOSOLIC TRNA AMINOACYLATION                                           | REACTOME_CYTOSOLIC TRNA AMINOACYLATION                                           | 24  | 0.30567676 | 0.30567676 | 0.019861  | 0.51715195 | 1 | 15642 tags=63%, list=32%, signal=92%  |
| REACTOME_GAP JUNCTION TRAFFICKING AND REGULATION                                 | REACTOME_GAP JUNCTION TRAFFICKING AND REGULATION                                 | 30  | 0.305429   | 0.305429   | 0.0070922 | 0.5168886  | 1 | 16064 tags=63%, list=33%, signal=94%  |
| REACTOME_HIGHLY CALCIUM PERMEABLE POSTSYNAPTIC NICOTINIC ACETYLCHOLINE RECEPTORS | REACTOME_HIGHLY CALCIUM PERMEABLE POSTSYNAPTIC NICOTINIC ACETYLCHOLINE RECEPTORS | 11  | 0.30426154 | 0.30426154 | 0.1935484 | 0.5204392  | 1 | 7361 tags=45%, list=15%, signal=53%   |
| REACTOME_DOWNREGULATION OF ERBB2 SIGNALING                                       | REACTOME_DOWNREGULATION OF ERBB2 SIGNALING                                       | 29  | 0.3039036  | 0.3039036  | 0.0069583 | 0.52065074 | 1 | 7077 tags=45%, list=14%, signal=52%   |
| REACTOME_P38MAPK EVENTS                                                          | REACTOME_P38MAPK EVENTS                                                          | 13  | 0.30358154 | 0.30358154 | 0.1329423 | 0.5206759  | 1 | 26570 tags=85%, list=54%, signal=185% |
| REACTOME_MRNA EDITING                                                            | REACTOME_MRNA EDITING                                                            | 9   | 0.3032973  | 0.3032973  | 0.2979146 | 0.5206047  | 1 | 6913 tags=44%, list=14%, signal=52%   |
| REACTOME_RESOLUTION OF D-LOOP STRUCTURES THROUGH HOLLIDAY JUNCTION               | REACTOME_RESOLUTION OF D-LOOP STRUCTURES THROUGH HOLLIDAY JUNCTION INTERMEDIATES | 31  | 0.30252662 | 0.30252662 | 0.0076923 | 0.52266186 | 1 | 18365 tags=68%, list=38%, signal=108% |
| REACTOME_RHO GTPASES ACTIVATE ROCKS                                              | REACTOME_RHO GTPASES ACTIVATE ROCKS                                              | 18  | 0.3017595  | 0.3017595  | 0.0574018 | 0.52467215 | 1 | 6991 tags=44%, list=14%, signal=52%   |
| REACTOME_OTHER INTERLEUKIN SIGNALING                                             | REACTOME_OTHER INTERLEUKIN SIGNALING                                             | 34  | 0.3012928  | 0.3012928  | 0.0020222 | 0.5254317  | 1 | 29901 tags=91%, list=61%, signal=234% |
| REACTOME_CARGO CONCENTRATION IN THE ER                                           | REACTOME_CARGO CONCENTRATION IN THE ER                                           | 33  | 0.3010963  | 0.3010963  | 0.0038835 | 0.52499    | 1 | 4555 tags=39%, list=9%, signal=43%    |
| REACTOME_WAX BIOSYNTHESIS                                                        | REACTOME_WAX BIOSYNTHESIS                                                        | 4   | 0.3010917  | 0.3010917  | 0.7664974 | 0.5237187  | 1 | 21981 tags=75%, list=45%, signal=136% |
| REACTOME_REGULATION OF TP53 ACTIVITY THROUGH ASSOCIATION WITH CO-FACTORS         | REACTOME_REGULATION OF TP53 ACTIVITY THROUGH ASSOCIATION WITH CO-FACTORS         | 14  | 0.30081105 | 0.30081105 | 0.13381   | 0.5236963  | 1 | 20249 tags=71%, list=41%, signal=122% |
| REACTOME_ESTABLISHMENT OF SISTER CHROMATID COHESION                              | REACTOME_ESTABLISHMENT OF SISTER CHROMATID COHESION                              | 11  | 0.3005326  | 0.3005326  | 0.208498  | 0.5236051  | 1 | 25349 tags=82%, list=52%, signal=170% |
| REACTOME_NUCLEOTIDE-LIKE (PURINERGIC) RECEPTORS                                  | REACTOME_NUCLEOTIDE-LIKE (PURINERGIC) RECEPTORS                                  | 15  | 0.30039498 | 0.30039498 | 0.1009901 | 0.5229677  | 1 | 8145 tags=47%, list=17%, signal=56%   |
| REACTOME_GAP JUNCTION ASSEMBLY                                                   | REACTOME_GAP JUNCTION ASSEMBLY                                                   | 19  | 0.30032992 | 0.30032992 | 0.0571705 | 0.52198696 | 1 | 8493 tags=47%, list=17%, signal=57%   |
| REACTOME_REGULATION OF RUNX1 EXPRESSION AND ACTIVITY                             | REACTOME_REGULATION OF RUNX1 EXPRESSION AND ACTIVITY                             | 17  | 0.2999582  | 0.2999582  | 0.075     | 0.52229303 | 1 | 8359 tags=47%, list=17%, signal=57%   |
| REACTOME_DDX58/IFIH1-MEDIATED INDUCTION OF INTERFERON-ALPHA/BETA                 | REACTOME_DDX58/IFIH1-MEDIATED INDUCTION OF INTERFERON-ALPHA/BETA                 | 80  | 0.29988238 | 0.29988238 | 0         | 0.52132076 | 1 | 12270 tags=55%, list=25%, signal=73%  |
| REACTOME_TRNA AMINOACYLATION                                                     | REACTOME_TRNA AMINOACYLATION                                                     | 42  | 0.29983172 | 0.29983172 | 0         | 0.5203068  | 1 | 15642 tags=62%, list=32%, signal=91%  |
| REACTOME_EPH-EPHRIN SIGNALING                                                    | REACTOME_EPH-EPHRIN SIGNALING                                                    | 95  | 0.29930213 | 0.29930213 | 0         | 0.52134675 | 1 | 12174 tags=55%, list=25%, signal=73%  |
| REACTOME_GAMMA CARBOXYLATION, HYPUSINE FORMATION AND ARYLSULFATASE ACTIVATION    | REACTOME_GAMMA CARBOXYLATION, HYPUSINE FORMATION AND ARYLSULFATASE ACTIVATION    | 39  | 0.29914984 | 0.29914984 | 0         | 0.5206644  | 1 | 5451 tags=41%, list=11%, signal=46%   |
| REACTOME_METABOLISM OF CARBOHYDRATES                                             | REACTOME_METABOLISM OF CARBOHYDRATES                                             | 271 | 0.29678404 | 0.29678404 | 0         | 0.5294922  | 1 | 7410 tags=45%, list=15%, signal=52%   |
| REACTOME_DISEASES OF GLYCOSYLATION                                               | REACTOME_DISEASES OF GLYCOSYLATION                                               | 85  | 0.2964776  | 0.2964776  | 0         | 0.5295876  | 1 | 13158 tags=56%, list=27%, signal=77%  |
| REACTOME_UNFOLDED PROTEIN RESPONSE (UPR)                                         | REACTOME_UNFOLDED PROTEIN RESPONSE (UPR)                                         | 93  | 0.2958283  | 0.2958283  | 0         | 0.5311535  | 1 | 7128 tags=44%, list=15%, signal=51%   |
| REACTOME_ARACHIDONATE PRODUCTION FROM DAG                                        | REACTOME_ARACHIDONATE PRODUCTION FROM DAG                                        | 5   | 0.2956495  | 0.2956495  | 0.6901408 | 0.5307092  | 1 | 24696 tags=80%, list=50%, signal=161% |
| REACTOME_CYTOSOLIC IRON-SULFUR CLUSTER ASSEMBLY                                  | REACTOME_CYTOSOLIC IRON-SULFUR CLUSTER ASSEMBLY                                  | 13  | 0.2951714  | 0.2951714  | 0.1914894 | 0.5316405  | 1 | 8149 tags=46%, list=17%, signal=55%   |
| REACTOME_NECTIN/NECL TRANS HETERODIMERIZATION                                    | REACTOME_NECTIN/NECL TRANS HETERODIMERIZATION                                    | 7   | 0.29433396 | 0.29433396 | 0.4744233 | 0.5341229  | 1 | 20564 tags=71%, list=42%, signal=123% |
| REACTOME_GLYCOLYSIS                                                              | REACTOME_GLYCOLYSIS                                                              | 70  | 0.29320994 | 0.29320994 | 0         | 0.53766733 | 1 | 7347 tags=44%, list=15%, signal=52%   |

|                                                                        |                                                                                |     |            |            |           |            |   |                                        |
|------------------------------------------------------------------------|--------------------------------------------------------------------------------|-----|------------|------------|-----------|------------|---|----------------------------------------|
| REACTOME_CLASSICAL ANTIBODY-MEDIATED COMPLEMENT ACTIVATION             | REACTOME_CLASSICAL ANTIBODY-MEDIATED COMPLEMENT ACTIVATION                     | 83  | 0.29315418 | 0.29315418 | 0         | 0.5366456  | 1 | 25195 tags=81%, list=51%, signal=166%  |
| REACTOME_RHO GTPASES ACTIVATE PAKS                                     | REACTOME_RHO GTPASES ACTIVATE PAKS                                             | 21  | 0.29294705 | 0.29294705 | 0.0360531 | 0.5362289  | 1 | 20636 tags=71%, list=42%, signal=123%  |
| REACTOME_LAGGING STRAND SYNTHESIS                                      | REACTOME_LAGGING STRAND SYNTHESIS                                              | 20  | 0.29220554 | 0.29220554 | 0.0540541 | 0.53817743 | 1 | 15076 tags=60%, list=31%, signal=87%   |
| REACTOME_WNT MEDIATED ACTIVATION OF DVL                                | REACTOME_WNT MEDIATED ACTIVATION OF DVL                                        | 8   | 0.29210836 | 0.29210836 | 0.4041096 | 0.53731424 | 1 | 22422 tags=75%, list=46%, signal=138%  |
| REACTOME_REGULATION OF CHOLESTEROL BIOSYNTHESIS BY SREBP (SREBF)       | REACTOME_REGULATION OF CHOLESTEROL BIOSYNTHESIS BY SREBP (SREBF)               | 55  | 0.29066187 | 0.29066187 | 0         | 0.5421619  | 1 | 6259 tags=42%, list=13%, signal=48%    |
| REACTOME_INTERLEUKIN-35 SIGNALLING                                     | REACTOME_INTERLEUKIN-35 SIGNALLING                                             | 7   | 0.29002416 | 0.29002416 | 0.5093966 | 0.54367155 | 1 | 34765 tags=100%, list=71%, signal=345% |
| REACTOME_ACYL CHAIN REMODELLING OF PS                                  | REACTOME_ACYL CHAIN REMODELLING OF PS                                          | 22  | 0.29001456 | 0.29001456 | 0.0392562 | 0.54246366 | 1 | 12513 tags=55%, list=26%, signal=73%   |
| REACTOME_MET ACTIVATES                                                 | REACTOME_MET ACTIVATES PTPN11                                                  | 5   | 0.28968546 | 0.28968546 | 0.6900585 | 0.54264116 | 1 | 34781 tags=100%, list=71%, signal=345% |
| REACTOME_ORGANIC CATION TRANSPORT                                      | REACTOME_ORGANIC CATION TRANSPORT                                              | 9   | 0.28930515 | 0.28930515 | 0.3564357 | 0.54304224 | 1 | 7598 tags=44%, list=16%, signal=53%    |
| REACTOME_SIGNALING BY                                                  | REACTOME_SIGNALING BY ACTIVIN                                                  | 13  | 0.28858253 | 0.28858253 | 0.1863231 | 0.5449764  | 1 | 4705 tags=38%, list=10%, signal=43%    |
| REACTOME_RECYCLING PATHWAY OF L1                                       | REACTOME_RECYCLING PATHWAY OF L1                                               | 28  | 0.28842187 | 0.28842187 | 0.0110664 | 0.54445636 | 1 | 10367 tags=50%, list=21%, signal=63%   |
| REACTOME_O-LINKED GLYCOSYLATION                                        | REACTOME_O-LINKED GLYCOSYLATION                                                | 114 | 0.28835642 | 0.28835642 | 0         | 0.5435201  | 1 | 10395 tags=50%, list=21%, signal=63%   |
| REACTOME_REGULATION OF KIT SIGNALING                                   | REACTOME_REGULATION OF KIT SIGNALING                                           | 16  | 0.28815323 | 0.28815323 | 0.118593  | 0.5431579  | 1 | 13437 tags=56%, list=27%, signal=77%   |
| REACTOME_REACTIONS SPECIFIC TO THE COMPLEX N-GLYCAN SYNTHESIS PATHWAY  | REACTOME_REACTIONS SPECIFIC TO THE COMPLEX N-GLYCAN SYNTHESIS PATHWAY          | 10  | 0.2870289  | 0.2870289  | 0.3346939 | 0.5467845  | 1 | 20223 tags=70%, list=41%, signal=119%  |
| REACTOME_PRE-NOTCH TRANSCRIPTION AND                                   | REACTOME_PRE-NOTCH TRANSCRIPTION AND TRANSLATION                               | 32  | 0.28670517 | 0.28670517 | 0.009901  | 0.54692364 | 1 | 8922 tags=47%, list=18%, signal=57%    |
| REACTOME_SIGNALING BY                                                  | REACTOME_SIGNALING BY NOTCH2                                                   | 32  | 0.28670517 | 0.28670517 | 0.0133333 | 0.54568344 | 1 | 8922 tags=47%, list=18%, signal=57%    |
| REACTOME_VITAMINS B6 ACTIVATION TO PYRIDOXAL PHOSPHATE                 | REACTOME_VITAMINS B6 ACTIVATION TO PYRIDOXAL PHOSPHATE                         | 3   | 0.28639898 | 0.28639898 | 0.9170041 | 0.5457979  | 1 | 2298 tags=33%, list=5%, signal=35%     |
| REACTOME_TAK1 ACTIVATES NFKB BY PHOSPHORYLATION AND ACTIVATION OF IKKS | REACTOME_TAK1 ACTIVATES NFKB BY PHOSPHORYLATION AND ACTIVATION OF IKKS COMPLEX | 30  | 0.28527302 | 0.28527302 | 0.0092402 | 0.54937786 | 1 | 3993 tags=37%, list=8%, signal=40%     |
| REACTOME_MET ACTIVATES RAP1 AND RAC1                                   | REACTOME_MET ACTIVATES RAP1 AND RAC1                                           | 11  | 0.28508767 | 0.28508767 | 0.2602339 | 0.5489587  | 1 | 12751 tags=55%, list=26%, signal=74%   |
| REACTOME_INTEGRIN ALPHAII B BETA3 SIGNALING                            | REACTOME_INTEGRIN ALPHAII B BETA3 SIGNALING                                    | 27  | 0.28506893 | 0.28506893 | 0.0219342 | 0.5477947  | 1 | 5997 tags=41%, list=12%, signal=46%    |
| REACTOME_GRB7 EVENTS IN ERBB2 SIGNALING                                | REACTOME_GRB7 EVENTS IN ERBB2 SIGNALING                                        | 5   | 0.2850286  | 0.2850286  | 0.7175421 | 0.5467253  | 1 | 5630 tags=40%, list=11%, signal=45%    |
| REACTOME_ER QUALITY CONTROL COMPARTMENT                                | REACTOME_ER QUALITY CONTROL COMPARTMENT (ERQC)                                 | 21  | 0.28476763 | 0.28476763 | 0.0561685 | 0.5466526  | 1 | 9378 tags=48%, list=19%, signal=59%    |
| REACTOME_HSF1-DEPENDENT TRANSACTIVATION                                | REACTOME_HSF1-DEPENDENT TRANSACTIVATION                                        | 34  | 0.28333655 | 0.28333655 | 0.0112821 | 0.5517544  | 1 | 14938 tags=59%, list=31%, signal=85%   |
| REACTOME_INTERFERON GAMMA SIGNALING                                    | REACTOME_INTERFERON GAMMA SIGNALING                                            | 91  | 0.2830245  | 0.2830245  | 0         | 0.5519354  | 1 | 10918 tags=51%, list=22%, signal=65%   |
| REACTOME_REGULATION OF INNATE IMMUNE RESPONSES TO CYTOSOLIC DNA        | REACTOME_REGULATION OF INNATE IMMUNE RESPONSES TO CYTOSOLIC DNA                | 14  | 0.28219038 | 0.28219038 | 0.1831276 | 0.55434406 | 1 | 3673 tags=36%, list=8%, signal=39%     |
| REACTOME_MTF1 ACTIVATES GENE EXPRESSION                                | REACTOME_MTF1 ACTIVATES GENE EXPRESSION                                        | 3   | 0.2820691  | 0.2820691  | 0.9322866 | 0.5536595  | 1 | 2510 tags=33%, list=5%, signal=35%     |

|                                                                                              |                                                                                              |    |            |            |           |            |   |                                        |
|----------------------------------------------------------------------------------------------|----------------------------------------------------------------------------------------------|----|------------|------------|-----------|------------|---|----------------------------------------|
| REACTOME_INITIAL TRIGGERING OF COMPLEMENT                                                    | REACTOME_INITIAL TRIGGERING OF COMPLEMENT                                                    | 98 | 0.28191096 | 0.28191096 | 0         | 0.5530564  | 1 | 25195 tags=80%, list=51%, signal=164%  |
| REACTOME_EGFR TRANSACTIVATION BY GASTRIN                                                     | REACTOME_EGFR TRANSACTIVATION BY GASTRIN                                                     | 9  | 0.28156805 | 0.28156805 | 0.3985944 | 0.55336887 | 1 | 29739 tags=89%, list=61%, signal=226%  |
| REACTOME_EPH-EPHRIN MEDIATED REPULSION OF CELLS                                              | REACTOME_EPH-EPHRIN MEDIATED REPULSION OF CELLS                                              | 48 | 0.28151172 | 0.28151172 | 0.0019666 | 0.55239636 | 1 | 12751 tags=54%, list=26%, signal=73%   |
| REACTOME_ADVANCED GLYCOSYLATION ENDPRODUCT RECEPTOR SIGNALING                                | REACTOME_ADVANCED GLYCOSYLATION ENDPRODUCT RECEPTOR SIGNALING                                | 13 | 0.28119698 | 0.28119698 | 0.2077922 | 0.5525913  | 1 | 1300 tags=31%, list=3%, signal=32%     |
| REACTOME_CHOLINE                                                                             | REACTOME_CHOLINE CATABOLISM                                                                  | 6  | 0.28053066 | 0.28053066 | 0.6632653 | 0.5541742  | 1 | 10747 tags=50%, list=22%, signal=64%   |
| REACTOME_MAP3K8 (TPL2)-DEPENDENT MAPK1/3                                                     | REACTOME_MAP3K8 (TPL2)-DEPENDENT MAPK1/3 ACTIVATION                                          | 16 | 0.28041813 | 0.28041813 | 0.1189516 | 0.55345047 | 1 | 7695 tags=44%, list=16%, signal=52%    |
| REACTOME_METABOLISM OF NITRIC OXIDE                                                          | REACTOME_METABOLISM OF NITRIC OXIDE                                                          | 20 | 0.2802993  | 0.2802993  | 0.0651068 | 0.5527724  | 1 | 8314 tags=45%, list=17%, signal=54%    |
| REACTOME_ENOS ACTIVATION AND REGULATION                                                      | REACTOME_ENOS ACTIVATION AND REGULATION                                                      | 20 | 0.2802993  | 0.2802993  | 0.0618661 | 0.5515681  | 1 | 8314 tags=45%, list=17%, signal=54%    |
| REACTOME_PECAM1                                                                              | REACTOME_PECAM1 INTERACTIONS                                                                 | 12 | 0.2802263  | 0.2802263  | 0.2589852 | 0.55068994 | 1 | 14844 tags=58%, list=30%, signal=84%   |
| REACTOME_RUNX1 REGULATES TRANSCRIPTION OF GENES INVOLVED IN BCR SIGNALING                    | REACTOME_RUNX1 REGULATES TRANSCRIPTION OF GENES INVOLVED IN BCR SIGNALING                    | 6  | 0.28016642 | 0.28016642 | 0.6669951 | 0.54973775 | 1 | 2604 tags=33%, list=5%, signal=35%     |
| REACTOME_PKMTS METHYLATE HISTONE LYSINES                                                     | REACTOME_PKMTS METHYLATE HISTONE LYSINES                                                     | 45 | 0.2800945  | 0.2800945  | 9.90E-04  | 0.54886705 | 1 | 8059 tags=44%, list=16%, signal=53%    |
| REACTOME_RESOLUTION OF D-LOOP STRUCTURES THROUGH SYNTHESIS-DEPENDENT STRAND ANNEALING (SDSA) | REACTOME_RESOLUTION OF D-LOOP STRUCTURES THROUGH SYNTHESIS-DEPENDENT STRAND ANNEALING (SDSA) | 26 | 0.27891004 | 0.27891004 | 0.025641  | 0.55281675 | 1 | 18365 tags=65%, list=38%, signal=105%  |
| REACTOME_ACTIVATED NOTCH1 TRANSMITS SIGNAL TO THE NUCLEUS                                    | REACTOME_ACTIVATED NOTCH1 TRANSMITS SIGNAL TO THE NUCLEUS                                    | 30 | 0.27886313 | 0.27886313 | 0.0091556 | 0.5518093  | 1 | 7571 tags=43%, list=15%, signal=51%    |
| REACTOME_TIGHT JUNCTION INTERACTIONS                                                         | REACTOME_TIGHT JUNCTION INTERACTIONS                                                         | 29 | 0.27865317 | 0.27865317 | 0.0173077 | 0.55161065 | 1 | 13378 tags=55%, list=27%, signal=76%   |
| REACTOME_CRMPS IN SEMA3A SIGNALING                                                           | REACTOME_CRMPS IN SEMA3A SIGNALING                                                           | 16 | 0.27849138 | 0.27849138 | 0.1325301 | 0.5511438  | 1 | 4729 tags=38%, list=10%, signal=41%    |
| REACTOME_REGULATION OF THYROID HORMONE ACTIVITY                                              | REACTOME_REGULATION OF THYROID HORMONE ACTIVITY                                              | 3  | 0.27817494 | 0.27817494 | 0.9381339 | 0.5514128  | 1 | 35344 tags=100%, list=72%, signal=359% |
| REACTOME_ASSEMBLY OF ACTIVE LPL AND LIPC LIPASE                                              | REACTOME_ASSEMBLY OF ACTIVE LPL AND LIPC LIPASE COMPLEXES                                    | 19 | 0.277797   | 0.277797   | 0.0861723 | 0.55191493 | 1 | 12173 tags=53%, list=25%, signal=70%   |
| REACTOME_TP53 REGULATES TRANSCRIPTION OF CELL CYCLE GENES                                    | REACTOME_TP53 REGULATES TRANSCRIPTION OF CELL CYCLE GENES                                    | 48 | 0.27777836 | 0.27777836 | 9.71E-04  | 0.55081356 | 1 | 6813 tags=42%, list=14%, signal=48%    |
| REACTOME_AUTOINTEGRATION RESULTS IN VIRAL DNA CIRCLES                                        | REACTOME_AUTOINTEGRATION RESULTS IN VIRAL DNA CIRCLES                                        | 3  | 0.27757582 | 0.27757582 | 0.9324727 | 0.5505357  | 1 | 2730 tags=33%, list=6%, signal=35%     |
| REACTOME_INTEGRATION OF VIRAL DNA INTO HOST GENOMIC                                          | REACTOME_INTEGRATION OF VIRAL DNA INTO HOST GENOMIC DNA                                      | 3  | 0.27757582 | 0.27757582 | 0.9424032 | 0.5493668  | 1 | 2730 tags=33%, list=6%, signal=35%     |
| REACTOME_METABOLISM OF FOLATE AND PTERINES                                                   | REACTOME_METABOLISM OF FOLATE AND PTERINES                                                   | 17 | 0.27753222 | 0.27753222 | 0.1166181 | 0.54839236 | 1 | 12337 tags=53%, list=25%, signal=71%   |
| REACTOME_SMAD2/SMAD3:SMAD4 HETEROTRIMER REGULATES TRANSCRIPTION                              | REACTOME_SMAD2/SMAD3:SMAD4 HETEROTRIMER REGULATES TRANSCRIPTION                              | 32 | 0.2773595  | 0.2773595  | 0.0117073 | 0.54801863 | 1 | 6319 tags=41%, list=13%, signal=47%    |
| REACTOME_BASIGIN                                                                             | REACTOME_BASIGIN INTERACTIONS                                                                | 25 | 0.27693093 | 0.27693093 | 0.0404858 | 0.5486556  | 1 | 25618 tags=80%, list=52%, signal=168%  |
| REACTOME_O-GLYCOSYLATION OF TSR DOMAIN-CONTAINING                                            | REACTOME_O-GLYCOSYLATION OF TSR DOMAIN-CONTAINING PROTEINS                                   | 39 | 0.2767691  | 0.2767691  | 0.0071795 | 0.5482207  | 1 | 6546 tags=41%, list=13%, signal=47%    |
| REACTOME_TNFR1-MEDIATED CERAMIDE PRODUCTION                                                  | REACTOME_TNFR1-MEDIATED CERAMIDE PRODUCTION                                                  | 6  | 0.27662945 | 0.27662945 | 0.6653307 | 0.54765534 | 1 | 10938 tags=50%, list=22%, signal=64%   |

|                                                                                            |                                                                                            |     |            |            |           |            |   |                                        |
|--------------------------------------------------------------------------------------------|--------------------------------------------------------------------------------------------|-----|------------|------------|-----------|------------|---|----------------------------------------|
| REACTOME_CONSTITUTIVE SIGNALING BY LIGAND-RESPONSIVE EGFR CANCER                           | REACTOME_CONSTITUTIVE SIGNALING BY LIGAND-RESPONSIVE EGFR CANCER VARIANTS                  | 19  | 0.27660775 | 0.27660775 | 0.0961338 | 0.5466043  | 1 | 7077 tags=42%, list=14%, signal=49%    |
| REACTOME_SIGNALING BY EGFR IN CANCER                                                       | REACTOME_SIGNALING BY EGFR IN CANCER                                                       | 19  | 0.27660775 | 0.27660775 | 0.1126761 | 0.54546076 | 1 | 7077 tags=42%, list=14%, signal=49%    |
| REACTOME_SIGNALING BY LIGAND-RESPONSIVE EGFR VARIANTS IN CANCER                            | REACTOME_SIGNALING BY LIGAND-RESPONSIVE EGFR VARIANTS IN CANCER                            | 19  | 0.27660775 | 0.27660775 | 0.0869141 | 0.544322   | 1 | 7077 tags=42%, list=14%, signal=49%    |
| REACTOME_ARYL HYDROCARBON RECEPTOR                                                         | REACTOME_ARYL HYDROCARBON RECEPTOR SIGNALLING                                              | 7   | 0.2765636  | 0.2765636  | 0.5693359 | 0.54337424 | 1 | 7444 tags=43%, list=15%, signal=51%    |
| REACTOME_GENERATION OF SECOND MESSENGER                                                    | REACTOME_GENERATION OF SECOND MESSENGER MOLECULES                                          | 34  | 0.27598825 | 0.27598825 | 0.0088583 | 0.54474473 | 1 | 19618 tags=68%, list=40%, signal=113%  |
| REACTOME_DEFECTIVE B3GALT CAUSES PETERS-PLUS SYNDROME (PPS)                                | REACTOME_DEFECTIVE B3GALT CAUSES PETERS-PLUS SYNDROME (PPS)                                | 37  | 0.2757842  | 0.2757842  | 0.0088933 | 0.54449314 | 1 | 12973 tags=54%, list=26%, signal=73%   |
| REACTOME_TELOMERE C-STRAND (LAGGING STRAND)                                                | REACTOME_TELOMERE C-STRAND (LAGGING STRAND) SYNTHESIS                                      | 24  | 0.2755546  | 0.2755546  | 0.0433498 | 0.5443826  | 1 | 15076 tags=58%, list=31%, signal=84%   |
| REACTOME_REGULATION OF PYRUVATE DEHYDROGENASE (PDH) COMPLEX                                | REACTOME_REGULATION OF PYRUVATE DEHYDROGENASE (PDH) COMPLEX                                | 15  | 0.27529454 | 0.27529454 | 0.1756098 | 0.5443478  | 1 | 12638 tags=53%, list=26%, signal=72%   |
| REACTOME_CATION-COUPLED CHLORIDE COTRANSPORTERS                                            | REACTOME_CATION-COUPLED CHLORIDE COTRANSPORTERS                                            | 7   | 0.27460274 | 0.27460274 | 0.5625    | 0.5460637  | 1 | 545 tags=29%, list=1%, signal=29%      |
| REACTOME_FICOLINS BIND TO REPETITIVE CARBOHYDRATE STRUCTURES ON THE TARGET CELL SURFACE    | REACTOME_FICOLINS BIND TO REPETITIVE CARBOHYDRATE STRUCTURES ON THE TARGET CELL SURFACE    | 5   | 0.27422386 | 0.27422386 | 0.7517803 | 0.54651946 | 1 | 6159 tags=40%, list=13%, signal=46%    |
| REACTOME_ION INFLUX/EFFLUX AT HOST-PATHOGEN INTERFACE                                      | REACTOME_ION INFLUX/EFFLUX AT HOST-PATHOGEN INTERFACE                                      | 4   | 0.27405488 | 0.27405488 | 0.8305253 | 0.546125   | 1 | 35546 tags=100%, list=73%, signal=365% |
| REACTOME_TFAP2 (AP-2) FAMILY REGULATES TRANSCRIPTION OF GROWTH FACTORS AND THEIR RECEPTORS | REACTOME_TFAP2 (AP-2) FAMILY REGULATES TRANSCRIPTION OF GROWTH FACTORS AND THEIR RECEPTORS | 13  | 0.27396855 | 0.27396855 | 0.2317881 | 0.5453385  | 1 | 16720 tags=62%, list=34%, signal=93%   |
| REACTOME_APOPTOTIC CLEAVAGE OF CELLULAR                                                    | REACTOME_APOPTOTIC CLEAVAGE OF CELLULAR PROTEINS                                           | 37  | 0.27364534 | 0.27364534 | 0.0069238 | 0.5456442  | 1 | 3814 tags=35%, list=8%, signal=38%     |
| REACTOME_GLYCOGEN METABOLISM                                                               | REACTOME_GLYCOGEN METABOLISM                                                               | 27  | 0.27327776 | 0.27327776 | 0.0240848 | 0.5460979  | 1 | 2947 tags=33%, list=6%, signal=35%     |
| REACTOME_FCGR ACTIVATION                                                                   | REACTOME_FCGR ACTIVATION                                                                   | 89  | 0.2724404  | 0.2724404  | 0         | 0.5486019  | 1 | 25195 tags=79%, list=51%, signal=162%  |
| REACTOME_ATTENUATION                                                                       | REACTOME_ATTENUATION PHASE                                                                 | 26  | 0.27197203 | 0.27197203 | 0.0284035 | 0.54950166 | 1 | 14938 tags=58%, list=31%, signal=83%   |
| REACTOME_DOWNREGULATION OF ERBB2:ERBB3 SIGNALING                                           | REACTOME_DOWNREGULATION OF ERBB2:ERBB3 SIGNALING                                           | 13  | 0.27185187 | 0.27185187 | 0.2345906 | 0.54892075 | 1 | 5524 tags=38%, list=11%, signal=43%    |
| REACTOME_PHASE 3 - RAPID REPOLARISATION                                                    | REACTOME_PHASE 3 - RAPID REPOLARISATION                                                    | 8   | 0.27174357 | 0.27174357 | 0.5055388 | 0.5482534  | 1 | 23419 tags=75%, list=48%, signal=144%  |
| REACTOME_DOWNREGULATION OF ERBB4 SIGNALING                                                 | REACTOME_DOWNREGULATION OF ERBB4 SIGNALING                                                 | 8   | 0.27110526 | 0.27110526 | 0.5315228 | 0.5499185  | 1 | 11209 tags=50%, list=23%, signal=65%   |
| REACTOME_INTRA-GOLGI                                                                       | REACTOME_INTRA-GOLGI TRAFFIC                                                               | 44  | 0.27082488 | 0.27082488 | 0.0020161 | 0.5499557  | 1 | 14571 tags=57%, list=30%, signal=81%   |
| REACTOME_SYNTHESIS OF SUBSTRATES IN N-GLYCAN BIOSYTHESIS                                   | REACTOME_SYNTHESIS OF SUBSTRATES IN N-GLYCAN BIOSYTHESIS                                   | 63  | 0.2708206  | 0.2708206  | 0         | 0.54886997 | 1 | 10072 tags=48%, list=21%, signal=60%   |
| REACTOME_REGULATION OF COMPLEMENT CASCADE                                                  | REACTOME_REGULATION OF COMPLEMENT CASCADE                                                  | 121 | 0.27009073 | 0.27009073 | 0         | 0.5507581  | 1 | 32939 tags=94%, list=67%, signal=287%  |
| REACTOME_NOTCH2 INTRACELLULAR DOMAIN REGULATES TRANSCRIPTION                               | REACTOME_NOTCH2 INTRACELLULAR DOMAIN REGULATES TRANSCRIPTION                               | 12  | 0.2697877  | 0.2697877  | 0.2865672 | 0.55092525 | 1 | 15355 tags=58%, list=31%, signal=85%   |
| REACTOME_RHO GTPASES ACTIVATE NADPH OXIDASES                                               | REACTOME_RHO GTPASES ACTIVATE NADPH OXIDASES                                               | 13  | 0.26926064 | 0.26926064 | 0.2414487 | 0.5520265  | 1 | 20717 tags=69%, list=42%, signal=120%  |

|                                                                                                                                                                  |                                                                                                                                |     |            |            |           |            |   |                                        |
|------------------------------------------------------------------------------------------------------------------------------------------------------------------|--------------------------------------------------------------------------------------------------------------------------------|-----|------------|------------|-----------|------------|---|----------------------------------------|
| REACTOME_BICARBONATE TRANSPORTERS                                                                                                                                | REACTOME_BICARBONATE TRANSPORTERS                                                                                              | 10  | 0.26833826 | 0.26833826 | 0.3830898 | 0.5547749  | 1 | 1552 tags=30%, list=3%, signal=31%     |
| REACTOME_METABOLIC DISORDERS OF BIOLOGICAL OXIDATION ENZYMES                                                                                                     | REACTOME_METABOLIC DISORDERS OF BIOLOGICAL OXIDATION ENZYMES                                                                   | 6   | 0.26832658 | 0.26832658 | 0.7105263 | 0.55372846 | 1 | 35827 tags=100%, list=73%, signal=373% |
| REACTOME_DEFECTIVE CYP11A1 CAUSES ADRENAL INSUFFICIENCY, CONGENITAL, WITH 46,XY SEX REVERSAL                                                                     | REACTOME_DEFECTIVE CYP11A1 CAUSES ADRENAL INSUFFICIENCY, CONGENITAL, WITH 46,XY SEX REVERSAL (AICSR)                           | 4   | 0.2683156  | 0.2683156  | 0.860396  | 0.5526799  | 1 | 35827 tags=100%, list=73%, signal=373% |
| REACTOME_ELECTRON TRANSPORT FROM NADPH TO REACTOME_BIOSYNTHESIS OF THE N-GLYCAN PRECURSOR (DOLICHOL LIPID-LINKED OLIGOSACCHARIDE, LLO) AND TRANSFER TO A NASCENT | REACTOME_ELECTRON TRANSPORT FROM NADPH TO FERREDOXIN                                                                           | 3   | 0.26831016 | 0.26831016 | 0.9412361 | 0.5516113  | 1 | 35827 tags=100%, list=73%, signal=373% |
| REACTOME_NEPHRIN FAMILY INTERACTIONS                                                                                                                             | REACTOME_BIOSYNTHESIS OF THE N-GLYCAN PRECURSOR (DOLICHOL LIPID-LINKED OLIGOSACCHARIDE, LLO) AND TRANSFER TO A NASCENT PROTEIN | 78  | 0.26760536 | 0.26760536 | 9.94E-04  | 0.5535588  | 1 | 3866 tags=35%, list=8%, signal=38%     |
| REACTOME_RECYCLING OF EIF2:GDP                                                                                                                                   | REACTOME_NEPHRIN FAMILY INTERACTIONS                                                                                           | 22  | 0.26699984 | 0.26699984 | 0.0653218 | 0.55512196 | 1 | 2511 tags=32%, list=5%, signal=34%     |
| REACTOME_CELL-CELL COMMUNICATION                                                                                                                                 | REACTOME_RECYCLING OF EIF2:GDP                                                                                                 | 8   | 0.26681578 | 0.26681578 | 0.5262626 | 0.5548495  | 1 | 11419 tags=50%, list=23%, signal=65%   |
| REACTOME_CREATION OF C4 AND C2 ACTIVATORS                                                                                                                        | REACTOME_CELL-CELL COMMUNICATION                                                                                               | 121 | 0.266668   | 0.266668   | 0         | 0.55438644 | 1 | 6398 tags=40%, list=13%, signal=46%    |
| REACTOME_REMOVAL OF AMINOTERMINAL PROPEPTIDES FROM GAMMA-CARBOXYLATED PROTEINS                                                                                   | REACTOME_CREATION OF C4 AND C2 ACTIVATORS                                                                                      | 91  | 0.2661428  | 0.2661428  | 0         | 0.55565304 | 1 | 25195 tags=78%, list=51%, signal=160%  |
| REACTOME_LYSOSOME VESICLE BIOGENESIS                                                                                                                             | REACTOME_REMOVAL OF AMINOTERMINAL PROPEPTIDES FROM GAMMA-CARBOXYLATED PROTEINS                                                 | 10  | 0.26607087 | 0.26607087 | 0.4031311 | 0.5548687  | 1 | 1663 tags=30%, list=3%, signal=31%     |
| REACTOME_PHENYLALANINE AND TYROSINE CATABOLISM                                                                                                                   | REACTOME_LYSOSOME VESICLE BIOGENESIS                                                                                           | 35  | 0.26591048 | 0.26591048 | 0.0133745 | 0.55446416 | 1 | 6574 tags=40%, list=13%, signal=46%    |
| REACTOME_NICOTINATE METABOLISM                                                                                                                                   | REACTOME_PHENYLALANINE AND TYROSINE CATABOLISM                                                                                 | 11  | 0.26563343 | 0.26563343 | 0.3648781 | 0.55455357 | 1 | 9252 tags=45%, list=19%, signal=56%    |
| REACTOME_TP53 REGULATES TRANSCRIPTION OF GENES INVOLVED IN CYTOCHROME C RELEASE                                                                                  | REACTOME_NICOTINATE METABOLISM                                                                                                 | 31  | 0.26537192 | 0.26537192 | 0.0225641 | 0.5545783  | 1 | 7547 tags=42%, list=15%, signal=50%    |
| REACTOME_CIRCADIAN CLOCK                                                                                                                                         | REACTOME_TP53 REGULATES TRANSCRIPTION OF GENES INVOLVED IN CYTOCHROME C RELEASE                                                | 20  | 0.2647921  | 0.2647921  | 0.0923226 | 0.555979   | 1 | 18866 tags=65%, list=39%, signal=106%  |
| REACTOME_ASTROCYTIC GLUTAMATE-GLUTAMINE UPTAKE AND METABOLISM                                                                                                    | REACTOME_CIRCADIAN CLOCK                                                                                                       | 69  | 0.26473698 | 0.26473698 | 0         | 0.5551289  | 1 | 5505 tags=38%, list=11%, signal=42%    |
| REACTOME_NEUROTRANSMITTER UPTAKE AND METABOLISM IN GLIAL CELLS                                                                                                   | REACTOME_ASTROCYTIC GLUTAMATE-GLUTAMINE UPTAKE AND METABOLISM                                                                  | 4   | 0.2639754  | 0.2639754  | 0.8773006 | 0.5573486  | 1 | 11557 tags=50%, list=24%, signal=65%   |
| REACTOME_PCNA-DEPENDENT LONG PATCH BASE EXCISION REPAIR                                                                                                          | REACTOME_NEUROTRANSMITTER UPTAKE AND METABOLISM IN GLIAL CELLS                                                                 | 4   | 0.2639754  | 0.2639754  | 0.8384845 | 0.5562706  | 1 | 11557 tags=50%, list=24%, signal=65%   |
| REACTOME_ELEVATION OF CYTOSOLIC CA2+ LEVELS                                                                                                                      | REACTOME_PCNA-DEPENDENT LONG PATCH BASE EXCISION REPAIR                                                                        | 21  | 0.26362783 | 0.26362783 | 0.0901961 | 0.5566774  | 1 | 15076 tags=57%, list=31%, signal=83%   |
| REACTOME_ACYL CHAIN REMODELLING OF PC                                                                                                                            | REACTOME_ELEVATION OF CYTOSOLIC CA2+ LEVELS                                                                                    | 16  | 0.2635562  | 0.2635562  | 0.1674926 | 0.5558915  | 1 | 14641 tags=56%, list=30%, signal=80%   |
| REACTOME_ADHERENS JUNCTIONS INTERACTIONS                                                                                                                         | REACTOME_ACYL CHAIN REMODELLING OF PC                                                                                          | 27  | 0.2630933  | 0.2630933  | 0.0468594 | 0.5569238  | 1 | 12513 tags=52%, list=26%, signal=70%   |
|                                                                                                                                                                  | REACTOME_ADHERENS JUNCTIONS INTERACTIONS                                                                                       | 31  | 0.26282734 | 0.26282734 | 0.0281974 | 0.5570977  | 1 | 6092 tags=39%, list=12%, signal=44%    |

|                                                                                                 |                                                                                                 |     |            |            |           |            |   |                                       |
|-------------------------------------------------------------------------------------------------|-------------------------------------------------------------------------------------------------|-----|------------|------------|-----------|------------|---|---------------------------------------|
| REACTOME_ZINC EFFLUX AND COMPARTMENTALIZATION BY THE SLC30 FAMILY                               | REACTOME_ZINC EFFLUX AND COMPARTMENTALIZATION BY THE SLC30 FAMILY                               | 7   | 0.262715   | 0.262715   | 0.6169154 | 0.55651456 | 1 | 8122 tags=43%, list=17%, signal=51%   |
| REACTOME_METABOLISM OF FAT-SOLUBLE VITAMINS                                                     | REACTOME_METABOLISM OF FAT-SOLUBLE VITAMINS                                                     | 48  | 0.26236236 | 0.26236236 | 0.0020367 | 0.55695564 | 1 | 6547 tags=40%, list=13%, signal=46%   |
| REACTOME_IRF3-MEDIATED INDUCTION OF TYPE I IFN                                                  | REACTOME_IRF3-MEDIATED INDUCTION OF TYPE I IFN                                                  | 12  | 0.26225325 | 0.26225325 | 0.3382789 | 0.55635124 | 1 | 7563 tags=42%, list=15%, signal=49%   |
| REACTOME_CREB PHOSPHORYLATION THROUGH THE ACTIVATION OF ADENYLATE CYCLASE                       | REACTOME_CREB PHOSPHORYLATION THROUGH THE ACTIVATION OF ADENYLATE CYCLASE                       | 7   | 0.26189798 | 0.26189798 | 0.6359127 | 0.55680704 | 1 | 15157 tags=57%, list=31%, signal=83%  |
| REACTOME_REGULATION OF GLUCOKINASE BY GLUCOKINASE REGULATORY PROTEIN                            | REACTOME_REGULATION OF GLUCOKINASE BY GLUCOKINASE REGULATORY PROTEIN                            | 31  | 0.26136586 | 0.26136586 | 0.0282132 | 0.55795354 | 1 | 4584 tags=35%, list=9%, signal=39%    |
| REACTOME_REGULATION OF IFNG SIGNALING                                                           | REACTOME_REGULATION OF IFNG SIGNALING                                                           | 14  | 0.26081184 | 0.26081184 | 0.2557443 | 0.55930835 | 1 | 1222 tags=29%, list=2%, signal=29%    |
| REACTOME_WNT5A-DEPENDENT INTERNALIZATION OF FZD4                                                | REACTOME_WNT5A-DEPENDENT INTERNALIZATION OF FZD4                                                | 15  | 0.26060608 | 0.26060608 | 0.2400398 | 0.5591063  | 1 | 13357 tags=53%, list=27%, signal=73%  |
| REACTOME_CD22 MEDIATED BCR REGULATION                                                           | REACTOME_CD22 MEDIATED BCR REGULATION                                                           | 65  | 0.25988203 | 0.25988203 | 0         | 0.56118786 | 1 | 29476 tags=86%, list=60%, signal=216% |
| REACTOME_COMPLEMENT CASCADE                                                                     | REACTOME_COMPLEMENT CASCADE                                                                     | 132 | 0.25979316 | 0.25979316 | 0         | 0.5605626  | 1 | 32939 tags=93%, list=67%, signal=284% |
| REACTOME_EXTENSION OF TELOMERES                                                                 | REACTOME_EXTENSION OF TELOMERES                                                                 | 30  | 0.25891152 | 0.25891152 | 0.0326087 | 0.56334364 | 1 | 15076 tags=57%, list=31%, signal=82%  |
| REACTOME_LOSS OF FUNCTION OF SMAD4 IN CANCER                                                    | REACTOME_LOSS OF FUNCTION OF SMAD4 IN CANCER                                                    | 3   | 0.258847   | 0.258847   | 0.9607251 | 0.56253666 | 1 | 3647 tags=33%, list=7%, signal=36%    |
| REACTOME_SMAD4 MH2 DOMAIN MUTANTS IN CANCER                                                     | REACTOME_SMAD4 MH2 DOMAIN MUTANTS IN CANCER                                                     | 3   | 0.258847   | 0.258847   | 0.9739218 | 0.56148124 | 1 | 3647 tags=33%, list=7%, signal=36%    |
| REACTOME_EGFR DOWNREGULATION                                                                    | REACTOME_EGFR DOWNREGULATION                                                                    | 25  | 0.25875765 | 0.25875765 | 0.0498961 | 0.5608509  | 1 | 8880 tags=44%, list=18%, signal=54%   |
| REACTOME_ACYL CHAIN REMODELLING OF PE                                                           | REACTOME_ACYL CHAIN REMODELLING OF PE                                                           | 29  | 0.25865874 | 0.25865874 | 0.0512295 | 0.56023574 | 1 | 12668 tags=52%, list=26%, signal=70%  |
| REACTOME_COMMON PATHWAY OF FIBRIN CLOT FORMATION                                                | REACTOME_COMMON PATHWAY OF FIBRIN CLOT FORMATION                                                | 22  | 0.25834692 | 0.25834692 | 0.1035176 | 0.5605394  | 1 | 27417 tags=82%, list=56%, signal=186% |
| REACTOME_CLEC7A (DECTIN-1) INDUCES NFAT ACTIVATION                                              | REACTOME_CLEC7A (DECTIN-1) INDUCES NFAT ACTIVATION                                              | 11  | 0.25779676 | 0.25779676 | 0.3817635 | 0.5618556  | 1 | 14087 tags=55%, list=29%, signal=77%  |
| REACTOME_HDR THROUGH MMEJ (ALT-NHEJ)                                                            | REACTOME_HDR THROUGH MMEJ (ALT-NHEJ)                                                            | 10  | 0.2576039  | 0.2576039  | 0.4438928 | 0.5616447  | 1 | 16767 tags=60%, list=34%, signal=91%  |
| REACTOME_RUNX3 REGULATES WNT SIGNALING                                                          | REACTOME_RUNX3 REGULATES WNT SIGNALING                                                          | 9   | 0.2574693  | 0.2574693  | 0.5010482 | 0.5611517  | 1 | 3716 tags=33%, list=8%, signal=36%    |
| REACTOME_BMAL1:CLOCK,NPAS 2 ACTIVATES CIRCADIAN GENE EXPRESSION                                 | REACTOME_BMAL1:CLOCK,NPAS2 ACTIVATES CIRCADIAN GENE EXPRESSION                                  | 46  | 0.25735933 | 0.25735933 | 0.0049652 | 0.56057584 | 1 | 5505 tags=37%, list=11%, signal=42%   |
| REACTOME_TRAFFICKING AND PROCESSING OF ENDOSOMAL                                                | REACTOME_TRAFFICKING AND PROCESSING OF ENDOSOMAL                                                | 13  | 0.25719544 | 0.25719544 | 0.3088843 | 0.5602639  | 1 | 10008 tags=46%, list=20%, signal=58%  |
| REACTOME_CLEAVAGE OF THE DAMAGED PURINE                                                         | REACTOME_CLEAVAGE OF THE DAMAGED PURINE                                                         | 3   | 0.2561306  | 0.2561306  | 0.9642857 | 0.5638821  | 1 | 3780 tags=33%, list=8%, signal=36%    |
| REACTOME_DEPURINATION                                                                           | REACTOME_DEPURINATION                                                                           | 3   | 0.2561306  | 0.2561306  | 0.9625247 | 0.5628437  | 1 | 3780 tags=33%, list=8%, signal=36%    |
| REACTOME_RECOGNITION AND ASSOCIATION OF DNA GLYCOSYLASE WITH SITE CONTAINING AN AFFECTED PURINE | REACTOME_RECOGNITION AND ASSOCIATION OF DNA GLYCOSYLASE WITH SITE CONTAINING AN AFFECTED PURINE | 3   | 0.2561306  | 0.2561306  | 0.9719439 | 0.56180906 | 1 | 3780 tags=33%, list=8%, signal=36%    |
| REACTOME_SCAVENGING OF HEME FROM PLASMA                                                         | REACTOME_SCAVENGING OF HEME FROM PLASMA                                                         | 87  | 0.25599816 | 0.25599816 | 0         | 0.5613695  | 1 | 25195 tags=77%, list=51%, signal=158% |

|                                                                                                      |                                                                                                      |     |            |            |           |            |   |                                       |
|------------------------------------------------------------------------------------------------------|------------------------------------------------------------------------------------------------------|-----|------------|------------|-----------|------------|---|---------------------------------------|
| REACTOME_NEGATIVE REGULATION OF TCF-DEPENDENT SIGNALING BY WNT                                       | REACTOME_NEGATIVE REGULATION OF TCF-DEPENDENT SIGNALING BY WNT LIGAND ANTAGONISTS                    | 14  | 0.2559192  | 0.2559192  | 0.2631058 | 0.56065726 | 1 | 4959 tags=36%, list=10%, signal=40%   |
| REACTOME_NADE MODULATES DEATH SIGNALLING                                                             | REACTOME_NADE MODULATES DEATH SIGNALLING                                                             | 6   | 0.25545186 | 0.25545186 | 0.7376238 | 0.5616175  | 1 | 3814 tags=33%, list=8%, signal=36%    |
| REACTOME_ACTIVATED TAK1 MEDIATES P38 MAPK                                                            | REACTOME_ACTIVATED TAK1 MEDIATES P38 MAPK ACTIVATION                                                 | 19  | 0.2548039  | 0.2548039  | 0.1298315 | 0.56340915 | 1 | 2990 tags=32%, list=6%, signal=34%    |
| REACTOME_REGULATION OF TLR BY ENDOGENOUS LIGAND                                                      | REACTOME_REGULATION OF TLR BY ENDOGENOUS LIGAND                                                      | 16  | 0.2532585  | 0.2532585  | 0.2520492 | 0.5691655  | 1 | 24326 tags=75%, list=50%, signal=149% |
| REACTOME_RETINOID METABOLISM AND TRANSPORT                                                           | REACTOME_RETINOID METABOLISM AND TRANSPORT                                                           | 44  | 0.2528627  | 0.2528627  | 0.0048309 | 0.5698803  | 1 | 6547 tags=39%, list=13%, signal=45%   |
| REACTOME_GLYCOGEN BREAKDOWN                                                                          | REACTOME_GLYCOGEN BREAKDOWN (GLYCOGENOLYSIS)                                                         | 16  | 0.2523762  | 0.2523762  | 0.2346939 | 0.5709547  | 1 | 2947 tags=31%, list=6%, signal=33%    |
| REACTOME_TETRAHYDROBIOPT ERIN (BH4) SYNTHESIS, RECYCLING, SALVAGE AND                                | REACTOME_TETRAHYDROBIOPTERIN (BH4) SYNTHESIS, RECYCLING, SALVAGE AND REGULATION                      | 10  | 0.25159842 | 0.25159842 | 0.473     | 0.57329327 | 1 | 7268 tags=40%, list=15%, signal=47%   |
| REACTOME_REGULATION OF PTEN LOCALIZATION                                                             | REACTOME_REGULATION OF PTEN LOCALIZATION                                                             | 9   | 0.25145483 | 0.25145483 | 0.5403226 | 0.5728931  | 1 | 9451 tags=44%, list=19%, signal=55%   |
| REACTOME_ROLE OF PHOSPHOLIPIDS IN                                                                    | REACTOME_ROLE OF PHOSPHOLIPIDS IN PHAGOCYTOSIS                                                       | 102 | 0.25065643 | 0.25065643 | 0         | 0.5754253  | 1 | 25195 tags=76%, list=51%, signal=157% |
| REACTOME_RELEASE OF HH-NP FROM THE SECRETING CELL                                                    | REACTOME_RELEASE OF HH-NP FROM THE SECRETING CELL                                                    | 8   | 0.25054383 | 0.25054383 | 0.6097319 | 0.574904   | 1 | 6095 tags=38%, list=12%, signal=43%   |
| REACTOME_FORMATION OF FIBRIN CLOT (CLOTTING                                                          | REACTOME_FORMATION OF FIBRIN CLOT (CLOTTING CASCADE)                                                 | 38  | 0.25020844 | 0.25020844 | 0.0153061 | 0.57543015 | 1 | 10951 tags=47%, list=22%, signal=61%  |
| REACTOME_BILE SALT AND ORGANIC ANION SLC TRANSPORTERS                                                | REACTOME_BILE SALT AND ORGANIC ANION SLC TRANSPORTERS                                                | 14  | 0.25015834 | 0.25015834 | 0.2945892 | 0.5746008  | 1 | 12236 tags=50%, list=25%, signal=67%  |
| REACTOME_LECTIN PATHWAY OF COMPLEMENT ACTIVATION                                                     | REACTOME_LECTIN PATHWAY OF COMPLEMENT ACTIVATION                                                     | 8   | 0.24923657 | 0.24923657 | 0.6438632 | 0.57768977 | 1 | 6159 tags=38%, list=13%, signal=43%   |
| REACTOME_UREA CYCLE                                                                                  | REACTOME_UREA CYCLE                                                                                  | 10  | 0.24921867 | 0.24921867 | 0.495229  | 0.5767321  | 1 | 2488 tags=30%, list=5%, signal=32%    |
| REACTOME_CLATHRIN DERIVED VESICLE BUDDING                                                            | REACTOME_CLATHRIN DERIVED VESICLE BUDDING                                                            | 72  | 0.24906144 | 0.24906144 | 0         | 0.5764233  | 1 | 10944 tags=47%, list=22%, signal=61%  |
| REACTOME_TRANS-GOLGI NETWORK VESICLE BUDDING                                                         | REACTOME_TRANS-GOLGI NETWORK VESICLE BUDDING                                                         | 72  | 0.24906144 | 0.24906144 | 0         | 0.57539576 | 1 | 10944 tags=47%, list=22%, signal=61%  |
| REACTOME_SHC-RELATED EVENTS TRIGGERED BY IGF1R                                                       | REACTOME_SHC-RELATED EVENTS TRIGGERED BY IGF1R                                                       | 9   | 0.24856333 | 0.24856333 | 0.5447236 | 0.576553   | 1 | 4152 tags=33%, list=8%, signal=36%    |
| REACTOME_NEGATIVE REGULATORS OF DDX58/IFIH1 SIGNALING                                                | REACTOME_NEGATIVE REGULATORS OF DDX58/IFIH1 SIGNALING                                                | 34  | 0.24838278 | 0.24838278 | 0.0220662 | 0.57636786 | 1 | 3687 tags=32%, list=8%, signal=35%    |
| REACTOME_RAF-INDEPENDENT MAPK1/3 ACTIVATION                                                          | REACTOME_RAF-INDEPENDENT MAPK1/3 ACTIVATION                                                          | 23  | 0.2481358  | 0.2481358  | 0.1149425 | 0.5764811  | 1 | 30433 tags=87%, list=62%, signal=230% |
| REACTOME_OPSINS                                                                                      | REACTOME_OPSINS                                                                                      | 7   | 0.24786556 | 0.24786556 | 0.7130178 | 0.5766536  | 1 | 15844 tags=57%, list=32%, signal=84%  |
| REACTOME_MYD88-INDEPENDENT TLR3/TLR4                                                                 | REACTOME_MYD88-INDEPENDENT TLR3/TLR4 CASCADE                                                         | 100 | 0.24781437 | 0.24781437 | 0         | 0.57586014 | 1 | 4048 tags=33%, list=8%, signal=36%    |
| REACTOME_TRIF-MEDIATED TLR3/TLR4 SIGNALING                                                           | REACTOME_TRIF-MEDIATED TLR3/TLR4 SIGNALING                                                           | 100 | 0.24781437 | 0.24781437 | 0         | 0.57484454 | 1 | 4048 tags=33%, list=8%, signal=36%    |
| REACTOME_TOLL LIKE RECEPTOR 3 (TLR3) CASCADE                                                         | REACTOME_TOLL LIKE RECEPTOR 3 (TLR3) CASCADE                                                         | 100 | 0.24781437 | 0.24781437 | 0         | 0.5738325  | 1 | 4048 tags=33%, list=8%, signal=36%    |
| REACTOME_SIGNALING BY TGF-BETA RECEPTOR COMPLEX                                                      | REACTOME_SIGNALING BY TGF-BETA RECEPTOR COMPLEX                                                      | 73  | 0.24764983 | 0.24764983 | 9.84E-04  | 0.5735693  | 1 | 6672 tags=38%, list=14%, signal=44%   |
| REACTOME_NUCLEOTIDE-BINDING DOMAIN, LEUCINE RICH REPEAT CONTAINING RECEPTOR (NLR) SIGNALING PATHWAYS | REACTOME_NUCLEOTIDE-BINDING DOMAIN, LEUCINE RICH REPEAT CONTAINING RECEPTOR (NLR) SIGNALING PATHWAYS | 47  | 0.24731922 | 0.24731922 | 0.0048309 | 0.5740517  | 1 | 7695 tags=40%, list=16%, signal=48%   |
| REACTOME_NEGATIVE REGULATION OF MET ACTIVITY                                                         | REACTOME_NEGATIVE REGULATION OF MET ACTIVITY                                                         | 21  | 0.24730305 | 0.24730305 | 0.1200397 | 0.57312846 | 1 | 8880 tags=43%, list=18%, signal=52%   |



|                                                                                             |                                                                                                         |     |            |            |           |            |   |                                        |
|---------------------------------------------------------------------------------------------|---------------------------------------------------------------------------------------------------------|-----|------------|------------|-----------|------------|---|----------------------------------------|
| REACTOME_GOLGI CISTERNAE PERICENTRIOLAR STACK REORGANIZATION                                | REACTOME_GOLGI CISTERNAE PERICENTRIOLAR STACK REORGANIZATION                                            | 14  | 0.24728814 | 0.24728814 | 0.2921811 | 0.5721988  | 1 | 22869 tags=71%, list=47%, signal=134%  |
| REACTOME_SYNTHESIS OF PROSTAGLANDINS (PG) AND THROMBOXANES (TX)                             | REACTOME_SYNTHESIS OF PROSTAGLANDINS (PG) AND THROMBOXANES (TX)                                         | 15  | 0.24721146 | 0.24721146 | 0.2893924 | 0.5715363  | 1 | 7484 tags=40%, list=15%, signal=47%    |
| REACTOME_NUCLEOTIDE                                                                         | REACTOME_NUCLEOTIDE SALVAGE                                                                             | 23  | 0.24719146 | 0.24719146 | 0.1082164 | 0.5706227  | 1 | 11319 tags=48%, list=23%, signal=62%   |
| REACTOME_HSF1 ACTIVATION                                                                    | REACTOME_HSF1 ACTIVATION                                                                                | 29  | 0.24677481 | 0.24677481 | 0.0477137 | 0.57147634 | 1 | 14938 tags=55%, list=31%, signal=79%   |
| REACTOME_GAMMA-CARBOXYLATION OF PROTEIN PRECURSORS                                          | REACTOME_GAMMA-CARBOXYLATION OF PROTEIN PRECURSORS                                                      | 10  | 0.24603207 | 0.24603207 | 0.4940594 | 0.5737237  | 1 | 2644 tags=30%, list=5%, signal=32%     |
| REACTOME_ERBB2 REGULATES CELL MOTILITY                                                      | REACTOME_ERBB2 REGULATES CELL MOTILITY                                                                  | 15  | 0.24599253 | 0.24599253 | 0.2650841 | 0.57288164 | 1 | 1015 tags=27%, list=2%, signal=27%     |
| REACTOME_SEMET INCORPORATION INTO PROTEINS                                                  | REACTOME_SEMET INCORPORATION INTO PROTEINS                                                              | 11  | 0.24588019 | 0.24588019 | 0.4444445 | 0.5723862  | 1 | 10219 tags=45%, list=21%, signal=57%   |
| REACTOME_ACYL CHAIN REMODELLING OF PG                                                       | REACTOME_ACYL CHAIN REMODELLING OF PG                                                                   | 18  | 0.24541852 | 0.24541852 | 0.172     | 0.57347876 | 1 | 12469 tags=50%, list=25%, signal=67%   |
| REACTOME_EPHB-MEDIATED FORWARD SIGNALING                                                    | REACTOME_EPHB-MEDIATED FORWARD SIGNALING                                                                | 42  | 0.2453822  | 0.2453822  | 0.0136187 | 0.5726487  | 1 | 10145 tags=45%, list=21%, signal=57%   |
| REACTOME_REGULATION OF LIPID METABOLISM BY PEROXISOME PROLIFERATOR-ACTIVATED RECEPTOR ALPHA | REACTOME_REGULATION OF LIPID METABOLISM BY PEROXISOME PROLIFERATOR-ACTIVATED RECEPTOR ALPHA (PPARALPHA) | 121 | 0.2452324  | 0.2452324  | 0         | 0.57227373 | 1 | 7445 tags=40%, list=15%, signal=47%    |
| REACTOME_LIPID PARTICLE ORGANIZATION                                                        | REACTOME_LIPID PARTICLE ORGANIZATION                                                                    | 6   | 0.24493967 | 0.24493967 | 0.7736585 | 0.57255524 | 1 | 36972 tags=100%, list=76%, signal=408% |
| REACTOME_THE NLRP3 INFLAMMASOME                                                             | REACTOME_THE NLRP3 INFLAMMASOME                                                                         | 12  | 0.24489479 | 0.24489479 | 0.3767396 | 0.5717445  | 1 | 20654 tags=67%, list=42%, signal=115%  |
| REACTOME_SEMAPHORIN INTERACTIONS                                                            | REACTOME_SEMAPHORIN INTERACTIONS                                                                        | 67  | 0.24488044 | 0.24488044 | 0         | 0.5708258  | 1 | 7757 tags=40%, list=16%, signal=48%    |
| REACTOME_BINDING AND UPTAKE OF LIGANDS BY SCAVENGER RECEPTORS                               | REACTOME_BINDING AND UPTAKE OF LIGANDS BY SCAVENGER RECEPTORS                                           | 116 | 0.24462858 | 0.24462858 | 0         | 0.57101923 | 1 | 25195 tags=76%, list=51%, signal=156%  |
| REACTOME_SYNTHESIS OF PIPS AT THE ER MEMBRANE                                               | REACTOME_SYNTHESIS OF PIPS AT THE ER MEMBRANE                                                           | 5   | 0.24389297 | 0.24389297 | 0.8801611 | 0.5733009  | 1 | 17437 tags=60%, list=36%, signal=93%   |
| REACTOME_TRAF6 MEDIATED INDUCTION OF PROINFLAMMATORY CYTOKINES                              | REACTOME_TRAF6 MEDIATED INDUCTION OF PROINFLAMMATORY CYTOKINES                                          | 83  | 0.24302141 | 0.24302141 | 0         | 0.5761061  | 1 | 4048 tags=33%, list=8%, signal=35%     |
| REACTOME_DEFECTIVE B4GALT1 CAUSES B4GALT1-CDG                                               | REACTOME_DEFECTIVE B4GALT1 CAUSES B4GALT1-CDG (CDG-2D)                                                  | 7   | 0.24255492 | 0.24255492 | 0.71139   | 0.5771926  | 1 | 37089 tags=100%, list=76%, signal=412% |
| REACTOME_DEFECTIVE CHST6 CAUSES MCDC1                                                       | REACTOME_DEFECTIVE CHST6 CAUSES MCDC1                                                                   | 7   | 0.24255492 | 0.24255492 | 0.7241379 | 0.5762126  | 1 | 37089 tags=100%, list=76%, signal=412% |
| REACTOME_DEFECTIVE ST3GAL3 CAUSES MCT12 AND                                                 | REACTOME_DEFECTIVE ST3GAL3 CAUSES MCT12 AND EIEE15                                                      | 7   | 0.24255492 | 0.24255492 | 0.7376238 | 0.575236   | 1 | 37089 tags=100%, list=76%, signal=412% |
| REACTOME_AXONAL GROWTH STIMULATION                                                          | REACTOME_AXONAL GROWTH STIMULATION                                                                      | 4   | 0.24158514 | 0.24158514 | 0.9268051 | 0.57849807 | 1 | 412 tags=25%, list=1%, signal=25%      |
| REACTOME_FORMATION OF THE EDITOSOME                                                         | REACTOME_FORMATION OF THE EDITOSOME                                                                     | 7   | 0.24132936 | 0.24132936 | 0.7359438 | 0.5786689  | 1 | 30154 tags=86%, list=62%, signal=223%  |
| REACTOME_MRNA EDITING: C TO U CONVERSION                                                    | REACTOME_MRNA EDITING: C TO U CONVERSION                                                                | 7   | 0.24132936 | 0.24132936 | 0.7051282 | 0.57769305 | 1 | 30154 tags=86%, list=62%, signal=223%  |
| REACTOME_SHC1 EVENTS IN ERBB2 SIGNALING                                                     | REACTOME_SHC1 EVENTS IN ERBB2 SIGNALING                                                                 | 22  | 0.2409965  | 0.2409965  | 0.1502392 | 0.5782344  | 1 | 1558 tags=27%, list=3%, signal=28%     |
| REACTOME_GLUONEOGENESIS                                                                     | REACTOME_GLUONEOGENESIS                                                                                 | 33  | 0.24024807 | 0.24024807 | 0.0352823 | 0.58055145 | 1 | 10500 tags=45%, list=21%, signal=58%   |
| REACTOME_TGF-BETA RECEPTOR SIGNALING                                                        | REACTOME_TGF-BETA RECEPTOR SIGNALING ACTIVATES SMADS                                                    | 32  | 0.2388751  | 0.2388751  | 0.037037  | 0.585508   | 1 | 6672 tags=38%, list=14%, signal=43%    |
| REACTOME_CELL-CELL JUNCTION ORGANIZATION                                                    | REACTOME_CELL-CELL JUNCTION ORGANIZATION                                                                | 62  | 0.23866071 | 0.23866071 | 0.0010163 | 0.5854925  | 1 | 10441 tags=45%, list=21%, signal=57%   |

|                                                                       |                                                                             |     |            |            |           |            |   |                                       |
|-----------------------------------------------------------------------|-----------------------------------------------------------------------------|-----|------------|------------|-----------|------------|---|---------------------------------------|
| REACTOME_TRANSPORT OF RIBONUCLEOPROTEINS INTO THE HOST NUCLEUS        | REACTOME_TRANSPORT OF RIBONUCLEOPROTEINS INTO THE HOST NUCLEUS              | 31  | 0.23828341 | 0.23828341 | 0.0573123 | 0.58613485 | 1 | 4134 tags=32%, list=8%, signal=35%    |
| REACTOME_PROCESSING OF INTRONLESS PRE-MRNAS                           | REACTOME_PROCESSING OF INTRONLESS PRE-MRNAS                                 | 19  | 0.23820668 | 0.23820668 | 0.2056452 | 0.58549464 | 1 | 19265 tags=63%, list=39%, signal=104% |
| REACTOME_VLDL CLEARANCE                                               | REACTOME_VLDL CLEARANCE                                                     | 6   | 0.23819251 | 0.23819251 | 0.814096  | 0.5845938  | 1 | 4659 tags=33%, list=10%, signal=37%   |
| REACTOME_GLUCOSE                                                      | REACTOME_GLUCOSE METABOLISM                                                 | 90  | 0.23797329 | 0.23797329 | 0         | 0.58451897 | 1 | 7410 tags=39%, list=15%, signal=46%   |
| REACTOME_EPHA-MEDIATED GROWTH CONE COLLAPSE                           | REACTOME_EPHA-MEDIATED GROWTH CONE COLLAPSE                                 | 34  | 0.23796594 | 0.23796594 | 0.0254065 | 0.58357584 | 1 | 7077 tags=38%, list=14%, signal=45%   |
| REACTOME_CHYLOMICRON CLEARANCE                                        | REACTOME_CHYLOMICRON CLEARANCE                                              | 5   | 0.23764297 | 0.23764297 | 0.8960396 | 0.58401763 | 1 | 7950 tags=40%, list=16%, signal=48%   |
| REACTOME_PEPTIDE HORMONE BIOSYNTHESIS                                 | REACTOME_PEPTIDE HORMONE BIOSYNTHESIS                                       | 12  | 0.23728204 | 0.23728204 | 0.4368635 | 0.5846737  | 1 | 4705 tags=33%, list=10%, signal=37%   |
| REACTOME_FERTILIZATION                                                | REACTOME_FERTILIZATION                                                      | 26  | 0.23717126 | 0.23717126 | 0.0938144 | 0.58424026 | 1 | 29824 tags=85%, list=61%, signal=216% |
| REACTOME_REPRODUCTION                                                 | REACTOME_REPRODUCTION                                                       | 26  | 0.23717126 | 0.23717126 | 0.0885312 | 0.5832762  | 1 | 29824 tags=85%, list=61%, signal=216% |
| REACTOME_FCERI MEDIATED CA+2 MOBILIZATION                             | REACTOME_FCERI MEDIATED CA+2 MOBILIZATION                                   | 102 | 0.23625684 | 0.23625684 | 0         | 0.5863765  | 1 | 29739 tags=84%, list=61%, signal=214% |
| REACTOME_TRAF6 MEDIATED IRF7 ACTIVATION IN TLR7/8 OR 9 SIGNALING      | REACTOME_TRAF6 MEDIATED IRF7 ACTIVATION IN TLR7/8 OR 9 SIGNALING            | 11  | 0.2350537  | 0.2350537  | 0.4736318 | 0.590628   | 1 | 10749 tags=45%, list=22%, signal=58%  |
| REACTOME_TRANSCRIPTIONAL ACTIVITY OF SMAD2/SMAD3:SMAD4                | REACTOME_TRANSCRIPTIONAL ACTIVITY OF SMAD2/SMAD3:SMAD4                      | 44  | 0.23477556 | 0.23477556 | 0.0119403 | 0.5908679  | 1 | 6319 tags=36%, list=13%, signal=42%   |
| REACTOME_FGFRL1 MODULATION OF FGFR1                                   | REACTOME_FGFRL1 MODULATION OF FGFR1 SIGNALING                               | 13  | 0.23428603 | 0.23428603 | 0.3889458 | 0.59214324 | 1 | 14896 tags=54%, list=30%, signal=77%  |
| REACTOME_SIGNALING BY REACTOME_DEPOLYMERISATION OF THE NUCLEAR LAMINA | REACTOME_SIGNALING BY NOTCH REACTOME_DEPOLYMERISATION OF THE NUCLEAR LAMINA | 113 | 0.23423755 | 0.23423755 | 0         | 0.59138227 | 1 | 8922 tags=42%, list=18%, signal=51%   |
| REACTOME_COPII (COAT PROTEIN 2) MEDIATED VESICLE TRANSPORT            | REACTOME_COPII (COAT PROTEIN 2) MEDIATED VESICLE TRANSPORT                  | 14  | 0.23349884 | 0.23349884 | 0.3874756 | 0.5937327  | 1 | 16549 tags=57%, list=34%, signal=86%  |
| REACTOME_ACTIVATION OF E2F1 TARGET GENES AT G1/S                      | REACTOME_ACTIVATION OF E2F1 TARGET GENES AT G1/S                            | 68  | 0.23193021 | 0.23193021 | 0         | 0.5997067  | 1 | 5220 tags=34%, list=11%, signal=38%   |
| REACTOME_G1/S-SPECIFIC TRANSCRIPTION                                  | REACTOME_G1/S-SPECIFIC TRANSCRIPTION                                        | 28  | 0.23167033 | 0.23167033 | 0.0898204 | 0.5999436  | 1 | 7898 tags=39%, list=16%, signal=47%   |
| REACTOME_ERK/MAPK TARGETS                                             | REACTOME_ERK/MAPK TARGETS                                                   | 28  | 0.23167033 | 0.23167033 | 0.0850851 | 0.598968   | 1 | 7898 tags=39%, list=16%, signal=47%   |
| REACTOME_CENTROSOME MATURATION                                        | REACTOME_CENTROSOME MATURATION                                              | 22  | 0.23150307 | 0.23150307 | 0.1888889 | 0.59875625 | 1 | 6474 tags=36%, list=13%, signal=42%   |
| REACTOME_RECRUITMENT OF MITOTIC CENTROSOME PROTEINS AND COMPLEXES     | REACTOME_RECRUITMENT OF MITOTIC CENTROSOME PROTEINS AND COMPLEXES           | 80  | 0.23131585 | 0.23131585 | 0         | 0.5985999  | 1 | 16846 tags=58%, list=34%, signal=88%  |
| REACTOME_THE CANONICAL RETINOID CYCLE IN RODS (TWILIGHT VISION)       | REACTOME_THE CANONICAL RETINOID CYCLE IN RODS (TWILIGHT VISION)             | 80  | 0.23131585 | 0.23131585 | 0         | 0.59763134 | 1 | 16846 tags=58%, list=34%, signal=88%  |
| REACTOME_CD28 DEPENDENT PI3K/AKT SIGNALING                            | REACTOME_CD28 DEPENDENT PI3K/AKT SIGNALING                                  | 23  | 0.2309513  | 0.2309513  | 0.1465863 | 0.59833145 | 1 | 7856 tags=39%, list=16%, signal=47%   |
| REACTOME_SCAVENGING BY CLASS B RECEPTORS                              | REACTOME_SCAVENGING BY CLASS B RECEPTORS                                    | 22  | 0.23093934 | 0.23093934 | 0.161689  | 0.59742016 | 1 | 17630 tags=59%, list=36%, signal=92%  |
| REACTOME_IRAK4 DEFICIENCY (TLR2/4)                                    | REACTOME_IRAK4 DEFICIENCY (TLR2/4)                                          | 6   | 0.23055346 | 0.23055346 | 0.8394161 | 0.5981262  | 1 | 5033 tags=33%, list=10%, signal=37%   |
| REACTOME_MYD88 DEFICIENCY (TLR2/4)                                    | REACTOME_MYD88 DEFICIENCY (TLR2/4)                                          | 11  | 0.23050027 | 0.23050027 | 0.5257937 | 0.59738934 | 1 | 24326 tags=73%, list=50%, signal=144% |
| REACTOME_NUCLEAR PORE COMPLEX (NPC) DISASSEMBLY                       | REACTOME_NUCLEAR PORE COMPLEX (NPC) DISASSEMBLY                             | 11  | 0.23050027 | 0.23050027 | 0.5043902 | 0.5964305  | 1 | 24326 tags=73%, list=50%, signal=144% |
| REACTOME_DOWNREGULATION OF SMAD2/3:SMAD4 TRANSCRIPTIONAL ACTIVITY     | REACTOME_DOWNREGULATION OF SMAD2/3:SMAD4 TRANSCRIPTIONAL ACTIVITY           | 35  | 0.23000205 | 0.23000205 | 0.0353288 | 0.5977316  | 1 | 4134 tags=31%, list=8%, signal=34%    |
|                                                                       |                                                                             | 23  | 0.22995365 | 0.22995365 | 0.1415753 | 0.5969758  | 1 | 3647 tags=30%, list=7%, signal=33%    |

|                                                                                 |                                                                                 |     |            |            |           |            |   |                                      |
|---------------------------------------------------------------------------------|---------------------------------------------------------------------------------|-----|------------|------------|-----------|------------|---|--------------------------------------|
| REACTOME_IRAK2 MEDIATED ACTIVATION OF TAK1 COMPLEX UPON TLR7/8 OR 9 STIMULATION | REACTOME_IRAK2 MEDIATED ACTIVATION OF TAK1 COMPLEX UPON TLR7/8 OR 9 STIMULATION | 16  | 0.2298834  | 0.2298834  | 0.3441624 | 0.5963209  | 1 | 4048 tags=31%, list=8%, signal=34%   |
| REACTOME_BUTYROPHILIN (BTN) FAMILY INTERACTIONS                                 | REACTOME_BUTYROPHILIN (BTN) FAMILY INTERACTIONS                                 | 12  | 0.22984293 | 0.22984293 | 0.4603175 | 0.59554    | 1 | 13230 tags=50%, list=27%, signal=68% |
| REACTOME_PPARG ACTIVATES GENE EXPRESSION                                        | REACTOME_PPARG ACTIVATES GENE EXPRESSION                                        | 118 | 0.22984202 | 0.22984202 | 0         | 0.5945948  | 1 | 7445 tags=38%, list=15%, signal=45%  |
| REACTOME_ACTIVATION OF GENE EXPRESSION BY SREBF                                 | REACTOME_ACTIVATION OF GENE EXPRESSION BY SREBF (SREBP)                         | 42  | 0.22949329 | 0.22949329 | 0.0227273 | 0.5952159  | 1 | 6259 tags=36%, list=13%, signal=41%  |
| REACTOME_ER-PHAGOSOME PATHWAY                                                   | REACTOME_ER-PHAGOSOME PATHWAY                                                   | 83  | 0.2293901  | 0.2293901  | 9.99E-04  | 0.5947214  | 1 | 17693 tags=59%, list=36%, signal=92% |
| REACTOME_INTERFERON                                                             | REACTOME_INTERFERON SIGNALING                                                   | 194 | 0.22923732 | 0.22923732 | 0         | 0.594492   | 1 | 10525 tags=44%, list=21%, signal=56% |
| REACTOME_NUCLEAR IMPORT OF REV PROTEIN                                          | REACTOME_NUCLEAR IMPORT OF REV PROTEIN                                          | 33  | 0.22838746 | 0.22838746 | 0.0517578 | 0.5974049  | 1 | 6629 tags=36%, list=14%, signal=42%  |
| REACTOME_EXPORT OF VIRAL RIBONUCLEOPROTEINS FROM NUCLEUS                        | REACTOME_EXPORT OF VIRAL RIBONUCLEOPROTEINS FROM NUCLEUS                        | 32  | 0.22820106 | 0.22820106 | 0.0553907 | 0.5972385  | 1 | 4134 tags=31%, list=8%, signal=34%   |
| REACTOME_NUCLEAR EVENTS (KINASE AND TRANSCRIPTION FACTOR ACTIVATION)            | REACTOME_NUCLEAR EVENTS (KINASE AND TRANSCRIPTION FACTOR ACTIVATION)            | 25  | 0.22787903 | 0.22787903 | 0.1384768 | 0.5977263  | 1 | 6474 tags=36%, list=13%, signal=41%  |
| REACTOME_CONSTITUTIVE SIGNALING BY NOTCH1 HD+PEST DOMAIN MUTANTS                | REACTOME_CONSTITUTIVE SIGNALING BY NOTCH1 HD+PEST DOMAIN MUTANTS                | 57  | 0.22734344 | 0.22734344 | 9.81E-04  | 0.59921867 | 1 | 11215 tags=46%, list=23%, signal=59% |
| REACTOME_CONSTITUTIVE SIGNALING BY NOTCH1 PEST DOMAIN MUTANTS                   | REACTOME_CONSTITUTIVE SIGNALING BY NOTCH1 PEST DOMAIN MUTANTS                   | 57  | 0.22734344 | 0.22734344 | 0.0050403 | 0.59827656 | 1 | 11215 tags=46%, list=23%, signal=59% |
| REACTOME_SIGNALING BY NOTCH1 HD+PEST DOMAIN MUTANTS IN CANCER                   | REACTOME_SIGNALING BY NOTCH1 HD+PEST DOMAIN MUTANTS IN CANCER                   | 57  | 0.22734344 | 0.22734344 | 0.0058537 | 0.5973373  | 1 | 11215 tags=46%, list=23%, signal=59% |
| REACTOME_SIGNALING BY NOTCH1 PEST DOMAIN MUTANTS IN CANCER                      | REACTOME_SIGNALING BY NOTCH1 PEST DOMAIN MUTANTS IN CANCER                      | 57  | 0.22734344 | 0.22734344 | 0.0050201 | 0.5964011  | 1 | 11215 tags=46%, list=23%, signal=59% |
| REACTOME_SIGNALING BY NOTCH1 IN CANCER                                          | REACTOME_SIGNALING BY NOTCH1 IN CANCER                                          | 57  | 0.22734344 | 0.22734344 | 0.0060302 | 0.5954677  | 1 | 11215 tags=46%, list=23%, signal=59% |
| REACTOME_PLATELET AGGREGATION (PLUG FORMATION)                                  | REACTOME_PLATELET AGGREGATION (PLUG FORMATION)                                  | 36  | 0.22729874 | 0.22729874 | 0.0383858 | 0.59474635 | 1 | 13360 tags=50%, list=27%, signal=69% |
| REACTOME_NUCLEOBASE CATABOLISM                                                  | REACTOME_NUCLEOBASE CATABOLISM                                                  | 36  | 0.22691667 | 0.22691667 | 0.0507614 | 0.5954889  | 1 | 6578 tags=36%, list=13%, signal=42%  |
| REACTOME_VPX CARGO-TARGETING TO CILIUM                                          | REACTOME_VPX CARGO-TARGETING TO CILIUM                                          | 21  | 0.2261292  | 0.2261292  | 0.2213198 | 0.5979896  | 1 | 12248 tags=48%, list=25%, signal=63% |
| REACTOME_RECRUITMENT OF NUMA TO MITOTIC CENTROSOMES                             | REACTOME_RECRUITMENT OF NUMA TO MITOTIC CENTROSOMES                             | 79  | 0.22592267 | 0.22592267 | 0.00199   | 0.5979668  | 1 | 16846 tags=57%, list=34%, signal=87% |
| REACTOME_RECOGNITION OF DNA DAMAGE BY PCNA-CONTAINING REPLICATION COMPLEX       | REACTOME_RECOGNITION OF DNA DAMAGE BY PCNA-CONTAINING REPLICATION COMPLEX       | 30  | 0.22566333 | 0.22566333 | 0.1007905 | 0.5981964  | 1 | 16703 tags=57%, list=34%, signal=86% |
| REACTOME_SIGNALING BY ERBB2                                                     | REACTOME_SIGNALING BY ERBB2                                                     | 50  | 0.22522947 | 0.22522947 | 0.0148305 | 0.5991615  | 1 | 5630 tags=34%, list=11%, signal=38%  |
| REACTOME_SIGNALING BY BRAF AND RAF FUSIONS                                      | REACTOME_SIGNALING BY BRAF AND RAF FUSIONS                                      | 58  | 0.22487226 | 0.22487226 | 0.0059701 | 0.5997875  | 1 | 10951 tags=45%, list=22%, signal=58% |
| REACTOME_ANTIGEN PROCESSING-CROSS PRESENTATION                                  | REACTOME_ANTIGEN PROCESSING-CROSS PRESENTATION                                  | 99  | 0.22483048 | 0.22483048 | 0         | 0.59900767 | 1 | 17699 tags=59%, list=36%, signal=92% |
| REACTOME_NEUTROPHIL DEGRANULATION                                               | REACTOME_NEUTROPHIL DEGRANULATION                                               | 474 | 0.22426558 | 0.22426558 | 0         | 0.6006854  | 1 | 11334 tags=45%, list=23%, signal=58% |
| REACTOME_AURKA ACTIVATION BY TPX2                                               | REACTOME_AURKA ACTIVATION BY TPX2                                               | 72  | 0.22335365 | 0.22335365 | 0.0019743 | 0.6038068  | 1 | 12881 tags=49%, list=26%, signal=66% |
| REACTOME_AKT PHOSPHORYLATES TARGETS IN THE CYTOSOL                              | REACTOME_AKT PHOSPHORYLATES TARGETS IN THE CYTOSOL                              | 14  | 0.22285552 | 0.22285552 | 0.4436475 | 0.6050608  | 1 | 10075 tags=43%, list=21%, signal=54% |

|                                                                                                                      |                                                                                                                               |     |            |            |           |            |   |                                       |
|----------------------------------------------------------------------------------------------------------------------|-------------------------------------------------------------------------------------------------------------------------------|-----|------------|------------|-----------|------------|---|---------------------------------------|
| REACTOME_MAPK TARGETS/<br>NUCLEAR EVENTS MEDIATED BY<br>MAP KINASES                                                  | REACTOME_MAPK TARGETS/ NUCLEAR<br>EVENTS MEDIATED BY MAP KINASES                                                              | 31  | 0.22274241 | 0.22274241 | 0.0798817 | 0.60463727 | 1 | 6474 tags=35%, list=13%, signal=41%   |
| REACTOME_CYTOSOLIC<br>SENSORS OF PATHOGEN-<br>REACTOME_SPHINGOLIPID<br>METABOLISM                                    | REACTOME_CYTOSOLIC SENSORS OF<br>PATHOGEN-ASSOCIATED DNA<br>REACTOME_SPHINGOLIPID<br>METABOLISM                               | 68  | 0.22264989 | 0.22264989 | 9.95E-04  | 0.60413104 | 1 | 7834 tags=38%, list=16%, signal=45%   |
| REACTOME_TNFR2 NON-<br>CANONICAL NF-KB PATHWAY                                                                       | REACTOME_TNFR2 NON-CANONICAL NF-<br>KB PATHWAY                                                                                | 90  | 0.22239728 | 0.22239728 | 0         | 0.60432595 | 1 | 5451 tags=33%, list=11%, signal=37%   |
| REACTOME_CDO IN<br>REACTOME_MYOGENESIS                                                                               | REACTOME_CDO IN MYOGENESIS<br>REACTOME_MYOGENESIS                                                                             | 98  | 0.2223674  | 0.2223674  | 0         | 0.6035315  | 1 | 8119 tags=39%, list=17%, signal=46%   |
| REACTOME_MOLYBDENUM<br>COFACTOR BIOSYNTHESIS                                                                         | REACTOME_MOLYBDENUM COFACTOR<br>BIOSYNTHESIS                                                                                  | 29  | 0.2223298  | 0.2223298  | 0.1117479 | 0.6027765  | 1 | 7692 tags=38%, list=16%, signal=45%   |
| REACTOME_CELLULAR HEXOSE<br>TRANSPORT                                                                                | REACTOME_CELLULAR HEXOSE<br>TRANSPORT                                                                                         | 29  | 0.2223298  | 0.2223298  | 0.1154219 | 0.60185766 | 1 | 7692 tags=38%, list=16%, signal=45%   |
| REACTOME_ACTIVATED TLR4<br>SIGNALLING                                                                                | REACTOME_ACTIVATED TLR4<br>SIGNALLING                                                                                         | 6   | 0.2223187  | 0.2223187  | 0.865458  | 0.60099554 | 1 | 13597 tags=50%, list=28%, signal=69%  |
| REACTOME_PLATELET<br>ACTIVATION, SIGNALING AND<br>REACTOME_PAUSING AND<br>RECOVERY OF TAT-MEDIATED<br>HIV ELONGATION | REACTOME_PLATELET ACTIVATION,<br>SIGNALING AND AGGREGATION<br>REACTOME_PAUSING AND RECOVERY<br>OF TAT-MEDIATED HIV ELONGATION | 22  | 0.22227435 | 0.22227435 | 0.1901544 | 0.6002853  | 1 | 4700 tags=32%, list=10%, signal=35%   |
| REACTOME_TAT-MEDIATED HIV<br>ELONGATION ARREST AND<br>RECOVERY                                                       | REACTOME_TAT-MEDIATED HIV<br>ELONGATION ARREST AND RECOVERY                                                                   | 115 | 0.22217791 | 0.22217791 | 0         | 0.5997934  | 1 | 4048 tags=30%, list=8%, signal=33%    |
| REACTOME_MET RECEPTOR<br>RECYCLING                                                                                   | REACTOME_MET RECEPTOR<br>RECYCLING                                                                                            | 275 | 0.22214605 | 0.22214605 | 0         | 0.5990131  | 1 | 6454 tags=35%, list=13%, signal=40%   |
| REACTOME_TFAP2A ACTS AS A<br>TRANSCRIPTIONAL REPRESSOR<br>DURING RETINOIC ACID INDUCED<br>CELL DIFFERENTIATION       | REACTOME_TFAP2A ACTS AS A<br>TRANSCRIPTIONAL REPRESSOR<br>DURING RETINOIC ACID INDUCED CELL<br>DIFFERENTIATION                | 27  | 0.22199896 | 0.22199896 | 0.129285  | 0.5987477  | 1 | 7270 tags=37%, list=15%, signal=43%   |
| REACTOME_NRAGE SIGNALS<br>DEATH THROUGH JNK                                                                          | REACTOME_NRAGE SIGNALS DEATH<br>THROUGH JNK                                                                                   | 27  | 0.22199896 | 0.22199896 | 0.1230159 | 0.5978432  | 1 | 7270 tags=37%, list=15%, signal=43%   |
| REACTOME_POU5F1 (OCT4),<br>SOX2, NANOG ACTIVATE GENES<br>RELATED TO PROLIFERATION                                    | REACTOME_POU5F1 (OCT4), SOX2,<br>NANOG ACTIVATE GENES RELATED TO<br>PROLIFERATION                                             | 10  | 0.2215504  | 0.2215504  | 0.6334341 | 0.598873   | 1 | 8739 tags=40%, list=18%, signal=49%   |
| REACTOME_SIGNALING BY<br>CYTOSOLIC FGFR1 FUSION                                                                      | REACTOME_SIGNALING BY CYTOSOLIC<br>FGFR1 FUSION MUTANTS                                                                       | 5   | 0.22017974 | 0.22017974 | 0.9195737 | 0.6040217  | 1 | 28391 tags=80%, list=58%, signal=190% |
| REACTOME_DNA REPLICATION<br>INITIATION                                                                               | REACTOME_DNA REPLICATION<br>INITIATION                                                                                        | 59  | 0.2198971  | 0.2198971  | 0.0061665 | 0.6043967  | 1 | 15802 tags=54%, list=32%, signal=80%  |
| REACTOME_TELOMERE C-<br>STRAND SYNTHESIS INITIATION                                                                  | REACTOME_TELOMERE C-STRAND<br>SYNTHESIS INITIATION                                                                            | 13  | 0.21943161 | 0.21943161 | 0.465641  | 0.60554314 | 1 | 557 tags=23%, list=1%, signal=23%     |
| REACTOME_VPR-MEDIATED<br>NUCLEAR IMPORT OF PICS                                                                      | REACTOME_VPR-MEDIATED NUCLEAR<br>IMPORT OF PICS                                                                               | 18  | 0.2189443  | 0.2189443  | 0.3065476 | 0.6068245  | 1 | 5604 tags=33%, list=11%, signal=38%   |
| REACTOME_INLB-MEDIATED<br>ENTRY OF LISTERIA<br>MONOCYTOGENES INTO HOST<br>CELL                                       | REACTOME_INLB-MEDIATED ENTRY OF<br>LISTERIA MONOCYTOGENES INTO HOST<br>CELL                                                   | 8   | 0.21883489 | 0.21883489 | 0.7694672 | 0.6064164  | 1 | 13768 tags=50%, list=28%, signal=70%  |
| REACTOME_REGULATION OF<br>PTEN GENE TRANSCRIPTION                                                                    | REACTOME_REGULATION OF PTEN<br>GENE TRANSCRIPTION                                                                             | 8   | 0.21883489 | 0.21883489 | 0.8011869 | 0.60551    | 1 | 13768 tags=50%, list=28%, signal=70%  |
| REACTOME_ASSOCIATION OF<br>TRIC/CCT WITH TARGET<br>PROTEINS DURING<br>BIOSYNTHESIS                                   | REACTOME_ASSOCIATION OF TRIC/CCT<br>WITH TARGET PROTEINS DURING<br>BIOSYNTHESIS                                               | 33  | 0.21872965 | 0.21872965 | 0.063745  | 0.60507405 | 1 | 4134 tags=30%, list=8%, signal=33%    |
| REACTOME_TIE2 SIGNALING                                                                                              | REACTOME_TIE2 SIGNALING                                                                                                       | 15  | 0.21869256 | 0.21869256 | 0.4158607 | 0.6043324  | 1 | 8880 tags=40%, list=18%, signal=49%   |
| REACTOME_GRB2 EVENTS IN<br>ERBB2 SIGNALING                                                                           | REACTOME_GRB2 EVENTS IN ERBB2<br>SIGNALING                                                                                    | 61  | 0.21868135 | 0.21868135 | 0.0039604 | 0.6034791  | 1 | 4556 tags=31%, list=9%, signal=34%    |
|                                                                                                                      |                                                                                                                               | 39  | 0.21861011 | 0.21861011 | 0.041958  | 0.6028697  | 1 | 10647 tags=44%, list=22%, signal=56%  |
|                                                                                                                      |                                                                                                                               | 18  | 0.21841311 | 0.21841311 | 0.3029126 | 0.60280174 | 1 | 5630 tags=33%, list=11%, signal=38%   |
|                                                                                                                      |                                                                                                                               | 16  | 0.21823224 | 0.21823224 | 0.3834661 | 0.60268843 | 1 | 1558 tags=25%, list=3%, signal=26%    |

|                                                                                                |                                                                                                |     |            |            |           |            |   |                                       |
|------------------------------------------------------------------------------------------------|------------------------------------------------------------------------------------------------|-----|------------|------------|-----------|------------|---|---------------------------------------|
| REACTOME_GPVI-MEDIATED ACTIVATION CASCADE                                                      | REACTOME_GPVI-MEDIATED ACTIVATION CASCADE                                                      | 53  | 0.21821323 | 0.21821323 | 0.0107422 | 0.6018977  | 1 | 22585 tags=68%, list=46%, signal=126% |
| REACTOME_REGULATION OF ACTIN DYNAMICS FOR PHAGOCYTIC CUP FORMATION                             | REACTOME_REGULATION OF ACTIN DYNAMICS FOR PHAGOCYTIC CUP FORMATION                             | 138 | 0.21792665 | 0.21792665 | 0         | 0.60225576 | 1 | 25195 tags=73%, list=51%, signal=150% |
| REACTOME_TRANSPORT OF MATURE MRNAS DERIVED FROM INTRONLESS TRANSCRIPTS                         | REACTOME_TRANSPORT OF MATURE MRNAS DERIVED FROM INTRONLESS TRANSCRIPTS                         | 42  | 0.21779463 | 0.21779463 | 0.0370732 | 0.6019584  | 1 | 9163 tags=40%, list=19%, signal=50%   |
| REACTOME_RESOLUTION OF AP SITES VIA THE MULTIPLE-NUCLEOTIDE PATCH REPLACEMENT PATHWAY          | REACTOME_RESOLUTION OF AP SITES VIA THE MULTIPLE-NUCLEOTIDE PATCH REPLACEMENT PATHWAY          | 25  | 0.21766244 | 0.21766244 | 0.1652004 | 0.6017     | 1 | 16767 tags=56%, list=34%, signal=85%  |
| REACTOME_SIGNALING BY HIGH-KINASE ACTIVITY BRAF                                                | REACTOME_SIGNALING BY HIGH-KINASE ACTIVITY BRAF MUTANTS                                        | 34  | 0.21765763 | 0.21765763 | 0.0682927 | 0.60083973 | 1 | 10951 tags=44%, list=22%, signal=57%  |
| REACTOME_LOSS OF NLP FROM MITOTIC CENTROSOMES                                                  | REACTOME_LOSS OF NLP FROM MITOTIC CENTROSOMES                                                  | 69  | 0.217589   | 0.217589   | 0         | 0.60026646 | 1 | 16326 tags=55%, list=33%, signal=83%  |
| REACTOME_LOSS OF PROTEINS REQUIRED FOR INTERPHASE MICROTUBULE ORGANIZATION FROM THE CENTROSOME | REACTOME_LOSS OF PROTEINS REQUIRED FOR INTERPHASE MICROTUBULE ORGANIZATION FROM THE CENTROSOME | 69  | 0.217589   | 0.217589   | 0.0040568 | 0.5993863  | 1 | 16326 tags=55%, list=33%, signal=83%  |
| REACTOME_SIGNALING BY RETINOIC ACID                                                            | REACTOME_SIGNALING BY RETINOIC ACID                                                            | 43  | 0.21677315 | 0.21677315 | 0.0341709 | 0.6020451  | 1 | 9891 tags=42%, list=20%, signal=52%   |
| REACTOME_SYNTHESIS OF PIPS AT THE GOLGI MEMBRANE                                               | REACTOME_SYNTHESIS OF PIPS AT THE GOLGI MEMBRANE                                               | 18  | 0.21670492 | 0.21670492 | 0.2950655 | 0.60148376 | 1 | 19315 tags=61%, list=39%, signal=101% |
| REACTOME_RHO GTPASES ACTIVATE CIT                                                              | REACTOME_RHO GTPASES ACTIVATE CIT                                                              | 19  | 0.21635552 | 0.21635552 | 0.326572  | 0.60209703 | 1 | 7449 tags=37%, list=15%, signal=43%   |
| REACTOME_HISTIDINE, LYSINE, PHENYLALANINE, TYROSINE, PROLINE AND TRYPTOPHAN CATABOLISM         | REACTOME_HISTIDINE, LYSINE, PHENYLALANINE, TYROSINE, PROLINE AND TRYPTOPHAN CATABOLISM         | 46  | 0.21548131 | 0.21548131 | 0.0200803 | 0.6050752  | 1 | 10747 tags=43%, list=22%, signal=56%  |
| REACTOME_P75 NTR RECEPTOR-MEDIATED SIGNALLING                                                  | REACTOME_P75 NTR RECEPTOR-MEDIATED SIGNALLING                                                  | 96  | 0.2136846  | 0.2136846  | 0         | 0.61211705 | 1 | 14549 tags=51%, list=30%, signal=72%  |
| REACTOME_DEADENYLATION OF MRNA                                                                 | REACTOME_DEADENYLATION OF MRNA                                                                 | 24  | 0.21335214 | 0.21335214 | 0.2007952 | 0.6127406  | 1 | 5879 tags=33%, list=12%, signal=38%   |
| REACTOME_ONCOGENIC MAPK SIGNALING                                                              | REACTOME_ONCOGENIC MAPK SIGNALING                                                              | 71  | 0.21325897 | 0.21325897 | 9.87E-04  | 0.6122489  | 1 | 10951 tags=44%, list=22%, signal=56%  |
| REACTOME_TRANSCRIPTIONAL REGULATION BY RUNX3                                                   | REACTOME_TRANSCRIPTIONAL REGULATION BY RUNX3                                                   | 108 | 0.21318413 | 0.21318413 | 0         | 0.6116824  | 1 | 17693 tags=57%, list=36%, signal=90%  |
| REACTOME_COENZYME A BIOSYNTHESIS                                                               | REACTOME_COENZYME A BIOSYNTHESIS                                                               | 8   | 0.21294707 | 0.21294707 | 0.8055832 | 0.6118375  | 1 | 1815 tags=25%, list=4%, signal=26%    |
| REACTOME_GAP-FILLING DNA REPAIR SYNTHESIS AND LIGATION IN GG-NER                               | REACTOME_GAP-FILLING DNA REPAIR SYNTHESIS AND LIGATION IN GG-NER                               | 25  | 0.21219452 | 0.21219452 | 0.1819096 | 0.614318   | 1 | 15076 tags=52%, list=31%, signal=75%  |
| REACTOME_OTHER SEMAPHORIN INTERACTIONS                                                         | REACTOME_OTHER SEMAPHORIN INTERACTIONS                                                         | 19  | 0.21186078 | 0.21186078 | 0.3320197 | 0.6149147  | 1 | 7669 tags=37%, list=16%, signal=44%   |
| REACTOME_PYRUVATE METABOLISM                                                                   | REACTOME_PYRUVATE METABOLISM                                                                   | 28  | 0.21154752 | 0.21154752 | 0.1275304 | 0.61536264 | 1 | 7134 tags=36%, list=15%, signal=42%   |
| REACTOME_TRAF6 MEDIATED INDUCTION OF TAK1 COMPLEX                                              | REACTOME_TRAF6 MEDIATED INDUCTION OF TAK1 COMPLEX                                              | 17  | 0.21149936 | 0.21149936 | 0.3898477 | 0.6146749  | 1 | 4048 tags=29%, list=8%, signal=32%    |
| REACTOME_SYNTHESIS OF GLYCOSYLPHOSPHATIDYLINOSITOL (GPI)                                       | REACTOME_SYNTHESIS OF GLYCOSYLPHOSPHATIDYLINOSITOL (GPI)                                       | 16  | 0.2113386  | 0.2113386  | 0.4246988 | 0.61454934 | 1 | 17197 tags=56%, list=35%, signal=87%  |
| REACTOME_TRAF6 MEDIATED INDUCTION OF NFKB AND MAP KINASES UPON TLR7/8 OR 9 ACTIVATION          | REACTOME_TRAF6 MEDIATED INDUCTION OF NFKB AND MAP KINASES UPON TLR7/8 OR 9 ACTIVATION          | 92  | 0.21118334 | 0.21118334 | 0         | 0.6143658  | 1 | 4048 tags=29%, list=8%, signal=32%    |

|                                                                                                 |                                                                                                 |     |            |            |           |            |   |                                       |
|-------------------------------------------------------------------------------------------------|-------------------------------------------------------------------------------------------------|-----|------------|------------|-----------|------------|---|---------------------------------------|
| REACTOME_POLB-DEPENDENT LONG PATCH BASE EXCISION REPAIR                                         | REACTOME_POLB-DEPENDENT LONG PATCH BASE EXCISION REPAIR                                         | 8   | 0.21091723 | 0.21091723 | 0.7985758 | 0.6146747  | 1 | 8035 tags=38%, list=16%, signal=45%   |
| REACTOME_CELL DEATH SIGNALLING VIA NRAGE, NRIF AND NADE                                         | REACTOME_CELL DEATH SIGNALLING VIA NRAGE, NRIF AND NADE                                         | 75  | 0.21091567 | 0.21091567 | 0.0039216 | 0.613798   | 1 | 15802 tags=53%, list=32%, signal=79%  |
| REACTOME_TRIGLYCERIDE CATABOLISM                                                                | REACTOME_TRIGLYCERIDE CATABOLISM                                                                | 24  | 0.21080741 | 0.21080741 | 0.2134831 | 0.6133974  | 1 | 20285 tags=63%, list=41%, signal=107% |
| REACTOME_METABOLISM OF INGESTED SEMET, SEC, MESEC INTO H2SE                                     | REACTOME_METABOLISM OF INGESTED SEMET, SEC, MESEC INTO H2SE                                     | 8   | 0.21077168 | 0.21077168 | 0.811608  | 0.6127001  | 1 | 26404 tags=75%, list=54%, signal=163% |
| REACTOME_INTRINSIC PATHWAY OF FIBRIN CLOT FORMATION                                             | REACTOME_INTRINSIC PATHWAY OF FIBRIN CLOT FORMATION                                             | 21  | 0.21054676 | 0.21054676 | 0.2736521 | 0.6128348  | 1 | 10679 tags=43%, list=22%, signal=55%  |
| REACTOME_METHYLATION                                                                            | REACTOME_METHYLATION                                                                            | 14  | 0.21041453 | 0.21041453 | 0.5010374 | 0.6125121  | 1 | 17679 tags=57%, list=36%, signal=89%  |
| REACTOME_CD209 (DC-SIGN) SIGNALING                                                              | REACTOME_CD209 (DC-SIGN) SIGNALING                                                              | 21  | 0.21014495 | 0.21014495 | 0.264151  | 0.6128288  | 1 | 15362 tags=52%, list=31%, signal=76%  |
| REACTOME_ERBB2 ACTIVATES PTK6 SIGNALING                                                         | REACTOME_ERBB2 ACTIVATES PTK6 SIGNALING                                                         | 13  | 0.2100755  | 0.2100755  | 0.5474227 | 0.6122736  | 1 | 1015 tags=23%, list=2%, signal=24%    |
| REACTOME_ASPARAGINE N-LINKED GLYCOSYLATION                                                      | REACTOME_ASPARAGINE N-LINKED GLYCOSYLATION                                                      | 286 | 0.20999297 | 0.20999297 | 0         | 0.6117315  | 1 | 7411 tags=36%, list=15%, signal=42%   |
| REACTOME_GRB2:SOS PROVIDES LINKAGE TO MAPK SIGNALING FOR INTEGRINS                              | REACTOME_GRB2:SOS PROVIDES LINKAGE TO MAPK SIGNALING FOR INTEGRINS                              | 15  | 0.20995575 | 0.20995575 | 0.449     | 0.6110143  | 1 | 2779 tags=27%, list=6%, signal=28%    |
| REACTOME_PLASMA LIPOPROTEIN REMODELING                                                          | REACTOME_PLASMA LIPOPROTEIN REMODELING                                                          | 32  | 0.209829   | 0.209829   | 0.0923695 | 0.610695   | 1 | 5033 tags=31%, list=10%, signal=35%   |
| REACTOME_HDR THROUGH HOMOLOGOUS RECOMBINATION (HRR)                                             | REACTOME_HDR THROUGH HOMOLOGOUS RECOMBINATION (HRR)                                             | 65  | 0.20980966 | 0.20980966 | 0.0072314 | 0.60992134 | 1 | 18365 tags=58%, list=38%, signal=93%  |
| REACTOME_ERKS ARE INACTIVATED                                                                   | REACTOME_ERKS ARE INACTIVATED                                                                   | 13  | 0.20934008 | 0.20934008 | 0.5503489 | 0.6110787  | 1 | 1051 tags=23%, list=2%, signal=24%    |
| REACTOME_INACTIVATION OF CDC42 AND RAC                                                          | REACTOME_INACTIVATION OF CDC42 AND RAC                                                          | 9   | 0.20914246 | 0.20914246 | 0.7619048 | 0.61111337 | 1 | 16963 tags=56%, list=35%, signal=85%  |
| REACTOME_IKK COMPLEX RECRUITMENT MEDIATED BY RIP1                                               | REACTOME_IKK COMPLEX RECRUITMENT MEDIATED BY RIP1                                               | 24  | 0.20907743 | 0.20907743 | 0.2058824 | 0.610547   | 1 | 4048 tags=29%, list=8%, signal=32%    |
| REACTOME_APEX1-INDEPENDENT RESOLUTION OF AP SITES VIA THE SINGLE NUCLEOTIDE REPLACEMENT PATHWAY | REACTOME_APEX1-INDEPENDENT RESOLUTION OF AP SITES VIA THE SINGLE NUCLEOTIDE REPLACEMENT PATHWAY | 7   | 0.20881166 | 0.20881166 | 0.8657172 | 0.6108825  | 1 | 3766 tags=29%, list=8%, signal=31%    |
| REACTOME_PARADOXICAL ACTIVATION OF RAF SIGNALING BY KINASE INACTIVE BRAF                        | REACTOME_PARADOXICAL ACTIVATION OF RAF SIGNALING BY KINASE INACTIVE BRAF                        | 38  | 0.20867985 | 0.20867985 | 0.0626896 | 0.6105861  | 1 | 3963 tags=29%, list=8%, signal=31%    |
| REACTOME_SIGNALING BY MODERATE KINASE ACTIVITY BRAF MUTANTS                                     | REACTOME_SIGNALING BY MODERATE KINASE ACTIVITY BRAF MUTANTS                                     | 38  | 0.20867985 | 0.20867985 | 0.077381  | 0.60973215 | 1 | 3963 tags=29%, list=8%, signal=31%    |
| REACTOME_COSTIMULATION BY THE CD28 FAMILY                                                       | REACTOME_COSTIMULATION BY THE CD28 FAMILY                                                       | 72  | 0.20763537 | 0.20763537 | 0.003     | 0.6135485  | 1 | 18410 tags=58%, list=38%, signal=93%  |
| REACTOME_MAP KINASE ACTIVATION IN TLR CASCADE                                                   | REACTOME_MAP KINASE ACTIVATION IN TLR CASCADE                                                   | 63  | 0.20761934 | 0.20761934 | 0.006135  | 0.6127543  | 1 | 3836 tags=29%, list=8%, signal=31%    |
| REACTOME_COBALAMIN (CBL, VITAMIN B12) TRANSPORT AND METABOLISM                                  | REACTOME_COBALAMIN (CBL, VITAMIN B12) TRANSPORT AND METABOLISM                                  | 21  | 0.20759101 | 0.20759101 | 0.2919075 | 0.61204106 | 1 | 15487 tags=52%, list=32%, signal=77%  |
| REACTOME_L1CAM INTERACTIONS                                                                     | REACTOME_L1CAM INTERACTIONS                                                                     | 100 | 0.20752582 | 0.20752582 | 0         | 0.61146307 | 1 | 6996 tags=35%, list=14%, signal=41%   |
| REACTOME_ANTIGEN ACTIVATES B CELL RECEPTOR (BCR) LEADING TO GENERATION OF SECOND MESSENGERS     | REACTOME_ANTIGEN ACTIVATES B CELL RECEPTOR (BCR) LEADING TO GENERATION OF SECOND MESSENGERS     | 97  | 0.20747136 | 0.20747136 | 9.89E-04  | 0.61085105 | 1 | 29739 tags=81%, list=61%, signal=207% |

|                                                                                             |                                                                                                |     |            |            |           |            |   |                                       |
|---------------------------------------------------------------------------------------------|------------------------------------------------------------------------------------------------|-----|------------|------------|-----------|------------|---|---------------------------------------|
| REACTOME_RA BIOSYNTHESIS PATHWAY                                                            | REACTOME_RA BIOSYNTHESIS PATHWAY                                                               | 22  | 0.20716214 | 0.20716214 | 0.2644466 | 0.61139363 | 1 | 9891 tags=41%, list=20%, signal=51%   |
| REACTOME_NRIF SIGNALS CELL DEATH FROM THE NUCLEUS                                           | REACTOME_NRIF SIGNALS CELL DEATH FROM THE NUCLEUS                                              | 15  | 0.20693907 | 0.20693907 | 0.4907317 | 0.6115472  | 1 | 6191 tags=33%, list=13%, signal=38%   |
| REACTOME_ACETYLCHOLINE BINDING AND DOWNSTREAM EVENTS                                        | REACTOME_ACETYLCHOLINE BINDING AND DOWNSTREAM EVENTS                                           | 14  | 0.20684972 | 0.20684972 | 0.5436508 | 0.61109215 | 1 | 7361 tags=36%, list=15%, signal=42%   |
| REACTOME_ACTIVATION OF NICOTINIC ACETYLCHOLINE RECEPTORS                                    | REACTOME_ACTIVATION OF NICOTINIC ACETYLCHOLINE RECEPTORS                                       | 14  | 0.20684972 | 0.20684972 | 0.505988  | 0.6102481  | 1 | 7361 tags=36%, list=15%, signal=42%   |
| REACTOME_POSTSYNAPTIC NICOTINIC ACETYLCHOLINE RECEPTORS                                     | REACTOME_POSTSYNAPTIC NICOTINIC ACETYLCHOLINE RECEPTORS                                        | 14  | 0.20684972 | 0.20684972 | 0.5024438 | 0.6094064  | 1 | 7361 tags=36%, list=15%, signal=42%   |
| REACTOME_MAP2K AND MAPK ACTIVATION                                                          | REACTOME_MAP2K AND MAPK ACTIVATION                                                             | 38  | 0.20667687 | 0.20667687 | 0.0646817 | 0.6093413  | 1 | 4061 tags=29%, list=8%, signal=32%    |
| REACTOME_NEP/NS2 INTERACTS WITH THE CELLULAR EXPORT MACHINERY                               | REACTOME_NEP/NS2 INTERACTS WITH THE CELLULAR EXPORT MACHINERY                                  | 31  | 0.20600492 | 0.20600492 | 0.1031434 | 0.61148894 | 1 | 4134 tags=29%, list=8%, signal=32%    |
| REACTOME_GOLGI ASSOCIATED VESICLE BIOGENESIS                                                | REACTOME_GOLGI ASSOCIATED VESICLE BIOGENESIS                                                   | 56  | 0.20527922 | 0.20527922 | 0.0143296 | 0.61388785 | 1 | 10944 tags=43%, list=22%, signal=55%  |
| REACTOME_HOST INTERACTIONS WITH INFLUENZA                                                   | REACTOME_HOST INTERACTIONS WITH INFLUENZA FACTORS                                              | 42  | 0.20515573 | 0.20515573 | 0.0439122 | 0.61356056 | 1 | 5118 tags=31%, list=10%, signal=35%   |
| REACTOME_MXD88 DEPENDENT CASCADE INITIATED ON                                               | REACTOME_MXD88 DEPENDENT CASCADE INITIATED ON ENDOSOME                                         | 94  | 0.20493574 | 0.20493574 | 9.99E-04  | 0.6136908  | 1 | 4048 tags=29%, list=8%, signal=31%    |
| REACTOME_TOLL LIKE RECEPTOR 7/8 (TLR7/8)                                                    | REACTOME_TOLL LIKE RECEPTOR 7/8 (TLR7/8) CASCADE                                               | 94  | 0.20493574 | 0.20493574 | 9.70E-04  | 0.61285126 | 1 | 4048 tags=29%, list=8%, signal=31%    |
| REACTOME_IMMUNOREGULATORY INTERACTIONS BETWEEN A LYMPHOID AND A NON-LYMPHOID CELL           | REACTOME_IMMUNOREGULATORY INTERACTIONS BETWEEN A LYMPHOID AND A NON-LYMPHOID CELL              | 199 | 0.20485389 | 0.20485389 | 0         | 0.61236954 | 1 | 25195 tags=72%, list=51%, signal=147% |
| REACTOME_GENE AND PROTEIN EXPRESSION BY JAK-STAT SIGNALING AFTER INTERLEUKIN-12 STIMULATION | REACTOME_GENE AND PROTEIN EXPRESSION BY JAK-STAT SIGNALING AFTER INTERLEUKIN-12 STIMULATION    | 37  | 0.20484598 | 0.20484598 | 0.0683168 | 0.61157167 | 1 | 20414 tags=62%, list=42%, signal=107% |
| REACTOME_TRANSPORT OF MATURE MRNA DERIVED FROM AN INTRONLESS TRANSCRIPT                     | REACTOME_TRANSPORT OF MATURE MRNA DERIVED FROM AN INTRONLESS TRANSCRIPT                        | 41  | 0.2046474  | 0.2046474  | 0.0491968 | 0.61159736 | 1 | 17455 tags=56%, list=36%, signal=87%  |
| REACTOME_COMPETING ENDOGENOUS RNAS (CERNAS) REGULATE PTEN TRANSLATION                       | REACTOME_COMPETING ENDOGENOUS RNAS (CERNAS) REGULATE PTEN TRANSLATION                          | 8   | 0.20429918 | 0.20429918 | 0.8214634 | 0.61238545 | 1 | 8359 tags=38%, list=17%, signal=45%   |
| REACTOME_RUNX1 REGULATES GENES INVOLVED IN MEGAKARYOCYTE DIFFERENTIATION AND                | REACTOME_RUNX1 REGULATES GENES INVOLVED IN MEGAKARYOCYTE DIFFERENTIATION AND PLATELET FUNCTION | 64  | 0.20419349 | 0.20419349 | 0.0070423 | 0.6119884  | 1 | 12201 tags=45%, list=25%, signal=60%  |
| REACTOME_GLYCOPROTEIN HORMONES                                                              | REACTOME_GLYCOPROTEIN HORMONES                                                                 | 10  | 0.20393218 | 0.20393218 | 0.7261331 | 0.6123117  | 1 | 4705 tags=30%, list=10%, signal=33%   |
| REACTOME_TRYPTOPHAN CATABOLISM                                                              | REACTOME_TRYPTOPHAN CATABOLISM                                                                 | 14  | 0.20350967 | 0.20350967 | 0.5351239 | 0.6133587  | 1 | 25012 tags=71%, list=51%, signal=146% |
| REACTOME_TOLL LIKE RECEPTOR 9 (TLR9) CASCADE                                                | REACTOME_TOLL LIKE RECEPTOR 9 (TLR9) CASCADE                                                   | 98  | 0.20342971 | 0.20342971 | 0         | 0.6128814  | 1 | 4048 tags=29%, list=8%, signal=31%    |
| REACTOME_SUMOYLATION OF TRANSCRIPTION FACTORS                                               | REACTOME_SUMOYLATION OF TRANSCRIPTION FACTORS                                                  | 20  | 0.20324855 | 0.20324855 | 0.3352999 | 0.6128387  | 1 | 9637 tags=40%, list=20%, signal=50%   |
| REACTOME_ALPHA-LINOLENIC (OMEGA3) AND LINOLEIC (OMEGA6) ACID METABOLISM                     | REACTOME_ALPHA-LINOLENIC (OMEGA3) AND LINOLEIC (OMEGA6) ACID METABOLISM                        | 13  | 0.20319277 | 0.20319277 | 0.554337  | 0.61228603 | 1 | 8885 tags=38%, list=18%, signal=47%   |

|                                                               |                                                                              |     |            |            |           |            |   |                                       |
|---------------------------------------------------------------|------------------------------------------------------------------------------|-----|------------|------------|-----------|------------|---|---------------------------------------|
| REACTOME_ALPHA-LINOLENIC ACID (ALA) METABOLISM                | REACTOME_ALPHA-LINOLENIC ACID (ALA) METABOLISM                               | 13  | 0.20319277 | 0.20319277 | 0.5733064 | 0.6114608  | 1 | 8885 tags=38%, list=18%, signal=47%   |
| REACTOME_THROMBOXANE SIGNALLING THROUGH TP RECEPTOR           | REACTOME_THROMBOXANE SIGNALLING THROUGH TP RECEPTOR                          | 23  | 0.20318373 | 0.20318373 | 0.2540816 | 0.61066455 | 1 | 9215 tags=39%, list=19%, signal=48%   |
| REACTOME_ENDOGENOUS STEROLS                                   | REACTOME_ENDOGENOUS STEROLS                                                  | 27  | 0.20287271 | 0.20287271 | 0.1928721 | 0.61123693 | 1 | 8206 tags=37%, list=17%, signal=44%   |
| REACTOME_INITIATION OF NUCLEAR ENVELOPE                       | REACTOME_INITIATION OF NUCLEAR ENVELOPE REFORMATION                          | 12  | 0.20221949 | 0.20221949 | 0.6432806 | 0.613288   | 1 | 2341 tags=25%, list=5%, signal=26%    |
| REACTOME_NUCLEAR ENVELOPE REASSEMBLY                          | REACTOME_NUCLEAR ENVELOPE REASSEMBLY                                         | 12  | 0.20221949 | 0.20221949 | 0.6286008 | 0.6124659  | 1 | 2341 tags=25%, list=5%, signal=26%    |
| REACTOME_ORGANIC CATION/ANION/ZWITTERION TRANSPORT            | REACTOME_ORGANIC CATION/ANION/ZWITTERION TRANSPORT                           | 14  | 0.20200814 | 0.20200814 | 0.545005  | 0.612578   | 1 | 7598 tags=36%, list=16%, signal=42%   |
| REACTOME_MYD88:MAL CASCADE INITIATED ON PLASMA                | REACTOME_MYD88:MAL CASCADE INITIATED ON PLASMA MEMBRANE                      | 95  | 0.20191056 | 0.20191056 | 0         | 0.6121624  | 1 | 4048 tags=28%, list=8%, signal=31%    |
| REACTOME_TOLL LIKE RECEPTOR 2 (TLR2) CASCADE                  | REACTOME_TOLL LIKE RECEPTOR 2 (TLR2) CASCADE                                 | 95  | 0.20191056 | 0.20191056 | 0         | 0.6113452  | 1 | 4048 tags=28%, list=8%, signal=31%    |
| REACTOME_TOLL LIKE RECEPTOR TLR1:TLR2 CASCADE                 | REACTOME_TOLL LIKE RECEPTOR TLR1:TLR2 CASCADE                                | 95  | 0.20191056 | 0.20191056 | 9.49E-04  | 0.61052996 | 1 | 4048 tags=28%, list=8%, signal=31%    |
| REACTOME_TOLL LIKE RECEPTOR TLR6:TLR2 CASCADE                 | REACTOME_TOLL LIKE RECEPTOR TLR6:TLR2 CASCADE                                | 95  | 0.20191056 | 0.20191056 | 0.0031881 | 0.6097171  | 1 | 4048 tags=28%, list=8%, signal=31%    |
| REACTOME_SIGNALING BY REACTOME_NUCLEAR RECEPTOR TRANSCRIPTION | REACTOME_SIGNALING BY NOTCH1 REACTOME_NUCLEAR RECEPTOR TRANSCRIPTION PATHWAY | 72  | 0.2017907  | 0.2017907  | 0.004065  | 0.609409   | 1 | 11215 tags=43%, list=23%, signal=56%  |
| REACTOME_MYD88 CASCADE INITIATED ON PLASMA                    | REACTOME_MYD88 CASCADE INITIATED ON PLASMA MEMBRANE                          | 51  | 0.20119947 | 0.20119947 | 0.0336301 | 0.6112269  | 1 | 4559 tags=29%, list=9%, signal=32%    |
| REACTOME_TOLL LIKE RECEPTOR 10 (TLR10) CASCADE                | REACTOME_TOLL LIKE RECEPTOR 10 (TLR10) CASCADE                               | 85  | 0.20113364 | 0.20113364 | 9.63E-04  | 0.610718   | 1 | 3993 tags=28%, list=8%, signal=31%    |
| REACTOME_TOLL LIKE RECEPTOR 5 (TLR5) CASCADE                  | REACTOME_TOLL LIKE RECEPTOR 5 (TLR5) CASCADE                                 | 85  | 0.20113364 | 0.20113364 | 0.0020263 | 0.6099091  | 1 | 3993 tags=28%, list=8%, signal=31%    |
| REACTOME_INTERLEUKIN-12 FAMILY SIGNALING                      | REACTOME_TOLL LIKE RECEPTOR 10 (TLR10) CASCADE                               | 85  | 0.20113364 | 0.20113364 | 0.002947  | 0.6091024  | 1 | 3993 tags=28%, list=8%, signal=31%    |
| REACTOME_VITAMIN C (ASCORBATE) METABOLISM                     | REACTOME_INTERLEUKIN-12 FAMILY SIGNALING                                     | 56  | 0.20092678 | 0.20092678 | 0.0162437 | 0.6091641  | 1 | 34765 tags=91%, list=71%, signal=314% |
| REACTOME_RHO GTPASE CYCLE                                     | REACTOME_VITAMIN C (ASCORBATE) METABOLISM                                    | 8   | 0.20058928 | 0.20058928 | 0.8377581 | 0.6098457  | 1 | 2420 tags=25%, list=5%, signal=26%    |
| REACTOME_TOLL LIKE RECEPTOR 4 (TLR4) CASCADE                  | REACTOME_RHO GTPASE CYCLE                                                    | 139 | 0.20057012 | 0.20057012 | 0         | 0.6091298  | 1 | 12751 tags=46%, list=26%, signal=62%  |
| REACTOME_REGULATION OF TP53 ACTIVITY THROUGH                  | REACTOME_TOLL LIKE RECEPTOR 4 (TLR4) CASCADE                                 | 126 | 0.20048529 | 0.20048529 | 0         | 0.6087183  | 1 | 7695 tags=36%, list=16%, signal=42%   |
| REACTOME_REGULATION OF HSF1-MEDIATED HEAT SHOCK               | REACTOME_REGULATION OF TP53 ACTIVITY THROUGH ACETYLATION                     | 30  | 0.19988765 | 0.19988765 | 0.1524574 | 0.61046207 | 1 | 24493 tags=70%, list=50%, signal=140% |
| REACTOME_TRIGLYCERIDE BIOSYNTHESIS                            | REACTOME_REGULATION OF HSF1-MEDIATED HEAT SHOCK RESPONSE                     | 81  | 0.19983311 | 0.19983311 | 0.001998  | 0.60989404 | 1 | 4134 tags=28%, list=8%, signal=31%    |
| REACTOME_ACTIVATION OF THE PRE-REPLICATIVE COMPLEX            | REACTOME_TRIGLYCERIDE BIOSYNTHESIS                                           | 14  | 0.19967932 | 0.19967932 | 0.5184079 | 0.60975945 | 1 | 35692 tags=93%, list=73%, signal=342% |
| REACTOME_CYTOKINE SIGNALING IN IMMUNE SYSTEM                  | REACTOME_ACTIVATION OF THE PRE-REPLICATIVE COMPLEX                           | 32  | 0.19948706 | 0.19948706 | 0.1375661 | 0.6098376  | 1 | 14720 tags=50%, list=30%, signal=71%  |
| REACTOME_INTERACTIONS OF REV WITH HOST CELLULAR               | REACTOME_CYTOKINE SIGNALING IN IMMUNE SYSTEM                                 | 900 | 0.19887434 | 0.19887434 | 0         | 0.61164993 | 1 | 10951 tags=42%, list=22%, signal=53%  |
| REACTOME_HEDGEHOG 'ON' STATE                                  | REACTOME_INTERACTIONS OF REV WITH HOST CELLULAR PROTEINS                     | 36  | 0.19807613 | 0.19807613 | 0.1056676 | 0.6143297  | 1 | 6629 tags=33%, list=14%, signal=39%   |
| REACTOME_FREE FATTY ACID RECEPTORS                            | REACTOME_HEDGEHOG 'ON' STATE                                                 | 85  | 0.19773637 | 0.19773637 | 0.0010417 | 0.61503464 | 1 | 13376 tags=47%, list=27%, signal=65%  |
| REACTOME_RHO GTPASES ACTIVATE KTN1                            | REACTOME_FREE FATTY ACID RECEPTORS                                           | 5   | 0.19750817 | 0.19750817 | 0.9692155 | 0.6152658  | 1 | 29501 tags=80%, list=60%, signal=201% |
|                                                               | REACTOME_RHO GTPASES ACTIVATE KTN1                                           | 11  | 0.19743954 | 0.19743954 | 0.7129001 | 0.61475843 | 1 | 8139 tags=36%, list=17%, signal=44%   |



|                                                                 |                                                                 |     |            |            |           |            |   |                                        |
|-----------------------------------------------------------------|-----------------------------------------------------------------|-----|------------|------------|-----------|------------|---|----------------------------------------|
| REACTOME_CHYLOMICRON REMODELING                                 | REACTOME_CHYLOMICRON REMODELING                                 | 10  | 0.19723216 | 0.19723216 | 0.7638749 | 0.61488307 | 1 | 5033 tags=30%, list=10%, signal=33%    |
| REACTOME_FATTY ACYL-COA BIOSYNTHESIS                            | REACTOME_FATTY ACYL-COA BIOSYNTHESIS                            | 37  | 0.19705074 | 0.19705074 | 0.1010204 | 0.61484516 | 1 | 8885 tags=38%, list=18%, signal=46%    |
| REACTOME_APOPTOTIC EXECUTION PHASE                              | REACTOME_APOPTOTIC EXECUTION PHASE                              | 51  | 0.196802   | 0.196802   | 0.0269231 | 0.6151448  | 1 | 3814 tags=27%, list=8%, signal=30%     |
| REACTOME_HIV ELONGATION ARREST AND RECOVERY                     | REACTOME_HIV ELONGATION ARREST AND RECOVERY                     | 29  | 0.19645011 | 0.19645011 | 0.1961962 | 0.6159152  | 1 | 7270 tags=34%, list=15%, signal=40%    |
| REACTOME_PAUSING AND RECOVERY OF HIV ELONGATION                 | REACTOME_PAUSING AND RECOVERY OF HIV ELONGATION                 | 29  | 0.19645011 | 0.19645011 | 0.182721  | 0.6151194  | 1 | 7270 tags=34%, list=15%, signal=40%    |
| REACTOME_TRANSPORT OF THE SLBP DEPENDANT MATURE                 | REACTOME_TRANSPORT OF THE SLBP DEPENDANT MATURE MRNA            | 35  | 0.1964439  | 0.1964439  | 0.1286008 | 0.61435723 | 1 | 7175 tags=34%, list=15%, signal=40%    |
| REACTOME_DOPAMINE                                               | REACTOME_DOPAMINE RECEPTORS                                     | 5   | 0.19609885 | 0.19609885 | 0.9611273 | 0.61503774 | 1 | 39363 tags=100%, list=80%, signal=510% |
| REACTOME_CELLULAR RESPONSE TO HEAT STRESS                       | REACTOME_CELLULAR RESPONSE TO HEAT STRESS                       | 97  | 0.19584675 | 0.19584675 | 0.0010142 | 0.6153469  | 1 | 3553 tags=27%, list=7%, signal=29%     |
| REACTOME_NS1 MEDIATED EFFECTS ON HOST PATHWAYS                  | REACTOME_NS1 MEDIATED EFFECTS ON HOST PATHWAYS                  | 40  | 0.19561575 | 0.19561575 | 0.0796813 | 0.61557454 | 1 | 5118 tags=30%, list=10%, signal=33%    |
| REACTOME_N-GLYCAN ANTENNAE ELONGATION IN THE MEDIAL/TRANS-GOLGI | REACTOME_N-GLYCAN ANTENNAE ELONGATION IN THE MEDIAL/TRANS-GOLGI | 26  | 0.19432828 | 0.19432828 | 0.2418236 | 0.6205534  | 1 | 13088 tags=46%, list=27%, signal=63%   |
| REACTOME_STRIATED MUSCLE CONTRACTION                            | REACTOME_STRIATED MUSCLE CONTRACTION                            | 34  | 0.19389188 | 0.19389188 | 0.1469388 | 0.62166846 | 1 | 3473 tags=26%, list=7%, signal=28%     |
| REACTOME_NUCLEAR SIGNALING BY ERBB4                             | REACTOME_NUCLEAR SIGNALING BY ERBB4                             | 25  | 0.19364119 | 0.19364119 | 0.2540323 | 0.62198275 | 1 | 6191 tags=32%, list=13%, signal=37%    |
| REACTOME_SYNTHESIS OF VERY LONG-CHAIN FATTY ACYL-               | REACTOME_SYNTHESIS OF VERY LONG-CHAIN FATTY ACYL-COAS           | 24  | 0.19361834 | 0.19361834 | 0.2625128 | 0.621293   | 1 | 8885 tags=38%, list=18%, signal=46%    |
| REACTOME_INTERACTIONS OF VPR WITH HOST CELLULAR                 | REACTOME_INTERACTIONS OF VPR WITH HOST CELLULAR PROTEINS        | 36  | 0.19347195 | 0.19347195 | 0.1163491 | 0.62109095 | 1 | 4134 tags=28%, list=8%, signal=30%     |
| REACTOME_CELL SURFACE INTERACTIONS AT THE VASCULAR WALL         | REACTOME_CELL SURFACE INTERACTIONS AT THE VASCULAR WALL         | 211 | 0.19326219 | 0.19326219 | 0         | 0.6211872  | 1 | 25618 tags=72%, list=52%, signal=149%  |
| REACTOME_SIGNAL REGULATORY PROTEIN FAMILY                       | REACTOME_SIGNAL REGULATORY PROTEIN FAMILY INTERACTIONS          | 13  | 0.19325997 | 0.19325997 | 0.6403326 | 0.6204017  | 1 | 35737 tags=92%, list=73%, signal=342%  |
| REACTOME_SIGNALING BY RAS MUTANTS                               | REACTOME_SIGNALING BY RAS MUTANTS                               | 48  | 0.19318609 | 0.19318609 | 0.0558276 | 0.6199697  | 1 | 10951 tags=42%, list=22%, signal=54%   |
| REACTOME_EARLY PHASE OF HIV LIFE CYCLE                          | REACTOME_EARLY PHASE OF HIV LIFE CYCLE                          | 14  | 0.19308086 | 0.19308086 | 0.5890688 | 0.6196916  | 1 | 8035 tags=36%, list=16%, signal=43%    |
| REACTOME_NUCLEAR ENVELOPE BREAKDOWN                             | REACTOME_NUCLEAR ENVELOPE BREAKDOWN                             | 51  | 0.19272083 | 0.19272083 | 0.0396432 | 0.62042695 | 1 | 17455 tags=55%, list=36%, signal=85%   |
| REACTOME_ANCHORING OF THE BASAL BODY TO THE PLASMA MEMBRANE     | REACTOME_ANCHORING OF THE BASAL BODY TO THE PLASMA MEMBRANE     | 97  | 0.1927127  | 0.1927127  | 0.003009  | 0.6196901  | 1 | 16326 tags=53%, list=33%, signal=79%   |
| REACTOME_TRANSCRIPTIONAL ACTIVATION OF MITOCHONDRIAL BIOGENESIS | REACTOME_TRANSCRIPTIONAL ACTIVATION OF MITOCHONDRIAL BIOGENESIS | 53  | 0.19232269 | 0.19232269 | 0.0303327 | 0.62061876 | 1 | 5374 tags=30%, list=11%, signal=34%    |
| REACTOME_DETOXIFICATION OF REACTIVE OXYGEN SPECIES              | REACTOME_DETOXIFICATION OF REACTIVE OXYGEN SPECIES              | 37  | 0.19225606 | 0.19225606 | 0.1061508 | 0.62011725 | 1 | 21030 tags=62%, list=43%, signal=109%  |
| REACTOME_RRNA MODIFICATION IN THE NUCLEUS                       | REACTOME_RRNA MODIFICATION IN THE NUCLEUS AND CYTOSOL           | 61  | 0.19210568 | 0.19210568 | 0.0212551 | 0.62001103 | 1 | 13080 tags=46%, list=27%, signal=63%   |
| REACTOME_EPHRIN SIGNALING                                       | REACTOME_EPHRIN SIGNALING                                       | 19  | 0.19165267 | 0.19165267 | 0.437811  | 0.6211928  | 1 | 6081 tags=32%, list=12%, signal=36%    |
| REACTOME_FCGAMMA RECEPTOR (FCGR) DEPENDENT                      | REACTOME_FCGAMMA RECEPTOR (FCGR) DEPENDENT PHAGOCYTOSIS         | 163 | 0.19158761 | 0.19158761 | 0         | 0.62067825 | 1 | 25195 tags=71%, list=51%, signal=145%  |
| REACTOME_COPI-DEPENDENT GOLGI-TO-ER RETROGRADE                  | REACTOME_COPI-DEPENDENT GOLGI-TO-ER RETROGRADE TRAFFIC          | 82  | 0.1914277  | 0.1914277  | 0.0091556 | 0.620591   | 1 | 10944 tags=41%, list=22%, signal=53%   |

|                                                                                                                           |                                                                                                                           |     |            |            |           |            |   |                                       |
|---------------------------------------------------------------------------------------------------------------------------|---------------------------------------------------------------------------------------------------------------------------|-----|------------|------------|-----------|------------|---|---------------------------------------|
| REACTOME_SUMOYLATION OF DNA DAMAGE RESPONSE AND REPAIR PROTEINS                                                           | REACTOME_SUMOYLATION OF DNA DAMAGE RESPONSE AND REPAIR PROTEINS                                                           | 76  | 0.19061305 | 0.19061305 | 0.0118812 | 0.6233621  | 1 | 18384 tags=57%, list=38%, signal=90%  |
| REACTOME_BH3-ONLY PROTEINS ASSOCIATE WITH AND INACTIVATE ANTI-APOPTOTIC                                                   | REACTOME_BH3-ONLY PROTEINS ASSOCIATE WITH AND INACTIVATE ANTI-APOPTOTIC BCL-2 MEMBERS                                     | 8   | 0.19005454 | 0.19005454 | 0.8687068 | 0.6250303  | 1 | 15177 tags=50%, list=31%, signal=72%  |
| REACTOME_CITRIC ACID CYCLE (TCA CYCLE)                                                                                    | REACTOME_CITRIC ACID CYCLE (TCA CYCLE)                                                                                    | 19  | 0.18891497 | 0.18891497 | 0.464497  | 0.6293805  | 1 | 6215 tags=32%, list=13%, signal=36%   |
| REACTOME_DOWNREGULATION OF TGF-BETA RECEPTOR                                                                              | REACTOME_DOWNREGULATION OF TGF-BETA RECEPTOR SIGNALING                                                                    | 26  | 0.18854399 | 0.18854399 | 0.2689162 | 0.6302131  | 1 | 5838 tags=31%, list=12%, signal=35%   |
| REACTOME_REV-MEDIATED NUCLEAR EXPORT OF HIV RNA                                                                           | REACTOME_REV-MEDIATED NUCLEAR EXPORT OF HIV RNA                                                                           | 34  | 0.18825729 | 0.18825729 | 0.1561866 | 0.63074136 | 1 | 6629 tags=32%, list=14%, signal=37%   |
| REACTOME_REGULATION OF FZD BY UBIQUITINATION                                                                              | REACTOME_REGULATION OF FZD BY UBIQUITINATION                                                                              | 21  | 0.18811296 | 0.18811296 | 0.4089069 | 0.6305979  | 1 | 11777 tags=43%, list=24%, signal=56%  |
| REACTOME_SYNTHESIS OF PA                                                                                                  | REACTOME_SYNTHESIS OF PA                                                                                                  | 39  | 0.18696053 | 0.18696053 | 0.1190717 | 0.63481396 | 1 | 13451 tags=46%, list=27%, signal=64%  |
| REACTOME_SIGNAL                                                                                                           | REACTOME_SIGNAL AMPLIFICATION                                                                                             | 32  | 0.18690608 | 0.18690608 | 0.180198  | 0.6342525  | 1 | 9215 tags=38%, list=19%, signal=46%   |
| REACTOME_THROMBIN SIGNALING THROUGH PROTEINASE ACTIVATED RECEPTORS (PARS)                                                 | REACTOME_THROMBIN SIGNALING THROUGH PROTEINASE ACTIVATED RECEPTORS (PARS)                                                 | 32  | 0.18690608 | 0.18690608 | 0.1971545 | 0.6334636  | 1 | 9215 tags=38%, list=19%, signal=46%   |
| REACTOME_POST-CHAPERONIN TUBULIN FOLDING PATHWAY                                                                          | REACTOME_POST-CHAPERONIN TUBULIN FOLDING PATHWAY                                                                          | 22  | 0.18554516 | 0.18554516 | 0.3804453 | 0.6387284  | 1 | 10949 tags=41%, list=22%, signal=53%  |
| REACTOME_REGULATION OF PLK1 ACTIVITY AT G2/M                                                                              | REACTOME_REGULATION OF PLK1 ACTIVITY AT G2/M TRANSITION                                                                   | 87  | 0.18551962 | 0.18551962 | 0.0078355 | 0.63804746 | 1 | 12881 tags=45%, list=26%, signal=61%  |
| REACTOME_RHO GTPASES ACTIVATE WASPS AND WAVES                                                                             | REACTOME_RHO GTPASES ACTIVATE WASPS AND WAVES                                                                             | 36  | 0.18523553 | 0.18523553 | 0.1570248 | 0.6385075  | 1 | 4537 tags=28%, list=9%, signal=31%    |
| REACTOME_TP53 REGULATES TRANSCRIPTION OF DNA REPAIR GENES                                                                 | REACTOME_TP53 REGULATES TRANSCRIPTION OF DNA REPAIR GENES                                                                 | 58  | 0.18485296 | 0.18485296 | 0.035122  | 0.6394572  | 1 | 12064 tags=43%, list=25%, signal=57%  |
| REACTOME_FANCONI ANEMIA PATHWAY                                                                                           | REACTOME_FANCONI ANEMIA PATHWAY                                                                                           | 36  | 0.184376   | 0.184376   | 0.1481113 | 0.64078283 | 1 | 23621 tags=67%, list=48%, signal=129% |
| REACTOME_DISASSEMBLY OF THE DESTRUCTION COMPLEX AND RECRUITMENT OF AXIN TO THE MEMBRANE                                   | REACTOME_DISASSEMBLY OF THE DESTRUCTION COMPLEX AND RECRUITMENT OF AXIN TO THE MEMBRANE                                   | 31  | 0.18386318 | 0.18386318 | 0.238477  | 0.6423547  | 1 | 6797 tags=32%, list=14%, signal=37%   |
| REACTOME_PKA ACTIVATION                                                                                                   | REACTOME_PKA ACTIVATION                                                                                                   | 16  | 0.1837065  | 0.1837065  | 0.6087805 | 0.64226264 | 1 | 3248 tags=25%, list=7%, signal=27%    |
| REACTOME_CD28 CO-                                                                                                         | REACTOME_CD28 CO-STIMULATION                                                                                              | 35  | 0.18291438 | 0.18291438 | 0.1829026 | 0.6450965  | 1 | 17630 tags=54%, list=36%, signal=85%  |
| REACTOME_PYRUVATE METABOLISM AND CITRIC ACID (TCA) CYCLE                                                                  | REACTOME_PYRUVATE METABOLISM AND CITRIC ACID (TCA) CYCLE                                                                  | 49  | 0.1809954  | 0.1809954  | 0.0733198 | 0.65293294 | 1 | 7134 tags=33%, list=15%, signal=38%   |
| REACTOME_METABOLISM OF NUCLEOTIDES                                                                                        | REACTOME_METABOLISM OF NUCLEOTIDES                                                                                        | 102 | 0.18093166 | 0.18093166 | 0.0050302 | 0.6524365  | 1 | 9400 tags=37%, list=19%, signal=46%   |
| REACTOME_TRANSCRIPTIONAL REGULATION BY THE AP-2 (TFAP2) FAMILY OF TRANSCRIPTION FACTORS                                   | REACTOME_TRANSCRIPTIONAL REGULATION BY THE AP-2 (TFAP2) FAMILY OF TRANSCRIPTION FACTORS                                   | 36  | 0.18071537 | 0.18071537 | 0.1549439 | 0.652562   | 1 | 12919 tags=44%, list=26%, signal=60%  |
| REACTOME_TRANSPORT OF THE SLBP INDEPENDENT MATURE                                                                         | REACTOME_TRANSPORT OF THE SLBP INDEPENDENT MATURE MRNA                                                                    | 34  | 0.18038306 | 0.18038306 | 0.1757451 | 0.65324825 | 1 | 4134 tags=26%, list=8%, signal=29%    |
| REACTOME_SUMOYLATION OF DNA REPLICATION PROTEINS                                                                          | REACTOME_SUMOYLATION OF DNA REPLICATION PROTEINS                                                                          | 45  | 0.18024895 | 0.18024895 | 0.1170635 | 0.65306807 | 1 | 18384 tags=56%, list=38%, signal=89%  |
| REACTOME_UPTAKE AND ACTIONS OF BACTERIAL TOXINS                                                                           | REACTOME_UPTAKE AND ACTIONS OF BACTERIAL TOXINS                                                                           | 29  | 0.18019313 | 0.18019313 | 0.2914172 | 0.65252155 | 1 | 9754 tags=38%, list=20%, signal=47%   |
| REACTOME_TP53 REGULATES TRANSCRIPTION OF ADDITIONAL CELL CYCLE GENES WHOSE EXACT ROLE IN THE P53 PATHWAY REMAIN UNCERTAIN | REACTOME_TP53 REGULATES TRANSCRIPTION OF ADDITIONAL CELL CYCLE GENES WHOSE EXACT ROLE IN THE P53 PATHWAY REMAIN UNCERTAIN | 20  | 0.17998774 | 0.17998774 | 0.4557823 | 0.65265083 | 1 | 5879 tags=30%, list=12%, signal=34%   |

|                                                                               |                                                                               |     |            |            |           |            |   |                                       |
|-------------------------------------------------------------------------------|-------------------------------------------------------------------------------|-----|------------|------------|-----------|------------|---|---------------------------------------|
| REACTOME_TRANSCRIPTIONAL REGULATION OF WHITE ADIPOCYTE DIFFERENTIATION        | REACTOME_TRANSCRIPTIONAL REGULATION OF WHITE ADIPOCYTE DIFFERENTIATION        | 83  | 0.17942297 | 0.17942297 | 0.01002   | 0.65436465 | 1 | 5387 tags=29%, list=11%, signal=32%   |
| REACTOME_SIGNALING BY INTERLEUKINS                                            | REACTOME_SIGNALING BY INTERLEUKINS                                            | 687 | 0.17913449 | 0.17913449 | 0         | 0.65491956 | 1 | 10951 tags=40%, list=22%, signal=51%  |
| REACTOME_TOLL-LIKE RECEPTORS CASCADES                                         | REACTOME_TOLL-LIKE RECEPTORS CASCADES                                         | 152 | 0.1789082  | 0.1789082  | 0         | 0.655176   | 1 | 7695 tags=34%, list=16%, signal=40%   |
| REACTOME_SYNTHESIS OF PIPS AT THE EARLY ENDOSOME                              | REACTOME_SYNTHESIS OF PIPS AT THE EARLY ENDOSOME MEMBRANE                     | 16  | 0.17864384 | 0.17864384 | 0.6290323 | 0.6555626  | 1 | 24918 tags=69%, list=51%, signal=140% |
| REACTOME_PCP/CE PATHWAY                                                       | REACTOME_PCP/CE PATHWAY                                                       | 91  | 0.17863518 | 0.17863518 | 0.007992  | 0.6548081  | 1 | 16558 tags=52%, list=34%, signal=78%  |
| REACTOME_SYNTHESIS OF LEUKOTRIENES (LT) AND EOXINS                            | REACTOME_SYNTHESIS OF LEUKOTRIENES (LT) AND EOXINS (EX)                       | 21  | 0.17800617 | 0.17800617 | 0.4747475 | 0.6567849  | 1 | 16935 tags=52%, list=35%, signal=80%  |
| REACTOME_TBC/RABGAPS                                                          | REACTOME_TBC/RABGAPS                                                          | 45  | 0.17711684 | 0.17711684 | 0.1155779 | 0.66005325 | 1 | 6568 tags=31%, list=13%, signal=36%   |
| REACTOME_G ALPHA (12/13) SIGNALLING EVENTS                                    | REACTOME_G ALPHA (12/13) SIGNALLING EVENTS                                    | 87  | 0.17666459 | 0.17666459 | 0.0111902 | 0.66126907 | 1 | 12751 tags=44%, list=26%, signal=59%  |
| REACTOME_NOTCH1 INTRACELLULAR DOMAIN REGULATES TRANSCRIPTION                  | REACTOME_NOTCH1 INTRACELLULAR DOMAIN REGULATES TRANSCRIPTION                  | 47  | 0.17650293 | 0.17650293 | 0.0880881 | 0.6612204  | 1 | 12201 tags=43%, list=25%, signal=57%  |
| REACTOME_FORMATION OF TUBULIN FOLDING INTERMEDIATES BY CCT/TRIC               | REACTOME_FORMATION OF TUBULIN FOLDING INTERMEDIATES BY CCT/TRIC               | 25  | 0.17646097 | 0.17646097 | 0.3642931 | 0.6605905  | 1 | 10949 tags=40%, list=22%, signal=51%  |
| REACTOME_POST-ELONGATION PROCESSING OF INTRONLESS PRE-MRNA                    | REACTOME_POST-ELONGATION PROCESSING OF INTRONLESS PRE-MRNA                    | 28  | 0.17630324 | 0.17630324 | 0.2910373 | 0.6605212  | 1 | 21100 tags=61%, list=43%, signal=107% |
| REACTOME_PROCESSING OF CAPPED INTRONLESS PRE-MRNA                             | REACTOME_PROCESSING OF CAPPED INTRONLESS PRE-MRNA                             | 28  | 0.17630324 | 0.17630324 | 0.3106893 | 0.6597263  | 1 | 21100 tags=61%, list=43%, signal=107% |
| REACTOME_REGULATION OF RUNX3 EXPRESSION AND ACTIVITY                          | REACTOME_REGULATION OF RUNX3 EXPRESSION AND ACTIVITY                          | 54  | 0.17587084 | 0.17587084 | 0.0639594 | 0.6608591  | 1 | 17693 tags=54%, list=36%, signal=84%  |
| REACTOME_SYNTHESIS OF IP3 AND IP4 IN THE CYTOSOL                              | REACTOME_SYNTHESIS OF IP3 AND IP4 IN THE CYTOSOL                              | 26  | 0.17504288 | 0.17504288 | 0.3550107 | 0.66374475 | 1 | 8382 tags=35%, list=17%, signal=42%   |
| REACTOME_TRP CHANNELS                                                         | REACTOME_TRP CHANNELS                                                         | 25  | 0.1735758  | 0.1735758  | 0.4048096 | 0.6696438  | 1 | 16966 tags=52%, list=35%, signal=80%  |
| REACTOME_MAPK6/MAPK4 SIGNALING                                                | REACTOME_MAPK6/MAPK4 SIGNALING                                                | 88  | 0.17304175 | 0.17304175 | 9.96E-04  | 0.67135364 | 1 | 17693 tags=53%, list=36%, signal=83%  |
| REACTOME_TRNA MODIFICATION IN THE NUCLEUS AND CYTOSOL                         | REACTOME_TRNA MODIFICATION IN THE NUCLEUS AND CYTOSOL                         | 43  | 0.17226139 | 0.17226139 | 0.1372162 | 0.6741192  | 1 | 6375 tags=30%, list=13%, signal=35%   |
| REACTOME_RETROGRADE TRANSPORT AT THE TRANS-GOLGI-NETWORK                      | REACTOME_RETROGRADE TRANSPORT AT THE TRANS-GOLGI-NETWORK                      | 49  | 0.1719595  | 0.1719595  | 0.0954774 | 0.67474914 | 1 | 14571 tags=47%, list=30%, signal=67%  |
| REACTOME_ADP SIGNALLING THROUGH P2Y PURINOCEPTOR 1                            | REACTOME_ADP SIGNALLING THROUGH P2Y PURINOCEPTOR 1                            | 25  | 0.17187168 | 0.17187168 | 0.4228395 | 0.67434597 | 1 | 9215 tags=36%, list=19%, signal=44%   |
| REACTOME_HOMOLOGY DIRECTED REPAIR                                             | REACTOME_HOMOLOGY DIRECTED REPAIR                                             | 118 | 0.17176585 | 0.17176585 | 9.79E-04  | 0.6740035  | 1 | 18581 tags=55%, list=38%, signal=89%  |
| REACTOME_TRANSCRIPTION OF E2F TARGETS UNDER NEGATIVE CONTROL BY DREAM COMPLEX | REACTOME_TRANSCRIPTION OF E2F TARGETS UNDER NEGATIVE CONTROL BY DREAM COMPLEX | 19  | 0.17154889 | 0.17154889 | 0.5656155 | 0.67419946 | 1 | 7065 tags=32%, list=14%, signal=37%   |
| REACTOME_SIGNALING BY HEDGEHOG                                                | REACTOME_SIGNALING BY HEDGEHOG                                                | 136 | 0.1713793  | 0.1713793  | 0.001007  | 0.6742128  | 1 | 13953 tags=46%, list=28%, signal=64%  |
| REACTOME_THE ROLE OF GTSE1 IN G2/M PROGRESSION AFTER G2 CHECKPOINT            | REACTOME_THE ROLE OF GTSE1 IN G2/M PROGRESSION AFTER G2 CHECKPOINT            | 59  | 0.17110445 | 0.17110445 | 0.0544355 | 0.67466    | 1 | 20678 tags=59%, list=42%, signal=103% |
| REACTOME_INTERLEUKIN-1 FAMILY SIGNALING                                       | REACTOME_INTERLEUKIN-1 FAMILY SIGNALING                                       | 94  | 0.17088279 | 0.17088279 | 0.0083074 | 0.67486113 | 1 | 17693 tags=53%, list=36%, signal=83%  |
| REACTOME_REPRESSION OF WNT TARGET GENES                                       | REACTOME_REPRESSION OF WNT TARGET GENES                                       | 14  | 0.17083411 | 0.17083411 | 0.7619522 | 0.6742898  | 1 | 2129 tags=21%, list=4%, signal=22%    |
| REACTOME_EFFECTS OF PIP2 HYDROLYSIS                                           | REACTOME_EFFECTS OF PIP2 HYDROLYSIS                                           | 27  | 0.17053701 | 0.17053701 | 0.3580875 | 0.674829   | 1 | 15229 tags=48%, list=31%, signal=70%  |

|                                                                                     |                                                                                     |      |            |            |           |            |   |                                      |
|-------------------------------------------------------------------------------------|-------------------------------------------------------------------------------------|------|------------|------------|-----------|------------|---|--------------------------------------|
| REACTOME_SYNTHESIS OF DNA                                                           | REACTOME_SYNTHESIS OF DNA                                                           | 99   | 0.17030185 | 0.17030185 | 0.0030519 | 0.67514706 | 1 | 19869 tags=58%, list=41%, signal=97% |
| REACTOME_KINESINS                                                                   | REACTOME_KINESINS                                                                   | 43   | 0.17028767 | 0.17028767 | 0.1589069 | 0.67440933 | 1 | 8749 tags=35%, list=18%, signal=42%  |
| REACTOME_ACTIVATION OF NF-KAPPAB IN B CELLS                                         | REACTOME_ACTIVATION OF NF-KAPPAB IN B CELLS                                         | 66   | 0.17018694 | 0.17018694 | 0.0433031 | 0.67408895 | 1 | 19869 tags=58%, list=41%, signal=97% |
| REACTOME_MHC CLASS II ANTIGEN PRESENTATION                                          | REACTOME_MHC CLASS II ANTIGEN PRESENTATION                                          | 105  | 0.16957295 | 0.16957295 | 0.0081716 | 0.67610073 | 1 | 10367 tags=38%, list=21%, signal=48% |
| REACTOME_VIRAL MESSENGER RNA SYNTHESIS                                              | REACTOME_VIRAL MESSENGER RNA SYNTHESIS                                              | 43   | 0.1693089  | 0.1693089  | 0.1565907 | 0.67653674 | 1 | 4242 tags=26%, list=9%, signal=28%   |
| REACTOME_EGFR INTERACTS WITH PHOSPHOLIPASE C-GAMMA                                  | REACTOME_EGFR INTERACTS WITH PHOSPHOLIPASE C-GAMMA                                  | 34   | 0.169058   | 0.169058   | 0.2547835 | 0.6769248  | 1 | 3248 tags=24%, list=7%, signal=25%   |
| REACTOME_PKA ACTIVATION IN GLUCAGON SIGNALLING                                      | REACTOME_PKA ACTIVATION IN GLUCAGON SIGNALLING                                      | 17   | 0.16899928 | 0.16899928 | 0.6443089 | 0.6763964  | 1 | 3248 tags=24%, list=7%, signal=25%   |
| REACTOME_PKA-MEDIATED PHOSPHORYLATION OF CREB                                       | REACTOME_PKA-MEDIATED PHOSPHORYLATION OF CREB                                       | 17   | 0.16899928 | 0.16899928 | 0.6564103 | 0.6756034  | 1 | 3248 tags=24%, list=7%, signal=25%   |
| REACTOME_DEACTIVATION OF THE BETA-CATENIN TRANSACTIVATING COMPLEX                   | REACTOME_DEACTIVATION OF THE BETA-CATENIN TRANSACTIVATING COMPLEX                   | 42   | 0.16813837 | 0.16813837 | 0.168932  | 0.67872983 | 1 | 6929 tags=31%, list=14%, signal=36%  |
| REACTOME_DNA DOUBLE STRAND BREAK RESPONSE                                           | REACTOME_DNA DOUBLE STRAND BREAK RESPONSE                                           | 59   | 0.1675265  | 0.1675265  | 0.0679012 | 0.6807684  | 1 | 10894 tags=39%, list=22%, signal=50% |
| REACTOME_ORC1 REMOVAL FROM CHROMATIN                                                | REACTOME_ORC1 REMOVAL FROM CHROMATIN                                                | 70   | 0.16745065 | 0.16745065 | 0.0371859 | 0.6803058  | 1 | 17693 tags=53%, list=36%, signal=83% |
| REACTOME_SWITCHING OF ORIGINS TO A POST-REPLICATIVE STATE                           | REACTOME_SWITCHING OF ORIGINS TO A POST-REPLICATIVE STATE                           | 70   | 0.16745065 | 0.16745065 | 0.0333333 | 0.679512   | 1 | 17693 tags=53%, list=36%, signal=83% |
| REACTOME_SUMO E3 LIGASES SUMOYLATE TARGET PROTEINS                                  | REACTOME_SUMO E3 LIGASES SUMOYLATE TARGET PROTEINS                                  | 112  | 0.16686158 | 0.16686158 | 0.0019157 | 0.6813761  | 1 | 16767 tags=51%, list=34%, signal=77% |
| REACTOME_PI3K EVENTS IN ERBB2 SIGNALING                                             | REACTOME_PI3K EVENTS IN ERBB2 SIGNALING                                             | 16   | 0.16680498 | 0.16680498 | 0.672888  | 0.68081784 | 1 | 1015 tags=19%, list=2%, signal=19%   |
| REACTOME_HOST INTERACTIONS OF HIV FACTORS                                           | REACTOME_HOST INTERACTIONS OF HIV FACTORS                                           | 127  | 0.16663107 | 0.16663107 | 0.0010183 | 0.6808053  | 1 | 17693 tags=53%, list=36%, signal=82% |
| REACTOME_ASYMMETRIC LOCALIZATION OF PCP                                             | REACTOME_ASYMMETRIC LOCALIZATION OF PCP PROTEINS                                    | 63   | 0.16584194 | 0.16584194 | 0.0493827 | 0.6836172  | 1 | 19869 tags=57%, list=41%, signal=96% |
| REACTOME_HDR THROUGH HOMOLOGOUS RECOMBINATION (HR) OR SINGLE STRAND ANNEALING (SSA) | REACTOME_HDR THROUGH HOMOLOGOUS RECOMBINATION (HR) OR SINGLE STRAND ANNEALING (SSA) | 112  | 0.16552594 | 0.16552594 | 0.002907  | 0.68428534 | 1 | 18581 tags=54%, list=38%, signal=88% |
| REACTOME_PLATELET CALCIUM HOMEOSTASIS                                               | REACTOME_PLATELET CALCIUM HOMEOSTASIS                                               | 28   | 0.16535038 | 0.16535038 | 0.3899497 | 0.68427914 | 1 | 14641 tags=46%, list=30%, signal=66% |
| REACTOME_FACTORS INVOLVED IN MEGAKARYOCYTE DEVELOPMENT AND PLATELET                 | REACTOME_FACTORS INVOLVED IN MEGAKARYOCYTE DEVELOPMENT AND PLATELET PRODUCTION      | 140  | 0.16462877 | 0.16462877 | 0.0019881 | 0.686792   | 1 | 8749 tags=34%, list=18%, signal=42%  |
| REACTOME_METABOLISM OF VITAMINS AND COFACTORS                                       | REACTOME_METABOLISM OF VITAMINS AND COFACTORS                                       | 180  | 0.16311538 | 0.16311538 | 0         | 0.6929649  | 1 | 7547 tags=32%, list=15%, signal=37%  |
| REACTOME_IMMUNE SYSTEM                                                              | REACTOME_IMMUNE SYSTEM                                                              | 2213 | 0.1629798  | 0.1629798  | 0         | 0.6927681  | 1 | 10567 tags=37%, list=22%, signal=45% |
| REACTOME_TCR SIGNALING                                                              | REACTOME_TCR SIGNALING                                                              | 118  | 0.16238791 | 0.16238791 | 0.003     | 0.6947047  | 1 | 19869 tags=57%, list=41%, signal=95% |
| REACTOME_REGULATION OF MRNA STABILITY BY PROTEINS THAT BIND AU-RICH ELEMENTS        | REACTOME_REGULATION OF MRNA STABILITY BY PROTEINS THAT BIND AU-RICH ELEMENTS        | 88   | 0.16214658 | 0.16214658 | 0.025974  | 0.69507205 | 1 | 14887 tags=47%, list=30%, signal=67% |
| REACTOME_DNA DOUBLE-STRAND BREAK REPAIR                                             | REACTOME_DNA DOUBLE-STRAND BREAK REPAIR                                             | 146  | 0.1620836  | 0.1620836  | 0         | 0.6945904  | 1 | 18581 tags=54%, list=38%, signal=87% |
| REACTOME_DOWNSTREAM TCR SIGNALING                                                   | REACTOME_DOWNSTREAM TCR SIGNALING                                                   | 97   | 0.16153023 | 0.16153023 | 0.011022  | 0.69638044 | 1 | 19869 tags=57%, list=41%, signal=95% |
| REACTOME_SIGNALING BY REACTOME_ASSEMBLY OF THE PRE-REPLICATIVE COMPLEX              | REACTOME_SIGNALING BY ERBB4 REACTOME_ASSEMBLY OF THE PRE-REPLICATIVE COMPLEX        | 43   | 0.16152431 | 0.16152431 | 0.1979695 | 0.69560814 | 1 | 8039 tags=33%, list=16%, signal=39%  |
| REACTOME_POST NMDA RECEPTOR ACTIVATION EVENTS                                       | REACTOME_POST NMDA RECEPTOR ACTIVATION EVENTS                                       | 67   | 0.16124853 | 0.16124853 | 0.0462366 | 0.6960464  | 1 | 17693 tags=52%, list=36%, signal=82% |
|                                                                                     |                                                                                     | 35   | 0.16106683 | 0.16106683 | 0.2834171 | 0.6961157  | 1 | 3310 tags=23%, list=7%, signal=24%   |

|                                                                                                                    |                                                                                                                    |      |            |            |           |            |   |                                       |
|--------------------------------------------------------------------------------------------------------------------|--------------------------------------------------------------------------------------------------------------------|------|------------|------------|-----------|------------|---|---------------------------------------|
| REACTOME_FORMATION OF THE BETA-CATENIN:TCF TRANSACTIVATING COMPLEX                                                 | REACTOME_FORMATION OF THE BETA-CATENIN:TCF TRANSACTIVATING COMPLEX                                                 | 61   | 0.160838   | 0.160838   | 0.0626808 | 0.6964105  | 1 | 12201 tags=41%, list=25%, signal=55%  |
| REACTOME_Glutathione conjugation                                                                                   | REACTOME_Glutathione conjugation                                                                                   | 35   | 0.15943184 | 0.15943184 | 0.3115079 | 0.7022076  | 1 | 3390 tags=23%, list=7%, signal=25%    |
| REACTOME_CDK-MEDIATED PHOSPHORYLATION AND REMOVAL OF CDC6                                                          | REACTOME_CDK-MEDIATED PHOSPHORYLATION AND REMOVAL OF CDC6                                                          | 50   | 0.15880197 | 0.15880197 | 0.1600408 | 0.7043601  | 1 | 17693 tags=52%, list=36%, signal=81%  |
| REACTOME_SUMOYLATION OF RNA BINDING PROTEINS                                                                       | REACTOME_SUMOYLATION OF RNA BINDING PROTEINS                                                                       | 46   | 0.15872289 | 0.15872289 | 0.1819106 | 0.7039214  | 1 | 2879 tags=22%, list=6%, signal=23%    |
| REACTOME_POST-TRANSLATIONAL PROTEIN MODIFICATION                                                                   | REACTOME_POST-TRANSLATIONAL PROTEIN MODIFICATION                                                                   | 1327 | 0.15847869 | 0.15847869 | 0         | 0.70425695 | 1 | 7209 tags=30%, list=15%, signal=34%   |
| REACTOME_REGULATION OF APOPTOSIS                                                                                   | REACTOME_REGULATION OF APOPTOSIS                                                                                   | 52   | 0.15803847 | 0.15803847 | 0.1325536 | 0.7054041  | 1 | 17693 tags=52%, list=36%, signal=81%  |
| REACTOME_AUF1 (HNRNP D0) BINDS AND DESTABILIZES MRNA                                                               | REACTOME_AUF1 (HNRNP D0) BINDS AND DESTABILIZES MRNA                                                               | 54   | 0.15733187 | 0.15733187 | 0.1138614 | 0.7079125  | 1 | 17693 tags=52%, list=36%, signal=81%  |
| REACTOME_RECRUITMENT AND ATM-MEDIATED PHOSPHORYLATION OF REPAIR AND SIGNALING PROTEINS AT DNA DOUBLE STRAND BREAKS | REACTOME_RECRUITMENT AND ATM-MEDIATED PHOSPHORYLATION OF REPAIR AND SIGNALING PROTEINS AT DNA DOUBLE STRAND BREAKS | 58   | 0.15699044 | 0.15699044 | 0.1019368 | 0.70870197 | 1 | 10894 tags=38%, list=22%, signal=49%  |
| REACTOME_DEGRADATION OF REACTOME_PACKAGING OF TELOMERE ENDS                                                        | REACTOME_DEGRADATION OF DVL REACTOME_PACKAGING OF TELOMERE ENDS                                                    | 56   | 0.1566762  | 0.1566762  | 0.1237425 | 0.7093791  | 1 | 17693 tags=52%, list=36%, signal=81%  |
| REACTOME_SYNTHESIS OF (16-20)-HYDROXYEICOSATETRAENOIC ACIDS (HETE)                                                 | REACTOME_SYNTHESIS OF (16-20)-HYDROXYEICOSATETRAENOIC ACIDS (HETE)                                                 | 33   | 0.1563289  | 0.1563289  | 0.3460076 | 0.71022326 | 1 | 30928 tags=79%, list=63%, signal=214% |
| REACTOME_TRANSPORT TO THE GOLGI AND SUBSEQUENT MODIFICATION                                                        | REACTOME_TRANSPORT TO THE GOLGI AND SUBSEQUENT MODIFICATION                                                        | 9    | 0.1561039  | 0.1561039  | 0.9641077 | 0.7104686  | 1 | 14119 tags=44%, list=29%, signal=62%  |
| REACTOME_PERK REGULATES GENE EXPRESSION                                                                            | REACTOME_PERK REGULATES GENE EXPRESSION                                                                            | 167  | 0.15566997 | 0.15566997 | 0.001003  | 0.7117581  | 1 | 7356 tags=31%, list=15%, signal=36%   |
| REACTOME_MET ACTIVATES PI3K/AKT SIGNALING                                                                          | REACTOME_MET ACTIVATES PI3K/AKT SIGNALING                                                                          | 28   | 0.15539369 | 0.15539369 | 0.4872549 | 0.71228296 | 1 | 9882 tags=36%, list=20%, signal=45%   |
| REACTOME_FcERI MEDIATED NF-KB ACTIVATION                                                                           | REACTOME_FcERI MEDIATED NF-KB ACTIVATION                                                                           | 6    | 0.15485747 | 0.15485747 | 0.9959391 | 0.7139793  | 1 | 8739 tags=33%, list=18%, signal=41%   |
| REACTOME_HEDGEHOG LIGAND BIOGENESIS                                                                                | REACTOME_HEDGEHOG LIGAND BIOGENESIS                                                                                | 151  | 0.15477985 | 0.15477985 | 0.005123  | 0.7135574  | 1 | 25195 tags=67%, list=51%, signal=137% |
| REACTOME_PROGRAMMED CELL DEATH                                                                                     | REACTOME_PROGRAMMED CELL DEATH                                                                                     | 64   | 0.15446675 | 0.15446675 | 0.0909091 | 0.71423596 | 1 | 17693 tags=52%, list=36%, signal=81%  |
| REACTOME_GLYCEROPHOSPHOLIPID BIOSYNTHESIS                                                                          | REACTOME_GLYCEROPHOSPHOLIPID BIOSYNTHESIS                                                                          | 169  | 0.15418413 | 0.15418413 | 0         | 0.714748   | 1 | 17972 tags=52%, list=37%, signal=82%  |
| REACTOME_ACTIVATION OF THE TFAP2 (AP-2) FAMILY OF TRANSCRIPTION FACTORS                                            | REACTOME_ACTIVATION OF THE TFAP2 (AP-2) FAMILY OF TRANSCRIPTION FACTORS                                            | 129  | 0.15365061 | 0.15365061 | 0.0030151 | 0.7164516  | 1 | 11474 tags=39%, list=23%, signal=50%  |
| REACTOME_CELLULAR RESPONSE TO HYPOXIA                                                                              | REACTOME_CELLULAR RESPONSE TO HYPOXIA                                                                              | 12   | 0.15284221 | 0.15284221 | 0.8959366 | 0.7194929  | 1 | 12919 tags=42%, list=26%, signal=57%  |
| REACTOME_REGULATION OF HYPOXIA-INDUCIBLE FACTOR (HIF) BY OXYGEN                                                    | REACTOME_REGULATION OF HYPOXIA-INDUCIBLE FACTOR (HIF) BY OXYGEN                                                    | 72   | 0.15275334 | 0.15275334 | 0.0636183 | 0.7191186  | 1 | 17693 tags=51%, list=36%, signal=80%  |
| REACTOME_REMOVAL OF LICENSING FACTORS FROM REACTOME_DAG AND IP3                                                    | REACTOME_REMOVAL OF LICENSING FACTORS FROM ORIGINS REACTOME_DAG AND IP3 SIGNALING                                  | 72   | 0.15275334 | 0.15275334 | 0.0814664 | 0.7183142  | 1 | 17693 tags=51%, list=36%, signal=80%  |
| REACTOME_CYTOSOLIC SULFONATION OF SMALL MOLECULES                                                                  | REACTOME_CYTOSOLIC SULFONATION OF SMALL MOLECULES                                                                  | 72   | 0.15275334 | 0.15275334 | 0.0661841 | 0.71751165 | 1 | 17693 tags=51%, list=36%, signal=80%  |
| REACTOME_G0 AND EARLY G1                                                                                           | REACTOME_G0 AND EARLY G1                                                                                           | 32   | 0.15249614 | 0.15249614 | 0.4092742 | 0.7178915  | 1 | 3248 tags=22%, list=7%, signal=23%    |
|                                                                                                                    |                                                                                                                    | 24   | 0.15232883 | 0.15232883 | 0.5659068 | 0.7178828  | 1 | 23147 tags=63%, list=47%, signal=118% |
|                                                                                                                    |                                                                                                                    | 27   | 0.152073   | 0.152073   | 0.5071428 | 0.71827114 | 1 | 7065 tags=30%, list=14%, signal=35%   |

|                                                                                      |                                                                                      |      |            |            |           |            |   |                                       |
|--------------------------------------------------------------------------------------|--------------------------------------------------------------------------------------|------|------------|------------|-----------|------------|---|---------------------------------------|
| REACTOME_ER TO GOLGI ANTEROGRADE TRANSPORT                                           | REACTOME_ER TO GOLGI ANTEROGRADE TRANSPORT                                           | 136  | 0.15194653 | 0.15194653 | 0.0069652 | 0.718073   | 1 | 6261 tags=28%, list=13%, signal=32%   |
| REACTOME_APOPTOSIS                                                                   | REACTOME_APOPTOSIS                                                                   | 166  | 0.15152787 | 0.15152787 | 0.0020346 | 0.7192581  | 1 | 17972 tags=52%, list=37%, signal=82%  |
| REACTOME_INTERCONVERSION OF NUCLEOTIDE DI- AND TRIPHOSPHATES                         | REACTOME_INTERCONVERSION OF NUCLEOTIDE DI- AND TRIPHOSPHATES                         | 32   | 0.15127955 | 0.15127955 | 0.3897959 | 0.7195847  | 1 | 7898 tags=31%, list=16%, signal=37%   |
| REACTOME_HEDGEHOG 'OFF' STATE                                                        | REACTOME_HEDGEHOG 'OFF' STATE                                                        | 99   | 0.15123796 | 0.15123796 | 0.0152439 | 0.7189687  | 1 | 17833 tags=52%, list=36%, signal=81%  |
| REACTOME_TRIGLYCERIDE METABOLISM                                                     | REACTOME_TRIGLYCERIDE METABOLISM                                                     | 38   | 0.15092196 | 0.15092196 | 0.3280633 | 0.71973175 | 1 | 20963 tags=58%, list=43%, signal=101% |
| REACTOME_CILIUM ASSEMBLY                                                             | REACTOME_CILIUM ASSEMBLY                                                             | 187  | 0.1503117  | 0.1503117  | 0         | 0.7218668  | 1 | 13091 tags=42%, list=27%, signal=57%  |
| REACTOME_INTRA-GOLGI AND RETROGRADE GOLGI-TO-ER TRAFFIC                              | REACTOME_INTRA-GOLGI AND RETROGRADE GOLGI-TO-ER TRAFFIC                              | 185  | 0.15001275 | 0.15001275 | 9.90E-04  | 0.7224751  | 1 | 10944 tags=37%, list=22%, signal=48%  |
| REACTOME_SUMOYLATION                                                                 | REACTOME_SUMOYLATION                                                                 | 118  | 0.14943688 | 0.14943688 | 0.008     | 0.724475   | 1 | 16767 tags=49%, list=34%, signal=75%  |
| REACTOME_CROSS-PRESENTATION OF SOLUBLE EXOGENOUS ANTIGENS                            | REACTOME_CROSS-PRESENTATION OF SOLUBLE EXOGENOUS ANTIGENS (ENDOSOMES)                | 49   | 0.14899302 | 0.14899302 | 0.1952895 | 0.72581947 | 1 | 17693 tags=51%, list=36%, signal=80%  |
| REACTOME_REGULATION OF ACTIVATED PAK-2P34 BY PROTEASOME MEDIATED DEGRADATION         | REACTOME_REGULATION OF ACTIVATED PAK-2P34 BY PROTEASOME MEDIATED DEGRADATION         | 49   | 0.14899302 | 0.14899302 | 0.203668  | 0.7250201  | 1 | 17693 tags=51%, list=36%, signal=80%  |
| REACTOME_HOMOLOGOUS DNA PAIRING AND STRAND EXCHANGE                                  | REACTOME_HOMOLOGOUS DNA PAIRING AND STRAND EXCHANGE                                  | 42   | 0.14885296 | 0.14885296 | 0.2958877 | 0.724875   | 1 | 18365 tags=52%, list=38%, signal=84%  |
| REACTOME_ONCOGENE INDUCED SENESCENCE                                                 | REACTOME_ONCOGENE INDUCED SENESCENCE                                                 | 31   | 0.14852856 | 0.14852856 | 0.4576772 | 0.725574   | 1 | 2208 tags=19%, list=5%, signal=20%    |
| REACTOME_BASE EXCISION REPAIR                                                        | REACTOME_BASE EXCISION REPAIR                                                        | 38   | 0.14845641 | 0.14845641 | 0.3366734 | 0.7251114  | 1 | 5621 tags=26%, list=11%, signal=30%   |
| REACTOME_RESOLUTION OF ABASIC SITES (AP SITES)                                       | REACTOME_RESOLUTION OF ABASIC SITES (AP SITES)                                       | 38   | 0.14845641 | 0.14845641 | 0.3253968 | 0.72431636 | 1 | 5621 tags=26%, list=11%, signal=30%   |
| REACTOME_C-TYPE LECTIN RECEPTORS (CLRS)                                              | REACTOME_C-TYPE LECTIN RECEPTORS (CLRS)                                              | 141  | 0.14837793 | 0.14837793 | 0.0019512 | 0.72388697 | 1 | 17758 tags=51%, list=36%, signal=80%  |
| REACTOME_INFLAMMASOMES                                                               | REACTOME_INFLAMMASOMES                                                               | 17   | 0.14830986 | 0.14830986 | 0.7782139 | 0.7234016  | 1 | 7141 tags=29%, list=15%, signal=34%   |
| REACTOME_DEPOSITION OF NEW CENPA-CONTAINING NUCLEOSOMES AT THE CENTROMERE            | REACTOME_DEPOSITION OF NEW CENPA-CONTAINING NUCLEOSOMES AT THE CENTROMERE            | 52   | 0.14820234 | 0.14820234 | 0.1631274 | 0.7231317  | 1 | 31357 tags=79%, list=64%, signal=219% |
| REACTOME_NUCLEOSOME ASSEMBLY                                                         | REACTOME_NUCLEOSOME ASSEMBLY                                                         | 52   | 0.14820234 | 0.14820234 | 0.1565041 | 0.72234225 | 1 | 31357 tags=79%, list=64%, signal=219% |
| REACTOME_DISEASES OF SIGNAL TRANSDUCTION                                             | REACTOME_DISEASES OF SIGNAL TRANSDUCTION                                             | 356  | 0.14819399 | 0.14819399 | 0         | 0.72159255 | 1 | 10951 tags=37%, list=22%, signal=47%  |
| REACTOME_DNA REPLICATION                                                             | REACTOME_DNA REPLICATION                                                             | 107  | 0.14812464 | 0.14812464 | 0.0234834 | 0.7210996  | 1 | 16558 tags=49%, list=34%, signal=73%  |
| REACTOME_HH MUTANTS THAT DON'T UNDERGO AUTOCATALYTIC PROCESSING ARE DEGRADED BY ERAD | REACTOME_HH MUTANTS THAT DON'T UNDERGO AUTOCATALYTIC PROCESSING ARE DEGRADED BY ERAD | 55   | 0.14789686 | 0.14789686 | 0.1767677 | 0.72141564 | 1 | 17693 tags=51%, list=36%, signal=80%  |
| REACTOME_HH MUTANTS ABROGATE LIGAND SECRETION                                        | REACTOME_HH MUTANTS ABROGATE LIGAND SECRETION                                        | 57   | 0.14758359 | 0.14758359 | 0.1620513 | 0.7221274  | 1 | 17693 tags=51%, list=36%, signal=80%  |
| REACTOME_INNATE IMMUNE SYSTEM                                                        | REACTOME_INNATE IMMUNE SYSTEM                                                        | 1394 | 0.1474198  | 0.1474198  | 0         | 0.72212654 | 1 | 11427 tags=38%, list=23%, signal=48%  |
| REACTOME_REGULATION OF PTEN MRNA TRANSLATION                                         | REACTOME_REGULATION OF PTEN MRNA TRANSLATION                                         | 13   | 0.14734057 | 0.14734057 | 0.8932927 | 0.72170454 | 1 | 4086 tags=23%, list=8%, signal=25%    |
| REACTOME_DEGRADATION OF GLI1 BY THE PROTEASOME                                       | REACTOME_DEGRADATION OF GLI1 BY THE PROTEASOME                                       | 59   | 0.1472919  | 0.1472919  | 0.1349125 | 0.72115564 | 1 | 17693 tags=51%, list=36%, signal=80%  |
| REACTOME_METABOLISM OF WATER-SOLUBLE VITAMINS AND COFACTORS                          | REACTOME_METABOLISM OF WATER-SOLUBLE VITAMINS AND COFACTORS                          | 123  | 0.14703141 | 0.14703141 | 0.0062893 | 0.72160506 | 1 | 7547 tags=30%, list=15%, signal=35%   |
| REACTOME_HEMOSTASIS                                                                  | REACTOME_HEMOSTASIS                                                                  | 684  | 0.14644608 | 0.14644608 | 0         | 0.7235838  | 1 | 8749 tags=32%, list=18%, signal=39%   |

|                                                                                     |                                                                                               |           |                          |                          |                |                        |        |                                                                             |
|-------------------------------------------------------------------------------------|-----------------------------------------------------------------------------------------------|-----------|--------------------------|--------------------------|----------------|------------------------|--------|-----------------------------------------------------------------------------|
| REACTOME_CONSTITUTIVE SIGNALING BY AKT1 E17K IN CANCER                              | REACTOME_CONSTITUTIVE SIGNALING BY AKT1 E17K IN CANCER                                        | 25        | 0.14574173               | 0.14574173               | 0.611002       | 0.7262173              | 1      | 14411 tags=44%, list=29%, signal=62%                                        |
| REACTOME_REGULATION OF DNA REPLICATION                                              | REACTOME_REGULATION OF DNA REPLICATION                                                        | 75        | 0.14552942               | 0.14552942               | 0.0625621      | 0.7264237              | 1      | 17693 tags=51%, list=36%, signal=79%                                        |
| REACTOME_AXON GUIDANCE                                                              | REACTOME_AXON GUIDANCE                                                                        | 555       | 0.14538394               | 0.14538394               | 0              | 0.72634673             | 1      | 7077 tags=29%, list=14%, signal=33%                                         |
| REACTOME_INTRAFLAGELLAR TRANSPORT                                                   | REACTOME_INTRAFLAGELLAR TRANSPORT                                                             | 41        | 0.14532794               | 0.14532794               | 0.3357216      | 0.7258359              | 1      | 10803 tags=37%, list=22%, signal=47%                                        |
| REACTOME_S PHASE                                                                    | REACTOME_S PHASE                                                                              | 138       | 0.14527453               | 0.14527453               | 0.0049164      | 0.7253025              | 1      | 17743 tags=51%, list=36%, signal=79%                                        |
| REACTOME_CHAPERONIN-MEDIATED PROTEIN FOLDING                                        | REACTOME_CHAPERONIN-MEDIATED PROTEIN FOLDING                                                  | 95        | 0.1450734                | 0.1450734                | 0.0339157      | 0.7254069              | 1      | 10949 tags=37%, list=22%, signal=47%                                        |
| REACTOME_METABOLISM OF REACTOME_ACTIVATION OF ATR IN RESPONSE TO REPLICATION STRESS | REACTOME_METABOLISM OF LIPIDS<br>REACTOME_ACTIVATION OF ATR IN RESPONSE TO REPLICATION STRESS | 733<br>37 | 0.14474992<br>0.14401361 | 0.14474992<br>0.14401361 | 0<br>0.3914767 | 0.7261285<br>0.7288602 | 1<br>1 | 7580 tags=30%, list=15%, signal=35%<br>11480 tags=38%, list=23%, signal=49% |
| REACTOME_ANTIVIRAL MECHANISM BY IFN-STIMULATED                                      | REACTOME_ANTIVIRAL MECHANISM BY IFN-STIMULATED GENES                                          | 73        | 0.14400372               | 0.14400372               | 0.1036168      | 0.7281259              | 1      | 18447 tags=52%, list=38%, signal=83%                                        |
| REACTOME_ISG15 ANTIVIRAL MECHANISM                                                  | REACTOME_ISG15 ANTIVIRAL MECHANISM                                                            | 73        | 0.14400372               | 0.14400372               | 0.0987167      | 0.7273471              | 1      | 18447 tags=52%, list=38%, signal=83%                                        |
| REACTOME_CLEC7A (DECTIN-1) SIGNALING                                                | REACTOME_CLEC7A (DECTIN-1) SIGNALING                                                          | 99        | 0.14398147               | 0.14398147               | 0.0306748      | 0.72666967             | 1      | 17693 tags=51%, list=36%, signal=79%                                        |
| REACTOME_SPRY REGULATION OF FGF SIGNALING                                           | REACTOME_SPRY REGULATION OF FGF SIGNALING                                                     | 16        | 0.1436061                | 0.1436061                | 0.8529412      | 0.7277334              | 1      | 35814 tags=88%, list=73%, signal=326%                                       |
| REACTOME_G2/M TRANSITION                                                            | REACTOME_G2/M TRANSITION                                                                      | 181       | 0.14357756               | 0.14357756               | 0              | 0.72707665             | 1      | 17883 tags=51%, list=37%, signal=80%                                        |
| REACTOME_MITOTIC G2-G2/M PHASES                                                     | REACTOME_MITOTIC G2-G2/M PHASES                                                               | 183       | 0.1434925                | 0.1434925                | 0              | 0.7266975              | 1      | 17883 tags=51%, list=37%, signal=80%                                        |
| REACTOME_SIGNALING BY ROBO RECEPTOR                                                 | REACTOME_SIGNALING BY ROBO RECEPTOR                                                           | 32        | 0.14308469               | 0.14308469               | 0.4833006      | 0.72791535             | 1      | 8299 tags=31%, list=17%, signal=38%                                         |
| REACTOME_PTEN REGULATION                                                            | REACTOME_PTEN REGULATION                                                                      | 142       | 0.14211178               | 0.14211178               | 0.0059642      | 0.73173076             | 1      | 17888 tags=51%, list=37%, signal=80%                                        |
| REACTOME_DIGESTION                                                                  | REACTOME_DIGESTION                                                                            | 22        | 0.14178368               | 0.14178368               | 0.7159329      | 0.73253024             | 1      | 39799 tags=95%, list=81%, signal=510%                                       |
| REACTOME_MITOTIC PROMETAPHASE                                                       | REACTOME_MITOTIC PROMETAPHASE                                                                 | 181       | 0.140902                 | 0.140902                 | 0              | 0.7360072              | 1      | 17743 tags=50%, list=36%, signal=79%                                        |
| REACTOME_DNA REPLICATION PRE-INITIATION                                             | REACTOME_DNA REPLICATION PRE-INITIATION                                                       | 84        | 0.1405744                | 0.1405744                | 0.0472362      | 0.7368732              | 1      | 18193 tags=51%, list=37%, signal=81%                                        |
| REACTOME_M/G1 TRANSITION                                                            | REACTOME_M/G1 TRANSITION                                                                      | 84        | 0.1405744                | 0.1405744                | 0.053554       | 0.73609346             | 1      | 18193 tags=51%, list=37%, signal=81%                                        |
| REACTOME_SIGNALING BY VEGF                                                          | REACTOME_SIGNALING BY VEGF                                                                    | 331       | 0.14010817               | 0.14010817               | 0              | 0.7374899              | 1      | 16558 tags=48%, list=34%, signal=72%                                        |
| REACTOME_REGULATION OF SIGNALING BY CBL                                             | REACTOME_REGULATION OF SIGNALING BY CBL                                                       | 18        | 0.13997793               | 0.13997793               | 0.814664       | 0.7372836              | 1      | 17630 tags=50%, list=36%, signal=78%                                        |
| REACTOME_PLC-GAMMA1 SIGNALLING                                                      | REACTOME_PLC-GAMMA1 SIGNALLING                                                                | 34        | 0.13962579               | 0.13962579               | 0.4683664      | 0.738176               | 1      | 3248 tags=21%, list=7%, signal=22%                                          |
| REACTOME_NIK-->NONCANONICAL NF-KB                                                   | REACTOME_NIK-->NONCANONICAL NF-KB SIGNALING                                                   | 58        | 0.13880426               | 0.13880426               | 0.1886051      | 0.74129134             | 1      | 17693 tags=50%, list=36%, signal=78%                                        |
| REACTOME_FBXL7 DOWN-REGULATES AURKA DURING MITOTIC ENTRY AND IN EARLY MITOSIS       | REACTOME_FBXL7 DOWN-REGULATES AURKA DURING MITOTIC ENTRY AND IN EARLY MITOSIS                 | 54        | 0.1387929                | 0.1387929                | 0.2332016      | 0.74057305             | 1      | 17693 tags=50%, list=36%, signal=78%                                        |
| REACTOME_SCF-BETA-TRCP MEDIATED DEGRADATION OF                                      | REACTOME_SCF-BETA-TRCP MEDIATED DEGRADATION OF EMI1                                           | 54        | 0.1387929                | 0.1387929                | 0.2243461      | 0.7397944              | 1      | 17693 tags=50%, list=36%, signal=78%                                        |
| REACTOME_KSRP (KHSRP) BINDS AND DESTABILIZES MRNA                                   | REACTOME_KSRP (KHSRP) BINDS AND DESTABILIZES MRNA                                             | 17        | 0.1378618                | 0.1378618                | 0.8620343      | 0.74334556             | 1      | 13413 tags=41%, list=27%, signal=57%                                        |
| REACTOME_DECTIN-2 FAMILY                                                            | REACTOME_DECTIN-2 FAMILY                                                                      | 28        | 0.13739096               | 0.13739096               | 0.6272991      | 0.7447658              | 1      | 17758 tags=50%, list=36%, signal=78%                                        |
| REACTOME_TRANSPORT OF BILE SALTS AND ORGANIC ACIDS, METAL IONS AND AMINE            | REACTOME_TRANSPORT OF BILE SALTS AND ORGANIC ACIDS, METAL IONS AND AMINE COMPOUNDS            | 85        | 0.13692236               | 0.13692236               | 0.0791583      | 0.74617565             | 1      | 10588 tags=35%, list=22%, signal=45%                                        |
| REACTOME_SIGNALING BY NGF                                                           | REACTOME_SIGNALING BY NGF                                                                     | 545       | 0.13686493               | 0.13686493               | 0              | 0.7456583              | 1      | 12958 tags=40%, list=26%, signal=54%                                        |
| REACTOME_TELOMERE MAINTENANCE                                                       | REACTOME_TELOMERE MAINTENANCE                                                                 | 63        | 0.13670656               | 0.13670656               | 0.1624016      | 0.74561757             | 1      | 15076 tags=44%, list=31%, signal=64%                                        |

|                                                                     |                                                                     |     |            |            |           |            |   |                                       |
|---------------------------------------------------------------------|---------------------------------------------------------------------|-----|------------|------------|-----------|------------|---|---------------------------------------|
| REACTOME_TRNA PROCESSING IN THE NUCLEUS                             | REACTOME_TRNA PROCESSING IN THE NUCLEUS                             | 58  | 0.1359297  | 0.1359297  | 0.1805274 | 0.7485804  | 1 | 4326 tags=22%, list=9%, signal=25%    |
| REACTOME_CONDENSATION OF PROPHASE CHROMOSOMES                       | REACTOME_CONDENSATION OF PROPHASE CHROMOSOMES                       | 43  | 0.13590592 | 0.13590592 | 0.3631011 | 0.7479152  | 1 | 30928 tags=77%, list=63%, signal=208% |
| REACTOME_SIGNALING BY RHO GTPASES                                   | REACTOME_SIGNALING BY RHO GTPASES                                   | 391 | 0.13461123 | 0.13461123 | 0         | 0.7532782  | 1 | 11744 tags=37%, list=24%, signal=49%  |
| REACTOME_SUMOYLATION OF CHROMATIN ORGANIZATION PROTEINS             | REACTOME_SUMOYLATION OF CHROMATIN ORGANIZATION PROTEINS             | 57  | 0.1343213  | 0.1343213  | 0.2303207 | 0.75385755 | 1 | 2879 tags=19%, list=6%, signal=20%    |
| REACTOME_IMPORT OF PALMITOYL-COA INTO THE MITOCHONDRIAL MATRIX      | REACTOME_IMPORT OF PALMITOYL-COA INTO THE MITOCHONDRIAL MATRIX      | 12  | 0.13412698 | 0.13412698 | 0.9611273 | 0.7540432  | 1 | 21996 tags=58%, list=45%, signal=106% |
| REACTOME_FORMATION OF HIV-1 ELONGATION COMPLEX CONTAINING HIV-1 TAT | REACTOME_FORMATION OF HIV-1 ELONGATION COMPLEX CONTAINING HIV-1 TAT | 39  | 0.13366392 | 0.13366392 | 0.4717899 | 0.7554281  | 1 | 7270 tags=28%, list=15%, signal=33%   |
| REACTOME_HIV TRANSCRIPTION ELONGATION                               | REACTOME_HIV TRANSCRIPTION ELONGATION                               | 39  | 0.13366392 | 0.13366392 | 0.4580078 | 0.7546437  | 1 | 7270 tags=28%, list=15%, signal=33%   |
| REACTOME_TAT-MEDIATED ELONGATION OF THE HIV-1 TRANSCRIPT            | REACTOME_TAT-MEDIATED ELONGATION OF THE HIV-1 TRANSCRIPT            | 39  | 0.13366392 | 0.13366392 | 0.4605769 | 0.75386083 | 1 | 7270 tags=28%, list=15%, signal=33%   |
| REACTOME_DNA METHYLATION                                            | REACTOME_DNA METHYLATION                                            | 34  | 0.13314305 | 0.13314305 | 0.5423228 | 0.7555342  | 1 | 30928 tags=76%, list=63%, signal=207% |
| REACTOME_REGULATION OF RAS BY GAPS                                  | REACTOME_REGULATION OF RAS BY GAPS                                  | 67  | 0.13169356 | 0.13169356 | 0.1866538 | 0.76165855 | 1 | 19869 tags=54%, list=41%, signal=90%  |
| REACTOME_DECTIN-1 MEDIATED NONCANONICAL NF-KB                       | REACTOME_DECTIN-1 MEDIATED NONCANONICAL NF-KB SIGNALING             | 61  | 0.13060579 | 0.13060579 | 0.2313278 | 0.76606786 | 1 | 17693 tags=49%, list=36%, signal=77%  |
| REACTOME_RHO GTPASES ACTIVATE FORMINS                               | REACTOME_RHO GTPASES ACTIVATE FORMINS                               | 119 | 0.1305857  | 0.1305857  | 0.0359343 | 0.7653754  | 1 | 13371 tags=40%, list=27%, signal=55%  |
| REACTOME_FORMATION OF RNA POL II ELONGATION COMPLEX                 | REACTOME_FORMATION OF RNA POL II ELONGATION COMPLEX                 | 54  | 0.1303312  | 0.1303312  | 0.2796117 | 0.7658201  | 1 | 6319 tags=26%, list=13%, signal=30%   |
| REACTOME_RNA POLYMERASE II TRANSCRIPTION ELONGATION                 | REACTOME_RNA POLYMERASE II TRANSCRIPTION ELONGATION                 | 54  | 0.1303312  | 0.1303312  | 0.2857143 | 0.7650306  | 1 | 6319 tags=26%, list=13%, signal=30%   |
| REACTOME_DEGRADATION OF GLI2 BY THE PROTEASOME                      | REACTOME_DEGRADATION OF GLI2 BY THE PROTEASOME                      | 59  | 0.13032229 | 0.13032229 | 0.2303823 | 0.7642791  | 1 | 17693 tags=49%, list=36%, signal=77%  |
| REACTOME_GLI3 IS PROCESSED TO GLI3R BY THE PROTEASOME               | REACTOME_GLI3 IS PROCESSED TO GLI3R BY THE PROTEASOME               | 59  | 0.13032229 | 0.13032229 | 0.2340842 | 0.7634929  | 1 | 17693 tags=49%, list=36%, signal=77%  |
| REACTOME_VEGFA-VEGFR2 PATHWAY                                       | REACTOME_VEGFA-VEGFR2 PATHWAY                                       | 323 | 0.13017058 | 0.13017058 | 0         | 0.7634159  | 1 | 16558 tags=47%, list=34%, signal=70%  |
| REACTOME_SIGNALING BY PDGF                                          | REACTOME_SIGNALING BY PDGF                                          | 451 | 0.12990381 | 0.12990381 | 0         | 0.76384497 | 1 | 12588 tags=39%, list=26%, signal=51%  |
| REACTOME_AUTODEGRADATION OF THE E3 UBIQUITIN LIGASE                 | REACTOME_AUTODEGRADATION OF THE E3 UBIQUITIN LIGASE COP1            | 51  | 0.12897028 | 0.12897028 | 0.3349609 | 0.7675277  | 1 | 17693 tags=49%, list=36%, signal=77%  |
| REACTOME_VIF-MEDIATED DEGRADATION OF APOBEC3G                       | REACTOME_VIF-MEDIATED DEGRADATION OF APOBEC3G                       | 51  | 0.12897028 | 0.12897028 | 0.3343284 | 0.7667413  | 1 | 17693 tags=49%, list=36%, signal=77%  |
| REACTOME_VPU MEDIATED DEGRADATION OF CD4                            | REACTOME_VPU MEDIATED DEGRADATION OF CD4                            | 51  | 0.12897028 | 0.12897028 | 0.3258537 | 0.76595646 | 1 | 17693 tags=49%, list=36%, signal=77%  |
| REACTOME_EPIGENETIC REGULATION OF GENE                              | REACTOME_EPIGENETIC REGULATION OF GENE EXPRESSION                   | 117 | 0.1289346  | 0.1289346  | 0.0467381 | 0.76535    | 1 | 12952 tags=39%, list=26%, signal=53%  |
| REACTOME_HDMS DEMETHYLATE HISTONES                                  | REACTOME_HDMS DEMETHYLATE HISTONES                                  | 27  | 0.12887053 | 0.12887053 | 0.7293087 | 0.76487356 | 1 | 10014 tags=33%, list=20%, signal=42%  |
| REACTOME_TRANSPORT OF MATURE TRANSCRIPT TO CYTOPLASM                | REACTOME_TRANSPORT OF MATURE TRANSCRIPT TO CYTOPLASM                | 82  | 0.12884821 | 0.12884821 | 0.1090555 | 0.7642023  | 1 | 9226 tags=32%, list=19%, signal=39%   |
| REACTOME_MEMBRANE TRAFFICKING                                       | REACTOME_MEMBRANE TRAFFICKING                                       | 614 | 0.12877911 | 0.12877911 | 0         | 0.7637413  | 1 | 6851 tags=27%, list=14%, signal=31%   |
| REACTOME_TRANSCRIPTIONAL REGULATION BY RUNX1                        | REACTOME_TRANSCRIPTIONAL REGULATION BY RUNX1                        | 206 | 0.12866412 | 0.12866412 | 9.79E-04  | 0.7634985  | 1 | 12741 tags=39%, list=26%, signal=52%  |



|                                                                                 |                                                                                               |     |            |            |           |            |   |                                        |
|---------------------------------------------------------------------------------|-----------------------------------------------------------------------------------------------|-----|------------|------------|-----------|------------|---|----------------------------------------|
| REACTOME_DIGESTION AND ABSORPTION                                               | REACTOME_DIGESTION AND ABSORPTION                                                             | 26  | 0.12860912 | 0.12860912 | 0.753878  | 0.76300657 | 1 | 42670 tags=100%, list=87%, signal=777% |
| REACTOME_SIGNALING BY                                                           | REACTOME_SIGNALING BY FGFR1                                                                   | 50  | 0.12829193 | 0.12829193 | 0.3359684 | 0.76370627 | 1 | 1558 tags=16%, list=3%, signal=17%     |
| REACTOME_SIGNALING BY SCF-                                                      | REACTOME_SIGNALING BY SCF-KIT                                                                 | 411 | 0.1280941  | 0.1280941  | 0         | 0.76390547 | 1 | 13437 tags=40%, list=27%, signal=55%   |
| REACTOME_RNA POLYMERASE II PRE-TRANSCRIPTION EVENTS                             | REACTOME_RNA POLYMERASE II PRE-TRANSCRIPTION EVENTS                                           | 76  | 0.12802067 | 0.12802067 | 0.1589267 | 0.76347804 | 1 | 7270 tags=28%, list=15%, signal=32%    |
| REACTOME_COPI-MEDIATED ANTEROGRADE TRANSPORT                                    | REACTOME_COPI-MEDIATED ANTEROGRADE TRANSPORT                                                  | 83  | 0.1275523  | 0.1275523  | 0.1278119 | 0.7649213  | 1 | 13232 tags=40%, list=27%, signal=54%   |
| REACTOME_PHASE I - FUNCTIONALIZATION OF COMPOUNDS                               | REACTOME_PHASE I - FUNCTIONALIZATION OF COMPOUNDS                                             | 106 | 0.12753063 | 0.12753063 | 0.0542714 | 0.7642597  | 1 | 7626 tags=28%, list=16%, signal=33%    |
| REACTOME_INTERLEUKIN-17 SIGNALING                                               | REACTOME_INTERLEUKIN-17 SIGNALING                                                             | 300 | 0.12710881 | 0.12710881 | 0         | 0.76546776 | 1 | 10951 tags=35%, list=22%, signal=45%   |
| REACTOME_CLASS I MHC MEDIATED ANTIGEN PROCESSING & PRESENTATION                 | REACTOME_CLASS I MHC MEDIATED ANTIGEN PROCESSING & PRESENTATION                               | 367 | 0.12635598 | 0.12635598 | 0         | 0.76830244 | 1 | 11870 tags=37%, list=24%, signal=48%   |
| REACTOME_DISEASE                                                                | REACTOME_DISEASE                                                                              | 836 | 0.12542656 | 0.12542656 | 0         | 0.77195793 | 1 | 7785 tags=28%, list=16%, signal=33%    |
| REACTOME_ABC-FAMILY PROTEINS MEDIATED                                           | REACTOME_ABC-FAMILY PROTEINS MEDIATED TRANSPORT                                               | 103 | 0.12507984 | 0.12507984 | 0.0685773 | 0.77278715 | 1 | 8149 tags=29%, list=17%, signal=35%    |
| REACTOME_INTERLEUKIN-7 SIGNALING                                                | REACTOME_INTERLEUKIN-7 SIGNALING                                                              | 274 | 0.12473932 | 0.12473932 | 0         | 0.7736933  | 1 | 17693 tags=49%, list=36%, signal=76%   |
| REACTOME_ACTIVATION OF HOX GENES DURING                                         | REACTOME_ACTIVATION OF HOX GENES DURING DIFFERENTIATION                                       | 90  | 0.12375562 | 0.12375562 | 0.0959446 | 0.77763695 | 1 | 18977 tags=51%, list=39%, signal=83%   |
| REACTOME_ACTIVATION OF ANTERIOR HOX GENES IN HINDBRAIN DEVELOPMENT DURING EARLY | REACTOME_ACTIVATION OF ANTERIOR HOX GENES IN HINDBRAIN DEVELOPMENT DURING EARLY EMBRYOGENESIS | 90  | 0.12375562 | 0.12375562 | 0.1126214 | 0.77685535 | 1 | 18977 tags=51%, list=39%, signal=83%   |
| REACTOME_DOWNSTREAM SIGNALING EVENTS OF B CELL RECEPTOR (BCR)                   | REACTOME_DOWNSTREAM SIGNALING EVENTS OF B CELL RECEPTOR (BCR)                                 | 279 | 0.12353016 | 0.12353016 | 0         | 0.77716976 | 1 | 12588 tags=38%, list=26%, signal=51%   |
| REACTOME_PHOSPHOLIPID METABOLISM                                                | REACTOME_PHOSPHOLIPID METABOLISM                                                              | 212 | 0.12223013 | 0.12223013 | 0.002045  | 0.78259164 | 1 | 7436 tags=27%, list=15%, signal=32%    |
| REACTOME_DAP12                                                                  | REACTOME_DAP12 INTERACTIONS                                                                   | 442 | 0.12220477 | 0.12220477 | 0         | 0.78193074 | 1 | 14896 tags=43%, list=30%, signal=61%   |
| REACTOME_DEFECTIVE CFTR CAUSES CYSTIC FIBROSIS                                  | REACTOME_DEFECTIVE CFTR CAUSES CYSTIC FIBROSIS                                                | 60  | 0.12212284 | 0.12212284 | 0.2876579 | 0.7815365  | 1 | 17693 tags=48%, list=36%, signal=76%   |
| REACTOME_VISUAL PHOTOTRANSDUCTION                                               | REACTOME_VISUAL PHOTOTRANSDUCTION                                                             | 98  | 0.12161727 | 0.12161727 | 0.0811359 | 0.7831764  | 1 | 6547 tags=26%, list=13%, signal=29%    |
| REACTOME_CDT1 ASSOCIATION WITH THE CDC6:ORC:ORIGIN COMPLEX                      | REACTOME_CDT1 ASSOCIATION WITH THE CDC6:ORC:ORIGIN COMPLEX                                    | 58  | 0.12154243 | 0.12154243 | 0.3298647 | 0.78277713 | 1 | 17693 tags=48%, list=36%, signal=75%   |
| REACTOME_M PHASE                                                                | REACTOME_M PHASE                                                                              | 344 | 0.12102712 | 0.12102712 | 0         | 0.7844737  | 1 | 17743 tags=48%, list=36%, signal=75%   |
| REACTOME_TERMINATION OF TRANSLESION DNA SYNTHESIS                               | REACTOME_TERMINATION OF TRANSLESION DNA SYNTHESIS                                             | 31  | 0.12044134 | 0.12044134 | 0.7175197 | 0.7865051  | 1 | 11480 tags=35%, list=23%, signal=46%   |
| REACTOME_CELL CYCLE,                                                            | REACTOME_CELL CYCLE, MITOTIC                                                                  | 485 | 0.12038592 | 0.12038592 | 0         | 0.78595215 | 1 | 17888 tags=48%, list=37%, signal=76%   |
| REACTOME_DEGRADATION OF                                                         | REACTOME_DEGRADATION OF AXIN                                                                  | 54  | 0.12025394 | 0.12025394 | 0.3594059 | 0.78578115 | 1 | 17693 tags=48%, list=36%, signal=75%   |
| REACTOME_FORMATION OF HIV ELONGATION COMPLEX IN THE ABSENCE OF HIV TAT          | REACTOME_FORMATION OF HIV ELONGATION COMPLEX IN THE ABSENCE OF HIV TAT                        | 41  | 0.11989925 | 0.11989925 | 0.5864136 | 0.7867292  | 1 | 7270 tags=27%, list=15%, signal=31%    |
| REACTOME_SCF(SKP2)-MEDIATED DEGRADATION OF                                      | REACTOME_SCF(SKP2)-MEDIATED DEGRADATION OF P27/P21                                            | 59  | 0.11976798 | 0.11976798 | 0.3537207 | 0.786558   | 1 | 19869 tags=53%, list=41%, signal=88%   |
| REACTOME_NGF SIGNALLING VIA TRKA FROM THE PLASMA MEMBRANE                       | REACTOME_NGF SIGNALLING VIA TRKA FROM THE PLASMA MEMBRANE                                     | 462 | 0.11970925 | 0.11970925 | 0         | 0.7860648  | 1 | 13376 tags=39%, list=27%, signal=53%   |
| REACTOME_UBIQUITIN MEDIATED DEGRADATION OF PHOSPHORYLATED CDC25A                | REACTOME_UBIQUITIN MEDIATED DEGRADATION OF PHOSPHORYLATED CDC25A                              | 52  | 0.11953604 | 0.11953604 | 0.4455348 | 0.7861363  | 1 | 17693 tags=48%, list=36%, signal=75%   |

|                                                                    |                                                                    |      |            |            |           |            |   |                                       |
|--------------------------------------------------------------------|--------------------------------------------------------------------|------|------------|------------|-----------|------------|---|---------------------------------------|
| REACTOME_P53-INDEPENDENT DNA DAMAGE RESPONSE                       | REACTOME_P53-INDEPENDENT DNA DAMAGE RESPONSE                       | 52   | 0.11953604 | 0.11953604 | 0.4121757 | 0.78535795 | 1 | 17693 tags=48%, list=36%, signal=75%  |
| REACTOME_P53-INDEPENDENT G1/S DNA DAMAGE CHECKPOINT                | REACTOME_P53-INDEPENDENT G1/S DNA DAMAGE CHECKPOINT                | 52   | 0.11953604 | 0.11953604 | 0.4074074 | 0.7845812  | 1 | 17693 tags=48%, list=36%, signal=75%  |
| REACTOME_CELLULAR SENESENCE                                        | REACTOME_CELLULAR SENESENCE                                        | 161  | 0.11942001 | 0.11942001 | 0.01417   | 0.7843876  | 1 | 10898 tags=34%, list=22%, signal=44%  |
| REACTOME_G1/S TRANSITION                                           | REACTOME_G1/S TRANSITION                                           | 127  | 0.11926412 | 0.11926412 | 0.045954  | 0.78435916 | 1 | 17693 tags=48%, list=36%, signal=75%  |
| REACTOME_HDACS DEACETYLATE HISTONES                                | REACTOME_HDACS DEACETYLATE HISTONES                                | 59   | 0.119262   | 0.119262   | 0.3277662 | 0.78359264 | 1 | 17404 tags=47%, list=36%, signal=74%  |
| REACTOME_METABOLISM OF STEROIDS                                    | REACTOME_METABOLISM OF STEROIDS                                    | 146  | 0.11908399 | 0.11908399 | 0.0310982 | 0.7836217  | 1 | 6259 tags=25%, list=13%, signal=28%   |
| REACTOME_PEROXISOMAL LIPID METABOLISM                              | REACTOME_PEROXISOMAL LIPID METABOLISM                              | 29   | 0.11879062 | 0.11879062 | 0.7671756 | 0.78425616 | 1 | 6005 tags=24%, list=12%, signal=27%   |
| REACTOME_REGULATION OF ORNITHINE DECARBOXYLASE                     | REACTOME_REGULATION OF ORNITHINE DECARBOXYLASE (ODC)               | 50   | 0.11876109 | 0.11876109 | 0.4542714 | 0.7836366  | 1 | 17693 tags=48%, list=36%, signal=75%  |
| REACTOME_UBIQUITIN-DEPENDENT DEGRADATION OF                        | REACTOME_UBIQUITIN-DEPENDENT DEGRADATION OF CYCLIN D               | 50   | 0.11876109 | 0.11876109 | 0.4462312 | 0.7828669  | 1 | 17693 tags=48%, list=36%, signal=75%  |
| REACTOME_UBIQUITIN-DEPENDENT DEGRADATION OF                        | REACTOME_UBIQUITIN-DEPENDENT DEGRADATION OF CYCLIN D1              | 50   | 0.11876109 | 0.11876109 | 0.4736842 | 0.7820986  | 1 | 17693 tags=48%, list=36%, signal=75%  |
| REACTOME_TRANSCRIPTIONAL REGULATION BY TP53                        | REACTOME_TRANSCRIPTIONAL REGULATION BY TP53                        | 355  | 0.11861234 | 0.11861234 | 0         | 0.78205913 | 1 | 8440 tags=29%, list=17%, signal=35%   |
| REACTOME_FORMATION OF THE CORNIFIED ENVELOPE                       | REACTOME_FORMATION OF THE CORNIFIED ENVELOPE                       | 65   | 0.11855907 | 0.11855907 | 0.3026052 | 0.7815399  | 1 | 7761 tags=28%, list=16%, signal=33%   |
| REACTOME_RNA POLYMERASE I PROMOTER OPENING                         | REACTOME_RNA POLYMERASE I PROMOTER OPENING                         | 32   | 0.11842215 | 0.11842215 | 0.7121662 | 0.7814053  | 1 | 30928 tags=75%, list=63%, signal=203% |
| REACTOME_NEGATIVE REGULATION OF MAPK                               | REACTOME_NEGATIVE REGULATION OF MAPK PATHWAY                       | 40   | 0.11825754 | 0.11825754 | 0.5890547 | 0.7814301  | 1 | 1558 tags=15%, list=3%, signal=15%    |
| REACTOME_G-PROTEIN BETA:GAMMA SIGNALLING                           | REACTOME_G-PROTEIN BETA:GAMMA SIGNALLING                           | 51   | 0.11823153 | 0.11823153 | 0.4519231 | 0.78077763 | 1 | 5737 tags=24%, list=12%, signal=27%   |
| REACTOME_PI3K/AKT SIGNALING IN CANCER                              | REACTOME_PI3K/AKT SIGNALING IN CANCER                              | 90   | 0.11820177 | 0.11820177 | 0.1336684 | 0.7801685  | 1 | 14896 tags=42%, list=30%, signal=61%  |
| REACTOME_DNA DAMAGE/TELOMERE STRESS INDUCED SENESENCE              | REACTOME_DNA DAMAGE/TELOMERE STRESS INDUCED SENESENCE              | 61   | 0.11788231 | 0.11788231 | 0.2947799 | 0.7809195  | 1 | 13499 tags=39%, list=28%, signal=54%  |
| REACTOME_SIGNALING BY EGFR                                         | REACTOME_SIGNALING BY EGFR                                         | 439  | 0.11772945 | 0.11772945 | 0         | 0.78089464 | 1 | 11909 tags=36%, list=24%, signal=47%  |
| REACTOME_RAB GEFS EXCHANGE GTP FOR GDP ON                          | REACTOME_RAB GEFS EXCHANGE GTP FOR GDP ON RABS                     | 90   | 0.1176914  | 0.1176914  | 0.1497006 | 0.7803251  | 1 | 15465 tags=43%, list=32%, signal=63%  |
| REACTOME_TRANSPORT OF VITAMINS, NUCLEOSIDES, AND RELATED MOLECULES | REACTOME_TRANSPORT OF VITAMINS, NUCLEOSIDES, AND RELATED MOLECULES | 39   | 0.11760828 | 0.11760828 | 0.5934718 | 0.7799607  | 1 | 4289 tags=21%, list=9%, signal=22%    |
| REACTOME_BETA-CATENIN INDEPENDENT WNT SIGNALING                    | REACTOME_BETA-CATENIN INDEPENDENT WNT SIGNALING                    | 140  | 0.11718893 | 0.11718893 | 0.0404449 | 0.7811953  | 1 | 15612 tags=44%, list=32%, signal=64%  |
| REACTOME_DNA DAMAGE BYPASS                                         | REACTOME_DNA DAMAGE BYPASS                                         | 47   | 0.11694647 | 0.11694647 | 0.5040984 | 0.781549   | 1 | 17198 tags=47%, list=35%, signal=72%  |
| REACTOME_INTERLEUKIN-19,20,22,24,26,28 AND 29                      | REACTOME_INTERLEUKIN-19,20,22,24,26,28 AND 29 SIGNALING            | 256  | 0.11678435 | 0.11678435 | 0.001     | 0.7815507  | 1 | 10951 tags=34%, list=22%, signal=44%  |
| REACTOME_DOWNSTREAM SIGNAL TRANSDUCTION                            | REACTOME_DOWNSTREAM SIGNAL TRANSDUCTION                            | 427  | 0.11658027 | 0.11658027 | 0         | 0.78178805 | 1 | 13376 tags=39%, list=27%, signal=53%  |
| REACTOME_MAPK FAMILY SIGNALING CASCADES                            | REACTOME_MAPK FAMILY SIGNALING CASCADES                            | 283  | 0.11634982 | 0.11634982 | 9.79E-04  | 0.78212816 | 1 | 11810 tags=36%, list=24%, signal=47%  |
| REACTOME_SIGNAL TRANSDUCTION                                       | REACTOME_SIGNAL TRANSDUCTION                                       | 2434 | 0.11630812 | 0.11630812 | 0         | 0.7815568  | 1 | 11928 tags=35%, list=24%, signal=44%  |
| REACTOME_GAB1 SIGNALLOSOME                                         | REACTOME_GAB1 SIGNALLOSOME                                         | 260  | 0.11617981 | 0.11617981 | 0.0020305 | 0.7813989  | 1 | 17693 tags=48%, list=36%, signal=74%  |
| REACTOME_HIV LIFE CYCLE                                            | REACTOME_HIV LIFE CYCLE                                            | 143  | 0.11594164 | 0.11594164 | 0.0276923 | 0.7817837  | 1 | 8035 tags=28%, list=16%, signal=33%   |
| REACTOME_PROCESSING OF DNA DOUBLE-STRAND BREAK                     | REACTOME_PROCESSING OF DNA DOUBLE-STRAND BREAK ENDS                | 80   | 0.11571546 | 0.11571546 | 0.2310838 | 0.78209627 | 1 | 11480 tags=35%, list=23%, signal=46%  |
| REACTOME_MRNA SPLICING - MAJOR PATHWAY                             | REACTOME_MRNA SPLICING - MAJOR PATHWAY                             | 180  | 0.11566511 | 0.11566511 | 0.0149254 | 0.78158826 | 1 | 11222 tags=34%, list=23%, signal=45%  |

|                                                                  |                                                                  |      |            |            |           |            |   |                                       |
|------------------------------------------------------------------|------------------------------------------------------------------|------|------------|------------|-----------|------------|---|---------------------------------------|
| REACTOME_CELLULAR RESPONSES TO STRESS                            | REACTOME_CELLULAR RESPONSES TO STRESS                            | 382  | 0.11517048 | 0.11517048 | 0         | 0.7830389  | 1 | 8119 tags=28%, list=17%, signal=33%   |
| REACTOME_METABOLISM OF PROTEINS                                  | REACTOME_METABOLISM OF PROTEINS                                  | 1976 | 0.11445591 | 0.11445591 | 0         | 0.78565395 | 1 | 7209 tags=26%, list=15%, signal=29%   |
| REACTOME_SENESCENCE-ASSOCIATED SECRETORY PHENOTYPE (SASP)        | REACTOME_SENESCENCE-ASSOCIATED SECRETORY PHENOTYPE (SASP)        | 79   | 0.11443364 | 0.11443364 | 0.234714  | 0.7850109  | 1 | 6801 tags=25%, list=14%, signal=29%   |
| REACTOME_VESICLE-MEDIATED TRANSPORT                              | REACTOME_VESICLE-MEDIATED TRANSPORT                              | 727  | 0.11425342 | 0.11425342 | 0         | 0.7850608  | 1 | 8901 tags=29%, list=18%, signal=35%   |
| REACTOME_MEIOTIC SYNAPSIS                                        | REACTOME_MEIOTIC SYNAPSIS                                        | 59   | 0.1142451  | 0.1142451  | 0.3932039 | 0.78435206 | 1 | 30928 tags=75%, list=63%, signal=202% |
| REACTOME_DEVELOPMENTAL BIOLOGY                                   | REACTOME_DEVELOPMENTAL BIOLOGY                                   | 1000 | 0.11401054 | 0.11401054 | 0         | 0.78465253 | 1 | 7800 tags=27%, list=16%, signal=32%   |
| REACTOME_PIP3 ACTIVATES AKT SIGNALING                            | REACTOME_PIP3 ACTIVATES AKT SIGNALING                            | 257  | 0.11394609 | 0.11394609 | 0.0010593 | 0.7842124  | 1 | 17693 tags=47%, list=36%, signal=74%  |
| REACTOME_LATE PHASE OF HIV LIFE CYCLE                            | REACTOME_LATE PHASE OF HIV LIFE CYCLE                            | 130  | 0.11334557 | 0.11334557 | 0.0643863 | 0.7861972  | 1 | 7270 tags=26%, list=15%, signal=31%   |
| REACTOME_CONSTITUTIVE SIGNALING BY ABERRANT PI3K IN CANCER       | REACTOME_CONSTITUTIVE SIGNALING BY ABERRANT PI3K IN CANCER       | 65   | 0.1129731  | 0.1129731  | 0.3644401 | 0.7871362  | 1 | 12554 tags=37%, list=26%, signal=50%  |
| REACTOME_G ALPHA (Q) SIGNALLING EVENTS                           | REACTOME_G ALPHA (Q) SIGNALLING EVENTS                           | 192  | 0.11269578 | 0.11269578 | 0.0108374 | 0.78764266 | 1 | 9294 tags=30%, list=19%, signal=37%   |
| REACTOME_RHO GTPASE EFFECTORS                                    | REACTOME_RHO GTPASE EFFECTORS                                    | 262  | 0.11231678 | 0.11231678 | 0.002064  | 0.7886644  | 1 | 17890 tags=48%, list=37%, signal=75%  |
| REACTOME_PI3K/AKT                                                | REACTOME_PI3K/AKT ACTIVATION                                     | 260  | 0.11231313 | 0.11231313 | 0.001002  | 0.787927   | 1 | 17693 tags=47%, list=36%, signal=74%  |
| REACTOME_G BETA:GAMMA SIGNALLING THROUGH                         | REACTOME_G BETA:GAMMA SIGNALLING THROUGH PI3KGAMMA               | 48   | 0.11209081 | 0.11209081 | 0.537092  | 0.78824794 | 1 | 5737 tags=23%, list=12%, signal=26%   |
| REACTOME_DISORDERS OF TRANSMEMBRANE                              | REACTOME_DISORDERS OF TRANSMEMBRANE TRANSPORTERS                 | 74   | 0.11178175 | 0.11178175 | 0.3145246 | 0.78894824 | 1 | 17693 tags=47%, list=36%, signal=74%  |
| REACTOME_POSITIVE EPIGENETIC REGULATION OF                       | REACTOME_POSITIVE EPIGENETIC REGULATION OF RNA EXPRESSION        | 75   | 0.11169701 | 0.11169701 | 0.2855721 | 0.7886012  | 1 | 14777 tags=41%, list=30%, signal=59%  |
| REACTOME_RNA POLYMERASE I TRANSCRIPTION INITIATION               | REACTOME_RNA POLYMERASE I TRANSCRIPTION INITIATION               | 47   | 0.11169191 | 0.11169191 | 0.5572968 | 0.78787446 | 1 | 12246 tags=36%, list=25%, signal=48%  |
| REACTOME_PEPTIDE LIGAND-BINDING RECEPTORS                        | REACTOME_PEPTIDE LIGAND-BINDING RECEPTORS                        | 188  | 0.11087988 | 0.11087988 | 0.0253807 | 0.79088056 | 1 | 11520 tags=35%, list=24%, signal=45%  |
| REACTOME_CELLULAR RESPONSES TO EXTERNAL                          | REACTOME_CELLULAR RESPONSES TO EXTERNAL STIMULI                  | 459  | 0.11061188 | 0.11061188 | 0         | 0.7913759  | 1 | 7755 tags=27%, list=16%, signal=32%   |
| REACTOME_ADAPTIVE IMMUNE SYSTEM                                  | REACTOME_ADAPTIVE IMMUNE SYSTEM                                  | 961  | 0.11059002 | 0.11059002 | 0         | 0.79073006 | 1 | 14103 tags=40%, list=29%, signal=55%  |
| REACTOME_ORGANELLE BIOGENESIS AND MAINTENANCE                    | REACTOME_ORGANELLE BIOGENESIS AND MAINTENANCE                    | 278  | 0.10999464 | 0.10999464 | 0.003996  | 0.79274744 | 1 | 12257 tags=36%, list=25%, signal=48%  |
| REACTOME_G2/M CHECKPOINTS                                        | REACTOME_G2/M CHECKPOINTS                                        | 149  | 0.10928422 | 0.10928422 | 0.0550363 | 0.7952446  | 1 | 16682 tags=45%, list=34%, signal=68%  |
| REACTOME_GAP-FILLING DNA REPAIR SYNTHESIS AND LIGATION IN TC-NER | REACTOME_GAP-FILLING DNA REPAIR SYNTHESIS AND LIGATION IN TC-NER | 64   | 0.10898359 | 0.10898359 | 0.3850051 | 0.7958672  | 1 | 8441 tags=28%, list=17%, signal=34%   |
| REACTOME_DAP12 SIGNALING                                         | REACTOME_DAP12 SIGNALING                                         | 430  | 0.10834163 | 0.10834163 | 0         | 0.7980836  | 1 | 14896 tags=41%, list=30%, signal=59%  |
| REACTOME_METABOLISM                                              | REACTOME_METABOLISM                                              | 2073 | 0.10830744 | 0.10830744 | 0         | 0.79748935 | 1 | 7628 tags=26%, list=16%, signal=29%   |
| REACTOME_SIGNALLING TO                                           | REACTOME_SIGNALLING TO ERKS                                      | 256  | 0.10824383 | 0.10824383 | 0.0049554 | 0.79702914 | 1 | 11367 tags=34%, list=23%, signal=44%  |
| REACTOME_DNA REPAIR                                              | REACTOME_DNA REPAIR                                              | 289  | 0.10786337 | 0.10786337 | 0.0031381 | 0.79806256 | 1 | 18977 tags=49%, list=39%, signal=80%  |
| REACTOME_DUAL INCISION IN GG-NER                                 | REACTOME_DUAL INCISION IN GG-NER                                 | 41   | 0.10680975 | 0.10680975 | 0.6821121 | 0.80214125 | 1 | 15076 tags=41%, list=31%, signal=60%  |
| REACTOME_PRC2 METHYLATES HISTONES AND DNA                        | REACTOME_PRC2 METHYLATES HISTONES AND DNA                        | 42   | 0.10653135 | 0.10653135 | 0.7028451 | 0.8026518  | 1 | 30928 tags=74%, list=63%, signal=200% |
| REACTOME_DEUBIQUITINATION                                        | REACTOME_DEUBIQUITINATION                                        | 265  | 0.10644145 | 0.10644145 | 0.0052966 | 0.80232126 | 1 | 8119 tags=27%, list=17%, signal=32%   |
| REACTOME_MRNA SPLICING                                           | REACTOME_MRNA SPLICING                                           | 191  | 0.10628861 | 0.10628861 | 0.0237859 | 0.8022706  | 1 | 11222 tags=34%, list=23%, signal=43%  |
| REACTOME_FATTY ACID METABOLISM                                   | REACTOME_FATTY ACID METABOLISM                                   | 176  | 0.10565336 | 0.10565336 | 0.0301455 | 0.8043917  | 1 | 9033 tags=29%, list=18%, signal=35%   |

|                                                                                                                   |                                                                                                                   |     |            |            |           |            |   |                                        |
|-------------------------------------------------------------------------------------------------------------------|-------------------------------------------------------------------------------------------------------------------|-----|------------|------------|-----------|------------|---|----------------------------------------|
| REACTOME_CHROMOSOME MAINTENANCE                                                                                   | REACTOME_CHROMOSOME MAINTENANCE                                                                                   | 88  | 0.10555206 | 0.10555206 | 0.2522523 | 0.8040948  | 1 | 29338 tags=70%, list=60%, signal=175%  |
| REACTOME_SPHINGOLIPID DE NOVO BIOSYNTHESIS                                                                        | REACTOME_SPHINGOLIPID DE NOVO BIOSYNTHESIS                                                                        | 44  | 0.10551149 | 0.10551149 | 0.6693069 | 0.8035202  | 1 | 3740 tags=18%, list=8%, signal=20%     |
| REACTOME_PI5P, PP2A AND IER3 REGULATE PI3K/AKT SIGNALING                                                          | REACTOME_PI5P, PP2A AND IER3 REGULATE PI3K/AKT SIGNALING                                                          | 94  | 0.10549702 | 0.10549702 | 0.2280355 | 0.80284196 | 1 | 12554 tags=36%, list=26%, signal=49%   |
| REACTOME_METABOLISM OF NON-CODING RNA                                                                             | REACTOME_METABOLISM OF NON-CODING RNA                                                                             | 52  | 0.10515061 | 0.10515061 | 0.5884146 | 0.80367845 | 1 | 17455 tags=46%, list=36%, signal=72%   |
| REACTOME_SNRNP ASSEMBLY                                                                                           | REACTOME_SNRNP ASSEMBLY                                                                                           | 52  | 0.10515061 | 0.10515061 | 0.5991903 | 0.8029309  | 1 | 17455 tags=46%, list=36%, signal=72%   |
| REACTOME_RNA POLYMERASE I TRANSCRIPTION TERMINATION                                                               | REACTOME_RNA POLYMERASE I TRANSCRIPTION TERMINATION                                                               | 31  | 0.1047876  | 0.1047876  | 0.8366081 | 0.8038922  | 1 | 12246 tags=35%, list=25%, signal=47%   |
| REACTOME_RESOLUTION OF SISTER CHROMATID COHESION                                                                  | REACTOME_RESOLUTION OF SISTER CHROMATID COHESION                                                                  | 105 | 0.1045095  | 0.1045095  | 0.2045455 | 0.8044288  | 1 | 17743 tags=47%, list=36%, signal=73%   |
| REACTOME_CELL CYCLE                                                                                               | REACTOME_CELL CYCLE                                                                                               | 589 | 0.10450535 | 0.10450535 | 0         | 0.8037011  | 1 | 17888 tags=47%, list=37%, signal=73%   |
| REACTOME_STABILIZATION OF REACTOME_SIGNALING BY THE B CELL RECEPTOR (BCR)                                         | REACTOME_STABILIZATION OF P53 REACTOME_SIGNALING BY THE B CELL RECEPTOR (BCR)                                     | 56  | 0.10441589 | 0.10441589 | 0.5625    | 0.80335945 | 1 | 20249 tags=52%, list=41%, signal=88%   |
| REACTOME_APC/C:CDH1 MEDIATED DEGRADATION OF CDC20 AND OTHER APC/C:CDH1 TARGETED PROTEINS IN LATE MITOSIS/EARLY G1 | REACTOME_APC/C:CDH1 MEDIATED DEGRADATION OF CDC20 AND OTHER APC/C:CDH1 TARGETED PROTEINS IN LATE MITOSIS/EARLY G1 | 369 | 0.10386639 | 0.10386639 | 0         | 0.80512315 | 1 | 17908 tags=47%, list=37%, signal=73%   |
| REACTOME_TCF DEPENDENT SIGNALING IN RESPONSE TO REACTOME_SLC-MEDIATED TRANSMEMBRANE TRANSPORT                     | REACTOME_TCF DEPENDENT SIGNALING IN RESPONSE TO WNT REACTOME_SLC-MEDIATED TRANSMEMBRANE TRANSPORT                 | 71  | 0.10357875 | 0.10357875 | 0.3849903 | 0.8057116  | 1 | 17693 tags=46%, list=36%, signal=73%   |
| REACTOME_POLO-LIKE KINASE MEDIATED EVENTS                                                                         | REACTOME_POLO-LIKE KINASE MEDIATED EVENTS                                                                         | 201 | 0.10301334 | 0.10301334 | 0.01998   | 0.8075861  | 1 | 13977 tags=39%, list=29%, signal=54%   |
| REACTOME_HIV INFECTION                                                                                            | REACTOME_HIV INFECTION                                                                                            | 245 | 0.10262432 | 0.10262432 | 0.0110887 | 0.8085989  | 1 | 10588 tags=32%, list=22%, signal=40%   |
| REACTOME_MITOTIC PROPHASE                                                                                         | REACTOME_MITOTIC PROPHASE                                                                                         | 16  | 0.10249443 | 0.10249443 | 0.9881423 | 0.8084496  | 1 | 43947 tags=100%, list=90%, signal=975% |
| REACTOME_OXYGEN-DEPENDENT PROLINE HYDROXYLATION OF HYPOXIA-INDUCIBLE FACTOR ALPHA                                 | REACTOME_OXYGEN-DEPENDENT PROLINE HYDROXYLATION OF HYPOXIA-INDUCIBLE FACTOR ALPHA                                 | 224 | 0.10249329 | 0.10249329 | 0.0145349 | 0.80770874 | 1 | 8119 tags=27%, list=17%, signal=32%    |
| REACTOME_VEGFR2 MEDIATED CELL PROLIFERATION                                                                       | REACTOME_VEGFR2 MEDIATED CELL PROLIFERATION                                                                       | 110 | 0.1022841  | 0.1022841  | 0.1883495 | 0.8079171  | 1 | 18149 tags=47%, list=37%, signal=75%   |
| REACTOME_ERCC6 (CSB) AND EHMT2 (G9A) POSITIVELY REGULATE RRNA EXPRESSION                                          | REACTOME_ERCC6 (CSB) AND EHMT2 (G9A) POSITIVELY REGULATE RRNA EXPRESSION                                          | 63  | 0.10226807 | 0.10226807 | 0.4822335 | 0.8072502  | 1 | 19869 tags=51%, list=41%, signal=85%   |
| REACTOME_SIGNALLING TO RAS                                                                                        | REACTOME_SIGNALLING TO RAS                                                                                        | 251 | 0.10182885 | 0.10182885 | 0.0110331 | 0.8085002  | 1 | 13376 tags=37%, list=27%, signal=51%   |
| REACTOME_CYCLIN A:CDK2-ASSOCIATED EVENTS AT S PHASE ENTRY                                                         | REACTOME_CYCLIN A:CDK2-ASSOCIATED EVENTS AT S PHASE ENTRY                                                         | 45  | 0.10177162 | 0.10177162 | 0.7026749 | 0.8080167  | 1 | 30928 tags=73%, list=63%, signal=199%  |
| REACTOME_MAPK1/MAPK3 SIGNALING                                                                                    | REACTOME_MAPK1/MAPK3 SIGNALING                                                                                    | 249 | 0.10168458 | 0.10168458 | 0.0102987 | 0.8076756  | 1 | 11367 tags=33%, list=23%, signal=43%   |
| REACTOME_PROCESSING OF CAPPED INTRON-CONTAINING PRE-MRNA                                                          | REACTOME_PROCESSING OF CAPPED INTRON-CONTAINING PRE-MRNA                                                          | 80  | 0.10130536 | 0.10130536 | 0.3753878 | 0.80861074 | 1 | 17693 tags=46%, list=36%, signal=72%   |
| REACTOME_UB-SPECIFIC PROCESSING PROTEASES                                                                         | REACTOME_UB-SPECIFIC PROCESSING PROTEASES                                                                         | 244 | 0.10060182 | 0.10060182 | 0.0217166 | 0.8111162  | 1 | 10951 tags=32%, list=22%, signal=41%   |
| REACTOME_NEGATIVE REGULATION OF THE PI3K/AKT NETWORK                                                              | REACTOME_NEGATIVE REGULATION OF THE PI3K/AKT NETWORK                                                              | 243 | 0.10051238 | 0.10051238 | 0.0145833 | 0.81078964 | 1 | 11222 tags=33%, list=23%, signal=42%   |
| REACTOME_TRANSPORT OF MATURE MRNA DERIVED FROM AN INTRON-CONTAINING TRANSCRIPT                                    | REACTOME_TRANSPORT OF MATURE MRNA DERIVED FROM AN INTRON-CONTAINING TRANSCRIPT                                    | 188 | 0.099972   | 0.099972   | 0.0484027 | 0.8125168  | 1 | 17782 tags=46%, list=36%, signal=72%   |
| REACTOME_PROLONGED ERK ACTIVATION EVENTS                                                                          | REACTOME_PROLONGED ERK ACTIVATION EVENTS                                                                          | 101 | 0.09953895 | 0.09953895 | 0.277666  | 0.8137426  | 1 | 12588 tags=36%, list=26%, signal=48%   |
|                                                                                                                   |                                                                                                                   | 73  | 0.09937866 | 0.09937866 | 0.4120553 | 0.8137138  | 1 | 9226 tags=29%, list=19%, signal=35%    |
|                                                                                                                   |                                                                                                                   | 245 | 0.09927574 | 0.09927574 | 0.0096432 | 0.81344503 | 1 | 10951 tags=32%, list=22%, signal=41%   |

|                                                                                     |                                                                                     |     |            |            |           |            |   |                                      |
|-------------------------------------------------------------------------------------|-------------------------------------------------------------------------------------|-----|------------|------------|-----------|------------|---|--------------------------------------|
| REACTOME_NCAM SIGNALING FOR NEURITE OUT-GROWTH                                      | REACTOME_NCAM SIGNALING FOR NEURITE OUT-GROWTH                                      | 271 | 0.09881721 | 0.09881721 | 0.0099108 | 0.81473917 | 1 | 11810 tags=34%, list=24%, signal=44% |
| REACTOME_GASTRIN-CREB SIGNALLING PATHWAY VIA PKC AND MAPK                           | REACTOME_GASTRIN-CREB SIGNALLING PATHWAY VIA PKC AND MAPK                           | 436 | 0.09830628 | 0.09830628 | 9.88E-04  | 0.8162959  | 1 | 10951 tags=32%, list=22%, signal=41% |
| REACTOME_RUNX1 REGULATES TRANSCRIPTION OF GENES INVOLVED IN DIFFERENTIATION OF HSCS | REACTOME_RUNX1 REGULATES TRANSCRIPTION OF GENES INVOLVED IN DIFFERENTIATION OF HSCS | 98  | 0.0980197  | 0.0980197  | 0.2813765 | 0.8168317  | 1 | 17693 tags=46%, list=36%, signal=72% |
| REACTOME_FRS2-MEDIATED ACTIVATION                                                   | REACTOME_FRS2-MEDIATED ACTIVATION                                                   | 243 | 0.09780305 | 0.09780305 | 0.022022  | 0.81701726 | 1 | 10951 tags=32%, list=22%, signal=41% |
| REACTOME_SIGNALING BY REACTOME_INTERLEUKIN-2 FAMILY SIGNALING                       | REACTOME_SIGNALING BY LEPTIN REACTOME_INTERLEUKIN-2 FAMILY SIGNALING                | 246 | 0.09759275 | 0.09759275 | 0.0130522 | 0.81719446 | 1 | 11367 tags=33%, list=23%, signal=43% |
| REACTOME_SEPARATION OF SISTER CHROMATIDS                                            | REACTOME_SEPARATION OF SISTER CHROMATIDS                                            | 259 | 0.09730806 | 0.09730806 | 0.0159521 | 0.8176994  | 1 | 10951 tags=32%, list=22%, signal=41% |
| REACTOME_UCH PROTEINASES                                                            | REACTOME_UCH PROTEINASES                                                            | 168 | 0.09628239 | 0.09628239 | 0.0809191 | 0.82153124 | 1 | 17743 tags=46%, list=36%, signal=72% |
| REACTOME_RET SIGNALING                                                              | REACTOME_RET SIGNALING                                                              | 94  | 0.09627147 | 0.09627147 | 0.3517636 | 0.82084316 | 1 | 17693 tags=46%, list=36%, signal=71% |
| REACTOME_ARACHIDONIC ACID METABOLISM                                                | REACTOME_ARACHIDONIC ACID METABOLISM                                                | 263 | 0.09623858 | 0.09623858 | 0.014437  | 0.8202369  | 1 | 10951 tags=32%, list=22%, signal=41% |
| REACTOME_CYCLIN E ASSOCIATED EVENTS DURING                                          | REACTOME_CYCLIN E ASSOCIATED EVENTS DURING G1/S TRANSITION                          | 59  | 0.09621813 | 0.09621813 | 0.5997994 | 0.81958866 | 1 | 8572 tags=27%, list=18%, signal=33%  |
| REACTOME_ROLE OF LAT2/NTAL/LAB ON CALCIUM MOBILIZATION                              | REACTOME_ROLE OF LAT2/NTAL/LAB ON CALCIUM MOBILIZATION                              | 81  | 0.0955881  | 0.0955881  | 0.418     | 0.8216258  | 1 | 17693 tags=46%, list=36%, signal=71% |
| REACTOME_INTERLEUKIN-3, 5 AND GM-CSF SIGNALING                                      | REACTOME_INTERLEUKIN-3, 5 AND GM-CSF SIGNALING                                      | 337 | 0.0952089  | 0.0952089  | 0.0050813 | 0.8225873  | 1 | 21232 tags=53%, list=43%, signal=93% |
| REACTOME_ARMS-MEDIATED ACTIVATION                                                   | REACTOME_ARMS-MEDIATED ACTIVATION                                                   | 264 | 0.09502418 | 0.09502418 | 0.015     | 0.8227275  | 1 | 10951 tags=32%, list=22%, signal=41% |
| REACTOME_SIGNALING TO P38 VIA RIT AND RIN                                           | REACTOME_SIGNALING TO P38 VIA RIT AND RIN                                           | 242 | 0.09498125 | 0.09498125 | 0.0256663 | 0.82219046 | 1 | 10951 tags=32%, list=22%, signal=41% |
| REACTOME_REGULATION OF PTEN STABILITY AND ACTIVITY                                  | REACTOME_REGULATION OF PTEN STABILITY AND ACTIVITY                                  | 242 | 0.09498125 | 0.09498125 | 0.0241935 | 0.8214511  | 1 | 10951 tags=32%, list=22%, signal=41% |
| REACTOME_P53-DEPENDENT G1 DNA DAMAGE RESPONSE                                       | REACTOME_P53-DEPENDENT G1 DNA DAMAGE RESPONSE                                       | 68  | 0.09465365 | 0.09465365 | 0.5361744 | 0.8221687  | 1 | 17693 tags=46%, list=36%, signal=71% |
| REACTOME_P53-DEPENDENT G1/S DNA DAMAGE CHECKPOINT                                   | REACTOME_P53-DEPENDENT G1/S DNA DAMAGE CHECKPOINT                                   | 65  | 0.09425673 | 0.09425673 | 0.5909548 | 0.82321787 | 1 | 20249 tags=51%, list=41%, signal=86% |
| REACTOME_G1/S DNA DAMAGE CHECKPOINTS                                                | REACTOME_G1/S DNA DAMAGE CHECKPOINTS                                                | 65  | 0.09425673 | 0.09425673 | 0.5936571 | 0.82247955 | 1 | 20249 tags=51%, list=41%, signal=86% |
| REACTOME_MITOTIC ANAPHASE                                                           | REACTOME_MITOTIC ANAPHASE                                                           | 67  | 0.09403063 | 0.09403063 | 0.5477099 | 0.82271767 | 1 | 20249 tags=51%, list=41%, signal=86% |
| REACTOME_POST-ELONGATION PROCESSING OF INTRON-CONTAINING PRE-MRNA                   | REACTOME_POST-ELONGATION PROCESSING OF INTRON-CONTAINING PRE-MRNA                   | 178 | 0.09301301 | 0.09301301 | 0.0918367 | 0.8263691  | 1 | 17743 tags=46%, list=36%, signal=71% |
| REACTOME_MRNA 3'-END PROCESSING                                                     | REACTOME_MRNA 3'-END PROCESSING                                                     | 57  | 0.09236857 | 0.09236857 | 0.7118812 | 0.82845414 | 1 | 9226 tags=28%, list=19%, signal=35%  |
| REACTOME_GRB2 EVENTS IN EGFR SIGNALING                                              | REACTOME_GRB2 EVENTS IN EGFR SIGNALING                                              | 57  | 0.09236857 | 0.09236857 | 0.7112887 | 0.8277138  | 1 | 9226 tags=28%, list=19%, signal=35%  |
| REACTOME_RAF/MAP KINASE CASCADE                                                     | REACTOME_RAF/MAP KINASE CASCADE                                                     | 238 | 0.09190281 | 0.09190281 | 0.0417515 | 0.8289345  | 1 | 10951 tags=32%, list=22%, signal=40% |
| REACTOME_SHC1 EVENTS IN EGFR SIGNALING                                              | REACTOME_SHC1 EVENTS IN EGFR SIGNALING                                              | 238 | 0.09190281 | 0.09190281 | 0.024728  | 0.82819504 | 1 | 10951 tags=32%, list=22%, signal=40% |
| REACTOME_SOS-MEDIATED SIGNALLING                                                    | REACTOME_SOS-MEDIATED SIGNALLING                                                    | 238 | 0.09190281 | 0.09190281 | 0.0372233 | 0.8274569  | 1 | 10951 tags=32%, list=22%, signal=40% |
| REACTOME_APC/C-MEDIATED DEGRADATION OF CELL CYCLE PROTEINS                          | REACTOME_APC/C-MEDIATED DEGRADATION OF CELL CYCLE PROTEINS                          | 238 | 0.09190281 | 0.09190281 | 0.0421569 | 0.82672006 | 1 | 10951 tags=32%, list=22%, signal=40% |
|                                                                                     |                                                                                     | 85  | 0.0912511  | 0.0912511  | 0.4421769 | 0.82879275 | 1 | 18581 tags=47%, list=38%, signal=76% |

|                                                                                            |                                                                                            |     |            |            |           |            |   |                                       |
|--------------------------------------------------------------------------------------------|--------------------------------------------------------------------------------------------|-----|------------|------------|-----------|------------|---|---------------------------------------|
| REACTOME_REGULATION OF MITOTIC CELL CYCLE                                                  | REACTOME_REGULATION OF MITOTIC CELL CYCLE                                                  | 85  | 0.0912511  | 0.0912511  | 0.4485219 | 0.828056   | 1 | 18581 tags=47%, list=38%, signal=76%  |
| REACTOME_METABOLISM OF POLYAMINES                                                          | REACTOME_METABOLISM OF POLYAMINES                                                          | 84  | 0.09117723 | 0.09117723 | 0.4753623 | 0.8276129  | 1 | 17693 tags=45%, list=36%, signal=71%  |
| REACTOME_B-WICH COMPLEX POSITIVELY REGULATES RRNA EXPRESSION                               | REACTOME_B-WICH COMPLEX POSITIVELY REGULATES RRNA EXPRESSION                               | 60  | 0.09107114 | 0.09107114 | 0.6513292 | 0.82735544 | 1 | 13499 tags=37%, list=28%, signal=51%  |
| REACTOME_MITOTIC METAPHASE AND ANAPHASE                                                    | REACTOME_MITOTIC METAPHASE AND ANAPHASE                                                    | 179 | 0.09046336 | 0.09046336 | 0.1130604 | 0.829201   | 1 | 17743 tags=45%, list=36%, signal=71%  |
| REACTOME_MITOTIC G1-G1/S PHASES                                                            | REACTOME_MITOTIC G1-G1/S PHASES                                                            | 145 | 0.08967141 | 0.08967141 | 0.1684518 | 0.83193505 | 1 | 16558 tags=43%, list=34%, signal=64%  |
| REACTOME_CLASS A/1 (RHODOPSIN-LIKE RECEPTORS)                                              | REACTOME_CLASS A/1 (RHODOPSIN-LIKE RECEPTORS)                                              | 320 | 0.08907615 | 0.08907615 | 0.0107738 | 0.8337646  | 1 | 6530 tags=22%, list=13%, signal=25%   |
| REACTOME_ACTIVATION OF APC/C AND APC/C:CDC20 MEDIATED DEGRADATION OF MITOTIC PROTEINS      | REACTOME_ACTIVATION OF APC/C AND APC/C:CDC20 MEDIATED DEGRADATION OF MITOTIC PROTEINS      | 75  | 0.08766756 | 0.08766756 | 0.5880567 | 0.8391659  | 1 | 19869 tags=49%, list=41%, signal=83%  |
| REACTOME_SIGNALING BY WNT                                                                  | REACTOME_SIGNALING BY WNT                                                                  | 292 | 0.08752456 | 0.08752456 | 0.0254324 | 0.8390464  | 1 | 11837 tags=33%, list=24%, signal=43%  |
| REACTOME_INTERLEUKIN RECEPTOR SHC SIGNALING                                                | REACTOME_INTERLEUKIN RECEPTOR SHC SIGNALING                                                | 248 | 0.08725584 | 0.08725584 | 0.0456853 | 0.83943546 | 1 | 10951 tags=31%, list=22%, signal=40%  |
| REACTOME_OXIDATIVE STRESS INDUCED SENESCENCE                                               | REACTOME_OXIDATIVE STRESS INDUCED SENESCENCE                                               | 91  | 0.08706219 | 0.08706219 | 0.4853516 | 0.8395257  | 1 | 17267 tags=44%, list=35%, signal=68%  |
| REACTOME_CHROMATIN MODIFYING ENZYMES                                                       | REACTOME_CHROMATIN MODIFYING ENZYMES                                                       | 238 | 0.08677158 | 0.08677158 | 0.0551724 | 0.84005195 | 1 | 8115 tags=25%, list=17%, signal=30%   |
| REACTOME_CHROMATIN ORGANIZATION                                                            | REACTOME_CHROMATIN ORGANIZATION                                                            | 238 | 0.08677158 | 0.08677158 | 0.0583333 | 0.8393125  | 1 | 8115 tags=25%, list=17%, signal=30%   |
| REACTOME_AMPLIFICATION OF SIGNAL FROM UNATTACHED KINETOCHORES VIA A MAD2 INHIBITORY SIGNAL | REACTOME_AMPLIFICATION OF SIGNAL FROM UNATTACHED KINETOCHORES VIA A MAD2 INHIBITORY SIGNAL | 92  | 0.08653775 | 0.08653775 | 0.464497  | 0.8395838  | 1 | 17591 tags=45%, list=36%, signal=69%  |
| REACTOME_AMPLIFICATION OF SIGNAL FROM THE KINETOCHORES                                     | REACTOME_AMPLIFICATION OF SIGNAL FROM THE KINETOCHORES                                     | 92  | 0.08653775 | 0.08653775 | 0.4501953 | 0.8388461  | 1 | 17591 tags=45%, list=36%, signal=69%  |
| REACTOME_ABC TRANSPORTER DISORDERS                                                         | REACTOME_ABC TRANSPORTER DISORDERS                                                         | 67  | 0.08651941 | 0.08651941 | 0.6423712 | 0.8381914  | 1 | 17693 tags=45%, list=36%, signal=70%  |
| REACTOME_AMYLOID FIBER FORMATION                                                           | REACTOME_AMYLOID FIBER FORMATION                                                           | 69  | 0.08622234 | 0.08622234 | 0.6702439 | 0.8387336  | 1 | 5718 tags=20%, list=12%, signal=23%   |
| REACTOME_KERATINIZATION                                                                    | REACTOME_KERATINIZATION                                                                    | 171 | 0.08597071 | 0.08597071 | 0.1581582 | 0.8390596  | 1 | 33029 tags=76%, list=67%, signal=233% |
| REACTOME_FC EPSILON RECEPTOR (FCER1) SIGNALING                                             | REACTOME_FC EPSILON RECEPTOR (FCER1) SIGNALING                                             | 519 | 0.0848435  | 0.0848435  | 0.0019608 | 0.84303117 | 1 | 20324 tags=50%, list=42%, signal=84%  |
| REACTOME_CLEAVAGE OF GROWING TRANSCRIPT IN THE TERMINATION REGION                          | REACTOME_CLEAVAGE OF GROWING TRANSCRIPT IN THE TERMINATION REGION                          | 66  | 0.08365544 | 0.08365544 | 0.7018634 | 0.8472203  | 1 | 12230 tags=33%, list=25%, signal=44%  |
| REACTOME_POST-ELONGATION PROCESSING OF THE TRANSCRIPT                                      | REACTOME_POST-ELONGATION PROCESSING OF THE TRANSCRIPT                                      | 66  | 0.08365544 | 0.08365544 | 0.7288136 | 0.8464797  | 1 | 12230 tags=33%, list=25%, signal=44%  |
| REACTOME_RNA POLYMERASE II TRANSCRIPTION TERMINATION                                       | REACTOME_RNA POLYMERASE II TRANSCRIPTION TERMINATION                                       | 66  | 0.08365544 | 0.08365544 | 0.7212787 | 0.84574044 | 1 | 12230 tags=33%, list=25%, signal=44%  |
| REACTOME_NEGATIVE EPIGENETIC REGULATION OF RNA EXPRESSION                                  | REACTOME_NEGATIVE EPIGENETIC REGULATION OF RNA EXPRESSION                                  | 78  | 0.08334868 | 0.08334868 | 0.6390593 | 0.84630275 | 1 | 12246 tags=33%, list=25%, signal=44%  |
| REACTOME_BIOLOGICAL OXIDATIONS                                                             | REACTOME_BIOLOGICAL OXIDATIONS                                                             | 215 | 0.08180418 | 0.08180418 | 0.1056676 | 0.85195166 | 1 | 7626 tags=24%, list=16%, signal=28%   |
| REACTOME_APC/C:CDC20 MEDIATED DEGRADATION OF MITOTIC PROTEINS                              | REACTOME_APC/C:CDC20 MEDIATED DEGRADATION OF MITOTIC PROTEINS                              | 74  | 0.08080855 | 0.08080855 | 0.7220039 | 0.855291   | 1 | 19869 tags=49%, list=41%, signal=82%  |
| REACTOME_INSULIN RECEPTOR SIGNALLING CASCADE                                               | REACTOME_INSULIN RECEPTOR SIGNALLING CASCADE                                               | 291 | 0.07977558 | 0.07977558 | 0.0480962 | 0.85872036 | 1 | 1837 tags=12%, list=4%, signal=12%    |

|                                                                                  |                                                                                     |     |            |            |           |            |   |                                       |
|----------------------------------------------------------------------------------|-------------------------------------------------------------------------------------|-----|------------|------------|-----------|------------|---|---------------------------------------|
| REACTOME_RHO GTPASES<br>ACTIVATE PKNS                                            | REACTOME_RHO GTPASES ACTIVATE<br>PKNS                                               | 63  | 0.07924696 | 0.07924696 | 0.8168168 | 0.86009264 | 1 | 14777 tags=38%, list=30%, signal=54%  |
| REACTOME_APC/C:CDC20<br>MEDIATED DEGRADATION OF                                  | REACTOME_APC/C:CDC20 MEDIATED<br>DEGRADATION OF SECURIN                             | 66  | 0.07915513 | 0.07915513 | 0.7778865 | 0.85971844 | 1 | 19869 tags=48%, list=41%, signal=81%  |
| REACTOME_FCERI MEDIATED<br>MAPK ACTIVATION                                       | REACTOME_FCERI MEDIATED MAPK<br>ACTIVATION                                          | 332 | 0.07894721 | 0.07894721 | 0.0306122 | 0.8597906  | 1 | 21232 tags=51%, list=43%, signal=90%  |
| REACTOME_TRANSCRIPTIONAL<br>REGULATION BY SMALL RNAS                             | REACTOME_TRANSCRIPTIONAL<br>REGULATION BY SMALL RNAS                                | 73  | 0.07828716 | 0.07828716 | 0.72167   | 0.861703   | 1 | 18977 tags=47%, list=39%, signal=76%  |
| REACTOME_IRS-MEDIATED<br>SIGNALLING                                              | REACTOME_IRS-MEDIATED SIGNALLING                                                    | 288 | 0.07750217 | 0.07750217 | 0.0558882 | 0.8640499  | 1 | 1837 tags=11%, list=4%, signal=12%    |
| REACTOME_SIGNALING BY TYPE 1<br>INSULIN-LIKE GROWTH<br>FACTOR 1 RECEPTOR (IGF1R) | REACTOME_SIGNALING BY TYPE 1<br>INSULIN-LIKE GROWTH FACTOR 1<br>RECEPTOR (IGF1R)    | 293 | 0.07713287 | 0.07713287 | 0.0472441 | 0.86474866 | 1 | 10951 tags=30%, list=22%, signal=38%  |
| REACTOME_REGULATION OF<br>APC/C ACTIVATORS BETWEEN<br>G1/S AND EARLY ANAPHASE    | REACTOME_REGULATION OF APC/C<br>ACTIVATORS BETWEEN G1/S AND<br>EARLY ANAPHASE       | 79  | 0.07632379 | 0.07632379 | 0.7099792 | 0.86727977 | 1 | 18581 tags=46%, list=38%, signal=73%  |
| REACTOME_GPCR LIGAND                                                             | REACTOME_GPCR LIGAND BINDING                                                        | 451 | 0.07574237 | 0.07574237 | 0.0099404 | 0.8688629  | 1 | 6530 tags=21%, list=13%, signal=24%   |
| REACTOME_RNA POLYMERASE I<br>TRANSCRIPTION                                       | REACTOME_RNA POLYMERASE I<br>TRANSCRIPTION                                          | 80  | 0.07500511 | 0.07500511 | 0.7277277 | 0.8709809  | 1 | 12246 tags=33%, list=25%, signal=43%  |
| REACTOME_CELL CYCLE<br>CHECKPOINTS                                               | REACTOME_CELL CYCLE CHECKPOINTS                                                     | 270 | 0.07237223 | 0.07237223 | 0.118593  | 0.8803273  | 1 | 17693 tags=43%, list=36%, signal=67%  |
| REACTOME_RNA POLYMERASE I<br>PROMOTER CLEARANCE                                  | REACTOME_RNA POLYMERASE I<br>PROMOTER CLEARANCE                                     | 78  | 0.07050771 | 0.07050771 | 0.7992203 | 0.88646805 | 1 | 12246 tags=32%, list=25%, signal=43%  |
| REACTOME_NORC NEGATIVELY<br>REGULATES RRNA EXPRESSION                            | REACTOME_NORC NEGATIVELY<br>REGULATES RRNA EXPRESSION                               | 75  | 0.06998978 | 0.06998978 | 0.8228856 | 0.8875867  | 1 | 12246 tags=32%, list=25%, signal=43%  |
| REACTOME_POST-<br>TRANSLATIONAL MODIFICATION:<br>SYNTHESIS OF GPI-ANCHORED       | REACTOME_POST-TRANSLATIONAL<br>MODIFICATION: SYNTHESIS OF GPI-<br>ANCHORED PROTEINS | 92  | 0.05890001 | 0.05890001 | 0.8786982 | 0.92497164 | 1 | 12555 tags=32%, list=26%, signal=42%  |
| REACTOME_ANTIMICROBIAL<br>PEPTIDES                                               | REACTOME_ANTIMICROBIAL PEPTIDES                                                     | 75  | 0.0585914  | 0.0585914  | 0.949495  | 0.92515135 | 1 | 23902 tags=55%, list=49%, signal=107% |
| REACTOME_MEIOSIS                                                                 | REACTOME_MEIOSIS                                                                    | 87  | 0.05810317 | 0.05810317 | 0.9057171 | 0.92587537 | 1 | 30928 tags=69%, list=63%, signal=187% |
