# Supplementary material for: Role of Lamin A/C as Candidate Biomarker of Aggressiveness and Tumorigenicity in Glioblastoma Multiforme
Source: MDPI journal article supplement (doi:10.3390/biomedicines9101343), 2021-09-28
Supplement: s1 [file s1]

**Table S5. Venn diagram breakdown of the core molecular KEGG pathways in relation to the GBM subtypes from microarray dataset.**

| <b>Names</b>                           | <b>total</b> | <b>elements</b>                                                                                                                                                                                                                                                                                                                                                                                                                                                                                                                                                                                                                                                                                                                                                                                                                                                                                                                                                                                                                                                                                                                                 |
|----------------------------------------|--------------|-------------------------------------------------------------------------------------------------------------------------------------------------------------------------------------------------------------------------------------------------------------------------------------------------------------------------------------------------------------------------------------------------------------------------------------------------------------------------------------------------------------------------------------------------------------------------------------------------------------------------------------------------------------------------------------------------------------------------------------------------------------------------------------------------------------------------------------------------------------------------------------------------------------------------------------------------------------------------------------------------------------------------------------------------------------------------------------------------------------------------------------------------|
| Classical Mesenchymal Neural Proneural | 43           | KEGG_GLYCOSPHINGOLIPID_BIOSYNTHESIS_GANGLIO_SERIES<br>KEGG_LYSOSOME<br>KEGG_GLYCOSAMINOGLYCAN_DEGRADATION<br>KEGG_DNA_REPLICATION<br>KEGG_GLUTATHIONE_METABOLISM<br>KEGG_FOCAL_ADHESION<br>KEGG_NOD_LIKE_RECEPTOR_SIGNALING_PATHWAY<br>KEGG_FRUCTOSE_AND_MANNOSSE_METABOLISM<br>KEGG_SNARE_INTERACTIONS_IN_VESICULAR_TRANSPORT<br>KEGG_GLYCOLYSIS_GLUONEOGENESIS<br>KEGG_PATHOGENIC_ESCHERICHIA_COLI_INFECTION<br>KEGG_PROTEIN_EXPORT<br>KEGG_GALACTOSE_METABOLISM<br>KEGG_N_GLYCAN_BIOSYNTHESIS<br>KEGG_OTHER_GLYCAN_DEGRADATION<br>KEGG_NICOTINATE_AND_NICOTINAMIDE_METABOLISM<br>KEGG_BASE_EXCISION_REPAIR<br>KEGG_PROTEASOME<br>KEGG_APOPTOSIS<br>KEGG_P53_SIGNALING_PATHWAY<br>KEGG_REGULATION_OF_ACTIN_CYTOSKELETON<br>KEGG_ECM_RECEPTOR_INTERACTION<br>KEGG_SMALL_CELL_LUNG_CANCER<br>KEGG_VALINE_LEUCINE_AND_ISOLEUCINE_BIOSYNTHESIS<br>KEGG_JAK_STAT_SIGNALING_PATHWAY<br>KEGG_PYRIMIDINE_METABOLISM<br>KEGG_DRUG_METABOLISM_OTHER_ENZYMES<br>KEGG_ONE_CARBON_POOL_BY_FOLATE<br>KEGG_PORPHYRIN_AND_CHLOROPHYLL_METABOLISM<br>KEGG_PANCREATIC_CANCER<br>KEGG_VIRAL_MYOCARDITIS<br>KEGG_BLADDER_CANCER<br>KEGG_PENTOSE_PHOSPHATE_PATHWAY |

Classical Mesenchymal Proneural

KEGG\_GLYCOSPHINGOLIPID\_BIOSYNTHESIS\_GLOBO\_SERIES  
KEGG\_STARCH\_AND\_SUCROSE\_METABOLISM  
KEGG\_CELL\_CYCLE  
KEGG\_GLYCOSAMINOGLYCAN\_BIOSYNTHESIS\_KERATAN\_SULFATE  
KEGG\_AMINO\_SUGAR\_AND\_NUCLEOTIDE\_SUGAR\_METABOLISM  
KEGG\_O\_GLYCAN\_BIOSYNTHESIS  
KEGG\_GLYCOSAMINOGLYCAN\_BIOSYNTHESIS\_HEPARAN\_SULFATE  
KEGG\_PATHWAYS\_IN\_CANCER  
KEGG\_PANTOTHENATE\_AND\_COA\_BIOSYNTHESIS  
KEGG\_GLYCOSAMINOGLYCAN\_BIOSYNTHESIS\_CHONDROITIN\_SULFATE  
17 KEGG\_HYPERTROPHIC\_CARDIOMYOPATHY\_HCM  
KEGG\_COMPLEMENT\_AND\_COAGULATION\_CASCADES  
KEGG\_PHENYLALANINE\_METABOLISM  
KEGG\_INTESTINAL\_IMMUNE\_NETWORK\_FOR\_IGA\_PRODUCTION  
KEGG\_STEROID\_BIOSYNTHESIS  
KEGG\_FOLATE\_BIOSYNTHESIS  
KEGG\_RIBOFLAVIN\_METABOLISM  
KEGG\_RIBOSOME  
KEGG\_THYROID\_CANCER  
KEGG\_CYTOKINE\_CYTOKINE\_RECEPTOR\_INTERACTION  
KEGG\_TYROSINE\_METABOLISM  
KEGG\_ALLOGRAFT\_REJECTION  
KEGG\_OOCYTE\_MEIOSIS  
KEGG\_AXON\_GUIDANCE  
KEGG\_HEMATOPOIETIC\_CELL\_LINEAGE  
KEGG\_RENIN\_ANGIOTENSIN\_SYSTEM  
KEGG\_PROGESTERONE\_MEDIATED\_OOCYTE\_MATURATION

Mesenchymal Neural Proneural

19 KEGG\_CYSTEINE\_AND\_METHIONINE\_METABOLISM  
KEGG\_CITRATE\_CYCLE\_TCA\_CYCLE  
KEGG\_RNA\_DEGRADATION  
KEGG\_ASCORBATE\_AND\_ALDARATE\_METABOLISM  
KEGG\_GLYCOSYLPHOSPHATIDYLINOSITOL\_GPI\_ANCHOR\_BIOSYNTHESIS  
KEGG\_RNA\_POLYMERASE  
KEGG\_SPLICEOSOME  
KEGG\_UBIQUITIN\_MEDIATED\_PROTEOLYSIS  
KEGG\_GLYOXYLATE\_AND\_DICARBOXYLATE\_METABOLISM

Classical Neural

KEGG\_MISMATCH\_REPAIR  
KEGG\_BASAL\_TRANSCRIPTION\_FACTORS  
KEGG\_NUCLEOTIDE\_EXCISION\_REPAIR  
KEGG\_HOMOLOGOUS\_RECOMBINATION  
KEGG\_NON\_HOMOLOGOUS\_END\_JOINING  
KEGG\_TERPENOID\_BACKBONE\_BIOSYNTHESIS  
KEGG\_TGF\_BETA\_SIGNALING\_PATHWAY  
KEGG\_AMINOACYL\_TRNA\_BIOSYNTHESIS  
KEGG\_RIG\_I\_LIKE\_RECEPTOR\_SIGNALING\_PATHWAY  
KEGG\_SELENOAMINO\_ACID\_METABOLISM  
29 KEGG\_GRAFT\_VERSUS\_HOST\_DISEASE  
KEGG\_TIGHT\_JUNCTION  
KEGG\_ENDOCYTOSIS  
KEGG\_SPHINGOLIPID\_METABOLISM  
KEGG\_NEUROTROPHIN\_SIGNALING\_PATHWAY  
KEGG\_ACUTE\_MYELOID\_LEUKEMIA  
KEGG\_ENDOMETRIAL\_CANCER  
KEGG\_COLORECTAL\_CANCER  
KEGG\_VEGF\_SIGNALING\_PATHWAY  
KEGG\_CELL\_ADHESION\_MOLECULES\_CAMS  
KEGG\_ADHERENS\_JUNCTION  
KEGG\_TOLL\_LIKE\_RECEPTOR\_SIGNALING\_PATHWAY  
KEGG\_CHRONIC\_MYELOID\_LEUKEMIA  
KEGG\_ERBB\_SIGNALING\_PATHWAY  
KEGG\_LEUKOCYTE\_TRANSENDOTHELIAL\_MIGRATION  
KEGG\_INSULIN\_SIGNALING\_PATHWAY  
KEGG\_PRION\_DISEASES  
KEGG\_BIOSYNTHESIS\_OF\_UNSATURATED\_FATTY\_ACIDS  
KEGG\_ARRHYTHMOGENIC\_RIGHT\_VENTRICULAR\_CARDIOMYOPATHY\_ARVC  
KEGG\_ADIPOCYTOKINE\_SIGNALING\_PATHWAY  
KEGG\_B\_CELL\_RECEPTOR\_SIGNALING\_PATHWAY  
KEGG\_PROSTATE\_CANCER  
KEGG\_EPITHELIAL\_CELL\_SIGNALING\_IN\_HELICOBACTER\_PYLORI\_INFECTION  
KEGG\_LEISHMANIA\_INFECTION  
KEGG\_FC\_GAMMA\_R\_MEDIATED\_PHAGOCYTOSIS  
KEGG\_VIBRIO\_CHOLERAЕ\_INFECTION

|                       |                                                                |
|-----------------------|----------------------------------------------------------------|
|                       | KEGG_CYTOSOLIC_DNA_SENSING_PATHWAY                             |
|                       | KEGG_RENAL_CELL_CARCINOMA                                      |
|                       | KEGG_ANTIGEN_PROCESSING_AND_PRESENTATION                       |
| Mesenchymal Proneural | 9 KEGG_GLYCOPHINGOLIPID_BIOSYNTHESIS_LACTO_AND_NEOLACTO_SERIES |
|                       | KEGG_SULFUR_METABOLISM                                         |
|                       | KEGG_PENTOSE_AND_GLUCURONATE_INTERCONVERSIONS                  |
|                       | KEGG_ALANINE_ASPARTATE_AND_GLUTAMATE_METABOLISM                |
|                       | KEGG_HEDGEHOG_SIGNALING_PATHWAY                                |
|                       | KEGG_PURINE_METABOLISM                                         |
|                       | KEGG_AUTOIMMUNE_THYROID_DISEASE                                |
|                       | KEGG_PARKINSONS_DISEASE                                        |
|                       | KEGG_HUNTINGTONS_DISEASE                                       |
| Classical             | 21 KEGG_TYPE_II_DIABETES_MELLITUS                              |
|                       | KEGG_MELANOMA                                                  |
|                       | KEGG_PRIMARY_BILE_ACID_BIOSYNTHESIS                            |
|                       | KEGG_GNRH_SIGNALING_PATHWAY                                    |
|                       | KEGG_FC_EPSILON_RI_SIGNALING_PATHWAY                           |
|                       | KEGG_VASCULAR_SMOOTH_MUSCLE_CONTRACTION                        |
|                       | KEGG_T_CELL_RECEPTOR_SIGNALING_PATHWAY                         |
|                       | KEGG_ALZHEIMERS_DISEASE                                        |
|                       | KEGG_BASAL_CELL_CARCINOMA                                      |
|                       | KEGG_SYSTEMIC_LUPUS_ERYTHEMATOSUS                              |
|                       | KEGG_ARACHIDONIC_ACID_METABOLISM                               |
|                       | KEGG_STEROID_HORMONE_BIOSYNTHESIS                              |
|                       | KEGG_PRIMARY_IMMUNODEFICIENCY                                  |
|                       | KEGG_MAPK_SIGNALING_PATHWAY                                    |
|                       | KEGG_GLIOMA                                                    |
|                       | KEGG_NATURAL_KILLER_CELL_MEDIATED_CYTOTOXICITY                 |
|                       | KEGG_MELANOGENESIS                                             |
|                       | KEGG_AMYOTROPHIC_LATERAL_SCLEROSIS_ALS                         |
|                       | KEGG_DILATED_CARDIOMYOPATHY                                    |
|                       | KEGG_GAP_JUNCTION                                              |
|                       | KEGG_CHEMOKINE_SIGNALING_PATHWAY                               |
| Neural                | 18 KEGG_FATTY_ACID_METABOLISM                                  |
|                       | KEGG_ARGININE_AND_PROLINE_METABOLISM                           |
|                       | KEGG_NON_SMALL_CELL_LUNG_CANCER                                |

KEGG\_ETHER\_LIPID\_METABOLISM  
KEGG\_GLYCINE\_SERINE\_AND\_THREONINE\_METABOLISM  
KEGG\_PEROXISOME  
KEGG\_MTOR\_SIGNALING\_PATHWAY  
KEGG\_DORSO\_VENTRAL\_AXIS\_FORMATION  
KEGG\_LIMONENE\_AND\_PINENE\_DEGRADATION  
KEGG\_BUTANOATE\_METABOLISM  
KEGG\_VALINE\_LEUCINE\_AND\_ISOLEUCINE\_DEGRADATION  
KEGG\_NOTCH\_SIGNALING\_PATHWAY  
KEGG\_TRYPTOPHAN\_METABOLISM  
KEGG\_PROPANOATE\_METABOLISM  
KEGG\_CIRCADIAN\_RHYTHM\_MAMMAL  
KEGG\_ABC\_TRANSPORTERS  
KEGG\_LYSINE\_DEGRADATION  
KEGG\_PYRUVATE\_METABOLISM
