# Supplementary material for: Role of Lamin A/C as Candidate Biomarker of Aggressiveness and Tumorigenicity in Glioblastoma Multiforme
Source: MDPI journal article supplement (doi:10.3390/biomedicines9101343), 2021-09-28
Supplement: s1 [file s1]

**Table S4. List of genes correlated with LMNA gene expression in GBM patients from microarray dataset.**

| var1    | var2 | corr         | corr_CI5%    | corr_CI95%   | pvalue   | FDR_corre<br>cted_Pval | Bonferroni_<br>corrected_P |
|---------|------|--------------|--------------|--------------|----------|------------------------|----------------------------|
| AACS    | LMNA | -0.107659701 | -0.2421123   | 0.030849806  | 1.27E-01 | 1.87E-01               | 1.00E+00                   |
| FSTL1   | LMNA | 0.619586736  | 0.526576204  | 0.69793976   | 8.34E-23 | 7.50E-21               | 9.90E-19                   |
| ELMO2   | LMNA | -0.0631694   | -0.199480808 | 0.075540358  | 3.72E-01 | 4.60E-01               | 1.00E+00                   |
| CREB3L1 | LMNA | 0.410451237  | 0.288762441  | 0.519088992  | 1.30E-09 | 1.05E-08               | 1.55E-05                   |
| RPS11   | LMNA | -0.221779939 | -0.3491413   | -0.086373428 | 1.51E-03 | 3.78E-03               | 1.00E+00                   |
| PNMA1   | LMNA | -0.224641487 | -0.351783    | -0.089361772 | 1.31E-03 | 3.33E-03               | 1.00E+00                   |
| MMP2    | LMNA | 0.406849219  | 0.284793938  | 0.515922923  | 1.87E-09 | 1.47E-08               | 2.22E-05                   |
| SAMD4A  | LMNA | 0.150245084  | 0.012452364  | 0.282437903  | 3.28E-02 | 5.81E-02               | 1.00E+00                   |
| SMARCD3 | LMNA | -0.418176163 | -0.52586894  | -0.297287459 | 5.92E-10 | 5.10E-09               | 7.02E-06                   |
| A4GNT   | LMNA | 0.011521386  | -0.126731185 | 0.149334864  | 8.71E-01 | 9.04E-01               | 1.00E+00                   |
| C9orf39 | LMNA | -0.015341176 | -0.153067999 | 0.122970259  | 8.28E-01 | 8.71E-01               | 1.00E+00                   |
| PKNOX2  | LMNA | -0.360282627 | -0.474722191 | -0.233863378 | 1.39E-07 | 7.77E-07               | 1.65E-03                   |
| RALYL   | LMNA | -0.466529739 | -0.567998833 | -0.351090699 | 2.60E-12 | 3.39E-11               | 3.08E-08                   |
| ZHX3    | LMNA | 0.084979773  | -0.053701226 | 0.220444618  | 2.29E-01 | 3.07E-01               | 1.00E+00                   |
| ERCC5   | LMNA | -0.098093992 | -0.23298985  | 0.040505534  | 1.65E-01 | 2.33E-01               | 1.00E+00                   |
| RXFP3   | LMNA | -0.055862295 | -0.19242931  | 0.082827459  | 4.30E-01 | 5.16E-01               | 1.00E+00                   |
| APBB2   | LMNA | -0.291739736 | -0.413151092 | -0.160138299 | 2.52E-05 | 9.27E-05               | 2.99E-01                   |
| BBOX1   | LMNA | 0.017878112  | -0.12047022  | 0.155545213  | 8.01E-01 | 8.50E-01               | 1.00E+00                   |
| PRO0478 | LMNA | -0.266826366 | -0.390493294 | -0.133700303 | 1.24E-04 | 3.98E-04               | 1.00E+00                   |
| GCSH    | LMNA | -0.341372226 | -0.457846401 | -0.213376996 | 6.63E-07 | 3.28E-06               | 7.87E-03                   |
| XDH     | LMNA | 0.08768326   | -0.0509849   | 0.223034482  | 2.15E-01 | 2.90E-01               | 1.00E+00                   |
| EDN1    | LMNA | -0.002298278 | -0.140304762 | 0.135795808  | 9.74E-01 | 9.80E-01               | 1.00E+00                   |
| MTERF   | LMNA | -0.034787827 | -0.172012737 | 0.103761488  | 6.23E-01 | 6.98E-01               | 1.00E+00                   |
| PDCL3   | LMNA | 0.216173873  | 0.080526012  | 0.343960066  | 2.00E-03 | 4.86E-03               | 1.00E+00                   |
| CLK4    | LMNA | -0.117301818 | -0.251283623 | 0.021090718  | 9.64E-02 | 1.47E-01               | 1.00E+00                   |
| KCNG1   | LMNA | 0.084814964  | -0.053866751 | 0.220286674  | 2.30E-01 | 3.08E-01               | 1.00E+00                   |
| CXCR4   | LMNA | 0.499214405  | 0.387896055  | 0.59617854   | 3.96E-14 | 6.71E-13               | 4.70E-10                   |
| DECR1   | LMNA | 0.021795943  | -0.116605919 | 0.159367415  | 7.58E-01 | 8.14E-01               | 1.00E+00                   |
| SALL1   | LMNA | -0.02878089  | -0.166171653 | 0.109705997  | 6.84E-01 | 7.52E-01               | 1.00E+00                   |
| PTPRR   | LMNA | -0.027480548 | -0.164905942 | 0.110991523  | 6.98E-01 | 7.63E-01               | 1.00E+00                   |
| CADM4   | LMNA | -0.211075047 | -0.339240867 | -0.075215768 | 2.57E-03 | 6.05E-03               | 1.00E+00                   |

|         |      |              |              |              |          |          |          |
|---------|------|--------------|--------------|--------------|----------|----------|----------|
| IRAK1   | LMNA | 0.596593461  | 0.499697728  | 0.678742971  | 7.33E-21 | 4.20E-19 | 8.69E-17 |
| CFHR5   | LMNA | 0.036733492  | -0.101833918 | 0.173902616  | 6.04E-01 | 6.81E-01 | 1.00E+00 |
| HNRPD   | LMNA | -0.218022496 | -0.34566946  | -0.08245319  | 1.83E-03 | 4.48E-03 | 1.00E+00 |
| TMSB10  | LMNA | 0.433547757  | 0.314308665  | 0.539319564  | 1.15E-10 | 1.14E-09 | 1.37E-06 |
| CXCL3   | LMNA | 0.29934002   | 0.168241462  | 0.420033478  | 1.51E-05 | 5.77E-05 | 1.79E-01 |
| LMAN1   | LMNA | 0.560944392  | 0.458390676  | 0.648756389  | 3.87E-18 | 1.43E-16 | 4.59E-14 |
| SUHW1   | LMNA | -0.005567716 | -0.143508412 | 0.132585194  | 9.37E-01 | 9.54E-01 | 1.00E+00 |
| CHD8    | LMNA | -0.085992112 | -0.221414634 | 0.05268432   | 2.24E-01 | 3.01E-01 | 1.00E+00 |
| SUMO1   | LMNA | -0.248378656 | -0.373618675 | -0.114244993 | 3.65E-04 | 1.06E-03 | 1.00E+00 |
| GP1BA   | LMNA | -0.076036919 | -0.211863989 | 0.062671947  | 2.82E-01 | 3.65E-01 | 1.00E+00 |
| OR7A10  | LMNA | -0.120188092 | -0.2540243   | 0.018164292  | 8.84E-02 | 1.37E-01 | 1.00E+00 |
| DDB1    | LMNA | -0.203430871 | -0.332153721 | -0.067269043 | 3.69E-03 | 8.33E-03 | 1.00E+00 |
| CHRNA10 | LMNA | -0.012098689 | -0.149899322 | 0.126163034  | 8.64E-01 | 9.00E-01 | 1.00E+00 |
| STYK1   | LMNA | -0.242350963 | -0.368086955 | -0.107910295 | 5.11E-04 | 1.44E-03 | 1.00E+00 |
| MYO9B   | LMNA | 0.339204765  | 0.211036068  | 0.455906766  | 7.88E-07 | 3.85E-06 | 9.35E-03 |
| CCNI    | LMNA | -0.287043108 | -0.408891148 | -0.155139767 | 3.45E-05 | 1.23E-04 | 4.09E-01 |
| MMP7    | LMNA | 0.334320626  | 0.205766425  | 0.451531939  | 1.16E-06 | 5.49E-06 | 1.37E-02 |
| EP300   | LMNA | -0.043674522 | -0.180636409 | 0.094948956  | 5.37E-01 | 6.19E-01 | 1.00E+00 |
| CRNKL1  | LMNA | 0.066191394  | -0.0725223   | 0.20239297   | 3.49E-01 | 4.36E-01 | 1.00E+00 |
| C9orf45 | LMNA | -0.453932603 | -0.557074083 | -0.336999994 | 1.16E-11 | 1.35E-10 | 1.38E-07 |
| XAB2    | LMNA | 0.07234421   | -0.066369637 | 0.208314732  | 3.06E-01 | 3.91E-01 | 1.00E+00 |
| RTN1    | LMNA | -0.410682419 | -0.519292093 | -0.289017288 | 1.27E-09 | 1.03E-08 | 1.51E-05 |
| HIC2    | LMNA | -0.221787217 | -0.349148022 | -0.086381027 | 1.51E-03 | 3.78E-03 | 1.00E+00 |
| TBX10   | LMNA | 0.101032147  | -0.03754248  | 0.235794385  | 1.53E-01 | 2.18E-01 | 1.00E+00 |
| CENPQ   | LMNA | -0.298240405 | -0.419038587 | -0.167067992 | 1.63E-05 | 6.19E-05 | 1.93E-01 |
| UTY     | LMNA | 0.020881081  | -0.117508656 | 0.158475252  | 7.68E-01 | 8.22E-01 | 1.00E+00 |
| OR2W1   | LMNA | 0.104530227  | -0.034011578 | 0.239130455  | 1.39E-01 | 2.01E-01 | 1.00E+00 |
| ATP5G2  | LMNA | -0.154083465 | -0.286049793 | -0.016380909 | 2.86E-02 | 5.12E-02 | 1.00E+00 |
| ZEB1    | LMNA | -0.259981526 | -0.384241815 | -0.126469609 | 1.87E-04 | 5.77E-04 | 1.00E+00 |
| ZG16    | LMNA | -0.047232869 | -0.184083545 | 0.091414202  | 5.04E-01 | 5.88E-01 | 1.00E+00 |
| ERG     | LMNA | 0.13318184   | -0.004960361 | 0.266336017  | 5.88E-02 | 9.67E-02 | 1.00E+00 |
| PARN    | LMNA | 0.299301484  | 0.168200331  | 0.419998616  | 1.51E-05 | 5.79E-05 | 1.79E-01 |
| SOD2    | LMNA | 0.450318545  | 0.332967084  | 0.55393322   | 1.76E-11 | 1.98E-10 | 2.09E-07 |
| JOSD3   | LMNA | -0.061306293 | -0.197684214 | 0.077399772  | 3.86E-01 | 4.73E-01 | 1.00E+00 |
| ADAM5P  | LMNA | 0.079425749  | -0.059275193 | 0.215118023  | 2.61E-01 | 3.43E-01 | 1.00E+00 |

|           |      |              |              |              |          |          |          |
|-----------|------|--------------|--------------|--------------|----------|----------|----------|
| CHD9      | LMNA | -0.264318197 | -0.388203875 | -0.131049099 | 1.44E-04 | 4.58E-04 | 1.00E+00 |
| hCG_40738 | LMNA | -0.217494219 | -0.345181057 | -0.081902361 | 1.88E-03 | 4.58E-03 | 1.00E+00 |
| STK16     | LMNA | 0.095046104  | -0.043576676 | 0.2300782    | 1.78E-01 | 2.49E-01 | 1.00E+00 |
| PDE1C     | LMNA | 0.201624328  | 0.06539352   | 0.330476695  | 4.01E-03 | 8.98E-03 | 1.00E+00 |
| SEMA4D    | LMNA | -0.170230678 | -0.301203247 | -0.032954116 | 1.54E-02 | 2.96E-02 | 1.00E+00 |
| AGPAT1    | LMNA | 0.074066407  | -0.064645591 | 0.209970472  | 2.95E-01 | 3.79E-01 | 1.00E+00 |
| TOB2      | LMNA | -0.146650528 | -0.27905205  | -0.008777225 | 3.73E-02 | 6.48E-02 | 1.00E+00 |
| BANK1     | LMNA | 0.131527823  | -0.006643813 | 0.264771227  | 6.21E-02 | 1.01E-01 | 1.00E+00 |
| MAP3K3    | LMNA | 0.160723361  | 0.02318683   | 0.292289046  | 2.23E-02 | 4.12E-02 | 1.00E+00 |
| MAX       | LMNA | 0.162222394  | 0.024725111  | 0.293696081  | 2.11E-02 | 3.92E-02 | 1.00E+00 |
| GRM2      | LMNA | -0.185092109 | -0.315091835 | -0.048274629 | 8.36E-03 | 1.73E-02 | 1.00E+00 |
| OSBPL8    | LMNA | -0.148610062 | -0.28089822  | -0.010780226 | 3.48E-02 | 6.09E-02 | 1.00E+00 |
| PROSC     | LMNA | -0.042096582 | -0.179106708 | 0.096515315  | 5.52E-01 | 6.33E-01 | 1.00E+00 |
| NR4A2     | LMNA | -0.002708505 | -0.140706893 | 0.135393121  | 9.69E-01 | 9.77E-01 | 1.00E+00 |
| RICS      | LMNA | -0.307930122 | -0.42779551  | -0.177421313 | 8.27E-06 | 3.31E-05 | 9.81E-02 |
| PIR       | LMNA | 0.154024027  | 0.016320042  | 0.285993891  | 2.86E-02 | 5.13E-02 | 1.00E+00 |
| PPCS      | LMNA | 0.31660212   | 0.186711776  | 0.435613651  | 4.42E-06 | 1.87E-05 | 5.25E-02 |
| IPO9      | LMNA | -0.165511733 | -0.296781554 | -0.028102856 | 1.86E-02 | 3.49E-02 | 1.00E+00 |
| LONP1     | LMNA | 0.313388211  | 0.183265947  | 0.43271828   | 5.59E-06 | 2.32E-05 | 6.63E-02 |
| EVC       | LMNA | 0.643070694  | 0.554221575  | 0.717430673  | 5.80E-25 | 7.73E-23 | 6.88E-21 |
| CXCL13    | LMNA | 0.252298989  | 0.118370861  | 0.377211659  | 2.92E-04 | 8.67E-04 | 1.00E+00 |
| SCYL3     | LMNA | -0.225053291 | -0.352162998 | -0.089792023 | 1.28E-03 | 3.27E-03 | 1.00E+00 |
| KIAA1199  | LMNA | 0.450731632  | 0.333427829  | 0.55429237   | 1.68E-11 | 1.89E-10 | 2.00E-07 |
| SORL1     | LMNA | -0.094607874 | -0.22965936  | 0.044018034  | 1.80E-01 | 2.51E-01 | 1.00E+00 |
| NAT10     | LMNA | 0.25541326   | 0.121651706  | 0.380063211  | 2.44E-04 | 7.37E-04 | 1.00E+00 |
| CHD1      | LMNA | 0.203742839  | 0.06759302   | 0.33244324   | 3.63E-03 | 8.23E-03 | 1.00E+00 |
| SYN3      | LMNA | -0.537448055 | -0.628841973 | -0.431405272 | 1.63E-16 | 4.55E-15 | 1.93E-12 |
| DMC1      | LMNA | -0.042932411 | -0.179917068 | 0.095685705  | 5.44E-01 | 6.25E-01 | 1.00E+00 |
| SLC22A2   | LMNA | 0.125264176  | -0.013011836 | 0.258839112  | 7.57E-02 | 1.20E-01 | 1.00E+00 |
| SERPINF1  | LMNA | 0.341687658  | 0.213717795  | 0.458128585  | 6.47E-07 | 3.20E-06 | 7.67E-03 |
| C20orf27  | LMNA | 0.207484471  | 0.07148093   | 0.335913746  | 3.05E-03 | 7.05E-03 | 1.00E+00 |
| OR7A17    | LMNA | 0.088703234  | -0.04995955  | 0.224011091  | 2.09E-01 | 2.84E-01 | 1.00E+00 |
| RPS6KA5   | LMNA | -0.534322127 | -0.626183512 | -0.427829408 | 2.62E-16 | 6.98E-15 | 3.11E-12 |
| TAOK3     | LMNA | -0.262886659 | -0.386896502 | -0.129536776 | 1.57E-04 | 4.94E-04 | 1.00E+00 |
| STK25     | LMNA | -0.002610919 | -0.140611238 | 0.135488917  | 9.71E-01 | 9.77E-01 | 1.00E+00 |

|           |      |              |              |              |          |          |          |
|-----------|------|--------------|--------------|--------------|----------|----------|----------|
| SLC12A4   | LMNA | 0.419798291  | 0.299080048  | 0.527290899  | 5.00E-10 | 4.37E-09 | 5.93E-06 |
| BRCA1     | LMNA | -0.098620755 | -0.233492822 | 0.039974486  | 1.63E-01 | 2.30E-01 | 1.00E+00 |
| GBL       | LMNA | -0.031390362 | -0.168710262 | 0.107124861  | 6.57E-01 | 7.28E-01 | 1.00E+00 |
| C14orf108 | LMNA | -0.250257283 | -0.375340906 | -0.116221535 | 3.28E-04 | 9.66E-04 | 1.00E+00 |
| CDC25B    | LMNA | 0.361755528  | 0.235463755  | 0.476033097  | 1.22E-07 | 6.91E-07 | 1.45E-03 |
| BMP3      | LMNA | 0.120964775  | -0.0173764   | 0.254761436  | 8.64E-02 | 1.34E-01 | 1.00E+00 |
| TMEM180   | LMNA | -0.140559543 | -0.273307185 | -0.002558182 | 4.60E-02 | 7.80E-02 | 1.00E+00 |
| CRYGC     | LMNA | 0.0908446    | -0.047805944 | 0.226060533  | 1.99E-01 | 2.72E-01 | 1.00E+00 |
| SLK       | LMNA | 0.434208532  | 0.315042073  | 0.539896555  | 1.07E-10 | 1.07E-09 | 1.27E-06 |
| POU3F1    | LMNA | -0.060224806 | -0.196640915 | 0.078478674  | 3.95E-01 | 4.82E-01 | 1.00E+00 |
| C20orf32  | LMNA | 0.279691351  | 0.147328968  | 0.402212264  | 5.55E-05 | 1.91E-04 | 6.58E-01 |
| USP52     | LMNA | -0.227630909 | -0.354540587 | -0.092486259 | 1.12E-03 | 2.91E-03 | 1.00E+00 |
| HIGD1B    | LMNA | -0.219981055 | -0.347479585 | -0.084496082 | 1.66E-03 | 4.10E-03 | 1.00E+00 |
| BAZ1B     | LMNA | 0.294478397  | 0.163056123  | 0.415632668  | 2.10E-05 | 7.84E-05 | 2.49E-01 |
| USP6NL    | LMNA | -0.117780607 | -0.251738409 | 0.020605432  | 9.50E-02 | 1.46E-01 | 1.00E+00 |
| SLCO2B1   | LMNA | 0.21142425   | 0.075579204  | 0.339564276  | 2.52E-03 | 5.96E-03 | 1.00E+00 |
| ABCD4     | LMNA | 0.03160474   | -0.106912728 | 0.168918737  | 6.55E-01 | 7.27E-01 | 1.00E+00 |
| DIMT1L    | LMNA | -0.217660701 | -0.345334981 | -0.082075942 | 1.86E-03 | 4.55E-03 | 1.00E+00 |
| SLC25A46  | LMNA | 0.086611193  | -0.052062304 | 0.222007701  | 2.20E-01 | 2.97E-01 | 1.00E+00 |
| LARP7     | LMNA | 0.109667508  | -0.028819816 | 0.244024056  | 1.20E-01 | 1.78E-01 | 1.00E+00 |
| TEK       | LMNA | 0.020057472  | -0.118321154 | 0.157671886  | 7.77E-01 | 8.30E-01 | 1.00E+00 |
| CD160     | LMNA | -0.22159267  | -0.348968348 | -0.086177946 | 1.53E-03 | 3.81E-03 | 1.00E+00 |
| TERF2IP   | LMNA | -0.328054274 | -0.445910769 | -0.199016371 | 1.88E-06 | 8.55E-06 | 2.23E-02 |
| PHF20     | LMNA | 0.043201244  | -0.095418832 | 0.18017767   | 5.42E-01 | 6.23E-01 | 1.00E+00 |
| COL1A1    | LMNA | 0.664719034  | 0.579880876  | 0.735295545  | 3.99E-27 | 7.63E-25 | 4.73E-23 |
| KIAA0090  | LMNA | 0.382380334  | 0.257945772  | 0.494336316  | 1.96E-08 | 1.27E-07 | 2.32E-04 |
| GTPBP1    | LMNA | -0.133259687 | -0.266409647 | 0.00488111   | 5.87E-02 | 9.64E-02 | 1.00E+00 |
| GRK5      | LMNA | 0.246793812  | 0.112578372  | 0.372165099  | 3.99E-04 | 1.15E-03 | 1.00E+00 |
| AP1S2     | LMNA | 0.179523369  | 0.042526314  | 0.309894145  | 1.06E-02 | 2.13E-02 | 1.00E+00 |
| RAB33B    | LMNA | -0.002735842 | -0.140733689 | 0.135366285  | 9.69E-01 | 9.77E-01 | 1.00E+00 |
| CA11      | LMNA | -0.216139312 | -0.3439281   | -0.080489992 | 2.01E-03 | 4.86E-03 | 1.00E+00 |
| ALDOC     | LMNA | -0.530148728 | -0.622630891 | -0.423060494 | 4.90E-16 | 1.27E-14 | 5.82E-12 |
| NUDT1     | LMNA | 0.001418164  | -0.136659591 | 0.139441865  | 9.84E-01 | 9.87E-01 | 1.00E+00 |
| ZNF212    | LMNA | 0.05484189   | -0.083843891 | 0.191443476  | 4.38E-01 | 5.24E-01 | 1.00E+00 |
| ACBD3     | LMNA | 0.337954996  | 0.209686945  | 0.454787857  | 8.70E-07 | 4.21E-06 | 1.03E-02 |



|          |      |              |              |              |          |          |          |
|----------|------|--------------|--------------|--------------|----------|----------|----------|
| ZNF83    | LMNA | -0.042951545 | -0.179935617 | 0.095666712  | 5.44E-01 | 6.25E-01 | 1.00E+00 |
| PRDM2    | LMNA | -0.29873405  | -0.419485255 | -0.167594747 | 1.57E-05 | 6.00E-05 | 1.86E-01 |
| GDPD5    | LMNA | 0.042020699  | -0.096590624 | 0.179033129  | 5.53E-01 | 6.34E-01 | 1.00E+00 |
| PDCD4    | LMNA | -0.27913212  | -0.401703683 | -0.146735494 | 5.75E-05 | 1.97E-04 | 6.82E-01 |
| CEP350   | LMNA | -0.175386917 | -0.306028258 | -0.038262337 | 1.25E-02 | 2.48E-02 | 1.00E+00 |
| FOXP3    | LMNA | 0.140126467  | 0.002116407  | 0.272898358  | 4.67E-02 | 7.90E-02 | 1.00E+00 |
| SMYD3    | LMNA | -0.206300634 | -0.33481607  | -0.070250364 | 3.22E-03 | 7.41E-03 | 1.00E+00 |
| CST7     | LMNA | 0.347857707  | 0.220390313  | 0.463643567  | 3.92E-07 | 2.03E-06 | 4.65E-03 |
| SELL     | LMNA | -0.000224548 | -0.138271263 | 0.137830725  | 9.97E-01 | 9.98E-01 | 1.00E+00 |
| CIAO1    | LMNA | 0.082367007  | -0.05632445  | 0.217939847  | 2.44E-01 | 3.23E-01 | 1.00E+00 |
| LGI2     | LMNA | 0.063798133  | -0.074912653 | 0.200086889  | 3.67E-01 | 4.54E-01 | 1.00E+00 |
| WDR45    | LMNA | 0.177246904  | 0.040179049  | 0.307767117  | 1.16E-02 | 2.32E-02 | 1.00E+00 |
| ANKRD6   | LMNA | -0.433313071 | -0.539114611 | -0.314048216 | 1.18E-10 | 1.17E-09 | 1.41E-06 |
| LTBP4    | LMNA | 0.14721045   | 0.009349455  | 0.279579679  | 3.66E-02 | 6.37E-02 | 1.00E+00 |
| PSCD3    | LMNA | 0.420309449  | 0.299645098  | 0.527738857  | 4.74E-10 | 4.16E-09 | 5.62E-06 |
| PYY      | LMNA | 0.056181772  | -0.082509165 | 0.192737907  | 4.27E-01 | 5.14E-01 | 1.00E+00 |
| KCNC1    | LMNA | -0.460013043 | -0.562351749 | -0.343794822 | 5.68E-12 | 6.99E-11 | 6.74E-08 |
| SIRT6    | LMNA | 0.078926738  | -0.059775572 | 0.214639049  | 2.64E-01 | 3.46E-01 | 1.00E+00 |
| CCL19    | LMNA | -0.047877092 | -0.184707273 | 0.090773877  | 4.99E-01 | 5.83E-01 | 1.00E+00 |
| ARHGEF9  | LMNA | -0.42643719  | -0.533104297 | -0.306425482 | 2.48E-10 | 2.30E-09 | 2.95E-06 |
| ABR      | LMNA | -0.119358611 | -0.253236882 | 0.019005555  | 9.07E-02 | 1.40E-01 | 1.00E+00 |
| C10orf22 | LMNA | -0.171436056 | -0.302331794 | -0.034194329 | 1.47E-02 | 2.84E-02 | 1.00E+00 |
| STK17A   | LMNA | 0.436520549  | 0.317609355  | 0.541914637  | 8.34E-11 | 8.50E-10 | 9.89E-07 |
| FOXE1    | LMNA | -0.011334157 | -0.149151781 | 0.126915427  | 8.73E-01 | 9.06E-01 | 1.00E+00 |
| GML      | LMNA | -0.098003508 | -0.232903445 | 0.040596746  | 1.65E-01 | 2.33E-01 | 1.00E+00 |
| CNGA3    | LMNA | 0.02789621   | -0.110580648 | 0.165310583  | 6.94E-01 | 7.59E-01 | 1.00E+00 |
| CD38     | LMNA | -0.187945397 | -0.317751989 | -0.051223442 | 7.39E-03 | 1.55E-02 | 1.00E+00 |
| ZDHHC6   | LMNA | 0.013802345  | -0.124485855 | 0.15156455   | 8.45E-01 | 8.85E-01 | 1.00E+00 |
| NEFH     | LMNA | -0.255141969 | -0.379814899 | -0.121365787 | 2.48E-04 | 7.47E-04 | 1.00E+00 |
| PGBD5    | LMNA | -0.264133141 | -0.388034897 | -0.130853564 | 1.46E-04 | 4.63E-04 | 1.00E+00 |
| CTDSP2   | LMNA | 0.006403197  | -0.131764279 | 0.144326618  | 9.28E-01 | 9.48E-01 | 1.00E+00 |
| RMND5B   | LMNA | -0.131750552 | -0.264981982 | 0.006417166  | 6.16E-02 | 1.01E-01 | 1.00E+00 |
| ZNF257   | LMNA | -0.392960535 | -0.503687212 | -0.269531225 | 7.26E-09 | 5.11E-08 | 8.61E-05 |
| DUSP4    | LMNA | 0.48695022   | 0.374043936  | 0.585632671  | 2.01E-13 | 3.10E-12 | 2.38E-09 |
| FLJ22167 | LMNA | -0.03226821  | -0.169563862 | 0.106256125  | 6.48E-01 | 7.21E-01 | 1.00E+00 |

|           |      |              |              |              |          |          |          |
|-----------|------|--------------|--------------|--------------|----------|----------|----------|
| EXOSC7    | LMNA | -0.038067315 | -0.175197611 | 0.100511899  | 5.91E-01 | 6.68E-01 | 1.00E+00 |
| ROR2      | LMNA | 0.296894063  | 0.165631731  | 0.417820072  | 1.78E-05 | 6.74E-05 | 2.11E-01 |
| FOXM1     | LMNA | 0.055200225  | -0.083486983 | 0.191789703  | 4.35E-01 | 5.21E-01 | 1.00E+00 |
| ZBTB48    | LMNA | 0.06742998   | -0.071284593 | 0.203585846  | 3.40E-01 | 4.26E-01 | 1.00E+00 |
| BUD31     | LMNA | 0.116722326  | -0.021677986 | 0.250733105  | 9.81E-02 | 1.50E-01 | 1.00E+00 |
| MAOA      | LMNA | -0.091495405 | -0.226683163 | 0.047151163  | 1.95E-01 | 2.69E-01 | 1.00E+00 |
| CCDC41    | LMNA | -0.177644657 | -0.308138854 | -0.040589064 | 1.14E-02 | 2.28E-02 | 1.00E+00 |
| TNNT3     | LMNA | 0.132537936  | -0.005615817 | 0.265726933  | 6.01E-02 | 9.85E-02 | 1.00E+00 |
| FBXO11    | LMNA | -0.304261576 | -0.424482766 | -0.173498123 | 1.07E-05 | 4.21E-05 | 1.27E-01 |
| GYPC      | LMNA | 0.287677203  | 0.155814228  | 0.409466596  | 3.30E-05 | 1.19E-04 | 3.92E-01 |
| PLIN      | LMNA | -0.215013951 | -0.342887072 | -0.079317317 | 2.12E-03 | 5.10E-03 | 1.00E+00 |
| RFXAP     | LMNA | -0.44785364  | -0.551789357 | -0.330218969 | 2.34E-11 | 2.57E-10 | 2.78E-07 |
| C6orf15   | LMNA | 0.161217202  | 0.023693529  | 0.292752642  | 2.19E-02 | 4.05E-02 | 1.00E+00 |
| RNF4      | LMNA | 0.121653958  | -0.016677126 | 0.255415398  | 8.46E-02 | 1.32E-01 | 1.00E+00 |
| PPP1R3D   | LMNA | 0.219172961  | 0.083653055  | 0.346732849  | 1.73E-03 | 4.25E-03 | 1.00E+00 |
| GRB2      | LMNA | -0.012094075 | -0.149894811 | 0.126167575  | 8.64E-01 | 9.00E-01 | 1.00E+00 |
| TPM3      | LMNA | -0.062971865 | -0.199290369 | 0.075737547  | 3.73E-01 | 4.61E-01 | 1.00E+00 |
| SYT13     | LMNA | -0.437327143 | -0.542618399 | -0.318505413 | 7.63E-11 | 7.83E-10 | 9.05E-07 |
| EPB42     | LMNA | -0.052725381 | -0.189397795 | 0.085951241  | 4.56E-01 | 5.42E-01 | 1.00E+00 |
| RP5-1077B | LMNA | -0.221402675 | -0.34879287  | -0.08597963  | 1.54E-03 | 3.84E-03 | 1.00E+00 |
| EIF1      | LMNA | 0.090476184  | -0.048176557 | 0.225708018  | 2.00E-01 | 2.74E-01 | 1.00E+00 |
| CETN3     | LMNA | -0.166014412 | -0.297252837 | -0.028619322 | 1.82E-02 | 3.44E-02 | 1.00E+00 |
| FPGT      | LMNA | -0.02249181  | -0.160045865 | 0.115919122  | 7.51E-01 | 8.08E-01 | 1.00E+00 |
| PRY       | LMNA | -0.247653706 | -0.372953847 | -0.113482542 | 3.80E-04 | 1.10E-03 | 1.00E+00 |
| NTHL1     | LMNA | -0.238052291 | -0.364136542 | -0.103399339 | 6.46E-04 | 1.78E-03 | 1.00E+00 |
| POLR2B    | LMNA | -0.165838739 | -0.297088143 | -0.028438822 | 1.83E-02 | 3.45E-02 | 1.00E+00 |
| RPS28     | LMNA | 0.053422814  | -0.085256963 | 0.19007202   | 4.50E-01 | 5.36E-01 | 1.00E+00 |
| GDF10     | LMNA | -0.274461161 | -0.397452818 | -0.141782238 | 7.72E-05 | 2.58E-04 | 9.16E-01 |
| COQ9      | LMNA | 0.004823146  | -0.133316622 | 0.142779079  | 9.46E-01 | 9.59E-01 | 1.00E+00 |
| P2RX3     | LMNA | -0.107436728 | -0.24189993  | 0.031075172  | 1.28E-01 | 1.88E-01 | 1.00E+00 |
| GCC2      | LMNA | -0.084687048 | -0.220164081 | 0.053995218  | 2.31E-01 | 3.09E-01 | 1.00E+00 |
| RARRES3   | LMNA | 0.22826735   | 0.093151799  | 0.355127386  | 1.09E-03 | 2.83E-03 | 1.00E+00 |
| PLXNA1    | LMNA | 0.484115482  | 0.370849316  | 0.583190341  | 2.89E-13 | 4.34E-12 | 3.43E-09 |
| WBP4      | LMNA | -0.16504252  | -0.296341589 | -0.02762084  | 1.89E-02 | 3.55E-02 | 1.00E+00 |
| KIAA0100  | LMNA | 0.033591348  | -0.104946322 | 0.170850062  | 6.35E-01 | 7.09E-01 | 1.00E+00 |

|          |      |              |              |              |          |          |          |
|----------|------|--------------|--------------|--------------|----------|----------|----------|
| PMF1     | LMNA | -0.209570037 | -0.337846676 | -0.073649826 | 2.76E-03 | 6.45E-03 | 1.00E+00 |
| HS2ST1   | LMNA | 0.423653404  | 0.303343695  | 0.530667881  | 3.34E-10 | 3.00E-09 | 3.96E-06 |
| CRELD2   | LMNA | 0.43033607   | 0.310745967  | 0.536513691  | 1.64E-10 | 1.57E-09 | 1.94E-06 |
| C8G      | LMNA | 0.068784876  | -0.069930169 | 0.204890275  | 3.31E-01 | 4.16E-01 | 1.00E+00 |
| CD82     | LMNA | 0.309808772  | 0.179431971  | 0.429490708  | 7.23E-06 | 2.94E-05 | 8.58E-02 |
| PMM1     | LMNA | 0.067338428  | -0.071376095 | 0.203497686  | 3.41E-01 | 4.27E-01 | 1.00E+00 |
| CBLL1    | LMNA | 0.109032288  | -0.029462178 | 0.243419337  | 1.22E-01 | 1.81E-01 | 1.00E+00 |
| LIM2     | LMNA | 0.120251791  | -0.01809968  | 0.254084761  | 8.83E-02 | 1.37E-01 | 1.00E+00 |
| VAX2     | LMNA | -0.339614516 | -0.456273532 | -0.211478499 | 7.63E-07 | 3.73E-06 | 9.05E-03 |
| SETDB1   | LMNA | -0.260045172 | -0.384299996 | -0.126536778 | 1.86E-04 | 5.75E-04 | 1.00E+00 |
| LRAP     | LMNA | 0.187898682  | 0.051175144  | 0.317708452  | 7.41E-03 | 1.55E-02 | 1.00E+00 |
| GCLM     | LMNA | 0.372071132  | 0.246691383  | 0.485199939  | 4.97E-08 | 3.01E-07 | 5.90E-04 |
| CPEB3    | LMNA | -0.451079084 | -0.554594426 | -0.33381541  | 1.62E-11 | 1.83E-10 | 1.92E-07 |
| PPM1A    | LMNA | -0.188236609 | -0.318023374 | -0.051524538 | 7.30E-03 | 1.53E-02 | 1.00E+00 |
| INTS1    | LMNA | 0.233968087  | 0.099118569  | 0.360379015  | 8.04E-04 | 2.16E-03 | 1.00E+00 |
| MMP16    | LMNA | -0.348888311 | -0.46456388  | -0.22150601  | 3.61E-07 | 1.88E-06 | 4.28E-03 |
| CAMTA1   | LMNA | -0.610432267 | -0.690310278 | -0.515852567 | 5.18E-22 | 3.63E-20 | 6.14E-18 |
| SAMSN1   | LMNA | 0.151488706  | 0.013724733  | 0.283608553  | 3.14E-02 | 5.58E-02 | 1.00E+00 |
| DRD3     | LMNA | 0.040320555  | -0.098277487 | 0.177384183  | 5.69E-01 | 6.48E-01 | 1.00E+00 |
| GMPPA    | LMNA | 0.637474575  | 0.547615972  | 0.71279662   | 1.97E-24 | 2.34E-22 | 2.34E-20 |
| C11orf73 | LMNA | -0.178250155 | -0.308704671 | -0.041213316 | 1.11E-02 | 2.23E-02 | 1.00E+00 |
| AIPL1    | LMNA | 0.000717941  | -0.137346672 | 0.13875519   | 9.92E-01 | 9.93E-01 | 1.00E+00 |
| PTP4A2   | LMNA | 0.457174556  | 0.340621328  | 0.559889053  | 7.95E-12 | 9.50E-11 | 9.43E-08 |
| IL24     | LMNA | 0.207077832  | 0.071058194  | 0.335536743  | 3.11E-03 | 7.17E-03 | 1.00E+00 |
| BDKRB1   | LMNA | 0.3841587    | 0.259890606  | 0.495909868  | 1.66E-08 | 1.09E-07 | 1.97E-04 |
| HPCA     | LMNA | -0.355846816 | -0.470771178 | -0.22904779  | 2.02E-07 | 1.10E-06 | 2.40E-03 |
| MLF1     | LMNA | -0.119621925 | -0.253486862 | 0.018738522  | 8.99E-02 | 1.39E-01 | 1.00E+00 |
| SEC14L1  | LMNA | 0.172803202  | 0.035601499  | 0.303611355  | 1.39E-02 | 2.71E-02 | 1.00E+00 |
| CHFR     | LMNA | 0.112847042  | -0.025602816 | 0.247049348  | 1.10E-01 | 1.65E-01 | 1.00E+00 |
| EMILIN1  | LMNA | 0.647171246  | 0.55906894   | 0.720822099  | 2.33E-25 | 3.33E-23 | 2.76E-21 |
| THADA    | LMNA | 0.206399468  | 0.070353084  | 0.334907724  | 3.21E-03 | 7.38E-03 | 1.00E+00 |
| TAF12    | LMNA | 0.259189838  | 0.125634208  | 0.383518021  | 1.95E-04 | 6.01E-04 | 1.00E+00 |
| NDUFS4   | LMNA | -0.091487439 | -0.226675542 | 0.047159179  | 1.95E-01 | 2.69E-01 | 1.00E+00 |
| ID1      | LMNA | 0.11763995   | -0.020748005 | 0.25160481   | 9.54E-02 | 1.46E-01 | 1.00E+00 |
| PIK3CB   | LMNA | -0.1741518   | -0.304873093 | -0.036990109 | 1.32E-02 | 2.59E-02 | 1.00E+00 |

|           |      |              |              |              |          |          |          |
|-----------|------|--------------|--------------|--------------|----------|----------|----------|
| COL18A1   | LMNA | 0.589468726  | 0.491406813  | 0.67277175   | 2.73E-20 | 1.43E-18 | 3.24E-16 |
| PDZD3     | LMNA | 0.184596875  | 0.047763058  | 0.314629915  | 8.54E-03 | 1.76E-02 | 1.00E+00 |
| TBC1D17   | LMNA | -0.051062684 | -0.187789906 | 0.087605873  | 4.70E-01 | 5.56E-01 | 1.00E+00 |
| COX8A     | LMNA | -0.143245266 | -0.27584146  | -0.005299055 | 4.20E-02 | 7.19E-02 | 1.00E+00 |
| CDC44     | LMNA | 0.243536501  | 0.109155354  | 0.369175648  | 4.78E-04 | 1.35E-03 | 1.00E+00 |
| C2orf44   | LMNA | -0.278681162 | -0.401293513 | -0.146256992 | 5.92E-05 | 2.02E-04 | 7.02E-01 |
| C9orf16   | LMNA | -0.127865614 | -0.261304082 | 0.010368409  | 6.98E-02 | 1.12E-01 | 1.00E+00 |
| ERBB2IP   | LMNA | 0.160482286  | 0.022939504  | 0.292062713  | 2.25E-02 | 4.15E-02 | 1.00E+00 |
| EMX2      | LMNA | 0.039757254  | -0.098836212 | 0.176837676  | 5.74E-01 | 6.53E-01 | 1.00E+00 |
| FUS       | LMNA | 0.017523852  | -0.120819433 | 0.155199397  | 8.04E-01 | 8.52E-01 | 1.00E+00 |
| NIPSNAP3E | LMNA | -0.218243668 | -0.345873918 | -0.082683829 | 1.81E-03 | 4.43E-03 | 1.00E+00 |
| TF        | LMNA | -0.264319849 | -0.388205383 | -0.131050844 | 1.44E-04 | 4.58E-04 | 1.00E+00 |
| CXorf56   | LMNA | 0.007388746  | -0.130795669 | 0.145291546  | 9.17E-01 | 9.40E-01 | 1.00E+00 |
| CLCN4     | LMNA | -0.244485952 | -0.37004729  | -0.110152776 | 4.54E-04 | 1.29E-03 | 1.00E+00 |
| PWP2      | LMNA | 0.119610363  | -0.018750248 | 0.253475886  | 9.00E-02 | 1.39E-01 | 1.00E+00 |
| MMP15     | LMNA | -0.244763325 | -0.370301891 | -0.110444215 | 4.47E-04 | 1.27E-03 | 1.00E+00 |
| MTMR14    | LMNA | 0.22569151   | 0.090458933  | 0.352751843  | 1.24E-03 | 3.17E-03 | 1.00E+00 |
| NPR1      | LMNA | 0.197909215  | 0.061539572  | 0.327025371  | 4.75E-03 | 1.04E-02 | 1.00E+00 |
| DNAL4     | LMNA | 0.076155329  | -0.062553314 | 0.21197774   | 2.81E-01 | 3.64E-01 | 1.00E+00 |
| ELAC2     | LMNA | -0.07537254  | -0.211225683 | 0.063337504  | 2.86E-01 | 3.70E-01 | 1.00E+00 |
| ASS1      | LMNA | 0.329705186  | 0.20079353   | 0.447392606  | 1.65E-06 | 7.63E-06 | 1.96E-02 |
| IPP       | LMNA | 0.062919905  | -0.075789415 | 0.199240273  | 3.74E-01 | 4.61E-01 | 1.00E+00 |
| TMEM59    | LMNA | 0.071760582  | -0.066953703 | 0.207753448  | 3.10E-01 | 3.95E-01 | 1.00E+00 |
| POLR2J    | LMNA | 0.072766865  | -0.065946605 | 0.208721149  | 3.03E-01 | 3.88E-01 | 1.00E+00 |
| SEC23IP   | LMNA | 0.21323755   | 0.077466997  | 0.341243152  | 2.31E-03 | 5.53E-03 | 1.00E+00 |
| RGS4      | LMNA | 0.12367832   | -0.014622341 | 0.257335594  | 7.95E-02 | 1.25E-01 | 1.00E+00 |
| UQCRC1    | LMNA | 0.041143394  | -0.097461175 | 0.178182339  | 5.61E-01 | 6.41E-01 | 1.00E+00 |
| SNX6      | LMNA | 0.128149042  | -0.01008029  | 0.261572536  | 6.91E-02 | 1.11E-01 | 1.00E+00 |
| DDX18     | LMNA | -0.049420745 | -0.186201371 | 0.089239097  | 4.85E-01 | 5.70E-01 | 1.00E+00 |
| POLG      | LMNA | 0.269660004  | 0.136697831  | 0.393077957  | 1.04E-04 | 3.39E-04 | 1.00E+00 |
| ADAM23    | LMNA | -0.116768987 | -0.250777436 | 0.021630703  | 9.79E-02 | 1.49E-01 | 1.00E+00 |
| ZNHIT2    | LMNA | 0.142876193  | 0.00492228   | 0.275493308  | 4.25E-02 | 7.27E-02 | 1.00E+00 |
| TFR2      | LMNA | 0.204845342  | 0.068738196  | 0.333466217  | 3.45E-03 | 7.87E-03 | 1.00E+00 |
| NCDN      | LMNA | -0.118940473 | -0.25283988  | 0.019429558  | 9.18E-02 | 1.41E-01 | 1.00E+00 |
| RAG1      | LMNA | 0.330835271  | 0.202010523  | 0.448406583  | 1.52E-06 | 7.03E-06 | 1.80E-02 |

|          |      |              |              |              |          |          |          |
|----------|------|--------------|--------------|--------------|----------|----------|----------|
| POMT1    | LMNA | -0.260889741 | -0.385071956 | -0.127428206 | 1.77E-04 | 5.50E-04 | 1.00E+00 |
| CYP1A1   | LMNA | -0.093998605 | -0.229076965 | 0.044631561  | 1.83E-01 | 2.54E-01 | 1.00E+00 |
| SNAPC1   | LMNA | 0.297500552  | 0.166278657  | 0.418369032  | 1.71E-05 | 6.48E-05 | 2.03E-01 |
| GNA11    | LMNA | 0.172805546  | 0.035603912  | 0.303613549  | 1.39E-02 | 2.71E-02 | 1.00E+00 |
| CCDC52   | LMNA | 0.077124757  | -0.061581915 | 0.212908885  | 2.75E-01 | 3.58E-01 | 1.00E+00 |
| CAPN1    | LMNA | 0.437762914  | 0.318989607  | 0.542998553  | 7.27E-11 | 7.48E-10 | 8.63E-07 |
| DDHD2    | LMNA | -0.310406911 | -0.430030261 | -0.180072369 | 6.93E-06 | 2.83E-05 | 8.22E-02 |
| UPF3A    | LMNA | -0.154901907 | -0.286819456 | -0.017219127 | 2.77E-02 | 4.99E-02 | 1.00E+00 |
| LAGE3    | LMNA | -0.055956153 | -0.192519975 | 0.082733951  | 4.29E-01 | 5.15E-01 | 1.00E+00 |
| GNRHR    | LMNA | -0.271095332 | -0.394386427 | -0.138217104 | 9.52E-05 | 3.12E-04 | 1.00E+00 |
| UNC13B   | LMNA | 0.098202887  | -0.040395759 | 0.233093833  | 1.64E-01 | 2.32E-01 | 1.00E+00 |
| TTLL4    | LMNA | 0.147441775  | 0.009585891  | 0.279797639  | 3.63E-02 | 6.32E-02 | 1.00E+00 |
| PPBP     | LMNA | 0.170106491  | 0.032826364  | 0.301086954  | 1.55E-02 | 2.97E-02 | 1.00E+00 |
| HTR3A    | LMNA | 0.016684795  | -0.1216464   | 0.154380203  | 8.14E-01 | 8.59E-01 | 1.00E+00 |
| SDC2     | LMNA | 0.424543724  | 0.30432905   | 0.531447297  | 3.04E-10 | 2.76E-09 | 3.60E-06 |
| ANKRD49  | LMNA | -0.250684716 | -0.375732634 | -0.116671395 | 3.20E-04 | 9.44E-04 | 1.00E+00 |
| BTF3     | LMNA | -0.083794519 | -0.219308576 | 0.054891461  | 2.36E-01 | 3.14E-01 | 1.00E+00 |
| COX7A2   | LMNA | -0.370349056 | -0.483671363 | -0.244814711 | 5.79E-08 | 3.47E-07 | 6.87E-04 |
| SARS     | LMNA | -0.073949575 | -0.209858173 | 0.064762574  | 2.96E-01 | 3.80E-01 | 1.00E+00 |
| C13orf18 | LMNA | 0.247015614  | 0.112811573  | 0.372368566  | 3.94E-04 | 1.14E-03 | 1.00E+00 |
| CACNB1   | LMNA | -0.288366936 | -0.410092426 | -0.156548009 | 3.16E-05 | 1.14E-04 | 3.75E-01 |
| QKI      | LMNA | -0.358827408 | -0.473426524 | -0.232282885 | 1.57E-07 | 8.71E-07 | 1.86E-03 |
| SETMAR   | LMNA | -0.366320879 | -0.480093109 | -0.240428584 | 8.25E-08 | 4.80E-07 | 9.78E-04 |
| LAMB4    | LMNA | 0.022743359  | -0.115670818 | 0.160291087  | 7.48E-01 | 8.06E-01 | 1.00E+00 |
| MAN2B1   | LMNA | 0.536731784  | 0.43058561   | 0.628233006  | 1.82E-16 | 5.04E-15 | 2.15E-12 |
| EML3     | LMNA | 0.365314468  | 0.239333544  | 0.479198516  | 9.00E-08 | 5.20E-07 | 1.07E-03 |
| ACADL    | LMNA | -0.058642178 | -0.195113614 | 0.080056933  | 4.07E-01 | 4.95E-01 | 1.00E+00 |
| OFD1     | LMNA | -0.120309631 | -0.25413966  | 0.018041011  | 8.81E-02 | 1.37E-01 | 1.00E+00 |
| CGA      | LMNA | -0.04184645  | -0.178864162 | 0.096763548  | 5.54E-01 | 6.35E-01 | 1.00E+00 |
| EIF3EIP  | LMNA | -0.206120241 | -0.334648776 | -0.070062888 | 3.25E-03 | 7.46E-03 | 1.00E+00 |
| PEX16    | LMNA | 0.152610076  | 0.014872407  | 0.284663787  | 3.01E-02 | 5.38E-02 | 1.00E+00 |
| GNG12    | LMNA | 0.390328111  | 0.266645344  | 0.501363069  | 9.32E-09 | 6.40E-08 | 1.11E-04 |
| HABP4    | LMNA | -0.144917117 | -0.277418104 | -0.007006284 | 3.96E-02 | 6.84E-02 | 1.00E+00 |
| CNTN2    | LMNA | -0.060387257 | -0.19679765  | 0.078316632  | 3.93E-01 | 4.81E-01 | 1.00E+00 |
| ASNSD1   | LMNA | -0.332903623 | -0.450261644 | -0.204238971 | 1.29E-06 | 6.08E-06 | 1.53E-02 |

|           |      |              |              |              |          |          |          |
|-----------|------|--------------|--------------|--------------|----------|----------|----------|
| FUT4      | LMNA | 0.371831082  | 0.246429727  | 0.484986903  | 5.08E-08 | 3.08E-07 | 6.02E-04 |
| DBH       | LMNA | -0.068157506 | -0.204286333 | 0.070557384  | 3.35E-01 | 4.21E-01 | 1.00E+00 |
| CD53      | LMNA | 0.151044946  | 0.013270664  | 0.283190877  | 3.19E-02 | 5.66E-02 | 1.00E+00 |
| HIST1H2BJ | LMNA | 0.064006323  | -0.074704779 | 0.200287556  | 3.65E-01 | 4.53E-01 | 1.00E+00 |
| TFAP2B    | LMNA | -0.066308857 | -0.202506116 | 0.072404938  | 3.48E-01 | 4.35E-01 | 1.00E+00 |
| ACF       | LMNA | -0.092888522 | -0.228015598 | 0.045749136  | 1.89E-01 | 2.60E-01 | 1.00E+00 |
| TMEM11    | LMNA | 0.01231146   | -0.125953613 | 0.150107337  | 8.62E-01 | 8.98E-01 | 1.00E+00 |
| CDH8      | LMNA | -0.422087355 | -0.529296472 | -0.301611108 | 3.93E-10 | 3.49E-09 | 4.67E-06 |
| C3orf32   | LMNA | -0.104234535 | -0.23884858  | 0.034310178  | 1.40E-01 | 2.03E-01 | 1.00E+00 |
| AGPS      | LMNA | 0.288826998  | 0.157037532  | 0.4105098    | 3.06E-05 | 1.11E-04 | 3.63E-01 |
| C4orf18   | LMNA | 0.233346863  | 0.098467884  | 0.359807121  | 8.31E-04 | 2.23E-03 | 1.00E+00 |
| PCCB      | LMNA | -0.281562516 | -0.403913407 | -0.149315403 | 4.92E-05 | 1.71E-04 | 5.84E-01 |
| IPO13     | LMNA | -0.040459823 | -0.177519286 | 0.098139337  | 5.68E-01 | 6.47E-01 | 1.00E+00 |
| PECI      | LMNA | 0.088104818  | -0.050561156 | 0.223438149  | 2.12E-01 | 2.88E-01 | 1.00E+00 |
| UNG       | LMNA | 0.012839561  | -0.125433773 | 0.150623579  | 8.56E-01 | 8.94E-01 | 1.00E+00 |
| C6orf105  | LMNA | 0.233395511  | 0.098518835  | 0.359851909  | 8.29E-04 | 2.22E-03 | 1.00E+00 |
| GSTP1     | LMNA | 0.130692082  | -0.007494129 | 0.263980304  | 6.38E-02 | 1.04E-01 | 1.00E+00 |
| SUV420H1  | LMNA | -0.315210661 | -0.434360405 | -0.185219515 | 4.90E-06 | 2.05E-05 | 5.81E-02 |
| ARHGAP15  | LMNA | 0.151453399  | 0.013688604  | 0.283575324  | 3.14E-02 | 5.58E-02 | 1.00E+00 |
| LTBR      | LMNA | 0.455492371  | 0.338741858  | 0.558428717  | 9.68E-12 | 1.14E-10 | 1.15E-07 |
| TDRKH     | LMNA | -0.513913775 | -0.608774473 | -0.404565181 | 5.20E-15 | 1.07E-13 | 6.16E-11 |
| PSG4      | LMNA | 0.2533614    | 0.119489768  | 0.378184711  | 2.75E-04 | 8.21E-04 | 1.00E+00 |
| SLC9A3R1  | LMNA | 0.046202299  | -0.092438298 | 0.18308553   | 5.14E-01 | 5.98E-01 | 1.00E+00 |
| NBPF3     | LMNA | -0.146176435 | -0.278605237 | -0.008292781 | 3.79E-02 | 6.57E-02 | 1.00E+00 |
| SLC9A3    | LMNA | -0.024943236 | -0.162434902 | 0.11349859   | 7.25E-01 | 7.85E-01 | 1.00E+00 |
| OSBP      | LMNA | 0.133768966  | -0.004362598 | 0.266891301  | 5.77E-02 | 9.50E-02 | 1.00E+00 |
| PRR5      | LMNA | 0.271100713  | 0.138222801  | 0.394391332  | 9.52E-05 | 3.12E-04 | 1.00E+00 |
| CHMP7     | LMNA | 0.029043526  | -0.109446299 | 0.166427238  | 6.82E-01 | 7.50E-01 | 1.00E+00 |
| ADRA1A    | LMNA | -0.218658232 | -0.34625712  | -0.083116176 | 1.77E-03 | 4.35E-03 | 1.00E+00 |
| ASAH1     | LMNA | -0.05572808  | -0.192299659 | 0.082961167  | 4.31E-01 | 5.17E-01 | 1.00E+00 |
| FKBP4     | LMNA | -0.011408678 | -0.149224653 | 0.126842096  | 8.72E-01 | 9.05E-01 | 1.00E+00 |
| ZNF350    | LMNA | -0.094497846 | -0.229554192 | 0.044128839  | 1.81E-01 | 2.51E-01 | 1.00E+00 |
| DOM3Z     | LMNA | -0.072286149 | -0.208258898 | 0.066427745  | 3.07E-01 | 3.91E-01 | 1.00E+00 |
| GIPR      | LMNA | -0.196794394 | -0.325989034 | -0.060383882 | 5.00E-03 | 1.09E-02 | 1.00E+00 |
| AHI1      | LMNA | -0.088889374 | -0.224189288 | 0.049772397  | 2.08E-01 | 2.83E-01 | 1.00E+00 |

|         |      |              |              |              |          |          |          |
|---------|------|--------------|--------------|--------------|----------|----------|----------|
| BST1    | LMNA | 0.376396168  | 0.25140884   | 0.489035947  | 3.38E-08 | 2.09E-07 | 4.00E-04 |
| NCR2    | LMNA | -0.142329562 | -0.2749776   | -0.004364315 | 4.33E-02 | 7.39E-02 | 1.00E+00 |
| NADSYN1 | LMNA | 0.47442146   | 0.359944814  | 0.574824688  | 9.85E-13 | 1.37E-11 | 1.17E-08 |
| UBE2W   | LMNA | -0.044990101 | -0.181911264 | 0.093642506  | 5.25E-01 | 6.08E-01 | 1.00E+00 |
| RGS14   | LMNA | 0.210506399  | 0.074624018  | 0.338714156  | 2.64E-03 | 6.20E-03 | 1.00E+00 |
| KRT15   | LMNA | 0.235467606  | 0.100689678  | 0.361759071  | 7.42E-04 | 2.01E-03 | 1.00E+00 |
| SCN11A  | LMNA | -0.232581867 | -0.35910274  | -0.097666766 | 8.66E-04 | 2.31E-03 | 1.00E+00 |
| GFI1    | LMNA | 0.038449927  | -0.100132582 | 0.175568998  | 5.87E-01 | 6.65E-01 | 1.00E+00 |
| FHL1    | LMNA | -0.262459636 | -0.386506421 | -0.129085776 | 1.61E-04 | 5.06E-04 | 1.00E+00 |
| SMC6    | LMNA | 0.083430894  | -0.055256536 | 0.218959975  | 2.38E-01 | 3.17E-01 | 1.00E+00 |
| GATA1   | LMNA | 0.128125862  | -0.010103854 | 0.261550581  | 6.92E-02 | 1.11E-01 | 1.00E+00 |
| OSGEP   | LMNA | 0.046415152  | -0.092226806 | 0.183291682  | 5.12E-01 | 5.96E-01 | 1.00E+00 |
| ARMC6   | LMNA | -0.056024246 | -0.192585749 | 0.082666111  | 4.28E-01 | 5.15E-01 | 1.00E+00 |
| HK3     | LMNA | 0.39848685   | 0.275596848  | 0.508561136  | 4.27E-09 | 3.14E-08 | 5.06E-05 |
| PSMD5   | LMNA | 0.258863905  | 0.125290332  | 0.383219994  | 1.99E-04 | 6.12E-04 | 1.00E+00 |
| RSU1    | LMNA | 0.236688152  | 0.101968992  | 0.362881971  | 6.95E-04 | 1.90E-03 | 1.00E+00 |
| RPL4    | LMNA | 0.034932043  | -0.103618649 | 0.172152853  | 6.22E-01 | 6.97E-01 | 1.00E+00 |
| MAD2L1  | LMNA | -0.149121413 | -0.281379827 | -0.011303102 | 3.42E-02 | 6.00E-02 | 1.00E+00 |
| RBPMS   | LMNA | 0.500459808  | 0.389305528  | 0.597247584  | 3.35E-14 | 5.77E-13 | 3.97E-10 |
| EIF4A3  | LMNA | 0.090163481  | -0.048491096 | 0.225408783  | 2.02E-01 | 2.76E-01 | 1.00E+00 |
| E4F1    | LMNA | 0.035902261  | -0.102657545 | 0.173095342  | 6.12E-01 | 6.88E-01 | 1.00E+00 |
| DLEC1   | LMNA | -0.110436444 | -0.244755929 | 0.028042083  | 1.18E-01 | 1.75E-01 | 1.00E+00 |
| PRPF3   | LMNA | -0.169926172 | -0.300918092 | -0.032640876 | 1.56E-02 | 2.99E-02 | 1.00E+00 |
| EMR1    | LMNA | 0.180101951  | 0.043123131  | 0.310434538  | 1.03E-02 | 2.09E-02 | 1.00E+00 |
| CHMP2B  | LMNA | -0.047563601 | -0.184403769 | 0.091085486  | 5.01E-01 | 5.86E-01 | 1.00E+00 |
| CAMSAP1 | LMNA | -0.226435597 | -0.353438238 | -0.091236622 | 1.19E-03 | 3.06E-03 | 1.00E+00 |
| RPS21   | LMNA | 0.12627063   | -0.011989367 | 0.259792974  | 7.33E-02 | 1.17E-01 | 1.00E+00 |
| XCR1    | LMNA | 0.121449275  | -0.01688482  | 0.255221187  | 8.51E-02 | 1.33E-01 | 1.00E+00 |
| ARID5A  | LMNA | 0.379494926  | 0.254792412  | 0.491781656  | 2.55E-08 | 1.62E-07 | 3.02E-04 |
| RBM6    | LMNA | -0.185788869 | -0.315741622 | -0.048994496 | 8.11E-03 | 1.69E-02 | 1.00E+00 |
| UBE2N   | LMNA | -0.400758103 | -0.51056222  | -0.278092591 | 3.42E-09 | 2.56E-08 | 4.06E-05 |
| KLF4    | LMNA | 0.280300674  | 0.14797571   | 0.402766315  | 5.34E-05 | 1.84E-04 | 6.33E-01 |
| MGC4172 | LMNA | -0.021993677 | -0.159560213 | 0.116410776  | 7.56E-01 | 8.12E-01 | 1.00E+00 |
| LMO4    | LMNA | -0.097031919 | -0.231975525 | 0.041576007  | 1.70E-01 | 2.38E-01 | 1.00E+00 |
| KLKB1   | LMNA | -0.124422417 | -0.258041138 | 0.013866768  | 7.77E-02 | 1.23E-01 | 1.00E+00 |

|          |      |              |              |              |          |          |          |
|----------|------|--------------|--------------|--------------|----------|----------|----------|
| HDAC3    | LMNA | 0.25073738   | 0.116726826  | 0.375780896  | 3.19E-04 | 9.42E-04 | 1.00E+00 |
| HP       | LMNA | 0.144285769  | 0.006361481  | 0.276822793  | 4.05E-02 | 6.97E-02 | 1.00E+00 |
| SCHIP1   | LMNA | -0.546445489 | -0.636481978 | -0.441716402 | 4.03E-17 | 1.27E-15 | 4.77E-13 |
| BTK      | LMNA | 0.099369968  | -0.039219044 | 0.234208074  | 1.59E-01 | 2.26E-01 | 1.00E+00 |
| KRCC1    | LMNA | -0.197522219 | -0.326665655 | -0.061138347 | 4.84E-03 | 1.06E-02 | 1.00E+00 |
| PRND     | LMNA | 0.073075663  | -0.0656375   | 0.209018054  | 3.01E-01 | 3.86E-01 | 1.00E+00 |
| C6orf27  | LMNA | -0.144335202 | -0.276869408 | -0.006411963 | 4.04E-02 | 6.96E-02 | 1.00E+00 |
| PIGL     | LMNA | 0.203596287  | 0.067440823  | 0.332307237  | 3.66E-03 | 8.27E-03 | 1.00E+00 |
| CLCA1    | LMNA | -0.019942233 | -0.157559466 | 0.118434824  | 7.78E-01 | 8.31E-01 | 1.00E+00 |
| C1orf112 | LMNA | -0.061542767 | -0.197912297 | 0.077163821  | 3.84E-01 | 4.72E-01 | 1.00E+00 |
| OLFML2A  | LMNA | 0.539660643  | 0.433938349  | 0.630722389  | 1.16E-16 | 3.34E-15 | 1.37E-12 |
| HUS1     | LMNA | 0.426976163  | 0.307022442  | 0.533575811  | 2.35E-10 | 2.19E-09 | 2.78E-06 |
| SFRS6    | LMNA | -0.136696512 | -0.269658757 | 0.001380541  | 5.24E-02 | 8.75E-02 | 1.00E+00 |
| CXCR7    | LMNA | -0.12851687  | -0.261920901 | 0.009706339  | 6.83E-02 | 1.10E-01 | 1.00E+00 |
| UIMC1    | LMNA | 0.056892993  | -0.08180048  | 0.193424809  | 4.21E-01 | 5.09E-01 | 1.00E+00 |
| FXD2     | LMNA | 0.020399732  | -0.117983534 | 0.158005756  | 7.73E-01 | 8.27E-01 | 1.00E+00 |
| GOT2     | LMNA | -0.109584878 | -0.243945399 | 0.028903382  | 1.21E-01 | 1.78E-01 | 1.00E+00 |
| ZNF667   | LMNA | -0.261890666 | -0.385986603 | -0.128484944 | 1.67E-04 | 5.21E-04 | 1.00E+00 |
| TFEC     | LMNA | 0.127731317  | -0.010504922 | 0.261176872  | 7.01E-02 | 1.12E-01 | 1.00E+00 |
| ATP7B    | LMNA | -0.393000082 | -0.503722115 | -0.269574596 | 7.23E-09 | 5.10E-08 | 8.58E-05 |
| RAB38    | LMNA | 0.426612402  | 0.306619535  | 0.533257587  | 2.44E-10 | 2.26E-09 | 2.89E-06 |
| POLD2    | LMNA | 0.263794944  | 0.130496246  | 0.387726064  | 1.49E-04 | 4.70E-04 | 1.00E+00 |
| PPM1H    | LMNA | -0.385759925 | -0.497326054 | -0.261642581 | 1.43E-08 | 9.53E-08 | 1.70E-04 |
| DCX      | LMNA | -0.504766597 | -0.600941846 | -0.39418371  | 1.86E-14 | 3.44E-13 | 2.21E-10 |
| NFYC     | LMNA | 0.021550072  | -0.116848554 | 0.159127666  | 7.61E-01 | 8.16E-01 | 1.00E+00 |
| ZNF228   | LMNA | -0.182903266 | -0.313049766 | -0.046014121 | 9.18E-03 | 1.88E-02 | 1.00E+00 |
| KIN      | LMNA | -0.151053573 | -0.283198998 | -0.013279491 | 3.19E-02 | 5.66E-02 | 1.00E+00 |
| PLSCR4   | LMNA | 0.002228906  | -0.1358639   | 0.140236755  | 9.75E-01 | 9.81E-01 | 1.00E+00 |
| HIST1H4I | LMNA | -0.184859423 | -0.314874809 | -0.048034258 | 8.44E-03 | 1.75E-02 | 1.00E+00 |
| PPARGC1A | LMNA | -0.136356511 | -0.269337462 | 0.001726999  | 5.30E-02 | 8.83E-02 | 1.00E+00 |
| HIG2     | LMNA | 0.205350512  | 0.069263039  | 0.333934846  | 3.37E-03 | 7.70E-03 | 1.00E+00 |
| KCNK10   | LMNA | -0.256648725 | -0.381193796 | -0.122954062 | 2.27E-04 | 6.90E-04 | 1.00E+00 |
| EXOC1    | LMNA | -0.181672466 | -0.31190097  | -0.044743639 | 9.66E-03 | 1.97E-02 | 1.00E+00 |
| OR6A2    | LMNA | -0.054696989 | -0.191303462 | 0.083988204  | 4.39E-01 | 5.26E-01 | 1.00E+00 |
| ETFA     | LMNA | -0.076382115 | -0.212195592 | 0.062326091  | 2.80E-01 | 3.63E-01 | 1.00E+00 |



|          |      |              |              |              |          |          |          |
|----------|------|--------------|--------------|--------------|----------|----------|----------|
| PDAP1    | LMNA | 0.397135037  | 0.274112208  | 0.507369558  | 4.86E-09 | 3.55E-08 | 5.77E-05 |
| C19orf6  | LMNA | 0.256387882  | 0.122679058  | 0.380955127  | 2.30E-04 | 6.99E-04 | 1.00E+00 |
| POLRMT   | LMNA | 0.23673152   | 0.102014456  | 0.362921862  | 6.94E-04 | 1.89E-03 | 1.00E+00 |
| ZNF146   | LMNA | -0.004819313 | -0.142775324 | 0.133320387  | 9.46E-01 | 9.59E-01 | 1.00E+00 |
| MIA2     | LMNA | -0.071742493 | -0.207736051 | 0.066971804  | 3.10E-01 | 3.95E-01 | 1.00E+00 |
| LY6G6E   | LMNA | 0.260526986  | 0.127045298  | 0.384740409  | 1.81E-04 | 5.61E-04 | 1.00E+00 |
| EIF4E2   | LMNA | 0.391397994  | 0.267817971  | 0.502307852  | 8.42E-09 | 5.84E-08 | 9.99E-05 |
| NENF     | LMNA | 0.001824369  | -0.13626095  | 0.13984015   | 9.79E-01 | 9.84E-01 | 1.00E+00 |
| HOXB5    | LMNA | 0.200432401  | 0.064156607  | 0.329369775  | 4.24E-03 | 9.44E-03 | 1.00E+00 |
| ZNF324   | LMNA | -0.096718628 | -0.231676263 | 0.041891715  | 1.71E-01 | 2.40E-01 | 1.00E+00 |
| CUGBP1   | LMNA | -0.085203745 | -0.220659249 | 0.053476269  | 2.28E-01 | 3.05E-01 | 1.00E+00 |
| ENTPD7   | LMNA | 0.453548226  | 0.336570865  | 0.556740173  | 1.21E-11 | 1.41E-10 | 1.44E-07 |
| TTC13    | LMNA | -0.334121589 | -0.451353538 | -0.205551835 | 1.18E-06 | 5.57E-06 | 1.39E-02 |
| GJB5     | LMNA | -0.062366136 | -0.198706334 | 0.076342148  | 3.78E-01 | 4.65E-01 | 1.00E+00 |
| PRSS22   | LMNA | 0.088183334  | -0.050482227 | 0.223513328  | 2.12E-01 | 2.87E-01 | 1.00E+00 |
| CYP3A5   | LMNA | -0.176845933 | -0.307392331 | -0.039765764 | 1.18E-02 | 2.35E-02 | 1.00E+00 |
| MBOAT5   | LMNA | 0.285133301  | 0.153109125  | 0.40715739   | 3.90E-05 | 1.38E-04 | 4.63E-01 |
| CUL4B    | LMNA | 0.297122895  | 0.165875807  | 0.418027208  | 1.75E-05 | 6.64E-05 | 2.08E-01 |
| CENPJ    | LMNA | -0.289264783 | -0.410906918 | -0.157503412 | 2.98E-05 | 1.08E-04 | 3.53E-01 |
| KIAA0664 | LMNA | -0.022580297 | -0.160132129 | 0.115831778  | 7.50E-01 | 8.07E-01 | 1.00E+00 |
| PITX1    | LMNA | 0.37328522   | 0.248015028  | 0.486277191  | 4.46E-08 | 2.72E-07 | 5.29E-04 |
| PDGFRB   | LMNA | 0.462163303  | 0.346200632  | 0.564216126  | 4.40E-12 | 5.51E-11 | 5.21E-08 |
| RDX      | LMNA | 0.005897065  | -0.132261609 | 0.143830973  | 9.34E-01 | 9.52E-01 | 1.00E+00 |
| CELSR3   | LMNA | -0.427990513 | -0.534463023 | -0.308146181 | 2.10E-10 | 1.98E-09 | 2.50E-06 |
| JUND     | LMNA | 0.118943582  | -0.019426406 | 0.252842832  | 9.18E-02 | 1.41E-01 | 1.00E+00 |
| ITSN1    | LMNA | 0.001104845  | -0.136967047 | 0.139134624  | 9.88E-01 | 9.90E-01 | 1.00E+00 |
| CHRNA1   | LMNA | -0.07945478  | -0.215145886 | 0.05924608   | 2.61E-01 | 3.42E-01 | 1.00E+00 |
| EHBP1L1  | LMNA | 0.545135914  | 0.440213897  | 0.635371075  | 4.95E-17 | 1.53E-15 | 5.87E-13 |
| C19orf2  | LMNA | -0.088100933 | -0.22343443  | 0.050565061  | 2.12E-01 | 2.88E-01 | 1.00E+00 |
| FETUB    | LMNA | -0.035411077 | -0.172618228 | 0.103144147  | 6.17E-01 | 6.92E-01 | 1.00E+00 |
| CAMK2B   | LMNA | -0.014951311 | -0.152687158 | 0.123354299  | 8.33E-01 | 8.74E-01 | 1.00E+00 |
| DCTN1    | LMNA | -0.037395941 | -0.17454584  | 0.101177393  | 5.97E-01 | 6.74E-01 | 1.00E+00 |
| TNKS2    | LMNA | -0.131311292 | -0.264566325 | 0.00686414   | 6.25E-02 | 1.02E-01 | 1.00E+00 |
| MRT04    | LMNA | 0.16324602   | 0.025775912  | 0.294656559  | 2.03E-02 | 3.78E-02 | 1.00E+00 |
| C1QBP    | LMNA | -0.221454978 | -0.348841178 | -0.086034223 | 1.54E-03 | 3.83E-03 | 1.00E+00 |

|         |      |              |              |              |          |          |          |
|---------|------|--------------|--------------|--------------|----------|----------|----------|
| TTC3    | LMNA | -0.366087624 | -0.47988579  | -0.240174758 | 8.42E-08 | 4.89E-07 | 9.98E-04 |
| NDUFB8  | LMNA | -0.189654005 | -0.319343966 | -0.052990395 | 6.86E-03 | 1.45E-02 | 1.00E+00 |
| CADPS2  | LMNA | 0.211961771  | 0.076138706  | 0.340062034  | 2.46E-03 | 5.83E-03 | 1.00E+00 |
| EDG2    | LMNA | 0.116807931  | -0.021591238 | 0.250814436  | 9.78E-02 | 1.49E-01 | 1.00E+00 |
| SEMA3G  | LMNA | -0.116270048 | -0.25030338  | 0.022136266  | 9.94E-02 | 1.51E-01 | 1.00E+00 |
| IL23A   | LMNA | 0.125429839  | -0.012843557 | 0.258996136  | 7.53E-02 | 1.20E-01 | 1.00E+00 |
| GJA9    | LMNA | 0.121960481  | -0.016366071 | 0.255706216  | 8.38E-02 | 1.31E-01 | 1.00E+00 |
| R3HDM2  | LMNA | -0.102757576 | -0.2374403   | 0.035801294  | 1.46E-01 | 2.10E-01 | 1.00E+00 |
| C5      | LMNA | 0.064849393  | -0.073862866 | 0.201100041  | 3.59E-01 | 4.46E-01 | 1.00E+00 |
| SLC2A10 | LMNA | 0.586018645  | 0.4873984    | 0.669876342  | 5.10E-20 | 2.61E-18 | 6.05E-16 |
| TRIM45  | LMNA | 0.256881742  | 0.123199747  | 0.38140699   | 2.24E-04 | 6.81E-04 | 1.00E+00 |
| TSP50   | LMNA | 0.153925122  | 0.016218762  | 0.285900867  | 2.87E-02 | 5.14E-02 | 1.00E+00 |
| PAQR3   | LMNA | -0.009550726 | -0.147407372 | 0.128669924  | 8.93E-01 | 9.22E-01 | 1.00E+00 |
| ANKRD26 | LMNA | -0.38409161  | -0.495850518 | -0.259817217 | 1.67E-08 | 1.10E-07 | 1.98E-04 |
| TCP1    | LMNA | -0.143388398 | -0.275976469 | -0.005445184 | 4.18E-02 | 7.16E-02 | 1.00E+00 |
| TMED7   | LMNA | 0.248406602  | 0.114274387  | 0.3736443    | 3.64E-04 | 1.06E-03 | 1.00E+00 |
| CMA1    | LMNA | 0.156664037  | 0.019024491  | 0.288475987  | 2.60E-02 | 4.71E-02 | 1.00E+00 |
| PTCRA   | LMNA | -0.039140305 | -0.176239023 | 0.099448049  | 5.80E-01 | 6.59E-01 | 1.00E+00 |
| HCRTR1  | LMNA | -0.155270196 | -0.287165739 | -0.017596377 | 2.73E-02 | 4.93E-02 | 1.00E+00 |
| FST     | LMNA | 0.409794239  | 0.288038285  | 0.518511732  | 1.39E-09 | 1.12E-08 | 1.65E-05 |
| PAWR    | LMNA | 0.178615017  | 0.041589531  | 0.309045578  | 1.10E-02 | 2.21E-02 | 1.00E+00 |
| LDLR    | LMNA | 0.505000028  | 0.394448289  | 0.60114196   | 1.80E-14 | 3.34E-13 | 2.14E-10 |
| ASTN2   | LMNA | -0.358176707 | -0.472847006 | -0.231576384 | 1.66E-07 | 9.18E-07 | 1.97E-03 |
| SCRN1   | LMNA | 0.115404528  | -0.023013111 | 0.249480872  | 1.02E-01 | 1.54E-01 | 1.00E+00 |
| GPATCH8 | LMNA | -0.145476689 | -0.277945651 | -0.007577876 | 3.88E-02 | 6.72E-02 | 1.00E+00 |
| KIF4A   | LMNA | 0.063671254  | -0.075039334 | 0.19996459   | 3.68E-01 | 4.56E-01 | 1.00E+00 |
| TANC2   | LMNA | -0.190960447 | -0.320560735 | -0.054342026 | 6.48E-03 | 1.38E-02 | 1.00E+00 |
| ZMYM5   | LMNA | 0.059590835  | -0.079110978 | 0.196029187  | 4.00E-01 | 4.87E-01 | 1.00E+00 |
| PGM1    | LMNA | -0.056302424 | -0.192854443 | 0.082388954  | 4.26E-01 | 5.13E-01 | 1.00E+00 |
| ZNF586  | LMNA | -0.064109191 | -0.200386702 | 0.074602063  | 3.65E-01 | 4.52E-01 | 1.00E+00 |
| POLR3G  | LMNA | -0.098512665 | -0.23338962  | 0.040083462  | 1.63E-01 | 2.31E-01 | 1.00E+00 |
| CPD     | LMNA | 0.395530328  | 0.272350583  | 0.505954513  | 5.68E-09 | 4.09E-08 | 6.73E-05 |
| SNCAIP  | LMNA | -0.356020001 | -0.470925522 | -0.229235686 | 1.99E-07 | 1.09E-06 | 2.36E-03 |
| DCT     | LMNA | -0.367802541 | -0.481409718 | -0.242041311 | 7.25E-08 | 4.28E-07 | 8.59E-04 |
| HLA-DOA | LMNA | 0.255433496  | 0.121673033  | 0.380081731  | 2.44E-04 | 7.36E-04 | 1.00E+00 |

|          |      |              |              |              |          |          |          |
|----------|------|--------------|--------------|--------------|----------|----------|----------|
| TANK     | LMNA | 0.336353765  | 0.207959133  | 0.45335375   | 9.87E-07 | 4.73E-06 | 1.17E-02 |
| RCAN1    | LMNA | 0.332137621  | 0.203413523  | 0.449574751  | 1.37E-06 | 6.40E-06 | 1.63E-02 |
| UPK1B    | LMNA | -0.054890893 | -0.191490826 | 0.083795085  | 4.38E-01 | 5.24E-01 | 1.00E+00 |
| DNAJB4   | LMNA | -0.022897384 | -0.160441229 | 0.115518772  | 7.46E-01 | 8.04E-01 | 1.00E+00 |
| LIMD2    | LMNA | -0.198990147 | -0.328029907 | -0.062660479 | 4.52E-03 | 1.00E-02 | 1.00E+00 |
| HIST1H4L | LMNA | -0.224632713 | -0.351774903 | -0.089352606 | 1.31E-03 | 3.33E-03 | 1.00E+00 |
| PECR     | LMNA | 0.119453419  | -0.01890941  | 0.253326891  | 9.04E-02 | 1.40E-01 | 1.00E+00 |
| HSPA2    | LMNA | 0.065835473  | -0.072877889 | 0.202050111  | 3.52E-01 | 4.39E-01 | 1.00E+00 |
| SERP1    | LMNA | -0.16721514  | -0.298378311 | -0.029853279 | 1.74E-02 | 3.29E-02 | 1.00E+00 |
| TACR2    | LMNA | 0.265914051  | 0.13273574   | 0.389660723  | 1.31E-04 | 4.19E-04 | 1.00E+00 |
| NUP85    | LMNA | 0.08931904   | -0.049340356 | 0.224600585  | 2.06E-01 | 2.81E-01 | 1.00E+00 |
| CD177    | LMNA | 0.157410791  | 0.019789838  | 0.289177752  | 2.53E-02 | 4.60E-02 | 1.00E+00 |
| GPR135   | LMNA | 0.164192771  | 0.026748069  | 0.295544668  | 1.95E-02 | 3.66E-02 | 1.00E+00 |
| PIGG     | LMNA | 0.206896135  | 0.07086932   | 0.335368274  | 3.13E-03 | 7.23E-03 | 1.00E+00 |
| LGR5     | LMNA | -0.411215449 | -0.519760329 | -0.289604946 | 1.21E-09 | 9.82E-09 | 1.43E-05 |
| JAK2     | LMNA | 0.043334711  | -0.095286331 | 0.180307042  | 5.40E-01 | 6.22E-01 | 1.00E+00 |
| DPYSL4   | LMNA | -0.365793636 | -0.479624474 | -0.239854869 | 8.63E-08 | 5.01E-07 | 1.02E-03 |
| TM9SF4   | LMNA | 0.477374207  | 0.363262957  | 0.577375045  | 6.81E-13 | 9.77E-12 | 8.08E-09 |
| PTHR1    | LMNA | -0.116443249 | -0.25046795  | 0.021960774  | 9.89E-02 | 1.51E-01 | 1.00E+00 |
| SIRPG    | LMNA | 0.334899771  | 0.206390892  | 0.452050986  | 1.11E-06 | 5.26E-06 | 1.31E-02 |
| ZNF264   | LMNA | 0.095247917  | -0.043373403 | 0.230271067  | 1.78E-01 | 2.48E-01 | 1.00E+00 |
| BICD1    | LMNA | 0.276025249  | 0.143440115  | 0.398876824  | 7.00E-05 | 2.36E-04 | 8.30E-01 |
| RAB5A    | LMNA | -0.011498947 | -0.149312923 | 0.126753267  | 8.71E-01 | 9.05E-01 | 1.00E+00 |
| FLJ13224 | LMNA | 0.146770936  | 0.008900271  | 0.279165519  | 3.71E-02 | 6.45E-02 | 1.00E+00 |
| METTL5   | LMNA | -0.193814191 | -0.323217116 | -0.057296222 | 5.71E-03 | 1.23E-02 | 1.00E+00 |
| HERC6    | LMNA | -0.031887769 | -0.169193955 | 0.106632643  | 6.52E-01 | 7.24E-01 | 1.00E+00 |
| CASP1    | LMNA | 0.403715558  | 0.281344844  | 0.513166099  | 2.56E-09 | 1.96E-08 | 3.03E-05 |
| USP9Y    | LMNA | -0.020611442 | -0.15821226  | 0.117774679  | 7.71E-01 | 8.25E-01 | 1.00E+00 |
| LRP1B    | LMNA | -0.332385361 | -0.449796921 | -0.20368047  | 1.35E-06 | 6.29E-06 | 1.60E-02 |
| XAF1     | LMNA | 0.239336174  | 0.104746045  | 0.365316886  | 6.02E-04 | 1.67E-03 | 1.00E+00 |
| PLA2G4C  | LMNA | -0.125566498 | -0.259125664 | 0.012704733  | 7.50E-02 | 1.19E-01 | 1.00E+00 |
| APOA2    | LMNA | -0.10524396  | -0.239810742 | 0.033290723  | 1.36E-01 | 1.98E-01 | 1.00E+00 |
| SPAG6    | LMNA | -0.233250898 | -0.359718768 | -0.098367379 | 8.36E-04 | 2.24E-03 | 1.00E+00 |
| KALRN    | LMNA | -0.210164425 | -0.338397364 | -0.074268198 | 2.68E-03 | 6.29E-03 | 1.00E+00 |
| SECTM1   | LMNA | 0.48730809   | 0.374447429  | 0.585940874  | 1.91E-13 | 2.97E-12 | 2.27E-09 |

|           |      |              |              |              |          |          |          |
|-----------|------|--------------|--------------|--------------|----------|----------|----------|
| THOC7     | LMNA | 0.031317029  | -0.107197423 | 0.168638945  | 6.58E-01 | 7.29E-01 | 1.00E+00 |
| IFNAR1    | LMNA | 0.389826804  | 0.266096022  | 0.500920288  | 9.78E-09 | 6.69E-08 | 1.16E-04 |
| TCTA      | LMNA | 0.157728277  | 0.020115277  | 0.289476067  | 2.50E-02 | 4.55E-02 | 1.00E+00 |
| NY-REN-7  | LMNA | -0.346393062 | -0.462335234 | -0.218805311 | 4.42E-07 | 2.26E-06 | 5.24E-03 |
| TALDO1    | LMNA | 0.059052774  | -0.079647537 | 0.19550992   | 4.04E-01 | 4.91E-01 | 1.00E+00 |
| B2M       | LMNA | 0.209254038  | 0.073321118  | 0.337553873  | 2.80E-03 | 6.53E-03 | 1.00E+00 |
| LPPR4     | LMNA | -0.197405303 | -0.326556973 | -0.061017142 | 4.86E-03 | 1.07E-02 | 1.00E+00 |
| SQLE      | LMNA | -0.111881606 | -0.246131022 | 0.026579932  | 1.13E-01 | 1.69E-01 | 1.00E+00 |
| SEPHS1    | LMNA | -0.360009346 | -0.474478911 | -0.23356652  | 1.42E-07 | 7.93E-07 | 1.69E-03 |
| FAM49A    | LMNA | 0.082108963  | -0.056583423 | 0.217692372  | 2.45E-01 | 3.25E-01 | 1.00E+00 |
| YTHDC2    | LMNA | -0.075540442 | -0.211387007 | 0.063169316  | 2.85E-01 | 3.69E-01 | 1.00E+00 |
| EHD2      | LMNA | 0.694806597  | 0.615824733  | 0.759962909  | 1.89E-30 | 6.59E-28 | 2.24E-26 |
| NCF1      | LMNA | 0.227796496  | 0.092659405  | 0.354693268  | 1.11E-03 | 2.89E-03 | 1.00E+00 |
| SPG7      | LMNA | -0.024184818 | -0.161695958 | 0.114247626  | 7.33E-01 | 7.92E-01 | 1.00E+00 |
| ZNF614    | LMNA | -0.090964422 | -0.226175176 | 0.047685399  | 1.98E-01 | 2.72E-01 | 1.00E+00 |
| HOXA5     | LMNA | -0.072644391 | -0.208603385 | 0.066069193  | 3.04E-01 | 3.89E-01 | 1.00E+00 |
| NUP133    | LMNA | -0.310248874 | -0.429887712 | -0.179903156 | 7.01E-06 | 2.85E-05 | 8.31E-02 |
| FGF12     | LMNA | -0.426433336 | -0.533100926 | -0.306421214 | 2.49E-10 | 2.30E-09 | 2.95E-06 |
| SLMO2     | LMNA | 0.123462862  | -0.014841093 | 0.257131273  | 8.00E-02 | 1.26E-01 | 1.00E+00 |
| INPP5B    | LMNA | 0.154263444  | 0.01656522   | 0.28621906   | 2.84E-02 | 5.09E-02 | 1.00E+00 |
| PPID      | LMNA | -0.005722119 | -0.143659637 | 0.132433496  | 9.36E-01 | 9.53E-01 | 1.00E+00 |
| SNTA1     | LMNA | 0.078703522  | -0.059999378 | 0.214424776  | 2.66E-01 | 3.47E-01 | 1.00E+00 |
| IL20RA    | LMNA | -0.018090738 | -0.155752755 | 0.120260607  | 7.98E-01 | 8.48E-01 | 1.00E+00 |
| UBE2J1    | LMNA | 0.124659877  | -0.013625613 | 0.258266265  | 7.71E-02 | 1.22E-01 | 1.00E+00 |
| CACNG2    | LMNA | -0.40920459  | -0.517993563 | -0.287388482 | 1.48E-09 | 1.19E-08 | 1.75E-05 |
| GCM1      | LMNA | 0.082962132  | -0.055727112 | 0.21851053   | 2.40E-01 | 3.20E-01 | 1.00E+00 |
| ELF1      | LMNA | 0.291796356  | 0.1601986    | 0.413202415  | 2.51E-05 | 9.25E-05 | 2.98E-01 |
| TLR5      | LMNA | 0.115004038  | -0.023418769 | 0.249100218  | 1.03E-01 | 1.56E-01 | 1.00E+00 |
| TCFL5     | LMNA | -0.00601811  | -0.143949517 | 0.132142675  | 9.32E-01 | 9.51E-01 | 1.00E+00 |
| C1orf107  | LMNA | 0.236589194  | 0.101865253  | 0.362790943  | 6.99E-04 | 1.91E-03 | 1.00E+00 |
| C19orf22  | LMNA | 0.322778016  | 0.193342316  | 0.441170534  | 2.80E-06 | 1.23E-05 | 3.32E-02 |
| SAFB2     | LMNA | -0.057664835 | -0.194170108 | 0.08103123   | 4.15E-01 | 5.03E-01 | 1.00E+00 |
| MAP3K7IP1 | LMNA | -0.217372873 | -0.34506886  | -0.081775847 | 1.89E-03 | 4.61E-03 | 1.00E+00 |
| NCK2      | LMNA | 0.134596215  | -0.003520195 | 0.267673535  | 5.62E-02 | 9.28E-02 | 1.00E+00 |
| OXA1L     | LMNA | 0.276241178  | 0.14366905   | 0.399073368  | 6.91E-05 | 2.33E-04 | 8.19E-01 |

|          |      |              |              |              |          |          |          |
|----------|------|--------------|--------------|--------------|----------|----------|----------|
| KIAA0652 | LMNA | -0.038391889 | -0.175512666 | 0.100190123  | 5.87E-01 | 6.66E-01 | 1.00E+00 |
| KLRG1    | LMNA | -0.502273582 | -0.598803898 | -0.391359181 | 2.62E-14 | 4.60E-13 | 3.10E-10 |
| FRAG1    | LMNA | 0.210897841  | 0.075031353  | 0.339076738  | 2.59E-03 | 6.10E-03 | 1.00E+00 |
| ZSCAN12  | LMNA | -0.286466509 | -0.408367793 | -0.154526569 | 3.58E-05 | 1.28E-04 | 4.24E-01 |
| PSMD12   | LMNA | 0.147967041  | 0.010122819  | 0.280292507  | 3.56E-02 | 6.22E-02 | 1.00E+00 |
| E2F4     | LMNA | 0.291697908  | 0.160093753  | 0.413113177  | 2.53E-05 | 9.29E-05 | 3.00E-01 |
| CLEC4M   | LMNA | 0.057817473  | -0.080879085 | 0.194317478  | 4.14E-01 | 5.02E-01 | 1.00E+00 |
| KIAA0999 | LMNA | -0.020458741 | -0.158063315 | 0.117925322  | 7.73E-01 | 8.26E-01 | 1.00E+00 |
| CLDN10   | LMNA | -0.048762831 | -0.185564656 | 0.089893309  | 4.91E-01 | 5.76E-01 | 1.00E+00 |
| MGC13053 | LMNA | -0.0778713   | -0.213625778 | 0.060833676  | 2.71E-01 | 3.53E-01 | 1.00E+00 |
| TAC1     | LMNA | -0.222443331 | -0.349753906 | -0.087065999 | 1.46E-03 | 3.67E-03 | 1.00E+00 |
| GYPA     | LMNA | -0.076464634 | -0.212274857 | 0.062243409  | 2.79E-01 | 3.62E-01 | 1.00E+00 |
| HPCAL4   | LMNA | -0.466066387 | -0.567597628 | -0.350571482 | 2.75E-12 | 3.57E-11 | 3.26E-08 |
| TRAIP    | LMNA | -0.208284762 | -0.336655595 | -0.072313045 | 2.93E-03 | 6.81E-03 | 1.00E+00 |
| MEX3D    | LMNA | 0.270870906  | 0.137979511  | 0.394181869  | 9.66E-05 | 3.16E-04 | 1.00E+00 |
| KIAA0232 | LMNA | -0.297669055 | -0.418521536 | -0.166458415 | 1.69E-05 | 6.42E-05 | 2.00E-01 |
| ERCC8    | LMNA | -0.073751417 | -0.209667695 | 0.064960981  | 2.97E-01 | 3.81E-01 | 1.00E+00 |
| NFAT5    | LMNA | 0.129684046  | -0.008519479 | 0.263026088  | 6.58E-02 | 1.07E-01 | 1.00E+00 |
| GPX4     | LMNA | -0.029698987 | -0.167065025 | 0.108798083  | 6.75E-01 | 7.44E-01 | 1.00E+00 |
| CSPG4LYP | LMNA | 0.056168802  | -0.082522088 | 0.192725379  | 4.27E-01 | 5.14E-01 | 1.00E+00 |
| KIAA0368 | LMNA | 0.295392089  | 0.164030101  | 0.416460188  | 1.97E-05 | 7.40E-05 | 2.34E-01 |
| FBXO3    | LMNA | -0.192190811 | -0.321706258 | -0.055615405 | 6.14E-03 | 1.31E-02 | 1.00E+00 |
| DVL1     | LMNA | 0.024042994  | -0.114387677 | 0.161557759  | 7.34E-01 | 7.93E-01 | 1.00E+00 |
| CMKLR1   | LMNA | 0.29311876   | 0.161607251  | 0.414400888  | 2.30E-05 | 8.53E-05 | 2.73E-01 |
| GPR157   | LMNA | 0.302689428  | 0.171818118  | 0.42306211   | 1.20E-05 | 4.67E-05 | 1.42E-01 |
| TYMS     | LMNA | 0.120474453  | -0.017873818 | 0.254296098  | 8.77E-02 | 1.36E-01 | 1.00E+00 |
| OR52A1   | LMNA | 0.023003239  | -0.115414274 | 0.160544412  | 7.45E-01 | 8.03E-01 | 1.00E+00 |
| PEF1     | LMNA | 0.20038489   | 0.064107312  | 0.329325646  | 4.24E-03 | 9.46E-03 | 1.00E+00 |
| ZNF750   | LMNA | 0.025305219  | -0.11314103  | 0.162787536  | 7.21E-01 | 7.83E-01 | 1.00E+00 |
| ALG9     | LMNA | 0.114610512  | -0.023817329 | 0.248726144  | 1.04E-01 | 1.58E-01 | 1.00E+00 |
| MCM5     | LMNA | 0.136058714  | -0.002030424 | 0.269056024  | 5.35E-02 | 8.91E-02 | 1.00E+00 |
| SDK2     | LMNA | -0.018484388 | -0.15613696  | 0.119872502  | 7.94E-01 | 8.44E-01 | 1.00E+00 |
| BAIAP3   | LMNA | -0.276784227 | -0.399567614 | -0.144244872 | 6.67E-05 | 2.26E-04 | 7.92E-01 |
| RABGGTB  | LMNA | -0.069455632 | -0.205535868 | 0.069259457  | 3.26E-01 | 4.12E-01 | 1.00E+00 |
| KCNK7    | LMNA | -0.1248124   | -0.258410858 | 0.013470707  | 7.68E-02 | 1.22E-01 | 1.00E+00 |

|          |      |              |              |              |          |          |          |
|----------|------|--------------|--------------|--------------|----------|----------|----------|
| PTP4A3   | LMNA | 0.065490037  | -0.07322297  | 0.201717318  | 3.54E-01 | 4.41E-01 | 1.00E+00 |
| ANKRD40  | LMNA | 0.186675893  | 0.049911142  | 0.316568668  | 7.81E-03 | 1.63E-02 | 1.00E+00 |
| CALCOCO2 | LMNA | 0.251546147  | 0.11757819   | 0.376521971  | 3.05E-04 | 9.03E-04 | 1.00E+00 |
| TMSL8    | LMNA | -0.348633863 | -0.464336685 | -0.221230522 | 3.68E-07 | 1.92E-06 | 4.37E-03 |
| SNCA     | LMNA | -0.302908852 | -0.423260426 | -0.17205255  | 1.18E-05 | 4.60E-05 | 1.40E-01 |
| ZNF551   | LMNA | -0.13987504  | -0.272660988 | -0.001859955 | 4.71E-02 | 7.96E-02 | 1.00E+00 |
| HBQ1     | LMNA | -0.164742121 | -0.296059886 | -0.027312278 | 1.91E-02 | 3.59E-02 | 1.00E+00 |
| ARHGAP26 | LMNA | 0.168615264  | 0.031292679  | 0.299690224  | 1.64E-02 | 3.14E-02 | 1.00E+00 |
| GEMIN6   | LMNA | 0.142823853  | 0.004868851  | 0.275443932  | 4.26E-02 | 7.28E-02 | 1.00E+00 |
| HRAS     | LMNA | 0.172530208  | 0.035320469  | 0.303355888  | 1.41E-02 | 2.74E-02 | 1.00E+00 |
| KLRC4    | LMNA | -0.468137769 | -0.569390813 | -0.352893154 | 2.14E-12 | 2.81E-11 | 2.53E-08 |
| BSDC1    | LMNA | -0.165140308 | -0.296433287 | -0.027721292 | 1.88E-02 | 3.54E-02 | 1.00E+00 |
| DSC1     | LMNA | -0.021220448 | -0.158806225 | 0.117173813  | 7.64E-01 | 8.19E-01 | 1.00E+00 |
| RNF43    | LMNA | -0.18124706  | -0.311503818 | -0.04430462  | 9.84E-03 | 2.00E-02 | 1.00E+00 |
| NDUFAF1  | LMNA | 0.002385036  | -0.135710648 | 0.140389813  | 9.73E-01 | 9.79E-01 | 1.00E+00 |
| MAP2K4   | LMNA | -0.395096553 | -0.505571906 | -0.271874534 | 5.92E-09 | 4.24E-08 | 7.02E-05 |
| FOLR2    | LMNA | 0.184262029  | 0.047417207  | 0.314317559  | 8.66E-03 | 1.79E-02 | 1.00E+00 |
| LYZL6    | LMNA | 0.074657776  | -0.064053396 | 0.210538841  | 2.91E-01 | 3.75E-01 | 1.00E+00 |
| EPB41L3  | LMNA | -0.086500287 | -0.221901462 | 0.052173744  | 2.21E-01 | 2.98E-01 | 1.00E+00 |
| TEKT2    | LMNA | -0.052401641 | -0.189084784 | 0.08627347   | 4.59E-01 | 5.45E-01 | 1.00E+00 |
| CDKN2B   | LMNA | -0.114656131 | -0.24876951  | 0.023771129  | 1.04E-01 | 1.58E-01 | 1.00E+00 |
| WSB1     | LMNA | -0.218488795 | -0.346100505 | -0.082939464 | 1.78E-03 | 4.38E-03 | 1.00E+00 |
| ZNF480   | LMNA | -0.112784209 | -0.246989589 | 0.025666417  | 1.10E-01 | 1.65E-01 | 1.00E+00 |
| MAP3K6   | LMNA | 0.639506723  | 0.550013405  | 0.714480169  | 1.27E-24 | 1.57E-22 | 1.50E-20 |
| PROS1    | LMNA | 0.539584206  | 0.433850813  | 0.630657446  | 1.17E-16 | 3.37E-15 | 1.39E-12 |
| PSMB8    | LMNA | 0.315870939  | 0.185927551  | 0.434955155  | 4.67E-06 | 1.97E-05 | 5.53E-02 |
| HN1      | LMNA | -0.261848725 | -0.385948282 | -0.128440659 | 1.67E-04 | 5.22E-04 | 1.00E+00 |
| MAS1     | LMNA | -0.063507016 | -0.199806274 | 0.075203307  | 3.69E-01 | 4.57E-01 | 1.00E+00 |
| APOL1    | LMNA | 0.486619178  | 0.373670729  | 0.585347547  | 2.09E-13 | 3.22E-12 | 2.48E-09 |
| CSHL1    | LMNA | -0.035654962 | -0.172855135 | 0.102902546  | 6.14E-01 | 6.90E-01 | 1.00E+00 |
| ZBTB7C   | LMNA | 0.262131237  | 0.128738976  | 0.386206402  | 1.64E-04 | 5.14E-04 | 1.00E+00 |
| AHCTF1   | LMNA | 0.196765161  | 0.060353583  | 0.325961856  | 5.01E-03 | 1.09E-02 | 1.00E+00 |
| SAE2     | LMNA | -0.193780495 | -0.323185762 | -0.057261326 | 5.72E-03 | 1.23E-02 | 1.00E+00 |
| ITGA2    | LMNA | 0.525201277  | 0.417414749  | 0.618414411  | 1.02E-15 | 2.44E-14 | 1.21E-11 |
| AP2S1    | LMNA | 0.195682183  | 0.059231263  | 0.324954815  | 5.26E-03 | 1.14E-02 | 1.00E+00 |

|          |      |              |              |              |          |          |          |
|----------|------|--------------|--------------|--------------|----------|----------|----------|
| P15RS    | LMNA | -0.529206276 | -0.621828098 | -0.421984381 | 5.64E-16 | 1.43E-14 | 6.69E-12 |
| MME      | LMNA | 0.470903615  | 0.355995419  | 0.571783692  | 1.52E-12 | 2.05E-11 | 1.81E-08 |
| VAT1     | LMNA | 0.342539776  | 0.214638597  | 0.458890769  | 6.04E-07 | 3.00E-06 | 7.16E-03 |
| MAST4    | LMNA | 0.228543936  | 0.093441068  | 0.355382367  | 1.07E-03 | 2.79E-03 | 1.00E+00 |
| TUFM     | LMNA | 0.00471618   | -0.133421688 | 0.142674289  | 9.47E-01 | 9.60E-01 | 1.00E+00 |
| KRT33B   | LMNA | -0.135577854 | -0.268601532 | 0.002520318  | 5.44E-02 | 9.02E-02 | 1.00E+00 |
| THEG     | LMNA | -0.202183785 | -0.330996129 | -0.065974235 | 3.91E-03 | 8.78E-03 | 1.00E+00 |
| KCTD2    | LMNA | -0.135257322 | -0.268298543 | 0.002846835  | 5.50E-02 | 9.11E-02 | 1.00E+00 |
| WDR26    | LMNA | 0.112298601  | -0.026157924 | 0.246527699  | 1.12E-01 | 1.67E-01 | 1.00E+00 |
| MFI2     | LMNA | 0.480297673  | 0.366551051  | 0.579898191  | 4.71E-13 | 6.89E-12 | 5.58E-09 |
| KRT34    | LMNA | 0.030656969  | -0.107850479 | 0.167996968  | 6.65E-01 | 7.35E-01 | 1.00E+00 |
| NR4A3    | LMNA | 0.19115975   | 0.054548267  | 0.320746321  | 6.43E-03 | 1.37E-02 | 1.00E+00 |
| SGSM3    | LMNA | -0.08249006  | -0.218057854 | 0.056200948  | 2.43E-01 | 3.23E-01 | 1.00E+00 |
| ARSA     | LMNA | 0.385377399  | 0.261223967  | 0.496987787  | 1.48E-08 | 9.84E-08 | 1.76E-04 |
| TOMM22   | LMNA | -0.059778718 | -0.196210489 | 0.078923601  | 3.98E-01 | 4.85E-01 | 1.00E+00 |
| SOCS3    | LMNA | 0.533378371  | 0.426750466  | 0.62538047   | 3.02E-16 | 7.98E-15 | 3.58E-12 |
| UNKL     | LMNA | -0.211330725 | -0.339477662 | -0.075481863 | 2.54E-03 | 5.99E-03 | 1.00E+00 |
| POP4     | LMNA | 0.183407305  | 0.046534538  | 0.313520113  | 8.98E-03 | 1.84E-02 | 1.00E+00 |
| BHLHB3   | LMNA | 0.23304469   | 0.098151423  | 0.359528908  | 8.45E-04 | 2.26E-03 | 1.00E+00 |
| MALL     | LMNA | 0.511435071  | 0.401749222  | 0.606653811  | 7.37E-15 | 1.47E-13 | 8.74E-11 |
| SOX15    | LMNA | -0.276763491 | -0.399548743 | -0.144222883 | 6.68E-05 | 2.26E-04 | 7.93E-01 |
| CCNA2    | LMNA | -0.017251861 | -0.154933865 | 0.121087526  | 8.07E-01 | 8.54E-01 | 1.00E+00 |
| PARK2    | LMNA | -0.285615754 | -0.407595453 | -0.153621998 | 3.78E-05 | 1.34E-04 | 4.49E-01 |
| GPR124   | LMNA | 0.442966666  | 0.324776388  | 0.547534822  | 4.07E-11 | 4.34E-10 | 4.83E-07 |
| CGRRF1   | LMNA | -0.188109517 | -0.317904937 | -0.05139313  | 7.34E-03 | 1.54E-02 | 1.00E+00 |
| RUVBL2   | LMNA | 0.023419407  | -0.115003408 | 0.160950044  | 7.41E-01 | 7.99E-01 | 1.00E+00 |
| MCAT     | LMNA | 0.040186517  | -0.098410444 | 0.177254149  | 5.70E-01 | 6.49E-01 | 1.00E+00 |
| WNT10B   | LMNA | -0.364226584 | -0.478231236 | -0.238150215 | 9.89E-08 | 5.67E-07 | 1.17E-03 |
| ISCA1    | LMNA | -0.215530831 | -0.343365257 | -0.079855882 | 2.07E-03 | 4.99E-03 | 1.00E+00 |
| RPAP1    | LMNA | -0.027703778 | -0.165123259 | 0.11077087   | 6.96E-01 | 7.61E-01 | 1.00E+00 |
| C12orf48 | LMNA | -0.066484874 | -0.202675656 | 0.072229067  | 3.47E-01 | 4.33E-01 | 1.00E+00 |
| RAI16    | LMNA | 0.069610213  | -0.069104869 | 0.205684634  | 3.25E-01 | 4.11E-01 | 1.00E+00 |
| EPN1     | LMNA | 0.167452144  | 0.030096891  | 0.298600417  | 1.72E-02 | 3.27E-02 | 1.00E+00 |
| MAGI1    | LMNA | -0.590754063 | -0.67384979  | -0.492901222 | 2.16E-20 | 1.16E-18 | 2.56E-16 |
| GBX2     | LMNA | -0.296100001 | -0.417101197 | -0.164784897 | 1.88E-05 | 7.09E-05 | 2.23E-01 |

|          |      |              |              |              |          |          |          |
|----------|------|--------------|--------------|--------------|----------|----------|----------|
| SLC35A1  | LMNA | -0.198310925 | -0.327398724 | -0.061956098 | 4.67E-03 | 1.03E-02 | 1.00E+00 |
| GAL      | LMNA | 0.233878379  | 0.0990246    | 0.360296437  | 8.08E-04 | 2.17E-03 | 1.00E+00 |
| SLC14A2  | LMNA | -0.144639021 | -0.277155894 | -0.006722247 | 4.00E-02 | 6.89E-02 | 1.00E+00 |
| RDH11    | LMNA | -0.22135459  | -0.348748458 | -0.085929441 | 1.55E-03 | 3.85E-03 | 1.00E+00 |
| ZNF518   | LMNA | -0.247311009 | -0.372639526 | -0.113122173 | 3.88E-04 | 1.12E-03 | 1.00E+00 |
| PCYT1B   | LMNA | -0.393840056 | -0.504463376 | -0.270495922 | 6.68E-09 | 4.73E-08 | 7.92E-05 |
| AUH      | LMNA | -0.212647552 | -0.340696981 | -0.076852653 | 2.38E-03 | 5.66E-03 | 1.00E+00 |
| EIF3H    | LMNA | -0.13781943  | -0.270719688 | 0.000236062  | 5.05E-02 | 8.46E-02 | 1.00E+00 |
| KIF1B    | LMNA | -0.412096568 | -0.520534199 | -0.290576568 | 1.10E-09 | 9.04E-09 | 1.31E-05 |
| MBD2     | LMNA | 0.412246564  | 0.290741996  | 0.52066592   | 1.09E-09 | 8.92E-09 | 1.29E-05 |
| AMOTL2   | LMNA | -0.286248299 | -0.408169712 | -0.154294534 | 3.63E-05 | 1.29E-04 | 4.31E-01 |
| C6orf120 | LMNA | 0.042023339  | -0.096588004 | 0.179035689  | 5.53E-01 | 6.34E-01 | 1.00E+00 |
| PIGT     | LMNA | 0.64694605   | 0.558802573  | 0.720635938  | 2.45E-25 | 3.46E-23 | 2.91E-21 |
| PSRC1    | LMNA | 0.014524188  | -0.123774991 | 0.152269876  | 8.37E-01 | 8.78E-01 | 1.00E+00 |
| PLA2G10  | LMNA | -0.051094704 | -0.187820877 | 0.087574016  | 4.70E-01 | 5.56E-01 | 1.00E+00 |
| ALAS1    | LMNA | 0.052566349  | -0.086109535 | 0.189244036  | 4.57E-01 | 5.44E-01 | 1.00E+00 |
| FOXO1    | LMNA | 0.231502051  | 0.096536261  | 0.358108238  | 9.16E-04 | 2.43E-03 | 1.00E+00 |
| C17orf62 | LMNA | 0.331147613  | 0.202346956  | 0.448686781  | 1.48E-06 | 6.87E-06 | 1.76E-02 |
| KIF5C    | LMNA | -0.502086025 | -0.598642997 | -0.391146767 | 2.68E-14 | 4.72E-13 | 3.18E-10 |
| DUSP10   | LMNA | 0.165084638  | 0.027664106  | 0.296381085  | 1.89E-02 | 3.54E-02 | 1.00E+00 |
| CRLF3    | LMNA | 0.0583686    | -0.080329685 | 0.194849533  | 4.09E-01 | 4.97E-01 | 1.00E+00 |
| CLCNKB   | LMNA | -0.085631076 | -0.221068723 | 0.053047017  | 2.26E-01 | 3.03E-01 | 1.00E+00 |
| PSMA5    | LMNA | 0.129970753  | -0.008227877 | 0.263297514  | 6.52E-02 | 1.06E-01 | 1.00E+00 |
| FARS2    | LMNA | 0.175544273  | 0.038424453  | 0.3061754    | 1.25E-02 | 2.46E-02 | 1.00E+00 |
| CCDC28A  | LMNA | 0.079481422  | -0.059219362 | 0.215171456  | 2.61E-01 | 3.42E-01 | 1.00E+00 |
| AMPD3    | LMNA | 0.34457703   | 0.216840983  | 0.460712313  | 5.12E-07 | 2.58E-06 | 6.08E-03 |
| PIAS1    | LMNA | -0.23326759  | -0.359734136 | -0.09838486  | 8.35E-04 | 2.23E-03 | 1.00E+00 |
| ADCYAP1R | LMNA | -0.237417185 | -0.363552505 | -0.10273334  | 6.69E-04 | 1.83E-03 | 1.00E+00 |
| TMEM134  | LMNA | 0.239339012  | 0.104749022  | 0.365319494  | 6.02E-04 | 1.67E-03 | 1.00E+00 |
| CDH20    | LMNA | -0.568544451 | -0.65517221  | -0.467159963 | 1.08E-18 | 4.58E-17 | 1.29E-14 |
| FBXO7    | LMNA | 0.00387438   | -0.134248425 | 0.141849511  | 9.56E-01 | 9.68E-01 | 1.00E+00 |
| FLJ14213 | LMNA | 0.108726731  | -0.02977113  | 0.243128414  | 1.23E-01 | 1.82E-01 | 1.00E+00 |
| ZNF3     | LMNA | -0.219733885 | -0.3472512   | -0.084238207 | 1.68E-03 | 4.14E-03 | 1.00E+00 |
| LRRFIP1  | LMNA | 0.630849454  | 0.539810199  | 0.707301953  | 8.12E-24 | 8.75E-22 | 9.63E-20 |
| TMEM49   | LMNA | 0.266243086  | 0.133083589  | 0.389961021  | 1.28E-04 | 4.11E-04 | 1.00E+00 |



|           |      |              |              |              |          |          |          |
|-----------|------|--------------|--------------|--------------|----------|----------|----------|
| CNOT2     | LMNA | 0.127143629  | -0.011102242 | 0.260620145  | 7.14E-02 | 1.14E-01 | 1.00E+00 |
| CBX2      | LMNA | -0.06763619  | -0.203784406 | 0.071078487  | 3.39E-01 | 4.25E-01 | 1.00E+00 |
| ZC3H14    | LMNA | 0.06376412   | -0.074946613 | 0.200054104  | 3.67E-01 | 4.55E-01 | 1.00E+00 |
| ALDH5A1   | LMNA | -0.475460954 | -0.575722746 | -0.361112613 | 8.65E-13 | 1.22E-11 | 1.03E-08 |
| HNT       | LMNA | -0.324106058 | -0.442364281 | -0.194769669 | 2.53E-06 | 1.13E-05 | 3.00E-02 |
| SERPINA4  | LMNA | -0.00699831  | -0.14490931  | 0.131179426  | 9.21E-01 | 9.44E-01 | 1.00E+00 |
| FLJ20920  | LMNA | 0.183547787  | 0.046679598  | 0.313651194  | 8.93E-03 | 1.83E-02 | 1.00E+00 |
| CRTAP     | LMNA | 0.501091002  | 0.390020074  | 0.597789264  | 3.07E-14 | 5.34E-13 | 3.65E-10 |
| DDX50     | LMNA | -0.072307008 | -0.208278956 | 0.06640687   | 3.06E-01 | 3.91E-01 | 1.00E+00 |
| STYXL1    | LMNA | 0.243049355  | 0.108643699  | 0.368728338  | 4.91E-04 | 1.39E-03 | 1.00E+00 |
| TK2       | LMNA | 0.256409821  | 0.122702187  | 0.380975201  | 2.30E-04 | 6.98E-04 | 1.00E+00 |
| BLVRB     | LMNA | 0.407689568  | 0.285719413  | 0.516661831  | 1.72E-09 | 1.37E-08 | 2.04E-05 |
| STMN1     | LMNA | -0.50365279  | -0.599986842 | -0.392921534 | 2.17E-14 | 3.92E-13 | 2.57E-10 |
| GUCA2A    | LMNA | -0.101915158 | -0.236636799 | 0.036651511  | 1.49E-01 | 2.14E-01 | 1.00E+00 |
| DPP6      | LMNA | -0.412702945 | -0.521066665 | -0.291245374 | 1.04E-09 | 8.56E-09 | 1.23E-05 |
| GALNT10   | LMNA | 0.448053956  | 0.330442227  | 0.551963634  | 2.29E-11 | 2.51E-10 | 2.71E-07 |
| STK39     | LMNA | -0.068104131 | -0.204234946 | 0.070610741  | 3.36E-01 | 4.21E-01 | 1.00E+00 |
| MMP24     | LMNA | 0.215444418  | 0.079765839  | 0.343285318  | 2.08E-03 | 5.01E-03 | 1.00E+00 |
| CKS2      | LMNA | 0.045391018  | -0.093244277 | 0.182299678  | 5.21E-01 | 6.04E-01 | 1.00E+00 |
| RHO       | LMNA | 0.02659784   | -0.111863909 | 0.164046485  | 7.07E-01 | 7.70E-01 | 1.00E+00 |
| BANF1     | LMNA | -0.116886402 | -0.250888986 | 0.021511718  | 9.76E-02 | 1.49E-01 | 1.00E+00 |
| CR1       | LMNA | 0.253296117  | 0.119421004  | 0.378124927  | 2.76E-04 | 8.24E-04 | 1.00E+00 |
| RPS6KA2   | LMNA | 0.271406973  | 0.138547054  | 0.394670459  | 9.34E-05 | 3.07E-04 | 1.00E+00 |
| HMBS      | LMNA | 0.005457927  | -0.132693054 | 0.143400879  | 9.39E-01 | 9.55E-01 | 1.00E+00 |
| C20orf112 | LMNA | -0.230093595 | -0.35681063  | -0.095062212 | 9.87E-04 | 2.59E-03 | 1.00E+00 |
| SLC25A24  | LMNA | 0.557172346  | 0.454045725  | 0.64556746   | 7.20E-18 | 2.55E-16 | 8.54E-14 |
| MRPL22    | LMNA | 0.103160216  | -0.035394856 | 0.237824273  | 1.44E-01 | 2.08E-01 | 1.00E+00 |
| SLC25A15  | LMNA | -0.001754131 | -0.139771285 | 0.136329883  | 9.80E-01 | 9.84E-01 | 1.00E+00 |
| GADD45B   | LMNA | 0.433973739  | 0.314781456  | 0.539691545  | 1.10E-10 | 1.10E-09 | 1.31E-06 |
| TDP1      | LMNA | 0.210765572  | 0.074893709  | 0.338954226  | 2.61E-03 | 6.13E-03 | 1.00E+00 |
| ZNF287    | LMNA | -0.216854673 | -0.34458969  | -0.081235624 | 1.94E-03 | 4.72E-03 | 1.00E+00 |
| DAAM2     | LMNA | -0.388918478 | -0.500117858 | -0.265100899 | 1.06E-08 | 7.23E-08 | 1.26E-04 |
| C11orf57  | LMNA | -0.084231145 | -0.219727116 | 0.054453046  | 2.33E-01 | 3.11E-01 | 1.00E+00 |
| RFK       | LMNA | 0.020120302  | -0.118259178 | 0.157733179  | 7.76E-01 | 8.30E-01 | 1.00E+00 |
| ZFYVE9    | LMNA | -0.148601937 | -0.280890567 | -0.010771919 | 3.48E-02 | 6.10E-02 | 1.00E+00 |

|           |      |              |              |              |          |          |          |
|-----------|------|--------------|--------------|--------------|----------|----------|----------|
| TCTN3     | LMNA | 0.333979066  | 0.205398183  | 0.451225785  | 1.19E-06 | 5.62E-06 | 1.41E-02 |
| STCH      | LMNA | 0.097736698  | -0.040865689 | 0.232648652  | 1.66E-01 | 2.34E-01 | 1.00E+00 |
| LOC283871 | LMNA | -0.268567238 | -0.392081437 | -0.135541573 | 1.11E-04 | 3.60E-04 | 1.00E+00 |
| NDUFB3    | LMNA | -0.148019105 | -0.280341555 | -0.010176044 | 3.55E-02 | 6.21E-02 | 1.00E+00 |
| DEFB4     | LMNA | 0.047170345  | -0.091476341 | 0.184023004  | 5.05E-01 | 5.89E-01 | 1.00E+00 |
| FPR1      | LMNA | 0.247246466  | 0.113054305  | 0.372580323  | 3.89E-04 | 1.12E-03 | 1.00E+00 |
| FMNL1     | LMNA | 0.457581522  | 0.341076162  | 0.560242251  | 7.57E-12 | 9.12E-11 | 8.98E-08 |
| Sep-07    | LMNA | -0.150897033 | -0.283051647 | -0.013119328 | 3.21E-02 | 5.68E-02 | 1.00E+00 |
| PTCD2     | LMNA | -0.018080544 | -0.155742805 | 0.120270656  | 7.98E-01 | 8.48E-01 | 1.00E+00 |
| GNLY      | LMNA | 0.051966265  | -0.08670677  | 0.188663792  | 4.63E-01 | 5.49E-01 | 1.00E+00 |
| GRAMD1C   | LMNA | -0.160293459 | -0.291885423 | -0.022745792 | 2.27E-02 | 4.18E-02 | 1.00E+00 |
| ZNF165    | LMNA | -0.044123696 | -0.18107173  | 0.094502953  | 5.33E-01 | 6.15E-01 | 1.00E+00 |
| ARMCX3    | LMNA | 0.025921822  | -0.112531878 | 0.163388133  | 7.14E-01 | 7.76E-01 | 1.00E+00 |
| NDE1      | LMNA | 0.112106552  | -0.026352288 | 0.246345013  | 1.12E-01 | 1.68E-01 | 1.00E+00 |
| MAGEF1    | LMNA | -0.244840656 | -0.370372869 | -0.110525471 | 4.45E-04 | 1.27E-03 | 1.00E+00 |
| ITGA10    | LMNA | 0.24421827   | 0.109871542  | 0.369801568  | 4.61E-04 | 1.31E-03 | 1.00E+00 |
| ARHGDIB   | LMNA | 0.231654121  | 0.096695449  | 0.358248311  | 9.09E-04 | 2.41E-03 | 1.00E+00 |
| FSHB      | LMNA | 0.171400686  | 0.034157932  | 0.302298684  | 1.47E-02 | 2.84E-02 | 1.00E+00 |
| ANXA2     | LMNA | 0.732010217  | 0.660729017  | 0.790207048  | 3.56E-35 | 3.02E-32 | 4.22E-31 |
| HLCS      | LMNA | 0.459108542  | 0.34278328   | 0.561567193  | 6.32E-12 | 7.71E-11 | 7.50E-08 |
| MCF2L     | LMNA | -0.462554412 | -0.564555124 | -0.346638386 | 4.20E-12 | 5.27E-11 | 4.98E-08 |
| AK1       | LMNA | -0.170967883 | -0.301893507 | -0.033712577 | 1.50E-02 | 2.89E-02 | 1.00E+00 |
| FH        | LMNA | 0.02820287   | -0.110277489 | 0.165609082  | 6.90E-01 | 7.57E-01 | 1.00E+00 |
| LGALS2    | LMNA | 0.065315709  | -0.073397106 | 0.20154936   | 3.56E-01 | 4.43E-01 | 1.00E+00 |
| SYNPO2L   | LMNA | -0.150510074 | -0.282687377 | -0.012723442 | 3.25E-02 | 5.76E-02 | 1.00E+00 |
| KIAA1045  | LMNA | -0.343353009 | -0.459618011 | -0.215517591 | 5.66E-07 | 2.83E-06 | 6.71E-03 |
| C1orf183  | LMNA | -0.267584776 | -0.391185258 | -0.134502338 | 1.18E-04 | 3.81E-04 | 1.00E+00 |
| MAGEA8    | LMNA | 0.035808039  | -0.102750894 | 0.173003823  | 6.13E-01 | 6.89E-01 | 1.00E+00 |
| DGCR8     | LMNA | -0.131830437 | -0.265057569 | 0.006335872  | 6.15E-02 | 1.00E-01 | 1.00E+00 |
| GSR       | LMNA | 0.276412186  | 0.143850368  | 0.399229015  | 6.83E-05 | 2.31E-04 | 8.10E-01 |
| CACNA1C   | LMNA | -0.006346024 | -0.144270632 | 0.131820462  | 9.29E-01 | 9.48E-01 | 1.00E+00 |
| FAM20B    | LMNA | -0.101989146 | -0.236707377 | 0.036576846  | 1.49E-01 | 2.13E-01 | 1.00E+00 |
| HES2      | LMNA | 0.130945063  | -0.007236758 | 0.264219737  | 6.32E-02 | 1.03E-01 | 1.00E+00 |
| PDCD6     | LMNA | -0.066673456 | -0.202857289 | 0.072040631  | 3.46E-01 | 4.32E-01 | 1.00E+00 |
| INTS7     | LMNA | -0.198444122 | -0.327522509 | -0.062094217 | 4.64E-03 | 1.02E-02 | 1.00E+00 |

|          |      |              |              |              |          |          |          |
|----------|------|--------------|--------------|--------------|----------|----------|----------|
| AMPH     | LMNA | -0.388395385 | -0.499655663 | -0.264527942 | 1.12E-08 | 7.56E-08 | 1.33E-04 |
| UCKL1    | LMNA | 0.218011361  | 0.082441579  | 0.345659166  | 1.83E-03 | 4.48E-03 | 1.00E+00 |
| ASB4     | LMNA | -0.262578805 | -0.386615285 | -0.129211631 | 1.60E-04 | 5.02E-04 | 1.00E+00 |
| C10orf97 | LMNA | -0.419541693 | -0.527066005 | -0.298796429 | 5.13E-10 | 4.47E-09 | 6.09E-06 |
| ALDH1L1  | LMNA | -0.041224321 | -0.178260829 | 0.09738088   | 5.60E-01 | 6.41E-01 | 1.00E+00 |
| CCL23    | LMNA | 0.126299562  | -0.01195997  | 0.259820391  | 7.33E-02 | 1.17E-01 | 1.00E+00 |
| OBSL1    | LMNA | 0.160231483  | 0.022682215  | 0.291827231  | 2.27E-02 | 4.19E-02 | 1.00E+00 |
| SLC12A7  | LMNA | 0.589250231  | 0.491152835  | 0.672588458  | 2.84E-20 | 1.48E-18 | 3.37E-16 |
| THAP4    | LMNA | 0.271009319  | 0.138126043  | 0.394308031  | 9.57E-05 | 3.14E-04 | 1.00E+00 |
| RBM4B    | LMNA | -0.427160612 | -0.533737159 | -0.307226758 | 2.30E-10 | 2.15E-09 | 2.73E-06 |
| OGFRL1   | LMNA | 0.252375542  | 0.118451473  | 0.377281782  | 2.91E-04 | 8.64E-04 | 1.00E+00 |
| KIAA0831 | LMNA | -0.057934686 | -0.194430642 | 0.080762246  | 4.13E-01 | 5.01E-01 | 1.00E+00 |
| C12orf11 | LMNA | 0.058147277  | -0.080550325 | 0.194635879  | 4.11E-01 | 4.99E-01 | 1.00E+00 |
| PPP1R15A | LMNA | 0.567195671  | 0.465602222  | 0.654034507  | 1.36E-18 | 5.56E-17 | 1.62E-14 |
| KIAA0240 | LMNA | -0.156950396 | -0.28874511  | -0.019317961 | 2.57E-02 | 4.67E-02 | 1.00E+00 |
| CD1B     | LMNA | -0.102008739 | -0.236726066 | 0.036557074  | 1.49E-01 | 2.13E-01 | 1.00E+00 |
| FCGR2A   | LMNA | 0.378228865  | 0.253409615  | 0.49066011   | 2.86E-08 | 1.80E-07 | 3.39E-04 |
| MDC1     | LMNA | -0.107464173 | -0.24192607  | 0.031047433  | 1.28E-01 | 1.88E-01 | 1.00E+00 |
| MAN1A1   | LMNA | 0.427645035  | 0.307763409  | 0.534160874  | 2.18E-10 | 2.04E-09 | 2.59E-06 |
| OCEL1    | LMNA | 0.2825354    | 0.150348642  | 0.404797557  | 4.62E-05 | 1.61E-04 | 5.48E-01 |
| ATP11B   | LMNA | 0.177061153  | 0.039987588  | 0.307593501  | 1.17E-02 | 2.33E-02 | 1.00E+00 |
| NLGN4X   | LMNA | -0.099321124 | -0.234161448 | 0.039268299  | 1.60E-01 | 2.27E-01 | 1.00E+00 |
| FBXO34   | LMNA | -0.142787712 | -0.275409838 | -0.004831959 | 4.26E-02 | 7.28E-02 | 1.00E+00 |
| ALOX12   | LMNA | 0.061392799  | -0.077313459 | 0.197767652  | 3.85E-01 | 4.73E-01 | 1.00E+00 |
| RB1CC1   | LMNA | -0.346905914 | -0.46279341  | -0.21936023  | 4.24E-07 | 2.17E-06 | 5.03E-03 |
| PCDH12   | LMNA | 0.236450645  | 0.101720014  | 0.362663494  | 7.04E-04 | 1.92E-03 | 1.00E+00 |
| RPE      | LMNA | 0.270621149  | 0.137715119  | 0.393954209  | 9.81E-05 | 3.21E-04 | 1.00E+00 |
| EIF4E    | LMNA | -0.143658854 | -0.276231562 | -0.00572132  | 4.14E-02 | 7.10E-02 | 1.00E+00 |
| CSDC2    | LMNA | -0.362390898 | -0.476598429 | -0.236154326 | 1.16E-07 | 6.57E-07 | 1.37E-03 |
| ABHD5    | LMNA | 0.19004198   | 0.053391737  | 0.319705355  | 6.75E-03 | 1.43E-02 | 1.00E+00 |
| TMBIM1   | LMNA | 0.51082131   | 0.401052272  | 0.606128497  | 8.03E-15 | 1.59E-13 | 9.53E-11 |
| PET112L  | LMNA | -0.203465645 | -0.332185994 | -0.067305155 | 3.68E-03 | 8.32E-03 | 1.00E+00 |
| P2RXL1   | LMNA | 0.182883688  | 0.045993908  | 0.313031496  | 9.18E-03 | 1.88E-02 | 1.00E+00 |
| F2RL2    | LMNA | 0.310398001  | 0.180062828  | 0.430022224  | 6.93E-06 | 2.83E-05 | 8.22E-02 |
| TRMT1    | LMNA | 0.115690148  | -0.022723777 | 0.249752319  | 1.01E-01 | 1.53E-01 | 1.00E+00 |

|          |      |              |              |              |          |          |          |
|----------|------|--------------|--------------|--------------|----------|----------|----------|
| IMPG2    | LMNA | -0.179039653 | -0.309442291 | -0.042027427 | 1.08E-02 | 2.17E-02 | 1.00E+00 |
| LRR32    | LMNA | 0.405853203  | 0.283697321  | 0.515046927  | 2.07E-09 | 1.61E-08 | 2.45E-05 |
| BGLAP    | LMNA | -0.19078351  | -0.320395969 | -0.05415894  | 6.53E-03 | 1.39E-02 | 1.00E+00 |
| HTR4     | LMNA | 0.086669225  | -0.052003991 | 0.222063289  | 2.20E-01 | 2.97E-01 | 1.00E+00 |
| MRAS     | LMNA | -0.172435281 | -0.303267051 | -0.035222754 | 1.41E-02 | 2.75E-02 | 1.00E+00 |
| TRAF6    | LMNA | 0.320961691  | 0.191391053  | 0.439537202  | 3.21E-06 | 1.39E-05 | 3.80E-02 |
| AXL      | LMNA | 0.355413668  | 0.22857789   | 0.470385122  | 2.10E-07 | 1.14E-06 | 2.49E-03 |
| ATP2C2   | LMNA | -0.338990663 | -0.455715108 | -0.210804911 | 8.02E-07 | 3.90E-06 | 9.51E-03 |
| LMNB1    | LMNA | -0.044698762 | -0.181628983 | 0.093931864  | 5.28E-01 | 6.10E-01 | 1.00E+00 |
| TELO2    | LMNA | 0.135075549  | -0.00303199  | 0.268126706  | 5.53E-02 | 9.16E-02 | 1.00E+00 |
| PNPLA3   | LMNA | 0.184720728  | 0.04789099   | 0.314745443  | 8.49E-03 | 1.76E-02 | 1.00E+00 |
| CSNK1E   | LMNA | -0.277941063 | -0.400620248 | -0.145471822 | 6.20E-05 | 2.11E-04 | 7.36E-01 |
| SRP14    | LMNA | 0.003717306  | -0.134402667 | 0.141695592  | 9.58E-01 | 9.69E-01 | 1.00E+00 |
| KCNQ4    | LMNA | 0.062884283  | -0.075824972 | 0.199205929  | 3.74E-01 | 4.62E-01 | 1.00E+00 |
| PIK3C2B  | LMNA | -0.295837739 | -0.416863735 | -0.164505248 | 1.91E-05 | 7.20E-05 | 2.27E-01 |
| C15orf15 | LMNA | -0.191284293 | -0.320862287 | -0.054677151 | 6.39E-03 | 1.36E-02 | 1.00E+00 |
| TUBB2B   | LMNA | -0.268888891 | -0.392374791 | -0.135881878 | 1.09E-04 | 3.54E-04 | 1.00E+00 |
| USP15    | LMNA | 0.017632486  | -0.120712351 | 0.155305444  | 8.03E-01 | 8.52E-01 | 1.00E+00 |
| C12orf41 | LMNA | -0.183598553 | -0.313698561 | -0.046732021 | 8.91E-03 | 1.83E-02 | 1.00E+00 |
| CEND1    | LMNA | -0.236576596 | -0.362779355 | -0.101852047 | 7.00E-04 | 1.91E-03 | 1.00E+00 |
| RNF31    | LMNA | 0.203791871  | 0.067643943  | 0.332488742  | 3.63E-03 | 8.21E-03 | 1.00E+00 |
| TCEAL2   | LMNA | -0.501947724 | -0.598524347 | -0.390990145 | 2.74E-14 | 4.80E-13 | 3.24E-10 |
| PTGER2   | LMNA | 0.402291853  | 0.279778874  | 0.511912855  | 2.94E-09 | 2.23E-08 | 3.49E-05 |
| UBN1     | LMNA | 0.306755956  | 0.176165193  | 0.426735573  | 8.98E-06 | 3.58E-05 | 1.07E-01 |
| SLC5A7   | LMNA | -0.231750118 | -0.358336732 | -0.096795943 | 9.05E-04 | 2.40E-03 | 1.00E+00 |
| SLC31A1  | LMNA | 0.227848737  | 0.092714032  | 0.354741436  | 1.11E-03 | 2.88E-03 | 1.00E+00 |
| ADAM29   | LMNA | -0.093501051 | -0.228601286 | 0.045132517  | 1.86E-01 | 2.57E-01 | 1.00E+00 |
| ST7L     | LMNA | -0.051739761 | -0.188444752 | 0.086932173  | 4.65E-01 | 5.50E-01 | 1.00E+00 |
| GFOD1    | LMNA | -0.358068273 | -0.472750425 | -0.231458664 | 1.68E-07 | 9.26E-07 | 1.99E-03 |
| CTNNA1   | LMNA | 0.454923718  | 0.338106724  | 0.557934914  | 1.03E-11 | 1.21E-10 | 1.23E-07 |
| HRBL     | LMNA | 0.069766693  | -0.068948375 | 0.20583522   | 3.24E-01 | 4.09E-01 | 1.00E+00 |
| CBX4     | LMNA | -0.143511582 | -0.276092658 | -0.005570953 | 4.16E-02 | 7.13E-02 | 1.00E+00 |
| NTRK2    | LMNA | -0.366303598 | -0.480077749 | -0.240409778 | 8.26E-08 | 4.81E-07 | 9.80E-04 |
| FOXN3    | LMNA | -0.109013145 | -0.243401111 | 0.029481534  | 1.23E-01 | 1.81E-01 | 1.00E+00 |
| MFGE8    | LMNA | 0.457676197  | 0.34118198   | 0.560324412  | 7.49E-12 | 9.03E-11 | 8.88E-08 |

|         |      |              |              |              |          |          |          |
|---------|------|--------------|--------------|--------------|----------|----------|----------|
| PFKFB2  | LMNA | -0.295494006 | -0.41655248  | -0.164138758 | 1.96E-05 | 7.36E-05 | 2.32E-01 |
| TAS2R4  | LMNA | -0.186495078 | -0.316400095 | -0.04972427  | 7.87E-03 | 1.64E-02 | 1.00E+00 |
| SH3TC2  | LMNA | 0.023990097  | -0.114439913 | 0.161506212  | 7.35E-01 | 7.94E-01 | 1.00E+00 |
| IL10    | LMNA | 0.149788329  | 0.011985163  | 0.282007851  | 3.34E-02 | 5.89E-02 | 1.00E+00 |
| PXMP4   | LMNA | 0.272377238  | 0.139574512  | 0.395554614  | 8.80E-05 | 2.90E-04 | 1.00E+00 |
| RNF167  | LMNA | 0.029779885  | -0.108718071 | 0.167143734  | 6.74E-01 | 7.43E-01 | 1.00E+00 |
| PRMT5   | LMNA | 0.020033507  | -0.118344793 | 0.157648508  | 7.77E-01 | 8.30E-01 | 1.00E+00 |
| TSKU    | LMNA | 0.595212725  | 0.498089604  | 0.677586628  | 9.48E-21 | 5.33E-19 | 1.12E-16 |
| ATPIF1  | LMNA | -0.101377846 | -0.236124214 | 0.037193692  | 1.51E-01 | 2.16E-01 | 1.00E+00 |
| ETV3    | LMNA | -0.12611529  | -0.259645769 | 0.012147198  | 7.37E-02 | 1.18E-01 | 1.00E+00 |
| PAK7    | LMNA | -0.614669649 | -0.693843991 | -0.520812597 | 2.24E-22 | 1.74E-20 | 2.66E-18 |
| PDLIM1  | LMNA | 0.497813952  | 0.386311728  | 0.594975992  | 4.78E-14 | 8.00E-13 | 5.67E-10 |
| CEP63   | LMNA | -0.003523553 | -0.141505721 | 0.134592918  | 9.60E-01 | 9.70E-01 | 1.00E+00 |
| WDFY3   | LMNA | -0.314596122 | -0.433806761 | -0.184560647 | 5.12E-06 | 2.14E-05 | 6.07E-02 |
| RNF126  | LMNA | 0.115489682  | -0.022926852 | 0.249561803  | 1.02E-01 | 1.54E-01 | 1.00E+00 |
| DPM1    | LMNA | 0.136280227  | -0.001804727 | 0.269265371  | 5.31E-02 | 8.85E-02 | 1.00E+00 |
| CLIC4   | LMNA | 0.443389747  | 0.32524726   | 0.547903364  | 3.88E-11 | 4.14E-10 | 4.61E-07 |
| ACR     | LMNA | 0.076593133  | -0.062114653 | 0.212398285  | 2.79E-01 | 3.61E-01 | 1.00E+00 |
| KLK7    | LMNA | -0.20437798  | -0.333032604 | -0.068252701 | 3.53E-03 | 8.02E-03 | 1.00E+00 |
| ALOX5AP | LMNA | 0.291773883  | 0.160174666  | 0.413182045  | 2.52E-05 | 9.25E-05 | 2.99E-01 |
| LRP1    | LMNA | 0.411752457  | 0.290197082  | 0.520231994  | 1.14E-09 | 9.33E-09 | 1.36E-05 |
| TAS2R9  | LMNA | 0.082119251  | -0.056573099 | 0.217702239  | 2.45E-01 | 3.25E-01 | 1.00E+00 |
| ZNF16   | LMNA | 0.003709435  | -0.134410396 | 0.141687878  | 9.58E-01 | 9.69E-01 | 1.00E+00 |
| POLR1B  | LMNA | -0.105405796 | -0.239964977 | 0.033127251  | 1.35E-01 | 1.97E-01 | 1.00E+00 |
| SLC8A2  | LMNA | -0.39463142  | -0.50516159  | -0.271364137 | 6.19E-09 | 4.41E-08 | 7.34E-05 |
| OLFM4   | LMNA | -0.197876907 | -0.326995342 | -0.061506075 | 4.76E-03 | 1.05E-02 | 1.00E+00 |
| TACC1   | LMNA | 0.410735748  | 0.289076079  | 0.519338942  | 1.27E-09 | 1.03E-08 | 1.50E-05 |
| SAMHD1  | LMNA | 0.138677147  | 0.000638368  | 0.271529839  | 4.90E-02 | 8.26E-02 | 1.00E+00 |
| ATP13A2 | LMNA | -0.035597627 | -0.172799442 | 0.102959345  | 6.15E-01 | 6.91E-01 | 1.00E+00 |
| KRT4    | LMNA | 0.029647582  | -0.108848924 | 0.167015011  | 6.75E-01 | 7.44E-01 | 1.00E+00 |
| PAX6    | LMNA | -0.082565742 | -0.21813043  | 0.056124987  | 2.43E-01 | 3.22E-01 | 1.00E+00 |
| SCG2    | LMNA | 0.365730571  | 0.239786251  | 0.479568416  | 8.68E-08 | 5.03E-07 | 1.03E-03 |
| SLC17A6 | LMNA | -0.414125117 | -0.522315158 | -0.292814431 | 8.98E-10 | 7.49E-09 | 1.06E-05 |
| TUBB4   | LMNA | -0.417010833 | -0.524847039 | -0.296000198 | 6.67E-10 | 5.70E-09 | 7.92E-06 |
| PADI4   | LMNA | -0.109896612 | -0.244242133 | 0.028588108  | 1.19E-01 | 1.77E-01 | 1.00E+00 |

|          |      |              |              |              |          |          |          |
|----------|------|--------------|--------------|--------------|----------|----------|----------|
| FMO3     | LMNA | 0.079414193  | -0.059286781 | 0.215106931  | 2.61E-01 | 3.43E-01 | 1.00E+00 |
| NLK      | LMNA | -0.110173742 | -0.244505907 | 0.028307809  | 1.19E-01 | 1.76E-01 | 1.00E+00 |
| POU4F3   | LMNA | -0.089514636 | -0.224787802 | 0.049143661  | 2.05E-01 | 2.80E-01 | 1.00E+00 |
| MDM2     | LMNA | 0.007613105  | -0.13057513  | 0.145511174  | 9.14E-01 | 9.38E-01 | 1.00E+00 |
| CAPNS1   | LMNA | 0.440097888  | 0.321585097  | 0.545034781  | 5.61E-11 | 5.86E-10 | 6.66E-07 |
| SDF4     | LMNA | 0.563851465  | 0.461742631  | 0.651211959  | 2.39E-18 | 9.29E-17 | 2.83E-14 |
| ITGBL1   | LMNA | 0.433563308  | 0.314325924  | 0.539333145  | 1.15E-10 | 1.14E-09 | 1.37E-06 |
| TAP2     | LMNA | 0.328793001  | 0.199811484  | 0.446573921  | 1.77E-06 | 8.13E-06 | 2.10E-02 |
| OR2C1    | LMNA | 0.073838492  | -0.064873798 | 0.209751397  | 2.96E-01 | 3.80E-01 | 1.00E+00 |
| KLHDC3   | LMNA | -0.509172562 | -0.604716932 | -0.399180682 | 1.01E-14 | 1.96E-13 | 1.20E-10 |
| EFHD2    | LMNA | 0.288446856  | 0.156633043  | 0.410164935  | 3.14E-05 | 1.14E-04 | 3.73E-01 |
| GALR3    | LMNA | 0.244558038  | 0.110228515  | 0.37011346   | 4.52E-04 | 1.29E-03 | 1.00E+00 |
| NBEA     | LMNA | -0.525422394 | -0.618602974 | -0.417666898 | 9.88E-16 | 2.39E-14 | 1.17E-11 |
| ABCA6    | LMNA | 0.178032628  | 0.040989039  | 0.308501409  | 1.12E-02 | 2.25E-02 | 1.00E+00 |
| ABBA-1   | LMNA | -0.279051382 | -0.401630251 | -0.14664982  | 5.78E-05 | 1.98E-04 | 6.86E-01 |
| GNAI1    | LMNA | -0.358266576 | -0.47292705  | -0.231673951 | 1.65E-07 | 9.12E-07 | 1.96E-03 |
| CLDN3    | LMNA | -0.038537307 | -0.175653809 | 0.100045949  | 5.86E-01 | 6.64E-01 | 1.00E+00 |
| AKT2     | LMNA | 0.032882126  | -0.105648457 | 0.170160697  | 6.42E-01 | 7.15E-01 | 1.00E+00 |
| EGFR     | LMNA | 0.038807206  | -0.099778345 | 0.17591576   | 5.83E-01 | 6.62E-01 | 1.00E+00 |
| VPS4B    | LMNA | 0.041349877  | -0.0972563   | 0.1783826    | 5.59E-01 | 6.40E-01 | 1.00E+00 |
| RBM16    | LMNA | -0.052695764 | -0.18936916  | 0.085980721  | 4.56E-01 | 5.43E-01 | 1.00E+00 |
| GALNT6   | LMNA | 0.344491302  | 0.216748279  | 0.460635682  | 5.16E-07 | 2.60E-06 | 6.12E-03 |
| ZDHHC3   | LMNA | 0.204658529  | 0.068544127  | 0.3332929    | 3.48E-03 | 7.93E-03 | 1.00E+00 |
| SLC25A4  | LMNA | -0.425942418 | -0.532671394 | -0.305877561 | 2.62E-10 | 2.42E-09 | 3.11E-06 |
| CYB5B    | LMNA | 0.152384232  | 0.014641236  | 0.284451289  | 3.04E-02 | 5.42E-02 | 1.00E+00 |
| NDRG1    | LMNA | 0.463821467  | 0.348056904  | 0.565653123  | 3.60E-12 | 4.59E-11 | 4.27E-08 |
| SESN1    | LMNA | -0.226907117 | -0.353873129 | -0.091729521 | 1.16E-03 | 3.00E-03 | 1.00E+00 |
| GBE1     | LMNA | 0.470041848  | 0.355028561  | 0.571038316  | 1.69E-12 | 2.27E-11 | 2.01E-08 |
| MRPL46   | LMNA | -0.183424764 | -0.313536404 | -0.046552566 | 8.98E-03 | 1.84E-02 | 1.00E+00 |
| CLASP1   | LMNA | -0.080770379 | -0.216408333 | 0.057926527  | 2.53E-01 | 3.34E-01 | 1.00E+00 |
| FARP2    | LMNA | -0.233539346 | -0.359984329 | -0.098669483 | 8.23E-04 | 2.21E-03 | 1.00E+00 |
| ACOT11   | LMNA | 0.185376134  | 0.048568056  | 0.315356727  | 8.26E-03 | 1.71E-02 | 1.00E+00 |
| LDHAL6B  | LMNA | 0.069611028  | -0.069104054 | 0.205685418  | 3.25E-01 | 4.11E-01 | 1.00E+00 |
| MAPKAPK3 | LMNA | 0.323655284  | 0.194285124  | 0.441959137  | 2.62E-06 | 1.16E-05 | 3.11E-02 |
| NCAM2    | LMNA | -0.424470987 | -0.531383627 | -0.304248538 | 3.06E-10 | 2.77E-09 | 3.63E-06 |

|         |      |              |              |              |          |          |          |
|---------|------|--------------|--------------|--------------|----------|----------|----------|
| AFAP1   | LMNA | 0.163591599  | 0.026130734  | 0.294980759  | 2.00E-02 | 3.74E-02 | 1.00E+00 |
| PRKD2   | LMNA | 0.425829622  | 0.30575266   | 0.532572695  | 2.65E-10 | 2.44E-09 | 3.14E-06 |
| OR2H2   | LMNA | -0.067327026 | -0.203486706 | 0.07138749   | 3.41E-01 | 4.27E-01 | 1.00E+00 |
| ZFP36L1 | LMNA | 0.327579685  | 0.198505646  | 0.445484665  | 1.95E-06 | 8.84E-06 | 2.31E-02 |
| DZIP1   | LMNA | -0.176994374 | -0.307531083 | -0.039918759 | 1.17E-02 | 2.34E-02 | 1.00E+00 |
| GPR161  | LMNA | -0.059339594 | -0.195786731 | 0.079361527  | 4.02E-01 | 4.89E-01 | 1.00E+00 |
| RNF146  | LMNA | -0.253946635 | -0.378720605 | -0.12010627  | 2.65E-04 | 7.96E-04 | 1.00E+00 |
| CCNB2   | LMNA | 0.046840757  | -0.091803885 | 0.183703853  | 5.08E-01 | 5.92E-01 | 1.00E+00 |
| ZNF10   | LMNA | -0.449695718 | -0.553391643 | -0.332272508 | 1.90E-11 | 2.11E-10 | 2.25E-07 |
| WDR74   | LMNA | 0.058751662  | -0.079947773 | 0.195219292  | 4.06E-01 | 4.94E-01 | 1.00E+00 |
| FAM134A | LMNA | -0.062362073 | -0.198702415 | 0.076346204  | 3.78E-01 | 4.65E-01 | 1.00E+00 |
| PCNP    | LMNA | -0.181104309 | -0.311370538 | -0.044157313 | 9.90E-03 | 2.01E-02 | 1.00E+00 |
| PURA    | LMNA | -0.058253096 | -0.194738033 | 0.080444834  | 4.10E-01 | 4.98E-01 | 1.00E+00 |
| DNPEP   | LMNA | 0.533008547  | 0.42632775   | 0.625065734  | 3.19E-16 | 8.42E-15 | 3.79E-12 |
| ERBB2   | LMNA | 0.435042826  | 0.315968279  | 0.540624922  | 9.81E-11 | 9.88E-10 | 1.16E-06 |
| CREB1   | LMNA | -0.1421799   | -0.27483639  | -0.004211564 | 4.35E-02 | 7.42E-02 | 1.00E+00 |
| NEO1    | LMNA | 0.107394768  | -0.031117581 | 0.241859963  | 1.28E-01 | 1.88E-01 | 1.00E+00 |
| DDX3Y   | LMNA | 0.103260327  | -0.035293793 | 0.237919736  | 1.44E-01 | 2.07E-01 | 1.00E+00 |
| RPS3A   | LMNA | -0.210682716 | -0.338877479 | -0.074807488 | 2.62E-03 | 6.15E-03 | 1.00E+00 |
| MXRA7   | LMNA | 0.441319195  | 0.322943377  | 0.546099336  | 4.90E-11 | 5.17E-10 | 5.81E-07 |
| LGALS3  | LMNA | 0.616653729  | 0.523137225  | 0.69549728   | 1.51E-22 | 1.23E-20 | 1.79E-18 |
| GLT8D1  | LMNA | 0.345817477  | 0.218182612  | 0.461820939  | 4.63E-07 | 2.36E-06 | 5.50E-03 |
| TMPRSS3 | LMNA | -0.015418052 | -0.153143091 | 0.122894527  | 8.28E-01 | 8.70E-01 | 1.00E+00 |
| UPB1    | LMNA | -0.07608459  | -0.211909785 | 0.062624187  | 2.82E-01 | 3.65E-01 | 1.00E+00 |
| LAT     | LMNA | 0.004025167  | -0.134100351 | 0.141997263  | 9.55E-01 | 9.66E-01 | 1.00E+00 |
| CLDN14  | LMNA | 0.124099096  | -0.014195095 | 0.257734587  | 7.85E-02 | 1.24E-01 | 1.00E+00 |
| DHX38   | LMNA | 0.075562576  | -0.063147143 | 0.211408274  | 2.85E-01 | 3.68E-01 | 1.00E+00 |
| KCNA3   | LMNA | -0.405697823 | -0.51491025  | -0.283526276 | 2.10E-09 | 1.64E-08 | 2.49E-05 |
| BTBD1   | LMNA | 0.01802149   | -0.120328875 | 0.155685164  | 7.99E-01 | 8.49E-01 | 1.00E+00 |
| TARS2   | LMNA | -0.082502122 | -0.218069421 | 0.056188841  | 2.43E-01 | 3.23E-01 | 1.00E+00 |
| SKIV2L2 | LMNA | -0.038336146 | -0.17545856  | 0.100245387  | 5.88E-01 | 6.66E-01 | 1.00E+00 |
| ABCF1   | LMNA | 0.061073002  | -0.077632533 | 0.197459187  | 3.88E-01 | 4.75E-01 | 1.00E+00 |
| CDT1    | LMNA | 0.009524089  | -0.128696123 | 0.147381311  | 8.93E-01 | 9.22E-01 | 1.00E+00 |
| ZHX2    | LMNA | -0.403261644 | -0.512766583 | -0.280845501 | 2.67E-09 | 2.04E-08 | 3.17E-05 |
| FCF1    | LMNA | 0.272464402  | 0.139666827  | 0.395634031  | 8.75E-05 | 2.89E-04 | 1.00E+00 |

|          |      |              |              |              |          |          |          |
|----------|------|--------------|--------------|--------------|----------|----------|----------|
| LRRC49   | LMNA | -0.46476337  | -0.566469118 | -0.349111744 | 3.22E-12 | 4.14E-11 | 3.82E-08 |
| GUCY1B2  | LMNA | -0.12719216  | -0.260666123 | 0.011052919  | 7.13E-02 | 1.14E-01 | 1.00E+00 |
| CD28     | LMNA | 0.383571393  | 0.259248211  | 0.495390282  | 1.75E-08 | 1.14E-07 | 2.08E-04 |
| SMARCA4  | LMNA | -0.070472134 | -0.206514012 | 0.068242783  | 3.19E-01 | 4.05E-01 | 1.00E+00 |
| Sep-02   | LMNA | -0.068604605 | -0.204716747 | 0.070110407  | 3.32E-01 | 4.18E-01 | 1.00E+00 |
| SOHLH2   | LMNA | -0.048119418 | -0.184941862 | 0.090532987  | 4.96E-01 | 5.81E-01 | 1.00E+00 |
| MCOLN3   | LMNA | 0.300354908  | 0.169324843  | 0.420951453  | 1.41E-05 | 5.41E-05 | 1.67E-01 |
| LRP8     | LMNA | -0.203741502 | -0.332442    | -0.067591632 | 3.63E-03 | 8.23E-03 | 1.00E+00 |
| TAGLN3   | LMNA | -0.566570373 | -0.653506932 | -0.464880264 | 1.51E-18 | 6.13E-17 | 1.80E-14 |
| MASP2    | LMNA | -0.274328909 | -0.397332384 | -0.14164209  | 7.79E-05 | 2.60E-04 | 9.24E-01 |
| GPATCH3  | LMNA | 0.020789476  | -0.117599034 | 0.158385908  | 7.69E-01 | 8.23E-01 | 1.00E+00 |
| TTRAP    | LMNA | -0.09839117  | -0.233273615 | 0.040205948  | 1.64E-01 | 2.31E-01 | 1.00E+00 |
| AGL      | LMNA | -0.24207619  | -0.367834578 | -0.107621787 | 5.19E-04 | 1.46E-03 | 1.00E+00 |
| NFE2L3   | LMNA | 0.418570346  | 0.297722987  | 0.526214537  | 5.68E-10 | 4.92E-09 | 6.74E-06 |
| PSD4     | LMNA | 0.392419499  | 0.268937916  | 0.503209667  | 7.65E-09 | 5.35E-08 | 9.07E-05 |
| PALMD    | LMNA | 0.127194248  | -0.011050797 | 0.260668101  | 7.12E-02 | 1.14E-01 | 1.00E+00 |
| CCNB1IP1 | LMNA | -0.183980944 | -0.314055331 | -0.047126908 | 8.77E-03 | 1.80E-02 | 1.00E+00 |
| TMEM43   | LMNA | 0.639833136  | 0.550398629  | 0.714750507  | 1.18E-24 | 1.49E-22 | 1.40E-20 |
| OBFC1    | LMNA | 0.397568317  | 0.274587998  | 0.507751526  | 4.66E-09 | 3.41E-08 | 5.53E-05 |
| STAT5B   | LMNA | -0.0920836   | -0.227245799 | 0.046559273  | 1.92E-01 | 2.65E-01 | 1.00E+00 |
| C14orf79 | LMNA | 0.257029272  | 0.123355306  | 0.381541962  | 2.22E-04 | 6.76E-04 | 1.00E+00 |
| ENPEP    | LMNA | 0.269201506  | 0.136212649  | 0.392659877  | 1.07E-04 | 3.48E-04 | 1.00E+00 |
| SSB      | LMNA | 0.077740094  | -0.060965191 | 0.213499794  | 2.71E-01 | 3.54E-01 | 1.00E+00 |
| SCT      | LMNA | 0.140158892  | 0.002149482  | 0.27292897   | 4.66E-02 | 7.90E-02 | 1.00E+00 |
| TIMM23   | LMNA | -0.215220554 | -0.343078216 | -0.079532578 | 2.10E-03 | 5.06E-03 | 1.00E+00 |
| SKI      | LMNA | 0.431062434  | 0.311551423  | 0.537148481  | 1.51E-10 | 1.46E-09 | 1.79E-06 |
| SLC22A13 | LMNA | -0.118310996 | -0.252242138 | 0.02006777   | 9.35E-02 | 1.44E-01 | 1.00E+00 |
| AKAP3    | LMNA | -0.227301712 | -0.354237028 | -0.092142058 | 1.14E-03 | 2.95E-03 | 1.00E+00 |
| OAS2     | LMNA | 0.226863437  | 0.091683858  | 0.353832844  | 1.17E-03 | 3.00E-03 | 1.00E+00 |
| KIAA0423 | LMNA | -0.112536278 | -0.246753774 | 0.025917369  | 1.11E-01 | 1.66E-01 | 1.00E+00 |
| SEC61G   | LMNA | 0.192381888  | 0.055813203  | 0.321884125  | 6.09E-03 | 1.30E-02 | 1.00E+00 |
| CAPN11   | LMNA | 0.158432185  | 0.020836923  | 0.290137381  | 2.43E-02 | 4.45E-02 | 1.00E+00 |
| TMEM50B  | LMNA | 0.129414687  | -0.008793415 | 0.262771066  | 6.64E-02 | 1.07E-01 | 1.00E+00 |
| DEGS1    | LMNA | 0.18623223   | 0.049452634  | 0.316155028  | 7.96E-03 | 1.66E-02 | 1.00E+00 |
| ARHGEF4  | LMNA | -0.312235755 | -0.431679447 | -0.182031106 | 6.07E-06 | 2.50E-05 | 7.20E-02 |



|          |      |              |              |              |          |          |          |
|----------|------|--------------|--------------|--------------|----------|----------|----------|
| DBNDD1   | LMNA | 0.199364654  | 0.063048917  | 0.328377878  | 4.45E-03 | 9.87E-03 | 1.00E+00 |
| TBL1XR1  | LMNA | -0.172918564 | -0.303719305 | -0.035720263 | 1.39E-02 | 2.70E-02 | 1.00E+00 |
| FAIM     | LMNA | 0.018947046  | -0.119416307 | 0.156588465  | 7.89E-01 | 8.40E-01 | 1.00E+00 |
| SP140    | LMNA | 0.237506245  | 0.102826724  | 0.363634409  | 6.65E-04 | 1.82E-03 | 1.00E+00 |
| G6PD     | LMNA | 0.553812345  | 0.450179527  | 0.64272428   | 1.24E-17 | 4.24E-16 | 1.47E-13 |
| NUDC     | LMNA | 0.116281259  | -0.022124907 | 0.250314032  | 9.94E-02 | 1.51E-01 | 1.00E+00 |
| GABRP    | LMNA | -0.01677447  | -0.154467765 | 0.121558026  | 8.13E-01 | 8.59E-01 | 1.00E+00 |
| SCARA3   | LMNA | 0.162017848  | 0.024515171  | 0.293504122  | 2.12E-02 | 3.95E-02 | 1.00E+00 |
| TACSTD2  | LMNA | 0.278710319  | 0.146287927  | 0.401320034  | 5.91E-05 | 2.02E-04 | 7.01E-01 |
| EIF3J    | LMNA | 0.014347878  | -0.123948633 | 0.152097613  | 8.39E-01 | 8.80E-01 | 1.00E+00 |
| PPP2R2A  | LMNA | -0.208152196 | -0.336532721 | -0.072175194 | 2.95E-03 | 6.85E-03 | 1.00E+00 |
| CPA3     | LMNA | 0.3344235    | 0.205877341  | 0.451624143  | 1.15E-06 | 5.45E-06 | 1.36E-02 |
| PVALB    | LMNA | -0.235106892 | -0.361427145 | -0.100311682 | 7.57E-04 | 2.05E-03 | 1.00E+00 |
| BCAT2    | LMNA | 0.394292915  | 0.270992735  | 0.504862947  | 6.39E-09 | 4.54E-08 | 7.58E-05 |
| MFN1     | LMNA | -0.041610902 | -0.178635742 | 0.096997293  | 5.57E-01 | 6.37E-01 | 1.00E+00 |
| F10      | LMNA | 0.125171222  | -0.013106255 | 0.258751002  | 7.59E-02 | 1.20E-01 | 1.00E+00 |
| FAM134C  | LMNA | 0.212020332  | 0.076199666  | 0.340116259  | 2.45E-03 | 5.81E-03 | 1.00E+00 |
| SNX11    | LMNA | -0.158727906 | -0.290415171 | -0.02114014  | 2.41E-02 | 4.40E-02 | 1.00E+00 |
| COMP     | LMNA | 0.259888603  | 0.126371545  | 0.384156869  | 1.88E-04 | 5.79E-04 | 1.00E+00 |
| GPR177   | LMNA | 0.0831361    | -0.055552478 | 0.218677336  | 2.39E-01 | 3.19E-01 | 1.00E+00 |
| TAL1     | LMNA | -0.351166774 | -0.466597623 | -0.223973781 | 2.99E-07 | 1.58E-06 | 3.54E-03 |
| ACSL1    | LMNA | 0.200977096  | 0.064721807  | 0.329875666  | 4.13E-03 | 9.24E-03 | 1.00E+00 |
| ABCC5    | LMNA | -0.26923582  | -0.392691167 | -0.136248958 | 1.07E-04 | 3.47E-04 | 1.00E+00 |
| HCFC2    | LMNA | -0.050300417 | -0.187052521 | 0.088364186  | 4.77E-01 | 5.62E-01 | 1.00E+00 |
| TCAP     | LMNA | -0.197780288 | -0.326905536 | -0.061405899 | 4.78E-03 | 1.05E-02 | 1.00E+00 |
| ABL1     | LMNA | 0.184742384  | 0.047913359  | 0.314765642  | 8.49E-03 | 1.75E-02 | 1.00E+00 |
| RBBP7    | LMNA | 0.100674115  | -0.037903677 | 0.235452755  | 1.54E-01 | 2.20E-01 | 1.00E+00 |
| PTPRG    | LMNA | -0.031638002 | -0.168951082 | 0.106879814  | 6.55E-01 | 7.26E-01 | 1.00E+00 |
| NCOR1    | LMNA | 0.003023933  | -0.135083459 | 0.141016065  | 9.66E-01 | 9.75E-01 | 1.00E+00 |
| MOCOS    | LMNA | 0.404533179  | 0.282244462  | 0.513885616  | 2.36E-09 | 1.81E-08 | 2.80E-05 |
| C14orf93 | LMNA | -0.280143625 | -0.40262352  | -0.147809006 | 5.39E-05 | 1.86E-04 | 6.39E-01 |
| PRDM10   | LMNA | -0.168391562 | -0.299480649 | -0.031062664 | 1.66E-02 | 3.17E-02 | 1.00E+00 |
| TNRC15   | LMNA | -0.050891546 | -0.187624368 | 0.087776137  | 4.72E-01 | 5.58E-01 | 1.00E+00 |
| SPINK4   | LMNA | -0.003976671 | -0.141949744 | 0.134147974  | 9.55E-01 | 9.67E-01 | 1.00E+00 |
| TXNRD1   | LMNA | 0.175705698  | 0.038590768  | 0.30632634   | 1.24E-02 | 2.45E-02 | 1.00E+00 |

|          |      |              |              |              |          |          |          |
|----------|------|--------------|--------------|--------------|----------|----------|----------|
| UBE2H    | LMNA | 0.35908341   | 0.232560877  | 0.473654494  | 1.54E-07 | 8.53E-07 | 1.82E-03 |
| BRDT     | LMNA | 0.233974211  | 0.099124985  | 0.360384653  | 8.04E-04 | 2.16E-03 | 1.00E+00 |
| SLC16A4  | LMNA | 0.238170999  | 0.103523836  | 0.364245694  | 6.42E-04 | 1.77E-03 | 1.00E+00 |
| VIP      | LMNA | -0.309895348 | -0.429568809 | -0.179524657 | 7.19E-06 | 2.92E-05 | 8.52E-02 |
| CALCR    | LMNA | 0.038349503  | -0.100232146 | 0.175471524  | 5.88E-01 | 6.66E-01 | 1.00E+00 |
| CCNE2    | LMNA | -0.229171318 | -0.355960674 | -0.094097305 | 1.04E-03 | 2.71E-03 | 1.00E+00 |
| SLC6A8   | LMNA | 0.211979069  | 0.076156712  | 0.340078052  | 2.46E-03 | 5.82E-03 | 1.00E+00 |
| LILRA1   | LMNA | 0.087567078  | -0.051101676 | 0.222923222  | 2.15E-01 | 2.91E-01 | 1.00E+00 |
| MC2R     | LMNA | 0.105853486  | -0.032675001 | 0.240391601  | 1.34E-01 | 1.95E-01 | 1.00E+00 |
| MBTD1    | LMNA | -0.350362189 | -0.465879595 | -0.22310216  | 3.19E-07 | 1.68E-06 | 3.79E-03 |
| USP33    | LMNA | -0.468293763 | -0.569525818 | -0.353068055 | 2.10E-12 | 2.77E-11 | 2.49E-08 |
| PPP1CB   | LMNA | 0.231794817  | 0.096842736  | 0.358377902  | 9.02E-04 | 2.40E-03 | 1.00E+00 |
| C15orf39 | LMNA | 0.423729828  | 0.303428266  | 0.530734792  | 3.31E-10 | 2.98E-09 | 3.93E-06 |
| ABHD8    | LMNA | 0.070783164  | -0.067931643 | 0.20681325   | 3.17E-01 | 4.02E-01 | 1.00E+00 |
| MAP3K12  | LMNA | 0.025586793  | -0.112862871 | 0.163061813  | 7.18E-01 | 7.80E-01 | 1.00E+00 |
| PAAF1    | LMNA | -0.472707187 | -0.573343134 | -0.358019731 | 1.22E-12 | 1.66E-11 | 1.45E-08 |
| ARF5     | LMNA | 0.198762122  | 0.062423992  | 0.327818022  | 4.57E-03 | 1.01E-02 | 1.00E+00 |
| CCT3     | LMNA | -0.22466888  | -0.351808278 | -0.08939039  | 1.31E-03 | 3.33E-03 | 1.00E+00 |
| SLC3A2   | LMNA | 0.344878834  | 0.21716736   | 0.460982078  | 5.00E-07 | 2.53E-06 | 5.93E-03 |
| PIWIL2   | LMNA | -0.166423858 | -0.297636662 | -0.029040052 | 1.79E-02 | 3.39E-02 | 1.00E+00 |
| RAD50    | LMNA | 0.276166217  | 0.143589572  | 0.399005137  | 6.94E-05 | 2.34E-04 | 8.23E-01 |
| IER5     | LMNA | 0.476799861  | 0.36261731   | 0.576879122  | 7.32E-13 | 1.05E-11 | 8.68E-09 |
| SYNE1    | LMNA | -0.321651009 | -0.440157164 | -0.19213146  | 3.04E-06 | 1.33E-05 | 3.61E-02 |
| MBTPS2   | LMNA | 0.170259531  | 0.032983798  | 0.301230265  | 1.54E-02 | 2.96E-02 | 1.00E+00 |
| MVK      | LMNA | 0.099125111  | -0.039465955 | 0.233974332  | 1.60E-01 | 2.27E-01 | 1.00E+00 |
| TSPYL1   | LMNA | -0.272394609 | -0.395570441 | -0.139592909 | 8.79E-05 | 2.90E-04 | 1.00E+00 |
| NCL      | LMNA | 0.202925281  | 0.066744051  | 0.33168446   | 3.77E-03 | 8.51E-03 | 1.00E+00 |
| PSMD10   | LMNA | -0.204876372 | -0.333495004 | -0.068770432 | 3.45E-03 | 7.86E-03 | 1.00E+00 |
| MOBP     | LMNA | -0.303005355 | -0.423347642 | -0.172155658 | 1.17E-05 | 4.57E-05 | 1.39E-01 |
| GUF1     | LMNA | -0.09314221  | -0.228258181 | 0.045493766  | 1.87E-01 | 2.59E-01 | 1.00E+00 |
| WDR44    | LMNA | 0.203591727  | 0.067436088  | 0.332303006  | 3.66E-03 | 8.27E-03 | 1.00E+00 |
| HRH1     | LMNA | 0.528987231  | 0.421734313  | 0.621641484  | 5.83E-16 | 1.47E-14 | 6.92E-12 |
| HIST1H3C | LMNA | -0.021118115 | -0.158706427 | 0.117274785  | 7.65E-01 | 8.20E-01 | 1.00E+00 |
| C5orf30  | LMNA | -0.508226864 | -0.603907008 | -0.39810758  | 1.15E-14 | 2.21E-13 | 1.37E-10 |
| RASGRP3  | LMNA | -0.061215653 | -0.197596787 | 0.077490208  | 3.87E-01 | 4.74E-01 | 1.00E+00 |

|          |      |              |              |              |          |          |          |
|----------|------|--------------|--------------|--------------|----------|----------|----------|
| RNPEP    | LMNA | 0.300259828  | 0.169223332  | 0.420865462  | 1.41E-05 | 5.45E-05 | 1.68E-01 |
| PRKRIP1  | LMNA | 0.203379625  | 0.067215827  | 0.33210616   | 3.70E-03 | 8.35E-03 | 1.00E+00 |
| MED21    | LMNA | -0.038389893 | -0.175510729 | 0.100192102  | 5.88E-01 | 6.66E-01 | 1.00E+00 |
| GRPR     | LMNA | 0.153772305  | 0.016062281  | 0.285757133  | 2.89E-02 | 5.17E-02 | 1.00E+00 |
| SYT11    | LMNA | -0.292743839 | -0.414061146 | -0.161207823 | 2.36E-05 | 8.73E-05 | 2.80E-01 |
| NTSR2    | LMNA | -0.348479452 | -0.464198806 | -0.221063353 | 3.73E-07 | 1.94E-06 | 4.42E-03 |
| Gcom1    | LMNA | -0.102522359 | -0.237215968 | 0.036038709  | 1.47E-01 | 2.11E-01 | 1.00E+00 |
| SPTBN2   | LMNA | -0.48386985  | -0.582978626 | -0.370572625 | 2.98E-13 | 4.47E-12 | 3.54E-09 |
| LRMP     | LMNA | -0.135227778 | -0.268270614 | 0.00287693   | 5.50E-02 | 9.12E-02 | 1.00E+00 |
| HTRA1    | LMNA | 0.271479567  | 0.138623917  | 0.394736618  | 9.30E-05 | 3.06E-04 | 1.00E+00 |
| RNF111   | LMNA | -0.113022616 | -0.247216329 | 0.025425089  | 1.09E-01 | 1.64E-01 | 1.00E+00 |
| SLC26A2  | LMNA | 0.350216696  | 0.222944567  | 0.465749738  | 3.23E-07 | 1.70E-06 | 3.83E-03 |
| WISP1    | LMNA | 0.389630624  | 0.265881073  | 0.500746995  | 9.96E-09 | 6.81E-08 | 1.18E-04 |
| ATP2B4   | LMNA | 0.090721475  | -0.047929808 | 0.225942726  | 1.99E-01 | 2.73E-01 | 1.00E+00 |
| FLJ10769 | LMNA | -0.238781865 | -0.364807329 | -0.104164552 | 6.21E-04 | 1.72E-03 | 1.00E+00 |
| PTH      | LMNA | -0.070440999 | -0.206484055 | 0.068273928  | 3.19E-01 | 4.05E-01 | 1.00E+00 |
| KIAA0895 | LMNA | -0.118010686 | -0.251956932 | 0.020372208  | 9.44E-02 | 1.45E-01 | 1.00E+00 |
| CHST12   | LMNA | 0.37742823   | 0.252535422  | 0.489950672  | 3.07E-08 | 1.92E-07 | 3.65E-04 |
| RAB22A   | LMNA | 0.31936639   | 0.189678078  | 0.438101979  | 3.61E-06 | 1.55E-05 | 4.28E-02 |
| TARDBP   | LMNA | -0.096465795 | -0.231434733 | 0.042146479  | 1.72E-01 | 2.41E-01 | 1.00E+00 |
| RANBP5   | LMNA | -0.238910982 | -0.364926029 | -0.104299993 | 6.17E-04 | 1.71E-03 | 1.00E+00 |
| P2RY10   | LMNA | 0.212129488  | 0.076313298  | 0.34021733   | 2.44E-03 | 5.79E-03 | 1.00E+00 |
| STAU1    | LMNA | 0.255594502  | 0.121842731  | 0.38022909   | 2.41E-04 | 7.30E-04 | 1.00E+00 |
| NME5     | LMNA | -0.06883359  | -0.204937166 | 0.069881462  | 3.30E-01 | 4.16E-01 | 1.00E+00 |
| DDX21    | LMNA | 0.143693204  | 0.005756393  | 0.276263959  | 4.13E-02 | 7.10E-02 | 1.00E+00 |
| CHMP1A   | LMNA | 0.232617566  | 0.097704147  | 0.359135613  | 8.64E-04 | 2.30E-03 | 1.00E+00 |
| BARX1    | LMNA | 0.156587233  | 0.018945784  | 0.288403802  | 2.61E-02 | 4.72E-02 | 1.00E+00 |
| HDAC11   | LMNA | -0.152291398 | -0.284363937 | -0.014546217 | 3.05E-02 | 5.44E-02 | 1.00E+00 |
| NOLA2    | LMNA | -0.227865045 | -0.354756472 | -0.092731086 | 1.11E-03 | 2.88E-03 | 1.00E+00 |
| MTO1     | LMNA | -0.046684911 | -0.183552932 | 0.091958754  | 5.09E-01 | 5.93E-01 | 1.00E+00 |
| DHX29    | LMNA | 0.262119269  | 0.128726338  | 0.386195467  | 1.64E-04 | 5.15E-04 | 1.00E+00 |
| HADHB    | LMNA | -0.131580534 | -0.264821106 | 0.006590176  | 6.20E-02 | 1.01E-01 | 1.00E+00 |
| ADAR     | LMNA | 0.051885081  | -0.08678756  | 0.188585286  | 4.63E-01 | 5.49E-01 | 1.00E+00 |
| SF4      | LMNA | -0.117879457 | -0.251832296 | 0.020505233  | 9.48E-02 | 1.45E-01 | 1.00E+00 |
| PLXNB2   | LMNA | 0.500833803  | 0.389728895  | 0.597568551  | 3.18E-14 | 5.51E-13 | 3.77E-10 |

|           |      |              |              |              |          |          |          |
|-----------|------|--------------|--------------|--------------|----------|----------|----------|
| P2RX1     | LMNA | -0.11772447  | -0.251685089 | 0.020662335  | 9.52E-02 | 1.46E-01 | 1.00E+00 |
| SLC15A3   | LMNA | 0.375259581  | 0.250168553  | 0.488028295  | 3.74E-08 | 2.29E-07 | 4.43E-04 |
| GAS2      | LMNA | -0.003007658 | -0.141000114 | 0.135099437  | 9.66E-01 | 9.75E-01 | 1.00E+00 |
| EN2       | LMNA | 0.104954208  | -0.033583384 | 0.239534584  | 1.37E-01 | 1.99E-01 | 1.00E+00 |
| NUMB      | LMNA | 0.424342958  | 0.30410683   | 0.531271555  | 3.10E-10 | 2.81E-09 | 3.68E-06 |
| C14orf172 | LMNA | 0.204265564  | 0.068135933  | 0.332928298  | 3.55E-03 | 8.05E-03 | 1.00E+00 |
| TNIP1     | LMNA | 0.536006504  | 0.429755815  | 0.627616264  | 2.03E-16 | 5.57E-15 | 2.41E-12 |
| INHBE     | LMNA | 0.02981049   | -0.108687801 | 0.16717351   | 6.74E-01 | 7.43E-01 | 1.00E+00 |
| TM9SF2    | LMNA | 0.174446998  | 0.037294137  | 0.305149217  | 1.30E-02 | 2.56E-02 | 1.00E+00 |
| PSKH1     | LMNA | 0.185677052  | 0.048878961  | 0.315637351  | 8.15E-03 | 1.69E-02 | 1.00E+00 |
| NSFL1C    | LMNA | 0.174825152  | 0.037683638  | 0.305502905  | 1.28E-02 | 2.53E-02 | 1.00E+00 |
| RHOG      | LMNA | 0.434577006  | 0.315451113  | 0.540218265  | 1.03E-10 | 1.04E-09 | 1.22E-06 |
| HBB       | LMNA | 0.004856159  | -0.133284195 | 0.142811419  | 9.45E-01 | 9.59E-01 | 1.00E+00 |
| MED15     | LMNA | 0.366845471  | 0.2409995    | 0.480559321  | 7.88E-08 | 4.61E-07 | 9.34E-04 |
| HEY1      | LMNA | -0.241905086 | -0.367677412 | -0.107442142 | 5.23E-04 | 1.47E-03 | 1.00E+00 |
| KNG1      | LMNA | -0.013659064 | -0.151424532 | 0.124626939  | 8.47E-01 | 8.86E-01 | 1.00E+00 |
| CASR      | LMNA | -0.048328444 | -0.185144201 | 0.090325188  | 4.95E-01 | 5.79E-01 | 1.00E+00 |
| ITGAX     | LMNA | 0.164784259  | 0.02735556   | 0.296099403  | 1.91E-02 | 3.58E-02 | 1.00E+00 |
| CANT1     | LMNA | 0.428832573  | 0.309079303  | 0.535199361  | 1.92E-10 | 1.82E-09 | 2.28E-06 |
| C6orf66   | LMNA | 0.021647022  | -0.116752883 | 0.159222204  | 7.60E-01 | 8.15E-01 | 1.00E+00 |
| UNC50     | LMNA | -0.073214719 | -0.209151747 | 0.065498297  | 3.00E-01 | 3.85E-01 | 1.00E+00 |
| C21orf33  | LMNA | 0.005329623  | -0.132819101 | 0.143275207  | 9.40E-01 | 9.56E-01 | 1.00E+00 |
| IRF2      | LMNA | 0.295227388  | 0.163854513  | 0.416311034  | 2.00E-05 | 7.48E-05 | 2.37E-01 |
| HEATR6    | LMNA | -0.11124563  | -0.245525948 | 0.027223457  | 1.15E-01 | 1.71E-01 | 1.00E+00 |
| GNG7      | LMNA | -0.123430581 | -0.25710066  | 0.014873866  | 8.01E-02 | 1.26E-01 | 1.00E+00 |
| RUNX2     | LMNA | 0.445875742  | 0.328015259  | 0.550068077  | 2.93E-11 | 3.17E-10 | 3.48E-07 |
| PGR       | LMNA | 0.166873531  | 0.029502174  | 0.298058149  | 1.76E-02 | 3.33E-02 | 1.00E+00 |
| SOX1      | LMNA | -0.160749849 | -0.292313913 | -0.023214006 | 2.23E-02 | 4.12E-02 | 1.00E+00 |
| CROCCL1   | LMNA | -0.264057054 | -0.387965419 | -0.130773172 | 1.46E-04 | 4.64E-04 | 1.00E+00 |
| BRE       | LMNA | 0.088071699  | -0.050594448 | 0.223406438  | 2.13E-01 | 2.88E-01 | 1.00E+00 |
| SRPX      | LMNA | 0.582765005  | 0.48362202   | 0.667143452  | 9.14E-20 | 4.51E-18 | 1.08E-15 |
| MBNL3     | LMNA | 0.137114275  | -0.000954799 | 0.270053497  | 5.17E-02 | 8.64E-02 | 1.00E+00 |
| ODC1      | LMNA | -0.128922441 | -0.262304971 | 0.009293972  | 6.75E-02 | 1.09E-01 | 1.00E+00 |
| SDC3      | LMNA | -0.022120439 | -0.159683806 | 0.116285668  | 7.55E-01 | 8.11E-01 | 1.00E+00 |
| NR2F6     | LMNA | 0.502717629  | 0.391862123  | 0.599184802  | 2.46E-14 | 4.37E-13 | 2.92E-10 |

|           |      |              |              |              |          |          |          |
|-----------|------|--------------|--------------|--------------|----------|----------|----------|
| ADORA2B   | LMNA | 0.281636974  | 0.14939447   | 0.403981083  | 4.90E-05 | 1.70E-04 | 5.81E-01 |
| ZRSR1     | LMNA | -0.134602622 | -0.267679593 | 0.00351367   | 5.61E-02 | 9.28E-02 | 1.00E+00 |
| ZFYVE16   | LMNA | -0.357657917 | -0.472384897 | -0.231013201 | 1.74E-07 | 9.57E-07 | 2.06E-03 |
| RPUSD2    | LMNA | -0.047773396 | -0.184606884 | 0.090876953  | 5.00E-01 | 5.84E-01 | 1.00E+00 |
| SYNJ2BP   | LMNA | 0.005033492  | -0.133110004 | 0.142985136  | 9.43E-01 | 9.58E-01 | 1.00E+00 |
| POLE      | LMNA | -0.08842155  | -0.22374141  | 0.050242748  | 2.11E-01 | 2.86E-01 | 1.00E+00 |
| E2F2      | LMNA | -0.156736609 | -0.288544193 | -0.019098863 | 2.59E-02 | 4.70E-02 | 1.00E+00 |
| C14orf173 | LMNA | 0.425834024  | 0.305757534  | 0.532576546  | 2.65E-10 | 2.44E-09 | 3.14E-06 |
| THRA      | LMNA | -0.57071092  | -0.656998814 | -0.469663389 | 7.49E-19 | 3.22E-17 | 8.89E-15 |
| MAPK11    | LMNA | 0.113748992  | -0.024689716 | 0.247907067  | 1.07E-01 | 1.61E-01 | 1.00E+00 |
| TBC1D22A  | LMNA | 0.234659796  | 0.099843218  | 0.361015686  | 7.75E-04 | 2.09E-03 | 1.00E+00 |
| PTGES2    | LMNA | -0.034272127 | -0.171511654 | 0.104272217  | 6.28E-01 | 7.03E-01 | 1.00E+00 |
| HIP1R     | LMNA | -0.384173317 | -0.495922798 | -0.259906595 | 1.66E-08 | 1.09E-07 | 1.97E-04 |
| ENO3      | LMNA | -0.116708244 | -0.250719726 | 0.021692256  | 9.81E-02 | 1.50E-01 | 1.00E+00 |
| COL4A6    | LMNA | 0.213732609  | 0.077982562  | 0.341701369  | 2.26E-03 | 5.40E-03 | 1.00E+00 |
| TOMM70A   | LMNA | -0.168664206 | -0.299736073 | -0.031343004 | 1.64E-02 | 3.13E-02 | 1.00E+00 |
| IRGC      | LMNA | 0.052086214  | -0.086587398 | 0.188779783  | 4.62E-01 | 5.47E-01 | 1.00E+00 |
| NAB1      | LMNA | -0.177099153 | -0.307629019 | -0.040026755 | 1.17E-02 | 2.33E-02 | 1.00E+00 |
| DET1      | LMNA | -0.21557409  | -0.343405275 | -0.079900959 | 2.06E-03 | 4.98E-03 | 1.00E+00 |
| TRPM3     | LMNA | 0.205641149  | 0.069565027  | 0.334204431  | 3.32E-03 | 7.61E-03 | 1.00E+00 |
| ZNF532    | LMNA | -0.098729266 | -0.233596424 | 0.039865082  | 1.62E-01 | 2.29E-01 | 1.00E+00 |
| RAP2A     | LMNA | -0.532640112 | -0.62475215  | -0.425906668 | 3.38E-16 | 8.86E-15 | 4.00E-12 |
| PLG       | LMNA | 0.132163132  | -0.005997291 | 0.265372347  | 6.08E-02 | 9.95E-02 | 1.00E+00 |
| FECH      | LMNA | 0.01679097   | -0.121541765 | 0.154483876  | 8.13E-01 | 8.59E-01 | 1.00E+00 |
| CRIP1     | LMNA | 0.557406878  | 0.454315735  | 0.645765825  | 6.93E-18 | 2.46E-16 | 8.22E-14 |
| AZIN1     | LMNA | -0.290364364 | -0.41190415  | -0.158673818 | 2.77E-05 | 1.01E-04 | 3.28E-01 |
| SLC7A7    | LMNA | 0.308695631  | 0.178240481  | 0.428486368  | 7.83E-06 | 3.16E-05 | 9.29E-02 |
| CA8       | LMNA | -0.388393647 | -0.499654127 | -0.264526039 | 1.12E-08 | 7.56E-08 | 1.33E-04 |
| IL10RA    | LMNA | 0.324382198  | 0.195066527  | 0.442612443  | 2.48E-06 | 1.11E-05 | 2.94E-02 |
| CDC42EP4  | LMNA | 0.024536634  | -0.113900181 | 0.16203876   | 7.29E-01 | 7.89E-01 | 1.00E+00 |
| C16orf58  | LMNA | 0.206386774  | 0.070339891  | 0.334895952  | 3.21E-03 | 7.38E-03 | 1.00E+00 |
| ARG2      | LMNA | -0.100293629 | -0.235089664 | 0.038287486  | 1.56E-01 | 2.22E-01 | 1.00E+00 |
| NOL7      | LMNA | 0.201557269  | 0.065323918  | 0.330414427  | 4.02E-03 | 9.01E-03 | 1.00E+00 |
| JARID1A   | LMNA | -0.021365242 | -0.158947429 | 0.11703094   | 7.63E-01 | 8.18E-01 | 1.00E+00 |
| PANK2     | LMNA | 0.404952057  | 0.282705431  | 0.514254173  | 2.26E-09 | 1.75E-08 | 2.68E-05 |

|          |      |              |              |              |          |          |          |
|----------|------|--------------|--------------|--------------|----------|----------|----------|
| ASH2L    | LMNA | -0.20453764  | -0.333180741 | -0.068418549 | 3.50E-03 | 7.97E-03 | 1.00E+00 |
| ICAM3    | LMNA | 0.554794487  | 0.45130923   | 0.643555606  | 1.06E-17 | 3.66E-16 | 1.26E-13 |
| TMEM16C  | LMNA | -0.45788785  | -0.560508083 | -0.341418556 | 7.31E-12 | 8.84E-11 | 8.67E-08 |
| MDS1     | LMNA | -0.065549763 | -0.20177486  | 0.073163308  | 3.54E-01 | 4.41E-01 | 1.00E+00 |
| CABYR    | LMNA | -0.376116193 | -0.48878776  | -0.251103282 | 3.46E-08 | 2.14E-07 | 4.11E-04 |
| SLC1A3   | LMNA | -0.005710405 | -0.143648164 | 0.132445006  | 9.36E-01 | 9.53E-01 | 1.00E+00 |
| RNF139   | LMNA | -0.274933069 | -0.397882524 | -0.142282365 | 7.50E-05 | 2.51E-04 | 8.89E-01 |
| ADAM8    | LMNA | 0.447498184  | 0.329822838  | 0.551480084  | 2.44E-11 | 2.67E-10 | 2.89E-07 |
| SFTPC    | LMNA | -0.354855606 | -0.469887669 | -0.227972565 | 2.20E-07 | 1.19E-06 | 2.61E-03 |
| BCL7B    | LMNA | 0.321049038  | 0.191484866  | 0.439615767  | 3.18E-06 | 1.38E-05 | 3.78E-02 |
| MAN2B2   | LMNA | 0.408901258  | 0.287054248  | 0.51772697   | 1.52E-09 | 1.22E-08 | 1.81E-05 |
| RGS12    | LMNA | -0.184399759 | -0.314446042 | -0.04755946  | 8.61E-03 | 1.78E-02 | 1.00E+00 |
| EIF1AY   | LMNA | 0.060047373  | -0.078655651 | 0.196469719  | 3.96E-01 | 4.83E-01 | 1.00E+00 |
| NUDT13   | LMNA | -0.225730952 | -0.35278823  | -0.090500152 | 1.24E-03 | 3.17E-03 | 1.00E+00 |
| ARL6IP4  | LMNA | 0.279446531  | 0.147069145  | 0.401989627  | 5.64E-05 | 1.93E-04 | 6.68E-01 |
| RPL35A   | LMNA | -0.007856854 | -0.145749767 | 0.130335515  | 9.12E-01 | 9.37E-01 | 1.00E+00 |
| CCDC21   | LMNA | -0.116832504 | -0.250837781 | 0.021566337  | 9.77E-02 | 1.49E-01 | 1.00E+00 |
| RAB40C   | LMNA | -0.059041101 | -0.195498654 | 0.079659176  | 4.04E-01 | 4.91E-01 | 1.00E+00 |
| EMR3     | LMNA | 0.254638565  | 0.1208353    | 0.37935409   | 2.55E-04 | 7.67E-04 | 1.00E+00 |
| PRRG3    | LMNA | -0.087262348 | -0.222631385 | 0.051407946  | 2.17E-01 | 2.93E-01 | 1.00E+00 |
| LRCH1    | LMNA | -0.198041675 | -0.327148485 | -0.061676912 | 4.72E-03 | 1.04E-02 | 1.00E+00 |
| SAA4     | LMNA | 0.126898516  | -0.011351343 | 0.260387919  | 7.19E-02 | 1.15E-01 | 1.00E+00 |
| RAPGEF5  | LMNA | -0.248557557 | -0.373782719 | -0.114433172 | 3.61E-04 | 1.05E-03 | 1.00E+00 |
| ZCCHC2   | LMNA | 0.13366936   | -0.004464016 | 0.266797103  | 5.79E-02 | 9.53E-02 | 1.00E+00 |
| CLIP3    | LMNA | -0.409447735 | -0.518207243 | -0.287656419 | 1.44E-09 | 1.16E-08 | 1.71E-05 |
| MAP4K2   | LMNA | 0.113168763  | -0.025277144 | 0.247355317  | 1.09E-01 | 1.63E-01 | 1.00E+00 |
| C20orf30 | LMNA | 0.183070448  | 0.046186728  | 0.313205781  | 9.11E-03 | 1.87E-02 | 1.00E+00 |
| SULF1    | LMNA | 0.07042788   | -0.068287051 | 0.206471434  | 3.19E-01 | 4.05E-01 | 1.00E+00 |
| C11orf48 | LMNA | -0.246214691 | -0.371633791 | -0.111969556 | 4.12E-04 | 1.18E-03 | 1.00E+00 |
| PRDM5    | LMNA | 0.174185285  | 0.037024594  | 0.304904416  | 1.32E-02 | 2.59E-02 | 1.00E+00 |
| ELOVL1   | LMNA | 0.458649336  | 0.342269835  | 0.561168812  | 6.68E-12 | 8.11E-11 | 7.92E-08 |
| PPP4R2   | LMNA | 0.207824325  | 0.071834276  | 0.336228802  | 3.00E-03 | 6.95E-03 | 1.00E+00 |
| KCNV1    | LMNA | -0.294293443 | -0.415465133 | -0.162858997 | 2.13E-05 | 7.93E-05 | 2.52E-01 |
| ACP1     | LMNA | 0.013893954  | -0.124395647 | 0.151654071  | 8.44E-01 | 8.85E-01 | 1.00E+00 |
| SIGLEC5  | LMNA | 0.244761426  | 0.11044222   | 0.370300148  | 4.47E-04 | 1.27E-03 | 1.00E+00 |

|          |      |              |              |              |          |          |          |
|----------|------|--------------|--------------|--------------|----------|----------|----------|
| ZMYM2    | LMNA | -0.341073314 | -0.457578974 | -0.213054073 | 6.79E-07 | 3.35E-06 | 8.06E-03 |
| C19orf61 | LMNA | 0.02618719   | -0.112269684 | 0.163646581  | 7.11E-01 | 7.74E-01 | 1.00E+00 |
| DAGLA    | LMNA | -0.18069336  | -0.310986826 | -0.043733282 | 1.01E-02 | 2.04E-02 | 1.00E+00 |
| GPR32    | LMNA | 0.145965162  | 0.008076917  | 0.278406103  | 3.82E-02 | 6.61E-02 | 1.00E+00 |
| EDG7     | LMNA | -0.079955611 | -0.215626536 | 0.058743801  | 2.58E-01 | 3.40E-01 | 1.00E+00 |
| NEUROD6  | LMNA | -0.425276515 | -0.53208867  | -0.305140252 | 2.81E-10 | 2.57E-09 | 3.33E-06 |
| NEURL    | LMNA | -0.125503653 | -0.259066099 | 0.012768575  | 7.51E-02 | 1.19E-01 | 1.00E+00 |
| SLC2A4RG | LMNA | 0.692771455  | 0.613383056  | 0.75830029   | 3.27E-30 | 1.05E-27 | 3.87E-26 |
| LPL      | LMNA | 0.147441447  | 0.009585555  | 0.27979733   | 3.63E-02 | 6.32E-02 | 1.00E+00 |
| CA5B     | LMNA | 0.022299571  | -0.116108868 | 0.159858451  | 7.53E-01 | 8.09E-01 | 1.00E+00 |
| MPHOSPH8 | LMNA | -0.14940634  | -0.281648152 | -0.011594484 | 3.38E-02 | 5.95E-02 | 1.00E+00 |
| CLEC2D   | LMNA | -0.059169513 | -0.195622588 | 0.07953113   | 4.03E-01 | 4.90E-01 | 1.00E+00 |
| HMG2L1   | LMNA | -0.149466298 | -0.281704614 | -0.011655803 | 3.37E-02 | 5.94E-02 | 1.00E+00 |
| GRRP1    | LMNA | 0.143858713  | 0.00592539   | 0.276420056  | 4.11E-02 | 7.06E-02 | 1.00E+00 |
| HCN4     | LMNA | 0.018091143  | -0.120260208 | 0.15575315   | 7.98E-01 | 8.48E-01 | 1.00E+00 |
| CD8B     | LMNA | 0.185944965  | 0.049155788  | 0.315887177  | 8.06E-03 | 1.68E-02 | 1.00E+00 |
| HIST1H3D | LMNA | 0.040751718  | -0.097849767 | 0.177802435  | 5.65E-01 | 6.45E-01 | 1.00E+00 |
| TGM4     | LMNA | -0.149348878 | -0.28159404  | -0.011535718 | 3.39E-02 | 5.96E-02 | 1.00E+00 |
| SLC6A12  | LMNA | -0.249945124 | -0.375054794 | -0.115893033 | 3.34E-04 | 9.81E-04 | 1.00E+00 |
| CD84     | LMNA | 0.123980918  | -0.014315096 | 0.257622531  | 7.88E-02 | 1.24E-01 | 1.00E+00 |
| TBC1D15  | LMNA | -0.05081515  | -0.187550468 | 0.087852141  | 4.73E-01 | 5.58E-01 | 1.00E+00 |
| RASA1    | LMNA | 0.161731474  | 0.024221267  | 0.293235353  | 2.15E-02 | 3.98E-02 | 1.00E+00 |
| PHKG1    | LMNA | 0.085478862  | -0.053199921 | 0.220922875  | 2.26E-01 | 3.04E-01 | 1.00E+00 |
| MAGEA11  | LMNA | 0.051499722  | -0.087171029 | 0.188212609  | 4.67E-01 | 5.52E-01 | 1.00E+00 |
| NONO     | LMNA | 0.040593651  | -0.098006577 | 0.177649107  | 5.66E-01 | 6.46E-01 | 1.00E+00 |
| IMPA1    | LMNA | -0.285824767 | -0.407785218 | -0.153844212 | 3.73E-05 | 1.33E-04 | 4.43E-01 |
| SH3BP1   | LMNA | 0.053890034  | -0.084791781 | 0.19052362   | 4.46E-01 | 5.33E-01 | 1.00E+00 |
| RARRES1  | LMNA | 0.330564243  | 0.201718616  | 0.448163429  | 1.55E-06 | 7.17E-06 | 1.84E-02 |
| NPM3     | LMNA | 0.046399775  | -0.092242085 | 0.18327679   | 5.12E-01 | 5.96E-01 | 1.00E+00 |
| CLEC5A   | LMNA | 0.552394843  | 0.448549637  | 0.641524077  | 1.56E-17 | 5.23E-16 | 1.85E-13 |
| B3GNTL1  | LMNA | 0.318489861  | 0.188737229  | 0.437313145  | 3.85E-06 | 1.65E-05 | 4.57E-02 |
| ITCH     | LMNA | 0.308224542  | 0.177736349  | 0.428061235  | 8.10E-06 | 3.25E-05 | 9.60E-02 |
| MGAT3    | LMNA | -0.384870682 | -0.496539646 | -0.260669517 | 1.55E-08 | 1.03E-07 | 1.84E-04 |
| ARPC5L   | LMNA | 0.170387797  | 0.033115752  | 0.301350372  | 1.53E-02 | 2.95E-02 | 1.00E+00 |
| KLHL26   | LMNA | 0.205495201  | 0.069413375  | 0.334069057  | 3.35E-03 | 7.65E-03 | 1.00E+00 |

|          |      |              |              |              |          |          |          |
|----------|------|--------------|--------------|--------------|----------|----------|----------|
| MBP      | LMNA | -0.26350924  | -0.387465144 | -0.130194414 | 1.51E-04 | 4.78E-04 | 1.00E+00 |
| SIM2     | LMNA | -0.272872453 | -0.39600579  | -0.140099026 | 8.53E-05 | 2.83E-04 | 1.00E+00 |
| RPP25    | LMNA | 0.192497748  | 0.055933143  | 0.321991971  | 6.06E-03 | 1.30E-02 | 1.00E+00 |
| SLC2A2   | LMNA | 0.119023063  | -0.019345814 | 0.252918299  | 9.16E-02 | 1.41E-01 | 1.00E+00 |
| EXO1     | LMNA | -0.094859331 | -0.229899697 | 0.043764789  | 1.79E-01 | 2.49E-01 | 1.00E+00 |
| SOSTDC1  | LMNA | -0.117272141 | -0.251255433 | 0.021120796  | 9.65E-02 | 1.47E-01 | 1.00E+00 |
| HRC      | LMNA | -0.078455287 | -0.21418647  | 0.060248253  | 2.67E-01 | 3.49E-01 | 1.00E+00 |
| TRIM48   | LMNA | -0.315741994 | -0.434839015 | -0.185789269 | 4.71E-06 | 1.98E-05 | 5.59E-02 |
| KIRREL   | LMNA | 0.544494466  | 0.439478162  | 0.634826802  | 5.47E-17 | 1.67E-15 | 6.49E-13 |
| PIK3R1   | LMNA | -0.464153303 | -0.565940624 | -0.348428496 | 3.46E-12 | 4.43E-11 | 4.11E-08 |
| HOXC11   | LMNA | 0.008781162  | -0.129426736 | 0.146654381  | 9.01E-01 | 9.28E-01 | 1.00E+00 |
| MAF      | LMNA | 0.315806657  | 0.185858614  | 0.434897257  | 4.69E-06 | 1.98E-05 | 5.56E-02 |
| DOK5     | LMNA | 0.016520067  | -0.121808732 | 0.154219353  | 8.15E-01 | 8.61E-01 | 1.00E+00 |
| HELZ     | LMNA | -0.076376653 | -0.212190346 | 0.062331563  | 2.80E-01 | 3.63E-01 | 1.00E+00 |
| ZMIZ2    | LMNA | 0.076461871  | -0.062246178 | 0.212272203  | 2.79E-01 | 3.62E-01 | 1.00E+00 |
| SLC46A3  | LMNA | 0.079331005  | -0.059370202 | 0.215027088  | 2.62E-01 | 3.43E-01 | 1.00E+00 |
| ADRB3    | LMNA | -0.092119573 | -0.227280206 | 0.046523071  | 1.92E-01 | 2.65E-01 | 1.00E+00 |
| PTRH2    | LMNA | 0.09956077   | -0.039026631 | 0.234390203  | 1.59E-01 | 2.25E-01 | 1.00E+00 |
| DMD      | LMNA | 0.035273413  | -0.103280515 | 0.172484495  | 6.18E-01 | 6.94E-01 | 1.00E+00 |
| STAMBP   | LMNA | -0.212829982 | -0.340865869 | -0.077042601 | 2.36E-03 | 5.62E-03 | 1.00E+00 |
| KRTAP2-4 | LMNA | 0.327254206  | 0.198155426  | 0.445192407  | 2.00E-06 | 9.05E-06 | 2.37E-02 |
| ADCY2    | LMNA | -0.314934534 | -0.434111165 | -0.184923455 | 5.00E-06 | 2.09E-05 | 5.92E-02 |
| MS4A12   | LMNA | 0.128247366  | -0.009980333 | 0.261665661  | 6.89E-02 | 1.11E-01 | 1.00E+00 |
| TCF20    | LMNA | -0.220448163 | -0.347911152 | -0.084983472 | 1.62E-03 | 4.01E-03 | 1.00E+00 |
| KLHL20   | LMNA | -0.074124255 | -0.210026074 | 0.064587667  | 2.94E-01 | 3.78E-01 | 1.00E+00 |
| SRM      | LMNA | 0.230160506  | 0.095132226  | 0.356872286  | 9.83E-04 | 2.58E-03 | 1.00E+00 |
| OTC      | LMNA | -0.125924037 | -0.259464522 | 0.012341507  | 7.41E-02 | 1.18E-01 | 1.00E+00 |
| ABCB11   | LMNA | 0.060005368  | -0.078697547 | 0.196429189  | 3.96E-01 | 4.83E-01 | 1.00E+00 |
| KCNC2    | LMNA | -0.332719744 | -0.450096768 | -0.204040806 | 1.31E-06 | 6.15E-06 | 1.56E-02 |
| CDH19    | LMNA | -0.017103807 | -0.15478932  | 0.12123345   | 8.09E-01 | 8.56E-01 | 1.00E+00 |
| SSH3     | LMNA | 0.440227273  | 0.32172897   | 0.545147576  | 5.53E-11 | 5.79E-10 | 6.56E-07 |
| ZNF135   | LMNA | -0.238348197 | -0.364408621 | -0.103709681 | 6.36E-04 | 1.75E-03 | 1.00E+00 |
| FLJ12529 | LMNA | -0.177725317 | -0.308214233 | -0.040672216 | 1.14E-02 | 2.28E-02 | 1.00E+00 |
| PER1     | LMNA | 0.123738004  | -0.014561742 | 0.257392191  | 7.93E-02 | 1.25E-01 | 1.00E+00 |
| KLC2     | LMNA | -0.0798007   | -0.215477874 | 0.058899167  | 2.59E-01 | 3.40E-01 | 1.00E+00 |



|           |      |              |              |              |          |          |          |
|-----------|------|--------------|--------------|--------------|----------|----------|----------|
| HDAC1     | LMNA | 0.419888894  | 0.299180197  | 0.527370304  | 4.95E-10 | 4.33E-09 | 5.87E-06 |
| FAM128A   | LMNA | -0.023660782 | -0.161185288 | 0.114765087  | 7.38E-01 | 7.97E-01 | 1.00E+00 |
| FNDC3B    | LMNA | 0.668466418  | 0.584339723  | 0.738378075  | 1.61E-27 | 3.19E-25 | 1.91E-23 |
| MTCP1     | LMNA | 0.277815018  | 0.145338118  | 0.400505572  | 6.25E-05 | 2.13E-04 | 7.42E-01 |
| GPR63     | LMNA | -0.32119765  | -0.439749432 | -0.191644483 | 3.15E-06 | 1.37E-05 | 3.74E-02 |
| FLJ21986  | LMNA | 0.273305827  | 0.140558103  | 0.396400577  | 8.30E-05 | 2.76E-04 | 9.85E-01 |
| LMCD1     | LMNA | 0.328449466  | 0.199441706  | 0.446265547  | 1.82E-06 | 8.32E-06 | 2.16E-02 |
| MICAL1    | LMNA | -0.107208266 | -0.241682318 | 0.031306071  | 1.29E-01 | 1.89E-01 | 1.00E+00 |
| BLZF1     | LMNA | 0.066754323  | -0.071959824 | 0.202935174  | 3.45E-01 | 4.31E-01 | 1.00E+00 |
| IQCA      | LMNA | -0.188493254 | -0.318262529 | -0.051789914 | 7.22E-03 | 1.52E-02 | 1.00E+00 |
| PCDHGC3   | LMNA | -0.028963873 | -0.166349725 | 0.109525063  | 6.82E-01 | 7.50E-01 | 1.00E+00 |
| ATRNL1    | LMNA | -0.532085984 | -0.624280462 | -0.425273445 | 3.67E-16 | 9.60E-15 | 4.35E-12 |
| CAV2      | LMNA | 0.404348787  | 0.282041559  | 0.513723362  | 2.40E-09 | 1.84E-08 | 2.85E-05 |
| SAC       | LMNA | 0.089186506  | -0.049473628 | 0.224473722  | 2.07E-01 | 2.82E-01 | 1.00E+00 |
| DUS1L     | LMNA | 0.377557796  | 0.252676878  | 0.490065489  | 3.04E-08 | 1.90E-07 | 3.60E-04 |
| NEK9      | LMNA | 0.210194048  | 0.074299019  | 0.338424808  | 2.68E-03 | 6.28E-03 | 1.00E+00 |
| WARS2     | LMNA | 0.317326459  | 0.187488826  | 0.436265859  | 4.19E-06 | 1.78E-05 | 4.97E-02 |
| DDO       | LMNA | 0.159118424  | 0.021540594  | 0.290781975  | 2.37E-02 | 4.35E-02 | 1.00E+00 |
| MARCO     | LMNA | 0.351232087  | 0.224044546  | 0.466655904  | 2.97E-07 | 1.57E-06 | 3.53E-03 |
| DCHS1     | LMNA | 0.067172857  | -0.071541568 | 0.203338245  | 3.42E-01 | 4.28E-01 | 1.00E+00 |
| TOMM40    | LMNA | 0.259628448  | 0.126097013  | 0.383919035  | 1.90E-04 | 5.87E-04 | 1.00E+00 |
| RP6-213H1 | LMNA | 0.306557459  | 0.175952883  | 0.426556354  | 9.11E-06 | 3.63E-05 | 1.08E-01 |
| TUBGCP5   | LMNA | -0.049885881 | -0.186651451 | 0.088776505  | 4.81E-01 | 5.66E-01 | 1.00E+00 |
| IGSF6     | LMNA | -0.007839884 | -0.145733157 | 0.130352197  | 9.12E-01 | 9.37E-01 | 1.00E+00 |
| TPPP      | LMNA | -0.161289269 | -0.29282029  | -0.023767478 | 2.18E-02 | 4.04E-02 | 1.00E+00 |
| Sep-11    | LMNA | 0.289468181  | 0.157719884  | 0.411091405  | 2.94E-05 | 1.07E-04 | 3.48E-01 |
| ADNP      | LMNA | -0.24956368  | -0.374705146 | -0.115491658 | 3.41E-04 | 1.00E-03 | 1.00E+00 |
| UST       | LMNA | -0.414960529 | -0.523048332 | -0.293736431 | 8.24E-10 | 6.92E-09 | 9.78E-06 |
| C13orf34  | LMNA | 0.033465633  | -0.105070791 | 0.170727877  | 6.36E-01 | 7.10E-01 | 1.00E+00 |
| GSTM5     | LMNA | 0.015511512  | -0.122802455 | 0.15323438   | 8.27E-01 | 8.70E-01 | 1.00E+00 |
| BTD       | LMNA | -0.206450567 | -0.33495511  | -0.070406193 | 3.20E-03 | 7.36E-03 | 1.00E+00 |
| PDCD1LG2  | LMNA | 0.430280054  | 0.310683858  | 0.536464732  | 1.65E-10 | 1.58E-09 | 1.95E-06 |
| SNRPB2    | LMNA | 0.186113965  | 0.049330422  | 0.316044759  | 8.00E-03 | 1.67E-02 | 1.00E+00 |
| APOA4     | LMNA | -0.057860886 | -0.194359392 | 0.080835811  | 4.13E-01 | 5.01E-01 | 1.00E+00 |
| APBA3     | LMNA | 0.312279544  | 0.182078018  | 0.431718924  | 6.06E-06 | 2.49E-05 | 7.18E-02 |

|          |      |              |              |              |          |          |          |
|----------|------|--------------|--------------|--------------|----------|----------|----------|
| CUTL1    | LMNA | 0.13584252   | -0.002250688 | 0.268851692  | 5.39E-02 | 8.97E-02 | 1.00E+00 |
| PMS1     | LMNA | -0.335935109 | -0.45297869  | -0.207507514 | 1.02E-06 | 4.88E-06 | 1.21E-02 |
| EIF3E    | LMNA | -0.133083772 | -0.266243259 | 0.005060196  | 5.90E-02 | 9.70E-02 | 1.00E+00 |
| IL9      | LMNA | 0.020473315  | -0.117910945 | 0.158077531  | 7.72E-01 | 8.26E-01 | 1.00E+00 |
| HOXA11   | LMNA | -0.062746449 | -0.199073037 | 0.075962555  | 3.75E-01 | 4.63E-01 | 1.00E+00 |
| NARG1    | LMNA | 0.071588017  | -0.06712638  | 0.207587473  | 3.11E-01 | 3.96E-01 | 1.00E+00 |
| RPL31    | LMNA | -0.163385461 | -0.294787377 | -0.025919079 | 2.02E-02 | 3.76E-02 | 1.00E+00 |
| RAB28    | LMNA | -0.115166504 | -0.249254643 | 0.023254211  | 1.03E-01 | 1.55E-01 | 1.00E+00 |
| LY9      | LMNA | 0.09271661   | -0.045922177 | 0.227851201  | 1.89E-01 | 2.61E-01 | 1.00E+00 |
| TFCP2    | LMNA | -0.079747493 | -0.215426812 | 0.058952529  | 2.59E-01 | 3.41E-01 | 1.00E+00 |
| ATP2B3   | LMNA | -0.277933902 | -0.400613733 | -0.145464227 | 6.21E-05 | 2.11E-04 | 7.36E-01 |
| KDELR2   | LMNA | 0.631327583  | 0.540373011  | 0.707698808  | 7.34E-24 | 7.99E-22 | 8.70E-20 |
| TLE4     | LMNA | 0.131569029  | -0.006601883 | 0.264810219  | 6.20E-02 | 1.01E-01 | 1.00E+00 |
| FLJ43806 | LMNA | -0.097702157 | -0.232615665 | 0.040900505  | 1.67E-01 | 2.34E-01 | 1.00E+00 |
| TLK2     | LMNA | -0.112837789 | -0.247040548 | 0.025612182  | 1.10E-01 | 1.65E-01 | 1.00E+00 |
| PKP3     | LMNA | 0.088419571  | -0.050244737 | 0.223739516  | 2.11E-01 | 2.86E-01 | 1.00E+00 |
| CIR      | LMNA | -0.048511677 | -0.185321563 | 0.090143019  | 4.93E-01 | 5.78E-01 | 1.00E+00 |
| RPN2     | LMNA | 0.545584578  | 0.440728593  | 0.635751715  | 4.61E-17 | 1.43E-15 | 5.47E-13 |
| SH3GL2   | LMNA | -0.561936905 | -0.649594959 | -0.459534751 | 3.29E-18 | 1.24E-16 | 3.90E-14 |
| CTSO     | LMNA | 0.172789154  | 0.035587036  | 0.303598209  | 1.39E-02 | 2.72E-02 | 1.00E+00 |
| SFMBT1   | LMNA | -0.003614757 | -0.141595098 | 0.134503364  | 9.59E-01 | 9.70E-01 | 1.00E+00 |
| WDR57    | LMNA | 0.023061779  | -0.115356482 | 0.160601472  | 7.45E-01 | 8.03E-01 | 1.00E+00 |
| SDF2L1   | LMNA | 0.412688541  | 0.291229486  | 0.521054018  | 1.04E-09 | 8.56E-09 | 1.23E-05 |
| IGFBP3   | LMNA | 0.459900518  | 0.343668966  | 0.562254156  | 5.76E-12 | 7.08E-11 | 6.83E-08 |
| FER1L3   | LMNA | 0.743872114  | 0.675154249  | 0.799790769  | 7.50E-37 | 8.89E-34 | 8.89E-33 |
| C20orf43 | LMNA | 0.059406486  | -0.079294822 | 0.195851285  | 4.01E-01 | 4.89E-01 | 1.00E+00 |
| ARHGAP24 | LMNA | 0.131536139  | -0.006635351 | 0.264779097  | 6.20E-02 | 1.01E-01 | 1.00E+00 |
| ALB      | LMNA | -0.091853771 | -0.227025968 | 0.046790558  | 1.94E-01 | 2.66E-01 | 1.00E+00 |
| SORBS3   | LMNA | 0.183843578  | 0.046985049  | 0.313927173  | 8.82E-03 | 1.81E-02 | 1.00E+00 |
| C4BPA    | LMNA | 0.099855711  | -0.038729178 | 0.23467172   | 1.57E-01 | 2.24E-01 | 1.00E+00 |
| UPF2     | LMNA | -0.156534089 | -0.288353852 | -0.018891324 | 2.61E-02 | 4.73E-02 | 1.00E+00 |
| AGBL2    | LMNA | 0.147912439  | 0.010067001  | 0.280241068  | 3.57E-02 | 6.23E-02 | 1.00E+00 |
| C1QA     | LMNA | 0.282631393  | 0.150450606  | 0.404884782  | 4.59E-05 | 1.60E-04 | 5.45E-01 |
| DOPEY1   | LMNA | -0.344455072 | -0.460603295 | -0.216709102 | 5.17E-07 | 2.60E-06 | 6.14E-03 |
| TERF1    | LMNA | -0.376163054 | -0.488829302 | -0.251154423 | 3.45E-08 | 2.13E-07 | 4.09E-04 |

|          |      |              |              |              |          |          |          |
|----------|------|--------------|--------------|--------------|----------|----------|----------|
| KIF22    | LMNA | -0.177165066 | -0.307690627 | -0.040094694 | 1.17E-02 | 2.32E-02 | 1.00E+00 |
| DNTT     | LMNA | 0.09540135   | -0.043218854 | 0.230417691  | 1.77E-01 | 2.47E-01 | 1.00E+00 |
| C10orf6  | LMNA | -0.019999719 | -0.157615546 | 0.118378121  | 7.78E-01 | 8.30E-01 | 1.00E+00 |
| C11orf41 | LMNA | -0.322071028 | -0.440534867 | -0.192582683 | 2.95E-06 | 1.29E-05 | 3.50E-02 |
| NINJ1    | LMNA | 0.011243633  | -0.127004504 | 0.149063258  | 8.74E-01 | 9.06E-01 | 1.00E+00 |
| SEC61A2  | LMNA | -0.592201033 | -0.675062972 | -0.494584246 | 1.66E-20 | 9.05E-19 | 1.96E-16 |
| HNRPF    | LMNA | 0.272527858  | 0.139734035  | 0.395691846  | 8.71E-05 | 2.88E-04 | 1.00E+00 |
| COL11A1  | LMNA | -0.002671405 | -0.140670528 | 0.13542954   | 9.70E-01 | 9.77E-01 | 1.00E+00 |
| HIST1H1D | LMNA | 0.097240907  | -0.041365391 | 0.232175142  | 1.69E-01 | 2.37E-01 | 1.00E+00 |
| UCP3     | LMNA | -0.010779837 | -0.148609681 | 0.127460847  | 8.79E-01 | 9.11E-01 | 1.00E+00 |
| MYL6B    | LMNA | -0.291820731 | -0.41322451  | -0.16022456  | 2.51E-05 | 9.24E-05 | 2.98E-01 |
| UBAP2    | LMNA | -0.260133081 | -0.384380356 | -0.126629554 | 1.85E-04 | 5.72E-04 | 1.00E+00 |
| TREM1    | LMNA | 0.492698128  | 0.380529802  | 0.590579412  | 9.46E-14 | 1.52E-12 | 1.12E-09 |
| CKMT2    | LMNA | 0.031259815  | -0.107254035 | 0.168583303  | 6.59E-01 | 7.29E-01 | 1.00E+00 |
| HLA-C    | LMNA | 0.407245333  | 0.28523015   | 0.516271242  | 1.80E-09 | 1.42E-08 | 2.14E-05 |
| SLC13A3  | LMNA | 0.00578249   | -0.132374182 | 0.143718763  | 9.35E-01 | 9.52E-01 | 1.00E+00 |
| PLA2G12A | LMNA | 0.219715933  | 0.084219478  | 0.347234612  | 1.68E-03 | 4.15E-03 | 1.00E+00 |
| SPRED2   | LMNA | 0.246578426  | 0.11235193   | 0.371967504  | 4.04E-04 | 1.16E-03 | 1.00E+00 |
| SCN10A   | LMNA | -0.055994623 | -0.192557135 | 0.082695625  | 4.29E-01 | 5.15E-01 | 1.00E+00 |
| TIMP4    | LMNA | -0.188847176 | -0.318592303 | -0.052155909 | 7.11E-03 | 1.49E-02 | 1.00E+00 |
| PITPNC1  | LMNA | -0.004837979 | -0.14279361  | 0.133302052  | 9.46E-01 | 9.59E-01 | 1.00E+00 |
| SLIT2    | LMNA | 0.175074091  | 0.03794007   | 0.305735718  | 1.27E-02 | 2.51E-02 | 1.00E+00 |
| RSF1     | LMNA | -0.230192704 | -0.356901955 | -0.095165917 | 9.82E-04 | 2.58E-03 | 1.00E+00 |
| POU3F3   | LMNA | -0.04730672  | -0.184155052 | 0.091340804  | 5.04E-01 | 5.88E-01 | 1.00E+00 |
| LIN7C    | LMNA | -0.09775157  | -0.232662855 | 0.040850698  | 1.66E-01 | 2.34E-01 | 1.00E+00 |
| NKX2-2   | LMNA | -0.398362484 | -0.508451529 | -0.275460237 | 4.32E-09 | 3.18E-08 | 5.12E-05 |
| DPPA4    | LMNA | -0.035152814 | -0.172367337 | 0.103399974  | 6.19E-01 | 6.95E-01 | 1.00E+00 |
| ZNF804A  | LMNA | -0.42856703  | -0.534967176 | -0.30878502  | 1.98E-10 | 1.87E-09 | 2.35E-06 |
| CCIN     | LMNA | 0.234419061  | 0.099591003  | 0.360794119  | 7.85E-04 | 2.12E-03 | 1.00E+00 |
| SLC25A31 | LMNA | 0.09685761   | -0.041751664 | 0.231809025  | 1.70E-01 | 2.39E-01 | 1.00E+00 |
| KCNMB4   | LMNA | -0.08642805  | -0.221832264 | 0.052246326  | 2.21E-01 | 2.98E-01 | 1.00E+00 |
| FUT2     | LMNA | 0.024649212  | -0.113788995 | 0.162148446  | 7.28E-01 | 7.88E-01 | 1.00E+00 |
| RABL5    | LMNA | 0.194174577  | 0.057669464  | 0.323552433  | 5.62E-03 | 1.21E-02 | 1.00E+00 |
| FZD4     | LMNA | 0.324180549  | 0.194849746  | 0.442431226  | 2.52E-06 | 1.12E-05 | 2.99E-02 |
| GALNS    | LMNA | 0.611407662  | 0.516993746  | 0.691124035  | 4.28E-22 | 3.08E-20 | 5.07E-18 |

|           |      |              |              |              |          |          |          |
|-----------|------|--------------|--------------|--------------|----------|----------|----------|
| PNMA3     | LMNA | -0.490781421 | -0.58893068  | -0.378365787 | 1.22E-13 | 1.93E-12 | 1.44E-09 |
| STX6      | LMNA | -0.108331316 | -0.242751902 | 0.030170898  | 1.25E-01 | 1.84E-01 | 1.00E+00 |
| HIST1H1C  | LMNA | -0.085787749 | -0.221218837 | 0.052889628  | 2.25E-01 | 3.02E-01 | 1.00E+00 |
| CIDEB     | LMNA | 0.261846701  | 0.128438521  | 0.385946433  | 1.67E-04 | 5.22E-04 | 1.00E+00 |
| CASP4     | LMNA | 0.474310868  | 0.359820592  | 0.574729128  | 9.99E-13 | 1.39E-11 | 1.18E-08 |
| PDK3      | LMNA | 0.422280215  | 0.301824434  | 0.529465392  | 3.86E-10 | 3.43E-09 | 4.57E-06 |
| WIT1      | LMNA | -0.005376955 | -0.143321569 | 0.132772602  | 9.39E-01 | 9.55E-01 | 1.00E+00 |
| TPR       | LMNA | 0.120633052  | -0.017712931 | 0.254446622  | 8.72E-02 | 1.35E-01 | 1.00E+00 |
| MTX2      | LMNA | -0.045307776 | -0.182219036 | 0.093326964  | 5.22E-01 | 6.05E-01 | 1.00E+00 |
| BRD3      | LMNA | -0.20844723  | -0.336806179 | -0.072481997 | 2.91E-03 | 6.76E-03 | 1.00E+00 |
| HIST1H2BC | LMNA | 0.149253704  | 0.011438387  | 0.281504413  | 3.40E-02 | 5.98E-02 | 1.00E+00 |
| SERPINA3  | LMNA | 0.221509302  | 0.086090926  | 0.348891351  | 1.53E-03 | 3.82E-03 | 1.00E+00 |
| UBXD6     | LMNA | -0.00263226  | -0.140632157 | 0.135467968  | 9.70E-01 | 9.77E-01 | 1.00E+00 |
| HOXB7     | LMNA | 0.209835334  | 0.073925815  | 0.338092479  | 2.72E-03 | 6.38E-03 | 1.00E+00 |
| C7orf23   | LMNA | 0.364269932  | 0.238197359  | 0.478269784  | 9.86E-08 | 5.65E-07 | 1.17E-03 |
| KIAA0143  | LMNA | 0.089627569  | -0.049030089 | 0.224895894  | 2.05E-01 | 2.79E-01 | 1.00E+00 |
| KCNJ16    | LMNA | -0.230989987 | -0.357636531 | -0.096000281 | 9.41E-04 | 2.48E-03 | 1.00E+00 |
| STAB2     | LMNA | 0.187438301  | 0.050699195  | 0.317279367  | 7.56E-03 | 1.58E-02 | 1.00E+00 |
| TNPO2     | LMNA | -0.083574562 | -0.219097711 | 0.0551123    | 2.37E-01 | 3.16E-01 | 1.00E+00 |
| CENTG1    | LMNA | -0.359713458 | -0.474215485 | -0.233245131 | 1.46E-07 | 8.12E-07 | 1.73E-03 |
| IRF9      | LMNA | 0.047954591  | -0.090696839 | 0.1847823    | 4.98E-01 | 5.83E-01 | 1.00E+00 |
| MCPH1     | LMNA | -0.286636527 | -0.40852212  | -0.154707368 | 3.54E-05 | 1.26E-04 | 4.20E-01 |
| FABP2     | LMNA | -0.0004295   | -0.138472291 | 0.137629661  | 9.95E-01 | 9.96E-01 | 1.00E+00 |
| C9orf3    | LMNA | 0.125961236  | -0.012303715 | 0.259499776  | 7.41E-02 | 1.18E-01 | 1.00E+00 |
| FBXL4     | LMNA | -0.008835333 | -0.146707391 | 0.129373468  | 9.01E-01 | 9.28E-01 | 1.00E+00 |
| LBH       | LMNA | 0.21630713   | 0.080664897  | 0.344083316  | 1.99E-03 | 4.83E-03 | 1.00E+00 |
| MYO1D     | LMNA | 0.292674706  | 0.161134176  | 0.413998496  | 2.37E-05 | 8.76E-05 | 2.81E-01 |
| PTDSS2    | LMNA | -0.016973642 | -0.154662233 | 0.121361737  | 8.11E-01 | 8.57E-01 | 1.00E+00 |
| BMP2K     | LMNA | 0.184045737  | 0.047193823  | 0.314115779  | 8.74E-03 | 1.80E-02 | 1.00E+00 |
| NFU1      | LMNA | -0.198046746 | -0.327153197 | -0.06168217  | 4.72E-03 | 1.04E-02 | 1.00E+00 |
| UGT8      | LMNA | -0.437304352 | -0.542598516 | -0.318480092 | 7.65E-11 | 7.84E-10 | 9.07E-07 |
| SLC25A23  | LMNA | -0.334030193 | -0.451271614 | -0.205453302 | 1.18E-06 | 5.60E-06 | 1.40E-02 |
| MAPK4     | LMNA | -0.039122483 | -0.176221728 | 0.099465722  | 5.80E-01 | 6.59E-01 | 1.00E+00 |
| HINT1     | LMNA | -0.055695253 | -0.192267946 | 0.08299387   | 4.31E-01 | 5.18E-01 | 1.00E+00 |
| GLP2R     | LMNA | -0.018695963 | -0.156343442 | 0.11966389   | 7.92E-01 | 8.43E-01 | 1.00E+00 |

|          |      |              |              |              |          |          |          |
|----------|------|--------------|--------------|--------------|----------|----------|----------|
| WNT7B    | LMNA | -0.126568309 | -0.260075049 | 0.011686895  | 7.27E-02 | 1.16E-01 | 1.00E+00 |
| SETD4    | LMNA | -0.053432471 | -0.190081354 | 0.085247349  | 4.50E-01 | 5.36E-01 | 1.00E+00 |
| CHCHD2   | LMNA | -0.006830301 | -0.144744817 | 0.131344548  | 9.23E-01 | 9.45E-01 | 1.00E+00 |
| DYNLT3   | LMNA | 0.512542672  | 0.403007269  | 0.60760159   | 6.31E-15 | 1.28E-13 | 7.48E-11 |
| FKBP11   | LMNA | 0.582749987  | 0.483604598  | 0.667130833  | 9.17E-20 | 4.51E-18 | 1.09E-15 |
| NDP      | LMNA | 0.0632587    | -0.075451211 | 0.199566897  | 3.71E-01 | 4.59E-01 | 1.00E+00 |
| RHOBTB1  | LMNA | 0.278952445  | 0.146544837  | 0.401540265  | 5.82E-05 | 1.99E-04 | 6.90E-01 |
| FLII     | LMNA | 0.562588626  | 0.460286176  | 0.650145478  | 2.95E-18 | 1.12E-16 | 3.50E-14 |
| SLC4A4   | LMNA | -0.000869226 | -0.138903559 | 0.137198238  | 9.90E-01 | 9.92E-01 | 1.00E+00 |
| RPL38    | LMNA | -0.184292081 | -0.314345594 | -0.047448245 | 8.65E-03 | 1.78E-02 | 1.00E+00 |
| HTF9C    | LMNA | 0.070282351  | -0.068432621 | 0.206331411  | 3.20E-01 | 4.06E-01 | 1.00E+00 |
| RPS16    | LMNA | -0.077005268 | -0.212794128 | 0.061701661  | 2.76E-01 | 3.58E-01 | 1.00E+00 |
| AP2A2    | LMNA | 0.08336049   | -0.055327216 | 0.218892476  | 2.38E-01 | 3.17E-01 | 1.00E+00 |
| CHPF     | LMNA | 0.645006233  | 0.556508872  | 0.71903193   | 3.78E-25 | 5.15E-23 | 4.48E-21 |
| CSNK2A1  | LMNA | 0.043083128  | -0.095536089 | 0.180063173  | 5.43E-01 | 6.24E-01 | 1.00E+00 |
| MAP7D1   | LMNA | 0.323841455  | 0.194485235  | 0.442126468  | 2.58E-06 | 1.14E-05 | 3.06E-02 |
| FKBP6    | LMNA | 0.11409258   | -0.024341818 | 0.248233752  | 1.06E-01 | 1.60E-01 | 1.00E+00 |
| ZNF214   | LMNA | -0.003695954 | -0.141674668 | 0.134423633  | 9.58E-01 | 9.69E-01 | 1.00E+00 |
| DDX56    | LMNA | 0.288694527  | 0.156896572  | 0.410389626  | 3.09E-05 | 1.12E-04 | 3.67E-01 |
| TWIST1   | LMNA | 0.447467752  | 0.329788925  | 0.551453605  | 2.45E-11 | 2.67E-10 | 2.90E-07 |
| EPO      | LMNA | 0.070272776  | -0.068442198 | 0.206322198  | 3.20E-01 | 4.06E-01 | 1.00E+00 |
| MRPS18B  | LMNA | -0.030511134 | -0.167855113 | 0.107994751  | 6.66E-01 | 7.36E-01 | 1.00E+00 |
| ZNF682   | LMNA | -0.35121595  | -0.466641505 | -0.224027062 | 2.98E-07 | 1.57E-06 | 3.53E-03 |
| AOX1     | LMNA | 0.223207671  | 0.087864119  | 0.350459595  | 1.41E-03 | 3.55E-03 | 1.00E+00 |
| RPL14    | LMNA | 0.074806641  | -0.063904308 | 0.210681902  | 2.90E-01 | 3.74E-01 | 1.00E+00 |
| CYR61    | LMNA | 0.543918399  | 0.43881754   | 0.634337929  | 5.98E-17 | 1.82E-15 | 7.10E-13 |
| JRKL     | LMNA | 0.061729532  | -0.076977456 | 0.198092424  | 3.83E-01 | 4.70E-01 | 1.00E+00 |
| DTNA     | LMNA | -0.12449521  | -0.258110152 | 0.013792843  | 7.75E-02 | 1.23E-01 | 1.00E+00 |
| MAFF     | LMNA | 0.56326301   | 0.461063886  | 0.650715045  | 2.64E-18 | 1.01E-16 | 3.13E-14 |
| LOC51136 | LMNA | -0.049182122 | -0.18597045  | 0.089476391  | 4.87E-01 | 5.72E-01 | 1.00E+00 |
| TMOD3    | LMNA | 0.571631135  | 0.47072722   | 0.657774365  | 6.40E-19 | 2.79E-17 | 7.59E-15 |
| LY96     | LMNA | 0.46872696   | 0.353553799  | 0.569900698  | 1.99E-12 | 2.64E-11 | 2.36E-08 |
| EEA1     | LMNA | 0.289155192  | 0.157386782  | 0.410807511  | 3.00E-05 | 1.09E-04 | 3.56E-01 |
| KLK3     | LMNA | -0.01336556  | -0.151137692 | 0.124915927  | 8.50E-01 | 8.89E-01 | 1.00E+00 |
| IL1R1    | LMNA | 0.514692579  | 0.405450379  | 0.609440501  | 4.65E-15 | 9.66E-14 | 5.52E-11 |

|           |      |              |              |              |          |          |          |
|-----------|------|--------------|--------------|--------------|----------|----------|----------|
| HRSP12    | LMNA | -0.337706778 | -0.454565586 | -0.209419052 | 8.87E-07 | 4.28E-06 | 1.05E-02 |
| KTN1      | LMNA | 0.215350081  | 0.07966754   | 0.343198046  | 2.08E-03 | 5.03E-03 | 1.00E+00 |
| LOH11CR2  | LMNA | 0.326987114  | 0.197868056  | 0.444952557  | 2.04E-06 | 9.22E-06 | 2.42E-02 |
| ARL5A     | LMNA | -0.208809839 | -0.337142241 | -0.072859105 | 2.86E-03 | 6.66E-03 | 1.00E+00 |
| MAB21L1   | LMNA | 0.20422712   | 0.068096002  | 0.332892626  | 3.55E-03 | 8.07E-03 | 1.00E+00 |
| C20orf59  | LMNA | 0.520932813  | 0.412550504  | 0.614772283  | 1.90E-15 | 4.30E-14 | 2.26E-11 |
| ADAM2     | LMNA | -0.100333141 | -0.235127371 | 0.038247631  | 1.55E-01 | 2.21E-01 | 1.00E+00 |
| PHKB      | LMNA | -0.137001943 | -0.269947361 | 0.001069281  | 5.19E-02 | 8.67E-02 | 1.00E+00 |
| CCT6A     | LMNA | 0.140799883  | 0.002803373  | 0.273534048  | 4.56E-02 | 7.75E-02 | 1.00E+00 |
| TBC1D8B   | LMNA | 0.532819161  | 0.426111295  | 0.624904546  | 3.29E-16 | 8.64E-15 | 3.90E-12 |
| FAM13A1   | LMNA | -0.338615263 | -0.455379035 | -0.210399641 | 8.26E-07 | 4.01E-06 | 9.80E-03 |
| EHHADH    | LMNA | -0.081709203 | -0.217308951 | 0.056984586  | 2.48E-01 | 3.28E-01 | 1.00E+00 |
| LAPTM4B   | LMNA | -0.335029519 | -0.45216726  | -0.206530808 | 1.10E-06 | 5.21E-06 | 1.30E-02 |
| TMEM147   | LMNA | 0.21117876   | 0.075323705  | 0.339336923  | 2.55E-03 | 6.03E-03 | 1.00E+00 |
| ITGB5     | LMNA | 0.565884043  | 0.464087995  | 0.652927766  | 1.70E-18 | 6.83E-17 | 2.02E-14 |
| YIPF3     | LMNA | 0.199312865  | 0.062995199  | 0.32832976   | 4.46E-03 | 9.88E-03 | 1.00E+00 |
| FKBP2     | LMNA | 0.30754451   | 0.177008739  | 0.427447448  | 8.50E-06 | 3.40E-05 | 1.01E-01 |
| XPO7      | LMNA | -0.188002119 | -0.31780485  | -0.051282087 | 7.38E-03 | 1.55E-02 | 1.00E+00 |
| GPR75     | LMNA | -0.179860472 | -0.310209008 | -0.04287403  | 1.04E-02 | 2.11E-02 | 1.00E+00 |
| NR1D1     | LMNA | 0.235631637  | 0.100861581  | 0.361910001  | 7.36E-04 | 2.00E-03 | 1.00E+00 |
| TRIM5     | LMNA | 0.411022892  | 0.289392644  | 0.519591186  | 1.23E-09 | 1.00E-08 | 1.46E-05 |
| TMEM110   | LMNA | 0.252405123  | 0.118482623  | 0.377308878  | 2.90E-04 | 8.63E-04 | 1.00E+00 |
| APOC1     | LMNA | -0.035452927 | -0.172658881 | 0.10310269   | 6.16E-01 | 6.92E-01 | 1.00E+00 |
| RNASE4    | LMNA | 0.503237099  | 0.392450576  | 0.599630349  | 2.29E-14 | 4.12E-13 | 2.72E-10 |
| PARD6B    | LMNA | -0.137981617 | -0.270872895 | 7.07E-05     | 5.02E-02 | 8.42E-02 | 1.00E+00 |
| ARID1A    | LMNA | -0.14966055  | -0.281887532 | -0.011854472 | 3.35E-02 | 5.91E-02 | 1.00E+00 |
| NEK2      | LMNA | -0.080879398 | -0.216512927 | 0.057817159  | 2.53E-01 | 3.33E-01 | 1.00E+00 |
| RRAGB     | LMNA | -0.212079895 | -0.340171411 | -0.076261672 | 2.45E-03 | 5.80E-03 | 1.00E+00 |
| PCDHGA3   | LMNA | -0.146199169 | -0.278626664 | -0.00831601  | 3.79E-02 | 6.57E-02 | 1.00E+00 |
| HIST2H2BE | LMNA | -0.082893591 | -0.218444809 | 0.055795913  | 2.41E-01 | 3.20E-01 | 1.00E+00 |
| RCN2      | LMNA | -0.17936148  | -0.309742926 | -0.042359341 | 1.06E-02 | 2.14E-02 | 1.00E+00 |
| STARD7    | LMNA | -0.243484873 | -0.369128244 | -0.109101124 | 4.80E-04 | 1.36E-03 | 1.00E+00 |
| SHMT2     | LMNA | 0.176260843  | 0.03916279   | 0.306845379  | 1.21E-02 | 2.40E-02 | 1.00E+00 |
| MLYCD     | LMNA | -0.068723111 | -0.204830821 | 0.069991924  | 3.31E-01 | 4.17E-01 | 1.00E+00 |
| KIAA1751  | LMNA | -0.278927523 | -0.401517597 | -0.146518392 | 5.83E-05 | 1.99E-04 | 6.91E-01 |

|           |      |              |              |              |          |          |          |
|-----------|------|--------------|--------------|--------------|----------|----------|----------|
| NDUFA5    | LMNA | -0.252919096 | -0.377779643 | -0.119023902 | 2.82E-04 | 8.40E-04 | 1.00E+00 |
| THAP9     | LMNA | -0.365685248 | -0.479528128 | -0.239736939 | 8.72E-08 | 5.05E-07 | 1.03E-03 |
| FLVCR2    | LMNA | 0.289263482  | 0.157502028  | 0.410905738  | 2.98E-05 | 1.08E-04 | 3.53E-01 |
| RP11-217H | LMNA | 0.326946379  | 0.19782423   | 0.444915975  | 2.04E-06 | 9.25E-06 | 2.42E-02 |
| AP1S1     | LMNA | 0.044855634  | -0.093776062 | 0.181780981  | 5.26E-01 | 6.09E-01 | 1.00E+00 |
| NCLN      | LMNA | 0.499097013  | 0.387763225  | 0.596077755  | 4.03E-14 | 6.81E-13 | 4.77E-10 |
| SDHA      | LMNA | 0.127601994  | -0.010636372 | 0.26105437   | 7.03E-02 | 1.13E-01 | 1.00E+00 |
| SMAD6     | LMNA | 0.27312814   | 0.140369872  | 0.396238717  | 8.40E-05 | 2.79E-04 | 9.96E-01 |
| SAV1      | LMNA | 0.22790863   | 0.092776663  | 0.354796658  | 1.11E-03 | 2.87E-03 | 1.00E+00 |
| SAT1      | LMNA | 0.40861637   | 0.286740364  | 0.51747657   | 1.57E-09 | 1.25E-08 | 1.86E-05 |
| ADAMTS7   | LMNA | 0.024550389  | -0.113886597 | 0.162052161  | 7.29E-01 | 7.89E-01 | 1.00E+00 |
| RPP38     | LMNA | -0.098791082 | -0.233655441 | 0.039802757  | 1.62E-01 | 2.29E-01 | 1.00E+00 |
| RCBTB2    | LMNA | -0.153306852 | -0.285319308 | -0.01558571  | 2.94E-02 | 5.25E-02 | 1.00E+00 |
| VEGFB     | LMNA | 0.123123685  | -0.015185428 | 0.256809603  | 8.09E-02 | 1.27E-01 | 1.00E+00 |
| COLQ      | LMNA | -0.071987825 | -0.207972002 | 0.066726301  | 3.09E-01 | 3.93E-01 | 1.00E+00 |
| RBMS1     | LMNA | 0.649719945  | 0.562084859  | 0.722928265  | 1.31E-25 | 2.07E-23 | 1.56E-21 |
| NRXN2     | LMNA | -0.562557098 | -0.650118848 | -0.460249822 | 2.96E-18 | 1.12E-16 | 3.52E-14 |
| WBSCR16   | LMNA | 0.520306232  | 0.411836987  | 0.614237307  | 2.08E-15 | 4.63E-14 | 2.47E-11 |
| DRG2      | LMNA | 0.326866245  | 0.197738016  | 0.44484401   | 2.06E-06 | 9.30E-06 | 2.44E-02 |
| KLRB1     | LMNA | 0.171753209  | 0.034520719  | 0.302628671  | 1.45E-02 | 2.81E-02 | 1.00E+00 |
| DNASE2B   | LMNA | -0.091223654 | -0.22642319  | 0.047424589  | 1.97E-01 | 2.70E-01 | 1.00E+00 |
| SAFB      | LMNA | -0.019991795 | -0.157607816 | 0.118385937  | 7.78E-01 | 8.30E-01 | 1.00E+00 |
| MAPK8IP1  | LMNA | -0.283083556 | -0.405295617 | -0.150930931 | 4.46E-05 | 1.56E-04 | 5.29E-01 |
| RFX2      | LMNA | 0.215600518  | 0.079928499  | 0.343429722  | 2.06E-03 | 4.98E-03 | 1.00E+00 |
| MLLT4     | LMNA | -0.274512818 | -0.397499858 | -0.14183698  | 7.70E-05 | 2.57E-04 | 9.13E-01 |
| ANKZF1    | LMNA | -0.211097056 | -0.339261251 | -0.075238672 | 2.56E-03 | 6.05E-03 | 1.00E+00 |
| DUSP8     | LMNA | -0.480389039 | -0.579977015 | -0.366653858 | 4.65E-13 | 6.82E-12 | 5.52E-09 |
| MEF2C     | LMNA | -0.327751378 | -0.445638824 | -0.198690404 | 1.92E-06 | 8.74E-06 | 2.28E-02 |
| SEN5      | LMNA | 0.054719102  | -0.083966181 | 0.19132483   | 4.39E-01 | 5.26E-01 | 1.00E+00 |
| NFKBIL2   | LMNA | -0.082956677 | -0.2185053   | 0.055732587  | 2.40E-01 | 3.20E-01 | 1.00E+00 |
| LBR       | LMNA | -0.148372457 | -0.280674413 | -0.010537291 | 3.51E-02 | 6.14E-02 | 1.00E+00 |
| CBFA2T3   | LMNA | -0.378328101 | -0.490748032 | -0.253517983 | 2.83E-08 | 1.78E-07 | 3.36E-04 |
| AFF3      | LMNA | -0.390927075 | -0.50189203  | -0.267301784 | 8.81E-09 | 6.09E-08 | 1.04E-04 |
| IL2RG     | LMNA | 0.299361574  | 0.168264467  | 0.420052976  | 1.50E-05 | 5.77E-05 | 1.78E-01 |
| CCDC51    | LMNA | -0.095524163 | -0.23053505  | 0.043095143  | 1.76E-01 | 2.46E-01 | 1.00E+00 |

|           |      |              |              |              |          |          |          |
|-----------|------|--------------|--------------|--------------|----------|----------|----------|
| COG7      | LMNA | 0.184844846  | 0.0480192    | 0.314861213  | 8.45E-03 | 1.75E-02 | 1.00E+00 |
| MYB       | LMNA | -0.277832461 | -0.400521442 | -0.14535662  | 6.25E-05 | 2.12E-04 | 7.41E-01 |
| KLF3      | LMNA | 0.290943838  | 0.159290765  | 0.412429569  | 2.66E-05 | 9.74E-05 | 3.16E-01 |
| PLXNA3    | LMNA | 0.348577074  | 0.221169041  | 0.464285977  | 3.70E-07 | 1.92E-06 | 4.39E-03 |
| KCTD14    | LMNA | 0.234930855  | 0.100127225  | 0.361265146  | 7.64E-04 | 2.07E-03 | 1.00E+00 |
| FZR1      | LMNA | 0.171948377  | 0.034721585  | 0.302811349  | 1.44E-02 | 2.79E-02 | 1.00E+00 |
| XRCC2     | LMNA | -0.157929402 | -0.289665035 | -0.020321456 | 2.48E-02 | 4.52E-02 | 1.00E+00 |
| SLC44A4   | LMNA | 0.123957217  | -0.014339161 | 0.257600058  | 7.88E-02 | 1.24E-01 | 1.00E+00 |
| ESPL1     | LMNA | -0.043130264 | -0.180108864 | 0.095489297  | 5.42E-01 | 6.24E-01 | 1.00E+00 |
| MMS19     | LMNA | 0.098275722  | -0.040322334 | 0.233163381  | 1.64E-01 | 2.32E-01 | 1.00E+00 |
| GMPR2     | LMNA | -0.051623813 | -0.18833262  | 0.087047551  | 4.66E-01 | 5.51E-01 | 1.00E+00 |
| ST8SIA5   | LMNA | -0.087865401 | -0.223208899 | 0.050801821  | 2.14E-01 | 2.89E-01 | 1.00E+00 |
| TBC1D19   | LMNA | 0.254406075  | 0.120590329  | 0.379141251  | 2.59E-04 | 7.77E-04 | 1.00E+00 |
| CHPT1     | LMNA | 0.328070968  | 0.199034337  | 0.445925757  | 1.88E-06 | 8.55E-06 | 2.22E-02 |
| ERBB4     | LMNA | -0.465286475 | -0.566922212 | -0.349697699 | 3.02E-12 | 3.90E-11 | 3.58E-08 |
| TSPAN32   | LMNA | 0.171418081  | 0.034175832  | 0.302314968  | 1.47E-02 | 2.84E-02 | 1.00E+00 |
| MAP4      | LMNA | 0.253886385  | 0.120042797  | 0.378665439  | 2.66E-04 | 7.98E-04 | 1.00E+00 |
| ACTR3     | LMNA | 0.368201601  | 0.24247579   | 0.481764237  | 7.00E-08 | 4.14E-07 | 8.30E-04 |
| UGCG      | LMNA | 0.385401551  | 0.261250396  | 0.497009146  | 1.48E-08 | 9.83E-08 | 1.75E-04 |
| GPHN      | LMNA | -0.332522807 | -0.449920174 | -0.203828579 | 1.33E-06 | 6.23E-06 | 1.58E-02 |
| ZAP70     | LMNA | 0.053824378  | -0.084857155 | 0.190460162  | 4.47E-01 | 5.33E-01 | 1.00E+00 |
| SLC6A2    | LMNA | 0.036623781  | -0.101942636 | 0.173796077  | 6.05E-01 | 6.82E-01 | 1.00E+00 |
| LPP       | LMNA | 0.551393875  | 0.447399108  | 0.640676292  | 1.83E-17 | 6.03E-16 | 2.18E-13 |
| PTPRCAP   | LMNA | -0.064483871 | -0.200747802 | 0.074227911  | 3.62E-01 | 4.49E-01 | 1.00E+00 |
| IL12RB1   | LMNA | 0.044287418  | -0.094340372 | 0.18123039   | 5.31E-01 | 6.14E-01 | 1.00E+00 |
| HIVEP1    | LMNA | -0.132733495 | -0.265911927 | 0.005416763  | 5.97E-02 | 9.79E-02 | 1.00E+00 |
| ATRX      | LMNA | 0.040402962  | -0.098195742 | 0.177464126  | 5.68E-01 | 6.48E-01 | 1.00E+00 |
| EIF4EBP2  | LMNA | -0.087692067 | -0.223042915 | 0.050976048  | 2.15E-01 | 2.90E-01 | 1.00E+00 |
| DFFB      | LMNA | -0.185688587 | -0.315648107 | -0.048890879 | 8.15E-03 | 1.69E-02 | 1.00E+00 |
| DMRT1     | LMNA | 0.078570439  | -0.060132806 | 0.214297018  | 2.66E-01 | 3.48E-01 | 1.00E+00 |
| CHST8     | LMNA | -0.06495343  | -0.20120029  | 0.073758959  | 3.58E-01 | 4.45E-01 | 1.00E+00 |
| HSPB6     | LMNA | 0.337162607  | 0.208831816  | 0.454078247  | 9.26E-07 | 4.46E-06 | 1.10E-02 |
| C14orf109 | LMNA | -0.01700506  | -0.154692909 | 0.121330772  | 8.10E-01 | 8.57E-01 | 1.00E+00 |
| IER2      | LMNA | 0.324100049  | 0.194763209  | 0.44235888   | 2.53E-06 | 1.13E-05 | 3.01E-02 |
| NMB       | LMNA | -0.114286006 | -0.248417647 | 0.024145953  | 1.05E-01 | 1.59E-01 | 1.00E+00 |



|          |      |              |              |              |          |          |          |
|----------|------|--------------|--------------|--------------|----------|----------|----------|
| COX5A    | LMNA | -0.08664123  | -0.222036473 | 0.052032122  | 2.20E-01 | 2.97E-01 | 1.00E+00 |
| EIF6     | LMNA | 0.379414087  | 0.254704103  | 0.491710055  | 2.57E-08 | 1.63E-07 | 3.04E-04 |
| AIFM1    | LMNA | 0.229008779  | 0.093927279  | 0.355810858  | 1.04E-03 | 2.73E-03 | 1.00E+00 |
| WWC2     | LMNA | 0.255332731  | 0.121566832  | 0.379989505  | 2.45E-04 | 7.39E-04 | 1.00E+00 |
| MRPL4    | LMNA | 0.153382625  | 0.015663288  | 0.285390587  | 2.93E-02 | 5.24E-02 | 1.00E+00 |
| SEMG1    | LMNA | -0.011796898 | -0.149604257 | 0.126460053  | 8.68E-01 | 9.02E-01 | 1.00E+00 |
| MPPED2   | LMNA | -0.517483456 | -0.611826142 | -0.408624204 | 3.13E-15 | 6.67E-14 | 3.71E-11 |
| FLJ21062 | LMNA | 0.118201248  | -0.02017903  | 0.252137913  | 9.39E-02 | 1.44E-01 | 1.00E+00 |
| TRAF3IP2 | LMNA | 0.077352971  | -0.061353199 | 0.213128051  | 2.74E-01 | 3.56E-01 | 1.00E+00 |
| EPB41L4A | LMNA | -0.135981997 | -0.268983518 | 0.002108587  | 5.37E-02 | 8.93E-02 | 1.00E+00 |
| LILRA4   | LMNA | -0.12555576  | -0.259115486 | 0.012715643  | 7.50E-02 | 1.19E-01 | 1.00E+00 |
| LAMA2    | LMNA | 0.476717201  | 0.362524398  | 0.576807742  | 7.40E-13 | 1.05E-11 | 8.77E-09 |
| TAF4B    | LMNA | -0.230850786 | -0.35750829  | -0.095854593 | 9.48E-04 | 2.50E-03 | 1.00E+00 |
| RLBP1    | LMNA | -0.250592202 | -0.375647851 | -0.116574022 | 3.22E-04 | 9.48E-04 | 1.00E+00 |
| SLTM     | LMNA | 0.040656741  | -0.09794399  | 0.177710306  | 5.66E-01 | 6.46E-01 | 1.00E+00 |
| CD300C   | LMNA | 0.344451919  | 0.216705692  | 0.460600477  | 5.18E-07 | 2.60E-06 | 6.14E-03 |
| FLJ10404 | LMNA | -0.059440522 | -0.195884132 | 0.079260879  | 4.01E-01 | 4.88E-01 | 1.00E+00 |
| RTDR1    | LMNA | 0.067690258  | -0.071024445 | 0.203836466  | 3.38E-01 | 4.25E-01 | 1.00E+00 |
| MALT1    | LMNA | 0.418821388  | 0.298000386  | 0.526434617  | 5.53E-10 | 4.80E-09 | 6.56E-06 |
| ARVCF    | LMNA | -0.40151249  | -0.511226608 | -0.278921908 | 3.18E-09 | 2.39E-08 | 3.77E-05 |
| RENBP    | LMNA | 0.278732341  | 0.146311293  | 0.401340065  | 5.90E-05 | 2.02E-04 | 7.00E-01 |
| ATXN7L1  | LMNA | 0.202385508  | 0.066183647  | 0.331183403  | 3.87E-03 | 8.70E-03 | 1.00E+00 |
| NID1     | LMNA | 0.454732454  | 0.337893124  | 0.557768809  | 1.06E-11 | 1.24E-10 | 1.25E-07 |
| TUBGCP3  | LMNA | -0.233772844 | -0.360199286 | -0.098914054 | 8.13E-04 | 2.18E-03 | 1.00E+00 |
| ZNF783   | LMNA | 0.147592895  | 0.009740357  | 0.279940021  | 3.61E-02 | 6.30E-02 | 1.00E+00 |
| ITIH5    | LMNA | -0.021265161 | -0.15884983  | 0.117129694  | 7.64E-01 | 8.19E-01 | 1.00E+00 |
| ZNF85    | LMNA | -0.302940611 | -0.423289129 | -0.172086483 | 1.17E-05 | 4.59E-05 | 1.39E-01 |
| MMP13    | LMNA | 0.388273182  | 0.264394102  | 0.499547677  | 1.13E-08 | 7.63E-08 | 1.34E-04 |
| KIAA0329 | LMNA | -0.131006779 | -0.264278147 | 0.007173967  | 6.31E-02 | 1.03E-01 | 1.00E+00 |
| C8A      | LMNA | -0.05157608  | -0.188286457 | 0.087095048  | 4.66E-01 | 5.52E-01 | 1.00E+00 |
| MGC87042 | LMNA | 0.089120588  | -0.049539912 | 0.224410623  | 2.07E-01 | 2.82E-01 | 1.00E+00 |
| HOXC13   | LMNA | -0.070250335 | -0.206300606 | 0.068464644  | 3.20E-01 | 4.06E-01 | 1.00E+00 |
| CLGN     | LMNA | -0.400124627 | -0.510004216 | -0.277396336 | 3.64E-09 | 2.71E-08 | 4.31E-05 |
| SLC25A37 | LMNA | 0.283613567  | 0.151494033  | 0.40577712   | 4.31E-05 | 1.51E-04 | 5.11E-01 |
| SMARCC2  | LMNA | -0.335188604 | -0.452309817 | -0.206702367 | 1.08E-06 | 5.15E-06 | 1.28E-02 |

|          |      |              |              |              |          |          |          |
|----------|------|--------------|--------------|--------------|----------|----------|----------|
| TFDP2    | LMNA | -0.191996984 | -0.321525822 | -0.055414773 | 6.19E-03 | 1.32E-02 | 1.00E+00 |
| POLI     | LMNA | -0.037224367 | -0.174379257 | 0.101347444  | 5.99E-01 | 6.76E-01 | 1.00E+00 |
| HCP5     | LMNA | 0.219893905  | 0.084405155  | 0.34739906   | 1.66E-03 | 4.12E-03 | 1.00E+00 |
| UCN      | LMNA | -0.246283589 | -0.371697004 | -0.112041981 | 4.11E-04 | 1.18E-03 | 1.00E+00 |
| ZNF764   | LMNA | -0.039369259 | -0.176461199 | 0.099221004  | 5.78E-01 | 6.57E-01 | 1.00E+00 |
| USF2     | LMNA | 0.050309391  | -0.08835526  | 0.187061203  | 4.77E-01 | 5.62E-01 | 1.00E+00 |
| C20orf24 | LMNA | 0.307351651  | 0.176802413  | 0.427273356  | 8.61E-06 | 3.44E-05 | 1.02E-01 |
| FHL3     | LMNA | 0.540602973  | 0.435017682  | 0.631522925  | 1.00E-16 | 2.93E-15 | 1.19E-12 |
| SPATA5L1 | LMNA | 0.086457611  | -0.052216624 | 0.221860582  | 2.21E-01 | 2.98E-01 | 1.00E+00 |
| JMJD3    | LMNA | -0.098596656 | -0.233469813 | 0.039998783  | 1.63E-01 | 2.30E-01 | 1.00E+00 |
| MMRN2    | LMNA | 0.192177203  | 0.055601319  | 0.32169359   | 6.14E-03 | 1.31E-02 | 1.00E+00 |
| DSP      | LMNA | 0.232518393  | 0.097600303  | 0.359044288  | 8.69E-04 | 2.31E-03 | 1.00E+00 |
| NDST1    | LMNA | 0.106861941  | -0.031656062 | 0.241352415  | 1.30E-01 | 1.90E-01 | 1.00E+00 |
| ZNF248   | LMNA | -0.570901199 | -0.657159196 | -0.469883341 | 7.25E-19 | 3.13E-17 | 8.60E-15 |
| PELP1    | LMNA | -0.142010583 | -0.27467663  | -0.004038761 | 4.38E-02 | 7.46E-02 | 1.00E+00 |
| MBL2     | LMNA | 0.003979887  | -0.134144817 | 0.141952895  | 9.55E-01 | 9.67E-01 | 1.00E+00 |
| ZNF230   | LMNA | -0.150106273 | -0.282307213 | -0.012310372 | 3.30E-02 | 5.83E-02 | 1.00E+00 |
| RNF41    | LMNA | -0.403476876 | -0.512956028 | -0.281082267 | 2.62E-09 | 2.00E-08 | 3.10E-05 |
| THOC5    | LMNA | -0.05548465  | -0.192064492 | 0.083203667  | 4.33E-01 | 5.19E-01 | 1.00E+00 |
| MSN      | LMNA | 0.635221122  | 0.544959178  | 0.710928714  | 3.20E-24 | 3.62E-22 | 3.80E-20 |
| SLC9A5   | LMNA | -0.207342017 | -0.335781679 | -0.071332831 | 3.07E-03 | 7.09E-03 | 1.00E+00 |
| SERINC3  | LMNA | 0.285128906  | 0.153104453  | 0.407153399  | 3.91E-05 | 1.38E-04 | 4.63E-01 |
| ZNF434   | LMNA | -0.119559126 | -0.253427245 | 0.018802209  | 9.01E-02 | 1.39E-01 | 1.00E+00 |
| MUSK     | LMNA | 0.004978078  | -0.133164437 | 0.142930852  | 9.44E-01 | 9.58E-01 | 1.00E+00 |
| SMARCD1  | LMNA | -0.115089941 | -0.24918187  | 0.023331761  | 1.03E-01 | 1.56E-01 | 1.00E+00 |
| C11orf75 | LMNA | 0.128247935  | -0.009979755 | 0.261666199  | 6.89E-02 | 1.11E-01 | 1.00E+00 |
| ZFP106   | LMNA | 0.135120553  | -0.00298615  | 0.268169251  | 5.52E-02 | 9.15E-02 | 1.00E+00 |
| GTF2E1   | LMNA | -0.150299049 | -0.28248871  | -0.012507567 | 3.28E-02 | 5.80E-02 | 1.00E+00 |
| RY1      | LMNA | -0.171787298 | -0.302660579 | -0.034555802 | 1.45E-02 | 2.81E-02 | 1.00E+00 |
| ATAD2B   | LMNA | -0.2410368   | -0.366879741 | -0.106530647 | 5.49E-04 | 1.53E-03 | 1.00E+00 |
| DDOST    | LMNA | 0.45877591   | 0.342411352  | 0.561278624  | 6.58E-12 | 7.99E-11 | 7.80E-08 |
| ARHGAP17 | LMNA | 0.182142227  | 0.045228493  | 0.312339477  | 9.48E-03 | 1.93E-02 | 1.00E+00 |
| GPNMB    | LMNA | 0.344981893  | 0.217278817  | 0.461074191  | 4.96E-07 | 2.51E-06 | 5.88E-03 |
| TTF2     | LMNA | 0.168681812  | 0.031361108  | 0.299752567  | 1.64E-02 | 3.13E-02 | 1.00E+00 |
| SFPQ     | LMNA | -0.138220358 | -0.271098405 | -0.000172652 | 4.98E-02 | 8.37E-02 | 1.00E+00 |

|          |      |              |              |              |          |          |          |
|----------|------|--------------|--------------|--------------|----------|----------|----------|
| GFRA4    | LMNA | 0.256929626  | 0.123250236  | 0.381450799  | 2.23E-04 | 6.79E-04 | 1.00E+00 |
| TIGD6    | LMNA | 0.220685885  | 0.08523154   | 0.348130766  | 1.60E-03 | 3.97E-03 | 1.00E+00 |
| SLC39A14 | LMNA | 0.431077387  | 0.311568005  | 0.537161547  | 1.51E-10 | 1.46E-09 | 1.79E-06 |
| AKR1B10  | LMNA | 0.17050537   | 0.033236709  | 0.301460462  | 1.53E-02 | 2.93E-02 | 1.00E+00 |
| NGRN     | LMNA | -0.338940867 | -0.455670531 | -0.21075115  | 8.05E-07 | 3.92E-06 | 9.55E-03 |
| RGS16    | LMNA | 0.161890692  | 0.024384668  | 0.293384785  | 2.13E-02 | 3.96E-02 | 1.00E+00 |
| URB1     | LMNA | 0.030538936  | -0.107967247 | 0.167882157  | 6.66E-01 | 7.36E-01 | 1.00E+00 |
| GPR137B  | LMNA | -0.157068725 | -0.288856311 | -0.019439235 | 2.56E-02 | 4.65E-02 | 1.00E+00 |
| MECP2    | LMNA | -0.01111942  | -0.148941788 | 0.127126726  | 8.75E-01 | 9.08E-01 | 1.00E+00 |
| PSMA1    | LMNA | 0.177290072  | 0.040223545  | 0.307807463  | 1.16E-02 | 2.31E-02 | 1.00E+00 |
| TOP3B    | LMNA | -0.146401933 | -0.278817767 | -0.008523194 | 3.76E-02 | 6.52E-02 | 1.00E+00 |
| NFATC4   | LMNA | 0.383076339  | 0.258706808  | 0.494952249  | 1.84E-08 | 1.19E-07 | 2.18E-04 |
| RAB7L1   | LMNA | 0.109779297  | -0.028706759 | 0.244130466  | 1.20E-01 | 1.78E-01 | 1.00E+00 |
| CSN3     | LMNA | -0.148930654 | -0.281200172 | -0.011108035 | 3.44E-02 | 6.03E-02 | 1.00E+00 |
| NOS1     | LMNA | -0.188056216 | -0.317855266 | -0.05133802  | 7.36E-03 | 1.54E-02 | 1.00E+00 |
| CA14     | LMNA | -0.287087289 | -0.408931245 | -0.155186756 | 3.44E-05 | 1.23E-04 | 4.07E-01 |
| BMPR1A   | LMNA | -0.220724343 | -0.348166293 | -0.085271674 | 1.60E-03 | 3.96E-03 | 1.00E+00 |
| YBX2     | LMNA | -0.211374638 | -0.339518331 | -0.075527568 | 2.53E-03 | 5.98E-03 | 1.00E+00 |
| PRL      | LMNA | -0.053146911 | -0.189805313 | 0.085531634  | 4.53E-01 | 5.39E-01 | 1.00E+00 |
| SNRP70   | LMNA | 0.012143306  | -0.12611912  | 0.149942943  | 8.64E-01 | 9.00E-01 | 1.00E+00 |
| C6orf130 | LMNA | -0.229267964 | -0.356049751 | -0.094198406 | 1.03E-03 | 2.69E-03 | 1.00E+00 |
| KIAA1166 | LMNA | -0.43443783  | -0.540096756 | -0.31529661  | 1.05E-10 | 1.05E-09 | 1.24E-06 |
| FUBP3    | LMNA | 0.076674924  | -0.062032696 | 0.212476847  | 2.78E-01 | 3.61E-01 | 1.00E+00 |
| STAG2    | LMNA | -0.078870902 | -0.214585452 | 0.059831557  | 2.65E-01 | 3.46E-01 | 1.00E+00 |
| ACACA    | LMNA | -0.344209627 | -0.460383884 | -0.216443703 | 5.28E-07 | 2.65E-06 | 6.26E-03 |
| ABCG1    | LMNA | 0.008600889  | -0.129603999 | 0.146477967  | 9.03E-01 | 9.30E-01 | 1.00E+00 |
| ODF1     | LMNA | -0.164210845 | -0.29556162  | -0.026766629 | 1.95E-02 | 3.66E-02 | 1.00E+00 |
| TMEM127  | LMNA | 0.435206184  | 0.31614966   | 0.540767521  | 9.63E-11 | 9.73E-10 | 1.14E-06 |
| CD55     | LMNA | 0.322216172  | 0.192738622  | 0.440665379  | 2.92E-06 | 1.28E-05 | 3.46E-02 |
| PLN      | LMNA | 0.17481846   | 0.037676745  | 0.305496647  | 1.28E-02 | 2.53E-02 | 1.00E+00 |
| RPS23    | LMNA | -0.163120028 | -0.294538354 | -0.02564656  | 2.04E-02 | 3.80E-02 | 1.00E+00 |
| LYPLA1   | LMNA | 0.033126024  | -0.105407012 | 0.170397781  | 6.40E-01 | 7.13E-01 | 1.00E+00 |
| PRDM9    | LMNA | -0.043871387 | -0.180827209 | 0.094753488  | 5.35E-01 | 6.17E-01 | 1.00E+00 |
| SSX2     | LMNA | 0.109699882  | -0.028787075 | 0.244054872  | 1.20E-01 | 1.78E-01 | 1.00E+00 |
| PLUNC    | LMNA | -0.00417396  | -0.142143055 | 0.133954228  | 9.53E-01 | 9.65E-01 | 1.00E+00 |

|          |      |              |              |              |          |          |          |
|----------|------|--------------|--------------|--------------|----------|----------|----------|
| SYNGR3   | LMNA | -0.278864028 | -0.401459845 | -0.146451019 | 5.85E-05 | 2.00E-04 | 6.94E-01 |
| EML1     | LMNA | 0.444570426  | 0.32656162   | 0.548931631  | 3.40E-11 | 3.65E-10 | 4.03E-07 |
| LNPEP    | LMNA | 0.518768596  | 0.41008657   | 0.612924103  | 2.60E-15 | 5.63E-14 | 3.08E-11 |
| SMAD3    | LMNA | 0.210797074  | 0.07492649   | 0.338983404  | 2.60E-03 | 6.12E-03 | 1.00E+00 |
| NUP93    | LMNA | 0.021356569  | -0.117039499 | 0.15893897   | 7.63E-01 | 8.18E-01 | 1.00E+00 |
| HISPPD1  | LMNA | -0.074047053 | -0.209951869 | 0.06466497   | 2.95E-01 | 3.79E-01 | 1.00E+00 |
| HNRPUL2  | LMNA | 0.079665251  | -0.059035009 | 0.215347884  | 2.60E-01 | 3.41E-01 | 1.00E+00 |
| YARS2    | LMNA | 0.212259224  | 0.076448359  | 0.340337453  | 2.42E-03 | 5.75E-03 | 1.00E+00 |
| TBC1D12  | LMNA | -0.31177611  | -0.431265031 | -0.181538718 | 6.28E-06 | 2.58E-05 | 7.45E-02 |
| ZCCHC4   | LMNA | 0.012313217  | -0.125951883 | 0.150109055  | 8.62E-01 | 8.98E-01 | 1.00E+00 |
| FBXO22   | LMNA | 0.181802987  | 0.044878347  | 0.312022813  | 9.61E-03 | 1.96E-02 | 1.00E+00 |
| C16orf24 | LMNA | -0.287504491 | -0.409309867 | -0.155630509 | 3.34E-05 | 1.20E-04 | 3.96E-01 |
| ZNF669   | LMNA | -0.252297718 | -0.377210495 | -0.118369522 | 2.92E-04 | 8.67E-04 | 1.00E+00 |
| PTGDR    | LMNA | 0.194203422  | 0.057699339  | 0.32357927   | 5.62E-03 | 1.21E-02 | 1.00E+00 |
| DDX27    | LMNA | 0.332446222  | 0.203746051  | 0.449851498  | 1.34E-06 | 6.27E-06 | 1.59E-02 |
| KIAA0409 | LMNA | 0.387064477  | 0.263070556  | 0.49847941   | 1.27E-08 | 8.51E-08 | 1.50E-04 |
| ASB8     | LMNA | -0.182974078 | -0.313115849 | -0.046087229 | 9.15E-03 | 1.87E-02 | 1.00E+00 |
| MEPE     | LMNA | -0.088449147 | -0.223767832 | 0.050215003  | 2.11E-01 | 2.86E-01 | 1.00E+00 |
| PLP2     | LMNA | 0.688870942  | 0.608707624  | 0.755111363  | 9.21E-30 | 2.48E-27 | 1.09E-25 |
| COQ7     | LMNA | -0.239077442 | -0.365079053 | -0.104474614 | 6.11E-04 | 1.69E-03 | 1.00E+00 |
| CHMP5    | LMNA | -0.200171268 | -0.329127218 | -0.063885674 | 4.29E-03 | 9.54E-03 | 1.00E+00 |
| CACNB3   | LMNA | -0.234200191 | -0.360592664 | -0.09936171  | 7.94E-04 | 2.14E-03 | 1.00E+00 |
| C10orf84 | LMNA | -0.216093794 | -0.343886    | -0.080442553 | 2.01E-03 | 4.87E-03 | 1.00E+00 |
| SPO11    | LMNA | -0.103166264 | -0.237830041 | 0.03538875   | 1.44E-01 | 2.08E-01 | 1.00E+00 |
| NEDD4    | LMNA | 0.303085869  | 0.172241686  | 0.423420406  | 1.16E-05 | 4.55E-05 | 1.38E-01 |
| THAP11   | LMNA | -0.222784634 | -0.350069037 | -0.087422365 | 1.44E-03 | 3.61E-03 | 1.00E+00 |
| ZNF43    | LMNA | -0.268854828 | -0.392343725 | -0.135845838 | 1.09E-04 | 3.55E-04 | 1.00E+00 |
| KRT13    | LMNA | 0.046615384  | -0.092027844 | 0.183485599  | 5.10E-01 | 5.94E-01 | 1.00E+00 |
| NEK4     | LMNA | -0.115249056 | -0.249333105 | 0.023170594  | 1.02E-01 | 1.55E-01 | 1.00E+00 |
| MRPL19   | LMNA | 0.051386438  | -0.087283749 | 0.188103045  | 4.68E-01 | 5.53E-01 | 1.00E+00 |
| RBBP9    | LMNA | -0.177322611 | -0.307837875 | -0.040257086 | 1.16E-02 | 2.31E-02 | 1.00E+00 |
| PRKAR2A  | LMNA | 0.207013925  | 0.070991761  | 0.335477489  | 3.12E-03 | 7.19E-03 | 1.00E+00 |
| IHPK1    | LMNA | -0.057943475 | -0.194439127 | 0.080753485  | 4.13E-01 | 5.01E-01 | 1.00E+00 |
| CACNA1E  | LMNA | -0.107234912 | -0.241707699 | 0.031279142  | 1.29E-01 | 1.89E-01 | 1.00E+00 |
| CEACAM8  | LMNA | 0.089608052  | -0.049049717 | 0.224877213  | 2.05E-01 | 2.79E-01 | 1.00E+00 |

|          |      |              |              |              |          |          |          |
|----------|------|--------------|--------------|--------------|----------|----------|----------|
| PEX14    | LMNA | 0.032810026  | -0.105719828 | 0.170090609  | 6.43E-01 | 7.16E-01 | 1.00E+00 |
| BXDC5    | LMNA | -0.107475347 | -0.241936714 | 0.031036139  | 1.28E-01 | 1.88E-01 | 1.00E+00 |
| ZBTB38   | LMNA | 0.447121325  | 0.329402898  | 0.551152158  | 2.55E-11 | 2.78E-10 | 3.02E-07 |
| PAFAH1B1 | LMNA | -0.151292059 | -0.283423471 | -0.013523511 | 3.16E-02 | 5.61E-02 | 1.00E+00 |
| PCTK2    | LMNA | -0.188415484 | -0.31819006  | -0.051709496 | 7.25E-03 | 1.52E-02 | 1.00E+00 |
| LRRC16   | LMNA | 0.236875721  | 0.102165632  | 0.363054502  | 6.88E-04 | 1.88E-03 | 1.00E+00 |
| OSTF1    | LMNA | 0.355439147  | 0.228605529  | 0.470407833  | 2.09E-07 | 1.14E-06 | 2.48E-03 |
| KIAA0323 | LMNA | 0.539275975  | 0.433497843  | 0.630395547  | 1.23E-16 | 3.51E-15 | 1.46E-12 |
| FYCO1    | LMNA | 0.441839701  | 0.323522406  | 0.546552933  | 4.62E-11 | 4.89E-10 | 5.48E-07 |
| TXNDC13  | LMNA | -0.037811347 | -0.174949132 | 0.100765639  | 5.93E-01 | 6.71E-01 | 1.00E+00 |
| PLTP     | LMNA | 0.460742431  | 0.344610724  | 0.562984279  | 5.21E-12 | 6.45E-11 | 6.18E-08 |
| SLC25A1  | LMNA | 0.125655618  | -0.0126142   | 0.25921013   | 7.48E-02 | 1.19E-01 | 1.00E+00 |
| EZH2     | LMNA | -0.082257985 | -0.217835293 | 0.056433867  | 2.44E-01 | 3.24E-01 | 1.00E+00 |
| PLEKHB1  | LMNA | -0.422643035 | -0.529783152 | -0.302225789 | 3.71E-10 | 3.31E-09 | 4.40E-06 |
| GRB7     | LMNA | 0.116340165  | -0.022065223 | 0.250370004  | 9.92E-02 | 1.51E-01 | 1.00E+00 |
| ZFP37    | LMNA | -0.323822041 | -0.442109019 | -0.194464367 | 2.59E-06 | 1.15E-05 | 3.07E-02 |
| MRPL33   | LMNA | -0.053588164 | -0.190231849 | 0.085092341  | 4.49E-01 | 5.35E-01 | 1.00E+00 |
| PELO     | LMNA | 0.524149975  | 0.416216136  | 0.617517745  | 1.19E-15 | 2.81E-14 | 1.41E-11 |
| ARMC1    | LMNA | -0.431238198 | -0.537302068 | -0.311746351 | 1.48E-10 | 1.44E-09 | 1.76E-06 |
| ZNF154   | LMNA | -0.136710089 | -0.269671588 | 0.001366705  | 5.24E-02 | 8.75E-02 | 1.00E+00 |
| C3orf64  | LMNA | 0.478820628  | 0.364889426  | 0.578623641  | 5.68E-13 | 8.24E-12 | 6.73E-09 |
| FLJ10357 | LMNA | 0.242550721  | 0.108120052  | 0.368270419  | 5.05E-04 | 1.42E-03 | 1.00E+00 |
| PON1     | LMNA | -0.286501035 | -0.408399133 | -0.154563283 | 3.57E-05 | 1.27E-04 | 4.23E-01 |
| SYT5     | LMNA | -0.344216171 | -0.460389734 | -0.216450779 | 5.28E-07 | 2.65E-06 | 6.26E-03 |
| TMEM66   | LMNA | -0.191638473 | -0.321192054 | -0.055043702 | 6.29E-03 | 1.34E-02 | 1.00E+00 |
| ATP4A    | LMNA | -0.00760217  | -0.14550047  | 0.130585879  | 9.14E-01 | 9.38E-01 | 1.00E+00 |
| HBEGF    | LMNA | 0.512846913  | 0.403352907  | 0.607861883  | 6.04E-15 | 1.24E-13 | 7.17E-11 |
| PI4KA    | LMNA | -0.290450153 | -0.411981941 | -0.158765148 | 2.75E-05 | 1.00E-04 | 3.26E-01 |
| LEPRE1   | LMNA | 0.713307965  | 0.63809169   | 0.775038676  | 1.05E-32 | 6.55E-30 | 1.24E-28 |
| POU2AF1  | LMNA | 0.135780726  | -0.002313643 | 0.268793287  | 5.40E-02 | 8.98E-02 | 1.00E+00 |
| MRPL12   | LMNA | -0.008874015 | -0.146745243 | 0.12933543   | 9.00E-01 | 9.28E-01 | 1.00E+00 |
| GNPDA1   | LMNA | 0.10825377   | -0.030249292 | 0.242678058  | 1.25E-01 | 1.84E-01 | 1.00E+00 |
| RASAL1   | LMNA | -0.200057219 | -0.329021278 | -0.063767352 | 4.31E-03 | 9.59E-03 | 1.00E+00 |
| ZC3H3    | LMNA | -0.006520993 | -0.144441963 | 0.131648522  | 9.27E-01 | 9.47E-01 | 1.00E+00 |
| DDAH1    | LMNA | -0.302243272 | -0.422658838 | -0.171341493 | 1.23E-05 | 4.81E-05 | 1.46E-01 |

|           |      |              |              |              |          |          |          |
|-----------|------|--------------|--------------|--------------|----------|----------|----------|
| MGAT1     | LMNA | 0.582020639  | 0.482758581  | 0.666517904  | 1.04E-19 | 5.07E-18 | 1.24E-15 |
| TIPARP    | LMNA | 0.303823202  | 0.173029598  | 0.424086693  | 1.10E-05 | 4.33E-05 | 1.31E-01 |
| UGT2B15   | LMNA | -0.087686058 | -0.223037161 | 0.050982088  | 2.15E-01 | 2.90E-01 | 1.00E+00 |
| DNASE1L3  | LMNA | -0.06173804  | -0.19810063  | 0.076968966  | 3.83E-01 | 4.70E-01 | 1.00E+00 |
| CHEK1     | LMNA | 0.110269616  | -0.028210833 | 0.244597156  | 1.18E-01 | 1.76E-01 | 1.00E+00 |
| ZNF8      | LMNA | -0.142460486 | -0.275101124 | -0.004497945 | 4.31E-02 | 7.36E-02 | 1.00E+00 |
| TXNDC1    | LMNA | 0.200738808  | 0.064474538  | 0.329654363  | 4.18E-03 | 9.32E-03 | 1.00E+00 |
| CKB       | LMNA | -0.403735921 | -0.513184021 | -0.281367247 | 2.55E-09 | 1.95E-08 | 3.03E-05 |
| RTN3      | LMNA | -0.551151169 | -0.640470695 | -0.447120189 | 1.91E-17 | 6.25E-16 | 2.26E-13 |
| IPO8      | LMNA | -0.014070923 | -0.151826999 | 0.124221378  | 8.42E-01 | 8.83E-01 | 1.00E+00 |
| FZD2      | LMNA | 0.244485756  | 0.11015257   | 0.37004711   | 4.54E-04 | 1.29E-03 | 1.00E+00 |
| PART1     | LMNA | -0.260622639 | -0.384827835 | -0.127146261 | 1.80E-04 | 5.58E-04 | 1.00E+00 |
| PSMB6     | LMNA | -0.01093675  | -0.148763144 | 0.127306461  | 8.77E-01 | 9.09E-01 | 1.00E+00 |
| MAP3K14   | LMNA | 0.203764122  | 0.067615124  | 0.332462992  | 3.63E-03 | 8.22E-03 | 1.00E+00 |
| PCDHB8    | LMNA | 0.040372864  | -0.098225598 | 0.177434929  | 5.68E-01 | 6.48E-01 | 1.00E+00 |
| PHC3      | LMNA | 0.125515141  | -0.012756905 | 0.259076987  | 7.51E-02 | 1.19E-01 | 1.00E+00 |
| PPP1R8    | LMNA | -0.111113738 | -0.245400452 | 0.0273569    | 1.15E-01 | 1.72E-01 | 1.00E+00 |
| NOVA2     | LMNA | -0.321643901 | -0.440150771 | -0.192123825 | 3.05E-06 | 1.33E-05 | 3.61E-02 |
| TNFRSF111 | LMNA | 0.377716235  | 0.252849864  | 0.490205889  | 3.00E-08 | 1.87E-07 | 3.55E-04 |
| GOLPH3    | LMNA | 0.304842798  | 0.174119414  | 0.425007832  | 1.03E-05 | 4.06E-05 | 1.22E-01 |
| LOC51233  | LMNA | 0.488513003  | 0.375806268  | 0.586978355  | 1.64E-13 | 2.56E-12 | 1.94E-09 |
| GGTLA4    | LMNA | -0.131895041 | -0.265118696 | 0.006270128  | 6.13E-02 | 1.00E-01 | 1.00E+00 |
| PDE6D     | LMNA | -0.428140092 | -0.534593834 | -0.308311919 | 2.07E-10 | 1.95E-09 | 2.46E-06 |
| TTLL1     | LMNA | -0.199055197 | -0.32809035  | -0.062727945 | 4.51E-03 | 9.99E-03 | 1.00E+00 |
| ZNF117    | LMNA | -0.177681203 | -0.308173007 | -0.040626738 | 1.14E-02 | 2.28E-02 | 1.00E+00 |
| NKRF      | LMNA | -0.367401675 | -0.481053558 | -0.241604916 | 7.50E-08 | 4.40E-07 | 8.90E-04 |
| CLK2      | LMNA | 0.036405972  | -0.102158465 | 0.173584558  | 6.07E-01 | 6.83E-01 | 1.00E+00 |
| TNFSF15   | LMNA | 0.287027463  | 0.155123128  | 0.408876949  | 3.45E-05 | 1.23E-04 | 4.09E-01 |
| DUSP2     | LMNA | 0.143021347  | 0.005070459  | 0.275630238  | 4.23E-02 | 7.24E-02 | 1.00E+00 |
| HSD17B11  | LMNA | -0.054959531 | -0.191557146 | 0.083726723  | 4.37E-01 | 5.23E-01 | 1.00E+00 |
| SECISBP2  | LMNA | -0.241676294 | -0.367467245 | -0.107201942 | 5.30E-04 | 1.49E-03 | 1.00E+00 |
| PPAP2C    | LMNA | 0.149574226  | 0.011766184  | 0.281806246  | 3.36E-02 | 5.92E-02 | 1.00E+00 |
| GABRR2    | LMNA | 0.068889077  | -0.069825983 | 0.204990575  | 3.30E-01 | 4.16E-01 | 1.00E+00 |
| LOC51145  | LMNA | -0.204529832 | -0.333173496 | -0.068410437 | 3.50E-03 | 7.97E-03 | 1.00E+00 |
| PIK3C3    | LMNA | 0.002144424  | -0.135946823 | 0.140153933  | 9.76E-01 | 9.81E-01 | 1.00E+00 |

|          |      |              |              |              |          |          |          |
|----------|------|--------------|--------------|--------------|----------|----------|----------|
| DHDDS    | LMNA | 0.305726305  | 0.175064026  | 0.425805821  | 9.66E-06 | 3.83E-05 | 1.15E-01 |
| CTSW     | LMNA | 0.24842873   | 0.114297663  | 0.373664592  | 3.64E-04 | 1.06E-03 | 1.00E+00 |
| NEFM     | LMNA | -0.220207058 | -0.347688399 | -0.08473189  | 1.64E-03 | 4.06E-03 | 1.00E+00 |
| ANKRD28  | LMNA | -0.208527497 | -0.336880572 | -0.07256547  | 2.90E-03 | 6.74E-03 | 1.00E+00 |
| MRPL28   | LMNA | -0.051084868 | -0.187811363 | 0.087583802  | 4.70E-01 | 5.56E-01 | 1.00E+00 |
| STMN3    | LMNA | -0.13034467  | -0.26365147  | 0.007847541  | 6.45E-02 | 1.05E-01 | 1.00E+00 |
| SYN1     | LMNA | -0.376510431 | -0.489137232 | -0.251533551 | 3.34E-08 | 2.07E-07 | 3.96E-04 |
| RAB14    | LMNA | -0.129020944 | -0.262398246 | 0.009193812  | 6.72E-02 | 1.08E-01 | 1.00E+00 |
| PIGV     | LMNA | 0.163879841  | 0.026426712  | 0.295251145  | 1.98E-02 | 3.70E-02 | 1.00E+00 |
| CDK2AP2  | LMNA | 0.331970343  | 0.203233288  | 0.44942473   | 1.39E-06 | 6.48E-06 | 1.65E-02 |
| ZIM2     | LMNA | -0.382722579 | -0.494639201 | -0.258319975 | 1.90E-08 | 1.23E-07 | 2.25E-04 |
| APBB1    | LMNA | -0.413983287 | -0.522190669 | -0.292657922 | 9.11E-10 | 7.58E-09 | 1.08E-05 |
| SND1     | LMNA | 0.459024561  | 0.342689375  | 0.56149434   | 6.39E-12 | 7.78E-11 | 7.58E-08 |
| C1orf123 | LMNA | -0.124052735 | -0.257690628 | 0.014242171  | 7.86E-02 | 1.24E-01 | 1.00E+00 |
| CHD3     | LMNA | -0.146804212 | -0.279196878 | -0.008934278 | 3.71E-02 | 6.45E-02 | 1.00E+00 |
| RNASE2   | LMNA | 0.332767176  | 0.204091922  | 0.450139299  | 1.31E-06 | 6.13E-06 | 1.55E-02 |
| BCAP31   | LMNA | 0.499381753  | 0.38808542   | 0.596322211  | 3.87E-14 | 6.59E-13 | 4.59E-10 |
| SLC25A44 | LMNA | -0.261814191 | -0.385916729 | -0.128404194 | 1.67E-04 | 5.23E-04 | 1.00E+00 |
| CXXC1    | LMNA | -0.085315155 | -0.220766009 | 0.053364362  | 2.27E-01 | 3.05E-01 | 1.00E+00 |
| PIB5PA   | LMNA | -0.181282014 | -0.311536453 | -0.044340691 | 9.82E-03 | 2.00E-02 | 1.00E+00 |
| CD40     | LMNA | 0.396933355  | 0.273890759  | 0.507191746  | 4.96E-09 | 3.62E-08 | 5.88E-05 |
| FAT2     | LMNA | -0.079519837 | -0.215208326 | 0.059180838  | 2.61E-01 | 3.42E-01 | 1.00E+00 |
| DYNC1LI2 | LMNA | -0.175384075 | -0.3060256   | -0.038259409 | 1.25E-02 | 2.48E-02 | 1.00E+00 |
| GDI1     | LMNA | -0.240602021 | -0.366480252 | -0.106074315 | 5.62E-04 | 1.57E-03 | 1.00E+00 |
| ZNF81    | LMNA | 0.006155094  | -0.132008076 | 0.144083664  | 9.31E-01 | 9.50E-01 | 1.00E+00 |
| VSNL1    | LMNA | -0.141682198 | -0.274366758 | -0.003703639 | 4.43E-02 | 7.54E-02 | 1.00E+00 |
| PIH1D1   | LMNA | -0.216132838 | -0.343922113 | -0.080483245 | 2.01E-03 | 4.86E-03 | 1.00E+00 |
| KRTAP5-9 | LMNA | 0.027794453  | -0.110681237 | 0.165211529  | 6.95E-01 | 7.60E-01 | 1.00E+00 |
| FLJ10081 | LMNA | 0.05081819   | -0.087849116 | 0.18755341   | 4.73E-01 | 5.58E-01 | 1.00E+00 |
| CS       | LMNA | -0.094018068 | -0.229095571 | 0.044611965  | 1.83E-01 | 2.54E-01 | 1.00E+00 |
| ZNF318   | LMNA | -0.184909943 | -0.31492193  | -0.048086445 | 8.43E-03 | 1.74E-02 | 1.00E+00 |
| IGFBP7   | LMNA | 0.307494511  | 0.176955248  | 0.427402316  | 8.53E-06 | 3.41E-05 | 1.01E-01 |
| ZNF609   | LMNA | -0.261855289 | -0.38595428  | -0.128447589 | 1.67E-04 | 5.22E-04 | 1.00E+00 |
| SIRT4    | LMNA | -0.497251627 | -0.59449301  | -0.385675757 | 5.16E-14 | 8.57E-13 | 6.12E-10 |
| SCN4A    | LMNA | 0.150121744  | 0.012326197  | 0.282321779  | 3.30E-02 | 5.82E-02 | 1.00E+00 |

|          |      |              |              |              |          |          |          |
|----------|------|--------------|--------------|--------------|----------|----------|----------|
| ARHGAP4  | LMNA | 0.319868707  | 0.190217362  | 0.438553956  | 3.48E-06 | 1.50E-05 | 4.12E-02 |
| EHMT2    | LMNA | -0.209285933 | -0.337583428 | -0.073354294 | 2.80E-03 | 6.53E-03 | 1.00E+00 |
| UFD1L    | LMNA | 0.018534467  | -0.119823125 | 0.156185834  | 7.93E-01 | 8.44E-01 | 1.00E+00 |
| EXOSC10  | LMNA | -0.0068043   | -0.14471936  | 0.131370102  | 9.23E-01 | 9.45E-01 | 1.00E+00 |
| ECE2     | LMNA | -0.077097437 | -0.212882647 | 0.061609294  | 2.75E-01 | 3.58E-01 | 1.00E+00 |
| ERMP1    | LMNA | -0.134383206 | -0.267472134 | 0.003737125  | 5.66E-02 | 9.34E-02 | 1.00E+00 |
| OVGP1    | LMNA | -0.266712284 | -0.390389194 | -0.133579673 | 1.25E-04 | 4.01E-04 | 1.00E+00 |
| GTPBP3   | LMNA | 0.172263189  | 0.035045612  | 0.303105994  | 1.42E-02 | 2.76E-02 | 1.00E+00 |
| FAM82C   | LMNA | 0.07938841   | -0.059312636 | 0.215082185  | 2.61E-01 | 3.43E-01 | 1.00E+00 |
| PACS2    | LMNA | -0.013572044 | -0.15133949  | 0.124712622  | 8.48E-01 | 8.87E-01 | 1.00E+00 |
| C19orf36 | LMNA | -0.102279178 | -0.236984025 | 0.036284145  | 1.47E-01 | 2.12E-01 | 1.00E+00 |
| UNC84A   | LMNA | 0.075107947  | -0.063602531 | 0.210971443  | 2.88E-01 | 3.72E-01 | 1.00E+00 |
| ARL4C    | LMNA | 0.476556507  | 0.362343778  | 0.576668973  | 7.55E-13 | 1.07E-11 | 8.95E-09 |
| SCD5     | LMNA | -0.463255334 | -0.565162571 | -0.347423031 | 3.86E-12 | 4.87E-11 | 4.58E-08 |
| ATG4B    | LMNA | 0.013691761  | -0.124594744 | 0.151456484  | 8.47E-01 | 8.86E-01 | 1.00E+00 |
| LASS6    | LMNA | -0.133977499 | -0.267088503 | 0.004150264  | 5.73E-02 | 9.44E-02 | 1.00E+00 |
| LSG1     | LMNA | 0.091870752  | -0.046773469 | 0.227042211  | 1.93E-01 | 2.66E-01 | 1.00E+00 |
| MAL      | LMNA | -0.139147374 | -0.27197391  | -0.001117847 | 4.83E-02 | 8.14E-02 | 1.00E+00 |
| GPR22    | LMNA | -0.4158795   | -0.523854653 | -0.294750909 | 7.50E-10 | 6.35E-09 | 8.90E-06 |
| WDR5B    | LMNA | -0.239257121 | -0.36524422  | -0.10466311  | 6.05E-04 | 1.68E-03 | 1.00E+00 |
| GALR1    | LMNA | 0.003202371  | -0.134908271 | 0.141190953  | 9.64E-01 | 9.73E-01 | 1.00E+00 |
| AQP4     | LMNA | -0.19910981  | -0.328141095 | -0.062784589 | 4.50E-03 | 9.96E-03 | 1.00E+00 |
| C17orf60 | LMNA | 0.215112997  | 0.079420512  | 0.342978708  | 2.11E-03 | 5.08E-03 | 1.00E+00 |
| HDAC7A   | LMNA | 0.52537896   | 0.417617368  | 0.618565936  | 9.94E-16 | 2.40E-14 | 1.18E-11 |
| GRIN2C   | LMNA | -0.231231358 | -0.357858888 | -0.096252916 | 9.30E-04 | 2.46E-03 | 1.00E+00 |
| ARMC8    | LMNA | -0.175519539 | -0.306152271 | -0.03839897  | 1.25E-02 | 2.47E-02 | 1.00E+00 |
| SLC47A1  | LMNA | 0.096167557  | -0.04244697  | 0.231149807  | 1.73E-01 | 2.43E-01 | 1.00E+00 |
| DMPK     | LMNA | 0.0688497    | -0.069865354 | 0.204952673  | 3.30E-01 | 4.16E-01 | 1.00E+00 |
| CCRN4L   | LMNA | 0.471350647  | 0.356497064  | 0.572170283  | 1.44E-12 | 1.95E-11 | 1.71E-08 |
| CBR4     | LMNA | -0.496430795 | -0.59378787  | -0.384747614 | 5.76E-14 | 9.47E-13 | 6.83E-10 |
| KIFC1    | LMNA | -0.087120244 | -0.222495286 | 0.05155076   | 2.18E-01 | 2.94E-01 | 1.00E+00 |
| LHX5     | LMNA | 0.005037244  | -0.133106318 | 0.142988811  | 9.43E-01 | 9.58E-01 | 1.00E+00 |
| SMC1A    | LMNA | 0.00915139   | -0.129062663 | 0.147016655  | 8.97E-01 | 9.26E-01 | 1.00E+00 |
| LPXN     | LMNA | 0.285413097  | 0.153406555  | 0.40741145   | 3.83E-05 | 1.36E-04 | 4.55E-01 |
| TRPC7    | LMNA | 0.129440135  | -0.008767535 | 0.26279516   | 6.64E-02 | 1.07E-01 | 1.00E+00 |



|          |      |              |              |              |          |          |          |
|----------|------|--------------|--------------|--------------|----------|----------|----------|
| SERPINA1 | LMNA | 0.43854639   | 0.319860297  | 0.543681925  | 6.67E-11 | 6.91E-10 | 7.91E-07 |
| SMYD5    | LMNA | -0.050099721 | -0.18685835  | 0.088563815  | 4.79E-01 | 5.64E-01 | 1.00E+00 |
| RPS13    | LMNA | -0.102109803 | -0.236822469 | 0.036455082  | 1.48E-01 | 2.13E-01 | 1.00E+00 |
| CRHR2    | LMNA | -0.202729032 | -0.331502296 | -0.066540291 | 3.81E-03 | 8.58E-03 | 1.00E+00 |
| TUSC2    | LMNA | -0.125269912 | -0.258844549 | 0.01300601   | 7.57E-02 | 1.20E-01 | 1.00E+00 |
| PRKAA1   | LMNA | 0.345131141  | 0.217440233  | 0.461207584  | 4.90E-07 | 2.48E-06 | 5.81E-03 |
| FADS2    | LMNA | -0.350708936 | -0.466189058 | -0.223477773 | 3.10E-07 | 1.63E-06 | 3.68E-03 |
| ENAH     | LMNA | -0.316383344 | -0.435416636 | -0.186477111 | 4.49E-06 | 1.90E-05 | 5.33E-02 |
| PRO1768  | LMNA | -0.119105922 | -0.252996971 | 0.019261794  | 9.13E-02 | 1.41E-01 | 1.00E+00 |
| KIR3DL2  | LMNA | 0.049821577  | -0.088840461 | 0.186589232  | 4.81E-01 | 5.67E-01 | 1.00E+00 |
| APBA2BP  | LMNA | 0.106046295  | -0.032480209 | 0.240575322  | 1.33E-01 | 1.94E-01 | 1.00E+00 |
| ATP2C1   | LMNA | 0.049894295  | -0.088768137 | 0.186659592  | 4.81E-01 | 5.66E-01 | 1.00E+00 |
| ALDH1A2  | LMNA | -0.098468496 | -0.233347447 | 0.040127992  | 1.63E-01 | 2.31E-01 | 1.00E+00 |
| RNF103   | LMNA | -0.16669971  | -0.297895229 | -0.029323533 | 1.77E-02 | 3.35E-02 | 1.00E+00 |
| AHCY     | LMNA | 0.197993111  | 0.061626558  | 0.327103348  | 4.73E-03 | 1.04E-02 | 1.00E+00 |
| CROT     | LMNA | 0.300321013  | 0.169288655  | 0.420920799  | 1.41E-05 | 5.43E-05 | 1.67E-01 |
| PABPC3   | LMNA | 0.067435875  | -0.071278701 | 0.203591522  | 3.40E-01 | 4.26E-01 | 1.00E+00 |
| ALG12    | LMNA | 0.310870917  | 0.180569233  | 0.430448761  | 6.70E-06 | 2.74E-05 | 7.95E-02 |
| EGR1     | LMNA | 0.34336756   | 0.21553332   | 0.459631022  | 5.65E-07 | 2.83E-06 | 6.70E-03 |
| THSD1    | LMNA | 0.004181926  | -0.133946404 | 0.14215086   | 9.53E-01 | 9.65E-01 | 1.00E+00 |
| CCL17    | LMNA | 0.138332763  | 0.000287248  | 0.271204577  | 4.96E-02 | 8.34E-02 | 1.00E+00 |
| KHK      | LMNA | -0.074744414 | -0.210622102 | 0.063966629  | 2.90E-01 | 3.74E-01 | 1.00E+00 |
| ESRRG    | LMNA | -0.18236061  | -0.312543312 | -0.045453914 | 9.39E-03 | 1.92E-02 | 1.00E+00 |
| SLC12A2  | LMNA | 0.168290828  | 0.030959091  | 0.299386272  | 1.67E-02 | 3.18E-02 | 1.00E+00 |
| CNGA1    | LMNA | 0.011350527  | -0.126899318 | 0.149167789  | 8.73E-01 | 9.06E-01 | 1.00E+00 |
| RDH5     | LMNA | 0.388871977  | 0.265049962  | 0.500076773  | 1.07E-08 | 7.25E-08 | 1.27E-04 |
| CD58     | LMNA | 0.390927028  | 0.267301732  | 0.501891988  | 8.81E-09 | 6.09E-08 | 1.04E-04 |
| PTGFR    | LMNA | 0.378973916  | 0.254223301  | 0.491320162  | 2.67E-08 | 1.69E-07 | 3.17E-04 |
| CCDC48   | LMNA | -0.068395791 | -0.204515732 | 0.070319171  | 3.33E-01 | 4.19E-01 | 1.00E+00 |
| CCDC76   | LMNA | -0.241446019 | -0.367255703 | -0.106960202 | 5.37E-04 | 1.50E-03 | 1.00E+00 |
| CDR2     | LMNA | 0.512205058  | 0.402623752  | 0.607312721  | 6.61E-15 | 1.33E-13 | 7.84E-11 |
| ZIC4     | LMNA | 0.018618128  | -0.119740636 | 0.156267482  | 7.93E-01 | 8.43E-01 | 1.00E+00 |
| SELE     | LMNA | 0.304184882  | 0.173416151  | 0.424413476  | 1.08E-05 | 4.23E-05 | 1.28E-01 |
| OR1G1    | LMNA | -0.07637952  | -0.212193099 | 0.062328691  | 2.80E-01 | 3.63E-01 | 1.00E+00 |
| EXOSC9   | LMNA | -0.027603493 | -0.165025632 | 0.110869999  | 6.97E-01 | 7.62E-01 | 1.00E+00 |

|            |      |              |              |              |          |          |          |
|------------|------|--------------|--------------|--------------|----------|----------|----------|
| PSMC6      | LMNA | -0.179600276 | -0.309965981 | -0.042605639 | 1.05E-02 | 2.13E-02 | 1.00E+00 |
| ABCB1      | LMNA | -0.17322569  | -0.304006681 | -0.036036465 | 1.37E-02 | 2.68E-02 | 1.00E+00 |
| GPR12      | LMNA | -0.17204978  | -0.302906259 | -0.034825953 | 1.43E-02 | 2.78E-02 | 1.00E+00 |
| KIAA0196   | LMNA | 0.030153513  | -0.108348512 | 0.167507227  | 6.70E-01 | 7.39E-01 | 1.00E+00 |
| SSR3       | LMNA | 0.432563295  | 0.313216252  | 0.538459744  | 1.29E-10 | 1.26E-09 | 1.52E-06 |
| MSI1       | LMNA | 0.06531551   | -0.073397304 | 0.201549168  | 3.56E-01 | 4.43E-01 | 1.00E+00 |
| TRAT1      | LMNA | 0.186295744  | 0.04951827   | 0.316214248  | 7.94E-03 | 1.65E-02 | 1.00E+00 |
| CC2D1A     | LMNA | 0.165065147  | 0.027644083  | 0.296362807  | 1.89E-02 | 3.55E-02 | 1.00E+00 |
| PLAGL1     | LMNA | 0.367481004  | 0.241691272  | 0.481124043  | 7.45E-08 | 4.38E-07 | 8.84E-04 |
| LLGL1      | LMNA | -0.209899091 | -0.338151548 | -0.073992144 | 2.72E-03 | 6.36E-03 | 1.00E+00 |
| KLF6       | LMNA | 0.582148299  | 0.482906649  | 0.666625196  | 1.02E-19 | 4.98E-18 | 1.21E-15 |
| MTF1       | LMNA | 0.213957958  | 0.078217269  | 0.341909927  | 2.23E-03 | 5.35E-03 | 1.00E+00 |
| RNF2       | LMNA | -0.22424075  | -0.351413172 | -0.088943132 | 1.34E-03 | 3.39E-03 | 1.00E+00 |
| tcag7.1314 | LMNA | 0.413193537  | 0.291786562  | 0.521497397  | 9.87E-10 | 8.17E-09 | 1.17E-05 |
| NR5A1      | LMNA | -0.052603734 | -0.189280183 | 0.086072323  | 4.57E-01 | 5.43E-01 | 1.00E+00 |
| THBD       | LMNA | 0.499236718  | 0.387921304  | 0.596197697  | 3.95E-14 | 6.70E-13 | 4.69E-10 |
| ABCD2      | LMNA | -0.085564154 | -0.2210046   | 0.053114244  | 2.26E-01 | 3.03E-01 | 1.00E+00 |
| ITGB7      | LMNA | 0.315280258  | 0.18529414   | 0.4344231    | 4.87E-06 | 2.05E-05 | 5.78E-02 |
| DNAJC7     | LMNA | -0.061572354 | -0.197940833 | 0.077134298  | 3.84E-01 | 4.71E-01 | 1.00E+00 |
| CCDC81     | LMNA | -0.108335006 | -0.242755416 | 0.030167167  | 1.25E-01 | 1.84E-01 | 1.00E+00 |
| TM2D3      | LMNA | -0.357513955 | -0.472256653 | -0.230856935 | 1.76E-07 | 9.68E-07 | 2.08E-03 |
| HUWE1      | LMNA | 0.061442409  | -0.077263959 | 0.197815502  | 3.85E-01 | 4.72E-01 | 1.00E+00 |
| CDH17      | LMNA | 0.177194276  | 0.040124802  | 0.307717928  | 1.16E-02 | 2.32E-02 | 1.00E+00 |
| CD180      | LMNA | 0.212648328  | 0.076853462  | 0.3406977    | 2.38E-03 | 5.66E-03 | 1.00E+00 |
| FAAH       | LMNA | -0.470004954 | -0.571006401 | -0.354987173 | 1.70E-12 | 2.28E-11 | 2.02E-08 |
| IL17A      | LMNA | -0.029106826 | -0.166488837 | 0.109383703  | 6.81E-01 | 7.49E-01 | 1.00E+00 |
| POLA1      | LMNA | -0.073009583 | -0.208954522 | 0.065703647  | 3.02E-01 | 3.86E-01 | 1.00E+00 |
| TMPO       | LMNA | -0.20092857  | -0.329830601 | -0.064671452 | 4.14E-03 | 9.25E-03 | 1.00E+00 |
| TM7SF2     | LMNA | -0.252152877 | -0.377077815 | -0.118217005 | 2.94E-04 | 8.74E-04 | 1.00E+00 |
| FLOT2      | LMNA | 0.213337327  | 0.077570901  | 0.341335508  | 2.30E-03 | 5.50E-03 | 1.00E+00 |
| MAP4K1     | LMNA | 0.144919344  | 0.007008558  | 0.277420204  | 3.96E-02 | 6.84E-02 | 1.00E+00 |
| HDGFRP3    | LMNA | -0.464683907 | -0.566400285 | -0.349022742 | 3.25E-12 | 4.17E-11 | 3.85E-08 |
| RRAS2      | LMNA | 0.176396253  | 0.03930233   | 0.306971971  | 1.20E-02 | 2.39E-02 | 1.00E+00 |
| OXCT1      | LMNA | -0.301490668 | -0.421978466 | -0.170537629 | 1.30E-05 | 5.05E-05 | 1.54E-01 |
| LTBP2      | LMNA | 0.570640152  | 0.469581589  | 0.656939164  | 7.59E-19 | 3.25E-17 | 9.00E-15 |

|          |      |              |              |              |          |          |          |
|----------|------|--------------|--------------|--------------|----------|----------|----------|
| ARPC5    | LMNA | 0.21830432   | 0.082747078  | 0.345929983  | 1.80E-03 | 4.42E-03 | 1.00E+00 |
| SV2B     | LMNA | -0.251885126 | -0.376832531 | -0.117935081 | 2.99E-04 | 8.86E-04 | 1.00E+00 |
| ZDHH4    | LMNA | 0.151299893  | 0.013531527  | 0.283430845  | 3.16E-02 | 5.61E-02 | 1.00E+00 |
| CYP2A6   | LMNA | -0.085578147 | -0.221018008 | 0.053100187  | 2.26E-01 | 3.03E-01 | 1.00E+00 |
| PDE9A    | LMNA | -0.354598158 | -0.469658156 | -0.227693346 | 2.25E-07 | 1.21E-06 | 2.66E-03 |
| ABCA8    | LMNA | 0.187716653  | 0.050986952  | 0.317538803  | 7.47E-03 | 1.56E-02 | 1.00E+00 |
| NDUFS2   | LMNA | -0.068979409 | -0.205077522 | 0.069735662  | 3.29E-01 | 4.15E-01 | 1.00E+00 |
| UBR5     | LMNA | -0.150177591 | -0.28237436  | -0.012383324 | 3.29E-02 | 5.82E-02 | 1.00E+00 |
| FLJ22662 | LMNA | 0.455686946  | 0.338959204  | 0.558597663  | 9.46E-12 | 1.12E-10 | 1.12E-07 |
| GP6      | LMNA | -0.006598278 | -0.144517638 | 0.131572572  | 9.26E-01 | 9.47E-01 | 1.00E+00 |
| CRYBA2   | LMNA | -0.144699785 | -0.277213189 | -0.006784307 | 3.99E-02 | 6.88E-02 | 1.00E+00 |
| LEF1     | LMNA | 0.383408609  | 0.259070178  | 0.495246254  | 1.78E-08 | 1.16E-07 | 2.11E-04 |
| ZNF20    | LMNA | -0.117936792 | -0.251886751 | 0.020447114  | 9.46E-02 | 1.45E-01 | 1.00E+00 |
| CTPS     | LMNA | -0.050670039 | -0.187410097 | 0.087996501  | 4.74E-01 | 5.59E-01 | 1.00E+00 |
| EPS8L1   | LMNA | 0.076061309  | -0.062647512 | 0.211887419  | 2.82E-01 | 3.65E-01 | 1.00E+00 |
| EYA1     | LMNA | -0.405622719 | -0.514844184 | -0.283443603 | 2.12E-09 | 1.65E-08 | 2.51E-05 |
| SERPINB2 | LMNA | -0.157165919 | -0.288947648 | -0.019538851 | 2.55E-02 | 4.63E-02 | 1.00E+00 |
| MAPK14   | LMNA | 0.168770714  | 0.031452524  | 0.299835849  | 1.63E-02 | 3.12E-02 | 1.00E+00 |
| GTF2F2   | LMNA | -0.120995507 | -0.2547906   | 0.017345221  | 8.63E-02 | 1.34E-01 | 1.00E+00 |
| ZNHIT4   | LMNA | 0.007050104  | -0.13112852  | 0.144960019  | 9.21E-01 | 9.43E-01 | 1.00E+00 |
| PLA1A    | LMNA | 0.109088315  | -0.029405526 | 0.243472678  | 1.22E-01 | 1.81E-01 | 1.00E+00 |
| RNF113A  | LMNA | 0.01635448   | -0.121971903 | 0.154057657  | 8.17E-01 | 8.62E-01 | 1.00E+00 |
| HPR      | LMNA | -0.072294212 | -0.208266652 | 0.066419676  | 3.07E-01 | 3.91E-01 | 1.00E+00 |
| CLCN2    | LMNA | 0.017830755  | -0.120516904 | 0.155498987  | 8.01E-01 | 8.50E-01 | 1.00E+00 |
| SATB2    | LMNA | 0.016033247  | -0.122288427 | 0.15374395   | 8.21E-01 | 8.65E-01 | 1.00E+00 |
| ANXA6    | LMNA | -0.015950191 | -0.153662835 | 0.122370261  | 8.22E-01 | 8.66E-01 | 1.00E+00 |
| KCNJ9    | LMNA | -0.400696404 | -0.510507875 | -0.278024771 | 3.44E-09 | 2.57E-08 | 4.08E-05 |
| EMID1    | LMNA | 0.173395017  | 0.036210807  | 0.304165109  | 1.36E-02 | 2.66E-02 | 1.00E+00 |
| DPM3     | LMNA | -0.057649008 | -0.194154827 | 0.081047005  | 4.15E-01 | 5.03E-01 | 1.00E+00 |
| SLC25A13 | LMNA | 0.14599095   | 0.008103265  | 0.27843041   | 3.82E-02 | 6.61E-02 | 1.00E+00 |
| KRT24    | LMNA | 0.044251192  | -0.094376347 | 0.181195284  | 5.32E-01 | 6.14E-01 | 1.00E+00 |
| SMPD1    | LMNA | 0.474289145  | 0.359796192  | 0.574710358  | 1.00E-12 | 1.39E-11 | 1.19E-08 |
| COL6A2   | LMNA | 0.700667461  | 0.622864833  | 0.76474621   | 3.81E-31 | 1.41E-28 | 4.51E-27 |
| TH       | LMNA | 0.193505707  | 0.056976765  | 0.322930065  | 5.79E-03 | 1.24E-02 | 1.00E+00 |
| MOCS3    | LMNA | 0.137961198  | -9.15E-05    | 0.270853607  | 5.02E-02 | 8.42E-02 | 1.00E+00 |

|           |      |              |              |              |          |          |          |
|-----------|------|--------------|--------------|--------------|----------|----------|----------|
| ANKS1B    | LMNA | -0.454987412 | -0.557990228 | -0.338177859 | 1.03E-11 | 1.20E-10 | 1.22E-07 |
| GPR126    | LMNA | 0.172283391  | 0.035066406  | 0.303124901  | 1.42E-02 | 2.76E-02 | 1.00E+00 |
| ZC3H12A   | LMNA | 0.537594739  | 0.431573152  | 0.628966669  | 1.59E-16 | 4.46E-15 | 1.89E-12 |
| TMEM47    | LMNA | 0.107470486  | -0.031041052 | 0.241932083  | 1.28E-01 | 1.88E-01 | 1.00E+00 |
| C17orf71  | LMNA | -0.106231735 | -0.240752012 | 0.032292853  | 1.32E-01 | 1.94E-01 | 1.00E+00 |
| HIST1H2BM | LMNA | 0.030730493  | -0.107777741 | 0.168068484  | 6.64E-01 | 7.34E-01 | 1.00E+00 |
| RAPGEF1   | LMNA | 0.130973523  | -0.007207802 | 0.264246673  | 6.32E-02 | 1.03E-01 | 1.00E+00 |
| HSF2BP    | LMNA | -0.183557378 | -0.313660143 | -0.046689503 | 8.93E-03 | 1.83E-02 | 1.00E+00 |
| MAP3K8    | LMNA | 0.265062015  | 0.131835136  | 0.38888298   | 1.38E-04 | 4.40E-04 | 1.00E+00 |
| AKAP10    | LMNA | -0.11006636  | -0.244403702 | 0.028416422  | 1.19E-01 | 1.76E-01 | 1.00E+00 |
| DLG4      | LMNA | -0.343601236 | -0.459839961 | -0.215785932 | 5.54E-07 | 2.78E-06 | 6.58E-03 |
| STC1      | LMNA | 0.474587962  | 0.360131843  | 0.574968551  | 9.65E-13 | 1.35E-11 | 1.14E-08 |
| RPAP3     | LMNA | 0.290553075  | 0.158874721  | 0.412075266  | 2.73E-05 | 9.98E-05 | 3.24E-01 |
| STOM      | LMNA | 0.295179308  | 0.163803257  | 0.416267492  | 2.00E-05 | 7.50E-05 | 2.37E-01 |
| MUPCDH    | LMNA | -0.006261195 | -0.144187565 | 0.131903819  | 9.30E-01 | 9.49E-01 | 1.00E+00 |
| TMEM14A   | LMNA | -0.150095796 | -0.282297348 | -0.012299655 | 3.30E-02 | 5.83E-02 | 1.00E+00 |
| TCP11L1   | LMNA | 0.253510533  | 0.119646859  | 0.378321279  | 2.72E-04 | 8.15E-04 | 1.00E+00 |
| CWF19L1   | LMNA | -0.22642257  | -0.353426222 | -0.091223006 | 1.19E-03 | 3.06E-03 | 1.00E+00 |
| MYH3      | LMNA | -0.227700963 | -0.354605181 | -0.09255951  | 1.12E-03 | 2.90E-03 | 1.00E+00 |
| GPKOW     | LMNA | -0.028053145 | -0.165463345 | 0.110425507  | 6.92E-01 | 7.58E-01 | 1.00E+00 |
| YY1AP1    | LMNA | 0.057014883  | -0.08167901  | 0.193542518  | 4.20E-01 | 5.08E-01 | 1.00E+00 |
| SPON1     | LMNA | -0.27017382  | -0.393546418 | -0.137241625 | 1.01E-04 | 3.29E-04 | 1.00E+00 |
| SULT1A1   | LMNA | -0.021753739 | -0.159326263 | 0.116647569  | 7.59E-01 | 8.14E-01 | 1.00E+00 |
| RAB23     | LMNA | 0.111786034  | -0.026676645 | 0.246040101  | 1.13E-01 | 1.69E-01 | 1.00E+00 |
| PLA2G4A   | LMNA | -0.051889294 | -0.188589359 | 0.086783368  | 4.63E-01 | 5.49E-01 | 1.00E+00 |
| MAPRE3    | LMNA | -0.320425476 | -0.43905486  | -0.190815197 | 3.34E-06 | 1.44E-05 | 3.96E-02 |
| SPEF1     | LMNA | -0.026972651 | -0.164411449 | 0.111493507  | 7.03E-01 | 7.67E-01 | 1.00E+00 |
| GGPS1     | LMNA | -0.191069631 | -0.320662406 | -0.05445501  | 6.45E-03 | 1.37E-02 | 1.00E+00 |
| C19orf42  | LMNA | 0.043240536  | -0.095379825 | 0.180215757  | 5.41E-01 | 6.23E-01 | 1.00E+00 |
| MAP2K2    | LMNA | 0.27749104   | 0.144994475  | 0.400210799  | 6.38E-05 | 2.17E-04 | 7.57E-01 |
| HIST1H2BE | LMNA | -0.080484693 | -0.216134228 | 0.058213113  | 2.55E-01 | 3.36E-01 | 1.00E+00 |
| ELN       | LMNA | 0.229230346  | 0.094159053  | 0.356015079  | 1.03E-03 | 2.70E-03 | 1.00E+00 |
| RNF19B    | LMNA | 0.28232367   | 0.150123753  | 0.404605159  | 4.69E-05 | 1.63E-04 | 5.56E-01 |
| MPI       | LMNA | 0.05873441   | -0.079964974 | 0.195202641  | 4.06E-01 | 4.94E-01 | 1.00E+00 |
| MEPCE     | LMNA | 0.300532155  | 0.169514084  | 0.421111749  | 1.39E-05 | 5.35E-05 | 1.65E-01 |

|           |      |              |              |              |          |          |          |
|-----------|------|--------------|--------------|--------------|----------|----------|----------|
| TLR8      | LMNA | 0.211993354  | 0.076171583  | 0.340091279  | 2.46E-03 | 5.82E-03 | 1.00E+00 |
| PCDHA9    | LMNA | -0.463791729 | -0.565627356 | -0.348023605 | 3.62E-12 | 4.60E-11 | 4.29E-08 |
| ABCC3     | LMNA | 0.560953789  | 0.458401507  | 0.648764329  | 3.87E-18 | 1.43E-16 | 4.59E-14 |
| HLA-DMB   | LMNA | 0.088774404  | -0.049887993 | 0.224079225  | 2.09E-01 | 2.84E-01 | 1.00E+00 |
| RRAGA     | LMNA | -0.009096405 | -0.146962854 | 0.129116737  | 8.98E-01 | 9.26E-01 | 1.00E+00 |
| CARS2     | LMNA | 0.243738987  | 0.109368047  | 0.369361558  | 4.73E-04 | 1.34E-03 | 1.00E+00 |
| ANGEL1    | LMNA | -0.050626832 | -0.187368299 | 0.088039484  | 4.74E-01 | 5.60E-01 | 1.00E+00 |
| CLUL1     | LMNA | -0.027425686 | -0.164852532 | 0.111045749  | 6.98E-01 | 7.63E-01 | 1.00E+00 |
| RHAG      | LMNA | -0.038486846 | -0.175604832 | 0.100095979  | 5.87E-01 | 6.65E-01 | 1.00E+00 |
| C9orf95   | LMNA | 0.309652414  | 0.179264584  | 0.42934965   | 7.31E-06 | 2.97E-05 | 8.67E-02 |
| C14orf143 | LMNA | 0.056301245  | -0.082390128 | 0.192853305  | 4.26E-01 | 5.13E-01 | 1.00E+00 |
| CPN1      | LMNA | 0.042561533  | -0.096053848 | 0.179557514  | 5.48E-01 | 6.28E-01 | 1.00E+00 |
| HLA-A     | LMNA | 0.453858946  | 0.336917757  | 0.557010099  | 1.17E-11 | 1.36E-10 | 1.39E-07 |
| EDNRB     | LMNA | -0.317832918 | -0.43672181  | -0.188032237 | 4.04E-06 | 1.72E-05 | 4.79E-02 |
| LDHA      | LMNA | 0.481786588  | 0.368226762  | 0.58118249   | 3.90E-13 | 5.75E-12 | 4.62E-09 |
| MRPL20    | LMNA | -0.03183203  | -0.169139756 | 0.106687804  | 6.53E-01 | 7.24E-01 | 1.00E+00 |
| SCD       | LMNA | 0.034480602  | -0.10406576  | 0.171714229  | 6.26E-01 | 7.01E-01 | 1.00E+00 |
| C8orf55   | LMNA | -0.110029119 | -0.244368256 | 0.028454088  | 1.19E-01 | 1.77E-01 | 1.00E+00 |
| ATP5S     | LMNA | -0.353610362 | -0.468777401 | -0.226622211 | 2.44E-07 | 1.31E-06 | 2.89E-03 |
| RABL4     | LMNA | -0.222850258 | -0.350129625 | -0.087490888 | 1.43E-03 | 3.61E-03 | 1.00E+00 |
| SILV      | LMNA | 0.133816692  | -0.004314003 | 0.266936435  | 5.76E-02 | 9.49E-02 | 1.00E+00 |
| RCVRN     | LMNA | 0.148850318  | 0.011025887  | 0.281124509  | 3.45E-02 | 6.05E-02 | 1.00E+00 |
| TEX28     | LMNA | 0.535569909  | 0.429256393  | 0.627244951  | 2.17E-16 | 5.91E-15 | 2.57E-12 |
| SHANK1    | LMNA | -0.330794595 | -0.448370092 | -0.201966713 | 1.52E-06 | 7.05E-06 | 1.80E-02 |
| CD226     | LMNA | 0.108722203  | -0.029775707 | 0.243124103  | 1.24E-01 | 1.82E-01 | 1.00E+00 |
| TCTN1     | LMNA | 0.261412927  | 0.127980529  | 0.385550075  | 1.71E-04 | 5.34E-04 | 1.00E+00 |
| STAT3     | LMNA | 0.425277277  | 0.305141095  | 0.532089337  | 2.81E-10 | 2.57E-09 | 3.33E-06 |
| PPP2R5C   | LMNA | -0.097815577 | -0.23272398  | 0.040786181  | 1.66E-01 | 2.34E-01 | 1.00E+00 |
| SYNJ2     | LMNA | 0.32673014   | 0.197591591  | 0.444721777  | 2.08E-06 | 9.38E-06 | 2.46E-02 |
| CAPG      | LMNA | 0.518176055  | 0.409412245  | 0.61241791   | 2.83E-15 | 6.09E-14 | 3.36E-11 |
| MBD4      | LMNA | 0.275238643  | 0.142606248  | 0.398160742  | 7.36E-05 | 2.47E-04 | 8.73E-01 |
| SLAMF8    | LMNA | 0.421703906  | 0.301187003  | 0.528960595  | 4.10E-10 | 3.63E-09 | 4.86E-06 |
| ROBO1     | LMNA | -0.059291264 | -0.195740089 | 0.079409722  | 4.02E-01 | 4.89E-01 | 1.00E+00 |
| ST3GAL6   | LMNA | -0.355692289 | -0.470633457 | -0.228880145 | 2.05E-07 | 1.11E-06 | 2.43E-03 |
| ATN1      | LMNA | 0.045928674  | -0.092710155 | 0.182820502  | 5.16E-01 | 6.00E-01 | 1.00E+00 |

|         |      |              |              |              |          |          |          |
|---------|------|--------------|--------------|--------------|----------|----------|----------|
| MPZL1   | LMNA | 0.018290391  | -0.120063771 | 0.155947623  | 7.96E-01 | 8.46E-01 | 1.00E+00 |
| ARSB    | LMNA | 0.388442683  | 0.264579745  | 0.499697457  | 1.11E-08 | 7.53E-08 | 1.32E-04 |
| KRT36   | LMNA | -0.081188652 | -0.216809613 | 0.057506896  | 2.51E-01 | 3.31E-01 | 1.00E+00 |
| MAD1L1  | LMNA | 0.230170438  | 0.095142619  | 0.356881439  | 9.83E-04 | 2.58E-03 | 1.00E+00 |
| DDX52   | LMNA | -0.235453778 | -0.361746348 | -0.100675187 | 7.43E-04 | 2.01E-03 | 1.00E+00 |
| AMPD1   | LMNA | -0.111034957 | -0.245325489 | 0.027436605  | 1.16E-01 | 1.72E-01 | 1.00E+00 |
| INPP1   | LMNA | -0.45895149  | -0.561430948 | -0.34260767  | 6.44E-12 | 7.84E-11 | 7.64E-08 |
| DPEP3   | LMNA | 0.126482738  | -0.011773846 | 0.259993966  | 7.29E-02 | 1.16E-01 | 1.00E+00 |
| DENND4A | LMNA | -0.159862    | -0.29148029  | -0.022303211 | 2.31E-02 | 4.24E-02 | 1.00E+00 |
| ANKRD11 | LMNA | 0.09609926   | -0.042515781 | 0.231084554  | 1.74E-01 | 2.43E-01 | 1.00E+00 |
| EIF5A2  | LMNA | 0.174268707  | 0.03711051   | 0.304982449  | 1.31E-02 | 2.58E-02 | 1.00E+00 |
| CAP1    | LMNA | 0.387589803  | 0.263645737  | 0.498943741  | 1.21E-08 | 8.11E-08 | 1.43E-04 |
| NT5DC3  | LMNA | 0.064865438  | -0.073846842 | 0.201115502  | 3.59E-01 | 4.46E-01 | 1.00E+00 |
| SEZ6L2  | LMNA | 0.16146998   | 0.023952916  | 0.292989916  | 2.17E-02 | 4.02E-02 | 1.00E+00 |
| Sep-09  | LMNA | 0.266087465  | 0.132919065  | 0.389818994  | 1.29E-04 | 4.15E-04 | 1.00E+00 |
| GUCY2D  | LMNA | 0.247665363  | 0.1134948    | 0.372964537  | 3.80E-04 | 1.10E-03 | 1.00E+00 |
| VPS11   | LMNA | -0.057138707 | -0.19366209  | 0.081555609  | 4.19E-01 | 5.07E-01 | 1.00E+00 |
| CPM     | LMNA | 0.056354652  | -0.082336915 | 0.192904888  | 4.26E-01 | 5.12E-01 | 1.00E+00 |
| NDUFB5  | LMNA | -0.233452568 | -0.359904438 | -0.098578593 | 8.27E-04 | 2.22E-03 | 1.00E+00 |
| CIDEA   | LMNA | -0.157690851 | -0.289440903 | -0.020076913 | 2.50E-02 | 4.56E-02 | 1.00E+00 |
| SLC26A4 | LMNA | -0.042572385 | -0.179568035 | 0.096043077  | 5.47E-01 | 6.28E-01 | 1.00E+00 |
| FAM59A  | LMNA | -0.119054281 | -0.25294794  | 0.019314159  | 9.15E-02 | 1.41E-01 | 1.00E+00 |
| N6AMT1  | LMNA | 0.058468326  | -0.080230262 | 0.1949458    | 4.08E-01 | 4.96E-01 | 1.00E+00 |
| FBXO5   | LMNA | -0.078918188 | -0.214630843 | 0.059784145  | 2.64E-01 | 3.46E-01 | 1.00E+00 |
| SIPA1L1 | LMNA | 0.462669569  | 0.346767288  | 0.564654932  | 4.14E-12 | 5.20E-11 | 4.91E-08 |
| OXR1    | LMNA | -0.118739336 | -0.252648895 | 0.019633498  | 9.24E-02 | 1.42E-01 | 1.00E+00 |
| DGKB    | LMNA | -0.601773832 | -0.683077815 | -0.505737191 | 2.76E-21 | 1.69E-19 | 3.27E-17 |
| DPYS    | LMNA | -0.122465724 | -0.25618552  | 0.015853301  | 8.25E-02 | 1.29E-01 | 1.00E+00 |
| GCN5L2  | LMNA | -0.237737199 | -0.3638468   | -0.103068906 | 6.57E-04 | 1.80E-03 | 1.00E+00 |
| MIR16   | LMNA | -0.024548464 | -0.162050286 | 0.113888498  | 7.29E-01 | 7.89E-01 | 1.00E+00 |
| TGM3    | LMNA | 0.102049297  | -0.036516143 | 0.236764754  | 1.48E-01 | 2.13E-01 | 1.00E+00 |
| MTCH1   | LMNA | -0.138567812 | -0.271426578 | -0.00052689  | 4.92E-02 | 8.28E-02 | 1.00E+00 |
| WDR4    | LMNA | 0.425875977  | 0.30580399   | 0.532613257  | 2.64E-10 | 2.43E-09 | 3.13E-06 |
| HK1     | LMNA | 0.34072674   | 0.212679697  | 0.45726888   | 6.98E-07 | 3.44E-06 | 8.28E-03 |
| PDC     | LMNA | 0.07204539   | -0.066668693 | 0.208027363  | 3.08E-01 | 3.93E-01 | 1.00E+00 |

|           |      |              |              |              |          |          |          |
|-----------|------|--------------|--------------|--------------|----------|----------|----------|
| VPS33B    | LMNA | -0.15633061  | -0.288162601 | -0.018682814 | 2.63E-02 | 4.76E-02 | 1.00E+00 |
| HEXB      | LMNA | 0.563962051  | 0.461870198  | 0.651305333  | 2.35E-18 | 9.18E-17 | 2.78E-14 |
| GALNT12   | LMNA | 0.28886364   | 0.157076524  | 0.41054304   | 3.06E-05 | 1.11E-04 | 3.62E-01 |
| LOC339229 | LMNA | -0.063050884 | -0.199366551 | 0.075658668  | 3.73E-01 | 4.60E-01 | 1.00E+00 |
| MRPL35    | LMNA | 0.24421643   | 0.109869609  | 0.369799878  | 4.61E-04 | 1.31E-03 | 1.00E+00 |
| ORC4L     | LMNA | -0.472869535 | -0.57348347  | -0.358202001 | 1.19E-12 | 1.63E-11 | 1.42E-08 |
| TCEB3     | LMNA | 0.310604427  | 0.180283864  | 0.430208413  | 6.83E-06 | 2.79E-05 | 8.10E-02 |
| TNKS      | LMNA | -0.157550209 | -0.289308755 | -0.019932745 | 2.51E-02 | 4.58E-02 | 1.00E+00 |
| C2orf24   | LMNA | 0.173821329  | 0.036649784  | 0.30456395   | 1.34E-02 | 2.62E-02 | 1.00E+00 |
| CRLF1     | LMNA | -0.173850854 | -0.304591571 | -0.036680189 | 1.33E-02 | 2.62E-02 | 1.00E+00 |
| GGTLA1    | LMNA | 0.368146498  | 0.242415794  | 0.481715286  | 7.03E-08 | 4.16E-07 | 8.34E-04 |
| PYCR1     | LMNA | 0.060314936  | -0.078388771 | 0.196727875  | 3.94E-01 | 4.81E-01 | 1.00E+00 |
| CDK5R2    | LMNA | -0.167981548 | -0.299096495 | -0.030641115 | 1.69E-02 | 3.21E-02 | 1.00E+00 |
| WAS       | LMNA | 0.314869931  | 0.184854193  | 0.434053449  | 5.02E-06 | 2.10E-05 | 5.95E-02 |
| CCBL2     | LMNA | 0.015766943  | -0.122550807 | 0.153483864  | 8.24E-01 | 8.67E-01 | 1.00E+00 |
| MADD      | LMNA | -0.216144485 | -0.343932886 | -0.080495383 | 2.00E-03 | 4.86E-03 | 1.00E+00 |
| SLC30A4   | LMNA | 0.025959751  | -0.112494403 | 0.163425074  | 7.14E-01 | 7.76E-01 | 1.00E+00 |
| WDR42A    | LMNA | -0.172062448 | -0.302918115 | -0.034838991 | 1.43E-02 | 2.78E-02 | 1.00E+00 |
| TUB       | LMNA | -0.52867477  | -0.621375267 | -0.421377628 | 6.11E-16 | 1.53E-14 | 7.24E-12 |
| KLF12     | LMNA | -0.450762246 | -0.554318986 | -0.333461977 | 1.68E-11 | 1.89E-10 | 1.99E-07 |
| ARHGEF18  | LMNA | 0.214285304  | 0.078558237  | 0.342212861  | 2.20E-03 | 5.27E-03 | 1.00E+00 |
| ARRB1     | LMNA | -0.149513009 | -0.2817486   | -0.011703575 | 3.37E-02 | 5.93E-02 | 1.00E+00 |
| KCNK1     | LMNA | -0.353948396 | -0.46907883  | -0.22698873  | 2.37E-07 | 1.27E-06 | 2.81E-03 |
| HSPA1A    | LMNA | 0.26320026   | 0.129868021  | 0.387182945  | 1.54E-04 | 4.86E-04 | 1.00E+00 |
| ITM2C     | LMNA | -0.239489126 | -0.365457477 | -0.104906515 | 5.97E-04 | 1.66E-03 | 1.00E+00 |
| DAPK2     | LMNA | -0.128532979 | -0.261936157 | 0.009689961  | 6.83E-02 | 1.10E-01 | 1.00E+00 |
| RUNDC3B   | LMNA | -0.51978529  | -0.613792459 | -0.411243866 | 2.24E-15 | 4.94E-14 | 2.66E-11 |
| SCAMP5    | LMNA | -0.561233508 | -0.649000684 | -0.458723907 | 3.69E-18 | 1.37E-16 | 4.38E-14 |
| EREG      | LMNA | 0.433575781  | 0.314339767  | 0.539344037  | 1.15E-10 | 1.14E-09 | 1.37E-06 |
| IL17RB    | LMNA | -0.254543018 | -0.379266621 | -0.120734622 | 2.56E-04 | 7.71E-04 | 1.00E+00 |
| CENPA     | LMNA | 0.025077149  | -0.113366317 | 0.162565361  | 7.23E-01 | 7.84E-01 | 1.00E+00 |
| TMED5     | LMNA | 0.165874526  | 0.028475592  | 0.297121694  | 1.83E-02 | 3.45E-02 | 1.00E+00 |
| MCAM      | LMNA | 0.332726872  | 0.204048487  | 0.450103159  | 1.31E-06 | 6.15E-06 | 1.55E-02 |
| FLJ20323  | LMNA | 0.073641108  | -0.065071424 | 0.209561657  | 2.98E-01 | 3.82E-01 | 1.00E+00 |
| CDH6      | LMNA | 0.290962373  | 0.1593105    | 0.412446373  | 2.66E-05 | 9.73E-05 | 3.15E-01 |

|           |      |              |              |              |          |          |          |
|-----------|------|--------------|--------------|--------------|----------|----------|----------|
| POLR3E    | LMNA | 0.022129094  | -0.116277126 | 0.159692244  | 7.55E-01 | 8.11E-01 | 1.00E+00 |
| BRP44     | LMNA | -0.135798296 | -0.268809893 | 0.002295743  | 5.40E-02 | 8.98E-02 | 1.00E+00 |
| AQR       | LMNA | 0.192066884  | 0.055487126  | 0.321590894  | 6.17E-03 | 1.32E-02 | 1.00E+00 |
| THG1L     | LMNA | 0.299625297  | 0.16854596   | 0.420291539  | 1.48E-05 | 5.67E-05 | 1.75E-01 |
| CAMP      | LMNA | 0.213111328  | 0.077335558  | 0.341126313  | 2.33E-03 | 5.55E-03 | 1.00E+00 |
| GABRA2    | LMNA | -0.290031758 | -0.411602533 | -0.158319749 | 2.83E-05 | 1.03E-04 | 3.35E-01 |
| C14orf166 | LMNA | 0.003658722  | -0.134460194 | 0.141638182  | 9.59E-01 | 9.69E-01 | 1.00E+00 |
| ADAMTSL2  | LMNA | -0.075051774 | -0.210917465 | 0.063658793  | 2.88E-01 | 3.72E-01 | 1.00E+00 |
| MYL1      | LMNA | 0.013332866  | -0.124948116 | 0.151105739  | 8.51E-01 | 8.89E-01 | 1.00E+00 |
| TNFSF18   | LMNA | -0.061991982 | -0.19834553  | 0.076715555  | 3.81E-01 | 4.68E-01 | 1.00E+00 |
| PIIB      | LMNA | 0.579529356  | 0.47987018   | 0.664423421  | 1.62E-19 | 7.57E-18 | 1.92E-15 |
| KLHL4     | LMNA | 0.296618853  | 0.165338209  | 0.417570938  | 1.82E-05 | 6.85E-05 | 2.15E-01 |
| SFN       | LMNA | 0.247567835  | 0.11339224   | 0.372875089  | 3.82E-04 | 1.11E-03 | 1.00E+00 |
| FRAP1     | LMNA | -0.095415438 | -0.230431154 | 0.043204663  | 1.77E-01 | 2.47E-01 | 1.00E+00 |
| CLMN      | LMNA | 0.323620807  | 0.194248067  | 0.441928148  | 2.63E-06 | 1.16E-05 | 3.12E-02 |
| GOLGA5    | LMNA | 0.245284833  | 0.110992231  | 0.370780531  | 4.34E-04 | 1.24E-03 | 1.00E+00 |
| SDCCAG1   | LMNA | -0.208755214 | -0.337091617 | -0.072802293 | 2.87E-03 | 6.67E-03 | 1.00E+00 |
| SSTR3     | LMNA | 0.001537118  | -0.136542857 | 0.139558504  | 9.83E-01 | 9.86E-01 | 1.00E+00 |
| MAGEA5    | LMNA | 0.003618467  | -0.134499721 | 0.141598734  | 9.59E-01 | 9.70E-01 | 1.00E+00 |
| OVOL2     | LMNA | -0.171385665 | -0.302284622 | -0.034142474 | 1.47E-02 | 2.85E-02 | 1.00E+00 |
| C10orf95  | LMNA | -0.11755158  | -0.251520871 | 0.020837575  | 9.57E-02 | 1.46E-01 | 1.00E+00 |
| RBL2      | LMNA | -0.22752175  | -0.354439932 | -0.092372121 | 1.13E-03 | 2.92E-03 | 1.00E+00 |
| JMJD1B    | LMNA | -0.297833334 | -0.418670211 | -0.166633675 | 1.67E-05 | 6.35E-05 | 1.98E-01 |
| PPP1R10   | LMNA | -0.072031419 | -0.208013927 | 0.066682675  | 3.08E-01 | 3.93E-01 | 1.00E+00 |
| C1orf163  | LMNA | 0.027847175  | -0.110629121 | 0.16526285   | 6.94E-01 | 7.60E-01 | 1.00E+00 |
| CSE1L     | LMNA | 0.00131054   | -0.136765204 | 0.139336332  | 9.85E-01 | 9.88E-01 | 1.00E+00 |
| ASRGL1    | LMNA | -0.556133716 | -0.644688849 | -0.452850206 | 8.53E-18 | 2.98E-16 | 1.01E-13 |
| RDH16     | LMNA | -0.138046765 | -0.270934434 | 4.32E-06     | 5.01E-02 | 8.41E-02 | 1.00E+00 |
| TOM1      | LMNA | 0.277148454  | 0.14463113   | 0.399899067  | 6.52E-05 | 2.21E-04 | 7.74E-01 |
| PTX3      | LMNA | 0.516575184  | 0.407591015  | 0.61104994   | 3.56E-15 | 7.56E-14 | 4.22E-11 |
| CENPN     | LMNA | -0.011839298 | -0.149645713 | 0.126418324  | 8.67E-01 | 9.02E-01 | 1.00E+00 |
| TTC15     | LMNA | -0.022185471 | -0.15974721  | 0.116221484  | 7.54E-01 | 8.10E-01 | 1.00E+00 |
| TMED2     | LMNA | 0.223600644  | 0.088274527  | 0.350822357  | 1.38E-03 | 3.49E-03 | 1.00E+00 |
| ANG       | LMNA | 0.523738727  | 0.415747365  | 0.617166921  | 1.26E-15 | 2.94E-14 | 1.50E-11 |
| RCAN3     | LMNA | 0.402484096  | 0.279990289  | 0.512082109  | 2.89E-09 | 2.19E-08 | 3.42E-05 |



|           |      |              |              |              |          |          |          |
|-----------|------|--------------|--------------|--------------|----------|----------|----------|
| CINP      | LMNA | 0.090543241  | -0.048109104 | 0.225772183  | 2.00E-01 | 2.74E-01 | 1.00E+00 |
| U2AF1     | LMNA | 0.196271409  | 0.059841852  | 0.325502762  | 5.12E-03 | 1.12E-02 | 1.00E+00 |
| NMT2      | LMNA | -0.332901561 | -0.450259795 | -0.204236749 | 1.29E-06 | 6.08E-06 | 1.53E-02 |
| OSGEPL1   | LMNA | -0.365680147 | -0.479523593 | -0.239731388 | 8.72E-08 | 5.05E-07 | 1.03E-03 |
| DFNB31    | LMNA | 0.380420369  | 0.255803507  | 0.492601228  | 2.34E-08 | 1.50E-07 | 2.78E-04 |
| Mar-07    | LMNA | -0.061201767 | -0.197583393 | 0.077504062  | 3.87E-01 | 4.74E-01 | 1.00E+00 |
| SLC6A20   | LMNA | -0.131766805 | -0.26499736  | 0.006400627  | 6.16E-02 | 1.01E-01 | 1.00E+00 |
| PFKM      | LMNA | -0.26296646  | -0.386969395 | -0.129621065 | 1.56E-04 | 4.92E-04 | 1.00E+00 |
| SGMS1     | LMNA | -0.243954724 | -0.369559624 | -0.109594675 | 4.67E-04 | 1.33E-03 | 1.00E+00 |
| DKC1      | LMNA | 0.111461098  | -0.027005444 | 0.245730959  | 1.14E-01 | 1.70E-01 | 1.00E+00 |
| MGC5590   | LMNA | -0.076731986 | -0.212531655 | 0.061975516  | 2.78E-01 | 3.61E-01 | 1.00E+00 |
| CREBZF    | LMNA | -0.128184222 | -0.261605855 | 0.010044527  | 6.91E-02 | 1.11E-01 | 1.00E+00 |
| RIOK3     | LMNA | 0.217485619  | 0.081893394  | 0.345173105  | 1.88E-03 | 4.58E-03 | 1.00E+00 |
| PRPSAP1   | LMNA | -0.339830136 | -0.456466516 | -0.211711337 | 7.50E-07 | 3.67E-06 | 8.89E-03 |
| GCHFR     | LMNA | 0.312940068  | 0.182785719  | 0.432314358  | 5.77E-06 | 2.38E-05 | 6.85E-02 |
| LOC196993 | LMNA | -0.092681714 | -0.227817831 | 0.045957301  | 1.90E-01 | 2.62E-01 | 1.00E+00 |
| UBD       | LMNA | 0.194888247  | 0.058408704  | 0.324216363  | 5.45E-03 | 1.18E-02 | 1.00E+00 |
| ATG9A     | LMNA | 0.069307948  | -0.069407142 | 0.205393735  | 3.27E-01 | 4.13E-01 | 1.00E+00 |
| S100A1    | LMNA | -0.290211598 | -0.41176562  | -0.15851119  | 2.79E-05 | 1.02E-04 | 3.31E-01 |
| RPL6      | LMNA | 0.078366681  | -0.060337082 | 0.214101405  | 2.68E-01 | 3.49E-01 | 1.00E+00 |
| TMEM40    | LMNA | -0.055669263 | -0.192242839 | 0.083019761  | 4.31E-01 | 5.18E-01 | 1.00E+00 |
| DNAJB6    | LMNA | -0.035991634 | -0.173182147 | 0.102569     | 6.11E-01 | 6.87E-01 | 1.00E+00 |
| ELP3      | LMNA | -0.173366016 | -0.304137976 | -0.036180947 | 1.36E-02 | 2.66E-02 | 1.00E+00 |
| ZNF787    | LMNA | 0.164633077  | 0.027200278  | 0.295957623  | 1.92E-02 | 3.60E-02 | 1.00E+00 |
| KERA      | LMNA | 0.244519413  | 0.110187932  | 0.370078005  | 4.53E-04 | 1.29E-03 | 1.00E+00 |
| PELI1     | LMNA | -0.419792299 | -0.527285648 | -0.299073425 | 5.00E-10 | 4.37E-09 | 5.93E-06 |
| PPT1      | LMNA | -0.051399003 | -0.188115198 | 0.087271246  | 4.68E-01 | 5.53E-01 | 1.00E+00 |
| SLC35C2   | LMNA | 0.369957115  | 0.244387716  | 0.483323366  | 6.00E-08 | 3.59E-07 | 7.11E-04 |
| MT1X      | LMNA | 0.327622575  | 0.198551799  | 0.445523175  | 1.94E-06 | 8.82E-06 | 2.30E-02 |
| UBE2B     | LMNA | -0.037601708 | -0.174745612 | 0.100973441  | 5.95E-01 | 6.73E-01 | 1.00E+00 |
| KEAP1     | LMNA | 0.212683707  | 0.076890297  | 0.340730453  | 2.37E-03 | 5.65E-03 | 1.00E+00 |
| MST1      | LMNA | -0.07442713  | -0.210317176 | 0.064284376  | 2.92E-01 | 3.76E-01 | 1.00E+00 |
| MUC4      | LMNA | -0.170189758 | -0.301164929 | -0.032912021 | 1.55E-02 | 2.97E-02 | 1.00E+00 |
| RFC4      | LMNA | -0.125035503 | -0.258622352 | 0.013244108  | 7.62E-02 | 1.21E-01 | 1.00E+00 |
| BCL2L13   | LMNA | 0.150723868  | 0.012942162  | 0.28288864   | 3.23E-02 | 5.71E-02 | 1.00E+00 |

|           |      |              |              |              |          |          |          |
|-----------|------|--------------|--------------|--------------|----------|----------|----------|
| GNB2      | LMNA | 0.491648149  | 0.379344194  | 0.589676332  | 1.09E-13 | 1.73E-12 | 1.29E-09 |
| NUP50     | LMNA | 0.005963832  | -0.132196008 | 0.143896361  | 9.33E-01 | 9.51E-01 | 1.00E+00 |
| SULT4A1   | LMNA | -0.259401532 | -0.383711575 | -0.125857571 | 1.93E-04 | 5.95E-04 | 1.00E+00 |
| S100A8    | LMNA | 0.267416929  | 0.134324822  | 0.391032129  | 1.19E-04 | 3.85E-04 | 1.00E+00 |
| C7        | LMNA | 0.155266761  | 0.017592858  | 0.28716251   | 2.74E-02 | 4.93E-02 | 1.00E+00 |
| CCDC130   | LMNA | 0.082510938  | -0.056179993 | 0.218077875  | 2.43E-01 | 3.23E-01 | 1.00E+00 |
| RQCD1     | LMNA | -0.177726733 | -0.308215556 | -0.040673675 | 1.14E-02 | 2.28E-02 | 1.00E+00 |
| AYTL2     | LMNA | 0.345098661  | 0.217405104  | 0.461178555  | 4.91E-07 | 2.49E-06 | 5.83E-03 |
| MTUS1     | LMNA | -0.115891149 | -0.249943334 | 0.022520149  | 1.00E-01 | 1.53E-01 | 1.00E+00 |
| ARFIP2    | LMNA | 0.134070312  | -0.004055755 | 0.267176269  | 5.71E-02 | 9.42E-02 | 1.00E+00 |
| UROS      | LMNA | -0.244657616 | -0.370204863 | -0.110333143 | 4.50E-04 | 1.28E-03 | 1.00E+00 |
| LEMD3     | LMNA | -0.233506661 | -0.359954239 | -0.098635249 | 8.24E-04 | 2.21E-03 | 1.00E+00 |
| PLEKHF2   | LMNA | 0.012846893  | -0.125426555 | 0.150630746  | 8.56E-01 | 8.94E-01 | 1.00E+00 |
| KHDRBS2   | LMNA | -0.458111816 | -0.560702428 | -0.341668912 | 7.12E-12 | 8.62E-11 | 8.44E-08 |
| HOXA7     | LMNA | -0.097751534 | -0.232662821 | 0.040850735  | 1.66E-01 | 2.34E-01 | 1.00E+00 |
| POLQ      | LMNA | -0.13679098  | -0.269748024 | 0.001284272  | 5.22E-02 | 8.72E-02 | 1.00E+00 |
| GTF3C2    | LMNA | -0.026263686 | -0.163721078 | 0.1121941    | 7.11E-01 | 7.73E-01 | 1.00E+00 |
| SOAT1     | LMNA | 0.453967246  | 0.337038672  | 0.557104175  | 1.16E-11 | 1.34E-10 | 1.37E-07 |
| SPAG4     | LMNA | 0.515491693  | 0.406358874  | 0.610123758  | 4.15E-15 | 8.70E-14 | 4.93E-11 |
| MRPS30    | LMNA | 0.276900597  | 0.144368277  | 0.399673516  | 6.63E-05 | 2.24E-04 | 7.86E-01 |
| MR1       | LMNA | 0.439047233  | 0.320416999  | 0.544118704  | 6.31E-11 | 6.55E-10 | 7.48E-07 |
| UBE1L2    | LMNA | -0.024650633 | -0.16214983  | 0.113787592  | 7.28E-01 | 7.88E-01 | 1.00E+00 |
| F8        | LMNA | 0.19822178   | 0.061863661  | 0.327315875  | 4.69E-03 | 1.03E-02 | 1.00E+00 |
| KPNA5     | LMNA | -0.307268377 | -0.427198183 | -0.176713327 | 8.66E-06 | 3.46E-05 | 1.03E-01 |
| ACHE      | LMNA | 0.138032021  | -1.93E-05    | 0.270920507  | 5.01E-02 | 8.41E-02 | 1.00E+00 |
| TNFRSF12L | LMNA | 0.719670336  | 0.645778179  | 0.780206843  | 1.60E-33 | 1.05E-30 | 1.89E-29 |
| EGR3      | LMNA | -0.003020864 | -0.141013057 | 0.135086473  | 9.66E-01 | 9.75E-01 | 1.00E+00 |
| TCEB3B    | LMNA | 0.272304259  | 0.139497221  | 0.39548812   | 8.84E-05 | 2.91E-04 | 1.00E+00 |
| ZNF184    | LMNA | -0.391918193 | -0.50276713  | -0.268388259 | 8.02E-09 | 5.58E-08 | 9.51E-05 |
| OASL      | LMNA | 0.22693404   | 0.091757667  | 0.353897959  | 1.16E-03 | 2.99E-03 | 1.00E+00 |
| SERPIND1  | LMNA | 0.167333324  | 0.029974756  | 0.298489068  | 1.73E-02 | 3.28E-02 | 1.00E+00 |
| IFRD1     | LMNA | 0.159964924  | 0.022408784  | 0.291576939  | 2.30E-02 | 4.22E-02 | 1.00E+00 |
| SPINLW1   | LMNA | 0.104763459  | -0.033776035 | 0.239352772  | 1.38E-01 | 2.00E-01 | 1.00E+00 |
| KCTD9     | LMNA | 0.508387782  | 0.398290155  | 0.604044837  | 1.13E-14 | 2.17E-13 | 1.34E-10 |
| PRR14     | LMNA | -0.024116739 | -0.16162962  | 0.114314855  | 7.33E-01 | 7.93E-01 | 1.00E+00 |

|         |      |              |              |              |          |          |          |
|---------|------|--------------|--------------|--------------|----------|----------|----------|
| ZNF267  | LMNA | 0.2769496    | 0.144420243  | 0.399718111  | 6.60E-05 | 2.24E-04 | 7.83E-01 |
| PPP1R3A | LMNA | -0.062742165 | -0.199068907 | 0.075966831  | 3.75E-01 | 4.63E-01 | 1.00E+00 |
| ZBTB6   | LMNA | -0.224360711 | -0.351523885 | -0.089068447 | 1.33E-03 | 3.37E-03 | 1.00E+00 |
| ACTN2   | LMNA | -0.26496368  | -0.388793208 | -0.13173121  | 1.39E-04 | 4.42E-04 | 1.00E+00 |
| TXNIP   | LMNA | -0.056818932 | -0.193353287 | 0.081874283  | 4.22E-01 | 5.09E-01 | 1.00E+00 |
| NUDT3   | LMNA | -0.314217971 | -0.433466036 | -0.184155277 | 5.26E-06 | 2.19E-05 | 6.24E-02 |
| DFNA5   | LMNA | 0.200780714  | 0.064518022  | 0.329693283  | 4.17E-03 | 9.30E-03 | 1.00E+00 |
| RPL36AL | LMNA | 0.156473242  | 0.018828972  | 0.288296664  | 2.62E-02 | 4.74E-02 | 1.00E+00 |
| KLK15   | LMNA | 0.267939939  | 0.134877991  | 0.391509256  | 1.16E-04 | 3.74E-04 | 1.00E+00 |
| RAP2B   | LMNA | 0.4143895    | 0.293106192  | 0.522547203  | 8.74E-10 | 7.30E-09 | 1.04E-05 |
| CHAD    | LMNA | -0.111525813 | -0.24579253  | 0.026939962  | 1.14E-01 | 1.70E-01 | 1.00E+00 |
| HEBP2   | LMNA | 0.375941693  | 0.250912851  | 0.488633065  | 3.52E-08 | 2.17E-07 | 4.17E-04 |
| GABPA   | LMNA | 0.207632982  | 0.071635332  | 0.336051424  | 3.03E-03 | 7.00E-03 | 1.00E+00 |
| CAMK2G  | LMNA | -0.469370296 | -0.57045735  | -0.354275285 | 1.84E-12 | 2.46E-11 | 2.18E-08 |
| TLR3    | LMNA | 0.121578033  | -0.016754169 | 0.255343359  | 8.48E-02 | 1.32E-01 | 1.00E+00 |
| FGF14   | LMNA | -0.38707935  | -0.498492557 | -0.263086839 | 1.27E-08 | 8.50E-08 | 1.50E-04 |
| HMGB2   | LMNA | -0.019265296 | -0.156899009 | 0.119102469  | 7.86E-01 | 8.37E-01 | 1.00E+00 |
| POLB    | LMNA | -0.423035975 | -0.530127257 | -0.302660511 | 3.56E-10 | 3.18E-09 | 4.22E-06 |
| KIF3B   | LMNA | 0.128977866  | -0.009237615 | 0.262357455  | 6.73E-02 | 1.09E-01 | 1.00E+00 |
| C3orf27 | LMNA | -0.039230088 | -0.17632615  | 0.099359017  | 5.79E-01 | 6.58E-01 | 1.00E+00 |
| MTMR9   | LMNA | -0.480367172 | -0.57995815  | -0.366629252 | 4.67E-13 | 6.83E-12 | 5.54E-09 |
| SEC31A  | LMNA | 0.560494684  | 0.457872409  | 0.648376363  | 4.17E-18 | 1.53E-16 | 4.95E-14 |
| TRIM58  | LMNA | -0.097954688 | -0.232856825 | 0.040645958  | 1.65E-01 | 2.33E-01 | 1.00E+00 |
| TAS2R14 | LMNA | -0.30009994  | -0.420720855 | -0.169052637 | 1.43E-05 | 5.50E-05 | 1.70E-01 |
| NSDHL   | LMNA | 0.174214772  | 0.037054962  | 0.304931998  | 1.31E-02 | 2.58E-02 | 1.00E+00 |
| GLRA3   | LMNA | -0.355993266 | -0.470901696 | -0.229206679 | 2.00E-07 | 1.09E-06 | 2.37E-03 |
| VPS8    | LMNA | -0.231226775 | -0.357854666 | -0.096248119 | 9.30E-04 | 2.46E-03 | 1.00E+00 |
| H1FO    | LMNA | -0.099188355 | -0.234034707 | 0.039402181  | 1.60E-01 | 2.27E-01 | 1.00E+00 |
| PRKCB1  | LMNA | -0.184239233 | -0.314296292 | -0.047393662 | 8.67E-03 | 1.79E-02 | 1.00E+00 |
| POLR2D  | LMNA | -0.027330002 | -0.164759376 | 0.111140324  | 6.99E-01 | 7.64E-01 | 1.00E+00 |
| UGT2A1  | LMNA | -0.00881851  | -0.146690928 | 0.129390011  | 9.01E-01 | 9.28E-01 | 1.00E+00 |
| TOR1B   | LMNA | 0.408839642  | 0.286986359  | 0.517672816  | 1.53E-09 | 1.23E-08 | 1.82E-05 |
| LSS     | LMNA | 0.233949029  | 0.099098606  | 0.360361472  | 8.05E-04 | 2.16E-03 | 1.00E+00 |
| TOPORS  | LMNA | -0.211603104 | -0.339729907 | -0.075765362 | 2.50E-03 | 5.92E-03 | 1.00E+00 |
| HNRNPC  | LMNA | -0.164119599 | -0.295476036 | -0.026672924 | 1.96E-02 | 3.66E-02 | 1.00E+00 |

|          |      |              |              |              |          |          |          |
|----------|------|--------------|--------------|--------------|----------|----------|----------|
| TMEM100  | LMNA | -0.312838242 | -0.432222573 | -0.182676612 | 5.82E-06 | 2.40E-05 | 6.90E-02 |
| DHRS9    | LMNA | -0.384725736 | -0.496411445 | -0.260510933 | 1.58E-08 | 1.04E-07 | 1.87E-04 |
| ISG15    | LMNA | -0.012756204 | -0.150542099 | 0.125515831  | 8.57E-01 | 8.95E-01 | 1.00E+00 |
| DNAH2    | LMNA | -0.216249029 | -0.344029578 | -0.080604341 | 1.99E-03 | 4.84E-03 | 1.00E+00 |
| ZCCHC14  | LMNA | -0.232976997 | -0.359466579 | -0.098080532 | 8.48E-04 | 2.26E-03 | 1.00E+00 |
| FXR1     | LMNA | 0.076201338  | -0.062507218 | 0.212021938  | 2.81E-01 | 3.64E-01 | 1.00E+00 |
| ZMYM3    | LMNA | -0.103481713 | -0.238130835 | 0.035070293  | 1.43E-01 | 2.06E-01 | 1.00E+00 |
| CREBL2   | LMNA | 0.157811245  | 0.020200329  | 0.289554021  | 2.49E-02 | 4.54E-02 | 1.00E+00 |
| TGDS     | LMNA | -0.024071141 | -0.161585186 | 0.114359883  | 7.34E-01 | 7.93E-01 | 1.00E+00 |
| CASP3    | LMNA | 0.302887152  | 0.172029366  | 0.423240815  | 1.18E-05 | 4.61E-05 | 1.40E-01 |
| FAM120C  | LMNA | 0.007819408  | -0.130372326 | 0.145713115  | 9.12E-01 | 9.37E-01 | 1.00E+00 |
| SCLY     | LMNA | -0.099824686 | -0.234642108 | 0.038760468  | 1.58E-01 | 2.24E-01 | 1.00E+00 |
| CACNA2D3 | LMNA | -0.218503885 | -0.346114454 | -0.082955201 | 1.78E-03 | 4.38E-03 | 1.00E+00 |
| CA7      | LMNA | -0.178648692 | -0.309077039 | -0.041624255 | 1.10E-02 | 2.20E-02 | 1.00E+00 |
| ENTPD5   | LMNA | 0.353572038  | 0.22658066   | 0.468743225  | 2.45E-07 | 1.31E-06 | 2.90E-03 |
| SUCLG1   | LMNA | -0.329719406 | -0.447405367 | -0.200808841 | 1.65E-06 | 7.63E-06 | 1.96E-02 |
| PDIA5    | LMNA | 0.597004429  | 0.500176505  | 0.67908707   | 6.79E-21 | 3.93E-19 | 8.05E-17 |
| KCTD20   | LMNA | -0.158422464 | -0.29012825  | -0.020826957 | 2.43E-02 | 4.45E-02 | 1.00E+00 |
| WDR47    | LMNA | -0.471671405 | -0.572447643 | -0.356857047 | 1.39E-12 | 1.88E-11 | 1.64E-08 |
| KLRF1    | LMNA | 0.04712196   | -0.091524429 | 0.183976153  | 5.05E-01 | 5.89E-01 | 1.00E+00 |
| MAGEH1   | LMNA | -0.438128868 | -0.543317767 | -0.319396272 | 6.98E-11 | 7.20E-10 | 8.28E-07 |
| PRPF40A  | LMNA | 0.108786344  | -0.029710856 | 0.243185174  | 1.23E-01 | 1.82E-01 | 1.00E+00 |
| SMR3A    | LMNA | 0.324743135  | 0.195454581  | 0.442936785  | 2.41E-06 | 1.08E-05 | 2.86E-02 |
| TAS2R16  | LMNA | 0.051830236  | -0.086842139 | 0.188532248  | 4.64E-01 | 5.50E-01 | 1.00E+00 |
| SPINK2   | LMNA | 0.034850695  | -0.103699221 | 0.172073818  | 6.22E-01 | 6.97E-01 | 1.00E+00 |
| NPY5R    | LMNA | -0.097423726 | -0.232349752 | 0.041181138  | 1.68E-01 | 2.36E-01 | 1.00E+00 |
| IRF4     | LMNA | 0.234506552  | 0.099682664  | 0.360874646  | 7.82E-04 | 2.11E-03 | 1.00E+00 |
| PRKCE    | LMNA | -0.496117368 | -0.593518578 | -0.38439327  | 6.00E-14 | 9.81E-13 | 7.12E-10 |
| ITGAM    | LMNA | 0.392303564  | 0.268810791  | 0.503107328  | 7.73E-09 | 5.40E-08 | 9.17E-05 |
| RGS2     | LMNA | 0.294589213  | 0.163174237  | 0.415733042  | 2.08E-05 | 7.78E-05 | 2.47E-01 |
| DDX19A   | LMNA | 0.178159151  | 0.041119486  | 0.308619636  | 1.12E-02 | 2.24E-02 | 1.00E+00 |
| PDPN     | LMNA | 0.50380865   | 0.393098131  | 0.600120497  | 2.12E-14 | 3.85E-13 | 2.52E-10 |
| TMEM34   | LMNA | -0.020597645 | -0.158198803 | 0.11778829   | 7.71E-01 | 8.25E-01 | 1.00E+00 |
| MST1R    | LMNA | -0.136204855 | -0.26919414  | 0.001881524  | 5.33E-02 | 8.87E-02 | 1.00E+00 |
| MGAM     | LMNA | 0.02421788   | -0.114214975 | 0.161728175  | 7.32E-01 | 7.92E-01 | 1.00E+00 |

|           |      |              |              |              |          |          |          |
|-----------|------|--------------|--------------|--------------|----------|----------|----------|
| COL3A1    | LMNA | 0.606826252  | 0.511636567  | 0.687300083  | 1.05E-21 | 6.76E-20 | 1.24E-17 |
| PTMA      | LMNA | 0.01174876   | -0.126507427 | 0.149557189  | 8.68E-01 | 9.02E-01 | 1.00E+00 |
| PRDM11    | LMNA | -0.277008633 | -0.399771832 | -0.144482847 | 6.58E-05 | 2.23E-04 | 7.80E-01 |
| NAPA      | LMNA | 0.074346255  | -0.064365365 | 0.210239447  | 2.93E-01 | 3.77E-01 | 1.00E+00 |
| DIRAS3    | LMNA | 0.516384809  | 0.407374493  | 0.610887224  | 3.66E-15 | 7.76E-14 | 4.34E-11 |
| LIPF      | LMNA | 0.089823596  | -0.048832944 | 0.225083508  | 2.04E-01 | 2.78E-01 | 1.00E+00 |
| PSG9      | LMNA | 0.019012882  | -0.119351386 | 0.156652709  | 7.88E-01 | 8.40E-01 | 1.00E+00 |
| ASGR2     | LMNA | 0.235412284  | 0.100631704  | 0.361708167  | 7.45E-04 | 2.02E-03 | 1.00E+00 |
| ARHGEF11  | LMNA | 0.005525429  | -0.132626738 | 0.143466994  | 9.38E-01 | 9.54E-01 | 1.00E+00 |
| PIK3R4    | LMNA | 0.055142921  | -0.083544062 | 0.191734337  | 4.36E-01 | 5.22E-01 | 1.00E+00 |
| IVNS1ABP  | LMNA | -0.029016761 | -0.166401193 | 0.109472765  | 6.82E-01 | 7.50E-01 | 1.00E+00 |
| SIGIRR    | LMNA | 0.094063241  | -0.044566478 | 0.229138755  | 1.83E-01 | 2.54E-01 | 1.00E+00 |
| BTBD3     | LMNA | -0.196137081 | -0.325377851 | -0.059702644 | 5.15E-03 | 1.12E-02 | 1.00E+00 |
| UBE2NL    | LMNA | -0.222769859 | -0.350055395 | -0.087406936 | 1.44E-03 | 3.62E-03 | 1.00E+00 |
| PPP1R2    | LMNA | -0.039073167 | -0.17617387  | 0.099514624  | 5.81E-01 | 6.59E-01 | 1.00E+00 |
| FOSL2     | LMNA | 0.613748916  | 0.519734302  | 0.693076481  | 2.69E-22 | 2.03E-20 | 3.19E-18 |
| IL1RAPL2  | LMNA | -0.206182731 | -0.334706729 | -0.07012783  | 3.24E-03 | 7.44E-03 | 1.00E+00 |
| C4orf30   | LMNA | -0.211443176 | -0.339581803 | -0.075598903 | 2.52E-03 | 5.96E-03 | 1.00E+00 |
| TUBA4A    | LMNA | 0.116122628  | -0.02228563  | 0.250163299  | 9.98E-02 | 1.52E-01 | 1.00E+00 |
| Sep-04    | LMNA | -0.196536269 | -0.325749037 | -0.060116347 | 5.06E-03 | 1.10E-02 | 1.00E+00 |
| SFRS2     | LMNA | -0.081356722 | -0.216970842 | 0.057338266  | 2.50E-01 | 3.30E-01 | 1.00E+00 |
| EEF2      | LMNA | 0.186271152  | 0.049492856  | 0.316191318  | 7.95E-03 | 1.66E-02 | 1.00E+00 |
| ZDHHC11   | LMNA | -0.26447963  | -0.388351274 | -0.13121968  | 1.43E-04 | 4.54E-04 | 1.00E+00 |
| HNF1A     | LMNA | -0.009699257 | -0.147552686 | 0.128523836  | 8.91E-01 | 9.21E-01 | 1.00E+00 |
| EPHA3     | LMNA | 0.375050352  | 0.249940279  | 0.487842769  | 3.81E-08 | 2.34E-07 | 4.52E-04 |
| PRDX3     | LMNA | -0.087819791 | -0.223165223 | 0.050847667  | 2.14E-01 | 2.90E-01 | 1.00E+00 |
| P4HA2     | LMNA | 0.663933575  | 0.578946937  | 0.734649071  | 4.81E-27 | 8.92E-25 | 5.71E-23 |
| RFWD3     | LMNA | 0.08199263   | -0.056700169 | 0.217580798  | 2.46E-01 | 3.26E-01 | 1.00E+00 |
| RBM12     | LMNA | -0.236143347 | -0.362380797 | -0.1013979   | 7.16E-04 | 1.95E-03 | 1.00E+00 |
| H2AFJ     | LMNA | 0.318741189  | 0.189006975  | 0.437539347  | 3.78E-06 | 1.62E-05 | 4.48E-02 |
| EDIL3     | LMNA | -0.0771692   | -0.212951567 | 0.061537376  | 2.75E-01 | 3.57E-01 | 1.00E+00 |
| LOC200383 | LMNA | -0.294463252 | -0.415618949 | -0.163039981 | 2.10E-05 | 7.85E-05 | 2.49E-01 |
| SERGEF    | LMNA | 0.052859486  | -0.085817753 | 0.189527447  | 4.55E-01 | 5.41E-01 | 1.00E+00 |
| B3GALT4   | LMNA | 0.219510456  | 0.084005116  | 0.347044739  | 1.70E-03 | 4.19E-03 | 1.00E+00 |
| SMC2      | LMNA | -0.05066587  | -0.187406064 | 0.088000648  | 4.74E-01 | 5.59E-01 | 1.00E+00 |

|          |      |              |              |              |          |          |          |
|----------|------|--------------|--------------|--------------|----------|----------|----------|
| LOC90925 | LMNA | -0.216915673 | -0.344646099 | -0.081299212 | 1.93E-03 | 4.70E-03 | 1.00E+00 |
| NPFF     | LMNA | -0.043075066 | -0.180055358 | 0.095544092  | 5.43E-01 | 6.24E-01 | 1.00E+00 |
| DEDD     | LMNA | 0.027858997  | -0.110617434 | 0.165274359  | 6.94E-01 | 7.60E-01 | 1.00E+00 |
| SCYL2    | LMNA | 0.112829272  | -0.025620803 | 0.247032447  | 1.10E-01 | 1.65E-01 | 1.00E+00 |
| PTPN1    | LMNA | 0.538127094  | 0.432182492  | 0.629419183  | 1.47E-16 | 4.14E-15 | 1.74E-12 |
| ZNF174   | LMNA | -0.139216306 | -0.272039002 | -0.00118814  | 4.82E-02 | 8.12E-02 | 1.00E+00 |
| MYH14    | LMNA | -0.158072012 | -0.289799019 | -0.020467657 | 2.47E-02 | 4.50E-02 | 1.00E+00 |
| CCR8     | LMNA | -0.059267493 | -0.195717148 | 0.079433427  | 4.02E-01 | 4.90E-01 | 1.00E+00 |
| SKAP1    | LMNA | 0.114395816  | -0.024034752 | 0.248522043  | 1.05E-01 | 1.59E-01 | 1.00E+00 |
| GADD45G  | LMNA | -0.465501391 | -0.567108346 | -0.349938462 | 2.94E-12 | 3.81E-11 | 3.49E-08 |
| PILRB    | LMNA | -0.048167228 | -0.184988144 | 0.090485459  | 4.96E-01 | 5.81E-01 | 1.00E+00 |
| IFITM3   | LMNA | 0.556620419  | 0.453410382  | 0.645100596  | 7.88E-18 | 2.77E-16 | 9.35E-14 |
| DNMT3L   | LMNA | 0.111834943  | -0.026627152 | 0.24608663   | 1.13E-01 | 1.69E-01 | 1.00E+00 |
| GPATCH1  | LMNA | 0.023933535  | -0.114495766 | 0.161451093  | 7.35E-01 | 7.94E-01 | 1.00E+00 |
| VPS37C   | LMNA | 0.415641771  | 0.294488448  | 0.523646084  | 7.69E-10 | 6.50E-09 | 9.12E-06 |
| DSC3     | LMNA | 0.018488624  | -0.119868325 | 0.156141094  | 7.94E-01 | 8.44E-01 | 1.00E+00 |
| TBX4     | LMNA | 0.250596969  | 0.11657904   | 0.375652221  | 3.22E-04 | 9.48E-04 | 1.00E+00 |
| B3GNT3   | LMNA | 0.252386837  | 0.118463368  | 0.377292129  | 2.90E-04 | 8.64E-04 | 1.00E+00 |
| LHCGR    | LMNA | -0.05244761  | -0.189129231 | 0.086227718  | 4.59E-01 | 5.44E-01 | 1.00E+00 |
| SAP130   | LMNA | -0.215565058 | -0.34339692  | -0.079891548 | 2.06E-03 | 4.99E-03 | 1.00E+00 |
| UBE2S    | LMNA | -0.009960794 | -0.147808544 | 0.128266585  | 8.88E-01 | 9.19E-01 | 1.00E+00 |
| CNR2     | LMNA | 0.105196046  | -0.03333912  | 0.239765077  | 1.36E-01 | 1.98E-01 | 1.00E+00 |
| PCDH1    | LMNA | 0.270061216  | 0.137122445  | 0.39344376   | 1.02E-04 | 3.31E-04 | 1.00E+00 |
| ATP6V1B2 | LMNA | -0.026099177 | -0.163560865 | 0.112356646  | 7.12E-01 | 7.75E-01 | 1.00E+00 |
| PLCG2    | LMNA | 0.193631674  | 0.057107209  | 0.323047282  | 5.76E-03 | 1.24E-02 | 1.00E+00 |
| CAPZA1   | LMNA | 0.299986193  | 0.168931208  | 0.420617976  | 1.44E-05 | 5.54E-05 | 1.71E-01 |
| GLRX3    | LMNA | 0.011724868  | -0.126530939 | 0.149533829  | 8.68E-01 | 9.03E-01 | 1.00E+00 |
| HRH3     | LMNA | -0.338574002 | -0.455342095 | -0.2103551   | 8.29E-07 | 4.02E-06 | 9.83E-03 |
| KIAA0247 | LMNA | 0.415792584  | 0.294654949  | 0.523778399  | 7.57E-10 | 6.40E-09 | 8.98E-06 |
| MGC15523 | LMNA | 0.322819685  | 0.193387093  | 0.441207995  | 2.79E-06 | 1.23E-05 | 3.31E-02 |
| CRYGD    | LMNA | -0.157693714 | -0.289443593 | -0.020079847 | 2.50E-02 | 4.56E-02 | 1.00E+00 |
| HTR2B    | LMNA | 0.204232679  | 0.068101776  | 0.332897785  | 3.55E-03 | 8.07E-03 | 1.00E+00 |
| CCR1     | LMNA | 0.259145304  | 0.12558722   | 0.383477301  | 1.96E-04 | 6.02E-04 | 1.00E+00 |
| NUS1     | LMNA | 0.161001489  | 0.023472191  | 0.292550148  | 2.21E-02 | 4.09E-02 | 1.00E+00 |
| DNAJA2   | LMNA | -0.062059608 | -0.198410746 | 0.076648067  | 3.80E-01 | 4.68E-01 | 1.00E+00 |

|          |      |              |              |              |          |          |          |
|----------|------|--------------|--------------|--------------|----------|----------|----------|
| PGRMC1   | LMNA | -0.099683887 | -0.234507719 | 0.038902468  | 1.58E-01 | 2.25E-01 | 1.00E+00 |
| UVRAG    | LMNA | -0.21217797  | -0.340262221 | -0.07636377  | 2.43E-03 | 5.78E-03 | 1.00E+00 |
| ITGA2B   | LMNA | 0.010352095  | -0.127881664 | 0.148191313  | 8.84E-01 | 9.15E-01 | 1.00E+00 |
| CLDN5    | LMNA | -0.312820821 | -0.43220687  | -0.182657945 | 5.82E-06 | 2.40E-05 | 6.91E-02 |
| PTPRN2   | LMNA | -0.246934209 | -0.372293892 | -0.112725983 | 3.96E-04 | 1.14E-03 | 1.00E+00 |
| PSAP     | LMNA | 0.150617017  | 0.012832848  | 0.282788054  | 3.24E-02 | 5.74E-02 | 1.00E+00 |
| MYOM2    | LMNA | -0.421533656 | -0.528811456 | -0.300998717 | 4.17E-10 | 3.69E-09 | 4.95E-06 |
| CHM      | LMNA | 0.120515653  | -0.017832025 | 0.254335201  | 8.76E-02 | 1.36E-01 | 1.00E+00 |
| CCNL1    | LMNA | -0.006013129 | -0.143944638 | 0.13214757   | 9.32E-01 | 9.51E-01 | 1.00E+00 |
| FAM105A  | LMNA | -0.138765702 | -0.271613473 | -0.00072866  | 4.89E-02 | 8.23E-02 | 1.00E+00 |
| LYN      | LMNA | 0.254592574  | 0.12078684   | 0.379311988  | 2.56E-04 | 7.69E-04 | 1.00E+00 |
| DUSP6    | LMNA | 0.396978093  | 0.27393988   | 0.507231189  | 4.94E-09 | 3.60E-08 | 5.86E-05 |
| TGFB3    | LMNA | 0.45150041   | 0.334285449  | 0.554960666  | 1.54E-11 | 1.75E-10 | 1.83E-07 |
| PCDH11Y  | LMNA | -0.499837058 | -0.596713063 | -0.388600672 | 3.64E-14 | 6.24E-13 | 4.32E-10 |
| NAP1L3   | LMNA | -0.544713682 | -0.635012818 | -0.439729585 | 5.28E-17 | 1.62E-15 | 6.27E-13 |
| ELK1     | LMNA | 0.262062166  | 0.128666038  | 0.386143296  | 1.65E-04 | 5.16E-04 | 1.00E+00 |
| HGD      | LMNA | 0.20143416   | 0.065196146  | 0.330300113  | 4.04E-03 | 9.05E-03 | 1.00E+00 |
| C10orf57 | LMNA | -0.133396033 | -0.266538604 | 0.004742299  | 5.84E-02 | 9.61E-02 | 1.00E+00 |
| B3GALNT1 | LMNA | -0.022283042 | -0.159842336 | 0.116125182  | 7.53E-01 | 8.09E-01 | 1.00E+00 |
| AARSD1   | LMNA | -0.247263901 | -0.372596315 | -0.113072638 | 3.89E-04 | 1.12E-03 | 1.00E+00 |
| MYO3A    | LMNA | -0.030959461 | -0.168291188 | 0.107551212  | 6.62E-01 | 7.32E-01 | 1.00E+00 |
| SERPINE2 | LMNA | -0.172351836 | -0.303188958 | -0.035136859 | 1.42E-02 | 2.75E-02 | 1.00E+00 |
| GDAP2    | LMNA | -0.007037037 | -0.144947226 | 0.131141364  | 9.21E-01 | 9.43E-01 | 1.00E+00 |
| MAPK6    | LMNA | -0.041928628 | -0.17894385  | 0.096681996  | 5.54E-01 | 6.34E-01 | 1.00E+00 |
| COX6B1   | LMNA | -0.029587921 | -0.166956962 | 0.10890793   | 6.76E-01 | 7.45E-01 | 1.00E+00 |
| DNASE2   | LMNA | 0.400817745  | 0.278158151  | 0.510614751  | 3.40E-09 | 2.54E-08 | 4.03E-05 |
| MSH5     | LMNA | -0.189105128 | -0.318832635 | -0.052422682 | 7.03E-03 | 1.48E-02 | 1.00E+00 |
| LGMN     | LMNA | 0.220485979  | 0.085022933  | 0.347946089  | 1.62E-03 | 4.00E-03 | 1.00E+00 |
| TCN1     | LMNA | 0.323135127  | 0.193726078  | 0.441491574  | 2.72E-06 | 1.20E-05 | 3.23E-02 |
| SLC24A6  | LMNA | 0.413711278  | 0.292357782  | 0.521951906  | 9.37E-10 | 7.77E-09 | 1.11E-05 |
| TATDN2   | LMNA | 0.062142806  | -0.076565037 | 0.198490977  | 3.80E-01 | 4.67E-01 | 1.00E+00 |
| SDCBP    | LMNA | 0.306277544  | 0.175653511  | 0.426303609  | 9.29E-06 | 3.69E-05 | 1.10E-01 |
| NUDT11   | LMNA | -0.463340611 | -0.565236467 | -0.347518505 | 3.82E-12 | 4.83E-11 | 4.53E-08 |
| LILRB1   | LMNA | 0.283314855  | 0.151176661  | 0.405505755  | 4.39E-05 | 1.54E-04 | 5.21E-01 |
| PYGL     | LMNA | 0.589838403  | 0.491836563  | 0.673081842  | 2.55E-20 | 1.35E-18 | 3.03E-16 |

|          |      |              |              |              |          |          |          |
|----------|------|--------------|--------------|--------------|----------|----------|----------|
| P2RY5    | LMNA | 0.163005027  | 0.025528495  | 0.294430457  | 2.05E-02 | 3.81E-02 | 1.00E+00 |
| SNPH     | LMNA | -0.162820523 | -0.294257344 | -0.025339082 | 2.06E-02 | 3.84E-02 | 1.00E+00 |
| NUCB2    | LMNA | 0.41456335   | 0.293298057  | 0.522699779  | 8.58E-10 | 7.19E-09 | 1.02E-05 |
| B3GNT4   | LMNA | -0.20932019  | -0.337615172 | -0.073389928 | 2.79E-03 | 6.52E-03 | 1.00E+00 |
| SNX27    | LMNA | -0.172637629 | -0.303456414 | -0.035431049 | 1.40E-02 | 2.73E-02 | 1.00E+00 |
| C2orf37  | LMNA | 0.129630464  | -0.008573973 | 0.262975359  | 6.60E-02 | 1.07E-01 | 1.00E+00 |
| MIZF     | LMNA | -0.343669355 | -0.459900865 | -0.215859574 | 5.51E-07 | 2.76E-06 | 6.54E-03 |
| FOXO4    | LMNA | -0.288750975 | -0.410440835 | -0.156956637 | 3.08E-05 | 1.11E-04 | 3.65E-01 |
| NUBPL    | LMNA | -0.183648349 | -0.313745023 | -0.046783441 | 8.89E-03 | 1.83E-02 | 1.00E+00 |
| NOD1     | LMNA | 0.505819819  | 0.395377615  | 0.601844651  | 1.61E-14 | 3.01E-13 | 1.91E-10 |
| ID4      | LMNA | -0.335133766 | -0.452260677 | -0.206643228 | 1.09E-06 | 5.17E-06 | 1.29E-02 |
| CDH22    | LMNA | -0.352218167 | -0.46753568  | -0.225113081 | 2.74E-07 | 1.46E-06 | 3.25E-03 |
| PXMP3    | LMNA | -0.227672315 | -0.354578766 | -0.092529554 | 1.12E-03 | 2.90E-03 | 1.00E+00 |
| SOX5     | LMNA | -0.367290418 | -0.480954702 | -0.241483808 | 7.58E-08 | 4.44E-07 | 8.99E-04 |
| NUBP1    | LMNA | 0.116017776  | -0.022391861 | 0.250063664  | 1.00E-01 | 1.52E-01 | 1.00E+00 |
| DSCAM    | LMNA | -0.462003229 | -0.564077371 | -0.346021482 | 4.48E-12 | 5.61E-11 | 5.32E-08 |
| INA      | LMNA | -0.519816065 | -0.61381874  | -0.411278902 | 2.23E-15 | 4.93E-14 | 2.65E-11 |
| DGKI     | LMNA | -0.524100947 | -0.617475922 | -0.416160247 | 1.20E-15 | 2.82E-14 | 1.42E-11 |
| MCOLN1   | LMNA | 0.3107065    | 0.180393165  | 0.430300475  | 6.78E-06 | 2.77E-05 | 8.04E-02 |
| FAM136A  | LMNA | 0.209181807  | 0.073245987  | 0.337486942  | 2.81E-03 | 6.55E-03 | 1.00E+00 |
| RIN3     | LMNA | 0.428819743  | 0.309065085  | 0.535188144  | 1.93E-10 | 1.82E-09 | 2.28E-06 |
| NFIX     | LMNA | -0.199511506 | -0.328514315 | -0.063201242 | 4.42E-03 | 9.81E-03 | 1.00E+00 |
| SLC16A6  | LMNA | 0.276839521  | 0.144303508  | 0.399617934  | 6.65E-05 | 2.25E-04 | 7.89E-01 |
| AKAP1    | LMNA | -0.405125989 | -0.514407199 | -0.282896857 | 2.22E-09 | 1.72E-08 | 2.64E-05 |
| PSG2     | LMNA | 0.127944844  | -0.01028787  | 0.261379128  | 6.96E-02 | 1.12E-01 | 1.00E+00 |
| HIBCH    | LMNA | -0.227681973 | -0.354587672 | -0.092539653 | 1.12E-03 | 2.90E-03 | 1.00E+00 |
| PLA2G5   | LMNA | 0.401480307  | 0.278886524  | 0.511198267  | 3.19E-09 | 2.40E-08 | 3.78E-05 |
| TIMM10   | LMNA | -0.094651993 | -0.229701529 | 0.043973602  | 1.80E-01 | 2.51E-01 | 1.00E+00 |
| MED17    | LMNA | -0.066347083 | -0.202542936 | 0.072366745  | 3.48E-01 | 4.34E-01 | 1.00E+00 |
| PSORS1C1 | LMNA | 0.314229253  | 0.184167371  | 0.433476202  | 5.26E-06 | 2.19E-05 | 6.24E-02 |
| KIAA0495 | LMNA | 0.239606864  | 0.105030044  | 0.365565694  | 5.94E-04 | 1.65E-03 | 1.00E+00 |
| LPA      | LMNA | -0.196061765 | -0.325307814 | -0.059624595 | 5.17E-03 | 1.12E-02 | 1.00E+00 |
| PIGA     | LMNA | 0.127922576  | -0.010310506 | 0.261358036  | 6.96E-02 | 1.12E-01 | 1.00E+00 |
| COL4A4   | LMNA | -0.178161292 | -0.308621637 | -0.041121694 | 1.12E-02 | 2.24E-02 | 1.00E+00 |
| LY75     | LMNA | 0.4066427    | 0.284566534  | 0.515741309  | 1.91E-09 | 1.50E-08 | 2.27E-05 |



|           |      |              |              |              |          |          |          |
|-----------|------|--------------|--------------|--------------|----------|----------|----------|
| TPP1      | LMNA | 0.525313175  | 0.41754235   | 0.618509837  | 1.00E-15 | 2.41E-14 | 1.19E-11 |
| UTS2      | LMNA | 0.00755273   | -0.130634478 | 0.145452073  | 9.15E-01 | 9.39E-01 | 1.00E+00 |
| GJA3      | LMNA | 0.446380634  | 0.328577672  | 0.550507547  | 2.77E-11 | 3.01E-10 | 3.28E-07 |
| GALNACT-2 | LMNA | 0.100363476  | -0.038217032 | 0.23515632   | 1.55E-01 | 2.21E-01 | 1.00E+00 |
| RREB1     | LMNA | 0.512463203  | 0.402916992  | 0.607533597  | 6.38E-15 | 1.29E-13 | 7.56E-11 |
| TMPRSS5   | LMNA | -0.404132471 | -0.513533007 | -0.281803542 | 2.45E-09 | 1.88E-08 | 2.91E-05 |
| MGC3196   | LMNA | 0.006891643  | -0.131284262 | 0.144804876  | 9.22E-01 | 9.44E-01 | 1.00E+00 |
| FLJ31568  | LMNA | -0.080241115 | -0.215900506 | 0.05845744   | 2.56E-01 | 3.38E-01 | 1.00E+00 |
| DNMBP     | LMNA | 0.395638871  | 0.272469714  | 0.506050246  | 5.62E-09 | 4.05E-08 | 6.66E-05 |
| LPHN1     | LMNA | -0.348965166 | -0.4646325   | -0.221589224 | 3.58E-07 | 1.87E-06 | 4.25E-03 |
| NQO1      | LMNA | 0.384637031  | 0.260413885  | 0.496332985  | 1.59E-08 | 1.05E-07 | 1.88E-04 |
| ZSCAN2    | LMNA | -0.273719907 | -0.396777745 | -0.140996796 | 8.09E-05 | 2.69E-04 | 9.60E-01 |
| SP1       | LMNA | 0.538250083  | 0.43232328   | 0.629523718  | 1.44E-16 | 4.07E-15 | 1.71E-12 |
| TOX4      | LMNA | -0.031500302 | -0.168817176 | 0.107016074  | 6.56E-01 | 7.27E-01 | 1.00E+00 |
| SEC24C    | LMNA | 0.015821429  | -0.122497125 | 0.153537079  | 8.23E-01 | 8.67E-01 | 1.00E+00 |
| HSPA9     | LMNA | 0.322442339  | 0.192981623  | 0.440868734  | 2.87E-06 | 1.26E-05 | 3.40E-02 |
| APOBEC1   | LMNA | 0.172467887  | 0.035256317  | 0.303297566  | 1.41E-02 | 2.75E-02 | 1.00E+00 |
| SURF1     | LMNA | -0.091886084 | -0.227056876 | 0.046758041  | 1.93E-01 | 2.66E-01 | 1.00E+00 |
| LSM5      | LMNA | 0.095331536  | -0.043289177 | 0.230350976  | 1.77E-01 | 2.47E-01 | 1.00E+00 |
| ZBTB1     | LMNA | 0.082510755  | -0.056180177 | 0.2180777    | 2.43E-01 | 3.23E-01 | 1.00E+00 |
| GTF2F1    | LMNA | 0.287432445  | 0.155553874  | 0.409244486  | 3.36E-05 | 1.21E-04 | 3.98E-01 |
| DUSP21    | LMNA | 0.012415897  | -0.125850815 | 0.150209435  | 8.61E-01 | 8.98E-01 | 1.00E+00 |
| RPS15A    | LMNA | -0.010534202 | -0.148369436 | 0.127702511  | 8.82E-01 | 9.13E-01 | 1.00E+00 |
| TAF1      | LMNA | 0.11738057   | -0.021010902 | 0.251358432  | 9.62E-02 | 1.47E-01 | 1.00E+00 |
| GIN5      | LMNA | 0.128835897  | -0.009381971 | 0.262223019  | 6.76E-02 | 1.09E-01 | 1.00E+00 |
| MYO15A    | LMNA | -0.210926818 | -0.339103578 | -0.075061508 | 2.59E-03 | 6.09E-03 | 1.00E+00 |
| AP1G2     | LMNA | -0.176961806 | -0.307500642 | -0.039885191 | 1.18E-02 | 2.34E-02 | 1.00E+00 |
| RBM42     | LMNA | 0.28390414   | 0.151802784  | 0.406041071  | 4.23E-05 | 1.49E-04 | 5.02E-01 |
| HCN2      | LMNA | 0.12359351   | -0.014708449 | 0.25725517   | 7.97E-02 | 1.25E-01 | 1.00E+00 |
| UTP3      | LMNA | 0.245941828  | 0.111682737  | 0.371383427  | 4.18E-04 | 1.20E-03 | 1.00E+00 |
| HNRPA3    | LMNA | -0.10759023  | -0.242046134 | 0.030920024  | 1.27E-01 | 1.87E-01 | 1.00E+00 |
| CKLF      | LMNA | 0.117876436  | -0.020508296 | 0.251829426  | 9.48E-02 | 1.45E-01 | 1.00E+00 |
| U1SNRNPE  | LMNA | -0.06979707  | -0.205864452 | 0.068917994  | 3.24E-01 | 4.09E-01 | 1.00E+00 |
| RUSC1     | LMNA | 0.33170082   | 0.202942906  | 0.449182999  | 1.42E-06 | 6.59E-06 | 1.68E-02 |
| MBNL1     | LMNA | 0.327513272  | 0.198434182  | 0.445425033  | 1.96E-06 | 8.89E-06 | 2.32E-02 |

|           |      |              |              |              |          |          |          |
|-----------|------|--------------|--------------|--------------|----------|----------|----------|
| NUP160    | LMNA | -0.121175361 | -0.254961273 | 0.017162744  | 8.58E-02 | 1.34E-01 | 1.00E+00 |
| GRIK5     | LMNA | -0.083521307 | -0.219046656 | 0.055165766  | 2.37E-01 | 3.16E-01 | 1.00E+00 |
| USP21     | LMNA | -0.235148321 | -0.361465269 | -0.100355094 | 7.55E-04 | 2.04E-03 | 1.00E+00 |
| FLJ22639  | LMNA | -0.143807253 | -0.276371523 | -0.005872844 | 4.12E-02 | 7.07E-02 | 1.00E+00 |
| HAND1     | LMNA | 0.112279398  | -0.026177359 | 0.246509432  | 1.12E-01 | 1.67E-01 | 1.00E+00 |
| ORMDL2    | LMNA | 0.241036548  | 0.106530382  | 0.36687951   | 5.49E-04 | 1.53E-03 | 1.00E+00 |
| SERPINB1  | LMNA | 0.386875307  | 0.262863455  | 0.498312189  | 1.29E-08 | 8.65E-08 | 1.53E-04 |
| FGA       | LMNA | -0.067602424 | -0.203751893 | 0.071112237  | 3.39E-01 | 4.25E-01 | 1.00E+00 |
| PRSS7     | LMNA | 0.162787823  | 0.025305513  | 0.294226661  | 2.06E-02 | 3.84E-02 | 1.00E+00 |
| IGFBP1    | LMNA | 0.170055667  | 0.032774082  | 0.301039361  | 1.55E-02 | 2.98E-02 | 1.00E+00 |
| SLC1A1    | LMNA | -0.322328279 | -0.44076618  | -0.192859071 | 2.89E-06 | 1.27E-05 | 3.43E-02 |
| DHX57     | LMNA | -0.213436323 | -0.34142714  | -0.077673995 | 2.29E-03 | 5.48E-03 | 1.00E+00 |
| PSAT1     | LMNA | -0.487954801 | -0.586497759 | -0.375176697 | 1.76E-13 | 2.73E-12 | 2.09E-09 |
| FLJ13195  | LMNA | -0.047868873 | -0.184699317 | 0.090782046  | 4.99E-01 | 5.83E-01 | 1.00E+00 |
| GDPD3     | LMNA | -0.091021412 | -0.226229702 | 0.047628063  | 1.98E-01 | 2.71E-01 | 1.00E+00 |
| PTPN21    | LMNA | 0.261228123  | 0.127785423  | 0.385381197  | 1.73E-04 | 5.40E-04 | 1.00E+00 |
| TBR1      | LMNA | -0.259364421 | -0.383677645 | -0.125818414 | 1.93E-04 | 5.96E-04 | 1.00E+00 |
| TBC1D1    | LMNA | 0.38625369   | 0.262182997  | 0.497762639  | 1.37E-08 | 9.13E-08 | 1.62E-04 |
| IFNG      | LMNA | 0.163589912  | 0.026129002  | 0.294979176  | 2.00E-02 | 3.74E-02 | 1.00E+00 |
| FOS       | LMNA | 0.292463224  | 0.160908894  | 0.413806839  | 2.40E-05 | 8.88E-05 | 2.85E-01 |
| IQGAP1    | LMNA | 0.744305504  | 0.675682291  | 0.800140384  | 6.48E-37 | 8.54E-34 | 7.69E-33 |
| ZNF226    | LMNA | -0.106174989 | -0.240697945 | 0.032350186  | 1.33E-01 | 1.94E-01 | 1.00E+00 |
| EMD       | LMNA | 0.43195295   | 0.312539139  | 0.537926563  | 1.37E-10 | 1.34E-09 | 1.63E-06 |
| RETN      | LMNA | 0.329853759  | 0.200953506  | 0.447525931  | 1.64E-06 | 7.56E-06 | 1.94E-02 |
| APH1A     | LMNA | 0.184672652  | 0.04784133   | 0.314700598  | 8.51E-03 | 1.76E-02 | 1.00E+00 |
| C14orf1   | LMNA | 0.078061596  | -0.060642922 | 0.213808493  | 2.69E-01 | 3.51E-01 | 1.00E+00 |
| PUS7      | LMNA | 0.22516157   | 0.089905162  | 0.352262908  | 1.27E-03 | 3.25E-03 | 1.00E+00 |
| PAFAH2    | LMNA | 0.177643584  | 0.040587958  | 0.308137851  | 1.14E-02 | 2.28E-02 | 1.00E+00 |
| NPEPL1    | LMNA | 0.407492743  | 0.28550263   | 0.516488781  | 1.76E-09 | 1.38E-08 | 2.08E-05 |
| RP11-114G | LMNA | -0.060042817 | -0.196465323 | 0.078660195  | 3.96E-01 | 4.83E-01 | 1.00E+00 |
| TUBB6     | LMNA | 0.551795738  | 0.447860974  | 0.641016682  | 1.72E-17 | 5.68E-16 | 2.04E-13 |
| FOXL2     | LMNA | 0.034626996  | -0.103920776 | 0.171856473  | 6.25E-01 | 6.99E-01 | 1.00E+00 |
| LATS1     | LMNA | -0.227615385 | -0.354526272 | -0.092470026 | 1.12E-03 | 2.91E-03 | 1.00E+00 |
| KCNQ2     | LMNA | -0.236801387 | -0.362986129 | -0.102087702 | 6.91E-04 | 1.89E-03 | 1.00E+00 |
| SPOCK2    | LMNA | 0.265994252  | 0.132820524  | 0.389733922  | 1.30E-04 | 4.17E-04 | 1.00E+00 |

|               |              |              |              |          |          |          |
|---------------|--------------|--------------|--------------|----------|----------|----------|
| Mar-06 LMNA   | -0.176212508 | -0.306800191 | -0.039112982 | 1.21E-02 | 2.41E-02 | 1.00E+00 |
| MGC10334 LMNA | 0.201842589  | 0.065620064  | 0.330679352  | 3.97E-03 | 8.90E-03 | 1.00E+00 |
| HTATIP2 LMNA  | 0.247011017  | 0.11280674   | 0.372364349  | 3.94E-04 | 1.14E-03 | 1.00E+00 |
| CENTA2 LMNA   | 0.222244121  | 0.086858013  | 0.349569958  | 1.48E-03 | 3.70E-03 | 1.00E+00 |
| FGF2 LMNA     | 0.002429353  | -0.135667147 | 0.140433256  | 9.73E-01 | 9.79E-01 | 1.00E+00 |
| FXVD7 LMNA    | -0.327230511 | -0.445171129 | -0.198129931 | 2.00E-06 | 9.06E-06 | 2.37E-02 |
| CCDC33 LMNA   | 0.053571875  | -0.085108558 | 0.190216104  | 4.49E-01 | 5.35E-01 | 1.00E+00 |
| PRODH LMNA    | -0.236668368 | -0.362863773 | -0.101948252 | 6.96E-04 | 1.90E-03 | 1.00E+00 |
| DDX6 LMNA     | -0.010249973 | -0.148091422 | 0.127982124  | 8.85E-01 | 9.16E-01 | 1.00E+00 |
| SLC43A1 LMNA  | 0.123451449  | -0.01485268  | 0.25712045   | 8.01E-02 | 1.26E-01 | 1.00E+00 |
| NTN1 LMNA     | 0.105601118  | -0.032929947 | 0.240151114  | 1.35E-01 | 1.96E-01 | 1.00E+00 |
| ING4 LMNA     | -0.494401429 | -0.592043888 | -0.382453907 | 7.55E-14 | 1.22E-12 | 8.95E-10 |
| DPH2 LMNA     | -0.001350035 | -0.13937506  | 0.136726448  | 9.85E-01 | 9.88E-01 | 1.00E+00 |
| ZNF313 LMNA   | 0.232366345  | 0.0974411    | 0.358904269  | 8.76E-04 | 2.33E-03 | 1.00E+00 |
| VPS28 LMNA    | -0.12823243  | -0.261651515 | 0.009995517  | 6.90E-02 | 1.11E-01 | 1.00E+00 |
| DIAPH1 LMNA   | 0.406378286  | 0.284275399  | 0.515508766  | 1.96E-09 | 1.53E-08 | 2.33E-05 |
| CEP76 LMNA    | -0.325204346 | -0.44335119  | -0.195950501 | 2.33E-06 | 1.04E-05 | 2.77E-02 |
| CORO1A LMNA   | 0.148137404  | 0.010296982  | 0.280452995  | 3.54E-02 | 6.19E-02 | 1.00E+00 |
| TRAF4 LMNA    | -0.231280147 | -0.357903831 | -0.096303984 | 9.27E-04 | 2.45E-03 | 1.00E+00 |
| RRM2 LMNA     | 0.237359117  | 0.102672453  | 0.363499102  | 6.71E-04 | 1.84E-03 | 1.00E+00 |
| EDG4 LMNA     | -0.191566335 | -0.321124891 | -0.054969041 | 6.31E-03 | 1.34E-02 | 1.00E+00 |
| OS9 LMNA      | 0.061827548  | -0.076879648 | 0.198186953  | 3.82E-01 | 4.70E-01 | 1.00E+00 |
| SLC4A1AP LMNA | 0.180345758  | 0.043374652  | 0.310662228  | 1.02E-02 | 2.07E-02 | 1.00E+00 |
| COG5 LMNA     | 0.187430843  | 0.050691485  | 0.317272415  | 7.56E-03 | 1.58E-02 | 1.00E+00 |
| COPS8 LMNA    | 0.104247285  | -0.034297303 | 0.238860735  | 1.40E-01 | 2.02E-01 | 1.00E+00 |
| NGLY1 LMNA    | 0.139695849  | 0.001677193  | 0.272491803  | 4.74E-02 | 8.00E-02 | 1.00E+00 |
| AKAP9 LMNA    | 0.029088635  | -0.109401692 | 0.166471135  | 6.81E-01 | 7.49E-01 | 1.00E+00 |
| NCBP2 LMNA    | 0.101936308  | -0.036630167 | 0.236656975  | 1.49E-01 | 2.13E-01 | 1.00E+00 |
| C17orf42 LMNA | -0.199432221 | -0.328440654 | -0.063119001 | 4.43E-03 | 9.84E-03 | 1.00E+00 |
| GPSM3 LMNA    | 0.227999234  | 0.09287141   | 0.354880195  | 1.10E-03 | 2.86E-03 | 1.00E+00 |
| SLC20A1 LMNA  | 0.533677591  | 0.427092514  | 0.625635098  | 2.89E-16 | 7.66E-15 | 3.42E-12 |
| SIL1 LMNA     | 0.56255395   | 0.460246192  | 0.650116189  | 2.97E-18 | 1.12E-16 | 3.52E-14 |
| LDB2 LMNA     | -0.08954114  | -0.22481317  | 0.049117008  | 2.05E-01 | 2.80E-01 | 1.00E+00 |
| ASB6 LMNA     | 0.268742193  | 0.135726669  | 0.392241002  | 1.10E-04 | 3.57E-04 | 1.00E+00 |
| KLK5 LMNA     | -0.233241227 | -0.359709863 | -0.098357249 | 8.36E-04 | 2.24E-03 | 1.00E+00 |

|          |      |              |              |              |          |          |          |
|----------|------|--------------|--------------|--------------|----------|----------|----------|
| SMAD5OS  | LMNA | 0.124749976  | -0.013534107 | 0.25835168   | 7.69E-02 | 1.22E-01 | 1.00E+00 |
| UNC93A   | LMNA | 0.034472858  | -0.104073429 | 0.171706705  | 6.26E-01 | 7.01E-01 | 1.00E+00 |
| SPTB     | LMNA | -0.120367809 | -0.25419488  | 0.017981996  | 8.79E-02 | 1.36E-01 | 1.00E+00 |
| EFEMP2   | LMNA | 0.662446513  | 0.577179377  | 0.733424787  | 6.86E-27 | 1.23E-24 | 8.13E-23 |
| EFNB2    | LMNA | 0.474750434  | 0.360314354  | 0.575108926  | 9.46E-13 | 1.32E-11 | 1.12E-08 |
| C21orf62 | LMNA | 0.296903673  | 0.165641981  | 0.417828771  | 1.78E-05 | 6.74E-05 | 2.11E-01 |
| PCM1     | LMNA | -0.112101895 | -0.246340584 | 0.026357     | 1.12E-01 | 1.68E-01 | 1.00E+00 |
| FMO5     | LMNA | -0.23223787  | -0.358785953 | -0.097306584 | 8.82E-04 | 2.34E-03 | 1.00E+00 |
| TSG101   | LMNA | -0.132828477 | -0.266001776 | 0.005320078  | 5.95E-02 | 9.77E-02 | 1.00E+00 |
| CEBPG    | LMNA | 0.191762191  | 0.05517175   | 0.321307237  | 6.26E-03 | 1.33E-02 | 1.00E+00 |
| GTF3C4   | LMNA | 0.095870195  | -0.042746555 | 0.230865694  | 1.75E-01 | 2.44E-01 | 1.00E+00 |
| ABHD3    | LMNA | 0.032287062  | -0.106237467 | 0.169582191  | 6.48E-01 | 7.21E-01 | 1.00E+00 |
| TNFRSF1B | LMNA | 0.42685504   | 0.30688828   | 0.533469854  | 2.38E-10 | 2.21E-09 | 2.82E-06 |
| CLEC1A   | LMNA | 0.110467358  | -0.028010811 | 0.24478535   | 1.18E-01 | 1.75E-01 | 1.00E+00 |
| IQSEC1   | LMNA | 0.189907953  | 0.053253088  | 0.319580517  | 6.79E-03 | 1.44E-02 | 1.00E+00 |
| PIGN     | LMNA | 0.089450966  | -0.04920769  | 0.224726861  | 2.06E-01 | 2.80E-01 | 1.00E+00 |
| PATZ1    | LMNA | -0.390475815 | -0.501493518 | -0.266807211 | 9.19E-09 | 6.31E-08 | 1.09E-04 |
| RBM22    | LMNA | -0.10890181  | -0.243295111 | 0.029594108  | 1.23E-01 | 1.81E-01 | 1.00E+00 |
| AEBP1    | LMNA | 0.433821909  | 0.314612935  | 0.539558967  | 1.12E-10 | 1.11E-09 | 1.33E-06 |
| BAG2     | LMNA | 0.089690886  | -0.048966413 | 0.224956494  | 2.04E-01 | 2.79E-01 | 1.00E+00 |
| PAQR5    | LMNA | 0.228813315  | 0.093722823  | 0.355630687  | 1.06E-03 | 2.75E-03 | 1.00E+00 |
| C9orf127 | LMNA | -0.230144979 | -0.356857979 | -0.095115979 | 9.84E-04 | 2.59E-03 | 1.00E+00 |
| THNSL1   | LMNA | -0.432547338 | -0.538445805 | -0.313198548 | 1.29E-10 | 1.26E-09 | 1.53E-06 |
| ANKRD2   | LMNA | 0.010228951  | -0.128002804 | 0.148070859  | 8.85E-01 | 9.16E-01 | 1.00E+00 |
| JAM2     | LMNA | 0.122688144  | -0.015627543 | 0.256396501  | 8.19E-02 | 1.28E-01 | 1.00E+00 |
| SNRPN    | LMNA | -0.328587936 | -0.446389848 | -0.19959075  | 1.80E-06 | 8.24E-06 | 2.14E-02 |
| ALX4     | LMNA | -0.007336478 | -0.145240378 | 0.130847046  | 9.17E-01 | 9.41E-01 | 1.00E+00 |
| FAM130A1 | LMNA | -0.153750635 | -0.285736751 | -0.016040092 | 2.89E-02 | 5.17E-02 | 1.00E+00 |
| CACNA1S  | LMNA | 0.101757436  | -0.036810671 | 0.236486344  | 1.50E-01 | 2.14E-01 | 1.00E+00 |
| TRIM38   | LMNA | 0.466829473  | 0.351426609  | 0.56825834   | 2.51E-12 | 3.28E-11 | 2.97E-08 |
| CORIN    | LMNA | 0.209218826  | 0.073284492  | 0.337521245  | 2.81E-03 | 6.54E-03 | 1.00E+00 |
| TMCC1    | LMNA | -0.290817879 | -0.412315366 | -0.159156651 | 2.68E-05 | 9.82E-05 | 3.18E-01 |
| PCLKC    | LMNA | 0.147118703  | 0.009255685  | 0.279493229  | 3.67E-02 | 6.39E-02 | 1.00E+00 |
| PLEKHG6  | LMNA | 0.200539786  | 0.064268028  | 0.329469516  | 4.21E-03 | 9.40E-03 | 1.00E+00 |
| LRRC40   | LMNA | -0.298169628 | -0.418974541 | -0.166992475 | 1.63E-05 | 6.22E-05 | 1.94E-01 |

|          |      |              |              |              |          |          |          |
|----------|------|--------------|--------------|--------------|----------|----------|----------|
| SMG5     | LMNA | 0.175851298  | 0.038740786  | 0.306462478  | 1.23E-02 | 2.44E-02 | 1.00E+00 |
| NCAPD2   | LMNA | -0.016901945 | -0.154592231 | 0.121432397  | 8.11E-01 | 8.58E-01 | 1.00E+00 |
| WNT2B    | LMNA | 0.099566245  | -0.039021109 | 0.234395429  | 1.59E-01 | 2.25E-01 | 1.00E+00 |
| DCP2     | LMNA | -0.189236712 | -0.318955225 | -0.052558773 | 6.99E-03 | 1.47E-02 | 1.00E+00 |
| ASNS     | LMNA | -0.16750359  | -0.298648628 | -0.030149774 | 1.72E-02 | 3.26E-02 | 1.00E+00 |
| MRPL49   | LMNA | -0.013824043 | -0.151585754 | 0.124464488  | 8.45E-01 | 8.85E-01 | 1.00E+00 |
| TMEM24   | LMNA | -0.294229232 | -0.415406966 | -0.162790562 | 2.13E-05 | 7.96E-05 | 2.53E-01 |
| RPL18    | LMNA | -0.058823209 | -0.195288351 | 0.079876436  | 4.06E-01 | 4.93E-01 | 1.00E+00 |
| SMU1     | LMNA | -0.024946907 | -0.162438479 | 0.113494964  | 7.25E-01 | 7.85E-01 | 1.00E+00 |
| ISG20    | LMNA | 0.557606705  | 0.454545806  | 0.645934829  | 6.71E-18 | 2.39E-16 | 7.96E-14 |
| CASZ1    | LMNA | 0.322538219  | 0.193084645  | 0.44095494   | 2.85E-06 | 1.26E-05 | 3.38E-02 |
| POLR1D   | LMNA | 0.164192768  | 0.026748065  | 0.295544664  | 1.95E-02 | 3.66E-02 | 1.00E+00 |
| GIN1     | LMNA | -0.133922557 | -0.267036548 | 0.004206208  | 5.74E-02 | 9.46E-02 | 1.00E+00 |
| TMEM177  | LMNA | -0.216439108 | -0.344205378 | -0.080802456 | 1.98E-03 | 4.80E-03 | 1.00E+00 |
| CDKN2AIP | LMNA | -0.227530332 | -0.354447845 | -0.092381094 | 1.13E-03 | 2.92E-03 | 1.00E+00 |
| KRR1     | LMNA | 0.009385751  | -0.128832179 | 0.147245963  | 8.95E-01 | 9.24E-01 | 1.00E+00 |
| CXCL1    | LMNA | 0.318060162  | 0.188276086  | 0.436926371  | 3.97E-06 | 1.70E-05 | 4.71E-02 |
| C1D      | LMNA | -0.150923399 | -0.283076465 | -0.013146303 | 3.20E-02 | 5.68E-02 | 1.00E+00 |
| EPM2A    | LMNA | -0.319939825 | -0.438617943 | -0.19029372  | 3.46E-06 | 1.49E-05 | 4.10E-02 |
| LDHC     | LMNA | 0.119509585  | -0.018852451 | 0.253380213  | 9.02E-02 | 1.39E-01 | 1.00E+00 |
| PC       | LMNA | -0.204206491 | -0.332873485 | -0.068074574 | 3.56E-03 | 8.07E-03 | 1.00E+00 |
| PDZRN4   | LMNA | -0.574078873 | -0.659836411 | -0.473558399 | 4.20E-19 | 1.85E-17 | 4.98E-15 |
| FAH      | LMNA | 0.503720972  | 0.392998787  | 0.600045312  | 2.15E-14 | 3.89E-13 | 2.55E-10 |
| UBE4B    | LMNA | -0.195072974 | -0.324388194 | -0.058600074 | 5.40E-03 | 1.17E-02 | 1.00E+00 |
| NIT1     | LMNA | -0.034850611 | -0.172073737 | 0.103699303  | 6.22E-01 | 6.97E-01 | 1.00E+00 |
| CDC2L6   | LMNA | -0.211323682 | -0.33947114  | -0.075474534 | 2.54E-03 | 5.99E-03 | 1.00E+00 |
| BTN3A3   | LMNA | 0.122688997  | -0.015626678 | 0.256397309  | 8.19E-02 | 1.28E-01 | 1.00E+00 |
| PAX8     | LMNA | 0.231314396  | 0.096339833  | 0.35793538   | 9.26E-04 | 2.45E-03 | 1.00E+00 |
| PRO2012  | LMNA | -0.191594731 | -0.321151329 | -0.054998431 | 6.30E-03 | 1.34E-02 | 1.00E+00 |
| BEX1     | LMNA | -0.579534947 | -0.664428124 | -0.479876661 | 1.62E-19 | 7.57E-18 | 1.92E-15 |
| COMMD3   | LMNA | -0.35135493  | -0.466765516 | -0.224177644 | 2.94E-07 | 1.56E-06 | 3.49E-03 |
| MRPL40   | LMNA | 0.006895473  | -0.131280497 | 0.144808627  | 9.22E-01 | 9.44E-01 | 1.00E+00 |
| SLC2A4   | LMNA | -0.034357836 | -0.171594939 | 0.104187339  | 6.27E-01 | 7.02E-01 | 1.00E+00 |
| SHFM1    | LMNA | 0.456268976  | 0.339609426  | 0.559102981  | 8.84E-12 | 1.05E-10 | 1.05E-07 |
| PKMYT1   | LMNA | -0.056432344 | -0.192979926 | 0.082259503  | 4.25E-01 | 5.12E-01 | 1.00E+00 |

|           |      |              |              |              |          |          |          |
|-----------|------|--------------|--------------|--------------|----------|----------|----------|
| FEZF2     | LMNA | -0.402624316 | -0.512205554 | -0.2801445   | 2.85E-09 | 2.16E-08 | 3.38E-05 |
| DUT       | LMNA | -0.188243011 | -0.31802934  | -0.051531157 | 7.30E-03 | 1.53E-02 | 1.00E+00 |
| LRRC59    | LMNA | 0.355327339  | 0.228484243  | 0.470308174  | 2.11E-07 | 1.15E-06 | 2.51E-03 |
| LY6H      | LMNA | -0.352170583 | -0.467493231 | -0.225061511 | 2.75E-07 | 1.46E-06 | 3.26E-03 |
| MAP2      | LMNA | -0.541575295 | -0.632348735 | -0.436131684 | 8.62E-17 | 2.56E-15 | 1.02E-12 |
| LYL1      | LMNA | 0.094777634  | -0.043847068 | 0.229821615  | 1.80E-01 | 2.50E-01 | 1.00E+00 |
| EDEM1     | LMNA | 0.544574852  | 0.439570356  | 0.634895015  | 5.40E-17 | 1.66E-15 | 6.41E-13 |
| NOS3      | LMNA | 0.359821917  | 0.233362934  | 0.474312047  | 1.44E-07 | 8.06E-07 | 1.71E-03 |
| ZNF34     | LMNA | -0.383250074 | -0.495105979 | -0.258896799 | 1.81E-08 | 1.17E-07 | 2.14E-04 |
| ADH1A     | LMNA | 0.069686237  | -0.069028838 | 0.205757795  | 3.24E-01 | 4.10E-01 | 1.00E+00 |
| CYP11B1   | LMNA | 0.124479606  | -0.013808691 | 0.258095358  | 7.76E-02 | 1.23E-01 | 1.00E+00 |
| CDC73     | LMNA | 0.143602037  | 0.005663308  | 0.276177973  | 4.15E-02 | 7.11E-02 | 1.00E+00 |
| GPR172A   | LMNA | 0.490560727  | 0.378116697  | 0.588740789  | 1.25E-13 | 1.99E-12 | 1.49E-09 |
| GSTM3     | LMNA | -0.345610282 | -0.461635787 | -0.217958483 | 4.71E-07 | 2.40E-06 | 5.59E-03 |
| KCNA5     | LMNA | -0.417747622 | -0.52549318  | -0.296814028 | 6.19E-10 | 5.32E-09 | 7.34E-06 |
| FLRT2     | LMNA | 0.016272931  | -0.12205226  | 0.153978021  | 8.18E-01 | 8.63E-01 | 1.00E+00 |
| WRN       | LMNA | 0.128331028  | -0.00989528  | 0.261744897  | 6.87E-02 | 1.11E-01 | 1.00E+00 |
| ANAPC5    | LMNA | -0.228346589 | -0.355200437 | -0.093234669 | 1.08E-03 | 2.81E-03 | 1.00E+00 |
| SDF2      | LMNA | -0.03288268  | -0.170161236 | 0.105647908  | 6.42E-01 | 7.15E-01 | 1.00E+00 |
| KRT8P12   | LMNA | 0.428064668  | 0.308228346  | 0.534527874  | 2.09E-10 | 1.96E-09 | 2.48E-06 |
| DZIP3     | LMNA | -0.513580692 | -0.608489582 | -0.404186658 | 5.45E-15 | 1.12E-13 | 6.46E-11 |
| C15orf24  | LMNA | 0.149211536  | 0.011395265  | 0.281464701  | 3.41E-02 | 5.98E-02 | 1.00E+00 |
| NFATC2IP  | LMNA | 0.093121244  | -0.045514872 | 0.228238133  | 1.87E-01 | 2.59E-01 | 1.00E+00 |
| RIT1      | LMNA | 0.174816226  | 0.037674444  | 0.305494557  | 1.28E-02 | 2.53E-02 | 1.00E+00 |
| RHBDF2    | LMNA | 0.346769618  | 0.219212746  | 0.462671651  | 4.29E-07 | 2.20E-06 | 5.09E-03 |
| SCML1     | LMNA | 0.234767375  | 0.099955933  | 0.361114695  | 7.71E-04 | 2.08E-03 | 1.00E+00 |
| MED9      | LMNA | 0.057397396  | -0.08129779  | 0.193911883  | 4.17E-01 | 5.05E-01 | 1.00E+00 |
| RAB13     | LMNA | 0.628667789  | 0.537243165  | 0.705490525  | 1.28E-23 | 1.30E-21 | 1.52E-19 |
| FBXW11    | LMNA | -0.118067593 | -0.252010979 | 0.020314521  | 9.42E-02 | 1.45E-01 | 1.00E+00 |
| ETAA1     | LMNA | 0.167676408  | 0.030327424  | 0.298810573  | 1.71E-02 | 3.24E-02 | 1.00E+00 |
| C14orf131 | LMNA | -0.197359941 | -0.326514805 | -0.060970116 | 4.87E-03 | 1.07E-02 | 1.00E+00 |
| SLC12A5   | LMNA | -0.356017685 | -0.470923458 | -0.229233174 | 1.99E-07 | 1.09E-06 | 2.36E-03 |
| PHF14     | LMNA | -0.094908215 | -0.229946418 | 0.043715554  | 1.79E-01 | 2.49E-01 | 1.00E+00 |
| NRIP3     | LMNA | -0.196634714 | -0.325840571 | -0.060218379 | 5.03E-03 | 1.10E-02 | 1.00E+00 |
| TMEM121   | LMNA | -0.34012914  | -0.456734113 | -0.212034243 | 7.32E-07 | 3.60E-06 | 8.69E-03 |

|          |      |              |              |              |          |          |          |
|----------|------|--------------|--------------|--------------|----------|----------|----------|
| NOS1AP   | LMNA | -0.372323923 | -0.485424267 | -0.246966947 | 4.86E-08 | 2.95E-07 | 5.77E-04 |
| FAM3A    | LMNA | 0.35679651   | 0.230078272  | 0.471617467  | 1.87E-07 | 1.02E-06 | 2.21E-03 |
| RPL13    | LMNA | 0.122788554  | -0.015525622 | 0.256491742  | 8.17E-02 | 1.28E-01 | 1.00E+00 |
| PRDX2    | LMNA | -0.355491685 | -0.470454661 | -0.228662523 | 2.08E-07 | 1.13E-06 | 2.47E-03 |
| SAP30BP  | LMNA | -0.161801092 | -0.293300693 | -0.024292713 | 2.14E-02 | 3.97E-02 | 1.00E+00 |
| WDR76    | LMNA | -0.044135546 | -0.181083215 | 0.094491185  | 5.33E-01 | 6.15E-01 | 1.00E+00 |
| PRMT3    | LMNA | -0.150861247 | -0.283017961 | -0.013082714 | 3.21E-02 | 5.69E-02 | 1.00E+00 |
| TRIM10   | LMNA | -0.075775965 | -0.21161329  | 0.062933378  | 2.84E-01 | 3.67E-01 | 1.00E+00 |
| FAM82B   | LMNA | 0.256424456  | 0.122717616  | 0.380988592  | 2.30E-04 | 6.98E-04 | 1.00E+00 |
| GCNT4    | LMNA | -0.102379419 | -0.237079636 | 0.036182976  | 1.47E-01 | 2.11E-01 | 1.00E+00 |
| MAP9     | LMNA | -0.076157405 | -0.211979734 | 0.062551235  | 2.81E-01 | 3.64E-01 | 1.00E+00 |
| GPRASP1  | LMNA | -0.224478996 | -0.351633046 | -0.089192015 | 1.32E-03 | 3.36E-03 | 1.00E+00 |
| CXorf36  | LMNA | 0.134073019  | -0.004052998 | 0.267178829  | 5.71E-02 | 9.42E-02 | 1.00E+00 |
| CDKN1C   | LMNA | -0.308381713 | -0.428203079 | -0.177904536 | 8.01E-06 | 3.22E-05 | 9.50E-02 |
| DSCR3    | LMNA | 0.09925339   | -0.039336602 | 0.23409679   | 1.60E-01 | 2.27E-01 | 1.00E+00 |
| ZFAND3   | LMNA | 0.202631901  | 0.066439447  | 0.331412133  | 3.83E-03 | 8.62E-03 | 1.00E+00 |
| C7orf43  | LMNA | 0.13127698   | -0.006899051 | 0.264533855  | 6.26E-02 | 1.02E-01 | 1.00E+00 |
| HSPH1    | LMNA | 0.063785469  | -0.074925298 | 0.200074682  | 3.67E-01 | 4.55E-01 | 1.00E+00 |
| SPSB3    | LMNA | -0.295450876 | -0.416513423 | -0.164092775 | 1.97E-05 | 7.38E-05 | 2.33E-01 |
| AQP1     | LMNA | -0.11351537  | -0.247684923 | 0.024926247  | 1.08E-01 | 1.62E-01 | 1.00E+00 |
| COL17A1  | LMNA | 0.165950501  | 0.028553654  | 0.297192921  | 1.83E-02 | 3.44E-02 | 1.00E+00 |
| GFAP     | LMNA | -0.219214995 | -0.346771696 | -0.083696901 | 1.72E-03 | 4.25E-03 | 1.00E+00 |
| CDC16    | LMNA | 0.011855033  | -0.126402839 | 0.149661098  | 8.67E-01 | 9.02E-01 | 1.00E+00 |
| KIAA1614 | LMNA | 0.234046507  | 0.099200717  | 0.360451201  | 8.01E-04 | 2.16E-03 | 1.00E+00 |
| PRSS16   | LMNA | -0.065320662 | -0.201554132 | 0.073392159  | 3.56E-01 | 4.43E-01 | 1.00E+00 |
| KIF13B   | LMNA | 0.367831801  | 0.242073167  | 0.481435714  | 7.23E-08 | 4.27E-07 | 8.57E-04 |
| PCDH9    | LMNA | -0.060440861 | -0.196849366 | 0.078263161  | 3.93E-01 | 4.80E-01 | 1.00E+00 |
| MKRN3    | LMNA | -0.488564768 | -0.587022919 | -0.375864656 | 1.63E-13 | 2.55E-12 | 1.93E-09 |
| ADAMTS13 | LMNA | 0.097259614  | -0.041346538 | 0.232193008  | 1.69E-01 | 2.37E-01 | 1.00E+00 |
| ITFG1    | LMNA | 0.206635854  | 0.070598774  | 0.335126928  | 3.17E-03 | 7.31E-03 | 1.00E+00 |
| TUBG2    | LMNA | -0.191009497 | -0.32060641  | -0.054392782 | 6.47E-03 | 1.37E-02 | 1.00E+00 |
| TTYH1    | LMNA | -0.415220795 | -0.523276713 | -0.294023717 | 8.02E-10 | 6.76E-09 | 9.52E-06 |
| SFRS7    | LMNA | -0.223588573 | -0.350811215 | -0.08826192  | 1.38E-03 | 3.49E-03 | 1.00E+00 |
| C3orf18  | LMNA | -0.149203091 | -0.281456748 | -0.011386628 | 3.41E-02 | 5.98E-02 | 1.00E+00 |
| FLJ13236 | LMNA | 0.469117946  | 0.353992264  | 0.570239013  | 1.90E-12 | 2.52E-11 | 2.25E-08 |

|          |      |              |              |              |          |          |          |
|----------|------|--------------|--------------|--------------|----------|----------|----------|
| C18orf25 | LMNA | 0.151695031  | 0.013935871  | 0.283802734  | 3.12E-02 | 5.54E-02 | 1.00E+00 |
| EXTL1    | LMNA | -0.338497833 | -0.4552739   | -0.210272876 | 8.34E-07 | 4.04E-06 | 9.89E-03 |
| RANBP10  | LMNA | 0.065839129  | -0.072874237 | 0.202053632  | 3.52E-01 | 4.39E-01 | 1.00E+00 |
| RARG     | LMNA | 0.300497912  | 0.169477524  | 0.421080782  | 1.39E-05 | 5.36E-05 | 1.65E-01 |
| MYO7A    | LMNA | 0.162770991  | 0.025288235  | 0.294210868  | 2.06E-02 | 3.84E-02 | 1.00E+00 |
| SFRS18   | LMNA | -0.269170009 | -0.392631154 | -0.136179322 | 1.07E-04 | 3.48E-04 | 1.00E+00 |
| CD96     | LMNA | 0.294287618  | 0.162852789  | 0.415459856  | 2.13E-05 | 7.93E-05 | 2.52E-01 |
| ACVR1B   | LMNA | -0.277412346 | -0.400139195 | -0.14491101  | 6.41E-05 | 2.17E-04 | 7.61E-01 |
| DENND1C  | LMNA | 0.240210277  | 0.105663202  | 0.366120265  | 5.74E-04 | 1.60E-03 | 1.00E+00 |
| RBMS3    | LMNA | -0.055736445 | -0.192307739 | 0.082952834  | 4.31E-01 | 5.17E-01 | 1.00E+00 |
| SLC41A3  | LMNA | -0.102441212 | -0.237138572 | 0.036120611  | 1.47E-01 | 2.11E-01 | 1.00E+00 |
| PSMD1    | LMNA | 0.136178996  | -0.001907872 | 0.269169702  | 5.33E-02 | 8.88E-02 | 1.00E+00 |
| DGCR6L   | LMNA | 0.075055701  | -0.06365486  | 0.210921238  | 2.88E-01 | 3.72E-01 | 1.00E+00 |
| ILVBL    | LMNA | 0.137319396  | -0.000745742 | 0.270247297  | 5.13E-02 | 8.59E-02 | 1.00E+00 |
| CSNK1G3  | LMNA | -0.001345287 | -0.139370404 | 0.136731108  | 9.85E-01 | 9.88E-01 | 1.00E+00 |
| RNF186   | LMNA | -0.095404007 | -0.230420231 | 0.043216177  | 1.77E-01 | 2.47E-01 | 1.00E+00 |
| IFNGR1   | LMNA | -0.050743049 | -0.187480723 | 0.08792387   | 4.73E-01 | 5.59E-01 | 1.00E+00 |
| MAGEL2   | LMNA | -0.336491947 | -0.453477534 | -0.208108208 | 9.77E-07 | 4.69E-06 | 1.16E-02 |
| TSPAN6   | LMNA | -0.062741521 | -0.199068286 | 0.075967474  | 3.75E-01 | 4.63E-01 | 1.00E+00 |
| SLC29A2  | LMNA | -0.046006773 | -0.182896149 | 0.092632563  | 5.16E-01 | 5.99E-01 | 1.00E+00 |
| MSL2L1   | LMNA | -0.166261209 | -0.297484196 | -0.028872915 | 1.80E-02 | 3.41E-02 | 1.00E+00 |
| MATN2    | LMNA | -0.030828331 | -0.168163647 | 0.107680947  | 6.63E-01 | 7.33E-01 | 1.00E+00 |
| ST6GALNA | LMNA | 0.31474064   | 0.184715579  | 0.433936966  | 5.07E-06 | 2.12E-05 | 6.01E-02 |
| RBMX     | LMNA | -0.308889469 | -0.42866128  | -0.178447934 | 7.72E-06 | 3.12E-05 | 9.16E-02 |
| MPP3     | LMNA | 0.048748106  | -0.08990795  | 0.185550404  | 4.91E-01 | 5.76E-01 | 1.00E+00 |
| FGL1     | LMNA | -0.063150986 | -0.199463057 | 0.07555874   | 3.72E-01 | 4.60E-01 | 1.00E+00 |
| PSORS1C2 | LMNA | -0.04389732  | -0.180852343 | 0.094727737  | 5.35E-01 | 6.17E-01 | 1.00E+00 |
| RAD51L3  | LMNA | -0.194330266 | -0.323697282 | -0.057830719 | 5.58E-03 | 1.20E-02 | 1.00E+00 |
| ARHGEF6  | LMNA | 0.061291498  | -0.077414534 | 0.197669944  | 3.86E-01 | 4.74E-01 | 1.00E+00 |
| TGFBR2   | LMNA | 0.508215012  | 0.398094133  | 0.603896856  | 1.16E-14 | 2.21E-13 | 1.37E-10 |
| ORAI2    | LMNA | 0.449476857  | 0.332028465  | 0.553201312  | 1.94E-11 | 2.16E-10 | 2.31E-07 |
| CDC123   | LMNA | -0.221677982 | -0.349047139 | -0.086266999 | 1.52E-03 | 3.80E-03 | 1.00E+00 |
| IL33     | LMNA | -0.076341021 | -0.212156118 | 0.062367265  | 2.80E-01 | 3.63E-01 | 1.00E+00 |
| DEAF1    | LMNA | -0.205565605 | -0.334134361 | -0.06948653  | 3.34E-03 | 7.63E-03 | 1.00E+00 |
| AMN      | LMNA | 0.123280033  | -0.015026706 | 0.256957885  | 8.05E-02 | 1.26E-01 | 1.00E+00 |



|           |      |              |              |              |          |          |          |
|-----------|------|--------------|--------------|--------------|----------|----------|----------|
| MSLN      | LMNA | 0.098546232  | -0.04004962  | 0.23342167   | 1.63E-01 | 2.30E-01 | 1.00E+00 |
| DEFA6     | LMNA | -0.116081426 | -0.250124148 | 0.022327374  | 9.99E-02 | 1.52E-01 | 1.00E+00 |
| WWTR1     | LMNA | 0.675324219  | 0.592512693  | 0.744011623  | 2.98E-28 | 6.79E-26 | 3.53E-24 |
| COBL      | LMNA | -0.109769517 | -0.244121156 | 0.02871665   | 1.20E-01 | 1.78E-01 | 1.00E+00 |
| PPP1R16B  | LMNA | -0.351672301 | -0.467048689 | -0.224521532 | 2.87E-07 | 1.52E-06 | 3.40E-03 |
| CIB1      | LMNA | 0.465670245  | 0.350127634  | 0.567254579  | 2.88E-12 | 3.74E-11 | 3.42E-08 |
| TSSK1B    | LMNA | -0.006998083 | -0.144909088 | 0.131179649  | 9.21E-01 | 9.44E-01 | 1.00E+00 |
| GAS7      | LMNA | 0.177834668  | 0.040784948  | 0.308316422  | 1.13E-02 | 2.27E-02 | 1.00E+00 |
| MDN1      | LMNA | -0.287415121 | -0.409228765 | -0.155535447 | 3.36E-05 | 1.21E-04 | 3.99E-01 |
| HAAO      | LMNA | 0.029034343  | -0.109455379 | 0.166418303  | 6.82E-01 | 7.50E-01 | 1.00E+00 |
| CTNNAL1   | LMNA | 0.272312125  | 0.139505551  | 0.395495287  | 8.83E-05 | 2.91E-04 | 1.00E+00 |
| TLE6      | LMNA | -0.027405187 | -0.164832574 | 0.111066011  | 6.99E-01 | 7.63E-01 | 1.00E+00 |
| CIT       | LMNA | -0.316807534 | -0.435798622 | -0.186932121 | 4.36E-06 | 1.85E-05 | 5.17E-02 |
| TNFAIP2   | LMNA | 0.42740916   | 0.307502094  | 0.533954566  | 2.24E-10 | 2.09E-09 | 2.66E-06 |
| FOXN1     | LMNA | 0.12296699   | -0.015344494 | 0.256660987  | 8.13E-02 | 1.27E-01 | 1.00E+00 |
| HERC4     | LMNA | -0.109510935 | -0.24387501  | 0.02897816   | 1.21E-01 | 1.79E-01 | 1.00E+00 |
| DRAP1     | LMNA | 0.402737568  | 0.280269057  | 0.512305255  | 2.82E-09 | 2.14E-08 | 3.34E-05 |
| PEMT      | LMNA | -0.185380244 | -0.31536056  | -0.048572302 | 8.26E-03 | 1.71E-02 | 1.00E+00 |
| SLC38A1   | LMNA | -0.246931367 | -0.372291284 | -0.112722994 | 3.96E-04 | 1.14E-03 | 1.00E+00 |
| ARHGAP6   | LMNA | 0.340091909  | 0.211994035  | 0.456700795  | 7.34E-07 | 3.60E-06 | 8.71E-03 |
| PHF20L1   | LMNA | -0.218255648 | -0.345884992 | -0.082696321 | 1.81E-03 | 4.43E-03 | 1.00E+00 |
| MCM3AP    | LMNA | 0.137151012  | -0.000917358 | 0.270088207  | 5.16E-02 | 8.63E-02 | 1.00E+00 |
| MYO1F     | LMNA | 0.375908852  | 0.250877012  | 0.488603949  | 3.53E-08 | 2.17E-07 | 4.18E-04 |
| RAB11A    | LMNA | -0.066532198 | -0.202721237 | 0.072181781  | 3.47E-01 | 4.33E-01 | 1.00E+00 |
| PTBP2     | LMNA | -0.586720255 | -0.67046536  | -0.488213216 | 4.50E-20 | 2.31E-18 | 5.33E-16 |
| SNX1      | LMNA | -0.000566298 | -0.138606463 | 0.137495452  | 9.94E-01 | 9.95E-01 | 1.00E+00 |
| CTB-1048E | LMNA | 0.101195818  | -0.037377351 | 0.235950546  | 1.52E-01 | 2.17E-01 | 1.00E+00 |
| C19orf60  | LMNA | 0.054127407  | -0.084555421 | 0.190753035  | 4.44E-01 | 5.31E-01 | 1.00E+00 |
| C7orf25   | LMNA | 0.160865047  | 0.023332198  | 0.292422061  | 2.22E-02 | 4.10E-02 | 1.00E+00 |
| ELF5      | LMNA | 0.063262086  | -0.07544783  | 0.199570162  | 3.71E-01 | 4.59E-01 | 1.00E+00 |
| HOXB9     | LMNA | 0.156030428  | 0.018375233  | 0.287880439  | 2.66E-02 | 4.81E-02 | 1.00E+00 |
| RBM8A     | LMNA | -0.146458692 | -0.278871259 | -0.008581192 | 3.75E-02 | 6.51E-02 | 1.00E+00 |
| PARP3     | LMNA | 0.365437872  | 0.239467797  | 0.479308221  | 8.91E-08 | 5.15E-07 | 1.06E-03 |
| ITGA9     | LMNA | 0.088438772  | -0.050225434 | 0.223757899  | 2.11E-01 | 2.86E-01 | 1.00E+00 |
| ZFR       | LMNA | -0.198965465 | -0.328006973 | -0.062634881 | 4.53E-03 | 1.00E-02 | 1.00E+00 |

|          |      |              |              |              |          |          |          |
|----------|------|--------------|--------------|--------------|----------|----------|----------|
| VANGL1   | LMNA | 0.165464997  | 0.028054842  | 0.296737734  | 1.86E-02 | 3.50E-02 | 1.00E+00 |
| FLJ20699 | LMNA | 0.376656414  | 0.251692889  | 0.489266629  | 3.30E-08 | 2.05E-07 | 3.91E-04 |
| ACSL6    | LMNA | -0.445110579 | -0.54940195  | -0.327163082 | 3.20E-11 | 3.44E-10 | 3.79E-07 |
| CHAF1B   | LMNA | 0.14897036   | 0.011148637  | 0.281237567  | 3.43E-02 | 6.03E-02 | 1.00E+00 |
| NDUFA3   | LMNA | -0.236711132 | -0.362903109 | -0.101993082 | 6.94E-04 | 1.90E-03 | 1.00E+00 |
| FABP4    | LMNA | 0.066473551  | -0.072240381 | 0.20266475   | 3.47E-01 | 4.33E-01 | 1.00E+00 |
| KCNB1    | LMNA | -0.529597638 | -0.622161489 | -0.422431209 | 5.32E-16 | 1.36E-14 | 6.32E-12 |
| CANX     | LMNA | 0.21853822   | 0.08299101   | 0.34614619   | 1.78E-03 | 4.38E-03 | 1.00E+00 |
| SLC25A28 | LMNA | -0.024678615 | -0.162177094 | 0.113759955  | 7.27E-01 | 7.88E-01 | 1.00E+00 |
| SHARPIN  | LMNA | 0.320696722  | 0.191106484  | 0.439298863  | 3.27E-06 | 1.42E-05 | 3.88E-02 |
| ADIPOR2  | LMNA | -0.054189889 | -0.190813421 | 0.084493202  | 4.44E-01 | 5.30E-01 | 1.00E+00 |
| TTC23    | LMNA | 0.289087218  | 0.157314445  | 0.410745853  | 3.01E-05 | 1.09E-04 | 3.57E-01 |
| UGP2     | LMNA | 0.234959076  | 0.100156795  | 0.361291117  | 7.63E-04 | 2.06E-03 | 1.00E+00 |
| ECHDC2   | LMNA | 0.260628477  | 0.127152423  | 0.384833171  | 1.80E-04 | 5.58E-04 | 1.00E+00 |
| CIRBP    | LMNA | -0.206299429 | -0.334814953 | -0.070249112 | 3.22E-03 | 7.41E-03 | 1.00E+00 |
| SEC14L4  | LMNA | 0.055526717  | -0.083161761 | 0.192105132  | 4.33E-01 | 5.19E-01 | 1.00E+00 |
| SMA4     | LMNA | -0.255166137 | -0.379837021 | -0.121391257 | 2.47E-04 | 7.46E-04 | 1.00E+00 |
| FRZB     | LMNA | 0.081043798  | -0.057652226 | 0.216670649  | 2.52E-01 | 3.32E-01 | 1.00E+00 |
| PABPC1   | LMNA | 0.128387236  | -0.009838135 | 0.26179813   | 6.86E-02 | 1.10E-01 | 1.00E+00 |
| APOBEC3G | LMNA | 0.418466809  | 0.297608586  | 0.526123765  | 5.74E-10 | 4.96E-09 | 6.81E-06 |
| CUEDC1   | LMNA | -0.050703389 | -0.187442358 | 0.087963324  | 4.74E-01 | 5.59E-01 | 1.00E+00 |
| CLDN8    | LMNA | -0.095734666 | -0.230736196 | 0.042883089  | 1.75E-01 | 2.45E-01 | 1.00E+00 |
| VPS52    | LMNA | -0.230426794 | -0.35711765  | -0.095410875 | 9.70E-04 | 2.55E-03 | 1.00E+00 |
| LOC23117 | LMNA | -0.053689135 | -0.190329444 | 0.084991811  | 4.48E-01 | 5.34E-01 | 1.00E+00 |
| FAT      | LMNA | 0.159693424  | 0.022130304  | 0.291321987  | 2.32E-02 | 4.26E-02 | 1.00E+00 |
| M6PRBP1  | LMNA | 0.61939321   | 0.526349199  | 0.697778657  | 8.68E-23 | 7.72E-21 | 1.03E-18 |
| PPM1F    | LMNA | 0.407550795  | 0.285566568  | 0.516539821  | 1.75E-09 | 1.38E-08 | 2.07E-05 |
| TSR1     | LMNA | 0.115507613  | -0.022908689 | 0.249578844  | 1.02E-01 | 1.54E-01 | 1.00E+00 |
| E2F6     | LMNA | 0.002981669  | -0.135124952 | 0.140974641  | 9.66E-01 | 9.75E-01 | 1.00E+00 |
| TMEM126B | LMNA | -0.156029519 | -0.287879584 | -0.018374301 | 2.66E-02 | 4.81E-02 | 1.00E+00 |
| ZFXH3    | LMNA | 0.32809024   | 0.199055078  | 0.445943058  | 1.87E-06 | 8.54E-06 | 2.22E-02 |
| PCSK5    | LMNA | 0.47223431   | 0.357488874  | 0.572934335  | 1.29E-12 | 1.76E-11 | 1.53E-08 |
| HEMK1    | LMNA | 0.035527006  | -0.103029306 | 0.172730841  | 6.16E-01 | 6.91E-01 | 1.00E+00 |
| GIMAP5   | LMNA | 0.209470938  | 0.073546738  | 0.337754855  | 2.77E-03 | 6.48E-03 | 1.00E+00 |
| DPY19L4  | LMNA | 0.112287165  | -0.026169498 | 0.246516821  | 1.12E-01 | 1.67E-01 | 1.00E+00 |

|          |      |              |              |              |          |          |          |
|----------|------|--------------|--------------|--------------|----------|----------|----------|
| FAM77C   | LMNA | -0.517300435 | -0.611669748 | -0.40841599  | 3.21E-15 | 6.83E-14 | 3.81E-11 |
| CTPS2    | LMNA | 0.220673648  | 0.08521877   | 0.348119461  | 1.60E-03 | 3.97E-03 | 1.00E+00 |
| NDUFA9   | LMNA | -0.175165882 | -0.305821559 | -0.038034628 | 1.27E-02 | 2.50E-02 | 1.00E+00 |
| SCRIB    | LMNA | -0.078913907 | -0.214626734 | 0.059788437  | 2.64E-01 | 3.46E-01 | 1.00E+00 |
| AURKC    | LMNA | 0.001032091  | -0.137038435 | 0.139063278  | 9.88E-01 | 9.91E-01 | 1.00E+00 |
| LOC51035 | LMNA | -0.243053511 | -0.368732154 | -0.108648063 | 4.91E-04 | 1.39E-03 | 1.00E+00 |
| RSRC2    | LMNA | -0.039318827 | -0.176412261 | 0.099271017  | 5.79E-01 | 6.57E-01 | 1.00E+00 |
| ORM2     | LMNA | 0.025062722  | -0.113380568 | 0.162551306  | 7.23E-01 | 7.84E-01 | 1.00E+00 |
| FAM115A  | LMNA | -0.07764715  | -0.213410546 | 0.061058351  | 2.72E-01 | 3.54E-01 | 1.00E+00 |
| EGLN3    | LMNA | 0.065097033  | -0.073615529 | 0.201338662  | 3.57E-01 | 4.44E-01 | 1.00E+00 |
| FZD6     | LMNA | 0.178439614  | 0.041408665  | 0.308881695  | 1.11E-02 | 2.22E-02 | 1.00E+00 |
| PITX3    | LMNA | 0.177389464  | 0.040325998  | 0.307900357  | 1.16E-02 | 2.31E-02 | 1.00E+00 |
| GPX3     | LMNA | 0.145722534  | 0.007829031  | 0.2781774    | 3.85E-02 | 6.66E-02 | 1.00E+00 |
| UNC119   | LMNA | -0.209928373 | -0.338178678 | -0.074022608 | 2.71E-03 | 6.36E-03 | 1.00E+00 |
| NOV      | LMNA | 0.295701609  | 0.1643601    | 0.41674047   | 1.93E-05 | 7.26E-05 | 2.29E-01 |
| GRM4     | LMNA | 0.017966341  | -0.120383243 | 0.155631334  | 8.00E-01 | 8.49E-01 | 1.00E+00 |
| CABC1    | LMNA | 0.016716071  | -0.121615578 | 0.154410743  | 8.13E-01 | 8.59E-01 | 1.00E+00 |
| KLK1     | LMNA | 0.100007216  | -0.038576374 | 0.23481632   | 1.57E-01 | 2.23E-01 | 1.00E+00 |
| GPM6B    | LMNA | -0.316927649 | -0.435906779 | -0.187060974 | 4.32E-06 | 1.83E-05 | 5.12E-02 |
| RRAGD    | LMNA | -0.070973115 | -0.206995988 | 0.067741611  | 3.16E-01 | 4.01E-01 | 1.00E+00 |
| EIF2S2   | LMNA | 0.201542789  | 0.065308889  | 0.330400982  | 4.02E-03 | 9.01E-03 | 1.00E+00 |
| RNF130   | LMNA | 0.209439643  | 0.073514184  | 0.337725857  | 2.78E-03 | 6.49E-03 | 1.00E+00 |
| CKAP5    | LMNA | -0.149970013 | -0.282178919 | -0.012170994 | 3.31E-02 | 5.85E-02 | 1.00E+00 |
| UCHL5    | LMNA | -0.05231439  | -0.18900042  | 0.086360309  | 4.60E-01 | 5.45E-01 | 1.00E+00 |
| C10orf18 | LMNA | -0.223109611 | -0.350369067 | -0.087761715 | 1.41E-03 | 3.57E-03 | 1.00E+00 |
| TMEM93   | LMNA | -0.096046903 | -0.231034531 | 0.04256853   | 1.74E-01 | 2.43E-01 | 1.00E+00 |
| KCNMB2   | LMNA | -0.34927596  | -0.464909979 | -0.221925752 | 3.49E-07 | 1.82E-06 | 4.14E-03 |
| AIM2     | LMNA | 0.136053998  | -0.002035229 | 0.269051567  | 5.35E-02 | 8.91E-02 | 1.00E+00 |
| PNO1     | LMNA | 0.121569668  | -0.016762658 | 0.255335421  | 8.48E-02 | 1.32E-01 | 1.00E+00 |
| ANK3     | LMNA | -0.335848527 | -0.452901118 | -0.207414122 | 1.03E-06 | 4.91E-06 | 1.22E-02 |
| OR2F2    | LMNA | 0.065572846  | -0.073140249 | 0.201797099  | 3.54E-01 | 4.41E-01 | 1.00E+00 |
| GNAT2    | LMNA | 0.146449348  | 0.008571645  | 0.278862453  | 3.75E-02 | 6.52E-02 | 1.00E+00 |
| KRT5     | LMNA | -0.092587387 | -0.227727623 | 0.046052243  | 1.90E-01 | 2.62E-01 | 1.00E+00 |
| ST13     | LMNA | -0.234089985 | -0.360491223 | -0.099246262 | 7.99E-04 | 2.15E-03 | 1.00E+00 |
| SIX1     | LMNA | -0.143613533 | -0.276188816 | -0.005675046 | 4.14E-02 | 7.11E-02 | 1.00E+00 |

|          |      |              |              |              |          |          |          |
|----------|------|--------------|--------------|--------------|----------|----------|----------|
| TIMP2    | LMNA | 0.425564314  | 0.305458895  | 0.532340532  | 2.73E-10 | 2.50E-09 | 3.23E-06 |
| CDH12    | LMNA | -0.27746272  | -0.40018503  | -0.144964438 | 6.39E-05 | 2.17E-04 | 7.58E-01 |
| ZMAT4    | LMNA | -0.009281    | -0.147143473 | 0.128935199  | 8.96E-01 | 9.24E-01 | 1.00E+00 |
| QRSL1    | LMNA | -0.269295778 | -0.392745842 | -0.136312402 | 1.06E-04 | 3.46E-04 | 1.00E+00 |
| CCL15    | LMNA | 0.031634414  | -0.106883364 | 0.168947593  | 6.55E-01 | 7.26E-01 | 1.00E+00 |
| GTF2IRD1 | LMNA | 0.112147252  | -0.026311098 | 0.24638373   | 1.12E-01 | 1.68E-01 | 1.00E+00 |
| CCDC22   | LMNA | 0.392590051  | 0.269124936  | 0.503360212  | 7.52E-09 | 5.27E-08 | 8.92E-05 |
| SNX24    | LMNA | 0.129061606  | -0.009152465 | 0.262436749  | 6.72E-02 | 1.08E-01 | 1.00E+00 |
| RARS     | LMNA | 0.440345029  | 0.321859915  | 0.545250229  | 5.46E-11 | 5.72E-10 | 6.48E-07 |
| MORC2    | LMNA | -0.045966566 | -0.182857204 | 0.092672509  | 5.16E-01 | 6.00E-01 | 1.00E+00 |
| FAM48A   | LMNA | -0.095239758 | -0.23026327  | 0.043381622  | 1.78E-01 | 2.48E-01 | 1.00E+00 |
| FOXD1    | LMNA | 0.040694669  | -0.097906364 | 0.177747097  | 5.65E-01 | 6.45E-01 | 1.00E+00 |
| COX4I1   | LMNA | -0.246141402 | -0.371566547 | -0.111892517 | 4.14E-04 | 1.19E-03 | 1.00E+00 |
| DSN1     | LMNA | 0.109252547  | -0.029239455 | 0.243629032  | 1.22E-01 | 1.80E-01 | 1.00E+00 |
| AMT      | LMNA | -0.031891036 | -0.169197131 | 0.10662941   | 6.52E-01 | 7.24E-01 | 1.00E+00 |
| GPRC5B   | LMNA | -0.258067292 | -0.382491479 | -0.124450003 | 2.09E-04 | 6.40E-04 | 1.00E+00 |
| CTAGE1   | LMNA | -0.04606297  | -0.182950581 | 0.092576729  | 5.15E-01 | 5.99E-01 | 1.00E+00 |
| DTWD1    | LMNA | 0.219770171  | 0.084276063  | 0.347284729  | 1.67E-03 | 4.14E-03 | 1.00E+00 |
| STRN4    | LMNA | -0.009440955 | -0.147299975 | 0.128777886  | 8.94E-01 | 9.23E-01 | 1.00E+00 |
| KITLG    | LMNA | 0.341470296  | 0.213482949  | 0.457934137  | 6.58E-07 | 3.25E-06 | 7.80E-03 |
| HSD11B1  | LMNA | 0.03452665   | -0.104020156 | 0.171758972  | 6.26E-01 | 7.00E-01 | 1.00E+00 |
| HDGF     | LMNA | 0.104552024  | -0.033989565 | 0.239151233  | 1.39E-01 | 2.01E-01 | 1.00E+00 |
| KRT6B    | LMNA | 0.057252387  | -0.081442313 | 0.193771863  | 4.18E-01 | 5.06E-01 | 1.00E+00 |
| ARID4B   | LMNA | -0.284561662 | -0.406638275 | -0.152501535 | 4.05E-05 | 1.43E-04 | 4.81E-01 |
| SETX     | LMNA | 0.166162906  | 0.028771903  | 0.297392044  | 1.81E-02 | 3.42E-02 | 1.00E+00 |
| DDR2     | LMNA | 0.402413006  | 0.279912108  | 0.512019521  | 2.91E-09 | 2.20E-08 | 3.45E-05 |
| KCTD12   | LMNA | 0.317809835  | 0.188007468  | 0.43670103   | 4.05E-06 | 1.73E-05 | 4.80E-02 |
| WWP2     | LMNA | -0.107512724 | -0.241972313 | 0.030998362  | 1.28E-01 | 1.88E-01 | 1.00E+00 |
| CTSH     | LMNA | 0.048388434  | -0.090265547 | 0.18520227   | 4.94E-01 | 5.79E-01 | 1.00E+00 |
| FASTKD1  | LMNA | -0.329027862 | -0.446784727 | -0.200064307 | 1.74E-06 | 8.00E-06 | 2.07E-02 |
| PAF1     | LMNA | 0.033984878  | -0.104556665 | 0.171232516  | 6.31E-01 | 7.05E-01 | 1.00E+00 |
| IFT57    | LMNA | 0.209491746  | 0.073568383  | 0.337774134  | 2.77E-03 | 6.48E-03 | 1.00E+00 |
| TMEM2    | LMNA | 0.486380635  | 0.373401824  | 0.585142076  | 2.16E-13 | 3.30E-12 | 2.56E-09 |
| ZNF592   | LMNA | 0.079051959  | -0.059650015 | 0.214759248  | 2.63E-01 | 3.45E-01 | 1.00E+00 |
| TNFSF9   | LMNA | 0.42483167   | 0.304647786  | 0.531699335  | 2.95E-10 | 2.68E-09 | 3.49E-06 |

|          |      |              |              |              |          |          |          |
|----------|------|--------------|--------------|--------------|----------|----------|----------|
| PPFIA4   | LMNA | -0.204688728 | -0.333320919 | -0.068575499 | 3.48E-03 | 7.92E-03 | 1.00E+00 |
| CFP      | LMNA | 0.137766189  | -0.000290333 | 0.270669394  | 5.06E-02 | 8.47E-02 | 1.00E+00 |
| DCTD     | LMNA | 0.372546658  | 0.247209764  | 0.485621911  | 4.77E-08 | 2.90E-07 | 5.65E-04 |
| CNIH3    | LMNA | 0.499759596  | 0.388513006  | 0.59664657   | 3.68E-14 | 6.30E-13 | 4.37E-10 |
| MAP4K4   | LMNA | 0.067104209  | -0.071610174 | 0.203272136  | 3.43E-01 | 4.29E-01 | 1.00E+00 |
| ROD1     | LMNA | 0.43285629   | 0.313541343  | 0.538715666  | 1.25E-10 | 1.22E-09 | 1.48E-06 |
| MFNG     | LMNA | -0.184223696 | -0.314281798 | -0.047377615 | 8.68E-03 | 1.79E-02 | 1.00E+00 |
| JMJD2B   | LMNA | -0.090967065 | -0.226177705 | 0.04768274   | 1.98E-01 | 2.72E-01 | 1.00E+00 |
| DOCK3    | LMNA | -0.581768775 | -0.666306217 | -0.482466471 | 1.09E-19 | 5.28E-18 | 1.29E-15 |
| STX16    | LMNA | 0.157037369  | 0.019407098  | 0.288826844  | 2.56E-02 | 4.65E-02 | 1.00E+00 |
| ALDH3B1  | LMNA | 0.477530184  | 0.363438317  | 0.577509712  | 6.68E-13 | 9.59E-12 | 7.92E-09 |
| THSD4    | LMNA | 0.001505952  | -0.136573442 | 0.139527945  | 9.83E-01 | 9.87E-01 | 1.00E+00 |
| DLAT     | LMNA | 0.17051091   | 0.033242409  | 0.30146565   | 1.53E-02 | 2.93E-02 | 1.00E+00 |
| KIF21B   | LMNA | -0.501430232 | -0.598080349 | -0.390404157 | 2.93E-14 | 5.11E-13 | 3.48E-10 |
| FEZ2     | LMNA | 0.034003405  | -0.10453832  | 0.17125052   | 6.31E-01 | 7.05E-01 | 1.00E+00 |
| CDC5L    | LMNA | -0.238539826 | -0.364584807 | -0.103910672 | 6.29E-04 | 1.74E-03 | 1.00E+00 |
| KCNJ5    | LMNA | 0.135814337  | -0.002279401 | 0.268825054  | 5.39E-02 | 8.97E-02 | 1.00E+00 |
| LMNA     | LMNA | 1            | 1            | 1            | 0.00E+00 | 0.00E+00 | 0.00E+00 |
| TBCD     | LMNA | -0.131581219 | -0.264821754 | 0.006589479  | 6.20E-02 | 1.01E-01 | 1.00E+00 |
| ZNF250   | LMNA | -0.36318782  | -0.477307373 | -0.237020667 | 1.08E-07 | 6.16E-07 | 1.28E-03 |
| CASQ2    | LMNA | -0.266651395 | -0.390333632 | -0.133515292 | 1.25E-04 | 4.02E-04 | 1.00E+00 |
| PEG10    | LMNA | -0.062487613 | -0.198823467 | 0.076220906  | 3.77E-01 | 4.64E-01 | 1.00E+00 |
| TPSD1    | LMNA | 0.016553405  | -0.12177588  | 0.154251907  | 8.15E-01 | 8.61E-01 | 1.00E+00 |
| PRAME    | LMNA | -0.104136016 | -0.23875466  | 0.03440966   | 1.40E-01 | 2.03E-01 | 1.00E+00 |
| NP       | LMNA | 0.221220727  | 0.085789722  | 0.348624815  | 1.56E-03 | 3.87E-03 | 1.00E+00 |
| ZNF12    | LMNA | 0.286779703  | 0.15485963   | 0.408652076  | 3.51E-05 | 1.25E-04 | 4.16E-01 |
| XTP3TPA  | LMNA | -0.168762413 | -0.299828073 | -0.031443989 | 1.64E-02 | 3.12E-02 | 1.00E+00 |
| SIGLEC7  | LMNA | 0.322530667  | 0.19307653   | 0.44094815   | 2.85E-06 | 1.26E-05 | 3.38E-02 |
| FAM70A   | LMNA | -0.166599631 | -0.297801424 | -0.029220684 | 1.78E-02 | 3.37E-02 | 1.00E+00 |
| PANK4    | LMNA | -0.097358589 | -0.232287541 | 0.041246787  | 1.68E-01 | 2.36E-01 | 1.00E+00 |
| SNED1    | LMNA | 0.438500969  | 0.319809814  | 0.543642311  | 6.70E-11 | 6.94E-10 | 7.95E-07 |
| HIP1     | LMNA | 0.091618036  | -0.04702777  | 0.226800473  | 1.95E-01 | 2.68E-01 | 1.00E+00 |
| WNK1     | LMNA | -0.001675346 | -0.139694038 | 0.136407203  | 9.81E-01 | 9.85E-01 | 1.00E+00 |
| AHNAK2   | LMNA | 0.624222811  | 0.532018263  | 0.701796768  | 3.23E-23 | 3.14E-21 | 3.84E-19 |
| FLJ10490 | LMNA | -0.124382586 | -0.258003374 | 0.013907217  | 7.78E-02 | 1.23E-01 | 1.00E+00 |

|          |      |              |              |              |          |          |          |
|----------|------|--------------|--------------|--------------|----------|----------|----------|
| TOE1     | LMNA | 0.0133294    | -0.124951529 | 0.151102351  | 8.51E-01 | 8.89E-01 | 1.00E+00 |
| RECQL4   | LMNA | -0.027543615 | -0.16496734  | 0.110929185  | 6.97E-01 | 7.62E-01 | 1.00E+00 |
| PPA1     | LMNA | -0.308046147 | -0.427900229 | -0.177545458 | 8.20E-06 | 3.29E-05 | 9.72E-02 |
| DPAGT1   | LMNA | 0.348486088  | 0.221070537  | 0.464204731  | 3.73E-07 | 1.94E-06 | 4.42E-03 |
| HAS1     | LMNA | 0.113747828  | -0.024690894 | 0.247905961  | 1.07E-01 | 1.61E-01 | 1.00E+00 |
| ST7      | LMNA | -0.100426844 | -0.235216793 | 0.038153113  | 1.55E-01 | 2.21E-01 | 1.00E+00 |
| MAGED2   | LMNA | -0.039095354 | -0.176195402 | 0.099492623  | 5.81E-01 | 6.59E-01 | 1.00E+00 |
| ANKRD55  | LMNA | -0.349635588 | -0.46523103  | -0.222315195 | 3.39E-07 | 1.77E-06 | 4.02E-03 |
| TRPS1    | LMNA | 0.104646327  | -0.033894329 | 0.239241123  | 1.38E-01 | 2.01E-01 | 1.00E+00 |
| POPDC3   | LMNA | 0.138311132  | 0.000265195  | 0.271184145  | 4.96E-02 | 8.35E-02 | 1.00E+00 |
| ACOX2    | LMNA | 0.438404761  | 0.319702888  | 0.543558403  | 6.77E-11 | 7.00E-10 | 8.03E-07 |
| TFPI2    | LMNA | 0.502676231  | 0.391815231  | 0.599149292  | 2.48E-14 | 4.38E-13 | 2.94E-10 |
| CYP4F11  | LMNA | 0.157635369  | 0.020020039  | 0.289388772  | 2.51E-02 | 4.57E-02 | 1.00E+00 |
| PDHB     | LMNA | -0.173390255 | -0.304160654 | -0.036205904 | 1.36E-02 | 2.66E-02 | 1.00E+00 |
| ERN1     | LMNA | 0.044187297  | -0.094439796 | 0.181133366  | 5.32E-01 | 6.15E-01 | 1.00E+00 |
| LHX2     | LMNA | -0.120798254 | -0.254603407 | 0.017545339  | 8.68E-02 | 1.35E-01 | 1.00E+00 |
| B3GALT1  | LMNA | 0.125908548  | -0.012357244 | 0.259449843  | 7.42E-02 | 1.18E-01 | 1.00E+00 |
| ADAMTS5  | LMNA | 0.043733105  | -0.094890789 | 0.180693189  | 5.37E-01 | 6.19E-01 | 1.00E+00 |
| NOTCH3   | LMNA | 0.551907098  | 0.447988972  | 0.6411111001 | 1.69E-17 | 5.60E-16 | 2.00E-13 |
| C1orf116 | LMNA | -0.001053482 | -0.139084255 | 0.137017446  | 9.88E-01 | 9.91E-01 | 1.00E+00 |
| UGCGL1   | LMNA | 0.557994527  | 0.454992363  | 0.646262803  | 6.29E-18 | 2.26E-16 | 7.47E-14 |
| NF2      | LMNA | 0.10307453   | -0.035481354 | 0.237742563  | 1.44E-01 | 2.08E-01 | 1.00E+00 |
| POM121   | LMNA | 0.109912354  | -0.028572187 | 0.244257117  | 1.19E-01 | 1.77E-01 | 1.00E+00 |
| CLPP     | LMNA | 0.101417842  | -0.037153336 | 0.236162372  | 1.51E-01 | 2.16E-01 | 1.00E+00 |
| MTMR3    | LMNA | -0.130864595 | -0.26414358  | 0.007318624  | 6.34E-02 | 1.03E-01 | 1.00E+00 |
| ATP1B3   | LMNA | 0.226402257  | 0.091201773  | 0.353407486  | 1.20E-03 | 3.07E-03 | 1.00E+00 |
| TMEM16A  | LMNA | 0.529596339  | 0.422429727  | 0.622160383  | 5.33E-16 | 1.36E-14 | 6.32E-12 |
| HIST1H3F | LMNA | -0.132997206 | -0.266161378 | 0.00514832   | 5.92E-02 | 9.72E-02 | 1.00E+00 |
| TRIM25   | LMNA | 0.263255581  | 0.129926458  | 0.387233473  | 1.54E-04 | 4.85E-04 | 1.00E+00 |
| CRKL     | LMNA | -0.18461635  | -0.314648081 | -0.047783174 | 8.53E-03 | 1.76E-02 | 1.00E+00 |
| HOXB2    | LMNA | 0.110207414  | -0.028273751 | 0.244537954  | 1.18E-01 | 1.76E-01 | 1.00E+00 |
| ANP32B   | LMNA | 0.028978159  | -0.109510936 | 0.166363628  | 6.82E-01 | 7.50E-01 | 1.00E+00 |
| NUP62    | LMNA | 0.14177339   | 0.003796698  | 0.274452812  | 4.42E-02 | 7.52E-02 | 1.00E+00 |
| GATM     | LMNA | -0.103852483 | -0.238484348 | 0.034695951  | 1.41E-01 | 2.04E-01 | 1.00E+00 |
| AP4E1    | LMNA | 0.091698692  | -0.046946611 | 0.226877627  | 1.94E-01 | 2.67E-01 | 1.00E+00 |

|           |      |              |              |              |          |          |          |
|-----------|------|--------------|--------------|--------------|----------|----------|----------|
| EDG5      | LMNA | 0.344559351  | 0.216821865  | 0.46069651   | 5.13E-07 | 2.59E-06 | 6.09E-03 |
| CDKN3     | LMNA | 0.135005731  | -0.003103104 | 0.268060703  | 5.54E-02 | 9.17E-02 | 1.00E+00 |
| CDH4      | LMNA | 0.143314518  | 0.005369757  | 0.275906783  | 4.19E-02 | 7.17E-02 | 1.00E+00 |
| PGD       | LMNA | 0.057188476  | -0.081506009 | 0.193710149  | 4.19E-01 | 5.06E-01 | 1.00E+00 |
| TMEM168   | LMNA | 0.01302024   | -0.125255903 | 0.150800183  | 8.54E-01 | 8.92E-01 | 1.00E+00 |
| RND1      | LMNA | -0.514274347 | -0.609082848 | -0.404974986 | 4.94E-15 | 1.02E-13 | 5.86E-11 |
| GAD1      | LMNA | -0.455839834 | -0.558730407 | -0.339129994 | 9.30E-12 | 1.10E-10 | 1.10E-07 |
| MPG       | LMNA | 0.188766763  | 0.052072749  | 0.318517379  | 7.14E-03 | 1.50E-02 | 1.00E+00 |
| ZNF133    | LMNA | -0.140308384 | -0.273070096 | -0.002301972 | 4.64E-02 | 7.86E-02 | 1.00E+00 |
| LOC440350 | LMNA | -0.128905829 | -0.262289241 | 0.009310864  | 6.75E-02 | 1.09E-01 | 1.00E+00 |
| FJX1      | LMNA | 0.228852536  | 0.093763847  | 0.35566684   | 1.05E-03 | 2.75E-03 | 1.00E+00 |
| CLCF1     | LMNA | 0.673330644  | 0.590135038  | 0.742374947  | 4.89E-28 | 1.08E-25 | 5.80E-24 |
| AMELY     | LMNA | 0.105147767  | -0.033387884 | 0.239719064  | 1.36E-01 | 1.98E-01 | 1.00E+00 |
| PHTF2     | LMNA | 0.106189992  | -0.032335028 | 0.240712239  | 1.33E-01 | 1.94E-01 | 1.00E+00 |
| IGSF2     | LMNA | -0.090102482 | -0.225350408 | 0.04855245   | 2.02E-01 | 2.76E-01 | 1.00E+00 |
| TFF3      | LMNA | -0.055569502 | -0.192146465 | 0.083119141  | 4.32E-01 | 5.18E-01 | 1.00E+00 |
| NDFIP1    | LMNA | -0.044610418 | -0.181543381 | 0.094019604  | 5.28E-01 | 6.11E-01 | 1.00E+00 |
| IQCC      | LMNA | -0.047620894 | -0.184459239 | 0.091028539  | 5.01E-01 | 5.85E-01 | 1.00E+00 |
| CUTA      | LMNA | -0.156331852 | -0.288163768 | -0.018684087 | 2.63E-02 | 4.76E-02 | 1.00E+00 |
| HEYL      | LMNA | 0.204826506  | 0.068718628  | 0.333448742  | 3.45E-03 | 7.87E-03 | 1.00E+00 |
| FTSJ2     | LMNA | 0.320090465  | 0.190455465  | 0.438753473  | 3.42E-06 | 1.48E-05 | 4.06E-02 |
| APPL1     | LMNA | -0.360886246 | -0.475259483 | -0.234519155 | 1.32E-07 | 7.40E-07 | 1.56E-03 |
| TNR       | LMNA | -0.495749485 | -0.593202472 | -0.383977403 | 6.31E-14 | 1.03E-12 | 7.48E-10 |
| WAC       | LMNA | -0.333066647 | -0.450407814 | -0.204414671 | 1.28E-06 | 6.01E-06 | 1.51E-02 |
| ADCY9     | LMNA | 0.201738456  | 0.065511976  | 0.330582664  | 3.99E-03 | 8.94E-03 | 1.00E+00 |
| PYCRL     | LMNA | 0.088905743  | -0.049755938 | 0.224204958  | 2.08E-01 | 2.83E-01 | 1.00E+00 |
| PCGF1     | LMNA | 0.282913969  | 0.150750774  | 0.405141536  | 4.51E-05 | 1.58E-04 | 5.35E-01 |
| PTPN13    | LMNA | 0.000996319  | -0.137073535 | 0.139028198  | 9.89E-01 | 9.91E-01 | 1.00E+00 |
| AGPAT7    | LMNA | -0.089640517 | -0.224908285 | 0.049017068  | 2.05E-01 | 2.79E-01 | 1.00E+00 |
| CDKAL1    | LMNA | -0.269395434 | -0.392836716 | -0.136417855 | 1.06E-04 | 3.44E-04 | 1.00E+00 |
| PDYN      | LMNA | -0.251553535 | -0.376528741 | -0.117585968 | 3.05E-04 | 9.02E-04 | 1.00E+00 |
| SFRP1     | LMNA | -0.230269485 | -0.356972704 | -0.095246261 | 9.78E-04 | 2.57E-03 | 1.00E+00 |
| VAV3      | LMNA | 0.278945562  | 0.146537533  | 0.401534004  | 5.82E-05 | 1.99E-04 | 6.90E-01 |
| MTMR11    | LMNA | 0.519423975  | 0.410832543  | 0.613483887  | 2.36E-15 | 5.18E-14 | 2.81E-11 |
| SUOX      | LMNA | -0.239453745 | -0.365424956 | -0.104869395 | 5.99E-04 | 1.66E-03 | 1.00E+00 |

|          |      |              |              |              |          |          |          |
|----------|------|--------------|--------------|--------------|----------|----------|----------|
| IDH3B    | LMNA | 0.015578337  | -0.122736621 | 0.153299651  | 8.26E-01 | 8.69E-01 | 1.00E+00 |
| STXBP3   | LMNA | -0.050484412 | -0.187230524 | 0.08818116   | 4.76E-01 | 5.61E-01 | 1.00E+00 |
| EIF3G    | LMNA | 0.143152812  | 0.005204668  | 0.27575425   | 4.21E-02 | 7.21E-02 | 1.00E+00 |
| GOLT1B   | LMNA | 0.194574156  | 0.058083341  | 0.323924178  | 5.52E-03 | 1.19E-02 | 1.00E+00 |
| ARHGAP22 | LMNA | -0.005420065 | -0.143363794 | 0.132730251  | 9.39E-01 | 9.55E-01 | 1.00E+00 |
| NPFFR1   | LMNA | 0.135729054  | -0.002366285 | 0.268744447  | 5.41E-02 | 8.99E-02 | 1.00E+00 |
| NPC1     | LMNA | 0.388597103  | 0.264748879  | 0.499833905  | 1.10E-08 | 7.43E-08 | 1.30E-04 |
| ALDH9A1  | LMNA | -0.057753844 | -0.194256046 | 0.080942509  | 4.14E-01 | 5.02E-01 | 1.00E+00 |
| ICAM5    | LMNA | -0.201287367 | -0.330163802 | -0.065043799 | 4.07E-03 | 9.11E-03 | 1.00E+00 |
| ADD2     | LMNA | -0.34061946  | -0.457172885 | -0.212563817 | 7.04E-07 | 3.47E-06 | 8.35E-03 |
| RASSF1   | LMNA | 0.337670364  | 0.209379753  | 0.454532977  | 8.90E-07 | 4.29E-06 | 1.06E-02 |
| PITPNB   | LMNA | -0.118523469 | -0.25244391  | 0.019852362  | 9.30E-02 | 1.43E-01 | 1.00E+00 |
| PAPOLB   | LMNA | 0.007981361  | -0.130213113 | 0.145871635  | 9.10E-01 | 9.36E-01 | 1.00E+00 |
| URM1     | LMNA | 0.098864969  | -0.039728259 | 0.233725982  | 1.62E-01 | 2.29E-01 | 1.00E+00 |
| TMEM106B | LMNA | -0.022801017 | -0.160347292 | 0.115613902  | 7.47E-01 | 8.05E-01 | 1.00E+00 |
| LRIG2    | LMNA | -0.089040237 | -0.224333707 | 0.049620706  | 2.08E-01 | 2.82E-01 | 1.00E+00 |
| SLC27A5  | LMNA | -0.259171824 | -0.38350155  | -0.125615201 | 1.96E-04 | 6.02E-04 | 1.00E+00 |
| CDKL1    | LMNA | 0.017751967  | -0.120594572 | 0.155422079  | 8.02E-01 | 8.51E-01 | 1.00E+00 |
| PRODH2   | LMNA | 0.01837879   | -0.119976617 | 0.1560339    | 7.95E-01 | 8.45E-01 | 1.00E+00 |
| SFRS11   | LMNA | -0.197608922 | -0.326746249 | -0.061228234 | 4.82E-03 | 1.06E-02 | 1.00E+00 |
| IL7      | LMNA | 0.336153923  | 0.20774355   | 0.453174723  | 1.00E-06 | 4.81E-06 | 1.19E-02 |
| SCN9A    | LMNA | -0.049916119 | -0.186680709 | 0.08874643   | 4.81E-01 | 5.66E-01 | 1.00E+00 |
| BTG3     | LMNA | 0.146579889  | 0.00870504   | 0.278985479  | 3.74E-02 | 6.49E-02 | 1.00E+00 |
| PAK2     | LMNA | 0.093561701  | -0.045071455 | 0.228659273  | 1.85E-01 | 2.57E-01 | 1.00E+00 |
| ATP2B1   | LMNA | 0.169779869  | 0.032490387  | 0.300781079  | 1.57E-02 | 3.01E-02 | 1.00E+00 |
| GATA4    | LMNA | 0.009649239  | -0.128573032 | 0.147503752  | 8.92E-01 | 9.22E-01 | 1.00E+00 |
| PRKAG1   | LMNA | 0.013353166  | -0.124928129 | 0.151125579  | 8.50E-01 | 8.89E-01 | 1.00E+00 |
| FAM64A   | LMNA | -0.105756762 | -0.240299433 | 0.032772714  | 1.34E-01 | 1.96E-01 | 1.00E+00 |
| ATF7IP2  | LMNA | -0.219762284 | -0.347277441 | -0.084267835 | 1.67E-03 | 4.14E-03 | 1.00E+00 |
| EEF1G    | LMNA | 0.018115418  | -0.120236275 | 0.155776844  | 7.98E-01 | 8.48E-01 | 1.00E+00 |
| INCENP   | LMNA | -0.075889884 | -0.211722734 | 0.062819254  | 2.83E-01 | 3.66E-01 | 1.00E+00 |
| SMAD5    | LMNA | -0.039197729 | -0.176294748 | 0.099391106  | 5.80E-01 | 6.58E-01 | 1.00E+00 |
| GARS     | LMNA | 0.347698413  | 0.220217897  | 0.463501299  | 3.98E-07 | 2.05E-06 | 4.71E-03 |
| CDK10    | LMNA | -0.069535069 | -0.205612318 | 0.069180017  | 3.25E-01 | 4.11E-01 | 1.00E+00 |
| HLX      | LMNA | 0.408568767  | 0.286687918  | 0.517434727  | 1.58E-09 | 1.26E-08 | 1.87E-05 |



|          |      |              |              |              |          |          |          |
|----------|------|--------------|--------------|--------------|----------|----------|----------|
| ELAVL3   | LMNA | -0.459194043 | -0.561641364 | -0.342878889 | 6.26E-12 | 7.65E-11 | 7.43E-08 |
| MDM4     | LMNA | -0.059590263 | -0.196028635 | 0.079111548  | 4.00E-01 | 4.87E-01 | 1.00E+00 |
| GNL2     | LMNA | 0.426385631  | 0.306368381  | 0.533059188  | 2.50E-10 | 2.31E-09 | 2.96E-06 |
| PFDN2    | LMNA | -0.078357977 | -0.214093048 | 0.060345808  | 2.68E-01 | 3.49E-01 | 1.00E+00 |
| ZNF200   | LMNA | 0.070750391  | -0.06796443  | 0.206781721  | 3.17E-01 | 4.02E-01 | 1.00E+00 |
| NDN      | LMNA | -0.342498835 | -0.458854153 | -0.21459435  | 6.06E-07 | 3.01E-06 | 7.19E-03 |
| PRR3     | LMNA | -0.248136394 | -0.373396519 | -0.113990182 | 3.70E-04 | 1.07E-03 | 1.00E+00 |
| FBLN5    | LMNA | 0.272165757  | 0.139350541  | 0.395361921  | 8.91E-05 | 2.94E-04 | 1.00E+00 |
| PUM1     | LMNA | -0.176394382 | -0.306970221 | -0.039300402 | 1.20E-02 | 2.39E-02 | 1.00E+00 |
| CCDC88A  | LMNA | -0.29363802  | -0.414871371 | -0.162160525 | 2.22E-05 | 8.26E-05 | 2.64E-01 |
| TNNT1    | LMNA | -0.011770483 | -0.14957843  | 0.126486048  | 8.68E-01 | 9.02E-01 | 1.00E+00 |
| KLHL24   | LMNA | -0.311438577 | -0.430960679 | -0.181177182 | 6.43E-06 | 2.64E-05 | 7.63E-02 |
| HNRPH2   | LMNA | 0.043662606  | -0.094960787 | 0.18062486   | 5.37E-01 | 6.19E-01 | 1.00E+00 |
| RAB7A    | LMNA | 0.17344754   | 0.036264888  | 0.30421425   | 1.36E-02 | 2.66E-02 | 1.00E+00 |
| SGPP1    | LMNA | 0.069008117  | -0.069706956 | 0.205105155  | 3.29E-01 | 4.15E-01 | 1.00E+00 |
| PMS2     | LMNA | 0.130341772  | -0.007850489 | 0.263648727  | 6.45E-02 | 1.05E-01 | 1.00E+00 |
| ARNT2    | LMNA | -0.348409133 | -0.464136013 | -0.220987227 | 3.75E-07 | 1.95E-06 | 4.45E-03 |
| CBR1     | LMNA | 0.248851885  | 0.114742787  | 0.374052589  | 3.55E-04 | 1.04E-03 | 1.00E+00 |
| ITPR3    | LMNA | 0.623782486  | 0.531501059  | 0.701430632  | 3.54E-23 | 3.42E-21 | 4.20E-19 |
| BIRC3    | LMNA | 0.455384404  | 0.33862126   | 0.558334967  | 9.80E-12 | 1.15E-10 | 1.16E-07 |
| NRSN2    | LMNA | 0.134826892  | -0.003285257 | 0.26789163   | 5.57E-02 | 9.22E-02 | 1.00E+00 |
| SPOCK1   | LMNA | -0.093953355 | -0.229033708 | 0.044677123  | 1.84E-01 | 2.55E-01 | 1.00E+00 |
| H2AFY    | LMNA | -0.079105657 | -0.214810792 | 0.059596171  | 2.63E-01 | 3.45E-01 | 1.00E+00 |
| RXRB     | LMNA | -0.347989949 | -0.463761672 | -0.220533455 | 3.88E-07 | 2.01E-06 | 4.60E-03 |
| ZNF638   | LMNA | -0.22693416  | -0.353898069 | -0.091757792 | 1.16E-03 | 2.99E-03 | 1.00E+00 |
| APBA1    | LMNA | -0.401095993 | -0.510859815 | -0.278464019 | 3.31E-09 | 2.48E-08 | 3.92E-05 |
| RAB2A    | LMNA | -0.079677551 | -0.215359688 | 0.059022674  | 2.60E-01 | 3.41E-01 | 1.00E+00 |
| ACTN4    | LMNA | 0.594746575  | 0.497546837  | 0.677196143  | 1.03E-20 | 5.79E-19 | 1.23E-16 |
| FXC1     | LMNA | 0.150182622  | 0.01238847   | 0.282379096  | 3.29E-02 | 5.82E-02 | 1.00E+00 |
| C6orf162 | LMNA | -0.448564841 | -0.552408069 | -0.331011681 | 2.16E-11 | 2.38E-10 | 2.56E-07 |
| HPSE2    | LMNA | -0.270767119 | -0.394087267 | -0.137869641 | 9.72E-05 | 3.18E-04 | 1.00E+00 |
| PLCE1    | LMNA | -0.035908195 | -0.173101105 | 0.102651667  | 6.12E-01 | 6.88E-01 | 1.00E+00 |
| INSL3    | LMNA | 0.020778139  | -0.117610219 | 0.158374851  | 7.69E-01 | 8.23E-01 | 1.00E+00 |
| PTPLA    | LMNA | 0.106905273  | -0.031612273 | 0.241393694  | 1.30E-01 | 1.90E-01 | 1.00E+00 |
| EIF2B5   | LMNA | -0.124194671 | -0.257825208 | 0.014098043  | 7.82E-02 | 1.23E-01 | 1.00E+00 |

|          |      |              |              |              |          |          |          |
|----------|------|--------------|--------------|--------------|----------|----------|----------|
| DLG1     | LMNA | 0.035814726  | -0.102744268 | 0.173010319  | 6.13E-01 | 6.89E-01 | 1.00E+00 |
| PINK1    | LMNA | -0.179582717 | -0.30994958  | -0.042587529 | 1.05E-02 | 2.13E-02 | 1.00E+00 |
| TFIP11   | LMNA | 0.067407297  | -0.071307264 | 0.203564003  | 3.41E-01 | 4.27E-01 | 1.00E+00 |
| VPS33A   | LMNA | 0.017497761  | -0.120845151 | 0.155173926  | 8.05E-01 | 8.52E-01 | 1.00E+00 |
| SKIP     | LMNA | -0.391629545 | -0.502512294 | -0.268071807 | 8.24E-09 | 5.73E-08 | 9.78E-05 |
| GRAP2    | LMNA | 0.287293075  | 0.155405632  | 0.409118007  | 3.39E-05 | 1.22E-04 | 4.02E-01 |
| GAPDHS   | LMNA | 0.011955267  | -0.126304191 | 0.149759099  | 8.66E-01 | 9.01E-01 | 1.00E+00 |
| POLR2G   | LMNA | -0.147073025 | -0.279450187 | -0.009209    | 3.67E-02 | 6.39E-02 | 1.00E+00 |
| CNTNAP1  | LMNA | 0.073675877  | -0.065036613 | 0.20959508   | 2.97E-01 | 3.81E-01 | 1.00E+00 |
| PSTPIP1  | LMNA | 0.184075478  | 0.047224538  | 0.314143525  | 8.73E-03 | 1.80E-02 | 1.00E+00 |
| CYP26A1  | LMNA | 0.185481985  | 0.048677417  | 0.315455442  | 8.22E-03 | 1.71E-02 | 1.00E+00 |
| APOL2    | LMNA | 0.204801752  | 0.068692912  | 0.333425776  | 3.46E-03 | 7.88E-03 | 1.00E+00 |
| TACC2    | LMNA | -0.359284557 | -0.473833604 | -0.232779316 | 1.51E-07 | 8.40E-07 | 1.79E-03 |
| CNBP     | LMNA | -0.098988103 | -0.233843537 | 0.039604104  | 1.61E-01 | 2.28E-01 | 1.00E+00 |
| WASF1    | LMNA | -0.539097001 | -0.630243467 | -0.433292907 | 1.26E-16 | 3.60E-15 | 1.50E-12 |
| HSPB1    | LMNA | 0.567570412  | 0.466034958  | 0.654350643  | 1.28E-18 | 5.30E-17 | 1.52E-14 |
| INPP5E   | LMNA | 0.055639274  | -0.083049635 | 0.192213869  | 4.32E-01 | 5.18E-01 | 1.00E+00 |
| COX7A2L  | LMNA | -0.088049113 | -0.223384811 | 0.050617153  | 2.13E-01 | 2.88E-01 | 1.00E+00 |
| HSD17B1  | LMNA | -0.231513635 | -0.358118909 | -0.096548388 | 9.16E-04 | 2.43E-03 | 1.00E+00 |
| ARRB2    | LMNA | 0.034844459  | -0.103705397 | 0.172067759  | 6.23E-01 | 6.97E-01 | 1.00E+00 |
| CUBN     | LMNA | 0.157980382  | 0.020373719  | 0.289712932  | 2.47E-02 | 4.52E-02 | 1.00E+00 |
| SLC7A6   | LMNA | -0.060806185 | -0.197201804 | 0.077898725  | 3.90E-01 | 4.77E-01 | 1.00E+00 |
| IGF1     | LMNA | 0.102619049  | -0.035941118 | 0.237308184  | 1.46E-01 | 2.10E-01 | 1.00E+00 |
| ITPK1    | LMNA | -0.146880599 | -0.279268861 | -0.009012341 | 3.70E-02 | 6.43E-02 | 1.00E+00 |
| NAALAD2  | LMNA | -0.171934396 | -0.302798263 | -0.034707196 | 1.44E-02 | 2.79E-02 | 1.00E+00 |
| G3BP1    | LMNA | 0.259161667  | 0.125604484  | 0.383492263  | 1.96E-04 | 6.02E-04 | 1.00E+00 |
| HSD17B10 | LMNA | 0.127602713  | -0.010635642 | 0.261055051  | 7.03E-02 | 1.13E-01 | 1.00E+00 |
| NUP155   | LMNA | 0.222613503  | 0.087243677  | 0.349911032  | 1.45E-03 | 3.64E-03 | 1.00E+00 |
| CYP39A1  | LMNA | -0.05250503  | -0.189184749 | 0.086170567  | 4.58E-01 | 5.44E-01 | 1.00E+00 |
| GLULD1   | LMNA | -0.009067869 | -0.146934932 | 0.129144799  | 8.98E-01 | 9.26E-01 | 1.00E+00 |
| RBM15    | LMNA | -0.035246567 | -0.172458415 | 0.103307108  | 6.18E-01 | 6.94E-01 | 1.00E+00 |
| AMZ2     | LMNA | -0.215165947 | -0.343027696 | -0.079475682 | 2.10E-03 | 5.07E-03 | 1.00E+00 |
| GDF15    | LMNA | 0.533741797  | 0.427165915  | 0.625689733  | 2.86E-16 | 7.60E-15 | 3.39E-12 |
| CYCS     | LMNA | -0.090551394 | -0.225779984 | 0.048100902  | 2.00E-01 | 2.74E-01 | 1.00E+00 |
| TECTA    | LMNA | -0.401219031 | -0.510968174 | -0.278599279 | 3.27E-09 | 2.46E-08 | 3.88E-05 |

|          |      |              |              |              |          |          |          |
|----------|------|--------------|--------------|--------------|----------|----------|----------|
| CCDC46   | LMNA | 0.473851631  | 0.359304802  | 0.574332287  | 1.06E-12 | 1.46E-11 | 1.25E-08 |
| GNAL     | LMNA | -0.381817837 | -0.493838448 | -0.257330831 | 2.06E-08 | 1.33E-07 | 2.44E-04 |
| LPO      | LMNA | 0.184238218  | 0.047392614  | 0.314295345  | 8.67E-03 | 1.79E-02 | 1.00E+00 |
| GZMM     | LMNA | 0.097404758  | -0.041200256 | 0.232331635  | 1.68E-01 | 2.36E-01 | 1.00E+00 |
| PAIP1    | LMNA | -0.203980116 | -0.332663428 | -0.067839451 | 3.59E-03 | 8.15E-03 | 1.00E+00 |
| DDX11    | LMNA | -0.146145346 | -0.278575934 | -0.008261015 | 3.80E-02 | 6.58E-02 | 1.00E+00 |
| TAF9B    | LMNA | -0.179683354 | -0.310043579 | -0.042691332 | 1.05E-02 | 2.12E-02 | 1.00E+00 |
| CACNA2D1 | LMNA | -0.008809415 | -0.146682028 | 0.129398954  | 9.01E-01 | 9.28E-01 | 1.00E+00 |
| IMP4     | LMNA | 0.19598836   | 0.059548528  | 0.325239553  | 5.18E-03 | 1.13E-02 | 1.00E+00 |
| SH3BP4   | LMNA | -0.012963218 | -0.150744449 | 0.125312039  | 8.55E-01 | 8.93E-01 | 1.00E+00 |
| PADI1    | LMNA | -0.04426647  | -0.181210091 | 0.094361174  | 5.32E-01 | 6.14E-01 | 1.00E+00 |
| Dec-01   | LMNA | 0.068978097  | -0.069736973 | 0.20507626   | 3.29E-01 | 4.15E-01 | 1.00E+00 |
| PON3     | LMNA | -0.249685533 | -0.374816845 | -0.115619873 | 3.39E-04 | 9.94E-04 | 1.00E+00 |
| PROP1    | LMNA | 0.055915647  | -0.082774306 | 0.192480847  | 4.29E-01 | 5.16E-01 | 1.00E+00 |
| UBB      | LMNA | -0.01899558  | -0.156635826 | 0.119368447  | 7.88E-01 | 8.40E-01 | 1.00E+00 |
| RPA4     | LMNA | -0.024527037 | -0.162029409 | 0.113909659  | 7.29E-01 | 7.89E-01 | 1.00E+00 |
| TCF25    | LMNA | -0.115453385 | -0.249527306 | 0.02296362   | 1.02E-01 | 1.54E-01 | 1.00E+00 |
| NDUFS1   | LMNA | -0.190049926 | -0.319712756 | -0.053399957 | 6.75E-03 | 1.43E-02 | 1.00E+00 |
| UPK1A    | LMNA | -0.018813794 | -0.156458431 | 0.119547704  | 7.90E-01 | 8.42E-01 | 1.00E+00 |
| AES      | LMNA | -0.069316732 | -0.205402189 | 0.069398358  | 3.27E-01 | 4.13E-01 | 1.00E+00 |
| PPP1R13B | LMNA | -0.163583442 | -0.294973107 | -0.026122359 | 2.00E-02 | 3.74E-02 | 1.00E+00 |
| TCL6     | LMNA | -0.178417684 | -0.308861205 | -0.041386053 | 1.11E-02 | 2.22E-02 | 1.00E+00 |
| ARL2     | LMNA | -0.112894531 | -0.247094513 | 0.025554746  | 1.10E-01 | 1.65E-01 | 1.00E+00 |
| CD2BP2   | LMNA | 0.328720524  | 0.199733468  | 0.446508864  | 1.78E-06 | 8.16E-06 | 2.12E-02 |
| TOP3A    | LMNA | -0.01964519  | -0.157269669 | 0.118727805  | 7.81E-01 | 8.34E-01 | 1.00E+00 |
| CHRM5    | LMNA | -0.167078862 | -0.298250592 | -0.029713209 | 1.75E-02 | 3.31E-02 | 1.00E+00 |
| FGFR1    | LMNA | 0.472448384  | 0.357729187  | 0.573119407  | 1.26E-12 | 1.72E-11 | 1.49E-08 |
| CEACAM6  | LMNA | -0.060894272 | -0.197286779 | 0.077810846  | 3.89E-01 | 4.77E-01 | 1.00E+00 |
| CERK     | LMNA | -0.15528248  | -0.287177289 | -0.017608961 | 2.73E-02 | 4.93E-02 | 1.00E+00 |
| FXD6     | LMNA | -0.545101508 | -0.635341883 | -0.44017443  | 4.97E-17 | 1.53E-15 | 5.90E-13 |
| AP3S2    | LMNA | 0.021880558  | -0.116522414 | 0.159449919  | 7.57E-01 | 8.13E-01 | 1.00E+00 |
| ZNF208   | LMNA | -0.308017633 | -0.427874493 | -0.177514948 | 8.22E-06 | 3.30E-05 | 9.74E-02 |
| CARKL    | LMNA | 0.08548721   | -0.053191535 | 0.220930874  | 2.26E-01 | 3.04E-01 | 1.00E+00 |
| HIST1H4E | LMNA | -0.181824781 | -0.312043157 | -0.04490084  | 9.60E-03 | 1.96E-02 | 1.00E+00 |
| GOT1     | LMNA | -0.157217641 | -0.288996252 | -0.019591863 | 2.54E-02 | 4.63E-02 | 1.00E+00 |

|          |      |              |              |              |          |          |          |
|----------|------|--------------|--------------|--------------|----------|----------|----------|
| BBC3     | LMNA | 0.028585802  | -0.109898893 | 0.165981789  | 6.86E-01 | 7.53E-01 | 1.00E+00 |
| CASP6    | LMNA | 0.373143037  | 0.247859991  | 0.486151051  | 4.52E-08 | 2.75E-07 | 5.36E-04 |
| HOXA1    | LMNA | 0.166241626  | 0.028852791  | 0.297465838  | 1.81E-02 | 3.41E-02 | 1.00E+00 |
| RCL1     | LMNA | -0.192617448 | -0.322103387 | -0.056057062 | 6.03E-03 | 1.29E-02 | 1.00E+00 |
| RAB40B   | LMNA | -0.224135114 | -0.351315678 | -0.088832784 | 1.34E-03 | 3.41E-03 | 1.00E+00 |
| PI4KB    | LMNA | 0.121633144  | -0.016698246 | 0.255395649  | 8.46E-02 | 1.32E-01 | 1.00E+00 |
| LRRN2    | LMNA | -0.195899534 | -0.325156949 | -0.059456482 | 5.20E-03 | 1.13E-02 | 1.00E+00 |
| B3GAT1   | LMNA | -0.376996694 | -0.489568229 | -0.252064324 | 3.20E-08 | 1.99E-07 | 3.79E-04 |
| OAZ2     | LMNA | 0.01863127   | -0.119727679 | 0.156280307  | 7.92E-01 | 8.43E-01 | 1.00E+00 |
| BET1L    | LMNA | 0.459213611  | 0.34290077   | 0.561658338  | 6.25E-12 | 7.64E-11 | 7.41E-08 |
| NOC4L    | LMNA | 0.079921998  | -0.058777513 | 0.21559428   | 2.58E-01 | 3.40E-01 | 1.00E+00 |
| FRY      | LMNA | -0.524819468 | -0.61808879  | -0.416979397 | 1.08E-15 | 2.57E-14 | 1.28E-11 |
| C10orf12 | LMNA | 0.231936024  | 0.096990564  | 0.358507958  | 8.96E-04 | 2.38E-03 | 1.00E+00 |
| AK3L1    | LMNA | 0.341245243  | 0.213239809  | 0.457732796  | 6.70E-07 | 3.31E-06 | 7.95E-03 |
| FADS1    | LMNA | -0.198612087 | -0.3276786   | -0.062268398 | 4.60E-03 | 1.02E-02 | 1.00E+00 |
| CSF3R    | LMNA | 0.203102159  | 0.066927708  | 0.331848636  | 3.74E-03 | 8.45E-03 | 1.00E+00 |
| DKK2     | LMNA | 0.362053554  | 0.235787658  | 0.476298282  | 1.19E-07 | 6.75E-07 | 1.42E-03 |
| POLR3K   | LMNA | -0.233221613 | -0.359691805 | -0.098336708 | 8.37E-04 | 2.24E-03 | 1.00E+00 |
| ATG2B    | LMNA | 0.066986323  | -0.071727984 | 0.203158608  | 3.44E-01 | 4.30E-01 | 1.00E+00 |
| RHOT1    | LMNA | -0.509800895 | -0.605254946 | -0.399893832 | 9.26E-15 | 1.81E-13 | 1.10E-10 |
| DARS     | LMNA | 0.02979652   | -0.108701619 | 0.167159918  | 6.74E-01 | 7.43E-01 | 1.00E+00 |
| EPS8     | LMNA | 0.284924499  | 0.15288718   | 0.406967784  | 3.96E-05 | 1.40E-04 | 4.69E-01 |
| OXT      | LMNA | 0.137543244  | -0.000517584 | 0.270458778  | 5.09E-02 | 8.53E-02 | 1.00E+00 |
| C10orf56 | LMNA | -0.184370917 | -0.314419137 | -0.04752967  | 8.62E-03 | 1.78E-02 | 1.00E+00 |
| ARL4A    | LMNA | 0.291292019  | 0.159661512  | 0.412745232  | 2.60E-05 | 9.54E-05 | 3.08E-01 |
| CCDC64   | LMNA | -0.015213313 | -0.152943101 | 0.123096215  | 8.30E-01 | 8.72E-01 | 1.00E+00 |
| DAD1     | LMNA | 0.087248375  | -0.051421989 | 0.222618003  | 2.17E-01 | 2.93E-01 | 1.00E+00 |
| HERC2    | LMNA | -0.172668778 | -0.303485563 | -0.035463115 | 1.40E-02 | 2.73E-02 | 1.00E+00 |
| HSD11B2  | LMNA | -0.016449021 | -0.154149978 | 0.121878742  | 8.16E-01 | 8.61E-01 | 1.00E+00 |
| USE1     | LMNA | 0.006808119  | -0.131366348 | 0.144723099  | 9.23E-01 | 9.45E-01 | 1.00E+00 |
| FAM96B   | LMNA | -0.092036801 | -0.227201037 | 0.04660637   | 1.93E-01 | 2.65E-01 | 1.00E+00 |
| HNMT     | LMNA | 0.037552594  | -0.101022123 | 0.17469793   | 5.96E-01 | 6.73E-01 | 1.00E+00 |
| PCGF3    | LMNA | -0.141088169 | -0.273806148 | -0.003097499 | 4.52E-02 | 7.68E-02 | 1.00E+00 |
| BSN      | LMNA | -0.479689581 | -0.579373525 | -0.365866881 | 5.09E-13 | 7.42E-12 | 6.03E-09 |
| CAND1    | LMNA | -0.121160582 | -0.254947248 | 0.01717774   | 8.59E-02 | 1.34E-01 | 1.00E+00 |

|         |      |              |              |              |          |          |          |
|---------|------|--------------|--------------|--------------|----------|----------|----------|
| ACTR10  | LMNA | -0.139412352 | -0.272224123 | -0.001388066 | 4.78E-02 | 8.07E-02 | 1.00E+00 |
| NASP    | LMNA | -0.13006643  | -0.263388086 | 0.008130562  | 6.50E-02 | 1.06E-01 | 1.00E+00 |
| C20orf4 | LMNA | 0.217826176  | 0.08224848   | 0.345487966  | 1.84E-03 | 4.52E-03 | 1.00E+00 |
| ACSBG2  | LMNA | -0.021517986 | -0.159096378 | 0.116880216  | 7.61E-01 | 8.16E-01 | 1.00E+00 |
| COL9A2  | LMNA | -0.180349649 | -0.310665862 | -0.043378667 | 1.02E-02 | 2.07E-02 | 1.00E+00 |
| RWDD2A  | LMNA | -0.392495469 | -0.503276726 | -0.26902122  | 7.59E-09 | 5.31E-08 | 9.00E-05 |
| PALLD   | LMNA | 0.429600399  | 0.309930365  | 0.535870645  | 1.77E-10 | 1.69E-09 | 2.10E-06 |
| GPC5    | LMNA | -0.141959155 | -0.274628103 | -0.003986275 | 4.39E-02 | 7.47E-02 | 1.00E+00 |
| CENTD2  | LMNA | 0.227311128  | 0.092151902  | 0.354245711  | 1.14E-03 | 2.95E-03 | 1.00E+00 |
| TBL3    | LMNA | 0.242310318  | 0.107867617  | 0.368049624  | 5.12E-04 | 1.44E-03 | 1.00E+00 |
| TLR1    | LMNA | 0.232347118  | 0.097420968  | 0.358886562  | 8.76E-04 | 2.33E-03 | 1.00E+00 |
| LMO6    | LMNA | 0.539762737  | 0.434055272  | 0.63080913   | 1.14E-16 | 3.30E-15 | 1.35E-12 |
| CCDC106 | LMNA | 0.008460892  | -0.129741651 | 0.146340962  | 9.05E-01 | 9.31E-01 | 1.00E+00 |
| KPNA2   | LMNA | 0.006988306  | -0.131189258 | 0.144899516  | 9.21E-01 | 9.44E-01 | 1.00E+00 |
| PARP16  | LMNA | 0.03265271   | -0.10587555  | 0.169937676  | 6.45E-01 | 7.17E-01 | 1.00E+00 |
| PDIA3   | LMNA | 0.61688688   | 0.523410486  | 0.695691505  | 1.44E-22 | 1.18E-20 | 1.71E-18 |
| MACROD1 | LMNA | -0.213153075 | -0.341164957 | -0.077379029 | 2.32E-03 | 5.54E-03 | 1.00E+00 |
| SFRS1   | LMNA | -0.093393077 | -0.22849805  | 0.045241219  | 1.86E-01 | 2.58E-01 | 1.00E+00 |
| DCP1A   | LMNA | 0.04451516   | -0.094114206 | 0.181451078  | 5.29E-01 | 6.12E-01 | 1.00E+00 |
| TMCO3   | LMNA | 0.296061783  | 0.164744143  | 0.417066594  | 1.89E-05 | 7.10E-05 | 2.24E-01 |
| NTN2L   | LMNA | 0.164555978  | 0.02712109   | 0.295885317  | 1.93E-02 | 3.61E-02 | 1.00E+00 |
| CLN5    | LMNA | 0.073960627  | -0.064751508 | 0.209868796  | 2.96E-01 | 3.80E-01 | 1.00E+00 |
| BIRC5   | LMNA | -0.04009253  | -0.177162966 | 0.098503671  | 5.71E-01 | 6.50E-01 | 1.00E+00 |
| PRR16   | LMNA | 0.452279746  | 0.335155046  | 0.555638003  | 1.41E-11 | 1.61E-10 | 1.67E-07 |
| FAM63B  | LMNA | 0.215927968  | 0.080269734  | 0.343732618  | 2.03E-03 | 4.91E-03 | 1.00E+00 |
| GLE1L   | LMNA | 0.124105151  | -0.014188947 | 0.257740328  | 7.85E-02 | 1.24E-01 | 1.00E+00 |
| CES2    | LMNA | 0.241528559  | 0.10704685   | 0.36733153   | 5.34E-04 | 1.50E-03 | 1.00E+00 |
| GNAS    | LMNA | 0.113994365  | -0.024441269 | 0.248140372  | 1.06E-01 | 1.60E-01 | 1.00E+00 |
| KATNB1  | LMNA | -0.284048757 | -0.406172431 | -0.151956458 | 4.19E-05 | 1.47E-04 | 4.97E-01 |
| CPLX3   | LMNA | -0.275315289 | -0.398230523 | -0.142687491 | 7.32E-05 | 2.46E-04 | 8.68E-01 |
| WNT8B   | LMNA | -0.200885517 | -0.329790617 | -0.064626775 | 4.15E-03 | 9.27E-03 | 1.00E+00 |
| TSPAN13 | LMNA | -0.210038734 | -0.338280922 | -0.074137427 | 2.70E-03 | 6.33E-03 | 1.00E+00 |
| MRPL52  | LMNA | -0.056684935 | -0.193223879 | 0.08200781   | 4.23E-01 | 5.10E-01 | 1.00E+00 |
| GHR     | LMNA | -0.026035648 | -0.163498993 | 0.112419416  | 7.13E-01 | 7.75E-01 | 1.00E+00 |
| BCLAF1  | LMNA | -0.197479326 | -0.326625783 | -0.06109388  | 4.85E-03 | 1.06E-02 | 1.00E+00 |

|          |      |              |              |              |          |          |          |
|----------|------|--------------|--------------|--------------|----------|----------|----------|
| GOLGA3   | LMNA | 0.29088857   | 0.159231919  | 0.41237946   | 2.67E-05 | 9.78E-05 | 3.17E-01 |
| CLEC4E   | LMNA | 0.171172627  | 0.033923252  | 0.302085188  | 1.49E-02 | 2.87E-02 | 1.00E+00 |
| SCUBE3   | LMNA | -0.052071007 | -0.188765078 | 0.086602532  | 4.62E-01 | 5.48E-01 | 1.00E+00 |
| UCRC     | LMNA | -0.138851266 | -0.27169428  | -0.000815905 | 4.88E-02 | 8.21E-02 | 1.00E+00 |
| CDKL3    | LMNA | -0.312390634 | -0.431819074 | -0.182197033 | 6.01E-06 | 2.47E-05 | 7.12E-02 |
| MGAT4B   | LMNA | 0.686420552  | 0.605773257  | 0.753106403  | 1.75E-29 | 4.51E-27 | 2.08E-25 |
| BBS7     | LMNA | -0.16887508  | -0.299933616 | -0.031559846 | 1.63E-02 | 3.11E-02 | 1.00E+00 |
| ZNF345   | LMNA | -0.09574276  | -0.23074393  | 0.042874935  | 1.75E-01 | 2.45E-01 | 1.00E+00 |
| RTF1     | LMNA | -0.076436404 | -0.212247741 | 0.062271695  | 2.80E-01 | 3.62E-01 | 1.00E+00 |
| SERPINB9 | LMNA | 0.174635258  | 0.03748804   | 0.305325301  | 1.29E-02 | 2.55E-02 | 1.00E+00 |
| DHRS7    | LMNA | -0.025362061 | -0.162842906 | 0.113084879  | 7.20E-01 | 7.82E-01 | 1.00E+00 |
| RIPK4    | LMNA | -0.020407471 | -0.158013305 | 0.1179759    | 7.73E-01 | 8.27E-01 | 1.00E+00 |
| PLEC1    | LMNA | 0.380232684  | 0.255598429  | 0.49243503   | 2.38E-08 | 1.52E-07 | 2.83E-04 |
| PIP3-E   | LMNA | -0.339208622 | -0.455910218 | -0.211040232 | 7.88E-07 | 3.85E-06 | 9.35E-03 |
| KNTC1    | LMNA | -0.006177626 | -0.144105729 | 0.131985936  | 9.30E-01 | 9.49E-01 | 1.00E+00 |
| EXOSC2   | LMNA | -0.163348539 | -0.294752738 | -0.025881169 | 2.02E-02 | 3.77E-02 | 1.00E+00 |
| MS4A2    | LMNA | 0.145173918  | 0.00726859   | 0.277660218  | 3.93E-02 | 6.79E-02 | 1.00E+00 |
| FGF17    | LMNA | -0.27115823  | -0.394443755 | -0.138283694 | 9.49E-05 | 3.11E-04 | 1.00E+00 |
| WDR59    | LMNA | -0.233069025 | -0.359551314 | -0.098176907 | 8.44E-04 | 2.25E-03 | 1.00E+00 |
| LAIR1    | LMNA | 0.326003415  | 0.196809861  | 0.444069044  | 2.19E-06 | 9.87E-06 | 2.60E-02 |
| EVI2A    | LMNA | -0.117053709 | -0.25104793  | 0.021342168  | 9.71E-02 | 1.48E-01 | 1.00E+00 |
| IL17RC   | LMNA | 0.52924834   | 0.422032404  | 0.621863933  | 5.61E-16 | 1.42E-14 | 6.65E-12 |
| GTF3C3   | LMNA | -0.006850378 | -0.144764474 | 0.131324817  | 9.23E-01 | 9.45E-01 | 1.00E+00 |
| HS3ST1   | LMNA | -0.173975495 | -0.304708169 | -0.036808543 | 1.33E-02 | 2.61E-02 | 1.00E+00 |
| ITGB1BP2 | LMNA | -0.192710949 | -0.322190416 | -0.056153863 | 6.00E-03 | 1.29E-02 | 1.00E+00 |
| RBPJ     | LMNA | -0.350865089 | -0.466328411 | -0.223646937 | 3.06E-07 | 1.62E-06 | 3.63E-03 |
| LRRC8D   | LMNA | -0.449860175 | -0.553534655 | -0.332455898 | 1.86E-11 | 2.08E-10 | 2.21E-07 |
| ALDH18A1 | LMNA | 0.095016135  | -0.04360686  | 0.230049558  | 1.79E-01 | 2.49E-01 | 1.00E+00 |
| INE1     | LMNA | -0.189441667 | -0.319146162 | -0.05277076  | 6.93E-03 | 1.46E-02 | 1.00E+00 |
| TPI1     | LMNA | 0.374738463  | 0.249600025  | 0.487566192  | 3.92E-08 | 2.40E-07 | 4.65E-04 |
| FLJ20035 | LMNA | 0.24801542   | 0.113862947  | 0.373285579  | 3.72E-04 | 1.08E-03 | 1.00E+00 |
| GATA6    | LMNA | 0.324712412  | 0.195421549  | 0.442909179  | 2.42E-06 | 1.08E-05 | 2.87E-02 |
| CABP1    | LMNA | -0.369073551 | -0.482538734 | -0.243425307 | 6.48E-08 | 3.85E-07 | 7.69E-04 |
| RASGRF1  | LMNA | -0.289290592 | -0.410930327 | -0.157530879 | 2.97E-05 | 1.08E-04 | 3.52E-01 |
| C4orf15  | LMNA | -0.032252195 | -0.169548291 | 0.106271976  | 6.49E-01 | 7.21E-01 | 1.00E+00 |

|          |      |              |              |              |          |          |          |
|----------|------|--------------|--------------|--------------|----------|----------|----------|
| ALDH2    | LMNA | -0.321100885 | -0.439662399 | -0.191540551 | 3.17E-06 | 1.38E-05 | 3.76E-02 |
| DAPK3    | LMNA | 0.437687999  | 0.318906362  | 0.542933202  | 7.33E-11 | 7.54E-10 | 8.70E-07 |
| C3       | LMNA | 0.205732151  | 0.06965959   | 0.334288838  | 3.31E-03 | 7.58E-03 | 1.00E+00 |
| EMP2     | LMNA | 0.350076693  | 0.222792926  | 0.465624775  | 3.27E-07 | 1.71E-06 | 3.88E-03 |
| GJB1     | LMNA | -0.216086727 | -0.343879463 | -0.080435187 | 2.01E-03 | 4.87E-03 | 1.00E+00 |
| PIN1     | LMNA | -0.185540104 | -0.315509641 | -0.048737464 | 8.20E-03 | 1.70E-02 | 1.00E+00 |
| SLC6A15  | LMNA | -0.133010388 | -0.266173846 | 0.005134901  | 5.91E-02 | 9.72E-02 | 1.00E+00 |
| POLE3    | LMNA | -0.043680195 | -0.180641907 | 0.094943323  | 5.37E-01 | 6.19E-01 | 1.00E+00 |
| RIN2     | LMNA | 0.083638385  | -0.055048222 | 0.219158898  | 2.37E-01 | 3.15E-01 | 1.00E+00 |
| CTSL2    | LMNA | -0.040812262 | -0.177861162 | 0.097789703  | 5.64E-01 | 6.44E-01 | 1.00E+00 |
| APOC4    | LMNA | 0.082427225  | -0.056264013 | 0.217997596  | 2.44E-01 | 3.23E-01 | 1.00E+00 |
| CYorf15B | LMNA | 0.000150273  | -0.137903588 | 0.138198407  | 9.98E-01 | 9.99E-01 | 1.00E+00 |
| TRIM2    | LMNA | -0.412084833 | -0.520523894 | -0.290563627 | 1.11E-09 | 9.04E-09 | 1.31E-05 |
| CP110    | LMNA | -0.28141549  | -0.403779772 | -0.149159282 | 4.97E-05 | 1.72E-04 | 5.89E-01 |
| KIAA1622 | LMNA | -0.310864122 | -0.430442632 | -0.180561956 | 6.70E-06 | 2.74E-05 | 7.95E-02 |
| DNM1     | LMNA | -0.236849483 | -0.363030367 | -0.102138124 | 6.89E-04 | 1.88E-03 | 1.00E+00 |
| HYOU1    | LMNA | 0.285743222  | 0.153757515  | 0.407711183  | 3.75E-05 | 1.33E-04 | 4.45E-01 |
| OTUD4    | LMNA | 0.190387491  | 0.05374919   | 0.320027159  | 6.65E-03 | 1.41E-02 | 1.00E+00 |
| USP7     | LMNA | -0.127610855 | -0.261062763 | 0.010627366  | 7.03E-02 | 1.13E-01 | 1.00E+00 |
| ZSCAN16  | LMNA | -0.508201529 | -0.603885307 | -0.398078836 | 1.16E-14 | 2.21E-13 | 1.37E-10 |
| ASCC1    | LMNA | -0.405205089 | -0.514476789 | -0.282983917 | 2.21E-09 | 1.71E-08 | 2.62E-05 |
| OTUD3    | LMNA | -0.040141496 | -0.177210472 | 0.0984551    | 5.71E-01 | 6.50E-01 | 1.00E+00 |
| YME1L1   | LMNA | 0.086345606  | -0.052329163 | 0.221753286  | 2.22E-01 | 2.98E-01 | 1.00E+00 |
| HNRNPR   | LMNA | -0.155314237 | -0.287207147 | -0.017641493 | 2.73E-02 | 4.92E-02 | 1.00E+00 |
| SERPING1 | LMNA | 0.45264155   | 0.335558821  | 0.555952408  | 1.35E-11 | 1.55E-10 | 1.60E-07 |
| TPCN1    | LMNA | 0.298031856  | 0.166845478  | 0.418849867  | 1.65E-05 | 6.27E-05 | 1.96E-01 |
| STARD13  | LMNA | 0.352540439  | 0.225462368  | 0.46782316   | 2.67E-07 | 1.42E-06 | 3.16E-03 |
| PCBP4    | LMNA | -0.248876924 | -0.374075546 | -0.114769128 | 3.55E-04 | 1.04E-03 | 1.00E+00 |
| ADI1     | LMNA | 0.02242588   | -0.115984198 | 0.159981591  | 7.51E-01 | 8.08E-01 | 1.00E+00 |
| CDH10    | LMNA | -0.504727029 | -0.600907924 | -0.394138864 | 1.87E-14 | 3.45E-13 | 2.22E-10 |
| WBSCR22  | LMNA | 0.330995292  | 0.202182883  | 0.448550139  | 1.50E-06 | 6.95E-06 | 1.78E-02 |
| SCP2     | LMNA | 0.079189956  | -0.059511641 | 0.214891706  | 2.63E-01 | 3.44E-01 | 1.00E+00 |
| KL       | LMNA | 0.1805604    | 0.043596099  | 0.310862669  | 1.01E-02 | 2.05E-02 | 1.00E+00 |
| SLC35D2  | LMNA | 0.352365488  | 0.225272747  | 0.4676671    | 2.71E-07 | 1.44E-06 | 3.21E-03 |
| MAFK     | LMNA | 0.117649989  | -0.020737829 | 0.251614346  | 9.54E-02 | 1.46E-01 | 1.00E+00 |

|           |      |              |              |              |          |          |          |
|-----------|------|--------------|--------------|--------------|----------|----------|----------|
| SON       | LMNA | 0.059156241  | -0.079544365 | 0.195609779  | 4.03E-01 | 4.91E-01 | 1.00E+00 |
| SBNO2     | LMNA | 0.567436408  | 0.46588021   | 0.654237599  | 1.31E-18 | 5.40E-17 | 1.55E-14 |
| RACGAP1   | LMNA | -0.149265366 | -0.281515395 | -0.011450314 | 3.40E-02 | 5.97E-02 | 1.00E+00 |
| SC4MOL    | LMNA | -0.057562925 | -0.194071711 | 0.081132807  | 4.16E-01 | 5.03E-01 | 1.00E+00 |
| SLC6A6    | LMNA | 0.407650202  | 0.285676055  | 0.516627221  | 1.73E-09 | 1.37E-08 | 2.05E-05 |
| OBP2A     | LMNA | 0.036896215  | -0.101672661 | 0.174060628  | 6.02E-01 | 6.79E-01 | 1.00E+00 |
| PSMD3     | LMNA | -0.03630206  | -0.173483641 | 0.102261427  | 6.08E-01 | 6.84E-01 | 1.00E+00 |
| ERLIN2    | LMNA | 0.187599966  | 0.05086632   | 0.317430048  | 7.51E-03 | 1.57E-02 | 1.00E+00 |
| PPP1R9A   | LMNA | -0.318966035 | -0.437741702 | -0.189248316 | 3.72E-06 | 1.60E-05 | 4.41E-02 |
| RAB35     | LMNA | 0.315643078  | 0.185683193  | 0.434749919  | 4.74E-06 | 2.00E-05 | 5.63E-02 |
| PDZRN3    | LMNA | -0.18050439  | -0.310810366 | -0.043538312 | 1.01E-02 | 2.06E-02 | 1.00E+00 |
| AVEN      | LMNA | 0.536150887  | 0.42992099   | 0.62773905   | 1.98E-16 | 5.48E-15 | 2.35E-12 |
| FLJ21075  | LMNA | -0.176561892 | -0.307126816 | -0.039473028 | 1.19E-02 | 2.38E-02 | 1.00E+00 |
| BCAM      | LMNA | 0.382398156  | 0.257965257  | 0.494352088  | 1.95E-08 | 1.26E-07 | 2.32E-04 |
| C14orf132 | LMNA | -0.300884526 | -0.421430399 | -0.169890329 | 1.35E-05 | 5.24E-05 | 1.61E-01 |
| PCK2      | LMNA | 0.38418018   | 0.259914103  | 0.49592887   | 1.66E-08 | 1.09E-07 | 1.97E-04 |
| FKRP      | LMNA | 0.199265529  | 0.062946101  | 0.32828578   | 4.47E-03 | 9.90E-03 | 1.00E+00 |
| HLA-DRA   | LMNA | 0.231063873  | 0.096077614  | 0.357704598  | 9.38E-04 | 2.48E-03 | 1.00E+00 |
| GUCY2C    | LMNA | 0.25538434   | 0.121621225  | 0.380036741  | 2.44E-04 | 7.37E-04 | 1.00E+00 |
| RP11-125A | LMNA | -0.085336192 | -0.220786166 | 0.053343232  | 2.27E-01 | 3.05E-01 | 1.00E+00 |
| BARX2     | LMNA | 0.135665149  | -0.002431389 | 0.268684044  | 5.42E-02 | 9.01E-02 | 1.00E+00 |
| DAO       | LMNA | -0.097961596 | -0.232863422 | 0.040638994  | 1.65E-01 | 2.33E-01 | 1.00E+00 |
| EDNRA     | LMNA | 0.320645717  | 0.191051708  | 0.439252981  | 3.28E-06 | 1.42E-05 | 3.89E-02 |
| NIPBL     | LMNA | 0.024346592  | -0.114087867 | 0.161853591  | 7.31E-01 | 7.91E-01 | 1.00E+00 |
| ZNF331    | LMNA | -0.080904342 | -0.216536859 | 0.057792135  | 2.52E-01 | 3.33E-01 | 1.00E+00 |
| PPP2R5A   | LMNA | -0.1368682   | -0.269820989 | 0.00120558   | 5.21E-02 | 8.70E-02 | 1.00E+00 |
| HMGNA4    | LMNA | -0.079816592 | -0.215493125 | 0.058883229  | 2.59E-01 | 3.40E-01 | 1.00E+00 |
| DDX39     | LMNA | 0.061158483  | -0.077547248 | 0.197541642  | 3.87E-01 | 4.75E-01 | 1.00E+00 |
| EFHC1     | LMNA | 0.101632835  | -0.036936402 | 0.236367478  | 1.50E-01 | 2.15E-01 | 1.00E+00 |
| EIF3M     | LMNA | 0.259163688  | 0.125606617  | 0.383494111  | 1.96E-04 | 6.02E-04 | 1.00E+00 |
| SLC17A3   | LMNA | 0.149735038  | 0.011930657  | 0.281957671  | 3.34E-02 | 5.90E-02 | 1.00E+00 |
| ZNF24     | LMNA | -0.366990649 | -0.480688332 | -0.241157515 | 7.78E-08 | 4.56E-07 | 9.23E-04 |
| ASCIZ     | LMNA | -0.18314716  | -0.313277365 | -0.04626593  | 9.08E-03 | 1.86E-02 | 1.00E+00 |
| FNDC8     | LMNA | -0.029575679 | -0.166945051 | 0.108920037  | 6.76E-01 | 7.45E-01 | 1.00E+00 |
| ESRRA     | LMNA | 0.227590883  | 0.092444407  | 0.35450368   | 1.12E-03 | 2.91E-03 | 1.00E+00 |



|           |      |              |              |              |          |          |          |
|-----------|------|--------------|--------------|--------------|----------|----------|----------|
| PTMS      | LMNA | -0.015114995 | -0.152847058 | 0.123193066  | 8.31E-01 | 8.73E-01 | 1.00E+00 |
| PHF7      | LMNA | 0.202073106  | 0.065859344  | 0.330893375  | 3.93E-03 | 8.82E-03 | 1.00E+00 |
| PIP4K2B   | LMNA | -0.354177975 | -0.469283534 | -0.227237675 | 2.33E-07 | 1.25E-06 | 2.76E-03 |
| IRF3      | LMNA | 0.32910111   | 0.200143162  | 0.446850471  | 1.73E-06 | 7.96E-06 | 2.06E-02 |
| GPR19     | LMNA | -0.498794013 | -0.595817602 | -0.387420399 | 4.19E-14 | 7.08E-13 | 4.97E-10 |
| HHLA2     | LMNA | -0.024320303 | -0.161827975 | 0.114113829  | 7.31E-01 | 7.91E-01 | 1.00E+00 |
| GMFG      | LMNA | 0.184964736  | 0.048143047  | 0.314973036  | 8.41E-03 | 1.74E-02 | 1.00E+00 |
| BDH2      | LMNA | 0.003702028  | -0.134417669 | 0.14168062   | 9.58E-01 | 9.69E-01 | 1.00E+00 |
| APOBEC2   | LMNA | -0.049392685 | -0.186174217 | 0.089267002  | 4.85E-01 | 5.70E-01 | 1.00E+00 |
| PRSS21    | LMNA | 0.128353593  | -0.009872339 | 0.261766268  | 6.87E-02 | 1.11E-01 | 1.00E+00 |
| PENK      | LMNA | -0.078938787 | -0.214650616 | 0.059763491  | 2.64E-01 | 3.46E-01 | 1.00E+00 |
| PHF16     | LMNA | -0.421993546 | -0.529214304 | -0.301507348 | 3.97E-10 | 3.53E-09 | 4.71E-06 |
| ZMAT5     | LMNA | -0.020909591 | -0.158503058 | 0.117480528  | 7.68E-01 | 8.22E-01 | 1.00E+00 |
| SMAD9     | LMNA | -0.375369458 | -0.48812572  | -0.250288436 | 3.70E-08 | 2.28E-07 | 4.39E-04 |
| SLAMF1    | LMNA | 0.292466425  | 0.160912304  | 0.413809741  | 2.40E-05 | 8.88E-05 | 2.85E-01 |
| RGL1      | LMNA | 0.036659277  | -0.101907462 | 0.173830547  | 6.04E-01 | 6.81E-01 | 1.00E+00 |
| DLGAP4    | LMNA | 0.436225359  | 0.317281476  | 0.541657043  | 8.62E-11 | 8.73E-10 | 1.02E-06 |
| MBD5      | LMNA | 0.432356482  | 0.312986801  | 0.538279087  | 1.31E-10 | 1.28E-09 | 1.56E-06 |
| PHLDA1    | LMNA | 0.132071764  | -0.006090278 | 0.265285903  | 6.10E-02 | 9.97E-02 | 1.00E+00 |
| BACE2     | LMNA | 0.638869113  | 0.549261024  | 0.713952029  | 1.46E-24 | 1.74E-22 | 1.73E-20 |
| APPBP2    | LMNA | -0.368595382 | -0.482114029 | -0.242904571 | 6.76E-08 | 4.01E-07 | 8.02E-04 |
| LIF       | LMNA | 0.531823771  | 0.424973841  | 0.624057236  | 3.82E-16 | 9.95E-15 | 4.53E-12 |
| OXTR      | LMNA | 0.242783158  | 0.10836414   | 0.368483884  | 4.99E-04 | 1.41E-03 | 1.00E+00 |
| ACTC1     | LMNA | 0.056994059  | -0.081699762 | 0.193522409  | 4.20E-01 | 5.08E-01 | 1.00E+00 |
| USP19     | LMNA | -0.033196889 | -0.170466664 | 0.105336856  | 6.39E-01 | 7.13E-01 | 1.00E+00 |
| SUV39H2   | LMNA | -0.422362352 | -0.52953733  | -0.30191529  | 3.82E-10 | 3.40E-09 | 4.53E-06 |
| ERO1L     | LMNA | 0.424329987  | 0.304092474  | 0.531260201  | 3.11E-10 | 2.81E-09 | 3.68E-06 |
| ZNF395    | LMNA | 0.334234351  | 0.205673406  | 0.45145461   | 1.17E-06 | 5.52E-06 | 1.38E-02 |
| CNTFR     | LMNA | -0.460412135 | -0.56269786  | -0.34424123  | 5.42E-12 | 6.69E-11 | 6.43E-08 |
| HIST1H2BL | LMNA | 0.092066892  | -0.046576088 | 0.227229818  | 1.93E-01 | 2.65E-01 | 1.00E+00 |
| WNT3      | LMNA | -0.191122448 | -0.320711587 | -0.054509665 | 6.44E-03 | 1.37E-02 | 1.00E+00 |
| ZNF549    | LMNA | -0.037153428 | -0.174310379 | 0.101417751  | 6.00E-01 | 6.77E-01 | 1.00E+00 |
| ZNF467    | LMNA | 0.106805059  | -0.031713543 | 0.241298227  | 1.30E-01 | 1.91E-01 | 1.00E+00 |
| SLC25A21  | LMNA | -0.210762687 | -0.338951553 | -0.074890706 | 2.61E-03 | 6.13E-03 | 1.00E+00 |
| IL5       | LMNA | -0.223267501 | -0.350514828 | -0.087926601 | 1.40E-03 | 3.54E-03 | 1.00E+00 |

|          |      |              |              |              |          |          |          |
|----------|------|--------------|--------------|--------------|----------|----------|----------|
| CLSTN2   | LMNA | -0.416069918 | -0.524021705 | -0.294961153 | 7.35E-10 | 6.24E-09 | 8.72E-06 |
| LSM12    | LMNA | 0.085394813  | -0.053284348 | 0.220842339  | 2.27E-01 | 3.04E-01 | 1.00E+00 |
| KRT37    | LMNA | 0.216834539  | 0.081214636  | 0.344571072  | 1.94E-03 | 4.72E-03 | 1.00E+00 |
| NACAD    | LMNA | -0.059403162 | -0.195848078 | 0.079298136  | 4.01E-01 | 4.89E-01 | 1.00E+00 |
| NAG18    | LMNA | -0.332800147 | -0.450168863 | -0.204127454 | 1.30E-06 | 6.12E-06 | 1.55E-02 |
| PTGES    | LMNA | 0.439836282  | 0.321294214  | 0.544806707  | 5.78E-11 | 6.02E-10 | 6.85E-07 |
| GDAP1L1  | LMNA | -0.580863154 | -0.665544944 | -0.481416321 | 1.28E-19 | 6.10E-18 | 1.52E-15 |
| MFAP5    | LMNA | 0.425995068  | 0.305935864  | 0.532717463  | 2.60E-10 | 2.41E-09 | 3.09E-06 |
| OPRK1    | LMNA | -0.085536778 | -0.220978369 | 0.053141744  | 2.26E-01 | 3.03E-01 | 1.00E+00 |
| C12orf4  | LMNA | -0.110848835 | -0.245148381 | 0.027624904  | 1.16E-01 | 1.73E-01 | 1.00E+00 |
| CST3     | LMNA | 0.137379439  | -0.000684544 | 0.270304024  | 5.12E-02 | 8.57E-02 | 1.00E+00 |
| WDR6     | LMNA | -0.209185945 | -0.337490776 | -0.07325029  | 2.81E-03 | 6.55E-03 | 1.00E+00 |
| NUP88    | LMNA | -0.136141471 | -0.269134237 | 0.001946106  | 5.34E-02 | 8.89E-02 | 1.00E+00 |
| CD300A   | LMNA | 0.17792479   | 0.04087786   | 0.308400639  | 1.13E-02 | 2.26E-02 | 1.00E+00 |
| FCGBP    | LMNA | 0.463614783  | 0.347825477  | 0.56547404   | 3.69E-12 | 4.69E-11 | 4.38E-08 |
| CNIH     | LMNA | -0.018759151 | -0.156405106 | 0.119601584  | 7.91E-01 | 8.42E-01 | 1.00E+00 |
| VASH1    | LMNA | -0.090158327 | -0.225403851 | 0.04849628   | 2.02E-01 | 2.76E-01 | 1.00E+00 |
| DHX16    | LMNA | 0.180847333  | 0.04389215   | 0.311130599  | 1.00E-02 | 2.03E-02 | 1.00E+00 |
| SLC35A5  | LMNA | -0.254217897 | -0.378968968 | -0.12039206  | 2.61E-04 | 7.84E-04 | 1.00E+00 |
| CLEC3B   | LMNA | 0.011190057  | -0.127057222 | 0.149010866  | 8.74E-01 | 9.07E-01 | 1.00E+00 |
| ARL2BP   | LMNA | -0.039226721 | -0.176322882 | 0.099362356  | 5.79E-01 | 6.58E-01 | 1.00E+00 |
| C10orf79 | LMNA | -0.152197799 | -0.284275863 | -0.014450417 | 3.06E-02 | 5.45E-02 | 1.00E+00 |
| ZNF79    | LMNA | 0.211324304  | 0.07547518   | 0.339471715  | 2.54E-03 | 5.99E-03 | 1.00E+00 |
| CRP      | LMNA | 0.071896259  | -0.066817933 | 0.207883939  | 3.09E-01 | 3.94E-01 | 1.00E+00 |
| OCRL     | LMNA | -0.032171898 | -0.16947022  | 0.106351448  | 6.49E-01 | 7.21E-01 | 1.00E+00 |
| GLA      | LMNA | 0.370498288  | 0.244977303  | 0.483803854  | 5.72E-08 | 3.43E-07 | 6.78E-04 |
| NEBL     | LMNA | -0.17528944  | -0.305937104 | -0.038161915 | 1.26E-02 | 2.49E-02 | 1.00E+00 |
| HSPA8    | LMNA | -0.025015856 | -0.162505649 | 0.11342686   | 7.24E-01 | 7.85E-01 | 1.00E+00 |
| DIDO1    | LMNA | 0.176153547  | 0.039052225  | 0.306745067  | 1.22E-02 | 2.41E-02 | 1.00E+00 |
| PLA2R1   | LMNA | 0.371584239  | 0.246160684  | 0.484767825  | 5.19E-08 | 3.14E-07 | 6.16E-04 |
| NGDN     | LMNA | -0.188843293 | -0.318588685 | -0.052151893 | 7.11E-03 | 1.49E-02 | 1.00E+00 |
| CBFA2T2  | LMNA | -0.167542226 | -0.298684834 | -0.030189489 | 1.72E-02 | 3.26E-02 | 1.00E+00 |
| SAC3D1   | LMNA | -0.007481301 | -0.14538215  | 0.130704692  | 9.16E-01 | 9.39E-01 | 1.00E+00 |
| PNOC     | LMNA | -0.187597536 | -0.317427783 | -0.050863808 | 7.51E-03 | 1.57E-02 | 1.00E+00 |
| PIGP     | LMNA | 0.129191438  | -0.009020443 | 0.262559684  | 6.69E-02 | 1.08E-01 | 1.00E+00 |

|           |      |              |              |              |          |          |          |
|-----------|------|--------------|--------------|--------------|----------|----------|----------|
| AGGF1     | LMNA | -0.013815691 | -0.151577592 | 0.124472712  | 8.45E-01 | 8.85E-01 | 1.00E+00 |
| PRRG1     | LMNA | 0.047886349  | -0.090764675 | 0.184716235  | 4.99E-01 | 5.83E-01 | 1.00E+00 |
| DPF2      | LMNA | -0.047489244 | -0.184331777 | 0.091159392  | 5.02E-01 | 5.86E-01 | 1.00E+00 |
| MYH13     | LMNA | 0.207664845  | 0.07166846   | 0.336080963  | 3.02E-03 | 6.99E-03 | 1.00E+00 |
| TMED9     | LMNA | 0.620210455  | 0.527307914  | 0.698458932  | 7.35E-23 | 6.66E-21 | 8.72E-19 |
| TRPV5     | LMNA | 0.041119231  | -0.097485149 | 0.178158903  | 5.61E-01 | 6.42E-01 | 1.00E+00 |
| UGT2B4    | LMNA | 0.223571292  | 0.088243872  | 0.350795264  | 1.38E-03 | 3.49E-03 | 1.00E+00 |
| PJA2      | LMNA | 0.10999456   | -0.028489043 | 0.244335363  | 1.19E-01 | 1.77E-01 | 1.00E+00 |
| COLEC11   | LMNA | -0.119295209 | -0.253176687 | 0.01906985   | 9.08E-02 | 1.40E-01 | 1.00E+00 |
| SCYE1     | LMNA | 0.332001     | 0.203266319  | 0.449452226  | 1.39E-06 | 6.47E-06 | 1.64E-02 |
| MED12     | LMNA | 0.02613075   | -0.11232545  | 0.163591614  | 7.12E-01 | 7.75E-01 | 1.00E+00 |
| CARS      | LMNA | 0.357006368  | 0.230306019  | 0.471804446  | 1.83E-07 | 1.01E-06 | 2.18E-03 |
| MYH1      | LMNA | 0.192890094  | 0.056339335  | 0.322357152  | 5.95E-03 | 1.28E-02 | 1.00E+00 |
| CYP7A1    | LMNA | 0.069311105  | -0.069403986 | 0.205396773  | 3.27E-01 | 4.13E-01 | 1.00E+00 |
| PHF1      | LMNA | -0.066309279 | -0.202506522 | 0.072404517  | 3.48E-01 | 4.35E-01 | 1.00E+00 |
| LOC644096 | LMNA | -0.201360796 | -0.330231988 | -0.065120005 | 4.06E-03 | 9.08E-03 | 1.00E+00 |
| FRYL      | LMNA | -0.024378576 | -0.161884756 | 0.114056279  | 7.31E-01 | 7.91E-01 | 1.00E+00 |
| RHOBTB2   | LMNA | -0.199201669 | -0.328226446 | -0.062879864 | 4.48E-03 | 9.93E-03 | 1.00E+00 |
| MMP27     | LMNA | 0.395524016  | 0.272343656  | 0.505948946  | 5.68E-09 | 4.09E-08 | 6.74E-05 |
| ZNF432    | LMNA | -0.110475927 | -0.244793505 | 0.028002143  | 1.18E-01 | 1.75E-01 | 1.00E+00 |
| SRD5A2    | LMNA | 0.013942306  | -0.124348034 | 0.151701319  | 8.44E-01 | 8.84E-01 | 1.00E+00 |
| UTP14C    | LMNA | -0.182685952 | -0.312846959 | -0.045789769 | 9.26E-03 | 1.89E-02 | 1.00E+00 |
| RABEP2    | LMNA | 0.340016865  | 0.21191299   | 0.456633634  | 7.39E-07 | 3.62E-06 | 8.76E-03 |
| VWA1      | LMNA | 0.387655518  | 0.263717695  | 0.499001821  | 1.20E-08 | 8.07E-08 | 1.42E-04 |
| FUBP1     | LMNA | -0.102729106 | -0.237413147 | 0.035830031  | 1.46E-01 | 2.10E-01 | 1.00E+00 |
| IGLL1     | LMNA | 0.105757277  | -0.032772194 | 0.240299923  | 1.34E-01 | 1.96E-01 | 1.00E+00 |
| KIAA0586  | LMNA | 0.002458025  | -0.135639002 | 0.140461363  | 9.72E-01 | 9.79E-01 | 1.00E+00 |
| IL27RA    | LMNA | 0.347637594  | 0.22015207   | 0.463446978  | 3.99E-07 | 2.06E-06 | 4.74E-03 |
| STON1     | LMNA | 0.032503861  | -0.106022885 | 0.169792968  | 6.46E-01 | 7.19E-01 | 1.00E+00 |
| IL5RA     | LMNA | -0.070817649 | -0.206846427 | 0.067897144  | 3.17E-01 | 4.02E-01 | 1.00E+00 |
| PERP      | LMNA | 0.400885186  | 0.278232284  | 0.510674151  | 3.38E-09 | 2.53E-08 | 4.01E-05 |
| SMPD2     | LMNA | 0.096020655  | -0.042594974 | 0.231009452  | 1.74E-01 | 2.43E-01 | 1.00E+00 |
| TNFSF12   | LMNA | 0.230062997  | 0.095030196  | 0.356782435  | 9.88E-04 | 2.59E-03 | 1.00E+00 |
| FN1       | LMNA | 0.561904454  | 0.459497338  | 0.649567544  | 3.30E-18 | 1.24E-16 | 3.92E-14 |
| MTR       | LMNA | 0.333056107  | 0.20440331   | 0.450398363  | 1.28E-06 | 6.01E-06 | 1.52E-02 |

|          |      |              |              |              |          |          |          |
|----------|------|--------------|--------------|--------------|----------|----------|----------|
| CSRP3    | LMNA | 0.082540143  | -0.05615068  | 0.218105882  | 2.43E-01 | 3.22E-01 | 1.00E+00 |
| MMP20    | LMNA | 0.113965772  | -0.02447022  | 0.248113186  | 1.06E-01 | 1.60E-01 | 1.00E+00 |
| PHLPPL   | LMNA | -0.204446149 | -0.333095854 | -0.068323511 | 3.52E-03 | 8.00E-03 | 1.00E+00 |
| CBX6     | LMNA | 0.037548166  | -0.101026511 | 0.174693632  | 5.96E-01 | 6.73E-01 | 1.00E+00 |
| DHFR     | LMNA | -0.0953929   | -0.230409617 | 0.043227366  | 1.77E-01 | 2.47E-01 | 1.00E+00 |
| PRG3     | LMNA | 0.191194618  | 0.05458435   | 0.320778788  | 6.42E-03 | 1.36E-02 | 1.00E+00 |
| ALPP     | LMNA | -0.247087881 | -0.372434857 | -0.112887557 | 3.92E-04 | 1.13E-03 | 1.00E+00 |
| ASH1L    | LMNA | -0.225057301 | -0.352166698 | -0.089796213 | 1.28E-03 | 3.27E-03 | 1.00E+00 |
| CHRNA2   | LMNA | 3.14E-06     | -0.138047916 | 0.138054085  | 1.00E+00 | 1.00E+00 | 1.00E+00 |
| PPP1R12A | LMNA | 0.073163002  | -0.065550069 | 0.209102025  | 3.01E-01 | 3.85E-01 | 1.00E+00 |
| RBM38    | LMNA | 0.347917514  | 0.220455049  | 0.463696981  | 3.90E-07 | 2.02E-06 | 4.63E-03 |
| ZNF7     | LMNA | -0.040694145 | -0.177746589 | 0.097906883  | 5.65E-01 | 6.45E-01 | 1.00E+00 |
| RDH8     | LMNA | 0.149584706  | 0.011776902  | 0.281816114  | 3.36E-02 | 5.92E-02 | 1.00E+00 |
| GPR132   | LMNA | 0.376630876  | 0.251665014  | 0.489243992  | 3.30E-08 | 2.05E-07 | 3.92E-04 |
| DGKD     | LMNA | -0.042652021 | -0.179645243 | 0.09596403   | 5.47E-01 | 6.28E-01 | 1.00E+00 |
| TPMT     | LMNA | -0.11169     | -0.245948738 | 0.026773823  | 1.14E-01 | 1.69E-01 | 1.00E+00 |
| ATP1A1   | LMNA | 0.464701714  | 0.349042687  | 0.56641571   | 3.24E-12 | 4.17E-11 | 3.84E-08 |
| SERTAD2  | LMNA | 0.36519845   | 0.239207329  | 0.479095373  | 9.09E-08 | 5.25E-07 | 1.08E-03 |
| C5orf4   | LMNA | -0.042352762 | -0.179355102 | 0.096261062  | 5.50E-01 | 6.31E-01 | 1.00E+00 |
| ZNF672   | LMNA | 0.000440697  | -0.137618676 | 0.138483273  | 9.95E-01 | 9.96E-01 | 1.00E+00 |
| PLXNB3   | LMNA | -0.139964605 | -0.272745547 | -0.001951308 | 4.70E-02 | 7.94E-02 | 1.00E+00 |
| FAIM3    | LMNA | 0.124982164  | -0.013298284 | 0.25857179   | 7.64E-02 | 1.21E-01 | 1.00E+00 |
| UBQLN2   | LMNA | -0.171059904 | -0.301979658 | -0.033807262 | 1.49E-02 | 2.88E-02 | 1.00E+00 |
| NR1I3    | LMNA | -0.017473381 | -0.155150126 | 0.120869182  | 8.05E-01 | 8.52E-01 | 1.00E+00 |
| ACVR2A   | LMNA | -0.184538286 | -0.314575263 | -0.04770254  | 8.56E-03 | 1.77E-02 | 1.00E+00 |
| YWHAZ    | LMNA | 0.089241151  | -0.04941868  | 0.224526029  | 2.07E-01 | 2.81E-01 | 1.00E+00 |
| LILRP2   | LMNA | 0.259324806  | 0.125776614  | 0.383641424  | 1.94E-04 | 5.97E-04 | 1.00E+00 |
| GNAO1    | LMNA | -0.608622693 | -0.688800044 | -0.513736317 | 7.38E-22 | 5.03E-20 | 8.75E-18 |
| OPA1     | LMNA | -0.20086127  | -0.329768098 | -0.064601614 | 4.15E-03 | 9.27E-03 | 1.00E+00 |
| RPS6KA6  | LMNA | -0.45542518  | -0.558370373 | -0.338666805 | 9.76E-12 | 1.15E-10 | 1.16E-07 |
| RPL10    | LMNA | 0.110116618  | -0.028365588 | 0.244451537  | 1.19E-01 | 1.76E-01 | 1.00E+00 |
| MMP23B   | LMNA | 0.380213676  | 0.25557766   | 0.492418197  | 2.39E-08 | 1.52E-07 | 2.83E-04 |
| PFKL     | LMNA | 0.484346181  | 0.371109203  | 0.583389171  | 2.81E-13 | 4.23E-12 | 3.33E-09 |
| TMEM140  | LMNA | 0.291256811  | 0.15962402   | 0.412713313  | 2.61E-05 | 9.56E-05 | 3.09E-01 |
| AURKB    | LMNA | -0.043943434 | -0.180897035 | 0.094681948  | 5.35E-01 | 6.17E-01 | 1.00E+00 |

|          |      |              |              |              |          |          |          |
|----------|------|--------------|--------------|--------------|----------|----------|----------|
| IFI16    | LMNA | 0.346282318  | 0.218685495  | 0.462236289  | 4.46E-07 | 2.28E-06 | 5.29E-03 |
| CSTA     | LMNA | 0.414440671  | 0.293162664  | 0.522592113  | 8.69E-10 | 7.27E-09 | 1.03E-05 |
| PRPF39   | LMNA | -0.222566699 | -0.349867816 | -0.087194807 | 1.45E-03 | 3.65E-03 | 1.00E+00 |
| DISC1    | LMNA | -0.260017733 | -0.384274914 | -0.12650782  | 1.86E-04 | 5.76E-04 | 1.00E+00 |
| USP4     | LMNA | 0.15705386   | 0.019424     | 0.288842342  | 2.56E-02 | 4.65E-02 | 1.00E+00 |
| OSBPL10  | LMNA | 0.524932428  | 0.417108193  | 0.618185131  | 1.06E-15 | 2.53E-14 | 1.26E-11 |
| CAPN6    | LMNA | 0.224204231  | 0.088904983  | 0.351379468  | 1.34E-03 | 3.39E-03 | 1.00E+00 |
| CLTCL1   | LMNA | -0.180890611 | -0.311171009 | -0.043936806 | 9.99E-03 | 2.03E-02 | 1.00E+00 |
| NUAK1    | LMNA | -0.052131216 | -0.1888233   | 0.086542611  | 4.61E-01 | 5.47E-01 | 1.00E+00 |
| ALG6     | LMNA | -0.094661079 | -0.229710213 | 0.043964452  | 1.80E-01 | 2.51E-01 | 1.00E+00 |
| NPPA     | LMNA | -0.412138184 | -0.520570745 | -0.290622465 | 1.10E-09 | 9.01E-09 | 1.30E-05 |
| LAMB3    | LMNA | 0.339199639  | 0.211030534  | 0.455902177  | 7.88E-07 | 3.85E-06 | 9.35E-03 |
| PPL      | LMNA | 0.414462955  | 0.293187257  | 0.52261167   | 8.67E-10 | 7.26E-09 | 1.03E-05 |
| LRTM1    | LMNA | 0.080933512  | -0.057762871 | 0.216564844  | 2.52E-01 | 3.33E-01 | 1.00E+00 |
| RRAD     | LMNA | 0.370043021  | 0.244481301  | 0.483399643  | 5.95E-08 | 3.57E-07 | 7.06E-04 |
| TIPIN    | LMNA | 0.195479734  | 0.059021498  | 0.324766529  | 5.30E-03 | 1.15E-02 | 1.00E+00 |
| CARD14   | LMNA | -0.150807819 | -0.282967667 | -0.013028051 | 3.22E-02 | 5.70E-02 | 1.00E+00 |
| RBM9     | LMNA | -0.141768322 | -0.274448029 | -0.003791526 | 4.42E-02 | 7.52E-02 | 1.00E+00 |
| LCN1     | LMNA | -0.006425139 | -0.144348103 | 0.131742717  | 9.28E-01 | 9.47E-01 | 1.00E+00 |
| RALGPS1  | LMNA | -0.664490249 | -0.735107256 | -0.57960882  | 4.21E-27 | 7.93E-25 | 4.99E-23 |
| NCOA3    | LMNA | 0.215317797  | 0.079633902  | 0.34316818   | 2.09E-03 | 5.03E-03 | 1.00E+00 |
| CCDC6    | LMNA | 0.123433802  | -0.014870596 | 0.257103714  | 8.01E-02 | 1.26E-01 | 1.00E+00 |
| RASSF4   | LMNA | -0.16793607  | -0.299053882 | -0.030594361 | 1.69E-02 | 3.22E-02 | 1.00E+00 |
| MTHFD1   | LMNA | 0.283044448  | 0.150889385  | 0.405260085  | 4.47E-05 | 1.56E-04 | 5.30E-01 |
| FCMD     | LMNA | 0.006122687  | -0.132039919 | 0.144051929  | 9.31E-01 | 9.50E-01 | 1.00E+00 |
| IGHD     | LMNA | 0.118478855  | -0.019897593 | 0.252401544  | 9.31E-02 | 1.43E-01 | 1.00E+00 |
| PLA2G6   | LMNA | -0.444924008 | -0.549239507 | -0.326955324 | 3.27E-11 | 3.51E-10 | 3.87E-07 |
| TPT1     | LMNA | 0.116489645  | -0.021913763 | 0.250512033  | 9.87E-02 | 1.50E-01 | 1.00E+00 |
| S100A3   | LMNA | 0.178196776  | 0.041158279  | 0.308654794  | 1.12E-02 | 2.24E-02 | 1.00E+00 |
| SEC63    | LMNA | 0.089886713  | -0.048769466 | 0.225143914  | 2.03E-01 | 2.78E-01 | 1.00E+00 |
| C10orf59 | LMNA | 0.084354557  | -0.054329119 | 0.219845407  | 2.33E-01 | 3.11E-01 | 1.00E+00 |
| TOR1AIP1 | LMNA | 0.203730588  | 0.067580298  | 0.332431872  | 3.64E-03 | 8.23E-03 | 1.00E+00 |
| PAFAH1B3 | LMNA | -0.441854152 | -0.546565526 | -0.323538484 | 4.61E-11 | 4.89E-10 | 5.47E-07 |
| CEBPD    | LMNA | 0.517948287  | 0.409153073  | 0.612223313  | 2.92E-15 | 6.27E-14 | 3.47E-11 |
| ZNF107   | LMNA | -0.184221887 | -0.314280111 | -0.047375747 | 8.68E-03 | 1.79E-02 | 1.00E+00 |

|          |      |              |              |              |          |          |          |
|----------|------|--------------|--------------|--------------|----------|----------|----------|
| ALDH6A1  | LMNA | -0.195444923 | -0.324734153 | -0.05898543  | 5.31E-03 | 1.15E-02 | 1.00E+00 |
| G6PC2    | LMNA | 0.094067171  | -0.044562522 | 0.229142512  | 1.83E-01 | 2.54E-01 | 1.00E+00 |
| SNTG2    | LMNA | -0.086138049 | -0.221554447 | 0.052537701  | 2.23E-01 | 3.00E-01 | 1.00E+00 |
| GRWD1    | LMNA | 0.335184266  | 0.206697689  | 0.45230593   | 1.08E-06 | 5.15E-06 | 1.28E-02 |
| FLJ22222 | LMNA | 0.347737515  | 0.220260219  | 0.463536222  | 3.96E-07 | 2.04E-06 | 4.70E-03 |
| BCKDK    | LMNA | 0.399879272  | 0.2771267    | 0.509788068  | 3.73E-09 | 2.77E-08 | 4.42E-05 |
| CTSB     | LMNA | 0.515453393  | 0.406315326  | 0.610091015  | 4.18E-15 | 8.72E-14 | 4.95E-11 |
| PFKFB1   | LMNA | -0.169419723 | -0.300443776 | -0.032119962 | 1.59E-02 | 3.05E-02 | 1.00E+00 |
| ZFP36    | LMNA | 0.421451329  | 0.300907671  | 0.528739335  | 4.21E-10 | 3.71E-09 | 4.99E-06 |
| SVEP1    | LMNA | 0.164114858  | 0.026668055  | 0.295471589  | 1.96E-02 | 3.66E-02 | 1.00E+00 |
| PXN      | LMNA | 0.591808998  | 0.494128183  | 0.674734323  | 1.78E-20 | 9.64E-19 | 2.11E-16 |
| TNF      | LMNA | -0.129753738 | -0.263092067 | 0.008448599  | 6.57E-02 | 1.06E-01 | 1.00E+00 |
| SIRT2    | LMNA | -0.431580187 | -0.537600886 | -0.312125657 | 1.43E-10 | 1.39E-09 | 1.70E-06 |
| C5orf21  | LMNA | -0.060059456 | -0.196481377 | 0.0786436    | 3.96E-01 | 4.83E-01 | 1.00E+00 |
| VIL2     | LMNA | -0.002992941 | -0.14098569  | 0.135113886  | 9.66E-01 | 9.75E-01 | 1.00E+00 |
| DIXDC1   | LMNA | 0.009069964  | -0.129142739 | 0.146936982  | 8.98E-01 | 9.26E-01 | 1.00E+00 |
| GANAB    | LMNA | 0.520560031  | 0.412125984  | 0.614454011  | 2.01E-15 | 4.48E-14 | 2.38E-11 |
| PDSS1    | LMNA | -0.401826799 | -0.511503381 | -0.27926749  | 3.08E-09 | 2.32E-08 | 3.65E-05 |
| GRM6     | LMNA | 0.04747111   | -0.091177416 | 0.18431422   | 5.02E-01 | 5.86E-01 | 1.00E+00 |
| NGFR     | LMNA | 0.093153898  | -0.045482001 | 0.228269357  | 1.87E-01 | 2.59E-01 | 1.00E+00 |
| ATP8B4   | LMNA | 0.120656945  | -0.017688693 | 0.254469298  | 8.72E-02 | 1.35E-01 | 1.00E+00 |
| MEIS1    | LMNA | 0.114004837  | -0.024430666 | 0.248150328  | 1.06E-01 | 1.60E-01 | 1.00E+00 |
| BMP8A    | LMNA | 0.100435241  | -0.038144643 | 0.235224806  | 1.55E-01 | 2.21E-01 | 1.00E+00 |
| NGFRAP1  | LMNA | -0.321917787 | -0.440397069 | -0.192418051 | 2.98E-06 | 1.31E-05 | 3.54E-02 |
| EDAR     | LMNA | -0.192977869 | -0.322438845 | -0.056430214 | 5.93E-03 | 1.27E-02 | 1.00E+00 |
| NEDD4L   | LMNA | -0.159044379 | -0.290712429 | -0.021464662 | 2.38E-02 | 4.36E-02 | 1.00E+00 |
| CRYBB3   | LMNA | -0.082512361 | -0.21807924  | 0.056178565  | 2.43E-01 | 3.23E-01 | 1.00E+00 |
| C6orf60  | LMNA | -0.208925491 | -0.337249418 | -0.072979389 | 2.85E-03 | 6.63E-03 | 1.00E+00 |
| IL1A     | LMNA | 0.080189399  | -0.058509313 | 0.215850881  | 2.57E-01 | 3.38E-01 | 1.00E+00 |
| GNRH1    | LMNA | -0.044910825 | -0.181834455 | 0.093721246  | 5.26E-01 | 6.09E-01 | 1.00E+00 |
| PDGFD    | LMNA | 0.347645787  | 0.220160937  | 0.463454296  | 3.99E-07 | 2.06E-06 | 4.74E-03 |
| CACNA1H  | LMNA | 0.036238829  | -0.102324079 | 0.173422231  | 6.09E-01 | 6.85E-01 | 1.00E+00 |
| TXNDC3   | LMNA | 0.190787037  | 0.05416259   | 0.320399253  | 6.53E-03 | 1.39E-02 | 1.00E+00 |
| ERCC1    | LMNA | 0.099452205  | -0.039136114 | 0.234286573  | 1.59E-01 | 2.26E-01 | 1.00E+00 |
| CAV3     | LMNA | 0.30497717   | 0.174263064  | 0.425129209  | 1.02E-05 | 4.02E-05 | 1.21E-01 |

|          |      |              |              |              |          |          |          |
|----------|------|--------------|--------------|--------------|----------|----------|----------|
| HARS     | LMNA | 0.195082756  | 0.058610208  | 0.324397293  | 5.40E-03 | 1.17E-02 | 1.00E+00 |
| AQP8     | LMNA | -0.067965862 | -0.204101825 | 0.070748958  | 3.37E-01 | 4.23E-01 | 1.00E+00 |
| CREBBP   | LMNA | -0.055667013 | -0.192240666 | 0.083022002  | 4.31E-01 | 5.18E-01 | 1.00E+00 |
| ITGB1    | LMNA | 0.567875757  | 0.466387592  | 0.654608212  | 1.21E-18 | 5.05E-17 | 1.44E-14 |
| SPACA1   | LMNA | -0.162689255 | -0.294134175 | -0.025204329 | 2.07E-02 | 3.85E-02 | 1.00E+00 |
| ZNF254   | LMNA | -0.24638101  | -0.371786387 | -0.112144393 | 4.08E-04 | 1.17E-03 | 1.00E+00 |
| PARK7    | LMNA | -0.138231498 | -0.271108927 | -0.000184008 | 4.98E-02 | 8.37E-02 | 1.00E+00 |
| PAX1     | LMNA | -0.064229226 | -0.20050239  | 0.074482202  | 3.64E-01 | 4.51E-01 | 1.00E+00 |
| PSMC4    | LMNA | 0.20927249   | 0.073340311  | 0.337570972  | 2.80E-03 | 6.53E-03 | 1.00E+00 |
| KCNH4    | LMNA | 0.011976201  | -0.126283587 | 0.149779567  | 8.66E-01 | 9.01E-01 | 1.00E+00 |
| TUBA1A   | LMNA | -0.311007058 | -0.430571541 | -0.180715028 | 6.64E-06 | 2.71E-05 | 7.87E-02 |
| PRMT8    | LMNA | -0.415528483 | -0.523546687 | -0.294363379 | 7.78E-10 | 6.57E-09 | 9.22E-06 |
| SELP     | LMNA | 0.293416786  | 0.161924789  | 0.414670927  | 2.26E-05 | 8.37E-05 | 2.67E-01 |
| PSMD8    | LMNA | 0.158606784  | 0.021015945  | 0.290301396  | 2.42E-02 | 4.42E-02 | 1.00E+00 |
| SOX10    | LMNA | -0.370018129 | -0.483377541 | -0.244454183 | 5.96E-08 | 3.57E-07 | 7.07E-04 |
| HTR1E    | LMNA | -0.28075366  | -0.403178152 | -0.148456588 | 5.18E-05 | 1.79E-04 | 6.15E-01 |
| RABGEF1  | LMNA | 0.199584864  | 0.063277337  | 0.328582468  | 4.40E-03 | 9.78E-03 | 1.00E+00 |
| EPS8L3   | LMNA | 0.006396885  | -0.131770482 | 0.144320436  | 9.28E-01 | 9.48E-01 | 1.00E+00 |
| MAP1LC3B | LMNA | -0.078234833 | -0.21397482  | 0.06046926   | 2.68E-01 | 3.50E-01 | 1.00E+00 |
| AGXT2L1  | LMNA | -0.449821675 | -0.553501176 | -0.332412965 | 1.87E-11 | 2.09E-10 | 2.22E-07 |
| CYB5R4   | LMNA | -0.110906069 | -0.245202844 | 0.027567002  | 1.16E-01 | 1.73E-01 | 1.00E+00 |
| MEMO1    | LMNA | -0.029201418 | -0.166580884 | 0.109290162  | 6.80E-01 | 7.48E-01 | 1.00E+00 |
| LRBA     | LMNA | 0.265532296  | 0.132332197  | 0.389312277  | 1.34E-04 | 4.28E-04 | 1.00E+00 |
| TRAPPC2  | LMNA | -0.407571994 | -0.51655846  | -0.285589916 | 1.74E-09 | 1.38E-08 | 2.07E-05 |
| FLJ14107 | LMNA | 0.135864846  | -0.002227942 | 0.268872794  | 5.39E-02 | 8.96E-02 | 1.00E+00 |
| FNTB     | LMNA | 0.157841107  | 0.020230941  | 0.289582078  | 2.49E-02 | 4.54E-02 | 1.00E+00 |
| MYST3    | LMNA | -0.21802879  | -0.345675278 | -0.082459753 | 1.83E-03 | 4.48E-03 | 1.00E+00 |
| KRT8     | LMNA | 0.21292502   | 0.077141557  | 0.340953848  | 2.35E-03 | 5.59E-03 | 1.00E+00 |
| AURKAIP1 | LMNA | 0.119571098  | -0.018790068 | 0.253438611  | 9.01E-02 | 1.39E-01 | 1.00E+00 |
| LMAN2L   | LMNA | 0.013300346  | -0.124980133 | 0.151073956  | 8.51E-01 | 8.89E-01 | 1.00E+00 |
| C1GALT1C | LMNA | 0.339396084  | 0.211242639  | 0.456078019  | 7.76E-07 | 3.80E-06 | 9.21E-03 |
| DSE      | LMNA | 0.467135194  | 0.351769259  | 0.56852301   | 2.41E-12 | 3.16E-11 | 2.86E-08 |
| FHIT     | LMNA | -0.405182201 | -0.514456653 | -0.282958725 | 2.21E-09 | 1.71E-08 | 2.62E-05 |
| OSBPL3   | LMNA | 0.495802242  | 0.384037039  | 0.593247806  | 6.26E-14 | 1.02E-12 | 7.43E-10 |
| PPOX     | LMNA | -0.269870802 | -0.393270156 | -0.136920919 | 1.03E-04 | 3.35E-04 | 1.00E+00 |

|           |      |              |              |              |          |          |          |
|-----------|------|--------------|--------------|--------------|----------|----------|----------|
| SLC39A9   | LMNA | -0.112914407 | -0.247113417 | 0.025534626  | 1.10E-01 | 1.64E-01 | 1.00E+00 |
| EPB49     | LMNA | -0.154753032 | -0.286679467 | -0.01706664  | 2.79E-02 | 5.01E-02 | 1.00E+00 |
| LOC137886 | LMNA | -0.228055071 | -0.354931676 | -0.092929801 | 1.10E-03 | 2.85E-03 | 1.00E+00 |
| C7orf49   | LMNA | 0.375395429  | 0.250316773  | 0.488148748  | 3.69E-08 | 2.27E-07 | 4.38E-04 |
| RHCE      | LMNA | 0.039852363  | -0.098741881 | 0.176929956  | 5.73E-01 | 6.53E-01 | 1.00E+00 |
| CST8      | LMNA | 0.115795427  | -0.022617123 | 0.249852369  | 1.01E-01 | 1.53E-01 | 1.00E+00 |
| ATG7      | LMNA | 0.256698356  | 0.12300639   | 0.381239206  | 2.26E-04 | 6.88E-04 | 1.00E+00 |
| SPP1      | LMNA | 0.255315847  | 0.121549038  | 0.379974051  | 2.45E-04 | 7.40E-04 | 1.00E+00 |
| GLI1      | LMNA | 0.142235599  | 0.004268412  | 0.274888945  | 4.35E-02 | 7.41E-02 | 1.00E+00 |
| HYPK      | LMNA | -0.026776468 | -0.164220425 | 0.111687387  | 7.05E-01 | 7.69E-01 | 1.00E+00 |
| SFTPD     | LMNA | -0.163063054 | -0.2944849   | -0.025588067 | 2.04E-02 | 3.80E-02 | 1.00E+00 |
| MCFD2     | LMNA | 0.540281541  | 0.434649483  | 0.63124988   | 1.05E-16 | 3.07E-15 | 1.25E-12 |
| ZNF157    | LMNA | -0.043153488 | -0.180131377 | 0.095466241  | 5.42E-01 | 6.24E-01 | 1.00E+00 |
| EPS15     | LMNA | -0.006011756 | -0.143943294 | 0.132148919  | 9.32E-01 | 9.51E-01 | 1.00E+00 |
| SFRS2B    | LMNA | -0.200594242 | -0.329520094 | -0.064324531 | 4.20E-03 | 9.37E-03 | 1.00E+00 |
| BTNL3     | LMNA | -0.090871103 | -0.22608589  | 0.047779282  | 1.98E-01 | 2.72E-01 | 1.00E+00 |
| GPR23     | LMNA | -0.372114829 | -0.485238716 | -0.246739015 | 4.95E-08 | 3.00E-07 | 5.87E-04 |
| TRPA1     | LMNA | 0.030339652  | -0.108164387 | 0.167688303  | 6.68E-01 | 7.38E-01 | 1.00E+00 |
| ASPSCR1   | LMNA | -0.127585836 | -0.261039063 | 0.010652797  | 7.04E-02 | 1.13E-01 | 1.00E+00 |
| GNS       | LMNA | 0.505887896  | 0.395454798  | 0.601902996  | 1.59E-14 | 2.99E-13 | 1.89E-10 |
| FDFT1     | LMNA | -0.301317899 | -0.421822259 | -0.170353118 | 1.31E-05 | 5.10E-05 | 1.56E-01 |
| ENO2      | LMNA | 0.043220638  | -0.095399579 | 0.180196468  | 5.41E-01 | 6.23E-01 | 1.00E+00 |
| CBX1      | LMNA | -0.338862454 | -0.455600334 | -0.210666495 | 8.10E-07 | 3.94E-06 | 9.61E-03 |
| PTGS2     | LMNA | 0.271834973  | 0.139000247  | 0.395060503  | 9.10E-05 | 2.99E-04 | 1.00E+00 |
| BMP7      | LMNA | -0.186966528 | -0.316839608 | -0.050211534 | 7.71E-03 | 1.61E-02 | 1.00E+00 |
| CCDC90B   | LMNA | -0.213931576 | -0.341885512 | -0.078189791 | 2.23E-03 | 5.35E-03 | 1.00E+00 |
| LRP5      | LMNA | -0.126032671 | -0.259567474 | 0.012231138  | 7.39E-02 | 1.18E-01 | 1.00E+00 |
| UBE2D3    | LMNA | 0.049970021  | -0.088692819 | 0.186732861  | 4.80E-01 | 5.65E-01 | 1.00E+00 |
| ARFGEF2   | LMNA | 0.274743363  | 0.142081307  | 0.397709789  | 7.59E-05 | 2.54E-04 | 9.00E-01 |
| ARR3      | LMNA | 0.03446306   | -0.104083133 | 0.171697184  | 6.26E-01 | 7.01E-01 | 1.00E+00 |
| MAP1A     | LMNA | -0.131442831 | -0.264690801 | 0.006730297  | 6.22E-02 | 1.01E-01 | 1.00E+00 |
| NEFL      | LMNA | -0.168051811 | -0.299162329 | -0.030713351 | 1.68E-02 | 3.20E-02 | 1.00E+00 |
| CD2       | LMNA | 0.286178539  | 0.154220358  | 0.408106385  | 3.65E-05 | 1.30E-04 | 4.33E-01 |
| FLJ23861  | LMNA | -0.352571417 | -0.467850793 | -0.225495944 | 2.66E-07 | 1.42E-06 | 3.15E-03 |
| NAV2      | LMNA | -0.02130009  | -0.158883893 | 0.117095229  | 7.64E-01 | 8.19E-01 | 1.00E+00 |



|          |      |              |              |              |          |          |          |
|----------|------|--------------|--------------|--------------|----------|----------|----------|
| ENTPD2   | LMNA | -0.055828145 | -0.192396322 | 0.08286148   | 4.30E-01 | 5.17E-01 | 1.00E+00 |
| COX7B    | LMNA | -0.039431728 | -0.176521816 | 0.099159054  | 5.77E-01 | 6.56E-01 | 1.00E+00 |
| ATP6V1A  | LMNA | -0.308821356 | -0.428599818 | -0.178375035 | 7.76E-06 | 3.13E-05 | 9.20E-02 |
| ANKRD17  | LMNA | -0.060284559 | -0.196698566 | 0.078419072  | 3.94E-01 | 4.81E-01 | 1.00E+00 |
| ADH1C    | LMNA | 0.094175318  | -0.044453624 | 0.229245894  | 1.82E-01 | 2.53E-01 | 1.00E+00 |
| ATXN7    | LMNA | 0.043244348  | -0.095376041 | 0.180219452  | 5.41E-01 | 6.23E-01 | 1.00E+00 |
| IL21R    | LMNA | 0.237426583  | 0.102743194  | 0.363561148  | 6.68E-04 | 1.83E-03 | 1.00E+00 |
| CHN2     | LMNA | -0.139889815 | -0.272674937 | -0.001875025 | 4.71E-02 | 7.96E-02 | 1.00E+00 |
| HAS2     | LMNA | 0.155188526  | 0.017512716  | 0.287088952  | 2.74E-02 | 4.94E-02 | 1.00E+00 |
| C6orf48  | LMNA | -0.162922564 | -0.294353086 | -0.025443837 | 2.05E-02 | 3.82E-02 | 1.00E+00 |
| TGIF2    | LMNA | 0.102511079  | -0.036050094 | 0.237205209  | 1.47E-01 | 2.11E-01 | 1.00E+00 |
| KIAA0241 | LMNA | 0.3813777    | 0.256849727  | 0.49344883   | 2.15E-08 | 1.39E-07 | 2.54E-04 |
| IGF2AS   | LMNA | -0.055957968 | -0.192521728 | 0.082732143  | 4.29E-01 | 5.15E-01 | 1.00E+00 |
| CYP2C9   | LMNA | -0.144646353 | -0.277162808 | -0.006729736 | 4.00E-02 | 6.89E-02 | 1.00E+00 |
| DNMT3A   | LMNA | 0.021475975  | -0.116921673 | 0.159055411  | 7.62E-01 | 8.17E-01 | 1.00E+00 |
| CNOT7    | LMNA | -0.361459233 | -0.47576943  | -0.235141762 | 1.26E-07 | 7.09E-07 | 1.49E-03 |
| FCAR     | LMNA | 0.098384101  | -0.040213075 | 0.233266865  | 1.64E-01 | 2.31E-01 | 1.00E+00 |
| SFRS10   | LMNA | -0.079694456 | -0.215375912 | 0.05900572   | 2.60E-01 | 3.41E-01 | 1.00E+00 |
| Mar-03   | LMNA | -0.208861164 | -0.337189805 | -0.072912485 | 2.85E-03 | 6.64E-03 | 1.00E+00 |
| RUNX1T1  | LMNA | -0.261697818 | -0.385810397 | -0.12828132  | 1.68E-04 | 5.26E-04 | 1.00E+00 |
| CTSK     | LMNA | 0.301655944  | 0.170714147  | 0.422127891  | 1.28E-05 | 4.99E-05 | 1.52E-01 |
| LRRC61   | LMNA | -0.002200065 | -0.140208481 | 0.135892209  | 9.75E-01 | 9.81E-01 | 1.00E+00 |
| HNF4G    | LMNA | 0.115723718  | -0.022689769 | 0.249784222  | 1.01E-01 | 1.53E-01 | 1.00E+00 |
| PSIP1    | LMNA | -0.321106746 | -0.439667671 | -0.191546847 | 3.17E-06 | 1.38E-05 | 3.76E-02 |
| AP2B1    | LMNA | -0.183318026 | -0.313436807 | -0.046442353 | 9.02E-03 | 1.85E-02 | 1.00E+00 |
| C7orf28A | LMNA | 0.082405945  | -0.05628537  | 0.217977189  | 2.44E-01 | 3.23E-01 | 1.00E+00 |
| SMCHD1   | LMNA | 0.030843566  | -0.107665874 | 0.168178466  | 6.63E-01 | 7.33E-01 | 1.00E+00 |
| EIF2C3   | LMNA | -0.164020047 | -0.295382659 | -0.02657069  | 1.97E-02 | 3.68E-02 | 1.00E+00 |
| S100B    | LMNA | -0.258832469 | -0.383191249 | -0.125257168 | 2.00E-04 | 6.13E-04 | 1.00E+00 |
| BMP2     | LMNA | -0.079596528 | -0.215281929 | 0.059103929  | 2.60E-01 | 3.42E-01 | 1.00E+00 |
| POP7     | LMNA | -0.02519318  | -0.162678395 | 0.113251703  | 7.22E-01 | 7.83E-01 | 1.00E+00 |
| UGT2A3   | LMNA | 0.095226576  | -0.043394899 | 0.230250673  | 1.78E-01 | 2.48E-01 | 1.00E+00 |
| ESR1     | LMNA | 0.246040739  | 0.111786704  | 0.371474184  | 4.16E-04 | 1.19E-03 | 1.00E+00 |
| ZFPL1    | LMNA | 0.214298652  | 0.078572141  | 0.342225213  | 2.19E-03 | 5.27E-03 | 1.00E+00 |
| ARHGAP12 | LMNA | -0.258870008 | -0.383225576 | -0.125296772 | 1.99E-04 | 6.12E-04 | 1.00E+00 |

|           |      |              |              |              |          |          |          |
|-----------|------|--------------|--------------|--------------|----------|----------|----------|
| PGGT1B    | LMNA | 0.287686332  | 0.155823939  | 0.409474879  | 3.30E-05 | 1.19E-04 | 3.92E-01 |
| LRRRC19   | LMNA | -0.230848753 | -0.357506417 | -0.095852465 | 9.48E-04 | 2.50E-03 | 1.00E+00 |
| ZNF767    | LMNA | -0.120068402 | -0.25391069  | 0.018285694  | 8.87E-02 | 1.37E-01 | 1.00E+00 |
| DEPDC6    | LMNA | -0.142743601 | -0.275368224 | -0.004786932 | 4.27E-02 | 7.29E-02 | 1.00E+00 |
| SLCO1B1   | LMNA | -0.002814259 | -0.140810553 | 0.135289303  | 9.68E-01 | 9.76E-01 | 1.00E+00 |
| SST       | LMNA | -0.351564442 | -0.466952454 | -0.224404657 | 2.89E-07 | 1.53E-06 | 3.43E-03 |
| NACA      | LMNA | -0.015292278 | -0.153020235 | 0.123018429  | 8.29E-01 | 8.71E-01 | 1.00E+00 |
| KCNN3     | LMNA | -0.315761245 | -0.434856354 | -0.185809913 | 4.70E-06 | 1.98E-05 | 5.58E-02 |
| GLOD4     | LMNA | -0.283650056 | -0.405810268 | -0.151532803 | 4.30E-05 | 1.51E-04 | 5.10E-01 |
| SCCPDH    | LMNA | -0.095800661 | -0.230799255 | 0.042816605  | 1.75E-01 | 2.45E-01 | 1.00E+00 |
| PRF1      | LMNA | 0.417098604  | 0.296097137  | 0.524924018  | 6.61E-10 | 5.66E-09 | 7.85E-06 |
| LST1      | LMNA | 0.039121239  | -0.099466955 | 0.176220521  | 5.80E-01 | 6.59E-01 | 1.00E+00 |
| CDK4      | LMNA | -0.165618105 | -0.296881287 | -0.028212139 | 1.85E-02 | 3.48E-02 | 1.00E+00 |
| TCF15     | LMNA | -0.223597391 | -0.350819354 | -0.088271129 | 1.38E-03 | 3.49E-03 | 1.00E+00 |
| PARC      | LMNA | -0.136378109 | -0.269357873 | 0.001704991  | 5.30E-02 | 8.83E-02 | 1.00E+00 |
| PRMT1     | LMNA | -0.002858462 | -0.140853879 | 0.135245909  | 9.68E-01 | 9.76E-01 | 1.00E+00 |
| ITIH3     | LMNA | 0.096214707  | -0.042399466 | 0.231194853  | 1.73E-01 | 2.42E-01 | 1.00E+00 |
| PPM2C     | LMNA | 0.061516597  | -0.077189934 | 0.197887056  | 3.84E-01 | 4.72E-01 | 1.00E+00 |
| TEX10     | LMNA | -0.214099872 | -0.342041261 | -0.078365085 | 2.22E-03 | 5.31E-03 | 1.00E+00 |
| EDA2R     | LMNA | 0.285794593  | 0.153812131  | 0.407757823  | 3.74E-05 | 1.33E-04 | 4.44E-01 |
| LOC283345 | LMNA | 0.123975352  | -0.014320747 | 0.257617254  | 7.88E-02 | 1.24E-01 | 1.00E+00 |
| NARFL     | LMNA | -0.202769522 | -0.331539881 | -0.066582329 | 3.80E-03 | 8.56E-03 | 1.00E+00 |
| DENND2A   | LMNA | 0.198889958  | 0.06255657   | 0.327936811  | 4.55E-03 | 1.00E-02 | 1.00E+00 |
| C1orf103  | LMNA | -0.054866332 | -0.191467094 | 0.083819547  | 4.38E-01 | 5.24E-01 | 1.00E+00 |
| DMXL1     | LMNA | -0.041214895 | -0.178251687 | 0.097390232  | 5.60E-01 | 6.41E-01 | 1.00E+00 |
| KCNAB1    | LMNA | -0.410738213 | -0.519341108 | -0.289078796 | 1.27E-09 | 1.03E-08 | 1.50E-05 |
| FLJ20254  | LMNA | 0.574866416  | 0.474469754  | 0.660499585  | 3.66E-19 | 1.64E-17 | 4.35E-15 |
| RBM3      | LMNA | 0.219111447  | 0.083588889  | 0.346676     | 1.73E-03 | 4.27E-03 | 1.00E+00 |
| GPR1      | LMNA | 0.088007278  | -0.050659206 | 0.223344753  | 2.13E-01 | 2.88E-01 | 1.00E+00 |
| DMTF1     | LMNA | -0.130729314 | -0.264015544 | 0.007456252  | 6.37E-02 | 1.03E-01 | 1.00E+00 |
| HTR5A     | LMNA | -0.316874413 | -0.435858843 | -0.187003865 | 4.33E-06 | 1.84E-05 | 5.14E-02 |
| MXRA5     | LMNA | 0.474329303  | 0.359841299  | 0.574745057  | 9.97E-13 | 1.39E-11 | 1.18E-08 |
| GRM1      | LMNA | -0.294726307 | -0.415857217 | -0.163320365 | 2.06E-05 | 7.72E-05 | 2.45E-01 |
| SCFD1     | LMNA | 0.077152437  | -0.061554175 | 0.212935468  | 2.75E-01 | 3.58E-01 | 1.00E+00 |
| RAPSN     | LMNA | 0.317575622  | 0.187756158  | 0.43649018   | 4.12E-06 | 1.75E-05 | 4.88E-02 |

|           |      |              |              |              |          |          |          |
|-----------|------|--------------|--------------|--------------|----------|----------|----------|
| ACOT9     | LMNA | 0.562789307  | 0.460517588  | 0.650314978  | 2.85E-18 | 1.09E-16 | 3.38E-14 |
| PDE4D     | LMNA | 0.132335473  | -0.005821888 | 0.265535396  | 6.05E-02 | 9.90E-02 | 1.00E+00 |
| TRPC4     | LMNA | -0.160854873 | -0.29241251  | -0.023321759 | 2.22E-02 | 4.10E-02 | 1.00E+00 |
| EPHB3     | LMNA | -0.19242916  | -0.321928127 | -0.055862139 | 6.08E-03 | 1.30E-02 | 1.00E+00 |
| GEMIN4    | LMNA | -0.023821923 | -0.161342326 | 0.114605976  | 7.36E-01 | 7.95E-01 | 1.00E+00 |
| RAMP3     | LMNA | 0.085522302  | -0.053156285 | 0.220964499  | 2.26E-01 | 3.03E-01 | 1.00E+00 |
| CNTN5     | LMNA | -0.069417102 | -0.205498787 | 0.069297988  | 3.26E-01 | 4.12E-01 | 1.00E+00 |
| TSPYL5    | LMNA | -0.088573821 | -0.223887195 | 0.050089661  | 2.10E-01 | 2.85E-01 | 1.00E+00 |
| GRTP1     | LMNA | 0.051511071  | -0.087159736 | 0.188223585  | 4.67E-01 | 5.52E-01 | 1.00E+00 |
| ITGB8     | LMNA | 0.247977122  | 0.113822669  | 0.373250457  | 3.73E-04 | 1.08E-03 | 1.00E+00 |
| GAP43     | LMNA | 0.089792512  | -0.048864206 | 0.225053759  | 2.04E-01 | 2.78E-01 | 1.00E+00 |
| FRS3      | LMNA | -0.486349568 | -0.585115315 | -0.373366804 | 2.17E-13 | 3.31E-12 | 2.57E-09 |
| PDE3A     | LMNA | 0.155006099  | 0.01732585   | 0.286917426  | 2.76E-02 | 4.97E-02 | 1.00E+00 |
| TNFRSF10C | LMNA | 0.2616945    | 0.128277817  | 0.385807366  | 1.69E-04 | 5.26E-04 | 1.00E+00 |
| JMJD5     | LMNA | -0.026321268 | -0.163777155 | 0.112137203  | 7.10E-01 | 7.73E-01 | 1.00E+00 |
| OTOF      | LMNA | -0.112228892 | -0.24646139  | 0.026228474  | 1.12E-01 | 1.67E-01 | 1.00E+00 |
| TEX14     | LMNA | -0.266327202 | -0.390037786 | -0.13317252  | 1.28E-04 | 4.09E-04 | 1.00E+00 |
| XYLT2     | LMNA | 0.464280739  | 0.348571208  | 0.566051027  | 3.41E-12 | 4.37E-11 | 4.04E-08 |
| HIPK3     | LMNA | 0.296833079  | 0.165566687  | 0.417764867  | 1.79E-05 | 6.76E-05 | 2.12E-01 |
| XPOT      | LMNA | 0.017882163  | -0.120466226 | 0.155549168  | 8.01E-01 | 8.50E-01 | 1.00E+00 |
| RRH       | LMNA | -0.273054477 | -0.396171613 | -0.14029184  | 8.43E-05 | 2.80E-04 | 1.00E+00 |
| CDR2L     | LMNA | 0.319546841  | 0.1898718    | 0.438264353  | 3.56E-06 | 1.53E-05 | 4.22E-02 |
| GAL3ST1   | LMNA | -0.343201102 | -0.459482179 | -0.215353384 | 5.73E-07 | 2.85E-06 | 6.79E-03 |
| DHCR7     | LMNA | 0.161429146  | 0.023911013  | 0.292951587  | 2.17E-02 | 4.03E-02 | 1.00E+00 |
| PDZD7     | LMNA | 0.073699963  | -0.065012497 | 0.209618234  | 2.97E-01 | 3.81E-01 | 1.00E+00 |
| FGFR4     | LMNA | 0.015443645  | -0.122869314 | 0.15316809   | 8.27E-01 | 8.70E-01 | 1.00E+00 |
| CRAT      | LMNA | 0.303297549  | 0.172467869  | 0.423611703  | 1.15E-05 | 4.49E-05 | 1.36E-01 |
| C1orf217  | LMNA | -0.115053468 | -0.249147203 | 0.023368703  | 1.03E-01 | 1.56E-01 | 1.00E+00 |
| SLC19A1   | LMNA | 0.169858751  | 0.032571526  | 0.300854952  | 1.57E-02 | 3.00E-02 | 1.00E+00 |
| PPP1R14D  | LMNA | -0.083371516 | -0.218903047 | 0.055316147  | 2.38E-01 | 3.17E-01 | 1.00E+00 |
| LIMS1     | LMNA | 0.579331872  | 0.47964131   | 0.664257335  | 1.68E-19 | 7.81E-18 | 1.99E-15 |
| TMPRSS11  | LMNA | -0.05317422  | -0.189831712 | 0.085504448  | 4.52E-01 | 5.39E-01 | 1.00E+00 |
| TRIM14    | LMNA | 0.353872058  | 0.226905956  | 0.469010761  | 2.39E-07 | 1.28E-06 | 2.83E-03 |
| PIK3CD    | LMNA | 0.314149629  | 0.184082021  | 0.433404455  | 5.29E-06 | 2.20E-05 | 6.27E-02 |
| MFAP3L    | LMNA | -0.015063235 | -0.152796496 | 0.123244051  | 8.32E-01 | 8.73E-01 | 1.00E+00 |

|           |      |              |              |              |          |          |          |
|-----------|------|--------------|--------------|--------------|----------|----------|----------|
| DERL2     | LMNA | 0.439955564  | 0.321426842  | 0.544910702  | 5.70E-11 | 5.94E-10 | 6.76E-07 |
| SLC7A11   | LMNA | -0.013474135 | -0.151243804 | 0.124809025  | 8.49E-01 | 8.88E-01 | 1.00E+00 |
| FHL5      | LMNA | -0.143605816 | -0.276181538 | -0.005667166 | 4.15E-02 | 7.11E-02 | 1.00E+00 |
| ACAN      | LMNA | 0.004728279  | -0.133409804 | 0.142686142  | 9.47E-01 | 9.60E-01 | 1.00E+00 |
| BRWD2     | LMNA | -0.097736986 | -0.232648927 | 0.040865398  | 1.66E-01 | 2.34E-01 | 1.00E+00 |
| PPM1E     | LMNA | -0.610759951 | -0.690583682 | -0.516235909 | 4.86E-22 | 3.43E-20 | 5.76E-18 |
| DCUN1D2   | LMNA | -0.384051438 | -0.495814981 | -0.259773275 | 1.68E-08 | 1.10E-07 | 1.99E-04 |
| TINAGL1   | LMNA | 0.303844839  | 0.173052723  | 0.424106244  | 1.10E-05 | 4.33E-05 | 1.31E-01 |
| C3orf36   | LMNA | -0.089255703 | -0.224539958 | 0.049404047  | 2.07E-01 | 2.81E-01 | 1.00E+00 |
| DOCK4     | LMNA | -0.193791055 | -0.323195588 | -0.057272262 | 5.72E-03 | 1.23E-02 | 1.00E+00 |
| ENOPH1    | LMNA | -0.404247907 | -0.513634591 | -0.281930557 | 2.43E-09 | 1.86E-08 | 2.88E-05 |
| FAM127A   | LMNA | -0.032250157 | -0.169546309 | 0.106273993  | 6.49E-01 | 7.21E-01 | 1.00E+00 |
| SLC5A3    | LMNA | 0.329292829  | 0.20034956   | 0.447022541  | 1.71E-06 | 7.85E-06 | 2.03E-02 |
| ARPC1A    | LMNA | 0.342429769  | 0.21451971   | 0.458792382  | 6.09E-07 | 3.03E-06 | 7.23E-03 |
| CHST2     | LMNA | 0.55569234   | 0.452342272  | 0.644315404  | 9.16E-18 | 3.20E-16 | 1.09E-13 |
| SPATA2    | LMNA | -0.228503324 | -0.355344928 | -0.093398592 | 1.07E-03 | 2.79E-03 | 1.00E+00 |
| PGLYRP4   | LMNA | -0.027222534 | -0.164654746 | 0.111246542  | 7.01E-01 | 7.65E-01 | 1.00E+00 |
| RUFY1     | LMNA | 0.414768123  | 0.293524062  | 0.522879486  | 8.41E-10 | 7.06E-09 | 9.97E-06 |
| NTS       | LMNA | -0.076849809 | -0.21264482  | 0.061857449  | 2.77E-01 | 3.60E-01 | 1.00E+00 |
| FRMD4A    | LMNA | -0.187236977 | -0.317091711 | -0.050491083 | 7.62E-03 | 1.59E-02 | 1.00E+00 |
| RPS4Y1    | LMNA | 0.093031238  | -0.045605476 | 0.228152069  | 1.88E-01 | 2.60E-01 | 1.00E+00 |
| BCL11B    | LMNA | -0.367893242 | -0.481490299 | -0.242140058 | 7.19E-08 | 4.25E-07 | 8.53E-04 |
| TNFRSF8   | LMNA | 0.087889855  | -0.05077724  | 0.223232315  | 2.14E-01 | 2.89E-01 | 1.00E+00 |
| FOXE3     | LMNA | -0.068587242 | -0.204700033 | 0.070127766  | 3.32E-01 | 4.18E-01 | 1.00E+00 |
| PTGIR     | LMNA | 0.425815055  | 0.30573653   | 0.532559948  | 2.65E-10 | 2.44E-09 | 3.15E-06 |
| ART4      | LMNA | -0.146549557 | -0.278956893 | -0.008674043 | 3.74E-02 | 6.50E-02 | 1.00E+00 |
| EVX1      | LMNA | -0.123506121 | -0.257172297 | 0.014797173  | 7.99E-02 | 1.26E-01 | 1.00E+00 |
| PRM1      | LMNA | -0.093014851 | -0.2281364   | 0.045621971  | 1.88E-01 | 2.60E-01 | 1.00E+00 |
| GLCE      | LMNA | -0.084666331 | -0.220144226 | 0.054016023  | 2.31E-01 | 3.09E-01 | 1.00E+00 |
| GPR18     | LMNA | 0.266887677  | 0.133765134  | 0.390549238  | 1.23E-04 | 3.97E-04 | 1.00E+00 |
| ACAA2     | LMNA | 0.14346722   | 0.00552566   | 0.276050816  | 4.17E-02 | 7.14E-02 | 1.00E+00 |
| PIGK      | LMNA | 0.09428179   | -0.04434641  | 0.229347671  | 1.82E-01 | 2.53E-01 | 1.00E+00 |
| HIST1H2AC | LMNA | -0.009904823 | -0.147753789 | 0.128321641  | 8.89E-01 | 9.19E-01 | 1.00E+00 |
| C16orf67  | LMNA | -0.431298833 | -0.53735505  | -0.311813599 | 1.47E-10 | 1.43E-09 | 1.75E-06 |
| UQCC      | LMNA | 0.005589903  | -0.132563395 | 0.143530143  | 9.37E-01 | 9.54E-01 | 1.00E+00 |

|           |      |              |              |              |          |          |          |
|-----------|------|--------------|--------------|--------------|----------|----------|----------|
| PLS3      | LMNA | 0.605999764  | 0.510670917  | 0.686609765  | 1.23E-21 | 7.78E-20 | 1.46E-17 |
| DAG1      | LMNA | 0.248927735  | 0.114822581  | 0.374122132  | 3.54E-04 | 1.03E-03 | 1.00E+00 |
| WWOX      | LMNA | -0.227353181 | -0.354284491 | -0.092195871 | 1.14E-03 | 2.94E-03 | 1.00E+00 |
| GTSE1     | LMNA | -0.008378136 | -0.146259971 | 0.129823019  | 9.06E-01 | 9.32E-01 | 1.00E+00 |
| GP2       | LMNA | 0.180282292  | 0.043309176  | 0.310602959  | 1.02E-02 | 2.07E-02 | 1.00E+00 |
| CHIT1     | LMNA | 0.202811397  | 0.066625807  | 0.331578751  | 3.79E-03 | 8.55E-03 | 1.00E+00 |
| PLOD2     | LMNA | 0.598956903  | 0.502451945  | 0.680721368  | 4.70E-21 | 2.76E-19 | 5.58E-17 |
| RPS24     | LMNA | -0.119542607 | -0.253411562 | 0.018818963  | 9.02E-02 | 1.39E-01 | 1.00E+00 |
| KLF9      | LMNA | 0.255963958  | 0.122232163  | 0.380567205  | 2.36E-04 | 7.16E-04 | 1.00E+00 |
| TTC27     | LMNA | 0.260046793  | 0.126538489  | 0.384301479  | 1.86E-04 | 5.75E-04 | 1.00E+00 |
| PYROXD1   | LMNA | 0.179841726  | 0.042854693  | 0.310191499  | 1.04E-02 | 2.11E-02 | 1.00E+00 |
| MIA       | LMNA | -0.005838524 | -0.143773641 | 0.132319128  | 9.34E-01 | 9.52E-01 | 1.00E+00 |
| TSPAN2    | LMNA | 0.221572301  | 0.086156685  | 0.348949536  | 1.53E-03 | 3.81E-03 | 1.00E+00 |
| MRPL9     | LMNA | -0.062679075 | -0.199008077 | 0.076029804  | 3.76E-01 | 4.63E-01 | 1.00E+00 |
| PCSK2     | LMNA | -0.52928158  | -0.62189225  | -0.422070353 | 5.58E-16 | 1.42E-14 | 6.62E-12 |
| PI3       | LMNA | 0.317907155  | 0.188111896  | 0.436788637  | 4.02E-06 | 1.72E-05 | 4.77E-02 |
| RPL24     | LMNA | -0.132166225 | -0.265375274 | 0.005994143  | 6.08E-02 | 9.95E-02 | 1.00E+00 |
| HIST1H2BE | LMNA | 0.152194629  | 0.014447173  | 0.28427288   | 3.06E-02 | 5.45E-02 | 1.00E+00 |
| CD86      | LMNA | 0.222721812  | 0.087356767  | 0.350011034  | 1.44E-03 | 3.62E-03 | 1.00E+00 |
| CALM2     | LMNA | -0.271412207 | -0.394675229 | -0.138552595 | 9.34E-05 | 3.07E-04 | 1.00E+00 |
| LFNG      | LMNA | 0.022335451  | -0.116073455 | 0.159893431  | 7.52E-01 | 8.09E-01 | 1.00E+00 |
| GYG2      | LMNA | -0.042078311 | -0.179088992 | 0.096533448  | 5.52E-01 | 6.33E-01 | 1.00E+00 |
| INTS12    | LMNA | -0.165836954 | -0.297086469 | -0.028436988 | 1.83E-02 | 3.45E-02 | 1.00E+00 |
| RAB4B     | LMNA | -0.173134268 | -0.30392114  | -0.035942338 | 1.37E-02 | 2.68E-02 | 1.00E+00 |
| CTSF      | LMNA | -0.041825542 | -0.178843887 | 0.096784297  | 5.55E-01 | 6.35E-01 | 1.00E+00 |
| HUNK      | LMNA | -0.200077601 | -0.329040211 | -0.063788497 | 4.30E-03 | 9.58E-03 | 1.00E+00 |
| GNA13     | LMNA | 0.052813616  | -0.085863412 | 0.1894831    | 4.55E-01 | 5.42E-01 | 1.00E+00 |
| B4GALT4   | LMNA | 0.273768302  | 0.141048071  | 0.396821824  | 8.07E-05 | 2.69E-04 | 9.57E-01 |
| TSPAN31   | LMNA | -0.190565023 | -0.320192498 | -0.053932871 | 6.60E-03 | 1.40E-02 | 1.00E+00 |
| CHD1L     | LMNA | 0.082863333  | -0.055826285 | 0.218415795  | 2.41E-01 | 3.20E-01 | 1.00E+00 |
| CNKSR2    | LMNA | -0.395950502 | -0.506325083 | -0.272811764 | 5.45E-09 | 3.94E-08 | 6.47E-05 |
| C1orf156  | LMNA | -0.104295123 | -0.238906339 | 0.034248996  | 1.40E-01 | 2.02E-01 | 1.00E+00 |
| IBSP      | LMNA | 0.342198028  | 0.214269275  | 0.45858511   | 6.21E-07 | 3.08E-06 | 7.36E-03 |
| FUT8      | LMNA | 0.069172669  | -0.069542417 | 0.205263535  | 3.28E-01 | 4.14E-01 | 1.00E+00 |
| TRMT11    | LMNA | -0.133408077 | -0.266549994 | 0.004730038  | 5.84E-02 | 9.60E-02 | 1.00E+00 |

|          |      |              |              |              |          |          |          |
|----------|------|--------------|--------------|--------------|----------|----------|----------|
| AGA      | LMNA | 0.271269671  | 0.138401681  | 0.394545324  | 9.42E-05 | 3.09E-04 | 1.00E+00 |
| GFRA2    | LMNA | -0.166981213 | -0.298159073 | -0.029612845 | 1.75E-02 | 3.32E-02 | 1.00E+00 |
| WWP1     | LMNA | 0.136433347  | -0.001648706 | 0.269410074  | 5.29E-02 | 8.81E-02 | 1.00E+00 |
| B9D2     | LMNA | 0.146515329  | 0.008639067  | 0.278924636  | 3.75E-02 | 6.50E-02 | 1.00E+00 |
| CPZ      | LMNA | 0.419479085  | 0.298727231  | 0.527011113  | 5.17E-10 | 4.50E-09 | 6.13E-06 |
| STAT1    | LMNA | 0.115163963  | -0.023256786 | 0.249252227  | 1.03E-01 | 1.55E-01 | 1.00E+00 |
| PTTG1    | LMNA | 0.082900349  | -0.055789129 | 0.218451289  | 2.41E-01 | 3.20E-01 | 1.00E+00 |
| TMEM62   | LMNA | 0.005184733  | -0.132961435 | 0.143133285  | 9.42E-01 | 9.57E-01 | 1.00E+00 |
| COL8A1   | LMNA | 0.555505619  | 0.452127414  | 0.644157408  | 9.45E-18 | 3.28E-16 | 1.12E-13 |
| RBPJL    | LMNA | 0.051569848  | -0.08710125  | 0.188280429  | 4.66E-01 | 5.52E-01 | 1.00E+00 |
| CASP8AP2 | LMNA | -0.230864709 | -0.357521117 | -0.095869164 | 9.48E-04 | 2.50E-03 | 1.00E+00 |
| SSBP2    | LMNA | 0.209052245  | 0.073111225  | 0.33736688   | 2.83E-03 | 6.59E-03 | 1.00E+00 |
| MMP12    | LMNA | 0.105342844  | -0.033190841 | 0.239904982  | 1.36E-01 | 1.97E-01 | 1.00E+00 |
| NME4     | LMNA | 0.078956065  | -0.059746167 | 0.214667201  | 2.64E-01 | 3.46E-01 | 1.00E+00 |
| LOC55565 | LMNA | -0.55233175  | -0.641470646 | -0.448477107 | 1.58E-17 | 5.26E-16 | 1.87E-13 |
| GABRA1   | LMNA | -0.347471699 | -0.463298805 | -0.21997252  | 4.05E-07 | 2.08E-06 | 4.80E-03 |
| PEX11B   | LMNA | -0.132867835 | -0.266039005 | 0.005280015  | 5.94E-02 | 9.76E-02 | 1.00E+00 |
| HABP2    | LMNA | 0.213065692  | 0.077288036  | 0.341084069  | 2.33E-03 | 5.56E-03 | 1.00E+00 |
| REEP1    | LMNA | -0.613296643 | -0.692699407 | -0.519204743 | 2.94E-22 | 2.18E-20 | 3.49E-18 |
| C9orf156 | LMNA | -0.133496359 | -0.266633489 | 0.004640157  | 5.82E-02 | 9.58E-02 | 1.00E+00 |
| SMARCA1  | LMNA | 0.070766089  | -0.067948725 | 0.206796823  | 3.17E-01 | 4.02E-01 | 1.00E+00 |
| WEE1     | LMNA | 0.409918248  | 0.28817496   | 0.518620698  | 1.38E-09 | 1.11E-08 | 1.63E-05 |
| APOF     | LMNA | -0.04332551  | -0.180298124 | 0.095295465  | 5.40E-01 | 6.22E-01 | 1.00E+00 |
| GCDH     | LMNA | -0.156369614 | -0.288199262 | -0.018722782 | 2.63E-02 | 4.76E-02 | 1.00E+00 |
| SSR4     | LMNA | 0.162426131  | 0.024934233  | 0.293887271  | 2.09E-02 | 3.89E-02 | 1.00E+00 |
| SPAST    | LMNA | -0.529830862 | -0.62236015  | -0.422697513 | 5.14E-16 | 1.32E-14 | 6.10E-12 |
| RGS1     | LMNA | 0.302816212  | 0.171953572  | 0.423176699  | 1.18E-05 | 4.63E-05 | 1.41E-01 |
| ACCN4    | LMNA | -0.239876506 | -0.365813522 | -0.105312964 | 5.85E-04 | 1.63E-03 | 1.00E+00 |
| PLXND1   | LMNA | 0.550510942  | 0.446384535  | 0.639928297  | 2.11E-17 | 6.83E-16 | 2.51E-13 |
| FLJ20489 | LMNA | -0.241400579 | -0.367213957 | -0.106912501 | 5.38E-04 | 1.51E-03 | 1.00E+00 |
| MLCK     | LMNA | -0.062843712 | -0.199166813 | 0.07586547   | 3.74E-01 | 4.62E-01 | 1.00E+00 |
| INTS5    | LMNA | 0.106198375  | -0.032326559 | 0.240720226  | 1.33E-01 | 1.94E-01 | 1.00E+00 |
| BSG      | LMNA | 0.321785968  | 0.19227644   | 0.440278531  | 3.01E-06 | 1.32E-05 | 3.57E-02 |
| PARP8    | LMNA | -0.03418876  | -0.171430644 | 0.104354773  | 6.29E-01 | 7.03E-01 | 1.00E+00 |
| ZNF215   | LMNA | 0.164146241  | 0.026700284  | 0.295501025  | 1.96E-02 | 3.66E-02 | 1.00E+00 |

|          |      |              |              |              |          |          |          |
|----------|------|--------------|--------------|--------------|----------|----------|----------|
| TEAD4    | LMNA | 0.429980493  | 0.310351734  | 0.536202898  | 1.70E-10 | 1.63E-09 | 2.02E-06 |
| PDE7B    | LMNA | -0.122819054 | -0.256520671 | 0.015494663  | 8.16E-02 | 1.28E-01 | 1.00E+00 |
| MS4A3    | LMNA | -0.041875672 | -0.178892499 | 0.096734549  | 5.54E-01 | 6.35E-01 | 1.00E+00 |
| DTX4     | LMNA | -0.399021866 | -0.509032617 | -0.276184595 | 4.05E-09 | 2.99E-08 | 4.80E-05 |
| EFEMP1   | LMNA | 0.363578649  | 0.237445613  | 0.477655001  | 1.05E-07 | 5.97E-07 | 1.24E-03 |
| TNRC6B   | LMNA | -0.255595102 | -0.380229639 | -0.121843364 | 2.41E-04 | 7.30E-04 | 1.00E+00 |
| TULP2    | LMNA | 0.156395242  | 0.018749043  | 0.288223351  | 2.62E-02 | 4.75E-02 | 1.00E+00 |
| RERE     | LMNA | -0.099883699 | -0.234698432 | 0.038700951  | 1.57E-01 | 2.24E-01 | 1.00E+00 |
| BNC1     | LMNA | 0.182741519  | 0.045847134  | 0.312898818  | 9.24E-03 | 1.89E-02 | 1.00E+00 |
| FGFBP1   | LMNA | -0.016246797 | -0.153952499 | 0.122078011  | 8.18E-01 | 8.63E-01 | 1.00E+00 |
| TIMM8A   | LMNA | 0.012548646  | -0.125720146 | 0.150339206  | 8.59E-01 | 8.96E-01 | 1.00E+00 |
| PIGB     | LMNA | 0.434236676  | 0.315073315  | 0.539921129  | 1.07E-10 | 1.07E-09 | 1.27E-06 |
| AJAP1    | LMNA | -0.45623647  | -0.559074761 | -0.339573108 | 8.87E-12 | 1.05E-10 | 1.05E-07 |
| COMMD8   | LMNA | -0.036470468 | -0.173647192 | 0.102094557  | 6.06E-01 | 6.83E-01 | 1.00E+00 |
| TRIP11   | LMNA | 0.441011169  | 0.322600759  | 0.545830876  | 5.07E-11 | 5.33E-10 | 6.01E-07 |
| SLC25A42 | LMNA | -0.027836711 | -0.165252664 | 0.110639465  | 6.94E-01 | 7.60E-01 | 1.00E+00 |
| SYP      | LMNA | -0.492374981 | -0.590301501 | -0.380164873 | 9.87E-14 | 1.58E-12 | 1.17E-09 |
| PCDHB6   | LMNA | -0.107417986 | -0.241882079 | 0.031094114  | 1.28E-01 | 1.88E-01 | 1.00E+00 |
| FLJ12716 | LMNA | -0.19970656  | -0.328695527 | -0.063403577 | 4.38E-03 | 9.73E-03 | 1.00E+00 |
| FKBP8    | LMNA | 0.006677837  | -0.131494386 | 0.144595538  | 9.25E-01 | 9.46E-01 | 1.00E+00 |
| KIAA1109 | LMNA | -0.216480225 | -0.344243404 | -0.080845312 | 1.97E-03 | 4.80E-03 | 1.00E+00 |
| PTPRC    | LMNA | 0.255819387  | 0.122079771  | 0.380434902  | 2.38E-04 | 7.21E-04 | 1.00E+00 |
| POT1     | LMNA | 0.07370089   | -0.065011569 | 0.209619125  | 2.97E-01 | 3.81E-01 | 1.00E+00 |
| CCT7     | LMNA | -0.051262682 | -0.18798335  | 0.087406885  | 4.69E-01 | 5.54E-01 | 1.00E+00 |
| MMP11    | LMNA | 0.546150533  | 0.441377941  | 0.636231801  | 4.22E-17 | 1.32E-15 | 5.00E-13 |
| MYO1E    | LMNA | 0.611640698  | 0.517266439  | 0.691318423  | 4.08E-22 | 2.97E-20 | 4.84E-18 |
| EEF1A2   | LMNA | -0.246990342 | -0.372345384 | -0.112785001 | 3.95E-04 | 1.14E-03 | 1.00E+00 |
| MIPEP    | LMNA | 0.169770924  | 0.032481187  | 0.300772701  | 1.57E-02 | 3.01E-02 | 1.00E+00 |
| ZFX      | LMNA | 0.275268746  | 0.142638156  | 0.398188149  | 7.34E-05 | 2.47E-04 | 8.71E-01 |
| UCHL3    | LMNA | -0.057000253 | -0.19352839  | 0.081693589  | 4.20E-01 | 5.08E-01 | 1.00E+00 |
| LRFN4    | LMNA | -0.096938851 | -0.231886627 | 0.041669796  | 1.70E-01 | 2.38E-01 | 1.00E+00 |
| XCL1     | LMNA | 0.282199543  | 0.149991917  | 0.404492359  | 4.72E-05 | 1.65E-04 | 5.60E-01 |
| CARHSP1  | LMNA | 0.319501436  | 0.189823055  | 0.438223497  | 3.57E-06 | 1.54E-05 | 4.24E-02 |
| GREM2    | LMNA | -0.247941831 | -0.373218092 | -0.113785552 | 3.74E-04 | 1.08E-03 | 1.00E+00 |
| CCDC102B | LMNA | 0.353088796  | 0.226056765  | 0.468312261  | 2.55E-07 | 1.36E-06 | 3.02E-03 |

|          |      |              |              |              |          |          |          |
|----------|------|--------------|--------------|--------------|----------|----------|----------|
| HDDC2    | LMNA | -0.301068412 | -0.421596676 | -0.17008669  | 1.34E-05 | 5.18E-05 | 1.59E-01 |
| SHC2     | LMNA | -0.200661921 | -0.329582954 | -0.064394757 | 4.19E-03 | 9.35E-03 | 1.00E+00 |
| SDS      | LMNA | 0.07910848   | -0.05959334  | 0.214813501  | 2.63E-01 | 3.45E-01 | 1.00E+00 |
| CASQ1    | LMNA | -0.336665957 | -0.453633405 | -0.208295942 | 9.63E-07 | 4.64E-06 | 1.14E-02 |
| LYPLA3   | LMNA | 0.412667601  | 0.291206388  | 0.521035632  | 1.04E-09 | 8.57E-09 | 1.24E-05 |
| INPPL1   | LMNA | 0.294855885  | 0.163458487  | 0.415974578  | 2.05E-05 | 7.66E-05 | 2.43E-01 |
| SLC25A40 | LMNA | 0.238287292  | 0.103645803  | 0.364352622  | 6.38E-04 | 1.76E-03 | 1.00E+00 |
| IHH      | LMNA | 0.052682792  | -0.085993633 | 0.189356619  | 4.56E-01 | 5.43E-01 | 1.00E+00 |
| CHGB     | LMNA | -0.395079083 | -0.505556495 | -0.271855362 | 5.93E-09 | 4.24E-08 | 7.03E-05 |
| COL9A3   | LMNA | 0.028647204  | -0.109838182 | 0.166041547  | 6.86E-01 | 7.53E-01 | 1.00E+00 |
| C2orf18  | LMNA | 0.486328135  | 0.373342645  | 0.585096853  | 2.17E-13 | 3.31E-12 | 2.58E-09 |
| DDEF2    | LMNA | 0.242549045  | 0.108118292  | 0.36826888   | 5.05E-04 | 1.42E-03 | 1.00E+00 |
| BUB3     | LMNA | -0.144046033 | -0.276596715 | -0.006116667 | 4.08E-02 | 7.02E-02 | 1.00E+00 |
| C6orf211 | LMNA | 0.151487058  | 0.013723047  | 0.283607002  | 3.14E-02 | 5.58E-02 | 1.00E+00 |
| FOXD2    | LMNA | -0.045517307 | -0.182422021 | 0.093118825  | 5.20E-01 | 6.04E-01 | 1.00E+00 |
| GGH      | LMNA | 0.007245522  | -0.130936448 | 0.145151335  | 9.18E-01 | 9.42E-01 | 1.00E+00 |
| GGT1     | LMNA | -0.143743929 | -0.2763118   | -0.005808186 | 4.13E-02 | 7.09E-02 | 1.00E+00 |
| ADARB1   | LMNA | 0.040479701  | -0.098119618 | 0.17753857   | 5.67E-01 | 6.47E-01 | 1.00E+00 |
| VPS35    | LMNA | -0.063390069 | -0.199693539 | 0.075320062  | 3.70E-01 | 4.58E-01 | 1.00E+00 |
| CNN2     | LMNA | 0.592507727  | 0.494941067  | 0.675320056  | 1.56E-20 | 8.63E-19 | 1.86E-16 |
| DBP      | LMNA | -0.081866379 | -0.217459708 | 0.056826864  | 2.47E-01 | 3.27E-01 | 1.00E+00 |
| WNT1     | LMNA | 0.080569733  | -0.058127808 | 0.216215823  | 2.54E-01 | 3.35E-01 | 1.00E+00 |
| COL5A3   | LMNA | 0.350106886  | 0.222825629  | 0.465651726  | 3.26E-07 | 1.71E-06 | 3.87E-03 |
| RHOD     | LMNA | 0.455643259  | 0.338910403  | 0.558559731  | 9.51E-12 | 1.12E-10 | 1.13E-07 |
| ASNA1    | LMNA | -0.062589349 | -0.198921564 | 0.076119362  | 3.76E-01 | 4.64E-01 | 1.00E+00 |
| WDTC1    | LMNA | -0.089519321 | -0.224792286 | 0.04913895   | 2.05E-01 | 2.80E-01 | 1.00E+00 |
| COL4A2   | LMNA | 0.480449392  | 0.36672177   | 0.580029083  | 4.62E-13 | 6.78E-12 | 5.48E-09 |
| HEBP1    | LMNA | 0.354245407  | 0.227310799  | 0.469343657  | 2.31E-07 | 1.25E-06 | 2.74E-03 |
| SLC1A6   | LMNA | -0.389564128 | -0.500688256 | -0.265808219 | 1.00E-08 | 6.85E-08 | 1.19E-04 |
| LUM      | LMNA | 0.579752959  | 0.480129338  | 0.664611464  | 1.56E-19 | 7.34E-18 | 1.85E-15 |
| C1S      | LMNA | 0.48101602   | 0.367359428  | 0.58051788   | 4.30E-13 | 6.32E-12 | 5.10E-09 |
| TCF7L1   | LMNA | -0.243020278 | -0.368701637 | -0.108613162 | 4.92E-04 | 1.39E-03 | 1.00E+00 |
| ZCCHC6   | LMNA | 0.523385139  | 0.415344365  | 0.616865255  | 1.33E-15 | 3.08E-14 | 1.58E-11 |
| ME2      | LMNA | -0.048348845 | -0.185163949 | 0.090304906  | 4.94E-01 | 5.79E-01 | 1.00E+00 |
| PAGE1    | LMNA | 0.113378334  | -0.025064983 | 0.247554612  | 1.08E-01 | 1.63E-01 | 1.00E+00 |



|         |      |              |              |              |          |          |          |
|---------|------|--------------|--------------|--------------|----------|----------|----------|
| DTX2    | LMNA | 0.552573598  | 0.448755137  | 0.641675453  | 1.52E-17 | 5.11E-16 | 1.80E-13 |
| KPNA4   | LMNA | 0.345281014  | 0.21760233   | 0.461341529  | 4.84E-07 | 2.46E-06 | 5.74E-03 |
| H3F3A   | LMNA | -0.396230655 | -0.50657214  | -0.27311929  | 5.31E-09 | 3.85E-08 | 6.30E-05 |
| GLO1    | LMNA | -0.124721563 | -0.258324745 | 0.013562963  | 7.70E-02 | 1.22E-01 | 1.00E+00 |
| WDR61   | LMNA | -0.037917211 | -0.175051901 | 0.100660699  | 5.92E-01 | 6.70E-01 | 1.00E+00 |
| CD302   | LMNA | 0.196221173  | 0.059789789  | 0.325456048  | 5.13E-03 | 1.12E-02 | 1.00E+00 |
| SIRT7   | LMNA | 0.0951724    | -0.043449468 | 0.230198899  | 1.78E-01 | 2.48E-01 | 1.00E+00 |
| D4S234E | LMNA | -0.260031677 | -0.38428766  | -0.126522536 | 1.86E-04 | 5.75E-04 | 1.00E+00 |
| RABIF   | LMNA | -0.143518236 | -0.276098934 | -0.005577747 | 4.16E-02 | 7.13E-02 | 1.00E+00 |
| DYRK3   | LMNA | 0.40207717   | 0.279542795  | 0.511723836  | 3.00E-09 | 2.27E-08 | 3.56E-05 |
| PKIG    | LMNA | 0.133262732  | -0.004878009 | 0.266412527  | 5.87E-02 | 9.64E-02 | 1.00E+00 |
| PFAS    | LMNA | -0.065547946 | -0.20177311  | 0.073165122  | 3.54E-01 | 4.41E-01 | 1.00E+00 |
| ALOXE3  | LMNA | -0.104922567 | -0.239504426 | 0.03361534   | 1.37E-01 | 1.99E-01 | 1.00E+00 |
| RPLP0   | LMNA | 0.16055414   | 0.023013219  | 0.292130174  | 2.25E-02 | 4.14E-02 | 1.00E+00 |
| RBM34   | LMNA | -0.113530648 | -0.247699451 | 0.024910779  | 1.08E-01 | 1.62E-01 | 1.00E+00 |
| MKNK2   | LMNA | 0.5741681    | 0.473661643  | 0.659911554  | 4.14E-19 | 1.83E-17 | 4.90E-15 |
| ZNF528  | LMNA | -0.246727614 | -0.37210437  | -0.112508775 | 4.00E-04 | 1.15E-03 | 1.00E+00 |
| U2AF2   | LMNA | -0.078535582 | -0.214263555 | 0.060167752  | 2.67E-01 | 3.48E-01 | 1.00E+00 |
| SEC16A  | LMNA | 0.098813601  | -0.039780052 | 0.23367694   | 1.62E-01 | 2.29E-01 | 1.00E+00 |
| EFNA5   | LMNA | 0.038133438  | -0.100446348 | 0.175261798  | 5.90E-01 | 6.68E-01 | 1.00E+00 |
| ZNF44   | LMNA | -0.184736155 | -0.314759832 | -0.047906925 | 8.49E-03 | 1.75E-02 | 1.00E+00 |
| FCGRT   | LMNA | 0.361083371  | 0.234733339  | 0.475434929  | 1.30E-07 | 7.30E-07 | 1.54E-03 |
| NOL4    | LMNA | -0.662928092 | -0.733821317 | -0.577751706 | 6.11E-27 | 1.12E-24 | 7.25E-23 |
| CCS     | LMNA | 0.307833916  | 0.177318376  | 0.427708676  | 8.32E-06 | 3.34E-05 | 9.87E-02 |
| IGF2BP2 | LMNA | 0.337761841  | 0.209478478  | 0.454614895  | 8.84E-07 | 4.27E-06 | 1.05E-02 |
| MFSD7   | LMNA | 0.436422482  | 0.317500425  | 0.541829062  | 8.43E-11 | 8.57E-10 | 1.00E-06 |
| SIX6    | LMNA | -0.209191435 | -0.337495863 | -0.073256001 | 2.81E-03 | 6.55E-03 | 1.00E+00 |
| CCR6    | LMNA | 0.28186869   | 0.14964054   | 0.404191681  | 4.82E-05 | 1.68E-04 | 5.72E-01 |
| TSSC4   | LMNA | 0.259534043  | 0.125997395  | 0.383832726  | 1.92E-04 | 5.91E-04 | 1.00E+00 |
| COL11A2 | LMNA | -0.308082279 | -0.427932839 | -0.17758412  | 8.18E-06 | 3.28E-05 | 9.70E-02 |
| CHRNA6  | LMNA | 0.193423529  | 0.056891667  | 0.322853592  | 5.81E-03 | 1.25E-02 | 1.00E+00 |
| PLD2    | LMNA | 0.292343011  | 0.160780843  | 0.413697891  | 2.42E-05 | 8.94E-05 | 2.87E-01 |
| PALM    | LMNA | -0.355793584 | -0.470723736 | -0.228990039 | 2.03E-07 | 1.11E-06 | 2.41E-03 |
| ORC1L   | LMNA | -0.114703508 | -0.248814547 | 0.023723147  | 1.04E-01 | 1.57E-01 | 1.00E+00 |
| SASH1   | LMNA | -0.133964267 | -0.267075991 | 0.004163737  | 5.73E-02 | 9.45E-02 | 1.00E+00 |

|          |      |              |              |              |          |          |          |
|----------|------|--------------|--------------|--------------|----------|----------|----------|
| PUM2     | LMNA | -0.347436897 | -0.46326772  | -0.219934854 | 4.06E-07 | 2.09E-06 | 4.82E-03 |
| ZNF365   | LMNA | -0.067205093 | -0.203369288 | 0.071509352  | 3.42E-01 | 4.28E-01 | 1.00E+00 |
| CDC14B   | LMNA | -0.305767547 | -0.425843067 | -0.175108126 | 9.63E-06 | 3.82E-05 | 1.14E-01 |
| PHC1     | LMNA | -0.321302372 | -0.439843619 | -0.191756965 | 3.12E-06 | 1.36E-05 | 3.71E-02 |
| KIAA0913 | LMNA | -0.122728277 | -0.256434568 | 0.015586807  | 8.18E-02 | 1.28E-01 | 1.00E+00 |
| LDLRAP1  | LMNA | 0.457714466  | 0.341224755  | 0.560357623  | 7.46E-12 | 9.01E-11 | 8.84E-08 |
| NAT8B    | LMNA | 0.074244852  | -0.064466908 | 0.210141986  | 2.94E-01 | 3.78E-01 | 1.00E+00 |
| PPP3CB   | LMNA | -0.4392307   | -0.544278689 | -0.320620948 | 6.18E-11 | 6.43E-10 | 7.33E-07 |
| ANGPTL4  | LMNA | 0.466155164  | 0.350670957  | 0.567674501  | 2.72E-12 | 3.54E-11 | 3.23E-08 |
| HHEX     | LMNA | 0.022930743  | -0.115485841 | 0.160473746  | 7.46E-01 | 8.04E-01 | 1.00E+00 |
| LSM14B   | LMNA | 0.011296472  | -0.12695251  | 0.149114929  | 8.73E-01 | 9.06E-01 | 1.00E+00 |
| PLCH1    | LMNA | -0.011639113 | -0.149449979 | 0.126615332  | 8.69E-01 | 9.03E-01 | 1.00E+00 |
| INSM1    | LMNA | -0.264817191 | -0.388659471 | -0.131576397 | 1.40E-04 | 4.46E-04 | 1.00E+00 |
| TLN2     | LMNA | -0.050836286 | -0.187570914 | 0.087831113  | 4.72E-01 | 5.58E-01 | 1.00E+00 |
| ZNF493   | LMNA | -0.450089971 | -0.553734475 | -0.332712164 | 1.81E-11 | 2.03E-10 | 2.15E-07 |
| HDAC4    | LMNA | -0.273425814 | -0.396509872 | -0.140685217 | 8.24E-05 | 2.74E-04 | 9.77E-01 |
| GLRA1    | LMNA | -0.079835871 | -0.215511627 | 0.058863893  | 2.59E-01 | 3.40E-01 | 1.00E+00 |
| RPS6     | LMNA | -0.124104722 | -0.257739921 | 0.014189382  | 7.85E-02 | 1.24E-01 | 1.00E+00 |
| SFXN1    | LMNA | -0.053836162 | -0.190471552 | 0.084845422  | 4.47E-01 | 5.33E-01 | 1.00E+00 |
| FAM102A  | LMNA | 0.318668825  | 0.188929307  | 0.437474219  | 3.80E-06 | 1.63E-05 | 4.51E-02 |
| KLHL1    | LMNA | -0.219038551 | -0.34660863  | -0.083512853 | 1.74E-03 | 4.28E-03 | 1.00E+00 |
| SAPS2    | LMNA | -0.309390067 | -0.429112962 | -0.17898375  | 7.45E-06 | 3.02E-05 | 8.84E-02 |
| CTNNBIP1 | LMNA | -0.187730108 | -0.317551344 | -0.051000863 | 7.46E-03 | 1.56E-02 | 1.00E+00 |
| SCGB1A1  | LMNA | -0.159892498 | -0.291508929 | -0.022334494 | 2.30E-02 | 4.23E-02 | 1.00E+00 |
| SCAND2   | LMNA | -0.261891856 | -0.385987691 | -0.128486202 | 1.67E-04 | 5.21E-04 | 1.00E+00 |
| HMG2     | LMNA | -0.238318407 | -0.36438123  | -0.103678436 | 6.37E-04 | 1.75E-03 | 1.00E+00 |
| NEUROD2  | LMNA | -0.415283469 | -0.523331707 | -0.294092902 | 7.97E-10 | 6.72E-09 | 9.46E-06 |
| YAF2     | LMNA | -0.322418011 | -0.440846861 | -0.192955484 | 2.87E-06 | 1.26E-05 | 3.41E-02 |
| BRPF1    | LMNA | 0.064693724  | -0.074018337 | 0.200950033  | 3.60E-01 | 4.47E-01 | 1.00E+00 |
| RIC2     | LMNA | -0.335980836 | -0.453019657 | -0.207556839 | 1.02E-06 | 4.87E-06 | 1.21E-02 |
| TBCE     | LMNA | -0.072768164 | -0.208722398 | 0.065945305  | 3.03E-01 | 3.88E-01 | 1.00E+00 |
| LIAS     | LMNA | -0.273742135 | -0.39679799  | -0.141020346 | 8.08E-05 | 2.69E-04 | 9.58E-01 |
| MAPK1    | LMNA | 0.070273728  | -0.068441246 | 0.206323114  | 3.20E-01 | 4.06E-01 | 1.00E+00 |
| MRM1     | LMNA | 0.19437935   | 0.057881559  | 0.323742947  | 5.57E-03 | 1.20E-02 | 1.00E+00 |
| HDHD1A   | LMNA | 0.112726901  | -0.025724425 | 0.246935082  | 1.10E-01 | 1.65E-01 | 1.00E+00 |

|           |      |              |              |              |          |          |          |
|-----------|------|--------------|--------------|--------------|----------|----------|----------|
| CTA-246H3 | LMNA | 0.019184484  | -0.119182163 | 0.156820157  | 7.86E-01 | 8.38E-01 | 1.00E+00 |
| ATP9A     | LMNA | -0.415882701 | -0.523857461 | -0.294754444 | 7.50E-10 | 6.35E-09 | 8.89E-06 |
| HSD17B3   | LMNA | -0.062075046 | -0.198425634 | 0.07663266   | 3.80E-01 | 4.68E-01 | 1.00E+00 |
| HN1L      | LMNA | 0.277480871  | 0.14498369   | 0.400201546  | 6.39E-05 | 2.17E-04 | 7.57E-01 |
| SAG       | LMNA | 0.063514463  | -0.075195873 | 0.199813452  | 3.69E-01 | 4.57E-01 | 1.00E+00 |
| C20orf10  | LMNA | -0.213878965 | -0.341836821 | -0.078134994 | 2.24E-03 | 5.36E-03 | 1.00E+00 |
| HNRNPA2E  | LMNA | 0.019319884  | -0.119048634 | 0.156952273  | 7.85E-01 | 8.37E-01 | 1.00E+00 |
| RNF216    | LMNA | 0.264962329  | 0.131729781  | 0.388791974  | 1.39E-04 | 4.42E-04 | 1.00E+00 |
| GADD45A   | LMNA | 0.501425873  | 0.390399221  | 0.598076609  | 2.94E-14 | 5.11E-13 | 3.48E-10 |
| MSH4      | LMNA | -0.035335031 | -0.172544354 | 0.103219478  | 6.18E-01 | 6.93E-01 | 1.00E+00 |
| HOXD12    | LMNA | -0.055427073 | -0.192008868 | 0.083261021  | 4.33E-01 | 5.19E-01 | 1.00E+00 |
| TMEM70    | LMNA | 0.077092537  | -0.061614205 | 0.212877941  | 2.75E-01 | 3.58E-01 | 1.00E+00 |
| PPP1R14B  | LMNA | 0.154452711  | 0.016759053  | 0.286397053  | 2.82E-02 | 5.06E-02 | 1.00E+00 |
| SBF1      | LMNA | -0.125327025 | -0.258898684 | 0.012947996  | 7.55E-02 | 1.20E-01 | 1.00E+00 |
| HIST1H2AA | LMNA | 0.006373636  | -0.131793327 | 0.144297671  | 9.28E-01 | 9.48E-01 | 1.00E+00 |
| GNG3      | LMNA | -0.41681099  | -0.524671762 | -0.295779489 | 6.81E-10 | 5.81E-09 | 8.08E-06 |
| C1orf50   | LMNA | -0.038088355 | -0.175218035 | 0.100491041  | 5.90E-01 | 6.68E-01 | 1.00E+00 |
| FTO       | LMNA | -0.332385189 | -0.449796767 | -0.203680284 | 1.35E-06 | 6.29E-06 | 1.60E-02 |
| CALCB     | LMNA | -0.166312493 | -0.29753227  | -0.028925613 | 1.80E-02 | 3.40E-02 | 1.00E+00 |
| PPP3R1    | LMNA | -0.313780046 | -0.433071412 | -0.183685887 | 5.43E-06 | 2.26E-05 | 6.44E-02 |
| USP46     | LMNA | -0.266358144 | -0.390066023 | -0.133205234 | 1.27E-04 | 4.09E-04 | 1.00E+00 |
| CCNJ      | LMNA | -0.183478531 | -0.313586574 | -0.046608085 | 8.96E-03 | 1.84E-02 | 1.00E+00 |
| PSD       | LMNA | -0.390894714 | -0.501863453 | -0.267266314 | 8.84E-09 | 6.09E-08 | 1.05E-04 |
| GNAZ      | LMNA | -0.396863836 | -0.507130452 | -0.273814429 | 4.99E-09 | 3.64E-08 | 5.92E-05 |
| FAM57A    | LMNA | 0.173900332  | 0.03673114   | 0.304637857  | 1.33E-02 | 2.61E-02 | 1.00E+00 |
| LILRB3    | LMNA | 0.454975905  | 0.338165007  | 0.557980234  | 1.03E-11 | 1.20E-10 | 1.22E-07 |
| DHX8      | LMNA | 0.129852239  | -0.008348417 | 0.263185319  | 6.55E-02 | 1.06E-01 | 1.00E+00 |
| SPI1      | LMNA | 0.309843795  | 0.179469465  | 0.429522303  | 7.21E-06 | 2.93E-05 | 8.56E-02 |
| OXSM      | LMNA | -0.129647968 | -0.262991931 | 0.008556171  | 6.59E-02 | 1.07E-01 | 1.00E+00 |
| GYS2      | LMNA | -0.185626203 | -0.315589933 | -0.048826422 | 8.17E-03 | 1.70E-02 | 1.00E+00 |
| UBE3B     | LMNA | 0.123502049  | -0.014801308 | 0.257168435  | 7.99E-02 | 1.26E-01 | 1.00E+00 |
| PLAT      | LMNA | 0.338993066  | 0.210807505  | 0.455717259  | 8.01E-07 | 3.90E-06 | 9.51E-03 |
| NUPL2     | LMNA | -0.218424672 | -0.346041234 | -0.08287259  | 1.79E-03 | 4.40E-03 | 1.00E+00 |
| SF3A1     | LMNA | 0.008585038  | -0.129619585 | 0.146462455  | 9.03E-01 | 9.30E-01 | 1.00E+00 |
| COPE      | LMNA | 0.06516708   | -0.073545565 | 0.201406154  | 3.57E-01 | 4.44E-01 | 1.00E+00 |

|          |      |              |              |              |          |          |          |
|----------|------|--------------|--------------|--------------|----------|----------|----------|
| EIF3A    | LMNA | 0.215633837  | 0.079963219  | 0.343460544  | 2.06E-03 | 4.97E-03 | 1.00E+00 |
| IQCE     | LMNA | 0.122492724  | -0.015825896 | 0.256211132  | 8.24E-02 | 1.29E-01 | 1.00E+00 |
| KIAA0182 | LMNA | -0.196456698 | -0.325675051 | -0.060033879 | 5.08E-03 | 1.11E-02 | 1.00E+00 |
| YRDC     | LMNA | 0.039161906  | -0.099426629 | 0.176259985  | 5.80E-01 | 6.59E-01 | 1.00E+00 |
| GPRC5D   | LMNA | -0.147225837 | -0.279594177 | -0.00936518  | 3.65E-02 | 6.36E-02 | 1.00E+00 |
| LRRC23   | LMNA | -0.04453127  | -0.181466688 | 0.094098208  | 5.29E-01 | 6.12E-01 | 1.00E+00 |
| BLVRA    | LMNA | 0.336398632  | 0.208007536  | 0.453393942  | 9.84E-07 | 4.72E-06 | 1.17E-02 |
| SLC22A7  | LMNA | -0.178156324 | -0.308616995 | -0.041116571 | 1.12E-02 | 2.24E-02 | 1.00E+00 |
| RASL12   | LMNA | -0.085792466 | -0.221223355 | 0.052884889  | 2.25E-01 | 3.02E-01 | 1.00E+00 |
| DAZAP2   | LMNA | -0.049186076 | -0.185974277 | 0.089472459  | 4.87E-01 | 5.72E-01 | 1.00E+00 |
| IKBB     | LMNA | 0.164836126  | 0.027408835  | 0.296148043  | 1.91E-02 | 3.58E-02 | 1.00E+00 |
| PPFIA2   | LMNA | -0.241058981 | -0.36690012  | -0.106553928 | 5.48E-04 | 1.53E-03 | 1.00E+00 |
| ZNF271   | LMNA | -0.267495152 | -0.391103493 | -0.13440755  | 1.19E-04 | 3.83E-04 | 1.00E+00 |
| CXorf6   | LMNA | -0.21617965  | -0.34396541  | -0.080532032 | 2.00E-03 | 4.86E-03 | 1.00E+00 |
| FRG1     | LMNA | -0.221245507 | -0.348647704 | -0.085815586 | 1.55E-03 | 3.87E-03 | 1.00E+00 |
| BTN2A2   | LMNA | 0.172339209  | 0.035123861  | 0.30317714   | 1.42E-02 | 2.76E-02 | 1.00E+00 |
| THBS4    | LMNA | 0.072005993  | -0.066708119 | 0.207989475  | 3.09E-01 | 3.93E-01 | 1.00E+00 |
| ARHGAP1  | LMNA | 0.239081531  | 0.104478903  | 0.365082811  | 6.11E-04 | 1.69E-03 | 1.00E+00 |
| ENOX1    | LMNA | -0.28442249  | -0.406511879 | -0.152353626 | 4.09E-05 | 1.44E-04 | 4.85E-01 |
| ZNF706   | LMNA | -0.170165071 | -0.301141812 | -0.032886625 | 1.55E-02 | 2.97E-02 | 1.00E+00 |
| DOK1     | LMNA | 0.507817206  | 0.397642826  | 0.603556104  | 1.22E-14 | 2.32E-13 | 1.45E-10 |
| FCHO1    | LMNA | -0.144895076 | -0.277397323 | -0.006983771 | 3.96E-02 | 6.84E-02 | 1.00E+00 |
| PGAP1    | LMNA | -0.305928961 | -0.425988835 | -0.175280732 | 9.52E-06 | 3.78E-05 | 1.13E-01 |
| HOXD10   | LMNA | 0.049944416  | -0.088718286 | 0.186708087  | 4.80E-01 | 5.66E-01 | 1.00E+00 |
| CXCR3    | LMNA | 0.291811526  | 0.160214757  | 0.413216166  | 2.51E-05 | 9.24E-05 | 2.98E-01 |
| FSCN1    | LMNA | 0.125264545  | -0.013011461 | 0.258839462  | 7.57E-02 | 1.20E-01 | 1.00E+00 |
| KIF17    | LMNA | -0.223969621 | -0.351162934 | -0.088659917 | 1.35E-03 | 3.43E-03 | 1.00E+00 |
| TRIM66   | LMNA | 0.019847232  | -0.118528528 | 0.157466785  | 7.79E-01 | 8.32E-01 | 1.00E+00 |
| CHI3L2   | LMNA | 0.169143823  | 0.031836213  | 0.300185354  | 1.61E-02 | 3.08E-02 | 1.00E+00 |
| SRPX2    | LMNA | 0.676064011  | 0.593395381  | 0.744618765  | 2.47E-28 | 5.75E-26 | 2.93E-24 |
| C13orf24 | LMNA | -0.049657343 | -0.186430318 | 0.0890038    | 4.83E-01 | 5.68E-01 | 1.00E+00 |
| CBR3     | LMNA | 0.165677668  | 0.028273334  | 0.296937132  | 1.85E-02 | 3.47E-02 | 1.00E+00 |
| ZNF132   | LMNA | -0.082924434 | -0.218474383 | 0.055764953  | 2.41E-01 | 3.20E-01 | 1.00E+00 |
| AQP3     | LMNA | 0.094724379  | -0.043900703 | 0.229770715  | 1.80E-01 | 2.50E-01 | 1.00E+00 |
| BNIP1    | LMNA | -0.117908721 | -0.25186009  | 0.020475569  | 9.47E-02 | 1.45E-01 | 1.00E+00 |

|               |              |              |              |          |          |          |
|---------------|--------------|--------------|--------------|----------|----------|----------|
| ST6GALNA LMNA | 0.415326201  | 0.294140074  | 0.523369202  | 7.94E-10 | 6.69E-09 | 9.42E-06 |
| KIAA0391 LMNA | -0.089084492 | -0.22437607  | 0.049576207  | 2.07E-01 | 2.82E-01 | 1.00E+00 |
| KRTAP5-8 LMNA | -0.075436471 | -0.211287111 | 0.063273464  | 2.86E-01 | 3.69E-01 | 1.00E+00 |
| SIRPA LMNA    | 0.187906583  | 0.051183313  | 0.317715815  | 7.41E-03 | 1.55E-02 | 1.00E+00 |
| LYVE1 LMNA    | 0.296833601  | 0.165567244  | 0.41776534   | 1.79E-05 | 6.76E-05 | 2.12E-01 |
| IGFBP6 LMNA   | 0.504552702  | 0.39394129   | 0.600758469  | 1.92E-14 | 3.52E-13 | 2.27E-10 |
| APOH LMNA     | -0.160422777 | -0.292006841 | -0.022878455 | 2.26E-02 | 4.16E-02 | 1.00E+00 |
| TSC22D2 LMNA  | -0.132346206 | -0.26554555  | 0.005810964  | 6.04E-02 | 9.90E-02 | 1.00E+00 |
| PLCD1 LMNA    | 0.050559112  | -0.088106851 | 0.187302789  | 4.75E-01 | 5.60E-01 | 1.00E+00 |
| NPHS2 LMNA    | -0.01813832  | -0.155799197 | 0.120213697  | 7.98E-01 | 8.48E-01 | 1.00E+00 |
| ARHGEF15 LMNA | 0.361821569  | 0.235535528  | 0.476091862  | 1.22E-07 | 6.88E-07 | 1.44E-03 |
| M-RIP LMNA    | 0.052349554  | -0.086325312 | 0.18903442   | 4.59E-01 | 5.45E-01 | 1.00E+00 |
| POLDIP2 LMNA  | -0.062641484 | -0.198971832 | 0.076067326  | 3.76E-01 | 4.63E-01 | 1.00E+00 |
| NDUFV1 LMNA   | -0.067068676 | -0.203237918 | 0.071645685  | 3.43E-01 | 4.29E-01 | 1.00E+00 |
| SRD5A1 LMNA   | 0.390993304  | 0.267374374  | 0.501950513  | 8.75E-09 | 6.05E-08 | 1.04E-04 |
| RAB3GAP2 LMNA | 0.232408807  | 0.097485559  | 0.358943372  | 8.74E-04 | 2.33E-03 | 1.00E+00 |
| CLEC7A LMNA   | 0.26216311   | 0.128772633  | 0.386235521  | 1.64E-04 | 5.14E-04 | 1.00E+00 |
| REXO4 LMNA    | 0.167775218  | 0.030428999  | 0.298903162  | 1.70E-02 | 3.23E-02 | 1.00E+00 |
| HSPA14 LMNA   | -0.246929077 | -0.372289183 | -0.112720586 | 3.96E-04 | 1.14E-03 | 1.00E+00 |
| TAAR5 LMNA    | -0.069699498 | -0.205770557 | 0.069015576  | 3.24E-01 | 4.10E-01 | 1.00E+00 |
| ZNF142 LMNA   | -0.243422196 | -0.369070695 | -0.109035291 | 4.81E-04 | 1.36E-03 | 1.00E+00 |
| MUT LMNA      | -0.211929951 | -0.34003257  | -0.076105582 | 2.46E-03 | 5.83E-03 | 1.00E+00 |
| C2orf43 LMNA  | -0.20586621  | -0.334413176 | -0.069798896 | 3.29E-03 | 7.54E-03 | 1.00E+00 |
| SELPLG LMNA   | 0.088602927  | -0.050060399 | 0.223915061  | 2.10E-01 | 2.85E-01 | 1.00E+00 |
| BAZ2B LMNA    | -0.382400516 | -0.494354177 | -0.257967837 | 1.95E-08 | 1.26E-07 | 2.32E-04 |
| SLC38A3 LMNA  | -0.192750681 | -0.322227396 | -0.056194996 | 5.99E-03 | 1.28E-02 | 1.00E+00 |
| BRD7 LMNA     | -0.074738043 | -0.210615979 | 0.06397301   | 2.90E-01 | 3.74E-01 | 1.00E+00 |
| POU6F2 LMNA   | -0.169301943 | -0.300333459 | -0.031998828 | 1.60E-02 | 3.06E-02 | 1.00E+00 |
| NISCH LMNA    | -0.154609399 | -0.286544401 | -0.016919528 | 2.80E-02 | 5.03E-02 | 1.00E+00 |
| TCEB1 LMNA    | -0.041617249 | -0.178641898 | 0.096990994  | 5.56E-01 | 6.37E-01 | 1.00E+00 |
| OPCML LMNA    | -0.519548806 | -0.613590499 | -0.410974647 | 2.32E-15 | 5.10E-14 | 2.76E-11 |
| DTYMK LMNA    | 0.085722498  | -0.052955178 | 0.221156318  | 2.25E-01 | 3.02E-01 | 1.00E+00 |
| TAX1BP3 LMNA  | 0.361345694  | 0.235018382  | 0.475668389  | 1.27E-07 | 7.15E-07 | 1.50E-03 |
| F13B LMNA     | -0.087099394 | -0.222475316 | 0.051571713  | 2.18E-01 | 2.94E-01 | 1.00E+00 |
| RPL34 LMNA    | -0.024979725 | -0.162470451 | 0.113462548  | 7.24E-01 | 7.85E-01 | 1.00E+00 |

|           |      |              |              |              |          |          |          |
|-----------|------|--------------|--------------|--------------|----------|----------|----------|
| AKAP12    | LMNA | 0.462672843  | 0.346770952  | 0.564657769  | 4.14E-12 | 5.20E-11 | 4.91E-08 |
| MARK2     | LMNA | -0.013883657 | -0.151644009 | 0.124405786  | 8.45E-01 | 8.85E-01 | 1.00E+00 |
| AMBN      | LMNA | 0.126116989  | -0.012145471 | 0.25964738   | 7.37E-02 | 1.18E-01 | 1.00E+00 |
| C14orf32  | LMNA | 0.214825664  | 0.079121151  | 0.342712864  | 2.14E-03 | 5.15E-03 | 1.00E+00 |
| FLJ21865  | LMNA | -0.02780648  | -0.165223237 | 0.110669348  | 6.94E-01 | 7.60E-01 | 1.00E+00 |
| HSD3B2    | LMNA | -0.032366783 | -0.169659699 | 0.106158562  | 6.47E-01 | 7.20E-01 | 1.00E+00 |
| HMG20A    | LMNA | -0.261774121 | -0.385880117 | -0.128361885 | 1.68E-04 | 5.24E-04 | 1.00E+00 |
| WDR77     | LMNA | -0.052770434 | -0.189441352 | 0.085906396  | 4.56E-01 | 5.42E-01 | 1.00E+00 |
| ATF2      | LMNA | -0.138278078 | -0.271152925 | -0.000231496 | 4.97E-02 | 8.35E-02 | 1.00E+00 |
| C10orf137 | LMNA | -0.355837805 | -0.470763147 | -0.229038014 | 2.02E-07 | 1.10E-06 | 2.40E-03 |
| ARL6IP5   | LMNA | 0.107929153  | -0.030577443 | 0.242368923  | 1.26E-01 | 1.86E-01 | 1.00E+00 |
| QTRT1     | LMNA | 0.201878646  | 0.06565749   | 0.33071283   | 3.96E-03 | 8.89E-03 | 1.00E+00 |
| CCNT1     | LMNA | -0.140058752 | -0.27283443  | -0.002047337 | 4.68E-02 | 7.92E-02 | 1.00E+00 |
| AP1B1     | LMNA | 0.19823714   | 0.061879588  | 0.32733015   | 4.68E-03 | 1.03E-02 | 1.00E+00 |
| CD74      | LMNA | 0.303762217  | 0.172964424  | 0.42403159   | 1.11E-05 | 4.35E-05 | 1.32E-01 |
| DYNLL1    | LMNA | -0.088377249 | -0.223698994 | 0.050287285  | 2.11E-01 | 2.86E-01 | 1.00E+00 |
| PLSCR1    | LMNA | 0.362785798  | 0.2365836    | 0.476949751  | 1.12E-07 | 6.36E-07 | 1.33E-03 |
| LIPG      | LMNA | 0.201778643  | 0.065553689  | 0.330619978  | 3.98E-03 | 8.92E-03 | 1.00E+00 |
| PHACTR2   | LMNA | 0.325236411  | 0.195984981  | 0.443379999  | 2.33E-06 | 1.04E-05 | 2.76E-02 |
| SLC35E1   | LMNA | 0.410390555  | 0.288695551  | 0.519035679  | 1.31E-09 | 1.06E-08 | 1.56E-05 |
| VENTX     | LMNA | 0.407553219  | 0.285569238  | 0.516541953  | 1.75E-09 | 1.38E-08 | 2.07E-05 |
| FEZ1      | LMNA | -0.446802316 | -0.550874544 | -0.329047458 | 2.64E-11 | 2.87E-10 | 3.13E-07 |
| APOD      | LMNA | -0.202490139 | -0.331280534 | -0.06629227  | 3.85E-03 | 8.67E-03 | 1.00E+00 |
| LAD1      | LMNA | 0.015347158  | -0.122964366 | 0.153073843  | 8.28E-01 | 8.71E-01 | 1.00E+00 |
| C16orf44  | LMNA | 0.442649876  | 0.324423851  | 0.547258842  | 4.22E-11 | 4.48E-10 | 5.01E-07 |
| C1orf166  | LMNA | 0.476820784  | 0.362640829  | 0.576897189  | 7.30E-13 | 1.04E-11 | 8.66E-09 |
| PAOX      | LMNA | 0.118504025  | -0.019872075 | 0.252425446  | 9.30E-02 | 1.43E-01 | 1.00E+00 |
| MAPK8     | LMNA | -0.475974994 | -0.576166754 | -0.361690233 | 8.12E-13 | 1.15E-11 | 9.63E-09 |
| NELF      | LMNA | -0.2269653   | -0.353926788 | -0.091790347 | 1.16E-03 | 2.99E-03 | 1.00E+00 |
| RBBP8     | LMNA | 0.132925778  | -0.005221031 | 0.266093814  | 5.93E-02 | 9.74E-02 | 1.00E+00 |
| DNAJC8    | LMNA | -0.243586036 | -0.369221128 | -0.109207384 | 4.77E-04 | 1.35E-03 | 1.00E+00 |
| KCNJ12    | LMNA | -0.135385009 | -0.268419244 | 0.002716768  | 5.47E-02 | 9.07E-02 | 1.00E+00 |
| WNT11     | LMNA | 0.181869331  | 0.044946821  | 0.312084744  | 9.59E-03 | 1.95E-02 | 1.00E+00 |
| SRP54     | LMNA | 0.109275871  | -0.029215869 | 0.243651236  | 1.22E-01 | 1.80E-01 | 1.00E+00 |
| GPR35     | LMNA | -0.038001852 | -0.175134065 | 0.100576794  | 5.91E-01 | 6.69E-01 | 1.00E+00 |

|          |      |              |              |              |          |          |          |
|----------|------|--------------|--------------|--------------|----------|----------|----------|
| NRGN     | LMNA | -0.231090775 | -0.357729381 | -0.096105771 | 9.37E-04 | 2.47E-03 | 1.00E+00 |
| IFNW1    | LMNA | -0.053298714 | -0.189952059 | 0.085380511  | 4.51E-01 | 5.37E-01 | 1.00E+00 |
| ACVR1    | LMNA | 0.26724712   | 0.134145238  | 0.390877202  | 1.21E-04 | 3.89E-04 | 1.00E+00 |
| SCN1B    | LMNA | 0.136736236  | -0.00134006  | 0.269696295  | 5.23E-02 | 8.74E-02 | 1.00E+00 |
| RNASEH2B | LMNA | -0.33267009  | -0.450052243 | -0.203987295 | 1.32E-06 | 6.17E-06 | 1.56E-02 |
| STAR     | LMNA | -0.234532849 | -0.360898849 | -0.099710216 | 7.80E-04 | 2.11E-03 | 1.00E+00 |
| C14orf65 | LMNA | -0.218596789 | -0.346200328 | -0.083052094 | 1.78E-03 | 4.37E-03 | 1.00E+00 |
| TAAR2    | LMNA | -0.068531901 | -0.204646759 | 0.070183095  | 3.32E-01 | 4.18E-01 | 1.00E+00 |
| VAMP5    | LMNA | 0.474086289  | 0.359568349  | 0.574535069  | 1.03E-12 | 1.42E-11 | 1.22E-08 |
| TUBA1C   | LMNA | 0.476641421  | 0.36243922   | 0.576742302  | 7.47E-13 | 1.06E-11 | 8.86E-09 |
| PIK3R2   | LMNA | -0.142550365 | -0.275185921 | -0.004589686 | 4.30E-02 | 7.34E-02 | 1.00E+00 |
| ARD1A    | LMNA | 0.196455129  | 0.060032252  | 0.325673592  | 5.08E-03 | 1.11E-02 | 1.00E+00 |
| SYTL2    | LMNA | 0.218951238  | 0.083421781  | 0.346527934  | 1.74E-03 | 4.29E-03 | 1.00E+00 |
| UBXD2    | LMNA | 0.109756302  | -0.028730015 | 0.244108578  | 1.20E-01 | 1.78E-01 | 1.00E+00 |
| EBF2     | LMNA | 0.241851013  | 0.107385371  | 0.367627741  | 5.25E-04 | 1.47E-03 | 1.00E+00 |
| CAMSAP1L | LMNA | -0.50983387  | -0.605283178 | -0.399931261 | 9.22E-15 | 1.80E-13 | 1.09E-10 |
| CYP3A43  | LMNA | -0.212133194 | -0.340220762 | -0.076317156 | 2.44E-03 | 5.79E-03 | 1.00E+00 |
| CCDC91   | LMNA | -0.031355858 | -0.168676706 | 0.107159003  | 6.58E-01 | 7.28E-01 | 1.00E+00 |
| AKR1B1   | LMNA | 0.001939752  | -0.136147707 | 0.139953275  | 9.78E-01 | 9.83E-01 | 1.00E+00 |
| KAL1     | LMNA | -0.197793648 | -0.326917954 | -0.061419751 | 4.78E-03 | 1.05E-02 | 1.00E+00 |
| GRID2    | LMNA | -0.511981236 | -0.607121201 | -0.402369521 | 6.82E-15 | 1.36E-13 | 8.09E-11 |
| ZNF423   | LMNA | -0.249036635 | -0.374221975 | -0.114937146 | 3.52E-04 | 1.03E-03 | 1.00E+00 |
| PSMB4    | LMNA | 0.070174624  | -0.068540374 | 0.206227757  | 3.21E-01 | 4.06E-01 | 1.00E+00 |
| ARPP-21  | LMNA | -0.583934839 | -0.668126314 | -0.484979379 | 7.42E-20 | 3.71E-18 | 8.80E-16 |
| XPNPEP3  | LMNA | -0.005053026 | -0.143004271 | 0.133090815  | 9.43E-01 | 9.58E-01 | 1.00E+00 |
| CYBB     | LMNA | 0.315126198  | 0.185128953  | 0.434284317  | 4.93E-06 | 2.07E-05 | 5.84E-02 |
| UXS1     | LMNA | 0.119796388  | -0.018561584 | 0.253652481  | 8.95E-02 | 1.38E-01 | 1.00E+00 |
| C7orf16  | LMNA | -0.249193538 | -0.374365824 | -0.115102217 | 3.48E-04 | 1.02E-03 | 1.00E+00 |
| SPTA1    | LMNA | 0.108811236  | -0.029685688 | 0.243208874  | 1.23E-01 | 1.82E-01 | 1.00E+00 |
| SHB      | LMNA | 0.326746553  | 0.197609249  | 0.444736518  | 2.07E-06 | 9.37E-06 | 2.46E-02 |
| CHST7    | LMNA | 0.346065923  | 0.218451382  | 0.462042939  | 4.54E-07 | 2.32E-06 | 5.39E-03 |
| SEMA6D   | LMNA | 0.017938839  | -0.120410355 | 0.155604489  | 8.00E-01 | 8.49E-01 | 1.00E+00 |
| IKZF4    | LMNA | -0.123950033 | -0.257593246 | 0.014346455  | 7.88E-02 | 1.24E-01 | 1.00E+00 |
| NDUFA1   | LMNA | 0.088181918  | -0.05048365  | 0.223511973  | 2.12E-01 | 2.87E-01 | 1.00E+00 |
| HSPE1    | LMNA | -0.077022334 | -0.212810518 | 0.061684559  | 2.76E-01 | 3.58E-01 | 1.00E+00 |

|           |      |              |              |              |          |          |          |
|-----------|------|--------------|--------------|--------------|----------|----------|----------|
| MAPK13    | LMNA | 0.416252808  | 0.295163094  | 0.524182144  | 7.22E-10 | 6.13E-09 | 8.56E-06 |
| MYCN      | LMNA | -0.508959947 | -0.60453486  | -0.398939398 | 1.04E-14 | 2.01E-13 | 1.24E-10 |
| KCNJ3     | LMNA | -0.46081529  | -0.563047457 | -0.344692235 | 5.16E-12 | 6.40E-11 | 6.13E-08 |
| ZNF573    | LMNA | -0.24705398  | -0.372403759 | -0.112851912 | 3.93E-04 | 1.14E-03 | 1.00E+00 |
| PCDHGA8   | LMNA | -0.153970268 | -0.285943329 | -0.016264992 | 2.87E-02 | 5.14E-02 | 1.00E+00 |
| ERO1LB    | LMNA | 0.040307641  | -0.098290297 | 0.177371655  | 5.69E-01 | 6.48E-01 | 1.00E+00 |
| NTF3      | LMNA | 0.054428145  | -0.084255943 | 0.191043671  | 4.42E-01 | 5.28E-01 | 1.00E+00 |
| GTF2B     | LMNA | -0.184804356 | -0.314823446 | -0.047977374 | 8.46E-03 | 1.75E-02 | 1.00E+00 |
| GSPT1     | LMNA | 0.338755268  | 0.210550781  | 0.455504377  | 8.17E-07 | 3.97E-06 | 9.69E-03 |
| GUSB      | LMNA | 0.630505448  | 0.539405315  | 0.707016393  | 8.73E-24 | 9.33E-22 | 1.04E-19 |
| EXTL3     | LMNA | 0.295848382  | 0.164516595  | 0.416873371  | 1.91E-05 | 7.20E-05 | 2.27E-01 |
| PMPCB     | LMNA | 0.137996908  | -5.51E-05    | 0.270887339  | 5.02E-02 | 8.41E-02 | 1.00E+00 |
| COPS3     | LMNA | -0.130558277 | -0.263853658 | 0.007630249  | 6.40E-02 | 1.04E-01 | 1.00E+00 |
| LIG1      | LMNA | -0.11188586  | -0.24613507  | 0.026575626  | 1.13E-01 | 1.69E-01 | 1.00E+00 |
| NID2      | LMNA | 0.344888931  | 0.21717828   | 0.460991103  | 5.00E-07 | 2.52E-06 | 5.93E-03 |
| LSM8      | LMNA | 0.321502216  | 0.191971627  | 0.440023351  | 3.08E-06 | 1.34E-05 | 3.65E-02 |
| TMEM97    | LMNA | -0.27488226  | -0.397836262 | -0.142228515 | 7.52E-05 | 2.52E-04 | 8.92E-01 |
| SUZ12     | LMNA | -0.257335891 | -0.381822467 | -0.123678633 | 2.18E-04 | 6.66E-04 | 1.00E+00 |
| EXTL2     | LMNA | -0.326121201 | -0.444174847 | -0.196936552 | 2.18E-06 | 9.79E-06 | 2.58E-02 |
| PDE6B     | LMNA | 0.015340891  | -0.122970539 | 0.153067721  | 8.28E-01 | 8.71E-01 | 1.00E+00 |
| MRPS16    | LMNA | -0.012711099 | -0.150498009 | 0.125560232  | 8.58E-01 | 8.95E-01 | 1.00E+00 |
| KRT18     | LMNA | 0.486241049  | 0.373244481  | 0.585021836  | 2.20E-13 | 3.34E-12 | 2.61E-09 |
| C10orf118 | LMNA | 0.0057976    | -0.132359336 | 0.143733562  | 9.35E-01 | 9.52E-01 | 1.00E+00 |
| ZDHHC13   | LMNA | -0.032838309 | -0.170118103 | 0.105691831  | 6.43E-01 | 7.16E-01 | 1.00E+00 |
| JMJD2C    | LMNA | -0.062860796 | -0.199183285 | 0.075848417  | 3.74E-01 | 4.62E-01 | 1.00E+00 |
| OR2F1     | LMNA | -0.059720013 | -0.196153841 | 0.078982149  | 3.99E-01 | 4.86E-01 | 1.00E+00 |
| ZNF415    | LMNA | -0.249540236 | -0.374683655 | -0.11546699  | 3.42E-04 | 1.00E-03 | 1.00E+00 |
| CDK5RAP3  | LMNA | -0.048712349 | -0.185515796 | 0.089943502  | 4.91E-01 | 5.76E-01 | 1.00E+00 |
| YTHDF2    | LMNA | 0.060868785  | -0.077836273 | 0.197262193  | 3.89E-01 | 4.77E-01 | 1.00E+00 |
| GGCX      | LMNA | 0.486391152  | 0.373413679  | 0.585151135  | 2.16E-13 | 3.30E-12 | 2.56E-09 |
| FZD8      | LMNA | 0.412472107  | 0.290990756  | 0.520863973  | 1.06E-09 | 8.73E-09 | 1.26E-05 |
| TCEA1     | LMNA | -0.026107839 | -0.163569301 | 0.112348088  | 7.12E-01 | 7.75E-01 | 1.00E+00 |
| ARPC4     | LMNA | 0.239338669  | 0.104748663  | 0.36531918   | 6.02E-04 | 1.67E-03 | 1.00E+00 |
| SUSD4     | LMNA | -0.418032548 | -0.525743018 | -0.297128794 | 6.01E-10 | 5.18E-09 | 7.12E-06 |
| C22orf24  | LMNA | -0.201094145 | -0.329984368 | -0.064843274 | 4.11E-03 | 9.19E-03 | 1.00E+00 |



|          |      |              |              |              |          |          |          |
|----------|------|--------------|--------------|--------------|----------|----------|----------|
| EGLN2    | LMNA | 0.25247638   | 0.118557662  | 0.37737415   | 2.89E-04 | 8.60E-04 | 1.00E+00 |
| KBTBD4   | LMNA | -0.177311384 | -0.307827382 | -0.040245514 | 1.16E-02 | 2.31E-02 | 1.00E+00 |
| TNFRSF14 | LMNA | 0.550665107  | 0.446561666  | 0.640058913  | 2.06E-17 | 6.70E-16 | 2.44E-13 |
| ROBO3    | LMNA | -0.040831519 | -0.177879841 | 0.097770598  | 5.64E-01 | 6.44E-01 | 1.00E+00 |
| TRIM28   | LMNA | -0.002415773 | -0.140419944 | 0.135680477  | 9.73E-01 | 9.79E-01 | 1.00E+00 |
| FGF5     | LMNA | 0.292956856  | 0.161434759  | 0.41425418   | 2.33E-05 | 8.62E-05 | 2.76E-01 |
| RTCD1    | LMNA | 0.440619215  | 0.322164832  | 0.545489238  | 5.30E-11 | 5.55E-10 | 6.28E-07 |
| MZF1     | LMNA | -0.087097668 | -0.222473663 | 0.051573448  | 2.18E-01 | 2.94E-01 | 1.00E+00 |
| CNIH4    | LMNA | 0.24456713   | 0.110238068  | 0.370121806  | 4.52E-04 | 1.29E-03 | 1.00E+00 |
| ZFP2     | LMNA | -0.364042399 | -0.478067443 | -0.237949908 | 1.01E-07 | 5.75E-07 | 1.19E-03 |
| CSPG5    | LMNA | -0.456607503 | -0.559396854 | -0.339987667 | 8.49E-12 | 1.01E-10 | 1.01E-07 |
| FKBP15   | LMNA | 0.394059611  | 0.270736779  | 0.504657102  | 6.54E-09 | 4.64E-08 | 7.75E-05 |
| BZW2     | LMNA | 0.008662546  | -0.129543372 | 0.146538305  | 9.03E-01 | 9.29E-01 | 1.00E+00 |
| PTPRN    | LMNA | -0.097869223 | -0.232775211 | 0.040732106  | 1.66E-01 | 2.34E-01 | 1.00E+00 |
| HTATSF1  | LMNA | -0.107491272 | -0.241951881 | 0.031020044  | 1.28E-01 | 1.88E-01 | 1.00E+00 |
| WFDC2    | LMNA | 0.02151949   | -0.116878733 | 0.159097845  | 7.61E-01 | 8.16E-01 | 1.00E+00 |
| TST      | LMNA | -0.114336901 | -0.248466034 | 0.024094413  | 1.05E-01 | 1.59E-01 | 1.00E+00 |
| NDUFA7   | LMNA | -0.078690841 | -0.214412603 | 0.060012092  | 2.66E-01 | 3.47E-01 | 1.00E+00 |
| TTC22    | LMNA | -0.000988494 | -0.139020523 | 0.137081213  | 9.89E-01 | 9.91E-01 | 1.00E+00 |
| RNF24    | LMNA | 0.394716528  | 0.271457523  | 0.505236671  | 6.14E-09 | 4.38E-08 | 7.28E-05 |
| SFRS4    | LMNA | 0.072953955  | -0.065759332 | 0.208901037  | 3.02E-01 | 3.86E-01 | 1.00E+00 |
| CD70     | LMNA | 0.528584346  | 0.421274413  | 0.621298223  | 6.19E-16 | 1.55E-14 | 7.34E-12 |
| DCPS     | LMNA | 0.416482827  | 0.29541709   | 0.524383918  | 7.05E-10 | 6.00E-09 | 8.36E-06 |
| PDXDC1   | LMNA | 0.311736368  | 0.181496148  | 0.431229197  | 6.30E-06 | 2.58E-05 | 7.47E-02 |
| SRC      | LMNA | -0.142799065 | -0.275420548 | -0.004843548 | 4.26E-02 | 7.28E-02 | 1.00E+00 |
| NTNG1    | LMNA | 0.128294556  | -0.009932358 | 0.261710354  | 6.88E-02 | 1.11E-01 | 1.00E+00 |
| SETD1B   | LMNA | 0.062817482  | -0.075891652 | 0.199141524  | 3.74E-01 | 4.62E-01 | 1.00E+00 |
| TINP1    | LMNA | 0.128190431  | -0.010038214 | 0.261611737  | 6.90E-02 | 1.11E-01 | 1.00E+00 |
| ZNF606   | LMNA | -0.268128783 | -0.391681517 | -0.135077746 | 1.14E-04 | 3.70E-04 | 1.00E+00 |
| SSR1     | LMNA | 0.326215644  | 0.197038137  | 0.444259679  | 2.16E-06 | 9.73E-06 | 2.56E-02 |
| NFS1     | LMNA | 0.074917445  | -0.063793334 | 0.210788381  | 2.89E-01 | 3.73E-01 | 1.00E+00 |
| CRMP1    | LMNA | -0.504017417 | -0.600299512 | -0.393334687 | 2.06E-14 | 3.76E-13 | 2.45E-10 |
| NUP107   | LMNA | -0.062003166 | -0.198356316 | 0.076704394  | 3.81E-01 | 4.68E-01 | 1.00E+00 |
| OSBPL9   | LMNA | 0.194697733  | 0.05821135   | 0.32403914   | 5.49E-03 | 1.19E-02 | 1.00E+00 |
| MYOZ3    | LMNA | -0.131264078 | -0.264521646 | 0.006912179  | 6.26E-02 | 1.02E-01 | 1.00E+00 |

|           |      |              |              |              |          |          |          |
|-----------|------|--------------|--------------|--------------|----------|----------|----------|
| PDE4B     | LMNA | -0.216213789 | -0.343996985 | -0.080567613 | 2.00E-03 | 4.85E-03 | 1.00E+00 |
| ADAM18    | LMNA | -0.053317468 | -0.189970188 | 0.085361841  | 4.51E-01 | 5.37E-01 | 1.00E+00 |
| FBXL7     | LMNA | 0.209666793  | 0.073750479  | 0.337936325  | 2.75E-03 | 6.43E-03 | 1.00E+00 |
| IDH3G     | LMNA | 0.108546786  | -0.029953061 | 0.242957076  | 1.24E-01 | 1.83E-01 | 1.00E+00 |
| CCDC87    | LMNA | 0.069514761  | -0.069200327 | 0.205592773  | 3.26E-01 | 4.11E-01 | 1.00E+00 |
| ARFGAP3   | LMNA | 0.15714652   | 0.019518969  | 0.288929418  | 2.55E-02 | 4.64E-02 | 1.00E+00 |
| MAPRE2    | LMNA | -0.154031667 | -0.286001076 | -0.016327866 | 2.86E-02 | 5.13E-02 | 1.00E+00 |
| CSNK1G1   | LMNA | 0.165461046  | 0.028050784  | 0.29673403   | 1.86E-02 | 3.50E-02 | 1.00E+00 |
| IL1RN     | LMNA | 0.339112951  | 0.210936939  | 0.455824578  | 7.94E-07 | 3.87E-06 | 9.42E-03 |
| MAFB      | LMNA | 0.338450082  | 0.210221331  | 0.455231148  | 8.37E-07 | 4.06E-06 | 9.92E-03 |
| RAC3      | LMNA | -0.30768871  | -0.42757761  | -0.177163015 | 8.41E-06 | 3.37E-05 | 9.97E-02 |
| C1orf54   | LMNA | 0.293512665  | 0.162026951  | 0.414757797  | 2.24E-05 | 8.33E-05 | 2.66E-01 |
| TMEM14B   | LMNA | -0.217734222 | -0.345402953 | -0.0821526   | 1.85E-03 | 4.53E-03 | 1.00E+00 |
| ADIPOR1   | LMNA | 0.366564672  | 0.240693894  | 0.480309779  | 8.07E-08 | 4.71E-07 | 9.58E-04 |
| GRINA     | LMNA | 0.107697759  | -0.030811338 | 0.242148548  | 1.27E-01 | 1.87E-01 | 1.00E+00 |
| CLIP4     | LMNA | -0.125588917 | -0.259146913 | 0.012681959  | 7.49E-02 | 1.19E-01 | 1.00E+00 |
| TFPI      | LMNA | 0.329725259  | 0.200815143  | 0.447410619  | 1.65E-06 | 7.63E-06 | 1.96E-02 |
| DPEP1     | LMNA | -0.025925493 | -0.163391708 | 0.112528251  | 7.14E-01 | 7.76E-01 | 1.00E+00 |
| C14orf118 | LMNA | 0.099109506  | -0.03948169  | 0.233959435  | 1.61E-01 | 2.28E-01 | 1.00E+00 |
| FABP6     | LMNA | -0.453041849 | -0.556300231 | -0.336005607 | 1.29E-11 | 1.49E-10 | 1.53E-07 |
| TMEM87A   | LMNA | 0.140617327  | 0.002617132  | 0.273361731  | 4.59E-02 | 7.79E-02 | 1.00E+00 |
| BBS5      | LMNA | -0.032441686 | -0.169732521 | 0.106084425  | 6.47E-01 | 7.19E-01 | 1.00E+00 |
| SMTN      | LMNA | 0.237063164  | 0.10236215   | 0.363226908  | 6.81E-04 | 1.86E-03 | 1.00E+00 |
| CYP17A1   | LMNA | -0.022351075 | -0.159908664 | 0.116058032  | 7.52E-01 | 8.09E-01 | 1.00E+00 |
| SCG3      | LMNA | -0.657241068 | -0.729135567 | -0.570998338 | 2.33E-26 | 4.01E-24 | 2.77E-22 |
| GFER      | LMNA | 0.305388429  | 0.174702753  | 0.425500671  | 9.89E-06 | 3.92E-05 | 1.17E-01 |
| CD209     | LMNA | 0.378977372  | 0.254227076  | 0.491323223  | 2.67E-08 | 1.69E-07 | 3.17E-04 |
| NRIP2     | LMNA | -0.147227527 | -0.27959577  | -0.009366908 | 3.65E-02 | 6.36E-02 | 1.00E+00 |
| CYB5R2    | LMNA | 0.40002564   | 0.27728755   | 0.509917014  | 3.67E-09 | 2.73E-08 | 4.36E-05 |
| RIC8B     | LMNA | -0.348420487 | -0.464146152 | -0.220999519 | 3.75E-07 | 1.95E-06 | 4.44E-03 |
| CSG1cA-T  | LMNA | 0.678344249  | 0.596117311  | 0.746489425  | 1.39E-28 | 3.31E-26 | 1.65E-24 |
| DNTTIP2   | LMNA | 0.281621028  | 0.149377537  | 0.403966589  | 4.90E-05 | 1.70E-04 | 5.81E-01 |
| TNNI1     | LMNA | -0.062427346 | -0.198765356 | 0.076281056  | 3.77E-01 | 4.65E-01 | 1.00E+00 |
| GABRB3    | LMNA | -0.519542885 | -0.613585442 | -0.410967906 | 2.32E-15 | 5.10E-14 | 2.76E-11 |
| PCBD1     | LMNA | 0.112864095  | -0.025585554 | 0.247065567  | 1.10E-01 | 1.65E-01 | 1.00E+00 |

|           |      |              |              |              |          |          |          |
|-----------|------|--------------|--------------|--------------|----------|----------|----------|
| KTELC1    | LMNA | 0.127783388  | -0.010451992 | 0.261226195  | 6.99E-02 | 1.12E-01 | 1.00E+00 |
| HOXD3     | LMNA | -0.35591161  | -0.470828924 | -0.229118087 | 2.01E-07 | 1.10E-06 | 2.39E-03 |
| GPR85     | LMNA | -0.546019127 | -0.636120339 | -0.441227162 | 4.31E-17 | 1.34E-15 | 5.11E-13 |
| P11       | LMNA | -0.280767322 | -0.403190572 | -0.148471092 | 5.18E-05 | 1.79E-04 | 6.14E-01 |
| SP3       | LMNA | 0.080061856  | -0.05863724  | 0.215728491  | 2.57E-01 | 3.39E-01 | 1.00E+00 |
| GOSR2     | LMNA | 0.118760698  | -0.01961184  | 0.252669179  | 9.23E-02 | 1.42E-01 | 1.00E+00 |
| DDX1      | LMNA | -0.122010483 | -0.255753654 | 0.016315328  | 8.37E-02 | 1.31E-01 | 1.00E+00 |
| BFSP1     | LMNA | 0.44125182   | 0.322868432  | 0.546040617  | 4.94E-11 | 5.20E-10 | 5.85E-07 |
| FLRT3     | LMNA | -0.12821839  | -0.261638217 | 0.010009791  | 6.90E-02 | 1.11E-01 | 1.00E+00 |
| RNPS1     | LMNA | -0.097728918 | -0.232641222 | 0.040873531  | 1.66E-01 | 2.34E-01 | 1.00E+00 |
| LCP2      | LMNA | 0.365182773  | 0.239190275  | 0.479081435  | 9.11E-08 | 5.26E-07 | 1.08E-03 |
| TAS2R8    | LMNA | -0.019512873 | -0.157140573 | 0.118858305  | 7.83E-01 | 8.35E-01 | 1.00E+00 |
| SEZ6L     | LMNA | -0.515458478 | -0.610095362 | -0.406321108 | 4.17E-15 | 8.72E-14 | 4.95E-11 |
| NR2C1     | LMNA | -0.318217429 | -0.437067933 | -0.188444855 | 3.93E-06 | 1.68E-05 | 4.66E-02 |
| EXDL2     | LMNA | -0.007310253 | -0.145214705 | 0.130872823  | 9.18E-01 | 9.41E-01 | 1.00E+00 |
| SLC25A10  | LMNA | -0.171964676 | -0.302826604 | -0.03473836  | 1.44E-02 | 2.79E-02 | 1.00E+00 |
| ADAMTS3   | LMNA | 0.157420362  | 0.019799649  | 0.289186746  | 2.53E-02 | 4.60E-02 | 1.00E+00 |
| PCYOX1L   | LMNA | 0.036906038  | -0.101662927 | 0.174070166  | 6.02E-01 | 6.79E-01 | 1.00E+00 |
| TNFRSF13I | LMNA | -0.066866111 | -0.203042836 | 0.071848115  | 3.44E-01 | 4.30E-01 | 1.00E+00 |
| VPS54     | LMNA | 0.178555243  | 0.041527894  | 0.30898973   | 1.10E-02 | 2.21E-02 | 1.00E+00 |
| MKI67     | LMNA | 0.058120465  | -0.080577052 | 0.194609995  | 4.11E-01 | 4.99E-01 | 1.00E+00 |
| C7orf54   | LMNA | 0.046158749  | -0.092481569 | 0.183043349  | 5.14E-01 | 5.98E-01 | 1.00E+00 |
| GLS       | LMNA | -0.053985849 | -0.190616225 | 0.084696377  | 4.45E-01 | 5.32E-01 | 1.00E+00 |
| PCDHB12   | LMNA | 0.033958561  | -0.104582725 | 0.171206941  | 6.31E-01 | 7.05E-01 | 1.00E+00 |
| LGALS13   | LMNA | -0.195095792 | -0.324409418 | -0.058623713 | 5.40E-03 | 1.17E-02 | 1.00E+00 |
| IL4R      | LMNA | 0.523550343  | 0.41553265   | 0.617006203  | 1.30E-15 | 3.01E-14 | 1.54E-11 |
| SEC11A    | LMNA | 0.281865486  | 0.149637138  | 0.404188769  | 4.83E-05 | 1.68E-04 | 5.72E-01 |
| C4orf6    | LMNA | 0.288577425  | 0.156771969  | 0.410283391  | 3.11E-05 | 1.13E-04 | 3.69E-01 |
| SPP2      | LMNA | 0.282204015  | 0.149996666  | 0.404496423  | 4.72E-05 | 1.65E-04 | 5.60E-01 |
| CCL5      | LMNA | 0.36417033   | 0.238089037  | 0.478181211  | 9.94E-08 | 5.69E-07 | 1.18E-03 |
| PEX5      | LMNA | -0.206181273 | -0.334705376 | -0.070126315 | 3.24E-03 | 7.44E-03 | 1.00E+00 |
| CLSPN     | LMNA | -0.001451619 | -0.139474669 | 0.136626761  | 9.84E-01 | 9.87E-01 | 1.00E+00 |
| LOC51336  | LMNA | -0.244656085 | -0.370203457 | -0.110331534 | 4.50E-04 | 1.28E-03 | 1.00E+00 |
| SPAG1     | LMNA | 0.052169138  | -0.086504871 | 0.188859969  | 4.61E-01 | 5.47E-01 | 1.00E+00 |
| C9orf82   | LMNA | -0.040753107 | -0.177803782 | 0.097848389  | 5.65E-01 | 6.45E-01 | 1.00E+00 |

|          |      |              |              |              |          |          |          |
|----------|------|--------------|--------------|--------------|----------|----------|----------|
| TM4SF1   | LMNA | 0.199686035  | 0.063382285  | 0.328676459  | 4.38E-03 | 9.74E-03 | 1.00E+00 |
| SMG7     | LMNA | 0.045792661  | -0.092845281 | 0.182688754  | 5.18E-01 | 6.01E-01 | 1.00E+00 |
| WDR45L   | LMNA | -0.088548522 | -0.223862975 | 0.050115096  | 2.10E-01 | 2.85E-01 | 1.00E+00 |
| TAS2R13  | LMNA | -0.005044954 | -0.142996363 | 0.133098745  | 9.43E-01 | 9.58E-01 | 1.00E+00 |
| SPAG8    | LMNA | -0.193766409 | -0.323172655 | -0.057246738 | 5.73E-03 | 1.23E-02 | 1.00E+00 |
| VASP     | LMNA | 0.583310475  | 0.48425487   | 0.667601778  | 8.29E-20 | 4.13E-18 | 9.84E-16 |
| ZCCHC11  | LMNA | -0.232995765 | -0.35948386  | -0.098100186 | 8.47E-04 | 2.26E-03 | 1.00E+00 |
| LOX      | LMNA | 0.590192306  | 0.492248019  | 0.673378676  | 2.39E-20 | 1.27E-18 | 2.84E-16 |
| SYPL1    | LMNA | 0.39792485   | 0.274979555  | 0.508065802  | 4.51E-09 | 3.30E-08 | 5.34E-05 |
| BAG5     | LMNA | 0.108102107  | -0.03040261  | 0.242533632  | 1.26E-01 | 1.85E-01 | 1.00E+00 |
| RPS27L   | LMNA | 0.283350886  | 0.151214941  | 0.405538489  | 4.38E-05 | 1.54E-04 | 5.20E-01 |
| MGC2752  | LMNA | 0.086553527  | -0.052120248 | 0.221952462  | 2.21E-01 | 2.97E-01 | 1.00E+00 |
| IQSEC3   | LMNA | -0.31129652  | -0.430832579 | -0.181025034 | 6.50E-06 | 2.66E-05 | 7.71E-02 |
| TGFBR3   | LMNA | -0.113490761 | -0.247661521 | 0.024951163  | 1.08E-01 | 1.62E-01 | 1.00E+00 |
| PPA2     | LMNA | -0.072516314 | -0.208480229 | 0.066197385  | 3.05E-01 | 3.90E-01 | 1.00E+00 |
| MED24    | LMNA | -0.277484068 | -0.400204455 | -0.144987081 | 6.38E-05 | 2.17E-04 | 7.57E-01 |
| CASP9    | LMNA | -0.179756959 | -0.310112327 | -0.042767255 | 1.05E-02 | 2.11E-02 | 1.00E+00 |
| PDCD1    | LMNA | 0.126040987  | -0.012222689 | 0.259575355  | 7.39E-02 | 1.18E-01 | 1.00E+00 |
| MAP3K7   | LMNA | 0.050553413  | -0.088112521 | 0.187297275  | 4.75E-01 | 5.60E-01 | 1.00E+00 |
| C17orf81 | LMNA | 0.029270897  | -0.109221454 | 0.166648492  | 6.79E-01 | 7.48E-01 | 1.00E+00 |
| SRPR     | LMNA | 0.590024195  | 0.492052564  | 0.673237678  | 2.47E-20 | 1.31E-18 | 2.93E-16 |
| BAG4     | LMNA | 0.110662853  | -0.027813051 | 0.244971397  | 1.17E-01 | 1.74E-01 | 1.00E+00 |
| ZNF32    | LMNA | -0.434418643 | -0.540080004 | -0.31527531  | 1.05E-10 | 1.05E-09 | 1.25E-06 |
| BRD2     | LMNA | 0.132437574  | -0.005717969 | 0.265631988  | 6.03E-02 | 9.87E-02 | 1.00E+00 |
| IL32     | LMNA | 0.392370216  | 0.268883875  | 0.503166164  | 7.68E-09 | 5.37E-08 | 9.11E-05 |
| LAMP2    | LMNA | 0.400053867  | 0.277318571  | 0.50994188   | 3.66E-09 | 2.73E-08 | 4.34E-05 |
| FAM53B   | LMNA | -0.075729471 | -0.211568621 | 0.062979955  | 2.84E-01 | 3.67E-01 | 1.00E+00 |
| CAT      | LMNA | 0.013094213  | -0.125183077 | 0.150872487  | 8.53E-01 | 8.92E-01 | 1.00E+00 |
| C16orf80 | LMNA | -0.360683554 | -0.475079072 | -0.234298936 | 1.34E-07 | 7.52E-07 | 1.59E-03 |
| SLC7A1   | LMNA | -0.070174096 | -0.206227249 | 0.068540902  | 3.21E-01 | 4.06E-01 | 1.00E+00 |
| C1orf76  | LMNA | -0.050419776 | -0.187167994 | 0.088245457  | 4.76E-01 | 5.61E-01 | 1.00E+00 |
| PRKCQ    | LMNA | -0.138212121 | -0.271090626 | -0.000164255 | 4.98E-02 | 8.37E-02 | 1.00E+00 |
| ATXN1    | LMNA | 0.139438266  | 0.001414494  | 0.272248593  | 4.78E-02 | 8.07E-02 | 1.00E+00 |
| LAMC2    | LMNA | 0.327288497  | 0.198192321  | 0.445223198  | 1.99E-06 | 9.03E-06 | 2.36E-02 |
| CPOX     | LMNA | 0.160955096  | 0.02342459   | 0.292506597  | 2.21E-02 | 4.09E-02 | 1.00E+00 |

|         |      |              |              |              |          |          |          |
|---------|------|--------------|--------------|--------------|----------|----------|----------|
| SPSB1   | LMNA | 0.38954456   | 0.26578678   | 0.50067097   | 1.00E-08 | 6.86E-08 | 1.19E-04 |
| APH1B   | LMNA | 0.368943257  | 0.243283407  | 0.482423013  | 6.56E-08 | 3.89E-07 | 7.78E-04 |
| USP36   | LMNA | 0.147845626  | 0.009998701  | 0.280178125  | 3.57E-02 | 6.25E-02 | 1.00E+00 |
| CTNND1  | LMNA | 0.300972153  | 0.1699839    | 0.421509636  | 1.35E-05 | 5.21E-05 | 1.60E-01 |
| MADCAM1 | LMNA | -0.122204411 | -0.255937631 | 0.016118516  | 8.32E-02 | 1.30E-01 | 1.00E+00 |
| GABRG2  | LMNA | -0.385664936 | -0.497242059 | -0.261538626 | 1.44E-08 | 9.60E-08 | 1.71E-04 |
| LYZ     | LMNA | 0.316967761  | 0.187104004  | 0.435942896  | 4.31E-06 | 1.83E-05 | 5.11E-02 |
| F5      | LMNA | -0.076188176 | -0.212009294 | 0.062520405  | 2.81E-01 | 3.64E-01 | 1.00E+00 |
| TMEM186 | LMNA | -0.155309089 | -0.287202307 | -0.017636219 | 2.73E-02 | 4.92E-02 | 1.00E+00 |
| TPM2    | LMNA | 0.53502309   | 0.428630976  | 0.626779836  | 2.35E-16 | 6.39E-15 | 2.79E-12 |
| SEMA4F  | LMNA | 0.135845356  | -0.002247799 | 0.268854373  | 5.39E-02 | 8.97E-02 | 1.00E+00 |
| NUDCD3  | LMNA | 0.072587386  | -0.06612625  | 0.208548571  | 3.05E-01 | 3.89E-01 | 1.00E+00 |
| OLFML3  | LMNA | 0.284167438  | 0.152082576  | 0.406280228  | 4.16E-05 | 1.46E-04 | 4.93E-01 |
| PPP1R11 | LMNA | 0.008286656  | -0.129912962 | 0.146170441  | 9.07E-01 | 9.33E-01 | 1.00E+00 |
| ELAVL1  | LMNA | -0.03236165  | -0.169654708 | 0.106163643  | 6.48E-01 | 7.20E-01 | 1.00E+00 |
| GCNT3   | LMNA | 0.173193836  | 0.036003668  | 0.303976876  | 1.37E-02 | 2.68E-02 | 1.00E+00 |
| DNAJC17 | LMNA | 0.203685811  | 0.067533796  | 0.332390319  | 3.64E-03 | 8.25E-03 | 1.00E+00 |
| N4BP1   | LMNA | 0.137164181  | -0.000903936 | 0.270100649  | 5.16E-02 | 8.62E-02 | 1.00E+00 |
| ABCA2   | LMNA | -0.10360634  | -0.238249665 | 0.03494447   | 1.42E-01 | 2.05E-01 | 1.00E+00 |
| BNIP3L  | LMNA | 0.048097623  | -0.090554654 | 0.184920764  | 4.97E-01 | 5.81E-01 | 1.00E+00 |
| SLC35F2 | LMNA | 0.392601271  | 0.26913724   | 0.503370116  | 7.51E-09 | 5.27E-08 | 8.91E-05 |
| ATP10D  | LMNA | 0.31316472   | 0.183026448  | 0.432516848  | 5.68E-06 | 2.35E-05 | 6.74E-02 |
| LCP1    | LMNA | 0.32747157   | 0.19838931   | 0.445387588  | 1.96E-06 | 8.91E-06 | 2.33E-02 |
| IGBP1   | LMNA | -0.038048703 | -0.175179544 | 0.10053035   | 5.91E-01 | 6.69E-01 | 1.00E+00 |
| GALNT8  | LMNA | -0.382469394 | -0.494415136 | -0.258043144 | 1.94E-08 | 1.26E-07 | 2.30E-04 |
| PRKCH   | LMNA | 0.278065597  | 0.145603929  | 0.400733545  | 6.15E-05 | 2.10E-04 | 7.30E-01 |
| DCAKD   | LMNA | -0.160969266 | -0.292519898 | -0.023439128 | 2.21E-02 | 4.09E-02 | 1.00E+00 |
| ELA2A   | LMNA | -0.020974701 | -0.15856656  | 0.117416287  | 7.67E-01 | 8.21E-01 | 1.00E+00 |
| PITRM1  | LMNA | 0.039815367  | -0.098778575 | 0.176894061  | 5.74E-01 | 6.53E-01 | 1.00E+00 |
| RASSF8  | LMNA | 0.547153784  | 0.44252929   | 0.637082664  | 3.60E-17 | 1.15E-15 | 4.27E-13 |
| GUK1    | LMNA | -0.064117283 | -0.2003945   | 0.074593983  | 3.65E-01 | 4.52E-01 | 1.00E+00 |
| USP12   | LMNA | 0.107005943  | -0.03151054  | 0.241489593  | 1.30E-01 | 1.90E-01 | 1.00E+00 |
| STXBP1  | LMNA | -0.414638751 | -0.522765951 | -0.293381274 | 8.52E-10 | 7.14E-09 | 1.01E-05 |
| ADM     | LMNA | 0.53062874   | 0.423608698  | 0.623039697  | 4.56E-16 | 1.18E-14 | 5.41E-12 |
| LSM2    | LMNA | -0.2392805   | -0.36526571  | -0.104687637 | 6.04E-04 | 1.67E-03 | 1.00E+00 |

|               |      |              |              |              |          |          |          |
|---------------|------|--------------|--------------|--------------|----------|----------|----------|
| GHRHR         | LMNA | 0.129163237  | -0.009049119 | 0.262532982  | 6.69E-02 | 1.08E-01 | 1.00E+00 |
| SERF2         | LMNA | 0.310184341  | 0.179834061  | 0.429829501  | 7.04E-06 | 2.87E-05 | 8.35E-02 |
| VPS72         | LMNA | -0.418724431 | -0.52634962  | -0.297893247 | 5.59E-10 | 4.85E-09 | 6.63E-06 |
| CD22          | LMNA | -0.053873627 | -0.190507763 | 0.084808117  | 4.46E-01 | 5.33E-01 | 1.00E+00 |
| CD47          | LMNA | 0.027797487  | -0.110678238 | 0.165214482  | 6.95E-01 | 7.60E-01 | 1.00E+00 |
| LAP3          | LMNA | 0.264030481  | 0.130745096  | 0.387941153  | 1.47E-04 | 4.65E-04 | 1.00E+00 |
| IMPDH1        | LMNA | 0.531422178  | 0.424515027  | 0.623715324  | 4.05E-16 | 1.05E-14 | 4.81E-12 |
| PPIC          | LMNA | 0.609381332  | 0.514623385  | 0.689433274  | 6.36E-22 | 4.36E-20 | 7.55E-18 |
| ACP6          | LMNA | 0.466874344  | 0.351476898  | 0.568297187  | 2.49E-12 | 3.26E-11 | 2.96E-08 |
| PRKACA        | LMNA | 0.367742559  | 0.241976009  | 0.481356428  | 7.28E-08 | 4.29E-07 | 8.64E-04 |
| PPP1R1A       | LMNA | -0.385688086 | -0.49726253  | -0.261563961 | 1.44E-08 | 9.59E-08 | 1.71E-04 |
| C9orf40       | LMNA | -0.040576068 | -0.177632051 | 0.098024021  | 5.66E-01 | 6.46E-01 | 1.00E+00 |
| ASXL1         | LMNA | 0.013765041  | -0.124522587 | 0.151528096  | 8.46E-01 | 8.85E-01 | 1.00E+00 |
| IDH1          | LMNA | 0.09905627   | -0.039535369 | 0.233908613  | 1.61E-01 | 2.28E-01 | 1.00E+00 |
| XRCC5         | LMNA | -0.168930823 | -0.299985834 | -0.031617169 | 1.62E-02 | 3.10E-02 | 1.00E+00 |
| TBRG4         | LMNA | 0.352529851  | 0.225450891  | 0.467813715  | 2.67E-07 | 1.42E-06 | 3.17E-03 |
| RAB1A         | LMNA | 0.116621801  | -0.02177985  | 0.250637597  | 9.84E-02 | 1.50E-01 | 1.00E+00 |
| INHA          | LMNA | -0.013352081 | -0.151124519 | 0.124929197  | 8.50E-01 | 8.89E-01 | 1.00E+00 |
| MLL2          | LMNA | -0.322957674 | -0.441332048 | -0.193535376 | 2.76E-06 | 1.22E-05 | 3.27E-02 |
| FXYP1         | LMNA | -0.108973154 | -0.243363037 | 0.029521971  | 1.23E-01 | 1.81E-01 | 1.00E+00 |
| DKFZP566E11.1 | LMNA | -0.206418055 | -0.334924961 | -0.070372402 | 3.21E-03 | 7.37E-03 | 1.00E+00 |
| KMO           | LMNA | 0.21035685   | 0.07446841   | 0.338575623  | 2.66E-03 | 6.24E-03 | 1.00E+00 |
| KIAA1128      | LMNA | -0.355515028 | -0.470475467 | -0.228687845 | 2.08E-07 | 1.13E-06 | 2.47E-03 |
| NUDT4         | LMNA | -0.152561992 | -0.284618546 | -0.014823188 | 3.02E-02 | 5.39E-02 | 1.00E+00 |
| USO1          | LMNA | 0.311901427  | 0.181672956  | 0.431378022  | 6.22E-06 | 2.56E-05 | 7.38E-02 |
| RAB9A         | LMNA | -0.0802377   | -0.21589723  | 0.058460865  | 2.56E-01 | 3.38E-01 | 1.00E+00 |
| RUFY3         | LMNA | -0.524624309 | -0.617922339 | -0.416756889 | 1.11E-15 | 2.63E-14 | 1.32E-11 |
| CLDN1         | LMNA | 0.338869231  | 0.210673811  | 0.455606401  | 8.09E-07 | 3.94E-06 | 9.60E-03 |
| FBXO38        | LMNA | 0.02796864   | -0.110509047 | 0.165381088  | 6.93E-01 | 7.59E-01 | 1.00E+00 |
| VRK3          | LMNA | 0.048393676  | -0.090260336 | 0.185207344  | 4.94E-01 | 5.79E-01 | 1.00E+00 |
| ICOS          | LMNA | 0.202984326  | 0.066805358  | 0.331739266  | 3.76E-03 | 8.49E-03 | 1.00E+00 |
| NFKB1         | LMNA | 0.505318255  | 0.394809009  | 0.601414749  | 1.72E-14 | 3.20E-13 | 2.05E-10 |
| FASTK         | LMNA | 0.391768502  | 0.268224145  | 0.502634975  | 8.13E-09 | 5.66E-08 | 9.65E-05 |
| LDB1          | LMNA | -0.241114814 | -0.366951418 | -0.106612533 | 5.47E-04 | 1.53E-03 | 1.00E+00 |
| ABCC1         | LMNA | 0.3510484    | 0.223845532  | 0.466491994  | 3.02E-07 | 1.59E-06 | 3.58E-03 |

|           |      |              |              |              |          |          |          |
|-----------|------|--------------|--------------|--------------|----------|----------|----------|
| IFNA6     | LMNA | -0.125229706 | -0.258806439 | 0.01304685   | 7.58E-02 | 1.20E-01 | 1.00E+00 |
| PCBP2     | LMNA | -0.041538745 | -0.178565767 | 0.097068894  | 5.57E-01 | 6.38E-01 | 1.00E+00 |
| RBP3      | LMNA | 0.187490059  | 0.0507527    | 0.317327609  | 7.54E-03 | 1.58E-02 | 1.00E+00 |
| MUC13     | LMNA | -0.056495724 | -0.193041141 | 0.08219635   | 4.25E-01 | 5.11E-01 | 1.00E+00 |
| C8orf30A  | LMNA | 0.280459221  | 0.148144012  | 0.402910464  | 5.28E-05 | 1.82E-04 | 6.27E-01 |
| NUP205    | LMNA | 0.140399034  | 0.002394443  | 0.273155669  | 4.63E-02 | 7.84E-02 | 1.00E+00 |
| MFAP1     | LMNA | 0.073212336  | -0.065500683 | 0.209149455  | 3.00E-01 | 3.85E-01 | 1.00E+00 |
| ACTA1     | LMNA | 0.187445436  | 0.050706571  | 0.317286017  | 7.56E-03 | 1.58E-02 | 1.00E+00 |
| NHLH1     | LMNA | -0.264698215 | -0.388550848 | -0.131450666 | 1.41E-04 | 4.49E-04 | 1.00E+00 |
| GABBR2    | LMNA | -0.318295277 | -0.437138004 | -0.188528399 | 3.90E-06 | 1.67E-05 | 4.63E-02 |
| CXorf34   | LMNA | 0.245056508  | 0.11075229   | 0.370570983  | 4.40E-04 | 1.25E-03 | 1.00E+00 |
| TDRD7     | LMNA | -0.077915177 | -0.213667908 | 0.060789694  | 2.70E-01 | 3.53E-01 | 1.00E+00 |
| KCND2     | LMNA | -0.539392715 | -0.630494742 | -0.433631524 | 1.21E-16 | 3.46E-15 | 1.43E-12 |
| WIPF1     | LMNA | 0.513648081  | 0.404263238  | 0.608547223  | 5.39E-15 | 1.11E-13 | 6.40E-11 |
| TIMM17B   | LMNA | -0.072511202 | -0.208475313 | 0.066202502  | 3.05E-01 | 3.90E-01 | 1.00E+00 |
| SNX15     | LMNA | 0.013579387  | -0.124705392 | 0.151346666  | 8.48E-01 | 8.87E-01 | 1.00E+00 |
| AGXT      | LMNA | -0.007160479 | -0.145068079 | 0.131020036  | 9.19E-01 | 9.42E-01 | 1.00E+00 |
| IGF2R     | LMNA | 0.442927713  | 0.324733038  | 0.547500888  | 4.09E-11 | 4.35E-10 | 4.85E-07 |
| PIP5K1B   | LMNA | -0.313222172 | -0.43256863  | -0.183088013 | 5.66E-06 | 2.34E-05 | 6.71E-02 |
| ATP8A2    | LMNA | -0.332594144 | -0.449984143 | -0.203905453 | 1.32E-06 | 6.20E-06 | 1.57E-02 |
| FGF21     | LMNA | -0.017560301 | -0.155234979 | 0.120783505  | 8.04E-01 | 8.52E-01 | 1.00E+00 |
| AFTPH     | LMNA | 0.127285601  | -0.010957952 | 0.260754646  | 7.10E-02 | 1.14E-01 | 1.00E+00 |
| RBM15B    | LMNA | 0.16267571   | 0.025190424  | 0.294121465  | 2.07E-02 | 3.85E-02 | 1.00E+00 |
| FCER1G    | LMNA | 0.296094087  | 0.16477859   | 0.417095842  | 1.88E-05 | 7.09E-05 | 2.23E-01 |
| AGBL5     | LMNA | 0.027349574  | -0.111120979 | 0.164778431  | 6.99E-01 | 7.64E-01 | 1.00E+00 |
| SNTB1     | LMNA | -0.016384517 | -0.154086988 | 0.121942305  | 8.17E-01 | 8.62E-01 | 1.00E+00 |
| APEX2     | LMNA | 0.389175256  | 0.265382188  | 0.500344719  | 1.04E-08 | 7.07E-08 | 1.23E-04 |
| C17orf39  | LMNA | 0.242779821  | 0.108360635  | 0.368480819  | 4.99E-04 | 1.41E-03 | 1.00E+00 |
| SLC24A3   | LMNA | -0.337857009 | -0.454700115 | -0.209581189 | 8.77E-07 | 4.24E-06 | 1.04E-02 |
| TXNL4B    | LMNA | -0.069436358 | -0.205517319 | 0.069278732  | 3.26E-01 | 4.12E-01 | 1.00E+00 |
| UBE3A     | LMNA | 0.007871811  | -0.130320811 | 0.145764407  | 9.11E-01 | 9.37E-01 | 1.00E+00 |
| TGFB1I1   | LMNA | 0.697120008  | 0.618602108  | 0.761851826  | 1.01E-30 | 3.62E-28 | 1.20E-26 |
| RPL10L    | LMNA | 0.053735632  | -0.084945516 | 0.190374386  | 4.48E-01 | 5.34E-01 | 1.00E+00 |
| RBM13     | LMNA | -0.012706726 | -0.150493734 | 0.125564537  | 8.58E-01 | 8.95E-01 | 1.00E+00 |
| LOC389517 | LMNA | -0.096882599 | -0.231832895 | 0.041726483  | 1.70E-01 | 2.39E-01 | 1.00E+00 |

|          |      |              |              |              |          |          |          |
|----------|------|--------------|--------------|--------------|----------|----------|----------|
| TOP2B    | LMNA | -0.418488428 | -0.526142719 | -0.297632473 | 5.73E-10 | 4.96E-09 | 6.79E-06 |
| NPVF     | LMNA | -0.132981345 | -0.266146375 | 0.005164466  | 5.92E-02 | 9.72E-02 | 1.00E+00 |
| SHOX2    | LMNA | 0.202417571  | 0.066216933  | 0.331213168  | 3.86E-03 | 8.69E-03 | 1.00E+00 |
| ITGA7    | LMNA | 0.520781746  | 0.412378465  | 0.61464331   | 1.94E-15 | 4.37E-14 | 2.31E-11 |
| RAD54L2  | LMNA | 0.071369965  | -0.067344561 | 0.207377736  | 3.13E-01 | 3.98E-01 | 1.00E+00 |
| KCNIP2   | LMNA | -0.503105753 | -0.599517699 | -0.392301779 | 2.34E-14 | 4.18E-13 | 2.77E-10 |
| C2orf47  | LMNA | 0.021128467  | -0.117264571 | 0.158716523  | 7.65E-01 | 8.20E-01 | 1.00E+00 |
| KLF13    | LMNA | -0.026344199 | -0.163799487 | 0.112114545  | 7.10E-01 | 7.73E-01 | 1.00E+00 |
| TSPAN4   | LMNA | 0.690231264  | 0.610337571  | 0.756223873  | 6.43E-30 | 1.86E-27 | 7.62E-26 |
| NLE1     | LMNA | -0.075252965 | -0.211110789 | 0.063457277  | 2.87E-01 | 3.71E-01 | 1.00E+00 |
| TPST1    | LMNA | 0.197670161  | 0.061291723  | 0.326803172  | 4.80E-03 | 1.05E-02 | 1.00E+00 |
| CEACAM1  | LMNA | 0.119691361  | -0.018668102 | 0.253552779  | 8.98E-02 | 1.39E-01 | 1.00E+00 |
| PFKFB4   | LMNA | 0.309716523  | 0.179333214  | 0.429407487  | 7.28E-06 | 2.96E-05 | 8.63E-02 |
| SREBF1   | LMNA | 0.261693784  | 0.12827706   | 0.385806711  | 1.69E-04 | 5.26E-04 | 1.00E+00 |
| RNF11    | LMNA | -0.152194445 | -0.284272707 | -0.014446985 | 3.06E-02 | 5.45E-02 | 1.00E+00 |
| IL21     | LMNA | -0.115287389 | -0.249369539 | 0.023131766  | 1.02E-01 | 1.55E-01 | 1.00E+00 |
| LTK      | LMNA | 0.048415499  | -0.090238639 | 0.185228468  | 4.94E-01 | 5.79E-01 | 1.00E+00 |
| DKKL1    | LMNA | 0.077882883  | -0.060822065 | 0.2136369    | 2.71E-01 | 3.53E-01 | 1.00E+00 |
| EPAS1    | LMNA | 0.354315938  | 0.227387284  | 0.469406542  | 2.30E-07 | 1.24E-06 | 2.73E-03 |
| POLD3    | LMNA | -0.027538936 | -0.164962785 | 0.11093381   | 6.97E-01 | 7.62E-01 | 1.00E+00 |
| UBTF     | LMNA | -0.070141876 | -0.206196246 | 0.068573129  | 3.21E-01 | 4.07E-01 | 1.00E+00 |
| PHB      | LMNA | -0.067907285 | -0.204045428 | 0.070807512  | 3.37E-01 | 4.23E-01 | 1.00E+00 |
| KIAA0427 | LMNA | -0.385214938 | -0.496844112 | -0.261046193 | 1.51E-08 | 9.98E-08 | 1.79E-04 |
| FPRL2    | LMNA | 0.376861775  | 0.251917047  | 0.489448649  | 3.24E-08 | 2.01E-07 | 3.84E-04 |
| HSDL2    | LMNA | -0.121747359 | -0.255504016 | 0.016582346  | 8.43E-02 | 1.32E-01 | 1.00E+00 |
| SEMA6B   | LMNA | -0.198777852 | -0.32783264  | -0.062440306 | 4.57E-03 | 1.01E-02 | 1.00E+00 |
| AKR1A1   | LMNA | 0.143190315  | 0.005242955  | 0.275789626  | 4.21E-02 | 7.20E-02 | 1.00E+00 |
| CLTB     | LMNA | 0.051161394  | -0.087507663 | 0.187885383  | 4.70E-01 | 5.55E-01 | 1.00E+00 |
| NXT2     | LMNA | -0.208366097 | -0.336730981 | -0.072397624 | 2.92E-03 | 6.79E-03 | 1.00E+00 |
| JDP2     | LMNA | 0.185329929  | 0.04852032   | 0.315313636  | 8.28E-03 | 1.72E-02 | 1.00E+00 |
| MORF4L1  | LMNA | -0.167143046 | -0.298310745 | -0.029779178 | 1.74E-02 | 3.30E-02 | 1.00E+00 |
| HSPB7    | LMNA | 0.174185528  | 0.037024844  | 0.304904643  | 1.32E-02 | 2.59E-02 | 1.00E+00 |
| POU2F1   | LMNA | -0.274598126 | -0.39757754  | -0.141927386 | 7.66E-05 | 2.56E-04 | 9.08E-01 |
| MLLT11   | LMNA | -0.403997164 | -0.513413934 | -0.281654667 | 2.49E-09 | 1.91E-08 | 2.95E-05 |
| CNNM2    | LMNA | -0.267447818 | -0.391060309 | -0.134357489 | 1.19E-04 | 3.84E-04 | 1.00E+00 |



|         |      |              |              |              |          |          |          |
|---------|------|--------------|--------------|--------------|----------|----------|----------|
| ZC3H15  | LMNA | -0.106377467 | -0.240890861 | 0.032145608  | 1.32E-01 | 1.93E-01 | 1.00E+00 |
| ELK3    | LMNA | 0.617438029  | 0.524056525  | 0.696150589  | 1.29E-22 | 1.07E-20 | 1.53E-18 |
| CBLC    | LMNA | 0.238310901  | 0.103670564  | 0.364374329  | 6.37E-04 | 1.75E-03 | 1.00E+00 |
| SEC61B  | LMNA | 0.246279173  | 0.11203734   | 0.371692953  | 4.11E-04 | 1.18E-03 | 1.00E+00 |
| RRP15   | LMNA | 0.040608033  | -0.09799231  | 0.177663059  | 5.66E-01 | 6.46E-01 | 1.00E+00 |
| OR3A2   | LMNA | -0.120814774 | -0.254619085 | 0.017528579  | 8.68E-02 | 1.35E-01 | 1.00E+00 |
| RSL1D1  | LMNA | 0.003844271  | -0.134277992 | 0.141820007  | 9.57E-01 | 9.68E-01 | 1.00E+00 |
| P2RX7   | LMNA | -0.378086838 | -0.490534271 | -0.253254524 | 2.90E-08 | 1.82E-07 | 3.44E-04 |
| ANKMY2  | LMNA | -0.054147564 | -0.190772516 | 0.084535349  | 4.44E-01 | 5.31E-01 | 1.00E+00 |
| PSME2   | LMNA | 0.430655897  | 0.311100597  | 0.536793211  | 1.58E-10 | 1.52E-09 | 1.87E-06 |
| ADNP2   | LMNA | -0.095489828 | -0.23050224  | 0.043129729  | 1.76E-01 | 2.46E-01 | 1.00E+00 |
| RBM25   | LMNA | -0.022192018 | -0.159753593 | 0.116215022  | 7.54E-01 | 8.10E-01 | 1.00E+00 |
| PLEKHA5 | LMNA | -0.062885427 | -0.199207032 | 0.07582383   | 3.74E-01 | 4.62E-01 | 1.00E+00 |
| DHX58   | LMNA | 0.170590561  | 0.033324355  | 0.301540229  | 1.52E-02 | 2.93E-02 | 1.00E+00 |
| ARCN1   | LMNA | 0.310066019  | 0.179707379  | 0.429722769  | 7.10E-06 | 2.89E-05 | 8.42E-02 |
| POLR2E  | LMNA | 0.13267039   | -0.005480996 | 0.265852233  | 5.98E-02 | 9.81E-02 | 1.00E+00 |
| SEC24A  | LMNA | 0.386028742  | 0.261936786  | 0.497563747  | 1.40E-08 | 9.31E-08 | 1.66E-04 |
| IFITM1  | LMNA | 0.263900436  | 0.130607698  | 0.3878224    | 1.48E-04 | 4.68E-04 | 1.00E+00 |
| ZNF643  | LMNA | -0.321087505 | -0.439650365 | -0.19152618  | 3.18E-06 | 1.38E-05 | 3.77E-02 |
| DNA2L   | LMNA | -0.380429486 | -0.492609301 | -0.255813469 | 2.34E-08 | 1.50E-07 | 2.78E-04 |
| ZBTB25  | LMNA | 0.223269646  | 0.08792884   | 0.350516808  | 1.40E-03 | 3.54E-03 | 1.00E+00 |
| HIGD2A  | LMNA | 0.014900396  | -0.123404449 | 0.15263742   | 8.33E-01 | 8.75E-01 | 1.00E+00 |
| TTLL5   | LMNA | 0.081002701  | -0.057693456 | 0.216631223  | 2.52E-01 | 3.33E-01 | 1.00E+00 |
| TBX6    | LMNA | -0.008430503 | -0.146311221 | 0.129771531  | 9.05E-01 | 9.32E-01 | 1.00E+00 |
| SPTBN4  | LMNA | -0.186187981 | -0.316113771 | -0.049406908 | 7.98E-03 | 1.66E-02 | 1.00E+00 |
| SGK3    | LMNA | -0.244623803 | -0.370173826 | -0.110297615 | 4.50E-04 | 1.28E-03 | 1.00E+00 |
| FBXO28  | LMNA | -0.079680638 | -0.215362651 | 0.059019577  | 2.60E-01 | 3.41E-01 | 1.00E+00 |
| GCN1L1  | LMNA | 0.126928578  | -0.011320792 | 0.260416402  | 7.18E-02 | 1.15E-01 | 1.00E+00 |
| CLEC10A | LMNA | 0.30046676   | 0.169444263  | 0.421052609  | 1.39E-05 | 5.37E-05 | 1.65E-01 |
| GAS6    | LMNA | 0.357136454  | 0.230447202  | 0.471920345  | 1.81E-07 | 9.98E-07 | 2.15E-03 |
| AMOT    | LMNA | -0.300608766 | -0.421181031 | -0.169595882 | 1.38E-05 | 5.33E-05 | 1.64E-01 |
| TSHR    | LMNA | -0.271576224 | -0.394824706 | -0.138726261 | 9.24E-05 | 3.04E-04 | 1.00E+00 |
| ETV1    | LMNA | -0.215331569 | -0.34318092  | -0.079648251 | 2.09E-03 | 5.03E-03 | 1.00E+00 |
| LDOC1   | LMNA | -0.194191747 | -0.323568408 | -0.057687247 | 5.62E-03 | 1.21E-02 | 1.00E+00 |
| ERGIC2  | LMNA | -0.105601487 | -0.240151465 | 0.032929574  | 1.35E-01 | 1.96E-01 | 1.00E+00 |

|          |      |              |              |              |          |          |          |
|----------|------|--------------|--------------|--------------|----------|----------|----------|
| ADAM11   | LMNA | -0.309148726 | -0.428895212 | -0.178725421 | 7.58E-06 | 3.07E-05 | 8.99E-02 |
| NAT1     | LMNA | 0.224857465  | 0.089587419  | 0.351982302  | 1.29E-03 | 3.30E-03 | 1.00E+00 |
| ASB9     | LMNA | 0.291195986  | 0.159559251  | 0.412658171  | 2.62E-05 | 9.59E-05 | 3.10E-01 |
| ATP6V0E2 | LMNA | -0.203905934 | -0.332594591 | -0.067762406 | 3.61E-03 | 8.18E-03 | 1.00E+00 |
| HGFAC    | LMNA | -0.051259602 | -0.187980371 | 0.08740995   | 4.69E-01 | 5.54E-01 | 1.00E+00 |
| TRAFD1   | LMNA | -0.011884624 | -0.149690031 | 0.126373716  | 8.67E-01 | 9.02E-01 | 1.00E+00 |
| MTCH2    | LMNA | 0.045475099  | -0.093160754 | 0.182381132  | 5.20E-01 | 6.04E-01 | 1.00E+00 |
| BACH2    | LMNA | -0.321070923 | -0.439635451 | -0.191508371 | 3.18E-06 | 1.38E-05 | 3.77E-02 |
| AUTS2    | LMNA | -0.023138876 | -0.16067662  | 0.11528037   | 7.44E-01 | 8.02E-01 | 1.00E+00 |
| PGS1     | LMNA | 0.034944204  | -0.103606603 | 0.172164668  | 6.22E-01 | 6.97E-01 | 1.00E+00 |
| LEPREL1  | LMNA | 0.481118738  | 0.367475033  | 0.580606481  | 4.24E-13 | 6.25E-12 | 5.03E-09 |
| TFF1     | LMNA | -0.092965644 | -0.228089346 | 0.045671505  | 1.88E-01 | 2.60E-01 | 1.00E+00 |
| RPRM     | LMNA | -0.535483342 | -0.627171322 | -0.429157376 | 2.20E-16 | 5.97E-15 | 2.60E-12 |
| PPP2R3A  | LMNA | -0.008795108 | -0.146668028 | 0.129413023  | 9.01E-01 | 9.28E-01 | 1.00E+00 |
| HAP1     | LMNA | 0.100785323  | -0.03779149  | 0.235558871  | 1.54E-01 | 2.19E-01 | 1.00E+00 |
| BAT2     | LMNA | 0.003237826  | -0.134873461 | 0.141225701  | 9.64E-01 | 9.73E-01 | 1.00E+00 |
| EPHB2    | LMNA | -0.032163519 | -0.169462073 | 0.10635974   | 6.50E-01 | 7.21E-01 | 1.00E+00 |
| LPHN2    | LMNA | 0.222799236  | 0.087437611  | 0.350082518  | 1.44E-03 | 3.61E-03 | 1.00E+00 |
| ACTG1    | LMNA | 0.410406753  | 0.288713406  | 0.51904991   | 1.31E-09 | 1.06E-08 | 1.55E-05 |
| CENPT    | LMNA | -0.140724638 | -0.273463024 | -0.002726608 | 4.58E-02 | 7.76E-02 | 1.00E+00 |
| RNF123   | LMNA | 0.015862813  | -0.122456352 | 0.153577498  | 8.23E-01 | 8.66E-01 | 1.00E+00 |
| ZP2      | LMNA | -0.040793577 | -0.177843038 | 0.09780824   | 5.64E-01 | 6.45E-01 | 1.00E+00 |
| PLAUR    | LMNA | 0.649182041  | 0.561448153  | 0.722483871  | 1.48E-25 | 2.28E-23 | 1.76E-21 |
| BMP5     | LMNA | -0.007625067 | -0.145522883 | 0.130563371  | 9.14E-01 | 9.38E-01 | 1.00E+00 |
| MUM1     | LMNA | -0.349488516 | -0.465099738 | -0.222155925 | 3.43E-07 | 1.79E-06 | 4.07E-03 |
| SNX26    | LMNA | -0.445564631 | -0.549797249 | -0.327668746 | 3.04E-11 | 3.28E-10 | 3.60E-07 |
| MID2     | LMNA | 0.191437801  | 0.054836016  | 0.321005218  | 6.35E-03 | 1.35E-02 | 1.00E+00 |
| ISG20L1  | LMNA | 0.376477994  | 0.251498148  | 0.48910848   | 3.35E-08 | 2.07E-07 | 3.97E-04 |
| RBM28    | LMNA | 0.170059514  | 0.03277804   | 0.301042963  | 1.55E-02 | 2.98E-02 | 1.00E+00 |
| SRRM2    | LMNA | -0.044105625 | -0.181054218 | 0.094520897  | 5.33E-01 | 6.15E-01 | 1.00E+00 |
| MEP1B    | LMNA | -0.047794526 | -0.18462734  | 0.09085595   | 4.99E-01 | 5.84E-01 | 1.00E+00 |
| PCSK7    | LMNA | 0.363234744  | 0.237071684  | 0.477349112  | 1.08E-07 | 6.14E-07 | 1.28E-03 |
| HNRNPA1  | LMNA | -0.2078087   | -0.336214317 | -0.071818029 | 3.00E-03 | 6.95E-03 | 1.00E+00 |
| PBX2     | LMNA | 0.141333722  | 0.003348046  | 0.274037897  | 4.48E-02 | 7.62E-02 | 1.00E+00 |
| CENTB1   | LMNA | 0.424561143  | 0.30434833   | 0.531462544  | 3.03E-10 | 2.76E-09 | 3.60E-06 |

|          |      |              |              |              |          |          |          |
|----------|------|--------------|--------------|--------------|----------|----------|----------|
| BCAS3    | LMNA | -0.324859095 | -0.443040982 | -0.195579262 | 2.39E-06 | 1.07E-05 | 2.84E-02 |
| HGS      | LMNA | 0.191524925  | 0.054926184  | 0.321086336  | 6.32E-03 | 1.35E-02 | 1.00E+00 |
| FLJ20184 | LMNA | -0.084318705 | -0.219811043 | 0.054365121  | 2.33E-01 | 3.11E-01 | 1.00E+00 |
| TMC7     | LMNA | 0.323065885  | 0.193651665  | 0.441429328  | 2.74E-06 | 1.21E-05 | 3.25E-02 |
| POLA2    | LMNA | -0.007660894 | -0.145557953 | 0.130528152  | 9.14E-01 | 9.38E-01 | 1.00E+00 |
| NOL10    | LMNA | 0.121165778  | -0.017172468 | 0.254952179  | 8.58E-02 | 1.34E-01 | 1.00E+00 |
| KCNJ8    | LMNA | 0.08686822   | -0.051804027 | 0.222253898  | 2.19E-01 | 2.95E-01 | 1.00E+00 |
| HSD17B6  | LMNA | -0.07297078  | -0.208917213 | 0.06574249   | 3.02E-01 | 3.86E-01 | 1.00E+00 |
| EDEM3    | LMNA | 0.313274369  | 0.183143948  | 0.432615676  | 5.64E-06 | 2.34E-05 | 6.68E-02 |
| SLC16A1  | LMNA | 0.271869717  | 0.139037039  | 0.395092164  | 9.08E-05 | 2.99E-04 | 1.00E+00 |
| TCOF1    | LMNA | 0.215950164  | 0.080292865  | 0.343753149  | 2.02E-03 | 4.90E-03 | 1.00E+00 |
| SF3B3    | LMNA | -0.037167819 | -0.174324352 | 0.101403488  | 5.99E-01 | 6.77E-01 | 1.00E+00 |
| RANBP9   | LMNA | 0.090214434  | -0.048439846 | 0.225457543  | 2.02E-01 | 2.76E-01 | 1.00E+00 |
| CPNE7    | LMNA | -0.04283469  | -0.179822334 | 0.09578271   | 5.45E-01 | 6.26E-01 | 1.00E+00 |
| EVL      | LMNA | -0.461408543 | -0.563561832 | -0.345355998 | 4.81E-12 | 5.99E-11 | 5.71E-08 |
| NUDT21   | LMNA | -0.002078589 | -0.140089391 | 0.13601144   | 9.77E-01 | 9.82E-01 | 1.00E+00 |
| IFNA21   | LMNA | -0.049115422 | -0.1859059   | 0.089542717  | 4.88E-01 | 5.73E-01 | 1.00E+00 |
| CFD      | LMNA | 0.263765354  | 0.130464984  | 0.387699042  | 1.49E-04 | 4.71E-04 | 1.00E+00 |
| PYCARD   | LMNA | 0.257426956  | 0.123774665  | 0.381905771  | 2.17E-04 | 6.63E-04 | 1.00E+00 |
| MYBPC2   | LMNA | 0.006750531  | -0.131422945 | 0.144666715  | 9.24E-01 | 9.45E-01 | 1.00E+00 |
| ZNF235   | LMNA | -0.317531454 | -0.436450417 | -0.187708767 | 4.13E-06 | 1.76E-05 | 4.90E-02 |
| ACSL4    | LMNA | 0.18333085   | 0.046455595  | 0.313448774  | 9.01E-03 | 1.85E-02 | 1.00E+00 |
| KIAA0644 | LMNA | -0.135282114 | -0.268321979 | 0.002821582  | 5.49E-02 | 9.10E-02 | 1.00E+00 |
| ERC1     | LMNA | -0.120100686 | -0.253941334 | 0.018252949  | 8.87E-02 | 1.37E-01 | 1.00E+00 |
| NKIRAS2  | LMNA | -0.033788809 | -0.171041971 | 0.10475081   | 6.33E-01 | 7.07E-01 | 1.00E+00 |
| TRMT5    | LMNA | -0.256164034 | -0.380750295 | -0.122443073 | 2.33E-04 | 7.08E-04 | 1.00E+00 |
| TMEM176B | LMNA | 0.230559952  | 0.095550223  | 0.357240339  | 9.63E-04 | 2.53E-03 | 1.00E+00 |
| PPP1R7   | LMNA | 0.080779035  | -0.057917844 | 0.216416638  | 2.53E-01 | 3.34E-01 | 1.00E+00 |
| SOX2     | LMNA | -0.310086898 | -0.429741604 | -0.179729734 | 7.09E-06 | 2.89E-05 | 8.41E-02 |
| C16orf30 | LMNA | 0.047580665  | -0.091068524 | 0.18442029   | 5.01E-01 | 5.86E-01 | 1.00E+00 |
| COMT     | LMNA | 0.298909243  | 0.167781708  | 0.419643761  | 1.55E-05 | 5.93E-05 | 1.84E-01 |
| AOC2     | LMNA | -0.022302455 | -0.159861263 | 0.116106022  | 7.53E-01 | 8.09E-01 | 1.00E+00 |
| PDLIM5   | LMNA | 0.080491225  | -0.058206561 | 0.216140495  | 2.55E-01 | 3.36E-01 | 1.00E+00 |
| SPHK2    | LMNA | -0.150832413 | -0.282990819 | -0.013053214 | 3.21E-02 | 5.70E-02 | 1.00E+00 |
| THNSL2   | LMNA | 0.182748075  | 0.045853902  | 0.312904936  | 9.24E-03 | 1.89E-02 | 1.00E+00 |

|         |      |              |              |              |          |          |          |
|---------|------|--------------|--------------|--------------|----------|----------|----------|
| LARP5   | LMNA | -0.072904325 | -0.208853319 | 0.065809011  | 3.02E-01 | 3.87E-01 | 1.00E+00 |
| C1QTNF1 | LMNA | 0.346029033  | 0.218411473  | 0.462009977  | 4.55E-07 | 2.32E-06 | 5.40E-03 |
| TRADD   | LMNA | 0.641976807  | 0.55292948   | 0.71652536   | 7.38E-25 | 9.73E-23 | 8.76E-21 |
| C1orf43 | LMNA | -0.067276171 | -0.203437735 | 0.071438316  | 3.41E-01 | 4.28E-01 | 1.00E+00 |
| SCARF1  | LMNA | 0.257948035  | 0.124324218  | 0.382382404  | 2.10E-04 | 6.44E-04 | 1.00E+00 |
| RAD51L1 | LMNA | 0.010754868  | -0.127485413 | 0.148585261  | 8.79E-01 | 9.11E-01 | 1.00E+00 |
| LETMD1  | LMNA | -0.103284576 | -0.237942859 | 0.035269314  | 1.44E-01 | 2.07E-01 | 1.00E+00 |
| KRT75   | LMNA | 0.190308924  | 0.053667905  | 0.319953986  | 6.67E-03 | 1.41E-02 | 1.00E+00 |
| CD3EAP  | LMNA | 0.2412903    | 0.106796737  | 0.367112643  | 5.41E-04 | 1.51E-03 | 1.00E+00 |
| B3GNT2  | LMNA | 0.322555663  | 0.193103389  | 0.440970625  | 2.85E-06 | 1.25E-05 | 3.38E-02 |
| TMEM63A | LMNA | 0.034310174  | -0.104234539 | 0.171548626  | 6.28E-01 | 7.02E-01 | 1.00E+00 |
| DUSP13  | LMNA | -0.101779391 | -0.236507288 | 0.036788516  | 1.49E-01 | 2.14E-01 | 1.00E+00 |
| FNBP1   | LMNA | 0.251393595  | 0.117417588  | 0.376382199  | 3.07E-04 | 9.10E-04 | 1.00E+00 |
| MAGEB2  | LMNA | 0.095129895  | -0.04349228  | 0.230158278  | 1.78E-01 | 2.48E-01 | 1.00E+00 |
| EYA2    | LMNA | 0.171805016  | 0.034574037  | 0.302677163  | 1.45E-02 | 2.81E-02 | 1.00E+00 |
| FANCG   | LMNA | -0.175880986 | -0.306490236 | -0.038771376 | 1.23E-02 | 2.43E-02 | 1.00E+00 |
| CD1C    | LMNA | 0.195813645  | 0.059367482  | 0.325077074  | 5.22E-03 | 1.14E-02 | 1.00E+00 |
| LASS2   | LMNA | 0.569849429  | 0.468667713  | 0.656272591  | 8.68E-19 | 3.70E-17 | 1.03E-14 |
| BCL2L14 | LMNA | -0.183559155 | -0.313661801 | -0.046691337 | 8.92E-03 | 1.83E-02 | 1.00E+00 |
| ZNF471  | LMNA | -0.115464444 | -0.249537817 | 0.022952417  | 1.02E-01 | 1.54E-01 | 1.00E+00 |
| ZNF224  | LMNA | 0.01586539   | -0.122453813 | 0.153580015  | 8.23E-01 | 8.66E-01 | 1.00E+00 |
| AVP     | LMNA | 0.18378555   | 0.046925123  | 0.313873034  | 8.84E-03 | 1.82E-02 | 1.00E+00 |
| CKAP4   | LMNA | 0.655697539  | 0.569167402  | 0.727862632  | 3.34E-26 | 5.66E-24 | 3.96E-22 |
| EFS     | LMNA | -0.196551764 | -0.325763445 | -0.060132407 | 5.05E-03 | 1.10E-02 | 1.00E+00 |
| PITPNM1 | LMNA | 0.339385192  | 0.211230878  | 0.456068269  | 7.77E-07 | 3.80E-06 | 9.22E-03 |
| TRIM68  | LMNA | 0.030221865  | -0.1082809   | 0.167573722  | 6.69E-01 | 7.39E-01 | 1.00E+00 |
| ZNF652  | LMNA | -0.294969947 | -0.416077883 | -0.163580074 | 2.03E-05 | 7.60E-05 | 2.41E-01 |
| UCK2    | LMNA | 0.213198361  | 0.077426187  | 0.341206876  | 2.32E-03 | 5.53E-03 | 1.00E+00 |
| TMEM4   | LMNA | -0.047749658 | -0.184583902 | 0.090900549  | 5.00E-01 | 5.84E-01 | 1.00E+00 |
| SCN3B   | LMNA | -0.423579554 | -0.530603223 | -0.303261974 | 3.36E-10 | 3.02E-09 | 3.99E-06 |
| RNASEH1 | LMNA | 0.201919359  | 0.06569975   | 0.33075063   | 3.95E-03 | 8.88E-03 | 1.00E+00 |
| FAM50A  | LMNA | 0.540079461  | 0.434418021  | 0.631078211  | 1.09E-16 | 3.16E-15 | 1.29E-12 |
| DRD1    | LMNA | -0.295367178 | -0.416437628 | -0.164003542 | 1.98E-05 | 7.41E-05 | 2.34E-01 |
| OAT     | LMNA | -0.156612428 | -0.288427481 | -0.018971603 | 2.60E-02 | 4.72E-02 | 1.00E+00 |
| IQGAP2  | LMNA | 0.243042178  | 0.108636162  | 0.368721747  | 4.92E-04 | 1.39E-03 | 1.00E+00 |

|           |      |              |              |              |          |          |          |
|-----------|------|--------------|--------------|--------------|----------|----------|----------|
| CDYL      | LMNA | -0.168349494 | -0.299441236 | -0.03101941  | 1.66E-02 | 3.17E-02 | 1.00E+00 |
| C20orf149 | LMNA | 0.384619807  | 0.26039504   | 0.49631775   | 1.59E-08 | 1.05E-07 | 1.89E-04 |
| ANKS1A    | LMNA | -0.205989761 | -0.334527764 | -0.069927289 | 3.27E-03 | 7.50E-03 | 1.00E+00 |
| HYAL3     | LMNA | 0.10569286   | -0.032837269 | 0.240238539  | 1.34E-01 | 1.96E-01 | 1.00E+00 |
| CLPB      | LMNA | 0.371048224  | 0.245576532  | 0.484292052  | 5.44E-08 | 3.28E-07 | 6.46E-04 |
| SMNDC1    | LMNA | -0.070154364 | -0.206208262 | 0.068560638  | 3.21E-01 | 4.07E-01 | 1.00E+00 |
| COBLL1    | LMNA | 0.121266573  | -0.017070199 | 0.255047825  | 8.56E-02 | 1.33E-01 | 1.00E+00 |
| DONSON    | LMNA | 0.185546885  | 0.048744471  | 0.315515965  | 8.20E-03 | 1.70E-02 | 1.00E+00 |
| SLC30A9   | LMNA | -0.279628168 | -0.402154808 | -0.147261912 | 5.57E-05 | 1.91E-04 | 6.61E-01 |
| E2F8      | LMNA | 0.201079358  | 0.064827929  | 0.329970635  | 4.11E-03 | 9.20E-03 | 1.00E+00 |
| CCDC25    | LMNA | -0.129228897 | -0.262595153 | 0.00898235   | 6.68E-02 | 1.08E-01 | 1.00E+00 |
| C20orf116 | LMNA | 0.366025807  | 0.240107493  | 0.479830845  | 8.46E-08 | 4.91E-07 | 1.00E-03 |
| C2orf55   | LMNA | -0.004700607 | -0.142659033 | 0.133436984  | 9.47E-01 | 9.60E-01 | 1.00E+00 |
| PRCP      | LMNA | -0.118016505 | -0.251962458 | 0.02036631   | 9.44E-02 | 1.45E-01 | 1.00E+00 |
| SPINK1    | LMNA | 0.331958161  | 0.203220162  | 0.449413805  | 1.39E-06 | 6.48E-06 | 1.65E-02 |
| FAM12B    | LMNA | -0.094887172 | -0.229926306 | 0.043736748  | 1.79E-01 | 2.49E-01 | 1.00E+00 |
| NDUFB1    | LMNA | -0.195581401 | -0.324861085 | -0.059126837 | 5.28E-03 | 1.15E-02 | 1.00E+00 |
| DIO3      | LMNA | 0.198982089  | 0.062652122  | 0.32802242   | 4.53E-03 | 1.00E-02 | 1.00E+00 |
| HPN       | LMNA | -0.063822947 | -0.200110807 | 0.074887878  | 3.67E-01 | 4.54E-01 | 1.00E+00 |
| NBN       | LMNA | -0.113499733 | -0.247670053 | 0.024942079  | 1.08E-01 | 1.62E-01 | 1.00E+00 |
| C14orf94  | LMNA | 0.009958025  | -0.128269309 | 0.147805835  | 8.88E-01 | 9.19E-01 | 1.00E+00 |
| PVRL1     | LMNA | -0.294034052 | -0.415230157 | -0.162582553 | 2.16E-05 | 8.05E-05 | 2.57E-01 |
| CNTD2     | LMNA | -0.02192619  | -0.159494411 | 0.11647738   | 7.57E-01 | 8.13E-01 | 1.00E+00 |
| OCLM      | LMNA | -0.124433732 | -0.258051866 | 0.013855277  | 7.77E-02 | 1.23E-01 | 1.00E+00 |
| ZSCAN18   | LMNA | -0.197468705 | -0.32661591  | -0.061082869 | 4.85E-03 | 1.06E-02 | 1.00E+00 |
| MYL4      | LMNA | 0.198548785  | 0.062202753  | 0.327619774  | 4.62E-03 | 1.02E-02 | 1.00E+00 |
| SLC17A1   | LMNA | 0.026904526  | -0.111560834 | 0.164345116  | 7.04E-01 | 7.68E-01 | 1.00E+00 |
| TAF5L     | LMNA | -0.103218254 | -0.237879617 | 0.035336266  | 1.44E-01 | 2.07E-01 | 1.00E+00 |
| L3MBTL    | LMNA | -0.237835474 | -0.363937171 | -0.103171962 | 6.54E-04 | 1.79E-03 | 1.00E+00 |
| TSTA3     | LMNA | 0.250723746  | 0.116712475  | 0.375768401  | 3.19E-04 | 9.42E-04 | 1.00E+00 |
| CCDC59    | LMNA | -0.007974408 | -0.14586483  | 0.130219949  | 9.10E-01 | 9.36E-01 | 1.00E+00 |
| RAC1      | LMNA | 0.194413099  | 0.057916516  | 0.323774345  | 5.56E-03 | 1.20E-02 | 1.00E+00 |
| C19orf15  | LMNA | 0.13299275   | -0.005152856 | 0.266157163  | 5.92E-02 | 9.72E-02 | 1.00E+00 |
| MED20     | LMNA | -0.180930864 | -0.311208593 | -0.04397834  | 9.97E-03 | 2.02E-02 | 1.00E+00 |
| CHMP4A    | LMNA | 0.224326166  | 0.089032359  | 0.351492003  | 1.33E-03 | 3.38E-03 | 1.00E+00 |

|          |      |              |              |              |          |          |          |
|----------|------|--------------|--------------|--------------|----------|----------|----------|
| NFE2     | LMNA | 0.072028479  | -0.066685617 | 0.208011099  | 3.08E-01 | 3.93E-01 | 1.00E+00 |
| KLK14    | LMNA | -0.07097451  | -0.20699733  | 0.067740216  | 3.16E-01 | 4.01E-01 | 1.00E+00 |
| FBXL12   | LMNA | 0.222892629  | 0.087535133  | 0.350168745  | 1.43E-03 | 3.60E-03 | 1.00E+00 |
| ZNF364   | LMNA | -0.067271073 | -0.203432826 | 0.071443411  | 3.41E-01 | 4.28E-01 | 1.00E+00 |
| TOMM20   | LMNA | -0.20881629  | -0.337148219 | -0.072865814 | 2.86E-03 | 6.65E-03 | 1.00E+00 |
| ARSF     | LMNA | 0.160085818  | 0.022532793  | 0.291690458  | 2.29E-02 | 4.21E-02 | 1.00E+00 |
| MAST2    | LMNA | 0.1366392    | -0.001438944 | 0.269604601  | 5.25E-02 | 8.76E-02 | 1.00E+00 |
| GTF2A1   | LMNA | -0.091557514 | -0.226742577 | 0.047088669  | 1.95E-01 | 2.68E-01 | 1.00E+00 |
| ATP1A3   | LMNA | -0.612649818 | -0.692160053 | -0.518447511 | 3.35E-22 | 2.47E-20 | 3.97E-18 |
| PNKP     | LMNA | 0.34661511   | 0.219045563  | 0.462533617  | 4.34E-07 | 2.22E-06 | 5.15E-03 |
| MRPS35   | LMNA | -0.116570961 | -0.250589294 | 0.021831366  | 9.85E-02 | 1.50E-01 | 1.00E+00 |
| MATR3    | LMNA | -0.510838941 | -0.606143588 | -0.401072291 | 8.01E-15 | 1.59E-13 | 9.50E-11 |
| S100P    | LMNA | -0.003685172 | -0.141664103 | 0.134434221  | 9.58E-01 | 9.69E-01 | 1.00E+00 |
| MSC      | LMNA | 0.360758606  | 0.234380476  | 0.475145875  | 1.33E-07 | 7.48E-07 | 1.58E-03 |
| CILP     | LMNA | 0.206416279  | 0.070370556  | 0.334923314  | 3.21E-03 | 7.37E-03 | 1.00E+00 |
| PROZ     | LMNA | 0.102601656  | -0.035958673 | 0.237291596  | 1.46E-01 | 2.10E-01 | 1.00E+00 |
| SEC23B   | LMNA | 0.034081228  | -0.104461257 | 0.171326149  | 6.30E-01 | 7.04E-01 | 1.00E+00 |
| FAM5C    | LMNA | -0.436457132 | -0.541859298 | -0.317538913 | 8.40E-11 | 8.55E-10 | 9.96E-07 |
| C19orf40 | LMNA | 0.246976776  | 0.112770738  | 0.372332939  | 3.95E-04 | 1.14E-03 | 1.00E+00 |
| DCK      | LMNA | -0.299192761 | -0.41990026  | -0.168084291 | 1.52E-05 | 5.83E-05 | 1.81E-01 |
| C17orf63 | LMNA | -0.109529185 | -0.243892383 | 0.028959705  | 1.21E-01 | 1.79E-01 | 1.00E+00 |
| TIA1     | LMNA | -0.286827933 | -0.408695851 | -0.154910922 | 3.49E-05 | 1.25E-04 | 4.14E-01 |
| SPAR     | LMNA | -0.171325101 | -0.302227927 | -0.034080151 | 1.48E-02 | 2.85E-02 | 1.00E+00 |
| SLC6A4   | LMNA | 0.150221585  | 0.012428326  | 0.28241578   | 3.28E-02 | 5.81E-02 | 1.00E+00 |
| SPTLC1   | LMNA | 0.118552106  | -0.019823328 | 0.252471105  | 9.29E-02 | 1.43E-01 | 1.00E+00 |
| HMGB3    | LMNA | -0.217534061 | -0.345217894 | -0.0819439   | 1.87E-03 | 4.58E-03 | 1.00E+00 |
| TOPBP1   | LMNA | -0.145899748 | -0.278344445 | -0.008010084 | 3.83E-02 | 6.63E-02 | 1.00E+00 |
| NAT8     | LMNA | -0.11334222  | -0.24752027  | 0.025101544  | 1.08E-01 | 1.63E-01 | 1.00E+00 |
| MID1IP1  | LMNA | 0.028704522  | -0.109781509 | 0.16609733   | 6.85E-01 | 7.53E-01 | 1.00E+00 |
| KLF11    | LMNA | 0.117382144  | -0.021009307 | 0.251359926  | 9.62E-02 | 1.47E-01 | 1.00E+00 |
| HOMER3   | LMNA | 0.456006413  | 0.339316087  | 0.558875033  | 9.12E-12 | 1.08E-10 | 1.08E-07 |
| KCNAB3   | LMNA | -0.259710568 | -0.383994111 | -0.126183668 | 1.90E-04 | 5.85E-04 | 1.00E+00 |
| KLHDC4   | LMNA | 0.083220391  | -0.055467861 | 0.218758154  | 2.39E-01 | 3.18E-01 | 1.00E+00 |
| PHLDA3   | LMNA | 0.456988326  | 0.34041321   | 0.559727414  | 8.12E-12 | 9.69E-11 | 9.63E-08 |
| DOCK2    | LMNA | 0.26368543   | 0.130380547  | 0.387626052  | 1.50E-04 | 4.73E-04 | 1.00E+00 |

|           |      |              |              |              |          |          |          |
|-----------|------|--------------|--------------|--------------|----------|----------|----------|
| TUG1      | LMNA | -0.089972936 | -0.225226432 | 0.048682746  | 2.03E-01 | 2.77E-01 | 1.00E+00 |
| NUP214    | LMNA | 0.162849068  | 0.025368386  | 0.294284127  | 2.06E-02 | 3.83E-02 | 1.00E+00 |
| GABARAP   | LMNA | -0.170908351 | -0.30183777  | -0.033651322 | 1.50E-02 | 2.89E-02 | 1.00E+00 |
| GOLM1     | LMNA | -0.216626892 | -0.344379045 | -0.080998188 | 1.96E-03 | 4.76E-03 | 1.00E+00 |
| DPYSL2    | LMNA | -0.205310565 | -0.33389779  | -0.069221533 | 3.38E-03 | 7.71E-03 | 1.00E+00 |
| SDCCAG8   | LMNA | -0.23765126  | -0.363767769 | -0.102978786 | 6.60E-04 | 1.81E-03 | 1.00E+00 |
| SOX13     | LMNA | -0.103746263 | -0.238383075 | 0.034803199  | 1.42E-01 | 2.05E-01 | 1.00E+00 |
| KEL       | LMNA | 0.043901019  | -0.094724064 | 0.180855928  | 5.35E-01 | 6.17E-01 | 1.00E+00 |
| EXOC5     | LMNA | -0.050458269 | -0.187205233 | 0.088207166  | 4.76E-01 | 5.61E-01 | 1.00E+00 |
| GK        | LMNA | 0.161727802  | 0.024217498  | 0.293231906  | 2.15E-02 | 3.98E-02 | 1.00E+00 |
| SLCO1B3   | LMNA | 0.126036973  | -0.012226768 | 0.259571551  | 7.39E-02 | 1.18E-01 | 1.00E+00 |
| RPL36A    | LMNA | 0.085252664  | -0.053427132 | 0.220706127  | 2.28E-01 | 3.05E-01 | 1.00E+00 |
| DNAJB1    | LMNA | 0.449105841  | 0.331614795  | 0.552878636  | 2.03E-11 | 2.24E-10 | 2.41E-07 |
| ALPK3     | LMNA | 0.249379454  | 0.115297822  | 0.374536264  | 3.45E-04 | 1.01E-03 | 1.00E+00 |
| IKZF5     | LMNA | -0.321990754 | -0.440462684 | -0.192496441 | 2.97E-06 | 1.30E-05 | 3.52E-02 |
| CYLC2     | LMNA | 0.120036644  | -0.018317906 | 0.253880545  | 8.88E-02 | 1.37E-01 | 1.00E+00 |
| C8orf51   | LMNA | 0.140349573  | 0.002343988  | 0.273108978  | 4.63E-02 | 7.85E-02 | 1.00E+00 |
| NRP1      | LMNA | 0.630463224  | 0.539355622  | 0.706981341  | 8.81E-24 | 9.33E-22 | 1.04E-19 |
| NR2F1     | LMNA | -0.119027552 | -0.252922562 | 0.019341261  | 9.16E-02 | 1.41E-01 | 1.00E+00 |
| ACAD8     | LMNA | -0.297509038 | -0.418376713 | -0.16628771  | 1.71E-05 | 6.48E-05 | 2.03E-01 |
| PLEK      | LMNA | 0.191457935  | 0.054856854  | 0.321023965  | 6.34E-03 | 1.35E-02 | 1.00E+00 |
| NLRP3     | LMNA | 0.222499105  | 0.087124232  | 0.349805404  | 1.46E-03 | 3.66E-03 | 1.00E+00 |
| RBM35A    | LMNA | -0.035938532 | -0.173130572 | 0.10262161   | 6.12E-01 | 6.88E-01 | 1.00E+00 |
| GPR3      | LMNA | 0.337057941  | 0.208718877  | 0.453984504  | 9.34E-07 | 4.50E-06 | 1.11E-02 |
| RAB8B     | LMNA | 0.059986058  | -0.078716808 | 0.196410556  | 3.96E-01 | 4.83E-01 | 1.00E+00 |
| UBE2E3    | LMNA | -0.291892265 | -0.41328935  | -0.160300747 | 2.50E-05 | 9.20E-05 | 2.96E-01 |
| C20orf111 | LMNA | 0.036682543  | -0.101884406 | 0.173853141  | 6.04E-01 | 6.81E-01 | 1.00E+00 |
| GNAI2     | LMNA | 0.461253515  | 0.345182533  | 0.563427424  | 4.90E-12 | 6.09E-11 | 5.81E-08 |
| METTL8    | LMNA | 0.113374963  | -0.025068397 | 0.247551406  | 1.08E-01 | 1.63E-01 | 1.00E+00 |
| SLC39A7   | LMNA | 0.436755251  | 0.317870067  | 0.542119431  | 8.13E-11 | 8.30E-10 | 9.64E-07 |
| CAMK1     | LMNA | 0.19423545   | 0.057732512  | 0.323609068  | 5.61E-03 | 1.21E-02 | 1.00E+00 |
| PRDX6     | LMNA | 0.457467167  | 0.34094835   | 0.560143008  | 7.68E-12 | 9.24E-11 | 9.11E-08 |
| RFC3      | LMNA | -0.194349726 | -0.323715386 | -0.057850874 | 5.58E-03 | 1.20E-02 | 1.00E+00 |
| FAM129A   | LMNA | 0.578246325  | 0.478383473  | 0.663344225  | 2.03E-19 | 9.34E-18 | 2.41E-15 |
| BCAN      | LMNA | -0.518834198 | -0.612980141 | -0.410161234 | 2.57E-15 | 5.58E-14 | 3.05E-11 |

|          |      |              |              |              |          |          |          |
|----------|------|--------------|--------------|--------------|----------|----------|----------|
| TETTRAN  | LMNA | 0.495165033  | 0.383316814  | 0.592700215  | 6.82E-14 | 1.11E-12 | 8.09E-10 |
| ILF2     | LMNA | -0.157529107 | -0.289288926 | -0.019911114 | 2.52E-02 | 4.58E-02 | 1.00E+00 |
| SMPD4    | LMNA | -0.038145777 | -0.175273774 | 0.100434116  | 5.90E-01 | 6.68E-01 | 1.00E+00 |
| AKAP7    | LMNA | -0.368299546 | -0.481851244 | -0.242582436 | 6.94E-08 | 4.11E-07 | 8.23E-04 |
| ZNF500   | LMNA | -0.196057042 | -0.325303423 | -0.059619701 | 5.17E-03 | 1.12E-02 | 1.00E+00 |
| FLJ11151 | LMNA | 0.314062465  | 0.183988591  | 0.433325911  | 5.32E-06 | 2.22E-05 | 6.31E-02 |
| PSMA3    | LMNA | 0.161284549  | 0.023762636  | 0.29281586   | 2.18E-02 | 4.04E-02 | 1.00E+00 |
| ASCC3    | LMNA | 0.125588251  | -0.012682635 | 0.259146282  | 7.49E-02 | 1.19E-01 | 1.00E+00 |
| ACYP2    | LMNA | -0.381131397 | -0.493230778 | -0.256580527 | 2.19E-08 | 1.41E-07 | 2.60E-04 |
| SOX21    | LMNA | -0.060514192 | -0.196920113 | 0.078190012  | 3.92E-01 | 4.80E-01 | 1.00E+00 |
| CLDN4    | LMNA | 0.204429416  | 0.06830613   | 0.333080329  | 3.52E-03 | 8.00E-03 | 1.00E+00 |
| LYRM1    | LMNA | -0.227183283 | -0.354127816 | -0.09201824  | 1.15E-03 | 2.96E-03 | 1.00E+00 |
| DEFB1    | LMNA | 0.013407219  | -0.12487491  | 0.151178406  | 8.50E-01 | 8.89E-01 | 1.00E+00 |
| GRM8     | LMNA | -0.263916787 | -0.387837331 | -0.130624974 | 1.48E-04 | 4.68E-04 | 1.00E+00 |
| SLC22A18 | LMNA | 0.576176378  | 0.475986136  | 0.661602384  | 2.92E-19 | 1.32E-17 | 3.46E-15 |
| RNF141   | LMNA | -0.075143478 | -0.211005584 | 0.063566943  | 2.88E-01 | 3.71E-01 | 1.00E+00 |
| OR7C2    | LMNA | -0.205927187 | -0.33446973  | -0.069862262 | 3.28E-03 | 7.52E-03 | 1.00E+00 |
| GRK6     | LMNA | 0.16786812   | 0.030524505  | 0.298990213  | 1.69E-02 | 3.22E-02 | 1.00E+00 |
| PIGZ     | LMNA | -0.189101725 | -0.318829465 | -0.052419162 | 7.03E-03 | 1.48E-02 | 1.00E+00 |
| VPS26A   | LMNA | -0.203444221 | -0.332166112 | -0.067282907 | 3.68E-03 | 8.33E-03 | 1.00E+00 |
| EPHA2    | LMNA | 0.541939469  | 0.436549008  | 0.632657982  | 8.15E-17 | 2.43E-15 | 9.66E-13 |
| KIAA0562 | LMNA | 0.132125605  | -0.006035483 | 0.265336843  | 6.09E-02 | 9.95E-02 | 1.00E+00 |
| TCHH     | LMNA | 0.108519376  | -0.029980773 | 0.242930977  | 1.24E-01 | 1.83E-01 | 1.00E+00 |
| MGC16824 | LMNA | -0.106095979 | -0.240622662 | 0.032430013  | 1.33E-01 | 1.94E-01 | 1.00E+00 |
| SARS2    | LMNA | -0.182369253 | -0.312551379 | -0.045462836 | 9.39E-03 | 1.92E-02 | 1.00E+00 |
| ZCWPW1   | LMNA | -0.072072211 | -0.208053158 | 0.066641852  | 3.08E-01 | 3.93E-01 | 1.00E+00 |
| WDR8     | LMNA | -0.06022127  | -0.196637504 | 0.078482201  | 3.95E-01 | 4.82E-01 | 1.00E+00 |
| MTHFR    | LMNA | 0.226434306  | 0.091235273  | 0.353437048  | 1.19E-03 | 3.06E-03 | 1.00E+00 |
| RPGRIP1  | LMNA | -0.033198622 | -0.170468349 | 0.10533514   | 6.39E-01 | 7.13E-01 | 1.00E+00 |
| ACAT1    | LMNA | -0.182227184 | -0.312418776 | -0.045316187 | 9.44E-03 | 1.93E-02 | 1.00E+00 |
| MEOX1    | LMNA | 0.251256255  | 0.117273007  | 0.376256361  | 3.10E-04 | 9.16E-04 | 1.00E+00 |
| DACH1    | LMNA | -0.197085372 | -0.326259557 | -0.060685492 | 4.93E-03 | 1.08E-02 | 1.00E+00 |
| ADAMDEC1 | LMNA | 0.089443237  | -0.049215462 | 0.224719463  | 2.06E-01 | 2.80E-01 | 1.00E+00 |
| PLK3     | LMNA | 0.582447295  | 0.483253465  | 0.666876471  | 9.67E-20 | 4.74E-18 | 1.15E-15 |
| PHKA2    | LMNA | 0.197773839  | 0.061399213  | 0.326899542  | 4.78E-03 | 1.05E-02 | 1.00E+00 |



|         |      |              |              |              |          |          |          |
|---------|------|--------------|--------------|--------------|----------|----------|----------|
| CALML4  | LMNA | -0.074155652 | -0.210056252 | 0.064556227  | 2.94E-01 | 3.78E-01 | 1.00E+00 |
| TSSC1   | LMNA | -0.292294391 | -0.413653826 | -0.160729054 | 2.43E-05 | 8.97E-05 | 2.88E-01 |
| TMEM45A | LMNA | 0.406060217  | 0.283925217  | 0.515229015  | 2.03E-09 | 1.58E-08 | 2.40E-05 |
| ATP5I   | LMNA | -0.172428879 | -0.30326106  | -0.035216163 | 1.41E-02 | 2.75E-02 | 1.00E+00 |
| MRPS34  | LMNA | 0.057654894  | -0.081041139 | 0.19416051   | 4.15E-01 | 5.03E-01 | 1.00E+00 |
| POU1F1  | LMNA | 0.058296316  | -0.080401747 | 0.194779755  | 4.10E-01 | 4.98E-01 | 1.00E+00 |
| TMEM28  | LMNA | -0.376567158 | -0.489187515 | -0.251595467 | 3.32E-08 | 2.06E-07 | 3.94E-04 |
| FBN2    | LMNA | 0.165938878  | 0.028541712  | 0.297182025  | 1.83E-02 | 3.44E-02 | 1.00E+00 |
| DAP3    | LMNA | 0.275207242  | 0.142572964  | 0.398132153  | 7.37E-05 | 2.47E-04 | 8.74E-01 |
| ZC3H7A  | LMNA | -0.080085377 | -0.215751062 | 0.058613648  | 2.57E-01 | 3.39E-01 | 1.00E+00 |
| LAIR2   | LMNA | 0.11950447   | -0.018857638 | 0.253375357  | 9.03E-02 | 1.39E-01 | 1.00E+00 |
| ST3GAL1 | LMNA | 0.546312821  | 0.441564161  | 0.636369453  | 4.11E-17 | 1.29E-15 | 4.88E-13 |
| PHF3    | LMNA | -0.026440158 | -0.163892934 | 0.112019725  | 7.09E-01 | 7.72E-01 | 1.00E+00 |
| DVL2    | LMNA | -0.004345627 | -0.142311252 | 0.133785634  | 9.51E-01 | 9.64E-01 | 1.00E+00 |
| LCT     | LMNA | 0.093454257  | -0.045179626 | 0.228556546  | 1.86E-01 | 2.57E-01 | 1.00E+00 |
| GEMIN8  | LMNA | -0.124538357 | -0.258151058 | 0.013749026  | 7.74E-02 | 1.22E-01 | 1.00E+00 |
| DICER1  | LMNA | 0.042628117  | -0.095987758 | 0.179622068  | 5.47E-01 | 6.28E-01 | 1.00E+00 |
| ARMCX5  | LMNA | -0.049451771 | -0.186231395 | 0.089208242  | 4.85E-01 | 5.70E-01 | 1.00E+00 |
| HIF3A   | LMNA | -0.195367038 | -0.324661713 | -0.058904735 | 5.33E-03 | 1.16E-02 | 1.00E+00 |
| CAPZA2  | LMNA | 0.012030139  | -0.126230501 | 0.149832303  | 8.65E-01 | 9.01E-01 | 1.00E+00 |
| IFNA2   | LMNA | 0.110863597  | -0.02760997  | 0.245162428  | 1.16E-01 | 1.73E-01 | 1.00E+00 |
| PLA2G2A | LMNA | 0.295391885  | 0.164029883  | 0.416460003  | 1.97E-05 | 7.40E-05 | 2.34E-01 |
| FOLH1   | LMNA | -0.151824484 | -0.283924561 | -0.014068349 | 3.10E-02 | 5.52E-02 | 1.00E+00 |
| MAPKAP1 | LMNA | 0.228559522  | 0.09345737   | 0.355396735  | 1.07E-03 | 2.79E-03 | 1.00E+00 |
| CYFIP1  | LMNA | 0.178101291  | 0.041059831  | 0.308565571  | 1.12E-02 | 2.25E-02 | 1.00E+00 |
| NPAS1   | LMNA | 0.035296003  | -0.103258139 | 0.17250644   | 6.18E-01 | 6.93E-01 | 1.00E+00 |
| TRPV6   | LMNA | 0.033847879  | -0.104692321 | 0.171099378  | 6.32E-01 | 7.06E-01 | 1.00E+00 |
| RSHL1   | LMNA | 0.00475737   | -0.13338123  | 0.142714641  | 9.46E-01 | 9.60E-01 | 1.00E+00 |
| PIAS3   | LMNA | 0.355159262  | 0.228301926  | 0.470158356  | 2.14E-07 | 1.16E-06 | 2.54E-03 |
| SOCS6   | LMNA | -0.014552858 | -0.152297887 | 0.123746754  | 8.37E-01 | 8.78E-01 | 1.00E+00 |
| TAF7L   | LMNA | -0.120204715 | -0.254040078 | 0.018147431  | 8.84E-02 | 1.37E-01 | 1.00E+00 |
| MRPL24  | LMNA | 0.062315075  | -0.07639311  | 0.198657096  | 3.78E-01 | 4.66E-01 | 1.00E+00 |
| YWHAE   | LMNA | -0.407750226 | -0.516715162 | -0.285786226 | 1.71E-09 | 1.36E-08 | 2.03E-05 |
| GREB1   | LMNA | -0.227306969 | -0.354241875 | -0.092147554 | 1.14E-03 | 2.95E-03 | 1.00E+00 |
| NUP62CL | LMNA | 0.036779608  | -0.101788219 | 0.173947397  | 6.03E-01 | 6.80E-01 | 1.00E+00 |

|          |      |              |              |              |          |          |          |
|----------|------|--------------|--------------|--------------|----------|----------|----------|
| MOSPD2   | LMNA | 0.184619335  | 0.047786257  | 0.314650866  | 8.53E-03 | 1.76E-02 | 1.00E+00 |
| NEUROG3  | LMNA | 0.037801672  | -0.10077523  | 0.17493974   | 5.93E-01 | 6.71E-01 | 1.00E+00 |
| MARK1    | LMNA | -0.428489495 | -0.534899377 | -0.308699097 | 2.00E-10 | 1.88E-09 | 2.37E-06 |
| MGST3    | LMNA | -0.099268839 | -0.234111537 | 0.039321024  | 1.60E-01 | 2.27E-01 | 1.00E+00 |
| BDNF     | LMNA | 0.2124224    | 0.076618238  | 0.340488532  | 2.40E-03 | 5.72E-03 | 1.00E+00 |
| LMBRD1   | LMNA | -0.067116261 | -0.203283743 | 0.07159813   | 3.43E-01 | 4.29E-01 | 1.00E+00 |
| PNMT     | LMNA | -0.1866042   | -0.316501829 | -0.049837046 | 7.84E-03 | 1.63E-02 | 1.00E+00 |
| PRPF19   | LMNA | 0.01185765   | -0.126400263 | 0.149663657  | 8.67E-01 | 9.02E-01 | 1.00E+00 |
| NDUFS8   | LMNA | 0.055383153  | -0.08330477  | 0.191966436  | 4.34E-01 | 5.20E-01 | 1.00E+00 |
| TFCP2L1  | LMNA | 0.273130102  | 0.140371949  | 0.396240504  | 8.39E-05 | 2.79E-04 | 9.96E-01 |
| SLC25A16 | LMNA | -0.216458046 | -0.344222892 | -0.080822194 | 1.97E-03 | 4.80E-03 | 1.00E+00 |
| EIF2B3   | LMNA | 0.082130119  | -0.056562192 | 0.217712662  | 2.45E-01 | 3.25E-01 | 1.00E+00 |
| HSPB3    | LMNA | -0.275463899 | -0.398365818 | -0.142845018 | 7.25E-05 | 2.44E-04 | 8.60E-01 |
| RPA2     | LMNA | -0.107524701 | -0.241983721 | 0.030986256  | 1.28E-01 | 1.88E-01 | 1.00E+00 |
| PAK6     | LMNA | -0.069779694 | -0.205847731 | 0.068935372  | 3.24E-01 | 4.09E-01 | 1.00E+00 |
| RBM4     | LMNA | -0.265736493 | -0.389498662 | -0.132548043 | 1.32E-04 | 4.23E-04 | 1.00E+00 |
| CSF1     | LMNA | 0.43714924   | 0.318307759  | 0.542463189  | 7.78E-11 | 7.95E-10 | 9.23E-07 |
| SEMA3E   | LMNA | 0.074788513  | -0.063922464 | 0.210664481  | 2.90E-01 | 3.74E-01 | 1.00E+00 |
| MXD4     | LMNA | -0.239933622 | -0.365866014 | -0.105372896 | 5.83E-04 | 1.62E-03 | 1.00E+00 |
| TNFSF10  | LMNA | 0.299646308  | 0.168568387  | 0.420310544  | 1.48E-05 | 5.67E-05 | 1.75E-01 |
| SMARCB1  | LMNA | -0.141117581 | -0.273833907 | -0.003127509 | 4.52E-02 | 7.67E-02 | 1.00E+00 |
| TADA2L   | LMNA | -0.270448752 | -0.393797056 | -0.137532631 | 9.91E-05 | 3.24E-04 | 1.00E+00 |
| SCIN     | LMNA | 0.067107102  | -0.071607283 | 0.203274922  | 3.43E-01 | 4.29E-01 | 1.00E+00 |
| PPAP2A   | LMNA | 0.082757964  | -0.05593205  | 0.218314758  | 2.42E-01 | 3.21E-01 | 1.00E+00 |
| ULK1     | LMNA | -0.141278737 | -0.273986005 | -0.003291942 | 4.49E-02 | 7.64E-02 | 1.00E+00 |
| NPAL2    | LMNA | 0.12467473   | -0.013610528 | 0.258280346  | 7.71E-02 | 1.22E-01 | 1.00E+00 |
| MRPS11   | LMNA | -0.0267972   | -0.164240612 | 0.111666899  | 7.05E-01 | 7.69E-01 | 1.00E+00 |
| SLC2A3   | LMNA | 0.473341137  | 0.358731526  | 0.573891099  | 1.13E-12 | 1.55E-11 | 1.34E-08 |
| ARID3A   | LMNA | 0.258397047  | 0.124797831  | 0.382793065  | 2.05E-04 | 6.28E-04 | 1.00E+00 |
| FEM1B    | LMNA | 0.31987325   | 0.190222239  | 0.438558044  | 3.47E-06 | 1.50E-05 | 4.12E-02 |
| GNG5     | LMNA | 0.421463045  | 0.300920628  | 0.528749599  | 4.20E-10 | 3.71E-09 | 4.98E-06 |
| ACOX1    | LMNA | -0.047861341 | -0.184692025 | 0.090789534  | 4.99E-01 | 5.83E-01 | 1.00E+00 |
| MTHFSD   | LMNA | 0.160673254  | 0.023135422  | 0.292242004  | 2.24E-02 | 4.13E-02 | 1.00E+00 |
| TLX2     | LMNA | 0.037409426  | -0.101164027 | 0.174558933  | 5.97E-01 | 6.74E-01 | 1.00E+00 |
| KIF5B    | LMNA | -0.057014895 | -0.19354253  | 0.081678998  | 4.20E-01 | 5.08E-01 | 1.00E+00 |

|           |      |              |              |              |          |          |          |
|-----------|------|--------------|--------------|--------------|----------|----------|----------|
| POLM      | LMNA | 0.324008233  | 0.19466451   | 0.442276362  | 2.55E-06 | 1.13E-05 | 3.03E-02 |
| C1orf181  | LMNA | 0.032100815  | -0.106421799 | 0.169401106  | 6.50E-01 | 7.22E-01 | 1.00E+00 |
| C10orf92  | LMNA | -0.057341728 | -0.193858132 | 0.081353271  | 4.18E-01 | 5.05E-01 | 1.00E+00 |
| MUC7      | LMNA | -0.07520363  | -0.211063384 | 0.063506693  | 2.87E-01 | 3.71E-01 | 1.00E+00 |
| NUP153    | LMNA | 0.017580291  | -0.1207638   | 0.155254493  | 8.04E-01 | 8.52E-01 | 1.00E+00 |
| CSDE1     | LMNA | -0.034765172 | -0.171990727 | 0.103783925  | 6.23E-01 | 6.98E-01 | 1.00E+00 |
| CLPTM1    | LMNA | 0.158273387  | 0.020674111  | 0.289988203  | 2.45E-02 | 4.47E-02 | 1.00E+00 |
| LRRC17    | LMNA | 0.194297078  | 0.057796343  | 0.323666405  | 5.59E-03 | 1.21E-02 | 1.00E+00 |
| ATP5B     | LMNA | -0.088707711 | -0.224015377 | 0.049955048  | 2.09E-01 | 2.84E-01 | 1.00E+00 |
| S100A5    | LMNA | 0.231717038  | 0.096761313  | 0.358306263  | 9.06E-04 | 2.40E-03 | 1.00E+00 |
| ZNHIT1    | LMNA | 0.147534814  | 0.00968099   | 0.279885299  | 3.61E-02 | 6.31E-02 | 1.00E+00 |
| EFHD1     | LMNA | -0.303154054 | -0.423482027 | -0.172314541 | 1.16E-05 | 4.53E-05 | 1.37E-01 |
| HIST1H4G  | LMNA | 0.002258371  | -0.135834979 | 0.140265641  | 9.75E-01 | 9.80E-01 | 1.00E+00 |
| GOLGA2L1  | LMNA | -0.056696635 | -0.193235178 | 0.081996152  | 4.23E-01 | 5.10E-01 | 1.00E+00 |
| COPZ2     | LMNA | 0.555513198  | 0.452136135  | 0.644163821  | 9.44E-18 | 3.28E-16 | 1.12E-13 |
| ELF3      | LMNA | -0.027852897 | -0.165268421 | 0.110623464  | 6.94E-01 | 7.60E-01 | 1.00E+00 |
| CPSF3L    | LMNA | 0.239321972  | 0.104731146  | 0.365303832  | 6.03E-04 | 1.67E-03 | 1.00E+00 |
| POLR2I    | LMNA | -0.148927978 | -0.281197652 | -0.011105299 | 3.44E-02 | 6.03E-02 | 1.00E+00 |
| ZNF665    | LMNA | -0.050367878 | -0.187117785 | 0.088297082  | 4.77E-01 | 5.62E-01 | 1.00E+00 |
| TLR6      | LMNA | 0.159563481  | 0.021997029  | 0.291199959  | 2.33E-02 | 4.28E-02 | 1.00E+00 |
| GPI       | LMNA | 0.429964769  | 0.310334302  | 0.536189154  | 1.70E-10 | 1.63E-09 | 2.02E-06 |
| ANGPTL7   | LMNA | 0.077211498  | -0.061494986 | 0.212992188  | 2.75E-01 | 3.57E-01 | 1.00E+00 |
| RAD9A     | LMNA | 0.087587169  | -0.051081483 | 0.222942462  | 2.15E-01 | 2.91E-01 | 1.00E+00 |
| NDST4     | LMNA | -0.341659935 | -0.458103785 | -0.213687841 | 6.48E-07 | 3.21E-06 | 7.69E-03 |
| AGPAT3    | LMNA | 0.236608591  | 0.101885587  | 0.362808787  | 6.98E-04 | 1.90E-03 | 1.00E+00 |
| ADORA2A   | LMNA | -0.139135018 | -0.271962242 | -0.001105247 | 4.83E-02 | 8.14E-02 | 1.00E+00 |
| TNRC5     | LMNA | 0.054542913  | -0.084141649 | 0.191154576  | 4.41E-01 | 5.27E-01 | 1.00E+00 |
| KCNH2     | LMNA | -0.159131521 | -0.290794276 | -0.021554025 | 2.37E-02 | 4.35E-02 | 1.00E+00 |
| CCHCR1    | LMNA | 0.030409513  | -0.108095278 | 0.167756262  | 6.67E-01 | 7.37E-01 | 1.00E+00 |
| RPS27A    | LMNA | -0.004081741 | -0.142052696 | 0.134044793  | 9.54E-01 | 9.66E-01 | 1.00E+00 |
| GCM2      | LMNA | 0.047635343  | -0.091014176 | 0.184473228  | 5.01E-01 | 5.85E-01 | 1.00E+00 |
| TUBA3C    | LMNA | 0.084591899  | -0.054090773 | 0.220072889  | 2.31E-01 | 3.09E-01 | 1.00E+00 |
| HOM-TES-1 | LMNA | 0.236226134  | 0.101484676  | 0.362456959  | 7.13E-04 | 1.94E-03 | 1.00E+00 |
| IGFALS    | LMNA | -0.21228849  | -0.34036455  | -0.076478827 | 2.42E-03 | 5.75E-03 | 1.00E+00 |
| E2F1      | LMNA | -0.016755122 | -0.154448873 | 0.121577094  | 8.13E-01 | 8.59E-01 | 1.00E+00 |

|           |      |              |              |              |          |          |          |
|-----------|------|--------------|--------------|--------------|----------|----------|----------|
| PLCB3     | LMNA | 0.433571285  | 0.314334777  | 0.539340111  | 1.15E-10 | 1.14E-09 | 1.37E-06 |
| NPAT      | LMNA | -0.287171049 | -0.409007263 | -0.155275843 | 3.42E-05 | 1.22E-04 | 4.05E-01 |
| NR0B1     | LMNA | -0.335616526 | -0.452693254 | -0.207163884 | 1.05E-06 | 4.99E-06 | 1.24E-02 |
| COIL      | LMNA | -0.400012752 | -0.509905661 | -0.277273387 | 3.68E-09 | 2.73E-08 | 4.36E-05 |
| RASGRP2   | LMNA | -0.174533226 | -0.30522987  | -0.037382948 | 1.30E-02 | 2.56E-02 | 1.00E+00 |
| APOB      | LMNA | 0.244384954  | 0.110046662  | 0.369954579  | 4.56E-04 | 1.30E-03 | 1.00E+00 |
| RAB11FIP2 | LMNA | -0.166933614 | -0.298114461 | -0.029563924 | 1.76E-02 | 3.33E-02 | 1.00E+00 |
| PIGR      | LMNA | 0.05343931   | -0.08524054  | 0.190087965  | 4.50E-01 | 5.36E-01 | 1.00E+00 |
| CDC25C    | LMNA | -0.125330636 | -0.258902107 | 0.012944328  | 7.55E-02 | 1.20E-01 | 1.00E+00 |
| RCOR3     | LMNA | -0.032154803 | -0.169453598 | 0.106368367  | 6.50E-01 | 7.22E-01 | 1.00E+00 |
| TSC2      | LMNA | -0.107054986 | -0.241536309 | 0.031460978  | 1.29E-01 | 1.90E-01 | 1.00E+00 |
| NRP2      | LMNA | 0.593605813  | 0.496218898  | 0.676240353  | 1.28E-20 | 7.08E-19 | 1.52E-16 |
| FUT6      | LMNA | -0.182710068 | -0.312869466 | -0.045814665 | 9.25E-03 | 1.89E-02 | 1.00E+00 |
| CDH2      | LMNA | 0.209251135  | 0.073318099  | 0.337551184  | 2.80E-03 | 6.53E-03 | 1.00E+00 |
| PTPRB     | LMNA | -0.003813244 | -0.141789604 | 0.134308459  | 9.57E-01 | 9.68E-01 | 1.00E+00 |
| ACP2      | LMNA | 0.478060494  | 0.364034585  | 0.577967528  | 6.25E-13 | 9.02E-12 | 7.41E-09 |
| GTF3A     | LMNA | -0.107479165 | -0.24194035  | 0.03103228   | 1.28E-01 | 1.88E-01 | 1.00E+00 |
| LAG3      | LMNA | 0.072169081  | -0.066544907 | 0.208146317  | 3.07E-01 | 3.92E-01 | 1.00E+00 |
| AIM1L     | LMNA | 0.007119786  | -0.131060032 | 0.14502824   | 9.20E-01 | 9.43E-01 | 1.00E+00 |
| ARID5B    | LMNA | 0.351900463  | 0.224768777  | 0.467252251  | 2.81E-07 | 1.49E-06 | 3.34E-03 |
| KIAA0256  | LMNA | -0.211637182 | -0.339761465 | -0.075800833 | 2.50E-03 | 5.91E-03 | 1.00E+00 |
| FLNC      | LMNA | 0.396696167  | 0.273630342  | 0.506982618  | 5.07E-09 | 3.69E-08 | 6.02E-05 |
| PRAF2     | LMNA | 0.031220988  | -0.107292453 | 0.168545542  | 6.59E-01 | 7.30E-01 | 1.00E+00 |
| ITGB1BP3  | LMNA | 0.169000402  | 0.031688721  | 0.30005101   | 1.62E-02 | 3.10E-02 | 1.00E+00 |
| C14orf147 | LMNA | 0.070882169  | -0.067832597 | 0.206908497  | 3.16E-01 | 4.02E-01 | 1.00E+00 |
| ZRSR2     | LMNA | 0.162212666  | 0.024715126  | 0.293686952  | 2.11E-02 | 3.92E-02 | 1.00E+00 |
| KRAS      | LMNA | -0.261173895 | -0.385331641 | -0.127728174 | 1.74E-04 | 5.42E-04 | 1.00E+00 |
| SPTAN1    | LMNA | -0.240364726 | -0.366262198 | -0.105825283 | 5.70E-04 | 1.59E-03 | 1.00E+00 |
| FLJ14803  | LMNA | 0.306652609  | 0.176054654  | 0.426642265  | 9.05E-06 | 3.60E-05 | 1.07E-01 |
| RCAN2     | LMNA | 0.166713378  | 0.029337581  | 0.297908041  | 1.77E-02 | 3.35E-02 | 1.00E+00 |
| NECAP2    | LMNA | 0.245267081  | 0.110973575  | 0.370764239  | 4.35E-04 | 1.24E-03 | 1.00E+00 |
| CDX2      | LMNA | 0.163315736  | 0.02584749   | 0.294721964  | 2.02E-02 | 3.77E-02 | 1.00E+00 |
| ECOP      | LMNA | 0.243683296  | 0.109309547  | 0.369310427  | 4.75E-04 | 1.34E-03 | 1.00E+00 |
| ACTR1A    | LMNA | -0.233349022 | -0.359809108 | -0.098470145 | 8.31E-04 | 2.23E-03 | 1.00E+00 |
| PPARG     | LMNA | 0.112018864  | -0.026441029 | 0.246261597  | 1.12E-01 | 1.68E-01 | 1.00E+00 |

|           |      |              |              |              |          |          |          |
|-----------|------|--------------|--------------|--------------|----------|----------|----------|
| BBS10     | LMNA | -0.463135699 | -0.565058898 | -0.347289095 | 3.91E-12 | 4.94E-11 | 4.64E-08 |
| ISOC2     | LMNA | 0.14930283   | 0.011488627  | 0.281550676  | 3.39E-02 | 5.97E-02 | 1.00E+00 |
| CITED1    | LMNA | 0.076596786  | -0.062110992 | 0.212401794  | 2.79E-01 | 3.61E-01 | 1.00E+00 |
| PRDM4     | LMNA | 0.152002599  | 0.014250635  | 0.284092178  | 3.08E-02 | 5.49E-02 | 1.00E+00 |
| HSPA4     | LMNA | 0.423881804  | 0.30359645   | 0.530867848  | 3.26E-10 | 2.94E-09 | 3.86E-06 |
| SERPINB7  | LMNA | 0.23503635   | 0.100237765  | 0.361362229  | 7.60E-04 | 2.06E-03 | 1.00E+00 |
| DHX40     | LMNA | -0.238626273 | -0.364664286 | -0.104001347 | 6.26E-04 | 1.73E-03 | 1.00E+00 |
| RAB26     | LMNA | -0.483673134 | -0.582809064 | -0.37035105  | 3.06E-13 | 4.57E-12 | 3.63E-09 |
| RRP9      | LMNA | 0.220017269  | 0.084533867  | 0.347513046  | 1.65E-03 | 4.09E-03 | 1.00E+00 |
| EVI5      | LMNA | -0.14746967  | -0.279823922 | -0.009614403 | 3.62E-02 | 6.32E-02 | 1.00E+00 |
| CAPN9     | LMNA | 0.066276784  | -0.072436984 | 0.202475222  | 3.49E-01 | 4.35E-01 | 1.00E+00 |
| HIP2      | LMNA | 0.002814288  | -0.135289274 | 0.140810582  | 9.68E-01 | 9.76E-01 | 1.00E+00 |
| GNB1L     | LMNA | -0.045177239 | -0.182092571 | 0.093456629  | 5.23E-01 | 6.06E-01 | 1.00E+00 |
| MYBL2     | LMNA | -0.012104207 | -0.149904717 | 0.126157603  | 8.64E-01 | 9.00E-01 | 1.00E+00 |
| ZNF407    | LMNA | -0.122209212 | -0.255942185 | 0.016113643  | 8.32E-02 | 1.30E-01 | 1.00E+00 |
| PPIG      | LMNA | 0.104145842  | -0.034399739 | 0.238764027  | 1.40E-01 | 2.03E-01 | 1.00E+00 |
| C12orf10  | LMNA | -0.0467036   | -0.18357103  | 0.091940183  | 5.09E-01 | 5.93E-01 | 1.00E+00 |
| MYL6      | LMNA | 0.340500078  | 0.212434871  | 0.457066059  | 7.11E-07 | 3.50E-06 | 8.43E-03 |
| NAGA      | LMNA | 0.475931166  | 0.361640981  | 0.5761289    | 8.16E-13 | 1.15E-11 | 9.68E-09 |
| MAPT      | LMNA | -0.593869688 | -0.676461466 | -0.496526029 | 1.22E-20 | 6.77E-19 | 1.44E-16 |
| MRE11A    | LMNA | 0.042826282  | -0.095791056 | 0.179814183  | 5.45E-01 | 6.26E-01 | 1.00E+00 |
| HSPA4L    | LMNA | -0.033386727 | -0.170651184 | 0.105148912  | 6.37E-01 | 7.11E-01 | 1.00E+00 |
| PLXNC1    | LMNA | -0.05048238  | -0.187228558 | 0.088183181  | 4.76E-01 | 5.61E-01 | 1.00E+00 |
| STBD1     | LMNA | 0.584570545  | 0.485717188  | 0.668660293  | 6.62E-20 | 3.34E-18 | 7.85E-16 |
| CTAG2     | LMNA | -0.118446528 | -0.252370846 | 0.019930367  | 9.32E-02 | 1.43E-01 | 1.00E+00 |
| C14orf169 | LMNA | 0.284300908  | 0.152224415  | 0.406401454  | 4.12E-05 | 1.45E-04 | 4.89E-01 |
| MTTP      | LMNA | 0.180090128  | 0.043110936  | 0.310423497  | 1.03E-02 | 2.09E-02 | 1.00E+00 |
| KCTD5     | LMNA | 0.082657001  | -0.05603339  | 0.218217943  | 2.42E-01 | 3.22E-01 | 1.00E+00 |
| ECM1      | LMNA | 0.580298901  | 0.480762163  | 0.66507054   | 1.42E-19 | 6.69E-18 | 1.68E-15 |
| CHRNA4    | LMNA | 0.021094936  | -0.117297656 | 0.158683822  | 7.66E-01 | 8.20E-01 | 1.00E+00 |
| NYX       | LMNA | 0.039096297  | -0.099491688 | 0.176196316  | 5.81E-01 | 6.59E-01 | 1.00E+00 |
| RLN1      | LMNA | -0.067357665 | -0.203516211 | 0.071356868  | 3.41E-01 | 4.27E-01 | 1.00E+00 |
| GZMK      | LMNA | 0.319751968  | 0.190092025  | 0.438448922  | 3.51E-06 | 1.51E-05 | 4.16E-02 |
| C1orf21   | LMNA | -0.287208732 | -0.409041463 | -0.155315923 | 3.41E-05 | 1.22E-04 | 4.04E-01 |
| EPB41L1   | LMNA | -0.22429493  | -0.351463176 | -0.088999729 | 1.33E-03 | 3.38E-03 | 1.00E+00 |

|          |      |              |              |              |          |          |          |
|----------|------|--------------|--------------|--------------|----------|----------|----------|
| HOXA3    | LMNA | 0.085733614  | -0.052944011 | 0.221166969  | 2.25E-01 | 3.02E-01 | 1.00E+00 |
| TOM1L2   | LMNA | -0.122636081 | -0.256347116 | 0.015680389  | 8.21E-02 | 1.28E-01 | 1.00E+00 |
| TMEM165  | LMNA | 0.137448554  | -0.000614099 | 0.270369321  | 5.11E-02 | 8.55E-02 | 1.00E+00 |
| MNDA     | LMNA | 0.223848189  | 0.088533079  | 0.351050852  | 1.36E-03 | 3.45E-03 | 1.00E+00 |
| RAB21    | LMNA | 0.245539667  | 0.111260048  | 0.371014394  | 4.28E-04 | 1.22E-03 | 1.00E+00 |
| RPS8     | LMNA | -0.014108408 | -0.151863627 | 0.124184464  | 8.42E-01 | 8.83E-01 | 1.00E+00 |
| FOXJ2    | LMNA | 0.225485318  | 0.090243459  | 0.352561614  | 1.25E-03 | 3.20E-03 | 1.00E+00 |
| MSX2     | LMNA | -0.093204714 | -0.228317947 | 0.045430845  | 1.87E-01 | 2.59E-01 | 1.00E+00 |
| C10orf76 | LMNA | -0.184011879 | -0.314084191 | -0.047158856 | 8.75E-03 | 1.80E-02 | 1.00E+00 |
| PBRM1    | LMNA | -0.191383797 | -0.320954936 | -0.054780127 | 6.36E-03 | 1.35E-02 | 1.00E+00 |
| ZNF343   | LMNA | 0.321720082  | 0.192205661  | 0.44021928   | 3.03E-06 | 1.32E-05 | 3.59E-02 |
| CPB2     | LMNA | -0.154554731 | -0.286492993 | -0.016863539 | 2.81E-02 | 5.04E-02 | 1.00E+00 |
| LY6G6C   | LMNA | -0.181833519 | -0.312051314 | -0.044909859 | 9.60E-03 | 1.96E-02 | 1.00E+00 |
| PIM1     | LMNA | 0.329617839  | 0.200699482  | 0.447314221  | 1.67E-06 | 7.68E-06 | 1.98E-02 |
| CTF1     | LMNA | 0.312951014  | 0.182797448  | 0.432324225  | 5.77E-06 | 2.38E-05 | 6.84E-02 |
| GRLF1    | LMNA | -0.195536259 | -0.324819101 | -0.059080065 | 5.29E-03 | 1.15E-02 | 1.00E+00 |
| EGFL7    | LMNA | -0.065288934 | -0.201523562 | 0.07342385   | 3.56E-01 | 4.43E-01 | 1.00E+00 |
| USP9X    | LMNA | 0.185189729  | 0.048375478  | 0.315182881  | 8.33E-03 | 1.73E-02 | 1.00E+00 |
| IFIT2    | LMNA | -0.04947644  | -0.186255266 | 0.08918371   | 4.84E-01 | 5.70E-01 | 1.00E+00 |
| S100G    | LMNA | 0.054258112  | -0.084425266 | 0.190879353  | 4.43E-01 | 5.30E-01 | 1.00E+00 |
| GUCY1B3  | LMNA | -0.131165535 | -0.264428389 | 0.007012444  | 6.28E-02 | 1.02E-01 | 1.00E+00 |
| NR3C1    | LMNA | 0.171305793  | 0.034060282  | 0.302209852  | 1.48E-02 | 2.85E-02 | 1.00E+00 |
| FCN2     | LMNA | 0.086096768  | -0.052579176 | 0.221514899  | 2.23E-01 | 3.00E-01 | 1.00E+00 |
| CORO1B   | LMNA | 0.477618349  | 0.363537441  | 0.577585829  | 6.60E-13 | 9.49E-12 | 7.83E-09 |
| PARP11   | LMNA | -0.174688662 | -0.30537525  | -0.037543047 | 1.29E-02 | 2.54E-02 | 1.00E+00 |
| F11      | LMNA | -0.140477347 | -0.273229596 | -0.002474332 | 4.61E-02 | 7.82E-02 | 1.00E+00 |
| DNALI1   | LMNA | 0.233850727  | 0.098995635  | 0.360270982  | 8.09E-04 | 2.17E-03 | 1.00E+00 |
| MAP2K6   | LMNA | -0.484138968 | -0.583210583 | -0.370875772 | 2.88E-13 | 4.33E-12 | 3.42E-09 |
| LEFTY1   | LMNA | -0.369315945 | -0.482754005 | -0.243689306 | 6.34E-08 | 3.78E-07 | 7.52E-04 |
| ATHL1    | LMNA | 0.23108952   | 0.096104458  | 0.357728225  | 9.37E-04 | 2.47E-03 | 1.00E+00 |
| FSTL4    | LMNA | -0.242302614 | -0.368042548 | -0.107859528 | 5.12E-04 | 1.44E-03 | 1.00E+00 |
| ANKRD47  | LMNA | -0.165196915 | -0.296486366 | -0.027779441 | 1.88E-02 | 3.53E-02 | 1.00E+00 |
| ATP2A1   | LMNA | 0.015527602  | -0.122786604 | 0.153250095  | 8.26E-01 | 8.70E-01 | 1.00E+00 |
| SERINC2  | LMNA | 0.127170898  | -0.011074528 | 0.26064598   | 7.13E-02 | 1.14E-01 | 1.00E+00 |
| PAXIP1   | LMNA | 0.157697606  | 0.020083836  | 0.289447249  | 2.50E-02 | 4.56E-02 | 1.00E+00 |

|           |      |              |              |              |          |          |          |
|-----------|------|--------------|--------------|--------------|----------|----------|----------|
| ZC3HAV1   | LMNA | 0.496197412  | 0.38448376   | 0.593587353  | 5.94E-14 | 9.72E-13 | 7.05E-10 |
| YY1       | LMNA | 0.109321275  | -0.029169956 | 0.24369446   | 1.21E-01 | 1.80E-01 | 1.00E+00 |
| PNLIP     | LMNA | 0.146883095  | 0.009014892  | 0.279271213  | 3.70E-02 | 6.43E-02 | 1.00E+00 |
| C14orf105 | LMNA | 0.075483727  | -0.063226128 | 0.211332515  | 2.86E-01 | 3.69E-01 | 1.00E+00 |
| ZNF80     | LMNA | 0.097503322  | -0.041100915 | 0.232425771  | 1.67E-01 | 2.35E-01 | 1.00E+00 |
| SLBP      | LMNA | 0.026110683  | -0.112345278 | 0.163572071  | 7.12E-01 | 7.75E-01 | 1.00E+00 |
| AASDHPPT  | LMNA | -0.367683648 | -0.481304088 | -0.241911875 | 7.32E-08 | 4.31E-07 | 8.68E-04 |
| UBL4A     | LMNA | 0.359720525  | 0.233252807  | 0.474221777  | 1.46E-07 | 8.12E-07 | 1.73E-03 |
| CKS1B     | LMNA | 0.035123518  | -0.103428993 | 0.172338875  | 6.20E-01 | 6.95E-01 | 1.00E+00 |
| MCM3      | LMNA | 0.089384556  | -0.049274473 | 0.224663296  | 2.06E-01 | 2.80E-01 | 1.00E+00 |
| KAZALD1   | LMNA | 0.16579973   | 0.028398743  | 0.297051571  | 1.84E-02 | 3.46E-02 | 1.00E+00 |
| SLC19A3   | LMNA | 0.025383094  | -0.113064102 | 0.162863395  | 7.20E-01 | 7.82E-01 | 1.00E+00 |
| CDC37L1   | LMNA | -0.048758666 | -0.185560624 | 0.08989745   | 4.91E-01 | 5.76E-01 | 1.00E+00 |
| NDUFA4L2  | LMNA | 0.289162849  | 0.157394931  | 0.410814456  | 3.00E-05 | 1.09E-04 | 3.55E-01 |
| THTPA     | LMNA | -0.384005268 | -0.495774136 | -0.259722772 | 1.68E-08 | 1.10E-07 | 2.00E-04 |
| BNIP3     | LMNA | 0.059074585  | -0.079625788 | 0.195530971  | 4.04E-01 | 4.91E-01 | 1.00E+00 |
| HIST3H2A  | LMNA | -0.325788135 | -0.44387566  | -0.196578318 | 2.23E-06 | 1.00E-05 | 2.65E-02 |
| STEAP4    | LMNA | 0.322148867  | 0.19266631   | 0.440604859  | 2.93E-06 | 1.29E-05 | 3.48E-02 |
| HTR3B     | LMNA | -0.154439201 | -0.286384348 | -0.016745217 | 2.82E-02 | 5.06E-02 | 1.00E+00 |
| FES       | LMNA | 0.505640458  | 0.39517427   | 0.601690922  | 1.65E-14 | 3.08E-13 | 1.96E-10 |
| C11orf71  | LMNA | -0.365146325 | -0.479049032 | -0.239150624 | 9.13E-08 | 5.27E-07 | 1.08E-03 |
| NPTX2     | LMNA | 0.084519828  | -0.054163151 | 0.220003813  | 2.32E-01 | 3.10E-01 | 1.00E+00 |
| CBLB      | LMNA | 0.052889114  | -0.08578826  | 0.189556091  | 4.55E-01 | 5.41E-01 | 1.00E+00 |
| NME6      | LMNA | 0.038529781  | -0.100053411 | 0.175646505  | 5.86E-01 | 6.64E-01 | 1.00E+00 |
| CETN1     | LMNA | -0.191307814 | -0.320884187 | -0.054701492 | 6.38E-03 | 1.36E-02 | 1.00E+00 |
| RORB      | LMNA | 0.089293416  | -0.049366123 | 0.224576057  | 2.06E-01 | 2.81E-01 | 1.00E+00 |
| AP2M1     | LMNA | 0.201903766  | 0.065683564  | 0.330736152  | 3.96E-03 | 8.88E-03 | 1.00E+00 |
| SNAPC4    | LMNA | -0.113978625 | -0.248125406 | 0.024457206  | 1.06E-01 | 1.60E-01 | 1.00E+00 |
| FAF1      | LMNA | 0.009258472  | -0.128957354 | 0.147121431  | 8.96E-01 | 9.25E-01 | 1.00E+00 |
| SLC9A7    | LMNA | 0.233804239  | 0.098946939  | 0.360228187  | 8.11E-04 | 2.18E-03 | 1.00E+00 |
| CDK6      | LMNA | 0.158851649  | 0.021267027  | 0.290531404  | 2.39E-02 | 4.38E-02 | 1.00E+00 |
| P2RY1     | LMNA | 0.164464718  | 0.027027361  | 0.295799728  | 1.93E-02 | 3.62E-02 | 1.00E+00 |
| VAPB      | LMNA | 0.272776294  | 0.139997173  | 0.395918188  | 8.58E-05 | 2.84E-04 | 1.00E+00 |
| CSK       | LMNA | 0.227901398  | 0.0927691    | 0.35478999   | 1.11E-03 | 2.87E-03 | 1.00E+00 |
| IGHM      | LMNA | 0.208050584  | 0.072069535  | 0.336438535  | 2.97E-03 | 6.88E-03 | 1.00E+00 |

|          |      |              |              |              |          |          |          |
|----------|------|--------------|--------------|--------------|----------|----------|----------|
| RAB27B   | LMNA | -0.116590716 | -0.250608063 | 0.021811349  | 9.84E-02 | 1.50E-01 | 1.00E+00 |
| C2orf33  | LMNA | -0.520067484 | -0.61403344  | -0.411565147 | 2.16E-15 | 4.77E-14 | 2.56E-11 |
| CTSS     | LMNA | 0.2546989    | 0.120898877  | 0.379409323  | 2.54E-04 | 7.64E-04 | 1.00E+00 |
| SNAP25   | LMNA | -0.422223317 | -0.529415558 | -0.301761497 | 3.88E-10 | 3.45E-09 | 4.60E-06 |
| TUFT1    | LMNA | 0.164253845  | 0.02681079   | 0.295601951  | 1.95E-02 | 3.65E-02 | 1.00E+00 |
| LILRA2   | LMNA | 0.086454995  | -0.052219253 | 0.221858075  | 2.21E-01 | 2.98E-01 | 1.00E+00 |
| TLL2     | LMNA | -0.008916669 | -0.146786981 | 0.129293486  | 9.00E-01 | 9.27E-01 | 1.00E+00 |
| LUC7L    | LMNA | -0.301468014 | -0.421957984 | -0.170513435 | 1.30E-05 | 5.05E-05 | 1.54E-01 |
| LCK      | LMNA | 0.181027509  | 0.044078064  | 0.311298832  | 9.93E-03 | 2.02E-02 | 1.00E+00 |
| PRPF6    | LMNA | 0.116005811  | -0.022403983 | 0.250052295  | 1.00E-01 | 1.52E-01 | 1.00E+00 |
| AKTIP    | LMNA | -0.308188991 | -0.428029149 | -0.177698306 | 8.12E-06 | 3.26E-05 | 9.63E-02 |
| FURIN    | LMNA | 0.708049115  | 0.63174968   | 0.770760659  | 4.78E-32 | 2.84E-29 | 5.67E-28 |
| SOX12    | LMNA | -0.130918037 | -0.26419416  | 0.007264253  | 6.33E-02 | 1.03E-01 | 1.00E+00 |
| UQCRFS1  | LMNA | -0.178873818 | -0.309287366 | -0.041856407 | 1.09E-02 | 2.18E-02 | 1.00E+00 |
| ADH7     | LMNA | 0.062160407  | -0.076547471 | 0.19850795   | 3.79E-01 | 4.67E-01 | 1.00E+00 |
| RAMP1    | LMNA | 0.076541931  | -0.062165958 | 0.212349104  | 2.79E-01 | 3.62E-01 | 1.00E+00 |
| KIR3DX1  | LMNA | 0.084529042  | -0.054153898 | 0.220012645  | 2.32E-01 | 3.10E-01 | 1.00E+00 |
| INSL5    | LMNA | -0.026775738 | -0.164219714 | 0.111688108  | 7.05E-01 | 7.69E-01 | 1.00E+00 |
| PDE8A    | LMNA | -0.012472465 | -0.150264734 | 0.125795134  | 8.60E-01 | 8.97E-01 | 1.00E+00 |
| NAT6     | LMNA | -0.104789495 | -0.239377589 | 0.03374974   | 1.38E-01 | 2.00E-01 | 1.00E+00 |
| EDN3     | LMNA | -0.025197377 | -0.162682482 | 0.113247558  | 7.22E-01 | 7.83E-01 | 1.00E+00 |
| BLM      | LMNA | 0.076812518  | -0.061894818 | 0.212609003  | 2.77E-01 | 3.60E-01 | 1.00E+00 |
| GMIP     | LMNA | 0.211071284  | 0.075211852  | 0.339237382  | 2.57E-03 | 6.05E-03 | 1.00E+00 |
| CHST4    | LMNA | 0.203890577  | 0.067746456  | 0.332580339  | 3.61E-03 | 8.18E-03 | 1.00E+00 |
| SF3A2    | LMNA | 0.13435045   | -0.003770483 | 0.267441162  | 5.66E-02 | 9.34E-02 | 1.00E+00 |
| FN3KRP   | LMNA | -0.113822849 | -0.247977293 | 0.024614935  | 1.07E-01 | 1.61E-01 | 1.00E+00 |
| PRUNE    | LMNA | -0.157374841 | -0.289143971 | -0.019752989 | 2.53E-02 | 4.60E-02 | 1.00E+00 |
| SMAD7    | LMNA | -0.039036263 | -0.176138057 | 0.099551218  | 5.81E-01 | 6.59E-01 | 1.00E+00 |
| SDC4     | LMNA | 0.538459548  | 0.432563072  | 0.629701746  | 1.39E-16 | 3.96E-15 | 1.65E-12 |
| IQWD1    | LMNA | 0.221805802  | 0.086400427  | 0.349165186  | 1.51E-03 | 3.78E-03 | 1.00E+00 |
| FHL2     | LMNA | 0.502716972  | 0.391861379  | 0.599184239  | 2.46E-14 | 4.37E-13 | 2.92E-10 |
| KIAA1107 | LMNA | -0.556376352 | -0.644894124 | -0.453129461 | 8.20E-18 | 2.88E-16 | 9.73E-14 |
| PSMB2    | LMNA | 0.288550482  | 0.156743301  | 0.410258948  | 3.12E-05 | 1.13E-04 | 3.70E-01 |
| GOLGA8A  | LMNA | -0.230945764 | -0.357595791 | -0.095953997 | 9.44E-04 | 2.49E-03 | 1.00E+00 |
| TMEM57   | LMNA | -0.061279921 | -0.197658777 | 0.077426085  | 3.86E-01 | 4.74E-01 | 1.00E+00 |



|         |      |              |              |              |          |          |          |
|---------|------|--------------|--------------|--------------|----------|----------|----------|
| WARS    | LMNA | 0.333025654  | 0.204370489  | 0.450371059  | 1.28E-06 | 6.02E-06 | 1.52E-02 |
| PHOX2A  | LMNA | 0.218717522  | 0.083178012  | 0.346311192  | 1.76E-03 | 4.34E-03 | 1.00E+00 |
| S100A14 | LMNA | -0.044482463 | -0.181419394 | 0.094146678  | 5.30E-01 | 6.12E-01 | 1.00E+00 |
| FGFR2   | LMNA | -0.299036086 | -0.419758518 | -0.167917077 | 1.54E-05 | 5.89E-05 | 1.83E-01 |
| ASPA    | LMNA | -0.170787407 | -0.301724536 | -0.033526882 | 1.51E-02 | 2.90E-02 | 1.00E+00 |
| CLDND1  | LMNA | -0.238475618 | -0.364525775 | -0.103843326 | 6.31E-04 | 1.74E-03 | 1.00E+00 |
| XRCC3   | LMNA | -0.022504246 | -0.160057989 | 0.115906847  | 7.51E-01 | 8.08E-01 | 1.00E+00 |
| ITPKA   | LMNA | 0.009893808  | -0.128332476 | 0.147743013  | 8.89E-01 | 9.19E-01 | 1.00E+00 |
| BTBD2   | LMNA | 0.047518866  | -0.091129949 | 0.184360457  | 5.02E-01 | 5.86E-01 | 1.00E+00 |
| GH2     | LMNA | 0.055201899  | -0.083485316 | 0.19179132   | 4.35E-01 | 5.21E-01 | 1.00E+00 |
| RDBP    | LMNA | -0.183574897 | -0.313676489 | -0.046707593 | 8.92E-03 | 1.83E-02 | 1.00E+00 |
| CSF3    | LMNA | 0.359588578  | 0.233109497  | 0.4741043    | 1.47E-07 | 8.20E-07 | 1.75E-03 |
| LMO2    | LMNA | 0.226515275  | 0.091319908  | 0.35351173   | 1.19E-03 | 3.05E-03 | 1.00E+00 |
| GPATCH4 | LMNA | -0.03298586  | -0.170261536 | 0.105545767  | 6.41E-01 | 7.14E-01 | 1.00E+00 |
| PDPR    | LMNA | 0.048282955  | -0.090370411 | 0.185100168  | 4.95E-01 | 5.80E-01 | 1.00E+00 |
| PTK7    | LMNA | 0.508370055  | 0.398270042  | 0.604029653  | 1.13E-14 | 2.17E-13 | 1.34E-10 |
| PPP2CB  | LMNA | -0.154344909 | -0.286295673 | -0.016648649 | 2.83E-02 | 5.07E-02 | 1.00E+00 |
| TWF2    | LMNA | 0.587015097  | 0.488555682  | 0.670712855  | 4.26E-20 | 2.20E-18 | 5.06E-16 |
| B4GALT6 | LMNA | -0.412493505 | -0.520882763 | -0.291014358 | 1.06E-09 | 8.72E-09 | 1.26E-05 |
| DOLPP1  | LMNA | -0.165135811 | -0.29642907  | -0.027716672 | 1.88E-02 | 3.54E-02 | 1.00E+00 |
| C4orf8  | LMNA | -0.209750779 | -0.338014139 | -0.073837849 | 2.74E-03 | 6.41E-03 | 1.00E+00 |
| GLT25D1 | LMNA | 0.703287808  | 0.626016488  | 0.766882504  | 1.84E-31 | 8.07E-29 | 2.18E-27 |
| TNNI2   | LMNA | 0.0680441    | -0.070670751 | 0.204177151  | 3.36E-01 | 4.22E-01 | 1.00E+00 |
| JHDM1D  | LMNA | -0.175908242 | -0.30651572  | -0.03879946  | 1.23E-02 | 2.43E-02 | 1.00E+00 |
| CD7     | LMNA | 0.157975033  | 0.020368235  | 0.289707906  | 2.47E-02 | 4.52E-02 | 1.00E+00 |
| RPL22   | LMNA | -0.04571015  | -0.182608828 | 0.092927252  | 5.18E-01 | 6.02E-01 | 1.00E+00 |
| CYC1    | LMNA | -0.178388425 | -0.308833866 | -0.041355883 | 1.11E-02 | 2.22E-02 | 1.00E+00 |
| EPRS    | LMNA | 0.047822277  | -0.090828365 | 0.184654206  | 4.99E-01 | 5.84E-01 | 1.00E+00 |
| B4GALT2 | LMNA | -0.013842146 | -0.151603444 | 0.124446663  | 8.45E-01 | 8.85E-01 | 1.00E+00 |
| CHUK    | LMNA | -0.05867617  | -0.195146426 | 0.080023041  | 4.07E-01 | 4.94E-01 | 1.00E+00 |
| CHAT    | LMNA | 0.262577145  | 0.129209878  | 0.386613769  | 1.60E-04 | 5.02E-04 | 1.00E+00 |
| RAB6B   | LMNA | -0.553210215 | -0.642214508 | -0.449487094 | 1.37E-17 | 4.63E-16 | 1.62E-13 |
| HR      | LMNA | -0.373671384 | -0.48661976  | -0.248436138 | 4.31E-08 | 2.63E-07 | 5.11E-04 |
| CCDC134 | LMNA | 0.149467592  | 0.011657126  | 0.281705832  | 3.37E-02 | 5.94E-02 | 1.00E+00 |
| PDPK1   | LMNA | -0.088425257 | -0.223744959 | 0.050239021  | 2.11E-01 | 2.86E-01 | 1.00E+00 |

|           |      |              |              |              |          |          |          |
|-----------|------|--------------|--------------|--------------|----------|----------|----------|
| C14orf130 | LMNA | 0.123920148  | -0.014376801 | 0.257564909  | 7.89E-02 | 1.24E-01 | 1.00E+00 |
| RAB33A    | LMNA | -0.577183861 | -0.662450287 | -0.477152781 | 2.45E-19 | 1.12E-17 | 2.90E-15 |
| DENND4B   | LMNA | -0.095214808 | -0.230239427 | 0.043406752  | 1.78E-01 | 2.48E-01 | 1.00E+00 |
| CPT1B     | LMNA | -0.2408843   | -0.366739624 | -0.10637058  | 5.54E-04 | 1.54E-03 | 1.00E+00 |
| KYNU      | LMNA | 0.473819589  | 0.359268817  | 0.574304597  | 1.06E-12 | 1.46E-11 | 1.26E-08 |
| MS4A5     | LMNA | 0.179349255  | 0.042346732  | 0.309731507  | 1.07E-02 | 2.14E-02 | 1.00E+00 |
| TNMD      | LMNA | 0.055630352  | -0.083058524 | 0.19220525   | 4.32E-01 | 5.18E-01 | 1.00E+00 |
| PEX7      | LMNA | -0.132038921 | -0.265254828 | 0.006123703  | 6.10E-02 | 9.98E-02 | 1.00E+00 |
| IL22      | LMNA | 0.285929682  | 0.153955759  | 0.407880467  | 3.71E-05 | 1.32E-04 | 4.40E-01 |
| SRD5A2L   | LMNA | 0.227317447  | 0.09215851   | 0.354251538  | 1.14E-03 | 2.95E-03 | 1.00E+00 |
| FAM62A    | LMNA | 0.563864357  | 0.461757501  | 0.651222843  | 2.38E-18 | 9.29E-17 | 2.83E-14 |
| HOXC5     | LMNA | 0.013555796  | -0.12472862  | 0.151323611  | 8.48E-01 | 8.87E-01 | 1.00E+00 |
| SPATA6    | LMNA | 0.141559652  | 0.003578585  | 0.274251113  | 4.45E-02 | 7.57E-02 | 1.00E+00 |
| C18orf22  | LMNA | 0.01785405   | -0.12049394  | 0.155521726  | 8.01E-01 | 8.50E-01 | 1.00E+00 |
| STX11     | LMNA | 0.452329892  | 0.335211007  | 0.555681582  | 1.40E-11 | 1.60E-10 | 1.66E-07 |
| KCNC3     | LMNA | 0.049555179  | -0.089105404 | 0.18633146   | 4.84E-01 | 5.69E-01 | 1.00E+00 |
| CYP7B1    | LMNA | -0.113333604 | -0.247512076 | 0.025110267  | 1.08E-01 | 1.63E-01 | 1.00E+00 |
| THOC1     | LMNA | -0.089489351 | -0.2247636   | 0.04916909   | 2.05E-01 | 2.80E-01 | 1.00E+00 |
| C14orf159 | LMNA | 0.11363995   | -0.024800117 | 0.247803384  | 1.07E-01 | 1.61E-01 | 1.00E+00 |
| TBXAS1    | LMNA | 0.246927257  | 0.112718673  | 0.372287514  | 3.96E-04 | 1.14E-03 | 1.00E+00 |
| HSF4      | LMNA | -0.010922492 | -0.1487492   | 0.12732049   | 8.77E-01 | 9.09E-01 | 1.00E+00 |
| ALDH1B1   | LMNA | 0.225027802  | 0.089765391  | 0.352139479  | 1.28E-03 | 3.27E-03 | 1.00E+00 |
| USP25     | LMNA | 0.214110022  | 0.078375657  | 0.342050654  | 2.22E-03 | 5.31E-03 | 1.00E+00 |
| ZNF124    | LMNA | -0.417040092 | -0.524872701 | -0.296032513 | 6.65E-10 | 5.69E-09 | 7.89E-06 |
| PCYOX1    | LMNA | 0.301474692  | 0.170520567  | 0.421964021  | 1.30E-05 | 5.05E-05 | 1.54E-01 |
| FBXO17    | LMNA | 0.310281701  | 0.179938304  | 0.429917322  | 6.99E-06 | 2.85E-05 | 8.29E-02 |
| C19orf29  | LMNA | 0.229598289  | 0.09454398   | 0.35635419   | 1.01E-03 | 2.65E-03 | 1.00E+00 |
| RAD51C    | LMNA | -0.239130432 | -0.365127764 | -0.104530203 | 6.09E-04 | 1.69E-03 | 1.00E+00 |
| SLPI      | LMNA | 0.274909441  | 0.142257322  | 0.39786101   | 7.51E-05 | 2.51E-04 | 8.91E-01 |
| GPR45     | LMNA | -0.107964511 | -0.242402595 | 0.030541702  | 1.26E-01 | 1.86E-01 | 1.00E+00 |
| PARP6     | LMNA | -0.112156886 | -0.246392894 | 0.026301348  | 1.12E-01 | 1.68E-01 | 1.00E+00 |
| C1orf159  | LMNA | -0.082820347 | -0.218374577 | 0.055869433  | 2.41E-01 | 3.21E-01 | 1.00E+00 |
| REV1      | LMNA | -0.138867791 | -0.271709886 | -0.000832755 | 4.87E-02 | 8.21E-02 | 1.00E+00 |
| SULT2A1   | LMNA | -0.010575657 | -0.148409982 | 0.127661727  | 8.81E-01 | 9.13E-01 | 1.00E+00 |
| SPEN      | LMNA | -0.176071827 | -0.306668666 | -0.038968018 | 1.22E-02 | 2.42E-02 | 1.00E+00 |

|          |      |              |              |              |          |          |          |
|----------|------|--------------|--------------|--------------|----------|----------|----------|
| PRPS1    | LMNA | -0.092352501 | -0.227502985 | 0.04628865   | 1.91E-01 | 2.64E-01 | 1.00E+00 |
| GNA15    | LMNA | 0.412088665  | 0.290567853  | 0.520527259  | 1.10E-09 | 9.04E-09 | 1.31E-05 |
| NIP30    | LMNA | -0.424333226 | -0.531263036 | -0.304096059 | 3.11E-10 | 2.81E-09 | 3.68E-06 |
| GAMT     | LMNA | 0.103679407  | -0.0348707   | 0.238319332  | 1.42E-01 | 2.05E-01 | 1.00E+00 |
| SMCP     | LMNA | -0.265773306 | -0.389532263 | -0.132586957 | 1.32E-04 | 4.22E-04 | 1.00E+00 |
| ZNF217   | LMNA | 0.609387329  | 0.514630399  | 0.68943828   | 6.35E-22 | 4.36E-20 | 7.54E-18 |
| GJA7     | LMNA | 0.257845838  | 0.12421643   | 0.382288929  | 2.12E-04 | 6.47E-04 | 1.00E+00 |
| NOX4     | LMNA | 0.304460086  | 0.173710307  | 0.424662105  | 1.06E-05 | 4.16E-05 | 1.25E-01 |
| FRAT2    | LMNA | -0.249399117 | -0.374554289 | -0.115318509 | 3.44E-04 | 1.01E-03 | 1.00E+00 |
| RNASEN   | LMNA | 0.032024861  | -0.106496969 | 0.169327255  | 6.51E-01 | 7.23E-01 | 1.00E+00 |
| MCHR1    | LMNA | 0.259366767  | 0.125820889  | 0.38367979   | 1.93E-04 | 5.96E-04 | 1.00E+00 |
| ACCN2    | LMNA | -0.561257723 | -0.649021144 | -0.458751818 | 3.68E-18 | 1.37E-16 | 4.36E-14 |
| TBX1     | LMNA | 0.195657695  | 0.059205889  | 0.324932041  | 5.26E-03 | 1.14E-02 | 1.00E+00 |
| OPRS1    | LMNA | 0.007495542  | -0.130690693 | 0.145396092  | 9.16E-01 | 9.39E-01 | 1.00E+00 |
| KCNG2    | LMNA | 0.14531033   | 0.007407934  | 0.277788821  | 3.91E-02 | 6.76E-02 | 1.00E+00 |
| HIRIP3   | LMNA | -0.279224483 | -0.401787686 | -0.146833506 | 5.72E-05 | 1.96E-04 | 6.78E-01 |
| SALL2    | LMNA | -0.368589478 | -0.482108785 | -0.242898142 | 6.76E-08 | 4.01E-07 | 8.02E-04 |
| MPHOSPH8 | LMNA | -0.057619292 | -0.194126135 | 0.081076625  | 4.15E-01 | 5.03E-01 | 1.00E+00 |
| CYP2E1   | LMNA | -0.389384037 | -0.500529164 | -0.265610913 | 1.02E-08 | 6.95E-08 | 1.21E-04 |
| ACO1     | LMNA | 0.049390838  | -0.089268839 | 0.18617243   | 4.85E-01 | 5.70E-01 | 1.00E+00 |
| THEM2    | LMNA | 0.111123881  | -0.027346638 | 0.245410103  | 1.15E-01 | 1.72E-01 | 1.00E+00 |
| OPRL1    | LMNA | -0.029018573 | -0.166402956 | 0.109470973  | 6.82E-01 | 7.50E-01 | 1.00E+00 |
| CTH      | LMNA | -0.055765025 | -0.192335348 | 0.082924362  | 4.31E-01 | 5.17E-01 | 1.00E+00 |
| ATF5     | LMNA | 0.177667532  | 0.040612645  | 0.308160231  | 1.14E-02 | 2.28E-02 | 1.00E+00 |
| IQCG     | LMNA | 0.248640904  | 0.114520845  | 0.373859142  | 3.60E-04 | 1.05E-03 | 1.00E+00 |
| TULP4    | LMNA | -0.207277534 | -0.335721896 | -0.071265795 | 3.08E-03 | 7.11E-03 | 1.00E+00 |
| MEGF9    | LMNA | -0.229948758 | -0.356677165 | -0.094910664 | 9.94E-04 | 2.61E-03 | 1.00E+00 |
| TM7SF4   | LMNA | 0.248475009  | 0.114346343  | 0.373707028  | 3.63E-04 | 1.06E-03 | 1.00E+00 |
| PLEKHA1  | LMNA | -0.281272436 | -0.403649741 | -0.149007384 | 5.01E-05 | 1.74E-04 | 5.95E-01 |
| PAPPA2   | LMNA | 0.104164058  | -0.034381345 | 0.238781393  | 1.40E-01 | 2.03E-01 | 1.00E+00 |
| SLC4A2   | LMNA | 0.542831263  | 0.437571144  | 0.633415147  | 7.09E-17 | 2.14E-15 | 8.41E-13 |
| SNUPN    | LMNA | 0.229606353  | 0.094552417  | 0.356361622  | 1.01E-03 | 2.65E-03 | 1.00E+00 |
| PFKFB3   | LMNA | 0.186315009  | 0.049538178  | 0.316232209  | 7.93E-03 | 1.65E-02 | 1.00E+00 |
| PKNOX1   | LMNA | -0.061310908 | -0.197688666 | 0.077395167  | 3.86E-01 | 4.73E-01 | 1.00E+00 |
| KIAA0406 | LMNA | 0.00263338   | -0.135466868 | 0.140633255  | 9.70E-01 | 9.77E-01 | 1.00E+00 |

|          |      |              |              |              |          |          |          |
|----------|------|--------------|--------------|--------------|----------|----------|----------|
| C20orf29 | LMNA | 0.273981124  | 0.141273565  | 0.397015655  | 7.96E-05 | 2.66E-04 | 9.44E-01 |
| FLJ20581 | LMNA | -0.229586852 | -0.356343649 | -0.094532015 | 1.01E-03 | 2.65E-03 | 1.00E+00 |
| SFRP4    | LMNA | 0.376312482  | 0.251317505  | 0.488961765  | 3.40E-08 | 2.10E-07 | 4.03E-04 |
| OSTM1    | LMNA | 0.169255071  | 0.031950623  | 0.300289556  | 1.60E-02 | 3.07E-02 | 1.00E+00 |
| CLCN7    | LMNA | 0.281358176  | 0.149098423  | 0.403727676  | 4.99E-05 | 1.73E-04 | 5.91E-01 |
| AGTR1    | LMNA | 0.224365406  | 0.089073352  | 0.351528218  | 1.33E-03 | 3.37E-03 | 1.00E+00 |
| FLJ23049 | LMNA | -0.142773257 | -0.275396201 | -0.004817204 | 4.27E-02 | 7.29E-02 | 1.00E+00 |
| HAPLN2   | LMNA | -0.222987625 | -0.350256449 | -0.08763433  | 1.42E-03 | 3.59E-03 | 1.00E+00 |
| PCDHGA9  | LMNA | 0.125255601  | -0.013020547 | 0.258830984  | 7.57E-02 | 1.20E-01 | 1.00E+00 |
| MAP3K10  | LMNA | -0.003221168 | -0.141209375 | 0.134889816  | 9.64E-01 | 9.73E-01 | 1.00E+00 |
| AMDHD2   | LMNA | 0.445812901  | 0.327945265  | 0.550013374  | 2.95E-11 | 3.19E-10 | 3.50E-07 |
| USP2     | LMNA | -0.407359822 | -0.516371909 | -0.285356237 | 1.78E-09 | 1.40E-08 | 2.11E-05 |
| MAN2A1   | LMNA | 0.45398081   | 0.337053816  | 0.557115958  | 1.15E-11 | 1.34E-10 | 1.37E-07 |
| ABCG4    | LMNA | -0.35289506  | -0.468139468 | -0.225846752 | 2.59E-07 | 1.38E-06 | 3.07E-03 |
| CLCA2    | LMNA | 0.218256779  | 0.082697501  | 0.345886037  | 1.81E-03 | 4.43E-03 | 1.00E+00 |
| CBX8     | LMNA | -0.046136152 | -0.183021462 | 0.09250402   | 5.14E-01 | 5.98E-01 | 1.00E+00 |
| STRAP    | LMNA | -0.221529084 | -0.348909622 | -0.086111575 | 1.53E-03 | 3.82E-03 | 1.00E+00 |
| RND3     | LMNA | 0.180942307  | 0.043990148  | 0.311219279  | 9.97E-03 | 2.02E-02 | 1.00E+00 |
| COQ3     | LMNA | -0.41431716  | -0.522483713 | -0.293026358 | 8.80E-10 | 7.35E-09 | 1.04E-05 |
| RRBP1    | LMNA | 0.66180673   | 0.57641916   | 0.732897919  | 7.98E-27 | 1.41E-24 | 9.46E-23 |
| NAT13    | LMNA | 0.069754018  | -0.06896105  | 0.205823023  | 3.24E-01 | 4.10E-01 | 1.00E+00 |
| IL1RAP   | LMNA | 0.402676501  | 0.280201894  | 0.512251495  | 2.83E-09 | 2.16E-08 | 3.36E-05 |
| MAT2B    | LMNA | -0.04265658  | -0.179649663 | 0.095959505  | 5.47E-01 | 6.28E-01 | 1.00E+00 |
| NDOR1    | LMNA | 0.315430167  | 0.185454883  | 0.434558138  | 4.82E-06 | 2.03E-05 | 5.71E-02 |
| CSNK1D   | LMNA | 0.619202512  | 0.526125524  | 0.697619899  | 9.02E-23 | 7.86E-21 | 1.07E-18 |
| KIR3DL1  | LMNA | 0.045029387  | -0.093603486 | 0.181949327  | 5.25E-01 | 6.08E-01 | 1.00E+00 |
| TJP1     | LMNA | -0.086948317 | -0.222330616 | 0.051723537  | 2.19E-01 | 2.95E-01 | 1.00E+00 |
| RALGDS   | LMNA | 0.006588456  | -0.131582224 | 0.14450802   | 9.26E-01 | 9.47E-01 | 1.00E+00 |
| PTPRT    | LMNA | -0.389232432 | -0.500395232 | -0.265444824 | 1.03E-08 | 7.04E-08 | 1.23E-04 |
| ASPHD1   | LMNA | 0.121806685  | -0.016522145 | 0.255560302  | 8.42E-02 | 1.31E-01 | 1.00E+00 |
| GPR44    | LMNA | -0.120501323 | -0.2543216   | 0.017846561  | 8.76E-02 | 1.36E-01 | 1.00E+00 |
| PER2     | LMNA | 0.104826682  | -0.033712183 | 0.239413034  | 1.38E-01 | 2.00E-01 | 1.00E+00 |
| ZKSCAN4  | LMNA | -0.074215489 | -0.210113764 | 0.06449631   | 2.94E-01 | 3.78E-01 | 1.00E+00 |
| KCNE1L   | LMNA | -0.046844618 | -0.183707592 | 0.091800048  | 5.08E-01 | 5.92E-01 | 1.00E+00 |
| CCKBR    | LMNA | -0.294188454 | -0.415370027 | -0.162747103 | 2.14E-05 | 7.97E-05 | 2.54E-01 |

|           |      |              |              |              |          |          |          |
|-----------|------|--------------|--------------|--------------|----------|----------|----------|
| RBM12B    | LMNA | -0.263864856 | -0.387789909 | -0.130570108 | 1.48E-04 | 4.69E-04 | 1.00E+00 |
| FAM118A   | LMNA | 0.108973815  | -0.029521302 | 0.243363666  | 1.23E-01 | 1.81E-01 | 1.00E+00 |
| TAF4      | LMNA | -0.043282257 | -0.180256198 | 0.095338406  | 5.41E-01 | 6.22E-01 | 1.00E+00 |
| NDUFB6    | LMNA | -0.227578565 | -0.354492322 | -0.092431528 | 1.12E-03 | 2.91E-03 | 1.00E+00 |
| ADRB2     | LMNA | -0.188496017 | -0.318265103 | -0.051792771 | 7.22E-03 | 1.52E-02 | 1.00E+00 |
| PMFBP1    | LMNA | -0.056029619 | -0.19259094  | 0.082660758  | 4.28E-01 | 5.15E-01 | 1.00E+00 |
| TRIM9     | LMNA | -0.169908578 | -0.300901616 | -0.032622779 | 1.56E-02 | 2.99E-02 | 1.00E+00 |
| PRSS3     | LMNA | -0.153513258 | -0.285513469 | -0.015797038 | 2.92E-02 | 5.22E-02 | 1.00E+00 |
| DKFZp762E | LMNA | 0.107428487  | -0.031083501 | 0.241892081  | 1.28E-01 | 1.88E-01 | 1.00E+00 |
| CD3D      | LMNA | 0.282040593  | 0.149823103  | 0.404347909  | 4.77E-05 | 1.66E-04 | 5.66E-01 |
| TBP       | LMNA | -0.285886166 | -0.40784096  | -0.153909491 | 3.72E-05 | 1.32E-04 | 4.41E-01 |
| CTSD      | LMNA | 0.42950984   | 0.309829979  | 0.535791479  | 1.79E-10 | 1.70E-09 | 2.12E-06 |
| HPGD      | LMNA | -0.137169439 | -0.270105618 | 0.000898577  | 5.16E-02 | 8.62E-02 | 1.00E+00 |
| DNAJC12   | LMNA | -0.467604111 | -0.56892892  | -0.352294878 | 2.28E-12 | 3.00E-11 | 2.70E-08 |
| SEMA3B    | LMNA | 0.147448372  | 0.009592633  | 0.279803854  | 3.63E-02 | 6.32E-02 | 1.00E+00 |
| MRPL17    | LMNA | 0.399064695  | 0.276231649  | 0.509070357  | 4.03E-09 | 2.98E-08 | 4.78E-05 |
| FKBP1B    | LMNA | -0.088357266 | -0.223679862 | 0.050307374  | 2.11E-01 | 2.86E-01 | 1.00E+00 |
| IL3       | LMNA | 0.076523992  | -0.062183933 | 0.212331873  | 2.79E-01 | 3.62E-01 | 1.00E+00 |
| DRAM      | LMNA | 0.542089427  | 0.436720864  | 0.632785314  | 7.96E-17 | 2.38E-15 | 9.44E-13 |
| ARHGAP19  | LMNA | 0.016683421  | -0.121647754 | 0.154378862  | 8.14E-01 | 8.59E-01 | 1.00E+00 |
| GLI3      | LMNA | 0.412168793  | 0.290656223  | 0.520597626  | 1.10E-09 | 8.98E-09 | 1.30E-05 |
| VAV2      | LMNA | 0.380726237  | 0.256137743  | 0.49287206   | 2.28E-08 | 1.46E-07 | 2.70E-04 |
| PTCH1     | LMNA | -0.375395513 | -0.488148823 | -0.250316865 | 3.69E-08 | 2.27E-07 | 4.38E-04 |
| TP53BP1   | LMNA | -0.011607934 | -0.149419492 | 0.126646015  | 8.70E-01 | 9.04E-01 | 1.00E+00 |
| ERCC3     | LMNA | -0.108961294 | -0.243351746 | 0.029533962  | 1.23E-01 | 1.81E-01 | 1.00E+00 |
| SLC17A7   | LMNA | -0.312877702 | -0.432258143 | -0.182718894 | 5.80E-06 | 2.39E-05 | 6.88E-02 |
| AMACR     | LMNA | 0.098570881  | -0.040024769 | 0.233445204  | 1.63E-01 | 2.30E-01 | 1.00E+00 |
| TFRC      | LMNA | 0.116495245  | -0.021908088 | 0.250517354  | 9.87E-02 | 1.50E-01 | 1.00E+00 |
| RHCG      | LMNA | -0.103732972 | -0.238370403 | 0.034816618  | 1.42E-01 | 2.05E-01 | 1.00E+00 |
| TMEM80    | LMNA | -0.083669479 | -0.219188707 | 0.055017004  | 2.36E-01 | 3.15E-01 | 1.00E+00 |
| DDX46     | LMNA | -0.220917979 | -0.348345167 | -0.085473752 | 1.58E-03 | 3.93E-03 | 1.00E+00 |
| TCEAL4    | LMNA | -0.01440081  | -0.15214933  | 0.123896503  | 8.39E-01 | 8.80E-01 | 1.00E+00 |
| AK2       | LMNA | 0.313415563  | 0.18329526   | 0.432742932  | 5.58E-06 | 2.31E-05 | 6.62E-02 |
| VPS13A    | LMNA | -0.155561847 | -0.28743994  | -0.017895153 | 2.71E-02 | 4.88E-02 | 1.00E+00 |
| LHPP      | LMNA | -0.226756672 | -0.353734377 | -0.091572248 | 1.17E-03 | 3.02E-03 | 1.00E+00 |

|          |      |              |              |              |          |          |          |
|----------|------|--------------|--------------|--------------|----------|----------|----------|
| FAM55D   | LMNA | -0.214026054 | -0.341972947 | -0.078288197 | 2.22E-03 | 5.33E-03 | 1.00E+00 |
| PRPF38B  | LMNA | -0.221391528 | -0.348782574 | -0.085967995 | 1.54E-03 | 3.84E-03 | 1.00E+00 |
| BCOR     | LMNA | -0.256847396 | -0.381375566 | -0.123163533 | 2.24E-04 | 6.82E-04 | 1.00E+00 |
| AVPR2    | LMNA | 0.080991906  | -0.057704287 | 0.216620866  | 2.52E-01 | 3.33E-01 | 1.00E+00 |
| PFDN5    | LMNA | -0.123563204 | -0.25722643  | 0.014739218  | 7.98E-02 | 1.25E-01 | 1.00E+00 |
| NSUN3    | LMNA | -0.084018258 | -0.219523053 | 0.054666813  | 2.35E-01 | 3.13E-01 | 1.00E+00 |
| CMTM6    | LMNA | 0.302080009  | 0.171167095  | 0.422511256  | 1.25E-05 | 4.86E-05 | 1.48E-01 |
| KCNK12   | LMNA | -0.191474318 | -0.321039218 | -0.054873809 | 6.34E-03 | 1.35E-02 | 1.00E+00 |
| GRB14    | LMNA | -0.176620392 | -0.307181502 | -0.039533317 | 1.19E-02 | 2.37E-02 | 1.00E+00 |
| RP2      | LMNA | 0.158870004  | 0.021285848  | 0.290548644  | 2.39E-02 | 4.38E-02 | 1.00E+00 |
| SERPINF2 | LMNA | 0.246197352  | 0.11195133   | 0.371617882  | 4.13E-04 | 1.18E-03 | 1.00E+00 |
| PICK1    | LMNA | 0.164146312  | 0.026700357  | 0.295501092  | 1.96E-02 | 3.66E-02 | 1.00E+00 |
| DYNC1I2  | LMNA | -0.185818369 | -0.31576913  | -0.049024977 | 8.10E-03 | 1.69E-02 | 1.00E+00 |
| TYRO3    | LMNA | 0.008903678  | -0.12930626  | 0.14677427   | 9.00E-01 | 9.28E-01 | 1.00E+00 |
| OR12D2   | LMNA | -0.05446161  | -0.19107601  | 0.084222617  | 4.41E-01 | 5.28E-01 | 1.00E+00 |
| FANCF    | LMNA | 0.024824018  | -0.113616343 | 0.162318756  | 7.26E-01 | 7.87E-01 | 1.00E+00 |
| CSNK1A1  | LMNA | 0.350662279  | 0.22342723   | 0.46614742   | 3.12E-07 | 1.64E-06 | 3.70E-03 |
| TBL1Y    | LMNA | 0.222503148  | 0.087128453  | 0.349809137  | 1.46E-03 | 3.66E-03 | 1.00E+00 |
| CCNC     | LMNA | -0.217722099 | -0.345391745 | -0.082139959 | 1.85E-03 | 4.54E-03 | 1.00E+00 |
| C3orf60  | LMNA | 0.079768517  | -0.058931444 | 0.215446989  | 2.59E-01 | 3.41E-01 | 1.00E+00 |
| SLC10A2  | LMNA | 0.016362338  | -0.12196416  | 0.15406533   | 8.17E-01 | 8.62E-01 | 1.00E+00 |
| ZBP1     | LMNA | 0.185099188  | 0.048281942  | 0.315098438  | 8.36E-03 | 1.73E-02 | 1.00E+00 |
| CHKA     | LMNA | -0.137497269 | -0.270415344 | 0.000564446  | 5.10E-02 | 8.54E-02 | 1.00E+00 |
| UBAP1    | LMNA | -0.277741357 | -0.400438553 | -0.145259983 | 6.28E-05 | 2.13E-04 | 7.45E-01 |
| DHRS3    | LMNA | 0.186611602  | 0.049844697  | 0.316508731  | 7.83E-03 | 1.63E-02 | 1.00E+00 |
| MAP3K1   | LMNA | -0.18539941  | -0.315378434 | -0.048592104 | 8.25E-03 | 1.71E-02 | 1.00E+00 |
| PBK      | LMNA | -0.02344684  | -0.160976781 | 0.114976323  | 7.40E-01 | 7.99E-01 | 1.00E+00 |
| ALDOA    | LMNA | 0.430005189  | 0.310379114  | 0.536224485  | 1.70E-10 | 1.63E-09 | 2.01E-06 |
| EXOSC5   | LMNA | -0.199577498 | -0.328575625 | -0.063269696 | 4.40E-03 | 9.78E-03 | 1.00E+00 |
| AZU1     | LMNA | 0.24267927   | 0.108255043  | 0.368388477  | 5.02E-04 | 1.41E-03 | 1.00E+00 |
| GAB2     | LMNA | -0.097435825 | -0.232361307 | 0.041168944  | 1.68E-01 | 2.36E-01 | 1.00E+00 |
| DIS3     | LMNA | -0.224916472 | -0.352036751 | -0.08964907  | 1.29E-03 | 3.29E-03 | 1.00E+00 |
| THAP3    | LMNA | -0.202566936 | -0.331351826 | -0.066371999 | 3.84E-03 | 8.64E-03 | 1.00E+00 |
| VPS13D   | LMNA | -0.190958903 | -0.320559297 | -0.054340428 | 6.48E-03 | 1.38E-02 | 1.00E+00 |
| IQCB1    | LMNA | -0.040383429 | -0.177445177 | 0.098215118  | 5.68E-01 | 6.48E-01 | 1.00E+00 |

|          |      |              |              |              |          |          |          |
|----------|------|--------------|--------------|--------------|----------|----------|----------|
| SPATS2   | LMNA | -0.235506513 | -0.361794871 | -0.100730452 | 7.41E-04 | 2.01E-03 | 1.00E+00 |
| SKIV2L   | LMNA | 0.146419587  | 0.008541234  | 0.278834405  | 3.76E-02 | 6.52E-02 | 1.00E+00 |
| ATF4     | LMNA | 0.138580541  | 0.000539868  | 0.2714386    | 4.92E-02 | 8.28E-02 | 1.00E+00 |
| C19orf62 | LMNA | -0.005588597 | -0.143528863 | 0.132564679  | 9.37E-01 | 9.54E-01 | 1.00E+00 |
| SPIN1    | LMNA | -0.19080794  | -0.320418719 | -0.054184218 | 6.53E-03 | 1.38E-02 | 1.00E+00 |
| IL12A    | LMNA | -0.006213798 | -0.144141152 | 0.131950392  | 9.30E-01 | 9.49E-01 | 1.00E+00 |
| PRB3     | LMNA | -0.073488541 | -0.209414992 | 0.065224169  | 2.99E-01 | 3.83E-01 | 1.00E+00 |
| RAPGEF4  | LMNA | -0.599849874 | -0.681468549 | -0.503493072 | 3.97E-21 | 2.41E-19 | 4.71E-17 |
| FUZ      | LMNA | -0.106074192 | -0.240601903 | 0.032452024  | 1.33E-01 | 1.94E-01 | 1.00E+00 |
| CST5     | LMNA | 0.058861715  | -0.079838043 | 0.195325516  | 4.05E-01 | 4.93E-01 | 1.00E+00 |
| C3orf37  | LMNA | 0.280765839  | 0.148469518  | 0.403189224  | 5.18E-05 | 1.79E-04 | 6.14E-01 |
| CROP     | LMNA | -0.303448121 | -0.42374777  | -0.172628767 | 1.13E-05 | 4.44E-05 | 1.34E-01 |
| ZNF696   | LMNA | -0.049977902 | -0.186740487 | 0.088684981  | 4.80E-01 | 5.65E-01 | 1.00E+00 |
| HEG1     | LMNA | 0.460117319  | 0.343911456  | 0.562442185  | 5.61E-12 | 6.91E-11 | 6.66E-08 |
| LIN28    | LMNA | -0.01754235  | -0.155217455 | 0.120801199  | 8.04E-01 | 8.52E-01 | 1.00E+00 |
| SURF2    | LMNA | -0.118480045 | -0.252402675 | 0.019896386  | 9.31E-02 | 1.43E-01 | 1.00E+00 |
| KIAA1539 | LMNA | 0.306984934  | 0.17641012   | 0.426942301  | 8.84E-06 | 3.53E-05 | 1.05E-01 |
| WHSC2    | LMNA | -0.11195346  | -0.246199379 | 0.026507217  | 1.13E-01 | 1.68E-01 | 1.00E+00 |
| PSMC1    | LMNA | 0.215951708  | 0.080294475  | 0.343754577  | 2.02E-03 | 4.90E-03 | 1.00E+00 |
| RFXANK   | LMNA | 0.240148824  | 0.105598715  | 0.366063791  | 5.76E-04 | 1.60E-03 | 1.00E+00 |
| SLC7A8   | LMNA | 0.263970989  | 0.13068224   | 0.387886827  | 1.47E-04 | 4.66E-04 | 1.00E+00 |
| SPATA7   | LMNA | -0.13335691  | -0.266501602 | 0.00478213   | 5.85E-02 | 9.62E-02 | 1.00E+00 |
| ADA      | LMNA | 0.243654243  | 0.10927903   | 0.369283752  | 4.75E-04 | 1.34E-03 | 1.00E+00 |
| MAZ      | LMNA | -0.138225935 | -0.271103674 | -0.000178338 | 4.98E-02 | 8.37E-02 | 1.00E+00 |
| PIN4     | LMNA | -0.211139344 | -0.339300417 | -0.075282683 | 2.56E-03 | 6.03E-03 | 1.00E+00 |
| PDCD10   | LMNA | 0.005871931  | -0.132286304 | 0.143806359  | 9.34E-01 | 9.52E-01 | 1.00E+00 |
| PDE1A    | LMNA | -0.259783597 | -0.384060874 | -0.126260734 | 1.89E-04 | 5.83E-04 | 1.00E+00 |
| TAF6L    | LMNA | -0.15142515  | -0.283548736 | -0.013659697 | 3.15E-02 | 5.59E-02 | 1.00E+00 |
| KIAA0284 | LMNA | 0.080657378  | -0.058039887 | 0.216299915  | 2.54E-01 | 3.35E-01 | 1.00E+00 |
| DCTN6    | LMNA | -0.394315562 | -0.504882928 | -0.271017582 | 6.38E-09 | 4.53E-08 | 7.57E-05 |
| ACADS    | LMNA | 0.268486931  | 0.135456614  | 0.392008191  | 1.12E-04 | 3.62E-04 | 1.00E+00 |
| MKRN2    | LMNA | -0.10057496  | -0.235358137 | 0.038003702  | 1.54E-01 | 2.20E-01 | 1.00E+00 |
| GALNT4   | LMNA | 0.56090187   | 0.458341669  | 0.648720458  | 3.90E-18 | 1.44E-16 | 4.63E-14 |
| C22orf31 | LMNA | -0.136569922 | -0.269539136 | 0.001509539  | 5.26E-02 | 8.78E-02 | 1.00E+00 |
| PSME4    | LMNA | 0.366148515  | 0.240241018  | 0.479939912  | 8.37E-08 | 4.87E-07 | 9.93E-04 |

|          |      |              |              |              |          |          |          |
|----------|------|--------------|--------------|--------------|----------|----------|----------|
| TFG      | LMNA | 0.139406356  | 0.001381952  | 0.272218462  | 4.78E-02 | 8.07E-02 | 1.00E+00 |
| SSNA1    | LMNA | 0.119124647  | -0.019242807 | 0.25301475   | 9.13E-02 | 1.41E-01 | 1.00E+00 |
| EPHX2    | LMNA | 0.078086751  | -0.060617706 | 0.213832645  | 2.69E-01 | 3.51E-01 | 1.00E+00 |
| ANXA5    | LMNA | 0.499265368  | 0.387953722  | 0.596222293  | 3.93E-14 | 6.69E-13 | 4.67E-10 |
| ELOVL4   | LMNA | -0.307273041 | -0.427202393 | -0.176718316 | 8.66E-06 | 3.46E-05 | 1.03E-01 |
| CCL24    | LMNA | 0.144766974  | 0.00685293   | 0.27727654   | 3.98E-02 | 6.87E-02 | 1.00E+00 |
| KRTAP1-1 | LMNA | 0.106149066  | -0.032376378 | 0.240673244  | 1.33E-01 | 1.94E-01 | 1.00E+00 |
| ZMAT3    | LMNA | 0.077257715  | -0.061448666 | 0.213036573  | 2.74E-01 | 3.57E-01 | 1.00E+00 |
| BATF     | LMNA | 0.353433527  | 0.226430489  | 0.468619704  | 2.48E-07 | 1.33E-06 | 2.94E-03 |
| ATF7IP   | LMNA | -0.134077709 | -0.267183265 | 0.004048222  | 5.71E-02 | 9.42E-02 | 1.00E+00 |
| MSTP9    | LMNA | -0.103831508 | -0.23846435  | 0.03471713   | 1.41E-01 | 2.04E-01 | 1.00E+00 |
| FAM131A  | LMNA | -0.18911821  | -0.318844824 | -0.052436212 | 7.03E-03 | 1.48E-02 | 1.00E+00 |
| VIPR2    | LMNA | -0.414658831 | -0.522783574 | -0.293403436 | 8.50E-10 | 7.13E-09 | 1.01E-05 |
| CCDC72   | LMNA | -0.063635949 | -0.199930558 | 0.075074583  | 3.68E-01 | 4.56E-01 | 1.00E+00 |
| TEF      | LMNA | -0.186627036 | -0.31652312  | -0.049860648 | 7.83E-03 | 1.63E-02 | 1.00E+00 |
| LYK5     | LMNA | -0.395089852 | -0.505565995 | -0.271867181 | 5.92E-09 | 4.24E-08 | 7.03E-05 |
| MRPL44   | LMNA | -0.139003128 | -0.271837694 | -0.000970756 | 4.85E-02 | 8.18E-02 | 1.00E+00 |
| LIMK2    | LMNA | 0.206802455  | 0.070771943  | 0.335281411  | 3.15E-03 | 7.26E-03 | 1.00E+00 |
| ETF1     | LMNA | 0.51211556   | 0.402522093  | 0.60723614   | 6.70E-15 | 1.34E-13 | 7.94E-11 |
| HHAT     | LMNA | 0.257890375  | 0.124263403  | 0.382329665  | 2.11E-04 | 6.46E-04 | 1.00E+00 |
| PROL1    | LMNA | -0.071617569 | -0.207615897 | 0.067096809  | 3.11E-01 | 3.96E-01 | 1.00E+00 |
| KCNJ14   | LMNA | 0.017386796  | -0.120954527 | 0.155065598  | 8.06E-01 | 8.53E-01 | 1.00E+00 |
| UBE4A    | LMNA | -0.105111086 | -0.239684105 | 0.033424933  | 1.37E-01 | 1.98E-01 | 1.00E+00 |
| MYST1    | LMNA | -0.32250772  | -0.440927519 | -0.193051874 | 2.86E-06 | 1.26E-05 | 3.39E-02 |
| EMX1     | LMNA | -0.026853877 | -0.164295799 | 0.111610888  | 7.04E-01 | 7.68E-01 | 1.00E+00 |
| MX2      | LMNA | 0.216957754  | 0.081343079  | 0.344685012  | 1.93E-03 | 4.70E-03 | 1.00E+00 |
| C11orf30 | LMNA | -0.33278561  | -0.450155828 | -0.204111788 | 1.30E-06 | 6.12E-06 | 1.55E-02 |
| HSP90AA1 | LMNA | 0.079590769  | -0.059109705 | 0.215276402  | 2.60E-01 | 3.42E-01 | 1.00E+00 |
| ICK      | LMNA | -0.297208807 | -0.418104972 | -0.165967446 | 1.74E-05 | 6.61E-05 | 2.07E-01 |
| CCDC68   | LMNA | 0.101155054  | -0.037418479 | 0.235911653  | 1.52E-01 | 2.17E-01 | 1.00E+00 |
| EIF2C1   | LMNA | -0.130751335 | -0.264036385 | 0.00743385   | 6.36E-02 | 1.03E-01 | 1.00E+00 |
| NDUFC2   | LMNA | -0.329642929 | -0.447336737 | -0.200726497 | 1.66E-06 | 7.67E-06 | 1.97E-02 |
| SEL1L    | LMNA | 0.282376426  | 0.150179786  | 0.404653098  | 4.67E-05 | 1.63E-04 | 5.54E-01 |
| DUOX1    | LMNA | 0.086219311  | -0.052456057 | 0.221632297  | 2.22E-01 | 2.99E-01 | 1.00E+00 |
| UBE2G2   | LMNA | -0.00307144  | -0.141062628 | 0.135036818  | 9.65E-01 | 9.74E-01 | 1.00E+00 |



|           |      |              |              |              |          |          |          |
|-----------|------|--------------|--------------|--------------|----------|----------|----------|
| PARP1     | LMNA | -0.254241355 | -0.378990445 | -0.120416775 | 2.61E-04 | 7.84E-04 | 1.00E+00 |
| FAM60A    | LMNA | -0.166521324 | -0.297728023 | -0.029140211 | 1.79E-02 | 3.38E-02 | 1.00E+00 |
| SIAH1     | LMNA | -0.360083879 | -0.474545263 | -0.233647481 | 1.41E-07 | 7.89E-07 | 1.68E-03 |
| SH2D4A    | LMNA | 0.426202109  | 0.306165138  | 0.532898619  | 2.55E-10 | 2.35E-09 | 3.02E-06 |
| LHX1      | LMNA | -0.30203696  | -0.42247234  | -0.171121111 | 1.25E-05 | 4.87E-05 | 1.48E-01 |
| EIF4B     | LMNA | -0.027618622 | -0.16504036  | 0.110855044  | 6.96E-01 | 7.62E-01 | 1.00E+00 |
| KRT2      | LMNA | -0.075338805 | -0.211193269 | 0.063371295  | 2.87E-01 | 3.70E-01 | 1.00E+00 |
| RPS15     | LMNA | -0.014879599 | -0.152617102 | 0.123424934  | 8.34E-01 | 8.75E-01 | 1.00E+00 |
| GOLGA7    | LMNA | -0.299092148 | -0.419809237 | -0.167976909 | 1.53E-05 | 5.87E-05 | 1.82E-01 |
| MAGEC2    | LMNA | -0.06263292  | -0.198963574 | 0.076075874  | 3.76E-01 | 4.63E-01 | 1.00E+00 |
| JAG2      | LMNA | -0.160696815 | -0.292264125 | -0.023159596 | 2.23E-02 | 4.12E-02 | 1.00E+00 |
| PPBPL2    | LMNA | 0.056647114  | -0.082045498 | 0.193187353  | 4.23E-01 | 5.10E-01 | 1.00E+00 |
| BLOC1S1   | LMNA | -0.133741042 | -0.266864894 | 0.00439103   | 5.78E-02 | 9.51E-02 | 1.00E+00 |
| CD34      | LMNA | 0.329467358  | 0.200537463  | 0.447179175  | 1.69E-06 | 7.76E-06 | 2.00E-02 |
| STX3      | LMNA | 0.355846036  | 0.229046944  | 0.470770483  | 2.02E-07 | 1.10E-06 | 2.40E-03 |
| SLCO4A1   | LMNA | 0.168359441  | 0.031029637  | 0.299450555  | 1.66E-02 | 3.17E-02 | 1.00E+00 |
| NXPH4     | LMNA | 0.136074378  | -0.002014465 | 0.269070828  | 5.35E-02 | 8.91E-02 | 1.00E+00 |
| MCTS1     | LMNA | 0.221357091  | 0.085932051  | 0.348750768  | 1.55E-03 | 3.85E-03 | 1.00E+00 |
| SLC37A4   | LMNA | 0.009356099  | -0.128861341 | 0.147216952  | 8.95E-01 | 9.24E-01 | 1.00E+00 |
| TGM1      | LMNA | -0.160120407 | -0.291722936 | -0.022568274 | 2.28E-02 | 4.20E-02 | 1.00E+00 |
| RP13-122B | LMNA | 0.172394036  | 0.035180297  | 0.303228451  | 1.42E-02 | 2.75E-02 | 1.00E+00 |
| ZC3H13    | LMNA | -0.068880738 | -0.204982548 | 0.069834321  | 3.30E-01 | 4.16E-01 | 1.00E+00 |
| PHACTR4   | LMNA | 0.001572867  | -0.136507774 | 0.139593557  | 9.82E-01 | 9.86E-01 | 1.00E+00 |
| ARPC2     | LMNA | 0.28783235   | 0.155979271  | 0.409607379  | 3.27E-05 | 1.18E-04 | 3.88E-01 |
| ACYP1     | LMNA | -0.2114381   | -0.339577103 | -0.07559362  | 2.52E-03 | 5.96E-03 | 1.00E+00 |
| P2RY13    | LMNA | -0.090641944 | -0.225866628 | 0.048009813  | 2.00E-01 | 2.74E-01 | 1.00E+00 |
| PRKCSH    | LMNA | 0.523125818  | 0.415048832  | 0.616643996  | 1.38E-15 | 3.19E-14 | 1.64E-11 |
| ENG       | LMNA | 0.518001061  | 0.409213122  | 0.612268403  | 2.90E-15 | 6.24E-14 | 3.44E-11 |
| GAPVD1    | LMNA | -0.006020525 | -0.143951882 | 0.132140303  | 9.32E-01 | 9.51E-01 | 1.00E+00 |
| DPH5      | LMNA | -0.289937759 | -0.411517287 | -0.158219691 | 2.85E-05 | 1.04E-04 | 3.38E-01 |
| CCNO      | LMNA | 0.252071857  | 0.118131694  | 0.377003595  | 2.96E-04 | 8.78E-04 | 1.00E+00 |
| HLA-F     | LMNA | 0.385760212  | 0.261642894  | 0.497326307  | 1.43E-08 | 9.53E-08 | 1.70E-04 |
| RXRG      | LMNA | -0.366201257 | -0.479986789 | -0.24029841  | 8.33E-08 | 4.85E-07 | 9.88E-04 |
| ZNF140    | LMNA | -0.096606709 | -0.231569349 | 0.042004491  | 1.71E-01 | 2.40E-01 | 1.00E+00 |
| SULT1E1   | LMNA | 0.150391732  | 0.012602378  | 0.282575967  | 3.26E-02 | 5.78E-02 | 1.00E+00 |

|           |      |              |              |              |          |          |          |
|-----------|------|--------------|--------------|--------------|----------|----------|----------|
| BRD9      | LMNA | -0.005924881 | -0.143858215 | 0.132234279  | 9.33E-01 | 9.51E-01 | 1.00E+00 |
| TBC1D4    | LMNA | -0.176321371 | -0.306901966 | -0.039225163 | 1.21E-02 | 2.40E-02 | 1.00E+00 |
| RIG       | LMNA | -0.077035853 | -0.212823502 | 0.061671011  | 2.76E-01 | 3.58E-01 | 1.00E+00 |
| GLUD1     | LMNA | -0.316772315 | -0.435766908 | -0.186894341 | 4.37E-06 | 1.85E-05 | 5.18E-02 |
| OGT       | LMNA | -0.082795214 | -0.218350477 | 0.05589466   | 2.41E-01 | 3.21E-01 | 1.00E+00 |
| HBXIP     | LMNA | -0.073691081 | -0.209609695 | 0.065021391  | 2.97E-01 | 3.81E-01 | 1.00E+00 |
| SYT1      | LMNA | -0.344340837 | -0.460501179 | -0.216585578 | 5.22E-07 | 2.62E-06 | 6.19E-03 |
| PLA2G3    | LMNA | -0.098166336 | -0.233058931 | 0.040432605  | 1.65E-01 | 2.32E-01 | 1.00E+00 |
| APIP      | LMNA | 0.01745113   | -0.120891115 | 0.155128404  | 8.05E-01 | 8.53E-01 | 1.00E+00 |
| ACRV1     | LMNA | -0.436712479 | -0.542082111 | -0.317822554 | 8.17E-11 | 8.33E-10 | 9.69E-07 |
| RNF207    | LMNA | 0.061718807  | -0.076988159 | 0.19808208   | 3.83E-01 | 4.70E-01 | 1.00E+00 |
| CMPK      | LMNA | 0.241868776  | 0.10740402   | 0.367644058  | 5.25E-04 | 1.47E-03 | 1.00E+00 |
| Mar-02    | LMNA | 0.042957103  | -0.095661195 | 0.179941005  | 5.44E-01 | 6.25E-01 | 1.00E+00 |
| MYLIP     | LMNA | -0.045160914 | -0.182076755 | 0.093472844  | 5.23E-01 | 6.06E-01 | 1.00E+00 |
| RPIA      | LMNA | 0.199068379  | 0.062741618  | 0.328102599  | 4.51E-03 | 9.98E-03 | 1.00E+00 |
| PHIP      | LMNA | -0.112169521 | -0.246404913 | 0.026288561  | 1.12E-01 | 1.67E-01 | 1.00E+00 |
| ZNF701    | LMNA | 0.123897629  | -0.014399667 | 0.257543555  | 7.90E-02 | 1.24E-01 | 1.00E+00 |
| HIST1H1B  | LMNA | -0.11295427  | -0.247151329 | 0.025494274  | 1.09E-01 | 1.64E-01 | 1.00E+00 |
| SLC11A2   | LMNA | -0.197107732 | -0.326280345 | -0.06070867  | 4.93E-03 | 1.08E-02 | 1.00E+00 |
| DHX32     | LMNA | 0.181168091  | 0.04422313   | 0.311430089  | 9.87E-03 | 2.01E-02 | 1.00E+00 |
| NBEAL2    | LMNA | 0.326851125  | 0.19772175   | 0.444830431  | 2.06E-06 | 9.31E-06 | 2.44E-02 |
| SCAPER    | LMNA | -0.43445926  | -0.540115466 | -0.3153204   | 1.05E-10 | 1.05E-09 | 1.24E-06 |
| RP4-691N2 | LMNA | -0.174134728 | -0.304857124 | -0.036972528 | 1.32E-02 | 2.59E-02 | 1.00E+00 |
| PLA2G2F   | LMNA | 0.167646404  | 0.03029658   | 0.298782457  | 1.71E-02 | 3.25E-02 | 1.00E+00 |
| MEN1      | LMNA | 0.247263502  | 0.113072219  | 0.37259595   | 3.89E-04 | 1.12E-03 | 1.00E+00 |
| TYROBP    | LMNA | 0.213347477  | 0.07758147   | 0.341344903  | 2.30E-03 | 5.50E-03 | 1.00E+00 |
| NIP7      | LMNA | 0.216526947  | 0.080894011  | 0.344286614  | 1.97E-03 | 4.79E-03 | 1.00E+00 |
| TCP11     | LMNA | 0.056520091  | -0.08217207  | 0.193064675  | 4.24E-01 | 5.11E-01 | 1.00E+00 |
| FASTKD3   | LMNA | -0.152472886 | -0.284534706 | -0.014731979 | 3.03E-02 | 5.41E-02 | 1.00E+00 |
| TMEM158   | LMNA | 0.512223029  | 0.402644166  | 0.607328098  | 6.60E-15 | 1.33E-13 | 7.82E-11 |
| RARA      | LMNA | 0.108514199  | -0.029986006 | 0.242926048  | 1.24E-01 | 1.83E-01 | 1.00E+00 |
| BDH1      | LMNA | 0.065542392  | -0.073170671 | 0.201767759  | 3.54E-01 | 4.41E-01 | 1.00E+00 |
| CARM1     | LMNA | 0.299499535  | 0.16841172   | 0.420177776  | 1.49E-05 | 5.72E-05 | 1.77E-01 |
| SS18      | LMNA | 0.234984769  | 0.100183716  | 0.361314761  | 7.62E-04 | 2.06E-03 | 1.00E+00 |
| NPHP4     | LMNA | -0.134758548 | -0.267827015 | 0.003354865  | 5.59E-02 | 9.24E-02 | 1.00E+00 |

|          |      |              |              |              |          |          |          |
|----------|------|--------------|--------------|--------------|----------|----------|----------|
| SFRP5    | LMNA | 0.001861777  | -0.136224236 | 0.139876827  | 9.79E-01 | 9.84E-01 | 1.00E+00 |
| IKZF2    | LMNA | -0.134729674 | -0.267799716 | 0.003384273  | 5.59E-02 | 9.25E-02 | 1.00E+00 |
| MYD88    | LMNA | 0.557699222  | 0.454652329  | 0.646013072  | 6.61E-18 | 2.36E-16 | 7.84E-14 |
| PML      | LMNA | 0.59902026   | 0.502525805  | 0.680774387  | 4.65E-21 | 2.74E-19 | 5.51E-17 |
| TAF1A    | LMNA | -0.064850612 | -0.201101215 | 0.073861649  | 3.59E-01 | 4.46E-01 | 1.00E+00 |
| CBFB     | LMNA | 0.312331957  | 0.18213417   | 0.431766176  | 6.03E-06 | 2.48E-05 | 7.16E-02 |
| EBAG9    | LMNA | -0.204997081 | -0.333606987 | -0.068895836 | 3.43E-03 | 7.82E-03 | 1.00E+00 |
| HIST1H3H | LMNA | -0.046363821 | -0.183241968 | 0.09227781   | 5.12E-01 | 5.96E-01 | 1.00E+00 |
| UROD     | LMNA | 0.252846816  | 0.118947778  | 0.377713444  | 2.83E-04 | 8.43E-04 | 1.00E+00 |
| DPP3     | LMNA | 0.368522198  | 0.242824878  | 0.482049023  | 6.80E-08 | 4.03E-07 | 8.07E-04 |
| COMMD4   | LMNA | 0.251828268  | 0.117875217  | 0.376780442  | 3.00E-04 | 8.89E-04 | 1.00E+00 |
| PDE2A    | LMNA | -0.419556003 | -0.527078548 | -0.298812246 | 5.13E-10 | 4.47E-09 | 6.08E-06 |
| DAB2     | LMNA | 0.395328729  | 0.27212933   | 0.5057767    | 5.79E-09 | 4.16E-08 | 6.87E-05 |
| TUBB2A   | LMNA | -0.143175674 | -0.275775815 | -0.005228007 | 4.21E-02 | 7.20E-02 | 1.00E+00 |
| RPL36    | LMNA | 0.173168043  | 0.035977112  | 0.303952742  | 1.37E-02 | 2.68E-02 | 1.00E+00 |
| ASPM     | LMNA | 0.023929741  | -0.114499511 | 0.161447396  | 7.35E-01 | 7.94E-01 | 1.00E+00 |
| LRP6     | LMNA | -0.369693601 | -0.483089376 | -0.244100662 | 6.14E-08 | 3.66E-07 | 7.28E-04 |
| SERPINH1 | LMNA | 0.777547321  | 0.71639501   | 0.826843915  | 3.67E-42 | 1.45E-38 | 4.35E-38 |
| RBCK1    | LMNA | 0.340225899  | 0.212138743  | 0.456820705  | 7.27E-07 | 3.57E-06 | 8.62E-03 |
| AFF2     | LMNA | -0.304759916 | -0.424932962 | -0.174030811 | 1.03E-05 | 4.08E-05 | 1.23E-01 |
| EXOD1    | LMNA | -0.13175094  | -0.264982349 | 0.006416771  | 6.16E-02 | 1.01E-01 | 1.00E+00 |
| TLE1     | LMNA | 0.176595707  | 0.039507877  | 0.307158426  | 1.19E-02 | 2.37E-02 | 1.00E+00 |
| CD244    | LMNA | 0.102522484  | -0.036038583 | 0.237216087  | 1.47E-01 | 2.11E-01 | 1.00E+00 |
| PLXNA2   | LMNA | 0.24702219   | 0.112818487  | 0.372374598  | 3.94E-04 | 1.14E-03 | 1.00E+00 |
| MGLL     | LMNA | 0.017015021  | -0.121320955 | 0.154702634  | 8.10E-01 | 8.57E-01 | 1.00E+00 |
| ACTL6B   | LMNA | -0.50937197  | -0.604887686 | -0.399406994 | 9.84E-15 | 1.91E-13 | 1.17E-10 |
| PNRC2    | LMNA | -0.252858722 | -0.377724348 | -0.118960317 | 2.83E-04 | 8.43E-04 | 1.00E+00 |
| IL2RA    | LMNA | 0.450821097  | 0.333527623  | 0.554370149  | 1.67E-11 | 1.88E-10 | 1.98E-07 |
| STXBP5L  | LMNA | -0.475360413 | -0.575635895 | -0.360999646 | 8.76E-13 | 1.23E-11 | 1.04E-08 |
| FAP      | LMNA | 0.525319622  | 0.417549701  | 0.618515334  | 1.00E-15 | 2.41E-14 | 1.19E-11 |
| TBCC     | LMNA | -0.213048931 | -0.341068553 | -0.077270583 | 2.33E-03 | 5.56E-03 | 1.00E+00 |
| NSF      | LMNA | -0.379110404 | -0.491441065 | -0.254372382 | 2.64E-08 | 1.67E-07 | 3.13E-04 |
| GPR37    | LMNA | 0.162458028  | 0.024966974  | 0.293917203  | 2.09E-02 | 3.89E-02 | 1.00E+00 |
| KCNJ1    | LMNA | -0.165908696 | -0.297153728 | -0.0285107   | 1.83E-02 | 3.45E-02 | 1.00E+00 |
| NFASC    | LMNA | -0.061643575 | -0.198009523 | 0.077063231  | 3.83E-01 | 4.71E-01 | 1.00E+00 |

|           |      |              |              |              |          |          |          |
|-----------|------|--------------|--------------|--------------|----------|----------|----------|
| SFRS15    | LMNA | 0.127031584  | -0.011216112 | 0.260513993  | 7.16E-02 | 1.15E-01 | 1.00E+00 |
| CLCA4     | LMNA | -0.230753142 | -0.357418331 | -0.095752401 | 9.53E-04 | 2.51E-03 | 1.00E+00 |
| LONRF3    | LMNA | 0.053937414  | -0.084744605 | 0.190569413  | 4.46E-01 | 5.32E-01 | 1.00E+00 |
| SCGB1D1   | LMNA | 0.033248892  | -0.105285373 | 0.170517212  | 6.39E-01 | 7.12E-01 | 1.00E+00 |
| OR2J3     | LMNA | -0.15750366  | -0.289265015 | -0.01988503  | 2.52E-02 | 4.58E-02 | 1.00E+00 |
| LSM6      | LMNA | -0.101665327 | -0.236398475 | 0.036903616  | 1.50E-01 | 2.15E-01 | 1.00E+00 |
| SMURF1    | LMNA | 0.382474222  | 0.258048423  | 0.494419409  | 1.94E-08 | 1.26E-07 | 2.30E-04 |
| MLLT1     | LMNA | 0.088584861  | -0.050078561 | 0.223897765  | 2.10E-01 | 2.85E-01 | 1.00E+00 |
| A2BP1     | LMNA | -0.386078363 | -0.497607621 | -0.261991096 | 1.39E-08 | 9.27E-08 | 1.65E-04 |
| HNRPDL    | LMNA | -0.345691783 | -0.461708619 | -0.218046644 | 4.68E-07 | 2.38E-06 | 5.55E-03 |
| BTNL8     | LMNA | 0.158212704  | 0.020611897  | 0.289931195  | 2.45E-02 | 4.48E-02 | 1.00E+00 |
| TPM4      | LMNA | 0.671953953  | 0.588493956  | 0.741244236  | 6.87E-28 | 1.45E-25 | 8.15E-24 |
| TNFSF4    | LMNA | 0.544483665  | 0.439465776  | 0.634817637  | 5.48E-17 | 1.67E-15 | 6.50E-13 |
| COPS5     | LMNA | -0.232056653 | -0.358619058 | -0.097116854 | 8.90E-04 | 2.37E-03 | 1.00E+00 |
| CSTF2     | LMNA | 0.180881594  | 0.043927502  | 0.311162589  | 9.99E-03 | 2.03E-02 | 1.00E+00 |
| ACADSB    | LMNA | -0.144849627 | -0.277354471 | -0.00693735  | 3.97E-02 | 6.85E-02 | 1.00E+00 |
| HERPUD1   | LMNA | 0.263579407  | 0.13026854   | 0.387529226  | 1.51E-04 | 4.76E-04 | 1.00E+00 |
| BCL2L11   | LMNA | -0.015830749 | -0.153546182 | 0.122487943  | 8.23E-01 | 8.67E-01 | 1.00E+00 |
| HTR1F     | LMNA | 0.070065119  | -0.068649902 | 0.206122388  | 3.22E-01 | 4.07E-01 | 1.00E+00 |
| SCPEP1    | LMNA | 0.311717173  | 0.181475587  | 0.431211889  | 6.31E-06 | 2.59E-05 | 7.48E-02 |
| PRSS12    | LMNA | -0.166367202 | -0.297583554 | -0.028981832 | 1.80E-02 | 3.39E-02 | 1.00E+00 |
| SLC28A2   | LMNA | 0.141610497  | 0.00363047   | 0.274299095  | 4.44E-02 | 7.56E-02 | 1.00E+00 |
| INHBA     | LMNA | 0.424452719  | 0.304228319  | 0.531367637  | 3.07E-10 | 2.78E-09 | 3.64E-06 |
| CDCA3     | LMNA | 0.043117351  | -0.095502116 | 0.180096347  | 5.42E-01 | 6.24E-01 | 1.00E+00 |
| UGDH      | LMNA | 0.133671319  | -0.004462021 | 0.266798956  | 5.79E-02 | 9.53E-02 | 1.00E+00 |
| RP11-298P | LMNA | -0.1970586   | -0.326234668 | -0.060657741 | 4.94E-03 | 1.08E-02 | 1.00E+00 |
| MYO1A     | LMNA | 0.060855922  | -0.077849107 | 0.197249783  | 3.90E-01 | 4.77E-01 | 1.00E+00 |
| SLC36A1   | LMNA | 0.379518598  | 0.254818271  | 0.491802622  | 2.54E-08 | 1.62E-07 | 3.02E-04 |
| PLCB1     | LMNA | -0.545276885 | -0.635490677 | -0.440375607 | 4.84E-17 | 1.50E-15 | 5.74E-13 |
| PPEF1     | LMNA | 0.173167377  | 0.035976426  | 0.303952119  | 1.37E-02 | 2.68E-02 | 1.00E+00 |
| SEPP1     | LMNA | -0.025863975 | -0.163331792 | 0.11258903   | 7.15E-01 | 7.77E-01 | 1.00E+00 |
| LOC440348 | LMNA | -0.080865405 | -0.216499502 | 0.057831197  | 2.53E-01 | 3.33E-01 | 1.00E+00 |
| LOXL2     | LMNA | 0.629680069  | 0.538434043  | 0.706331142  | 1.04E-23 | 1.08E-21 | 1.23E-19 |
| BPTF      | LMNA | -0.257345824 | -0.381831553 | -0.123689107 | 2.18E-04 | 6.66E-04 | 1.00E+00 |
| SERPINA7  | LMNA | -0.070224227 | -0.206275484 | 0.068490759  | 3.21E-01 | 4.06E-01 | 1.00E+00 |

|           |      |              |              |              |          |          |          |
|-----------|------|--------------|--------------|--------------|----------|----------|----------|
| LOC201229 | LMNA | -0.337199515 | -0.454111303 | -0.208871642 | 9.24E-07 | 4.45E-06 | 1.10E-02 |
| DENR      | LMNA | 0.114278233  | -0.024153824 | 0.248410258  | 1.05E-01 | 1.59E-01 | 1.00E+00 |
| CHRNA1    | LMNA | 0.139543348  | 0.001521661  | 0.272347813  | 4.76E-02 | 8.04E-02 | 1.00E+00 |
| RARRES2   | LMNA | 0.381085095  | 0.256529923  | 0.493189786  | 2.20E-08 | 1.42E-07 | 2.61E-04 |
| RPL21     | LMNA | -0.150580878 | -0.282754032 | -0.012795876 | 3.24E-02 | 5.74E-02 | 1.00E+00 |
| SENP2     | LMNA | -0.120687978 | -0.254498751 | 0.017657211  | 8.71E-02 | 1.35E-01 | 1.00E+00 |
| XPNPEP1   | LMNA | 0.045187513  | -0.093446424 | 0.182102525  | 5.23E-01 | 6.06E-01 | 1.00E+00 |
| ADPRH     | LMNA | 0.451976624  | 0.334816794  | 0.55537457   | 1.46E-11 | 1.67E-10 | 1.73E-07 |
| C17orf68  | LMNA | -0.032864427 | -0.170143492 | 0.105665977  | 6.42E-01 | 7.15E-01 | 1.00E+00 |
| KCNS1     | LMNA | -0.101668749 | -0.236401739 | 0.036900163  | 1.50E-01 | 2.15E-01 | 1.00E+00 |
| ADAMTS1   | LMNA | 0.54085662   | 0.435308258  | 0.631738372  | 9.63E-17 | 2.82E-15 | 1.14E-12 |
| CDK5RAP1  | LMNA | -0.048216896 | -0.185036223 | 0.090436083  | 4.96E-01 | 5.81E-01 | 1.00E+00 |
| ZNF571    | LMNA | -0.292097634 | -0.413475496 | -0.160519481 | 2.46E-05 | 9.08E-05 | 2.92E-01 |
| PRKG1     | LMNA | 0.084416351  | -0.054267065 | 0.219904636  | 2.32E-01 | 3.10E-01 | 1.00E+00 |
| P2RY6     | LMNA | 0.337916205  | 0.209645078  | 0.454753122  | 8.73E-07 | 4.22E-06 | 1.04E-02 |
| RASGRP1   | LMNA | -0.067541476 | -0.203693207 | 0.071173155  | 3.40E-01 | 4.26E-01 | 1.00E+00 |
| TRIM21    | LMNA | 0.417725844  | 0.29678997   | 0.525474083  | 6.20E-10 | 5.33E-09 | 7.35E-06 |
| CADM3     | LMNA | -0.250585879 | -0.375642056 | -0.116567366 | 3.22E-04 | 9.49E-04 | 1.00E+00 |
| CFI       | LMNA | 0.517551292  | 0.408701381  | 0.611884107  | 3.10E-15 | 6.61E-14 | 3.67E-11 |
| ADRA2B    | LMNA | 0.174244836  | 0.037085925  | 0.30496012   | 1.31E-02 | 2.58E-02 | 1.00E+00 |
| PCF11     | LMNA | -0.154413985 | -0.286360634 | -0.016719392 | 2.82E-02 | 5.06E-02 | 1.00E+00 |
| FOXRED2   | LMNA | -0.24833848  | -0.373581835 | -0.114202735 | 3.66E-04 | 1.06E-03 | 1.00E+00 |
| LOC400451 | LMNA | -0.008380303 | -0.146262092 | 0.129820888  | 9.06E-01 | 9.32E-01 | 1.00E+00 |
| CYP20A1   | LMNA | 0.246186492  | 0.111939914  | 0.371607918  | 4.13E-04 | 1.18E-03 | 1.00E+00 |
| FABP1     | LMNA | -0.123522982 | -0.257188287 | 0.014780055  | 7.99E-02 | 1.26E-01 | 1.00E+00 |
| GLTSCR1   | LMNA | 0.086738144  | -0.051934738 | 0.222129304  | 2.20E-01 | 2.96E-01 | 1.00E+00 |
| C17orf88  | LMNA | -0.011625537 | -0.149436704 | 0.126628692  | 8.70E-01 | 9.03E-01 | 1.00E+00 |
| CDH16     | LMNA | -0.141022008 | -0.273743703 | -0.003029996 | 4.53E-02 | 7.69E-02 | 1.00E+00 |
| CYTL1     | LMNA | -0.111997818 | -0.246241577 | 0.026462327  | 1.13E-01 | 1.68E-01 | 1.00E+00 |
| SORBS1    | LMNA | -0.212959523 | -0.340985789 | -0.077177485 | 2.34E-03 | 5.58E-03 | 1.00E+00 |
| PEA15     | LMNA | -0.404496754 | -0.513853564 | -0.282204379 | 2.37E-09 | 1.82E-08 | 2.81E-05 |
| FGF7      | LMNA | 0.223557953  | 0.08822994   | 0.35078295   | 1.38E-03 | 3.49E-03 | 1.00E+00 |
| GUCY1A2   | LMNA | -0.033005386 | -0.170280516 | 0.105526438  | 6.41E-01 | 7.14E-01 | 1.00E+00 |
| NPC1L1    | LMNA | 0.077615392  | -0.061090182 | 0.213380051  | 2.72E-01 | 3.55E-01 | 1.00E+00 |
| PH-4      | LMNA | 0.087885761  | -0.050781355 | 0.223228395  | 2.14E-01 | 2.89E-01 | 1.00E+00 |

|          |      |              |              |              |          |          |          |
|----------|------|--------------|--------------|--------------|----------|----------|----------|
| TAT      | LMNA | 0.225776905  | 0.090548176  | 0.352830624  | 1.23E-03 | 3.16E-03 | 1.00E+00 |
| TBCA     | LMNA | -0.017087645 | -0.15477354  | 0.121249379  | 8.09E-01 | 8.56E-01 | 1.00E+00 |
| FNBP4    | LMNA | 0.008707039  | -0.129499622 | 0.146581846  | 9.02E-01 | 9.29E-01 | 1.00E+00 |
| C12orf43 | LMNA | -0.118470556 | -0.252393664 | 0.019906007  | 9.31E-02 | 1.43E-01 | 1.00E+00 |
| STXBP6   | LMNA | -0.213070518 | -0.341088536 | -0.077293061 | 2.33E-03 | 5.56E-03 | 1.00E+00 |
| SNAP23   | LMNA | 0.229822067  | 0.094778107  | 0.356560416  | 1.00E-03 | 2.63E-03 | 1.00E+00 |
| CBL      | LMNA | 0.060019297  | -0.078683655 | 0.196442628  | 3.96E-01 | 4.83E-01 | 1.00E+00 |
| WDR25    | LMNA | -0.060372538 | -0.196783449 | 0.078331314  | 3.93E-01 | 4.81E-01 | 1.00E+00 |
| ZBTB33   | LMNA | -0.21077952  | -0.338967145 | -0.074908224 | 2.60E-03 | 6.13E-03 | 1.00E+00 |
| MGA      | LMNA | -0.109318071 | -0.243691411 | 0.029173196  | 1.21E-01 | 1.80E-01 | 1.00E+00 |
| FAM128B  | LMNA | -0.1714838   | -0.302376488 | -0.034243463 | 1.47E-02 | 2.84E-02 | 1.00E+00 |
| GPR4     | LMNA | 0.28801928   | 0.156178132  | 0.409776994  | 3.23E-05 | 1.17E-04 | 3.83E-01 |
| GSTK1    | LMNA | 0.488865742  | 0.37620416   | 0.587282016  | 1.56E-13 | 2.46E-12 | 1.85E-09 |
| CLCN5    | LMNA | -0.009809801 | -0.147660832 | 0.128415106  | 8.90E-01 | 9.20E-01 | 1.00E+00 |
| SGCA     | LMNA | 0.067529819  | -0.071184806 | 0.203681982  | 3.40E-01 | 4.26E-01 | 1.00E+00 |
| FUSIP1   | LMNA | -0.042666086 | -0.179658879 | 0.09595007   | 5.47E-01 | 6.28E-01 | 1.00E+00 |
| C22orf29 | LMNA | 0.126694409  | -0.011558758 | 0.260194532  | 7.24E-02 | 1.16E-01 | 1.00E+00 |
| YIPF1    | LMNA | 0.25411207   | 0.120280563  | 0.378872077  | 2.63E-04 | 7.89E-04 | 1.00E+00 |
| MAG      | LMNA | -0.149244405 | -0.281495655 | -0.011428877 | 3.40E-02 | 5.98E-02 | 1.00E+00 |
| FLT3     | LMNA | 0.057101207  | -0.081592981 | 0.193625879  | 4.20E-01 | 5.07E-01 | 1.00E+00 |
| GALK2    | LMNA | 0.101284729  | -0.037287644 | 0.236035375  | 1.51E-01 | 2.17E-01 | 1.00E+00 |
| DLK2     | LMNA | -0.348361484 | -0.464093464 | -0.220935643 | 3.77E-07 | 1.95E-06 | 4.47E-03 |
| ZNF451   | LMNA | -0.30628219  | -0.426307804 | -0.17565848  | 9.29E-06 | 3.69E-05 | 1.10E-01 |
| RAB3B    | LMNA | -0.358210166 | -0.472876807 | -0.231612708 | 1.66E-07 | 9.16E-07 | 1.96E-03 |
| UCP1     | LMNA | 0.138189749  | 0.000141446  | 0.271069493  | 4.98E-02 | 8.37E-02 | 1.00E+00 |
| REEP5    | LMNA | 0.126381387  | -0.011876829 | 0.259897929  | 7.31E-02 | 1.17E-01 | 1.00E+00 |
| FGF9     | LMNA | -0.623117899 | -0.700877942 | -0.530720569 | 4.06E-23 | 3.82E-21 | 4.82E-19 |
| FADD     | LMNA | 0.446130446  | 0.32829897   | 0.550289784  | 2.85E-11 | 3.09E-10 | 3.38E-07 |
| VNN1     | LMNA | 0.350335942  | 0.22307373   | 0.465856169  | 3.20E-07 | 1.68E-06 | 3.80E-03 |
| SRPK2    | LMNA | -0.377994302 | -0.49045228  | -0.25315348  | 2.92E-08 | 1.83E-07 | 3.46E-04 |
| ABI1     | LMNA | -0.288718536 | -0.410411407 | -0.156922119 | 3.09E-05 | 1.12E-04 | 3.66E-01 |
| CACNA1A  | LMNA | -0.172303799 | -0.303144    | -0.035087412 | 1.42E-02 | 2.76E-02 | 1.00E+00 |
| ALDH3A1  | LMNA | 0.170406292  | 0.033134779  | 0.30136769   | 1.53E-02 | 2.95E-02 | 1.00E+00 |
| GRIN2D   | LMNA | 0.132453599  | -0.005701659 | 0.265647148  | 6.02E-02 | 9.87E-02 | 1.00E+00 |
| SLC1A4   | LMNA | -0.284561756 | -0.406638361 | -0.152501635 | 4.05E-05 | 1.43E-04 | 4.81E-01 |

|           |      |              |              |              |          |          |          |
|-----------|------|--------------|--------------|--------------|----------|----------|----------|
| CDX4      | LMNA | 0.092927024  | -0.04571038  | 0.228052416  | 1.88E-01 | 2.60E-01 | 1.00E+00 |
| SPG21     | LMNA | 0.182770669  | 0.045877227  | 0.312926022  | 9.23E-03 | 1.89E-02 | 1.00E+00 |
| ZNF286A   | LMNA | -0.353321339 | -0.468519654 | -0.226308862 | 2.50E-07 | 1.34E-06 | 2.96E-03 |
| IL1F6     | LMNA | -0.227159855 | -0.35410621  | -0.091993745 | 1.15E-03 | 2.96E-03 | 1.00E+00 |
| DOK3      | LMNA | 0.385670013  | 0.261544182  | 0.497246548  | 1.44E-08 | 9.60E-08 | 1.71E-04 |
| ZNF302    | LMNA | -0.295978882 | -0.416991533 | -0.164655745 | 1.90E-05 | 7.14E-05 | 2.25E-01 |
| ENY2      | LMNA | 0.046220388  | -0.092420325 | 0.18310305   | 5.14E-01 | 5.98E-01 | 1.00E+00 |
| GRIN1     | LMNA | -0.290990978 | -0.412472307 | -0.159340957 | 2.65E-05 | 9.72E-05 | 3.15E-01 |
| OR1A1     | LMNA | 0.142390767  | 0.004426784  | 0.275035346  | 4.32E-02 | 7.38E-02 | 1.00E+00 |
| CALU      | LMNA | 0.649074574  | 0.56132096   | 0.722395079  | 1.52E-25 | 2.31E-23 | 1.80E-21 |
| ANKFY1    | LMNA | -0.145117391 | -0.277606926 | -0.00721085  | 3.93E-02 | 6.80E-02 | 1.00E+00 |
| LIMCH1    | LMNA | -0.315670314 | -0.434774451 | -0.1857124   | 4.73E-06 | 1.99E-05 | 5.62E-02 |
| DENND3    | LMNA | 0.156105337  | 0.018451986  | 0.287950854  | 2.65E-02 | 4.80E-02 | 1.00E+00 |
| JARID1D   | LMNA | 0.031682951  | -0.106835333 | 0.168994791  | 6.54E-01 | 7.26E-01 | 1.00E+00 |
| RWDD1     | LMNA | -0.054662096 | -0.191269746 | 0.084022955  | 4.40E-01 | 5.26E-01 | 1.00E+00 |
| HIST1H2Ak | LMNA | -0.161553762 | -0.293068554 | -0.024038892 | 2.16E-02 | 4.01E-02 | 1.00E+00 |
| SLC18A2   | LMNA | 0.111401719  | -0.027065525 | 0.245674463  | 1.14E-01 | 1.71E-01 | 1.00E+00 |
| UPK3A     | LMNA | -0.146294539 | -0.27871655  | -0.008413457 | 3.78E-02 | 6.55E-02 | 1.00E+00 |
| LOC93349  | LMNA | 0.476072676  | 0.361800008  | 0.576251122  | 8.02E-13 | 1.13E-11 | 9.51E-09 |
| FIP1L1    | LMNA | -0.215716113 | -0.343536653 | -0.080048957 | 2.05E-03 | 4.96E-03 | 1.00E+00 |
| SSH1      | LMNA | 0.333772268  | 0.205175249  | 0.451040411  | 1.21E-06 | 5.70E-06 | 1.43E-02 |
| LENEP     | LMNA | 0.079685572  | -0.059014629 | 0.215367387  | 2.60E-01 | 3.41E-01 | 1.00E+00 |
| RHOB      | LMNA | 0.015265546  | -0.123044762 | 0.152994123  | 8.29E-01 | 8.71E-01 | 1.00E+00 |
| RIBC2     | LMNA | 0.085288434  | -0.053391203 | 0.220740403  | 2.27E-01 | 3.05E-01 | 1.00E+00 |
| ENSA      | LMNA | -0.126170138 | -0.259697746 | 0.012091471  | 7.36E-02 | 1.17E-01 | 1.00E+00 |
| CKAP2     | LMNA | -0.248146078 | -0.373405399 | -0.114000367 | 3.70E-04 | 1.07E-03 | 1.00E+00 |
| HOOK2     | LMNA | 0.075184127  | -0.063526228 | 0.211044643  | 2.88E-01 | 3.71E-01 | 1.00E+00 |
| INTS9     | LMNA | -0.152023918 | -0.28411224  | -0.014272454 | 3.08E-02 | 5.48E-02 | 1.00E+00 |
| DKFZP564L | LMNA | -0.291524925 | -0.412956369 | -0.159909533 | 2.56E-05 | 9.40E-05 | 3.04E-01 |
| CCNG1     | LMNA | 0.18699491   | 0.05024087   | 0.316866066  | 7.70E-03 | 1.61E-02 | 1.00E+00 |
| HNRPAB    | LMNA | 0.217350901  | 0.081752939  | 0.345048544  | 1.89E-03 | 4.61E-03 | 1.00E+00 |
| AMH       | LMNA | -0.222579543 | -0.349879676 | -0.087208218 | 1.45E-03 | 3.65E-03 | 1.00E+00 |
| HADH      | LMNA | -0.222937092 | -0.350209795 | -0.087581562 | 1.43E-03 | 3.59E-03 | 1.00E+00 |
| TRPM1     | LMNA | 0.130047166  | -0.008150156 | 0.26336985   | 6.51E-02 | 1.06E-01 | 1.00E+00 |
| CACNG3    | LMNA | -0.328174731 | -0.446018912 | -0.199146011 | 1.86E-06 | 8.48E-06 | 2.21E-02 |

|           |      |              |              |              |          |          |          |
|-----------|------|--------------|--------------|--------------|----------|----------|----------|
| PPP2R1A   | LMNA | -0.028690389 | -0.166083577 | 0.109795482  | 6.85E-01 | 7.53E-01 | 1.00E+00 |
| CCKAR     | LMNA | 0.318762091  | 0.18902941   | 0.437558159  | 3.77E-06 | 1.62E-05 | 4.47E-02 |
| COL2A1    | LMNA | 0.040353315  | -0.09824499  | 0.177415964  | 5.69E-01 | 6.48E-01 | 1.00E+00 |
| PTH2R     | LMNA | -0.285404558 | -0.407403696 | -0.153397477 | 3.84E-05 | 1.36E-04 | 4.55E-01 |
| IFI30     | LMNA | 0.407879126  | 0.285928206  | 0.516828486  | 1.69E-09 | 1.34E-08 | 2.00E-05 |
| DDN       | LMNA | -0.288368185 | -0.410093559 | -0.156549338 | 3.16E-05 | 1.14E-04 | 3.75E-01 |
| GLUL      | LMNA | 0.237677907  | 0.10300673   | 0.363792275  | 6.59E-04 | 1.81E-03 | 1.00E+00 |
| HK2       | LMNA | 0.257374636  | 0.123719491  | 0.38185791   | 2.18E-04 | 6.65E-04 | 1.00E+00 |
| ELOVL6    | LMNA | 0.344958074  | 0.217253057  | 0.461052903  | 4.97E-07 | 2.51E-06 | 5.89E-03 |
| MDK       | LMNA | 0.512223792  | 0.402645032  | 0.60732875   | 6.60E-15 | 1.33E-13 | 7.82E-11 |
| EPHX1     | LMNA | 0.124365824  | -0.01392424  | 0.257987482  | 7.78E-02 | 1.23E-01 | 1.00E+00 |
| RASSF2    | LMNA | -0.124877054 | -0.258472149 | 0.013405042  | 7.66E-02 | 1.21E-01 | 1.00E+00 |
| BFAR      | LMNA | 0.30867617   | 0.178219654  | 0.428468807  | 7.84E-06 | 3.16E-05 | 9.30E-02 |
| ZNF14     | LMNA | -0.22306502  | -0.350327901 | -0.087715151 | 1.42E-03 | 3.57E-03 | 1.00E+00 |
| PPIL2     | LMNA | -0.027508714 | -0.164933363 | 0.110963683  | 6.98E-01 | 7.62E-01 | 1.00E+00 |
| PRTN3     | LMNA | 0.070744256  | -0.067970566 | 0.206775819  | 3.17E-01 | 4.02E-01 | 1.00E+00 |
| CTA-126B4 | LMNA | 0.012161654  | -0.126101061 | 0.149960881  | 8.64E-01 | 9.00E-01 | 1.00E+00 |
| AVPR1A    | LMNA | 0.24423691   | 0.109891125  | 0.369818679  | 4.60E-04 | 1.31E-03 | 1.00E+00 |
| KLHL22    | LMNA | -0.154427359 | -0.286373212 | -0.016733089 | 2.82E-02 | 5.06E-02 | 1.00E+00 |
| HSPBP1    | LMNA | -0.056043253 | -0.192604109 | 0.082647174  | 4.28E-01 | 5.15E-01 | 1.00E+00 |
| PRKD1     | LMNA | -0.062731191 | -0.199058326 | 0.075977785  | 3.75E-01 | 4.63E-01 | 1.00E+00 |
| TNFAIP8   | LMNA | 0.450099288  | 0.332722554  | 0.553742576  | 1.81E-11 | 2.03E-10 | 2.15E-07 |
| KIAA0195  | LMNA | -0.177461519 | -0.307967699 | -0.040400275 | 1.15E-02 | 2.30E-02 | 1.00E+00 |
| GNB2L1    | LMNA | 0.291198485  | 0.159561912  | 0.412660436  | 2.62E-05 | 9.59E-05 | 3.10E-01 |
| SCGB2A2   | LMNA | 0.027907154  | -0.11056983  | 0.165321236  | 6.93E-01 | 7.59E-01 | 1.00E+00 |
| CALCRL    | LMNA | -0.143310469 | -0.275902963 | -0.005365623 | 4.19E-02 | 7.17E-02 | 1.00E+00 |
| ICAM1     | LMNA | 0.550739063  | 0.446646642  | 0.64012157   | 2.04E-17 | 6.64E-16 | 2.42E-13 |
| UBXD7     | LMNA | -0.078212375 | -0.213953259 | 0.060491773  | 2.69E-01 | 3.50E-01 | 1.00E+00 |
| TMEM35    | LMNA | -0.599388427 | -0.681082461 | -0.50295503  | 4.34E-21 | 2.58E-19 | 5.14E-17 |
| ZNF674    | LMNA | -0.034732685 | -0.171959162 | 0.103816102  | 6.24E-01 | 6.98E-01 | 1.00E+00 |
| BCL2L1    | LMNA | 0.396416644  | 0.273323465  | 0.506736147  | 5.21E-09 | 3.78E-08 | 6.18E-05 |
| HECTD3    | LMNA | 0.399318633  | 0.276510652  | 0.509294115  | 3.94E-09 | 2.92E-08 | 4.67E-05 |
| BRSK2     | LMNA | -0.534806168 | -0.626595307 | -0.428382902 | 2.43E-16 | 6.57E-15 | 2.89E-12 |
| CD19      | LMNA | -0.100039556 | -0.234847186 | 0.038543755  | 1.57E-01 | 2.23E-01 | 1.00E+00 |
| RAPGEF3   | LMNA | -0.270982005 | -0.394283135 | -0.138097127 | 9.59E-05 | 3.14E-04 | 1.00E+00 |



|           |      |              |              |              |          |          |          |
|-----------|------|--------------|--------------|--------------|----------|----------|----------|
| LGALS9    | LMNA | 0.191680227  | 0.055086917  | 0.321230928  | 6.28E-03 | 1.34E-02 | 1.00E+00 |
| SCARB2    | LMNA | 0.125528884  | -0.012742944 | 0.259090013  | 7.51E-02 | 1.19E-01 | 1.00E+00 |
| KIAA0974  | LMNA | -0.28769845  | -0.409485876 | -0.15583683  | 3.30E-05 | 1.19E-04 | 3.91E-01 |
| MAPK3     | LMNA | -0.089733932 | -0.224997693 | 0.048923121  | 2.04E-01 | 2.79E-01 | 1.00E+00 |
| USP34     | LMNA | -0.202068068 | -0.330888697 | -0.065854114 | 3.93E-03 | 8.82E-03 | 1.00E+00 |
| MAP2K1IP1 | LMNA | 0.014558356  | -0.12374134  | 0.152303258  | 8.37E-01 | 8.78E-01 | 1.00E+00 |
| CHIC2     | LMNA | -0.132677128 | -0.265858606 | 0.005474139  | 5.98E-02 | 9.81E-02 | 1.00E+00 |
| SLC16A3   | LMNA | 0.605027879  | 0.509535697  | 0.68579782   | 1.48E-21 | 9.29E-20 | 1.76E-17 |
| STK4      | LMNA | 0.108397303  | -0.030104188 | 0.242814737  | 1.25E-01 | 1.84E-01 | 1.00E+00 |
| APLP2     | LMNA | 0.528125355  | 0.420750532  | 0.620907114  | 6.63E-16 | 1.64E-14 | 7.86E-12 |
| DLX5      | LMNA | -0.147247826 | -0.279614896 | -0.009387655 | 3.65E-02 | 6.36E-02 | 1.00E+00 |
| FBXO41    | LMNA | -0.324640632 | -0.442844678 | -0.195344373 | 2.43E-06 | 1.09E-05 | 2.89E-02 |
| MICAL3    | LMNA | -0.280897471 | -0.403308888 | -0.148609267 | 5.14E-05 | 1.78E-04 | 6.09E-01 |
| ITIH2     | LMNA | -0.021003103 | -0.15859426  | 0.117388265  | 7.67E-01 | 8.21E-01 | 1.00E+00 |
| ADK       | LMNA | -0.344468485 | -0.460615286 | -0.216723606 | 5.17E-07 | 2.60E-06 | 6.13E-03 |
| TNNI3K    | LMNA | -0.368459525 | -0.481993352 | -0.242756633 | 6.84E-08 | 4.05E-07 | 8.11E-04 |
| HDAC2     | LMNA | -0.257238552 | -0.381733421 | -0.123575987 | 2.19E-04 | 6.69E-04 | 1.00E+00 |
| PRR7      | LMNA | 0.257747475  | 0.124112689  | 0.382198959  | 2.13E-04 | 6.51E-04 | 1.00E+00 |
| THBS2     | LMNA | 0.297484441  | 0.16626147   | 0.418354451  | 1.71E-05 | 6.49E-05 | 2.03E-01 |
| CA2       | LMNA | -0.030391526 | -0.167738765 | 0.108113072  | 6.68E-01 | 7.37E-01 | 1.00E+00 |
| RANBP17   | LMNA | -0.391390703 | -0.502301415 | -0.267809979 | 8.43E-09 | 5.84E-08 | 1.00E-04 |
| CRYZ      | LMNA | 0.334218762  | 0.205656599  | 0.451440637  | 1.17E-06 | 5.53E-06 | 1.38E-02 |
| GBAS      | LMNA | -0.083596067 | -0.219118328 | 0.055090709  | 2.37E-01 | 3.16E-01 | 1.00E+00 |
| TGOLN2    | LMNA | 0.541309188  | 0.43582677   | 0.632122746  | 8.98E-17 | 2.64E-15 | 1.07E-12 |
| CTBS      | LMNA | 0.389914797  | 0.266192437  | 0.500998013  | 9.69E-09 | 6.64E-08 | 1.15E-04 |
| ETS1      | LMNA | 0.314582407  | 0.184545945  | 0.433794404  | 5.12E-06 | 2.14E-05 | 6.08E-02 |
| FGD1      | LMNA | -0.116236761 | -0.250271751 | 0.022169992  | 9.95E-02 | 1.51E-01 | 1.00E+00 |
| EDC4      | LMNA | -0.110261967 | -0.244589876 | 0.02821857   | 1.18E-01 | 1.76E-01 | 1.00E+00 |
| PCDH8     | LMNA | -0.059262822 | -0.19571264  | 0.079438085  | 4.02E-01 | 4.90E-01 | 1.00E+00 |
| KCNK15    | LMNA | 0.20097122   | 0.06471571   | 0.329870209  | 4.13E-03 | 9.24E-03 | 1.00E+00 |
| HSP90B1   | LMNA | 0.520547919  | 0.412112191  | 0.61444367   | 2.01E-15 | 4.48E-14 | 2.38E-11 |
| GSTA3     | LMNA | -0.062481011 | -0.198817101 | 0.076227495  | 3.77E-01 | 4.64E-01 | 1.00E+00 |
| TNIP2     | LMNA | 0.319799871  | 0.190143455  | 0.438492022  | 3.49E-06 | 1.51E-05 | 4.14E-02 |
| BCAS1     | LMNA | -0.313116984 | -0.432473823 | -0.182975294 | 5.70E-06 | 2.36E-05 | 6.76E-02 |
| HOXB6     | LMNA | 0.359424795  | 0.232931617  | 0.473958472  | 1.49E-07 | 8.30E-07 | 1.77E-03 |

|          |      |              |              |              |          |          |          |
|----------|------|--------------|--------------|--------------|----------|----------|----------|
| NOL6     | LMNA | 0.089430526  | -0.049228245 | 0.224707296  | 2.06E-01 | 2.80E-01 | 1.00E+00 |
| PDHA2    | LMNA | 0.210578341  | 0.074698878  | 0.338780797  | 2.63E-03 | 6.18E-03 | 1.00E+00 |
| SORD     | LMNA | -0.118830124 | -0.252735102 | 0.019541447  | 9.21E-02 | 1.42E-01 | 1.00E+00 |
| SPC25    | LMNA | -0.02040848  | -0.158014289 | 0.117974905  | 7.73E-01 | 8.27E-01 | 1.00E+00 |
| VAMP3    | LMNA | 0.282930528  | 0.150768366  | 0.405156582  | 4.51E-05 | 1.57E-04 | 5.34E-01 |
| WDHD1    | LMNA | 0.098546091  | -0.040049762 | 0.233421535  | 1.63E-01 | 2.30E-01 | 1.00E+00 |
| TCIRG1   | LMNA | 0.631573603  | 0.540662636  | 0.70790299   | 6.97E-24 | 7.65E-22 | 8.26E-20 |
| STAP2    | LMNA | 0.21863733   | 0.083094375  | 0.346237799  | 1.77E-03 | 4.36E-03 | 1.00E+00 |
| CHCHD8   | LMNA | -0.149619177 | -0.281848573 | -0.011812157 | 3.36E-02 | 5.92E-02 | 1.00E+00 |
| TRIM44   | LMNA | 0.204968813  | 0.068866468  | 0.333580763  | 3.43E-03 | 7.83E-03 | 1.00E+00 |
| KIAA1305 | LMNA | 0.009640752  | -0.12858138  | 0.147495449  | 8.92E-01 | 9.22E-01 | 1.00E+00 |
| PARL     | LMNA | -0.149525939 | -0.281760776 | -0.011716799 | 3.37E-02 | 5.93E-02 | 1.00E+00 |
| CRNN     | LMNA | 0.156872279  | 0.019237901  | 0.288671697  | 2.58E-02 | 4.68E-02 | 1.00E+00 |
| SIDT2    | LMNA | 0.253170779  | 0.119288986  | 0.378010144  | 2.78E-04 | 8.29E-04 | 1.00E+00 |
| RYR2     | LMNA | -0.301121923 | -0.421645061 | -0.170143833 | 1.33E-05 | 5.16E-05 | 1.58E-01 |
| TRRAP    | LMNA | 0.161798648  | 0.024290204  | 0.293298399  | 2.14E-02 | 3.97E-02 | 1.00E+00 |
| TRAF1    | LMNA | 0.493844001  | 0.38182411   | 0.591564689  | 8.13E-14 | 1.31E-12 | 9.64E-10 |
| GRN      | LMNA | 0.550598579  | 0.446485226  | 0.640002548  | 2.08E-17 | 6.75E-16 | 2.47E-13 |
| SCAMP1   | LMNA | -0.345447761 | -0.46149055  | -0.217782688 | 4.78E-07 | 2.43E-06 | 5.66E-03 |
| TRIM32   | LMNA | 0.055529806  | -0.083158685 | 0.192108116  | 4.32E-01 | 5.19E-01 | 1.00E+00 |
| PTS      | LMNA | -0.005497938 | -0.143440068 | 0.132653746  | 9.38E-01 | 9.54E-01 | 1.00E+00 |
| BANP     | LMNA | -0.015498402 | -0.153221574 | 0.122815371  | 8.27E-01 | 8.70E-01 | 1.00E+00 |
| ATP6V1G1 | LMNA | 0.003360557  | -0.13475296  | 0.141345983  | 9.62E-01 | 9.72E-01 | 1.00E+00 |
| PRKACG   | LMNA | -0.204420363 | -0.333071929 | -0.068296726 | 3.52E-03 | 8.00E-03 | 1.00E+00 |
| ADCY6    | LMNA | 0.097309519  | -0.041296241 | 0.232240674  | 1.68E-01 | 2.36E-01 | 1.00E+00 |
| PRKY     | LMNA | -0.110661952 | -0.24497054  | 0.027813962  | 1.17E-01 | 1.74E-01 | 1.00E+00 |
| CYP51A1  | LMNA | 0.221797302  | 0.086391554  | 0.349157336  | 1.51E-03 | 3.78E-03 | 1.00E+00 |
| DDC      | LMNA | -0.083434115 | -0.218963064 | 0.055253302  | 2.38E-01 | 3.17E-01 | 1.00E+00 |
| ANPEP    | LMNA | 0.592400985  | 0.494816874  | 0.675230583  | 1.60E-20 | 8.76E-19 | 1.89E-16 |
| NPR2     | LMNA | 0.228025946  | 0.092899343  | 0.354904823  | 1.10E-03 | 2.86E-03 | 1.00E+00 |
| PROM1    | LMNA | -0.283188544 | -0.405391001 | -0.151042467 | 4.43E-05 | 1.55E-04 | 5.26E-01 |
| COPG     | LMNA | 0.433814897  | 0.314605153  | 0.539552844  | 1.12E-10 | 1.11E-09 | 1.33E-06 |
| OR5I1    | LMNA | -0.142385422 | -0.275030303 | -0.004421329 | 4.32E-02 | 7.38E-02 | 1.00E+00 |
| TRIP4    | LMNA | 0.451826366  | 0.334649133  | 0.555243978  | 1.48E-11 | 1.69E-10 | 1.76E-07 |
| ZFYVE26  | LMNA | 0.1191847    | -0.019181912 | 0.253071767  | 9.11E-02 | 1.41E-01 | 1.00E+00 |

|          |      |              |              |              |          |          |          |
|----------|------|--------------|--------------|--------------|----------|----------|----------|
| SNX3     | LMNA | -0.090531091 | -0.225760557 | 0.048121325  | 2.00E-01 | 2.74E-01 | 1.00E+00 |
| C1orf175 | LMNA | -0.03667799  | -0.17384872  | 0.101888918  | 6.04E-01 | 6.81E-01 | 1.00E+00 |
| CSH2     | LMNA | 0.124663126  | -0.013622313 | 0.258269345  | 7.71E-02 | 1.22E-01 | 1.00E+00 |
| PPY2     | LMNA | -0.058437034 | -0.194915594 | 0.080261459  | 4.09E-01 | 4.96E-01 | 1.00E+00 |
| STOML2   | LMNA | -0.077057511 | -0.212844303 | 0.061649306  | 2.76E-01 | 3.58E-01 | 1.00E+00 |
| ALPI     | LMNA | 0.081888151  | -0.056805016 | 0.21748059   | 2.47E-01 | 3.27E-01 | 1.00E+00 |
| FTSJ1    | LMNA | 0.334052887  | 0.205477768  | 0.451291957  | 1.18E-06 | 5.59E-06 | 1.40E-02 |
| ZNF273   | LMNA | -0.373290449 | -0.48628183  | -0.248020731 | 4.46E-08 | 2.72E-07 | 5.29E-04 |
| DST      | LMNA | -0.019523874 | -0.157151307 | 0.118847455  | 7.83E-01 | 8.35E-01 | 1.00E+00 |
| GLRX5    | LMNA | -0.212699127 | -0.340744728 | -0.076906352 | 2.37E-03 | 5.65E-03 | 1.00E+00 |
| C20orf12 | LMNA | -0.151605387 | -0.283718368 | -0.013844134 | 3.13E-02 | 5.56E-02 | 1.00E+00 |
| CAB39    | LMNA | -0.037970878 | -0.175103998 | 0.100607499  | 5.92E-01 | 6.69E-01 | 1.00E+00 |
| RAB5C    | LMNA | 0.073596323  | -0.065116262 | 0.209518605  | 2.98E-01 | 3.82E-01 | 1.00E+00 |
| FLAD1    | LMNA | -0.108171004 | -0.242599243 | 0.030332962  | 1.25E-01 | 1.85E-01 | 1.00E+00 |
| TTLL3    | LMNA | 0.023445467  | -0.114977679 | 0.160975443  | 7.40E-01 | 7.99E-01 | 1.00E+00 |
| MSH2     | LMNA | -0.158917096 | -0.290592877 | -0.021334138 | 2.39E-02 | 4.37E-02 | 1.00E+00 |
| NPPC     | LMNA | 0.036029266  | -0.102531715 | 0.173218698  | 6.11E-01 | 6.87E-01 | 1.00E+00 |
| PIP4K2C  | LMNA | -0.175225167 | -0.305877    | -0.038095702 | 1.26E-02 | 2.49E-02 | 1.00E+00 |
| CYLD     | LMNA | 0.20586806   | 0.069800819  | 0.334414892  | 3.29E-03 | 7.54E-03 | 1.00E+00 |
| ZEB2     | LMNA | -0.263085228 | -0.387077878 | -0.129746514 | 1.55E-04 | 4.89E-04 | 1.00E+00 |
| MRP63    | LMNA | -0.125599364 | -0.259156814 | 0.012671347  | 7.49E-02 | 1.19E-01 | 1.00E+00 |
| WTAP     | LMNA | 0.129252632  | -0.008958214 | 0.262617627  | 6.68E-02 | 1.08E-01 | 1.00E+00 |
| NEUROD4  | LMNA | -0.202301455 | -0.331105372 | -0.066096389 | 3.89E-03 | 8.73E-03 | 1.00E+00 |
| MGAT4A   | LMNA | 0.159014717  | 0.021434243  | 0.290684569  | 2.38E-02 | 4.36E-02 | 1.00E+00 |
| MTMR2    | LMNA | -0.082332491 | -0.217906746 | 0.056359092  | 2.44E-01 | 3.24E-01 | 1.00E+00 |
| CHRM2    | LMNA | -0.212690921 | -0.340737132 | -0.076897809 | 2.37E-03 | 5.65E-03 | 1.00E+00 |
| TSC22D4  | LMNA | -0.199832108 | -0.32881216  | -0.063533816 | 4.35E-03 | 9.68E-03 | 1.00E+00 |
| PPYR1    | LMNA | 0.083248404  | -0.055439739 | 0.218785013  | 2.39E-01 | 3.18E-01 | 1.00E+00 |
| CCNH     | LMNA | -0.135586166 | -0.268609389 | 0.002511851  | 5.44E-02 | 9.02E-02 | 1.00E+00 |
| USP48    | LMNA | 0.04792409   | -0.090727159 | 0.184752772  | 4.98E-01 | 5.83E-01 | 1.00E+00 |
| NR1H4    | LMNA | -0.103274689 | -0.237933432 | 0.035279294  | 1.44E-01 | 2.07E-01 | 1.00E+00 |
| RASL10A  | LMNA | -0.498432872 | -0.595507503 | -0.387011828 | 4.40E-14 | 7.40E-13 | 5.22E-10 |
| RRM1     | LMNA | 0.115321872  | -0.023096838 | 0.249402313  | 1.02E-01 | 1.55E-01 | 1.00E+00 |
| GABRA4   | LMNA | -0.304860706 | -0.425024008 | -0.174138557 | 1.03E-05 | 4.05E-05 | 1.22E-01 |
| C1orf35  | LMNA | -0.04241521  | -0.179415649 | 0.096199081  | 5.49E-01 | 6.30E-01 | 1.00E+00 |

|          |      |              |              |              |          |          |          |
|----------|------|--------------|--------------|--------------|----------|----------|----------|
| SSTR1    | LMNA | -0.225288353 | -0.352379888 | -0.090037639 | 1.27E-03 | 3.23E-03 | 1.00E+00 |
| APOBEC3C | LMNA | 0.529335287  | 0.422131671  | 0.621938003  | 5.54E-16 | 1.41E-14 | 6.57E-12 |
| CTDSPL   | LMNA | 0.14660327   | 0.008728932  | 0.279007514  | 3.73E-02 | 6.49E-02 | 1.00E+00 |
| RUSC2    | LMNA | -0.273888391 | -0.396931198 | -0.141175309 | 8.01E-05 | 2.67E-04 | 9.50E-01 |
| PDE11A   | LMNA | -0.336501842 | -0.453486396 | -0.208118882 | 9.76E-07 | 4.69E-06 | 1.16E-02 |
| ZCCHC8   | LMNA | 0.02815426   | -0.110325546 | 0.165561768  | 6.91E-01 | 7.57E-01 | 1.00E+00 |
| RAD17    | LMNA | -0.117588236 | -0.251555689 | 0.020800421  | 9.56E-02 | 1.46E-01 | 1.00E+00 |
| TEX12    | LMNA | -0.062685887 | -0.199014645 | 0.076023005  | 3.75E-01 | 4.63E-01 | 1.00E+00 |
| LILRB5   | LMNA | 0.26180361   | 0.128393022  | 0.385907061  | 1.67E-04 | 5.23E-04 | 1.00E+00 |
| CD5      | LMNA | 0.308349144  | 0.177869683  | 0.428173686  | 8.02E-06 | 3.23E-05 | 9.52E-02 |
| ARHGEF1  | LMNA | 0.451720477  | 0.334530984  | 0.555151945  | 1.50E-11 | 1.71E-10 | 1.78E-07 |
| ABCA4    | LMNA | 0.272062012  | 0.139240673  | 0.395267389  | 8.97E-05 | 2.96E-04 | 1.00E+00 |
| TSPAN9   | LMNA | 0.619173306  | 0.526091269  | 0.697595584  | 9.07E-23 | 7.86E-21 | 1.08E-18 |
| WDR67    | LMNA | -0.223902824 | -0.351101281 | -0.088590145 | 1.36E-03 | 3.44E-03 | 1.00E+00 |
| THUMPD1  | LMNA | -0.163527621 | -0.294920741 | -0.026065043 | 2.00E-02 | 3.75E-02 | 1.00E+00 |
| ARID4A   | LMNA | -0.33649715  | -0.453482194 | -0.20811382  | 9.76E-07 | 4.69E-06 | 1.16E-02 |
| OPRM1    | LMNA | -0.063850889 | -0.20013774  | 0.074859978  | 3.67E-01 | 4.54E-01 | 1.00E+00 |
| SYCP2    | LMNA | -0.147324233 | -0.27968689  | -0.00946575  | 3.64E-02 | 6.35E-02 | 1.00E+00 |
| CYP26B1  | LMNA | -0.121748228 | -0.25550484  | 0.016581465  | 8.43E-02 | 1.32E-01 | 1.00E+00 |
| FLJ13231 | LMNA | -0.146425734 | -0.278840198 | -0.008547515 | 3.76E-02 | 6.52E-02 | 1.00E+00 |
| LECT2    | LMNA | -0.167329304 | -0.298485301 | -0.029970624 | 1.73E-02 | 3.28E-02 | 1.00E+00 |
| PCCA     | LMNA | -0.401589725 | -0.511294621 | -0.279006824 | 3.15E-09 | 2.38E-08 | 3.74E-05 |
| AQP5     | LMNA | 0.069728557  | -0.068986515 | 0.205798521  | 3.24E-01 | 4.10E-01 | 1.00E+00 |
| RAB30    | LMNA | -0.229253705 | -0.356036609 | -0.09418349  | 1.03E-03 | 2.70E-03 | 1.00E+00 |
| OSBPL11  | LMNA | -0.282968914 | -0.405191458 | -0.150809143 | 4.49E-05 | 1.57E-04 | 5.33E-01 |
| YLPM1    | LMNA | -0.10345914  | -0.238109312 | 0.035093082  | 1.43E-01 | 2.06E-01 | 1.00E+00 |
| GNB5     | LMNA | -0.026715298 | -0.164160861 | 0.111747837  | 7.06E-01 | 7.69E-01 | 1.00E+00 |
| CCL21    | LMNA | -0.063257841 | -0.199566069 | 0.075452068  | 3.71E-01 | 4.59E-01 | 1.00E+00 |
| PRKAR1B  | LMNA | -0.26376802  | -0.387701476 | -0.1304678   | 1.49E-04 | 4.71E-04 | 1.00E+00 |
| C1orf121 | LMNA | 0.253742856  | 0.119891593  | 0.378534016  | 2.69E-04 | 8.05E-04 | 1.00E+00 |
| FMO2     | LMNA | 0.074517436  | -0.064193941 | 0.210403967  | 2.92E-01 | 3.76E-01 | 1.00E+00 |
| IL16     | LMNA | 0.187026817  | 0.050273849  | 0.316895809  | 7.69E-03 | 1.61E-02 | 1.00E+00 |
| MSTN     | LMNA | -0.483609806 | -0.582754476 | -0.370279724 | 3.09E-13 | 4.60E-12 | 3.66E-09 |
| VCL      | LMNA | 0.57507106   | 0.474706607  | 0.660671891  | 3.54E-19 | 1.59E-17 | 4.19E-15 |
| TCF3     | LMNA | 0.126441957  | -0.011815285 | 0.259955323  | 7.30E-02 | 1.16E-01 | 1.00E+00 |

|          |      |              |              |              |          |          |          |
|----------|------|--------------|--------------|--------------|----------|----------|----------|
| CCDC88C  | LMNA | -0.073143188 | -0.209082976 | 0.065569904  | 3.01E-01 | 3.85E-01 | 1.00E+00 |
| HFE      | LMNA | 0.515555574  | 0.406431508  | 0.610178372  | 4.12E-15 | 8.64E-14 | 4.88E-11 |
| SERPINE1 | LMNA | 0.692103826  | 0.612582393  | 0.757754681  | 3.90E-30 | 1.22E-27 | 4.63E-26 |
| FAM125B  | LMNA | -0.40198932  | -0.511646485 | -0.279446194 | 3.03E-09 | 2.29E-08 | 3.59E-05 |
| BAI2     | LMNA | -0.211840418 | -0.339949665 | -0.076012383 | 2.47E-03 | 5.86E-03 | 1.00E+00 |
| SMC5     | LMNA | 0.300794678  | 0.169794391  | 0.421349152  | 1.36E-05 | 5.26E-05 | 1.62E-01 |
| AKAP5    | LMNA | -0.325843394 | -0.4439253   | -0.19663775  | 2.22E-06 | 9.98E-06 | 2.63E-02 |
| POU2F3   | LMNA | 0.203109607  | 0.066935442  | 0.331855549  | 3.74E-03 | 8.45E-03 | 1.00E+00 |
| BACH1    | LMNA | 0.400073109  | 0.277339717  | 0.509958832  | 3.66E-09 | 2.72E-08 | 4.34E-05 |
| PPP2R2D  | LMNA | -0.161416776 | -0.292939976 | -0.023898319 | 2.17E-02 | 4.03E-02 | 1.00E+00 |
| C11orf63 | LMNA | 0.185336031  | 0.048526624  | 0.315319326  | 8.27E-03 | 1.72E-02 | 1.00E+00 |
| SSSCA1   | LMNA | 0.231514277  | 0.096549059  | 0.3581195    | 9.16E-04 | 2.43E-03 | 1.00E+00 |
| LRR51    | LMNA | -0.235994712 | -0.362244053 | -0.101242109 | 7.22E-04 | 1.96E-03 | 1.00E+00 |
| LRR3     | LMNA | -0.030071965 | -0.167427895 | 0.108429175  | 6.71E-01 | 7.40E-01 | 1.00E+00 |
| PORCN    | LMNA | 0.142773094  | 0.004817037  | 0.275396047  | 4.27E-02 | 7.29E-02 | 1.00E+00 |
| DTL      | LMNA | -0.03425846  | -0.171498373 | 0.104285752  | 6.28E-01 | 7.03E-01 | 1.00E+00 |
| ACTG2    | LMNA | 0.436361976  | 0.317433219  | 0.541776262  | 8.49E-11 | 8.61E-10 | 1.01E-06 |
| FAM124B  | LMNA | -0.07210255  | -0.208082335 | 0.06661149   | 3.08E-01 | 3.93E-01 | 1.00E+00 |
| RSAD2    | LMNA | 0.089488924  | -0.049169519 | 0.224763192  | 2.05E-01 | 2.80E-01 | 1.00E+00 |
| CTBP2    | LMNA | -0.243870572 | -0.369482366 | -0.109506273 | 4.70E-04 | 1.33E-03 | 1.00E+00 |
| ZMYND11  | LMNA | -0.358725507 | -0.473335776 | -0.232172236 | 1.59E-07 | 8.78E-07 | 1.88E-03 |
| CRTC3    | LMNA | 0.2732009    | 0.140446948  | 0.396304997  | 8.36E-05 | 2.77E-04 | 9.91E-01 |
| MYH8     | LMNA | 0.066557446  | -0.072156552 | 0.202745555  | 3.47E-01 | 4.33E-01 | 1.00E+00 |
| LRRFIP2  | LMNA | 0.23588137   | 0.101123315  | 0.362139775  | 7.26E-04 | 1.97E-03 | 1.00E+00 |
| TTN      | LMNA | -0.205051898 | -0.33365784  | -0.068952787 | 3.42E-03 | 7.80E-03 | 1.00E+00 |
| RGS6     | LMNA | 0.174681238  | 0.037535401  | 0.305368307  | 1.29E-02 | 2.54E-02 | 1.00E+00 |
| PLLP     | LMNA | -0.353089045 | -0.468312483 | -0.226057035 | 2.55E-07 | 1.36E-06 | 3.02E-03 |
| SRGAP3   | LMNA | -0.58174951  | -0.666290025 | -0.48244413  | 1.10E-19 | 5.28E-18 | 1.30E-15 |
| PDK1     | LMNA | 0.153402213  | 0.015683343  | 0.285409013  | 2.93E-02 | 5.24E-02 | 1.00E+00 |
| NBR2     | LMNA | -0.273892447 | -0.396934893 | -0.141179607 | 8.00E-05 | 2.67E-04 | 9.49E-01 |
| ZFYVE21  | LMNA | 0.051698759  | -0.086972973 | 0.1884051    | 4.65E-01 | 5.51E-01 | 1.00E+00 |
| C13orf1  | LMNA | -0.104718555 | -0.239309971 | 0.033821385  | 1.38E-01 | 2.00E-01 | 1.00E+00 |
| ZNF137   | LMNA | -0.160661155 | -0.292230645 | -0.023123009 | 2.24E-02 | 4.13E-02 | 1.00E+00 |
| CEP27    | LMNA | 0.260993856  | 0.127538113  | 0.385167108  | 1.76E-04 | 5.47E-04 | 1.00E+00 |
| WDR41    | LMNA | 0.126881855  | -0.011368274 | 0.260372134  | 7.20E-02 | 1.15E-01 | 1.00E+00 |

|         |      |              |              |              |          |          |          |
|---------|------|--------------|--------------|--------------|----------|----------|----------|
| BEST2   | LMNA | 0.136461158  | -0.001620368 | 0.269436355  | 5.28E-02 | 8.81E-02 | 1.00E+00 |
| RNF121  | LMNA | 0.101956648  | -0.036609641 | 0.236676377  | 1.49E-01 | 2.13E-01 | 1.00E+00 |
| MEG3    | LMNA | -0.170510625 | -0.301465383 | -0.033242116 | 1.53E-02 | 2.93E-02 | 1.00E+00 |
| BCCIP   | LMNA | -0.225639514 | -0.352703873 | -0.090404595 | 1.24E-03 | 3.18E-03 | 1.00E+00 |
| OXSRI   | LMNA | 0.189891791  | 0.053236369  | 0.319565463  | 6.79E-03 | 1.44E-02 | 1.00E+00 |
| RAD51   | LMNA | -0.046466636 | -0.183341544 | 0.09217565   | 5.11E-01 | 5.95E-01 | 1.00E+00 |
| RPL13A  | LMNA | -0.008569355 | -0.146447108 | 0.129635005  | 9.04E-01 | 9.30E-01 | 1.00E+00 |
| MEST    | LMNA | 0.04596169   | -0.092677354 | 0.182852481  | 5.16E-01 | 6.00E-01 | 1.00E+00 |
| DYRK1A  | LMNA | -0.177948887 | -0.308423157 | -0.040902703 | 1.13E-02 | 2.26E-02 | 1.00E+00 |
| HTRA2   | LMNA | -0.040516032 | -0.177573812 | 0.098083578  | 5.67E-01 | 6.47E-01 | 1.00E+00 |
| SARDH   | LMNA | 0.154436231  | 0.016742175  | 0.286381555  | 2.82E-02 | 5.06E-02 | 1.00E+00 |
| ILKAP   | LMNA | -0.23680183  | -0.362986536 | -0.102088166 | 6.91E-04 | 1.89E-03 | 1.00E+00 |
| ANGPTL2 | LMNA | 0.199930609  | 0.063636001  | 0.328903664  | 4.33E-03 | 9.64E-03 | 1.00E+00 |
| RBBP5   | LMNA | -0.018450407 | -0.156103796 | 0.119906006  | 7.94E-01 | 8.45E-01 | 1.00E+00 |
| ORC2L   | LMNA | 0.011266952  | -0.126981557 | 0.149086063  | 8.74E-01 | 9.06E-01 | 1.00E+00 |
| HBS1L   | LMNA | -0.098614332 | -0.23348669  | 0.039980962  | 1.63E-01 | 2.30E-01 | 1.00E+00 |
| TMEM30A | LMNA | 0.127827128  | -0.010407531 | 0.261267626  | 6.98E-02 | 1.12E-01 | 1.00E+00 |
| PDS5A   | LMNA | 0.036756182  | -0.101811433 | 0.17392465   | 6.04E-01 | 6.81E-01 | 1.00E+00 |
| WISP3   | LMNA | -0.068213176 | -0.204339929 | 0.070501732  | 3.35E-01 | 4.21E-01 | 1.00E+00 |
| CRK     | LMNA | 0.132342536  | -0.0058147   | 0.265542077  | 6.04E-02 | 9.90E-02 | 1.00E+00 |
| NCAPH2  | LMNA | -0.147670995 | -0.280013602 | -0.00982019  | 3.60E-02 | 6.28E-02 | 1.00E+00 |
| RNASET2 | LMNA | 0.184260182  | 0.047415298  | 0.314315835  | 8.66E-03 | 1.79E-02 | 1.00E+00 |
| NEDD9   | LMNA | 0.521680772  | 0.413402415  | 0.615410779  | 1.71E-15 | 3.89E-14 | 2.02E-11 |
| WDR79   | LMNA | -0.132244185 | -0.26544903  | 0.005914799  | 6.06E-02 | 9.93E-02 | 1.00E+00 |
| PSG6    | LMNA | 0.011826548  | -0.126430872 | 0.149633247  | 8.67E-01 | 9.02E-01 | 1.00E+00 |
| SMPDL3B | LMNA | 0.011905652  | -0.126353021 | 0.14971059   | 8.66E-01 | 9.02E-01 | 1.00E+00 |
| MORC4   | LMNA | 0.437895051  | 0.319136439  | 0.543113817  | 7.17E-11 | 7.38E-10 | 8.50E-07 |
| PSMD13  | LMNA | 0.129852137  | -0.008348521 | 0.263185222  | 6.55E-02 | 1.06E-01 | 1.00E+00 |
| DDX23   | LMNA | -0.033613541 | -0.170871631 | 0.104924349  | 6.35E-01 | 7.09E-01 | 1.00E+00 |
| ETV5    | LMNA | 0.228154119  | 0.093033382  | 0.355022994  | 1.09E-03 | 2.84E-03 | 1.00E+00 |
| MYRIP   | LMNA | -0.25233114  | -0.377241111 | -0.118404717 | 2.91E-04 | 8.66E-04 | 1.00E+00 |
| LY6E    | LMNA | 0.260573758  | 0.127094666  | 0.384783159  | 1.80E-04 | 5.60E-04 | 1.00E+00 |
| ATP12A  | LMNA | 0.196593241  | 0.060175394  | 0.32580201   | 5.04E-03 | 1.10E-02 | 1.00E+00 |
| BTBD7   | LMNA | 0.142943515  | 0.004991005  | 0.275556817  | 4.24E-02 | 7.26E-02 | 1.00E+00 |
| AUP1    | LMNA | 0.230124346  | 0.09509439   | 0.356838967  | 9.85E-04 | 2.59E-03 | 1.00E+00 |

|          |      |              |              |              |          |          |          |
|----------|------|--------------|--------------|--------------|----------|----------|----------|
| PIP      | LMNA | 0.092677879  | -0.045961161 | 0.227814163  | 1.90E-01 | 2.62E-01 | 1.00E+00 |
| GSTO1    | LMNA | 0.19904645   | 0.062718874  | 0.328082223  | 4.51E-03 | 9.99E-03 | 1.00E+00 |
| CORO7    | LMNA | -0.113882853 | -0.248034346 | 0.02455418   | 1.07E-01 | 1.61E-01 | 1.00E+00 |
| COX6A2   | LMNA | -0.091135934 | -0.226339269 | 0.047512845  | 1.97E-01 | 2.71E-01 | 1.00E+00 |
| MAD2L1BP | LMNA | -0.149223432 | -0.281475904 | -0.01140743  | 3.40E-02 | 5.98E-02 | 1.00E+00 |
| PITPNM3  | LMNA | -0.108297338 | -0.242719547 | 0.030205247  | 1.25E-01 | 1.84E-01 | 1.00E+00 |
| ENPP1    | LMNA | 0.279475407  | 0.14709979   | 0.402015887  | 5.63E-05 | 1.93E-04 | 6.67E-01 |
| SCNN1A   | LMNA | 0.246058756  | 0.111805643  | 0.371490716  | 4.16E-04 | 1.19E-03 | 1.00E+00 |
| LSM1     | LMNA | -0.141015036 | -0.273737123 | -0.003022883 | 4.53E-02 | 7.69E-02 | 1.00E+00 |
| KCNE2    | LMNA | -0.088897293 | -0.224196869 | 0.049764435  | 2.08E-01 | 2.83E-01 | 1.00E+00 |
| IDUA     | LMNA | 0.415467987  | 0.294296595  | 0.523493608  | 7.82E-10 | 6.60E-09 | 9.28E-06 |
| P2RX4    | LMNA | 0.306334817  | 0.175714764  | 0.426355324  | 9.26E-06 | 3.68E-05 | 1.10E-01 |
| PPP2R3C  | LMNA | -0.227976836 | -0.354859544 | -0.092847987 | 1.10E-03 | 2.86E-03 | 1.00E+00 |
| CCND2    | LMNA | -0.159696009 | -0.291324415 | -0.022132956 | 2.32E-02 | 4.26E-02 | 1.00E+00 |
| COX11    | LMNA | -0.322184551 | -0.440636946 | -0.192704648 | 2.93E-06 | 1.28E-05 | 3.47E-02 |
| CUL4A    | LMNA | 0.174467894  | 0.037315658  | 0.305168762  | 1.30E-02 | 2.56E-02 | 1.00E+00 |
| CFB      | LMNA | 0.426384409  | 0.306367027  | 0.533058119  | 2.50E-10 | 2.31E-09 | 2.96E-06 |
| PDZK1    | LMNA | 0.159205584  | 0.021629978  | 0.290863837  | 2.36E-02 | 4.33E-02 | 1.00E+00 |
| PCP4     | LMNA | -0.281972648 | -0.404286161 | -0.149750944 | 4.79E-05 | 1.67E-04 | 5.68E-01 |
| UBIAD1   | LMNA | 0.362225454  | 0.235974496  | 0.476451231  | 1.18E-07 | 6.66E-07 | 1.39E-03 |
| CDC42BPB | LMNA | 0.014570514  | -0.123729365 | 0.152315137  | 8.37E-01 | 8.78E-01 | 1.00E+00 |
| ZNF323   | LMNA | -0.356308744 | -0.471182837 | -0.229548978 | 1.95E-07 | 1.07E-06 | 2.31E-03 |
| RIMS2    | LMNA | -0.489783157 | -0.58807166  | -0.377239206 | 1.39E-13 | 2.19E-12 | 1.65E-09 |
| CXCL6    | LMNA | 0.287130219  | 0.155232416  | 0.408970207  | 3.43E-05 | 1.23E-04 | 4.06E-01 |
| SLC34A2  | LMNA | 0.123972579  | -0.014323563 | 0.257614624  | 7.88E-02 | 1.24E-01 | 1.00E+00 |
| RNMTL1   | LMNA | -0.03449897  | -0.171732077 | 0.104047569  | 6.26E-01 | 7.01E-01 | 1.00E+00 |
| NPTN     | LMNA | 0.145865141  | 0.007974726  | 0.278311824  | 3.83E-02 | 6.63E-02 | 1.00E+00 |
| SART3    | LMNA | -0.08837714  | -0.223698891 | 0.050287395  | 2.11E-01 | 2.86E-01 | 1.00E+00 |
| UPP1     | LMNA | 0.584567533  | 0.485713692  | 0.668657763  | 6.62E-20 | 3.34E-18 | 7.86E-16 |
| CAPN10   | LMNA | -0.03667879  | -0.173849496 | 0.101888126  | 6.04E-01 | 6.81E-01 | 1.00E+00 |
| SLC6A9   | LMNA | 0.002811576  | -0.135291937 | 0.140807923  | 9.68E-01 | 9.76E-01 | 1.00E+00 |
| CCR5     | LMNA | 0.348648176  | 0.221246019  | 0.464349466  | 3.68E-07 | 1.91E-06 | 4.36E-03 |
| NDUFS5   | LMNA | 0.002744771  | -0.135357519 | 0.140742441  | 9.69E-01 | 9.76E-01 | 1.00E+00 |
| CISD1    | LMNA | -0.356902462 | -0.471711869 | -0.230193254 | 1.85E-07 | 1.02E-06 | 2.19E-03 |
| PDLIM3   | LMNA | 0.162022466  | 0.024519912  | 0.293508457  | 2.12E-02 | 3.95E-02 | 1.00E+00 |

|           |      |              |              |              |          |          |          |
|-----------|------|--------------|--------------|--------------|----------|----------|----------|
| ZNHIT3    | LMNA | -0.393991196 | -0.504596737 | -0.270661725 | 6.58E-09 | 4.67E-08 | 7.81E-05 |
| SNRPD3    | LMNA | 0.114346631  | -0.02408456  | 0.248475284  | 1.05E-01 | 1.59E-01 | 1.00E+00 |
| VPS24     | LMNA | 0.255791393  | 0.122050262  | 0.380409283  | 2.39E-04 | 7.22E-04 | 1.00E+00 |
| SCN8A     | LMNA | -0.373489678 | -0.486458571 | -0.248237983 | 4.38E-08 | 2.67E-07 | 5.20E-04 |
| KIAA0701  | LMNA | -0.219984061 | -0.347482363 | -0.084499219 | 1.66E-03 | 4.10E-03 | 1.00E+00 |
| UNC93B1   | LMNA | 0.425769345  | 0.305685916  | 0.53251995   | 2.67E-10 | 2.45E-09 | 3.16E-06 |
| GMNN      | LMNA | -0.249870557 | -0.374986445 | -0.115814566 | 3.35E-04 | 9.85E-04 | 1.00E+00 |
| FDXR      | LMNA | 0.178116154  | 0.041075155  | 0.308579459  | 1.12E-02 | 2.25E-02 | 1.00E+00 |
| SPCS2     | LMNA | -0.105955907 | -0.240489196 | 0.032571527  | 1.33E-01 | 1.95E-01 | 1.00E+00 |
| CDCP1     | LMNA | 0.560527737  | 0.457910499  | 0.648404296  | 4.15E-18 | 1.52E-16 | 4.92E-14 |
| PAX3      | LMNA | 0.031874812  | -0.106645466 | 0.169181356  | 6.52E-01 | 7.24E-01 | 1.00E+00 |
| PNLIPRP1  | LMNA | 0.158418556  | 0.02082295   | 0.290124578  | 2.43E-02 | 4.45E-02 | 1.00E+00 |
| LASS4     | LMNA | -0.234343213 | -0.360724308 | -0.099511542 | 7.88E-04 | 2.12E-03 | 1.00E+00 |
| HSD17B8   | LMNA | 0.088557629  | -0.05010594  | 0.223871693  | 2.10E-01 | 2.85E-01 | 1.00E+00 |
| EYA4      | LMNA | 0.28772118   | 0.15586101   | 0.409506502  | 3.30E-05 | 1.19E-04 | 3.91E-01 |
| PRKAB1    | LMNA | 0.033230831  | -0.105303253 | 0.170499656  | 6.39E-01 | 7.12E-01 | 1.00E+00 |
| KIF20A    | LMNA | 0.200974382  | 0.064718991  | 0.329873146  | 4.13E-03 | 9.24E-03 | 1.00E+00 |
| YAP1      | LMNA | 0.611367201  | 0.516946401  | 0.691090283  | 4.31E-22 | 3.08E-20 | 5.11E-18 |
| SC5DL     | LMNA | -0.402897093 | -0.512445687 | -0.280444513 | 2.77E-09 | 2.11E-08 | 3.29E-05 |
| NNT       | LMNA | -0.173535765 | -0.304296793 | -0.036355731 | 1.35E-02 | 2.65E-02 | 1.00E+00 |
| DKFZp566f | LMNA | -0.135077912 | -0.268128941 | 0.003029583  | 5.53E-02 | 9.16E-02 | 1.00E+00 |
| ITPKC     | LMNA | 0.393875889  | 0.270535231  | 0.504494995  | 6.65E-09 | 4.71E-08 | 7.89E-05 |
| ST8SIA2   | LMNA | -0.067789654 | -0.20393217  | 0.070925094  | 3.38E-01 | 4.24E-01 | 1.00E+00 |
| LMX1B     | LMNA | 0.028421978  | -0.110060866 | 0.165822345  | 6.88E-01 | 7.55E-01 | 1.00E+00 |
| RAD21     | LMNA | -0.50724155  | -0.603062945 | -0.396989844 | 1.32E-14 | 2.50E-13 | 1.57E-10 |
| SNRPB     | LMNA | 0.100894539  | -0.037681309 | 0.235663085  | 1.53E-01 | 2.19E-01 | 1.00E+00 |
| MIF       | LMNA | 0.167513235  | 0.030159688  | 0.298657666  | 1.72E-02 | 3.26E-02 | 1.00E+00 |
| DLGAP2    | LMNA | -0.317233577 | -0.436182233 | -0.187389176 | 4.22E-06 | 1.79E-05 | 5.01E-02 |
| PFN1      | LMNA | 0.528162889  | 0.42079337   | 0.620939099  | 6.59E-16 | 1.64E-14 | 7.82E-12 |
| IRF8      | LMNA | -0.034557355 | -0.171788806 | 0.103989748  | 6.25E-01 | 7.00E-01 | 1.00E+00 |
| PRO0132   | LMNA | 0.088980747  | -0.049680523 | 0.224276759  | 2.08E-01 | 2.83E-01 | 1.00E+00 |
| MICALL2   | LMNA | 0.508952696  | 0.39893117   | 0.60452865   | 1.04E-14 | 2.01E-13 | 1.24E-10 |
| ZNF654    | LMNA | 0.115407334  | -0.023010268 | 0.249483539  | 1.02E-01 | 1.54E-01 | 1.00E+00 |
| SS18L1    | LMNA | -0.243722671 | -0.369346578 | -0.109350908 | 4.74E-04 | 1.34E-03 | 1.00E+00 |
| ACD       | LMNA | 0.020621913  | -0.117764348 | 0.158222474  | 7.71E-01 | 8.25E-01 | 1.00E+00 |



|          |      |              |              |              |          |          |          |
|----------|------|--------------|--------------|--------------|----------|----------|----------|
| BCL3     | LMNA | 0.619371511  | 0.526323747  | 0.697760592  | 8.72E-23 | 7.72E-21 | 1.03E-18 |
| SLC16A8  | LMNA | -0.081410111 | -0.217022056 | 0.057284697  | 2.49E-01 | 3.30E-01 | 1.00E+00 |
| ITGB3    | LMNA | 0.543283247  | 0.438089292  | 0.633798831  | 6.61E-17 | 2.00E-15 | 7.84E-13 |
| MRLC2    | LMNA | 0.390905483  | 0.267278117  | 0.501872963  | 8.83E-09 | 6.09E-08 | 1.05E-04 |
| CEP152   | LMNA | -0.166005979 | -0.29724493  | -0.028610657 | 1.82E-02 | 3.44E-02 | 1.00E+00 |
| F2RL3    | LMNA | 0.072981207  | -0.065732053 | 0.208927239  | 3.02E-01 | 3.86E-01 | 1.00E+00 |
| CLIP1    | LMNA | 0.279049556  | 0.146647882  | 0.40162859   | 5.78E-05 | 1.98E-04 | 6.86E-01 |
| ZNF75    | LMNA | 0.01474646   | -0.123556071 | 0.152487033  | 8.35E-01 | 8.76E-01 | 1.00E+00 |
| SF3B4    | LMNA | 0.226913232  | 0.091735913  | 0.353878768  | 1.16E-03 | 3.00E-03 | 1.00E+00 |
| ATP5C1   | LMNA | -0.280401472 | -0.40285796  | -0.148082709 | 5.30E-05 | 1.83E-04 | 6.29E-01 |
| MAP7D3   | LMNA | 0.542646894  | 0.437359805  | 0.633258625  | 7.30E-17 | 2.20E-15 | 8.66E-13 |
| SEMA5A   | LMNA | 0.052787389  | -0.085889519 | 0.189457744  | 4.56E-01 | 5.42E-01 | 1.00E+00 |
| PSCDBP   | LMNA | 0.373090581  | 0.247802794  | 0.486104512  | 4.54E-08 | 2.76E-07 | 5.38E-04 |
| UBP1     | LMNA | -0.04211877  | -0.179128223 | 0.096493295  | 5.52E-01 | 6.33E-01 | 1.00E+00 |
| XYLB     | LMNA | 0.073220083  | -0.065492927 | 0.209156903  | 3.00E-01 | 3.85E-01 | 1.00E+00 |
| C13orf15 | LMNA | -0.370861693 | -0.48412647  | -0.24537327  | 5.53E-08 | 3.33E-07 | 6.56E-04 |
| ZNF282   | LMNA | 0.300537507  | 0.169519799  | 0.421116589  | 1.39E-05 | 5.35E-05 | 1.65E-01 |
| ZNF222   | LMNA | -0.265956022 | -0.38969903  | -0.132780108 | 1.30E-04 | 4.18E-04 | 1.00E+00 |
| COL10A1  | LMNA | 0.534642491  | 0.428195732  | 0.626456066  | 2.49E-16 | 6.69E-15 | 2.96E-12 |
| MFSD5    | LMNA | 0.383610789  | 0.259291299  | 0.495425138  | 1.75E-08 | 1.14E-07 | 2.07E-04 |
| C20orf67 | LMNA | -0.102582206 | -0.237273046 | 0.035978304  | 1.46E-01 | 2.10E-01 | 1.00E+00 |
| NLGN4Y   | LMNA | 0.00964166   | -0.128580486 | 0.147496337  | 8.92E-01 | 9.22E-01 | 1.00E+00 |
| INHBC    | LMNA | -0.102325247 | -0.237027966 | 0.03623765   | 1.47E-01 | 2.12E-01 | 1.00E+00 |
| GNG13    | LMNA | -0.311597525 | -0.431104005 | -0.181347429 | 6.36E-06 | 2.61E-05 | 7.54E-02 |
| NUMA1    | LMNA | -0.039531113 | -0.176618253 | 0.099060491  | 5.76E-01 | 6.56E-01 | 1.00E+00 |
| F12      | LMNA | -0.057269501 | -0.193788388 | 0.081425257  | 4.18E-01 | 5.06E-01 | 1.00E+00 |
| C1orf41  | LMNA | 0.071203376  | -0.067511239 | 0.207217492  | 3.14E-01 | 3.99E-01 | 1.00E+00 |
| SUPT6H   | LMNA | 0.143838822  | 0.005905079  | 0.276401296  | 4.11E-02 | 7.07E-02 | 1.00E+00 |
| GSK3A    | LMNA | -0.065291457 | -0.201525993 | 0.07342133   | 3.56E-01 | 4.43E-01 | 1.00E+00 |
| GIPC1    | LMNA | 0.136651407  | -0.001426505 | 0.269616136  | 5.25E-02 | 8.76E-02 | 1.00E+00 |
| ELL2     | LMNA | 0.273338027  | 0.140592216  | 0.396429908  | 8.29E-05 | 2.75E-04 | 9.83E-01 |
| C9orf167 | LMNA | 0.503519822  | 0.392770881  | 0.599872814  | 2.21E-14 | 3.99E-13 | 2.62E-10 |
| PVRL3    | LMNA | 0.300018505  | 0.168965701  | 0.420647201  | 1.44E-05 | 5.53E-05 | 1.71E-01 |
| ADAM20   | LMNA | 0.006443974  | -0.131724208 | 0.144366547  | 9.27E-01 | 9.47E-01 | 1.00E+00 |
| GPR87    | LMNA | 0.129584176  | -0.008621048 | 0.262931535  | 6.61E-02 | 1.07E-01 | 1.00E+00 |

|          |      |              |              |              |          |          |          |
|----------|------|--------------|--------------|--------------|----------|----------|----------|
| ZNF770   | LMNA | -0.1357759   | -0.268788725 | 0.002318559  | 5.40E-02 | 8.98E-02 | 1.00E+00 |
| SMR3B    | LMNA | -0.097541397 | -0.232462135 | 0.041062539  | 1.67E-01 | 2.35E-01 | 1.00E+00 |
| FZD1     | LMNA | 0.6729265    | 0.589653208  | 0.742043054  | 5.40E-28 | 1.17E-25 | 6.41E-24 |
| TRPC4AP  | LMNA | 0.144376427  | 0.006454064  | 0.276908283  | 4.04E-02 | 6.95E-02 | 1.00E+00 |
| MKL1     | LMNA | 0.134938523  | -0.003171559 | 0.267997165  | 5.55E-02 | 9.19E-02 | 1.00E+00 |
| C2orf28  | LMNA | 0.21096813   | 0.0751045    | 0.339141841  | 2.58E-03 | 6.08E-03 | 1.00E+00 |
| LAMA4    | LMNA | 0.478352079  | 0.364362477  | 0.578219227  | 6.02E-13 | 8.72E-12 | 7.14E-09 |
| EIF4G2   | LMNA | 0.157501045  | 0.01988235   | 0.289262558  | 2.52E-02 | 4.58E-02 | 1.00E+00 |
| ZZZ3     | LMNA | -0.037921678 | -0.175056237 | 0.100656271  | 5.92E-01 | 6.70E-01 | 1.00E+00 |
| C16orf5  | LMNA | -0.281435123 | -0.403797617 | -0.149180129 | 4.96E-05 | 1.72E-04 | 5.88E-01 |
| GALNAC4S | LMNA | 0.095604694  | -0.04301402  | 0.230612002  | 1.76E-01 | 2.46E-01 | 1.00E+00 |
| IGFBP4   | LMNA | 0.482801611  | 0.369369551  | 0.582057738  | 3.42E-13 | 5.09E-12 | 4.06E-09 |
| NDUFA10  | LMNA | 0.047257199  | -0.091390021 | 0.184107103  | 5.04E-01 | 5.88E-01 | 1.00E+00 |
| CTNNA2   | LMNA | -0.307941779 | -0.427806031 | -0.177433785 | 8.26E-06 | 3.31E-05 | 9.80E-02 |
| NUDT15   | LMNA | 0.141318034  | 0.003332039  | 0.274023092  | 4.48E-02 | 7.63E-02 | 1.00E+00 |
| CEPT1    | LMNA | -0.113801222 | -0.24795673  | 0.024636832  | 1.07E-01 | 1.61E-01 | 1.00E+00 |
| CLIC2    | LMNA | 0.259946237  | 0.126432368  | 0.384209556  | 1.87E-04 | 5.78E-04 | 1.00E+00 |
| RNF13    | LMNA | -0.252497155 | -0.377393178 | -0.118579539 | 2.89E-04 | 8.59E-04 | 1.00E+00 |
| TDRD1    | LMNA | -0.065197691 | -0.201435648 | 0.07351499   | 3.57E-01 | 4.43E-01 | 1.00E+00 |
| KCNK5    | LMNA | 0.098238331  | -0.040360029 | 0.233127677  | 1.64E-01 | 2.32E-01 | 1.00E+00 |
| CCDC92   | LMNA | -0.06119506  | -0.197576923 | 0.077510754  | 3.87E-01 | 4.74E-01 | 1.00E+00 |
| ETNK1    | LMNA | -0.186941429 | -0.316816211 | -0.05018559  | 7.72E-03 | 1.61E-02 | 1.00E+00 |
| CD69     | LMNA | 0.076122282  | -0.062586424 | 0.211945994  | 2.82E-01 | 3.64E-01 | 1.00E+00 |
| LTA      | LMNA | 0.154362911  | 0.016667085  | 0.286312603  | 2.83E-02 | 5.07E-02 | 1.00E+00 |
| TPPA     | LMNA | -0.207689421 | -0.336103745 | -0.071694012 | 3.02E-03 | 6.99E-03 | 1.00E+00 |
| MYOZ1    | LMNA | -0.23848115  | -0.364530861 | -0.103849129 | 6.31E-04 | 1.74E-03 | 1.00E+00 |
| IFNB1    | LMNA | -0.143725955 | -0.276294848 | -0.005789833 | 4.13E-02 | 7.09E-02 | 1.00E+00 |
| CLNS1A   | LMNA | -0.377990719 | -0.490449106 | -0.253149569 | 2.92E-08 | 1.83E-07 | 3.47E-04 |
| SC65     | LMNA | 0.483542674  | 0.370204112  | 0.582696608  | 3.11E-13 | 4.64E-12 | 3.69E-09 |
| CXorf45  | LMNA | -0.314676936 | -0.433879572 | -0.184647284 | 5.09E-06 | 2.13E-05 | 6.04E-02 |
| ZXDB     | LMNA | 0.046503479  | -0.092139041 | 0.183377225  | 5.11E-01 | 5.95E-01 | 1.00E+00 |
| PEX5L    | LMNA | -0.357976911 | -0.472669047 | -0.231359481 | 1.69E-07 | 9.32E-07 | 2.00E-03 |
| EPS15L1  | LMNA | -0.011767367 | -0.149575383 | 0.126489114  | 8.68E-01 | 9.02E-01 | 1.00E+00 |
| GPA33    | LMNA | 0.130752009  | -0.007433163 | 0.264037024  | 6.36E-02 | 1.03E-01 | 1.00E+00 |
| MGEA5    | LMNA | -0.277188815 | -0.399935795 | -0.144673935 | 6.51E-05 | 2.20E-04 | 7.72E-01 |

|          |      |              |              |              |          |          |          |
|----------|------|--------------|--------------|--------------|----------|----------|----------|
| HIST1H3A | LMNA | -0.297556753 | -0.418419898 | -0.166338611 | 1.70E-05 | 6.47E-05 | 2.02E-01 |
| BCAT1    | LMNA | 0.473778705  | 0.359222903  | 0.574269266  | 1.07E-12 | 1.47E-11 | 1.27E-08 |
| ING1     | LMNA | -0.116523923 | -0.250544602 | 0.021879029  | 9.86E-02 | 1.50E-01 | 1.00E+00 |
| SLC2A9   | LMNA | 0.191245772  | 0.054637287  | 0.320826419  | 6.40E-03 | 1.36E-02 | 1.00E+00 |
| ORC6L    | LMNA | -0.191975769 | -0.321506072 | -0.055392814 | 6.20E-03 | 1.32E-02 | 1.00E+00 |
| KLK11    | LMNA | 0.174510629  | 0.037359674  | 0.305208734  | 1.30E-02 | 2.56E-02 | 1.00E+00 |
| C19orf28 | LMNA | 0.557731238  | 0.454689194  | 0.646040148  | 6.57E-18 | 2.36E-16 | 7.80E-14 |
| MAGEB1   | LMNA | -0.124001369 | -0.257641923 | 0.014294329  | 7.87E-02 | 1.24E-01 | 1.00E+00 |
| MED22    | LMNA | -0.131469592 | -0.264716125 | 0.006703066  | 6.22E-02 | 1.01E-01 | 1.00E+00 |
| ETV6     | LMNA | 0.386227406  | 0.262154228  | 0.4977394    | 1.37E-08 | 9.15E-08 | 1.62E-04 |
| CEBPB    | LMNA | 0.621191193  | 0.528458735  | 0.699275112  | 6.02E-23 | 5.58E-21 | 7.14E-19 |
| KRT85    | LMNA | -0.134345304 | -0.267436296 | 0.003775723  | 5.66E-02 | 9.34E-02 | 1.00E+00 |
| CRYGA    | LMNA | -0.273970659 | -0.397006124 | -0.141262477 | 7.97E-05 | 2.66E-04 | 9.45E-01 |
| HMGA1    | LMNA | 0.225509365  | 0.090268588  | 0.3525838    | 1.25E-03 | 3.20E-03 | 1.00E+00 |
| CAPN7    | LMNA | -0.017448015 | -0.155125363 | 0.120894185  | 8.05E-01 | 8.53E-01 | 1.00E+00 |
| MGC5566  | LMNA | -0.318306328 | -0.437147952 | -0.188540259 | 3.90E-06 | 1.67E-05 | 4.63E-02 |
| GEM      | LMNA | 0.454079956  | 0.337164515  | 0.55720208   | 1.14E-11 | 1.33E-10 | 1.35E-07 |
| NANOS1   | LMNA | -0.306298262 | -0.426322317 | -0.175675669 | 9.28E-06 | 3.69E-05 | 1.10E-01 |
| RANBP2   | LMNA | 0.134446396  | -0.003672772 | 0.267531882  | 5.64E-02 | 9.32E-02 | 1.00E+00 |
| APITD1   | LMNA | 0.076206055  | -0.062502492 | 0.212026469  | 2.81E-01 | 3.64E-01 | 1.00E+00 |
| LIG3     | LMNA | -0.161281156 | -0.292812675 | -0.023759153 | 2.18E-02 | 4.04E-02 | 1.00E+00 |
| IRAK4    | LMNA | 0.287058766  | 0.15515642   | 0.408905358  | 3.44E-05 | 1.23E-04 | 4.08E-01 |
| PARD3    | LMNA | -0.147172745 | -0.279544151 | -0.009310918 | 3.66E-02 | 6.37E-02 | 1.00E+00 |
| SERPINI2 | LMNA | -0.095821814 | -0.230819467 | 0.042795295  | 1.75E-01 | 2.45E-01 | 1.00E+00 |
| TTC9     | LMNA | -0.237336907 | -0.363478675 | -0.102649165 | 6.71E-04 | 1.84E-03 | 1.00E+00 |
| MLPH     | LMNA | 0.448352937  | 0.330775473  | 0.552223734  | 2.21E-11 | 2.44E-10 | 2.62E-07 |
| RETSAT   | LMNA | 0.264420624  | 0.131157329  | 0.388297398  | 1.43E-04 | 4.56E-04 | 1.00E+00 |
| NRG1     | LMNA | -0.039085008 | -0.176185361 | 0.099502883  | 5.81E-01 | 6.59E-01 | 1.00E+00 |
| CAST     | LMNA | 0.734870912  | 0.664203092  | 0.79252093   | 1.43E-35 | 1.30E-32 | 1.70E-31 |
| TBC1D9   | LMNA | -0.053504457 | -0.190150938 | 0.08517568   | 4.49E-01 | 5.36E-01 | 1.00E+00 |
| TTK      | LMNA | -0.077297546 | -0.213074825 | 0.061408747  | 2.74E-01 | 3.57E-01 | 1.00E+00 |
| ZNF557   | LMNA | 0.251105286  | 0.117114085  | 0.376118029  | 3.13E-04 | 9.23E-04 | 1.00E+00 |
| DDX41    | LMNA | 0.352394797  | 0.225304512  | 0.467693244  | 2.70E-07 | 1.44E-06 | 3.20E-03 |
| TGFBI    | LMNA | 0.637295946  | 0.547405304  | 0.712648592  | 2.05E-24 | 2.41E-22 | 2.43E-20 |
| PGM3     | LMNA | 0.139090601  | 0.001059953  | 0.271920297  | 4.84E-02 | 8.15E-02 | 1.00E+00 |

|           |      |              |              |              |          |          |          |
|-----------|------|--------------|--------------|--------------|----------|----------|----------|
| PSMB10    | LMNA | 0.354937457  | 0.228061341  | 0.469960635  | 2.18E-07 | 1.18E-06 | 2.59E-03 |
| UBE2D2    | LMNA | -0.140232059 | -0.272998042 | -0.002224115 | 4.65E-02 | 7.88E-02 | 1.00E+00 |
| GABARAPL  | LMNA | -0.387977242 | -0.499286154 | -0.264070002 | 1.16E-08 | 7.83E-08 | 1.38E-04 |
| DGCR2     | LMNA | -0.16103435  | -0.292580996 | -0.023505908 | 2.21E-02 | 4.08E-02 | 1.00E+00 |
| UNC45A    | LMNA | 0.574556555  | 0.474111154  | 0.660238674  | 3.87E-19 | 1.72E-17 | 4.59E-15 |
| CISH      | LMNA | 0.459737477  | 0.343486617  | 0.562112745  | 5.87E-12 | 7.20E-11 | 6.96E-08 |
| OGDHL     | LMNA | -0.065249762 | -0.20148582  | 0.073462978  | 3.56E-01 | 4.43E-01 | 1.00E+00 |
| SPINT2    | LMNA | 0.031520061  | -0.106996522 | 0.168836391  | 6.56E-01 | 7.27E-01 | 1.00E+00 |
| CASK      | LMNA | -0.210283942 | -0.338508084 | -0.07439255  | 2.67E-03 | 6.26E-03 | 1.00E+00 |
| GIT2      | LMNA | 0.319628448  | 0.189959411  | 0.438337782  | 3.54E-06 | 1.53E-05 | 4.20E-02 |
| CLDN18    | LMNA | 0.113276407  | -0.025168172 | 0.247457684  | 1.08E-01 | 1.63E-01 | 1.00E+00 |
| RNF128    | LMNA | 0.321069389  | 0.191506723  | 0.439634071  | 3.18E-06 | 1.38E-05 | 3.77E-02 |
| ABHD6     | LMNA | -0.420209026 | -0.527650855 | -0.29953408  | 4.79E-10 | 4.20E-09 | 5.68E-06 |
| C14orf161 | LMNA | 0.159005672  | 0.021424968  | 0.290676073  | 2.38E-02 | 4.36E-02 | 1.00E+00 |
| UTP11L    | LMNA | 0.017648235  | -0.120696827 | 0.155320818  | 8.03E-01 | 8.51E-01 | 1.00E+00 |
| GCNT1     | LMNA | 0.546436652  | 0.441706261  | 0.636474483  | 4.03E-17 | 1.27E-15 | 4.78E-13 |
| DUSP9     | LMNA | -0.104100479 | -0.238720781 | 0.034445545  | 1.40E-01 | 2.03E-01 | 1.00E+00 |
| TM4SF5    | LMNA | 0.235714752  | 0.100948688  | 0.361986474  | 7.33E-04 | 1.99E-03 | 1.00E+00 |
| SUCLA2    | LMNA | -0.267797529 | -0.391379346 | -0.134727361 | 1.17E-04 | 3.77E-04 | 1.00E+00 |
| NANS      | LMNA | 0.393877614  | 0.270537123  | 0.504496516  | 6.65E-09 | 4.71E-08 | 7.89E-05 |
| OLFML1    | LMNA | 0.174645174  | 0.037498254  | 0.305334576  | 1.29E-02 | 2.55E-02 | 1.00E+00 |
| ATP10B    | LMNA | -0.294649627 | -0.415787763 | -0.163238631 | 2.08E-05 | 7.76E-05 | 2.46E-01 |
| SCNM1     | LMNA | -0.196048997 | -0.325295941 | -0.059611364 | 5.17E-03 | 1.12E-02 | 1.00E+00 |
| NPAS3     | LMNA | -0.15177447  | -0.283877494 | -0.014017166 | 3.11E-02 | 5.53E-02 | 1.00E+00 |
| AMD1      | LMNA | 0.050687778  | -0.087978855 | 0.187427257  | 4.74E-01 | 5.59E-01 | 1.00E+00 |
| GGA2      | LMNA | 0.043598343  | -0.095024591 | 0.180562575  | 5.38E-01 | 6.20E-01 | 1.00E+00 |
| PRKCA     | LMNA | -0.119325108 | -0.253205074 | 0.019039529  | 9.08E-02 | 1.40E-01 | 1.00E+00 |
| TRIB2     | LMNA | 0.067789165  | -0.070925582 | 0.203931699  | 3.38E-01 | 4.24E-01 | 1.00E+00 |
| SDCCAG3   | LMNA | 0.178583652  | 0.041557188  | 0.309016273  | 1.10E-02 | 2.21E-02 | 1.00E+00 |
| TTC1      | LMNA | 0.024649656  | -0.113788557 | 0.162148878  | 7.28E-01 | 7.88E-01 | 1.00E+00 |
| GHSR      | LMNA | -0.070255236 | -0.206305321 | 0.068459742  | 3.20E-01 | 4.06E-01 | 1.00E+00 |
| ATP8B1    | LMNA | 0.450405313  | 0.333063858  | 0.554008662  | 1.75E-11 | 1.96E-10 | 2.07E-07 |
| HIPK1     | LMNA | -0.01604122  | -0.153751736 | 0.122280572  | 8.21E-01 | 8.65E-01 | 1.00E+00 |
| C1orf78   | LMNA | 0.616517092  | 0.52297709   | 0.69538345   | 1.55E-22 | 1.25E-20 | 1.84E-18 |
| CLN3      | LMNA | 0.191794588  | 0.055205281  | 0.321337398  | 6.25E-03 | 1.33E-02 | 1.00E+00 |

|         |      |              |              |              |          |          |          |
|---------|------|--------------|--------------|--------------|----------|----------|----------|
| STX4    | LMNA | 0.486598396  | 0.3736473    | 0.585329646  | 2.10E-13 | 3.22E-12 | 2.49E-09 |
| WAPAL   | LMNA | 0.045698262  | -0.092939062 | 0.182597313  | 5.18E-01 | 6.02E-01 | 1.00E+00 |
| TUBB1   | LMNA | 0.062151846  | -0.076556015 | 0.198499694  | 3.80E-01 | 4.67E-01 | 1.00E+00 |
| SCN5A   | LMNA | -0.180018515 | -0.310356615 | -0.04303706  | 1.04E-02 | 2.09E-02 | 1.00E+00 |
| ZNF192  | LMNA | -0.21752268  | -0.345207372 | -0.081932035 | 1.87E-03 | 4.58E-03 | 1.00E+00 |
| SEC22A  | LMNA | 0.071122832  | -0.067591824 | 0.207140012  | 3.14E-01 | 4.00E-01 | 1.00E+00 |
| DPY19L1 | LMNA | 0.414149302  | 0.292841119  | 0.522336385  | 8.96E-10 | 7.48E-09 | 1.06E-05 |
| C11orf9 | LMNA | -0.194148102 | -0.323527801 | -0.057642043 | 5.63E-03 | 1.21E-02 | 1.00E+00 |
| GRIA2   | LMNA | -0.599700753 | -0.681343786 | -0.50331919  | 4.09E-21 | 2.46E-19 | 4.85E-17 |
| VDAC2   | LMNA | -0.094265679 | -0.229332271 | 0.044362633  | 1.82E-01 | 2.53E-01 | 1.00E+00 |
| C8orf44 | LMNA | -0.459610215 | -0.562002362 | -0.343344289 | 5.96E-12 | 7.29E-11 | 7.07E-08 |
| ZPBP    | LMNA | -0.118154589 | -0.2520936   | 0.020226331  | 9.40E-02 | 1.44E-01 | 1.00E+00 |
| NUSAP1  | LMNA | 0.008888108  | -0.129321572 | 0.146759034  | 9.00E-01 | 9.28E-01 | 1.00E+00 |
| LANCL1  | LMNA | -0.47594132  | -0.57613767  | -0.361652391 | 8.15E-13 | 1.15E-11 | 9.67E-09 |
| FGF23   | LMNA | -0.012351461 | -0.150146442 | 0.12591424   | 8.62E-01 | 8.98E-01 | 1.00E+00 |
| PCNT    | LMNA | -0.104781254 | -0.239369734 | 0.033758063  | 1.38E-01 | 2.00E-01 | 1.00E+00 |
| BCKDHB  | LMNA | -0.061907806 | -0.198264354 | 0.076799557  | 3.81E-01 | 4.69E-01 | 1.00E+00 |
| IFNA8   | LMNA | -0.004406839 | -0.142371226 | 0.133725516  | 9.50E-01 | 9.63E-01 | 1.00E+00 |
| BET1    | LMNA | 0.356853063  | 0.230139644  | 0.471667855  | 1.86E-07 | 1.02E-06 | 2.20E-03 |
| SPRR1B  | LMNA | -0.143870338 | -0.276431019 | -0.00593726  | 4.11E-02 | 7.06E-02 | 1.00E+00 |
| FLRT1   | LMNA | -0.497513148 | -0.59471764  | -0.385971516 | 4.98E-14 | 8.31E-13 | 5.91E-10 |
| HDAC6   | LMNA | 0.026373874  | -0.112085222 | 0.163828385  | 7.09E-01 | 7.73E-01 | 1.00E+00 |
| SNX17   | LMNA | 0.084242778  | -0.054441364 | 0.219738267  | 2.33E-01 | 3.11E-01 | 1.00E+00 |
| N4BP3   | LMNA | -0.100665503 | -0.235444537 | 0.037912364  | 1.54E-01 | 2.20E-01 | 1.00E+00 |
| PLSCR3  | LMNA | 0.49949346   | 0.388211828  | 0.596418109  | 3.82E-14 | 6.50E-13 | 4.53E-10 |
| TTC30A  | LMNA | -0.008824816 | -0.1466971   | 0.129383809  | 9.01E-01 | 9.28E-01 | 1.00E+00 |
| CRISP1  | LMNA | -0.174406615 | -0.305111445 | -0.037252545 | 1.30E-02 | 2.57E-02 | 1.00E+00 |
| KRT32   | LMNA | -0.004890701 | -0.142845257 | 0.133250266  | 9.45E-01 | 9.59E-01 | 1.00E+00 |
| GHRH    | LMNA | -0.155734553 | -0.287602303 | -0.01807209  | 2.69E-02 | 4.86E-02 | 1.00E+00 |
| IL11RA  | LMNA | -0.180082259 | -0.310416148 | -0.043102818 | 1.03E-02 | 2.09E-02 | 1.00E+00 |
| GDF3    | LMNA | 0.022069061  | -0.116336376 | 0.159633713  | 7.55E-01 | 8.11E-01 | 1.00E+00 |
| RPS6KB1 | LMNA | -0.058120914 | -0.194610429 | 0.080576605  | 4.11E-01 | 4.99E-01 | 1.00E+00 |
| POLR3B  | LMNA | -0.419634544 | -0.527147386 | -0.298899055 | 5.08E-10 | 4.44E-09 | 6.03E-06 |
| TOP1    | LMNA | 0.278552537  | 0.146120521  | 0.401176513  | 5.97E-05 | 2.04E-04 | 7.08E-01 |
| DNAJC10 | LMNA | 0.418232888  | 0.297350132  | 0.525918676  | 5.88E-10 | 5.08E-09 | 6.98E-06 |

|         |      |              |              |              |          |          |          |
|---------|------|--------------|--------------|--------------|----------|----------|----------|
| CRCT1   | LMNA | 0.010003427  | -0.128224649 | 0.147850249  | 8.88E-01 | 9.18E-01 | 1.00E+00 |
| ADIPOQ  | LMNA | -0.17427077  | -0.304984379 | -0.037112635 | 1.31E-02 | 2.58E-02 | 1.00E+00 |
| MPST    | LMNA | -0.170869891 | -0.301801763 | -0.03361175  | 1.50E-02 | 2.90E-02 | 1.00E+00 |
| DPM2    | LMNA | 0.185395175  | 0.048587729  | 0.315374485  | 8.25E-03 | 1.71E-02 | 1.00E+00 |
| FAM38B  | LMNA | 0.006023695  | -0.132137188 | 0.143954986  | 9.32E-01 | 9.51E-01 | 1.00E+00 |
| RIT2    | LMNA | -0.33326723  | -0.45058765  | -0.20463086  | 1.26E-06 | 5.92E-06 | 1.49E-02 |
| SLC18A1 | LMNA | -0.097037565 | -0.231980918 | 0.041570318  | 1.69E-01 | 2.38E-01 | 1.00E+00 |
| RPS17   | LMNA | 0.149708804  | 0.011903825  | 0.281932969  | 3.35E-02 | 5.90E-02 | 1.00E+00 |
| ABCA3   | LMNA | -0.205459158 | -0.334035625 | -0.069375925 | 3.35E-03 | 7.67E-03 | 1.00E+00 |
| CD44    | LMNA | 0.587114054  | 0.48867063   | 0.670795917  | 4.19E-20 | 2.17E-18 | 4.97E-16 |
| FARP1   | LMNA | -0.040059012 | -0.177130448 | 0.098536916  | 5.71E-01 | 6.51E-01 | 1.00E+00 |
| KCNMA1  | LMNA | -0.117475576 | -0.251448678 | 0.02091461   | 9.59E-02 | 1.47E-01 | 1.00E+00 |
| PAX7    | LMNA | -0.090143483 | -0.225389645 | 0.048511211  | 2.02E-01 | 2.76E-01 | 1.00E+00 |
| TUBD1   | LMNA | -0.374038929 | -0.486945779 | -0.248836987 | 4.17E-08 | 2.55E-07 | 4.95E-04 |
| NARG2   | LMNA | -0.142096758 | -0.274757942 | -0.004126709 | 4.37E-02 | 7.44E-02 | 1.00E+00 |
| GNL3    | LMNA | 0.205141376  | 0.06904575   | 0.333740846  | 3.40E-03 | 7.77E-03 | 1.00E+00 |
| BTG2    | LMNA | -0.068535082 | -0.204649821 | 0.070179915  | 3.32E-01 | 4.18E-01 | 1.00E+00 |
| ITGA5   | LMNA | 0.769314996  | 0.706273571  | 0.820251435  | 8.83E-41 | 2.62E-37 | 1.05E-36 |
| NDUFS6  | LMNA | 0.322128446  | 0.19264437   | 0.440586497  | 2.94E-06 | 1.29E-05 | 3.48E-02 |
| MEFV    | LMNA | 0.08445395   | -0.054229307 | 0.219940673  | 2.32E-01 | 3.10E-01 | 1.00E+00 |
| TUT1    | LMNA | -0.004506843 | -0.142469203 | 0.133627297  | 9.49E-01 | 9.62E-01 | 1.00E+00 |
| ERAL1   | LMNA | -0.180900042 | -0.311179815 | -0.043946537 | 9.98E-03 | 2.03E-02 | 1.00E+00 |
| ECHS1   | LMNA | -0.039253883 | -0.17634924  | 0.09933542   | 5.79E-01 | 6.58E-01 | 1.00E+00 |
| NMBR    | LMNA | -0.050637849 | -0.187378957 | 0.088028524  | 4.74E-01 | 5.60E-01 | 1.00E+00 |
| VPS4A   | LMNA | -0.088851089 | -0.224152637 | 0.049810891  | 2.09E-01 | 2.83E-01 | 1.00E+00 |
| ABCB7   | LMNA | 0.292819834  | 0.161288782  | 0.414130013  | 2.35E-05 | 8.69E-05 | 2.78E-01 |
| CYP11A1 | LMNA | 0.048810665  | -0.089845749 | 0.185610952  | 4.90E-01 | 5.75E-01 | 1.00E+00 |
| PFKP    | LMNA | 0.119183894  | -0.019182729 | 0.253071002  | 9.11E-02 | 1.41E-01 | 1.00E+00 |
| C9orf91 | LMNA | -0.221031159 | -0.348449714 | -0.085591873 | 1.57E-03 | 3.90E-03 | 1.00E+00 |
| ABCC6   | LMNA | 0.013022003  | -0.125254167 | 0.150801907  | 8.54E-01 | 8.92E-01 | 1.00E+00 |
| LRRRC41 | LMNA | 0.366136698  | 0.240228158  | 0.479929408  | 8.38E-08 | 4.87E-07 | 9.94E-04 |
| ATP5F1  | LMNA | -0.215411241 | -0.343254625 | -0.079731267 | 2.08E-03 | 5.01E-03 | 1.00E+00 |
| GFOD2   | LMNA | -0.155864197 | -0.287724177 | -0.018204915 | 2.68E-02 | 4.83E-02 | 1.00E+00 |
| MOSC1   | LMNA | -0.341796129 | -0.458225618 | -0.213834996 | 6.41E-07 | 3.18E-06 | 7.60E-03 |
| NCF4    | LMNA | 0.301242909  | 0.170273034  | 0.421754456  | 1.32E-05 | 5.12E-05 | 1.57E-01 |

|           |      |              |              |              |          |          |          |
|-----------|------|--------------|--------------|--------------|----------|----------|----------|
| HYMAI     | LMNA | 0.142929221  | 0.004976413  | 0.275543333  | 4.24E-02 | 7.26E-02 | 1.00E+00 |
| SLC25A3   | LMNA | 0.011046647  | -0.127198331 | 0.14887062   | 8.76E-01 | 9.08E-01 | 1.00E+00 |
| NAGPA     | LMNA | 0.4295832    | 0.3099113    | 0.53585561   | 1.77E-10 | 1.69E-09 | 2.10E-06 |
| MTHFD2L   | LMNA | -0.502962326 | -0.599394685 | -0.392139303 | 2.38E-14 | 4.25E-13 | 2.83E-10 |
| ZNF646    | LMNA | -0.13172404  | -0.264956896 | 0.006444145  | 6.17E-02 | 1.01E-01 | 1.00E+00 |
| RAB1B     | LMNA | 0.264388466  | 0.131123348  | 0.388268035  | 1.43E-04 | 4.56E-04 | 1.00E+00 |
| IFT122    | LMNA | 0.214731793  | 0.079023356  | 0.342626009  | 2.15E-03 | 5.17E-03 | 1.00E+00 |
| GALNT3    | LMNA | -0.093152881 | -0.228268385 | 0.045483025  | 1.87E-01 | 2.59E-01 | 1.00E+00 |
| LDB3      | LMNA | -0.26486616  | -0.388704177 | -0.131628147 | 1.39E-04 | 4.45E-04 | 1.00E+00 |
| GARNL1    | LMNA | -0.423806689 | -0.530802085 | -0.303513323 | 3.28E-10 | 2.96E-09 | 3.89E-06 |
| ALDOAP2   | LMNA | 0.468507864  | 0.353308118  | 0.569711102  | 2.04E-12 | 2.70E-11 | 2.42E-08 |
| LRRC6     | LMNA | 0.033046222  | -0.105486013 | 0.170320211  | 6.41E-01 | 7.14E-01 | 1.00E+00 |
| NTRK1     | LMNA | 0.364256182  | 0.238182405  | 0.478257556  | 9.87E-08 | 5.66E-07 | 1.17E-03 |
| ARTS-1    | LMNA | 0.415005733  | 0.293786326  | 0.523087999  | 8.20E-10 | 6.90E-09 | 9.73E-06 |
| UBAC1     | LMNA | -0.03302178  | -0.170296452 | 0.105510209  | 6.41E-01 | 7.14E-01 | 1.00E+00 |
| SLC6A11   | LMNA | -0.107728741 | -0.242178055 | 0.030780022  | 1.27E-01 | 1.87E-01 | 1.00E+00 |
| NAP1L2    | LMNA | -0.400216343 | -0.510085011 | -0.277497133 | 3.61E-09 | 2.69E-08 | 4.28E-05 |
| EPB41L4B  | LMNA | -0.240643784 | -0.366518628 | -0.106118147 | 5.61E-04 | 1.56E-03 | 1.00E+00 |
| RPL19     | LMNA | -0.118716694 | -0.252627395 | 0.019656456  | 9.24E-02 | 1.42E-01 | 1.00E+00 |
| CNGB1     | LMNA | -0.047540091 | -0.184381007 | 0.091108853  | 5.02E-01 | 5.86E-01 | 1.00E+00 |
| LOC643641 | LMNA | -0.026380387 | -0.163834728 | 0.112078787  | 7.09E-01 | 7.73E-01 | 1.00E+00 |
| FAM134B   | LMNA | 0.026473051  | -0.111987222 | 0.163924966  | 7.08E-01 | 7.72E-01 | 1.00E+00 |
| WISP2     | LMNA | 0.083942354  | -0.054743026 | 0.219450293  | 2.35E-01 | 3.13E-01 | 1.00E+00 |
| NTSR1     | LMNA | 0.100857594  | -0.037718581 | 0.235627833  | 1.53E-01 | 2.19E-01 | 1.00E+00 |
| HS3ST3A1  | LMNA | 0.452540119  | 0.335445619  | 0.555864269  | 1.37E-11 | 1.57E-10 | 1.62E-07 |
| GPSM2     | LMNA | -0.359478471 | -0.474006264 | -0.232989912 | 1.49E-07 | 8.27E-07 | 1.76E-03 |
| PRKCG     | LMNA | -0.176673369 | -0.307231024 | -0.039587915 | 1.19E-02 | 2.37E-02 | 1.00E+00 |
| CHORDC1   | LMNA | 0.066552305  | -0.07216169  | 0.202740603  | 3.47E-01 | 4.33E-01 | 1.00E+00 |
| MON1B     | LMNA | 0.193323157  | 0.056787733  | 0.322760186  | 5.84E-03 | 1.25E-02 | 1.00E+00 |
| TRIB3     | LMNA | 0.255964323  | 0.122232548  | 0.380567539  | 2.36E-04 | 7.16E-04 | 1.00E+00 |
| SLC2A5    | LMNA | 0.155621627  | 0.017956396  | 0.28749614   | 2.70E-02 | 4.87E-02 | 1.00E+00 |
| C2orf49   | LMNA | 0.008637305  | -0.129568191 | 0.146513605  | 9.03E-01 | 9.30E-01 | 1.00E+00 |
| DDX5      | LMNA | -0.060576331 | -0.196980062 | 0.078128025  | 3.92E-01 | 4.79E-01 | 1.00E+00 |
| ZNF446    | LMNA | 0.007512817  | -0.130673712 | 0.145413003  | 9.15E-01 | 9.39E-01 | 1.00E+00 |
| MLF1IP    | LMNA | -0.053954556 | -0.19058598  | 0.084727537  | 4.46E-01 | 5.32E-01 | 1.00E+00 |

|           |      |              |              |              |          |          |          |
|-----------|------|--------------|--------------|--------------|----------|----------|----------|
| SLC26A1   | LMNA | 0.068539227  | -0.07017577  | 0.204653812  | 3.32E-01 | 4.18E-01 | 1.00E+00 |
| RGN       | LMNA | -0.023320213 | -0.160853365 | 0.115101343  | 7.42E-01 | 8.00E-01 | 1.00E+00 |
| COL4A5    | LMNA | 0.165633689  | 0.028228151  | 0.296895899  | 1.85E-02 | 3.48E-02 | 1.00E+00 |
| CCNB1     | LMNA | 0.093857398  | -0.044773741 | 0.228941972  | 1.84E-01 | 2.55E-01 | 1.00E+00 |
| CCDC28B   | LMNA | -0.401197814 | -0.510949489 | -0.278575954 | 3.28E-09 | 2.46E-08 | 3.88E-05 |
| RP11-35N6 | LMNA | -0.613646534 | -0.692991126 | -0.519614419 | 2.75E-22 | 2.06E-20 | 3.26E-18 |
| KCNK3     | LMNA | -0.37167008  | -0.484844012 | -0.246254243 | 5.15E-08 | 3.12E-07 | 6.11E-04 |
| ZFP161    | LMNA | -0.298254155 | -0.419051029 | -0.167082664 | 1.62E-05 | 6.19E-05 | 1.93E-01 |
| FGR       | LMNA | 0.338259004  | 0.210015076  | 0.455060067  | 8.49E-07 | 4.12E-06 | 1.01E-02 |
| COX15     | LMNA | -0.218270323 | -0.345898557 | -0.082711625 | 1.80E-03 | 4.43E-03 | 1.00E+00 |
| EPN2      | LMNA | -0.228432766 | -0.355279884 | -0.093324798 | 1.08E-03 | 2.80E-03 | 1.00E+00 |
| AQP9      | LMNA | 0.303312859  | 0.172484229  | 0.423625539  | 1.14E-05 | 4.49E-05 | 1.36E-01 |
| XK        | LMNA | -0.125187514 | -0.258766445 | 0.013089707  | 7.59E-02 | 1.20E-01 | 1.00E+00 |
| SLC15A2   | LMNA | -0.287022646 | -0.408872577 | -0.155118005 | 3.45E-05 | 1.23E-04 | 4.09E-01 |
| MREG      | LMNA | 0.267877382  | 0.134811822  | 0.39145219   | 1.16E-04 | 3.75E-04 | 1.00E+00 |
| HEPH      | LMNA | 0.292757271  | 0.161222133  | 0.414073319  | 2.36E-05 | 8.72E-05 | 2.80E-01 |
| THRAP3    | LMNA | 0.129205711  | -0.009005928 | 0.262573199  | 6.69E-02 | 1.08E-01 | 1.00E+00 |
| MET       | LMNA | 0.293828118  | 0.162363095  | 0.415043595  | 2.19E-05 | 8.16E-05 | 2.60E-01 |
| PDLIM2    | LMNA | 0.332831348  | 0.20416108   | 0.450196839  | 1.30E-06 | 6.11E-06 | 1.54E-02 |
| ING3      | LMNA | -0.388826741 | -0.500036806 | -0.265000412 | 1.07E-08 | 7.28E-08 | 1.27E-04 |
| PHYHIP    | LMNA | -0.276478597 | -0.399289459 | -0.143920786 | 6.80E-05 | 2.30E-04 | 8.07E-01 |
| ADAM7     | LMNA | -0.081702509 | -0.217302529 | 0.056991303  | 2.48E-01 | 3.28E-01 | 1.00E+00 |
| COPS7A    | LMNA | 0.052230903  | -0.0864434   | 0.188919693  | 4.60E-01 | 5.46E-01 | 1.00E+00 |
| WSCD1     | LMNA | -0.19130957  | -0.320885823 | -0.05470331  | 6.38E-03 | 1.36E-02 | 1.00E+00 |
| SLC12A8   | LMNA | 0.242662115  | 0.108237028  | 0.368372723  | 5.02E-04 | 1.41E-03 | 1.00E+00 |
| RNF185    | LMNA | -0.061352599 | -0.197728878 | 0.07735357   | 3.86E-01 | 4.73E-01 | 1.00E+00 |
| TNS3      | LMNA | -0.038021516 | -0.175153153 | 0.100557301  | 5.91E-01 | 6.69E-01 | 1.00E+00 |
| IGSF3     | LMNA | -0.063130806 | -0.199443601 | 0.075578885  | 3.72E-01 | 4.60E-01 | 1.00E+00 |
| SRPK1     | LMNA | -0.257663176 | -0.382121851 | -0.124023783 | 2.14E-04 | 6.54E-04 | 1.00E+00 |
| MED13L    | LMNA | -0.182995059 | -0.313135428 | -0.046108891 | 9.14E-03 | 1.87E-02 | 1.00E+00 |
| C7orf44   | LMNA | -0.157632498 | -0.289386074 | -0.020017096 | 2.51E-02 | 4.57E-02 | 1.00E+00 |
| PTCD3     | LMNA | -0.386989521 | -0.498413153 | -0.262988494 | 1.28E-08 | 8.56E-08 | 1.51E-04 |
| RPL7A     | LMNA | -0.079201591 | -0.214902874 | 0.059499974  | 2.63E-01 | 3.44E-01 | 1.00E+00 |
| TEAD1     | LMNA | 0.235348913  | 0.100565294  | 0.361649855  | 7.47E-04 | 2.02E-03 | 1.00E+00 |
| ARL6IP1   | LMNA | -0.319355956 | -0.43809259  | -0.189666877 | 3.61E-06 | 1.55E-05 | 4.28E-02 |



|          |      |              |              |              |          |          |          |
|----------|------|--------------|--------------|--------------|----------|----------|----------|
| CTAGE5   | LMNA | -0.105458849 | -0.240015535 | 0.033073661  | 1.35E-01 | 1.97E-01 | 1.00E+00 |
| SLC25A14 | LMNA | -0.177838169 | -0.308319694 | -0.040788558 | 1.13E-02 | 2.27E-02 | 1.00E+00 |
| LEP      | LMNA | 0.129145668  | -0.009066985 | 0.262516346  | 6.70E-02 | 1.08E-01 | 1.00E+00 |
| PCDH21   | LMNA | -0.488730254 | -0.587165382 | -0.376051324 | 1.59E-13 | 2.50E-12 | 1.89E-09 |
| CACNG5   | LMNA | -0.141333361 | -0.274037556 | -0.003347677 | 4.48E-02 | 7.62E-02 | 1.00E+00 |
| ECH1     | LMNA | -0.023538941 | -0.161066544 | 0.114885388  | 7.39E-01 | 7.98E-01 | 1.00E+00 |
| MAPKAPK2 | LMNA | 0.547975655  | 0.443472741  | 0.637779535  | 3.16E-17 | 1.01E-15 | 3.75E-13 |
| ATXN10   | LMNA | -0.445836418 | -0.550033846 | -0.327971459 | 2.95E-11 | 3.18E-10 | 3.49E-07 |
| LHFPL2   | LMNA | 0.412865778  | 0.291424992  | 0.521209636  | 1.02E-09 | 8.43E-09 | 1.21E-05 |
| CCL22    | LMNA | 0.172662723  | 0.035456882  | 0.303479897  | 1.40E-02 | 2.73E-02 | 1.00E+00 |
| ACTR8    | LMNA | -0.144036865 | -0.276588068 | -0.006107305 | 4.08E-02 | 7.03E-02 | 1.00E+00 |
| PTPN22   | LMNA | 0.400425091  | 0.27772656   | 0.510268894  | 3.53E-09 | 2.64E-08 | 4.19E-05 |
| CYP2F1   | LMNA | -0.050518227 | -0.187263237 | 0.088147523  | 4.75E-01 | 5.61E-01 | 1.00E+00 |
| ITGA3    | LMNA | 0.597286896  | 0.500505613  | 0.679323557  | 6.44E-21 | 3.74E-19 | 7.64E-17 |
| RABGGTA  | LMNA | 0.285276708  | 0.153261567  | 0.407287609  | 3.87E-05 | 1.37E-04 | 4.59E-01 |
| KIAA1033 | LMNA | 0.210349533  | 0.074460797  | 0.338568846  | 2.66E-03 | 6.24E-03 | 1.00E+00 |
| ZNF510   | LMNA | -0.410536162 | -0.519163603 | -0.288856057 | 1.29E-09 | 1.05E-08 | 1.53E-05 |
| SLC26A10 | LMNA | -0.26255322  | -0.386591913 | -0.129184611 | 1.60E-04 | 5.03E-04 | 1.00E+00 |
| STX8     | LMNA | -0.232919034 | -0.359413208 | -0.098019832 | 8.50E-04 | 2.27E-03 | 1.00E+00 |
| RUNX3    | LMNA | 0.365340308  | 0.239361655  | 0.479221488  | 8.98E-08 | 5.19E-07 | 1.07E-03 |
| EFNB1    | LMNA | 0.457055682  | 0.340488481  | 0.559785876  | 8.06E-12 | 9.63E-11 | 9.56E-08 |
| EIF4G3   | LMNA | -0.080406382 | -0.216059087 | 0.058291667  | 2.55E-01 | 3.36E-01 | 1.00E+00 |
| ACSM3    | LMNA | 0.322378548  | 0.192913083  | 0.440811379  | 2.88E-06 | 1.27E-05 | 3.42E-02 |
| C5AR1    | LMNA | 0.506503681  | 0.396153023  | 0.602430714  | 1.46E-14 | 2.75E-13 | 1.74E-10 |
| SIGLEC8  | LMNA | -0.063964907 | -0.200247637 | 0.074746134  | 3.66E-01 | 4.53E-01 | 1.00E+00 |
| ASCC3L1  | LMNA | -0.023775793 | -0.161297372 | 0.114651525  | 7.37E-01 | 7.96E-01 | 1.00E+00 |
| ZNF623   | LMNA | -0.169311575 | -0.300342481 | -0.032008735 | 1.60E-02 | 3.06E-02 | 1.00E+00 |
| A2M      | LMNA | 0.264577572  | 0.131323177  | 0.388440699  | 1.42E-04 | 4.52E-04 | 1.00E+00 |
| NOL8     | LMNA | 0.180476554  | 0.043509594  | 0.310784372  | 1.02E-02 | 2.06E-02 | 1.00E+00 |
| GRPEL1   | LMNA | 0.309122127  | 0.178696951  | 0.428871212  | 7.59E-06 | 3.07E-05 | 9.01E-02 |
| LMNB2    | LMNA | 0.168073071  | 0.030735208  | 0.299182249  | 1.68E-02 | 3.20E-02 | 1.00E+00 |
| ROCK2    | LMNA | 0.152253178  | 0.014507098  | 0.284327974  | 3.05E-02 | 5.44E-02 | 1.00E+00 |
| SNX16    | LMNA | -0.140715555 | -0.27345445  | -0.002717341 | 4.58E-02 | 7.76E-02 | 1.00E+00 |
| Magmas   | LMNA | -0.180000856 | -0.310340122 | -0.043018844 | 1.04E-02 | 2.09E-02 | 1.00E+00 |
| ANXA3    | LMNA | -0.081323174 | -0.21693866  | 0.057371926  | 2.50E-01 | 3.30E-01 | 1.00E+00 |

|          |      |              |              |              |          |          |          |
|----------|------|--------------|--------------|--------------|----------|----------|----------|
| C11orf2  | LMNA | -0.179234773 | -0.309624566 | -0.042228659 | 1.07E-02 | 2.15E-02 | 1.00E+00 |
| VKORC1   | LMNA | 0.490224977  | 0.377737777  | 0.58845188   | 1.31E-13 | 2.07E-12 | 1.55E-09 |
| TRPM6    | LMNA | -0.048436932 | -0.185249215 | 0.09021733   | 4.94E-01 | 5.79E-01 | 1.00E+00 |
| KIAA1609 | LMNA | 0.434946104  | 0.315860889  | 0.540540488  | 9.91E-11 | 9.97E-10 | 1.18E-06 |
| FOXK2    | LMNA | 0.079106642  | -0.059595182 | 0.214811737  | 2.63E-01 | 3.45E-01 | 1.00E+00 |
| FEV      | LMNA | -0.241532112 | -0.367334793 | -0.107050579 | 5.34E-04 | 1.50E-03 | 1.00E+00 |
| EED      | LMNA | -0.211432475 | -0.339571893 | -0.075587765 | 2.52E-03 | 5.96E-03 | 1.00E+00 |
| RNF32    | LMNA | -0.066690788 | -0.202873983 | 0.072023312  | 3.46E-01 | 4.32E-01 | 1.00E+00 |
| PDCD5    | LMNA | 0.229846417  | 0.094803584  | 0.356582856  | 1.00E-03 | 2.62E-03 | 1.00E+00 |
| SLC8A1   | LMNA | 0.006836352  | -0.131338601 | 0.144750742  | 9.23E-01 | 9.45E-01 | 1.00E+00 |
| HES1     | LMNA | 0.180453346  | 0.04348565   | 0.3107627    | 1.02E-02 | 2.06E-02 | 1.00E+00 |
| DGUOK    | LMNA | -0.151775616 | -0.283878573 | -0.014018339 | 3.11E-02 | 5.53E-02 | 1.00E+00 |
| CLDN16   | LMNA | -0.053433816 | -0.190082654 | 0.08524601   | 4.50E-01 | 5.36E-01 | 1.00E+00 |
| CLC      | LMNA | -0.098426808 | -0.233307643 | 0.040170019  | 1.63E-01 | 2.31E-01 | 1.00E+00 |
| ISL1     | LMNA | -0.258989494 | -0.383334833 | -0.125422831 | 1.98E-04 | 6.08E-04 | 1.00E+00 |
| C1QTNF3  | LMNA | -0.055375417 | -0.191958962 | 0.083312477  | 4.34E-01 | 5.20E-01 | 1.00E+00 |
| GAGE1    | LMNA | 0.071607866  | -0.067106519 | 0.207606564  | 3.11E-01 | 3.96E-01 | 1.00E+00 |
| KIAA0528 | LMNA | -0.356930283 | -0.471736657 | -0.230223447 | 1.85E-07 | 1.01E-06 | 2.19E-03 |
| VGLL3    | LMNA | 0.452070383  | 0.334921415  | 0.555456055  | 1.44E-11 | 1.65E-10 | 1.71E-07 |
| MANEA    | LMNA | 0.098720251  | -0.039874172 | 0.233587817  | 1.62E-01 | 2.30E-01 | 1.00E+00 |
| C1orf61  | LMNA | -0.549407704 | -0.638993428 | -0.445117188 | 2.52E-17 | 8.12E-16 | 2.99E-13 |
| SUPT4H1  | LMNA | -0.278395943 | -0.401034066 | -0.145954384 | 6.03E-05 | 2.05E-04 | 7.15E-01 |
| CD1A     | LMNA | 0.115291126  | -0.023127981 | 0.249373091  | 1.02E-01 | 1.55E-01 | 1.00E+00 |
| ASAH1    | LMNA | 0.343095457  | 0.21523919   | 0.45938771   | 5.77E-07 | 2.88E-06 | 6.85E-03 |
| TRAF5    | LMNA | 0.173952704  | 0.036785073  | 0.30468685   | 1.33E-02 | 2.61E-02 | 1.00E+00 |
| RAPGEF6  | LMNA | -0.332214141 | -0.449643375 | -0.203495974 | 1.36E-06 | 6.37E-06 | 1.62E-02 |
| WHSC1    | LMNA | -0.233721396 | -0.360151924 | -0.098860165 | 8.15E-04 | 2.19E-03 | 1.00E+00 |
| NEIL1    | LMNA | -0.107342428 | -0.24181011  | 0.03117048   | 1.28E-01 | 1.88E-01 | 1.00E+00 |
| KIAA0020 | LMNA | 0.302088938  | 0.171176633  | 0.422519328  | 1.25E-05 | 4.86E-05 | 1.48E-01 |
| C16orf45 | LMNA | -0.274550545 | -0.397534213 | -0.141876962 | 7.68E-05 | 2.57E-04 | 9.11E-01 |
| GFPT2    | LMNA | 0.521392777  | 0.413074372  | 0.615164947  | 1.78E-15 | 4.04E-14 | 2.11E-11 |
| RBM10    | LMNA | 0.031424671  | -0.107090912 | 0.168743627  | 6.57E-01 | 7.28E-01 | 1.00E+00 |
| MRS2L    | LMNA | -0.004922542 | -0.142876449 | 0.13321899   | 9.45E-01 | 9.59E-01 | 1.00E+00 |
| DNAH17   | LMNA | -0.188208623 | -0.317997294 | -0.051495601 | 7.31E-03 | 1.53E-02 | 1.00E+00 |
| STARD5   | LMNA | 0.297015547  | 0.165761305  | 0.417930039  | 1.77E-05 | 6.69E-05 | 2.10E-01 |

|          |      |              |              |              |          |          |          |
|----------|------|--------------|--------------|--------------|----------|----------|----------|
| C19orf10 | LMNA | 0.514198385  | 0.404888649  | 0.609017885  | 4.99E-15 | 1.03E-13 | 5.92E-11 |
| SIP1     | LMNA | -0.271164586 | -0.394449548 | -0.138290424 | 9.48E-05 | 3.11E-04 | 1.00E+00 |
| DNAJC15  | LMNA | 0.113274021  | -0.025170587 | 0.247455414  | 1.08E-01 | 1.63E-01 | 1.00E+00 |
| C1orf160 | LMNA | 0.112649956  | -0.025802308 | 0.246861899  | 1.10E-01 | 1.65E-01 | 1.00E+00 |
| SLFN12   | LMNA | 0.285135026  | 0.153110959  | 0.407158957  | 3.90E-05 | 1.38E-04 | 4.63E-01 |
| STAU2    | LMNA | -0.537780415 | -0.629124505 | -0.431785668 | 1.55E-16 | 4.36E-15 | 1.83E-12 |
| FAM98A   | LMNA | 0.196074251  | 0.059637534  | 0.325319425  | 5.16E-03 | 1.12E-02 | 1.00E+00 |
| EXOC3    | LMNA | 0.165712719  | 0.028309346  | 0.296969994  | 1.84E-02 | 3.47E-02 | 1.00E+00 |
| RAD23B   | LMNA | 0.078505369  | -0.060198042 | 0.214234551  | 2.67E-01 | 3.48E-01 | 1.00E+00 |
| HIST3H3  | LMNA | -0.132580865 | -0.265767544 | 0.005572121  | 6.00E-02 | 9.84E-02 | 1.00E+00 |
| NCOR2    | LMNA | 0.227421461  | 0.092267261  | 0.354347454  | 1.13E-03 | 2.93E-03 | 1.00E+00 |
| TNFRSF9  | LMNA | 0.420591178  | 0.299956565  | 0.527985726  | 4.60E-10 | 4.06E-09 | 5.46E-06 |
| KLK8     | LMNA | -0.108267789 | -0.242691408 | 0.03023512   | 1.25E-01 | 1.84E-01 | 1.00E+00 |
| NOL1     | LMNA | 0.195116729  | 0.058645404  | 0.324428893  | 5.39E-03 | 1.17E-02 | 1.00E+00 |
| ALX1     | LMNA | -0.144870935 | -0.277374561 | -0.006959114 | 3.97E-02 | 6.85E-02 | 1.00E+00 |
| CCNE1    | LMNA | 0.135663     | -0.002433578 | 0.268682013  | 5.42E-02 | 9.01E-02 | 1.00E+00 |
| PKDREJ   | LMNA | 0.072756353  | -0.065957126 | 0.208711042  | 3.03E-01 | 3.88E-01 | 1.00E+00 |
| TIAL1    | LMNA | -0.199541754 | -0.328542417 | -0.063232618 | 4.41E-03 | 9.79E-03 | 1.00E+00 |
| WHSC1L1  | LMNA | -0.270491905 | -0.393836393 | -0.137578309 | 9.89E-05 | 3.23E-04 | 1.00E+00 |
| HIST1H1E | LMNA | -0.241005555 | -0.366851033 | -0.10649785  | 5.50E-04 | 1.54E-03 | 1.00E+00 |
| SMUG1    | LMNA | -0.036326777 | -0.173507646 | 0.102236936  | 6.08E-01 | 6.84E-01 | 1.00E+00 |
| TM4SF4   | LMNA | 0.160068996  | 0.022515537  | 0.291674662  | 2.29E-02 | 4.21E-02 | 1.00E+00 |
| NPY6R    | LMNA | -0.099034932 | -0.233888243 | 0.039556885  | 1.61E-01 | 2.28E-01 | 1.00E+00 |
| UFM1     | LMNA | 0.180364005  | 0.043393477  | 0.310679269  | 1.02E-02 | 2.07E-02 | 1.00E+00 |
| AP3M2    | LMNA | -0.375013759 | -0.487810319 | -0.249900356 | 3.82E-08 | 2.34E-07 | 4.53E-04 |
| USP14    | LMNA | -0.019874887 | -0.157493764 | 0.118501252  | 7.79E-01 | 8.31E-01 | 1.00E+00 |
| CORO2A   | LMNA | 0.123347431  | -0.014958283 | 0.257021803  | 8.03E-02 | 1.26E-01 | 1.00E+00 |
| ETNK2    | LMNA | 0.009201411  | -0.129013471 | 0.1470656    | 8.97E-01 | 9.25E-01 | 1.00E+00 |
| APOE     | LMNA | -0.143941355 | -0.276497996 | -0.006009776 | 4.10E-02 | 7.05E-02 | 1.00E+00 |
| ANGPT4   | LMNA | 0.117723972  | -0.02066284  | 0.251684616  | 9.52E-02 | 1.46E-01 | 1.00E+00 |
| DSTN     | LMNA | 0.182954718  | 0.046067242  | 0.313097782  | 9.16E-03 | 1.87E-02 | 1.00E+00 |
| SFRS14   | LMNA | -0.24086446  | -0.366721395 | -0.106349757 | 5.54E-04 | 1.55E-03 | 1.00E+00 |
| FRS2     | LMNA | 0.085106306  | -0.053574138 | 0.220565876  | 2.28E-01 | 3.06E-01 | 1.00E+00 |
| NR2E3    | LMNA | -0.008401375 | -0.146282715 | 0.12980017   | 9.06E-01 | 9.32E-01 | 1.00E+00 |
| ST8SIA4  | LMNA | 0.380199451  | 0.255562118  | 0.492405601  | 2.39E-08 | 1.52E-07 | 2.83E-04 |

|           |      |              |              |              |          |          |          |
|-----------|------|--------------|--------------|--------------|----------|----------|----------|
| GMPR      | LMNA | 0.018118919  | -0.120232824 | 0.155780261  | 7.98E-01 | 8.48E-01 | 1.00E+00 |
| TUBB2C    | LMNA | 0.222438348  | 0.087060796  | 0.349749305  | 1.46E-03 | 3.67E-03 | 1.00E+00 |
| LOC730092 | LMNA | -0.193230935 | -0.322674364 | -0.056692241 | 5.86E-03 | 1.26E-02 | 1.00E+00 |
| ORM1      | LMNA | 0.281216337  | 0.148947817  | 0.403598747  | 5.03E-05 | 1.74E-04 | 5.97E-01 |
| HSPD1     | LMNA | 0.093948897  | -0.044681612 | 0.229029446  | 1.84E-01 | 2.55E-01 | 1.00E+00 |
| C5orf13   | LMNA | -0.251503958 | -0.376483317 | -0.117533774 | 3.06E-04 | 9.05E-04 | 1.00E+00 |
| F2RL1     | LMNA | 0.322448873  | 0.192988644  | 0.440874609  | 2.87E-06 | 1.26E-05 | 3.40E-02 |
| PLEKHA9   | LMNA | 0.213117859  | 0.077342358  | 0.341132359  | 2.32E-03 | 5.55E-03 | 1.00E+00 |
| ZNF232    | LMNA | -0.383133825 | -0.495003117 | -0.258769672 | 1.83E-08 | 1.19E-07 | 2.16E-04 |
| SLC6A7    | LMNA | -0.037900091 | -0.175035282 | 0.10067767   | 5.92E-01 | 6.70E-01 | 1.00E+00 |
| ADH5      | LMNA | -0.219602619 | -0.347129904 | -0.084101263 | 1.69E-03 | 4.17E-03 | 1.00E+00 |
| SHBG      | LMNA | 0.039133685  | -0.099454614 | 0.176232599  | 5.80E-01 | 6.59E-01 | 1.00E+00 |
| DSCR6     | LMNA | -0.089704107 | -0.224969148 | 0.048953116  | 2.04E-01 | 2.79E-01 | 1.00E+00 |
| CROCCL2   | LMNA | -0.283634016 | -0.405795696 | -0.15151576  | 4.30E-05 | 1.51E-04 | 5.11E-01 |
| CDIPT     | LMNA | 0.236402831  | 0.101669894  | 0.36261951   | 7.06E-04 | 1.92E-03 | 1.00E+00 |
| SLC16A5   | LMNA | 0.300978453  | 0.169990627  | 0.421515333  | 1.35E-05 | 5.21E-05 | 1.60E-01 |
| TUBB      | LMNA | 0.085188742  | -0.053491337 | 0.220644873  | 2.28E-01 | 3.05E-01 | 1.00E+00 |
| GAS2L1    | LMNA | 0.155720139  | 0.018057322  | 0.287588752  | 2.69E-02 | 4.86E-02 | 1.00E+00 |
| TOR3A     | LMNA | 0.177102466  | 0.04003017   | 0.307632116  | 1.17E-02 | 2.33E-02 | 1.00E+00 |
| PREP      | LMNA | -0.01428308  | -0.152034301 | 0.124012447  | 8.40E-01 | 8.81E-01 | 1.00E+00 |
| RFX3      | LMNA | -0.243340667 | -0.368995835 | -0.108949658 | 4.84E-04 | 1.37E-03 | 1.00E+00 |
| CHMP1B    | LMNA | 0.045923461  | -0.092715334 | 0.182815452  | 5.16E-01 | 6.00E-01 | 1.00E+00 |
| COPS4     | LMNA | -0.240091489 | -0.366011099 | -0.10553855  | 5.78E-04 | 1.61E-03 | 1.00E+00 |
| MYH6      | LMNA | -0.031511464 | -0.168828031 | 0.107005028  | 6.56E-01 | 7.27E-01 | 1.00E+00 |
| BCHE      | LMNA | -0.378088199 | -0.490535477 | -0.25325601  | 2.90E-08 | 1.82E-07 | 3.44E-04 |
| MAP3K13   | LMNA | -0.45301653  | -0.556278232 | -0.335977347 | 1.29E-11 | 1.49E-10 | 1.53E-07 |
| LCMT1     | LMNA | -0.179548219 | -0.309917357 | -0.042551946 | 1.06E-02 | 2.13E-02 | 1.00E+00 |
| EIF1AX    | LMNA | -0.126128454 | -0.259658244 | 0.012133823  | 7.37E-02 | 1.17E-01 | 1.00E+00 |
| SLC24A5   | LMNA | -0.305226112 | -0.425354066 | -0.174529209 | 1.00E-05 | 3.96E-05 | 1.19E-01 |
| BCL2      | LMNA | -0.19475978  | -0.324096859 | -0.058275623 | 5.48E-03 | 1.18E-02 | 1.00E+00 |
| HBZ       | LMNA | -0.205082427 | -0.33368616  | -0.068984504 | 3.41E-03 | 7.79E-03 | 1.00E+00 |
| TJAP1     | LMNA | -0.101128871 | -0.235886672 | 0.037444896  | 1.52E-01 | 2.18E-01 | 1.00E+00 |
| MAPBPIP   | LMNA | 0.226155523  | 0.090943881  | 0.353179896  | 1.21E-03 | 3.10E-03 | 1.00E+00 |
| TMEM156   | LMNA | -0.206452283 | -0.334956701 | -0.070407976 | 3.20E-03 | 7.36E-03 | 1.00E+00 |
| MYO15B    | LMNA | 0.009745191  | -0.128478656 | 0.147597624  | 8.91E-01 | 9.21E-01 | 1.00E+00 |

|          |      |              |              |              |          |          |          |
|----------|------|--------------|--------------|--------------|----------|----------|----------|
| ZNF239   | LMNA | -0.396082659 | -0.50644163  | -0.27295683  | 5.38E-09 | 3.89E-08 | 6.39E-05 |
| KIAA1324 | LMNA | -0.222849866 | -0.350129264 | -0.087490479 | 1.43E-03 | 3.61E-03 | 1.00E+00 |
| PLCL2    | LMNA | -0.227694348 | -0.354599083 | -0.092552594 | 1.12E-03 | 2.90E-03 | 1.00E+00 |
| C4orf29  | LMNA | -0.32596857  | -0.444037745 | -0.196772383 | 2.20E-06 | 9.89E-06 | 2.61E-02 |
| SNX19    | LMNA | 0.142835306  | 0.004880543  | 0.275454737  | 4.26E-02 | 7.28E-02 | 1.00E+00 |
| NAALADL1 | LMNA | 0.239165965  | 0.104567479  | 0.365160427  | 6.08E-04 | 1.68E-03 | 1.00E+00 |
| DUSP5    | LMNA | 0.521424445  | 0.413110442  | 0.615191979  | 1.77E-15 | 4.03E-14 | 2.10E-11 |
| GKN1     | LMNA | 0.053856598  | -0.084825073 | 0.190491304  | 4.47E-01 | 5.33E-01 | 1.00E+00 |
| PXDN     | LMNA | 0.362952625  | 0.236764964  | 0.477098159  | 1.10E-07 | 6.28E-07 | 1.31E-03 |
| FCN1     | LMNA | 0.225745574  | 0.090515433  | 0.35280172   | 1.24E-03 | 3.16E-03 | 1.00E+00 |
| SLMO1    | LMNA | -0.138175974 | -0.271056482 | -0.000127403 | 4.99E-02 | 8.37E-02 | 1.00E+00 |
| TNXB     | LMNA | 0.213202849  | 0.077430861  | 0.341211031  | 2.32E-03 | 5.53E-03 | 1.00E+00 |
| C1QL1    | LMNA | -0.316983627 | -0.435957182 | -0.187121025 | 4.30E-06 | 1.82E-05 | 5.10E-02 |
| BIRC7    | LMNA | 0.041421582  | -0.097185151 | 0.178452142  | 5.58E-01 | 6.39E-01 | 1.00E+00 |
| A4GALT   | LMNA | 0.327772303  | 0.198712922  | 0.445657611  | 1.92E-06 | 8.73E-06 | 2.28E-02 |
| TIMM22   | LMNA | 0.025696015  | -0.112754968 | 0.163168199  | 7.17E-01 | 7.79E-01 | 1.00E+00 |
| ABHD9    | LMNA | 0.097844552  | -0.040756975 | 0.23275165   | 1.66E-01 | 2.34E-01 | 1.00E+00 |
| TOMM34   | LMNA | 0.357695904  | 0.231054435  | 0.472418736  | 1.73E-07 | 9.54E-07 | 2.05E-03 |
| ZNF35    | LMNA | -0.19793785  | -0.327051985 | -0.061569261 | 4.75E-03 | 1.04E-02 | 1.00E+00 |
| LIMD1    | LMNA | 0.021171714  | -0.1172219   | 0.158758699  | 7.65E-01 | 8.20E-01 | 1.00E+00 |
| CARD8    | LMNA | 0.095684077  | -0.042934052 | 0.230687856  | 1.76E-01 | 2.45E-01 | 1.00E+00 |
| KIAA0286 | LMNA | 0.051474299  | -0.087196326 | 0.188188021  | 4.67E-01 | 5.53E-01 | 1.00E+00 |
| CD6      | LMNA | 0.221438841  | 0.086017379  | 0.348826274  | 1.54E-03 | 3.84E-03 | 1.00E+00 |
| RSRC1    | LMNA | -0.097254838 | -0.232188447 | 0.041351351  | 1.69E-01 | 2.37E-01 | 1.00E+00 |
| TOX3     | LMNA | -0.499920686 | -0.596784848 | -0.388695318 | 3.60E-14 | 6.19E-13 | 4.27E-10 |
| C16orf35 | LMNA | -0.020051666 | -0.157666223 | 0.118326881  | 7.77E-01 | 8.30E-01 | 1.00E+00 |
| CRHBP    | LMNA | -0.184753386 | -0.314775905 | -0.047924725 | 8.48E-03 | 1.75E-02 | 1.00E+00 |
| PTRF     | LMNA | 0.80366019   | 0.748671352  | 0.847665964  | 5.77E-47 | 3.42E-43 | 6.84E-43 |
| FBXO24   | LMNA | 0.229142326  | 0.094066977  | 0.355933952  | 1.04E-03 | 2.71E-03 | 1.00E+00 |
| CHST11   | LMNA | 0.197084771  | 0.060684869  | 0.326258998  | 4.93E-03 | 1.08E-02 | 1.00E+00 |
| THRB     | LMNA | 0.077685949  | -0.061019462 | 0.213447802  | 2.72E-01 | 3.54E-01 | 1.00E+00 |
| RNF39    | LMNA | 0.146597303  | 0.008722834  | 0.27900189   | 3.74E-02 | 6.49E-02 | 1.00E+00 |
| MYBPC1   | LMNA | -0.215325373 | -0.343175188 | -0.079641795 | 2.09E-03 | 5.03E-03 | 1.00E+00 |
| PSMD11   | LMNA | 0.090766363  | -0.047884651 | 0.225985675  | 1.99E-01 | 2.73E-01 | 1.00E+00 |
| ALAD     | LMNA | 0.122711256  | -0.015604084 | 0.256418423  | 8.19E-02 | 1.28E-01 | 1.00E+00 |

|          |      |              |              |              |          |          |          |
|----------|------|--------------|--------------|--------------|----------|----------|----------|
| AQP2     | LMNA | 0.060612911  | -0.078091534 | 0.197015351  | 3.91E-01 | 4.79E-01 | 1.00E+00 |
| EN1      | LMNA | 0.047227025  | -0.09142001  | 0.184077886  | 5.04E-01 | 5.88E-01 | 1.00E+00 |
| GSTM4    | LMNA | 0.063482569  | -0.075227714 | 0.199782708  | 3.69E-01 | 4.57E-01 | 1.00E+00 |
| ZNF187   | LMNA | -0.463437636 | -0.565320542 | -0.347627134 | 3.77E-12 | 4.78E-11 | 4.48E-08 |
| CDC42BPA | LMNA | 0.108803143  | -0.029693871 | 0.243201169  | 1.23E-01 | 1.82E-01 | 1.00E+00 |
| F7       | LMNA | -0.253395862 | -0.37821627  | -0.119526068 | 2.74E-04 | 8.20E-04 | 1.00E+00 |
| CNOT1    | LMNA | 0.038137468  | -0.100442353 | 0.175265709  | 5.90E-01 | 6.68E-01 | 1.00E+00 |
| SLC13A4  | LMNA | -0.074076035 | -0.209979726 | 0.064635951  | 2.95E-01 | 3.79E-01 | 1.00E+00 |
| ZBTB11   | LMNA | -0.182491262 | -0.312665255 | -0.045588784 | 9.34E-03 | 1.91E-02 | 1.00E+00 |
| B3GALT5  | LMNA | 0.056554192  | -0.082138091 | 0.19309761   | 4.24E-01 | 5.11E-01 | 1.00E+00 |
| LUC7L2   | LMNA | -0.045102147 | -0.18201982  | 0.093531216  | 5.24E-01 | 6.07E-01 | 1.00E+00 |
| SPTBN1   | LMNA | -0.113162408 | -0.247349273 | 0.025283577  | 1.09E-01 | 1.63E-01 | 1.00E+00 |
| EXOC2    | LMNA | -0.113708544 | -0.247868608 | 0.024730668  | 1.07E-01 | 1.61E-01 | 1.00E+00 |
| LSM4     | LMNA | -0.132007393 | -0.265224999 | 0.006155789  | 6.11E-02 | 9.99E-02 | 1.00E+00 |
| IRS1     | LMNA | 0.251563588  | 0.117596551  | 0.37653795   | 3.04E-04 | 9.02E-04 | 1.00E+00 |
| TMEM1    | LMNA | 0.05664858   | -0.082044037 | 0.193188769  | 4.23E-01 | 5.10E-01 | 1.00E+00 |
| MRPL34   | LMNA | 0.013012744  | -0.125263283 | 0.150792857  | 8.54E-01 | 8.92E-01 | 1.00E+00 |
| SAMM50   | LMNA | -0.118233213 | -0.25216827  | 0.020146625  | 9.38E-02 | 1.44E-01 | 1.00E+00 |
| CDC42EP3 | LMNA | 0.34320387   | 0.215356377  | 0.459484654  | 5.72E-07 | 2.85E-06 | 6.79E-03 |
| HSF2     | LMNA | -0.485665524 | -0.584526034 | -0.37259581  | 2.37E-13 | 3.59E-12 | 2.81E-09 |
| SRP72    | LMNA | -0.042227027 | -0.179233191 | 0.096385853  | 5.51E-01 | 6.32E-01 | 1.00E+00 |
| MFN2     | LMNA | -0.008094339 | -0.145982215 | 0.130102041  | 9.09E-01 | 9.35E-01 | 1.00E+00 |
| TSPAN7   | LMNA | -0.496738106 | -0.594051884 | -0.385095074 | 5.53E-14 | 9.12E-13 | 6.55E-10 |
| SGK269   | LMNA | -0.102441156 | -0.237138519 | 0.036120667  | 1.47E-01 | 2.11E-01 | 1.00E+00 |
| NUCB1    | LMNA | 0.499861733  | 0.388628597  | 0.596734244  | 3.63E-14 | 6.23E-13 | 4.31E-10 |
| RHOH     | LMNA | 0.309417245  | 0.179012842  | 0.429137483  | 7.44E-06 | 3.02E-05 | 8.82E-02 |
| MTX1     | LMNA | 0.211963674  | 0.076140686  | 0.340063796  | 2.46E-03 | 5.83E-03 | 1.00E+00 |
| CENTA1   | LMNA | -0.227030978 | -0.353987359 | -0.091859009 | 1.16E-03 | 2.98E-03 | 1.00E+00 |
| ATR      | LMNA | 0.110006731  | -0.028476732 | 0.244346947  | 1.19E-01 | 1.77E-01 | 1.00E+00 |
| DDX49    | LMNA | -0.002866407 | -0.140861667 | 0.135238109  | 9.68E-01 | 9.76E-01 | 1.00E+00 |
| TACR1    | LMNA | 0.033385808  | -0.105149822 | 0.170650291  | 6.37E-01 | 7.11E-01 | 1.00E+00 |
| SFRS5    | LMNA | 0.023017809  | -0.11539989  | 0.160558614  | 7.45E-01 | 8.03E-01 | 1.00E+00 |
| THAP1    | LMNA | -0.128718725 | -0.26211206  | 0.009501108  | 6.79E-02 | 1.09E-01 | 1.00E+00 |
| RHBDF1   | LMNA | 0.415941412  | 0.294819266  | 0.523908968  | 7.45E-10 | 6.32E-09 | 8.84E-06 |
| RASIP1   | LMNA | 0.032008576  | -0.106513086 | 0.169311421  | 6.51E-01 | 7.23E-01 | 1.00E+00 |

|          |      |              |              |              |          |          |          |
|----------|------|--------------|--------------|--------------|----------|----------|----------|
| DPYD     | LMNA | 0.524042644  | 0.416093786  | 0.617426187  | 1.21E-15 | 2.83E-14 | 1.43E-11 |
| MYO5C    | LMNA | 0.079984919  | -0.058714406 | 0.215654661  | 2.58E-01 | 3.39E-01 | 1.00E+00 |
| DOHH     | LMNA | 0.146059103  | 0.008172898  | 0.278494648  | 3.81E-02 | 6.59E-02 | 1.00E+00 |
| POF1B    | LMNA | 0.246814628  | 0.112600256  | 0.372184194  | 3.99E-04 | 1.15E-03 | 1.00E+00 |
| MAPK10   | LMNA | -0.516369988 | -0.610874556 | -0.407357637 | 3.66E-15 | 7.76E-14 | 4.35E-11 |
| ZNF552   | LMNA | 0.001596143  | -0.136484932 | 0.13961638   | 9.82E-01 | 9.86E-01 | 1.00E+00 |
| USP32    | LMNA | 0.097676513  | -0.040926352 | 0.232591175  | 1.67E-01 | 2.34E-01 | 1.00E+00 |
| MED27    | LMNA | -0.134968221 | -0.268025242 | 0.00314131   | 5.55E-02 | 9.18E-02 | 1.00E+00 |
| NCAM1    | LMNA | -0.519234534 | -0.613322088 | -0.4106169   | 2.43E-15 | 5.30E-14 | 2.88E-11 |
| PRDX4    | LMNA | 0.393128228  | 0.269715139  | 0.503835213  | 7.15E-09 | 5.04E-08 | 8.48E-05 |
| AGT      | LMNA | -0.208214365 | -0.336590345 | -0.072239841 | 2.94E-03 | 6.83E-03 | 1.00E+00 |
| SLC22A14 | LMNA | -0.331610448 | -0.449101941 | -0.202845544 | 1.43E-06 | 6.64E-06 | 1.69E-02 |
| DAPP1    | LMNA | 0.027242491  | -0.111226818 | 0.164674176  | 7.00E-01 | 7.65E-01 | 1.00E+00 |
| PILRA    | LMNA | 0.189271707  | 0.052594968  | 0.318987827  | 6.98E-03 | 1.47E-02 | 1.00E+00 |
| ATF7     | LMNA | 0.280272553  | 0.14794586   | 0.402740746  | 5.35E-05 | 1.84E-04 | 6.34E-01 |
| ABCF2    | LMNA | 0.376529852  | 0.251554749  | 0.489154447  | 3.33E-08 | 2.07E-07 | 3.96E-04 |
| KIAA0748 | LMNA | -0.166041572 | -0.297278298 | -0.028647229 | 1.82E-02 | 3.43E-02 | 1.00E+00 |
| C17orf85 | LMNA | -0.096483306 | -0.231451462 | 0.042128835  | 1.72E-01 | 2.41E-01 | 1.00E+00 |
| TKTL1    | LMNA | -0.233422298 | -0.359876571 | -0.098546891 | 8.28E-04 | 2.22E-03 | 1.00E+00 |
| FGF1     | LMNA | 0.080242625  | -0.058455926 | 0.215901955  | 2.56E-01 | 3.38E-01 | 1.00E+00 |
| IL6R     | LMNA | 0.344340362  | 0.216585064  | 0.460500754  | 5.22E-07 | 2.62E-06 | 6.20E-03 |
| CHRNA2   | LMNA | -0.404947137 | -0.514249844 | -0.282700016 | 2.26E-09 | 1.75E-08 | 2.68E-05 |
| COL7A1   | LMNA | 0.260238388  | 0.126740695  | 0.384476616  | 1.84E-04 | 5.69E-04 | 1.00E+00 |
| NFIL3    | LMNA | 0.172918542  | 0.03572024   | 0.303719285  | 1.39E-02 | 2.70E-02 | 1.00E+00 |
| LRRC48   | LMNA | -0.01970456  | -0.157327593 | 0.118669248  | 7.81E-01 | 8.33E-01 | 1.00E+00 |
| TM6SF1   | LMNA | -0.144169829 | -0.27671346  | -0.006243083 | 4.07E-02 | 7.00E-02 | 1.00E+00 |
| SPG20    | LMNA | -0.120544132 | -0.25436223  | 0.017803135  | 8.75E-02 | 1.36E-01 | 1.00E+00 |
| COX10    | LMNA | -0.034093676 | -0.171338245 | 0.104448931  | 6.30E-01 | 7.04E-01 | 1.00E+00 |
| DNAJA3   | LMNA | -0.035878241 | -0.173072011 | 0.102681343  | 6.12E-01 | 6.88E-01 | 1.00E+00 |
| ECEL1    | LMNA | -0.179247519 | -0.309636472 | -0.042241804 | 1.07E-02 | 2.15E-02 | 1.00E+00 |
| GCA      | LMNA | 0.005237294  | -0.132909802 | 0.14318477   | 9.41E-01 | 9.56E-01 | 1.00E+00 |
| GLG1     | LMNA | 0.49855298   | 0.387147706  | 0.595610639  | 4.33E-14 | 7.29E-13 | 5.14E-10 |
| CIITA    | LMNA | 0.321490551  | 0.191959097  | 0.44001286   | 3.08E-06 | 1.34E-05 | 3.65E-02 |
| CLDN6    | LMNA | 0.247284859  | 0.113094676  | 0.372615539  | 3.88E-04 | 1.12E-03 | 1.00E+00 |
| EPHA4    | LMNA | -0.044463304 | -0.18140083  | 0.094165705  | 5.30E-01 | 6.12E-01 | 1.00E+00 |

|          |      |              |              |              |          |          |          |
|----------|------|--------------|--------------|--------------|----------|----------|----------|
| FANCC    | LMNA | -0.113823895 | -0.247978288 | 0.024613876  | 1.07E-01 | 1.61E-01 | 1.00E+00 |
| MUTYH    | LMNA | -0.053691431 | -0.190331663 | 0.084989526  | 4.48E-01 | 5.34E-01 | 1.00E+00 |
| L2HGDH   | LMNA | -0.380615573 | -0.492774075 | -0.256016813 | 2.30E-08 | 1.48E-07 | 2.73E-04 |
| GPATCH2  | LMNA | 0.18560204   | 0.048801457  | 0.3155674    | 8.18E-03 | 1.70E-02 | 1.00E+00 |
| PSG3     | LMNA | -0.175954224 | -0.306558712 | -0.038846839 | 1.23E-02 | 2.43E-02 | 1.00E+00 |
| ZNF227   | LMNA | -0.125448104 | -0.259013449 | 0.012825003  | 7.53E-02 | 1.20E-01 | 1.00E+00 |
| MRPL15   | LMNA | 0.096527276  | -0.04208453  | 0.231493467  | 1.72E-01 | 2.41E-01 | 1.00E+00 |
| NQO2     | LMNA | 0.176617804  | 0.03953065   | 0.307179083  | 1.19E-02 | 2.37E-02 | 1.00E+00 |
| C21orf59 | LMNA | 0.335052393  | 0.206555475  | 0.452187757  | 1.09E-06 | 5.20E-06 | 1.30E-02 |
| ZBTB20   | LMNA | -0.125476986 | -0.259040823 | 0.012795664  | 7.52E-02 | 1.19E-01 | 1.00E+00 |
| NEU1     | LMNA | 0.349562127  | 0.222235641  | 0.465165452  | 3.41E-07 | 1.78E-06 | 4.05E-03 |
| QRICH1   | LMNA | -0.128944729 | -0.262326076 | 0.00927131   | 6.74E-02 | 1.09E-01 | 1.00E+00 |
| C2orf34  | LMNA | -0.117910238 | -0.251861531 | 0.020474031  | 9.47E-02 | 1.45E-01 | 1.00E+00 |
| UBE2L6   | LMNA | 0.116197697  | -0.022209572 | 0.250234632  | 9.96E-02 | 1.51E-01 | 1.00E+00 |
| HP1BP3   | LMNA | -0.185890931 | -0.315836792 | -0.049099954 | 8.08E-03 | 1.68E-02 | 1.00E+00 |
| MED14    | LMNA | 0.192320824  | 0.055749991  | 0.321827284  | 6.11E-03 | 1.31E-02 | 1.00E+00 |
| TSN      | LMNA | -0.104166326 | -0.238783556 | 0.034379055  | 1.40E-01 | 2.03E-01 | 1.00E+00 |
| TPBG     | LMNA | 0.418817423  | 0.297996004  | 0.526431141  | 5.54E-10 | 4.80E-09 | 6.57E-06 |
| SPRY2    | LMNA | 0.317991461  | 0.188202363  | 0.436864528  | 3.99E-06 | 1.71E-05 | 4.74E-02 |
| LZTFL1   | LMNA | -0.129287008 | -0.262650176 | 0.008923256  | 6.67E-02 | 1.08E-01 | 1.00E+00 |
| OSR2     | LMNA | 0.198481047  | 0.062132509  | 0.327556825  | 4.63E-03 | 1.02E-02 | 1.00E+00 |
| KLHL7    | LMNA | -0.23582434  | -0.362087304 | -0.101063542 | 7.28E-04 | 1.98E-03 | 1.00E+00 |
| XPC      | LMNA | 0.224323062  | 0.089029117  | 0.351489139  | 1.33E-03 | 3.38E-03 | 1.00E+00 |
| GMFB     | LMNA | -0.191139525 | -0.320727488 | -0.054527337 | 6.43E-03 | 1.37E-02 | 1.00E+00 |
| PBEF1    | LMNA | 0.480777178  | 0.367090633  | 0.580311854  | 4.43E-13 | 6.51E-12 | 5.25E-09 |
| CCR3     | LMNA | 0.132925147  | -0.005221673 | 0.266093218  | 5.93E-02 | 9.74E-02 | 1.00E+00 |
| AGTPBP1  | LMNA | -0.237424156 | -0.363558916 | -0.102740649 | 6.68E-04 | 1.83E-03 | 1.00E+00 |
| TMEM8    | LMNA | 0.43294536   | 0.313640175  | 0.538793462  | 1.23E-10 | 1.21E-09 | 1.46E-06 |
| PCSK6    | LMNA | -0.239504366 | -0.365471484 | -0.104922504 | 5.97E-04 | 1.66E-03 | 1.00E+00 |
| STAT5A   | LMNA | 0.504575726  | 0.393967384  | 0.600778209  | 1.91E-14 | 3.52E-13 | 2.27E-10 |
| FAM18B   | LMNA | 0.252926794  | 0.11903201   | 0.377786694  | 2.82E-04 | 8.40E-04 | 1.00E+00 |
| PTPN2    | LMNA | 0.341317208  | 0.213317557  | 0.45779718   | 6.66E-07 | 3.29E-06 | 7.90E-03 |
| SF3A3    | LMNA | 0.08195108   | -0.056741865 | 0.217540947  | 2.46E-01 | 3.26E-01 | 1.00E+00 |
| EFCBP2   | LMNA | -0.453508401 | -0.556705575 | -0.336526406 | 1.22E-11 | 1.41E-10 | 1.45E-07 |
| HCFC1    | LMNA | 0.017218101  | -0.121120801 | 0.154900906  | 8.08E-01 | 8.55E-01 | 1.00E+00 |



|          |      |              |              |              |          |          |          |
|----------|------|--------------|--------------|--------------|----------|----------|----------|
| NFYA     | LMNA | 0.263871099  | 0.130576703  | 0.38779561   | 1.48E-04 | 4.69E-04 | 1.00E+00 |
| PBLD     | LMNA | -0.229502186 | -0.35626562  | -0.094443437 | 1.02E-03 | 2.66E-03 | 1.00E+00 |
| PIGF     | LMNA | -0.23429925  | -0.360683843 | -0.099465485 | 7.90E-04 | 2.13E-03 | 1.00E+00 |
| AHNAK    | LMNA | 0.56863869   | 0.467268825  | 0.655251686  | 1.07E-18 | 4.52E-17 | 1.27E-14 |
| ACTR5    | LMNA | -0.056135967 | -0.192693664 | 0.082554803  | 4.27E-01 | 5.14E-01 | 1.00E+00 |
| KIF14    | LMNA | -0.036787331 | -0.173954897 | 0.101780565  | 6.03E-01 | 6.80E-01 | 1.00E+00 |
| PTGER1   | LMNA | 0.260627729  | 0.127151634  | 0.384832488  | 1.80E-04 | 5.58E-04 | 1.00E+00 |
| NOS2A    | LMNA | 0.173327476  | 0.036141265  | 0.304101916  | 1.36E-02 | 2.67E-02 | 1.00E+00 |
| TENC1    | LMNA | 0.085420331  | -0.053258715 | 0.220866791  | 2.27E-01 | 3.04E-01 | 1.00E+00 |
| YIPF2    | LMNA | 0.441419487  | 0.323054939  | 0.546186741  | 4.84E-11 | 5.12E-10 | 5.75E-07 |
| ETV2     | LMNA | -0.017426429 | -0.15510429  | 0.120915462  | 8.06E-01 | 8.53E-01 | 1.00E+00 |
| KIAA1012 | LMNA | -0.347844369 | -0.463631656 | -0.220375876 | 3.93E-07 | 2.03E-06 | 4.66E-03 |
| C17orf53 | LMNA | 0.027108144  | -0.111359599 | 0.164543373  | 7.02E-01 | 7.66E-01 | 1.00E+00 |
| AHR      | LMNA | 0.260608653  | 0.127131499  | 0.384815053  | 1.80E-04 | 5.59E-04 | 1.00E+00 |
| PTPRH    | LMNA | 0.424526215  | 0.304309668  | 0.531431971  | 3.04E-10 | 2.76E-09 | 3.61E-06 |
| ATP10A   | LMNA | 0.099228783  | -0.039361415 | 0.2340733    | 1.60E-01 | 2.27E-01 | 1.00E+00 |
| ATP6V1C1 | LMNA | -0.09083599  | -0.226052295 | 0.047814606  | 1.99E-01 | 2.72E-01 | 1.00E+00 |
| DPH4     | LMNA | -0.235486644 | -0.361776589 | -0.10070963  | 7.42E-04 | 2.01E-03 | 1.00E+00 |
| TAS2R3   | LMNA | -0.212502    | -0.340562228 | -0.076701112 | 2.40E-03 | 5.70E-03 | 1.00E+00 |
| C5orf5   | LMNA | -0.214771511 | -0.342662759 | -0.079064734 | 2.14E-03 | 5.16E-03 | 1.00E+00 |
| KCNA4    | LMNA | -0.286211809 | -0.408136587 | -0.154255734 | 3.64E-05 | 1.30E-04 | 4.32E-01 |
| COQ10B   | LMNA | 0.219755908  | 0.084261183  | 0.34727155   | 1.68E-03 | 4.14E-03 | 1.00E+00 |
| NMNAT2   | LMNA | -0.389452502 | -0.500589647 | -0.265685921 | 1.01E-08 | 6.91E-08 | 1.20E-04 |
| PSMF1    | LMNA | 0.271164407  | 0.138290235  | 0.394449385  | 9.48E-05 | 3.11E-04 | 1.00E+00 |
| SORBS2   | LMNA | -0.253688161 | -0.378483934 | -0.119833975 | 2.69E-04 | 8.07E-04 | 1.00E+00 |
| NFE2L2   | LMNA | 0.28664246   | 0.154713677  | 0.408527505  | 3.54E-05 | 1.26E-04 | 4.20E-01 |
| SH3PXD2A | LMNA | 0.259465129  | 0.125924678  | 0.383769721  | 1.92E-04 | 5.93E-04 | 1.00E+00 |
| NRF1     | LMNA | -0.040981918 | -0.178025721 | 0.097621385  | 5.63E-01 | 6.43E-01 | 1.00E+00 |
| SPINK5   | LMNA | -0.12008053  | -0.253922202 | 0.018273393  | 8.87E-02 | 1.37E-01 | 1.00E+00 |
| SH2D2A   | LMNA | 0.3829998    | 0.25862311   | 0.494884521  | 1.85E-08 | 1.20E-07 | 2.19E-04 |
| PRDM12   | LMNA | 0.162179722  | 0.024681313  | 0.293656036  | 2.11E-02 | 3.92E-02 | 1.00E+00 |
| RBBP6    | LMNA | -0.025272679 | -0.162755838 | 0.113173174  | 7.21E-01 | 7.83E-01 | 1.00E+00 |
| OPA3     | LMNA | 0.385549225  | 0.261411998  | 0.497139737  | 1.46E-08 | 9.70E-08 | 1.73E-04 |
| PAQR4    | LMNA | -0.214415186 | -0.342333049 | -0.078693532 | 2.18E-03 | 5.24E-03 | 1.00E+00 |
| IFI27    | LMNA | 0.008727475  | -0.129479527 | 0.146601845  | 9.02E-01 | 9.29E-01 | 1.00E+00 |

|         |      |              |              |              |          |          |          |
|---------|------|--------------|--------------|--------------|----------|----------|----------|
| SKAP2   | LMNA | 0.089302356  | -0.049357133 | 0.224584615  | 2.06E-01 | 2.81E-01 | 1.00E+00 |
| TJP3    | LMNA | 0.105091471  | -0.033444746 | 0.23966541   | 1.37E-01 | 1.98E-01 | 1.00E+00 |
| C9orf61 | LMNA | -0.287269411 | -0.409096531 | -0.155380462 | 3.39E-05 | 1.22E-04 | 4.03E-01 |
| MT1G    | LMNA | 0.394776811  | 0.27152367   | 0.505289851  | 6.10E-09 | 4.36E-08 | 7.24E-05 |
| HS1BP3  | LMNA | 0.291950539  | 0.160362811  | 0.41334217   | 2.49E-05 | 9.17E-05 | 2.95E-01 |
| IDS     | LMNA | 0.320547118  | 0.190945824  | 0.439164287  | 3.31E-06 | 1.43E-05 | 3.92E-02 |
| PARG    | LMNA | -0.360294525 | -0.474732783 | -0.233876303 | 1.39E-07 | 7.76E-07 | 1.65E-03 |
| OR2B2   | LMNA | 0.074468569  | -0.064242878 | 0.210357003  | 2.92E-01 | 3.76E-01 | 1.00E+00 |
| DYRK4   | LMNA | -0.079326036 | -0.215022318 | 0.059375185  | 2.62E-01 | 3.43E-01 | 1.00E+00 |
| MICALL1 | LMNA | 0.399236548  | 0.276420463  | 0.509221788  | 3.97E-09 | 2.94E-08 | 4.70E-05 |
| GALR2   | LMNA | -0.067821033 | -0.203962382 | 0.070893729  | 3.38E-01 | 4.24E-01 | 1.00E+00 |
| CHRM4   | LMNA | -0.045391912 | -0.182300545 | 0.093243389  | 5.21E-01 | 6.04E-01 | 1.00E+00 |
| RIC3    | LMNA | -0.5188535   | -0.612996628 | -0.410183202 | 2.57E-15 | 5.58E-14 | 3.05E-11 |
| GPBP1L1 | LMNA | 0.11412852   | -0.024305427 | 0.248267921  | 1.06E-01 | 1.60E-01 | 1.00E+00 |
| ART1    | LMNA | -0.274990424 | -0.397934746 | -0.142343154 | 7.47E-05 | 2.50E-04 | 8.86E-01 |
| TBX21   | LMNA | -0.060079291 | -0.196500515 | 0.078623816  | 3.96E-01 | 4.83E-01 | 1.00E+00 |
| DUS4L   | LMNA | 0.073550434  | -0.065162205 | 0.209474491  | 2.98E-01 | 3.82E-01 | 1.00E+00 |
| KCNJ6   | LMNA | 0.036608099  | -0.101958176 | 0.173780849  | 6.05E-01 | 6.82E-01 | 1.00E+00 |
| TNFAIP6 | LMNA | 0.42535752   | 0.305229936  | 0.532159563  | 2.79E-10 | 2.56E-09 | 3.30E-06 |
| CCT4    | LMNA | -0.0666982   | -0.202881121 | 0.072015906  | 3.46E-01 | 4.32E-01 | 1.00E+00 |
| RTEL1   | LMNA | 0.226354083  | 0.09115142   | 0.353363051  | 1.20E-03 | 3.07E-03 | 1.00E+00 |
| CASP5   | LMNA | 0.411446767  | 0.289859999  | 0.519963508  | 1.18E-09 | 9.61E-09 | 1.40E-05 |
| CHMP6   | LMNA | 0.015753525  | -0.122564027 | 0.153470759  | 8.24E-01 | 8.67E-01 | 1.00E+00 |
| BRD4    | LMNA | 0.331464363  | 0.202688167  | 0.448970909  | 1.45E-06 | 6.71E-06 | 1.71E-02 |
| NDUFA13 | LMNA | -0.169991632 | -0.300979394 | -0.032708212 | 1.56E-02 | 2.99E-02 | 1.00E+00 |
| CYP19A1 | LMNA | 0.220908159  | 0.085463504  | 0.348336096  | 1.58E-03 | 3.93E-03 | 1.00E+00 |
| CD151   | LMNA | 0.705002251  | 0.628079924  | 0.768279478  | 1.13E-31 | 5.61E-29 | 1.35E-27 |
| DOK4    | LMNA | -0.112100327 | -0.246339092 | 0.026358587  | 1.12E-01 | 1.68E-01 | 1.00E+00 |
| FAM26B  | LMNA | 0.536105005  | 0.4298685    | 0.627700031  | 2.00E-16 | 5.51E-15 | 2.37E-12 |
| ARFRP1  | LMNA | 0.420387559  | 0.29973145   | 0.527807303  | 4.70E-10 | 4.14E-09 | 5.58E-06 |
| MRPL41  | LMNA | 0.012671853  | -0.125598866 | 0.150459645  | 8.58E-01 | 8.95E-01 | 1.00E+00 |
| CRYBA1  | LMNA | 0.067079922  | -0.071634446 | 0.203248747  | 3.43E-01 | 4.29E-01 | 1.00E+00 |
| HRH2    | LMNA | 0.118547094  | -0.019828409 | 0.252466345  | 9.29E-02 | 1.43E-01 | 1.00E+00 |
| MTMR6   | LMNA | -0.172446117 | -0.303277192 | -0.035233907 | 1.41E-02 | 2.75E-02 | 1.00E+00 |
| SCAMP3  | LMNA | 0.275223813  | 0.142590528  | 0.39814724   | 7.36E-05 | 2.47E-04 | 8.73E-01 |

|          |      |              |              |              |          |          |          |
|----------|------|--------------|--------------|--------------|----------|----------|----------|
| MTG1     | LMNA | -0.030340236 | -0.167688872 | 0.108163809  | 6.68E-01 | 7.38E-01 | 1.00E+00 |
| UBTD1    | LMNA | 0.449562641  | 0.332124118  | 0.553275915  | 1.93E-11 | 2.14E-10 | 2.28E-07 |
| SOX9     | LMNA | 0.001983518  | -0.136104752 | 0.139996183  | 9.78E-01 | 9.83E-01 | 1.00E+00 |
| CRABP1   | LMNA | -0.221228133 | -0.348631657 | -0.085797453 | 1.56E-03 | 3.87E-03 | 1.00E+00 |
| FLJ33790 | LMNA | -0.365330798 | -0.479213033 | -0.239351309 | 8.99E-08 | 5.20E-07 | 1.07E-03 |
| FAU      | LMNA | -0.144139323 | -0.276684691 | -0.006211931 | 4.07E-02 | 7.00E-02 | 1.00E+00 |
| DTNB     | LMNA | -0.391506895 | -0.502404005 | -0.267937351 | 8.34E-09 | 5.79E-08 | 9.89E-05 |
| CARD9    | LMNA | 0.320794173  | 0.191211141  | 0.439386521  | 3.25E-06 | 1.41E-05 | 3.85E-02 |
| PACSIN3  | LMNA | 0.360275271  | 0.233855386  | 0.474715643  | 1.39E-07 | 7.77E-07 | 1.65E-03 |
| OMD      | LMNA | 0.160627938  | 0.023088931  | 0.29219946   | 2.24E-02 | 4.13E-02 | 1.00E+00 |
| HOXB8    | LMNA | 0.132316499  | -0.005841199 | 0.265517445  | 6.05E-02 | 9.91E-02 | 1.00E+00 |
| NSBP1    | LMNA | -0.350007042 | -0.465562606 | -0.222717488 | 3.29E-07 | 1.72E-06 | 3.90E-03 |
| SLC4A5   | LMNA | -0.207753792 | -0.336163418 | -0.07176094  | 3.01E-03 | 6.97E-03 | 1.00E+00 |
| FBXO46   | LMNA | -0.030653361 | -0.16799346  | 0.107854048  | 6.65E-01 | 7.35E-01 | 1.00E+00 |
| UGCGL2   | LMNA | 0.080490446  | -0.058207342 | 0.216139748  | 2.55E-01 | 3.36E-01 | 1.00E+00 |
| SVIL     | LMNA | 0.568226842  | 0.466793091  | 0.65490434   | 1.14E-18 | 4.81E-17 | 1.36E-14 |
| OAS1     | LMNA | 0.166130807  | 0.02873892   | 0.297361953  | 1.81E-02 | 3.42E-02 | 1.00E+00 |
| PHB2     | LMNA | -0.104008116 | -0.238632727 | 0.034538807  | 1.41E-01 | 2.04E-01 | 1.00E+00 |
| NDRG2    | LMNA | -0.497390288 | -0.594612113 | -0.385832568 | 5.06E-14 | 8.42E-13 | 6.01E-10 |
| ERMAP    | LMNA | 0.271249455  | 0.138380278  | 0.394526899  | 9.43E-05 | 3.10E-04 | 1.00E+00 |
| APBA2    | LMNA | -0.523807538 | -0.617225623 | -0.415825796 | 1.25E-15 | 2.92E-14 | 1.48E-11 |
| TCF21    | LMNA | 0.197424242  | 0.061036775  | 0.326574578  | 4.86E-03 | 1.06E-02 | 1.00E+00 |
| JPH2     | LMNA | 0.40755565   | 0.285571915  | 0.51654409   | 1.75E-09 | 1.38E-08 | 2.07E-05 |
| DLST     | LMNA | 0.244639319  | 0.110313918  | 0.370188068  | 4.50E-04 | 1.28E-03 | 1.00E+00 |
| SLA      | LMNA | 0.306106784  | 0.175470894  | 0.426149415  | 9.41E-06 | 3.74E-05 | 1.12E-01 |
| AMELX    | LMNA | 0.189516827  | 0.052848501  | 0.319216178  | 6.91E-03 | 1.46E-02 | 1.00E+00 |
| WNT6     | LMNA | -0.094928823 | -0.229966114 | 0.043694799  | 1.79E-01 | 2.49E-01 | 1.00E+00 |
| ATP2B2   | LMNA | -0.554310928 | -0.643146327 | -0.450752978 | 1.15E-17 | 3.92E-16 | 1.36E-13 |
| CPVL     | LMNA | 0.343306487  | 0.215467302  | 0.459576413  | 5.68E-07 | 2.84E-06 | 6.73E-03 |
| RGS20    | LMNA | 0.044798734  | -0.093832576 | 0.181725849  | 5.27E-01 | 6.10E-01 | 1.00E+00 |
| TRAM2    | LMNA | 0.684173064  | 0.603083795  | 0.751266372  | 3.14E-29 | 7.76E-27 | 3.72E-25 |
| ZNRF4    | LMNA | 0.051393612  | -0.087276611 | 0.188109983  | 4.68E-01 | 5.53E-01 | 1.00E+00 |
| ZNF419   | LMNA | -0.12917738  | -0.262546373 | 0.009034738  | 6.69E-02 | 1.08E-01 | 1.00E+00 |
| LXN      | LMNA | 0.106906075  | -0.031611464 | 0.241394457  | 1.30E-01 | 1.90E-01 | 1.00E+00 |
| TLK1     | LMNA | 0.213562958  | 0.077805876  | 0.34154435   | 2.28E-03 | 5.44E-03 | 1.00E+00 |

|           |      |              |              |              |          |          |          |
|-----------|------|--------------|--------------|--------------|----------|----------|----------|
| UPK3B     | LMNA | -0.16149565  | -0.29301401  | -0.023979258 | 2.17E-02 | 4.02E-02 | 1.00E+00 |
| MTMR12    | LMNA | 0.127866601  | -0.010367406 | 0.261305016  | 6.98E-02 | 1.12E-01 | 1.00E+00 |
| KLHL21    | LMNA | 0.442619513  | 0.324390064  | 0.547232389  | 4.23E-11 | 4.49E-10 | 5.02E-07 |
| ZNF384    | LMNA | -0.032634303 | -0.169919781 | 0.10589377   | 6.45E-01 | 7.17E-01 | 1.00E+00 |
| PI15      | LMNA | 0.223154927  | 0.087809038  | 0.350410902  | 1.41E-03 | 3.56E-03 | 1.00E+00 |
| RER1      | LMNA | 0.484721479  | 0.371532021  | 0.5837126    | 2.68E-13 | 4.03E-12 | 3.17E-09 |
| ELAVL2    | LMNA | -0.451909643 | -0.555316356 | -0.334742053 | 1.47E-11 | 1.68E-10 | 1.74E-07 |
| KLF2      | LMNA | 0.133646695  | -0.004487093 | 0.266775669  | 5.79E-02 | 9.53E-02 | 1.00E+00 |
| RPN1      | LMNA | 0.373859388  | 0.248641172  | 0.486786527  | 4.24E-08 | 2.59E-07 | 5.03E-04 |
| PMVK      | LMNA | -0.043565883 | -0.180531113 | 0.095056819  | 5.38E-01 | 6.20E-01 | 1.00E+00 |
| SIX2      | LMNA | 0.043922864  | -0.094702373 | 0.1808771    | 5.35E-01 | 6.17E-01 | 1.00E+00 |
| HPS1      | LMNA | 0.380552186  | 0.255947546  | 0.492717949  | 2.31E-08 | 1.48E-07 | 2.74E-04 |
| RNF7      | LMNA | 0.320370464  | 0.190756123  | 0.439005371  | 3.35E-06 | 1.45E-05 | 3.97E-02 |
| TFE3      | LMNA | 0.466764448  | 0.351353733  | 0.568202043  | 2.53E-12 | 3.30E-11 | 3.00E-08 |
| C11orf17  | LMNA | 0.231184298  | 0.096203659  | 0.357815536  | 9.32E-04 | 2.46E-03 | 1.00E+00 |
| SNRPC     | LMNA | -0.033870395 | -0.171121259 | 0.104670026  | 6.32E-01 | 7.06E-01 | 1.00E+00 |
| KCTD13    | LMNA | -0.10480284  | -0.239390309 | 0.033736261  | 1.38E-01 | 2.00E-01 | 1.00E+00 |
| DLGAP1    | LMNA | -0.488492584 | -0.586960775 | -0.375783236 | 1.64E-13 | 2.57E-12 | 1.95E-09 |
| PGLYRP1   | LMNA | -0.09015822  | -0.225403748 | 0.048496387  | 2.02E-01 | 2.76E-01 | 1.00E+00 |
| IL8       | LMNA | 0.32794295   | 0.198896564  | 0.445810823  | 1.89E-06 | 8.62E-06 | 2.25E-02 |
| IRF7      | LMNA | 0.29872403   | 0.167584054  | 0.419476189  | 1.57E-05 | 6.00E-05 | 1.86E-01 |
| SERPINB13 | LMNA | -0.064566269 | -0.200827209 | 0.074145624  | 3.61E-01 | 4.48E-01 | 1.00E+00 |
| SET       | LMNA | -0.032029544 | -0.169331809 | 0.106492334  | 6.51E-01 | 7.23E-01 | 1.00E+00 |
| NAB2      | LMNA | 0.449907998  | 0.332509228  | 0.55357624   | 1.85E-11 | 2.07E-10 | 2.19E-07 |
| BLR1      | LMNA | -0.02003917  | -0.157654032 | 0.118339208  | 7.77E-01 | 8.30E-01 | 1.00E+00 |
| LRP5L     | LMNA | 0.025083434  | -0.113360109 | 0.162571483  | 7.23E-01 | 7.84E-01 | 1.00E+00 |
| FAM120A   | LMNA | 0.463791074  | 0.348022872  | 0.565626789  | 3.62E-12 | 4.60E-11 | 4.29E-08 |
| ASCL2     | LMNA | 0.278408869  | 0.145968097  | 0.401045824  | 6.02E-05 | 2.05E-04 | 7.14E-01 |
| SHH       | LMNA | 0.084330994  | -0.054352781 | 0.219822822  | 2.33E-01 | 3.11E-01 | 1.00E+00 |
| SH2B1     | LMNA | -0.111716112 | -0.24597358  | 0.026747401  | 1.13E-01 | 1.69E-01 | 1.00E+00 |
| ATP5H     | LMNA | 0.027320956  | -0.111149265 | 0.164750569  | 7.00E-01 | 7.64E-01 | 1.00E+00 |
| THPO      | LMNA | -0.137409099 | -0.270332045 | 0.000654314  | 5.12E-02 | 8.56E-02 | 1.00E+00 |
| HIST1H3E  | LMNA | -0.028169639 | -0.165576737 | 0.110310342  | 6.91E-01 | 7.57E-01 | 1.00E+00 |
| TYRP1     | LMNA | -0.172081971 | -0.302936388 | -0.034859085 | 1.43E-02 | 2.78E-02 | 1.00E+00 |
| EIF2S1    | LMNA | 0.085387652  | -0.053291542 | 0.220835477  | 2.27E-01 | 3.04E-01 | 1.00E+00 |

|           |      |              |              |              |          |          |          |
|-----------|------|--------------|--------------|--------------|----------|----------|----------|
| RFNG      | LMNA | 0.36992155   | 0.244348972  | 0.483291786  | 6.01E-08 | 3.60E-07 | 7.13E-04 |
| RAB20     | LMNA | 0.465424424  | 0.349852237  | 0.567041688  | 2.97E-12 | 3.85E-11 | 3.52E-08 |
| TNFRSF17  | LMNA | 0.005233428  | -0.1329136   | 0.143180983  | 9.41E-01 | 9.56E-01 | 1.00E+00 |
| RBM7      | LMNA | 0.0908498    | -0.047800713 | 0.226065508  | 1.98E-01 | 2.72E-01 | 1.00E+00 |
| TMPRSS4   | LMNA | -0.097067247 | -0.23200927  | 0.041540405  | 1.69E-01 | 2.38E-01 | 1.00E+00 |
| NKX2-8    | LMNA | -0.025683241 | -0.163155757 | 0.112767588  | 7.17E-01 | 7.79E-01 | 1.00E+00 |
| C1orf115  | LMNA | -0.283183099 | -0.405386054 | -0.151036682 | 4.43E-05 | 1.55E-04 | 5.26E-01 |
| TAF9      | LMNA | 0.028657592  | -0.10982791  | 0.166051658  | 6.86E-01 | 7.53E-01 | 1.00E+00 |
| TERF2     | LMNA | -0.329990909 | -0.447649002 | -0.201101188 | 1.62E-06 | 7.48E-06 | 1.92E-02 |
| TNFRSF1A  | LMNA | 0.620831451  | 0.528036566  | 0.698975754  | 6.48E-23 | 5.96E-21 | 7.69E-19 |
| ACADVL    | LMNA | 0.205385387  | 0.069299275  | 0.333967196  | 3.36E-03 | 7.69E-03 | 1.00E+00 |
| ISCU      | LMNA | -0.143394942 | -0.275982642 | -0.005451866 | 4.18E-02 | 7.16E-02 | 1.00E+00 |
| KIAA0841  | LMNA | -0.023166513 | -0.160703558 | 0.115253086  | 7.43E-01 | 8.02E-01 | 1.00E+00 |
| GTF2H5    | LMNA | -0.053141332 | -0.18979992  | 0.085537188  | 4.53E-01 | 5.39E-01 | 1.00E+00 |
| EDG8      | LMNA | 0.004810904  | -0.133328647 | 0.142767086  | 9.46E-01 | 9.59E-01 | 1.00E+00 |
| RAB15     | LMNA | -0.043137527 | -0.180115905 | 0.095482086  | 5.42E-01 | 6.24E-01 | 1.00E+00 |
| HBP1      | LMNA | 0.101179751  | -0.037393562 | 0.235935217  | 1.52E-01 | 2.17E-01 | 1.00E+00 |
| TNNT2     | LMNA | -0.279568122 | -0.402100203 | -0.147198185 | 5.59E-05 | 1.92E-04 | 6.63E-01 |
| CECR5     | LMNA | -0.277467124 | -0.400189038 | -0.14496911  | 6.39E-05 | 2.17E-04 | 7.58E-01 |
| JRK       | LMNA | -0.282483324 | -0.404750237 | -0.150293328 | 4.64E-05 | 1.62E-04 | 5.50E-01 |
| PHGDH     | LMNA | -0.415402323 | -0.523435993 | -0.294224106 | 7.88E-10 | 6.64E-09 | 9.34E-06 |
| XPO4      | LMNA | 0.021007307  | -0.117384117 | 0.15859836   | 7.67E-01 | 8.21E-01 | 1.00E+00 |
| ARHGAP25  | LMNA | 0.165993508  | 0.028597843  | 0.297233239  | 1.82E-02 | 3.44E-02 | 1.00E+00 |
| CA9       | LMNA | 0.479649013  | 0.365821241  | 0.579338519  | 5.11E-13 | 7.45E-12 | 6.06E-09 |
| TLX1      | LMNA | -0.271051832 | -0.394346779 | -0.138171105 | 9.55E-05 | 3.13E-04 | 1.00E+00 |
| GPS1      | LMNA | -0.248293931 | -0.373540983 | -0.114155877 | 3.67E-04 | 1.07E-03 | 1.00E+00 |
| RPS29     | LMNA | -0.127669715 | -0.261118519 | 0.010567538  | 7.02E-02 | 1.12E-01 | 1.00E+00 |
| MKLN1     | LMNA | 0.017202371  | -0.121136305 | 0.154885548  | 8.08E-01 | 8.55E-01 | 1.00E+00 |
| ATP6V0A2  | LMNA | 0.134769597  | -0.003343612 | 0.267837461  | 5.58E-02 | 9.24E-02 | 1.00E+00 |
| KIAA0319L | LMNA | 0.160617779  | 0.023078508  | 0.292189922  | 2.24E-02 | 4.13E-02 | 1.00E+00 |
| DOPEY2    | LMNA | 0.019830689  | -0.118544845 | 0.157450646  | 7.79E-01 | 8.32E-01 | 1.00E+00 |
| SLC29A3   | LMNA | -0.109899224 | -0.244244619 | 0.028585467  | 1.19E-01 | 1.77E-01 | 1.00E+00 |
| LGALS4    | LMNA | -0.165619548 | -0.29688264  | -0.028213622 | 1.85E-02 | 3.48E-02 | 1.00E+00 |
| SDHD      | LMNA | 0.002020145  | -0.136068802 | 0.140032094  | 9.77E-01 | 9.82E-01 | 1.00E+00 |
| USH2A     | LMNA | 0.12400286   | -0.014292815 | 0.257643337  | 7.87E-02 | 1.24E-01 | 1.00E+00 |

|          |      |              |              |              |          |          |          |
|----------|------|--------------|--------------|--------------|----------|----------|----------|
| NF1      | LMNA | -0.464006375 | -0.565813329 | -0.34826396  | 3.52E-12 | 4.50E-11 | 4.18E-08 |
| IMPAD1   | LMNA | 0.35374664   | 0.226769968  | 0.468898925  | 2.41E-07 | 1.29E-06 | 2.86E-03 |
| APOBEC3A | LMNA | 0.352575854  | 0.225500752  | 0.46785475   | 2.66E-07 | 1.42E-06 | 3.15E-03 |
| OLR1     | LMNA | 0.022639313  | -0.115773524 | 0.16018966   | 7.49E-01 | 8.07E-01 | 1.00E+00 |
| HCFC1R1  | LMNA | 0.001942272  | -0.136145233 | 0.139955746  | 9.78E-01 | 9.83E-01 | 1.00E+00 |
| TAOK2    | LMNA | 0.078548899  | -0.060154401 | 0.21427634   | 2.66E-01 | 3.48E-01 | 1.00E+00 |
| NRAP     | LMNA | 0.03619687   | -0.102365653 | 0.173381481  | 6.09E-01 | 6.85E-01 | 1.00E+00 |
| PPFIBP1  | LMNA | 0.363205322  | 0.237039695  | 0.47732294   | 1.08E-07 | 6.15E-07 | 1.28E-03 |
| LYPD3    | LMNA | 0.09647565   | -0.042136549 | 0.231444148  | 1.72E-01 | 2.41E-01 | 1.00E+00 |
| BCL7A    | LMNA | -0.600189951 | -0.681753059 | -0.503889646 | 3.73E-21 | 2.27E-19 | 4.42E-17 |
| AGER     | LMNA | -0.16500436  | -0.296305806 | -0.027581642 | 1.89E-02 | 3.55E-02 | 1.00E+00 |
| MCM10    | LMNA | -0.171478038 | -0.302371094 | -0.034237533 | 1.47E-02 | 2.84E-02 | 1.00E+00 |
| MAP4K3   | LMNA | -0.259665224 | -0.383952657 | -0.126135819 | 1.90E-04 | 5.86E-04 | 1.00E+00 |
| PFTK1    | LMNA | 0.022950668  | -0.115466171 | 0.160493169  | 7.46E-01 | 8.04E-01 | 1.00E+00 |
| CBS      | LMNA | -0.335552192 | -0.45263561  | -0.207094495 | 1.05E-06 | 5.02E-06 | 1.25E-02 |
| CLK3     | LMNA | 0.268785141  | 0.135772108  | 0.392280171  | 1.10E-04 | 3.56E-04 | 1.00E+00 |
| GABRE    | LMNA | 0.099983909  | -0.038599881 | 0.234794075  | 1.57E-01 | 2.23E-01 | 1.00E+00 |
| FIS1     | LMNA | -0.078524533 | -0.214252948 | 0.06017883   | 2.67E-01 | 3.48E-01 | 1.00E+00 |
| ELF4     | LMNA | 0.615803614  | 0.522141026  | 0.694789     | 1.79E-22 | 1.42E-20 | 2.12E-18 |
| C11orf49 | LMNA | -0.243036934 | -0.368716931 | -0.108630654 | 4.92E-04 | 1.39E-03 | 1.00E+00 |
| CLIP2    | LMNA | 0.010904783  | -0.127337914 | 0.148731881  | 8.78E-01 | 9.10E-01 | 1.00E+00 |
| CLPS     | LMNA | 0.03134426   | -0.107170479 | 0.168665427  | 6.58E-01 | 7.28E-01 | 1.00E+00 |
| PPCDC    | LMNA | 0.262764951  | 0.129408229  | 0.386785327  | 1.58E-04 | 4.97E-04 | 1.00E+00 |
| KDELR1   | LMNA | 0.495144528  | 0.38329364   | 0.592682593  | 6.84E-14 | 1.11E-12 | 8.11E-10 |
| NT5E     | LMNA | 0.420408668  | 0.299754787  | 0.527825801  | 4.69E-10 | 4.13E-09 | 5.56E-06 |
| FOXN2    | LMNA | -0.324004277 | -0.442272807 | -0.194660258 | 2.55E-06 | 1.13E-05 | 3.03E-02 |
| NCSTN    | LMNA | 0.474837785  | 0.360412482  | 0.575184395  | 9.35E-13 | 1.31E-11 | 1.11E-08 |
| PARP4    | LMNA | 0.414103804  | 0.292790911  | 0.522296451  | 9.00E-10 | 7.50E-09 | 1.07E-05 |
| CD83     | LMNA | 0.119193446  | -0.019173043 | 0.253080071  | 9.11E-02 | 1.41E-01 | 1.00E+00 |
| NPY      | LMNA | -0.283952835 | -0.406085303 | -0.151854528 | 4.22E-05 | 1.48E-04 | 5.00E-01 |
| IL18     | LMNA | -0.007965048 | -0.145855669 | 0.13022915   | 9.10E-01 | 9.36E-01 | 1.00E+00 |
| BEGAIN   | LMNA | -0.21485109  | -0.34273639  | -0.079147641 | 2.14E-03 | 5.14E-03 | 1.00E+00 |
| VPS16    | LMNA | 0.200225748  | 0.063942197  | 0.329177824  | 4.28E-03 | 9.52E-03 | 1.00E+00 |
| SLC16A2  | LMNA | 0.081252728  | -0.057442607 | 0.216871081  | 2.50E-01 | 3.31E-01 | 1.00E+00 |
| SLC35B1  | LMNA | 0.040040589  | -0.098555189 | 0.177112575  | 5.72E-01 | 6.51E-01 | 1.00E+00 |

|          |      |              |              |              |          |          |          |
|----------|------|--------------|--------------|--------------|----------|----------|----------|
| C4orf20  | LMNA | -0.026691043 | -0.164137243 | 0.111771806  | 7.06E-01 | 7.70E-01 | 1.00E+00 |
| IGFBP2   | LMNA | 0.503372299  | 0.392603744  | 0.5997463    | 2.25E-14 | 4.05E-13 | 2.67E-10 |
| NOTCH2   | LMNA | 0.261707081  | 0.128291099  | 0.385818861  | 1.68E-04 | 5.26E-04 | 1.00E+00 |
| SIGLEC1  | LMNA | 0.280788051  | 0.148493099  | 0.403209416  | 5.17E-05 | 1.79E-04 | 6.13E-01 |
| SLC9A2   | LMNA | -0.045155212 | -0.182071231 | 0.093478507  | 5.23E-01 | 6.06E-01 | 1.00E+00 |
| CD93     | LMNA | 0.506218378  | 0.395829508  | 0.602186224  | 1.52E-14 | 2.86E-13 | 1.81E-10 |
| CEP164   | LMNA | 0.113758693  | -0.024679893 | 0.247916292  | 1.07E-01 | 1.61E-01 | 1.00E+00 |
| P53AIP1  | LMNA | -0.274451335 | -0.397443871 | -0.141771826 | 7.73E-05 | 2.58E-04 | 9.17E-01 |
| ADD1     | LMNA | -0.220681742 | -0.348126939 | -0.085227218 | 1.60E-03 | 3.97E-03 | 1.00E+00 |
| ZNF136   | LMNA | -0.077859248 | -0.213614207 | 0.060845756  | 2.71E-01 | 3.53E-01 | 1.00E+00 |
| MGP      | LMNA | 0.323847869  | 0.194492129  | 0.442132233  | 2.58E-06 | 1.14E-05 | 3.06E-02 |
| DNAJC1   | LMNA | 0.325365633  | 0.196123941  | 0.443496096  | 2.30E-06 | 1.03E-05 | 2.73E-02 |
| CCDC144A | LMNA | -0.324144319 | -0.442398666 | -0.194810799 | 2.53E-06 | 1.12E-05 | 3.00E-02 |
| ACLY     | LMNA | 0.081744874  | -0.056948792 | 0.217343165  | 2.47E-01 | 3.27E-01 | 1.00E+00 |
| TRPC1    | LMNA | -0.134199642 | -0.267298563 | 0.003924058  | 5.69E-02 | 9.38E-02 | 1.00E+00 |
| CYP4F12  | LMNA | -0.099906361 | -0.234720062 | 0.038678095  | 1.57E-01 | 2.24E-01 | 1.00E+00 |
| FKBP5    | LMNA | 0.367895118  | 0.2421421    | 0.481491965  | 7.19E-08 | 4.25E-07 | 8.52E-04 |
| SMS      | LMNA | 0.524204754  | 0.416278581  | 0.617564472  | 1.18E-15 | 2.79E-14 | 1.40E-11 |
| MAPK7    | LMNA | 0.245484299  | 0.111201858  | 0.370963584  | 4.29E-04 | 1.23E-03 | 1.00E+00 |
| RRAGC    | LMNA | 0.308536347  | 0.178070016  | 0.428342628  | 7.92E-06 | 3.19E-05 | 9.39E-02 |
| PARD6A   | LMNA | -0.430714845 | -0.536844727 | -0.311165964 | 1.57E-10 | 1.52E-09 | 1.86E-06 |
| CCDC85B  | LMNA | 0.093255372  | -0.045379848 | 0.228366385  | 1.87E-01 | 2.59E-01 | 1.00E+00 |
| SYNGR4   | LMNA | 0.119912009  | -0.018444318 | 0.253762237  | 8.92E-02 | 1.38E-01 | 1.00E+00 |
| WIF1     | LMNA | -0.233305946 | -0.359769449 | -0.098425031 | 8.33E-04 | 2.23E-03 | 1.00E+00 |
| GCH1     | LMNA | 0.226025165  | 0.090807635  | 0.353059645  | 1.22E-03 | 3.12E-03 | 1.00E+00 |
| STRN3    | LMNA | 0.094933037  | -0.043690554 | 0.229970141  | 1.79E-01 | 2.49E-01 | 1.00E+00 |
| TMOD2    | LMNA | -0.396474334 | -0.506787017 | -0.273386798 | 5.18E-09 | 3.76E-08 | 6.15E-05 |
| FLI1     | LMNA | 0.20688759   | 0.070860437  | 0.335360351  | 3.13E-03 | 7.23E-03 | 1.00E+00 |
| DGKQ     | LMNA | 0.028099252  | -0.110379927 | 0.165508224  | 6.91E-01 | 7.58E-01 | 1.00E+00 |
| MAB21L2  | LMNA | 0.11168828   | -0.026775565 | 0.245947101  | 1.14E-01 | 1.69E-01 | 1.00E+00 |
| SCNN1B   | LMNA | 0.313392387  | 0.183270423  | 0.432722044  | 5.59E-06 | 2.32E-05 | 6.63E-02 |
| ECHDC3   | LMNA | 0.050376103  | -0.0882889   | 0.187125743  | 4.76E-01 | 5.62E-01 | 1.00E+00 |
| TMEM106C | LMNA | 0.073349031  | -0.065363838 | 0.209280873  | 3.00E-01 | 3.84E-01 | 1.00E+00 |
| CSNK2A2  | LMNA | 0.144617812  | 0.006700586  | 0.277135896  | 4.00E-02 | 6.90E-02 | 1.00E+00 |
| GPRIN2   | LMNA | -0.186247191 | -0.316168978 | -0.049468095 | 7.96E-03 | 1.66E-02 | 1.00E+00 |

|          |      |              |              |              |          |          |          |
|----------|------|--------------|--------------|--------------|----------|----------|----------|
| CPA4     | LMNA | 0.421813983  | 0.301308745  | 0.529057018  | 4.05E-10 | 3.59E-09 | 4.80E-06 |
| RPL39    | LMNA | 0.042273942  | -0.096339291 | 0.179278679  | 5.50E-01 | 6.31E-01 | 1.00E+00 |
| HERC3    | LMNA | -0.013533722 | -0.151302038 | 0.124750355  | 8.48E-01 | 8.87E-01 | 1.00E+00 |
| MELK     | LMNA | 0.138572036  | 0.000531198  | 0.271430568  | 4.92E-02 | 8.28E-02 | 1.00E+00 |
| IL15RA   | LMNA | 0.447199797  | 0.329490337  | 0.551220443  | 2.52E-11 | 2.76E-10 | 2.99E-07 |
| HMBOX1   | LMNA | -0.15073318  | -0.282897406 | -0.012951689 | 3.23E-02 | 5.71E-02 | 1.00E+00 |
| CUL3     | LMNA | -0.411966693 | -0.520420144 | -0.290433338 | 1.12E-09 | 9.14E-09 | 1.33E-05 |
| PODXL    | LMNA | 0.25706441   | 0.123392357  | 0.381574109  | 2.21E-04 | 6.75E-04 | 1.00E+00 |
| CCT6B    | LMNA | -0.118374483 | -0.252302429 | 0.020003408  | 9.34E-02 | 1.43E-01 | 1.00E+00 |
| GPX2     | LMNA | -0.01392731  | -0.151686666 | 0.1243628    | 8.44E-01 | 8.84E-01 | 1.00E+00 |
| ITK      | LMNA | 0.250293584  | 0.116259738  | 0.375374175  | 3.27E-04 | 9.64E-04 | 1.00E+00 |
| CLIC5    | LMNA | -0.155102064 | -0.287007658 | -0.017424149 | 2.75E-02 | 4.96E-02 | 1.00E+00 |
| RABAC1   | LMNA | 0.02817322   | -0.110306802 | 0.165580222  | 6.91E-01 | 7.57E-01 | 1.00E+00 |
| YPEL1    | LMNA | -0.527374883 | -0.620267535 | -0.419894118 | 7.41E-16 | 1.83E-14 | 8.78E-12 |
| DNAJC4   | LMNA | 0.338625484  | 0.210410675  | 0.455388186  | 8.25E-07 | 4.01E-06 | 9.79E-03 |
| NR1D2    | LMNA | -0.268447289 | -0.391972035 | -0.135414677 | 1.12E-04 | 3.63E-04 | 1.00E+00 |
| KIAA0776 | LMNA | -0.081749737 | -0.217347829 | 0.056943912  | 2.47E-01 | 3.27E-01 | 1.00E+00 |
| FBXL5    | LMNA | -0.285801223 | -0.407763842 | -0.153819181 | 3.74E-05 | 1.33E-04 | 4.43E-01 |
| C13orf27 | LMNA | -0.114695543 | -0.248806975 | 0.023731214  | 1.04E-01 | 1.57E-01 | 1.00E+00 |
| DEFA5    | LMNA | 0.258561999  | 0.124971836  | 0.382943915  | 2.03E-04 | 6.22E-04 | 1.00E+00 |
| TRHDE    | LMNA | -0.287375057 | -0.409192407 | -0.155492832 | 3.37E-05 | 1.21E-04 | 4.00E-01 |
| ZNF536   | LMNA | -0.351941581 | -0.467288934 | -0.224813336 | 2.80E-07 | 1.49E-06 | 3.32E-03 |
| MEF2B    | LMNA | -0.410447164 | -0.519085413 | -0.288757951 | 1.30E-09 | 1.05E-08 | 1.55E-05 |
| UQCRQ    | LMNA | -0.063571026 | -0.199867977 | 0.075139401  | 3.69E-01 | 4.56E-01 | 1.00E+00 |
| ITGB2    | LMNA | 0.367495995  | 0.241707592  | 0.481137362  | 7.44E-08 | 4.37E-07 | 8.83E-04 |
| PTPN4    | LMNA | -0.553345111 | -0.642328719 | -0.44964221  | 1.34E-17 | 4.54E-16 | 1.59E-13 |
| STX5     | LMNA | 0.068112123  | -0.070602752 | 0.204242641  | 3.35E-01 | 4.21E-01 | 1.00E+00 |
| CD72     | LMNA | 0.384978328  | 0.260787296  | 0.496634853  | 1.54E-08 | 1.02E-07 | 1.83E-04 |
| ERH      | LMNA | -0.158784172 | -0.290468023 | -0.021197835 | 2.40E-02 | 4.39E-02 | 1.00E+00 |
| XRCC1    | LMNA | 0.107272534  | -0.031241119 | 0.241743535  | 1.29E-01 | 1.89E-01 | 1.00E+00 |
| VEGFA    | LMNA | 0.361309301  | 0.234978835  | 0.475636001  | 1.27E-07 | 7.17E-07 | 1.51E-03 |
| MPHOSPH  | LMNA | -0.001119005 | -0.13914851  | 0.136953152  | 9.87E-01 | 9.90E-01 | 1.00E+00 |
| MORC1    | LMNA | -0.200933476 | -0.329835157 | -0.064676542 | 4.14E-03 | 9.25E-03 | 1.00E+00 |
| PARVB    | LMNA | 0.528788244  | 0.421507159  | 0.62147195   | 6.01E-16 | 1.52E-14 | 7.12E-12 |
| ELL      | LMNA | 0.504263594  | 0.393613651  | 0.600510594  | 1.99E-14 | 3.65E-13 | 2.36E-10 |



|          |      |              |              |              |          |          |          |
|----------|------|--------------|--------------|--------------|----------|----------|----------|
| SETBP1   | LMNA | -0.093759587 | -0.228848464 | 0.044872222  | 1.84E-01 | 2.56E-01 | 1.00E+00 |
| CDH11    | LMNA | 0.317900039  | 0.188104261  | 0.436782232  | 4.02E-06 | 1.72E-05 | 4.77E-02 |
| NDC80    | LMNA | 0.030872124  | -0.10763762  | 0.168206242  | 6.63E-01 | 7.33E-01 | 1.00E+00 |
| GIMAP6   | LMNA | 0.22361158   | 0.088285949  | 0.350832452  | 1.38E-03 | 3.49E-03 | 1.00E+00 |
| AREG     | LMNA | 0.365065085  | 0.239062248  | 0.478976804  | 9.20E-08 | 5.30E-07 | 1.09E-03 |
| BAT2D1   | LMNA | 0.112982397  | -0.025465803 | 0.247178078  | 1.09E-01 | 1.64E-01 | 1.00E+00 |
| CDS2     | LMNA | 0.133318533  | -0.004821201 | 0.266465304  | 5.86E-02 | 9.63E-02 | 1.00E+00 |
| LIPT1    | LMNA | -0.214085932 | -0.342028361 | -0.078350565 | 2.22E-03 | 5.32E-03 | 1.00E+00 |
| SENP3    | LMNA | -0.272299909 | -0.395484156 | -0.139492614 | 8.84E-05 | 2.91E-04 | 1.00E+00 |
| IL1F9    | LMNA | -0.058989168 | -0.195448531 | 0.07971096   | 4.04E-01 | 4.92E-01 | 1.00E+00 |
| GRIN2A   | LMNA | -0.228370072 | -0.355222086 | -0.093259228 | 1.08E-03 | 2.81E-03 | 1.00E+00 |
| MAN2C1   | LMNA | 0.067239647  | -0.071474818 | 0.203402564  | 3.42E-01 | 4.28E-01 | 1.00E+00 |
| NSUN5    | LMNA | 0.366575165  | 0.240705314  | 0.480319104  | 8.07E-08 | 4.71E-07 | 9.57E-04 |
| SF3B5    | LMNA | -0.049922449 | -0.186686833 | 0.088740135  | 4.80E-01 | 5.66E-01 | 1.00E+00 |
| CEP72    | LMNA | -0.09778916  | -0.232698753 | 0.040812809  | 1.66E-01 | 2.34E-01 | 1.00E+00 |
| MYC      | LMNA | 0.222659278  | 0.087291472  | 0.349953297  | 1.45E-03 | 3.63E-03 | 1.00E+00 |
| NRXN1    | LMNA | -0.706206992 | -0.769260773 | -0.62953055  | 8.07E-32 | 4.16E-29 | 9.58E-28 |
| DECR2    | LMNA | 0.002229422  | -0.135863394 | 0.140237261  | 9.75E-01 | 9.81E-01 | 1.00E+00 |
| SLC37A1  | LMNA | -0.107334044 | -0.241802124 | 0.031178953  | 1.28E-01 | 1.88E-01 | 1.00E+00 |
| SUPT16H  | LMNA | 0.038213276  | -0.100367199 | 0.175339295  | 5.89E-01 | 6.67E-01 | 1.00E+00 |
| MUS81    | LMNA | 0.016329317  | -0.121996698 | 0.154033084  | 8.18E-01 | 8.62E-01 | 1.00E+00 |
| PHYH     | LMNA | 0.025217636  | -0.113227545 | 0.162702219  | 7.22E-01 | 7.83E-01 | 1.00E+00 |
| ULBP1    | LMNA | -0.150882394 | -0.283037867 | -0.01310435  | 3.21E-02 | 5.69E-02 | 1.00E+00 |
| OIP5     | LMNA | -0.055543933 | -0.192121764 | 0.083144612  | 4.32E-01 | 5.18E-01 | 1.00E+00 |
| IL10RB   | LMNA | 0.496233329  | 0.384524365  | 0.593618213  | 5.91E-14 | 9.69E-13 | 7.01E-10 |
| OTUB2    | LMNA | -0.167020396 | -0.298195797 | -0.029653117 | 1.75E-02 | 3.32E-02 | 1.00E+00 |
| NELL2    | LMNA | -0.160710259 | -0.292276746 | -0.023173388 | 2.23E-02 | 4.12E-02 | 1.00E+00 |
| MAPK8IP2 | LMNA | -0.448952118 | -0.552744934 | -0.331443414 | 2.06E-11 | 2.28E-10 | 2.45E-07 |
| POU3F2   | LMNA | 0.040707032  | -0.097894099 | 0.17775909   | 5.65E-01 | 6.45E-01 | 1.00E+00 |
| RPLP2    | LMNA | 0.080579562  | -0.058117948 | 0.216225254  | 2.54E-01 | 3.35E-01 | 1.00E+00 |
| FGF22    | LMNA | 0.254235794  | 0.120410916  | 0.378985354  | 2.61E-04 | 7.84E-04 | 1.00E+00 |
| PSCD4    | LMNA | 0.317218001  | 0.187372464  | 0.436168209  | 4.23E-06 | 1.80E-05 | 5.01E-02 |
| TRAPPC6A | LMNA | -0.091929266 | -0.22709818  | 0.046714586  | 1.93E-01 | 2.66E-01 | 1.00E+00 |
| C21orf2  | LMNA | -0.007244652 | -0.145150483 | 0.130937303  | 9.18E-01 | 9.42E-01 | 1.00E+00 |
| CEMP1    | LMNA | 0.338547472  | 0.210326461  | 0.455318343  | 8.30E-07 | 4.03E-06 | 9.85E-03 |

|          |      |              |              |              |          |          |          |
|----------|------|--------------|--------------|--------------|----------|----------|----------|
| IL1RAPL1 | LMNA | -0.518495901 | -0.612691156 | -0.409776222 | 2.70E-15 | 5.84E-14 | 3.21E-11 |
| LIN7B    | LMNA | -0.312936569 | -0.432311204 | -0.18278197  | 5.77E-06 | 2.38E-05 | 6.85E-02 |
| VCP      | LMNA | 0.173740248  | 0.03656629   | 0.304488097  | 1.34E-02 | 2.63E-02 | 1.00E+00 |
| NKX2-1   | LMNA | -0.260888114 | -0.385070468 | -0.127426488 | 1.77E-04 | 5.50E-04 | 1.00E+00 |
| BGN      | LMNA | 0.498148538  | 0.386690184  | 0.595263336  | 4.57E-14 | 7.67E-13 | 5.42E-10 |
| LAMA3    | LMNA | 0.206282779  | 0.070231808  | 0.334799512  | 3.23E-03 | 7.41E-03 | 1.00E+00 |
| APOBEC3F | LMNA | 0.553433487  | 0.449743836  | 0.642403543  | 1.32E-17 | 4.49E-16 | 1.57E-13 |
| COCH     | LMNA | -0.230706013 | -0.35737491  | -0.095703078 | 9.56E-04 | 2.52E-03 | 1.00E+00 |
| SCGB1D2  | LMNA | -0.138798328 | -0.271644285 | -0.000761927 | 4.88E-02 | 8.23E-02 | 1.00E+00 |
| SP4      | LMNA | -0.297741226 | -0.418586853 | -0.166535409 | 1.68E-05 | 6.39E-05 | 1.99E-01 |
| SLC11A1  | LMNA | 0.397090919  | 0.274063765  | 0.507330663  | 4.88E-09 | 3.57E-08 | 5.79E-05 |
| ICAM2    | LMNA | -0.080837376 | -0.216472611 | 0.057859317  | 2.53E-01 | 3.34E-01 | 1.00E+00 |
| C21orf25 | LMNA | 0.356021093  | 0.229236871  | 0.470926495  | 1.99E-07 | 1.09E-06 | 2.36E-03 |
| SH3GL1   | LMNA | 0.374228975  | 0.24904427   | 0.487114341  | 4.10E-08 | 2.51E-07 | 4.86E-04 |
| RALB     | LMNA | 0.326244434  | 0.197069105  | 0.444285538  | 2.15E-06 | 9.71E-06 | 2.56E-02 |
| GSK3B    | LMNA | -0.193371784 | -0.322805439 | -0.056838085 | 5.83E-03 | 1.25E-02 | 1.00E+00 |
| GNGT1    | LMNA | -0.080307018 | -0.215963744 | 0.058391336  | 2.56E-01 | 3.37E-01 | 1.00E+00 |
| GPD1L    | LMNA | -0.157221549 | -0.288999924 | -0.019595868 | 2.54E-02 | 4.63E-02 | 1.00E+00 |
| VPS37B   | LMNA | -0.070912881 | -0.206938042 | 0.067801873  | 3.16E-01 | 4.01E-01 | 1.00E+00 |
| TNFAIP3  | LMNA | 0.50183506   | 0.390862561  | 0.598427689  | 2.78E-14 | 4.85E-13 | 3.29E-10 |
| C6orf32  | LMNA | 0.040280391  | -0.098317328 | 0.17734522   | 5.69E-01 | 6.48E-01 | 1.00E+00 |
| ATG3     | LMNA | 0.038868719  | -0.099717352 | 0.175975459  | 5.83E-01 | 6.61E-01 | 1.00E+00 |
| KLHDC2   | LMNA | -0.398203287 | -0.508311219 | -0.275285373 | 4.39E-09 | 3.22E-08 | 5.20E-05 |
| NDUFV2   | LMNA | -0.032991709 | -0.170267221 | 0.105539977  | 6.41E-01 | 7.14E-01 | 1.00E+00 |
| PANK3    | LMNA | -0.099142465 | -0.233990898 | 0.039448456  | 1.60E-01 | 2.27E-01 | 1.00E+00 |
| BLK      | LMNA | -0.075688871 | -0.211529614 | 0.063020628  | 2.84E-01 | 3.67E-01 | 1.00E+00 |
| MATN4    | LMNA | -0.122095547 | -0.255834354 | 0.016229     | 8.34E-02 | 1.30E-01 | 1.00E+00 |
| GPM6A    | LMNA | -0.604036724 | -0.684969569 | -0.50837831  | 1.79E-21 | 1.11E-19 | 2.12E-17 |
| WDR82    | LMNA | -0.075134009 | -0.210996485 | 0.063576427  | 2.88E-01 | 3.71E-01 | 1.00E+00 |
| APOM     | LMNA | -0.188099078 | -0.317895209 | -0.051382336 | 7.35E-03 | 1.54E-02 | 1.00E+00 |
| PKP2     | LMNA | -0.076457682 | -0.21226818  | 0.062250375  | 2.79E-01 | 3.62E-01 | 1.00E+00 |
| C1orf135 | LMNA | -0.13173783  | -0.264969944 | 0.006430112  | 6.16E-02 | 1.01E-01 | 1.00E+00 |
| TRIP10   | LMNA | 0.635245726  | 0.544988177  | 0.710949114  | 3.19E-24 | 3.62E-22 | 3.78E-20 |
| HRASLS   | LMNA | -0.403222818 | -0.512732409 | -0.280802793 | 2.68E-09 | 2.05E-08 | 3.18E-05 |
| TESK1    | LMNA | 0.105045259  | -0.033491421 | 0.239621365  | 1.37E-01 | 1.99E-01 | 1.00E+00 |

|          |      |              |              |              |          |          |          |
|----------|------|--------------|--------------|--------------|----------|----------|----------|
| FSD1     | LMNA | -0.471916827 | -0.572659846 | -0.357132505 | 1.34E-12 | 1.83E-11 | 1.59E-08 |
| SFXN3    | LMNA | 0.365157899  | 0.239163215  | 0.479059321  | 9.13E-08 | 5.26E-07 | 1.08E-03 |
| MMP1     | LMNA | 0.470379211  | 0.355407036  | 0.571330135  | 1.62E-12 | 2.18E-11 | 1.93E-08 |
| CA12     | LMNA | 0.652697288  | 0.565610953  | 0.725386927  | 6.66E-26 | 1.08E-23 | 7.90E-22 |
| ZNF611   | LMNA | -0.070727719 | -0.206759909 | 0.06798711   | 3.17E-01 | 4.03E-01 | 1.00E+00 |
| C19orf58 | LMNA | 0.005618038  | -0.132535754 | 0.143557698  | 9.37E-01 | 9.53E-01 | 1.00E+00 |
| NCOA6    | LMNA | 0.038660916  | -0.099923393 | 0.175773781  | 5.85E-01 | 6.63E-01 | 1.00E+00 |
| PDE6G    | LMNA | 0.113720098  | -0.02471897  | 0.247879594  | 1.07E-01 | 1.61E-01 | 1.00E+00 |
| PPP4R1   | LMNA | -0.023443698 | -0.160973719 | 0.114979425  | 7.41E-01 | 7.99E-01 | 1.00E+00 |
| GCLC     | LMNA | -0.286890577 | -0.408752709 | -0.154977544 | 3.48E-05 | 1.24E-04 | 4.13E-01 |
| MAN1A2   | LMNA | 0.097822695  | -0.040779007 | 0.232730778  | 1.66E-01 | 2.34E-01 | 1.00E+00 |
| SEC61A1  | LMNA | 0.457455527  | 0.340935341  | 0.560132906  | 7.69E-12 | 9.24E-11 | 9.12E-08 |
| IKBKAP   | LMNA | -0.172652757 | -0.303470571 | -0.035446623 | 1.40E-02 | 2.73E-02 | 1.00E+00 |
| TWSG1    | LMNA | 0.461843061  | 0.345842234  | 0.563938528  | 4.57E-12 | 5.71E-11 | 5.42E-08 |
| UPF1     | LMNA | 0.266804558  | 0.133677242  | 0.390473394  | 1.24E-04 | 3.99E-04 | 1.00E+00 |
| KIAA1219 | LMNA | 0.177700635  | 0.04064677   | 0.308191166  | 1.14E-02 | 2.28E-02 | 1.00E+00 |
| CTDP1    | LMNA | 0.242615005  | 0.108187556  | 0.368329457  | 5.03E-04 | 1.42E-03 | 1.00E+00 |
| ZMYND10  | LMNA | 0.15887852   | 0.02129458   | 0.290556643  | 2.39E-02 | 4.38E-02 | 1.00E+00 |
| WNT16    | LMNA | 0.005886518  | -0.132271972 | 0.143820645  | 9.34E-01 | 9.52E-01 | 1.00E+00 |
| ADAMTS6  | LMNA | -0.176580461 | -0.307144175 | -0.039492165 | 1.19E-02 | 2.37E-02 | 1.00E+00 |
| SNW1     | LMNA | 0.209183191  | 0.073247425  | 0.337488224  | 2.81E-03 | 6.55E-03 | 1.00E+00 |
| IL18RAP  | LMNA | 0.135648019  | -0.002448839 | 0.268667853  | 5.42E-02 | 9.01E-02 | 1.00E+00 |
| RPP30    | LMNA | -0.007086335 | -0.14499549  | 0.131092911  | 9.20E-01 | 9.43E-01 | 1.00E+00 |
| KRT86    | LMNA | 0.023575327  | -0.114849462 | 0.161102006  | 7.39E-01 | 7.98E-01 | 1.00E+00 |
| CDC40    | LMNA | -0.184127592 | -0.314192143 | -0.04727836  | 8.71E-03 | 1.79E-02 | 1.00E+00 |
| SLIT1    | LMNA | -0.40774623  | -0.516711649 | -0.285781824 | 1.71E-09 | 1.36E-08 | 2.03E-05 |
| KIAA0574 | LMNA | -0.077559298 | -0.213326185 | 0.061146406  | 2.73E-01 | 3.55E-01 | 1.00E+00 |
| GTPBP2   | LMNA | 0.085964353  | -0.052712208 | 0.221388038  | 2.24E-01 | 3.01E-01 | 1.00E+00 |
| SETD3    | LMNA | 0.03645116   | -0.102113689 | 0.173628441  | 6.07E-01 | 6.83E-01 | 1.00E+00 |
| C15orf44 | LMNA | 0.180867397  | 0.043912853  | 0.311149333  | 1.00E-02 | 2.03E-02 | 1.00E+00 |
| PRRX2    | LMNA | 0.45505245   | 0.338250497  | 0.558046708  | 1.02E-11 | 1.20E-10 | 1.21E-07 |
| GPR110   | LMNA | 0.181232302  | 0.044289391  | 0.31149004   | 9.85E-03 | 2.00E-02 | 1.00E+00 |
| C11orf10 | LMNA | -0.030742579 | -0.16808024  | 0.107765784  | 6.64E-01 | 7.34E-01 | 1.00E+00 |
| MKKS     | LMNA | -0.204139809 | -0.332811611 | -0.068005315 | 3.57E-03 | 8.09E-03 | 1.00E+00 |
| ELK4     | LMNA | 0.264193195  | 0.130917017  | 0.388089734  | 1.45E-04 | 4.61E-04 | 1.00E+00 |

|          |      |              |              |              |          |          |          |
|----------|------|--------------|--------------|--------------|----------|----------|----------|
| ACOX3    | LMNA | 0.142886861  | 0.00493317   | 0.275503372  | 4.25E-02 | 7.27E-02 | 1.00E+00 |
| ADCY1    | LMNA | -0.234332106 | -0.360714085 | -0.099499905 | 7.89E-04 | 2.13E-03 | 1.00E+00 |
| KIAA0372 | LMNA | 0.087554286  | -0.051114533 | 0.222910972  | 2.15E-01 | 2.91E-01 | 1.00E+00 |
| TP53AP1  | LMNA | 0.224265944  | 0.08896945   | 0.351436424  | 1.33E-03 | 3.39E-03 | 1.00E+00 |
| RHBG     | LMNA | 0.114198617  | -0.024234446 | 0.248334565  | 1.06E-01 | 1.59E-01 | 1.00E+00 |
| SMURF2   | LMNA | 0.022028593  | -0.116376316 | 0.159594257  | 7.56E-01 | 8.12E-01 | 1.00E+00 |
| TP53I3   | LMNA | 0.296955799  | 0.165697578  | 0.417875956  | 1.77E-05 | 6.72E-05 | 2.10E-01 |
| EBP      | LMNA | 0.129867476  | -0.00833292  | 0.263199743  | 6.55E-02 | 1.06E-01 | 1.00E+00 |
| SLC22A3  | LMNA | -0.178834802 | -0.309250916 | -0.041816172 | 1.09E-02 | 2.19E-02 | 1.00E+00 |
| TOR1A    | LMNA | 0.311824819  | 0.181590893  | 0.431308949  | 6.26E-06 | 2.57E-05 | 7.42E-02 |
| P2RY4    | LMNA | -0.001105516 | -0.139135282 | 0.136966388  | 9.88E-01 | 9.90E-01 | 1.00E+00 |
| TRPV1    | LMNA | -0.324338282 | -0.442572978 | -0.195019315 | 2.49E-06 | 1.11E-05 | 2.95E-02 |
| ADAMTS12 | LMNA | 0.542108074  | 0.436742234  | 0.632801147  | 7.94E-17 | 2.38E-15 | 9.41E-13 |
| PES1     | LMNA | 0.111348204  | -0.027119673 | 0.245623546  | 1.15E-01 | 1.71E-01 | 1.00E+00 |
| UCP2     | LMNA | 0.002822223  | -0.135281477 | 0.140818367  | 9.68E-01 | 9.76E-01 | 1.00E+00 |
| ATG4A    | LMNA | 0.089345085  | -0.049314165 | 0.224625515  | 2.06E-01 | 2.81E-01 | 1.00E+00 |
| FOXG1    | LMNA | 0.138383229  | 0.000338699  | 0.271252242  | 4.95E-02 | 8.33E-02 | 1.00E+00 |
| MAGEA10  | LMNA | -0.087246519 | -0.222616225 | 0.051423855  | 2.17E-01 | 2.93E-01 | 1.00E+00 |
| WFS1     | LMNA | -0.071980834 | -0.207965279 | 0.066733297  | 3.09E-01 | 3.93E-01 | 1.00E+00 |
| TRIM24   | LMNA | 0.011442589  | -0.126808726 | 0.149257813  | 8.72E-01 | 9.05E-01 | 1.00E+00 |
| PABPN1   | LMNA | -0.149283358 | -0.281532339 | -0.011468713 | 3.40E-02 | 5.97E-02 | 1.00E+00 |
| PROC     | LMNA | -0.135993784 | -0.268994658 | 0.002096578  | 5.36E-02 | 8.93E-02 | 1.00E+00 |
| SLCO1C1  | LMNA | -0.239896313 | -0.365831726 | -0.105333748 | 5.84E-04 | 1.62E-03 | 1.00E+00 |
| SLC25A30 | LMNA | 0.189529039  | 0.052861133  | 0.319227555  | 6.90E-03 | 1.46E-02 | 1.00E+00 |
| SLC22A5  | LMNA | -0.015448361 | -0.153172696 | 0.122864669  | 8.27E-01 | 8.70E-01 | 1.00E+00 |
| DEPDC1   | LMNA | 0.099566601  | -0.03902075  | 0.234395769  | 1.59E-01 | 2.25E-01 | 1.00E+00 |
| KIF23    | LMNA | 0.11619259   | -0.022214746 | 0.250229779  | 9.96E-02 | 1.51E-01 | 1.00E+00 |
| SYN2     | LMNA | -0.363224013 | -0.477339567 | -0.237060017 | 1.08E-07 | 6.15E-07 | 1.28E-03 |
| ASPN     | LMNA | 0.494872487  | 0.382986201  | 0.592448784  | 7.09E-14 | 1.15E-12 | 8.41E-10 |
| CENTG2   | LMNA | -0.129179422 | -0.262548307 | 0.009032661  | 6.69E-02 | 1.08E-01 | 1.00E+00 |
| ZDHHC17  | LMNA | -0.40104481  | -0.510814738 | -0.278407753 | 3.32E-09 | 2.49E-08 | 3.94E-05 |
| VNN3     | LMNA | 0.154852551  | 0.017168573  | 0.286773047  | 2.78E-02 | 4.99E-02 | 1.00E+00 |
| KCNH1    | LMNA | -0.355851376 | -0.470775242 | -0.229052737 | 2.02E-07 | 1.10E-06 | 2.40E-03 |
| PPARD    | LMNA | 0.296158034  | 0.16484678   | 0.41715374   | 1.87E-05 | 7.06E-05 | 2.22E-01 |
| PSMAL    | LMNA | -0.155726408 | -0.287594645 | -0.018063745 | 2.69E-02 | 4.86E-02 | 1.00E+00 |

|          |      |              |              |              |          |          |          |
|----------|------|--------------|--------------|--------------|----------|----------|----------|
| FLJ10815 | LMNA | 0.275699528  | 0.143094801  | 0.398580324  | 7.15E-05 | 2.41E-04 | 8.48E-01 |
| YBX1     | LMNA | 0.036847098  | -0.101721336 | 0.174012934  | 6.03E-01 | 6.80E-01 | 1.00E+00 |
| STK24    | LMNA | 0.218528984  | 0.082981377  | 0.346137654  | 1.78E-03 | 4.38E-03 | 1.00E+00 |
| SPEG     | LMNA | 0.250847907  | 0.116843162  | 0.375882181  | 3.17E-04 | 9.36E-04 | 1.00E+00 |
| STK10    | LMNA | 0.377694154  | 0.252825755  | 0.490186322  | 3.00E-08 | 1.88E-07 | 3.56E-04 |
| ZNF695   | LMNA | -0.205665249 | -0.334226785 | -0.06959007  | 3.32E-03 | 7.60E-03 | 1.00E+00 |
| SCTR     | LMNA | 0.009562849  | -0.128658001 | 0.147419233  | 8.93E-01 | 9.22E-01 | 1.00E+00 |
| AAAS     | LMNA | -0.096143559 | -0.231126879 | 0.042471149  | 1.73E-01 | 2.43E-01 | 1.00E+00 |
| SSX3     | LMNA | -0.104506318 | -0.239107665 | 0.034035722  | 1.39E-01 | 2.01E-01 | 1.00E+00 |
| ABCD3    | LMNA | -0.309387709 | -0.429110835 | -0.178981226 | 7.45E-06 | 3.02E-05 | 8.84E-02 |
| MTF2     | LMNA | -0.206488856 | -0.334990616 | -0.070445988 | 3.19E-03 | 7.36E-03 | 1.00E+00 |
| FIG4     | LMNA | -0.303552141 | -0.423841766 | -0.172739924 | 1.13E-05 | 4.41E-05 | 1.33E-01 |
| TMCO6    | LMNA | 0.073108992  | -0.065604136 | 0.209050098  | 3.01E-01 | 3.85E-01 | 1.00E+00 |
| C9orf46  | LMNA | 0.032394846  | -0.106130787 | 0.169686982  | 6.47E-01 | 7.20E-01 | 1.00E+00 |
| ATP6V1F  | LMNA | -0.036704411 | -0.173874376 | 0.101862737  | 6.04E-01 | 6.81E-01 | 1.00E+00 |
| IGHMBP2  | LMNA | 0.012206594  | -0.126056829 | 0.150004817  | 8.63E-01 | 9.00E-01 | 1.00E+00 |
| CCDC94   | LMNA | -0.027948627 | -0.165361607 | 0.110528831  | 6.93E-01 | 7.59E-01 | 1.00E+00 |
| DUS2L    | LMNA | -0.05663569  | -0.19317632  | 0.082056882  | 4.23E-01 | 5.10E-01 | 1.00E+00 |
| FAM3C    | LMNA | 0.224292829  | 0.088997535  | 0.351461237  | 1.33E-03 | 3.38E-03 | 1.00E+00 |
| DCTN4    | LMNA | -0.073798207 | -0.209712673 | 0.064914133  | 2.97E-01 | 3.81E-01 | 1.00E+00 |
| EIF2AK2  | LMNA | 0.024420006  | -0.114015364 | 0.161925124  | 7.30E-01 | 7.90E-01 | 1.00E+00 |
| CST4     | LMNA | 0.034623187  | -0.103924549 | 0.171852772  | 6.25E-01 | 6.99E-01 | 1.00E+00 |
| CCL11    | LMNA | 0.337995385  | 0.209730538  | 0.454824024  | 8.67E-07 | 4.20E-06 | 1.03E-02 |
| LMO7     | LMNA | -0.121086866 | -0.254877297 | 0.01725253   | 8.61E-02 | 1.34E-01 | 1.00E+00 |
| PAM      | LMNA | 0.455963653  | 0.339268317  | 0.558837909  | 9.16E-12 | 1.08E-10 | 1.09E-07 |
| NUTF2    | LMNA | 0.067466454  | -0.071248138 | 0.203620968  | 3.40E-01 | 4.26E-01 | 1.00E+00 |
| ADRBK1   | LMNA | 0.242133874  | 0.107682352  | 0.367887562  | 5.17E-04 | 1.45E-03 | 1.00E+00 |
| ZNF84    | LMNA | -0.02139958  | -0.158980914 | 0.116997058  | 7.62E-01 | 8.18E-01 | 1.00E+00 |
| SLC39A4  | LMNA | 0.25725757   | 0.123596042  | 0.381750819  | 2.19E-04 | 6.68E-04 | 1.00E+00 |
| CITED2   | LMNA | 0.350738201  | 0.223509476  | 0.466215175  | 3.10E-07 | 1.63E-06 | 3.67E-03 |
| C12orf49 | LMNA | 0.253702894  | 0.119849495  | 0.378497424  | 2.69E-04 | 8.06E-04 | 1.00E+00 |
| GRM3     | LMNA | -0.376762182 | -0.489360377 | -0.251808337 | 3.27E-08 | 2.03E-07 | 3.87E-04 |
| CCDC49   | LMNA | -0.089319355 | -0.224600886 | 0.04934004   | 2.06E-01 | 2.81E-01 | 1.00E+00 |
| STARD8   | LMNA | 0.091132349  | -0.047516452 | 0.226335838  | 1.97E-01 | 2.71E-01 | 1.00E+00 |
| FND4     | LMNA | 0.220669223  | 0.085214153  | 0.348115374  | 1.60E-03 | 3.97E-03 | 1.00E+00 |

|          |      |              |              |              |          |          |          |
|----------|------|--------------|--------------|--------------|----------|----------|----------|
| SIAH2    | LMNA | 0.265248227  | 0.132031943  | 0.38905297   | 1.36E-04 | 4.35E-04 | 1.00E+00 |
| CCDC103  | LMNA | -0.117990463 | -0.251937725 | 0.020392709  | 9.44E-02 | 1.45E-01 | 1.00E+00 |
| ATP5A1   | LMNA | -0.292424878 | -0.413772087 | -0.160868047 | 2.41E-05 | 8.90E-05 | 2.86E-01 |
| HTR7P    | LMNA | 0.052951397  | -0.085726263 | 0.189616303  | 4.54E-01 | 5.41E-01 | 1.00E+00 |
| LALBA    | LMNA | -0.219240395 | -0.34679517  | -0.083723397 | 1.72E-03 | 4.24E-03 | 1.00E+00 |
| RMND5A   | LMNA | -0.242499327 | -0.368223217 | -0.108066084 | 5.07E-04 | 1.42E-03 | 1.00E+00 |
| ATP5J2   | LMNA | 0.029089015  | -0.109401316 | 0.166471504  | 6.81E-01 | 7.49E-01 | 1.00E+00 |
| PSCD2    | LMNA | 0.148445615  | 0.010612089  | 0.280743324  | 3.50E-02 | 6.13E-02 | 1.00E+00 |
| MMP3     | LMNA | 0.152620576  | 0.014883155  | 0.284673667  | 3.01E-02 | 5.38E-02 | 1.00E+00 |
| ZNF409   | LMNA | -0.247960569 | -0.373235277 | -0.11380526  | 3.74E-04 | 1.08E-03 | 1.00E+00 |
| CRHR1    | LMNA | -0.126069377 | -0.259602259 | 0.012193846  | 7.38E-02 | 1.18E-01 | 1.00E+00 |
| WDR70    | LMNA | -0.121214935 | -0.254998826 | 0.017122592  | 8.57E-02 | 1.33E-01 | 1.00E+00 |
| ZFAND1   | LMNA | -0.08393566  | -0.219443877 | 0.054749748  | 2.35E-01 | 3.13E-01 | 1.00E+00 |
| CCL18    | LMNA | 0.28583631   | 0.153856485  | 0.407795697  | 3.73E-05 | 1.33E-04 | 4.42E-01 |
| KRTAP1-3 | LMNA | -0.225516746 | -0.352590609 | -0.0902763   | 1.25E-03 | 3.20E-03 | 1.00E+00 |
| RINT1    | LMNA | 0.141362366  | 0.003377274  | 0.27406493   | 4.48E-02 | 7.62E-02 | 1.00E+00 |
| NRN1     | LMNA | 0.26231576   | 0.128933834  | 0.386374981  | 1.62E-04 | 5.09E-04 | 1.00E+00 |
| SPAG5    | LMNA | -0.052450071 | -0.18913161  | 0.086225269  | 4.58E-01 | 5.44E-01 | 1.00E+00 |
| KIAA0408 | LMNA | -0.354358264 | -0.469444279 | -0.227433184 | 2.29E-07 | 1.24E-06 | 2.72E-03 |
| F13A1    | LMNA | 0.473021585  | 0.358372719  | 0.5736149    | 1.17E-12 | 1.61E-11 | 1.39E-08 |
| DNAH7    | LMNA | -0.245516237 | -0.370992893 | -0.111235424 | 4.29E-04 | 1.23E-03 | 1.00E+00 |
| SLC10A1  | LMNA | 0.305600268  | 0.174929257  | 0.425691995  | 9.75E-06 | 3.86E-05 | 1.16E-01 |
| BRCA2    | LMNA | 0.029251258  | -0.109240875 | 0.166629382  | 6.79E-01 | 7.48E-01 | 1.00E+00 |
| ACADM    | LMNA | -0.218716684 | -0.346311147 | -0.083177139 | 1.76E-03 | 4.34E-03 | 1.00E+00 |
| GIPC2    | LMNA | 0.194060846  | 0.057551671  | 0.323446616  | 5.65E-03 | 1.22E-02 | 1.00E+00 |
| OGN      | LMNA | 0.167378623  | 0.030021318  | 0.298531519  | 1.73E-02 | 3.28E-02 | 1.00E+00 |
| RAGE     | LMNA | -0.135971383 | -0.268973487 | 0.0021194    | 5.37E-02 | 8.93E-02 | 1.00E+00 |
| XPO6     | LMNA | 0.091897552  | -0.0467465   | 0.227067845  | 1.93E-01 | 2.66E-01 | 1.00E+00 |
| FMR1     | LMNA | -0.205887425 | -0.334432852 | -0.069820942 | 3.29E-03 | 7.53E-03 | 1.00E+00 |
| DUSP3    | LMNA | 0.474069123  | 0.359549069  | 0.574520235  | 1.03E-12 | 1.42E-11 | 1.22E-08 |
| ANKMY1   | LMNA | 0.121064441  | -0.017275282 | 0.254856016  | 8.61E-02 | 1.34E-01 | 1.00E+00 |
| CHMP2A   | LMNA | 0.193261962  | 0.056724368  | 0.322703238  | 5.86E-03 | 1.26E-02 | 1.00E+00 |
| FAM8A1   | LMNA | -0.328265545 | -0.44610044  | -0.199243751 | 1.85E-06 | 8.43E-06 | 2.19E-02 |
| GPR21    | LMNA | -0.068159505 | -0.204288258 | 0.070555385  | 3.35E-01 | 4.21E-01 | 1.00E+00 |
| BBS9     | LMNA | 0.00084261   | -0.137224353 | 0.138877456  | 9.91E-01 | 9.92E-01 | 1.00E+00 |

|           |      |              |              |              |          |          |          |
|-----------|------|--------------|--------------|--------------|----------|----------|----------|
| UNC119B   | LMNA | 0.18276111   | 0.045867359  | 0.312917102  | 9.23E-03 | 1.89E-02 | 1.00E+00 |
| SLC12A3   | LMNA | 0.047789257  | -0.090861187 | 0.184622239  | 4.99E-01 | 5.84E-01 | 1.00E+00 |
| ZDHHC7    | LMNA | 0.408508496  | 0.286621518  | 0.517381749  | 1.59E-09 | 1.27E-08 | 1.88E-05 |
| FVT1      | LMNA | 0.275969948  | 0.143381484  | 0.398826486  | 7.03E-05 | 2.37E-04 | 8.33E-01 |
| ENTPD6    | LMNA | 0.065763329  | -0.072949962 | 0.201980609  | 3.52E-01 | 4.39E-01 | 1.00E+00 |
| PPP1R2P9  | LMNA | 0.164720542  | 0.027290114  | 0.29603965   | 1.91E-02 | 3.59E-02 | 1.00E+00 |
| ERCC4     | LMNA | -0.062145232 | -0.198493317 | 0.076562615  | 3.80E-01 | 4.67E-01 | 1.00E+00 |
| MMP8      | LMNA | 0.089853321  | -0.048803049 | 0.225111956  | 2.03E-01 | 2.78E-01 | 1.00E+00 |
| RAD23A    | LMNA | 0.23288296   | 0.097982056  | 0.359379993  | 8.52E-04 | 2.27E-03 | 1.00E+00 |
| ACY1      | LMNA | 0.196478006  | 0.060055963  | 0.325694864  | 5.07E-03 | 1.11E-02 | 1.00E+00 |
| MT1E      | LMNA | 0.40786309   | 0.285910542  | 0.516814387  | 1.69E-09 | 1.35E-08 | 2.01E-05 |
| PPP5C     | LMNA | -0.10772286  | -0.242172454 | 0.030785966  | 1.27E-01 | 1.87E-01 | 1.00E+00 |
| GPR20     | LMNA | 0.039330375  | -0.099259565 | 0.176423467  | 5.78E-01 | 6.57E-01 | 1.00E+00 |
| GHITM     | LMNA | -0.161392237 | -0.292916942 | -0.023873138 | 2.18E-02 | 4.03E-02 | 1.00E+00 |
| SCAMP4    | LMNA | 0.329318149  | 0.20037682   | 0.447045265  | 1.70E-06 | 7.84E-06 | 2.02E-02 |
| NARG1L    | LMNA | -0.33608747  | -0.45311519  | -0.207671865 | 1.01E-06 | 4.83E-06 | 1.20E-02 |
| MYO9A     | LMNA | -0.164542589 | -0.295872761 | -0.027107339 | 1.93E-02 | 3.61E-02 | 1.00E+00 |
| BLMH      | LMNA | -0.070537656 | -0.206577052 | 0.06817724   | 3.18E-01 | 4.04E-01 | 1.00E+00 |
| NDUFB7    | LMNA | -0.118710801 | -0.252621799 | 0.01966243   | 9.24E-02 | 1.42E-01 | 1.00E+00 |
| ADCYAP1   | LMNA | -0.329580063 | -0.44728032  | -0.200658809 | 1.67E-06 | 7.70E-06 | 1.98E-02 |
| SP110     | LMNA | 0.311164899  | 0.180884068  | 0.430713885  | 6.56E-06 | 2.68E-05 | 7.78E-02 |
| MIER2     | LMNA | 0.114760534  | -0.023665393 | 0.248868755  | 1.04E-01 | 1.57E-01 | 1.00E+00 |
| KIAA0513  | LMNA | -0.214040055 | -0.341985904 | -0.07830278  | 2.22E-03 | 5.33E-03 | 1.00E+00 |
| SH3BP2    | LMNA | 0.280041573  | 0.147700684  | 0.402530728  | 5.43E-05 | 1.87E-04 | 6.44E-01 |
| PNMA2     | LMNA | -0.324034835 | -0.44230027  | -0.194693106 | 2.55E-06 | 1.13E-05 | 3.02E-02 |
| MAP3K7IP2 | LMNA | -0.090468385 | -0.225700554 | 0.048184403  | 2.00E-01 | 2.74E-01 | 1.00E+00 |
| AGRN      | LMNA | 0.14549089   | 0.007592384  | 0.277959038  | 3.88E-02 | 6.71E-02 | 1.00E+00 |
| CEP290    | LMNA | -0.04232144  | -0.179324733 | 0.096292149  | 5.50E-01 | 6.31E-01 | 1.00E+00 |
| ANXA10    | LMNA | -0.003453849 | -0.141437411 | 0.134661359  | 9.61E-01 | 9.71E-01 | 1.00E+00 |
| RTN2      | LMNA | -0.303999695 | -0.424246161 | -0.173218223 | 1.09E-05 | 4.28E-05 | 1.29E-01 |
| C14orf133 | LMNA | -0.106192418 | -0.24071455  | 0.032332577  | 1.33E-01 | 1.94E-01 | 1.00E+00 |
| PRPS1L1   | LMNA | 0.056275733  | -0.082415548 | 0.192828663  | 4.26E-01 | 5.13E-01 | 1.00E+00 |
| PRPH2     | LMNA | -0.129887706 | -0.263218895 | 0.008312344  | 6.54E-02 | 1.06E-01 | 1.00E+00 |
| KLRA1     | LMNA | -0.060791673 | -0.197187804 | 0.077913203  | 3.90E-01 | 4.77E-01 | 1.00E+00 |
| IRX4      | LMNA | 0.049327979  | -0.089331348 | 0.186111601  | 4.86E-01 | 5.71E-01 | 1.00E+00 |

|          |      |              |              |              |          |          |          |
|----------|------|--------------|--------------|--------------|----------|----------|----------|
| GOLGB1   | LMNA | 0.094537188  | -0.044089219 | 0.229591797  | 1.81E-01 | 2.51E-01 | 1.00E+00 |
| GPR97    | LMNA | 0.196392463  | 0.059967307  | 0.325615324  | 5.09E-03 | 1.11E-02 | 1.00E+00 |
| NFKBIL1  | LMNA | 0.04905063   | -0.089607145 | 0.185843195  | 4.88E-01 | 5.73E-01 | 1.00E+00 |
| CHD7     | LMNA | -0.468236641 | -0.569476382 | -0.353004009 | 2.11E-12 | 2.78E-11 | 2.50E-08 |
| APBB3    | LMNA | -0.211174891 | -0.339333339 | -0.075319677 | 2.55E-03 | 6.03E-03 | 1.00E+00 |
| RPS10    | LMNA | -0.116151322 | -0.250190565 | 0.022256559  | 9.97E-02 | 1.52E-01 | 1.00E+00 |
| HIC1     | LMNA | 0.413482222  | 0.292105055  | 0.521750832  | 9.59E-10 | 7.94E-09 | 1.14E-05 |
| TLE3     | LMNA | -0.165951914 | -0.297194246 | -0.028555106 | 1.83E-02 | 3.44E-02 | 1.00E+00 |
| PSMB7    | LMNA | -0.034867942 | -0.172090575 | 0.103682138  | 6.22E-01 | 6.97E-01 | 1.00E+00 |
| IAPP     | LMNA | -0.240544863 | -0.36642773  | -0.106014329 | 5.64E-04 | 1.57E-03 | 1.00E+00 |
| SHQ1     | LMNA | 0.304057683  | 0.173280199  | 0.424298553  | 1.09E-05 | 4.27E-05 | 1.29E-01 |
| API5     | LMNA | 0.052550657  | -0.086125153 | 0.189228864  | 4.58E-01 | 5.44E-01 | 1.00E+00 |
| GP1BB    | LMNA | -0.001839148 | -0.13985464  | 0.136246445  | 9.79E-01 | 9.84E-01 | 1.00E+00 |
| SLC6A1   | LMNA | -0.487241497 | -0.585883525 | -0.374372344 | 1.93E-13 | 2.99E-12 | 2.29E-09 |
| OCLN     | LMNA | -0.252988661 | -0.377843355 | -0.119097169 | 2.81E-04 | 8.37E-04 | 1.00E+00 |
| NAGLU    | LMNA | 0.384061183  | 0.259783934  | 0.495823601  | 1.68E-08 | 1.10E-07 | 1.99E-04 |
| FAM117A  | LMNA | 0.055796835  | -0.082892672 | 0.192366077  | 4.30E-01 | 5.17E-01 | 1.00E+00 |
| SPRY1    | LMNA | 0.396852978  | 0.273802508  | 0.507120879  | 5.00E-09 | 3.64E-08 | 5.93E-05 |
| FLJ10781 | LMNA | -0.434675753 | -0.540304475 | -0.315560739 | 1.02E-10 | 1.03E-09 | 1.21E-06 |
| CDON     | LMNA | -0.015667446 | -0.153386685 | 0.122648833  | 8.25E-01 | 8.68E-01 | 1.00E+00 |
| SH3YL1   | LMNA | -0.370890377 | -0.484151933 | -0.245404527 | 5.52E-08 | 3.32E-07 | 6.55E-04 |
| IGKC     | LMNA | 0.175911033  | 0.038802335  | 0.306518329  | 1.23E-02 | 2.43E-02 | 1.00E+00 |
| TREM2    | LMNA | 0.029305242  | -0.10918749  | 0.166681911  | 6.79E-01 | 7.47E-01 | 1.00E+00 |
| MMP14    | LMNA | 0.756580551  | 0.690667492  | 0.810026912  | 9.39E-39 | 1.59E-35 | 1.11E-34 |
| SERPINI1 | LMNA | -0.184409298 | -0.31445494  | -0.047569311 | 8.61E-03 | 1.78E-02 | 1.00E+00 |
| HDHD3    | LMNA | 0.262655387  | 0.129292512  | 0.386685243  | 1.59E-04 | 5.00E-04 | 1.00E+00 |
| DYNC1LI1 | LMNA | -0.218519885 | -0.346129243 | -0.082971888 | 1.78E-03 | 4.38E-03 | 1.00E+00 |
| FASTKD5  | LMNA | 0.133260042  | -0.004880748 | 0.266409983  | 5.87E-02 | 9.64E-02 | 1.00E+00 |
| TDRD3    | LMNA | -0.149737    | -0.281959519 | -0.011932663 | 3.34E-02 | 5.90E-02 | 1.00E+00 |
| THSD7A   | LMNA | -0.360159515 | -0.474612597 | -0.233729642 | 1.40E-07 | 7.84E-07 | 1.66E-03 |
| NDST3    | LMNA | -0.272341637 | -0.395522176 | -0.139536806 | 8.82E-05 | 2.91E-04 | 1.00E+00 |
| CXCL2    | LMNA | 0.270748057  | 0.137849461  | 0.394069891  | 9.73E-05 | 3.18E-04 | 1.00E+00 |
| DHRS12   | LMNA | 0.078750942  | -0.059951834 | 0.214470298  | 2.65E-01 | 3.47E-01 | 1.00E+00 |
| MAP3K15  | LMNA | -0.359503205 | -0.474028288 | -0.233016775 | 1.48E-07 | 8.26E-07 | 1.76E-03 |
| FBXO9    | LMNA | -0.348130597 | -0.463887278 | -0.220685702 | 3.84E-07 | 1.99E-06 | 4.55E-03 |



|           |      |              |              |              |          |          |          |
|-----------|------|--------------|--------------|--------------|----------|----------|----------|
| APPL2     | LMNA | -0.241947433 | -0.367716309 | -0.107486601 | 5.22E-04 | 1.47E-03 | 1.00E+00 |
| TNPO1     | LMNA | 0.20023961   | 0.063956579  | 0.329190701  | 4.27E-03 | 9.52E-03 | 1.00E+00 |
| CARD10    | LMNA | 0.156265997  | 0.018616606  | 0.288101869  | 2.64E-02 | 4.77E-02 | 1.00E+00 |
| MRPL13    | LMNA | -0.017322708 | -0.155003031 | 0.121017697  | 8.07E-01 | 8.54E-01 | 1.00E+00 |
| SNX5      | LMNA | 0.137456383  | -0.00060612  | 0.270376717  | 5.11E-02 | 8.55E-02 | 1.00E+00 |
| EEF1D     | LMNA | 0.079192914  | -0.059508675 | 0.214894545  | 2.63E-01 | 3.44E-01 | 1.00E+00 |
| RAB6A     | LMNA | -0.174703944 | -0.305389543 | -0.037558788 | 1.29E-02 | 2.54E-02 | 1.00E+00 |
| SOD1      | LMNA | 0.079588286  | -0.059112195 | 0.215274019  | 2.60E-01 | 3.42E-01 | 1.00E+00 |
| C12orf5   | LMNA | 0.119638758  | -0.018721451 | 0.253502842  | 8.99E-02 | 1.39E-01 | 1.00E+00 |
| PACS1     | LMNA | 0.233297539  | 0.098416226  | 0.359761709  | 8.33E-04 | 2.23E-03 | 1.00E+00 |
| PAPOLG    | LMNA | -0.181350164 | -0.311600079 | -0.044411019 | 9.80E-03 | 1.99E-02 | 1.00E+00 |
| CHML      | LMNA | -0.157592734 | -0.289348712 | -0.019976335 | 2.51E-02 | 4.57E-02 | 1.00E+00 |
| SIRT5     | LMNA | -0.167290211 | -0.298448664 | -0.029930441 | 1.73E-02 | 3.28E-02 | 1.00E+00 |
| MSRB2     | LMNA | -0.250062946 | -0.375162787 | -0.11601702  | 3.32E-04 | 9.75E-04 | 1.00E+00 |
| BCR       | LMNA | -0.197535177 | -0.3266777   | -0.061151781 | 4.83E-03 | 1.06E-02 | 1.00E+00 |
| PUS3      | LMNA | -0.118582045 | -0.252499535 | 0.019792974  | 9.28E-02 | 1.43E-01 | 1.00E+00 |
| CAPN2     | LMNA | 0.534726593  | 0.428291904  | 0.626527613  | 2.46E-16 | 6.64E-15 | 2.92E-12 |
| FXD5      | LMNA | 0.52412139   | 0.416183551  | 0.617493361  | 1.20E-15 | 2.81E-14 | 1.42E-11 |
| TWISTNB   | LMNA | 0.441054112  | 0.322648522  | 0.545868304  | 5.05E-11 | 5.31E-10 | 5.98E-07 |
| UBE1L     | LMNA | 0.262361951  | 0.128982614  | 0.38641718   | 1.62E-04 | 5.08E-04 | 1.00E+00 |
| UBE1C     | LMNA | -0.191016336 | -0.320612779 | -0.05439986  | 6.47E-03 | 1.37E-02 | 1.00E+00 |
| CHD2      | LMNA | 0.142516634  | 0.004555256  | 0.275154098  | 4.30E-02 | 7.35E-02 | 1.00E+00 |
| C15orf2   | LMNA | -0.088662616 | -0.223972205 | 0.050000387  | 2.10E-01 | 2.85E-01 | 1.00E+00 |
| FZD5      | LMNA | 0.398731186  | 0.275865255  | 0.508776465  | 4.17E-09 | 3.07E-08 | 4.94E-05 |
| NR4A1     | LMNA | -0.011803131 | -0.149610351 | 0.126453918  | 8.68E-01 | 9.02E-01 | 1.00E+00 |
| LOC339047 | LMNA | -0.093772727 | -0.228861026 | 0.044858992  | 1.84E-01 | 2.56E-01 | 1.00E+00 |
| TRIM17    | LMNA | -0.149589179 | -0.281820326 | -0.011781477 | 3.36E-02 | 5.92E-02 | 1.00E+00 |
| RPL15     | LMNA | -0.293508569 | -0.414754086 | -0.162022586 | 2.24E-05 | 8.33E-05 | 2.66E-01 |
| ATP5G3    | LMNA | -0.06027079  | -0.196685282 | 0.078432806  | 3.94E-01 | 4.81E-01 | 1.00E+00 |
| PRC1      | LMNA | 0.10439373   | -0.034149421 | 0.239000339  | 1.39E-01 | 2.02E-01 | 1.00E+00 |
| ADAMTS8   | LMNA | -0.121046138 | -0.254838647 | 0.017293852  | 8.62E-02 | 1.34E-01 | 1.00E+00 |
| ABCB9     | LMNA | 0.170821473  | 0.033561932  | 0.301756431  | 1.51E-02 | 2.90E-02 | 1.00E+00 |
| HOXC4     | LMNA | -0.043930174 | -0.180884183 | 0.094695116  | 5.35E-01 | 6.17E-01 | 1.00E+00 |
| TRAK2     | LMNA | 0.10183984   | -0.036727516 | 0.236564953  | 1.49E-01 | 2.14E-01 | 1.00E+00 |
| STAB1     | LMNA | 0.434463135  | 0.315324702  | 0.540118849  | 1.05E-10 | 1.05E-09 | 1.24E-06 |

|          |      |              |              |              |          |          |          |
|----------|------|--------------|--------------|--------------|----------|----------|----------|
| CEACAM5  | LMNA | -0.026724591 | -0.16416991  | 0.111738654  | 7.06E-01 | 7.69E-01 | 1.00E+00 |
| MYT1L    | LMNA | -0.46478747  | -0.566489994 | -0.349138738 | 3.21E-12 | 4.14E-11 | 3.81E-08 |
| RASA2    | LMNA | 0.162175496  | 0.024676976  | 0.293652071  | 2.11E-02 | 3.92E-02 | 1.00E+00 |
| LRRTM2   | LMNA | -0.370678205 | -0.483963581 | -0.245173336 | 5.63E-08 | 3.38E-07 | 6.67E-04 |
| STAG1    | LMNA | 0.11362012   | -0.024820194 | 0.247784529  | 1.07E-01 | 1.62E-01 | 1.00E+00 |
| OSBPL7   | LMNA | -0.02589486  | -0.163361872 | 0.112558517  | 7.15E-01 | 7.77E-01 | 1.00E+00 |
| GIMAP4   | LMNA | 0.176974978  | 0.039898767  | 0.307512954  | 1.17E-02 | 2.34E-02 | 1.00E+00 |
| FUT3     | LMNA | -0.149338197 | -0.281583981 | -0.011524794 | 3.39E-02 | 5.96E-02 | 1.00E+00 |
| DBI      | LMNA | -0.171795323 | -0.302668091 | -0.034564062 | 1.45E-02 | 2.81E-02 | 1.00E+00 |
| LPIN2    | LMNA | 0.065491622  | -0.073221386 | 0.201718846  | 3.54E-01 | 4.41E-01 | 1.00E+00 |
| PAPD1    | LMNA | -0.34294106  | -0.459249641 | -0.215072304 | 5.85E-07 | 2.91E-06 | 6.94E-03 |
| APOOL    | LMNA | -0.086859789 | -0.222245822 | 0.0518125    | 2.19E-01 | 2.95E-01 | 1.00E+00 |
| DIABLO   | LMNA | -0.208212807 | -0.336588901 | -0.07223822  | 2.94E-03 | 6.83E-03 | 1.00E+00 |
| ARMC9    | LMNA | 0.236333472  | 0.101597188  | 0.362555704  | 7.09E-04 | 1.93E-03 | 1.00E+00 |
| RPS6KA4  | LMNA | 0.296604578  | 0.165322984  | 0.417558015  | 1.82E-05 | 6.86E-05 | 2.16E-01 |
| TRHR     | LMNA | -0.092545901 | -0.227687948 | 0.046093999  | 1.90E-01 | 2.62E-01 | 1.00E+00 |
| SLITRK3  | LMNA | -0.279068181 | -0.40164553  | -0.146667646 | 5.77E-05 | 1.98E-04 | 6.85E-01 |
| TGFBRAP1 | LMNA | -0.001718326 | -0.139736179 | 0.136365023  | 9.81E-01 | 9.85E-01 | 1.00E+00 |
| FAHD2A   | LMNA | 0.116643093  | -0.021758274 | 0.250657827  | 9.83E-02 | 1.50E-01 | 1.00E+00 |
| CNTN1    | LMNA | -0.537001107 | -0.628461995 | -0.430893788 | 1.74E-16 | 4.85E-15 | 2.07E-12 |
| ZNF211   | LMNA | -0.000616237 | -0.138655442 | 0.137446457  | 9.93E-01 | 9.94E-01 | 1.00E+00 |
| BBS4     | LMNA | -0.123351232 | -0.257025409 | 0.014954424  | 8.03E-02 | 1.26E-01 | 1.00E+00 |
| TMEM181  | LMNA | -0.100448415 | -0.235237378 | 0.038131353  | 1.55E-01 | 2.21E-01 | 1.00E+00 |
| PFDN1    | LMNA | 0.017598551  | -0.120745801 | 0.155272318  | 8.04E-01 | 8.52E-01 | 1.00E+00 |
| MINPP1   | LMNA | 0.099393765  | -0.039195047 | 0.234230789  | 1.59E-01 | 2.26E-01 | 1.00E+00 |
| MPHOSPH6 | LMNA | -0.155006135 | -0.28691746  | -0.017325886 | 2.76E-02 | 4.97E-02 | 1.00E+00 |
| RGS11    | LMNA | -0.147187538 | -0.279558089 | -0.009326036 | 3.66E-02 | 6.37E-02 | 1.00E+00 |
| HOXC10   | LMNA | -0.015496189 | -0.153219413 | 0.122817551  | 8.27E-01 | 8.70E-01 | 1.00E+00 |
| ITPKB    | LMNA | 0.149154222  | 0.011336653  | 0.281410725  | 3.41E-02 | 5.99E-02 | 1.00E+00 |
| HS6ST1   | LMNA | 0.359665977  | 0.233193561  | 0.474173212  | 1.46E-07 | 8.15E-07 | 1.74E-03 |
| AKR1D1   | LMNA | 0.135519655  | -0.002579606 | 0.26854652   | 5.45E-02 | 9.04E-02 | 1.00E+00 |
| TNP2     | LMNA | -0.098165645 | -0.233058271 | 0.040433302  | 1.65E-01 | 2.32E-01 | 1.00E+00 |
| MEOX2    | LMNA | 0.251966227  | 0.118020473  | 0.376906829  | 2.98E-04 | 8.83E-04 | 1.00E+00 |
| EML4     | LMNA | 0.264307857  | 0.131038173  | 0.388194433  | 1.44E-04 | 4.58E-04 | 1.00E+00 |
| SGTA     | LMNA | -0.154434554 | -0.286379978 | -0.016740458 | 2.82E-02 | 5.06E-02 | 1.00E+00 |

|           |      |              |              |              |          |          |          |
|-----------|------|--------------|--------------|--------------|----------|----------|----------|
| ATP6V0C   | LMNA | -0.102827592 | -0.237507072 | 0.035730621  | 1.45E-01 | 2.09E-01 | 1.00E+00 |
| PRPF8     | LMNA | -0.021894298 | -0.159463316 | 0.116508854  | 7.57E-01 | 8.13E-01 | 1.00E+00 |
| PSMD6     | LMNA | -0.011246685 | -0.149066243 | 0.1270015    | 8.74E-01 | 9.06E-01 | 1.00E+00 |
| HIST1H2BI | LMNA | 0.174900303  | 0.037761049  | 0.305573189  | 1.28E-02 | 2.52E-02 | 1.00E+00 |
| TMC5      | LMNA | 0.11408787   | -0.024346588 | 0.248229273  | 1.06E-01 | 1.60E-01 | 1.00E+00 |
| FKBP3     | LMNA | -0.190687424 | -0.320306488 | -0.054059518 | 6.56E-03 | 1.39E-02 | 1.00E+00 |
| FLJ20273  | LMNA | 0.497197672  | 0.385614741  | 0.594446664  | 5.20E-14 | 8.62E-13 | 6.16E-10 |
| PLEKHB2   | LMNA | -0.067835042 | -0.203975871 | 0.070879726  | 3.37E-01 | 4.24E-01 | 1.00E+00 |
| RPL28     | LMNA | 0.056869693  | -0.081823699 | 0.193402308  | 4.21E-01 | 5.09E-01 | 1.00E+00 |
| NOX3      | LMNA | -0.263006691 | -0.387006142 | -0.129663558 | 1.56E-04 | 4.91E-04 | 1.00E+00 |
| ZNF544    | LMNA | -0.095552098 | -0.230561744 | 0.043067002  | 1.76E-01 | 2.46E-01 | 1.00E+00 |
| EPYC      | LMNA | 0.346086767  | 0.218473932  | 0.462061564  | 4.53E-07 | 2.31E-06 | 5.38E-03 |
| ELAC1     | LMNA | -0.182691504 | -0.312852141 | -0.0457955   | 9.26E-03 | 1.89E-02 | 1.00E+00 |
| METT11D1  | LMNA | -0.111012712 | -0.245304322 | 0.027459111  | 1.16E-01 | 1.72E-01 | 1.00E+00 |
| BIN2      | LMNA | 0.164299435  | 0.026857611  | 0.295644711  | 1.95E-02 | 3.64E-02 | 1.00E+00 |
| RPL18A    | LMNA | -0.012914613 | -0.15069694  | 0.125359889  | 8.55E-01 | 8.93E-01 | 1.00E+00 |
| UBOX5     | LMNA | -0.010269487 | -0.148110509 | 0.127962928  | 8.85E-01 | 9.16E-01 | 1.00E+00 |
| TCERG1    | LMNA | -0.218852905 | -0.346437051 | -0.083319217 | 1.75E-03 | 4.32E-03 | 1.00E+00 |
| MPP6      | LMNA | 0.087160838  | -0.051509963 | 0.222534165  | 2.17E-01 | 2.93E-01 | 1.00E+00 |
| KRT16     | LMNA | 0.115238826  | -0.023180957 | 0.249323382  | 1.02E-01 | 1.55E-01 | 1.00E+00 |
| UBE2O     | LMNA | -0.287723882 | -0.409508954 | -0.155863884 | 3.29E-05 | 1.19E-04 | 3.91E-01 |
| KLF5      | LMNA | 0.457290493  | 0.340750896  | 0.559989676  | 7.84E-12 | 9.38E-11 | 9.30E-08 |
| C9orf31   | LMNA | 0.248069733  | 0.11392007   | 0.373335387  | 3.71E-04 | 1.08E-03 | 1.00E+00 |
| APOLD1    | LMNA | -0.133535761 | -0.266670754 | 0.004600041  | 5.81E-02 | 9.57E-02 | 1.00E+00 |
| UBL5      | LMNA | -0.100654896 | -0.235434416 | 0.037923065  | 1.54E-01 | 2.20E-01 | 1.00E+00 |
| ARHGAP29  | LMNA | 0.53433052   | 0.427839005  | 0.626190653  | 2.62E-16 | 6.98E-15 | 3.10E-12 |
| TNFSF8    | LMNA | 0.187169483  | 0.050421316  | 0.317028797  | 7.65E-03 | 1.60E-02 | 1.00E+00 |
| PDE5A     | LMNA | 0.099423921  | -0.039164636 | 0.234259575  | 1.59E-01 | 2.26E-01 | 1.00E+00 |
| CDR1      | LMNA | -0.44392128  | -0.548366321 | -0.325838919 | 3.66E-11 | 3.90E-10 | 4.34E-07 |
| FBLN2     | LMNA | 0.252867413  | 0.11896947   | 0.377732307  | 2.83E-04 | 8.42E-04 | 1.00E+00 |
| C14orf104 | LMNA | -0.334394204 | -0.451597886 | -0.205845754 | 1.15E-06 | 5.46E-06 | 1.37E-02 |
| HBE1      | LMNA | -0.106810826 | -0.241303721 | 0.031707716  | 1.30E-01 | 1.91E-01 | 1.00E+00 |
| ROBO4     | LMNA | 0.091828751  | -0.046815735 | 0.227002035  | 1.94E-01 | 2.67E-01 | 1.00E+00 |
| C1orf108  | LMNA | 0.087197558  | -0.051473061 | 0.222569333  | 2.17E-01 | 2.93E-01 | 1.00E+00 |
| FOXI1     | LMNA | 0.103985443  | -0.034561701 | 0.238611111  | 1.41E-01 | 2.04E-01 | 1.00E+00 |

|           |      |              |              |              |          |          |          |
|-----------|------|--------------|--------------|--------------|----------|----------|----------|
| BCKDHA    | LMNA | -0.073009145 | -0.2089541   | 0.065704086  | 3.02E-01 | 3.86E-01 | 1.00E+00 |
| RAB4A     | LMNA | -0.272816761 | -0.395955054 | -0.140040036 | 8.56E-05 | 2.84E-04 | 1.00E+00 |
| C11orf80  | LMNA | 0.049775894  | -0.088885896 | 0.18654503   | 4.82E-01 | 5.67E-01 | 1.00E+00 |
| MYOC      | LMNA | -0.113891721 | -0.248042778 | 0.024545201  | 1.07E-01 | 1.61E-01 | 1.00E+00 |
| GIF       | LMNA | -0.171896664 | -0.302762946 | -0.034668361 | 1.44E-02 | 2.80E-02 | 1.00E+00 |
| TMEM39B   | LMNA | 0.113002198  | -0.025445758 | 0.24719691   | 1.09E-01 | 1.64E-01 | 1.00E+00 |
| RPL3      | LMNA | -0.04713903  | -0.183992681 | 0.091507464  | 5.05E-01 | 5.89E-01 | 1.00E+00 |
| THBS1     | LMNA | 0.60756756   | 0.512502899  | 0.687919131  | 9.06E-22 | 6.04E-20 | 1.07E-17 |
| APOO      | LMNA | -0.063901731 | -0.200186745 | 0.074809214  | 3.66E-01 | 4.54E-01 | 1.00E+00 |
| ATPBD1C   | LMNA | -0.148786531 | -0.281064432 | -0.010960664 | 3.46E-02 | 6.06E-02 | 1.00E+00 |
| FARSA     | LMNA | 0.019096099  | -0.119269324 | 0.156733912  | 7.87E-01 | 8.39E-01 | 1.00E+00 |
| ARMCX1    | LMNA | -0.313612984 | -0.432920855 | -0.183506836 | 5.50E-06 | 2.28E-05 | 6.52E-02 |
| EIF4ENIF1 | LMNA | -0.233834363 | -0.360255918 | -0.098978494 | 8.10E-04 | 2.18E-03 | 1.00E+00 |
| CMAS      | LMNA | 0.062993456  | -0.075715994 | 0.199311185  | 3.73E-01 | 4.61E-01 | 1.00E+00 |
| OR7E24    | LMNA | 0.103982889  | -0.03456428  | 0.238608676  | 1.41E-01 | 2.04E-01 | 1.00E+00 |
| TNFRSF21  | LMNA | -0.022395489 | -0.159951963 | 0.116014195  | 7.52E-01 | 8.09E-01 | 1.00E+00 |
| PLAC1     | LMNA | -0.019913103 | -0.157531047 | 0.118463557  | 7.78E-01 | 8.31E-01 | 1.00E+00 |
| KLHL18    | LMNA | 0.090310524  | -0.048343193 | 0.225549496  | 2.01E-01 | 2.76E-01 | 1.00E+00 |
| LBA1      | LMNA | 0.308213961  | 0.177725026  | 0.428051685  | 8.10E-06 | 3.26E-05 | 9.61E-02 |
| MKL2      | LMNA | 0.022604844  | -0.115807548 | 0.160156058  | 7.49E-01 | 8.07E-01 | 1.00E+00 |
| TBX3      | LMNA | -0.117865756 | -0.251819283 | 0.020519121  | 9.48E-02 | 1.45E-01 | 1.00E+00 |
| TAZ       | LMNA | 0.053307352  | -0.085371912 | 0.189960409  | 4.51E-01 | 5.37E-01 | 1.00E+00 |
| CRIP2     | LMNA | 0.16775018   | 0.03040326   | 0.2988797    | 1.70E-02 | 3.24E-02 | 1.00E+00 |
| DAXX      | LMNA | 0.123581693  | -0.014720447 | 0.257243963  | 7.97E-02 | 1.25E-01 | 1.00E+00 |
| ELMO1     | LMNA | -0.434431166 | -0.540090938 | -0.315289213 | 1.05E-10 | 1.05E-09 | 1.24E-06 |
| RGS13     | LMNA | 0.159114872  | 0.021536952  | 0.290778639  | 2.37E-02 | 4.35E-02 | 1.00E+00 |
| DIO2      | LMNA | 0.052817403  | -0.085859643 | 0.189486761  | 4.55E-01 | 5.42E-01 | 1.00E+00 |
| UNC13A    | LMNA | -0.428506709 | -0.534914429 | -0.308718173 | 1.99E-10 | 1.88E-09 | 2.36E-06 |
| TAF11     | LMNA | -0.256955353 | -0.381474336 | -0.123277363 | 2.23E-04 | 6.79E-04 | 1.00E+00 |
| ORC3L     | LMNA | -0.226602864 | -0.353592518 | -0.091411466 | 1.18E-03 | 3.04E-03 | 1.00E+00 |
| PRX       | LMNA | 0.242970138  | 0.108560503  | 0.368655593  | 4.94E-04 | 1.39E-03 | 1.00E+00 |
| TARBP2    | LMNA | -0.031367886 | -0.168688404 | 0.107147101  | 6.58E-01 | 7.28E-01 | 1.00E+00 |
| CABIN1    | LMNA | -0.023870668 | -0.16138983  | 0.114557843  | 7.36E-01 | 7.95E-01 | 1.00E+00 |
| TRIOBP    | LMNA | 0.501351468  | 0.390314976  | 0.598012766  | 2.97E-14 | 5.16E-13 | 3.52E-10 |
| HIST1H2AC | LMNA | -0.020793873 | -0.158390196 | 0.117594697  | 7.69E-01 | 8.23E-01 | 1.00E+00 |

|          |      |              |              |              |          |          |          |
|----------|------|--------------|--------------|--------------|----------|----------|----------|
| RBM5     | LMNA | -0.214027432 | -0.341974223 | -0.078289632 | 2.22E-03 | 5.33E-03 | 1.00E+00 |
| TUBGCP4  | LMNA | -0.151612098 | -0.283724684 | -0.013851002 | 3.12E-02 | 5.56E-02 | 1.00E+00 |
| NCOA1    | LMNA | -0.263945875 | -0.387863894 | -0.130655706 | 1.47E-04 | 4.67E-04 | 1.00E+00 |
| CDK7     | LMNA | 0.276436354  | 0.143875994  | 0.399251011  | 6.82E-05 | 2.30E-04 | 8.09E-01 |
| SSR2     | LMNA | 0.122551156  | -0.015766588 | 0.25626656   | 8.23E-02 | 1.29E-01 | 1.00E+00 |
| IL25     | LMNA | -7.29E-05    | -0.138122511 | 0.137979489  | 9.99E-01 | 9.99E-01 | 1.00E+00 |
| CRELD1   | LMNA | 0.173470305  | 0.036288328  | 0.304235549  | 1.36E-02 | 2.65E-02 | 1.00E+00 |
| GPR6     | LMNA | -0.149604599 | -0.281834847 | -0.011797248 | 3.36E-02 | 5.92E-02 | 1.00E+00 |
| SNCG     | LMNA | -0.262296268 | -0.386357174 | -0.128913249 | 1.63E-04 | 5.10E-04 | 1.00E+00 |
| CHEK2    | LMNA | 0.003910777  | -0.134212683 | 0.141885175  | 9.56E-01 | 9.67E-01 | 1.00E+00 |
| GAL3ST4  | LMNA | 0.378450439  | 0.253651583  | 0.490856419  | 2.80E-08 | 1.77E-07 | 3.32E-04 |
| KBTBD10  | LMNA | -0.183604807 | -0.313704396 | -0.046738478 | 8.91E-03 | 1.83E-02 | 1.00E+00 |
| DRD4     | LMNA | 0.005678701  | -0.132476154 | 0.143617113  | 9.36E-01 | 9.53E-01 | 1.00E+00 |
| GDF11    | LMNA | -0.036818159 | -0.173984832 | 0.101750015  | 6.03E-01 | 6.80E-01 | 1.00E+00 |
| SEMG2    | LMNA | -0.00685291  | -0.144766954 | 0.131322328  | 9.23E-01 | 9.45E-01 | 1.00E+00 |
| MCM2     | LMNA | 0.057397826  | -0.081297361 | 0.193912299  | 4.17E-01 | 5.05E-01 | 1.00E+00 |
| CD247    | LMNA | 0.103735822  | -0.03481374  | 0.238373121  | 1.42E-01 | 2.05E-01 | 1.00E+00 |
| SOX14    | LMNA | 0.065556776  | -0.073156302 | 0.201781617  | 3.54E-01 | 4.41E-01 | 1.00E+00 |
| RBMX2    | LMNA | 0.015999348  | -0.122321828 | 0.153710844  | 8.21E-01 | 8.65E-01 | 1.00E+00 |
| KIAA0922 | LMNA | -0.014967652 | -0.152703123 | 0.123338202  | 8.33E-01 | 8.74E-01 | 1.00E+00 |
| TGS1     | LMNA | -0.10245924  | -0.237155767 | 0.036102414  | 1.47E-01 | 2.11E-01 | 1.00E+00 |
| C16orf57 | LMNA | 0.370934375  | 0.245452471  | 0.484190991  | 5.50E-08 | 3.31E-07 | 6.52E-04 |
| SYF2     | LMNA | 0.161809056  | 0.024300886  | 0.293308167  | 2.14E-02 | 3.97E-02 | 1.00E+00 |
| MCM4     | LMNA | 0.043340927  | -0.09528016  | 0.180313068  | 5.40E-01 | 6.22E-01 | 1.00E+00 |
| PDZD2    | LMNA | 0.1003046    | -0.03827642  | 0.235100134  | 1.56E-01 | 2.22E-01 | 1.00E+00 |
| CEP192   | LMNA | -0.266310731 | -0.390022754 | -0.133155106 | 1.28E-04 | 4.10E-04 | 1.00E+00 |
| IFT88    | LMNA | -0.207051147 | -0.335512001 | -0.071030454 | 3.11E-03 | 7.18E-03 | 1.00E+00 |
| MCC      | LMNA | 0.377947865  | 0.253102775  | 0.490411134  | 2.93E-08 | 1.84E-07 | 3.48E-04 |
| RPL9     | LMNA | -0.126625987 | -0.260129701 | 0.011628286  | 7.25E-02 | 1.16E-01 | 1.00E+00 |
| RAB32    | LMNA | 0.444011157  | 0.325938972  | 0.548444596  | 3.62E-11 | 3.87E-10 | 4.29E-07 |
| P2RX2    | LMNA | 0.06405586   | -0.074655316 | 0.200335301  | 3.65E-01 | 4.52E-01 | 1.00E+00 |
| DDX43    | LMNA | 0.006741897  | -0.13143143  | 0.144658261  | 9.24E-01 | 9.45E-01 | 1.00E+00 |
| HHLA3    | LMNA | 0.125971125  | -0.012293668 | 0.259509148  | 7.40E-02 | 1.18E-01 | 1.00E+00 |
| ID2      | LMNA | -0.304663091 | -0.424845496 | -0.173927307 | 1.04E-05 | 4.10E-05 | 1.23E-01 |
| UBE1     | LMNA | 0.242673867  | 0.108249369  | 0.368383516  | 5.02E-04 | 1.41E-03 | 1.00E+00 |

|           |      |              |              |              |          |          |          |
|-----------|------|--------------|--------------|--------------|----------|----------|----------|
| SLC24A1   | LMNA | 0.383018474  | 0.25864353   | 0.494901045  | 1.84E-08 | 1.20E-07 | 2.19E-04 |
| ARHGAP5   | LMNA | -0.159310745 | -0.290962603 | -0.021737825 | 2.35E-02 | 4.32E-02 | 1.00E+00 |
| C20orf23  | LMNA | 0.380806137  | 0.256225059  | 0.492942805  | 2.26E-08 | 1.45E-07 | 2.68E-04 |
| CETP      | LMNA | 0.084037471  | -0.05464752  | 0.219541471  | 2.34E-01 | 3.13E-01 | 1.00E+00 |
| ZNF688    | LMNA | -0.156381135 | -0.288210091 | -0.018734588 | 2.63E-02 | 4.75E-02 | 1.00E+00 |
| APOC2     | LMNA | -0.039816024 | -0.176894697 | 0.098777924  | 5.74E-01 | 6.53E-01 | 1.00E+00 |
| PWP1      | LMNA | 0.058640128  | -0.080058977 | 0.195111636  | 4.07E-01 | 4.95E-01 | 1.00E+00 |
| FAM50B    | LMNA | 0.224796347  | 0.089523563  | 0.351925904  | 1.30E-03 | 3.31E-03 | 1.00E+00 |
| PTPN6     | LMNA | 0.330488309  | 0.201636836  | 0.448095301  | 1.56E-06 | 7.21E-06 | 1.85E-02 |
| BAHD1     | LMNA | 0.046653035  | -0.09199043  | 0.183522062  | 5.10E-01 | 5.94E-01 | 1.00E+00 |
| GPR56     | LMNA | -0.225185395 | -0.352284891 | -0.089930056 | 1.27E-03 | 3.25E-03 | 1.00E+00 |
| GRIK3     | LMNA | -0.122852296 | -0.256552201 | 0.01546092   | 8.15E-02 | 1.28E-01 | 1.00E+00 |
| DGCR14    | LMNA | -0.106714309 | -0.241211774 | 0.031805247  | 1.31E-01 | 1.91E-01 | 1.00E+00 |
| CACNB2    | LMNA | -0.287959877 | -0.409723094 | -0.156114936 | 3.24E-05 | 1.17E-04 | 3.85E-01 |
| PDE10A    | LMNA | -0.277925312 | -0.400605918 | -0.145455114 | 6.21E-05 | 2.11E-04 | 7.36E-01 |
| METAP2    | LMNA | -0.156262242 | -0.28809834  | -0.018612759 | 2.64E-02 | 4.77E-02 | 1.00E+00 |
| RHOQ      | LMNA | 0.209606441  | 0.073687695  | 0.337880406  | 2.75E-03 | 6.44E-03 | 1.00E+00 |
| MAP3K4    | LMNA | -0.102507633 | -0.237201923 | 0.036053571  | 1.47E-01 | 2.11E-01 | 1.00E+00 |
| PDHX      | LMNA | -0.212497948 | -0.340558477 | -0.076696893 | 2.40E-03 | 5.70E-03 | 1.00E+00 |
| RPL23AP13 | LMNA | -0.204048663 | -0.332727035 | -0.067910645 | 3.58E-03 | 8.13E-03 | 1.00E+00 |
| MTA1      | LMNA | -0.155973723 | -0.287827135 | -0.018317133 | 2.66E-02 | 4.82E-02 | 1.00E+00 |
| GNG11     | LMNA | 0.450752422  | 0.333451019  | 0.554310445  | 1.68E-11 | 1.89E-10 | 1.99E-07 |
| ZBED4     | LMNA | -0.199280533 | -0.32829972  | -0.062961663 | 4.46E-03 | 9.90E-03 | 1.00E+00 |
| CLCN3     | LMNA | -0.148669096 | -0.280953824 | -0.010840587 | 3.47E-02 | 6.08E-02 | 1.00E+00 |
| CDK2      | LMNA | 0.194950924  | 0.058473635  | 0.324274666  | 5.43E-03 | 1.18E-02 | 1.00E+00 |
| SLAMF7    | LMNA | 0.207668718  | 0.071672487  | 0.336084553  | 3.02E-03 | 6.99E-03 | 1.00E+00 |
| CDC37     | LMNA | 0.349646016  | 0.222326489  | 0.465240339  | 3.39E-07 | 1.77E-06 | 4.02E-03 |
| ZER1      | LMNA | -0.159358742 | -0.29100768  | -0.021787048 | 2.35E-02 | 4.31E-02 | 1.00E+00 |
| GRK4      | LMNA | -0.433379197 | -0.539172361 | -0.314121599 | 1.18E-10 | 1.16E-09 | 1.40E-06 |
| PRPH      | LMNA | 0.061067967  | -0.077637557 | 0.19745433   | 3.88E-01 | 4.75E-01 | 1.00E+00 |
| PPP2CA    | LMNA | -0.140231476 | -0.272997492 | -0.002223521 | 4.65E-02 | 7.88E-02 | 1.00E+00 |
| LRP12     | LMNA | 0.072255259  | -0.066458661 | 0.208229192  | 3.07E-01 | 3.91E-01 | 1.00E+00 |
| POLR2A    | LMNA | -0.020553566 | -0.158155809 | 0.117831775  | 7.72E-01 | 8.25E-01 | 1.00E+00 |
| SEC14L2   | LMNA | 0.36624656   | 0.240347709  | 0.480027055  | 8.30E-08 | 4.83E-07 | 9.85E-04 |
| OGFOD1    | LMNA | 0.177365325  | 0.040301116  | 0.307877796  | 1.16E-02 | 2.31E-02 | 1.00E+00 |

|           |      |              |              |              |          |          |          |
|-----------|------|--------------|--------------|--------------|----------|----------|----------|
| DKFZP586f | LMNA | 0.257708898  | 0.124072004  | 0.382163673  | 2.13E-04 | 6.52E-04 | 1.00E+00 |
| MC3R      | LMNA | 0.121749979  | -0.016579688 | 0.255506502  | 8.43E-02 | 1.32E-01 | 1.00E+00 |
| NOL5A     | LMNA | -0.022529372 | -0.160082483 | 0.115882045  | 7.50E-01 | 8.07E-01 | 1.00E+00 |
| PHEX      | LMNA | 0.148783524  | 0.010957589  | 0.281061599  | 3.46E-02 | 6.06E-02 | 1.00E+00 |
| HIST1H2AE | LMNA | -0.213721865 | -0.341691425 | -0.077971372 | 2.26E-03 | 5.40E-03 | 1.00E+00 |
| C20orf117 | LMNA | -0.292822423 | -0.414132359 | -0.16129154  | 2.35E-05 | 8.69E-05 | 2.78E-01 |
| POLH      | LMNA | -0.039799456 | -0.176878623 | 0.098794355  | 5.74E-01 | 6.53E-01 | 1.00E+00 |
| DDX17     | LMNA | -0.131608313 | -0.264847391 | 0.006561909  | 6.19E-02 | 1.01E-01 | 1.00E+00 |
| CAMTA2    | LMNA | -0.064374483 | -0.200642383 | 0.074337149  | 3.63E-01 | 4.50E-01 | 1.00E+00 |
| PLEKHA2   | LMNA | 0.18519179   | 0.048377607  | 0.315184803  | 8.32E-03 | 1.73E-02 | 1.00E+00 |
| SNAPC2    | LMNA | 0.503114011  | 0.392311134  | 0.599524783  | 2.33E-14 | 4.18E-13 | 2.77E-10 |
| FILIP1L   | LMNA | 0.428523932  | 0.308737259  | 0.53492949   | 1.99E-10 | 1.88E-09 | 2.36E-06 |
| PDE4DIP   | LMNA | -0.17265202  | -0.303469881 | -0.035445863 | 1.40E-02 | 2.73E-02 | 1.00E+00 |
| LRRC1     | LMNA | -0.328956404 | -0.446720589 | -0.199987382 | 1.75E-06 | 8.04E-06 | 2.08E-02 |
| SCN7A     | LMNA | 0.129919258  | -0.008280253 | 0.263248765  | 6.53E-02 | 1.06E-01 | 1.00E+00 |
| GAS1      | LMNA | 0.082295553  | -0.056396163 | 0.217871321  | 2.44E-01 | 3.24E-01 | 1.00E+00 |
| DGKA      | LMNA | 0.088687069  | -0.049975803 | 0.223995615  | 2.09E-01 | 2.84E-01 | 1.00E+00 |
| PEG3      | LMNA | -0.438388202 | -0.54354396  | -0.319684484 | 6.79E-11 | 7.01E-10 | 8.05E-07 |
| NADK      | LMNA | 0.471352831  | 0.356499514  | 0.572172171  | 1.44E-12 | 1.95E-11 | 1.71E-08 |
| SGSH      | LMNA | 0.521713007  | 0.413439134  | 0.615438294  | 1.70E-15 | 3.88E-14 | 2.01E-11 |
| CXCL10    | LMNA | 0.214373986  | 0.078650615  | 0.342294925  | 2.19E-03 | 5.25E-03 | 1.00E+00 |
| GALT      | LMNA | -0.232492014 | -0.359019997 | -0.097572683 | 8.70E-04 | 2.32E-03 | 1.00E+00 |
| MCF2      | LMNA | -0.395460283 | -0.505892734 | -0.272273708 | 5.72E-09 | 4.11E-08 | 6.78E-05 |
| ZMYM4     | LMNA | -0.208004592 | -0.336395903 | -0.072021712 | 2.97E-03 | 6.89E-03 | 1.00E+00 |
| ZNF263    | LMNA | 0.1507566    | 0.01297565   | 0.282919453  | 3.22E-02 | 5.71E-02 | 1.00E+00 |
| STK32B    | LMNA | 0.028637229  | -0.109848045 | 0.166031839  | 6.86E-01 | 7.53E-01 | 1.00E+00 |
| KIAA0888  | LMNA | -0.541401869 | -0.632201456 | -0.435932965 | 8.85E-17 | 2.61E-15 | 1.05E-12 |
| TACSTD1   | LMNA | -0.223373148 | -0.350612356 | -0.088036933 | 1.40E-03 | 3.52E-03 | 1.00E+00 |
| ATP6AP2   | LMNA | 0.245047958  | 0.110743305  | 0.370563135  | 4.40E-04 | 1.26E-03 | 1.00E+00 |
| TYR       | LMNA | -0.120065989 | -0.253908399 | 0.018288142  | 8.87E-02 | 1.37E-01 | 1.00E+00 |
| GDPD2     | LMNA | 0.183251511  | 0.046373674  | 0.31337474   | 9.04E-03 | 1.85E-02 | 1.00E+00 |
| ABHD10    | LMNA | -0.509581747 | -0.605067309 | -0.399645087 | 9.55E-15 | 1.86E-13 | 1.13E-10 |
| TACR3     | LMNA | -0.07796658  | -0.213717263 | 0.060738168  | 2.70E-01 | 3.52E-01 | 1.00E+00 |
| SLC35C1   | LMNA | 0.574807571  | 0.474401651  | 0.660450038  | 3.70E-19 | 1.65E-17 | 4.39E-15 |
| KIF1A     | LMNA | -0.534529928 | -0.626360304 | -0.428067017 | 2.54E-16 | 6.79E-15 | 3.01E-12 |

|           |      |              |              |              |          |          |          |
|-----------|------|--------------|--------------|--------------|----------|----------|----------|
| VCAN      | LMNA | 0.119223119  | -0.019142953 | 0.253108244  | 9.10E-02 | 1.40E-01 | 1.00E+00 |
| HERC5     | LMNA | 0.130038972  | -0.00815849  | 0.263362094  | 6.51E-02 | 1.06E-01 | 1.00E+00 |
| UBE2A     | LMNA | 0.206287623  | 0.070236842  | 0.334804004  | 3.22E-03 | 7.41E-03 | 1.00E+00 |
| SYDE1     | LMNA | 0.627216394  | 0.535536334  | 0.70428488   | 1.74E-23 | 1.72E-21 | 2.06E-19 |
| ELA3A     | LMNA | 0.090117565  | -0.04853728  | 0.225364842  | 2.02E-01 | 2.76E-01 | 1.00E+00 |
| TM9SF3    | LMNA | 0.224570997  | 0.089288129  | 0.351717949  | 1.31E-03 | 3.34E-03 | 1.00E+00 |
| HAO2      | LMNA | -0.026855381 | -0.164297264 | 0.111609402  | 7.04E-01 | 7.68E-01 | 1.00E+00 |
| RNH1      | LMNA | 0.434418829  | 0.315275517  | 0.540080167  | 1.05E-10 | 1.05E-09 | 1.25E-06 |
| MAFG      | LMNA | 0.226369364  | 0.091167392  | 0.353377146  | 1.20E-03 | 3.07E-03 | 1.00E+00 |
| BICD2     | LMNA | 0.289107336  | 0.157335854  | 0.410764101  | 3.01E-05 | 1.09E-04 | 3.57E-01 |
| C14orf43  | LMNA | 0.389492473  | 0.265729712  | 0.500624957  | 1.01E-08 | 6.88E-08 | 1.20E-04 |
| CDH7      | LMNA | -0.280910706 | -0.403320919 | -0.148623318 | 5.13E-05 | 1.78E-04 | 6.09E-01 |
| JUP       | LMNA | 0.270423204  | 0.137505588  | 0.393773766  | 9.93E-05 | 3.24E-04 | 1.00E+00 |
| SHANK2    | LMNA | -0.575535501 | -0.661062904 | -0.475244197 | 3.26E-19 | 1.47E-17 | 3.87E-15 |
| OSBP2     | LMNA | 0.18334606   | 0.0464713    | 0.313462966  | 9.01E-03 | 1.85E-02 | 1.00E+00 |
| DAK       | LMNA | 0.104852791  | -0.033685813 | 0.23943792   | 1.38E-01 | 2.00E-01 | 1.00E+00 |
| CBX3      | LMNA | 0.002503218  | -0.135594641 | 0.140505663  | 9.72E-01 | 9.78E-01 | 1.00E+00 |
| C3orf58   | LMNA | 0.291102063  | 0.15945924   | 0.41257302   | 2.63E-05 | 9.65E-05 | 3.12E-01 |
| RBMXL2    | LMNA | -0.080787614 | -0.216424869 | 0.057909238  | 2.53E-01 | 3.34E-01 | 1.00E+00 |
| TCL1B     | LMNA | 0.014433817  | -0.123863995 | 0.15218158   | 8.38E-01 | 8.79E-01 | 1.00E+00 |
| FGF13     | LMNA | -0.431347923 | -0.537397944 | -0.311868045 | 1.47E-10 | 1.42E-09 | 1.74E-06 |
| KBTBD2    | LMNA | 0.047791111  | -0.090859344 | 0.184624035  | 4.99E-01 | 5.84E-01 | 1.00E+00 |
| KIF3A     | LMNA | -0.510623056 | -0.605958795 | -0.400827174 | 8.26E-15 | 1.63E-13 | 9.79E-11 |
| DCXR      | LMNA | -0.354578563 | -0.469640687 | -0.227672095 | 2.25E-07 | 1.22E-06 | 2.67E-03 |
| MYL9      | LMNA | 0.629211241  | 0.537882454  | 0.705941845  | 1.15E-23 | 1.17E-21 | 1.36E-19 |
| PDIA6     | LMNA | 0.437217545  | 0.318383646  | 0.542522782  | 7.72E-11 | 7.90E-10 | 9.16E-07 |
| CDC23     | LMNA | -0.046032335 | -0.182920908 | 0.092607167  | 5.15E-01 | 5.99E-01 | 1.00E+00 |
| CASKIN2   | LMNA | -0.179405521 | -0.309784065 | -0.042404764 | 1.06E-02 | 2.14E-02 | 1.00E+00 |
| PBXIP1    | LMNA | -0.002335493 | -0.140341245 | 0.135759279  | 9.74E-01 | 9.80E-01 | 1.00E+00 |
| EHD1      | LMNA | 0.175154179  | 0.038022572  | 0.305810615  | 1.27E-02 | 2.50E-02 | 1.00E+00 |
| NBL1      | LMNA | 0.222075198  | 0.086681658  | 0.349413969  | 1.49E-03 | 3.73E-03 | 1.00E+00 |
| MARCKSL1  | LMNA | -0.502432503 | -0.598940225 | -0.391539172 | 2.56E-14 | 4.51E-13 | 3.04E-10 |
| RAB11FIP5 | LMNA | 0.380952673  | 0.2563852    | 0.493072545  | 2.23E-08 | 1.44E-07 | 2.65E-04 |
| CDKN1A    | LMNA | 0.460957258  | 0.344851066  | 0.563170556  | 5.08E-12 | 6.30E-11 | 6.02E-08 |
| NCK1      | LMNA | -0.06140065  | -0.197775224 | 0.077305626  | 3.85E-01 | 4.73E-01 | 1.00E+00 |



|          |      |              |              |              |          |          |          |
|----------|------|--------------|--------------|--------------|----------|----------|----------|
| SAPS3    | LMNA | -0.146733093 | -0.279129857 | -0.008861598 | 3.72E-02 | 6.46E-02 | 1.00E+00 |
| ZNF550   | LMNA | -0.08464975  | -0.220128335 | 0.054032675  | 2.31E-01 | 3.09E-01 | 1.00E+00 |
| TRAF3IP3 | LMNA | 0.15828654   | 0.020687597  | 0.29000056   | 2.45E-02 | 4.47E-02 | 1.00E+00 |
| LSR      | LMNA | 0.011723251  | -0.126532531 | 0.149532248  | 8.68E-01 | 9.03E-01 | 1.00E+00 |
| MIS12    | LMNA | -0.315843849 | -0.434930756 | -0.185898499 | 4.67E-06 | 1.97E-05 | 5.54E-02 |
| KIAA0774 | LMNA | -0.241716594 | -0.367504265 | -0.10724425  | 5.29E-04 | 1.48E-03 | 1.00E+00 |
| CXorf1   | LMNA | -0.510354928 | -0.605729268 | -0.400522761 | 8.57E-15 | 1.69E-13 | 1.02E-10 |
| CUL7     | LMNA | 0.59118993   | 0.493408118  | 0.674215281  | 1.99E-20 | 1.07E-18 | 2.36E-16 |
| DIO1     | LMNA | 0.060240666  | -0.078462854 | 0.196656218  | 3.94E-01 | 4.82E-01 | 1.00E+00 |
| LIPC     | LMNA | 0.036828918  | -0.101739353 | 0.17399528   | 6.03E-01 | 6.80E-01 | 1.00E+00 |
| EIF2B1   | LMNA | -0.093063304 | -0.228182732 | 0.045573197  | 1.88E-01 | 2.60E-01 | 1.00E+00 |
| HS3ST2   | LMNA | -0.07276588  | -0.208720202 | 0.065947591  | 3.03E-01 | 3.88E-01 | 1.00E+00 |
| C20orf11 | LMNA | 0.297687517  | 0.166478111  | 0.418538245  | 1.69E-05 | 6.41E-05 | 2.00E-01 |
| CTRL     | LMNA | -0.113440513 | -0.24761374  | 0.025002034  | 1.08E-01 | 1.62E-01 | 1.00E+00 |
| GSTZ1    | LMNA | 0.011319084  | -0.126930259 | 0.149137042  | 8.73E-01 | 9.06E-01 | 1.00E+00 |
| PAK4     | LMNA | 0.314773111  | 0.184750392  | 0.433966221  | 5.05E-06 | 2.11E-05 | 5.99E-02 |
| CCRL1    | LMNA | 0.005179769  | -0.132966313 | 0.143128422  | 9.42E-01 | 9.57E-01 | 1.00E+00 |
| RNF10    | LMNA | 0.251299958  | 0.117319013  | 0.376296404  | 3.09E-04 | 9.14E-04 | 1.00E+00 |
| MAGOH    | LMNA | 0.176077508  | 0.038973872  | 0.306673977  | 1.22E-02 | 2.42E-02 | 1.00E+00 |
| CENPB    | LMNA | 0.39463866   | 0.271372082  | 0.505167977  | 6.19E-09 | 4.41E-08 | 7.34E-05 |
| C19orf7  | LMNA | -0.074806367 | -0.210681638 | 0.063904583  | 2.90E-01 | 3.74E-01 | 1.00E+00 |
| JMJD1A   | LMNA | -0.075034688 | -0.210901046 | 0.063675907  | 2.89E-01 | 3.72E-01 | 1.00E+00 |
| GATA2    | LMNA | -0.010740209 | -0.148570924 | 0.127499835  | 8.79E-01 | 9.11E-01 | 1.00E+00 |
| HIST1H4H | LMNA | -0.0364453   | -0.173622751 | 0.102119496  | 6.07E-01 | 6.83E-01 | 1.00E+00 |
| CELSR2   | LMNA | -0.175736158 | -0.306354822 | -0.038622153 | 1.24E-02 | 2.45E-02 | 1.00E+00 |
| GABRA5   | LMNA | -0.264105662 | -0.388009805 | -0.13082453  | 1.46E-04 | 4.63E-04 | 1.00E+00 |
| STAM2    | LMNA | 0.221009035  | 0.085568782  | 0.348429277  | 1.57E-03 | 3.91E-03 | 1.00E+00 |
| GPC3     | LMNA | -0.079604391 | -0.215289475 | 0.059096044  | 2.60E-01 | 3.42E-01 | 1.00E+00 |
| GRP      | LMNA | 0.002433872  | -0.135662711 | 0.140437686  | 9.73E-01 | 9.79E-01 | 1.00E+00 |
| SV2A     | LMNA | -0.281411834 | -0.403776449 | -0.149155399 | 4.97E-05 | 1.72E-04 | 5.89E-01 |
| EBNA1BP2 | LMNA | 0.087498375  | -0.051170729 | 0.222857428  | 2.16E-01 | 2.91E-01 | 1.00E+00 |
| TAF1C    | LMNA | -0.20389727  | -0.332586551 | -0.067753407 | 3.61E-03 | 8.18E-03 | 1.00E+00 |
| MAGEA12  | LMNA | -0.081950677 | -0.21754056  | 0.05674227   | 2.46E-01 | 3.26E-01 | 1.00E+00 |
| GSG1     | LMNA | 0.127114907  | -0.011131432 | 0.260592934  | 7.14E-02 | 1.14E-01 | 1.00E+00 |
| PDGFRA   | LMNA | -0.272661588 | -0.395813685 | -0.139875677 | 8.64E-05 | 2.86E-04 | 1.00E+00 |

|          |      |              |              |              |          |          |          |
|----------|------|--------------|--------------|--------------|----------|----------|----------|
| CACNG1   | LMNA | -0.219329254 | -0.346877288 | -0.083816089 | 1.71E-03 | 4.22E-03 | 1.00E+00 |
| CIAPIN1  | LMNA | -0.240520296 | -0.366405155 | -0.105988546 | 5.65E-04 | 1.57E-03 | 1.00E+00 |
| CSTB     | LMNA | 0.354181574  | 0.227241578  | 0.469286743  | 2.33E-07 | 1.25E-06 | 2.76E-03 |
| FRMPD1   | LMNA | -0.236041185 | -0.362286808 | -0.101290819 | 7.20E-04 | 1.96E-03 | 1.00E+00 |
| PTPRJ    | LMNA | 0.148952939  | 0.011130823  | 0.28122116   | 3.44E-02 | 6.03E-02 | 1.00E+00 |
| ZNF668   | LMNA | 0.204735818  | 0.068624417  | 0.333364606  | 3.47E-03 | 7.90E-03 | 1.00E+00 |
| PLEKHJ1  | LMNA | -0.038953294 | -0.176057538 | 0.09963349   | 5.82E-01 | 6.60E-01 | 1.00E+00 |
| ADAT1    | LMNA | -0.044743168 | -0.181672009 | 0.093887763  | 5.27E-01 | 6.10E-01 | 1.00E+00 |
| TMEM50A  | LMNA | 0.194475313  | 0.057980956  | 0.323832224  | 5.55E-03 | 1.20E-02 | 1.00E+00 |
| CENPI    | LMNA | 0.04519878   | -0.093435232 | 0.182113441  | 5.23E-01 | 6.06E-01 | 1.00E+00 |
| HOOK1    | LMNA | -0.230360216 | -0.357056306 | -0.095341205 | 9.73E-04 | 2.56E-03 | 1.00E+00 |
| RPP21    | LMNA | -0.146074389 | -0.278509055 | -0.008188516 | 3.80E-02 | 6.59E-02 | 1.00E+00 |
| GTF2E2   | LMNA | 0.388888802  | 0.265068393  | 0.500091639  | 1.07E-08 | 7.24E-08 | 1.27E-04 |
| IL17B    | LMNA | -0.009149964 | -0.14701526  | 0.129064066  | 8.97E-01 | 9.26E-01 | 1.00E+00 |
| CCNF     | LMNA | -0.056191753 | -0.192747548 | 0.082499221  | 4.27E-01 | 5.14E-01 | 1.00E+00 |
| CRYL1    | LMNA | -0.320381859 | -0.439015622 | -0.190768359 | 3.35E-06 | 1.45E-05 | 3.97E-02 |
| FOXH1    | LMNA | 0.11831831   | -0.020060356 | 0.252249084  | 9.35E-02 | 1.44E-01 | 1.00E+00 |
| NFYB     | LMNA | -0.189415598 | -0.319121876 | -0.052743795 | 6.94E-03 | 1.46E-02 | 1.00E+00 |
| KCNQ3    | LMNA | -0.1191038   | -0.252994957 | 0.019263946  | 9.14E-02 | 1.41E-01 | 1.00E+00 |
| PPM1G    | LMNA | 0.26345283   | 0.130134824  | 0.387413626  | 1.52E-04 | 4.79E-04 | 1.00E+00 |
| NOVA1    | LMNA | -0.436446277 | -0.541849826 | -0.317526855 | 8.41E-11 | 8.55E-10 | 9.97E-07 |
| FZD3     | LMNA | -0.091353413 | -0.226547328 | 0.047294033  | 1.96E-01 | 2.69E-01 | 1.00E+00 |
| NMT1     | LMNA | 0.047726143  | -0.090923922 | 0.184561137  | 5.00E-01 | 5.84E-01 | 1.00E+00 |
| AKAP8    | LMNA | 0.292344995  | 0.160782956  | 0.413699689  | 2.42E-05 | 8.94E-05 | 2.87E-01 |
| SOCS5    | LMNA | 0.204916592  | 0.068812216  | 0.333532316  | 3.44E-03 | 7.84E-03 | 1.00E+00 |
| HADHA    | LMNA | 0.117931032  | -0.020452953 | 0.25188128   | 9.46E-02 | 1.45E-01 | 1.00E+00 |
| PLEKHF1  | LMNA | 0.407460876  | 0.285467533  | 0.516460762  | 1.76E-09 | 1.39E-08 | 2.09E-05 |
| DLG5     | LMNA | 0.075854524  | -0.062854678 | 0.211688763  | 2.83E-01 | 3.66E-01 | 1.00E+00 |
| CFDP1    | LMNA | -0.074724114 | -0.210602593 | 0.06398696   | 2.91E-01 | 3.74E-01 | 1.00E+00 |
| PGM5     | LMNA | -0.143837086 | -0.276399659 | -0.005903307 | 4.11E-02 | 7.07E-02 | 1.00E+00 |
| C1orf144 | LMNA | 0.255459398  | 0.121700333  | 0.380105438  | 2.43E-04 | 7.35E-04 | 1.00E+00 |
| SUHW4    | LMNA | -0.371683525 | -0.484855945 | -0.246268897 | 5.15E-08 | 3.12E-07 | 6.10E-04 |
| TFEB     | LMNA | 0.049081936  | -0.089576014 | 0.185873493  | 4.88E-01 | 5.73E-01 | 1.00E+00 |
| RND2     | LMNA | -0.340657748 | -0.457207146 | -0.212605174 | 7.02E-07 | 3.46E-06 | 8.33E-03 |
| ATG12    | LMNA | 0.158642487  | 0.021052553  | 0.290334933  | 2.41E-02 | 4.41E-02 | 1.00E+00 |

|          |      |              |              |              |          |          |          |
|----------|------|--------------|--------------|--------------|----------|----------|----------|
| BMI1     | LMNA | -0.401738142 | -0.511425314 | -0.279170008 | 3.11E-09 | 2.34E-08 | 3.68E-05 |
| RNMT     | LMNA | -0.079234085 | -0.214934063 | 0.05946739   | 2.62E-01 | 3.44E-01 | 1.00E+00 |
| MASP1    | LMNA | -0.324328506 | -0.442564193 | -0.195008805 | 2.49E-06 | 1.11E-05 | 2.95E-02 |
| MYH4     | LMNA | 0.143198507  | 0.005251318  | 0.275797353  | 4.20E-02 | 7.20E-02 | 1.00E+00 |
| SLURP1   | LMNA | 0.202378428  | 0.066176297  | 0.33117683   | 3.87E-03 | 8.71E-03 | 1.00E+00 |
| KIAA0984 | LMNA | -0.343220465 | -0.459499494 | -0.215374315 | 5.72E-07 | 2.85E-06 | 6.78E-03 |
| ASTN1    | LMNA | -0.325036496 | -0.44320038  | -0.195770011 | 2.36E-06 | 1.06E-05 | 2.80E-02 |
| MYCL1    | LMNA | -0.449368426 | -0.553107012 | -0.331907564 | 1.97E-11 | 2.18E-10 | 2.33E-07 |
| SH3BGR   | LMNA | 0.065798427  | -0.072914899 | 0.202014421  | 3.52E-01 | 4.39E-01 | 1.00E+00 |
| RPAP2    | LMNA | -0.291495653 | -0.412929834 | -0.15987836  | 2.57E-05 | 9.41E-05 | 3.04E-01 |
| FOSB     | LMNA | 0.24285693   | 0.108441612  | 0.368551632  | 4.97E-04 | 1.40E-03 | 1.00E+00 |
| KRT35    | LMNA | 0.135725039  | -0.002370376 | 0.268740652  | 5.41E-02 | 8.99E-02 | 1.00E+00 |
| MIA3     | LMNA | -0.204823746 | -0.333446181 | -0.06871576  | 3.45E-03 | 7.87E-03 | 1.00E+00 |
| KIR3DL3  | LMNA | -0.268644256 | -0.39215168  | -0.135623054 | 1.11E-04 | 3.59E-04 | 1.00E+00 |
| SEMA3F   | LMNA | 0.457357729  | 0.340826038  | 0.560048029  | 7.78E-12 | 9.33E-11 | 9.22E-08 |
| TMEM135  | LMNA | -0.061514737 | -0.197885262 | 0.07719179   | 3.84E-01 | 4.72E-01 | 1.00E+00 |
| SLC27A2  | LMNA | -0.206450807 | -0.334955333 | -0.070406442 | 3.20E-03 | 7.36E-03 | 1.00E+00 |
| NDUFB2   | LMNA | -0.022323466 | -0.159881746 | 0.116085284  | 7.52E-01 | 8.09E-01 | 1.00E+00 |
| FAM46C   | LMNA | 0.071476163  | -0.067238302 | 0.207479885  | 3.12E-01 | 3.97E-01 | 1.00E+00 |
| G6PC     | LMNA | -0.176242388 | -0.306828126 | -0.039143773 | 1.21E-02 | 2.40E-02 | 1.00E+00 |
| KRT33A   | LMNA | -0.047260165 | -0.184109974 | 0.091387074  | 5.04E-01 | 5.88E-01 | 1.00E+00 |
| OVOL1    | LMNA | 0.175475208  | 0.038353298  | 0.306110819  | 1.25E-02 | 2.47E-02 | 1.00E+00 |
| PAMCI    | LMNA | 0.254085205  | 0.120252258  | 0.37884748   | 2.63E-04 | 7.90E-04 | 1.00E+00 |
| S100A7   | LMNA | -0.034854027 | -0.172077056 | 0.103695921  | 6.22E-01 | 6.97E-01 | 1.00E+00 |
| MAPKBP1  | LMNA | -0.004600399 | -0.142560861 | 0.133535408  | 9.48E-01 | 9.61E-01 | 1.00E+00 |
| CPE      | LMNA | -0.222695836 | -0.349987051 | -0.087329645 | 1.44E-03 | 3.63E-03 | 1.00E+00 |
| HARS2    | LMNA | 0.364097802  | 0.23801016   | 0.478116713  | 1.00E-07 | 5.73E-07 | 1.19E-03 |
| GNB1     | LMNA | 0.041655852  | -0.096952688 | 0.178679333  | 5.56E-01 | 6.37E-01 | 1.00E+00 |
| TRIM46   | LMNA | -0.023885529 | -0.161404312 | 0.114543169  | 7.36E-01 | 7.95E-01 | 1.00E+00 |
| UPF3B    | LMNA | -0.078173793 | -0.213916216 | 0.060530451  | 2.69E-01 | 3.51E-01 | 1.00E+00 |
| CXCR6    | LMNA | 0.273332705  | 0.140586578  | 0.39642506   | 8.29E-05 | 2.75E-04 | 9.83E-01 |
| C16orf3  | LMNA | -0.016175096 | -0.153882479 | 0.122148661  | 8.19E-01 | 8.64E-01 | 1.00E+00 |
| HLA-DOB  | LMNA | -0.003109996 | -0.141100417 | 0.134998965  | 9.65E-01 | 9.74E-01 | 1.00E+00 |
| HPSE     | LMNA | 0.2142422    | 0.078513337  | 0.342172973  | 2.20E-03 | 5.28E-03 | 1.00E+00 |
| GSCL     | LMNA | -0.027865828 | -0.165281009 | 0.110610681  | 6.94E-01 | 7.60E-01 | 1.00E+00 |

|         |      |              |              |              |          |          |          |
|---------|------|--------------|--------------|--------------|----------|----------|----------|
| POLD1   | LMNA | 0.090209264  | -0.048445046 | 0.225452596  | 2.02E-01 | 2.76E-01 | 1.00E+00 |
| DMWD    | LMNA | -0.062953979 | -0.199273125 | 0.075755401  | 3.73E-01 | 4.61E-01 | 1.00E+00 |
| CALD1   | LMNA | 0.573198155  | 0.472539477  | 0.659094617  | 4.89E-19 | 2.15E-17 | 5.80E-15 |
| LCAT    | LMNA | -0.025087778 | -0.162575715 | 0.113355818  | 7.23E-01 | 7.84E-01 | 1.00E+00 |
| SCRT1   | LMNA | -0.188853998 | -0.318598659 | -0.052162963 | 7.11E-03 | 1.49E-02 | 1.00E+00 |
| ST6GAL1 | LMNA | -0.221427334 | -0.348815646 | -0.086005368 | 1.54E-03 | 3.84E-03 | 1.00E+00 |
| POMC    | LMNA | -0.070382561 | -0.20642783  | 0.068332383  | 3.20E-01 | 4.05E-01 | 1.00E+00 |
| UNC84B  | LMNA | 0.202062216  | 0.065848039  | 0.330883264  | 3.93E-03 | 8.82E-03 | 1.00E+00 |
| NSMAF   | LMNA | 0.2319102    | 0.096963529  | 0.358484174  | 8.97E-04 | 2.38E-03 | 1.00E+00 |
| ADSS    | LMNA | 0.192358942  | 0.05578945   | 0.321862766  | 6.09E-03 | 1.30E-02 | 1.00E+00 |
| SKIL    | LMNA | 0.064437848  | -0.074273871 | 0.200703449  | 3.62E-01 | 4.49E-01 | 1.00E+00 |
| HMGCS1  | LMNA | -0.217642479 | -0.345318133 | -0.082056942 | 1.86E-03 | 4.55E-03 | 1.00E+00 |
| PYGO1   | LMNA | -0.221664263 | -0.349034469 | -0.086252678 | 1.52E-03 | 3.80E-03 | 1.00E+00 |
| POLR3F  | LMNA | -0.13805157  | -0.270938973 | -5.80E-07    | 5.01E-02 | 8.41E-02 | 1.00E+00 |
| ZNF277P | LMNA | 0.068596717  | -0.070118293 | 0.204709153  | 3.32E-01 | 4.18E-01 | 1.00E+00 |
| CNNM3   | LMNA | -0.145718596 | -0.278173689 | -0.007825008 | 3.85E-02 | 6.66E-02 | 1.00E+00 |
| WRNIP1  | LMNA | -0.016371161 | -0.154073946 | 0.121955466  | 8.17E-01 | 8.62E-01 | 1.00E+00 |
| ALAS2   | LMNA | 0.044554897  | -0.094074743 | 0.181489583  | 5.29E-01 | 6.12E-01 | 1.00E+00 |
| MRPL23  | LMNA | 0.157343739  | 0.019721109  | 0.289114745  | 2.53E-02 | 4.61E-02 | 1.00E+00 |
| ST3GAL5 | LMNA | -0.193772059 | -0.323177913 | -0.05725259  | 5.72E-03 | 1.23E-02 | 1.00E+00 |
| ZBTB7B  | LMNA | 0.420868075  | 0.300262716  | 0.528228344  | 4.47E-10 | 3.94E-09 | 5.30E-06 |
| DHRS1   | LMNA | 0.125658673  | -0.012611096 | 0.259213026  | 7.48E-02 | 1.19E-01 | 1.00E+00 |
| NFKBIA  | LMNA | 0.35049628   | 0.223247409  | 0.465999271  | 3.16E-07 | 1.66E-06 | 3.75E-03 |
| CNOT3   | LMNA | 0.097408706  | -0.041196276 | 0.232335407  | 1.68E-01 | 2.36E-01 | 1.00E+00 |
| GAK     | LMNA | 0.100714616  | -0.03786282  | 0.235491403  | 1.54E-01 | 2.20E-01 | 1.00E+00 |
| SFT2D2  | LMNA | 0.507737713  | 0.397552648  | 0.603488007  | 1.23E-14 | 2.34E-13 | 1.46E-10 |
| HOXA6   | LMNA | -0.152391979 | -0.284458578 | -0.014649165 | 3.04E-02 | 5.42E-02 | 1.00E+00 |
| PSMA6   | LMNA | -0.005216455 | -0.143164358 | 0.132930274  | 9.41E-01 | 9.56E-01 | 1.00E+00 |
| CRTC1   | LMNA | -0.10666623  | -0.24116597  | 0.031853831  | 1.31E-01 | 1.91E-01 | 1.00E+00 |
| LY6D    | LMNA | 0.029839007  | -0.108659596 | 0.167201255  | 6.73E-01 | 7.43E-01 | 1.00E+00 |
| CPT1A   | LMNA | 0.23816269   | 0.103515121  | 0.364238054  | 6.42E-04 | 1.77E-03 | 1.00E+00 |
| ALMS1   | LMNA | -0.077255003 | -0.213033968 | 0.061451385  | 2.74E-01 | 3.57E-01 | 1.00E+00 |
| LMO1    | LMNA | -0.203893984 | -0.332583501 | -0.067749994 | 3.61E-03 | 8.18E-03 | 1.00E+00 |
| EIF3I   | LMNA | 0.229023506  | 0.093942684  | 0.355824432  | 1.04E-03 | 2.73E-03 | 1.00E+00 |
| DCN     | LMNA | 0.36898361   | 0.243327353  | 0.482458853  | 6.53E-08 | 3.88E-07 | 7.75E-04 |

|          |      |              |              |              |          |          |          |
|----------|------|--------------|--------------|--------------|----------|----------|----------|
| PRB4     | LMNA | 0.028643865  | -0.109841483 | 0.166038298  | 6.86E-01 | 7.53E-01 | 1.00E+00 |
| MCM3APAS | LMNA | -0.411628002 | -0.520122689 | -0.290059842 | 1.16E-09 | 9.44E-09 | 1.37E-05 |
| SUCLG2   | LMNA | 0.369172854  | 0.243533459  | 0.482626927  | 6.42E-08 | 3.82E-07 | 7.62E-04 |
| FOXF2    | LMNA | 0.108873109  | -0.029623129 | 0.243267785  | 1.23E-01 | 1.81E-01 | 1.00E+00 |
| MLH1     | LMNA | -0.108200583 | -0.24262741  | 0.030303061  | 1.25E-01 | 1.84E-01 | 1.00E+00 |
| S100A12  | LMNA | 0.092574624  | -0.046065089 | 0.227715417  | 1.90E-01 | 2.62E-01 | 1.00E+00 |
| ABHD14A  | LMNA | -0.370502833 | -0.483807889 | -0.244982255 | 5.71E-08 | 3.43E-07 | 6.78E-04 |
| DEXI     | LMNA | 0.016338192  | -0.121987953 | 0.154041751  | 8.17E-01 | 8.62E-01 | 1.00E+00 |
| ACTN1    | LMNA | 0.578390076  | 0.478550016  | 0.663465156  | 1.98E-19 | 9.15E-18 | 2.35E-15 |
| AMPD2    | LMNA | 0.251298053  | 0.117317008  | 0.376294659  | 3.09E-04 | 9.14E-04 | 1.00E+00 |
| IFNAR2   | LMNA | 0.056328055  | -0.082363415 | 0.192879199  | 4.26E-01 | 5.13E-01 | 1.00E+00 |
| CYB5A    | LMNA | -0.247885321 | -0.373166267 | -0.113726121 | 3.75E-04 | 1.09E-03 | 1.00E+00 |
| TLOC1    | LMNA | -0.156109074 | -0.287954366 | -0.018455815 | 2.65E-02 | 4.80E-02 | 1.00E+00 |
| NRBF2    | LMNA | 0.334026316  | 0.205449122  | 0.451268139  | 1.18E-06 | 5.60E-06 | 1.40E-02 |
| MKS1     | LMNA | -0.206111346 | -0.334640526 | -0.070053643 | 3.25E-03 | 7.46E-03 | 1.00E+00 |
| CX3CR1   | LMNA | -0.133662346 | -0.26679047  | 0.004471157  | 5.79E-02 | 9.53E-02 | 1.00E+00 |
| PDE1B    | LMNA | -0.207325412 | -0.335766284 | -0.071315568 | 3.07E-03 | 7.10E-03 | 1.00E+00 |
| KCTD3    | LMNA | -0.092971043 | -0.228094508 | 0.04566607   | 1.88E-01 | 2.60E-01 | 1.00E+00 |
| ITGAE    | LMNA | -0.248370463 | -0.373611162 | -0.114236375 | 3.65E-04 | 1.06E-03 | 1.00E+00 |
| SLC30A3  | LMNA | -0.429320421 | -0.535625886 | -0.309620015 | 1.82E-10 | 1.74E-09 | 2.16E-06 |
| KISS1    | LMNA | -0.036299663 | -0.173481314 | 0.102263802  | 6.08E-01 | 6.84E-01 | 1.00E+00 |
| PLP1     | LMNA | -0.464387189 | -0.566143246 | -0.348690423 | 3.37E-12 | 4.32E-11 | 3.99E-08 |
| C14orf2  | LMNA | -0.251178798 | -0.376185388 | -0.117191469 | 3.11E-04 | 9.20E-04 | 1.00E+00 |
| IFRD2    | LMNA | 0.448815247  | 0.331290825  | 0.552625882  | 2.10E-11 | 2.32E-10 | 2.49E-07 |
| ANKRD7   | LMNA | -0.08555652  | -0.220997286 | 0.053121912  | 2.26E-01 | 3.03E-01 | 1.00E+00 |
| XAB1     | LMNA | 0.070528213  | -0.068186686 | 0.206567967  | 3.19E-01 | 4.04E-01 | 1.00E+00 |
| NARS2    | LMNA | -0.345968507 | -0.461955895 | -0.218345995 | 4.58E-07 | 2.33E-06 | 5.43E-03 |
| TMLHE    | LMNA | -0.245554987 | -0.371028453 | -0.111276149 | 4.28E-04 | 1.22E-03 | 1.00E+00 |
| SERPINB3 | LMNA | 0.038037414  | -0.100541541 | 0.175168586  | 5.91E-01 | 6.69E-01 | 1.00E+00 |
| FAM127B  | LMNA | 0.119589252  | -0.018771658 | 0.253455845  | 9.00E-02 | 1.39E-01 | 1.00E+00 |
| ZNF391   | LMNA | -0.278937824 | -0.401526967 | -0.146529323 | 5.82E-05 | 1.99E-04 | 6.90E-01 |
| ABCA5    | LMNA | 0.03889124   | -0.099695021 | 0.175997315  | 5.83E-01 | 6.61E-01 | 1.00E+00 |
| DNAJB14  | LMNA | -0.113213019 | -0.247397403 | 0.025232342  | 1.09E-01 | 1.63E-01 | 1.00E+00 |
| TSFM     | LMNA | -0.202803891 | -0.331571783 | -0.066618013 | 3.80E-03 | 8.55E-03 | 1.00E+00 |
| WRB      | LMNA | -0.294271306 | -0.415445079 | -0.162835404 | 2.13E-05 | 7.94E-05 | 2.53E-01 |

|          |      |              |              |              |          |          |          |
|----------|------|--------------|--------------|--------------|----------|----------|----------|
| ABCC8    | LMNA | -0.434085513 | -0.539789142 | -0.314905521 | 1.09E-10 | 1.08E-09 | 1.29E-06 |
| MAP1S    | LMNA | 0.175445265  | 0.038322449  | 0.306082819  | 1.25E-02 | 2.47E-02 | 1.00E+00 |
| BPI      | LMNA | 0.192042578  | 0.055461966  | 0.321568267  | 6.18E-03 | 1.32E-02 | 1.00E+00 |
| TTC4     | LMNA | 0.174538585  | 0.037388468  | 0.305234882  | 1.30E-02 | 2.56E-02 | 1.00E+00 |
| BNC2     | LMNA | 0.499572174  | 0.388300904  | 0.596485682  | 3.78E-14 | 6.44E-13 | 4.48E-10 |
| HIST1H4A | LMNA | -0.207451635 | -0.335883306 | -0.071446793 | 3.05E-03 | 7.06E-03 | 1.00E+00 |
| NDUFS3   | LMNA | -0.22650944  | -0.353506349 | -0.091313809 | 1.19E-03 | 3.05E-03 | 1.00E+00 |
| WDR3     | LMNA | -0.047405718 | -0.184250905 | 0.09124241   | 5.03E-01 | 5.87E-01 | 1.00E+00 |
| MAGED1   | LMNA | -0.074168652 | -0.210068747 | 0.06454321   | 2.94E-01 | 3.78E-01 | 1.00E+00 |
| TTC33    | LMNA | -0.421840509 | -0.529080254 | -0.301338084 | 4.04E-10 | 3.58E-09 | 4.79E-06 |
| CPN2     | LMNA | -0.106999845 | -0.241483784 | 0.031516702  | 1.30E-01 | 1.90E-01 | 1.00E+00 |
| STMN2    | LMNA | -0.471371188 | -0.572188045 | -0.356520115 | 1.44E-12 | 1.95E-11 | 1.70E-08 |
| PCOLCE2  | LMNA | 0.215587063  | 0.079914477  | 0.343417275  | 2.06E-03 | 4.98E-03 | 1.00E+00 |
| ROR1     | LMNA | 0.497875303  | 0.386381121  | 0.595028683  | 4.74E-14 | 7.95E-13 | 5.63E-10 |
| HSD17B14 | LMNA | 0.10569515   | -0.032834956 | 0.240240721  | 1.34E-01 | 1.96E-01 | 1.00E+00 |
| SAMD4B   | LMNA | 0.278075883  | 0.14561484   | 0.400742903  | 6.15E-05 | 2.10E-04 | 7.29E-01 |
| HEXA     | LMNA | 0.552339886  | 0.448486459  | 0.641477535  | 1.58E-17 | 5.26E-16 | 1.87E-13 |
| USP39    | LMNA | 0.002640773  | -0.135459611 | 0.140640502  | 9.70E-01 | 9.77E-01 | 1.00E+00 |
| HNRNPU   | LMNA | 0.010516063  | -0.127720356 | 0.148351694  | 8.82E-01 | 9.13E-01 | 1.00E+00 |
| NRD1     | LMNA | 0.274881007  | 0.142227186  | 0.39783512   | 7.52E-05 | 2.52E-04 | 8.92E-01 |
| ATXN2L   | LMNA | -0.007649645 | -0.145546942 | 0.13053921   | 9.14E-01 | 9.38E-01 | 1.00E+00 |
| MAP2K3   | LMNA | 0.706745992  | 0.630179732  | 0.769699708  | 6.93E-32 | 3.74E-29 | 8.22E-28 |
| FLT4     | LMNA | 0.090221419  | -0.04843282  | 0.225464227  | 2.02E-01 | 2.76E-01 | 1.00E+00 |
| OMG      | LMNA | -0.618552026 | -0.697078307 | -0.525362649 | 1.03E-22 | 8.72E-21 | 1.22E-18 |
| SCAP     | LMNA | 0.057962305  | -0.080734715 | 0.194457306  | 4.13E-01 | 5.00E-01 | 1.00E+00 |
| ELA2     | LMNA | 0.18136271   | 0.044423965  | 0.311611791  | 9.79E-03 | 1.99E-02 | 1.00E+00 |
| NARS     | LMNA | -0.098587643 | -0.233461208 | 0.04000787   | 1.63E-01 | 2.30E-01 | 1.00E+00 |
| PRCC     | LMNA | 0.036308681  | -0.102254867 | 0.173490071  | 6.08E-01 | 6.84E-01 | 1.00E+00 |
| ZNF675   | LMNA | -0.429477665 | -0.535763352 | -0.309794313 | 1.79E-10 | 1.71E-09 | 2.13E-06 |
| VENTXP1  | LMNA | 0.151960848  | 0.014207905  | 0.284052888  | 3.09E-02 | 5.49E-02 | 1.00E+00 |
| CALCOCO1 | LMNA | -0.313267392 | -0.432609388 | -0.183136472 | 5.64E-06 | 2.34E-05 | 6.69E-02 |
| ZBTB32   | LMNA | 0.071256683  | -0.067457905 | 0.207268769  | 3.14E-01 | 3.99E-01 | 1.00E+00 |
| RFC5     | LMNA | -0.171470012 | -0.302363581 | -0.034229273 | 1.47E-02 | 2.84E-02 | 1.00E+00 |
| BRAF     | LMNA | 0.068378856  | -0.070336101 | 0.204499429  | 3.34E-01 | 4.19E-01 | 1.00E+00 |
| PAX5     | LMNA | 0.285358329  | 0.153348333  | 0.407361721  | 3.85E-05 | 1.36E-04 | 4.56E-01 |

|           |      |              |              |              |          |          |          |
|-----------|------|--------------|--------------|--------------|----------|----------|----------|
| MGC14376  | LMNA | 0.46754791   | 0.352231877  | 0.568880273  | 2.30E-12 | 3.01E-11 | 2.72E-08 |
| TNFSF5IP1 | LMNA | -0.100974735 | -0.235739605 | 0.037600403  | 1.53E-01 | 2.18E-01 | 1.00E+00 |
| PEBP1     | LMNA | -0.188044471 | -0.31784432  | -0.051325876 | 7.36E-03 | 1.54E-02 | 1.00E+00 |
| AAK1      | LMNA | -0.207408584 | -0.335843394 | -0.071402035 | 3.06E-03 | 7.07E-03 | 1.00E+00 |
| FBXO2     | LMNA | -0.309196095 | -0.428937952 | -0.178776123 | 7.55E-06 | 3.06E-05 | 8.96E-02 |
| RMND1     | LMNA | -0.153784226 | -0.285768346 | -0.016074488 | 2.89E-02 | 5.17E-02 | 1.00E+00 |
| IGKV1-5   | LMNA | 0.134973853  | -0.003135573 | 0.268030567  | 5.55E-02 | 9.18E-02 | 1.00E+00 |
| COL1A2    | LMNA | 0.701804176  | 0.624231722  | 0.765673114  | 2.78E-31 | 1.06E-28 | 3.29E-27 |
| SERPINA5  | LMNA | 0.198585044  | 0.062240354  | 0.327653469  | 4.61E-03 | 1.02E-02 | 1.00E+00 |
| GMEB1     | LMNA | -0.020046012 | -0.157660706 | 0.118332459  | 7.77E-01 | 8.30E-01 | 1.00E+00 |
| AKT3      | LMNA | -0.313624815 | -0.432931518 | -0.183519516 | 5.49E-06 | 2.28E-05 | 6.52E-02 |
| AANAT     | LMNA | 0.004527543  | -0.133606966 | 0.142489483  | 9.49E-01 | 9.62E-01 | 1.00E+00 |
| CRB1      | LMNA | -0.63011947  | -0.706695962 | -0.538951082 | 9.47E-24 | 9.94E-22 | 1.12E-19 |
| C19orf21  | LMNA | -0.112589838 | -0.246804718 | 0.025863157  | 1.11E-01 | 1.66E-01 | 1.00E+00 |
| UBR4      | LMNA | 0.002824322  | -0.135279424 | 0.140820417  | 9.68E-01 | 9.76E-01 | 1.00E+00 |
| LTBP3     | LMNA | 0.512772048  | 0.403267852  | 0.607797833  | 6.11E-15 | 1.25E-13 | 7.24E-11 |
| AMHR2     | LMNA | 0.263036634  | 0.129695186  | 0.387033492  | 1.56E-04 | 4.90E-04 | 1.00E+00 |
| CTTN      | LMNA | 0.375164856  | 0.250065203  | 0.487944302  | 3.77E-08 | 2.31E-07 | 4.47E-04 |
| UTP15     | LMNA | 0.20093863   | 0.064681891  | 0.329839944  | 4.14E-03 | 9.25E-03 | 1.00E+00 |
| C20orf39  | LMNA | -0.331250745 | -0.448779294 | -0.202458049 | 1.47E-06 | 6.82E-06 | 1.74E-02 |
| MYBBP1A   | LMNA | 0.057778567  | -0.080917866 | 0.194279915  | 4.14E-01 | 5.02E-01 | 1.00E+00 |
| HSBP1     | LMNA | -0.39529181  | -0.505744135 | -0.272088812 | 5.81E-09 | 4.17E-08 | 6.89E-05 |
| PROCR     | LMNA | 0.488460278  | 0.375746798  | 0.586932963  | 1.65E-13 | 2.57E-12 | 1.96E-09 |
| PHF11     | LMNA | 0.2431983    | 0.108800129  | 0.368865109  | 4.87E-04 | 1.38E-03 | 1.00E+00 |
| PASK      | LMNA | -0.195034928 | -0.324352805 | -0.058560659 | 5.41E-03 | 1.17E-02 | 1.00E+00 |
| RFXDC2    | LMNA | -0.193040678 | -0.3224973   | -0.056495245 | 5.91E-03 | 1.27E-02 | 1.00E+00 |
| KIAA0467  | LMNA | 0.111845977  | -0.026615987 | 0.246097127  | 1.13E-01 | 1.69E-01 | 1.00E+00 |
| NDEL1     | LMNA | 0.250326743  | 0.116294636  | 0.375404566  | 3.27E-04 | 9.62E-04 | 1.00E+00 |
| USP8      | LMNA | 0.004573824  | -0.13356151  | 0.142534825  | 9.48E-01 | 9.61E-01 | 1.00E+00 |
| BAIAP2    | LMNA | 0.202271265  | 0.066065048  | 0.331077344  | 3.89E-03 | 8.75E-03 | 1.00E+00 |
| SI        | LMNA | 0.205308995  | 0.069219902  | 0.333896335  | 3.38E-03 | 7.71E-03 | 1.00E+00 |
| ARSJ      | LMNA | 0.631863432  | 0.541003863  | 0.708143514  | 6.55E-24 | 7.26E-22 | 7.77E-20 |
| GULP1     | LMNA | -0.006470773 | -0.144392788 | 0.131697873  | 9.27E-01 | 9.47E-01 | 1.00E+00 |
| KCNE4     | LMNA | 0.447559276  | 0.329890918  | 0.551533241  | 2.42E-11 | 2.65E-10 | 2.87E-07 |
| KCNS3     | LMNA | -0.189455581 | -0.319159124 | -0.052785151 | 6.92E-03 | 1.46E-02 | 1.00E+00 |

|           |      |              |              |              |          |          |          |
|-----------|------|--------------|--------------|--------------|----------|----------|----------|
| BAAT      | LMNA | -0.060883569 | -0.197276453 | 0.077821525  | 3.89E-01 | 4.77E-01 | 1.00E+00 |
| DKFZp434k | LMNA | 0.127095631  | -0.011151022 | 0.260574672  | 7.15E-02 | 1.14E-01 | 1.00E+00 |
| MBD1      | LMNA | 0.07174715   | -0.066967144 | 0.207740529  | 3.10E-01 | 3.95E-01 | 1.00E+00 |
| ITGAL     | LMNA | 0.175947132  | 0.038839531  | 0.306552081  | 1.23E-02 | 2.43E-02 | 1.00E+00 |
| WDR73     | LMNA | 0.13942291   | 0.001398833  | 0.272234092  | 4.78E-02 | 8.07E-02 | 1.00E+00 |
| ARFGAP1   | LMNA | 0.340125994  | 0.212030845  | 0.456731298  | 7.32E-07 | 3.60E-06 | 8.69E-03 |
| ZBTB40    | LMNA | -0.08830492  | -0.223629744 | 0.050359999  | 2.11E-01 | 2.87E-01 | 1.00E+00 |
| CH25H     | LMNA | 0.22964377   | 0.094591563  | 0.356396104  | 1.01E-03 | 2.65E-03 | 1.00E+00 |
| LOC81691  | LMNA | -0.407938004 | -0.516880248 | -0.28599306  | 1.68E-09 | 1.34E-08 | 1.99E-05 |
| CYP4B1    | LMNA | -0.115942544 | -0.249992174 | 0.022468081  | 1.00E-01 | 1.52E-01 | 1.00E+00 |
| ALPL      | LMNA | 0.090664788  | -0.047986833 | 0.225888486  | 1.99E-01 | 2.73E-01 | 1.00E+00 |
| FOLR3     | LMNA | 0.285938409  | 0.153965037  | 0.40788839   | 3.70E-05 | 1.32E-04 | 4.39E-01 |
| CHST3     | LMNA | 0.253742403  | 0.119891115  | 0.378533601  | 2.69E-04 | 8.05E-04 | 1.00E+00 |
| TRIM62    | LMNA | -0.108888798 | -0.243282723 | 0.029607265  | 1.23E-01 | 1.81E-01 | 1.00E+00 |
| MAP3K9    | LMNA | -0.256744091 | -0.38128105  | -0.12305461  | 2.26E-04 | 6.86E-04 | 1.00E+00 |
| ABLIM1    | LMNA | -0.188658141 | -0.31841617  | -0.051960421 | 7.17E-03 | 1.51E-02 | 1.00E+00 |
| BTAF1     | LMNA | -0.219058287 | -0.34662687  | -0.083533439 | 1.73E-03 | 4.28E-03 | 1.00E+00 |
| MAST3     | LMNA | -0.255636094 | -0.380267155 | -0.12188657  | 2.41E-04 | 7.28E-04 | 1.00E+00 |
| RBM35B    | LMNA | -0.143933538 | -0.276490623 | -0.006001794 | 4.10E-02 | 7.05E-02 | 1.00E+00 |
| ANKRD25   | LMNA | 0.640337853  | 0.550994358  | 0.715168475  | 1.06E-24 | 1.35E-22 | 1.25E-20 |
| RYBP      | LMNA | 0.102151944  | -0.036412553 | 0.236862665  | 1.48E-01 | 2.12E-01 | 1.00E+00 |
| UQCRC2    | LMNA | -0.284422975 | -0.40651232  | -0.152354141 | 4.09E-05 | 1.44E-04 | 4.85E-01 |
| TTC26     | LMNA | 0.34527212   | 0.217592711  | 0.461333581  | 4.84E-07 | 2.46E-06 | 5.74E-03 |
| ZNF22     | LMNA | -0.433145511 | -0.538968273 | -0.313862273 | 1.21E-10 | 1.18E-09 | 1.43E-06 |
| MAEA      | LMNA | 0.006867351  | -0.131308136 | 0.144781092  | 9.23E-01 | 9.45E-01 | 1.00E+00 |
| RNPEPL1   | LMNA | 0.538384493  | 0.432477148  | 0.629637956  | 1.41E-16 | 4.00E-15 | 1.67E-12 |
| HYAL1     | LMNA | -0.009366208 | -0.147226842 | 0.128851399  | 8.95E-01 | 9.24E-01 | 1.00E+00 |
| PSD3      | LMNA | -0.214263614 | -0.342192789 | -0.078535643 | 2.20E-03 | 5.28E-03 | 1.00E+00 |
| AGR2      | LMNA | -0.013975144 | -0.151733408 | 0.124315697  | 8.44E-01 | 8.84E-01 | 1.00E+00 |
| HDLBP     | LMNA | 0.584839114  | 0.486028935  | 0.668885859  | 6.31E-20 | 3.21E-18 | 7.48E-16 |
| GNB3      | LMNA | -0.226034892 | -0.353068618 | -0.090817801 | 1.22E-03 | 3.12E-03 | 1.00E+00 |
| HECW1     | LMNA | -0.394672625 | -0.50519794  | -0.271409349 | 6.17E-09 | 4.40E-08 | 7.31E-05 |
| ACTR2     | LMNA | 0.27783731   | 0.145361764  | 0.400525854  | 6.24E-05 | 2.12E-04 | 7.41E-01 |
| HMGB1     | LMNA | -0.249692009 | -0.374822781 | -0.115626687 | 3.39E-04 | 9.94E-04 | 1.00E+00 |
| EDG1      | LMNA | -0.295656872 | -0.416699961 | -0.164312401 | 1.94E-05 | 7.28E-05 | 2.30E-01 |



|           |      |              |              |              |          |          |          |
|-----------|------|--------------|--------------|--------------|----------|----------|----------|
| HOPX      | LMNA | 0.013011804  | -0.125264208 | 0.150791938  | 8.54E-01 | 8.92E-01 | 1.00E+00 |
| ZNF304    | LMNA | -0.134444282 | -0.267529883 | 0.003674926  | 5.64E-02 | 9.32E-02 | 1.00E+00 |
| OR12D3    | LMNA | -0.014336643 | -0.152086636 | 0.123959697  | 8.40E-01 | 8.80E-01 | 1.00E+00 |
| METTL1    | LMNA | -0.056469366 | -0.193015683 | 0.082222614  | 4.25E-01 | 5.12E-01 | 1.00E+00 |
| PSPH      | LMNA | -0.023613953 | -0.161139649 | 0.114811325  | 7.39E-01 | 7.97E-01 | 1.00E+00 |
| SOAT2     | LMNA | 0.205649692  | 0.069573905  | 0.334212355  | 3.32E-03 | 7.61E-03 | 1.00E+00 |
| RAP1GDS1  | LMNA | -0.284394461 | -0.406486423 | -0.152323838 | 4.10E-05 | 1.44E-04 | 4.86E-01 |
| CLCA3     | LMNA | 0.380708121  | 0.256117946  | 0.49285602   | 2.28E-08 | 1.46E-07 | 2.71E-04 |
| DARS2     | LMNA | -0.007881281 | -0.145773677 | 0.130311501  | 9.11E-01 | 9.37E-01 | 1.00E+00 |
| CDC25A    | LMNA | -0.223197486 | -0.350450192 | -0.087853483 | 1.41E-03 | 3.55E-03 | 1.00E+00 |
| RCN3      | LMNA | 0.61601696   | 0.522391008  | 0.694966765  | 1.71E-22 | 1.37E-20 | 2.03E-18 |
| CREBL1    | LMNA | 0.02395961   | -0.114470018 | 0.161476503  | 7.35E-01 | 7.94E-01 | 1.00E+00 |
| PTGER3    | LMNA | -0.146878459 | -0.279266845 | -0.009010155 | 3.70E-02 | 6.43E-02 | 1.00E+00 |
| USP29     | LMNA | -0.125118651 | -0.25870117  | 0.013159653  | 7.60E-02 | 1.21E-01 | 1.00E+00 |
| ARHGEF10  | LMNA | -0.149353507 | -0.281598399 | -0.011540452 | 3.39E-02 | 5.96E-02 | 1.00E+00 |
| ADAM30    | LMNA | -0.056877135 | -0.193409495 | 0.081816283  | 4.21E-01 | 5.09E-01 | 1.00E+00 |
| ATOX1     | LMNA | 0.116712894  | -0.021687543 | 0.250724144  | 9.81E-02 | 1.50E-01 | 1.00E+00 |
| KIF26B    | LMNA | 0.214556298  | 0.078840531  | 0.342463625  | 2.17E-03 | 5.21E-03 | 1.00E+00 |
| C17orf70  | LMNA | 0.117675656  | -0.020711813 | 0.251638725  | 9.53E-02 | 1.46E-01 | 1.00E+00 |
| STT3A     | LMNA | 0.481629003  | 0.368049372  | 0.581046585  | 3.97E-13 | 5.86E-12 | 4.71E-09 |
| ZNF225    | LMNA | -0.114172316 | -0.24830956  | 0.024261078  | 1.06E-01 | 1.59E-01 | 1.00E+00 |
| DNASE1    | LMNA | -0.130828631 | -0.264109543 | 0.007355212  | 6.35E-02 | 1.03E-01 | 1.00E+00 |
| C1orf106  | LMNA | -0.405568425 | -0.514796423 | -0.283383838 | 2.13E-09 | 1.65E-08 | 2.52E-05 |
| PTN       | LMNA | 0.027588091  | -0.110885223 | 0.165010638  | 6.97E-01 | 7.62E-01 | 1.00E+00 |
| RAB6IP1   | LMNA | -0.174367719 | -0.305075063 | -0.037212484 | 1.31E-02 | 2.57E-02 | 1.00E+00 |
| HECA      | LMNA | -0.003484409 | -0.14146736  | 0.134631353  | 9.61E-01 | 9.71E-01 | 1.00E+00 |
| RAE1      | LMNA | 0.075156486  | -0.063553913 | 0.211018084  | 2.88E-01 | 3.71E-01 | 1.00E+00 |
| TNIK      | LMNA | -0.322663691 | -0.44106775  | -0.193219467 | 2.82E-06 | 1.25E-05 | 3.35E-02 |
| RNF122    | LMNA | -0.131003546 | -0.264275087 | 0.007177256  | 6.31E-02 | 1.03E-01 | 1.00E+00 |
| ACTN3     | LMNA | 0.449375204  | 0.331915122  | 0.553112907  | 1.97E-11 | 2.18E-10 | 2.33E-07 |
| SLC22A18A | LMNA | 0.179084652  | 0.042073835  | 0.309484329  | 1.08E-02 | 2.17E-02 | 1.00E+00 |
| CCNA1     | LMNA | -0.051809058 | -0.188511767 | 0.086863214  | 4.64E-01 | 5.50E-01 | 1.00E+00 |
| ELP4      | LMNA | -0.098494683 | -0.233372451 | 0.04010159   | 1.63E-01 | 2.31E-01 | 1.00E+00 |
| FAM65A    | LMNA | 0.250358572  | 0.116328134  | 0.375433738  | 3.26E-04 | 9.61E-04 | 1.00E+00 |
| IL26      | LMNA | -0.041479577 | -0.178508386 | 0.097127605  | 5.58E-01 | 6.38E-01 | 1.00E+00 |

|           |      |              |              |              |          |          |          |
|-----------|------|--------------|--------------|--------------|----------|----------|----------|
| RYK       | LMNA | 0.105736481  | -0.032793203 | 0.240280106  | 1.34E-01 | 1.96E-01 | 1.00E+00 |
| QARS      | LMNA | 0.297899207  | 0.166703954  | 0.418729825  | 1.66E-05 | 6.33E-05 | 1.97E-01 |
| RPL10A    | LMNA | -0.069871998 | -0.205936555 | 0.068843056  | 3.23E-01 | 4.09E-01 | 1.00E+00 |
| LRP3      | LMNA | -0.103825306 | -0.238458437 | 0.034723391  | 1.41E-01 | 2.04E-01 | 1.00E+00 |
| OR2S2     | LMNA | -0.22151224  | -0.348894064 | -0.086093992 | 1.53E-03 | 3.82E-03 | 1.00E+00 |
| BID       | LMNA | -0.197147949 | -0.326317733 | -0.060750359 | 4.92E-03 | 1.08E-02 | 1.00E+00 |
| IRS4      | LMNA | -0.026173125 | -0.163632883 | 0.112283581  | 7.12E-01 | 7.74E-01 | 1.00E+00 |
| MACF1     | LMNA | 0.280397104  | 0.148078072  | 0.402853989  | 5.30E-05 | 1.83E-04 | 6.29E-01 |
| CXCL14    | LMNA | 0.392715593  | 0.269262605  | 0.503471022  | 7.43E-09 | 5.22E-08 | 8.82E-05 |
| SEC24D    | LMNA | 0.612161021  | 0.51787538   | 0.691752412  | 3.69E-22 | 2.70E-20 | 4.37E-18 |
| LOC374395 | LMNA | 0.260326413  | 0.126833599  | 0.384557078  | 1.83E-04 | 5.67E-04 | 1.00E+00 |
| TGFB2     | LMNA | 0.345673127  | 0.218026463  | 0.461691947  | 4.69E-07 | 2.38E-06 | 5.56E-03 |
| CHRNE     | LMNA | 0.024213972  | -0.114218835 | 0.161724366  | 7.32E-01 | 7.92E-01 | 1.00E+00 |
| MDFIC     | LMNA | 0.636279595  | 0.54620688   | 0.711806224  | 2.55E-24 | 2.97E-22 | 3.03E-20 |
| HSPB8     | LMNA | -0.170813223 | -0.301748706 | -0.033553444 | 1.51E-02 | 2.90E-02 | 1.00E+00 |
| PRDM14    | LMNA | 0.057607201  | -0.081088676 | 0.194114461  | 4.15E-01 | 5.03E-01 | 1.00E+00 |
| MNAT1     | LMNA | -0.165946426 | -0.297189101 | -0.028549468 | 1.83E-02 | 3.44E-02 | 1.00E+00 |
| ADD3      | LMNA | -0.438489901 | -0.543632659 | -0.319797514 | 6.71E-11 | 6.95E-10 | 7.96E-07 |
| MBNL2     | LMNA | -0.070967135 | -0.206990235 | 0.067747595  | 3.16E-01 | 4.01E-01 | 1.00E+00 |
| KLK6      | LMNA | -0.130789241 | -0.264072262 | 0.007395286  | 6.36E-02 | 1.03E-01 | 1.00E+00 |
| ATP6V0D1  | LMNA | 0.031844604  | -0.106675361 | 0.169151982  | 6.53E-01 | 7.24E-01 | 1.00E+00 |
| MTA2      | LMNA | -0.077262373 | -0.213041047 | 0.061443998  | 2.74E-01 | 3.57E-01 | 1.00E+00 |
| TMEM111   | LMNA | 0.128837825  | -0.00938001  | 0.262224844  | 6.76E-02 | 1.09E-01 | 1.00E+00 |
| KIAA1279  | LMNA | -0.257132434 | -0.381636341 | -0.123464087 | 2.21E-04 | 6.72E-04 | 1.00E+00 |
| LZTR1     | LMNA | 0.106558664  | -0.031962522 | 0.241063493  | 1.31E-01 | 1.92E-01 | 1.00E+00 |
| RAP1A     | LMNA | 0.103025967  | -0.035530377 | 0.237696252  | 1.45E-01 | 2.08E-01 | 1.00E+00 |
| AXIN1     | LMNA | 0.250675453  | 0.116661645  | 0.375724145  | 3.20E-04 | 9.44E-04 | 1.00E+00 |
| POLR1C    | LMNA | -0.07143699  | -0.207442206 | 0.067277498  | 3.12E-01 | 3.98E-01 | 1.00E+00 |
| TRIO      | LMNA | 0.206176144  | 0.070120985  | 0.33470062   | 3.24E-03 | 7.44E-03 | 1.00E+00 |
| NUBP2     | LMNA | -0.189623837 | -0.319315863 | -0.052959189 | 6.87E-03 | 1.45E-02 | 1.00E+00 |
| ID3       | LMNA | -0.061447443 | -0.197820357 | 0.077258936  | 3.85E-01 | 4.72E-01 | 1.00E+00 |
| TM9SF1    | LMNA | 0.50257803   | 0.391704001  | 0.599065058  | 2.51E-14 | 4.44E-13 | 2.98E-10 |
| POU4F2    | LMNA | -0.290286145 | -0.411833221 | -0.158590549 | 2.78E-05 | 1.01E-04 | 3.30E-01 |
| ZNF473    | LMNA | -0.021698865 | -0.159272757 | 0.116701721  | 7.59E-01 | 8.15E-01 | 1.00E+00 |
| IQCK      | LMNA | -0.092736871 | -0.227870577 | 0.045901783  | 1.89E-01 | 2.61E-01 | 1.00E+00 |

|          |      |              |              |              |          |          |          |
|----------|------|--------------|--------------|--------------|----------|----------|----------|
| MTM1     | LMNA | 0.053511957  | -0.085168214 | 0.190158187  | 4.49E-01 | 5.36E-01 | 1.00E+00 |
| GPR107   | LMNA | 0.392945477  | 0.269514711  | 0.503673922  | 7.27E-09 | 5.12E-08 | 8.63E-05 |
| CAPN3    | LMNA | -0.249465386 | -0.374615039 | -0.115388234 | 3.43E-04 | 1.01E-03 | 1.00E+00 |
| FLJ14154 | LMNA | -0.013563738 | -0.151331373 | 0.124720801  | 8.48E-01 | 8.87E-01 | 1.00E+00 |
| RECQL    | LMNA | 0.445925963  | 0.328071198  | 0.550111793  | 2.92E-11 | 3.16E-10 | 3.46E-07 |
| AP1G1    | LMNA | -0.009342245 | -0.147203397 | 0.128874966  | 8.95E-01 | 9.24E-01 | 1.00E+00 |
| CTNNBL1  | LMNA | 0.21926677   | 0.083750909  | 0.346819544  | 1.72E-03 | 4.24E-03 | 1.00E+00 |
| ENPP4    | LMNA | -0.13448041  | -0.267564043 | 0.003638133  | 5.64E-02 | 9.31E-02 | 1.00E+00 |
| PADI3    | LMNA | -0.09983291  | -0.234649957 | 0.038752174  | 1.57E-01 | 2.24E-01 | 1.00E+00 |
| ECHDC1   | LMNA | 0.159666278  | 0.022102462  | 0.291296495  | 2.32E-02 | 4.27E-02 | 1.00E+00 |
| RNF170   | LMNA | -0.137279176 | -0.270209298 | 0.000786734  | 5.14E-02 | 8.60E-02 | 1.00E+00 |
| SMARCC1  | LMNA | -0.075058891 | -0.210924304 | 0.063651665  | 2.88E-01 | 3.72E-01 | 1.00E+00 |
| C16orf7  | LMNA | 0.181766432  | 0.044840618  | 0.311988688  | 9.63E-03 | 1.96E-02 | 1.00E+00 |
| CG018    | LMNA | -0.293484318 | -0.414732114 | -0.161996746 | 2.24E-05 | 8.34E-05 | 2.66E-01 |
| GNAI3    | LMNA | 0.20288665   | 0.06670394   | 0.331648603  | 3.78E-03 | 8.53E-03 | 1.00E+00 |
| KCNE1    | LMNA | 0.328619806  | 0.199625054  | 0.446418456  | 1.80E-06 | 8.22E-06 | 2.13E-02 |
| POLG2    | LMNA | -0.341700467 | -0.458140044 | -0.213731635 | 6.46E-07 | 3.20E-06 | 7.66E-03 |
| CD4      | LMNA | 0.288656998  | 0.156856638  | 0.41035558   | 3.10E-05 | 1.12E-04 | 3.67E-01 |
| EBI2     | LMNA | 0.377690443  | 0.252821704  | 0.490183034  | 3.00E-08 | 1.88E-07 | 3.56E-04 |
| IRF1     | LMNA | 0.520909849  | 0.412524351  | 0.614752677  | 1.91E-15 | 4.30E-14 | 2.26E-11 |
| TPD52L2  | LMNA | 0.599144422  | 0.502670553  | 0.680878287  | 4.54E-21 | 2.69E-19 | 5.39E-17 |
| PTPRE    | LMNA | 0.277016847  | 0.144491558  | 0.399779306  | 6.58E-05 | 2.23E-04 | 7.80E-01 |
| PTK2B    | LMNA | 0.235476159  | 0.100698641  | 0.361766941  | 7.42E-04 | 2.01E-03 | 1.00E+00 |
| SDHB     | LMNA | 0.025059731  | -0.113383522 | 0.162548392  | 7.23E-01 | 7.84E-01 | 1.00E+00 |
| SOX4     | LMNA | -0.362318153 | -0.476533708 | -0.236075255 | 1.17E-07 | 6.61E-07 | 1.38E-03 |
| TSPAN3   | LMNA | -0.372986687 | -0.486012337 | -0.247689513 | 4.58E-08 | 2.79E-07 | 5.43E-04 |
| RHOF     | LMNA | 0.091733344  | -0.046911741 | 0.226910774  | 1.94E-01 | 2.67E-01 | 1.00E+00 |
| SH2D1A   | LMNA | 0.104049061  | -0.034497464 | 0.238671762  | 1.41E-01 | 2.03E-01 | 1.00E+00 |
| PTPLAD1  | LMNA | -0.054426361 | -0.191041946 | 0.08425772   | 4.42E-01 | 5.28E-01 | 1.00E+00 |
| DUSP22   | LMNA | 0.125824491  | -0.01244264  | 0.259370181  | 7.44E-02 | 1.18E-01 | 1.00E+00 |
| USP20    | LMNA | -0.17329679  | -0.304073206 | -0.03610967  | 1.36E-02 | 2.67E-02 | 1.00E+00 |
| CALB1    | LMNA | 0.157523476  | 0.019905343  | 0.289283636  | 2.52E-02 | 4.58E-02 | 1.00E+00 |
| DERA     | LMNA | -0.102096997 | -0.236810254 | 0.036468005  | 1.48E-01 | 2.13E-01 | 1.00E+00 |
| TMEM118  | LMNA | -0.397981027 | -0.508115319 | -0.275041255 | 4.48E-09 | 3.29E-08 | 5.32E-05 |
| MCRS1    | LMNA | -0.105475007 | -0.240030934 | 0.03305734   | 1.35E-01 | 1.97E-01 | 1.00E+00 |

|           |      |              |              |              |          |          |          |
|-----------|------|--------------|--------------|--------------|----------|----------|----------|
| C18orf8   | LMNA | 0.18728956   | 0.050545437  | 0.317140725  | 7.61E-03 | 1.59E-02 | 1.00E+00 |
| FLJ10241  | LMNA | -0.029977696 | -0.167336184 | 0.108522419  | 6.72E-01 | 7.41E-01 | 1.00E+00 |
| GINS3     | LMNA | -0.196765582 | -0.325962247 | -0.060354019 | 5.01E-03 | 1.09E-02 | 1.00E+00 |
| C19orf53  | LMNA | 0.111513196  | -0.026952728 | 0.245780527  | 1.14E-01 | 1.70E-01 | 1.00E+00 |
| TPP2      | LMNA | -0.159225617 | -0.290882651 | -0.021650522 | 2.36E-02 | 4.33E-02 | 1.00E+00 |
| GJA12     | LMNA | -0.134667311 | -0.267740755 | 0.003447787  | 5.60E-02 | 9.26E-02 | 1.00E+00 |
| PKD1      | LMNA | 0.100246003  | -0.038335526 | 0.235044212  | 1.56E-01 | 2.22E-01 | 1.00E+00 |
| ST6GALNA  | LMNA | 0.147377748  | 0.009520447  | 0.279737313  | 3.63E-02 | 6.34E-02 | 1.00E+00 |
| JAM3      | LMNA | 0.246769479  | 0.112552788  | 0.372142776  | 4.00E-04 | 1.15E-03 | 1.00E+00 |
| CHSY1     | LMNA | 0.571292038  | 0.470335167  | 0.657488598  | 6.78E-19 | 2.94E-17 | 8.05E-15 |
| LAPTM4A   | LMNA | 0.353793182  | 0.226820432  | 0.468940428  | 2.40E-07 | 1.29E-06 | 2.85E-03 |
| TRPM8     | LMNA | 0.245911971  | 0.111651355  | 0.371356031  | 4.19E-04 | 1.20E-03 | 1.00E+00 |
| MYOM1     | LMNA | -0.160876085 | -0.292432423 | -0.023343523 | 2.22E-02 | 4.10E-02 | 1.00E+00 |
| PHKG2     | LMNA | -0.025966904 | -0.16343204  | 0.112487337  | 7.14E-01 | 7.76E-01 | 1.00E+00 |
| EXT2      | LMNA | 0.464074626  | 0.348340389  | 0.56587246   | 3.50E-12 | 4.46E-11 | 4.15E-08 |
| MOBKL1B   | LMNA | 0.334087273  | 0.205514839  | 0.451322779  | 1.18E-06 | 5.58E-06 | 1.40E-02 |
| DIAPH2    | LMNA | 0.104054123  | -0.034492352 | 0.238676588  | 1.41E-01 | 2.03E-01 | 1.00E+00 |
| DOLK      | LMNA | 0.309090932  | 0.178663561  | 0.428843065  | 7.61E-06 | 3.07E-05 | 9.03E-02 |
| TUBAL3    | LMNA | -0.01181797  | -0.14962486  | 0.126439314  | 8.67E-01 | 9.02E-01 | 1.00E+00 |
| CRYZL1    | LMNA | -0.272645879 | -0.395799372 | -0.139859037 | 8.65E-05 | 2.86E-04 | 1.00E+00 |
| CLN8      | LMNA | -0.167609498 | -0.298747874 | -0.030258642 | 1.71E-02 | 3.25E-02 | 1.00E+00 |
| PTPN12    | LMNA | 0.512670441  | 0.403152418  | 0.607710904  | 6.19E-15 | 1.26E-13 | 7.35E-11 |
| ABL2      | LMNA | 0.496409065  | 0.384723046  | 0.5937692    | 5.77E-14 | 9.47E-13 | 6.85E-10 |
| ACVRL1    | LMNA | 0.280133174  | 0.147797912  | 0.402614017  | 5.39E-05 | 1.86E-04 | 6.40E-01 |
| C14orf156 | LMNA | 0.006541058  | -0.131628804 | 0.14446161   | 9.26E-01 | 9.47E-01 | 1.00E+00 |
| CRY2      | LMNA | -0.286819903 | -0.408688563 | -0.154902382 | 3.50E-05 | 1.25E-04 | 4.15E-01 |
| PTPRZ1    | LMNA | -0.29055529  | -0.412077274 | -0.158877079 | 2.73E-05 | 9.98E-05 | 3.24E-01 |
| LAMP1     | LMNA | 0.33194192   | 0.203202664  | 0.449399239  | 1.39E-06 | 6.49E-06 | 1.65E-02 |
| PNPLA4    | LMNA | 0.232173434  | 0.09723912   | 0.35872661   | 8.85E-04 | 2.35E-03 | 1.00E+00 |
| FCGR2B    | LMNA | 0.505421411  | 0.394925947  | 0.601503171  | 1.70E-14 | 3.17E-13 | 2.02E-10 |
| DIP2C     | LMNA | -0.302463364 | -0.422857781 | -0.171576608 | 1.21E-05 | 4.74E-05 | 1.44E-01 |
| RXRA      | LMNA | 0.208835602  | 0.072885899  | 0.337166115  | 2.86E-03 | 6.65E-03 | 1.00E+00 |
| MAP3K5    | LMNA | 0.044304214  | -0.094323693 | 0.181246667  | 5.31E-01 | 6.14E-01 | 1.00E+00 |
| PDLIM7    | LMNA | 0.628240727  | 0.536740865  | 0.705135819  | 1.40E-23 | 1.41E-21 | 1.67E-19 |
| ALKBH1    | LMNA | -0.049093827 | -0.185885001 | 0.089564191  | 4.88E-01 | 5.73E-01 | 1.00E+00 |

|          |      |              |              |              |          |          |          |
|----------|------|--------------|--------------|--------------|----------|----------|----------|
| ARL14    | LMNA | 0.172742514  | 0.035539022  | 0.303554565  | 1.40E-02 | 2.72E-02 | 1.00E+00 |
| SNIP1    | LMNA | 0.160804929  | 0.023270517  | 0.292365622  | 2.22E-02 | 4.11E-02 | 1.00E+00 |
| CLDN11   | LMNA | -0.153046043 | -0.285073955 | -0.015318698 | 2.97E-02 | 5.30E-02 | 1.00E+00 |
| TIMP3    | LMNA | 0.142138219  | 0.004169024  | 0.274797063  | 4.36E-02 | 7.43E-02 | 1.00E+00 |
| CIB2     | LMNA | -0.089303668 | -0.22458587  | 0.049355814  | 2.06E-01 | 2.81E-01 | 1.00E+00 |
| HRK      | LMNA | -0.22053016  | -0.347986905 | -0.085069036 | 1.61E-03 | 3.99E-03 | 1.00E+00 |
| MXRA8    | LMNA | 0.579016021  | 0.479275287  | 0.663991682  | 1.78E-19 | 8.22E-18 | 2.11E-15 |
| RGS3     | LMNA | 0.483769543  | 0.370459641  | 0.582892166  | 3.02E-13 | 4.52E-12 | 3.59E-09 |
| SPAG16   | LMNA | -0.164699474 | -0.296019892 | -0.027268474 | 1.92E-02 | 3.59E-02 | 1.00E+00 |
| C4orf31  | LMNA | 0.029870994  | -0.108627958 | 0.167232375  | 6.73E-01 | 7.42E-01 | 1.00E+00 |
| FAM5B    | LMNA | -0.30854246  | -0.428348145 | -0.178076559 | 7.91E-06 | 3.19E-05 | 9.39E-02 |
| ABHD4    | LMNA | 0.149609594  | 0.011802356  | 0.28183955   | 3.36E-02 | 5.92E-02 | 1.00E+00 |
| ARHGEF12 | LMNA | -0.096454064 | -0.231423527 | 0.042158298  | 1.72E-01 | 2.41E-01 | 1.00E+00 |
| NFATC1   | LMNA | 0.158353371  | 0.020756116  | 0.290063342  | 2.44E-02 | 4.46E-02 | 1.00E+00 |
| RAC2     | LMNA | 0.485992806  | 0.372964674  | 0.58480799   | 2.27E-13 | 3.45E-12 | 2.69E-09 |
| GLUD2    | LMNA | 0.001888305  | -0.1361982   | 0.139902836  | 9.79E-01 | 9.84E-01 | 1.00E+00 |
| Sep-10   | LMNA | 0.154614749  | 0.016925008  | 0.286549432  | 2.80E-02 | 5.03E-02 | 1.00E+00 |
| UAP1L1   | LMNA | 0.366787187  | 0.240936066  | 0.480507527  | 7.92E-08 | 4.63E-07 | 9.39E-04 |
| RPP40    | LMNA | 0.120102822  | -0.018250782 | 0.253943362  | 8.87E-02 | 1.37E-01 | 1.00E+00 |
| SLC18A3  | LMNA | -0.044602603 | -0.181535809 | 0.094027365  | 5.28E-01 | 6.11E-01 | 1.00E+00 |
| YOD1     | LMNA | -0.154942291 | -0.286857429 | -0.017260491 | 2.77E-02 | 4.98E-02 | 1.00E+00 |
| RALY     | LMNA | 0.325137197  | 0.195878295  | 0.443290859  | 2.34E-06 | 1.05E-05 | 2.78E-02 |
| TBX5     | LMNA | -0.19850301  | -0.327577235 | -0.062155285 | 4.63E-03 | 1.02E-02 | 1.00E+00 |
| NAPG     | LMNA | 0.094867489  | -0.043756572 | 0.229907494  | 1.79E-01 | 2.49E-01 | 1.00E+00 |
| C14orf45 | LMNA | 0.287680497  | 0.155817733  | 0.409469585  | 3.30E-05 | 1.19E-04 | 3.92E-01 |
| RHD      | LMNA | -0.132654985 | -0.26583766  | 0.005496677  | 5.98E-02 | 9.81E-02 | 1.00E+00 |
| HMOX2    | LMNA | -0.025226293 | -0.162710651 | 0.113218995  | 7.22E-01 | 7.83E-01 | 1.00E+00 |
| DBNDD2   | LMNA | -0.150187169 | -0.282383377 | -0.012393121 | 3.29E-02 | 5.82E-02 | 1.00E+00 |
| YIPF4    | LMNA | 0.092915601  | -0.045721878 | 0.228041493  | 1.88E-01 | 2.60E-01 | 1.00E+00 |
| ZBTB22   | LMNA | -0.078596156 | -0.214321706 | 0.060107023  | 2.66E-01 | 3.48E-01 | 1.00E+00 |
| THAP10   | LMNA | -0.305031038 | -0.425177867 | -0.174320652 | 1.01E-05 | 4.01E-05 | 1.20E-01 |
| ANKRD10  | LMNA | -0.152148993 | -0.284229937 | -0.014400464 | 3.06E-02 | 5.46E-02 | 1.00E+00 |
| PLCG1    | LMNA | 0.198177762  | 0.061818018  | 0.327274965  | 4.69E-03 | 1.03E-02 | 1.00E+00 |
| TAGLN2   | LMNA | 0.704388424  | 0.627341023  | 0.767779385  | 1.35E-31 | 6.15E-29 | 1.60E-27 |
| SLC16A7  | LMNA | -0.170384334 | -0.301347129 | -0.033112189 | 1.53E-02 | 2.95E-02 | 1.00E+00 |

|          |      |              |              |              |          |          |          |
|----------|------|--------------|--------------|--------------|----------|----------|----------|
| HTR2C    | LMNA | -0.284435479 | -0.406523676 | -0.152367429 | 4.09E-05 | 1.44E-04 | 4.85E-01 |
| TSGA14   | LMNA | 0.017556003  | -0.120787742 | 0.155230783  | 8.04E-01 | 8.52E-01 | 1.00E+00 |
| MDH1     | LMNA | -0.249711441 | -0.374840594 | -0.115647134 | 3.38E-04 | 9.93E-04 | 1.00E+00 |
| ITGB4    | LMNA | 0.285357331  | 0.153347272  | 0.407360814  | 3.85E-05 | 1.36E-04 | 4.56E-01 |
| DCBLD2   | LMNA | 0.641080312  | 0.551870865  | 0.715783224  | 8.99E-25 | 1.16E-22 | 1.07E-20 |
| C5orf28  | LMNA | 0.09564606   | -0.042972349 | 0.23065153   | 1.76E-01 | 2.46E-01 | 1.00E+00 |
| YTHDF3   | LMNA | -0.070259501 | -0.206309426 | 0.068455476  | 3.20E-01 | 4.06E-01 | 1.00E+00 |
| FMO4     | LMNA | 0.221378502  | 0.085954398  | 0.348770543  | 1.54E-03 | 3.84E-03 | 1.00E+00 |
| THYN1    | LMNA | -0.37154009  | -0.484728641 | -0.246112568 | 5.21E-08 | 3.15E-07 | 6.18E-04 |
| OTOR     | LMNA | 0.013762616  | -0.124524975 | 0.151525726  | 8.46E-01 | 8.85E-01 | 1.00E+00 |
| PGRMC2   | LMNA | 0.280203194  | 0.147872236  | 0.402677683  | 5.37E-05 | 1.85E-04 | 6.37E-01 |
| DRD5     | LMNA | -0.302190822 | -0.422611427 | -0.171285465 | 1.24E-05 | 4.83E-05 | 1.47E-01 |
| TMEM30B  | LMNA | 0.019095112  | -0.119270297 | 0.156732949  | 7.87E-01 | 8.39E-01 | 1.00E+00 |
| PAQR6    | LMNA | -0.29860086  | -0.419364745 | -0.167452616 | 1.59E-05 | 6.05E-05 | 1.88E-01 |
| UBE2I    | LMNA | 0.058058182  | -0.08063914  | 0.194549867  | 4.12E-01 | 5.00E-01 | 1.00E+00 |
| TBC1D5   | LMNA | -0.106463401 | -0.240972734 | 0.03205878   | 1.32E-01 | 1.92E-01 | 1.00E+00 |
| C8orf70  | LMNA | -0.302446337 | -0.422842391 | -0.171558418 | 1.22E-05 | 4.74E-05 | 1.44E-01 |
| HRH4     | LMNA | 0.013978478  | -0.124312413 | 0.151736666  | 8.43E-01 | 8.84E-01 | 1.00E+00 |
| ANGPTL3  | LMNA | 0.043867987  | -0.094756863 | 0.180823915  | 5.35E-01 | 6.17E-01 | 1.00E+00 |
| MYO6     | LMNA | -0.207458597 | -0.335889759 | -0.07145403  | 3.05E-03 | 7.06E-03 | 1.00E+00 |
| GLRX2    | LMNA | 0.256934163  | 0.12325502   | 0.381454949  | 2.23E-04 | 6.79E-04 | 1.00E+00 |
| ATP11A   | LMNA | 0.167608621  | 0.03025774   | 0.298747051  | 1.71E-02 | 3.25E-02 | 1.00E+00 |
| MUC16    | LMNA | 0.086322841  | -0.052352036 | 0.221731478  | 2.22E-01 | 2.99E-01 | 1.00E+00 |
| SLC25A5  | LMNA | -0.017124904 | -0.154809917 | 0.121212657  | 8.09E-01 | 8.56E-01 | 1.00E+00 |
| MYO1C    | LMNA | 0.590656643  | 0.492787936  | 0.673768095  | 2.20E-20 | 1.17E-18 | 2.61E-16 |
| RBM23    | LMNA | -0.175427338 | -0.306066055 | -0.03830398  | 1.25E-02 | 2.47E-02 | 1.00E+00 |
| FAM89B   | LMNA | -0.005280345 | -0.143226939 | 0.13286751   | 9.41E-01 | 9.56E-01 | 1.00E+00 |
| FAS      | LMNA | 0.447882701  | 0.330251358  | 0.551814641  | 2.33E-11 | 2.56E-10 | 2.77E-07 |
| KIFAP3   | LMNA | -0.22629159  | -0.353305408 | -0.091086099 | 1.20E-03 | 3.08E-03 | 1.00E+00 |
| NGFB     | LMNA | 0.000357094  | -0.137700695 | 0.138401272  | 9.96E-01 | 9.97E-01 | 1.00E+00 |
| C1orf63  | LMNA | -0.045349173 | -0.18225914  | 0.093285844  | 5.22E-01 | 6.05E-01 | 1.00E+00 |
| PERLD1   | LMNA | 0.169914268  | 0.032628631  | 0.300906944  | 1.56E-02 | 2.99E-02 | 1.00E+00 |
| GLRA2    | LMNA | -0.254815022 | -0.379515624 | -0.121021243 | 2.52E-04 | 7.60E-04 | 1.00E+00 |
| BTN3A2   | LMNA | 0.202243905  | 0.066036646  | 0.331051944  | 3.90E-03 | 8.75E-03 | 1.00E+00 |
| C17orf59 | LMNA | 0.107585375  | -0.030924931 | 0.24204151   | 1.28E-01 | 1.87E-01 | 1.00E+00 |

|         |      |              |              |              |          |          |          |
|---------|------|--------------|--------------|--------------|----------|----------|----------|
| HSPBAP1 | LMNA | -0.189152113 | -0.318876409 | -0.052471276 | 7.02E-03 | 1.48E-02 | 1.00E+00 |
| CSTF3   | LMNA | -0.278513016 | -0.401140563 | -0.146078591 | 5.98E-05 | 2.04E-04 | 7.09E-01 |
| PRKCI   | LMNA | 0.079930474  | -0.058769012 | 0.215602414  | 2.58E-01 | 3.40E-01 | 1.00E+00 |
| OSMR    | LMNA | 0.615796332  | 0.522132493  | 0.694782932  | 1.79E-22 | 1.42E-20 | 2.12E-18 |
| SOD3    | LMNA | 0.391295103  | 0.267705183  | 0.502217004  | 8.51E-09 | 5.89E-08 | 1.01E-04 |
| ZNF574  | LMNA | -0.087552993 | -0.222909733 | 0.051115833  | 2.15E-01 | 2.91E-01 | 1.00E+00 |
| CYSLTR2 | LMNA | -0.090512235 | -0.225742514 | 0.048140294  | 2.00E-01 | 2.74E-01 | 1.00E+00 |
| RPL12   | LMNA | 0.238253507  | 0.103610369  | 0.364321558  | 6.39E-04 | 1.76E-03 | 1.00E+00 |
| WIZ     | LMNA | 0.124269396  | -0.014022162 | 0.257896057  | 7.81E-02 | 1.23E-01 | 1.00E+00 |
| ALDH4A1 | LMNA | -0.097711651 | -0.232624732 | 0.040890935  | 1.67E-01 | 2.34E-01 | 1.00E+00 |
| CRYAB   | LMNA | -0.210216402 | -0.338445516 | -0.074322277 | 2.67E-03 | 6.28E-03 | 1.00E+00 |
| RNF17   | LMNA | 0.01174596   | -0.126510183 | 0.149554451  | 8.68E-01 | 9.02E-01 | 1.00E+00 |
| NEIL3   | LMNA | -0.10588844  | -0.240424908 | 0.032639688  | 1.34E-01 | 1.95E-01 | 1.00E+00 |
| COPA    | LMNA | 0.167827265  | 0.030482505  | 0.298951931  | 1.70E-02 | 3.23E-02 | 1.00E+00 |
| KIF11   | LMNA | -0.0643535   | -0.20062216  | 0.074358103  | 3.63E-01 | 4.50E-01 | 1.00E+00 |
| SLC26A3 | LMNA | -0.047484558 | -0.18432724  | 0.09116405   | 5.02E-01 | 5.86E-01 | 1.00E+00 |
| SKP2    | LMNA | -0.070679714 | -0.206713725 | 0.068035133  | 3.18E-01 | 4.03E-01 | 1.00E+00 |
| ZNF175  | LMNA | -0.207370294 | -0.335807895 | -0.071362228 | 3.06E-03 | 7.08E-03 | 1.00E+00 |
| PARVA   | LMNA | 0.563357369  | 0.461172715  | 0.65079473   | 2.59E-18 | 9.99E-17 | 3.08E-14 |
| JAKMIP2 | LMNA | -0.347428299 | -0.463260039 | -0.219925549 | 4.06E-07 | 2.09E-06 | 4.82E-03 |
| C8orf4  | LMNA | 0.405555299  | 0.28336939   | 0.514784877  | 2.13E-09 | 1.65E-08 | 2.53E-05 |
| PTHLH   | LMNA | 0.461217338  | 0.345142055  | 0.563396058  | 4.92E-12 | 6.11E-11 | 5.84E-08 |
| RNF34   | LMNA | -0.095303282 | -0.230323977 | 0.043317636  | 1.77E-01 | 2.47E-01 | 1.00E+00 |
| PKLR    | LMNA | 0.038085583  | -0.100493789 | 0.175215345  | 5.90E-01 | 6.68E-01 | 1.00E+00 |
| PCDHB17 | LMNA | 0.050299783  | -0.088364817 | 0.187051907  | 4.77E-01 | 5.62E-01 | 1.00E+00 |
| CD36    | LMNA | 0.146758687  | 0.008887754  | 0.279153977  | 3.71E-02 | 6.46E-02 | 1.00E+00 |
| CCT2    | LMNA | -0.056504217 | -0.193049343 | 0.082187888  | 4.24E-01 | 5.11E-01 | 1.00E+00 |
| PRKG2   | LMNA | -0.344661733 | -0.460788026 | -0.216932579 | 5.09E-07 | 2.57E-06 | 6.04E-03 |
| ARF4    | LMNA | 0.232949789  | 0.098052039  | 0.359441527  | 8.49E-04 | 2.27E-03 | 1.00E+00 |
| SIKE    | LMNA | -0.147753041 | -0.2800909   | -0.009904058 | 3.59E-02 | 6.26E-02 | 1.00E+00 |
| ANAPC13 | LMNA | -0.315443158 | -0.43456984  | -0.185468813 | 4.81E-06 | 2.02E-05 | 5.71E-02 |
| MBTPS1  | LMNA | 0.174385005  | 0.037230287  | 0.305091231  | 1.31E-02 | 2.57E-02 | 1.00E+00 |
| SLCO3A1 | LMNA | 0.081633983  | -0.057060065 | 0.2172368    | 2.48E-01 | 3.28E-01 | 1.00E+00 |
| ZNF692  | LMNA | -0.158258277 | -0.289974009 | -0.02065862  | 2.45E-02 | 4.47E-02 | 1.00E+00 |
| GPSN2   | LMNA | 0.2170906    | 0.081481568  | 0.344807856  | 1.91E-03 | 4.67E-03 | 1.00E+00 |

|          |      |              |              |              |          |          |          |
|----------|------|--------------|--------------|--------------|----------|----------|----------|
| NCF2     | LMNA | 0.369889872  | 0.244314464  | 0.483263658  | 6.03E-08 | 3.60E-07 | 7.15E-04 |
| SH3GLB1  | LMNA | 0.464587922  | 0.348915238  | 0.566317138  | 3.29E-12 | 4.22E-11 | 3.90E-08 |
| SLC12A6  | LMNA | -0.069959736 | -0.206020984 | 0.068755304  | 3.22E-01 | 4.08E-01 | 1.00E+00 |
| MRPL48   | LMNA | -0.31749575  | -0.436418273 | -0.18767046  | 4.14E-06 | 1.76E-05 | 4.91E-02 |
| HMGH3    | LMNA | -0.395455041 | -0.50588811  | -0.272267955 | 5.72E-09 | 4.11E-08 | 6.78E-05 |
| SUPT5H   | LMNA | 0.044116272  | -0.094510324 | 0.181064536  | 5.33E-01 | 6.15E-01 | 1.00E+00 |
| XRCC6    | LMNA | -0.072812227 | -0.208764766 | 0.0659012    | 3.03E-01 | 3.88E-01 | 1.00E+00 |
| SOS2     | LMNA | -0.207777629 | -0.336185514 | -0.071785723 | 3.01E-03 | 6.96E-03 | 1.00E+00 |
| PAX9     | LMNA | 0.07540309   | -0.063306902 | 0.211255037  | 2.86E-01 | 3.70E-01 | 1.00E+00 |
| CCDC99   | LMNA | 0.031365676  | -0.107149287 | 0.168686255  | 6.58E-01 | 7.28E-01 | 1.00E+00 |
| NNAT     | LMNA | -0.150960629 | -0.283111511 | -0.013184395 | 3.20E-02 | 5.67E-02 | 1.00E+00 |
| USP16    | LMNA | 0.032894124  | -0.105636579 | 0.170172361  | 6.42E-01 | 7.15E-01 | 1.00E+00 |
| C20orf42 | LMNA | -0.386339834 | -0.497838801 | -0.262277287 | 1.36E-08 | 9.07E-08 | 1.61E-04 |
| LARS     | LMNA | -0.146099564 | -0.278532783 | -0.008214238 | 3.80E-02 | 6.59E-02 | 1.00E+00 |
| SCML2    | LMNA | -0.396723792 | -0.507006975 | -0.27366067  | 5.06E-09 | 3.68E-08 | 6.00E-05 |
| BCL9     | LMNA | -0.028008708 | -0.16542009  | 0.110469437  | 6.92E-01 | 7.58E-01 | 1.00E+00 |
| ABO      | LMNA | 0.106510656  | -0.032011032 | 0.241017755  | 1.31E-01 | 1.92E-01 | 1.00E+00 |
| TRAF3    | LMNA | 0.355766552  | 0.228960711  | 0.470699644  | 2.04E-07 | 1.11E-06 | 2.41E-03 |
| LETM1    | LMNA | 0.151460328  | 0.013695694  | 0.283581845  | 3.14E-02 | 5.58E-02 | 1.00E+00 |
| PLXNB1   | LMNA | -0.420285393 | -0.527717776 | -0.299618503 | 4.75E-10 | 4.17E-09 | 5.64E-06 |
| NIPSNAP1 | LMNA | -0.207158977 | -0.335611977 | -0.071142546 | 3.09E-03 | 7.15E-03 | 1.00E+00 |
| USP10    | LMNA | -0.116094923 | -0.250136974 | 0.022313699  | 9.99E-02 | 1.52E-01 | 1.00E+00 |
| F9       | LMNA | -0.046498331 | -0.183372239 | 0.092144156  | 5.11E-01 | 5.95E-01 | 1.00E+00 |
| CNGB3    | LMNA | -0.22611289  | -0.353140569 | -0.090899322 | 1.21E-03 | 3.11E-03 | 1.00E+00 |
| LIPE     | LMNA | -0.444208972 | -0.548616869 | -0.326159192 | 3.54E-11 | 3.79E-10 | 4.20E-07 |
| C12orf52 | LMNA | 0.161720593  | 0.0242101    | 0.29322514   | 2.15E-02 | 3.98E-02 | 1.00E+00 |
| PI4K2A   | LMNA | 0.270587989  | 0.137680018  | 0.393923982  | 9.83E-05 | 3.21E-04 | 1.00E+00 |
| KIAA0515 | LMNA | -0.070117861 | -0.206173138 | 0.068597149  | 3.21E-01 | 4.07E-01 | 1.00E+00 |
| MED8     | LMNA | 0.367720488  | 0.241951982  | 0.481336819  | 7.30E-08 | 4.30E-07 | 8.66E-04 |
| TEX261   | LMNA | 0.391988372  | 0.268465201  | 0.502829085  | 7.97E-09 | 5.55E-08 | 9.45E-05 |
| STAT4    | LMNA | 0.032802402  | -0.105727375 | 0.170083197  | 6.43E-01 | 7.16E-01 | 1.00E+00 |
| LY86     | LMNA | 0.008297562  | -0.12990224  | 0.146181114  | 9.07E-01 | 9.33E-01 | 1.00E+00 |
| WDR32    | LMNA | -0.039565152 | -0.176651281 | 0.099026734  | 5.76E-01 | 6.55E-01 | 1.00E+00 |
| FLJ13611 | LMNA | -0.360939929 | -0.475307263 | -0.234577483 | 1.31E-07 | 7.38E-07 | 1.56E-03 |
| SNRPA    | LMNA | -0.058250227 | -0.194735264 | 0.080447694  | 4.10E-01 | 4.98E-01 | 1.00E+00 |



|          |      |              |              |              |          |          |          |
|----------|------|--------------|--------------|--------------|----------|----------|----------|
| ZMYND8   | LMNA | -0.031554699 | -0.168870075 | 0.106962246  | 6.56E-01 | 7.27E-01 | 1.00E+00 |
| GATAD2A  | LMNA | 0.373736603  | 0.248507263  | 0.486677612  | 4.29E-08 | 2.62E-07 | 5.08E-04 |
| PDXK     | LMNA | 0.2724612    | 0.139663436  | 0.395631114  | 8.75E-05 | 2.89E-04 | 1.00E+00 |
| PTGES3   | LMNA | -0.08330123  | -0.21883566  | 0.055386708  | 2.39E-01 | 3.18E-01 | 1.00E+00 |
| C7orf42  | LMNA | 0.629538971  | 0.538268029  | 0.706213984  | 1.07E-23 | 1.10E-21 | 1.27E-19 |
| TAP1     | LMNA | 0.389051884  | 0.265247037  | 0.500235724  | 1.05E-08 | 7.14E-08 | 1.25E-04 |
| CYP11B2  | LMNA | 0.111450877  | -0.027015786 | 0.245721234  | 1.14E-01 | 1.70E-01 | 1.00E+00 |
| ETS2     | LMNA | -0.007923328 | -0.145814833 | 0.130270165  | 9.11E-01 | 9.36E-01 | 1.00E+00 |
| C6orf166 | LMNA | -0.09151974  | -0.226706442 | 0.047126678  | 1.95E-01 | 2.68E-01 | 1.00E+00 |
| PRMT2    | LMNA | 0.20022288   | 0.063939221  | 0.32917516   | 4.28E-03 | 9.52E-03 | 1.00E+00 |
| PRDX1    | LMNA | 0.089110155  | -0.049550402 | 0.224400636  | 2.07E-01 | 2.82E-01 | 1.00E+00 |
| FGB      | LMNA | 0.027141329  | -0.1113268   | 0.164575683  | 7.01E-01 | 7.66E-01 | 1.00E+00 |
| INTS8    | LMNA | -0.089936019 | -0.225191102 | 0.048719875  | 2.03E-01 | 2.77E-01 | 1.00E+00 |
| COX17    | LMNA | 0.116321062  | -0.022084578 | 0.250351853  | 9.92E-02 | 1.51E-01 | 1.00E+00 |
| C16orf33 | LMNA | -0.369915038 | -0.483286004 | -0.244341879 | 6.02E-08 | 3.60E-07 | 7.14E-04 |
| EPHA5    | LMNA | -0.078456834 | -0.214187955 | 0.060246702  | 2.67E-01 | 3.49E-01 | 1.00E+00 |
| PIWIL1   | LMNA | -0.226614086 | -0.353602868 | -0.091423196 | 1.18E-03 | 3.04E-03 | 1.00E+00 |
| FOLR1    | LMNA | 0.134145797  | -0.003978889 | 0.267247649  | 5.70E-02 | 9.40E-02 | 1.00E+00 |
| FREQ     | LMNA | -0.025720255 | -0.163191809 | 0.11273102   | 7.16E-01 | 7.78E-01 | 1.00E+00 |
| KIAA0082 | LMNA | -0.074377952 | -0.210269912 | 0.064333623  | 2.93E-01 | 3.77E-01 | 1.00E+00 |
| TSGA10   | LMNA | -0.147825358 | -0.28015903  | -0.009977982 | 3.58E-02 | 6.25E-02 | 1.00E+00 |
| TMCC2    | LMNA | -0.440192605 | -0.545117353 | -0.321690419 | 5.55E-11 | 5.80E-10 | 6.59E-07 |
| TCF12    | LMNA | -0.322615712 | -0.441024613 | -0.193167912 | 2.83E-06 | 1.25E-05 | 3.36E-02 |
| FAM130A2 | LMNA | -0.566344218 | -0.6533161   | -0.464619183 | 1.57E-18 | 6.34E-17 | 1.87E-14 |
| MYOT     | LMNA | -0.437250689 | -0.542551698 | -0.31842047  | 7.70E-11 | 7.88E-10 | 9.13E-07 |
| HAL      | LMNA | 0.06967184   | -0.069043237 | 0.20574394   | 3.24E-01 | 4.10E-01 | 1.00E+00 |
| POU4F1   | LMNA | -0.300005451 | -0.420635394 | -0.168951765 | 1.44E-05 | 5.54E-05 | 1.71E-01 |
| SNRPF    | LMNA | 0.059056594  | -0.079643728 | 0.195513607  | 4.04E-01 | 4.91E-01 | 1.00E+00 |
| BCL2L2   | LMNA | 0.120143693  | -0.018209327 | 0.253982157  | 8.85E-02 | 1.37E-01 | 1.00E+00 |
| CUGBP2   | LMNA | -0.341903442 | -0.458321611 | -0.21395095  | 6.35E-07 | 3.15E-06 | 7.54E-03 |
| EMG1     | LMNA | 0.06491854   | -0.073793806 | 0.201166671  | 3.59E-01 | 4.45E-01 | 1.00E+00 |
| PRRG4    | LMNA | 0.130390085  | -0.007801343 | 0.263694458  | 6.44E-02 | 1.04E-01 | 1.00E+00 |
| HIRA     | LMNA | -0.103402596 | -0.238055395 | 0.035150168  | 1.43E-01 | 2.06E-01 | 1.00E+00 |
| MERTK    | LMNA | 0.076889385  | -0.06181779  | 0.21268283   | 2.77E-01 | 3.59E-01 | 1.00E+00 |
| BAG1     | LMNA | -0.194090229 | -0.323473955 | -0.057582104 | 5.64E-03 | 1.22E-02 | 1.00E+00 |

|           |      |              |              |              |          |          |          |
|-----------|------|--------------|--------------|--------------|----------|----------|----------|
| MYNN      | LMNA | -0.198895502 | -0.327941963 | -0.06256232  | 4.54E-03 | 1.00E-02 | 1.00E+00 |
| CORO2B    | LMNA | 0.167407815  | 0.030051325  | 0.298558876  | 1.72E-02 | 3.27E-02 | 1.00E+00 |
| ALOX15    | LMNA | 0.072801221  | -0.065912216 | 0.208754183  | 3.03E-01 | 3.88E-01 | 1.00E+00 |
| TBXA2R    | LMNA | 0.369384551  | 0.24376403   | 0.482814932  | 6.31E-08 | 3.76E-07 | 7.48E-04 |
| RNF144A   | LMNA | -0.201078611 | -0.329969942 | -0.064827154 | 4.11E-03 | 9.20E-03 | 1.00E+00 |
| Mar-05    | LMNA | -0.208608666 | -0.336955799 | -0.072649882 | 2.89E-03 | 6.71E-03 | 1.00E+00 |
| CST1      | LMNA | 0.061729312  | -0.076977676 | 0.198092212  | 3.83E-01 | 4.70E-01 | 1.00E+00 |
| NUPR1     | LMNA | 0.28718531   | 0.155291011  | 0.409020206  | 3.41E-05 | 1.22E-04 | 4.05E-01 |
| DULLARD   | LMNA | 0.215505154  | 0.079829126  | 0.343341504  | 2.07E-03 | 5.00E-03 | 1.00E+00 |
| DCLRE1B   | LMNA | 0.060635893  | -0.078068608 | 0.197037523  | 3.91E-01 | 4.79E-01 | 1.00E+00 |
| ITGA8     | LMNA | 0.136549087  | -0.001530769 | 0.269519447  | 5.27E-02 | 8.78E-02 | 1.00E+00 |
| CCL7      | LMNA | 0.26901397   | 0.136014217  | 0.392488857  | 1.08E-04 | 3.52E-04 | 1.00E+00 |
| TP73      | LMNA | 0.063038824  | -0.075670707 | 0.199354924  | 3.73E-01 | 4.60E-01 | 1.00E+00 |
| PRKCD     | LMNA | 0.307279045  | 0.176724739  | 0.427207813  | 8.66E-06 | 3.46E-05 | 1.03E-01 |
| NDUFB4    | LMNA | -0.00634807  | -0.144272636 | 0.131818451  | 9.29E-01 | 9.48E-01 | 1.00E+00 |
| DSC2      | LMNA | 0.262405718  | 0.129028835  | 0.386457164  | 1.62E-04 | 5.07E-04 | 1.00E+00 |
| RBMS2     | LMNA | 0.202807048  | 0.066621292  | 0.331574714  | 3.80E-03 | 8.55E-03 | 1.00E+00 |
| GRIK4     | LMNA | -0.42344463  | -0.530485087 | -0.303112673 | 3.41E-10 | 3.05E-09 | 4.05E-06 |
| TMPRSS6   | LMNA | -0.005804196 | -0.143740022 | 0.132352855  | 9.35E-01 | 9.52E-01 | 1.00E+00 |
| GLB1L     | LMNA | 0.363637821  | 0.237509954  | 0.477707629  | 1.04E-07 | 5.95E-07 | 1.23E-03 |
| COL4A3    | LMNA | -0.194052056 | -0.323438439 | -0.057542568 | 5.65E-03 | 1.22E-02 | 1.00E+00 |
| PUS1      | LMNA | 0.321684988  | 0.192167962  | 0.440187721  | 3.04E-06 | 1.33E-05 | 3.60E-02 |
| MYO10     | LMNA | -0.310509296 | -0.43012261  | -0.180181999 | 6.88E-06 | 2.81E-05 | 8.16E-02 |
| PEX1      | LMNA | -0.139942334 | -0.272724521 | -0.001928592 | 4.70E-02 | 7.94E-02 | 1.00E+00 |
| OLFM1     | LMNA | -0.48246744  | -0.58176961  | -0.368993278 | 3.57E-13 | 5.29E-12 | 4.24E-09 |
| RBM19     | LMNA | 0.094895679  | -0.04372818  | 0.229934437  | 1.79E-01 | 2.49E-01 | 1.00E+00 |
| RET       | LMNA | -0.003174476 | -0.141163613 | 0.134935659  | 9.64E-01 | 9.73E-01 | 1.00E+00 |
| TAPBP     | LMNA | 0.563450605  | 0.461280252  | 0.650873465  | 2.55E-18 | 9.87E-17 | 3.03E-14 |
| RUNX1     | LMNA | 0.660313625  | 0.574645565  | 0.731667998  | 1.14E-26 | 1.98E-24 | 1.35E-22 |
| IL1RL1    | LMNA | 0.290490799  | 0.15880842   | 0.412018797  | 2.74E-05 | 1.00E-04 | 3.25E-01 |
| ALX3      | LMNA | -0.015887156 | -0.153601272 | 0.122432368  | 8.22E-01 | 8.66E-01 | 1.00E+00 |
| MID1      | LMNA | 0.245800912  | 0.111534623  | 0.371254124  | 4.22E-04 | 1.21E-03 | 1.00E+00 |
| C14orf138 | LMNA | -0.154076936 | -0.286043653 | -0.016374223 | 2.86E-02 | 5.12E-02 | 1.00E+00 |
| GPR64     | LMNA | -0.022619711 | -0.160170551 | 0.115792873  | 7.49E-01 | 8.07E-01 | 1.00E+00 |
| SNX10     | LMNA | 0.095123172  | -0.043499052 | 0.230151853  | 1.78E-01 | 2.48E-01 | 1.00E+00 |

|         |      |              |              |              |          |          |          |
|---------|------|--------------|--------------|--------------|----------|----------|----------|
| MYO16   | LMNA | -0.380205993 | -0.492411394 | -0.255569265 | 2.39E-08 | 1.52E-07 | 2.83E-04 |
| DBF4    | LMNA | 0.011360651  | -0.126889356 | 0.149177689  | 8.73E-01 | 9.06E-01 | 1.00E+00 |
| POGK    | LMNA | -0.265966777 | -0.389708845 | -0.132791478 | 1.30E-04 | 4.18E-04 | 1.00E+00 |
| MAPK9   | LMNA | 0.112470928  | -0.025983511 | 0.246691616  | 1.11E-01 | 1.66E-01 | 1.00E+00 |
| RIPK2   | LMNA | 0.058467754  | -0.080230833 | 0.194945248  | 4.09E-01 | 4.96E-01 | 1.00E+00 |
| LRRC31  | LMNA | -0.024812415 | -0.162307451 | 0.113627804  | 7.26E-01 | 7.87E-01 | 1.00E+00 |
| C8orf79 | LMNA | -0.019511861 | -0.157139585 | 0.118859303  | 7.83E-01 | 8.35E-01 | 1.00E+00 |
| CLDN7   | LMNA | 0.340827756  | 0.212788813  | 0.457359266  | 6.93E-07 | 3.41E-06 | 8.21E-03 |
| EFNB3   | LMNA | -0.39135137  | -0.502266685 | -0.267766861 | 8.46E-09 | 5.86E-08 | 1.00E-04 |
| GLP1R   | LMNA | -0.114321549 | -0.248451438 | 0.02410996   | 1.05E-01 | 1.59E-01 | 1.00E+00 |
| CSTF2T  | LMNA | -0.309260591 | -0.428996144 | -0.178845158 | 7.52E-06 | 3.05E-05 | 8.92E-02 |
| TRIM37  | LMNA | -0.551098898 | -0.640426414 | -0.447060121 | 1.92E-17 | 6.28E-16 | 2.28E-13 |
| GRHL2   | LMNA | -0.107656234 | -0.242108998 | 0.03085331   | 1.27E-01 | 1.87E-01 | 1.00E+00 |
| IREB2   | LMNA | -0.02404697  | -0.161561633 | 0.114383751  | 7.34E-01 | 7.93E-01 | 1.00E+00 |
| GRSF1   | LMNA | -0.16615211  | -0.297381924 | -0.02876081  | 1.81E-02 | 3.42E-02 | 1.00E+00 |
| CNR1    | LMNA | 0.157617422  | 0.020001642  | 0.289371909  | 2.51E-02 | 4.57E-02 | 1.00E+00 |
| ABCC4   | LMNA | -0.055559159 | -0.192136473 | 0.083129444  | 4.32E-01 | 5.18E-01 | 1.00E+00 |
| DLG3    | LMNA | -0.204915666 | -0.333531458 | -0.068811255 | 3.44E-03 | 7.84E-03 | 1.00E+00 |
| ZFP36L2 | LMNA | 0.417709363  | 0.296771764  | 0.525459631  | 6.21E-10 | 5.34E-09 | 7.37E-06 |
| VGLL1   | LMNA | 0.0154339    | -0.122878914 | 0.153158571  | 8.27E-01 | 8.70E-01 | 1.00E+00 |
| IL1F7   | LMNA | 0.034235015  | -0.104308968 | 0.171475591  | 6.29E-01 | 7.03E-01 | 1.00E+00 |
| NR2E1   | LMNA | 0.22731206   | 0.092152877  | 0.354246571  | 1.14E-03 | 2.95E-03 | 1.00E+00 |
| MS4A6A  | LMNA | 0.189107043  | 0.052424663  | 0.31883442   | 7.03E-03 | 1.48E-02 | 1.00E+00 |
| FTL     | LMNA | 0.295453328  | 0.164095389  | 0.416515644  | 1.97E-05 | 7.38E-05 | 2.33E-01 |
| DYRK2   | LMNA | 0.004871001  | -0.133269616 | 0.142825959  | 9.45E-01 | 9.59E-01 | 1.00E+00 |
| PCLO    | LMNA | -0.283329448 | -0.405519013 | -0.151192165 | 4.39E-05 | 1.54E-04 | 5.21E-01 |
| ARIH2   | LMNA | -0.038536659 | -0.175653181 | 0.100046592  | 5.86E-01 | 6.64E-01 | 1.00E+00 |
| PCNX    | LMNA | 0.217783269  | 0.08220374   | 0.345448298  | 1.85E-03 | 4.52E-03 | 1.00E+00 |
| ANXA9   | LMNA | 0.122711701  | -0.015603633 | 0.256418845  | 8.19E-02 | 1.28E-01 | 1.00E+00 |
| SRR     | LMNA | -0.346574867 | -0.462497663 | -0.219002019 | 4.36E-07 | 2.23E-06 | 5.17E-03 |
| SCNN1D  | LMNA | -0.207157008 | -0.335610152 | -0.0711405   | 3.10E-03 | 7.15E-03 | 1.00E+00 |
| NOL3    | LMNA | 0.349430618  | 0.222093227  | 0.465048051  | 3.45E-07 | 1.80E-06 | 4.09E-03 |
| IFITM2  | LMNA | 0.561768354  | 0.459340437  | 0.649452566  | 3.38E-18 | 1.27E-16 | 4.01E-14 |
| ARNTL2  | LMNA | 0.42352275   | 0.303199116  | 0.530553488  | 3.38E-10 | 3.03E-09 | 4.01E-06 |
| MRPS18A | LMNA | 0.05104666   | -0.087621816 | 0.187774406  | 4.71E-01 | 5.56E-01 | 1.00E+00 |

|           |      |              |              |              |          |          |          |
|-----------|------|--------------|--------------|--------------|----------|----------|----------|
| ASPH      | LMNA | 0.097769018  | -0.040833112 | 0.232679517  | 1.66E-01 | 2.34E-01 | 1.00E+00 |
| PVRIG     | LMNA | 0.131909782  | -0.006255127 | 0.265132643  | 6.13E-02 | 1.00E-01 | 1.00E+00 |
| CPA2      | LMNA | 0.04037402   | -0.098224452 | 0.177436049  | 5.68E-01 | 6.48E-01 | 1.00E+00 |
| LEPR      | LMNA | 0.103957689  | -0.034589725 | 0.23858465   | 1.41E-01 | 2.04E-01 | 1.00E+00 |
| SH3BGRL   | LMNA | -0.024872922 | -0.1623664   | 0.113568041  | 7.25E-01 | 7.86E-01 | 1.00E+00 |
| C16orf42  | LMNA | 0.189685722  | 0.053023203  | 0.319373511  | 6.86E-03 | 1.45E-02 | 1.00E+00 |
| C9orf6    | LMNA | 0.18484586   | 0.048020248  | 0.314862159  | 8.45E-03 | 1.75E-02 | 1.00E+00 |
| ERN2      | LMNA | -0.115248895 | -0.249332952 | 0.023170758  | 1.02E-01 | 1.55E-01 | 1.00E+00 |
| SYNGR2    | LMNA | 0.247824856  | 0.113662531  | 0.373110814  | 3.77E-04 | 1.09E-03 | 1.00E+00 |
| CDKN2D    | LMNA | -0.198094602 | -0.327197676 | -0.06173179  | 4.71E-03 | 1.04E-02 | 1.00E+00 |
| PITPNA    | LMNA | 0.009523898  | -0.12869631  | 0.147381124  | 8.93E-01 | 9.22E-01 | 1.00E+00 |
| PRPF4B    | LMNA | -0.089187043 | -0.224474236 | 0.049473088  | 2.07E-01 | 2.82E-01 | 1.00E+00 |
| NRBP1     | LMNA | 0.500767312  | 0.389653623  | 0.59751149   | 3.21E-14 | 5.54E-13 | 3.81E-10 |
| SLC43A3   | LMNA | 0.567299696  | 0.465722342  | 0.654122267  | 1.34E-18 | 5.51E-17 | 1.59E-14 |
| SLC25A22  | LMNA | -0.122754447 | -0.256459391 | 0.015560244  | 8.18E-02 | 1.28E-01 | 1.00E+00 |
| ILK       | LMNA | 0.485160279  | 0.372026442  | 0.584090716  | 2.53E-13 | 3.82E-12 | 3.00E-09 |
| SLC22A8   | LMNA | 0.129050569  | -0.009163687 | 0.262426299  | 6.72E-02 | 1.08E-01 | 1.00E+00 |
| SEC14L3   | LMNA | 0.267953825  | 0.134892679  | 0.391521923  | 1.16E-04 | 3.74E-04 | 1.00E+00 |
| MRPS7     | LMNA | -0.170538263 | -0.301491261 | -0.03327055  | 1.52E-02 | 2.93E-02 | 1.00E+00 |
| SLC22A1   | LMNA | 0.026478403  | -0.111981933 | 0.163930178  | 7.08E-01 | 7.72E-01 | 1.00E+00 |
| BTN2A3    | LMNA | 0.032732485  | -0.105796584 | 0.170015229  | 6.44E-01 | 7.16E-01 | 1.00E+00 |
| RASA4     | LMNA | -0.250040061 | -0.375141811 | -0.115992937 | 3.32E-04 | 9.76E-04 | 1.00E+00 |
| PITX2     | LMNA | 0.089590154  | -0.049067717 | 0.224860083  | 2.05E-01 | 2.79E-01 | 1.00E+00 |
| CCNL2     | LMNA | -0.024189696 | -0.161700711 | 0.114242809  | 7.33E-01 | 7.92E-01 | 1.00E+00 |
| GJA4      | LMNA | 0.190714635  | 0.054087673  | 0.320331828  | 6.55E-03 | 1.39E-02 | 1.00E+00 |
| FABP3     | LMNA | -0.032931732 | -0.170208919 | 0.10559935   | 6.42E-01 | 7.15E-01 | 1.00E+00 |
| MYBPC3    | LMNA | -0.051846156 | -0.188547643 | 0.086826297  | 4.64E-01 | 5.50E-01 | 1.00E+00 |
| LOC728215 | LMNA | -0.273277594 | -0.396374859 | -0.140528195 | 8.32E-05 | 2.76E-04 | 9.87E-01 |
| TRPV2     | LMNA | 0.426726705  | 0.306746134  | 0.533357584  | 2.41E-10 | 2.24E-09 | 2.86E-06 |
| NIBP      | LMNA | -0.322254522 | -0.440699861 | -0.192779825 | 2.91E-06 | 1.28E-05 | 3.45E-02 |
| CDADC1    | LMNA | -0.191585339 | -0.321142584 | -0.05498871  | 6.31E-03 | 1.34E-02 | 1.00E+00 |
| ZFHX4     | LMNA | 0.156123953  | 0.018471061  | 0.287968353  | 2.65E-02 | 4.79E-02 | 1.00E+00 |
| TFPT      | LMNA | 0.064793403  | -0.073918786 | 0.201046088  | 3.60E-01 | 4.46E-01 | 1.00E+00 |
| TSPYL2    | LMNA | -0.241478574 | -0.36728561  | -0.106994376 | 5.36E-04 | 1.50E-03 | 1.00E+00 |
| EIF2S3    | LMNA | 0.181191383  | 0.044247166  | 0.311451836  | 9.86E-03 | 2.01E-02 | 1.00E+00 |

|           |      |              |              |              |          |          |          |
|-----------|------|--------------|--------------|--------------|----------|----------|----------|
| ABTB2     | LMNA | 0.213190773  | 0.077418285  | 0.341199853  | 2.32E-03 | 5.54E-03 | 1.00E+00 |
| SOX30     | LMNA | 0.095247337  | -0.043373988 | 0.230270513  | 1.78E-01 | 2.48E-01 | 1.00E+00 |
| VBP1      | LMNA | -0.299850422 | -0.420495172 | -0.16878627  | 1.45E-05 | 5.59E-05 | 1.73E-01 |
| DKFZP564C | LMNA | -0.212283814 | -0.34036022  | -0.076473958 | 2.42E-03 | 5.75E-03 | 1.00E+00 |
| MORC3     | LMNA | -0.147381601 | -0.279740943 | -0.009524385 | 3.63E-02 | 6.34E-02 | 1.00E+00 |
| BHMT2     | LMNA | 0.179627343  | 0.042633559  | 0.309991263  | 1.05E-02 | 2.12E-02 | 1.00E+00 |
| FZD7      | LMNA | 0.558278788  | 0.455319708  | 0.646503178  | 6.01E-18 | 2.17E-16 | 7.13E-14 |
| CDH18     | LMNA | -0.446503997 | -0.550614916 | -0.328715101 | 2.73E-11 | 2.97E-10 | 3.24E-07 |
| CHL1      | LMNA | 0.198391557  | 0.06203971   | 0.327473659  | 4.65E-03 | 1.03E-02 | 1.00E+00 |
| PMS2CL    | LMNA | -0.073168587 | -0.209107395 | 0.065544478  | 3.01E-01 | 3.85E-01 | 1.00E+00 |
| TBC1D2B   | LMNA | 0.413598746  | 0.292233619  | 0.521853123  | 9.47E-10 | 7.86E-09 | 1.12E-05 |
| FA2H      | LMNA | -0.395719019 | -0.506120933 | -0.272557683 | 5.58E-09 | 4.02E-08 | 6.61E-05 |
| TTLL7     | LMNA | -0.066403609 | -0.202597382 | 0.072310266  | 3.48E-01 | 4.34E-01 | 1.00E+00 |
| SPOCK3    | LMNA | -0.292631687 | -0.413959511 | -0.161088349 | 2.38E-05 | 8.79E-05 | 2.82E-01 |
| SLC13A2   | LMNA | -0.071405249 | -0.207411675 | 0.067309257  | 3.13E-01 | 3.98E-01 | 1.00E+00 |
| AIM1      | LMNA | 0.546608278  | 0.441903214  | 0.636620045  | 3.92E-17 | 1.24E-15 | 4.65E-13 |
| GSN       | LMNA | 0.434378822  | 0.315231105  | 0.540045237  | 1.05E-10 | 1.05E-09 | 1.25E-06 |
| EGR2      | LMNA | 0.367466547  | 0.241675534  | 0.481111197  | 7.46E-08 | 4.38E-07 | 8.85E-04 |
| SMARCA5   | LMNA | 0.058332387  | -0.080365787 | 0.194814576  | 4.10E-01 | 4.97E-01 | 1.00E+00 |
| GARNL4    | LMNA | 0.017545614  | -0.120797982 | 0.155220641  | 8.04E-01 | 8.52E-01 | 1.00E+00 |
| WWC1      | LMNA | -0.148826465 | -0.281102043 | -0.011001497 | 3.45E-02 | 6.05E-02 | 1.00E+00 |
| PLEKHG3   | LMNA | -0.263940098 | -0.387858619 | -0.130649603 | 1.47E-04 | 4.67E-04 | 1.00E+00 |
| PLS1      | LMNA | -0.260402097 | -0.384626257 | -0.12691348  | 1.82E-04 | 5.65E-04 | 1.00E+00 |
| DGKZ      | LMNA | 0.094566902  | -0.044059295 | 0.229620198  | 1.81E-01 | 2.51E-01 | 1.00E+00 |
| EFNA1     | LMNA | 0.089662476  | -0.048994985 | 0.224929303  | 2.04E-01 | 2.79E-01 | 1.00E+00 |
| ANK2      | LMNA | -0.103141053 | -0.237806    | 0.0354142    | 1.44E-01 | 2.08E-01 | 1.00E+00 |
| PAGE4     | LMNA | -0.222836893 | -0.350117286 | -0.087476933 | 1.43E-03 | 3.61E-03 | 1.00E+00 |
| SH3GL3    | LMNA | -0.487876592 | -0.586430418 | -0.375088496 | 1.78E-13 | 2.76E-12 | 2.11E-09 |
| SENP6     | LMNA | -0.177403224 | -0.307913217 | -0.040340183 | 1.15E-02 | 2.30E-02 | 1.00E+00 |
| AKR7A2    | LMNA | 0.147927567  | 0.010082466  | 0.28025532   | 3.56E-02 | 6.23E-02 | 1.00E+00 |
| FKBP10    | LMNA | 0.653218114  | 0.5662281    | 0.72581683   | 5.91E-26 | 9.74E-24 | 7.01E-22 |
| RIF1      | LMNA | 0.002874389  | -0.135230273 | 0.140869491  | 9.68E-01 | 9.76E-01 | 1.00E+00 |
| PRLH      | LMNA | -0.175330761 | -0.305975745 | -0.038204484 | 1.26E-02 | 2.48E-02 | 1.00E+00 |
| VLDLR     | LMNA | 0.180938498  | 0.043986218  | 0.311215722  | 9.97E-03 | 2.02E-02 | 1.00E+00 |
| VEGFC     | LMNA | 0.515429474  | 0.406288131  | 0.610070565  | 4.19E-15 | 8.73E-14 | 4.97E-11 |

|           |      |              |              |              |          |          |          |
|-----------|------|--------------|--------------|--------------|----------|----------|----------|
| LARP1     | LMNA | 0.294124355  | 0.162678791  | 0.415311962  | 2.15E-05 | 8.00E-05 | 2.55E-01 |
| SRBD1     | LMNA | 0.005541341  | -0.132611105 | 0.14348258   | 9.38E-01 | 9.54E-01 | 1.00E+00 |
| DBT       | LMNA | -0.346194761 | -0.462158057 | -0.218590767 | 4.49E-07 | 2.29E-06 | 5.33E-03 |
| ITGB6     | LMNA | -0.116304599 | -0.25033621  | 0.022101259  | 9.93E-02 | 1.51E-01 | 1.00E+00 |
| CGGBP1    | LMNA | -0.006425122 | -0.144348087 | 0.131742734  | 9.28E-01 | 9.47E-01 | 1.00E+00 |
| SLC1A2    | LMNA | -0.172028892 | -0.302886709 | -0.034804454 | 1.44E-02 | 2.79E-02 | 1.00E+00 |
| INVS      | LMNA | 0.334246055  | 0.205686025  | 0.4514651    | 1.16E-06 | 5.52E-06 | 1.38E-02 |
| MPO       | LMNA | -0.189467464 | -0.319170194 | -0.052797442 | 6.92E-03 | 1.46E-02 | 1.00E+00 |
| ZBTB16    | LMNA | -0.092226055 | -0.22738205  | 0.046415909  | 1.92E-01 | 2.64E-01 | 1.00E+00 |
| TADA3L    | LMNA | 0.278550894  | 0.146118778  | 0.401175018  | 5.97E-05 | 2.04E-04 | 7.08E-01 |
| MOBK13    | LMNA | -0.232978901 | -0.359468333 | -0.098082526 | 8.48E-04 | 2.26E-03 | 1.00E+00 |
| PDGFB     | LMNA | 0.172457768  | 0.0352459    | 0.303288095  | 1.41E-02 | 2.75E-02 | 1.00E+00 |
| CUTL2     | LMNA | -0.451238503 | -0.554733007 | -0.333993254 | 1.59E-11 | 1.80E-10 | 1.88E-07 |
| RFX1      | LMNA | 0.383551997  | 0.259226998  | 0.495373121  | 1.76E-08 | 1.15E-07 | 2.08E-04 |
| KLK2      | LMNA | -0.046067204 | -0.182954682 | 0.092572523  | 5.15E-01 | 5.99E-01 | 1.00E+00 |
| VIM       | LMNA | 0.644441225  | 0.555841043  | 0.718564584  | 4.28E-25 | 5.77E-23 | 5.08E-21 |
| REG1B     | LMNA | 0.144053734  | 0.006124531  | 0.276603978  | 4.08E-02 | 7.02E-02 | 1.00E+00 |
| SUMO3     | LMNA | 0.053078459  | -0.085599777 | 0.189739139  | 4.53E-01 | 5.39E-01 | 1.00E+00 |
| UQCRB     | LMNA | -0.423396188 | -0.530442673 | -0.303059071 | 3.43E-10 | 3.07E-09 | 4.07E-06 |
| MLL4      | LMNA | 0.082855018  | -0.055834632 | 0.218407822  | 2.41E-01 | 3.20E-01 | 1.00E+00 |
| LGALS3BP  | LMNA | 0.609441692  | 0.514693972  | 0.689483651  | 6.29E-22 | 4.36E-20 | 7.46E-18 |
| DKFZP564C | LMNA | 0.005711303  | -0.132444123 | 0.143649043  | 9.36E-01 | 9.53E-01 | 1.00E+00 |
| MRFAP1L1  | LMNA | -0.322374134 | -0.44080741  | -0.19290834  | 2.88E-06 | 1.27E-05 | 3.42E-02 |
| SPR       | LMNA | 0.216195684  | 0.080548743  | 0.34398024   | 2.00E-03 | 4.85E-03 | 1.00E+00 |
| HOXA10    | LMNA | -0.080080768 | -0.21574664  | 0.058618271  | 2.57E-01 | 3.39E-01 | 1.00E+00 |
| NGB       | LMNA | -0.019528477 | -0.157155798 | 0.118842915  | 7.83E-01 | 8.35E-01 | 1.00E+00 |
| LZTS1     | LMNA | 0.457339718  | 0.34080591   | 0.560032398  | 7.79E-12 | 9.34E-11 | 9.24E-08 |
| ABCE1     | LMNA | 0.007777941  | -0.130413091 | 0.145672525  | 9.13E-01 | 9.37E-01 | 1.00E+00 |
| ARHGEF3   | LMNA | 0.106985389  | -0.031531311 | 0.241470013  | 1.30E-01 | 1.90E-01 | 1.00E+00 |
| ChGn      | LMNA | -0.286069327 | -0.408007242 | -0.154104235 | 3.67E-05 | 1.31E-04 | 4.36E-01 |
| CSNK1G2   | LMNA | 0.413085709  | 0.291667607  | 0.521402731  | 9.98E-10 | 8.26E-09 | 1.18E-05 |
| SUPT3H    | LMNA | -0.148966659 | -0.281234082 | -0.011144852 | 3.44E-02 | 6.03E-02 | 1.00E+00 |
| GABRB2    | LMNA | -0.300928861 | -0.421470489 | -0.169937671 | 1.35E-05 | 5.22E-05 | 1.60E-01 |
| MGC72080  | LMNA | 0.121194881  | -0.017142939 | 0.254979796  | 8.58E-02 | 1.33E-01 | 1.00E+00 |
| SLIT3     | LMNA | 0.275627083  | 0.143018003  | 0.398514375  | 7.18E-05 | 2.42E-04 | 8.52E-01 |

|          |      |              |              |              |          |          |          |
|----------|------|--------------|--------------|--------------|----------|----------|----------|
| CD27     | LMNA | 0.234506379  | 0.099682483  | 0.360874486  | 7.82E-04 | 2.11E-03 | 1.00E+00 |
| EGLN1    | LMNA | 0.213736725  | 0.077986848  | 0.341705178  | 2.26E-03 | 5.40E-03 | 1.00E+00 |
| PEX13    | LMNA | 0.330601227  | 0.201758448  | 0.448196611  | 1.54E-06 | 7.15E-06 | 1.83E-02 |
| MAN1C1   | LMNA | 0.389359392  | 0.265583913  | 0.500507393  | 1.02E-08 | 6.96E-08 | 1.21E-04 |
| RWDD3    | LMNA | -0.105621577 | -0.24017061  | 0.03290928   | 1.35E-01 | 1.96E-01 | 1.00E+00 |
| GRIN2B   | LMNA | -0.340019525 | -0.456636015 | -0.211915863 | 7.39E-07 | 3.62E-06 | 8.76E-03 |
| HSPA6    | LMNA | 0.518426068  | 0.409696751  | 0.612631499  | 2.73E-15 | 5.89E-14 | 3.24E-11 |
| ATP6AP1  | LMNA | 0.383378492  | 0.25903724   | 0.495219606  | 1.78E-08 | 1.16E-07 | 2.12E-04 |
| NR1H2    | LMNA | 0.264396605  | 0.131131948  | 0.388275467  | 1.43E-04 | 4.56E-04 | 1.00E+00 |
| PDK2     | LMNA | -0.122760476 | -0.256465109 | 0.015554124  | 8.18E-02 | 1.28E-01 | 1.00E+00 |
| PHC2     | LMNA | 0.417370612  | 0.296397574  | 0.52516257   | 6.43E-10 | 5.52E-09 | 7.63E-06 |
| LIN7A    | LMNA | 0.183684499  | 0.046820771  | 0.313778752  | 8.88E-03 | 1.82E-02 | 1.00E+00 |
| SLC38A2  | LMNA | 0.194597563  | 0.058107587  | 0.323945954  | 5.52E-03 | 1.19E-02 | 1.00E+00 |
| FAM83E   | LMNA | 0.158298019  | 0.020699366  | 0.290011344  | 2.44E-02 | 4.47E-02 | 1.00E+00 |
| SPHK1    | LMNA | 0.488366235  | 0.375640725  | 0.586851999  | 1.67E-13 | 2.60E-12 | 1.98E-09 |
| TRIM26   | LMNA | 0.183558997  | 0.046691174  | 0.313661653  | 8.92E-03 | 1.83E-02 | 1.00E+00 |
| C18orf24 | LMNA | 0.035812562  | -0.102746413 | 0.173008217  | 6.13E-01 | 6.89E-01 | 1.00E+00 |
| C15orf29 | LMNA | -0.346314999 | -0.462265488 | -0.218720852 | 4.45E-07 | 2.27E-06 | 5.28E-03 |
| ADAM9    | LMNA | 0.556990056  | 0.453835873  | 0.645413272  | 7.42E-18 | 2.62E-16 | 8.80E-14 |
| RUVBL1   | LMNA | 0.016216491  | -0.122107873 | 0.153922904  | 8.19E-01 | 8.63E-01 | 1.00E+00 |
| TMUB2    | LMNA | -0.070928415 | -0.206952986 | 0.067786332  | 3.16E-01 | 4.01E-01 | 1.00E+00 |
| APAF1    | LMNA | -0.044890707 | -0.181814962 | 0.093741228  | 5.26E-01 | 6.09E-01 | 1.00E+00 |
| GPR176   | LMNA | 0.066310734  | -0.072403063 | 0.202507924  | 3.48E-01 | 4.35E-01 | 1.00E+00 |
| MYH11    | LMNA | 0.15661613   | 0.018975396  | 0.288430961  | 2.60E-02 | 4.72E-02 | 1.00E+00 |
| NEK1     | LMNA | -0.219868436 | -0.347375527 | -0.084378583 | 1.67E-03 | 4.12E-03 | 1.00E+00 |
| MPP2     | LMNA | -0.340894147 | -0.457418669 | -0.212860529 | 6.89E-07 | 3.40E-06 | 8.17E-03 |
| TNK2     | LMNA | -0.375345028 | -0.488104059 | -0.250261781 | 3.71E-08 | 2.28E-07 | 4.40E-04 |
| C12orf24 | LMNA | -0.378554952 | -0.490949011 | -0.25376572  | 2.78E-08 | 1.75E-07 | 3.29E-04 |
| MATN3    | LMNA | 0.227284857  | 0.092124436  | 0.354221485  | 1.14E-03 | 2.95E-03 | 1.00E+00 |
| ZNF289   | LMNA | 0.006455495  | -0.131712886 | 0.144377828  | 9.27E-01 | 9.47E-01 | 1.00E+00 |
| AGK      | LMNA | 0.262911366  | 0.129562873  | 0.386919071  | 1.57E-04 | 4.93E-04 | 1.00E+00 |
| IFNGR2   | LMNA | 0.515994581  | 0.406930707  | 0.610553666  | 3.87E-15 | 8.16E-14 | 4.59E-11 |
| NDUFA4   | LMNA | -0.191275398 | -0.320854005 | -0.054667946 | 6.39E-03 | 1.36E-02 | 1.00E+00 |
| ITPR1    | LMNA | 0.206158221  | 0.070102358  | 0.334683998  | 3.24E-03 | 7.45E-03 | 1.00E+00 |
| DUSP1    | LMNA | 0.438186884  | 0.319460747  | 0.54336837   | 6.94E-11 | 7.16E-10 | 8.23E-07 |

|           |      |              |              |              |          |          |          |
|-----------|------|--------------|--------------|--------------|----------|----------|----------|
| DDAH2     | LMNA | 0.090259952  | -0.048394061 | 0.225501102  | 2.01E-01 | 2.76E-01 | 1.00E+00 |
| ATXN3     | LMNA | 0.024176012  | -0.114256322 | 0.161687377  | 7.33E-01 | 7.92E-01 | 1.00E+00 |
| TRIM27    | LMNA | 0.004548461  | -0.133586421 | 0.142509977  | 9.49E-01 | 9.62E-01 | 1.00E+00 |
| LUZP4     | LMNA | 0.118908101  | -0.019462382 | 0.252809143  | 9.19E-02 | 1.42E-01 | 1.00E+00 |
| SETD6     | LMNA | -0.316513678 | -0.435534007 | -0.186616909 | 4.45E-06 | 1.88E-05 | 5.28E-02 |
| CDC42EP2  | LMNA | 0.157816355  | 0.020205567  | 0.289558822  | 2.49E-02 | 4.54E-02 | 1.00E+00 |
| P2RY2     | LMNA | 0.282525892  | 0.150338543  | 0.404788918  | 4.62E-05 | 1.61E-04 | 5.49E-01 |
| SLC45A2   | LMNA | -0.172091079 | -0.302944912 | -0.03486846  | 1.43E-02 | 2.78E-02 | 1.00E+00 |
| RABGAP1   | LMNA | -0.360910641 | -0.475281196 | -0.234545661 | 1.32E-07 | 7.39E-07 | 1.56E-03 |
| CHP       | LMNA | 0.209332292  | 0.073402516  | 0.337626385  | 2.79E-03 | 6.52E-03 | 1.00E+00 |
| GPRC5A    | LMNA | 0.485444826  | 0.372347092  | 0.584335889  | 2.44E-13 | 3.69E-12 | 2.89E-09 |
| SOX17     | LMNA | 0.029312803  | -0.109180013 | 0.166689268  | 6.79E-01 | 7.47E-01 | 1.00E+00 |
| PAK3      | LMNA | -0.504424643 | -0.600648676 | -0.39379616  | 1.95E-14 | 3.58E-13 | 2.31E-10 |
| ZNF259    | LMNA | 0.410513103  | 0.288830638  | 0.519143344  | 1.30E-09 | 1.05E-08 | 1.54E-05 |
| LOC63920  | LMNA | -0.336414285 | -0.453407964 | -0.208024423 | 9.83E-07 | 4.72E-06 | 1.17E-02 |
| TGFBF1    | LMNA | 0.190076716  | 0.053427672  | 0.319737709  | 6.74E-03 | 1.43E-02 | 1.00E+00 |
| GBP2      | LMNA | 0.434302047  | 0.315145879  | 0.539978205  | 1.06E-10 | 1.06E-09 | 1.26E-06 |
| MRC2      | LMNA | 0.690465692  | 0.610618533  | 0.756415556  | 6.04E-30 | 1.79E-27 | 7.16E-26 |
| CDC42     | LMNA | -0.267191895 | -0.390826815 | -0.134086836 | 1.21E-04 | 3.90E-04 | 1.00E+00 |
| AOF2      | LMNA | -0.316461677 | -0.435487178 | -0.186561131 | 4.47E-06 | 1.89E-05 | 5.30E-02 |
| LRPPRC    | LMNA | -0.165821904 | -0.29707236  | -0.028421526 | 1.83E-02 | 3.46E-02 | 1.00E+00 |
| CD97      | LMNA | 0.648986598  | 0.561216837  | 0.722322389  | 1.55E-25 | 2.32E-23 | 1.84E-21 |
| SETD5     | LMNA | -0.244567694 | -0.370122323 | -0.110238661 | 4.52E-04 | 1.29E-03 | 1.00E+00 |
| NINJ2     | LMNA | -0.167986837 | -0.299101451 | -0.030646553 | 1.69E-02 | 3.21E-02 | 1.00E+00 |
| PTER      | LMNA | 0.14080967   | 0.002813358  | 0.273543285  | 4.56E-02 | 7.74E-02 | 1.00E+00 |
| POMGNT1   | LMNA | 0.240482164  | 0.105948527  | 0.366370115  | 5.66E-04 | 1.58E-03 | 1.00E+00 |
| RRS1      | LMNA | 0.245887117  | 0.111625231  | 0.371333225  | 4.20E-04 | 1.20E-03 | 1.00E+00 |
| HRB       | LMNA | 0.075666528  | -0.06304301  | 0.211508148  | 2.84E-01 | 3.68E-01 | 1.00E+00 |
| SNX2      | LMNA | 0.171828169  | 0.034597867  | 0.302698836  | 1.45E-02 | 2.80E-02 | 1.00E+00 |
| ECGF1     | LMNA | 0.513347421  | 0.403921586  | 0.608290047  | 5.63E-15 | 1.15E-13 | 6.68E-11 |
| ATP1B2    | LMNA | -0.085330086 | -0.220780316 | 0.053349365  | 2.27E-01 | 3.05E-01 | 1.00E+00 |
| RBX1      | LMNA | -0.184360741 | -0.314409643 | -0.047519159 | 8.63E-03 | 1.78E-02 | 1.00E+00 |
| LOC400506 | LMNA | -0.271939015 | -0.395155311 | -0.139110422 | 9.04E-05 | 2.98E-04 | 1.00E+00 |
| COL4A3BP  | LMNA | 0.229819967  | 0.09477591   | 0.35655848   | 1.00E-03 | 2.63E-03 | 1.00E+00 |
| C6orf97   | LMNA | 0.280903717  | 0.148615898  | 0.403314566  | 5.13E-05 | 1.78E-04 | 6.09E-01 |



|          |      |              |              |              |          |          |          |
|----------|------|--------------|--------------|--------------|----------|----------|----------|
| GRHPR    | LMNA | -0.227686922 | -0.354592235 | -0.092544828 | 1.12E-03 | 2.90E-03 | 1.00E+00 |
| TSNAX    | LMNA | -0.193845109 | -0.323245884 | -0.057328241 | 5.71E-03 | 1.23E-02 | 1.00E+00 |
| TAS2R1   | LMNA | -0.076052552 | -0.211879007 | 0.062656285  | 2.82E-01 | 3.65E-01 | 1.00E+00 |
| SEMA7A   | LMNA | 0.298514391  | 0.167360346  | 0.419286507  | 1.59E-05 | 6.08E-05 | 1.89E-01 |
| ZBTB7A   | LMNA | 0.429954085  | 0.310322458  | 0.536179816  | 1.70E-10 | 1.63E-09 | 2.02E-06 |
| ATM      | LMNA | 0.0413947    | -0.097211826 | 0.17842607   | 5.59E-01 | 6.39E-01 | 1.00E+00 |
| TIE1     | LMNA | 0.035172792  | -0.103380186 | 0.172386745  | 6.19E-01 | 6.95E-01 | 1.00E+00 |
| PCID2    | LMNA | -0.069457638 | -0.205537799 | 0.069257451  | 3.26E-01 | 4.12E-01 | 1.00E+00 |
| HIST1H3G | LMNA | 0.142803696  | 0.004848276  | 0.275424917  | 4.26E-02 | 7.28E-02 | 1.00E+00 |
| EDF1     | LMNA | 0.193736586  | 0.057215854  | 0.323144905  | 5.73E-03 | 1.23E-02 | 1.00E+00 |
| GTF2H4   | LMNA | 0.032995136  | -0.105536585 | 0.170270552  | 6.41E-01 | 7.14E-01 | 1.00E+00 |
| NEUROD1  | LMNA | -0.313030681 | -0.432396034 | -0.182882815 | 5.74E-06 | 2.37E-05 | 6.80E-02 |
| LRR15    | LMNA | 0.47764608   | 0.363568619  | 0.57760977   | 6.58E-13 | 9.48E-12 | 7.81E-09 |
| TFF2     | LMNA | 0.212139505  | 0.076323727  | 0.340226605  | 2.44E-03 | 5.79E-03 | 1.00E+00 |
| PARP2    | LMNA | -0.31181123  | -0.431296697 | -0.181576338 | 6.26E-06 | 2.57E-05 | 7.43E-02 |
| WDR60    | LMNA | 0.023989504  | -0.114440497 | 0.161505635  | 7.35E-01 | 7.94E-01 | 1.00E+00 |
| IFNA5    | LMNA | 0.008983481  | -0.129227785 | 0.146852359  | 8.99E-01 | 9.27E-01 | 1.00E+00 |
| ZNF134   | LMNA | 0.012011712  | -0.126248637 | 0.149814287  | 8.65E-01 | 9.01E-01 | 1.00E+00 |
| GSDML    | LMNA | -0.246283468 | -0.371696893 | -0.112041855 | 4.11E-04 | 1.18E-03 | 1.00E+00 |
| SMEK1    | LMNA | 0.066893095  | -0.071821149 | 0.203068825  | 3.44E-01 | 4.30E-01 | 1.00E+00 |
| PCGF2    | LMNA | -0.248360671 | -0.373602183 | -0.114226076 | 3.65E-04 | 1.06E-03 | 1.00E+00 |
| CYP2A13  | LMNA | 0.015057516  | -0.123249685 | 0.152790909  | 8.32E-01 | 8.73E-01 | 1.00E+00 |
| TNS1     | LMNA | 0.299038375  | 0.16791952   | 0.419760589  | 1.54E-05 | 5.89E-05 | 1.82E-01 |
| MDM1     | LMNA | -0.125924374 | -0.259464842 | 0.012341165  | 7.41E-02 | 1.18E-01 | 1.00E+00 |
| KCNH6    | LMNA | -0.329022267 | -0.446779705 | -0.200058284 | 1.74E-06 | 8.00E-06 | 2.07E-02 |
| SMPX     | LMNA | -0.227735087 | -0.354636646 | -0.092595192 | 1.12E-03 | 2.89E-03 | 1.00E+00 |
| CD9      | LMNA | 0.252752869  | 0.118848836  | 0.377627398  | 2.84E-04 | 8.47E-04 | 1.00E+00 |
| SRGN     | LMNA | 0.238854972  | 0.10424124   | 0.364874539  | 6.18E-04 | 1.71E-03 | 1.00E+00 |
| ALDH7A1  | LMNA | 0.121120064  | -0.017218849 | 0.254908799  | 8.60E-02 | 1.34E-01 | 1.00E+00 |
| EIF3F    | LMNA | 0.08770874   | -0.05095929  | 0.223058881  | 2.15E-01 | 2.90E-01 | 1.00E+00 |
| VDAC3    | LMNA | -0.377508345 | -0.490021668 | -0.252622889 | 3.05E-08 | 1.91E-07 | 3.62E-04 |
| CASP7    | LMNA | 0.577015258  | 0.476957517  | 0.662308405  | 2.52E-19 | 1.15E-17 | 2.99E-15 |
| KCNJ10   | LMNA | -0.475118776 | -0.575427152 | -0.36072816  | 9.03E-13 | 1.27E-11 | 1.07E-08 |
| EDEM2    | LMNA | 0.527237313  | 0.419737148  | 0.620150279  | 7.56E-16 | 1.86E-14 | 8.97E-12 |
| CCNJL    | LMNA | -0.041921721 | -0.178937152 | 0.096688851  | 5.54E-01 | 6.34E-01 | 1.00E+00 |

|          |      |              |              |              |          |          |          |
|----------|------|--------------|--------------|--------------|----------|----------|----------|
| CAMK1G   | LMNA | -0.201669556 | -0.33051869  | -0.065440462 | 4.00E-03 | 8.97E-03 | 1.00E+00 |
| AATF     | LMNA | 0.086540304  | -0.052133535 | 0.221939795  | 2.21E-01 | 2.97E-01 | 1.00E+00 |
| CDC20    | LMNA | 0.180437986  | 0.043469803  | 0.310748356  | 1.02E-02 | 2.06E-02 | 1.00E+00 |
| E2F5     | LMNA | -0.079029878 | -0.214738054 | 0.059672155  | 2.64E-01 | 3.45E-01 | 1.00E+00 |
| ACSL5    | LMNA | 0.245238709  | 0.11094376   | 0.370738202  | 4.35E-04 | 1.24E-03 | 1.00E+00 |
| FTSJ3    | LMNA | 0.242839935  | 0.108423765  | 0.368536025  | 4.97E-04 | 1.40E-03 | 1.00E+00 |
| PRUNE2   | LMNA | 0.172581417  | 0.035373183  | 0.30340381   | 1.40E-02 | 2.73E-02 | 1.00E+00 |
| LYPLA2   | LMNA | 0.289566429  | 0.157824451  | 0.411180516  | 2.92E-05 | 1.06E-04 | 3.46E-01 |
| C19orf56 | LMNA | -0.00182156  | -0.139837395 | 0.136263707  | 9.79E-01 | 9.84E-01 | 1.00E+00 |
| FAM30A   | LMNA | -0.058974444 | -0.19543432  | 0.079725641  | 4.04E-01 | 4.92E-01 | 1.00E+00 |
| SMAD4    | LMNA | -0.136192386 | -0.269182355 | 0.001894229  | 5.33E-02 | 8.88E-02 | 1.00E+00 |
| AFM      | LMNA | -0.020256109 | -0.157865658 | 0.118125214  | 7.75E-01 | 8.28E-01 | 1.00E+00 |
| ACPP     | LMNA | 0.418273972  | 0.297395523  | 0.525954697  | 5.86E-10 | 5.06E-09 | 6.95E-06 |
| G0S2     | LMNA | 0.313607724  | 0.183501199  | 0.432916115  | 5.50E-06 | 2.28E-05 | 6.52E-02 |
| FCHSD2   | LMNA | -0.567261452 | -0.654090003 | -0.465678181 | 1.35E-18 | 5.53E-17 | 1.60E-14 |
| SLC4A7   | LMNA | 0.260249391  | 0.126752308  | 0.384486674  | 1.84E-04 | 5.69E-04 | 1.00E+00 |
| RRP1B    | LMNA | 0.191839147  | 0.055251401  | 0.321378882  | 6.24E-03 | 1.33E-02 | 1.00E+00 |
| STAT6    | LMNA | 0.40408044   | 0.281746293  | 0.513487219  | 2.47E-09 | 1.89E-08 | 2.92E-05 |
| CCDC40   | LMNA | 0.012101449  | -0.126160317 | 0.149902021  | 8.64E-01 | 9.00E-01 | 1.00E+00 |
| GNL1     | LMNA | 0.198919679  | 0.062587395  | 0.327964429  | 4.54E-03 | 1.00E-02 | 1.00E+00 |
| ZNF195   | LMNA | -0.3895033   | -0.500634522 | -0.265741575 | 1.01E-08 | 6.88E-08 | 1.20E-04 |
| GART     | LMNA | 0.035871419  | -0.102688101 | 0.173065385  | 6.12E-01 | 6.88E-01 | 1.00E+00 |
| THOP1    | LMNA | -0.051514309 | -0.188226716 | 0.087156514  | 4.67E-01 | 5.52E-01 | 1.00E+00 |
| PER3     | LMNA | -0.13113072  | -0.264395442 | 0.007047866  | 6.29E-02 | 1.02E-01 | 1.00E+00 |
| TRIAP1   | LMNA | 0.138001929  | -5.00E-05    | 0.270892082  | 5.02E-02 | 8.41E-02 | 1.00E+00 |
| SCARB1   | LMNA | 0.131823279  | -0.006343157 | 0.265050796  | 6.15E-02 | 1.00E-01 | 1.00E+00 |
| ADCY8    | LMNA | -0.152253721 | -0.284328484 | -0.014507653 | 3.05E-02 | 5.44E-02 | 1.00E+00 |
| CACNA1F  | LMNA | 0.082208272  | -0.056483759 | 0.217787615  | 2.45E-01 | 3.24E-01 | 1.00E+00 |
| C10orf10 | LMNA | 0.379124212  | 0.254387464  | 0.491453296  | 2.64E-08 | 1.67E-07 | 3.13E-04 |
| SFRS8    | LMNA | -0.102518941 | -0.237212707 | 0.036042159  | 1.47E-01 | 2.11E-01 | 1.00E+00 |
| PBOV1    | LMNA | -0.180712675 | -0.311004862 | -0.043753211 | 1.01E-02 | 2.04E-02 | 1.00E+00 |
| GOLSYN   | LMNA | -0.216197334 | -0.343981766 | -0.080550463 | 2.00E-03 | 4.85E-03 | 1.00E+00 |
| PSG1     | LMNA | 0.091041517  | -0.047607836 | 0.226248937  | 1.98E-01 | 2.71E-01 | 1.00E+00 |
| DHX34    | LMNA | -0.014822744 | -0.152561559 | 0.123480935  | 8.34E-01 | 8.76E-01 | 1.00E+00 |
| CAMK2N1  | LMNA | 0.111483429  | -0.026982848 | 0.245752205  | 1.14E-01 | 1.70E-01 | 1.00E+00 |

|          |      |              |              |              |          |          |          |
|----------|------|--------------|--------------|--------------|----------|----------|----------|
| FLJ20433 | LMNA | 0.135621733  | -0.002475618 | 0.268643007  | 5.43E-02 | 9.02E-02 | 1.00E+00 |
| GREM1    | LMNA | 0.007366078  | -0.130817951 | 0.145269355  | 9.17E-01 | 9.41E-01 | 1.00E+00 |
| NFIC     | LMNA | 0.52191379   | 0.413667857  | 0.61560967   | 1.65E-15 | 3.78E-14 | 1.96E-11 |
| ITPR2    | LMNA | 0.101419672  | -0.037151489 | 0.236164119  | 1.51E-01 | 2.16E-01 | 1.00E+00 |
| QPCT     | LMNA | 0.085369284  | -0.053309991 | 0.220817877  | 2.27E-01 | 3.04E-01 | 1.00E+00 |
| PRKAG2   | LMNA | -0.204763933 | -0.33339069  | -0.068653624 | 3.46E-03 | 7.89E-03 | 1.00E+00 |
| H2AFZ    | LMNA | -0.105629377 | -0.240178044 | 0.0329014    | 1.35E-01 | 1.96E-01 | 1.00E+00 |
| MLLT3    | LMNA | -0.19079816  | -0.320409611 | -0.054174099 | 6.53E-03 | 1.38E-02 | 1.00E+00 |
| CCNT2    | LMNA | -0.3472454   | -0.463096669 | -0.219727608 | 4.13E-07 | 2.12E-06 | 4.89E-03 |
| PLK4     | LMNA | -0.106392269 | -0.240904963 | 0.032130653  | 1.32E-01 | 1.93E-01 | 1.00E+00 |
| H2AFX    | LMNA | -0.227049799 | -0.354004716 | -0.091878686 | 1.16E-03 | 2.98E-03 | 1.00E+00 |
| MED16    | LMNA | 0.179010626  | 0.041997493  | 0.309415175  | 1.08E-02 | 2.17E-02 | 1.00E+00 |
| PLEKHQ1  | LMNA | 0.433341964  | 0.31408028   | 0.539139845  | 1.18E-10 | 1.16E-09 | 1.40E-06 |
| GOSR1    | LMNA | -0.083574608 | -0.219097756 | 0.055112253  | 2.37E-01 | 3.16E-01 | 1.00E+00 |
| BTG4     | LMNA | 0.060560436  | -0.078143881 | 0.196964727  | 3.92E-01 | 4.79E-01 | 1.00E+00 |
| RPL30    | LMNA | -0.142270817 | -0.274922173 | -0.004304356 | 4.34E-02 | 7.40E-02 | 1.00E+00 |
| PLOD3    | LMNA | 0.731347166  | 0.659924233  | 0.789670499  | 4.39E-35 | 3.47E-32 | 5.21E-31 |
| ZBTB39   | LMNA | -0.116416383 | -0.250442424 | 0.021987996  | 9.90E-02 | 1.51E-01 | 1.00E+00 |
| SHC3     | LMNA | -0.28115832  | -0.40354601  | -0.148886217 | 5.05E-05 | 1.75E-04 | 5.99E-01 |
| HAVCR1   | LMNA | -0.100590826 | -0.235373277 | 0.037987697  | 1.54E-01 | 2.20E-01 | 1.00E+00 |
| DYNC2H1  | LMNA | -0.066717114 | -0.202899338 | 0.071997005  | 3.45E-01 | 4.32E-01 | 1.00E+00 |
| WASF3    | LMNA | -0.401915642 | -0.51158161  | -0.279365178 | 3.05E-09 | 2.31E-08 | 3.62E-05 |
| DRG1     | LMNA | -0.14511339  | -0.277603153 | -0.007206763 | 3.93E-02 | 6.80E-02 | 1.00E+00 |
| SPCS1    | LMNA | -0.052351629 | -0.189036427 | 0.086323246  | 4.59E-01 | 5.45E-01 | 1.00E+00 |
| PRR4     | LMNA | -0.2702454   | -0.393611675 | -0.137317388 | 1.00E-04 | 3.28E-04 | 1.00E+00 |
| KDELR3   | LMNA | 0.738489966  | 0.668602508  | 0.795445837  | 4.43E-36 | 4.38E-33 | 5.26E-32 |
| SRP19    | LMNA | 0.173804867  | 0.036632832  | 0.304548549  | 1.34E-02 | 2.62E-02 | 1.00E+00 |
| GABRA6   | LMNA | -0.062998621 | -0.199316165 | 0.075710838  | 3.73E-01 | 4.61E-01 | 1.00E+00 |
| RNF5     | LMNA | -0.405376989 | -0.514628016 | -0.28317312  | 2.17E-09 | 1.68E-08 | 2.57E-05 |
| MFSD1    | LMNA | 0.41122133   | 0.28961143   | 0.519765495  | 1.21E-09 | 9.82E-09 | 1.43E-05 |
| KRI1     | LMNA | 0.070467117  | -0.068247803 | 0.206509184  | 3.19E-01 | 4.05E-01 | 1.00E+00 |
| LRP10    | LMNA | 0.595746539  | 0.49871125   | 0.678033736  | 8.59E-21 | 4.85E-19 | 1.02E-16 |
| KLHL25   | LMNA | -0.260099495 | -0.384349655 | -0.126594109 | 1.85E-04 | 5.73E-04 | 1.00E+00 |
| PUS7L    | LMNA | -0.209229395 | -0.337531039 | -0.073295486 | 2.80E-03 | 6.54E-03 | 1.00E+00 |
| MGMT     | LMNA | 0.058991287  | -0.079708847 | 0.195450576  | 4.04E-01 | 4.92E-01 | 1.00E+00 |

|          |      |              |              |              |          |          |          |
|----------|------|--------------|--------------|--------------|----------|----------|----------|
| BUB1     | LMNA | 0.04260137   | -0.096014307 | 0.179596136  | 5.47E-01 | 6.28E-01 | 1.00E+00 |
| RNF138   | LMNA | -0.141566787 | -0.274257847 | -0.003585866 | 4.45E-02 | 7.57E-02 | 1.00E+00 |
| MYLPF    | LMNA | 0.06200809   | -0.076699479 | 0.198361065  | 3.81E-01 | 4.68E-01 | 1.00E+00 |
| HOXD1    | LMNA | -0.337657421 | -0.454521387 | -0.209365785 | 8.91E-07 | 4.30E-06 | 1.06E-02 |
| DYNLRB1  | LMNA | -0.014614453 | -0.152358065 | 0.123686089  | 8.36E-01 | 8.78E-01 | 1.00E+00 |
| AIF1     | LMNA | 0.125178934  | -0.013098422 | 0.258758312  | 7.59E-02 | 1.20E-01 | 1.00E+00 |
| HCN3     | LMNA | -0.474099018 | -0.574546068 | -0.359582645 | 1.03E-12 | 1.42E-11 | 1.22E-08 |
| MAP4K5   | LMNA | -0.169329963 | -0.300359704 | -0.032027647 | 1.60E-02 | 3.06E-02 | 1.00E+00 |
| CHODL    | LMNA | 0.122648615  | -0.015667667 | 0.256359005  | 8.20E-02 | 1.28E-01 | 1.00E+00 |
| EXOSC8   | LMNA | -0.198270722 | -0.327361361 | -0.06191441  | 4.68E-03 | 1.03E-02 | 1.00E+00 |
| LASP1    | LMNA | 0.302910508  | 0.17205432   | 0.423261923  | 1.18E-05 | 4.60E-05 | 1.40E-01 |
| SLC28A1  | LMNA | -0.05385627  | -0.190490987 | 0.0848254    | 4.47E-01 | 5.33E-01 | 1.00E+00 |
| PLAA     | LMNA | -0.078424044 | -0.214156476 | 0.060279575  | 2.67E-01 | 3.49E-01 | 1.00E+00 |
| KRT6A    | LMNA | 0.027562515  | -0.110910503 | 0.16498574   | 6.97E-01 | 7.62E-01 | 1.00E+00 |
| MYO7B    | LMNA | 0.034373324  | -0.104172001 | 0.171609989  | 6.27E-01 | 7.02E-01 | 1.00E+00 |
| SEH1L    | LMNA | -0.000585093 | -0.138624897 | 0.137477012  | 9.93E-01 | 9.95E-01 | 1.00E+00 |
| MTNR1A   | LMNA | 0.017864808  | -0.120483335 | 0.155532227  | 8.01E-01 | 8.50E-01 | 1.00E+00 |
| TSPAN5   | LMNA | -0.040273217 | -0.177338259 | 0.098324444  | 5.69E-01 | 6.48E-01 | 1.00E+00 |
| MCL1     | LMNA | 0.567187867  | 0.465593212  | 0.654027924  | 1.36E-18 | 5.56E-17 | 1.62E-14 |
| EHBP1    | LMNA | 0.216483592  | 0.080848821  | 0.344246518  | 1.97E-03 | 4.80E-03 | 1.00E+00 |
| CDC45L   | LMNA | -0.070932635 | -0.206957046 | 0.06778211   | 3.16E-01 | 4.01E-01 | 1.00E+00 |
| ATAD3A   | LMNA | 0.309002358  | 0.178568759  | 0.428763144  | 7.66E-06 | 3.09E-05 | 9.08E-02 |
| PRNP     | LMNA | 0.15894747   | 0.021365285  | 0.290621407  | 2.39E-02 | 4.37E-02 | 1.00E+00 |
| OSGIN2   | LMNA | -0.089633432 | -0.224901505 | 0.049024193  | 2.05E-01 | 2.79E-01 | 1.00E+00 |
| DARC     | LMNA | -0.059030631 | -0.195488549 | 0.079669616  | 4.04E-01 | 4.91E-01 | 1.00E+00 |
| SHMT1    | LMNA | 0.165818658  | 0.028418191  | 0.297069317  | 1.84E-02 | 3.46E-02 | 1.00E+00 |
| POPDC2   | LMNA | 0.337193213  | 0.208864841  | 0.454105658  | 9.24E-07 | 4.45E-06 | 1.10E-02 |
| CRISP3   | LMNA | 0.028378624  | -0.110103729 | 0.165780149  | 6.88E-01 | 7.55E-01 | 1.00E+00 |
| FBXL8    | LMNA | 0.208663474  | 0.072706883  | 0.337006595  | 2.88E-03 | 6.70E-03 | 1.00E+00 |
| TRIP13   | LMNA | 0.102635211  | -0.035924805 | 0.237323599  | 1.46E-01 | 2.10E-01 | 1.00E+00 |
| C1orf113 | LMNA | 0.472755233  | 0.358073671  | 0.573384666  | 1.21E-12 | 1.66E-11 | 1.44E-08 |
| NEB      | LMNA | -0.204606815 | -0.333244921 | -0.068490406 | 3.49E-03 | 7.94E-03 | 1.00E+00 |
| ASGR1    | LMNA | -0.168505386 | -0.299587287 | -0.031179698 | 1.65E-02 | 3.15E-02 | 1.00E+00 |
| IL6      | LMNA | 0.385231192  | 0.261063979  | 0.496858488  | 1.50E-08 | 9.97E-08 | 1.78E-04 |
| CTGF     | LMNA | 0.512347773  | 0.402785866  | 0.607434833  | 6.48E-15 | 1.31E-13 | 7.69E-11 |

|          |      |              |              |              |          |          |          |
|----------|------|--------------|--------------|--------------|----------|----------|----------|
| RAB17    | LMNA | 0.200692943  | 0.064426947  | 0.329611766  | 4.18E-03 | 9.34E-03 | 1.00E+00 |
| JARID1B  | LMNA | -0.191799201 | -0.321341693 | -0.055210056 | 6.25E-03 | 1.33E-02 | 1.00E+00 |
| FBXL2    | LMNA | -0.243828098 | -0.369443371 | -0.109461655 | 4.71E-04 | 1.33E-03 | 1.00E+00 |
| PTBP1    | LMNA | 0.390663256  | 0.267012634  | 0.501659054  | 9.03E-09 | 6.22E-08 | 1.07E-04 |
| PTPN7    | LMNA | 0.351685746  | 0.2245361    | 0.467060684  | 2.86E-07 | 1.52E-06 | 3.40E-03 |
| BRD1     | LMNA | -0.108826205 | -0.243223126 | 0.029670553  | 1.23E-01 | 1.82E-01 | 1.00E+00 |
| STATH    | LMNA | 0.097806626  | -0.040795204 | 0.232715432  | 1.66E-01 | 2.34E-01 | 1.00E+00 |
| CDC7     | LMNA | -0.351704778 | -0.467077665 | -0.224556724 | 2.86E-07 | 1.51E-06 | 3.39E-03 |
| ZNF335   | LMNA | 0.311824818  | 0.181590893  | 0.431308949  | 6.26E-06 | 2.57E-05 | 7.42E-02 |
| SNX7     | LMNA | 0.280393349  | 0.148074087  | 0.402850575  | 5.30E-05 | 1.83E-04 | 6.29E-01 |
| MCCC2    | LMNA | 0.122483032  | -0.015835733 | 0.256201939  | 8.25E-02 | 1.29E-01 | 1.00E+00 |
| CPT2     | LMNA | 0.097864595  | -0.040736771 | 0.232770791  | 1.66E-01 | 2.34E-01 | 1.00E+00 |
| CDC2     | LMNA | 0.014910851  | -0.123394151 | 0.152647633  | 8.33E-01 | 8.75E-01 | 1.00E+00 |
| C5orf23  | LMNA | -0.122722557 | -0.256429142 | 0.015592614  | 8.19E-02 | 1.28E-01 | 1.00E+00 |
| IVD      | LMNA | -0.017102204 | -0.154787755 | 0.121235029  | 8.09E-01 | 8.56E-01 | 1.00E+00 |
| HEATR1   | LMNA | 0.326059319  | 0.19686999   | 0.444119261  | 2.19E-06 | 9.83E-06 | 2.59E-02 |
| HSPC152  | LMNA | 0.132152056  | -0.006008563 | 0.265361868  | 6.08E-02 | 9.95E-02 | 1.00E+00 |
| PSME1    | LMNA | 0.231900847  | 0.096953737  | 0.358475559  | 8.97E-04 | 2.38E-03 | 1.00E+00 |
| STAG3    | LMNA | 0.044119463  | -0.094507155 | 0.181067629  | 5.33E-01 | 6.15E-01 | 1.00E+00 |
| MSL3L1   | LMNA | 0.135141526  | -0.002964787 | 0.268189078  | 5.52E-02 | 9.14E-02 | 1.00E+00 |
| MVP      | LMNA | 0.669658128  | 0.585758752  | 0.739357743  | 1.21E-27 | 2.47E-25 | 1.43E-23 |
| EPOR     | LMNA | 0.272743495  | 0.139962432  | 0.395888306  | 8.60E-05 | 2.85E-04 | 1.00E+00 |
| ZMYM1    | LMNA | -0.08621865  | -0.221631664 | 0.052456721  | 2.22E-01 | 2.99E-01 | 1.00E+00 |
| BCL7C    | LMNA | 0.327944412  | 0.198898138  | 0.445812136  | 1.89E-06 | 8.62E-06 | 2.25E-02 |
| PSTPIP2  | LMNA | 0.35146778   | 0.224299919  | 0.466866209  | 2.91E-07 | 1.54E-06 | 3.46E-03 |
| SF1      | LMNA | -0.114051644 | -0.248194831 | 0.02438327   | 1.06E-01 | 1.60E-01 | 1.00E+00 |
| PNLIPRP2 | LMNA | -0.023323351 | -0.160856424 | 0.115098245  | 7.42E-01 | 8.00E-01 | 1.00E+00 |
| BCAS4    | LMNA | 0.036258104  | -0.102304981 | 0.173440951  | 6.08E-01 | 6.85E-01 | 1.00E+00 |
| TRSPAP1  | LMNA | 0.001537163  | -0.136542813 | 0.139558548  | 9.83E-01 | 9.86E-01 | 1.00E+00 |
| NUP210   | LMNA | -0.005829438 | -0.143764742 | 0.132328055  | 9.34E-01 | 9.52E-01 | 1.00E+00 |
| RAB11B   | LMNA | -0.104604369 | -0.239201129 | 0.033936703  | 1.38E-01 | 2.01E-01 | 1.00E+00 |
| ANP32C   | LMNA | -0.143720983 | -0.276290159 | -0.005784757 | 4.13E-02 | 7.09E-02 | 1.00E+00 |
| ITGB3BP  | LMNA | 0.034725779  | -0.103822941 | 0.171952452  | 6.24E-01 | 6.98E-01 | 1.00E+00 |
| EDG6     | LMNA | 0.248167507  | 0.114022905  | 0.373425051  | 3.69E-04 | 1.07E-03 | 1.00E+00 |
| UBASH3A  | LMNA | 0.189331558  | 0.052656872  | 0.319043585  | 6.96E-03 | 1.47E-02 | 1.00E+00 |

|         |      |              |              |              |          |          |          |
|---------|------|--------------|--------------|--------------|----------|----------|----------|
| YWHAB   | LMNA | -0.077301158 | -0.213078293 | 0.061405128  | 2.74E-01 | 3.57E-01 | 1.00E+00 |
| CUL1    | LMNA | 0.239197305  | 0.104600358  | 0.365189236  | 6.07E-04 | 1.68E-03 | 1.00E+00 |
| CCRK    | LMNA | 0.044332948  | -0.094295159 | 0.181274511  | 5.31E-01 | 6.14E-01 | 1.00E+00 |
| LY6G5C  | LMNA | -0.254462681 | -0.379193073 | -0.120649972 | 2.58E-04 | 7.74E-04 | 1.00E+00 |
| DHX9    | LMNA | -0.247682989 | -0.372980704 | -0.113513337 | 3.80E-04 | 1.10E-03 | 1.00E+00 |
| SLC7A2  | LMNA | -0.056338751 | -0.19288953  | 0.082352758  | 4.26E-01 | 5.13E-01 | 1.00E+00 |
| CLK1    | LMNA | -0.213053553 | -0.341072832 | -0.077275396 | 2.33E-03 | 5.56E-03 | 1.00E+00 |
| NCKAP1  | LMNA | -0.09620377  | -0.231184404 | 0.042410486  | 1.73E-01 | 2.42E-01 | 1.00E+00 |
| PKN2    | LMNA | -0.060477653 | -0.196884861 | 0.078226461  | 3.93E-01 | 4.80E-01 | 1.00E+00 |
| VDR     | LMNA | 0.61913631   | 0.526047877  | 0.697564783  | 9.14E-23 | 7.86E-21 | 1.08E-18 |
| PODNL1  | LMNA | 0.559326556  | 0.456526521  | 0.647389031  | 5.06E-18 | 1.84E-16 | 6.00E-14 |
| ACE     | LMNA | 0.369057181  | 0.243407478  | 0.482524195  | 6.49E-08 | 3.86E-07 | 7.70E-04 |
| DALRD3  | LMNA | 0.221841358  | 0.086437543  | 0.349198022  | 1.51E-03 | 3.77E-03 | 1.00E+00 |
| PSMA2   | LMNA | -0.094926107 | -0.229963518 | 0.043697534  | 1.79E-01 | 2.49E-01 | 1.00E+00 |
| OPN1SW  | LMNA | -0.060853741 | -0.19724768  | 0.077851282  | 3.90E-01 | 4.77E-01 | 1.00E+00 |
| CCDC131 | LMNA | -0.08107253  | -0.216698213 | 0.0576234    | 2.51E-01 | 3.32E-01 | 1.00E+00 |
| EML2    | LMNA | 0.248150455  | 0.114004971  | 0.373409413  | 3.70E-04 | 1.07E-03 | 1.00E+00 |
| DUSP11  | LMNA | -0.010040277 | -0.147886297 | 0.128188402  | 8.87E-01 | 9.18E-01 | 1.00E+00 |
| DSPP    | LMNA | -0.132273962 | -0.265477202 | 0.005884493  | 6.06E-02 | 9.92E-02 | 1.00E+00 |
| L1CAM   | LMNA | -0.232413999 | -0.358948153 | -0.097490995 | 8.73E-04 | 2.33E-03 | 1.00E+00 |
| NEK11   | LMNA | 0.036691711  | -0.101875322 | 0.173862043  | 6.04E-01 | 6.81E-01 | 1.00E+00 |
| DLL3    | LMNA | -0.541099117 | -0.631944335 | -0.435586081 | 9.28E-17 | 2.72E-15 | 1.10E-12 |
| CREB3L2 | LMNA | 0.537665531  | 0.431654175  | 0.629026847  | 1.57E-16 | 4.42E-15 | 1.87E-12 |
| GFRA3   | LMNA | 0.003231515  | -0.134879658 | 0.141219515  | 9.64E-01 | 9.73E-01 | 1.00E+00 |
| CPA1    | LMNA | 0.237935249  | 0.103276596  | 0.364028919  | 6.50E-04 | 1.79E-03 | 1.00E+00 |
| PPT2    | LMNA | -0.139756734 | -0.272549289 | -0.00173929  | 4.73E-02 | 7.99E-02 | 1.00E+00 |
| FASLG   | LMNA | 0.310532042  | 0.180206355  | 0.430143126  | 6.87E-06 | 2.80E-05 | 8.14E-02 |
| RTN4    | LMNA | -0.115847345 | -0.249901707 | 0.022564527  | 1.01E-01 | 1.53E-01 | 1.00E+00 |
| GNL3L   | LMNA | 0.148242902  | 0.010404837  | 0.280552376  | 3.52E-02 | 6.17E-02 | 1.00E+00 |
| NUDT2   | LMNA | -0.234318658 | -0.360701706 | -0.099485817 | 7.89E-04 | 2.13E-03 | 1.00E+00 |
| GTPBP8  | LMNA | -0.266434116 | -0.390135355 | -0.133285558 | 1.27E-04 | 4.07E-04 | 1.00E+00 |
| CACNA1D | LMNA | -0.407657323 | -0.516633482 | -0.285683898 | 1.73E-09 | 1.37E-08 | 2.05E-05 |
| PRKAA2  | LMNA | -0.236875601 | -0.363054391 | -0.102165505 | 6.88E-04 | 1.88E-03 | 1.00E+00 |
| CD163   | LMNA | 0.473061583  | 0.358417628  | 0.573649473  | 1.17E-12 | 1.60E-11 | 1.38E-08 |
| CD37    | LMNA | 0.218392455  | 0.082838992  | 0.346011454  | 1.79E-03 | 4.40E-03 | 1.00E+00 |

|           |      |              |              |              |          |          |          |
|-----------|------|--------------|--------------|--------------|----------|----------|----------|
| NBLA00301 | LMNA | -0.172228062 | -0.303073119 | -0.035009456 | 1.42E-02 | 2.77E-02 | 1.00E+00 |
| DPT       | LMNA | 0.482600523  | 0.369143124  | 0.58188436   | 3.51E-13 | 5.21E-12 | 4.16E-09 |
| RGS5      | LMNA | -0.260200646 | -0.384442117 | -0.126700862 | 1.84E-04 | 5.70E-04 | 1.00E+00 |
| ACTL8     | LMNA | -0.025843732 | -0.163312076 | 0.112609029  | 7.15E-01 | 7.77E-01 | 1.00E+00 |
| PRDM8     | LMNA | 0.003106699  | -0.135002202 | 0.141097185  | 9.65E-01 | 9.74E-01 | 1.00E+00 |
| PRKAR2B   | LMNA | -0.208466198 | -0.336823759 | -0.072501722 | 2.91E-03 | 6.76E-03 | 1.00E+00 |
| OPLAH     | LMNA | 0.321517652  | 0.191988208  | 0.440037233  | 3.07E-06 | 1.34E-05 | 3.65E-02 |
| KRT14     | LMNA | -0.018546261 | -0.156197345 | 0.119811496  | 7.93E-01 | 8.44E-01 | 1.00E+00 |
| MRPL18    | LMNA | -0.043530082 | -0.180496413 | 0.095092364  | 5.38E-01 | 6.20E-01 | 1.00E+00 |
| PACRG     | LMNA | -0.263227137 | -0.387207494 | -0.129896413 | 1.54E-04 | 4.85E-04 | 1.00E+00 |
| ABCG2     | LMNA | -0.398076919 | -0.508199839 | -0.275146575 | 4.44E-09 | 3.26E-08 | 5.27E-05 |
| KREMEN2   | LMNA | 0.025121744  | -0.113322267 | 0.162608804  | 7.23E-01 | 7.84E-01 | 1.00E+00 |
| HNRPUL1   | LMNA | -0.061595114 | -0.197962784 | 0.077111587  | 3.84E-01 | 4.71E-01 | 1.00E+00 |
| FBXO21    | LMNA | -0.433086936 | -0.538917114 | -0.313797273 | 1.21E-10 | 1.19E-09 | 1.44E-06 |
| GRB10     | LMNA | 0.568176314  | 0.466734729  | 0.654861723  | 1.15E-18 | 4.82E-17 | 1.37E-14 |
| CLSTN1    | LMNA | 0.0055698    | -0.132583146 | 0.143510453  | 9.37E-01 | 9.54E-01 | 1.00E+00 |
| TBL1X     | LMNA | 0.269794743  | 0.136840423  | 0.393200808  | 1.03E-04 | 3.36E-04 | 1.00E+00 |
| CHCHD3    | LMNA | 0.336216611  | 0.207811175  | 0.453230883  | 9.98E-07 | 4.78E-06 | 1.18E-02 |
| LMAN2     | LMNA | 0.587761124  | 0.489422347  | 0.671338999  | 3.72E-20 | 1.94E-18 | 4.42E-16 |
| CRKRS     | LMNA | 0.112932622  | -0.025516188 | 0.24713074   | 1.10E-01 | 1.64E-01 | 1.00E+00 |
| INSIG2    | LMNA | 0.238750342  | 0.104131486  | 0.364778349  | 6.22E-04 | 1.72E-03 | 1.00E+00 |
| GPR65     | LMNA | 0.152040315  | 0.014289235  | 0.284127669  | 3.08E-02 | 5.48E-02 | 1.00E+00 |
| STXBP2    | LMNA | 0.315964852  | 0.186028268  | 0.43503974   | 4.63E-06 | 1.96E-05 | 5.50E-02 |
| CMAH      | LMNA | 0.286411862  | 0.154468458  | 0.408318188  | 3.59E-05 | 1.28E-04 | 4.26E-01 |
| ZNF155    | LMNA | -0.100463083 | -0.235251375 | 0.038116558  | 1.55E-01 | 2.21E-01 | 1.00E+00 |
| DFFA      | LMNA | 0.112223559  | -0.026233872 | 0.246456317  | 1.12E-01 | 1.67E-01 | 1.00E+00 |
| FUT1      | LMNA | -0.218415055 | -0.346032345 | -0.082862561 | 1.79E-03 | 4.40E-03 | 1.00E+00 |
| COQ6      | LMNA | -0.127946817 | -0.261380997 | 0.010285864  | 6.96E-02 | 1.12E-01 | 1.00E+00 |
| TSPAN15   | LMNA | -0.187394995 | -0.317239002 | -0.050654428 | 7.57E-03 | 1.58E-02 | 1.00E+00 |
| PRPF4     | LMNA | 0.192378366  | 0.055809557  | 0.321880846  | 6.09E-03 | 1.30E-02 | 1.00E+00 |
| PGK2      | LMNA | 0.161264743  | 0.023742312  | 0.292797268  | 2.19E-02 | 4.05E-02 | 1.00E+00 |
| MS4A1     | LMNA | -0.002106659 | -0.14011691  | 0.135983889  | 9.76E-01 | 9.82E-01 | 1.00E+00 |
| TMEM51    | LMNA | 0.365056886  | 0.239053329  | 0.478969514  | 9.21E-08 | 5.30E-07 | 1.09E-03 |
| ZNF580    | LMNA | -0.18516084  | -0.315155938 | -0.048345633 | 8.34E-03 | 1.73E-02 | 1.00E+00 |
| DDX28     | LMNA | -0.109886626 | -0.244232628 | 0.028598209  | 1.20E-01 | 1.77E-01 | 1.00E+00 |

|         |      |              |              |              |          |          |          |
|---------|------|--------------|--------------|--------------|----------|----------|----------|
| BTN1A1  | LMNA | 0.02032495   | -0.118057305 | 0.15793281   | 7.74E-01 | 8.27E-01 | 1.00E+00 |
| EZH1    | LMNA | -0.227197754 | -0.354141161 | -0.092033369 | 1.15E-03 | 2.96E-03 | 1.00E+00 |
| TTC31   | LMNA | 0.097897938  | -0.040703162 | 0.232802632  | 1.66E-01 | 2.34E-01 | 1.00E+00 |
| LSP1    | LMNA | 0.405558574  | 0.283372994  | 0.514787757  | 2.13E-09 | 1.65E-08 | 2.53E-05 |
| PCAF    | LMNA | -0.314634094 | -0.433840973 | -0.184601355 | 5.11E-06 | 2.13E-05 | 6.06E-02 |
| CHP2    | LMNA | -0.33193132  | -0.449389733 | -0.203191244 | 1.39E-06 | 6.49E-06 | 1.65E-02 |
| WDR46   | LMNA | 0.221567894  | 0.086152085  | 0.348945466  | 1.53E-03 | 3.81E-03 | 1.00E+00 |
| ALOX15B | LMNA | 0.272437764  | 0.139638615  | 0.395609761  | 8.76E-05 | 2.89E-04 | 1.00E+00 |
| CDK9    | LMNA | 0.179795456  | 0.042806965  | 0.310148284  | 1.05E-02 | 2.11E-02 | 1.00E+00 |
| CD59    | LMNA | 0.363514833  | 0.237376222  | 0.477598241  | 1.05E-07 | 6.00E-07 | 1.25E-03 |
| ERP29   | LMNA | 0.331914019  | 0.203172603  | 0.449374216  | 1.40E-06 | 6.50E-06 | 1.66E-02 |
| LRRTM4  | LMNA | -0.477705839 | -0.577661361 | -0.363635808 | 6.53E-13 | 9.43E-12 | 7.75E-09 |
| BCMO1   | LMNA | -0.028261929 | -0.165666567 | 0.110219101  | 6.90E-01 | 7.56E-01 | 1.00E+00 |
| TTR     | LMNA | 0.009866296  | -0.128359537 | 0.1477161    | 8.89E-01 | 9.20E-01 | 1.00E+00 |
| DDIT4   | LMNA | 0.181274179  | 0.044332606  | 0.311529138  | 9.83E-03 | 2.00E-02 | 1.00E+00 |
| MAOB    | LMNA | 0.171042318  | 0.033789166  | 0.301963193  | 1.49E-02 | 2.88E-02 | 1.00E+00 |
| CACNB4  | LMNA | -0.578193307 | -0.663299623 | -0.478322052 | 2.05E-19 | 9.39E-18 | 2.43E-15 |
| PTGDS   | LMNA | -0.154462457 | -0.286406218 | -0.016769034 | 2.82E-02 | 5.06E-02 | 1.00E+00 |
| C3orf63 | LMNA | -0.033327267 | -0.170593391 | 0.10520778   | 6.38E-01 | 7.12E-01 | 1.00E+00 |
| BST2    | LMNA | 0.345220594  | 0.217536982  | 0.461287532  | 4.86E-07 | 2.47E-06 | 5.77E-03 |
| ATP5L   | LMNA | -0.214606864 | -0.342510414 | -0.078893208 | 2.16E-03 | 5.20E-03 | 1.00E+00 |
| CYP1A2  | LMNA | -0.231259856 | -0.357885139 | -0.096282745 | 9.28E-04 | 2.45E-03 | 1.00E+00 |
| ONECUT1 | LMNA | -0.142046863 | -0.274710863 | -0.004075787 | 4.37E-02 | 7.45E-02 | 1.00E+00 |
| NUDT9   | LMNA | 0.193836711  | 0.057319544  | 0.32323807   | 5.71E-03 | 1.23E-02 | 1.00E+00 |
| TMEM149 | LMNA | 0.144457492  | 0.006536853  | 0.276984725  | 4.03E-02 | 6.93E-02 | 1.00E+00 |
| STX1A   | LMNA | -0.101992244 | -0.236710332 | 0.036573719  | 1.49E-01 | 2.13E-01 | 1.00E+00 |
| STX17   | LMNA | 0.128347023  | -0.009879018 | 0.261760045  | 6.87E-02 | 1.11E-01 | 1.00E+00 |
| USP6    | LMNA | -0.409020755 | -0.517831997 | -0.287185915 | 1.51E-09 | 1.21E-08 | 1.79E-05 |
| MRPL3   | LMNA | 0.046086266  | -0.092553584 | 0.182973145  | 5.15E-01 | 5.99E-01 | 1.00E+00 |
| POMP    | LMNA | 0.065041204  | -0.073671291 | 0.201284867  | 3.58E-01 | 4.45E-01 | 1.00E+00 |
| INPP4B  | LMNA | 0.147255411  | 0.009395408  | 0.279622044  | 3.65E-02 | 6.36E-02 | 1.00E+00 |
| GMPPB   | LMNA | 0.515981896  | 0.406916281  | 0.610542822  | 3.87E-15 | 8.16E-14 | 4.59E-11 |
| ALLC    | LMNA | 0.077251244  | -0.061455152 | 0.213030359  | 2.74E-01 | 3.57E-01 | 1.00E+00 |
| BMPR2   | LMNA | -0.059401565 | -0.195846537 | 0.079299729  | 4.01E-01 | 4.89E-01 | 1.00E+00 |
| KLF7    | LMNA | 0.301988975  | 0.171069857  | 0.422428963  | 1.25E-05 | 4.89E-05 | 1.49E-01 |



|           |      |              |              |              |          |          |          |
|-----------|------|--------------|--------------|--------------|----------|----------|----------|
| EAPP      | LMNA | -0.215420253 | -0.343262963 | -0.079740659 | 2.08E-03 | 5.01E-03 | 1.00E+00 |
| AHSA1     | LMNA | 0.011983501  | -0.126276403 | 0.149786705  | 8.66E-01 | 9.01E-01 | 1.00E+00 |
| GCC1      | LMNA | 0.356318649  | 0.229559725  | 0.471191663  | 1.94E-07 | 1.06E-06 | 2.31E-03 |
| TIMM9     | LMNA | -0.070115602 | -0.206170965 | 0.068599408  | 3.21E-01 | 4.07E-01 | 1.00E+00 |
| CDO1      | LMNA | -0.214119231 | -0.342059177 | -0.07838525  | 2.21E-03 | 5.31E-03 | 1.00E+00 |
| IFI6      | LMNA | -0.006507797 | -0.144429042 | 0.131661489  | 9.27E-01 | 9.47E-01 | 1.00E+00 |
| MGAT2     | LMNA | 0.342271496  | 0.214348667  | 0.458650822  | 6.17E-07 | 3.06E-06 | 7.32E-03 |
| WBP5      | LMNA | 0.448497627  | 0.330936756  | 0.5523496    | 2.18E-11 | 2.40E-10 | 2.58E-07 |
| SLC5A6    | LMNA | 0.256010831  | 0.122281573  | 0.3806101    | 2.36E-04 | 7.14E-04 | 1.00E+00 |
| HIVEP2    | LMNA | -0.024343896 | -0.161850964 | 0.114090528  | 7.31E-01 | 7.91E-01 | 1.00E+00 |
| KIAA0907  | LMNA | -0.295739677 | -0.416774941 | -0.16440069  | 1.93E-05 | 7.25E-05 | 2.29E-01 |
| SUMO2     | LMNA | -0.399137675 | -0.509134666 | -0.276311831 | 4.01E-09 | 2.96E-08 | 4.75E-05 |
| KIAA1822L | LMNA | 0.18939262   | 0.052720029  | 0.319100471  | 6.94E-03 | 1.46E-02 | 1.00E+00 |
| C11orf67  | LMNA | 0.189407167  | 0.052735075  | 0.319114022  | 6.94E-03 | 1.46E-02 | 1.00E+00 |
| CTSG      | LMNA | 0.123117102  | -0.01519211  | 0.25680336   | 8.09E-02 | 1.27E-01 | 1.00E+00 |
| TXK       | LMNA | 0.345073451  | 0.217377838  | 0.461156023  | 4.92E-07 | 2.49E-06 | 5.84E-03 |
| GRIK1     | LMNA | -0.026881994 | -0.164323177 | 0.111583101  | 7.04E-01 | 7.68E-01 | 1.00E+00 |
| CUL5      | LMNA | -0.121254911 | -0.255036759 | 0.017082031  | 8.56E-02 | 1.33E-01 | 1.00E+00 |
| FRMD1     | LMNA | 0.094114132  | -0.044515235 | 0.229187404  | 1.83E-01 | 2.54E-01 | 1.00E+00 |
| ICAM4     | LMNA | 0.057784213  | -0.080912238 | 0.194285367  | 4.14E-01 | 5.02E-01 | 1.00E+00 |
| FPGS      | LMNA | 0.312434276  | 0.18224379   | 0.431858418  | 5.99E-06 | 2.47E-05 | 7.10E-02 |
| ANAPC2    | LMNA | 0.082659262  | -0.056031121 | 0.218220111  | 2.42E-01 | 3.22E-01 | 1.00E+00 |
| SNRPA1    | LMNA | 0.030573616  | -0.107932939 | 0.167915891  | 6.66E-01 | 7.36E-01 | 1.00E+00 |
| TAF13     | LMNA | 0.135395323  | -0.002706262 | 0.268428993  | 5.47E-02 | 9.07E-02 | 1.00E+00 |
| KCNJ4     | LMNA | -0.301415461 | -0.421910469 | -0.170457309 | 1.31E-05 | 5.07E-05 | 1.55E-01 |
| HIST1H2BC | LMNA | -0.074381381 | -0.210273207 | 0.06433019   | 2.93E-01 | 3.77E-01 | 1.00E+00 |
| SLC5A5    | LMNA | 0.133883496  | -0.004245982 | 0.26699961   | 5.75E-02 | 9.47E-02 | 1.00E+00 |
| IL12RB2   | LMNA | -0.120042073 | -0.253885698 | 0.0183124    | 8.88E-02 | 1.37E-01 | 1.00E+00 |
| EIF5      | LMNA | -0.056903439 | -0.193434897 | 0.081790069  | 4.21E-01 | 5.09E-01 | 1.00E+00 |
| SYNC1     | LMNA | 0.290074584  | 0.158365337  | 0.411641371  | 2.82E-05 | 1.03E-04 | 3.34E-01 |
| PALB2     | LMNA | -0.117724749 | -0.251685355 | 0.020662051  | 9.52E-02 | 1.46E-01 | 1.00E+00 |
| UBL3      | LMNA | -0.29249241  | -0.41383329  | -0.160939984 | 2.40E-05 | 8.87E-05 | 2.85E-01 |
| RNASE3    | LMNA | 0.188920088  | 0.052231312  | 0.318660236  | 7.09E-03 | 1.49E-02 | 1.00E+00 |
| PIK3CG    | LMNA | 0.267906274  | 0.134842383  | 0.391478547  | 1.16E-04 | 3.74E-04 | 1.00E+00 |
| BCORL1    | LMNA | 0.030165621  | -0.108336536 | 0.167519007  | 6.70E-01 | 7.39E-01 | 1.00E+00 |

|          |      |              |              |              |          |          |          |
|----------|------|--------------|--------------|--------------|----------|----------|----------|
| CD5L     | LMNA | -0.093112176 | -0.228229463 | 0.045524     | 1.87E-01 | 2.59E-01 | 1.00E+00 |
| ZNF238   | LMNA | -0.523717172 | -0.617148531 | -0.415722796 | 1.27E-15 | 2.94E-14 | 1.50E-11 |
| TRIM49   | LMNA | -0.011635468 | -0.149446415 | 0.126618919  | 8.69E-01 | 9.03E-01 | 1.00E+00 |
| POLR2K   | LMNA | -0.227533471 | -0.35445074  | -0.092384377 | 1.13E-03 | 2.92E-03 | 1.00E+00 |
| C8B      | LMNA | 0.081348984  | -0.05734603  | 0.216963419  | 2.50E-01 | 3.30E-01 | 1.00E+00 |
| PREB     | LMNA | 0.240107087  | 0.105554918  | 0.366025434  | 5.78E-04 | 1.61E-03 | 1.00E+00 |
| TUBA8    | LMNA | -0.365118502 | -0.479024295 | -0.239120356 | 9.16E-08 | 5.28E-07 | 1.09E-03 |
| IGLV2-14 | LMNA | 0.253953046  | 0.120113024  | 0.378726475  | 2.65E-04 | 7.96E-04 | 1.00E+00 |
| STIL     | LMNA | -0.018722505 | -0.156369344 | 0.119637719  | 7.91E-01 | 8.42E-01 | 1.00E+00 |
| NME7     | LMNA | -0.041027804 | -0.178070227 | 0.09757586   | 5.62E-01 | 6.42E-01 | 1.00E+00 |
| UBE2C    | LMNA | 0.124355318  | -0.013934909 | 0.257977521  | 7.78E-02 | 1.23E-01 | 1.00E+00 |
| FHOD1    | LMNA | 0.627909877  | 0.536351772  | 0.704860998  | 1.51E-23 | 1.50E-21 | 1.79E-19 |
| CDK2AP1  | LMNA | -0.160561443 | -0.292137032 | -0.023020712 | 2.24E-02 | 4.14E-02 | 1.00E+00 |
| CYP3A7   | LMNA | -0.024248752 | -0.161758256 | 0.114184488  | 7.32E-01 | 7.92E-01 | 1.00E+00 |
| DHPS     | LMNA | -0.235323181 | -0.361626177 | -0.100538329 | 7.48E-04 | 2.03E-03 | 1.00E+00 |
| RPL5     | LMNA | -0.249360938 | -0.374519289 | -0.115278339 | 3.45E-04 | 1.01E-03 | 1.00E+00 |
| TFDP1    | LMNA | 0.041266759  | -0.097338773 | 0.178301988  | 5.60E-01 | 6.40E-01 | 1.00E+00 |
| TRGV5    | LMNA | -0.058269089 | -0.194753472 | 0.08042889   | 4.10E-01 | 4.98E-01 | 1.00E+00 |
| HCCS     | LMNA | 0.27284578   | 0.140070774  | 0.395981491  | 8.54E-05 | 2.83E-04 | 1.00E+00 |
| LHX3     | LMNA | -0.324167364 | -0.442419376 | -0.194835572 | 2.52E-06 | 1.12E-05 | 2.99E-02 |
| GTPBP4   | LMNA | -0.064930972 | -0.20117865  | 0.073781389  | 3.59E-01 | 4.45E-01 | 1.00E+00 |
| TUBGCP2  | LMNA | 0.171507283  | 0.034267628  | 0.30239847   | 1.47E-02 | 2.84E-02 | 1.00E+00 |
| CXorf57  | LMNA | -0.25659444  | -0.381144127 | -0.122896828 | 2.28E-04 | 6.91E-04 | 1.00E+00 |
| SLITRK5  | LMNA | -0.328896094 | -0.446666456 | -0.19992246  | 1.76E-06 | 8.07E-06 | 2.09E-02 |
| IRF2BP1  | LMNA | 0.020603124  | -0.117782885 | 0.158204147  | 7.71E-01 | 8.25E-01 | 1.00E+00 |
| NDST2    | LMNA | 0.017347048  | -0.120993706 | 0.155026794  | 8.06E-01 | 8.53E-01 | 1.00E+00 |
| CD79A    | LMNA | -0.028904584 | -0.166292028 | 0.10958369   | 6.83E-01 | 7.51E-01 | 1.00E+00 |
| CIC      | LMNA | 0.085886197  | -0.052790727 | 0.221313159  | 2.24E-01 | 3.01E-01 | 1.00E+00 |
| IL1R2    | LMNA | 0.29476087   | 0.163357206  | 0.415888521  | 2.06E-05 | 7.70E-05 | 2.44E-01 |
| PPME1    | LMNA | -0.02987619  | -0.16723743  | 0.108622819  | 6.73E-01 | 7.42E-01 | 1.00E+00 |
| PIK3CA   | LMNA | 0.077033982  | -0.061672886 | 0.212821705  | 2.76E-01 | 3.58E-01 | 1.00E+00 |
| TNPO3    | LMNA | 0.104276671  | -0.034267629 | 0.238888749  | 1.40E-01 | 2.02E-01 | 1.00E+00 |
| COLEC10  | LMNA | 0.039157344  | -0.099431153 | 0.176255558  | 5.80E-01 | 6.59E-01 | 1.00E+00 |
| SLC9A6   | LMNA | -0.364531384 | -0.478502273 | -0.238481719 | 9.64E-08 | 5.53E-07 | 1.14E-03 |
| CCDC53   | LMNA | 0.032296366  | -0.106228258 | 0.169591237  | 6.48E-01 | 7.20E-01 | 1.00E+00 |

|         |      |              |              |              |          |          |          |
|---------|------|--------------|--------------|--------------|----------|----------|----------|
| DCUN1D1 | LMNA | -0.309128823 | -0.428877254 | -0.178704118 | 7.59E-06 | 3.07E-05 | 9.00E-02 |
| GK3P    | LMNA | 0.328211616  | 0.199185708  | 0.446052025  | 1.86E-06 | 8.46E-06 | 2.20E-02 |
| CYB5R1  | LMNA | 0.264137253  | 0.130857909  | 0.388038653  | 1.46E-04 | 4.63E-04 | 1.00E+00 |
| TSR2    | LMNA | 0.062919252  | -0.075790066 | 0.199239644  | 3.74E-01 | 4.61E-01 | 1.00E+00 |
| SLC6A5  | LMNA | -0.035733898 | -0.172931809 | 0.102824345  | 6.14E-01 | 6.89E-01 | 1.00E+00 |
| RAB3D   | LMNA | 0.333914848  | 0.205328953  | 0.451168221  | 1.19E-06 | 5.64E-06 | 1.42E-02 |
| ERBB3   | LMNA | -0.416306783 | -0.524229493 | -0.295222694 | 7.18E-10 | 6.10E-09 | 8.51E-06 |
| DAZL    | LMNA | 0.24047842   | 0.105944598  | 0.366366674  | 5.66E-04 | 1.58E-03 | 1.00E+00 |
| DCUN1D4 | LMNA | -0.198560197 | -0.327630379 | -0.062214588 | 4.61E-03 | 1.02E-02 | 1.00E+00 |
| CYP2C18 | LMNA | 0.004524101  | -0.133610347 | 0.142486111  | 9.49E-01 | 9.62E-01 | 1.00E+00 |
| SDC1    | LMNA | 0.606909887  | 0.511734297  | 0.68736993   | 1.03E-21 | 6.71E-20 | 1.22E-17 |
| ATP6V1H | LMNA | -0.205749909 | -0.334305308 | -0.069678042 | 3.31E-03 | 7.58E-03 | 1.00E+00 |
| SYK     | LMNA | 0.247880653  | 0.113721211  | 0.373161986  | 3.75E-04 | 1.09E-03 | 1.00E+00 |
| IFI44L  | LMNA | -0.079505875 | -0.215194925 | 0.05919484   | 2.61E-01 | 3.42E-01 | 1.00E+00 |
| RPL3L   | LMNA | 0.077556048  | -0.061149663 | 0.213323065  | 2.73E-01 | 3.55E-01 | 1.00E+00 |
| ST20    | LMNA | 0.105843875  | -0.032684709 | 0.240382443  | 1.34E-01 | 1.95E-01 | 1.00E+00 |
| FUT9    | LMNA | -0.611246918 | -0.690989942 | -0.516805657 | 4.41E-22 | 3.13E-20 | 5.23E-18 |
| ACSM1   | LMNA | 0.051192876  | -0.08747634  | 0.187915833  | 4.69E-01 | 5.55E-01 | 1.00E+00 |
| ADMR    | LMNA | -0.103672455 | -0.238312703 | 0.034877719  | 1.42E-01 | 2.05E-01 | 1.00E+00 |
| TDG     | LMNA | -0.134877165 | -0.267939158 | 0.003234054  | 5.56E-02 | 9.21E-02 | 1.00E+00 |
| PMP2    | LMNA | -0.352745001 | -0.468005625 | -0.225684093 | 2.62E-07 | 1.40E-06 | 3.11E-03 |
| PLAG1   | LMNA | 0.326770637  | 0.197635159  | 0.444758147  | 2.07E-06 | 9.36E-06 | 2.46E-02 |
| MYCBP2  | LMNA | -0.380314954 | -0.492507882 | -0.255688321 | 2.36E-08 | 1.51E-07 | 2.80E-04 |
| AGPAT2  | LMNA | 0.682622785  | 0.601229724  | 0.749996542  | 4.68E-29 | 1.13E-26 | 5.55E-25 |
| SLC12A1 | LMNA | -0.165307787 | -0.296590328 | -0.027893337 | 1.87E-02 | 3.52E-02 | 1.00E+00 |
| ENTPD4  | LMNA | 0.01100537   | -0.127238945 | 0.148830253  | 8.76E-01 | 9.09E-01 | 1.00E+00 |
| BRP44L  | LMNA | -0.176900791 | -0.30744361  | -0.039822304 | 1.18E-02 | 2.35E-02 | 1.00E+00 |
| CYP27A1 | LMNA | 0.378409392  | 0.253606757  | 0.490820054  | 2.81E-08 | 1.77E-07 | 3.34E-04 |
| THAP7   | LMNA | -0.063156228 | -0.19946811  | 0.075553507  | 3.72E-01 | 4.60E-01 | 1.00E+00 |
| XPO1    | LMNA | -0.168059418 | -0.299169457 | -0.030721172 | 1.68E-02 | 3.20E-02 | 1.00E+00 |
| KCNN1   | LMNA | -0.354203612 | -0.469306392 | -0.227265476 | 2.32E-07 | 1.25E-06 | 2.75E-03 |
| C1orf2  | LMNA | 0.289777071  | 0.158048651  | 0.411371557  | 2.88E-05 | 1.05E-04 | 3.41E-01 |
| SLC7A9  | LMNA | -0.098773826 | -0.233638966 | 0.039820155  | 1.62E-01 | 2.29E-01 | 1.00E+00 |
| CAMK2A  | LMNA | -0.198001913 | -0.327111528 | -0.061635684 | 4.73E-03 | 1.04E-02 | 1.00E+00 |
| DBC1    | LMNA | -0.312014419 | -0.431479896 | -0.181793995 | 6.17E-06 | 2.54E-05 | 7.32E-02 |

|           |      |              |              |              |          |          |          |
|-----------|------|--------------|--------------|--------------|----------|----------|----------|
| IHPK2     | LMNA | -0.202841264 | -0.331606475 | -0.066656817 | 3.79E-03 | 8.54E-03 | 1.00E+00 |
| FADS3     | LMNA | 0.195455532  | 0.058996422  | 0.32474402   | 5.31E-03 | 1.15E-02 | 1.00E+00 |
| GRM5      | LMNA | -0.413516815 | -0.5217812   | -0.292143222 | 9.55E-10 | 7.92E-09 | 1.13E-05 |
| PEX3      | LMNA | -0.121927726 | -0.25567514  | 0.016399312  | 8.39E-02 | 1.31E-01 | 1.00E+00 |
| AZGP1     | LMNA | 0.049885037  | -0.088777345 | 0.186650635  | 4.81E-01 | 5.66E-01 | 1.00E+00 |
| MED1      | LMNA | -0.009457698 | -0.147316355 | 0.12876142   | 8.94E-01 | 9.23E-01 | 1.00E+00 |
| CLU       | LMNA | 0.13769598   | -0.0003619   | 0.270603069  | 5.07E-02 | 8.49E-02 | 1.00E+00 |
| PABPC4    | LMNA | 0.306869282  | 0.176286411  | 0.426837889  | 8.91E-06 | 3.55E-05 | 1.06E-01 |
| CXCL12    | LMNA | 0.15578079   | 0.018119461  | 0.287645769  | 2.68E-02 | 4.85E-02 | 1.00E+00 |
| HNRPH3    | LMNA | -0.205717824 | -0.334275549 | -0.069644702 | 3.31E-03 | 7.59E-03 | 1.00E+00 |
| TFAP2C    | LMNA | 0.416472282  | 0.295405444  | 0.524374667  | 7.06E-10 | 6.00E-09 | 8.37E-06 |
| ENDOD1    | LMNA | 0.362962058  | 0.236775218  | 0.477106549  | 1.10E-07 | 6.27E-07 | 1.31E-03 |
| IDI1      | LMNA | -0.39449532  | -0.50504152  | -0.271214806 | 6.27E-09 | 4.46E-08 | 7.44E-05 |
| ULBP2     | LMNA | 0.275938316  | 0.14334795   | 0.398797693  | 7.04E-05 | 2.37E-04 | 8.35E-01 |
| CA10      | LMNA | -0.496411738 | -0.593771496 | -0.384726067 | 5.77E-14 | 9.47E-13 | 6.85E-10 |
| OPRD1     | LMNA | -0.068182717 | -0.204310605 | 0.070532181  | 3.35E-01 | 4.21E-01 | 1.00E+00 |
| CCL16     | LMNA | 0.276131408  | 0.143552666  | 0.398973454  | 6.95E-05 | 2.35E-04 | 8.25E-01 |
| COMMD10   | LMNA | -0.057942636 | -0.194438317 | 0.080754322  | 4.13E-01 | 5.01E-01 | 1.00E+00 |
| SACM1L    | LMNA | -0.217321917 | -0.345021745 | -0.081722721 | 1.89E-03 | 4.62E-03 | 1.00E+00 |
| CST6      | LMNA | 0.417805801  | 0.296878298  | 0.525544196  | 6.15E-10 | 5.30E-09 | 7.29E-06 |
| KLHL12    | LMNA | 0.011988407  | -0.126271574 | 0.149791501  | 8.66E-01 | 9.01E-01 | 1.00E+00 |
| CD63      | LMNA | 0.563624733  | 0.461481096  | 0.651020506  | 2.48E-18 | 9.62E-17 | 2.94E-14 |
| LGI1      | LMNA | -0.096886189 | -0.231836324 | 0.041722865  | 1.70E-01 | 2.39E-01 | 1.00E+00 |
| CRYBB1    | LMNA | 0.048621892  | -0.09003344  | 0.185428243  | 4.92E-01 | 5.77E-01 | 1.00E+00 |
| TOP2A     | LMNA | -0.039439113 | -0.176528982 | 0.09915173   | 5.77E-01 | 6.56E-01 | 1.00E+00 |
| CX3CL1    | LMNA | 0.032747805  | -0.10578142  | 0.170030122  | 6.44E-01 | 7.16E-01 | 1.00E+00 |
| GPR50     | LMNA | 0.00763269   | -0.130555877 | 0.145530346  | 9.14E-01 | 9.38E-01 | 1.00E+00 |
| GYPB      | LMNA | -0.230104581 | -0.356820753 | -0.095073707 | 9.86E-04 | 2.59E-03 | 1.00E+00 |
| NR5A2     | LMNA | -0.105552688 | -0.240104962 | 0.03297887   | 1.35E-01 | 1.96E-01 | 1.00E+00 |
| GADD45GII | LMNA | 0.128763473  | -0.00945561  | 0.262154436  | 6.78E-02 | 1.09E-01 | 1.00E+00 |
| FEN1      | LMNA | 0.084697117  | -0.053985105 | 0.220173732  | 2.31E-01 | 3.09E-01 | 1.00E+00 |
| EHD3      | LMNA | -0.274532902 | -0.397518147 | -0.141858264 | 7.69E-05 | 2.57E-04 | 9.12E-01 |
| IGF1R     | LMNA | 0.114380213  | -0.024050554 | 0.248507209  | 1.05E-01 | 1.59E-01 | 1.00E+00 |
| CAPRIN2   | LMNA | 0.24559598   | 0.111319232  | 0.37106607   | 4.27E-04 | 1.22E-03 | 1.00E+00 |
| KLRC3     | LMNA | -0.525884608 | -0.618997102 | -0.418194032 | 9.23E-16 | 2.24E-14 | 1.09E-11 |

|          |      |              |              |              |          |          |          |
|----------|------|--------------|--------------|--------------|----------|----------|----------|
| PURG     | LMNA | -0.618416945 | -0.696965828 | -0.525204248 | 1.06E-22 | 8.89E-21 | 1.25E-18 |
| SF3B1    | LMNA | -0.111625878 | -0.245887733 | 0.026838709  | 1.14E-01 | 1.70E-01 | 1.00E+00 |
| DEFB126  | LMNA | -0.128360782 | -0.261773077 | 0.00986503   | 6.87E-02 | 1.11E-01 | 1.00E+00 |
| CAV1     | LMNA | 0.569775524  | 0.468582308  | 0.656210282  | 8.79E-19 | 3.74E-17 | 1.04E-14 |
| ALDH1A1  | LMNA | 0.090837649  | -0.047812937 | 0.226053882  | 1.99E-01 | 2.72E-01 | 1.00E+00 |
| ANKRD5   | LMNA | 0.209375633  | 0.0734476    | 0.337666546  | 2.78E-03 | 6.50E-03 | 1.00E+00 |
| NLGN1    | LMNA | -0.258207178 | -0.382619419 | -0.124597552 | 2.07E-04 | 6.35E-04 | 1.00E+00 |
| DDEFL1   | LMNA | 0.139795906  | 0.001779243  | 0.272586273  | 4.72E-02 | 7.98E-02 | 1.00E+00 |
| HPRT1    | LMNA | 0.170642236  | 0.033377521  | 0.301588614  | 1.52E-02 | 2.92E-02 | 1.00E+00 |
| RNASEL   | LMNA | 0.166445601  | 0.029062395  | 0.297657043  | 1.79E-02 | 3.39E-02 | 1.00E+00 |
| DNAH9    | LMNA | 0.24428799   | 0.10994479   | 0.36986557   | 4.59E-04 | 1.30E-03 | 1.00E+00 |
| TNS4     | LMNA | 0.056684039  | -0.082008704 | 0.193223014  | 4.23E-01 | 5.10E-01 | 1.00E+00 |
| FANCI    | LMNA | -0.016511718 | -0.154211201 | 0.121816959  | 8.16E-01 | 8.61E-01 | 1.00E+00 |
| PSMA7    | LMNA | 0.305350078  | 0.174661749  | 0.425466033  | 9.92E-06 | 3.93E-05 | 1.18E-01 |
| TTF1     | LMNA | -0.192648227 | -0.322132036 | -0.056088927 | 6.02E-03 | 1.29E-02 | 1.00E+00 |
| DBF4B    | LMNA | -0.429226862 | -0.535544091 | -0.309516311 | 1.84E-10 | 1.75E-09 | 2.19E-06 |
| TUBG1    | LMNA | 0.04675357   | -0.091890527 | 0.183619421  | 5.09E-01 | 5.93E-01 | 1.00E+00 |
| RAD54L   | LMNA | -0.062289691 | -0.198632619 | 0.076418443  | 3.78E-01 | 4.66E-01 | 1.00E+00 |
| PLAGL2   | LMNA | 0.295316525  | 0.163949541  | 0.416391757  | 1.98E-05 | 7.43E-05 | 2.35E-01 |
| HMGCL    | LMNA | 0.368998881  | 0.243343984  | 0.482472416  | 6.52E-08 | 3.88E-07 | 7.74E-04 |
| C11orf60 | LMNA | -0.218020059 | -0.345667207 | -0.082450649 | 1.83E-03 | 4.48E-03 | 1.00E+00 |
| ABCD1    | LMNA | 0.525584076  | 0.417851281  | 0.618740845  | 9.65E-16 | 2.34E-14 | 1.14E-11 |
| ACAA1    | LMNA | -0.004142934 | -0.142112655 | 0.133984697  | 9.53E-01 | 9.65E-01 | 1.00E+00 |
| SPARCL1  | LMNA | -0.252768103 | -0.37764135  | -0.118864879 | 2.84E-04 | 8.47E-04 | 1.00E+00 |
| TXNDC14  | LMNA | -0.1003509   | -0.235144319 | 0.038229717  | 1.55E-01 | 2.21E-01 | 1.00E+00 |
| FAM32A   | LMNA | -0.031579998 | -0.168894676 | 0.106937212  | 6.55E-01 | 7.27E-01 | 1.00E+00 |
| IL6ST    | LMNA | 0.324156581  | 0.194823981  | 0.442409686  | 2.52E-06 | 1.12E-05 | 2.99E-02 |
| TMEM109  | LMNA | 0.534700825  | 0.428262438  | 0.626505692  | 2.47E-16 | 6.65E-15 | 2.93E-12 |
| CCBL1    | LMNA | -0.340860742 | -0.45738878  | -0.212824444 | 6.91E-07 | 3.41E-06 | 8.19E-03 |
| FAM90A1  | LMNA | 0.129926953  | -0.008272426 | 0.26325605   | 6.53E-02 | 1.06E-01 | 1.00E+00 |
| PRSS23   | LMNA | 0.596018859  | 0.499028416  | 0.678261801  | 8.16E-21 | 4.65E-19 | 9.68E-17 |
| ANK1     | LMNA | 0.115893516  | -0.022517751 | 0.249945583  | 1.00E-01 | 1.53E-01 | 1.00E+00 |
| IL22RA1  | LMNA | 0.077573358  | -0.061132314 | 0.213339687  | 2.72E-01 | 3.55E-01 | 1.00E+00 |
| SPATA20  | LMNA | 0.335946687  | 0.207520003  | 0.452989063  | 1.02E-06 | 4.87E-06 | 1.21E-02 |
| ATP4B    | LMNA | 0.014604207  | -0.12369618  | 0.152348055  | 8.37E-01 | 8.78E-01 | 1.00E+00 |

|           |      |              |              |              |          |          |          |
|-----------|------|--------------|--------------|--------------|----------|----------|----------|
| TEC       | LMNA | 0.314535624  | 0.184495792  | 0.433752253  | 5.14E-06 | 2.14E-05 | 6.10E-02 |
| C14orf122 | LMNA | -0.123893374 | -0.25753952  | 0.014403987  | 7.90E-02 | 1.24E-01 | 1.00E+00 |
| APCS      | LMNA | 0.10197326   | -0.036592877 | 0.236692224  | 1.49E-01 | 2.13E-01 | 1.00E+00 |
| PSMB5     | LMNA | 0.02812654   | -0.11035295  | 0.165534786  | 6.91E-01 | 7.57E-01 | 1.00E+00 |
| ABCB4     | LMNA | 0.067541694  | -0.071172937 | 0.203693417  | 3.40E-01 | 4.26E-01 | 1.00E+00 |
| C9orf38   | LMNA | -0.000505544 | -0.138546875 | 0.137555057  | 9.94E-01 | 9.95E-01 | 1.00E+00 |
| C6orf10   | LMNA | -0.124484517 | -0.258100014 | 0.013803703  | 7.75E-02 | 1.23E-01 | 1.00E+00 |
| MXD3      | LMNA | -0.171357877 | -0.30225861  | -0.034113879 | 1.48E-02 | 2.85E-02 | 1.00E+00 |
| SFTPB     | LMNA | 0.008360109  | -0.129840743 | 0.146242329  | 9.06E-01 | 9.32E-01 | 1.00E+00 |
| CARTPT    | LMNA | -0.238444821 | -0.36449746  | -0.103811025 | 6.32E-04 | 1.74E-03 | 1.00E+00 |
| MON2      | LMNA | -0.128495611 | -0.261900768 | 0.009727953  | 6.84E-02 | 1.10E-01 | 1.00E+00 |
| HNF4A     | LMNA | 0.122763057  | -0.015551504 | 0.256467558  | 8.18E-02 | 1.28E-01 | 1.00E+00 |
| CNTNAP2   | LMNA | -0.402408879 | -0.512015888 | -0.279907569 | 2.91E-09 | 2.20E-08 | 3.45E-05 |
| RABEP1    | LMNA | -0.187749202 | -0.317569139 | -0.051020603 | 7.46E-03 | 1.56E-02 | 1.00E+00 |
| TNFRSF10I | LMNA | 0.516210513  | 0.407176269  | 0.610738244  | 3.75E-15 | 7.93E-14 | 4.45E-11 |
| FRK       | LMNA | 0.121405574  | -0.016929163 | 0.255179721  | 8.52E-02 | 1.33E-01 | 1.00E+00 |
| TBX19     | LMNA | 0.379834134  | 0.255162983  | 0.492082081  | 2.47E-08 | 1.57E-07 | 2.93E-04 |
| PPAP2B    | LMNA | -0.084227681 | -0.219723796 | 0.054456525  | 2.33E-01 | 3.11E-01 | 1.00E+00 |
| TMEM16K   | LMNA | 0.167709644  | 0.03036159   | 0.298841717  | 1.70E-02 | 3.24E-02 | 1.00E+00 |
| CTDSP1    | LMNA | 0.514312271  | 0.405018091  | 0.609115281  | 4.91E-15 | 1.02E-13 | 5.82E-11 |
| CDK5R1    | LMNA | -0.63613694  | -0.711687972 | -0.546038698 | 2.63E-24 | 3.03E-22 | 3.12E-20 |
| CHD4      | LMNA | 0.036164706  | -0.102397522 | 0.173350243  | 6.09E-01 | 6.85E-01 | 1.00E+00 |
| GABRR1    | LMNA | 0.136947122  | -0.001125151 | 0.269895561  | 5.20E-02 | 8.68E-02 | 1.00E+00 |
| MOSC2     | LMNA | 0.085037901  | -0.053642844 | 0.220500323  | 2.29E-01 | 3.06E-01 | 1.00E+00 |
| C6orf26   | LMNA | -0.15900732  | -0.290677622 | -0.021426659 | 2.38E-02 | 4.36E-02 | 1.00E+00 |
| IKBKE     | LMNA | 0.412424316  | 0.290938045  | 0.520822009  | 1.07E-09 | 8.77E-09 | 1.27E-05 |
| HIF1A     | LMNA | 0.315265329  | 0.185278132  | 0.434409651  | 4.88E-06 | 2.05E-05 | 5.78E-02 |
| RELA      | LMNA | 0.379866698  | 0.255198559  | 0.492110921  | 2.46E-08 | 1.57E-07 | 2.92E-04 |
| DBN1      | LMNA | -0.188602217 | -0.318364061 | -0.05190259  | 7.19E-03 | 1.51E-02 | 1.00E+00 |
| TMEM16B   | LMNA | -0.027859687 | -0.16527503  | 0.110616752  | 6.94E-01 | 7.60E-01 | 1.00E+00 |
| ACAD10    | LMNA | -0.042635904 | -0.179629618 | 0.095980028  | 5.47E-01 | 6.28E-01 | 1.00E+00 |
| QTRTD1    | LMNA | 0.340247595  | 0.212162174  | 0.45684012   | 7.25E-07 | 3.57E-06 | 8.60E-03 |
| TSEN34    | LMNA | 0.160603675  | 0.023064038  | 0.292176681  | 2.24E-02 | 4.13E-02 | 1.00E+00 |
| RPS19     | LMNA | -0.013733292 | -0.15149707  | 0.12455385   | 8.46E-01 | 8.86E-01 | 1.00E+00 |
| KIF18A    | LMNA | -0.040674756 | -0.177727781 | 0.097926118  | 5.65E-01 | 6.45E-01 | 1.00E+00 |

|          |      |              |              |              |          |          |          |
|----------|------|--------------|--------------|--------------|----------|----------|----------|
| C1QB     | LMNA | 0.207269373  | 0.071257311  | 0.33571433   | 3.08E-03 | 7.11E-03 | 1.00E+00 |
| TXNDC9   | LMNA | 0.071018055  | -0.067696651 | 0.20703922   | 3.15E-01 | 4.01E-01 | 1.00E+00 |
| TMEM22   | LMNA | 0.223404145  | 0.088069305  | 0.35064097   | 1.39E-03 | 3.52E-03 | 1.00E+00 |
| KHSRP    | LMNA | 0.045662152  | -0.092974936 | 0.182562333  | 5.19E-01 | 6.02E-01 | 1.00E+00 |
| SPATA2L  | LMNA | 0.180480822  | 0.043513997  | 0.310788357  | 1.02E-02 | 2.06E-02 | 1.00E+00 |
| TNFRSF11 | LMNA | 0.410685805  | 0.28902102   | 0.519295067  | 1.27E-09 | 1.03E-08 | 1.51E-05 |
| SEMA4G   | LMNA | -0.386640165 | -0.498104319 | -0.262606041 | 1.32E-08 | 8.83E-08 | 1.56E-04 |
| IBTK     | LMNA | 0.034452507  | -0.104093584 | 0.171686929  | 6.26E-01 | 7.01E-01 | 1.00E+00 |
| FBL      | LMNA | 0.115981315  | -0.0224288   | 0.250029017  | 1.00E-01 | 1.52E-01 | 1.00E+00 |
| C21orf91 | LMNA | -0.006384938 | -0.144308738 | 0.131782221  | 9.28E-01 | 9.48E-01 | 1.00E+00 |
| MATN1    | LMNA | 0.153633718  | 0.015920378  | 0.285626778  | 2.90E-02 | 5.19E-02 | 1.00E+00 |
| GPR172B  | LMNA | 0.145252532  | 0.007348894  | 0.277734333  | 3.92E-02 | 6.77E-02 | 1.00E+00 |
| CFTR     | LMNA | 0.05745003   | -0.08124533  | 0.193962706  | 4.17E-01 | 5.04E-01 | 1.00E+00 |
| VSX1     | LMNA | -0.392006702 | -0.502845267 | -0.268485299 | 7.95E-09 | 5.54E-08 | 9.43E-05 |
| CAMK1D   | LMNA | -0.3287473   | -0.446532899 | -0.19976229  | 1.78E-06 | 8.15E-06 | 2.11E-02 |
| RTP4     | LMNA | 0.152616746  | 0.014879235  | 0.284670063  | 3.01E-02 | 5.38E-02 | 1.00E+00 |
| ARMCX6   | LMNA | 0.069508769  | -0.069206319 | 0.205587007  | 3.26E-01 | 4.11E-01 | 1.00E+00 |
| DYNC1I1  | LMNA | -0.377369339 | -0.489898483 | -0.252471129 | 3.09E-08 | 1.93E-07 | 3.67E-04 |
| PPP4C    | LMNA | 0.102588228  | -0.035972226 | 0.23727879   | 1.46E-01 | 2.10E-01 | 1.00E+00 |
| KIAA0828 | LMNA | -0.16730287  | -0.298460528 | -0.029943453 | 1.73E-02 | 3.28E-02 | 1.00E+00 |
| TREH     | LMNA | 0.003605203  | -0.134512745 | 0.141585736  | 9.59E-01 | 9.70E-01 | 1.00E+00 |
| PAR5     | LMNA | -0.425215297 | -0.532035095 | -0.305072477 | 2.83E-10 | 2.58E-09 | 3.36E-06 |
| CD48     | LMNA | 0.216729571  | 0.081105217  | 0.344474001  | 1.95E-03 | 4.74E-03 | 1.00E+00 |
| ST14     | LMNA | 0.325782393  | 0.196572143  | 0.443870502  | 2.23E-06 | 1.00E-05 | 2.65E-02 |
| GDI2     | LMNA | -0.099949003 | -0.234760761 | 0.038635086  | 1.57E-01 | 2.23E-01 | 1.00E+00 |
| PKN1     | LMNA | 0.329619195  | 0.200700942  | 0.447315437  | 1.67E-06 | 7.68E-06 | 1.98E-02 |
| SPON2    | LMNA | 0.472869393  | 0.358201842  | 0.573483347  | 1.19E-12 | 1.63E-11 | 1.42E-08 |
| XBP1     | LMNA | 0.402496987  | 0.280004466  | 0.512093458  | 2.88E-09 | 2.19E-08 | 3.42E-05 |
| MLF2     | LMNA | -0.25976805  | -0.384046661 | -0.126244327 | 1.89E-04 | 5.83E-04 | 1.00E+00 |
| CEBPA    | LMNA | -0.005409135 | -0.143353089 | 0.132740988  | 9.39E-01 | 9.55E-01 | 1.00E+00 |
| SFRS12   | LMNA | 0.137994336  | -5.78E-05    | 0.270884909  | 5.02E-02 | 8.41E-02 | 1.00E+00 |
| EFCAB6   | LMNA | -0.071655493 | -0.207652373 | 0.067058861  | 3.11E-01 | 3.96E-01 | 1.00E+00 |
| SELT     | LMNA | -0.044841718 | -0.181767497 | 0.093789884  | 5.26E-01 | 6.09E-01 | 1.00E+00 |
| SLC39A2  | LMNA | 0.093062415  | -0.045574092 | 0.228181881  | 1.88E-01 | 2.60E-01 | 1.00E+00 |
| ALOX12B  | LMNA | -0.022942707 | -0.160485408 | 0.11547403   | 7.46E-01 | 8.04E-01 | 1.00E+00 |

|          |      |              |              |              |          |          |          |
|----------|------|--------------|--------------|--------------|----------|----------|----------|
| ERF      | LMNA | 0.116627929  | -0.021773641 | 0.250643419  | 9.83E-02 | 1.50E-01 | 1.00E+00 |
| ARL3     | LMNA | -0.525327503 | -0.618522055 | -0.417558688 | 1.00E-15 | 2.41E-14 | 1.19E-11 |
| MLLT10   | LMNA | -0.229499689 | -0.356263319 | -0.094440825 | 1.02E-03 | 2.66E-03 | 1.00E+00 |
| BPHL     | LMNA | -0.227834617 | -0.354728417 | -0.092699267 | 1.11E-03 | 2.88E-03 | 1.00E+00 |
| COX5B    | LMNA | -0.174011226 | -0.304741595 | -0.03684534  | 1.33E-02 | 2.60E-02 | 1.00E+00 |
| S100A10  | LMNA | 0.565111383  | 0.463196265  | 0.652275628  | 1.93E-18 | 7.70E-17 | 2.29E-14 |
| TDGF1    | LMNA | -0.260392712 | -0.384617679 | -0.126903575 | 1.82E-04 | 5.65E-04 | 1.00E+00 |
| ERCC6    | LMNA | -0.320664209 | -0.439269616 | -0.191071567 | 3.28E-06 | 1.42E-05 | 3.89E-02 |
| THOC6    | LMNA | 0.200476643  | 0.064202511  | 0.329410868  | 4.23E-03 | 9.42E-03 | 1.00E+00 |
| BAZ1A    | LMNA | 0.113996546  | -0.02443906  | 0.248142446  | 1.06E-01 | 1.60E-01 | 1.00E+00 |
| RRP12    | LMNA | 0.188512207  | 0.051809513  | 0.318280189  | 7.21E-03 | 1.52E-02 | 1.00E+00 |
| LRRN3    | LMNA | -0.060673548 | -0.197073849 | 0.078031044  | 3.91E-01 | 4.78E-01 | 1.00E+00 |
| EFTUD1   | LMNA | 0.288849245  | 0.157061205  | 0.410529982  | 3.06E-05 | 1.11E-04 | 3.63E-01 |
| PTPRO    | LMNA | -0.369697041 | -0.483092431 | -0.244104408 | 6.13E-08 | 3.66E-07 | 7.28E-04 |
| ARID3B   | LMNA | 0.08173773   | -0.05695596  | 0.217336313  | 2.48E-01 | 3.27E-01 | 1.00E+00 |
| ACBD4    | LMNA | 0.095538667  | -0.043080532 | 0.23054891   | 1.76E-01 | 2.46E-01 | 1.00E+00 |
| KIAA0133 | LMNA | -0.049039183 | -0.185832117 | 0.089618527  | 4.88E-01 | 5.73E-01 | 1.00E+00 |
| CD3G     | LMNA | 0.254925439  | 0.121137599  | 0.379616698  | 2.51E-04 | 7.55E-04 | 1.00E+00 |
| NAT11    | LMNA | -0.210031783 | -0.338274482 | -0.074130195 | 2.70E-03 | 6.33E-03 | 1.00E+00 |
| PPAT     | LMNA | -0.064637039 | -0.200895408 | 0.074074948  | 3.61E-01 | 4.48E-01 | 1.00E+00 |
| SIRT3    | LMNA | 0.056434152  | -0.082257702 | 0.192981672  | 4.25E-01 | 5.12E-01 | 1.00E+00 |
| DPP8     | LMNA | -0.083184122 | -0.21872338  | 0.05550427   | 2.39E-01 | 3.18E-01 | 1.00E+00 |
| ZDHHC14  | LMNA | -0.043631953 | -0.18059515  | 0.094991221  | 5.38E-01 | 6.20E-01 | 1.00E+00 |
| OTUD7B   | LMNA | 0.239104771  | 0.104503283  | 0.365104174  | 6.10E-04 | 1.69E-03 | 1.00E+00 |
| ZFP64    | LMNA | 0.120162001  | -0.018190756 | 0.253999535  | 8.85E-02 | 1.37E-01 | 1.00E+00 |
| ACTB     | LMNA | 0.525987281  | 0.418311136  | 0.619084644  | 9.09E-16 | 2.22E-14 | 1.08E-11 |
| IL7R     | LMNA | 0.461430944  | 0.345381063  | 0.563581253  | 4.80E-12 | 5.98E-11 | 5.69E-08 |
| MSRA     | LMNA | -0.009143132 | -0.147008576 | 0.129070784  | 8.97E-01 | 9.26E-01 | 1.00E+00 |
| TRMT12   | LMNA | -0.222522393 | -0.349826907 | -0.087148547 | 1.46E-03 | 3.65E-03 | 1.00E+00 |
| TLR4     | LMNA | 0.049110346  | -0.089547764 | 0.185900988  | 4.88E-01 | 5.73E-01 | 1.00E+00 |
| IFI35    | LMNA | 0.349083259  | 0.221717092  | 0.464737938  | 3.55E-07 | 1.85E-06 | 4.21E-03 |
| BSCL2    | LMNA | -0.016198938 | -0.153905762 | 0.122125169  | 8.19E-01 | 8.63E-01 | 1.00E+00 |
| ANKRD12  | LMNA | -0.149393983 | -0.281636515 | -0.011581846 | 3.38E-02 | 5.95E-02 | 1.00E+00 |
| CFHR2    | LMNA | 0.251334759  | 0.117355649  | 0.376328291  | 3.08E-04 | 9.13E-04 | 1.00E+00 |
| DDX51    | LMNA | -0.005681521 | -0.143619875 | 0.132473383  | 9.36E-01 | 9.53E-01 | 1.00E+00 |



|          |      |              |              |              |          |          |          |
|----------|------|--------------|--------------|--------------|----------|----------|----------|
| KIAA1086 | LMNA | -0.222542833 | -0.349845781 | -0.087169889 | 1.46E-03 | 3.65E-03 | 1.00E+00 |
| SLC30A5  | LMNA | 0.371543505  | 0.246116289  | 0.484731672  | 5.21E-08 | 3.15E-07 | 6.18E-04 |
| IMPG1    | LMNA | -0.04308915  | -0.18006901  | 0.095530112  | 5.43E-01 | 6.24E-01 | 1.00E+00 |
| ACVR2B   | LMNA | -0.384688124 | -0.496378177 | -0.260469783 | 1.58E-08 | 1.05E-07 | 1.88E-04 |
| ZNF185   | LMNA | 0.295972928  | 0.164649396  | 0.416986142  | 1.90E-05 | 7.14E-05 | 2.25E-01 |
| DNASE1L2 | LMNA | -0.463000305 | -0.564941566 | -0.347137521 | 3.98E-12 | 5.01E-11 | 4.72E-08 |
| LMO3     | LMNA | -0.166600797 | -0.297802517 | -0.029221883 | 1.78E-02 | 3.37E-02 | 1.00E+00 |
| NEUROG1  | LMNA | 0.03105925   | -0.107452481 | 0.168388242  | 6.61E-01 | 7.31E-01 | 1.00E+00 |
| LIN37    | LMNA | -0.092765164 | -0.227897634 | 0.045873305  | 1.89E-01 | 2.61E-01 | 1.00E+00 |
| SOCS2    | LMNA | 0.192310722  | 0.055739533  | 0.32181788   | 6.11E-03 | 1.31E-02 | 1.00E+00 |
| DSCR4    | LMNA | -0.12775788  | -0.261202033 | 0.010477921  | 7.00E-02 | 1.12E-01 | 1.00E+00 |
| ZNF587   | LMNA | -0.123600745 | -0.25726203  | 0.014701104  | 7.97E-02 | 1.25E-01 | 1.00E+00 |
| PPP2R5D  | LMNA | -0.223939628 | -0.35113525  | -0.088628588 | 1.36E-03 | 3.43E-03 | 1.00E+00 |
| CYP2C8   | LMNA | -0.143504127 | -0.276085626 | -0.005563341 | 4.16E-02 | 7.13E-02 | 1.00E+00 |
| C1orf80  | LMNA | 0.149752498  | 0.011948515  | 0.281974112  | 3.34E-02 | 5.90E-02 | 1.00E+00 |
| DOCK5    | LMNA | 0.181977148  | 0.045058103  | 0.312185388  | 9.54E-03 | 1.95E-02 | 1.00E+00 |
| C11orf24 | LMNA | 0.464275715  | 0.348565582  | 0.566046675  | 3.41E-12 | 4.37E-11 | 4.05E-08 |
| CCDC15   | LMNA | -0.074698054 | -0.210577549 | 0.064013059  | 2.91E-01 | 3.74E-01 | 1.00E+00 |
| CAP2     | LMNA | -0.137812449 | -0.270713093 | 0.000243178  | 5.05E-02 | 8.46E-02 | 1.00E+00 |
| TIMM44   | LMNA | 0.07825707   | -0.060446968 | 0.21399617   | 2.68E-01 | 3.50E-01 | 1.00E+00 |
| ROM1     | LMNA | -0.002539585 | -0.140541313 | 0.135558941  | 9.71E-01 | 9.78E-01 | 1.00E+00 |
| MYLC2PL  | LMNA | 0.092969203  | -0.045667922 | 0.228092749  | 1.88E-01 | 2.60E-01 | 1.00E+00 |
| MOS      | LMNA | -0.075859156 | -0.211693214 | 0.062850037  | 2.83E-01 | 3.66E-01 | 1.00E+00 |
| MLH3     | LMNA | 0.108918408  | -0.029577326 | 0.243310914  | 1.23E-01 | 1.81E-01 | 1.00E+00 |
| CD1E     | LMNA | 0.13208209   | -0.00607977  | 0.265295672  | 6.10E-02 | 9.97E-02 | 1.00E+00 |
| NOX1     | LMNA | 0.134727877  | -0.003386103 | 0.267798017  | 5.59E-02 | 9.25E-02 | 1.00E+00 |
| DPEP2    | LMNA | 0.171177574  | 0.033928342  | 0.302089819  | 1.49E-02 | 2.87E-02 | 1.00E+00 |
| DNAJB5   | LMNA | -0.30442218  | -0.424627861 | -0.173669789 | 1.06E-05 | 4.17E-05 | 1.26E-01 |
| MBIP     | LMNA | -0.328743001 | -0.44652904  | -0.199757662 | 1.78E-06 | 8.15E-06 | 2.11E-02 |
| COPB1    | LMNA | 0.35196537   | 0.224839116  | 0.467310158  | 2.80E-07 | 1.49E-06 | 3.32E-03 |
| CCDC90A  | LMNA | 0.174669654  | 0.037523469  | 0.305357472  | 1.29E-02 | 2.54E-02 | 1.00E+00 |
| NOLA1    | LMNA | 0.251009652  | 0.117013416  | 0.376030397  | 3.14E-04 | 9.28E-04 | 1.00E+00 |
| CD320    | LMNA | 0.276811248  | 0.144273526  | 0.399592204  | 6.66E-05 | 2.25E-04 | 7.90E-01 |
| RABL3    | LMNA | 0.171568021  | 0.034330134  | 0.302455326  | 1.46E-02 | 2.83E-02 | 1.00E+00 |
| ANGEL2   | LMNA | -0.296600514 | -0.417554336 | -0.165318651 | 1.82E-05 | 6.86E-05 | 2.16E-01 |

|          |      |              |              |              |          |          |          |
|----------|------|--------------|--------------|--------------|----------|----------|----------|
| C19orf24 | LMNA | 0.399216125  | 0.276398024  | 0.509203792  | 3.97E-09 | 2.94E-08 | 4.71E-05 |
| SMG6     | LMNA | 0.097651364  | -0.040951701 | 0.232567158  | 1.67E-01 | 2.35E-01 | 1.00E+00 |
| INSR     | LMNA | 0.08385026   | -0.054835495 | 0.219362011  | 2.35E-01 | 3.14E-01 | 1.00E+00 |
| GLRB     | LMNA | -0.396123741 | -0.506477858 | -0.273001926 | 5.36E-09 | 3.88E-08 | 6.36E-05 |
| HLA-DMA  | LMNA | 0.257196776  | 0.123531934  | 0.381695203  | 2.20E-04 | 6.70E-04 | 1.00E+00 |
| HCRP1    | LMNA | -0.301363867 | -0.421863821 | -0.170402209 | 1.31E-05 | 5.08E-05 | 1.55E-01 |
| GPR137   | LMNA | 0.180298553  | 0.043325952  | 0.310618145  | 1.02E-02 | 2.07E-02 | 1.00E+00 |
| URG4     | LMNA | 0.243398727  | 0.109010641  | 0.369049146  | 4.82E-04 | 1.36E-03 | 1.00E+00 |
| CIZ1     | LMNA | 0.235535888  | 0.100761236  | 0.361821901  | 7.40E-04 | 2.01E-03 | 1.00E+00 |
| MARK4    | LMNA | -0.053523806 | -0.19016964  | 0.085156417  | 4.49E-01 | 5.36E-01 | 1.00E+00 |
| LRDD     | LMNA | -0.056517896 | -0.193062555 | 0.082174257  | 4.24E-01 | 5.11E-01 | 1.00E+00 |
| METTL4   | LMNA | -0.154954688 | -0.286869086 | -0.017273189 | 2.77E-02 | 4.98E-02 | 1.00E+00 |
| CBY1     | LMNA | -0.013792459 | -0.151554889 | 0.124495589  | 8.46E-01 | 8.85E-01 | 1.00E+00 |
| NFX1     | LMNA | -0.120524922 | -0.254343998 | 0.017822622  | 8.75E-02 | 1.36E-01 | 1.00E+00 |
| MBD3     | LMNA | 0.126750995  | -0.011501256 | 0.260248147  | 7.22E-02 | 1.15E-01 | 1.00E+00 |
| MTERFD2  | LMNA | -0.180501675 | -0.31080783  | -0.043535511 | 1.02E-02 | 2.06E-02 | 1.00E+00 |
| PGC      | LMNA | -0.117490722 | -0.251463064 | 0.020899259  | 9.59E-02 | 1.47E-01 | 1.00E+00 |
| FGF3     | LMNA | -0.121039379 | -0.254832233 | 0.01730071   | 8.62E-02 | 1.34E-01 | 1.00E+00 |
| SLC35A3  | LMNA | 0.019772084  | -0.118602649 | 0.157393471  | 7.80E-01 | 8.32E-01 | 1.00E+00 |
| CLEC16A  | LMNA | -0.238213531 | -0.364284801 | -0.103568442 | 6.40E-04 | 1.76E-03 | 1.00E+00 |
| IER3IP1  | LMNA | 0.14883419   | 0.011009396  | 0.281109319  | 3.45E-02 | 6.05E-02 | 1.00E+00 |
| RASAL2   | LMNA | 0.159500589  | 0.021932525  | 0.291140895  | 2.34E-02 | 4.29E-02 | 1.00E+00 |
| C1orf89  | LMNA | 0.239460316  | 0.104876288  | 0.365430996  | 5.98E-04 | 1.66E-03 | 1.00E+00 |
| PAICS    | LMNA | 0.108727029  | -0.029770828 | 0.243128699  | 1.23E-01 | 1.82E-01 | 1.00E+00 |
| SYNJ1    | LMNA | -0.326273217 | -0.444311391 | -0.197100065 | 2.15E-06 | 9.70E-06 | 2.55E-02 |
| MMD      | LMNA | -0.247727464 | -0.373021494 | -0.113560109 | 3.79E-04 | 1.10E-03 | 1.00E+00 |
| NFKBIE   | LMNA | 0.279711863  | 0.147350738  | 0.402230917  | 5.54E-05 | 1.90E-04 | 6.57E-01 |
| KLK10    | LMNA | 0.073873333  | -0.064838913 | 0.209784887  | 2.96E-01 | 3.80E-01 | 1.00E+00 |
| TCEB2    | LMNA | -0.346058317 | -0.462036143 | -0.218443153 | 4.54E-07 | 2.32E-06 | 5.39E-03 |
| NIT2     | LMNA | 0.112557182  | -0.02589621  | 0.246773658  | 1.11E-01 | 1.66E-01 | 1.00E+00 |
| SERPINB1 | LMNA | 0.069267641  | -0.069447448 | 0.205354942  | 3.27E-01 | 4.13E-01 | 1.00E+00 |
| KLF15    | LMNA | -0.397978399 | -0.508113002 | -0.275038368 | 4.48E-09 | 3.29E-08 | 5.32E-05 |
| HLA-B    | LMNA | 0.456082212  | 0.339400768  | 0.558940841  | 9.03E-12 | 1.07E-10 | 1.07E-07 |
| PPP2R2B  | LMNA | -0.386161317 | -0.497680967 | -0.26208189  | 1.38E-08 | 9.20E-08 | 1.64E-04 |
| ARHGEF17 | LMNA | 0.017703857  | -0.120641997 | 0.155375115  | 8.03E-01 | 8.51E-01 | 1.00E+00 |

|          |      |              |              |              |          |          |          |
|----------|------|--------------|--------------|--------------|----------|----------|----------|
| TCF7L2   | LMNA | -0.093413905 | -0.228517965 | 0.04522025   | 1.86E-01 | 2.58E-01 | 1.00E+00 |
| WSB2     | LMNA | -0.352830905 | -0.468082247 | -0.22577721  | 2.60E-07 | 1.39E-06 | 3.09E-03 |
| CHD5     | LMNA | -0.338139531 | -0.454953093 | -0.209886119 | 8.58E-07 | 4.15E-06 | 1.02E-02 |
| ME3      | LMNA | -0.110434828 | -0.244754392 | 0.028043717  | 1.18E-01 | 1.75E-01 | 1.00E+00 |
| CACYBP   | LMNA | -0.321685234 | -0.440187942 | -0.192168226 | 3.04E-06 | 1.33E-05 | 3.60E-02 |
| TCTN2    | LMNA | 0.347261092  | 0.21974459   | 0.463110686  | 4.12E-07 | 2.12E-06 | 4.89E-03 |
| C2orf25  | LMNA | -0.031595869 | -0.168910111 | 0.106921506  | 6.55E-01 | 7.27E-01 | 1.00E+00 |
| JAK1     | LMNA | 0.079121015  | -0.059580771 | 0.214825533  | 2.63E-01 | 3.45E-01 | 1.00E+00 |
| GPD2     | LMNA | 0.060405876  | -0.07829806  | 0.196815613  | 3.93E-01 | 4.80E-01 | 1.00E+00 |
| FBXL11   | LMNA | 0.295640937  | 0.164295412  | 0.416685531  | 1.94E-05 | 7.29E-05 | 2.30E-01 |
| CDV3     | LMNA | 0.407464658  | 0.285471699  | 0.516464087  | 1.76E-09 | 1.39E-08 | 2.09E-05 |
| SCUBE2   | LMNA | -0.095235477 | -0.230259179 | 0.043385934  | 1.78E-01 | 2.48E-01 | 1.00E+00 |
| GALNT11  | LMNA | 0.339354196  | 0.211197411  | 0.456040525  | 7.79E-07 | 3.81E-06 | 9.24E-03 |
| MYCBP    | LMNA | 0.323773767  | 0.194412478  | 0.442065631  | 2.60E-06 | 1.15E-05 | 3.08E-02 |
| GPX5     | LMNA | -0.20926394  | -0.337563049 | -0.073331418 | 2.80E-03 | 6.53E-03 | 1.00E+00 |
| QSER1    | LMNA | 0.135392913  | -0.002708717 | 0.268426716  | 5.47E-02 | 9.07E-02 | 1.00E+00 |
| FLOT1    | LMNA | 0.343261759  | 0.215418952  | 0.459536418  | 5.70E-07 | 2.84E-06 | 6.76E-03 |
| C1orf164 | LMNA | -0.166895616 | -0.298078848 | -0.029524872 | 1.76E-02 | 3.33E-02 | 1.00E+00 |
| MMP25    | LMNA | -0.016540588 | -0.154239392 | 0.12178851   | 8.15E-01 | 8.61E-01 | 1.00E+00 |
| ULK2     | LMNA | -0.283637875 | -0.405799202 | -0.151519861 | 4.30E-05 | 1.51E-04 | 5.10E-01 |
| PIGO     | LMNA | 0.204576623  | 0.068459043  | 0.333216909  | 3.49E-03 | 7.95E-03 | 1.00E+00 |
| CHST5    | LMNA | -0.112883042 | -0.247083586 | 0.025566376  | 1.10E-01 | 1.65E-01 | 1.00E+00 |
| NRCAM    | LMNA | 0.322493278  | 0.193036356  | 0.440914534  | 2.86E-06 | 1.26E-05 | 3.39E-02 |
| SLC35E3  | LMNA | -0.060810124 | -0.197205604 | 0.077894795  | 3.90E-01 | 4.77E-01 | 1.00E+00 |
| LYRM4    | LMNA | -0.241998115 | -0.367762864 | -0.107539813 | 5.21E-04 | 1.46E-03 | 1.00E+00 |
| CSRP2    | LMNA | 0.283799169  | 0.151691243  | 0.40594572   | 4.26E-05 | 1.50E-04 | 5.05E-01 |
| HYPE     | LMNA | 0.182040153  | 0.045123134  | 0.312244199  | 9.52E-03 | 1.94E-02 | 1.00E+00 |
| HIPK2    | LMNA | -0.229698815 | -0.356446832 | -0.094649153 | 1.01E-03 | 2.64E-03 | 1.00E+00 |
| GPFR     | LMNA | -0.068275923 | -0.204400336 | 0.070439004  | 3.34E-01 | 4.20E-01 | 1.00E+00 |
| DAP      | LMNA | 0.5524122    | 0.44856959   | 0.641538775  | 1.56E-17 | 5.23E-16 | 1.85E-13 |
| ZMIZ1    | LMNA | -0.206032928 | -0.3345678   | -0.069972149 | 3.26E-03 | 7.49E-03 | 1.00E+00 |
| DDX58    | LMNA | 0.168620543  | 0.031298107  | 0.299695169  | 1.64E-02 | 3.14E-02 | 1.00E+00 |
| TIMM13   | LMNA | -0.062854529 | -0.199177243 | 0.075854673  | 3.74E-01 | 4.62E-01 | 1.00E+00 |
| DCC1     | LMNA | -0.121549703 | -0.255316479 | 0.016782916  | 8.48E-02 | 1.32E-01 | 1.00E+00 |
| AKT1     | LMNA | 0.358793958  | 0.232246563  | 0.473396736  | 1.58E-07 | 8.73E-07 | 1.87E-03 |

|           |      |              |              |              |          |          |          |
|-----------|------|--------------|--------------|--------------|----------|----------|----------|
| GBA3      | LMNA | -0.079153555 | -0.214856767 | 0.059548141  | 2.63E-01 | 3.44E-01 | 1.00E+00 |
| CDC34     | LMNA | 0.066970593  | -0.071743704 | 0.20314346   | 3.44E-01 | 4.30E-01 | 1.00E+00 |
| TEX13A    | LMNA | -0.105628218 | -0.240176939 | 0.032902571  | 1.35E-01 | 1.96E-01 | 1.00E+00 |
| MTRF1     | LMNA | -0.211884963 | -0.339990913 | -0.076058752 | 2.47E-03 | 5.84E-03 | 1.00E+00 |
| MCM6      | LMNA | 0.097886253  | -0.040714941 | 0.232791474  | 1.66E-01 | 2.34E-01 | 1.00E+00 |
| RNF125    | LMNA | -0.152260846 | -0.284335189 | -0.014514946 | 3.05E-02 | 5.44E-02 | 1.00E+00 |
| ABCA7     | LMNA | 0.189474441  | 0.052804659  | 0.319176693  | 6.92E-03 | 1.46E-02 | 1.00E+00 |
| CASC1     | LMNA | -0.169578122 | -0.300592132 | -0.032282878 | 1.58E-02 | 3.03E-02 | 1.00E+00 |
| EIF4A2    | LMNA | -0.454167409 | -0.557278043 | -0.337262161 | 1.13E-11 | 1.32E-10 | 1.34E-07 |
| SHROOM2   | LMNA | 0.100817541  | -0.037758988 | 0.235589614  | 1.53E-01 | 2.19E-01 | 1.00E+00 |
| RPGR      | LMNA | 0.288575946  | 0.156770395  | 0.410282049  | 3.11E-05 | 1.13E-04 | 3.69E-01 |
| COL6A3    | LMNA | 0.619237224  | 0.526166237  | 0.697648797  | 8.96E-23 | 7.86E-21 | 1.06E-18 |
| TMEFF1    | LMNA | -0.52794938  | -0.620757153 | -0.420549698 | 6.80E-16 | 1.68E-14 | 8.07E-12 |
| GPR125    | LMNA | -0.069428202 | -0.20550947  | 0.069286888  | 3.26E-01 | 4.12E-01 | 1.00E+00 |
| PLEKHA4   | LMNA | 0.509215388  | 0.399229286  | 0.604753605  | 1.01E-14 | 1.95E-13 | 1.19E-10 |
| USP22     | LMNA | -0.173327248 | -0.304101703 | -0.03614103  | 1.36E-02 | 2.67E-02 | 1.00E+00 |
| PTCD1     | LMNA | 0.205701912  | 0.069628168  | 0.334260791  | 3.32E-03 | 7.59E-03 | 1.00E+00 |
| GNPAT     | LMNA | -0.171170464 | -0.302083163 | -0.033921026 | 1.49E-02 | 2.87E-02 | 1.00E+00 |
| CRTAC1    | LMNA | -0.396016469 | -0.506383259 | -0.272884174 | 5.42E-09 | 3.91E-08 | 6.43E-05 |
| BXDC2     | LMNA | 0.064427568  | -0.074284137 | 0.200693542  | 3.62E-01 | 4.49E-01 | 1.00E+00 |
| C18orf1   | LMNA | -0.362943719 | -0.477090235 | -0.236755281 | 1.11E-07 | 6.28E-07 | 1.31E-03 |
| WDR18     | LMNA | -0.049117601 | -0.185908009 | 0.08954055   | 4.88E-01 | 5.73E-01 | 1.00E+00 |
| HSD17B12  | LMNA | -0.012531486 | -0.150322431 | 0.125737038  | 8.60E-01 | 8.96E-01 | 1.00E+00 |
| HIST1H2BM | LMNA | 0.04334412   | -0.09527699  | 0.180316163  | 5.40E-01 | 6.22E-01 | 1.00E+00 |
| FAM107A   | LMNA | -0.341910549 | -0.458327969 | -0.21395863  | 6.35E-07 | 3.15E-06 | 7.53E-03 |
| EFNA3     | LMNA | -0.323045943 | -0.441411401 | -0.193630234 | 2.74E-06 | 1.21E-05 | 3.25E-02 |
| P18SRP    | LMNA | -0.155379491 | -0.287268498 | -0.017708339 | 2.72E-02 | 4.91E-02 | 1.00E+00 |
| CYP2B6    | LMNA | 0.148592516  | 0.010762286  | 0.280881694  | 3.48E-02 | 6.10E-02 | 1.00E+00 |
| CAMKK2    | LMNA | -0.218231272 | -0.345862458 | -0.082670901 | 1.81E-03 | 4.43E-03 | 1.00E+00 |
| NES       | LMNA | 0.315778853  | 0.185828796  | 0.434872214  | 4.70E-06 | 1.98E-05 | 5.57E-02 |
| KIAA0649  | LMNA | -0.114406044 | -0.248531767 | 0.024024394  | 1.05E-01 | 1.59E-01 | 1.00E+00 |
| TBC1D2    | LMNA | 0.286459937  | 0.15451958   | 0.408361828  | 3.58E-05 | 1.28E-04 | 4.25E-01 |
| SLC25A12  | LMNA | -0.211519388 | -0.339652382 | -0.075678227 | 2.51E-03 | 5.94E-03 | 1.00E+00 |
| ERCC6L    | LMNA | 0.155403724  | 0.017733165  | 0.287291281  | 2.72E-02 | 4.91E-02 | 1.00E+00 |
| POLR2C    | LMNA | 0.009521248  | -0.128698917 | 0.147378531  | 8.93E-01 | 9.22E-01 | 1.00E+00 |

|          |      |              |              |              |          |          |          |
|----------|------|--------------|--------------|--------------|----------|----------|----------|
| PON2     | LMNA | -0.037527827 | -0.174673885 | 0.101046671  | 5.96E-01 | 6.73E-01 | 1.00E+00 |
| ANKRD27  | LMNA | 0.117049003  | -0.021346937 | 0.25104346   | 9.71E-02 | 1.48E-01 | 1.00E+00 |
| HPX      | LMNA | 0.060904138  | -0.077801003 | 0.197296296  | 3.89E-01 | 4.77E-01 | 1.00E+00 |
| EIF3K    | LMNA | -0.004109754 | -0.142080145 | 0.134017282  | 9.54E-01 | 9.66E-01 | 1.00E+00 |
| CLEC4A   | LMNA | 0.115508055  | -0.02290824  | 0.249579264  | 1.02E-01 | 1.54E-01 | 1.00E+00 |
| CPSF4    | LMNA | 0.079886995  | -0.05881262  | 0.215560689  | 2.58E-01 | 3.40E-01 | 1.00E+00 |
| MLXIPL   | LMNA | -0.179749952 | -0.310105783 | -0.042760027 | 1.05E-02 | 2.11E-02 | 1.00E+00 |
| ENC1     | LMNA | -0.197049888 | -0.326226569 | -0.06064871  | 4.94E-03 | 1.08E-02 | 1.00E+00 |
| MAP2K1   | LMNA | 0.109647493  | -0.028840058 | 0.244005003  | 1.20E-01 | 1.78E-01 | 1.00E+00 |
| GH1      | LMNA | 0.092888129  | -0.045749532 | 0.228015222  | 1.89E-01 | 2.60E-01 | 1.00E+00 |
| FKSG2    | LMNA | 0.139174806  | 0.00114582   | 0.271999814  | 4.82E-02 | 8.13E-02 | 1.00E+00 |
| HPS5     | LMNA | 0.138894542  | 0.000860032  | 0.271735149  | 4.87E-02 | 8.20E-02 | 1.00E+00 |
| KIAA0430 | LMNA | -0.304813048 | -0.424980958 | -0.17408761  | 1.03E-05 | 4.06E-05 | 1.22E-01 |
| POP5     | LMNA | -0.118513481 | -0.252434426 | 0.019862488  | 9.30E-02 | 1.43E-01 | 1.00E+00 |
| PTP4A1   | LMNA | -0.031262996 | -0.168586397 | 0.107250887  | 6.59E-01 | 7.29E-01 | 1.00E+00 |
| MARS     | LMNA | -0.089668523 | -0.224935091 | 0.048988902  | 2.04E-01 | 2.79E-01 | 1.00E+00 |
| ARSE     | LMNA | 0.258585434  | 0.124996557  | 0.382965346  | 2.03E-04 | 6.21E-04 | 1.00E+00 |
| PPIE     | LMNA | 0.031927154  | -0.106593666 | 0.169232251  | 6.52E-01 | 7.24E-01 | 1.00E+00 |
| UBR2     | LMNA | -0.003433677 | -0.141417643 | 0.134681165  | 9.61E-01 | 9.71E-01 | 1.00E+00 |
| GP5      | LMNA | 0.228638074  | 0.093539529  | 0.355469148  | 1.06E-03 | 2.78E-03 | 1.00E+00 |
| IL8RB    | LMNA | 0.107577492  | -0.030932899 | 0.242034002  | 1.28E-01 | 1.87E-01 | 1.00E+00 |
| MAK      | LMNA | 0.037632728  | -0.100942694 | 0.174775727  | 5.95E-01 | 6.72E-01 | 1.00E+00 |
| OR11A1   | LMNA | -0.039494322 | -0.176582554 | 0.099096978  | 5.77E-01 | 6.56E-01 | 1.00E+00 |
| STC2     | LMNA | 0.146868131  | 0.0089996    | 0.279257112  | 3.70E-02 | 6.44E-02 | 1.00E+00 |
| PGLS     | LMNA | 0.423663991  | 0.303355411  | 0.530677151  | 3.33E-10 | 3.00E-09 | 3.95E-06 |
| SAE1     | LMNA | 0.046286421  | -0.092354716 | 0.183167005  | 5.13E-01 | 5.97E-01 | 1.00E+00 |
| COL6A1   | LMNA | 0.702810933  | 0.625442734  | 0.766493826  | 2.10E-31 | 8.58E-29 | 2.49E-27 |
| STMN4    | LMNA | -0.598307494 | -0.680177878 | -0.501694967 | 5.32E-21 | 3.11E-19 | 6.31E-17 |
| OAZ1     | LMNA | 0.140370403  | 0.002365236  | 0.273128642  | 4.63E-02 | 7.85E-02 | 1.00E+00 |
| SGCE     | LMNA | 0.106740601  | -0.031778679 | 0.241236821  | 1.31E-01 | 1.91E-01 | 1.00E+00 |
| YIPF5    | LMNA | 0.260212908  | 0.126713803  | 0.384453326  | 1.84E-04 | 5.70E-04 | 1.00E+00 |
| PRSS8    | LMNA | -0.027009573 | -0.164447399 | 0.111457017  | 7.03E-01 | 7.67E-01 | 1.00E+00 |
| IL11     | LMNA | 0.34700914   | 0.219471933  | 0.462885624  | 4.21E-07 | 2.16E-06 | 4.99E-03 |
| WNT4     | LMNA | 0.045445098  | -0.093190556 | 0.182352069  | 5.21E-01 | 6.04E-01 | 1.00E+00 |
| CSN2     | LMNA | 0.390479006  | 0.266810708  | 0.501496336  | 9.19E-09 | 6.31E-08 | 1.09E-04 |

|          |      |              |              |              |          |          |          |
|----------|------|--------------|--------------|--------------|----------|----------|----------|
| TCF7     | LMNA | 0.093515539  | -0.04511793  | 0.228615138  | 1.86E-01 | 2.57E-01 | 1.00E+00 |
| SAMD9    | LMNA | 0.34524178   | 0.217559895  | 0.461306465  | 4.86E-07 | 2.46E-06 | 5.76E-03 |
| TDO2     | LMNA | 0.40057873   | 0.277895428  | 0.510404226  | 3.48E-09 | 2.60E-08 | 4.13E-05 |
| MMRN1    | LMNA | -0.012572047 | -0.150362081 | 0.125697112  | 8.59E-01 | 8.96E-01 | 1.00E+00 |
| SV2C     | LMNA | -0.249614184 | -0.374751442 | -0.115544798 | 3.40E-04 | 9.98E-04 | 1.00E+00 |
| LCN2     | LMNA | 0.049933015  | -0.088729626 | 0.186697056  | 4.80E-01 | 5.66E-01 | 1.00E+00 |
| AKR1C3   | LMNA | -0.206496983 | -0.334998153 | -0.070454435 | 3.19E-03 | 7.35E-03 | 1.00E+00 |
| RNF19A   | LMNA | -0.028818624 | -0.166208375 | 0.109668686  | 6.84E-01 | 7.51E-01 | 1.00E+00 |
| YKT6     | LMNA | 0.511986596  | 0.402375609  | 0.607125787  | 6.82E-15 | 1.36E-13 | 8.09E-11 |
| GMDS     | LMNA | 0.331837956  | 0.203090652  | 0.449305996  | 1.40E-06 | 6.53E-06 | 1.67E-02 |
| SPARC    | LMNA | 0.370391248  | 0.24486068   | 0.483708822  | 5.77E-08 | 3.46E-07 | 6.84E-04 |
| CBX5     | LMNA | -0.192048366 | -0.321573655 | -0.055467958 | 6.18E-03 | 1.32E-02 | 1.00E+00 |
| MAGEB4   | LMNA | -0.152086688 | -0.284171308 | -0.014336697 | 3.07E-02 | 5.47E-02 | 1.00E+00 |
| UBE2V2   | LMNA | -0.189165213 | -0.318888614 | -0.052484825 | 7.01E-03 | 1.48E-02 | 1.00E+00 |
| ASB7     | LMNA | 0.484066088  | 0.370793674  | 0.583147768  | 2.91E-13 | 4.36E-12 | 3.45E-09 |
| BOLA1    | LMNA | -0.291811079 | -0.41321576  | -0.16021428  | 2.51E-05 | 9.24E-05 | 2.98E-01 |
| PPP2R5E  | LMNA | -0.079672814 | -0.215355143 | 0.059027424  | 2.60E-01 | 3.41E-01 | 1.00E+00 |
| COL5A1   | LMNA | 0.702893891  | 0.625542539  | 0.766561445  | 2.05E-31 | 8.58E-29 | 2.43E-27 |
| DERL1    | LMNA | 0.329163384  | 0.200210202  | 0.446906363  | 1.73E-06 | 7.93E-06 | 2.05E-02 |
| FBXL18   | LMNA | 0.194998625  | 0.058523051  | 0.324319037  | 5.42E-03 | 1.17E-02 | 1.00E+00 |
| KIAA0460 | LMNA | -0.24637253  | -0.371778606 | -0.112135478 | 4.09E-04 | 1.17E-03 | 1.00E+00 |
| ADAM22   | LMNA | -0.30847878  | -0.428290677 | -0.17800841  | 7.95E-06 | 3.20E-05 | 9.43E-02 |
| SERPINC1 | LMNA | 0.051832422  | -0.086839964 | 0.188534361  | 4.64E-01 | 5.50E-01 | 1.00E+00 |
| MOAP1    | LMNA | -0.433213366 | -0.539027534 | -0.313937571 | 1.20E-10 | 1.18E-09 | 1.42E-06 |
| F3       | LMNA | 0.25702704   | 0.123352952  | 0.381539921  | 2.22E-04 | 6.76E-04 | 1.00E+00 |
| MYOHD1   | LMNA | 0.185584669  | 0.048783509  | 0.315551201  | 8.19E-03 | 1.70E-02 | 1.00E+00 |
| ZNF37A   | LMNA | -0.177783562 | -0.308268664 | -0.040732262 | 1.14E-02 | 2.27E-02 | 1.00E+00 |
| GTF3C1   | LMNA | 0.062569934  | -0.076138741 | 0.198902844  | 3.76E-01 | 4.64E-01 | 1.00E+00 |
| CTSZ     | LMNA | 0.520268591  | 0.411794127  | 0.614205166  | 2.09E-15 | 4.65E-14 | 2.48E-11 |
| PLEKHM2  | LMNA | 0.266638904  | 0.133502084  | 0.390322234  | 1.25E-04 | 4.02E-04 | 1.00E+00 |
| PRNPIP   | LMNA | -0.216376077 | -0.344147083 | -0.080736759 | 1.98E-03 | 4.82E-03 | 1.00E+00 |
| DRD1IP   | LMNA | -0.321076561 | -0.439640522 | -0.191514426 | 3.18E-06 | 1.38E-05 | 3.77E-02 |
| NR1I2    | LMNA | 0.100294468  | -0.03828664  | 0.235090464  | 1.56E-01 | 2.22E-01 | 1.00E+00 |
| ZNF266   | LMNA | -0.199276668 | -0.32829613  | -0.062957654 | 4.47E-03 | 9.90E-03 | 1.00E+00 |
| EFCAB1   | LMNA | -0.048608376 | -0.18541516  | 0.090046878  | 4.92E-01 | 5.77E-01 | 1.00E+00 |

|          |      |              |              |              |          |          |          |
|----------|------|--------------|--------------|--------------|----------|----------|----------|
| COX4NB   | LMNA | 0.006474592  | -0.13169412  | 0.144396527  | 9.27E-01 | 9.47E-01 | 1.00E+00 |
| TMEM48   | LMNA | 0.290725259  | 0.159058039  | 0.412231389  | 2.70E-05 | 9.88E-05 | 3.20E-01 |
| SAPS1    | LMNA | 0.338241796  | 0.209996502  | 0.45504466   | 8.51E-07 | 4.12E-06 | 1.01E-02 |
| SEPHS2   | LMNA | 0.181821517  | 0.044897472  | 0.312040111  | 9.60E-03 | 1.96E-02 | 1.00E+00 |
| APOA1    | LMNA | -0.068019561 | -0.204153526 | 0.07069528   | 3.36E-01 | 4.22E-01 | 1.00E+00 |
| PYGM     | LMNA | -0.095482643 | -0.230495375 | 0.043136967  | 1.76E-01 | 2.46E-01 | 1.00E+00 |
| KPNB1    | LMNA | 0.145714386  | 0.007820707  | 0.27816972   | 3.85E-02 | 6.66E-02 | 1.00E+00 |
| WNT5B    | LMNA | 0.146845728  | 0.008976705  | 0.279236001  | 3.70E-02 | 6.44E-02 | 1.00E+00 |
| FOXO3    | LMNA | -0.014570459 | -0.152315083 | 0.123729419  | 8.37E-01 | 8.78E-01 | 1.00E+00 |
| KHDRBS1  | LMNA | -0.067656625 | -0.203804083 | 0.071058062  | 3.39E-01 | 4.25E-01 | 1.00E+00 |
| CRYBB2   | LMNA | 0.048699063  | -0.089956712 | 0.185502936  | 4.91E-01 | 5.76E-01 | 1.00E+00 |
| LARS2    | LMNA | 0.006422331  | -0.131745476 | 0.144345354  | 9.28E-01 | 9.47E-01 | 1.00E+00 |
| C3orf28  | LMNA | 0.128229296  | -0.009998703 | 0.261648547  | 6.90E-02 | 1.11E-01 | 1.00E+00 |
| ZBTB5    | LMNA | -0.500770221 | -0.597513987 | -0.389656917 | 3.21E-14 | 5.54E-13 | 3.81E-10 |
| SLC25A38 | LMNA | 0.054788705  | -0.083896861 | 0.191392085  | 4.39E-01 | 5.25E-01 | 1.00E+00 |
| C10orf68 | LMNA | -0.328677056 | -0.446469846 | -0.199686678 | 1.79E-06 | 8.19E-06 | 2.12E-02 |
| FTCD     | LMNA | -0.147575374 | -0.279923513 | -0.009722448 | 3.61E-02 | 6.30E-02 | 1.00E+00 |
| DCTN2    | LMNA | -0.22853502  | -0.355374148 | -0.093431743 | 1.07E-03 | 2.79E-03 | 1.00E+00 |
| PSEN1    | LMNA | 0.041386069  | -0.09722039  | 0.1784177    | 5.59E-01 | 6.39E-01 | 1.00E+00 |
| PLA2G4B  | LMNA | -0.287461427 | -0.409270787 | -0.155584702 | 3.35E-05 | 1.21E-04 | 3.98E-01 |
| MCF2L2   | LMNA | -0.532076153 | -0.624272092 | -0.425262212 | 3.67E-16 | 9.60E-15 | 4.36E-12 |
| CDKN2A   | LMNA | -0.119037707 | -0.252932203 | 0.019330965  | 9.15E-02 | 1.41E-01 | 1.00E+00 |
| OLA1     | LMNA | -0.240914284 | -0.366767174 | -0.106402052 | 5.53E-04 | 1.54E-03 | 1.00E+00 |
| TSHB     | LMNA | -0.039432824 | -0.17652288  | 0.099157966  | 5.77E-01 | 6.56E-01 | 1.00E+00 |
| RELN     | LMNA | -0.378883765 | -0.491240303 | -0.254124836 | 2.69E-08 | 1.70E-07 | 3.20E-04 |
| SCN2B    | LMNA | -0.237812204 | -0.363915772 | -0.10314756  | 6.54E-04 | 1.80E-03 | 1.00E+00 |
| MFHAS1   | LMNA | 0.216657238  | 0.081029819  | 0.344407109  | 1.95E-03 | 4.76E-03 | 1.00E+00 |
| NKX3-2   | LMNA | -0.060497109 | -0.196903633 | 0.078207052  | 3.92E-01 | 4.80E-01 | 1.00E+00 |
| MEX3C    | LMNA | 0.227246893  | 0.092084744  | 0.354186476  | 1.14E-03 | 2.95E-03 | 1.00E+00 |
| SSBP1    | LMNA | 0.223922792  | 0.088611002  | 0.351119711  | 1.36E-03 | 3.44E-03 | 1.00E+00 |
| KPNA6    | LMNA | 0.241969727  | 0.107510008  | 0.367736788  | 5.22E-04 | 1.46E-03 | 1.00E+00 |
| ATP5E    | LMNA | 0.287986121  | 0.156142856  | 0.409746907  | 3.24E-05 | 1.17E-04 | 3.84E-01 |
| SUPT7L   | LMNA | -0.180650668 | -0.31094696  | -0.043689233 | 1.01E-02 | 2.05E-02 | 1.00E+00 |
| CASP2    | LMNA | 0.224012249  | 0.088704443  | 0.351202278  | 1.35E-03 | 3.43E-03 | 1.00E+00 |
| PDIA4    | LMNA | 0.63949757   | 0.550002603  | 0.714472588  | 1.27E-24 | 1.57E-22 | 1.51E-20 |

|          |      |              |              |              |          |          |          |
|----------|------|--------------|--------------|--------------|----------|----------|----------|
| SERBP1   | LMNA | 0.263339724  | 0.130015341  | 0.387310324  | 1.53E-04 | 4.82E-04 | 1.00E+00 |
| TESC     | LMNA | -0.160170077 | -0.291769574 | -0.022619224 | 2.28E-02 | 4.20E-02 | 1.00E+00 |
| YTHDC1   | LMNA | -0.370560327 | -0.483858932 | -0.245044898 | 5.68E-08 | 3.42E-07 | 6.74E-04 |
| KIAA1641 | LMNA | -0.282458211 | -0.404727417 | -0.150266653 | 4.64E-05 | 1.62E-04 | 5.51E-01 |
| CSF1R    | LMNA | 0.236971155  | 0.102265684  | 0.363142281  | 6.85E-04 | 1.87E-03 | 1.00E+00 |
| JUN      | LMNA | 0.510221051  | 0.400370777  | 0.605614658  | 8.74E-15 | 1.71E-13 | 1.04E-10 |
| NAGK     | LMNA | 0.10577585   | -0.032753431 | 0.240317622  | 1.34E-01 | 1.95E-01 | 1.00E+00 |
| PCNXL2   | LMNA | -0.096293831 | -0.231270447 | 0.042319746  | 1.73E-01 | 2.42E-01 | 1.00E+00 |
| ATAD5    | LMNA | -0.255016045 | -0.379699636 | -0.121233082 | 2.50E-04 | 7.51E-04 | 1.00E+00 |
| MYL2     | LMNA | 0.150991158  | 0.013215631  | 0.283140248  | 3.20E-02 | 5.67E-02 | 1.00E+00 |
| AZI1     | LMNA | -0.148536383 | -0.280828822 | -0.010704893 | 3.49E-02 | 6.11E-02 | 1.00E+00 |
| STK38    | LMNA | 0.238000288  | 0.103344803  | 0.364088725  | 6.48E-04 | 1.78E-03 | 1.00E+00 |
| RBP1     | LMNA | 0.285800634  | 0.153818554  | 0.407763307  | 3.74E-05 | 1.33E-04 | 4.43E-01 |
| KIAA1026 | LMNA | 0.073084992  | -0.065628161 | 0.209027024  | 3.01E-01 | 3.86E-01 | 1.00E+00 |
| HIST1H4C | LMNA | -0.449367083 | -0.553105844 | -0.331906066 | 1.97E-11 | 2.18E-10 | 2.34E-07 |
| ADAMTSL3 | LMNA | -0.17636995  | -0.306947381 | -0.039275224 | 1.20E-02 | 2.39E-02 | 1.00E+00 |
| TOMM7    | LMNA | 0.149733444  | 0.011929027  | 0.281956171  | 3.34E-02 | 5.90E-02 | 1.00E+00 |
| HSFX1    | LMNA | -0.174473781 | -0.305174269 | -0.037321722 | 1.30E-02 | 2.56E-02 | 1.00E+00 |
| TREX1    | LMNA | 0.026607361  | -0.1118545   | 0.164055757  | 7.07E-01 | 7.70E-01 | 1.00E+00 |
| TNFSF14  | LMNA | 0.124485992  | -0.013802205 | 0.258101413  | 7.75E-02 | 1.23E-01 | 1.00E+00 |
| C18orf10 | LMNA | -0.151957349 | -0.284049596 | -0.014204325 | 3.09E-02 | 5.49E-02 | 1.00E+00 |
| CRISPLD2 | LMNA | 0.463640053  | 0.347853771  | 0.565495936  | 3.68E-12 | 4.68E-11 | 4.37E-08 |
| AOAH     | LMNA | 0.077414723  | -0.061291309 | 0.213187352  | 2.73E-01 | 3.56E-01 | 1.00E+00 |
| CA6      | LMNA | -0.092572598 | -0.227713479 | 0.046067129  | 1.90E-01 | 2.62E-01 | 1.00E+00 |
| TRIM15   | LMNA | -0.006680544 | -0.144598188 | 0.131491726  | 9.25E-01 | 9.46E-01 | 1.00E+00 |
| PNN      | LMNA | -0.100746119 | -0.235521463 | 0.037831039  | 1.54E-01 | 2.19E-01 | 1.00E+00 |
| CEP57    | LMNA | -0.321505321 | -0.440026144 | -0.191974962 | 3.08E-06 | 1.34E-05 | 3.65E-02 |
| AR       | LMNA | 0.178059823  | 0.041017077  | 0.308526822  | 1.12E-02 | 2.25E-02 | 1.00E+00 |
| DDX3X    | LMNA | 0.123814777  | -0.014483791 | 0.257464992  | 7.92E-02 | 1.25E-01 | 1.00E+00 |
| PLXDC1   | LMNA | 0.135742987  | -0.002352091 | 0.268757616  | 5.41E-02 | 8.99E-02 | 1.00E+00 |
| HNRNPL   | LMNA | -0.163353348 | -0.29475725  | -0.025886107 | 2.02E-02 | 3.77E-02 | 1.00E+00 |
| KIF3C    | LMNA | -0.208288661 | -0.336659208 | -0.072317099 | 2.93E-03 | 6.81E-03 | 1.00E+00 |
| EPB41L5  | LMNA | -0.541522549 | -0.632303942 | -0.436071244 | 8.69E-17 | 2.57E-15 | 1.03E-12 |
| RUNDC3A  | LMNA | -0.632238281 | -0.708454568 | -0.541445231 | 6.05E-24 | 6.77E-22 | 7.18E-20 |
| ARHGEF10 | LMNA | 0.041105167  | -0.097499103 | 0.178145263  | 5.61E-01 | 6.42E-01 | 1.00E+00 |



|           |      |              |              |              |          |          |          |
|-----------|------|--------------|--------------|--------------|----------|----------|----------|
| POLR3D    | LMNA | 0.103950134  | -0.034597354 | 0.238577448  | 1.41E-01 | 2.04E-01 | 1.00E+00 |
| INDO      | LMNA | 0.335976658  | 0.207552332  | 0.453015913  | 1.02E-06 | 4.87E-06 | 1.21E-02 |
| GABRA3    | LMNA | -0.524062123 | -0.617442803 | -0.416115991 | 1.21E-15 | 2.83E-14 | 1.43E-11 |
| E2F3      | LMNA | -0.165291282 | -0.296574851 | -0.027876382 | 1.87E-02 | 3.52E-02 | 1.00E+00 |
| SCG5      | LMNA | -0.009322041 | -0.147183629 | 0.128894836  | 8.95E-01 | 9.24E-01 | 1.00E+00 |
| HDC       | LMNA | 0.044831562  | -0.093799971 | 0.181757657  | 5.26E-01 | 6.09E-01 | 1.00E+00 |
| KLHL3     | LMNA | -0.313701269 | -0.433000418 | -0.183601455 | 5.46E-06 | 2.27E-05 | 6.48E-02 |
| FGD6      | LMNA | -0.054236053 | -0.190858034 | 0.084447233  | 4.43E-01 | 5.30E-01 | 1.00E+00 |
| ATP6V1B1  | LMNA | -0.100522978 | -0.235308532 | 0.038056139  | 1.55E-01 | 2.20E-01 | 1.00E+00 |
| GOLGA4    | LMNA | 0.206771526  | 0.070739794  | 0.335252732  | 3.15E-03 | 7.27E-03 | 1.00E+00 |
| NOTCH1    | LMNA | -0.093433575 | -0.228536772 | 0.045200448  | 1.86E-01 | 2.58E-01 | 1.00E+00 |
| ATPAF2    | LMNA | 0.012634924  | -0.125635217 | 0.150423546  | 8.58E-01 | 8.96E-01 | 1.00E+00 |
| ECD       | LMNA | 0.11401898   | -0.024416345 | 0.248163775  | 1.06E-01 | 1.60E-01 | 1.00E+00 |
| SSX5      | LMNA | 0.011818079  | -0.126439207 | 0.149624967  | 8.67E-01 | 9.02E-01 | 1.00E+00 |
| SNAP91    | LMNA | -0.581191603 | -0.665821061 | -0.481797155 | 1.21E-19 | 5.78E-18 | 1.43E-15 |
| OCA2      | LMNA | -0.19764521  | -0.32677998  | -0.061265856 | 4.81E-03 | 1.06E-02 | 1.00E+00 |
| PNPO      | LMNA | 0.023067603  | -0.115350733 | 0.160607149  | 7.45E-01 | 8.03E-01 | 1.00E+00 |
| TMF1      | LMNA | 0.424782456  | 0.304593308  | 0.53165626   | 2.96E-10 | 2.69E-09 | 3.51E-06 |
| DAPK1     | LMNA | -0.199120651 | -0.328151168 | -0.062795832 | 4.50E-03 | 9.96E-03 | 1.00E+00 |
| RPS6KC1   | LMNA | -0.249284659 | -0.374449361 | -0.115198085 | 3.47E-04 | 1.01E-03 | 1.00E+00 |
| CDH5      | LMNA | 0.329118496  | 0.200161878  | 0.446866075  | 1.73E-06 | 7.95E-06 | 2.05E-02 |
| DAAM1     | LMNA | -0.076597934 | -0.212402897 | 0.062109842  | 2.79E-01 | 3.61E-01 | 1.00E+00 |
| SELENBP1  | LMNA | 0.006220072  | -0.131944227 | 0.144147295  | 9.30E-01 | 9.49E-01 | 1.00E+00 |
| NEK3      | LMNA | -0.270073449 | -0.393454912 | -0.137135392 | 1.01E-04 | 3.31E-04 | 1.00E+00 |
| SSTR4     | LMNA | 0.309179057  | 0.178757886  | 0.428922579  | 7.56E-06 | 3.06E-05 | 8.97E-02 |
| TNFRSF10I | LMNA | 0.439723946  | 0.321169313  | 0.544708765  | 5.85E-11 | 6.09E-10 | 6.94E-07 |
| FOSL1     | LMNA | 0.669233514  | 0.585253084  | 0.739008714  | 1.34E-27 | 2.69E-25 | 1.59E-23 |
| GSTT1     | LMNA | 0.048947189  | -0.089710001 | 0.185743085  | 4.89E-01 | 5.74E-01 | 1.00E+00 |
| INPP5A    | LMNA | -0.222877414 | -0.350154697 | -0.087519244 | 1.43E-03 | 3.60E-03 | 1.00E+00 |
| CD40LG    | LMNA | -0.012619471 | -0.15040844  | 0.125650429  | 8.59E-01 | 8.96E-01 | 1.00E+00 |
| CES1      | LMNA | 0.17185757   | 0.034628126  | 0.302726355  | 1.45E-02 | 2.80E-02 | 1.00E+00 |
| DCI       | LMNA | -0.11021969  | -0.244549639 | 0.028261333  | 1.18E-01 | 1.76E-01 | 1.00E+00 |
| TRAF3IP1  | LMNA | 0.371420097  | 0.245981792  | 0.484622138  | 5.27E-08 | 3.18E-07 | 6.25E-04 |
| SMARCE1   | LMNA | -0.135393331 | -0.268427111 | 0.002708291  | 5.47E-02 | 9.07E-02 | 1.00E+00 |
| B3GAT3    | LMNA | 0.402571188  | 0.28008607   | 0.512158782  | 2.86E-09 | 2.17E-08 | 3.39E-05 |

|           |      |              |              |              |          |          |          |
|-----------|------|--------------|--------------|--------------|----------|----------|----------|
| VRK1      | LMNA | -0.159946028 | -0.291559195 | -0.022389401 | 2.30E-02 | 4.23E-02 | 1.00E+00 |
| STK17B    | LMNA | 0.129500839  | -0.008705802 | 0.262852634  | 6.62E-02 | 1.07E-01 | 1.00E+00 |
| AARS      | LMNA | -0.022808471 | -0.160354558 | 0.115606544  | 7.47E-01 | 8.05E-01 | 1.00E+00 |
| CNTN6     | LMNA | -0.326234463 | -0.444276582 | -0.19705838  | 2.16E-06 | 9.72E-06 | 2.56E-02 |
| CYP3A4    | LMNA | -0.14311799  | -0.275721402 | -0.005169118 | 4.22E-02 | 7.22E-02 | 1.00E+00 |
| PISD      | LMNA | -0.074082483 | -0.209985924 | 0.064629493  | 2.95E-01 | 3.79E-01 | 1.00E+00 |
| ZAK       | LMNA | 0.53641328   | 0.430221186  | 0.62796218   | 1.91E-16 | 5.28E-15 | 2.26E-12 |
| USP1      | LMNA | -0.068658475 | -0.204768603 | 0.070056548  | 3.32E-01 | 4.17E-01 | 1.00E+00 |
| TRAP1     | LMNA | -0.152367185 | -0.284435249 | -0.014623787 | 3.04E-02 | 5.43E-02 | 1.00E+00 |
| RNF44     | LMNA | -0.160128084 | -0.291730144 | -0.022576148 | 2.28E-02 | 4.20E-02 | 1.00E+00 |
| CENPM     | LMNA | -0.039622923 | -0.176707337 | 0.098969439  | 5.76E-01 | 6.55E-01 | 1.00E+00 |
| NPTXR     | LMNA | -0.176755175 | -0.307307495 | -0.039672225 | 1.19E-02 | 2.36E-02 | 1.00E+00 |
| SAR1B     | LMNA | 0.021178403  | -0.1172153   | 0.158765222  | 7.65E-01 | 8.20E-01 | 1.00E+00 |
| DPYSL3    | LMNA | 0.189447285  | 0.05277657   | 0.319151396  | 6.93E-03 | 1.46E-02 | 1.00E+00 |
| GPC1      | LMNA | 0.43545642   | 0.316427521  | 0.540985945  | 9.37E-11 | 9.47E-10 | 1.11E-06 |
| APP       | LMNA | 0.280624456  | 0.148319422  | 0.403060689  | 5.23E-05 | 1.81E-04 | 6.20E-01 |
| GLS2      | LMNA | -0.34491033  | -0.461010229 | -0.217201422 | 4.99E-07 | 2.52E-06 | 5.92E-03 |
| TOB1      | LMNA | 0.074485439  | -0.064225983 | 0.210373217  | 2.92E-01 | 3.76E-01 | 1.00E+00 |
| MNX1      | LMNA | -0.387853042 | -0.499176391 | -0.263933991 | 1.18E-08 | 7.92E-08 | 1.40E-04 |
| TCEAL1    | LMNA | -0.306719849 | -0.426702973 | -0.176126572 | 9.01E-06 | 3.59E-05 | 1.07E-01 |
| ORC5L     | LMNA | -0.016717032 | -0.154411681 | 0.121614631  | 8.13E-01 | 8.59E-01 | 1.00E+00 |
| CENPF     | LMNA | 0.012639038  | -0.125631168 | 0.150427567  | 8.58E-01 | 8.96E-01 | 1.00E+00 |
| C6        | LMNA | 0.048123693  | -0.090528737 | 0.184946     | 4.96E-01 | 5.81E-01 | 1.00E+00 |
| LOC441601 | LMNA | -0.033013404 | -0.17028831  | 0.105518501  | 6.41E-01 | 7.14E-01 | 1.00E+00 |
| PRSS1     | LMNA | 0.068379764  | -0.070335194 | 0.204500303  | 3.34E-01 | 4.19E-01 | 1.00E+00 |
| PTGIS     | LMNA | 0.347640366  | 0.22015507   | 0.463449454  | 3.99E-07 | 2.06E-06 | 4.74E-03 |
| C6orf124  | LMNA | -0.411745005 | -0.52022545  | -0.290188865 | 1.14E-09 | 9.33E-09 | 1.36E-05 |
| CEACAM3   | LMNA | 0.193453165  | 0.056922355  | 0.322881171  | 5.81E-03 | 1.25E-02 | 1.00E+00 |
| KRT23     | LMNA | 0.102780574  | -0.03577808  | 0.237462233  | 1.46E-01 | 2.10E-01 | 1.00E+00 |
| ODZ4      | LMNA | 0.112471668  | -0.025982763 | 0.246692319  | 1.11E-01 | 1.66E-01 | 1.00E+00 |
| UBC       | LMNA | 0.384558744  | 0.260328237  | 0.496263739  | 1.60E-08 | 1.06E-07 | 1.90E-04 |
| ATRNL     | LMNA | 0.201816941  | 0.065593441  | 0.330655537  | 3.97E-03 | 8.91E-03 | 1.00E+00 |
| HAPLN1    | LMNA | -0.075947758 | -0.211778334 | 0.062761273  | 2.83E-01 | 3.66E-01 | 1.00E+00 |
| RANGAP1   | LMNA | -0.15553519  | -0.287414879 | -0.017867844 | 2.71E-02 | 4.89E-02 | 1.00E+00 |
| SNCB      | LMNA | -0.319560661 | -0.438276788 | -0.189886637 | 3.56E-06 | 1.53E-05 | 4.22E-02 |

|          |      |              |              |              |          |          |          |
|----------|------|--------------|--------------|--------------|----------|----------|----------|
| S100A9   | LMNA | 0.307523367  | 0.176986119  | 0.427428363  | 8.51E-06 | 3.41E-05 | 1.01E-01 |
| C10orf26 | LMNA | 0.08616602   | -0.052509598 | 0.221581244  | 2.23E-01 | 3.00E-01 | 1.00E+00 |
| SRY      | LMNA | 0.147848261  | 0.010001395  | 0.280180608  | 3.57E-02 | 6.25E-02 | 1.00E+00 |
| RNGTT    | LMNA | -0.260317077 | -0.384548544 | -0.126823746 | 1.83E-04 | 5.67E-04 | 1.00E+00 |
| CDCa8    | LMNA | 0.00981285   | -0.128412107 | 0.147663814  | 8.90E-01 | 9.20E-01 | 1.00E+00 |
| CEP250   | LMNA | 0.173098955  | 0.035905981  | 0.303888099  | 1.38E-02 | 2.69E-02 | 1.00E+00 |
| MLC1     | LMNA | 0.070051524  | -0.068663499 | 0.206109307  | 3.22E-01 | 4.07E-01 | 1.00E+00 |
| ATPBD1B  | LMNA | 0.362760557  | 0.236556161  | 0.476927297  | 1.12E-07 | 6.37E-07 | 1.33E-03 |
| TNIP3    | LMNA | 0.319064421  | 0.189353923  | 0.437830241  | 3.69E-06 | 1.59E-05 | 4.38E-02 |
| KCNJ2    | LMNA | 0.075937427  | -0.062771623 | 0.211768409  | 2.83E-01 | 3.66E-01 | 1.00E+00 |
| IFT52    | LMNA | -0.065668881 | -0.20188962  | 0.073044314  | 3.53E-01 | 4.40E-01 | 1.00E+00 |
| UTP20    | LMNA | 0.21954032   | 0.08403627   | 0.347072335  | 1.69E-03 | 4.18E-03 | 1.00E+00 |
| ZNF492   | LMNA | -0.450970482 | -0.554500016 | -0.33369426  | 1.64E-11 | 1.85E-10 | 1.94E-07 |
| PDHA1    | LMNA | 0.119652635  | -0.018707377 | 0.253516016  | 8.99E-02 | 1.39E-01 | 1.00E+00 |
| BYSL     | LMNA | -0.010097534 | -0.147942307 | 0.128132079  | 8.87E-01 | 9.18E-01 | 1.00E+00 |
| TKT      | LMNA | 0.304401903  | 0.173648115  | 0.424609542  | 1.06E-05 | 4.17E-05 | 1.26E-01 |
| PMPCA    | LMNA | 0.04719948   | -0.091447386 | 0.184051215  | 5.05E-01 | 5.89E-01 | 1.00E+00 |
| RNF38    | LMNA | -0.301925944 | -0.422371982 | -0.17100253  | 1.26E-05 | 4.91E-05 | 1.49E-01 |
| KLHL2    | LMNA | -0.111399781 | -0.245672619 | 0.027067486  | 1.14E-01 | 1.71E-01 | 1.00E+00 |
| AHDC1    | LMNA | 0.151301328  | 0.013532995  | 0.283432196  | 3.16E-02 | 5.61E-02 | 1.00E+00 |
| APOB48R  | LMNA | 0.430682708  | 0.311130328  | 0.536816642  | 1.58E-10 | 1.52E-09 | 1.87E-06 |
| GLTP     | LMNA | -0.079882271 | -0.215556155 | 0.058817357  | 2.58E-01 | 3.40E-01 | 1.00E+00 |
| MPL      | LMNA | -0.046636806 | -0.183506345 | 0.092006557  | 5.10E-01 | 5.94E-01 | 1.00E+00 |
| DMP1     | LMNA | 0.262342659  | 0.128962241  | 0.386399556  | 1.62E-04 | 5.09E-04 | 1.00E+00 |
| C9orf78  | LMNA | 0.018596639  | -0.119761824 | 0.156246511  | 7.93E-01 | 8.44E-01 | 1.00E+00 |
| ADAM12   | LMNA | 0.687295648  | 0.606820942  | 0.753822567  | 1.39E-29 | 3.67E-27 | 1.65E-25 |
| CRTAM    | LMNA | 0.275679814  | 0.143073902  | 0.398562378  | 7.16E-05 | 2.41E-04 | 8.49E-01 |
| CSPG4    | LMNA | 0.144819678  | 0.006906761  | 0.277326233  | 3.97E-02 | 6.86E-02 | 1.00E+00 |
| HSD17B2  | LMNA | 0.08800334   | -0.050663165 | 0.223340982  | 2.13E-01 | 2.88E-01 | 1.00E+00 |
| UBE2G1   | LMNA | -0.160691303 | -0.292258949 | -0.02315394  | 2.23E-02 | 4.12E-02 | 1.00E+00 |
| ADCY7    | LMNA | 0.184518811  | 0.047682426  | 0.314557097  | 8.57E-03 | 1.77E-02 | 1.00E+00 |
| PAK1     | LMNA | 0.053394424  | -0.085285227 | 0.190044577  | 4.50E-01 | 5.37E-01 | 1.00E+00 |
| FRAS1    | LMNA | -0.124722483 | -0.258325616 | 0.01356203   | 7.70E-02 | 1.22E-01 | 1.00E+00 |
| PELI2    | LMNA | -0.318566398 | -0.437382033 | -0.188819374 | 3.83E-06 | 1.64E-05 | 4.54E-02 |
| ATP13A1  | LMNA | 0.317176579  | 0.187328025  | 0.436130914  | 4.24E-06 | 1.80E-05 | 5.03E-02 |

|          |      |              |              |              |          |          |          |
|----------|------|--------------|--------------|--------------|----------|----------|----------|
| OR2B6    | LMNA | -0.156049265 | -0.287898146 | -0.018394534 | 2.66E-02 | 4.80E-02 | 1.00E+00 |
| SIDT1    | LMNA | -0.271759024 | -0.394991292 | -0.138919824 | 9.14E-05 | 3.01E-04 | 1.00E+00 |
| C1RL     | LMNA | 0.524557698  | 0.416680946  | 0.617865524  | 1.12E-15 | 2.65E-14 | 1.33E-11 |
| ATP9B    | LMNA | -0.160069432 | -0.291675071 | -0.022515984 | 2.29E-02 | 4.21E-02 | 1.00E+00 |
| TPX2     | LMNA | 0.140498128  | 0.00249553   | 0.273249212  | 4.61E-02 | 7.82E-02 | 1.00E+00 |
| DAZAP1   | LMNA | 0.202244456  | 0.066037218  | 0.331052456  | 3.90E-03 | 8.75E-03 | 1.00E+00 |
| HMGCS2   | LMNA | 0.110203498  | -0.028277711 | 0.244534228  | 1.18E-01 | 1.76E-01 | 1.00E+00 |
| PRKRA    | LMNA | -0.190916924 | -0.320520207 | -0.05429699  | 6.50E-03 | 1.38E-02 | 1.00E+00 |
| TLN1     | LMNA | 0.504082283  | 0.39340819   | 0.600355133  | 2.04E-14 | 3.73E-13 | 2.42E-10 |
| B9D1     | LMNA | 0.057789164  | -0.080907303 | 0.194290147  | 4.14E-01 | 5.02E-01 | 1.00E+00 |
| NKX2-5   | LMNA | 0.199357978  | 0.063041991  | 0.328371675  | 4.45E-03 | 9.87E-03 | 1.00E+00 |
| MITF     | LMNA | 0.261923943  | 0.128520082  | 0.386017008  | 1.66E-04 | 5.20E-04 | 1.00E+00 |
| LILRB2   | LMNA | 0.488696853  | 0.376013647  | 0.587136628  | 1.60E-13 | 2.51E-12 | 1.90E-09 |
| CSTF1    | LMNA | 0.176493655  | 0.039402707  | 0.307063027  | 1.20E-02 | 2.38E-02 | 1.00E+00 |
| GYS1     | LMNA | 0.432533983  | 0.313183731  | 0.53843414   | 1.29E-10 | 1.26E-09 | 1.53E-06 |
| BTN2A1   | LMNA | 0.20877726   | 0.072825221  | 0.337112047  | 2.87E-03 | 6.66E-03 | 1.00E+00 |
| NSMCE4A  | LMNA | -0.28953553  | -0.41115249  | -0.157791564 | 2.92E-05 | 1.06E-04 | 3.47E-01 |
| DNAI1    | LMNA | -0.231973652 | -0.358542614 | -0.097029958 | 8.94E-04 | 2.38E-03 | 1.00E+00 |
| IGF2BP3  | LMNA | 0.096968671  | -0.041639745 | 0.231915112  | 1.70E-01 | 2.38E-01 | 1.00E+00 |
| HOXD11   | LMNA | 0.053048093  | -0.085630006 | 0.189709784  | 4.53E-01 | 5.40E-01 | 1.00E+00 |
| FNBP1L   | LMNA | -0.169585536 | -0.300599075 | -0.032290503 | 1.58E-02 | 3.03E-02 | 1.00E+00 |
| DHX35    | LMNA | -0.017880768 | -0.155547805 | 0.120467602  | 8.01E-01 | 8.50E-01 | 1.00E+00 |
| SLC33A1  | LMNA | 0.364032436  | 0.237939073  | 0.478058582  | 1.01E-07 | 5.75E-07 | 1.19E-03 |
| HRG      | LMNA | -0.211774664 | -0.339888777 | -0.075943938 | 2.48E-03 | 5.87E-03 | 1.00E+00 |
| ZNF131   | LMNA | -0.166196112 | -0.297423172 | -0.028806023 | 1.81E-02 | 3.42E-02 | 1.00E+00 |
| USP47    | LMNA | -0.101494583 | -0.236235585 | 0.037075904  | 1.51E-01 | 2.16E-01 | 1.00E+00 |
| TRIM33   | LMNA | -0.321201516 | -0.439752909 | -0.191648636 | 3.15E-06 | 1.37E-05 | 3.73E-02 |
| FBXO42   | LMNA | -0.140141978 | -0.272913002 | -0.002132229 | 4.67E-02 | 7.90E-02 | 1.00E+00 |
| HTN1     | LMNA | -0.026214904 | -0.163673571 | 0.112242301  | 7.11E-01 | 7.74E-01 | 1.00E+00 |
| C13orf23 | LMNA | -0.105066446 | -0.239641559 | 0.033470022  | 1.37E-01 | 1.99E-01 | 1.00E+00 |
| PAPOLA   | LMNA | 0.226029889  | 0.090812572  | 0.353064003  | 1.22E-03 | 3.12E-03 | 1.00E+00 |
| C1orf27  | LMNA | 0.118375664  | -0.02000221  | 0.252303551  | 9.34E-02 | 1.43E-01 | 1.00E+00 |
| AATK     | LMNA | -0.352176749 | -0.467498731 | -0.225068193 | 2.75E-07 | 1.46E-06 | 3.26E-03 |
| MSH3     | LMNA | 0.291785534  | 0.160187075  | 0.413192606  | 2.52E-05 | 9.25E-05 | 2.98E-01 |
| RNF14    | LMNA | 0.109946769  | -0.02853738  | 0.244289874  | 1.19E-01 | 1.77E-01 | 1.00E+00 |

|          |      |              |              |              |          |          |          |
|----------|------|--------------|--------------|--------------|----------|----------|----------|
| NDUFAB1  | LMNA | -0.244466283 | -0.370029236 | -0.110132111 | 4.54E-04 | 1.29E-03 | 1.00E+00 |
| SLC4A8   | LMNA | -0.173552781 | -0.304312712 | -0.036373252 | 1.35E-02 | 2.65E-02 | 1.00E+00 |
| BAK1     | LMNA | 0.392887709  | 0.269451357  | 0.503622936  | 7.31E-09 | 5.14E-08 | 8.67E-05 |
| COX6C    | LMNA | -0.211667326 | -0.33978938  | -0.07583221  | 2.49E-03 | 5.90E-03 | 1.00E+00 |
| MTNR1B   | LMNA | 0.143586698  | 0.005647647  | 0.276163507  | 4.15E-02 | 7.12E-02 | 1.00E+00 |
| SPECC1L  | LMNA | 0.006993401  | -0.131184251 | 0.144904504  | 9.21E-01 | 9.44E-01 | 1.00E+00 |
| PGCP     | LMNA | 0.476764777  | 0.362577874  | 0.576848825  | 7.35E-13 | 1.05E-11 | 8.72E-09 |
| SPN      | LMNA | -0.067210253 | -0.203374257 | 0.071504195  | 3.42E-01 | 4.28E-01 | 1.00E+00 |
| GPR143   | LMNA | -0.064882103 | -0.201131561 | 0.073830197  | 3.59E-01 | 4.46E-01 | 1.00E+00 |
| ZNF576   | LMNA | 0.110211014  | -0.028270109 | 0.244541381  | 1.18E-01 | 1.76E-01 | 1.00E+00 |
| TMEM39A  | LMNA | 0.305780635  | 0.175122121  | 0.425854886  | 9.62E-06 | 3.82E-05 | 1.14E-01 |
| PCSK1    | LMNA | 0.315073282  | 0.185072216  | 0.434236647  | 4.95E-06 | 2.07E-05 | 5.87E-02 |
| ATP5D    | LMNA | -0.049262734 | -0.186048462 | 0.08939623   | 4.86E-01 | 5.72E-01 | 1.00E+00 |
| MAGEB3   | LMNA | -0.136634766 | -0.269600411 | 0.001443462  | 5.25E-02 | 8.76E-02 | 1.00E+00 |
| SLC13A1  | LMNA | -0.180092984 | -0.310426164 | -0.043113882 | 1.03E-02 | 2.09E-02 | 1.00E+00 |
| RPS5     | LMNA | -0.057234936 | -0.193755012 | 0.081459706  | 4.18E-01 | 5.06E-01 | 1.00E+00 |
| ARF6     | LMNA | 0.536030578  | 0.429783356  | 0.627636738  | 2.02E-16 | 5.56E-15 | 2.40E-12 |
| KIAA1009 | LMNA | -0.113408125 | -0.247582941 | 0.025034824  | 1.08E-01 | 1.62E-01 | 1.00E+00 |
| ANP32E   | LMNA | 0.022091498  | -0.116314232 | 0.159655588  | 7.55E-01 | 8.11E-01 | 1.00E+00 |
| YEATS4   | LMNA | -0.169670951 | -0.300679072 | -0.032378357 | 1.58E-02 | 3.02E-02 | 1.00E+00 |
| MTMR1    | LMNA | -0.263221371 | -0.387202228 | -0.129890322 | 1.54E-04 | 4.85E-04 | 1.00E+00 |
| PCOLCE   | LMNA | 0.693377847  | 0.614110421  | 0.758795774  | 2.78E-30 | 9.41E-28 | 3.29E-26 |
| MNS1     | LMNA | 0.022212833  | -0.116194478 | 0.159773886  | 7.54E-01 | 8.10E-01 | 1.00E+00 |
| HMG1     | LMNA | -0.047879243 | -0.184709356 | 0.090771739  | 4.99E-01 | 5.83E-01 | 1.00E+00 |
| CXADR    | LMNA | -0.103863546 | -0.238494896 | 0.034684781  | 1.41E-01 | 2.04E-01 | 1.00E+00 |
| PCYT2    | LMNA | 0.103127983  | -0.035427395 | 0.237793536  | 1.44E-01 | 2.08E-01 | 1.00E+00 |
| TSC22D1  | LMNA | -0.416287899 | -0.524212927 | -0.295201841 | 7.19E-10 | 6.11E-09 | 8.53E-06 |
| UTF1     | LMNA | -0.016841228 | -0.154532947 | 0.121492236  | 8.12E-01 | 8.58E-01 | 1.00E+00 |
| BZRAP1   | LMNA | -0.514909816 | -0.609626256 | -0.405697329 | 4.51E-15 | 9.39E-14 | 5.35E-11 |
| LAX1     | LMNA | 0.137678682  | -0.000379532 | 0.270586728  | 5.07E-02 | 8.49E-02 | 1.00E+00 |
| PUF60    | LMNA | -0.259277822 | -0.383598467 | -0.12572704  | 1.94E-04 | 5.98E-04 | 1.00E+00 |
| ELOVL5   | LMNA | 0.105522752  | -0.03300911  | 0.240076434  | 1.35E-01 | 1.96E-01 | 1.00E+00 |
| SPPL2B   | LMNA | 0.176979044  | 0.039902957  | 0.307516754  | 1.17E-02 | 2.34E-02 | 1.00E+00 |
| SHC1     | LMNA | 0.76173454   | 0.696976326  | 0.814168983  | 1.47E-39 | 3.17E-36 | 1.75E-35 |
| B4GALNT1 | LMNA | -0.328898793 | -0.446668879 | -0.199925365 | 1.76E-06 | 8.07E-06 | 2.09E-02 |

|          |      |              |              |              |          |          |          |
|----------|------|--------------|--------------|--------------|----------|----------|----------|
| ZNF673   | LMNA | -0.187785257 | -0.317602742 | -0.051057877 | 7.45E-03 | 1.56E-02 | 1.00E+00 |
| IRX5     | LMNA | 0.102432422  | -0.036129482 | 0.237130189  | 1.47E-01 | 2.11E-01 | 1.00E+00 |
| LIMS2    | LMNA | -0.192019747 | -0.321547013 | -0.055438335 | 6.19E-03 | 1.32E-02 | 1.00E+00 |
| ITM2B    | LMNA | 0.109126104  | -0.029367314 | 0.243508655  | 1.22E-01 | 1.80E-01 | 1.00E+00 |
| GIN51    | LMNA | -0.032835889 | -0.17011575  | 0.105694226  | 6.43E-01 | 7.16E-01 | 1.00E+00 |
| BAHCC1   | LMNA | -0.25592855  | -0.380534803 | -0.122194839 | 2.37E-04 | 7.17E-04 | 1.00E+00 |
| PAPSS2   | LMNA | 0.304697112  | 0.173963674  | 0.424876229  | 1.04E-05 | 4.10E-05 | 1.23E-01 |
| ENTPD3   | LMNA | -0.12287939  | -0.2565779   | 0.015433418  | 8.15E-02 | 1.28E-01 | 1.00E+00 |
| CLCC1    | LMNA | 0.255120928  | 0.121343613  | 0.379795641  | 2.48E-04 | 7.47E-04 | 1.00E+00 |
| SMO      | LMNA | 0.215499568  | 0.079823305  | 0.343336336  | 2.07E-03 | 5.00E-03 | 1.00E+00 |
| ACSL3    | LMNA | 0.1494838    | 0.011673702  | 0.281721095  | 3.37E-02 | 5.94E-02 | 1.00E+00 |
| PIK3R5   | LMNA | 0.378711309  | 0.253936482  | 0.491087529  | 2.74E-08 | 1.73E-07 | 3.25E-04 |
| GLT8D2   | LMNA | 0.448309481  | 0.330727035  | 0.55218593   | 2.22E-11 | 2.45E-10 | 2.64E-07 |
| CDC14A   | LMNA | -0.366751893 | -0.480476161 | -0.240897652 | 7.94E-08 | 4.64E-07 | 9.42E-04 |
| UTRN     | LMNA | 0.36935688   | 0.243733891  | 0.482790358  | 6.32E-08 | 3.77E-07 | 7.50E-04 |
| CNN1     | LMNA | 0.462815126  | 0.346930223  | 0.564781082  | 4.07E-12 | 5.12E-11 | 4.82E-08 |
| KRT1     | LMNA | 0.027779632  | -0.110695888 | 0.1651971    | 6.95E-01 | 7.60E-01 | 1.00E+00 |
| HISPPD2A | LMNA | -0.10733187  | -0.241800054 | 0.03118115   | 1.28E-01 | 1.88E-01 | 1.00E+00 |
| SDAD1    | LMNA | 0.145578412  | 0.007681794  | 0.278041543  | 3.87E-02 | 6.70E-02 | 1.00E+00 |
| SIGLEC9  | LMNA | 0.366937694  | 0.241099877  | 0.480641275  | 7.82E-08 | 4.57E-07 | 9.27E-04 |
| C22orf26 | LMNA | 0.064873897  | -0.073838394 | 0.201123653  | 3.59E-01 | 4.46E-01 | 1.00E+00 |
| RPL35    | LMNA | 0.056678906  | -0.082013818 | 0.193218057  | 4.23E-01 | 5.10E-01 | 1.00E+00 |
| IMPDH2   | LMNA | 0.13247733   | -0.005677504 | 0.265669598  | 6.02E-02 | 9.86E-02 | 1.00E+00 |
| FLJ22655 | LMNA | -0.526582679 | -0.619592256 | -0.418990289 | 8.33E-16 | 2.04E-14 | 9.88E-12 |
| ENOX2    | LMNA | 0.272521704  | 0.139727517  | 0.395686238  | 8.72E-05 | 2.88E-04 | 1.00E+00 |
| INTS6    | LMNA | 0.11429879   | -0.024133006 | 0.248429802  | 1.05E-01 | 1.59E-01 | 1.00E+00 |
| FPRL1    | LMNA | 0.317832167  | 0.188031431  | 0.436721133  | 4.04E-06 | 1.72E-05 | 4.79E-02 |
| CLTA     | LMNA | -0.03195053  | -0.16925498  | 0.106570532  | 6.52E-01 | 7.23E-01 | 1.00E+00 |
| SEC14L5  | LMNA | -0.244207805 | -0.36979196  | -0.109860547 | 4.61E-04 | 1.31E-03 | 1.00E+00 |
| SMC3     | LMNA | -0.116191897 | -0.250229121 | 0.022215448  | 9.96E-02 | 1.51E-01 | 1.00E+00 |
| C6orf123 | LMNA | -0.054275819 | -0.190896465 | 0.084407634  | 4.43E-01 | 5.30E-01 | 1.00E+00 |
| OGDH     | LMNA | 0.386306     | 0.262240254  | 0.497808888  | 1.36E-08 | 9.09E-08 | 1.61E-04 |
| GPR37L1  | LMNA | -0.008105101 | -0.145992748 | 0.130091461  | 9.09E-01 | 9.35E-01 | 1.00E+00 |
| FLJ20160 | LMNA | -0.175862785 | -0.306473219 | -0.038752622 | 1.23E-02 | 2.44E-02 | 1.00E+00 |
| ASB13    | LMNA | -0.435456854 | -0.540986324 | -0.316428003 | 9.37E-11 | 9.47E-10 | 1.11E-06 |

|          |      |              |              |              |          |          |          |
|----------|------|--------------|--------------|--------------|----------|----------|----------|
| GSS      | LMNA | 0.406351598  | 0.284246016  | 0.515485294  | 1.97E-09 | 1.54E-08 | 2.33E-05 |
| NT5M     | LMNA | -0.25007873  | -0.375177254 | -0.116033631 | 3.31E-04 | 9.74E-04 | 1.00E+00 |
| SIX5     | LMNA | 0.423552889  | 0.303232467  | 0.530579876  | 3.37E-10 | 3.02E-09 | 4.00E-06 |
| KPNA3    | LMNA | -0.194946651 | -0.32427069  | -0.058469207 | 5.43E-03 | 1.18E-02 | 1.00E+00 |
| TAF5     | LMNA | -0.257213923 | -0.38171089  | -0.123550016 | 2.20E-04 | 6.70E-04 | 1.00E+00 |
| KCNA1    | LMNA | -0.092897455 | -0.228024141 | 0.045740144  | 1.89E-01 | 2.60E-01 | 1.00E+00 |
| HSPA1L   | LMNA | -0.215125134 | -0.342989937 | -0.079433159 | 2.11E-03 | 5.08E-03 | 1.00E+00 |
| RHOC     | LMNA | 0.393279262  | 0.26988079   | 0.503968504  | 7.04E-09 | 4.97E-08 | 8.36E-05 |
| TH1L     | LMNA | 0.110794132  | -0.027680245 | 0.245096325  | 1.16E-01 | 1.73E-01 | 1.00E+00 |
| SSTR2    | LMNA | -0.463552929 | -0.565420444 | -0.347756221 | 3.72E-12 | 4.72E-11 | 4.41E-08 |
| PPP3CA   | LMNA | -0.254836612 | -0.379535387 | -0.121043994 | 2.52E-04 | 7.59E-04 | 1.00E+00 |
| CHRNA5   | LMNA | 0.06631123   | -0.072402568 | 0.202508401  | 3.48E-01 | 4.35E-01 | 1.00E+00 |
| DLX2     | LMNA | -0.165616673 | -0.296879945 | -0.028210668 | 1.85E-02 | 3.48E-02 | 1.00E+00 |
| SLC1A7   | LMNA | 0.072648158  | -0.066065423 | 0.208607008  | 3.04E-01 | 3.89E-01 | 1.00E+00 |
| C6orf108 | LMNA | 0.050331993  | -0.088332778 | 0.187083069  | 4.77E-01 | 5.62E-01 | 1.00E+00 |
| ALDH3A2  | LMNA | -0.077723601 | -0.213483957 | 0.060981723  | 2.72E-01 | 3.54E-01 | 1.00E+00 |
| DDB2     | LMNA | 0.425333372  | 0.3052032    | 0.532138429  | 2.79E-10 | 2.56E-09 | 3.31E-06 |
| FLJ11286 | LMNA | 0.441274141  | 0.322893261  | 0.54606007   | 4.92E-11 | 5.19E-10 | 5.84E-07 |
| SPATA1   | LMNA | 0.091049426  | -0.047599879 | 0.226256504  | 1.98E-01 | 2.71E-01 | 1.00E+00 |
| CLEC1B   | LMNA | 0.063192869  | -0.075516929 | 0.199503434  | 3.72E-01 | 4.59E-01 | 1.00E+00 |
| MKNK1    | LMNA | 0.161973859  | 0.024470025  | 0.293462839  | 2.13E-02 | 3.95E-02 | 1.00E+00 |
| DYSF     | LMNA | 0.262552633  | 0.12918399   | 0.386591376  | 1.60E-04 | 5.03E-04 | 1.00E+00 |
| FOXJ1    | LMNA | 0.056636708  | -0.082055868 | 0.193177302  | 4.23E-01 | 5.10E-01 | 1.00E+00 |
| LEPREL2  | LMNA | 0.602697469  | 0.50681499   | 0.683850098  | 2.31E-21 | 1.42E-19 | 2.74E-17 |
| SLC27A3  | LMNA | 0.447083663  | 0.329360933  | 0.551119384  | 2.56E-11 | 2.79E-10 | 3.03E-07 |
| C1orf174 | LMNA | 0.000341413  | -0.137716079 | 0.138385891  | 9.96E-01 | 9.97E-01 | 1.00E+00 |
| MTRR     | LMNA | 0.174410399  | 0.037256442  | 0.305114985  | 1.30E-02 | 2.57E-02 | 1.00E+00 |
| PLEKHO1  | LMNA | 0.006628524  | -0.131542848 | 0.144547253  | 9.25E-01 | 9.46E-01 | 1.00E+00 |
| HTR7     | LMNA | 0.294221816  | 0.162782659  | 0.415400249  | 2.14E-05 | 7.96E-05 | 2.53E-01 |
| RING1    | LMNA | -0.231298066 | -0.357920338 | -0.09632274  | 9.26E-04 | 2.45E-03 | 1.00E+00 |
| NPC2     | LMNA | 0.396629271  | 0.273556897  | 0.506923634  | 5.11E-09 | 3.71E-08 | 6.06E-05 |
| BHMT     | LMNA | -0.221065814 | -0.348481725 | -0.08562804  | 1.57E-03 | 3.90E-03 | 1.00E+00 |
| YTHDF1   | LMNA | 0.206065524  | 0.070006024  | 0.33459803   | 3.26E-03 | 7.48E-03 | 1.00E+00 |
| MSMB     | LMNA | -0.197110171 | -0.326282612 | -0.060711199 | 4.93E-03 | 1.08E-02 | 1.00E+00 |
| LMAN1L   | LMNA | 0.045314803  | -0.093319985 | 0.182225843  | 5.22E-01 | 6.05E-01 | 1.00E+00 |

|          |      |              |              |              |          |          |          |
|----------|------|--------------|--------------|--------------|----------|----------|----------|
| CEP170   | LMNA | -0.327814421 | -0.445695426 | -0.198758246 | 1.91E-06 | 8.70E-06 | 2.27E-02 |
| PF4      | LMNA | 0.069255959  | -0.069459131 | 0.205343698  | 3.27E-01 | 4.13E-01 | 1.00E+00 |
| MSH6     | LMNA | 0.011848516  | -0.126409252 | 0.149654726  | 8.67E-01 | 9.02E-01 | 1.00E+00 |
| IL1F5    | LMNA | 0.065343406  | -0.07336944  | 0.201576045  | 3.56E-01 | 4.42E-01 | 1.00E+00 |
| ZNF556   | LMNA | -0.278784434 | -0.401387449 | -0.146366566 | 5.88E-05 | 2.01E-04 | 6.97E-01 |
| PLEKHC1  | LMNA | 0.131009246  | -0.007171458 | 0.264280481  | 6.31E-02 | 1.03E-01 | 1.00E+00 |
| BCL2L10  | LMNA | -0.24112547  | -0.366961208 | -0.106623718 | 5.46E-04 | 1.53E-03 | 1.00E+00 |
| AIRE     | LMNA | 0.106179907  | -0.032345217 | 0.24070263   | 1.33E-01 | 1.94E-01 | 1.00E+00 |
| IPO4     | LMNA | 0.507982126  | 0.39782992   | 0.603697375  | 1.19E-14 | 2.27E-13 | 1.42E-10 |
| FIGF     | LMNA | -0.09825125  | -0.233140013 | 0.040347005  | 1.64E-01 | 2.32E-01 | 1.00E+00 |
| QDPR     | LMNA | -0.212763588 | -0.340804405 | -0.07697347  | 2.37E-03 | 5.63E-03 | 1.00E+00 |
| SLCO2A1  | LMNA | 0.238781532  | 0.104164203  | 0.364807023  | 6.21E-04 | 1.72E-03 | 1.00E+00 |
| FOXA2    | LMNA | -0.012376886 | -0.150171298 | 0.125889214  | 8.61E-01 | 8.98E-01 | 1.00E+00 |
| MAPK12   | LMNA | -0.077717261 | -0.213477869 | 0.060988078  | 2.72E-01 | 3.54E-01 | 1.00E+00 |
| BOP1     | LMNA | -0.097704689 | -0.232618083 | 0.040897953  | 1.67E-01 | 2.34E-01 | 1.00E+00 |
| PRDM16   | LMNA | 0.099214976  | -0.039375338 | 0.234060119  | 1.60E-01 | 2.27E-01 | 1.00E+00 |
| POLR1E   | LMNA | 0.109282061  | -0.02920961  | 0.243657129  | 1.22E-01 | 1.80E-01 | 1.00E+00 |
| INSRR    | LMNA | 0.240419182  | 0.105882431  | 0.36631224   | 5.68E-04 | 1.58E-03 | 1.00E+00 |
| PDE6C    | LMNA | -0.052084241 | -0.188777876 | 0.086589361  | 4.62E-01 | 5.47E-01 | 1.00E+00 |
| C1orf216 | LMNA | -0.073929904 | -0.209839265 | 0.064782271  | 2.96E-01 | 3.80E-01 | 1.00E+00 |
| SIPA1    | LMNA | 0.385389775  | 0.261237509  | 0.496998731  | 1.48E-08 | 9.83E-08 | 1.76E-04 |
| EP400    | LMNA | -0.00524775  | -0.143195012 | 0.13289953   | 9.41E-01 | 9.56E-01 | 1.00E+00 |
| ULK4     | LMNA | -0.019247005 | -0.156881162 | 0.119120507  | 7.86E-01 | 8.37E-01 | 1.00E+00 |
| PTK2     | LMNA | -0.409127031 | -0.5179254   | -0.287303018 | 1.49E-09 | 1.19E-08 | 1.77E-05 |
| BTN3A1   | LMNA | 0.028093541  | -0.110385573 | 0.165502665  | 6.91E-01 | 7.58E-01 | 1.00E+00 |
| NDUFA8   | LMNA | -0.088742679 | -0.224048854 | 0.04991989   | 2.09E-01 | 2.84E-01 | 1.00E+00 |
| LAMP3    | LMNA | 0.380019727  | 0.255365751  | 0.492246444  | 2.43E-08 | 1.55E-07 | 2.88E-04 |
| FABP5    | LMNA | 0.270088349  | 0.137151162  | 0.393468496  | 1.01E-04 | 3.31E-04 | 1.00E+00 |
| GLTSCR2  | LMNA | 0.052556734  | -0.086119105 | 0.18923474   | 4.58E-01 | 5.44E-01 | 1.00E+00 |
| SORT1    | LMNA | 0.233446105  | 0.098571825  | 0.359898489  | 8.27E-04 | 2.22E-03 | 1.00E+00 |
| LLGL2    | LMNA | -0.032709545 | -0.169992928 | 0.105819291  | 6.44E-01 | 7.17E-01 | 1.00E+00 |
| YWHAQ    | LMNA | -0.24960288  | -0.374741079 | -0.115532903 | 3.40E-04 | 9.98E-04 | 1.00E+00 |
| LRIT1    | LMNA | 0.118621184  | -0.019753292 | 0.252536701  | 9.27E-02 | 1.43E-01 | 1.00E+00 |
| KIAA1704 | LMNA | -0.183003611 | -0.313143409 | -0.046117721 | 9.14E-03 | 1.87E-02 | 1.00E+00 |
| ENOSF1   | LMNA | 0.111472082  | -0.02699433  | 0.245741409  | 1.14E-01 | 1.70E-01 | 1.00E+00 |



|           |      |              |              |              |          |          |          |
|-----------|------|--------------|--------------|--------------|----------|----------|----------|
| MEIS2     | LMNA | -0.084039416 | -0.219543335 | 0.054645567  | 2.34E-01 | 3.13E-01 | 1.00E+00 |
| KIR2DL4   | LMNA | 0.083856603  | -0.054829126 | 0.219368092  | 2.35E-01 | 3.14E-01 | 1.00E+00 |
| PCDH7     | LMNA | -0.287421325 | -0.409234395 | -0.155542046 | 3.36E-05 | 1.21E-04 | 3.99E-01 |
| NFKB2     | LMNA | 0.565022332  | 0.463093504  | 0.652200459  | 1.96E-18 | 7.79E-17 | 2.33E-14 |
| RPLP1     | LMNA | 0.12556212   | -0.012709181 | 0.259121514  | 7.50E-02 | 1.19E-01 | 1.00E+00 |
| FZD9      | LMNA | -0.236693808 | -0.362887174 | -0.101974922 | 6.95E-04 | 1.90E-03 | 1.00E+00 |
| HESX1     | LMNA | -0.138209365 | -0.271088022 | -0.000161445 | 4.98E-02 | 8.37E-02 | 1.00E+00 |
| GNAT1     | LMNA | 0.183586204  | 0.046719269  | 0.313687039  | 8.91E-03 | 1.83E-02 | 1.00E+00 |
| NKX6-1    | LMNA | -0.037427259 | -0.174576247 | 0.101146351  | 5.97E-01 | 6.74E-01 | 1.00E+00 |
| CTA-216E1 | LMNA | 0.109220419  | -0.029271943 | 0.243598445  | 1.22E-01 | 1.80E-01 | 1.00E+00 |
| IFT140    | LMNA | -0.042466589 | -0.179465464 | 0.096148085  | 5.48E-01 | 6.29E-01 | 1.00E+00 |
| ORAI3     | LMNA | 0.309004893  | 0.178571472  | 0.428765431  | 7.66E-06 | 3.09E-05 | 9.08E-02 |
| DENND1A   | LMNA | 0.195585868  | 0.059131465  | 0.324865239  | 5.28E-03 | 1.15E-02 | 1.00E+00 |
| ABHD2     | LMNA | 0.23041398   | 0.095397466  | 0.357105843  | 9.70E-04 | 2.55E-03 | 1.00E+00 |
| ALCAM     | LMNA | -0.399214058 | -0.50920197  | -0.276395752 | 3.98E-09 | 2.94E-08 | 4.72E-05 |
| QPRT      | LMNA | 0.150124321  | 0.012328833  | 0.282324205  | 3.30E-02 | 5.82E-02 | 1.00E+00 |
| TRAM1     | LMNA | 0.445299169  | 0.327373101  | 0.549566143  | 3.13E-11 | 3.37E-10 | 3.71E-07 |
| TRIM29    | LMNA | 0.088167761  | -0.050497883 | 0.223498417  | 2.12E-01 | 2.87E-01 | 1.00E+00 |
| ATP1B4    | LMNA | 0.129063937  | -0.009150095 | 0.262438956  | 6.72E-02 | 1.08E-01 | 1.00E+00 |
| NUP37     | LMNA | 0.259323491  | 0.125775227  | 0.383640222  | 1.94E-04 | 5.97E-04 | 1.00E+00 |
| CDS1      | LMNA | -0.143345348 | -0.275935862 | -0.005401232 | 4.18E-02 | 7.17E-02 | 1.00E+00 |
| RHEB      | LMNA | -0.084731244 | -0.220206438 | 0.053950832  | 2.31E-01 | 3.08E-01 | 1.00E+00 |
| C4orf27   | LMNA | -0.250127001 | -0.375221497 | -0.116084429 | 3.30E-04 | 9.72E-04 | 1.00E+00 |
| RAB3A     | LMNA | -0.505369887 | -0.601459007 | -0.394867539 | 1.71E-14 | 3.18E-13 | 2.03E-10 |
| SAA3P     | LMNA | 0.036957141  | -0.101612283 | 0.174119787  | 6.02E-01 | 6.79E-01 | 1.00E+00 |
| SLC22A6   | LMNA | -0.148250741 | -0.28055976  | -0.010412851 | 3.52E-02 | 6.17E-02 | 1.00E+00 |
| GPD1      | LMNA | -0.305625471 | -0.425714756 | -0.174956205 | 9.73E-06 | 3.86E-05 | 1.15E-01 |
| KIAA0265  | LMNA | 0.242366928  | 0.107927058  | 0.368101617  | 5.10E-04 | 1.43E-03 | 1.00E+00 |
| CDH15     | LMNA | 0.157122974  | 0.019494835  | 0.288907291  | 2.55E-02 | 4.64E-02 | 1.00E+00 |
| NPM1      | LMNA | 0.252092065  | 0.118152972  | 0.377022107  | 2.95E-04 | 8.77E-04 | 1.00E+00 |
| ERAF      | LMNA | -0.021044552 | -0.158634684 | 0.117347369  | 7.66E-01 | 8.21E-01 | 1.00E+00 |
| ADAM19    | LMNA | 0.438741108  | 0.320076722  | 0.543851743  | 6.53E-11 | 6.77E-10 | 7.74E-07 |
| PRPS2     | LMNA | 0.433177785  | 0.313898087  | 0.53899646   | 1.20E-10 | 1.18E-09 | 1.43E-06 |
| GCK       | LMNA | 0.082633018  | -0.056057462 | 0.218194945  | 2.42E-01 | 3.22E-01 | 1.00E+00 |
| DNMT3B    | LMNA | -0.132226587 | -0.265432381 | 0.005932709  | 6.07E-02 | 9.93E-02 | 1.00E+00 |

|          |      |              |              |              |          |          |          |
|----------|------|--------------|--------------|--------------|----------|----------|----------|
| SNF1LK2  | LMNA | 0.353153884  | 0.226127325  | 0.468370311  | 2.53E-07 | 1.36E-06 | 3.01E-03 |
| ADRA2A   | LMNA | 0.026232254  | -0.112225157 | 0.163690468  | 7.11E-01 | 7.74E-01 | 1.00E+00 |
| TSPYL4   | LMNA | -0.496428225 | -0.593785662 | -0.384744708 | 5.76E-14 | 9.47E-13 | 6.83E-10 |
| MGC24039 | LMNA | -0.367909414 | -0.481504666 | -0.242157664 | 7.18E-08 | 4.24E-07 | 8.51E-04 |
| TASP1    | LMNA | 0.281907525  | 0.149681782  | 0.404226975  | 4.81E-05 | 1.67E-04 | 5.71E-01 |
| WDR19    | LMNA | 0.094676635  | -0.043948785 | 0.229725082  | 1.80E-01 | 2.50E-01 | 1.00E+00 |
| C10orf38 | LMNA | -0.392338512 | -0.503138178 | -0.268849112 | 7.70E-09 | 5.39E-08 | 9.14E-05 |
| CCT8     | LMNA | 0.108089743  | -0.030415108 | 0.242521858  | 1.26E-01 | 1.85E-01 | 1.00E+00 |
| PDE4C    | LMNA | -0.156796437 | -0.28860042  | -0.019160176 | 2.58E-02 | 4.69E-02 | 1.00E+00 |
| N-PAC    | LMNA | -0.114460691 | -0.248583718 | 0.023969055  | 1.05E-01 | 1.58E-01 | 1.00E+00 |
| POGZ     | LMNA | -0.266679638 | -0.390359404 | -0.133545154 | 1.25E-04 | 4.01E-04 | 1.00E+00 |
| FYB      | LMNA | 0.152130297  | 0.014381329  | 0.284212344  | 3.07E-02 | 5.46E-02 | 1.00E+00 |
| GUCA1B   | LMNA | -0.275194261 | -0.398120334 | -0.142559205 | 7.38E-05 | 2.48E-04 | 8.75E-01 |
| ZZEF1    | LMNA | -0.068730482 | -0.204837916 | 0.069984554  | 3.31E-01 | 4.17E-01 | 1.00E+00 |
| PPFIA3   | LMNA | -0.355420098 | -0.470390854 | -0.228584866 | 2.10E-07 | 1.14E-06 | 2.49E-03 |
| ZNF334   | LMNA | 0.010054558  | -0.128174354 | 0.147900267  | 8.87E-01 | 9.18E-01 | 1.00E+00 |
| C12orf44 | LMNA | 0.140943743  | 0.002950145  | 0.273669833  | 4.54E-02 | 7.71E-02 | 1.00E+00 |
| RANBP6   | LMNA | -0.275915932 | -0.398777317 | -0.143324219 | 7.05E-05 | 2.37E-04 | 8.36E-01 |
| LDHB     | LMNA | -0.362570764 | -0.476758452 | -0.236349843 | 1.14E-07 | 6.47E-07 | 1.35E-03 |
| CRYBA4   | LMNA | 0.058580116  | -0.080118809 | 0.195053709  | 4.08E-01 | 4.95E-01 | 1.00E+00 |
| BAMBI    | LMNA | -0.18262855  | -0.312793387 | -0.045730509 | 9.28E-03 | 1.90E-02 | 1.00E+00 |
| RAB5B    | LMNA | -0.138483199 | -0.271346663 | -0.000440622 | 4.94E-02 | 8.30E-02 | 1.00E+00 |
| FOXB1    | LMNA | -0.099308443 | -0.234149343 | 0.039281087  | 1.60E-01 | 2.27E-01 | 1.00E+00 |
| MRPS12   | LMNA | 0.193781444  | 0.057262309  | 0.323186645  | 5.72E-03 | 1.23E-02 | 1.00E+00 |
| CRIP1    | LMNA | -0.384381959 | -0.496107363 | -0.260134835 | 1.63E-08 | 1.07E-07 | 1.93E-04 |
| DEPDC5   | LMNA | -0.219045069 | -0.346614653 | -0.083519651 | 1.74E-03 | 4.28E-03 | 1.00E+00 |
| RYR1     | LMNA | -0.320084765 | -0.438748344 | -0.190449344 | 3.42E-06 | 1.48E-05 | 4.06E-02 |
| LTBP1    | LMNA | 0.535790622  | 0.429508859  | 0.627432667  | 2.10E-16 | 5.74E-15 | 2.49E-12 |
| MAPRE1   | LMNA | 0.021785922  | -0.116615809 | 0.159357644  | 7.58E-01 | 8.14E-01 | 1.00E+00 |
| TRIP12   | LMNA | 0.25749694   | 0.123848469  | 0.381969789  | 2.16E-04 | 6.60E-04 | 1.00E+00 |
| FGF8     | LMNA | 0.049900301  | -0.088762163 | 0.186665404  | 4.81E-01 | 5.66E-01 | 1.00E+00 |
| NDUFA2   | LMNA | -0.127204408 | -0.260677726 | 0.011040471  | 7.12E-02 | 1.14E-01 | 1.00E+00 |
| C3orf52  | LMNA | 0.344786925  | 0.217067965  | 0.460899928  | 5.04E-07 | 2.54E-06 | 5.98E-03 |
| SEN7     | LMNA | -0.406962667 | -0.516022685 | -0.284918865 | 1.85E-09 | 1.45E-08 | 2.20E-05 |
| MOBK2L2B | LMNA | -0.454821494 | -0.557846138 | -0.337992561 | 1.05E-11 | 1.22E-10 | 1.24E-07 |

|          |      |              |              |              |          |          |          |
|----------|------|--------------|--------------|--------------|----------|----------|----------|
| KIAA0355 | LMNA | 0.071082739  | -0.067631937 | 0.207101444  | 3.15E-01 | 4.00E-01 | 1.00E+00 |
| CPEB1    | LMNA | -0.027799118 | -0.165216069 | 0.110676626  | 6.95E-01 | 7.60E-01 | 1.00E+00 |
| ACOT7    | LMNA | -0.003584401 | -0.14156535  | 0.134533171  | 9.60E-01 | 9.70E-01 | 1.00E+00 |
| FGF6     | LMNA | 0.142367479  | 0.004403015  | 0.275013374  | 4.33E-02 | 7.38E-02 | 1.00E+00 |
| PPEF2    | LMNA | 0.197577694  | 0.061195859  | 0.326717222  | 4.82E-03 | 1.06E-02 | 1.00E+00 |
| ABI2     | LMNA | 0.134828062  | -0.003284066 | 0.267892735  | 5.57E-02 | 9.22E-02 | 1.00E+00 |
| KIAA0317 | LMNA | 0.073217904  | -0.065495108 | 0.209154809  | 3.00E-01 | 3.85E-01 | 1.00E+00 |
| IKZF3    | LMNA | -0.063520813 | -0.199819574 | 0.075189533  | 3.69E-01 | 4.57E-01 | 1.00E+00 |
| H3F3B    | LMNA | -0.173491638 | -0.304255508 | -0.036310295 | 1.35E-02 | 2.65E-02 | 1.00E+00 |
| SLC38A4  | LMNA | 0.121996209  | -0.016329814 | 0.255740111  | 8.37E-02 | 1.31E-01 | 1.00E+00 |
| ATF1     | LMNA | 0.218985709  | 0.083457736  | 0.346559793  | 1.74E-03 | 4.29E-03 | 1.00E+00 |
| FGFR3    | LMNA | -0.09237362  | -0.227523183 | 0.046267395  | 1.91E-01 | 2.63E-01 | 1.00E+00 |
| DYNC1H1  | LMNA | -0.103934082 | -0.238562144 | 0.034613561  | 1.41E-01 | 2.04E-01 | 1.00E+00 |
| DIP      | LMNA | 0.074286135  | -0.064425568 | 0.210181665  | 2.93E-01 | 3.77E-01 | 1.00E+00 |
| TMEM33   | LMNA | 0.018481038  | -0.119875805 | 0.15613369   | 7.94E-01 | 8.44E-01 | 1.00E+00 |
| ARIH1    | LMNA | 0.300147717  | 0.169103643  | 0.420764067  | 1.43E-05 | 5.49E-05 | 1.69E-01 |
| POLDIP3  | LMNA | -0.177517741 | -0.308020243 | -0.04045823  | 1.15E-02 | 2.29E-02 | 1.00E+00 |
| C1orf129 | LMNA | 0.160375313  | 0.022829763  | 0.291962277  | 2.26E-02 | 4.17E-02 | 1.00E+00 |
| POU6F1   | LMNA | -0.221631449 | -0.349004164 | -0.086218426 | 1.52E-03 | 3.80E-03 | 1.00E+00 |
| BBS1     | LMNA | 0.003604026  | -0.134513901 | 0.141584582  | 9.59E-01 | 9.70E-01 | 1.00E+00 |
| RGPD5    | LMNA | -0.143024241 | -0.275632968 | -0.005073414 | 4.23E-02 | 7.24E-02 | 1.00E+00 |
| C7orf24  | LMNA | 0.214647613  | 0.078935658  | 0.342548118  | 2.16E-03 | 5.19E-03 | 1.00E+00 |
| GPR171   | LMNA | 0.228505183  | 0.093400536  | 0.355346642  | 1.07E-03 | 2.79E-03 | 1.00E+00 |
| CDC6     | LMNA | -0.013872403 | -0.151633011 | 0.124416868  | 8.45E-01 | 8.85E-01 | 1.00E+00 |
| PLD1     | LMNA | 0.261466647  | 0.128037244  | 0.385599163  | 1.71E-04 | 5.33E-04 | 1.00E+00 |
| KDELC1   | LMNA | 0.215442151  | 0.079763476  | 0.34328322   | 2.08E-03 | 5.01E-03 | 1.00E+00 |
| SULT1C2  | LMNA | 0.084296876  | -0.054387041 | 0.21979012   | 2.33E-01 | 3.11E-01 | 1.00E+00 |
| CHI3L1   | LMNA | 0.555104586  | 0.451665989  | 0.643818043  | 1.01E-17 | 3.49E-16 | 1.20E-13 |
| PIP5K3   | LMNA | -0.253147451 | -0.37798878  | -0.119264414 | 2.78E-04 | 8.30E-04 | 1.00E+00 |
| CSDA     | LMNA | 0.607136644  | 0.511999283  | 0.687559297  | 9.85E-22 | 6.49E-20 | 1.17E-17 |
| ITFG2    | LMNA | -0.033687068 | -0.170943092 | 0.104851548  | 6.34E-01 | 7.08E-01 | 1.00E+00 |
| VTN1     | LMNA | -0.099616614 | -0.234443507 | 0.038970313  | 1.58E-01 | 2.25E-01 | 1.00E+00 |
| WDR62    | LMNA | -0.108483058 | -0.242896395 | 0.030017491  | 1.24E-01 | 1.83E-01 | 1.00E+00 |
| NDUFC1   | LMNA | 0.053196542  | -0.085482226 | 0.189853291  | 4.52E-01 | 5.38E-01 | 1.00E+00 |
| NBR1     | LMNA | -0.065352326 | -0.20158464  | 0.07336053   | 3.55E-01 | 4.42E-01 | 1.00E+00 |

|          |      |              |              |              |          |          |          |
|----------|------|--------------|--------------|--------------|----------|----------|----------|
| HPS4     | LMNA | -0.24757092  | -0.372877918 | -0.113395484 | 3.82E-04 | 1.11E-03 | 1.00E+00 |
| KIF2A    | LMNA | -0.383812512 | -0.495603608 | -0.259511933 | 1.71E-08 | 1.12E-07 | 2.03E-04 |
| RARB     | LMNA | -0.118329278 | -0.252259499 | 0.020049237  | 9.35E-02 | 1.44E-01 | 1.00E+00 |
| CEL      | LMNA | 0.144624017  | 0.006706924  | 0.277141747  | 4.00E-02 | 6.90E-02 | 1.00E+00 |
| IMMT     | LMNA | 0.045965897  | -0.092673174 | 0.182856556  | 5.16E-01 | 6.00E-01 | 1.00E+00 |
| CNOT6    | LMNA | -0.193637404 | -0.323052614 | -0.057113142 | 5.76E-03 | 1.24E-02 | 1.00E+00 |
| PICALM   | LMNA | 0.171956283  | 0.034729722  | 0.302818749  | 1.44E-02 | 2.79E-02 | 1.00E+00 |
| MARK3    | LMNA | -0.000938207 | -0.138971208 | 0.137130554  | 9.89E-01 | 9.91E-01 | 1.00E+00 |
| DHX15    | LMNA | -0.111867265 | -0.24611738  | 0.026594444  | 1.13E-01 | 1.69E-01 | 1.00E+00 |
| ZNF702   | LMNA | -0.132388602 | -0.265585658 | 0.005767814  | 6.04E-02 | 9.89E-02 | 1.00E+00 |
| HIST1H1A | LMNA | 0.084847212  | -0.053834364 | 0.220317579  | 2.30E-01 | 3.08E-01 | 1.00E+00 |
| HLF      | LMNA | -0.430114292 | -0.536319849 | -0.310500074 | 1.68E-10 | 1.61E-09 | 1.99E-06 |
| ADAMTS2  | LMNA | 0.433450978  | 0.31420126   | 0.539235048  | 1.17E-10 | 1.15E-09 | 1.38E-06 |
| ARPC3    | LMNA | 0.157314567  | 0.019691209  | 0.289087332  | 2.54E-02 | 4.61E-02 | 1.00E+00 |
| BRD8     | LMNA | -0.469305612 | -0.570401386 | -0.354202738 | 1.85E-12 | 2.47E-11 | 2.20E-08 |
| NPHS1    | LMNA | -0.002203429 | -0.14021178  | 0.135888907  | 9.75E-01 | 9.81E-01 | 1.00E+00 |
| WDR12    | LMNA | -0.009136287 | -0.147001878 | 0.129077516  | 8.97E-01 | 9.26E-01 | 1.00E+00 |
| HOXD13   | LMNA | -0.151196991 | -0.283333399 | -0.013426235 | 3.17E-02 | 5.63E-02 | 1.00E+00 |
| KIAA0494 | LMNA | 0.225824388  | 0.0905978    | 0.352874429  | 1.23E-03 | 3.15E-03 | 1.00E+00 |
| GABRQ    | LMNA | -0.088361362 | -0.223683784 | 0.050303257  | 2.11E-01 | 2.86E-01 | 1.00E+00 |
| TCF4     | LMNA | -0.432711902 | -0.53858955  | -0.313381135 | 1.26E-10 | 1.24E-09 | 1.50E-06 |
| APOBEC3B | LMNA | 0.510213808  | 0.400362555  | 0.605608458  | 8.74E-15 | 1.71E-13 | 1.04E-10 |
| NR2C2    | LMNA | -0.180037112 | -0.310373983 | -0.043056244 | 1.03E-02 | 2.09E-02 | 1.00E+00 |
| NKTR     | LMNA | -0.209623261 | -0.337895991 | -0.073705193 | 2.75E-03 | 6.44E-03 | 1.00E+00 |
| MYH2     | LMNA | 0.019742221  | -0.118632103 | 0.157364336  | 7.80E-01 | 8.33E-01 | 1.00E+00 |
| TLE2     | LMNA | -0.143448138 | -0.276032817 | -0.005506177 | 4.17E-02 | 7.15E-02 | 1.00E+00 |
| FXN      | LMNA | 0.086986093  | -0.051685575 | 0.222366798  | 2.18E-01 | 2.95E-01 | 1.00E+00 |
| AURKA    | LMNA | 0.162038869  | 0.024536746  | 0.29352385   | 2.12E-02 | 3.94E-02 | 1.00E+00 |
| KIAA0892 | LMNA | 0.086440819  | -0.052233496 | 0.221844496  | 2.21E-01 | 2.98E-01 | 1.00E+00 |
| GPRC5C   | LMNA | -0.043430084 | -0.180399488 | 0.095191644  | 5.39E-01 | 6.21E-01 | 1.00E+00 |
| TBC1D9B  | LMNA | 0.377132547  | 0.252212625  | 0.489688631  | 3.16E-08 | 1.97E-07 | 3.75E-04 |
| PAEP     | LMNA | 0.309197018  | 0.17877711   | 0.428938784  | 7.55E-06 | 3.06E-05 | 8.96E-02 |
| PNPLA6   | LMNA | 0.335392921  | 0.206922717  | 0.4524929    | 1.06E-06 | 5.07E-06 | 1.26E-02 |
| SPG11    | LMNA | 0.030398148  | -0.108106521 | 0.167745207  | 6.68E-01 | 7.37E-01 | 1.00E+00 |
| KCNJ13   | LMNA | -0.251149505 | -0.376158547 | -0.117160632 | 3.12E-04 | 9.21E-04 | 1.00E+00 |

|          |      |              |              |              |          |          |          |
|----------|------|--------------|--------------|--------------|----------|----------|----------|
| NOC3L    | LMNA | -0.051879625 | -0.188580009 | 0.08679299   | 4.63E-01 | 5.49E-01 | 1.00E+00 |
| AP3B1    | LMNA | 0.371674375  | 0.246258924  | 0.484847824  | 5.15E-08 | 3.12E-07 | 6.11E-04 |
| C11orf68 | LMNA | 0.09174328   | -0.046901743 | 0.226920278  | 1.94E-01 | 2.67E-01 | 1.00E+00 |
| NAG      | LMNA | 0.000946638  | -0.137122283 | 0.138979476  | 9.89E-01 | 9.91E-01 | 1.00E+00 |
| AKR7A3   | LMNA | 0.067753401  | -0.070961331 | 0.203897264  | 3.38E-01 | 4.24E-01 | 1.00E+00 |
| AHCYL1   | LMNA | -0.246080623 | -0.37151078  | -0.111828628 | 4.15E-04 | 1.19E-03 | 1.00E+00 |
| FLJ11184 | LMNA | -0.022556471 | -0.160108901 | 0.115855297  | 7.50E-01 | 8.07E-01 | 1.00E+00 |
| MLN      | LMNA | 0.036554309  | -0.102011478 | 0.173728613  | 6.06E-01 | 6.82E-01 | 1.00E+00 |
| RPP14    | LMNA | -0.040361722 | -0.17742412  | 0.098236651  | 5.68E-01 | 6.48E-01 | 1.00E+00 |
| TIAM1    | LMNA | -0.033526552 | -0.170787086 | 0.105010476  | 6.36E-01 | 7.10E-01 | 1.00E+00 |
| PBX1     | LMNA | -0.391618499 | -0.502502541 | -0.268059697 | 8.25E-09 | 5.73E-08 | 9.79E-05 |
| PXMP2    | LMNA | -0.283166161 | -0.405370666 | -0.151018688 | 4.44E-05 | 1.55E-04 | 5.26E-01 |
| KRT17    | LMNA | 0.016489296  | -0.121839055 | 0.154189305  | 8.16E-01 | 8.61E-01 | 1.00E+00 |
| LACTB2   | LMNA | 0.024475758  | -0.113960304 | 0.161979445  | 7.30E-01 | 7.90E-01 | 1.00E+00 |
| ZNF711   | LMNA | -0.521844893 | -0.615550865 | -0.413589371 | 1.67E-15 | 3.81E-14 | 1.98E-11 |
| GGA1     | LMNA | -0.130488464 | -0.263787579 | 0.007701268  | 6.42E-02 | 1.04E-01 | 1.00E+00 |
| VAMP4    | LMNA | 0.149739041  | 0.011934751  | 0.28196144   | 3.34E-02 | 5.90E-02 | 1.00E+00 |
| C20orf19 | LMNA | -0.355015321 | -0.470030046 | -0.228145796 | 2.17E-07 | 1.17E-06 | 2.57E-03 |
| BCAP29   | LMNA | 0.383727076  | 0.259418487  | 0.495528022  | 1.73E-08 | 1.13E-07 | 2.05E-04 |
| DDX24    | LMNA | -0.041570413 | -0.178596477 | 0.09703747   | 5.57E-01 | 6.38E-01 | 1.00E+00 |
| PHACTR1  | LMNA | -0.410919989 | -0.519500793 | -0.289279194 | 1.24E-09 | 1.01E-08 | 1.48E-05 |
| SLC35E2  | LMNA | -0.2552098   | -0.379876987 | -0.121437274 | 2.47E-04 | 7.44E-04 | 1.00E+00 |
| LOXL1    | LMNA | 0.72708463   | 0.654754451  | 0.786219079  | 1.67E-34 | 1.23E-31 | 1.98E-30 |
| IQSEC2   | LMNA | 0.011621487  | -0.126632677 | 0.149432744  | 8.70E-01 | 9.03E-01 | 1.00E+00 |
| RGSL1    | LMNA | 0.213160558  | 0.077386822  | 0.341171884  | 2.32E-03 | 5.54E-03 | 1.00E+00 |
| SETD8    | LMNA | 0.332234977  | 0.203518424  | 0.44966206   | 1.36E-06 | 6.36E-06 | 1.61E-02 |
| HEXIM1   | LMNA | 0.121639578  | -0.016691718 | 0.255401753  | 8.46E-02 | 1.32E-01 | 1.00E+00 |
| PRRX1    | LMNA | 0.50282358   | 0.391982136  | 0.59927568   | 2.43E-14 | 4.32E-13 | 2.88E-10 |
| SULT1A2  | LMNA | -0.118734633 | -0.252644429 | 0.019638267  | 9.24E-02 | 1.42E-01 | 1.00E+00 |
| ASTE1    | LMNA | 0.056369602  | -0.082322019 | 0.192919327  | 4.26E-01 | 5.12E-01 | 1.00E+00 |
| KLHL9    | LMNA | -0.248317333 | -0.373562443 | -0.114180492 | 3.66E-04 | 1.07E-03 | 1.00E+00 |
| GAA      | LMNA | 0.478101044  | 0.364080183  | 0.578002532  | 6.21E-13 | 8.99E-12 | 7.37E-09 |
| MYOD1    | LMNA | 0.224370642  | 0.089078821  | 0.35153305   | 1.33E-03 | 3.37E-03 | 1.00E+00 |
| ZNF747   | LMNA | 0.198076989  | 0.061713528  | 0.327181306  | 4.72E-03 | 1.04E-02 | 1.00E+00 |
| ARHGEF16 | LMNA | -0.155947529 | -0.287802513 | -0.018290295 | 2.67E-02 | 4.82E-02 | 1.00E+00 |

|          |      |              |              |              |          |          |          |
|----------|------|--------------|--------------|--------------|----------|----------|----------|
| SCN1A    | LMNA | -0.445711912 | -0.549925463 | -0.327832782 | 2.99E-11 | 3.22E-10 | 3.54E-07 |
| GDF9     | LMNA | -0.40791456  | -0.516859637 | -0.285967237 | 1.68E-09 | 1.34E-08 | 2.00E-05 |
| IL1RL2   | LMNA | 0.003995955  | -0.134129038 | 0.141968639  | 9.55E-01 | 9.67E-01 | 1.00E+00 |
| HNRPH1   | LMNA | -0.154723199 | -0.286651414 | -0.017036084 | 2.79E-02 | 5.02E-02 | 1.00E+00 |
| MED18    | LMNA | 0.041034035  | -0.097569678 | 0.178076271  | 5.62E-01 | 6.42E-01 | 1.00E+00 |
| TRAF2    | LMNA | 0.222256319  | 0.086870748  | 0.349581222  | 1.48E-03 | 3.70E-03 | 1.00E+00 |
| ECE1     | LMNA | 0.645670213  | 0.557293832  | 0.719581055  | 3.26E-25 | 4.49E-23 | 3.86E-21 |
| TEX13B   | LMNA | 0.040655512  | -0.097945209 | 0.177709114  | 5.66E-01 | 6.46E-01 | 1.00E+00 |
| SNN      | LMNA | -0.379101499 | -0.491433176 | -0.254362654 | 2.64E-08 | 1.67E-07 | 3.13E-04 |
| HCK      | LMNA | 0.287183021  | 0.155288576  | 0.409018128  | 3.41E-05 | 1.22E-04 | 4.05E-01 |
| C6orf62  | LMNA | 0.066817925  | -0.071896267 | 0.20299643   | 3.45E-01 | 4.31E-01 | 1.00E+00 |
| GABBR1   | LMNA | -0.496770644 | -0.594079837 | -0.385131865 | 5.50E-14 | 9.09E-13 | 6.53E-10 |
| YIPF6    | LMNA | -0.124452944 | -0.25807008  | 0.013835767  | 7.76E-02 | 1.23E-01 | 1.00E+00 |
| BMP6     | LMNA | -0.17231046  | -0.303150235 | -0.035094269 | 1.42E-02 | 2.76E-02 | 1.00E+00 |
| PROX1    | LMNA | -0.105581455 | -0.240132376 | 0.03294981   | 1.35E-01 | 1.96E-01 | 1.00E+00 |
| LANCL2   | LMNA | 0.028253004  | -0.110227925 | 0.16565788   | 6.90E-01 | 7.57E-01 | 1.00E+00 |
| SCN3A    | LMNA | -0.599509853 | -0.681184061 | -0.503096604 | 4.24E-21 | 2.54E-19 | 5.03E-17 |
| IL8RA    | LMNA | 0.104480677  | -0.034061617 | 0.239083222  | 1.39E-01 | 2.01E-01 | 1.00E+00 |
| LSM3     | LMNA | -0.240658167 | -0.366531843 | -0.106133242 | 5.61E-04 | 1.56E-03 | 1.00E+00 |
| CDSN     | LMNA | 0.015073308  | -0.123234129 | 0.152806336  | 8.31E-01 | 8.73E-01 | 1.00E+00 |
| EFHA1    | LMNA | -0.197373823 | -0.32652771  | -0.060984507 | 4.87E-03 | 1.07E-02 | 1.00E+00 |
| SSRP1    | LMNA | 0.036769334  | -0.1017984   | 0.173937421  | 6.03E-01 | 6.81E-01 | 1.00E+00 |
| ASXL2    | LMNA | -0.019534683 | -0.157161853 | 0.118836794  | 7.83E-01 | 8.35E-01 | 1.00E+00 |
| RPE65    | LMNA | -0.134052208 | -0.26715915  | 0.00407419   | 5.72E-02 | 9.42E-02 | 1.00E+00 |
| SNAI1    | LMNA | 0.48807259   | 0.375309537  | 0.586599178  | 1.73E-13 | 2.70E-12 | 2.06E-09 |
| SPCS3    | LMNA | 0.12238602   | -0.015934197 | 0.256109912  | 8.27E-02 | 1.29E-01 | 1.00E+00 |
| EFNA2    | LMNA | -0.223002223 | -0.350269925 | -0.087649574 | 1.42E-03 | 3.58E-03 | 1.00E+00 |
| CLDN9    | LMNA | -0.044835757 | -0.181761722 | 0.093795804  | 5.26E-01 | 6.09E-01 | 1.00E+00 |
| DEF8     | LMNA | -0.202889914 | -0.331651633 | -0.066707329 | 3.78E-03 | 8.53E-03 | 1.00E+00 |
| CHAF1A   | LMNA | -0.017881461 | -0.155548482 | 0.120466919  | 8.01E-01 | 8.50E-01 | 1.00E+00 |
| C1orf165 | LMNA | -0.413719704 | -0.521959302 | -0.292367079 | 9.36E-10 | 7.77E-09 | 1.11E-05 |
| ZFPM2    | LMNA | -0.422475216 | -0.529636179 | -0.30204014  | 3.78E-10 | 3.36E-09 | 4.48E-06 |
| C9orf7   | LMNA | -0.090811531 | -0.226028893 | 0.047839212  | 1.99E-01 | 2.73E-01 | 1.00E+00 |
| GC       | LMNA | -0.000755767 | -0.138792287 | 0.137309559  | 9.91E-01 | 9.93E-01 | 1.00E+00 |
| FTH1     | LMNA | 0.246056193  | 0.111802949  | 0.371488364  | 4.16E-04 | 1.19E-03 | 1.00E+00 |

|          |      |              |              |              |          |          |          |
|----------|------|--------------|--------------|--------------|----------|----------|----------|
| IER3     | LMNA | 0.406611353  | 0.284532018  | 0.515713741  | 1.92E-09 | 1.50E-08 | 2.27E-05 |
| YWHAH    | LMNA | -0.083010144 | -0.218556566 | 0.055678917  | 2.40E-01 | 3.20E-01 | 1.00E+00 |
| ADRB1    | LMNA | 0.02953467   | -0.108960595 | 0.166905149  | 6.76E-01 | 7.45E-01 | 1.00E+00 |
| FOXL1    | LMNA | 0.098477275  | -0.040119141 | 0.233355829  | 1.63E-01 | 2.31E-01 | 1.00E+00 |
| MGC31957 | LMNA | 0.173154131  | 0.035962789  | 0.303939726  | 1.37E-02 | 2.68E-02 | 1.00E+00 |
| MUC5B    | LMNA | 0.11095316   | -0.02751936  | 0.245247654  | 1.16E-01 | 1.73E-01 | 1.00E+00 |
| ZNF193   | LMNA | -0.163269684 | -0.29467876  | -0.025800209 | 2.02E-02 | 3.78E-02 | 1.00E+00 |
| CSRP1    | LMNA | 0.279262065  | 0.146873387  | 0.401821865  | 5.70E-05 | 1.96E-04 | 6.76E-01 |
| MOSPD1   | LMNA | -0.01927386  | -0.156907365 | 0.119094023  | 7.85E-01 | 8.37E-01 | 1.00E+00 |
| UMPS     | LMNA | 0.227032413  | 0.091860509  | 0.353988682  | 1.16E-03 | 2.98E-03 | 1.00E+00 |
| RAD1     | LMNA | -0.000418153 | -0.138461161 | 0.137640793  | 9.95E-01 | 9.96E-01 | 1.00E+00 |
| RCP9     | LMNA | 0.164907503  | 0.027482151  | 0.296214978  | 1.90E-02 | 3.57E-02 | 1.00E+00 |
| COG4     | LMNA | -0.06186126  | -0.198219465 | 0.076846006  | 3.82E-01 | 4.69E-01 | 1.00E+00 |
| NFRKB    | LMNA | -0.084493207 | -0.219978299 | 0.054189885  | 2.32E-01 | 3.10E-01 | 1.00E+00 |
| FANCA    | LMNA | -0.086602282 | -0.221999165 | 0.052071258  | 2.20E-01 | 2.97E-01 | 1.00E+00 |
| CDC2L5   | LMNA | 0.090554592  | -0.048097685 | 0.225783044  | 2.00E-01 | 2.74E-01 | 1.00E+00 |
| GDF2     | LMNA | -0.076207977 | -0.212028315 | 0.062500566  | 2.81E-01 | 3.64E-01 | 1.00E+00 |
| PCBP3    | LMNA | -0.278306635 | -0.400952824 | -0.145859636 | 6.06E-05 | 2.07E-04 | 7.19E-01 |
| TIMM17A  | LMNA | 0.049066205  | -0.089591657 | 0.185858269  | 4.88E-01 | 5.73E-01 | 1.00E+00 |
| BFSP2    | LMNA | -0.033180381 | -0.170450618 | 0.105353199  | 6.39E-01 | 7.13E-01 | 1.00E+00 |
| OR2H1    | LMNA | -0.022995198 | -0.160536573 | 0.115422212  | 7.45E-01 | 8.03E-01 | 1.00E+00 |
| HNRNPA0  | LMNA | -0.083114575 | -0.218656697 | 0.055574086  | 2.40E-01 | 3.19E-01 | 1.00E+00 |
| IKBKG    | LMNA | 0.508064944  | 0.397923876  | 0.603768315  | 1.18E-14 | 2.25E-13 | 1.40E-10 |
| TM4SF20  | LMNA | 0.02157846   | -0.116820541 | 0.159155348  | 7.61E-01 | 8.16E-01 | 1.00E+00 |
| PCBP1    | LMNA | 0.248910022  | 0.114803947  | 0.374105892  | 3.54E-04 | 1.03E-03 | 1.00E+00 |
| LRRC2    | LMNA | 0.1540687    | 0.016365789  | 0.286035906  | 2.86E-02 | 5.12E-02 | 1.00E+00 |
| NSD1     | LMNA | 0.090525299  | -0.048127152 | 0.225755015  | 2.00E-01 | 2.74E-01 | 1.00E+00 |
| AMMECR1  | LMNA | 0.265082974  | 0.131857287  | 0.388902114  | 1.38E-04 | 4.40E-04 | 1.00E+00 |
| MAGEC1   | LMNA | -0.078778772 | -0.214497013 | 0.059923931  | 2.65E-01 | 3.47E-01 | 1.00E+00 |
| SEC13    | LMNA | 0.205894365  | 0.069828154  | 0.334439289  | 3.29E-03 | 7.53E-03 | 1.00E+00 |
| WDR91    | LMNA | 0.217909294  | 0.082335148  | 0.345564808  | 1.84E-03 | 4.50E-03 | 1.00E+00 |
| HAGH     | LMNA | -0.304396869 | -0.424604995 | -0.173642735 | 1.06E-05 | 4.17E-05 | 1.26E-01 |
| EGF      | LMNA | 0.260497759  | 0.127014449  | 0.384713695  | 1.81E-04 | 5.62E-04 | 1.00E+00 |
| NHLH2    | LMNA | -0.16082401  | -0.292383536 | -0.023290094 | 2.22E-02 | 4.11E-02 | 1.00E+00 |
| NCAPD3   | LMNA | -0.060321582 | -0.196734286 | 0.078382143  | 3.94E-01 | 4.81E-01 | 1.00E+00 |

|          |      |              |              |              |          |          |          |
|----------|------|--------------|--------------|--------------|----------|----------|----------|
| BRCC3    | LMNA | 0.241516069  | 0.107033738  | 0.367320056  | 5.35E-04 | 1.50E-03 | 1.00E+00 |
| CNDP2    | LMNA | 0.099391181  | -0.039197653 | 0.234228322  | 1.59E-01 | 2.26E-01 | 1.00E+00 |
| FYN      | LMNA | -0.214482659 | -0.342395485 | -0.078763819 | 2.18E-03 | 5.23E-03 | 1.00E+00 |
| YPEL5    | LMNA | -0.246371374 | -0.371777546 | -0.112134263 | 4.09E-04 | 1.17E-03 | 1.00E+00 |
| KCND3    | LMNA | -0.187855969 | -0.317668645 | -0.051130984 | 7.42E-03 | 1.55E-02 | 1.00E+00 |
| LRRC42   | LMNA | 0.100919611  | -0.037656015 | 0.235687008  | 1.53E-01 | 2.19E-01 | 1.00E+00 |
| GTF3C5   | LMNA | -0.122241213 | -0.255972544 | 0.016081165  | 8.31E-02 | 1.30E-01 | 1.00E+00 |
| AKR1C4   | LMNA | 0.009093314  | -0.129119776 | 0.14695983   | 8.98E-01 | 9.26E-01 | 1.00E+00 |
| RBM26    | LMNA | -0.268033349 | -0.391594465 | -0.134976797 | 1.15E-04 | 3.72E-04 | 1.00E+00 |
| DUSP14   | LMNA | -0.015379792 | -0.153105719 | 0.122932218  | 8.28E-01 | 8.71E-01 | 1.00E+00 |
| AP4M1    | LMNA | 0.405468971  | 0.283274365  | 0.514708934  | 2.15E-09 | 1.67E-08 | 2.55E-05 |
| RIMBP2   | LMNA | -0.325999771 | -0.444065772 | -0.196805942 | 2.20E-06 | 9.87E-06 | 2.60E-02 |
| ABCC2    | LMNA | 0.024385134  | -0.114049803 | 0.161891146  | 7.30E-01 | 7.91E-01 | 1.00E+00 |
| COL5A2   | LMNA | 0.704534284  | 0.62751659   | 0.767898226  | 1.29E-31 | 6.14E-29 | 1.54E-27 |
| DNAJC16  | LMNA | 0.074096485  | -0.064615474 | 0.209999382  | 2.95E-01 | 3.79E-01 | 1.00E+00 |
| TTC12    | LMNA | 0.335782028  | 0.207342394  | 0.452841539  | 1.03E-06 | 4.93E-06 | 1.22E-02 |
| SNX13    | LMNA | 0.173458788  | 0.036276469  | 0.304224773  | 1.36E-02 | 2.66E-02 | 1.00E+00 |
| ELA2B    | LMNA | 0.062532593  | -0.076176011 | 0.198866839  | 3.77E-01 | 4.64E-01 | 1.00E+00 |
| CSPP1    | LMNA | -0.221839405 | -0.349196219 | -0.086435505 | 1.51E-03 | 3.77E-03 | 1.00E+00 |
| NAIP     | LMNA | 0.001855694  | -0.136230206 | 0.139870863  | 9.79E-01 | 9.84E-01 | 1.00E+00 |
| MYOZ2    | LMNA | 0.135620198  | -0.002477182 | 0.268641556  | 5.43E-02 | 9.02E-02 | 1.00E+00 |
| XRCC4    | LMNA | 0.00462726   | -0.133509026 | 0.142587176  | 9.48E-01 | 9.61E-01 | 1.00E+00 |
| CYB561   | LMNA | 0.480061062  | 0.366284823  | 0.579694051  | 4.85E-13 | 7.09E-12 | 5.75E-09 |
| CHST10   | LMNA | -0.051400599 | -0.188116742 | 0.087269658  | 4.68E-01 | 5.53E-01 | 1.00E+00 |
| BAI1     | LMNA | -0.32543651  | -0.443559774 | -0.196200162 | 2.29E-06 | 1.03E-05 | 2.72E-02 |
| THY1     | LMNA | 0.165834301  | 0.028434263  | 0.297083982  | 1.83E-02 | 3.45E-02 | 1.00E+00 |
| KIT      | LMNA | -0.471400461 | -0.572213358 | -0.356552966 | 1.43E-12 | 1.94E-11 | 1.70E-08 |
| TBC1D8   | LMNA | 0.253290767  | 0.119415368  | 0.378120028  | 2.76E-04 | 8.24E-04 | 1.00E+00 |
| PDE6H    | LMNA | -0.26973467  | -0.393146036 | -0.136776848 | 1.04E-04 | 3.37E-04 | 1.00E+00 |
| EPHA7    | LMNA | -0.306017098 | -0.426068427 | -0.175374984 | 9.46E-06 | 3.76E-05 | 1.12E-01 |
| SOLH     | LMNA | 0.105365844  | -0.033167608 | 0.239926901  | 1.36E-01 | 1.97E-01 | 1.00E+00 |
| FLJ20309 | LMNA | -0.090009576 | -0.225261497 | 0.048645895  | 2.03E-01 | 2.77E-01 | 1.00E+00 |
| MAP7     | LMNA | -0.14934907  | -0.28159422  | -0.011535914 | 3.39E-02 | 5.96E-02 | 1.00E+00 |
| SPAG9    | LMNA | -0.30727765  | -0.427206554 | -0.176723247 | 8.66E-06 | 3.46E-05 | 1.03E-01 |
| ZNF294   | LMNA | -0.153850458 | -0.285830642 | -0.016142308 | 2.88E-02 | 5.16E-02 | 1.00E+00 |



|           |      |              |              |              |          |          |          |
|-----------|------|--------------|--------------|--------------|----------|----------|----------|
| CENTB2    | LMNA | -0.072391646 | -0.208360348 | 0.066322161  | 3.06E-01 | 3.91E-01 | 1.00E+00 |
| FLJ21963  | LMNA | 0.493395032  | 0.38131693   | 0.591178679  | 8.62E-14 | 1.38E-12 | 1.02E-09 |
| ANTXR1    | LMNA | -0.068504173 | -0.204620068 | 0.070210816  | 3.33E-01 | 4.18E-01 | 1.00E+00 |
| CREB3     | LMNA | 0.045869984  | -0.092768464 | 0.182763652  | 5.17E-01 | 6.00E-01 | 1.00E+00 |
| ETV7      | LMNA | 0.383655517  | 0.259340219  | 0.495464711  | 1.74E-08 | 1.14E-07 | 2.06E-04 |
| DGAT1     | LMNA | 0.035928534  | -0.102631516 | 0.17312086   | 6.12E-01 | 6.88E-01 | 1.00E+00 |
| TAC3      | LMNA | -0.184685165 | -0.314712271 | -0.047854255 | 8.51E-03 | 1.76E-02 | 1.00E+00 |
| CORO1C    | LMNA | -0.095784275 | -0.230783598 | 0.042833113  | 1.75E-01 | 2.45E-01 | 1.00E+00 |
| RAD54B    | LMNA | -0.180939023 | -0.311216212 | -0.043986759 | 9.97E-03 | 2.02E-02 | 1.00E+00 |
| HRASLS3   | LMNA | 0.325428904  | 0.196191983  | 0.443552941  | 2.29E-06 | 1.03E-05 | 2.72E-02 |
| MED25     | LMNA | -0.02800913  | -0.165420501 | 0.11046902   | 6.92E-01 | 7.58E-01 | 1.00E+00 |
| BARD1     | LMNA | 0.108273988  | -0.030228854 | 0.242697311  | 1.25E-01 | 1.84E-01 | 1.00E+00 |
| ZNF177    | LMNA | -0.393280387 | -0.503969497 | -0.269882024 | 7.04E-09 | 4.97E-08 | 8.35E-05 |
| MIP       | LMNA | -0.106732231 | -0.241228848 | 0.031787137  | 1.31E-01 | 1.91E-01 | 1.00E+00 |
| ZNF442    | LMNA | -0.037537929 | -0.174683693 | 0.101036659  | 5.96E-01 | 6.73E-01 | 1.00E+00 |
| F2        | LMNA | 0.217103718  | 0.081495242  | 0.344819986  | 1.91E-03 | 4.67E-03 | 1.00E+00 |
| FDX1      | LMNA | 0.174312599  | 0.037155714  | 0.305023505  | 1.31E-02 | 2.58E-02 | 1.00E+00 |
| GRIA1     | LMNA | -0.0255195   | -0.162996266 | 0.11292935   | 7.18E-01 | 7.80E-01 | 1.00E+00 |
| IL13RA1   | LMNA | 0.441182607  | 0.322791445  | 0.545980295  | 4.97E-11 | 5.23E-10 | 5.90E-07 |
| EIF2B2    | LMNA | 0.126936607  | -0.011312634 | 0.260424008  | 7.18E-02 | 1.15E-01 | 1.00E+00 |
| NHP2L1    | LMNA | -0.220616142 | -0.348066337 | -0.085158761 | 1.60E-03 | 3.98E-03 | 1.00E+00 |
| WNT5A     | LMNA | 0.065096858  | -0.073615704 | 0.201338493  | 3.57E-01 | 4.44E-01 | 1.00E+00 |
| ZNF593    | LMNA | 0.283599134  | 0.151478697  | 0.405764009  | 4.31E-05 | 1.51E-04 | 5.12E-01 |
| TRA@      | LMNA | 0.342364981  | 0.214449694  | 0.458734436  | 6.12E-07 | 3.04E-06 | 7.26E-03 |
| WIPI2     | LMNA | 0.035105616  | -0.103446726 | 0.172321483  | 6.20E-01 | 6.95E-01 | 1.00E+00 |
| TAS2R7    | LMNA | 0.052629487  | -0.086046691 | 0.189305081  | 4.57E-01 | 5.43E-01 | 1.00E+00 |
| RANBP1    | LMNA | -0.120539288 | -0.254357633 | 0.017808048  | 8.75E-02 | 1.36E-01 | 1.00E+00 |
| CSNK2B    | LMNA | 0.022321396  | -0.116087327 | 0.159879729  | 7.53E-01 | 8.09E-01 | 1.00E+00 |
| DKFZP434C | LMNA | 0.052933189  | -0.085744387 | 0.189598701  | 4.54E-01 | 5.41E-01 | 1.00E+00 |
| SLC7A4    | LMNA | -0.283002691 | -0.405222146 | -0.150845025 | 4.48E-05 | 1.57E-04 | 5.32E-01 |
| WBP11     | LMNA | -0.001778671 | -0.139795345 | 0.136305799  | 9.80E-01 | 9.84E-01 | 1.00E+00 |
| TEX2      | LMNA | 0.100177764  | -0.038404355 | 0.234979089  | 1.56E-01 | 2.22E-01 | 1.00E+00 |
| C17orf80  | LMNA | -0.332903869 | -0.450261865 | -0.204239237 | 1.29E-06 | 6.08E-06 | 1.53E-02 |
| TMEM176A  | LMNA | 0.187704131  | 0.050974007  | 0.317527133  | 7.47E-03 | 1.56E-02 | 1.00E+00 |
| GALNT2    | LMNA | 0.62238953   | 0.529865354  | 0.700272103  | 4.71E-23 | 4.40E-21 | 5.59E-19 |

|           |      |              |              |              |          |          |          |
|-----------|------|--------------|--------------|--------------|----------|----------|----------|
| CTNNB1    | LMNA | -0.010503579 | -0.148339483 | 0.127732637  | 8.82E-01 | 9.13E-01 | 1.00E+00 |
| BHLHB2    | LMNA | 0.580782588  | 0.481322911  | 0.665477211  | 1.30E-19 | 6.17E-18 | 1.54E-15 |
| TMEM185B  | LMNA | 0.424285435  | 0.304043163  | 0.5312212    | 3.12E-10 | 2.82E-09 | 3.70E-06 |
| ARD1B     | LMNA | 0.040689039  | -0.097911949 | 0.177741636  | 5.65E-01 | 6.45E-01 | 1.00E+00 |
| STK3      | LMNA | 0.290428452  | 0.158742045  | 0.411962263  | 2.75E-05 | 1.01E-04 | 3.27E-01 |
| REPS2     | LMNA | -0.356394638 | -0.471259377 | -0.229642179 | 1.93E-07 | 1.06E-06 | 2.29E-03 |
| LOC541469 | LMNA | 0.001050373  | -0.137020497 | 0.139081206  | 9.88E-01 | 9.91E-01 | 1.00E+00 |
| H2AFY2    | LMNA | -0.336686205 | -0.453651542 | -0.208317787 | 9.62E-07 | 4.63E-06 | 1.14E-02 |
| CCNK      | LMNA | 0.122462628  | -0.015856443 | 0.256182584  | 8.25E-02 | 1.29E-01 | 1.00E+00 |
| FSHR      | LMNA | 0.110175413  | -0.028306119 | 0.244507497  | 1.19E-01 | 1.76E-01 | 1.00E+00 |
| GAS8      | LMNA | 0.317454497  | 0.187626197  | 0.436381133  | 4.15E-06 | 1.77E-05 | 4.93E-02 |
| UPK2      | LMNA | -0.216006218 | -0.343804997 | -0.080351283 | 2.02E-03 | 4.89E-03 | 1.00E+00 |
| C1orf66   | LMNA | -0.082713982 | -0.218272583 | 0.055976196  | 2.42E-01 | 3.21E-01 | 1.00E+00 |
| LCE2B     | LMNA | 0.079612372  | -0.05908804  | 0.215297135  | 2.60E-01 | 3.42E-01 | 1.00E+00 |
| CD200     | LMNA | -0.5239899   | -0.617381194 | -0.416033664 | 1.22E-15 | 2.85E-14 | 1.45E-11 |
| IMPACT    | LMNA | 0.029795878  | -0.108702253 | 0.167159294  | 6.74E-01 | 7.43E-01 | 1.00E+00 |
| KRT83     | LMNA | -0.01901433  | -0.156654121 | 0.119349958  | 7.88E-01 | 8.40E-01 | 1.00E+00 |
| COL19A1   | LMNA | 0.209423206  | 0.073497085  | 0.337710626  | 2.78E-03 | 6.49E-03 | 1.00E+00 |
| BMP15     | LMNA | -0.085408959 | -0.220855894 | 0.053270138  | 2.27E-01 | 3.04E-01 | 1.00E+00 |
| POL3S     | LMNA | 0.195259396  | 0.058793211  | 0.324561594  | 5.36E-03 | 1.16E-02 | 1.00E+00 |
| ITGA6     | LMNA | 0.105794728  | -0.03273436  | 0.24033561   | 1.34E-01 | 1.95E-01 | 1.00E+00 |
| GAD2      | LMNA | -0.339760562 | -0.456404247 | -0.211636206 | 7.54E-07 | 3.69E-06 | 8.94E-03 |
| C1GALT1   | LMNA | 0.158782625  | 0.021196248  | 0.290466569  | 2.40E-02 | 4.39E-02 | 1.00E+00 |
| BAG3      | LMNA | 0.346575983  | 0.219003227  | 0.46249866   | 4.36E-07 | 2.23E-06 | 5.17E-03 |
| ZNF468    | LMNA | 0.046604994  | -0.092038168 | 0.183475537  | 5.10E-01 | 5.94E-01 | 1.00E+00 |
| RIC8A     | LMNA | 0.393581431  | 0.270212225  | 0.504235162  | 6.84E-09 | 4.84E-08 | 8.12E-05 |
| CA5A      | LMNA | -0.221983367 | -0.349329166 | -0.08658579  | 1.50E-03 | 3.75E-03 | 1.00E+00 |
| CCND1     | LMNA | -0.051178653 | -0.187902076 | 0.087490491  | 4.69E-01 | 5.55E-01 | 1.00E+00 |
| DKK4      | LMNA | -0.158176732 | -0.289897401 | -0.020575017 | 2.46E-02 | 4.48E-02 | 1.00E+00 |
| SGK2      | LMNA | -0.097560396 | -0.23248028  | 0.041043389  | 1.67E-01 | 2.35E-01 | 1.00E+00 |
| PIK3C2G   | LMNA | -0.176331282 | -0.306911231 | -0.039235376 | 1.21E-02 | 2.40E-02 | 1.00E+00 |
| USP11     | LMNA | -0.32709919  | -0.445053204 | -0.197988638 | 2.02E-06 | 9.15E-06 | 2.40E-02 |
| IMPA2     | LMNA | 0.429556131  | 0.309881294  | 0.535831947  | 1.78E-10 | 1.70E-09 | 2.11E-06 |
| PRKDC     | LMNA | -0.044146159 | -0.1810935   | 0.094480646  | 5.33E-01 | 6.15E-01 | 1.00E+00 |
| DSCR2     | LMNA | 0.144643171  | 0.006726485  | 0.277159807  | 4.00E-02 | 6.89E-02 | 1.00E+00 |

|          |      |              |              |              |          |          |          |
|----------|------|--------------|--------------|--------------|----------|----------|----------|
| MSR1     | LMNA | 0.320314007  | 0.190695498  | 0.438954581  | 3.36E-06 | 1.45E-05 | 3.99E-02 |
| NOL11    | LMNA | -0.094881452 | -0.22992084  | 0.043742509  | 1.79E-01 | 2.49E-01 | 1.00E+00 |
| ZCCHC10  | LMNA | -0.153504572 | -0.285505298 | -0.015788145 | 2.92E-02 | 5.22E-02 | 1.00E+00 |
| PDCD6IP  | LMNA | 0.363149833  | 0.236979366  | 0.477273583  | 1.09E-07 | 6.18E-07 | 1.29E-03 |
| TRPM2    | LMNA | 0.274268189  | 0.141577746  | 0.397277088  | 7.82E-05 | 2.61E-04 | 9.27E-01 |
| PSMD2    | LMNA | 0.161662596  | 0.02415058   | 0.293170705  | 2.15E-02 | 3.99E-02 | 1.00E+00 |
| USP18    | LMNA | 0.037511981  | -0.101062378 | 0.174658501  | 5.96E-01 | 6.73E-01 | 1.00E+00 |
| ATXN2    | LMNA | -0.174894621 | -0.305567875 | -0.037755196 | 1.28E-02 | 2.52E-02 | 1.00E+00 |
| SLC17A4  | LMNA | 0.02325371   | -0.115166999 | 0.160788548  | 7.43E-01 | 8.01E-01 | 1.00E+00 |
| RS1      | LMNA | -0.136970084 | -0.269917258 | 0.001101749  | 5.19E-02 | 8.68E-02 | 1.00E+00 |
| RRAS     | LMNA | 0.596646585  | 0.499759613  | 0.678787453  | 7.26E-21 | 4.18E-19 | 8.61E-17 |
| LAMC3    | LMNA | 0.172625584  | 0.03541865   | 0.303445142  | 1.40E-02 | 2.73E-02 | 1.00E+00 |
| NET1     | LMNA | -0.379588521 | -0.491864553 | -0.254894657 | 2.53E-08 | 1.61E-07 | 3.00E-04 |
| NPY1R    | LMNA | -0.142978866 | -0.275590164 | -0.005027092 | 4.24E-02 | 7.25E-02 | 1.00E+00 |
| TOX      | LMNA | -0.294871605 | -0.415988816 | -0.163475244 | 2.04E-05 | 7.65E-05 | 2.42E-01 |
| MVD      | LMNA | 0.043984029  | -0.09464164  | 0.180936377  | 5.34E-01 | 6.17E-01 | 1.00E+00 |
| C11orf61 | LMNA | -0.155030551 | -0.286940418 | -0.017350897 | 2.76E-02 | 4.97E-02 | 1.00E+00 |
| IK       | LMNA | 0.016121694  | -0.12220128  | 0.153830328  | 8.20E-01 | 8.64E-01 | 1.00E+00 |
| GCNT2    | LMNA | -0.289234806 | -0.410879727 | -0.15747151  | 2.98E-05 | 1.08E-04 | 3.54E-01 |
| GABRG3   | LMNA | -0.156432737 | -0.288258593 | -0.018787465 | 2.62E-02 | 4.75E-02 | 1.00E+00 |
| BCS1L    | LMNA | -0.26490277  | -0.3887376   | -0.131666837 | 1.39E-04 | 4.44E-04 | 1.00E+00 |
| BCAS2    | LMNA | -0.199660134 | -0.328652397 | -0.063355417 | 4.39E-03 | 9.75E-03 | 1.00E+00 |
| ACE2     | LMNA | 0.006495136  | -0.131673932 | 0.144416644  | 9.27E-01 | 9.47E-01 | 1.00E+00 |
| KCTD17   | LMNA | 0.05125464   | -0.087414887 | 0.187975571  | 4.69E-01 | 5.54E-01 | 1.00E+00 |
| TPPP3    | LMNA | 0.112141543  | -0.026316876 | 0.246378299  | 1.12E-01 | 1.68E-01 | 1.00E+00 |
| CALB2    | LMNA | -0.194516343 | -0.323870395 | -0.058023456 | 5.54E-03 | 1.20E-02 | 1.00E+00 |
| ICT1     | LMNA | -0.101246967 | -0.235999347 | 0.037325744  | 1.52E-01 | 2.17E-01 | 1.00E+00 |
| CD79B    | LMNA | 0.103958147  | -0.034589263 | 0.238585087  | 1.41E-01 | 2.04E-01 | 1.00E+00 |
| CEBPZ    | LMNA | 0.01065585   | -0.127582831 | 0.148488417  | 8.80E-01 | 9.12E-01 | 1.00E+00 |
| FMOD     | LMNA | 0.366986452  | 0.241152946  | 0.480684602  | 7.78E-08 | 4.56E-07 | 9.23E-04 |
| IRS2     | LMNA | 0.258735361  | 0.125154722  | 0.38310245   | 2.01E-04 | 6.16E-04 | 1.00E+00 |
| C21orf66 | LMNA | -0.14958891  | -0.281820073 | -0.011781202 | 3.36E-02 | 5.92E-02 | 1.00E+00 |
| LUZP2    | LMNA | -0.441547964 | -0.546298706 | -0.323197857 | 4.77E-11 | 5.05E-10 | 5.66E-07 |
| CLN6     | LMNA | 0.475569272  | 0.361234321  | 0.575816311  | 8.54E-13 | 1.20E-11 | 1.01E-08 |
| ANAPC1   | LMNA | 0.179067422  | 0.042056065  | 0.309468232  | 1.08E-02 | 2.17E-02 | 1.00E+00 |

|         |      |              |              |              |          |          |          |
|---------|------|--------------|--------------|--------------|----------|----------|----------|
| PTPN14  | LMNA | 0.654644399  | 0.567918658  | 0.726993831  | 4.26E-26 | 7.11E-24 | 5.05E-22 |
| APTX    | LMNA | -0.168256884 | -0.29935447  | -0.030924191 | 1.67E-02 | 3.18E-02 | 1.00E+00 |
| SNRPG   | LMNA | -0.128446126 | -0.261853903 | 0.009778264  | 6.85E-02 | 1.10E-01 | 1.00E+00 |
| BMS1    | LMNA | 0.124003791  | -0.01429187  | 0.257644219  | 7.87E-02 | 1.24E-01 | 1.00E+00 |
| NFATC3  | LMNA | 0.029321283  | -0.109171626 | 0.16669752   | 6.79E-01 | 7.47E-01 | 1.00E+00 |
| ADCK2   | LMNA | 0.260963534  | 0.127506103  | 0.385139396  | 1.76E-04 | 5.48E-04 | 1.00E+00 |
| ZKSCAN1 | LMNA | -0.210302914 | -0.338525659 | -0.07441229  | 2.66E-03 | 6.25E-03 | 1.00E+00 |
| FASTKD2 | LMNA | 0.042590255  | -0.096025339 | 0.179585361  | 5.47E-01 | 6.28E-01 | 1.00E+00 |
| ARS2    | LMNA | 0.021248473  | -0.117146161 | 0.158833556  | 7.64E-01 | 8.19E-01 | 1.00E+00 |
| LRIG1   | LMNA | -0.160772701 | -0.292335367 | -0.023237452 | 2.23E-02 | 4.11E-02 | 1.00E+00 |
| KCNMB3  | LMNA | -0.073230674 | -0.209167086 | 0.065482325  | 3.00E-01 | 3.85E-01 | 1.00E+00 |
| ERC2    | LMNA | -0.502702153 | -0.599171527 | -0.391844593 | 2.47E-14 | 4.38E-13 | 2.93E-10 |
| POFUT2  | LMNA | 0.614637866  | 0.520775371  | 0.6938175    | 2.26E-22 | 1.74E-20 | 2.68E-18 |
| PRKACB  | LMNA | -0.422822127 | -0.529939991 | -0.302423918 | 3.64E-10 | 3.25E-09 | 4.32E-06 |
| PRDM13  | LMNA | -0.209577519 | -0.337853608 | -0.073657609 | 2.76E-03 | 6.45E-03 | 1.00E+00 |
| KLK12   | LMNA | 0.036604062  | -0.101962177 | 0.173776928  | 6.05E-01 | 6.82E-01 | 1.00E+00 |
| ZNF354A | LMNA | -0.031509308 | -0.168825934 | 0.107007162  | 6.56E-01 | 7.27E-01 | 1.00E+00 |
| PCDH11X | LMNA | -0.46154054  | -0.563676269 | -0.3455037   | 4.74E-12 | 5.91E-11 | 5.62E-08 |
| TMC6    | LMNA | 0.105617091  | -0.032913811 | 0.240166336  | 1.35E-01 | 1.96E-01 | 1.00E+00 |
| CAND2   | LMNA | -0.238859434 | -0.36487864  | -0.10424592  | 6.18E-04 | 1.71E-03 | 1.00E+00 |
| RIMS1   | LMNA | -0.470802763 | -0.57169647  | -0.355882255 | 1.54E-12 | 2.08E-11 | 1.83E-08 |
| SF3B2   | LMNA | 0.056754679  | -0.081938312 | 0.193291235  | 4.22E-01 | 5.10E-01 | 1.00E+00 |
| RCN1    | LMNA | 0.534899649  | 0.428489807  | 0.62667483   | 2.40E-16 | 6.50E-15 | 2.85E-12 |
| CPB1    | LMNA | -0.006526151 | -0.144447014 | 0.131643452  | 9.27E-01 | 9.47E-01 | 1.00E+00 |
| BCAR3   | LMNA | 0.241730075  | 0.107258403  | 0.367516648  | 5.29E-04 | 1.48E-03 | 1.00E+00 |
| BCL6    | LMNA | 0.026946797  | -0.111519058 | 0.164386275  | 7.03E-01 | 7.68E-01 | 1.00E+00 |
| MDH2    | LMNA | 0.235780689  | 0.101017793  | 0.362047142  | 7.30E-04 | 1.98E-03 | 1.00E+00 |
| DRP2    | LMNA | -0.520741811 | -0.614609214 | -0.412332987 | 1.96E-15 | 4.39E-14 | 2.32E-11 |
| TPD52L1 | LMNA | -0.009664525 | -0.147518707 | 0.128557997  | 8.91E-01 | 9.21E-01 | 1.00E+00 |
| TXNL4A  | LMNA | -0.028897181 | -0.166284824 | 0.109591009  | 6.83E-01 | 7.51E-01 | 1.00E+00 |
| OR3A1   | LMNA | 0.156882617  | 0.019248496  | 0.288681412  | 2.58E-02 | 4.68E-02 | 1.00E+00 |
| RAB25   | LMNA | -0.118820306 | -0.252725779 | 0.019551401  | 9.21E-02 | 1.42E-01 | 1.00E+00 |
| C22orf9 | LMNA | 0.031378003  | -0.10713709  | 0.168698242  | 6.58E-01 | 7.28E-01 | 1.00E+00 |
| PCTK3   | LMNA | 0.033946012  | -0.104595151 | 0.171194746  | 6.32E-01 | 7.06E-01 | 1.00E+00 |
| POR     | LMNA | 0.359628362  | 0.233152706  | 0.474139721  | 1.47E-07 | 8.18E-07 | 1.74E-03 |

|          |      |              |              |              |          |          |          |
|----------|------|--------------|--------------|--------------|----------|----------|----------|
| ARPP-19  | LMNA | -0.25318843  | -0.378026309 | -0.119307577 | 2.77E-04 | 8.29E-04 | 1.00E+00 |
| SREBF2   | LMNA | -0.181208091 | -0.311467435 | -0.044264406 | 9.86E-03 | 2.00E-02 | 1.00E+00 |
| ZWINT    | LMNA | -0.029274949 | -0.166652435 | 0.109217447  | 6.79E-01 | 7.48E-01 | 1.00E+00 |
| PAK1IP1  | LMNA | -0.103453486 | -0.23810392  | 0.035098791  | 1.43E-01 | 2.06E-01 | 1.00E+00 |
| OR10H1   | LMNA | -0.232234586 | -0.358782928 | -0.097303145 | 8.82E-04 | 2.34E-03 | 1.00E+00 |
| ENPP2    | LMNA | -0.052257742 | -0.188945644 | 0.086416689  | 4.60E-01 | 5.46E-01 | 1.00E+00 |
| UXT      | LMNA | 0.046262776  | -0.092378209 | 0.183144105  | 5.13E-01 | 5.97E-01 | 1.00E+00 |
| ZXDC     | LMNA | 0.04921195   | -0.089446731 | 0.185999316  | 4.87E-01 | 5.72E-01 | 1.00E+00 |
| TGFB1    | LMNA | 0.615467267  | 0.521746951  | 0.694508728  | 1.91E-22 | 1.50E-20 | 2.27E-18 |
| SLC6A16  | LMNA | -0.048352667 | -0.185167648 | 0.090301106  | 4.94E-01 | 5.79E-01 | 1.00E+00 |
| SLC31A2  | LMNA | 0.130292217  | -0.007900897 | 0.263601819  | 6.46E-02 | 1.05E-01 | 1.00E+00 |
| LRRC8E   | LMNA | 0.477640552  | 0.363562404  | 0.577604997  | 6.59E-13 | 9.48E-12 | 7.81E-09 |
| ZNF780B  | LMNA | 0.198580831  | 0.062235986  | 0.327649555  | 4.61E-03 | 1.02E-02 | 1.00E+00 |
| APEX1    | LMNA | -0.139825307 | -0.272614032 | -0.00180923  | 4.72E-02 | 7.97E-02 | 1.00E+00 |
| PPIAL4   | LMNA | 0.114563143  | -0.023865301 | 0.248681113  | 1.04E-01 | 1.58E-01 | 1.00E+00 |
| ZIC3     | LMNA | -0.293312732 | -0.414576647 | -0.16181392  | 2.27E-05 | 8.43E-05 | 2.69E-01 |
| CEP68    | LMNA | -0.459116814 | -0.561574369 | -0.342792531 | 6.32E-12 | 7.71E-11 | 7.49E-08 |
| PAX2     | LMNA | 0.283844837  | 0.151739769  | 0.405987203  | 4.25E-05 | 1.49E-04 | 5.04E-01 |
| MRPL11   | LMNA | 0.060749879  | -0.077954897 | 0.197147486  | 3.90E-01 | 4.78E-01 | 1.00E+00 |
| LPAL2    | LMNA | -0.105229933 | -0.239797374 | 0.033304891  | 1.36E-01 | 1.98E-01 | 1.00E+00 |
| VPS53    | LMNA | -0.367794339 | -0.481402431 | -0.242032382 | 7.25E-08 | 4.28E-07 | 8.60E-04 |
| MPDU1    | LMNA | 0.061789355  | -0.07691776  | 0.198150119  | 3.82E-01 | 4.70E-01 | 1.00E+00 |
| PSEN2    | LMNA | 0.333434295  | 0.204810934  | 0.450737429  | 1.24E-06 | 5.85E-06 | 1.47E-02 |
| GAST     | LMNA | -0.124066103 | -0.257703304 | 0.014228597  | 7.85E-02 | 1.24E-01 | 1.00E+00 |
| DHRS7B   | LMNA | -0.045859233 | -0.182753239 | 0.092779144  | 5.17E-01 | 6.00E-01 | 1.00E+00 |
| C10orf28 | LMNA | -0.156161366 | -0.28800352  | -0.018509395 | 2.65E-02 | 4.79E-02 | 1.00E+00 |
| UBE2L3   | LMNA | 0.074585039  | -0.06412624  | 0.210468938  | 2.91E-01 | 3.75E-01 | 1.00E+00 |
| ADRA1D   | LMNA | 0.361463458  | 0.235146352  | 0.47577319   | 1.26E-07 | 7.09E-07 | 1.49E-03 |
| FZD10    | LMNA | 0.078598867  | -0.060104305 | 0.214324309  | 2.66E-01 | 3.48E-01 | 1.00E+00 |
| ATP6V1E1 | LMNA | -0.04140324  | -0.178434353 | 0.097203351  | 5.59E-01 | 6.39E-01 | 1.00E+00 |
| SAR1A    | LMNA | 0.048854608  | -0.089802056 | 0.185653482  | 4.90E-01 | 5.75E-01 | 1.00E+00 |
| ASB1     | LMNA | 0.039093356  | -0.099494605 | 0.176193462  | 5.81E-01 | 6.59E-01 | 1.00E+00 |
| MCTP2    | LMNA | 0.438294588  | 0.319580443  | 0.543462311  | 6.86E-11 | 7.08E-10 | 8.13E-07 |
| TMEM5    | LMNA | -0.00255085  | -0.140552355 | 0.135547883  | 9.71E-01 | 9.78E-01 | 1.00E+00 |
| LCMT2    | LMNA | -0.184076113 | -0.314144117 | -0.047225194 | 8.73E-03 | 1.80E-02 | 1.00E+00 |

|          |      |              |              |              |          |          |          |
|----------|------|--------------|--------------|--------------|----------|----------|----------|
| ZNF223   | LMNA | -0.316708232 | -0.435709204 | -0.1868256   | 4.39E-06 | 1.86E-05 | 5.20E-02 |
| BIRC2    | LMNA | 0.085728207  | -0.052949443 | 0.221161787  | 2.25E-01 | 3.02E-01 | 1.00E+00 |
| NLGN3    | LMNA | -0.352630712 | -0.467903683 | -0.225560214 | 2.65E-07 | 1.41E-06 | 3.14E-03 |
| MEP1A    | LMNA | -0.048550678 | -0.185359314 | 0.090104243  | 4.93E-01 | 5.78E-01 | 1.00E+00 |
| LOH3CR2A | LMNA | 0.127933674  | -0.010299225 | 0.261368547  | 6.96E-02 | 1.12E-01 | 1.00E+00 |
| TMEM53   | LMNA | 0.224712575  | 0.089436041  | 0.3518486    | 1.30E-03 | 3.32E-03 | 1.00E+00 |
| SLC9A3R2 | LMNA | 0.221763146  | 0.086355899  | 0.349125792  | 1.51E-03 | 3.78E-03 | 1.00E+00 |
| TIMP1    | LMNA | 0.671890188  | 0.588417962  | 0.741191855  | 6.98E-28 | 1.45E-25 | 8.28E-24 |
| PTPN9    | LMNA | 0.521066956  | 0.412703276  | 0.614886803  | 1.87E-15 | 4.23E-14 | 2.21E-11 |
| ABCA12   | LMNA | 0.178627957  | 0.041602874  | 0.309057667  | 1.10E-02 | 2.20E-02 | 1.00E+00 |
| TPST2    | LMNA | 0.46601101   | 0.350509433  | 0.567549675  | 2.77E-12 | 3.59E-11 | 3.28E-08 |
| AQP6     | LMNA | -0.178401464 | -0.308846049 | -0.041369328 | 1.11E-02 | 2.22E-02 | 1.00E+00 |
| KCNIP1   | LMNA | -0.098445445 | -0.233325438 | 0.040151231  | 1.63E-01 | 2.31E-01 | 1.00E+00 |
| YES1     | LMNA | 0.05928124   | -0.079419718 | 0.195730416  | 4.02E-01 | 4.90E-01 | 1.00E+00 |
| ABT1     | LMNA | 0.122326268  | -0.015994842 | 0.25605323   | 8.29E-02 | 1.30E-01 | 1.00E+00 |
| RIPK5    | LMNA | -0.067246035 | -0.203408714 | 0.071468435  | 3.42E-01 | 4.28E-01 | 1.00E+00 |
| SMG1     | LMNA | -0.189765592 | -0.31944791  | -0.053105822 | 6.83E-03 | 1.44E-02 | 1.00E+00 |
| IL13     | LMNA | 0.055832255  | -0.082857386 | 0.192400292  | 4.30E-01 | 5.17E-01 | 1.00E+00 |
| MDFI     | LMNA | -0.100647281 | -0.235427149 | 0.037930747  | 1.54E-01 | 2.20E-01 | 1.00E+00 |
| PIP5K1C  | LMNA | 0.208569016  | 0.072608648  | 0.336919052  | 2.89E-03 | 6.73E-03 | 1.00E+00 |
| POU2F2   | LMNA | 0.19245433   | 0.055888196  | 0.321951557  | 6.07E-03 | 1.30E-02 | 1.00E+00 |
| TSPAN14  | LMNA | 0.150430783  | 0.012642327  | 0.282612731  | 3.26E-02 | 5.77E-02 | 1.00E+00 |
| GPT      | LMNA | -0.12954238  | -0.262891964 | 0.008663555  | 6.61E-02 | 1.07E-01 | 1.00E+00 |
| PDK4     | LMNA | -0.194950413 | -0.32427419  | -0.058473105 | 5.43E-03 | 1.18E-02 | 1.00E+00 |
| CLIC1    | LMNA | 0.690043383  | 0.61011241   | 0.756070241  | 6.75E-30 | 1.91E-27 | 8.01E-26 |
| LILRA5   | LMNA | 0.341622665  | 0.213647573  | 0.458070445  | 6.50E-07 | 3.22E-06 | 7.71E-03 |
| TREML2   | LMNA | 0.22907514   | 0.093996695  | 0.355872025  | 1.04E-03 | 2.72E-03 | 1.00E+00 |
| ELL3     | LMNA | 0.116240298  | -0.022166409 | 0.250275112  | 9.95E-02 | 1.51E-01 | 1.00E+00 |
| NNMT     | LMNA | 0.525350688  | 0.417585127  | 0.618541826  | 9.98E-16 | 2.41E-14 | 1.18E-11 |
| NUFIP1   | LMNA | -0.13187116  | -0.265096101 | 0.00629443   | 6.14E-02 | 1.00E-01 | 1.00E+00 |
| ZNF74    | LMNA | -0.388774352 | -0.499990517 | -0.264943026 | 1.08E-08 | 7.31E-08 | 1.28E-04 |
| RHBDL1   | LMNA | 0.167587757  | 0.030236292  | 0.2987275    | 1.71E-02 | 3.25E-02 | 1.00E+00 |
| HYAL2    | LMNA | 0.379206369  | 0.254477204  | 0.491526069  | 2.62E-08 | 1.66E-07 | 3.10E-04 |
| IGFBP5   | LMNA | 0.347424457  | 0.219921391  | 0.463256608  | 4.07E-07 | 2.09E-06 | 4.82E-03 |
| FAM29A   | LMNA | -0.170835156 | -0.301769242 | -0.033576011 | 1.51E-02 | 2.90E-02 | 1.00E+00 |

|          |      |              |              |              |          |          |          |
|----------|------|--------------|--------------|--------------|----------|----------|----------|
| NRTN     | LMNA | -0.116501896 | -0.250523674 | 0.021901348  | 9.87E-02 | 1.50E-01 | 1.00E+00 |
| KIAA0556 | LMNA | -0.190824527 | -0.320434164 | -0.054201381 | 6.52E-03 | 1.38E-02 | 1.00E+00 |
| JMJD2A   | LMNA | -0.076402072 | -0.212214762 | 0.062306095  | 2.80E-01 | 3.63E-01 | 1.00E+00 |
| ERGIC3   | LMNA | 0.248789526  | 0.114677187  | 0.373995414  | 3.57E-04 | 1.04E-03 | 1.00E+00 |
| POLD4    | LMNA | 0.501892493  | 0.390927599  | 0.598476963  | 2.76E-14 | 4.82E-13 | 3.27E-10 |
| EPHB1    | LMNA | -0.511025904 | -0.606303617 | -0.401284583 | 7.80E-15 | 1.55E-13 | 9.26E-11 |
| LRRC36   | LMNA | -0.253192975 | -0.378030471 | -0.119312364 | 2.77E-04 | 8.29E-04 | 1.00E+00 |
| TARBP1   | LMNA | -0.28187997  | -0.404201932 | -0.149652519 | 4.82E-05 | 1.68E-04 | 5.72E-01 |
| ANAPC10  | LMNA | 0.065020088  | -0.073692382 | 0.201264521  | 3.58E-01 | 4.45E-01 | 1.00E+00 |
| C1orf9   | LMNA | 0.102248558  | -0.036315048 | 0.236954819  | 1.48E-01 | 2.12E-01 | 1.00E+00 |
| COLEC12  | LMNA | 0.297210331  | 0.165969071  | 0.418106351  | 1.74E-05 | 6.61E-05 | 2.07E-01 |
| TNFRSF25 | LMNA | -0.074150861 | -0.210051647 | 0.064561025  | 2.94E-01 | 3.78E-01 | 1.00E+00 |
| MEGF6    | LMNA | -0.153914619 | -0.285890989 | -0.016208007 | 2.87E-02 | 5.15E-02 | 1.00E+00 |
| LPHN3    | LMNA | -0.445398268 | -0.549652418 | -0.327483464 | 3.10E-11 | 3.33E-10 | 3.67E-07 |
| BMP10    | LMNA | -0.174221903 | -0.304938669 | -0.037062307 | 1.31E-02 | 2.58E-02 | 1.00E+00 |
| C21orf55 | LMNA | -0.275057854 | -0.39799614  | -0.142414623 | 7.44E-05 | 2.50E-04 | 8.83E-01 |
| SLC2A1   | LMNA | 0.380078873  | 0.255430372  | 0.492298822  | 2.42E-08 | 1.54E-07 | 2.87E-04 |
| CER1     | LMNA | 0.009503346  | -0.128716523 | 0.147361017  | 8.93E-01 | 9.23E-01 | 1.00E+00 |
| LSAMP    | LMNA | -0.462380804 | -0.564404652 | -0.346444067 | 4.28E-12 | 5.37E-11 | 5.08E-08 |
| RPH3A    | LMNA | -0.145135875 | -0.277624352 | -0.007229731 | 3.93E-02 | 6.79E-02 | 1.00E+00 |
| CREM     | LMNA | 0.124569416  | -0.013717484 | 0.258180504  | 7.73E-02 | 1.22E-01 | 1.00E+00 |
| SGK      | LMNA | 0.002856981  | -0.135247363 | 0.140852428  | 9.68E-01 | 9.76E-01 | 1.00E+00 |
| ATP2A3   | LMNA | 0.311748716  | 0.181509375  | 0.431240331  | 6.29E-06 | 2.58E-05 | 7.46E-02 |
| PTGER4   | LMNA | 0.419547397  | 0.298802733  | 0.527071005  | 5.13E-10 | 4.47E-09 | 6.09E-06 |
| CCR7     | LMNA | 0.348394406  | 0.220971283  | 0.464122862  | 3.75E-07 | 1.95E-06 | 4.45E-03 |
| METAP1   | LMNA | -0.068884308 | -0.204985984 | 0.069830752  | 3.30E-01 | 4.16E-01 | 1.00E+00 |
| KCNQ1    | LMNA | 0.313568062  | 0.183458692  | 0.432880371  | 5.52E-06 | 2.29E-05 | 6.54E-02 |
| RECQL5   | LMNA | -0.080558091 | -0.216204653 | 0.058139486  | 2.54E-01 | 3.35E-01 | 1.00E+00 |
| SSFA2    | LMNA | 0.224127452  | 0.088824781  | 0.351308607  | 1.34E-03 | 3.41E-03 | 1.00E+00 |
| NR2F2    | LMNA | 0.128030689  | -0.010200605 | 0.261460438  | 6.94E-02 | 1.11E-01 | 1.00E+00 |
| MTERFD1  | LMNA | -0.032453233 | -0.169743747 | 0.106072996  | 6.47E-01 | 7.19E-01 | 1.00E+00 |
| BCL2A1   | LMNA | 0.275146216  | 0.142508279  | 0.398076591  | 7.40E-05 | 2.48E-04 | 8.78E-01 |
| ZBTB24   | LMNA | -0.006621637 | -0.14454051  | 0.131549616  | 9.25E-01 | 9.46E-01 | 1.00E+00 |
| NLRX1    | LMNA | 0.339342495  | 0.211184777  | 0.456030052  | 7.80E-07 | 3.81E-06 | 9.25E-03 |
| FHOD3    | LMNA | -0.264404135 | -0.388282343 | -0.131139905 | 1.43E-04 | 4.56E-04 | 1.00E+00 |

|           |      |              |              |              |          |          |          |
|-----------|------|--------------|--------------|--------------|----------|----------|----------|
| PRDM1     | LMNA | 0.52773988   | 0.420310617  | 0.620578614  | 7.02E-16 | 1.73E-14 | 8.32E-12 |
| PSG7      | LMNA | -0.0060606   | -0.143991128 | 0.132100925  | 9.32E-01 | 9.50E-01 | 1.00E+00 |
| ARHGEF5   | LMNA | 0.314920026  | 0.184907901  | 0.43409858   | 5.00E-06 | 2.09E-05 | 5.93E-02 |
| CCDC47    | LMNA | 0.167366307  | 0.030008659  | 0.298519978  | 1.73E-02 | 3.28E-02 | 1.00E+00 |
| FGD2      | LMNA | 0.135549723  | -0.002548976 | 0.268574941  | 5.44E-02 | 9.03E-02 | 1.00E+00 |
| SLC26A6   | LMNA | 0.195738892  | 0.059290024  | 0.325007555  | 5.24E-03 | 1.14E-02 | 1.00E+00 |
| BIN1      | LMNA | -0.187384325 | -0.317229056 | -0.050643398 | 7.58E-03 | 1.58E-02 | 1.00E+00 |
| SRRM1     | LMNA | 0.028596726  | -0.109888092 | 0.16599242   | 6.86E-01 | 7.53E-01 | 1.00E+00 |
| P2RY14    | LMNA | -0.35726769  | -0.472037264 | -0.230589638 | 1.79E-07 | 9.88E-07 | 2.13E-03 |
| PCSK1N    | LMNA | -0.404676979 | -0.514012145 | -0.282402705 | 2.32E-09 | 1.79E-08 | 2.76E-05 |
| PPP1CA    | LMNA | 0.250739283  | 0.116728829  | 0.37578264   | 3.19E-04 | 9.42E-04 | 1.00E+00 |
| ZNF33B    | LMNA | -0.280975775 | -0.403380071 | -0.148692402 | 5.11E-05 | 1.77E-04 | 6.06E-01 |
| MOCS1     | LMNA | 0.143706847  | 0.005770323  | 0.276276827  | 4.13E-02 | 7.09E-02 | 1.00E+00 |
| NAP1L1    | LMNA | -0.166049605 | -0.297285829 | -0.028655483 | 1.82E-02 | 3.43E-02 | 1.00E+00 |
| ECT2      | LMNA | -0.048029358 | -0.184854679 | 0.090622516  | 4.97E-01 | 5.82E-01 | 1.00E+00 |
| CACNA2D2  | LMNA | -0.476618114 | -0.576722176 | -0.362413024 | 7.49E-13 | 1.06E-11 | 8.88E-09 |
| PTDSS1    | LMNA | 0.015463646  | -0.12284961  | 0.153187626  | 8.27E-01 | 8.70E-01 | 1.00E+00 |
| DOCK6     | LMNA | 0.360887999  | 0.23452106   | 0.475261043  | 1.32E-07 | 7.40E-07 | 1.56E-03 |
| SLC38A6   | LMNA | 0.370986323  | 0.245509078  | 0.484237104  | 5.47E-08 | 3.30E-07 | 6.49E-04 |
| C10orf119 | LMNA | 0.030219606  | -0.108283135 | 0.167571524  | 6.69E-01 | 7.39E-01 | 1.00E+00 |
| CCR4      | LMNA | 0.290669955  | 0.158999158  | 0.412181244  | 2.71E-05 | 9.91E-05 | 3.21E-01 |
| COX6A1    | LMNA | -0.410258595 | -0.518919741 | -0.288550094 | 1.33E-09 | 1.07E-08 | 1.58E-05 |
| B3GALT2   | LMNA | -0.546326862 | -0.636381363 | -0.441580274 | 4.10E-17 | 1.29E-15 | 4.86E-13 |
| CD14      | LMNA | 0.348683328  | 0.221284075  | 0.464380853  | 3.67E-07 | 1.91E-06 | 4.35E-03 |
| ABCC9     | LMNA | -0.030302809 | -0.167652464 | 0.108200832  | 6.69E-01 | 7.38E-01 | 1.00E+00 |
| SNAP29    | LMNA | 0.099181828  | -0.039408763 | 0.234028476  | 1.60E-01 | 2.27E-01 | 1.00E+00 |
| TRIP6     | LMNA | 0.565110446  | 0.463195183  | 0.652274837  | 1.93E-18 | 7.70E-17 | 2.30E-14 |
| HMGCR     | LMNA | -0.285749264 | -0.407716669 | -0.153763939 | 3.75E-05 | 1.33E-04 | 4.45E-01 |
| CDH3      | LMNA | -0.001041815 | -0.139072814 | 0.137028893  | 9.88E-01 | 9.91E-01 | 1.00E+00 |
| KLHDC8A   | LMNA | 0.034547349  | -0.103999657 | 0.171779084  | 6.25E-01 | 7.00E-01 | 1.00E+00 |
| IFT74     | LMNA | -0.096689107 | -0.231648062 | 0.041921463  | 1.71E-01 | 2.40E-01 | 1.00E+00 |
| C9orf116  | LMNA | 0.189222291  | 0.052543858  | 0.31894179   | 7.00E-03 | 1.47E-02 | 1.00E+00 |
| EI24      | LMNA | 0.088420072  | -0.050244234 | 0.223739995  | 2.11E-01 | 2.86E-01 | 1.00E+00 |
| CENTD1    | LMNA | 0.011241168  | -0.127006929 | 0.149060848  | 8.74E-01 | 9.06E-01 | 1.00E+00 |
| RWDD2B    | LMNA | -0.041563992 | -0.17859025  | 0.097043842  | 5.57E-01 | 6.38E-01 | 1.00E+00 |



|          |      |              |              |              |          |          |          |
|----------|------|--------------|--------------|--------------|----------|----------|----------|
| INSL6    | LMNA | 0.004715722  | -0.133422137 | 0.142673841  | 9.47E-01 | 9.60E-01 | 1.00E+00 |
| HERC1    | LMNA | -0.327499281 | -0.44541247  | -0.198419128 | 1.96E-06 | 8.89E-06 | 2.32E-02 |
| NPAS2    | LMNA | 0.405777657  | 0.283614158  | 0.514980476  | 2.08E-09 | 1.62E-08 | 2.47E-05 |
| NR3C2    | LMNA | -0.109527731 | -0.243890999 | 0.028961175  | 1.21E-01 | 1.79E-01 | 1.00E+00 |
| DOCK1    | LMNA | 0.160859283  | 0.023326284  | 0.29241665   | 2.22E-02 | 4.10E-02 | 1.00E+00 |
| FAM63A   | LMNA | -0.201436031 | -0.330301851 | -0.065198088 | 4.04E-03 | 9.05E-03 | 1.00E+00 |
| FAM111A  | LMNA | 0.184497211  | 0.047660115  | 0.314536948  | 8.58E-03 | 1.77E-02 | 1.00E+00 |
| INPP5F   | LMNA | -0.132123251 | -0.265334615 | 0.006037879  | 6.09E-02 | 9.95E-02 | 1.00E+00 |
| MYBL1    | LMNA | -0.173305757 | -0.304081595 | -0.036118902 | 1.36E-02 | 2.67E-02 | 1.00E+00 |
| HOXB1    | LMNA | 0.313741359  | 0.183644422  | 0.433036547  | 5.45E-06 | 2.27E-05 | 6.46E-02 |
| CRADD    | LMNA | -0.128016265 | -0.261446776 | 0.010215268  | 6.94E-02 | 1.11E-01 | 1.00E+00 |
| EMCN     | LMNA | -0.097837347 | -0.23274477  | 0.040764238  | 1.66E-01 | 2.34E-01 | 1.00E+00 |
| DUSP12   | LMNA | -0.071103575 | -0.207121488 | 0.067611091  | 3.15E-01 | 4.00E-01 | 1.00E+00 |
| BLNK     | LMNA | -0.036421109 | -0.173599258 | 0.102143466  | 6.07E-01 | 6.83E-01 | 1.00E+00 |
| VASH2    | LMNA | -0.141148469 | -0.27386306  | -0.003159024 | 4.51E-02 | 7.67E-02 | 1.00E+00 |
| PDZK1IP1 | LMNA | 0.164615654  | 0.027182383  | 0.295941284  | 1.92E-02 | 3.60E-02 | 1.00E+00 |
| SKP1A    | LMNA | -0.215710223 | -0.343531203 | -0.080042818 | 2.05E-03 | 4.96E-03 | 1.00E+00 |
| IL19     | LMNA | -0.036189952 | -0.173374762 | 0.102372508  | 6.09E-01 | 6.85E-01 | 1.00E+00 |
| DOC2A    | LMNA | -0.332293388 | -0.449714443 | -0.203581364 | 1.36E-06 | 6.33E-06 | 1.61E-02 |
| COPB2    | LMNA | 0.497085477  | 0.385487867  | 0.59435029   | 5.27E-14 | 8.74E-13 | 6.26E-10 |
| CTR9     | LMNA | 0.188790157  | 0.052096941  | 0.318539176  | 7.13E-03 | 1.50E-02 | 1.00E+00 |
| VIL1     | LMNA | 0.123091839  | -0.015217756 | 0.2567794    | 8.09E-02 | 1.27E-01 | 1.00E+00 |
| CDC27    | LMNA | -0.014778919 | -0.152518744 | 0.123524101  | 8.35E-01 | 8.76E-01 | 1.00E+00 |
| PTTG1IP  | LMNA | 0.309106049  | 0.178679742  | 0.428856705  | 7.60E-06 | 3.07E-05 | 9.02E-02 |
| LECT1    | LMNA | 0.007551397  | -0.130635788 | 0.145450769  | 9.15E-01 | 9.39E-01 | 1.00E+00 |
| COPS6    | LMNA | 0.231603438  | 0.096642393  | 0.358201627  | 9.12E-04 | 2.42E-03 | 1.00E+00 |
| COL9A1   | LMNA | -0.273758827 | -0.396813193 | -0.141038031 | 8.07E-05 | 2.69E-04 | 9.57E-01 |
| MCCC1    | LMNA | -0.233475309 | -0.359925375 | -0.098602412 | 8.26E-04 | 2.21E-03 | 1.00E+00 |
| GPC4     | LMNA | 0.406626504  | 0.2845487    | 0.515727065  | 1.91E-09 | 1.50E-08 | 2.27E-05 |
| VAC14    | LMNA | 0.227768267  | 0.092629887  | 0.35466724   | 1.11E-03 | 2.89E-03 | 1.00E+00 |
| PSMD9    | LMNA | 0.223946275  | 0.088635531  | 0.351141386  | 1.36E-03 | 3.43E-03 | 1.00E+00 |
| PPY      | LMNA | 0.098542445  | -0.040053438 | 0.233418053  | 1.63E-01 | 2.30E-01 | 1.00E+00 |
| SRCAP    | LMNA | 0.098764377  | -0.039829682 | 0.233629945  | 1.62E-01 | 2.29E-01 | 1.00E+00 |
| PPP1R13L | LMNA | 0.33002344   | 0.201136218  | 0.447678192  | 1.61E-06 | 7.47E-06 | 1.92E-02 |
| BPGM     | LMNA | -0.138045343 | -0.270933091 | 5.77E-06     | 5.01E-02 | 8.41E-02 | 1.00E+00 |

|           |      |              |              |              |          |          |          |
|-----------|------|--------------|--------------|--------------|----------|----------|----------|
| TTC19     | LMNA | -0.258704586 | -0.383074307 | -0.125122255 | 2.01E-04 | 6.17E-04 | 1.00E+00 |
| GFPT1     | LMNA | 0.260736227  | 0.127266158  | 0.384931652  | 1.78E-04 | 5.55E-04 | 1.00E+00 |
| C1orf114  | LMNA | -0.243693527 | -0.36931982  | -0.109320294 | 4.74E-04 | 1.34E-03 | 1.00E+00 |
| HMOX1     | LMNA | 0.35816662   | 0.231565433  | 0.472838022  | 1.66E-07 | 9.18E-07 | 1.97E-03 |
| SLC27A6   | LMNA | 0.20318018   | 0.067008722  | 0.331921051  | 3.73E-03 | 8.42E-03 | 1.00E+00 |
| CALML5    | LMNA | -0.061846417 | -0.19820515  | 0.076860818  | 3.82E-01 | 4.69E-01 | 1.00E+00 |
| MRPS10    | LMNA | -0.120928193 | -0.25472672  | 0.017413514  | 8.65E-02 | 1.34E-01 | 1.00E+00 |
| PRR13     | LMNA | 0.308218886  | 0.177730296  | 0.42805613   | 8.10E-06 | 3.26E-05 | 9.61E-02 |
| INS       | LMNA | 0.317571102  | 0.187751308  | 0.436486112  | 4.12E-06 | 1.75E-05 | 4.89E-02 |
| CECR1     | LMNA | 0.268674611  | 0.135655169  | 0.392179366  | 1.11E-04 | 3.58E-04 | 1.00E+00 |
| SERPINB8  | LMNA | 0.395256914  | 0.272050516  | 0.505713356  | 5.83E-09 | 4.18E-08 | 6.91E-05 |
| FLT1      | LMNA | 0.287445555  | 0.155567819  | 0.409256384  | 3.36E-05 | 1.21E-04 | 3.98E-01 |
| FEM1C     | LMNA | 0.430157643  | 0.310548138  | 0.53635774   | 1.67E-10 | 1.60E-09 | 1.98E-06 |
| PDIA2     | LMNA | -0.280949354 | -0.403356053 | -0.148664351 | 5.12E-05 | 1.77E-04 | 6.07E-01 |
| TMED3     | LMNA | 0.390086452  | 0.266380529  | 0.501149631  | 9.54E-09 | 6.54E-08 | 1.13E-04 |
| NUCKS1    | LMNA | -0.029851945 | -0.167213842 | 0.108646799  | 6.73E-01 | 7.42E-01 | 1.00E+00 |
| EXT1      | LMNA | 0.366695443  | 0.240836215  | 0.480425996  | 7.98E-08 | 4.66E-07 | 9.47E-04 |
| RCOR1     | LMNA | 0.17847298   | 0.041443069  | 0.30891287   | 1.10E-02 | 2.22E-02 | 1.00E+00 |
| EBI3      | LMNA | 0.08896239   | -0.049698981 | 0.224259186  | 2.08E-01 | 2.83E-01 | 1.00E+00 |
| SMAD2     | LMNA | 0.043948662  | -0.094676757 | 0.180902101  | 5.35E-01 | 6.17E-01 | 1.00E+00 |
| ODZ3      | LMNA | 0.173478865  | 0.036297142  | 0.304243557  | 1.35E-02 | 2.65E-02 | 1.00E+00 |
| POLS      | LMNA | 0.009037099  | -0.129175058 | 0.146904824  | 8.98E-01 | 9.26E-01 | 1.00E+00 |
| NXN       | LMNA | -0.247084094 | -0.372431384 | -0.112883576 | 3.93E-04 | 1.13E-03 | 1.00E+00 |
| PPIH      | LMNA | -0.130598609 | -0.263891833 | 0.007589219  | 6.39E-02 | 1.04E-01 | 1.00E+00 |
| FOXJ3     | LMNA | 0.132508064  | -0.005646222 | 0.265698673  | 6.01E-02 | 9.86E-02 | 1.00E+00 |
| EIF5B     | LMNA | 0.057478485  | -0.081216969 | 0.193990181  | 4.16E-01 | 5.04E-01 | 1.00E+00 |
| EIF2B4    | LMNA | 0.045508271  | -0.093127802 | 0.182413267  | 5.20E-01 | 6.04E-01 | 1.00E+00 |
| C20orf121 | LMNA | 0.20942424   | 0.073498161  | 0.337711585  | 2.78E-03 | 6.49E-03 | 1.00E+00 |
| CENPE     | LMNA | 0.01853802   | -0.119819622 | 0.156189302  | 7.93E-01 | 8.44E-01 | 1.00E+00 |
| KIAA0415  | LMNA | 0.360945762  | 0.234583821  | 0.475312455  | 1.31E-07 | 7.38E-07 | 1.56E-03 |
| CRABP2    | LMNA | 0.451642903  | 0.334444443  | 0.55508452   | 1.51E-11 | 1.72E-10 | 1.80E-07 |
| TSPAN12   | LMNA | -0.296022447 | -0.417030978 | -0.164702198 | 1.89E-05 | 7.12E-05 | 2.24E-01 |
| CXorf15   | LMNA | 0.028617833  | -0.109867223 | 0.166012963  | 6.86E-01 | 7.53E-01 | 1.00E+00 |
| LOC57228  | LMNA | 0.499981379  | 0.388764009  | 0.596836945  | 3.57E-14 | 6.15E-13 | 4.24E-10 |
| ACTR3B    | LMNA | -0.237778184 | -0.363884488 | -0.103111884 | 6.56E-04 | 1.80E-03 | 1.00E+00 |

|           |      |              |              |              |          |          |          |
|-----------|------|--------------|--------------|--------------|----------|----------|----------|
| ASL       | LMNA | 0.571621581  | 0.470716174  | 0.657766314  | 6.41E-19 | 2.79E-17 | 7.61E-15 |
| GATA3     | LMNA | 0.347823868  | 0.220353686  | 0.463613346  | 3.93E-07 | 2.03E-06 | 4.67E-03 |
| TFAM      | LMNA | -0.304970595 | -0.42512327  | -0.174256034 | 1.02E-05 | 4.02E-05 | 1.21E-01 |
| PCDHA5    | LMNA | -0.19596302  | -0.325215988 | -0.059522269 | 5.19E-03 | 1.13E-02 | 1.00E+00 |
| PARP12    | LMNA | 0.317519065  | 0.187695475  | 0.436439264  | 4.13E-06 | 1.76E-05 | 4.90E-02 |
| PIGH      | LMNA | -0.171633178 | -0.302516317 | -0.034397188 | 1.46E-02 | 2.82E-02 | 1.00E+00 |
| ENDOGL1   | LMNA | -0.183921401 | -0.31399978  | -0.047065417 | 8.79E-03 | 1.81E-02 | 1.00E+00 |
| GTF2H1    | LMNA | 0.076435787  | -0.062272314 | 0.212247148  | 2.80E-01 | 3.62E-01 | 1.00E+00 |
| MPZ       | LMNA | -0.053380643 | -0.190031255 | 0.085298947  | 4.51E-01 | 5.37E-01 | 1.00E+00 |
| BIRC4     | LMNA | 0.191533307  | 0.054934859  | 0.321094141  | 6.32E-03 | 1.35E-02 | 1.00E+00 |
| SSBP3     | LMNA | -0.395228912 | -0.505688656 | -0.272019786 | 5.84E-09 | 4.19E-08 | 6.93E-05 |
| BPESC1    | LMNA | 0.134426547  | -0.003692987 | 0.267513115  | 5.65E-02 | 9.33E-02 | 1.00E+00 |
| FOXC2     | LMNA | 0.299584777  | 0.168502708  | 0.420254885  | 1.48E-05 | 5.69E-05 | 1.76E-01 |
| HS3ST3B1  | LMNA | 0.40753671   | 0.285551055  | 0.516527438  | 1.75E-09 | 1.38E-08 | 2.07E-05 |
| GDNF      | LMNA | -0.056626916 | -0.193167845 | 0.082065625  | 4.23E-01 | 5.10E-01 | 1.00E+00 |
| CTNS      | LMNA | 0.210632448  | 0.07475518   | 0.338830917  | 2.62E-03 | 6.16E-03 | 1.00E+00 |
| KIAA0859  | LMNA | 0.094858504  | -0.043765621 | 0.229898907  | 1.79E-01 | 2.49E-01 | 1.00E+00 |
| TRPC5     | LMNA | -0.236057959 | -0.362302241 | -0.101308401 | 7.19E-04 | 1.96E-03 | 1.00E+00 |
| PMS2L3    | LMNA | 0.018249914  | -0.120103678 | 0.155908117  | 7.97E-01 | 8.47E-01 | 1.00E+00 |
| TEP1      | LMNA | 0.418965306  | 0.298159422  | 0.526560779  | 5.45E-10 | 4.74E-09 | 6.47E-06 |
| KIDINS220 | LMNA | -0.204139747 | -0.332811553 | -0.068005249 | 3.57E-03 | 8.09E-03 | 1.00E+00 |
| CRH       | LMNA | -0.099318975 | -0.234159397 | 0.039270466  | 1.60E-01 | 2.27E-01 | 1.00E+00 |
| CES3      | LMNA | 0.123450122  | -0.014854028 | 0.257119191  | 8.01E-02 | 1.26E-01 | 1.00E+00 |
| ACP5      | LMNA | 0.355981579  | 0.229193999  | 0.47089128   | 2.00E-07 | 1.09E-06 | 2.37E-03 |
| AMFR      | LMNA | 0.125087243  | -0.013191555 | 0.258671397  | 7.61E-02 | 1.21E-01 | 1.00E+00 |
| CA4       | LMNA | -0.248337505 | -0.37358094  | -0.114201709 | 3.66E-04 | 1.06E-03 | 1.00E+00 |
| PLCB4     | LMNA | -0.511625605 | -0.606816871 | -0.401965606 | 7.17E-15 | 1.43E-13 | 8.51E-11 |
| MPHOSPH   | LMNA | 0.207708973  | 0.071714341  | 0.33612187   | 3.02E-03 | 6.98E-03 | 1.00E+00 |
| PGF       | LMNA | -0.025983458 | -0.163448163 | 0.112470981  | 7.14E-01 | 7.76E-01 | 1.00E+00 |
| G3BP2     | LMNA | -0.200378389 | -0.329319606 | -0.064100566 | 4.25E-03 | 9.46E-03 | 1.00E+00 |
| SR140     | LMNA | -0.149229201 | -0.281481337 | -0.011413329 | 3.40E-02 | 5.98E-02 | 1.00E+00 |
| ISLR      | LMNA | 0.348245759  | 0.220810366  | 0.463990122  | 3.80E-07 | 1.97E-06 | 4.51E-03 |
| HoxA2     | LMNA | -0.171149119 | -0.30206318  | -0.033899062 | 1.49E-02 | 2.87E-02 | 1.00E+00 |
| PYGB      | LMNA | 0.326354066  | 0.197187032  | 0.444384009  | 2.14E-06 | 9.65E-06 | 2.53E-02 |
| BAT1      | LMNA | -0.123207258 | -0.256888865 | 0.015100587  | 8.07E-02 | 1.27E-01 | 1.00E+00 |

|          |      |              |              |              |          |          |          |
|----------|------|--------------|--------------|--------------|----------|----------|----------|
| TSC1     | LMNA | -0.209738325 | -0.3380026   | -0.073824893 | 2.74E-03 | 6.41E-03 | 1.00E+00 |
| NARF     | LMNA | -0.167887954 | -0.299008798 | -0.030544895 | 1.69E-02 | 3.22E-02 | 1.00E+00 |
| DKK3     | LMNA | 0.147091006  | 0.009227377  | 0.279467131  | 3.67E-02 | 6.39E-02 | 1.00E+00 |
| UTP18    | LMNA | -0.191305982 | -0.320882482 | -0.054699597 | 6.38E-03 | 1.36E-02 | 1.00E+00 |
| TSKS     | LMNA | 0.192978838  | 0.056431218  | 0.322439747  | 5.93E-03 | 1.27E-02 | 1.00E+00 |
| DDX31    | LMNA | 0.160371879  | 0.02282624   | 0.291959052  | 2.26E-02 | 4.17E-02 | 1.00E+00 |
| TULP1    | LMNA | 0.176793153  | 0.039711367  | 0.307342996  | 1.18E-02 | 2.36E-02 | 1.00E+00 |
| TNRC4    | LMNA | -0.560206202 | -0.648132558 | -0.457539983 | 4.38E-18 | 1.60E-16 | 5.19E-14 |
| ZNF430   | LMNA | -0.06545387  | -0.201682473 | 0.073259098  | 3.55E-01 | 4.41E-01 | 1.00E+00 |
| POSTN    | LMNA | 0.582916563  | 0.483797847  | 0.667270804  | 8.90E-20 | 4.42E-18 | 1.06E-15 |
| AASS     | LMNA | 0.059446582  | -0.079254836 | 0.19588998   | 4.01E-01 | 4.88E-01 | 1.00E+00 |
| APOL5    | LMNA | -0.044778568 | -0.18170631  | 0.093852604  | 5.27E-01 | 6.10E-01 | 1.00E+00 |
| PLA2G1B  | LMNA | -0.086846065 | -0.222232677 | 0.05182629   | 2.19E-01 | 2.95E-01 | 1.00E+00 |
| FLJ11506 | LMNA | 0.312084215  | 0.181868764  | 0.431542824  | 6.14E-06 | 2.53E-05 | 7.28E-02 |
| GTF2A2   | LMNA | -0.094278454 | -0.229344483 | 0.044349769  | 1.82E-01 | 2.53E-01 | 1.00E+00 |
| RCHY1    | LMNA | -0.300821498 | -0.421373406 | -0.169823029 | 1.36E-05 | 5.26E-05 | 1.61E-01 |
| CYP27B1  | LMNA | -0.154507011 | -0.286448117 | -0.016814664 | 2.81E-02 | 5.05E-02 | 1.00E+00 |
| VPREB1   | LMNA | -0.140661968 | -0.273403869 | -0.002662672 | 4.59E-02 | 7.78E-02 | 1.00E+00 |
| MGC4294  | LMNA | 0.440659604  | 0.32220975   | 0.545524444  | 5.27E-11 | 5.53E-10 | 6.25E-07 |
| TACC3    | LMNA | 0.171397146  | 0.034154289  | 0.30229537   | 1.47E-02 | 2.84E-02 | 1.00E+00 |
| PDCL     | LMNA | -0.112361794 | -0.246587809 | 0.026093967  | 1.11E-01 | 1.67E-01 | 1.00E+00 |
| DMXL2    | LMNA | -0.412550188 | -0.520932535 | -0.291076879 | 1.05E-09 | 8.67E-09 | 1.25E-05 |
| EID1     | LMNA | -0.09764536  | -0.232561424 | 0.040957753  | 1.67E-01 | 2.35E-01 | 1.00E+00 |
| MS4A4A   | LMNA | 0.264332485  | 0.131064196  | 0.388216921  | 1.44E-04 | 4.58E-04 | 1.00E+00 |
| RBM14    | LMNA | -0.108323811 | -0.242744755 | 0.030178485  | 1.25E-01 | 1.84E-01 | 1.00E+00 |
| MGC29506 | LMNA | 0.034203797  | -0.104339883 | 0.171445256  | 6.29E-01 | 7.03E-01 | 1.00E+00 |
| PPP2R5B  | LMNA | -0.087777424 | -0.223124653 | 0.050890252  | 2.14E-01 | 2.90E-01 | 1.00E+00 |
| TNFSF11  | LMNA | 0.246904859  | 0.112695123  | 0.372266967  | 3.96E-04 | 1.14E-03 | 1.00E+00 |
| ATG2A    | LMNA | 0.086130558  | -0.052545227 | 0.221547271  | 2.23E-01 | 3.00E-01 | 1.00E+00 |
| RPGRIP1L | LMNA | -0.061498087 | -0.197869203 | 0.077208403  | 3.85E-01 | 4.72E-01 | 1.00E+00 |
| SPOP     | LMNA | -0.397749491 | -0.507911231 | -0.274786965 | 4.58E-09 | 3.35E-08 | 5.44E-05 |
| OSGIN1   | LMNA | 0.273561772  | 0.140829256  | 0.396633712  | 8.17E-05 | 2.72E-04 | 9.69E-01 |
| PTPRF    | LMNA | 0.093890332  | -0.04474058  | 0.228973458  | 1.84E-01 | 2.55E-01 | 1.00E+00 |
| ICMT     | LMNA | 0.468164607  | 0.352923245  | 0.569414041  | 2.13E-12 | 2.80E-11 | 2.53E-08 |
| SEC24B   | LMNA | 0.055683776  | -0.083005303 | 0.192256859  | 4.31E-01 | 5.18E-01 | 1.00E+00 |

|          |      |              |              |              |          |          |          |
|----------|------|--------------|--------------|--------------|----------|----------|----------|
| MAML1    | LMNA | 0.214406355  | 0.078684333  | 0.342324878  | 2.18E-03 | 5.25E-03 | 1.00E+00 |
| POLL     | LMNA | -0.09805304  | -0.232950744 | 0.040546816  | 1.65E-01 | 2.33E-01 | 1.00E+00 |
| FXR2     | LMNA | -0.230754311 | -0.357419407 | -0.095753624 | 9.53E-04 | 2.51E-03 | 1.00E+00 |
| TYK2     | LMNA | 0.251405952  | 0.117430597  | 0.376393522  | 3.07E-04 | 9.09E-04 | 1.00E+00 |
| MUC6     | LMNA | -0.029478268 | -0.166850271 | 0.109016375  | 6.77E-01 | 7.46E-01 | 1.00E+00 |
| ADAM28   | LMNA | 0.056717724  | -0.081975137 | 0.193255546  | 4.23E-01 | 5.10E-01 | 1.00E+00 |
| MYL3     | LMNA | -0.236219389 | -0.362450753 | -0.101477606 | 7.13E-04 | 1.94E-03 | 1.00E+00 |
| NRL      | LMNA | -0.2143045   | -0.342230625 | -0.078578233 | 2.19E-03 | 5.27E-03 | 1.00E+00 |
| PIP4K2A  | LMNA | -0.097833536 | -0.232741131 | 0.040768079  | 1.66E-01 | 2.34E-01 | 1.00E+00 |
| MED7     | LMNA | 0.057366601  | -0.081328482 | 0.193882149  | 4.17E-01 | 5.05E-01 | 1.00E+00 |
| MYLK     | LMNA | 0.332579289  | 0.203889444  | 0.449970822  | 1.33E-06 | 6.21E-06 | 1.57E-02 |
| RRP1     | LMNA | 0.301892652  | 0.17096697   | 0.422341886  | 1.26E-05 | 4.91E-05 | 1.50E-01 |
| TFAP4    | LMNA | -0.165102381 | -0.296397722 | -0.027682331 | 1.89E-02 | 3.54E-02 | 1.00E+00 |
| CYP4F2   | LMNA | 0.116866756  | -0.021531627 | 0.250870322  | 9.76E-02 | 1.49E-01 | 1.00E+00 |
| UNC5C    | LMNA | 0.281339     | 0.149078062  | 0.403710246  | 4.99E-05 | 1.73E-04 | 5.92E-01 |
| ARL4D    | LMNA | 0.016764341  | -0.121568009 | 0.154457874  | 8.13E-01 | 8.59E-01 | 1.00E+00 |
| SH3BP5   | LMNA | 0.432604142  | 0.313261572  | 0.538495424  | 1.28E-10 | 1.25E-09 | 1.52E-06 |
| AKAP6    | LMNA | -0.514360973 | -0.609156929 | -0.405073446 | 4.88E-15 | 1.01E-13 | 5.78E-11 |
| CTLA4    | LMNA | 0.077533438  | -0.061172325 | 0.213301353  | 2.73E-01 | 3.55E-01 | 1.00E+00 |
| ACSBG1   | LMNA | -0.047843364 | -0.184674621 | 0.090807403  | 4.99E-01 | 5.84E-01 | 1.00E+00 |
| MTMR4    | LMNA | -0.276915853 | -0.3996874   | -0.144384456 | 6.62E-05 | 2.24E-04 | 7.85E-01 |
| NECAP1   | LMNA | -0.419126952 | -0.526702476 | -0.298338058 | 5.36E-10 | 4.66E-09 | 6.36E-06 |
| SLC25A17 | LMNA | -0.156828056 | -0.288630136 | -0.01919258  | 2.58E-02 | 4.68E-02 | 1.00E+00 |
| POLR2F   | LMNA | -0.402048536 | -0.511698624 | -0.279511308 | 3.01E-09 | 2.28E-08 | 3.57E-05 |
| PLA2G2D  | LMNA | -0.112196843 | -0.246430904 | 0.026260909  | 1.12E-01 | 1.67E-01 | 1.00E+00 |
| WNT2     | LMNA | 0.323761259  | 0.194399033  | 0.442054389  | 2.60E-06 | 1.15E-05 | 3.08E-02 |
| GLMN     | LMNA | -0.097546135 | -0.23246666  | 0.041057764  | 1.67E-01 | 2.35E-01 | 1.00E+00 |
| MCM7     | LMNA | -0.02917561  | -0.16655577  | 0.109315684  | 6.80E-01 | 7.48E-01 | 1.00E+00 |
| TRIM52   | LMNA | -0.066799282 | -0.202978474 | 0.071914897  | 3.45E-01 | 4.31E-01 | 1.00E+00 |
| DCLRE1A  | LMNA | -0.392601086 | -0.503369952 | -0.269137036 | 7.51E-09 | 5.27E-08 | 8.91E-05 |
| PDX1     | LMNA | 0.127711356  | -0.010525211 | 0.261157964  | 7.01E-02 | 1.12E-01 | 1.00E+00 |
| UBQLN3   | LMNA | 0.004108879  | -0.134018141 | 0.142079287  | 9.54E-01 | 9.66E-01 | 1.00E+00 |
| PRPF31   | LMNA | 0.107937003  | -0.030569508 | 0.242376399  | 1.26E-01 | 1.86E-01 | 1.00E+00 |
| TLR7     | LMNA | 0.098491944  | -0.040104352 | 0.233369836  | 1.63E-01 | 2.31E-01 | 1.00E+00 |
| SMAD1    | LMNA | 0.244873505  | 0.110559988  | 0.370403019  | 4.44E-04 | 1.27E-03 | 1.00E+00 |

|          |      |              |              |              |          |          |          |
|----------|------|--------------|--------------|--------------|----------|----------|----------|
| CLCN1    | LMNA | 0.086601889  | -0.052071654 | 0.221998788  | 2.20E-01 | 2.97E-01 | 1.00E+00 |
| RIOK2    | LMNA | 0.247510668  | 0.113332123  | 0.372822656  | 3.83E-04 | 1.11E-03 | 1.00E+00 |
| CEACAM21 | LMNA | 0.129973436  | -0.008225148 | 0.263300054  | 6.52E-02 | 1.06E-01 | 1.00E+00 |
| PDLIM4   | LMNA | 0.475917941  | 0.361626119  | 0.576117477  | 8.17E-13 | 1.15E-11 | 9.70E-09 |
| STX18    | LMNA | -0.038542724 | -0.175659067 | 0.100040578  | 5.86E-01 | 6.64E-01 | 1.00E+00 |
| CCPG1    | LMNA | 0.230928239  | 0.095935655  | 0.357579645  | 9.45E-04 | 2.49E-03 | 1.00E+00 |
| SLC2A6   | LMNA | 0.027506716  | -0.110965658 | 0.164931418  | 6.98E-01 | 7.62E-01 | 1.00E+00 |
| SORCS3   | LMNA | -0.457880981 | -0.560502122 | -0.341410879 | 7.31E-12 | 8.84E-11 | 8.67E-08 |
| NOLA3    | LMNA | 0.12600596   | -0.012258276 | 0.25954216   | 7.40E-02 | 1.18E-01 | 1.00E+00 |
| PDGFA    | LMNA | 0.289128773  | 0.157358668  | 0.410783547  | 3.00E-05 | 1.09E-04 | 3.56E-01 |
| TRDMT1   | LMNA | -0.192018452 | -0.321545807 | -0.055436994 | 6.19E-03 | 1.32E-02 | 1.00E+00 |
| CFL1     | LMNA | 0.082405379  | -0.056285938 | 0.217976646  | 2.44E-01 | 3.23E-01 | 1.00E+00 |
| IL4      | LMNA | 0.316897707  | 0.187028853  | 0.435879817  | 4.33E-06 | 1.83E-05 | 5.13E-02 |
| NAT2     | LMNA | -0.197971092 | -0.327082883 | -0.061603728 | 4.74E-03 | 1.04E-02 | 1.00E+00 |
| CPSF6    | LMNA | -0.056232588 | -0.19278699  | 0.082458535  | 4.27E-01 | 5.13E-01 | 1.00E+00 |
| PRG2     | LMNA | -0.168062413 | -0.299172263 | -0.030724252 | 1.68E-02 | 3.20E-02 | 1.00E+00 |
| PIGQ     | LMNA | 0.159103677  | 0.021525471  | 0.290768124  | 2.37E-02 | 4.35E-02 | 1.00E+00 |
| CLSTN3   | LMNA | -0.18965687  | -0.319346634 | -0.052993358 | 6.86E-03 | 1.45E-02 | 1.00E+00 |
| KIAA0146 | LMNA | -0.045607441 | -0.182509335 | 0.093029286  | 5.19E-01 | 6.03E-01 | 1.00E+00 |
| GBP1     | LMNA | 0.378287704  | 0.253473868  | 0.490712241  | 2.84E-08 | 1.79E-07 | 3.37E-04 |
| CEP55    | LMNA | 0.360850796  | 0.23448064   | 0.475227931  | 1.32E-07 | 7.42E-07 | 1.57E-03 |
| ZNF408   | LMNA | 0.199760609  | 0.063459644  | 0.328745738  | 4.37E-03 | 9.71E-03 | 1.00E+00 |
| KRT20    | LMNA | -0.035748563 | -0.172946053 | 0.102809817  | 6.13E-01 | 6.89E-01 | 1.00E+00 |
| EYA3     | LMNA | 0.170277497  | 0.03300228   | 0.301247089  | 1.54E-02 | 2.96E-02 | 1.00E+00 |
| KRT38    | LMNA | 0.054234188  | -0.08444909  | 0.190856232  | 4.43E-01 | 5.30E-01 | 1.00E+00 |
| WDR7     | LMNA | -0.293131073 | -0.414412046 | -0.16162037  | 2.30E-05 | 8.53E-05 | 2.73E-01 |
| BLCAP    | LMNA | -0.256607033 | -0.381155649 | -0.122910105 | 2.27E-04 | 6.91E-04 | 1.00E+00 |
| HLA-DPB1 | LMNA | 0.250876738  | 0.116873509  | 0.375908601  | 3.17E-04 | 9.35E-04 | 1.00E+00 |
| SFI1     | LMNA | -0.17583326  | -0.306445612 | -0.0387222   | 1.23E-02 | 2.44E-02 | 1.00E+00 |
| GNF      | LMNA | -0.169872195 | -0.300867543 | -0.032585354 | 1.57E-02 | 3.00E-02 | 1.00E+00 |
| MGAT4C   | LMNA | -0.360085069 | -0.474546323 | -0.233648774 | 1.41E-07 | 7.89E-07 | 1.68E-03 |
| SLC35A2  | LMNA | 0.595954761  | 0.49895376   | 0.678208121  | 8.26E-21 | 4.69E-19 | 9.80E-17 |
| TUSC3    | LMNA | -0.179032546 | -0.309435652 | -0.042020098 | 1.08E-02 | 2.17E-02 | 1.00E+00 |
| GABRD    | LMNA | -0.278423582 | -0.401059209 | -0.145983707 | 6.02E-05 | 2.05E-04 | 7.13E-01 |
| IARS     | LMNA | 0.029659108  | -0.108837525 | 0.167026224  | 6.75E-01 | 7.44E-01 | 1.00E+00 |

|          |      |              |              |              |          |          |          |
|----------|------|--------------|--------------|--------------|----------|----------|----------|
| ARFIP1   | LMNA | 0.173027018  | 0.035831918  | 0.303820787  | 1.38E-02 | 2.69E-02 | 1.00E+00 |
| SFRS9    | LMNA | 0.120065246  | -0.018288895 | 0.253907694  | 8.88E-02 | 1.37E-01 | 1.00E+00 |
| CEP110   | LMNA | -0.08365163  | -0.219171595 | 0.055034924  | 2.37E-01 | 3.15E-01 | 1.00E+00 |
| MYF6     | LMNA | 0.127850118  | -0.010384162 | 0.261289403  | 6.98E-02 | 1.12E-01 | 1.00E+00 |
| MGST2    | LMNA | 0.234779908  | 0.099969064  | 0.361126229  | 7.70E-04 | 2.08E-03 | 1.00E+00 |
| EVI2B    | LMNA | 0.173866306  | 0.036696101  | 0.304606026  | 1.33E-02 | 2.62E-02 | 1.00E+00 |
| TRPV4    | LMNA | 0.189503059  | 0.05283426   | 0.319203353  | 6.91E-03 | 1.46E-02 | 1.00E+00 |
| SLC25A11 | LMNA | -0.130862031 | -0.264141154 | 0.007321232  | 6.34E-02 | 1.03E-01 | 1.00E+00 |
| EHD4     | LMNA | 0.581548657  | 0.482211199  | 0.666121201  | 1.13E-19 | 5.45E-18 | 1.35E-15 |
| NOX5     | LMNA | -0.003728709 | -0.141706766 | 0.13439147   | 9.58E-01 | 9.69E-01 | 1.00E+00 |
| NCKAP1L  | LMNA | 0.264511669  | 0.131253536  | 0.388380528  | 1.42E-04 | 4.54E-04 | 1.00E+00 |
| EMP3     | LMNA | 0.673299388  | 0.590097771  | 0.74234928   | 4.93E-28 | 1.08E-25 | 5.84E-24 |
| SYNCRIP  | LMNA | 0.167850527  | 0.030506419  | 0.298973729  | 1.70E-02 | 3.23E-02 | 1.00E+00 |
| C1orf38  | LMNA | 0.366615337  | 0.240749033  | 0.480354805  | 8.04E-08 | 4.69E-07 | 9.53E-04 |
| ZNF426   | LMNA | 0.059934534  | -0.078768196 | 0.196360841  | 3.97E-01 | 4.84E-01 | 1.00E+00 |
| ELOVL2   | LMNA | 0.179454325  | 0.0424551    | 0.309829652  | 1.06E-02 | 2.14E-02 | 1.00E+00 |
| ATP5J    | LMNA | -0.117786408 | -0.251743919 | 0.020599552  | 9.50E-02 | 1.46E-01 | 1.00E+00 |
| CBX7     | LMNA | -0.109891584 | -0.244237347 | 0.028593194  | 1.19E-01 | 1.77E-01 | 1.00E+00 |
| OSBPL1A  | LMNA | -0.10614489  | -0.240669265 | 0.032380597  | 1.33E-01 | 1.94E-01 | 1.00E+00 |
| MED13    | LMNA | -0.238444104 | -0.364496801 | -0.103810273 | 6.32E-04 | 1.74E-03 | 1.00E+00 |
| ZNF589   | LMNA | -0.155056953 | -0.286965242 | -0.01737794  | 2.76E-02 | 4.96E-02 | 1.00E+00 |
| CHRNA3   | LMNA | 0.014293936  | -0.124001757 | 0.152044907  | 8.40E-01 | 8.81E-01 | 1.00E+00 |
| GOLGA2   | LMNA | 0.322032729  | 0.192541536  | 0.440500428  | 2.96E-06 | 1.30E-05 | 3.51E-02 |
| NIF3L1   | LMNA | -0.328296827 | -0.446128522 | -0.199277418 | 1.84E-06 | 8.42E-06 | 2.19E-02 |
| TRA2A    | LMNA | -0.136621193 | -0.269587585 | 0.001457293  | 5.25E-02 | 8.76E-02 | 1.00E+00 |
| F2R      | LMNA | 0.336446041  | 0.208058682  | 0.453436411  | 9.80E-07 | 4.71E-06 | 1.16E-02 |
| PHF2     | LMNA | -0.135344555 | -0.268381004 | 0.002757977  | 5.48E-02 | 9.09E-02 | 1.00E+00 |
| PID1     | LMNA | -0.489194691 | -0.587565173 | -0.376575254 | 1.50E-13 | 2.36E-12 | 1.78E-09 |
| MTAP     | LMNA | -0.026688411 | -0.16413468  | 0.111774407  | 7.06E-01 | 7.70E-01 | 1.00E+00 |
| RFC1     | LMNA | 0.054603575  | -0.084081236 | 0.191213196  | 4.40E-01 | 5.27E-01 | 1.00E+00 |
| C5orf3   | LMNA | 0.134556374  | -0.003560771 | 0.267635866  | 5.62E-02 | 9.29E-02 | 1.00E+00 |
| ADORA3   | LMNA | 0.095976011  | -0.042639951 | 0.230966798  | 1.74E-01 | 2.44E-01 | 1.00E+00 |
| ACTL7A   | LMNA | 0.045286357  | -0.09334824  | 0.182198286  | 5.22E-01 | 6.05E-01 | 1.00E+00 |
| RAI2     | LMNA | -0.468846959 | -0.570004535 | -0.353688364 | 1.96E-12 | 2.60E-11 | 2.32E-08 |
| MAP2K7   | LMNA | 0.28733516   | 0.155450396  | 0.4091562    | 3.38E-05 | 1.21E-04 | 4.01E-01 |

|          |      |              |              |              |          |          |          |
|----------|------|--------------|--------------|--------------|----------|----------|----------|
| HYAL4    | LMNA | -0.283765415 | -0.405915059 | -0.151655377 | 4.27E-05 | 1.50E-04 | 5.06E-01 |
| GZMB     | LMNA | 0.325523305  | 0.196293503  | 0.44363775   | 2.28E-06 | 1.02E-05 | 2.70E-02 |
| BMP1     | LMNA | 0.606104443  | 0.510793209  | 0.686697206  | 1.20E-21 | 7.71E-20 | 1.43E-17 |
| CPNE6    | LMNA | -0.275777405 | -0.398651217 | -0.143177359 | 7.11E-05 | 2.39E-04 | 8.44E-01 |
| SP2      | LMNA | -0.160093771 | -0.291697925 | -0.02254095  | 2.28E-02 | 4.21E-02 | 1.00E+00 |
| DPF1     | LMNA | -0.491543505 | -0.589586314 | -0.379226053 | 1.10E-13 | 1.76E-12 | 1.31E-09 |
| SMPD3    | LMNA | -0.522987325 | -0.616525825 | -0.414891008 | 1.41E-15 | 3.25E-14 | 1.67E-11 |
| TMEM38B  | LMNA | 0.006448044  | -0.131720209 | 0.144370532  | 9.27E-01 | 9.47E-01 | 1.00E+00 |
| CCDC56   | LMNA | -0.416742557 | -0.524611738 | -0.295703913 | 6.86E-10 | 5.85E-09 | 8.14E-06 |
| NFE2L1   | LMNA | 0.363611031  | 0.237480823  | 0.477683801  | 1.04E-07 | 5.96E-07 | 1.24E-03 |
| MRPS31   | LMNA | -0.238329711 | -0.364391624 | -0.103690293 | 6.36E-04 | 1.75E-03 | 1.00E+00 |
| STIP1    | LMNA | 0.141255482  | 0.003268213  | 0.273964058  | 4.49E-02 | 7.64E-02 | 1.00E+00 |
| MMP26    | LMNA | 0.067172184  | -0.071542241 | 0.203337597  | 3.42E-01 | 4.28E-01 | 1.00E+00 |
| RASL11B  | LMNA | -0.314577183 | -0.433789697 | -0.184540345 | 5.13E-06 | 2.14E-05 | 6.08E-02 |
| NT5DC2   | LMNA | 0.117236895  | -0.021156516 | 0.251221951  | 9.66E-02 | 1.48E-01 | 1.00E+00 |
| HLA-G    | LMNA | 0.445901476  | 0.328043923  | 0.550090478  | 2.92E-11 | 3.17E-10 | 3.47E-07 |
| LRP2     | LMNA | -0.13024778  | -0.263559756 | 0.007946098  | 6.47E-02 | 1.05E-01 | 1.00E+00 |
| MTDH     | LMNA | 0.35292535   | 0.225879586  | 0.468166485  | 2.58E-07 | 1.38E-06 | 3.06E-03 |
| HSP90AB1 | LMNA | 0.100799074  | -0.037777618 | 0.235571993  | 1.53E-01 | 2.19E-01 | 1.00E+00 |
| PMAIP1   | LMNA | 0.367703819  | 0.241933834  | 0.481322009  | 7.31E-08 | 4.30E-07 | 8.67E-04 |
| LMBR1L   | LMNA | -0.226699965 | -0.353682076 | -0.091512968 | 1.18E-03 | 3.03E-03 | 1.00E+00 |
| SLC25A20 | LMNA | 0.151671547  | 0.013911838  | 0.283780632  | 3.12E-02 | 5.54E-02 | 1.00E+00 |
| RSBN1    | LMNA | -0.450642086 | -0.554214519 | -0.333327947 | 1.70E-11 | 1.91E-10 | 2.02E-07 |
| S100A2   | LMNA | 0.354217548  | 0.227280588  | 0.469318818  | 2.32E-07 | 1.25E-06 | 2.75E-03 |
| C2       | LMNA | 0.334504551  | 0.205964731  | 0.451696787  | 1.14E-06 | 5.42E-06 | 1.35E-02 |
| RHOT2    | LMNA | 0.056468302  | -0.082223673 | 0.193014656  | 4.25E-01 | 5.12E-01 | 1.00E+00 |
| RALGPS2  | LMNA | -0.375931719 | -0.488624222 | -0.250901966 | 3.52E-08 | 2.17E-07 | 4.17E-04 |
| EIF4EBP1 | LMNA | 0.268965019  | 0.135962425  | 0.392444217  | 1.09E-04 | 3.53E-04 | 1.00E+00 |
| C2orf27  | LMNA | -0.453035125 | -0.556294388 | -0.335998101 | 1.29E-11 | 1.49E-10 | 1.53E-07 |
| GCKR     | LMNA | 0.311311856  | 0.181041458  | 0.430846408  | 6.49E-06 | 2.66E-05 | 7.70E-02 |
| FER      | LMNA | 0.081041842  | -0.057654188 | 0.216668773  | 2.52E-01 | 3.32E-01 | 1.00E+00 |
| TRPC6    | LMNA | 0.223339219  | 0.088001498  | 0.350581034  | 1.40E-03 | 3.53E-03 | 1.00E+00 |
| RGL2     | LMNA | -0.010662118 | -0.148494548 | 0.127576664  | 8.80E-01 | 9.12E-01 | 1.00E+00 |
| ARPC1B   | LMNA | 0.615345571  | 0.521604378  | 0.694407315  | 1.96E-22 | 1.53E-20 | 2.32E-18 |
| SNRK     | LMNA | -0.279431833 | -0.40197626  | -0.147053547 | 5.64E-05 | 1.94E-04 | 6.69E-01 |



|           |      |              |              |              |          |          |          |
|-----------|------|--------------|--------------|--------------|----------|----------|----------|
| UTP6      | LMNA | -0.047145836 | -0.183999271 | 0.0915007    | 5.05E-01 | 5.89E-01 | 1.00E+00 |
| DNM2      | LMNA | 0.358686334  | 0.232129701  | 0.473300891  | 1.59E-07 | 8.80E-07 | 1.89E-03 |
| GCS1      | LMNA | 0.405119002  | 0.282889168  | 0.514401052  | 2.22E-09 | 1.72E-08 | 2.64E-05 |
| EHMT1     | LMNA | 0.029279344  | -0.109213101 | 0.166656711  | 6.79E-01 | 7.48E-01 | 1.00E+00 |
| GLDC      | LMNA | -0.079719949 | -0.215400378 | 0.058980153  | 2.59E-01 | 3.41E-01 | 1.00E+00 |
| FBP1      | LMNA | 0.336465916  | 0.208080124  | 0.453454215  | 9.79E-07 | 4.70E-06 | 1.16E-02 |
| VARS      | LMNA | 0.093899894  | -0.044730953 | 0.228982599  | 1.84E-01 | 2.55E-01 | 1.00E+00 |
| PLA2G7    | LMNA | -0.05247422  | -0.18915496  | 0.086201232  | 4.58E-01 | 5.44E-01 | 1.00E+00 |
| RAX       | LMNA | 0.024182327  | -0.114250085 | 0.161693531  | 7.33E-01 | 7.92E-01 | 1.00E+00 |
| TERT      | LMNA | 0.051653853  | -0.087017659 | 0.188361672  | 4.65E-01 | 5.51E-01 | 1.00E+00 |
| CCL1      | LMNA | -0.045092565 | -0.182010537 | 0.093540733  | 5.24E-01 | 6.07E-01 | 1.00E+00 |
| FUCA1     | LMNA | 0.343014059  | 0.215151206  | 0.45931492   | 5.81E-07 | 2.90E-06 | 6.89E-03 |
| ALS2CR8   | LMNA | -0.257257869 | -0.381751091 | -0.123596356 | 2.19E-04 | 6.68E-04 | 1.00E+00 |
| CXorf21   | LMNA | 0.094870541  | -0.043753498 | 0.229910411  | 1.79E-01 | 2.49E-01 | 1.00E+00 |
| KCMF1     | LMNA | 0.233930798  | 0.099079509  | 0.36034469   | 8.06E-04 | 2.17E-03 | 1.00E+00 |
| MFAP2     | LMNA | 0.391244892  | 0.267650143  | 0.502172668  | 8.55E-09 | 5.92E-08 | 1.01E-04 |
| OXCT2     | LMNA | 0.125078062  | -0.01320088  | 0.258662695  | 7.61E-02 | 1.21E-01 | 1.00E+00 |
| WWC3      | LMNA | 0.347298894  | 0.219785501  | 0.463144453  | 4.11E-07 | 2.11E-06 | 4.87E-03 |
| SOCS1     | LMNA | 0.395342797  | 0.272144769  | 0.505789109  | 5.78E-09 | 4.15E-08 | 6.86E-05 |
| IL17RA    | LMNA | 0.357928668  | 0.231307109  | 0.472626075  | 1.70E-07 | 9.36E-07 | 2.01E-03 |
| C14orf115 | LMNA | 0.039709048  | -0.098884022 | 0.176790903  | 5.75E-01 | 6.54E-01 | 1.00E+00 |
| ST5       | LMNA | 0.28490133   | 0.152862553  | 0.406946743  | 3.96E-05 | 1.40E-04 | 4.70E-01 |
| STRA6     | LMNA | 0.466698984  | 0.351280366  | 0.568145366  | 2.55E-12 | 3.32E-11 | 3.02E-08 |
| MPP5      | LMNA | 0.056265725  | -0.08242552  | 0.192818996  | 4.26E-01 | 5.13E-01 | 1.00E+00 |
| SPA17     | LMNA | -0.028568801 | -0.165965243 | 0.109915701  | 6.87E-01 | 7.53E-01 | 1.00E+00 |
| C21orf7   | LMNA | 0.369996438  | 0.244430553  | 0.483358281  | 5.97E-08 | 3.58E-07 | 7.09E-04 |
| FLJ10986  | LMNA | 0.19184886   | 0.055261455  | 0.321387925  | 6.23E-03 | 1.33E-02 | 1.00E+00 |
| LHFP      | LMNA | 0.147573617  | 0.009720652  | 0.279921858  | 3.61E-02 | 6.30E-02 | 1.00E+00 |
| CAMK4     | LMNA | -0.233556774 | -0.360000374 | -0.098687738 | 8.22E-04 | 2.21E-03 | 1.00E+00 |
| GALNT14   | LMNA | -0.383313062 | -0.495161713 | -0.258965685 | 1.80E-08 | 1.17E-07 | 2.13E-04 |
| CLPX      | LMNA | 0.015529576  | -0.12278466  | 0.153252023  | 8.26E-01 | 8.70E-01 | 1.00E+00 |
| NPLOC4    | LMNA | 0.252524281  | 0.118608104  | 0.377418025  | 2.88E-04 | 8.58E-04 | 1.00E+00 |
| PJA1      | LMNA | -0.294179534 | -0.415361947 | -0.162737597 | 2.14E-05 | 7.97E-05 | 2.54E-01 |
| CPLX2     | LMNA | -0.406936367 | -0.515999559 | -0.284889904 | 1.86E-09 | 1.46E-08 | 2.20E-05 |
| ARSD      | LMNA | 0.502462547  | 0.3915732    | 0.598965997  | 2.55E-14 | 4.50E-13 | 3.02E-10 |

|           |      |              |              |              |          |          |          |
|-----------|------|--------------|--------------|--------------|----------|----------|----------|
| WHDC1L1   | LMNA | 0.221250298  | 0.085820586  | 0.348652129  | 1.55E-03 | 3.87E-03 | 1.00E+00 |
| RB1       | LMNA | -0.026515593 | -0.163966394 | 0.111945184  | 7.08E-01 | 7.71E-01 | 1.00E+00 |
| PHLDA2    | LMNA | 0.512526612  | 0.402989024  | 0.607587849  | 6.32E-15 | 1.28E-13 | 7.50E-11 |
| C2orf56   | LMNA | -0.006450548 | -0.144372984 | 0.131717748  | 9.27E-01 | 9.47E-01 | 1.00E+00 |
| GUCY2F    | LMNA | 0.007669543  | -0.13051965  | 0.14556642   | 9.14E-01 | 9.38E-01 | 1.00E+00 |
| MPV17     | LMNA | 0.134211605  | -0.003911875 | 0.267309876  | 5.69E-02 | 9.38E-02 | 1.00E+00 |
| PSMD4     | LMNA | -0.002681346 | -0.140680272 | 0.135419782  | 9.70E-01 | 9.77E-01 | 1.00E+00 |
| SLC35D1   | LMNA | 0.565610654  | 0.463772451  | 0.652697035  | 1.78E-18 | 7.13E-17 | 2.11E-14 |
| C20orf103 | LMNA | -0.148186197 | -0.280498959 | -0.010346864 | 3.53E-02 | 6.18E-02 | 1.00E+00 |
| COL16A1   | LMNA | 0.242769417  | 0.108349709  | 0.368471265  | 4.99E-04 | 1.41E-03 | 1.00E+00 |
| ERLIN1    | LMNA | 0.298519106  | 0.167365376  | 0.419290772  | 1.59E-05 | 6.08E-05 | 1.89E-01 |
| JMJD4     | LMNA | 0.194849945  | 0.058369026  | 0.324180734  | 5.46E-03 | 1.18E-02 | 1.00E+00 |
| SLC29A1   | LMNA | 0.232760935  | 0.097854274  | 0.359267632  | 8.58E-04 | 2.29E-03 | 1.00E+00 |
| GLRX      | LMNA | 0.21077171   | 0.074900096  | 0.338959911  | 2.60E-03 | 6.13E-03 | 1.00E+00 |
| TP53I11   | LMNA | 0.062309327  | -0.076398847 | 0.198651553  | 3.78E-01 | 4.66E-01 | 1.00E+00 |
| ST3GAL4   | LMNA | 0.404735867  | 0.28246751   | 0.514063959  | 2.31E-09 | 1.78E-08 | 2.74E-05 |
| ALG8      | LMNA | 0.142323532  | 0.00435816   | 0.27497191   | 4.33E-02 | 7.39E-02 | 1.00E+00 |
| PF4V1     | LMNA | 0.061342983  | -0.077363164 | 0.197719603  | 3.86E-01 | 4.73E-01 | 1.00E+00 |
| SHOC2     | LMNA | -0.105271518 | -0.239837006 | 0.033262887  | 1.36E-01 | 1.98E-01 | 1.00E+00 |
| REG1A     | LMNA | 0.145160415  | 0.007254797  | 0.277647487  | 3.93E-02 | 6.79E-02 | 1.00E+00 |
| FBXW7     | LMNA | -0.409739056 | -0.518463242 | -0.287977468 | 1.40E-09 | 1.13E-08 | 1.66E-05 |
| CYB5R3    | LMNA | 0.231027722  | 0.096039776  | 0.357671294  | 9.40E-04 | 2.48E-03 | 1.00E+00 |
| MINA      | LMNA | 0.146258619  | 0.008376754  | 0.278682696  | 3.78E-02 | 6.55E-02 | 1.00E+00 |
| HHLA1     | LMNA | 0.179809707  | 0.042821664  | 0.310161594  | 1.04E-02 | 2.11E-02 | 1.00E+00 |
| MYST4     | LMNA | -0.367592461 | -0.481223072 | -0.241812605 | 7.38E-08 | 4.34E-07 | 8.75E-04 |
| NR0B2     | LMNA | -0.121728257 | -0.255485892 | 0.016601731  | 8.44E-02 | 1.32E-01 | 1.00E+00 |
| TFAP2A    | LMNA | -0.234622924 | -0.360981752 | -0.099804587 | 7.77E-04 | 2.10E-03 | 1.00E+00 |
| UCHL5IP   | LMNA | 0.011307894  | -0.12694127  | 0.149126099  | 8.73E-01 | 9.06E-01 | 1.00E+00 |
| TIMELESS  | LMNA | -0.049538549 | -0.186315367 | 0.089121943  | 4.84E-01 | 5.69E-01 | 1.00E+00 |
| DDX10     | LMNA | 0.200072678  | 0.063783389  | 0.329035637  | 4.31E-03 | 9.58E-03 | 1.00E+00 |
| SLC25A36  | LMNA | -0.222724708 | -0.350013708 | -0.087359791 | 1.44E-03 | 3.62E-03 | 1.00E+00 |
| TMED10    | LMNA | 0.272858558  | 0.140084309  | 0.395993132  | 8.54E-05 | 2.83E-04 | 1.00E+00 |
| ZNF507    | LMNA | -0.169304133 | -0.30033551  | -0.032001081 | 1.60E-02 | 3.06E-02 | 1.00E+00 |
| LOC90379  | LMNA | 0.121355238  | -0.016980236 | 0.255131959  | 8.54E-02 | 1.33E-01 | 1.00E+00 |
| RAB11FIP1 | LMNA | 0.400744049  | 0.278077143  | 0.510549841  | 3.42E-09 | 2.56E-08 | 4.06E-05 |

|          |      |              |              |              |          |          |          |
|----------|------|--------------|--------------|--------------|----------|----------|----------|
| ATAD4    | LMNA | -0.076390242 | -0.212203399 | 0.062317948  | 2.80E-01 | 3.63E-01 | 1.00E+00 |
| PHF15    | LMNA | 0.383251843  | 0.258898734  | 0.495107545  | 1.81E-08 | 1.17E-07 | 2.14E-04 |
| ZNF26    | LMNA | -0.170637323 | -0.301584013 | -0.033372466 | 1.52E-02 | 2.92E-02 | 1.00E+00 |
| KRT7     | LMNA | 0.399116421  | 0.276288479  | 0.509115937  | 4.01E-09 | 2.96E-08 | 4.76E-05 |
| RPA3     | LMNA | 0.146551378  | 0.008675904  | 0.278958609  | 3.74E-02 | 6.50E-02 | 1.00E+00 |
| YIF1A    | LMNA | 0.160364794  | 0.022818972  | 0.291952401  | 2.26E-02 | 4.17E-02 | 1.00E+00 |
| PPRC1    | LMNA | 0.211545085  | 0.075704973  | 0.339676179  | 2.51E-03 | 5.93E-03 | 1.00E+00 |
| PCDH17   | LMNA | -0.279893829 | -0.402396385 | -0.147543867 | 5.48E-05 | 1.88E-04 | 6.50E-01 |
| PHF8     | LMNA | 0.003081024  | -0.135027409 | 0.141072022  | 9.65E-01 | 9.74E-01 | 1.00E+00 |
| RDH14    | LMNA | 0.153005604  | 0.015277299  | 0.285035912  | 2.97E-02 | 5.31E-02 | 1.00E+00 |
| DNAJB2   | LMNA | -0.02483832  | -0.162332689 | 0.113602218  | 7.26E-01 | 7.86E-01 | 1.00E+00 |
| HNRPK    | LMNA | -0.098414598 | -0.233295985 | 0.040182329  | 1.63E-01 | 2.31E-01 | 1.00E+00 |
| PTPLB    | LMNA | 0.198428498  | 0.062078016  | 0.327507989  | 4.64E-03 | 1.02E-02 | 1.00E+00 |
| RABEPK   | LMNA | 0.026325567  | -0.112132955 | 0.163781342  | 7.10E-01 | 7.73E-01 | 1.00E+00 |
| SNF8     | LMNA | 0.066255223  | -0.072458527 | 0.202454454  | 3.49E-01 | 4.35E-01 | 1.00E+00 |
| CBARA1   | LMNA | -0.29463135  | -0.415771209 | -0.16321915  | 2.08E-05 | 7.76E-05 | 2.46E-01 |
| RAD51AP1 | LMNA | -0.142702333 | -0.275329291 | -0.004744806 | 4.28E-02 | 7.30E-02 | 1.00E+00 |
| HAT1     | LMNA | 0.163464253  | 0.025999978  | 0.294861294  | 2.01E-02 | 3.75E-02 | 1.00E+00 |
| H2AFV    | LMNA | -0.172505892 | -0.303333132 | -0.035295439 | 1.41E-02 | 2.74E-02 | 1.00E+00 |
| OAZ3     | LMNA | -0.068813879 | -0.204918193 | 0.06990117   | 3.30E-01 | 4.16E-01 | 1.00E+00 |
| CXorf48  | LMNA | -0.016813583 | -0.154505955 | 0.12151948   | 8.12E-01 | 8.58E-01 | 1.00E+00 |
| RC3H2    | LMNA | 0.077383389  | -0.061322714 | 0.213157261  | 2.74E-01 | 3.56E-01 | 1.00E+00 |
| SGCD     | LMNA | 0.023574092  | -0.114850682 | 0.161100801  | 7.39E-01 | 7.98E-01 | 1.00E+00 |
| PHTF1    | LMNA | 0.189030719  | 0.052345726  | 0.318763311  | 7.05E-03 | 1.48E-02 | 1.00E+00 |
| CA3      | LMNA | 0.086723223  | -0.051949732 | 0.222115012  | 2.20E-01 | 2.96E-01 | 1.00E+00 |
| PKIA     | LMNA | -0.461767895 | -0.563873367 | -0.345758117 | 4.61E-12 | 5.76E-11 | 5.47E-08 |
| STX10    | LMNA | 0.212324064  | 0.076515862  | 0.340397487  | 2.42E-03 | 5.74E-03 | 1.00E+00 |
| PEO1     | LMNA | -0.2749714   | -0.397917424 | -0.142322991 | 7.48E-05 | 2.51E-04 | 8.87E-01 |
| JMJD2D   | LMNA | -0.252618563 | -0.377504383 | -0.118707393 | 2.87E-04 | 8.54E-04 | 1.00E+00 |
| KRT19    | LMNA | 0.184061255  | 0.047209849  | 0.314130256  | 8.74E-03 | 1.80E-02 | 1.00E+00 |
| ZNF143   | LMNA | -0.168952329 | -0.300005979 | -0.031639284 | 1.62E-02 | 3.10E-02 | 1.00E+00 |
| ENO1     | LMNA | 0.313105836  | 0.182963348  | 0.432463774  | 5.70E-06 | 2.36E-05 | 6.77E-02 |
| TIPRL    | LMNA | -0.124944538 | -0.258536122 | 0.0133365    | 7.64E-02 | 1.21E-01 | 1.00E+00 |
| MAN1B1   | LMNA | 0.564238485  | 0.462189098  | 0.651538732  | 2.24E-18 | 8.79E-17 | 2.66E-14 |
| P4HA1    | LMNA | 0.47650039   | 0.362280705  | 0.576620512  | 7.60E-13 | 1.08E-11 | 9.01E-09 |

|          |      |              |              |              |          |          |          |
|----------|------|--------------|--------------|--------------|----------|----------|----------|
| TPTE     | LMNA | -0.227173911 | -0.354119172 | -0.092008441 | 1.15E-03 | 2.96E-03 | 1.00E+00 |
| AKAP8L   | LMNA | -0.055411279 | -0.191993609 | 0.083276754  | 4.33E-01 | 5.19E-01 | 1.00E+00 |
| GPR17    | LMNA | -0.427762326 | -0.534263457 | -0.307893357 | 2.16E-10 | 2.02E-09 | 2.56E-06 |
| LRRC20   | LMNA | -0.428692667 | -0.535077032 | -0.308924252 | 1.95E-10 | 1.85E-09 | 2.32E-06 |
| UBE2Z    | LMNA | 0.451683242  | 0.334489439  | 0.555119582  | 1.51E-11 | 1.71E-10 | 1.79E-07 |
| COL4A1   | LMNA | 0.425200907  | 0.305056545  | 0.5320225    | 2.83E-10 | 2.58E-09 | 3.36E-06 |
| ISOC1    | LMNA | -0.016701654 | -0.154396665 | 0.121629786  | 8.13E-01 | 8.59E-01 | 1.00E+00 |
| RNASE1   | LMNA | 0.353063591  | 0.226029442  | 0.468289781  | 2.55E-07 | 1.37E-06 | 3.03E-03 |
| C20orf20 | LMNA | 0.518843354  | 0.410171655  | 0.612987962  | 2.57E-15 | 5.58E-14 | 3.05E-11 |
| NDUFB11  | LMNA | -0.219932416 | -0.347434644 | -0.084445336 | 1.66E-03 | 4.11E-03 | 1.00E+00 |
| STK19    | LMNA | 0.050591482  | -0.08807465  | 0.187334103  | 4.75E-01 | 5.60E-01 | 1.00E+00 |
| OSBPL2   | LMNA | -0.055493246 | -0.192072797 | 0.083195104  | 4.33E-01 | 5.19E-01 | 1.00E+00 |
| GRM7     | LMNA | -0.280356188 | -0.402816788 | -0.148034638 | 5.32E-05 | 1.83E-04 | 6.31E-01 |
| SLC39A8  | LMNA | 0.396838121  | 0.273786195  | 0.50710778   | 5.01E-09 | 3.64E-08 | 5.94E-05 |
| APPBP1   | LMNA | -0.238520768 | -0.364567286 | -0.103890683 | 6.30E-04 | 1.74E-03 | 1.00E+00 |
| STS      | LMNA | 0.228363498  | 0.093252353  | 0.355216025  | 1.08E-03 | 2.81E-03 | 1.00E+00 |
| TMEM123  | LMNA | 0.24442505   | 0.110088789  | 0.369991386  | 4.55E-04 | 1.29E-03 | 1.00E+00 |
| GLI2     | LMNA | 0.216813338  | 0.081192535  | 0.344551466  | 1.94E-03 | 4.72E-03 | 1.00E+00 |
| BTNL2    | LMNA | -0.156096501 | -0.287942548 | -0.018442933 | 2.65E-02 | 4.80E-02 | 1.00E+00 |
| ALDH1A3  | LMNA | 0.255383283  | 0.121620111  | 0.380035774  | 2.44E-04 | 7.37E-04 | 1.00E+00 |
| TGIF1    | LMNA | 0.437483844  | 0.318679519  | 0.542755105  | 7.50E-11 | 7.70E-10 | 8.90E-07 |
| SCO2     | LMNA | 0.171295423  | 0.034049611  | 0.302200145  | 1.48E-02 | 2.85E-02 | 1.00E+00 |
| TP53     | LMNA | 0.200759918  | 0.064496444  | 0.329673969  | 4.17E-03 | 9.31E-03 | 1.00E+00 |
| CCDC69   | LMNA | 0.139417283  | 0.001393095  | 0.272228779  | 4.78E-02 | 8.07E-02 | 1.00E+00 |
| ZFAND5   | LMNA | 0.18567019   | 0.048871871  | 0.315630952  | 8.16E-03 | 1.69E-02 | 1.00E+00 |
| ICA1     | LMNA | -0.458178322 | -0.560760136 | -0.341743258 | 7.06E-12 | 8.56E-11 | 8.37E-08 |
| RAPGEF2  | LMNA | -0.446930361 | -0.550985977 | -0.329190122 | 2.60E-11 | 2.83E-10 | 3.09E-07 |
| NAV3     | LMNA | -0.263834012 | -0.387761742 | -0.130537521 | 1.48E-04 | 4.69E-04 | 1.00E+00 |
| EPS8L2   | LMNA | 0.348288436  | 0.220856565  | 0.464028232  | 3.79E-07 | 1.96E-06 | 4.49E-03 |
| ATP6V1G2 | LMNA | -0.623128451 | -0.700886719 | -0.53073296  | 4.05E-23 | 3.82E-21 | 4.81E-19 |
| MNT      | LMNA | 0.087397219  | -0.051272397 | 0.222760552  | 2.16E-01 | 2.92E-01 | 1.00E+00 |
| C6orf145 | LMNA | 0.237779739  | 0.103113515  | 0.363885919  | 6.56E-04 | 1.80E-03 | 1.00E+00 |
| PPP6C    | LMNA | 0.204275408  | 0.068146158  | 0.332937431  | 3.54E-03 | 8.05E-03 | 1.00E+00 |
| OR51E2   | LMNA | 0.314588008  | 0.184551949  | 0.43379945   | 5.12E-06 | 2.14E-05 | 6.08E-02 |
| OTUB1    | LMNA | -0.110682544 | -0.244990136 | 0.027793131  | 1.17E-01 | 1.74E-01 | 1.00E+00 |

|           |      |              |              |              |          |          |          |
|-----------|------|--------------|--------------|--------------|----------|----------|----------|
| ENTPD1    | LMNA | -0.005885933 | -0.143820072 | 0.132272546  | 9.34E-01 | 9.52E-01 | 1.00E+00 |
| TMEM115   | LMNA | 0.408302635  | 0.286394727  | 0.517200792  | 1.62E-09 | 1.29E-08 | 1.92E-05 |
| STK11     | LMNA | 0.307951607  | 0.177444301  | 0.427814901  | 8.25E-06 | 3.31E-05 | 9.79E-02 |
| PRPSAP2   | LMNA | -0.520573533 | -0.614465539 | -0.412141358 | 2.00E-15 | 4.48E-14 | 2.38E-11 |
| SH3BGR13  | LMNA | 0.608133355  | 0.513164247  | 0.688391534  | 8.12E-22 | 5.50E-20 | 9.63E-18 |
| MX1       | LMNA | 0.12362766   | -0.014673777 | 0.257287554  | 7.96E-02 | 1.25E-01 | 1.00E+00 |
| PSMC5     | LMNA | 0.132662908  | -0.005488613 | 0.265845155  | 5.98E-02 | 9.81E-02 | 1.00E+00 |
| TTY9A     | LMNA | 0.211013632  | 0.075151853  | 0.339183985  | 2.57E-03 | 6.07E-03 | 1.00E+00 |
| EXOSC4    | LMNA | -0.004962257 | -0.142915355 | 0.133179977  | 9.44E-01 | 9.58E-01 | 1.00E+00 |
| SETD1A    | LMNA | 0.167817789  | 0.030472764  | 0.298943053  | 1.70E-02 | 3.23E-02 | 1.00E+00 |
| YARS      | LMNA | 0.084886132  | -0.053795275 | 0.220354879  | 2.30E-01 | 3.07E-01 | 1.00E+00 |
| SLN       | LMNA | 0.182231821  | 0.045320973  | 0.312423104  | 9.44E-03 | 1.93E-02 | 1.00E+00 |
| RELB      | LMNA | 0.616617502  | 0.523094767  | 0.6954671    | 1.52E-22 | 1.23E-20 | 1.80E-18 |
| NLRP1     | LMNA | -0.230722239 | -0.35738986  | -0.09572006  | 9.55E-04 | 2.51E-03 | 1.00E+00 |
| LAMB2     | LMNA | 0.528430935  | 0.421099305  | 0.621167506  | 6.33E-16 | 1.58E-14 | 7.51E-12 |
| FNTA      | LMNA | -0.265232184 | -0.389038325 | -0.132014987 | 1.36E-04 | 4.36E-04 | 1.00E+00 |
| HNF1B     | LMNA | -0.17089923  | -0.301829231 | -0.033641938 | 1.50E-02 | 2.89E-02 | 1.00E+00 |
| C14orf139 | LMNA | 0.266062501  | 0.132892674  | 0.389796211  | 1.30E-04 | 4.15E-04 | 1.00E+00 |
| UMOD      | LMNA | -0.013408808 | -0.151179959 | 0.124873346  | 8.50E-01 | 8.89E-01 | 1.00E+00 |
| ZNF512B   | LMNA | 0.061086549  | -0.077619017 | 0.197472255  | 3.88E-01 | 4.75E-01 | 1.00E+00 |
| GPR25     | LMNA | 0.028699993  | -0.109785987 | 0.166092923  | 6.85E-01 | 7.53E-01 | 1.00E+00 |
| C6orf49   | LMNA | -0.224859121 | -0.35198383  | -0.089589149 | 1.29E-03 | 3.30E-03 | 1.00E+00 |
| ATP6V0A1  | LMNA | -0.378163583 | -0.49060227  | -0.253338328 | 2.88E-08 | 1.81E-07 | 3.41E-04 |
| SNFT      | LMNA | 0.299534417  | 0.168448954  | 0.420209331  | 1.49E-05 | 5.70E-05 | 1.76E-01 |
| ZNF768    | LMNA | 0.181325817  | 0.044385893  | 0.311577348  | 9.81E-03 | 2.00E-02 | 1.00E+00 |
| GTF2I     | LMNA | -0.269525214 | -0.392955054 | -0.13655519  | 1.05E-04 | 3.42E-04 | 1.00E+00 |
| KCNN2     | LMNA | -0.324003419 | -0.442272036 | -0.194659335 | 2.55E-06 | 1.13E-05 | 3.03E-02 |
| DYNC2LI1  | LMNA | -0.046113916 | -0.182999926 | 0.092526113  | 5.15E-01 | 5.98E-01 | 1.00E+00 |
| DGKE      | LMNA | -0.212619263 | -0.340670792 | -0.076823201 | 2.38E-03 | 5.67E-03 | 1.00E+00 |
| DNAH3     | LMNA | 0.024545637  | -0.11389129  | 0.162047532  | 7.29E-01 | 7.89E-01 | 1.00E+00 |
| RPS6KA1   | LMNA | 0.168448072  | 0.031120767  | 0.299533591  | 1.66E-02 | 3.16E-02 | 1.00E+00 |
| C9orf53   | LMNA | -0.019974368 | -0.157590815 | 0.118403127  | 7.78E-01 | 8.31E-01 | 1.00E+00 |
| PTPRM     | LMNA | -0.171463373 | -0.302357366 | -0.034222441 | 1.47E-02 | 2.84E-02 | 1.00E+00 |
| MRPS15    | LMNA | 0.186556406  | 0.049787652  | 0.316457272  | 7.85E-03 | 1.64E-02 | 1.00E+00 |
| TMEM59L   | LMNA | -0.405097927 | -0.514382511 | -0.282865972 | 2.23E-09 | 1.72E-08 | 2.64E-05 |

|           |      |              |              |              |          |          |          |
|-----------|------|--------------|--------------|--------------|----------|----------|----------|
| SSPN      | LMNA | 0.138628798  | 0.000589071  | 0.271484177  | 4.91E-02 | 8.27E-02 | 1.00E+00 |
| CNOT8     | LMNA | -0.263454061 | -0.387414749 | -0.130136124 | 1.52E-04 | 4.79E-04 | 1.00E+00 |
| GORASP2   | LMNA | 0.094724785  | -0.043900293 | 0.229771103  | 1.80E-01 | 2.50E-01 | 1.00E+00 |
| ADAM17    | LMNA | 0.180590521  | 0.043627176  | 0.310890796  | 1.01E-02 | 2.05E-02 | 1.00E+00 |
| CHRNA3    | LMNA | -0.158591297 | -0.290286848 | -0.021000065 | 2.42E-02 | 4.42E-02 | 1.00E+00 |
| MYOG      | LMNA | -0.032408571 | -0.169700327 | 0.106117202  | 6.47E-01 | 7.19E-01 | 1.00E+00 |
| UBE2D4    | LMNA | 0.01179104   | -0.126465817 | 0.149598529  | 8.68E-01 | 9.02E-01 | 1.00E+00 |
| CPNE1     | LMNA | 0.202436403  | 0.066236484  | 0.331230651  | 3.86E-03 | 8.69E-03 | 1.00E+00 |
| AK5       | LMNA | -0.25887006  | -0.383225623 | -0.125296826 | 1.99E-04 | 6.12E-04 | 1.00E+00 |
| RPL37A    | LMNA | -0.235329985 | -0.361632437 | -0.100545459 | 7.48E-04 | 2.03E-03 | 1.00E+00 |
| CPS1      | LMNA | -0.195499389 | -0.324784809 | -0.059041862 | 5.30E-03 | 1.15E-02 | 1.00E+00 |
| NDRG4     | LMNA | -0.367408599 | -0.48105971  | -0.241612454 | 7.50E-08 | 4.40E-07 | 8.90E-04 |
| ALG5      | LMNA | -0.007330296 | -0.145234326 | 0.130853122  | 9.18E-01 | 9.41E-01 | 1.00E+00 |
| NCOA2     | LMNA | -0.315131387 | -0.434288991 | -0.185134516 | 4.92E-06 | 2.07E-05 | 5.84E-02 |
| LOC130074 | LMNA | -0.06170294  | -0.198066778 | 0.077003992  | 3.83E-01 | 4.70E-01 | 1.00E+00 |
| PIAS4     | LMNA | 0.167379301  | 0.030022015  | 0.298532155  | 1.73E-02 | 3.28E-02 | 1.00E+00 |
| S100PBP   | LMNA | -0.110348857 | -0.244672572 | 0.02813068   | 1.18E-01 | 1.75E-01 | 1.00E+00 |
| TEGT      | LMNA | 0.356110472  | 0.229333846  | 0.471006148  | 1.98E-07 | 1.08E-06 | 2.35E-03 |
| USP5      | LMNA | -0.06671353  | -0.202895886 | 0.072000587  | 3.46E-01 | 4.32E-01 | 1.00E+00 |
| CFLAR     | LMNA | 0.405487562  | 0.283294829  | 0.514725289  | 2.14E-09 | 1.66E-08 | 2.54E-05 |
| KIAA0692  | LMNA | 0.276575136  | 0.144023152  | 0.399377322  | 6.76E-05 | 2.28E-04 | 8.02E-01 |
| WDR48     | LMNA | -0.430727869 | -0.53685611  | -0.311180406 | 1.57E-10 | 1.52E-09 | 1.86E-06 |
| PCDHGB6   | LMNA | -0.090068488 | -0.225317876 | 0.048586641  | 2.02E-01 | 2.77E-01 | 1.00E+00 |
| NRXN3     | LMNA | -0.178507021 | -0.308944675 | -0.04147817  | 1.10E-02 | 2.21E-02 | 1.00E+00 |
| ACACB     | LMNA | 0.099263077  | -0.039326834 | 0.234106037  | 1.60E-01 | 2.27E-01 | 1.00E+00 |
| CDKN2C    | LMNA | -0.032834983 | -0.170114869 | 0.105695123  | 6.43E-01 | 7.16E-01 | 1.00E+00 |
| KIAA0226  | LMNA | -0.12427674  | -0.257903021 | 0.014014704  | 7.80E-02 | 1.23E-01 | 1.00E+00 |
| TRAK1     | LMNA | -0.294349016 | -0.415515472 | -0.162918226 | 2.12E-05 | 7.90E-05 | 2.51E-01 |
| CUTC      | LMNA | -0.257064813 | -0.381574478 | -0.123392782 | 2.21E-04 | 6.75E-04 | 1.00E+00 |
| AGPAT5    | LMNA | -0.072289196 | -0.208261828 | 0.066424696  | 3.07E-01 | 3.91E-01 | 1.00E+00 |
| WDR68     | LMNA | -0.224238337 | -0.351410946 | -0.088940611 | 1.34E-03 | 3.39E-03 | 1.00E+00 |
| PREPL     | LMNA | -0.274845623 | -0.397802902 | -0.142189685 | 7.54E-05 | 2.52E-04 | 8.94E-01 |
| ABCB6     | LMNA | 0.011028994  | -0.127215701 | 0.148853356  | 8.76E-01 | 9.08E-01 | 1.00E+00 |
| RABGAP1L  | LMNA | 0.270983764  | 0.138098988  | 0.394284738  | 9.59E-05 | 3.14E-04 | 1.00E+00 |
| FCGR1A    | LMNA | 0.105256546  | -0.03327801  | 0.239822737  | 1.36E-01 | 1.98E-01 | 1.00E+00 |

|          |      |              |              |              |          |          |          |
|----------|------|--------------|--------------|--------------|----------|----------|----------|
| EIF4H    | LMNA | 0.350814104  | 0.223591703  | 0.466282912  | 3.08E-07 | 1.62E-06 | 3.65E-03 |
| DLC1     | LMNA | 0.401413293  | 0.278812848  | 0.511139253  | 3.21E-09 | 2.41E-08 | 3.80E-05 |
| MAPK8IP3 | LMNA | -0.376519386 | -0.48914517  | -0.251543325 | 3.34E-08 | 2.07E-07 | 3.96E-04 |
| SPRY4    | LMNA | 0.348752512  | 0.22135898   | 0.464442628  | 3.65E-07 | 1.90E-06 | 4.32E-03 |
| RAP2C    | LMNA | 0.398755067  | 0.275891489  | 0.50879751   | 4.16E-09 | 3.06E-08 | 4.93E-05 |
| ETFB     | LMNA | 0.181161059  | 0.044215874  | 0.311423524  | 9.87E-03 | 2.01E-02 | 1.00E+00 |
| RORC     | LMNA | 0.067158819  | -0.071555598 | 0.203324726  | 3.42E-01 | 4.28E-01 | 1.00E+00 |
| GRAP     | LMNA | 0.044601327  | -0.094028632 | 0.181534572  | 5.29E-01 | 6.11E-01 | 1.00E+00 |
| SEPW1    | LMNA | -0.325349111 | -0.443481253 | -0.196106174 | 2.31E-06 | 1.03E-05 | 2.74E-02 |
| NMU      | LMNA | -0.246033086 | -0.371467162 | -0.11177866  | 4.16E-04 | 1.19E-03 | 1.00E+00 |
| MXD1     | LMNA | 0.017671465  | -0.120673927 | 0.155343496  | 8.03E-01 | 8.51E-01 | 1.00E+00 |
| IFIH1    | LMNA | 0.209902141  | 0.073995317  | 0.338154374  | 2.72E-03 | 6.36E-03 | 1.00E+00 |
| AZI2     | LMNA | -0.047250553 | -0.184100668 | 0.091396626  | 5.04E-01 | 5.88E-01 | 1.00E+00 |
| WDR37    | LMNA | -0.252259964 | -0.377175911 | -0.118329767 | 2.93E-04 | 8.69E-04 | 1.00E+00 |
| SEMA4A   | LMNA | -0.12570896  | -0.259260687 | 0.01256001   | 7.46E-02 | 1.19E-01 | 1.00E+00 |
| RPL8     | LMNA | 0.104808555  | -0.033730489 | 0.239395756  | 1.38E-01 | 2.00E-01 | 1.00E+00 |
| NUAK2    | LMNA | 0.449297208  | 0.331828158  | 0.553045074  | 1.98E-11 | 2.20E-10 | 2.35E-07 |
| AHSG     | LMNA | -0.274989678 | -0.397934067 | -0.142342364 | 7.47E-05 | 2.50E-04 | 8.86E-01 |
| RBM39    | LMNA | 0.009296564  | -0.128919892 | 0.147158701  | 8.96E-01 | 9.24E-01 | 1.00E+00 |
| MANSC1   | LMNA | -0.163115663 | -0.294534259 | -0.025642078 | 2.04E-02 | 3.80E-02 | 1.00E+00 |
| IMP3     | LMNA | -0.078595361 | -0.214320943 | 0.060107819  | 2.66E-01 | 3.48E-01 | 1.00E+00 |
| ARHGDIG  | LMNA | -0.392076787 | -0.502907138 | -0.26856214  | 7.90E-09 | 5.51E-08 | 9.37E-05 |
| ELTD1    | LMNA | 0.213091666  | 0.077315083  | 0.341108113  | 2.33E-03 | 5.56E-03 | 1.00E+00 |
| PRAMEF10 | LMNA | 0.057371098  | -0.081323999 | 0.193886491  | 4.17E-01 | 5.05E-01 | 1.00E+00 |
| RGS17    | LMNA | 0.259319826  | 0.12577136   | 0.383636872  | 1.94E-04 | 5.97E-04 | 1.00E+00 |
| KPTN     | LMNA | -0.065857365 | -0.2020712   | 0.072856019  | 3.52E-01 | 4.38E-01 | 1.00E+00 |
| C2orf3   | LMNA | -0.107640608 | -0.242094116 | 0.030869104  | 1.27E-01 | 1.87E-01 | 1.00E+00 |
| PCTP     | LMNA | 0.064566923  | -0.074144971 | 0.200827839  | 3.61E-01 | 4.48E-01 | 1.00E+00 |
| MRPL42   | LMNA | 0.011948643  | -0.12631071  | 0.149752623  | 8.66E-01 | 9.01E-01 | 1.00E+00 |
| SIRT1    | LMNA | -0.384582656 | -0.496284889 | -0.260354397 | 1.60E-08 | 1.05E-07 | 1.89E-04 |
| MANBA    | LMNA | 0.377650829  | 0.252778452  | 0.49014793   | 3.01E-08 | 1.88E-07 | 3.57E-04 |
| CD164    | LMNA | 0.420350624  | 0.299690617  | 0.527774938  | 4.72E-10 | 4.15E-09 | 5.60E-06 |
| ZNF671   | LMNA | -0.272823567 | -0.395961255 | -0.140047245 | 8.56E-05 | 2.83E-04 | 1.00E+00 |
| GFRA1    | LMNA | -0.396202588 | -0.50654739  | -0.27308848  | 5.32E-09 | 3.85E-08 | 6.31E-05 |
| PRM2     | LMNA | 0.326852282  | 0.197722995  | 0.444831471  | 2.06E-06 | 9.31E-06 | 2.44E-02 |

|           |      |              |              |              |          |          |          |
|-----------|------|--------------|--------------|--------------|----------|----------|----------|
| IL1B      | LMNA | 0.164120069  | 0.026673406  | 0.295476477  | 1.96E-02 | 3.66E-02 | 1.00E+00 |
| HAX1      | LMNA | -0.154571878 | -0.286509118 | -0.0168811   | 2.81E-02 | 5.04E-02 | 1.00E+00 |
| REN       | LMNA | 0.093356372  | -0.045278171 | 0.228462955  | 1.86E-01 | 2.58E-01 | 1.00E+00 |
| ZKSCAN3   | LMNA | -0.179275804 | -0.309662895 | -0.042270977 | 1.07E-02 | 2.15E-02 | 1.00E+00 |
| CTSA      | LMNA | 0.666736884  | 0.582281196  | 0.736955755  | 2.45E-27 | 4.77E-25 | 2.91E-23 |
| TPRKB     | LMNA | -0.07310074  | -0.209042165 | 0.065612396  | 3.01E-01 | 3.85E-01 | 1.00E+00 |
| UBFD1     | LMNA | 0.141149249  | 0.00315982   | 0.273863796  | 4.51E-02 | 7.67E-02 | 1.00E+00 |
| CDKL5     | LMNA | -0.215792603 | -0.343607406 | -0.080128666 | 2.04E-03 | 4.94E-03 | 1.00E+00 |
| HIST1H2BC | LMNA | 0.132781046  | -0.005368359 | 0.265956909  | 5.96E-02 | 9.78E-02 | 1.00E+00 |
| COQ4      | LMNA | 0.285716232  | 0.153728821  | 0.407686679  | 3.76E-05 | 1.33E-04 | 4.46E-01 |
| TXNDC4    | LMNA | 0.362621913  | 0.236405444  | 0.476803956  | 1.14E-07 | 6.45E-07 | 1.35E-03 |
| C5orf22   | LMNA | 0.140547514  | 0.002545911  | 0.273295831  | 4.60E-02 | 7.80E-02 | 1.00E+00 |
| VGF       | LMNA | -0.157504562 | -0.289265863 | -0.019885955 | 2.52E-02 | 4.58E-02 | 1.00E+00 |
| INPP4A    | LMNA | -0.069452004 | -0.205532377 | 0.069263086  | 3.26E-01 | 4.12E-01 | 1.00E+00 |
| RNF8      | LMNA | -0.179712606 | -0.310070901 | -0.042721505 | 1.05E-02 | 2.12E-02 | 1.00E+00 |
| BMX       | LMNA | 0.294312769  | 0.162879595  | 0.415482639  | 2.12E-05 | 7.92E-05 | 2.52E-01 |
| SLCO5A1   | LMNA | -0.436410476 | -0.541818585 | -0.317487089 | 8.44E-11 | 8.57E-10 | 1.00E-06 |
| PTPRU     | LMNA | 0.344355501  | 0.216601434  | 0.460514288  | 5.22E-07 | 2.62E-06 | 6.19E-03 |
| ATP8B3    | LMNA | 0.019791696  | -0.118583305 | 0.157412604  | 7.80E-01 | 8.32E-01 | 1.00E+00 |
| HOXC8     | LMNA | 0.089566208  | -0.049091798 | 0.224837163  | 2.05E-01 | 2.80E-01 | 1.00E+00 |
| ADPGK     | LMNA | 0.388309396  | 0.264433764  | 0.499579678  | 1.13E-08 | 7.61E-08 | 1.34E-04 |
| IL12B     | LMNA | 0.057722476  | -0.080973776 | 0.19422576   | 4.15E-01 | 5.02E-01 | 1.00E+00 |
| LARP4     | LMNA | 0.101338551  | -0.03723334  | 0.236086724  | 1.51E-01 | 2.17E-01 | 1.00E+00 |
| ZMPSTE24  | LMNA | 0.203285312  | 0.067117891  | 0.332018628  | 3.71E-03 | 8.38E-03 | 1.00E+00 |
| PFDN4     | LMNA | -0.035568412 | -0.172771063 | 0.102988287  | 6.15E-01 | 6.91E-01 | 1.00E+00 |
| KLHL11    | LMNA | -0.255807136 | -0.38042369  | -0.122066857 | 2.38E-04 | 7.22E-04 | 1.00E+00 |
| PSMB3     | LMNA | -0.02765201  | -0.165072864 | 0.110822041  | 6.96E-01 | 7.61E-01 | 1.00E+00 |
| KIAA0157  | LMNA | -0.272376865 | -0.395554274 | -0.139574117 | 8.80E-05 | 2.90E-04 | 1.00E+00 |
| DDX25     | LMNA | -0.520083031 | -0.614046716 | -0.411582848 | 2.15E-15 | 4.77E-14 | 2.55E-11 |
| NCAN      | LMNA | -0.455624113 | -0.558543107 | -0.338889016 | 9.53E-12 | 1.12E-10 | 1.13E-07 |
| RPS25     | LMNA | -0.072126816 | -0.208105671 | 0.066587206  | 3.08E-01 | 3.92E-01 | 1.00E+00 |
| SOBP      | LMNA | -0.392306718 | -0.503110113 | -0.268814249 | 7.73E-09 | 5.40E-08 | 9.17E-05 |
| TESK2     | LMNA | -0.14834201  | -0.280645733 | -0.010506162 | 3.51E-02 | 6.15E-02 | 1.00E+00 |
| DNM1L     | LMNA | -0.070028719 | -0.206087362 | 0.068686309  | 3.22E-01 | 4.07E-01 | 1.00E+00 |
| LOC55908  | LMNA | -0.025583478 | -0.163058585 | 0.112866146  | 7.18E-01 | 7.80E-01 | 1.00E+00 |



|          |      |              |              |              |          |          |          |
|----------|------|--------------|--------------|--------------|----------|----------|----------|
| MTIF2    | LMNA | 0.155676138  | 0.018012242  | 0.287547386  | 2.69E-02 | 4.86E-02 | 1.00E+00 |
| ZNF207   | LMNA | -0.090146759 | -0.22539278  | 0.048507916  | 2.02E-01 | 2.76E-01 | 1.00E+00 |
| EXOC7    | LMNA | -0.020946466 | -0.158539022 | 0.117444146  | 7.67E-01 | 8.22E-01 | 1.00E+00 |
| CLEC11A  | LMNA | 0.054665508  | -0.084019557 | 0.191273042  | 4.40E-01 | 5.26E-01 | 1.00E+00 |
| TXN2     | LMNA | -0.156894006 | -0.288692116 | -0.019260168 | 2.58E-02 | 4.67E-02 | 1.00E+00 |
| TOLLIP   | LMNA | 0.072637878  | -0.066075712 | 0.208597123  | 3.04E-01 | 3.89E-01 | 1.00E+00 |
| TRAPPC3  | LMNA | 0.26951998   | 0.136549651  | 0.392950282  | 1.05E-04 | 3.42E-04 | 1.00E+00 |
| TAF15    | LMNA | -0.120466129 | -0.254288197 | 0.017882262  | 8.77E-02 | 1.36E-01 | 1.00E+00 |
| HAMP     | LMNA | 0.114940125  | -0.023483502 | 0.249039467  | 1.03E-01 | 1.56E-01 | 1.00E+00 |
| GRIA4    | LMNA | -0.364631559 | -0.478591347 | -0.238590676 | 9.55E-08 | 5.48E-07 | 1.13E-03 |
| IDE      | LMNA | 0.373490304  | 0.248238665  | 0.486459126  | 4.38E-08 | 2.67E-07 | 5.20E-04 |
| DLK1     | LMNA | -0.000320561 | -0.138365438 | 0.137736535  | 9.96E-01 | 9.97E-01 | 1.00E+00 |
| PLVAP    | LMNA | 0.358925773  | 0.232389696  | 0.47351412   | 1.56E-07 | 8.64E-07 | 1.85E-03 |
| NOD2     | LMNA | 0.396101653  | 0.272977681  | 0.50645838   | 5.37E-09 | 3.89E-08 | 6.37E-05 |
| SCMH1    | LMNA | 0.262054731  | 0.128658187  | 0.386136503  | 1.65E-04 | 5.16E-04 | 1.00E+00 |
| ELMO3    | LMNA | 0.041180113  | -0.097424743 | 0.178217952  | 5.61E-01 | 6.41E-01 | 1.00E+00 |
| GPR68    | LMNA | 0.140448479  | 0.002444883  | 0.273202345  | 4.62E-02 | 7.83E-02 | 1.00E+00 |
| HTR2A    | LMNA | -0.199363892 | -0.32837717  | -0.063048127 | 4.45E-03 | 9.87E-03 | 1.00E+00 |
| FUT7     | LMNA | -0.091498839 | -0.226686448 | 0.047147708  | 1.95E-01 | 2.69E-01 | 1.00E+00 |
| PRELP    | LMNA | -0.072633353 | -0.208592772 | 0.066080241  | 3.04E-01 | 3.89E-01 | 1.00E+00 |
| COL8A2   | LMNA | 0.479318892  | 0.365449875  | 0.579053651  | 5.33E-13 | 7.76E-12 | 6.32E-09 |
| GYG1     | LMNA | -0.138196491 | -0.271075862 | -0.00014832  | 4.98E-02 | 8.37E-02 | 1.00E+00 |
| C16orf68 | LMNA | -0.067862141 | -0.204001962 | 0.070852638  | 3.37E-01 | 4.23E-01 | 1.00E+00 |
| R3HDM1   | LMNA | -0.429025343 | -0.535367906 | -0.309292953 | 1.88E-10 | 1.79E-09 | 2.23E-06 |
| ZNF91    | LMNA | -0.202604063 | -0.331386291 | -0.066410545 | 3.83E-03 | 8.62E-03 | 1.00E+00 |
| LPIN1    | LMNA | -0.191877046 | -0.321414165 | -0.055290629 | 6.23E-03 | 1.33E-02 | 1.00E+00 |
| KRT12    | LMNA | 0.042184772  | -0.09642779  | 0.17919222   | 5.51E-01 | 6.32E-01 | 1.00E+00 |
| BAALC    | LMNA | -0.346512599 | -0.462442032 | -0.218934646 | 4.38E-07 | 2.24E-06 | 5.19E-03 |
| MKRN1    | LMNA | -0.155403423 | -0.287290998 | -0.017732856 | 2.72E-02 | 4.91E-02 | 1.00E+00 |
| KIAA1598 | LMNA | -0.277692218 | -0.400393845 | -0.145207861 | 6.30E-05 | 2.14E-04 | 7.47E-01 |
| ANXA7    | LMNA | -0.002799814 | -0.140796395 | 0.135303484  | 9.68E-01 | 9.76E-01 | 1.00E+00 |
| TNP1     | LMNA | -0.070852267 | -0.20687973  | 0.067862512  | 3.16E-01 | 4.02E-01 | 1.00E+00 |
| WDR13    | LMNA | 0.292227308  | 0.1606576    | 0.413593026  | 2.44E-05 | 9.00E-05 | 2.90E-01 |
| GAPDH    | LMNA | 0.364949571  | 0.238936591  | 0.478874102  | 9.29E-08 | 5.34E-07 | 1.10E-03 |
| BSPRY    | LMNA | -0.209753782 | -0.338016921 | -0.073840974 | 2.73E-03 | 6.41E-03 | 1.00E+00 |

|          |      |              |              |              |          |          |          |
|----------|------|--------------|--------------|--------------|----------|----------|----------|
| COX7C    | LMNA | -0.204390003 | -0.333043759 | -0.06826519  | 3.53E-03 | 8.01E-03 | 1.00E+00 |
| FAM108B1 | LMNA | -0.301570963 | -0.422051061 | -0.170623385 | 1.29E-05 | 5.02E-05 | 1.53E-01 |
| PGAM2    | LMNA | -0.042086506 | -0.179096938 | 0.096525315  | 5.52E-01 | 6.33E-01 | 1.00E+00 |
| PEX12    | LMNA | -0.198155661 | -0.327254425 | -0.061795102 | 4.70E-03 | 1.03E-02 | 1.00E+00 |
| APC      | LMNA | -0.416900772 | -0.524750508 | -0.295878643 | 6.75E-10 | 5.76E-09 | 8.01E-06 |
| PMP22    | LMNA | 0.506917058  | 0.396621813  | 0.602784924  | 1.38E-14 | 2.61E-13 | 1.64E-10 |
| TLR2     | LMNA | 0.315245513  | 0.185256884  | 0.4343918    | 4.88E-06 | 2.05E-05 | 5.79E-02 |
| NPBWR2   | LMNA | 0.056938888  | -0.081754743 | 0.193469131  | 4.21E-01 | 5.08E-01 | 1.00E+00 |
| WFDC1    | LMNA | -0.131807672 | -0.265036029 | 0.006359039  | 6.15E-02 | 1.00E-01 | 1.00E+00 |
| MTL5     | LMNA | 0.26910186   | 0.136107212  | 0.392569008  | 1.08E-04 | 3.50E-04 | 1.00E+00 |
| COMMD9   | LMNA | -0.002826996 | -0.140823038 | 0.135276799  | 9.68E-01 | 9.76E-01 | 1.00E+00 |
| INADL    | LMNA | 0.037018684  | -0.101551291 | 0.174179546  | 6.01E-01 | 6.78E-01 | 1.00E+00 |
| GPX1     | LMNA | 0.159311996  | 0.021739107  | 0.290963777  | 2.35E-02 | 4.32E-02 | 1.00E+00 |
| PSG11    | LMNA | 0.030159899  | -0.108342196 | 0.16751344   | 6.70E-01 | 7.39E-01 | 1.00E+00 |
| SLC39A1  | LMNA | 0.608001787  | 0.51301045   | 0.688281689  | 8.33E-22 | 5.61E-20 | 9.88E-18 |
| SNAPC3   | LMNA | -0.126869251 | -0.260360192 | 0.011381083  | 7.20E-02 | 1.15E-01 | 1.00E+00 |
| C4orf16  | LMNA | -0.031223337 | -0.168547827 | 0.107290128  | 6.59E-01 | 7.30E-01 | 1.00E+00 |
| GNA12    | LMNA | 0.255767486  | 0.122025064  | 0.380387404  | 2.39E-04 | 7.23E-04 | 1.00E+00 |
| LIMK1    | LMNA | 0.512691885  | 0.403176781  | 0.607729251  | 6.17E-15 | 1.26E-13 | 7.32E-11 |
| MECR     | LMNA | 0.017602789  | -0.120741624 | 0.155276455  | 8.04E-01 | 8.52E-01 | 1.00E+00 |
| CDC42EP1 | LMNA | 0.280339845  | 0.148017291  | 0.40280193   | 5.32E-05 | 1.83E-04 | 6.31E-01 |
| KIAA0101 | LMNA | 0.061743277  | -0.076963741 | 0.19810568   | 3.83E-01 | 4.70E-01 | 1.00E+00 |
| B4GALT5  | LMNA | 0.375906776  | 0.250874746  | 0.488602109  | 3.53E-08 | 2.17E-07 | 4.18E-04 |
| PIGC     | LMNA | 0.007695501  | -0.130494133 | 0.145591829  | 9.13E-01 | 9.38E-01 | 1.00E+00 |
| LRAT     | LMNA | 0.144547456  | 0.006628731  | 0.277069556  | 4.01E-02 | 6.91E-02 | 1.00E+00 |
| MMP19    | LMNA | 0.464935393  | 0.349304425  | 0.566618124  | 3.15E-12 | 4.07E-11 | 3.74E-08 |
| IL18R1   | LMNA | 0.361147019  | 0.234802498  | 0.475491575  | 1.29E-07 | 7.26E-07 | 1.53E-03 |
| VNN2     | LMNA | 0.129350371  | -0.008858821 | 0.26271017   | 6.65E-02 | 1.08E-01 | 1.00E+00 |
| AKAP11   | LMNA | -0.412970194 | -0.521301313 | -0.291540176 | 1.01E-09 | 8.34E-09 | 1.20E-05 |
| BCL10    | LMNA | 0.410162525  | 0.288444201  | 0.518835333  | 1.34E-09 | 1.08E-08 | 1.59E-05 |
| GLB1     | LMNA | 0.519274305  | 0.410662172  | 0.613356057  | 2.42E-15 | 5.28E-14 | 2.87E-11 |
| DTX3     | LMNA | -0.324948419 | -0.443121243 | -0.195675306 | 2.38E-06 | 1.06E-05 | 2.82E-02 |
| ACCN3    | LMNA | -0.36641907  | -0.480180377 | -0.240535438 | 8.18E-08 | 4.77E-07 | 9.70E-04 |
| MOCS2    | LMNA | -0.17831552  | -0.308765746 | -0.041280711 | 1.11E-02 | 2.23E-02 | 1.00E+00 |
| HCRT     | LMNA | -0.047323222 | -0.18417103  | 0.091324402  | 5.04E-01 | 5.88E-01 | 1.00E+00 |

|           |      |              |              |              |          |          |          |
|-----------|------|--------------|--------------|--------------|----------|----------|----------|
| CYBRD1    | LMNA | 0.435002605  | 0.315923621  | 0.540589811  | 9.85E-11 | 9.92E-10 | 1.17E-06 |
| REG3A     | LMNA | 0.018500627  | -0.119856491 | 0.156152809  | 7.94E-01 | 8.44E-01 | 1.00E+00 |
| SULT2B1   | LMNA | 0.081192042  | -0.057503495 | 0.216812865  | 2.51E-01 | 3.31E-01 | 1.00E+00 |
| Sep-06    | LMNA | 0.325416366  | 0.196178499  | 0.443541676  | 2.29E-06 | 1.03E-05 | 2.72E-02 |
| MMP10     | LMNA | 0.30215977   | 0.171252295  | 0.422583357  | 1.24E-05 | 4.83E-05 | 1.47E-01 |
| CDA       | LMNA | 0.09744604   | -0.041158648 | 0.232371064  | 1.68E-01 | 2.36E-01 | 1.00E+00 |
| ME1       | LMNA | 0.060829388  | -0.077875577 | 0.197224187  | 3.90E-01 | 4.77E-01 | 1.00E+00 |
| TCN2      | LMNA | 0.364684264  | 0.238648004  | 0.478638211  | 9.51E-08 | 5.46E-07 | 1.13E-03 |
| MGRN1     | LMNA | 0.062040532  | -0.076667104 | 0.19839235   | 3.80E-01 | 4.68E-01 | 1.00E+00 |
| ZFY       | LMNA | 0.029373657  | -0.109119832 | 0.166748482  | 6.78E-01 | 7.47E-01 | 1.00E+00 |
| CHRNA6    | LMNA | 0.034635818  | -0.103912039 | 0.171865044  | 6.25E-01 | 6.99E-01 | 1.00E+00 |
| IVL       | LMNA | 0.04760565   | -0.091043691 | 0.184444448  | 5.01E-01 | 5.85E-01 | 1.00E+00 |
| PLEKHA6   | LMNA | -0.173181634 | -0.303965459 | -0.035991105 | 1.37E-02 | 2.68E-02 | 1.00E+00 |
| CALM1     | LMNA | -0.167854859 | -0.298977788 | -0.030510873 | 1.69E-02 | 3.23E-02 | 1.00E+00 |
| PGDS      | LMNA | -0.016893559 | -0.154584043 | 0.121440662  | 8.11E-01 | 8.58E-01 | 1.00E+00 |
| C8orf33   | LMNA | -0.105324994 | -0.239887971 | 0.033208871  | 1.36E-01 | 1.97E-01 | 1.00E+00 |
| CYFIP2    | LMNA | -0.479263936 | -0.579006225 | -0.365388056 | 5.37E-13 | 7.80E-12 | 6.37E-09 |
| TEX11     | LMNA | -0.074494645 | -0.210382064 | 0.064216765  | 2.92E-01 | 3.76E-01 | 1.00E+00 |
| CKM       | LMNA | 0.051082808  | -0.087585851 | 0.187809371  | 4.70E-01 | 5.56E-01 | 1.00E+00 |
| MAP3K11   | LMNA | 0.485851189  | 0.37280506   | 0.584685989  | 2.31E-13 | 3.51E-12 | 2.74E-09 |
| CEBPE     | LMNA | 0.306763749  | 0.176173528  | 0.426742609  | 8.98E-06 | 3.58E-05 | 1.06E-01 |
| ACOT8     | LMNA | -0.025050355 | -0.162539258 | 0.113392783  | 7.23E-01 | 7.84E-01 | 1.00E+00 |
| ESR2      | LMNA | 0.382573285  | 0.258156735  | 0.494507079  | 1.92E-08 | 1.25E-07 | 2.28E-04 |
| OLIG2     | LMNA | -0.484869809 | -0.583840422 | -0.371699146 | 2.62E-13 | 3.96E-12 | 3.11E-09 |
| AGTR2     | LMNA | -0.06867378  | -0.204783335 | 0.070041246  | 3.31E-01 | 4.17E-01 | 1.00E+00 |
| DNAI2     | LMNA | -0.195387687 | -0.324680918 | -0.058926129 | 5.33E-03 | 1.16E-02 | 1.00E+00 |
| EPM2AIP1  | LMNA | -0.345302108 | -0.461360382 | -0.217625146 | 4.83E-07 | 2.45E-06 | 5.73E-03 |
| C14orf106 | LMNA | -0.078187212 | -0.2139291   | 0.060516998  | 2.69E-01 | 3.51E-01 | 1.00E+00 |
| PZP       | LMNA | 0.298806371  | 0.167671925  | 0.419550689  | 1.56E-05 | 5.97E-05 | 1.85E-01 |
| RPS9      | LMNA | -0.055549602 | -0.192127241 | 0.083138964  | 4.32E-01 | 5.18E-01 | 1.00E+00 |
| SIVA1     | LMNA | 0.167062193  | 0.029696076  | 0.29823497   | 1.75E-02 | 3.31E-02 | 1.00E+00 |
| HEATR2    | LMNA | 0.419572831  | 0.298830845  | 0.527093297  | 5.12E-10 | 4.47E-09 | 6.07E-06 |
| CD3E      | LMNA | 0.340262083  | 0.212177822  | 0.456853086  | 7.25E-07 | 3.56E-06 | 8.59E-03 |
| APRT      | LMNA | 0.409723201  | 0.287959994  | 0.51844931   | 1.40E-09 | 1.13E-08 | 1.66E-05 |
| AMIGO2    | LMNA | 0.235461436  | 0.100683213  | 0.361753394  | 7.43E-04 | 2.01E-03 | 1.00E+00 |

|           |      |              |              |              |          |          |          |
|-----------|------|--------------|--------------|--------------|----------|----------|----------|
| GPS2      | LMNA | -0.002245826 | -0.140253343 | 0.135847292  | 9.75E-01 | 9.80E-01 | 1.00E+00 |
| NOL14     | LMNA | 0.25405868   | 0.120224314  | 0.378823194  | 2.64E-04 | 7.91E-04 | 1.00E+00 |
| TRIM36    | LMNA | -0.109460964 | -0.243827441 | 0.029028695  | 1.21E-01 | 1.79E-01 | 1.00E+00 |
| RALBP1    | LMNA | 0.298393055  | 0.167230873  | 0.419176716  | 1.61E-05 | 6.13E-05 | 1.91E-01 |
| EVPL      | LMNA | -0.058801614 | -0.195267507 | 0.079897968  | 4.06E-01 | 4.93E-01 | 1.00E+00 |
| ITIH4     | LMNA | -0.247989587 | -0.373261888 | -0.113835778 | 3.73E-04 | 1.08E-03 | 1.00E+00 |
| ADARB2    | LMNA | -0.427693614 | -0.534203362 | -0.30781723  | 2.17E-10 | 2.03E-09 | 2.58E-06 |
| PIM2      | LMNA | 0.091935141  | -0.046708674 | 0.2271038    | 1.93E-01 | 2.66E-01 | 1.00E+00 |
| REGL      | LMNA | 0.007878008  | -0.130314718 | 0.145770474  | 9.11E-01 | 9.37E-01 | 1.00E+00 |
| GJA5      | LMNA | 0.222796188  | 0.087434428  | 0.350079704  | 1.44E-03 | 3.61E-03 | 1.00E+00 |
| SLC17A5   | LMNA | 0.217013652  | 0.08140135   | 0.344736702  | 1.92E-03 | 4.68E-03 | 1.00E+00 |
| PIPOX     | LMNA | 0.319265894  | 0.189570195  | 0.438011546  | 3.63E-06 | 1.56E-05 | 4.31E-02 |
| HGF       | LMNA | 0.337816995  | 0.209538003  | 0.454664284  | 8.80E-07 | 4.25E-06 | 1.04E-02 |
| EPHB4     | LMNA | 0.689735405  | 0.609743351  | 0.755818389  | 7.33E-30 | 2.02E-27 | 8.69E-26 |
| SOX18     | LMNA | 0.160051363  | 0.022497449  | 0.291658104  | 2.29E-02 | 4.21E-02 | 1.00E+00 |
| SERPINA1C | LMNA | 0.172992121  | 0.035795991  | 0.303788134  | 1.38E-02 | 2.70E-02 | 1.00E+00 |
| INSIG1    | LMNA | 0.245842377  | 0.111578206  | 0.371292172  | 4.21E-04 | 1.21E-03 | 1.00E+00 |
| WDR23     | LMNA | -0.030234102 | -0.167585626 | 0.108268796  | 6.69E-01 | 7.39E-01 | 1.00E+00 |
| SYNGR1    | LMNA | -0.296865951 | -0.417794624 | -0.165601747 | 1.79E-05 | 6.75E-05 | 2.12E-01 |
| TEX15     | LMNA | -0.167925578 | -0.299044051 | -0.030583575 | 1.69E-02 | 3.22E-02 | 1.00E+00 |
| REEP2     | LMNA | -0.138477964 | -0.271341719 | -0.000435285 | 4.94E-02 | 8.30E-02 | 1.00E+00 |
| CDK3      | LMNA | -0.027101293 | -0.164536702 | 0.11136637   | 7.02E-01 | 7.66E-01 | 1.00E+00 |
| HSPA12A   | LMNA | -0.35642235  | -0.471284072 | -0.229672249 | 1.93E-07 | 1.06E-06 | 2.29E-03 |
| REPIN1    | LMNA | -0.175759833 | -0.306376958 | -0.038646545 | 1.23E-02 | 2.44E-02 | 1.00E+00 |
| ARL8B     | LMNA | 0.021817704  | -0.116584444 | 0.159388633  | 7.58E-01 | 8.14E-01 | 1.00E+00 |
| PDE4A     | LMNA | 0.03269793   | -0.105830789 | 0.169981636  | 6.44E-01 | 7.17E-01 | 1.00E+00 |
| CAPZB     | LMNA | 0.317142023  | 0.187290952  | 0.436099801  | 4.25E-06 | 1.80E-05 | 5.04E-02 |
| SATB1     | LMNA | -0.5249303   | -0.618183315 | -0.417105766 | 1.06E-15 | 2.53E-14 | 1.26E-11 |
| PPM1D     | LMNA | -0.402638526 | -0.512218064 | -0.280160128 | 2.84E-09 | 2.16E-08 | 3.37E-05 |
| VPS45     | LMNA | -0.504876544 | -0.601036103 | -0.394308326 | 1.83E-14 | 3.39E-13 | 2.17E-10 |
| TP53BP2   | LMNA | -0.208823801 | -0.33715518  | -0.072873626 | 2.86E-03 | 6.65E-03 | 1.00E+00 |
| GIN2      | LMNA | -0.033032327 | -0.170306704 | 0.105499768  | 6.41E-01 | 7.14E-01 | 1.00E+00 |
| CYP11B1   | LMNA | 0.420307614  | 0.299643069  | 0.527737248  | 4.74E-10 | 4.16E-09 | 5.62E-06 |
| CACNA1G   | LMNA | -0.17321611  | -0.303997717 | -0.036026601 | 1.37E-02 | 2.68E-02 | 1.00E+00 |
| VGLL4     | LMNA | 0.261156226  | 0.127709521  | 0.385315494  | 1.74E-04 | 5.42E-04 | 1.00E+00 |

|          |      |              |              |              |          |          |          |
|----------|------|--------------|--------------|--------------|----------|----------|----------|
| XYLT1    | LMNA | -0.171454835 | -0.302349374 | -0.034213655 | 1.47E-02 | 2.84E-02 | 1.00E+00 |
| BRWD1    | LMNA | -0.43360937  | -0.539373369 | -0.314377045 | 1.15E-10 | 1.14E-09 | 1.36E-06 |
| ROS1     | LMNA | 0.05692044   | -0.081773127 | 0.193451315  | 4.21E-01 | 5.08E-01 | 1.00E+00 |
| BMP8B    | LMNA | 0.009483532  | -0.128736011 | 0.147341631  | 8.93E-01 | 9.23E-01 | 1.00E+00 |
| SLC5A4   | LMNA | -0.090119662 | -0.225366849 | 0.04853517   | 2.02E-01 | 2.76E-01 | 1.00E+00 |
| SLC6A3   | LMNA | -0.000712433 | -0.138749787 | 0.137352077  | 9.92E-01 | 9.93E-01 | 1.00E+00 |
| C16orf53 | LMNA | 0.136356973  | -0.001726528 | 0.269337899  | 5.30E-02 | 8.83E-02 | 1.00E+00 |
| APC2     | LMNA | -0.260302832 | -0.384535523 | -0.12680871  | 1.83E-04 | 5.67E-04 | 1.00E+00 |
| GOLPH3L  | LMNA | 0.019396751  | -0.118972828 | 0.157027274  | 7.84E-01 | 8.36E-01 | 1.00E+00 |
| ZBTB17   | LMNA | -0.085640585 | -0.221077834 | 0.053037465  | 2.26E-01 | 3.03E-01 | 1.00E+00 |
| C6orf54  | LMNA | -0.191822736 | -0.321363604 | -0.055234416 | 6.24E-03 | 1.33E-02 | 1.00E+00 |
| SLC19A2  | LMNA | 0.005289797  | -0.132858225 | 0.143236197  | 9.40E-01 | 9.56E-01 | 1.00E+00 |
| C6orf134 | LMNA | -0.545689928 | -0.635841087 | -0.440849458 | 4.53E-17 | 1.41E-15 | 5.38E-13 |
| C9       | LMNA | -0.073557812 | -0.209481584 | 0.065154818  | 2.98E-01 | 3.82E-01 | 1.00E+00 |
| ZBED5    | LMNA | -0.349427808 | -0.465045543 | -0.222090185 | 3.45E-07 | 1.80E-06 | 4.09E-03 |
| PVR      | LMNA | 0.505383858  | 0.394883376  | 0.601470982  | 1.71E-14 | 3.18E-13 | 2.03E-10 |
| ARTN     | LMNA | -0.036397201 | -0.173576039 | 0.102167156  | 6.07E-01 | 6.83E-01 | 1.00E+00 |
| LTA4H    | LMNA | 0.232463734  | 0.097543071  | 0.358993954  | 8.71E-04 | 2.32E-03 | 1.00E+00 |
| MAGEA4   | LMNA | 0.079219295  | -0.059482222 | 0.214919866  | 2.62E-01 | 3.44E-01 | 1.00E+00 |
| PDE3B    | LMNA | -0.37694874  | -0.489525727 | -0.252011976 | 3.21E-08 | 2.00E-07 | 3.81E-04 |
| GNRH2    | LMNA | -0.011341626 | -0.149159085 | 0.126908077  | 8.73E-01 | 9.06E-01 | 1.00E+00 |
| STEAP1   | LMNA | 0.443394606  | 0.325252669  | 0.547907597  | 3.88E-11 | 4.14E-10 | 4.60E-07 |
| FLJ10292 | LMNA | 0.079547846  | -0.05915275  | 0.215235207  | 2.60E-01 | 3.42E-01 | 1.00E+00 |
| RPL39L   | LMNA | 0.173877315  | 0.036707438  | 0.304616325  | 1.33E-02 | 2.62E-02 | 1.00E+00 |
| PGK1     | LMNA | 0.366308563  | 0.240415181  | 0.480082162  | 8.26E-08 | 4.81E-07 | 9.79E-04 |
| CCL13    | LMNA | 0.347242976  | 0.219724984  | 0.463094504  | 4.13E-07 | 2.12E-06 | 4.89E-03 |
| RLF      | LMNA | -0.264656455 | -0.38851272  | -0.131406535 | 1.41E-04 | 4.50E-04 | 1.00E+00 |
| MLXIP    | LMNA | 0.236335776  | 0.101599603  | 0.362557823  | 7.09E-04 | 1.93E-03 | 1.00E+00 |
| PLOD1    | LMNA | 0.739162816  | 0.669420982  | 0.79598934   | 3.56E-36 | 3.84E-33 | 4.22E-32 |
| MTFR1    | LMNA | 0.074771005  | -0.063939998 | 0.210647656  | 2.90E-01 | 3.74E-01 | 1.00E+00 |
| NPDC1    | LMNA | -0.170098816 | -0.301079768 | -0.032818469 | 1.55E-02 | 2.98E-02 | 1.00E+00 |
| C11orf16 | LMNA | 0.017786501  | -0.120560529 | 0.155455789  | 8.02E-01 | 8.50E-01 | 1.00E+00 |
| RRN3     | LMNA | -0.115720088 | -0.249780772 | 0.022693447  | 1.01E-01 | 1.53E-01 | 1.00E+00 |
| GPAA1    | LMNA | 0.297269288  | 0.166031961  | 0.418159716  | 1.74E-05 | 6.58E-05 | 2.06E-01 |
| C3orf14  | LMNA | -0.087756166 | -0.223104297 | 0.05091162   | 2.14E-01 | 2.90E-01 | 1.00E+00 |

|          |      |              |              |              |          |          |          |
|----------|------|--------------|--------------|--------------|----------|----------|----------|
| TEX264   | LMNA | 0.343905776  | 0.216115175  | 0.460112241  | 5.41E-07 | 2.71E-06 | 6.42E-03 |
| C22orf28 | LMNA | -0.110992277 | -0.245284877 | 0.027479785  | 1.16E-01 | 1.72E-01 | 1.00E+00 |
| RYR3     | LMNA | 0.084026197  | -0.054658841 | 0.219530664  | 2.34E-01 | 3.13E-01 | 1.00E+00 |
| VAMP2    | LMNA | -0.357226241 | -0.472000337 | -0.230544651 | 1.80E-07 | 9.91E-07 | 2.14E-03 |
| XPNPEP2  | LMNA | 0.315243125  | 0.185254323  | 0.434389649  | 4.88E-06 | 2.05E-05 | 5.79E-02 |
| PDE6A    | LMNA | -0.148862884 | -0.281136344 | -0.011038736 | 3.45E-02 | 6.05E-02 | 1.00E+00 |
| SUPV3L1  | LMNA | -0.212868695 | -0.340901707 | -0.07708291  | 2.35E-03 | 5.61E-03 | 1.00E+00 |
| FIBP     | LMNA | 0.109852336  | -0.028632888 | 0.244199989  | 1.20E-01 | 1.77E-01 | 1.00E+00 |
| SPIB     | LMNA | 0.032243727  | -0.106280357 | 0.169540058  | 6.49E-01 | 7.21E-01 | 1.00E+00 |
| TBCB     | LMNA | -0.126394158 | -0.25991003  | 0.011863853  | 7.31E-02 | 1.17E-01 | 1.00E+00 |
| DHCR24   | LMNA | 0.155212089  | 0.017536853  | 0.287111107  | 2.74E-02 | 4.94E-02 | 1.00E+00 |
| ADRA2C   | LMNA | -0.311300525 | -0.43083619  | -0.181029323 | 6.50E-06 | 2.66E-05 | 7.71E-02 |
| MEF2D    | LMNA | 0.162971699  | 0.025494279  | 0.294399187  | 2.05E-02 | 3.82E-02 | 1.00E+00 |
| MYO1B    | LMNA | 0.380069716  | 0.255420368  | 0.492290713  | 2.42E-08 | 1.54E-07 | 2.87E-04 |
| VAMP8    | LMNA | 0.211287427  | 0.0754368    | 0.339437563  | 2.54E-03 | 6.00E-03 | 1.00E+00 |
| ANKRA2   | LMNA | -0.305696764 | -0.425779143 | -0.175032438 | 9.68E-06 | 3.84E-05 | 1.15E-01 |
| PANX1    | LMNA | 0.342395704  | 0.214482895  | 0.458761914  | 6.11E-07 | 3.04E-06 | 7.25E-03 |
| RCBTB1   | LMNA | -0.361258624 | -0.475590901 | -0.234923768 | 1.28E-07 | 7.20E-07 | 1.52E-03 |
| FGL2     | LMNA | 0.234413314  | 0.099584982  | 0.36078883   | 7.85E-04 | 2.12E-03 | 1.00E+00 |
| CEP70    | LMNA | -0.392158969 | -0.502979686 | -0.268652247 | 7.84E-09 | 5.47E-08 | 9.30E-05 |
| WASL     | LMNA | 0.219659957  | 0.08416108   | 0.347182887  | 1.68E-03 | 4.16E-03 | 1.00E+00 |
| DCHS2    | LMNA | -0.094904864 | -0.229943215 | 0.04371893   | 1.79E-01 | 2.49E-01 | 1.00E+00 |
| RNF25    | LMNA | 0.118436139  | -0.0199409   | 0.25236098   | 9.32E-02 | 1.43E-01 | 1.00E+00 |
| CYBA     | LMNA | 0.24385418   | 0.109489053  | 0.369467317  | 4.70E-04 | 1.33E-03 | 1.00E+00 |
| ARHGAP11 | LMNA | 0.066279086  | -0.072434685 | 0.202477439  | 3.49E-01 | 4.35E-01 | 1.00E+00 |
| PLAU     | LMNA | 0.617500571  | 0.524129842  | 0.69620268   | 1.27E-22 | 1.06E-20 | 1.51E-18 |
| MPZL2    | LMNA | 0.404949078  | 0.282702153  | 0.514251553  | 2.26E-09 | 1.75E-08 | 2.68E-05 |
| MATK     | LMNA | -0.17276337  | -0.303574081 | -0.035560492 | 1.39E-02 | 2.72E-02 | 1.00E+00 |
| EHF      | LMNA | 0.160300584  | 0.022753101  | 0.291892112  | 2.27E-02 | 4.18E-02 | 1.00E+00 |
| CTNND2   | LMNA | -0.442277778 | -0.54693465  | -0.324009808 | 4.40E-11 | 4.66E-10 | 5.22E-07 |
| PTEN     | LMNA | 0.05180184   | -0.086870396 | 0.188504787  | 4.64E-01 | 5.50E-01 | 1.00E+00 |
| ANXA1    | LMNA | 0.647390831  | 0.559328687  | 0.721003611  | 2.22E-25 | 3.25E-23 | 2.63E-21 |
| AFF1     | LMNA | 0.325316264  | 0.196070852  | 0.443451743  | 2.31E-06 | 1.04E-05 | 2.74E-02 |
| ZNF189   | LMNA | -0.280367474 | -0.402827049 | -0.148046619 | 5.31E-05 | 1.83E-04 | 6.30E-01 |
| SUSD5    | LMNA | -0.282806004 | -0.40504344  | -0.150636085 | 4.54E-05 | 1.59E-04 | 5.39E-01 |

|           |      |              |              |              |          |          |          |
|-----------|------|--------------|--------------|--------------|----------|----------|----------|
| SLC28A3   | LMNA | 0.271469189  | 0.138612929  | 0.39472716   | 9.31E-05 | 3.06E-04 | 1.00E+00 |
| GUCY1A3   | LMNA | 0.095155513  | -0.043466477 | 0.230182761  | 1.78E-01 | 2.48E-01 | 1.00E+00 |
| RASSF7    | LMNA | 0.148937946  | 0.011115491  | 0.28120704   | 3.44E-02 | 6.03E-02 | 1.00E+00 |
| SETD2     | LMNA | -0.111009359 | -0.245301131 | 0.027462503  | 1.16E-01 | 1.72E-01 | 1.00E+00 |
| ROGDI     | LMNA | -0.350920945 | -0.466378256 | -0.223707448 | 3.05E-07 | 1.61E-06 | 3.62E-03 |
| C20orf195 | LMNA | 0.176427958  | 0.039335003  | 0.30700161   | 1.20E-02 | 2.39E-02 | 1.00E+00 |
| TICAM1    | LMNA | 0.427192807  | 0.307262422  | 0.533765321  | 2.29E-10 | 2.14E-09 | 2.72E-06 |
| PACSIN2   | LMNA | 0.241201901  | 0.106703946  | 0.367031429  | 5.44E-04 | 1.52E-03 | 1.00E+00 |
| SERPINB5  | LMNA | 0.090813722  | -0.047837008 | 0.226030989  | 1.99E-01 | 2.73E-01 | 1.00E+00 |
| PRKCDBP   | LMNA | 0.470380895  | 0.355408925  | 0.571331592  | 1.62E-12 | 2.18E-11 | 1.93E-08 |
| TFDP3     | LMNA | -0.04672552  | -0.183592257 | 0.091918401  | 5.09E-01 | 5.93E-01 | 1.00E+00 |
| PLCB2     | LMNA | 0.178183594  | 0.041144688  | 0.308642476  | 1.12E-02 | 2.24E-02 | 1.00E+00 |
| RFX5      | LMNA | -0.039462772 | -0.17655194  | 0.099128267  | 5.77E-01 | 6.56E-01 | 1.00E+00 |
| TXNDC15   | LMNA | 0.520673055  | 0.412254689  | 0.614550511  | 1.97E-15 | 4.43E-14 | 2.34E-11 |
| PTPN18    | LMNA | 0.389265619  | 0.265481181  | 0.500424551  | 1.03E-08 | 7.02E-08 | 1.22E-04 |
| HLTF      | LMNA | -0.342644231 | -0.458984188 | -0.214751487 | 5.99E-07 | 2.98E-06 | 7.10E-03 |
| PKP1      | LMNA | 0.163299399  | 0.025830716  | 0.294706637  | 2.02E-02 | 3.77E-02 | 1.00E+00 |
| NDUFA6    | LMNA | -0.102607902 | -0.237297553 | 0.035952369  | 1.46E-01 | 2.10E-01 | 1.00E+00 |
| KCNF1     | LMNA | 0.244666034  | 0.110341988  | 0.37021259   | 4.49E-04 | 1.28E-03 | 1.00E+00 |
| HMG20B    | LMNA | 0.338320862  | 0.210081847  | 0.455115453  | 8.45E-07 | 4.10E-06 | 1.00E-02 |
| SYNE2     | LMNA | -0.041700726 | -0.17872285  | 0.096908158  | 5.56E-01 | 6.37E-01 | 1.00E+00 |
| SLC22A4   | LMNA | 0.292936309  | 0.161412869  | 0.414235561  | 2.33E-05 | 8.63E-05 | 2.76E-01 |
| VCPIP1    | LMNA | 0.376765069  | 0.251811487  | 0.489362935  | 3.26E-08 | 2.03E-07 | 3.87E-04 |
| NETO2     | LMNA | 0.011572261  | -0.126681121 | 0.14938461   | 8.70E-01 | 9.04E-01 | 1.00E+00 |
| SQRDL     | LMNA | 0.469629697  | 0.354566236  | 0.570681772  | 1.78E-12 | 2.38E-11 | 2.11E-08 |
| BAI3      | LMNA | -0.604308975 | -0.685197094 | -0.508696187 | 1.70E-21 | 1.06E-19 | 2.02E-17 |
| GALK1     | LMNA | 0.307386629  | 0.176839833  | 0.427304932  | 8.59E-06 | 3.44E-05 | 1.02E-01 |
| SERPINA6  | LMNA | -0.095683948 | -0.230687734 | 0.042934181  | 1.76E-01 | 2.45E-01 | 1.00E+00 |
| ASCL3     | LMNA | -0.136486348 | -0.269460159 | 0.001594701  | 5.28E-02 | 8.80E-02 | 1.00E+00 |
| NOSIP     | LMNA | -0.089099926 | -0.224390844 | 0.049560687  | 2.07E-01 | 2.82E-01 | 1.00E+00 |
| HD        | LMNA | -0.005093695 | -0.143044109 | 0.133050866  | 9.43E-01 | 9.58E-01 | 1.00E+00 |
| TRIM23    | LMNA | -0.426737006 | -0.533366596 | -0.306757543 | 2.41E-10 | 2.24E-09 | 2.85E-06 |
| FBXL6     | LMNA | 0.20079302   | 0.064530792  | 0.329704712  | 4.17E-03 | 9.30E-03 | 1.00E+00 |
| FABP7     | LMNA | 0.143981013  | 0.006050272  | 0.276535396  | 4.09E-02 | 7.04E-02 | 1.00E+00 |
| ARL1      | LMNA | 0.267984992  | 0.134925646  | 0.391550354  | 1.15E-04 | 3.73E-04 | 1.00E+00 |

|          |      |              |              |              |          |          |          |
|----------|------|--------------|--------------|--------------|----------|----------|----------|
| MAGEC3   | LMNA | -0.027151945 | -0.164586019 | 0.111316308  | 7.01E-01 | 7.66E-01 | 1.00E+00 |
| CDK5RAP2 | LMNA | 0.073414603  | -0.065298192 | 0.209343911  | 2.99E-01 | 3.83E-01 | 1.00E+00 |
| KCTD15   | LMNA | -0.163242918 | -0.294653649 | -0.025772728 | 2.03E-02 | 3.78E-02 | 1.00E+00 |
| CD1D     | LMNA | 0.227706488  | 0.092565287  | 0.354610276  | 1.12E-03 | 2.90E-03 | 1.00E+00 |
| EIF3B    | LMNA | 0.315081528  | 0.185081058  | 0.434244075  | 4.94E-06 | 2.07E-05 | 5.86E-02 |
| KIAA0141 | LMNA | -0.007772474 | -0.145667174 | 0.130418465  | 9.13E-01 | 9.37E-01 | 1.00E+00 |
| BIK      | LMNA | -0.029802955 | -0.167166179 | 0.108695254  | 6.74E-01 | 7.43E-01 | 1.00E+00 |
| PAX4     | LMNA | -0.367551358 | -0.481186552 | -0.24176786  | 7.41E-08 | 4.36E-07 | 8.79E-04 |
| NANOG    | LMNA | -0.198833289 | -0.327884153 | -0.062497799 | 4.56E-03 | 1.01E-02 | 1.00E+00 |
| CEP135   | LMNA | -0.089310795 | -0.224592693 | 0.049348647  | 2.06E-01 | 2.81E-01 | 1.00E+00 |
| ALOX5    | LMNA | 0.372146191  | 0.246773201  | 0.485266548  | 4.94E-08 | 3.00E-07 | 5.86E-04 |
| TRIM22   | LMNA | 0.300866439  | 0.169871016  | 0.421414044  | 1.36E-05 | 5.24E-05 | 1.61E-01 |
| LYRM2    | LMNA | -0.214586951 | -0.342491989 | -0.078872464 | 2.16E-03 | 5.20E-03 | 1.00E+00 |
| GPR162   | LMNA | -0.452156516 | -0.555530911 | -0.33501753  | 1.43E-11 | 1.63E-10 | 1.69E-07 |
| RNASE6   | LMNA | 0.271182831  | 0.138309741  | 0.394466177  | 9.47E-05 | 3.11E-04 | 1.00E+00 |
| GJA1     | LMNA | 0.127303109  | -0.010940158 | 0.260771232  | 7.10E-02 | 1.14E-01 | 1.00E+00 |
| TAS2R10  | LMNA | -0.289617455 | -0.411226795 | -0.15787876  | 2.91E-05 | 1.06E-04 | 3.45E-01 |
| FASN     | LMNA | -0.161575584 | -0.293089037 | -0.024061287 | 2.16E-02 | 4.01E-02 | 1.00E+00 |
| MRPS14   | LMNA | 0.027818886  | -0.110657085 | 0.165235313  | 6.94E-01 | 7.60E-01 | 1.00E+00 |
| HMHB1    | LMNA | 0.043588169  | -0.095034692 | 0.180552714  | 5.38E-01 | 6.20E-01 | 1.00E+00 |
| GPR116   | LMNA | 0.127269912  | -0.010973897 | 0.260739783  | 7.11E-02 | 1.14E-01 | 1.00E+00 |
| TAF7     | LMNA | -0.105309506 | -0.23987321  | 0.033224515  | 1.36E-01 | 1.97E-01 | 1.00E+00 |
| GK2      | LMNA | 0.012573183  | -0.125695993 | 0.150363192  | 8.59E-01 | 8.96E-01 | 1.00E+00 |
| ZNF219   | LMNA | -0.085189664 | -0.220645756 | 0.053490412  | 2.28E-01 | 3.05E-01 | 1.00E+00 |
| AMBP     | LMNA | 0.069155506  | -0.069559579 | 0.205247016  | 3.28E-01 | 4.14E-01 | 1.00E+00 |
| CD33     | LMNA | 0.223845246  | 0.088530005  | 0.351048136  | 1.36E-03 | 3.45E-03 | 1.00E+00 |
| RAB3GAP1 | LMNA | 0.017724837  | -0.120621316 | 0.155395595  | 8.02E-01 | 8.51E-01 | 1.00E+00 |
| NXPH3    | LMNA | -0.283908378 | -0.406044921 | -0.151807288 | 4.23E-05 | 1.49E-04 | 5.02E-01 |
| KIAA0953 | LMNA | -0.062621442 | -0.198952507 | 0.07608733   | 3.76E-01 | 4.63E-01 | 1.00E+00 |
| CROCC    | LMNA | -0.102006635 | -0.236724059 | 0.036559197  | 1.49E-01 | 2.13E-01 | 1.00E+00 |
| CCBP2    | LMNA | -0.263459678 | -0.38741988  | -0.130142058 | 1.52E-04 | 4.79E-04 | 1.00E+00 |
| GPX7     | LMNA | 0.275420925  | 0.142799464  | 0.398326694  | 7.27E-05 | 2.45E-04 | 8.63E-01 |
| TGM2     | LMNA | 0.521009703  | 0.412638071  | 0.614837925  | 1.88E-15 | 4.26E-14 | 2.23E-11 |
| STAM     | LMNA | -0.241847132 | -0.367624176 | -0.107381296 | 5.25E-04 | 1.47E-03 | 1.00E+00 |
| BASP1    | LMNA | -0.417269895 | -0.525074242 | -0.296286328 | 6.50E-10 | 5.57E-09 | 7.71E-06 |



|          |      |              |              |              |          |          |          |
|----------|------|--------------|--------------|--------------|----------|----------|----------|
| ZNF202   | LMNA | -0.200247373 | -0.329197911 | -0.063964633 | 4.27E-03 | 9.51E-03 | 1.00E+00 |
| ACTL6A   | LMNA | -0.031053452 | -0.168382603 | 0.107458217  | 6.61E-01 | 7.31E-01 | 1.00E+00 |
| ARHGEF7  | LMNA | -0.469738883 | -0.570776231 | -0.354688708 | 1.76E-12 | 2.35E-11 | 2.08E-08 |
| SLC23A2  | LMNA | -0.129500255 | -0.26285208  | 0.008706396  | 6.62E-02 | 1.07E-01 | 1.00E+00 |
| TBK1     | LMNA | 0.043771211  | -0.094852953 | 0.180730121  | 5.36E-01 | 6.18E-01 | 1.00E+00 |
| CRYM     | LMNA | -0.313204619 | -0.43255281  | -0.183069204 | 5.66E-06 | 2.34E-05 | 6.72E-02 |
| PKD2     | LMNA | 0.437213424  | 0.318379067  | 0.542519186  | 7.73E-11 | 7.90E-10 | 9.17E-07 |
| STX2     | LMNA | 0.135294279  | -0.002809191 | 0.268333478  | 5.49E-02 | 9.10E-02 | 1.00E+00 |
| ACTL7B   | LMNA | 0.204992137  | 0.0688907    | 0.3336024    | 3.43E-03 | 7.82E-03 | 1.00E+00 |
| RPL29    | LMNA | 0.012763531  | -0.125508618 | 0.150549261  | 8.57E-01 | 8.95E-01 | 1.00E+00 |
| NR1H3    | LMNA | 0.182518364  | 0.045616761  | 0.31269055   | 9.33E-03 | 1.90E-02 | 1.00E+00 |
| MPPE1    | LMNA | -0.022071452 | -0.159636043 | 0.116334017  | 7.55E-01 | 8.11E-01 | 1.00E+00 |
| CLCN6    | LMNA | -0.319609719 | -0.43832093  | -0.189939304 | 3.54E-06 | 1.53E-05 | 4.20E-02 |
| C16orf59 | LMNA | -0.184666558 | -0.314694914 | -0.047835035 | 8.51E-03 | 1.76E-02 | 1.00E+00 |
| AADAC    | LMNA | 0.00570479   | -0.132450523 | 0.143642664  | 9.36E-01 | 9.53E-01 | 1.00E+00 |
| SQSTM1   | LMNA | 0.498618618  | 0.387221963  | 0.595667     | 4.29E-14 | 7.23E-13 | 5.09E-10 |
| TCP10    | LMNA | 0.123109042  | -0.015200293 | 0.256795715  | 8.09E-02 | 1.27E-01 | 1.00E+00 |
| BIN3     | LMNA | 0.373045264  | 0.247753382  | 0.486064307  | 4.56E-08 | 2.77E-07 | 5.41E-04 |
| DEFA4    | LMNA | 0.043073468  | -0.095545679 | 0.180053808  | 5.43E-01 | 6.24E-01 | 1.00E+00 |
| HPS6     | LMNA | 0.156186368  | 0.018535014  | 0.288027021  | 2.64E-02 | 4.78E-02 | 1.00E+00 |
| ZNF197   | LMNA | -0.154699343 | -0.286628981 | -0.01701165  | 2.79E-02 | 5.02E-02 | 1.00E+00 |
| MAN2A2   | LMNA | -0.125218114 | -0.258795451 | 0.013058624  | 7.58E-02 | 1.20E-01 | 1.00E+00 |
| PTOV1    | LMNA | -0.235442789 | -0.361736236 | -0.100663671 | 7.43E-04 | 2.01E-03 | 1.00E+00 |
| GABPB2   | LMNA | 0.225333856  | 0.090085186  | 0.352421871  | 1.26E-03 | 3.23E-03 | 1.00E+00 |
| KCND1    | LMNA | 0.087072659  | -0.051598581 | 0.22244971   | 2.18E-01 | 2.94E-01 | 1.00E+00 |
| RNF208   | LMNA | -0.26717721  | -0.390813417 | -0.134071307 | 1.21E-04 | 3.90E-04 | 1.00E+00 |
| PTPN11   | LMNA | -0.099021323 | -0.233875251 | 0.039570607  | 1.61E-01 | 2.28E-01 | 1.00E+00 |
| ZNF274   | LMNA | -0.04100618  | -0.178049253 | 0.097597314  | 5.62E-01 | 6.43E-01 | 1.00E+00 |
| C7orf26  | LMNA | 0.103581979  | -0.034969065 | 0.238226438  | 1.42E-01 | 2.06E-01 | 1.00E+00 |
| ATF3     | LMNA | 0.388323135  | 0.264448811  | 0.499591819  | 1.13E-08 | 7.60E-08 | 1.34E-04 |
| UCHL1    | LMNA | -0.309811807 | -0.429493446 | -0.17943522  | 7.23E-06 | 2.94E-05 | 8.57E-02 |
| APOL6    | LMNA | 0.335940353  | 0.207513171  | 0.452983388  | 1.02E-06 | 4.88E-06 | 1.21E-02 |
| PLK1     | LMNA | 0.042896743  | -0.095721113 | 0.17988249   | 5.44E-01 | 6.26E-01 | 1.00E+00 |
| NPHP1    | LMNA | 0.078270664  | -0.06043334  | 0.214009222  | 2.68E-01 | 3.50E-01 | 1.00E+00 |
| DAB1     | LMNA | -0.298954165 | -0.419684404 | -0.167829649 | 1.55E-05 | 5.92E-05 | 1.84E-01 |

|          |      |              |              |              |          |          |          |
|----------|------|--------------|--------------|--------------|----------|----------|----------|
| MLL      | LMNA | -0.266122532 | -0.389850998 | -0.132956138 | 1.29E-04 | 4.14E-04 | 1.00E+00 |
| ANKRD15  | LMNA | -0.201872974 | -0.330707563 | -0.065651603 | 3.96E-03 | 8.89E-03 | 1.00E+00 |
| C1orf218 | LMNA | 0.008370615  | -0.129830414 | 0.14625261   | 9.06E-01 | 9.32E-01 | 1.00E+00 |
| DDX47    | LMNA | -0.072338382 | -0.208309127 | 0.06637547   | 3.06E-01 | 3.91E-01 | 1.00E+00 |
| ATP8B2   | LMNA | 0.267822994  | 0.134754295  | 0.391402576  | 1.16E-04 | 3.76E-04 | 1.00E+00 |
| ANXA13   | LMNA | 0.263222662  | 0.129891685  | 0.387203406  | 1.54E-04 | 4.85E-04 | 1.00E+00 |
| RFTN1    | LMNA | 0.346380664  | 0.218791897  | 0.462324157  | 4.43E-07 | 2.26E-06 | 5.25E-03 |
| TAPBPL   | LMNA | 0.423847638  | 0.30355864   | 0.530837936  | 3.27E-10 | 2.95E-09 | 3.88E-06 |
| BTG1     | LMNA | 0.123576633  | -0.014725584 | 0.257239165  | 7.97E-02 | 1.25E-01 | 1.00E+00 |
| DPP4     | LMNA | 0.457366145  | 0.340835444  | 0.560055333  | 7.77E-12 | 9.33E-11 | 9.22E-08 |
| KLHL23   | LMNA | -0.639050622 | -0.714102384 | -0.54947519  | 1.40E-24 | 1.69E-22 | 1.66E-20 |
| APOC3    | LMNA | -0.031341591 | -0.168662831 | 0.10717312   | 6.58E-01 | 7.28E-01 | 1.00E+00 |
| NPPB     | LMNA | 0.067919231  | -0.070795571 | 0.204056929  | 3.37E-01 | 4.23E-01 | 1.00E+00 |
| ZNF148   | LMNA | -0.081070077 | -0.21669586  | 0.057625861  | 2.51E-01 | 3.32E-01 | 1.00E+00 |
| CNOT4    | LMNA | -0.035129162 | -0.172344359 | 0.103423402  | 6.20E-01 | 6.95E-01 | 1.00E+00 |
| HIST1H3I | LMNA | -0.037538758 | -0.174684498 | 0.101035837  | 5.96E-01 | 6.73E-01 | 1.00E+00 |
| IKZF1    | LMNA | 0.16243909   | 0.024947535  | 0.293899431  | 2.09E-02 | 3.89E-02 | 1.00E+00 |
| ZNF141   | LMNA | -0.259923957 | -0.384189189 | -0.126408856 | 1.87E-04 | 5.78E-04 | 1.00E+00 |
| PSMC2    | LMNA | 0.321944796  | 0.192447067  | 0.440421357  | 2.98E-06 | 1.30E-05 | 3.53E-02 |
| APEH     | LMNA | 0.267672706  | 0.134595338  | 0.391265475  | 1.18E-04 | 3.79E-04 | 1.00E+00 |
| GGA3     | LMNA | -0.245166967 | -0.370672359 | -0.110868366 | 4.37E-04 | 1.25E-03 | 1.00E+00 |
| KCNA2    | LMNA | -0.459854156 | -0.562213945 | -0.343617112 | 5.79E-12 | 7.11E-11 | 6.87E-08 |
| LPGAT1   | LMNA | 0.097115319  | -0.041491959 | 0.232055187  | 1.69E-01 | 2.37E-01 | 1.00E+00 |
| TMEM159  | LMNA | 0.26604846   | 0.13287783   | 0.389783396  | 1.30E-04 | 4.16E-04 | 1.00E+00 |
| PCYT1A   | LMNA | 0.413054785  | 0.291633492  | 0.521375581  | 1.00E-09 | 8.28E-09 | 1.19E-05 |
| BRMS1    | LMNA | 0.429311903  | 0.309610573  | 0.535618439  | 1.83E-10 | 1.74E-09 | 2.17E-06 |
| CHST1    | LMNA | -0.007638341 | -0.145535877 | 0.130550323  | 9.14E-01 | 9.38E-01 | 1.00E+00 |
| LGALS1   | LMNA | 0.707718154  | 0.631350893  | 0.770491237  | 5.26E-32 | 2.97E-29 | 6.23E-28 |
| THOC2    | LMNA | 0.126474261  | -0.01178246  | 0.259985934  | 7.29E-02 | 1.16E-01 | 1.00E+00 |
| TAF1B    | LMNA | -0.185477887 | -0.31545162  | -0.048673183 | 8.22E-03 | 1.71E-02 | 1.00E+00 |
| GPR173   | LMNA | 0.00136345   | -0.136713284 | 0.139388214  | 9.85E-01 | 9.88E-01 | 1.00E+00 |
| CASP10   | LMNA | 0.140814051  | 0.002817828  | 0.273547421  | 4.56E-02 | 7.74E-02 | 1.00E+00 |
| COL15A1  | LMNA | 0.531701912  | 0.424834613  | 0.62395349   | 3.89E-16 | 1.01E-14 | 4.61E-12 |
| ALK      | LMNA | 0.21547448   | 0.079797163  | 0.343313128  | 2.07E-03 | 5.00E-03 | 1.00E+00 |
| GAN      | LMNA | -0.144661176 | -0.277176785 | -0.006744875 | 4.00E-02 | 6.89E-02 | 1.00E+00 |

|           |      |              |              |              |          |          |          |
|-----------|------|--------------|--------------|--------------|----------|----------|----------|
| EXOC6B    | LMNA | 0.086296479  | -0.052378523 | 0.221706224  | 2.22E-01 | 2.99E-01 | 1.00E+00 |
| PCMT1     | LMNA | -0.171383462 | -0.302282561 | -0.034140207 | 1.47E-02 | 2.85E-02 | 1.00E+00 |
| HIST1H2AE | LMNA | -0.039156541 | -0.176254779 | 0.099431949  | 5.80E-01 | 6.59E-01 | 1.00E+00 |
| VAMP1     | LMNA | -0.296419068 | -0.417390071 | -0.165125145 | 1.84E-05 | 6.94E-05 | 2.18E-01 |
| HDAC5     | LMNA | -0.284103849 | -0.406222471 | -0.152015002 | 4.18E-05 | 1.47E-04 | 4.95E-01 |
| SRI       | LMNA | -0.086294484 | -0.221704312 | 0.052380528  | 2.22E-01 | 2.99E-01 | 1.00E+00 |
| HLA-E     | LMNA | 0.359241172  | 0.2327322    | 0.473794973  | 1.52E-07 | 8.43E-07 | 1.80E-03 |
| SLC25A32  | LMNA | 0.190165239  | 0.053519253  | 0.319820161  | 6.71E-03 | 1.42E-02 | 1.00E+00 |
| FLT3LG    | LMNA | 0.353522054  | 0.226526467  | 0.468698651  | 2.46E-07 | 1.32E-06 | 2.91E-03 |
| WDR1      | LMNA | 0.618765955  | 0.525613524  | 0.697256433  | 9.85E-23 | 8.41E-21 | 1.17E-18 |
| ATP1B1    | LMNA | -0.345564453 | -0.461594833 | -0.21790891  | 4.73E-07 | 2.40E-06 | 5.61E-03 |
| SGPL1     | LMNA | 0.043349277  | -0.095271869 | 0.180321162  | 5.40E-01 | 6.22E-01 | 1.00E+00 |
| AFG3L2    | LMNA | 0.225144688  | 0.089887521  | 0.352247331  | 1.28E-03 | 3.25E-03 | 1.00E+00 |
| C5orf15   | LMNA | 0.255978621  | 0.12224762   | 0.380580624  | 2.36E-04 | 7.15E-04 | 1.00E+00 |
| SWAP70    | LMNA | 0.572654638  | 0.471910803  | 0.658636751  | 5.37E-19 | 2.35E-17 | 6.37E-15 |
| UBXD1     | LMNA | 0.118151658  | -0.020229302 | 0.252090816  | 9.40E-02 | 1.44E-01 | 1.00E+00 |
| TRIM31    | LMNA | 0.11494723   | -0.023476306 | 0.249046221  | 1.03E-01 | 1.56E-01 | 1.00E+00 |
| LILRB4    | LMNA | 0.149772788  | 0.011969267  | 0.281993217  | 3.34E-02 | 5.89E-02 | 1.00E+00 |
| GSTA4     | LMNA | -0.639447282 | -0.714430936 | -0.549943258 | 1.28E-24 | 1.57E-22 | 1.52E-20 |
| ARNT      | LMNA | 0.277821942  | 0.145345463  | 0.400511872  | 6.25E-05 | 2.13E-04 | 7.41E-01 |
| CDKN1B    | LMNA | -0.486642685 | -0.585367794 | -0.373697228 | 2.09E-13 | 3.21E-12 | 2.48E-09 |
| SEMA3A    | LMNA | 0.375920602  | 0.250889835  | 0.488614367  | 3.52E-08 | 2.17E-07 | 4.18E-04 |
| FOXC1     | LMNA | 0.36184272   | 0.235558514  | 0.476110683  | 1.21E-07 | 6.87E-07 | 1.44E-03 |
| BTRC      | LMNA | -0.495606081 | -0.593079243 | -0.383815307 | 6.43E-14 | 1.05E-12 | 7.62E-10 |
| LSM14A    | LMNA | 0.120806697  | -0.017536773 | 0.25461142   | 8.68E-02 | 1.35E-01 | 1.00E+00 |
| IQCH      | LMNA | 0.06023047   | -0.078473024 | 0.196646381  | 3.94E-01 | 4.82E-01 | 1.00E+00 |
| STEAP3    | LMNA | 0.607151853  | 0.512017058  | 0.687571998  | 9.82E-22 | 6.49E-20 | 1.16E-17 |
| YEATS2    | LMNA | -0.144458945 | -0.276986094 | -0.006538336 | 4.02E-02 | 6.93E-02 | 1.00E+00 |
| CABP5     | LMNA | -0.001038636 | -0.139069697 | 0.137032012  | 9.88E-01 | 9.91E-01 | 1.00E+00 |
| TRIM3     | LMNA | -0.150930685 | -0.283083325 | -0.013153758 | 3.20E-02 | 5.68E-02 | 1.00E+00 |
| FGG       | LMNA | -0.020512133 | -0.158115395 | 0.11787265   | 7.72E-01 | 8.26E-01 | 1.00E+00 |
| ABCA1     | LMNA | 0.393358375  | 0.269967563  | 0.504038322  | 6.99E-09 | 4.94E-08 | 8.29E-05 |
| HNRPM     | LMNA | 0.077351389  | -0.061354785 | 0.213126531  | 2.74E-01 | 3.56E-01 | 1.00E+00 |
| PLSCR2    | LMNA | 0.223556098  | 0.088228003  | 0.350781238  | 1.38E-03 | 3.49E-03 | 1.00E+00 |
| JTB       | LMNA | -0.131351659 | -0.264604526 | 0.006823066  | 6.24E-02 | 1.02E-01 | 1.00E+00 |

|         |      |              |              |              |          |          |          |
|---------|------|--------------|--------------|--------------|----------|----------|----------|
| PQBP1   | LMNA | -0.205550437 | -0.334120292 | -0.06947077  | 3.34E-03 | 7.64E-03 | 1.00E+00 |
| CLEC2B  | LMNA | 0.455539051  | 0.338793999  | 0.558469248  | 9.63E-12 | 1.13E-10 | 1.14E-07 |
| EDC3    | LMNA | -0.029090597 | -0.166473044 | 0.109399752  | 6.81E-01 | 7.49E-01 | 1.00E+00 |
| REST    | LMNA | 0.388946013  | 0.265131062  | 0.500142186  | 1.06E-08 | 7.21E-08 | 1.26E-04 |
| THBS3   | LMNA | 0.537373017  | 0.431319395  | 0.628778182  | 1.65E-16 | 4.59E-15 | 1.95E-12 |
| EVI1    | LMNA | 0.25833225   | 0.12472948   | 0.382733805  | 2.06E-04 | 6.30E-04 | 1.00E+00 |
| MGAT5   | LMNA | -0.078572073 | -0.214298586 | 0.060131168  | 2.66E-01 | 3.48E-01 | 1.00E+00 |
| TSPAN8  | LMNA | -0.083619259 | -0.219140562 | 0.055067425  | 2.37E-01 | 3.16E-01 | 1.00E+00 |
| DYNLT1  | LMNA | -0.048097584 | -0.184920726 | 0.090554692  | 4.97E-01 | 5.81E-01 | 1.00E+00 |
| MUC1    | LMNA | 0.503094949  | 0.39228954   | 0.599508434  | 2.34E-14 | 4.18E-13 | 2.77E-10 |
| IGSF1   | LMNA | -0.077274619 | -0.213052807 | 0.061431725  | 2.74E-01 | 3.57E-01 | 1.00E+00 |
| TEAD3   | LMNA | 0.649600247  | 0.561943166  | 0.722829381  | 1.35E-25 | 2.10E-23 | 1.60E-21 |
| ATP13A3 | LMNA | 0.407845527  | 0.285891196  | 0.516798947  | 1.70E-09 | 1.35E-08 | 2.01E-05 |
| C3AR1   | LMNA | 0.216626071  | 0.080997332  | 0.344378286  | 1.96E-03 | 4.76E-03 | 1.00E+00 |
| STOML1  | LMNA | 0.110172671  | -0.028308892 | 0.244504887  | 1.19E-01 | 1.76E-01 | 1.00E+00 |
| EFNA4   | LMNA | 0.314147846  | 0.18408011   | 0.433402848  | 5.29E-06 | 2.20E-05 | 6.27E-02 |
| HAO1    | LMNA | 0.141094601  | 0.003104062  | 0.273812219  | 4.52E-02 | 7.68E-02 | 1.00E+00 |
| USP24   | LMNA | -0.218589864 | -0.346193927 | -0.083044871 | 1.78E-03 | 4.37E-03 | 1.00E+00 |
| TWF1    | LMNA | 0.082136825  | -0.056555462 | 0.217719093  | 2.45E-01 | 3.25E-01 | 1.00E+00 |
| MRPS17  | LMNA | 0.172810687  | 0.035609204  | 0.303618359  | 1.39E-02 | 2.71E-02 | 1.00E+00 |
| MYH9    | LMNA | 0.69112792   | 0.611412319  | 0.756956974  | 5.06E-30 | 1.54E-27 | 6.01E-26 |
| C9orf9  | LMNA | 0.031515209  | -0.107001323 | 0.168831672  | 6.56E-01 | 7.27E-01 | 1.00E+00 |
| LBP     | LMNA | 0.255176931  | 0.121402633  | 0.379846901  | 2.47E-04 | 7.46E-04 | 1.00E+00 |
| FSCN3   | LMNA | 0.128470827  | -0.009753151 | 0.261877296  | 6.84E-02 | 1.10E-01 | 1.00E+00 |
| BDKRB2  | LMNA | 0.510052923  | 0.400179917  | 0.605470722  | 8.94E-15 | 1.75E-13 | 1.06E-10 |
| HSD17B4 | LMNA | -0.250099302 | -0.37519611  | -0.11605528  | 3.31E-04 | 9.73E-04 | 1.00E+00 |
| SEC31B  | LMNA | -0.396234693 | -0.506575701 | -0.273123723 | 5.31E-09 | 3.85E-08 | 6.29E-05 |
| IDH2    | LMNA | -0.081881836 | -0.217474533 | 0.056811352  | 2.47E-01 | 3.27E-01 | 1.00E+00 |
| SFRS16  | LMNA | -0.01456491  | -0.152309662 | 0.123734884  | 8.37E-01 | 8.78E-01 | 1.00E+00 |
| AICDA   | LMNA | 0.263197669  | 0.129865285  | 0.387180579  | 1.54E-04 | 4.86E-04 | 1.00E+00 |
| RAP1GAP | LMNA | -0.360366715 | -0.474797045 | -0.233954725 | 1.38E-07 | 7.72E-07 | 1.64E-03 |
| C1orf56 | LMNA | -0.05388584  | -0.190519567 | 0.084795957  | 4.46E-01 | 5.33E-01 | 1.00E+00 |
| DCLK1   | LMNA | -0.255079558 | -0.379757773 | -0.121300015 | 2.49E-04 | 7.49E-04 | 1.00E+00 |
| MEF2A   | LMNA | 0.279295357  | 0.146908716  | 0.401852143  | 5.69E-05 | 1.95E-04 | 6.75E-01 |
| ASF1B   | LMNA | 0.180701361  | 0.043741537  | 0.310994296  | 1.01E-02 | 2.04E-02 | 1.00E+00 |

|          |      |              |              |              |          |          |          |
|----------|------|--------------|--------------|--------------|----------|----------|----------|
| HTN3     | LMNA | 0.112735467  | -0.025715754 | 0.24694323   | 1.10E-01 | 1.65E-01 | 1.00E+00 |
| ADAMTS9  | LMNA | 0.290574601  | 0.158897638  | 0.412094784  | 2.73E-05 | 9.97E-05 | 3.24E-01 |
| COPZ1    | LMNA | 0.073517193  | -0.065195485 | 0.209442536  | 2.98E-01 | 3.83E-01 | 1.00E+00 |
| SLC4A3   | LMNA | 0.309329734  | 0.178919169  | 0.429058529  | 7.48E-06 | 3.03E-05 | 8.88E-02 |
| TAF2     | LMNA | -0.196005167 | -0.325255182 | -0.059565944 | 5.18E-03 | 1.13E-02 | 1.00E+00 |
| KATNA1   | LMNA | 0.030458335  | -0.108046982 | 0.167803754  | 6.67E-01 | 7.37E-01 | 1.00E+00 |
| STIM1    | LMNA | 0.403557132  | 0.281170555  | 0.513026665  | 2.60E-09 | 1.98E-08 | 3.08E-05 |
| TBX2     | LMNA | 0.289832796  | 0.158107965  | 0.411422096  | 2.87E-05 | 1.04E-04 | 3.40E-01 |
| FOXD3    | LMNA | -0.04702322  | -0.183880542 | 0.091622557  | 5.06E-01 | 5.90E-01 | 1.00E+00 |
| RPS4X    | LMNA | 0.027057542  | -0.111409609 | 0.164494105  | 7.02E-01 | 7.66E-01 | 1.00E+00 |
| PODXL2   | LMNA | -0.490278656 | -0.588498072 | -0.377798355 | 1.30E-13 | 2.06E-12 | 1.54E-09 |
| C1orf176 | LMNA | -0.24368941  | -0.36931604  | -0.10931597  | 4.74E-04 | 1.34E-03 | 1.00E+00 |
| RPS3     | LMNA | -0.119415112 | -0.253290523 | 0.018948258  | 9.05E-02 | 1.40E-01 | 1.00E+00 |
| COL21A1  | LMNA | 0.280603053  | 0.1482967    | 0.403041231  | 5.23E-05 | 1.81E-04 | 6.21E-01 |
| RAI14    | LMNA | 0.498788783  | 0.387414482  | 0.595813112  | 4.20E-14 | 7.08E-13 | 4.98E-10 |
| LRFN3    | LMNA | 0.124536879  | -0.013750526 | 0.258149657  | 7.74E-02 | 1.22E-01 | 1.00E+00 |
| SRPK3    | LMNA | -0.275233729 | -0.398156268 | -0.142601039 | 7.36E-05 | 2.47E-04 | 8.73E-01 |
| FKBP14   | LMNA | 0.309374489  | 0.178967075  | 0.429098908  | 7.46E-06 | 3.02E-05 | 8.85E-02 |
| TNNI3    | LMNA | -0.119704058 | -0.253564833 | 0.018655225  | 8.97E-02 | 1.39E-01 | 1.00E+00 |
| CXorf9   | LMNA | 0.248855035  | 0.114746101  | 0.374055477  | 3.55E-04 | 1.04E-03 | 1.00E+00 |
| REC8     | LMNA | -0.305188935 | -0.425320486 | -0.174489461 | 1.00E-05 | 3.97E-05 | 1.19E-01 |
| HOXB3    | LMNA | 0.324469584  | 0.195160475  | 0.442690972  | 2.46E-06 | 1.10E-05 | 2.92E-02 |
| SGCB     | LMNA | 0.081821945  | -0.056871453 | 0.217417089  | 2.47E-01 | 3.27E-01 | 1.00E+00 |
| FRAT1    | LMNA | -0.102356899 | -0.237058156 | 0.036205705  | 1.47E-01 | 2.11E-01 | 1.00E+00 |
| CLP1     | LMNA | 0.233383827  | 0.098506598  | 0.359841152  | 8.30E-04 | 2.22E-03 | 1.00E+00 |
| MORN1    | LMNA | 0.128134955  | -0.010094611 | 0.261559193  | 6.92E-02 | 1.11E-01 | 1.00E+00 |
| DUOX2    | LMNA | 0.114373541  | -0.02405731  | 0.248500866  | 1.05E-01 | 1.59E-01 | 1.00E+00 |
| TSC22D3  | LMNA | 0.234640549  | 0.099823053  | 0.360997972  | 7.76E-04 | 2.10E-03 | 1.00E+00 |
| ARHGEF2  | LMNA | 0.050939999  | -0.087727933 | 0.187671236  | 4.72E-01 | 5.57E-01 | 1.00E+00 |
| CASP8    | LMNA | 0.539652997  | 0.433929593  | 0.630715893  | 1.16E-16 | 3.34E-15 | 1.38E-12 |
| PRKD3    | LMNA | -0.044512307 | -0.181448313 | 0.09411704   | 5.29E-01 | 6.12E-01 | 1.00E+00 |
| CFH      | LMNA | 0.379061331  | 0.25431878   | 0.491397596  | 2.65E-08 | 1.68E-07 | 3.14E-04 |
| NRIP1    | LMNA | 0.301175822  | 0.170201391  | 0.421693797  | 1.33E-05 | 5.14E-05 | 1.57E-01 |
| TRO      | LMNA | -0.424958241 | -0.531810117 | -0.3047879   | 2.91E-10 | 2.65E-09 | 3.45E-06 |
| BNIP2    | LMNA | 0.343271352  | 0.215429322  | 0.459544996  | 5.69E-07 | 2.84E-06 | 6.75E-03 |

|           |      |              |              |              |          |          |          |
|-----------|------|--------------|--------------|--------------|----------|----------|----------|
| DHX30     | LMNA | -0.064954391 | -0.201201217 | 0.073757999  | 3.58E-01 | 4.45E-01 | 1.00E+00 |
| TBC1D22B  | LMNA | -0.019319913 | -0.156952301 | 0.119048606  | 7.85E-01 | 8.37E-01 | 1.00E+00 |
| GPR52     | LMNA | 0.070304865  | -0.0684101   | 0.206353074  | 3.20E-01 | 4.06E-01 | 1.00E+00 |
| FGF20     | LMNA | -0.31087584  | -0.430453201 | -0.180574505 | 6.70E-06 | 2.74E-05 | 7.95E-02 |
| CASC3     | LMNA | -0.431908584 | -0.537887802 | -0.312489923 | 1.38E-10 | 1.34E-09 | 1.64E-06 |
| METRNL    | LMNA | -0.180602456 | -0.310901941 | -0.043639491 | 1.01E-02 | 2.05E-02 | 1.00E+00 |
| KRT3      | LMNA | -0.029935306 | -0.167294944 | 0.108564348  | 6.72E-01 | 7.42E-01 | 1.00E+00 |
| ARF1      | LMNA | 0.22936658   | 0.094301572  | 0.356140642  | 1.03E-03 | 2.68E-03 | 1.00E+00 |
| MOG       | LMNA | -0.253151858 | -0.377992816 | -0.119269057 | 2.78E-04 | 8.30E-04 | 1.00E+00 |
| ATP7A     | LMNA | 0.161983935  | 0.024480365  | 0.293472295  | 2.13E-02 | 3.95E-02 | 1.00E+00 |
| CCNG2     | LMNA | -0.355907313 | -0.470825095 | -0.229113425 | 2.01E-07 | 1.10E-06 | 2.39E-03 |
| PLCH2     | LMNA | -0.343488768 | -0.459739401 | -0.215664349 | 5.59E-07 | 2.80E-06 | 6.64E-03 |
| ITSN2     | LMNA | 0.146036243  | 0.00814954   | 0.2784731    | 3.81E-02 | 6.60E-02 | 1.00E+00 |
| GIP       | LMNA | 0.081345108  | -0.057349919 | 0.2169597    | 2.50E-01 | 3.30E-01 | 1.00E+00 |
| LOC89944  | LMNA | -0.182347856 | -0.312531409 | -0.045440749 | 9.39E-03 | 1.92E-02 | 1.00E+00 |
| PSPN      | LMNA | 0.210991839  | 0.075129173  | 0.3391638    | 2.58E-03 | 6.07E-03 | 1.00E+00 |
| HOXB13    | LMNA | -0.056959041 | -0.193488592 | 0.08173466   | 4.21E-01 | 5.08E-01 | 1.00E+00 |
| MTMR8     | LMNA | -0.109570488 | -0.243931701 | 0.028917934  | 1.21E-01 | 1.78E-01 | 1.00E+00 |
| UBXD8     | LMNA | 0.300544287  | 0.169527037  | 0.421122721  | 1.39E-05 | 5.35E-05 | 1.64E-01 |
| GYPE      | LMNA | -0.253248043 | -0.378080902 | -0.119370367 | 2.76E-04 | 8.26E-04 | 1.00E+00 |
| SPAM1     | LMNA | -0.053903089 | -0.190536238 | 0.084778782  | 4.46E-01 | 5.33E-01 | 1.00E+00 |
| PPP2R1B   | LMNA | 0.260657776  | 0.12718335   | 0.384859951  | 1.79E-04 | 5.58E-04 | 1.00E+00 |
| CNN3      | LMNA | 0.223937437  | 0.0886263    | 0.351133229  | 1.36E-03 | 3.43E-03 | 1.00E+00 |
| JAG1      | LMNA | 0.333736575  | 0.205136773  | 0.451008415  | 1.21E-06 | 5.71E-06 | 1.44E-02 |
| HIST1H2AL | LMNA | 0.04199309   | -0.096618024 | 0.179006357  | 5.53E-01 | 6.34E-01 | 1.00E+00 |
| CHGA      | LMNA | -0.417608743 | -0.525371397 | -0.296660614 | 6.27E-10 | 5.39E-09 | 7.44E-06 |
| CACNA1B   | LMNA | -0.221977212 | -0.349323482 | -0.086579365 | 1.50E-03 | 3.75E-03 | 1.00E+00 |
| PAPPA     | LMNA | 0.448154217  | 0.330553976  | 0.552050859  | 2.26E-11 | 2.49E-10 | 2.68E-07 |
| RAPGEFL1  | LMNA | -0.504262916 | -0.600510013 | -0.393612883 | 1.99E-14 | 3.65E-13 | 2.36E-10 |
| RHOA      | LMNA | 0.112958016  | -0.025490482 | 0.247154892  | 1.09E-01 | 1.64E-01 | 1.00E+00 |
| CYP4F8    | LMNA | 0.356593684  | 0.229858168  | 0.471436743  | 1.90E-07 | 1.04E-06 | 2.25E-03 |
| TRH       | LMNA | 0.126370682  | -0.011887707 | 0.259887784  | 7.31E-02 | 1.17E-01 | 1.00E+00 |
| DCTN3     | LMNA | -0.369398459 | -0.482827283 | -0.24377918  | 6.30E-08 | 3.76E-07 | 7.47E-04 |
| NT5C      | LMNA | 0.076111195  | -0.062597532 | 0.211935343  | 2.82E-01 | 3.64E-01 | 1.00E+00 |
| SLC1A5    | LMNA | 0.494304092  | 0.382343925  | 0.591960216  | 7.64E-14 | 1.24E-12 | 9.07E-10 |

|          |      |              |              |              |          |          |          |
|----------|------|--------------|--------------|--------------|----------|----------|----------|
| CALCA    | LMNA | 0.027332933  | -0.111137426 | 0.16476223   | 6.99E-01 | 7.64E-01 | 1.00E+00 |
| VPS41    | LMNA | -0.198581272 | -0.327649964 | -0.062236442 | 4.61E-03 | 1.02E-02 | 1.00E+00 |
| SYCP1    | LMNA | -0.074871591 | -0.210744318 | 0.063839258  | 2.90E-01 | 3.73E-01 | 1.00E+00 |
| KIAA0174 | LMNA | -0.082447909 | -0.218017431 | 0.056243254  | 2.43E-01 | 3.23E-01 | 1.00E+00 |
| CXCL11   | LMNA | 0.203602744  | 0.067447529  | 0.33231323   | 3.66E-03 | 8.27E-03 | 1.00E+00 |
| ZNF639   | LMNA | -0.235181424 | -0.361495732 | -0.100389782 | 7.54E-04 | 2.04E-03 | 1.00E+00 |
| CACNG4   | LMNA | -0.316084301 | -0.43514732  | -0.186156374 | 4.59E-06 | 1.94E-05 | 5.45E-02 |
| TNNC1    | LMNA | -0.065555894 | -0.201780768 | 0.073157183  | 3.54E-01 | 4.41E-01 | 1.00E+00 |
| GFI1B    | LMNA | -0.041360729 | -0.178393124 | 0.097245533  | 5.59E-01 | 6.39E-01 | 1.00E+00 |
| C11orf58 | LMNA | -0.060217066 | -0.196633448 | 0.078486394  | 3.95E-01 | 4.82E-01 | 1.00E+00 |
| PSCD1    | LMNA | -0.236034968 | -0.362281089 | -0.101284302 | 7.20E-04 | 1.96E-03 | 1.00E+00 |
| NUDT18   | LMNA | 0.149215957  | 0.011399785  | 0.281468865  | 3.41E-02 | 5.98E-02 | 1.00E+00 |
| CASD1    | LMNA | -0.31866327  | -0.43746922  | -0.188923345 | 3.80E-06 | 1.63E-05 | 4.51E-02 |
| LPPR2    | LMNA | 0.001659514  | -0.136422741 | 0.139678515  | 9.81E-01 | 9.85E-01 | 1.00E+00 |
| TTC35    | LMNA | 0.030450706  | -0.108054529 | 0.167796332  | 6.67E-01 | 7.37E-01 | 1.00E+00 |
| SMC4     | LMNA | 0.183673945  | 0.046809873  | 0.313768905  | 8.88E-03 | 1.83E-02 | 1.00E+00 |
| ZNF771   | LMNA | 0.007808774  | -0.13038278  | 0.145702706  | 9.12E-01 | 9.37E-01 | 1.00E+00 |
| TTBK2    | LMNA | -0.460344383 | -0.562639105 | -0.344165442 | 5.46E-12 | 6.74E-11 | 6.48E-08 |
| GJB3     | LMNA | 0.060195226  | -0.078508178 | 0.196612376  | 3.95E-01 | 4.82E-01 | 1.00E+00 |
| RGS19    | LMNA | 0.268882392  | 0.135875001  | 0.392368863  | 1.09E-04 | 3.54E-04 | 1.00E+00 |
| SFRS3    | LMNA | -0.237155583 | -0.36331191  | -0.102459047 | 6.78E-04 | 1.85E-03 | 1.00E+00 |
| SCRG1    | LMNA | -0.376587917 | -0.489205915 | -0.251618125 | 3.32E-08 | 2.06E-07 | 3.93E-04 |
| NRAS     | LMNA | 0.074936726  | -0.063774023 | 0.21080691   | 2.89E-01 | 3.73E-01 | 1.00E+00 |
| FBXW2    | LMNA | 0.308733299  | 0.178280794  | 0.428520359  | 7.81E-06 | 3.15E-05 | 9.26E-02 |
| SIX3     | LMNA | -0.101462177 | -0.236204669 | 0.037108603  | 1.51E-01 | 2.16E-01 | 1.00E+00 |
| DUSP26   | LMNA | -0.647737665 | -0.721290288 | -0.559738991 | 2.05E-25 | 3.04E-23 | 2.43E-21 |
| HDAC9    | LMNA | -0.123875246 | -0.257522331 | 0.014422394  | 7.90E-02 | 1.24E-01 | 1.00E+00 |
| ZDHHC24  | LMNA | 0.51165639   | 0.40200057   | 0.606843217  | 7.14E-15 | 1.43E-13 | 8.47E-11 |
| OGG1     | LMNA | -0.100577809 | -0.235360856 | 0.038000828  | 1.54E-01 | 2.20E-01 | 1.00E+00 |
| DNAJC3   | LMNA | 0.384406155  | 0.260161304  | 0.496128766  | 1.62E-08 | 1.07E-07 | 1.92E-04 |
| LITAF    | LMNA | 0.364858945  | 0.23883801   | 0.478793526  | 9.37E-08 | 5.38E-07 | 1.11E-03 |
| ZNF410   | LMNA | 0.026895358  | -0.111569894 | 0.16433619   | 7.04E-01 | 7.68E-01 | 1.00E+00 |
| APLP1    | LMNA | -0.124638948 | -0.258246423 | 0.013646868  | 7.72E-02 | 1.22E-01 | 1.00E+00 |
| AFP      | LMNA | 0.227939899  | 0.092809361  | 0.354825489  | 1.10E-03 | 2.87E-03 | 1.00E+00 |
| OR7A5    | LMNA | -0.129018396 | -0.262395834 | 0.009196402  | 6.73E-02 | 1.08E-01 | 1.00E+00 |

|          |      |              |              |              |          |          |          |
|----------|------|--------------|--------------|--------------|----------|----------|----------|
| ZW10     | LMNA | 0.195073465  | 0.058600584  | 0.324388651  | 5.40E-03 | 1.17E-02 | 1.00E+00 |
| DLX4     | LMNA | -0.143664558 | -0.276236942 | -0.005727144 | 4.14E-02 | 7.10E-02 | 1.00E+00 |
| TUBA1B   | LMNA | -0.087284853 | -0.222652939 | 0.051385329  | 2.17E-01 | 2.93E-01 | 1.00E+00 |
| MGC70863 | LMNA | 0.055603592  | -0.083085182 | 0.192179398  | 4.32E-01 | 5.18E-01 | 1.00E+00 |
| C12orf29 | LMNA | -0.328742293 | -0.446528404 | -0.1997569   | 1.78E-06 | 8.15E-06 | 2.11E-02 |
| CRY1     | LMNA | -0.067512702 | -0.203665501 | 0.071201914  | 3.40E-01 | 4.26E-01 | 1.00E+00 |
| OR1D2    | LMNA | -0.065173511 | -0.201412351 | 0.073539141  | 3.57E-01 | 4.44E-01 | 1.00E+00 |
| C1orf25  | LMNA | -0.225496438 | -0.352571873 | -0.090255079 | 1.25E-03 | 3.20E-03 | 1.00E+00 |
| PHOX2B   | LMNA | 0.039605898  | -0.098986323 | 0.176690818  | 5.76E-01 | 6.55E-01 | 1.00E+00 |
| CUZD1    | LMNA | -0.179395572 | -0.309774772 | -0.042394503 | 1.06E-02 | 2.14E-02 | 1.00E+00 |
| SCAND1   | LMNA | 0.134437229  | -0.003682108 | 0.267523215  | 5.65E-02 | 9.32E-02 | 1.00E+00 |
| MYT1     | LMNA | -0.508457851 | -0.604104851 | -0.398369658 | 1.12E-14 | 2.15E-13 | 1.32E-10 |
| VILL     | LMNA | -0.114605164 | -0.24872106  | 0.023822744  | 1.04E-01 | 1.58E-01 | 1.00E+00 |
| PPP3CC   | LMNA | 0.071265445  | -0.067449138 | 0.207277198  | 3.14E-01 | 3.99E-01 | 1.00E+00 |
| GOLGA1   | LMNA | 0.020462501  | -0.117921613 | 0.158066983  | 7.73E-01 | 8.26E-01 | 1.00E+00 |
| ZBTB43   | LMNA | 0.057069294  | -0.081624786 | 0.193595061  | 4.20E-01 | 5.07E-01 | 1.00E+00 |
| VAPA     | LMNA | -0.127625424 | -0.261076565 | 0.010612557  | 7.03E-02 | 1.13E-01 | 1.00E+00 |
| MEA1     | LMNA | 0.021068378  | -0.117323861 | 0.15865792   | 7.66E-01 | 8.21E-01 | 1.00E+00 |
| STAP1    | LMNA | 0.025171082  | -0.113273532 | 0.162656867  | 7.22E-01 | 7.84E-01 | 1.00E+00 |
| PIK3R3   | LMNA | -0.334131532 | -0.45136245  | -0.205562555 | 1.17E-06 | 5.57E-06 | 1.39E-02 |
| TGM5     | LMNA | 0.177481187  | 0.040420549  | 0.30798608   | 1.15E-02 | 2.30E-02 | 1.00E+00 |
| SLC34A1  | LMNA | -0.15099551  | -0.283144344 | -0.013220083 | 3.19E-02 | 5.67E-02 | 1.00E+00 |
| USPL1    | LMNA | -0.19434504  | -0.323711026 | -0.05784602  | 5.58E-03 | 1.20E-02 | 1.00E+00 |
| DLX6     | LMNA | -0.187015675 | -0.316885423 | -0.050262333 | 7.70E-03 | 1.61E-02 | 1.00E+00 |
| FBXO40   | LMNA | -0.198196575 | -0.32729245  | -0.061837525 | 4.69E-03 | 1.03E-02 | 1.00E+00 |
| NKG7     | LMNA | 0.245507622  | 0.111226369  | 0.370984987  | 4.29E-04 | 1.23E-03 | 1.00E+00 |
| BRF1     | LMNA | -0.108503065 | -0.242915445 | 0.029997264  | 1.24E-01 | 1.83E-01 | 1.00E+00 |
| CCL27    | LMNA | -0.04681553  | -0.183679423 | 0.091828955  | 5.08E-01 | 5.92E-01 | 1.00E+00 |
| EMP1     | LMNA | 0.607088542  | 0.51194307   | 0.687519127  | 9.94E-22 | 6.51E-20 | 1.18E-17 |
| ACTR6    | LMNA | -0.421667577 | -0.528928771 | -0.301146824 | 4.11E-10 | 3.64E-09 | 4.88E-06 |
| PFN2     | LMNA | -0.490911897 | -0.58904294  | -0.378513059 | 1.20E-13 | 1.90E-12 | 1.42E-09 |
| MYBPH    | LMNA | 0.356223455  | 0.229456434  | 0.471106833  | 1.96E-07 | 1.07E-06 | 2.32E-03 |
| CHCHD7   | LMNA | 0.250194894  | 0.116155877  | 0.375283724  | 3.29E-04 | 9.69E-04 | 1.00E+00 |
| TCEA2    | LMNA | -0.203842544 | -0.332535766 | -0.06769657  | 3.62E-03 | 8.19E-03 | 1.00E+00 |
| PPP1CC   | LMNA | -0.255584072 | -0.380219544 | -0.121831738 | 2.41E-04 | 7.30E-04 | 1.00E+00 |



|          |      |              |              |              |          |          |          |
|----------|------|--------------|--------------|--------------|----------|----------|----------|
| COG2     | LMNA | -0.428474899 | -0.534886614 | -0.308682922 | 2.00E-10 | 1.88E-09 | 2.37E-06 |
| FLJ20294 | LMNA | 0.030519955  | -0.107986025 | 0.167863693  | 6.66E-01 | 7.36E-01 | 1.00E+00 |
| TARS     | LMNA | 0.29686373   | 0.165599379  | 0.417792614  | 1.79E-05 | 6.75E-05 | 2.12E-01 |
| ARHGAP28 | LMNA | -0.07965969  | -0.215342547 | 0.059040586  | 2.60E-01 | 3.41E-01 | 1.00E+00 |
| TRAPPC2L | LMNA | -0.028754683 | -0.166146148 | 0.109731911  | 6.85E-01 | 7.52E-01 | 1.00E+00 |
| CCDC109B | LMNA | 0.544360557  | 0.439324588  | 0.634713168  | 5.59E-17 | 1.70E-15 | 6.62E-13 |
| LGTN     | LMNA | 0.316562133  | 0.186668883  | 0.435577641  | 4.44E-06 | 1.88E-05 | 5.26E-02 |
| KCNB2    | LMNA | -0.386336995 | -0.497836291 | -0.26227418  | 1.36E-08 | 9.07E-08 | 1.61E-04 |
| USP13    | LMNA | -0.068977498 | -0.205075683 | 0.069737573  | 3.29E-01 | 4.15E-01 | 1.00E+00 |
| RPS2     | LMNA | 0.197270707  | 0.060877612  | 0.326431852  | 4.89E-03 | 1.07E-02 | 1.00E+00 |
| C17orf75 | LMNA | -0.326244068 | -0.444285209 | -0.197068711 | 2.16E-06 | 9.71E-06 | 2.56E-02 |
| FBXW4    | LMNA | 0.004860412  | -0.133280017 | 0.142815586  | 9.45E-01 | 9.59E-01 | 1.00E+00 |
| SLC2A8   | LMNA | 0.084303832  | -0.054380057 | 0.219796787  | 2.33E-01 | 3.11E-01 | 1.00E+00 |
| WT1      | LMNA | 0.192831534  | 0.056278706  | 0.322302649  | 5.97E-03 | 1.28E-02 | 1.00E+00 |
| SNRPE    | LMNA | -0.075477012 | -0.211326064 | 0.063232854  | 2.86E-01 | 3.69E-01 | 1.00E+00 |
| LEPROT   | LMNA | 0.318368032  | 0.18860648   | 0.437203491  | 3.88E-06 | 1.66E-05 | 4.61E-02 |
| STK38L   | LMNA | 0.019070762  | -0.119294309 | 0.156709189  | 7.88E-01 | 8.39E-01 | 1.00E+00 |
| CUEDC2   | LMNA | -0.377739755 | -0.49022673  | -0.252875545 | 2.99E-08 | 1.87E-07 | 3.55E-04 |
| IL13RA2  | LMNA | 0.134357041  | -0.00376377  | 0.267447395  | 5.66E-02 | 9.34E-02 | 1.00E+00 |
| DDX42    | LMNA | 0.022030366  | -0.116374566 | 0.159595985  | 7.56E-01 | 8.12E-01 | 1.00E+00 |
| TXNRD2   | LMNA | 0.083654874  | -0.055031667 | 0.219174705  | 2.37E-01 | 3.15E-01 | 1.00E+00 |
| C4orf19  | LMNA | -0.039801882 | -0.176880976 | 0.09879195   | 5.74E-01 | 6.53E-01 | 1.00E+00 |
| TNFRSF4  | LMNA | 0.127613765  | -0.010624408 | 0.26106552   | 7.03E-02 | 1.13E-01 | 1.00E+00 |
| AOC3     | LMNA | 0.217479757  | 0.081887283  | 0.345167685  | 1.88E-03 | 4.58E-03 | 1.00E+00 |
| MTHFD2   | LMNA | -0.057409914 | -0.193923971 | 0.081285313  | 4.17E-01 | 5.05E-01 | 1.00E+00 |
| KSR1     | LMNA | 0.100905559  | -0.037670192 | 0.2356736    | 1.53E-01 | 2.19E-01 | 1.00E+00 |
| SS18L2   | LMNA | -0.299409068 | -0.42009594  | -0.168315159 | 1.50E-05 | 5.75E-05 | 1.78E-01 |
| OAS3     | LMNA | 0.277745665  | 0.145264553  | 0.400442473  | 6.28E-05 | 2.13E-04 | 7.45E-01 |
| SLC22A11 | LMNA | -0.025437589 | -0.162916478 | 0.113010268  | 7.19E-01 | 7.81E-01 | 1.00E+00 |
| LARGE    | LMNA | -0.365089696 | -0.478998685 | -0.239089021 | 9.18E-08 | 5.29E-07 | 1.09E-03 |
| LIMA1    | LMNA | 0.028582503  | -0.109902154 | 0.165978578  | 6.86E-01 | 7.53E-01 | 1.00E+00 |
| STARD3   | LMNA | 0.139381839  | 0.001356948  | 0.272195311  | 4.79E-02 | 8.08E-02 | 1.00E+00 |
| VPS39    | LMNA | -0.017608058 | -0.155281598 | 0.12073643   | 8.04E-01 | 8.52E-01 | 1.00E+00 |
| ZNF236   | LMNA | -0.243763958 | -0.369384484 | -0.109394278 | 4.72E-04 | 1.34E-03 | 1.00E+00 |
| C8orf32  | LMNA | -0.245416072 | -0.370900972 | -0.111130154 | 4.31E-04 | 1.23E-03 | 1.00E+00 |

|          |      |              |              |              |          |          |          |
|----------|------|--------------|--------------|--------------|----------|----------|----------|
| GABRB1   | LMNA | -0.29688481  | -0.417811696 | -0.165621862 | 1.78E-05 | 6.74E-05 | 2.11E-01 |
| ODAM     | LMNA | 0.07114407   | -0.067570576 | 0.207160442  | 3.14E-01 | 4.00E-01 | 1.00E+00 |
| MORF4L2  | LMNA | -0.049411046 | -0.186191986 | 0.089248742  | 4.85E-01 | 5.70E-01 | 1.00E+00 |
| FBLN1    | LMNA | 0.425289166  | 0.305154258  | 0.532099742  | 2.81E-10 | 2.57E-09 | 3.33E-06 |
| PRKAB2   | LMNA | -0.084548211 | -0.220031017 | 0.054134648  | 2.32E-01 | 3.10E-01 | 1.00E+00 |
| AFF4     | LMNA | 0.268133921  | 0.13508318   | 0.391686204  | 1.14E-04 | 3.70E-04 | 1.00E+00 |
| HSPB2    | LMNA | 0.107365649  | -0.031147011 | 0.241832228  | 1.28E-01 | 1.88E-01 | 1.00E+00 |
| ZNF76    | LMNA | -0.176207523 | -0.30679553  | -0.039107845 | 1.21E-02 | 2.41E-02 | 1.00E+00 |
| RAF1     | LMNA | -0.196076142 | -0.325321184 | -0.059639494 | 5.16E-03 | 1.12E-02 | 1.00E+00 |
| SUB1     | LMNA | -0.09912522  | -0.233974436 | 0.039465844  | 1.60E-01 | 2.27E-01 | 1.00E+00 |
| MRPS33   | LMNA | -0.039449702 | -0.176539257 | 0.099141229  | 5.77E-01 | 6.56E-01 | 1.00E+00 |
| ZIC1     | LMNA | 0.016143044  | -0.122180243 | 0.153851177  | 8.20E-01 | 8.64E-01 | 1.00E+00 |
| KLRK1    | LMNA | -0.336144463 | -0.453166248 | -0.207733344 | 1.00E-06 | 4.81E-06 | 1.19E-02 |
| LYST     | LMNA | 0.055101288  | -0.08358553  | 0.191694112  | 4.36E-01 | 5.22E-01 | 1.00E+00 |
| UBE2M    | LMNA | 0.09106418   | -0.047585036 | 0.226270619  | 1.97E-01 | 2.71E-01 | 1.00E+00 |
| RAG1AP1  | LMNA | 0.425368878  | 0.305242511  | 0.532169502  | 2.78E-10 | 2.55E-09 | 3.30E-06 |
| ZNF281   | LMNA | -0.099713373 | -0.234535863 | 0.038872732  | 1.58E-01 | 2.25E-01 | 1.00E+00 |
| P2RX5    | LMNA | -0.292821128 | -0.414131186 | -0.161290161 | 2.35E-05 | 8.69E-05 | 2.78E-01 |
| NCR3     | LMNA | 0.00522694   | -0.132919974 | 0.143174628  | 9.41E-01 | 9.56E-01 | 1.00E+00 |
| ST8SIA1  | LMNA | -0.159368515 | -0.291016859 | -0.021797071 | 2.35E-02 | 4.31E-02 | 1.00E+00 |
| HLA-DPA1 | LMNA | 0.209096019  | 0.073156755  | 0.337407445  | 2.82E-03 | 6.57E-03 | 1.00E+00 |
| FKBPL    | LMNA | -0.035079523 | -0.172296135 | 0.103472571  | 6.20E-01 | 6.95E-01 | 1.00E+00 |
| ANKRD46  | LMNA | -0.701969557 | -0.765807948 | -0.62443063  | 2.65E-31 | 1.05E-28 | 3.15E-27 |
| CD248    | LMNA | 0.533596861  | 0.427000225  | 0.6255664    | 2.92E-16 | 7.74E-15 | 3.47E-12 |
| SNX4     | LMNA | -0.271043881 | -0.394339533 | -0.138162633 | 9.55E-05 | 3.13E-04 | 1.00E+00 |
| CCR2     | LMNA | 0.418494342  | 0.297639007  | 0.526147903  | 5.72E-10 | 4.96E-09 | 6.79E-06 |
| ZYX      | LMNA | 0.641163295  | 0.551968842  | 0.715851926  | 8.83E-25 | 1.15E-22 | 1.05E-20 |
| SMOX     | LMNA | 0.194358281  | 0.057859735  | 0.323723345  | 5.58E-03 | 1.20E-02 | 1.00E+00 |
| ZSCAN5   | LMNA | -0.000860165 | -0.138894672 | 0.137207129  | 9.90E-01 | 9.92E-01 | 1.00E+00 |
| RIMS3    | LMNA | -0.525962815 | -0.619063784 | -0.418283232 | 9.12E-16 | 2.22E-14 | 1.08E-11 |
| NACAP1   | LMNA | -0.029347034 | -0.166722577 | 0.10914616   | 6.78E-01 | 7.47E-01 | 1.00E+00 |
| DRD2     | LMNA | -0.026644232 | -0.16409166  | 0.111818065  | 7.07E-01 | 7.70E-01 | 1.00E+00 |
| COPS2    | LMNA | 0.228824632  | 0.093734659  | 0.355641118  | 1.05E-03 | 2.75E-03 | 1.00E+00 |
| CEACAM4  | LMNA | 0.316060073  | 0.18613039   | 0.4351255    | 4.60E-06 | 1.94E-05 | 5.46E-02 |
| KRT76    | LMNA | -0.02509986  | -0.162587485 | 0.113343884  | 7.23E-01 | 7.84E-01 | 1.00E+00 |

|          |      |              |              |              |          |          |          |
|----------|------|--------------|--------------|--------------|----------|----------|----------|
| SOX3     | LMNA | -0.093562385 | -0.228659927 | 0.045070767  | 1.85E-01 | 2.57E-01 | 1.00E+00 |
| GATAD1   | LMNA | 0.248432183  | 0.114301295  | 0.373667758  | 3.64E-04 | 1.06E-03 | 1.00E+00 |
| AVIL     | LMNA | -0.122151817 | -0.255887737 | 0.016171893  | 8.33E-02 | 1.30E-01 | 1.00E+00 |
| LMOD1    | LMNA | 0.122221509  | -0.016101163 | 0.255953851  | 8.31E-02 | 1.30E-01 | 1.00E+00 |
| FCER1A   | LMNA | 0.146336877  | 0.008456719  | 0.278756453  | 3.77E-02 | 6.54E-02 | 1.00E+00 |
| TMEM112B | LMNA | 0.529546838  | 0.422373207  | 0.622118215  | 5.36E-16 | 1.37E-14 | 6.36E-12 |
| HIGD1A   | LMNA | -0.199337523 | -0.328352671 | -0.063020775 | 4.45E-03 | 9.87E-03 | 1.00E+00 |
| CALR     | LMNA | 0.55459741   | 0.451082518  | 0.643388809  | 1.09E-17 | 3.76E-16 | 1.30E-13 |
| ADRA1B   | LMNA | 0.124910965  | -0.013370599 | 0.258504296  | 7.65E-02 | 1.21E-01 | 1.00E+00 |
| SNRPD1   | LMNA | -0.232414991 | -0.358949067 | -0.097492034 | 8.73E-04 | 2.33E-03 | 1.00E+00 |
| LTB      | LMNA | 0.301392631  | 0.170432928  | 0.421889828  | 1.31E-05 | 5.08E-05 | 1.55E-01 |
| NCAPG2   | LMNA | 0.153328142  | 0.015607507  | 0.285339336  | 2.94E-02 | 5.25E-02 | 1.00E+00 |
| NEU3     | LMNA | -0.221411354 | -0.348800886 | -0.085988689 | 1.54E-03 | 3.84E-03 | 1.00E+00 |
| KCNMB1   | LMNA | 0.379413957  | 0.254703962  | 0.49170994   | 2.57E-08 | 1.63E-07 | 3.04E-04 |
| DES      | LMNA | 0.416595752  | 0.295541792  | 0.524482971  | 6.97E-10 | 5.94E-09 | 8.26E-06 |
| BZW1     | LMNA | 0.150194431  | 0.012400549  | 0.282390214  | 3.29E-02 | 5.81E-02 | 1.00E+00 |
| ITGAV    | LMNA | 0.198356933  | 0.062003806  | 0.327441482  | 4.66E-03 | 1.03E-02 | 1.00E+00 |
| ZNF221   | LMNA | -0.202843033 | -0.331608116 | -0.066658654 | 3.79E-03 | 8.54E-03 | 1.00E+00 |
| LENG4    | LMNA | 0.371169004  | 0.245708151  | 0.484399264  | 5.39E-08 | 3.25E-07 | 6.39E-04 |
| C20orf3  | LMNA | 0.071926029  | -0.066788142 | 0.20791257   | 3.09E-01 | 3.94E-01 | 1.00E+00 |
| GDAP1    | LMNA | -0.481796828 | -0.581191321 | -0.368238289 | 3.89E-13 | 5.75E-12 | 4.61E-09 |
| PIP5K1A  | LMNA | 0.115762602  | -0.022650377 | 0.249821175  | 1.01E-01 | 1.53E-01 | 1.00E+00 |
| PCNA     | LMNA | -0.000515822 | -0.138556956 | 0.137544973  | 9.94E-01 | 9.95E-01 | 1.00E+00 |
| C1orf34  | LMNA | 0.297815066  | 0.166614185  | 0.418653678  | 1.67E-05 | 6.36E-05 | 1.98E-01 |
| BEST1    | LMNA | -0.199621258 | -0.328616279 | -0.063315089 | 4.40E-03 | 9.76E-03 | 1.00E+00 |
| RBBP4    | LMNA | -0.223950584 | -0.351145363 | -0.088640032 | 1.36E-03 | 3.43E-03 | 1.00E+00 |
| MMACHC   | LMNA | 0.125389528  | -0.012884506 | 0.258957928  | 7.54E-02 | 1.20E-01 | 1.00E+00 |
| REV3L    | LMNA | -0.394323961 | -0.504890338 | -0.271026797 | 6.37E-09 | 4.53E-08 | 7.56E-05 |
| PHKA1    | LMNA | 0.176194612  | 0.03909454   | 0.30678346   | 1.21E-02 | 2.41E-02 | 1.00E+00 |
| PRKAR1A  | LMNA | 0.092497975  | -0.046142236 | 0.227642113  | 1.90E-01 | 2.63E-01 | 1.00E+00 |
| AVPI1    | LMNA | 0.035234727  | -0.103318836 | 0.172446913  | 6.19E-01 | 6.94E-01 | 1.00E+00 |
| HSD3B1   | LMNA | -0.05816708  | -0.194654996 | 0.080530583  | 4.11E-01 | 4.99E-01 | 1.00E+00 |
| ATG5     | LMNA | 0.00905013   | -0.129162243 | 0.146917575  | 8.98E-01 | 9.26E-01 | 1.00E+00 |
| SARM1    | LMNA | -0.230975459 | -0.357623147 | -0.095985076 | 9.42E-04 | 2.49E-03 | 1.00E+00 |
| RAD52    | LMNA | -0.189093977 | -0.318822246 | -0.052411149 | 7.03E-03 | 1.48E-02 | 1.00E+00 |

|           |      |              |              |              |          |          |          |
|-----------|------|--------------|--------------|--------------|----------|----------|----------|
| RGS7      | LMNA | -0.503809563 | -0.60012128  | -0.393099165 | 2.12E-14 | 3.85E-13 | 2.52E-10 |
| CD207     | LMNA | 0.105513998  | -0.033017953 | 0.240068091  | 1.35E-01 | 1.97E-01 | 1.00E+00 |
| HMP19     | LMNA | -0.56821121  | -0.654891156 | -0.466775036 | 1.15E-18 | 4.81E-17 | 1.36E-14 |
| TMEPAI    | LMNA | 0.609489468  | 0.514749844  | 0.689523524  | 6.23E-22 | 4.35E-20 | 7.39E-18 |
| MYCT1     | LMNA | 0.035356939  | -0.103197776 | 0.172565636  | 6.17E-01 | 6.93E-01 | 1.00E+00 |
| GM2A      | LMNA | 0.333872631  | 0.205283442  | 0.451130378  | 1.20E-06 | 5.66E-06 | 1.42E-02 |
| SCGN      | LMNA | -0.106141179 | -0.24066573  | 0.032384346  | 1.33E-01 | 1.94E-01 | 1.00E+00 |
| ETV4      | LMNA | 0.312994652  | 0.182844208  | 0.432363559  | 5.75E-06 | 2.38E-05 | 6.82E-02 |
| MPP1      | LMNA | 0.224300446  | 0.089005491  | 0.351468266  | 1.33E-03 | 3.38E-03 | 1.00E+00 |
| CD2AP     | LMNA | 0.493418164  | 0.38134306   | 0.591198568  | 8.60E-14 | 1.38E-12 | 1.02E-09 |
| CCL20     | LMNA | 0.347747201  | 0.220270702  | 0.463544873  | 3.96E-07 | 2.04E-06 | 4.70E-03 |
| CCDC86    | LMNA | 0.359157331  | 0.23264115   | 0.473720317  | 1.53E-07 | 8.48E-07 | 1.81E-03 |
| ZFP30     | LMNA | -0.360733456 | -0.47512349  | -0.234353152 | 1.34E-07 | 7.49E-07 | 1.58E-03 |
| MYH10     | LMNA | -0.284456488 | -0.406542756 | -0.152389757 | 4.08E-05 | 1.44E-04 | 4.84E-01 |
| CTBP1     | LMNA | -0.063093272 | -0.199407416 | 0.075616354  | 3.72E-01 | 4.60E-01 | 1.00E+00 |
| MAK10     | LMNA | -0.208305425 | -0.336674747 | -0.072334533 | 2.93E-03 | 6.80E-03 | 1.00E+00 |
| OR10J1    | LMNA | -0.128839339 | -0.262226278 | 0.009378471  | 6.76E-02 | 1.09E-01 | 1.00E+00 |
| TMEM9B    | LMNA | -0.109131726 | -0.243514007 | 0.029361629  | 1.22E-01 | 1.80E-01 | 1.00E+00 |
| DNAJA1    | LMNA | 0.067156505  | -0.071557911 | 0.203322498  | 3.42E-01 | 4.28E-01 | 1.00E+00 |
| LOR       | LMNA | -0.266740939 | -0.390415342 | -0.133609972 | 1.24E-04 | 4.00E-04 | 1.00E+00 |
| MAP6D1    | LMNA | -0.333662902 | -0.45094237  | -0.205057355 | 1.22E-06 | 5.74E-06 | 1.45E-02 |
| LRRC50    | LMNA | -0.06595398  | -0.202164272 | 0.072759497  | 3.51E-01 | 4.38E-01 | 1.00E+00 |
| PRKX      | LMNA | -0.376851455 | -0.489439502 | -0.251905782 | 3.24E-08 | 2.01E-07 | 3.84E-04 |
| ARMC7     | LMNA | -0.032698539 | -0.169982228 | 0.105830186  | 6.44E-01 | 7.17E-01 | 1.00E+00 |
| KIF5A     | LMNA | -0.454606514 | -0.557659431 | -0.337752482 | 1.07E-11 | 1.25E-10 | 1.27E-07 |
| ARG1      | LMNA | -0.057253019 | -0.193772473 | 0.081441684  | 4.18E-01 | 5.06E-01 | 1.00E+00 |
| PCTK1     | LMNA | 0.293051508  | 0.161535601  | 0.41433995   | 2.31E-05 | 8.57E-05 | 2.74E-01 |
| NSL1      | LMNA | -0.398845992 | -0.508877636 | -0.275991377 | 4.12E-09 | 3.04E-08 | 4.89E-05 |
| ASCC2     | LMNA | 0.32638708   | 0.197222545  | 0.444413662  | 2.13E-06 | 9.63E-06 | 2.53E-02 |
| KIF2C     | LMNA | -0.003386512 | -0.14137142  | 0.134727475  | 9.62E-01 | 9.72E-01 | 1.00E+00 |
| PSENN     | LMNA | 0.141604345  | 0.003624193  | 0.27429329   | 4.44E-02 | 7.56E-02 | 1.00E+00 |
| FCRL2     | LMNA | 0.045597761  | -0.093038902 | 0.182499958  | 5.19E-01 | 6.03E-01 | 1.00E+00 |
| RAB11FIP3 | LMNA | -0.046447023 | -0.183322549 | 0.092195138  | 5.12E-01 | 5.96E-01 | 1.00E+00 |
| NPR3      | LMNA | -0.085124445 | -0.220583258 | 0.053555919  | 2.28E-01 | 3.06E-01 | 1.00E+00 |
| CENTD3    | LMNA | 0.390289309  | 0.266602823  | 0.5013288    | 9.36E-09 | 6.42E-08 | 1.11E-04 |

|          |      |              |              |              |          |          |          |
|----------|------|--------------|--------------|--------------|----------|----------|----------|
| KBTBD11  | LMNA | -0.355118051 | -0.470121621 | -0.228257225 | 2.15E-07 | 1.16E-06 | 2.55E-03 |
| HBD      | LMNA | -0.04063178  | -0.177686094 | 0.097968752  | 5.66E-01 | 6.46E-01 | 1.00E+00 |
| PCK1     | LMNA | 0.0163041    | -0.122021546 | 0.154008459  | 8.18E-01 | 8.63E-01 | 1.00E+00 |
| IRAK3    | LMNA | 0.226312614  | 0.091108074  | 0.3533248    | 1.20E-03 | 3.08E-03 | 1.00E+00 |
| OLAH     | LMNA | -0.23435056  | -0.36073107  | -0.099519238 | 7.88E-04 | 2.12E-03 | 1.00E+00 |
| CNNM4    | LMNA | 0.185823742  | 0.049030529  | 0.31577414   | 8.10E-03 | 1.69E-02 | 1.00E+00 |
| MYO5A    | LMNA | -0.018072029 | -0.155734493 | 0.120279052  | 7.99E-01 | 8.48E-01 | 1.00E+00 |
| CYB561D2 | LMNA | 0.32065782   | 0.191064706  | 0.439263868  | 3.28E-06 | 1.42E-05 | 3.89E-02 |
| MEGF8    | LMNA | 0.08361247   | -0.05507424  | 0.219134054  | 2.37E-01 | 3.16E-01 | 1.00E+00 |
| SIPA1L3  | LMNA | 0.068757175  | -0.069957865 | 0.204863611  | 3.31E-01 | 4.17E-01 | 1.00E+00 |
| ADAM10   | LMNA | 0.476709505  | 0.362515747  | 0.576801096  | 7.40E-13 | 1.05E-11 | 8.78E-09 |
| ALPPL2   | LMNA | -0.196510977 | -0.325725521 | -0.060090134 | 5.06E-03 | 1.10E-02 | 1.00E+00 |
| OBFC2B   | LMNA | -0.210309202 | -0.338531484 | -0.074418833 | 2.66E-03 | 6.25E-03 | 1.00E+00 |
| GALC     | LMNA | 0.203622526  | 0.067468073  | 0.332331588  | 3.65E-03 | 8.27E-03 | 1.00E+00 |
| LIPA     | LMNA | -0.095456465 | -0.230470359 | 0.043163336  | 1.77E-01 | 2.47E-01 | 1.00E+00 |
| NAP1L4   | LMNA | 0.069518247  | -0.06919684  | 0.205596129  | 3.26E-01 | 4.11E-01 | 1.00E+00 |
| MRPS22   | LMNA | -0.081934844 | -0.217525374 | 0.056758159  | 2.46E-01 | 3.26E-01 | 1.00E+00 |
| GNG4     | LMNA | -0.528663218 | -0.621365425 | -0.421364442 | 6.12E-16 | 1.53E-14 | 7.26E-12 |
| TBKBP1   | LMNA | -0.238009515 | -0.364097209 | -0.103354479 | 6.47E-04 | 1.78E-03 | 1.00E+00 |
| PSG5     | LMNA | 0.09216786   | -0.046474475 | 0.227326391  | 1.92E-01 | 2.65E-01 | 1.00E+00 |
| CAMLG    | LMNA | -0.292783749 | -0.414097313 | -0.16125034  | 2.35E-05 | 8.71E-05 | 2.79E-01 |
| RSAD1    | LMNA | -0.192521036 | -0.322013648 | -0.055957252 | 6.05E-03 | 1.30E-02 | 1.00E+00 |
| SLC6A13  | LMNA | -0.30939012  | -0.429113011 | -0.178983807 | 7.45E-06 | 3.02E-05 | 8.84E-02 |
| AGPAT4   | LMNA | -0.27351374  | -0.396589962 | -0.140778368 | 8.20E-05 | 2.73E-04 | 9.72E-01 |
| ZNF167   | LMNA | -0.344712391 | -0.460833307 | -0.216987362 | 5.07E-07 | 2.56E-06 | 6.01E-03 |
| FAM53C   | LMNA | -0.04184206  | -0.178859906 | 0.096767904  | 5.54E-01 | 6.35E-01 | 1.00E+00 |
| VWF      | LMNA | 0.206569204  | 0.070529499  | 0.335065124  | 3.18E-03 | 7.33E-03 | 1.00E+00 |
| VTN      | LMNA | -0.137339313 | -0.270266115 | 0.000725441  | 5.13E-02 | 8.58E-02 | 1.00E+00 |
| BAD      | LMNA | -0.008156154 | -0.146042715 | 0.130041269  | 9.08E-01 | 9.34E-01 | 1.00E+00 |
| TPM1     | LMNA | 0.347967968  | 0.220509662  | 0.463742041  | 3.89E-07 | 2.01E-06 | 4.61E-03 |
| PYHIN1   | LMNA | 0.229805685  | 0.094760967  | 0.356545319  | 1.00E-03 | 2.63E-03 | 1.00E+00 |
| PDS5B    | LMNA | -0.215475174 | -0.34331377  | -0.079797886 | 2.07E-03 | 5.00E-03 | 1.00E+00 |
| CIDEC    | LMNA | -0.10040929  | -0.235200041 | 0.038170819  | 1.55E-01 | 2.21E-01 | 1.00E+00 |
| CRIM1    | LMNA | 0.390598301  | 0.266941447  | 0.501601691  | 9.09E-09 | 6.25E-08 | 1.08E-04 |
| DHTKD1   | LMNA | -0.344062327 | -0.4602522   | -0.216284437 | 5.34E-07 | 2.68E-06 | 6.34E-03 |

|           |      |              |              |              |          |          |          |
|-----------|------|--------------|--------------|--------------|----------|----------|----------|
| SH3GLB2   | LMNA | -0.249759178 | -0.374884351 | -0.115697365 | 3.37E-04 | 9.91E-04 | 1.00E+00 |
| SMPDL3A   | LMNA | 0.312726511  | 0.182556895  | 0.432121857  | 5.86E-06 | 2.42E-05 | 6.95E-02 |
| SFRS2IP   | LMNA | 0.255113288  | 0.121335562  | 0.379788647  | 2.48E-04 | 7.48E-04 | 1.00E+00 |
| FLNB      | LMNA | 0.394536838  | 0.27126036   | 0.505078149  | 6.25E-09 | 4.45E-08 | 7.41E-05 |
| NOC2L     | LMNA | 0.147834409  | 0.009987235  | 0.280167557  | 3.58E-02 | 6.25E-02 | 1.00E+00 |
| NRG2      | LMNA | -0.273854968 | -0.396900757 | -0.141139895 | 8.02E-05 | 2.67E-04 | 9.52E-01 |
| C14orf162 | LMNA | -0.314245659 | -0.433490985 | -0.184184957 | 5.25E-06 | 2.19E-05 | 6.23E-02 |
| HMG4L     | LMNA | -0.057327753 | -0.193844637 | 0.0813672    | 4.18E-01 | 5.05E-01 | 1.00E+00 |
| IL15      | LMNA | 0.428147316  | 0.308319924  | 0.534600152  | 2.07E-10 | 1.95E-09 | 2.45E-06 |
| GABARAPL  | LMNA | -0.138428193 | -0.271294711 | -0.000384541 | 4.94E-02 | 8.32E-02 | 1.00E+00 |
| SPTBN5    | LMNA | 0.19305614   | 0.056511254  | 0.32251169   | 5.91E-03 | 1.27E-02 | 1.00E+00 |
| C1orf77   | LMNA | -0.129123574 | -0.262495426 | 0.009089452  | 6.70E-02 | 1.08E-01 | 1.00E+00 |
| LAT2      | LMNA | 0.093308692  | -0.045326172 | 0.228417366  | 1.87E-01 | 2.58E-01 | 1.00E+00 |
| WDR78     | LMNA | 0.115720239  | -0.022693294 | 0.249780916  | 1.01E-01 | 1.53E-01 | 1.00E+00 |
| SLCO1A2   | LMNA | -0.542303764 | -0.632967302 | -0.436966513 | 7.70E-17 | 2.31E-15 | 9.13E-13 |
| LIG4      | LMNA | -0.213116418 | -0.341131025 | -0.077340858 | 2.33E-03 | 5.55E-03 | 1.00E+00 |
| GSDMDC1   | LMNA | 0.486249876  | 0.37325443   | 0.58502944   | 2.20E-13 | 3.34E-12 | 2.61E-09 |
| METT10D   | LMNA | -0.212361131 | -0.340431806 | -0.076554452 | 2.41E-03 | 5.73E-03 | 1.00E+00 |
| ECSIT     | LMNA | -0.304627385 | -0.424813241 | -0.173889138 | 1.04E-05 | 4.11E-05 | 1.24E-01 |
| BMP4      | LMNA | 0.027520836  | -0.110951701 | 0.164945164  | 6.97E-01 | 7.62E-01 | 1.00E+00 |
| VSIG4     | LMNA | 0.231199421  | 0.096219487  | 0.357829467  | 9.31E-04 | 2.46E-03 | 1.00E+00 |
| DIRAS2    | LMNA | -0.361920485 | -0.476179879 | -0.235643031 | 1.21E-07 | 6.83E-07 | 1.43E-03 |
| SLC12A9   | LMNA | 0.380462658  | 0.255849716  | 0.492638674  | 2.33E-08 | 1.49E-07 | 2.77E-04 |
| MC1R      | LMNA | 0.390902244  | 0.267274568  | 0.501870103  | 8.83E-09 | 6.09E-08 | 1.05E-04 |
| TXNL1     | LMNA | -0.045500253 | -0.1824055   | 0.093135767  | 5.20E-01 | 6.04E-01 | 1.00E+00 |
| GALNT7    | LMNA | 0.351607387  | 0.224451192  | 0.466990772  | 2.88E-07 | 1.52E-06 | 3.42E-03 |
| ISG20L2   | LMNA | 0.105883691  | -0.032644486 | 0.240420383  | 1.34E-01 | 1.95E-01 | 1.00E+00 |
| OBSCN     | LMNA | 0.017480728  | -0.12086194  | 0.155157298  | 8.05E-01 | 8.52E-01 | 1.00E+00 |
| GBA       | LMNA | 0.406770475  | 0.284707229  | 0.515853675  | 1.89E-09 | 1.48E-08 | 2.24E-05 |
| C6orf64   | LMNA | -0.135597182 | -0.2686198   | 0.002500629  | 5.43E-02 | 9.02E-02 | 1.00E+00 |
| ESD       | LMNA | 0.017771464  | -0.120575352 | 0.15544111   | 8.02E-01 | 8.50E-01 | 1.00E+00 |
| PNRC1     | LMNA | 0.00701877   | -0.131159318 | 0.144929341  | 9.21E-01 | 9.44E-01 | 1.00E+00 |
| PPIA      | LMNA | 0.164824677  | 0.027397075  | 0.296137307  | 1.91E-02 | 3.58E-02 | 1.00E+00 |
| VDAC1     | LMNA | 0.303829097  | 0.173035898  | 0.424092019  | 1.10E-05 | 4.33E-05 | 1.31E-01 |
| CLDN17    | LMNA | -0.087768437 | -0.223116048 | 0.050899285  | 2.14E-01 | 2.90E-01 | 1.00E+00 |

|          |      |              |              |              |          |          |          |
|----------|------|--------------|--------------|--------------|----------|----------|----------|
| TRIB1    | LMNA | 0.401896501  | 0.279344131  | 0.511564756  | 3.06E-09 | 2.31E-08 | 3.63E-05 |
| MED6     | LMNA | -0.069315288 | -0.2054008   | 0.069399802  | 3.27E-01 | 4.13E-01 | 1.00E+00 |
| TXNDC5   | LMNA | 0.68628488   | 0.605610853  | 0.752995358  | 1.81E-29 | 4.58E-27 | 2.15E-25 |
| CD46     | LMNA | 0.384159403  | 0.259891375  | 0.49591049   | 1.66E-08 | 1.09E-07 | 1.97E-04 |
| ICOSLG   | LMNA | 0.30902066   | 0.178588348  | 0.428779659  | 7.65E-06 | 3.09E-05 | 9.07E-02 |
| RGR      | LMNA | -0.338708702 | -0.455462689 | -0.210500511 | 8.20E-07 | 3.98E-06 | 9.72E-03 |
| DSG1     | LMNA | 0.159620328  | 0.022055333  | 0.291253344  | 2.33E-02 | 4.27E-02 | 1.00E+00 |
| CCK      | LMNA | -0.380311985 | -0.492505253 | -0.255685077 | 2.37E-08 | 1.51E-07 | 2.81E-04 |
| C17orf48 | LMNA | -0.18771384  | -0.317536181 | -0.050984044 | 7.47E-03 | 1.56E-02 | 1.00E+00 |
| C1orf69  | LMNA | -0.150945539 | -0.283097307 | -0.013168956 | 3.20E-02 | 5.68E-02 | 1.00E+00 |
| DEF6     | LMNA | 0.260718568  | 0.127247519  | 0.384915513  | 1.79E-04 | 5.56E-04 | 1.00E+00 |
| SIT1     | LMNA | 0.231917278  | 0.096970939  | 0.358490693  | 8.97E-04 | 2.38E-03 | 1.00E+00 |
| UTP14A   | LMNA | 0.379033704  | 0.254288604  | 0.491373123  | 2.66E-08 | 1.68E-07 | 3.15E-04 |
| RPH3AL   | LMNA | -0.12189182  | -0.255641075 | 0.01643575   | 8.40E-02 | 1.31E-01 | 1.00E+00 |
| NXF1     | LMNA | 0.053658197  | -0.085022614 | 0.190299541  | 4.48E-01 | 5.35E-01 | 1.00E+00 |
| C20orf46 | LMNA | -0.245406921 | -0.370892574 | -0.111120537 | 4.31E-04 | 1.23E-03 | 1.00E+00 |
| NHEJ1    | LMNA | 0.071757172  | -0.066957116 | 0.207750169  | 3.10E-01 | 3.95E-01 | 1.00E+00 |
| SLC24A2  | LMNA | -0.117675217 | -0.251638307 | 0.020712258  | 9.53E-02 | 1.46E-01 | 1.00E+00 |
| TUBB3    | LMNA | -0.090251321 | -0.225492842 | 0.048402744  | 2.01E-01 | 2.76E-01 | 1.00E+00 |
| SEC22B   | LMNA | 0.172397129  | 0.035183481  | 0.303231346  | 1.42E-02 | 2.75E-02 | 1.00E+00 |
| S100A6   | LMNA | 0.515555139  | 0.406431013  | 0.610178     | 4.12E-15 | 8.64E-14 | 4.88E-11 |
| CDKL2    | LMNA | -0.248152184 | -0.373410998 | -0.114006789 | 3.70E-04 | 1.07E-03 | 1.00E+00 |
| TINF2    | LMNA | 0.067784291  | -0.070930455 | 0.203927006  | 3.38E-01 | 4.24E-01 | 1.00E+00 |
| SLC7A10  | LMNA | -0.100888262 | -0.235657095 | 0.037687642  | 1.53E-01 | 2.19E-01 | 1.00E+00 |
| SPRR1A   | LMNA | -0.104960589 | -0.239540666 | 0.033576939  | 1.37E-01 | 1.99E-01 | 1.00E+00 |
| CYP4A11  | LMNA | -0.137292106 | -0.270221514 | 0.000773556  | 5.14E-02 | 8.59E-02 | 1.00E+00 |
| SCEL     | LMNA | -0.065142563 | -0.201382531 | 0.073570053  | 3.57E-01 | 4.44E-01 | 1.00E+00 |
| TES      | LMNA | 0.492307178  | 0.380088309  | 0.590243187  | 9.96E-14 | 1.59E-12 | 1.18E-09 |
| CCDC70   | LMNA | 0.241669698  | 0.107195018  | 0.367461186  | 5.30E-04 | 1.49E-03 | 1.00E+00 |
| SH3TC1   | LMNA | 0.33914117   | 0.210967405  | 0.455849838  | 7.92E-07 | 3.86E-06 | 9.40E-03 |
| RAB36    | LMNA | 0.383435452  | 0.259099534  | 0.495270004  | 1.78E-08 | 1.16E-07 | 2.11E-04 |
| GRIA3    | LMNA | -0.364632183 | -0.478591902 | -0.238591356 | 9.55E-08 | 5.48E-07 | 1.13E-03 |
| CRYGB    | LMNA | -0.237961963 | -0.364053484 | -0.10330461  | 6.49E-04 | 1.78E-03 | 1.00E+00 |
| BHLHB9   | LMNA | -0.262723553 | -0.386747511 | -0.129364506 | 1.58E-04 | 4.99E-04 | 1.00E+00 |
| CRISP2   | LMNA | 0.047832883  | -0.090817822 | 0.184664474  | 4.99E-01 | 5.84E-01 | 1.00E+00 |

|          |      |              |              |              |          |          |          |
|----------|------|--------------|--------------|--------------|----------|----------|----------|
| ILF3     | LMNA | -0.103781771 | -0.23841693  | 0.034767347  | 1.42E-01 | 2.05E-01 | 1.00E+00 |
| NTRK3    | LMNA | -0.430568711 | -0.536717015 | -0.31100392  | 1.60E-10 | 1.54E-09 | 1.89E-06 |
| B3GNT1   | LMNA | -0.306812119 | -0.426786279 | -0.176225266 | 8.95E-06 | 3.57E-05 | 1.06E-01 |
| ZNF444   | LMNA | -0.138592565 | -0.271449956 | -0.000552128 | 4.92E-02 | 8.28E-02 | 1.00E+00 |
| LARP6    | LMNA | 0.106224762  | -0.032299898 | 0.240745368  | 1.32E-01 | 1.94E-01 | 1.00E+00 |
| FMO1     | LMNA | 0.329871243  | 0.200972332  | 0.447541621  | 1.63E-06 | 7.55E-06 | 1.94E-02 |
| POLR3C   | LMNA | -0.00569503  | -0.143633106 | 0.132460111  | 9.36E-01 | 9.53E-01 | 1.00E+00 |
| FBN1     | LMNA | 0.646467783  | 0.55823693   | 0.720240539  | 2.73E-25 | 3.80E-23 | 3.23E-21 |
| SGCG     | LMNA | -0.222244578 | -0.349570379 | -0.08685849  | 1.48E-03 | 3.70E-03 | 1.00E+00 |
| JOSD1    | LMNA | 0.193773129  | 0.057253697  | 0.323178908  | 5.72E-03 | 1.23E-02 | 1.00E+00 |
| BEX4     | LMNA | -0.528447828 | -0.6211819   | -0.421118587 | 6.32E-16 | 1.58E-14 | 7.49E-12 |
| INHBB    | LMNA | 0.129372347  | -0.008836473 | 0.262730977  | 6.65E-02 | 1.08E-01 | 1.00E+00 |
| TBL2     | LMNA | 0.474210047  | 0.35970735   | 0.57464201   | 1.01E-12 | 1.40E-11 | 1.20E-08 |
| HYDIN    | LMNA | -0.125087169 | -0.258671327 | 0.01319163   | 7.61E-02 | 1.21E-01 | 1.00E+00 |
| RPS6KB2  | LMNA | 0.248984431  | 0.114882225  | 0.374174113  | 3.53E-04 | 1.03E-03 | 1.00E+00 |
| ADRM1    | LMNA | 0.561497231  | 0.459027894  | 0.649223506  | 3.53E-18 | 1.32E-16 | 4.19E-14 |
| DDEF1    | LMNA | 0.093951943  | -0.044678545 | 0.229032357  | 1.84E-01 | 2.55E-01 | 1.00E+00 |
| PEX6     | LMNA | 0.028195891  | -0.110284389 | 0.165602289  | 6.90E-01 | 7.57E-01 | 1.00E+00 |
| BAT3     | LMNA | 0.061725548  | -0.076981433 | 0.198088581  | 3.83E-01 | 4.70E-01 | 1.00E+00 |
| TXLNA    | LMNA | 0.471574882  | 0.356748717  | 0.572364182  | 1.40E-12 | 1.90E-11 | 1.66E-08 |
| RAB31    | LMNA | 0.22671058   | 0.091524065  | 0.353691866  | 1.18E-03 | 3.03E-03 | 1.00E+00 |
| SCGB2A1  | LMNA | -0.076251209 | -0.212069844 | 0.062457252  | 2.81E-01 | 3.64E-01 | 1.00E+00 |
| TMEM187  | LMNA | 0.063456924  | -0.075253318 | 0.199757986  | 3.70E-01 | 4.57E-01 | 1.00E+00 |
| AIP      | LMNA | -0.052971451 | -0.189635691 | 0.085706299  | 4.54E-01 | 5.40E-01 | 1.00E+00 |
| LGALS14  | LMNA | -0.090492843 | -0.225723958 | 0.0481598    | 2.00E-01 | 2.74E-01 | 1.00E+00 |
| SLC6A14  | LMNA | -0.157731049 | -0.289478672 | -0.020118119 | 2.50E-02 | 4.55E-02 | 1.00E+00 |
| DDX4     | LMNA | -0.206931552 | -0.335401113 | -0.070906135 | 3.13E-03 | 7.22E-03 | 1.00E+00 |
| CTNNA3   | LMNA | -0.383824026 | -0.495613794 | -0.259524527 | 1.71E-08 | 1.12E-07 | 2.03E-04 |
| PRRC1    | LMNA | 0.468619628  | 0.353433441  | 0.569807818  | 2.01E-12 | 2.67E-11 | 2.39E-08 |
| AP3B2    | LMNA | -0.440261697 | -0.545177585 | -0.321767249 | 5.51E-11 | 5.77E-10 | 6.54E-07 |
| TRGV7    | LMNA | 0.141212092  | 0.00322394   | 0.273923106  | 4.50E-02 | 7.65E-02 | 1.00E+00 |
| LAMA5    | LMNA | 0.546641895  | 0.441941793  | 0.636648556  | 3.90E-17 | 1.24E-15 | 4.63E-13 |
| TMEM184B | LMNA | 0.157183313  | 0.019556679  | 0.288963994  | 2.55E-02 | 4.63E-02 | 1.00E+00 |
| AKAP4    | LMNA | 0.019246453  | -0.119121051 | 0.156880623  | 7.86E-01 | 8.37E-01 | 1.00E+00 |
| ZNF292   | LMNA | -0.343441488 | -0.459697125 | -0.215613237 | 5.62E-07 | 2.81E-06 | 6.66E-03 |



|          |      |              |              |              |          |          |          |
|----------|------|--------------|--------------|--------------|----------|----------|----------|
| C21orf45 | LMNA | 0.005241493  | -0.132905678 | 0.143188883  | 9.41E-01 | 9.56E-01 | 1.00E+00 |
| ARNTL    | LMNA | 0.098094929  | -0.040504589 | 0.232990745  | 1.65E-01 | 2.33E-01 | 1.00E+00 |
| CTCF     | LMNA | -0.171613606 | -0.302497997 | -0.034377047 | 1.46E-02 | 2.83E-02 | 1.00E+00 |
| CCL2     | LMNA | 0.457681382  | 0.341187776  | 0.560328912  | 7.49E-12 | 9.03E-11 | 8.88E-08 |
| SNTB2    | LMNA | 0.499735223  | 0.388485423  | 0.596625648  | 3.69E-14 | 6.31E-13 | 4.38E-10 |
| KPNA1    | LMNA | -0.033890285 | -0.171140589 | 0.104650331  | 6.32E-01 | 7.06E-01 | 1.00E+00 |
| KIAA0746 | LMNA | 0.324336162  | 0.195017036  | 0.442571073  | 2.49E-06 | 1.11E-05 | 2.95E-02 |
| KRT81    | LMNA | -0.124420218 | -0.258039054 | 0.013869001  | 7.77E-02 | 1.23E-01 | 1.00E+00 |
| ALDH3B2  | LMNA | 0.093542524  | -0.045090762 | 0.228640938  | 1.85E-01 | 2.57E-01 | 1.00E+00 |
| TMEM41B  | LMNA | -0.131551634 | -0.264793759 | 0.006619584  | 6.20E-02 | 1.01E-01 | 1.00E+00 |
| M6PR     | LMNA | 0.309646085  | 0.179257809  | 0.429343941  | 7.32E-06 | 2.97E-05 | 8.68E-02 |
| S100A11  | LMNA | 0.614253551  | 0.520325257  | 0.69349716   | 2.43E-22 | 1.86E-20 | 2.89E-18 |
| LAMC1    | LMNA | 0.722356493  | 0.649027874  | 0.782386335  | 7.10E-34 | 4.95E-31 | 8.42E-30 |
| CCND3    | LMNA | 0.154735456  | 0.017048638  | 0.286662939  | 2.79E-02 | 5.01E-02 | 1.00E+00 |
| COASY    | LMNA | 0.111544526  | -0.026921028 | 0.245810334  | 1.14E-01 | 1.70E-01 | 1.00E+00 |
| EFHC2    | LMNA | 0.129236268  | -0.008974854 | 0.262602133  | 6.68E-02 | 1.08E-01 | 1.00E+00 |
| DOT1L    | LMNA | 0.003911194  | -0.134212274 | 0.141885584  | 9.56E-01 | 9.67E-01 | 1.00E+00 |
| CLTC     | LMNA | 0.020068469  | -0.118310307 | 0.157682614  | 7.77E-01 | 8.30E-01 | 1.00E+00 |
| CLASP2   | LMNA | -0.747408156 | -0.80264218  | -0.679464616 | 2.28E-37 | 3.37E-34 | 2.70E-33 |
| SRP9     | LMNA | -0.329366832 | -0.447088957 | -0.200429233 | 1.70E-06 | 7.81E-06 | 2.01E-02 |
| EIF2AK3  | LMNA | 0.205800978  | 0.06973111   | 0.334352674  | 3.30E-03 | 7.56E-03 | 1.00E+00 |
| GPR88    | LMNA | -0.173142823 | -0.303929145 | -0.035951146 | 1.37E-02 | 2.68E-02 | 1.00E+00 |
| COL13A1  | LMNA | 0.503250154  | 0.392465366  | 0.599641546  | 2.29E-14 | 4.12E-13 | 2.72E-10 |
| SMYD2    | LMNA | 0.224246561  | 0.088949202  | 0.351418536  | 1.34E-03 | 3.39E-03 | 1.00E+00 |
| TMPRSS2  | LMNA | 0.140343885  | 0.002338186  | 0.273103609  | 4.64E-02 | 7.85E-02 | 1.00E+00 |
| PBX3     | LMNA | 0.121499265  | -0.016834095 | 0.255268621  | 8.50E-02 | 1.32E-01 | 1.00E+00 |
| SIGLEC6  | LMNA | -0.306972448 | -0.426931028 | -0.176396763 | 8.85E-06 | 3.53E-05 | 1.05E-01 |
| PVRL2    | LMNA | 0.592045086  | 0.494402823  | 0.674932243  | 1.70E-20 | 9.27E-19 | 2.02E-16 |
| ALKBH4   | LMNA | 0.082945618  | -0.055743688 | 0.218494696  | 2.41E-01 | 3.20E-01 | 1.00E+00 |
| ZNF629   | LMNA | 0.060980282  | -0.077725038 | 0.197369747  | 3.89E-01 | 4.76E-01 | 1.00E+00 |
| NXT1     | LMNA | 0.191367626  | 0.054763391  | 0.320939879  | 6.37E-03 | 1.35E-02 | 1.00E+00 |
| CCDC93   | LMNA | -0.016526642 | -0.154225773 | 0.121802253  | 8.15E-01 | 8.61E-01 | 1.00E+00 |
| TROAP    | LMNA | -0.121293185 | -0.255073077 | 0.017043198  | 8.55E-02 | 1.33E-01 | 1.00E+00 |
| KCNA10   | LMNA | -0.052460699 | -0.189141886 | 0.08621469   | 4.58E-01 | 5.44E-01 | 1.00E+00 |
| FLJ10154 | LMNA | -0.259751513 | -0.384031544 | -0.126226877 | 1.89E-04 | 5.84E-04 | 1.00E+00 |

|          |      |              |              |              |          |          |          |
|----------|------|--------------|--------------|--------------|----------|----------|----------|
| ANGPT1   | LMNA | 0.301902476  | 0.170977463  | 0.422350767  | 1.26E-05 | 4.91E-05 | 1.50E-01 |
| MED23    | LMNA | -0.120664166 | -0.254476152 | 0.017681367  | 8.72E-02 | 1.35E-01 | 1.00E+00 |
| RAN      | LMNA | -0.077239155 | -0.213018749 | 0.061467268  | 2.75E-01 | 3.57E-01 | 1.00E+00 |
| LMTK2    | LMNA | -0.099151539 | -0.233999561 | 0.039439306  | 1.60E-01 | 2.27E-01 | 1.00E+00 |
| SEMA6A   | LMNA | -0.171986575 | -0.302847102 | -0.0347609   | 1.44E-02 | 2.79E-02 | 1.00E+00 |
| UFC1     | LMNA | -0.21755385  | -0.34523619  | -0.081964533 | 1.87E-03 | 4.57E-03 | 1.00E+00 |
| UBE1DC1  | LMNA | -0.016978667 | -0.15466714  | 0.121356784  | 8.10E-01 | 8.57E-01 | 1.00E+00 |
| GMEB2    | LMNA | 0.293870337  | 0.162408085  | 0.415081843  | 2.19E-05 | 8.13E-05 | 2.59E-01 |
| EEF1A1   | LMNA | -0.092514579 | -0.227657993 | 0.046125524  | 1.90E-01 | 2.63E-01 | 1.00E+00 |
| PSMD14   | LMNA | -0.028830897 | -0.166220319 | 0.109656551  | 6.84E-01 | 7.51E-01 | 1.00E+00 |
| FLJ10213 | LMNA | -0.090022417 | -0.225273786 | 0.048632979  | 2.03E-01 | 2.77E-01 | 1.00E+00 |
| CHAC1    | LMNA | 0.0994978    | -0.039090133 | 0.234330096  | 1.59E-01 | 2.26E-01 | 1.00E+00 |
| PDCD2    | LMNA | 0.050180521  | -0.088483446 | 0.186936525  | 4.78E-01 | 5.63E-01 | 1.00E+00 |
| MAST1    | LMNA | -0.611375255 | -0.691097001 | -0.516955825 | 4.30E-22 | 3.08E-20 | 5.10E-18 |
| EPHA1    | LMNA | 0.183382576  | 0.046509004  | 0.313497039  | 8.99E-03 | 1.84E-02 | 1.00E+00 |
| HMGGA2   | LMNA | 0.410286437  | 0.288580783  | 0.518944203  | 1.33E-09 | 1.07E-08 | 1.57E-05 |
| EIF4G1   | LMNA | 0.344875856  | 0.21716414   | 0.460979416  | 5.00E-07 | 2.53E-06 | 5.93E-03 |
| ING2     | LMNA | 0.022575221  | -0.115836789 | 0.16012718   | 7.50E-01 | 8.07E-01 | 1.00E+00 |
| C1orf109 | LMNA | -0.092236584 | -0.22739212  | 0.046405312  | 1.92E-01 | 2.64E-01 | 1.00E+00 |
| INTS3    | LMNA | 0.013327011  | -0.124953881 | 0.151100017  | 8.51E-01 | 8.89E-01 | 1.00E+00 |
| TRPM4    | LMNA | 0.503447208  | 0.392688612  | 0.599810542  | 2.23E-14 | 4.02E-13 | 2.64E-10 |
| LTB4R    | LMNA | 0.059057025  | -0.079643298 | 0.195514023  | 4.04E-01 | 4.91E-01 | 1.00E+00 |
| ISYNA1   | LMNA | 0.145799531  | 0.007907695  | 0.27824998   | 3.84E-02 | 6.65E-02 | 1.00E+00 |
| UBE2D1   | LMNA | -0.138866452 | -0.271708621 | -0.00083139  | 4.87E-02 | 8.21E-02 | 1.00E+00 |
| LSM7     | LMNA | -0.141020547 | -0.273742324 | -0.003028505 | 4.53E-02 | 7.69E-02 | 1.00E+00 |
| IDH3A    | LMNA | 0.08645997   | -0.052214254 | 0.221862841  | 2.21E-01 | 2.98E-01 | 1.00E+00 |
| FLJ21511 | LMNA | 0.095306321  | -0.043314576 | 0.23032688   | 1.77E-01 | 2.47E-01 | 1.00E+00 |
| CREB5    | LMNA | -0.070404077 | -0.206448532 | 0.068310861  | 3.19E-01 | 4.05E-01 | 1.00E+00 |
| LRRC47   | LMNA | -0.193139638 | -0.322589399 | -0.056597709 | 5.89E-03 | 1.26E-02 | 1.00E+00 |
| ANGPT2   | LMNA | 0.285511256  | 0.153510905  | 0.407500575  | 3.81E-05 | 1.35E-04 | 4.52E-01 |
| RANBP3   | LMNA | 0.023778418  | -0.114648933 | 0.16129993   | 7.37E-01 | 7.96E-01 | 1.00E+00 |
| DYRK1B   | LMNA | -0.055048323 | -0.191642938 | 0.083638285  | 4.36E-01 | 5.23E-01 | 1.00E+00 |
| HLA-DRB6 | LMNA | 0.234132213  | 0.099290499  | 0.360530093  | 7.97E-04 | 2.15E-03 | 1.00E+00 |
| ATP6V0A4 | LMNA | -0.312065756 | -0.431526182 | -0.18184899  | 6.15E-06 | 2.53E-05 | 7.29E-02 |
| COPS7B   | LMNA | -0.073424611 | -0.209353533 | 0.065288173  | 2.99E-01 | 3.83E-01 | 1.00E+00 |

|           |      |              |              |              |          |          |          |
|-----------|------|--------------|--------------|--------------|----------|----------|----------|
| TMSB4Y    | LMNA | -0.00415887  | -0.14212827  | 0.133969047  | 9.53E-01 | 9.65E-01 | 1.00E+00 |
| RBKS      | LMNA | 0.198039975  | 0.061675149  | 0.327146905  | 4.72E-03 | 1.04E-02 | 1.00E+00 |
| ITGA4     | LMNA | 0.564345291  | 0.462312318  | 0.651628905  | 2.20E-18 | 8.67E-17 | 2.61E-14 |
| RIN1      | LMNA | 0.620337624  | 0.527457117  | 0.698564774  | 7.16E-23 | 6.54E-21 | 8.50E-19 |
| DNAJC6    | LMNA | -0.453152873 | -0.556396694 | -0.336129533 | 1.27E-11 | 1.47E-10 | 1.51E-07 |
| SEC23A    | LMNA | 0.326246529  | 0.197071358  | 0.44428742   | 2.15E-06 | 9.71E-06 | 2.56E-02 |
| PHLDB1    | LMNA | 0.067475072  | -0.071239525 | 0.203629265  | 3.40E-01 | 4.26E-01 | 1.00E+00 |
| CLOCK     | LMNA | -0.0708253   | -0.206853787 | 0.067889491  | 3.17E-01 | 4.02E-01 | 1.00E+00 |
| LOC26010  | LMNA | 0.605906656  | 0.510562147  | 0.686531988  | 1.25E-21 | 7.88E-20 | 1.48E-17 |
| MLX       | LMNA | 0.097020384  | -0.041587632 | 0.231964507  | 1.70E-01 | 2.38E-01 | 1.00E+00 |
| TPD52     | LMNA | -0.006191256 | -0.144119076 | 0.131972543  | 9.30E-01 | 9.49E-01 | 1.00E+00 |
| PSMA4     | LMNA | 0.0995926    | -0.038994531 | 0.234420585  | 1.58E-01 | 2.25E-01 | 1.00E+00 |
| C1orf149  | LMNA | -0.098731794 | -0.233598837 | 0.039862534  | 1.62E-01 | 2.29E-01 | 1.00E+00 |
| C14orf135 | LMNA | -0.074699638 | -0.210579071 | 0.064011472  | 2.91E-01 | 3.74E-01 | 1.00E+00 |
| KIFC3     | LMNA | 0.379409951  | 0.254699586  | 0.491706392  | 2.57E-08 | 1.63E-07 | 3.05E-04 |
| ROCK1     | LMNA | 0.216925895  | 0.081309868  | 0.344655552  | 1.93E-03 | 4.70E-03 | 1.00E+00 |
| NCAPH     | LMNA | -0.085795671 | -0.221226426 | 0.05288167   | 2.25E-01 | 3.02E-01 | 1.00E+00 |
| TAGLN     | LMNA | 0.508254249  | 0.398138649  | 0.603930464  | 1.15E-14 | 2.20E-13 | 1.36E-10 |
| PTPRK     | LMNA | -0.215336511 | -0.343185492 | -0.0796534   | 2.09E-03 | 5.03E-03 | 1.00E+00 |
| CCDC19    | LMNA | 0.248686366  | 0.114568668  | 0.373900827  | 3.59E-04 | 1.05E-03 | 1.00E+00 |
| ZNF45     | LMNA | 0.057751746  | -0.080944601 | 0.19425402   | 4.14E-01 | 5.02E-01 | 1.00E+00 |
| ZNF329    | LMNA | -0.194472573 | -0.323829675 | -0.057978118 | 5.55E-03 | 1.20E-02 | 1.00E+00 |
| TK1       | LMNA | 0.233627255  | 0.098761559  | 0.360065259  | 8.19E-04 | 2.20E-03 | 1.00E+00 |
| TAX1BP1   | LMNA | 0.085926744  | -0.052749991 | 0.221352007  | 2.24E-01 | 3.01E-01 | 1.00E+00 |
| ZDHHC18   | LMNA | 0.541894265  | 0.436497204  | 0.632619598  | 8.20E-17 | 2.44E-15 | 9.73E-13 |
| C10orf88  | LMNA | -0.350329048 | -0.465850016 | -0.223066262 | 3.20E-07 | 1.68E-06 | 3.80E-03 |
| TMBIM4    | LMNA | 0.153837379  | 0.016128914  | 0.28581834   | 2.88E-02 | 5.16E-02 | 1.00E+00 |
| KLF1      | LMNA | -0.137996154 | -0.270886627 | 5.59E-05     | 5.02E-02 | 8.41E-02 | 1.00E+00 |
| NMUR1     | LMNA | 0.256229697  | 0.122512296  | 0.380810382  | 2.33E-04 | 7.05E-04 | 1.00E+00 |
| KIR2DS4   | LMNA | -0.079254863 | -0.214954006 | 0.059446555  | 2.62E-01 | 3.44E-01 | 1.00E+00 |
| SAP30L    | LMNA | 0.488259503  | 0.375520343  | 0.586760107  | 1.69E-13 | 2.63E-12 | 2.01E-09 |
| KDR       | LMNA | 0.252067913  | 0.118127542  | 0.376999983  | 2.96E-04 | 8.78E-04 | 1.00E+00 |
| KCNK2     | LMNA | -0.370946454 | -0.484201713 | -0.245465633 | 5.49E-08 | 3.31E-07 | 6.52E-04 |
| VEZF1     | LMNA | -0.392842483 | -0.503583019 | -0.269401758 | 7.34E-09 | 5.16E-08 | 8.71E-05 |
| GIT1      | LMNA | -0.172692418 | -0.303507686 | -0.035487451 | 1.40E-02 | 2.72E-02 | 1.00E+00 |

|          |      |              |              |              |          |          |          |
|----------|------|--------------|--------------|--------------|----------|----------|----------|
| RLN2     | LMNA | -0.17358521  | -0.304343052 | -0.036406644 | 1.35E-02 | 2.64E-02 | 1.00E+00 |
| ST3GAL2  | LMNA | 0.390632989  | 0.266979463  | 0.501632325  | 9.06E-09 | 6.23E-08 | 1.07E-04 |
| DNM3     | LMNA | -0.506904326 | -0.602774015 | -0.396607374 | 1.39E-14 | 2.61E-13 | 1.64E-10 |
| C7orf10  | LMNA | 0.277709569  | 0.145226265  | 0.400409632  | 6.29E-05 | 2.14E-04 | 7.47E-01 |
| MMP28    | LMNA | -0.162872969 | -0.294306553 | -0.025392923 | 2.06E-02 | 3.83E-02 | 1.00E+00 |
| ZNF394   | LMNA | 0.412691775  | 0.291233053  | 0.521056857  | 1.04E-09 | 8.56E-09 | 1.23E-05 |
| HPD      | LMNA | 0.380755209  | 0.256169404  | 0.492897713  | 2.27E-08 | 1.46E-07 | 2.69E-04 |
| MOXD1    | LMNA | 0.483084654  | 0.369688283  | 0.582301763  | 3.30E-13 | 4.91E-12 | 3.91E-09 |
| PDGFRL   | LMNA | 0.284718881  | 0.152668632  | 0.406781057  | 4.01E-05 | 1.42E-04 | 4.76E-01 |
| ODF2     | LMNA | 0.2163461    | 0.080705514  | 0.344119358  | 1.98E-03 | 4.82E-03 | 1.00E+00 |
| TREX2    | LMNA | 0.170179631  | 0.032901603  | 0.301155446  | 1.55E-02 | 2.97E-02 | 1.00E+00 |
| MFAP4    | LMNA | 0.347833429  | 0.220364035  | 0.463621885  | 3.93E-07 | 2.03E-06 | 4.66E-03 |
| SMCR7L   | LMNA | -0.099015159 | -0.233869366 | 0.039576823  | 1.61E-01 | 2.28E-01 | 1.00E+00 |
| EPB41    | LMNA | -0.398216162 | -0.508322567 | -0.275299516 | 4.38E-09 | 3.22E-08 | 5.20E-05 |
| GZMH     | LMNA | 0.267301593  | 0.134202845  | 0.390926901  | 1.20E-04 | 3.87E-04 | 1.00E+00 |
| CNNM1    | LMNA | -0.375342946 | -0.488102213 | -0.250259509 | 3.71E-08 | 2.28E-07 | 4.40E-04 |
| PHF17    | LMNA | -0.224001801 | -0.351192635 | -0.08869353  | 1.35E-03 | 3.43E-03 | 1.00E+00 |
| CBLN1    | LMNA | -0.473113679 | -0.573694502 | -0.358476122 | 1.16E-12 | 1.59E-11 | 1.37E-08 |
| NUP98    | LMNA | 0.401070611  | 0.278436117  | 0.510837461  | 3.32E-09 | 2.49E-08 | 3.93E-05 |
| PRKRIR   | LMNA | -0.417056384 | -0.52488699  | -0.296050507 | 6.64E-10 | 5.69E-09 | 7.88E-06 |
| RMI1     | LMNA | -0.317351629 | -0.43628852  | -0.18751583  | 4.19E-06 | 1.78E-05 | 4.96E-02 |
| MED4     | LMNA | 0.055602316  | -0.083086452 | 0.192178166  | 4.32E-01 | 5.18E-01 | 1.00E+00 |
| TRABD    | LMNA | 0.335290081  | 0.206811805  | 0.452400749  | 1.07E-06 | 5.11E-06 | 1.27E-02 |
| C11orf21 | LMNA | 0.055041695  | -0.083644886 | 0.191636534  | 4.37E-01 | 5.23E-01 | 1.00E+00 |
| SHCBP1   | LMNA | 0.273777875  | 0.141058213  | 0.396830543  | 8.06E-05 | 2.69E-04 | 9.56E-01 |
| ECM2     | LMNA | 0.165294815  | 0.027880012  | 0.296578165  | 1.87E-02 | 3.52E-02 | 1.00E+00 |
| PTPRS    | LMNA | -0.318373274 | -0.437208209 | -0.188612105 | 3.88E-06 | 1.66E-05 | 4.61E-02 |
| COTL1    | LMNA | 0.197969599  | 0.06160218   | 0.327081495  | 4.74E-03 | 1.04E-02 | 1.00E+00 |
| ANKRD57  | LMNA | 0.110046199  | -0.028436813 | 0.244384513  | 1.19E-01 | 1.76E-01 | 1.00E+00 |
| CLDN15   | LMNA | 0.138948661  | 0.000915216  | 0.271786258  | 4.86E-02 | 8.19E-02 | 1.00E+00 |
| ZNF659   | LMNA | 0.394405515  | 0.271116274  | 0.50496229   | 6.32E-09 | 4.50E-08 | 7.50E-05 |
| TNC      | LMNA | 0.547788723  | 0.443258136  | 0.637621047  | 3.26E-17 | 1.04E-15 | 3.86E-13 |
| GUCA2B   | LMNA | -0.486639097 | -0.585364703 | -0.373693184 | 2.09E-13 | 3.21E-12 | 2.48E-09 |
| DOCK9    | LMNA | -0.29243653  | -0.413782647 | -0.160880459 | 2.41E-05 | 8.89E-05 | 2.86E-01 |
| ITGB1BP1 | LMNA | 0.167064223  | 0.029698163  | 0.298236873  | 1.75E-02 | 3.31E-02 | 1.00E+00 |

|          |      |              |              |              |          |          |          |
|----------|------|--------------|--------------|--------------|----------|----------|----------|
| DLG2     | LMNA | -0.460133755 | -0.56245644  | -0.34392984  | 5.60E-12 | 6.90E-11 | 6.64E-08 |
| BRAP     | LMNA | 0.178301153  | 0.041265899  | 0.308752323  | 1.11E-02 | 2.23E-02 | 1.00E+00 |
| C13orf7  | LMNA | -0.369886209 | -0.483260406 | -0.244310474 | 6.03E-08 | 3.60E-07 | 7.16E-04 |
| ZC3H7B   | LMNA | -0.080739425 | -0.216378635 | 0.05795758   | 2.53E-01 | 3.34E-01 | 1.00E+00 |
| PPP1R12B | LMNA | -0.426375975 | -0.53305074  | -0.306357687 | 2.50E-10 | 2.31E-09 | 2.97E-06 |
| SOCS7    | LMNA | -0.204990644 | -0.333601015 | -0.068889149 | 3.43E-03 | 7.82E-03 | 1.00E+00 |
| MARCKS   | LMNA | -0.420089478 | -0.527546091 | -0.299401925 | 4.85E-10 | 4.25E-09 | 5.75E-06 |
| SACS     | LMNA | -0.147682997 | -0.28002491  | -0.009832459 | 3.60E-02 | 6.28E-02 | 1.00E+00 |
| TTLL12   | LMNA | 0.070686651  | -0.068028193 | 0.206720399  | 3.17E-01 | 4.03E-01 | 1.00E+00 |
| SH2D3A   | LMNA | 0.000410787  | -0.137648019 | 0.138453936  | 9.95E-01 | 9.96E-01 | 1.00E+00 |
| RFC2     | LMNA | 0.197043965  | 0.060642571  | 0.326221063  | 4.94E-03 | 1.08E-02 | 1.00E+00 |
| PPARA    | LMNA | 0.015055311  | -0.123251857 | 0.152788755  | 8.32E-01 | 8.73E-01 | 1.00E+00 |
| DVL3     | LMNA | 0.06558344   | -0.073129667 | 0.201807305  | 3.54E-01 | 4.41E-01 | 1.00E+00 |
| ADFP     | LMNA | 0.396558776  | 0.273479503  | 0.506861475  | 5.14E-09 | 3.73E-08 | 6.10E-05 |
| KRIT1    | LMNA | -0.048630011 | -0.185436101 | 0.090025367  | 4.92E-01 | 5.77E-01 | 1.00E+00 |
| SERTAD3  | LMNA | 0.507769179  | 0.397588343  | 0.603514962  | 1.23E-14 | 2.33E-13 | 1.46E-10 |
| LEFTY2   | LMNA | 0.137184105  | -0.000883631 | 0.270119474  | 5.16E-02 | 8.62E-02 | 1.00E+00 |
| MN1      | LMNA | -0.331753608 | -0.449230345 | -0.202999778 | 1.41E-06 | 6.57E-06 | 1.68E-02 |
| PTPRD    | LMNA | -0.519847592 | -0.613845664 | -0.411314796 | 2.22E-15 | 4.91E-14 | 2.64E-11 |
| RORA     | LMNA | 0.059655122  | -0.079046865 | 0.196091223  | 3.99E-01 | 4.86E-01 | 1.00E+00 |
| PIAS2    | LMNA | -0.060029971 | -0.196452927 | 0.078673008  | 3.96E-01 | 4.83E-01 | 1.00E+00 |
| MOSPD3   | LMNA | 0.117198738  | -0.021195188 | 0.251185704  | 9.67E-02 | 1.48E-01 | 1.00E+00 |
| FBXL15   | LMNA | -0.199657955 | -0.328650372 | -0.063353156 | 4.39E-03 | 9.75E-03 | 1.00E+00 |
| MYH15    | LMNA | -0.201932839 | -0.330763145 | -0.065713742 | 3.95E-03 | 8.87E-03 | 1.00E+00 |
| CRX      | LMNA | 0.221685234  | 0.086274569  | 0.349053837  | 1.52E-03 | 3.80E-03 | 1.00E+00 |
| SLC22A17 | LMNA | -0.476906207 | -0.576970952 | -0.36273685  | 7.22E-13 | 1.03E-11 | 8.57E-09 |
| TBC1D13  | LMNA | 0.107391109  | -0.031121279 | 0.241856478  | 1.28E-01 | 1.88E-01 | 1.00E+00 |
| PLK2     | LMNA | 0.15192522   | 0.014171443  | 0.284019361  | 3.09E-02 | 5.50E-02 | 1.00E+00 |
| EIF1B    | LMNA | -0.381273275 | -0.493356384 | -0.256735592 | 2.17E-08 | 1.40E-07 | 2.57E-04 |
| PRIM1    | LMNA | -0.239846796 | -0.365786217 | -0.105281791 | 5.86E-04 | 1.63E-03 | 1.00E+00 |
| ATP1A2   | LMNA | -0.354252675 | -0.469350137 | -0.22731868  | 2.31E-07 | 1.25E-06 | 2.74E-03 |
| CRYAA    | LMNA | 0.227477388  | 0.092325737  | 0.354399026  | 1.13E-03 | 2.92E-03 | 1.00E+00 |
| PLEK2    | LMNA | 0.504216065  | 0.39355979   | 0.600469842  | 2.01E-14 | 3.67E-13 | 2.38E-10 |
| BACE1    | LMNA | 0.16986145   | 0.032574301  | 0.30085748   | 1.57E-02 | 3.00E-02 | 1.00E+00 |
| FAM12A   | LMNA | 0.017868622  | -0.120479575 | 0.15553595   | 8.01E-01 | 8.50E-01 | 1.00E+00 |

|          |      |              |              |              |          |          |          |
|----------|------|--------------|--------------|--------------|----------|----------|----------|
| TG       | LMNA | -0.05627791  | -0.192830765 | 0.082413379  | 4.26E-01 | 5.13E-01 | 1.00E+00 |
| AGTRL1   | LMNA | 0.040812602  | -0.097789366 | 0.177861492  | 5.64E-01 | 6.44E-01 | 1.00E+00 |
| OPTN     | LMNA | 0.07035189   | -0.068363062 | 0.20639832   | 3.20E-01 | 4.05E-01 | 1.00E+00 |
| MAPKAPK5 | LMNA | 0.033003235  | -0.105528568 | 0.170278425  | 6.41E-01 | 7.14E-01 | 1.00E+00 |
| DGKG     | LMNA | -0.125991589 | -0.259528541 | 0.012272877  | 7.40E-02 | 1.18E-01 | 1.00E+00 |
| RBP4     | LMNA | -0.159851114 | -0.291470068 | -0.022292045 | 2.31E-02 | 4.24E-02 | 1.00E+00 |
| ZNF428   | LMNA | -0.235531964 | -0.36181829  | -0.100757124 | 7.40E-04 | 2.01E-03 | 1.00E+00 |
| TFB2M    | LMNA | 0.040457403  | -0.098141737 | 0.177516939  | 5.68E-01 | 6.47E-01 | 1.00E+00 |
| METTL9   | LMNA | -0.390728499 | -0.501716671 | -0.26708414  | 8.98E-09 | 6.18E-08 | 1.06E-04 |
| ATP5O    | LMNA | -0.186522614 | -0.316425767 | -0.049752728 | 7.86E-03 | 1.64E-02 | 1.00E+00 |
| SP100    | LMNA | 0.510529803  | 0.400721299  | 0.605878969  | 8.37E-15 | 1.65E-13 | 9.92E-11 |
| CPSF1    | LMNA | 0.056670805  | -0.082021891 | 0.193210233  | 4.23E-01 | 5.10E-01 | 1.00E+00 |
| LIME1    | LMNA | -0.017961395 | -0.155626506 | 0.120388119  | 8.00E-01 | 8.49E-01 | 1.00E+00 |
| S100A4   | LMNA | 0.623685252  | 0.531386859  | 0.701349776  | 3.61E-23 | 3.46E-21 | 4.29E-19 |
| BTC      | LMNA | 0.238610678  | 0.103984989  | 0.364649948  | 6.27E-04 | 1.73E-03 | 1.00E+00 |
| MAP2K5   | LMNA | 0.102614688  | -0.035945519 | 0.237304025  | 1.46E-01 | 2.10E-01 | 1.00E+00 |
| NUP188   | LMNA | 0.109345524  | -0.029145434 | 0.243717545  | 1.21E-01 | 1.79E-01 | 1.00E+00 |
| SDPR     | LMNA | -0.066802752 | -0.202981816 | 0.07191143   | 3.45E-01 | 4.31E-01 | 1.00E+00 |
| RPS20    | LMNA | 0.075485319  | -0.063224533 | 0.211334045  | 2.86E-01 | 3.69E-01 | 1.00E+00 |
| LAMB1    | LMNA | 0.650644932  | 0.563179988  | 0.723692309  | 1.06E-25 | 1.70E-23 | 1.26E-21 |
| IGF2     | LMNA | -0.013866328 | -0.151627075 | 0.12442285   | 8.45E-01 | 8.85E-01 | 1.00E+00 |
| ATAD2    | LMNA | -0.134288517 | -0.267382601 | 0.003833553  | 5.67E-02 | 9.36E-02 | 1.00E+00 |
| ADM2     | LMNA | 0.064241829  | -0.074469616 | 0.200514537  | 3.64E-01 | 4.51E-01 | 1.00E+00 |
| NPEPPS   | LMNA | -0.284221673 | -0.406329488 | -0.152140211 | 4.14E-05 | 1.46E-04 | 4.91E-01 |
| DMN      | LMNA | 0.206673885  | 0.070638303  | 0.335162193  | 3.17E-03 | 7.30E-03 | 1.00E+00 |
| EPN3     | LMNA | -0.170345475 | -0.301310743 | -0.033072212 | 1.54E-02 | 2.95E-02 | 1.00E+00 |
| CD80     | LMNA | 0.304219     | 0.173452617  | 0.424444301  | 1.07E-05 | 4.22E-05 | 1.27E-01 |
| GPR77    | LMNA | 0.052564871  | -0.086111006 | 0.189242607  | 4.58E-01 | 5.44E-01 | 1.00E+00 |
| CLIC3    | LMNA | 0.381542122  | 0.257029446  | 0.493594385  | 2.11E-08 | 1.37E-07 | 2.51E-04 |
| HOMER2   | LMNA | 0.425287591  | 0.305152515  | 0.532098364  | 2.81E-10 | 2.57E-09 | 3.33E-06 |
| KLF8     | LMNA | 0.162594871  | 0.025107442  | 0.294045611  | 2.08E-02 | 3.87E-02 | 1.00E+00 |
| DNMT1    | LMNA | 0.006920072  | -0.131256321 | 0.144832711  | 9.22E-01 | 9.44E-01 | 1.00E+00 |
| HTR1B    | LMNA | -0.108346783 | -0.24276663  | 0.030155262  | 1.25E-01 | 1.84E-01 | 1.00E+00 |
| EPB41L2  | LMNA | -0.127833684 | -0.261273837 | 0.010400867  | 6.98E-02 | 1.12E-01 | 1.00E+00 |
| JMJD6    | LMNA | 0.469091166  | 0.353962231  | 0.570215842  | 1.90E-12 | 2.53E-11 | 2.26E-08 |

|         |      |              |              |              |          |          |          |
|---------|------|--------------|--------------|--------------|----------|----------|----------|
| CTSL1   | LMNA | 0.465322229  | 0.349737752  | 0.566953178  | 3.01E-12 | 3.89E-11 | 3.57E-08 |
| BRIP1   | LMNA | -0.196887454 | -0.326075555 | -0.06048034  | 4.98E-03 | 1.09E-02 | 1.00E+00 |
| SMARCD2 | LMNA | 0.451508782  | 0.33429479   | 0.554967943  | 1.54E-11 | 1.75E-10 | 1.82E-07 |
| WIPF2   | LMNA | -0.097466383 | -0.232390493 | 0.041138145  | 1.68E-01 | 2.36E-01 | 1.00E+00 |
| GPR27   | LMNA | -0.116414759 | -0.250440881 | 0.021989641  | 9.90E-02 | 1.51E-01 | 1.00E+00 |
| ELAVL4  | LMNA | -0.604608377 | -0.685447291 | -0.509045795 | 1.60E-21 | 1.00E-19 | 1.90E-17 |
| CDH9    | LMNA | -0.324855868 | -0.443038082 | -0.195575792 | 2.39E-06 | 1.07E-05 | 2.84E-02 |
| PPM1B   | LMNA | -0.237204355 | -0.363356766 | -0.102510183 | 6.76E-04 | 1.85E-03 | 1.00E+00 |
| SUV39H1 | LMNA | 0.217369866  | 0.081772712  | 0.34506608   | 1.89E-03 | 4.61E-03 | 1.00E+00 |
| SLC7A5  | LMNA | -0.079551472 | -0.215238686 | 0.059149114  | 2.60E-01 | 3.42E-01 | 1.00E+00 |
| DLG7    | LMNA | 0.116023987  | -0.022385568 | 0.250069567  | 1.00E-01 | 1.52E-01 | 1.00E+00 |
| AAMP    | LMNA | 0.054188176  | -0.084494908 | 0.190811765  | 4.44E-01 | 5.30E-01 | 1.00E+00 |
| T       | LMNA | -0.2229152   | -0.350189584 | -0.087558702 | 1.43E-03 | 3.60E-03 | 1.00E+00 |
| NFIB    | LMNA | -0.395063375 | -0.505542639 | -0.271838125 | 5.94E-09 | 4.25E-08 | 7.04E-05 |
| MBD6    | LMNA | -0.057468788 | -0.193980817 | 0.081226634  | 4.17E-01 | 5.04E-01 | 1.00E+00 |
| TUSC4   | LMNA | -0.203173327 | -0.331914691 | -0.067001607 | 3.73E-03 | 8.43E-03 | 1.00E+00 |
| CAPRIN1 | LMNA | 0.040545591  | -0.098054255 | 0.177602487  | 5.67E-01 | 6.46E-01 | 1.00E+00 |
| ETFDH   | LMNA | 0.035418655  | -0.10313664  | 0.172625589  | 6.17E-01 | 6.92E-01 | 1.00E+00 |
| SLC15A1 | LMNA | 0.267314198  | 0.134216176  | 0.390938402  | 1.20E-04 | 3.87E-04 | 1.00E+00 |
| KLK13   | LMNA | 0.111436483  | -0.027030351 | 0.245707539  | 1.14E-01 | 1.70E-01 | 1.00E+00 |
| GSPT2   | LMNA | -0.060910471 | -0.197302405 | 0.077794685  | 3.89E-01 | 4.77E-01 | 1.00E+00 |
| TRIM13  | LMNA | -0.339780554 | -0.456422141 | -0.211657795 | 7.53E-07 | 3.69E-06 | 8.93E-03 |
| NAT9    | LMNA | -0.063347819 | -0.19965281  | 0.075362242  | 3.70E-01 | 4.58E-01 | 1.00E+00 |
| MB      | LMNA | -0.111969402 | -0.246214544 | 0.026491084  | 1.13E-01 | 1.68E-01 | 1.00E+00 |
| C15orf5 | LMNA | -0.189401401 | -0.31910865  | -0.052729111 | 6.94E-03 | 1.46E-02 | 1.00E+00 |
| LIFR    | LMNA | -0.21856713  | -0.346172913 | -0.083021161 | 1.78E-03 | 4.37E-03 | 1.00E+00 |
| DMBT1   | LMNA | 0.189192137  | 0.052512671  | 0.318913698  | 7.00E-03 | 1.48E-02 | 1.00E+00 |
| KCNAB2  | LMNA | -0.026368787 | -0.163823431 | 0.112090249  | 7.10E-01 | 7.73E-01 | 1.00E+00 |
| EIF4A1  | LMNA | 0.237321894  | 0.102633424  | 0.363464868  | 6.72E-04 | 1.84E-03 | 1.00E+00 |
| MXI1    | LMNA | -0.426695688 | -0.53333045  | -0.306711178 | 2.42E-10 | 2.25E-09 | 2.87E-06 |
| SPTLC2  | LMNA | 0.195229459  | 0.058762194  | 0.324533748  | 5.36E-03 | 1.16E-02 | 1.00E+00 |
| TTC28   | LMNA | -0.095134438 | -0.23016262  | 0.043487704  | 1.78E-01 | 2.48E-01 | 1.00E+00 |
| TSEN2   | LMNA | -0.224669686 | -0.351809022 | -0.089391233 | 1.31E-03 | 3.33E-03 | 1.00E+00 |
| MAGI2   | LMNA | -0.254723938 | -0.379432244 | -0.120925262 | 2.54E-04 | 7.64E-04 | 1.00E+00 |
| NLRP2   | LMNA | 0.047849838  | -0.090800968 | 0.184680889  | 4.99E-01 | 5.84E-01 | 1.00E+00 |

|           |      |              |              |              |          |          |          |
|-----------|------|--------------|--------------|--------------|----------|----------|----------|
| EXPH5     | LMNA | -0.146767946 | -0.279162702 | -0.008897216 | 3.71E-02 | 6.45E-02 | 1.00E+00 |
| NELL1     | LMNA | -0.271596073 | -0.394842795 | -0.138747278 | 9.23E-05 | 3.04E-04 | 1.00E+00 |
| MAP3K2    | LMNA | 0.135091095  | -0.003016155 | 0.268141403  | 5.53E-02 | 9.15E-02 | 1.00E+00 |
| SEPX1     | LMNA | 0.174687648  | 0.037542003  | 0.305374302  | 1.29E-02 | 2.54E-02 | 1.00E+00 |
| TSP0      | LMNA | 0.427761353  | 0.307892279  | 0.534262607  | 2.16E-10 | 2.02E-09 | 2.56E-06 |
| ADORA1    | LMNA | 0.209677998  | 0.073762135  | 0.337946707  | 2.74E-03 | 6.43E-03 | 1.00E+00 |
| CLINT1    | LMNA | 0.269439644  | 0.136464639  | 0.392877029  | 1.05E-04 | 3.43E-04 | 1.00E+00 |
| SYMPK     | LMNA | 0.132237293  | -0.005921813 | 0.26544251   | 6.07E-02 | 9.93E-02 | 1.00E+00 |
| LEPROTL1  | LMNA | -0.394535265 | -0.505076761 | -0.271258634 | 6.25E-09 | 4.45E-08 | 7.41E-05 |
| C2orf54   | LMNA | 0.052037411  | -0.086635966 | 0.188732592  | 4.62E-01 | 5.48E-01 | 1.00E+00 |
| SEMA6C    | LMNA | -0.37529482  | -0.488059541 | -0.250207    | 3.73E-08 | 2.29E-07 | 4.42E-04 |
| POLE2     | LMNA | 0.028265522  | -0.110215548 | 0.165670065  | 6.90E-01 | 7.56E-01 | 1.00E+00 |
| IL2       | LMNA | 0.028145823  | -0.110333887 | 0.165553555  | 6.91E-01 | 7.57E-01 | 1.00E+00 |
| TBPL1     | LMNA | -0.384321617 | -0.496053985 | -0.260068823 | 1.64E-08 | 1.08E-07 | 1.94E-04 |
| STX12     | LMNA | -0.249525736 | -0.374670362 | -0.115451733 | 3.42E-04 | 1.00E-03 | 1.00E+00 |
| MRPL39    | LMNA | 0.08699511   | -0.051676513 | 0.222375435  | 2.18E-01 | 2.95E-01 | 1.00E+00 |
| PLCL1     | LMNA | -0.42375287  | -0.530754966 | -0.303453765 | 3.30E-10 | 2.97E-09 | 3.92E-06 |
| CASC5     | LMNA | -0.04841457  | -0.185227569 | 0.090239562  | 4.94E-01 | 5.79E-01 | 1.00E+00 |
| IFIT5     | LMNA | -0.348665609 | -0.464365032 | -0.221264892 | 3.67E-07 | 1.91E-06 | 4.36E-03 |
| DDIT3     | LMNA | 0.043603955  | -0.095019019 | 0.180568014  | 5.38E-01 | 6.20E-01 | 1.00E+00 |
| FAM46A    | LMNA | 0.478629378  | 0.364674331  | 0.578458576  | 5.81E-13 | 8.43E-12 | 6.90E-09 |
| CYLC1     | LMNA | -0.170276707 | -0.301246349 | -0.033001467 | 1.54E-02 | 2.96E-02 | 1.00E+00 |
| HPCAL1    | LMNA | 0.189584579  | 0.052918582  | 0.319279294  | 6.89E-03 | 1.45E-02 | 1.00E+00 |
| HOMER1    | LMNA | -0.063817281 | -0.200105345 | 0.074893535  | 3.67E-01 | 4.54E-01 | 1.00E+00 |
| CDH1      | LMNA | -0.166400265 | -0.297614547 | -0.029015808 | 1.79E-02 | 3.39E-02 | 1.00E+00 |
| CCDC101   | LMNA | -0.222454056 | -0.349763809 | -0.087077197 | 1.46E-03 | 3.67E-03 | 1.00E+00 |
| ITPA      | LMNA | 0.282076264  | 0.149860986  | 0.404380326  | 4.76E-05 | 1.66E-04 | 5.65E-01 |
| D15Wsu75c | LMNA | 0.226624125  | 0.091433691  | 0.353612128  | 1.18E-03 | 3.04E-03 | 1.00E+00 |
| EDA       | LMNA | -0.033297034 | -0.170564005 | 0.105237712  | 6.38E-01 | 7.12E-01 | 1.00E+00 |
| CREG1     | LMNA | 0.158363084  | 0.020766075  | 0.290072468  | 2.44E-02 | 4.46E-02 | 1.00E+00 |
| SAP18     | LMNA | -0.198296335 | -0.327385165 | -0.061940969 | 4.67E-03 | 1.03E-02 | 1.00E+00 |
| IFIT1     | LMNA | -0.231496847 | -0.358103444 | -0.096530814 | 9.17E-04 | 2.43E-03 | 1.00E+00 |
| CHRNA4    | LMNA | -0.147430671 | -0.279787177 | -0.009574541 | 3.63E-02 | 6.33E-02 | 1.00E+00 |
| CALML3    | LMNA | -0.043976241 | -0.180928829 | 0.094649372  | 5.34E-01 | 6.17E-01 | 1.00E+00 |
| HSPA5     | LMNA | 0.614169084  | 0.520226335  | 0.693426749  | 2.48E-22 | 1.88E-20 | 2.94E-18 |



|          |      |              |              |              |          |          |          |
|----------|------|--------------|--------------|--------------|----------|----------|----------|
| JUNB     | LMNA | 0.486526802  | 0.373566593  | 0.585267979  | 2.12E-13 | 3.25E-12 | 2.51E-09 |
| SERPINB6 | LMNA | 0.48694611   | 0.374039302  | 0.58562913   | 2.01E-13 | 3.10E-12 | 2.38E-09 |
| RAB40A   | LMNA | -0.120101196 | -0.253941818 | 0.018252432  | 8.87E-02 | 1.37E-01 | 1.00E+00 |
| SCN2A    | LMNA | -0.551421838 | -0.640699978 | -0.447431244 | 1.83E-17 | 6.01E-16 | 2.17E-13 |
| ALDH8A1  | LMNA | -0.257270307 | -0.38176247  | -0.123609473 | 2.19E-04 | 6.68E-04 | 1.00E+00 |
| ZKSCAN5  | LMNA | 0.056704261  | -0.081988553 | 0.193242543  | 4.23E-01 | 5.10E-01 | 1.00E+00 |
| WNT7A    | LMNA | -0.112406737 | -0.246630558 | 0.026048481  | 1.11E-01 | 1.66E-01 | 1.00E+00 |
| PRRG2    | LMNA | 0.035615169  | -0.102941968 | 0.172816481  | 6.15E-01 | 6.91E-01 | 1.00E+00 |
| RALA     | LMNA | 0.215659437  | 0.079989895  | 0.343484225  | 2.05E-03 | 4.97E-03 | 1.00E+00 |
| H6PD     | LMNA | 0.482733632  | 0.369293005  | 0.581999128  | 3.45E-13 | 5.12E-12 | 4.09E-09 |
| CAD      | LMNA | 0.324383951  | 0.195068412  | 0.442614019  | 2.48E-06 | 1.11E-05 | 2.94E-02 |
| SAP30    | LMNA | 0.084439633  | -0.054243685 | 0.219926951  | 2.32E-01 | 3.10E-01 | 1.00E+00 |
| DOCK10   | LMNA | -0.203626264 | -0.332335057 | -0.067471955 | 3.65E-03 | 8.27E-03 | 1.00E+00 |
| XPA      | LMNA | -0.244644882 | -0.370193174 | -0.110319762 | 4.50E-04 | 1.28E-03 | 1.00E+00 |
| FAIM2    | LMNA | -0.415034884 | -0.523113579 | -0.293818503 | 8.18E-10 | 6.88E-09 | 9.70E-06 |
| PRB1     | LMNA | -0.076479565 | -0.212289199 | 0.062228449  | 2.79E-01 | 3.62E-01 | 1.00E+00 |
| SPDEF    | LMNA | -0.09177328  | -0.226948975 | 0.046871554  | 1.94E-01 | 2.67E-01 | 1.00E+00 |
| ETHE1    | LMNA | 0.350737852  | 0.223509097  | 0.466214863  | 3.10E-07 | 1.63E-06 | 3.67E-03 |
| GNPTAB   | LMNA | -0.226988053 | -0.353947772 | -0.091814133 | 1.16E-03 | 2.99E-03 | 1.00E+00 |
| IRF5     | LMNA | 0.112435578  | -0.02601929  | 0.246657992  | 1.11E-01 | 1.66E-01 | 1.00E+00 |
| ABCC10   | LMNA | 0.180863002  | 0.043908318  | 0.31114523   | 1.00E-02 | 2.03E-02 | 1.00E+00 |
| INSL4    | LMNA | -0.03088198  | -0.168215828 | 0.107627869  | 6.63E-01 | 7.33E-01 | 1.00E+00 |
| GNMT     | LMNA | -0.386726545 | -0.498180682 | -0.262700601 | 1.31E-08 | 8.76E-08 | 1.55E-04 |
| PFDN6    | LMNA | 0.013986554  | -0.124304461 | 0.151744558  | 8.43E-01 | 8.84E-01 | 1.00E+00 |
| RPA1     | LMNA | 0.017676923  | -0.120668547 | 0.155348823  | 8.03E-01 | 8.51E-01 | 1.00E+00 |
| ACTR1B   | LMNA | 0.105899191  | -0.032628826 | 0.240435153  | 1.34E-01 | 1.95E-01 | 1.00E+00 |
| TROVE2   | LMNA | -0.152001354 | -0.284091006 | -0.014249361 | 3.08E-02 | 5.49E-02 | 1.00E+00 |
| C12orf35 | LMNA | 0.234766355  | 0.099954864  | 0.361113756  | 7.71E-04 | 2.08E-03 | 1.00E+00 |
| EEF1E1   | LMNA | -0.08720814  | -0.222579468 | 0.051462426  | 2.17E-01 | 2.93E-01 | 1.00E+00 |
| PLEKHM1  | LMNA | 0.216478044  | 0.080843038  | 0.344241387  | 1.97E-03 | 4.80E-03 | 1.00E+00 |
| MSX1     | LMNA | 0.075361381  | -0.063348682 | 0.211214961  | 2.86E-01 | 3.70E-01 | 1.00E+00 |
| FNDC3A   | LMNA | 0.106024841  | -0.032501885 | 0.240554879  | 1.33E-01 | 1.94E-01 | 1.00E+00 |
| ESF1     | LMNA | 0.196732403  | 0.060319629  | 0.325931398  | 5.01E-03 | 1.09E-02 | 1.00E+00 |
| HSPC171  | LMNA | 0.282221156  | 0.150014871  | 0.404511999  | 4.72E-05 | 1.64E-04 | 5.59E-01 |
| MRPL2    | LMNA | 0.070175013  | -0.068539984 | 0.206228131  | 3.21E-01 | 4.06E-01 | 1.00E+00 |

|           |      |              |              |              |          |          |          |
|-----------|------|--------------|--------------|--------------|----------|----------|----------|
| MICB      | LMNA | 0.400875326  | 0.278221445  | 0.510665466  | 3.38E-09 | 2.53E-08 | 4.01E-05 |
| CELP      | LMNA | 0.008824479  | -0.129384141 | 0.146696769  | 9.01E-01 | 9.28E-01 | 1.00E+00 |
| ST8SIA3   | LMNA | -0.440170196 | -0.545097818 | -0.321665501 | 5.57E-11 | 5.81E-10 | 6.60E-07 |
| C10orf116 | LMNA | -0.094056701 | -0.229132503 | 0.044573064  | 1.83E-01 | 2.54E-01 | 1.00E+00 |
| MYL7      | LMNA | 0.05256305   | -0.086112818 | 0.189240847  | 4.58E-01 | 5.44E-01 | 1.00E+00 |
| NCR1      | LMNA | 0.178688217  | 0.041665013  | 0.309113968  | 1.09E-02 | 2.20E-02 | 1.00E+00 |
| CD52      | LMNA | 0.2624513    | 0.129076973  | 0.386498805  | 1.61E-04 | 5.06E-04 | 1.00E+00 |
| KHDRBS3   | LMNA | -0.206950315 | -0.33541851  | -0.070925639 | 3.13E-03 | 7.21E-03 | 1.00E+00 |
| SLC30A10  | LMNA | -0.429971637 | -0.536195157 | -0.310341916 | 1.70E-10 | 1.63E-09 | 2.02E-06 |
| PMS2L5    | LMNA | -0.024606973 | -0.162107293 | 0.113830712  | 7.28E-01 | 7.89E-01 | 1.00E+00 |
| UBE2E1    | LMNA | -0.221763861 | -0.349126452 | -0.086356645 | 1.51E-03 | 3.78E-03 | 1.00E+00 |
| AP4S1     | LMNA | -0.136135454 | -0.26912855  | 0.001952237  | 5.34E-02 | 8.89E-02 | 1.00E+00 |
| TPK1      | LMNA | 0.11681604   | -0.02158302  | 0.25082214   | 9.78E-02 | 1.49E-01 | 1.00E+00 |
| MICAL2    | LMNA | 0.3308771    | 0.202055576  | 0.448444108  | 1.51E-06 | 7.01E-06 | 1.79E-02 |
| UBA52     | LMNA | 0.15489501   | 0.017212062  | 0.286812971  | 2.77E-02 | 4.99E-02 | 1.00E+00 |
| GEMIN7    | LMNA | 0.041113315  | -0.097491019 | 0.178153165  | 5.61E-01 | 6.42E-01 | 1.00E+00 |
| PPIF      | LMNA | -0.129176229 | -0.262545284 | 0.009035908  | 6.69E-02 | 1.08E-01 | 1.00E+00 |
| RIPK1     | LMNA | 0.521955306  | 0.413715152  | 0.615645105  | 1.64E-15 | 3.77E-14 | 1.94E-11 |
| COL14A1   | LMNA | 0.403570151  | 0.281184877  | 0.513038124  | 2.59E-09 | 1.98E-08 | 3.08E-05 |
| HSPC159   | LMNA | -0.099925961 | -0.234738769 | 0.038658326  | 1.57E-01 | 2.24E-01 | 1.00E+00 |
| CPNE3     | LMNA | 0.004980942  | -0.133161624 | 0.142933658  | 9.44E-01 | 9.58E-01 | 1.00E+00 |
| ATP8A1    | LMNA | -0.493564782 | -0.59132463  | -0.381508681 | 8.43E-14 | 1.36E-12 | 1.00E-09 |
| ALOX12P2  | LMNA | -0.063860087 | -0.200146605 | 0.074850795  | 3.67E-01 | 4.54E-01 | 1.00E+00 |
| CSAD      | LMNA | -0.102216409 | -0.236924155 | 0.036347493  | 1.48E-01 | 2.12E-01 | 1.00E+00 |
| MTHFS     | LMNA | 0.354091296  | 0.227143682  | 0.469206248  | 2.34E-07 | 1.26E-06 | 2.78E-03 |
| RECK      | LMNA | 0.101222353  | -0.037350579 | 0.235975863  | 1.52E-01 | 2.17E-01 | 1.00E+00 |
| CXCL9     | LMNA | 0.303138815  | 0.172298258  | 0.423468255  | 1.16E-05 | 4.54E-05 | 1.37E-01 |
| ABAT      | LMNA | -0.552298269 | -0.641442291 | -0.448438618 | 1.59E-17 | 5.27E-16 | 1.88E-13 |
| VPREB3    | LMNA | 0.093942269  | -0.044688286 | 0.229023109  | 1.84E-01 | 2.55E-01 | 1.00E+00 |
| EGFL6     | LMNA | 0.387278004  | 0.263304337  | 0.498668153  | 1.24E-08 | 8.35E-08 | 1.47E-04 |
| C1orf14   | LMNA | 0.163290639  | 0.025821723  | 0.294698419  | 2.02E-02 | 3.78E-02 | 1.00E+00 |
| RAB3IL1   | LMNA | 0.238590592  | 0.103963921  | 0.364631482  | 6.27E-04 | 1.73E-03 | 1.00E+00 |
| FGF18     | LMNA | 0.121304265  | -0.017031956 | 0.255083591  | 8.55E-02 | 1.33E-01 | 1.00E+00 |
| LHX6      | LMNA | -0.079709331 | -0.215390188 | 0.058990802  | 2.59E-01 | 3.41E-01 | 1.00E+00 |
| SLC20A2   | LMNA | -0.03016154  | -0.167515036 | 0.108340572  | 6.70E-01 | 7.39E-01 | 1.00E+00 |

|          |      |              |              |              |          |          |          |
|----------|------|--------------|--------------|--------------|----------|----------|----------|
| JARID2   | LMNA | -0.196143151 | -0.325383496 | -0.059708934 | 5.15E-03 | 1.12E-02 | 1.00E+00 |
| CRBN     | LMNA | -0.348809102 | -0.464493157 | -0.221420249 | 3.63E-07 | 1.89E-06 | 4.30E-03 |
| SPINT1   | LMNA | 0.489077663  | 0.376443228  | 0.587464439  | 1.52E-13 | 2.40E-12 | 1.80E-09 |
| PIN1L    | LMNA | -0.062930646 | -0.199250629 | 0.075778692  | 3.74E-01 | 4.61E-01 | 1.00E+00 |
| ABCF3    | LMNA | 0.150130024  | 0.012334667  | 0.282329575  | 3.30E-02 | 5.82E-02 | 1.00E+00 |
| NCBP1    | LMNA | -0.028523144 | -0.165920807 | 0.109960844  | 6.87E-01 | 7.54E-01 | 1.00E+00 |
| SSX1     | LMNA | 0.043361178  | -0.095260055 | 0.180332697  | 5.40E-01 | 6.22E-01 | 1.00E+00 |
| CELSR1   | LMNA | 0.343949066  | 0.216161979  | 0.460150944  | 5.39E-07 | 2.70E-06 | 6.39E-03 |
| SLC9A1   | LMNA | 0.509664141  | 0.399738607  | 0.605137857  | 9.44E-15 | 1.84E-13 | 1.12E-10 |
| CHRND    | LMNA | 0.022526542  | -0.115884838 | 0.160079725  | 7.50E-01 | 8.07E-01 | 1.00E+00 |
| ELSPBP1  | LMNA | 0.036349952  | -0.102213973 | 0.173530153  | 6.08E-01 | 6.84E-01 | 1.00E+00 |
| SRPRB    | LMNA | 0.081399382  | -0.057295463 | 0.217011763  | 2.49E-01 | 3.30E-01 | 1.00E+00 |
| FOXF1    | LMNA | 0.116829799  | -0.021569077 | 0.250835212  | 9.78E-02 | 1.49E-01 | 1.00E+00 |
| LTF      | LMNA | 0.315381724  | 0.185402938  | 0.434514501  | 4.84E-06 | 2.03E-05 | 5.73E-02 |
| TPO      | LMNA | -0.202926335 | -0.331685438 | -0.066745145 | 3.77E-03 | 8.51E-03 | 1.00E+00 |
| KIAA1467 | LMNA | -0.351817396 | -0.467178141 | -0.22467876  | 2.83E-07 | 1.50E-06 | 3.36E-03 |
| DNAJB9   | LMNA | 0.010651797  | -0.127586819 | 0.148484453  | 8.80E-01 | 9.12E-01 | 1.00E+00 |
| PAFAH1B2 | LMNA | 0.372987217  | 0.247690091  | 0.486012806  | 4.58E-08 | 2.79E-07 | 5.43E-04 |
| MRPS27   | LMNA | -0.194518031 | -0.323871965 | -0.058025205 | 5.54E-03 | 1.20E-02 | 1.00E+00 |
| TNN      | LMNA | 0.132236308  | -0.005922816 | 0.265441579  | 6.07E-02 | 9.93E-02 | 1.00E+00 |
| UBAP2L   | LMNA | 0.036093995  | -0.102467582 | 0.173281566  | 6.10E-01 | 6.86E-01 | 1.00E+00 |
| WBP2     | LMNA | -0.101501607 | -0.236242287 | 0.037068816  | 1.51E-01 | 2.16E-01 | 1.00E+00 |
| AGRP     | LMNA | 0.154400851  | 0.016705941  | 0.286348283  | 2.82E-02 | 5.06E-02 | 1.00E+00 |
| PRPF18   | LMNA | -0.110845313 | -0.245145029 | 0.027628467  | 1.16E-01 | 1.73E-01 | 1.00E+00 |
| GTDC1    | LMNA | -0.449540525 | -0.553256682 | -0.332099457 | 1.93E-11 | 2.15E-10 | 2.29E-07 |
| TMEM131  | LMNA | 0.210862419  | 0.07499449   | 0.339043929  | 2.59E-03 | 6.10E-03 | 1.00E+00 |
| RCE1     | LMNA | 0.404403461  | 0.28210172   | 0.513771472  | 2.39E-09 | 1.84E-08 | 2.83E-05 |
| CD81     | LMNA | 0.228553364  | 0.093450929  | 0.355391059  | 1.07E-03 | 2.79E-03 | 1.00E+00 |
| TIMM8B   | LMNA | -0.170857751 | -0.301790396 | -0.033599258 | 1.50E-02 | 2.90E-02 | 1.00E+00 |
| MYH7     | LMNA | -0.209998394 | -0.338243549 | -0.074095457 | 2.70E-03 | 6.34E-03 | 1.00E+00 |
| SCRN3    | LMNA | -0.316650632 | -0.435657336 | -0.186763813 | 4.41E-06 | 1.86E-05 | 5.23E-02 |
| SH2B3    | LMNA | 0.61339163   | 0.519315956  | 0.692778604  | 2.89E-22 | 2.16E-20 | 3.43E-18 |
| KIF1C    | LMNA | 0.130771167  | -0.007413673 | 0.264055156  | 6.36E-02 | 1.03E-01 | 1.00E+00 |
| TMCO1    | LMNA | 0.08429315   | -0.054390782 | 0.219786549  | 2.33E-01 | 3.11E-01 | 1.00E+00 |
| NEUROG2  | LMNA | 0.124047421  | -0.014247567 | 0.257685589  | 7.86E-02 | 1.24E-01 | 1.00E+00 |

|          |      |              |              |              |          |          |          |
|----------|------|--------------|--------------|--------------|----------|----------|----------|
| SUHW2    | LMNA | -0.297512424 | -0.418379777 | -0.166291321 | 1.71E-05 | 6.48E-05 | 2.03E-01 |
| PAPSS1   | LMNA | -0.249075298 | -0.374257422 | -0.114977821 | 3.51E-04 | 1.03E-03 | 1.00E+00 |
| CABP2    | LMNA | -0.043008012 | -0.179990356 | 0.095610657  | 5.43E-01 | 6.25E-01 | 1.00E+00 |
| H1FX     | LMNA | -0.232874634 | -0.359372326 | -0.097973337 | 8.52E-04 | 2.27E-03 | 1.00E+00 |
| ELF2     | LMNA | -0.15027948  | -0.282470286 | -0.012487549 | 3.28E-02 | 5.80E-02 | 1.00E+00 |
| HOXA4    | LMNA | -0.009762551 | -0.147614607 | 0.128461581  | 8.90E-01 | 9.21E-01 | 1.00E+00 |
| KCNK13   | LMNA | 0.078441743  | -0.060261831 | 0.214173467  | 2.67E-01 | 3.49E-01 | 1.00E+00 |
| SEMA3D   | LMNA | -0.370521814 | -0.48382474  | -0.245002936 | 5.70E-08 | 3.43E-07 | 6.76E-04 |
| AP3D1    | LMNA | 0.231691165  | 0.096734227  | 0.358282431  | 9.07E-04 | 2.41E-03 | 1.00E+00 |
| GLYAT    | LMNA | -0.078478254 | -0.214208519 | 0.060225227  | 2.67E-01 | 3.49E-01 | 1.00E+00 |
| OGFR     | LMNA | 0.287455524  | 0.155578423  | 0.409265431  | 3.35E-05 | 1.21E-04 | 3.98E-01 |
| MC5R     | LMNA | -0.018675587 | -0.156323557 | 0.11968398   | 7.92E-01 | 8.43E-01 | 1.00E+00 |
| FLJ30092 | LMNA | -0.442689095 | -0.54729301  | -0.324467494 | 4.20E-11 | 4.47E-10 | 4.98E-07 |
| TGFA     | LMNA | 0.05462507   | -0.08405983  | 0.191233967  | 4.40E-01 | 5.26E-01 | 1.00E+00 |
| C8orf17  | LMNA | 0.01205529   | -0.126205747 | 0.149856893  | 8.65E-01 | 9.01E-01 | 1.00E+00 |
| DDX54    | LMNA | 0.365493835  | 0.239528683  | 0.479357971  | 8.86E-08 | 5.13E-07 | 1.05E-03 |
| NPAL3    | LMNA | 0.086585732  | -0.052087888 | 0.221983311  | 2.20E-01 | 2.97E-01 | 1.00E+00 |
| NXF3     | LMNA | 0.321960691  | 0.192464144  | 0.44043565   | 2.97E-06 | 1.30E-05 | 3.53E-02 |
| MMP17    | LMNA | -0.216613278 | -0.344366455 | -0.080983997 | 1.96E-03 | 4.77E-03 | 1.00E+00 |
| KIF15    | LMNA | -0.155378037 | -0.287267131 | -0.01770685  | 2.72E-02 | 4.91E-02 | 1.00E+00 |
| MYL5     | LMNA | 0.121695498  | -0.016634973 | 0.255454811  | 8.45E-02 | 1.32E-01 | 1.00E+00 |
| PRLR     | LMNA | 0.1311317    | -0.007046869 | 0.264396369  | 6.29E-02 | 1.02E-01 | 1.00E+00 |
| AP3S1    | LMNA | 0.270708183  | 0.137807251  | 0.394033545  | 9.75E-05 | 3.19E-04 | 1.00E+00 |
| CHIA     | LMNA | 0.082003318  | -0.056689443 | 0.217591049  | 2.46E-01 | 3.26E-01 | 1.00E+00 |
| FGFR1OP  | LMNA | 0.231292542  | 0.096316958  | 0.357915249  | 9.27E-04 | 2.45E-03 | 1.00E+00 |
| MED28    | LMNA | 0.029012412  | -0.109477065 | 0.166396961  | 6.82E-01 | 7.50E-01 | 1.00E+00 |
| PTPRA    | LMNA | 0.069067288  | -0.069647791 | 0.205162107  | 3.29E-01 | 4.14E-01 | 1.00E+00 |
| CEACAM7  | LMNA | 0.00053202   | -0.137529082 | 0.138572843  | 9.94E-01 | 9.95E-01 | 1.00E+00 |
| GOLIM4   | LMNA | 0.116235365  | -0.022171408 | 0.250270424  | 9.95E-02 | 1.51E-01 | 1.00E+00 |
| PADI2    | LMNA | -0.072343586 | -0.208314132 | 0.066370261  | 3.06E-01 | 3.91E-01 | 1.00E+00 |
| ADSL     | LMNA | -0.101520765 | -0.236260563 | 0.037049486  | 1.51E-01 | 2.16E-01 | 1.00E+00 |
| HSF1     | LMNA | 0.184927996  | 0.048105094  | 0.314938769  | 8.42E-03 | 1.74E-02 | 1.00E+00 |
| LAS1L    | LMNA | 0.232971076  | 0.098074331  | 0.359461127  | 8.48E-04 | 2.26E-03 | 1.00E+00 |
| DR1      | LMNA | 0.003523271  | -0.134593195 | 0.141505444  | 9.60E-01 | 9.70E-01 | 1.00E+00 |
| BAP1     | LMNA | 0.062434801  | -0.076273616 | 0.198772544  | 3.77E-01 | 4.65E-01 | 1.00E+00 |

|           |      |              |              |              |          |          |          |
|-----------|------|--------------|--------------|--------------|----------|----------|----------|
| C14orf140 | LMNA | 0.093996208  | -0.044633975 | 0.229074674  | 1.83E-01 | 2.54E-01 | 1.00E+00 |
| SLC17A2   | LMNA | -0.052484261 | -0.189164668 | 0.086191239  | 4.58E-01 | 5.44E-01 | 1.00E+00 |
| HOXA9     | LMNA | -0.127821524 | -0.261262319 | 0.010413227  | 6.99E-02 | 1.12E-01 | 1.00E+00 |
| TMEM161A  | LMNA | 0.287833853  | 0.155980869  | 0.409608742  | 3.27E-05 | 1.18E-04 | 3.88E-01 |
| TMEM144   | LMNA | -0.19072156  | -0.320338277 | -0.054094839 | 6.55E-03 | 1.39E-02 | 1.00E+00 |
| HIF1AN    | LMNA | -0.073235369 | -0.2091716   | 0.065477624  | 3.00E-01 | 3.85E-01 | 1.00E+00 |
| METTL7A   | LMNA | -0.075174059 | -0.21103497  | 0.063536312  | 2.88E-01 | 3.71E-01 | 1.00E+00 |
| NCKIPSD   | LMNA | 0.024052568  | -0.114378223 | 0.161567089  | 7.34E-01 | 7.93E-01 | 1.00E+00 |
| ITM2A     | LMNA | -0.460609414 | -0.562868935 | -0.344461916 | 5.29E-12 | 6.55E-11 | 6.28E-08 |
| POLR2H    | LMNA | -0.010375581 | -0.148214286 | 0.127858559  | 8.83E-01 | 9.15E-01 | 1.00E+00 |
| ABCG5     | LMNA | -0.037666069 | -0.174808095 | 0.100909646  | 5.95E-01 | 6.72E-01 | 1.00E+00 |
| PCDHA3    | LMNA | -0.160888046 | -0.292443652 | -0.023355795 | 2.22E-02 | 4.10E-02 | 1.00E+00 |
| DSG3      | LMNA | 0.341532976  | 0.21355067   | 0.457990211  | 6.55E-07 | 3.24E-06 | 7.76E-03 |
| ZNF180    | LMNA | -0.10076109  | -0.235535748 | 0.037815937  | 1.54E-01 | 2.19E-01 | 1.00E+00 |
| BUB1B     | LMNA | -0.020062058 | -0.15767636  | 0.118316631  | 7.77E-01 | 8.30E-01 | 1.00E+00 |
| JMJD1C    | LMNA | -0.317685405 | -0.436589014 | -0.187873952 | 4.08E-06 | 1.74E-05 | 4.84E-02 |
| NFKBIB    | LMNA | 0.264117082  | 0.130836597  | 0.388020233  | 1.46E-04 | 4.63E-04 | 1.00E+00 |
| DKK1      | LMNA | 0.456468886  | 0.339832784  | 0.559276525  | 8.63E-12 | 1.03E-10 | 1.02E-07 |
| CAPN5     | LMNA | 0.085869495  | -0.052807505 | 0.221297158  | 2.24E-01 | 3.01E-01 | 1.00E+00 |
| ZNF205    | LMNA | 0.26271394   | 0.129354353  | 0.38673873   | 1.59E-04 | 4.99E-04 | 1.00E+00 |
| COX7A1    | LMNA | -8.00E-05    | -0.138129495 | 0.137972505  | 9.99E-01 | 9.99E-01 | 1.00E+00 |
| OLFML2B   | LMNA | 0.444078915  | 0.326014402  | 0.548503606  | 3.59E-11 | 3.84E-10 | 4.26E-07 |
| MAGEA1    | LMNA | -0.003932407 | -0.141906371 | 0.134191442  | 9.56E-01 | 9.67E-01 | 1.00E+00 |
| PA2G4     | LMNA | -0.004208605 | -0.142177001 | 0.133920203  | 9.53E-01 | 9.65E-01 | 1.00E+00 |
| NEDD8     | LMNA | -0.111411731 | -0.245683989 | 0.027055395  | 1.14E-01 | 1.71E-01 | 1.00E+00 |
| MRPS2     | LMNA | 0.142847079  | 0.004892561  | 0.275465843  | 4.26E-02 | 7.28E-02 | 1.00E+00 |
| ABHD11    | LMNA | 0.3899408    | 0.266220929  | 0.501020981  | 9.67E-09 | 6.63E-08 | 1.15E-04 |
| NOTCH4    | LMNA | 0.046399872  | -0.092241989 | 0.183276884  | 5.12E-01 | 5.96E-01 | 1.00E+00 |
| CADM1     | LMNA | 0.13422922   | -0.003893938 | 0.267326532  | 5.68E-02 | 9.38E-02 | 1.00E+00 |
| PAIP2B    | LMNA | -0.497556896 | -0.594755215 | -0.386020993 | 4.95E-14 | 8.27E-13 | 5.87E-10 |
| MAT1A     | LMNA | 0.1171744    | -0.021219854 | 0.251162584  | 9.68E-02 | 1.48E-01 | 1.00E+00 |
| THUMPD2   | LMNA | -0.13244096  | -0.265635191 | 0.005714522  | 6.03E-02 | 9.87E-02 | 1.00E+00 |
| CALM3     | LMNA | -0.298111123 | -0.418921598 | -0.166930051 | 1.64E-05 | 6.24E-05 | 1.94E-01 |
| KCNC4     | LMNA | 0.056651929  | -0.0820407   | 0.193192003  | 4.23E-01 | 5.10E-01 | 1.00E+00 |
| TSPAN1    | LMNA | 0.223438946  | 0.08810565   | 0.350673095  | 1.39E-03 | 3.51E-03 | 1.00E+00 |

|          |      |              |              |              |          |          |          |
|----------|------|--------------|--------------|--------------|----------|----------|----------|
| NMI      | LMNA | 0.424466639  | 0.304243726  | 0.531379821  | 3.06E-10 | 2.77E-09 | 3.63E-06 |
| ACIN1    | LMNA | 0.040546646  | -0.098053208 | 0.17760351   | 5.67E-01 | 6.46E-01 | 1.00E+00 |
| RGS9     | LMNA | -0.397870541 | -0.508017932 | -0.274919908 | 4.53E-09 | 3.32E-08 | 5.37E-05 |
| XKR8     | LMNA | 0.432532719  | 0.313182328  | 0.538433035  | 1.29E-10 | 1.26E-09 | 1.53E-06 |
| RPL23    | LMNA | -0.130945669 | -0.264220312 | 0.00723614   | 6.32E-02 | 1.03E-01 | 1.00E+00 |
| B4GALT7  | LMNA | 0.471018225  | 0.356124024  | 0.57188281   | 1.50E-12 | 2.03E-11 | 1.78E-08 |
| CNKSR1   | LMNA | -0.196713425 | -0.325913754 | -0.060299959 | 5.02E-03 | 1.10E-02 | 1.00E+00 |
| MPDZ     | LMNA | -0.240219613 | -0.366128844 | -0.105672999 | 5.74E-04 | 1.60E-03 | 1.00E+00 |
| SDHC     | LMNA | -0.039791571 | -0.176870972 | 0.098802176  | 5.74E-01 | 6.53E-01 | 1.00E+00 |
| ATF6     | LMNA | 0.413981324  | 0.292655757  | 0.522188946  | 9.11E-10 | 7.58E-09 | 1.08E-05 |
| GBF1     | LMNA | 0.022416242  | -0.115993711 | 0.159972195  | 7.52E-01 | 8.08E-01 | 1.00E+00 |
| ITIH1    | LMNA | 0.044308288  | -0.094319647 | 0.181250615  | 5.31E-01 | 6.14E-01 | 1.00E+00 |
| ZC3H11A  | LMNA | 0.001111345  | -0.136960668 | 0.139140999  | 9.87E-01 | 9.90E-01 | 1.00E+00 |
| RNASEH2A | LMNA | -0.005065144 | -0.143016141 | 0.133078912  | 9.43E-01 | 9.58E-01 | 1.00E+00 |
| CCR10    | LMNA | 0.101120367  | -0.037453476 | 0.235878558  | 1.52E-01 | 2.18E-01 | 1.00E+00 |
| EIF2AK1  | LMNA | 0.043029859  | -0.09558897  | 0.180011534  | 5.43E-01 | 6.24E-01 | 1.00E+00 |
| B4GALT3  | LMNA | 0.077173579  | -0.061532987 | 0.212955772  | 2.75E-01 | 3.57E-01 | 1.00E+00 |
| TMEM112  | LMNA | 0.090262787  | -0.04839121  | 0.225503815  | 2.01E-01 | 2.76E-01 | 1.00E+00 |
| MAP1B    | LMNA | 0.220160795  | 0.084683619  | 0.347645656  | 1.64E-03 | 4.07E-03 | 1.00E+00 |
| NVL      | LMNA | -0.180011821 | -0.310350363 | -0.043030154 | 1.04E-02 | 2.09E-02 | 1.00E+00 |
| PKM2     | LMNA | 0.606813478  | 0.51162164   | 0.687289414  | 1.05E-21 | 6.76E-20 | 1.24E-17 |
| GGNBP2   | LMNA | -0.071047887 | -0.207067917 | 0.067666806  | 3.15E-01 | 4.00E-01 | 1.00E+00 |
| ARC      | LMNA | -0.088693498 | -0.22400177  | 0.049969339  | 2.09E-01 | 2.84E-01 | 1.00E+00 |
| NUP54    | LMNA | 0.031486525  | -0.107029707 | 0.168803778  | 6.56E-01 | 7.27E-01 | 1.00E+00 |
| PPFIBP2  | LMNA | 0.050379023  | -0.088285996 | 0.187128568  | 4.76E-01 | 5.62E-01 | 1.00E+00 |
| GPR175   | LMNA | 0.417359533  | 0.296385337  | 0.525152853  | 6.44E-10 | 5.52E-09 | 7.64E-06 |
| VCAM1    | LMNA | 0.172452138  | 0.035240105  | 0.303282827  | 1.41E-02 | 2.75E-02 | 1.00E+00 |
| STAT2    | LMNA | 0.335329856  | 0.206854702  | 0.45243639   | 1.07E-06 | 5.10E-06 | 1.27E-02 |
| Sep-08   | LMNA | -0.18285322  | -0.313003063 | -0.045962453 | 9.20E-03 | 1.88E-02 | 1.00E+00 |
| PTAFR    | LMNA | 0.162869004  | 0.025388852  | 0.294302832  | 2.06E-02 | 3.83E-02 | 1.00E+00 |
| ALG3     | LMNA | 0.444173637  | 0.326119854  | 0.548586098  | 3.55E-11 | 3.81E-10 | 4.22E-07 |
| REL      | LMNA | 0.13197882   | -0.006184867 | 0.265197965  | 6.12E-02 | 9.99E-02 | 1.00E+00 |
| GNA14    | LMNA | 0.23142165   | 0.0964521    | 0.358034178  | 9.20E-04 | 2.44E-03 | 1.00E+00 |
| CR2      | LMNA | 0.116102101  | -0.022306428 | 0.250143794  | 9.99E-02 | 1.52E-01 | 1.00E+00 |
| RNF40    | LMNA | 0.196091658  | 0.059655572  | 0.325335612  | 5.16E-03 | 1.12E-02 | 1.00E+00 |

|          |      |              |              |              |          |          |          |
|----------|------|--------------|--------------|--------------|----------|----------|----------|
| EWSR1    | LMNA | -0.022760071 | -0.160307378 | 0.115654321  | 7.48E-01 | 8.05E-01 | 1.00E+00 |
| CSN1S1   | LMNA | -0.12436424  | -0.257985981 | 0.013925848  | 7.78E-02 | 1.23E-01 | 1.00E+00 |
| PLEKHH3  | LMNA | 0.196418338  | 0.059994123  | 0.325639383  | 5.08E-03 | 1.11E-02 | 1.00E+00 |
| IFT81    | LMNA | -0.124665326 | -0.258271431 | 0.013620078  | 7.71E-02 | 1.22E-01 | 1.00E+00 |
| PDCD11   | LMNA | 0.048131808  | -0.09052067  | 0.184953857  | 4.96E-01 | 5.81E-01 | 1.00E+00 |
| PCDHB1   | LMNA | -0.053759554 | -0.190397508 | 0.084921698  | 4.47E-01 | 5.34E-01 | 1.00E+00 |
| TM7SF3   | LMNA | -0.017500625 | -0.155176722 | 0.120842328  | 8.05E-01 | 8.52E-01 | 1.00E+00 |
| OR10H3   | LMNA | 0.017792634  | -0.120554484 | 0.155461775  | 8.02E-01 | 8.50E-01 | 1.00E+00 |
| ABP1     | LMNA | -0.049160013 | -0.185949054 | 0.089498377  | 4.87E-01 | 5.72E-01 | 1.00E+00 |
| GLT25D2  | LMNA | 0.05703583   | -0.081658135 | 0.193562746  | 4.20E-01 | 5.08E-01 | 1.00E+00 |
| CHRD     | LMNA | -0.088437613 | -0.223756789 | 0.050226599  | 2.11E-01 | 2.86E-01 | 1.00E+00 |
| PEX10    | LMNA | 0.146245051  | 0.008362891  | 0.278669908  | 3.78E-02 | 6.56E-02 | 1.00E+00 |
| C19orf57 | LMNA | -0.280031041 | -0.402521151 | -0.147689505 | 5.43E-05 | 1.87E-04 | 6.44E-01 |
| KLC1     | LMNA | -0.116625291 | -0.250640913 | 0.021776313  | 9.83E-02 | 1.50E-01 | 1.00E+00 |
| GALE     | LMNA | 0.218997862  | 0.083470411  | 0.346571024  | 1.74E-03 | 4.29E-03 | 1.00E+00 |
| NT5C2    | LMNA | -0.307396173 | -0.427313547 | -0.176850043 | 8.59E-06 | 3.43E-05 | 1.02E-01 |
| TBC1D10B | LMNA | 0.170186111  | 0.032908269  | 0.301161514  | 1.55E-02 | 2.97E-02 | 1.00E+00 |
| EFCAB2   | LMNA | -0.229737888 | -0.356482841 | -0.094690033 | 1.01E-03 | 2.64E-03 | 1.00E+00 |
| NCALD    | LMNA | -0.526517707 | -0.619536867 | -0.418916171 | 8.41E-16 | 2.06E-14 | 9.97E-12 |
| AKAP13   | LMNA | 0.435156639  | 0.316094648  | 0.540724273  | 9.69E-11 | 9.77E-10 | 1.15E-06 |
| FLG      | LMNA | 0.097184632  | -0.041422106 | 0.232121391  | 1.69E-01 | 2.37E-01 | 1.00E+00 |
| ACCN1    | LMNA | -0.15228192  | -0.284355018 | -0.014536515 | 3.05E-02 | 5.44E-02 | 1.00E+00 |
| ZNF337   | LMNA | -0.12349395  | -0.257160755 | 0.01480953   | 7.99E-02 | 1.26E-01 | 1.00E+00 |
| ARMET    | LMNA | 0.496900954  | 0.385279211  | 0.594191781  | 5.41E-14 | 8.94E-13 | 6.41E-10 |
| ALS2CL   | LMNA | 0.192341857  | 0.055771764  | 0.321846863  | 6.10E-03 | 1.30E-02 | 1.00E+00 |
| REEP4    | LMNA | 0.549341299  | 0.445040918  | 0.638937149  | 2.54E-17 | 8.18E-16 | 3.02E-13 |
| MTSS1    | LMNA | -0.528664417 | -0.621366446 | -0.42136581  | 6.12E-16 | 1.53E-14 | 7.26E-12 |
| ACN9     | LMNA | -0.123442855 | -0.25711123  | 0.014861405  | 8.01E-02 | 1.26E-01 | 1.00E+00 |
| ADH1B    | LMNA | -0.086864428 | -0.222250265 | 0.051807838  | 2.19E-01 | 2.95E-01 | 1.00E+00 |
| DLD      | LMNA | 0.123357606  | -0.014947952 | 0.257031454  | 8.03E-02 | 1.26E-01 | 1.00E+00 |
| CDK5     | LMNA | -0.13809556  | -0.270980525 | -4.54E-05    | 5.00E-02 | 8.39E-02 | 1.00E+00 |
| PPFIA1   | LMNA | 0.049206578  | -0.089452072 | 0.185994117  | 4.87E-01 | 5.72E-01 | 1.00E+00 |
| DNAJB12  | LMNA | 0.139431769  | 0.001407868  | 0.272242457  | 4.78E-02 | 8.07E-02 | 1.00E+00 |
| MLANA    | LMNA | -0.023176512 | -0.160713303 | 0.115243214  | 7.43E-01 | 8.02E-01 | 1.00E+00 |
| HMMR     | LMNA | 0.139975314  | 0.001962231  | 0.272755657  | 4.69E-02 | 7.94E-02 | 1.00E+00 |

|           |      |              |              |              |          |          |          |
|-----------|------|--------------|--------------|--------------|----------|----------|----------|
| CUL2      | LMNA | -0.238049998 | -0.364134434 | -0.103396935 | 6.46E-04 | 1.78E-03 | 1.00E+00 |
| DENND4C   | LMNA | 0.078471396  | -0.060232102 | 0.214201936  | 2.67E-01 | 3.49E-01 | 1.00E+00 |
| KIAA0319  | LMNA | -0.318905877 | -0.437687563 | -0.189183743 | 3.73E-06 | 1.60E-05 | 4.43E-02 |
| RPS7      | LMNA | -0.103311686 | -0.23796871  | 0.035241945  | 1.43E-01 | 2.07E-01 | 1.00E+00 |
| JAK3      | LMNA | 0.331829092  | 0.203081103  | 0.449298047  | 1.40E-06 | 6.53E-06 | 1.67E-02 |
| C6orf106  | LMNA | 0.274189186  | 0.141494031  | 0.397205141  | 7.86E-05 | 2.62E-04 | 9.32E-01 |
| HEY2      | LMNA | -0.260541169 | -0.384753372 | -0.127060268 | 1.80E-04 | 5.61E-04 | 1.00E+00 |
| GCG       | LMNA | -0.183954172 | -0.314030353 | -0.047099259 | 8.78E-03 | 1.81E-02 | 1.00E+00 |
| FCER2     | LMNA | -0.125818474 | -0.259364478 | 0.012448753  | 7.44E-02 | 1.18E-01 | 1.00E+00 |
| CAMKV     | LMNA | -0.564527322 | -0.651782585 | -0.462522335 | 2.13E-18 | 8.44E-17 | 2.53E-14 |
| ARHGDIA   | LMNA | 0.407169845  | 0.285147016  | 0.516204865  | 1.81E-09 | 1.43E-08 | 2.15E-05 |
| ARFGEF1   | LMNA | 0.019439196  | -0.118930968 | 0.157068687  | 7.84E-01 | 8.36E-01 | 1.00E+00 |
| CXCL5     | LMNA | 0.270098188  | 0.137161576  | 0.393477466  | 1.01E-04 | 3.30E-04 | 1.00E+00 |
| AP1M2     | LMNA | -0.028864249 | -0.166252776 | 0.109623572  | 6.83E-01 | 7.51E-01 | 1.00E+00 |
| GCAT      | LMNA | -0.117244942 | -0.251229596 | 0.021148361  | 9.66E-02 | 1.48E-01 | 1.00E+00 |
| TRAPPC4   | LMNA | -0.0961791   | -0.231160835 | 0.042435341  | 1.73E-01 | 2.43E-01 | 1.00E+00 |
| LL22NC03- | LMNA | -0.350596993 | -0.466089155 | -0.223356507 | 3.13E-07 | 1.65E-06 | 3.72E-03 |
| SPRR3     | LMNA | -0.065250032 | -0.20148608  | 0.073462708  | 3.56E-01 | 4.43E-01 | 1.00E+00 |
| LAPTM5    | LMNA | 0.280781588  | 0.148486237  | 0.403203541  | 5.17E-05 | 1.79E-04 | 6.14E-01 |
| CETN2     | LMNA | 0.122738492  | -0.015576439 | 0.256444257  | 8.18E-02 | 1.28E-01 | 1.00E+00 |
| NOLC1     | LMNA | -0.082190097 | -0.217770184 | 0.056502     | 2.45E-01 | 3.25E-01 | 1.00E+00 |
| IARS2     | LMNA | 0.26406252   | 0.130778947  | 0.38797041   | 1.46E-04 | 4.64E-04 | 1.00E+00 |
| HSPC111   | LMNA | 0.388088672  | 0.264192032  | 0.499384627  | 1.15E-08 | 7.76E-08 | 1.37E-04 |
| C16orf61  | LMNA | -0.230735888 | -0.357402434 | -0.095734344 | 9.54E-04 | 2.51E-03 | 1.00E+00 |
| RHOBTB3   | LMNA | -0.198145149 | -0.327244655 | -0.061784202 | 4.70E-03 | 1.03E-02 | 1.00E+00 |
| RGS10     | LMNA | 0.034773214  | -0.103775961 | 0.171998539  | 6.23E-01 | 6.98E-01 | 1.00E+00 |
| PHLPP     | LMNA | -0.459715865 | -0.562094    | -0.343462446 | 5.89E-12 | 7.21E-11 | 6.98E-08 |
| CAB39L    | LMNA | -0.39281113  | -0.503555346 | -0.269367375 | 7.37E-09 | 5.17E-08 | 8.74E-05 |
| CHERP     | LMNA | 0.034361695  | -0.104183517 | 0.171598689  | 6.27E-01 | 7.02E-01 | 1.00E+00 |
| FSTL3     | LMNA | 0.450939296  | 0.333659472  | 0.554472905  | 1.64E-11 | 1.86E-10 | 1.95E-07 |
| QSOX1     | LMNA | 0.558205676  | 0.455235512  | 0.646441355  | 6.08E-18 | 2.19E-16 | 7.21E-14 |
| PEX11A    | LMNA | -0.038564069 | -0.175679784 | 0.100019416  | 5.86E-01 | 6.64E-01 | 1.00E+00 |
| FCN3      | LMNA | 0.27244307   | 0.139644234  | 0.395614595  | 8.76E-05 | 2.89E-04 | 1.00E+00 |
| NPTX1     | LMNA | -0.140046257 | -0.272822635 | -0.002034593 | 4.68E-02 | 7.92E-02 | 1.00E+00 |
| PTPN3     | LMNA | -0.146667618 | -0.279068155 | -0.008794689 | 3.73E-02 | 6.47E-02 | 1.00E+00 |



|          |      |              |              |              |          |          |          |
|----------|------|--------------|--------------|--------------|----------|----------|----------|
| C11orf51 | LMNA | -0.093976477 | -0.229055811 | 0.044653842  | 1.83E-01 | 2.54E-01 | 1.00E+00 |
| ZBED2    | LMNA | 0.045569573  | -0.093066904 | 0.182472652  | 5.20E-01 | 6.03E-01 | 1.00E+00 |
| NPY2R    | LMNA | 0.150119161  | 0.012323555  | 0.282319347  | 3.30E-02 | 5.82E-02 | 1.00E+00 |
| SCAMP2   | LMNA | 0.299911737  | 0.168851724  | 0.420550632  | 1.45E-05 | 5.57E-05 | 1.72E-01 |
| SYT17    | LMNA | -0.23142389  | -0.358036241 | -0.096454444 | 9.20E-04 | 2.44E-03 | 1.00E+00 |
| PLD3     | LMNA | 0.393364795  | 0.269974604  | 0.504043987  | 6.99E-09 | 4.94E-08 | 8.29E-05 |
| ART3     | LMNA | -0.119350629 | -0.253229303 | 0.01901365   | 9.07E-02 | 1.40E-01 | 1.00E+00 |
| SGSM2    | LMNA | -0.249986041 | -0.375092298 | -0.11593609  | 3.33E-04 | 9.79E-04 | 1.00E+00 |
| SLC5A1   | LMNA | 0.106501367  | -0.032020418 | 0.241008905  | 1.31E-01 | 1.92E-01 | 1.00E+00 |
| MLNR     | LMNA | 0.172883821  | 0.035684494  | 0.303686794  | 1.39E-02 | 2.71E-02 | 1.00E+00 |
| EPHB6    | LMNA | -0.248186679 | -0.373442631 | -0.114043069 | 3.69E-04 | 1.07E-03 | 1.00E+00 |
| POFUT1   | LMNA | 0.607609452  | 0.512551862  | 0.68795411   | 8.99E-22 | 6.02E-20 | 1.07E-17 |
| C6orf25  | LMNA | -0.111577112 | -0.245841337 | 0.026888054  | 1.14E-01 | 1.70E-01 | 1.00E+00 |
| STAC     | LMNA | 0.435754984  | 0.316759072  | 0.541246535  | 9.07E-11 | 9.18E-10 | 1.08E-06 |
| CXXC4    | LMNA | -0.624351302 | -0.701903602 | -0.532169201 | 3.15E-23 | 3.09E-21 | 3.74E-19 |
| TJP2     | LMNA | -0.237636283 | -0.363753996 | -0.102963081 | 6.61E-04 | 1.81E-03 | 1.00E+00 |
| JARID1C  | LMNA | 0.145033246  | 0.0071249    | 0.277527593  | 3.95E-02 | 6.81E-02 | 1.00E+00 |
| LILRA3   | LMNA | 0.251566332  | 0.117599441  | 0.376540465  | 3.04E-04 | 9.02E-04 | 1.00E+00 |
| SERINC1  | LMNA | -0.089564816 | -0.224835831 | 0.049093198  | 2.05E-01 | 2.80E-01 | 1.00E+00 |
| CCT5     | LMNA | 0.079944934  | -0.058754509 | 0.21561629   | 2.58E-01 | 3.40E-01 | 1.00E+00 |
| ARF3     | LMNA | -0.101183862 | -0.235939139 | 0.037389414  | 1.52E-01 | 2.17E-01 | 1.00E+00 |
| RAB27A   | LMNA | 0.584093056  | 0.485162995  | 0.668259221  | 7.21E-20 | 3.62E-18 | 8.55E-16 |
| SLC9A8   | LMNA | 0.057595427  | -0.081100412 | 0.194103093  | 4.16E-01 | 5.03E-01 | 1.00E+00 |
| PEX19    | LMNA | -0.204032165 | -0.332711726 | -0.06789351  | 3.58E-03 | 8.13E-03 | 1.00E+00 |
| CNP      | LMNA | -0.320446492 | -0.439073766 | -0.190837765 | 3.33E-06 | 1.44E-05 | 3.95E-02 |
| EDN2     | LMNA | 0.210314057  | 0.074423885  | 0.338535982  | 2.66E-03 | 6.25E-03 | 1.00E+00 |
| PSMD7    | LMNA | 0.011870077  | -0.126388033 | 0.149675807  | 8.67E-01 | 9.02E-01 | 1.00E+00 |
| UQCR     | LMNA | -0.124145309 | -0.257778404 | 0.014148169  | 7.84E-02 | 1.24E-01 | 1.00E+00 |
| CCDC121  | LMNA | -0.380712176 | -0.492859611 | -0.256122378 | 2.28E-08 | 1.46E-07 | 2.70E-04 |
| SSX2IP   | LMNA | 0.095200668  | -0.043420995 | 0.230225914  | 1.78E-01 | 2.48E-01 | 1.00E+00 |
| PPP1R3C  | LMNA | 0.080337357  | -0.058360904 | 0.215992856  | 2.56E-01 | 3.37E-01 | 1.00E+00 |
| TM2D1    | LMNA | -0.055791981 | -0.192361387 | 0.082897508  | 4.30E-01 | 5.17E-01 | 1.00E+00 |
| LRP4     | LMNA | -0.339959559 | -0.456582348 | -0.211851103 | 7.42E-07 | 3.64E-06 | 8.80E-03 |
| TTC17    | LMNA | 0.060437616  | -0.078266398 | 0.196846235  | 3.93E-01 | 4.80E-01 | 1.00E+00 |
| C4BPB    | LMNA | 0.154440752  | 0.016746805  | 0.286385807  | 2.82E-02 | 5.06E-02 | 1.00E+00 |

|          |      |              |              |              |          |          |          |
|----------|------|--------------|--------------|--------------|----------|----------|----------|
| POMT2    | LMNA | 0.043616814  | -0.095006252 | 0.180580478  | 5.38E-01 | 6.20E-01 | 1.00E+00 |
| ARL15    | LMNA | -0.344054927 | -0.460245585 | -0.216276436 | 5.34E-07 | 2.68E-06 | 6.34E-03 |
| ZNF253   | LMNA | -0.430129722 | -0.536333336 | -0.310517182 | 1.67E-10 | 1.61E-09 | 1.98E-06 |
| CHRNA9   | LMNA | 0.497448625  | 0.385898544  | 0.594662221  | 5.02E-14 | 8.37E-13 | 5.96E-10 |
| SOX11    | LMNA | -0.381297077 | -0.493377456 | -0.256761607 | 2.16E-08 | 1.39E-07 | 2.56E-04 |
| HIVEP3   | LMNA | 0.517719754  | 0.408893047  | 0.612028051  | 3.02E-15 | 6.47E-14 | 3.58E-11 |
| Sep-15   | LMNA | 0.097395867  | -0.041209216 | 0.232323144  | 1.68E-01 | 2.36E-01 | 1.00E+00 |
| MRPL16   | LMNA | -0.016219711 | -0.153926049 | 0.1221047    | 8.19E-01 | 8.63E-01 | 1.00E+00 |
| PKD2L1   | LMNA | -0.037812744 | -0.174950488 | 0.100764255  | 5.93E-01 | 6.71E-01 | 1.00E+00 |
| RHBDD3   | LMNA | 0.211890689  | 0.076064712  | 0.339996215  | 2.47E-03 | 5.84E-03 | 1.00E+00 |
| BMPR1B   | LMNA | -0.129233673 | -0.262599675 | 0.008977494  | 6.68E-02 | 1.08E-01 | 1.00E+00 |
| PDE8B    | LMNA | -0.200693266 | -0.329612065 | -0.064427281 | 4.18E-03 | 9.34E-03 | 1.00E+00 |
| ABLM3    | LMNA | 0.139692209  | 0.001673481  | 0.272488367  | 4.74E-02 | 8.00E-02 | 1.00E+00 |
| CENPC1   | LMNA | -0.171516778 | -0.302407359 | -0.0342774   | 1.47E-02 | 2.84E-02 | 1.00E+00 |
| C2orf42  | LMNA | -0.129594621 | -0.262941424 | 0.008610426  | 6.60E-02 | 1.07E-01 | 1.00E+00 |
| LTC4S    | LMNA | 0.090567064  | -0.048085139 | 0.225794979  | 2.00E-01 | 2.74E-01 | 1.00E+00 |
| PSMC3    | LMNA | 0.144733147  | 0.006818382  | 0.277244646  | 3.99E-02 | 6.88E-02 | 1.00E+00 |
| SMARCA2  | LMNA | -0.039486307 | -0.176574777 | 0.099104926  | 5.77E-01 | 6.56E-01 | 1.00E+00 |
| FUT5     | LMNA | 0.051791438  | -0.086880747 | 0.188494728  | 4.64E-01 | 5.50E-01 | 1.00E+00 |
| P4HB     | LMNA | 0.647247336  | 0.559158944  | 0.720884997  | 2.29E-25 | 3.31E-23 | 2.72E-21 |
| ADH6     | LMNA | 0.178660703  | 0.041636641  | 0.309088262  | 1.10E-02 | 2.20E-02 | 1.00E+00 |
| CST2     | LMNA | 0.072540277  | -0.066173401 | 0.208503272  | 3.05E-01 | 3.89E-01 | 1.00E+00 |
| PLAC4    | LMNA | -0.228052608 | -0.354929405 | -0.092927225 | 1.10E-03 | 2.85E-03 | 1.00E+00 |
| BRF2     | LMNA | -0.032046616 | -0.169348408 | 0.106475439  | 6.51E-01 | 7.23E-01 | 1.00E+00 |
| RAMP2    | LMNA | -0.267286793 | -0.390913399 | -0.134187194 | 1.20E-04 | 3.88E-04 | 1.00E+00 |
| BCL11A   | LMNA | -0.360934715 | -0.475302622 | -0.234571817 | 1.31E-07 | 7.38E-07 | 1.56E-03 |
| F11R     | LMNA | 0.454311515  | 0.337423068  | 0.557403212  | 1.11E-11 | 1.29E-10 | 1.32E-07 |
| CLUAP1   | LMNA | -0.069303057 | -0.205389028 | 0.069412033  | 3.27E-01 | 4.13E-01 | 1.00E+00 |
| ZNF330   | LMNA | 0.186722489  | 0.0499593    | 0.316612107  | 7.80E-03 | 1.63E-02 | 1.00E+00 |
| PSMB1    | LMNA | 0.12424776   | -0.014044133 | 0.257875543  | 7.81E-02 | 1.23E-01 | 1.00E+00 |
| VIPR1    | LMNA | -0.341411693 | -0.457881709 | -0.213419634 | 6.61E-07 | 3.27E-06 | 7.84E-03 |
| TXN      | LMNA | 0.393687593  | 0.270328677  | 0.504328843  | 6.77E-09 | 4.79E-08 | 8.04E-05 |
| ACTA2    | LMNA | 0.456168178  | 0.33949681   | 0.559015473  | 8.94E-12 | 1.06E-10 | 1.06E-07 |
| KIAA0947 | LMNA | 0.183187371  | 0.046307449  | 0.313314889  | 9.07E-03 | 1.86E-02 | 1.00E+00 |
| REM1     | LMNA | -0.115814696 | -0.24987068  | 0.022597603  | 1.01E-01 | 1.53E-01 | 1.00E+00 |

|           |      |              |              |              |          |          |          |
|-----------|------|--------------|--------------|--------------|----------|----------|----------|
| FANCE     | LMNA | -0.068852829 | -0.204955685 | 0.069862226  | 3.30E-01 | 4.16E-01 | 1.00E+00 |
| PLAC8     | LMNA | -0.033850988 | -0.171102399 | 0.104689243  | 6.32E-01 | 7.06E-01 | 1.00E+00 |
| BECN1     | LMNA | 0.144264085  | 0.006339337  | 0.276802345  | 4.05E-02 | 6.98E-02 | 1.00E+00 |
| GMPS      | LMNA | 0.39562685   | 0.27245652   | 0.506039644  | 5.63E-09 | 4.05E-08 | 6.67E-05 |
| LGALS8    | LMNA | 0.428653248  | 0.308880566  | 0.535042564  | 1.96E-10 | 1.85E-09 | 2.33E-06 |
| ANKRD1    | LMNA | 0.275738179  | 0.143135775  | 0.398615509  | 7.13E-05 | 2.40E-04 | 8.46E-01 |
| DDR1      | LMNA | -0.044081944 | -0.181031268 | 0.094544412  | 5.33E-01 | 6.16E-01 | 1.00E+00 |
| ATP6V1D   | LMNA | 0.087645424  | -0.051022931 | 0.222998249  | 2.15E-01 | 2.90E-01 | 1.00E+00 |
| PTGS1     | LMNA | 0.35286888   | 0.225818374  | 0.468116118  | 2.59E-07 | 1.39E-06 | 3.08E-03 |
| ALDOB     | LMNA | -0.104719761 | -0.23931112  | 0.033820166  | 1.38E-01 | 2.00E-01 | 1.00E+00 |
| DCC       | LMNA | -0.380664941 | -0.492817787 | -0.25607076  | 2.29E-08 | 1.47E-07 | 2.72E-04 |
| SPAG7     | LMNA | 0.018291243  | -0.120062932 | 0.155948454  | 7.96E-01 | 8.46E-01 | 1.00E+00 |
| HOXD9     | LMNA | -0.16741513  | -0.298565731 | -0.030058844 | 1.72E-02 | 3.27E-02 | 1.00E+00 |
| LOC440295 | LMNA | -0.185403145 | -0.315381917 | -0.048595963 | 8.25E-03 | 1.71E-02 | 1.00E+00 |
| SYNPO     | LMNA | 0.567132961  | 0.465529813  | 0.653981601  | 1.38E-18 | 5.59E-17 | 1.63E-14 |
| C6orf47   | LMNA | 0.288293842  | 0.15647024   | 0.41002611   | 3.17E-05 | 1.15E-04 | 3.76E-01 |
| UBE3C     | LMNA | 0.43621915   | 0.317274581  | 0.541651625  | 8.62E-11 | 8.73E-10 | 1.02E-06 |
| TRIT1     | LMNA | -0.226428082 | -0.353431306 | -0.091228767 | 1.19E-03 | 3.06E-03 | 1.00E+00 |
| HOXC6     | LMNA | 0.091378243  | -0.04726905  | 0.226571081  | 1.96E-01 | 2.69E-01 | 1.00E+00 |
| LRP2BP    | LMNA | -0.36337378  | -0.477472782 | -0.237222854 | 1.06E-07 | 6.07E-07 | 1.26E-03 |
| PDSS2     | LMNA | -0.015556975 | -0.153278785 | 0.122757667  | 8.26E-01 | 8.69E-01 | 1.00E+00 |
| MYST2     | LMNA | -0.301318647 | -0.421822935 | -0.170353916 | 1.31E-05 | 5.10E-05 | 1.56E-01 |
| GABARAPL  | LMNA | -0.238077284 | -0.364159524 | -0.103425552 | 6.45E-04 | 1.77E-03 | 1.00E+00 |
| ARAF      | LMNA | 0.529899687  | 0.422776104  | 0.622418774  | 5.09E-16 | 1.31E-14 | 6.04E-12 |
| PLA2G2E   | LMNA | 0.253003391  | 0.119112684  | 0.377856846  | 2.80E-04 | 8.37E-04 | 1.00E+00 |
| KLF10     | LMNA | 0.390810155  | 0.267173635  | 0.501788781  | 8.91E-09 | 6.14E-08 | 1.06E-04 |
| DCTN5     | LMNA | 0.056304615  | -0.082386771 | 0.192856559  | 4.26E-01 | 5.13E-01 | 1.00E+00 |
| ASCL1     | LMNA | -0.554388987 | -0.6432124   | -0.450842767 | 1.13E-17 | 3.88E-16 | 1.34E-13 |
| TSNAXIP1  | LMNA | -0.073864114 | -0.209776026 | 0.064848144  | 2.96E-01 | 3.80E-01 | 1.00E+00 |
| HKDC1     | LMNA | 0.329501088  | 0.200573778  | 0.447209445  | 1.68E-06 | 7.74E-06 | 1.99E-02 |
| PHF10     | LMNA | 0.433667526  | 0.314441589  | 0.539424154  | 1.14E-10 | 1.13E-09 | 1.35E-06 |
| FAM131B   | LMNA | -0.17561545  | -0.306241954 | -0.038497785 | 1.24E-02 | 2.46E-02 | 1.00E+00 |
| PSME3     | LMNA | -0.128928877 | -0.262311066 | 0.009287428  | 6.74E-02 | 1.09E-01 | 1.00E+00 |
| IFNA10    | LMNA | 0.031037353  | -0.107474146 | 0.168366945  | 6.61E-01 | 7.31E-01 | 1.00E+00 |
| NUP43     | LMNA | -0.16549181  | -0.296762874 | -0.028082389 | 1.86E-02 | 3.49E-02 | 1.00E+00 |

|          |      |              |              |              |          |          |          |
|----------|------|--------------|--------------|--------------|----------|----------|----------|
| DBR1     | LMNA | -0.109355917 | -0.243727439 | 0.029134925  | 1.21E-01 | 1.79E-01 | 1.00E+00 |
| NME3     | LMNA | 0.164781454  | 0.027352679  | 0.296096773  | 1.91E-02 | 3.58E-02 | 1.00E+00 |
| CYP46A1  | LMNA | -0.211267833 | -0.339419417 | -0.075416408 | 2.54E-03 | 6.00E-03 | 1.00E+00 |
| L1TD1    | LMNA | -0.249115161 | -0.374293968 | -0.115019758 | 3.50E-04 | 1.02E-03 | 1.00E+00 |
| NMD3     | LMNA | 0.134594092  | -0.003522357 | 0.267671529  | 5.62E-02 | 9.28E-02 | 1.00E+00 |
| CHN1     | LMNA | -0.17648957  | -0.307059208 | -0.039398497 | 1.20E-02 | 2.38E-02 | 1.00E+00 |
| HGSNAT   | LMNA | 0.423288863  | 0.302940317  | 0.530348699  | 3.47E-10 | 3.10E-09 | 4.11E-06 |
| RAG2     | LMNA | 0.016129165  | -0.122193918 | 0.153837623  | 8.20E-01 | 8.64E-01 | 1.00E+00 |
| KIAA0754 | LMNA | 0.090839082  | -0.047811495 | 0.226055253  | 1.99E-01 | 2.72E-01 | 1.00E+00 |
| TMED1    | LMNA | 0.3355377    | 0.207078865  | 0.452622625  | 1.05E-06 | 5.02E-06 | 1.25E-02 |
| PMM2     | LMNA | 0.501921162  | 0.390960065  | 0.598501559  | 2.75E-14 | 4.81E-13 | 3.26E-10 |
| VPS13C   | LMNA | 0.140726026  | 0.002728024  | 0.273464334  | 4.58E-02 | 7.76E-02 | 1.00E+00 |
| METTL3   | LMNA | -0.079916654 | -0.215589152 | 0.058782873  | 2.58E-01 | 3.40E-01 | 1.00E+00 |
| REXO2    | LMNA | 0.558518904  | 0.455596239  | 0.646706209  | 5.78E-18 | 2.10E-16 | 6.85E-14 |
| SLC14A1  | LMNA | -0.23520069  | -0.361513461 | -0.10040997  | 7.53E-04 | 2.04E-03 | 1.00E+00 |
| ANXA4    | LMNA | 0.489211286  | 0.376593977  | 0.587579457  | 1.49E-13 | 2.36E-12 | 1.77E-09 |
| CA1      | LMNA | -0.08838344  | -0.223704923 | 0.050281061  | 2.11E-01 | 2.86E-01 | 1.00E+00 |
| UAP1     | LMNA | 0.422734331  | 0.302326788  | 0.529863105  | 3.68E-10 | 3.28E-09 | 4.36E-06 |
| KCNJ15   | LMNA | 0.424831553  | 0.304647657  | 0.531699233  | 2.95E-10 | 2.68E-09 | 3.49E-06 |
| DHODH    | LMNA | 0.305438751  | 0.174756557  | 0.425546121  | 9.86E-06 | 3.90E-05 | 1.17E-01 |
| TULP3    | LMNA | 0.332328383  | 0.203619073  | 0.449745825  | 1.35E-06 | 6.32E-06 | 1.60E-02 |
| RPS14    | LMNA | -0.044587138 | -0.181520824 | 0.094042723  | 5.29E-01 | 6.11E-01 | 1.00E+00 |
| ATP2A2   | LMNA | -0.131316919 | -0.26457165  | 0.006858414  | 6.25E-02 | 1.02E-01 | 1.00E+00 |
| APBB1IP  | LMNA | 0.011084888  | -0.127160704 | 0.148908018  | 8.76E-01 | 9.08E-01 | 1.00E+00 |
| ATIC     | LMNA | 0.076324828  | -0.06238349  | 0.212140563  | 2.80E-01 | 3.63E-01 | 1.00E+00 |
| ONECUT2  | LMNA | -0.414010649 | -0.522214686 | -0.292688116 | 9.08E-10 | 7.57E-09 | 1.08E-05 |
| ADAM15   | LMNA | 0.493564951  | 0.381508873  | 0.591324776  | 8.43E-14 | 1.36E-12 | 1.00E-09 |
| FAM110B  | LMNA | -0.452353026 | -0.555701686 | -0.335236824 | 1.40E-11 | 1.60E-10 | 1.66E-07 |
| NPL      | LMNA | 0.103445881  | -0.035106468 | 0.238096669  | 1.43E-01 | 2.06E-01 | 1.00E+00 |
| LGR4     | LMNA | -0.007192149 | -0.145099084 | 0.130988908  | 9.19E-01 | 9.42E-01 | 1.00E+00 |
| STRN     | LMNA | -0.083002261 | -0.218549008 | 0.05568683   | 2.40E-01 | 3.20E-01 | 1.00E+00 |
| UEVLD    | LMNA | 0.233149968  | 0.098261675  | 0.35962584   | 8.40E-04 | 2.25E-03 | 1.00E+00 |
| GAB1     | LMNA | -0.301261648 | -0.421771399 | -0.170293046 | 1.32E-05 | 5.12E-05 | 1.57E-01 |
| SULT1B1  | LMNA | 0.242908592  | 0.108495867  | 0.368599074  | 4.95E-04 | 1.40E-03 | 1.00E+00 |
| SNAI2    | LMNA | 0.526827674  | 0.419269782  | 0.619801105  | 8.03E-16 | 1.97E-14 | 9.52E-12 |

|          |      |              |              |              |          |          |          |
|----------|------|--------------|--------------|--------------|----------|----------|----------|
| ZGPAT    | LMNA | 0.469171152  | 0.354051935  | 0.570285049  | 1.88E-12 | 2.51E-11 | 2.23E-08 |
| KCNN4    | LMNA | 0.535715717  | 0.429423176  | 0.627368962  | 2.12E-16 | 5.79E-15 | 2.51E-12 |
| SNF1LK   | LMNA | 0.501061789  | 0.389987001  | 0.597764196  | 3.09E-14 | 5.35E-13 | 3.66E-10 |
| DLEU1    | LMNA | -0.195531987 | -0.324815127 | -0.059075638 | 5.29E-03 | 1.15E-02 | 1.00E+00 |
| UBE2Q1   | LMNA | 0.20434372   | 0.068217114  | 0.333000816  | 3.53E-03 | 8.03E-03 | 1.00E+00 |
| ZMYM6    | LMNA | 0.229639445  | 0.094587039  | 0.356392119  | 1.01E-03 | 2.65E-03 | 1.00E+00 |
| JPH3     | LMNA | -0.474285684 | -0.574707367 | -0.359792305 | 1.00E-12 | 1.39E-11 | 1.19E-08 |
| HEATR3   | LMNA | 0.140058921  | 0.00204751   | 0.27283459   | 4.68E-02 | 7.92E-02 | 1.00E+00 |
| CYP2J2   | LMNA | -0.121149638 | -0.254936863 | 0.017188843  | 8.59E-02 | 1.34E-01 | 1.00E+00 |
| FAM119B  | LMNA | -0.030445638 | -0.167791403 | 0.108059542  | 6.67E-01 | 7.37E-01 | 1.00E+00 |
| FAM38A   | LMNA | 0.606013875  | 0.510687402  | 0.686621552  | 1.22E-21 | 7.78E-20 | 1.45E-17 |
| APOL3    | LMNA | 0.399201562  | 0.276382023  | 0.509190959  | 3.98E-09 | 2.94E-08 | 4.72E-05 |
| FLNA     | LMNA | 0.693237557  | 0.613942132  | 0.75868115   | 2.88E-30 | 9.50E-28 | 3.42E-26 |
| IL2RB    | LMNA | 0.444570691  | 0.326561915  | 0.548931861  | 3.40E-11 | 3.65E-10 | 4.03E-07 |
| SLCO4C1  | LMNA | 0.012363597  | -0.125902294 | 0.150158307  | 8.61E-01 | 8.98E-01 | 1.00E+00 |
| DENND2D  | LMNA | 0.251966426  | 0.118020683  | 0.376907012  | 2.98E-04 | 8.83E-04 | 1.00E+00 |
| KIAA0152 | LMNA | 0.451952716  | 0.334790116  | 0.555353792  | 1.46E-11 | 1.67E-10 | 1.73E-07 |
| BAX      | LMNA | 0.313648023  | 0.183544389  | 0.432952433  | 5.48E-06 | 2.28E-05 | 6.51E-02 |
| CP       | LMNA | 0.363624349  | 0.237495305  | 0.477695647  | 1.04E-07 | 5.95E-07 | 1.24E-03 |
| LRPAP1   | LMNA | 0.298611259  | 0.167463713  | 0.419374154  | 1.58E-05 | 6.05E-05 | 1.88E-01 |
| G6PC3    | LMNA | 0.212767643  | 0.076977691  | 0.340808158  | 2.36E-03 | 5.63E-03 | 1.00E+00 |
| RPL37    | LMNA | 0.115424718  | -0.022992659 | 0.249500061  | 1.02E-01 | 1.54E-01 | 1.00E+00 |
| NCOA4    | LMNA | -0.220363648 | -0.347833072 | -0.084895283 | 1.63E-03 | 4.03E-03 | 1.00E+00 |
| LRRC14   | LMNA | -0.123994943 | -0.25763583  | 0.014300854  | 7.87E-02 | 1.24E-01 | 1.00E+00 |
| GORASP1  | LMNA | -0.05896164  | -0.195421961 | 0.079738409  | 4.05E-01 | 4.92E-01 | 1.00E+00 |
| FKBP1A   | LMNA | 0.379530391  | 0.254831154  | 0.491813067  | 2.54E-08 | 1.61E-07 | 3.01E-04 |
| FXD3     | LMNA | -0.283952605 | -0.406085094 | -0.151854284 | 4.22E-05 | 1.48E-04 | 5.00E-01 |
| CYP24A1  | LMNA | 0.159491079  | 0.021922772  | 0.291131964  | 2.34E-02 | 4.29E-02 | 1.00E+00 |
| SMARCA1  | LMNA | 0.383903593  | 0.259611557  | 0.495684187  | 1.70E-08 | 1.11E-07 | 2.02E-04 |
| NDUFS7   | LMNA | -0.045849976 | -0.182744272 | 0.092788341  | 5.17E-01 | 6.00E-01 | 1.00E+00 |
| ABCB8    | LMNA | 0.348007824  | 0.220552804  | 0.463777636  | 3.88E-07 | 2.01E-06 | 4.60E-03 |
| CCDC44   | LMNA | -0.007607952 | -0.145506129 | 0.130580195  | 9.14E-01 | 9.38E-01 | 1.00E+00 |
| PRMT7    | LMNA | -0.119236207 | -0.25312067  | 0.019129681  | 9.10E-02 | 1.40E-01 | 1.00E+00 |
| ZNF562   | LMNA | -0.119847206 | -0.253700721 | 0.018510044  | 8.93E-02 | 1.38E-01 | 1.00E+00 |
| COQ2     | LMNA | 0.22283597   | 0.087475969  | 0.350116434  | 1.43E-03 | 3.61E-03 | 1.00E+00 |

|         |      |              |              |              |          |          |          |
|---------|------|--------------|--------------|--------------|----------|----------|----------|
| USH1C   | LMNA | -0.511228765 | -0.606477244 | -0.401514939 | 7.59E-15 | 1.51E-13 | 9.00E-11 |
| SRF     | LMNA | 0.427822154  | 0.307959643  | 0.534315783  | 2.14E-10 | 2.01E-09 | 2.54E-06 |
| MAT2A   | LMNA | -0.122226817 | -0.255958887 | 0.016095776  | 8.31E-02 | 1.30E-01 | 1.00E+00 |
| PGPEP1  | LMNA | 0.35447111   | 0.227555562  | 0.469544889  | 2.27E-07 | 1.23E-06 | 2.69E-03 |
| TRPC3   | LMNA | -0.206706875 | -0.335192784 | -0.070672594 | 3.16E-03 | 7.29E-03 | 1.00E+00 |
| SEMA4C  | LMNA | -0.005976539 | -0.143908805 | 0.132183522  | 9.33E-01 | 9.51E-01 | 1.00E+00 |
| SIN3B   | LMNA | 0.120986424  | -0.017354435 | 0.254781981  | 8.63E-02 | 1.34E-01 | 1.00E+00 |
| KLRD1   | LMNA | 0.070898188  | -0.067816572 | 0.206923907  | 3.16E-01 | 4.01E-01 | 1.00E+00 |
| UTX     | LMNA | -0.016464633 | -0.154165223 | 0.121863358  | 8.16E-01 | 8.61E-01 | 1.00E+00 |
| TRIM8   | LMNA | -0.015413076 | -0.153138231 | 0.122899429  | 8.28E-01 | 8.70E-01 | 1.00E+00 |
| NDRG3   | LMNA | -0.469022291 | -0.570156247 | -0.353884989 | 1.92E-12 | 2.55E-11 | 2.27E-08 |
| SLC10A3 | LMNA | 0.761497504  | 0.696685957  | 0.813978603  | 1.60E-39 | 3.17E-36 | 1.90E-35 |
| SEMA3C  | LMNA | 0.226924145  | 0.091747322  | 0.353888833  | 1.16E-03 | 3.00E-03 | 1.00E+00 |
| RNF6    | LMNA | 0.147802273  | 0.009954384  | 0.280137282  | 3.58E-02 | 6.25E-02 | 1.00E+00 |
| GRAMD3  | LMNA | -0.230025511 | -0.356747892 | -0.094990973 | 9.90E-04 | 2.60E-03 | 1.00E+00 |
| VAV1    | LMNA | 0.240318894  | 0.105777186  | 0.366220081  | 5.71E-04 | 1.59E-03 | 1.00E+00 |
| PDGFC   | LMNA | 0.389063876  | 0.265260174  | 0.500246318  | 1.05E-08 | 7.14E-08 | 1.25E-04 |
| CACNA1I | LMNA | -0.212969947 | -0.340995438 | -0.077188338 | 2.34E-03 | 5.58E-03 | 1.00E+00 |
| PEPD    | LMNA | 0.256412409  | 0.122704916  | 0.38097757   | 2.30E-04 | 6.98E-04 | 1.00E+00 |
| S100A13 | LMNA | 0.399330114  | 0.276523266  | 0.509304231  | 3.93E-09 | 2.92E-08 | 4.66E-05 |
| ARMCX2  | LMNA | 0.305050904  | 0.174341891  | 0.425195811  | 1.01E-05 | 4.01E-05 | 1.20E-01 |
| TP63    | LMNA | 0.137793803  | -0.000262185 | 0.270695479  | 5.05E-02 | 8.46E-02 | 1.00E+00 |
| ANXA11  | LMNA | 0.39187592   | 0.268341911  | 0.502729809  | 8.05E-09 | 5.60E-08 | 9.55E-05 |
| CSF2RB  | LMNA | 0.468283695  | 0.353056767  | 0.569517105  | 2.10E-12 | 2.77E-11 | 2.49E-08 |
| ZNF358  | LMNA | 0.023910379  | -0.114518631 | 0.161428528  | 7.36E-01 | 7.94E-01 | 1.00E+00 |
| IFI44   | LMNA | 0.118948142  | -0.019421782 | 0.252847162  | 9.18E-02 | 1.41E-01 | 1.00E+00 |
| EIF2C4  | LMNA | -0.299781341 | -0.420432687 | -0.168712528 | 1.46E-05 | 5.62E-05 | 1.73E-01 |
| RPS6KA3 | LMNA | 0.503429401  | 0.392668438  | 0.599795271  | 2.23E-14 | 4.03E-13 | 2.65E-10 |
| PHF21A  | LMNA | -0.149463997 | -0.281702447 | -0.01165345  | 3.38E-02 | 5.94E-02 | 1.00E+00 |
| FAM49B  | LMNA | -0.298398636 | -0.419181766 | -0.167236828 | 1.61E-05 | 6.13E-05 | 1.91E-01 |
| DACT1   | LMNA | 0.175520968  | 0.038400442  | 0.306153608  | 1.25E-02 | 2.47E-02 | 1.00E+00 |
| ATP5G1  | LMNA | -0.285857563 | -0.407814992 | -0.153879081 | 3.72E-05 | 1.32E-04 | 4.42E-01 |
| PPWD1   | LMNA | 0.018566916  | -0.119791131 | 0.156217503  | 7.93E-01 | 8.44E-01 | 1.00E+00 |
| PNPLA2  | LMNA | 0.539828155  | 0.434130193  | 0.630864709  | 1.13E-16 | 3.27E-15 | 1.34E-12 |
| DNAJC13 | LMNA | 0.220811779  | 0.08536292   | 0.348247064  | 1.59E-03 | 3.94E-03 | 1.00E+00 |

|           |      |              |              |              |          |          |          |
|-----------|------|--------------|--------------|--------------|----------|----------|----------|
| PAH       | LMNA | -0.212341966 | -0.340414062 | -0.0765345   | 2.41E-03 | 5.74E-03 | 1.00E+00 |
| PTCH2     | LMNA | -0.052754    | -0.189425464 | 0.085922754  | 4.56E-01 | 5.42E-01 | 1.00E+00 |
| EAF2      | LMNA | 0.092937039  | -0.045700299 | 0.228061993  | 1.88E-01 | 2.60E-01 | 1.00E+00 |
| ERCC2     | LMNA | 0.11793575   | -0.02044817  | 0.251885761  | 9.46E-02 | 1.45E-01 | 1.00E+00 |
| TRMU      | LMNA | -0.116096287 | -0.250138269 | 0.022312318  | 9.99E-02 | 1.52E-01 | 1.00E+00 |
| USP3      | LMNA | -0.227211885 | -0.354154192 | -0.092048143 | 1.15E-03 | 2.96E-03 | 1.00E+00 |
| C14orf101 | LMNA | 0.10349938   | -0.035052457 | 0.23814768   | 1.43E-01 | 2.06E-01 | 1.00E+00 |
| CCDC9     | LMNA | 0.31848292   | 0.18872978   | 0.437306898  | 3.85E-06 | 1.65E-05 | 4.57E-02 |
| VPS13B    | LMNA | -0.162528674 | -0.293983495 | -0.025039491 | 2.08E-02 | 3.88E-02 | 1.00E+00 |
| DCLRE1C   | LMNA | -0.286126675 | -0.408059303 | -0.154165211 | 3.66E-05 | 1.30E-04 | 4.34E-01 |
| ST18      | LMNA | -0.333803008 | -0.451067967 | -0.205208388 | 1.21E-06 | 5.69E-06 | 1.43E-02 |
| FRMD4B    | LMNA | 0.038277297  | -0.10030373  | 0.175401438  | 5.89E-01 | 6.67E-01 | 1.00E+00 |
| PSMB9     | LMNA | 0.330653181  | 0.201814403  | 0.448243222  | 1.54E-06 | 7.13E-06 | 1.82E-02 |
| RFPL1     | LMNA | -0.399935773 | -0.509837844 | -0.277188791 | 3.71E-09 | 2.75E-08 | 4.39E-05 |
| LOC552889 | LMNA | -0.367495565 | -0.48113698  | -0.241707123 | 7.44E-08 | 4.37E-07 | 8.83E-04 |
| CDC2L2    | LMNA | 0.085070748  | -0.053609853 | 0.2205318    | 2.29E-01 | 3.06E-01 | 1.00E+00 |
| ProSAPiP1 | LMNA | -0.409615308 | -0.518354501 | -0.287841089 | 1.42E-09 | 1.14E-08 | 1.68E-05 |
| ADRBK2    | LMNA | -0.291701788 | -0.413116693 | -0.160097884 | 2.53E-05 | 9.29E-05 | 3.00E-01 |
| HCLS1     | LMNA | 0.284690999  | 0.152638998  | 0.406755736  | 4.02E-05 | 1.42E-04 | 4.77E-01 |
| GPR15     | LMNA | -0.020392173 | -0.157998383 | 0.117990991  | 7.73E-01 | 8.27E-01 | 1.00E+00 |
| CSF2      | LMNA | 0.223532171  | 0.088203013  | 0.350759151  | 1.38E-03 | 3.50E-03 | 1.00E+00 |
| SLC2A11   | LMNA | -0.314800533 | -0.433990927 | -0.184779791 | 5.04E-06 | 2.11E-05 | 5.98E-02 |
| GRIP2     | LMNA | -0.154430466 | -0.286376133 | -0.01673627  | 2.82E-02 | 5.06E-02 | 1.00E+00 |
| MMP9      | LMNA | 0.3063413    | 0.175721697  | 0.426361178  | 9.25E-06 | 3.68E-05 | 1.10E-01 |
| GPLD1     | LMNA | -0.45036402  | -0.55397276  | -0.333017803 | 1.76E-11 | 1.97E-10 | 2.08E-07 |
| KIAA0802  | LMNA | 0.190091528  | 0.053442996  | 0.319751505  | 6.73E-03 | 1.43E-02 | 1.00E+00 |
| DHRS2     | LMNA | -0.231641239 | -0.358236446 | -0.096681964 | 9.10E-04 | 2.41E-03 | 1.00E+00 |
| RAB8A     | LMNA | 0.413762375  | 0.292414162  | 0.521996759  | 9.32E-10 | 7.74E-09 | 1.11E-05 |
| SGEF      | LMNA | -0.003297393 | -0.14128408  | 0.134814977  | 9.63E-01 | 9.72E-01 | 1.00E+00 |
| PIK3IP1   | LMNA | -0.115866078 | -0.249919509 | 0.022545548  | 1.01E-01 | 1.53E-01 | 1.00E+00 |
| RPS27     | LMNA | 0.101878279  | -0.036688727 | 0.23660162   | 1.49E-01 | 2.14E-01 | 1.00E+00 |
| SNRPD2    | LMNA | 0.011081877  | -0.127163667 | 0.148905073  | 8.76E-01 | 9.08E-01 | 1.00E+00 |
| SLC39A6   | LMNA | -0.157224199 | -0.289002414 | -0.019598585 | 2.54E-02 | 4.63E-02 | 1.00E+00 |
| CTSC      | LMNA | 0.407108404  | 0.285079354  | 0.516150839  | 1.82E-09 | 1.43E-08 | 2.16E-05 |
| AQP7      | LMNA | -0.045447583 | -0.182354476 | 0.093188088  | 5.21E-01 | 6.04E-01 | 1.00E+00 |
