# Supplementary material for: Role of Lamin A/C as Candidate Biomarker of Aggressiveness and Tumorigenicity in Glioblastoma Multiforme
Source: MDPI journal article supplement (doi:10.3390/biomedicines9101343), 2021-09-28
Supplement: s1 [file s1]

**Table S1. List of genes correlated with LMNA gene expression in GBM patients from TCGA RNASeq data.**

| var1                       | var2                    | corr     | corr_CI5%    | corr_CI95%  | pvalue   | FDR_corr<br>ected_Pv<br>al | Bonferro<br>ni_correc<br>ted Pval |
|----------------------------|-------------------------|----------|--------------|-------------|----------|----------------------------|-----------------------------------|
| ENSG00000198804.2_MT-CO1   | ENSG00000160789.18_LMNA | -0.07543 | -0.231841961 | 0.084793727 | 3.56E-01 | 6.39E-01                   | 1.00E+00                          |
| ENSG00000198712.1_MT-CO2   | ENSG00000160789.18_LMNA | -0.08738 | -0.243200158 | 0.072831177 | 2.84E-01 | 5.70E-01                   | 1.00E+00                          |
| ENSG00000198938.2_MT-CO3   | ENSG00000160789.18_LMNA | -0.10589 | -0.26069709  | 0.054223593 | 1.94E-01 | 4.63E-01                   | 1.00E+00                          |
| ENSG00000198886.2_MT-ND4   | ENSG00000160789.18_LMNA | -0.04667 | -0.204348304 | 0.113377256 | 5.68E-01 | 7.98E-01                   | 1.00E+00                          |
| ENSG00000210082.2_MT-RNR2  | ENSG00000160789.18_LMNA | -0.2448  | -0.388849341 | -0.08907397 | 2.37E-03 | 2.23E-02                   | 1.00E+00                          |
| ENSG00000198899.2_MT-ATP6  | ENSG00000160789.18_LMNA | -0.0679  | -0.224675206 | 0.092295136 | 4.06E-01 | 6.81E-01                   | 1.00E+00                          |
| ENSG00000087086.12_FTL     | ENSG00000160789.18_LMNA | -0.01079 | -0.169695688 | 0.14866961  | 8.95E-01 | 9.59E-01                   | 1.00E+00                          |
| ENSG00000198727.2_MT-CYB   | ENSG00000160789.18_LMNA | -0.0821  | -0.238192233 | 0.078116798 | 3.15E-01 | 6.01E-01                   | 1.00E+00                          |
| ENSG00000198840.2_MT-ND3   | ENSG00000160789.18_LMNA | -0.20335 | -0.351184778 | -0.04562985 | 1.20E-02 | 7.47E-02                   | 1.00E+00                          |
| ENSG00000198888.2_MT-ND1   | ENSG00000160789.18_LMNA | -0.0862  | -0.242075001 | 0.074020274 | 2.91E-01 | 5.76E-01                   | 1.00E+00                          |
| ENSG00000131095.10_GFAP    | ENSG00000160789.18_LMNA | -0.13738 | -0.290230427 | 0.022311441 | 9.15E-02 | 2.95E-01                   | 1.00E+00                          |
| ENSG00000198763.3_MT-ND2   | ENSG00000160789.18_LMNA | -0.09697 | -0.252278475 | 0.063203981 | 2.35E-01 | 5.12E-01                   | 1.00E+00                          |
| ENSG00000075624.12_ACTB    | ENSG00000160789.18_LMNA | 0.37417  | 0.228580944  | 0.503381237 | 2.05E-06 | 8.15E-05                   | 1.05E-01                          |
| ENSG00000034510.5_TMSB10   | ENSG00000160789.18_LMNA | 0.1625   | 0.003391312  | 0.313592103 | 4.55E-02 | 1.89E-01                   | 1.00E+00                          |
| ENSG00000198695.2_MT-ND6   | ENSG00000160789.18_LMNA | -0.04973 | -0.20728873  | 0.110345181 | 5.43E-01 | 7.82E-01                   | 1.00E+00                          |
| ENSG00000212907.2_MT-ND4L  | ENSG00000160789.18_LMNA | -0.06853 | -0.225274021 | 0.091669734 | 4.02E-01 | 6.78E-01                   | 1.00E+00                          |
| ENSG00000228253.1_MT-ATP8  | ENSG00000160789.18_LMNA | -0.13935 | -0.292072688 | 0.020299462 | 8.69E-02 | 2.86E-01                   | 1.00E+00                          |
| ENSG00000118785.12_SPP1    | ENSG00000160789.18_LMNA | -0.00769 | -0.166683346 | 0.151699723 | 9.25E-01 | 9.71E-01                   | 1.00E+00                          |
| ENSG00000205542.9_TMSB4X   | ENSG00000160789.18_LMNA | 0.03292  | -0.126949375 | 0.191115775 | 6.87E-01 | 8.65E-01                   | 1.00E+00                          |
| ENSG00000211459.2_MT-RNR1  | ENSG00000160789.18_LMNA | -0.30052 | -0.438734046 | -0.14842443 | 1.69E-04 | 2.86E-03                   | 1.00E+00                          |
| ENSG00000120885.18_CLU     | ENSG00000160789.18_LMNA | 0.07476  | -0.085456838 | 0.231209814 | 3.60E-01 | 6.42E-01                   | 1.00E+00                          |
| ENSG00000111640.13_GAPDH   | ENSG00000160789.18_LMNA | 0.29525  | 0.142758697  | 0.434047951 | 2.22E-04 | 3.54E-03                   | 1.00E+00                          |
| ENSG00000198786.2_MT-ND5   | ENSG00000160789.18_LMNA | -0.02553 | -0.1839824   | 0.134216741 | 7.55E-01 | 8.98E-01                   | 1.00E+00                          |
| ENSG00000133048.11_CHI3L1  | ENSG00000160789.18_LMNA | 0.48448  | 0.352459879  | 0.597585359 | 2.55E-10 | 4.98E-08                   | 1.31E-05                          |
| ENSG00000184009.8_ACTG1    | ENSG00000160789.18_LMNA | 0.32541  | 0.175292742  | 0.46074373  | 4.30E-05 | 9.49E-04                   | 1.00E+00                          |
| ENSG00000156508.16_EEF1A1  | ENSG00000160789.18_LMNA | -0.17853 | -0.328393441 | -0.01989079 | 2.78E-02 | 1.36E-01                   | 1.00E+00                          |
| ENSG00000167552.12_TUBA1A  | ENSG00000160789.18_LMNA | -0.34893 | -0.481393725 | -0.20089384 | 1.05E-05 | 3.04E-04                   | 5.41E-01                          |
| ENSG00000113140.9_SPARC    | ENSG00000160789.18_LMNA | 0.16619  | 0.007181661  | 0.317005734 | 4.07E-02 | 1.76E-01                   | 1.00E+00                          |
| ENSG00000142534.5_RPS11    | ENSG00000160789.18_LMNA | -0.17678 | -0.326779306 | -0.01808327 | 2.94E-02 | 1.41E-01                   | 1.00E+00                          |
| ENSG00000130203.8_APOE     | ENSG00000160789.18_LMNA | -0.10662 | -0.261380906 | 0.053491902 | 1.91E-01 | 4.59E-01                   | 1.00E+00                          |
| ENSG00000204287.12_HLA-DRA | ENSG00000160789.18_LMNA | -0.04471 | -0.202468612 | 0.11531244  | 5.84E-01 | 8.07E-01                   | 1.00E+00                          |

|                            |                         |          |              |             |          |          |          |
|----------------------------|-------------------------|----------|--------------|-------------|----------|----------|----------|
| ENSG00000166710.16_B2M     | ENSG00000160789.18_LMNA | 0.06027  | -0.099884464 | 0.217389389 | 4.61E-01 | 7.24E-01 | 1.00E+00 |
| ENSG00000106153.12_CHCHD2  | ENSG00000160789.18_LMNA | -0.04143 | -0.199314576 | 0.118554178 | 6.12E-01 | 8.24E-01 | 1.00E+00 |
| ENSG00000019582.13_CD74    | ENSG00000160789.18_LMNA | 0.06402  | -0.096156052 | 0.220973119 | 4.33E-01 | 7.03E-01 | 1.00E+00 |
| ENSG00000197746.12_PSAP    | ENSG00000160789.18_LMNA | -0.04443 | -0.202198497 | 0.115590331 | 5.87E-01 | 8.08E-01 | 1.00E+00 |
| ENSG00000112306.7_RPS12    | ENSG00000160789.18_LMNA | -0.17524 | -0.325366627 | -0.01650299 | 3.08E-02 | 1.46E-01 | 1.00E+00 |
| ENSG00000231500.5_RPS18    | ENSG00000160789.18_LMNA | -0.12002 | -0.27398863  | 0.039940635 | 1.41E-01 | 3.83E-01 | 1.00E+00 |
| ENSG00000026025.12_VIM     | ENSG00000160789.18_LMNA | 0.64748  | 0.544394412  | 0.731298451 | 1.99E-19 | 1.13E-15 | 1.02E-14 |
| ENSG00000142541.15_RPL13A  | ENSG00000160789.18_LMNA | -0.1275  | -0.280993436 | 0.032361362 | 1.18E-01 | 3.43E-01 | 1.00E+00 |
| ENSG00000248527.1_MTATP6P1 | ENSG00000160789.18_LMNA | -0.1109  | -0.265414696 | 0.04916881  | 1.74E-01 | 4.34E-01 | 1.00E+00 |
| ENSG00000197956.8_S100A6   | ENSG00000160789.18_LMNA | 0.37524  | 0.229768343  | 0.50431631  | 1.90E-06 | 7.70E-05 | 9.77E-02 |
| ENSG00000152583.11_SPARCL1 | ENSG00000160789.18_LMNA | -0.28162 | -0.421909294 | -0.12817065 | 4.40E-04 | 6.11E-03 | 1.00E+00 |
| ENSG00000177954.10_RPS27   | ENSG00000160789.18_LMNA | -0.08695 | -0.242786342 | 0.073268613 | 2.87E-01 | 5.72E-01 | 1.00E+00 |
| ENSG00000105894.10_PTN     | ENSG00000160789.18_LMNA | 0.2032   | 0.04547209   | 0.351046182 | 1.20E-02 | 7.50E-02 | 1.00E+00 |
| ENSG00000135916.14_ITM2C   | ENSG00000160789.18_LMNA | -0.20808 | -0.355504802 | -0.05055477 | 1.01E-02 | 6.61E-02 | 1.00E+00 |
| ENSG00000125148.6_MT2A     | ENSG00000160789.18_LMNA | 0.3297   | 0.179940029  | 0.464515358 | 3.36E-05 | 7.84E-04 | 1.00E+00 |
| ENSG00000210196.2_MT-TP    | ENSG00000160789.18_LMNA | -0.28146 | -0.421760193 | -0.12799225 | 4.44E-04 | 6.15E-03 | 1.00E+00 |
| ENSG00000170315.12_UBB     | ENSG00000160789.18_LMNA | -0.09348 | -0.248974614 | 0.066714403 | 2.52E-01 | 5.33E-01 | 1.00E+00 |
| ENSG00000162734.11_PEA15   | ENSG00000160789.18_LMNA | -0.34513 | -0.478067492 | -0.19674405 | 1.33E-05 | 3.69E-04 | 6.84E-01 |
| ENSG00000160307.8_S100B    | ENSG00000160789.18_LMNA | -0.27833 | -0.418967585 | -0.12465439 | 5.17E-04 | 6.92E-03 | 1.00E+00 |
| ENSG00000167658.14_EEF2    | ENSG00000160789.18_LMNA | 0.1105   | -0.049570549 | 0.265040305 | 1.75E-01 | 4.36E-01 | 1.00E+00 |
| ENSG00000101439.7_CST3     | ENSG00000160789.18_LMNA | 0.07293  | -0.087287712 | 0.229463045 | 3.72E-01 | 6.52E-01 | 1.00E+00 |
| ENSG00000161016.14_RPL8    | ENSG00000160789.18_LMNA | 0.00189  | -0.157354496 | 0.161045795 | 9.82E-01 | 9.93E-01 | 1.00E+00 |
| ENSG00000206503.10_HLA-A   | ENSG00000160789.18_LMNA | 0.26811  | 0.113770354  | 0.409822674 | 8.39E-04 | 1.01E-02 | 1.00E+00 |
| ENSG00000109846.6_CRYAB    | ENSG00000160789.18_LMNA | -0.4645  | -0.580751083 | -0.32967383 | 1.66E-09 | 2.37E-07 | 8.52E-05 |
| ENSG00000163453.10_IGFBP7  | ENSG00000160789.18_LMNA | 0.19638  | 0.038383104  | 0.344804368 | 1.53E-02 | 8.92E-02 | 1.00E+00 |
| ENSG00000074800.12_ENO1    | ENSG00000160789.18_LMNA | 0.31354  | 0.162443363  | 0.450261539 | 8.38E-05 | 1.63E-03 | 1.00E+00 |
| ENSG00000234745.8_HLA-B    | ENSG00000160789.18_LMNA | 0.2449   | 0.089171936  | 0.38893316  | 2.36E-03 | 2.22E-02 | 1.00E+00 |
| ENSG00000148303.15_RPL7A   | ENSG00000160789.18_LMNA | -0.14563 | -0.297927051 | 0.013888928 | 7.34E-02 | 2.58E-01 | 1.00E+00 |
| ENSG00000100097.10_LGALS1  | ENSG00000160789.18_LMNA | 0.43522  | 0.29656801   | 0.555903874 | 2.10E-08 | 2.01E-06 | 1.08E-03 |
| ENSG00000126709.13_IFI6    | ENSG00000160789.18_LMNA | -0.06273 | -0.219735177 | 0.097444978 | 4.43E-01 | 7.10E-01 | 1.00E+00 |
| ENSG00000089157.14_RPLP0   | ENSG00000160789.18_LMNA | 0.01009  | -0.149352247 | 0.169017573 | 9.02E-01 | 9.62E-01 | 1.00E+00 |
| ENSG00000135404.10_CD63    | ENSG00000160789.18_LMNA | 0.36226  | 0.215491216  | 0.493030288 | 4.51E-06 | 1.53E-04 | 2.32E-01 |
| ENSG00000087250.7_MT3      | ENSG00000160789.18_LMNA | 0.10095  | -0.05920418  | 0.256033974 | 2.16E-01 | 4.90E-01 | 1.00E+00 |



|                            |                         |          |              |             |          |          |          |
|----------------------------|-------------------------|----------|--------------|-------------|----------|----------|----------|
| ENSG00000137154.11_RPS6    | ENSG00000160789.18_LMNA | -0.18171 | -0.331324047 | -0.02317768 | 2.51E-02 | 1.27E-01 | 1.00E+00 |
| ENSG00000140988.14_RPS2    | ENSG00000160789.18_LMNA | 0.11884  | -0.041142933 | 0.27287439  | 1.45E-01 | 3.90E-01 | 1.00E+00 |
| ENSG00000132692.17_BCAN    | ENSG00000160789.18_LMNA | -0.33341 | -0.467778373 | -0.18397089 | 2.70E-05 | 6.57E-04 | 1.00E+00 |
| ENSG00000179218.12_CALR    | ENSG00000160789.18_LMNA | 0.41738  | 0.276550703  | 0.540651868 | 8.82E-08 | 6.47E-06 | 4.53E-03 |
| ENSG00000274012.1_RN7SL2   | ENSG00000160789.18_LMNA | -0.05763 | -0.214857815 | 0.102512884 | 4.81E-01 | 7.38E-01 | 1.00E+00 |
| ENSG00000240583.9_AQP1     | ENSG00000160789.18_LMNA | -0.36383 | -0.494397839 | -0.21721491 | 4.07E-06 | 1.40E-04 | 2.09E-01 |
| ENSG00000145425.8_RPS3A    | ENSG00000160789.18_LMNA | -0.16074 | -0.311956281 | -0.00157812 | 4.79E-02 | 1.96E-01 | 1.00E+00 |
| ENSG00000204525.13_HLA-C   | ENSG00000160789.18_LMNA | 0.17869  | 0.020064869  | 0.328548796 | 2.76E-02 | 1.36E-01 | 1.00E+00 |
| ENSG00000167996.14_FTH1    | ENSG00000160789.18_LMNA | 0.04239  | -0.117602354 | 0.200241332 | 6.04E-01 | 8.18E-01 | 1.00E+00 |
| ENSG00000132432.12_SEC61G  | ENSG00000160789.18_LMNA | 0.17239  | 0.013557844  | 0.322730145 | 3.37E-02 | 1.55E-01 | 1.00E+00 |
| ENSG00000176340.3_COX8A    | ENSG00000160789.18_LMNA | -0.13832 | -0.291108336 | 0.021352971 | 8.92E-02 | 2.91E-01 | 1.00E+00 |
| ENSG00000065978.16_YBX1    | ENSG00000160789.18_LMNA | 0.02408  | -0.135637588 | 0.182583821 | 7.68E-01 | 9.04E-01 | 1.00E+00 |
| ENSG00000096384.18_HSP90AB | ENSG00000160789.18_LMNA | 0.03016  | -0.129659752 | 0.188459292 | 7.12E-01 | 8.78E-01 | 1.00E+00 |
| ENSG00000102265.10_TIMP1   | ENSG00000160789.18_LMNA | 0.49482  | 0.364316976  | 0.606260693 | 9.18E-11 | 2.10E-08 | 4.71E-06 |
| ENSG00000108298.8_RPL19    | ENSG00000160789.18_LMNA | -0.23873 | -0.383363984 | -0.08267512 | 3.06E-03 | 2.71E-02 | 1.00E+00 |
| ENSG00000171858.16_RPS21   | ENSG00000160789.18_LMNA | -0.06658 | -0.223413878 | 0.093611649 | 4.15E-01 | 6.88E-01 | 1.00E+00 |
| ENSG00000108953.15_YWHAE   | ENSG00000160789.18_LMNA | -0.32545 | -0.460774229 | -0.17533027 | 4.29E-05 | 9.48E-04 | 1.00E+00 |
| ENSG00000168653.9_NDUFS5   | ENSG00000160789.18_LMNA | -0.02081 | -0.179412285 | 0.13885478  | 7.99E-01 | 9.19E-01 | 1.00E+00 |
| ENSG00000117519.14_CNN3    | ENSG00000160789.18_LMNA | 0.1751   | 0.016359728  | 0.325238487 | 3.10E-02 | 1.46E-01 | 1.00E+00 |
| ENSG00000173369.14_C1QB    | ENSG00000160789.18_LMNA | 0.00975  | -0.149682985 | 0.168688917 | 9.05E-01 | 9.63E-01 | 1.00E+00 |
| ENSG00000175130.6_MARCKSL1 | ENSG00000160789.18_LMNA | -0.31564 | -0.452118514 | -0.1647126  | 7.46E-05 | 1.49E-03 | 1.00E+00 |
| ENSG00000198755.9_RPL10A   | ENSG00000160789.18_LMNA | -0.19011 | -0.339049279 | -0.03187412 | 1.90E-02 | 1.04E-01 | 1.00E+00 |
| ENSG00000159189.10_C1QC    | ENSG00000160789.18_LMNA | 0.01743  | -0.14216587  | 0.17614126  | 8.31E-01 | 9.34E-01 | 1.00E+00 |
| ENSG00000142937.10_RPS8    | ENSG00000160789.18_LMNA | -0.12453 | -0.278214733 | 0.035372267 | 1.26E-01 | 3.59E-01 | 1.00E+00 |
| ENSG00000166165.11_CKB     | ENSG00000160789.18_LMNA | -0.18563 | -0.33493215  | -0.02723359 | 2.20E-02 | 1.16E-01 | 1.00E+00 |
| ENSG00000136942.13_RPL35   | ENSG00000160789.18_LMNA | -0.04673 | -0.204409265 | 0.113314455 | 5.68E-01 | 7.98E-01 | 1.00E+00 |
| ENSG00000198034.9_RPS4X    | ENSG00000160789.18_LMNA | -0.04995 | -0.207501256 | 0.110125801 | 5.41E-01 | 7.81E-01 | 1.00E+00 |
| ENSG00000133112.15_TPT1    | ENSG00000160789.18_LMNA | -0.11269 | -0.267099407 | 0.047359775 | 1.67E-01 | 4.24E-01 | 1.00E+00 |
| ENSG00000159335.14_PTMS    | ENSG00000160789.18_LMNA | -0.05369 | -0.211088641 | 0.106418054 | 5.11E-01 | 7.60E-01 | 1.00E+00 |
| ENSG00000187653.11_TMSB4XP | ENSG00000160789.18_LMNA | 0.05708  | -0.103055752 | 0.214334417 | 4.85E-01 | 7.42E-01 | 1.00E+00 |
| ENSG00000111669.13_TPI1    | ENSG00000160789.18_LMNA | 0.28068  | 0.127162839  | 0.421066787 | 4.61E-04 | 6.32E-03 | 1.00E+00 |
| ENSG00000109971.12_HSPA8   | ENSG00000160789.18_LMNA | -0.07149 | -0.228097832 | 0.088717171 | 3.81E-01 | 6.60E-01 | 1.00E+00 |
| ENSG00000233276.3_GPX1     | ENSG00000160789.18_LMNA | -0.09398 | -0.249448774 | 0.066211078 | 2.49E-01 | 5.30E-01 | 1.00E+00 |

|                            |                         |          |              |             |          |          |          |
|----------------------------|-------------------------|----------|--------------|-------------|----------|----------|----------|
| ENSG00000229117.7_RPL41    | ENSG00000160789.18_LMNA | -0.13045 | -0.28375516  | 0.029363211 | 1.09E-01 | 3.29E-01 | 1.00E+00 |
| ENSG00000131469.11_RPL27   | ENSG00000160789.18_LMNA | -0.19545 | -0.343951503 | -0.03741687 | 1.58E-02 | 9.12E-02 | 1.00E+00 |
| ENSG00000135744.7_AGT      | ENSG00000160789.18_LMNA | -0.20796 | -0.355393911 | -0.05042817 | 1.01E-02 | 6.63E-02 | 1.00E+00 |
| ENSG00000110955.7_ATP5B    | ENSG00000160789.18_LMNA | -0.16885 | -0.31946478  | -0.00991761 | 3.76E-02 | 1.66E-01 | 1.00E+00 |
| ENSG00000196126.9_HLA-DRB1 | ENSG00000160789.18_LMNA | 0.02751  | -0.132265538 | 0.185900925 | 7.37E-01 | 8.89E-01 | 1.00E+00 |
| ENSG00000196230.11_TUBB    | ENSG00000160789.18_LMNA | 0.10341  | -0.056721735 | 0.258360019 | 2.05E-01 | 4.76E-01 | 1.00E+00 |
| ENSG00000089220.4_PEBP1    | ENSG00000160789.18_LMNA | -0.17841 | -0.328286236 | -0.01977068 | 2.79E-02 | 1.36E-01 | 1.00E+00 |
| ENSG00000142089.14_IFITM3  | ENSG00000160789.18_LMNA | 0.3756   | 0.230156597  | 0.504621919 | 1.86E-06 | 7.59E-05 | 9.54E-02 |
| ENSG00000137818.10_RPLP1   | ENSG00000160789.18_LMNA | 0.0436   | -0.116404221 | 0.201407104 | 5.94E-01 | 8.12E-01 | 1.00E+00 |
| ENSG00000122406.11_RPL5    | ENSG00000160789.18_LMNA | -0.22362 | -0.369660645 | -0.06679735 | 5.62E-03 | 4.28E-02 | 1.00E+00 |
| ENSG00000177600.7_RPLP2    | ENSG00000160789.18_LMNA | 0.03893  | -0.121016062 | 0.196914887 | 6.34E-01 | 8.36E-01 | 1.00E+00 |
| ENSG00000162244.9_RPL29    | ENSG00000160789.18_LMNA | -0.1821  | -0.331685832 | -0.02358391 | 2.47E-02 | 1.25E-01 | 1.00E+00 |
| ENSG00000108518.7_PFN1     | ENSG00000160789.18_LMNA | 0.3179   | 0.167155018  | 0.454114419 | 6.58E-05 | 1.34E-03 | 1.00E+00 |
| ENSG00000202198.1_7SK      | ENSG00000160789.18_LMNA | -0.14516 | -0.29748881  | 0.014369692 | 7.44E-02 | 2.60E-01 | 1.00E+00 |
| ENSG00000067560.9_RHOA     | ENSG00000160789.18_LMNA | -0.1205  | -0.274433432 | 0.039460426 | 1.39E-01 | 3.80E-01 | 1.00E+00 |
| ENSG00000155368.15_DBI     | ENSG00000160789.18_LMNA | -0.15883 | -0.310184391 | 0.000383594 | 5.07E-02 | 2.03E-01 | 1.00E+00 |
| ENSG00000172020.11_GAP43   | ENSG00000160789.18_LMNA | 0.1788   | 0.020172833  | 0.328645141 | 2.75E-02 | 1.35E-01 | 1.00E+00 |
| ENSG00000244734.2_HBB      | ENSG00000160789.18_LMNA | -0.13187 | -0.285088443 | 0.027913767 | 1.05E-01 | 3.22E-01 | 1.00E+00 |
| ENSG00000143878.9_RHOB     | ENSG00000160789.18_LMNA | -0.18319 | -0.332691135 | -0.02471325 | 2.39E-02 | 1.23E-01 | 1.00E+00 |
| ENSG00000166681.12_BEX3    | ENSG00000160789.18_LMNA | -0.13704 | -0.289917919 | 0.022652488 | 9.23E-02 | 2.97E-01 | 1.00E+00 |
| ENSG00000109472.12_CPE     | ENSG00000160789.18_LMNA | 0.01401  | -0.145512094 | 0.17282837  | 8.64E-01 | 9.47E-01 | 1.00E+00 |
| ENSG00000147588.6_PMP2     | ENSG00000160789.18_LMNA | -0.26463 | -0.406699276 | -0.11006918 | 9.86E-04 | 1.15E-02 | 1.00E+00 |
| ENSG00000126432.12_PRDX5   | ENSG00000160789.18_LMNA | -0.07691 | -0.233250786 | 0.083314882 | 3.46E-01 | 6.31E-01 | 1.00E+00 |
| ENSG00000118181.9_RPS25    | ENSG00000160789.18_LMNA | -0.26422 | -0.40633313  | -0.10963584 | 1.00E-03 | 1.16E-02 | 1.00E+00 |
| ENSG00000100316.14_RPL3    | ENSG00000160789.18_LMNA | -0.14158 | -0.294150248 | 0.018027469 | 8.19E-02 | 2.76E-01 | 1.00E+00 |
| ENSG00000128524.4_ATP6V1F  | ENSG00000160789.18_LMNA | -0.11846 | -0.272524425 | 0.041520369 | 1.46E-01 | 3.91E-01 | 1.00E+00 |
| ENSG00000163191.5_S100A11  | ENSG00000160789.18_LMNA | 0.35285  | 0.205178025  | 0.48481922  | 8.25E-06 | 2.49E-04 | 4.23E-01 |
| ENSG00000173372.15_C1QA    | ENSG00000160789.18_LMNA | 0.0412   | -0.118779483 | 0.199095121 | 6.14E-01 | 8.25E-01 | 1.00E+00 |
| ENSG00000168028.12_RPSA    | ENSG00000160789.18_LMNA | -0.22819 | -0.373812874 | -0.07159231 | 4.69E-03 | 3.74E-02 | 1.00E+00 |
| ENSG00000142192.19_APP     | ENSG00000160789.18_LMNA | 0.29907  | 0.146857993  | 0.43744003  | 1.82E-04 | 3.03E-03 | 1.00E+00 |
| ENSG00000164111.13_ANXA5   | ENSG00000160789.18_LMNA | 0.41219  | 0.27075281   | 0.536201549 | 1.32E-07 | 9.10E-06 | 6.76E-03 |
| ENSG00000105193.7_RPS16    | ENSG00000160789.18_LMNA | -0.13778 | -0.290608431 | 0.02189882  | 9.05E-02 | 2.93E-01 | 1.00E+00 |
| ENSG00000099795.5_NDUFB7   | ENSG00000160789.18_LMNA | -0.1194  | -0.27340191  | 0.040573837 | 1.43E-01 | 3.86E-01 | 1.00E+00 |

|                            |                         |          |              |             |          |          |          |
|----------------------------|-------------------------|----------|--------------|-------------|----------|----------|----------|
| ENSG00000171885.12_AQP4    | ENSG00000160789.18_LMNA | -0.22836 | -0.373965875 | -0.07176926 | 4.66E-03 | 3.72E-02 | 1.00E+00 |
| ENSG00000166033.10_HTRA1   | ENSG00000160789.18_LMNA | 0.19584  | 0.037816078  | 0.344303932 | 1.56E-02 | 9.03E-02 | 1.00E+00 |
| ENSG00000137285.9_TUBB2B   | ENSG00000160789.18_LMNA | -0.03384 | -0.192001491 | 0.126044633 | 6.79E-01 | 8.60E-01 | 1.00E+00 |
| ENSG00000142676.11_RPL11   | ENSG00000160789.18_LMNA | 0.02211  | -0.137576442 | 0.180673274 | 7.87E-01 | 9.13E-01 | 1.00E+00 |
| ENSG00000147403.15_RPL10   | ENSG00000160789.18_LMNA | -0.05843 | -0.215627779 | 0.101713933 | 4.75E-01 | 7.34E-01 | 1.00E+00 |
| ENSG00000204592.8_HLA-E    | ENSG00000160789.18_LMNA | 0.16014  | 0.000962592  | 0.311400547 | 4.88E-02 | 1.98E-01 | 1.00E+00 |
| ENSG00000149925.15_ALDOA   | ENSG00000160789.18_LMNA | 0.32284  | 0.172504675  | 0.458476042 | 4.98E-05 | 1.07E-03 | 1.00E+00 |
| ENSG00000117450.12_PRDX1   | ENSG00000160789.18_LMNA | -0.01829 | -0.17697661  | 0.141320965 | 8.23E-01 | 9.31E-01 | 1.00E+00 |
| ENSG00000144713.11_RPL32   | ENSG00000160789.18_LMNA | -0.22995 | -0.375412101 | -0.07344281 | 4.37E-03 | 3.54E-02 | 1.00E+00 |
| ENSG00000129244.7_ATP1B2   | ENSG00000160789.18_LMNA | 0.16533  | 0.006290748  | 0.31620409  | 4.18E-02 | 1.79E-01 | 1.00E+00 |
| ENSG00000149806.9_FAU      | ENSG00000160789.18_LMNA | -0.12822 | -0.281673078 | 0.03162406  | 1.15E-01 | 3.40E-01 | 1.00E+00 |
| ENSG00000083845.7_RPS5     | ENSG00000160789.18_LMNA | -0.10019 | -0.255321156 | 0.059964148 | 2.19E-01 | 4.94E-01 | 1.00E+00 |
| ENSG00000106211.8_HSPB1    | ENSG00000160789.18_LMNA | 0.49421  | 0.36361903   | 0.605751625 | 9.76E-11 | 2.20E-08 | 5.01E-06 |
| ENSG00000080824.17_HSP90AA | ENSG00000160789.18_LMNA | 0.12652  | -0.033348085 | 0.280083388 | 1.20E-01 | 3.49E-01 | 1.00E+00 |
| ENSG00000002586.16_CD99    | ENSG00000160789.18_LMNA | 0.23312  | 0.076772057  | 0.378284745 | 3.85E-03 | 3.22E-02 | 1.00E+00 |
| ENSG00000158710.13_TAGLN2  | ENSG00000160789.18_LMNA | 0.58274  | 0.466850571  | 0.678952747 | 3.38E-15 | 5.83E-12 | 1.73E-10 |
| ENSG00000105372.5_RPS19    | ENSG00000160789.18_LMNA | -0.05992 | -0.217053885 | 0.100233057 | 4.63E-01 | 7.26E-01 | 1.00E+00 |
| ENSG00000169100.11_SLC25A6 | ENSG00000160789.18_LMNA | 0.07445  | -0.085769883 | 0.230911294 | 3.62E-01 | 6.44E-01 | 1.00E+00 |
| ENSG00000139644.11_TMBIM6  | ENSG00000160789.18_LMNA | 0.09586  | -0.064319    | 0.251229862 | 2.40E-01 | 5.19E-01 | 1.00E+00 |
| ENSG00000163682.14_RPL9    | ENSG00000160789.18_LMNA | -0.22566 | -0.371515794 | -0.06893793 | 5.18E-03 | 4.04E-02 | 1.00E+00 |
| ENSG00000092841.17_MYL6    | ENSG00000160789.18_LMNA | 0.00865  | -0.150761335 | 0.167616866 | 9.16E-01 | 9.68E-01 | 1.00E+00 |
| ENSG00000115268.8_RPS15    | ENSG00000160789.18_LMNA | -0.04708 | -0.204747574 | 0.112965888 | 5.65E-01 | 7.95E-01 | 1.00E+00 |
| ENSG00000134590.12_FAM127A | ENSG00000160789.18_LMNA | -0.12168 | -0.275542735 | 0.03826219  | 1.35E-01 | 3.74E-01 | 1.00E+00 |
| ENSG00000228474.4_OST4     | ENSG00000160789.18_LMNA | -0.09615 | -0.251500133 | 0.064031689 | 2.39E-01 | 5.17E-01 | 1.00E+00 |
| ENSG00000164733.19_CTSB    | ENSG00000160789.18_LMNA | 0.19415  | 0.036060105  | 0.342753068 | 1.65E-02 | 9.42E-02 | 1.00E+00 |
| ENSG00000046653.13_GPM6B   | ENSG00000160789.18_LMNA | -0.16743 | -0.318150963 | -0.00845527 | 3.92E-02 | 1.71E-01 | 1.00E+00 |
| ENSG00000134308.12_YWHAQ   | ENSG00000160789.18_LMNA | -0.31065 | -0.447705167 | -0.15932442 | 9.82E-05 | 1.85E-03 | 1.00E+00 |
| ENSG00000111716.11_LDHB    | ENSG00000160789.18_LMNA | -0.35364 | -0.485503605 | -0.20603525 | 7.85E-06 | 2.41E-04 | 4.03E-01 |
| ENSG00000129562.9_DAD1     | ENSG00000160789.18_LMNA | 0.03688  | -0.123041998 | 0.194937273 | 6.52E-01 | 8.46E-01 | 1.00E+00 |
| ENSG00000115461.4_IGFBP5   | ENSG00000160789.18_LMNA | 0.13601  | -0.023706785 | 0.288951424 | 9.48E-02 | 3.01E-01 | 1.00E+00 |
| ENSG00000126267.7_COX6B1   | ENSG00000160789.18_LMNA | -0.15222 | -0.304047903 | 0.007159067 | 6.12E-02 | 2.29E-01 | 1.00E+00 |
| ENSG00000150991.13_UBC     | ENSG00000160789.18_LMNA | 0.30309  | 0.151187376  | 0.441013545 | 1.47E-04 | 2.56E-03 | 1.00E+00 |
| ENSG00000197958.11_RPL12   | ENSG00000160789.18_LMNA | -0.03326 | -0.191449106 | 0.126608945 | 6.84E-01 | 8.63E-01 | 1.00E+00 |

|                           |                         |          |              |             |          |          |          |
|---------------------------|-------------------------|----------|--------------|-------------|----------|----------|----------|
| ENSG00000172757.11_CFL1   | ENSG00000160789.18_LMNA | 0.071    | -0.089213192 | 0.227623814 | 3.85E-01 | 6.63E-01 | 1.00E+00 |
| ENSG00000172270.17_BSG    | ENSG00000160789.18_LMNA | 0.21641  | 0.059251481  | 0.363101657 | 7.41E-03 | 5.25E-02 | 1.00E+00 |
| ENSG00000196262.12_PPIA   | ENSG00000160789.18_LMNA | 0.07004  | -0.090168971 | 0.226710006 | 3.91E-01 | 6.69E-01 | 1.00E+00 |
| ENSG00000005022.5_SLC25A5 | ENSG00000160789.18_LMNA | -0.06335 | -0.220328758 | 0.096827083 | 4.38E-01 | 7.06E-01 | 1.00E+00 |
| ENSG00000103363.13_TCEB2  | ENSG00000160789.18_LMNA | -0.24847 | -0.392154206 | -0.09294118 | 2.02E-03 | 1.97E-02 | 1.00E+00 |
| ENSG00000147604.12_RPL7   | ENSG00000160789.18_LMNA | -0.13747 | -0.290315569 | 0.022218511 | 9.12E-02 | 2.95E-01 | 1.00E+00 |
| ENSG00000100979.13_PLTP   | ENSG00000160789.18_LMNA | 0.31441  | 0.163390489  | 0.451036898 | 7.98E-05 | 1.57E-03 | 1.00E+00 |
| ENSG00000117984.11_CTSD   | ENSG00000160789.18_LMNA | 0.24622  | 0.090569759  | 0.39012854  | 2.23E-03 | 2.13E-02 | 1.00E+00 |
| ENSG00000152661.7_GJA1    | ENSG00000160789.18_LMNA | -0.05806 | -0.21527501  | 0.102080034 | 4.77E-01 | 7.36E-01 | 1.00E+00 |
| ENSG00000067225.16_PKM    | ENSG00000160789.18_LMNA | 0.44961  | 0.312797829  | 0.568143169 | 6.22E-09 | 7.20E-07 | 3.19E-04 |
| ENSG00000112335.13_SNX3   | ENSG00000160789.18_LMNA | -0.13738 | -0.290236573 | 0.022304733 | 9.14E-02 | 2.95E-01 | 1.00E+00 |
| ENSG00000117318.8_ID3     | ENSG00000160789.18_LMNA | -0.23573 | -0.380649556 | -0.0795178  | 3.46E-03 | 2.98E-02 | 1.00E+00 |
| ENSG00000169714.15_CNBP   | ENSG00000160789.18_LMNA | -0.2814  | -0.421705728 | -0.12792709 | 4.45E-04 | 6.16E-03 | 1.00E+00 |
| ENSG00000135446.15_CDK4   | ENSG00000160789.18_LMNA | -0.27617 | -0.417031363 | -0.12234402 | 5.73E-04 | 7.49E-03 | 1.00E+00 |
| ENSG00000187514.13_PTMA   | ENSG00000160789.18_LMNA | 0.03038  | -0.129444646 | 0.188670292 | 7.10E-01 | 8.77E-01 | 1.00E+00 |
| ENSG00000123416.14_TUBA1B | ENSG00000160789.18_LMNA | -0.04439 | -0.202159929 | 0.115630005 | 5.87E-01 | 8.08E-01 | 1.00E+00 |
| ENSG00000106278.10_PTPRZ1 | ENSG00000160789.18_LMNA | -0.06422 | -0.221160925 | 0.095960418 | 4.32E-01 | 7.01E-01 | 1.00E+00 |
| ENSG00000173812.9	EIF1    | ENSG00000160789.18_LMNA | -0.05592 | -0.213219118 | 0.10421191  | 4.94E-01 | 7.49E-01 | 1.00E+00 |
| ENSG00000175899.13_A2M    | ENSG00000160789.18_LMNA | 0.22991  | 0.073397743  | 0.375373171 | 4.38E-03 | 3.55E-02 | 1.00E+00 |
| ENSG00000114391.11_RPL24  | ENSG00000160789.18_LMNA | -0.20762 | -0.355082047 | -0.05007217 | 1.03E-02 | 6.68E-02 | 1.00E+00 |
| ENSG00000008988.8_RPS20   | ENSG00000160789.18_LMNA | -0.09887 | -0.254066929 | 0.061300448 | 2.26E-01 | 5.02E-01 | 1.00E+00 |
| ENSG00000079215.12_SLC1A3 | ENSG00000160789.18_LMNA | 0.07612  | -0.084099968 | 0.232503037 | 3.51E-01 | 6.35E-01 | 1.00E+00 |
| ENSG00000123560.12_PLP1   | ENSG00000160789.18_LMNA | -0.52361 | -0.630274363 | -0.39755213 | 4.46E-12 | 1.82E-09 | 2.29E-07 |
| ENSG00000143947.11_RPS27A | ENSG00000160789.18_LMNA | -0.20093 | -0.348964527 | -0.04310448 | 1.31E-02 | 7.94E-02 | 1.00E+00 |
| ENSG00000133872.12_SARAF  | ENSG00000160789.18_LMNA | -0.13669 | -0.289591112 | 0.023009062 | 9.31E-02 | 2.98E-01 | 1.00E+00 |
| ENSG00000122026.9_RPL21   | ENSG00000160789.18_LMNA | -0.27814 | -0.418798951 | -0.12445304 | 5.21E-04 | 6.97E-03 | 1.00E+00 |
| ENSG00000136238.16_RAC1   | ENSG00000160789.18_LMNA | 0.06609  | -0.094103848 | 0.222942038 | 4.19E-01 | 6.91E-01 | 1.00E+00 |
| ENSG00000167815.10_PRDX2  | ENSG00000160789.18_LMNA | -0.28413 | -0.424143944 | -0.13084671 | 3.89E-04 | 5.54E-03 | 1.00E+00 |
| ENSG00000110700.5_RPS13   | ENSG00000160789.18_LMNA | -0.20736 | -0.354850411 | -0.0498078  | 1.04E-02 | 6.72E-02 | 1.00E+00 |
| ENSG00000130066.15_SAT1   | ENSG00000160789.18_LMNA | 0.12105  | -0.038903372 | 0.274949245 | 1.37E-01 | 3.78E-01 | 1.00E+00 |
| ENSG00000254999.3_BRK1    | ENSG00000160789.18_LMNA | -0.25052 | -0.394010588 | -0.0951174  | 1.85E-03 | 1.85E-02 | 1.00E+00 |
| ENSG00000068697.6_LAPTM4A | ENSG00000160789.18_LMNA | 0.18855  | 0.03026213   | 0.337620436 | 2.00E-02 | 1.08E-01 | 1.00E+00 |
| ENSG00000174444.13_RPL4   | ENSG00000160789.18_LMNA | -0.06603 | -0.222887002 | 0.094161249 | 4.19E-01 | 6.91E-01 | 1.00E+00 |

|                            |                         |          |              |             |          |          |          |
|----------------------------|-------------------------|----------|--------------|-------------|----------|----------|----------|
| ENSG00000044574.7_HSPA5    | ENSG00000160789.18_LMNA | 0.51934  | 0.392601134  | 0.626725084 | 7.12E-12 | 2.66E-09 | 3.65E-07 |
| ENSG00000204628.10_RACK1   | ENSG00000160789.18_LMNA | 0.08195  | -0.07826705  | 0.238049628 | 3.15E-01 | 6.02E-01 | 1.00E+00 |
| ENSG00000135821.15_GLUL    | ENSG00000160789.18_LMNA | 0.12603  | -0.0338477   | 0.279622382 | 1.22E-01 | 3.51E-01 | 1.00E+00 |
| ENSG00000127022.13_CANX    | ENSG00000160789.18_LMNA | 0.20593  | 0.048313298  | 0.353540249 | 1.09E-02 | 6.98E-02 | 1.00E+00 |
| ENSG00000164587.10_RPS14   | ENSG00000160789.18_LMNA | -0.1826  | -0.332141698 | -0.02409592 | 2.43E-02 | 1.24E-01 | 1.00E+00 |
| ENSG00000130255.11_RPL36   | ENSG00000160789.18_LMNA | -0.0073  | -0.16630898  | 0.152075879 | 9.29E-01 | 9.73E-01 | 1.00E+00 |
| ENSG00000179010.13_MRFAP1  | ENSG00000160789.18_LMNA | -0.13733 | -0.290189671 | 0.022355923 | 9.16E-02 | 2.95E-01 | 1.00E+00 |
| ENSG00000145284.10_SCD5    | ENSG00000160789.18_LMNA | -0.31134 | -0.448315381 | -0.1600684  | 9.45E-05 | 1.81E-03 | 1.00E+00 |
| ENSG00000104904.11_OAZ1    | ENSG00000160789.18_LMNA | -0.06565 | -0.222525451 | 0.094538281 | 4.22E-01 | 6.93E-01 | 1.00E+00 |
| ENSG00000130208.8_APOC1    | ENSG00000160789.18_LMNA | -0.17984 | -0.329601901 | -0.02124536 | 2.66E-02 | 1.32E-01 | 1.00E+00 |
| ENSG00000107223.11_EDF1    | ENSG00000160789.18_LMNA | 0.13035  | -0.029460068 | 0.283666021 | 1.09E-01 | 3.29E-01 | 1.00E+00 |
| ENSG0000012223.11_LTF      | ENSG00000160789.18_LMNA | 0.19218  | 0.034020889  | 0.340949946 | 1.77E-02 | 9.88E-02 | 1.00E+00 |
| ENSG00000188643.9_S100A16  | ENSG00000160789.18_LMNA | 0.40199  | 0.259388079  | 0.527435237 | 2.85E-07 | 1.69E-05 | 1.46E-02 |
| ENSG00000143742.11_SRP9    | ENSG00000160789.18_LMNA | -0.35417 | -0.485966962 | -0.20661588 | 7.59E-06 | 2.34E-04 | 3.89E-01 |
| ENSG00000227097.5_RPS28P7  | ENSG00000160789.18_LMNA | -0.13547 | -0.288447318 | 0.024256411 | 9.61E-02 | 3.04E-01 | 1.00E+00 |
| ENSG00000277443.1_MARCKS   | ENSG00000160789.18_LMNA | -0.4093  | -0.533723386 | -0.26753258 | 1.64E-07 | 1.08E-05 | 8.43E-03 |
| ENSG00000114942.12_EEF1B2  | ENSG00000160789.18_LMNA | -0.19466 | -0.343225305 | -0.0365946  | 1.63E-02 | 9.30E-02 | 1.00E+00 |
| ENSG00000132688.10_NES     | ENSG00000160789.18_LMNA | 0.46598  | 0.331364128  | 0.582007286 | 1.45E-09 | 2.13E-07 | 7.44E-05 |
| ENSG00000183255.10_PTTG1IP | ENSG00000160789.18_LMNA | 0.18765  | 0.029322088  | 0.336786543 | 2.06E-02 | 1.10E-01 | 1.00E+00 |
| ENSG00000162511.7_LAPTM5   | ENSG00000160789.18_LMNA | -0.00192 | -0.161073643 | 0.157326614 | 9.81E-01 | 9.93E-01 | 1.00E+00 |
| ENSG00000087460.22_GNAS    | ENSG00000160789.18_LMNA | 0.01126  | -0.14820626  | 0.170155796 | 8.90E-01 | 9.57E-01 | 1.00E+00 |
| ENSG00000198242.12_RPL23A  | ENSG00000160789.18_LMNA | -0.11992 | -0.273892146 | 0.04004478  | 1.41E-01 | 3.83E-01 | 1.00E+00 |
| ENSG00000240342.3_RPS2P5   | ENSG00000160789.18_LMNA | -0.03516 | -0.193281668 | 0.12473602  | 6.67E-01 | 8.53E-01 | 1.00E+00 |
| ENSG00000118680.11_MYL12B  | ENSG00000160789.18_LMNA | 0.00925  | -0.150168084 | 0.168206745 | 9.10E-01 | 9.66E-01 | 1.00E+00 |
| ENSG00000197747.7_S100A10  | ENSG00000160789.18_LMNA | 0.30492  | 0.153157305  | 0.442636507 | 1.34E-04 | 2.38E-03 | 1.00E+00 |
| ENSG00000125534.8_PPDPF    | ENSG00000160789.18_LMNA | 0.25227  | 0.096966345  | 0.395585872 | 1.72E-03 | 1.74E-02 | 1.00E+00 |
| ENSG00000149273.13_RPS3    | ENSG00000160789.18_LMNA | -0.20604 | -0.353637201 | -0.04842384 | 1.09E-02 | 6.95E-02 | 1.00E+00 |
| ENSG00000170889.12_RPS9    | ENSG00000160789.18_LMNA | -0.09734 | -0.252623386 | 0.062837055 | 2.33E-01 | 5.11E-01 | 1.00E+00 |
| ENSG00000084207.14_GSTP1   | ENSG00000160789.18_LMNA | 0.202    | 0.044221036  | 0.349946605 | 1.26E-02 | 7.72E-02 | 1.00E+00 |
| ENSG00000164929.15_BAALC   | ENSG00000160789.18_LMNA | -0.32835 | -0.463326527 | -0.17847381 | 3.63E-05 | 8.34E-04 | 1.00E+00 |
| ENSG00000182492.14_BGN     | ENSG00000160789.18_LMNA | 0.45747  | 0.321702506  | 0.574810747 | 3.12E-09 | 4.02E-07 | 1.60E-04 |
| ENSG00000132507.16	EIF5A   | ENSG00000160789.18_LMNA | 0.02374  | -0.135974312 | 0.182252186 | 7.72E-01 | 9.06E-01 | 1.00E+00 |
| ENSG00000164434.10_FABP7   | ENSG00000160789.18_LMNA | 0.1508   | -0.008603773 | 0.302736096 | 6.37E-02 | 2.35E-01 | 1.00E+00 |

|                            |                         |          |              |             |          |          |          |
|----------------------------|-------------------------|----------|--------------|-------------|----------|----------|----------|
| ENSG00000146648.14_EGFR    | ENSG00000160789.18_LMNA | 0.06766  | -0.092539539 | 0.224441128 | 4.08E-01 | 6.83E-01 | 1.00E+00 |
| ENSG00000181449.3_SOX2     | ENSG00000160789.18_LMNA | -0.12631 | -0.279885039 | 0.033563064 | 1.21E-01 | 3.50E-01 | 1.00E+00 |
| ENSG00000125730.15_C3      | ENSG00000160789.18_LMNA | 0.02494  | -0.13479908  | 0.183409344 | 7.60E-01 | 9.00E-01 | 1.00E+00 |
| ENSG00000122862.4_SRGN     | ENSG00000160789.18_LMNA | -0.04124 | -0.199128779 | 0.11874493  | 6.14E-01 | 8.25E-01 | 1.00E+00 |
| ENSG00000124614.12_RPS10   | ENSG00000160789.18_LMNA | -0.14006 | -0.292734107 | 0.019576493 | 8.52E-02 | 2.83E-01 | 1.00E+00 |
| ENSG00000084623.10	EIF3I   | ENSG00000160789.18_LMNA | 0.01618  | -0.143393714 | 0.174926485 | 8.43E-01 | 9.39E-01 | 1.00E+00 |
| ENSG00000102144.12_PGK1    | ENSG00000160789.18_LMNA | 0.19356  | 0.035454722  | 0.34221801  | 1.69E-02 | 9.56E-02 | 1.00E+00 |
| ENSG00000063177.11_RPL18   | ENSG00000160789.18_LMNA | -0.05469 | -0.212046517 | 0.105426545 | 5.03E-01 | 7.55E-01 | 1.00E+00 |
| ENSG00000146731.9_CCT6A    | ENSG00000160789.18_LMNA | 0.08516  | -0.075054838 | 0.241095374 | 2.97E-01 | 5.83E-01 | 1.00E+00 |
| ENSG00000075785.11_RAB7A   | ENSG00000160789.18_LMNA | -0.0773  | -0.233626586 | 0.082920169 | 3.44E-01 | 6.28E-01 | 1.00E+00 |
| ENSG00000011600.10_TYROBP  | ENSG00000160789.18_LMNA | -0.04422 | -0.201994721 | 0.11579994  | 5.89E-01 | 8.09E-01 | 1.00E+00 |
| ENSG00000172354.8_GNB2     | ENSG00000160789.18_LMNA | 0.39058  | 0.246721264  | 0.517596823 | 6.53E-07 | 3.25E-05 | 3.35E-02 |
| ENSG00000166598.11_HSP90B1 | ENSG00000160789.18_LMNA | 0.39074  | 0.246899889  | 0.517736062 | 6.46E-07 | 3.22E-05 | 3.31E-02 |
| ENSG00000109107.12_ALDOC   | ENSG00000160789.18_LMNA | -0.52129 | -0.628342005 | -0.39485494 | 5.76E-12 | 2.25E-09 | 2.95E-07 |
| ENSG00000154277.11_UCHL1   | ENSG00000160789.18_LMNA | -0.40957 | -0.533953212 | -0.26783097 | 1.61E-07 | 1.06E-05 | 8.26E-03 |
| ENSG00000143933.15_CALM2   | ENSG00000160789.18_LMNA | -0.30168 | -0.439756198 | -0.14966281 | 1.59E-04 | 2.73E-03 | 1.00E+00 |
| ENSG00000213719.7_CLIC1    | ENSG00000160789.18_LMNA | 0.41486  | 0.273737896  | 0.538494671 | 1.07E-07 | 7.65E-06 | 5.50E-03 |
| ENSG00000174748.17_RPL15   | ENSG00000160789.18_LMNA | -0.3727  | -0.50210689  | -0.22696403 | 2.26E-06 | 8.76E-05 | 1.16E-01 |
| ENSG00000111775.2_COX6A1   | ENSG00000160789.18_LMNA | -0.24736 | -0.391156183 | -0.09177238 | 2.12E-03 | 2.05E-02 | 1.00E+00 |
| ENSG00000143761.12_ARF1    | ENSG00000160789.18_LMNA | 0.08166  | -0.078566632 | 0.237765254 | 3.17E-01 | 6.04E-01 | 1.00E+00 |
| ENSG00000167468.15_GPX4    | ENSG00000160789.18_LMNA | -0.07401 | -0.230497632 | 0.086203569 | 3.65E-01 | 6.46E-01 | 1.00E+00 |
| ENSG00000188229.5_TUBB4B   | ENSG00000160789.18_LMNA | 0.31955  | 0.168940591  | 0.455571744 | 6.00E-05 | 1.24E-03 | 1.00E+00 |
| ENSG00000110651.10_CD81    | ENSG00000160789.18_LMNA | 0.13534  | -0.024381511 | 0.288332554 | 9.64E-02 | 3.05E-01 | 1.00E+00 |
| ENSG00000140319.9_SRP14    | ENSG00000160789.18_LMNA | -0.10395 | -0.258862656 | 0.056184789 | 2.03E-01 | 4.73E-01 | 1.00E+00 |
| ENSG00000255302.3_EID1     | ENSG00000160789.18_LMNA | -0.03975 | -0.197696046 | 0.120215086 | 6.27E-01 | 8.32E-01 | 1.00E+00 |
| ENSG00000182117.5_NOP10    | ENSG00000160789.18_LMNA | 0.01065  | -0.148805412 | 0.16956081  | 8.96E-01 | 9.60E-01 | 1.00E+00 |
| ENSG00000169504.13_CLIC4   | ENSG00000160789.18_LMNA | 0.32936  | 0.179572006  | 0.464217056 | 3.42E-05 | 7.96E-04 | 1.00E+00 |
| ENSG00000105640.11_RPL18A  | ENSG00000160789.18_LMNA | -0.15074 | -0.302679352 | 0.008666236 | 6.38E-02 | 2.35E-01 | 1.00E+00 |
| ENSG00000145741.14_BTF3    | ENSG00000160789.18_LMNA | -0.16941 | -0.319977352 | -0.01048848 | 3.69E-02 | 1.64E-01 | 1.00E+00 |
| ENSG00000167526.12_RPL13   | ENSG00000160789.18_LMNA | 0.02847  | -0.131321816 | 0.186827972 | 7.28E-01 | 8.85E-01 | 1.00E+00 |
| ENSG00000118705.15_RPN2    | ENSG00000160789.18_LMNA | 0.36669  | 0.220356104  | 0.496886486 | 3.38E-06 | 1.21E-04 | 1.73E-01 |
| ENSG00000101182.13_PSMA7   | ENSG00000160789.18_LMNA | 0.03631  | -0.123605467 | 0.194386783 | 6.57E-01 | 8.48E-01 | 1.00E+00 |
| ENSG00000125995.14_ROMO1   | ENSG00000160789.18_LMNA | -0.06069 | -0.217783731 | 0.099474637 | 4.58E-01 | 7.22E-01 | 1.00E+00 |

|                             |                         |          |              |             |          |          |          |
|-----------------------------|-------------------------|----------|--------------|-------------|----------|----------|----------|
| ENSG00000100427.14_MLC1     | ENSG00000160789.18_LMNA | 0.08277  | -0.077448054 | 0.238826773 | 3.11E-01 | 5.97E-01 | 1.00E+00 |
| ENSG00000132329.9_RAMP1     | ENSG00000160789.18_LMNA | 0.10015  | -0.060004459 | 0.255283336 | 2.20E-01 | 4.95E-01 | 1.00E+00 |
| ENSG00000169567.10_HINT1    | ENSG00000160789.18_LMNA | -0.10924 | -0.263850425 | 0.05084667  | 1.80E-01 | 4.44E-01 | 1.00E+00 |
| ENSG00000182899.13_RPL35A   | ENSG00000160789.18_LMNA | -0.18533 | -0.334655283 | -0.026922   | 2.23E-02 | 1.17E-01 | 1.00E+00 |
| ENSG00000125743.9_SNRPD2    | ENSG00000160789.18_LMNA | -0.01566 | -0.17442424  | 0.143901075 | 8.48E-01 | 9.41E-01 | 1.00E+00 |
| ENSG00000165119.17_HNRNPK   | ENSG00000160789.18_LMNA | 0.01605  | -0.1435187   | 0.174802775 | 8.44E-01 | 9.39E-01 | 1.00E+00 |
| ENSG00000113732.7_ATP6V0E1  | ENSG00000160789.18_LMNA | -0.09489 | -0.25031381  | 0.065292421 | 2.45E-01 | 5.25E-01 | 1.00E+00 |
| ENSG00000160014.15_CALM3    | ENSG00000160789.18_LMNA | -0.12828 | -0.281727422 | 0.03156509  | 1.15E-01 | 3.39E-01 | 1.00E+00 |
| ENSG00000165502.6_RPL36AL   | ENSG00000160789.18_LMNA | 0.02637  | -0.133388042 | 0.184797517 | 7.47E-01 | 8.94E-01 | 1.00E+00 |
| ENSG00000166925.7_TSC22D4   | ENSG00000160789.18_LMNA | -0.20645 | -0.354013406 | -0.04885287 | 1.07E-02 | 6.88E-02 | 1.00E+00 |
| ENSG00000169976.6_SF3B5     | ENSG00000160789.18_LMNA | -0.14145 | -0.294026026 | 0.018163406 | 8.22E-02 | 2.77E-01 | 1.00E+00 |
| ENSG00000135486.16_HNRNPA1  | ENSG00000160789.18_LMNA | -0.05135 | -0.208839065 | 0.10874414  | 5.30E-01 | 7.73E-01 | 1.00E+00 |
| ENSG00000132718.8_SYT11     | ENSG00000160789.18_LMNA | -0.22873 | -0.374304197 | -0.07216061 | 4.59E-03 | 3.68E-02 | 1.00E+00 |
| ENSG00000125835.16_SNRPB    | ENSG00000160789.18_LMNA | 0.07999  | -0.080228014 | 0.236187224 | 3.27E-01 | 6.14E-01 | 1.00E+00 |
| ENSG00000184221.11_OLIG1    | ENSG00000160789.18_LMNA | -0.37258 | -0.502006873 | -0.2268372  | 2.28E-06 | 8.81E-05 | 1.17E-01 |
| ENSG00000108679.11_LGALS3BI | ENSG00000160789.18_LMNA | 0.30937  | 0.15794762   | 0.446575198 | 1.05E-04 | 1.96E-03 | 1.00E+00 |
| ENSG00000070087.12_PFN2     | ENSG00000160789.18_LMNA | -0.45851 | -0.575689862 | -0.32287993 | 2.85E-09 | 3.73E-07 | 1.46E-04 |
| ENSG00000178719.15_GRINA    | ENSG00000160789.18_LMNA | -0.00759 | -0.166592854 | 0.151790655 | 9.26E-01 | 9.72E-01 | 1.00E+00 |
| ENSG00000159377.9_PSMB4     | ENSG00000160789.18_LMNA | 0.04309  | -0.116909033 | 0.200916037 | 5.98E-01 | 8.15E-01 | 1.00E+00 |
| ENSG00000131094.3_C1QL1     | ENSG00000160789.18_LMNA | -0.19809 | -0.346370339 | -0.04015872 | 1.44E-02 | 8.55E-02 | 1.00E+00 |
| ENSG00000115457.8_IGFBP2    | ENSG00000160789.18_LMNA | 0.4278   | 0.288234933  | 0.549575706 | 3.85E-08 | 3.33E-06 | 1.98E-03 |
| ENSG00000233927.4_RPS28     | ENSG00000160789.18_LMNA | -0.05454 | -0.211897118 | 0.105581231 | 5.05E-01 | 7.55E-01 | 1.00E+00 |
| ENSG00000162512.14_SDC3     | ENSG00000160789.18_LMNA | 0.09072  | -0.069480811 | 0.246365802 | 2.66E-01 | 5.50E-01 | 1.00E+00 |
| ENSG00000142168.13_SOD1     | ENSG00000160789.18_LMNA | -0.02885 | -0.187194551 | 0.130948484 | 7.24E-01 | 8.83E-01 | 1.00E+00 |
| ENSG00000232112.3_TMA7      | ENSG00000160789.18_LMNA | -0.25776 | -0.400524744 | -0.10277658 | 1.35E-03 | 1.45E-02 | 1.00E+00 |
| ENSG00000125356.6_NDUFA1    | ENSG00000160789.18_LMNA | -0.15175 | -0.303613488 | 0.007637636 | 6.20E-02 | 2.30E-01 | 1.00E+00 |
| ENSG00000183291.14_SELENOF  | ENSG00000160789.18_LMNA | -0.04402 | -0.201810242 | 0.115989676 | 5.90E-01 | 8.10E-01 | 1.00E+00 |
| ENSG00000221983.6_UBA52     | ENSG00000160789.18_LMNA | -0.05558 | -0.21289251  | 0.104550321 | 4.96E-01 | 7.51E-01 | 1.00E+00 |
| ENSG00000133169.5_BEX1      | ENSG00000160789.18_LMNA | -0.39965 | -0.525419986 | -0.25678594 | 3.38E-07 | 1.94E-05 | 1.74E-02 |
| ENSG00000198830.9_HMG2      | ENSG00000160789.18_LMNA | -0.09666 | -0.251980549 | 0.063520854 | 2.36E-01 | 5.14E-01 | 1.00E+00 |
| ENSG00000168309.15_FAM107A  | ENSG00000160789.18_LMNA | -0.30297 | -0.440902502 | -0.15105268 | 1.48E-04 | 2.57E-03 | 1.00E+00 |
| ENSG00000135506.14_OS9      | ENSG00000160789.18_LMNA | -0.11927 | -0.273282071 | 0.040703139 | 1.43E-01 | 3.87E-01 | 1.00E+00 |
| ENSG00000159840.14_ZYX      | ENSG00000160789.18_LMNA | 0.5167   | 0.389546225  | 0.624530219 | 9.46E-12 | 3.42E-09 | 4.85E-07 |

|                            |                         |          |              |             |          |          |          |
|----------------------------|-------------------------|----------|--------------|-------------|----------|----------|----------|
| ENSG00000197728.8_RPS26    | ENSG00000160789.18_LMNA | -0.1963  | -0.344725764 | -0.03829403 | 1.54E-02 | 8.93E-02 | 1.00E+00 |
| ENSG00000150625.15_GPM6A   | ENSG00000160789.18_LMNA | -0.38461 | -0.512438117 | -0.24011629 | 9.97E-07 | 4.59E-05 | 5.12E-02 |
| ENSG00000035862.11_TIMP2   | ENSG00000160789.18_LMNA | 0.15668  | -0.002580659 | 0.30819736  | 5.39E-02 | 2.11E-01 | 1.00E+00 |
| ENSG00000168385.16_SEPT2   | ENSG00000160789.18_LMNA | -0.26159 | -0.403964274 | -0.10683499 | 1.13E-03 | 1.27E-02 | 1.00E+00 |
| ENSG00000105701.14_FKBP8   | ENSG00000160789.18_LMNA | -0.00885 | -0.167810766 | 0.150566352 | 9.14E-01 | 9.67E-01 | 1.00E+00 |
| ENSG00000116288.11_PARK7   | ENSG00000160789.18_LMNA | -0.12231 | -0.276129387 | 0.037628141 | 1.33E-01 | 3.71E-01 | 1.00E+00 |
| ENSG00000170540.13_ARL6IP1 | ENSG00000160789.18_LMNA | -0.1785  | -0.328368678 | -0.01986305 | 2.78E-02 | 1.36E-01 | 1.00E+00 |
| ENSG00000156482.9_RPL30    | ENSG00000160789.18_LMNA | -0.20115 | -0.349168262 | -0.04333605 | 1.30E-02 | 7.90E-02 | 1.00E+00 |
| ENSG00000070756.12_PABPC1  | ENSG00000160789.18_LMNA | -0.0576  | -0.214835498 | 0.102536035 | 4.81E-01 | 7.39E-01 | 1.00E+00 |
| ENSG00000113657.11_DPYSL3  | ENSG00000160789.18_LMNA | -0.0429  | -0.200728525 | 0.11710175  | 6.00E-01 | 8.16E-01 | 1.00E+00 |
| ENSG00000166794.4_PPIB     | ENSG00000160789.18_LMNA | 0.3522   | 0.204461822  | 0.484247164 | 8.60E-06 | 2.58E-04 | 4.41E-01 |
| ENSG00000130303.11_BST2    | ENSG00000160789.18_LMNA | 0.16766  | 0.008693112  | 0.31836473  | 3.90E-02 | 1.70E-01 | 1.00E+00 |
| ENSG00000105767.2_CADM4    | ENSG00000160789.18_LMNA | -0.09992 | -0.255061082 | 0.060241332 | 2.21E-01 | 4.96E-01 | 1.00E+00 |
| ENSG00000186468.11_RPS23   | ENSG00000160789.18_LMNA | -0.23494 | -0.379931871 | -0.07868403 | 3.57E-03 | 3.05E-02 | 1.00E+00 |
| ENSG00000198668.9_CALM1    | ENSG00000160789.18_LMNA | -0.04752 | -0.20516836  | 0.112532234 | 5.61E-01 | 7.93E-01 | 1.00E+00 |
| ENSG00000128272.13_ATF4    | ENSG00000160789.18_LMNA | -0.15072 | -0.302661752 | 0.008685609 | 6.38E-02 | 2.35E-01 | 1.00E+00 |
| ENSG00000005486.15_RHBDD2  | ENSG00000160789.18_LMNA | 0.21711  | 0.0599853    | 0.363740829 | 7.21E-03 | 5.15E-02 | 1.00E+00 |
| ENSG00000178952.7_TUFM     | ENSG00000160789.18_LMNA | 0.00118  | -0.158051629 | 0.160349344 | 9.89E-01 | 9.96E-01 | 1.00E+00 |
| ENSG00000126247.9_CAPNS1   | ENSG00000160789.18_LMNA | 0.19427  | 0.03618986   | 0.342867724 | 1.65E-02 | 9.39E-02 | 1.00E+00 |
| ENSG00000189043.8_NDUFA4   | ENSG00000160789.18_LMNA | -0.21449 | -0.361353315 | -0.05724592 | 7.96E-03 | 5.54E-02 | 1.00E+00 |
| ENSG00000075618.16_FSCN1   | ENSG00000160789.18_LMNA | 0.08752  | -0.07269647  | 0.243327568 | 2.84E-01 | 5.69E-01 | 1.00E+00 |
| ENSG00000196683.9_TOMM7    | ENSG00000160789.18_LMNA | 0.02835  | -0.131447632 | 0.186704412 | 7.29E-01 | 8.85E-01 | 1.00E+00 |
| ENSG00000132475.7_H3F3B    | ENSG00000160789.18_LMNA | -0.09385 | -0.249322949 | 0.066344659 | 2.50E-01 | 5.31E-01 | 1.00E+00 |
| ENSG00000111897.6_SERINC1  | ENSG00000160789.18_LMNA | -0.15105 | -0.302968006 | 0.008348462 | 6.32E-02 | 2.34E-01 | 1.00E+00 |
| ENSG00000187608.7_ISG15    | ENSG00000160789.18_LMNA | -0.05053 | -0.208054896 | 0.109554162 | 5.36E-01 | 7.77E-01 | 1.00E+00 |
| ENSG00000120738.7_EGR1     | ENSG00000160789.18_LMNA | 0.30914  | 0.157703771  | 0.446374971 | 1.07E-04 | 1.98E-03 | 1.00E+00 |
| ENSG00000110321.14	EIF4G2  | ENSG00000160789.18_LMNA | 0.04497  | -0.115054591 | 0.202719202 | 5.82E-01 | 8.06E-01 | 1.00E+00 |
| ENSG00000143621.15_ILF2    | ENSG00000160789.18_LMNA | -0.11129 | -0.265784395 | 0.048772006 | 1.72E-01 | 4.31E-01 | 1.00E+00 |
| ENSG00000117592.8_PRDX6    | ENSG00000160789.18_LMNA | 0.23011  | 0.073610257  | 0.375556718 | 4.34E-03 | 3.53E-02 | 1.00E+00 |
| ENSG00000106624.7_AEBP1    | ENSG00000160789.18_LMNA | 0.39524  | 0.251888751  | 0.521619119 | 4.67E-07 | 2.49E-05 | 2.40E-02 |
| ENSG00000137409.17_MTCH1   | ENSG00000160789.18_LMNA | -0.25034 | -0.393842705 | -0.09492048 | 1.87E-03 | 1.86E-02 | 1.00E+00 |
| ENSG00000122566.19_HNRNPA2 | ENSG00000160789.18_LMNA | 0.19381  | 0.035711959  | 0.342445389 | 1.67E-02 | 9.50E-02 | 1.00E+00 |
| ENSG00000105854.11_PON2    | ENSG00000160789.18_LMNA | -0.08561 | -0.241523048 | 0.074603264 | 2.94E-01 | 5.80E-01 | 1.00E+00 |



|                            |                         |          |              |             |          |          |          |
|----------------------------|-------------------------|----------|--------------|-------------|----------|----------|----------|
| ENSG00000189058.7_APOD     | ENSG00000160789.18_LMNA | -0.10518 | -0.260026658 | 0.054940635 | 1.97E-01 | 4.67E-01 | 1.00E+00 |
| ENSG00000064886.12_CHI3L2  | ENSG00000160789.18_LMNA | -0.009   | -0.167956628 | 0.150419659 | 9.12E-01 | 9.67E-01 | 1.00E+00 |
| ENSG00000134333.12_LDHA    | ENSG00000160789.18_LMNA | 0.33608  | 0.186878487  | 0.470127299 | 2.31E-05 | 5.79E-04 | 1.00E+00 |
| ENSG00000203879.10_GDI1    | ENSG00000160789.18_LMNA | -0.14509 | -0.297418984 | 0.014446281 | 7.45E-02 | 2.60E-01 | 1.00E+00 |
| ENSG00000277791.3_PSMB3    | ENSG00000160789.18_LMNA | -0.14841 | -0.300506932 | 0.011055796 | 6.80E-02 | 2.45E-01 | 1.00E+00 |
| ENSG00000106682.13	EIF4H   | ENSG00000160789.18_LMNA | 0.38077  | 0.235868269  | 0.509109851 | 1.30E-06 | 5.72E-05 | 6.69E-02 |
| ENSG00000182774.9_RPS17    | ENSG00000160789.18_LMNA | -0.0365  | -0.194572799 | 0.123415088 | 6.55E-01 | 8.47E-01 | 1.00E+00 |
| ENSG00000170458.12_CD14    | ENSG00000160789.18_LMNA | 0.18159  | 0.023054432  | 0.331214268 | 2.52E-02 | 1.27E-01 | 1.00E+00 |
| ENSG00000131238.15_PPT1    | ENSG00000160789.18_LMNA | -0.14757 | -0.299732791 | 0.011906455 | 6.96E-02 | 2.49E-01 | 1.00E+00 |
| ENSG00000123349.12_PFDN5   | ENSG00000160789.18_LMNA | -0.21123 | -0.358377627 | -0.05383809 | 9.00E-03 | 6.07E-02 | 1.00E+00 |
| ENSG00000118816.8_CCNI     | ENSG00000160789.18_LMNA | -0.21231 | -0.359362878 | -0.05496564 | 8.64E-03 | 5.89E-02 | 1.00E+00 |
| ENSG00000181163.12_NPM1    | ENSG00000160789.18_LMNA | -0.04253 | -0.200378336 | 0.117461596 | 6.03E-01 | 8.18E-01 | 1.00E+00 |
| ENSG00000204580.10_DDR1    | ENSG00000160789.18_LMNA | 0.0204   | -0.139253498 | 0.179018764 | 8.03E-01 | 9.21E-01 | 1.00E+00 |
| ENSG00000168710.16_AHCYL1  | ENSG00000160789.18_LMNA | -0.16854 | -0.319173777 | -0.00959359 | 3.79E-02 | 1.67E-01 | 1.00E+00 |
| ENSG00000089009.14_RPL6    | ENSG00000160789.18_LMNA | -0.13391 | -0.286990403 | 0.02584382  | 1.00E-01 | 3.12E-01 | 1.00E+00 |
| ENSG00000142669.12_SH3BGR1 | ENSG00000160789.18_LMNA | 0.35278  | 0.205095036  | 0.484752946 | 8.29E-06 | 2.50E-04 | 4.25E-01 |
| ENSG00000135940.5_COX5B    | ENSG00000160789.18_LMNA | -0.22628 | -0.372073462 | -0.06958195 | 5.06E-03 | 3.96E-02 | 1.00E+00 |
| ENSG00000088832.13_FKBP1A  | ENSG00000160789.18_LMNA | 0.27357  | 0.119579373  | 0.414710906 | 6.49E-04 | 8.27E-03 | 1.00E+00 |
| ENSG00000161203.12_AP2M1   | ENSG00000160789.18_LMNA | 0.14372  | -0.015841574 | 0.296146296 | 7.73E-02 | 2.66E-01 | 1.00E+00 |
| ENSG00000143612.17_C1orf43 | ENSG00000160789.18_LMNA | -0.14791 | -0.30004107  | 0.011567759 | 6.90E-02 | 2.47E-01 | 1.00E+00 |
| ENSG00000142156.13_COL6A1  | ENSG00000160789.18_LMNA | 0.57287  | 0.45517961   | 0.670883072 | 1.24E-14 | 1.63E-11 | 6.36E-10 |
| ENSG00000164405.9_UQCRQ    | ENSG00000160789.18_LMNA | -0.14728 | -0.299457826 | 0.012208491 | 7.02E-02 | 2.50E-01 | 1.00E+00 |
| ENSG00000197756.8_RPL37A   | ENSG00000160789.18_LMNA | -0.17354 | -0.323795492 | -0.01474727 | 3.25E-02 | 1.51E-01 | 1.00E+00 |
| ENSG00000132646.9_PCNA     | ENSG00000160789.18_LMNA | 0.04714  | -0.112907022 | 0.2048047   | 5.64E-01 | 7.95E-01 | 1.00E+00 |
| ENSG00000129538.12_RNASE1  | ENSG00000160789.18_LMNA | 0.02959  | -0.130228088 | 0.187901667 | 7.17E-01 | 8.80E-01 | 1.00E+00 |
| ENSG00000123562.15_MORF4L2 | ENSG00000160789.18_LMNA | -0.20214 | -0.350076195 | -0.04436843 | 1.25E-02 | 7.70E-02 | 1.00E+00 |
| ENSG00000172201.9_ID4      | ENSG00000160789.18_LMNA | -0.19922 | -0.347399409 | -0.04132662 | 1.39E-02 | 8.29E-02 | 1.00E+00 |
| ENSG00000198258.9_UBL5     | ENSG00000160789.18_LMNA | -0.17743 | -0.327378955 | -0.01875453 | 2.88E-02 | 1.39E-01 | 1.00E+00 |
| ENSG00000088986.9_DYNLL1   | ENSG00000160789.18_LMNA | -0.20084 | -0.348889057 | -0.0430187  | 1.31E-02 | 7.96E-02 | 1.00E+00 |
| ENSG00000225630.1_MTND2P28 | ENSG00000160789.18_LMNA | -0.10453 | -0.259411272 | 0.055598518 | 2.00E-01 | 4.70E-01 | 1.00E+00 |
| ENSG00000075142.12_SRI     | ENSG00000160789.18_LMNA | -0.06878 | -0.225510803 | 0.09142237  | 4.00E-01 | 6.76E-01 | 1.00E+00 |
| ENSG00000110958.14_PTGES3  | ENSG00000160789.18_LMNA | -0.21486 | -0.361693291 | -0.05763573 | 7.85E-03 | 5.48E-02 | 1.00E+00 |
| ENSG00000105088.7_OLFM2    | ENSG00000160789.18_LMNA | -0.09622 | -0.251563836 | 0.063963962 | 2.38E-01 | 5.17E-01 | 1.00E+00 |

|                            |                         |          |              |             |          |          |          |
|----------------------------|-------------------------|----------|--------------|-------------|----------|----------|----------|
| ENSG00000126524.8_SBDS     | ENSG00000160789.18_LMNA | 0.06982  | -0.090385942 | 0.226502485 | 3.93E-01 | 6.70E-01 | 1.00E+00 |
| ENSG00000058262.8_SEC61A1  | ENSG00000160789.18_LMNA | 0.41502  | 0.273918519  | 0.538633299 | 1.06E-07 | 7.59E-06 | 5.44E-03 |
| ENSG00000147065.15_MSN     | ENSG00000160789.18_LMNA | 0.51254  | 0.384734491  | 0.621065581 | 1.48E-11 | 4.67E-09 | 7.57E-07 |
| ENSG00000010278.10_CD9     | ENSG00000160789.18_LMNA | -0.05195 | -0.209414293 | 0.108149678 | 5.25E-01 | 7.70E-01 | 1.00E+00 |
| ENSG00000214253.7_FIS1     | ENSG00000160789.18_LMNA | -0.13916 | -0.291891084 | 0.020497909 | 8.73E-02 | 2.87E-01 | 1.00E+00 |
| ENSG00000004059.9_ARF5     | ENSG00000160789.18_LMNA | 0.0935   | -0.066694887 | 0.248993002 | 2.52E-01 | 5.33E-01 | 1.00E+00 |
| ENSG00000170439.6_METTL7B  | ENSG00000160789.18_LMNA | 0.44013  | 0.302095912  | 0.560085263 | 1.40E-08 | 1.42E-06 | 7.17E-04 |
| ENSG00000127184.9_COX7C    | ENSG00000160789.18_LMNA | -0.22335 | -0.369415984 | -0.06651525 | 5.68E-03 | 4.31E-02 | 1.00E+00 |
| ENSG00000115738.8_ID2      | ENSG00000160789.18_LMNA | -0.28056 | -0.420956714 | -0.12703121 | 4.64E-04 | 6.35E-03 | 1.00E+00 |
| ENSG00000131981.14_LGALS3  | ENSG00000160789.18_LMNA | 0.48866  | 0.357249293  | 0.601096493 | 1.69E-10 | 3.47E-08 | 8.68E-06 |
| ENSG00000168374.9_ARF4     | ENSG00000160789.18_LMNA | -0.07775 | -0.234055732 | 0.082469303 | 3.41E-01 | 6.26E-01 | 1.00E+00 |
| ENSG00000174021.9_GNG5     | ENSG00000160789.18_LMNA | 0.26612  | 0.111650903  | 0.408034932 | 9.20E-04 | 1.09E-02 | 1.00E+00 |
| ENSG00000171863.11_RPS7    | ENSG00000160789.18_LMNA | -0.19276 | -0.341478589 | -0.03461849 | 1.74E-02 | 9.74E-02 | 1.00E+00 |
| ENSG00000101421.3_CHMP4B   | ENSG00000160789.18_LMNA | 0.28658  | 0.133468629  | 0.426329931 | 3.44E-04 | 5.00E-03 | 1.00E+00 |
| ENSG00000174903.13_RAB1B   | ENSG00000160789.18_LMNA | 0.07179  | -0.088424451 | 0.228377498 | 3.79E-01 | 6.58E-01 | 1.00E+00 |
| ENSG00000123144.9_C19orf43 | ENSG00000160789.18_LMNA | -0.03389 | -0.19205627  | 0.125988659 | 6.78E-01 | 8.60E-01 | 1.00E+00 |
| ENSG00000197696.8_NMB      | ENSG00000160789.18_LMNA | -0.19963 | -0.347779958 | -0.04175871 | 1.37E-02 | 8.20E-02 | 1.00E+00 |
| ENSG00000237550.5_RPL9P9   | ENSG00000160789.18_LMNA | -0.06091 | -0.217998626 | 0.099251259 | 4.56E-01 | 7.20E-01 | 1.00E+00 |
| ENSG00000173660.10_UQCRH   | ENSG00000160789.18_LMNA | -0.18291 | -0.332431432 | -0.02442143 | 2.41E-02 | 1.23E-01 | 1.00E+00 |
| ENSG00000138326.17_RPS24   | ENSG00000160789.18_LMNA | -0.20656 | -0.354117777 | -0.04897191 | 1.07E-02 | 6.86E-02 | 1.00E+00 |
| ENSG00000135069.12_PSAT1   | ENSG00000160789.18_LMNA | -0.39202 | -0.518842503 | -0.24831996 | 5.89E-07 | 3.00E-05 | 3.02E-02 |
| ENSG00000105887.10_MTPN    | ENSG00000160789.18_LMNA | 0.12492  | -0.034979554 | 0.278577458 | 1.25E-01 | 3.57E-01 | 1.00E+00 |
| ENSG00000018625.13_ATP1A2  | ENSG00000160789.18_LMNA | -0.29852 | -0.436952356 | -0.14626803 | 1.87E-04 | 3.10E-03 | 1.00E+00 |
| ENSG00000170345.8_FOS      | ENSG00000160789.18_LMNA | 0.2193   | 0.062277714  | 0.365735728 | 6.64E-03 | 4.84E-02 | 1.00E+00 |
| ENSG00000102316.15_MAGED2  | ENSG00000160789.18_LMNA | -0.21953 | -0.365938509 | -0.06251092 | 6.58E-03 | 4.82E-02 | 1.00E+00 |
| ENSG00000137312.13_FLOT1   | ENSG00000160789.18_LMNA | 0.25137  | 0.096012792  | 0.394773671 | 1.79E-03 | 1.79E-02 | 1.00E+00 |
| ENSG00000198356.10_ASNA1   | ENSG00000160789.18_LMNA | -0.1942  | -0.34280443  | -0.03611823 | 1.65E-02 | 9.41E-02 | 1.00E+00 |
| ENSG00000095970.15_TREM2   | ENSG00000160789.18_LMNA | -0.18423 | -0.333648102 | -0.02578902 | 2.31E-02 | 1.20E-01 | 1.00E+00 |
| ENSG00000185624.13_P4HB    | ENSG00000160789.18_LMNA | 0.59699  | 0.483768843  | 0.690560294 | 4.77E-16 | 1.11E-12 | 2.45E-11 |
| ENSG00000177700.5_POLR2L   | ENSG00000160789.18_LMNA | 0.14909  | -0.010356166 | 0.301143321 | 6.68E-02 | 2.42E-01 | 1.00E+00 |
| ENSG00000169020.8_ATP5I    | ENSG00000160789.18_LMNA | -0.21285 | -0.359860372 | -0.05553528 | 8.47E-03 | 5.81E-02 | 1.00E+00 |
| ENSG00000115380.17_EFEMP1  | ENSG00000160789.18_LMNA | 0.15746  | -0.001787596 | 0.308914921 | 5.27E-02 | 2.08E-01 | 1.00E+00 |
| ENSG00000111843.12_TMEM14C | ENSG00000160789.18_LMNA | -0.18834 | -0.337427356 | -0.03004442 | 2.01E-02 | 1.09E-01 | 1.00E+00 |

|                             |                         |          |              |             |          |          |          |
|-----------------------------|-------------------------|----------|--------------|-------------|----------|----------|----------|
| ENSG00000166595.10_FAM96B   | ENSG00000160789.18_LMNA | -0.1116  | -0.266074047 | 0.048461047 | 1.71E-01 | 4.30E-01 | 1.00E+00 |
| ENSG00000166913.11_YWHAB    | ENSG00000160789.18_LMNA | -0.22037 | -0.36670683  | -0.0633948  | 6.37E-03 | 4.70E-02 | 1.00E+00 |
| ENSG00000185825.14_BCAP31   | ENSG00000160789.18_LMNA | 0.24973  | 0.094280236  | 0.393296748 | 1.92E-03 | 1.89E-02 | 1.00E+00 |
| ENSG00000100632.9_ERH       | ENSG00000160789.18_LMNA | -0.16234 | -0.313442706 | -0.00322563 | 4.57E-02 | 1.90E-01 | 1.00E+00 |
| ENSG00000128245.13_YWHAH    | ENSG00000160789.18_LMNA | -0.15804 | -0.309451578 | 0.001194217 | 5.18E-02 | 2.06E-01 | 1.00E+00 |
| ENSG00000171130.16_ATP6V0E2 | ENSG00000160789.18_LMNA | -0.09423 | -0.249689275 | 0.065955722 | 2.48E-01 | 5.28E-01 | 1.00E+00 |
| ENSG00000107317.10_PTGDS    | ENSG00000160789.18_LMNA | -0.15736 | -0.308824602 | 0.00188744  | 5.29E-02 | 2.08E-01 | 1.00E+00 |
| ENSG00000184076.12_UQCR10   | ENSG00000160789.18_LMNA | -0.13589 | -0.288840783 | 0.023827433 | 9.51E-02 | 3.02E-01 | 1.00E+00 |
| ENSG00000175334.6_BANF1     | ENSG00000160789.18_LMNA | -0.16485 | -0.315760211 | -0.00579765 | 4.24E-02 | 1.80E-01 | 1.00E+00 |
| ENSG00000092964.15_DPYSL2   | ENSG00000160789.18_LMNA | -0.15193 | -0.303780001 | 0.007454215 | 6.17E-02 | 2.30E-01 | 1.00E+00 |
| ENSG00000072506.11_HSD17B1  | ENSG00000160789.18_LMNA | 0.03665  | -0.123267307 | 0.194717177 | 6.54E-01 | 8.47E-01 | 1.00E+00 |
| ENSG00000170027.6_YWHAG     | ENSG00000160789.18_LMNA | 0.10841  | -0.051685421 | 0.263067836 | 1.84E-01 | 4.49E-01 | 1.00E+00 |
| ENSG00000164032.10_H2AFZ    | ENSG00000160789.18_LMNA | -0.0461  | -0.20380094  | 0.113941028 | 5.73E-01 | 8.01E-01 | 1.00E+00 |
| ENSG00000100823.10_APEX1    | ENSG00000160789.18_LMNA | -0.08473 | -0.240682806 | 0.07549034  | 2.99E-01 | 5.86E-01 | 1.00E+00 |
| ENSG00000078369.16_GNB1     | ENSG00000160789.18_LMNA | -0.03045 | -0.188731428 | 0.129382314 | 7.10E-01 | 8.77E-01 | 1.00E+00 |
| ENSG00000168899.4_VAMP5     | ENSG00000160789.18_LMNA | 0.19802  | 0.040079842  | 0.346300807 | 1.45E-02 | 8.57E-02 | 1.00E+00 |
| ENSG00000109475.15_RPL34    | ENSG00000160789.18_LMNA | -0.18251 | -0.332065175 | -0.02400996 | 2.44E-02 | 1.24E-01 | 1.00E+00 |
| ENSG00000143543.13_JTB      | ENSG00000160789.18_LMNA | -0.06594 | -0.222797747 | 0.094254335 | 4.20E-01 | 6.91E-01 | 1.00E+00 |
| ENSG00000053438.8_NNAT      | ENSG00000160789.18_LMNA | -0.00883 | -0.167790991 | 0.150586238 | 9.14E-01 | 9.67E-01 | 1.00E+00 |
| ENSG00000184897.5_H1FX      | ENSG00000160789.18_LMNA | -0.11849 | -0.27254936  | 0.041493479 | 1.46E-01 | 3.91E-01 | 1.00E+00 |
| ENSG00000136810.11_TXN      | ENSG00000160789.18_LMNA | 0.19314  | 0.035016455  | 0.34183053  | 1.71E-02 | 9.65E-02 | 1.00E+00 |
| ENSG00000131236.15_CAP1     | ENSG00000160789.18_LMNA | 0.11031  | -0.049763693 | 0.264860275 | 1.76E-01 | 4.37E-01 | 1.00E+00 |
| ENSG00000182220.12_ATP6AP2  | ENSG00000160789.18_LMNA | 0.05665  | -0.103485663 | 0.213919796 | 4.88E-01 | 7.44E-01 | 1.00E+00 |
| ENSG00000084234.15_APLP2    | ENSG00000160789.18_LMNA | 0.3513   | 0.203484717  | 0.483466329 | 9.09E-06 | 2.70E-04 | 4.66E-01 |
| ENSG00000104979.7_C19orf53  | ENSG00000160789.18_LMNA | -0.05029 | -0.207824941 | 0.109791619 | 5.38E-01 | 7.79E-01 | 1.00E+00 |
| ENSG00000155659.13_VSIG4    | ENSG00000160789.18_LMNA | 0.00277  | -0.156500119 | 0.161898904 | 9.73E-01 | 9.89E-01 | 1.00E+00 |
| ENSG00000171867.15_PRNP     | ENSG00000160789.18_LMNA | 0.08178  | -0.078442377 | 0.237883208 | 3.17E-01 | 6.03E-01 | 1.00E+00 |
| ENSG00000071082.9_RPL31     | ENSG00000160789.18_LMNA | -0.12154 | -0.27541137  | 0.038404134 | 1.36E-01 | 3.75E-01 | 1.00E+00 |
| ENSG00000163220.10_S100A9   | ENSG00000160789.18_LMNA | 0.09613  | -0.064052161 | 0.251480877 | 2.39E-01 | 5.17E-01 | 1.00E+00 |
| ENSG00000196419.11_XRCC6    | ENSG00000160789.18_LMNA | -0.17193 | -0.322312829 | -0.01309216 | 3.42E-02 | 1.56E-01 | 1.00E+00 |
| ENSG00000244038.8_DDOST     | ENSG00000160789.18_LMNA | 0.35049  | 0.202597447  | 0.482756898 | 9.57E-06 | 2.81E-04 | 4.91E-01 |
| ENSG00000177606.6_JUN       | ENSG00000160789.18_LMNA | 0.42008  | 0.279581136  | 0.542972086 | 7.13E-08 | 5.49E-06 | 3.66E-03 |
| ENSG00000070831.14_CDC42    | ENSG00000160789.18_LMNA | -0.12489 | -0.278547703 | 0.035011772 | 1.25E-01 | 3.58E-01 | 1.00E+00 |

|                            |                         |          |              |             |          |          |          |
|----------------------------|-------------------------|----------|--------------|-------------|----------|----------|----------|
| ENSG00000101856.9_PGRMC1   | ENSG00000160789.18_LMNA | -0.19087 | -0.339746518 | -0.03266131 | 1.85E-02 | 1.02E-01 | 1.00E+00 |
| ENSG00000265972.4_TXNIP    | ENSG00000160789.18_LMNA | -0.10203 | -0.257054404 | 0.058115618 | 2.11E-01 | 4.84E-01 | 1.00E+00 |
| ENSG00000187193.8_MT1X     | ENSG00000160789.18_LMNA | -0.02561 | -0.184061423 | 0.134136421 | 7.54E-01 | 8.98E-01 | 1.00E+00 |
| ENSG00000115414.17_FN1     | ENSG00000160789.18_LMNA | 0.28289  | 0.129520162  | 0.423036652 | 4.14E-04 | 5.82E-03 | 1.00E+00 |
| ENSG00000120129.5_DUSP1    | ENSG00000160789.18_LMNA | 0.0788   | -0.081421827 | 0.235052273 | 3.35E-01 | 6.20E-01 | 1.00E+00 |
| ENSG00000111328.5_CDK2AP1  | ENSG00000160789.18_LMNA | -0.16608 | -0.316902024 | -0.00706637 | 4.09E-02 | 1.76E-01 | 1.00E+00 |
| ENSG00000124733.3_MEA1     | ENSG00000160789.18_LMNA | -0.02295 | -0.181482878 | 0.136755141 | 7.79E-01 | 9.09E-01 | 1.00E+00 |
| ENSG00000158869.9_FCER1G   | ENSG00000160789.18_LMNA | 0.03943  | -0.120530681 | 0.197388307 | 6.30E-01 | 8.33E-01 | 1.00E+00 |
| ENSG00000069535.13_MAOB    | ENSG00000160789.18_LMNA | 0.2651   | 0.110560547  | 0.407114338 | 9.65E-04 | 1.13E-02 | 1.00E+00 |
| ENSG00000089597.15_GANAB   | ENSG00000160789.18_LMNA | 0.44028  | 0.302267572  | 0.560214899 | 1.38E-08 | 1.41E-06 | 7.07E-04 |
| ENSG00000077549.16_CAPZB   | ENSG00000160789.18_LMNA | 0.01192  | -0.147560786 | 0.170796524 | 8.84E-01 | 9.55E-01 | 1.00E+00 |
| ENSG00000235174.1_RPL39P3  | ENSG00000160789.18_LMNA | -0.09123 | -0.246844067 | 0.068974018 | 2.64E-01 | 5.47E-01 | 1.00E+00 |
| ENSG00000168542.11_COL3A1  | ENSG00000160789.18_LMNA | 0.36133  | 0.214467922  | 0.492217774 | 4.80E-06 | 1.61E-04 | 2.46E-01 |
| ENSG00000119655.7_NPC2     | ENSG00000160789.18_LMNA | 0.0589   | -0.101248669 | 0.216075982 | 4.71E-01 | 7.31E-01 | 1.00E+00 |
| ENSG00000223865.9_HLA-DPB1 | ENSG00000160789.18_LMNA | 0.0232   | -0.136500486 | 0.181733819 | 7.77E-01 | 9.08E-01 | 1.00E+00 |
| ENSG00000136930.11_PSMB7   | ENSG00000160789.18_LMNA | -0.03129 | -0.189547226 | 0.128550321 | 7.02E-01 | 8.73E-01 | 1.00E+00 |
| ENSG00000196205.8_EEF1A1P5 | ENSG00000160789.18_LMNA | -0.18399 | -0.33342058  | -0.02553318 | 2.33E-02 | 1.20E-01 | 1.00E+00 |
| ENSG00000215021.7_PHB2     | ENSG00000160789.18_LMNA | -0.23491 | -0.379906784 | -0.07865489 | 3.58E-03 | 3.05E-02 | 1.00E+00 |
| ENSG00000131171.11_SH3BGRL | ENSG00000160789.18_LMNA | -0.35549 | -0.487122295 | -0.20806446 | 6.98E-06 | 2.19E-04 | 3.58E-01 |
| ENSG00000155366.15_RHOC    | ENSG00000160789.18_LMNA | 0.21335  | 0.056055606  | 0.360314645 | 8.31E-03 | 5.73E-02 | 1.00E+00 |
| ENSG00000162430.15_SELENON | ENSG00000160789.18_LMNA | 0.55072  | 0.42914188   | 0.652693728 | 1.97E-13 | 1.47E-10 | 1.01E-08 |
| ENSG00000169564.6_PCBP1    | ENSG00000160789.18_LMNA | 0.27459  | 0.120662997  | 0.415620884 | 6.18E-04 | 7.97E-03 | 1.00E+00 |
| ENSG00000136888.6_ATP6V1G1 | ENSG00000160789.18_LMNA | -0.13237 | -0.285555581 | 0.027405619 | 1.04E-01 | 3.19E-01 | 1.00E+00 |
| ENSG00000162493.15_PDPN    | ENSG00000160789.18_LMNA | 0.35232  | 0.204597342  | 0.484355426 | 8.53E-06 | 2.56E-04 | 4.38E-01 |
| ENSG00000189060.5_H1FO     | ENSG00000160789.18_LMNA | -0.08199 | -0.238079418 | 0.078235664 | 3.15E-01 | 6.02E-01 | 1.00E+00 |
| ENSG00000146066.2_HIGD2A   | ENSG00000160789.18_LMNA | -0.04754 | -0.20519073  | 0.112509177 | 5.61E-01 | 7.93E-01 | 1.00E+00 |
| ENSG00000108107.11_RPL28   | ENSG00000160789.18_LMNA | 0.11949  | -0.040477724 | 0.273490983 | 1.43E-01 | 3.86E-01 | 1.00E+00 |
| ENSG00000104267.8_CA2      | ENSG00000160789.18_LMNA | -0.01067 | -0.169580378 | 0.14878571  | 8.96E-01 | 9.59E-01 | 1.00E+00 |
| ENSG00000133318.12_RTN3    | ENSG00000160789.18_LMNA | -0.32406 | -0.459552798 | -0.17382795 | 4.65E-05 | 1.01E-03 | 1.00E+00 |
| ENSG00000166441.11_RPL27A  | ENSG00000160789.18_LMNA | -0.13855 | -0.291320501 | 0.02112125  | 8.87E-02 | 2.90E-01 | 1.00E+00 |
| ENSG00000144746.6_ARL6IP5  | ENSG00000160789.18_LMNA | -0.14069 | -0.293324717 | 0.018930645 | 8.38E-02 | 2.80E-01 | 1.00E+00 |
| ENSG00000198502.5_HLA-DRB5 | ENSG00000160789.18_LMNA | 0.08741  | -0.072807781 | 0.243222288 | 2.84E-01 | 5.70E-01 | 1.00E+00 |
| ENSG00000030582.15_GRN     | ENSG00000160789.18_LMNA | 0.36864  | 0.222499659  | 0.498582135 | 2.97E-06 | 1.09E-04 | 1.52E-01 |

|                            |                         |          |              |             |          |          |          |
|----------------------------|-------------------------|----------|--------------|-------------|----------|----------|----------|
| ENSG00000213639.8_PPP1CB   | ENSG00000160789.18_LMNA | 0.17733  | 0.018657374  | 0.32729218  | 2.88E-02 | 1.40E-01 | 1.00E+00 |
| ENSG00000165795.19_NDRG2   | ENSG00000160789.18_LMNA | -0.42007 | -0.542955903 | -0.27955998 | 7.14E-08 | 5.49E-06 | 3.67E-03 |
| ENSG00000110492.14_MDK     | ENSG00000160789.18_LMNA | 0.4451   | 0.307705342  | 0.564314926 | 9.17E-09 | 9.94E-07 | 4.70E-04 |
| ENSG00000104805.14_NUCB1   | ENSG00000160789.18_LMNA | 0.48253  | 0.350230498  | 0.59594778  | 3.07E-10 | 5.84E-08 | 1.58E-05 |
| ENSG00000172809.11_RPL38   | ENSG00000160789.18_LMNA | -0.17865 | -0.328505964 | -0.02001687 | 2.77E-02 | 1.36E-01 | 1.00E+00 |
| ENSG00000105438.7_KDELRL1  | ENSG00000160789.18_LMNA | 0.42725  | 0.287606806  | 0.549097485 | 4.03E-08 | 3.45E-06 | 2.07E-03 |
| ENSG00000163902.10_RPN1    | ENSG00000160789.18_LMNA | 0.24407  | 0.08829955   | 0.388186607 | 2.44E-03 | 2.28E-02 | 1.00E+00 |
| ENSG00000141522.10_ARHGDI  | ENSG00000160789.18_LMNA | 0.41246  | 0.271054745  | 0.536433671 | 1.29E-07 | 8.93E-06 | 6.62E-03 |
| ENSG00000168461.11_RAB31   | ENSG00000160789.18_LMNA | 0.0931   | -0.067096108 | 0.248614926 | 2.54E-01 | 5.36E-01 | 1.00E+00 |
| ENSG00000115758.11_ODC1    | ENSG00000160789.18_LMNA | -0.21279 | -0.359805733 | -0.05547271 | 8.49E-03 | 5.82E-02 | 1.00E+00 |
| ENSG00000196924.13_FLNA    | ENSG00000160789.18_LMNA | 0.58108  | 0.464881848  | 0.677595094 | 4.22E-15 | 6.91E-12 | 2.16E-10 |
| ENSG00000125868.14_DSTN    | ENSG00000160789.18_LMNA | -0.11543 | -0.269675825 | 0.044589235 | 1.57E-01 | 4.09E-01 | 1.00E+00 |
| ENSG00000101367.8_MAPRE1   | ENSG00000160789.18_LMNA | -0.12084 | -0.274758273 | 0.039109636 | 1.38E-01 | 3.79E-01 | 1.00E+00 |
| ENSG00000125462.15_C1orf61 | ENSG00000160789.18_LMNA | -0.25    | -0.393535338 | -0.09456    | 1.90E-03 | 1.88E-02 | 1.00E+00 |
| ENSG00000146674.13_IGFBP3  | ENSG00000160789.18_LMNA | 0.28594  | 0.132788066  | 0.425762851 | 3.55E-04 | 5.13E-03 | 1.00E+00 |
| ENSG00000197457.8_STMN3    | ENSG00000160789.18_LMNA | 0.07724  | -0.082979248 | 0.233570344 | 3.44E-01 | 6.29E-01 | 1.00E+00 |
| ENSG00000155660.9_PDIA4    | ENSG00000160789.18_LMNA | 0.56837  | 0.449874177  | 0.667197758 | 2.21E-14 | 2.70E-11 | 1.14E-09 |
| ENSG00000170348.7_TMED10   | ENSG00000160789.18_LMNA | 0.28094  | 0.127441958  | 0.421300174 | 4.55E-04 | 6.26E-03 | 1.00E+00 |
| ENSG00000161970.11_RPL26   | ENSG00000160789.18_LMNA | -0.1416  | -0.294164885 | 0.01801145  | 8.18E-02 | 2.76E-01 | 1.00E+00 |
| ENSG00000205336.10_ADGRG1  | ENSG00000160789.18_LMNA | 0.00795  | -0.15143879  | 0.166942982 | 9.23E-01 | 9.70E-01 | 1.00E+00 |
| ENSG00000179222.16_MAGED1  | ENSG00000160789.18_LMNA | -0.08049 | -0.236661693 | 0.079728667 | 3.24E-01 | 6.11E-01 | 1.00E+00 |
| ENSG00000147140.14_NONO    | ENSG00000160789.18_LMNA | 0.06617  | -0.094021809 | 0.223020694 | 4.18E-01 | 6.90E-01 | 1.00E+00 |
| ENSG00000114353.15_GNAI2   | ENSG00000160789.18_LMNA | 0.24785  | 0.092291973  | 0.391599943 | 2.08E-03 | 2.01E-02 | 1.00E+00 |
| ENSG00000128016.5_ZFP36    | ENSG00000160789.18_LMNA | 0.22994  | 0.07342717   | 0.375398588 | 4.38E-03 | 3.55E-02 | 1.00E+00 |
| ENSG00000147123.10_NDUFB11 | ENSG00000160789.18_LMNA | -0.13128 | -0.284534007 | 0.028516667 | 1.07E-01 | 3.25E-01 | 1.00E+00 |
| ENSG00000124702.16_KLHDC3  | ENSG00000160789.18_LMNA | -0.46797 | -0.5836864   | -0.33362599 | 1.21E-09 | 1.82E-07 | 6.20E-05 |
| ENSG00000130726.10_TRIM28  | ENSG00000160789.18_LMNA | 0.16491  | 0.005861977  | 0.315818122 | 4.23E-02 | 1.80E-01 | 1.00E+00 |
| ENSG00000135046.12_ANXA1   | ENSG00000160789.18_LMNA | 0.42681  | 0.287122257  | 0.54872846  | 4.18E-08 | 3.52E-06 | 2.14E-03 |
| ENSG00000106366.8_SERPINE1 | ENSG00000160789.18_LMNA | 0.47888  | 0.346061505  | 0.592879977 | 4.36E-10 | 7.82E-08 | 2.24E-05 |
| ENSG00000130522.5_JUND     | ENSG00000160789.18_LMNA | 0.15664  | -0.002622608 | 0.308159394 | 5.40E-02 | 2.11E-01 | 1.00E+00 |
| ENSG00000241468.6_ATP5J2   | ENSG00000160789.18_LMNA | -0.04723 | -0.204894283 | 0.112814706 | 5.63E-01 | 7.95E-01 | 1.00E+00 |
| ENSG00000171223.5_JUNB     | ENSG00000160789.18_LMNA | 0.29667  | 0.144278816  | 0.435306781 | 2.06E-04 | 3.34E-03 | 1.00E+00 |
| ENSG00000101160.12_CTSZ    | ENSG00000160789.18_LMNA | 0.30155  | 0.149523116  | 0.439640935 | 1.60E-04 | 2.74E-03 | 1.00E+00 |

|                            |                         |          |              |             |          |          |          |
|----------------------------|-------------------------|----------|--------------|-------------|----------|----------|----------|
| ENSG00000102760.12_RGCC    | ENSG00000160789.18_LMNA | -0.58092 | -0.677464352 | -0.46469237 | 4.31E-15 | 6.91E-12 | 2.21E-10 |
| ENSG00000138085.15_ATRAID  | ENSG00000160789.18_LMNA | 0.03926  | -0.12069078  | 0.19723217  | 6.31E-01 | 8.34E-01 | 1.00E+00 |
| ENSG00000089693.9_MLF2     | ENSG00000160789.18_LMNA | -0.19288 | -0.341588587 | -0.03474286 | 1.73E-02 | 9.72E-02 | 1.00E+00 |
| ENSG00000112514.14_CUTA    | ENSG00000160789.18_LMNA | -0.13074 | -0.284027245 | 0.029067527 | 1.08E-01 | 3.28E-01 | 1.00E+00 |
| ENSG00000175203.14_DCTN2   | ENSG00000160789.18_LMNA | -0.38895 | -0.516188687 | -0.24491585 | 7.34E-07 | 3.58E-05 | 3.77E-02 |
| ENSG00000054148.16_PHPT1   | ENSG00000160789.18_LMNA | 0.06771  | -0.092487411 | 0.224491056 | 4.07E-01 | 6.82E-01 | 1.00E+00 |
| ENSG00000140990.13_NDUFB10 | ENSG00000160789.18_LMNA | -0.14287 | -0.295351624 | 0.016712185 | 7.91E-02 | 2.70E-01 | 1.00E+00 |
| ENSG00000109099.12_PMP22   | ENSG00000160789.18_LMNA | 0.36356  | 0.21690865   | 0.494154957 | 4.15E-06 | 1.43E-04 | 2.13E-01 |
| ENSG00000119335.15_SET     | ENSG00000160789.18_LMNA | 0.05055  | -0.109531439 | 0.208076899 | 5.36E-01 | 7.77E-01 | 1.00E+00 |
| ENSG00000178913.7_TAF7     | ENSG00000160789.18_LMNA | -0.16188 | -0.313009292 | -0.00274507 | 4.63E-02 | 1.91E-01 | 1.00E+00 |
| ENSG00000184840.10_TMED9   | ENSG00000160789.18_LMNA | 0.48733  | 0.355728236  | 0.599982421 | 1.93E-10 | 3.89E-08 | 9.89E-06 |
| ENSG00000173511.8_VEGFB    | ENSG00000160789.18_LMNA | 0.17214  | 0.013304422  | 0.322503059 | 3.40E-02 | 1.55E-01 | 1.00E+00 |
| ENSG00000179091.4_CYC1     | ENSG00000160789.18_LMNA | -0.11855 | -0.272604533 | 0.04143398  | 1.46E-01 | 3.91E-01 | 1.00E+00 |
| ENSG00000100292.15_HMOX1   | ENSG00000160789.18_LMNA | 0.11792  | -0.042074033 | 0.272010907 | 1.48E-01 | 3.94E-01 | 1.00E+00 |
| ENSG00000227063.5_RPL41P1  | ENSG00000160789.18_LMNA | -0.13278 | -0.285939953 | 0.026987381 | 1.03E-01 | 3.17E-01 | 1.00E+00 |
| ENSG00000167004.11_PDIA3   | ENSG00000160789.18_LMNA | 0.5163   | 0.389078167  | 0.624193604 | 9.88E-12 | 3.47E-09 | 5.07E-07 |
| ENSG00000108654.10_DDX5    | ENSG00000160789.18_LMNA | -0.11284 | -0.267240546 | 0.047208128 | 1.66E-01 | 4.23E-01 | 1.00E+00 |
| ENSG00000115310.16_RTN4    | ENSG00000160789.18_LMNA | -0.04682 | -0.204497055 | 0.113224011 | 5.67E-01 | 7.97E-01 | 1.00E+00 |
| ENSG00000236552.2_RPL13AP5 | ENSG00000160789.18_LMNA | -0.07375 | -0.230247664 | 0.08646558  | 3.67E-01 | 6.47E-01 | 1.00E+00 |
| ENSG00000135624.14_CCT7    | ENSG00000160789.18_LMNA | -0.1054  | -0.260234933 | 0.054717915 | 1.96E-01 | 4.65E-01 | 1.00E+00 |
| ENSG00000163399.14_ATP1A1  | ENSG00000160789.18_LMNA | 0.48094  | 0.348421021  | 0.594617135 | 3.58E-10 | 6.60E-08 | 1.84E-05 |
| ENSG00000112308.11_C6orf62 | ENSG00000160789.18_LMNA | 0.09243  | -0.067765428 | 0.247984003 | 2.57E-01 | 5.40E-01 | 1.00E+00 |
| ENSG00000116729.12_WLS     | ENSG00000160789.18_LMNA | 0.10803  | -0.052069777 | 0.262709078 | 1.85E-01 | 4.51E-01 | 1.00E+00 |
| ENSG00000187957.7_DNER     | ENSG00000160789.18_LMNA | -0.43055 | -0.55191591  | -0.29131196 | 3.09E-08 | 2.76E-06 | 1.58E-03 |
| ENSG00000155876.5_RRAGA    | ENSG00000160789.18_LMNA | 0.03086  | -0.128974471 | 0.189131387 | 7.06E-01 | 8.75E-01 | 1.00E+00 |
| ENSG00000125691.11_RPL23   | ENSG00000160789.18_LMNA | -0.23657 | -0.381404904 | -0.08039579 | 3.34E-03 | 2.90E-02 | 1.00E+00 |
| ENSG00000135047.13_CTSL    | ENSG00000160789.18_LMNA | 0.17552  | 0.016786953  | 0.325620573 | 3.05E-02 | 1.45E-01 | 1.00E+00 |
| ENSG00000146701.10_MDH2    | ENSG00000160789.18_LMNA | 0.1391   | -0.020556999 | 0.291837005 | 8.74E-02 | 2.88E-01 | 1.00E+00 |
| ENSG00000204387.11_C6orf48 | ENSG00000160789.18_LMNA | -0.15984 | -0.311127686 | -0.00066046 | 4.92E-02 | 1.99E-01 | 1.00E+00 |
| ENSG00000146729.8_GBAS     | ENSG00000160789.18_LMNA | 0.00799  | -0.151401581 | 0.166980002 | 9.22E-01 | 9.70E-01 | 1.00E+00 |
| ENSG00000169715.13_MT1E    | ENSG00000160789.18_LMNA | 0.16796  | 0.009000267  | 0.318640747 | 3.86E-02 | 1.69E-01 | 1.00E+00 |
| ENSG00000099194.5_SCD      | ENSG00000160789.18_LMNA | -0.04457 | -0.202331589 | 0.115453413 | 5.86E-01 | 8.08E-01 | 1.00E+00 |
| ENSG00000101474.10_APMAP   | ENSG00000160789.18_LMNA | -0.07392 | -0.230408754 | 0.086296734 | 3.65E-01 | 6.47E-01 | 1.00E+00 |

|                            |                         |          |              |             |          |          |          |
|----------------------------|-------------------------|----------|--------------|-------------|----------|----------|----------|
| ENSG00000117362.11_APH1A   | ENSG00000160789.18_LMNA | 0.13975  | -0.019897433 | 0.292440527 | 8.60E-02 | 2.85E-01 | 1.00E+00 |
| ENSG00000170043.10_TRAPPC1 | ENSG00000160789.18_LMNA | -0.02881 | -0.187155294 | 0.130988469 | 7.25E-01 | 8.83E-01 | 1.00E+00 |
| ENSG00000086061.14_DNAJA1  | ENSG00000160789.18_LMNA | -0.04861 | -0.20621249  | 0.111455652 | 5.52E-01 | 7.88E-01 | 1.00E+00 |
| ENSG00000100906.9_NFKBIA   | ENSG00000160789.18_LMNA | 0.18317  | 0.024687287  | 0.332668034 | 2.39E-02 | 1.23E-01 | 1.00E+00 |
| ENSG00000112096.15_SOD2    | ENSG00000160789.18_LMNA | 0.18255  | 0.024051633  | 0.332102272 | 2.44E-02 | 1.24E-01 | 1.00E+00 |
| ENSG00000105404.9_RABAC1   | ENSG00000160789.18_LMNA | 0.01067  | -0.148787051 | 0.169579046 | 8.96E-01 | 9.59E-01 | 1.00E+00 |
| ENSG00000156298.11_TSPAN7  | ENSG00000160789.18_LMNA | -0.32848 | -0.463447518 | -0.17862298 | 3.60E-05 | 8.29E-04 | 1.00E+00 |
| ENSG00000112695.10_COX7A2  | ENSG00000160789.18_LMNA | -0.25984 | -0.402395398 | -0.10498259 | 1.23E-03 | 1.35E-02 | 1.00E+00 |
| ENSG00000171603.15_CLSTN1  | ENSG00000160789.18_LMNA | 0.13829  | -0.021378985 | 0.291084515 | 8.93E-02 | 2.91E-01 | 1.00E+00 |
| ENSG00000168036.15_CTNNB1  | ENSG00000160789.18_LMNA | -0.09866 | -0.253870264 | 0.06150988  | 2.27E-01 | 5.03E-01 | 1.00E+00 |
| ENSG00000111348.7_ARHGDIB  | ENSG00000160789.18_LMNA | -0.02808 | -0.186443611 | 0.13171316  | 7.31E-01 | 8.87E-01 | 1.00E+00 |
| ENSG00000136156.11_ITM2B   | ENSG00000160789.18_LMNA | -0.19332 | -0.341998277 | -0.03520617 | 1.70E-02 | 9.61E-02 | 1.00E+00 |
| ENSG00000132963.7_POMP     | ENSG00000160789.18_LMNA | -0.16675 | -0.317523101 | -0.0077569  | 4.00E-02 | 1.74E-01 | 1.00E+00 |
| ENSG00000143384.11_MCL1    | ENSG00000160789.18_LMNA | 0.41052  | 0.268890554  | 0.534768989 | 1.50E-07 | 1.00E-05 | 7.68E-03 |
| ENSG00000137726.14_FXYD6   | ENSG00000160789.18_LMNA | -0.42299 | -0.545462965 | -0.28284032 | 5.67E-08 | 4.52E-06 | 2.91E-03 |
| ENSG00000023734.9_STRAP    | ENSG00000160789.18_LMNA | -0.32572 | -0.461016483 | -0.17562839 | 4.22E-05 | 9.38E-04 | 1.00E+00 |
| ENSG00000148248.12_SURF4   | ENSG00000160789.18_LMNA | 0.46012  | 0.324703929  | 0.577050582 | 2.46E-09 | 3.31E-07 | 1.26E-04 |
| ENSG00000092820.16_EZR     | ENSG00000160789.18_LMNA | -0.0482  | -0.205819304 | 0.111861146 | 5.55E-01 | 7.89E-01 | 1.00E+00 |
| ENSG00000117691.8_NENF     | ENSG00000160789.18_LMNA | -0.02978 | -0.188085971 | 0.130040267 | 7.16E-01 | 8.79E-01 | 1.00E+00 |
| ENSG00000130287.12_NCAN    | ENSG00000160789.18_LMNA | -0.24472 | -0.388775424 | -0.08898758 | 2.38E-03 | 2.23E-02 | 1.00E+00 |
| ENSG00000203747.8_FCGR3A   | ENSG00000160789.18_LMNA | 0.06001  | -0.100143539 | 0.217114005 | 4.63E-01 | 7.26E-01 | 1.00E+00 |
| ENSG00000009307.14_CSDE1   | ENSG00000160789.18_LMNA | -0.00702 | -0.166033455 | 0.152352663 | 9.32E-01 | 9.73E-01 | 1.00E+00 |
| ENSG00000104964.13_AES     | ENSG00000160789.18_LMNA | -0.02509 | -0.183561819 | 0.134644156 | 7.59E-01 | 8.99E-01 | 1.00E+00 |
| ENSG00000188186.9_LAMTOR4  | ENSG00000160789.18_LMNA | -0.1132  | -0.267581078 | 0.04684218  | 1.65E-01 | 4.21E-01 | 1.00E+00 |
| ENSG00000152137.5_HSPB8    | ENSG00000160789.18_LMNA | -0.27415 | -0.415225914 | -0.12019257 | 6.31E-04 | 8.10E-03 | 1.00E+00 |
| ENSG00000123131.11_PRDX4   | ENSG00000160789.18_LMNA | 0.2225   | 0.065621825  | 0.368640842 | 5.87E-03 | 4.43E-02 | 1.00E+00 |
| ENSG00000140391.13_TSPAN3  | ENSG00000160789.18_LMNA | -0.24643 | -0.390318037 | -0.09079146 | 2.21E-03 | 2.11E-02 | 1.00E+00 |
| ENSG00000103260.7_METRN    | ENSG00000160789.18_LMNA | -0.03609 | -0.194172816 | 0.123824424 | 6.59E-01 | 8.49E-01 | 1.00E+00 |
| ENSG00000142507.8_PSMB6    | ENSG00000160789.18_LMNA | -0.10572 | -0.26053621  | 0.054395687 | 1.95E-01 | 4.64E-01 | 1.00E+00 |
| ENSG00000124562.8_SNRPC    | ENSG00000160789.18_LMNA | -0.15236 | -0.30418148  | 0.007011885 | 6.10E-02 | 2.28E-01 | 1.00E+00 |
| ENSG00000008018.8_PSMB1    | ENSG00000160789.18_LMNA | -0.06696 | -0.223779878 | 0.09322975  | 4.12E-01 | 6.86E-01 | 1.00E+00 |
| ENSG00000124767.6_GLO1     | ENSG00000160789.18_LMNA | -0.14855 | -0.300638208 | 0.010911499 | 6.78E-02 | 2.44E-01 | 1.00E+00 |
| ENSG00000213593.8_TMX2     | ENSG00000160789.18_LMNA | -0.17851 | -0.328375544 | -0.01987074 | 2.78E-02 | 1.36E-01 | 1.00E+00 |

|                            |                         |          |              |             |          |          |          |
|----------------------------|-------------------------|----------|--------------|-------------|----------|----------|----------|
| ENSG00000260032.1_NORAD    | ENSG00000160789.18_LMNA | 0.17035  | 0.011458158  | 0.320847583 | 3.59E-02 | 1.61E-01 | 1.00E+00 |
| ENSG00000171951.4_SCG2     | ENSG00000160789.18_LMNA | 0.32792  | 0.178013277  | 0.462952904 | 3.72E-05 | 8.49E-04 | 1.00E+00 |
| ENSG00000142227.9_EMP3     | ENSG00000160789.18_LMNA | 0.58267  | 0.466769254  | 0.678896699 | 3.41E-15 | 5.83E-12 | 1.75E-10 |
| ENSG00000128595.15_CALU    | ENSG00000160789.18_LMNA | 0.45895  | 0.32338086   | 0.576063699 | 2.74E-09 | 3.60E-07 | 1.40E-04 |
| ENSG00000173113.5_TRMT112  | ENSG00000160789.18_LMNA | 0.02975  | -0.130062011 | 0.188064636 | 7.16E-01 | 8.79E-01 | 1.00E+00 |
| ENSG00000085063.13_CD59    | ENSG00000160789.18_LMNA | 0.0867   | -0.07351996  | 0.242548516 | 2.88E-01 | 5.74E-01 | 1.00E+00 |
| ENSG00000100380.11_ST13    | ENSG00000160789.18_LMNA | -0.31111 | -0.448114701 | -0.15982369 | 9.57E-05 | 1.82E-03 | 1.00E+00 |
| ENSG00000149557.11_FEZ1    | ENSG00000160789.18_LMNA | -0.34564 | -0.478507698 | -0.19729267 | 1.29E-05 | 3.61E-04 | 6.63E-01 |
| ENSG00000034713.6_GABARAPL | ENSG00000160789.18_LMNA | -0.37807 | -0.506764485 | -0.23288103 | 1.57E-06 | 6.66E-05 | 8.06E-02 |
| ENSG00000041982.13_TNC     | ENSG00000160789.18_LMNA | 0.58865  | 0.473855497  | 0.683771691 | 1.52E-15 | 2.88E-12 | 7.78E-11 |
| ENSG00000129103.16_SUMF2   | ENSG00000160789.18_LMNA | 0.0982   | -0.061972936 | 0.253435342 | 2.29E-01 | 5.06E-01 | 1.00E+00 |
| ENSG00000137267.5_TUBB2A   | ENSG00000160789.18_LMNA | 0.08162  | -0.078604103 | 0.237729681 | 3.17E-01 | 6.04E-01 | 1.00E+00 |
| ENSG00000185432.11_METTL7A | ENSG00000160789.18_LMNA | -0.16813 | -0.318797492 | -0.00917472 | 3.84E-02 | 1.69E-01 | 1.00E+00 |
| ENSG00000173726.9_TOMM20   | ENSG00000160789.18_LMNA | -0.33212 | -0.466644014 | -0.18256852 | 2.91E-05 | 6.96E-04 | 1.00E+00 |
| ENSG00000102007.9_PLP2     | ENSG00000160789.18_LMNA | 0.56513  | 0.446059489  | 0.664541369 | 3.34E-14 | 3.72E-11 | 1.71E-09 |
| ENSG00000226278.1_PSPHP1   | ENSG00000160789.18_LMNA | -0.05638 | -0.213665794 | 0.103748973 | 4.90E-01 | 7.46E-01 | 1.00E+00 |
| ENSG00000105669.11_COPE    | ENSG00000160789.18_LMNA | -0.10287 | -0.257847995 | 0.057268521 | 2.07E-01 | 4.79E-01 | 1.00E+00 |
| ENSG00000143321.17_HDGF    | ENSG00000160789.18_LMNA | 0.17957  | 0.020968693  | 0.329355157 | 2.69E-02 | 1.33E-01 | 1.00E+00 |
| ENSG00000152518.6_ZFP36L2  | ENSG00000160789.18_LMNA | 0.417    | 0.276130163  | 0.540329568 | 9.08E-08 | 6.64E-06 | 4.66E-03 |
| ENSG00000163468.13_CCT3    | ENSG00000160789.18_LMNA | -0.11127 | -0.265761277 | 0.048796822 | 1.72E-01 | 4.31E-01 | 1.00E+00 |
| ENSG00000148672.8_GLUD1    | ENSG00000160789.18_LMNA | -0.30292 | -0.440864479 | -0.15100656 | 1.49E-04 | 2.58E-03 | 1.00E+00 |
| ENSG00000132341.10_RAN     | ENSG00000160789.18_LMNA | -0.14948 | -0.301508474 | 0.009954589 | 6.61E-02 | 2.40E-01 | 1.00E+00 |
| ENSG00000008441.15_NFIX    | ENSG00000160789.18_LMNA | -0.0956  | -0.250979005 | 0.064585628 | 2.41E-01 | 5.21E-01 | 1.00E+00 |
| ENSG00000156587.14_UBE2L6  | ENSG00000160789.18_LMNA | -0.06388 | -0.220835668 | 0.096299216 | 4.34E-01 | 7.03E-01 | 1.00E+00 |
| ENSG00000165916.7_PSMC3    | ENSG00000160789.18_LMNA | 0.11921  | -0.040761432 | 0.273228041 | 1.44E-01 | 3.87E-01 | 1.00E+00 |
| ENSG00000125817.7_CENPB    | ENSG00000160789.18_LMNA | 0.43221  | 0.293180646  | 0.553335119 | 2.69E-08 | 2.49E-06 | 1.38E-03 |
| ENSG00000213585.9_VDAC1    | ENSG00000160789.18_LMNA | 0.28734  | 0.134282345  | 0.42700766  | 3.32E-04 | 4.85E-03 | 1.00E+00 |
| ENSG00000092199.16_HNRNPC  | ENSG00000160789.18_LMNA | -0.09725 | -0.252544538 | 0.062920943 | 2.33E-01 | 5.11E-01 | 1.00E+00 |
| ENSG00000185236.10_RAB11B  | ENSG00000160789.18_LMNA | -0.09729 | -0.252577914 | 0.062885434 | 2.33E-01 | 5.11E-01 | 1.00E+00 |
| ENSG00000149131.14_SERPING | ENSG00000160789.18_LMNA | 0.26923  | 0.114959621  | 0.410824816 | 7.96E-04 | 9.69E-03 | 1.00E+00 |
| ENSG00000241685.7_ARPC1A   | ENSG00000160789.18_LMNA | 0.23335  | 0.077005611  | 0.378486051 | 3.81E-03 | 3.20E-02 | 1.00E+00 |
| ENSG00000111676.13_ATN1    | ENSG00000160789.18_LMNA | 0.07333  | -0.086883381 | 0.229848978 | 3.69E-01 | 6.50E-01 | 1.00E+00 |
| ENSG00000178980.13_SELENOV | ENSG00000160789.18_LMNA | -0.21988 | -0.366259952 | -0.06288065 | 6.49E-03 | 4.77E-02 | 1.00E+00 |



|                            |                         |          |              |             |          |          |          |
|----------------------------|-------------------------|----------|--------------|-------------|----------|----------|----------|
| ENSG00000157150.4_TIMP4    | ENSG00000160789.18_LMNA | -0.22442 | -0.370391003 | -0.06763975 | 5.44E-03 | 4.18E-02 | 1.00E+00 |
| ENSG00000136938.8_ANP32B   | ENSG00000160789.18_LMNA | 0.07578  | -0.08443963  | 0.232179413 | 3.53E-01 | 6.37E-01 | 1.00E+00 |
| ENSG00000131143.7_COX4I1   | ENSG00000160789.18_LMNA | -0.15126 | -0.303162442 | 0.008134376 | 6.29E-02 | 2.33E-01 | 1.00E+00 |
| ENSG00000175061.16_LRRC75A | ENSG00000160789.18_LMNA | -0.30338 | -0.441264848 | -0.15149225 | 1.45E-04 | 2.53E-03 | 1.00E+00 |
| ENSG00000108828.14_VAT1    | ENSG00000160789.18_LMNA | 0.15269  | -0.006671536 | 0.30449032  | 6.04E-02 | 2.27E-01 | 1.00E+00 |
| ENSG00000117525.12_F3      | ENSG00000160789.18_LMNA | 0.42845  | 0.288964213  | 0.550130724 | 3.66E-08 | 3.19E-06 | 1.88E-03 |
| ENSG00000115484.13_CCT4    | ENSG00000160789.18_LMNA | -0.18469 | -0.334064275 | -0.02625708 | 2.27E-02 | 1.18E-01 | 1.00E+00 |
| ENSG00000132002.6_DNAJB1   | ENSG00000160789.18_LMNA | 0.2191   | 0.062067309  | 0.365552746 | 6.69E-03 | 4.87E-02 | 1.00E+00 |
| ENSG00000168159.10_RNF187  | ENSG00000160789.18_LMNA | 0.02835  | -0.131448413 | 0.186703645 | 7.29E-01 | 8.85E-01 | 1.00E+00 |
| ENSG00000092010.13_PSME1   | ENSG00000160789.18_LMNA | 0.0619   | -0.098270704 | 0.218941577 | 4.49E-01 | 7.15E-01 | 1.00E+00 |
| ENSG00000119421.6_NDUFA8   | ENSG00000160789.18_LMNA | -0.07818 | -0.234463581 | 0.082040693 | 3.38E-01 | 6.24E-01 | 1.00E+00 |
| ENSG00000099341.10_PSMD8   | ENSG00000160789.18_LMNA | -0.01173 | -0.170609098 | 0.147749629 | 8.86E-01 | 9.56E-01 | 1.00E+00 |
| ENSG00000106565.16_TMEM176 | ENSG00000160789.18_LMNA | 0.00147  | -0.157763041 | 0.160637688 | 9.86E-01 | 9.94E-01 | 1.00E+00 |
| ENSG00000168002.10_POLR2G  | ENSG00000160789.18_LMNA | -0.22243 | -0.368574795 | -0.06554572 | 5.88E-03 | 4.44E-02 | 1.00E+00 |
| ENSG00000130724.7_CHMP2A   | ENSG00000160789.18_LMNA | 0.13619  | -0.02352362  | 0.289119381 | 9.43E-02 | 3.01E-01 | 1.00E+00 |
| ENSG00000105270.13_CLIP3   | ENSG00000160789.18_LMNA | -0.24968 | -0.393247013 | -0.09422192 | 1.92E-03 | 1.89E-02 | 1.00E+00 |
| ENSG00000124155.15_PIGT    | ENSG00000160789.18_LMNA | 0.45472  | 0.318585192  | 0.572480405 | 3.98E-09 | 4.93E-07 | 2.04E-04 |
| ENSG00000164924.16_YWHAZ   | ENSG00000160789.18_LMNA | 0.06065  | -0.0995102   | 0.217749516 | 4.58E-01 | 7.22E-01 | 1.00E+00 |
| ENSG00000106367.12_AP1S1   | ENSG00000160789.18_LMNA | 0.02868  | -0.131118297 | 0.187027821 | 7.26E-01 | 8.84E-01 | 1.00E+00 |
| ENSG00000063660.7_GPC1     | ENSG00000160789.18_LMNA | 0.43207  | 0.293020789  | 0.553213771 | 2.73E-08 | 2.50E-06 | 1.40E-03 |
| ENSG00000136240.8_KDEL2    | ENSG00000160789.18_LMNA | 0.34542  | 0.197057962  | 0.478319386 | 1.31E-05 | 3.64E-04 | 6.72E-01 |
| ENSG00000166340.13_TPP1    | ENSG00000160789.18_LMNA | 0.36057  | 0.2136372    | 0.49155781  | 5.04E-06 | 1.67E-04 | 2.58E-01 |
| ENSG00000113013.11_HSPA9   | ENSG00000160789.18_LMNA | 0.23072  | 0.074250274  | 0.376109352 | 4.24E-03 | 3.47E-02 | 1.00E+00 |
| ENSG00000237973.1_MTCO1P12 | ENSG00000160789.18_LMNA | -0.21697 | -0.363613406 | -0.05983898 | 7.25E-03 | 5.17E-02 | 1.00E+00 |
| ENSG00000111229.14_ARPC3   | ENSG00000160789.18_LMNA | -0.16142 | -0.312587649 | -0.0022777  | 4.70E-02 | 1.93E-01 | 1.00E+00 |
| ENSG00000022267.15_FHL1    | ENSG00000160789.18_LMNA | -0.20513 | -0.35280968  | -0.04748053 | 1.12E-02 | 7.12E-02 | 1.00E+00 |
| ENSG00000144381.15_HSPD1   | ENSG00000160789.18_LMNA | 0.08556  | -0.074659214 | 0.241470066 | 2.95E-01 | 5.80E-01 | 1.00E+00 |
| ENSG00000167614.12_TTYH1   | ENSG00000160789.18_LMNA | -0.17233 | -0.32267779  | -0.01349941 | 3.38E-02 | 1.55E-01 | 1.00E+00 |
| ENSG00000178741.10_COX5A   | ENSG00000160789.18_LMNA | -0.08182 | -0.2379254   | 0.078397929 | 3.16E-01 | 6.03E-01 | 1.00E+00 |
| ENSG00000105290.10_APLP1   | ENSG00000160789.18_LMNA | -0.08288 | -0.238924451 | 0.077345085 | 3.10E-01 | 5.96E-01 | 1.00E+00 |
| ENSG00000177697.16_CD151   | ENSG00000160789.18_LMNA | 0.57519  | 0.457923464  | 0.672784865 | 9.17E-15 | 1.31E-11 | 4.70E-10 |
| ENSG00000100804.17_PSMB5   | ENSG00000160789.18_LMNA | 0.01391  | -0.145611402 | 0.17272994  | 8.65E-01 | 9.47E-01 | 1.00E+00 |
| ENSG00000198918.7_RPL39    | ENSG00000160789.18_LMNA | -0.13428 | -0.287339294 | 0.025463824 | 9.91E-02 | 3.10E-01 | 1.00E+00 |

|                            |                         |          |              |             |          |          |          |
|----------------------------|-------------------------|----------|--------------|-------------|----------|----------|----------|
| ENSG00000042753.10_AP2S1   | ENSG00000160789.18_LMNA | 0.12802  | -0.031830395 | 0.281482911 | 1.16E-01 | 3.41E-01 | 1.00E+00 |
| ENSG00000108551.4_RASD1    | ENSG00000160789.18_LMNA | -0.02976 | -0.18806745  | 0.130059142 | 7.16E-01 | 8.79E-01 | 1.00E+00 |
| ENSG00000136295.13_TTYH3   | ENSG00000160789.18_LMNA | 0.41162  | 0.270122767  | 0.535717052 | 1.38E-07 | 9.42E-06 | 7.06E-03 |
| ENSG00000168090.8_COPS6    | ENSG00000160789.18_LMNA | 0.15394  | -0.005390702 | 0.30565199  | 5.83E-02 | 2.21E-01 | 1.00E+00 |
| ENSG00000188486.3_H2AFX    | ENSG00000160789.18_LMNA | -0.0391  | -0.197075184 | 0.120851733 | 6.32E-01 | 8.35E-01 | 1.00E+00 |
| ENSG00000142173.13_COL6A2  | ENSG00000160789.18_LMNA | 0.5312   | 0.406367954  | 0.636570276 | 1.92E-12 | 9.18E-10 | 9.83E-08 |
| ENSG00000163346.15_PBXIP1  | ENSG00000160789.18_LMNA | -0.00405 | -0.163143339 | 0.15525298  | 9.61E-01 | 9.84E-01 | 1.00E+00 |
| ENSG00000144485.9_HES6     | ENSG00000160789.18_LMNA | -0.41895 | -0.542004721 | -0.27831702 | 7.80E-08 | 5.89E-06 | 4.00E-03 |
| ENSG00000115053.14_NCL     | ENSG00000160789.18_LMNA | 0.25802  | 0.103055957  | 0.400761786 | 1.33E-03 | 1.44E-02 | 1.00E+00 |
| ENSG00000143256.4_PFDN2    | ENSG00000160789.18_LMNA | 0.01802  | -0.141587987 | 0.176712657 | 8.26E-01 | 9.32E-01 | 1.00E+00 |
| ENSG00000101955.13_SRPX    | ENSG00000160789.18_LMNA | 0.31423  | 0.163195363  | 0.450877195 | 8.06E-05 | 1.58E-03 | 1.00E+00 |
| ENSG00000198618.5_PPIAP22  | ENSG00000160789.18_LMNA | 0.10835  | -0.051747465 | 0.263009929 | 1.84E-01 | 4.49E-01 | 1.00E+00 |
| ENSG00000084733.9_RAB10    | ENSG00000160789.18_LMNA | -0.06221 | -0.219243281 | 0.097956838 | 4.46E-01 | 7.13E-01 | 1.00E+00 |
| ENSG00000184602.5_SNN      | ENSG00000160789.18_LMNA | -0.25377 | -0.396930167 | -0.0985458  | 1.61E-03 | 1.66E-02 | 1.00E+00 |
| ENSG00000104341.15_LAPTM4B | ENSG00000160789.18_LMNA | -0.28925 | -0.428711674 | -0.13633002 | 3.01E-04 | 4.52E-03 | 1.00E+00 |
| ENSG00000141753.6_IGFBP4   | ENSG00000160789.18_LMNA | 0.23871  | 0.082650688  | 0.383342996 | 3.06E-03 | 2.71E-02 | 1.00E+00 |
| ENSG00000026508.15_CD44    | ENSG00000160789.18_LMNA | 0.43496  | 0.296274979  | 0.555681854 | 2.15E-08 | 2.05E-06 | 1.10E-03 |
| ENSG00000163382.10_NAXE    | ENSG00000160789.18_LMNA | -0.11985 | -0.273822207 | 0.040120269 | 1.41E-01 | 3.84E-01 | 1.00E+00 |
| ENSG00000175550.6_DRAP1    | ENSG00000160789.18_LMNA | 0.30631  | 0.154649353  | 0.443864497 | 1.24E-04 | 2.25E-03 | 1.00E+00 |
| ENSG00000123989.12_CHPF    | ENSG00000160789.18_LMNA | 0.57742  | 0.460558515  | 0.674608576 | 6.84E-15 | 1.03E-11 | 3.51E-10 |
| ENSG00000135052.15_GOLM1   | ENSG00000160789.18_LMNA | -0.10247 | -0.257473177 | 0.057668666 | 2.09E-01 | 4.82E-01 | 1.00E+00 |
| ENSG00000101210.9_EEF1A2   | ENSG00000160789.18_LMNA | -0.02031 | -0.178936544 | 0.13933679  | 8.04E-01 | 9.21E-01 | 1.00E+00 |
| ENSG00000050165.16_DKK3    | ENSG00000160789.18_LMNA | 0.00878  | -0.150626416 | 0.167751038 | 9.14E-01 | 9.67E-01 | 1.00E+00 |
| ENSG00000168906.11_MAT2A   | ENSG00000160789.18_LMNA | -0.30335 | -0.441244313 | -0.15146734 | 1.45E-04 | 2.53E-03 | 1.00E+00 |
| ENSG00000181061.12_HIGD1A  | ENSG00000160789.18_LMNA | -0.27985 | -0.420324395 | -0.12627528 | 4.80E-04 | 6.53E-03 | 1.00E+00 |
| ENSG00000130985.15_UBA1    | ENSG00000160789.18_LMNA | 0.2151   | 0.057877434  | 0.361904064 | 7.79E-03 | 5.44E-02 | 1.00E+00 |
| ENSG00000175215.8_CTDSP2   | ENSG00000160789.18_LMNA | -0.14239 | -0.294906645 | 0.017199481 | 8.01E-02 | 2.72E-01 | 1.00E+00 |
| ENSG00000169223.13_LMAN2   | ENSG00000160789.18_LMNA | 0.39536  | 0.252020181  | 0.521721266 | 4.63E-07 | 2.47E-05 | 2.38E-02 |
| ENSG00000138760.7_SCARB2   | ENSG00000160789.18_LMNA | -0.0251  | -0.183563564 | 0.134642383 | 7.59E-01 | 8.99E-01 | 1.00E+00 |
| ENSG00000004142.10_POLDIP2 | ENSG00000160789.18_LMNA | -0.21144 | -0.358572037 | -0.05406052 | 8.92E-03 | 6.04E-02 | 1.00E+00 |
| ENSG00000010256.9_UQCRC1   | ENSG00000160789.18_LMNA | -0.04026 | -0.198186476 | 0.119712003 | 6.22E-01 | 8.29E-01 | 1.00E+00 |
| ENSG00000116459.9_ATP5F1   | ENSG00000160789.18_LMNA | -0.32435 | -0.459804669 | -0.17413763 | 4.57E-05 | 1.00E-03 | 1.00E+00 |
| ENSG00000125398.5_SOX9     | ENSG00000160789.18_LMNA | 0.30573  | 0.154021016  | 0.443347494 | 1.28E-04 | 2.31E-03 | 1.00E+00 |

|                            |                         |          |              |             |          |          |          |
|----------------------------|-------------------------|----------|--------------|-------------|----------|----------|----------|
| ENSG00000138069.15_RAB1A   | ENSG00000160789.18_LMNA | -0.14304 | -0.295507622 | 0.016541317 | 7.88E-02 | 2.69E-01 | 1.00E+00 |
| ENSG00000187498.13_COL4A1  | ENSG00000160789.18_LMNA | 0.36074  | 0.213814686  | 0.49169884  | 4.99E-06 | 1.65E-04 | 2.56E-01 |
| ENSG00000100994.10_PYGB    | ENSG00000160789.18_LMNA | 0.25149  | 0.09614356   | 0.394885082 | 1.78E-03 | 1.79E-02 | 1.00E+00 |
| ENSG00000021300.12_PLEKHB1 | ENSG00000160789.18_LMNA | -0.35393 | -0.485756604 | -0.20635226 | 7.71E-06 | 2.37E-04 | 3.95E-01 |
| ENSG00000131507.10_NDFIP1  | ENSG00000160789.18_LMNA | -0.17437 | -0.324561554 | -0.0156031  | 3.17E-02 | 1.49E-01 | 1.00E+00 |
| ENSG00000182004.11_SNRPE   | ENSG00000160789.18_LMNA | -0.10874 | -0.263376627 | 0.051354523 | 1.82E-01 | 4.47E-01 | 1.00E+00 |
| ENSG00000164692.16_COL1A2  | ENSG00000160789.18_LMNA | 0.45955  | 0.324061573  | 0.576571538 | 2.59E-09 | 3.45E-07 | 1.33E-04 |
| ENSG00000231389.6_HLA-DPA1 | ENSG00000160789.18_LMNA | -0.0304  | -0.188687931 | 0.129426662 | 7.10E-01 | 8.77E-01 | 1.00E+00 |
| ENSG00000166226.11_CCT2    | ENSG00000160789.18_LMNA | -0.10229 | -0.257301634 | 0.057851768 | 2.10E-01 | 4.83E-01 | 1.00E+00 |
| ENSG00000185222.7_TCEAL9   | ENSG00000160789.18_LMNA | 0.21331  | 0.056012185  | 0.360276741 | 8.32E-03 | 5.73E-02 | 1.00E+00 |
| ENSG00000198937.8_CCDC167  | ENSG00000160789.18_LMNA | -0.35053 | -0.482788015 | -0.20263635 | 9.54E-06 | 2.81E-04 | 4.90E-01 |
| ENSG00000188536.11_HBA2    | ENSG00000160789.18_LMNA | -0.03687 | -0.194930129 | 0.123049311 | 6.52E-01 | 8.46E-01 | 1.00E+00 |
| ENSG00000106803.8_SEC61B   | ENSG00000160789.18_LMNA | 0.07901  | -0.081212219 | 0.235251608 | 3.33E-01 | 6.19E-01 | 1.00E+00 |
| ENSG00000118418.13_HMGH3   | ENSG00000160789.18_LMNA | -0.34356 | -0.476686719 | -0.19502436 | 1.47E-05 | 4.01E-04 | 7.53E-01 |
| ENSG00000111639.6_MRPL51   | ENSG00000160789.18_LMNA | -0.17967 | -0.329449572 | -0.02107455 | 2.68E-02 | 1.33E-01 | 1.00E+00 |
| ENSG00000242372.5	EIF6     | ENSG00000160789.18_LMNA | 0.18699  | 0.028642764  | 0.336183627 | 2.11E-02 | 1.12E-01 | 1.00E+00 |
| ENSG00000129824.14_RPS4Y1  | ENSG00000160789.18_LMNA | -0.08246 | -0.238531481 | 0.077759298 | 3.12E-01 | 5.99E-01 | 1.00E+00 |
| ENSG00000084090.12_STARD7  | ENSG00000160789.18_LMNA | -0.24247 | -0.386738305 | -0.08660844 | 2.62E-03 | 2.40E-02 | 1.00E+00 |
| ENSG00000174684.6_B4GAT1   | ENSG00000160789.18_LMNA | -0.15213 | -0.303970111 | 0.007244776 | 6.13E-02 | 2.29E-01 | 1.00E+00 |
| ENSG00000235655.3_H3F3AP4  | ENSG00000160789.18_LMNA | -0.236   | -0.380885986 | -0.07979257 | 3.42E-03 | 2.95E-02 | 1.00E+00 |
| ENSG00000117632.19_STMN1   | ENSG00000160789.18_LMNA | -0.39801 | -0.524011587 | -0.25496969 | 3.82E-07 | 2.12E-05 | 1.96E-02 |
| ENSG00000176903.4_PNMA1    | ENSG00000160789.18_LMNA | 0.0327   | -0.127163967 | 0.19090562  | 6.89E-01 | 8.66E-01 | 1.00E+00 |
| ENSG00000145293.13_ENOPH1  | ENSG00000160789.18_LMNA | -0.19686 | -0.345244379 | -0.03888183 | 1.51E-02 | 8.81E-02 | 1.00E+00 |
| ENSG00000135390.16_ATP5G2  | ENSG00000160789.18_LMNA | -0.30806 | -0.445417143 | -0.15653776 | 1.13E-04 | 2.08E-03 | 1.00E+00 |
| ENSG00000197451.9_HNRNPAB  | ENSG00000160789.18_LMNA | 0.14192  | -0.01767954  | 0.294468141 | 8.11E-02 | 2.75E-01 | 1.00E+00 |
| ENSG00000118523.5_CTGF     | ENSG00000160789.18_LMNA | 0.17795  | 0.019294605  | 0.327861237 | 2.83E-02 | 1.38E-01 | 1.00E+00 |
| ENSG00000226608.3_FTLF3    | ENSG00000160789.18_LMNA | -0.00302 | -0.16214396  | 0.156254611 | 9.71E-01 | 9.89E-01 | 1.00E+00 |
| ENSG00000111674.7_ENO2     | ENSG00000160789.18_LMNA | 0.12287  | -0.037058269 | 0.276656459 | 1.32E-01 | 3.68E-01 | 1.00E+00 |
| ENSG00000168003.15_SLC3A2  | ENSG00000160789.18_LMNA | 0.26564  | 0.111142779  | 0.407605996 | 9.41E-04 | 1.11E-02 | 1.00E+00 |
| ENSG00000134153.8 EMC7     | ENSG00000160789.18_LMNA | 0.02878  | -0.131021038 | 0.187123317 | 7.25E-01 | 8.83E-01 | 1.00E+00 |
| ENSG00000100644.15_HIF1A   | ENSG00000160789.18_LMNA | 0.17879  | 0.020159336  | 0.328633097 | 2.75E-02 | 1.35E-01 | 1.00E+00 |
| ENSG00000188612.10_SUMO2   | ENSG00000160789.18_LMNA | -0.27218 | -0.413464488 | -0.11809625 | 6.93E-04 | 8.71E-03 | 1.00E+00 |
| ENSG00000215030.5_RPL13P12 | ENSG00000160789.18_LMNA | 0.02311  | -0.136590141 | 0.181645476 | 7.77E-01 | 9.09E-01 | 1.00E+00 |

|                             |                         |          |              |             |          |          |          |
|-----------------------------|-------------------------|----------|--------------|-------------|----------|----------|----------|
| ENSG00000159388.5_BTG2      | ENSG00000160789.18_LMNA | -0.06262 | -0.219630504 | 0.097553914 | 4.43E-01 | 7.11E-01 | 1.00E+00 |
| ENSG00000115307.15_AUP1     | ENSG00000160789.18_LMNA | 0.01382  | -0.145703407 | 0.172638744 | 8.66E-01 | 9.48E-01 | 1.00E+00 |
| ENSG00000157227.11_MMP14    | ENSG00000160789.18_LMNA | 0.66328  | 0.563594746  | 0.743928187 | 1.27E-20 | 1.09E-16 | 6.54E-16 |
| ENSG00000134686.15_PHC2     | ENSG00000160789.18_LMNA | 0.30014  | 0.148009939  | 0.438391755 | 1.72E-04 | 2.90E-03 | 1.00E+00 |
| ENSG00000168894.8_RNF181    | ENSG00000160789.18_LMNA | -0.05311 | -0.210530156 | 0.106995858 | 5.16E-01 | 7.63E-01 | 1.00E+00 |
| ENSG00000122705.15_CLTA     | ENSG00000160789.18_LMNA | -0.08886 | -0.244596277 | 0.07135447  | 2.76E-01 | 5.61E-01 | 1.00E+00 |
| ENSG00000182054.8_IDH2      | ENSG00000160789.18_LMNA | 0.00728  | -0.15209222  | 0.166292715 | 9.29E-01 | 9.73E-01 | 1.00E+00 |
| ENSG00000069275.12_NUCKS1   | ENSG00000160789.18_LMNA | 0.11388  | -0.046161507 | 0.268214269 | 1.62E-01 | 4.17E-01 | 1.00E+00 |
| ENSG00000183283.14_DAZAP2   | ENSG00000160789.18_LMNA | -0.29783 | -0.436344211 | -0.14553261 | 1.94E-04 | 3.19E-03 | 1.00E+00 |
| ENSG00000117410.12_ATP6V0B  | ENSG00000160789.18_LMNA | -0.07578 | -0.232183908 | 0.084434912 | 3.53E-01 | 6.37E-01 | 1.00E+00 |
| ENSG00000102409.9_BEX4      | ENSG00000160789.18_LMNA | -0.36312 | -0.493777844 | -0.21643324 | 4.27E-06 | 1.46E-04 | 2.19E-01 |
| ENSG00000102109.8_PCSK1N    | ENSG00000160789.18_LMNA | -0.11565 | -0.269880141 | 0.044369319 | 1.56E-01 | 4.07E-01 | 1.00E+00 |
| ENSG00000091129.18_NRCAM    | ENSG00000160789.18_LMNA | 0.14671  | -0.012792481 | 0.298926028 | 7.13E-02 | 2.53E-01 | 1.00E+00 |
| ENSG00000204392.9_LSM2      | ENSG00000160789.18_LMNA | -0.19002 | -0.338966607 | -0.03178081 | 1.90E-02 | 1.04E-01 | 1.00E+00 |
| ENSG00000178531.5_CTXN1     | ENSG00000160789.18_LMNA | -0.14096 | -0.293568515 | 0.01866397  | 8.33E-02 | 2.79E-01 | 1.00E+00 |
| ENSG00000163069.11_SGCB     | ENSG00000160789.18_LMNA | 0.04242  | -0.117572416 | 0.200270473 | 6.04E-01 | 8.18E-01 | 1.00E+00 |
| ENSG00000105518.12_TMEM205  | ENSG00000160789.18_LMNA | 0.16279  | 0.003682793  | 0.313854899 | 4.51E-02 | 1.88E-01 | 1.00E+00 |
| ENSG00000086598.9_TMED2     | ENSG00000160789.18_LMNA | -0.08371 | -0.239719916 | 0.076506285 | 3.05E-01 | 5.92E-01 | 1.00E+00 |
| ENSG00000154978.11_VOPP1    | ENSG00000160789.18_LMNA | 0.12028  | -0.039684318 | 0.274226065 | 1.40E-01 | 3.82E-01 | 1.00E+00 |
| ENSG00000005075.14_POLR2J   | ENSG00000160789.18_LMNA | 0.01943  | -0.14020296  | 0.178081268 | 8.12E-01 | 9.26E-01 | 1.00E+00 |
| ENSG00000134419.14_RPS15A   | ENSG00000160789.18_LMNA | -0.16608 | -0.316899987 | -0.00706411 | 4.09E-02 | 1.76E-01 | 1.00E+00 |
| ENSG00000150779.10_TIMM8B   | ENSG00000160789.18_LMNA | -0.2472  | -0.391010358 | -0.09160167 | 2.14E-03 | 2.06E-02 | 1.00E+00 |
| ENSG00000125901.5_MRPS26    | ENSG00000160789.18_LMNA | -0.00593 | -0.16497513  | 0.15341536  | 9.42E-01 | 9.77E-01 | 1.00E+00 |
| ENSG00000233639.4_LINC01158 | ENSG00000160789.18_LMNA | -0.08208 | -0.238167208 | 0.078143166 | 3.15E-01 | 6.01E-01 | 1.00E+00 |
| ENSG00000106636.6_YKT6      | ENSG00000160789.18_LMNA | 0.31679  | 0.165963027  | 0.453140701 | 7.00E-05 | 1.41E-03 | 1.00E+00 |
| ENSG00000162545.5_CAMK2N1   | ENSG00000160789.18_LMNA | 0.10084  | -0.059315105 | 0.255929953 | 2.16E-01 | 4.91E-01 | 1.00E+00 |
| ENSG00000105223.17_PLD3     | ENSG00000160789.18_LMNA | 0.31804  | 0.167313421  | 0.454243764 | 6.53E-05 | 1.33E-03 | 1.00E+00 |
| ENSG00000142657.19_PGD      | ENSG00000160789.18_LMNA | 0.04454  | -0.115480371 | 0.202305386 | 5.86E-01 | 8.08E-01 | 1.00E+00 |
| ENSG00000185787.13_MORF4L1  | ENSG00000160789.18_LMNA | -0.20714 | -0.354648813 | -0.04957775 | 1.04E-02 | 6.76E-02 | 1.00E+00 |
| ENSG00000105968.17_H2AFV    | ENSG00000160789.18_LMNA | -0.14271 | -0.295205685 | 0.016872019 | 7.94E-02 | 2.71E-01 | 1.00E+00 |
| ENSG00000133321.9_RARRES3   | ENSG00000160789.18_LMNA | 0.00439  | -0.15492332  | 0.163472115 | 9.57E-01 | 9.83E-01 | 1.00E+00 |
| ENSG00000134287.8_ARF3      | ENSG00000160789.18_LMNA | 0.02373  | -0.135985091 | 0.182241568 | 7.72E-01 | 9.06E-01 | 1.00E+00 |
| ENSG00000140264.18_SERF2    | ENSG00000160789.18_LMNA | 0.07946  | -0.08076015  | 0.235681432 | 3.30E-01 | 6.16E-01 | 1.00E+00 |

|                            |                         |          |              |             |          |          |          |
|----------------------------|-------------------------|----------|--------------|-------------|----------|----------|----------|
| ENSG00000125971.15_DYNLRB1 | ENSG00000160789.18_LMNA | -0.02799 | -0.18635639  | 0.131801953 | 7.32E-01 | 8.87E-01 | 1.00E+00 |
| ENSG00000165283.14_STOML2  | ENSG00000160789.18_LMNA | -0.01217 | -0.171038836 | 0.147316609 | 8.82E-01 | 9.54E-01 | 1.00E+00 |
| ENSG00000165629.18_ATP5C1  | ENSG00000160789.18_LMNA | -0.36815 | -0.498157565 | -0.22196269 | 3.07E-06 | 1.12E-04 | 1.57E-01 |
| ENSG00000108821.12_COL1A1  | ENSG00000160789.18_LMNA | 0.40766  | 0.265707422  | 0.532316787 | 1.86E-07 | 1.20E-05 | 9.54E-03 |
| ENSG00000172531.13_PPP1CA  | ENSG00000160789.18_LMNA | 0.02175  | -0.137933056 | 0.180321605 | 7.90E-01 | 9.15E-01 | 1.00E+00 |
| ENSG00000165678.18_GHITM   | ENSG00000160789.18_LMNA | -0.32683 | -0.461990344 | -0.17682738 | 3.96E-05 | 8.94E-04 | 1.00E+00 |
| ENSG00000137309.18_HMGA1   | ENSG00000160789.18_LMNA | 0.22234  | 0.065460327  | 0.36850068  | 5.90E-03 | 4.45E-02 | 1.00E+00 |
| ENSG00000130175.8_PRKCSH   | ENSG00000160789.18_LMNA | 0.42851  | 0.289025288  | 0.550177195 | 3.64E-08 | 3.18E-06 | 1.87E-03 |
| ENSG00000137575.10_SDCBP   | ENSG00000160789.18_LMNA | 0.14144  | -0.018166675 | 0.294023039 | 8.22E-02 | 2.77E-01 | 1.00E+00 |
| ENSG00000134871.16_COL4A2  | ENSG00000160789.18_LMNA | 0.40122  | 0.258534367  | 0.526774404 | 3.01E-07 | 1.77E-05 | 1.55E-02 |
| ENSG00000106484.13_MEST    | ENSG00000160789.18_LMNA | 0.15931  | 0.000110125  | 0.310630539 | 4.99E-02 | 2.01E-01 | 1.00E+00 |
| ENSG00000179085.7_DPM3     | ENSG00000160789.18_LMNA | 0.04636  | -0.113680767 | 0.204053651 | 5.71E-01 | 7.99E-01 | 1.00E+00 |
| ENSG00000136193.15_SCRN1   | ENSG00000160789.18_LMNA | 0.16332  | 0.004231953  | 0.314349886 | 4.44E-02 | 1.86E-01 | 1.00E+00 |
| ENSG00000178982.8	EIF3K    | ENSG00000160789.18_LMNA | -0.11379 | -0.268131562 | 0.046250433 | 1.63E-01 | 4.18E-01 | 1.00E+00 |
| ENSG00000105058.10_FAM32A  | ENSG00000160789.18_LMNA | -0.24365 | -0.38780837  | -0.08785774 | 2.49E-03 | 2.31E-02 | 1.00E+00 |
| ENSG00000116649.8_SRM      | ENSG00000160789.18_LMNA | 0.12188  | -0.038056219 | 0.275733335 | 1.35E-01 | 3.73E-01 | 1.00E+00 |
| ENSG00000106244.11_PDAP1   | ENSG00000160789.18_LMNA | 0.38348  | 0.238862546  | 0.511456676 | 1.08E-06 | 4.88E-05 | 5.54E-02 |
| ENSG00000123975.4_CKS2     | ENSG00000160789.18_LMNA | -0.06285 | -0.219849065 | 0.097326444 | 4.42E-01 | 7.09E-01 | 1.00E+00 |
| ENSG00000173786.15_CNP     | ENSG00000160789.18_LMNA | -0.29341 | -0.43241177  | -0.14078495 | 2.44E-04 | 3.83E-03 | 1.00E+00 |
| ENSG00000122545.16_SEPT7   | ENSG00000160789.18_LMNA | -0.01705 | -0.175773733 | 0.142537454 | 8.35E-01 | 9.36E-01 | 1.00E+00 |
| ENSG00000240184.5_PCDHGC3  | ENSG00000160789.18_LMNA | 0.04501  | -0.115019352 | 0.202753446 | 5.82E-01 | 8.05E-01 | 1.00E+00 |
| ENSG00000156976.13	EIF4A2  | ENSG00000160789.18_LMNA | -0.43142 | -0.552660647 | -0.29229232 | 2.87E-08 | 2.61E-06 | 1.47E-03 |
| ENSG00000173915.11_USMG5   | ENSG00000160789.18_LMNA | -0.26356 | -0.40573492  | -0.10892809 | 1.04E-03 | 1.19E-02 | 1.00E+00 |
| ENSG00000122565.17_CBX3    | ENSG00000160789.18_LMNA | -0.04504 | -0.202789226 | 0.114982531 | 5.82E-01 | 8.05E-01 | 1.00E+00 |
| ENSG00000159228.11_CBR1    | ENSG00000160789.18_LMNA | 0.26634  | 0.111886617  | 0.408233868 | 9.11E-04 | 1.08E-02 | 1.00E+00 |
| ENSG00000171766.14_GATM    | ENSG00000160789.18_LMNA | 0.03741  | -0.122525058 | 0.195442129 | 6.47E-01 | 8.43E-01 | 1.00E+00 |
| ENSG00000130402.10_ACTN4   | ENSG00000160789.18_LMNA | 0.54171  | 0.418612835  | 0.645264474 | 5.73E-13 | 3.68E-10 | 2.94E-08 |
| ENSG00000204308.7_RNF5     | ENSG00000160789.18_LMNA | -0.32478 | -0.460183342 | -0.17460333 | 4.46E-05 | 9.79E-04 | 1.00E+00 |
| ENSG00000135452.8_TSPAN31  | ENSG00000160789.18_LMNA | -0.33923 | -0.472892466 | -0.19030769 | 1.91E-05 | 4.97E-04 | 9.79E-01 |
| ENSG00000178498.14_DTX3    | ENSG00000160789.18_LMNA | -0.37543 | -0.504475418 | -0.22997047 | 1.88E-06 | 7.64E-05 | 9.65E-02 |
| ENSG00000173457.9_PPP1R14B | ENSG00000160789.18_LMNA | 0.13085  | -0.02895493  | 0.284130842 | 1.08E-01 | 3.27E-01 | 1.00E+00 |
| ENSG00000173432.9_SAA1     | ENSG00000160789.18_LMNA | 0.02835  | -0.131441211 | 0.186710719 | 7.29E-01 | 8.85E-01 | 1.00E+00 |
| ENSG00000108561.7_C1QBP    | ENSG00000160789.18_LMNA | -0.24996 | -0.393499646 | -0.09451815 | 1.90E-03 | 1.88E-02 | 1.00E+00 |

|                             |                         |          |              |             |          |          |          |
|-----------------------------|-------------------------|----------|--------------|-------------|----------|----------|----------|
| ENSG00000143774.15_GUK1     | ENSG00000160789.18_LMNA | -0.03066 | -0.188938639 | 0.129171032 | 7.08E-01 | 8.76E-01 | 1.00E+00 |
| ENSG00000167460.13_TPM4     | ENSG00000160789.18_LMNA | 0.38171  | 0.236903168  | 0.509921434 | 1.22E-06 | 5.41E-05 | 6.27E-02 |
| ENSG00000084754.9_HADHA     | ENSG00000160789.18_LMNA | -0.07339 | -0.229909256 | 0.086820221 | 3.69E-01 | 6.50E-01 | 1.00E+00 |
| ENSG00000042493.14_CAPG     | ENSG00000160789.18_LMNA | 0.21287  | 0.055554875  | 0.359877481 | 8.46E-03 | 5.81E-02 | 1.00E+00 |
| ENSG00000089063.13_TMEM230  | ENSG00000160789.18_LMNA | -0.07222 | -0.228786432 | 0.087996329 | 3.77E-01 | 6.56E-01 | 1.00E+00 |
| ENSG00000137161.15_CNPY3    | ENSG00000160789.18_LMNA | -0.15506 | -0.30669021  | 0.004245119 | 5.65E-02 | 2.17E-01 | 1.00E+00 |
| ENSG00000155115.6_GTF3C6    | ENSG00000160789.18_LMNA | -0.20772 | -0.355172924 | -0.0501759  | 1.02E-02 | 6.66E-02 | 1.00E+00 |
| ENSG00000170390.13_DCLK2    | ENSG00000160789.18_LMNA | -0.26634 | -0.408233836 | -0.11188658 | 9.11E-04 | 1.08E-02 | 1.00E+00 |
| ENSG00000138071.12_ACTR2    | ENSG00000160789.18_LMNA | 0.09496  | -0.065221994 | 0.250380105 | 2.45E-01 | 5.24E-01 | 1.00E+00 |
| ENSG00000074842.6_MYDGF     | ENSG00000160789.18_LMNA | 0.20815  | 0.0506321    | 0.355572528 | 1.01E-02 | 6.59E-02 | 1.00E+00 |
| ENSG00000211445.10_GPX3     | ENSG00000160789.18_LMNA | -0.09292 | -0.248444863 | 0.067276549 | 2.55E-01 | 5.37E-01 | 1.00E+00 |
| ENSG00000147400.8_CETN2     | ENSG00000160789.18_LMNA | -0.05742 | -0.214659236 | 0.102718872 | 4.82E-01 | 7.40E-01 | 1.00E+00 |
| ENSG00000111341.8_MGP       | ENSG00000160789.18_LMNA | 0.05069  | -0.109393404 | 0.208210555 | 5.35E-01 | 7.76E-01 | 1.00E+00 |
| ENSG00000124762.12_CDKN1A   | ENSG00000160789.18_LMNA | 0.4059   | 0.263747349  | 0.530804569 | 2.12E-07 | 1.33E-05 | 1.09E-02 |
| ENSG00000100348.8_TXN2      | ENSG00000160789.18_LMNA | -0.19225 | -0.341012581 | -0.03409168 | 1.77E-02 | 9.87E-02 | 1.00E+00 |
| ENSG00000108774.13_RAB5C    | ENSG00000160789.18_LMNA | -0.09997 | -0.255114768 | 0.060184119 | 2.20E-01 | 4.96E-01 | 1.00E+00 |
| ENSG00000167191.10_GPRC5B   | ENSG00000160789.18_LMNA | -0.17952 | -0.329311121 | -0.02091932 | 2.69E-02 | 1.33E-01 | 1.00E+00 |
| ENSG00000242299.1_RP11-234A | ENSG00000160789.18_LMNA | -0.08822 | -0.243989993 | 0.071995921 | 2.80E-01 | 5.65E-01 | 1.00E+00 |
| ENSG00000243279.3_PRAF2     | ENSG00000160789.18_LMNA | 0.00153  | -0.157711119 | 0.160689489 | 9.85E-01 | 9.94E-01 | 1.00E+00 |
| ENSG00000005893.14_LAMP2    | ENSG00000160789.18_LMNA | 0.1778   | 0.019136317  | 0.327719905 | 2.84E-02 | 1.38E-01 | 1.00E+00 |
| ENSG00000165280.14_VCP      | ENSG00000160789.18_LMNA | 0.14516  | -0.014375369 | 0.297483634 | 7.44E-02 | 2.60E-01 | 1.00E+00 |
| ENSG00000132434.8_LANCL2    | ENSG00000160789.18_LMNA | -0.07148 | -0.228080646 | 0.088735158 | 3.82E-01 | 6.60E-01 | 1.00E+00 |
| ENSG00000185043.9_CIB1      | ENSG00000160789.18_LMNA | 0.19414  | 0.036058766  | 0.342751885 | 1.65E-02 | 9.42E-02 | 1.00E+00 |
| ENSG00000184983.8_NDUFA6    | ENSG00000160789.18_LMNA | -0.17319 | -0.323468959 | -0.01438261 | 3.29E-02 | 1.52E-01 | 1.00E+00 |
| ENSG00000147684.6_NDUFB9    | ENSG00000160789.18_LMNA | -0.32172 | -0.457485489 | -0.17128825 | 5.31E-05 | 1.13E-03 | 1.00E+00 |
| ENSG00000175826.10_CTDNEP1  | ENSG00000160789.18_LMNA | 0.03641  | -0.123509138 | 0.194480907 | 6.56E-01 | 8.48E-01 | 1.00E+00 |
| ENSG00000111678.9_C12orf57  | ENSG00000160789.18_LMNA | -0.11976 | -0.27374008  | 0.040208907 | 1.42E-01 | 3.84E-01 | 1.00E+00 |
| ENSG00000074071.12_MRPS34   | ENSG00000160789.18_LMNA | -0.03029 | -0.188578013 | 0.129538724 | 7.11E-01 | 8.77E-01 | 1.00E+00 |
| ENSG00000141756.17_FKBP10   | ENSG00000160789.18_LMNA | 0.5051   | 0.376146547  | 0.614858883 | 3.22E-11 | 8.79E-09 | 1.65E-06 |
| ENSG00000127884.4_ECHS1     | ENSG00000160789.18_LMNA | -0.17676 | -0.326762424 | -0.01806438 | 2.94E-02 | 1.41E-01 | 1.00E+00 |
| ENSG00000120509.9_PDZD11    | ENSG00000160789.18_LMNA | -0.07819 | -0.234474021 | 0.08202972  | 3.38E-01 | 6.24E-01 | 1.00E+00 |
| ENSG00000203950.6_FAM127B   | ENSG00000160789.18_LMNA | -0.05904 | -0.216210424 | 0.101109081 | 4.70E-01 | 7.30E-01 | 1.00E+00 |
| ENSG00000175166.15_PSMD2    | ENSG00000160789.18_LMNA | 0.13587  | -0.023846761 | 0.288823057 | 9.51E-02 | 3.02E-01 | 1.00E+00 |

|                             |                         |          |              |             |          |          |          |
|-----------------------------|-------------------------|----------|--------------|-------------|----------|----------|----------|
| ENSG00000060762.17_MPC1     | ENSG00000160789.18_LMNA | -0.16248 | -0.313567913 | -0.00336448 | 4.55E-02 | 1.89E-01 | 1.00E+00 |
| ENSG00000159403.14_C1R      | ENSG00000160789.18_LMNA | 0.45208  | 0.315588153  | 0.5702361   | 5.02E-09 | 6.02E-07 | 2.58E-04 |
| ENSG00000184900.14_SUMO3    | ENSG00000160789.18_LMNA | 0.02338  | -0.136324198 | 0.181907511 | 7.75E-01 | 9.07E-01 | 1.00E+00 |
| ENSG00000105677.10_TMEN147  | ENSG00000160789.18_LMNA | 0.08132  | -0.078904353 | 0.237444611 | 3.19E-01 | 6.06E-01 | 1.00E+00 |
| ENSG00000168077.12_SCARA3   | ENSG00000160789.18_LMNA | 0.25544  | 0.100322599  | 0.398440895 | 1.49E-03 | 1.56E-02 | 1.00E+00 |
| ENSG00000131495.7_NDUFA2    | ENSG00000160789.18_LMNA | -0.21436 | -0.361233178 | -0.0571082  | 8.00E-03 | 5.56E-02 | 1.00E+00 |
| ENSG00000185896.10_LAMP1    | ENSG00000160789.18_LMNA | 0.21458  | 0.057338679  | 0.361434221 | 7.94E-03 | 5.53E-02 | 1.00E+00 |
| ENSG00000092096.13_SLC22A17 | ENSG00000160789.18_LMNA | -0.15713 | -0.308611395 | 0.002123106 | 5.32E-02 | 2.09E-01 | 1.00E+00 |
| ENSG00000149357.8_LAMTOR1   | ENSG00000160789.18_LMNA | -0.19672 | -0.34511284  | -0.03873272 | 1.51E-02 | 8.84E-02 | 1.00E+00 |
| ENSG00000078596.9_ITM2A     | ENSG00000160789.18_LMNA | -0.40237 | -0.527763949 | -0.25981289 | 2.77E-07 | 1.65E-05 | 1.42E-02 |
| ENSG00000079246.14_XRCC5    | ENSG00000160789.18_LMNA | -0.05653 | -0.213805252 | 0.10360441  | 4.89E-01 | 7.45E-01 | 1.00E+00 |
| ENSG00000145824.11_CXCL14   | ENSG00000160789.18_LMNA | 0.28733  | 0.134275845  | 0.427002247 | 3.32E-04 | 4.85E-03 | 1.00E+00 |
| ENSG00000104833.9_TUBB4A    | ENSG00000160789.18_LMNA | -0.35323 | -0.48514442  | -0.2055853  | 8.06E-06 | 2.45E-04 | 4.13E-01 |
| ENSG00000081154.10_PCNP     | ENSG00000160789.18_LMNA | -0.16326 | -0.314292984 | -0.00416881 | 4.45E-02 | 1.86E-01 | 1.00E+00 |
| ENSG00000143862.6_ARL8A     | ENSG00000160789.18_LMNA | 0.02285  | -0.136849797 | 0.181389592 | 7.80E-01 | 9.10E-01 | 1.00E+00 |
| ENSG00000244313.3_RP11-425L | ENSG00000160789.18_LMNA | -0.10168 | -0.256724251 | 0.058467896 | 2.13E-01 | 4.86E-01 | 1.00E+00 |
| ENSG00000213442.5_RPL18AP3  | ENSG00000160789.18_LMNA | -0.13063 | -0.283924046 | 0.029179683 | 1.09E-01 | 3.28E-01 | 1.00E+00 |
| ENSG00000121653.10_MAPK8IP1 | ENSG00000160789.18_LMNA | -0.10493 | -0.259790278 | 0.055193371 | 1.98E-01 | 4.68E-01 | 1.00E+00 |
| ENSG00000175197.9_DDIT3     | ENSG00000160789.18_LMNA | -0.14565 | -0.297942303 | 0.013872194 | 7.34E-02 | 2.58E-01 | 1.00E+00 |
| ENSG00000198961.8_PJA2      | ENSG00000160789.18_LMNA | 0.17028  | 0.01138338   | 0.320780493 | 3.60E-02 | 1.61E-01 | 1.00E+00 |
| ENSG00000102172.14_SMS      | ENSG00000160789.18_LMNA | 0.47695  | 0.343854588  | 0.591253086 | 5.23E-10 | 9.13E-08 | 2.69E-05 |
| ENSG00000104695.11_PPP2CB   | ENSG00000160789.18_LMNA | -0.09813 | -0.25337334  | 0.062038939 | 2.29E-01 | 5.06E-01 | 1.00E+00 |
| ENSG00000105568.16_PPP2R1A  | ENSG00000160789.18_LMNA | 0.03945  | -0.120511809 | 0.197406712 | 6.29E-01 | 8.33E-01 | 1.00E+00 |
| ENSG00000148834.11_GSTO1    | ENSG00000160789.18_LMNA | -0.0867  | -0.242557358 | 0.073510615 | 2.88E-01 | 5.74E-01 | 1.00E+00 |
| ENSG00000100300.16_TSPO     | ENSG00000160789.18_LMNA | 0.16868  | 0.009743677  | 0.319308578 | 3.78E-02 | 1.67E-01 | 1.00E+00 |
| ENSG00000148175.11_STOM     | ENSG00000160789.18_LMNA | 0.03874  | -0.12120848  | 0.19672717  | 6.36E-01 | 8.37E-01 | 1.00E+00 |
| ENSG00000099622.12_CIRBP    | ENSG00000160789.18_LMNA | -0.07328 | -0.229798104 | 0.086936687 | 3.70E-01 | 6.50E-01 | 1.00E+00 |
| ENSG00000146007.9_ZMAT2     | ENSG00000160789.18_LMNA | -0.18233 | -0.331896488 | -0.02382049 | 2.46E-02 | 1.25E-01 | 1.00E+00 |
| ENSG00000134817.10_APLNR    | ENSG00000160789.18_LMNA | -0.13193 | -0.285137627 | 0.027860272 | 1.05E-01 | 3.22E-01 | 1.00E+00 |
| ENSG00000179604.9_CDC42EP4  | ENSG00000160789.18_LMNA | -0.04286 | -0.200690583 | 0.117140742 | 6.00E-01 | 8.16E-01 | 1.00E+00 |
| ENSG00000182718.15_ANXA2    | ENSG00000160789.18_LMNA | 0.56821  | 0.449682208  | 0.66706421  | 2.26E-14 | 2.70E-11 | 1.16E-09 |
| ENSG00000115128.6_SF3B6     | ENSG00000160789.18_LMNA | -0.09049 | -0.246144381 | 0.069715384 | 2.68E-01 | 5.52E-01 | 1.00E+00 |
| ENSG00000132589.14_FLOT2    | ENSG00000160789.18_LMNA | 0.26342  | 0.10877601   | 0.405606343 | 1.04E-03 | 1.19E-02 | 1.00E+00 |

|                             |                         |          |              |             |          |          |          |
|-----------------------------|-------------------------|----------|--------------|-------------|----------|----------|----------|
| ENSG00000177469.12_PTRF     | ENSG00000160789.18_LMNA | 0.7066   | 0.616777723  | 0.778251349 | 2.70E-24 | 6.92E-20 | 1.38E-19 |
| ENSG00000049245.11_VAMP3    | ENSG00000160789.18_LMNA | 0.07346  | -0.086756463 | 0.229970101 | 3.68E-01 | 6.49E-01 | 1.00E+00 |
| ENSG00000031698.11_SARS     | ENSG00000160789.18_LMNA | -0.06435 | -0.221287266 | 0.095828797 | 4.31E-01 | 7.00E-01 | 1.00E+00 |
| ENSG00000164096.12_C4orf3   | ENSG00000160789.18_LMNA | -0.02677 | -0.185181178 | 0.132997833 | 7.43E-01 | 8.92E-01 | 1.00E+00 |
| ENSG00000124172.8_ATP5E     | ENSG00000160789.18_LMNA | -0.03308 | -0.191269416 | 0.126792471 | 6.86E-01 | 8.64E-01 | 1.00E+00 |
| ENSG00000127540.10_UQCR11   | ENSG00000160789.18_LMNA | -0.17819 | -0.328087691 | -0.01954826 | 2.81E-02 | 1.37E-01 | 1.00E+00 |
| ENSG00000085662.12_AKR1B1   | ENSG00000160789.18_LMNA | -0.27295 | -0.41415139  | -0.11891344 | 6.69E-04 | 8.46E-03 | 1.00E+00 |
| ENSG00000266472.4_MRPS21    | ENSG00000160789.18_LMNA | -0.1251  | -0.27874447  | 0.034798701 | 1.25E-01 | 3.56E-01 | 1.00E+00 |
| ENSG00000102804.13_TSC22D1  | ENSG00000160789.18_LMNA | -0.47145 | -0.58662284  | -0.33758847 | 8.76E-10 | 1.41E-07 | 4.49E-05 |
| ENSG00000071553.15_ATP6AP1  | ENSG00000160789.18_LMNA | 0.26302  | 0.108360697  | 0.405255158 | 1.06E-03 | 1.21E-02 | 1.00E+00 |
| ENSG00000115541.9_HSPE1     | ENSG00000160789.18_LMNA | -0.1483  | -0.300411682 | 0.011160485 | 6.82E-02 | 2.45E-01 | 1.00E+00 |
| ENSG00000197971.13_MBP      | ENSG00000160789.18_LMNA | -0.32748 | -0.462561724 | -0.17753123 | 3.82E-05 | 8.68E-04 | 1.00E+00 |
| ENSG00000088247.14_KHSRP    | ENSG00000160789.18_LMNA | 0.13533  | -0.024392097 | 0.288322843 | 9.64E-02 | 3.05E-01 | 1.00E+00 |
| ENSG00000110107.7_PRPF19    | ENSG00000160789.18_LMNA | -0.04183 | -0.199698742 | 0.118159692 | 6.09E-01 | 8.21E-01 | 1.00E+00 |
| ENSG00000102317.16_RBM3     | ENSG00000160789.18_LMNA | -0.03604 | -0.19413116  | 0.123867047 | 6.59E-01 | 8.50E-01 | 1.00E+00 |
| ENSG00000245910.7_SNHG6     | ENSG00000160789.18_LMNA | -0.25074 | -0.394209277 | -0.0953505  | 1.83E-03 | 1.84E-02 | 1.00E+00 |
| ENSG00000106615.8_RHEB      | ENSG00000160789.18_LMNA | -0.07423 | -0.230700642 | 0.085990747 | 3.63E-01 | 6.45E-01 | 1.00E+00 |
| ENSG00000105835.10_NAMPT    | ENSG00000160789.18_LMNA | 0.29819  | 0.145916115  | 0.436661377 | 1.91E-04 | 3.15E-03 | 1.00E+00 |
| ENSG00000220205.7_VAMP2     | ENSG00000160789.18_LMNA | -0.25607 | -0.399004105 | -0.10098549 | 1.45E-03 | 1.53E-02 | 1.00E+00 |
| ENSG00000104763.16_ASAH1    | ENSG00000160789.18_LMNA | -0.33874 | -0.472458939 | -0.1897696  | 1.97E-05 | 5.10E-04 | 1.00E+00 |
| ENSG00000159352.14_PSMC4    | ENSG00000160789.18_LMNA | 0.0857   | -0.074519841 | 0.241602042 | 2.94E-01 | 5.80E-01 | 1.00E+00 |
| ENSG00000134222.15_PSRC1    | ENSG00000160789.18_LMNA | 0.12037  | -0.039589946 | 0.274313475 | 1.40E-01 | 3.81E-01 | 1.00E+00 |
| ENSG00000129353.13_SLC44A2  | ENSG00000160789.18_LMNA | 0.16702  | 0.008036286  | 0.317774312 | 3.97E-02 | 1.73E-01 | 1.00E+00 |
| ENSG0000013275.6_PSMC4      | ENSG00000160789.18_LMNA | -0.0202  | -0.178822381 | 0.139452436 | 8.05E-01 | 9.22E-01 | 1.00E+00 |
| ENSG00000107874.9_CUEDC2    | ENSG00000160789.18_LMNA | -0.42353 | -0.545917074 | -0.28343515 | 5.43E-08 | 4.38E-06 | 2.79E-03 |
| ENSG00000185650.9_ZFP36L1   | ENSG00000160789.18_LMNA | 0.18006  | 0.021471607  | 0.329803645 | 2.64E-02 | 1.32E-01 | 1.00E+00 |
| ENSG00000147533.15_GOLGA7   | ENSG00000160789.18_LMNA | -0.28497 | -0.424897577 | -0.13175017 | 3.73E-04 | 5.35E-03 | 1.00E+00 |
| ENSG00000198892.6_SHISA4    | ENSG00000160789.18_LMNA | -0.17581 | -0.325890624 | -0.01708898 | 3.03E-02 | 1.44E-01 | 1.00E+00 |
| ENSG00000063244.11_U2AF2    | ENSG00000160789.18_LMNA | 0.11723  | -0.042767852 | 0.271367143 | 1.50E-01 | 3.98E-01 | 1.00E+00 |
| ENSG00000154723.11_ATP5J    | ENSG00000160789.18_LMNA | -0.15324 | -0.305003901 | 0.006105397 | 5.94E-02 | 2.24E-01 | 1.00E+00 |
| ENSG00000175756.12_AURKAIP1 | ENSG00000160789.18_LMNA | 0.09591  | -0.064271703 | 0.251274358 | 2.40E-01 | 5.19E-01 | 1.00E+00 |
| ENSG00000143222.10_UFC1     | ENSG00000160789.18_LMNA | -0.27195 | -0.413256573 | -0.11784898 | 7.01E-04 | 8.79E-03 | 1.00E+00 |
| ENSG00000225733.4_FGD5-AS1  | ENSG00000160789.18_LMNA | -0.42396 | -0.546290324 | -0.28392422 | 5.25E-08 | 4.25E-06 | 2.69E-03 |



|                            |                         |          |              |             |          |          |          |
|----------------------------|-------------------------|----------|--------------|-------------|----------|----------|----------|
| ENSG00000176101.10_SSNA1   | ENSG00000160789.18_LMNA | 0.07286  | -0.08735472  | 0.229399077 | 3.72E-01 | 6.53E-01 | 1.00E+00 |
| ENSG00000101265.14_RASSF2  | ENSG00000160789.18_LMNA | -0.06717 | -0.223979223 | 0.093021707 | 4.11E-01 | 6.85E-01 | 1.00E+00 |
| ENSG00000141504.10_SAT2    | ENSG00000160789.18_LMNA | -0.08782 | -0.243613331 | 0.072394299 | 2.82E-01 | 5.67E-01 | 1.00E+00 |
| ENSG00000105254.10_TBCB    | ENSG00000160789.18_LMNA | -0.16306 | -0.314109912 | -0.00396569 | 4.47E-02 | 1.87E-01 | 1.00E+00 |
| ENSG00000130725.6_UBE2M    | ENSG00000160789.18_LMNA | 0.13206  | -0.027722601 | 0.285264198 | 1.05E-01 | 3.21E-01 | 1.00E+00 |
| ENSG00000125991.17_ERGIC3  | ENSG00000160789.18_LMNA | 0.14265  | -0.016938408 | 0.295145063 | 7.96E-02 | 2.71E-01 | 1.00E+00 |
| ENSG00000152795.16_HNRNPDL | ENSG00000160789.18_LMNA | -0.13838 | -0.29116284  | 0.021293446 | 8.91E-02 | 2.91E-01 | 1.00E+00 |
| ENSG00000114646.8_CSPG5    | ENSG00000160789.18_LMNA | -0.26056 | -0.403038711 | -0.10574191 | 1.19E-03 | 1.32E-02 | 1.00E+00 |
| ENSG00000176978.12_DPP7    | ENSG00000160789.18_LMNA | 0.37358  | 0.227935712  | 0.502872849 | 2.13E-06 | 8.37E-05 | 1.09E-01 |
| ENSG00000188846.12_RPL14   | ENSG00000160789.18_LMNA | -0.18914 | -0.338155428 | -0.03086551 | 1.96E-02 | 1.06E-01 | 1.00E+00 |
| ENSG00000142871.14_CYR61   | ENSG00000160789.18_LMNA | 0.34642  | 0.198149321  | 0.479194778 | 1.23E-05 | 3.47E-04 | 6.32E-01 |
| ENSG00000115234.9_SNX17    | ENSG00000160789.18_LMNA | -0.18367 | -0.333129287 | -0.0252057  | 2.35E-02 | 1.21E-01 | 1.00E+00 |
| ENSG00000132471.10_WBP2    | ENSG00000160789.18_LMNA | -0.02144 | -0.180028231 | 0.138230492 | 7.93E-01 | 9.16E-01 | 1.00E+00 |
| ENSG00000126698.9_DNAJC8   | ENSG00000160789.18_LMNA | -0.20421 | -0.351963848 | -0.04651691 | 1.16E-02 | 7.29E-02 | 1.00E+00 |
| ENSG00000027697.11_IFNGR1  | ENSG00000160789.18_LMNA | -0.34792 | -0.480504194 | -0.19978308 | 1.12E-05 | 3.20E-04 | 5.76E-01 |
| ENSG00000170142.10_UBE2E1  | ENSG00000160789.18_LMNA | -0.40984 | -0.534186771 | -0.26813427 | 1.58E-07 | 1.04E-05 | 8.09E-03 |
| ENSG00000176971.3_FIBIN    | ENSG00000160789.18_LMNA | -0.05278 | -0.21021264  | 0.107324262 | 5.18E-01 | 7.65E-01 | 1.00E+00 |
| ENSG00000132965.8_ALOX5AP  | ENSG00000160789.18_LMNA | 0.04451  | -0.115511228 | 0.202275392 | 5.86E-01 | 8.08E-01 | 1.00E+00 |
| ENSG00000069849.9_ATP1B3   | ENSG00000160789.18_LMNA | 0.01154  | -0.147934648 | 0.170425444 | 8.88E-01 | 9.56E-01 | 1.00E+00 |
| ENSG00000131711.13_MAP1B   | ENSG00000160789.18_LMNA | 0.1588   | -0.000409224 | 0.310161227 | 5.07E-02 | 2.03E-01 | 1.00E+00 |
| ENSG00000198843.11_SELENOT | ENSG00000160789.18_LMNA | -0.26038 | -0.402884255 | -0.10555957 | 1.20E-03 | 1.33E-02 | 1.00E+00 |
| ENSG00000101444.11_AHCY    | ENSG00000160789.18_LMNA | 0.07435  | -0.085871459 | 0.230814418 | 3.63E-01 | 6.44E-01 | 1.00E+00 |
| ENSG00000164054.14_SHISA5  | ENSG00000160789.18_LMNA | 0.37619  | 0.230808813  | 0.505135147 | 1.79E-06 | 7.33E-05 | 9.16E-02 |
| ENSG00000152234.14_ATP5A1  | ENSG00000160789.18_LMNA | -0.22482 | -0.370754795 | -0.06805951 | 5.36E-03 | 4.13E-02 | 1.00E+00 |
| ENSG00000006125.15_AP2B1   | ENSG00000160789.18_LMNA | -0.21898 | -0.365437649 | -0.06193498 | 6.72E-03 | 4.89E-02 | 1.00E+00 |
| ENSG00000204472.11_AIF1    | ENSG00000160789.18_LMNA | -0.10803 | -0.262715495 | 0.052062903 | 1.85E-01 | 4.51E-01 | 1.00E+00 |
| ENSG00000108523.14_RNF167  | ENSG00000160789.18_LMNA | -0.00554 | -0.164599331 | 0.153792535 | 9.46E-01 | 9.78E-01 | 1.00E+00 |
| ENSG00000112473.15_SLC39A7 | ENSG00000160789.18_LMNA | 0.37237  | 0.22660726   | 0.501825543 | 2.31E-06 | 8.91E-05 | 1.19E-01 |
| ENSG00000107281.8_NPDC1    | ENSG00000160789.18_LMNA | 0.06702  | -0.093173654 | 0.223833631 | 4.12E-01 | 6.86E-01 | 1.00E+00 |
| ENSG00000067167.6_TRAM1    | ENSG00000160789.18_LMNA | 0.15104  | -0.008361373 | 0.30295628  | 6.32E-02 | 2.34E-01 | 1.00E+00 |
| ENSG00000204264.7_PSMB8    | ENSG00000160789.18_LMNA | 0.12715  | -0.032708785 | 0.280673075 | 1.19E-01 | 3.45E-01 | 1.00E+00 |
| ENSG00000005513.9_SOX8     | ENSG00000160789.18_LMNA | -0.42178 | -0.544420135 | -0.28147509 | 6.24E-08 | 4.93E-06 | 3.20E-03 |
| ENSG00000007080.9_CCDC124  | ENSG00000160789.18_LMNA | 0.09043  | -0.069779595 | 0.246083765 | 2.68E-01 | 5.52E-01 | 1.00E+00 |

|                            |                         |          |              |             |          |          |          |
|----------------------------|-------------------------|----------|--------------|-------------|----------|----------|----------|
| ENSG00000205927.4_OLIG2    | ENSG00000160789.18_LMNA | -0.35039 | -0.482669878 | -0.20248864 | 9.63E-06 | 2.83E-04 | 4.94E-01 |
| ENSG00000105401.5_CDC37    | ENSG00000160789.18_LMNA | 0.29443  | 0.141875339  | 0.433315909 | 2.31E-04 | 3.67E-03 | 1.00E+00 |
| ENSG00000183684.7_ALYREF   | ENSG00000160789.18_LMNA | 0.12508  | -0.034815995 | 0.278728501 | 1.25E-01 | 3.56E-01 | 1.00E+00 |
| ENSG00000116717.10_GADD45A | ENSG00000160789.18_LMNA | 0.53154  | 0.406765186  | 0.636853242 | 1.84E-12 | 9.09E-10 | 9.45E-08 |
| ENSG00000272398.4_CD24     | ENSG00000160789.18_LMNA | -0.29821 | -0.436676435 | -0.14593432 | 1.90E-04 | 3.14E-03 | 1.00E+00 |
| ENSG00000143870.11_PDIA6   | ENSG00000160789.18_LMNA | 0.37936  | 0.234311165  | 0.507887832 | 1.44E-06 | 6.21E-05 | 7.37E-02 |
| ENSG00000104870.11_FCGRT   | ENSG00000160789.18_LMNA | 0.04051  | -0.119460946 | 0.198431159 | 6.20E-01 | 8.28E-01 | 1.00E+00 |
| ENSG00000265452.1_MIR3682  | ENSG00000160789.18_LMNA | -0.24395 | -0.388075227 | -0.08816944 | 2.46E-03 | 2.29E-02 | 1.00E+00 |
| ENSG00000179950.12_PUF60   | ENSG00000160789.18_LMNA | -0.17513 | -0.325261881 | -0.01638588 | 3.09E-02 | 1.46E-01 | 1.00E+00 |
| ENSG00000160213.5_CSTB     | ENSG00000160789.18_LMNA | 0.16798  | 0.009016324  | 0.318655175 | 3.86E-02 | 1.69E-01 | 1.00E+00 |
| ENSG00000111481.8_COPZ1    | ENSG00000160789.18_LMNA | -0.31965 | -0.455665321 | -0.16905531 | 5.96E-05 | 1.23E-03 | 1.00E+00 |
| ENSG00000161547.13_SRSF2   | ENSG00000160789.18_LMNA | -0.18442 | -0.333820964 | -0.02598341 | 2.29E-02 | 1.19E-01 | 1.00E+00 |
| ENSG00000143553.9_SNAPIN   | ENSG00000160789.18_LMNA | -0.2767  | -0.417511587 | -0.12291674 | 5.59E-04 | 7.35E-03 | 1.00E+00 |
| ENSG00000141580.14_WDR45B  | ENSG00000160789.18_LMNA | -0.11533 | -0.269585226 | 0.044686743 | 1.57E-01 | 4.09E-01 | 1.00E+00 |
| ENSG00000182952.4_HMGNA4   | ENSG00000160789.18_LMNA | -0.14758 | -0.299741026 | 0.011897409 | 6.96E-02 | 2.49E-01 | 1.00E+00 |
| ENSG00000103257.7_SLC7A5   | ENSG00000160789.18_LMNA | -0.01139 | -0.170278716 | 0.148082451 | 8.89E-01 | 9.57E-01 | 1.00E+00 |
| ENSG00000132670.19_PTPRA   | ENSG00000160789.18_LMNA | 0.10308  | -0.057057423 | 0.258045694 | 2.06E-01 | 4.78E-01 | 1.00E+00 |
| ENSG00000178035.10_IMPDH2  | ENSG00000160789.18_LMNA | 0.01294  | -0.146564888 | 0.171784571 | 8.74E-01 | 9.51E-01 | 1.00E+00 |
| ENSG00000225972.1_MTND1P23 | ENSG00000160789.18_LMNA | -0.14958 | -0.301601001 | 0.009852816 | 6.59E-02 | 2.40E-01 | 1.00E+00 |
| ENSG00000137207.10_YIPF3   | ENSG00000160789.18_LMNA | 0.04883  | -0.111230832 | 0.206430441 | 5.50E-01 | 7.87E-01 | 1.00E+00 |
| ENSG00000143570.16_SLC39A1 | ENSG00000160789.18_LMNA | 0.54384  | 0.421092254  | 0.647017809 | 4.47E-13 | 3.02E-10 | 2.29E-08 |
| ENSG00000129625.11_REEP5   | ENSG00000160789.18_LMNA | -0.10985 | -0.264426186 | 0.050229307 | 1.78E-01 | 4.40E-01 | 1.00E+00 |
| ENSG00000143753.11_DEGS1   | ENSG00000160789.18_LMNA | 0.09634  | -0.0638374   | 0.251682871 | 2.38E-01 | 5.16E-01 | 1.00E+00 |
| ENSG00000180992.6_MRPL14   | ENSG00000160789.18_LMNA | -0.06252 | -0.219537623 | 0.09765057  | 4.44E-01 | 7.11E-01 | 1.00E+00 |
| ENSG00000177706.8_FAM20C   | ENSG00000160789.18_LMNA | 0.63423  | 0.528376253  | 0.720662918 | 1.76E-18 | 6.95E-15 | 9.04E-14 |
| ENSG00000155959.9_VBP1     | ENSG00000160789.18_LMNA | -0.33263 | -0.467095321 | -0.18312631 | 2.83E-05 | 6.80E-04 | 1.00E+00 |
| ENSG00000104765.13_BNIP3L  | ENSG00000160789.18_LMNA | -0.06996 | -0.226639112 | 0.090243097 | 3.92E-01 | 6.70E-01 | 1.00E+00 |
| ENSG00000101363.11_MANBAL  | ENSG00000160789.18_LMNA | -0.1361  | -0.289038576 | 0.023611744 | 9.45E-02 | 3.01E-01 | 1.00E+00 |
| ENSG00000002549.11_LAP3    | ENSG00000160789.18_LMNA | 0.19531  | 0.037268253  | 0.343820275 | 1.59E-02 | 9.15E-02 | 1.00E+00 |
| ENSG00000071575.10_TRIB2   | ENSG00000160789.18_LMNA | 0.1959   | 0.037879317  | 0.344359752 | 1.56E-02 | 9.01E-02 | 1.00E+00 |
| ENSG00000123091.4_RNF11    | ENSG00000160789.18_LMNA | -0.07358 | -0.230080988 | 0.086640261 | 3.68E-01 | 6.48E-01 | 1.00E+00 |
| ENSG00000101198.13_NKAIN4  | ENSG00000160789.18_LMNA | -0.44437 | -0.563694344 | -0.3068812  | 9.76E-09 | 1.05E-06 | 5.00E-04 |
| ENSG00000078549.13_ADCYAP1 | ENSG00000160789.18_LMNA | -0.25008 | -0.393605877 | -0.09464272 | 1.89E-03 | 1.87E-02 | 1.00E+00 |

|                            |                         |          |              |             |          |          |          |
|----------------------------|-------------------------|----------|--------------|-------------|----------|----------|----------|
| ENSG00000143149.11_ALDH9A1 | ENSG00000160789.18_LMNA | -0.1833  | -0.332791099 | -0.02482559 | 2.38E-02 | 1.22E-01 | 1.00E+00 |
| ENSG00000145592.12_RPL37   | ENSG00000160789.18_LMNA | -0.15389 | -0.305606166 | 0.005441246 | 5.84E-02 | 2.21E-01 | 1.00E+00 |
| ENSG00000171604.10_CXXC5   | ENSG00000160789.18_LMNA | 0.09868  | -0.061487744 | 0.253891051 | 2.26E-01 | 5.03E-01 | 1.00E+00 |
| ENSG00000057608.15_GDI2    | ENSG00000160789.18_LMNA | -0.29594 | -0.43466448  | -0.14350302 | 2.14E-04 | 3.44E-03 | 1.00E+00 |
| ENSG00000082641.14_NFE2L1  | ENSG00000160789.18_LMNA | 0.27685  | 0.123076661  | 0.417645648 | 5.55E-04 | 7.31E-03 | 1.00E+00 |
| ENSG00000134824.12_FADS2   | ENSG00000160789.18_LMNA | -0.22431 | -0.370283944 | -0.06751624 | 5.47E-03 | 4.19E-02 | 1.00E+00 |
| ENSG00000168913.6_ENHO     | ENSG00000160789.18_LMNA | -0.40518 | -0.530182216 | -0.26294132 | 2.24E-07 | 1.39E-05 | 1.15E-02 |
| ENSG00000090861.14_AARS    | ENSG00000160789.18_LMNA | 0.05131  | -0.108782063 | 0.208802361 | 5.30E-01 | 7.73E-01 | 1.00E+00 |
| ENSG00000156261.11_CCT8    | ENSG00000160789.18_LMNA | 0.1153   | -0.044719351 | 0.269554927 | 1.57E-01 | 4.09E-01 | 1.00E+00 |
| ENSG00000164104.10_HMGB2   | ENSG00000160789.18_LMNA | 0.03079  | -0.129043107 | 0.189064085 | 7.06E-01 | 8.75E-01 | 1.00E+00 |
| ENSG00000065518.7_NDUFB4   | ENSG00000160789.18_LMNA | -0.17352 | -0.32377639  | -0.01472594 | 3.25E-02 | 1.51E-01 | 1.00E+00 |
| ENSG00000102226.8_USP11    | ENSG00000160789.18_LMNA | -0.09559 | -0.2509675   | 0.064597855 | 2.41E-01 | 5.21E-01 | 1.00E+00 |
| ENSG00000100138.12_SNU13   | ENSG00000160789.18_LMNA | -0.2686  | -0.4102564   | -0.11428496 | 8.20E-04 | 9.91E-03 | 1.00E+00 |
| ENSG00000121774.16_KHDRBS1 | ENSG00000160789.18_LMNA | 0.0917   | -0.068501029 | 0.247290292 | 2.61E-01 | 5.44E-01 | 1.00E+00 |
| ENSG00000189403.13_HMGB1   | ENSG00000160789.18_LMNA | -0.1869  | -0.336101902 | -0.0285507  | 2.11E-02 | 1.12E-01 | 1.00E+00 |
| ENSG00000106628.9_POLD2    | ENSG00000160789.18_LMNA | 0.17262  | 0.013798882  | 0.322946101 | 3.35E-02 | 1.54E-01 | 1.00E+00 |
| ENSG00000126756.10_UXT     | ENSG00000160789.18_LMNA | -0.17186 | -0.322240821 | -0.01301182 | 3.43E-02 | 1.56E-01 | 1.00E+00 |
| ENSG00000105696.7_TMEM59L  | ENSG00000160789.18_LMNA | -0.20571 | -0.353339842 | -0.04808481 | 1.10E-02 | 7.01E-02 | 1.00E+00 |
| ENSG00000072778.18_ACADVL  | ENSG00000160789.18_LMNA | 0.18303  | 0.024548335  | 0.33254438  | 2.40E-02 | 1.23E-01 | 1.00E+00 |
| ENSG00000122218.13_COPA    | ENSG00000160789.18_LMNA | -0.02607 | -0.184506296 | 0.133684166 | 7.50E-01 | 8.95E-01 | 1.00E+00 |
| ENSG00000213553.4_RPLP0P6  | ENSG00000160789.18_LMNA | 0.02224  | -0.137443847 | 0.18080401  | 7.86E-01 | 9.13E-01 | 1.00E+00 |
| ENSG00000044115.19_CTNNA1  | ENSG00000160789.18_LMNA | 0.35181  | 0.204040744  | 0.483910721 | 8.81E-06 | 2.63E-04 | 4.52E-01 |
| ENSG00000008282.6_SYPL1    | ENSG00000160789.18_LMNA | 0.18758  | 0.029253275  | 0.336725481 | 2.07E-02 | 1.10E-01 | 1.00E+00 |
| ENSG00000143819.11_EPHX1   | ENSG00000160789.18_LMNA | 0.05845  | -0.101697384 | 0.215643724 | 4.74E-01 | 7.34E-01 | 1.00E+00 |
| ENSG00000105583.8_WDR83OS  | ENSG00000160789.18_LMNA | -0.14432 | -0.296705995 | 0.015228105 | 7.61E-02 | 2.64E-01 | 1.00E+00 |
| ENSG00000162873.13_KLHDC8A | ENSG00000160789.18_LMNA | 0.07646  | -0.083758291 | 0.23282851  | 3.49E-01 | 6.33E-01 | 1.00E+00 |
| ENSG00000143575.13_HAX1    | ENSG00000160789.18_LMNA | -0.1754  | -0.325508967 | -0.01666215 | 3.07E-02 | 1.45E-01 | 1.00E+00 |
| ENSG00000198856.11_OSTC    | ENSG00000160789.18_LMNA | 0.01673  | -0.142850818 | 0.175463721 | 8.38E-01 | 9.37E-01 | 1.00E+00 |
| ENSG00000169862.17_CTNND2  | ENSG00000160789.18_LMNA | -0.22698 | -0.372708485 | -0.0703156  | 4.92E-03 | 3.87E-02 | 1.00E+00 |
| ENSG00000172301.9_COPRS    | ENSG00000160789.18_LMNA | -0.01513 | -0.173908666 | 0.144421728 | 8.53E-01 | 9.42E-01 | 1.00E+00 |
| ENSG00000168209.4_DDIT4    | ENSG00000160789.18_LMNA | -0.03355 | -0.191723676 | 0.126328473 | 6.82E-01 | 8.61E-01 | 1.00E+00 |
| ENSG00000149932.15_TMEM219 | ENSG00000160789.18_LMNA | -0.24248 | -0.386748081 | -0.08661985 | 2.61E-03 | 2.40E-02 | 1.00E+00 |
| ENSG00000226958.1_         | ENSG00000160789.18_LMNA | -0.01932 | -0.177970272 | 0.140315333 | 8.13E-01 | 9.27E-01 | 1.00E+00 |

|                            |                         |          |              |             |          |          |          |
|----------------------------|-------------------------|----------|--------------|-------------|----------|----------|----------|
| ENSG00000169813.15_HNRNPF  | ENSG00000160789.18_LMNA | 0.36472  | 0.218190801  | 0.495171486 | 3.84E-06 | 1.34E-04 | 1.97E-01 |
| ENSG00000118640.9_VAMP8    | ENSG00000160789.18_LMNA | -0.05203 | -0.209495474 | 0.108065765 | 5.24E-01 | 7.70E-01 | 1.00E+00 |
| ENSG00000006327.12_TNFRSF1 | ENSG00000160789.18_LMNA | 0.599    | 0.486158322  | 0.692191164 | 3.59E-16 | 8.78E-13 | 1.84E-11 |
| ENSG00000108830.9_RND2     | ENSG00000160789.18_LMNA | -0.30011 | -0.438365429 | -0.14797806 | 1.72E-04 | 2.91E-03 | 1.00E+00 |
| ENSG00000112977.14_DAP     | ENSG00000160789.18_LMNA | 0.14117  | -0.01844361  | 0.29376994  | 8.28E-02 | 2.78E-01 | 1.00E+00 |
| ENSG00000171388.11_APLN    | ENSG00000160789.18_LMNA | -0.07222 | -0.228792359 | 0.087990124 | 3.77E-01 | 6.56E-01 | 1.00E+00 |
| ENSG00000116857.15_TMEN9   | ENSG00000160789.18_LMNA | -0.14048 | -0.293129417 | 0.019144239 | 8.43E-02 | 2.81E-01 | 1.00E+00 |
| ENSG00000136158.9_SPRY2    | ENSG00000160789.18_LMNA | 0.4274   | 0.28778573   | 0.549233725 | 3.98E-08 | 3.42E-06 | 2.04E-03 |
| ENSG00000130706.11_ADRM1   | ENSG00000160789.18_LMNA | 0.41052  | 0.268893896  | 0.534771561 | 1.50E-07 | 1.00E-05 | 7.68E-03 |
| ENSG00000106665.14_CLIP2   | ENSG00000160789.18_LMNA | 0.20287  | 0.045125388  | 0.350741542 | 1.22E-02 | 7.56E-02 | 1.00E+00 |
| ENSG00000143153.11_ATP1B1  | ENSG00000160789.18_LMNA | -0.26409 | -0.406213474 | -0.10949425 | 1.01E-03 | 1.17E-02 | 1.00E+00 |
| ENSG00000104852.13_SNRNP70 | ENSG00000160789.18_LMNA | 0.13645  | -0.023258157 | 0.289362768 | 9.37E-02 | 2.99E-01 | 1.00E+00 |
| ENSG00000126945.8_HNRNPH2  | ENSG00000160789.18_LMNA | 0.0812   | -0.079020471 | 0.23733435  | 3.20E-01 | 6.06E-01 | 1.00E+00 |
| ENSG00000134248.12_LAMTOR5 | ENSG00000160789.18_LMNA | -0.16381 | -0.314797868 | -0.00472912 | 4.37E-02 | 1.84E-01 | 1.00E+00 |
| ENSG00000101161.7_PRPF6    | ENSG00000160789.18_LMNA | 0.17939  | 0.020786791  | 0.329192907 | 2.70E-02 | 1.33E-01 | 1.00E+00 |
| ENSG00000108691.8_CCL2     | ENSG00000160789.18_LMNA | 0.19122  | 0.033028379  | 0.340071528 | 1.83E-02 | 1.01E-01 | 1.00E+00 |
| ENSG00000185262.8_UBALD2   | ENSG00000160789.18_LMNA | 0.19135  | 0.033159565  | 0.340187664 | 1.82E-02 | 1.01E-01 | 1.00E+00 |
| ENSG00000183722.7_LHFP     | ENSG00000160789.18_LMNA | 0.17522  | 0.016483068  | 0.325348806 | 3.08E-02 | 1.46E-01 | 1.00E+00 |
| ENSG00000105323.15_HNRNPUL | ENSG00000160789.18_LMNA | 0.11048  | -0.049587973 | 0.265024065 | 1.75E-01 | 4.36E-01 | 1.00E+00 |
| ENSG00000149923.12_PPP4C   | ENSG00000160789.18_LMNA | 0.04208  | -0.117905787 | 0.199945953 | 6.07E-01 | 8.20E-01 | 1.00E+00 |
| ENSG00000117419.13_ERI3    | ENSG00000160789.18_LMNA | -0.2375  | -0.382247025 | -0.08137519 | 3.22E-03 | 2.81E-02 | 1.00E+00 |
| ENSG00000117748.8_RPA2     | ENSG00000160789.18_LMNA | -0.13195 | -0.285157368 | 0.027838801 | 1.05E-01 | 3.22E-01 | 1.00E+00 |
| ENSG00000101608.11_MYL12A  | ENSG00000160789.18_LMNA | 0.23496  | 0.078708348  | 0.379952812 | 3.57E-03 | 3.04E-02 | 1.00E+00 |
| ENSG0000012660.12_ELOVL5   | ENSG00000160789.18_LMNA | 0.10575  | -0.054370445 | 0.260559808 | 1.95E-01 | 4.64E-01 | 1.00E+00 |
| ENSG00000232573.1_RPL3P4   | ENSG00000160789.18_LMNA | -0.1213  | -0.275184263 | 0.038649499 | 1.37E-01 | 3.76E-01 | 1.00E+00 |
| ENSG00000180964.15_TCEAL8  | ENSG00000160789.18_LMNA | -0.21081 | -0.357994557 | -0.0533999  | 9.14E-03 | 6.14E-02 | 1.00E+00 |
| ENSG00000171476.20_HOPX    | ENSG00000160789.18_LMNA | 0.05492  | -0.10520196  | 0.212263399 | 5.02E-01 | 7.53E-01 | 1.00E+00 |
| ENSG00000118971.6_CCND2    | ENSG00000160789.18_LMNA | -0.08676 | -0.242605491 | 0.073459749 | 2.88E-01 | 5.73E-01 | 1.00E+00 |
| ENSG00000137168.7_PPIL1    | ENSG00000160789.18_LMNA | -0.35453 | -0.4862858   | -0.20701552 | 7.42E-06 | 2.30E-04 | 3.81E-01 |
| ENSG00000240972.1_MIF      | ENSG00000160789.18_LMNA | 0.03501  | -0.124882531 | 0.193138394 | 6.68E-01 | 8.54E-01 | 1.00E+00 |
| ENSG00000137547.7_MRPL15   | ENSG00000160789.18_LMNA | -0.03554 | -0.193646874 | 0.124362498 | 6.64E-01 | 8.52E-01 | 1.00E+00 |
| ENSG00000145912.7_NHP2     | ENSG00000160789.18_LMNA | -0.28881 | -0.428321183 | -0.13586055 | 3.08E-04 | 4.60E-03 | 1.00E+00 |
| ENSG00000067182.6_TNFRSF1A | ENSG00000160789.18_LMNA | 0.52063  | 0.394088572  | 0.627792423 | 6.19E-12 | 2.39E-09 | 3.17E-07 |

|                            |                         |          |              |             |          |          |          |
|----------------------------|-------------------------|----------|--------------|-------------|----------|----------|----------|
| ENSG00000179262.8_RAD23A   | ENSG00000160789.18_LMNA | 0.11465  | -0.045378314 | 0.268942493 | 1.60E-01 | 4.13E-01 | 1.00E+00 |
| ENSG00000154146.11_NRG1    | ENSG00000160789.18_LMNA | -0.05604 | -0.213335563 | 0.104091239 | 4.93E-01 | 7.48E-01 | 1.00E+00 |
| ENSG00000164683.15_HEY1    | ENSG00000160789.18_LMNA | -0.19134 | -0.340181492 | -0.03315259 | 1.82E-02 | 1.01E-01 | 1.00E+00 |
| ENSG00000167283.6_ATP5L    | ENSG00000160789.18_LMNA | -0.29176 | -0.430947374 | -0.1390204  | 2.65E-04 | 4.08E-03 | 1.00E+00 |
| ENSG00000114850.5_SSR3     | ENSG00000160789.18_LMNA | 0.07052  | -0.089684352 | 0.227173414 | 3.88E-01 | 6.66E-01 | 1.00E+00 |
| ENSG00000099804.7_CDC34    | ENSG00000160789.18_LMNA | -0.04426 | -0.20203428  | 0.115759251 | 5.88E-01 | 8.09E-01 | 1.00E+00 |
| ENSG00000100201.17_DDX17   | ENSG00000160789.18_LMNA | -0.17094 | -0.321394495 | -0.01206787 | 3.52E-02 | 1.59E-01 | 1.00E+00 |
| ENSG00000131100.11_ATP6V1E | ENSG00000160789.18_LMNA | -0.1738  | -0.324032137 | -0.0150116  | 3.22E-02 | 1.50E-01 | 1.00E+00 |
| ENSG00000170144.17_HNRNPA3 | ENSG00000160789.18_LMNA | 0.04951  | -0.110560872 | 0.207079747 | 5.45E-01 | 7.83E-01 | 1.00E+00 |
| ENSG00000154096.12_THY1    | ENSG00000160789.18_LMNA | -0.02194 | -0.180509598 | 0.13774243  | 7.88E-01 | 9.14E-01 | 1.00E+00 |
| ENSG00000182481.7_KPNA2    | ENSG00000160789.18_LMNA | 0.11083  | -0.049240063 | 0.2653483   | 1.74E-01 | 4.34E-01 | 1.00E+00 |
| ENSG00000179632.8_MAF1     | ENSG00000160789.18_LMNA | -0.05169 | -0.209165543 | 0.108406774 | 5.27E-01 | 7.72E-01 | 1.00E+00 |
| ENSG00000010810.16_FYN     | ENSG00000160789.18_LMNA | -0.1458  | -0.298081047 | 0.013719956 | 7.31E-02 | 2.57E-01 | 1.00E+00 |
| ENSG00000131174.4_COX7B    | ENSG00000160789.18_LMNA | -0.22003 | -0.366400319 | -0.06304213 | 6.45E-03 | 4.75E-02 | 1.00E+00 |
| ENSG00000177410.11_ZFAS1   | ENSG00000160789.18_LMNA | -0.13513 | -0.288127583 | 0.024604919 | 9.70E-02 | 3.06E-01 | 1.00E+00 |
| ENSG00000162517.11_PEF1    | ENSG00000160789.18_LMNA | 0.01686  | -0.142728185 | 0.175585051 | 8.37E-01 | 9.37E-01 | 1.00E+00 |
| ENSG00000100991.10_TRPC4AP | ENSG00000160789.18_LMNA | -0.03597 | -0.194061651 | 0.123938168 | 6.60E-01 | 8.50E-01 | 1.00E+00 |
| ENSG00000131473.15_ACY1    | ENSG00000160789.18_LMNA | 0.13915  | -0.020509443 | 0.291880529 | 8.73E-02 | 2.87E-01 | 1.00E+00 |
| ENSG00000071127.15_WDR1    | ENSG00000160789.18_LMNA | 0.53668  | 0.41274912   | 0.64110839  | 1.03E-12 | 5.54E-10 | 5.27E-08 |
| ENSG00000163344.5_PMK1     | ENSG00000160789.18_LMNA | 0.00955  | -0.149880165 | 0.168492946 | 9.07E-01 | 9.64E-01 | 1.00E+00 |
| ENSG00000105202.6_FBL      | ENSG00000160789.18_LMNA | 0.15415  | -0.005173273 | 0.305849099 | 5.79E-02 | 2.20E-01 | 1.00E+00 |
| ENSG00000104969.8_SGTA     | ENSG00000160789.18_LMNA | -0.1464  | -0.298637639 | 0.013109086 | 7.19E-02 | 2.54E-01 | 1.00E+00 |
| ENSG00000172336.4_POP7     | ENSG00000160789.18_LMNA | -0.00957 | -0.168509986 | 0.149863021 | 9.07E-01 | 9.64E-01 | 1.00E+00 |
| ENSG00000112531.15_QKI     | ENSG00000160789.18_LMNA | -0.21406 | -0.360958788 | -0.05679369 | 8.10E-03 | 5.61E-02 | 1.00E+00 |
| ENSG00000153187.15_HNRNPU  | ENSG00000160789.18_LMNA | 0.14941  | -0.010031561 | 0.301438491 | 6.62E-02 | 2.40E-01 | 1.00E+00 |
| ENSG00000124107.5_SLPI     | ENSG00000160789.18_LMNA | 0.03044  | -0.129391837 | 0.188722088 | 7.10E-01 | 8.77E-01 | 1.00E+00 |
| ENSG00000104853.14_CLPTM1  | ENSG00000160789.18_LMNA | 0.23358  | 0.077250244  | 0.378696874 | 3.78E-03 | 3.18E-02 | 1.00E+00 |
| ENSG00000204227.4_RING1    | ENSG00000160789.18_LMNA | 0.03548  | -0.124422044 | 0.19358866  | 6.64E-01 | 8.52E-01 | 1.00E+00 |
| ENSG00000172115.7_CYCS     | ENSG00000160789.18_LMNA | -0.08668 | -0.242529188 | 0.073540385 | 2.88E-01 | 5.74E-01 | 1.00E+00 |
| ENSG00000166508.16_MCM7    | ENSG00000160789.18_LMNA | 0.0834   | -0.076817666 | 0.239424672 | 3.07E-01 | 5.93E-01 | 1.00E+00 |
| ENSG00000099956.16_SMARCB1 | ENSG00000160789.18_LMNA | -0.18989 | -0.338846877 | -0.03164568 | 1.91E-02 | 1.04E-01 | 1.00E+00 |
| ENSG00000125304.8_TM9SF2   | ENSG00000160789.18_LMNA | 0.00437  | -0.154933716 | 0.163461749 | 9.57E-01 | 9.83E-01 | 1.00E+00 |
| ENSG00000146733.12_PSPH    | ENSG00000160789.18_LMNA | 0.00277  | -0.156503079 | 0.16189595  | 9.73E-01 | 9.89E-01 | 1.00E+00 |

|                            |                         |          |              |             |          |          |          |
|----------------------------|-------------------------|----------|--------------|-------------|----------|----------|----------|
| ENSG00000143545.7_RAB13    | ENSG00000160789.18_LMNA | 0.54947  | 0.427681674  | 0.651665974 | 2.29E-13 | 1.63E-10 | 1.17E-08 |
| ENSG00000090273.12_NUDC    | ENSG00000160789.18_LMNA | 0.19852  | 0.040600453  | 0.346759648 | 1.42E-02 | 8.46E-02 | 1.00E+00 |
| ENSG00000165264.9_NDUFB6   | ENSG00000160789.18_LMNA | -0.18995 | -0.338899724 | -0.03170532 | 1.91E-02 | 1.04E-01 | 1.00E+00 |
| ENSG00000123143.11_PKN1    | ENSG00000160789.18_LMNA | 0.267    | 0.112583516  | 0.408821864 | 8.84E-04 | 1.05E-02 | 1.00E+00 |
| ENSG00000133110.13_POSTN   | ENSG00000160789.18_LMNA | 0.32248  | 0.172117305  | 0.458160678 | 5.08E-05 | 1.09E-03 | 1.00E+00 |
| ENSG00000197858.9_GPAA1    | ENSG00000160789.18_LMNA | 0.37757  | 0.23233623   | 0.506336312 | 1.62E-06 | 6.82E-05 | 8.33E-02 |
| ENSG00000136450.11_SRSF1   | ENSG00000160789.18_LMNA | 0.05253  | -0.107571625 | 0.209973434 | 5.20E-01 | 7.66E-01 | 1.00E+00 |
| ENSG00000196531.9_NACA     | ENSG00000160789.18_LMNA | -0.22179 | -0.367996414 | -0.06487943 | 6.03E-03 | 4.52E-02 | 1.00E+00 |
| ENSG00000204463.11_BAG6    | ENSG00000160789.18_LMNA | 0.11773  | -0.042262374 | 0.271836181 | 1.49E-01 | 3.95E-01 | 1.00E+00 |
| ENSG00000104112.7_SCG3     | ENSG00000160789.18_LMNA | -0.40611 | -0.53098298  | -0.26397848 | 2.09E-07 | 1.32E-05 | 1.07E-02 |
| ENSG00000158604.13_TMED4   | ENSG00000160789.18_LMNA | 0.20279  | 0.045039774  | 0.350666305 | 1.22E-02 | 7.58E-02 | 1.00E+00 |
| ENSG00000143119.11_CD53    | ENSG00000160789.18_LMNA | -0.0883  | -0.244071562 | 0.071909636 | 2.79E-01 | 5.65E-01 | 1.00E+00 |
| ENSG00000177156.9_TALDO1   | ENSG00000160789.18_LMNA | -0.05954 | -0.216687369 | 0.100613784 | 4.66E-01 | 7.28E-01 | 1.00E+00 |
| ENSG00000157593.15_SLC35B2 | ENSG00000160789.18_LMNA | 0.05675  | -0.103385373 | 0.214016529 | 4.87E-01 | 7.44E-01 | 1.00E+00 |
| ENSG00000143314.11_MRPL24  | ENSG00000160789.18_LMNA | -0.00935 | -0.168295577 | 0.150078724 | 9.09E-01 | 9.65E-01 | 1.00E+00 |
| ENSG00000146535.12_GNA12   | ENSG00000160789.18_LMNA | 0.25856  | 0.103626952  | 0.401246135 | 1.30E-03 | 1.41E-02 | 1.00E+00 |
| ENSG00000241553.11_ARPC4   | ENSG00000160789.18_LMNA | -0.07782 | -0.234115878 | 0.082406103 | 3.41E-01 | 6.26E-01 | 1.00E+00 |
| ENSG00000116030.15_SUMO1   | ENSG00000160789.18_LMNA | -0.28746 | -0.427114953 | -0.1344112  | 3.30E-04 | 4.85E-03 | 1.00E+00 |
| ENSG00000164687.9_FABP5    | ENSG00000160789.18_LMNA | 0.12451  | -0.035394579 | 0.278194122 | 1.26E-01 | 3.59E-01 | 1.00E+00 |
| ENSG00000161057.9_PSMC2    | ENSG00000160789.18_LMNA | 0.02989  | -0.129931417 | 0.188192773 | 7.15E-01 | 8.79E-01 | 1.00E+00 |
| ENSG00000183617.4_MRPL54   | ENSG00000160789.18_LMNA | -0.20676 | -0.35429727  | -0.04917666 | 1.06E-02 | 6.83E-02 | 1.00E+00 |
| ENSG00000132481.5_TRIM47   | ENSG00000160789.18_LMNA | 0.2805   | 0.126968398  | 0.420904181 | 4.65E-04 | 6.36E-03 | 1.00E+00 |
| ENSG00000159200.16_RCAN1   | ENSG00000160789.18_LMNA | 0.29526  | 0.142765426  | 0.434053526 | 2.22E-04 | 3.54E-03 | 1.00E+00 |
| ENSG00000125968.8_ID1      | ENSG00000160789.18_LMNA | -0.00783 | -0.16681847  | 0.151563929 | 9.24E-01 | 9.71E-01 | 1.00E+00 |
| ENSG00000136160.13_EDNRB   | ENSG00000160789.18_LMNA | -0.30114 | -0.439280991 | -0.14908696 | 1.63E-04 | 2.78E-03 | 1.00E+00 |
| ENSG00000168066.19_SF1     | ENSG00000160789.18_LMNA | 0.04057  | -0.119406166 | 0.198484544 | 6.20E-01 | 8.28E-01 | 1.00E+00 |
| ENSG00000134809.7_TIMM10   | ENSG00000160789.18_LMNA | -0.14509 | -0.297423055 | 0.014441815 | 7.45E-02 | 2.60E-01 | 1.00E+00 |
| ENSG00000197111.14_PCBP2   | ENSG00000160789.18_LMNA | -0.15876 | -0.310126501 | 0.000447646 | 5.07E-02 | 2.03E-01 | 1.00E+00 |
| ENSG00000187840.4{EIF4EBP1 | ENSG00000160789.18_LMNA | 0.16538  | 0.006349052  | 0.316256565 | 4.17E-02 | 1.78E-01 | 1.00E+00 |
| ENSG00000187837.3_HIST1H1C | ENSG00000160789.18_LMNA | -0.01907 | -0.177728949 | 0.140559624 | 8.16E-01 | 9.28E-01 | 1.00E+00 |
| ENSG00000165802.18_NSMF    | ENSG00000160789.18_LMNA | -0.00127 | -0.160438836 | 0.157962067 | 9.88E-01 | 9.95E-01 | 1.00E+00 |
| ENSG00000148229.11_POLE3   | ENSG00000160789.18_LMNA | -0.21262 | -0.359648    | -0.05529209 | 8.54E-03 | 5.85E-02 | 1.00E+00 |
| ENSG00000213246.5_SUPT4H1  | ENSG00000160789.18_LMNA | -0.3672  | -0.497325575 | -0.22091092 | 3.27E-06 | 1.18E-04 | 1.68E-01 |

|                             |                         |          |              |             |          |          |          |
|-----------------------------|-------------------------|----------|--------------|-------------|----------|----------|----------|
| ENSG00000125841.11_NRSN2    | ENSG00000160789.18_LMNA | 0.31965  | 0.16904977   | 0.455660802 | 5.97E-05 | 1.23E-03 | 1.00E+00 |
| ENSG00000126254.10_RBM42    | ENSG00000160789.18_LMNA | 0.22544  | 0.068700219  | 0.371309898 | 5.23E-03 | 4.06E-02 | 1.00E+00 |
| ENSG00000174080.9_CTSF      | ENSG00000160789.18_LMNA | -0.0594  | -0.216550559 | 0.100755875 | 4.67E-01 | 7.29E-01 | 1.00E+00 |
| ENSG00000086065.12_CHMP5    | ENSG00000160789.18_LMNA | -0.23547 | -0.38041061  | -0.07924016 | 3.50E-03 | 3.00E-02 | 1.00E+00 |
| ENSG00000182307.11_C8orf33  | ENSG00000160789.18_LMNA | -0.21511 | -0.361914442 | -0.05788934 | 7.78E-03 | 5.44E-02 | 1.00E+00 |
| ENSG00000134531.8_EMP1      | ENSG00000160789.18_LMNA | 0.55958  | 0.439530557  | 0.659982044 | 6.68E-14 | 6.35E-11 | 3.43E-09 |
| ENSG00000127837.8_AAMP      | ENSG00000160789.18_LMNA | 0.06426  | -0.095925171 | 0.221194759 | 4.32E-01 | 7.01E-01 | 1.00E+00 |
| ENSG00000116251.8_RPL22     | ENSG00000160789.18_LMNA | -0.11961 | -0.273598877 | 0.040361294 | 1.42E-01 | 3.85E-01 | 1.00E+00 |
| ENSG00000166848.5_TERF2IP   | ENSG00000160789.18_LMNA | -0.21807 | -0.364615503 | -0.06099003 | 6.96E-03 | 5.02E-02 | 1.00E+00 |
| ENSG00000177383.4_MAGEF1    | ENSG00000160789.18_LMNA | -0.09233 | -0.247891044 | 0.067864021 | 2.58E-01 | 5.41E-01 | 1.00E+00 |
| ENSG00000185201.15_IFITM2   | ENSG00000160789.18_LMNA | 0.27112  | 0.116965868  | 0.412513773 | 7.29E-04 | 9.04E-03 | 1.00E+00 |
| ENSG00000119013.7_NDUFB3    | ENSG00000160789.18_LMNA | -0.22402 | -0.370025415 | -0.06721802 | 5.53E-03 | 4.22E-02 | 1.00E+00 |
| ENSG00000117394.18_SLC2A1   | ENSG00000160789.18_LMNA | 0.23476  | 0.078490506  | 0.379765245 | 3.60E-03 | 3.06E-02 | 1.00E+00 |
| ENSG00000087077.10_TRIP6    | ENSG00000160789.18_LMNA | 0.47914  | 0.34635796   | 0.593098364 | 4.25E-10 | 7.65E-08 | 2.18E-05 |
| ENSG00000080822.15_CLDND1   | ENSG00000160789.18_LMNA | -0.34112 | -0.474551288 | -0.19236819 | 1.70E-05 | 4.52E-04 | 8.74E-01 |
| ENSG00000130332.13_LSM7     | ENSG00000160789.18_LMNA | -0.1298  | -0.283150846 | 0.030019741 | 1.11E-01 | 3.32E-01 | 1.00E+00 |
| ENSG00000177885.12_GRB2     | ENSG00000160789.18_LMNA | -0.05139 | -0.208879767 | 0.108702084 | 5.30E-01 | 7.73E-01 | 1.00E+00 |
| ENSG00000128185.8_DGCR6L    | ENSG00000160789.18_LMNA | -0.05127 | -0.208768445 | 0.108817105 | 5.30E-01 | 7.73E-01 | 1.00E+00 |
| ENSG00000182916.7_TCEAL7    | ENSG00000160789.18_LMNA | -0.34733 | -0.479991154 | -0.19914278 | 1.16E-05 | 3.30E-04 | 5.97E-01 |
| ENSG00000007520.3_TSR3      | ENSG00000160789.18_LMNA | 0.15482  | -0.004492077 | 0.30646646  | 5.68E-02 | 2.18E-01 | 1.00E+00 |
| ENSG00000144749.12_LRIG1    | ENSG00000160789.18_LMNA | -0.09734 | -0.252625142 | 0.062835186 | 2.33E-01 | 5.11E-01 | 1.00E+00 |
| ENSG00000164258.10_NDUFS4   | ENSG00000160789.18_LMNA | -0.26238 | -0.404680626 | -0.10768148 | 1.09E-03 | 1.24E-02 | 1.00E+00 |
| ENSG00000178988.10_MRFAP1L  | ENSG00000160789.18_LMNA | -0.35213 | -0.484190166 | -0.20439048 | 8.63E-06 | 2.59E-04 | 4.43E-01 |
| ENSG00000083444.15_PLOD1    | ENSG00000160789.18_LMNA | 0.5116   | 0.383645347  | 0.62028007  | 1.63E-11 | 5.10E-09 | 8.37E-07 |
| ENSG00000128739.19_SNRPN    | ENSG00000160789.18_LMNA | -0.42883 | -0.55045253  | -0.2893872  | 3.55E-08 | 3.12E-06 | 1.82E-03 |
| ENSG00000179271.2_GADD45GII | ENSG00000160789.18_LMNA | 0.03252  | -0.127336984 | 0.190736159 | 6.91E-01 | 8.67E-01 | 1.00E+00 |
| ENSG00000121900.17_TMEM54   | ENSG00000160789.18_LMNA | 0.1244   | -0.035507938 | 0.278089401 | 1.27E-01 | 3.60E-01 | 1.00E+00 |
| ENSG00000114631.10_PODXL2   | ENSG00000160789.18_LMNA | -0.32619 | -0.461429286 | -0.17613652 | 4.11E-05 | 9.20E-04 | 1.00E+00 |
| ENSG00000188986.4_NELFB     | ENSG00000160789.18_LMNA | 0.26033  | 0.105504101  | 0.402837264 | 1.20E-03 | 1.33E-02 | 1.00E+00 |
| ENSG00000122176.10_FMOD     | ENSG00000160789.18_LMNA | 0.16656  | 0.007554638  | 0.317341208 | 4.03E-02 | 1.74E-01 | 1.00E+00 |
| ENSG00000118564.13_FBXL5    | ENSG00000160789.18_LMNA | -0.33441 | -0.468659042 | -0.18506044 | 2.55E-05 | 6.26E-04 | 1.00E+00 |
| ENSG00000139266.5_MARCH9    | ENSG00000160789.18_LMNA | -0.28588 | -0.425706539 | -0.1327205  | 3.57E-04 | 5.15E-03 | 1.00E+00 |
| ENSG00000221869.4_CEBPD     | ENSG00000160789.18_LMNA | 0.41156  | 0.270049048  | 0.535660352 | 1.38E-07 | 9.45E-06 | 7.10E-03 |

|                              |                         |          |              |             |          |          |          |
|------------------------------|-------------------------|----------|--------------|-------------|----------|----------|----------|
| ENSG00000131116.10_ZNF428    | ENSG00000160789.18_LMNA | -0.06298 | -0.219972454 | 0.097198012 | 4.41E-01 | 7.09E-01 | 1.00E+00 |
| ENSG00000105220.13_GPI       | ENSG00000160789.18_LMNA | 0.29186  | 0.139121569  | 0.431031376 | 2.64E-04 | 4.06E-03 | 1.00E+00 |
| ENSG00000103187.7_COTL1      | ENSG00000160789.18_LMNA | 0.08114  | -0.079083647 | 0.237274356 | 3.20E-01 | 6.07E-01 | 1.00E+00 |
| ENSG00000218175.2_AC016739.1 | ENSG00000160789.18_LMNA | 0.03783  | -0.122101353 | 0.195855804 | 6.44E-01 | 8.41E-01 | 1.00E+00 |
| ENSG00000177105.9_RHOG       | ENSG00000160789.18_LMNA | 0.12767  | -0.032180859 | 0.281159852 | 1.17E-01 | 3.42E-01 | 1.00E+00 |
| ENSG00000004779.8_NDUFAB1    | ENSG00000160789.18_LMNA | -0.26695 | -0.408780729 | -0.11253475 | 8.85E-04 | 1.05E-02 | 1.00E+00 |
| ENSG00000187601.4_MAGEH1     | ENSG00000160789.18_LMNA | -0.36498 | -0.495397269 | -0.21847571 | 3.78E-06 | 1.32E-04 | 1.94E-01 |
| ENSG00000137710.13_RDX       | ENSG00000160789.18_LMNA | -0.06804 | -0.224802589 | 0.092162118 | 4.05E-01 | 6.81E-01 | 1.00E+00 |
| ENSG00000086232.11	EIF2AK1   | ENSG00000160789.18_LMNA | 0.04056  | -0.119407028 | 0.198483703 | 6.20E-01 | 8.28E-01 | 1.00E+00 |
| ENSG00000170558.7_CDH2       | ENSG00000160789.18_LMNA | 0.34268  | 0.194065022  | 0.475915842 | 1.55E-05 | 4.20E-04 | 7.95E-01 |
| ENSG00000159176.12_CSRP1     | ENSG00000160789.18_LMNA | -0.02015 | -0.178780763 | 0.139494592 | 8.05E-01 | 9.22E-01 | 1.00E+00 |
| ENSG00000227081.5_RP11-543P  | ENSG00000160789.18_LMNA | -0.08133 | -0.237458246 | 0.078889994 | 3.19E-01 | 6.06E-01 | 1.00E+00 |
| ENSG00000185885.14_IFITM1    | ENSG00000160789.18_LMNA | 0.13679  | -0.022907911 | 0.289683826 | 9.29E-02 | 2.98E-01 | 1.00E+00 |
| ENSG00000160932.9_LY6E       | ENSG00000160789.18_LMNA | 0.14185  | -0.017751233 | 0.294402643 | 8.13E-02 | 2.75E-01 | 1.00E+00 |
| ENSG00000122203.13_KIAA1191  | ENSG00000160789.18_LMNA | -0.1719  | -0.322285105 | -0.01306123 | 3.42E-02 | 1.56E-01 | 1.00E+00 |
| ENSG00000105355.7_PLIN3      | ENSG00000160789.18_LMNA | 0.39501  | 0.251630921  | 0.521418712 | 4.75E-07 | 2.52E-05 | 2.44E-02 |
| ENSG00000184216.10_IRAK1     | ENSG00000160789.18_LMNA | 0.32797  | 0.178064468  | 0.462994438 | 3.71E-05 | 8.48E-04 | 1.00E+00 |
| ENSG00000114956.18_DGUOK     | ENSG00000160789.18_LMNA | -0.252   | -0.395339116 | -0.09667659 | 1.74E-03 | 1.76E-02 | 1.00E+00 |
| ENSG00000234664.1_HMG2P5     | ENSG00000160789.18_LMNA | -0.08258 | -0.23864399  | 0.077640718 | 3.12E-01 | 5.98E-01 | 1.00E+00 |
| ENSG00000068903.18_SIRT2     | ENSG00000160789.18_LMNA | -0.48954 | -0.601832873 | -0.35825539 | 1.55E-10 | 3.26E-08 | 7.96E-06 |
| ENSG00000198053.10_SIRPA     | ENSG00000160789.18_LMNA | 0.07411  | -0.086109903 | 0.230586983 | 3.64E-01 | 6.46E-01 | 1.00E+00 |
| ENSG00000182578.12_CSF1R     | ENSG00000160789.18_LMNA | 0.02713  | -0.132646968 | 0.185526074 | 7.40E-01 | 8.91E-01 | 1.00E+00 |
| ENSG00000116752.5_BCAS2      | ENSG00000160789.18_LMNA | -0.25205 | -0.395385964 | -0.09673159 | 1.73E-03 | 1.75E-02 | 1.00E+00 |
| ENSG00000121766.13_ZCCHC17   | ENSG00000160789.18_LMNA | -0.36096 | -0.49189716  | -0.2140643  | 4.91E-06 | 1.64E-04 | 2.52E-01 |
| ENSG00000124422.10_USP22     | ENSG00000160789.18_LMNA | -0.13026 | -0.283580853 | 0.029552606 | 1.10E-01 | 3.30E-01 | 1.00E+00 |
| ENSG00000099624.6_ATP5D      | ENSG00000160789.18_LMNA | 0.02749  | -0.132291698 | 0.185875219 | 7.37E-01 | 8.89E-01 | 1.00E+00 |
| ENSG00000146425.9_DYNLT1     | ENSG00000160789.18_LMNA | -0.18509 | -0.334434495 | -0.02667357 | 2.24E-02 | 1.17E-01 | 1.00E+00 |
| ENSG00000160710.14_ADAR      | ENSG00000160789.18_LMNA | 0.12887  | -0.03096186  | 0.282283222 | 1.14E-01 | 3.37E-01 | 1.00E+00 |
| ENSG00000122034.11_GTF3A     | ENSG00000160789.18_LMNA | -0.22217 | -0.368339052 | -0.06527411 | 5.94E-03 | 4.47E-02 | 1.00E+00 |
| ENSG00000113811.9_SELENOK    | ENSG00000160789.18_LMNA | -0.30373 | -0.441577751 | -0.15187194 | 1.42E-04 | 2.50E-03 | 1.00E+00 |
| ENSG00000197043.12_ANXA6     | ENSG00000160789.18_LMNA | -0.25418 | -0.397301672 | -0.09898256 | 1.58E-03 | 1.63E-02 | 1.00E+00 |
| ENSG00000149257.12_SERPINH   | ENSG00000160789.18_LMNA | 0.55185  | 0.430470773  | 0.653628345 | 1.72E-13 | 1.34E-10 | 8.82E-09 |
| ENSG00000166741.6_NNMT       | ENSG00000160789.18_LMNA | 0.1949   | 0.036840914  | 0.343442879 | 1.61E-02 | 9.24E-02 | 1.00E+00 |



|                             |                         |          |              |             |          |          |          |
|-----------------------------|-------------------------|----------|--------------|-------------|----------|----------|----------|
| ENSG00000162736.14_NCSTN    | ENSG00000160789.18_LMNA | 0.40146  | 0.258800021  | 0.526980073 | 2.96E-07 | 1.75E-05 | 1.52E-02 |
| ENSG00000126457.19_PRMT1    | ENSG00000160789.18_LMNA | -0.01543 | -0.174200947 | 0.144126589 | 8.50E-01 | 9.41E-01 | 1.00E+00 |
| ENSG00000175348.9_TMEN9B    | ENSG00000160789.18_LMNA | -0.15217 | -0.304005635 | 0.007205638 | 6.13E-02 | 2.29E-01 | 1.00E+00 |
| ENSG00000115226.8_FNDC4     | ENSG00000160789.18_LMNA | 0.15837  | -0.000849739 | 0.309763035 | 5.13E-02 | 2.05E-01 | 1.00E+00 |
| ENSG00000159713.9_TPPP3     | ENSG00000160789.18_LMNA | -0.02339 | -0.181910008 | 0.136321663 | 7.75E-01 | 9.07E-01 | 1.00E+00 |
| ENSG00000075415.11_SLC25A3  | ENSG00000160789.18_LMNA | -0.13839 | -0.291174122 | 0.021281125 | 8.91E-02 | 2.91E-01 | 1.00E+00 |
| ENSG00000047849.20_MAP4     | ENSG00000160789.18_LMNA | 0.12679  | -0.03308339  | 0.28032757  | 1.20E-01 | 3.47E-01 | 1.00E+00 |
| ENSG00000130811.9_EIF3G     | ENSG00000160789.18_LMNA | 0.07653  | -0.083693116 | 0.232890587 | 3.49E-01 | 6.33E-01 | 1.00E+00 |
| ENSG00000123384.12_LRP1     | ENSG00000160789.18_LMNA | 0.40056  | 0.257804173  | 0.526208925 | 3.16E-07 | 1.83E-05 | 1.62E-02 |
| ENSG00000166922.7_SCG5      | ENSG00000160789.18_LMNA | -0.20045 | -0.348526737 | -0.04260698 | 1.33E-02 | 8.03E-02 | 1.00E+00 |
| ENSG00000175445.13_LPL      | ENSG00000160789.18_LMNA | 0.09037  | -0.069832409 | 0.246033906 | 2.68E-01 | 5.52E-01 | 1.00E+00 |
| ENSG00000106003.11_LFNG     | ENSG00000160789.18_LMNA | 0.11458  | -0.045449502 | 0.268876316 | 1.60E-01 | 4.13E-01 | 1.00E+00 |
| ENSG00000150459.11_SAP18    | ENSG00000160789.18_LMNA | -0.25322 | -0.39643929  | -0.09796888 | 1.65E-03 | 1.69E-02 | 1.00E+00 |
| ENSG00000088826.16_SMOX     | ENSG00000160789.18_LMNA | 0.262    | 0.107270583  | 0.404332948 | 1.11E-03 | 1.26E-02 | 1.00E+00 |
| ENSG00000163466.14_ARPC2    | ENSG00000160789.18_LMNA | 0.03484  | -0.125057128 | 0.192967637 | 6.70E-01 | 8.55E-01 | 1.00E+00 |
| ENSG00000100345.19_MYH9     | ENSG00000160789.18_LMNA | 0.5269   | 0.401371349  | 0.633005661 | 3.10E-12 | 1.38E-09 | 1.59E-07 |
| ENSG00000126088.11_UROD     | ENSG00000160789.18_LMNA | 0.11035  | -0.049727264 | 0.264894233 | 1.76E-01 | 4.37E-01 | 1.00E+00 |
| ENSG00000108468.13_CBX1     | ENSG00000160789.18_LMNA | -0.13339 | -0.286509699 | 0.026367236 | 1.01E-01 | 3.14E-01 | 1.00E+00 |
| ENSG00000174574.14_AKIRIN1  | ENSG00000160789.18_LMNA | -0.01482 | -0.173610343 | 0.144722909 | 8.56E-01 | 9.43E-01 | 1.00E+00 |
| ENSG00000124785.7_NRN1      | ENSG00000160789.18_LMNA | 0.07781  | -0.082413078 | 0.23410924  | 3.41E-01 | 6.26E-01 | 1.00E+00 |
| ENSG00000130520.9_LSM4      | ENSG00000160789.18_LMNA | -0.17152 | -0.321934108 | -0.01266966 | 3.46E-02 | 1.57E-01 | 1.00E+00 |
| ENSG00000165672.6_PRDX3     | ENSG00000160789.18_LMNA | -0.2516  | -0.394976881 | -0.09625132 | 1.77E-03 | 1.78E-02 | 1.00E+00 |
| ENSG00000112697.14_TMEN30A  | ENSG00000160789.18_LMNA | -0.12592 | -0.279515002 | 0.03396405  | 1.22E-01 | 3.52E-01 | 1.00E+00 |
| ENSG00000135926.11_TMBIM1   | ENSG00000160789.18_LMNA | 0.24118  | 0.085249587  | 0.385573475 | 2.76E-03 | 2.51E-02 | 1.00E+00 |
| ENSG00000107742.11_SPOCK2   | ENSG00000160789.18_LMNA | 0.21648  | 0.059318919  | 0.363160409 | 7.39E-03 | 5.24E-02 | 1.00E+00 |
| ENSG00000100353.16_EIF3D    | ENSG00000160789.18_LMNA | -0.02492 | -0.18339327  | 0.13481541  | 7.61E-01 | 9.00E-01 | 1.00E+00 |
| ENSG00000133142.16_TCEAL4   | ENSG00000160789.18_LMNA | -0.02278 | -0.181322153 | 0.136918223 | 7.81E-01 | 9.10E-01 | 1.00E+00 |
| ENSG00000244398.1_RP11-466H | ENSG00000160789.18_LMNA | -0.04539 | -0.203124822 | 0.114637131 | 5.79E-01 | 8.04E-01 | 1.00E+00 |
| ENSG00000148180.15_GSN      | ENSG00000160789.18_LMNA | 0.23449  | 0.078203901  | 0.379518432 | 3.64E-03 | 3.09E-02 | 1.00E+00 |
| ENSG00000204469.11_PRRC2A   | ENSG00000160789.18_LMNA | 0.17419  | 0.015416848  | 0.324394874 | 3.19E-02 | 1.49E-01 | 1.00E+00 |
| ENSG00000134440.10_NARS     | ENSG00000160789.18_LMNA | 0.05573  | -0.104401783 | 0.213035876 | 4.95E-01 | 7.50E-01 | 1.00E+00 |
| ENSG00000100243.19_CYB5R3   | ENSG00000160789.18_LMNA | 0.01507  | -0.144479874 | 0.173851076 | 8.54E-01 | 9.43E-01 | 1.00E+00 |
| ENSG00000101365.19_IDH3B    | ENSG00000160789.18_LMNA | 0.00978  | -0.149649693 | 0.168722003 | 9.05E-01 | 9.63E-01 | 1.00E+00 |

|                             |                         |          |              |             |          |          |          |
|-----------------------------|-------------------------|----------|--------------|-------------|----------|----------|----------|
| ENSG00000072832.13_CRMP1    | ENSG00000160789.18_LMNA | -0.2589  | -0.401546885 | -0.1039816  | 1.28E-03 | 1.39E-02 | 1.00E+00 |
| ENSG00000167470.11_MIDN     | ENSG00000160789.18_LMNA | 0.13033  | -0.029478844 | 0.283648741 | 1.10E-01 | 3.29E-01 | 1.00E+00 |
| ENSG00000165475.12_CRYL1    | ENSG00000160789.18_LMNA | -0.33259 | -0.467063251 | -0.18308667 | 2.83E-05 | 6.81E-04 | 1.00E+00 |
| ENSG00000175582.18_RAB6A    | ENSG00000160789.18_LMNA | -0.18233 | -0.331898216 | -0.02382243 | 2.46E-02 | 1.25E-01 | 1.00E+00 |
| ENSG00000172428.9_COPS9     | ENSG00000160789.18_LMNA | -0.24952 | -0.39310249  | -0.09405249 | 1.93E-03 | 1.90E-02 | 1.00E+00 |
| ENSG00000249992.1_TMEN158   | ENSG00000160789.18_LMNA | 0.58925  | 0.474569941  | 0.684262157 | 1.40E-15 | 2.76E-12 | 7.17E-11 |
| ENSG00000184007.16_PTP4A2   | ENSG00000160789.18_LMNA | 0.25563  | 0.100516904  | 0.398606006 | 1.48E-03 | 1.55E-02 | 1.00E+00 |
| ENSG00000107175.9_CREB3     | ENSG00000160789.18_LMNA | 0.02105  | -0.138612412 | 0.179651445 | 7.97E-01 | 9.18E-01 | 1.00E+00 |
| ENSG00000180879.12_SSR4     | ENSG00000160789.18_LMNA | -0.08915 | -0.24487355  | 0.071061027 | 2.75E-01 | 5.59E-01 | 1.00E+00 |
| ENSG00000142230.10_SAE1     | ENSG00000160789.18_LMNA | 0.15792  | -0.001312206 | 0.309344883 | 5.20E-02 | 2.06E-01 | 1.00E+00 |
| ENSG00000141985.8_SH3GL1    | ENSG00000160789.18_LMNA | 0.33779  | 0.188737044  | 0.471626652 | 2.08E-05 | 5.34E-04 | 1.00E+00 |
| ENSG00000111667.12_USP5     | ENSG00000160789.18_LMNA | -0.11668 | -0.270853024 | 0.043321729 | 1.52E-01 | 4.01E-01 | 1.00E+00 |
| ENSG00000181789.13_COPG1    | ENSG00000160789.18_LMNA | 0.32014  | 0.169583932  | 0.45609644  | 5.80E-05 | 1.21E-03 | 1.00E+00 |
| ENSG00000225663.6_MCRIP1    | ENSG00000160789.18_LMNA | -0.19784 | -0.346138779 | -0.03989604 | 1.46E-02 | 8.60E-02 | 1.00E+00 |
| ENSG00000078808.15_SDF4     | ENSG00000160789.18_LMNA | 0.53179  | 0.407055899  | 0.637060292 | 1.79E-12 | 8.92E-10 | 9.19E-08 |
| ENSG00000141367.10_CLTC     | ENSG00000160789.18_LMNA | 0.08777  | -0.072441226 | 0.243568956 | 2.82E-01 | 5.68E-01 | 1.00E+00 |
| ENSG00000145494.10_NDUFS6   | ENSG00000160789.18_LMNA | 0.2169   | 0.05976149   | 0.363545916 | 7.27E-03 | 5.18E-02 | 1.00E+00 |
| ENSG00000184557.4_SOCS3     | ENSG00000160789.18_LMNA | 0.50123  | 0.371692022  | 0.61162781  | 4.80E-11 | 1.24E-08 | 2.46E-06 |
| ENSG00000196338.11_NLGN3    | ENSG00000160789.18_LMNA | -0.16243 | -0.313525199 | -0.00331711 | 4.56E-02 | 1.89E-01 | 1.00E+00 |
| ENSG00000099860.7_GADD45B   | ENSG00000160789.18_LMNA | 0.33114  | 0.181506524  | 0.465784367 | 3.09E-05 | 7.31E-04 | 1.00E+00 |
| ENSG00000120265.15_PCMT1    | ENSG00000160789.18_LMNA | -0.30478 | -0.442506947 | -0.15299996 | 1.35E-04 | 2.39E-03 | 1.00E+00 |
| ENSG00000159128.13_IFNGR2   | ENSG00000160789.18_LMNA | 0.32449  | 0.174290869  | 0.45992928  | 4.53E-05 | 9.93E-04 | 1.00E+00 |
| ENSG00000104823.7_ECH1      | ENSG00000160789.18_LMNA | -0.01905 | -0.177711562 | 0.140577223 | 8.16E-01 | 9.28E-01 | 1.00E+00 |
| ENSG00000275395.3_FCGBP     | ENSG00000160789.18_LMNA | 0.34129  | 0.192555589  | 0.47470206  | 1.69E-05 | 4.48E-04 | 8.65E-01 |
| ENSG00000063046.16 EIF4B    | ENSG00000160789.18_LMNA | -0.01064 | -0.169555985 | 0.14881027  | 8.96E-01 | 9.60E-01 | 1.00E+00 |
| ENSG00000187713.6_TMEN203   | ENSG00000160789.18_LMNA | 0.05221  | -0.107887017 | 0.209668387 | 5.23E-01 | 7.68E-01 | 1.00E+00 |
| ENSG00000124193.13_SRSF6    | ENSG00000160789.18_LMNA | -0.13169 | -0.284913908 | 0.028103583 | 1.06E-01 | 3.23E-01 | 1.00E+00 |
| ENSG00000112081.15_SRSF3    | ENSG00000160789.18_LMNA | -0.26439 | -0.406480929 | -0.10981075 | 9.97E-04 | 1.16E-02 | 1.00E+00 |
| ENSG00000124126.12_PREX1    | ENSG00000160789.18_LMNA | 0.18139  | 0.022846071  | 0.331028654 | 2.53E-02 | 1.27E-01 | 1.00E+00 |
| ENSG00000218426.5_RP11-475C | ENSG00000160789.18_LMNA | -0.11356 | -0.267917262 | 0.046480823 | 1.64E-01 | 4.19E-01 | 1.00E+00 |
| ENSG00000149591.15_TAGLN    | ENSG00000160789.18_LMNA | 0.32603  | 0.175961561  | 0.461287164 | 4.15E-05 | 9.25E-04 | 1.00E+00 |
| ENSG00000100075.8_SLC25A1   | ENSG00000160789.18_LMNA | 0.12205  | -0.037890033 | 0.275887101 | 1.34E-01 | 3.72E-01 | 1.00E+00 |
| ENSG00000182087.11_TMEN259  | ENSG00000160789.18_LMNA | 0.16748  | 0.008504767  | 0.318195452 | 3.92E-02 | 1.71E-01 | 1.00E+00 |

|                             |                         |          |              |             |          |          |          |
|-----------------------------|-------------------------|----------|--------------|-------------|----------|----------|----------|
| ENSG00000132824.12_SERINC3  | ENSG00000160789.18_LMNA | 0.13592  | -0.023791745 | 0.288873512 | 9.50E-02 | 3.02E-01 | 1.00E+00 |
| ENSG00000088882.7_CPXM1     | ENSG00000160789.18_LMNA | 0.05735  | -0.102790129 | 0.214590536 | 4.83E-01 | 7.40E-01 | 1.00E+00 |
| ENSG00000115415.17_STAT1    | ENSG00000160789.18_LMNA | 0.04491  | -0.115117863 | 0.202657715 | 5.83E-01 | 8.06E-01 | 1.00E+00 |
| ENSG00000188257.9_PLA2G2A   | ENSG00000160789.18_LMNA | 0.0886   | -0.071606245 | 0.244358335 | 2.78E-01 | 5.63E-01 | 1.00E+00 |
| ENSG00000147224.9_PRPS1     | ENSG00000160789.18_LMNA | -0.32949 | -0.464332537 | -0.17971447 | 3.40E-05 | 7.91E-04 | 1.00E+00 |
| ENSG00000134108.11_ARL8B    | ENSG00000160789.18_LMNA | -0.22369 | -0.369721801 | -0.06686787 | 5.60E-03 | 4.27E-02 | 1.00E+00 |
| ENSG00000124145.6_SDC4      | ENSG00000160789.18_LMNA | 0.35441  | 0.206886712  | 0.486183044 | 7.47E-06 | 2.31E-04 | 3.83E-01 |
| ENSG00000146072.6_TNFRSF21  | ENSG00000160789.18_LMNA | 0.00768  | -0.151702921 | 0.166680163 | 9.25E-01 | 9.71E-01 | 1.00E+00 |
| ENSG00000172037.12_LAMB2    | ENSG00000160789.18_LMNA | 0.50554  | 0.37665836   | 0.615229612 | 3.08E-11 | 8.49E-09 | 1.58E-06 |
| ENSG00000275830.1_RP11-403A | ENSG00000160789.18_LMNA | 0.05149  | -0.108605362 | 0.208973373 | 5.29E-01 | 7.73E-01 | 1.00E+00 |
| ENSG00000106609.15_TMEN248  | ENSG00000160789.18_LMNA | 0.29718  | 0.144836086  | 0.435767979 | 2.01E-04 | 3.27E-03 | 1.00E+00 |
| ENSG00000116741.7_RGS2      | ENSG00000160789.18_LMNA | -0.00242 | -0.161557417 | 0.156842171 | 9.76E-01 | 9.91E-01 | 1.00E+00 |
| ENSG00000079462.6_PAFAH1B3  | ENSG00000160789.18_LMNA | -0.15543 | -0.307029796 | 0.003870239 | 5.59E-02 | 2.16E-01 | 1.00E+00 |
| ENSG00000119396.9_RAB14     | ENSG00000160789.18_LMNA | -0.08061 | -0.236772823 | 0.079611688 | 3.24E-01 | 6.10E-01 | 1.00E+00 |
| ENSG00000116560.9_SFPQ      | ENSG00000160789.18_LMNA | -0.02291 | -0.181447756 | 0.13679078  | 7.79E-01 | 9.09E-01 | 1.00E+00 |
| ENSG00000138029.12_HADHB    | ENSG00000160789.18_LMNA | -0.20047 | -0.348543749 | -0.04262631 | 1.33E-02 | 8.03E-02 | 1.00E+00 |
| ENSG00000165507.8_C10orf10  | ENSG00000160789.18_LMNA | 0.18848  | 0.030187637  | 0.337554372 | 2.00E-02 | 1.08E-01 | 1.00E+00 |
| ENSG00000168216.9_LMBRD1    | ENSG00000160789.18_LMNA | -0.15527 | -0.306884463 | 0.004030687 | 5.61E-02 | 2.16E-01 | 1.00E+00 |
| ENSG00000128564.6_VGF       | ENSG00000160789.18_LMNA | 0.03741  | -0.122522564 | 0.195444564 | 6.47E-01 | 8.43E-01 | 1.00E+00 |
| ENSG00000164754.11_RAD21    | ENSG00000160789.18_LMNA | -0.28072 | -0.421100235 | -0.12720284 | 4.60E-04 | 6.32E-03 | 1.00E+00 |
| ENSG00000198171.11_DDRGK1   | ENSG00000160789.18_LMNA | 0.42577  | 0.285955029  | 0.547839098 | 4.54E-08 | 3.77E-06 | 2.33E-03 |
| ENSG00000131409.11_LRRC4B   | ENSG00000160789.18_LMNA | -0.04335 | -0.201161116 | 0.116657114 | 5.96E-01 | 8.14E-01 | 1.00E+00 |
| ENSG00000143368.9_SF3B4     | ENSG00000160789.18_LMNA | 0.30422  | 0.152402777  | 0.4420151   | 1.39E-04 | 2.44E-03 | 1.00E+00 |
| ENSG00000158526.7_TSR2      | ENSG00000160789.18_LMNA | -0.05066 | -0.208182999 | 0.109421864 | 5.35E-01 | 7.77E-01 | 1.00E+00 |
| ENSG00000164919.9_COX6C     | ENSG00000160789.18_LMNA | -0.20689 | -0.354419955 | -0.04931663 | 1.05E-02 | 6.81E-02 | 1.00E+00 |
| ENSG00000120438.10_TCP1     | ENSG00000160789.18_LMNA | -0.16528 | -0.316166249 | -0.00624871 | 4.19E-02 | 1.79E-01 | 1.00E+00 |
| ENSG00000131508.14_UBE2D2   | ENSG00000160789.18_LMNA | -0.28313 | -0.423254117 | -0.1297806  | 4.09E-04 | 5.76E-03 | 1.00E+00 |
| ENSG00000082996.18_RNF13    | ENSG00000160789.18_LMNA | -0.4353  | -0.555967734 | -0.2966523  | 2.09E-08 | 2.00E-06 | 1.07E-03 |
| ENSG00000170075.8_GPR37L1   | ENSG00000160789.18_LMNA | 0.11295  | -0.047095249 | 0.267345594 | 1.66E-01 | 4.23E-01 | 1.00E+00 |
| ENSG00000113068.8_PFDN1     | ENSG00000160789.18_LMNA | -0.27153 | -0.412885431 | -0.11740767 | 7.15E-04 | 8.91E-03 | 1.00E+00 |
| ENSG00000186591.10_UBE2H    | ENSG00000160789.18_LMNA | 0.26897  | 0.114679281  | 0.41058865  | 8.06E-04 | 9.79E-03 | 1.00E+00 |
| ENSG00000143977.12_SNRPG    | ENSG00000160789.18_LMNA | -0.17974 | -0.329509259 | -0.02114148 | 2.67E-02 | 1.33E-01 | 1.00E+00 |
| ENSG00000182809.9_CRIP2     | ENSG00000160789.18_LMNA | 0.19167  | 0.033491244  | 0.340481252 | 1.80E-02 | 1.00E-01 | 1.00E+00 |

|                             |                         |          |              |             |          |          |          |
|-----------------------------|-------------------------|----------|--------------|-------------|----------|----------|----------|
| ENSG00000169902.12_TPST1    | ENSG00000160789.18_LMNA | 0.18767  | 0.029347661  | 0.336809234 | 2.06E-02 | 1.10E-01 | 1.00E+00 |
| ENSG00000108528.12_SLC25A11 | ENSG00000160789.18_LMNA | -0.14585 | -0.298124375 | 0.013672411 | 7.30E-02 | 2.57E-01 | 1.00E+00 |
| ENSG00000022277.11_RTDFC1   | ENSG00000160789.18_LMNA | -0.21372 | -0.360653565 | -0.05644391 | 8.20E-03 | 5.67E-02 | 1.00E+00 |
| ENSG00000112759.15_SLC29A1  | ENSG00000160789.18_LMNA | 0.00409  | -0.155209629 | 0.163186578 | 9.60E-01 | 9.84E-01 | 1.00E+00 |
| ENSG00000173402.10_DAG1     | ENSG00000160789.18_LMNA | 0.23557  | 0.079345642  | 0.380501397 | 3.48E-03 | 2.99E-02 | 1.00E+00 |
| ENSG00000113758.12_DBN1     | ENSG00000160789.18_LMNA | -0.15554 | -0.307139833 | 0.003748746 | 5.57E-02 | 2.15E-01 | 1.00E+00 |
| ENSG00000162407.8_PLPP3     | ENSG00000160789.18_LMNA | 0.05616  | -0.103970642 | 0.213451928 | 4.92E-01 | 7.47E-01 | 1.00E+00 |
| ENSG00000089248.6_ERP29     | ENSG00000160789.18_LMNA | 0.26614  | 0.111669905  | 0.40805097  | 9.19E-04 | 1.09E-02 | 1.00E+00 |
| ENSG00000135677.9_GNS       | ENSG00000160789.18_LMNA | 0.25764  | 0.102654698  | 0.400421317 | 1.35E-03 | 1.45E-02 | 1.00E+00 |
| ENSG00000130821.14_SLC6A8   | ENSG00000160789.18_LMNA | 0.12031  | -0.039647751 | 0.274259935 | 1.40E-01 | 3.81E-01 | 1.00E+00 |
| ENSG00000135387.18_CAPRIN1  | ENSG00000160789.18_LMNA | 0.02685  | -0.132919086 | 0.185258592 | 7.43E-01 | 8.92E-01 | 1.00E+00 |
| ENSG00000137876.8_RSL24D1   | ENSG00000160789.18_LMNA | -0.19065 | -0.339543918 | -0.03243253 | 1.86E-02 | 1.02E-01 | 1.00E+00 |
| ENSG00000159346.11_ADIPOR1  | ENSG00000160789.18_LMNA | 0.2428   | 0.086962723  | 0.38704184  | 2.58E-03 | 2.38E-02 | 1.00E+00 |
| ENSG00000112110.8_MRPL18    | ENSG00000160789.18_LMNA | -0.14758 | -0.299740055 | 0.011898476 | 6.96E-02 | 2.49E-01 | 1.00E+00 |
| ENSG00000109919.8_MTCH2     | ENSG00000160789.18_LMNA | -0.15837 | -0.30975637  | 0.000857112 | 5.13E-02 | 2.05E-01 | 1.00E+00 |
| ENSG00000198576.3_ARC       | ENSG00000160789.18_LMNA | 0.00516  | -0.154162785 | 0.164230341 | 9.50E-01 | 9.80E-01 | 1.00E+00 |
| ENSG00000140941.11_MAP1LC3  | ENSG00000160789.18_LMNA | -0.23293 | -0.378111131 | -0.07657066 | 3.88E-03 | 3.24E-02 | 1.00E+00 |
| ENSG00000111652.8_COPS7A    | ENSG00000160789.18_LMNA | -0.09999 | -0.255131572 | 0.060166209 | 2.20E-01 | 4.95E-01 | 1.00E+00 |
| ENSG00000161921.13_CXCL16   | ENSG00000160789.18_LMNA | 0.13648  | -0.023223008 | 0.289394991 | 9.36E-02 | 2.99E-01 | 1.00E+00 |
| ENSG00000110711.8_AIP       | ENSG00000160789.18_LMNA | -0.17268 | -0.322997539 | -0.0138563  | 3.34E-02 | 1.54E-01 | 1.00E+00 |
| ENSG00000256235.1_SMIM3     | ENSG00000160789.18_LMNA | 0.26196  | 0.107235109  | 0.404302927 | 1.11E-03 | 1.26E-02 | 1.00E+00 |
| ENSG00000075461.5_CACNG4    | ENSG00000160789.18_LMNA | -0.22466 | -0.3706024   | -0.06788365 | 5.39E-03 | 4.15E-02 | 1.00E+00 |
| ENSG00000197982.13_C1orf122 | ENSG00000160789.18_LMNA | -0.0669  | -0.223718843 | 0.093293443 | 4.13E-01 | 6.86E-01 | 1.00E+00 |
| ENSG00000184640.16_SEPT9    | ENSG00000160789.18_LMNA | 0.33985  | 0.190985611  | 0.473438453 | 1.84E-05 | 4.81E-04 | 9.43E-01 |
| ENSG00000183978.7_COA3      | ENSG00000160789.18_LMNA | -0.38324 | -0.511246169 | -0.23859375 | 1.10E-06 | 4.95E-05 | 5.63E-02 |
| ENSG00000147274.13_RBMX     | ENSG00000160789.18_LMNA | -0.23051 | -0.375913679 | -0.07402363 | 4.28E-03 | 3.49E-02 | 1.00E+00 |
| ENSG00000167863.10_ATP5H    | ENSG00000160789.18_LMNA | -0.14347 | -0.29591043  | 0.016100028 | 7.78E-02 | 2.67E-01 | 1.00E+00 |
| ENSG00000135829.15_DHX9     | ENSG00000160789.18_LMNA | 0.0298   | -0.130018981 | 0.188106857 | 7.16E-01 | 8.79E-01 | 1.00E+00 |
| ENSG00000124102.4_PI3       | ENSG00000160789.18_LMNA | 0.16348  | 0.004398329  | 0.314499816 | 4.42E-02 | 1.85E-01 | 1.00E+00 |
| ENSG00000170296.8_GABARAP   | ENSG00000160789.18_LMNA | -0.30153 | -0.439624387 | -0.14950306 | 1.60E-04 | 2.74E-03 | 1.00E+00 |
| ENSG00000128989.9_ARPP19    | ENSG00000160789.18_LMNA | -0.05595 | -0.213254278 | 0.104175475 | 4.94E-01 | 7.49E-01 | 1.00E+00 |
| ENSG00000183726.9_TMEM50A   | ENSG00000160789.18_LMNA | 0.00155  | -0.157690109 | 0.16071055  | 9.85E-01 | 9.94E-01 | 1.00E+00 |
| ENSG00000099783.10_HNRNPM   | ENSG00000160789.18_LMNA | 0.17427  | 0.015494881  | 0.324464711 | 3.18E-02 | 1.49E-01 | 1.00E+00 |

|                            |                         |          |              |             |          |          |          |
|----------------------------|-------------------------|----------|--------------|-------------|----------|----------|----------|
| ENSG00000164106.6_SCRG1    | ENSG00000160789.18_LMNA | -0.42636 | -0.548342331 | -0.28661539 | 4.33E-08 | 3.61E-06 | 2.22E-03 |
| ENSG00000174917.7_C19orf70 | ENSG00000160789.18_LMNA | -0.0421  | -0.199959039 | 0.117892345 | 6.07E-01 | 8.20E-01 | 1.00E+00 |
| ENSG00000167792.10_NDUFV1  | ENSG00000160789.18_LMNA | 0.10015  | -0.060008566 | 0.255279482 | 2.20E-01 | 4.95E-01 | 1.00E+00 |
| ENSG00000204356.10_NELFE   | ENSG00000160789.18_LMNA | -0.13451 | -0.287553505 | 0.025230469 | 9.85E-02 | 3.09E-01 | 1.00E+00 |
| ENSG00000170525.17_PFKFB3  | ENSG00000160789.18_LMNA | 0.2161   | 0.05893123   | 0.362822622 | 7.50E-03 | 5.29E-02 | 1.00E+00 |
| ENSG00000113312.9_TTC1     | ENSG00000160789.18_LMNA | -0.23891 | -0.383523758 | -0.08286116 | 3.03E-03 | 2.70E-02 | 1.00E+00 |
| ENSG00000114115.8_RBP1     | ENSG00000160789.18_LMNA | 0.2006   | 0.042766833  | 0.348667417 | 1.32E-02 | 8.00E-02 | 1.00E+00 |
| ENSG00000160781.14_PAQR6   | ENSG00000160789.18_LMNA | -0.11365 | -0.267998349 | 0.046393652 | 1.63E-01 | 4.19E-01 | 1.00E+00 |
| ENSG00000110880.9_CORO1C   | ENSG00000160789.18_LMNA | -0.25224 | -0.395553375 | -0.09692818 | 1.72E-03 | 1.74E-02 | 1.00E+00 |
| ENSG00000113558.17_SKP1    | ENSG00000160789.18_LMNA | -0.33625 | -0.47027738  | -0.18706443 | 2.28E-05 | 5.75E-04 | 1.00E+00 |
| ENSG00000100216.5_TOMM22   | ENSG00000160789.18_LMNA | -0.28804 | -0.427635007 | -0.13503592 | 3.20E-04 | 4.73E-03 | 1.00E+00 |
| ENSG00000171159.4_C9orf16  | ENSG00000160789.18_LMNA | -0.07858 | -0.234839948 | 0.081645063 | 3.36E-01 | 6.22E-01 | 1.00E+00 |
| ENSG00000114867.18	EIF4G1  | ENSG00000160789.18_LMNA | 0.34347  | 0.194927363  | 0.476608795 | 1.48E-05 | 4.03E-04 | 7.58E-01 |
| ENSG00000131165.13_CHMP1A  | ENSG00000160789.18_LMNA | 0.20432  | 0.046640181  | 0.352072079 | 1.16E-02 | 7.27E-02 | 1.00E+00 |
| ENSG00000163479.12_SSR2    | ENSG00000160789.18_LMNA | 0.04675  | -0.113294051 | 0.204429071 | 5.67E-01 | 7.97E-01 | 1.00E+00 |
| ENSG00000135334.8_AKIRIN2  | ENSG00000160789.18_LMNA | -0.13081 | -0.28409369  | 0.028995311 | 1.08E-01 | 3.27E-01 | 1.00E+00 |
| ENSG00000138448.10_ITGAV   | ENSG00000160789.18_LMNA | 0.08881  | -0.071400716 | 0.244552575 | 2.77E-01 | 5.61E-01 | 1.00E+00 |
| ENSG00000119383.18_PTPA    | ENSG00000160789.18_LMNA | 0.34239  | 0.193755439  | 0.475666984 | 1.58E-05 | 4.23E-04 | 8.09E-01 |
| ENSG00000078668.12_VDAC3   | ENSG00000160789.18_LMNA | -0.30075 | -0.438936026 | -0.14866907 | 1.67E-04 | 2.83E-03 | 1.00E+00 |
| ENSG00000234741.6_GAS5     | ENSG00000160789.18_LMNA | -0.1404  | -0.293046968 | 0.019234403 | 8.45E-02 | 2.82E-01 | 1.00E+00 |
| ENSG00000197894.9_ADH5     | ENSG00000160789.18_LMNA | -0.17221 | -0.322567774 | -0.01337664 | 3.39E-02 | 1.55E-01 | 1.00E+00 |
| ENSG00000173905.7_GOLIM4   | ENSG00000160789.18_LMNA | 0.05289  | -0.107217558 | 0.210315814 | 5.18E-01 | 7.64E-01 | 1.00E+00 |
| ENSG00000115241.10_PPM1G   | ENSG00000160789.18_LMNA | 0.2783   | 0.124619302  | 0.418938201 | 5.17E-04 | 6.93E-03 | 1.00E+00 |
| ENSG00000066322.11_ELOVL1  | ENSG00000160789.18_LMNA | 0.16321  | 0.004120262  | 0.314249227 | 4.45E-02 | 1.86E-01 | 1.00E+00 |
| ENSG00000151552.10_QDPR    | ENSG00000160789.18_LMNA | -0.23373 | -0.378833982 | -0.07740936 | 3.75E-03 | 3.16E-02 | 1.00E+00 |
| ENSG00000135424.14_ITGA7   | ENSG00000160789.18_LMNA | 0.51432  | 0.386785737  | 0.622543689 | 1.22E-11 | 4.04E-09 | 6.27E-07 |
| ENSG00000168734.12_PKIG    | ENSG00000160789.18_LMNA | 0.0045   | -0.154812554 | 0.163582568 | 9.56E-01 | 9.82E-01 | 1.00E+00 |
| ENSG00000198816.5_ZNF358   | ENSG00000160789.18_LMNA | 0.13357  | -0.026192641 | 0.286670064 | 1.01E-01 | 3.13E-01 | 1.00E+00 |
| ENSG00000162191.12_UBXN1   | ENSG00000160789.18_LMNA | -0.20941 | -0.356718476 | -0.05194106 | 9.62E-03 | 6.38E-02 | 1.00E+00 |
| ENSG00000188042.7_ARL4C    | ENSG00000160789.18_LMNA | 0.46507  | 0.330321794  | 0.58123278  | 1.58E-09 | 2.29E-07 | 8.09E-05 |
| ENSG00000106245.8_BUD31    | ENSG00000160789.18_LMNA | -0.05371 | -0.211104135 | 0.106402021 | 5.11E-01 | 7.60E-01 | 1.00E+00 |
| ENSG00000189159.14_HN1     | ENSG00000160789.18_LMNA | -0.33383 | -0.468148437 | -0.18442864 | 2.63E-05 | 6.45E-04 | 1.00E+00 |
| ENSG00000119318.11_RAD23B  | ENSG00000160789.18_LMNA | 0.1055   | -0.054622751 | 0.260323916 | 1.96E-01 | 4.65E-01 | 1.00E+00 |

|                             |                         |          |              |             |          |          |          |
|-----------------------------|-------------------------|----------|--------------|-------------|----------|----------|----------|
| ENSG00000204257.13_HLA-DMA  | ENSG00000160789.18_LMNA | 0.02053  | -0.139126683 | 0.179143937 | 8.02E-01 | 9.20E-01 | 1.00E+00 |
| ENSG00000266412.4_NCOA4     | ENSG00000160789.18_LMNA | -0.39523 | -0.521612174 | -0.25187982 | 4.67E-07 | 2.49E-05 | 2.40E-02 |
| ENSG00000105698.14_USF2     | ENSG00000160789.18_LMNA | -0.11463 | -0.268927729 | 0.045394195 | 1.60E-01 | 4.13E-01 | 1.00E+00 |
| ENSG00000095139.12_ARCN1    | ENSG00000160789.18_LMNA | 0.12469  | -0.035205149 | 0.2783691   | 1.26E-01 | 3.59E-01 | 1.00E+00 |
| ENSG00000124214.18_STAU1    | ENSG00000160789.18_LMNA | 0.24771  | 0.092145099  | 0.391474518 | 2.09E-03 | 2.02E-02 | 1.00E+00 |
| ENSG00000142864.13_SERBP1   | ENSG00000160789.18_LMNA | 0.29796  | 0.145668774  | 0.436456828 | 1.93E-04 | 3.17E-03 | 1.00E+00 |
| ENSG00000143799.11_PARP1    | ENSG00000160789.18_LMNA | 0.0347   | -0.125188484 | 0.192839158 | 6.71E-01 | 8.56E-01 | 1.00E+00 |
| ENSG00000178449.7_COX14     | ENSG00000160789.18_LMNA | -0.2355  | -0.380438851 | -0.07927297 | 3.49E-03 | 3.00E-02 | 1.00E+00 |
| ENSG00000106538.8_RARRES2   | ENSG00000160789.18_LMNA | 0.31443  | 0.163413192  | 0.451055478 | 7.98E-05 | 1.57E-03 | 1.00E+00 |
| ENSG00000125651.12_GTF2F1   | ENSG00000160789.18_LMNA | 0.24048  | 0.084513428  | 0.38494203  | 2.84E-03 | 2.57E-02 | 1.00E+00 |
| ENSG00000230202.1_RP11-632C | ENSG00000160789.18_LMNA | -0.07808 | -0.234371457 | 0.082137517 | 3.39E-01 | 6.24E-01 | 1.00E+00 |
| ENSG00000135245.9_HILPDA    | ENSG00000160789.18_LMNA | 0.14523  | -0.014304548 | 0.2975482   | 7.42E-02 | 2.60E-01 | 1.00E+00 |
| ENSG00000078804.11_TP53INP2 | ENSG00000160789.18_LMNA | -0.01872 | -0.177394003 | 0.140898624 | 8.19E-01 | 9.30E-01 | 1.00E+00 |
| ENSG00000175416.11_CLTB     | ENSG00000160789.18_LMNA | 0.13378  | -0.025975963 | 0.286869059 | 1.00E-01 | 3.12E-01 | 1.00E+00 |
| ENSG00000109180.13_OCIAD1   | ENSG00000160789.18_LMNA | -0.31416 | -0.450814632 | -0.16311893 | 8.10E-05 | 1.59E-03 | 1.00E+00 |
| ENSG00000160948.12_VPS28    | ENSG00000160789.18_LMNA | -0.18256 | -0.332108454 | -0.02405858 | 2.44E-02 | 1.24E-01 | 1.00E+00 |
| ENSG00000103647.11_CORO2B   | ENSG00000160789.18_LMNA | 0.1721   | 0.013262742  | 0.322465707 | 3.40E-02 | 1.56E-01 | 1.00E+00 |
| ENSG00000099800.6_TIMM13    | ENSG00000160789.18_LMNA | -0.06325 | -0.220233206 | 0.096926566 | 4.39E-01 | 7.07E-01 | 1.00E+00 |
| ENSG00000130770.16_ATPIF1   | ENSG00000160789.18_LMNA | -0.30254 | -0.440526685 | -0.15059688 | 1.52E-04 | 2.62E-03 | 1.00E+00 |
| ENSG00000113575.8_PPP2CA    | ENSG00000160789.18_LMNA | -0.21433 | -0.361204825 | -0.0570757  | 8.01E-03 | 5.57E-02 | 1.00E+00 |
| ENSG00000181817.5_LSM10     | ENSG00000160789.18_LMNA | 0.01039  | -0.149058451 | 0.16930946  | 8.99E-01 | 9.61E-01 | 1.00E+00 |
| ENSG00000152558.13_TMEM123  | ENSG00000160789.18_LMNA | -0.11848 | -0.272536983 | 0.041506826 | 1.46E-01 | 3.91E-01 | 1.00E+00 |
| ENSG00000196154.10_S100A4   | ENSG00000160789.18_LMNA | 0.26872  | 0.114414136  | 0.410365249 | 8.16E-04 | 9.86E-03 | 1.00E+00 |
| ENSG00000130741.9	EIF2S3    | ENSG00000160789.18_LMNA | 0.16838  | 0.009433674  | 0.319030129 | 3.81E-02 | 1.68E-01 | 1.00E+00 |
| ENSG00000116774.10_OLFML3   | ENSG00000160789.18_LMNA | 0.04089  | -0.119090753 | 0.198791881 | 6.17E-01 | 8.26E-01 | 1.00E+00 |
| ENSG00000125977.6	EIF2S2    | ENSG00000160789.18_LMNA | 0.07731  | -0.082915026 | 0.233631482 | 3.44E-01 | 6.28E-01 | 1.00E+00 |
| ENSG00000108424.8_KPNB1     | ENSG00000160789.18_LMNA | 0.18984  | 0.031596298  | 0.338803124 | 1.92E-02 | 1.05E-01 | 1.00E+00 |
| ENSG00000158773.13_USF1     | ENSG00000160789.18_LMNA | -0.25806 | -0.400791853 | -0.1030914  | 1.33E-03 | 1.43E-02 | 1.00E+00 |
| ENSG00000142634.11_EFHD2    | ENSG00000160789.18_LMNA | 0.13526  | -0.024468775 | 0.288252495 | 9.66E-02 | 3.05E-01 | 1.00E+00 |
| ENSG00000121966.6_CXCR4     | ENSG00000160789.18_LMNA | 0.11437  | -0.045665483 | 0.26867552  | 1.61E-01 | 4.15E-01 | 1.00E+00 |
| ENSG00000152082.12_MZT2B    | ENSG00000160789.18_LMNA | 0.21622  | 0.059052714  | 0.362928477 | 7.46E-03 | 5.28E-02 | 1.00E+00 |
| ENSG00000171530.12_TBCA     | ENSG00000160789.18_LMNA | -0.07991 | -0.236104282 | 0.080315288 | 3.28E-01 | 6.14E-01 | 1.00E+00 |
| ENSG00000156639.10_ZFAND3   | ENSG00000160789.18_LMNA | 0.15036  | -0.009056152 | 0.302325088 | 6.45E-02 | 2.36E-01 | 1.00E+00 |

|                             |                         |          |              |             |          |          |          |
|-----------------------------|-------------------------|----------|--------------|-------------|----------|----------|----------|
| ENSG00000214078.10_CPNE1    | ENSG00000160789.18_LMNA | 0.03734  | -0.122584931 | 0.195383664 | 6.48E-01 | 8.43E-01 | 1.00E+00 |
| ENSG00000108588.12_CCDC47   | ENSG00000160789.18_LMNA | 0.20481  | 0.047150539  | 0.352520081 | 1.14E-02 | 7.18E-02 | 1.00E+00 |
| ENSG00000182326.13_C1S      | ENSG00000160789.18_LMNA | 0.32229  | 0.171913742  | 0.457994925 | 5.14E-05 | 1.10E-03 | 1.00E+00 |
| ENSG00000158470.5_B4GALT5   | ENSG00000160789.18_LMNA | 0.36454  | 0.217990357  | 0.495012618 | 3.89E-06 | 1.35E-04 | 2.00E-01 |
| ENSG00000167775.9_CD320     | ENSG00000160789.18_LMNA | 0.18861  | 0.030316546  | 0.337668693 | 2.00E-02 | 1.08E-01 | 1.00E+00 |
| ENSG00000143653.9_SCCPDH    | ENSG00000160789.18_LMNA | -0.10137 | -0.256433555 | 0.058778009 | 2.14E-01 | 4.88E-01 | 1.00E+00 |
| ENSG00000145919.9_BOD1      | ENSG00000160789.18_LMNA | -0.19992 | -0.348040354 | -0.04205445 | 1.35E-02 | 8.14E-02 | 1.00E+00 |
| ENSG00000149547.13_EI24     | ENSG00000160789.18_LMNA | -0.0542  | -0.211574424 | 0.105915293 | 5.07E-01 | 7.57E-01 | 1.00E+00 |
| ENSG00000171148.12_TADA3    | ENSG00000160789.18_LMNA | 0.21582  | 0.058638711  | 0.362567702 | 7.58E-03 | 5.33E-02 | 1.00E+00 |
| ENSG00000113578.16_FGF1     | ENSG00000160789.18_LMNA | 0.02084  | -0.138825439 | 0.17944124  | 7.99E-01 | 9.19E-01 | 1.00E+00 |
| ENSG00000002330.12_BAD      | ENSG00000160789.18_LMNA | -0.03508 | -0.193201869 | 0.124817623 | 6.68E-01 | 8.54E-01 | 1.00E+00 |
| ENSG00000179051.12_RCC2     | ENSG00000160789.18_LMNA | 0.07718  | -0.083038512 | 0.233513923 | 3.45E-01 | 6.29E-01 | 1.00E+00 |
| ENSG00000113384.12_GOLPH3   | ENSG00000160789.18_LMNA | 0.00891  | -0.15050266  | 0.167874099 | 9.13E-01 | 9.67E-01 | 1.00E+00 |
| ENSG00000176871.7_WSB2      | ENSG00000160789.18_LMNA | -0.2457  | -0.389656401 | -0.09001752 | 2.28E-03 | 2.16E-02 | 1.00E+00 |
| ENSG00000116586.10_LAMTOR2  | ENSG00000160789.18_LMNA | 0.1813   | 0.02275709   | 0.330949379 | 2.54E-02 | 1.28E-01 | 1.00E+00 |
| ENSG00000171314.8_PGAM1     | ENSG00000160789.18_LMNA | 0.01632  | -0.143256986 | 0.175061805 | 8.42E-01 | 9.38E-01 | 1.00E+00 |
| ENSG00000087245.11_MMP2     | ENSG00000160789.18_LMNA | 0.1466   | -0.012898067 | 0.298829859 | 7.15E-02 | 2.53E-01 | 1.00E+00 |
| ENSG00000114784.3_EIF1B     | ENSG00000160789.18_LMNA | -0.38673 | -0.514264811 | -0.24245223 | 8.59E-07 | 4.03E-05 | 4.41E-02 |
| ENSG00000124570.16_SERPINB1 | ENSG00000160789.18_LMNA | 0.30292  | 0.15100036   | 0.44085937  | 1.49E-04 | 2.58E-03 | 1.00E+00 |
| ENSG00000177575.11_CD163    | ENSG00000160789.18_LMNA | 0.25586  | 0.100766164  | 0.398817785 | 1.46E-03 | 1.54E-02 | 1.00E+00 |
| ENSG00000197780.8_TAF13     | ENSG00000160789.18_LMNA | 0.01623  | -0.143336478 | 0.174983133 | 8.43E-01 | 9.39E-01 | 1.00E+00 |
| ENSG00000104419.13_NDRG1    | ENSG00000160789.18_LMNA | 0.22133  | 0.06439643   | 0.367576997 | 6.14E-03 | 4.58E-02 | 1.00E+00 |
| ENSG00000214022.10_REPIN1   | ENSG00000160789.18_LMNA | 0.07897  | -0.081252162 | 0.235213625 | 3.34E-01 | 6.19E-01 | 1.00E+00 |
| ENSG00000129596.4_CDO1      | ENSG00000160789.18_LMNA | -0.24402 | -0.388137911 | -0.08824266 | 2.45E-03 | 2.29E-02 | 1.00E+00 |
| ENSG00000168288.11_MMADHC   | ENSG00000160789.18_LMNA | -0.21331 | -0.360277374 | -0.05601291 | 8.32E-03 | 5.73E-02 | 1.00E+00 |
| ENSG00000091483.6_FH        | ENSG00000160789.18_LMNA | 0.06747  | -0.092729487 | 0.22425918  | 4.09E-01 | 6.83E-01 | 1.00E+00 |
| ENSG00000116521.9_SCAMP3    | ENSG00000160789.18_LMNA | 0.27285  | 0.118809534  | 0.414064071 | 6.72E-04 | 8.50E-03 | 1.00E+00 |
| ENSG00000179431.6_FJX1      | ENSG00000160789.18_LMNA | 0.24644  | 0.090805613  | 0.390330136 | 2.21E-03 | 2.11E-02 | 1.00E+00 |
| ENSG00000126351.11_THRA     | ENSG00000160789.18_LMNA | -0.4068  | -0.531575557 | -0.2647464  | 1.99E-07 | 1.26E-05 | 1.02E-02 |
| ENSG00000096092.5_TMEM14A   | ENSG00000160789.18_LMNA | -0.23775 | -0.382477112 | -0.08164288 | 3.18E-03 | 2.79E-02 | 1.00E+00 |
| ENSG00000119801.11_YPEL5    | ENSG00000160789.18_LMNA | -0.42322 | -0.545659595 | -0.28309786 | 5.56E-08 | 4.46E-06 | 2.85E-03 |
| ENSG00000101400.5_SNTA1     | ENSG00000160789.18_LMNA | 0.10666  | -0.053445621 | 0.261424148 | 1.91E-01 | 4.59E-01 | 1.00E+00 |
| ENSG00000168439.15_STIP1    | ENSG00000160789.18_LMNA | 0.18057  | 0.022002351  | 0.3302768   | 2.60E-02 | 1.30E-01 | 1.00E+00 |

|                            |                         |          |              |             |          |          |          |
|----------------------------|-------------------------|----------|--------------|-------------|----------|----------|----------|
| ENSG00000204568.10_MRPS18B | ENSG00000160789.18_LMNA | -0.15373 | -0.305453722 | 0.005609381 | 5.86E-02 | 2.22E-01 | 1.00E+00 |
| ENSG00000105258.7_POLR2I   | ENSG00000160789.18_LMNA | -0.10157 | -0.256622277 | 0.058576688 | 2.13E-01 | 4.87E-01 | 1.00E+00 |
| ENSG00000117758.12_STX12   | ENSG00000160789.18_LMNA | -0.34342 | -0.476561635 | -0.19486866 | 1.48E-05 | 4.03E-04 | 7.60E-01 |
| ENSG00000100997.17_ABHD12  | ENSG00000160789.18_LMNA | 0.11803  | -0.041958705 | 0.272117887 | 1.48E-01 | 3.94E-01 | 1.00E+00 |
| ENSG00000136802.10_LRRC8A  | ENSG00000160789.18_LMNA | 0.08036  | -0.079857467 | 0.236539325 | 3.25E-01 | 6.12E-01 | 1.00E+00 |
| ENSG00000105520.9_PLPPR2   | ENSG00000160789.18_LMNA | 0.0798   | -0.080422795 | 0.236002106 | 3.28E-01 | 6.15E-01 | 1.00E+00 |
| ENSG00000105953.13_OGDH    | ENSG00000160789.18_LMNA | 0.28704  | 0.133963272  | 0.426741949 | 3.37E-04 | 4.90E-03 | 1.00E+00 |
| ENSG00000163430.8_FSTL1    | ENSG00000160789.18_LMNA | 0.33235  | 0.182827207  | 0.466853336 | 2.87E-05 | 6.88E-04 | 1.00E+00 |
| ENSG00000167085.10_PHB     | ENSG00000160789.18_LMNA | -0.09215 | -0.247717828 | 0.068047717 | 2.59E-01 | 5.42E-01 | 1.00E+00 |
| ENSG00000135441.6_BLOC1S1  | ENSG00000160789.18_LMNA | -0.18134 | -0.330985887 | -0.02279807 | 2.54E-02 | 1.28E-01 | 1.00E+00 |
| ENSG00000170515.12_PA2G4   | ENSG00000160789.18_LMNA | -0.03664 | -0.194706661 | 0.123278071 | 6.54E-01 | 8.47E-01 | 1.00E+00 |
| ENSG00000231925.10_TAPBP   | ENSG00000160789.18_LMNA | 0.37524  | 0.229767696  | 0.5043158   | 1.90E-06 | 7.70E-05 | 9.77E-02 |
| ENSG00000126878.11_AIF1L   | ENSG00000160789.18_LMNA | -0.19568 | -0.344156608 | -0.03764919 | 1.57E-02 | 9.06E-02 | 1.00E+00 |
| ENSG00000103202.11_NME4    | ENSG00000160789.18_LMNA | 0.01599  | -0.143579962 | 0.174742134 | 8.45E-01 | 9.40E-01 | 1.00E+00 |
| ENSG00000179115.9_FARSA    | ENSG00000160789.18_LMNA | 0.04282  | -0.117175579 | 0.200656683 | 6.00E-01 | 8.16E-01 | 1.00E+00 |
| ENSG00000079785.13_DDX1    | ENSG00000160789.18_LMNA | 0.01336  | -0.146151509 | 0.172194504 | 8.70E-01 | 9.50E-01 | 1.00E+00 |
| ENSG00000183011.12_NAA38   | ENSG00000160789.18_LMNA | -0.09619 | -0.251540399 | 0.06398888  | 2.38E-01 | 5.17E-01 | 1.00E+00 |
| ENSG00000172992.10_DCAKD   | ENSG00000160789.18_LMNA | -0.12259 | -0.276399881 | 0.037335708 | 1.32E-01 | 3.69E-01 | 1.00E+00 |
| ENSG00000128283.6_CDC42EP1 | ENSG00000160789.18_LMNA | 0.1983   | 0.040368789  | 0.346555489 | 1.43E-02 | 8.51E-02 | 1.00E+00 |
| ENSG00000120708.15_TGFB1   | ENSG00000160789.18_LMNA | 0.30645  | 0.154802275  | 0.443990294 | 1.23E-04 | 2.24E-03 | 1.00E+00 |
| ENSG00000213722.7_DDAH2    | ENSG00000160789.18_LMNA | 0.11016  | -0.049913917 | 0.264720236 | 1.77E-01 | 4.38E-01 | 1.00E+00 |
| ENSG00000178252.16_WDR6    | ENSG00000160789.18_LMNA | -0.02717 | -0.185572804 | 0.132599423 | 7.40E-01 | 8.91E-01 | 1.00E+00 |
| ENSG00000112715.19_VEGFA   | ENSG00000160789.18_LMNA | 0.28729  | 0.134225505  | 0.426960329 | 3.32E-04 | 4.86E-03 | 1.00E+00 |
| ENSG00000164091.10_WDR82   | ENSG00000160789.18_LMNA | -0.09844 | -0.253664718 | 0.061728739 | 2.28E-01 | 5.04E-01 | 1.00E+00 |
| ENSG00000111276.9_CDKN1B   | ENSG00000160789.18_LMNA | -0.35573 | -0.487329481 | -0.20832436 | 6.88E-06 | 2.17E-04 | 3.53E-01 |
| ENSG00000057757.8_PITHD1   | ENSG00000160789.18_LMNA | -0.17731 | -0.327276907 | -0.01864027 | 2.89E-02 | 1.40E-01 | 1.00E+00 |
| ENSG00000099817.10_POLR2E  | ENSG00000160789.18_LMNA | 0.025    | -0.13473733  | 0.183470119 | 7.60E-01 | 9.00E-01 | 1.00E+00 |
| ENSG00000115649.14_CNPPD1  | ENSG00000160789.18_LMNA | 0.14249  | -0.017101934 | 0.294995731 | 7.99E-02 | 2.72E-01 | 1.00E+00 |
| ENSG00000169045.16_HNRNPH1 | ENSG00000160789.18_LMNA | -0.02525 | -0.18371165  | 0.134491904 | 7.57E-01 | 8.99E-01 | 1.00E+00 |
| ENSG00000122642.9_FKBP9    | ENSG00000160789.18_LMNA | 0.56108  | 0.441295541  | 0.661216182 | 5.55E-14 | 5.49E-11 | 2.85E-09 |
| ENSG00000122694.14_GLIPR2  | ENSG00000160789.18_LMNA | 0.03153  | -0.128314306 | 0.189778567 | 7.00E-01 | 8.72E-01 | 1.00E+00 |
| ENSG00000125652.6_ALKBH7   | ENSG00000160789.18_LMNA | -0.06417 | -0.221110376 | 0.096013076 | 4.32E-01 | 7.02E-01 | 1.00E+00 |
| ENSG00000089280.17_FUS     | ENSG00000160789.18_LMNA | 0.1102   | -0.049878018 | 0.264753703 | 1.77E-01 | 4.38E-01 | 1.00E+00 |



|                             |                         |          |              |             |          |          |          |
|-----------------------------|-------------------------|----------|--------------|-------------|----------|----------|----------|
| ENSG00000106991.12_ENG      | ENSG00000160789.18_LMNA | 0.30415  | 0.152326497  | 0.441952262 | 1.39E-04 | 2.45E-03 | 1.00E+00 |
| ENSG00000063322.12_MED29    | ENSG00000160789.18_LMNA | -0.03834 | -0.196346379 | 0.121598733 | 6.39E-01 | 8.39E-01 | 1.00E+00 |
| ENSG00000167978.15_SRRM2    | ENSG00000160789.18_LMNA | 0.08863  | -0.071584539 | 0.24437885  | 2.78E-01 | 5.63E-01 | 1.00E+00 |
| ENSG00000125656.7_CLPP      | ENSG00000160789.18_LMNA | 0.12058  | -0.039373919 | 0.274513547 | 1.39E-01 | 3.80E-01 | 1.00E+00 |
| ENSG00000104408.8	EIF3E     | ENSG00000160789.18_LMNA | -0.19735 | -0.345693207 | -0.0393907  | 1.48E-02 | 8.71E-02 | 1.00E+00 |
| ENSG00000093010.10_COMT     | ENSG00000160789.18_LMNA | 0.07639  | -0.083832195 | 0.232758118 | 3.50E-01 | 6.33E-01 | 1.00E+00 |
| ENSG00000169738.6_DCXR      | ENSG00000160789.18_LMNA | -0.18006 | -0.329808558 | -0.02147712 | 2.64E-02 | 1.32E-01 | 1.00E+00 |
| ENSG00000170275.13_CRTAP    | ENSG00000160789.18_LMNA | 0.19463  | 0.036561453  | 0.343196026 | 1.63E-02 | 9.31E-02 | 1.00E+00 |
| ENSG00000198898.11_CAPZA2   | ENSG00000160789.18_LMNA | -0.09517 | -0.250578243 | 0.065011489 | 2.43E-01 | 5.23E-01 | 1.00E+00 |
| ENSG00000176788.8_BASP1     | ENSG00000160789.18_LMNA | -0.35784 | -0.489175875 | -0.21064231 | 6.01E-06 | 1.93E-04 | 3.08E-01 |
| ENSG00000211450.8_SELENOH   | ENSG00000160789.18_LMNA | -0.10894 | -0.2635685   | 0.051148879 | 1.82E-01 | 4.46E-01 | 1.00E+00 |
| ENSG00000143013.11_LMO4     | ENSG00000160789.18_LMNA | 0.04173  | -0.11825488  | 0.199606053 | 6.10E-01 | 8.22E-01 | 1.00E+00 |
| ENSG00000171552.11_BCL2L1   | ENSG00000160789.18_LMNA | 0.17718  | 0.018497324  | 0.327149218 | 2.90E-02 | 1.40E-01 | 1.00E+00 |
| ENSG00000159461.13_AMFR     | ENSG00000160789.18_LMNA | 0.12298  | -0.036945846 | 0.276760417 | 1.31E-01 | 3.67E-01 | 1.00E+00 |
| ENSG00000161011.18_SQSTM1   | ENSG00000160789.18_LMNA | 0.32062  | 0.170100939  | 0.456517958 | 5.65E-05 | 1.18E-03 | 1.00E+00 |
| ENSG00000077585.12_GPR137B  | ENSG00000160789.18_LMNA | -0.15797 | -0.309390521 | 0.001261738 | 5.19E-02 | 2.06E-01 | 1.00E+00 |
| ENSG00000184113.9_CLDN5     | ENSG00000160789.18_LMNA | -0.23495 | -0.379935624 | -0.07868838 | 3.57E-03 | 3.05E-02 | 1.00E+00 |
| ENSG00000068912.12_ERLEC1   | ENSG00000160789.18_LMNA | -0.10182 | -0.256853084 | 0.058330438 | 2.12E-01 | 4.86E-01 | 1.00E+00 |
| ENSG00000106105.12_GARS     | ENSG00000160789.18_LMNA | 0.28219  | 0.128769498  | 0.422409671 | 4.28E-04 | 5.98E-03 | 1.00E+00 |
| ENSG00000174851.13_YIF1A    | ENSG00000160789.18_LMNA | -0.00766 | -0.16666037  | 0.151722811 | 9.25E-01 | 9.71E-01 | 1.00E+00 |
| ENSG00000104915.13_STX10    | ENSG00000160789.18_LMNA | 0.05483  | -0.105290751 | 0.212177657 | 5.02E-01 | 7.54E-01 | 1.00E+00 |
| ENSG00000143549.18_TPM3     | ENSG00000160789.18_LMNA | 0.35332  | 0.205693571  | 0.485230857 | 8.01E-06 | 2.44E-04 | 4.11E-01 |
| ENSG00000100227.16_POLDIP3  | ENSG00000160789.18_LMNA | -0.13812 | -0.290919823 | 0.021558831 | 8.97E-02 | 2.92E-01 | 1.00E+00 |
| ENSG00000197694.12_SPTAN1   | ENSG00000160789.18_LMNA | 0.03759  | -0.12234219  | 0.195620682 | 6.46E-01 | 8.43E-01 | 1.00E+00 |
| ENSG00000148053.14_NTRK2    | ENSG00000160789.18_LMNA | -0.3434  | -0.476548029 | -0.19485173 | 1.48E-05 | 4.04E-04 | 7.61E-01 |
| ENSG00000182195.7_LDOC1     | ENSG00000160789.18_LMNA | -0.14434 | -0.296726708 | 0.015205398 | 7.60E-02 | 2.64E-01 | 1.00E+00 |
| ENSG00000105612.7_DNASE2    | ENSG00000160789.18_LMNA | 0.16648  | 0.007472578  | 0.317267406 | 4.04E-02 | 1.74E-01 | 1.00E+00 |
| ENSG00000013306.14_SLC25A3C | ENSG00000160789.18_LMNA | -0.00042 | -0.159607395 | 0.158793954 | 9.96E-01 | 9.98E-01 | 1.00E+00 |
| ENSG00000149600.10_COMMD7   | ENSG00000160789.18_LMNA | -0.25054 | -0.394028973 | -0.09513897 | 1.85E-03 | 1.85E-02 | 1.00E+00 |
| ENSG00000102119.9_EMD       | ENSG00000160789.18_LMNA | 0.23847  | 0.0823938    | 0.383122334 | 3.09E-03 | 2.73E-02 | 1.00E+00 |
| ENSG00000205531.11_NAP1L4   | ENSG00000160789.18_LMNA | 0.19011  | 0.031878716  | 0.339053352 | 1.90E-02 | 1.04E-01 | 1.00E+00 |
| ENSG00000144028.13_SNRNP20  | ENSG00000160789.18_LMNA | 0.10591  | -0.054207933 | 0.260711729 | 1.94E-01 | 4.63E-01 | 1.00E+00 |
| ENSG00000257698.1_RP11-620J | ENSG00000160789.18_LMNA | -0.4108  | -0.53501074  | -0.26920468 | 1.47E-07 | 9.86E-06 | 7.52E-03 |

|                             |                         |          |              |             |          |          |          |
|-----------------------------|-------------------------|----------|--------------|-------------|----------|----------|----------|
| ENSG00000108946.13_PRKAR1A  | ENSG00000160789.18_LMNA | 0.03808  | -0.121863978 | 0.19608751  | 6.41E-01 | 8.40E-01 | 1.00E+00 |
| ENSG00000123080.9_CDKN2C    | ENSG00000160789.18_LMNA | 0.04443  | -0.115592364 | 0.202196521 | 5.87E-01 | 8.08E-01 | 1.00E+00 |
| ENSG00000117448.12_AKR1A1   | ENSG00000160789.18_LMNA | -0.06303 | -0.220025892 | 0.097142386 | 4.40E-01 | 7.08E-01 | 1.00E+00 |
| ENSG00000259976.1_MIR568    | ENSG00000160789.18_LMNA | 0.0308   | -0.129030969 | 0.189075987 | 7.06E-01 | 8.75E-01 | 1.00E+00 |
| ENSG00000116489.11_CAPZA1   | ENSG00000160789.18_LMNA | 0.11338  | -0.046663545 | 0.267747278 | 1.64E-01 | 4.20E-01 | 1.00E+00 |
| ENSG00000170035.14_UBE2E3   | ENSG00000160789.18_LMNA | -0.35206 | -0.484128529 | -0.20431333 | 8.67E-06 | 2.60E-04 | 4.45E-01 |
| ENSG00000149136.6_SSRP1     | ENSG00000160789.18_LMNA | 0.12369  | -0.036219886 | 0.277431534 | 1.29E-01 | 3.64E-01 | 1.00E+00 |
| ENSG00000197448.12_GSTK1    | ENSG00000160789.18_LMNA | 0.23221  | 0.075812695  | 0.377457553 | 3.99E-03 | 3.31E-02 | 1.00E+00 |
| ENSG00000134291.10_TMEM106  | ENSG00000160789.18_LMNA | 0.00834  | -0.151059681 | 0.167320129 | 9.19E-01 | 9.69E-01 | 1.00E+00 |
| ENSG00000172380.5_GNG12     | ENSG00000160789.18_LMNA | 0.17737  | 0.018694105  | 0.327324988 | 2.88E-02 | 1.39E-01 | 1.00E+00 |
| ENSG00000214194.7_LINC00998 | ENSG00000160789.18_LMNA | -0.14185 | -0.294402528 | 0.017751358 | 8.13E-02 | 2.75E-01 | 1.00E+00 |
| ENSG00000117118.8_SDHB      | ENSG00000160789.18_LMNA | -0.1368  | -0.28968837  | 0.022902954 | 9.29E-02 | 2.98E-01 | 1.00E+00 |
| ENSG00000116871.14_MAP7D1   | ENSG00000160789.18_LMNA | 0.21727  | 0.060153267  | 0.363887091 | 7.17E-03 | 5.12E-02 | 1.00E+00 |
| ENSG00000204310.9_AGPAT1    | ENSG00000160789.18_LMNA | 0.12168  | -0.038264165 | 0.275540907 | 1.35E-01 | 3.74E-01 | 1.00E+00 |
| ENSG00000138413.12_IDH1     | ENSG00000160789.18_LMNA | 0.15405  | -0.005280727 | 0.305751691 | 5.81E-02 | 2.21E-01 | 1.00E+00 |
| ENSG00000055070.15_SZRD1    | ENSG00000160789.18_LMNA | 0.18603  | 0.02764448   | 0.335297169 | 2.18E-02 | 1.15E-01 | 1.00E+00 |
| ENSG00000131669.8_NINJ1     | ENSG00000160789.18_LMNA | -0.1138  | -0.268138348 | 0.046243137 | 1.63E-01 | 4.18E-01 | 1.00E+00 |
| ENSG00000049540.15_ELN      | ENSG00000160789.18_LMNA | 0.26055  | 0.10573346   | 0.403031552 | 1.19E-03 | 1.32E-02 | 1.00E+00 |
| ENSG00000204388.6_HSPA1B    | ENSG00000160789.18_LMNA | 0.22077  | 0.063814738  | 0.367071714 | 6.27E-03 | 4.65E-02 | 1.00E+00 |
| ENSG00000108344.13_PSMD3    | ENSG00000160789.18_LMNA | -0.1206  | -0.274533698 | 0.03935216  | 1.39E-01 | 3.80E-01 | 1.00E+00 |
| ENSG00000133265.9_HSPBP1    | ENSG00000160789.18_LMNA | 0.12756  | -0.032297215 | 0.281052579 | 1.17E-01 | 3.43E-01 | 1.00E+00 |
| ENSG00000138801.7_PAPSS1    | ENSG00000160789.18_LMNA | -0.21256 | -0.359588697 | -0.05522418 | 8.56E-03 | 5.85E-02 | 1.00E+00 |
| ENSG00000175063.15_UBE2C    | ENSG00000160789.18_LMNA | 0.06687  | -0.093323665 | 0.223689881 | 4.13E-01 | 6.86E-01 | 1.00E+00 |
| ENSG00000102898.10_NUTF2    | ENSG00000160789.18_LMNA | -0.23351 | -0.378633398 | -0.07717658 | 3.79E-03 | 3.18E-02 | 1.00E+00 |
| ENSG00000127990.14_SGCE     | ENSG00000160789.18_LMNA | 0.01533  | -0.144218199 | 0.17411023  | 8.51E-01 | 9.42E-01 | 1.00E+00 |
| ENSG00000053371.11_AKR7A2   | ENSG00000160789.18_LMNA | 0.08559  | -0.074624921 | 0.24150254  | 2.94E-01 | 5.80E-01 | 1.00E+00 |
| ENSG00000144567.9_FAM134A   | ENSG00000160789.18_LMNA | 0.15744  | -0.001808539 | 0.308895977 | 5.27E-02 | 2.08E-01 | 1.00E+00 |
| ENSG00000158864.11_NDUFS2   | ENSG00000160789.18_LMNA | 0.07601  | -0.084208793 | 0.232399358 | 3.52E-01 | 6.36E-01 | 1.00E+00 |
| ENSG00000149294.15_NCAM1    | ENSG00000160789.18_LMNA | -0.39264 | -0.519371447 | -0.24899925 | 5.64E-07 | 2.89E-05 | 2.89E-02 |
| ENSG00000106537.7_TSPAN13   | ENSG00000160789.18_LMNA | -0.16018 | -0.311442299 | -0.00100883 | 4.87E-02 | 1.98E-01 | 1.00E+00 |
| ENSG00000147955.15_SIGMAR1  | ENSG00000160789.18_LMNA | 0.02101  | -0.138654782 | 0.179609638 | 7.97E-01 | 9.18E-01 | 1.00E+00 |
| ENSG00000159199.12_ATP5G1   | ENSG00000160789.18_LMNA | -0.28978 | -0.42918015  | -0.13689341 | 2.93E-04 | 4.42E-03 | 1.00E+00 |
| ENSG00000175573.6_C11orf68  | ENSG00000160789.18_LMNA | 0.04958  | -0.110495079 | 0.207143497 | 5.44E-01 | 7.82E-01 | 1.00E+00 |

|                            |                         |          |              |             |          |          |          |
|----------------------------|-------------------------|----------|--------------|-------------|----------|----------|----------|
| ENSG00000134243.10_SORT1   | ENSG00000160789.18_LMNA | 0.2003   | 0.042456375  | 0.348394175 | 1.34E-02 | 8.06E-02 | 1.00E+00 |
| ENSG00000158195.9_WASF2    | ENSG00000160789.18_LMNA | 0.2524   | 0.097096705  | 0.395696872 | 1.71E-03 | 1.73E-02 | 1.00E+00 |
| ENSG00000116209.10_TMEN59  | ENSG00000160789.18_LMNA | -0.18947 | -0.338460668 | -0.03120987 | 1.94E-02 | 1.06E-01 | 1.00E+00 |
| ENSG00000116786.10_PLEKHM2 | ENSG00000160789.18_LMNA | 0.24851  | 0.092983973  | 0.392190734 | 2.02E-03 | 1.97E-02 | 1.00E+00 |
| ENSG00000103145.9_HCFC1R1  | ENSG00000160789.18_LMNA | -0.06435 | -0.221286346 | 0.095829755 | 4.31E-01 | 7.00E-01 | 1.00E+00 |
| ENSG00000143162.7_CREG1    | ENSG00000160789.18_LMNA | -0.12033 | -0.274273899 | 0.039632675 | 1.40E-01 | 3.81E-01 | 1.00E+00 |
| ENSG00000100664.9	EIF5     | ENSG00000160789.18_LMNA | -0.02292 | -0.181457582 | 0.136780809 | 7.79E-01 | 9.09E-01 | 1.00E+00 |
| ENSG00000105722.8_ERF      | ENSG00000160789.18_LMNA | 0.25549  | 0.100369124  | 0.398480431 | 1.49E-03 | 1.56E-02 | 1.00E+00 |
| ENSG00000144043.10_TEX261  | ENSG00000160789.18_LMNA | 0.26508  | 0.110544457  | 0.407100749 | 9.65E-04 | 1.13E-02 | 1.00E+00 |
| ENSG00000132563.14_REEP2   | ENSG00000160789.18_LMNA | -0.09572 | -0.251094509 | 0.064462868 | 2.41E-01 | 5.20E-01 | 1.00E+00 |
| ENSG00000065427.13_KARS    | ENSG00000160789.18_LMNA | 0.10463  | -0.055492456 | 0.2595105   | 2.00E-01 | 4.70E-01 | 1.00E+00 |
| ENSG00000011304.15_PTBP1   | ENSG00000160789.18_LMNA | 0.35043  | 0.202530916  | 0.482703687 | 9.60E-06 | 2.82E-04 | 4.93E-01 |
| ENSG00000110917.6_MLEC     | ENSG00000160789.18_LMNA | 0.41947  | 0.278890271  | 0.542443486 | 7.49E-08 | 5.70E-06 | 3.84E-03 |
| ENSG00000006712.13_PAF1    | ENSG00000160789.18_LMNA | 0.09054  | -0.069662096 | 0.246194684 | 2.67E-01 | 5.51E-01 | 1.00E+00 |
| ENSG00000100220.10_RTCB    | ENSG00000160789.18_LMNA | -0.23103 | -0.37638727  | -0.07457223 | 4.19E-03 | 3.44E-02 | 1.00E+00 |
| ENSG00000088930.7_XRN2     | ENSG00000160789.18_LMNA | 0.08457  | -0.075652323 | 0.240529324 | 3.00E-01 | 5.87E-01 | 1.00E+00 |
| ENSG00000132639.11_SNAP25  | ENSG00000160789.18_LMNA | -0.21244 | -0.359480971 | -0.05510084 | 8.60E-03 | 5.87E-02 | 1.00E+00 |
| ENSG00000132823.9_OSER1    | ENSG00000160789.18_LMNA | -0.12908 | -0.282474566 | 0.030754135 | 1.13E-01 | 3.36E-01 | 1.00E+00 |
| ENSG00000239672.6_NME1     | ENSG00000160789.18_LMNA | -0.17094 | -0.321392971 | -0.01206617 | 3.52E-02 | 1.59E-01 | 1.00E+00 |
| ENSG00000104824.15_HNRNPL  | ENSG00000160789.18_LMNA | -0.15992 | -0.311200243 | -0.00074079 | 4.91E-02 | 1.99E-01 | 1.00E+00 |
| ENSG00000145022.4_TCTA     | ENSG00000160789.18_LMNA | -0.13945 | -0.292163936 | 0.020199742 | 8.66E-02 | 2.86E-01 | 1.00E+00 |
| ENSG00000089289.14_IGBP1   | ENSG00000160789.18_LMNA | -0.17008 | -0.320599271 | -0.01118141 | 3.62E-02 | 1.62E-01 | 1.00E+00 |
| ENSG00000100412.14_ACO2    | ENSG00000160789.18_LMNA | -0.21667 | -0.363334223 | -0.05951845 | 7.34E-03 | 5.21E-02 | 1.00E+00 |
| ENSG00000087191.11_PSMC5   | ENSG00000160789.18_LMNA | 0.16088  | 0.001728185  | 0.312091737 | 4.77E-02 | 1.95E-01 | 1.00E+00 |
| ENSG00000134853.10_PDGFR   | ENSG00000160789.18_LMNA | -0.13665 | -0.289553302 | 0.023050311 | 9.32E-02 | 2.99E-01 | 1.00E+00 |
| ENSG00000121005.7_CRISPLD1 | ENSG00000160789.18_LMNA | -0.14812 | -0.300243252 | 0.011345589 | 6.86E-02 | 2.46E-01 | 1.00E+00 |
| ENSG00000111642.13_CHD4    | ENSG00000160789.18_LMNA | 0.17009  | 0.011191762  | 0.32060856  | 3.62E-02 | 1.62E-01 | 1.00E+00 |
| ENSG00000155096.12_AZIN1   | ENSG00000160789.18_LMNA | -0.42983 | -0.551306143 | -0.29050969 | 3.27E-08 | 2.88E-06 | 1.68E-03 |
| ENSG00000162729.12_IGSF8   | ENSG00000160789.18_LMNA | 0.01051  | -0.148935638 | 0.169431458 | 8.98E-01 | 9.60E-01 | 1.00E+00 |
| ENSG00000169230.8_PRELID1  | ENSG00000160789.18_LMNA | 0.10262  | -0.057520951 | 0.257611554 | 2.08E-01 | 4.81E-01 | 1.00E+00 |
| ENSG00000166482.10_MFAP4   | ENSG00000160789.18_LMNA | 0.13839  | -0.021276263 | 0.291178574 | 8.91E-02 | 2.91E-01 | 1.00E+00 |
| ENSG00000090104.10_RGS1    | ENSG00000160789.18_LMNA | -0.01281 | -0.171663027 | 0.146687432 | 8.76E-01 | 9.52E-01 | 1.00E+00 |
| ENSG00000078018.18_MAP2    | ENSG00000160789.18_LMNA | -0.36401 | -0.49454817  | -0.2174045  | 4.03E-06 | 1.39E-04 | 2.07E-01 |

|                              |                         |          |              |             |          |          |          |
|------------------------------|-------------------------|----------|--------------|-------------|----------|----------|----------|
| ENSG00000130638.14_ATXN10    | ENSG00000160789.18_LMNA | -0.37539 | -0.504447623 | -0.22993516 | 1.88E-06 | 7.66E-05 | 9.67E-02 |
| ENSG00000113583.7_C5orf15    | ENSG00000160789.18_LMNA | -0.09163 | -0.247228153 | 0.068566903 | 2.62E-01 | 5.45E-01 | 1.00E+00 |
| ENSG00000197622.11_CDC42SE   | ENSG00000160789.18_LMNA | -0.01424 | -0.173045273 | 0.14529323  | 8.62E-01 | 9.46E-01 | 1.00E+00 |
| ENSG00000205544.3_TMEN256    | ENSG00000160789.18_LMNA | -0.18087 | -0.330555486 | -0.02231504 | 2.57E-02 | 1.29E-01 | 1.00E+00 |
| ENSG00000107372.11_ZFAND5    | ENSG00000160789.18_LMNA | -0.01256 | -0.171413125 | 0.146939362 | 8.78E-01 | 9.53E-01 | 1.00E+00 |
| ENSG00000197903.7_HIST1H2BK  | ENSG00000160789.18_LMNA | 0.08286  | -0.077365954 | 0.238904655 | 3.10E-01 | 5.97E-01 | 1.00E+00 |
| ENSG00000171222.9_SCAND1     | ENSG00000160789.18_LMNA | 0.0742   | -0.086018785 | 0.230673898 | 3.64E-01 | 6.45E-01 | 1.00E+00 |
| ENSG00000138279.14_ANXA7     | ENSG00000160789.18_LMNA | -0.19061 | -0.339512245 | -0.03239677 | 1.87E-02 | 1.03E-01 | 1.00E+00 |
| ENSG00000159069.12_FBXW5     | ENSG00000160789.18_LMNA | 0.43097  | 0.291786475  | 0.552276432 | 2.98E-08 | 2.68E-06 | 1.53E-03 |
| ENSG00000092621.10_PHGDH     | ENSG00000160789.18_LMNA | -0.22006 | -0.366420652 | -0.06306553 | 6.45E-03 | 4.75E-02 | 1.00E+00 |
| ENSG00000116863.10_ADPRHL2   | ENSG00000160789.18_LMNA | 0.17573  | 0.017005137  | 0.325815664 | 3.03E-02 | 1.44E-01 | 1.00E+00 |
| ENSG00000157514.15_TSC22D3   | ENSG00000160789.18_LMNA | -0.14392 | -0.29632778  | 0.015642681 | 7.69E-02 | 2.66E-01 | 1.00E+00 |
| ENSG00000162368.12_CMPK1     | ENSG00000160789.18_LMNA | 0.23076  | 0.074293356  | 0.376146545 | 4.23E-03 | 3.46E-02 | 1.00E+00 |
| ENSG00000138107.10_ACTR1A    | ENSG00000160789.18_LMNA | -0.32132 | -0.457133424 | -0.17085612 | 5.43E-05 | 1.15E-03 | 1.00E+00 |
| ENSG00000141552.16_ANAPC11   | ENSG00000160789.18_LMNA | -0.11196 | -0.266410027 | 0.048100278 | 1.70E-01 | 4.28E-01 | 1.00E+00 |
| ENSG00000232533.1_AC093673.1 | ENSG00000160789.18_LMNA | 0.43046  | 0.291216788  | 0.551843588 | 3.11E-08 | 2.77E-06 | 1.59E-03 |
| ENSG00000148290.8_SURF1      | ENSG00000160789.18_LMNA | -0.11121 | -0.265710731 | 0.048851079 | 1.73E-01 | 4.32E-01 | 1.00E+00 |
| ENSG00000101843.17_PSM10     | ENSG00000160789.18_LMNA | -0.3643  | -0.494801071 | -0.21772348 | 3.95E-06 | 1.37E-04 | 2.03E-01 |
| ENSG00000061794.11_MRPS35    | ENSG00000160789.18_LMNA | -0.26645 | -0.408332266 | -0.11200322 | 9.06E-04 | 1.07E-02 | 1.00E+00 |
| ENSG00000265354.3_TIMM23     | ENSG00000160789.18_LMNA | -0.22915 | -0.374682618 | -0.07259845 | 4.52E-03 | 3.63E-02 | 1.00E+00 |
| ENSG00000155380.10_SLC16A1   | ENSG00000160789.18_LMNA | 0.12869  | -0.031147058 | 0.282112609 | 1.14E-01 | 3.37E-01 | 1.00E+00 |
| ENSG0000014641.16_MDH1       | ENSG00000160789.18_LMNA | -0.30128 | -0.439405713 | -0.14923808 | 1.62E-04 | 2.77E-03 | 1.00E+00 |
| ENSG00000183207.11_RUVBL2    | ENSG00000160789.18_LMNA | 0.13988  | -0.019761234 | 0.292565122 | 8.57E-02 | 2.84E-01 | 1.00E+00 |
| ENSG00000132591.10_ERAL1     | ENSG00000160789.18_LMNA | -0.26932 | -0.4108995   | -0.11504828 | 7.93E-04 | 9.67E-03 | 1.00E+00 |
| ENSG00000166780.9_C16orf45   | ENSG00000160789.18_LMNA | -0.14706 | -0.299256631 | 0.012429457 | 7.06E-02 | 2.51E-01 | 1.00E+00 |
| ENSG00000115866.9_DARS       | ENSG00000160789.18_LMNA | -0.08536 | -0.2412817   | 0.074858116 | 2.96E-01 | 5.82E-01 | 1.00E+00 |
| ENSG00000091542.8_ALKBH5     | ENSG00000160789.18_LMNA | 0.37719  | 0.231912445  | 0.506003153 | 1.67E-06 | 6.95E-05 | 8.56E-02 |
| ENSG00000129055.11_ANAPC13   | ENSG00000160789.18_LMNA | -0.37788 | -0.506601199 | -0.23267325 | 1.59E-06 | 6.70E-05 | 8.16E-02 |
| ENSG00000135535.13_CD164     | ENSG00000160789.18_LMNA | 0.17388  | 0.015093883  | 0.324105798 | 3.22E-02 | 1.50E-01 | 1.00E+00 |
| ENSG00000115677.15_HDLBP     | ENSG00000160789.18_LMNA | 0.37276  | 0.227034656  | 0.502162575 | 2.25E-06 | 8.75E-05 | 1.16E-01 |
| ENSG00000174780.14_SRP72     | ENSG00000160789.18_LMNA | -0.15548 | -0.30707866  | 0.003816289 | 5.58E-02 | 2.16E-01 | 1.00E+00 |
| ENSG00000215301.8_DDX3X      | ENSG00000160789.18_LMNA | 0.19585  | 0.037831454  | 0.344317504 | 1.56E-02 | 9.02E-02 | 1.00E+00 |
| ENSG00000114686.7_MRPL3      | ENSG00000160789.18_LMNA | -0.10935 | -0.26395334  | 0.050736337 | 1.80E-01 | 4.43E-01 | 1.00E+00 |

|                             |                         |          |              |             |          |          |          |
|-----------------------------|-------------------------|----------|--------------|-------------|----------|----------|----------|
| ENSG00000124766.5_SOX4      | ENSG00000160789.18_LMNA | -0.21864 | -0.365128355 | -0.06157942 | 6.81E-03 | 4.93E-02 | 1.00E+00 |
| ENSG00000139289.12_PHLDA1   | ENSG00000160789.18_LMNA | 0.03807  | -0.121872017 | 0.196079664 | 6.41E-01 | 8.40E-01 | 1.00E+00 |
| ENSG00000120727.11_PAIP2    | ENSG00000160789.18_LMNA | -0.40989 | -0.534229433 | -0.26818967 | 1.57E-07 | 1.04E-05 | 8.06E-03 |
| ENSG00000178695.5_KCTD12    | ENSG00000160789.18_LMNA | 0.10349  | -0.056641898 | 0.258434766 | 2.05E-01 | 4.76E-01 | 1.00E+00 |
| ENSG00000073921.16_PICALM   | ENSG00000160789.18_LMNA | 0.02924  | -0.130570204 | 0.187565899 | 7.21E-01 | 8.81E-01 | 1.00E+00 |
| ENSG000000213190.3_MLLT11   | ENSG00000160789.18_LMNA | -0.297   | -0.43560342  | -0.14463723 | 2.03E-04 | 3.30E-03 | 1.00E+00 |
| ENSG00000004776.10_HSPB6    | ENSG00000160789.18_LMNA | 0.37157  | 0.22572346   | 0.501128337 | 2.44E-06 | 9.29E-05 | 1.25E-01 |
| ENSG00000174238.13_PITPNA   | ENSG00000160789.18_LMNA | -0.04527 | -0.203008587 | 0.114756771 | 5.80E-01 | 8.04E-01 | 1.00E+00 |
| ENSG00000183172.8_SMDT1     | ENSG00000160789.18_LMNA | -0.43968 | -0.55970157  | -0.30158794 | 1.45E-08 | 1.47E-06 | 7.44E-04 |
| ENSG00000180354.14_MTURN    | ENSG00000160789.18_LMNA | -0.40252 | -0.527895833 | -0.25998336 | 2.74E-07 | 1.64E-05 | 1.40E-02 |
| ENSG00000184752.11_NDUFA12  | ENSG00000160789.18_LMNA | -0.26184 | -0.404188554 | -0.10709996 | 1.12E-03 | 1.26E-02 | 1.00E+00 |
| ENSG00000137076.17_TLN1     | ENSG00000160789.18_LMNA | 0.39839  | 0.255383469  | 0.524332577 | 3.71E-07 | 2.08E-05 | 1.90E-02 |
| ENSG00000168101.13_NUDT16L  | ENSG00000160789.18_LMNA | -0.27041 | -0.411881005 | -0.11621395 | 7.54E-04 | 9.28E-03 | 1.00E+00 |
| ENSG00000147669.9_POLR2K    | ENSG00000160789.18_LMNA | -0.27156 | -0.412909828 | -0.11743668 | 7.14E-04 | 8.90E-03 | 1.00E+00 |
| ENSG00000125818.16_PSMF1    | ENSG00000160789.18_LMNA | 0.07399  | -0.086224741 | 0.230477435 | 3.65E-01 | 6.46E-01 | 1.00E+00 |
| ENSG00000122042.9_UBL3      | ENSG00000160789.18_LMNA | -0.20334 | -0.351171984 | -0.04561528 | 1.20E-02 | 7.47E-02 | 1.00E+00 |
| ENSG00000213741.7_RPS29     | ENSG00000160789.18_LMNA | -0.17973 | -0.329506805 | -0.02113873 | 2.67E-02 | 1.33E-01 | 1.00E+00 |
| ENSG00000182103.4_FAM181B   | ENSG00000160789.18_LMNA | -0.28231 | -0.42251842  | -0.12889968 | 4.26E-04 | 5.95E-03 | 1.00E+00 |
| ENSG00000102241.10_HTATSF1  | ENSG00000160789.18_LMNA | 0.0183   | -0.141313713 | 0.176983778 | 8.23E-01 | 9.31E-01 | 1.00E+00 |
| ENSG00000135363.10_LMO2     | ENSG00000160789.18_LMNA | 0.24902  | 0.093530464  | 0.392657124 | 1.98E-03 | 1.93E-02 | 1.00E+00 |
| ENSG00000010404.16_IDS      | ENSG00000160789.18_LMNA | 0.15793  | -0.001301308 | 0.309354738 | 5.20E-02 | 2.06E-01 | 1.00E+00 |
| ENSG00000126261.11_UBA2     | ENSG00000160789.18_LMNA | -0.1574  | -0.308863078 | 0.001844907 | 5.28E-02 | 2.08E-01 | 1.00E+00 |
| ENSG00000161642.16_ZNF385A  | ENSG00000160789.18_LMNA | -0.09604 | -0.251395299 | 0.064143139 | 2.39E-01 | 5.18E-01 | 1.00E+00 |
| ENSG00000180573.9_HIST1H2AC | ENSG00000160789.18_LMNA | -0.1544  | -0.306080111 | 0.004918408 | 5.75E-02 | 2.20E-01 | 1.00E+00 |
| ENSG00000127483.16_HP1BP3   | ENSG00000160789.18_LMNA | -0.07901 | -0.235253441 | 0.081210292 | 3.33E-01 | 6.19E-01 | 1.00E+00 |
| ENSG00000133134.10_BEX2     | ENSG00000160789.18_LMNA | -0.50104 | -0.611468175 | -0.37147223 | 4.89E-11 | 1.25E-08 | 2.51E-06 |
| ENSG00000196976.6_LAGE3     | ENSG00000160789.18_LMNA | -0.00263 | -0.161765823 | 0.15663343  | 9.74E-01 | 9.90E-01 | 1.00E+00 |
| ENSG00000143420.16_ENSA     | ENSG00000160789.18_LMNA | -0.05031 | -0.207845869 | 0.10977001  | 5.38E-01 | 7.78E-01 | 1.00E+00 |
| ENSG00000119632.3_IFI27L2   | ENSG00000160789.18_LMNA | 0.0035   | -0.155790568 | 0.162607041 | 9.66E-01 | 9.87E-01 | 1.00E+00 |
| ENSG00000185475.7_TMEM179B  | ENSG00000160789.18_LMNA | 0.00065  | -0.158562295 | 0.159838976 | 9.94E-01 | 9.97E-01 | 1.00E+00 |
| ENSG00000119333.10_WDR34    | ENSG00000160789.18_LMNA | 0.34019  | 0.191351954  | 0.47373341  | 1.80E-05 | 4.73E-04 | 9.24E-01 |
| ENSG00000168394.10_TAP1     | ENSG00000160789.18_LMNA | 0.26267  | 0.107985006  | 0.4049374   | 1.08E-03 | 1.23E-02 | 1.00E+00 |
| ENSG00000102103.14_PQBP1    | ENSG00000160789.18_LMNA | -0.21817 | -0.364706416 | -0.06109449 | 6.93E-03 | 5.01E-02 | 1.00E+00 |

|                            |                         |          |              |             |          |          |          |
|----------------------------|-------------------------|----------|--------------|-------------|----------|----------|----------|
| ENSG00000140740.9_UQCRC2   | ENSG00000160789.18_LMNA | -0.39705 | -0.523178729 | -0.25389655 | 4.09E-07 | 2.24E-05 | 2.10E-02 |
| ENSG00000115073.7_ACTR1B   | ENSG00000160789.18_LMNA | 0.01854  | -0.141081941 | 0.177212848 | 8.21E-01 | 9.30E-01 | 1.00E+00 |
| ENSG00000169689.13_CENPX   | ENSG00000160789.18_LMNA | -0.12569 | -0.279304791 | 0.034191797 | 1.23E-01 | 3.53E-01 | 1.00E+00 |
| ENSG00000076604.13_TRAF4   | ENSG00000160789.18_LMNA | -0.16285 | -0.313914446 | -0.00374885 | 4.50E-02 | 1.88E-01 | 1.00E+00 |
| ENSG00000168615.10_ADAM9   | ENSG00000160789.18_LMNA | 0.45474  | 0.318601515  | 0.572492618 | 3.98E-09 | 4.93E-07 | 2.04E-04 |
| ENSG00000104960.14_PTOV1   | ENSG00000160789.18_LMNA | -0.13491 | -0.287928121 | 0.024822293 | 9.75E-02 | 3.07E-01 | 1.00E+00 |
| ENSG00000011028.12_MRC2    | ENSG00000160789.18_LMNA | 0.62361  | 0.515594879  | 0.712111084 | 9.40E-18 | 3.01E-14 | 4.82E-13 |
| ENSG00000105605.6_CACNG7   | ENSG00000160789.18_LMNA | -0.23667 | -0.381499884 | -0.08050622 | 3.33E-03 | 2.89E-02 | 1.00E+00 |
| ENSG00000143772.8_ITPKB    | ENSG00000160789.18_LMNA | 0.18662  | 0.028260839  | 0.335844549 | 2.13E-02 | 1.13E-01 | 1.00E+00 |
| ENSG00000128050.7_PAICS    | ENSG00000160789.18_LMNA | 0.12061  | -0.039344371 | 0.274540911 | 1.39E-01 | 3.80E-01 | 1.00E+00 |
| ENSG00000123297.15_TSFM    | ENSG00000160789.18_LMNA | -0.31972 | -0.455723678 | -0.16912686 | 5.94E-05 | 1.23E-03 | 1.00E+00 |
| ENSG00000100983.8_GSS      | ENSG00000160789.18_LMNA | 0.26539  | 0.110877333  | 0.407381865 | 9.52E-04 | 1.12E-02 | 1.00E+00 |
| ENSG00000124299.12_PEPD    | ENSG00000160789.18_LMNA | 0.10112  | -0.059032162 | 0.256195273 | 2.15E-01 | 4.89E-01 | 1.00E+00 |
| ENSG00000204256.11_BRD2    | ENSG00000160789.18_LMNA | 0.11293  | -0.047114565 | 0.267327618 | 1.66E-01 | 4.23E-01 | 1.00E+00 |
| ENSG00000207770.1_         | ENSG00000160789.18_LMNA | 0.04633  | -0.113706046 | 0.204029107 | 5.71E-01 | 7.99E-01 | 1.00E+00 |
| ENSG00000165478.6_HEPACAM  | ENSG00000160789.18_LMNA | -0.10198 | -0.257003505 | 0.058169933 | 2.11E-01 | 4.85E-01 | 1.00E+00 |
| ENSG00000090932.9_DLL3     | ENSG00000160789.18_LMNA | -0.375   | -0.504108094 | -0.22950387 | 1.94E-06 | 7.78E-05 | 9.93E-02 |
| ENSG00000189077.9_TMEM120A | ENSG00000160789.18_LMNA | 0.14091  | -0.018712082 | 0.293524532 | 8.34E-02 | 2.79E-01 | 1.00E+00 |
| ENSG00000134970.13_TMED7   | ENSG00000160789.18_LMNA | -0.04036 | -0.19828762  | 0.119608229 | 6.22E-01 | 8.29E-01 | 1.00E+00 |
| ENSG00000152102.16_FAM168B | ENSG00000160789.18_LMNA | 0.02939  | -0.130422215 | 0.187711151 | 7.19E-01 | 8.81E-01 | 1.00E+00 |
| ENSG00000170906.14_NDUFA3  | ENSG00000160789.18_LMNA | -0.11007 | -0.264632536 | 0.050007988 | 1.77E-01 | 4.39E-01 | 1.00E+00 |
| ENSG00000116016.12_EPAS1   | ENSG00000160789.18_LMNA | 0.19348  | 0.035368765  | 0.342142022 | 1.69E-02 | 9.57E-02 | 1.00E+00 |
| ENSG00000110436.10_SLC1A2  | ENSG00000160789.18_LMNA | -0.06272 | -0.219728753 | 0.097451665 | 4.43E-01 | 7.10E-01 | 1.00E+00 |
| ENSG00000100129.16_EIF3L   | ENSG00000160789.18_LMNA | -0.29044 | -0.429767722 | -0.1376003  | 2.84E-04 | 4.30E-03 | 1.00E+00 |
| ENSG00000087087.17_SRRT    | ENSG00000160789.18_LMNA | 0.13662  | -0.023086202 | 0.289520402 | 9.33E-02 | 2.99E-01 | 1.00E+00 |
| ENSG00000100650.14_SRSF5   | ENSG00000160789.18_LMNA | -0.11171 | -0.266177696 | 0.04834976  | 1.71E-01 | 4.30E-01 | 1.00E+00 |
| ENSG00000103024.6_NME3     | ENSG00000160789.18_LMNA | 0.23596  | 0.079757197  | 0.380855552 | 3.43E-03 | 2.95E-02 | 1.00E+00 |
| ENSG00000165006.12_UBAP1   | ENSG00000160789.18_LMNA | -0.17789 | -0.327806213 | -0.01923298 | 2.83E-02 | 1.38E-01 | 1.00E+00 |
| ENSG00000179195.14_ZNF664  | ENSG00000160789.18_LMNA | -0.13723 | -0.290096085 | 0.02245806  | 9.18E-02 | 2.96E-01 | 1.00E+00 |
| ENSG00000139684.12_ESD     | ENSG00000160789.18_LMNA | -0.25678 | -0.399645522 | -0.10174075 | 1.41E-03 | 1.50E-02 | 1.00E+00 |
| ENSG00000100410.6_PHF5A    | ENSG00000160789.18_LMNA | -0.18164 | -0.331261167 | -0.02310708 | 2.51E-02 | 1.27E-01 | 1.00E+00 |
| ENSG00000079739.14_PGM1    | ENSG00000160789.18_LMNA | -0.14115 | -0.293749984 | 0.018465443 | 8.28E-02 | 2.78E-01 | 1.00E+00 |
| ENSG00000186577.10_C6orf1  | ENSG00000160789.18_LMNA | 0.0994   | -0.060758907 | 0.254575337 | 2.23E-01 | 4.99E-01 | 1.00E+00 |

|                              |                         |          |              |             |          |          |          |
|------------------------------|-------------------------|----------|--------------|-------------|----------|----------|----------|
| ENSG00000205581.9_HMGN1      | ENSG00000160789.18_LMNA | 0.00117  | -0.158061352 | 0.160339628 | 9.89E-01 | 9.96E-01 | 1.00E+00 |
| ENSG00000172500.11_FIBP      | ENSG00000160789.18_LMNA | 0.09542  | -0.064767805 | 0.250807578 | 2.42E-01 | 5.21E-01 | 1.00E+00 |
| ENSG00000079999.12_KEAP1     | ENSG00000160789.18_LMNA | 0.15059  | -0.008826866 | 0.30253342  | 6.41E-02 | 2.36E-01 | 1.00E+00 |
| ENSG00000090266.11_NDUFB2    | ENSG00000160789.18_LMNA | -0.06065 | -0.217752796 | 0.099506791 | 4.58E-01 | 7.22E-01 | 1.00E+00 |
| ENSG00000095059.14_DHPS      | ENSG00000160789.18_LMNA | -0.15952 | -0.3108302   | -0.00033112 | 4.96E-02 | 2.00E-01 | 1.00E+00 |
| ENSG00000111540.14_RAB5B     | ENSG00000160789.18_LMNA | -0.30086 | -0.439030138 | -0.14878307 | 1.66E-04 | 2.82E-03 | 1.00E+00 |
| ENSG00000146966.11_DENND2A   | ENSG00000160789.18_LMNA | 0.25623  | 0.101154738  | 0.399147868 | 1.44E-03 | 1.52E-02 | 1.00E+00 |
| ENSG00000151500.13_THYN1     | ENSG00000160789.18_LMNA | -0.36408 | -0.494610615 | -0.21748325 | 4.01E-06 | 1.39E-04 | 2.06E-01 |
| ENSG00000197157.9_SND1       | ENSG00000160789.18_LMNA | 0.33222  | 0.182678306  | 0.466732856 | 2.90E-05 | 6.93E-04 | 1.00E+00 |
| ENSG00000269893.5_SNHG8      | ENSG00000160789.18_LMNA | -0.16301 | -0.31405863  | -0.0039088  | 4.48E-02 | 1.87E-01 | 1.00E+00 |
| ENSG00000108829.9_LRRC59     | ENSG00000160789.18_LMNA | 0.22301  | 0.066157738  | 0.369105853 | 5.75E-03 | 4.36E-02 | 1.00E+00 |
| ENSG00000110108.8_TMEM109    | ENSG00000160789.18_LMNA | 0.29312  | 0.140478844  | 0.432157842 | 2.47E-04 | 3.86E-03 | 1.00E+00 |
| ENSG00000143418.18_CERS2     | ENSG00000160789.18_LMNA | 0.30591  | 0.154224336  | 0.443514809 | 1.27E-04 | 2.29E-03 | 1.00E+00 |
| ENSG00000148362.9_C9orf142   | ENSG00000160789.18_LMNA | 0.03335  | -0.126521071 | 0.191535137 | 6.83E-01 | 8.62E-01 | 1.00E+00 |
| ENSG00000116221.14_MRPL37    | ENSG00000160789.18_LMNA | 0.23809  | 0.081997701  | 0.382782025 | 3.14E-03 | 2.76E-02 | 1.00E+00 |
| ENSG00000170876.7_TMEM43     | ENSG00000160789.18_LMNA | 0.38243  | 0.237697977  | 0.510544405 | 1.16E-06 | 5.19E-05 | 5.96E-02 |
| ENSG00000167615.15_LENG8     | ENSG00000160789.18_LMNA | 0.08495  | -0.075264325 | 0.240896934 | 2.98E-01 | 5.84E-01 | 1.00E+00 |
| ENSG00000169217.7_CD2BP2     | ENSG00000160789.18_LMNA | 0.03061  | -0.12921868  | 0.188891911 | 7.08E-01 | 8.76E-01 | 1.00E+00 |
| ENSG00000176087.13_SLC35A4   | ENSG00000160789.18_LMNA | 0.23248  | 0.076090968  | 0.377697539 | 3.95E-03 | 3.29E-02 | 1.00E+00 |
| ENSG00000119408.15_NEK6      | ENSG00000160789.18_LMNA | 0.50755  | 0.378966403  | 0.616900121 | 2.50E-11 | 7.16E-09 | 1.28E-06 |
| ENSG00000091527.14_CDV3      | ENSG00000160789.18_LMNA | 0.16648  | 0.007472552  | 0.317267383 | 4.04E-02 | 1.74E-01 | 1.00E+00 |
| ENSG00000126067.10_PSMB2     | ENSG00000160789.18_LMNA | 0.0138   | -0.145719538 | 0.172622755 | 8.66E-01 | 9.48E-01 | 1.00E+00 |
| ENSG00000247596.7_TWF2       | ENSG00000160789.18_LMNA | 0.34554  | 0.197187211  | 0.478423087 | 1.30E-05 | 3.62E-04 | 6.67E-01 |
| ENSG00000152291.12_TGOLN2    | ENSG00000160789.18_LMNA | 0.213    | 0.055688218  | 0.359993909 | 8.42E-03 | 5.79E-02 | 1.00E+00 |
| ENSG00000198931.9_APRT       | ENSG00000160789.18_LMNA | 0.22143  | 0.064500676  | 0.367667531 | 6.12E-03 | 4.56E-02 | 1.00E+00 |
| ENSG00000233762.3_AC007969.1 | ENSG00000160789.18_LMNA | -0.09875 | -0.253953634 | 0.061421101 | 2.26E-01 | 5.02E-01 | 1.00E+00 |
| ENSG00000237949.1_LINC00844  | ENSG00000160789.18_LMNA | -0.57392 | -0.671745398 | -0.45642324 | 1.08E-14 | 1.50E-11 | 5.55E-10 |
| ENSG00000099797.10_TECR      | ENSG00000160789.18_LMNA | 0.12208  | -0.037856535 | 0.275918093 | 1.34E-01 | 3.72E-01 | 1.00E+00 |
| ENSG00000106605.9_BLVRA      | ENSG00000160789.18_LMNA | 0.0734   | -0.08681979  | 0.229909667 | 3.69E-01 | 6.50E-01 | 1.00E+00 |
| ENSG00000141349.7_G6PC3      | ENSG00000160789.18_LMNA | 0.20001  | 0.042152431  | 0.348126617 | 1.35E-02 | 8.13E-02 | 1.00E+00 |
| ENSG00000082014.15_SMARCD3   | ENSG00000160789.18_LMNA | -0.16931 | -0.319884336 | -0.01038487 | 3.71E-02 | 1.65E-01 | 1.00E+00 |
| ENSG00000116350.14_SRSF4     | ENSG00000160789.18_LMNA | 0.26708  | 0.112674086  | 0.408898263 | 8.80E-04 | 1.05E-02 | 1.00E+00 |
| ENSG00000122786.18_CALD1     | ENSG00000160789.18_LMNA | 0.38429  | 0.239756214  | 0.512156319 | 1.02E-06 | 4.67E-05 | 5.23E-02 |

|                             |                         |          |              |             |          |          |          |
|-----------------------------|-------------------------|----------|--------------|-------------|----------|----------|----------|
| ENSG00000182154.7_MRPL41    | ENSG00000160789.18_LMNA | 0.04806  | -0.111999212 | 0.205685405 | 5.57E-01 | 7.90E-01 | 1.00E+00 |
| ENSG00000174695.8_TMEM167A  | ENSG00000160789.18_LMNA | -0.44849 | -0.567197051 | -0.3115379  | 6.85E-09 | 7.83E-07 | 3.51E-04 |
| ENSG00000173486.11_FKBP2    | ENSG00000160789.18_LMNA | 0.23325  | 0.076907315  | 0.378401331 | 3.83E-03 | 3.21E-02 | 1.00E+00 |
| ENSG00000101150.16_TPD52L2  | ENSG00000160789.18_LMNA | 0.30375  | 0.151897455  | 0.441598775 | 1.42E-04 | 2.49E-03 | 1.00E+00 |
| ENSG00000240694.7_PNMA2     | ENSG00000160789.18_LMNA | -0.04761 | -0.205253653 | 0.112444319 | 5.60E-01 | 7.93E-01 | 1.00E+00 |
| ENSG00000064601.15_CTSA     | ENSG00000160789.18_LMNA | 0.49349  | 0.362790729  | 0.605147222 | 1.05E-10 | 2.33E-08 | 5.38E-06 |
| ENSG00000125648.13_SLC25A23 | ENSG00000160789.18_LMNA | -0.18675 | -0.335958371 | -0.02838903 | 2.12E-02 | 1.13E-01 | 1.00E+00 |
| ENSG00000105373.17_GLTSCR2  | ENSG00000160789.18_LMNA | 0.13373  | -0.026020786 | 0.286827895 | 1.00E-01 | 3.12E-01 | 1.00E+00 |
| ENSG00000140931.18_CMTM3    | ENSG00000160789.18_LMNA | 0.45027  | 0.313548199  | 0.568706322 | 5.87E-09 | 6.91E-07 | 3.01E-04 |
| ENSG00000077097.12_TOP2B    | ENSG00000160789.18_LMNA | -0.19657 | -0.344971432 | -0.03857244 | 1.52E-02 | 8.88E-02 | 1.00E+00 |
| ENSG00000134769.20_DTNA     | ENSG00000160789.18_LMNA | -0.10562 | -0.260441626 | 0.054496856 | 1.95E-01 | 4.64E-01 | 1.00E+00 |
| ENSG00000100600.13_LGMN     | ENSG00000160789.18_LMNA | 0.01281  | -0.146687288 | 0.171663171 | 8.76E-01 | 9.52E-01 | 1.00E+00 |
| ENSG00000136830.10_FAM129B  | ENSG00000160789.18_LMNA | 0.48848  | 0.357049019  | 0.600949859 | 1.72E-10 | 3.52E-08 | 8.83E-06 |
| ENSG00000070413.17_DGCR2    | ENSG00000160789.18_LMNA | -0.04325 | -0.201068286 | 0.116752539 | 5.97E-01 | 8.14E-01 | 1.00E+00 |
| ENSG00000125166.11_GOT2     | ENSG00000160789.18_LMNA | -0.05853 | -0.215718322 | 0.101619955 | 4.74E-01 | 7.33E-01 | 1.00E+00 |
| ENSG00000141030.11_COPS3    | ENSG00000160789.18_LMNA | -0.24951 | -0.393094795 | -0.09404347 | 1.94E-03 | 1.90E-02 | 1.00E+00 |
| ENSG00000120742.9_SERP1     | ENSG00000160789.18_LMNA | -0.37639 | -0.505307882 | -0.23102838 | 1.76E-06 | 7.26E-05 | 9.04E-02 |
| ENSG00000235363.1_SNRPGP1C  | ENSG00000160789.18_LMNA | -0.11823 | -0.2723081   | 0.041753629 | 1.47E-01 | 3.93E-01 | 1.00E+00 |
| ENSG00000149658.16_YTHDF1   | ENSG00000160789.18_LMNA | 0.18593  | 0.027546597  | 0.335210221 | 2.18E-02 | 1.15E-01 | 1.00E+00 |
| ENSG00000145050.14_MANF     | ENSG00000160789.18_LMNA | 0.28544  | 0.132245667  | 0.42531073  | 3.65E-04 | 5.24E-03 | 1.00E+00 |
| ENSG00000115875.17_SRSF7    | ENSG00000160789.18_LMNA | -0.16456 | -0.315496634 | -0.00550492 | 4.28E-02 | 1.81E-01 | 1.00E+00 |
| ENSG00000159164.8_SV2A      | ENSG00000160789.18_LMNA | 0.02794  | -0.131845389 | 0.186313721 | 7.33E-01 | 8.87E-01 | 1.00E+00 |
| ENSG00000149541.8_B3GAT3    | ENSG00000160789.18_LMNA | 0.25738  | 0.102375024  | 0.400183964 | 1.37E-03 | 1.47E-02 | 1.00E+00 |
| ENSG00000099785.9_MARCH2    | ENSG00000160789.18_LMNA | -0.12401 | -0.277731629 | 0.035895161 | 1.28E-01 | 3.62E-01 | 1.00E+00 |
| ENSG00000116688.15_MFN2     | ENSG00000160789.18_LMNA | 0.1073   | -0.05280393  | 0.262023576 | 1.88E-01 | 4.55E-01 | 1.00E+00 |
| ENSG00000259330.1_INAFM2    | ENSG00000160789.18_LMNA | 0.2369   | 0.080740487  | 0.381701345 | 3.30E-03 | 2.87E-02 | 1.00E+00 |
| ENSG00000260260.1_SNHG19    | ENSG00000160789.18_LMNA | -0.09693 | -0.252235683 | 0.063249499 | 2.35E-01 | 5.13E-01 | 1.00E+00 |
| ENSG00000225648.4_SBDSP1    | ENSG00000160789.18_LMNA | 0.05267  | -0.10743263  | 0.21010785  | 5.19E-01 | 7.65E-01 | 1.00E+00 |
| ENSG00000172053.13_QARS     | ENSG00000160789.18_LMNA | 0.09554  | -0.064648493 | 0.250919851 | 2.42E-01 | 5.21E-01 | 1.00E+00 |
| ENSG00000179958.7_DCTPP1    | ENSG00000160789.18_LMNA | -0.15559 | -0.307183498 | 0.003700533 | 5.56E-02 | 2.15E-01 | 1.00E+00 |
| ENSG00000126458.3_RRAS      | ENSG00000160789.18_LMNA | 0.26311  | 0.108453404  | 0.405333557 | 1.06E-03 | 1.21E-02 | 1.00E+00 |
| ENSG00000139579.11_NABP2    | ENSG00000160789.18_LMNA | -0.22533 | -0.371213737 | -0.06858921 | 5.25E-03 | 4.07E-02 | 1.00E+00 |
| ENSG00000119917.12_IFIT3    | ENSG00000160789.18_LMNA | -0.16172 | -0.312866151 | -0.00258639 | 4.65E-02 | 1.92E-01 | 1.00E+00 |



|                            |                         |          |              |             |          |          |          |
|----------------------------|-------------------------|----------|--------------|-------------|----------|----------|----------|
| ENSG00000049541.9_RFC2     | ENSG00000160789.18_LMNA | 0.2204   | 0.063422267  | 0.366730696 | 6.36E-03 | 4.70E-02 | 1.00E+00 |
| ENSG00000204370.7_SDHD     | ENSG00000160789.18_LMNA | -0.18295 | -0.332470621 | -0.02446546 | 2.41E-02 | 1.23E-01 | 1.00E+00 |
| ENSG00000071859.13_FAM50A  | ENSG00000160789.18_LMNA | 0.36211  | 0.215317608  | 0.492892474 | 4.56E-06 | 1.55E-04 | 2.34E-01 |
| ENSG00000172379.17_ARNT2   | ENSG00000160789.18_LMNA | -0.01616 | -0.17491084  | 0.143409521 | 8.43E-01 | 9.39E-01 | 1.00E+00 |
| ENSG00000113387.10_SUB1    | ENSG00000160789.18_LMNA | -0.35243 | -0.484453017 | -0.20471951 | 8.47E-06 | 2.55E-04 | 4.35E-01 |
| ENSG00000101460.11_MAP1LC3 | ENSG00000160789.18_LMNA | 0.16504  | 0.005997927  | 0.315940512 | 4.22E-02 | 1.80E-01 | 1.00E+00 |
| ENSG00000068078.16_FGFR3   | ENSG00000160789.18_LMNA | 0.08772  | -0.072497141 | 0.24351608  | 2.83E-01 | 5.68E-01 | 1.00E+00 |
| ENSG00000123159.14_GIPC1   | ENSG00000160789.18_LMNA | -0.0579  | -0.215122173 | 0.102238619 | 4.79E-01 | 7.37E-01 | 1.00E+00 |
| ENSG00000171617.12_ENC1    | ENSG00000160789.18_LMNA | -0.04663 | -0.204313078 | 0.113413544 | 5.68E-01 | 7.98E-01 | 1.00E+00 |
| ENSG00000054965.9_FAM168A  | ENSG00000160789.18_LMNA | 0.03     | -0.129821047 | 0.188301059 | 7.14E-01 | 8.78E-01 | 1.00E+00 |
| ENSG00000189067.11_LITAF   | ENSG00000160789.18_LMNA | 0.21741  | 0.060298029  | 0.364013135 | 7.13E-03 | 5.11E-02 | 1.00E+00 |
| ENSG00000124207.15_CSE1L   | ENSG00000160789.18_LMNA | -0.0357  | -0.193800458 | 0.124205391 | 6.62E-01 | 8.51E-01 | 1.00E+00 |
| ENSG00000169429.9_CXCL8    | ENSG00000160789.18_LMNA | 0.09256  | -0.067640157 | 0.248102108 | 2.57E-01 | 5.39E-01 | 1.00E+00 |
| ENSG00000179295.14_PTPN11  | ENSG00000160789.18_LMNA | 0.00357  | -0.155719818 | 0.162677633 | 9.65E-01 | 9.86E-01 | 1.00E+00 |
| ENSG00000117862.10_TXNDC12 | ENSG00000160789.18_LMNA | 0.13211  | -0.027676029 | 0.285307013 | 1.05E-01 | 3.21E-01 | 1.00E+00 |
| ENSG00000204619.6_PPP1R11  | ENSG00000160789.18_LMNA | -0.07489 | -0.231333611 | 0.085326999 | 3.59E-01 | 6.42E-01 | 1.00E+00 |
| ENSG00000177807.6_KCNJ10   | ENSG00000160789.18_LMNA | -0.29768 | -0.436210291 | -0.14537071 | 1.96E-04 | 3.21E-03 | 1.00E+00 |
| ENSG00000105974.10_CAV1    | ENSG00000160789.18_LMNA | 0.34594  | 0.197621855  | 0.478771761 | 1.27E-05 | 3.55E-04 | 6.51E-01 |
| ENSG00000136522.12_MRPL47  | ENSG00000160789.18_LMNA | -0.2126  | -0.359630902 | -0.05527251 | 8.55E-03 | 5.85E-02 | 1.00E+00 |
| ENSG00000198732.9_SMOC1    | ENSG00000160789.18_LMNA | -0.40348 | -0.528719127 | -0.2610479  | 2.55E-07 | 1.55E-05 | 1.31E-02 |
| ENSG00000107796.11_ACTA2   | ENSG00000160789.18_LMNA | 0.2886   | 0.135630251  | 0.428129583 | 3.11E-04 | 4.64E-03 | 1.00E+00 |
| ENSG00000100591.6_AHSA1    | ENSG00000160789.18_LMNA | 0.01286  | -0.146637962 | 0.171712095 | 8.75E-01 | 9.51E-01 | 1.00E+00 |
| ENSG00000141959.15_PFKL    | ENSG00000160789.18_LMNA | 0.44983  | 0.313043017  | 0.568327209 | 6.11E-09 | 7.14E-07 | 3.13E-04 |
| ENSG00000196576.13_PLXNB2  | ENSG00000160789.18_LMNA | 0.47949  | 0.346760244  | 0.593394653 | 4.11E-10 | 7.48E-08 | 2.11E-05 |
| ENSG00000155980.10_KIF5A   | ENSG00000160789.18_LMNA | -0.39354 | -0.520148838 | -0.24999808 | 5.28E-07 | 2.74E-05 | 2.71E-02 |
| ENSG00000162706.11_CADM3   | ENSG00000160789.18_LMNA | -0.24643 | -0.390321511 | -0.09079552 | 2.21E-03 | 2.11E-02 | 1.00E+00 |
| ENSG00000162975.4_KCNF1    | ENSG00000160789.18_LMNA | 0.36824  | 0.222055373  | 0.498230859 | 3.05E-06 | 1.11E-04 | 1.56E-01 |
| ENSG00000136859.8_ANGPTL2  | ENSG00000160789.18_LMNA | 0.10136  | -0.058788778 | 0.256423459 | 2.14E-01 | 4.88E-01 | 1.00E+00 |
| ENSG00000183044.10_ABAT    | ENSG00000160789.18_LMNA | -0.39882 | -0.524703438 | -0.25586166 | 3.60E-07 | 2.03E-05 | 1.85E-02 |
| ENSG00000077380.14_DYNC112 | ENSG00000160789.18_LMNA | -0.31256 | -0.4493998   | -0.16139134 | 8.84E-05 | 1.71E-03 | 1.00E+00 |
| ENSG00000140262.16_TCF12   | ENSG00000160789.18_LMNA | -0.21353 | -0.360475031 | -0.05623935 | 8.26E-03 | 5.70E-02 | 1.00E+00 |
| ENSG00000168056.13_LTBP3   | ENSG00000160789.18_LMNA | 0.42841  | 0.288914228  | 0.55009269  | 3.67E-08 | 3.19E-06 | 1.88E-03 |
| ENSG00000101224.16_CDC25B  | ENSG00000160789.18_LMNA | 0.36337  | 0.216709992  | 0.493997387 | 4.20E-06 | 1.44E-04 | 2.15E-01 |

|                             |                         |          |              |             |          |          |          |
|-----------------------------|-------------------------|----------|--------------|-------------|----------|----------|----------|
| ENSG00000232388.4_LINC00493 | ENSG00000160789.18_LMNA | -0.11742 | -0.271540438 | 0.042581112 | 1.50E-01 | 3.97E-01 | 1.00E+00 |
| ENSG00000162496.7_DHRS3     | ENSG00000160789.18_LMNA | -0.07489 | -0.231332763 | 0.085327888 | 3.59E-01 | 6.42E-01 | 1.00E+00 |
| ENSG00000187416.10_LHFPL3   | ENSG00000160789.18_LMNA | -0.28118 | -0.421510877 | -0.12769399 | 4.50E-04 | 6.21E-03 | 1.00E+00 |
| ENSG00000006118.13_TMEM132  | ENSG00000160789.18_LMNA | 0.07812  | -0.082097817 | 0.23440923  | 3.39E-01 | 6.24E-01 | 1.00E+00 |
| ENSG00000213619.8_NDUFS3    | ENSG00000160789.18_LMNA | -0.13364 | -0.286738409 | 0.026118226 | 1.01E-01 | 3.13E-01 | 1.00E+00 |
| ENSG00000185627.16_PSM13    | ENSG00000160789.18_LMNA | -0.05976 | -0.216900622 | 0.100392274 | 4.65E-01 | 7.27E-01 | 1.00E+00 |
| ENSG00000145247.10_OCIAD2   | ENSG00000160789.18_LMNA | 0.24264  | 0.086787007  | 0.386891301 | 2.60E-03 | 2.39E-02 | 1.00E+00 |
| ENSG00000164615.4_CAMLG     | ENSG00000160789.18_LMNA | -0.34001 | -0.473573552 | -0.1911534  | 1.82E-05 | 4.78E-04 | 9.35E-01 |
| ENSG00000168610.13_STAT3    | ENSG00000160789.18_LMNA | 0.42792  | 0.288364795  | 0.549674554 | 3.82E-08 | 3.30E-06 | 1.96E-03 |
| ENSG00000150093.17_ITGB1    | ENSG00000160789.18_LMNA | 0.3185   | 0.167806563  | 0.454646367 | 6.36E-05 | 1.30E-03 | 1.00E+00 |
| ENSG00000163950.11_SLBP     | ENSG00000160789.18_LMNA | 0.14999  | -0.009439742 | 0.301976489 | 6.51E-02 | 2.38E-01 | 1.00E+00 |
| ENSG00000133639.4_BTG1      | ENSG00000160789.18_LMNA | -0.12676 | -0.28030519  | 0.033107652 | 1.20E-01 | 3.48E-01 | 1.00E+00 |
| ENSG00000185721.10_DRG1     | ENSG00000160789.18_LMNA | -0.18927 | -0.33827485  | -0.03100023 | 1.95E-02 | 1.06E-01 | 1.00E+00 |
| ENSG00000242265.4_PEG10     | ENSG00000160789.18_LMNA | 0.01582  | -0.143741631 | 0.174582094 | 8.47E-01 | 9.40E-01 | 1.00E+00 |
| ENSG00000022840.14_RNF10    | ENSG00000160789.18_LMNA | 0.19993  | 0.042064556  | 0.348049252 | 1.35E-02 | 8.14E-02 | 1.00E+00 |
| ENSG00000139433.8_GLTP      | ENSG00000160789.18_LMNA | -0.36194 | -0.49275     | -0.21513815 | 4.61E-06 | 1.56E-04 | 2.37E-01 |
| ENSG00000134107.4_BHLHE40   | ENSG00000160789.18_LMNA | 0.55957  | 0.439526231  | 0.659979018 | 6.69E-14 | 6.35E-11 | 3.43E-09 |
| ENSG00000185651.13_UBE2L3   | ENSG00000160789.18_LMNA | -0.04212 | -0.199975946 | 0.117874978 | 6.06E-01 | 8.20E-01 | 1.00E+00 |
| ENSG00000067829.17_IDH3G    | ENSG00000160789.18_LMNA | 0.0078   | -0.151590277 | 0.166792253 | 9.24E-01 | 9.71E-01 | 1.00E+00 |
| ENSG00000197324.7_LRP10     | ENSG00000160789.18_LMNA | 0.41268  | 0.271298218  | 0.53662082  | 1.27E-07 | 8.81E-06 | 6.51E-03 |
| ENSG00000126934.12_MAP2K2   | ENSG00000160789.18_LMNA | 0.13497  | -0.024763052 | 0.287982483 | 9.73E-02 | 3.07E-01 | 1.00E+00 |
| ENSG00000141424.11_SLC39A6  | ENSG00000160789.18_LMNA | -0.14105 | -0.293659803 | 0.018564104 | 8.30E-02 | 2.78E-01 | 1.00E+00 |
| ENSG00000154721.13_JAM2     | ENSG00000160789.18_LMNA | 0.01057  | -0.148886056 | 0.169480708 | 8.97E-01 | 9.60E-01 | 1.00E+00 |
| ENSG00000112667.11_DNPH1    | ENSG00000160789.18_LMNA | 0.17408  | 0.015304725  | 0.324294523 | 3.20E-02 | 1.49E-01 | 1.00E+00 |
| ENSG00000169740.12_ZNF32    | ENSG00000160789.18_LMNA | -0.3968  | -0.522961333 | -0.25361654 | 4.17E-07 | 2.28E-05 | 2.14E-02 |
| ENSG00000188157.12_AGRN     | ENSG00000160789.18_LMNA | 0.23104  | 0.074583546  | 0.376397037 | 4.19E-03 | 3.44E-02 | 1.00E+00 |
| ENSG00000100280.15_AP1B1    | ENSG00000160789.18_LMNA | 0.0963   | -0.063879788 | 0.251643005 | 2.38E-01 | 5.16E-01 | 1.00E+00 |
| ENSG00000154518.8_ATP5G3    | ENSG00000160789.18_LMNA | -0.15677 | -0.308278909 | 0.002490549 | 5.38E-02 | 2.11E-01 | 1.00E+00 |
| ENSG00000241837.5_ATP5O     | ENSG00000160789.18_LMNA | -0.20299 | -0.350855349 | -0.0452549  | 1.21E-02 | 7.54E-02 | 1.00E+00 |
| ENSG00000138629.14_UBL7     | ENSG00000160789.18_LMNA | -0.006   | -0.165046419 | 0.1533438   | 9.41E-01 | 9.77E-01 | 1.00E+00 |
| ENSG00000132661.3_NXT1      | ENSG00000160789.18_LMNA | 0.08516  | -0.075062821 | 0.241087813 | 2.97E-01 | 5.83E-01 | 1.00E+00 |
| ENSG00000090097.19_PCBP4    | ENSG00000160789.18_LMNA | -0.2323  | -0.377539997 | -0.07590829 | 3.98E-03 | 3.30E-02 | 1.00E+00 |
| ENSG00000242485.4_MRPL20    | ENSG00000160789.18_LMNA | -0.08799 | -0.24377367  | 0.072224727 | 2.81E-01 | 5.67E-01 | 1.00E+00 |

|                            |                         |          |              |             |          |          |          |
|----------------------------|-------------------------|----------|--------------|-------------|----------|----------|----------|
| ENSG00000024422.10_EHD2    | ENSG00000160789.18_LMNA | 0.64859  | 0.545745953  | 0.73219169  | 1.65E-19 | 1.07E-15 | 8.45E-15 |
| ENSG00000147164.10_SNX12   | ENSG00000160789.18_LMNA | -0.03131 | -0.189567899 | 0.128529232 | 7.02E-01 | 8.72E-01 | 1.00E+00 |
| ENSG00000104435.12_STMN2   | ENSG00000160789.18_LMNA | -0.31749 | -0.453756482 | -0.16671675 | 6.73E-05 | 1.37E-03 | 1.00E+00 |
| ENSG00000168994.12_PXDC1   | ENSG00000160789.18_LMNA | 0.33205  | 0.182501172  | 0.466589518 | 2.92E-05 | 6.98E-04 | 1.00E+00 |
| ENSG00000276171.1_         | ENSG00000160789.18_LMNA | -0.25945 | -0.402047837 | -0.1045725  | 1.25E-03 | 1.37E-02 | 1.00E+00 |
| ENSG00000135617.3_PRADC1   | ENSG00000160789.18_LMNA | -0.20519 | -0.352860734 | -0.04753871 | 1.12E-02 | 7.11E-02 | 1.00E+00 |
| ENSG00000132613.13_MTSS1L  | ENSG00000160789.18_LMNA | -0.0263  | -0.184728013 | 0.133458721 | 7.48E-01 | 8.95E-01 | 1.00E+00 |
| ENSG00000150753.10_CCT5    | ENSG00000160789.18_LMNA | -0.09709 | -0.25238856  | 0.063086879 | 2.34E-01 | 5.12E-01 | 1.00E+00 |
| ENSG00000162521.17_RBBP4   | ENSG00000160789.18_LMNA | -0.19968 | -0.347825192 | -0.04181008 | 1.36E-02 | 8.19E-02 | 1.00E+00 |
| ENSG00000146540.13_C7orf50 | ENSG00000160789.18_LMNA | 0.10228  | -0.057865341 | 0.257288916 | 2.10E-01 | 4.83E-01 | 1.00E+00 |
| ENSG00000162889.9_MAPKAPK2 | ENSG00000160789.18_LMNA | 0.40483  | 0.262554847  | 0.529883708 | 2.30E-07 | 1.42E-05 | 1.18E-02 |
| ENSG00000072110.12_ACTN1   | ENSG00000160789.18_LMNA | 0.55198  | 0.430622127  | 0.65373475  | 1.69E-13 | 1.34E-10 | 8.69E-09 |
| ENSG00000086504.14_MRPL28  | ENSG00000160789.18_LMNA | -0.08196 | -0.238055596 | 0.078260763 | 3.15E-01 | 6.02E-01 | 1.00E+00 |
| ENSG00000125877.11_ITPA    | ENSG00000160789.18_LMNA | 0.15357  | -0.005767683 | 0.305310178 | 5.89E-02 | 2.23E-01 | 1.00E+00 |
| ENSG00000168701.17_TMEM208 | ENSG00000160789.18_LMNA | 0.07958  | -0.080639302 | 0.235796312 | 3.30E-01 | 6.16E-01 | 1.00E+00 |
| ENSG00000101361.13_NOP56   | ENSG00000160789.18_LMNA | 0.01308  | -0.14642742  | 0.171920905 | 8.73E-01 | 9.51E-01 | 1.00E+00 |
| ENSG00000104388.13_RAB2A   | ENSG00000160789.18_LMNA | -0.41804 | -0.541217631 | -0.27728916 | 8.38E-08 | 6.19E-06 | 4.30E-03 |
| ENSG00000087365.13_SF3B2   | ENSG00000160789.18_LMNA | 0.17368  | 0.014887348  | 0.323920904 | 3.24E-02 | 1.51E-01 | 1.00E+00 |
| ENSG00000115306.14_SPTBN1  | ENSG00000160789.18_LMNA | 0.05277  | -0.107336724 | 0.21020059  | 5.19E-01 | 7.65E-01 | 1.00E+00 |
| ENSG00000182199.9_SHMT2    | ENSG00000160789.18_LMNA | 0.06955  | -0.090656872 | 0.226243315 | 3.95E-01 | 6.72E-01 | 1.00E+00 |
| ENSG00000141698.15_NT5C3B  | ENSG00000160789.18_LMNA | -0.23966 | -0.384198849 | -0.08364742 | 2.94E-03 | 2.64E-02 | 1.00E+00 |
| ENSG00000126062.3_TMEM115  | ENSG00000160789.18_LMNA | 0.35013  | 0.202199337  | 0.482438464 | 9.79E-06 | 2.86E-04 | 5.02E-01 |
| ENSG00000002834.16_LASP1   | ENSG00000160789.18_LMNA | 0.2949   | 0.142388694  | 0.433741376 | 2.26E-04 | 3.60E-03 | 1.00E+00 |
| ENSG00000205364.3_MT1M     | ENSG00000160789.18_LMNA | 0.1597   | 0.000510172  | 0.310991941 | 4.94E-02 | 2.00E-01 | 1.00E+00 |
| ENSG00000185633.9_NDUFA4L2 | ENSG00000160789.18_LMNA | 0.14713  | -0.012362655 | 0.299317458 | 7.05E-02 | 2.51E-01 | 1.00E+00 |
| ENSG00000167797.6_CDK2AP2  | ENSG00000160789.18_LMNA | 0.23253  | 0.076146969  | 0.377745829 | 3.94E-03 | 3.28E-02 | 1.00E+00 |
| ENSG00000136026.12_CKAP4   | ENSG00000160789.18_LMNA | 0.38471  | 0.240218404  | 0.512518021 | 9.91E-07 | 4.57E-05 | 5.08E-02 |
| ENSG00000109332.18_UBE2D3  | ENSG00000160789.18_LMNA | -0.25668 | -0.399554662 | -0.10163374 | 1.41E-03 | 1.50E-02 | 1.00E+00 |
| ENSG00000129351.16_ILF3    | ENSG00000160789.18_LMNA | 0.0757   | -0.084516298 | 0.232106355 | 3.54E-01 | 6.37E-01 | 1.00E+00 |
| ENSG00000144476.5_ACKR3    | ENSG00000160789.18_LMNA | -0.20908 | -0.356416223 | -0.05159571 | 9.74E-03 | 6.44E-02 | 1.00E+00 |
| ENSG00000068323.15_TFE3    | ENSG00000160789.18_LMNA | 0.36748  | 0.221221824  | 0.497571565 | 3.21E-06 | 1.16E-04 | 1.64E-01 |
| ENSG00000107798.16_LIPA    | ENSG00000160789.18_LMNA | -0.30804 | -0.445398477 | -0.15651504 | 1.13E-04 | 2.08E-03 | 1.00E+00 |
| ENSG00000113845.8_TIMMDC1  | ENSG00000160789.18_LMNA | -0.28207 | -0.422306244 | -0.1286457  | 4.30E-04 | 6.00E-03 | 1.00E+00 |

|                            |                         |          |              |             |          |          |          |
|----------------------------|-------------------------|----------|--------------|-------------|----------|----------|----------|
| ENSG00000150551.10_LYPD1   | ENSG00000160789.18_LMNA | 0.1307   | -0.029109959 | 0.283988202 | 1.09E-01 | 3.28E-01 | 1.00E+00 |
| ENSG00000181104.6_F2R      | ENSG00000160789.18_LMNA | 0.1521   | -0.007274865 | 0.3039428   | 6.14E-02 | 2.29E-01 | 1.00E+00 |
| ENSG00000148908.13_RGS10   | ENSG00000160789.18_LMNA | -0.23358 | -0.378698515 | -0.07725215 | 3.78E-03 | 3.18E-02 | 1.00E+00 |
| ENSG00000171298.11_GAA     | ENSG00000160789.18_LMNA | 0.31177  | 0.160537266  | 0.448699809 | 9.23E-05 | 1.77E-03 | 1.00E+00 |
| ENSG00000144566.9_RAB5A    | ENSG00000160789.18_LMNA | -0.04799 | -0.205622787 | 0.112063775 | 5.57E-01 | 7.91E-01 | 1.00E+00 |
| ENSG00000105329.8_TGFB1    | ENSG00000160789.18_LMNA | 0.35419  | 0.206642958  | 0.485988569 | 7.58E-06 | 2.34E-04 | 3.89E-01 |
| ENSG00000130429.11_ARPC1B  | ENSG00000160789.18_LMNA | 0.32601  | 0.175940617  | 0.46127015  | 4.15E-05 | 9.26E-04 | 1.00E+00 |
| ENSG00000167671.10_UBXN6   | ENSG00000160789.18_LMNA | 0.03381  | -0.126073678 | 0.191973064 | 6.79E-01 | 8.60E-01 | 1.00E+00 |
| ENSG00000184117.10_NIPSNAP | ENSG00000160789.18_LMNA | -0.15836 | -0.309754288 | 0.000859415 | 5.13E-02 | 2.05E-01 | 1.00E+00 |
| ENSG00000108179.12_PPIF    | ENSG00000160789.18_LMNA | -0.31461 | -0.45121079  | -0.16360298 | 7.90E-05 | 1.56E-03 | 1.00E+00 |
| ENSG00000051523.9_CYBA     | ENSG00000160789.18_LMNA | 0.00813  | -0.151270871 | 0.167110043 | 9.21E-01 | 9.70E-01 | 1.00E+00 |
| ENSG00000167772.10_ANGPTL4 | ENSG00000160789.18_LMNA | 0.25704  | 0.102015478  | 0.399878767 | 1.39E-03 | 1.48E-02 | 1.00E+00 |
| ENSG00000136235.14_GPNMB   | ENSG00000160789.18_LMNA | 0.10014  | -0.060013575 | 0.255274782 | 2.20E-01 | 4.95E-01 | 1.00E+00 |
| ENSG00000006451.6_RALA     | ENSG00000160789.18_LMNA | 0.01269  | -0.146809621 | 0.171541827 | 8.77E-01 | 9.52E-01 | 1.00E+00 |
| ENSG00000144647.5_POMGNT2  | ENSG00000160789.18_LMNA | -0.34151 | -0.474894778 | -0.19279516 | 1.66E-05 | 4.43E-04 | 8.53E-01 |
| ENSG00000115524.14_SF3B1   | ENSG00000160789.18_LMNA | -0.09919 | -0.254371637 | 0.060975904 | 2.24E-01 | 5.00E-01 | 1.00E+00 |
| ENSG00000173418.10_NAA20   | ENSG00000160789.18_LMNA | -0.06005 | -0.217179181 | 0.100102882 | 4.62E-01 | 7.25E-01 | 1.00E+00 |
| ENSG00000185883.9_ATP6V0C  | ENSG00000160789.18_LMNA | -0.02638 | -0.184802755 | 0.133382715 | 7.47E-01 | 8.94E-01 | 1.00E+00 |
| ENSG00000183648.8_NDUFB1   | ENSG00000160789.18_LMNA | -0.18155 | -0.331180271 | -0.02301627 | 2.52E-02 | 1.27E-01 | 1.00E+00 |
| ENSG00000165389.6_SPTSSA   | ENSG00000160789.18_LMNA | 0.05952  | -0.100634681 | 0.216667249 | 4.66E-01 | 7.28E-01 | 1.00E+00 |
| ENSG00000169021.5_UQCRFS1  | ENSG00000160789.18_LMNA | -0.20802 | -0.355446389 | -0.05048808 | 1.01E-02 | 6.62E-02 | 1.00E+00 |
| ENSG00000131467.9_PSME3    | ENSG00000160789.18_LMNA | -0.07134 | -0.227948822 | 0.088873115 | 3.82E-01 | 6.61E-01 | 1.00E+00 |
| ENSG00000106333.11_PCOLCE  | ENSG00000160789.18_LMNA | 0.46185  | 0.326673409  | 0.578518262 | 2.11E-09 | 2.88E-07 | 1.08E-04 |
| ENSG00000243147.6_MRPL33   | ENSG00000160789.18_LMNA | -0.25702 | -0.399857405 | -0.10199032 | 1.39E-03 | 1.48E-02 | 1.00E+00 |
| ENSG00000167193.7_CRK      | ENSG00000160789.18_LMNA | 0.14254  | -0.017051849 | 0.295041471 | 7.98E-02 | 2.72E-01 | 1.00E+00 |
| ENSG00000173674.9	EIF1AX   | ENSG00000160789.18_LMNA | -0.10966 | -0.264248085 | 0.050420303 | 1.79E-01 | 4.41E-01 | 1.00E+00 |
| ENSG00000105671.10_DDX49   | ENSG00000160789.18_LMNA | -0.06792 | -0.224691391 | 0.092278236 | 4.06E-01 | 6.81E-01 | 1.00E+00 |
| ENSG00000100911.12_PSME2   | ENSG00000160789.18_LMNA | 0.14643  | -0.013079225 | 0.298664841 | 7.18E-02 | 2.54E-01 | 1.00E+00 |
| ENSG00000084070.10_SMAP2   | ENSG00000160789.18_LMNA | -0.25199 | -0.395333336 | -0.0966698  | 1.74E-03 | 1.76E-02 | 1.00E+00 |
| ENSG00000166986.11_MARS    | ENSG00000160789.18_LMNA | -0.26995 | -0.411470368 | -0.11572616 | 7.70E-04 | 9.42E-03 | 1.00E+00 |
| ENSG00000144224.15_UBXN4   | ENSG00000160789.18_LMNA | -0.00804 | -0.16702821  | 0.151353127 | 9.22E-01 | 9.70E-01 | 1.00E+00 |
| ENSG00000165637.12_VDAC2   | ENSG00000160789.18_LMNA | -0.18033 | -0.330059172 | -0.02175821 | 2.62E-02 | 1.31E-01 | 1.00E+00 |
| ENSG00000228232.1_GAPDHP1  | ENSG00000160789.18_LMNA | 0.28106  | 0.12756526   | 0.421403261 | 4.52E-04 | 6.24E-03 | 1.00E+00 |

|                            |                         |          |              |             |          |          |          |
|----------------------------|-------------------------|----------|--------------|-------------|----------|----------|----------|
| ENSG00000264364.2_DYNLL2   | ENSG00000160789.18_LMNA | -0.06936 | -0.226068988 | 0.090839083 | 3.96E-01 | 6.73E-01 | 1.00E+00 |
| ENSG00000101335.8_MYL9     | ENSG00000160789.18_LMNA | 0.38762  | 0.243443396  | 0.515039157 | 8.07E-07 | 3.83E-05 | 4.14E-02 |
| ENSG00000178057.13_NDUFAF3 | ENSG00000160789.18_LMNA | -0.03401 | -0.192167273 | 0.12587523  | 6.77E-01 | 8.59E-01 | 1.00E+00 |
| ENSG00000087274.15_ADD1    | ENSG00000160789.18_LMNA | -0.10973 | -0.264314689 | 0.050348879 | 1.78E-01 | 4.40E-01 | 1.00E+00 |
| ENSG00000102158.18_MAGT1   | ENSG00000160789.18_LMNA | 0.03503  | -0.124867356 | 0.193153234 | 6.68E-01 | 8.54E-01 | 1.00E+00 |
| ENSG00000116133.10_DHCR24  | ENSG00000160789.18_LMNA | 0.18296  | 0.02447021   | 0.33247485  | 2.41E-02 | 1.23E-01 | 1.00E+00 |
| ENSG00000146278.10_PNRC1   | ENSG00000160789.18_LMNA | -0.13747 | -0.29031305  | 0.02222126  | 9.13E-02 | 2.95E-01 | 1.00E+00 |
| ENSG00000182175.12_RGMA    | ENSG00000160789.18_LMNA | 0.0077   | -0.151683327 | 0.166699661 | 9.25E-01 | 9.71E-01 | 1.00E+00 |
| ENSG00000112118.16_MCM3    | ENSG00000160789.18_LMNA | 0.25504  | 0.099893506  | 0.398076206 | 1.52E-03 | 1.59E-02 | 1.00E+00 |
| ENSG00000052802.11_MSMO1   | ENSG00000160789.18_LMNA | 0.0799   | -0.080325092 | 0.236094965 | 3.28E-01 | 6.14E-01 | 1.00E+00 |
| ENSG00000169992.8_NLGN2    | ENSG00000160789.18_LMNA | -0.08299 | -0.23903171  | 0.077232009 | 3.09E-01 | 5.96E-01 | 1.00E+00 |
| ENSG00000155189.10_AGPAT5  | ENSG00000160789.18_LMNA | -0.019   | -0.177659853 | 0.140629562 | 8.16E-01 | 9.28E-01 | 1.00E+00 |
| ENSG00000133243.7_BTBD2    | ENSG00000160789.18_LMNA | 0.03229  | -0.127563426 | 0.190514342 | 6.93E-01 | 8.68E-01 | 1.00E+00 |
| ENSG00000087088.18_BAX     | ENSG00000160789.18_LMNA | 0.29996  | 0.147813906  | 0.438229841 | 1.74E-04 | 2.93E-03 | 1.00E+00 |
| ENSG00000109079.8_TNFAIP1  | ENSG00000160789.18_LMNA | -0.04731 | -0.204962598 | 0.112744304 | 5.63E-01 | 7.94E-01 | 1.00E+00 |
| ENSG00000141858.10_SAMD1   | ENSG00000160789.18_LMNA | 0.01507  | -0.144481858 | 0.173849111 | 8.54E-01 | 9.43E-01 | 1.00E+00 |
| ENSG00000123136.13_DDX39A  | ENSG00000160789.18_LMNA | 0.08501  | -0.075205592 | 0.240952572 | 2.98E-01 | 5.84E-01 | 1.00E+00 |
| ENSG00000103855.16_CD276   | ENSG00000160789.18_LMNA | 0.62675  | 0.51936658   | 0.714640754 | 5.77E-18 | 1.97E-14 | 2.96E-13 |
| ENSG00000166311.8_SMPD1    | ENSG00000160789.18_LMNA | 0.31924  | 0.168609276  | 0.455301452 | 6.10E-05 | 1.26E-03 | 1.00E+00 |
| ENSG00000055130.14_CUL1    | ENSG00000160789.18_LMNA | 0.29333  | 0.140696762  | 0.432338618 | 2.45E-04 | 3.84E-03 | 1.00E+00 |
| ENSG00000196937.9_FAM3C    | ENSG00000160789.18_LMNA | 0.34182  | 0.193126738  | 0.475161465 | 1.63E-05 | 4.36E-04 | 8.38E-01 |
| ENSG00000167553.13_TUBA1C  | ENSG00000160789.18_LMNA | 0.4069   | 0.264860965  | 0.531663945 | 1.97E-07 | 1.25E-05 | 1.01E-02 |
| ENSG00000100258.16_LMF2    | ENSG00000160789.18_LMNA | 0.45938  | 0.323859373  | 0.576420709 | 2.63E-09 | 3.49E-07 | 1.35E-04 |
| ENSG00000124795.13_DEK     | ENSG00000160789.18_LMNA | 0.14501  | -0.014528238 | 0.297344258 | 7.47E-02 | 2.60E-01 | 1.00E+00 |
| ENSG00000174231.15_PRPF8   | ENSG00000160789.18_LMNA | 0.14638  | -0.013128864 | 0.298619621 | 7.19E-02 | 2.54E-01 | 1.00E+00 |
| ENSG00000225921.5_NOL7     | ENSG00000160789.18_LMNA | -0.0524  | -0.209854284 | 0.107694823 | 5.21E-01 | 7.67E-01 | 1.00E+00 |
| ENSG00000090382.5_LYZ      | ENSG00000160789.18_LMNA | -0.00343 | -0.162545441 | 0.155852304 | 9.67E-01 | 9.87E-01 | 1.00E+00 |
| ENSG00000138668.17_HNRNPD  | ENSG00000160789.18_LMNA | 0.11641  | -0.043594285 | 0.270599966 | 1.53E-01 | 4.03E-01 | 1.00E+00 |
| ENSG00000257103.7_LSM14A   | ENSG00000160789.18_LMNA | 0.04162  | -0.118361951 | 0.199501786 | 6.11E-01 | 8.22E-01 | 1.00E+00 |
| ENSG00000198900.5_TOP1     | ENSG00000160789.18_LMNA | 0.19315  | 0.035025139  | 0.34183821  | 1.71E-02 | 9.65E-02 | 1.00E+00 |
| ENSG00000136271.9_DDX56    | ENSG00000160789.18_LMNA | 0.19897  | 0.041065592  | 0.347169475 | 1.40E-02 | 8.35E-02 | 1.00E+00 |
| ENSG00000171659.12_GPR34   | ENSG00000160789.18_LMNA | -0.26845 | -0.410120946 | -0.11412423 | 8.26E-04 | 9.97E-03 | 1.00E+00 |
| ENSG00000124491.14_F13A1   | ENSG00000160789.18_LMNA | 0.17477  | 0.016019458  | 0.324934098 | 3.13E-02 | 1.47E-01 | 1.00E+00 |

|                             |                         |          |              |             |          |          |          |
|-----------------------------|-------------------------|----------|--------------|-------------|----------|----------|----------|
| ENSG00000137100.14_DCTN3    | ENSG00000160789.18_LMNA | -0.24918 | -0.392799451 | -0.09369727 | 1.96E-03 | 1.92E-02 | 1.00E+00 |
| ENSG00000171202.5_TMEM126A  | ENSG00000160789.18_LMNA | -0.2472  | -0.391012874 | -0.09160462 | 2.14E-03 | 2.06E-02 | 1.00E+00 |
| ENSG00000171135.12_JAGN1    | ENSG00000160789.18_LMNA | -0.17415 | -0.324361371 | -0.01537941 | 3.19E-02 | 1.49E-01 | 1.00E+00 |
| ENSG00000010270.12_STARD3N  | ENSG00000160789.18_LMNA | -0.09633 | -0.251668119 | 0.063853085 | 2.38E-01 | 5.16E-01 | 1.00E+00 |
| ENSG00000265241.5_RBM8A     | ENSG00000160789.18_LMNA | -0.05804 | -0.215250524 | 0.102105441 | 4.78E-01 | 7.36E-01 | 1.00E+00 |
| ENSG00000276293.3_PIP4K2B   | ENSG00000160789.18_LMNA | -0.18199 | -0.331581506 | -0.02346676 | 2.48E-02 | 1.26E-01 | 1.00E+00 |
| ENSG00000105576.14_TNPO2    | ENSG00000160789.18_LMNA | 0.01422  | -0.14530536  | 0.173033253 | 8.62E-01 | 9.46E-01 | 1.00E+00 |
| ENSG00000130731.14_METTL26  | ENSG00000160789.18_LMNA | 0.05372  | -0.106393155 | 0.211112703 | 5.11E-01 | 7.60E-01 | 1.00E+00 |
| ENSG00000140105.16_WARS     | ENSG00000160789.18_LMNA | 0.22762  | 0.070996155  | 0.37329729  | 4.80E-03 | 3.80E-02 | 1.00E+00 |
| ENSG00000103502.12_CDIPT    | ENSG00000160789.18_LMNA | 0.29257  | 0.139884005  | 0.43166427  | 2.55E-04 | 3.96E-03 | 1.00E+00 |
| ENSG00000101220.16_C20orf27 | ENSG00000160789.18_LMNA | 0.15823  | -0.000990835 | 0.309635472 | 5.15E-02 | 2.05E-01 | 1.00E+00 |
| ENSG00000116962.13_NID1     | ENSG00000160789.18_LMNA | 0.28379  | 0.130485756  | 0.423842738 | 3.96E-04 | 5.62E-03 | 1.00E+00 |
| ENSG00000181924.6_COA4      | ENSG00000160789.18_LMNA | -0.19531 | -0.343819449 | -0.03726732 | 1.59E-02 | 9.15E-02 | 1.00E+00 |
| ENSG00000168268.9_NT5DC2    | ENSG00000160789.18_LMNA | 0.05296  | -0.107146126 | 0.210384878 | 5.17E-01 | 7.64E-01 | 1.00E+00 |
| ENSG00000226950.5_DANCR     | ENSG00000160789.18_LMNA | -0.38611 | -0.51373102  | -0.2417693  | 8.98E-07 | 4.19E-05 | 4.61E-02 |
| ENSG00000134825.12_TMEM258  | ENSG00000160789.18_LMNA | -0.17956 | -0.329346934 | -0.02095947 | 2.69E-02 | 1.33E-01 | 1.00E+00 |
| ENSG00000132635.15_PCED1A   | ENSG00000160789.18_LMNA | 0.02839  | -0.13140878  | 0.186742569 | 7.28E-01 | 8.85E-01 | 1.00E+00 |
| ENSG00000090013.8_BLVRB     | ENSG00000160789.18_LMNA | 0.31939  | 0.168773011  | 0.455435036 | 6.05E-05 | 1.25E-03 | 1.00E+00 |
| ENSG00000173852.12_DPY19L1  | ENSG00000160789.18_LMNA | 0.326    | 0.175927208  | 0.461259256 | 4.16E-05 | 9.26E-04 | 1.00E+00 |
| ENSG00000213676.9_ATF6B     | ENSG00000160789.18_LMNA | 0.12892  | -0.030911618 | 0.282329505 | 1.13E-01 | 3.36E-01 | 1.00E+00 |
| ENSG00000196562.13_SULF2    | ENSG00000160789.18_LMNA | -0.0134  | -0.172233255 | 0.146112425 | 8.70E-01 | 9.49E-01 | 1.00E+00 |
| ENSG00000125445.9_MRPS7     | ENSG00000160789.18_LMNA | -0.29974 | -0.438040024 | -0.14758412 | 1.76E-04 | 2.95E-03 | 1.00E+00 |
| ENSG00000171206.12_TRIM8    | ENSG00000160789.18_LMNA | 0.08194  | -0.078280741 | 0.238036634 | 3.16E-01 | 6.02E-01 | 1.00E+00 |
| ENSG00000102882.10_MAPK3    | ENSG00000160789.18_LMNA | 0.02679  | -0.132976892 | 0.185201766 | 7.43E-01 | 8.92E-01 | 1.00E+00 |
| ENSG00000124479.8_NDP       | ENSG00000160789.18_LMNA | -0.03328 | -0.191461482 | 0.126596305 | 6.84E-01 | 8.63E-01 | 1.00E+00 |
| ENSG00000197977.3_ELOVL2    | ENSG00000160789.18_LMNA | 0.32661  | 0.176594372  | 0.461801143 | 4.01E-05 | 9.05E-04 | 1.00E+00 |
| ENSG00000111142.12_METAP2   | ENSG00000160789.18_LMNA | -0.12306 | -0.276836956 | 0.036863069 | 1.31E-01 | 3.67E-01 | 1.00E+00 |
| ENSG00000176907.4_C8orf4    | ENSG00000160789.18_LMNA | 0.13546  | -0.024265639 | 0.288438853 | 9.61E-02 | 3.04E-01 | 1.00E+00 |
| ENSG00000149792.7_MRPL49    | ENSG00000160789.18_LMNA | -0.14576 | -0.298043319 | 0.013761355 | 7.32E-02 | 2.57E-01 | 1.00E+00 |
| ENSG00000184831.12_APOO     | ENSG00000160789.18_LMNA | -0.06753 | -0.224321613 | 0.092664311 | 4.08E-01 | 6.83E-01 | 1.00E+00 |
| ENSG00000196465.9_MYL6B     | ENSG00000160789.18_LMNA | -0.22956 | -0.375052817 | -0.0730269  | 4.44E-03 | 3.58E-02 | 1.00E+00 |
| ENSG00000146834.12_MEPC     | ENSG00000160789.18_LMNA | 0.28133  | 0.127852087  | 0.421643035 | 4.46E-04 | 6.17E-03 | 1.00E+00 |
| ENSG00000145730.19_PAM      | ENSG00000160789.18_LMNA | 0.27029  | 0.116083309  | 0.411771042 | 7.58E-04 | 9.31E-03 | 1.00E+00 |

|                              |                         |          |              |             |          |          |          |
|------------------------------|-------------------------|----------|--------------|-------------|----------|----------|----------|
| ENSG00000125826.18_RBCK1     | ENSG00000160789.18_LMNA | 0.25151  | 0.096158161  | 0.394897521 | 1.77E-03 | 1.79E-02 | 1.00E+00 |
| ENSG00000230989.5_HSBP1      | ENSG00000160789.18_LMNA | -0.39032 | -0.517373238 | -0.24643447 | 6.66E-07 | 3.30E-05 | 3.42E-02 |
| ENSG00000182934.10_SRPR      | ENSG00000160789.18_LMNA | 0.39185  | 0.248122882  | 0.518689006 | 5.97E-07 | 3.03E-05 | 3.06E-02 |
| ENSG00000131446.14_MGAT1     | ENSG00000160789.18_LMNA | 0.26124  | 0.106465269  | 0.403651284 | 1.15E-03 | 1.29E-02 | 1.00E+00 |
| ENSG00000130005.10_GAMT      | ENSG00000160789.18_LMNA | 0.06312  | -0.097059467 | 0.220105547 | 4.40E-01 | 7.08E-01 | 1.00E+00 |
| ENSG00000109390.10_NDUFC1    | ENSG00000160789.18_LMNA | 0.00324  | -0.156045983 | 0.162352173 | 9.68E-01 | 9.88E-01 | 1.00E+00 |
| ENSG00000100505.12_TRIM9     | ENSG00000160789.18_LMNA | 0.1106   | -0.049469301 | 0.26513467  | 1.75E-01 | 4.36E-01 | 1.00E+00 |
| ENSG00000184524.5_CEND1      | ENSG00000160789.18_LMNA | -0.15062 | -0.30256149  | 0.00879597  | 6.40E-02 | 2.35E-01 | 1.00E+00 |
| ENSG00000064726.8_BTBD1      | ENSG00000160789.18_LMNA | 0.02824  | -0.131551925 | 0.186601982 | 7.30E-01 | 8.86E-01 | 1.00E+00 |
| ENSG00000225840.2_AC010970.1 | ENSG00000160789.18_LMNA | -0.10139 | -0.256452818 | 0.058757461 | 2.14E-01 | 4.88E-01 | 1.00E+00 |
| ENSG00000058668.13_ATP2B4    | ENSG00000160789.18_LMNA | 0.06462  | -0.095567037 | 0.221538494 | 4.29E-01 | 6.99E-01 | 1.00E+00 |
| ENSG00000117751.16_PPP1R8    | ENSG00000160789.18_LMNA | -0.20331 | -0.351143287 | -0.04558262 | 1.20E-02 | 7.48E-02 | 1.00E+00 |
| ENSG00000135679.20_MDM2      | ENSG00000160789.18_LMNA | 0.05237  | -0.10772867  | 0.209821547 | 5.22E-01 | 7.67E-01 | 1.00E+00 |
| ENSG00000168936.9_TMEN129    | ENSG00000160789.18_LMNA | 0.13504  | -0.024693256 | 0.288046529 | 9.72E-02 | 3.06E-01 | 1.00E+00 |
| ENSG00000101166.14_PRELID3E  | ENSG00000160789.18_LMNA | 0.08669  | -0.073530242 | 0.242538785 | 2.88E-01 | 5.74E-01 | 1.00E+00 |
| ENSG00000147677.9	EIF3H      | ENSG00000160789.18_LMNA | -0.17084 | -0.321305963 | -0.01196915 | 3.53E-02 | 1.60E-01 | 1.00E+00 |
| ENSG00000144834.11_TAGLN3    | ENSG00000160789.18_LMNA | -0.40496 | -0.529992516 | -0.26269571 | 2.28E-07 | 1.41E-05 | 1.17E-02 |
| ENSG00000129083.11_COPB1     | ENSG00000160789.18_LMNA | 0.12277  | -0.037159942 | 0.276562437 | 1.32E-01 | 3.68E-01 | 1.00E+00 |
| ENSG00000092330.14_TINF2     | ENSG00000160789.18_LMNA | -0.00911 | -0.168068643 | 0.150306996 | 9.11E-01 | 9.66E-01 | 1.00E+00 |
| ENSG00000211460.10_TSN       | ENSG00000160789.18_LMNA | -0.34768 | -0.480299835 | -0.199528   | 1.14E-05 | 3.24E-04 | 5.85E-01 |
| ENSG00000124226.9_RNF114     | ENSG00000160789.18_LMNA | 0.0252   | -0.134541522 | 0.183662823 | 7.58E-01 | 8.99E-01 | 1.00E+00 |
| ENSG00000166734.17_CASC4     | ENSG00000160789.18_LMNA | 0.05863  | -0.101515746 | 0.215818715 | 4.73E-01 | 7.33E-01 | 1.00E+00 |
| ENSG00000146457.13_WTAP      | ENSG00000160789.18_LMNA | -0.05263 | -0.210066126 | 0.107475777 | 5.20E-01 | 7.66E-01 | 1.00E+00 |
| ENSG00000139737.20_SLAIN1    | ENSG00000160789.18_LMNA | -0.37039 | -0.50010546  | -0.22442765 | 2.64E-06 | 9.88E-05 | 1.35E-01 |
| ENSG00000213995.10_NAXD      | ENSG00000160789.18_LMNA | -0.16653 | -0.317316289 | -0.00752693 | 4.03E-02 | 1.74E-01 | 1.00E+00 |
| ENSG00000134352.18_IL6ST     | ENSG00000160789.18_LMNA | 0.08955  | -0.070655266 | 0.245256867 | 2.73E-01 | 5.57E-01 | 1.00E+00 |
| ENSG00000153904.17_DDAH1     | ENSG00000160789.18_LMNA | 0.00772  | -0.151667443 | 0.166715468 | 9.25E-01 | 9.71E-01 | 1.00E+00 |
| ENSG00000050405.12_LIMA1     | ENSG00000160789.18_LMNA | -0.05411 | -0.21148904  | 0.106003672 | 5.08E-01 | 7.58E-01 | 1.00E+00 |
| ENSG00000243317.6_C7orf73    | ENSG00000160789.18_LMNA | -0.05837 | -0.215567173 | 0.101776835 | 4.75E-01 | 7.34E-01 | 1.00E+00 |
| ENSG00000100167.18_SEPT3     | ENSG00000160789.18_LMNA | -0.41312 | -0.53700541  | -0.27179866 | 1.23E-07 | 8.56E-06 | 6.29E-03 |
| ENSG00000062485.17_CS        | ENSG00000160789.18_LMNA | -0.09734 | -0.252624684 | 0.062835674 | 2.33E-01 | 5.11E-01 | 1.00E+00 |
| ENSG00000099942.11_CRKL      | ENSG00000160789.18_LMNA | -0.11321 | -0.267588765 | 0.046833919 | 1.65E-01 | 4.21E-01 | 1.00E+00 |
| ENSG00000101152.9_DNAJC5     | ENSG00000160789.18_LMNA | 0.21644  | 0.059285581  | 0.363131365 | 7.40E-03 | 5.24E-02 | 1.00E+00 |

|                             |                         |          |              |             |          |          |          |
|-----------------------------|-------------------------|----------|--------------|-------------|----------|----------|----------|
| ENSG00000157827.18_FMNL2    | ENSG00000160789.18_LMNA | -0.17689 | -0.326883923 | -0.01820036 | 2.93E-02 | 1.41E-01 | 1.00E+00 |
| ENSG00000074696.11_HACD3    | ENSG00000160789.18_LMNA | -0.2363  | -0.381162796 | -0.08011432 | 3.38E-03 | 2.92E-02 | 1.00E+00 |
| ENSG00000107341.4_UBE2R2    | ENSG00000160789.18_LMNA | -0.09177 | -0.247361134 | 0.068425925 | 2.61E-01 | 5.44E-01 | 1.00E+00 |
| ENSG00000111786.7_SRSF9     | ENSG00000160789.18_LMNA | 0.06297  | -0.097209741 | 0.219961186 | 4.41E-01 | 7.09E-01 | 1.00E+00 |
| ENSG00000204272.9_LINC01420 | ENSG00000160789.18_LMNA | -0.16277 | -0.313837577 | -0.00366358 | 4.51E-02 | 1.88E-01 | 1.00E+00 |
| ENSG00000175220.10_ARHGAP1  | ENSG00000160789.18_LMNA | 0.12852  | -0.031317538 | 0.281955535 | 1.15E-01 | 3.38E-01 | 1.00E+00 |
| ENSG00000117115.11_PADI2    | ENSG00000160789.18_LMNA | -0.16833 | -0.318984168 | -0.00938251 | 3.82E-02 | 1.68E-01 | 1.00E+00 |
| ENSG00000115762.15_PLEKHB2  | ENSG00000160789.18_LMNA | -0.27797 | -0.418644694 | -0.12426888 | 5.26E-04 | 7.01E-03 | 1.00E+00 |
| ENSG00000147416.9_ATP6V1B2  | ENSG00000160789.18_LMNA | -0.18359 | -0.333055836 | -0.02512314 | 2.36E-02 | 1.21E-01 | 1.00E+00 |
| ENSG00000037241.6_RPL26L1   | ENSG00000160789.18_LMNA | -0.15565 | -0.30723975  | 0.003638419 | 5.55E-02 | 2.15E-01 | 1.00E+00 |
| ENSG00000113141.14_IK       | ENSG00000160789.18_LMNA | 0.07113  | -0.089080432 | 0.2277507   | 3.84E-01 | 6.62E-01 | 1.00E+00 |
| ENSG00000164896.18_FASTK    | ENSG00000160789.18_LMNA | 0.35568  | 0.208271734  | 0.487287529 | 6.90E-06 | 2.18E-04 | 3.54E-01 |
| ENSG00000182628.11_SKA2     | ENSG00000160789.18_LMNA | -0.31461 | -0.451209068 | -0.16360087 | 7.90E-05 | 1.56E-03 | 1.00E+00 |
| ENSG00000162909.16_CAPN2    | ENSG00000160789.18_LMNA | 0.48401  | 0.351932102  | 0.597197868 | 2.66E-10 | 5.17E-08 | 1.37E-05 |
| ENSG00000160789.18_LMNA     | ENSG00000160789.18_LMNA | 1        | 1            | 1           | 0.00E+00 | 0.00E+00 | 0.00E+00 |
| ENSG00000130717.11_UCK1     | ENSG00000160789.18_LMNA | -0.00224 | -0.161383604 | 0.157016242 | 9.78E-01 | 9.92E-01 | 1.00E+00 |
| ENSG00000112245.8_PTP4A1    | ENSG00000160789.18_LMNA | -0.07057 | -0.227219181 | 0.089636481 | 3.88E-01 | 6.66E-01 | 1.00E+00 |
| ENSG00000144021.2_CIAO1     | ENSG00000160789.18_LMNA | -0.15383 | -0.305551258 | 0.005501808 | 5.85E-02 | 2.22E-01 | 1.00E+00 |
| ENSG00000054118.12_THRAP3   | ENSG00000160789.18_LMNA | 0.2643   | 0.109720138  | 0.406404365 | 1.00E-03 | 1.16E-02 | 1.00E+00 |
| ENSG00000037897.15_METTL1   | ENSG00000160789.18_LMNA | -0.21466 | -0.36150975  | -0.05742527 | 7.91E-03 | 5.52E-02 | 1.00E+00 |
| ENSG00000170606.12_HSPA4    | ENSG00000160789.18_LMNA | 0.12992  | -0.029902768 | 0.283258534 | 1.11E-01 | 3.32E-01 | 1.00E+00 |
| ENSG00000104897.8_SF3A2     | ENSG00000160789.18_LMNA | 0.10683  | -0.053273599 | 0.261584864 | 1.90E-01 | 4.58E-01 | 1.00E+00 |
| ENSG00000109062.8_SLC9A3R1  | ENSG00000160789.18_LMNA | -0.14653 | -0.298760118 | 0.012974632 | 7.16E-02 | 2.53E-01 | 1.00E+00 |
| ENSG00000128590.4_DNAJB9    | ENSG00000160789.18_LMNA | -0.1341  | -0.287173973 | 0.025643895 | 9.95E-02 | 3.11E-01 | 1.00E+00 |
| ENSG00000056097.14_ZFR      | ENSG00000160789.18_LMNA | -0.31818 | -0.454364962 | -0.16746186 | 6.48E-05 | 1.32E-03 | 1.00E+00 |
| ENSG00000189266.10_PNRC2    | ENSG00000160789.18_LMNA | -0.22598 | -0.371807189 | -0.06927441 | 5.12E-03 | 4.00E-02 | 1.00E+00 |
| ENSG00000163485.14_ADORA1   | ENSG00000160789.18_LMNA | 0.37519  | 0.229714824  | 0.504274178 | 1.91E-06 | 7.71E-05 | 9.80E-02 |
| ENSG00000116670.13_MAD2L2   | ENSG00000160789.18_LMNA | -0.05162 | -0.209103324 | 0.108471073 | 5.28E-01 | 7.72E-01 | 1.00E+00 |
| ENSG00000129675.14_ARHGEF6  | ENSG00000160789.18_LMNA | 0.06997  | -0.090238833 | 0.22664319  | 3.92E-01 | 6.70E-01 | 1.00E+00 |
| ENSG00000090581.8_GNPTG     | ENSG00000160789.18_LMNA | 0.10652  | -0.05359109  | 0.261288227 | 1.92E-01 | 4.59E-01 | 1.00E+00 |
| ENSG00000204389.9_HSPA1A    | ENSG00000160789.18_LMNA | 0.24377  | 0.087986102  | 0.387918275 | 2.47E-03 | 2.30E-02 | 1.00E+00 |
| ENSG00000174437.15_ATP2A2   | ENSG00000160789.18_LMNA | 0.18578  | 0.027386026  | 0.335067578 | 2.19E-02 | 1.15E-01 | 1.00E+00 |
| ENSG00000102178.11_UBL4A    | ENSG00000160789.18_LMNA | 0.26481  | 0.110258062  | 0.406858842 | 9.78E-04 | 1.14E-02 | 1.00E+00 |



|                            |                         |          |              |             |          |          |          |
|----------------------------|-------------------------|----------|--------------|-------------|----------|----------|----------|
| ENSG00000132305.19_IMMT    | ENSG00000160789.18_LMNA | 0.07198  | -0.088230897 | 0.228562391 | 3.78E-01 | 6.57E-01 | 1.00E+00 |
| ENSG00000102181.18_CD99L2  | ENSG00000160789.18_LMNA | 0.01374  | -0.145776372 | 0.172566417 | 8.67E-01 | 9.48E-01 | 1.00E+00 |
| ENSG00000130312.5_MRPL34   | ENSG00000160789.18_LMNA | -0.10813 | -0.262806194 | 0.05196574  | 1.85E-01 | 4.50E-01 | 1.00E+00 |
| ENSG00000198612.9_COPS8    | ENSG00000160789.18_LMNA | -0.10107 | -0.256146562 | 0.059084112 | 2.15E-01 | 4.89E-01 | 1.00E+00 |
| ENSG00000120705.11 ETF1    | ENSG00000160789.18_LMNA | 0.2961   | 0.143670407  | 0.434803087 | 2.12E-04 | 3.41E-03 | 1.00E+00 |
| ENSG00000170899.9_GSTA4    | ENSG00000160789.18_LMNA | -0.53235 | -0.637524266 | -0.40770752 | 1.68E-12 | 8.46E-10 | 8.63E-08 |
| ENSG00000055211.11_GINM1   | ENSG00000160789.18_LMNA | 0.08356  | -0.076660242 | 0.239573945 | 3.06E-01 | 5.93E-01 | 1.00E+00 |
| ENSG00000097033.13_SH3GLB1 | ENSG00000160789.18_LMNA | 0.21903  | 0.061988293  | 0.365484022 | 6.71E-03 | 4.88E-02 | 1.00E+00 |
| ENSG00000100387.8_RBX1     | ENSG00000160789.18_LMNA | -0.2428  | -0.387040004 | -0.08696058 | 2.58E-03 | 2.38E-02 | 1.00E+00 |
| ENSG00000135924.14_DNAJB2  | ENSG00000160789.18_LMNA | 0.10005  | -0.06010686  | 0.255187259 | 2.20E-01 | 4.95E-01 | 1.00E+00 |
| ENSG00000174243.8_DDX23    | ENSG00000160789.18_LMNA | 0.08227  | -0.077950355 | 0.238350188 | 3.14E-01 | 6.00E-01 | 1.00E+00 |
| ENSG00000100439.9_ABHD4    | ENSG00000160789.18_LMNA | 0.15816  | -0.00107064  | 0.309563317 | 5.16E-02 | 2.06E-01 | 1.00E+00 |
| ENSG00000189171.12_S100A13 | ENSG00000160789.18_LMNA | 0.32979  | 0.18003846   | 0.464595131 | 3.34E-05 | 7.81E-04 | 1.00E+00 |
| ENSG00000143158.9_MPC2     | ENSG00000160789.18_LMNA | -0.2191  | -0.365553172 | -0.0620678  | 6.69E-03 | 4.87E-02 | 1.00E+00 |
| ENSG00000136485.13_DCAF7   | ENSG00000160789.18_LMNA | -0.11868 | -0.272727346 | 0.04130153  | 1.45E-01 | 3.90E-01 | 1.00E+00 |
| ENSG00000141741.10_MIEN1   | ENSG00000160789.18_LMNA | -0.3352  | -0.469355159 | -0.18592215 | 2.43E-05 | 6.04E-04 | 1.00E+00 |
| ENSG00000175193.11_PARL    | ENSG00000160789.18_LMNA | -0.2445  | -0.388576591 | -0.08875521 | 2.40E-03 | 2.25E-02 | 1.00E+00 |
| ENSG00000172086.7_KRCC1    | ENSG00000160789.18_LMNA | -0.22223 | -0.368400363 | -0.06534475 | 5.93E-03 | 4.46E-02 | 1.00E+00 |
| ENSG00000000419.11_DPM1    | ENSG00000160789.18_LMNA | -0.01279 | -0.17164249  | 0.146708138 | 8.76E-01 | 9.52E-01 | 1.00E+00 |
| ENSG00000196743.7_GM2A     | ENSG00000160789.18_LMNA | 0.04081  | -0.119160863 | 0.198723572 | 6.18E-01 | 8.27E-01 | 1.00E+00 |
| ENSG00000118508.4_RAB32    | ENSG00000160789.18_LMNA | 0.1137   | -0.046336145 | 0.26805184  | 1.63E-01 | 4.18E-01 | 1.00E+00 |
| ENSG00000105185.10_PDCD5   | ENSG00000160789.18_LMNA | 0.01545  | -0.144103653 | 0.174223658 | 8.50E-01 | 9.41E-01 | 1.00E+00 |
| ENSG00000189241.6_TSPYL1   | ENSG00000160789.18_LMNA | -0.32037 | -0.456297275 | -0.16983024 | 5.73E-05 | 1.19E-03 | 1.00E+00 |
| ENSG00000130382.8_MLLT1    | ENSG00000160789.18_LMNA | 0.2124   | 0.055061971  | 0.359447021 | 8.61E-03 | 5.88E-02 | 1.00E+00 |
| ENSG00000134996.11_OSTF1   | ENSG00000160789.18_LMNA | 0.06144  | -0.098723418 | 0.218506298 | 4.52E-01 | 7.17E-01 | 1.00E+00 |
| ENSG00000213923.9_CSNK1E   | ENSG00000160789.18_LMNA | -0.1432  | -0.29566403  | 0.016369982 | 7.84E-02 | 2.69E-01 | 1.00E+00 |
| ENSG00000154640.13_BTG3    | ENSG00000160789.18_LMNA | 0.14719  | -0.012300641 | 0.299373924 | 7.04E-02 | 2.50E-01 | 1.00E+00 |
| ENSG00000170855.3_TRIAP1   | ENSG00000160789.18_LMNA | -0.11037 | -0.264912987 | 0.049707144 | 1.76E-01 | 4.37E-01 | 1.00E+00 |
| ENSG00000033050.6_ABCF2    | ENSG00000160789.18_LMNA | 0.25509  | 0.099947074  | 0.398121739 | 1.52E-03 | 1.58E-02 | 1.00E+00 |
| ENSG00000120306.8_CYSTM1   | ENSG00000160789.18_LMNA | 0.03908  | -0.120871162 | 0.197056232 | 6.33E-01 | 8.35E-01 | 1.00E+00 |
| ENSG00000184014.6_DENND5A  | ENSG00000160789.18_LMNA | -0.07722 | -0.233550029 | 0.083000587 | 3.44E-01 | 6.29E-01 | 1.00E+00 |
| ENSG00000101310.13_SEC23B  | ENSG00000160789.18_LMNA | 0.11541  | -0.044611089 | 0.26965552  | 1.57E-01 | 4.09E-01 | 1.00E+00 |
| ENSG00000157778.7_PSMG3    | ENSG00000160789.18_LMNA | 0.16911  | 0.010187901  | 0.319707493 | 3.73E-02 | 1.65E-01 | 1.00E+00 |

|                              |                         |          |              |             |          |          |          |
|------------------------------|-------------------------|----------|--------------|-------------|----------|----------|----------|
| ENSG00000146677.7_AC004453.i | ENSG00000160789.18_LMNA | -0.13712 | -0.289993714 | 0.022569778 | 9.21E-02 | 2.96E-01 | 1.00E+00 |
| ENSG00000074201.7_CLNS1A     | ENSG00000160789.18_LMNA | -0.31159 | -0.448537697 | -0.16033953 | 9.32E-05 | 1.79E-03 | 1.00E+00 |
| ENSG00000125870.9_SNRPB2     | ENSG00000160789.18_LMNA | -0.10583 | -0.260641371 | 0.054283198 | 1.94E-01 | 4.63E-01 | 1.00E+00 |
| ENSG00000117411.15_B4GALT2   | ENSG00000160789.18_LMNA | 0.15072  | -0.008689933 | 0.302657825 | 6.38E-02 | 2.35E-01 | 1.00E+00 |
| ENSG00000145860.10_RNF145    | ENSG00000160789.18_LMNA | 0.13451  | -0.025231272 | 0.287552768 | 9.85E-02 | 3.09E-01 | 1.00E+00 |
| ENSG00000263266.2_RPS7P1     | ENSG00000160789.18_LMNA | -0.18463 | -0.334012599 | -0.02619895 | 2.28E-02 | 1.18E-01 | 1.00E+00 |
| ENSG00000160255.15_ITGB2     | ENSG00000160789.18_LMNA | 0.12185  | -0.038088695 | 0.275703284 | 1.35E-01 | 3.73E-01 | 1.00E+00 |
| ENSG00000157933.9_SKI        | ENSG00000160789.18_LMNA | 0.35335  | 0.205717979  | 0.485250343 | 8.00E-06 | 2.44E-04 | 4.10E-01 |
| ENSG00000186298.10_PPP1CC    | ENSG00000160789.18_LMNA | -0.2765  | -0.417333078 | -0.12270383 | 5.64E-04 | 7.40E-03 | 1.00E+00 |
| ENSG00000130309.9_COLGALT1   | ENSG00000160789.18_LMNA | 0.50129  | 0.371756153  | 0.611674384 | 4.77E-11 | 1.24E-08 | 2.45E-06 |
| ENSG00000229119.3_CTB-63M22  | ENSG00000160789.18_LMNA | 0.01041  | -0.149035562 | 0.169332198 | 8.99E-01 | 9.61E-01 | 1.00E+00 |
| ENSG00000129255.13_MPDU1     | ENSG00000160789.18_LMNA | 0.00617  | -0.153180555 | 0.165209032 | 9.40E-01 | 9.76E-01 | 1.00E+00 |
| ENSG00000118363.10_SPCS2     | ENSG00000160789.18_LMNA | -0.19013 | -0.339071654 | -0.03189938 | 1.90E-02 | 1.04E-01 | 1.00E+00 |
| ENSG00000114200.8_BCHE       | ENSG00000160789.18_LMNA | -0.36514 | -0.495539098 | -0.21865471 | 3.74E-06 | 1.31E-04 | 1.92E-01 |
| ENSG00000198561.11_CTND1     | ENSG00000160789.18_LMNA | 0.16411  | 0.005046094  | 0.315083405 | 4.33E-02 | 1.83E-01 | 1.00E+00 |
| ENSG00000138080.12_EMILIN1   | ENSG00000160789.18_LMNA | 0.47762  | 0.344620952  | 0.591818261 | 4.91E-10 | 8.72E-08 | 2.52E-05 |
| ENSG00000136045.10_PWP1      | ENSG00000160789.18_LMNA | -0.23007 | -0.375513498 | -0.07356021 | 4.35E-03 | 3.54E-02 | 1.00E+00 |
| ENSG00000117298.13_ECE1      | ENSG00000160789.18_LMNA | 0.56403  | 0.444763494  | 0.663637633 | 3.83E-14 | 4.10E-11 | 1.97E-09 |
| ENSG00000172775.15_FAM192A   | ENSG00000160789.18_LMNA | -0.22833 | -0.373934872 | -0.0717334  | 4.67E-03 | 3.72E-02 | 1.00E+00 |
| ENSG00000198744.5_MTCO3P12   | ENSG00000160789.18_LMNA | -0.14612 | -0.298375967 | 0.013396305 | 7.25E-02 | 2.55E-01 | 1.00E+00 |
| ENSG00000086289.10_EPDR1     | ENSG00000160789.18_LMNA | 0.07889  | -0.081335074 | 0.235134777 | 3.34E-01 | 6.20E-01 | 1.00E+00 |
| ENSG00000103034.13_NDRG4     | ENSG00000160789.18_LMNA | -0.22236 | -0.368518867 | -0.06548128 | 5.90E-03 | 4.45E-02 | 1.00E+00 |
| ENSG00000100028.10_SNRPD3    | ENSG00000160789.18_LMNA | 0.0057   | -0.153636808 | 0.164754501 | 9.44E-01 | 9.78E-01 | 1.00E+00 |
| ENSG00000132383.10_RPA1      | ENSG00000160789.18_LMNA | 0.07679  | -0.083429368 | 0.233141768 | 3.47E-01 | 6.31E-01 | 1.00E+00 |
| ENSG00000198176.11_TFDP1     | ENSG00000160789.18_LMNA | 0.03103  | -0.128807294 | 0.189295302 | 7.04E-01 | 8.74E-01 | 1.00E+00 |
| ENSG00000181222.13_POLR2A    | ENSG00000160789.18_LMNA | 0.17679  | 0.018098959  | 0.326793324 | 2.93E-02 | 1.41E-01 | 1.00E+00 |
| ENSG00000080493.12_SLC4A4    | ENSG00000160789.18_LMNA | 0.01883  | -0.140793663 | 0.177497717 | 8.18E-01 | 9.29E-01 | 1.00E+00 |
| ENSG00000168264.9_IRF2BP2    | ENSG00000160789.18_LMNA | 0.0446   | -0.115423048 | 0.202361105 | 5.85E-01 | 8.07E-01 | 1.00E+00 |
| ENSG00000138381.8_ASNSD1     | ENSG00000160789.18_LMNA | -0.361   | -0.491924946 | -0.21409928 | 4.90E-06 | 1.64E-04 | 2.51E-01 |
| ENSG00000163930.8_BAP1       | ENSG00000160789.18_LMNA | 0.09154  | -0.06865871  | 0.247141549 | 2.62E-01 | 5.45E-01 | 1.00E+00 |
| ENSG00000103769.8_RAB11A     | ENSG00000160789.18_LMNA | -0.15456 | -0.306221681 | 0.0047622   | 5.73E-02 | 2.19E-01 | 1.00E+00 |
| ENSG00000010017.12_RANBP9    | ENSG00000160789.18_LMNA | 0.27356  | 0.119568025  | 0.414701373 | 6.49E-04 | 8.27E-03 | 1.00E+00 |
| ENSG00000077312.7_SNRPA      | ENSG00000160789.18_LMNA | 0.00912  | -0.15029585  | 0.168079725 | 9.11E-01 | 9.66E-01 | 1.00E+00 |

|                             |                         |          |              |             |          |          |          |
|-----------------------------|-------------------------|----------|--------------|-------------|----------|----------|----------|
| ENSG00000139168.6_ZCRB1     | ENSG00000160789.18_LMNA | -0.2835  | -0.423585992 | -0.13017814 | 4.01E-04 | 5.67E-03 | 1.00E+00 |
| ENSG00000135919.11_SERPINE2 | ENSG00000160789.18_LMNA | -0.02502 | -0.183487066 | 0.134720111 | 7.60E-01 | 9.00E-01 | 1.00E+00 |
| ENSG00000102401.18_ARMCX3   | ENSG00000160789.18_LMNA | 0.07683  | -0.083390829 | 0.233178467 | 3.47E-01 | 6.31E-01 | 1.00E+00 |
| ENSG00000130222.9_GADD45G   | ENSG00000160789.18_LMNA | -0.37414 | -0.50335555  | -0.22854834 | 2.05E-06 | 8.16E-05 | 1.05E-01 |
| ENSG00000176485.9_PLA2G16   | ENSG00000160789.18_LMNA | 0.1502   | -0.009224292 | 0.302172296 | 6.48E-02 | 2.37E-01 | 1.00E+00 |
| ENSG00000106066.12_CPVL     | ENSG00000160789.18_LMNA | 0.0744   | -0.085813212 | 0.230869971 | 3.62E-01 | 6.44E-01 | 1.00E+00 |
| ENSG00000175183.8_CSRP2     | ENSG00000160789.18_LMNA | 0.10998  | -0.050099958 | 0.26454679  | 1.77E-01 | 4.39E-01 | 1.00E+00 |
| ENSG00000167862.8_MRPL58    | ENSG00000160789.18_LMNA | -0.20662 | -0.354168408 | -0.04902967 | 1.07E-02 | 6.85E-02 | 1.00E+00 |
| ENSG00000129151.7_BBOX1     | ENSG00000160789.18_LMNA | -0.07624 | -0.232615492 | 0.083981923 | 3.51E-01 | 6.34E-01 | 1.00E+00 |
| ENSG00000143183.15_TMCO1    | ENSG00000160789.18_LMNA | 0.00364  | -0.155651199 | 0.162746094 | 9.65E-01 | 9.86E-01 | 1.00E+00 |
| ENSG00000243449.5_C4orf48   | ENSG00000160789.18_LMNA | -0.0974  | -0.252683745 | 0.062772834 | 2.33E-01 | 5.10E-01 | 1.00E+00 |
| ENSG00000164776.8_PHKG1     | ENSG00000160789.18_LMNA | -0.01412 | -0.172934777 | 0.145404729 | 8.63E-01 | 9.46E-01 | 1.00E+00 |
| ENSG00000068079.6_IFI35     | ENSG00000160789.18_LMNA | 0.12429  | -0.035616517 | 0.277989089 | 1.27E-01 | 3.61E-01 | 1.00E+00 |
| ENSG00000100603.12_SNW1     | ENSG00000160789.18_LMNA | 0.21031  | 0.052884679  | 0.357544009 | 9.30E-03 | 6.22E-02 | 1.00E+00 |
| ENSG00000174775.15_HRAS     | ENSG00000160789.18_LMNA | 0.27983  | 0.126256438  | 0.420308627 | 4.80E-04 | 6.53E-03 | 1.00E+00 |
| ENSG00000161202.16_DVL3     | ENSG00000160789.18_LMNA | 0.06782  | -0.092373582 | 0.224600078 | 4.06E-01 | 6.82E-01 | 1.00E+00 |
| ENSG00000103035.9_PSMC7     | ENSG00000160789.18_LMNA | 0.06775  | -0.092452015 | 0.224524958 | 4.07E-01 | 6.82E-01 | 1.00E+00 |
| ENSG00000066336.10_SPI1     | ENSG00000160789.18_LMNA | 0.07968  | -0.080540164 | 0.235890548 | 3.29E-01 | 6.15E-01 | 1.00E+00 |
| ENSG00000204103.3_MAFB      | ENSG00000160789.18_LMNA | 0.06038  | -0.099778536 | 0.217491324 | 4.60E-01 | 7.23E-01 | 1.00E+00 |
| ENSG00000179918.16_SEPHS2   | ENSG00000160789.18_LMNA | 0.22916  | 0.07261163   | 0.374694005 | 4.51E-03 | 3.63E-02 | 1.00E+00 |
| ENSG00000160691.17_SHC1     | ENSG00000160789.18_LMNA | 0.57614  | 0.459038661  | 0.673557008 | 8.10E-15 | 1.19E-11 | 4.16E-10 |
| ENSG00000106397.10_PLOD3    | ENSG00000160789.18_LMNA | 0.69113  | 0.597695217  | 0.766045902 | 6.56E-23 | 9.95E-19 | 3.36E-18 |
| ENSG00000108819.10_PPP1R9B  | ENSG00000160789.18_LMNA | 0.23761  | 0.081493094  | 0.382348372 | 3.20E-03 | 2.80E-02 | 1.00E+00 |
| ENSG00000114503.9_NCBP2     | ENSG00000160789.18_LMNA | -0.06489 | -0.221801472 | 0.095292988 | 4.27E-01 | 6.98E-01 | 1.00E+00 |
| ENSG00000164105.3_SAP30     | ENSG00000160789.18_LMNA | 0.03005  | -0.129772479 | 0.188348706 | 7.13E-01 | 8.78E-01 | 1.00E+00 |
| ENSG00000131779.9_PEX11B    | ENSG00000160789.18_LMNA | -0.2036  | -0.351405862 | -0.04588153 | 1.19E-02 | 7.42E-02 | 1.00E+00 |
| ENSG00000004455.15_AK2      | ENSG00000160789.18_LMNA | 0.16849  | 0.009549036  | 0.319133755 | 3.80E-02 | 1.67E-01 | 1.00E+00 |
| ENSG00000111653.18_ING4     | ENSG00000160789.18_LMNA | -0.50908 | -0.618178363 | -0.38073447 | 2.13E-11 | 6.33E-09 | 1.09E-06 |
| ENSG00000151366.11_NDUFC2   | ENSG00000160789.18_LMNA | -0.40713 | -0.531858821 | -0.26511359 | 1.94E-07 | 1.23E-05 | 9.94E-03 |
| ENSG00000071054.14_MAP4K4   | ENSG00000160789.18_LMNA | 0.00043  | -0.158785429 | 0.159615918 | 9.96E-01 | 9.98E-01 | 1.00E+00 |
| ENSG00000196704.10_AMZ2     | ENSG00000160789.18_LMNA | -0.1499  | -0.301898252 | 0.009525819 | 6.53E-02 | 2.38E-01 | 1.00E+00 |
| ENSG00000007168.11_PAFAH1B  | ENSG00000160789.18_LMNA | -0.04444 | -0.202209242 | 0.115579278 | 5.87E-01 | 8.08E-01 | 1.00E+00 |
| ENSG00000205155.6_PSENEN    | ENSG00000160789.18_LMNA | -0.06208 | -0.219110515 | 0.098094964 | 4.47E-01 | 7.14E-01 | 1.00E+00 |

|                             |                         |          |              |             |          |          |          |
|-----------------------------|-------------------------|----------|--------------|-------------|----------|----------|----------|
| ENSG00000224114.1_RP11-343H | ENSG00000160789.18_LMNA | 0.07848  | -0.08173895  | 0.234750641 | 3.37E-01 | 6.22E-01 | 1.00E+00 |
| ENSG00000138073.12_PREB     | ENSG00000160789.18_LMNA | -0.07688 | -0.23323008  | 0.083336628 | 3.46E-01 | 6.31E-01 | 1.00E+00 |
| ENSG00000141510.14_TP53     | ENSG00000160789.18_LMNA | 0.24502  | 0.089304047  | 0.38904618  | 2.35E-03 | 2.21E-02 | 1.00E+00 |
| ENSG00000240771.5_ARHGEF25  | ENSG00000160789.18_LMNA | -0.34244 | -0.475704714 | -0.19380237 | 1.57E-05 | 4.23E-04 | 8.07E-01 |
| ENSG00000165943.4_MOAP1     | ENSG00000160789.18_LMNA | -0.30116 | -0.439297331 | -0.14910676 | 1.63E-04 | 2.78E-03 | 1.00E+00 |
| ENSG00000149480.5_MTA2      | ENSG00000160789.18_LMNA | 0.07842  | -0.08180045  | 0.234692138 | 3.37E-01 | 6.22E-01 | 1.00E+00 |
| ENSG00000106236.3_NPTX2     | ENSG00000160789.18_LMNA | 0.10821  | -0.051882991 | 0.262883435 | 1.85E-01 | 4.50E-01 | 1.00E+00 |
| ENSG00000144579.6_CTDSP1    | ENSG00000160789.18_LMNA | 0.37466  | 0.229130075  | 0.503813756 | 1.98E-06 | 7.92E-05 | 1.02E-01 |
| ENSG00000168393.11_DTYMK    | ENSG00000160789.18_LMNA | -0.04173 | -0.19960205  | 0.118258991 | 6.10E-01 | 8.22E-01 | 1.00E+00 |
| ENSG00000162236.10_STX5     | ENSG00000160789.18_LMNA | -0.13953 | -0.292237155 | 0.020119721 | 8.65E-02 | 2.86E-01 | 1.00E+00 |
| ENSG00000106263.16_EIF3B    | ENSG00000160789.18_LMNA | 0.35345  | 0.20583428   | 0.485343184 | 7.94E-06 | 2.43E-04 | 4.07E-01 |
| ENSG00000164985.13_PSIP1    | ENSG00000160789.18_LMNA | -0.02396 | -0.182468782 | 0.135754401 | 7.69E-01 | 9.05E-01 | 1.00E+00 |
| ENSG00000166313.17_APBB1    | ENSG00000160789.18_LMNA | -0.26151 | -0.403893416 | -0.10675128 | 1.14E-03 | 1.28E-02 | 1.00E+00 |
| ENSG00000129187.13_DCTD     | ENSG00000160789.18_LMNA | 0.35924  | 0.212173716  | 0.490394373 | 5.49E-06 | 1.79E-04 | 2.82E-01 |
| ENSG00000132912.11_DCTN4    | ENSG00000160789.18_LMNA | -0.13583 | -0.288785389 | 0.023887833 | 9.52E-02 | 3.02E-01 | 1.00E+00 |
| ENSG00000122884.11_P4HA1    | ENSG00000160789.18_LMNA | 0.22979  | 0.073274647  | 0.375266842 | 4.40E-03 | 3.56E-02 | 1.00E+00 |
| ENSG00000108773.9_KAT2A     | ENSG00000160789.18_LMNA | -0.0069  | -0.165919947 | 0.152466675 | 9.33E-01 | 9.74E-01 | 1.00E+00 |
| ENSG00000102978.11_POLR2C   | ENSG00000160789.18_LMNA | -0.03419 | -0.192339151 | 0.125699579 | 6.76E-01 | 8.58E-01 | 1.00E+00 |
| ENSG00000187735.11_TCEA1    | ENSG00000160789.18_LMNA | -0.02465 | -0.183127695 | 0.13508521  | 7.63E-01 | 9.01E-01 | 1.00E+00 |
| ENSG00000169413.2_RNASE6    | ENSG00000160789.18_LMNA | -0.05236 | -0.209815112 | 0.107735324 | 5.22E-01 | 7.67E-01 | 1.00E+00 |
| ENSG00000143393.15_PI4KB    | ENSG00000160789.18_LMNA | 0.26096  | 0.106168238  | 0.403399777 | 1.17E-03 | 1.30E-02 | 1.00E+00 |
| ENSG00000135211.5_TMEM60    | ENSG00000160789.18_LMNA | 0.07467  | -0.085549251 | 0.231121696 | 3.61E-01 | 6.43E-01 | 1.00E+00 |
| ENSG00000164897.11_TMUB1    | ENSG00000160789.18_LMNA | 0.42734  | 0.287707945  | 0.549174498 | 4.00E-08 | 3.43E-06 | 2.05E-03 |
| ENSG00000090432.6_MUL1      | ENSG00000160789.18_LMNA | 0.38308  | 0.238422138  | 0.511111752 | 1.11E-06 | 5.00E-05 | 5.69E-02 |
| ENSG00000187778.12_MCRS1    | ENSG00000160789.18_LMNA | -0.30948 | -0.446671218 | -0.15806457 | 1.05E-04 | 1.96E-03 | 1.00E+00 |
| ENSG00000106635.6_BCL7B     | ENSG00000160789.18_LMNA | 0.21224  | 0.054895939  | 0.359301994 | 8.66E-03 | 5.90E-02 | 1.00E+00 |
| ENSG00000180398.10_MCFD2    | ENSG00000160789.18_LMNA | 0.20882  | 0.051329368  | 0.356183074 | 9.83E-03 | 6.48E-02 | 1.00E+00 |
| ENSG00000264350.1_SNRPGP2   | ENSG00000160789.18_LMNA | -0.16428 | -0.315237387 | -0.00521705 | 4.31E-02 | 1.82E-01 | 1.00E+00 |
| ENSG00000165457.12_FOLR2    | ENSG00000160789.18_LMNA | -0.05218 | -0.209643179 | 0.107913076 | 5.23E-01 | 7.69E-01 | 1.00E+00 |
| ENSG00000164879.6_CA3       | ENSG00000160789.18_LMNA | -0.04838 | -0.20599805  | 0.111676818 | 5.54E-01 | 7.88E-01 | 1.00E+00 |
| ENSG00000136628.16_EPRS     | ENSG00000160789.18_LMNA | 0.08904  | -0.071165733 | 0.24477462  | 2.75E-01 | 5.60E-01 | 1.00E+00 |
| ENSG00000125734.12_GPR108   | ENSG00000160789.18_LMNA | 0.17525  | 0.016512477  | 0.325375109 | 3.08E-02 | 1.46E-01 | 1.00E+00 |
| ENSG00000131475.5_VPS25     | ENSG00000160789.18_LMNA | -0.15789 | -0.309314973 | 0.001345281 | 5.20E-02 | 2.07E-01 | 1.00E+00 |

|                             |                         |          |              |             |          |          |          |
|-----------------------------|-------------------------|----------|--------------|-------------|----------|----------|----------|
| ENSG00000175567.7_UCP2      | ENSG00000160789.18_LMNA | -0.08017 | -0.236358637 | 0.080047632 | 3.26E-01 | 6.13E-01 | 1.00E+00 |
| ENSG00000233913.7_RPL10P9   | ENSG00000160789.18_LMNA | -0.01711 | -0.175829142 | 0.14248144  | 8.34E-01 | 9.36E-01 | 1.00E+00 |
| ENSG00000100442.9_FKBP3     | ENSG00000160789.18_LMNA | -0.07827 | -0.234547202 | 0.081952801 | 3.38E-01 | 6.23E-01 | 1.00E+00 |
| ENSG00000196365.10_LONP1    | ENSG00000160789.18_LMNA | 0.356    | 0.208618736  | 0.487564106 | 6.76E-06 | 2.14E-04 | 3.47E-01 |
| ENSG00000108349.13_CASC3    | ENSG00000160789.18_LMNA | -0.33465 | -0.468868153 | -0.18531925 | 2.51E-05 | 6.20E-04 | 1.00E+00 |
| ENSG00000115446.10_UNC50    | ENSG00000160789.18_LMNA | -0.25104 | -0.394474922 | -0.09566219 | 1.81E-03 | 1.82E-02 | 1.00E+00 |
| ENSG00000227615.1_RP11-864N | ENSG00000160789.18_LMNA | -0.16189 | -0.313025267 | -0.00276278 | 4.63E-02 | 1.91E-01 | 1.00E+00 |
| ENSG00000182132.11_KCNIP1   | ENSG00000160789.18_LMNA | 0.00713  | -0.152241286 | 0.166144332 | 9.31E-01 | 9.73E-01 | 1.00E+00 |
| ENSG00000183513.7_COA5      | ENSG00000160789.18_LMNA | -0.45673 | -0.574184237 | -0.32086388 | 3.33E-09 | 4.23E-07 | 1.71E-04 |
| ENSG00000155304.5_HSPA13    | ENSG00000160789.18_LMNA | -0.0237  | -0.182215111 | 0.136011951 | 7.72E-01 | 9.06E-01 | 1.00E+00 |
| ENSG00000169727.11_GPS1     | ENSG00000160789.18_LMNA | -0.20563 | -0.353266728 | -0.04800147 | 1.10E-02 | 7.03E-02 | 1.00E+00 |
| ENSG00000085117.10_CD82     | ENSG00000160789.18_LMNA | 0.18354  | 0.025068655  | 0.333007364 | 2.36E-02 | 1.21E-01 | 1.00E+00 |
| ENSG00000095321.15_CRAT     | ENSG00000160789.18_LMNA | 0.34973  | 0.201768098  | 0.482093446 | 1.00E-05 | 2.92E-04 | 5.15E-01 |
| ENSG00000143436.9_MRPL9     | ENSG00000160789.18_LMNA | -0.02069 | -0.179296801 | 0.1389718   | 8.00E-01 | 9.20E-01 | 1.00E+00 |
| ENSG00000148337.18_CIZ1     | ENSG00000160789.18_LMNA | 0.23852  | 0.082455108  | 0.383174999 | 3.08E-03 | 2.73E-02 | 1.00E+00 |
| ENSG00000213465.6_ARL2      | ENSG00000160789.18_LMNA | -0.21824 | -0.36476877  | -0.06116615 | 6.91E-03 | 5.00E-02 | 1.00E+00 |
| ENSG00000162735.17_PEX19    | ENSG00000160789.18_LMNA | -0.3927  | -0.519425904 | -0.2490692  | 5.61E-07 | 2.88E-05 | 2.88E-02 |
| ENSG00000175745.10_NR2F1    | ENSG00000160789.18_LMNA | -0.01572 | -0.174487477 | 0.143837203 | 8.48E-01 | 9.40E-01 | 1.00E+00 |
| ENSG00000101079.19_NDRG3    | ENSG00000160789.18_LMNA | -0.46695 | -0.582823429 | -0.33246316 | 1.33E-09 | 1.96E-07 | 6.81E-05 |
| ENSG00000132406.10_TMEM128  | ENSG00000160789.18_LMNA | -0.32728 | -0.462387369 | -0.17731642 | 3.86E-05 | 8.75E-04 | 1.00E+00 |
| ENSG00000063180.7_CA11      | ENSG00000160789.18_LMNA | -0.09168 | -0.247270056 | 0.068522482 | 2.61E-01 | 5.45E-01 | 1.00E+00 |
| ENSG00000230629.2_RPS23P8   | ENSG00000160789.18_LMNA | -0.16569 | -0.316538648 | -0.0066625  | 4.14E-02 | 1.77E-01 | 1.00E+00 |
| ENSG00000153395.8_LPCAT1    | ENSG00000160789.18_LMNA | 0.24982  | 0.094373481  | 0.393376274 | 1.91E-03 | 1.89E-02 | 1.00E+00 |
| ENSG00000150316.10_CWC15    | ENSG00000160789.18_LMNA | -0.34363 | -0.476752728 | -0.19510653 | 1.46E-05 | 4.00E-04 | 7.50E-01 |
| ENSG00000224631.4_RPS27AP1  | ENSG00000160789.18_LMNA | -0.15198 | -0.303833701 | 0.007395058 | 6.16E-02 | 2.29E-01 | 1.00E+00 |
| ENSG00000198858.8_R3HDM4    | ENSG00000160789.18_LMNA | 0.20925  | 0.05177585   | 0.356573889 | 9.67E-03 | 6.41E-02 | 1.00E+00 |
| ENSG00000104889.4_RNASEH2A  | ENSG00000160789.18_LMNA | -0.00632 | -0.165358269 | 0.153030724 | 9.38E-01 | 9.76E-01 | 1.00E+00 |
| ENSG00000122756.13_CNTFR    | ENSG00000160789.18_LMNA | -0.27593 | -0.416821723 | -0.12209406 | 5.80E-04 | 7.57E-03 | 1.00E+00 |
| ENSG00000162434.10_JAK1     | ENSG00000160789.18_LMNA | -0.05263 | -0.210068628 | 0.107473189 | 5.20E-01 | 7.66E-01 | 1.00E+00 |
| ENSG00000137965.9_IFI44     | ENSG00000160789.18_LMNA | -0.08224 | -0.238320344 | 0.077981804 | 3.14E-01 | 6.00E-01 | 1.00E+00 |
| ENSG00000166562.7_SEC11C    | ENSG00000160789.18_LMNA | -0.299   | -0.437384434 | -0.14679072 | 1.83E-04 | 3.04E-03 | 1.00E+00 |
| ENSG00000106400.10_ZNHIT1   | ENSG00000160789.18_LMNA | -0.07997 | -0.236162151 | 0.080254397 | 3.27E-01 | 6.14E-01 | 1.00E+00 |
| ENSG00000101457.11_DNNTIP1  | ENSG00000160789.18_LMNA | 0.16405  | 0.004977536  | 0.31502165  | 4.34E-02 | 1.83E-01 | 1.00E+00 |

|                            |                         |          |              |             |          |          |          |
|----------------------------|-------------------------|----------|--------------|-------------|----------|----------|----------|
| ENSG00000163754.16_GYG1    | ENSG00000160789.18_LMNA | -0.39159 | -0.51846927  | -0.2478408  | 6.08E-07 | 3.06E-05 | 3.12E-02 |
| ENSG00000101347.8_SAMHD1   | ENSG00000160789.18_LMNA | -0.0317  | -0.189942077 | 0.128147471 | 6.98E-01 | 8.71E-01 | 1.00E+00 |
| ENSG00000146112.10_PPP1R18 | ENSG00000160789.18_LMNA | 0.5239   | 0.397890687  | 0.630516714 | 4.32E-12 | 1.77E-09 | 2.22E-07 |
| ENSG00000184887.12_BTBD6   | ENSG00000160789.18_LMNA | 0.27312  | 0.119096993  | 0.414305636 | 6.63E-04 | 8.40E-03 | 1.00E+00 |
| ENSG00000109113.16_RAB34   | ENSG00000160789.18_LMNA | 0.4602   | 0.324800589  | 0.577122652 | 2.45E-09 | 3.29E-07 | 1.25E-04 |
| ENSG00000176890.14_TYMS    | ENSG00000160789.18_LMNA | 0.11519  | -0.044832968 | 0.269449351 | 1.58E-01 | 4.10E-01 | 1.00E+00 |
| ENSG00000089486.15_CDIP1   | ENSG00000160789.18_LMNA | -0.30387 | -0.441702917 | -0.15202385 | 1.41E-04 | 2.48E-03 | 1.00E+00 |
| ENSG00000113552.14_GNPDA1  | ENSG00000160789.18_LMNA | 0.02267  | -0.137021691 | 0.181220172 | 7.82E-01 | 9.10E-01 | 1.00E+00 |
| ENSG00000143546.8_S100A8   | ENSG00000160789.18_LMNA | 0.08985  | -0.0703568   | 0.24553876  | 2.71E-01 | 5.55E-01 | 1.00E+00 |
| ENSG00000144867.10_SRPRB   | ENSG00000160789.18_LMNA | -0.08895 | -0.244687666 | 0.071257757 | 2.76E-01 | 5.60E-01 | 1.00E+00 |
| ENSG00000124098.9_FAM210B  | ENSG00000160789.18_LMNA | 0.18415  | 0.025700196  | 0.333569115 | 2.31E-02 | 1.20E-01 | 1.00E+00 |
| ENSG00000056050.6_HPF1     | ENSG00000160789.18_LMNA | -0.20615 | -0.353740598 | -0.04854175 | 1.08E-02 | 6.94E-02 | 1.00E+00 |
| ENSG00000171051.7_FPR1     | ENSG00000160789.18_LMNA | -0.01979 | -0.178427758 | 0.139852115 | 8.09E-01 | 9.24E-01 | 1.00E+00 |
| ENSG00000072042.11_RDH11   | ENSG00000160789.18_LMNA | -0.09883 | -0.254037977 | 0.061331281 | 2.26E-01 | 5.02E-01 | 1.00E+00 |
| ENSG00000165424.6_ZCCHC24  | ENSG00000160789.18_LMNA | 0.01369  | -0.145826887 | 0.172516341 | 8.67E-01 | 9.48E-01 | 1.00E+00 |
| ENSG00000148926.8_ADM      | ENSG00000160789.18_LMNA | 0.34519  | 0.19680973   | 0.478120198 | 1.33E-05 | 3.68E-04 | 6.82E-01 |
| ENSG00000104131.11_EIF3J   | ENSG00000160789.18_LMNA | -0.01483 | -0.173625112 | 0.144708    | 8.56E-01 | 9.43E-01 | 1.00E+00 |
| ENSG00000184905.7_TCEAL2   | ENSG00000160789.18_LMNA | -0.29457 | -0.433444316 | -0.14203026 | 2.30E-04 | 3.65E-03 | 1.00E+00 |
| ENSG00000173141.4_MRPL57   | ENSG00000160789.18_LMNA | -0.13153 | -0.284769684 | 0.028260417 | 1.06E-01 | 3.24E-01 | 1.00E+00 |
| ENSG00000161671.15 EMC10   | ENSG00000160789.18_LMNA | 0.03818  | -0.121757183 | 0.196191743 | 6.40E-01 | 8.39E-01 | 1.00E+00 |
| ENSG00000090487.9_SPG21    | ENSG00000160789.18_LMNA | -0.04264 | -0.20048     | 0.117357137 | 6.02E-01 | 8.17E-01 | 1.00E+00 |
| ENSG00000105409.14_ATP1A3  | ENSG00000160789.18_LMNA | -0.38178 | -0.509983179 | -0.23698193 | 1.22E-06 | 5.38E-05 | 6.23E-02 |
| ENSG00000076706.13_MCAM    | ENSG00000160789.18_LMNA | 0.18754  | 0.029207271  | 0.336684658 | 2.07E-02 | 1.10E-01 | 1.00E+00 |
| ENSG00000205339.8_IPO7     | ENSG00000160789.18_LMNA | 0.03807  | -0.121867829 | 0.196083751 | 6.41E-01 | 8.40E-01 | 1.00E+00 |
| ENSG00000172239.12_PAIP1   | ENSG00000160789.18_LMNA | -0.15746 | -0.30891502  | 0.001787487 | 5.27E-02 | 2.08E-01 | 1.00E+00 |
| ENSG00000141480.16_ARRB2   | ENSG00000160789.18_LMNA | -0.0847  | -0.240655356 | 0.075519312 | 3.00E-01 | 5.86E-01 | 1.00E+00 |
| ENSG00000218283.2_MORF4L1P | ENSG00000160789.18_LMNA | -0.14751 | -0.299671436 | 0.011973856 | 6.98E-02 | 2.49E-01 | 1.00E+00 |
| ENSG00000163527.8_STT3B    | ENSG00000160789.18_LMNA | 0.16459  | 0.005536299  | 0.315524888 | 4.27E-02 | 1.81E-01 | 1.00E+00 |
| ENSG00000239789.4_MRPS17   | ENSG00000160789.18_LMNA | 0.02473  | -0.135002422 | 0.183209192 | 7.62E-01 | 9.01E-01 | 1.00E+00 |
| ENSG00000151465.12_CDC123  | ENSG00000160789.18_LMNA | -0.36075 | -0.491713734 | -0.21383343 | 4.98E-06 | 1.65E-04 | 2.55E-01 |
| ENSG00000198794.10_SCAMP5  | ENSG00000160789.18_LMNA | -0.32299 | -0.458611825 | -0.17267149 | 4.94E-05 | 1.07E-03 | 1.00E+00 |
| ENSG00000079459.11_FDFT1   | ENSG00000160789.18_LMNA | -0.23797 | -0.382673725 | -0.08187167 | 3.16E-03 | 2.77E-02 | 1.00E+00 |
| ENSG00000111237.17_VPS29   | ENSG00000160789.18_LMNA | -0.23906 | -0.383657499 | -0.08301689 | 3.02E-03 | 2.69E-02 | 1.00E+00 |

|                             |                         |          |              |             |          |          |          |
|-----------------------------|-------------------------|----------|--------------|-------------|----------|----------|----------|
| ENSG00000006468.12_ETV1     | ENSG00000160789.18_LMNA | -0.15976 | -0.311053464 | -0.00057828 | 4.93E-02 | 1.99E-01 | 1.00E+00 |
| ENSG00000138796.14_HADH     | ENSG00000160789.18_LMNA | -0.26625 | -0.408147435 | -0.1117842  | 9.15E-04 | 1.08E-02 | 1.00E+00 |
| ENSG00000115216.12_NRBP1    | ENSG00000160789.18_LMNA | 0.32082  | 0.170317415  | 0.456694413 | 5.58E-05 | 1.17E-03 | 1.00E+00 |
| ENSG00000114902.12_SPCS1    | ENSG00000160789.18_LMNA | -0.19498 | -0.343519527 | -0.0369277  | 1.61E-02 | 9.22E-02 | 1.00E+00 |
| ENSG00000165458.12_INPPL1   | ENSG00000160789.18_LMNA | 0.21342  | 0.056128691  | 0.36037844  | 8.29E-03 | 5.72E-02 | 1.00E+00 |
| ENSG00000198860.10_TSEN15   | ENSG00000160789.18_LMNA | -0.23358 | -0.378702158 | -0.07725638 | 3.78E-03 | 3.18E-02 | 1.00E+00 |
| ENSG00000105700.9_KXD1      | ENSG00000160789.18_LMNA | 0.0627   | -0.09746956  | 0.219711558 | 4.43E-01 | 7.10E-01 | 1.00E+00 |
| ENSG00000071967.10_CYBRD1   | ENSG00000160789.18_LMNA | 0.20924  | 0.051768511  | 0.356567466 | 9.68E-03 | 6.41E-02 | 1.00E+00 |
| ENSG00000155438.10_NIFK     | ENSG00000160789.18_LMNA | -0.02746 | -0.185852723 | 0.132314592 | 7.37E-01 | 8.89E-01 | 1.00E+00 |
| ENSG00000102054.16_RBBP7    | ENSG00000160789.18_LMNA | 0.05021  | -0.109869836 | 0.207749187 | 5.39E-01 | 7.79E-01 | 1.00E+00 |
| ENSG00000105426.13_PTPRS    | ENSG00000160789.18_LMNA | -0.12296 | -0.27674028  | 0.036967624 | 1.31E-01 | 3.67E-01 | 1.00E+00 |
| ENSG00000088448.13_ANKRD10  | ENSG00000160789.18_LMNA | -0.06019 | -0.217311659 | 0.099965234 | 4.61E-01 | 7.25E-01 | 1.00E+00 |
| ENSG00000109736.13_MFSD10   | ENSG00000160789.18_LMNA | 0.4251   | 0.285197844  | 0.547261849 | 4.79E-08 | 3.93E-06 | 2.46E-03 |
| ENSG00000164402.12_SEPT8    | ENSG00000160789.18_LMNA | -0.13673 | -0.289622252 | 0.022975089 | 9.30E-02 | 2.98E-01 | 1.00E+00 |
| ENSG00000112559.12_MDFI     | ENSG00000160789.18_LMNA | -0.12643 | -0.279998352 | 0.033440254 | 1.21E-01 | 3.49E-01 | 1.00E+00 |
| ENSG00000278970.1_HEIH      | ENSG00000160789.18_LMNA | -0.0402  | -0.198128216 | 0.119771774 | 6.23E-01 | 8.30E-01 | 1.00E+00 |
| ENSG00000116044.14_NFE2L2   | ENSG00000160789.18_LMNA | 0.34872  | 0.200664171  | 0.481209842 | 1.07E-05 | 3.07E-04 | 5.48E-01 |
| ENSG00000034677.10_RNF19A   | ENSG00000160789.18_LMNA | -0.09474 | -0.250166638 | 0.065448753 | 2.46E-01 | 5.25E-01 | 1.00E+00 |
| ENSG00000131462.6_TUBG1     | ENSG00000160789.18_LMNA | 0.18005  | 0.021467646  | 0.329800114 | 2.64E-02 | 1.32E-01 | 1.00E+00 |
| ENSG00000151239.12_TWF1     | ENSG00000160789.18_LMNA | -0.12385 | -0.277577057 | 0.036062428 | 1.28E-01 | 3.63E-01 | 1.00E+00 |
| ENSG00000163661.3_PTX3      | ENSG00000160789.18_LMNA | 0.37355  | 0.227899751  | 0.502844509 | 2.14E-06 | 8.38E-05 | 1.10E-01 |
| ENSG00000053372.4_MRTO4     | ENSG00000160789.18_LMNA | -0.04187 | -0.199737563 | 0.118119822 | 6.09E-01 | 8.21E-01 | 1.00E+00 |
| ENSG00000105393.14_BABAM1   | ENSG00000160789.18_LMNA | -0.21594 | -0.36267108  | -0.05875733 | 7.54E-03 | 5.32E-02 | 1.00E+00 |
| ENSG00000100612.12_DHRS7    | ENSG00000160789.18_LMNA | -0.25569 | -0.398665131 | -0.10058649 | 1.48E-03 | 1.55E-02 | 1.00E+00 |
| ENSG00000176533.11_GNG7     | ENSG00000160789.18_LMNA | -0.00495 | -0.16402532  | 0.154368468 | 9.52E-01 | 9.81E-01 | 1.00E+00 |
| ENSG00000163565.17_IFI16    | ENSG00000160789.18_LMNA | 0.26057  | 0.105751583  | 0.403046903 | 1.19E-03 | 1.32E-02 | 1.00E+00 |
| ENSG00000106299.7_WASL      | ENSG00000160789.18_LMNA | 0.2309   | 0.074435814  | 0.37626952  | 4.21E-03 | 3.45E-02 | 1.00E+00 |
| ENSG00000114354.11_TFG      | ENSG00000160789.18_LMNA | 0.22088  | 0.063930372  | 0.367172173 | 6.25E-03 | 4.63E-02 | 1.00E+00 |
| ENSG00000156642.15_NPTN     | ENSG00000160789.18_LMNA | 0.1042   | -0.05593262  | 0.259098654 | 2.01E-01 | 4.72E-01 | 1.00E+00 |
| ENSG00000164305.16_CASP3    | ENSG00000160789.18_LMNA | 0.188    | 0.029688738  | 0.337111849 | 2.04E-02 | 1.09E-01 | 1.00E+00 |
| ENSG00000172638.11_EFEMP2   | ENSG00000160789.18_LMNA | 0.64419  | 0.540411536  | 0.728662415 | 3.45E-19 | 1.77E-15 | 1.77E-14 |
| ENSG00000128567.15_PODXL    | ENSG00000160789.18_LMNA | 0.30616  | 0.154490081  | 0.443733465 | 1.25E-04 | 2.26E-03 | 1.00E+00 |
| ENSG00000260807.5_RP11-161M | ENSG00000160789.18_LMNA | -0.43758 | -0.557916309 | -0.29922633 | 1.73E-08 | 1.70E-06 | 8.87E-04 |

|                            |                         |          |              |             |          |          |          |
|----------------------------|-------------------------|----------|--------------|-------------|----------|----------|----------|
| ENSG00000105618.12_PRPF31  | ENSG00000160789.18_LMNA | 0.26282  | 0.108148279  | 0.405075505 | 1.07E-03 | 1.22E-02 | 1.00E+00 |
| ENSG00000132470.12_ITGB4   | ENSG00000160789.18_LMNA | 0.25589  | 0.100793143  | 0.398840706 | 1.46E-03 | 1.54E-02 | 1.00E+00 |
| ENSG00000244187.6_TMEM141  | ENSG00000160789.18_LMNA | -0.00871 | -0.167673685 | 0.150704201 | 9.15E-01 | 9.68E-01 | 1.00E+00 |
| ENSG00000163931.14_TKT     | ENSG00000160789.18_LMNA | 0.16695  | 0.00796385   | 0.317709185 | 3.98E-02 | 1.73E-01 | 1.00E+00 |
| ENSG00000160752.13_FDPS    | ENSG00000160789.18_LMNA | 0.0592   | -0.100952078 | 0.216361626 | 4.69E-01 | 7.30E-01 | 1.00E+00 |
| ENSG00000169919.15_GUSB    | ENSG00000160789.18_LMNA | 0.54401  | 0.421293105  | 0.647159738 | 4.38E-13 | 3.00E-10 | 2.25E-08 |
| ENSG00000105559.10_PLEKHA4 | ENSG00000160789.18_LMNA | 0.49512  | 0.364668782  | 0.606517218 | 8.91E-11 | 2.06E-08 | 4.57E-06 |
| ENSG00000149428.17_HYOU1   | ENSG00000160789.18_LMNA | 0.26285  | 0.10817315   | 0.40509654  | 1.07E-03 | 1.22E-02 | 1.00E+00 |
| ENSG00000177733.6_HNRNPA0  | ENSG00000160789.18_LMNA | -0.0674  | -0.224198389 | 0.092792945 | 4.09E-01 | 6.83E-01 | 1.00E+00 |
| ENSG00000169604.18_ANTXR1  | ENSG00000160789.18_LMNA | -0.12665 | -0.280200284 | 0.033221374 | 1.20E-01 | 3.48E-01 | 1.00E+00 |
| ENSG00000135472.7_FAIM2    | ENSG00000160789.18_LMNA | -0.36725 | -0.497373349 | -0.2209713  | 3.25E-06 | 1.17E-04 | 1.67E-01 |
| ENSG00000183431.10_SF3A3   | ENSG00000160789.18_LMNA | 0.11141  | -0.048658427 | 0.265890198 | 1.72E-01 | 4.31E-01 | 1.00E+00 |
| ENSG00000163041.8_H3F3A    | ENSG00000160789.18_LMNA | -0.30293 | -0.440871291 | -0.15101482 | 1.49E-04 | 2.58E-03 | 1.00E+00 |
| ENSG00000125970.10_RALY    | ENSG00000160789.18_LMNA | 0.17529  | 0.016548822  | 0.325407615 | 3.08E-02 | 1.46E-01 | 1.00E+00 |
| ENSG00000106723.15_SPIN1   | ENSG00000160789.18_LMNA | -0.08337 | -0.239392401 | 0.076851697 | 3.07E-01 | 5.94E-01 | 1.00E+00 |
| ENSG00000068308.12_OTUD5   | ENSG00000160789.18_LMNA | 0.19173  | 0.033555883  | 0.34053846  | 1.80E-02 | 9.99E-02 | 1.00E+00 |
| ENSG00000171421.11_MRPL36  | ENSG00000160789.18_LMNA | 0.15329  | -0.006063234 | 0.305042144 | 5.94E-02 | 2.24E-01 | 1.00E+00 |
| ENSG00000112799.7_LY86     | ENSG00000160789.18_LMNA | -0.16014 | -0.311399518 | -0.00096145 | 4.88E-02 | 1.98E-01 | 1.00E+00 |
| ENSG00000104679.9_R3HCC1   | ENSG00000160789.18_LMNA | -0.12213 | -0.27596254  | 0.037808493 | 1.34E-01 | 3.72E-01 | 1.00E+00 |
| ENSG00000163131.9_CTSS     | ENSG00000160789.18_LMNA | -0.07345 | -0.22995883  | 0.086768273 | 3.69E-01 | 6.49E-01 | 1.00E+00 |
| ENSG00000068394.10_GPKOW   | ENSG00000160789.18_LMNA | 0.08117  | -0.07905395  | 0.237302558 | 3.20E-01 | 6.07E-01 | 1.00E+00 |
| ENSG00000136247.13_ZDHHC4  | ENSG00000160789.18_LMNA | 0.08061  | -0.079609384 | 0.236775012 | 3.24E-01 | 6.10E-01 | 1.00E+00 |
| ENSG00000178605.11_GTPBP6  | ENSG00000160789.18_LMNA | 0.08914  | -0.071067618 | 0.244867323 | 2.75E-01 | 5.59E-01 | 1.00E+00 |
| ENSG00000062716.9_VMP1     | ENSG00000160789.18_LMNA | 0.15355  | -0.005791101 | 0.305288942 | 5.89E-02 | 2.23E-01 | 1.00E+00 |
| ENSG00000025772.7_TOMM34   | ENSG00000160789.18_LMNA | 0.10681  | -0.053298053 | 0.261562019 | 1.90E-01 | 4.58E-01 | 1.00E+00 |
| ENSG00000130313.5_PGLS     | ENSG00000160789.18_LMNA | 0.2507   | 0.095301717  | 0.3941677   | 1.84E-03 | 1.84E-02 | 1.00E+00 |
| ENSG00000157020.16_SEC13   | ENSG00000160789.18_LMNA | -0.07252 | -0.229078801 | 0.087690171 | 3.75E-01 | 6.55E-01 | 1.00E+00 |
| ENSG00000256043.2_CTSO     | ENSG00000160789.18_LMNA | -0.00148 | -0.160640438 | 0.157760288 | 9.86E-01 | 9.94E-01 | 1.00E+00 |
| ENSG00000067057.15_PFKP    | ENSG00000160789.18_LMNA | 0.23255  | 0.076168763  | 0.377764622 | 3.94E-03 | 3.28E-02 | 1.00E+00 |
| ENSG00000076248.9_UNG      | ENSG00000160789.18_LMNA | -0.04739 | -0.205039176 | 0.112665382 | 5.62E-01 | 7.94E-01 | 1.00E+00 |
| ENSG00000166974.11_MAPRE2  | ENSG00000160789.18_LMNA | -0.19668 | -0.34507639  | -0.03869141 | 1.52E-02 | 8.85E-02 | 1.00E+00 |
| ENSG00000112640.13_PPP2R5D | ENSG00000160789.18_LMNA | -0.15378 | -0.305503003 | 0.00555503  | 5.85E-02 | 2.22E-01 | 1.00E+00 |
| ENSG00000115468.10_EFHD1   | ENSG00000160789.18_LMNA | -0.30372 | -0.441567528 | -0.15185953 | 1.42E-04 | 2.50E-03 | 1.00E+00 |



|                            |                         |          |              |             |          |          |          |
|----------------------------|-------------------------|----------|--------------|-------------|----------|----------|----------|
| ENSG00000177889.8_UBE2N    | ENSG00000160789.18_LMNA | -0.35876 | -0.489976175 | -0.21164797 | 5.66E-06 | 1.84E-04 | 2.91E-01 |
| ENSG00000135862.5_LAMC1    | ENSG00000160789.18_LMNA | 0.54234  | 0.419346806  | 0.645783754 | 5.33E-13 | 3.46E-10 | 2.73E-08 |
| ENSG00000123095.5_BHLHE41  | ENSG00000160789.18_LMNA | 0.07186  | -0.088353433 | 0.228445341 | 3.79E-01 | 6.58E-01 | 1.00E+00 |
| ENSG00000206418.3_RAB12    | ENSG00000160789.18_LMNA | 0.02879  | -0.131015227 | 0.187129023 | 7.25E-01 | 8.83E-01 | 1.00E+00 |
| ENSG00000149218.4_ENDOD1   | ENSG00000160789.18_LMNA | 0.27214  | 0.11805063   | 0.413426133 | 6.95E-04 | 8.72E-03 | 1.00E+00 |
| ENSG00000203875.9_SNHG5    | ENSG00000160789.18_LMNA | -0.07891 | -0.235156959 | 0.081311749 | 3.34E-01 | 6.20E-01 | 1.00E+00 |
| ENSG00000000003.13_TSPAN6  | ENSG00000160789.18_LMNA | -0.02632 | -0.184743481 | 0.133442992 | 7.48E-01 | 8.95E-01 | 1.00E+00 |
| ENSG00000198663.15_C6orf89 | ENSG00000160789.18_LMNA | -0.06745 | -0.224238717 | 0.092750848 | 4.09E-01 | 6.83E-01 | 1.00E+00 |
| ENSG00000130511.14_SSBP4   | ENSG00000160789.18_LMNA | 0.44201  | 0.304221671  | 0.561689727 | 1.19E-08 | 1.25E-06 | 6.11E-04 |
| ENSG00000182287.12_AP1S2   | ENSG00000160789.18_LMNA | 0.13522  | -0.024511584 | 0.288213219 | 9.67E-02 | 3.05E-01 | 1.00E+00 |
| ENSG00000185437.12_SH3BGR  | ENSG00000160789.18_LMNA | -0.17631 | -0.326350077 | -0.01760296 | 2.98E-02 | 1.43E-01 | 1.00E+00 |
| ENSG00000065548.16_ZC3H15  | ENSG00000160789.18_LMNA | -0.18298 | -0.332493219 | -0.02449085 | 2.40E-02 | 1.23E-01 | 1.00E+00 |
| ENSG00000164062.11_APEH    | ENSG00000160789.18_LMNA | 0.08283  | -0.077386684 | 0.238884991 | 3.10E-01 | 5.97E-01 | 1.00E+00 |
| ENSG00000270647.4_TAF15    | ENSG00000160789.18_LMNA | 0.18415  | 0.025698808  | 0.333567881 | 2.31E-02 | 1.20E-01 | 1.00E+00 |
| ENSG00000197102.9_DYNC1H1  | ENSG00000160789.18_LMNA | 0.14066  | -0.018965288 | 0.293293043 | 8.39E-02 | 2.80E-01 | 1.00E+00 |
| ENSG00000132541.9_RIDA     | ENSG00000160789.18_LMNA | -0.24583 | -0.389774163 | -0.09015524 | 2.27E-03 | 2.15E-02 | 1.00E+00 |
| ENSG00000121691.4_CAT      | ENSG00000160789.18_LMNA | -0.19235 | -0.341109248 | -0.03420095 | 1.76E-02 | 9.84E-02 | 1.00E+00 |
| ENSG00000170291.13_ELP5    | ENSG00000160789.18_LMNA | -0.1457  | -0.297986487 | 0.013823714 | 7.33E-02 | 2.57E-01 | 1.00E+00 |
| ENSG00000173692.11_PSMC1   | ENSG00000160789.18_LMNA | 0.11241  | -0.047644984 | 0.266833927 | 1.68E-01 | 4.26E-01 | 1.00E+00 |
| ENSG00000131724.9_IL13RA1  | ENSG00000160789.18_LMNA | 0.26149  | 0.106733723  | 0.403878555 | 1.14E-03 | 1.28E-02 | 1.00E+00 |
| ENSG00000023330.13_ALAS1   | ENSG00000160789.18_LMNA | -0.01829 | -0.176971971 | 0.141325658 | 8.23E-01 | 9.31E-01 | 1.00E+00 |
| ENSG00000181524.6_RPL24P4  | ENSG00000160789.18_LMNA | -0.15809 | -0.309499992 | 0.001140675 | 5.17E-02 | 2.06E-01 | 1.00E+00 |
| ENSG00000166086.11_JAM3    | ENSG00000160789.18_LMNA | 0.04976  | -0.110319347 | 0.207313758 | 5.43E-01 | 7.82E-01 | 1.00E+00 |
| ENSG00000002933.6_TMEM176A | ENSG00000160789.18_LMNA | -0.02921 | -0.187542932 | 0.130593603 | 7.21E-01 | 8.82E-01 | 1.00E+00 |
| ENSG00000136842.12_TMOD1   | ENSG00000160789.18_LMNA | -0.23261 | -0.377815023 | -0.07622721 | 3.93E-03 | 3.28E-02 | 1.00E+00 |
| ENSG00000149260.13_CAPN5   | ENSG00000160789.18_LMNA | 0.16945  | 0.010529835  | 0.320014476 | 3.69E-02 | 1.64E-01 | 1.00E+00 |
| ENSG00000181191.11_PJA1    | ENSG00000160789.18_LMNA | -0.1035  | -0.258437778 | 0.05663868  | 2.04E-01 | 4.76E-01 | 1.00E+00 |
| ENSG00000116574.5_RHOU     | ENSG00000160789.18_LMNA | -0.26792 | -0.40964636  | -0.11356121 | 8.47E-04 | 1.02E-02 | 1.00E+00 |
| ENSG00000134884.12_ARGLU1  | ENSG00000160789.18_LMNA | -0.19414 | -0.342744602 | -0.03605052 | 1.65E-02 | 9.42E-02 | 1.00E+00 |
| ENSG00000067113.15_PLPP1   | ENSG00000160789.18_LMNA | -0.33551 | -0.469628213 | -0.18626028 | 2.38E-05 | 5.96E-04 | 1.00E+00 |
| ENSG00000085998.12_POMGNT  | ENSG00000160789.18_LMNA | 0.15183  | -0.007556709 | 0.303686958 | 6.19E-02 | 2.30E-01 | 1.00E+00 |
| ENSG00000108639.6_SYNGR2   | ENSG00000160789.18_LMNA | -0.08226 | -0.23834372  | 0.07795717  | 3.14E-01 | 6.00E-01 | 1.00E+00 |
| ENSG00000166908.16_PIP4K2C | ENSG00000160789.18_LMNA | -0.18435 | -0.333751662 | -0.02590547 | 2.30E-02 | 1.19E-01 | 1.00E+00 |

|                             |                         |          |              |             |          |          |          |
|-----------------------------|-------------------------|----------|--------------|-------------|----------|----------|----------|
| ENSG00000101052.11_IFT52    | ENSG00000160789.18_LMNA | -0.21048 | -0.3576906   | -0.05305229 | 9.25E-03 | 6.19E-02 | 1.00E+00 |
| ENSG00000126461.13_SCAF1    | ENSG00000160789.18_LMNA | 0.27945  | 0.12584406   | 0.419963557 | 4.89E-04 | 6.62E-03 | 1.00E+00 |
| ENSG00000139352.3_ASCL1     | ENSG00000160789.18_LMNA | -0.32645 | -0.461654954 | -0.17641436 | 4.05E-05 | 9.12E-04 | 1.00E+00 |
| ENSG00000088356.5_PDRG1     | ENSG00000160789.18_LMNA | -0.12697 | -0.280499147 | 0.032897373 | 1.19E-01 | 3.46E-01 | 1.00E+00 |
| ENSG00000148700.12_ADD3     | ENSG00000160789.18_LMNA | -0.46417 | -0.580475424 | -0.32930313 | 1.71E-09 | 2.41E-07 | 8.77E-05 |
| ENSG00000198914.2_POU3F3    | ENSG00000160789.18_LMNA | 0.05638  | -0.103747123 | 0.213667579 | 4.90E-01 | 7.46E-01 | 1.00E+00 |
| ENSG00000130159.12_ECSIT    | ENSG00000160789.18_LMNA | -0.21546 | -0.362233754 | -0.05825559 | 7.68E-03 | 5.39E-02 | 1.00E+00 |
| ENSG00000143569.17_UBAP2L   | ENSG00000160789.18_LMNA | 0.18592  | 0.027531671  | 0.335196962 | 2.18E-02 | 1.15E-01 | 1.00E+00 |
| ENSG00000114383.8_TUSC2     | ENSG00000160789.18_LMNA | -0.37472 | -0.503864827 | -0.22919493 | 1.97E-06 | 7.90E-05 | 1.01E-01 |
| ENSG00000134294.12_SLC38A2  | ENSG00000160789.18_LMNA | -0.04225 | -0.200100044 | 0.117747502 | 6.05E-01 | 8.19E-01 | 1.00E+00 |
| ENSG00000165175.14_MID1IP1  | ENSG00000160789.18_LMNA | -0.00032 | -0.159514749 | 0.158886623 | 9.97E-01 | 9.99E-01 | 1.00E+00 |
| ENSG00000134057.13_CCNB1    | ENSG00000160789.18_LMNA | 0.04571  | -0.114326238 | 0.203426827 | 5.76E-01 | 8.02E-01 | 1.00E+00 |
| ENSG00000143401.13_ANP32E   | ENSG00000160789.18_LMNA | 0.28068  | 0.127164392  | 0.421068086 | 4.61E-04 | 6.32E-03 | 1.00E+00 |
| ENSG00000149564.10_ESAM     | ENSG00000160789.18_LMNA | -0.09137 | -0.246981723 | 0.068828121 | 2.63E-01 | 5.46E-01 | 1.00E+00 |
| ENSG00000167118.9_URM1      | ENSG00000160789.18_LMNA | 0.00999  | -0.149452258 | 0.168918199 | 9.03E-01 | 9.62E-01 | 1.00E+00 |
| ENSG00000100982.10_PCIF1    | ENSG00000160789.18_LMNA | -0.03054 | -0.188820733 | 0.129291258 | 7.09E-01 | 8.76E-01 | 1.00E+00 |
| ENSG00000116685.14_KIAA2013 | ENSG00000160789.18_LMNA | 0.38762  | 0.243443535  | 0.515039265 | 8.07E-07 | 3.83E-05 | 4.14E-02 |
| ENSG00000101337.14_TM9SF4   | ENSG00000160789.18_LMNA | 0.3646   | 0.218057199  | 0.495065598 | 3.88E-06 | 1.35E-04 | 1.99E-01 |
| ENSG00000108106.12_UBE2S    | ENSG00000160789.18_LMNA | 0.10039  | -0.059770868 | 0.255502476 | 2.19E-01 | 4.93E-01 | 1.00E+00 |
| ENSG00000004487.14_KDM1A    | ENSG00000160789.18_LMNA | -0.19578 | -0.344253467 | -0.03775891 | 1.56E-02 | 9.03E-02 | 1.00E+00 |
| ENSG00000090971.4_NAT14     | ENSG00000160789.18_LMNA | 0.24298  | 0.087150985  | 0.387203111 | 2.56E-03 | 2.36E-02 | 1.00E+00 |
| ENSG00000115107.18_STEAP3   | ENSG00000160789.18_LMNA | 0.46222  | 0.327086772  | 0.578826098 | 2.04E-09 | 2.81E-07 | 1.05E-04 |
| ENSG00000226976.3_COX6A1P2  | ENSG00000160789.18_LMNA | -0.16996 | -0.320486133 | -0.01105533 | 3.63E-02 | 1.62E-01 | 1.00E+00 |
| ENSG00000159658.9_EFCAB14   | ENSG00000160789.18_LMNA | 0.18533  | 0.026925892  | 0.334658739 | 2.23E-02 | 1.17E-01 | 1.00E+00 |
| ENSG00000119689.13_DLST     | ENSG00000160789.18_LMNA | 0.15479  | -0.00452537  | 0.306436293 | 5.69E-02 | 2.18E-01 | 1.00E+00 |
| ENSG00000054116.10_TRAPPC3  | ENSG00000160789.18_LMNA | -0.07785 | -0.234150039 | 0.082370206 | 3.40E-01 | 6.26E-01 | 1.00E+00 |
| ENSG00000103710.9_RASL12    | ENSG00000160789.18_LMNA | -0.22578 | -0.37161988  | -0.06905812 | 5.16E-03 | 4.02E-02 | 1.00E+00 |
| ENSG00000131386.16_GALNT15  | ENSG00000160789.18_LMNA | -0.18912 | -0.338138912 | -0.03084688 | 1.96E-02 | 1.06E-01 | 1.00E+00 |
| ENSG00000186395.6_KRT10     | ENSG00000160789.18_LMNA | -0.15008 | -0.302063969 | 0.009343489 | 6.50E-02 | 2.37E-01 | 1.00E+00 |
| ENSG00000165443.10_PHYHIPL  | ENSG00000160789.18_LMNA | -0.59228 | -0.686724733 | -0.47816127 | 9.21E-16 | 1.89E-12 | 4.73E-11 |
| ENSG00000188706.11_ZDHHC9   | ENSG00000160789.18_LMNA | 0.10413  | -0.056001224 | 0.259034453 | 2.02E-01 | 4.72E-01 | 1.00E+00 |
| ENSG00000164970.13_FAM219A  | ENSG00000160789.18_LMNA | -0.08381 | -0.239807523 | 0.076413878 | 3.05E-01 | 5.91E-01 | 1.00E+00 |
| ENSG00000099995.17_SF3A1    | ENSG00000160789.18_LMNA | 0.09194  | -0.068258109 | 0.247519414 | 2.60E-01 | 5.43E-01 | 1.00E+00 |

|                             |                         |          |              |             |          |          |          |
|-----------------------------|-------------------------|----------|--------------|-------------|----------|----------|----------|
| ENSG00000103495.12_MAZ      | ENSG00000160789.18_LMNA | 0.07433  | -0.085886458 | 0.230800113 | 3.63E-01 | 6.44E-01 | 1.00E+00 |
| ENSG00000128463.11_EMC4     | ENSG00000160789.18_LMNA | -0.13152 | -0.284757023 | 0.028274184 | 1.06E-01 | 3.24E-01 | 1.00E+00 |
| ENSG00000158615.8_PPP1R15B  | ENSG00000160789.18_LMNA | -0.11237 | -0.266794776 | 0.04768704  | 1.68E-01 | 4.26E-01 | 1.00E+00 |
| ENSG00000110799.12_VWF      | ENSG00000160789.18_LMNA | 0.22036  | 0.06338439   | 0.366697781 | 6.37E-03 | 4.71E-02 | 1.00E+00 |
| ENSG00000100985.7_MMP9      | ENSG00000160789.18_LMNA | 0.20903  | 0.051541193  | 0.356368503 | 9.76E-03 | 6.45E-02 | 1.00E+00 |
| ENSG00000065000.14_AP3D1    | ENSG00000160789.18_LMNA | 0.26913  | 0.114853319  | 0.410735269 | 8.00E-04 | 9.73E-03 | 1.00E+00 |
| ENSG00000088298.11_EDEM2    | ENSG00000160789.18_LMNA | 0.18973  | 0.031475041  | 0.338695674 | 1.92E-02 | 1.05E-01 | 1.00E+00 |
| ENSG00000077152.8_UBE2T     | ENSG00000160789.18_LMNA | -0.11937 | -0.273372383 | 0.040605697 | 1.43E-01 | 3.86E-01 | 1.00E+00 |
| ENSG00000197006.12_METTL9   | ENSG00000160789.18_LMNA | -0.34433 | -0.47736072  | -0.19586358 | 1.40E-05 | 3.86E-04 | 7.19E-01 |
| ENSG00000125355.14_TMEM255  | ENSG00000160789.18_LMNA | -0.02286 | -0.181396463 | 0.136842825 | 7.80E-01 | 9.10E-01 | 1.00E+00 |
| ENSG00000151929.8_BAG3      | ENSG00000160789.18_LMNA | 0.22664  | 0.069966857  | 0.372406659 | 4.99E-03 | 3.92E-02 | 1.00E+00 |
| ENSG00000213281.4_NRAS      | ENSG00000160789.18_LMNA | -0.0305  | -0.188786809 | 0.129325848 | 7.09E-01 | 8.76E-01 | 1.00E+00 |
| ENSG00000128335.12_APOL2    | ENSG00000160789.18_LMNA | 0.11693  | -0.043076922 | 0.27108028  | 1.51E-01 | 4.00E-01 | 1.00E+00 |
| ENSG00000197582.5_GPX1P1    | ENSG00000160789.18_LMNA | -0.02229 | -0.180850978 | 0.137396208 | 7.85E-01 | 9.12E-01 | 1.00E+00 |
| ENSG00000143294.13_PRCC     | ENSG00000160789.18_LMNA | 0.08234  | -0.077880953 | 0.238416046 | 3.13E-01 | 6.00E-01 | 1.00E+00 |
| ENSG00000163541.10_SUCLG1   | ENSG00000160789.18_LMNA | -0.38708 | -0.514568447 | -0.24284082 | 8.38E-07 | 3.94E-05 | 4.30E-02 |
| ENSG00000182872.14_RBM10    | ENSG00000160789.18_LMNA | 0.18851  | 0.030218244  | 0.337581516 | 2.00E-02 | 1.08E-01 | 1.00E+00 |
| ENSG00000177674.14_AGTRAP   | ENSG00000160789.18_LMNA | 0.26154  | 0.106783553  | 0.403920737 | 1.14E-03 | 1.27E-02 | 1.00E+00 |
| ENSG00000130300.7_PLVAP     | ENSG00000160789.18_LMNA | 0.21252  | 0.055189432  | 0.359558347 | 8.57E-03 | 5.86E-02 | 1.00E+00 |
| ENSG00000183258.10_DDX41    | ENSG00000160789.18_LMNA | 0.27673  | 0.122942911  | 0.417533525 | 5.58E-04 | 7.34E-03 | 1.00E+00 |
| ENSG00000137509.9_PRCP      | ENSG00000160789.18_LMNA | -0.19939 | -0.347559845 | -0.04150877 | 1.38E-02 | 8.25E-02 | 1.00E+00 |
| ENSG00000270170.1_NCBP2-AS: | ENSG00000160789.18_LMNA | -0.11333 | -0.267700424 | 0.046713907 | 1.64E-01 | 4.20E-01 | 1.00E+00 |
| ENSG00000162910.17_MRPL55   | ENSG00000160789.18_LMNA | 0.03636  | -0.123555585 | 0.194435524 | 6.57E-01 | 8.48E-01 | 1.00E+00 |
| ENSG00000168329.12_CX3CR1   | ENSG00000160789.18_LMNA | -0.18165 | -0.331266672 | -0.02311326 | 2.51E-02 | 1.27E-01 | 1.00E+00 |
| ENSG00000125520.12_SLC2A4R  | ENSG00000160789.18_LMNA | 0.53766  | 0.4138872    | 0.641916086 | 9.17E-13 | 5.29E-10 | 4.71E-08 |
| ENSG00000105695.13_MAG      | ENSG00000160789.18_LMNA | -0.30068 | -0.438870222 | -0.14858936 | 1.67E-04 | 2.84E-03 | 1.00E+00 |
| ENSG00000112078.12_KCTD20   | ENSG00000160789.18_LMNA | -0.17869 | -0.328543084 | -0.02005847 | 2.76E-02 | 1.36E-01 | 1.00E+00 |
| ENSG00000048544.5_MRPS10    | ENSG00000160789.18_LMNA | -0.22488 | -0.370807839 | -0.06812072 | 5.35E-03 | 4.12E-02 | 1.00E+00 |
| ENSG00000170759.10_KIF5B    | ENSG00000160789.18_LMNA | -0.03141 | -0.189661428 | 0.128433817 | 7.01E-01 | 8.72E-01 | 1.00E+00 |
| ENSG00000162840.4_MT2P1     | ENSG00000160789.18_LMNA | 0.32782  | 0.177907065  | 0.462866722 | 3.74E-05 | 8.51E-04 | 1.00E+00 |
| ENSG00000004478.7_FKBP4     | ENSG00000160789.18_LMNA | -0.09524 | -0.250640604 | 0.06494523  | 2.43E-01 | 5.23E-01 | 1.00E+00 |
| ENSG00000070761.6_CFAP20    | ENSG00000160789.18_LMNA | -0.3072  | -0.444650253 | -0.15560476 | 1.18E-04 | 2.17E-03 | 1.00E+00 |
| ENSG00000119280.15_C1orf198 | ENSG00000160789.18_LMNA | -0.15231 | -0.304139617 | 0.007058013 | 6.10E-02 | 2.28E-01 | 1.00E+00 |

|                              |                         |          |              |             |          |          |          |
|------------------------------|-------------------------|----------|--------------|-------------|----------|----------|----------|
| ENSG00000196507.9_TCEAL3     | ENSG00000160789.18_LMNA | -0.06286 | -0.219857267 | 0.097317907 | 4.42E-01 | 7.09E-01 | 1.00E+00 |
| ENSG00000064115.9_TM7SF3     | ENSG00000160789.18_LMNA | -0.09932 | -0.254495933 | 0.060843498 | 2.23E-01 | 4.99E-01 | 1.00E+00 |
| ENSG00000198467.12_TPM2      | ENSG00000160789.18_LMNA | 0.41819  | 0.277456405  | 0.54134573  | 8.28E-08 | 6.13E-06 | 4.25E-03 |
| ENSG00000278845.3_MRPL45     | ENSG00000160789.18_LMNA | -0.38047 | -0.508852024 | -0.23553963 | 1.33E-06 | 5.82E-05 | 6.83E-02 |
| ENSG00000134247.9_PTGFRN     | ENSG00000160789.18_LMNA | 0.39658  | 0.253373884  | 0.52277291  | 4.24E-07 | 2.31E-05 | 2.17E-02 |
| ENSG00000142875.18_PRKACB    | ENSG00000160789.18_LMNA | -0.46175 | -0.578432988 | -0.32655892 | 2.13E-09 | 2.90E-07 | 1.09E-04 |
| ENSG00000136003.14_ISCU      | ENSG00000160789.18_LMNA | -0.30206 | -0.440093485 | -0.15007164 | 1.56E-04 | 2.68E-03 | 1.00E+00 |
| ENSG00000160888.6_IER2       | ENSG00000160789.18_LMNA | 0.2157   | 0.058506704  | 0.362452648 | 7.61E-03 | 5.35E-02 | 1.00E+00 |
| ENSG00000204128.5_C2orf72    | ENSG00000160789.18_LMNA | -0.06364 | -0.22060765  | 0.096536683 | 4.36E-01 | 7.04E-01 | 1.00E+00 |
| ENSG00000012963.12_UBR7      | ENSG00000160789.18_LMNA | 0.23416  | 0.077856821  | 0.379219484 | 3.69E-03 | 3.12E-02 | 1.00E+00 |
| ENSG00000116120.9_FARSB      | ENSG00000160789.18_LMNA | -0.03974 | -0.197689075 | 0.120222236 | 6.27E-01 | 8.32E-01 | 1.00E+00 |
| ENSG00000255690.2_TRIL       | ENSG00000160789.18_LMNA | 0.03872  | -0.121230787 | 0.196705406 | 6.36E-01 | 8.37E-01 | 1.00E+00 |
| ENSG00000106049.7_HIBADH     | ENSG00000160789.18_LMNA | 0.00815  | -0.151250305 | 0.167130503 | 9.21E-01 | 9.70E-01 | 1.00E+00 |
| ENSG00000170891.9_CYTL1      | ENSG00000160789.18_LMNA | -0.17217 | -0.322533321 | -0.01333819 | 3.39E-02 | 1.55E-01 | 1.00E+00 |
| ENSG00000138434.15_SSFA2     | ENSG00000160789.18_LMNA | 0.22276  | 0.065900718  | 0.368882856 | 5.81E-03 | 4.39E-02 | 1.00E+00 |
| ENSG00000167770.10_OTUB1     | ENSG00000160789.18_LMNA | -0.31964 | -0.455655224 | -0.16904293 | 5.97E-05 | 1.23E-03 | 1.00E+00 |
| ENSG00000234648.1_AL162151.3 | ENSG00000160789.18_LMNA | -0.06567 | -0.222543088 | 0.094519891 | 4.22E-01 | 6.93E-01 | 1.00E+00 |
| ENSG00000164292.11_RHOBTB3   | ENSG00000160789.18_LMNA | -0.08712 | -0.242952078 | 0.073093432 | 2.86E-01 | 5.71E-01 | 1.00E+00 |
| ENSG00000101144.11_BMP7      | ENSG00000160789.18_LMNA | -0.15297 | -0.304749404 | 0.006385964 | 5.99E-02 | 2.25E-01 | 1.00E+00 |
| ENSG00000064490.12_RFXANK    | ENSG00000160789.18_LMNA | 0.14198  | -0.017620098 | 0.294522445 | 8.10E-02 | 2.74E-01 | 1.00E+00 |
| ENSG00000198492.13_YTHDF2    | ENSG00000160789.18_LMNA | 0.04471  | -0.115313187 | 0.202467886 | 5.84E-01 | 8.07E-01 | 1.00E+00 |
| ENSG00000164978.16_NUDT2     | ENSG00000160789.18_LMNA | -0.2166  | -0.363274597 | -0.05945    | 7.36E-03 | 5.22E-02 | 1.00E+00 |
| ENSG00000102225.14_CDK16     | ENSG00000160789.18_LMNA | 0.32364  | 0.173370745  | 0.459180863 | 4.76E-05 | 1.03E-03 | 1.00E+00 |
| ENSG00000245526.7_LINC00461  | ENSG00000160789.18_LMNA | -0.16504 | -0.315942797 | -0.00600047 | 4.22E-02 | 1.80E-01 | 1.00E+00 |
| ENSG00000133606.9_MKRN1      | ENSG00000160789.18_LMNA | 0.09862  | -0.06155156  | 0.253831121 | 2.27E-01 | 5.03E-01 | 1.00E+00 |
| ENSG00000160271.13_RALGDS    | ENSG00000160789.18_LMNA | 0.07953  | -0.080696182 | 0.235742242 | 3.30E-01 | 6.16E-01 | 1.00E+00 |
| ENSG00000001036.12_FUCA2     | ENSG00000160789.18_LMNA | 0.36097  | 0.214068127  | 0.491900198 | 4.91E-06 | 1.64E-04 | 2.52E-01 |
| ENSG00000154589.5_LY96       | ENSG00000160789.18_LMNA | 0.07727  | -0.082946726 | 0.233601304 | 3.44E-01 | 6.29E-01 | 1.00E+00 |
| ENSG00000135439.10_AGAP2     | ENSG00000160789.18_LMNA | -0.28918 | -0.428645558 | -0.13625052 | 3.02E-04 | 4.53E-03 | 1.00E+00 |
| ENSG00000136636.11_KCTD3     | ENSG00000160789.18_LMNA | 0.03716  | -0.122771096 | 0.195201863 | 6.49E-01 | 8.44E-01 | 1.00E+00 |
| ENSG00000187325.4_TAF9B      | ENSG00000160789.18_LMNA | -0.23342 | -0.378551258 | -0.07708127 | 3.80E-03 | 3.19E-02 | 1.00E+00 |
| ENSG00000097007.16_ABL1      | ENSG00000160789.18_LMNA | 0.22032  | 0.06334207   | 0.366661003 | 6.38E-03 | 4.71E-02 | 1.00E+00 |
| ENSG00000104671.6_DCTN6      | ENSG00000160789.18_LMNA | -0.35476 | -0.48648823  | -0.2072693  | 7.31E-06 | 2.27E-04 | 3.75E-01 |

|                             |                         |          |              |             |          |          |          |
|-----------------------------|-------------------------|----------|--------------|-------------|----------|----------|----------|
| ENSG00000106330.10_MOSPD3   | ENSG00000160789.18_LMNA | 0.08549  | -0.074730234 | 0.24140281  | 2.95E-01 | 5.81E-01 | 1.00E+00 |
| ENSG00000243678.10_NME2     | ENSG00000160789.18_LMNA | 0.03781  | -0.122129012 | 0.195828803 | 6.44E-01 | 8.42E-01 | 1.00E+00 |
| ENSG00000160131.12_VMA21    | ENSG00000160789.18_LMNA | -0.13672 | -0.289620399 | 0.02297711  | 9.30E-02 | 2.98E-01 | 1.00E+00 |
| ENSG00000171960.9_PPIH      | ENSG00000160789.18_LMNA | -0.13921 | -0.291939041 | 0.020445507 | 8.72E-02 | 2.87E-01 | 1.00E+00 |
| ENSG00000185608.7_MRPL40    | ENSG00000160789.18_LMNA | -0.12896 | -0.282368117 | 0.030869701 | 1.13E-01 | 3.36E-01 | 1.00E+00 |
| ENSG00000167244.16_IGF2     | ENSG00000160789.18_LMNA | -0.10636 | -0.261140287 | 0.053749406 | 1.92E-01 | 4.60E-01 | 1.00E+00 |
| ENSG00000234797.5_RPS3AP6   | ENSG00000160789.18_LMNA | -0.11437 | -0.268677423 | 0.045663437 | 1.61E-01 | 4.15E-01 | 1.00E+00 |
| ENSG00000138449.9_SLC40A1   | ENSG00000160789.18_LMNA | -0.25681 | -0.399672416 | -0.10177242 | 1.40E-03 | 1.49E-02 | 1.00E+00 |
| ENSG00000198952.8_SMG5      | ENSG00000160789.18_LMNA | 0.27131  | 0.117166026  | 0.412682164 | 7.22E-04 | 8.98E-03 | 1.00E+00 |
| ENSG00000141905.16_NFIC     | ENSG00000160789.18_LMNA | 0.4251   | 0.28519778   | 0.5472618   | 4.79E-08 | 3.93E-06 | 2.46E-03 |
| ENSG00000213625.7_LEPROT    | ENSG00000160789.18_LMNA | 0.0446   | -0.115420149 | 0.202363923 | 5.85E-01 | 8.07E-01 | 1.00E+00 |
| ENSG00000121753.11_ADGRB2   | ENSG00000160789.18_LMNA | 0.1855   | 0.027097523  | 0.33481125  | 2.21E-02 | 1.16E-01 | 1.00E+00 |
| ENSG00000272579.1_RP11-101E | ENSG00000160789.18_LMNA | -0.09569 | -0.251065635 | 0.064493556 | 2.41E-01 | 5.20E-01 | 1.00E+00 |
| ENSG00000125249.6_RAP2A     | ENSG00000160789.18_LMNA | -0.52108 | -0.62817259  | -0.39461867 | 5.89E-12 | 2.29E-09 | 3.02E-07 |
| ENSG00000116906.10_GNPAT    | ENSG00000160789.18_LMNA | -0.20119 | -0.349202118 | -0.04337453 | 1.29E-02 | 7.89E-02 | 1.00E+00 |
| ENSG00000084073.7_ZMPSTE24  | ENSG00000160789.18_LMNA | 0.02718  | -0.132596344 | 0.18557583  | 7.40E-01 | 8.91E-01 | 1.00E+00 |
| ENSG00000130294.13_KIF1A    | ENSG00000160789.18_LMNA | -0.20604 | -0.353637429 | -0.0484241  | 1.09E-02 | 6.95E-02 | 1.00E+00 |
| ENSG00000175602.3_CCDC85B   | ENSG00000160789.18_LMNA | 0.30064  | 0.148545234  | 0.438833788 | 1.68E-04 | 2.84E-03 | 1.00E+00 |
| ENSG00000148110.14_MFSD14B  | ENSG00000160789.18_LMNA | 0.2899   | 0.137018411  | 0.429284068 | 2.92E-04 | 4.40E-03 | 1.00E+00 |
| ENSG00000051108.13_HERPUD1  | ENSG00000160789.18_LMNA | 0.03993  | -0.120028943 | 0.197877526 | 6.25E-01 | 8.31E-01 | 1.00E+00 |
| ENSG0000016864.15_GLT8D1    | ENSG00000160789.18_LMNA | 0.08491  | -0.075306491 | 0.240856987 | 2.98E-01 | 5.84E-01 | 1.00E+00 |
| ENSG00000008952.15_SEC62    | ENSG00000160789.18_LMNA | -0.19919 | -0.347378438 | -0.04130281 | 1.39E-02 | 8.30E-02 | 1.00E+00 |
| ENSG00000171490.11_RSL1D1   | ENSG00000160789.18_LMNA | -0.0627  | -0.219705221 | 0.097476155 | 4.43E-01 | 7.10E-01 | 1.00E+00 |
| ENSG00000203880.10_PCMTD2   | ENSG00000160789.18_LMNA | -0.15321 | -0.304969719 | 0.006143084 | 5.95E-02 | 2.24E-01 | 1.00E+00 |
| ENSG00000140632.15_GLYR1    | ENSG00000160789.18_LMNA | -0.16677 | -0.317543038 | -0.00777907 | 4.00E-02 | 1.73E-01 | 1.00E+00 |
| ENSG00000166181.11_API5     | ENSG00000160789.18_LMNA | 0.06093  | -0.099236356 | 0.218012962 | 4.56E-01 | 7.20E-01 | 1.00E+00 |
| ENSG00000257704.3_INAFM1    | ENSG00000160789.18_LMNA | 0.30957  | 0.158168397  | 0.446756456 | 1.04E-04 | 1.95E-03 | 1.00E+00 |
| ENSG00000234851.4_RPL23AP4  | ENSG00000160789.18_LMNA | -0.05851 | -0.215698287 | 0.101640751 | 4.74E-01 | 7.34E-01 | 1.00E+00 |
| ENSG00000067840.11_PDZD4    | ENSG00000160789.18_LMNA | -0.12203 | -0.27587     | 0.037908516 | 1.34E-01 | 3.72E-01 | 1.00E+00 |
| ENSG00000006007.10_GDE1     | ENSG00000160789.18_LMNA | -0.35315 | -0.485076985 | -0.20550084 | 8.10E-06 | 2.46E-04 | 4.15E-01 |
| ENSG00000167778.7_SPRYD3    | ENSG00000160789.18_LMNA | -0.01166 | -0.170539925 | 0.147819318 | 8.87E-01 | 9.56E-01 | 1.00E+00 |
| ENSG00000197461.12_PDGFA    | ENSG00000160789.18_LMNA | 0.28391  | 0.130610571  | 0.4239469   | 3.93E-04 | 5.59E-03 | 1.00E+00 |
| ENSG00000145349.15_CAMK2D   | ENSG00000160789.18_LMNA | 0.47813  | 0.345203924  | 0.592248027 | 4.68E-10 | 8.34E-08 | 2.40E-05 |

|                            |                         |          |              |             |          |          |          |
|----------------------------|-------------------------|----------|--------------|-------------|----------|----------|----------|
| ENSG00000169439.10_SDC2    | ENSG00000160789.18_LMNA | 0.14681  | -0.012682787 | 0.299025934 | 7.11E-02 | 2.52E-01 | 1.00E+00 |
| ENSG00000123595.6_RAB9A    | ENSG00000160789.18_LMNA | -0.06478 | -0.221697251 | 0.095401602 | 4.28E-01 | 6.98E-01 | 1.00E+00 |
| ENSG00000204209.9_DAXX     | ENSG00000160789.18_LMNA | 0.126    | -0.033879169 | 0.279593339 | 1.22E-01 | 3.51E-01 | 1.00E+00 |
| ENSG00000065150.17_IPO5    | ENSG00000160789.18_LMNA | -0.17159 | -0.3219978   | -0.01274071 | 3.45E-02 | 1.57E-01 | 1.00E+00 |
| ENSG00000156411.8_C14orf2  | ENSG00000160789.18_LMNA | -0.17622 | -0.326266945 | -0.01750995 | 2.99E-02 | 1.43E-01 | 1.00E+00 |
| ENSG00000177963.11_RIC8A   | ENSG00000160789.18_LMNA | 0.3453   | 0.196921756  | 0.478210095 | 1.32E-05 | 3.67E-04 | 6.77E-01 |
| ENSG00000064995.15_TAF11   | ENSG00000160789.18_LMNA | -0.34066 | -0.474143053 | -0.19186087 | 1.75E-05 | 4.63E-04 | 8.99E-01 |
| ENSG00000229344.1_MTCO2P12 | ENSG00000160789.18_LMNA | -0.11797 | -0.272062645 | 0.042018258 | 1.48E-01 | 3.94E-01 | 1.00E+00 |
| ENSG00000082153.16_BZW1    | ENSG00000160789.18_LMNA | 0.00046  | -0.158754682 | 0.159646657 | 9.96E-01 | 9.98E-01 | 1.00E+00 |
| ENSG00000167986.12_DDB1    | ENSG00000160789.18_LMNA | -0.08472 | -0.240673827 | 0.075499817 | 2.99E-01 | 5.86E-01 | 1.00E+00 |
| ENSG00000134575.8_ACP2     | ENSG00000160789.18_LMNA | 0.39819  | 0.255161338  | 0.524160266 | 3.77E-07 | 2.10E-05 | 1.93E-02 |
| ENSG00000114125.12_RNF7    | ENSG00000160789.18_LMNA | -0.10638 | -0.261158368 | 0.053730057 | 1.92E-01 | 4.60E-01 | 1.00E+00 |
| ENSG00000104325.5_DECR1    | ENSG00000160789.18_LMNA | -0.10823 | -0.262902263 | 0.051862819 | 1.84E-01 | 4.50E-01 | 1.00E+00 |
| ENSG00000114023.14_FAM162A | ENSG00000160789.18_LMNA | -0.07636 | -0.232729874 | 0.083861846 | 3.50E-01 | 6.33E-01 | 1.00E+00 |
| ENSG00000107130.8_NCS1     | ENSG00000160789.18_LMNA | 0.02782  | -0.131966717 | 0.186194528 | 7.34E-01 | 8.88E-01 | 1.00E+00 |
| ENSG00000143811.15_PYCR2   | ENSG00000160789.18_LMNA | 0.08261  | -0.07761233  | 0.238670924 | 3.12E-01 | 5.98E-01 | 1.00E+00 |
| ENSG00000071051.12_NCK2    | ENSG00000160789.18_LMNA | 0.14952  | -0.009918388 | 0.301541386 | 6.60E-02 | 2.40E-01 | 1.00E+00 |
| ENSG00000255737.2_AGAP2-AS | ENSG00000160789.18_LMNA | 0.05916  | -0.100993192 | 0.216322033 | 4.69E-01 | 7.30E-01 | 1.00E+00 |
| ENSG00000163634.10_THOC7   | ENSG00000160789.18_LMNA | -0.20895 | -0.356295626 | -0.05145794 | 9.78E-03 | 6.46E-02 | 1.00E+00 |
| ENSG00000176171.10_BNIP3   | ENSG00000160789.18_LMNA | 0.02485  | -0.134879772 | 0.183329921 | 7.61E-01 | 9.00E-01 | 1.00E+00 |
| ENSG00000188243.11_COMMD6  | ENSG00000160789.18_LMNA | -0.19791 | -0.346202576 | -0.03996841 | 1.45E-02 | 8.59E-02 | 1.00E+00 |
| ENSG00000113369.7_ARRDC3   | ENSG00000160789.18_LMNA | 0.06415  | -0.096027857 | 0.221096187 | 4.32E-01 | 7.02E-01 | 1.00E+00 |
| ENSG00000183864.4_TOB2     | ENSG00000160789.18_LMNA | -0.20868 | -0.356055724 | -0.0511839  | 9.88E-03 | 6.50E-02 | 1.00E+00 |
| ENSG00000009954.9_BAZ1B    | ENSG00000160789.18_LMNA | 0.32796  | 0.178055703  | 0.462987327 | 3.71E-05 | 8.48E-04 | 1.00E+00 |
| ENSG00000131477.9_RAMP2    | ENSG00000160789.18_LMNA | -0.24529 | -0.389289797 | -0.08958885 | 2.32E-03 | 2.19E-02 | 1.00E+00 |
| ENSG00000174871.9_CNIH2    | ENSG00000160789.18_LMNA | -0.10324 | -0.258194101 | 0.056898939 | 2.06E-01 | 4.77E-01 | 1.00E+00 |
| ENSG00000137804.11_NUSAP1  | ENSG00000160789.18_LMNA | 0.0669   | -0.093298179 | 0.223714304 | 4.13E-01 | 6.86E-01 | 1.00E+00 |
| ENSG00000265681.5_RPL17    | ENSG00000160789.18_LMNA | -0.15963 | -0.31093032  | -0.00044196 | 4.95E-02 | 2.00E-01 | 1.00E+00 |
| ENSG00000170290.3_SLN      | ENSG00000160789.18_LMNA | -0.08288 | -0.238925768 | 0.077343697 | 3.10E-01 | 5.96E-01 | 1.00E+00 |
| ENSG00000108465.13_CDK5RAP | ENSG00000160789.18_LMNA | 0.07751  | -0.082706547 | 0.233829932 | 3.43E-01 | 6.27E-01 | 1.00E+00 |
| ENSG00000086589.10_RBM22   | ENSG00000160789.18_LMNA | -0.19275 | -0.341473738 | -0.034613   | 1.74E-02 | 9.74E-02 | 1.00E+00 |
| ENSG00000106554.10_CHCHD3  | ENSG00000160789.18_LMNA | 0.20977  | 0.052313624  | 0.357044472 | 9.49E-03 | 6.32E-02 | 1.00E+00 |
| ENSG00000091592.14_NLRP1   | ENSG00000160789.18_LMNA | -0.16929 | -0.319869826 | -0.01036871 | 3.71E-02 | 1.65E-01 | 1.00E+00 |

|                            |                         |          |              |             |          |          |          |
|----------------------------|-------------------------|----------|--------------|-------------|----------|----------|----------|
| ENSG00000119471.13_HSDL2   | ENSG00000160789.18_LMNA | 0.02307  | -0.136628509 | 0.181607668 | 7.78E-01 | 9.09E-01 | 1.00E+00 |
| ENSG00000233476.3_EEF1A1P6 | ENSG00000160789.18_LMNA | -0.12413 | -0.277844745 | 0.035772743 | 1.28E-01 | 3.62E-01 | 1.00E+00 |
| ENSG00000187109.12_NAP1L1  | ENSG00000160789.18_LMNA | -0.28583 | -0.425662161 | -0.13266726 | 3.57E-04 | 5.16E-03 | 1.00E+00 |
| ENSG00000100567.11_PSMA3   | ENSG00000160789.18_LMNA | 0.02816  | -0.13162896  | 0.186526317 | 7.31E-01 | 8.86E-01 | 1.00E+00 |
| ENSG00000103266.9_STUB1    | ENSG00000160789.18_LMNA | 0.01653  | -0.143046416 | 0.175270184 | 8.40E-01 | 9.38E-01 | 1.00E+00 |
| ENSG00000117133.9_RPF1     | ENSG00000160789.18_LMNA | -0.08163 | -0.237740326 | 0.07859289  | 3.17E-01 | 6.04E-01 | 1.00E+00 |
| ENSG00000182149.19_IST1    | ENSG00000160789.18_LMNA | -0.13789 | -0.290706521 | 0.021791729 | 9.03E-02 | 2.93E-01 | 1.00E+00 |
| ENSG00000197093.9_GAL3ST4  | ENSG00000160789.18_LMNA | 0.17005  | 0.011154729  | 0.320575329 | 3.62E-02 | 1.62E-01 | 1.00E+00 |
| ENSG00000105723.10_GSK3A   | ENSG00000160789.18_LMNA | 0.09049  | -0.069712269 | 0.246147322 | 2.68E-01 | 5.52E-01 | 1.00E+00 |
| ENSG00000160877.5_NACC1    | ENSG00000160789.18_LMNA | 0.26838  | 0.114052376  | 0.410060385 | 8.29E-04 | 9.99E-03 | 1.00E+00 |
| ENSG00000160803.7_UBQLN4   | ENSG00000160789.18_LMNA | -0.19978 | -0.347914028 | -0.04191097 | 1.36E-02 | 8.17E-02 | 1.00E+00 |
| ENSG00000120896.12_SORBS3  | ENSG00000160789.18_LMNA | 0.28074  | 0.127225072  | 0.421118827 | 4.59E-04 | 6.32E-03 | 1.00E+00 |
| ENSG00000155506.15_LARP1   | ENSG00000160789.18_LMNA | 0.2451   | 0.089385281  | 0.389115672 | 2.34E-03 | 2.21E-02 | 1.00E+00 |
| ENSG00000160310.15_PRMT2   | ENSG00000160789.18_LMNA | 0.22334  | 0.066505478  | 0.369407506 | 5.68E-03 | 4.31E-02 | 1.00E+00 |
| ENSG00000188191.13_PRKAR1B | ENSG00000160789.18_LMNA | -0.09652 | -0.251852444 | 0.063657086 | 2.37E-01 | 5.15E-01 | 1.00E+00 |
| ENSG00000175928.5_LRRN1    | ENSG00000160789.18_LMNA | -0.2954  | -0.434185623 | -0.14292488 | 2.20E-04 | 3.52E-03 | 1.00E+00 |
| ENSG00000155463.11_OXA1L   | ENSG00000160789.18_LMNA | 0.25447  | 0.099290549  | 0.397563589 | 1.56E-03 | 1.62E-02 | 1.00E+00 |
| ENSG00000077721.14_UBE2A   | ENSG00000160789.18_LMNA | -0.12607 | -0.279661108 | 0.033805736 | 1.22E-01 | 3.51E-01 | 1.00E+00 |
| ENSG00000165168.7_CYBB     | ENSG00000160789.18_LMNA | 0.02323  | -0.136470931 | 0.18176294  | 7.76E-01 | 9.08E-01 | 1.00E+00 |
| ENSG00000196235.12_SUPT5H  | ENSG00000160789.18_LMNA | 0.0733   | -0.086914577 | 0.229819206 | 3.69E-01 | 6.50E-01 | 1.00E+00 |
| ENSG00000244405.6_ETV5     | ENSG00000160789.18_LMNA | 0.27422  | 0.120274323  | 0.41529456  | 6.29E-04 | 8.08E-03 | 1.00E+00 |
| ENSG00000001629.8_ANKIB1   | ENSG00000160789.18_LMNA | -0.06625 | -0.223096723 | 0.093942506 | 4.17E-01 | 6.90E-01 | 1.00E+00 |
| ENSG00000154719.12_MRPL39  | ENSG00000160789.18_LMNA | 0.04733  | -0.112722557 | 0.204983699 | 5.63E-01 | 7.94E-01 | 1.00E+00 |
| ENSG00000130560.7_UBAC1    | ENSG00000160789.18_LMNA | 0.00416  | -0.155140967 | 0.16325506  | 9.59E-01 | 9.84E-01 | 1.00E+00 |
| ENSG00000124181.13_PLCG1   | ENSG00000160789.18_LMNA | 0.22384  | 0.067027365  | 0.369860106 | 5.57E-03 | 4.25E-02 | 1.00E+00 |
| ENSG00000117228.9_GBP1     | ENSG00000160789.18_LMNA | 0.27764  | 0.123915407  | 0.418348567 | 5.34E-04 | 7.10E-03 | 1.00E+00 |
| ENSG00000136807.10_CDK9    | ENSG00000160789.18_LMNA | 0.13764  | -0.022041085 | 0.290478112 | 9.08E-02 | 2.94E-01 | 1.00E+00 |
| ENSG00000204574.11_ABCF1   | ENSG00000160789.18_LMNA | 0.12762  | -0.032239003 | 0.281106248 | 1.17E-01 | 3.43E-01 | 1.00E+00 |
| ENSG00000085719.10_CPNE3   | ENSG00000160789.18_LMNA | -0.02338 | -0.181904227 | 0.136327531 | 7.75E-01 | 9.07E-01 | 1.00E+00 |
| ENSG00000139726.9_DENR     | ENSG00000160789.18_LMNA | 0.02333  | -0.136381292 | 0.181851259 | 7.75E-01 | 9.08E-01 | 1.00E+00 |
| ENSG00000168488.17_ATXN2L  | ENSG00000160789.18_LMNA | 0.18811  | 0.029800038  | 0.337210584 | 2.03E-02 | 1.09E-01 | 1.00E+00 |
| ENSG00000158164.6_TMSB15A  | ENSG00000160789.18_LMNA | -0.30691 | -0.444400003 | -0.15530042 | 1.20E-04 | 2.19E-03 | 1.00E+00 |
| ENSG00000139318.7_DUSP6    | ENSG00000160789.18_LMNA | 0.32304  | 0.172724099  | 0.458654647 | 4.92E-05 | 1.06E-03 | 1.00E+00 |

|                             |                         |          |              |             |          |          |          |
|-----------------------------|-------------------------|----------|--------------|-------------|----------|----------|----------|
| ENSG00000129559.11_NEDD8    | ENSG00000160789.18_LMNA | -0.09166 | -0.247256422 | 0.068536935 | 2.61E-01 | 5.45E-01 | 1.00E+00 |
| ENSG00000113328.17_CCNG1    | ENSG00000160789.18_LMNA | -0.04957 | -0.207136201 | 0.110502609 | 5.44E-01 | 7.82E-01 | 1.00E+00 |
| ENSG00000164548.9_TRA2A     | ENSG00000160789.18_LMNA | -0.13893 | -0.291678049 | 0.02073067  | 8.78E-02 | 2.88E-01 | 1.00E+00 |
| ENSG00000110717.9_NDUFS8    | ENSG00000160789.18_LMNA | 0.08529  | -0.074932737 | 0.241211026 | 2.96E-01 | 5.82E-01 | 1.00E+00 |
| ENSG00000168802.11_CHTF8    | ENSG00000160789.18_LMNA | 0.02346  | -0.136251335 | 0.181979295 | 7.74E-01 | 9.07E-01 | 1.00E+00 |
| ENSG00000143641.9_GALNT2    | ENSG00000160789.18_LMNA | 0.49207  | 0.361157757  | 0.60395484  | 1.21E-10 | 2.62E-08 | 6.20E-06 |
| ENSG00000205352.9_PRR13     | ENSG00000160789.18_LMNA | -0.06935 | -0.226057415 | 0.090851179 | 3.96E-01 | 6.73E-01 | 1.00E+00 |
| ENSG00000171860.4_C3AR1     | ENSG00000160789.18_LMNA | -0.02244 | -0.180997151 | 0.137247939 | 7.84E-01 | 9.11E-01 | 1.00E+00 |
| ENSG00000132676.14_DAP3     | ENSG00000160789.18_LMNA | 0.13247  | -0.027305538 | 0.285647567 | 1.04E-01 | 3.19E-01 | 1.00E+00 |
| ENSG00000156515.20_HK1      | ENSG00000160789.18_LMNA | 0.36605  | 0.219651881  | 0.496328953 | 3.52E-06 | 1.25E-04 | 1.81E-01 |
| ENSG00000085733.14_CTTN     | ENSG00000160789.18_LMNA | 0.22377  | 0.066959738  | 0.369801465 | 5.58E-03 | 4.26E-02 | 1.00E+00 |
| ENSG00000020129.14_NCDN     | ENSG00000160789.18_LMNA | -0.00697 | -0.165986709 | 0.152399618 | 9.32E-01 | 9.73E-01 | 1.00E+00 |
| ENSG00000116478.10_HDAC1    | ENSG00000160789.18_LMNA | 0.26279  | 0.108111617  | 0.405044495 | 1.07E-03 | 1.22E-02 | 1.00E+00 |
| ENSG00000170989.8_S1PR1     | ENSG00000160789.18_LMNA | -0.27036 | -0.411836944 | -0.1161616  | 7.55E-04 | 9.29E-03 | 1.00E+00 |
| ENSG00000163938.15_GNL3     | ENSG00000160789.18_LMNA | -0.06597 | -0.222826317 | 0.094224539 | 4.19E-01 | 6.91E-01 | 1.00E+00 |
| ENSG00000049449.7_RCN1      | ENSG00000160789.18_LMNA | 0.27252  | 0.118462468  | 0.413772362 | 6.82E-04 | 8.60E-03 | 1.00E+00 |
| ENSG00000124541.6_RRP36     | ENSG00000160789.18_LMNA | -0.06761 | -0.224397337 | 0.092585257 | 4.08E-01 | 6.83E-01 | 1.00E+00 |
| ENSG00000120333.4_MRPS14    | ENSG00000160789.18_LMNA | -0.33774 | -0.471588039 | -0.18868916 | 2.09E-05 | 5.35E-04 | 1.00E+00 |
| ENSG00000131747.13_TOP2A    | ENSG00000160789.18_LMNA | -0.02514 | -0.18360309  | 0.13460222  | 7.59E-01 | 8.99E-01 | 1.00E+00 |
| ENSG00000086300.14_SNX10    | ENSG00000160789.18_LMNA | 0.02672  | -0.133046525 | 0.185133309 | 7.44E-01 | 8.93E-01 | 1.00E+00 |
| ENSG00000100836.9_PABPN1    | ENSG00000160789.18_LMNA | 0.01734  | -0.142251322 | 0.176056749 | 8.32E-01 | 9.35E-01 | 1.00E+00 |
| ENSG00000142188.15_TMEM50B  | ENSG00000160789.18_LMNA | -0.04224 | -0.200097743 | 0.117749866 | 6.05E-01 | 8.19E-01 | 1.00E+00 |
| ENSG00000106052.12_TAX1BP1  | ENSG00000160789.18_LMNA | 0.08382  | -0.076403706 | 0.239817166 | 3.05E-01 | 5.91E-01 | 1.00E+00 |
| ENSG00000147027.3_TMEM47    | ENSG00000160789.18_LMNA | -0.03911 | -0.197082014 | 0.12084473  | 6.32E-01 | 8.35E-01 | 1.00E+00 |
| ENSG00000087074.7_PPP1R15A  | ENSG00000160789.18_LMNA | 0.43147  | 0.292349992  | 0.552704449 | 2.86E-08 | 2.61E-06 | 1.47E-03 |
| ENSG00000011009.9_LYPLA2    | ENSG00000160789.18_LMNA | 0.32859  | 0.178736712  | 0.463539764 | 3.58E-05 | 8.25E-04 | 1.00E+00 |
| ENSG00000186010.17_NDUFA13  | ENSG00000160789.18_LMNA | -0.16197 | -0.313094639 | -0.00283969 | 4.62E-02 | 1.91E-01 | 1.00E+00 |
| ENSG00000182944.16_EWSR1    | ENSG00000160789.18_LMNA | -0.0084  | -0.167377607 | 0.151001896 | 9.18E-01 | 9.69E-01 | 1.00E+00 |
| ENSG00000168286.2_THAP11    | ENSG00000160789.18_LMNA | -0.11806 | -0.272140992 | 0.041933796 | 1.47E-01 | 3.94E-01 | 1.00E+00 |
| ENSG00000264281.3_CTD-2031P | ENSG00000160789.18_LMNA | -0.19715 | -0.345508244 | -0.03918097 | 1.49E-02 | 8.75E-02 | 1.00E+00 |
| ENSG00000105619.12_TFPT     | ENSG00000160789.18_LMNA | 0.15371  | -0.005630771 | 0.305434327 | 5.87E-02 | 2.22E-01 | 1.00E+00 |
| ENSG00000127337.5_YEATS4    | ENSG00000160789.18_LMNA | -0.25412 | -0.397246077 | -0.09891719 | 1.58E-03 | 1.63E-02 | 1.00E+00 |
| ENSG00000157191.18_NECAP2   | ENSG00000160789.18_LMNA | -0.10116 | -0.256233664 | 0.058991216 | 2.15E-01 | 4.89E-01 | 1.00E+00 |



|                            |                         |          |              |             |          |          |          |
|----------------------------|-------------------------|----------|--------------|-------------|----------|----------|----------|
| ENSG00000114767.6_RRP9     | ENSG00000160789.18_LMNA | 0.07314  | -0.087071364 | 0.229669562 | 3.71E-01 | 6.51E-01 | 1.00E+00 |
| ENSG00000212802.4_RPL15P3  | ENSG00000160789.18_LMNA | -0.22754 | -0.373221062 | -0.07090803 | 4.81E-03 | 3.81E-02 | 1.00E+00 |
| ENSG00000136448.10_NMT1    | ENSG00000160789.18_LMNA | -0.01845 | -0.177134305 | 0.141161414 | 8.21E-01 | 9.30E-01 | 1.00E+00 |
| ENSG00000066117.13_SMARCD1 | ENSG00000160789.18_LMNA | -0.08788 | -0.243675995 | 0.072328029 | 2.82E-01 | 5.67E-01 | 1.00E+00 |
| ENSG00000084652.14_TXLNA   | ENSG00000160789.18_LMNA | 0.40831  | 0.266423415  | 0.53286876  | 1.77E-07 | 1.15E-05 | 9.09E-03 |
| ENSG00000162704.14_ARPC5   | ENSG00000160789.18_LMNA | -0.03391 | -0.192070284 | 0.12597434  | 6.78E-01 | 8.60E-01 | 1.00E+00 |
| ENSG00000135929.7_CYP27A1  | ENSG00000160789.18_LMNA | 0.29475  | 0.142219457  | 0.433601126 | 2.28E-04 | 3.62E-03 | 1.00E+00 |
| ENSG00000198721.11_ECI2    | ENSG00000160789.18_LMNA | 0.02216  | -0.137523688 | 0.18072529  | 7.86E-01 | 9.13E-01 | 1.00E+00 |
| ENSG00000023191.15_RNH1    | ENSG00000160789.18_LMNA | 0.41367  | 0.272408741  | 0.537474108 | 1.18E-07 | 8.26E-06 | 6.03E-03 |
| ENSG00000149532.14_CPSF7   | ENSG00000160789.18_LMNA | -0.11493 | -0.269207967 | 0.045092705 | 1.59E-01 | 4.12E-01 | 1.00E+00 |
| ENSG00000142186.15_SCYL1   | ENSG00000160789.18_LMNA | 0.28057  | 0.127040994  | 0.420964894 | 4.63E-04 | 6.35E-03 | 1.00E+00 |
| ENSG00000005194.13_CIAPIN1 | ENSG00000160789.18_LMNA | -0.23942 | -0.383982994 | -0.08339598 | 2.97E-03 | 2.66E-02 | 1.00E+00 |
| ENSG00000124380.9_SNRNP27  | ENSG00000160789.18_LMNA | -0.29924 | -0.437596587 | -0.14704743 | 1.80E-04 | 3.01E-03 | 1.00E+00 |
| ENSG00000109220.9_CHIC2    | ENSG00000160789.18_LMNA | -0.17154 | -0.321948909 | -0.01268617 | 3.46E-02 | 1.57E-01 | 1.00E+00 |
| ENSG00000169245.5_CXCL10   | ENSG00000160789.18_LMNA | 0.11666  | -0.043350155 | 0.270826633 | 1.52E-01 | 4.02E-01 | 1.00E+00 |
| ENSG00000165949.11_IFI27   | ENSG00000160789.18_LMNA | -0.10514 | -0.259990343 | 0.054979465 | 1.97E-01 | 4.67E-01 | 1.00E+00 |
| ENSG00000100528.10_CNIH1   | ENSG00000160789.18_LMNA | -0.14123 | -0.293827249 | 0.018380908 | 8.26E-02 | 2.78E-01 | 1.00E+00 |
| ENSG00000072062.12_PRKACA  | ENSG00000160789.18_LMNA | 0.32788  | 0.177964538  | 0.462913357 | 3.73E-05 | 8.50E-04 | 1.00E+00 |
| ENSG00000141543.8	EIF4A3   | ENSG00000160789.18_LMNA | 0.16389  | 0.004814533  | 0.314874813 | 4.36E-02 | 1.84E-01 | 1.00E+00 |
| ENSG00000132561.12_MATN2   | ENSG00000160789.18_LMNA | -0.00119 | -0.160355494 | 0.158045474 | 9.88E-01 | 9.96E-01 | 1.00E+00 |
| ENSG0000010610.8_CD4       | ENSG00000160789.18_LMNA | 0.03306  | -0.126806486 | 0.191255693 | 6.86E-01 | 8.64E-01 | 1.00E+00 |
| ENSG00000188010.11_MORN2   | ENSG00000160789.18_LMNA | -0.20175 | -0.349720294 | -0.04396367 | 1.27E-02 | 7.77E-02 | 1.00E+00 |
| ENSG00000124333.13_VAMP7   | ENSG00000160789.18_LMNA | -0.06441 | -0.221345341 | 0.095768291 | 4.30E-01 | 7.00E-01 | 1.00E+00 |
| ENSG00000175221.13_MED16   | ENSG00000160789.18_LMNA | 0.15889  | -0.000322964 | 0.310239187 | 5.06E-02 | 2.03E-01 | 1.00E+00 |
| ENSG00000130558.17_OLFM1   | ENSG00000160789.18_LMNA | -0.1397  | -0.292395687 | 0.019946446 | 8.61E-02 | 2.85E-01 | 1.00E+00 |
| ENSG00000262655.3_SPON1    | ENSG00000160789.18_LMNA | -0.24453 | -0.388603789 | -0.08878699 | 2.40E-03 | 2.25E-02 | 1.00E+00 |
| ENSG00000164611.11_PTTG1   | ENSG00000160789.18_LMNA | 0.04103  | -0.118946536 | 0.198932386 | 6.16E-01 | 8.26E-01 | 1.00E+00 |
| ENSG00000135018.12_UBQLN1  | ENSG00000160789.18_LMNA | 0.07055  | -0.089653618 | 0.227202798 | 3.88E-01 | 6.66E-01 | 1.00E+00 |
| ENSG00000136908.16_DPM2    | ENSG00000160789.18_LMNA | 0.11135  | -0.048711537 | 0.265840725 | 1.72E-01 | 4.31E-01 | 1.00E+00 |
| ENSG00000174307.6_PHLDA3   | ENSG00000160789.18_LMNA | 0.39067  | 0.246818803  | 0.517672857 | 6.49E-07 | 3.23E-05 | 3.33E-02 |
| ENSG00000129084.16_PSMA1   | ENSG00000160789.18_LMNA | -0.0545  | -0.211860983 | 0.105618643 | 5.05E-01 | 7.56E-01 | 1.00E+00 |
| ENSG00000170881.4_RNF139   | ENSG00000160789.18_LMNA | -0.27568 | -0.416597766 | -0.12182708 | 5.87E-04 | 7.65E-03 | 1.00E+00 |
| ENSG00000273749.3_CYFIP1   | ENSG00000160789.18_LMNA | 0.08571  | -0.074505913 | 0.241615231 | 2.94E-01 | 5.80E-01 | 1.00E+00 |

|                             |                         |          |              |             |          |          |          |
|-----------------------------|-------------------------|----------|--------------|-------------|----------|----------|----------|
| ENSG00000180900.15_SCRIB    | ENSG00000160789.18_LMNA | 0.20548  | 0.047848247  | 0.353132315 | 1.11E-02 | 7.05E-02 | 1.00E+00 |
| ENSG00000119048.6_UBE2B     | ENSG00000160789.18_LMNA | -0.23837 | -0.383032826 | -0.08228961 | 3.10E-03 | 2.74E-02 | 1.00E+00 |
| ENSG00000139970.15_RTN1     | ENSG00000160789.18_LMNA | -0.2744  | -0.415452606 | -0.12046256 | 6.24E-04 | 8.03E-03 | 1.00E+00 |
| ENSG00000068745.13_IP6K2    | ENSG00000160789.18_LMNA | -0.22142 | -0.367663657 | -0.06449622 | 6.12E-03 | 4.56E-02 | 1.00E+00 |
| ENSG00000101266.15_CSNK2A1  | ENSG00000160789.18_LMNA | -0.00332 | -0.162435512 | 0.15596247  | 9.68E-01 | 9.87E-01 | 1.00E+00 |
| ENSG00000221823.9_PPP3R1    | ENSG00000160789.18_LMNA | -0.35875 | -0.489965737 | -0.21163485 | 5.67E-06 | 1.84E-04 | 2.91E-01 |
| ENSG00000179344.15_HLA-DQB1 | ENSG00000160789.18_LMNA | 0.12097  | -0.038981272 | 0.274877124 | 1.38E-01 | 3.78E-01 | 1.00E+00 |
| ENSG00000133597.8_ADCK2     | ENSG00000160789.18_LMNA | 0.24662  | 0.090990842  | 0.39048844  | 2.19E-03 | 2.10E-02 | 1.00E+00 |
| ENSG00000161981.9_SNRNP25   | ENSG00000160789.18_LMNA | -0.21735 | -0.363960998 | -0.06023815 | 7.15E-03 | 5.12E-02 | 1.00E+00 |
| ENSG00000237441.8_RGL2      | ENSG00000160789.18_LMNA | 0.05019  | -0.109891609 | 0.207728098 | 5.39E-01 | 7.79E-01 | 1.00E+00 |
| ENSG00000166228.7_PCBD1     | ENSG00000160789.18_LMNA | -0.01395 | -0.172762474 | 0.145578579 | 8.65E-01 | 9.47E-01 | 1.00E+00 |
| ENSG00000048828.15_FAM120A  | ENSG00000160789.18_LMNA | 0.34938  | 0.201384817  | 0.481786725 | 1.03E-05 | 2.97E-04 | 5.26E-01 |
| ENSG00000158109.13_TPRG1L   | ENSG00000160789.18_LMNA | -0.23017 | -0.37560424  | -0.07366528 | 4.34E-03 | 3.52E-02 | 1.00E+00 |
| ENSG00000173546.7_CSPG4     | ENSG00000160789.18_LMNA | 0.26629  | 0.111829796  | 0.408185915 | 9.13E-04 | 1.08E-02 | 1.00E+00 |
| ENSG00000096080.10_MRPS18A  | ENSG00000160789.18_LMNA | 0.02614  | -0.13361819  | 0.184571184 | 7.49E-01 | 8.95E-01 | 1.00E+00 |
| ENSG00000224877.3_NDUFAF8   | ENSG00000160789.18_LMNA | -0.09304 | -0.248560861 | 0.067153475 | 2.54E-01 | 5.36E-01 | 1.00E+00 |
| ENSG00000158716.7_DUSP23    | ENSG00000160789.18_LMNA | 0.15601  | -0.003272102 | 0.307571455 | 5.49E-02 | 2.14E-01 | 1.00E+00 |
| ENSG00000127948.12_POR      | ENSG00000160789.18_LMNA | 0.34246  | 0.193830394  | 0.475727241 | 1.57E-05 | 4.22E-04 | 8.05E-01 |
| ENSG00000221978.10_CCNL2    | ENSG00000160789.18_LMNA | -0.02607 | -0.184506344 | 0.133684117 | 7.50E-01 | 8.95E-01 | 1.00E+00 |
| ENSG00000146005.3_PSD2      | ENSG00000160789.18_LMNA | -0.35567 | -0.487276665 | -0.20825811 | 6.90E-06 | 2.18E-04 | 3.54E-01 |
| ENSG00000018408.13_WWTR1    | ENSG00000160789.18_LMNA | 0.50356  | 0.374369296  | 0.613570721 | 3.78E-11 | 1.01E-08 | 1.94E-06 |
| ENSG00000119487.15_MAPKAP1  | ENSG00000160789.18_LMNA | 0.08292  | -0.07730174  | 0.238965568 | 3.10E-01 | 5.96E-01 | 1.00E+00 |
| ENSG00000184489.10_PTP4A3   | ENSG00000160789.18_LMNA | 0.27753  | 0.123797782  | 0.418250011 | 5.37E-04 | 7.13E-03 | 1.00E+00 |
| ENSG00000065154.10_OAT      | ENSG00000160789.18_LMNA | -0.27814 | -0.418799299 | -0.12445346 | 5.21E-04 | 6.97E-03 | 1.00E+00 |
| ENSG00000169032.8_MAP2K1    | ENSG00000160789.18_LMNA | 0.12777  | -0.032085209 | 0.28124803  | 1.17E-01 | 3.42E-01 | 1.00E+00 |
| ENSG00000179526.15_SHARPIN  | ENSG00000160789.18_LMNA | 0.22045  | 0.063472258  | 0.366774138 | 6.35E-03 | 4.70E-02 | 1.00E+00 |
| ENSG00000241258.5_CRCP      | ENSG00000160789.18_LMNA | 0.11606  | -0.043952648 | 0.270267174 | 1.54E-01 | 4.05E-01 | 1.00E+00 |
| ENSG00000132386.9_SERPINF1  | ENSG00000160789.18_LMNA | 0.13007  | -0.02974914  | 0.283399954 | 1.10E-01 | 3.31E-01 | 1.00E+00 |
| ENSG00000104687.11_GSR      | ENSG00000160789.18_LMNA | 0.12227  | -0.037666605 | 0.276093805 | 1.33E-01 | 3.71E-01 | 1.00E+00 |
| ENSG00000182013.16_PNMAL1   | ENSG00000160789.18_LMNA | -0.0782  | -0.234484598 | 0.082018603 | 3.38E-01 | 6.24E-01 | 1.00E+00 |
| ENSG00000100030.13_MAPK1    | ENSG00000160789.18_LMNA | -0.00015 | -0.159346319 | 0.159055078 | 9.99E-01 | 9.99E-01 | 1.00E+00 |
| ENSG00000162076.11_FLYWCH2  | ENSG00000160789.18_LMNA | 0.06542  | -0.09476506  | 0.222307943 | 4.23E-01 | 6.94E-01 | 1.00E+00 |
| ENSG00000103449.10_SALL1    | ENSG00000160789.18_LMNA | 0.12347  | -0.036451512 | 0.27721744  | 1.30E-01 | 3.65E-01 | 1.00E+00 |

|                             |                         |          |              |             |          |          |          |
|-----------------------------|-------------------------|----------|--------------|-------------|----------|----------|----------|
| ENSG00000173039.17_RELA     | ENSG00000160789.18_LMNA | 0.26273  | 0.108044736  | 0.404987924 | 1.08E-03 | 1.23E-02 | 1.00E+00 |
| ENSG00000067704.9_IARS2     | ENSG00000160789.18_LMNA | 0.24045  | 0.084481216  | 0.384914394 | 2.85E-03 | 2.57E-02 | 1.00E+00 |
| ENSG00000049860.12_HEXB     | ENSG00000160789.18_LMNA | 0.39036  | 0.246476293  | 0.517405843 | 6.64E-07 | 3.29E-05 | 3.41E-02 |
| ENSG00000140612.12_SEC11A   | ENSG00000160789.18_LMNA | 0.10512  | -0.055003509 | 0.259967857 | 1.97E-01 | 4.67E-01 | 1.00E+00 |
| ENSG00000182180.12_MRPS16   | ENSG00000160789.18_LMNA | -0.20355 | -0.351360579 | -0.04582998 | 1.19E-02 | 7.43E-02 | 1.00E+00 |
| ENSG00000178381.10_ZFAND2A  | ENSG00000160789.18_LMNA | -0.03789 | -0.195907971 | 0.122047913 | 6.43E-01 | 8.41E-01 | 1.00E+00 |
| ENSG00000151729.9_SLC25A4   | ENSG00000160789.18_LMNA | -0.2784  | -0.419027983 | -0.12472651 | 5.15E-04 | 6.90E-03 | 1.00E+00 |
| ENSG00000120063.8_GNA13     | ENSG00000160789.18_LMNA | -0.07509 | -0.231518608 | 0.085132954 | 3.58E-01 | 6.41E-01 | 1.00E+00 |
| ENSG00000136720.6_HS6ST1    | ENSG00000160789.18_LMNA | 0.3863   | 0.241977116  | 0.513893475 | 8.86E-07 | 4.14E-05 | 4.54E-02 |
| ENSG00000103051.17_COG4     | ENSG00000160789.18_LMNA | -0.00888 | -0.167839044 | 0.150537914 | 9.14E-01 | 9.67E-01 | 1.00E+00 |
| ENSG00000091513.13_TF       | ENSG00000160789.18_LMNA | -0.37804 | -0.506739746 | -0.23284954 | 1.57E-06 | 6.66E-05 | 8.07E-02 |
| ENSG00000250317.7_SMIM20    | ENSG00000160789.18_LMNA | -0.26996 | -0.411472234 | -0.11572838 | 7.70E-04 | 9.42E-03 | 1.00E+00 |
| ENSG00000184371.12_CSF1     | ENSG00000160789.18_LMNA | 0.33796  | 0.188924077  | 0.471777446 | 2.06E-05 | 5.29E-04 | 1.00E+00 |
| ENSG00000163875.14_MEAF6    | ENSG00000160789.18_LMNA | -0.15228 | -0.304106333 | 0.007094687 | 6.11E-02 | 2.28E-01 | 1.00E+00 |
| ENSG00000204262.10_COL5A2   | ENSG00000160789.18_LMNA | 0.44652  | 0.309310035  | 0.565522435 | 8.12E-09 | 9.07E-07 | 4.16E-04 |
| ENSG00000109046.13_WSB1     | ENSG00000160789.18_LMNA | -0.15972 | -0.311014525 | -0.00053517 | 4.93E-02 | 2.00E-01 | 1.00E+00 |
| ENSG00000242808.6_SOX2-OT   | ENSG00000160789.18_LMNA | -0.41452 | -0.538203782 | -0.27335895 | 1.10E-07 | 7.83E-06 | 5.65E-03 |
| ENSG00000154917.9_RAB6B     | ENSG00000160789.18_LMNA | -0.39949 | -0.525281476 | -0.25660724 | 3.42E-07 | 1.96E-05 | 1.76E-02 |
| ENSG00000179241.11_LDLRAD3  | ENSG00000160789.18_LMNA | 0.05163  | -0.108466882 | 0.20910738  | 5.28E-01 | 7.72E-01 | 1.00E+00 |
| ENSG00000164713.8_BRI3      | ENSG00000160789.18_LMNA | 0.17478  | 0.016025477  | 0.324939483 | 3.13E-02 | 1.47E-01 | 1.00E+00 |
| ENSG00000179403.11_VWA1     | ENSG00000160789.18_LMNA | 0.35325  | 0.205617836  | 0.485170394 | 8.04E-06 | 2.45E-04 | 4.13E-01 |
| ENSG00000128656.12_CHN1     | ENSG00000160789.18_LMNA | -0.10458 | -0.259463508 | 0.055542685 | 2.00E-01 | 4.70E-01 | 1.00E+00 |
| ENSG00000170775.2_GPR37     | ENSG00000160789.18_LMNA | -0.03735 | -0.19538891  | 0.122579559 | 6.48E-01 | 8.43E-01 | 1.00E+00 |
| ENSG00000112033.12_PPARD    | ENSG00000160789.18_LMNA | 0.31539  | 0.164450517  | 0.451904169 | 7.56E-05 | 1.50E-03 | 1.00E+00 |
| ENSG00000251562.6_MALAT1    | ENSG00000160789.18_LMNA | 0.04582  | -0.114213804 | 0.203536031 | 5.75E-01 | 8.02E-01 | 1.00E+00 |
| ENSG00000109572.12_CLCN3    | ENSG00000160789.18_LMNA | -0.12893 | -0.282334126 | 0.030906601 | 1.13E-01 | 3.36E-01 | 1.00E+00 |
| ENSG00000214717.8_ZBED1     | ENSG00000160789.18_LMNA | 0.01782  | -0.141782286 | 0.176520563 | 8.27E-01 | 9.32E-01 | 1.00E+00 |
| ENSG00000262814.5_MRPL12    | ENSG00000160789.18_LMNA | 0.00371  | -0.155580634 | 0.162816494 | 9.64E-01 | 9.86E-01 | 1.00E+00 |
| ENSG00000078618.18_NRDC     | ENSG00000160789.18_LMNA | 0.29959  | 0.147424984  | 0.437908553 | 1.77E-04 | 2.97E-03 | 1.00E+00 |
| ENSG00000139637.12_C12orf10 | ENSG00000160789.18_LMNA | -0.09358 | -0.24907449  | 0.066608398 | 2.51E-01 | 5.32E-01 | 1.00E+00 |
| ENSG00000172216.5_CEBPB     | ENSG00000160789.18_LMNA | 0.39195  | 0.248237281  | 0.51877811  | 5.92E-07 | 3.01E-05 | 3.04E-02 |
| ENSG00000171204.11_TMEM126  | ENSG00000160789.18_LMNA | -0.30025 | -0.438490825 | -0.1481299  | 1.71E-04 | 2.89E-03 | 1.00E+00 |
| ENSG00000183386.8_FHL3      | ENSG00000160789.18_LMNA | 0.36257  | 0.215824354  | 0.493294701 | 4.43E-06 | 1.51E-04 | 2.27E-01 |

|                            |                         |          |              |             |          |          |          |
|----------------------------|-------------------------|----------|--------------|-------------|----------|----------|----------|
| ENSG00000239697.9_TNFSF12  | ENSG00000160789.18_LMNA | 0.14697  | -0.012524907 | 0.299169713 | 7.08E-02 | 2.51E-01 | 1.00E+00 |
| ENSG00000227500.8_SCAMP4   | ENSG00000160789.18_LMNA | 0.22367  | 0.066852126  | 0.369708147 | 5.60E-03 | 4.27E-02 | 1.00E+00 |
| ENSG00000100242.14_SUN2    | ENSG00000160789.18_LMNA | 0.05562  | -0.104508769 | 0.212932616 | 4.96E-01 | 7.50E-01 | 1.00E+00 |
| ENSG00000125821.10_DTD1    | ENSG00000160789.18_LMNA | -0.24646 | -0.39034583  | -0.09082397 | 2.21E-03 | 2.11E-02 | 1.00E+00 |
| ENSG00000130202.8_NECTIN2  | ENSG00000160789.18_LMNA | 0.50107  | 0.371504209  | 0.611491404 | 4.88E-11 | 1.25E-08 | 2.50E-06 |
| ENSG00000115365.10_LANCL1  | ENSG00000160789.18_LMNA | -0.52007 | -0.627327126 | -0.39343999 | 6.58E-12 | 2.50E-09 | 3.37E-07 |
| ENSG00000131408.12_NR1H2   | ENSG00000160789.18_LMNA | 0.28963  | 0.136732896  | 0.429046693 | 2.96E-04 | 4.44E-03 | 1.00E+00 |
| ENSG00000101294.15_HM13    | ENSG00000160789.18_LMNA | 0.25321  | 0.097955308  | 0.396427741 | 1.65E-03 | 1.69E-02 | 1.00E+00 |
| ENSG00000197965.10_MPZL1   | ENSG00000160789.18_LMNA | -0.25043 | -0.393925588 | -0.0950177  | 1.86E-03 | 1.85E-02 | 1.00E+00 |
| ENSG00000065268.9_WDR18    | ENSG00000160789.18_LMNA | -0.01989 | -0.178527737 | 0.139750865 | 8.08E-01 | 9.23E-01 | 1.00E+00 |
| ENSG00000176095.10_IP6K1   | ENSG00000160789.18_LMNA | -0.035   | -0.193124128 | 0.124897119 | 6.69E-01 | 8.54E-01 | 1.00E+00 |
| ENSG00000146409.9_SLC18B1  | ENSG00000160789.18_LMNA | -0.14799 | -0.300118875 | 0.011482266 | 6.88E-02 | 2.47E-01 | 1.00E+00 |
| ENSG00000182636.5_NDN      | ENSG00000160789.18_LMNA | -0.2542  | -0.397318236 | -0.09900203 | 1.58E-03 | 1.63E-02 | 1.00E+00 |
| ENSG00000160679.11_CHTOP   | ENSG00000160789.18_LMNA | -0.13795 | -0.290763499 | 0.02172952  | 9.01E-02 | 2.92E-01 | 1.00E+00 |
| ENSG00000143320.7_CRABP2   | ENSG00000160789.18_LMNA | 0.38735  | 0.243148236  | 0.514808611 | 8.22E-07 | 3.88E-05 | 4.22E-02 |
| ENSG00000119669.4_IRF2BPL  | ENSG00000160789.18_LMNA | 0.42545  | 0.285596098  | 0.547565494 | 4.66E-08 | 3.85E-06 | 2.39E-03 |
| ENSG00000033100.13_CHPF2   | ENSG00000160789.18_LMNA | 0.53812  | 0.414425124  | 0.642297676 | 8.70E-13 | 5.13E-10 | 4.46E-08 |
| ENSG00000179314.12_WSCD1   | ENSG00000160789.18_LMNA | -0.01956 | -0.178207036 | 0.14007562  | 8.11E-01 | 9.26E-01 | 1.00E+00 |
| ENSG00000110696.8_C11orf58 | ENSG00000160789.18_LMNA | -0.27708 | -0.417844521 | -0.12331392 | 5.49E-04 | 7.26E-03 | 1.00E+00 |
| ENSG00000096746.16_HNRNPH3 | ENSG00000160789.18_LMNA | 0.02779  | -0.131991918 | 0.186169769 | 7.34E-01 | 8.88E-01 | 1.00E+00 |
| ENSG00000139112.9_GABARAPL | ENSG00000160789.18_LMNA | -0.23913 | -0.383724406 | -0.08309481 | 3.01E-03 | 2.68E-02 | 1.00E+00 |
| ENSG00000166797.9_FAM96A   | ENSG00000160789.18_LMNA | -0.09133 | -0.246937501 | 0.068874991 | 2.63E-01 | 5.46E-01 | 1.00E+00 |
| ENSG00000145901.13_TNIP1   | ENSG00000160789.18_LMNA | 0.24865  | 0.093134765  | 0.392319439 | 2.01E-03 | 1.96E-02 | 1.00E+00 |
| ENSG00000154945.6_ANKRD40  | ENSG00000160789.18_LMNA | -0.16595 | -0.316780565 | -0.00693137 | 4.10E-02 | 1.76E-01 | 1.00E+00 |
| ENSG00000143727.14_ACP1    | ENSG00000160789.18_LMNA | -0.19112 | -0.339978779 | -0.03292362 | 1.83E-02 | 1.01E-01 | 1.00E+00 |
| ENSG00000172465.12_TCEAL1  | ENSG00000160789.18_LMNA | -0.39499 | -0.521401973 | -0.25160939 | 4.76E-07 | 2.52E-05 | 2.44E-02 |
| ENSG00000167657.10_DAPK3   | ENSG00000160789.18_LMNA | 0.39035  | 0.246462568  | 0.517395142 | 6.64E-07 | 3.29E-05 | 3.41E-02 |
| ENSG00000110092.3_CCND1    | ENSG00000160789.18_LMNA | -0.05776 | -0.214981264 | 0.102384815 | 4.80E-01 | 7.38E-01 | 1.00E+00 |
| ENSG00000133313.13_CNDP2   | ENSG00000160789.18_LMNA | -0.00945 | -0.168395388 | 0.149978314 | 9.08E-01 | 9.65E-01 | 1.00E+00 |
| ENSG00000184588.16_PDE4B   | ENSG00000160789.18_LMNA | -0.03167 | -0.189914465 | 0.128175646 | 6.99E-01 | 8.71E-01 | 1.00E+00 |
| ENSG00000198911.10_SREBF2  | ENSG00000160789.18_LMNA | 0.01024  | -0.149207387 | 0.169161498 | 9.00E-01 | 9.61E-01 | 1.00E+00 |
| ENSG00000179094.12_PER1    | ENSG00000160789.18_LMNA | 0.02643  | -0.133328539 | 0.184856027 | 7.47E-01 | 8.94E-01 | 1.00E+00 |
| ENSG00000114573.8_ATP6V1A  | ENSG00000160789.18_LMNA | -0.32405 | -0.459547555 | -0.1738215  | 4.65E-05 | 1.01E-03 | 1.00E+00 |

|                             |                         |          |              |             |          |          |          |
|-----------------------------|-------------------------|----------|--------------|-------------|----------|----------|----------|
| ENSG00000113621.13_TXNDC15  | ENSG00000160789.18_LMNA | 0.03298  | -0.126887016 | 0.19117684  | 6.87E-01 | 8.64E-01 | 1.00E+00 |
| ENSG00000128791.10_TWSG1    | ENSG00000160789.18_LMNA | 0.19445  | 0.036370893  | 0.343027676 | 1.64E-02 | 9.35E-02 | 1.00E+00 |
| ENSG00000055208.16_TAB2     | ENSG00000160789.18_LMNA | -0.05649 | -0.213769067 | 0.10364192  | 4.89E-01 | 7.46E-01 | 1.00E+00 |
| ENSG00000180304.13_OAZ2     | ENSG00000160789.18_LMNA | -0.17389 | -0.324115597 | -0.01510483 | 3.22E-02 | 1.50E-01 | 1.00E+00 |
| ENSG00000127947.14_PTPN12   | ENSG00000160789.18_LMNA | 0.4939   | 0.363262057  | 0.60549118  | 1.01E-10 | 2.25E-08 | 5.17E-06 |
| ENSG00000180370.9_PAK2      | ENSG00000160789.18_LMNA | 0.04488  | -0.115144148 | 0.202632171 | 5.83E-01 | 8.06E-01 | 1.00E+00 |
| ENSG00000110876.9_SELPLG    | ENSG00000160789.18_LMNA | -0.0579  | -0.215116214 | 0.102244803 | 4.79E-01 | 7.37E-01 | 1.00E+00 |
| ENSG00000166963.11_MAP1A    | ENSG00000160789.18_LMNA | 0.01464  | -0.144903081 | 0.173431852 | 8.58E-01 | 9.44E-01 | 1.00E+00 |
| ENSG00000107404.16_DVL1     | ENSG00000160789.18_LMNA | 0.19728  | 0.039314069  | 0.345625626 | 1.48E-02 | 8.73E-02 | 1.00E+00 |
| ENSG00000151348.12_EXT2     | ENSG00000160789.18_LMNA | 0.32554  | 0.175430821  | 0.460855941 | 4.27E-05 | 9.45E-04 | 1.00E+00 |
| ENSG00000136521.11_NDUFB5   | ENSG00000160789.18_LMNA | -0.29409 | -0.433020276 | -0.14151873 | 2.35E-04 | 3.72E-03 | 1.00E+00 |
| ENSG00000136261.13_BZW2     | ENSG00000160789.18_LMNA | -0.07508 | -0.231509355 | 0.08514266  | 3.58E-01 | 6.41E-01 | 1.00E+00 |
| ENSG00000143155.11_TIPRL    | ENSG00000160789.18_LMNA | -0.23815 | -0.382836734 | -0.08206137 | 3.13E-03 | 2.76E-02 | 1.00E+00 |
| ENSG00000167106.10_FAM102A  | ENSG00000160789.18_LMNA | 0.25061  | 0.095205675  | 0.394085833 | 1.85E-03 | 1.84E-02 | 1.00E+00 |
| ENSG00000144659.9_SLC25A38  | ENSG00000160789.18_LMNA | -0.2192  | -0.36564427  | -0.06217255 | 6.66E-03 | 4.86E-02 | 1.00E+00 |
| ENSG00000170581.12_STAT2    | ENSG00000160789.18_LMNA | 0.10736  | -0.052741453 | 0.262081925 | 1.88E-01 | 4.55E-01 | 1.00E+00 |
| ENSG00000185339.7_TCN2      | ENSG00000160789.18_LMNA | 0.14553  | -0.013993863 | 0.297831409 | 7.36E-02 | 2.58E-01 | 1.00E+00 |
| ENSG00000187189.10_TSPYL4   | ENSG00000160789.18_LMNA | -0.34419 | -0.477241686 | -0.19571534 | 1.41E-05 | 3.89E-04 | 7.25E-01 |
| ENSG00000042445.12_RETSAT   | ENSG00000160789.18_LMNA | 0.04582  | -0.114210459 | 0.203539281 | 5.75E-01 | 8.02E-01 | 1.00E+00 |
| ENSG00000237190.3_CDKN2AIP1 | ENSG00000160789.18_LMNA | -0.20763 | -0.355094829 | -0.05008676 | 1.03E-02 | 6.68E-02 | 1.00E+00 |
| ENSG00000165030.3_NFIL3     | ENSG00000160789.18_LMNA | 0.06071  | -0.099449488 | 0.217807927 | 4.57E-01 | 7.22E-01 | 1.00E+00 |
| ENSG00000131051.19_RBM39    | ENSG00000160789.18_LMNA | 0.05669  | -0.103447311 | 0.213956788 | 4.88E-01 | 7.44E-01 | 1.00E+00 |
| ENSG00000112511.16_PHF1     | ENSG00000160789.18_LMNA | 0.09104  | -0.069159855 | 0.246668709 | 2.65E-01 | 5.48E-01 | 1.00E+00 |
| ENSG00000157916.17_RER1     | ENSG00000160789.18_LMNA | 0.18095  | 0.022398999  | 0.330630309 | 2.57E-02 | 1.29E-01 | 1.00E+00 |
| ENSG00000144118.12_RALB     | ENSG00000160789.18_LMNA | 0.19989  | 0.042028429  | 0.348017445 | 1.35E-02 | 8.14E-02 | 1.00E+00 |
| ENSG00000011465.15_DCN      | ENSG00000160789.18_LMNA | 0.14623  | -0.013275369 | 0.298486152 | 7.22E-02 | 2.55E-01 | 1.00E+00 |
| ENSG00000017483.13_SLC38A5  | ENSG00000160789.18_LMNA | -0.22199 | -0.368179064 | -0.06508981 | 5.98E-03 | 4.50E-02 | 1.00E+00 |
| ENSG00000198189.9_HSD17B11  | ENSG00000160789.18_LMNA | -0.17429 | -0.324490857 | -0.0155241  | 3.17E-02 | 1.49E-01 | 1.00E+00 |
| ENSG00000100462.14_PRMT5    | ENSG00000160789.18_LMNA | 0.11246  | -0.047596692 | 0.266878882 | 1.68E-01 | 4.26E-01 | 1.00E+00 |
| ENSG00000177225.15_PDDC1    | ENSG00000160789.18_LMNA | -0.0518  | -0.209270845 | 0.108297944 | 5.26E-01 | 7.71E-01 | 1.00E+00 |
| ENSG00000100842.11_EFS      | ENSG00000160789.18_LMNA | -0.05876 | -0.215943165 | 0.101386556 | 4.72E-01 | 7.32E-01 | 1.00E+00 |
| ENSG00000177731.14_FLII     | ENSG00000160789.18_LMNA | 0.46299  | 0.327958533  | 0.579475073 | 1.90E-09 | 2.65E-07 | 9.77E-05 |
| ENSG00000162385.9_MAGOH     | ENSG00000160789.18_LMNA | 0.17019  | 0.011296424  | 0.320702472 | 3.61E-02 | 1.62E-01 | 1.00E+00 |

|                             |                         |          |              |             |          |          |          |
|-----------------------------|-------------------------|----------|--------------|-------------|----------|----------|----------|
| ENSG00000100401.18_RANGAP1  | ENSG00000160789.18_LMNA | -0.02519 | -0.183649495 | 0.134555065 | 7.58E-01 | 8.99E-01 | 1.00E+00 |
| ENSG00000131435.11_PDLIM4   | ENSG00000160789.18_LMNA | 0.37816  | 0.232986179  | 0.506847112 | 1.56E-06 | 6.63E-05 | 8.00E-02 |
| ENSG00000140497.15_SCAMP2   | ENSG00000160789.18_LMNA | 0.12063  | -0.039325503 | 0.274558383 | 1.39E-01 | 3.80E-01 | 1.00E+00 |
| ENSG00000164904.14_ALDH7A1  | ENSG00000160789.18_LMNA | 0.08355  | -0.076669016 | 0.239565626 | 3.06E-01 | 5.93E-01 | 1.00E+00 |
| ENSG00000113916.16_BCL6     | ENSG00000160789.18_LMNA | 0.06604  | -0.094150101 | 0.222897691 | 4.19E-01 | 6.91E-01 | 1.00E+00 |
| ENSG00000174938.13_SEZ6L2   | ENSG00000160789.18_LMNA | 0.04139  | -0.118592447 | 0.199277303 | 6.13E-01 | 8.24E-01 | 1.00E+00 |
| ENSG00000176014.11_TUBB6    | ENSG00000160789.18_LMNA | 0.37708  | 0.231797338  | 0.505912648 | 1.68E-06 | 6.98E-05 | 8.62E-02 |
| ENSG00000168883.18_USP39    | ENSG00000160789.18_LMNA | -0.18172 | -0.331333298 | -0.02318806 | 2.51E-02 | 1.27E-01 | 1.00E+00 |
| ENSG00000162576.15_MXRA8    | ENSG00000160789.18_LMNA | 0.40525  | 0.26301852   | 0.530241835 | 2.23E-07 | 1.39E-05 | 1.14E-02 |
| ENSG00000196517.10_SLC6A9   | ENSG00000160789.18_LMNA | 0.10326  | -0.05687601  | 0.25821557  | 2.06E-01 | 4.77E-01 | 1.00E+00 |
| ENSG00000121851.11_POLR3GL  | ENSG00000160789.18_LMNA | 0.0157   | -0.143856411 | 0.17446846  | 8.48E-01 | 9.41E-01 | 1.00E+00 |
| ENSG00000179820.14_MYADM    | ENSG00000160789.18_LMNA | 0.55022  | 0.428561721  | 0.652285486 | 2.09E-13 | 1.53E-10 | 1.07E-08 |
| ENSG00000120686.10_UFM1     | ENSG00000160789.18_LMNA | -0.05307 | -0.210490841 | 0.107036525 | 5.16E-01 | 7.63E-01 | 1.00E+00 |
| ENSG00000165527.6_ARF6      | ENSG00000160789.18_LMNA | 0.51122  | 0.383212885  | 0.619968039 | 1.70E-11 | 5.21E-09 | 8.71E-07 |
| ENSG00000160714.8_UBE2Q1    | ENSG00000160789.18_LMNA | 0.15186  | -0.007526645 | 0.30371425  | 6.18E-02 | 2.30E-01 | 1.00E+00 |
| ENSG00000122515.13_ZMIZ2    | ENSG00000160789.18_LMNA | 0.05382  | -0.106289279 | 0.211213082 | 5.10E-01 | 7.59E-01 | 1.00E+00 |
| ENSG00000151502.9_VPS26B    | ENSG00000160789.18_LMNA | -0.14126 | -0.293854706 | 0.018350866 | 8.26E-02 | 2.78E-01 | 1.00E+00 |
| ENSG00000172057.8_ORMDL3    | ENSG00000160789.18_LMNA | 0.00147  | -0.157765191 | 0.16063554  | 9.86E-01 | 9.94E-01 | 1.00E+00 |
| ENSG00000128591.14_FLNC     | ENSG00000160789.18_LMNA | 0.21768  | 0.06057906   | 0.364257797 | 7.06E-03 | 5.07E-02 | 1.00E+00 |
| ENSG00000114650.17_SCAP     | ENSG00000160789.18_LMNA | 0.10758  | -0.052521562 | 0.262287269 | 1.87E-01 | 4.53E-01 | 1.00E+00 |
| ENSG00000159111.11_MRPL10   | ENSG00000160789.18_LMNA | -0.17302 | -0.323316706 | -0.01421261 | 3.30E-02 | 1.52E-01 | 1.00E+00 |
| ENSG00000132819.15_RBM38    | ENSG00000160789.18_LMNA | 0.14478  | -0.014761805 | 0.297131281 | 7.51E-02 | 2.62E-01 | 1.00E+00 |
| ENSG00000102024.16_PLS3     | ENSG00000160789.18_LMNA | 0.4607   | 0.325367562  | 0.577545311 | 2.34E-09 | 3.17E-07 | 1.20E-04 |
| ENSG00000143248.11_RGS5     | ENSG00000160789.18_LMNA | -0.20983 | -0.357105336 | -0.05238319 | 9.47E-03 | 6.30E-02 | 1.00E+00 |
| ENSG00000025770.17_NCAPH2   | ENSG00000160789.18_LMNA | -0.03123 | -0.189486749 | 0.128612015 | 7.03E-01 | 8.73E-01 | 1.00E+00 |
| ENSG00000275400.1_RP4-756H1 | ENSG00000160789.18_LMNA | 0.1552   | -0.004101928 | 0.306819929 | 5.62E-02 | 2.17E-01 | 1.00E+00 |
| ENSG00000125827.7_TMX4      | ENSG00000160789.18_LMNA | -0.16199 | -0.313114132 | -0.0028613  | 4.62E-02 | 1.91E-01 | 1.00E+00 |
| ENSG00000141429.12_GALNT1   | ENSG00000160789.18_LMNA | -0.15179 | -0.303650686 | 0.007596663 | 6.19E-02 | 2.30E-01 | 1.00E+00 |
| ENSG00000169957.9_ZNF768    | ENSG00000160789.18_LMNA | 0.32217  | 0.171784208  | 0.457889441 | 5.17E-05 | 1.11E-03 | 1.00E+00 |
| ENSG00000100605.15_ITPK1    | ENSG00000160789.18_LMNA | -0.02512 | -0.183588206 | 0.134617344 | 7.59E-01 | 8.99E-01 | 1.00E+00 |
| ENSG00000148411.6_NACC2     | ENSG00000160789.18_LMNA | 0.36452  | 0.217972573  | 0.494998522 | 3.89E-06 | 1.35E-04 | 2.00E-01 |
| ENSG00000130600.14_H19      | ENSG00000160789.18_LMNA | 0.21945  | 0.062430589  | 0.365868664 | 6.60E-03 | 4.82E-02 | 1.00E+00 |
| ENSG00000161714.10_PLCD3    | ENSG00000160789.18_LMNA | -0.0002  | -0.159400476 | 0.159000914 | 9.98E-01 | 9.99E-01 | 1.00E+00 |

|                              |                         |          |              |             |          |          |          |
|------------------------------|-------------------------|----------|--------------|-------------|----------|----------|----------|
| ENSG00000104812.13_GYS1      | ENSG00000160789.18_LMNA | 0.38933  | 0.245338821  | 0.516518715 | 7.14E-07 | 3.51E-05 | 3.66E-02 |
| ENSG00000138757.13_G3BP2     | ENSG00000160789.18_LMNA | -0.29624 | -0.434932374 | -0.14382655 | 2.11E-04 | 3.40E-03 | 1.00E+00 |
| ENSG00000131899.9_LLGL1      | ENSG00000160789.18_LMNA | -0.20951 | -0.356805384 | -0.05204038 | 9.59E-03 | 6.36E-02 | 1.00E+00 |
| ENSG00000242574.7_HLA-DMB    | ENSG00000160789.18_LMNA | -0.13726 | -0.290123636 | 0.022427992 | 9.17E-02 | 2.95E-01 | 1.00E+00 |
| ENSG00000125844.14_RRBP1     | ENSG00000160789.18_LMNA | 0.53699  | 0.413104874  | 0.641360923 | 9.91E-13 | 5.53E-10 | 5.08E-08 |
| ENSG00000168958.18_MFF       | ENSG00000160789.18_LMNA | -0.50642 | -0.615958669 | -0.37766529 | 2.81E-11 | 7.88E-09 | 1.44E-06 |
| ENSG00000078061.11_ARAF      | ENSG00000160789.18_LMNA | 0.38884  | 0.244788814  | 0.51608955  | 7.40E-07 | 3.60E-05 | 3.80E-02 |
| ENSG00000107833.9_NPM3       | ENSG00000160789.18_LMNA | -0.03789 | -0.19590885  | 0.122047012 | 6.43E-01 | 8.41E-01 | 1.00E+00 |
| ENSG00000240376.1_RP11-36C2  | ENSG00000160789.18_LMNA | -0.09761 | -0.252878562 | 0.062565537 | 2.32E-01 | 5.09E-01 | 1.00E+00 |
| ENSG00000172331.10_BPGM      | ENSG00000160789.18_LMNA | -0.27356 | -0.414697437 | -0.11956334 | 6.49E-04 | 8.27E-03 | 1.00E+00 |
| ENSG00000135900.3_MRPL44     | ENSG00000160789.18_LMNA | -0.29499 | -0.433816144 | -0.14247892 | 2.25E-04 | 3.58E-03 | 1.00E+00 |
| ENSG00000108262.14_GIT1      | ENSG00000160789.18_LMNA | 0.00324  | -0.156039599 | 0.162358544 | 9.68E-01 | 9.88E-01 | 1.00E+00 |
| ENSG00000129515.17_SNX6      | ENSG00000160789.18_LMNA | -0.10248 | -0.257482573 | 0.057658638 | 2.09E-01 | 4.82E-01 | 1.00E+00 |
| ENSG00000148291.8_SURF2      | ENSG00000160789.18_LMNA | -0.00295 | -0.162077639 | 0.156321059 | 9.71E-01 | 9.89E-01 | 1.00E+00 |
| ENSG00000173918.13_C1QTNF1   | ENSG00000160789.18_LMNA | 0.28774  | 0.134709204  | 0.427363051 | 3.25E-04 | 4.79E-03 | 1.00E+00 |
| ENSG00000152556.14_PFKM      | ENSG00000160789.18_LMNA | -0.14793 | -0.300062813 | 0.011543869 | 6.89E-02 | 2.47E-01 | 1.00E+00 |
| ENSG00000129518.7_EAPP       | ENSG00000160789.18_LMNA | -0.29338 | -0.432387915 | -0.14075619 | 2.44E-04 | 3.83E-03 | 1.00E+00 |
| ENSG00000177971.8_IMP3       | ENSG00000160789.18_LMNA | -0.08996 | -0.245642854 | 0.070246573 | 2.70E-01 | 5.55E-01 | 1.00E+00 |
| ENSG00000253683.1_CTB-79E8.1 | ENSG00000160789.18_LMNA | -0.1769  | -0.326896847 | -0.01821483 | 2.92E-02 | 1.41E-01 | 1.00E+00 |
| ENSG00000164543.5_STK17A     | ENSG00000160789.18_LMNA | 0.25526  | 0.10013169   | 0.398278652 | 1.50E-03 | 1.57E-02 | 1.00E+00 |
| ENSG00000117408.9_IPO13      | ENSG00000160789.18_LMNA | 0.04303  | -0.116976625 | 0.200850272 | 5.99E-01 | 8.15E-01 | 1.00E+00 |
| ENSG00000130204.11_TOMM40    | ENSG00000160789.18_LMNA | 0.32384  | 0.173592289  | 0.459361102 | 4.70E-05 | 1.02E-03 | 1.00E+00 |
| ENSG00000135241.15_PNPLA8    | ENSG00000160789.18_LMNA | -0.2627  | -0.404961506 | -0.1080135  | 1.08E-03 | 1.23E-02 | 1.00E+00 |
| ENSG00000187446.10_CHP1      | ENSG00000160789.18_LMNA | 0.1881   | 0.029794613  | 0.337205771 | 2.03E-02 | 1.09E-01 | 1.00E+00 |
| ENSG00000184432.8_COPB2      | ENSG00000160789.18_LMNA | 0.20573  | 0.048107837  | 0.353360037 | 1.10E-02 | 7.01E-02 | 1.00E+00 |
| ENSG00000064961.17_HMG20B    | ENSG00000160789.18_LMNA | 0.23596  | 0.079750849  | 0.38085009  | 3.43E-03 | 2.95E-02 | 1.00E+00 |
| ENSG00000167325.13_RRM1      | ENSG00000160789.18_LMNA | 0.15549  | -0.003808164 | 0.307086019 | 5.58E-02 | 2.16E-01 | 1.00E+00 |
| ENSG00000090238.10_YPEL3     | ENSG00000160789.18_LMNA | -0.17615 | -0.326198485 | -0.01743336 | 3.00E-02 | 1.43E-01 | 1.00E+00 |
| ENSG00000114520.9_SNX4       | ENSG00000160789.18_LMNA | -0.34835 | -0.480880519 | -0.20025291 | 1.09E-05 | 3.13E-04 | 5.61E-01 |
| ENSG00000038427.14_VCAN      | ENSG00000160789.18_LMNA | -0.16234 | -0.313437314 | -0.00321965 | 4.57E-02 | 1.90E-01 | 1.00E+00 |
| ENSG00000116161.16_CACYBP    | ENSG00000160789.18_LMNA | -0.31532 | -0.451842961 | -0.16437568 | 7.59E-05 | 1.51E-03 | 1.00E+00 |
| ENSG00000115806.11_GORASP2   | ENSG00000160789.18_LMNA | -0.18372 | -0.33317947  | -0.02526212 | 2.35E-02 | 1.21E-01 | 1.00E+00 |
| ENSG00000139329.4_LUM        | ENSG00000160789.18_LMNA | 0.25821  | 0.103250013  | 0.400926413 | 1.32E-03 | 1.43E-02 | 1.00E+00 |

|                             |                         |          |              |             |          |          |          |
|-----------------------------|-------------------------|----------|--------------|-------------|----------|----------|----------|
| ENSG00000111361.11	EIF2B1   | ENSG00000160789.18_LMNA | -0.20564 | -0.353274949 | -0.04801084 | 1.10E-02 | 7.03E-02 | 1.00E+00 |
| ENSG00000167645.15_YIF1B    | ENSG00000160789.18_LMNA | 0.0019   | -0.157348317 | 0.161051966 | 9.81E-01 | 9.93E-01 | 1.00E+00 |
| ENSG00000104635.12_SLC39A14 | ENSG00000160789.18_LMNA | 0.30917  | 0.157727885  | 0.446394772 | 1.06E-04 | 1.98E-03 | 1.00E+00 |
| ENSG00000116898.10_MRPS15   | ENSG00000160789.18_LMNA | -0.0636  | -0.220564132 | 0.096582    | 4.36E-01 | 7.04E-01 | 1.00E+00 |
| ENSG00000141560.13_FN3KRP   | ENSG00000160789.18_LMNA | -0.06468 | -0.221600375 | 0.095502556 | 4.29E-01 | 6.99E-01 | 1.00E+00 |
| ENSG00000114978.16_MOB1A    | ENSG00000160789.18_LMNA | 0.0624   | -0.097772819 | 0.219420142 | 4.45E-01 | 7.12E-01 | 1.00E+00 |
| ENSG00000117399.12_CDC20    | ENSG00000160789.18_LMNA | 0.15637  | -0.002900717 | 0.307907671 | 5.44E-02 | 2.12E-01 | 1.00E+00 |
| ENSG00000088325.14_TPX2     | ENSG00000160789.18_LMNA | 0.14766  | -0.011818174 | 0.29981315  | 6.95E-02 | 2.48E-01 | 1.00E+00 |
| ENSG00000104872.9_PIH1D1    | ENSG00000160789.18_LMNA | -0.09021 | -0.245877185 | 0.069998405 | 2.69E-01 | 5.53E-01 | 1.00E+00 |
| ENSG00000129654.7_FOXJ1     | ENSG00000160789.18_LMNA | 0.13452  | -0.025220954 | 0.287562239 | 9.85E-02 | 3.09E-01 | 1.00E+00 |
| ENSG00000146576.11_C7orf26  | ENSG00000160789.18_LMNA | 0.17819  | 0.019547791  | 0.328087274 | 2.81E-02 | 1.37E-01 | 1.00E+00 |
| ENSG00000175216.13_CKAP5    | ENSG00000160789.18_LMNA | 0.07639  | -0.083828866 | 0.232761288 | 3.50E-01 | 6.33E-01 | 1.00E+00 |
| ENSG00000138385.14_SSB      | ENSG00000160789.18_LMNA | -0.01048 | -0.169395132 | 0.148972208 | 8.98E-01 | 9.60E-01 | 1.00E+00 |
| ENSG00000091140.11_DLD      | ENSG00000160789.18_LMNA | 0.15704  | -0.002219235 | 0.308524419 | 5.33E-02 | 2.10E-01 | 1.00E+00 |
| ENSG00000136451.7_VEZF1     | ENSG00000160789.18_LMNA | -0.28661 | -0.426358301 | -0.13350268 | 3.44E-04 | 4.99E-03 | 1.00E+00 |
| ENSG00000125505.15_MBOAT7   | ENSG00000160789.18_LMNA | 0.44104  | 0.303124797  | 0.560862079 | 1.29E-08 | 1.34E-06 | 6.64E-04 |
| ENSG00000125944.17_HNRNPR   | ENSG00000160789.18_LMNA | 0.02831  | -0.131486936 | 0.186665811 | 7.29E-01 | 8.85E-01 | 1.00E+00 |
| ENSG00000015676.16_NUDCD3   | ENSG00000160789.18_LMNA | 0.10918  | -0.050905951 | 0.263795127 | 1.81E-01 | 4.44E-01 | 1.00E+00 |
| ENSG00000123983.12_ACSL3    | ENSG00000160789.18_LMNA | 0.25007  | 0.094642159  | 0.393605398 | 1.89E-03 | 1.87E-02 | 1.00E+00 |
| ENSG00000113296.13_THBS4    | ENSG00000160789.18_LMNA | 0.00906  | -0.150354261 | 0.168021651 | 9.12E-01 | 9.66E-01 | 1.00E+00 |
| ENSG00000159348.11_CYB5R1   | ENSG00000160789.18_LMNA | 0.15972  | 0.000528319  | 0.311008332 | 4.94E-02 | 2.00E-01 | 1.00E+00 |
| ENSG00000058799.12_YIPF1    | ENSG00000160789.18_LMNA | 0.10975  | -0.050332458 | 0.264330002 | 1.78E-01 | 4.40E-01 | 1.00E+00 |
| ENSG00000159202.16_UBE2Z    | ENSG00000160789.18_LMNA | 0.2865   | 0.13337988   | 0.426255994 | 3.46E-04 | 5.02E-03 | 1.00E+00 |
| ENSG00000198736.10_MSRB1    | ENSG00000160789.18_LMNA | -0.04524 | -0.202982082 | 0.11478405  | 5.80E-01 | 8.04E-01 | 1.00E+00 |
| ENSG00000118292.7_C1orf54   | ENSG00000160789.18_LMNA | 0.01636  | -0.143217655 | 0.175100729 | 8.41E-01 | 9.38E-01 | 1.00E+00 |
| ENSG00000072274.11_TFRC     | ENSG00000160789.18_LMNA | 0.18163  | 0.023095507  | 0.331250856 | 2.51E-02 | 1.27E-01 | 1.00E+00 |
| ENSG00000128602.8_SMO       | ENSG00000160789.18_LMNA | 0.24743  | 0.091844771  | 0.391218016 | 2.12E-03 | 2.04E-02 | 1.00E+00 |
| ENSG00000213654.8_GPSM3     | ENSG00000160789.18_LMNA | -0.0676  | -0.224387661 | 0.092595359 | 4.08E-01 | 6.83E-01 | 1.00E+00 |
| ENSG00000125912.9_NCLN      | ENSG00000160789.18_LMNA | 0.40104  | 0.258332088  | 0.526617778 | 3.05E-07 | 1.79E-05 | 1.57E-02 |
| ENSG00000089006.15_SNX5     | ENSG00000160789.18_LMNA | 0.02531  | -0.134436133 | 0.18376653  | 7.57E-01 | 8.99E-01 | 1.00E+00 |
| ENSG00000166123.12_GPT2     | ENSG00000160789.18_LMNA | -0.12481 | -0.278475614 | 0.035089827 | 1.26E-01 | 3.58E-01 | 1.00E+00 |
| ENSG00000196305.16_IARS     | ENSG00000160789.18_LMNA | 0.16192  | 0.002793074  | 0.313052589 | 4.63E-02 | 1.91E-01 | 1.00E+00 |
| ENSG00000101057.14_MYBL2    | ENSG00000160789.18_LMNA | 0.00977  | -0.149662565 | 0.168709211 | 9.05E-01 | 9.63E-01 | 1.00E+00 |



|                            |                         |          |              |             |          |          |          |
|----------------------------|-------------------------|----------|--------------|-------------|----------|----------|----------|
| ENSG00000140545.13_MFGE8   | ENSG00000160789.18_LMNA | 0.35064  | 0.202757536  | 0.482884927 | 9.48E-06 | 2.79E-04 | 4.86E-01 |
| ENSG00000125037.11_EMC3    | ENSG00000160789.18_LMNA | -0.11097 | -0.26548419  | 0.049094228 | 1.73E-01 | 4.33E-01 | 1.00E+00 |
| ENSG00000131067.15_GGT7    | ENSG00000160789.18_LMNA | -0.06191 | -0.218951289 | 0.098260601 | 4.49E-01 | 7.15E-01 | 1.00E+00 |
| ENSG00000136718.8_IMP4     | ENSG00000160789.18_LMNA | -0.12287 | -0.276662267 | 0.037051989 | 1.32E-01 | 3.68E-01 | 1.00E+00 |
| ENSG00000074319.11_TSG101  | ENSG00000160789.18_LMNA | -0.27083 | -0.412259913 | -0.11666416 | 7.39E-04 | 9.13E-03 | 1.00E+00 |
| ENSG00000147649.8_MTDH     | ENSG00000160789.18_LMNA | 0.17924  | 0.02062295   | 0.32904675  | 2.71E-02 | 1.34E-01 | 1.00E+00 |
| ENSG00000166197.15_NOLC1   | ENSG00000160789.18_LMNA | 0.02848  | -0.131315105 | 0.186834563 | 7.28E-01 | 8.85E-01 | 1.00E+00 |
| ENSG00000089685.13_BIRC5   | ENSG00000160789.18_LMNA | -0.04973 | -0.207292806 | 0.110340973 | 5.43E-01 | 7.82E-01 | 1.00E+00 |
| ENSG00000101134.10_DOK5    | ENSG00000160789.18_LMNA | 0.02758  | -0.132201567 | 0.185963784 | 7.36E-01 | 8.89E-01 | 1.00E+00 |
| ENSG00000140259.6_MFAP1    | ENSG00000160789.18_LMNA | 0.2052   | 0.047557657  | 0.352877356 | 1.12E-02 | 7.11E-02 | 1.00E+00 |
| ENSG00000198792.11_TMEM184 | ENSG00000160789.18_LMNA | 0.12137  | -0.038574025 | 0.275254125 | 1.36E-01 | 3.76E-01 | 1.00E+00 |
| ENSG00000164050.11_PLXNB1  | ENSG00000160789.18_LMNA | -0.23777 | -0.382493844 | -0.08166235 | 3.18E-03 | 2.79E-02 | 1.00E+00 |
| ENSG00000137491.13_SLCO2B1 | ENSG00000160789.18_LMNA | -0.06135 | -0.218416646 | 0.098816645 | 4.53E-01 | 7.18E-01 | 1.00E+00 |
| ENSG00000160075.11_SSU72   | ENSG00000160789.18_LMNA | -0.01503 | -0.173814909 | 0.144516389 | 8.54E-01 | 9.43E-01 | 1.00E+00 |
| ENSG00000167965.16_MLST8   | ENSG00000160789.18_LMNA | -0.12897 | -0.282376406 | 0.030860702 | 1.13E-01 | 3.36E-01 | 1.00E+00 |
| ENSG00000168389.16_MFSD2A  | ENSG00000160789.18_LMNA | -0.15354 | -0.305281679 | 0.00579911  | 5.89E-02 | 2.23E-01 | 1.00E+00 |
| ENSG00000185803.7_SLC52A2  | ENSG00000160789.18_LMNA | 0.40476  | 0.262471988  | 0.529819701 | 2.31E-07 | 1.43E-05 | 1.19E-02 |
| ENSG00000006625.16_GGCT    | ENSG00000160789.18_LMNA | 0.28221  | 0.128800064  | 0.422435206 | 4.27E-04 | 5.97E-03 | 1.00E+00 |
| ENSG00000069345.10_DNAJA2  | ENSG00000160789.18_LMNA | -0.15944 | -0.310751363 | -0.00024386 | 4.98E-02 | 2.01E-01 | 1.00E+00 |
| ENSG00000135316.16_SYNCRIP | ENSG00000160789.18_LMNA | 0.17149  | 0.012635835  | 0.32190378  | 3.46E-02 | 1.57E-01 | 1.00E+00 |
| ENSG00000167740.8_CYB5D2   | ENSG00000160789.18_LMNA | -0.07932 | -0.235544987 | 0.080903671 | 3.31E-01 | 6.17E-01 | 1.00E+00 |
| ENSG00000255112.2_CHMP1B   | ENSG00000160789.18_LMNA | -0.27049 | -0.41194942  | -0.11629523 | 7.51E-04 | 9.25E-03 | 1.00E+00 |
| ENSG00000122140.9_MRPS2    | ENSG00000160789.18_LMNA | 0.19596  | 0.037947699  | 0.344420111 | 1.55E-02 | 9.00E-02 | 1.00E+00 |
| ENSG00000119414.10_PPP6C   | ENSG00000160789.18_LMNA | -0.19716 | -0.345517105 | -0.03919102 | 1.49E-02 | 8.75E-02 | 1.00E+00 |
| ENSG00000169180.10_XPO6    | ENSG00000160789.18_LMNA | 0.14226  | -0.017331621 | 0.294785956 | 8.04E-02 | 2.73E-01 | 1.00E+00 |
| ENSG00000101193.7_GID8     | ENSG00000160789.18_LMNA | 0.05726  | -0.102877991 | 0.214505823 | 4.83E-01 | 7.41E-01 | 1.00E+00 |
| ENSG00000174282.10_ZBTB4   | ENSG00000160789.18_LMNA | 0.15203  | -0.007344035 | 0.303880016 | 6.15E-02 | 2.29E-01 | 1.00E+00 |
| ENSG00000106028.9_SSBP1    | ENSG00000160789.18_LMNA | 0.04435  | -0.115666547 | 0.202124405 | 5.87E-01 | 8.08E-01 | 1.00E+00 |
| ENSG00000157851.15_DPYSL5  | ENSG00000160789.18_LMNA | -0.02379 | -0.182296186 | 0.135929641 | 7.71E-01 | 9.05E-01 | 1.00E+00 |
| ENSG00000197249.11_SERPINA | ENSG00000160789.18_LMNA | 0.17013  | 0.011232866  | 0.320645443 | 3.61E-02 | 1.62E-01 | 1.00E+00 |
| ENSG00000187678.8_SPRY4    | ENSG00000160789.18_LMNA | 0.38661  | 0.242327568  | 0.51416739  | 8.66E-07 | 4.06E-05 | 4.44E-02 |
| ENSG00000236876.3_TMSB4XP1 | ENSG00000160789.18_LMNA | 0.04974  | -0.110331321 | 0.207302158 | 5.43E-01 | 7.82E-01 | 1.00E+00 |
| ENSG00000159423.15_ALDH4A1 | ENSG00000160789.18_LMNA | -0.02586 | -0.184304358 | 0.133889471 | 7.52E-01 | 8.97E-01 | 1.00E+00 |

|                            |                         |          |              |             |          |          |          |
|----------------------------|-------------------------|----------|--------------|-------------|----------|----------|----------|
| ENSG00000213523.8_SRA1     | ENSG00000160789.18_LMNA | -0.05924 | -0.21639873  | 0.100913548 | 4.68E-01 | 7.29E-01 | 1.00E+00 |
| ENSG00000185189.14_NRBP2   | ENSG00000160789.18_LMNA | 0.0245   | -0.135231159 | 0.182984012 | 7.65E-01 | 9.02E-01 | 1.00E+00 |
| ENSG00000188636.3_LDOC1L   | ENSG00000160789.18_LMNA | -0.12775 | -0.281226387 | 0.032108686 | 1.17E-01 | 3.42E-01 | 1.00E+00 |
| ENSG00000155508.12_CNOT8   | ENSG00000160789.18_LMNA | -0.40735 | -0.53205104  | -0.26536281 | 1.90E-07 | 1.22E-05 | 9.77E-03 |
| ENSG00000034053.13_APBA2   | ENSG00000160789.18_LMNA | -0.07738 | -0.233698051 | 0.082845097 | 3.43E-01 | 6.28E-01 | 1.00E+00 |
| ENSG00000141232.4_TOB1     | ENSG00000160789.18_LMNA | 0.16878  | 0.009839542  | 0.319394675 | 3.77E-02 | 1.66E-01 | 1.00E+00 |
| ENSG00000136717.13_BIN1    | ENSG00000160789.18_LMNA | -0.28177 | -0.422035784 | -0.12832202 | 4.37E-04 | 6.08E-03 | 1.00E+00 |
| ENSG00000221890.2_NPTXR    | ENSG00000160789.18_LMNA | 0.10373  | -0.05639838  | 0.258662734 | 2.03E-01 | 4.74E-01 | 1.00E+00 |
| ENSG00000186501.13_TMEN222 | ENSG00000160789.18_LMNA | 0.04329  | -0.116716576 | 0.201103272 | 5.96E-01 | 8.14E-01 | 1.00E+00 |
| ENSG00000164442.9_CITED2   | ENSG00000160789.18_LMNA | 0.03053  | -0.129301018 | 0.188811161 | 7.09E-01 | 8.76E-01 | 1.00E+00 |
| ENSG00000073111.12_MCM2    | ENSG00000160789.18_LMNA | 0.13451  | -0.025228483 | 0.287555328 | 9.85E-02 | 3.09E-01 | 1.00E+00 |
| ENSG00000091317.7_CMTM6    | ENSG00000160789.18_LMNA | -0.05687 | -0.214136049 | 0.10326145  | 4.86E-01 | 7.43E-01 | 1.00E+00 |
| ENSG00000253719.3_ATXN7L3B | ENSG00000160789.18_LMNA | -0.38426 | -0.512134369 | -0.23972817 | 1.02E-06 | 4.68E-05 | 5.24E-02 |
| ENSG00000108312.13_UBTF    | ENSG00000160789.18_LMNA | 0.13055  | -0.029256366 | 0.283853483 | 1.09E-01 | 3.28E-01 | 1.00E+00 |
| ENSG00000003056.6_M6PR     | ENSG00000160789.18_LMNA | -0.01539 | -0.1741596   | 0.144168343 | 8.51E-01 | 9.41E-01 | 1.00E+00 |
| ENSG00000084463.6_WBP11    | ENSG00000160789.18_LMNA | -0.01159 | -0.170475852 | 0.147883868 | 8.87E-01 | 9.56E-01 | 1.00E+00 |
| ENSG00000117395.9_EBNA1BP2 | ENSG00000160789.18_LMNA | 0.05998  | -0.100181719 | 0.217103301 | 4.63E-01 | 7.26E-01 | 1.00E+00 |
| ENSG00000124225.14_PMEPA1  | ENSG00000160789.18_LMNA | 0.43907  | 0.300896839  | 0.559179381 | 1.53E-08 | 1.54E-06 | 7.83E-04 |
| ENSG00000089737.14_DDX24   | ENSG00000160789.18_LMNA | 0.08651  | -0.073706425 | 0.242372056 | 2.89E-01 | 5.75E-01 | 1.00E+00 |
| ENSG00000135956.7_TMEN127  | ENSG00000160789.18_LMNA | 0.29398  | 0.141397038  | 0.432919378 | 2.37E-04 | 3.74E-03 | 1.00E+00 |
| ENSG00000213699.7_SLC35F6  | ENSG00000160789.18_LMNA | 0.40255  | 0.260011802  | 0.527917837 | 2.73E-07 | 1.64E-05 | 1.40E-02 |
| ENSG00000127445.12_PIN1    | ENSG00000160789.18_LMNA | -0.14833 | -0.300439831 | 0.011129547 | 6.82E-02 | 2.45E-01 | 1.00E+00 |
| ENSG00000071564.13_TCF3    | ENSG00000160789.18_LMNA | 0.16411  | 0.005045522  | 0.31508289  | 4.33E-02 | 1.83E-01 | 1.00E+00 |
| ENSG00000144744.15_UBA3    | ENSG00000160789.18_LMNA | -0.40613 | -0.530996458 | -0.26399594 | 2.09E-07 | 1.32E-05 | 1.07E-02 |
| ENSG00000099901.15_RANBP1  | ENSG00000160789.18_LMNA | -0.07479 | -0.231237028 | 0.085428297 | 3.60E-01 | 6.42E-01 | 1.00E+00 |
| ENSG00000106683.13_LIMK1   | ENSG00000160789.18_LMNA | 0.47316  | 0.339539388  | 0.588066186 | 7.47E-10 | 1.23E-07 | 3.83E-05 |
| ENSG00000133706.16_LARS    | ENSG00000160789.18_LMNA | -0.10432 | -0.259215875 | 0.055807352 | 2.01E-01 | 4.71E-01 | 1.00E+00 |
| ENSG00000018236.13_CNTN1   | ENSG00000160789.18_LMNA | -0.52741 | -0.633428523 | -0.40196336 | 2.93E-12 | 1.33E-09 | 1.50E-07 |
| ENSG00000160445.9_ZER1     | ENSG00000160789.18_LMNA | -0.03726 | -0.195298076 | 0.122672576 | 6.49E-01 | 8.44E-01 | 1.00E+00 |
| ENSG00000162738.5_VANGL2   | ENSG00000160789.18_LMNA | -0.097   | -0.252304934 | 0.063175836 | 2.35E-01 | 5.12E-01 | 1.00E+00 |
| ENSG00000167005.12_NUDT21  | ENSG00000160789.18_LMNA | 0.04378  | -0.116230543 | 0.201576016 | 5.92E-01 | 8.11E-01 | 1.00E+00 |
| ENSG00000115266.10_APC2    | ENSG00000160789.18_LMNA | -0.16209 | -0.313204667 | -0.00296168 | 4.60E-02 | 1.91E-01 | 1.00E+00 |
| ENSG00000014216.14_CAPN1   | ENSG00000160789.18_LMNA | 0.30788  | 0.156341326  | 0.445255717 | 1.14E-04 | 2.10E-03 | 1.00E+00 |

|                             |                         |          |              |             |          |          |          |
|-----------------------------|-------------------------|----------|--------------|-------------|----------|----------|----------|
| ENSG00000267100.1_ILF3-AS1  | ENSG00000160789.18_LMNA | -0.28834 | -0.427902354 | -0.13535717 | 3.15E-04 | 4.68E-03 | 1.00E+00 |
| ENSG00000120948.14_TARDBP   | ENSG00000160789.18_LMNA | 0.10506  | -0.055060474 | 0.259914579 | 1.98E-01 | 4.67E-01 | 1.00E+00 |
| ENSG00000064419.12_TNPO3    | ENSG00000160789.18_LMNA | 0.24801  | 0.092464175  | 0.391746982 | 2.06E-03 | 2.00E-02 | 1.00E+00 |
| ENSG00000149657.18_LSM14B   | ENSG00000160789.18_LMNA | 0.04819  | -0.11186737  | 0.205813268 | 5.55E-01 | 7.89E-01 | 1.00E+00 |
| ENSG00000167969.11_EC11     | ENSG00000160789.18_LMNA | 0.01555  | -0.144008801 | 0.174317579 | 8.49E-01 | 9.41E-01 | 1.00E+00 |
| ENSG00000143387.11_CTSK     | ENSG00000160789.18_LMNA | 0.09125  | -0.068954661 | 0.246862331 | 2.64E-01 | 5.47E-01 | 1.00E+00 |
| ENSG00000100941.7_PNN       | ENSG00000160789.18_LMNA | 0.12559  | -0.034292577 | 0.279211761 | 1.23E-01 | 3.54E-01 | 1.00E+00 |
| ENSG00000130755.11_GMFG     | ENSG00000160789.18_LMNA | -0.07089 | -0.227524425 | 0.089317174 | 3.85E-01 | 6.64E-01 | 1.00E+00 |
| ENSG00000176490.4_DIRAS1    | ENSG00000160789.18_LMNA | 0.06456  | -0.095621002 | 0.221486703 | 4.29E-01 | 6.99E-01 | 1.00E+00 |
| ENSG00000116754.12_SRSF11   | ENSG00000160789.18_LMNA | -0.00887 | -0.167834023 | 0.150542963 | 9.14E-01 | 9.67E-01 | 1.00E+00 |
| ENSG00000138663.7_COPS4     | ENSG00000160789.18_LMNA | -0.31693 | -0.453259005 | -0.16610781 | 6.95E-05 | 1.40E-03 | 1.00E+00 |
| ENSG00000221821.3_C6orf226  | ENSG00000160789.18_LMNA | -0.17942 | -0.329216917 | -0.02081371 | 2.70E-02 | 1.33E-01 | 1.00E+00 |
| ENSG00000171703.15_TCEA2    | ENSG00000160789.18_LMNA | -0.01416 | -0.17296997  | 0.145369218 | 8.63E-01 | 9.46E-01 | 1.00E+00 |
| ENSG00000101126.14_ADNP     | ENSG00000160789.18_LMNA | -0.05375 | -0.211147965 | 0.106356666 | 5.11E-01 | 7.59E-01 | 1.00E+00 |
| ENSG00000040633.11_PHF23    | ENSG00000160789.18_LMNA | 0.04142  | -0.118561057 | 0.199307876 | 6.12E-01 | 8.24E-01 | 1.00E+00 |
| ENSG00000131016.15_AKAP12   | ENSG00000160789.18_LMNA | 0.39098  | 0.247162965  | 0.517941105 | 6.35E-07 | 3.18E-05 | 3.26E-02 |
| ENSG00000124160.10_NCOA5    | ENSG00000160789.18_LMNA | -0.08358 | -0.239592985 | 0.076640161 | 3.06E-01 | 5.93E-01 | 1.00E+00 |
| ENSG00000175970.8_UNC119B   | ENSG00000160789.18_LMNA | 0.18706  | 0.028714477  | 0.336247285 | 2.10E-02 | 1.12E-01 | 1.00E+00 |
| ENSG00000091640.6_SPAG7     | ENSG00000160789.18_LMNA | -0.00753 | -0.166530967 | 0.151852841 | 9.27E-01 | 9.72E-01 | 1.00E+00 |
| ENSG00000037042.8_TUBG2     | ENSG00000160789.18_LMNA | 0.03415  | -0.125729715 | 0.192309664 | 6.76E-01 | 8.58E-01 | 1.00E+00 |
| ENSG00000103507.12_BCKDK    | ENSG00000160789.18_LMNA | 0.34251  | 0.193882106  | 0.475768811 | 1.57E-05 | 4.22E-04 | 8.03E-01 |
| ENSG00000167635.10_ZNF146   | ENSG00000160789.18_LMNA | 0.0093   | -0.150123122 | 0.168251442 | 9.09E-01 | 9.65E-01 | 1.00E+00 |
| ENSG00000107263.17_RAPGEF1  | ENSG00000160789.18_LMNA | 0.11962  | -0.040345646 | 0.273613377 | 1.42E-01 | 3.85E-01 | 1.00E+00 |
| ENSG00000272888.4_LINC01578 | ENSG00000160789.18_LMNA | -0.08637 | -0.242236968 | 0.073849158 | 2.90E-01 | 5.75E-01 | 1.00E+00 |
| ENSG00000204569.8_PPP1R10   | ENSG00000160789.18_LMNA | 0.06962  | -0.090586183 | 0.22631094  | 3.94E-01 | 6.72E-01 | 1.00E+00 |
| ENSG00000147853.15_AK3      | ENSG00000160789.18_LMNA | -0.18476 | -0.334128043 | -0.02632881 | 2.27E-02 | 1.18E-01 | 1.00E+00 |
| ENSG00000185818.7_NAT8L     | ENSG00000160789.18_LMNA | -0.02958 | -0.187897039 | 0.130232804 | 7.18E-01 | 8.80E-01 | 1.00E+00 |
| ENSG00000173114.11_LRRN3    | ENSG00000160789.18_LMNA | 0.10268  | -0.057462184 | 0.257666602 | 2.08E-01 | 4.81E-01 | 1.00E+00 |
| ENSG00000163001.10_CFAP36   | ENSG00000160789.18_LMNA | -0.13765 | -0.290483061 | 0.022035683 | 9.08E-02 | 2.94E-01 | 1.00E+00 |
| ENSG00000159140.16_SON      | ENSG00000160789.18_LMNA | 0.11415  | -0.045880046 | 0.268476017 | 1.61E-01 | 4.16E-01 | 1.00E+00 |
| ENSG00000159363.16_ATP13A2  | ENSG00000160789.18_LMNA | 0.13613  | -0.023584523 | 0.289063536 | 9.45E-02 | 3.01E-01 | 1.00E+00 |
| ENSG00000174807.3_CD248     | ENSG00000160789.18_LMNA | 0.41994  | 0.279423074  | 0.542851167 | 7.21E-08 | 5.53E-06 | 3.70E-03 |
| ENSG00000210140.1_MT-TC     | ENSG00000160789.18_LMNA | -0.19354 | -0.342194787 | -0.03542845 | 1.69E-02 | 9.56E-02 | 1.00E+00 |

|                             |                         |          |              |             |          |          |          |
|-----------------------------|-------------------------|----------|--------------|-------------|----------|----------|----------|
| ENSG00000131043.10_AAR2     | ENSG00000160789.18_LMNA | 0.10161  | -0.058538793 | 0.256657798 | 2.13E-01 | 4.87E-01 | 1.00E+00 |
| ENSG00000169313.9_P2RY12    | ENSG00000160789.18_LMNA | -0.42876 | -0.550388441 | -0.28930295 | 3.57E-08 | 3.13E-06 | 1.83E-03 |
| ENSG00000240065.6_PSMB9     | ENSG00000160789.18_LMNA | 0.13394  | -0.025809627 | 0.287021801 | 9.99E-02 | 3.11E-01 | 1.00E+00 |
| ENSG00000114315.3_HES1      | ENSG00000160789.18_LMNA | 0.2348   | 0.078530573  | 0.379799745 | 3.59E-03 | 3.06E-02 | 1.00E+00 |
| ENSG00000107551.19_RASSF4   | ENSG00000160789.18_LMNA | -0.25046 | -0.393951671 | -0.09504829 | 1.86E-03 | 1.85E-02 | 1.00E+00 |
| ENSG00000134202.9_GSTM3     | ENSG00000160789.18_LMNA | -0.29484 | -0.433686359 | -0.1423223  | 2.27E-04 | 3.60E-03 | 1.00E+00 |
| ENSG00000067082.13_KLF6     | ENSG00000160789.18_LMNA | 0.35201  | 0.204253289  | 0.484080556 | 8.70E-06 | 2.60E-04 | 4.46E-01 |
| ENSG00000129128.11_SPCS3    | ENSG00000160789.18_LMNA | -0.1942  | -0.342799257 | -0.03611238 | 1.65E-02 | 9.41E-02 | 1.00E+00 |
| ENSG00000196821.8_C6orf106  | ENSG00000160789.18_LMNA | 0.28634  | 0.133207347  | 0.426112244 | 3.49E-04 | 5.05E-03 | 1.00E+00 |
| ENSG00000133027.16_PEMT     | ENSG00000160789.18_LMNA | -0.1865  | -0.33573072  | -0.02813265 | 2.14E-02 | 1.13E-01 | 1.00E+00 |
| ENSG00000134986.12_NREP     | ENSG00000160789.18_LMNA | -0.31289 | -0.449693601 | -0.16174994 | 8.68E-05 | 1.68E-03 | 1.00E+00 |
| ENSG00000137216.17_TMEM63B  | ENSG00000160789.18_LMNA | 0.15778  | -0.001460496 | 0.309210777 | 5.22E-02 | 2.07E-01 | 1.00E+00 |
| ENSG00000072803.16_FBXW11   | ENSG00000160789.18_LMNA | -0.15848 | -0.309867437 | 0.000734253 | 5.12E-02 | 2.04E-01 | 1.00E+00 |
| ENSG00000120992.16_LYPLA1   | ENSG00000160789.18_LMNA | -0.09034 | -0.245998512 | 0.069869899 | 2.68E-01 | 5.52E-01 | 1.00E+00 |
| ENSG00000149823.6_VPS51     | ENSG00000160789.18_LMNA | -0.10033 | -0.255451779 | 0.059824911 | 2.19E-01 | 4.94E-01 | 1.00E+00 |
| ENSG00000139239.7_RPL14P1   | ENSG00000160789.18_LMNA | -0.10401 | -0.258921927 | 0.056121461 | 2.02E-01 | 4.73E-01 | 1.00E+00 |
| ENSG00000274523.3_RCC1L     | ENSG00000160789.18_LMNA | 0.40312  | 0.260650874  | 0.528412135 | 2.62E-07 | 1.58E-05 | 1.34E-02 |
| ENSG00000073712.12_FERMT2   | ENSG00000160789.18_LMNA | 0.21018  | 0.052748429  | 0.357424838 | 9.35E-03 | 6.24E-02 | 1.00E+00 |
| ENSG00000188554.12_NBR1     | ENSG00000160789.18_LMNA | -0.06357 | -0.220541091 | 0.096605993 | 4.37E-01 | 7.05E-01 | 1.00E+00 |
| ENSG00000198121.12_LPAR1    | ENSG00000160789.18_LMNA | -0.02221 | -0.180768202 | 0.137480166 | 7.86E-01 | 9.13E-01 | 1.00E+00 |
| ENSG00000103152.10_MPG      | ENSG00000160789.18_LMNA | 0.00835  | -0.151054856 | 0.167324928 | 9.19E-01 | 9.69E-01 | 1.00E+00 |
| ENSG00000278730.1_RP11-147L | ENSG00000160789.18_LMNA | 0.06625  | -0.09393829  | 0.223100765 | 4.17E-01 | 6.90E-01 | 1.00E+00 |
| ENSG00000138363.13_ATIC     | ENSG00000160789.18_LMNA | 0.10419  | -0.055933894 | 0.259097461 | 2.01E-01 | 4.72E-01 | 1.00E+00 |
| ENSG00000140848.15_CPNE2    | ENSG00000160789.18_LMNA | 0.17595  | 0.017230969  | 0.326017567 | 3.01E-02 | 1.44E-01 | 1.00E+00 |
| ENSG00000130177.13_CDC16    | ENSG00000160789.18_LMNA | -0.06114 | -0.218218964 | 0.099022189 | 4.54E-01 | 7.19E-01 | 1.00E+00 |
| ENSG00000161013.15_MGAT4B   | ENSG00000160789.18_LMNA | 0.55595  | 0.43527594   | 0.657002169 | 1.04E-13 | 9.08E-11 | 5.36E-09 |
| ENSG00000184575.10_XPOT     | ENSG00000160789.18_LMNA | -0.08028 | -0.236454632 | 0.079946605 | 3.26E-01 | 6.12E-01 | 1.00E+00 |
| ENSG00000141002.17_TCF25    | ENSG00000160789.18_LMNA | 0.1148   | -0.045228223 | 0.269082008 | 1.59E-01 | 4.12E-01 | 1.00E+00 |
| ENSG00000135720.11_DYNC1LI2 | ENSG00000160789.18_LMNA | -0.02107 | -0.179671074 | 0.138592518 | 7.97E-01 | 9.18E-01 | 1.00E+00 |
| ENSG00000131653.11_TRAF7    | ENSG00000160789.18_LMNA | 0.25448  | 0.09929968   | 0.397571353 | 1.56E-03 | 1.62E-02 | 1.00E+00 |
| ENSG00000126947.10_ARMCX1   | ENSG00000160789.18_LMNA | -0.24933 | -0.392934305 | -0.09385534 | 1.95E-03 | 1.92E-02 | 1.00E+00 |
| ENSG00000204231.9_RXRB      | ENSG00000160789.18_LMNA | -0.32876 | -0.463694571 | -0.1789276  | 3.54E-05 | 8.19E-04 | 1.00E+00 |
| ENSG00000138758.10_SEPT11   | ENSG00000160789.18_LMNA | 0.31699  | 0.166179983  | 0.45331798  | 6.92E-05 | 1.40E-03 | 1.00E+00 |

|                             |                         |          |              |             |          |          |          |
|-----------------------------|-------------------------|----------|--------------|-------------|----------|----------|----------|
| ENSG00000115091.10_ACTR3    | ENSG00000160789.18_LMNA | 0.17044  | 0.0115521    | 0.320931863 | 3.58E-02 | 1.61E-01 | 1.00E+00 |
| ENSG00000111269.2_CREBL2    | ENSG00000160789.18_LMNA | -0.03304 | -0.191231332 | 0.126831366 | 6.86E-01 | 8.64E-01 | 1.00E+00 |
| ENSG00000054793.12_ATP9A    | ENSG00000160789.18_LMNA | -0.18797 | -0.337081059 | -0.02965403 | 2.04E-02 | 1.09E-01 | 1.00E+00 |
| ENSG00000148308.16_GTF3C5   | ENSG00000160789.18_LMNA | -0.03812 | -0.196128401 | 0.121822082 | 6.41E-01 | 8.40E-01 | 1.00E+00 |
| ENSG00000123496.6_IL13RA2   | ENSG00000160789.18_LMNA | -0.13686 | -0.289746719 | 0.022839291 | 9.27E-02 | 2.98E-01 | 1.00E+00 |
| ENSG00000204843.11_DCTN1    | ENSG00000160789.18_LMNA | 0.01428  | -0.145252841 | 0.173085298 | 8.61E-01 | 9.46E-01 | 1.00E+00 |
| ENSG00000179163.11_FUCA1    | ENSG00000160789.18_LMNA | 0.06354  | -0.096639406 | 0.220509004 | 4.37E-01 | 7.05E-01 | 1.00E+00 |
| ENSG00000086666.17_ZFAND6   | ENSG00000160789.18_LMNA | -0.07235 | -0.228916364 | 0.087860276 | 3.76E-01 | 6.56E-01 | 1.00E+00 |
| ENSG00000204435.12_CSNK2B   | ENSG00000160789.18_LMNA | 0.00026  | -0.158948326 | 0.159453058 | 9.97E-01 | 9.99E-01 | 1.00E+00 |
| ENSG00000137343.16_ATAT1    | ENSG00000160789.18_LMNA | -0.37805 | -0.506755466 | -0.23286955 | 1.57E-06 | 6.66E-05 | 8.06E-02 |
| ENSG00000068001.12_HYAL2    | ENSG00000160789.18_LMNA | 0.11553  | -0.044486639 | 0.269771147 | 1.56E-01 | 4.08E-01 | 1.00E+00 |
| ENSG00000182165.16_TP53TG1  | ENSG00000160789.18_LMNA | -0.07491 | -0.231353025 | 0.085306637 | 3.59E-01 | 6.42E-01 | 1.00E+00 |
| ENSG00000135932.9_CAB39     | ENSG00000160789.18_LMNA | 0.02584  | -0.133914551 | 0.184279688 | 7.52E-01 | 8.97E-01 | 1.00E+00 |
| ENSG00000128626.10_MRPS12   | ENSG00000160789.18_LMNA | 0.04908  | -0.110992454 | 0.206661503 | 5.48E-01 | 7.85E-01 | 1.00E+00 |
| ENSG00000132155.10_RAF1     | ENSG00000160789.18_LMNA | -0.21539 | -0.36217514  | -0.05818835 | 7.70E-03 | 5.40E-02 | 1.00E+00 |
| ENSG00000115350.10_POLE4    | ENSG00000160789.18_LMNA | -0.2031  | -0.350952079 | -0.04536499 | 1.21E-02 | 7.52E-02 | 1.00E+00 |
| ENSG00000116157.5_GPX7      | ENSG00000160789.18_LMNA | 0.02841  | -0.131380235 | 0.186770602 | 7.28E-01 | 8.85E-01 | 1.00E+00 |
| ENSG00000119729.9_RHOQ      | ENSG00000160789.18_LMNA | -0.1235  | -0.27725381  | 0.036412166 | 1.30E-01 | 3.65E-01 | 1.00E+00 |
| ENSG00000218227.3_RP11-889L | ENSG00000160789.18_LMNA | -0.14767 | -0.299823281 | 0.011807045 | 6.94E-02 | 2.48E-01 | 1.00E+00 |
| ENSG00000168092.12_PAFAH1B  | ENSG00000160789.18_LMNA | -0.15506 | -0.306688156 | 0.004247386 | 5.65E-02 | 2.17E-01 | 1.00E+00 |
| ENSG00000100554.10_ATP6V1D  | ENSG00000160789.18_LMNA | -0.04578 | -0.203495585 | 0.114255447 | 5.75E-01 | 8.02E-01 | 1.00E+00 |
| ENSG00000234518.2_PTGES3P1  | ENSG00000160789.18_LMNA | 0.02915  | -0.130661059 | 0.187476717 | 7.22E-01 | 8.82E-01 | 1.00E+00 |
| ENSG00000232559.3_GS1-124K5 | ENSG00000160789.18_LMNA | 0.16635  | 0.007340573  | 0.317148677 | 4.05E-02 | 1.75E-01 | 1.00E+00 |
| ENSG00000133393.11_FOPNL    | ENSG00000160789.18_LMNA | -0.20332 | -0.351158491 | -0.04559993 | 1.20E-02 | 7.48E-02 | 1.00E+00 |
| ENSG00000154856.11_APCDD1   | ENSG00000160789.18_LMNA | -0.51023 | -0.619136428 | -0.38206081 | 1.89E-11 | 5.72E-09 | 9.67E-07 |
| ENSG00000148400.9_NOTCH1    | ENSG00000160789.18_LMNA | 0.11966  | -0.040304402 | 0.273651595 | 1.42E-01 | 3.85E-01 | 1.00E+00 |
| ENSG00000142949.15_PTPRF    | ENSG00000160789.18_LMNA | 0.22652  | 0.069840948  | 0.372297674 | 5.01E-03 | 3.93E-02 | 1.00E+00 |
| ENSG00000219507.4_FTH1P8    | ENSG00000160789.18_LMNA | 0.04282  | -0.117182005 | 0.20065043  | 6.00E-01 | 8.16E-01 | 1.00E+00 |
| ENSG00000148484.16_RSU1     | ENSG00000160789.18_LMNA | 0.06563  | -0.094562017 | 0.222502687 | 4.22E-01 | 6.93E-01 | 1.00E+00 |
| ENSG00000198833.6_UBE2J1    | ENSG00000160789.18_LMNA | -0.06526 | -0.222155195 | 0.094924297 | 4.24E-01 | 6.95E-01 | 1.00E+00 |
| ENSG00000102038.14_SMARCA1  | ENSG00000160789.18_LMNA | 0.05512  | -0.105004741 | 0.212453827 | 5.00E-01 | 7.53E-01 | 1.00E+00 |
| ENSG00000141540.9_TTYH2     | ENSG00000160789.18_LMNA | -0.33616 | -0.470197588 | -0.18696557 | 2.29E-05 | 5.77E-04 | 1.00E+00 |
| ENSG00000172893.14_DHCR7    | ENSG00000160789.18_LMNA | 0.28632  | 0.13319272   | 0.426100057 | 3.49E-04 | 5.05E-03 | 1.00E+00 |

|                             |                         |          |              |             |          |          |          |
|-----------------------------|-------------------------|----------|--------------|-------------|----------|----------|----------|
| ENSG00000103342.11_GSPT1    | ENSG00000160789.18_LMNA | 0.04979  | -0.110283514 | 0.207348473 | 5.42E-01 | 7.81E-01 | 1.00E+00 |
| ENSG00000070214.14_SLC44A1  | ENSG00000160789.18_LMNA | -0.39325 | -0.519904598 | -0.24968421 | 5.39E-07 | 2.79E-05 | 2.77E-02 |
| ENSG00000104368.16_PLAT     | ENSG00000160789.18_LMNA | 0.39113  | 0.24733059   | 0.518071736 | 6.28E-07 | 3.15E-05 | 3.22E-02 |
| ENSG00000169136.7_ATF5      | ENSG00000160789.18_LMNA | 0.15259  | -0.006775749 | 0.304395761 | 6.06E-02 | 2.27E-01 | 1.00E+00 |
| ENSG00000159842.13_ABR      | ENSG00000160789.18_LMNA | 0.05343  | -0.106675701 | 0.210839634 | 5.13E-01 | 7.61E-01 | 1.00E+00 |
| ENSG00000173545.4_ZNF622    | ENSG00000160789.18_LMNA | -0.03786 | -0.195882404 | 0.122074104 | 6.43E-01 | 8.41E-01 | 1.00E+00 |
| ENSG00000011260.12_UTP18    | ENSG00000160789.18_LMNA | -0.19375 | -0.342393356 | -0.03565309 | 1.68E-02 | 9.51E-02 | 1.00E+00 |
| ENSG00000105248.14_CCDC94   | ENSG00000160789.18_LMNA | -0.09632 | -0.251661626 | 0.063859989 | 2.38E-01 | 5.16E-01 | 1.00E+00 |
| ENSG00000241839.8_PLEKHO2   | ENSG00000160789.18_LMNA | 0.20703  | 0.049454372  | 0.354540686 | 1.05E-02 | 6.78E-02 | 1.00E+00 |
| ENSG00000105402.6_NAPA      | ENSG00000160789.18_LMNA | 0.05103  | -0.109061487 | 0.208531895 | 5.32E-01 | 7.75E-01 | 1.00E+00 |
| ENSG00000169710.6_FASN      | ENSG00000160789.18_LMNA | 0.14899  | -0.01045845  | 0.3010503   | 6.70E-02 | 2.42E-01 | 1.00E+00 |
| ENSG00000105755.6_ETHE1     | ENSG00000160789.18_LMNA | 0.16772  | 0.008750255  | 0.318416084 | 3.89E-02 | 1.70E-01 | 1.00E+00 |
| ENSG00000184678.9_HIST2H2BE | ENSG00000160789.18_LMNA | -0.10873 | -0.263376316 | 0.051354856 | 1.82E-01 | 4.47E-01 | 1.00E+00 |
| ENSG00000196776.13_CD47     | ENSG00000160789.18_LMNA | 0.02572  | -0.134032334 | 0.184163822 | 7.53E-01 | 8.97E-01 | 1.00E+00 |
| ENSG00000259781.1_HMGB1P6   | ENSG00000160789.18_LMNA | -0.0657  | -0.222575434 | 0.094486164 | 4.21E-01 | 6.93E-01 | 1.00E+00 |
| ENSG00000102390.9_PBDC1     | ENSG00000160789.18_LMNA | 0.29831  | 0.146046358  | 0.436769076 | 1.89E-04 | 3.13E-03 | 1.00E+00 |
| ENSG00000162073.12_PAQR4    | ENSG00000160789.18_LMNA | -0.18749 | -0.336638502 | -0.02915526 | 2.07E-02 | 1.11E-01 | 1.00E+00 |
| ENSG00000128228.4_SDF2L1    | ENSG00000160789.18_LMNA | 0.36341  | 0.216752324  | 0.494030965 | 4.19E-06 | 1.44E-04 | 2.15E-01 |
| ENSG00000170382.10_LRRN2    | ENSG00000160789.18_LMNA | -0.10377 | -0.258693165 | 0.056365869 | 2.03E-01 | 4.74E-01 | 1.00E+00 |
| ENSG00000197045.11_GMFB     | ENSG00000160789.18_LMNA | -0.27766 | -0.418363899 | -0.12393371 | 5.34E-04 | 7.10E-03 | 1.00E+00 |
| ENSG00000253352.7_TUG1      | ENSG00000160789.18_LMNA | 0.06908  | -0.091122555 | 0.225797741 | 3.98E-01 | 6.75E-01 | 1.00E+00 |
| ENSG00000072210.17_ALDH3A2  | ENSG00000160789.18_LMNA | -0.07453 | -0.230986038 | 0.085691508 | 3.62E-01 | 6.43E-01 | 1.00E+00 |
| ENSG00000149182.13_ARFGAP2  | ENSG00000160789.18_LMNA | -0.04246 | -0.200310361 | 0.117531435 | 6.03E-01 | 8.18E-01 | 1.00E+00 |
| ENSG00000105855.8_ITGB8     | ENSG00000160789.18_LMNA | 0.21397  | 0.05670033   | 0.360877323 | 8.12E-03 | 5.63E-02 | 1.00E+00 |
| ENSG00000164182.9_NDUFAF2   | ENSG00000160789.18_LMNA | -0.12622 | -0.279795551 | 0.033660046 | 1.21E-01 | 3.50E-01 | 1.00E+00 |
| ENSG00000155093.16_PTPRN2   | ENSG00000160789.18_LMNA | -0.18247 | -0.332022812 | -0.02396238 | 2.45E-02 | 1.25E-01 | 1.00E+00 |
| ENSG00000156875.12_MFSD14A  | ENSG00000160789.18_LMNA | 0.02686  | -0.132909891 | 0.185267632 | 7.43E-01 | 8.92E-01 | 1.00E+00 |
| ENSG00000131401.10_NAPSB    | ENSG00000160789.18_LMNA | 0.02625  | -0.1335118   | 0.184675814 | 7.48E-01 | 8.95E-01 | 1.00E+00 |
| ENSG00000120697.7_ALG5      | ENSG00000160789.18_LMNA | -0.17273 | -0.3230441   | -0.01390827 | 3.33E-02 | 1.53E-01 | 1.00E+00 |
| ENSG00000250479.7_CHCHD10   | ENSG00000160789.18_LMNA | 0.1217   | -0.038240058 | 0.275563217 | 1.35E-01 | 3.74E-01 | 1.00E+00 |
| ENSG00000167674.13_CTB-50L1 | ENSG00000160789.18_LMNA | 0.18656  | 0.028201696  | 0.335792034 | 2.14E-02 | 1.13E-01 | 1.00E+00 |
| ENSG00000063015.18_SEZ6     | ENSG00000160789.18_LMNA | -0.05682 | -0.214088594 | 0.103310654 | 4.87E-01 | 7.43E-01 | 1.00E+00 |
| ENSG00000169085.10_C8orf46  | ENSG00000160789.18_LMNA | -0.43113 | -0.552415167 | -0.29196911 | 2.94E-08 | 2.66E-06 | 1.51E-03 |

|                            |                         |          |              |             |          |          |          |
|----------------------------|-------------------------|----------|--------------|-------------|----------|----------|----------|
| ENSG00000139921.11_TMX1    | ENSG00000160789.18_LMNA | 0.22266  | 0.065792377  | 0.368788846 | 5.83E-03 | 4.41E-02 | 1.00E+00 |
| ENSG00000136997.13_MYC     | ENSG00000160789.18_LMNA | 0.09209  | -0.068113988 | 0.247655333 | 2.59E-01 | 5.42E-01 | 1.00E+00 |
| ENSG00000047315.13_POLR2B  | ENSG00000160789.18_LMNA | -0.10804 | -0.262722859 | 0.052055013 | 1.85E-01 | 4.51E-01 | 1.00E+00 |
| ENSG00000169189.15_NSMCE1  | ENSG00000160789.18_LMNA | -0.08649 | -0.242356192 | 0.073723187 | 2.89E-01 | 5.75E-01 | 1.00E+00 |
| ENSG00000112576.11_CCND3   | ENSG00000160789.18_LMNA | -0.02048 | -0.179099302 | 0.139171905 | 8.02E-01 | 9.21E-01 | 1.00E+00 |
| ENSG00000127418.13_FGFRL1  | ENSG00000160789.18_LMNA | 0.57965  | 0.463198401  | 0.676433018 | 5.10E-15 | 7.92E-12 | 2.61E-10 |
| ENSG00000140450.8_ARRDC4   | ENSG00000160789.18_LMNA | 0.05417  | -0.105942809 | 0.211547841 | 5.07E-01 | 7.57E-01 | 1.00E+00 |
| ENSG00000196498.12_NCOR2   | ENSG00000160789.18_LMNA | 0.20551  | 0.047871214  | 0.353152464 | 1.11E-02 | 7.05E-02 | 1.00E+00 |
| ENSG00000137038.7_TMEM261  | ENSG00000160789.18_LMNA | -0.09725 | -0.252538424 | 0.062927447 | 2.33E-01 | 5.11E-01 | 1.00E+00 |
| ENSG00000185115.4_NSMCE3   | ENSG00000160789.18_LMNA | 0.09101  | -0.069191341 | 0.246638996 | 2.65E-01 | 5.48E-01 | 1.00E+00 |
| ENSG00000166902.4_MRPL16   | ENSG00000160789.18_LMNA | -0.1034  | -0.258347634 | 0.056734964 | 2.05E-01 | 4.76E-01 | 1.00E+00 |
| ENSG00000178464.6_RPL10P16 | ENSG00000160789.18_LMNA | -0.00772 | -0.166718888 | 0.151664006 | 9.25E-01 | 9.71E-01 | 1.00E+00 |
| ENSG00000163320.9_CGGBP1   | ENSG00000160789.18_LMNA | -0.30009 | -0.438345145 | -0.14795351 | 1.73E-04 | 2.91E-03 | 1.00E+00 |
| ENSG00000141551.13_CSNK1D  | ENSG00000160789.18_LMNA | 0.26818  | 0.11384489   | 0.409885502 | 8.36E-04 | 1.01E-02 | 1.00E+00 |
| ENSG00000163348.3_PYGO2    | ENSG00000160789.18_LMNA | 0.09349  | -0.066707818 | 0.248980819 | 2.52E-01 | 5.33E-01 | 1.00E+00 |
| ENSG00000147471.10_PROSC   | ENSG00000160789.18_LMNA | -0.00864 | -0.167612938 | 0.150765285 | 9.16E-01 | 9.68E-01 | 1.00E+00 |
| ENSG00000180447.6_GAS1     | ENSG00000160789.18_LMNA | 0.1148   | -0.045222693 | 0.269087148 | 1.59E-01 | 4.12E-01 | 1.00E+00 |
| ENSG00000158186.11_MRAS    | ENSG00000160789.18_LMNA | -0.06924 | -0.225954051 | 0.090959207 | 3.97E-01 | 6.73E-01 | 1.00E+00 |
| ENSG00000167977.7_KCTD5    | ENSG00000160789.18_LMNA | -0.01278 | -0.171632161 | 0.146718551 | 8.76E-01 | 9.52E-01 | 1.00E+00 |
| ENSG00000078319.8_PMS2P1   | ENSG00000160789.18_LMNA | -0.01127 | -0.170164207 | 0.148197789 | 8.90E-01 | 9.57E-01 | 1.00E+00 |
| ENSG00000159692.14_CTBP1   | ENSG00000160789.18_LMNA | 0.13104  | -0.028760141 | 0.284310046 | 1.08E-01 | 3.26E-01 | 1.00E+00 |
| ENSG00000112972.13_HMGCS1  | ENSG00000160789.18_LMNA | -0.05875 | -0.215933457 | 0.101396634 | 4.72E-01 | 7.32E-01 | 1.00E+00 |
| ENSG00000181929.10_PRKAG1  | ENSG00000160789.18_LMNA | -0.2405  | -0.384961922 | -0.08453661 | 2.84E-03 | 2.56E-02 | 1.00E+00 |
| ENSG00000174744.12_BRMS1   | ENSG00000160789.18_LMNA | 0.28186  | 0.128419625  | 0.422117348 | 4.35E-04 | 6.05E-03 | 1.00E+00 |
| ENSG00000184486.8_POU3F2   | ENSG00000160789.18_LMNA | 0.16392  | 0.004847006  | 0.314904066 | 4.36E-02 | 1.84E-01 | 1.00E+00 |
| ENSG00000182272.10_B4GALNT | ENSG00000160789.18_LMNA | 0.0842   | -0.07601819  | 0.240182599 | 3.02E-01 | 5.89E-01 | 1.00E+00 |
| ENSG00000144230.15_GPR17   | ENSG00000160789.18_LMNA | -0.42683 | -0.548740864 | -0.28713854 | 4.17E-08 | 3.52E-06 | 2.14E-03 |
| ENSG00000110077.13_MS4A6A  | ENSG00000160789.18_LMNA | -0.06189 | -0.218933249 | 0.098279367 | 4.49E-01 | 7.15E-01 | 1.00E+00 |
| ENSG00000166886.11_NAB2    | ENSG00000160789.18_LMNA | 0.55779  | 0.437438678  | 0.658517788 | 8.33E-14 | 7.77E-11 | 4.27E-09 |
| ENSG00000090863.10_GLG1    | ENSG00000160789.18_LMNA | 0.48085  | 0.348308183  | 0.594534113 | 3.61E-10 | 6.62E-08 | 1.85E-05 |
| ENSG00000213977.6_TAX1BP3  | ENSG00000160789.18_LMNA | 0.03179  | -0.128054129 | 0.19003355  | 6.97E-01 | 8.70E-01 | 1.00E+00 |
| ENSG00000090621.12_PABPC4  | ENSG00000160789.18_LMNA | 0.24956  | 0.094098552  | 0.393141781 | 1.93E-03 | 1.90E-02 | 1.00E+00 |
| ENSG00000183624.12_HMCES   | ENSG00000160789.18_LMNA | 0.2688   | 0.114500785  | 0.41043826  | 8.13E-04 | 9.84E-03 | 1.00E+00 |

|                            |                         |          |              |             |          |          |          |
|----------------------------|-------------------------|----------|--------------|-------------|----------|----------|----------|
| ENSG00000172340.13_SUCLG2  | ENSG00000160789.18_LMNA | 0.15582  | -0.003469734 | 0.307392507 | 5.52E-02 | 2.14E-01 | 1.00E+00 |
| ENSG00000134910.11_STT3A   | ENSG00000160789.18_LMNA | 0.33872  | 0.189747533  | 0.472441157 | 1.97E-05 | 5.10E-04 | 1.00E+00 |
| ENSG00000065320.7_NTN1     | ENSG00000160789.18_LMNA | 0.09154  | -0.068664868 | 0.247135739 | 2.62E-01 | 5.45E-01 | 1.00E+00 |
| ENSG00000211895.4_IGHA1    | ENSG00000160789.18_LMNA | 0.01242  | -0.14707122  | 0.171282311 | 8.79E-01 | 9.53E-01 | 1.00E+00 |
| ENSG00000100029.16_PES1    | ENSG00000160789.18_LMNA | 0.08055  | -0.07966844  | 0.23671891  | 3.24E-01 | 6.11E-01 | 1.00E+00 |
| ENSG00000256393.1_RPL41P5  | ENSG00000160789.18_LMNA | -0.14236 | -0.294881117 | 0.017227431 | 8.02E-02 | 2.73E-01 | 1.00E+00 |
| ENSG00000121933.16_TMIGD3  | ENSG00000160789.18_LMNA | -0.15936 | -0.310675617 | -0.00016002 | 4.99E-02 | 2.01E-01 | 1.00E+00 |
| ENSG00000100266.16_PACSIN2 | ENSG00000160789.18_LMNA | 0.25945  | 0.104569424  | 0.402045227 | 1.25E-03 | 1.37E-02 | 1.00E+00 |
| ENSG00000100504.15_PYGL    | ENSG00000160789.18_LMNA | 0.53598  | 0.411928348  | 0.640525572 | 1.11E-12 | 5.95E-10 | 5.71E-08 |
| ENSG00000156804.6_FBXO32   | ENSG00000160789.18_LMNA | 0.26076  | 0.105953745  | 0.403218129 | 1.18E-03 | 1.31E-02 | 1.00E+00 |
| ENSG00000082146.11_STRADB  | ENSG00000160789.18_LMNA | -0.12003 | -0.273991317 | 0.039937734 | 1.41E-01 | 3.83E-01 | 1.00E+00 |
| ENSG00000116473.13_RAP1A   | ENSG00000160789.18_LMNA | -0.09906 | -0.254253489 | 0.061101752 | 2.25E-01 | 5.01E-01 | 1.00E+00 |
| ENSG00000129116.16_PALLD   | ENSG00000160789.18_LMNA | 0.29845  | 0.146192419  | 0.436889844 | 1.88E-04 | 3.11E-03 | 1.00E+00 |
| ENSG00000100938.16_GMPR2   | ENSG00000160789.18_LMNA | -0.08158 | -0.237696782 | 0.078638757 | 3.18E-01 | 6.04E-01 | 1.00E+00 |
| ENSG00000111726.11_CMAS    | ENSG00000160789.18_LMNA | -0.06904 | -0.225757653 | 0.091164445 | 3.98E-01 | 6.75E-01 | 1.00E+00 |
| ENSG00000214087.7_ARL16    | ENSG00000160789.18_LMNA | -0.30621 | -0.443774656 | -0.15454015 | 1.25E-04 | 2.26E-03 | 1.00E+00 |
| ENSG00000146223.13_RPL7L1  | ENSG00000160789.18_LMNA | -0.20466 | -0.352378033 | -0.0469887  | 1.14E-02 | 7.21E-02 | 1.00E+00 |
| ENSG00000115275.10_MOGS    | ENSG00000160789.18_LMNA | 0.37081  | 0.22489014   | 0.500470627 | 2.57E-06 | 9.64E-05 | 1.32E-01 |
| ENSG00000017797.10_RALBP1  | ENSG00000160789.18_LMNA | 0.23277  | 0.076398668  | 0.377962855 | 3.90E-03 | 3.26E-02 | 1.00E+00 |
| ENSG00000180817.10_PPA1    | ENSG00000160789.18_LMNA | -0.42625 | -0.548247271 | -0.28649063 | 4.37E-08 | 3.64E-06 | 2.24E-03 |
| ENSG00000198522.12_GPN1    | ENSG00000160789.18_LMNA | -0.12586 | -0.27946309  | 0.034020295 | 1.22E-01 | 3.52E-01 | 1.00E+00 |
| ENSG00000178209.13_PLEC    | ENSG00000160789.18_LMNA | 0.29228  | 0.139577418  | 0.431409808 | 2.58E-04 | 4.00E-03 | 1.00E+00 |
| ENSG00000099864.16_PALM    | ENSG00000160789.18_LMNA | -0.20314 | -0.350992272 | -0.04541073 | 1.21E-02 | 7.51E-02 | 1.00E+00 |
| ENSG00000099256.17_PRTFDC1 | ENSG00000160789.18_LMNA | -0.43761 | -0.557939143 | -0.29925652 | 1.72E-08 | 1.70E-06 | 8.85E-04 |
| ENSG00000132780.15_NASP    | ENSG00000160789.18_LMNA | 0.16665  | 0.007649765  | 0.317426758 | 4.02E-02 | 1.74E-01 | 1.00E+00 |
| ENSG00000157103.9_SLC6A1   | ENSG00000160789.18_LMNA | -0.24794 | -0.391676068 | -0.09238112 | 2.07E-03 | 2.01E-02 | 1.00E+00 |
| ENSG00000075945.11_KIFAP3  | ENSG00000160789.18_LMNA | -0.12707 | -0.280593289 | 0.032795298 | 1.19E-01 | 3.46E-01 | 1.00E+00 |
| ENSG00000008294.19_SPAG9   | ENSG00000160789.18_LMNA | -0.15768 | -0.309120602 | 0.001560201 | 5.24E-02 | 2.07E-01 | 1.00E+00 |
| ENSG00000160211.14_G6PD    | ENSG00000160789.18_LMNA | 0.42686  | 0.28717565   | 0.548769129 | 4.16E-08 | 3.52E-06 | 2.13E-03 |
| ENSG00000166997.6_CNPY4    | ENSG00000160789.18_LMNA | 0.36449  | 0.217930503  | 0.494965175 | 3.90E-06 | 1.36E-04 | 2.00E-01 |
| ENSG00000084764.9_MAPRE3   | ENSG00000160789.18_LMNA | -0.20436 | -0.352102912 | -0.0466753  | 1.16E-02 | 7.27E-02 | 1.00E+00 |
| ENSG00000105819.12_PMPCB   | ENSG00000160789.18_LMNA | -0.00723 | -0.166240317 | 0.15214486  | 9.30E-01 | 9.73E-01 | 1.00E+00 |
| ENSG00000090054.12_SPTLC1  | ENSG00000160789.18_LMNA | 0.05657  | -0.103559889 | 0.213848198 | 4.89E-01 | 7.45E-01 | 1.00E+00 |



|                             |                         |          |              |             |          |          |          |
|-----------------------------|-------------------------|----------|--------------|-------------|----------|----------|----------|
| ENSG00000101158.11_NELFCD   | ENSG00000160789.18_LMNA | 0.01484  | -0.144707339 | 0.173625767 | 8.56E-01 | 9.43E-01 | 1.00E+00 |
| ENSG00000203778.6_FAM229B   | ENSG00000160789.18_LMNA | -0.38076 | -0.509098372 | -0.23585364 | 1.30E-06 | 5.72E-05 | 6.69E-02 |
| ENSG00000070610.13_GBA2     | ENSG00000160789.18_LMNA | 0.08022  | -0.079998242 | 0.236405567 | 3.26E-01 | 6.12E-01 | 1.00E+00 |
| ENSG00000171302.15_CANT1    | ENSG00000160789.18_LMNA | 0.30602  | 0.154342864  | 0.443612338 | 1.26E-04 | 2.28E-03 | 1.00E+00 |
| ENSG00000113368.10_LMNB1    | ENSG00000160789.18_LMNA | 0.07283  | -0.087388004 | 0.229367302 | 3.73E-01 | 6.53E-01 | 1.00E+00 |
| ENSG00000170852.9_KBTBD2    | ENSG00000160789.18_LMNA | 0.29467  | 0.142133544  | 0.433529924 | 2.29E-04 | 3.63E-03 | 1.00E+00 |
| ENSG00000159720.10_ATP6V0D  | ENSG00000160789.18_LMNA | -0.08466 | -0.240620617 | 0.075555976 | 3.00E-01 | 5.86E-01 | 1.00E+00 |
| ENSG00000277394.1_          | ENSG00000160789.18_LMNA | -0.24365 | -0.387810802 | -0.08786058 | 2.49E-03 | 2.31E-02 | 1.00E+00 |
| ENSG00000167972.12_ABCA3    | ENSG00000160789.18_LMNA | -0.01657 | -0.175309797 | 0.143006384 | 8.39E-01 | 9.38E-01 | 1.00E+00 |
| ENSG00000156052.9_GNAQ      | ENSG00000160789.18_LMNA | -0.00016 | -0.159354131 | 0.159047265 | 9.98E-01 | 9.99E-01 | 1.00E+00 |
| ENSG00000250510.6_GPR162    | ENSG00000160789.18_LMNA | -0.35787 | -0.489195421 | -0.21066686 | 6.00E-06 | 1.93E-04 | 3.08E-01 |
| ENSG00000223551.1_TMSB4XP4  | ENSG00000160789.18_LMNA | -0.0555  | -0.21282089  | 0.10462452  | 4.97E-01 | 7.51E-01 | 1.00E+00 |
| ENSG00000177628.14_GBA      | ENSG00000160789.18_LMNA | 0.32985  | 0.180110837  | 0.464653786 | 3.33E-05 | 7.79E-04 | 1.00E+00 |
| ENSG00000175390.11_EIF3F    | ENSG00000160789.18_LMNA | -0.01732 | -0.176032393 | 0.142275948 | 8.32E-01 | 9.35E-01 | 1.00E+00 |
| ENSG00000121769.6_FABP3     | ENSG00000160789.18_LMNA | -0.15417 | -0.305859203 | 0.005162127 | 5.79E-02 | 2.20E-01 | 1.00E+00 |
| ENSG00000068971.12_PPP2R5B  | ENSG00000160789.18_LMNA | -0.05448 | -0.211841092 | 0.105639236 | 5.05E-01 | 7.56E-01 | 1.00E+00 |
| ENSG00000101346.10_POFUT1   | ENSG00000160789.18_LMNA | 0.46198  | 0.32681185   | 0.578621369 | 2.09E-09 | 2.86E-07 | 1.07E-04 |
| ENSG00000103194.14_USP10    | ENSG00000160789.18_LMNA | 0.03144  | -0.128400058 | 0.189694517 | 7.01E-01 | 8.72E-01 | 1.00E+00 |
| ENSG00000116679.14_IVNS1ABF | ENSG00000160789.18_LMNA | 0.01684  | -0.142744717 | 0.175568695 | 8.37E-01 | 9.37E-01 | 1.00E+00 |
| ENSG00000158941.15_CCAR2    | ENSG00000160789.18_LMNA | 0.13465  | -0.025083824 | 0.287688104 | 9.81E-02 | 3.08E-01 | 1.00E+00 |
| ENSG00000182534.12_MXRA7    | ENSG00000160789.18_LMNA | 0.14809  | -0.011376457 | 0.300215164 | 6.86E-02 | 2.46E-01 | 1.00E+00 |
| ENSG00000164967.8_RPP25L    | ENSG00000160789.18_LMNA | -0.13712 | -0.289988766 | 0.022575178 | 9.21E-02 | 2.96E-01 | 1.00E+00 |
| ENSG00000133398.3_MED10     | ENSG00000160789.18_LMNA | 0.15384  | -0.00549659  | 0.305555989 | 5.85E-02 | 2.22E-01 | 1.00E+00 |
| ENSG00000176619.9_LMNB2     | ENSG00000160789.18_LMNA | 0.22432  | 0.067530236  | 0.370296078 | 5.47E-03 | 4.19E-02 | 1.00E+00 |
| ENSG00000133983.13_COX16    | ENSG00000160789.18_LMNA | -0.11602 | -0.270232431 | 0.043990056 | 1.55E-01 | 4.05E-01 | 1.00E+00 |
| ENSG00000160094.13_ZNF362   | ENSG00000160789.18_LMNA | 0.00832  | -0.151077295 | 0.167302608 | 9.19E-01 | 9.69E-01 | 1.00E+00 |
| ENSG00000177830.16_CHID1    | ENSG00000160789.18_LMNA | 0.29861  | 0.146371428  | 0.43703784  | 1.86E-04 | 3.09E-03 | 1.00E+00 |
| ENSG00000158042.8_MRPL17    | ENSG00000160789.18_LMNA | 0.20097  | 0.043151028  | 0.349005485 | 1.30E-02 | 7.93E-02 | 1.00E+00 |
| ENSG00000138430.14_OLA1     | ENSG00000160789.18_LMNA | -0.27886 | -0.419435665 | -0.1252134  | 5.04E-04 | 6.78E-03 | 1.00E+00 |
| ENSG00000165821.10_SALL2    | ENSG00000160789.18_LMNA | -0.05151 | -0.208998205 | 0.108579701 | 5.29E-01 | 7.72E-01 | 1.00E+00 |
| ENSG00000140374.14_ETFA     | ENSG00000160789.18_LMNA | -0.20614 | -0.35373314  | -0.04853324 | 1.08E-02 | 6.94E-02 | 1.00E+00 |
| ENSG00000160058.17_BSDC1    | ENSG00000160789.18_LMNA | -0.07909 | -0.235326127 | 0.081133853 | 3.33E-01 | 6.18E-01 | 1.00E+00 |
| ENSG00000177666.14_PNPLA2   | ENSG00000160789.18_LMNA | 0.3769   | 0.231598576  | 0.505756352 | 1.70E-06 | 7.05E-05 | 8.72E-02 |

|                            |                         |          |              |             |          |          |          |
|----------------------------|-------------------------|----------|--------------|-------------|----------|----------|----------|
| ENSG00000161999.10_JMJD8   | ENSG00000160789.18_LMNA | 0.24747  | 0.091893142  | 0.391259331 | 2.11E-03 | 2.04E-02 | 1.00E+00 |
| ENSG00000160917.13_CPSF4   | ENSG00000160789.18_LMNA | 0.17465  | 0.015891367  | 0.324819497 | 3.14E-02 | 1.48E-01 | 1.00E+00 |
| ENSG00000140350.14_ANP32A  | ENSG00000160789.18_LMNA | -0.00154 | -0.160703984 | 0.157696682 | 9.85E-01 | 9.94E-01 | 1.00E+00 |
| ENSG00000213339.7_QTRT1    | ENSG00000160789.18_LMNA | 0.09395  | -0.066236532 | 0.249424799 | 2.50E-01 | 5.30E-01 | 1.00E+00 |
| ENSG00000133275.14_CSNK1G2 | ENSG00000160789.18_LMNA | 0.33171  | 0.182124035  | 0.466284287 | 2.98E-05 | 7.11E-04 | 1.00E+00 |
| ENSG00000167397.13_VKORC1  | ENSG00000160789.18_LMNA | 0.22985  | 0.07333537   | 0.375319295 | 4.39E-03 | 3.55E-02 | 1.00E+00 |
| ENSG00000163956.9_LRPAP1   | ENSG00000160789.18_LMNA | 0.33807  | 0.18904175   | 0.471872311 | 2.05E-05 | 5.27E-04 | 1.00E+00 |
| ENSG00000205707.9_ETFRF1   | ENSG00000160789.18_LMNA | -0.36738 | -0.497488166 | -0.22111641 | 3.23E-06 | 1.17E-04 | 1.65E-01 |
| ENSG00000236609.3_ZNF853   | ENSG00000160789.18_LMNA | 0.03987  | -0.120094993 | 0.197813134 | 6.26E-01 | 8.31E-01 | 1.00E+00 |
| ENSG00000170266.14_GLB1    | ENSG00000160789.18_LMNA | 0.29254  | 0.139847912  | 0.431634315 | 2.55E-04 | 3.96E-03 | 1.00E+00 |
| ENSG00000179134.13_SAMD4B  | ENSG00000160789.18_LMNA | 0.2594   | 0.104518369  | 0.402001952 | 1.25E-03 | 1.37E-02 | 1.00E+00 |
| ENSG00000160813.5_PPP1R35  | ENSG00000160789.18_LMNA | 0.21981  | 0.062805068  | 0.366194247 | 6.51E-03 | 4.78E-02 | 1.00E+00 |
| ENSG00000262902.1_MTCO1P40 | ENSG00000160789.18_LMNA | -0.15912 | -0.310452082 | 8.74E-05    | 5.02E-02 | 2.02E-01 | 1.00E+00 |
| ENSG00000161677.10_JOSD2   | ENSG00000160789.18_LMNA | 0.24477  | 0.089035943  | 0.388816808 | 2.37E-03 | 2.23E-02 | 1.00E+00 |
| ENSG00000150540.12_HNMT    | ENSG00000160789.18_LMNA | -0.34522 | -0.478144163 | -0.19683959 | 1.33E-05 | 3.68E-04 | 6.80E-01 |
| ENSG00000196961.11_AP2A1   | ENSG00000160789.18_LMNA | 0.26055  | 0.10573843   | 0.403035762 | 1.19E-03 | 1.32E-02 | 1.00E+00 |
| ENSG00000078902.14_TOLLIP  | ENSG00000160789.18_LMNA | 0.13597  | -0.023747484 | 0.288914101 | 9.49E-02 | 3.02E-01 | 1.00E+00 |
| ENSG00000122861.14_PLAU    | ENSG00000160789.18_LMNA | 0.51774  | 0.39074575   | 0.625392486 | 8.46E-12 | 3.12E-09 | 4.34E-07 |
| ENSG00000204394.11_VARS    | ENSG00000160789.18_LMNA | 0.12517  | -0.034717774 | 0.278819198 | 1.24E-01 | 3.56E-01 | 1.00E+00 |
| ENSG00000158417.9	EIF5B    | ENSG00000160789.18_LMNA | 0.11277  | -0.047278007 | 0.267175511 | 1.67E-01 | 4.24E-01 | 1.00E+00 |
| ENSG00000172922.7_RNASEH2C | ENSG00000160789.18_LMNA | -0.14815 | -0.300267691 | 0.011318732 | 6.85E-02 | 2.46E-01 | 1.00E+00 |
| ENSG00000089818.15_NECAP1  | ENSG00000160789.18_LMNA | -0.41518 | -0.53876576  | -0.27409112 | 1.05E-07 | 7.52E-06 | 5.37E-03 |
| ENSG00000213760.9_ATP6V1G2 | ENSG00000160789.18_LMNA | -0.43704 | -0.55745461  | -0.2986161  | 1.81E-08 | 1.77E-06 | 9.28E-04 |
| ENSG00000172725.12_CORO1B  | ENSG00000160789.18_LMNA | 0.25275  | 0.097473134  | 0.396017346 | 1.68E-03 | 1.71E-02 | 1.00E+00 |
| ENSG00000077147.13_TM9SF3  | ENSG00000160789.18_LMNA | 0.04515  | -0.114879547 | 0.202889295 | 5.81E-01 | 8.05E-01 | 1.00E+00 |
| ENSG00000109270.11_LAMTOR3 | ENSG00000160789.18_LMNA | -0.25363 | -0.396809247 | -0.09840367 | 1.62E-03 | 1.66E-02 | 1.00E+00 |
| ENSG00000103811.14_CTSH    | ENSG00000160789.18_LMNA | -0.12654 | -0.280100932 | 0.033329069 | 1.20E-01 | 3.49E-01 | 1.00E+00 |
| ENSG00000127952.15_STYXL1  | ENSG00000160789.18_LMNA | 0.15595  | -0.00333723  | 0.307512486 | 5.50E-02 | 2.14E-01 | 1.00E+00 |
| ENSG00000214389.2_RPS3AP26 | ENSG00000160789.18_LMNA | -0.14595 | -0.298225431 | 0.013561514 | 7.28E-02 | 2.56E-01 | 1.00E+00 |
| ENSG00000117153.14_KLHL12  | ENSG00000160789.18_LMNA | 0.10795  | -0.052143013 | 0.262640709 | 1.86E-01 | 4.51E-01 | 1.00E+00 |
| ENSG00000120805.12_ARL1    | ENSG00000160789.18_LMNA | -0.09824 | -0.253472219 | 0.06193368  | 2.29E-01 | 5.05E-01 | 1.00E+00 |
| ENSG00000069509.5_FUNDC1   | ENSG00000160789.18_LMNA | -0.16916 | -0.319751741 | -0.01023718 | 3.72E-02 | 1.65E-01 | 1.00E+00 |
| ENSG00000107581.11	EIF3A   | ENSG00000160789.18_LMNA | 0.20478  | 0.047111898  | 0.352486166 | 1.14E-02 | 7.18E-02 | 1.00E+00 |

|                            |                         |          |              |             |          |          |          |
|----------------------------|-------------------------|----------|--------------|-------------|----------|----------|----------|
| ENSG00000155324.8_GRAMD3   | ENSG00000160789.18_LMNA | -0.27988 | -0.420353209 | -0.12630972 | 4.79E-04 | 6.52E-03 | 1.00E+00 |
| ENSG00000144655.13_CSRNP1  | ENSG00000160789.18_LMNA | -0.01501 | -0.173790782 | 0.144540748 | 8.54E-01 | 9.43E-01 | 1.00E+00 |
| ENSG00000178585.13_CTNNBIP | ENSG00000160789.18_LMNA | -0.17958 | -0.329363708 | -0.02097828 | 2.68E-02 | 1.33E-01 | 1.00E+00 |
| ENSG00000104331.7_IMPAD1   | ENSG00000160789.18_LMNA | 0.00677  | -0.15259981  | 0.165787391 | 9.34E-01 | 9.74E-01 | 1.00E+00 |
| ENSG00000055917.14_PUM2    | ENSG00000160789.18_LMNA | -0.07887 | -0.235115712 | 0.081355122 | 3.34E-01 | 6.20E-01 | 1.00E+00 |
| ENSG00000131871.13_SELENOS | ENSG00000160789.18_LMNA | 0.22447  | 0.067685025  | 0.370430247 | 5.43E-03 | 4.17E-02 | 1.00E+00 |
| ENSG00000170892.9_TSEN34   | ENSG00000160789.18_LMNA | 0.28744  | 0.13438569   | 0.427093711 | 3.30E-04 | 4.85E-03 | 1.00E+00 |
| ENSG00000099331.12_MYO9B   | ENSG00000160789.18_LMNA | 0.2899   | 0.137021874  | 0.429286947 | 2.92E-04 | 4.40E-03 | 1.00E+00 |
| ENSG00000104738.15_MCM4    | ENSG00000160789.18_LMNA | 0.204    | 0.046299771  | 0.351773183 | 1.17E-02 | 7.34E-02 | 1.00E+00 |
| ENSG00000100379.16_KCTD17  | ENSG00000160789.18_LMNA | 0.11448  | -0.04555304  | 0.268780061 | 1.60E-01 | 4.14E-01 | 1.00E+00 |
| ENSG00000158467.15_AHCYL2  | ENSG00000160789.18_LMNA | -0.1249  | -0.278557224 | 0.035001463 | 1.25E-01 | 3.58E-01 | 1.00E+00 |
| ENSG00000119900.7_OGFR1    | ENSG00000160789.18_LMNA | -0.20104 | -0.349069892 | -0.04322423 | 1.30E-02 | 7.92E-02 | 1.00E+00 |
| ENSG00000122033.13_MTIF3   | ENSG00000160789.18_LMNA | -0.20683 | -0.354363571 | -0.0492523  | 1.06E-02 | 6.81E-02 | 1.00E+00 |
| ENSG00000180353.9_HCLS1    | ENSG00000160789.18_LMNA | 0.07173  | -0.08848193  | 0.228322586 | 3.80E-01 | 6.59E-01 | 1.00E+00 |
| ENSG00000204386.9_NEU1     | ENSG00000160789.18_LMNA | 0.13443  | -0.025310916 | 0.287479661 | 9.87E-02 | 3.09E-01 | 1.00E+00 |
| ENSG00000170915.8_PAQR8    | ENSG00000160789.18_LMNA | -0.33322 | -0.467612744 | -0.18376606 | 2.73E-05 | 6.63E-04 | 1.00E+00 |
| ENSG00000153130.16_SCOC    | ENSG00000160789.18_LMNA | -0.29548 | -0.434256292 | -0.14301019 | 2.19E-04 | 3.51E-03 | 1.00E+00 |
| ENSG00000104976.10_SNAPC2  | ENSG00000160789.18_LMNA | 0.27654  | 0.122743298  | 0.417366171 | 5.63E-04 | 7.39E-03 | 1.00E+00 |
| ENSG00000134375.9_TIMM17A  | ENSG00000160789.18_LMNA | 0.00424  | -0.15506398  | 0.163331841 | 9.59E-01 | 9.83E-01 | 1.00E+00 |
| ENSG00000189343.7_RPS2P46  | ENSG00000160789.18_LMNA | 0.09891  | -0.061251344 | 0.254113036 | 2.25E-01 | 5.01E-01 | 1.00E+00 |
| ENSG00000198431.14_TXNRD1  | ENSG00000160789.18_LMNA | 0.02322  | -0.136489775 | 0.181744372 | 7.76E-01 | 9.08E-01 | 1.00E+00 |
| ENSG00000135070.12_ISCA1   | ENSG00000160789.18_LMNA | -0.28083 | -0.421203182 | -0.12732595 | 4.57E-04 | 6.29E-03 | 1.00E+00 |
| ENSG00000215305.8_VPS16    | ENSG00000160789.18_LMNA | 0.23101  | 0.074554385  | 0.376371868 | 4.19E-03 | 3.44E-02 | 1.00E+00 |
| ENSG00000162595.4_DIRAS3   | ENSG00000160789.18_LMNA | 0.41874  | 0.278072492  | 0.541817511 | 7.93E-08 | 5.95E-06 | 4.07E-03 |
| ENSG00000169908.9_TM4SF1   | ENSG00000160789.18_LMNA | -0.1723  | -0.322648454 | -0.01346667 | 3.38E-02 | 1.55E-01 | 1.00E+00 |
| ENSG00000130764.8_LRRC47   | ENSG00000160789.18_LMNA | -0.01556 | -0.174325077 | 0.144001229 | 8.49E-01 | 9.41E-01 | 1.00E+00 |
| ENSG00000188021.8_UBQLN2   | ENSG00000160789.18_LMNA | -0.10841 | -0.263073818 | 0.051679011 | 1.84E-01 | 4.49E-01 | 1.00E+00 |
| ENSG00000140564.9_FURIN    | ENSG00000160789.18_LMNA | 0.56873  | 0.450296521  | 0.667491521 | 2.11E-14 | 2.70E-11 | 1.08E-09 |
| ENSG00000279483.1_AC090498 | ENSG00000160789.18_LMNA | -0.23318 | -0.378338469 | -0.07683438 | 3.84E-03 | 3.21E-02 | 1.00E+00 |
| ENSG00000157601.12_MX1     | ENSG00000160789.18_LMNA | 0.08728  | -0.072930626 | 0.243106089 | 2.85E-01 | 5.70E-01 | 1.00E+00 |
| ENSG00000126768.11_TIMM17B | ENSG00000160789.18_LMNA | -0.10847 | -0.263129782 | 0.051619046 | 1.83E-01 | 4.48E-01 | 1.00E+00 |
| ENSG00000115694.13_STK25   | ENSG00000160789.18_LMNA | 0.02946  | -0.130356672 | 0.187775477 | 7.19E-01 | 8.80E-01 | 1.00E+00 |
| ENSG00000144369.11_FAM171B | ENSG00000160789.18_LMNA | -0.43364 | -0.554557191 | -0.29479135 | 2.40E-08 | 2.25E-06 | 1.23E-03 |

|                             |                         |          |              |             |          |          |          |
|-----------------------------|-------------------------|----------|--------------|-------------|----------|----------|----------|
| ENSG00000100575.12_TIMM9    | ENSG00000160789.18_LMNA | -0.03583 | -0.193924896 | 0.124078086 | 6.61E-01 | 8.50E-01 | 1.00E+00 |
| ENSG00000136754.15_ABI1     | ENSG00000160789.18_LMNA | -0.37344 | -0.502748209 | -0.22777756 | 2.15E-06 | 8.43E-05 | 1.10E-01 |
| ENSG00000114988.10_LMAN2L   | ENSG00000160789.18_LMNA | -0.15069 | -0.302626283 | 0.008724652 | 6.39E-02 | 2.35E-01 | 1.00E+00 |
| ENSG00000158457.5_TSPAN33   | ENSG00000160789.18_LMNA | -0.06891 | -0.225631129 | 0.09129665  | 3.99E-01 | 6.76E-01 | 1.00E+00 |
| ENSG00000101558.12_VAPA     | ENSG00000160789.18_LMNA | -0.18436 | -0.333766805 | -0.0259225  | 2.30E-02 | 1.19E-01 | 1.00E+00 |
| ENSG00000182544.8_MFSD5     | ENSG00000160789.18_LMNA | 0.16606  | 0.007048238  | 0.316885708 | 4.09E-02 | 1.76E-01 | 1.00E+00 |
| ENSG00000090372.13_STRN4    | ENSG00000160789.18_LMNA | 0.14378  | -0.015785999 | 0.296197009 | 7.72E-02 | 2.66E-01 | 1.00E+00 |
| ENSG00000167654.16_ATCAY    | ENSG00000160789.18_LMNA | -0.38053 | -0.508903611 | -0.23560538 | 1.32E-06 | 5.80E-05 | 6.80E-02 |
| ENSG00000123505.13_AMD1     | ENSG00000160789.18_LMNA | -0.08698 | -0.24281447  | 0.073238884 | 2.87E-01 | 5.72E-01 | 1.00E+00 |
| ENSG00000107438.7_PDLIM1    | ENSG00000160789.18_LMNA | 0.25479  | 0.099625584  | 0.397848449 | 1.54E-03 | 1.60E-02 | 1.00E+00 |
| ENSG00000205250.7_E2F4      | ENSG00000160789.18_LMNA | 0.15795  | -0.001280861 | 0.309373228 | 5.20E-02 | 2.06E-01 | 1.00E+00 |
| ENSG00000122644.11_ARL4A    | ENSG00000160789.18_LMNA | 0.14346  | -0.016108802 | 0.295902423 | 7.79E-02 | 2.67E-01 | 1.00E+00 |
| ENSG00000168496.3_FEN1      | ENSG00000160789.18_LMNA | 0.20564  | 0.048014649  | 0.353278293 | 1.10E-02 | 7.02E-02 | 1.00E+00 |
| ENSG00000088682.12_COQ9     | ENSG00000160789.18_LMNA | 0.05327  | -0.106836587 | 0.210684122 | 5.15E-01 | 7.62E-01 | 1.00E+00 |
| ENSG00000168118.10_RAB4A    | ENSG00000160789.18_LMNA | -0.32621 | -0.461449631 | -0.17616157 | 4.11E-05 | 9.20E-04 | 1.00E+00 |
| ENSG00000122679.7_RAMP3     | ENSG00000160789.18_LMNA | 0.03359  | -0.126281148 | 0.19177     | 6.81E-01 | 8.61E-01 | 1.00E+00 |
| ENSG00000168575.8_SLC20A2   | ENSG00000160789.18_LMNA | 0.14962  | -0.009814822 | 0.301635542 | 6.58E-02 | 2.40E-01 | 1.00E+00 |
| ENSG00000167272.9_POP5      | ENSG00000160789.18_LMNA | -0.25506 | -0.398096218 | -0.09991705 | 1.52E-03 | 1.58E-02 | 1.00E+00 |
| ENSG00000242071.3_RPL7AP6   | ENSG00000160789.18_LMNA | -0.12009 | -0.274047171 | 0.039877443 | 1.41E-01 | 3.82E-01 | 1.00E+00 |
| ENSG00000148730.6	EIF4EBP2  | ENSG00000160789.18_LMNA | -0.17305 | -0.323341093 | -0.01423984 | 3.30E-02 | 1.52E-01 | 1.00E+00 |
| ENSG00000175040.5_CHST2     | ENSG00000160789.18_LMNA | 0.41776  | 0.276983779  | 0.540983694 | 8.56E-08 | 6.32E-06 | 4.39E-03 |
| ENSG00000153048.9_CARHSP1   | ENSG00000160789.18_LMNA | 0.06464  | -0.095546934 | 0.221557786 | 4.29E-01 | 6.99E-01 | 1.00E+00 |
| ENSG00000177030.15_DEAF1    | ENSG00000160789.18_LMNA | -0.06194 | -0.218983556 | 0.098227037 | 4.48E-01 | 7.15E-01 | 1.00E+00 |
| ENSG00000007237.17_GAS7     | ENSG00000160789.18_LMNA | 0.04463  | -0.115391789 | 0.202391488 | 5.85E-01 | 8.07E-01 | 1.00E+00 |
| ENSG00000171033.11_PKIA     | ENSG00000160789.18_LMNA | -0.39402 | -0.520565401 | -0.25053354 | 5.10E-07 | 2.66E-05 | 2.62E-02 |
| ENSG00000228300.12_C19orf24 | ENSG00000160789.18_LMNA | 0.23865  | 0.082586167  | 0.383287576 | 3.07E-03 | 2.72E-02 | 1.00E+00 |
| ENSG00000170604.4_IRF2BP1   | ENSG00000160789.18_LMNA | 0.26491  | 0.110364986  | 0.406949162 | 9.73E-04 | 1.14E-02 | 1.00E+00 |
| ENSG00000143106.11_PSMA5    | ENSG00000160789.18_LMNA | -0.10156 | -0.256613304 | 0.058586261 | 2.13E-01 | 4.87E-01 | 1.00E+00 |
| ENSG00000132485.11_ZRANB2   | ENSG00000160789.18_LMNA | -0.27342 | -0.414578714 | -0.11942201 | 6.54E-04 | 8.32E-03 | 1.00E+00 |
| ENSG00000062194.14_GBPB1    | ENSG00000160789.18_LMNA | -0.25684 | -0.399699815 | -0.1018047  | 1.40E-03 | 1.49E-02 | 1.00E+00 |
| ENSG00000168291.11_PDHB     | ENSG00000160789.18_LMNA | -0.29216 | -0.431297709 | -0.13944237 | 2.60E-04 | 4.02E-03 | 1.00E+00 |
| ENSG00000188338.13_SLC38A3  | ENSG00000160789.18_LMNA | -0.09962 | -0.254782972 | 0.060537687 | 2.22E-01 | 4.97E-01 | 1.00E+00 |
| ENSG00000123933.13_MXD4     | ENSG00000160789.18_LMNA | -0.39344 | -0.520062975 | -0.24988773 | 5.32E-07 | 2.76E-05 | 2.73E-02 |

|                             |                         |          |              |             |          |          |          |
|-----------------------------|-------------------------|----------|--------------|-------------|----------|----------|----------|
| ENSG00000115204.13_MPV17    | ENSG00000160789.18_LMNA | -0.15876 | -0.310118086 | 0.000456957 | 5.08E-02 | 2.03E-01 | 1.00E+00 |
| ENSG00000101464.9_PIGU      | ENSG00000160789.18_LMNA | 0.07206  | -0.088151156 | 0.228638558 | 3.78E-01 | 6.57E-01 | 1.00E+00 |
| ENSG00000247627.2_MTND4P12  | ENSG00000160789.18_LMNA | -0.08076 | -0.236916435 | 0.079460504 | 3.23E-01 | 6.09E-01 | 1.00E+00 |
| ENSG00000261236.4_BOP1      | ENSG00000160789.18_LMNA | 0.03055  | -0.129279041 | 0.188832715 | 7.09E-01 | 8.76E-01 | 1.00E+00 |
| ENSG00000143333.6_RGS16     | ENSG00000160789.18_LMNA | 0.09771  | -0.062460312 | 0.252977441 | 2.31E-01 | 5.09E-01 | 1.00E+00 |
| ENSG00000124783.11_SSR1     | ENSG00000160789.18_LMNA | 0.20991  | 0.052462007  | 0.357174289 | 9.44E-03 | 6.29E-02 | 1.00E+00 |
| ENSG00000103415.10_HMOX2    | ENSG00000160789.18_LMNA | -0.18166 | -0.331280138 | -0.02312838 | 2.51E-02 | 1.27E-01 | 1.00E+00 |
| ENSG00000149100.11_EIF3M    | ENSG00000160789.18_LMNA | -0.02837 | -0.186726724 | 0.131424914 | 7.29E-01 | 8.85E-01 | 1.00E+00 |
| ENSG00000178896.6_EXOSC4    | ENSG00000160789.18_LMNA | 0.00304  | -0.15623345  | 0.16216508  | 9.70E-01 | 9.88E-01 | 1.00E+00 |
| ENSG00000076003.4_MCM6      | ENSG00000160789.18_LMNA | 0.17626  | 0.017552249  | 0.326304756 | 2.98E-02 | 1.43E-01 | 1.00E+00 |
| ENSG00000114993.14_RTKN     | ENSG00000160789.18_LMNA | -0.32512 | -0.460486973 | -0.17497683 | 4.37E-05 | 9.63E-04 | 1.00E+00 |
| ENSG00000163879.10_DNAL1    | ENSG00000160789.18_LMNA | 0.10167  | -0.05847379  | 0.256718727 | 2.13E-01 | 4.86E-01 | 1.00E+00 |
| ENSG00000107738.18_C10orf54 | ENSG00000160789.18_LMNA | -0.15633 | -0.307869569 | 0.002942809 | 5.44E-02 | 2.12E-01 | 1.00E+00 |
| ENSG00000204655.10_MOG      | ENSG00000160789.18_LMNA | -0.38239 | -0.510512129 | -0.23765679 | 1.16E-06 | 5.19E-05 | 5.98E-02 |
| ENSG00000179456.10_ZBTB18   | ENSG00000160789.18_LMNA | -0.29984 | -0.438130165 | -0.14769324 | 1.75E-04 | 2.94E-03 | 1.00E+00 |
| ENSG00000175283.7_DOLK      | ENSG00000160789.18_LMNA | 0.26263  | 0.107937969  | 0.404897612 | 1.08E-03 | 1.23E-02 | 1.00E+00 |
| ENSG00000178397.11_FAM220A  | ENSG00000160789.18_LMNA | -0.04645 | -0.204136795 | 0.113595129 | 5.70E-01 | 7.99E-01 | 1.00E+00 |
| ENSG00000175467.13_SART1    | ENSG00000160789.18_LMNA | 0.22212  | 0.065230577  | 0.36830126  | 5.95E-03 | 4.48E-02 | 1.00E+00 |
| ENSG00000092201.8_SUPT16H   | ENSG00000160789.18_LMNA | 0.22154  | 0.064616167  | 0.367767823 | 6.09E-03 | 4.55E-02 | 1.00E+00 |
| ENSG00000122687.16_MRM2     | ENSG00000160789.18_LMNA | 0.24373  | 0.087942791  | 0.387881194 | 2.48E-03 | 2.31E-02 | 1.00E+00 |
| ENSG00000163659.11_TIPARP   | ENSG00000160789.18_LMNA | 0.0606   | -0.099557099 | 0.217704394 | 4.58E-01 | 7.22E-01 | 1.00E+00 |
| ENSG00000160408.13_ST6GALN  | ENSG00000160789.18_LMNA | 0.21401  | 0.056743326  | 0.360914841 | 8.11E-03 | 5.62E-02 | 1.00E+00 |
| ENSG00000140307.9_GTF2A2    | ENSG00000160789.18_LMNA | -0.16128 | -0.312460814 | -0.00213714 | 4.71E-02 | 1.94E-01 | 1.00E+00 |
| ENSG00000162961.12_DPY30    | ENSG00000160789.18_LMNA | -0.28551 | -0.425378073 | -0.13232645 | 3.63E-04 | 5.22E-03 | 1.00E+00 |
| ENSG00000133935.6_C14orf1   | ENSG00000160789.18_LMNA | 0.15973  | 0.000541222  | 0.311019987 | 4.93E-02 | 2.00E-01 | 1.00E+00 |
| ENSG00000176165.9_FOXG1     | ENSG00000160789.18_LMNA | 0.02446  | -0.135262828 | 0.182952833 | 7.65E-01 | 9.02E-01 | 1.00E+00 |
| ENSG00000120053.10_GOT1     | ENSG00000160789.18_LMNA | -0.26321 | -0.40542285  | -0.108559   | 1.05E-03 | 1.20E-02 | 1.00E+00 |
| ENSG00000157259.6_GATAD1    | ENSG00000160789.18_LMNA | 0.16036  | 0.001187809  | 0.311603911 | 4.84E-02 | 1.97E-01 | 1.00E+00 |
| ENSG00000135318.10_NT5E     | ENSG00000160789.18_LMNA | 0.23903  | 0.082987702  | 0.383632432 | 3.02E-03 | 2.69E-02 | 1.00E+00 |
| ENSG00000196182.9_STK40     | ENSG00000160789.18_LMNA | 0.47377  | 0.340226552  | 0.588574194 | 7.06E-10 | 1.18E-07 | 3.62E-05 |
| ENSG00000188725.6_SMIM15    | ENSG00000160789.18_LMNA | 0.17126  | 0.012398485  | 0.321690975 | 3.49E-02 | 1.58E-01 | 1.00E+00 |
| ENSG00000164889.11_SLC4A2   | ENSG00000160789.18_LMNA | 0.42115  | 0.280770475  | 0.543881593 | 6.56E-08 | 5.16E-06 | 3.37E-03 |
| ENSG00000187051.7_RPS19BP1  | ENSG00000160789.18_LMNA | -0.02972 | -0.188026898 | 0.13010047  | 7.16E-01 | 8.79E-01 | 1.00E+00 |

|                            |                         |          |              |             |          |          |          |
|----------------------------|-------------------------|----------|--------------|-------------|----------|----------|----------|
| ENSG00000088256.7_GNA11    | ENSG00000160789.18_LMNA | 0.2441   | 0.088327674  | 0.388210681 | 2.44E-03 | 2.28E-02 | 1.00E+00 |
| ENSG00000131966.12_ACTR10  | ENSG00000160789.18_LMNA | -0.13768 | -0.290512385 | 0.022003672 | 9.07E-02 | 2.94E-01 | 1.00E+00 |
| ENSG00000175324.8_LSM1     | ENSG00000160789.18_LMNA | -0.17674 | -0.326749225 | -0.01804961 | 2.94E-02 | 1.41E-01 | 1.00E+00 |
| ENSG00000111783.11_RFX4    | ENSG00000160789.18_LMNA | -0.20551 | -0.353159789 | -0.04787956 | 1.11E-02 | 7.05E-02 | 1.00E+00 |
| ENSG00000169783.11_LINGO1  | ENSG00000160789.18_LMNA | -0.1975  | -0.345823559 | -0.03953852 | 1.47E-02 | 8.67E-02 | 1.00E+00 |
| ENSG00000144895.10	EIF2A   | ENSG00000160789.18_LMNA | -0.27259 | -0.413827716 | -0.11852832 | 6.80E-04 | 8.58E-03 | 1.00E+00 |
| ENSG00000212864.3_RNF208   | ENSG00000160789.18_LMNA | -0.0476  | -0.205246366 | 0.11245183  | 5.60E-01 | 7.93E-01 | 1.00E+00 |
| ENSG00000239521.6_GATS     | ENSG00000160789.18_LMNA | -0.38759 | -0.515014844 | -0.24341227 | 8.08E-07 | 3.83E-05 | 4.15E-02 |
| ENSG00000205937.10_RNPS1   | ENSG00000160789.18_LMNA | 0.00779  | -0.15160228  | 0.166780309 | 9.24E-01 | 9.71E-01 | 1.00E+00 |
| ENSG00000108861.7_DUSP3    | ENSG00000160789.18_LMNA | 0.3499   | 0.201949175  | 0.48223833  | 9.93E-06 | 2.90E-04 | 5.09E-01 |
| ENSG00000129925.9_TMEM8A   | ENSG00000160789.18_LMNA | 0.4089   | 0.267089724  | 0.533382226 | 1.69E-07 | 1.10E-05 | 8.69E-03 |
| ENSG00000176973.7_FAM89B   | ENSG00000160789.18_LMNA | 0.02466  | -0.135071282 | 0.183141406 | 7.63E-01 | 9.01E-01 | 1.00E+00 |
| ENSG00000153147.5_SMARCA5  | ENSG00000160789.18_LMNA | 0.01604  | -0.143524714 | 0.174796821 | 8.44E-01 | 9.39E-01 | 1.00E+00 |
| ENSG00000164332.7_UBLCP1   | ENSG00000160789.18_LMNA | -0.2659  | -0.407836004 | -0.11141523 | 9.30E-04 | 1.10E-02 | 1.00E+00 |
| ENSG00000211584.12_SLC48A1 | ENSG00000160789.18_LMNA | -0.33365 | -0.467991618 | -0.18423465 | 2.66E-05 | 6.51E-04 | 1.00E+00 |
| ENSG00000101199.11_ARFGAP1 | ENSG00000160789.18_LMNA | 0.16065  | 0.001488744  | 0.3118756   | 4.80E-02 | 1.96E-01 | 1.00E+00 |
| ENSG00000127616.16_SMARCA4 | ENSG00000160789.18_LMNA | 0.07376  | -0.08645845  | 0.230254466 | 3.66E-01 | 6.47E-01 | 1.00E+00 |
| ENSG00000207652.1_MIR621   | ENSG00000160789.18_LMNA | -0.0475  | -0.205153148 | 0.112547914 | 5.61E-01 | 7.93E-01 | 1.00E+00 |
| ENSG00000070669.15_ASNS    | ENSG00000160789.18_LMNA | -0.08726 | -0.243081878 | 0.072956221 | 2.85E-01 | 5.71E-01 | 1.00E+00 |
| ENSG00000119138.4_KLF9     | ENSG00000160789.18_LMNA | 0.12367  | -0.036247903 | 0.277405639 | 1.29E-01 | 3.64E-01 | 1.00E+00 |
| ENSG00000164530.12_PI16    | ENSG00000160789.18_LMNA | -0.44038 | -0.560294844 | -0.30237344 | 1.37E-08 | 1.40E-06 | 7.02E-04 |
| ENSG00000023697.11_DERA    | ENSG00000160789.18_LMNA | -0.25871 | -0.401380667 | -0.10378559 | 1.29E-03 | 1.40E-02 | 1.00E+00 |
| ENSG00000184500.13_PROS1   | ENSG00000160789.18_LMNA | 0.47487  | 0.341483601  | 0.589502999 | 6.37E-10 | 1.08E-07 | 3.27E-05 |
| ENSG00000102753.8_KPNA3    | ENSG00000160789.18_LMNA | -0.40427 | -0.52940146  | -0.26193067 | 2.40E-07 | 1.48E-05 | 1.23E-02 |
| ENSG00000135148.10_TRAFD1  | ENSG00000160789.18_LMNA | -0.05602 | -0.213315839 | 0.10411168  | 4.93E-01 | 7.48E-01 | 1.00E+00 |
| ENSG00000082781.10_ITGB5   | ENSG00000160789.18_LMNA | 0.43359  | 0.294737053  | 0.554516011 | 2.40E-08 | 2.26E-06 | 1.23E-03 |
| ENSG00000145675.13_PIK3R1  | ENSG00000160789.18_LMNA | -0.30618 | -0.443748728 | -0.15450863 | 1.25E-04 | 2.26E-03 | 1.00E+00 |
| ENSG00000132879.12_FBXO44  | ENSG00000160789.18_LMNA | -0.26507 | -0.407093962 | -0.11053642 | 9.66E-04 | 1.13E-02 | 1.00E+00 |
| ENSG00000070614.13_NDST1   | ENSG00000160789.18_LMNA | 0.07834  | -0.081882945 | 0.234613659 | 3.37E-01 | 6.23E-01 | 1.00E+00 |
| ENSG00000151176.6_PLBD2    | ENSG00000160789.18_LMNA | 0.33401  | 0.184627839  | 0.468309443 | 2.61E-05 | 6.39E-04 | 1.00E+00 |
| ENSG00000255198.4_SNHG9    | ENSG00000160789.18_LMNA | -0.21411 | -0.361001639 | -0.05684281 | 8.08E-03 | 5.60E-02 | 1.00E+00 |
| ENSG00000108406.8_DHX40    | ENSG00000160789.18_LMNA | -0.24446 | -0.388543268 | -0.08871627 | 2.40E-03 | 2.25E-02 | 1.00E+00 |
| ENSG00000149743.12_TRPT1   | ENSG00000160789.18_LMNA | 0.03301  | -0.126855755 | 0.19120745  | 6.86E-01 | 8.64E-01 | 1.00E+00 |

|                             |                         |          |              |             |          |          |          |
|-----------------------------|-------------------------|----------|--------------|-------------|----------|----------|----------|
| ENSG00000103653.15_CSK      | ENSG00000160789.18_LMNA | 0.18766  | 0.029331503  | 0.336794897 | 2.06E-02 | 1.10E-01 | 1.00E+00 |
| ENSG00000128311.12_TST      | ENSG00000160789.18_LMNA | -0.13772 | -0.290550847 | 0.021961685 | 9.06E-02 | 2.93E-01 | 1.00E+00 |
| ENSG00000198369.8_SPRED2    | ENSG00000160789.18_LMNA | 0.45732  | 0.321525309  | 0.574678394 | 3.16E-09 | 4.04E-07 | 1.62E-04 |
| ENSG00000169242.10_EFNA1    | ENSG00000160789.18_LMNA | 0.15009  | -0.009329493 | 0.30207669  | 6.49E-02 | 2.37E-01 | 1.00E+00 |
| ENSG00000127946.15_HIP1     | ENSG00000160789.18_LMNA | 0.20208  | 0.044307607  | 0.350022721 | 1.25E-02 | 7.71E-02 | 1.00E+00 |
| ENSG00000167747.12_C19orf48 | ENSG00000160789.18_LMNA | 0.12642  | -0.033454445 | 0.279985259 | 1.21E-01 | 3.49E-01 | 1.00E+00 |
| ENSG00000006831.9_ADIPOR2   | ENSG00000160789.18_LMNA | -0.27166 | -0.412995152 | -0.11753812 | 7.11E-04 | 8.88E-03 | 1.00E+00 |
| ENSG00000102879.14_CORO1A   | ENSG00000160789.18_LMNA | 0.04243  | -0.11756763  | 0.200275132 | 6.04E-01 | 8.18E-01 | 1.00E+00 |
| ENSG00000165689.15_SDCCAG3  | ENSG00000160789.18_LMNA | 0.09482  | -0.06537198  | 0.250238914 | 2.45E-01 | 5.25E-01 | 1.00E+00 |
| ENSG00000108947.4_EFNB3     | ENSG00000160789.18_LMNA | -0.09663 | -0.251955438 | 0.063547559 | 2.36E-01 | 5.15E-01 | 1.00E+00 |
| ENSG00000116237.14_ICMT     | ENSG00000160789.18_LMNA | 0.42718  | 0.287531505  | 0.549040144 | 4.05E-08 | 3.46E-06 | 2.08E-03 |
| ENSG00000156471.11_PTDSS1   | ENSG00000160789.18_LMNA | -0.0889  | -0.244641856 | 0.071306237 | 2.76E-01 | 5.61E-01 | 1.00E+00 |
| ENSG00000163444.10_TMEM183  | ENSG00000160789.18_LMNA | -0.18858 | -0.337639433 | -0.03028355 | 2.00E-02 | 1.08E-01 | 1.00E+00 |
| ENSG00000185950.8_IRS2      | ENSG00000160789.18_LMNA | 0.3716   | 0.225753834  | 0.501152304 | 2.44E-06 | 9.28E-05 | 1.25E-01 |
| ENSG00000113721.12_PDGFRB   | ENSG00000160789.18_LMNA | 0.35373  | 0.206139786  | 0.485587037 | 7.80E-06 | 2.40E-04 | 4.00E-01 |
| ENSG00000186318.15_BACE1    | ENSG00000160789.18_LMNA | 0.10912  | -0.050968214 | 0.263737045 | 1.81E-01 | 4.44E-01 | 1.00E+00 |
| ENSG00000250722.4_SELENOP   | ENSG00000160789.18_LMNA | -0.15895 | -0.310296911 | 0.000259091 | 5.05E-02 | 2.02E-01 | 1.00E+00 |
| ENSG00000164022.15_AIMP1    | ENSG00000160789.18_LMNA | -0.02324 | -0.181766853 | 0.136466959 | 7.76E-01 | 9.08E-01 | 1.00E+00 |
| ENSG00000128951.12_DUT      | ENSG00000160789.18_LMNA | -0.07502 | -0.231456759 | 0.08519783  | 3.58E-01 | 6.41E-01 | 1.00E+00 |
| ENSG00000136044.10_APPL2    | ENSG00000160789.18_LMNA | -0.3406  | -0.474097902 | -0.19180477 | 1.76E-05 | 4.64E-04 | 9.02E-01 |
| ENSG00000136819.13_C9orf78  | ENSG00000160789.18_LMNA | -0.06673 | -0.22355245  | 0.093467069 | 4.14E-01 | 6.87E-01 | 1.00E+00 |
| ENSG00000108784.8_NAGLU     | ENSG00000160789.18_LMNA | 0.29931  | 0.147119788  | 0.437656379 | 1.80E-04 | 3.00E-03 | 1.00E+00 |
| ENSG00000152092.14_ASTN1    | ENSG00000160789.18_LMNA | -0.05382 | -0.211208126 | 0.106294409 | 5.10E-01 | 7.59E-01 | 1.00E+00 |
| ENSG00000160563.12_MED27    | ENSG00000160789.18_LMNA | -0.05757 | -0.214805763 | 0.10256688  | 4.81E-01 | 7.39E-01 | 1.00E+00 |
| ENSG00000094916.12_CBX5     | ENSG00000160789.18_LMNA | -0.11937 | -0.273377577 | 0.040600092 | 1.43E-01 | 3.86E-01 | 1.00E+00 |
| ENSG00000137106.16_GRHPR    | ENSG00000160789.18_LMNA | -0.20428 | -0.352028941 | -0.04659105 | 1.16E-02 | 7.28E-02 | 1.00E+00 |
| ENSG00000111711.8_GOLT1B    | ENSG00000160789.18_LMNA | -0.17641 | -0.326446056 | -0.01771035 | 2.97E-02 | 1.42E-01 | 1.00E+00 |
| ENSG00000130165.9_ELOF1     | ENSG00000160789.18_LMNA | 0.02024  | -0.139408578 | 0.178865678 | 8.05E-01 | 9.22E-01 | 1.00E+00 |
| ENSG00000138942.14_RNF185   | ENSG00000160789.18_LMNA | -0.21189 | -0.358982773 | -0.05453054 | 8.78E-03 | 5.96E-02 | 1.00E+00 |
| ENSG00000186469.7_GNG2      | ENSG00000160789.18_LMNA | -0.30677 | -0.444274142 | -0.15514738 | 1.21E-04 | 2.20E-03 | 1.00E+00 |
| ENSG00000140526.15_ABHD2    | ENSG00000160789.18_LMNA | 0.33837  | 0.189371689  | 0.472138264 | 2.01E-05 | 5.18E-04 | 1.00E+00 |
| ENSG00000124006.13_OBSL1    | ENSG00000160789.18_LMNA | 0.3441   | 0.195612781  | 0.477159328 | 1.42E-05 | 3.91E-04 | 7.29E-01 |
| ENSG00000148516.20_ZEB1     | ENSG00000160789.18_LMNA | -0.12211 | -0.275950911 | 0.037821063 | 1.34E-01 | 3.72E-01 | 1.00E+00 |

|                            |                         |          |              |             |          |          |          |
|----------------------------|-------------------------|----------|--------------|-------------|----------|----------|----------|
| ENSG00000164880.14_INTS1   | ENSG00000160789.18_LMNA | 0.28714  | 0.134065292  | 0.426826913 | 3.35E-04 | 4.89E-03 | 1.00E+00 |
| ENSG00000197226.11_TBC1D9B | ENSG00000160789.18_LMNA | 0.21702  | 0.059886109  | 0.363654448 | 7.24E-03 | 5.16E-02 | 1.00E+00 |
| ENSG00000114166.7_KAT2B    | ENSG00000160789.18_LMNA | -0.2031  | -0.350952787 | -0.04536579 | 1.21E-02 | 7.52E-02 | 1.00E+00 |
| ENSG00000168275.13_COA6    | ENSG00000160789.18_LMNA | -0.07792 | -0.234211437 | 0.082305686 | 3.40E-01 | 6.25E-01 | 1.00E+00 |
| ENSG00000105737.8_GRIK5    | ENSG00000160789.18_LMNA | 0.04513  | -0.114895998 | 0.20287331  | 5.81E-01 | 8.05E-01 | 1.00E+00 |
| ENSG00000107331.15_ABCA2   | ENSG00000160789.18_LMNA | -0.01766 | -0.176368744 | 0.141935831 | 8.29E-01 | 9.33E-01 | 1.00E+00 |
| ENSG00000176946.10_THAP4   | ENSG00000160789.18_LMNA | 0.30867  | 0.15718865   | 0.445951903 | 1.09E-04 | 2.03E-03 | 1.00E+00 |
| ENSG00000182551.12_ADI1    | ENSG00000160789.18_LMNA | -0.1978  | -0.346101788 | -0.03985408 | 1.46E-02 | 8.61E-02 | 1.00E+00 |
| ENSG00000174173.6_TRMT10C  | ENSG00000160789.18_LMNA | -0.21707 | -0.363705659 | -0.05994491 | 7.23E-03 | 5.15E-02 | 1.00E+00 |
| ENSG00000132153.13_DHX30   | ENSG00000160789.18_LMNA | 0.05139  | -0.108697554 | 0.208884151 | 5.29E-01 | 7.73E-01 | 1.00E+00 |
| ENSG00000163882.8_POLR2H   | ENSG00000160789.18_LMNA | 0.0193   | -0.140328329 | 0.177957435 | 8.13E-01 | 9.27E-01 | 1.00E+00 |
| ENSG00000141503.14_MINK1   | ENSG00000160789.18_LMNA | -0.04484 | -0.202590939 | 0.115186575 | 5.83E-01 | 8.06E-01 | 1.00E+00 |
| ENSG00000179761.10_PIOX    | ENSG00000160789.18_LMNA | 0.32883  | 0.179000508  | 0.463753697 | 3.53E-05 | 8.17E-04 | 1.00E+00 |
| ENSG00000123472.11_ATPAF1  | ENSG00000160789.18_LMNA | -0.10928 | -0.263885779 | 0.050808769 | 1.80E-01 | 4.43E-01 | 1.00E+00 |
| ENSG00000119777.17_TMEN214 | ENSG00000160789.18_LMNA | 0.49477  | 0.364263967  | 0.606222036 | 9.23E-11 | 2.10E-08 | 4.73E-06 |
| ENSG00000140474.11_ULK3    | ENSG00000160789.18_LMNA | 0.07751  | -0.082714232 | 0.233822618 | 3.43E-01 | 6.27E-01 | 1.00E+00 |
| ENSG00000071655.16_MBD3    | ENSG00000160789.18_LMNA | 0.17281  | 0.013991311  | 0.323118484 | 3.33E-02 | 1.53E-01 | 1.00E+00 |
| ENSG00000130881.12_LRP3    | ENSG00000160789.18_LMNA | -0.00405 | -0.163148303 | 0.155248004 | 9.60E-01 | 9.84E-01 | 1.00E+00 |
| ENSG00000108826.14_MRPL27  | ENSG00000160789.18_LMNA | -0.21978 | -0.366170154 | -0.06277735 | 6.52E-03 | 4.78E-02 | 1.00E+00 |
| ENSG00000162627.15_SNX7    | ENSG00000160789.18_LMNA | 0.07042  | -0.089786779 | 0.227075481 | 3.89E-01 | 6.67E-01 | 1.00E+00 |
| ENSG00000158796.15_DEDD    | ENSG00000160789.18_LMNA | -0.01108 | -0.169983937 | 0.148379346 | 8.92E-01 | 9.58E-01 | 1.00E+00 |
| ENSG00000170860.3_LSM3     | ENSG00000160789.18_LMNA | -0.40087 | -0.526469449 | -0.25814055 | 3.09E-07 | 1.80E-05 | 1.59E-02 |
| ENSG00000174547.12_MRPL11  | ENSG00000160789.18_LMNA | -0.07738 | -0.233700814 | 0.082842193 | 3.43E-01 | 6.28E-01 | 1.00E+00 |
| ENSG00000169764.13_UGP2    | ENSG00000160789.18_LMNA | 0.31569  | 0.164775683  | 0.452170097 | 7.44E-05 | 1.48E-03 | 1.00E+00 |
| ENSG00000173456.4_RNF26    | ENSG00000160789.18_LMNA | 0.15267  | -0.006689505 | 0.304474015 | 6.04E-02 | 2.27E-01 | 1.00E+00 |
| ENSG00000125753.12_VASP    | ENSG00000160789.18_LMNA | 0.46438  | 0.329544044  | 0.580654577 | 1.68E-09 | 2.37E-07 | 8.61E-05 |
| ENSG00000163481.6_RNF25    | ENSG00000160789.18_LMNA | 0.04346  | -0.116549704 | 0.201265598 | 5.95E-01 | 8.13E-01 | 1.00E+00 |
| ENSG00000125931.9_CITED1   | ENSG00000160789.18_LMNA | 0.22419  | 0.067397179  | 0.370180735 | 5.49E-03 | 4.20E-02 | 1.00E+00 |
| ENSG00000172590.17_MRPL52  | ENSG00000160789.18_LMNA | -0.03332 | -0.191509213 | 0.12654755  | 6.84E-01 | 8.63E-01 | 1.00E+00 |
| ENSG00000130733.9_YIPF2    | ENSG00000160789.18_LMNA | 0.00389  | -0.155409624 | 0.162987091 | 9.62E-01 | 9.85E-01 | 1.00E+00 |
| ENSG00000115944.13_COX7A2L | ENSG00000160789.18_LMNA | -0.27799 | -0.41865966  | -0.12428675 | 5.25E-04 | 7.01E-03 | 1.00E+00 |
| ENSG00000196396.8_PTPN1    | ENSG00000160789.18_LMNA | 0.31334  | 0.16223545   | 0.450091275 | 8.47E-05 | 1.65E-03 | 1.00E+00 |
| ENSG00000136518.15_ACTL6A  | ENSG00000160789.18_LMNA | -0.20305 | -0.350911695 | -0.04531903 | 1.21E-02 | 7.53E-02 | 1.00E+00 |



|                             |                         |          |              |             |          |          |          |
|-----------------------------|-------------------------|----------|--------------|-------------|----------|----------|----------|
| ENSG00000146122.15_DAAM2    | ENSG00000160789.18_LMNA | -0.45078 | -0.569141114 | -0.31412775 | 5.62E-09 | 6.64E-07 | 2.88E-04 |
| ENSG00000172081.12_MOB3A    | ENSG00000160789.18_LMNA | 0.35184  | 0.20406822   | 0.483932678 | 8.79E-06 | 2.62E-04 | 4.51E-01 |
| ENSG00000141639.10_MAPK4    | ENSG00000160789.18_LMNA | 0.10729  | -0.052810655 | 0.262017294 | 1.88E-01 | 4.55E-01 | 1.00E+00 |
| ENSG00000138674.15_SEC31A   | ENSG00000160789.18_LMNA | 0.27282  | 0.118773047  | 0.414033407 | 6.73E-04 | 8.51E-03 | 1.00E+00 |
| ENSG0000013561.16_RNF14     | ENSG00000160789.18_LMNA | -0.16395 | -0.314935051 | -0.0048814  | 4.36E-02 | 1.84E-01 | 1.00E+00 |
| ENSG00000067955.12_CBF3     | ENSG00000160789.18_LMNA | 0.22734  | 0.070696369  | 0.373037949 | 4.85E-03 | 3.83E-02 | 1.00E+00 |
| ENSG00000121064.11_SCPEP1   | ENSG00000160789.18_LMNA | 0.0741   | -0.086111822 | 0.230585153 | 3.64E-01 | 6.46E-01 | 1.00E+00 |
| ENSG00000087076.7_HSD17B14  | ENSG00000160789.18_LMNA | -0.0086  | -0.167568735 | 0.150809731 | 9.16E-01 | 9.68E-01 | 1.00E+00 |
| ENSG00000204681.9_GABBR1    | ENSG00000160789.18_LMNA | -0.28915 | -0.428619907 | -0.13621968 | 3.03E-04 | 4.53E-03 | 1.00E+00 |
| ENSG00000155287.9_SLC25A28  | ENSG00000160789.18_LMNA | -0.08235 | -0.238423739 | 0.077872845 | 3.13E-01 | 6.00E-01 | 1.00E+00 |
| ENSG00000204237.4_OXLD1     | ENSG00000160789.18_LMNA | 0.04727  | -0.112782677 | 0.204925363 | 5.63E-01 | 7.94E-01 | 1.00E+00 |
| ENSG00000152620.11_NADK2    | ENSG00000160789.18_LMNA | -0.09959 | -0.254749364 | 0.060573496 | 2.22E-01 | 4.98E-01 | 1.00E+00 |
| ENSG00000136143.12_SUCLA2   | ENSG00000160789.18_LMNA | -0.36633 | -0.496566623 | -0.21995205 | 3.46E-06 | 1.23E-04 | 1.77E-01 |
| ENSG00000078140.12_UBE2K    | ENSG00000160789.18_LMNA | -0.16739 | -0.31811024  | -0.00840996 | 3.93E-02 | 1.71E-01 | 1.00E+00 |
| ENSG00000227057.6_WDR46     | ENSG00000160789.18_LMNA | 0.16013  | 0.000949825  | 0.311389018 | 4.88E-02 | 1.98E-01 | 1.00E+00 |
| ENSG00000196376.9_SLC35F1   | ENSG00000160789.18_LMNA | -0.16216 | -0.313271935 | -0.00303627 | 4.59E-02 | 1.90E-01 | 1.00E+00 |
| ENSG00000196072.10_BLOC1S2  | ENSG00000160789.18_LMNA | -0.27376 | -0.414879225 | -0.11977976 | 6.43E-04 | 8.23E-03 | 1.00E+00 |
| ENSG00000106305.8_AIMP2     | ENSG00000160789.18_LMNA | -0.00673 | -0.165752189 | 0.152635163 | 9.34E-01 | 9.74E-01 | 1.00E+00 |
| ENSG00000167641.9_PPP1R14A  | ENSG00000160789.18_LMNA | -0.32706 | -0.462198516 | -0.17708378 | 3.91E-05 | 8.85E-04 | 1.00E+00 |
| ENSG00000142166.11_IFNAR1   | ENSG00000160789.18_LMNA | 0.36     | 0.213006934  | 0.491056884 | 5.23E-06 | 1.72E-04 | 2.68E-01 |
| ENSG00000125457.12_MIF4GD   | ENSG00000160789.18_LMNA | -0.27105 | -0.412453653 | -0.11689441 | 7.31E-04 | 9.06E-03 | 1.00E+00 |
| ENSG00000130748.6_TMEM160   | ENSG00000160789.18_LMNA | -0.06192 | -0.218967    | 0.098244259 | 4.49E-01 | 7.15E-01 | 1.00E+00 |
| ENSG00000165886.4_UBTD1     | ENSG00000160789.18_LMNA | 0.49344  | 0.36273031   | 0.605103124 | 1.05E-10 | 2.33E-08 | 5.41E-06 |
| ENSG00000007255.9_TRAPPC6A  | ENSG00000160789.18_LMNA | -0.11522 | -0.269477079 | 0.044803129 | 1.58E-01 | 4.10E-01 | 1.00E+00 |
| ENSG00000176393.9_RNPEP     | ENSG00000160789.18_LMNA | 0.10682  | -0.053283008 | 0.261576074 | 1.90E-01 | 4.58E-01 | 1.00E+00 |
| ENSG00000134851.11_TMEM165  | ENSG00000160789.18_LMNA | 0.02992  | -0.129902665 | 0.188220983 | 7.14E-01 | 8.79E-01 | 1.00E+00 |
| ENSG00000205403.11_CFI      | ENSG00000160789.18_LMNA | 0.40066  | 0.257908324  | 0.526289596 | 3.14E-07 | 1.82E-05 | 1.61E-02 |
| ENSG00000188313.11_PLSCR1   | ENSG00000160789.18_LMNA | 0.18747  | 0.029140709  | 0.336625589 | 2.07E-02 | 1.11E-01 | 1.00E+00 |
| ENSG00000118855.17_MFSD1    | ENSG00000160789.18_LMNA | 0.14663  | -0.01287014  | 0.298855296 | 7.14E-02 | 2.53E-01 | 1.00E+00 |
| ENSG00000165801.8_ARHGEF40  | ENSG00000160789.18_LMNA | 0.28809  | 0.135079513  | 0.427671287 | 3.19E-04 | 4.72E-03 | 1.00E+00 |
| ENSG00000091136.12_LAMB1    | ENSG00000160789.18_LMNA | 0.46974  | 0.335639475  | 0.585179334 | 1.03E-09 | 1.61E-07 | 5.27E-05 |
| ENSG00000007202.13_KIAA0100 | ENSG00000160789.18_LMNA | 0.10958  | -0.050501937 | 0.264171955 | 1.79E-01 | 4.41E-01 | 1.00E+00 |
| ENSG00000173581.6_CCDC106   | ENSG00000160789.18_LMNA | 0.19562  | 0.037589085  | 0.344103547 | 1.57E-02 | 9.07E-02 | 1.00E+00 |

|                            |                         |          |              |             |          |          |          |
|----------------------------|-------------------------|----------|--------------|-------------|----------|----------|----------|
| ENSG00000122378.12_FAM213A | ENSG00000160789.18_LMNA | -0.06933 | -0.226039203 | 0.090870213 | 3.96E-01 | 6.73E-01 | 1.00E+00 |
| ENSG00000101384.10_JAG1    | ENSG00000160789.18_LMNA | 0.29157  | 0.138810003  | 0.430772665 | 2.68E-04 | 4.11E-03 | 1.00E+00 |
| ENSG00000008838.16_MED24   | ENSG00000160789.18_LMNA | -0.07902 | -0.235257159 | 0.081206382 | 3.33E-01 | 6.19E-01 | 1.00E+00 |
| ENSG00000156467.8_UQCRB    | ENSG00000160789.18_LMNA | -0.24077 | -0.385202327 | -0.08481685 | 2.81E-03 | 2.54E-02 | 1.00E+00 |
| ENSG00000166272.15_WBP1L   | ENSG00000160789.18_LMNA | -0.22175 | -0.367961212 | -0.06483888 | 6.04E-03 | 4.52E-02 | 1.00E+00 |
| ENSG00000018189.11_RUFY3   | ENSG00000160789.18_LMNA | -0.38738 | -0.514834723 | -0.24318166 | 8.20E-07 | 3.88E-05 | 4.21E-02 |
| ENSG00000171720.8_HDAC3    | ENSG00000160789.18_LMNA | 0.0366   | -0.123314568 | 0.194671006 | 6.54E-01 | 8.47E-01 | 1.00E+00 |
| ENSG00000106511.5_MEOX2    | ENSG00000160789.18_LMNA | 0.40435  | 0.262018026  | 0.529468964 | 2.39E-07 | 1.47E-05 | 1.22E-02 |
| ENSG00000273841.3_TAF9     | ENSG00000160789.18_LMNA | -0.1556  | -0.307188711 | 0.003694776 | 5.56E-02 | 2.15E-01 | 1.00E+00 |
| ENSG00000136827.11_TOR1A   | ENSG00000160789.18_LMNA | 0.18336  | 0.024889183  | 0.332847686 | 2.37E-02 | 1.22E-01 | 1.00E+00 |
| ENSG00000177728.13_TMEN94  | ENSG00000160789.18_LMNA | 0.00945  | -0.149972599 | 0.168401069 | 9.08E-01 | 9.65E-01 | 1.00E+00 |
| ENSG00000110871.13_COQ5    | ENSG00000160789.18_LMNA | -0.3666  | -0.496807062 | -0.22025577 | 3.40E-06 | 1.21E-04 | 1.74E-01 |
| ENSG00000168591.14_TMUB2   | ENSG00000160789.18_LMNA | -0.21191 | -0.358995148 | -0.05454471 | 8.77E-03 | 5.96E-02 | 1.00E+00 |
| ENSG00000197586.11_ENTPD6  | ENSG00000160789.18_LMNA | 0.10103  | -0.059122647 | 0.256110429 | 2.16E-01 | 4.90E-01 | 1.00E+00 |
| ENSG00000187479.5_C11orf96 | ENSG00000160789.18_LMNA | 0.14274  | -0.016848055 | 0.295227566 | 7.94E-02 | 2.71E-01 | 1.00E+00 |
| ENSG00000137692.10_DCUN1D5 | ENSG00000160789.18_LMNA | 0.00056  | -0.158657946 | 0.159743361 | 9.95E-01 | 9.98E-01 | 1.00E+00 |
| ENSG00000147872.8_PLIN2    | ENSG00000160789.18_LMNA | 0.15702  | -0.002235135 | 0.308510032 | 5.34E-02 | 2.10E-01 | 1.00E+00 |
| ENSG00000102359.5_SRPX2    | ENSG00000160789.18_LMNA | 0.50727  | 0.378647971  | 0.616669775 | 2.57E-11 | 7.29E-09 | 1.32E-06 |
| ENSG00000137947.10_GTF2B   | ENSG00000160789.18_LMNA | -0.28059 | -0.420985746 | -0.12706593 | 4.63E-04 | 6.34E-03 | 1.00E+00 |
| ENSG00000244509.3_APOBEC3C | ENSG00000160789.18_LMNA | 0.19728  | 0.03931493   | 0.345626385 | 1.48E-02 | 8.73E-02 | 1.00E+00 |
| ENSG00000082898.15_XPO1    | ENSG00000160789.18_LMNA | -0.05405 | -0.211429089 | 0.106065725 | 5.08E-01 | 7.58E-01 | 1.00E+00 |
| ENSG00000125144.12_MT1G    | ENSG00000160789.18_LMNA | 0.06552  | -0.094669575 | 0.222399528 | 4.23E-01 | 6.94E-01 | 1.00E+00 |
| ENSG00000198728.9_LDB1     | ENSG00000160789.18_LMNA | -0.23416 | -0.379225821 | -0.07786418 | 3.69E-03 | 3.12E-02 | 1.00E+00 |
| ENSG00000119865.7_CNRIP1   | ENSG00000160789.18_LMNA | -0.4987  | -0.609505868 | -0.3687726  | 6.21E-11 | 1.54E-08 | 3.19E-06 |
| ENSG00000205302.5_SNX2     | ENSG00000160789.18_LMNA | -0.1478  | -0.299944292 | 0.011674094 | 6.92E-02 | 2.48E-01 | 1.00E+00 |
| ENSG00000130826.14_DKC1    | ENSG00000160789.18_LMNA | 0.06342  | -0.096759881 | 0.220393302 | 4.38E-01 | 7.06E-01 | 1.00E+00 |
| ENSG00000166295.7_ANAPC16  | ENSG00000160789.18_LMNA | -0.26189 | -0.404234092 | -0.10715377 | 1.12E-03 | 1.26E-02 | 1.00E+00 |
| ENSG00000134882.14_UBAC2   | ENSG00000160789.18_LMNA | -0.18243 | -0.331987651 | -0.02392288 | 2.45E-02 | 1.25E-01 | 1.00E+00 |
| ENSG00000117697.13_NSL1    | ENSG00000160789.18_LMNA | -0.40428 | -0.529411228 | -0.26194331 | 2.40E-07 | 1.48E-05 | 1.23E-02 |
| ENSG00000164885.11_CDK5    | ENSG00000160789.18_LMNA | -0.02976 | -0.188070326 | 0.130056212 | 7.16E-01 | 8.79E-01 | 1.00E+00 |
| ENSG00000184867.12_ARMCX2  | ENSG00000160789.18_LMNA | 0.26474  | 0.110185845  | 0.406797836 | 9.81E-04 | 1.14E-02 | 1.00E+00 |
| ENSG00000086475.13_SEPHS1  | ENSG00000160789.18_LMNA | -0.28852 | -0.428062487 | -0.13554961 | 3.12E-04 | 4.65E-03 | 1.00E+00 |
| ENSG00000131584.17_ACAP3   | ENSG00000160789.18_LMNA | -0.09775 | -0.253014452 | 0.062420925 | 2.31E-01 | 5.09E-01 | 1.00E+00 |

|                             |                         |          |              |             |          |          |          |
|-----------------------------|-------------------------|----------|--------------|-------------|----------|----------|----------|
| ENSG00000177868.10_SVBP     | ENSG00000160789.18_LMNA | -0.22468 | -0.370622173 | -0.06790647 | 5.39E-03 | 4.15E-02 | 1.00E+00 |
| ENSG00000128928.7_IVD       | ENSG00000160789.18_LMNA | 0.05885  | -0.10129527  | 0.216031095 | 4.71E-01 | 7.31E-01 | 1.00E+00 |
| ENSG00000015592.15_STMN4    | ENSG00000160789.18_LMNA | -0.415   | -0.538611837 | -0.27389055 | 1.06E-07 | 7.59E-06 | 5.45E-03 |
| ENSG00000139200.12_PIANP    | ENSG00000160789.18_LMNA | -0.28706 | -0.426753366 | -0.13397698 | 3.36E-04 | 4.90E-03 | 1.00E+00 |
| ENSG00000028137.15_TNFRSF1  | ENSG00000160789.18_LMNA | 0.18701  | 0.028662967  | 0.336201561 | 2.11E-02 | 1.12E-01 | 1.00E+00 |
| ENSG00000170017.11_ALCAM    | ENSG00000160789.18_LMNA | -0.50188 | -0.612170296 | -0.37243915 | 4.49E-11 | 1.17E-08 | 2.30E-06 |
| ENSG00000271601.3_LIX1L     | ENSG00000160789.18_LMNA | 0.12983  | -0.02999214  | 0.283176256 | 1.11E-01 | 3.32E-01 | 1.00E+00 |
| ENSG00000149489.7_ROM1      | ENSG00000160789.18_LMNA | 0.01349  | -0.146026716 | 0.172318234 | 8.69E-01 | 9.49E-01 | 1.00E+00 |
| ENSG00000074181.7_NOTCH3    | ENSG00000160789.18_LMNA | 0.46256  | 0.32747354   | 0.579114063 | 1.98E-09 | 2.74E-07 | 1.02E-04 |
| ENSG00000166136.14_NDUFB8   | ENSG00000160789.18_LMNA | -0.27157 | -0.41291951  | -0.11744819 | 7.13E-04 | 8.90E-03 | 1.00E+00 |
| ENSG00000151135.8_TMEN263   | ENSG00000160789.18_LMNA | -0.08368 | -0.239689128 | 0.076538759 | 3.05E-01 | 5.92E-01 | 1.00E+00 |
| ENSG00000224550.1_RP11-270C | ENSG00000160789.18_LMNA | -0.17616 | -0.326215053 | -0.01745189 | 2.99E-02 | 1.43E-01 | 1.00E+00 |
| ENSG00000148334.13_PTGES2   | ENSG00000160789.18_LMNA | -0.02857 | -0.186918037 | 0.131230101 | 7.27E-01 | 8.84E-01 | 1.00E+00 |
| ENSG00000010327.9_STAB1     | ENSG00000160789.18_LMNA | 0.26581  | 0.111323973  | 0.407758967 | 9.33E-04 | 1.10E-02 | 1.00E+00 |
| ENSG00000263465.3_SRSF8     | ENSG00000160789.18_LMNA | -0.33689 | -0.470838533 | -0.18775986 | 2.20E-05 | 5.57E-04 | 1.00E+00 |
| ENSG00000197568.12_HHLA3    | ENSG00000160789.18_LMNA | 0.01847  | -0.141150386 | 0.177145205 | 8.21E-01 | 9.30E-01 | 1.00E+00 |
| ENSG00000139687.12_RB1      | ENSG00000160789.18_LMNA | -0.25257 | -0.395854634 | -0.097282   | 1.69E-03 | 1.72E-02 | 1.00E+00 |
| ENSG00000124222.20_STX16    | ENSG00000160789.18_LMNA | 0.14772  | -0.011758181 | 0.299867757 | 6.93E-02 | 2.48E-01 | 1.00E+00 |
| ENSG00000173264.12_GPR137   | ENSG00000160789.18_LMNA | 0.22563  | 0.068906543  | 0.371488608 | 5.19E-03 | 4.04E-02 | 1.00E+00 |
| ENSG00000158623.13_COPG2    | ENSG00000160789.18_LMNA | -0.08332 | -0.239347126 | 0.07689944  | 3.07E-01 | 5.94E-01 | 1.00E+00 |
| ENSG00000173391.7_OLR1      | ENSG00000160789.18_LMNA | -0.15605 | -0.307609511 | 0.00323007  | 5.49E-02 | 2.14E-01 | 1.00E+00 |
| ENSG00000116691.9_MIIP      | ENSG00000160789.18_LMNA | -0.20123 | -0.349240144 | -0.04341776 | 1.29E-02 | 7.88E-02 | 1.00E+00 |
| ENSG00000125945.13_ZNF436   | ENSG00000160789.18_LMNA | 0.49909  | 0.36922441   | 0.609834485 | 5.97E-11 | 1.50E-08 | 3.06E-06 |
| ENSG00000138867.15_GUCD1    | ENSG00000160789.18_LMNA | 0.17984  | 0.021249966  | 0.329606008 | 2.66E-02 | 1.32E-01 | 1.00E+00 |
| ENSG00000198408.12_MGEA5    | ENSG00000160789.18_LMNA | -0.15968 | -0.310970817 | -0.00048679 | 4.94E-02 | 2.00E-01 | 1.00E+00 |
| ENSG00000004399.11_PLXND1   | ENSG00000160789.18_LMNA | 0.40691  | 0.264871098  | 0.531671762 | 1.97E-07 | 1.25E-05 | 1.01E-02 |
| ENSG00000230897.1_RPS18P12  | ENSG00000160789.18_LMNA | -0.0782  | -0.234478295 | 0.082025228 | 3.38E-01 | 6.24E-01 | 1.00E+00 |
| ENSG00000153774.7_CFD1P1    | ENSG00000160789.18_LMNA | 0.00598  | -0.153368185 | 0.165022127 | 9.42E-01 | 9.77E-01 | 1.00E+00 |
| ENSG00000116171.15_SCP2     | ENSG00000160789.18_LMNA | -0.03775 | -0.195770056 | 0.122189189 | 6.44E-01 | 8.42E-01 | 1.00E+00 |
| ENSG00000100095.17_SEZ6L    | ENSG00000160789.18_LMNA | -0.30177 | -0.439835699 | -0.14975916 | 1.58E-04 | 2.72E-03 | 1.00E+00 |
| ENSG0000013364.17_MVP       | ENSG00000160789.18_LMNA | 0.51141  | 0.383423549  | 0.620120047 | 1.66E-11 | 5.14E-09 | 8.54E-07 |
| ENSG00000101972.17_STAG2    | ENSG00000160789.18_LMNA | 0.00931  | -0.150116177 | 0.168258346 | 9.09E-01 | 9.65E-01 | 1.00E+00 |
| ENSG00000186660.14_ZFP91    | ENSG00000160789.18_LMNA | -0.08015 | -0.236331402 | 0.080076293 | 3.26E-01 | 6.13E-01 | 1.00E+00 |

|                             |                         |          |              |             |          |          |          |
|-----------------------------|-------------------------|----------|--------------|-------------|----------|----------|----------|
| ENSG00000136146.13_MED4     | ENSG00000160789.18_LMNA | -0.18529 | -0.334616923 | -0.02687884 | 2.23E-02 | 1.17E-01 | 1.00E+00 |
| ENSG00000242247.9_ARFGAP3   | ENSG00000160789.18_LMNA | -0.0141  | -0.172914311 | 0.14542538  | 8.63E-01 | 9.46E-01 | 1.00E+00 |
| ENSG00000115963.12_RND3     | ENSG00000160789.18_LMNA | -0.00599 | -0.165029231 | 0.153361053 | 9.42E-01 | 9.77E-01 | 1.00E+00 |
| ENSG00000185122.9_HSF1      | ENSG00000160789.18_LMNA | 0.19566  | 0.037628726  | 0.344138543 | 1.57E-02 | 9.07E-02 | 1.00E+00 |
| ENSG00000166582.8_CENPV     | ENSG00000160789.18_LMNA | -0.15972 | -0.311014753 | -0.00053543 | 4.93E-02 | 2.00E-01 | 1.00E+00 |
| ENSG00000105364.12_MRPL4    | ENSG00000160789.18_LMNA | 0.09411  | -0.066081339 | 0.249570971 | 2.49E-01 | 5.29E-01 | 1.00E+00 |
| ENSG00000134121.8_CHL1      | ENSG00000160789.18_LMNA | 0.15554  | -0.00375857  | 0.307130936 | 5.57E-02 | 2.15E-01 | 1.00E+00 |
| ENSG00000109501.12_WFS1     | ENSG00000160789.18_LMNA | 0.03398  | -0.125902913 | 0.192140183 | 6.78E-01 | 8.59E-01 | 1.00E+00 |
| ENSG00000088833.16_NSFL1C   | ENSG00000160789.18_LMNA | 0.06735  | -0.092843495 | 0.224149962 | 4.10E-01 | 6.84E-01 | 1.00E+00 |
| ENSG00000129250.10_KIF1C    | ENSG00000160789.18_LMNA | 0.11094  | -0.049130587 | 0.265450312 | 1.74E-01 | 4.33E-01 | 1.00E+00 |
| ENSG00000135097.5_MSI1      | ENSG00000160789.18_LMNA | 0.06552  | -0.094667126 | 0.222401877 | 4.23E-01 | 6.94E-01 | 1.00E+00 |
| ENSG0000012061.14_ERCC1     | ENSG00000160789.18_LMNA | 0.02832  | -0.131469922 | 0.186682521 | 7.29E-01 | 8.85E-01 | 1.00E+00 |
| ENSG00000163159.10_VPS72    | ENSG00000160789.18_LMNA | -0.195   | -0.343534883 | -0.03694508 | 1.61E-02 | 9.22E-02 | 1.00E+00 |
| ENSG00000119977.19_TCTN3    | ENSG00000160789.18_LMNA | 0.20209  | 0.044319561  | 0.350033231 | 1.25E-02 | 7.70E-02 | 1.00E+00 |
| ENSG00000185641.6_CTD-2287C | ENSG00000160789.18_LMNA | -0.19676 | -0.345147318 | -0.0387718  | 1.51E-02 | 8.84E-02 | 1.00E+00 |
| ENSG00000059573.7_ALDH18A1  | ENSG00000160789.18_LMNA | 0.0216   | -0.138078946 | 0.180177715 | 7.92E-01 | 9.16E-01 | 1.00E+00 |
| ENSG00000114853.12_ZBTB47   | ENSG00000160789.18_LMNA | -0.08413 | -0.24011679  | 0.076087623 | 3.03E-01 | 5.89E-01 | 1.00E+00 |
| ENSG00000079931.13_MOXD1    | ENSG00000160789.18_LMNA | 0.21497  | 0.057743161  | 0.36178698  | 7.82E-03 | 5.46E-02 | 1.00E+00 |
| ENSG00000134001.11	EIF2S1   | ENSG00000160789.18_LMNA | 0.16684  | 0.007844852  | 0.317602188 | 3.99E-02 | 1.73E-01 | 1.00E+00 |
| ENSG00000179933.5_C14orf119 | ENSG00000160789.18_LMNA | -0.01317 | -0.172014645 | 0.146332893 | 8.72E-01 | 9.50E-01 | 1.00E+00 |
| ENSG00000167114.11_SLC27A4  | ENSG00000160789.18_LMNA | 0.06537  | -0.094819671 | 0.222255559 | 4.24E-01 | 6.95E-01 | 1.00E+00 |
| ENSG00000122557.8_HERPUD2   | ENSG00000160789.18_LMNA | 0.13041  | -0.029396499 | 0.283724525 | 1.09E-01 | 3.29E-01 | 1.00E+00 |
| ENSG00000144136.9_SLC20A1   | ENSG00000160789.18_LMNA | 0.48886  | 0.357477231  | 0.60126336  | 1.66E-10 | 3.43E-08 | 8.51E-06 |
| ENSG00000053501.11_USE1     | ENSG00000160789.18_LMNA | -0.10066 | -0.255759923 | 0.059496402 | 2.17E-01 | 4.92E-01 | 1.00E+00 |
| ENSG00000137198.8_GMPR      | ENSG00000160789.18_LMNA | 0.00817  | -0.151223138 | 0.167157529 | 9.20E-01 | 9.70E-01 | 1.00E+00 |
| ENSG00000198951.10_NAGA     | ENSG00000160789.18_LMNA | 0.15387  | -0.00546628  | 0.30558347  | 5.84E-02 | 2.22E-01 | 1.00E+00 |
| ENSG00000128654.12_MTX2     | ENSG00000160789.18_LMNA | -0.18091 | -0.330587334 | -0.02235077 | 2.57E-02 | 1.29E-01 | 1.00E+00 |
| ENSG00000075975.14_MKRN2    | ENSG00000160789.18_LMNA | -0.3068  | -0.444301145 | -0.15518021 | 1.21E-04 | 2.20E-03 | 1.00E+00 |
| ENSG00000095906.15_NUBP2    | ENSG00000160789.18_LMNA | -0.17333 | -0.323604353 | -0.01453381 | 3.27E-02 | 1.51E-01 | 1.00E+00 |
| ENSG00000067064.9_IDI1      | ENSG00000160789.18_LMNA | -0.32817 | -0.463171041 | -0.17828214 | 3.67E-05 | 8.41E-04 | 1.00E+00 |
| ENSG00000139620.11_KANSL2   | ENSG00000160789.18_LMNA | -0.2495  | -0.393086158 | -0.09403334 | 1.94E-03 | 1.91E-02 | 1.00E+00 |
| ENSG00000079819.15_EPB41L2  | ENSG00000160789.18_LMNA | -0.29148 | -0.430691152 | -0.13871185 | 2.69E-04 | 4.13E-03 | 1.00E+00 |
| ENSG00000099875.13_MKNK2    | ENSG00000160789.18_LMNA | 0.42357  | 0.283481549  | 0.545952487 | 5.41E-08 | 4.37E-06 | 2.78E-03 |

|                            |                         |          |              |             |          |          |          |
|----------------------------|-------------------------|----------|--------------|-------------|----------|----------|----------|
| ENSG00000162607.11_USP1    | ENSG00000160789.18_LMNA | 0.10594  | -0.054170859 | 0.260746384 | 1.94E-01 | 4.63E-01 | 1.00E+00 |
| ENSG00000132463.12_GRSF1   | ENSG00000160789.18_LMNA | -0.07918 | -0.235415583 | 0.081039773 | 3.32E-01 | 6.18E-01 | 1.00E+00 |
| ENSG00000117640.16_MTFR1L  | ENSG00000160789.18_LMNA | -0.17737 | -0.327330523 | -0.0187003  | 2.88E-02 | 1.39E-01 | 1.00E+00 |
| ENSG00000188290.9_HES4     | ENSG00000160789.18_LMNA | -0.15859 | -0.309969308 | 0.000621558 | 5.10E-02 | 2.04E-01 | 1.00E+00 |
| ENSG00000105429.11_MEGF8   | ENSG00000160789.18_LMNA | 0.28102  | 0.127521419  | 0.421366608 | 4.53E-04 | 6.25E-03 | 1.00E+00 |
| ENSG00000145781.7_COMMD10  | ENSG00000160789.18_LMNA | -0.20172 | -0.349689914 | -0.04392912 | 1.27E-02 | 7.78E-02 | 1.00E+00 |
| ENSG00000147100.8_SLC16A2  | ENSG00000160789.18_LMNA | 0.1011   | -0.05905075  | 0.256177843 | 2.15E-01 | 4.89E-01 | 1.00E+00 |
| ENSG00000132581.8_SDF2     | ENSG00000160789.18_LMNA | -0.17032 | -0.320825799 | -0.01143388 | 3.59E-02 | 1.61E-01 | 1.00E+00 |
| ENSG00000062598.16_ELMO2   | ENSG00000160789.18_LMNA | -0.05052 | -0.208047849 | 0.10956144  | 5.37E-01 | 7.77E-01 | 1.00E+00 |
| ENSG00000261371.4_PECAM1   | ENSG00000160789.18_LMNA | 0.04891  | -0.11115286  | 0.206506025 | 5.50E-01 | 7.86E-01 | 1.00E+00 |
| ENSG00000134717.16_BTFL3L4 | ENSG00000160789.18_LMNA | -0.40823 | -0.532799242 | -0.26633322 | 1.78E-07 | 1.15E-05 | 9.15E-03 |
| ENSG00000115685.13_PPP1R7  | ENSG00000160789.18_LMNA | 0.06773  | -0.092468694 | 0.224508984 | 4.07E-01 | 6.82E-01 | 1.00E+00 |
| ENSG00000137200.11_CMTR1   | ENSG00000160789.18_LMNA | -0.06062 | -0.217715458 | 0.099545599 | 4.58E-01 | 7.22E-01 | 1.00E+00 |
| ENSG00000260549.1_MT1L     | ENSG00000160789.18_LMNA | 0.25172  | 0.096377082  | 0.395084015 | 1.76E-03 | 1.77E-02 | 1.00E+00 |
| ENSG00000198355.4_PIM3     | ENSG00000160789.18_LMNA | 0.27806  | 0.124365222  | 0.418725394 | 5.23E-04 | 6.99E-03 | 1.00E+00 |
| ENSG00000180901.9_KCTD2    | ENSG00000160789.18_LMNA | 0.01465  | -0.144884957 | 0.173449808 | 8.58E-01 | 9.44E-01 | 1.00E+00 |
| ENSG00000169599.11_NFU1    | ENSG00000160789.18_LMNA | -0.26073 | -0.403197563 | -0.10592946 | 1.18E-03 | 1.31E-02 | 1.00E+00 |
| ENSG00000147862.13_NFIB    | ENSG00000160789.18_LMNA | -0.16414 | -0.315110089 | -0.00507572 | 4.33E-02 | 1.83E-01 | 1.00E+00 |
| ENSG00000104442.8_ARMC1    | ENSG00000160789.18_LMNA | -0.46439 | -0.58066583  | -0.32955918 | 1.68E-09 | 2.37E-07 | 8.60E-05 |
| ENSG00000140367.10_UBE2Q2  | ENSG00000160789.18_LMNA | -0.13762 | -0.290459679 | 0.022061208 | 9.09E-02 | 2.94E-01 | 1.00E+00 |
| ENSG00000132970.11_WASF3   | ENSG00000160789.18_LMNA | -0.25809 | -0.40082431  | -0.10312965 | 1.33E-03 | 1.43E-02 | 1.00E+00 |
| ENSG00000136149.6_RPL13AP2 | ENSG00000160789.18_LMNA | -0.20572 | -0.353344953 | -0.04809064 | 1.10E-02 | 7.01E-02 | 1.00E+00 |
| ENSG00000164949.6_GEM      | ENSG00000160789.18_LMNA | 0.31087  | 0.159571244  | 0.447907641 | 9.69E-05 | 1.84E-03 | 1.00E+00 |
| ENSG00000186340.13_THBS2   | ENSG00000160789.18_LMNA | 0.27912  | 0.125500472  | 0.419675984 | 4.97E-04 | 6.71E-03 | 1.00E+00 |
| ENSG00000156171.13_DRAM2   | ENSG00000160789.18_LMNA | -0.23399 | -0.379070622 | -0.07768402 | 3.71E-03 | 3.14E-02 | 1.00E+00 |
| ENSG00000198876.11_DCAF12  | ENSG00000160789.18_LMNA | -0.13997 | -0.292646271 | 0.019672522 | 8.55E-02 | 2.84E-01 | 1.00E+00 |
| ENSG00000234975.6_FTH1P2   | ENSG00000160789.18_LMNA | 0.01696  | -0.142625071 | 0.175687061 | 8.36E-01 | 9.36E-01 | 1.00E+00 |
| ENSG00000128581.14_IPT22   | ENSG00000160789.18_LMNA | 0.1436   | -0.015966644 | 0.296032161 | 7.76E-02 | 2.67E-01 | 1.00E+00 |
| ENSG00000049656.12_CLPTM1L | ENSG00000160789.18_LMNA | 0.32789  | 0.177976876  | 0.462923368 | 3.73E-05 | 8.50E-04 | 1.00E+00 |
| ENSG00000166987.13_MBD6    | ENSG00000160789.18_LMNA | -0.20124 | -0.349249192 | -0.04342804 | 1.29E-02 | 7.88E-02 | 1.00E+00 |
| ENSG00000106009.14_BRAT1   | ENSG00000160789.18_LMNA | 0.33902  | 0.190083511  | 0.472711866 | 1.93E-05 | 5.02E-04 | 9.92E-01 |
| ENSG00000135250.15_SRPK2   | ENSG00000160789.18_LMNA | -0.27363 | -0.414762791 | -0.11964114 | 6.47E-04 | 8.26E-03 | 1.00E+00 |
| ENSG00000196363.8_WDR5     | ENSG00000160789.18_LMNA | 0.24117  | 0.085238374  | 0.385563859 | 2.76E-03 | 2.51E-02 | 1.00E+00 |

|                               |                          |          |              |             |          |          |          |
|-------------------------------|--------------------------|----------|--------------|-------------|----------|----------|----------|
| ENSG00000013374.14_NUB1       | ENSG000000160789.18_LMNA | 0.17879  | 0.020161453  | 0.328634987 | 2.75E-02 | 1.35E-01 | 1.00E+00 |
| ENSG000000223501.7_VPS52      | ENSG000000160789.18_LMNA | -0.13944 | -0.2921556   | 0.020208853 | 8.67E-02 | 2.86E-01 | 1.00E+00 |
| ENSG000000114738.9_MAPKAPK3   | ENSG000000160789.18_LMNA | -0.02615 | -0.184583635 | 0.13360553  | 7.49E-01 | 8.95E-01 | 1.00E+00 |
| ENSG000000171792.9_RHNO1      | ENSG000000160789.18_LMNA | -0.06179 | -0.218834512 | 0.098382069 | 4.50E-01 | 7.15E-01 | 1.00E+00 |
| ENSG000000225792.1_AC004540.4 | ENSG000000160789.18_LMNA | -0.31512 | -0.4516613   | -0.1641536  | 7.68E-05 | 1.52E-03 | 1.00E+00 |
| ENSG000000185745.9_IFIT1      | ENSG000000160789.18_LMNA | -0.23598 | -0.380875903 | -0.07978085 | 3.42E-03 | 2.95E-02 | 1.00E+00 |
| ENSG000000108848.14_LUC7L3    | ENSG000000160789.18_LMNA | -0.10081 | -0.255905471 | 0.05934121  | 2.17E-01 | 4.91E-01 | 1.00E+00 |
| ENSG000000206341.7_HLA-H      | ENSG000000160789.18_LMNA | 0.17052  | 0.011632032  | 0.32100357  | 3.57E-02 | 1.61E-01 | 1.00E+00 |
| ENSG000000123427.14_METTL21F  | ENSG000000160789.18_LMNA | -0.1648  | -0.315720209 | -0.00575322 | 4.25E-02 | 1.80E-01 | 1.00E+00 |
| ENSG000000132612.15_VPS4A     | ENSG000000160789.18_LMNA | 0.00154  | -0.157700943 | 0.160699726 | 9.85E-01 | 9.94E-01 | 1.00E+00 |
| ENSG000000117280.11_RAB29     | ENSG000000160789.18_LMNA | 0.06638  | -0.093811678 | 0.223222141 | 4.16E-01 | 6.89E-01 | 1.00E+00 |
| ENSG000000131778.16_CHD1L     | ENSG000000160789.18_LMNA | 0.06207  | -0.098103769 | 0.219102051 | 4.47E-01 | 7.14E-01 | 1.00E+00 |
| ENSG000000164898.11_FMC1      | ENSG000000160789.18_LMNA | -0.18993 | -0.338887062 | -0.03169103 | 1.91E-02 | 1.04E-01 | 1.00E+00 |
| ENSG000000133574.8_GIMAP4     | ENSG000000160789.18_LMNA | -0.02988 | -0.188185968 | 0.129938352 | 7.15E-01 | 8.79E-01 | 1.00E+00 |
| ENSG000000205138.3_SDHAF1     | ENSG000000160789.18_LMNA | -0.15652 | -0.308046272 | 0.002747595 | 5.41E-02 | 2.12E-01 | 1.00E+00 |
| ENSG000000060237.15_WNK1      | ENSG000000160789.18_LMNA | 0.04115  | -0.118825477 | 0.199050318 | 6.15E-01 | 8.25E-01 | 1.00E+00 |
| ENSG000000103978.14_TMEM87A   | ENSG000000160789.18_LMNA | 0.00927  | -0.150151308 | 0.168223422 | 9.10E-01 | 9.66E-01 | 1.00E+00 |
| ENSG000000133835.13_HSD17B4   | ENSG000000160789.18_LMNA | -0.36894 | -0.498843607 | -0.22283044 | 2.91E-06 | 1.07E-04 | 1.49E-01 |
| ENSG000000091986.14_CCDC80    | ENSG000000160789.18_LMNA | 0.01662  | -0.142960388 | 0.175355309 | 8.39E-01 | 9.37E-01 | 1.00E+00 |
| ENSG000000183010.15_PYCR1     | ENSG000000160789.18_LMNA | -0.03001 | -0.188309405 | 0.129812539 | 7.14E-01 | 8.78E-01 | 1.00E+00 |
| ENSG000000108883.11_EFTUD2    | ENSG000000160789.18_LMNA | 0.26376  | 0.109141629  | 0.405915436 | 1.03E-03 | 1.18E-02 | 1.00E+00 |
| ENSG000000102974.13_CTCF      | ENSG000000160789.18_LMNA | -0.00571 | -0.164760012 | 0.153631277 | 9.44E-01 | 9.78E-01 | 1.00E+00 |
| ENSG000000137563.10_GGH       | ENSG000000160789.18_LMNA | -0.06978 | -0.226460363 | 0.090429979 | 3.93E-01 | 6.71E-01 | 1.00E+00 |
| ENSG000000109536.10_FRG1      | ENSG000000160789.18_LMNA | -0.23865 | -0.383287597 | -0.08258619 | 3.07E-03 | 2.72E-02 | 1.00E+00 |
| ENSG000000080845.16_DLGAP4    | ENSG000000160789.18_LMNA | 0.27338  | 0.119379046  | 0.414542616 | 6.55E-04 | 8.33E-03 | 1.00E+00 |
| ENSG000000196290.13_NIF3L1    | ENSG000000160789.18_LMNA | -0.35854 | -0.489780439 | -0.21140195 | 5.75E-06 | 1.86E-04 | 2.95E-01 |
| ENSG000000149084.10_HSD17B1   | ENSG000000160789.18_LMNA | -0.14954 | -0.301565697 | 0.009891648 | 6.59E-02 | 2.40E-01 | 1.00E+00 |
| ENSG000000111737.10_RAB35     | ENSG000000160789.18_LMNA | 0.19659  | 0.038599759  | 0.344995534 | 1.52E-02 | 8.87E-02 | 1.00E+00 |
| ENSG000000159784.16_FAM131B   | ENSG000000160789.18_LMNA | -0.00427 | -0.163356614 | 0.15503914  | 9.58E-01 | 9.83E-01 | 1.00E+00 |
| ENSG000000090565.14_RAB11FIP  | ENSG000000160789.18_LMNA | 0.14772  | -0.011755566 | 0.299870137 | 6.93E-02 | 2.48E-01 | 1.00E+00 |
| ENSG000000135077.7_HAVCR2     | ENSG000000160789.18_LMNA | -0.11277 | -0.267175009 | 0.047278546 | 1.67E-01 | 4.24E-01 | 1.00E+00 |
| ENSG000000076242.13_MLH1      | ENSG000000160789.18_LMNA | -0.24302 | -0.387241508 | -0.08719581 | 2.55E-03 | 2.36E-02 | 1.00E+00 |
| ENSG000000100003.16_SEC14L2   | ENSG000000160789.18_LMNA | 0.29248  | 0.139782992  | 0.431580436 | 2.56E-04 | 3.97E-03 | 1.00E+00 |

|                             |                         |          |              |             |          |          |          |
|-----------------------------|-------------------------|----------|--------------|-------------|----------|----------|----------|
| ENSG00000121039.8_RDH10     | ENSG00000160789.18_LMNA | 0.24844  | 0.092916018  | 0.392132729 | 2.03E-03 | 1.97E-02 | 1.00E+00 |
| ENSG00000121579.11_NAA50    | ENSG00000160789.18_LMNA | 0.0263   | -0.133455536 | 0.184731146 | 7.48E-01 | 8.95E-01 | 1.00E+00 |
| ENSG00000107719.8_PALD1     | ENSG00000160789.18_LMNA | -0.04753 | -0.205174401 | 0.112526008 | 5.61E-01 | 7.93E-01 | 1.00E+00 |
| ENSG00000189091.11_SF3B3    | ENSG00000160789.18_LMNA | 0.12982  | -0.030002413 | 0.283166799 | 1.11E-01 | 3.32E-01 | 1.00E+00 |
| ENSG00000126860.10_EVI2A    | ENSG00000160789.18_LMNA | -0.37363 | -0.502919803 | -0.22799529 | 2.12E-06 | 8.35E-05 | 1.09E-01 |
| ENSG00000172586.7_CHCHD1    | ENSG00000160789.18_LMNA | -0.2302  | -0.375634616 | -0.07370046 | 4.33E-03 | 3.52E-02 | 1.00E+00 |
| ENSG00000110330.7_BIRC2     | ENSG00000160789.18_LMNA | -0.10049 | -0.255605151 | 0.059661411 | 2.18E-01 | 4.93E-01 | 1.00E+00 |
| ENSG00000139832.4_RAB20     | ENSG00000160789.18_LMNA | 0.18901  | 0.030730499  | 0.338035738 | 1.97E-02 | 1.07E-01 | 1.00E+00 |
| ENSG00000141101.11_NOB1     | ENSG00000160789.18_LMNA | 0.19646  | 0.038466962  | 0.344878363 | 1.53E-02 | 8.90E-02 | 1.00E+00 |
| ENSG00000163513.16_TGFB2    | ENSG00000160789.18_LMNA | 0.14502  | -0.014518599 | 0.297353047 | 7.47E-02 | 2.60E-01 | 1.00E+00 |
| ENSG00000129009.11_ISLR     | ENSG00000160789.18_LMNA | 0.14983  | -0.009595681 | 0.30183475  | 6.54E-02 | 2.39E-01 | 1.00E+00 |
| ENSG00000127220.5_ABHD8     | ENSG00000160789.18_LMNA | 0.16253  | 0.003417265  | 0.313615504 | 4.54E-02 | 1.89E-01 | 1.00E+00 |
| ENSG00000124587.12_PEX6     | ENSG00000160789.18_LMNA | 0.14862  | -0.010838931 | 0.300704224 | 6.77E-02 | 2.44E-01 | 1.00E+00 |
| ENSG00000143226.12_FCGR2A   | ENSG00000160789.18_LMNA | 0.13172  | -0.028067569 | 0.284947024 | 1.06E-01 | 3.23E-01 | 1.00E+00 |
| ENSG00000100221.9_JOSD1     | ENSG00000160789.18_LMNA | 0.10015  | -0.060004591 | 0.255283212 | 2.20E-01 | 4.95E-01 | 1.00E+00 |
| ENSG00000124659.6_TBCC      | ENSG00000160789.18_LMNA | -0.24564 | -0.389603449 | -0.0899556  | 2.29E-03 | 2.17E-02 | 1.00E+00 |
| ENSG00000116212.13_LRRC42   | ENSG00000160789.18_LMNA | 0.13202  | -0.027760044 | 0.285229775 | 1.05E-01 | 3.21E-01 | 1.00E+00 |
| ENSG00000111666.9_CHPT1     | ENSG00000160789.18_LMNA | 0.13661  | -0.02309599  | 0.28951143  | 9.33E-02 | 2.99E-01 | 1.00E+00 |
| ENSG00000139910.18_NOVA1    | ENSG00000160789.18_LMNA | -0.18794 | -0.337052009 | -0.02962129 | 2.04E-02 | 1.10E-01 | 1.00E+00 |
| ENSG00000169490.15_TM2D2    | ENSG00000160789.18_LMNA | 0.03337  | -0.126504769 | 0.191551096 | 6.83E-01 | 8.62E-01 | 1.00E+00 |
| ENSG00000168175.13_MAPK1IP1 | ENSG00000160789.18_LMNA | 0.31117  | 0.159887759  | 0.448167243 | 9.54E-05 | 1.82E-03 | 1.00E+00 |
| ENSG00000119878.5_CRIPT     | ENSG00000160789.18_LMNA | -0.49821 | -0.60909853  | -0.36821272 | 6.53E-11 | 1.59E-08 | 3.35E-06 |
| ENSG00000234287.1_RP11-761N | ENSG00000160789.18_LMNA | -0.03524 | -0.193351922 | 0.124664173 | 6.66E-01 | 8.53E-01 | 1.00E+00 |
| ENSG00000137824.14_RMDN3    | ENSG00000160789.18_LMNA | 0.2487   | 0.093187927  | 0.392364812 | 2.00E-03 | 1.96E-02 | 1.00E+00 |
| ENSG00000115526.9_CHST10    | ENSG00000160789.18_LMNA | -0.03199 | -0.190223426 | 0.127860358 | 6.96E-01 | 8.69E-01 | 1.00E+00 |
| ENSG00000171700.12_RGS19    | ENSG00000160789.18_LMNA | 0.16887  | 0.009933379  | 0.319478945 | 3.76E-02 | 1.66E-01 | 1.00E+00 |
| ENSG00000126767.16_ELK1     | ENSG00000160789.18_LMNA | 0.18749  | 0.029154782  | 0.336638078 | 2.07E-02 | 1.11E-01 | 1.00E+00 |
| ENSG00000215717.5_TMEN167B  | ENSG00000160789.18_LMNA | -0.10263 | -0.257619198 | 0.057512791 | 2.08E-01 | 4.81E-01 | 1.00E+00 |
| ENSG00000148358.18_GPR107   | ENSG00000160789.18_LMNA | 0.18901  | 0.030732641  | 0.338037636 | 1.97E-02 | 1.07E-01 | 1.00E+00 |
| ENSG00000128789.19_PSMG2    | ENSG00000160789.18_LMNA | -0.14406 | -0.296463917 | 0.015493469 | 7.66E-02 | 2.65E-01 | 1.00E+00 |
| ENSG00000104774.11_MAN2B1   | ENSG00000160789.18_LMNA | 0.36911  | 0.223009113  | 0.498984826 | 2.88E-06 | 1.06E-04 | 1.48E-01 |
| ENSG00000177352.9_CCDC71    | ENSG00000160789.18_LMNA | -0.10375 | -0.25867614  | 0.056384058 | 2.03E-01 | 4.74E-01 | 1.00E+00 |
| ENSG00000101084.15_C20orf24 | ENSG00000160789.18_LMNA | 0.12257  | -0.037356054 | 0.276381063 | 1.32E-01 | 3.69E-01 | 1.00E+00 |

|                              |                         |          |              |             |          |          |          |
|------------------------------|-------------------------|----------|--------------|-------------|----------|----------|----------|
| ENSG00000106290.13_TAF6      | ENSG00000160789.18_LMNA | 0.2595   | 0.104623637  | 0.402091179 | 1.24E-03 | 1.37E-02 | 1.00E+00 |
| ENSG00000116584.16_ARHGEF2   | ENSG00000160789.18_LMNA | 0.11136  | -0.048708563 | 0.265843495 | 1.72E-01 | 4.31E-01 | 1.00E+00 |
| ENSG00000235501.4_RP4-639F2  | ENSG00000160789.18_LMNA | 0.05532  | -0.104804085 | 0.21264755  | 4.98E-01 | 7.52E-01 | 1.00E+00 |
| ENSG00000168078.8_PBK        | ENSG00000160789.18_LMNA | 0.02423  | -0.135491724 | 0.182727459 | 7.67E-01 | 9.03E-01 | 1.00E+00 |
| ENSG00000068438.13_FTSJ1     | ENSG00000160789.18_LMNA | 0.1764   | 0.017698904  | 0.326435831 | 2.97E-02 | 1.42E-01 | 1.00E+00 |
| ENSG00000010322.14_NISCH     | ENSG00000160789.18_LMNA | 0.01639  | -0.143182351 | 0.175135667 | 8.41E-01 | 9.38E-01 | 1.00E+00 |
| ENSG00000185340.14_GAS2L1    | ENSG00000160789.18_LMNA | 0.11536  | -0.044663563 | 0.269606764 | 1.57E-01 | 4.09E-01 | 1.00E+00 |
| ENSG00000213024.9_NUP62      | ENSG00000160789.18_LMNA | 0.24798  | 0.092423474  | 0.39171223  | 2.07E-03 | 2.00E-02 | 1.00E+00 |
| ENSG00000134684.9_YARS       | ENSG00000160789.18_LMNA | 0.08938  | -0.070831844 | 0.245090068 | 2.74E-01 | 5.58E-01 | 1.00E+00 |
| ENSG00000107863.15_ARHGAP2   | ENSG00000160789.18_LMNA | -0.05772 | -0.21494884  | 0.102418454 | 4.80E-01 | 7.38E-01 | 1.00E+00 |
| ENSG00000106524.7_ANKMY2     | ENSG00000160789.18_LMNA | -0.11916 | -0.273179731 | 0.040813552 | 1.44E-01 | 3.88E-01 | 1.00E+00 |
| ENSG00000197345.11_MRPL21    | ENSG00000160789.18_LMNA | -0.22158 | -0.367806913 | -0.06466118 | 6.08E-03 | 4.54E-02 | 1.00E+00 |
| ENSG00000198719.8_DLL1       | ENSG00000160789.18_LMNA | -0.24732 | -0.391123524 | -0.09173415 | 2.13E-03 | 2.05E-02 | 1.00E+00 |
| ENSG00000138768.13_USO1      | ENSG00000160789.18_LMNA | 0.18312  | 0.024642087  | 0.332627812 | 2.39E-02 | 1.23E-01 | 1.00E+00 |
| ENSG00000272106.1_RP11-345P  | ENSG00000160789.18_LMNA | -0.18017 | -0.329912081 | -0.02159323 | 2.63E-02 | 1.31E-01 | 1.00E+00 |
| ENSG00000074695.5_LMAN1      | ENSG00000160789.18_LMNA | 0.38693  | 0.242675869  | 0.514439569 | 8.47E-07 | 3.98E-05 | 4.35E-02 |
| ENSG00000051128.17_HOMER3    | ENSG00000160789.18_LMNA | 0.27358  | 0.119588273  | 0.414718382 | 6.49E-04 | 8.27E-03 | 1.00E+00 |
| ENSG00000083937.7_CHMP2B     | ENSG00000160789.18_LMNA | -0.15446 | -0.306133791 | 0.004859179 | 5.74E-02 | 2.19E-01 | 1.00E+00 |
| ENSG00000263146.2_RP11-849I1 | ENSG00000160789.18_LMNA | -0.36467 | -0.495123556 | -0.21813033 | 3.86E-06 | 1.35E-04 | 1.98E-01 |
| ENSG00000109606.11_DHX15     | ENSG00000160789.18_LMNA | -0.06982 | -0.226507798 | 0.090380388 | 3.93E-01 | 6.70E-01 | 1.00E+00 |
| ENSG00000188976.9_NOC2L      | ENSG00000160789.18_LMNA | 0.22922  | 0.072676271  | 0.374749864 | 4.50E-03 | 3.63E-02 | 1.00E+00 |
| ENSG00000185989.10_RASA3     | ENSG00000160789.18_LMNA | 0.24869  | 0.093180658  | 0.392358608 | 2.01E-03 | 1.96E-02 | 1.00E+00 |
| ENSG00000211592.5_IGKC       | ENSG00000160789.18_LMNA | 0.00518  | -0.15415071  | 0.164242376 | 9.50E-01 | 9.80E-01 | 1.00E+00 |
| ENSG00000134644.14_PUM1      | ENSG00000160789.18_LMNA | 0.08342  | -0.076796524 | 0.23944472  | 3.07E-01 | 5.93E-01 | 1.00E+00 |
| ENSG00000140575.11_IQGAP1    | ENSG00000160789.18_LMNA | 0.54906  | 0.427201023  | 0.651327491 | 2.41E-13 | 1.67E-10 | 1.23E-08 |
| ENSG00000118096.6_IPT46      | ENSG00000160789.18_LMNA | -0.28645 | -0.426217933 | -0.1333342  | 3.47E-04 | 5.02E-03 | 1.00E+00 |
| ENSG00000226415.1_TPI1P1     | ENSG00000160789.18_LMNA | 0.22681  | 0.070146487  | 0.37256213  | 4.95E-03 | 3.90E-02 | 1.00E+00 |
| ENSG00000166068.11_SPRED1    | ENSG00000160789.18_LMNA | 0.33876  | 0.189798993  | 0.472482623 | 1.96E-05 | 5.09E-04 | 1.00E+00 |
| ENSG00000174705.10_SH3PXD2   | ENSG00000160789.18_LMNA | 0.40567  | 0.263485796  | 0.53060265  | 2.16E-07 | 1.35E-05 | 1.11E-02 |
| ENSG00000076201.13_PTPN23    | ENSG00000160789.18_LMNA | 0.06339  | -0.096785787 | 0.220368421 | 4.38E-01 | 7.06E-01 | 1.00E+00 |
| ENSG00000107164.15_FUBP3     | ENSG00000160789.18_LMNA | 0.13181  | -0.027975978 | 0.285031242 | 1.06E-01 | 3.22E-01 | 1.00E+00 |
| ENSG00000167930.14_FAM234A   | ENSG00000160789.18_LMNA | 0.34503  | 0.196627451  | 0.477973914 | 1.34E-05 | 3.71E-04 | 6.89E-01 |
| ENSG00000182093.13_WRB       | ENSG00000160789.18_LMNA | -0.20056 | -0.348629131 | -0.04272333 | 1.32E-02 | 8.01E-02 | 1.00E+00 |



|                            |                         |          |              |             |          |          |          |
|----------------------------|-------------------------|----------|--------------|-------------|----------|----------|----------|
| ENSG00000162998.4_FRZB     | ENSG00000160789.18_LMNA | -0.09966 | -0.254819621 | 0.060498637 | 2.22E-01 | 4.97E-01 | 1.00E+00 |
| ENSG00000138814.15_PPP3CA  | ENSG00000160789.18_LMNA | -0.17209 | -0.322452381 | -0.01324787 | 3.40E-02 | 1.56E-01 | 1.00E+00 |
| ENSG00000177879.13_AP3S1   | ENSG00000160789.18_LMNA | -0.06304 | -0.220032944 | 0.097135045 | 4.40E-01 | 7.08E-01 | 1.00E+00 |
| ENSG00000073969.17_NSF     | ENSG00000160789.18_LMNA | -0.25377 | -0.396935272 | -0.0985518  | 1.61E-03 | 1.66E-02 | 1.00E+00 |
| ENSG00000213626.10_LBH     | ENSG00000160789.18_LMNA | 0.14258  | -0.017010516 | 0.295079216 | 7.97E-02 | 2.72E-01 | 1.00E+00 |
| ENSG00000173020.9_GRK2     | ENSG00000160789.18_LMNA | 0.26841  | 0.114085023  | 0.410087901 | 8.27E-04 | 9.98E-03 | 1.00E+00 |
| ENSG00000142546.12_NOSIP   | ENSG00000160789.18_LMNA | -0.09561 | -0.250994867 | 0.064568769 | 2.41E-01 | 5.20E-01 | 1.00E+00 |
| ENSG00000105197.9_TIMM50   | ENSG00000160789.18_LMNA | -0.22334 | -0.369405457 | -0.06650312 | 5.68E-03 | 4.31E-02 | 1.00E+00 |
| ENSG00000176108.8_CHMP6    | ENSG00000160789.18_LMNA | -0.17166 | -0.322059622 | -0.01280967 | 3.45E-02 | 1.57E-01 | 1.00E+00 |
| ENSG00000111845.4_PAK1IP1  | ENSG00000160789.18_LMNA | -0.15636 | -0.307895945 | 0.002913672 | 5.44E-02 | 2.12E-01 | 1.00E+00 |
| ENSG00000065600.11_TMEM206 | ENSG00000160789.18_LMNA | -0.45733 | -0.574692929 | -0.32154477 | 3.16E-09 | 4.04E-07 | 1.62E-04 |
| ENSG00000157954.13_WIPI2   | ENSG00000160789.18_LMNA | 0.07907  | -0.081155237 | 0.235305793 | 3.33E-01 | 6.19E-01 | 1.00E+00 |
| ENSG00000105135.14_ILVBL   | ENSG00000160789.18_LMNA | -0.00084 | -0.160020524 | 0.15838066  | 9.92E-01 | 9.97E-01 | 1.00E+00 |
| ENSG00000112290.11_WASF1   | ENSG00000160789.18_LMNA | -0.38516 | -0.512913396 | -0.24072376 | 9.59E-07 | 4.44E-05 | 4.92E-02 |
| ENSG00000118515.10_SGK1    | ENSG00000160789.18_LMNA | -0.31032 | -0.447419528 | -0.15897628 | 9.99E-05 | 1.88E-03 | 1.00E+00 |
| ENSG00000184281.13_TSSC4   | ENSG00000160789.18_LMNA | 0.24973  | 0.094273596  | 0.393291085 | 1.92E-03 | 1.89E-02 | 1.00E+00 |
| ENSG00000197019.4_SERTAD1  | ENSG00000160789.18_LMNA | 0.31058  | 0.159257679  | 0.447650411 | 9.85E-05 | 1.86E-03 | 1.00E+00 |
| ENSG00000113719.14_ERGIC1  | ENSG00000160789.18_LMNA | 0.2827   | 0.129320257  | 0.422869712 | 4.17E-04 | 5.86E-03 | 1.00E+00 |
| ENSG00000125952.17_MAX     | ENSG00000160789.18_LMNA | 0.12778  | -0.032074157 | 0.281258218 | 1.17E-01 | 3.42E-01 | 1.00E+00 |
| ENSG00000119403.12_PHF19   | ENSG00000160789.18_LMNA | 0.36611  | 0.219711537  | 0.496376191 | 3.51E-06 | 1.25E-04 | 1.80E-01 |
| ENSG00000198218.9_QRICH1   | ENSG00000160789.18_LMNA | -0.08245 | -0.23852071  | 0.07777065  | 3.13E-01 | 5.99E-01 | 1.00E+00 |
| ENSG00000110104.10_CCDC86  | ENSG00000160789.18_LMNA | 0.1976   | 0.039642181  | 0.345914961 | 1.47E-02 | 8.65E-02 | 1.00E+00 |
| ENSG00000181218.5_HIST3H2A | ENSG00000160789.18_LMNA | -0.33235 | -0.466851628 | -0.1828251  | 2.87E-05 | 6.88E-04 | 1.00E+00 |
| ENSG00000107020.8_PLGRKT   | ENSG00000160789.18_LMNA | -0.00229 | -0.161429907 | 0.156969873 | 9.78E-01 | 9.92E-01 | 1.00E+00 |
| ENSG00000169385.2_RNASE2   | ENSG00000160789.18_LMNA | 0.18224  | 0.023729121  | 0.331815136 | 2.46E-02 | 1.25E-01 | 1.00E+00 |
| ENSG00000139613.10_SMARCC2 | ENSG00000160789.18_LMNA | -0.07121 | -0.227825648 | 0.089002009 | 3.83E-01 | 6.62E-01 | 1.00E+00 |
| ENSG00000174109.4_C16orf91 | ENSG00000160789.18_LMNA | -0.09446 | -0.249905204 | 0.065726422 | 2.47E-01 | 5.27E-01 | 1.00E+00 |
| ENSG00000167601.10_AXL     | ENSG00000160789.18_LMNA | 0.19457  | 0.036503367  | 0.343144712 | 1.63E-02 | 9.32E-02 | 1.00E+00 |
| ENSG00000182512.4_GLRX5    | ENSG00000160789.18_LMNA | -0.09344 | -0.248937268 | 0.066754039 | 2.52E-01 | 5.33E-01 | 1.00E+00 |
| ENSG00000226564.1_FTH1P20  | ENSG00000160789.18_LMNA | -0.02733 | -0.18571822  | 0.132451462 | 7.38E-01 | 8.90E-01 | 1.00E+00 |
| ENSG00000175224.15_ATG13   | ENSG00000160789.18_LMNA | -0.12797 | -0.28143968  | 0.031877298 | 1.16E-01 | 3.41E-01 | 1.00E+00 |
| ENSG00000167695.13_FAM57A  | ENSG00000160789.18_LMNA | 0.2871   | 0.134028461  | 0.42679624  | 3.35E-04 | 4.90E-03 | 1.00E+00 |
| ENSG00000145354.8_CISD2    | ENSG00000160789.18_LMNA | -0.1657  | -0.316546844 | -0.00667161 | 4.13E-02 | 1.77E-01 | 1.00E+00 |

|                             |                         |          |              |             |          |          |          |
|-----------------------------|-------------------------|----------|--------------|-------------|----------|----------|----------|
| ENSG00000147383.9_NSDHL     | ENSG00000160789.18_LMNA | 0.03769  | -0.122247055 | 0.195713563 | 6.45E-01 | 8.42E-01 | 1.00E+00 |
| ENSG00000166770.9_ZNF667-AS | ENSG00000160789.18_LMNA | -0.18294 | -0.332458901 | -0.02445229 | 2.41E-02 | 1.23E-01 | 1.00E+00 |
| ENSG00000152952.10_PLOD2    | ENSG00000160789.18_LMNA | 0.34469  | 0.196262421  | 0.47768092  | 1.37E-05 | 3.78E-04 | 7.03E-01 |
| ENSG00000178537.8_SLC25A20  | ENSG00000160789.18_LMNA | 0.02764  | -0.132147006 | 0.186017394 | 7.35E-01 | 8.89E-01 | 1.00E+00 |
| ENSG00000128563.12_PRKRIP1  | ENSG00000160789.18_LMNA | 0.1837   | 0.02523544   | 0.33315574  | 2.35E-02 | 1.21E-01 | 1.00E+00 |
| ENSG00000109654.13_TRIM2    | ENSG00000160789.18_LMNA | -0.33995 | -0.473524679 | -0.1910927  | 1.83E-05 | 4.79E-04 | 9.38E-01 |
| ENSG00000139197.9_PEX5      | ENSG00000160789.18_LMNA | -0.28808 | -0.427663313 | -0.13506993 | 3.20E-04 | 4.72E-03 | 1.00E+00 |
| ENSG00000127838.12_PNKD     | ENSG00000160789.18_LMNA | -0.20942 | -0.356726097 | -0.05194977 | 9.62E-03 | 6.38E-02 | 1.00E+00 |
| ENSG00000239306.4_RBM14     | ENSG00000160789.18_LMNA | 0.09041  | -0.069796183 | 0.246068105 | 2.68E-01 | 5.52E-01 | 1.00E+00 |
| ENSG00000136161.11_RCBTB2   | ENSG00000160789.18_LMNA | -0.45523 | -0.572912946 | -0.31916339 | 3.81E-09 | 4.77E-07 | 1.95E-04 |
| ENSG00000185565.10_LSAMP    | ENSG00000160789.18_LMNA | -0.40623 | -0.53108653  | -0.26411265 | 2.07E-07 | 1.31E-05 | 1.06E-02 |
| ENSG00000153879.7_CEBPG     | ENSG00000160789.18_LMNA | 0.02104  | -0.138623358 | 0.179640644 | 7.97E-01 | 9.18E-01 | 1.00E+00 |
| ENSG00000204065.2_TCEAL5    | ENSG00000160789.18_LMNA | -0.23595 | -0.380846729 | -0.07974694 | 3.43E-03 | 2.95E-02 | 1.00E+00 |
| ENSG00000139641.11_ESYT1    | ENSG00000160789.18_LMNA | 0.37547  | 0.230018827  | 0.504513483 | 1.87E-06 | 7.63E-05 | 9.62E-02 |
| ENSG00000159479.15_MED8     | ENSG00000160789.18_LMNA | 0.15742  | -0.001827941 | 0.308878425 | 5.28E-02 | 2.08E-01 | 1.00E+00 |
| ENSG00000100813.13_ACIN1    | ENSG00000160789.18_LMNA | 0.20535  | 0.047713947  | 0.353014488 | 1.11E-02 | 7.08E-02 | 1.00E+00 |
| ENSG00000038274.15_MAT2B    | ENSG00000160789.18_LMNA | -0.20702 | -0.354535752 | -0.04944874 | 1.05E-02 | 6.78E-02 | 1.00E+00 |
| ENSG00000142686.7_C1orf216  | ENSG00000160789.18_LMNA | -0.13679 | -0.289678564 | 0.022913652 | 9.29E-02 | 2.98E-01 | 1.00E+00 |
| ENSG00000127920.5_GNG11     | ENSG00000160789.18_LMNA | 0.10587  | -0.054240054 | 0.260681703 | 1.94E-01 | 4.63E-01 | 1.00E+00 |
| ENSG00000131828.12_PDHA1    | ENSG00000160789.18_LMNA | -0.03253 | -0.190740894 | 0.127332149 | 6.91E-01 | 8.67E-01 | 1.00E+00 |
| ENSG00000213058.3_RP4-765C7 | ENSG00000160789.18_LMNA | 0.08739  | -0.072821399 | 0.243209406 | 2.84E-01 | 5.70E-01 | 1.00E+00 |
| ENSG00000089327.13_FXYD5    | ENSG00000160789.18_LMNA | 0.17279  | 0.01397861   | 0.323107106 | 3.33E-02 | 1.53E-01 | 1.00E+00 |
| ENSG00000104936.16_DMPK     | ENSG00000160789.18_LMNA | 0.20051  | 0.042669775  | 0.348582    | 1.33E-02 | 8.02E-02 | 1.00E+00 |
| ENSG00000149115.12_TNKS1BP  | ENSG00000160789.18_LMNA | 0.51271  | 0.384930395  | 0.62120682  | 1.45E-11 | 4.62E-09 | 7.44E-07 |
| ENSG00000106025.7_TSPAN12   | ENSG00000160789.18_LMNA | -0.18215 | -0.331731647 | -0.02363536 | 2.47E-02 | 1.25E-01 | 1.00E+00 |
| ENSG00000021355.11_SERPINB1 | ENSG00000160789.18_LMNA | 0.05201  | -0.108085914 | 0.209475982 | 5.25E-01 | 7.70E-01 | 1.00E+00 |
| ENSG00000180228.11_PRKRA    | ENSG00000160789.18_LMNA | -0.34988 | -0.482224335 | -0.20193168 | 9.94E-06 | 2.90E-04 | 5.10E-01 |
| ENSG00000169221.12_TBC1D10L | ENSG00000160789.18_LMNA | 0.15004  | -0.00938185  | 0.302029105 | 6.50E-02 | 2.38E-01 | 1.00E+00 |
| ENSG00000132669.11_RIN2     | ENSG00000160789.18_LMNA | -0.09487 | -0.250285828 | 0.065322145 | 2.45E-01 | 5.25E-01 | 1.00E+00 |
| ENSG00000130227.15_XPO7     | ENSG00000160789.18_LMNA | -0.00832 | -0.167296637 | 0.151083299 | 9.19E-01 | 9.69E-01 | 1.00E+00 |
| ENSG00000143398.18_PIP5K1A  | ENSG00000160789.18_LMNA | 0.18071  | 0.022144325  | 0.330403344 | 2.59E-02 | 1.30E-01 | 1.00E+00 |
| ENSG00000106268.14_NUDT1    | ENSG00000160789.18_LMNA | 0.01276  | -0.14673514  | 0.171615707 | 8.76E-01 | 9.52E-01 | 1.00E+00 |
| ENSG00000165704.13_HPRT1    | ENSG00000160789.18_LMNA | 0.00979  | -0.149643625 | 0.168728033 | 9.05E-01 | 9.63E-01 | 1.00E+00 |

|                             |                         |          |              |             |          |          |          |
|-----------------------------|-------------------------|----------|--------------|-------------|----------|----------|----------|
| ENSG00000154813.8_DPH3      | ENSG00000160789.18_LMNA | -0.31876 | -0.454873642 | -0.16808501 | 6.27E-05 | 1.29E-03 | 1.00E+00 |
| ENSG00000186480.11_INSIG1   | ENSG00000160789.18_LMNA | 0.22629  | 0.069600488  | 0.372089513 | 5.06E-03 | 3.96E-02 | 1.00E+00 |
| ENSG00000185909.13_KLHDC8B  | ENSG00000160789.18_LMNA | -0.07093 | -0.227558108 | 0.089281935 | 3.85E-01 | 6.64E-01 | 1.00E+00 |
| ENSG00000255248.5_MIR100HG  | ENSG00000160789.18_LMNA | -0.17153 | -0.321934929 | -0.01267058 | 3.46E-02 | 1.57E-01 | 1.00E+00 |
| ENSG00000066027.10_PPP2R5A  | ENSG00000160789.18_LMNA | -0.11156 | -0.266031721 | 0.048506491 | 1.71E-01 | 4.30E-01 | 1.00E+00 |
| ENSG00000166619.11_BLCAP    | ENSG00000160789.18_LMNA | -0.24953 | -0.393118424 | -0.09407117 | 1.93E-03 | 1.90E-02 | 1.00E+00 |
| ENSG00000041357.14_PSM4     | ENSG00000160789.18_LMNA | -0.17358 | -0.323835675 | -0.01479215 | 3.25E-02 | 1.51E-01 | 1.00E+00 |
| ENSG00000154174.7_TOMM70    | ENSG00000160789.18_LMNA | -0.1795  | -0.329293718 | -0.02089981 | 2.69E-02 | 1.33E-01 | 1.00E+00 |
| ENSG00000066044.12_ELAVL1   | ENSG00000160789.18_LMNA | 0.13396  | -0.025787762 | 0.287041878 | 9.99E-02 | 3.11E-01 | 1.00E+00 |
| ENSG00000147162.12_OGT      | ENSG00000160789.18_LMNA | -0.13987 | -0.292559112 | 0.019767804 | 8.57E-02 | 2.84E-01 | 1.00E+00 |
| ENSG00000162384.12_C1orf123 | ENSG00000160789.18_LMNA | -0.15553 | -0.307125218 | 0.003764884 | 5.57E-02 | 2.15E-01 | 1.00E+00 |
| ENSG00000154582.15_TCEB1    | ENSG00000160789.18_LMNA | -0.14896 | -0.301023925 | 0.010487451 | 6.70E-02 | 2.42E-01 | 1.00E+00 |
| ENSG00000017260.18_ATP2C1   | ENSG00000160789.18_LMNA | -0.0074  | -0.166407911 | 0.151976484 | 9.28E-01 | 9.72E-01 | 1.00E+00 |
| ENSG00000164040.15_PGRMC2   | ENSG00000160789.18_LMNA | 0.14618  | -0.013331187 | 0.298435297 | 7.23E-02 | 2.55E-01 | 1.00E+00 |
| ENSG00000160360.10_GP5M1    | ENSG00000160789.18_LMNA | -0.07485 | -0.231296224 | 0.085366212 | 3.59E-01 | 6.42E-01 | 1.00E+00 |
| ENSG00000155827.10_RNF20    | ENSG00000160789.18_LMNA | 0.06829  | -0.09190606  | 0.225047769 | 4.03E-01 | 6.79E-01 | 1.00E+00 |
| ENSG00000183160.8_TM5M119   | ENSG00000160789.18_LMNA | -0.115   | -0.269274539 | 0.045021075 | 1.58E-01 | 4.11E-01 | 1.00E+00 |
| ENSG00000186283.12_TOR3A    | ENSG00000160789.18_LMNA | 0.14893  | -0.01052192  | 0.300992575 | 6.71E-02 | 2.43E-01 | 1.00E+00 |
| ENSG00000076924.10_XAB2     | ENSG00000160789.18_LMNA | 0.10839  | -0.051700474 | 0.263053787 | 1.84E-01 | 4.49E-01 | 1.00E+00 |
| ENSG00000151640.11_DP5SL4   | ENSG00000160789.18_LMNA | -0.20577 | -0.353392792 | -0.04814518 | 1.10E-02 | 7.00E-02 | 1.00E+00 |
| ENSG00000196449.3_YRDC      | ENSG00000160789.18_LMNA | -0.05774 | -0.214960783 | 0.102406063 | 4.80E-01 | 7.38E-01 | 1.00E+00 |
| ENSG00000145817.15_YIPF5    | ENSG00000160789.18_LMNA | -0.04981 | -0.207362626 | 0.110268905 | 5.42E-01 | 7.81E-01 | 1.00E+00 |
| ENSG00000104522.14_T5TA3    | ENSG00000160789.18_LMNA | 0.12202  | -0.037918893 | 0.275860398 | 1.34E-01 | 3.72E-01 | 1.00E+00 |
| ENSG00000204371.10_EHMT2    | ENSG00000160789.18_LMNA | 0.08278  | -0.077440704 | 0.238833745 | 3.11E-01 | 5.97E-01 | 1.00E+00 |
| ENSG00000011485.13_PPP5C    | ENSG00000160789.18_LMNA | 0.0507   | -0.109378739 | 0.208224755 | 5.35E-01 | 7.76E-01 | 1.00E+00 |
| ENSG00000176894.8_PXMP2     | ENSG00000160789.18_LMNA | -0.15883 | -0.310187903 | 0.000379709 | 5.06E-02 | 2.03E-01 | 1.00E+00 |
| ENSG00000155760.2_FZD7      | ENSG00000160789.18_LMNA | 0.5541   | 0.433103362  | 0.655477848 | 1.31E-13 | 1.08E-10 | 6.72E-09 |
| ENSG00000095637.19_SORBS1   | ENSG00000160789.18_LMNA | 0.07029  | -0.089917747 | 0.226950252 | 3.90E-01 | 6.68E-01 | 1.00E+00 |
| ENSG00000229391.6_HLA-DRB6  | ENSG00000160789.18_LMNA | -0.07647 | -0.232838093 | 0.08374823  | 3.49E-01 | 6.33E-01 | 1.00E+00 |
| ENSG00000142208.14_AKT1     | ENSG00000160789.18_LMNA | 0.38203  | 0.237258834  | 0.51020024  | 1.19E-06 | 5.30E-05 | 6.13E-02 |
| ENSG00000104825.15_NFKBIB   | ENSG00000160789.18_LMNA | 0.18812  | 0.029814714  | 0.337223602 | 2.03E-02 | 1.09E-01 | 1.00E+00 |
| ENSG00000006210.6_CX3CL1    | ENSG00000160789.18_LMNA | 0.16291  | 0.003803119  | 0.31396337  | 4.49E-02 | 1.88E-01 | 1.00E+00 |
| ENSG00000149212.9_SESN3     | ENSG00000160789.18_LMNA | -0.20785 | -0.355294332 | -0.05031449 | 1.02E-02 | 6.64E-02 | 1.00E+00 |

|                            |                         |          |              |             |          |          |          |
|----------------------------|-------------------------|----------|--------------|-------------|----------|----------|----------|
| ENSG00000142039.3_CCDC97   | ENSG00000160789.18_LMNA | 0.12401  | -0.035903221 | 0.277724181 | 1.28E-01 | 3.62E-01 | 1.00E+00 |
| ENSG00000132535.17_DLG4    | ENSG00000160789.18_LMNA | -0.024   | -0.182505676 | 0.135716939 | 7.69E-01 | 9.04E-01 | 1.00E+00 |
| ENSG00000255717.5_SNHG1    | ENSG00000160789.18_LMNA | -0.28652 | -0.426274147 | -0.13340167 | 3.45E-04 | 5.01E-03 | 1.00E+00 |
| ENSG00000113643.7_RARS     | ENSG00000160789.18_LMNA | 0.28592  | 0.132760907  | 0.425740215 | 3.56E-04 | 5.14E-03 | 1.00E+00 |
| ENSG00000068120.13_COASY   | ENSG00000160789.18_LMNA | 0.26472  | 0.110165812  | 0.406780913 | 9.81E-04 | 1.14E-02 | 1.00E+00 |
| ENSG00000114923.15_SLC4A3  | ENSG00000160789.18_LMNA | 0.4424   | 0.304659527  | 0.562019969 | 1.15E-08 | 1.22E-06 | 5.92E-04 |
| ENSG00000198818.8_SFT2D1   | ENSG00000160789.18_LMNA | -0.11245 | -0.266874263 | 0.047601654 | 1.68E-01 | 4.26E-01 | 1.00E+00 |
| ENSG00000162231.12_NXF1    | ENSG00000160789.18_LMNA | -0.02228 | -0.180837137 | 0.137410247 | 7.85E-01 | 9.12E-01 | 1.00E+00 |
| ENSG00000169251.11_NMD3    | ENSG00000160789.18_LMNA | -0.03054 | -0.188823448 | 0.129288489 | 7.09E-01 | 8.76E-01 | 1.00E+00 |
| ENSG00000132274.14_TRIM22  | ENSG00000160789.18_LMNA | 0.0871   | -0.073112037 | 0.242934477 | 2.86E-01 | 5.71E-01 | 1.00E+00 |
| ENSG00000138175.8_ARL3     | ENSG00000160789.18_LMNA | -0.43664 | -0.557114785 | -0.29816708 | 1.87E-08 | 1.82E-06 | 9.59E-04 |
| ENSG0000015171.17_ZMYND11  | ENSG00000160789.18_LMNA | -0.247   | -0.390833689 | -0.09139488 | 2.16E-03 | 2.07E-02 | 1.00E+00 |
| ENSG00000223802.6_CERS1    | ENSG00000160789.18_LMNA | -0.0635  | -0.22047102  | 0.096678958 | 4.37E-01 | 7.05E-01 | 1.00E+00 |
| ENSG00000236104.2_ZBTB22   | ENSG00000160789.18_LMNA | -0.00314 | -0.162260075 | 0.156138268 | 9.69E-01 | 9.88E-01 | 1.00E+00 |
| ENSG00000144040.11_SFXN5   | ENSG00000160789.18_LMNA | 0.19866  | 0.040752862  | 0.346893946 | 1.41E-02 | 8.42E-02 | 1.00E+00 |
| ENSG00000243646.7_IL10RB   | ENSG00000160789.18_LMNA | 0.30189  | 0.1498985    | 0.439950654 | 1.57E-04 | 2.70E-03 | 1.00E+00 |
| ENSG00000188938.14_FAM120A | ENSG00000160789.18_LMNA | 0.05123  | -0.108859233 | 0.20872767  | 5.31E-01 | 7.74E-01 | 1.00E+00 |
| ENSG00000071894.13_CPSF1   | ENSG00000160789.18_LMNA | 0.20868  | 0.051181554  | 0.356053666 | 9.88E-03 | 6.50E-02 | 1.00E+00 |
| ENSG00000169750.7_RAC3     | ENSG00000160789.18_LMNA | -0.14209 | -0.294627063 | 0.017505574 | 8.08E-02 | 2.74E-01 | 1.00E+00 |
| ENSG00000162783.10_IER5    | ENSG00000160789.18_LMNA | 0.47242  | 0.338694341  | 0.587441189 | 8.00E-10 | 1.30E-07 | 4.11E-05 |
| ENSG00000186868.14_MAPT    | ENSG00000160789.18_LMNA | -0.30137 | -0.439487811 | -0.14933756 | 1.61E-04 | 2.76E-03 | 1.00E+00 |
| ENSG00000103549.20_RNF40   | ENSG00000160789.18_LMNA | 0.19671  | 0.038722661  | 0.345103965 | 1.51E-02 | 8.84E-02 | 1.00E+00 |
| ENSG00000116514.15_RNF19B  | ENSG00000160789.18_LMNA | 0.31401  | 0.162955007  | 0.450680448 | 8.16E-05 | 1.59E-03 | 1.00E+00 |
| ENSG00000164751.13_PEX2    | ENSG00000160789.18_LMNA | -0.2683  | -0.409990644 | -0.11396963 | 8.32E-04 | 1.00E-02 | 1.00E+00 |
| ENSG00000148218.14_ALAD    | ENSG00000160789.18_LMNA | 0.00531  | -0.154016103 | 0.164376534 | 9.48E-01 | 9.79E-01 | 1.00E+00 |
| ENSG00000088280.17_ASAP3   | ENSG00000160789.18_LMNA | 0.24223  | 0.086356176  | 0.386522131 | 2.64E-03 | 2.42E-02 | 1.00E+00 |
| ENSG00000144827.7_ABHD10   | ENSG00000160789.18_LMNA | -0.5391  | -0.64310847  | -0.41556862 | 7.77E-13 | 4.74E-10 | 3.98E-08 |
| ENSG00000134056.10_MRPS36  | ENSG00000160789.18_LMNA | -0.22762 | -0.37329661  | -0.07099537 | 4.80E-03 | 3.80E-02 | 1.00E+00 |
| ENSG00000006282.18_SPATA20 | ENSG00000160789.18_LMNA | 0.31333  | 0.162216721  | 0.450075936 | 8.48E-05 | 1.65E-03 | 1.00E+00 |
| ENSG00000136877.13_FPGS    | ENSG00000160789.18_LMNA | 0.25016  | 0.094727941  | 0.393678544 | 1.88E-03 | 1.87E-02 | 1.00E+00 |
| ENSG00000140983.12_RHOT2   | ENSG00000160789.18_LMNA | 0.12143  | -0.038511253 | 0.275312226 | 1.36E-01 | 3.76E-01 | 1.00E+00 |
| ENSG00000171310.9_CHST11   | ENSG00000160789.18_LMNA | 0.08982  | -0.070389375 | 0.245507997 | 2.71E-01 | 5.55E-01 | 1.00E+00 |
| ENSG00000074410.12_CA12    | ENSG00000160789.18_LMNA | 0.39654  | 0.253326861  | 0.522736394 | 4.25E-07 | 2.31E-05 | 2.18E-02 |

|                            |                         |          |              |             |          |          |          |
|----------------------------|-------------------------|----------|--------------|-------------|----------|----------|----------|
| ENSG00000175854.10_SWI5    | ENSG00000160789.18_LMNA | 0.1716   | 0.012746148  | 0.322002675 | 3.45E-02 | 1.57E-01 | 1.00E+00 |
| ENSG00000102003.9_SYP      | ENSG00000160789.18_LMNA | -0.31024 | -0.447345259 | -0.15888577 | 1.00E-04 | 1.89E-03 | 1.00E+00 |
| ENSG00000089057.13_SLC23A2 | ENSG00000160789.18_LMNA | -0.062   | -0.219036736 | 0.098171716 | 4.48E-01 | 7.14E-01 | 1.00E+00 |
| ENSG00000137404.13_NRM     | ENSG00000160789.18_LMNA | 0.35358  | 0.205976576  | 0.485456769 | 7.88E-06 | 2.42E-04 | 4.04E-01 |
| ENSG00000113712.15_CSNK1A1 | ENSG00000160789.18_LMNA | 0.14035  | -0.019281288 | 0.293004093 | 8.46E-02 | 2.82E-01 | 1.00E+00 |
| ENSG00000136270.12_TBRG4   | ENSG00000160789.18_LMNA | 0.26255  | 0.107862137  | 0.404833463 | 1.08E-03 | 1.23E-02 | 1.00E+00 |
| ENSG00000138459.7_SLC35A5  | ENSG00000160789.18_LMNA | -0.36805 | -0.498071005 | -0.22185323 | 3.09E-06 | 1.12E-04 | 1.58E-01 |
| ENSG00000101350.7_KIF3B    | ENSG00000160789.18_LMNA | 0.1313   | -0.028499519 | 0.28454978  | 1.07E-01 | 3.25E-01 | 1.00E+00 |
| ENSG00000105397.12_TYK2    | ENSG00000160789.18_LMNA | 0.22065  | 0.063689391  | 0.366962809 | 6.30E-03 | 4.66E-02 | 1.00E+00 |
| ENSG00000113407.12_TARS    | ENSG00000160789.18_LMNA | 0.08946  | -0.07075296  | 0.245164586 | 2.73E-01 | 5.58E-01 | 1.00E+00 |
| ENSG00000171566.10_PLRG1   | ENSG00000160789.18_LMNA | -0.07129 | -0.227906374 | 0.088917535 | 3.83E-01 | 6.61E-01 | 1.00E+00 |
| ENSG00000137414.5_FAM8A1   | ENSG00000160789.18_LMNA | -0.20083 | -0.348878543 | -0.04300676 | 1.31E-02 | 7.96E-02 | 1.00E+00 |
| ENSG00000065911.10_MTHFD2  | ENSG00000160789.18_LMNA | -0.35545 | -0.487087218 | -0.20802046 | 7.00E-06 | 2.20E-04 | 3.59E-01 |
| ENSG00000134748.12_PRPF38A | ENSG00000160789.18_LMNA | -0.0934  | -0.248904186 | 0.06678915  | 2.52E-01 | 5.33E-01 | 1.00E+00 |
| ENSG00000139343.9_SNRPF    | ENSG00000160789.18_LMNA | -0.13566 | -0.288628173 | 0.024059246 | 9.56E-02 | 3.03E-01 | 1.00E+00 |
| ENSG00000123992.17_DNPEP   | ENSG00000160789.18_LMNA | 0.3771   | 0.231820916  | 0.505931187 | 1.68E-06 | 6.97E-05 | 8.60E-02 |
| ENSG00000104946.9_TBC1D17  | ENSG00000160789.18_LMNA | 0.02311  | -0.136595243 | 0.181640448 | 7.77E-01 | 9.09E-01 | 1.00E+00 |
| ENSG00000184162.13_NR2C2AP | ENSG00000160789.18_LMNA | 0.02786  | -0.131929956 | 0.186230643 | 7.33E-01 | 8.88E-01 | 1.00E+00 |
| ENSG00000134668.11_SPOCD1  | ENSG00000160789.18_LMNA | 0.37916  | 0.234091941  | 0.507715696 | 1.46E-06 | 6.28E-05 | 7.47E-02 |
| ENSG00000152240.11_HAUS1   | ENSG00000160789.18_LMNA | -0.1059  | -0.260703815 | 0.054216398 | 1.94E-01 | 4.63E-01 | 1.00E+00 |
| ENSG00000101940.16_WDR13   | ENSG00000160789.18_LMNA | 0.1413   | -0.0183126   | 0.29388968  | 8.25E-02 | 2.77E-01 | 1.00E+00 |
| ENSG00000075790.9_BCAP29   | ENSG00000160789.18_LMNA | 0.12979  | -0.030026885 | 0.283144269 | 1.11E-01 | 3.32E-01 | 1.00E+00 |
| ENSG00000172466.14_ZNF24   | ENSG00000160789.18_LMNA | -0.19706 | -0.345421563 | -0.0390827  | 1.50E-02 | 8.77E-02 | 1.00E+00 |
| ENSG00000134569.8_LRP4     | ENSG00000160789.18_LMNA | -0.13858 | -0.291352723 | 0.021086055 | 8.86E-02 | 2.90E-01 | 1.00E+00 |
| ENSG00000196843.14_ARID5A  | ENSG00000160789.18_LMNA | 0.31391  | 0.162846515  | 0.45059163  | 8.21E-05 | 1.60E-03 | 1.00E+00 |
| ENSG00000198231.11_DDX42   | ENSG00000160789.18_LMNA | 0.17053  | 0.011643871  | 0.321014191 | 3.57E-02 | 1.61E-01 | 1.00E+00 |
| ENSG00000198700.8_IPO9     | ENSG00000160789.18_LMNA | 0.1249   | -0.034994986 | 0.278563206 | 1.25E-01 | 3.58E-01 | 1.00E+00 |
| ENSG00000083720.11_OXCT1   | ENSG00000160789.18_LMNA | -0.14547 | -0.297775681 | 0.014055003 | 7.37E-02 | 2.58E-01 | 1.00E+00 |
| ENSG00000135108.13_FBXO21  | ENSG00000160789.18_LMNA | -0.22999 | -0.375448022 | -0.0734844  | 4.37E-03 | 3.54E-02 | 1.00E+00 |
| ENSG00000182827.8_ACBD3    | ENSG00000160789.18_LMNA | 0.21848  | 0.0614125    | 0.364983131 | 6.85E-03 | 4.96E-02 | 1.00E+00 |
| ENSG00000008324.9_SS18L2   | ENSG00000160789.18_LMNA | -0.38003 | -0.508464497 | -0.23504578 | 1.37E-06 | 5.97E-05 | 7.04E-02 |
| ENSG00000130723.16_PRRC2B  | ENSG00000160789.18_LMNA | 0.12213  | -0.037803702 | 0.275966973 | 1.34E-01 | 3.71E-01 | 1.00E+00 |
| ENSG00000136167.12_LCP1    | ENSG00000160789.18_LMNA | -0.00967 | -0.168610786 | 0.149761602 | 9.06E-01 | 9.64E-01 | 1.00E+00 |

|                            |                         |          |              |             |          |          |          |
|----------------------------|-------------------------|----------|--------------|-------------|----------|----------|----------|
| ENSG00000110079.15_MS4A4A  | ENSG00000160789.18_LMNA | 0.04598  | -0.114052417 | 0.203692769 | 5.74E-01 | 8.01E-01 | 1.00E+00 |
| ENSG00000069329.14_VPS35   | ENSG00000160789.18_LMNA | -0.09027 | -0.245931744 | 0.06994062  | 2.69E-01 | 5.53E-01 | 1.00E+00 |
| ENSG00000077348.7_EXOSC5   | ENSG00000160789.18_LMNA | -0.16405 | -0.315019808 | -0.00497549 | 4.34E-02 | 1.83E-01 | 1.00E+00 |
| ENSG00000105325.12_FZR1    | ENSG00000160789.18_LMNA | 0.17418  | 0.015407724  | 0.324386708 | 3.19E-02 | 1.49E-01 | 1.00E+00 |
| ENSG00000218739.8_CEBPZOS  | ENSG00000160789.18_LMNA | -0.23035 | -0.375767169 | -0.07385396 | 4.30E-03 | 3.50E-02 | 1.00E+00 |
| ENSG00000163156.10_SCNM1   | ENSG00000160789.18_LMNA | -0.11892 | -0.272955396 | 0.041055556 | 1.44E-01 | 3.89E-01 | 1.00E+00 |
| ENSG00000119950.19_MXI1    | ENSG00000160789.18_LMNA | -0.42525 | -0.547388831 | -0.28536438 | 4.73E-08 | 3.91E-06 | 2.43E-03 |
| ENSG00000136279.17_DBNL    | ENSG00000160789.18_LMNA | 0.20606  | 0.048449731  | 0.353659904 | 1.09E-02 | 6.95E-02 | 1.00E+00 |
| ENSG00000169093.13_ASMTL   | ENSG00000160789.18_LMNA | 0.24811  | 0.09256824   | 0.391835834 | 2.06E-03 | 1.99E-02 | 1.00E+00 |
| ENSG00000159792.8_PSKH1    | ENSG00000160789.18_LMNA | 0.12244  | -0.037490099 | 0.276257079 | 1.33E-01 | 3.70E-01 | 1.00E+00 |
| ENSG00000154832.13_CXXC1   | ENSG00000160789.18_LMNA | 0.00202  | -0.157232424 | 0.161167715 | 9.80E-01 | 9.93E-01 | 1.00E+00 |
| ENSG00000054523.15_KIF1B   | ENSG00000160789.18_LMNA | -0.10107 | -0.256146464 | 0.059084216 | 2.15E-01 | 4.89E-01 | 1.00E+00 |
| ENSG00000116001.14_TIA1    | ENSG00000160789.18_LMNA | -0.31359 | -0.450311322 | -0.16250416 | 8.35E-05 | 1.63E-03 | 1.00E+00 |
| ENSG00000166887.14_VPS39   | ENSG00000160789.18_LMNA | -0.02931 | -0.187634918 | 0.130499887 | 7.20E-01 | 8.81E-01 | 1.00E+00 |
| ENSG00000127585.10_FBXL16  | ENSG00000160789.18_LMNA | -0.25208 | -0.395416031 | -0.0967669  | 1.73E-03 | 1.75E-02 | 1.00E+00 |
| ENSG00000131378.12_RFTN1   | ENSG00000160789.18_LMNA | 0.20934  | 0.051868287  | 0.356654788 | 9.64E-03 | 6.39E-02 | 1.00E+00 |
| ENSG00000182985.15_CADM1   | ENSG00000160789.18_LMNA | 0.00909  | -0.150327605 | 0.168048153 | 9.11E-01 | 9.66E-01 | 1.00E+00 |
| ENSG00000127125.8_PPCS     | ENSG00000160789.18_LMNA | 0.09949  | -0.060675331 | 0.254653784 | 2.23E-01 | 4.98E-01 | 1.00E+00 |
| ENSG00000032444.14_PNPLA6  | ENSG00000160789.18_LMNA | 0.24206  | 0.086176699  | 0.386368312 | 2.66E-03 | 2.43E-02 | 1.00E+00 |
| ENSG00000129657.13_SEC14L1 | ENSG00000160789.18_LMNA | 0.18571  | 0.027320744  | 0.335009581 | 2.20E-02 | 1.15E-01 | 1.00E+00 |
| ENSG00000176022.4_B3GALT6  | ENSG00000160789.18_LMNA | 0.39849  | 0.255499305  | 0.524422424 | 3.68E-07 | 2.07E-05 | 1.89E-02 |
| ENSG00000163873.8_GRIK3    | ENSG00000160789.18_LMNA | -0.10833 | -0.262994239 | 0.051764276 | 1.84E-01 | 4.49E-01 | 1.00E+00 |
| ENSG00000161281.9_COX7A1   | ENSG00000160789.18_LMNA | -0.03221 | -0.190438223 | 0.127641125 | 6.94E-01 | 8.68E-01 | 1.00E+00 |
| ENSG00000247077.5_PGAM5    | ENSG00000160789.18_LMNA | -0.13635 | -0.289269914 | 0.023359438 | 9.39E-02 | 3.00E-01 | 1.00E+00 |
| ENSG00000186111.7_PIP5K1C  | ENSG00000160789.18_LMNA | 0.18893  | 0.03065522   | 0.337968996 | 1.97E-02 | 1.07E-01 | 1.00E+00 |
| ENSG00000055044.9_NOP58    | ENSG00000160789.18_LMNA | 0.08464  | -0.075578374 | 0.240599394 | 3.00E-01 | 5.86E-01 | 1.00E+00 |
| ENSG00000083312.16_TNPO1   | ENSG00000160789.18_LMNA | 0.09997  | -0.060184027 | 0.255114854 | 2.20E-01 | 4.96E-01 | 1.00E+00 |
| ENSG00000172936.11_MYD88   | ENSG00000160789.18_LMNA | 0.29402  | 0.141444147  | 0.432958438 | 2.36E-04 | 3.73E-03 | 1.00E+00 |
| ENSG00000100647.7_SUSD6    | ENSG00000160789.18_LMNA | 0.20674  | 0.049157472  | 0.354280446 | 1.06E-02 | 6.83E-02 | 1.00E+00 |
| ENSG00000184702.16_SEPT5   | ENSG00000160789.18_LMNA | 0.13331  | -0.026457099 | 0.286427152 | 1.02E-01 | 3.15E-01 | 1.00E+00 |
| ENSG00000143126.7_CELSR2   | ENSG00000160789.18_LMNA | 0.13893  | -0.020724682 | 0.29168353  | 8.78E-02 | 2.88E-01 | 1.00E+00 |
| ENSG00000156973.12_PDE6D   | ENSG00000160789.18_LMNA | -0.38863 | -0.515909719 | -0.2445584  | 7.51E-07 | 3.64E-05 | 3.85E-02 |
| ENSG00000168137.14_SETD5   | ENSG00000160789.18_LMNA | -0.07493 | -0.231374069 | 0.085284565 | 3.59E-01 | 6.42E-01 | 1.00E+00 |

|                             |                         |          |              |             |          |          |          |
|-----------------------------|-------------------------|----------|--------------|-------------|----------|----------|----------|
| ENSG00000185090.13_MANEAL   | ENSG00000160789.18_LMNA | -0.14161 | -0.294181315 | 0.017993469 | 8.18E-02 | 2.76E-01 | 1.00E+00 |
| ENSG00000170270.4_GON7      | ENSG00000160789.18_LMNA | 0.01143  | -0.148037213 | 0.170323627 | 8.89E-01 | 9.57E-01 | 1.00E+00 |
| ENSG00000158435.6_CNOT11    | ENSG00000160789.18_LMNA | -0.05835 | -0.215552628 | 0.101791931 | 4.75E-01 | 7.34E-01 | 1.00E+00 |
| ENSG00000219438.7_FAM19A5   | ENSG00000160789.18_LMNA | -0.40658 | -0.531387696 | -0.26450291 | 2.02E-07 | 1.28E-05 | 1.04E-02 |
| ENSG00000196476.10_C20orf96 | ENSG00000160789.18_LMNA | -0.00517 | -0.164239191 | 0.154153906 | 9.50E-01 | 9.80E-01 | 1.00E+00 |
| ENSG00000146282.16_RARS2    | ENSG00000160789.18_LMNA | -0.10412 | -0.259024669 | 0.056011679 | 2.02E-01 | 4.72E-01 | 1.00E+00 |
| ENSG00000205629.10_LCMT1    | ENSG00000160789.18_LMNA | -0.2555  | -0.398489568 | -0.10037988 | 1.49E-03 | 1.56E-02 | 1.00E+00 |
| ENSG00000072071.15_ADGRL1   | ENSG00000160789.18_LMNA | -0.00738 | -0.166387452 | 0.151997039 | 9.28E-01 | 9.72E-01 | 1.00E+00 |
| ENSG00000107021.14_TBC1D13  | ENSG00000160789.18_LMNA | 0.13935  | -0.020302937 | 0.292069508 | 8.69E-02 | 2.86E-01 | 1.00E+00 |
| ENSG00000141759.13_TXNL4A   | ENSG00000160789.18_LMNA | -0.12227 | -0.276093423 | 0.037667018 | 1.33E-01 | 3.71E-01 | 1.00E+00 |
| ENSG00000112651.10_MRPL2    | ENSG00000160789.18_LMNA | 0.04215  | -0.117842137 | 0.200007918 | 6.06E-01 | 8.20E-01 | 1.00E+00 |
| ENSG00000060688.11_SNRNP40  | ENSG00000160789.18_LMNA | -0.05298 | -0.210404763 | 0.10712556  | 5.17E-01 | 7.64E-01 | 1.00E+00 |
| ENSG00000196781.12_TLE1     | ENSG00000160789.18_LMNA | 0.24912  | 0.093637404  | 0.392748371 | 1.97E-03 | 1.93E-02 | 1.00E+00 |
| ENSG00000152154.9_TMEM178A  | ENSG00000160789.18_LMNA | -0.23582 | -0.380725375 | -0.07960591 | 3.45E-03 | 2.97E-02 | 1.00E+00 |
| ENSG00000262919.6_FAM58A    | ENSG00000160789.18_LMNA | -0.13465 | -0.287680712 | 0.025091878 | 9.82E-02 | 3.08E-01 | 1.00E+00 |
| ENSG00000164056.9_SPRY1     | ENSG00000160789.18_LMNA | 0.41408  | 0.272869965  | 0.537828337 | 1.14E-07 | 8.05E-06 | 5.84E-03 |
| ENSG00000166889.13_PATL1    | ENSG00000160789.18_LMNA | 0.24022  | 0.084236793  | 0.384704672 | 2.87E-03 | 2.59E-02 | 1.00E+00 |
| ENSG00000197744.5_PTMAP2    | ENSG00000160789.18_LMNA | 0.07455  | -0.085671663 | 0.231004963 | 3.61E-01 | 6.43E-01 | 1.00E+00 |
| ENSG00000102393.8_GLA       | ENSG00000160789.18_LMNA | -0.03822 | -0.196226871 | 0.12172119  | 6.40E-01 | 8.39E-01 | 1.00E+00 |
| ENSG00000089351.13_GRAMD1A  | ENSG00000160789.18_LMNA | 0.06546  | -0.094730763 | 0.22234084  | 4.23E-01 | 6.94E-01 | 1.00E+00 |
| ENSG00000077942.16_FBLN1    | ENSG00000160789.18_LMNA | 0.28551  | 0.132320451  | 0.425373075 | 3.63E-04 | 5.22E-03 | 1.00E+00 |
| ENSG00000104660.16_LEPROTL  | ENSG00000160789.18_LMNA | -0.34391 | -0.476997571 | -0.19541136 | 1.44E-05 | 3.95E-04 | 7.37E-01 |
| ENSG00000235552.4_RPL6P27   | ENSG00000160789.18_LMNA | -0.12549 | -0.279112759 | 0.03439982  | 1.23E-01 | 3.54E-01 | 1.00E+00 |
| ENSG00000145721.10_LIX1     | ENSG00000160789.18_LMNA | -0.37563 | -0.504649092 | -0.23019112 | 1.86E-06 | 7.58E-05 | 9.52E-02 |
| ENSG00000143537.12_ADAM15   | ENSG00000160789.18_LMNA | 0.43243  | 0.293435049  | 0.553528213 | 2.64E-08 | 2.45E-06 | 1.36E-03 |
| ENSG00000182871.13_COL18A1  | ENSG00000160789.18_LMNA | 0.45982  | 0.324367762  | 0.576799903 | 2.53E-09 | 3.38E-07 | 1.30E-04 |
| ENSG00000164346.8_NSA2      | ENSG00000160789.18_LMNA | -0.10374 | -0.258668137 | 0.056392608 | 2.03E-01 | 4.74E-01 | 1.00E+00 |
| ENSG00000116132.10_PRRX1    | ENSG00000160789.18_LMNA | 0.29651  | 0.144110016  | 0.435167052 | 2.08E-04 | 3.36E-03 | 1.00E+00 |
| ENSG00000011275.17_RNF216   | ENSG00000160789.18_LMNA | 0.26025  | 0.105417709  | 0.402764075 | 1.20E-03 | 1.33E-02 | 1.00E+00 |
| ENSG00000204498.9_NFKBIL1   | ENSG00000160789.18_LMNA | 0.12319  | -0.036731185 | 0.276958893 | 1.31E-01 | 3.66E-01 | 1.00E+00 |
| ENSG00000081721.10_DUSP12   | ENSG00000160789.18_LMNA | -0.02395 | -0.182455484 | 0.135767904 | 7.70E-01 | 9.05E-01 | 1.00E+00 |
| ENSG00000167130.16_DOLPP1   | ENSG00000160789.18_LMNA | -0.08299 | -0.239033601 | 0.077230016 | 3.09E-01 | 5.96E-01 | 1.00E+00 |
| ENSG00000106483.10_SFRP4    | ENSG00000160789.18_LMNA | 0.20134  | 0.043538576  | 0.349346422 | 1.29E-02 | 7.86E-02 | 1.00E+00 |

|                            |                         |          |              |             |          |          |          |
|----------------------------|-------------------------|----------|--------------|-------------|----------|----------|----------|
| ENSG00000130024.13_PHF10   | ENSG00000160789.18_LMNA | -0.04772 | -0.205357719 | 0.112337045 | 5.59E-01 | 7.92E-01 | 1.00E+00 |
| ENSG00000224051.5_CPTP     | ENSG00000160789.18_LMNA | 0.28124  | 0.127762998  | 0.421568565 | 4.48E-04 | 6.19E-03 | 1.00E+00 |
| ENSG00000131459.11_GFPT2   | ENSG00000160789.18_LMNA | 0.18674  | 0.028384476  | 0.335954324 | 2.12E-02 | 1.13E-01 | 1.00E+00 |
| ENSG00000167315.16_ACAA2   | ENSG00000160789.18_LMNA | 0.02413  | -0.135591781 | 0.18262893  | 7.68E-01 | 9.04E-01 | 1.00E+00 |
| ENSG00000186310.9_NAP1L3   | ENSG00000160789.18_LMNA | -0.39888 | -0.524757442 | -0.2559313  | 3.58E-07 | 2.03E-05 | 1.84E-02 |
| ENSG00000005243.8_COPZ2    | ENSG00000160789.18_LMNA | 0.1305   | -0.029308001 | 0.283805967 | 1.09E-01 | 3.29E-01 | 1.00E+00 |
| ENSG00000125458.5_NT5C     | ENSG00000160789.18_LMNA | 0.05181  | -0.108283531 | 0.209284791 | 5.26E-01 | 7.71E-01 | 1.00E+00 |
| ENSG00000162188.5_GNG3     | ENSG00000160789.18_LMNA | -0.17857 | -0.328434374 | -0.01993666 | 2.77E-02 | 1.36E-01 | 1.00E+00 |
| ENSG00000135457.8_TFCP2    | ENSG00000160789.18_LMNA | -0.11714 | -0.271281433 | 0.042860203 | 1.51E-01 | 3.99E-01 | 1.00E+00 |
| ENSG00000163166.12_IWS1    | ENSG00000160789.18_LMNA | -0.0084  | -0.167375349 | 0.151004167 | 9.18E-01 | 9.69E-01 | 1.00E+00 |
| ENSG00000157870.13_FAM213B | ENSG00000160789.18_LMNA | 0.2099   | 0.052448918  | 0.357162838 | 9.45E-03 | 6.29E-02 | 1.00E+00 |
| ENSG00000006715.14_VPS41   | ENSG00000160789.18_LMNA | -0.17082 | -0.321283223 | -0.0119438  | 3.54E-02 | 1.60E-01 | 1.00E+00 |
| ENSG00000187091.12_PLCD1   | ENSG00000160789.18_LMNA | -0.03737 | -0.195409113 | 0.122558869 | 6.48E-01 | 8.43E-01 | 1.00E+00 |
| ENSG00000160741.15_CRTC2   | ENSG00000160789.18_LMNA | 0.21775  | 0.060652298  | 0.36432155  | 7.04E-03 | 5.07E-02 | 1.00E+00 |
| ENSG00000115902.9_SLC1A4   | ENSG00000160789.18_LMNA | -0.22629 | -0.372082672 | -0.06959259 | 5.06E-03 | 3.96E-02 | 1.00E+00 |
| ENSG0000013810.17_TACC3    | ENSG00000160789.18_LMNA | 0.15663  | -0.00263572  | 0.308147527 | 5.40E-02 | 2.11E-01 | 1.00E+00 |
| ENSG00000250182.3_EEF1A1P1 | ENSG00000160789.18_LMNA | -0.1567  | -0.308216219 | 0.00255982  | 5.39E-02 | 2.11E-01 | 1.00E+00 |
| ENSG00000177951.16_BET1L   | ENSG00000160789.18_LMNA | 0.46305  | 0.328028322  | 0.579527013 | 1.89E-09 | 2.64E-07 | 9.71E-05 |
| ENSG00000188895.10_MSL1    | ENSG00000160789.18_LMNA | -0.08914 | -0.244868848 | 0.071066004 | 2.75E-01 | 5.59E-01 | 1.00E+00 |
| ENSG00000100418.7_DESI1    | ENSG00000160789.18_LMNA | -0.2696  | -0.411156014 | -0.11535285 | 7.83E-04 | 9.56E-03 | 1.00E+00 |
| ENSG00000128607.12_KLHDC10 | ENSG00000160789.18_LMNA | 0.20835  | 0.050836801  | 0.355751796 | 1.00E-02 | 6.56E-02 | 1.00E+00 |
| ENSG00000064393.14_HIPK2   | ENSG00000160789.18_LMNA | -0.1599  | -0.311180518 | -0.00071895 | 4.91E-02 | 1.99E-01 | 1.00E+00 |
| ENSG00000029725.15_RABEP1  | ENSG00000160789.18_LMNA | -0.21871 | -0.365194804 | -0.0616558  | 6.79E-03 | 4.92E-02 | 1.00E+00 |
| ENSG00000241343.8_RPL36A   | ENSG00000160789.18_LMNA | -0.08633 | -0.242197212 | 0.073891161 | 2.90E-01 | 5.76E-01 | 1.00E+00 |
| ENSG00000108671.8_PSMD11   | ENSG00000160789.18_LMNA | 0.03668  | -0.123242466 | 0.194741446 | 6.54E-01 | 8.47E-01 | 1.00E+00 |
| ENSG00000223891.4_OSER1-AS | ENSG00000160789.18_LMNA | -0.38099 | -0.509298888 | -0.23610927 | 1.28E-06 | 5.64E-05 | 6.59E-02 |
| ENSG00000162745.9_OLFML2B  | ENSG00000160789.18_LMNA | 0.21136  | 0.053979482  | 0.358501212 | 8.95E-03 | 6.05E-02 | 1.00E+00 |
| ENSG00000135632.10_SMYD5   | ENSG00000160789.18_LMNA | -0.10331 | -0.258262566 | 0.056825818 | 2.05E-01 | 4.77E-01 | 1.00E+00 |
| ENSG00000136854.16_STXBP1  | ENSG00000160789.18_LMNA | -0.16905 | -0.319647476 | -0.01012106 | 3.73E-02 | 1.65E-01 | 1.00E+00 |
| ENSG00000112312.8_GMNN     | ENSG00000160789.18_LMNA | -0.18225 | -0.331826224 | -0.02374157 | 2.46E-02 | 1.25E-01 | 1.00E+00 |
| ENSG00000100422.12_CERK    | ENSG00000160789.18_LMNA | -0.15478 | -0.306426996 | 0.004535629 | 5.69E-02 | 2.18E-01 | 1.00E+00 |
| ENSG00000075426.10_FOSL2   | ENSG00000160789.18_LMNA | 0.50731  | 0.378695268  | 0.616703991 | 2.56E-11 | 7.29E-09 | 1.31E-06 |
| ENSG00000104957.12_CCDC130 | ENSG00000160789.18_LMNA | 0.09195  | -0.068252146 | 0.247525038 | 2.60E-01 | 5.43E-01 | 1.00E+00 |



|                            |                         |          |              |             |          |          |          |
|----------------------------|-------------------------|----------|--------------|-------------|----------|----------|----------|
| ENSG00000025708.11_TYMP    | ENSG00000160789.18_LMNA | 0.21418  | 0.056919215  | 0.361068304 | 8.06E-03 | 5.59E-02 | 1.00E+00 |
| ENSG00000091409.13_ITGA6   | ENSG00000160789.18_LMNA | 0.00375  | -0.15554609  | 0.162850955 | 9.63E-01 | 9.85E-01 | 1.00E+00 |
| ENSG00000135766.8_EGLN1    | ENSG00000160789.18_LMNA | -0.07363 | -0.230129676 | 0.086589236 | 3.67E-01 | 6.48E-01 | 1.00E+00 |
| ENSG00000128699.12_ORMDL1  | ENSG00000160789.18_LMNA | -0.23524 | -0.380198565 | -0.07899381 | 3.53E-03 | 3.02E-02 | 1.00E+00 |
| ENSG00000071246.9_VASH1    | ENSG00000160789.18_LMNA | 0.05466  | -0.105462466 | 0.212011825 | 5.04E-01 | 7.55E-01 | 1.00E+00 |
| ENSG00000116455.12_WDR77   | ENSG00000160789.18_LMNA | -0.17771 | -0.32763936  | -0.01904612 | 2.85E-02 | 1.38E-01 | 1.00E+00 |
| ENSG00000111911.6_HINT3    | ENSG00000160789.18_LMNA | -0.36711 | -0.497250816 | -0.22081645 | 3.28E-06 | 1.18E-04 | 1.69E-01 |
| ENSG00000198417.6_MT1F     | ENSG00000160789.18_LMNA | 0.11763  | -0.042369084 | 0.271737176 | 1.49E-01 | 3.96E-01 | 1.00E+00 |
| ENSG00000102531.15_FNDC3A  | ENSG00000160789.18_LMNA | 0.04838  | -0.111684233 | 0.20599086  | 5.54E-01 | 7.88E-01 | 1.00E+00 |
| ENSG00000121390.16_PSPC1   | ENSG00000160789.18_LMNA | -0.23352 | -0.378645363 | -0.07719047 | 3.79E-03 | 3.18E-02 | 1.00E+00 |
| ENSG00000133895.13_MEN1    | ENSG00000160789.18_LMNA | 0.18662  | 0.028261871  | 0.335845465 | 2.13E-02 | 1.13E-01 | 1.00E+00 |
| ENSG00000078967.11_UBE2D4  | ENSG00000160789.18_LMNA | -0.22106 | -0.36732917  | -0.0641111  | 6.20E-03 | 4.61E-02 | 1.00E+00 |
| ENSG00000169446.5_MMGT1    | ENSG00000160789.18_LMNA | -0.17546 | -0.325566305 | -0.01672627 | 3.06E-02 | 1.45E-01 | 1.00E+00 |
| ENSG00000123689.5_G0S2     | ENSG00000160789.18_LMNA | 0.1905   | 0.032277793  | 0.339406868 | 1.87E-02 | 1.03E-01 | 1.00E+00 |
| ENSG00000108175.15_ZMIZ1   | ENSG00000160789.18_LMNA | -0.00035 | -0.159544332 | 0.158857034 | 9.97E-01 | 9.99E-01 | 1.00E+00 |
| ENSG00000029993.13_HMGB3   | ENSG00000160789.18_LMNA | -0.04187 | -0.199736503 | 0.118120911 | 6.09E-01 | 8.21E-01 | 1.00E+00 |
| ENSG00000167699.12_GLOD4   | ENSG00000160789.18_LMNA | -0.15529 | -0.306902329 | 0.004010964 | 5.61E-02 | 2.16E-01 | 1.00E+00 |
| ENSG00000164172.17_MOCS2   | ENSG00000160789.18_LMNA | -0.28263 | -0.422810188 | -0.12924899 | 4.19E-04 | 5.87E-03 | 1.00E+00 |
| ENSG00000143344.14_RGL1    | ENSG00000160789.18_LMNA | 0.0932   | -0.066998008 | 0.248707376 | 2.53E-01 | 5.35E-01 | 1.00E+00 |
| ENSG00000124688.12_MAD2L1B | ENSG00000160789.18_LMNA | -0.14808 | -0.300200647 | 0.011392409 | 6.87E-02 | 2.46E-01 | 1.00E+00 |
| ENSG00000146085.7_MUT      | ENSG00000160789.18_LMNA | -0.21508 | -0.361892562 | -0.05786424 | 7.79E-03 | 5.45E-02 | 1.00E+00 |
| ENSG00000170091.9_HMP19    | ENSG00000160789.18_LMNA | -0.40897 | -0.533440172 | -0.26716493 | 1.68E-07 | 1.10E-05 | 8.64E-03 |
| ENSG00000141699.9_FAM134C  | ENSG00000160789.18_LMNA | -0.00139 | -0.160554096 | 0.157846709 | 9.86E-01 | 9.95E-01 | 1.00E+00 |
| ENSG00000113194.11_FAF2    | ENSG00000160789.18_LMNA | 0.21756  | 0.060449699  | 0.364145182 | 7.09E-03 | 5.09E-02 | 1.00E+00 |
| ENSG00000153406.12_NMRAL1  | ENSG00000160789.18_LMNA | 0.232    | 0.075594421  | 0.377269282 | 4.03E-03 | 3.33E-02 | 1.00E+00 |
| ENSG00000156136.8_DCK      | ENSG00000160789.18_LMNA | -0.28918 | -0.428644793 | -0.1362496  | 3.02E-04 | 4.53E-03 | 1.00E+00 |
| ENSG00000125285.5_SOX21    | ENSG00000160789.18_LMNA | -0.1281  | -0.281556638 | 0.031750403 | 1.16E-01 | 3.40E-01 | 1.00E+00 |
| ENSG00000168310.9_IRF2     | ENSG00000160789.18_LMNA | 0.25921  | 0.104315774  | 0.401830211 | 1.26E-03 | 1.38E-02 | 1.00E+00 |
| ENSG00000105676.12_ARMC6   | ENSG00000160789.18_LMNA | -0.11954 | -0.273534166 | 0.040431125 | 1.42E-01 | 3.85E-01 | 1.00E+00 |
| ENSG00000204590.11_GNL1    | ENSG00000160789.18_LMNA | 0.18016  | 0.021574842  | 0.329895691 | 2.64E-02 | 1.31E-01 | 1.00E+00 |
| ENSG00000206053.11_HN1L    | ENSG00000160789.18_LMNA | 0.13692  | -0.022779055 | 0.289801926 | 9.26E-02 | 2.97E-01 | 1.00E+00 |
| ENSG00000129245.10_FXR2    | ENSG00000160789.18_LMNA | 0.01585  | -0.143717058 | 0.174606421 | 8.46E-01 | 9.40E-01 | 1.00E+00 |
| ENSG00000105245.8_NUMBL    | ENSG00000160789.18_LMNA | 0.44782  | 0.310770183  | 0.566620223 | 7.26E-09 | 8.26E-07 | 3.73E-04 |

|                            |                         |          |              |             |          |          |          |
|----------------------------|-------------------------|----------|--------------|-------------|----------|----------|----------|
| ENSG00000117528.10_ABCD3   | ENSG00000160789.18_LMNA | -0.08562 | -0.241528571 | 0.074597432 | 2.94E-01 | 5.80E-01 | 1.00E+00 |
| ENSG00000090989.16_EXOC1   | ENSG00000160789.18_LMNA | -0.10966 | -0.264244681 | 0.050423953 | 1.79E-01 | 4.41E-01 | 1.00E+00 |
| ENSG00000110048.10_OSBP    | ENSG00000160789.18_LMNA | 0.1156   | -0.044413747 | 0.269838867 | 1.56E-01 | 4.08E-01 | 1.00E+00 |
| ENSG00000121067.16_SPOP    | ENSG00000160789.18_LMNA | -0.39422 | -0.520743369 | -0.25076235 | 5.03E-07 | 2.63E-05 | 2.58E-02 |
| ENSG00000154328.14_NEIL2   | ENSG00000160789.18_LMNA | -0.0582  | -0.215404427 | 0.101945736 | 4.76E-01 | 7.35E-01 | 1.00E+00 |
| ENSG00000156858.10_PRR14   | ENSG00000160789.18_LMNA | 0.12216  | -0.037778506 | 0.275990283 | 1.34E-01 | 3.71E-01 | 1.00E+00 |
| ENSG00000178445.8_GLDC     | ENSG00000160789.18_LMNA | 0.09508  | -0.065102912 | 0.250492194 | 2.44E-01 | 5.23E-01 | 1.00E+00 |
| ENSG00000137806.7_NDUFAF1  | ENSG00000160789.18_LMNA | -0.00557 | -0.16462306  | 0.153768722 | 9.46E-01 | 9.78E-01 | 1.00E+00 |
| ENSG00000086189.8_DIMT1    | ENSG00000160789.18_LMNA | -0.5343  | -0.639132091 | -0.40996743 | 1.35E-12 | 6.92E-10 | 6.92E-08 |
| ENSG00000090661.10_CERS4   | ENSG00000160789.18_LMNA | -0.20783 | -0.355277375 | -0.05029513 | 1.02E-02 | 6.64E-02 | 1.00E+00 |
| ENSG00000112851.13_ERBIN   | ENSG00000160789.18_LMNA | 0.30917  | 0.157733808  | 0.446399636 | 1.06E-04 | 1.98E-03 | 1.00E+00 |
| ENSG00000094914.11_AAAS    | ENSG00000160789.18_LMNA | -0.09591 | -0.251277955 | 0.064267879 | 2.40E-01 | 5.19E-01 | 1.00E+00 |
| ENSG00000116285.11_ERRFI1  | ENSG00000160789.18_LMNA | 0.39649  | 0.253281698  | 0.522701321 | 4.26E-07 | 2.32E-05 | 2.19E-02 |
| ENSG00000120802.12_TMPO    | ENSG00000160789.18_LMNA | -0.10337 | -0.258323027 | 0.056761245 | 2.05E-01 | 4.76E-01 | 1.00E+00 |
| ENSG00000103591.11_AAGAB   | ENSG00000160789.18_LMNA | 0.06157  | -0.098598024 | 0.218626875 | 4.51E-01 | 7.17E-01 | 1.00E+00 |
| ENSG00000171992.11_SYNPO   | ENSG00000160789.18_LMNA | 0.33434  | 0.184986505  | 0.4685993   | 2.56E-05 | 6.28E-04 | 1.00E+00 |
| ENSG00000111802.12_TDP2    | ENSG00000160789.18_LMNA | -0.26703 | -0.408851148 | -0.11261823 | 8.82E-04 | 1.05E-02 | 1.00E+00 |
| ENSG0000013441.14_CLK1     | ENSG00000160789.18_LMNA | -0.27125 | -0.412628858 | -0.11710266 | 7.24E-04 | 9.00E-03 | 1.00E+00 |
| ENSG00000187555.13_USP7    | ENSG00000160789.18_LMNA | 0.02931  | -0.130498423 | 0.187636354 | 7.20E-01 | 8.81E-01 | 1.00E+00 |
| ENSG00000104907.11_TRMT1   | ENSG00000160789.18_LMNA | 0.06838  | -0.091823056 | 0.225127239 | 4.03E-01 | 6.78E-01 | 1.00E+00 |
| ENSG00000186834.3_HEXIM1   | ENSG00000160789.18_LMNA | 0.25791  | 0.10293351   | 0.400657899 | 1.34E-03 | 1.44E-02 | 1.00E+00 |
| ENSG00000173409.12_ARV1    | ENSG00000160789.18_LMNA | -0.35799 | -0.489301076 | -0.2107996  | 5.95E-06 | 1.92E-04 | 3.05E-01 |
| ENSG00000086544.2_ITPKC    | ENSG00000160789.18_LMNA | 0.38923  | 0.245226424  | 0.516431024 | 7.20E-07 | 3.53E-05 | 3.69E-02 |
| ENSG00000137033.10_IL33    | ENSG00000160789.18_LMNA | -0.21964 | -0.366040059 | -0.06262771 | 6.55E-03 | 4.80E-02 | 1.00E+00 |
| ENSG00000136875.11_PRP4    | ENSG00000160789.18_LMNA | 0.15881  | -0.000404487 | 0.310165509 | 5.07E-02 | 2.03E-01 | 1.00E+00 |
| ENSG00000148154.8_UGCG     | ENSG00000160789.18_LMNA | 0.11745  | -0.042548445 | 0.271570751 | 1.50E-01 | 3.97E-01 | 1.00E+00 |
| ENSG00000172046.17_USP19   | ENSG00000160789.18_LMNA | 0.05412  | -0.105997608 | 0.2114949   | 5.08E-01 | 7.58E-01 | 1.00E+00 |
| ENSG00000143514.15_TP53BP2 | ENSG00000160789.18_LMNA | 0.04815  | -0.111909812 | 0.205772108 | 5.56E-01 | 7.90E-01 | 1.00E+00 |
| ENSG00000127472.9_PLA2G5   | ENSG00000160789.18_LMNA | 0.35111  | 0.203273783  | 0.483297707 | 9.20E-06 | 2.73E-04 | 4.72E-01 |
| ENSG00000079432.6_CIC      | ENSG00000160789.18_LMNA | 0.26424  | 0.10965265   | 0.406347337 | 1.00E-03 | 1.16E-02 | 1.00E+00 |
| ENSG00000105063.17_PPP6R1  | ENSG00000160789.18_LMNA | 0.38232  | 0.237581023  | 0.510452754 | 1.17E-06 | 5.21E-05 | 6.00E-02 |
| ENSG00000055950.15_MRPL43  | ENSG00000160789.18_LMNA | -0.30839 | -0.445706497 | -0.15688992 | 1.11E-04 | 2.05E-03 | 1.00E+00 |
| ENSG00000066455.11_GOLGA5  | ENSG00000160789.18_LMNA | 0.13555  | -0.024176803 | 0.288520343 | 9.59E-02 | 3.04E-01 | 1.00E+00 |

|                              |                         |          |              |             |          |          |          |
|------------------------------|-------------------------|----------|--------------|-------------|----------|----------|----------|
| ENSG00000122958.13_VPS26A    | ENSG00000160789.18_LMNA | -0.25991 | -0.402453889 | -0.10505162 | 1.22E-03 | 1.35E-02 | 1.00E+00 |
| ENSG00000158828.5_PINK1      | ENSG00000160789.18_LMNA | -0.07367 | -0.230171287 | 0.086545627 | 3.67E-01 | 6.48E-01 | 1.00E+00 |
| ENSG00000237039.1_AC018738.1 | ENSG00000160789.18_LMNA | 0.05494  | -0.105184091 | 0.212280653 | 5.01E-01 | 7.53E-01 | 1.00E+00 |
| ENSG00000125266.6_EFNB2      | ENSG00000160789.18_LMNA | 0.33363  | 0.18421861   | 0.467978649 | 2.66E-05 | 6.51E-04 | 1.00E+00 |
| ENSG00000160469.15_BRSK1     | ENSG00000160789.18_LMNA | -0.12875 | -0.282166219 | 0.031088867 | 1.14E-01 | 3.37E-01 | 1.00E+00 |
| ENSG00000185127.6_C6orf120   | ENSG00000160789.18_LMNA | -0.00867 | -0.167640351 | 0.15073772  | 9.16E-01 | 9.68E-01 | 1.00E+00 |
| ENSG00000144580.12_CNOT9     | ENSG00000160789.18_LMNA | -0.10813 | -0.262808173 | 0.05196362  | 1.85E-01 | 4.50E-01 | 1.00E+00 |
| ENSG00000101412.12_E2F1      | ENSG00000160789.18_LMNA | 0.13008  | -0.02974139  | 0.283407088 | 1.10E-01 | 3.31E-01 | 1.00E+00 |
| ENSG00000198752.8_CDC42BPB   | ENSG00000160789.18_LMNA | 0.14133  | -0.018281113 | 0.293918456 | 8.24E-02 | 2.77E-01 | 1.00E+00 |
| ENSG00000065054.12_SLC9A3R1  | ENSG00000160789.18_LMNA | 0.15236  | -0.007006114 | 0.304186716 | 6.09E-02 | 2.28E-01 | 1.00E+00 |
| ENSG00000170619.9_COMMD5     | ENSG00000160789.18_LMNA | -0.11622 | -0.270414021 | 0.043794527 | 1.54E-01 | 4.04E-01 | 1.00E+00 |
| ENSG00000116005.10_PCYOX1    | ENSG00000160789.18_LMNA | 0.11466  | -0.045366313 | 0.268953649 | 1.60E-01 | 4.13E-01 | 1.00E+00 |
| ENSG00000184787.17_UBE2G2    | ENSG00000160789.18_LMNA | 0.08788  | -0.072333832 | 0.243670507 | 2.82E-01 | 5.67E-01 | 1.00E+00 |
| ENSG00000081791.7_KIAA0141   | ENSG00000160789.18_LMNA | -0.21994 | -0.366316192 | -0.06294535 | 6.48E-03 | 4.76E-02 | 1.00E+00 |
| ENSG00000171824.12_EXOSC10   | ENSG00000160789.18_LMNA | 0.02799  | -0.131795478 | 0.18636275  | 7.32E-01 | 8.87E-01 | 1.00E+00 |
| ENSG00000100239.14_PPP6R2    | ENSG00000160789.18_LMNA | -0.0149  | -0.173686483 | 0.144646045 | 8.55E-01 | 9.43E-01 | 1.00E+00 |
| ENSG00000099246.15_RAB18     | ENSG00000160789.18_LMNA | -0.38328 | -0.511286117 | -0.23864476 | 1.09E-06 | 4.94E-05 | 5.61E-02 |
| ENSG00000005007.11_UPF1      | ENSG00000160789.18_LMNA | 0.21291  | 0.05559277   | 0.35991057  | 8.45E-03 | 5.80E-02 | 1.00E+00 |
| ENSG00000110881.10_ASIC1     | ENSG00000160789.18_LMNA | -0.30333 | -0.441227115 | -0.15144647 | 1.45E-04 | 2.53E-03 | 1.00E+00 |
| ENSG00000157216.14_SSBP3     | ENSG00000160789.18_LMNA | -0.22132 | -0.367569704 | -0.06438803 | 6.14E-03 | 4.58E-02 | 1.00E+00 |
| ENSG00000165512.4_ZNF22      | ENSG00000160789.18_LMNA | -0.34291 | -0.476118566 | -0.19431726 | 1.53E-05 | 4.15E-04 | 7.84E-01 |
| ENSG00000091732.14_ZC3HC1    | ENSG00000160789.18_LMNA | 0.12976  | -0.030060568 | 0.283113257 | 1.11E-01 | 3.32E-01 | 1.00E+00 |
| ENSG00000155090.13_KLF10     | ENSG00000160789.18_LMNA | 0.36131  | 0.214440082  | 0.492195662 | 4.80E-06 | 1.61E-04 | 2.46E-01 |
| ENSG00000137210.12_TMEM14B   | ENSG00000160789.18_LMNA | -0.22494 | -0.370860969 | -0.06818204 | 5.33E-03 | 4.12E-02 | 1.00E+00 |
| ENSG00000165410.13_CFL2      | ENSG00000160789.18_LMNA | -0.20591 | -0.353524137 | -0.04829493 | 1.09E-02 | 6.98E-02 | 1.00E+00 |
| ENSG00000130958.10_SLC35D2   | ENSG00000160789.18_LMNA | 0.18277  | 0.024278567  | 0.33230428  | 2.42E-02 | 1.24E-01 | 1.00E+00 |
| ENSG00000106348.15_IMPDH1    | ENSG00000160789.18_LMNA | 0.33142  | 0.181807889  | 0.466028366 | 3.04E-05 | 7.21E-04 | 1.00E+00 |
| ENSG00000105176.16_URI1      | ENSG00000160789.18_LMNA | -0.2048  | -0.352509542 | -0.04713853 | 1.14E-02 | 7.18E-02 | 1.00E+00 |
| ENSG00000160087.19_UBE2J2    | ENSG00000160789.18_LMNA | 0.07524  | -0.084983198 | 0.231661364 | 3.57E-01 | 6.40E-01 | 1.00E+00 |
| ENSG00000126391.12_FRMD8     | ENSG00000160789.18_LMNA | 0.46739  | 0.332960982  | 0.583192948 | 1.28E-09 | 1.90E-07 | 6.54E-05 |
| ENSG00000100883.10_SRP54     | ENSG00000160789.18_LMNA | 0.15922  | 2.38E-05     | 0.310552573 | 5.01E-02 | 2.01E-01 | 1.00E+00 |
| ENSG00000198925.9_ATG9A      | ENSG00000160789.18_LMNA | 0.22576  | 0.06903745   | 0.371601983 | 5.17E-03 | 4.03E-02 | 1.00E+00 |
| ENSG00000180891.11_CUEDC1    | ENSG00000160789.18_LMNA | -0.03171 | -0.189951028 | 0.128138337 | 6.98E-01 | 8.71E-01 | 1.00E+00 |

|                             |                         |          |              |             |          |          |          |
|-----------------------------|-------------------------|----------|--------------|-------------|----------|----------|----------|
| ENSG00000178927.15_C17orf62 | ENSG00000160789.18_LMNA | 0.17891  | 0.020288067  | 0.328747967 | 2.74E-02 | 1.35E-01 | 1.00E+00 |
| ENSG00000163884.3_KLF15     | ENSG00000160789.18_LMNA | -0.35868 | -0.489909785 | -0.21156452 | 5.69E-06 | 1.85E-04 | 2.92E-01 |
| ENSG00000234127.7_TRIM26    | ENSG00000160789.18_LMNA | 0.11022  | -0.049856874 | 0.264773414 | 1.76E-01 | 4.38E-01 | 1.00E+00 |
| ENSG00000110076.17_NRXN2    | ENSG00000160789.18_LMNA | -0.26212 | -0.404441017 | -0.10739829 | 1.11E-03 | 1.25E-02 | 1.00E+00 |
| ENSG00000118518.14_RNF146   | ENSG00000160789.18_LMNA | -0.22369 | -0.369722721 | -0.06686893 | 5.60E-03 | 4.27E-02 | 1.00E+00 |
| ENSG00000138698.13_RAP1GDS  | ENSG00000160789.18_LMNA | -0.38704 | -0.514537996 | -0.24280184 | 8.40E-07 | 3.95E-05 | 4.31E-02 |
| ENSG00000108960.6_MMD       | ENSG00000160789.18_LMNA | -0.38449 | -0.512334564 | -0.23998396 | 1.01E-06 | 4.62E-05 | 5.16E-02 |
| ENSG00000198563.12_DDX39B   | ENSG00000160789.18_LMNA | -0.03099 | -0.189260539 | 0.128842751 | 7.05E-01 | 8.74E-01 | 1.00E+00 |
| ENSG00000117054.12_ACADM    | ENSG00000160789.18_LMNA | -0.07486 | -0.231304903 | 0.085357109 | 3.59E-01 | 6.42E-01 | 1.00E+00 |
| ENSG00000132128.15_LRRC41   | ENSG00000160789.18_LMNA | 0.32623  | 0.176175542  | 0.461460984 | 4.10E-05 | 9.20E-04 | 1.00E+00 |
| ENSG00000160862.11_AZGP1    | ENSG00000160789.18_LMNA | -0.00603 | -0.165074888 | 0.153315222 | 9.41E-01 | 9.77E-01 | 1.00E+00 |
| ENSG00000169255.12_B3GALNT  | ENSG00000160789.18_LMNA | -0.10314 | -0.258102409 | 0.056996858 | 2.06E-01 | 4.78E-01 | 1.00E+00 |
| ENSG00000119392.13_GLE1     | ENSG00000160789.18_LMNA | 0.11046  | -0.049609763 | 0.265003755 | 1.75E-01 | 4.36E-01 | 1.00E+00 |
| ENSG00000198890.7_PRMT6     | ENSG00000160789.18_LMNA | -0.02853 | -0.18687881  | 0.131270047 | 7.27E-01 | 8.85E-01 | 1.00E+00 |
| ENSG00000114744.7_COMMD2    | ENSG00000160789.18_LMNA | -0.4405  | -0.560400436 | -0.30251328 | 1.35E-08 | 1.39E-06 | 6.95E-04 |
| ENSG00000127419.15_TMEM175  | ENSG00000160789.18_LMNA | -0.01075 | -0.169658155 | 0.148707401 | 8.95E-01 | 9.59E-01 | 1.00E+00 |
| ENSG00000136783.9_NIPSNAP3  | ENSG00000160789.18_LMNA | -0.10823 | -0.262900944 | 0.051864232 | 1.84E-01 | 4.50E-01 | 1.00E+00 |
| ENSG00000171155.7_C1GALT1C  | ENSG00000160789.18_LMNA | 0.06475  | -0.09543478  | 0.221665414 | 4.28E-01 | 6.99E-01 | 1.00E+00 |
| ENSG00000177732.7_SOX12     | ENSG00000160789.18_LMNA | 0.08782  | -0.072392572 | 0.243614964 | 2.82E-01 | 5.67E-01 | 1.00E+00 |
| ENSG00000010292.11_NCAPD2   | ENSG00000160789.18_LMNA | #####    | -0.1592761   | 0.159125302 | 9.99E-01 | 1.00E+00 | 1.00E+00 |
| ENSG00000023318.7_ERP44     | ENSG00000160789.18_LMNA | 0.25847  | 0.10352539   | 0.401159997 | 1.30E-03 | 1.42E-02 | 1.00E+00 |
| ENSG00000141380.12_SS18     | ENSG00000160789.18_LMNA | 0.17285  | 0.01404052   | 0.323162563 | 3.32E-02 | 1.53E-01 | 1.00E+00 |
| ENSG00000176105.12_YES1     | ENSG00000160789.18_LMNA | 0.09146  | -0.068744273 | 0.247060829 | 2.62E-01 | 5.46E-01 | 1.00E+00 |
| ENSG00000146386.7_ABRACL    | ENSG00000160789.18_LMNA | -0.11337 | -0.267738555 | 0.046672922 | 1.64E-01 | 4.20E-01 | 1.00E+00 |
| ENSG00000219928.2_RP11-40C6 | ENSG00000160789.18_LMNA | -0.16976 | -0.320303296 | -0.0108516  | 3.65E-02 | 1.63E-01 | 1.00E+00 |
| ENSG00000137193.12_PIM1     | ENSG00000160789.18_LMNA | 0.3057   | 0.153998915  | 0.443329305 | 1.28E-04 | 2.31E-03 | 1.00E+00 |
| ENSG00000067141.15_NEO1     | ENSG00000160789.18_LMNA | 0.11809  | -0.041895923 | 0.272176121 | 1.47E-01 | 3.93E-01 | 1.00E+00 |
| ENSG00000115317.10_HTRA2    | ENSG00000160789.18_LMNA | -0.06862 | -0.22536062  | 0.091579269 | 4.01E-01 | 6.77E-01 | 1.00E+00 |
| ENSG00000092758.14_COL9A3   | ENSG00000160789.18_LMNA | 0.13102  | -0.028782531 | 0.284289448 | 1.08E-01 | 3.26E-01 | 1.00E+00 |
| ENSG00000115233.10_PSMD14   | ENSG00000160789.18_LMNA | -0.14283 | -0.29531463  | 0.016752703 | 7.92E-02 | 2.70E-01 | 1.00E+00 |
| ENSG00000240409.1_MTATP8P1  | ENSG00000160789.18_LMNA | -0.15545 | -0.307051277 | 0.003846522 | 5.58E-02 | 2.16E-01 | 1.00E+00 |
| ENSG00000106591.3_MRPL32    | ENSG00000160789.18_LMNA | -0.02371 | -0.182219085 | 0.136007917 | 7.72E-01 | 9.06E-01 | 1.00E+00 |
| ENSG00000145780.7_FEM1C     | ENSG00000160789.18_LMNA | 0.39705  | 0.253896636  | 0.523178799 | 4.09E-07 | 2.24E-05 | 2.10E-02 |

|                             |                         |          |              |             |          |          |          |
|-----------------------------|-------------------------|----------|--------------|-------------|----------|----------|----------|
| ENSG00000133083.13_DCLK1    | ENSG00000160789.18_LMNA | -0.10651 | -0.261276527 | 0.053603611 | 1.92E-01 | 4.59E-01 | 1.00E+00 |
| ENSG00000108100.16_CCNY     | ENSG00000160789.18_LMNA | -0.27755 | -0.418273327 | -0.12382561 | 5.36E-04 | 7.13E-03 | 1.00E+00 |
| ENSG00000157869.13_RAB28    | ENSG00000160789.18_LMNA | -0.1738  | -0.324039173 | -0.01501946 | 3.22E-02 | 1.50E-01 | 1.00E+00 |
| ENSG00000023902.12_PLEKHO1  | ENSG00000160789.18_LMNA | -0.08504 | -0.240979253 | 0.075177427 | 2.98E-01 | 5.83E-01 | 1.00E+00 |
| ENSG00000160209.17_PDXK     | ENSG00000160789.18_LMNA | 0.24022  | 0.08424218   | 0.384709295 | 2.87E-03 | 2.59E-02 | 1.00E+00 |
| ENSG00000106638.14_TBL2     | ENSG00000160789.18_LMNA | 0.29327  | 0.140631874  | 0.432284792 | 2.46E-04 | 3.84E-03 | 1.00E+00 |
| ENSG00000136933.15_RABEPK   | ENSG00000160789.18_LMNA | -0.13205 | -0.285256864 | 0.027730578 | 1.05E-01 | 3.21E-01 | 1.00E+00 |
| ENSG00000071462.10_WBSCR22  | ENSG00000160789.18_LMNA | 0.12269  | -0.037236927 | 0.276491239 | 1.32E-01 | 3.69E-01 | 1.00E+00 |
| ENSG00000109790.15_KLHL5    | ENSG00000160789.18_LMNA | -0.29889 | -0.437282544 | -0.14666745 | 1.84E-04 | 3.05E-03 | 1.00E+00 |
| ENSG00000231064.4_MIR92B    | ENSG00000160789.18_LMNA | -0.02616 | -0.184590724 | 0.133598323 | 7.49E-01 | 8.95E-01 | 1.00E+00 |
| ENSG00000158985.12_CDC42SE  | ENSG00000160789.18_LMNA | -0.312   | -0.448899754 | -0.16078118 | 9.12E-05 | 1.75E-03 | 1.00E+00 |
| ENSG00000168246.5_UBTD2     | ENSG00000160789.18_LMNA | -0.04447 | -0.202235055 | 0.115552724 | 5.86E-01 | 8.08E-01 | 1.00E+00 |
| ENSG00000230715.3_RP11-274B | ENSG00000160789.18_LMNA | 0.1294   | -0.030422631 | 0.282779876 | 1.12E-01 | 3.34E-01 | 1.00E+00 |
| ENSG00000147155.9_EBP       | ENSG00000160789.18_LMNA | 0.09225  | -0.067945561 | 0.247814158 | 2.58E-01 | 5.41E-01 | 1.00E+00 |
| ENSG00000173757.8_STAT5B    | ENSG00000160789.18_LMNA | -0.00591 | -0.164953552 | 0.15343702  | 9.42E-01 | 9.77E-01 | 1.00E+00 |
| ENSG00000163584.16_RPL22L1  | ENSG00000160789.18_LMNA | -0.05621 | -0.213498262 | 0.10392262  | 4.92E-01 | 7.47E-01 | 1.00E+00 |
| ENSG00000103429.9_BFAR      | ENSG00000160789.18_LMNA | 0.05521  | -0.10491616  | 0.21253935  | 4.99E-01 | 7.52E-01 | 1.00E+00 |
| ENSG00000146830.9_GIGYF1    | ENSG00000160789.18_LMNA | 0.14221  | -0.017385096 | 0.294737112 | 8.05E-02 | 2.73E-01 | 1.00E+00 |
| ENSG00000137970.7_RPL7P9    | ENSG00000160789.18_LMNA | -0.11049 | -0.265032238 | 0.049579204 | 1.75E-01 | 4.36E-01 | 1.00E+00 |
| ENSG00000258289.6_CHURC1    | ENSG00000160789.18_LMNA | -0.13849 | -0.291271444 | 0.021174832 | 8.88E-02 | 2.90E-01 | 1.00E+00 |
| ENSG00000100241.19_SBF1     | ENSG00000160789.18_LMNA | 0.04933  | -0.110741234 | 0.206904973 | 5.46E-01 | 7.84E-01 | 1.00E+00 |
| ENSG00000008130.14_NADK     | ENSG00000160789.18_LMNA | 0.25611  | 0.101032627  | 0.399044146 | 1.45E-03 | 1.53E-02 | 1.00E+00 |
| ENSG00000125124.10_BBS2     | ENSG00000160789.18_LMNA | 0.02521  | -0.134526572 | 0.183677534 | 7.58E-01 | 8.99E-01 | 1.00E+00 |
| ENSG00000163832.14_ELP6     | ENSG00000160789.18_LMNA | -0.28158 | -0.42187071  | -0.12812449 | 4.41E-04 | 6.12E-03 | 1.00E+00 |
| ENSG00000167123.17_CERCAM   | ENSG00000160789.18_LMNA | 0.14402  | -0.015534394 | 0.296426578 | 7.67E-02 | 2.65E-01 | 1.00E+00 |
| ENSG00000109084.12_TMEM97   | ENSG00000160789.18_LMNA | -0.19222 | -0.340985598 | -0.03406118 | 1.77E-02 | 9.87E-02 | 1.00E+00 |
| ENSG00000064607.15_SUGP2    | ENSG00000160789.18_LMNA | -0.12665 | -0.280205552 | 0.033215664 | 1.20E-01 | 3.48E-01 | 1.00E+00 |
| ENSG00000123179.12_EBPL     | ENSG00000160789.18_LMNA | -0.20826 | -0.355664339 | -0.05073693 | 1.00E-02 | 6.58E-02 | 1.00E+00 |
| ENSG00000006744.17_ELAC2    | ENSG00000160789.18_LMNA | -0.03    | -0.188301841 | 0.129820249 | 7.14E-01 | 8.78E-01 | 1.00E+00 |
| ENSG00000181904.8_C5orf24   | ENSG00000160789.18_LMNA | -0.2294  | -0.374905299 | -0.07285616 | 4.47E-03 | 3.61E-02 | 1.00E+00 |
| ENSG00000157837.14_SPPL3    | ENSG00000160789.18_LMNA | -0.2973  | -0.435868906 | -0.14495806 | 2.00E-04 | 3.26E-03 | 1.00E+00 |
| ENSG00000005059.14_MCUB     | ENSG00000160789.18_LMNA | 0.37179  | 0.225967951  | 0.501321245 | 2.40E-06 | 9.18E-05 | 1.23E-01 |
| ENSG00000276023.3_DUSP14    | ENSG00000160789.18_LMNA | -0.05548 | -0.212802484 | 0.104643587 | 4.97E-01 | 7.51E-01 | 1.00E+00 |

|                             |                         |          |              |             |          |          |          |
|-----------------------------|-------------------------|----------|--------------|-------------|----------|----------|----------|
| ENSG00000227051.5_C14orf132 | ENSG00000160789.18_LMNA | -0.11053 | -0.265067148 | 0.049541748 | 1.75E-01 | 4.36E-01 | 1.00E+00 |
| ENSG00000147419.15_CCDC25   | ENSG00000160789.18_LMNA | -0.01571 | -0.174473062 | 0.143851763 | 8.48E-01 | 9.41E-01 | 1.00E+00 |
| ENSG00000096060.13_FKBP5    | ENSG00000160789.18_LMNA | 0.12302  | -0.03690143  | 0.276801486 | 1.31E-01 | 3.67E-01 | 1.00E+00 |
| ENSG00000100100.11_PIK3IP1  | ENSG00000160789.18_LMNA | -0.39824 | -0.5242029   | -0.2552163  | 3.75E-07 | 2.10E-05 | 1.93E-02 |
| ENSG00000169733.10_RFNG     | ENSG00000160789.18_LMNA | 0.11949  | -0.04048543  | 0.273483841 | 1.43E-01 | 3.86E-01 | 1.00E+00 |
| ENSG00000142694.6_EVA1B     | ENSG00000160789.18_LMNA | 0.44862  | 0.311677457  | 0.567301884 | 6.78E-09 | 7.76E-07 | 3.48E-04 |
| ENSG00000177119.14_ANO6     | ENSG00000160789.18_LMNA | 0.22192  | 0.065019235  | 0.368117793 | 6.00E-03 | 4.50E-02 | 1.00E+00 |
| ENSG00000162298.15_SYVN1    | ENSG00000160789.18_LMNA | 0.29888  | 0.146662137  | 0.437278151 | 1.84E-04 | 3.05E-03 | 1.00E+00 |
| ENSG00000089159.14_PXN      | ENSG00000160789.18_LMNA | 0.45809  | 0.322402568  | 0.575333513 | 2.95E-09 | 3.83E-07 | 1.52E-04 |
| ENSG00000069998.11_CECR5    | ENSG00000160789.18_LMNA | -0.16181 | -0.312948506 | -0.00267769 | 4.64E-02 | 1.92E-01 | 1.00E+00 |
| ENSG00000167900.10_TK1      | ENSG00000160789.18_LMNA | 0.12708  | -0.032783678 | 0.280604006 | 1.19E-01 | 3.46E-01 | 1.00E+00 |
| ENSG00000138095.17_LRPPRC   | ENSG00000160789.18_LMNA | -0.10679 | -0.261548063 | 0.053312991 | 1.90E-01 | 4.58E-01 | 1.00E+00 |
| ENSG00000104324.14_CPQ      | ENSG00000160789.18_LMNA | 0.2255   | 0.068768697  | 0.371369214 | 5.22E-03 | 4.05E-02 | 1.00E+00 |
| ENSG00000163374.18_YY1AP1   | ENSG00000160789.18_LMNA | 0.18844  | 0.030144578  | 0.337516184 | 2.01E-02 | 1.08E-01 | 1.00E+00 |
| ENSG00000099203.5_TMED1     | ENSG00000160789.18_LMNA | 0.15965  | 0.000465952  | 0.310951996 | 4.94E-02 | 2.00E-01 | 1.00E+00 |
| ENSG00000119203.12_CPSF3    | ENSG00000160789.18_LMNA | -0.14123 | -0.293827305 | 0.018380846 | 8.26E-02 | 2.78E-01 | 1.00E+00 |
| ENSG00000228343.1_RP11-1148 | ENSG00000160789.18_LMNA | -0.03609 | -0.194173383 | 0.123823843 | 6.59E-01 | 8.49E-01 | 1.00E+00 |
| ENSG00000167088.9_SNRPD1    | ENSG00000160789.18_LMNA | -0.20034 | -0.348430959 | -0.04249817 | 1.33E-02 | 8.06E-02 | 1.00E+00 |
| ENSG00000131558.13_EXOC4    | ENSG00000160789.18_LMNA | 0.07474  | -0.085475057 | 0.231192442 | 3.60E-01 | 6.42E-01 | 1.00E+00 |
| ENSG00000106799.11_TGFBR1   | ENSG00000160789.18_LMNA | -0.11113 | -0.265626967 | 0.048940988 | 1.73E-01 | 4.32E-01 | 1.00E+00 |
| ENSG00000100211.9_CBY1      | ENSG00000160789.18_LMNA | -0.09111 | -0.246734901 | 0.06908971  | 2.64E-01 | 5.48E-01 | 1.00E+00 |
| ENSG00000127863.14_TNFRSF1  | ENSG00000160789.18_LMNA | 0.15702  | -0.002232859 | 0.308512092 | 5.34E-02 | 2.10E-01 | 1.00E+00 |
| ENSG00000168397.15_ATG4B    | ENSG00000160789.18_LMNA | -0.00674 | -0.165759421 | 0.1526279   | 9.34E-01 | 9.74E-01 | 1.00E+00 |
| ENSG00000198276.12_UCKL1    | ENSG00000160789.18_LMNA | 0.13317  | -0.026591995 | 0.286303231 | 1.02E-01 | 3.15E-01 | 1.00E+00 |
| ENSG00000238227.6_C9orf69   | ENSG00000160789.18_LMNA | 0.39311  | 0.249529415  | 0.519784132 | 5.45E-07 | 2.81E-05 | 2.80E-02 |
| ENSG00000182253.13_SYNM     | ENSG00000160789.18_LMNA | 0.15695  | -0.002304688 | 0.308447097 | 5.35E-02 | 2.10E-01 | 1.00E+00 |
| ENSG00000196141.11_SPATS2L  | ENSG00000160789.18_LMNA | 0.50795  | 0.379429466  | 0.617235018 | 2.40E-11 | 6.98E-09 | 1.23E-06 |
| ENSG00000105649.8_RAB3A     | ENSG00000160789.18_LMNA | -0.29978 | -0.438077512 | -0.1476295  | 1.75E-04 | 2.94E-03 | 1.00E+00 |
| ENSG00000085832.15_EPS15    | ENSG00000160789.18_LMNA | -0.05703 | -0.214284872 | 0.103107131 | 4.85E-01 | 7.42E-01 | 1.00E+00 |
| ENSG00000079332.13_SAR1A    | ENSG00000160789.18_LMNA | -0.23115 | -0.376496782 | -0.07469911 | 4.17E-03 | 3.43E-02 | 1.00E+00 |
| ENSG00000131748.14_STARD3   | ENSG00000160789.18_LMNA | 0.01355  | -0.145964691 | 0.172379727 | 8.68E-01 | 9.49E-01 | 1.00E+00 |
| ENSG00000136205.15_TNS3     | ENSG00000160789.18_LMNA | -0.13825 | -0.291049313 | 0.021417428 | 8.94E-02 | 2.91E-01 | 1.00E+00 |
| ENSG00000167491.16_GATAD2A  | ENSG00000160789.18_LMNA | 0.22967  | 0.073139236  | 0.375149868 | 4.42E-03 | 3.57E-02 | 1.00E+00 |

|                             |                         |          |              |             |          |          |          |
|-----------------------------|-------------------------|----------|--------------|-------------|----------|----------|----------|
| ENSG00000115816.12_CEBPZ    | ENSG00000160789.18_LMNA | -0.0188  | -0.17746864  | 0.14082309  | 8.18E-01 | 9.29E-01 | 1.00E+00 |
| ENSG00000075239.12_ACAT1    | ENSG00000160789.18_LMNA | -0.35634 | -0.48786574  | -0.20899726 | 6.61E-06 | 2.10E-04 | 3.39E-01 |
| ENSG00000025039.13_RRAGD    | ENSG00000160789.18_LMNA | -0.17803 | -0.327935502 | -0.01937779 | 2.82E-02 | 1.37E-01 | 1.00E+00 |
| ENSG00000114790.11_ARHGEF2  | ENSG00000160789.18_LMNA | 0.08498  | -0.075235721 | 0.240924031 | 2.98E-01 | 5.84E-01 | 1.00E+00 |
| ENSG00000136274.8_NACAD     | ENSG00000160789.18_LMNA | 0.01023  | -0.149214269 | 0.169154661 | 9.00E-01 | 9.61E-01 | 1.00E+00 |
| ENSG00000006652.12_IFRD1    | ENSG00000160789.18_LMNA | 0.07758  | -0.082637517 | 0.233895636 | 3.42E-01 | 6.27E-01 | 1.00E+00 |
| ENSG00000165169.9_DYNLT3    | ENSG00000160789.18_LMNA | 0.33885  | 0.189895521  | 0.472560402 | 1.95E-05 | 5.07E-04 | 1.00E+00 |
| ENSG00000198805.10_PNP      | ENSG00000160789.18_LMNA | 0.16939  | 0.010472964  | 0.319963423 | 3.70E-02 | 1.64E-01 | 1.00E+00 |
| ENSG00000243927.4_MRPS6     | ENSG00000160789.18_LMNA | 0.07812  | -0.082104511 | 0.234402861 | 3.39E-01 | 6.24E-01 | 1.00E+00 |
| ENSG00000117713.16_ARID1A   | ENSG00000160789.18_LMNA | 0.06613  | -0.094060154 | 0.222983931 | 4.18E-01 | 6.90E-01 | 1.00E+00 |
| ENSG00000162772.15_ATF3     | ENSG00000160789.18_LMNA | 0.23234  | 0.075947001  | 0.377573385 | 3.97E-03 | 3.30E-02 | 1.00E+00 |
| ENSG00000138078.14_PREPL    | ENSG00000160789.18_LMNA | -0.36369 | -0.494274496 | -0.21705938 | 4.11E-06 | 1.42E-04 | 2.11E-01 |
| ENSG00000130226.15_DPP6     | ENSG00000160789.18_LMNA | -0.115   | -0.2692711   | 0.045024775 | 1.58E-01 | 4.11E-01 | 1.00E+00 |
| ENSG00000115946.6_PNO1      | ENSG00000160789.18_LMNA | -0.15046 | -0.302418875 | 0.008952936 | 6.43E-02 | 2.36E-01 | 1.00E+00 |
| ENSG00000107745.15_MICU1    | ENSG00000160789.18_LMNA | -0.40104 | -0.526618843 | -0.25833346 | 3.05E-07 | 1.79E-05 | 1.57E-02 |
| ENSG00000163870.13_TPRA1    | ENSG00000160789.18_LMNA | 0.26149  | 0.106733994  | 0.403878785 | 1.14E-03 | 1.28E-02 | 1.00E+00 |
| ENSG00000214753.2_HNRNPUL2  | ENSG00000160789.18_LMNA | 0.10221  | -0.057937933 | 0.257220901 | 2.10E-01 | 4.83E-01 | 1.00E+00 |
| ENSG00000177432.6_NAP1L5    | ENSG00000160789.18_LMNA | -0.27901 | -0.419573557 | -0.12537811 | 5.00E-04 | 6.74E-03 | 1.00E+00 |
| ENSG00000087258.12_GNAO1    | ENSG00000160789.18_LMNA | -0.26039 | -0.402890298 | -0.10556671 | 1.20E-03 | 1.33E-02 | 1.00E+00 |
| ENSG00000028528.13_SNX1     | ENSG00000160789.18_LMNA | -0.06479 | -0.221702383 | 0.095396254 | 4.28E-01 | 6.98E-01 | 1.00E+00 |
| ENSG00000125875.12_TBC1D20  | ENSG00000160789.18_LMNA | 0.17677  | 0.018076711  | 0.326773445 | 2.94E-02 | 1.41E-01 | 1.00E+00 |
| ENSG00000162441.10_LZIC     | ENSG00000160789.18_LMNA | -0.28966 | -0.429076562 | -0.13676882 | 2.95E-04 | 4.44E-03 | 1.00E+00 |
| ENSG00000182670.12_TTC3     | ENSG00000160789.18_LMNA | -0.14789 | -0.300030744 | 0.011579106 | 6.90E-02 | 2.47E-01 | 1.00E+00 |
| ENSG00000104067.15_TJP1     | ENSG00000160789.18_LMNA | 0.03973  | -0.12022699  | 0.19768444  | 6.27E-01 | 8.32E-01 | 1.00E+00 |
| ENSG00000277258.3_PCGF2     | ENSG00000160789.18_LMNA | -0.04817 | -0.205792027 | 0.111889274 | 5.56E-01 | 7.90E-01 | 1.00E+00 |
| ENSG00000085365.16_SCAMP1   | ENSG00000160789.18_LMNA | -0.32385 | -0.4593641   | -0.17359597 | 4.70E-05 | 1.02E-03 | 1.00E+00 |
| ENSG00000162599.14_NFIA     | ENSG00000160789.18_LMNA | -0.20866 | -0.356032513 | -0.05115739 | 9.89E-03 | 6.51E-02 | 1.00E+00 |
| ENSG00000253982.1_CTD-2336C | ENSG00000160789.18_LMNA | -0.12483 | -0.278498065 | 0.035065519 | 1.25E-01 | 3.58E-01 | 1.00E+00 |
| ENSG00000126012.10_KDM5C    | ENSG00000160789.18_LMNA | 0.25909  | 0.104187481  | 0.401721445 | 1.27E-03 | 1.39E-02 | 1.00E+00 |
| ENSG00000100299.16_ARSA     | ENSG00000160789.18_LMNA | 0.15251  | -0.006860356 | 0.304318988 | 6.07E-02 | 2.27E-01 | 1.00E+00 |
| ENSG00000149090.10_PAMR1    | ENSG00000160789.18_LMNA | 0.17393  | 0.015149038  | 0.324155169 | 3.21E-02 | 1.50E-01 | 1.00E+00 |
| ENSG00000038382.16_TRIO     | ENSG00000160789.18_LMNA | 0.21922  | 0.062190231  | 0.36565965  | 6.66E-03 | 4.85E-02 | 1.00E+00 |
| ENSG00000132254.11_ARFIP2   | ENSG00000160789.18_LMNA | -0.02144 | -0.180022402 | 0.138236402 | 7.93E-01 | 9.16E-01 | 1.00E+00 |

|                             |                         |          |              |             |          |          |          |
|-----------------------------|-------------------------|----------|--------------|-------------|----------|----------|----------|
| ENSG00000162433.13_AK4      | ENSG00000160789.18_LMNA | 0.24258  | 0.086732407  | 0.38684452  | 2.60E-03 | 2.39E-02 | 1.00E+00 |
| ENSG00000140157.13_NIPA2    | ENSG00000160789.18_LMNA | 0.24782  | 0.092261025  | 0.391573515 | 2.08E-03 | 2.02E-02 | 1.00E+00 |
| ENSG00000137133.9_HINT2     | ENSG00000160789.18_LMNA | 0.06041  | -0.099746339 | 0.217522307 | 4.60E-01 | 7.23E-01 | 1.00E+00 |
| ENSG00000141425.16_RPRD1A   | ENSG00000160789.18_LMNA | -0.51693 | -0.624721196 | -0.38981183 | 9.23E-12 | 3.36E-09 | 4.74E-07 |
| ENSG00000196368.4_NUDT11    | ENSG00000160789.18_LMNA | -0.49903 | -0.609787109 | -0.36915927 | 6.00E-11 | 1.50E-08 | 3.08E-06 |
| ENSG00000156603.13_MED19    | ENSG00000160789.18_LMNA | -0.27166 | -0.412999366 | -0.11754313 | 7.10E-04 | 8.88E-03 | 1.00E+00 |
| ENSG00000088766.10_CRLS1    | ENSG00000160789.18_LMNA | -0.20101 | -0.349043169 | -0.04319386 | 1.30E-02 | 7.93E-02 | 1.00E+00 |
| ENSG00000281383.1_CH507-513 | ENSG00000160789.18_LMNA | -0.06622 | -0.223068286 | 0.093972168 | 4.18E-01 | 6.90E-01 | 1.00E+00 |
| ENSG00000004777.17_ARHGAP3  | ENSG00000160789.18_LMNA | -0.14892 | -0.300984413 | 0.010530894 | 6.71E-02 | 2.43E-01 | 1.00E+00 |
| ENSG00000127054.17_CPSF3L   | ENSG00000160789.18_LMNA | 0.24386  | 0.088075543  | 0.387994847 | 2.47E-03 | 2.30E-02 | 1.00E+00 |
| ENSG00000170265.10_ZNF282   | ENSG00000160789.18_LMNA | 0.31152  | 0.16026724   | 0.448478424 | 9.36E-05 | 1.79E-03 | 1.00E+00 |
| ENSG00000130311.9_DDA1      | ENSG00000160789.18_LMNA | -0.19242 | -0.341171215 | -0.03427099 | 1.75E-02 | 9.82E-02 | 1.00E+00 |
| ENSG00000184990.11_SIVA1    | ENSG00000160789.18_LMNA | 0.10891  | -0.051175912 | 0.263543278 | 1.82E-01 | 4.46E-01 | 1.00E+00 |
| ENSG00000152377.11_SPOCK1   | ENSG00000160789.18_LMNA | -0.13385 | -0.286935533 | 0.025903574 | 1.00E-01 | 3.12E-01 | 1.00E+00 |
| ENSG00000153823.17_PID1     | ENSG00000160789.18_LMNA | -0.30316 | -0.441074373 | -0.15126117 | 1.47E-04 | 2.55E-03 | 1.00E+00 |
| ENSG00000116096.5_SPR       | ENSG00000160789.18_LMNA | 0.03421  | -0.125671284 | 0.192366837 | 6.76E-01 | 8.58E-01 | 1.00E+00 |
| ENSG00000153786.11_ZDHHC7   | ENSG00000160789.18_LMNA | 0.28069  | 0.127175084  | 0.421077027 | 4.61E-04 | 6.32E-03 | 1.00E+00 |
| ENSG00000112658.7_SRF       | ENSG00000160789.18_LMNA | 0.40043  | 0.257648896  | 0.526088644 | 3.20E-07 | 1.85E-05 | 1.64E-02 |
| ENSG00000015475.17_BID      | ENSG00000160789.18_LMNA | -0.37391 | -0.503160249 | -0.22830044 | 2.08E-06 | 8.22E-05 | 1.07E-01 |
| ENSG00000160695.13_VPS11    | ENSG00000160789.18_LMNA | -0.03268 | -0.190885352 | 0.127184661 | 6.89E-01 | 8.66E-01 | 1.00E+00 |
| ENSG00000136816.14_TOR1B    | ENSG00000160789.18_LMNA | 0.27309  | 0.119060627  | 0.414275078 | 6.64E-04 | 8.41E-03 | 1.00E+00 |
| ENSG00000160285.13_LSS      | ENSG00000160789.18_LMNA | 0.29323  | 0.140590872  | 0.432250778 | 2.46E-04 | 3.85E-03 | 1.00E+00 |
| ENSG00000106355.8_LSM5      | ENSG00000160789.18_LMNA | -0.03796 | -0.195980828 | 0.121973274 | 6.42E-01 | 8.41E-01 | 1.00E+00 |
| ENSG00000275052.3_PPP4R3B   | ENSG00000160789.18_LMNA | -0.1905  | -0.339409965 | -0.03228129 | 1.87E-02 | 1.03E-01 | 1.00E+00 |
| ENSG00000167779.6_IGFBP6    | ENSG00000160789.18_LMNA | 0.28983  | 0.136952405  | 0.429229195 | 2.92E-04 | 4.42E-03 | 1.00E+00 |
| ENSG00000130489.11_SCO2     | ENSG00000160789.18_LMNA | 0.07931  | -0.080911516 | 0.235537528 | 3.31E-01 | 6.17E-01 | 1.00E+00 |
| ENSG00000186432.7_KPNA4     | ENSG00000160789.18_LMNA | -0.00342 | -0.162535048 | 0.15586272  | 9.67E-01 | 9.87E-01 | 1.00E+00 |
| ENSG00000134086.7_VHL       | ENSG00000160789.18_LMNA | -0.22851 | -0.37409885  | -0.07192307 | 4.63E-03 | 3.70E-02 | 1.00E+00 |
| ENSG00000072134.14_EPN2     | ENSG00000160789.18_LMNA | -0.03508 | -0.193205907 | 0.124813495 | 6.68E-01 | 8.54E-01 | 1.00E+00 |
| ENSG00000008394.11_MGST1    | ENSG00000160789.18_LMNA | -0.00475 | -0.163825077 | 0.15456933  | 9.54E-01 | 9.81E-01 | 1.00E+00 |
| ENSG00000100336.16_APOL4    | ENSG00000160789.18_LMNA | -0.10509 | -0.259945385 | 0.055027536 | 1.98E-01 | 4.67E-01 | 1.00E+00 |
| ENSG00000161800.11_RACGAP1  | ENSG00000160789.18_LMNA | -0.04887 | -0.206467959 | 0.111192129 | 5.50E-01 | 7.86E-01 | 1.00E+00 |
| ENSG00000229833.8_PET100    | ENSG00000160789.18_LMNA | -0.31998 | -0.455950124 | -0.16940451 | 5.86E-05 | 1.22E-03 | 1.00E+00 |



|                            |                         |          |              |             |          |          |          |
|----------------------------|-------------------------|----------|--------------|-------------|----------|----------|----------|
| ENSG00000164039.13_BDH2    | ENSG00000160789.18_LMNA | -0.14163 | -0.294199903 | 0.017973127 | 8.18E-02 | 2.76E-01 | 1.00E+00 |
| ENSG0000010361.12_FUZ      | ENSG00000160789.18_LMNA | 0.00139  | -0.157849331 | 0.160551477 | 9.86E-01 | 9.95E-01 | 1.00E+00 |
| ENSG00000108788.10_MLX     | ENSG00000160789.18_LMNA | -0.16482 | -0.315733007 | -0.00576744 | 4.24E-02 | 1.80E-01 | 1.00E+00 |
| ENSG00000029559.6_IBSP     | ENSG00000160789.18_LMNA | 0.21344  | 0.056145557  | 0.360393161 | 8.29E-03 | 5.72E-02 | 1.00E+00 |
| ENSG00000168280.15_KIF5C   | ENSG00000160789.18_LMNA | -0.29311 | -0.432144687 | -0.14046299 | 2.48E-04 | 3.87E-03 | 1.00E+00 |
| ENSG00000066032.17_CTNNA2  | ENSG00000160789.18_LMNA | -0.15921 | -0.310543055 | -1.33E-05   | 5.01E-02 | 2.02E-01 | 1.00E+00 |
| ENSG00000164163.9_ABCE1    | ENSG00000160789.18_LMNA | 0.05798  | -0.102163535 | 0.215194538 | 4.78E-01 | 7.36E-01 | 1.00E+00 |
| ENSG00000033627.13_ATP6V0A | ENSG00000160789.18_LMNA | -0.06689 | -0.223709671 | 0.093303014 | 4.13E-01 | 6.86E-01 | 1.00E+00 |
| ENSG00000145029.10_NICN1   | ENSG00000160789.18_LMNA | -0.20019 | -0.348291096 | -0.04233927 | 1.34E-02 | 8.08E-02 | 1.00E+00 |
| ENSG00000137815.13_RTF1    | ENSG00000160789.18_LMNA | 0.04852  | -0.111539222 | 0.206131465 | 5.53E-01 | 7.88E-01 | 1.00E+00 |
| ENSG00000008056.11_SYN1    | ENSG00000160789.18_LMNA | -0.22565 | -0.371502054 | -0.06892207 | 5.19E-03 | 4.04E-02 | 1.00E+00 |
| ENSG00000084731.12_KIF3C   | ENSG00000160789.18_LMNA | -0.00139 | -0.160557092 | 0.157843711 | 9.86E-01 | 9.95E-01 | 1.00E+00 |
| ENSG00000197724.9_PHF2     | ENSG00000160789.18_LMNA | 0.0408   | -0.119176211 | 0.198708617 | 6.18E-01 | 8.27E-01 | 1.00E+00 |
| ENSG00000111275.11_ALDH2   | ENSG00000160789.18_LMNA | -0.39166 | -0.518532356 | -0.24792178 | 6.05E-07 | 3.05E-05 | 3.10E-02 |
| ENSG00000129946.9_SHC2     | ENSG00000160789.18_LMNA | -0.01248 | -0.171337371 | 0.147015721 | 8.79E-01 | 9.53E-01 | 1.00E+00 |
| ENSG00000183020.12_AP2A2   | ENSG00000160789.18_LMNA | 0.18722  | 0.028883383  | 0.336397211 | 2.09E-02 | 1.11E-01 | 1.00E+00 |
| ENSG00000058673.14_ZC3H11A | ENSG00000160789.18_LMNA | 0.07038  | -0.089824692 | 0.227039231 | 3.89E-01 | 6.67E-01 | 1.00E+00 |
| ENSG00000132640.13_BTBD3   | ENSG00000160789.18_LMNA | -0.17573 | -0.325811115 | -0.01700005 | 3.04E-02 | 1.44E-01 | 1.00E+00 |
| ENSG00000168884.13_TNIP2   | ENSG00000160789.18_LMNA | 0.25208  | 0.096757567  | 0.395408083 | 1.73E-03 | 1.75E-02 | 1.00E+00 |
| ENSG00000104886.8_PLEKHJ1  | ENSG00000160789.18_LMNA | -0.03205 | -0.190283746 | 0.127798795 | 6.95E-01 | 8.69E-01 | 1.00E+00 |
| ENSG00000103275.17_UBE2I   | ENSG00000160789.18_LMNA | -0.03491 | -0.193034628 | 0.124988633 | 6.69E-01 | 8.55E-01 | 1.00E+00 |
| ENSG00000080503.18_SMARCA2 | ENSG00000160789.18_LMNA | 0.0932   | -0.06699386  | 0.248711285 | 2.53E-01 | 5.35E-01 | 1.00E+00 |
| ENSG00000112578.8_BYSL     | ENSG00000160789.18_LMNA | -0.03952 | -0.197477751 | 0.120438961 | 6.29E-01 | 8.33E-01 | 1.00E+00 |
| ENSG00000154079.5_SDHAF4   | ENSG00000160789.18_LMNA | -0.15275 | -0.304541264 | 0.006615387 | 6.03E-02 | 2.26E-01 | 1.00E+00 |
| ENSG00000107159.11_CA9     | ENSG00000160789.18_LMNA | 0.3459   | 0.197577018  | 0.478735797 | 1.27E-05 | 3.55E-04 | 6.53E-01 |
| ENSG00000120733.12_KDM3B   | ENSG00000160789.18_LMNA | -0.13407 | -0.287142529 | 0.025678142 | 9.96E-02 | 3.11E-01 | 1.00E+00 |
| ENSG00000181038.12_METTL23 | ENSG00000160789.18_LMNA | -0.03423 | -0.19237759  | 0.125660294 | 6.76E-01 | 8.58E-01 | 1.00E+00 |
| ENSG00000145555.13_MYO10   | ENSG00000160789.18_LMNA | -0.14477 | -0.297124129 | 0.014769649 | 7.52E-02 | 2.62E-01 | 1.00E+00 |
| ENSG00000147889.15_CDKN2A  | ENSG00000160789.18_LMNA | -0.05332 | -0.210729807 | 0.106789325 | 5.14E-01 | 7.62E-01 | 1.00E+00 |
| ENSG00000134013.14_LOXL2   | ENSG00000160789.18_LMNA | 0.37836  | 0.233211592  | 0.507024221 | 1.54E-06 | 6.55E-05 | 7.89E-02 |
| ENSG00000014824.12_SLC30A9 | ENSG00000160789.18_LMNA | -0.3664  | -0.496633885 | -0.22003701 | 3.44E-06 | 1.23E-04 | 1.77E-01 |
| ENSG00000065717.13_TLE2    | ENSG00000160789.18_LMNA | 0.01211  | -0.147378594 | 0.170977328 | 8.82E-01 | 9.54E-01 | 1.00E+00 |
| ENSG00000155097.10_ATP6V1C | ENSG00000160789.18_LMNA | -0.06075 | -0.217848348 | 0.099407473 | 4.57E-01 | 7.21E-01 | 1.00E+00 |

|                             |                         |          |              |             |          |          |          |
|-----------------------------|-------------------------|----------|--------------|-------------|----------|----------|----------|
| ENSG00000171848.12_RRM2     | ENSG00000160789.18_LMNA | 0.1466   | -0.012902748 | 0.298825595 | 7.15E-02 | 2.53E-01 | 1.00E+00 |
| ENSG00000131844.14_MCCC2    | ENSG00000160789.18_LMNA | -0.0217  | -0.180275861 | 0.137979437 | 7.91E-01 | 9.15E-01 | 1.00E+00 |
| ENSG00000086758.14_HUWE1    | ENSG00000160789.18_LMNA | 0.11991  | -0.040053568 | 0.273884005 | 1.41E-01 | 3.83E-01 | 1.00E+00 |
| ENSG00000164081.11_TEX264   | ENSG00000160789.18_LMNA | 0.17233  | 0.013498873  | 0.322677305 | 3.38E-02 | 1.55E-01 | 1.00E+00 |
| ENSG00000105251.9_SHD       | ENSG00000160789.18_LMNA | -0.42655 | -0.548503474 | -0.2868269  | 4.26E-08 | 3.58E-06 | 2.19E-03 |
| ENSG00000232888.4_RPS11P5   | ENSG00000160789.18_LMNA | -0.14651 | -0.298739902 | 0.012996825 | 7.17E-02 | 2.53E-01 | 1.00E+00 |
| ENSG00000148300.10_REXO4    | ENSG00000160789.18_LMNA | 0.19655  | 0.038551532  | 0.344952983 | 1.52E-02 | 8.88E-02 | 1.00E+00 |
| ENSG00000118432.12_CNR1     | ENSG00000160789.18_LMNA | 0.06958  | -0.090625188 | 0.226273626 | 3.94E-01 | 6.72E-01 | 1.00E+00 |
| ENSG00000074317.9_SNCB      | ENSG00000160789.18_LMNA | -0.16017 | -0.311425436 | -0.00099015 | 4.87E-02 | 1.98E-01 | 1.00E+00 |
| ENSG00000228058.1_RP11-552D | ENSG00000160789.18_LMNA | -0.3191  | -0.455180384 | -0.1684609  | 6.15E-05 | 1.27E-03 | 1.00E+00 |
| ENSG00000124535.14_WRNIP1   | ENSG00000160789.18_LMNA | 0.17411  | 0.015338199  | 0.324324483 | 3.19E-02 | 1.49E-01 | 1.00E+00 |
| ENSG00000129195.14_FAM64A   | ENSG00000160789.18_LMNA | -0.06763 | -0.224419001 | 0.09256264  | 4.08E-01 | 6.83E-01 | 1.00E+00 |
| ENSG00000126456.14_IRF3     | ENSG00000160789.18_LMNA | 0.37903  | 0.23395071   | 0.507604789 | 1.47E-06 | 6.31E-05 | 7.54E-02 |
| ENSG00000163795.12_ZNF513   | ENSG00000160789.18_LMNA | 0.04734  | -0.112708096 | 0.204997731 | 5.62E-01 | 7.94E-01 | 1.00E+00 |
| ENSG00000154380.15_ENAH     | ENSG00000160789.18_LMNA | -0.10316 | -0.258121973 | 0.056975966 | 2.06E-01 | 4.78E-01 | 1.00E+00 |
| ENSG00000116957.11_TBCE     | ENSG00000160789.18_LMNA | -0.09404 | -0.249506816 | 0.066149455 | 2.49E-01 | 5.30E-01 | 1.00E+00 |
| ENSG00000117500.11_TMED5    | ENSG00000160789.18_LMNA | -0.11039 | -0.264934488 | 0.049684077 | 1.76E-01 | 4.37E-01 | 1.00E+00 |
| ENSG00000172534.12_HCFC1    | ENSG00000160789.18_LMNA | 0.13616  | -0.023549274 | 0.289095857 | 9.44E-02 | 3.01E-01 | 1.00E+00 |
| ENSG00000159210.8_SNF8      | ENSG00000160789.18_LMNA | 0.04908  | -0.110983699 | 0.206669988 | 5.48E-01 | 7.85E-01 | 1.00E+00 |
| ENSG00000099385.10_BCL7C    | ENSG00000160789.18_LMNA | 0.19139  | 0.03320103   | 0.340224371 | 1.82E-02 | 1.01E-01 | 1.00E+00 |
| ENSG00000013297.9_CLDN11    | ENSG00000160789.18_LMNA | -0.25201 | -0.395351046 | -0.09669059 | 1.74E-03 | 1.76E-02 | 1.00E+00 |
| ENSG00000105655.17_ISYNA1   | ENSG00000160789.18_LMNA | 0.12375  | -0.036167965 | 0.277479521 | 1.29E-01 | 3.64E-01 | 1.00E+00 |
| ENSG00000142784.14_WDTC1    | ENSG00000160789.18_LMNA | 0.04967  | -0.110403956 | 0.207231786 | 5.43E-01 | 7.82E-01 | 1.00E+00 |
| ENSG00000204220.8_PFDN6     | ENSG00000160789.18_LMNA | -0.20982 | -0.357093627 | -0.05236981 | 9.47E-03 | 6.31E-02 | 1.00E+00 |
| ENSG00000111875.7_ASF1A     | ENSG00000160789.18_LMNA | -0.31744 | -0.453715971 | -0.16666715 | 6.75E-05 | 1.37E-03 | 1.00E+00 |
| ENSG00000109111.13_SUPT6H   | ENSG00000160789.18_LMNA | 0.17284  | 0.014023602  | 0.323147409 | 3.32E-02 | 1.53E-01 | 1.00E+00 |
| ENSG00000117614.8_SYF2      | ENSG00000160789.18_LMNA | 0.10561  | -0.054508445 | 0.26043079  | 1.95E-01 | 4.64E-01 | 1.00E+00 |
| ENSG00000250742.1_RP11-834C | ENSG00000160789.18_LMNA | -0.33669 | -0.470665399 | -0.18754527 | 2.22E-05 | 5.63E-04 | 1.00E+00 |
| ENSG00000049089.12_COL9A2   | ENSG00000160789.18_LMNA | -0.07987 | -0.236066611 | 0.080354925 | 3.28E-01 | 6.14E-01 | 1.00E+00 |
| ENSG00000161920.8_MED11     | ENSG00000160789.18_LMNA | -0.15267 | -0.304470802 | 0.006693047 | 6.04E-02 | 2.27E-01 | 1.00E+00 |
| ENSG00000110367.10_DDX6     | ENSG00000160789.18_LMNA | -0.07993 | -0.236127253 | 0.080291117 | 3.28E-01 | 6.14E-01 | 1.00E+00 |
| ENSG00000198648.9_STK39     | ENSG00000160789.18_LMNA | -0.07336 | -0.229879544 | 0.086851354 | 3.69E-01 | 6.50E-01 | 1.00E+00 |
| ENSG00000232187.1_FTH1P7    | ENSG00000160789.18_LMNA | 0.01411  | -0.145414042 | 0.172925547 | 8.63E-01 | 9.46E-01 | 1.00E+00 |

|                            |                         |          |              |             |          |          |          |
|----------------------------|-------------------------|----------|--------------|-------------|----------|----------|----------|
| ENSG00000167881.13_SRP68   | ENSG00000160789.18_LMNA | 0.19271  | 0.034572956  | 0.341438319 | 1.74E-02 | 9.75E-02 | 1.00E+00 |
| ENSG00000174886.11_NDUFA11 | ENSG00000160789.18_LMNA | -0.17039 | -0.320884077 | -0.01149883 | 3.58E-02 | 1.61E-01 | 1.00E+00 |
| ENSG00000097021.18_ACOT7   | ENSG00000160789.18_LMNA | -0.01105 | -0.169954887 | 0.148408602 | 8.92E-01 | 9.58E-01 | 1.00E+00 |
| ENSG00000090006.16_LTBP4   | ENSG00000160789.18_LMNA | 0.14505  | -0.014485556 | 0.297383175 | 7.46E-02 | 2.60E-01 | 1.00E+00 |
| ENSG00000226221.1_RPL26P19 | ENSG00000160789.18_LMNA | -0.09204 | -0.247610747 | 0.068161266 | 2.59E-01 | 5.43E-01 | 1.00E+00 |
| ENSG00000166452.10_AKIP1   | ENSG00000160789.18_LMNA | 0.06775  | -0.092444738 | 0.224531928 | 4.07E-01 | 6.82E-01 | 1.00E+00 |
| ENSG00000126107.13_HECTD3  | ENSG00000160789.18_LMNA | 0.41092  | 0.26933427   | 0.535110461 | 1.45E-07 | 9.80E-06 | 7.45E-03 |
| ENSG00000047249.15_ATP6V1H | ENSG00000160789.18_LMNA | -0.21338 | -0.360337981 | -0.05608234 | 8.30E-03 | 5.73E-02 | 1.00E+00 |
| ENSG00000235084.3_CHCHD2P6 | ENSG00000160789.18_LMNA | -0.03154 | -0.189792265 | 0.12830033  | 7.00E-01 | 8.71E-01 | 1.00E+00 |
| ENSG00000071889.15_FAM3A   | ENSG00000160789.18_LMNA | 0.20808  | 0.050555189  | 0.355505166 | 1.01E-02 | 6.61E-02 | 1.00E+00 |
| ENSG00000162613.15_FUBP1   | ENSG00000160789.18_LMNA | -0.05512 | -0.212452811 | 0.105005793 | 5.00E-01 | 7.53E-01 | 1.00E+00 |
| ENSG00000100811.9_YY1      | ENSG00000160789.18_LMNA | 0.13799  | -0.021683721 | 0.290805445 | 9.00E-02 | 2.92E-01 | 1.00E+00 |
| ENSG00000126785.11_RHOJ    | ENSG00000160789.18_LMNA | 0.40283  | 0.260319178  | 0.528155603 | 2.67E-07 | 1.61E-05 | 1.37E-02 |
| ENSG00000113648.15_H2AFY   | ENSG00000160789.18_LMNA | -0.16588 | -0.316715705 | -0.00685928 | 4.11E-02 | 1.77E-01 | 1.00E+00 |
| ENSG00000073578.15_SDHA    | ENSG00000160789.18_LMNA | 0.19928  | 0.04139367   | 0.34745847  | 1.38E-02 | 8.28E-02 | 1.00E+00 |
| ENSG00000158850.13_B4GALT3 | ENSG00000160789.18_LMNA | 0.06328  | -0.096899872 | 0.220258846 | 4.39E-01 | 7.07E-01 | 1.00E+00 |
| ENSG00000120451.9_SNX19    | ENSG00000160789.18_LMNA | -0.0758  | -0.232200491 | 0.084417509 | 3.53E-01 | 6.37E-01 | 1.00E+00 |
| ENSG00000103512.13_NOMO1   | ENSG00000160789.18_LMNA | -0.00964 | -0.168586001 | 0.149786539 | 9.06E-01 | 9.64E-01 | 1.00E+00 |
| ENSG00000136950.12_ARPC5L  | ENSG00000160789.18_LMNA | 0.18823  | 0.029929195  | 0.337325151 | 2.02E-02 | 1.09E-01 | 1.00E+00 |
| ENSG00000121073.12_SLC35B1 | ENSG00000160789.18_LMNA | -0.0146  | -0.173401749 | 0.144933466 | 8.58E-01 | 9.44E-01 | 1.00E+00 |
| ENSG00000136732.13_GYPC    | ENSG00000160789.18_LMNA | -0.09395 | -0.249415989 | 0.066245885 | 2.50E-01 | 5.30E-01 | 1.00E+00 |
| ENSG00000100350.13_FOXRED2 | ENSG00000160789.18_LMNA | -0.01759 | -0.176301567 | 0.142003766 | 8.30E-01 | 9.34E-01 | 1.00E+00 |
| ENSG00000118242.14_MREG    | ENSG00000160789.18_LMNA | 0.16778  | 0.008815339  | 0.318474573 | 3.88E-02 | 1.70E-01 | 1.00E+00 |
| ENSG00000141576.13_RNF157  | ENSG00000160789.18_LMNA | 0.02259  | -0.137105269 | 0.18113779  | 7.82E-01 | 9.11E-01 | 1.00E+00 |
| ENSG00000123146.18_ADGRE5  | ENSG00000160789.18_LMNA | 0.52714  | 0.401646882  | 0.633202485 | 3.02E-12 | 1.36E-09 | 1.55E-07 |
| ENSG00000136868.10_SLC31A1 | ENSG00000160789.18_LMNA | 0.02648  | -0.133285871 | 0.184897983 | 7.46E-01 | 8.94E-01 | 1.00E+00 |
| ENSG00000087152.14_ATXN7L3 | ENSG00000160789.18_LMNA | 0.00766  | -0.151727152 | 0.16665605  | 9.25E-01 | 9.71E-01 | 1.00E+00 |
| ENSG00000213015.7_ZNF580   | ENSG00000160789.18_LMNA | 0.01178  | -0.147700947 | 0.170657417 | 8.86E-01 | 9.56E-01 | 1.00E+00 |
| ENSG00000100116.15_GCAT    | ENSG00000160789.18_LMNA | -0.13774 | -0.290569183 | 0.021941667 | 9.06E-02 | 2.93E-01 | 1.00E+00 |
| ENSG00000197170.8_PSMD12   | ENSG00000160789.18_LMNA | 0.08673  | -0.07348557  | 0.242581058 | 2.88E-01 | 5.74E-01 | 1.00E+00 |
| ENSG00000107897.17_ACBD5   | ENSG00000160789.18_LMNA | -0.22442 | -0.370386659 | -0.06763474 | 5.44E-03 | 4.18E-02 | 1.00E+00 |
| ENSG00000132017.9_DCAF15   | ENSG00000160789.18_LMNA | 0.0995   | -0.060662619 | 0.254665716 | 2.23E-01 | 4.98E-01 | 1.00E+00 |
| ENSG00000153936.15_HS2ST1  | ENSG00000160789.18_LMNA | 0.28706  | 0.133985302  | 0.426760297 | 3.36E-04 | 4.90E-03 | 1.00E+00 |

|                              |                         |          |              |             |          |          |          |
|------------------------------|-------------------------|----------|--------------|-------------|----------|----------|----------|
| ENSG00000120694.18_HSPH1     | ENSG00000160789.18_LMNA | 0.04823  | -0.11182595  | 0.205853436 | 5.55E-01 | 7.89E-01 | 1.00E+00 |
| ENSG00000196735.10_HLA-DQA   | ENSG00000160789.18_LMNA | 0.0256   | -0.134147003 | 0.184051012 | 7.54E-01 | 8.98E-01 | 1.00E+00 |
| ENSG00000184924.5_PTRHD1     | ENSG00000160789.18_LMNA | -0.22916 | -0.374690434 | -0.0726075  | 4.51E-03 | 3.63E-02 | 1.00E+00 |
| ENSG00000137944.15_KYAT3     | ENSG00000160789.18_LMNA | 1.68E-05 | -0.15918436  | 0.159217044 | 1.00E+00 | 1.00E+00 | 1.00E+00 |
| ENSG00000182446.12_NPLOC4    | ENSG00000160789.18_LMNA | 0.27373  | 0.119747434  | 0.414852074 | 6.44E-04 | 8.23E-03 | 1.00E+00 |
| ENSG00000160678.10_S100A1    | ENSG00000160789.18_LMNA | -0.29314 | -0.432173124 | -0.14049726 | 2.47E-04 | 3.86E-03 | 1.00E+00 |
| ENSG00000196361.8_ELAVL3     | ENSG00000160789.18_LMNA | -0.29771 | -0.436237748 | -0.1454039  | 1.95E-04 | 3.20E-03 | 1.00E+00 |
| ENSG00000140688.15_C16orf58  | ENSG00000160789.18_LMNA | 0.05073  | -0.109354505 | 0.208248218 | 5.35E-01 | 7.76E-01 | 1.00E+00 |
| ENSG00000129968.14_ABHD17A   | ENSG00000160789.18_LMNA | 0.03862  | -0.121321986 | 0.196616426 | 6.37E-01 | 8.37E-01 | 1.00E+00 |
| ENSG00000133026.11_MYH10     | ENSG00000160789.18_LMNA | 0.07562  | -0.084602552 | 0.232024159 | 3.55E-01 | 6.38E-01 | 1.00E+00 |
| ENSG00000101577.8_LPIN2      | ENSG00000160789.18_LMNA | 0.09908  | -0.061084429 | 0.254269753 | 2.25E-01 | 5.01E-01 | 1.00E+00 |
| ENSG00000149485.15_FADS1     | ENSG00000160789.18_LMNA | -0.12394 | -0.277659098 | 0.035973651 | 1.28E-01 | 3.62E-01 | 1.00E+00 |
| ENSG00000168243.9_GNG4       | ENSG00000160789.18_LMNA | -0.36196 | -0.492769465 | -0.21516267 | 4.60E-06 | 1.56E-04 | 2.36E-01 |
| ENSG00000166337.8_TAF10      | ENSG00000160789.18_LMNA | 0.1976   | 0.039650357  | 0.34592217  | 1.47E-02 | 8.65E-02 | 1.00E+00 |
| ENSG00000160633.11_SAFB      | ENSG00000160789.18_LMNA | 0.18799  | 0.029675942  | 0.337100497 | 2.04E-02 | 1.09E-01 | 1.00E+00 |
| ENSG00000029364.10_SLC39A9   | ENSG00000160789.18_LMNA | -0.04582 | -0.203539071 | 0.114210674 | 5.75E-01 | 8.02E-01 | 1.00E+00 |
| ENSG00000005884.16_ITGA3     | ENSG00000160789.18_LMNA | 0.57373  | 0.456202686  | 0.671592508 | 1.11E-14 | 1.50E-11 | 5.69E-10 |
| ENSG00000136527.16_TRA2B     | ENSG00000160789.18_LMNA | -0.09689 | -0.252197543 | 0.063290066 | 2.35E-01 | 5.13E-01 | 1.00E+00 |
| ENSG00000059804.14_SLC2A3    | ENSG00000160789.18_LMNA | 0.34052  | 0.19170849   | 0.474020411 | 1.77E-05 | 4.66E-04 | 9.06E-01 |
| ENSG000000212747.4_FAM127C   | ENSG00000160789.18_LMNA | -0.0516  | -0.209080904 | 0.108494243 | 5.28E-01 | 7.72E-01 | 1.00E+00 |
| ENSG00000158290.15_CUL4B     | ENSG00000160789.18_LMNA | 0.0662   | -0.093994468 | 0.223046907 | 4.18E-01 | 6.90E-01 | 1.00E+00 |
| ENSG00000139722.5_VPS37B     | ENSG00000160789.18_LMNA | 0.08396  | -0.076256803 | 0.239956428 | 3.04E-01 | 5.90E-01 | 1.00E+00 |
| ENSG00000161638.9_ITGA5      | ENSG00000160789.18_LMNA | 0.49581  | 0.365450543  | 0.607087071 | 8.32E-11 | 1.95E-08 | 4.27E-06 |
| ENSG00000148468.15_FAM171A   | ENSG00000160789.18_LMNA | -0.30855 | -0.445847269 | -0.15706127 | 1.10E-04 | 2.03E-03 | 1.00E+00 |
| ENSG00000105341.17_ATP5SL    | ENSG00000160789.18_LMNA | -0.0077  | -0.166697674 | 0.151685324 | 9.25E-01 | 9.71E-01 | 1.00E+00 |
| ENSG000000239900.10_ADSL     | ENSG00000160789.18_LMNA | -0.21992 | -0.366295121 | -0.06292111 | 6.48E-03 | 4.77E-02 | 1.00E+00 |
| ENSG00000196715.5_VKORC1L1   | ENSG00000160789.18_LMNA | 0.15183  | -0.007550571 | 0.30369253  | 6.19E-02 | 2.30E-01 | 1.00E+00 |
| ENSG000000235106.7_LINC00094 | ENSG00000160789.18_LMNA | -0.03473 | -0.192865693 | 0.125161355 | 6.71E-01 | 8.56E-01 | 1.00E+00 |
| ENSG000000114446.4_IFT57     | ENSG00000160789.18_LMNA | 0.15605  | -0.00322609  | 0.307613115 | 5.49E-02 | 2.14E-01 | 1.00E+00 |
| ENSG000000116991.9_SIPA1L2   | ENSG00000160789.18_LMNA | 0.20227  | 0.044497772  | 0.350189907 | 1.25E-02 | 7.68E-02 | 1.00E+00 |
| ENSG000000249915.6_PDCD6     | ENSG00000160789.18_LMNA | -0.2254  | -0.371277234 | -0.06866251 | 5.24E-03 | 4.06E-02 | 1.00E+00 |
| ENSG000000180957.16_PITPNB   | ENSG00000160789.18_LMNA | -0.09509 | -0.250499917 | 0.065094707 | 2.44E-01 | 5.23E-01 | 1.00E+00 |
| ENSG000000122122.9_SASH3     | ENSG00000160789.18_LMNA | -0.01466 | -0.17345172  | 0.144883027 | 8.58E-01 | 9.44E-01 | 1.00E+00 |

|                            |                         |          |              |             |          |          |          |
|----------------------------|-------------------------|----------|--------------|-------------|----------|----------|----------|
| ENSG00000074416.12_MGLL    | ENSG00000160789.18_LMNA | -0.018   | -0.1766936   | 0.141607265 | 8.26E-01 | 9.32E-01 | 1.00E+00 |
| ENSG00000143622.9_RIT1     | ENSG00000160789.18_LMNA | 0.11643  | -0.043580517 | 0.270612751 | 1.53E-01 | 4.03E-01 | 1.00E+00 |
| ENSG00000132467.3_UTP3     | ENSG00000160789.18_LMNA | 0.33893  | 0.189985432  | 0.472632845 | 1.94E-05 | 5.05E-04 | 9.97E-01 |
| ENSG00000185728.15_YTHDF3  | ENSG00000160789.18_LMNA | -0.0428  | -0.200630983 | 0.117201989 | 6.01E-01 | 8.16E-01 | 1.00E+00 |
| ENSG00000103018.15_CYB5B   | ENSG00000160789.18_LMNA | 0.17678  | 0.018088843  | 0.326784284 | 2.94E-02 | 1.41E-01 | 1.00E+00 |
| ENSG00000132313.13_MRPL35  | ENSG00000160789.18_LMNA | -0.14138 | -0.293962463 | 0.01823296  | 8.23E-02 | 2.77E-01 | 1.00E+00 |
| ENSG00000119711.11_ALDH6A1 | ENSG00000160789.18_LMNA | -0.08077 | -0.2369251   | 0.079451381 | 3.23E-01 | 6.09E-01 | 1.00E+00 |
| ENSG00000058091.15_CDK14   | ENSG00000160789.18_LMNA | 0.09035  | -0.069859699 | 0.246008142 | 2.68E-01 | 5.52E-01 | 1.00E+00 |
| ENSG00000110315.5_RNF141   | ENSG00000160789.18_LMNA | -0.28004 | -0.42049668  | -0.12648121 | 4.75E-04 | 6.48E-03 | 1.00E+00 |
| ENSG00000111530.11_CAND1   | ENSG00000160789.18_LMNA | -0.00174 | -0.160892905 | 0.157507563 | 9.83E-01 | 9.94E-01 | 1.00E+00 |
| ENSG00000130707.16_ASS1    | ENSG00000160789.18_LMNA | 0.06791  | -0.092290853 | 0.224679308 | 4.06E-01 | 6.81E-01 | 1.00E+00 |
| ENSG00000132792.17_CTNNBL1 | ENSG00000160789.18_LMNA | 0.15872  | -0.000488677 | 0.310089416 | 5.08E-02 | 2.03E-01 | 1.00E+00 |
| ENSG00000171067.9_C11orf24 | ENSG00000160789.18_LMNA | 0.28072  | 0.127206952  | 0.421103676 | 4.60E-04 | 6.32E-03 | 1.00E+00 |
| ENSG00000092969.10_TGFB2   | ENSG00000160789.18_LMNA | 0.12601  | -0.033867998 | 0.279603649 | 1.22E-01 | 3.51E-01 | 1.00E+00 |
| ENSG00000141582.13_CBX4    | ENSG00000160789.18_LMNA | 0.07366  | -0.086556755 | 0.230160669 | 3.67E-01 | 6.48E-01 | 1.00E+00 |
| ENSG00000173621.8_LRFN4    | ENSG00000160789.18_LMNA | 0.13857  | -0.0210977   | 0.291342062 | 8.87E-02 | 2.90E-01 | 1.00E+00 |
| ENSG00000197405.6_C5AR1    | ENSG00000160789.18_LMNA | 0.24713  | 0.091525613  | 0.390945379 | 2.15E-03 | 2.06E-02 | 1.00E+00 |
| ENSG00000168283.12_BMI1    | ENSG00000160789.18_LMNA | -0.52967 | -0.635298331 | -0.40458346 | 2.28E-12 | 1.07E-09 | 1.17E-07 |
| ENSG00000168785.6_TSPAN5   | ENSG00000160789.18_LMNA | 0.02297  | -0.136730644 | 0.181507019 | 7.79E-01 | 9.09E-01 | 1.00E+00 |
| ENSG00000089335.19_ZNF302  | ENSG00000160789.18_LMNA | -0.24631 | -0.390206724 | -0.09066122 | 2.22E-03 | 2.12E-02 | 1.00E+00 |
| ENSG00000165487.12_MICU2   | ENSG00000160789.18_LMNA | -0.19356 | -0.342218911 | -0.03545574 | 1.69E-02 | 9.56E-02 | 1.00E+00 |
| ENSG00000183696.12_UPP1    | ENSG00000160789.18_LMNA | 0.401    | 0.258287921  | 0.526583577 | 3.06E-07 | 1.79E-05 | 1.57E-02 |
| ENSG00000101557.13_USP14   | ENSG00000160789.18_LMNA | -0.08003 | -0.236221824 | 0.080191604 | 3.27E-01 | 6.14E-01 | 1.00E+00 |
| ENSG00000141696.11_P3H4    | ENSG00000160789.18_LMNA | 0.40166  | 0.259021235  | 0.527151314 | 2.92E-07 | 1.73E-05 | 1.50E-02 |
| ENSG00000162692.9_VCAM1    | ENSG00000160789.18_LMNA | 0.02243  | -0.137264542 | 0.180980783 | 7.84E-01 | 9.12E-01 | 1.00E+00 |
| ENSG00000133104.11_SPG20   | ENSG00000160789.18_LMNA | -0.13325 | -0.286371224 | 0.026517982 | 1.02E-01 | 3.15E-01 | 1.00E+00 |
| ENSG00000010165.18_METTL13 | ENSG00000160789.18_LMNA | 0.13393  | -0.025819254 | 0.287012961 | 1.00E-01 | 3.11E-01 | 1.00E+00 |
| ENSG00000101782.13_RIOK3   | ENSG00000160789.18_LMNA | -0.00854 | -0.167511985 | 0.150866791 | 9.17E-01 | 9.68E-01 | 1.00E+00 |
| ENSG00000189046.9_ALKBH2   | ENSG00000160789.18_LMNA | -0.23847 | -0.38312307  | -0.08239466 | 3.09E-03 | 2.73E-02 | 1.00E+00 |
| ENSG00000167515.9_TRAPPC2L | ENSG00000160789.18_LMNA | -0.15012 | -0.302098628 | 0.009305353 | 6.49E-02 | 2.37E-01 | 1.00E+00 |
| ENSG00000164125.14_FAM198B | ENSG00000160789.18_LMNA | -0.03395 | -0.192113042 | 0.125930648 | 6.78E-01 | 8.59E-01 | 1.00E+00 |
| ENSG00000131504.14_DIAPH1  | ENSG00000160789.18_LMNA | 0.33977  | 0.190895573  | 0.47336595  | 1.85E-05 | 4.83E-04 | 9.48E-01 |
| ENSG00000100403.11_ZC3H7B  | ENSG00000160789.18_LMNA | 0.04721  | -0.112836714 | 0.204872927 | 5.64E-01 | 7.95E-01 | 1.00E+00 |

|                             |                         |          |              |             |          |          |          |
|-----------------------------|-------------------------|----------|--------------|-------------|----------|----------|----------|
| ENSG00000087111.19_PIGS     | ENSG00000160789.18_LMNA | 0.0685   | -0.091699742 | 0.225245293 | 4.02E-01 | 6.78E-01 | 1.00E+00 |
| ENSG00000117143.12_UAP1     | ENSG00000160789.18_LMNA | 0.24367  | 0.087874349  | 0.387822594 | 2.49E-03 | 2.31E-02 | 1.00E+00 |
| ENSG00000060491.15_OGFR     | ENSG00000160789.18_LMNA | 0.37206  | 0.226261389  | 0.501552737 | 2.36E-06 | 9.05E-05 | 1.21E-01 |
| ENSG00000137996.11_RTCA     | ENSG00000160789.18_LMNA | 0.12872  | -0.031116512 | 0.282140751 | 1.14E-01 | 3.37E-01 | 1.00E+00 |
| ENSG00000081913.12_PHLPP1   | ENSG00000160789.18_LMNA | -0.25021 | -0.39372747  | -0.09478532 | 1.88E-03 | 1.87E-02 | 1.00E+00 |
| ENSG00000187244.9_BCAM      | ENSG00000160789.18_LMNA | 0.40226  | 0.259689086  | 0.52766816  | 2.79E-07 | 1.66E-05 | 1.43E-02 |
| ENSG00000198954.5_KIF1BP    | ENSG00000160789.18_LMNA | -0.17369 | -0.323936448 | -0.01490471 | 3.24E-02 | 1.51E-01 | 1.00E+00 |
| ENSG00000146833.14_TRIM4    | ENSG00000160789.18_LMNA | 0.17669  | 0.017991635  | 0.326697426 | 2.94E-02 | 1.41E-01 | 1.00E+00 |
| ENSG00000114316.11_USP4     | ENSG00000160789.18_LMNA | 0.14754  | -0.011940947 | 0.299701393 | 6.97E-02 | 2.49E-01 | 1.00E+00 |
| ENSG00000198797.6_BRINP2    | ENSG00000160789.18_LMNA | -0.0762  | -0.232580937 | 0.084018197 | 3.51E-01 | 6.34E-01 | 1.00E+00 |
| ENSG00000111962.7_UST       | ENSG00000160789.18_LMNA | -0.49827 | -0.609146599 | -0.36827878 | 6.49E-11 | 1.59E-08 | 3.33E-06 |
| ENSG00000213445.7_SIPA1     | ENSG00000160789.18_LMNA | 0.32448  | 0.174279792  | 0.459920273 | 4.54E-05 | 9.93E-04 | 1.00E+00 |
| ENSG00000163703.16_CRELD1   | ENSG00000160789.18_LMNA | 0.0042   | -0.155106009 | 0.163289925 | 9.59E-01 | 9.84E-01 | 1.00E+00 |
| ENSG00000121644.17_DESI2    | ENSG00000160789.18_LMNA | 0.0661   | -0.094091338 | 0.222954033 | 4.18E-01 | 6.90E-01 | 1.00E+00 |
| ENSG00000136631.11_VPS45    | ENSG00000160789.18_LMNA | -0.25377 | -0.396933046 | -0.09854918 | 1.61E-03 | 1.66E-02 | 1.00E+00 |
| ENSG00000253729.6_PRKDC     | ENSG00000160789.18_LMNA | 0.16877  | 0.009829139  | 0.319385331 | 3.77E-02 | 1.66E-01 | 1.00E+00 |
| ENSG00000173473.9_SMARCC1   | ENSG00000160789.18_LMNA | -0.00419 | -0.163285129 | 0.155110818 | 9.59E-01 | 9.84E-01 | 1.00E+00 |
| ENSG00000196510.11_ANAPC7   | ENSG00000160789.18_LMNA | -0.33105 | -0.465703507 | -0.18140667 | 3.10E-05 | 7.33E-04 | 1.00E+00 |
| ENSG00000173992.7_CCS       | ENSG00000160789.18_LMNA | 0.20973  | 0.05227199   | 0.357008045 | 9.51E-03 | 6.32E-02 | 1.00E+00 |
| ENSG00000105137.11_SYDE1    | ENSG00000160789.18_LMNA | 0.4724   | 0.33867055   | 0.587423589 | 8.02E-10 | 1.30E-07 | 4.11E-05 |
| ENSG00000245060.5_LINC00847 | ENSG00000160789.18_LMNA | -0.20138 | -0.349383992 | -0.04358129 | 1.29E-02 | 7.85E-02 | 1.00E+00 |
| ENSG00000104980.6_TIMM44    | ENSG00000160789.18_LMNA | 0.01507  | -0.144480803 | 0.173850155 | 8.54E-01 | 9.43E-01 | 1.00E+00 |
| ENSG00000177479.18_ARIH2    | ENSG00000160789.18_LMNA | -0.06693 | -0.223745609 | 0.093265512 | 4.13E-01 | 6.86E-01 | 1.00E+00 |
| ENSG00000142512.13_SIGLEC10 | ENSG00000160789.18_LMNA | -0.00747 | -0.166473637 | 0.151910446 | 9.27E-01 | 9.72E-01 | 1.00E+00 |
| ENSG00000214160.8_ALG3      | ENSG00000160789.18_LMNA | 0.24663  | 0.091002094  | 0.390498056 | 2.19E-03 | 2.10E-02 | 1.00E+00 |
| ENSG00000099821.12_POLRMT   | ENSG00000160789.18_LMNA | 0.25072  | 0.095327496  | 0.394189673 | 1.84E-03 | 1.84E-02 | 1.00E+00 |
| ENSG00000197256.9_KANK2     | ENSG00000160789.18_LMNA | 0.56549  | 0.446482986  | 0.664836547 | 3.19E-14 | 3.64E-11 | 1.64E-09 |
| ENSG00000213672.6_NCKIPSD   | ENSG00000160789.18_LMNA | 0.06155  | -0.098618675 | 0.218607018 | 4.51E-01 | 7.17E-01 | 1.00E+00 |
| ENSG00000124772.10_CPNE5    | ENSG00000160789.18_LMNA | -0.06278 | -0.219787789 | 0.097390222 | 4.42E-01 | 7.10E-01 | 1.00E+00 |
| ENSG00000112079.8_STK38     | ENSG00000160789.18_LMNA | 0.17015  | 0.011251453  | 0.32066212  | 3.61E-02 | 1.62E-01 | 1.00E+00 |
| ENSG00000132388.11_UBE2G1   | ENSG00000160789.18_LMNA | -0.16142 | -0.312589058 | -0.00227927 | 4.69E-02 | 1.93E-01 | 1.00E+00 |
| ENSG00000024862.15_CCDC28A  | ENSG00000160789.18_LMNA | -0.14637 | -0.298608924 | 0.013140607 | 7.20E-02 | 2.54E-01 | 1.00E+00 |
| ENSG00000074219.12_TEAD2    | ENSG00000160789.18_LMNA | 0.18289  | 0.024402768  | 0.332414826 | 2.41E-02 | 1.23E-01 | 1.00E+00 |

|                             |                         |          |              |             |          |          |          |
|-----------------------------|-------------------------|----------|--------------|-------------|----------|----------|----------|
| ENSG00000131634.12_TMEM204  | ENSG00000160789.18_LMNA | -0.06764 | -0.224423305 | 0.092558146 | 4.08E-01 | 6.83E-01 | 1.00E+00 |
| ENSG00000073050.10_XRCC1    | ENSG00000160789.18_LMNA | 0.18938  | 0.031117012  | 0.338378367 | 1.95E-02 | 1.06E-01 | 1.00E+00 |
| ENSG00000162645.11_GBP2     | ENSG00000160789.18_LMNA | 0.23798  | 0.08187928   | 0.382680267 | 3.15E-03 | 2.77E-02 | 1.00E+00 |
| ENSG00000181790.9_ADGRB1    | ENSG00000160789.18_LMNA | -0.17256 | -0.322893385 | -0.01374004 | 3.35E-02 | 1.54E-01 | 1.00E+00 |
| ENSG00000169105.7_CHST14    | ENSG00000160789.18_LMNA | 0.45412  | 0.317906866  | 0.57197278  | 4.20E-09 | 5.15E-07 | 2.15E-04 |
| ENSG00000132109.9_TRIM21    | ENSG00000160789.18_LMNA | 0.19207  | 0.03390112   | 0.340843974 | 1.78E-02 | 9.92E-02 | 1.00E+00 |
| ENSG00000261455.1_LINC01003 | ENSG00000160789.18_LMNA | -0.06625 | -0.223096429 | 0.093942812 | 4.17E-01 | 6.90E-01 | 1.00E+00 |
| ENSG00000122692.8_SMU1      | ENSG00000160789.18_LMNA | -0.04346 | -0.201266996 | 0.116548267 | 5.95E-01 | 8.13E-01 | 1.00E+00 |
| ENSG00000266017.1_MIR4477B  | ENSG00000160789.18_LMNA | -0.18164 | -0.331265088 | -0.02311149 | 2.51E-02 | 1.27E-01 | 1.00E+00 |
| ENSG00000136710.8_CCDC115   | ENSG00000160789.18_LMNA | -0.37856 | -0.507193938 | -0.23342763 | 1.52E-06 | 6.48E-05 | 7.79E-02 |
| ENSG00000107140.14_TESK1    | ENSG00000160789.18_LMNA | 0.22561  | 0.068881599  | 0.371467003 | 5.20E-03 | 4.04E-02 | 1.00E+00 |
| ENSG00000170248.12_PDCD6IP  | ENSG00000160789.18_LMNA | 0.13944  | -0.020212494 | 0.292152268 | 8.67E-02 | 2.86E-01 | 1.00E+00 |
| ENSG00000145495.13_MARCH6   | ENSG00000160789.18_LMNA | -0.15179 | -0.303651817 | 0.007595417 | 6.19E-02 | 2.30E-01 | 1.00E+00 |
| ENSG00000157557.10_ETS2     | ENSG00000160789.18_LMNA | -0.19858 | -0.346820049 | -0.040669   | 1.42E-02 | 8.45E-02 | 1.00E+00 |
| ENSG00000100568.9_VTI1B     | ENSG00000160789.18_LMNA | -0.07987 | -0.23606716  | 0.080354347 | 3.28E-01 | 6.14E-01 | 1.00E+00 |
| ENSG00000153485.5_TMEM251   | ENSG00000160789.18_LMNA | -0.06596 | -0.222825578 | 0.09422531  | 4.19E-01 | 6.91E-01 | 1.00E+00 |
| ENSG00000126602.9_TRAP1     | ENSG00000160789.18_LMNA | -0.05613 | -0.213425489 | 0.103998043 | 4.92E-01 | 7.48E-01 | 1.00E+00 |
| ENSG00000215845.9_TSTD1     | ENSG00000160789.18_LMNA | 0.16504  | 0.006001932  | 0.315944117 | 4.22E-02 | 1.80E-01 | 1.00E+00 |
| ENSG00000136444.8_RSAD1     | ENSG00000160789.18_LMNA | -0.05871 | -0.215894822 | 0.101436742 | 4.72E-01 | 7.32E-01 | 1.00E+00 |
| ENSG00000260804.3_PKI55     | ENSG00000160789.18_LMNA | -0.18577 | -0.33505864  | -0.02737596 | 2.19E-02 | 1.15E-01 | 1.00E+00 |
| ENSG00000130254.10_SAFB2    | ENSG00000160789.18_LMNA | 0.13193  | -0.027859721 | 0.285138134 | 1.05E-01 | 3.22E-01 | 1.00E+00 |
| ENSG00000198715.10_GLMP     | ENSG00000160789.18_LMNA | 0.41537  | 0.27431158   | 0.538934923 | 1.03E-07 | 7.43E-06 | 5.29E-03 |
| ENSG00000159063.11_ALG8     | ENSG00000160789.18_LMNA | 0.01718  | -0.142412751 | 0.175897085 | 8.34E-01 | 9.35E-01 | 1.00E+00 |
| ENSG00000178096.8_BOLA1     | ENSG00000160789.18_LMNA | -0.15965 | -0.310948317 | -0.00046188 | 4.95E-02 | 2.00E-01 | 1.00E+00 |
| ENSG00000125810.9_CD93      | ENSG00000160789.18_LMNA | 0.28935  | 0.136432458  | 0.428796867 | 3.00E-04 | 4.50E-03 | 1.00E+00 |
| ENSG00000111206.11_FOXM1    | ENSG00000160789.18_LMNA | 0.13106  | -0.028736788 | 0.284331528 | 1.08E-01 | 3.26E-01 | 1.00E+00 |
| ENSG00000039523.16_FAM65A   | ENSG00000160789.18_LMNA | 0.23311  | 0.076758469  | 0.378273033 | 3.85E-03 | 3.22E-02 | 1.00E+00 |
| ENSG00000087470.16_DNM1L    | ENSG00000160789.18_LMNA | -0.27869 | -0.419290108 | -0.12503954 | 5.08E-04 | 6.82E-03 | 1.00E+00 |
| ENSG00000089053.11_ANAPC5   | ENSG00000160789.18_LMNA | -0.35106 | -0.483252742 | -0.20321754 | 9.23E-06 | 2.73E-04 | 4.74E-01 |
| ENSG00000115539.12_PDCL3    | ENSG00000160789.18_LMNA | 0.05105  | -0.10904002  | 0.208552676 | 5.32E-01 | 7.75E-01 | 1.00E+00 |
| ENSG00000147586.8_MRPS28    | ENSG00000160789.18_LMNA | -0.36934 | -0.499187527 | -0.22326561 | 2.83E-06 | 1.05E-04 | 1.45E-01 |
| ENSG00000072310.15_SREBF1   | ENSG00000160789.18_LMNA | 0.21149  | 0.054114999  | 0.358619653 | 8.91E-03 | 6.03E-02 | 1.00E+00 |
| ENSG00000137478.13_FCHSD2   | ENSG00000160789.18_LMNA | -0.41324 | -0.53710618  | -0.27192981 | 1.22E-07 | 8.51E-06 | 6.24E-03 |

|                             |                         |          |              |             |          |          |          |
|-----------------------------|-------------------------|----------|--------------|-------------|----------|----------|----------|
| ENSG00000090776.5_EFNB1     | ENSG00000160789.18_LMNA | 0.29323  | 0.14058859   | 0.432248886 | 2.46E-04 | 3.85E-03 | 1.00E+00 |
| ENSG00000198756.9_COLGALT2  | ENSG00000160789.18_LMNA | 0.08611  | -0.074110679 | 0.241989421 | 2.92E-01 | 5.77E-01 | 1.00E+00 |
| ENSG00000143198.11_MGST3    | ENSG00000160789.18_LMNA | -0.23465 | -0.379667133 | -0.07837657 | 3.62E-03 | 3.07E-02 | 1.00E+00 |
| ENSG00000117906.12_RCN2     | ENSG00000160789.18_LMNA | -0.11951 | -0.273511626 | 0.040455448 | 1.42E-01 | 3.85E-01 | 1.00E+00 |
| ENSG00000002919.13_SNX11    | ENSG00000160789.18_LMNA | -0.28977 | -0.429169055 | -0.13688007 | 2.93E-04 | 4.42E-03 | 1.00E+00 |
| ENSG00000132394.9_EEFSEC    | ENSG00000160789.18_LMNA | 0.03863  | -0.121319163 | 0.196619181 | 6.37E-01 | 8.37E-01 | 1.00E+00 |
| ENSG00000006015.16_C19orf60 | ENSG00000160789.18_LMNA | 0.0166   | -0.142979306 | 0.175336591 | 8.39E-01 | 9.38E-01 | 1.00E+00 |
| ENSG00000155957.15_TMBIM4   | ENSG00000160789.18_LMNA | -0.19531 | -0.343824269 | -0.03727278 | 1.59E-02 | 9.15E-02 | 1.00E+00 |
| ENSG00000170310.13_STX8     | ENSG00000160789.18_LMNA | -0.31951 | -0.455539677 | -0.16890128 | 6.01E-05 | 1.24E-03 | 1.00E+00 |
| ENSG00000181788.3_SIAH2     | ENSG00000160789.18_LMNA | 0.16492  | 0.005873352  | 0.315828363 | 4.23E-02 | 1.80E-01 | 1.00E+00 |
| ENSG00000119760.14_SUPT7L   | ENSG00000160789.18_LMNA | -0.13819 | -0.290992117 | 0.021479887 | 8.95E-02 | 2.91E-01 | 1.00E+00 |
| ENSG00000089127.11_OAS1     | ENSG00000160789.18_LMNA | -0.01507 | -0.173853756 | 0.144477168 | 8.54E-01 | 9.43E-01 | 1.00E+00 |
| ENSG00000117868.14_ESYT2    | ENSG00000160789.18_LMNA | 0.29498  | 0.142474479  | 0.433812461 | 2.25E-04 | 3.58E-03 | 1.00E+00 |
| ENSG00000108439.8_PNPO      | ENSG00000160789.18_LMNA | -0.15159 | -0.303470479 | 0.00779515  | 6.23E-02 | 2.31E-01 | 1.00E+00 |
| ENSG00000161204.10_ABCF3    | ENSG00000160789.18_LMNA | 0.12924  | -0.030594165 | 0.282621904 | 1.13E-01 | 3.35E-01 | 1.00E+00 |
| ENSG00000160049.10_DFFA     | ENSG00000160789.18_LMNA | -0.12252 | -0.2763309   | 0.037410289 | 1.33E-01 | 3.69E-01 | 1.00E+00 |
| ENSG00000196923.12_PDLIM7   | ENSG00000160789.18_LMNA | 0.49042  | 0.359271881  | 0.602576436 | 1.42E-10 | 3.02E-08 | 7.30E-06 |
| ENSG00000139514.11_SLC7A1   | ENSG00000160789.18_LMNA | 0.0217   | -0.137979521 | 0.180275779 | 7.91E-01 | 9.15E-01 | 1.00E+00 |
| ENSG00000122550.16_KLHL7    | ENSG00000160789.18_LMNA | -0.31566 | -0.452139432 | -0.16473818 | 7.45E-05 | 1.49E-03 | 1.00E+00 |
| ENSG00000204351.10_SKIV2L   | ENSG00000160789.18_LMNA | 0.22521  | 0.068465718  | 0.371106754 | 5.28E-03 | 4.08E-02 | 1.00E+00 |
| ENSG00000177239.13_MAN1B1   | ENSG00000160789.18_LMNA | 0.50518  | 0.376235117  | 0.614923046 | 3.20E-11 | 8.77E-09 | 1.64E-06 |
| ENSG00000183779.6_ZNF703    | ENSG00000160789.18_LMNA | 0.14736  | -0.012121498 | 0.299537027 | 7.00E-02 | 2.50E-01 | 1.00E+00 |
| ENSG00000168961.15_LGALS9   | ENSG00000160789.18_LMNA | -0.04141 | -0.199301231 | 0.118567879 | 6.12E-01 | 8.24E-01 | 1.00E+00 |
| ENSG00000087302.7_C14orf166 | ENSG00000160789.18_LMNA | -0.17235 | -0.322699772 | -0.01352395 | 3.37E-02 | 1.55E-01 | 1.00E+00 |
| ENSG00000186940.6_CHCHD2P9  | ENSG00000160789.18_LMNA | -0.00398 | -0.163076722 | 0.155319768 | 9.61E-01 | 9.84E-01 | 1.00E+00 |
| ENSG00000060138.11_YBX3     | ENSG00000160789.18_LMNA | 0.44198  | 0.304177414  | 0.561656343 | 1.20E-08 | 1.25E-06 | 6.13E-04 |
| ENSG00000162813.16_BPNT1    | ENSG00000160789.18_LMNA | -0.33176 | -0.466329246 | -0.18217958 | 2.98E-05 | 7.09E-04 | 1.00E+00 |
| ENSG00000108798.7_ABI3      | ENSG00000160789.18_LMNA | -0.03546 | -0.19356996  | 0.124441171 | 6.64E-01 | 8.52E-01 | 1.00E+00 |
| ENSG00000146707.13_POMZP3   | ENSG00000160789.18_LMNA | -0.05619 | -0.213485058 | 0.103936306 | 4.92E-01 | 7.47E-01 | 1.00E+00 |
| ENSG00000164961.14_KIAA0196 | ENSG00000160789.18_LMNA | -0.0293  | -0.187625562 | 0.130509419 | 7.20E-01 | 8.81E-01 | 1.00E+00 |
| ENSG00000091947.8_TMEM101   | ENSG00000160789.18_LMNA | -0.1037  | -0.258627745 | 0.056435758 | 2.04E-01 | 4.75E-01 | 1.00E+00 |
| ENSG00000029363.14_BCLAF1   | ENSG00000160789.18_LMNA | -0.01568 | -0.174441634 | 0.143883506 | 8.48E-01 | 9.41E-01 | 1.00E+00 |
| ENSG00000114450.8_GNB4      | ENSG00000160789.18_LMNA | -0.21172 | -0.358824025 | -0.05434886 | 8.83E-03 | 5.99E-02 | 1.00E+00 |



|                             |                         |          |              |             |          |          |          |
|-----------------------------|-------------------------|----------|--------------|-------------|----------|----------|----------|
| ENSG00000119705.8_SLIRP     | ENSG00000160789.18_LMNA | -0.08982 | -0.245512683 | 0.070384413 | 2.71E-01 | 5.55E-01 | 1.00E+00 |
| ENSG00000108479.10_GALK1    | ENSG00000160789.18_LMNA | 0.27675  | 0.122965984  | 0.417552867 | 5.58E-04 | 7.34E-03 | 1.00E+00 |
| ENSG00000235750.8_KIAA0040  | ENSG00000160789.18_LMNA | 0.32274  | 0.172393595  | 0.458385617 | 5.01E-05 | 1.08E-03 | 1.00E+00 |
| ENSG00000165688.10_PMPCA    | ENSG00000160789.18_LMNA | 0.15216  | -0.007219493 | 0.303993059 | 6.13E-02 | 2.29E-01 | 1.00E+00 |
| ENSG00000089050.13_RBBP9    | ENSG00000160789.18_LMNA | -0.1811  | -0.33076703  | -0.02255243 | 2.56E-02 | 1.28E-01 | 1.00E+00 |
| ENSG00000159399.8_HK2       | ENSG00000160789.18_LMNA | 0.12693  | -0.032936866 | 0.280462721 | 1.19E-01 | 3.47E-01 | 1.00E+00 |
| ENSG00000145907.13_G3BP1    | ENSG00000160789.18_LMNA | 0.11404  | -0.045995286 | 0.268368854 | 1.62E-01 | 4.17E-01 | 1.00E+00 |
| ENSG00000077254.13_USP33    | ENSG00000160789.18_LMNA | -0.25642 | -0.399320024 | -0.10135744 | 1.43E-03 | 1.51E-02 | 1.00E+00 |
| ENSG00000136463.7_TACO1     | ENSG00000160789.18_LMNA | -0.13767 | -0.290506195 | 0.02201043  | 9.08E-02 | 2.94E-01 | 1.00E+00 |
| ENSG00000101290.12_CDS2     | ENSG00000160789.18_LMNA | -0.131   | -0.284272123 | 0.028801363 | 1.08E-01 | 3.26E-01 | 1.00E+00 |
| ENSG00000137288.8_UQCC2     | ENSG00000160789.18_LMNA | -0.24085 | -0.385280261 | -0.08490771 | 2.80E-03 | 2.53E-02 | 1.00E+00 |
| ENSG00000167700.7_MFSD3     | ENSG00000160789.18_LMNA | 0.05535  | -0.104771611 | 0.212678899 | 4.98E-01 | 7.51E-01 | 1.00E+00 |
| ENSG00000035687.9_ADSS      | ENSG00000160789.18_LMNA | 0.07125  | -0.088959488 | 0.227866283 | 3.83E-01 | 6.62E-01 | 1.00E+00 |
| ENSG00000133065.9_SLC41A1   | ENSG00000160789.18_LMNA | 0.08836  | -0.071852913 | 0.244125182 | 2.79E-01 | 5.64E-01 | 1.00E+00 |
| ENSG00000172432.17_GTPBP2   | ENSG00000160789.18_LMNA | -0.00101 | -0.160180695 | 0.158220395 | 9.90E-01 | 9.96E-01 | 1.00E+00 |
| ENSG00000204304.10_PBX2     | ENSG00000160789.18_LMNA | 0.10755  | -0.052546218 | 0.262264246 | 1.87E-01 | 4.54E-01 | 1.00E+00 |
| ENSG00000110057.6_UNC93B1   | ENSG00000160789.18_LMNA | 0.29803  | 0.145747353  | 0.436521816 | 1.92E-04 | 3.17E-03 | 1.00E+00 |
| ENSG00000176444.17_CLK2     | ENSG00000160789.18_LMNA | 0.17373  | 0.014943868  | 0.323971504 | 3.23E-02 | 1.50E-01 | 1.00E+00 |
| ENSG00000136536.13_MARCH7   | ENSG00000160789.18_LMNA | -0.0917  | -0.247291809 | 0.068499421 | 2.61E-01 | 5.44E-01 | 1.00E+00 |
| ENSG00000152904.10_GGPS1    | ENSG00000160789.18_LMNA | -0.15436 | -0.306036682 | 0.004966324 | 5.76E-02 | 2.20E-01 | 1.00E+00 |
| ENSG00000267321.1_RP11-1094 | ENSG00000160789.18_LMNA | -0.30981 | -0.446967888 | -0.15842596 | 1.03E-04 | 1.93E-03 | 1.00E+00 |
| ENSG00000113269.12_RNF130   | ENSG00000160789.18_LMNA | -0.2229  | -0.369009259 | -0.0660464  | 5.78E-03 | 4.37E-02 | 1.00E+00 |
| ENSG00000132024.16_CC2D1A   | ENSG00000160789.18_LMNA | 0.25014  | 0.094711767  | 0.393664753 | 1.88E-03 | 1.87E-02 | 1.00E+00 |
| ENSG00000169018.5_FEM1B     | ENSG00000160789.18_LMNA | -0.05052 | -0.208052038 | 0.109557113 | 5.36E-01 | 7.77E-01 | 1.00E+00 |
| ENSG00000033327.11_GAB2     | ENSG00000160789.18_LMNA | 0.02494  | -0.134793615 | 0.183414722 | 7.60E-01 | 9.00E-01 | 1.00E+00 |
| ENSG00000124067.15_SLC12A4  | ENSG00000160789.18_LMNA | 0.38954  | 0.245566986  | 0.516696711 | 7.04E-07 | 3.47E-05 | 3.61E-02 |
| ENSG00000164932.11_CTHRC1   | ENSG00000160789.18_LMNA | 0.16547  | 0.00644039   | 0.316338768 | 4.16E-02 | 1.78E-01 | 1.00E+00 |
| ENSG00000137331.11_IER3     | ENSG00000160789.18_LMNA | 0.16217  | 0.003052407  | 0.31328649  | 4.59E-02 | 1.90E-01 | 1.00E+00 |
| ENSG00000035141.6_FAM136A   | ENSG00000160789.18_LMNA | 0.20932  | 0.051849408  | 0.356638266 | 9.65E-03 | 6.39E-02 | 1.00E+00 |
| ENSG00000159593.13_NAE1     | ENSG00000160789.18_LMNA | -0.2114  | -0.358530083 | -0.05401251 | 8.94E-03 | 6.05E-02 | 1.00E+00 |
| ENSG00000171161.11_ZNF672   | ENSG00000160789.18_LMNA | 0.25734  | 0.102336336  | 0.400151127 | 1.37E-03 | 1.47E-02 | 1.00E+00 |
| ENSG00000129235.9_TXNDC17   | ENSG00000160789.18_LMNA | 0.01534  | -0.144216473 | 0.17411194  | 8.51E-01 | 9.42E-01 | 1.00E+00 |
| ENSG00000214941.6_ZSWIM7    | ENSG00000160789.18_LMNA | -0.25968 | -0.402250938 | -0.10481213 | 1.23E-03 | 1.36E-02 | 1.00E+00 |

|                             |                         |          |              |             |          |          |          |
|-----------------------------|-------------------------|----------|--------------|-------------|----------|----------|----------|
| ENSG00000168256.16_NKIRAS2  | ENSG00000160789.18_LMNA | -0.05848 | -0.215673152 | 0.101666839 | 4.74E-01 | 7.34E-01 | 1.00E+00 |
| ENSG00000113048.15_MRPS27   | ENSG00000160789.18_LMNA | -0.32552 | -0.460835463 | -0.17540562 | 4.27E-05 | 9.46E-04 | 1.00E+00 |
| ENSG00000041880.13_PARP3    | ENSG00000160789.18_LMNA | 0.14961  | -0.009827398 | 0.301624109 | 6.58E-02 | 2.40E-01 | 1.00E+00 |
| ENSG00000079616.11_KIF22    | ENSG00000160789.18_LMNA | -0.04571 | -0.203431964 | 0.114320949 | 5.76E-01 | 8.02E-01 | 1.00E+00 |
| ENSG00000184436.10_THAP7    | ENSG00000160789.18_LMNA | -0.06601 | -0.222868694 | 0.094180343 | 4.19E-01 | 6.91E-01 | 1.00E+00 |
| ENSG00000134313.13_KIDINS22 | ENSG00000160789.18_LMNA | -0.05334 | -0.210750095 | 0.106768336 | 5.14E-01 | 7.62E-01 | 1.00E+00 |
| ENSG00000105726.15_ATP13A1  | ENSG00000160789.18_LMNA | 0.28563  | 0.132454807  | 0.425485077 | 3.61E-04 | 5.20E-03 | 1.00E+00 |
| ENSG00000187773.8_FAM69C    | ENSG00000160789.18_LMNA | -0.17251 | -0.322842654 | -0.01368342 | 3.36E-02 | 1.54E-01 | 1.00E+00 |
| ENSG00000056736.8_IL17RB    | ENSG00000160789.18_LMNA | 0.05006  | -0.110017146 | 0.207606505 | 5.40E-01 | 7.80E-01 | 1.00E+00 |
| ENSG00000100814.16_CCNB1IP1 | ENSG00000160789.18_LMNA | -0.16312 | -0.314160684 | -0.00402202 | 4.47E-02 | 1.87E-01 | 1.00E+00 |
| ENSG00000092421.15_SEMA6A   | ENSG00000160789.18_LMNA | -0.05462 | -0.211979104 | 0.105496345 | 5.04E-01 | 7.55E-01 | 1.00E+00 |
| ENSG00000136108.13_CKAP2    | ENSG00000160789.18_LMNA | -0.24441 | -0.388490965 | -0.08865515 | 2.41E-03 | 2.26E-02 | 1.00E+00 |
| ENSG00000204228.3_HSD17B8   | ENSG00000160789.18_LMNA | 0.13465  | -0.02509338  | 0.287679333 | 9.82E-02 | 3.08E-01 | 1.00E+00 |
| ENSG00000149196.14_HIKESHI  | ENSG00000160789.18_LMNA | -0.35206 | -0.484124523 | -0.20430832 | 8.67E-06 | 2.60E-04 | 4.45E-01 |
| ENSG00000142453.10_CARM1    | ENSG00000160789.18_LMNA | 0.19547  | 0.037430999  | 0.343963975 | 1.58E-02 | 9.11E-02 | 1.00E+00 |
| ENSG00000269958.1_RP11-73M1 | ENSG00000160789.18_LMNA | 0.26496  | 0.110422085  | 0.406997392 | 9.71E-04 | 1.13E-02 | 1.00E+00 |
| ENSG00000204252.11_HLA-DOA  | ENSG00000160789.18_LMNA | -0.06843 | -0.225176725 | 0.091771366 | 4.02E-01 | 6.78E-01 | 1.00E+00 |
| ENSG00000204673.9_AKT1S1    | ENSG00000160789.18_LMNA | 0.27961  | 0.126019829  | 0.420110648 | 4.85E-04 | 6.58E-03 | 1.00E+00 |
| ENSG00000160216.17_AGPAT3   | ENSG00000160789.18_LMNA | 0.19032  | 0.032095661  | 0.33924554  | 1.88E-02 | 1.03E-01 | 1.00E+00 |
| ENSG00000162819.10_BROX     | ENSG00000160789.18_LMNA | -0.13347 | -0.286580807 | 0.026289819 | 1.01E-01 | 3.14E-01 | 1.00E+00 |
| ENSG00000139624.11_CERS5    | ENSG00000160789.18_LMNA | -0.06324 | -0.220224271 | 0.096935868 | 4.39E-01 | 7.07E-01 | 1.00E+00 |
| ENSG00000100726.13_TELO2    | ENSG00000160789.18_LMNA | 0.1741   | 0.015326458  | 0.324313974 | 3.19E-02 | 1.49E-01 | 1.00E+00 |
| ENSG00000206527.8_HACD2     | ENSG00000160789.18_LMNA | 0.0275   | -0.132282173 | 0.185884579 | 7.37E-01 | 8.89E-01 | 1.00E+00 |
| ENSG00000175115.10_PACS1    | ENSG00000160789.18_LMNA | 0.27253  | 0.118465495  | 0.413774906 | 6.82E-04 | 8.60E-03 | 1.00E+00 |
| ENSG00000148123.13_PLPPR1   | ENSG00000160789.18_LMNA | -0.50912 | -0.618209122 | -0.38077704 | 2.12E-11 | 6.33E-09 | 1.09E-06 |
| ENSG00000132286.10_TIMM10B  | ENSG00000160789.18_LMNA | -0.12928 | -0.282666394 | 0.030545857 | 1.12E-01 | 3.35E-01 | 1.00E+00 |
| ENSG00000170473.15_PYM1     | ENSG00000160789.18_LMNA | -0.19032 | -0.339243025 | -0.03209282 | 1.88E-02 | 1.03E-01 | 1.00E+00 |
| ENSG00000107819.12_SFXN3    | ENSG00000160789.18_LMNA | 0.28742  | 0.134369533  | 0.427080258 | 3.30E-04 | 4.85E-03 | 1.00E+00 |
| ENSG00000112186.10_CAP2     | ENSG00000160789.18_LMNA | -0.06362 | -0.22058454  | 0.096560749 | 4.36E-01 | 7.04E-01 | 1.00E+00 |
| ENSG00000160688.17_FLAD1    | ENSG00000160789.18_LMNA | -0.15365 | -0.305379487 | 0.00569125  | 5.88E-02 | 2.22E-01 | 1.00E+00 |
| ENSG00000215861.5_WI2-1896O | ENSG00000160789.18_LMNA | -0.24432 | -0.388409289 | -0.08855972 | 2.42E-03 | 2.26E-02 | 1.00E+00 |
| ENSG00000244462.6_RBM12     | ENSG00000160789.18_LMNA | -0.05535 | -0.212672324 | 0.104778423 | 4.98E-01 | 7.52E-01 | 1.00E+00 |
| ENSG00000005448.15_WDR54    | ENSG00000160789.18_LMNA | 0.10086  | -0.059291076 | 0.255952487 | 2.16E-01 | 4.91E-01 | 1.00E+00 |

|                            |                         |          |              |             |          |          |          |
|----------------------------|-------------------------|----------|--------------|-------------|----------|----------|----------|
| ENSG00000166454.8_ATMIN    | ENSG00000160789.18_LMNA | -0.04006 | -0.197999538 | 0.119903784 | 6.24E-01 | 8.31E-01 | 1.00E+00 |
| ENSG00000267541.1_MTCO2P2  | ENSG00000160789.18_LMNA | -0.12982 | -0.283172305 | 0.029996432 | 1.11E-01 | 3.32E-01 | 1.00E+00 |
| ENSG00000084676.14_NCOA1   | ENSG00000160789.18_LMNA | -0.03669 | -0.194749929 | 0.123233781 | 6.54E-01 | 8.47E-01 | 1.00E+00 |
| ENSG00000123610.4_TNFAIP6  | ENSG00000160789.18_LMNA | 0.24167  | 0.08577322   | 0.386022454 | 2.70E-03 | 2.47E-02 | 1.00E+00 |
| ENSG00000110011.12_DNAJC4  | ENSG00000160789.18_LMNA | 0.18627  | 0.027896473  | 0.335520985 | 2.16E-02 | 1.14E-01 | 1.00E+00 |
| ENSG00000117643.13_MAN1C1  | ENSG00000160789.18_LMNA | 0.39012  | 0.246210991  | 0.517198983 | 6.75E-07 | 3.34E-05 | 3.46E-02 |
| ENSG00000152492.12_CCDC50  | ENSG00000160789.18_LMNA | -0.1453  | -0.297614488 | 0.014231835 | 7.41E-02 | 2.59E-01 | 1.00E+00 |
| ENSG00000141971.11_MVB12A  | ENSG00000160789.18_LMNA | 0.06471  | -0.095478413 | 0.221623543 | 4.28E-01 | 6.99E-01 | 1.00E+00 |
| ENSG00000116815.14_CD58    | ENSG00000160789.18_LMNA | 0.14227  | -0.01731814  | 0.294798269 | 8.04E-02 | 2.73E-01 | 1.00E+00 |
| ENSG00000130787.12_HIP1R   | ENSG00000160789.18_LMNA | -0.19172 | -0.34052367  | -0.03353917 | 1.80E-02 | 9.99E-02 | 1.00E+00 |
| ENSG00000005206.15_SPPL2B  | ENSG00000160789.18_LMNA | 0.11236  | -0.047689803 | 0.266792203 | 1.68E-01 | 4.26E-01 | 1.00E+00 |
| ENSG00000069248.11_NUP133  | ENSG00000160789.18_LMNA | -0.14784 | -0.299979619 | 0.011635279 | 6.91E-02 | 2.48E-01 | 1.00E+00 |
| ENSG00000111145.6_ELK3     | ENSG00000160789.18_LMNA | 0.36304  | 0.216338485  | 0.493702669 | 4.29E-06 | 1.47E-04 | 2.20E-01 |
| ENSG00000139405.14_RITA1   | ENSG00000160789.18_LMNA | 0.03132  | -0.128524304 | 0.18957273  | 7.02E-01 | 8.72E-01 | 1.00E+00 |
| ENSG00000175606.9_TMEN70   | ENSG00000160789.18_LMNA | 0.05455  | -0.105562985 | 0.211914741 | 5.04E-01 | 7.55E-01 | 1.00E+00 |
| ENSG00000166927.11_MS4A7   | ENSG00000160789.18_LMNA | -0.08963 | -0.245326058 | 0.070582012 | 2.72E-01 | 5.57E-01 | 1.00E+00 |
| ENSG00000075151.18_EIF4G3  | ENSG00000160789.18_LMNA | 0.07377  | -0.086443581 | 0.230268653 | 3.66E-01 | 6.47E-01 | 1.00E+00 |
| ENSG00000120656.10_TAF12   | ENSG00000160789.18_LMNA | 0.13609  | -0.023621401 | 0.28902972  | 9.46E-02 | 3.01E-01 | 1.00E+00 |
| ENSG00000136758.17_YME1L1  | ENSG00000160789.18_LMNA | 0.00129  | -0.157938322 | 0.160462562 | 9.87E-01 | 9.95E-01 | 1.00E+00 |
| ENSG00000073849.13_ST6GAL1 | ENSG00000160789.18_LMNA | -0.27346 | -0.414607703 | -0.11945652 | 6.53E-04 | 8.31E-03 | 1.00E+00 |
| ENSG00000147457.12_CHMP7   | ENSG00000160789.18_LMNA | 0.09811  | -0.062056093 | 0.253357225 | 2.29E-01 | 5.06E-01 | 1.00E+00 |
| ENSG00000149499.10_EML3    | ENSG00000160789.18_LMNA | 0.28017  | 0.126613558  | 0.42060739  | 4.72E-04 | 6.45E-03 | 1.00E+00 |
| ENSG00000145623.11_OSMR    | ENSG00000160789.18_LMNA | 0.49624  | 0.365945547  | 0.607447769 | 7.96E-11 | 1.87E-08 | 4.09E-06 |
| ENSG00000090060.16_PAPOLA  | ENSG00000160789.18_LMNA | 0.10469  | -0.055438296 | 0.259561167 | 1.99E-01 | 4.70E-01 | 1.00E+00 |
| ENSG00000160783.18_PMF1    | ENSG00000160789.18_LMNA | -0.0907  | -0.246339254 | 0.069508938 | 2.66E-01 | 5.50E-01 | 1.00E+00 |
| ENSG00000185298.11_CCDC137 | ENSG00000160789.18_LMNA | 0.35954  | 0.212504332  | 0.490657292 | 5.39E-06 | 1.76E-04 | 2.76E-01 |
| ENSG00000135372.7_NAT10    | ENSG00000160789.18_LMNA | 0.21094  | 0.053537958  | 0.358115258 | 9.09E-03 | 6.12E-02 | 1.00E+00 |
| ENSG00000196655.8_TRAPPC4  | ENSG00000160789.18_LMNA | -0.19733 | -0.34566882  | -0.03936305 | 1.48E-02 | 8.72E-02 | 1.00E+00 |
| ENSG00000205220.10_PSMB10  | ENSG00000160789.18_LMNA | 0.05596  | -0.104172542 | 0.213257108 | 4.94E-01 | 7.49E-01 | 1.00E+00 |
| ENSG00000064787.11_BCAS1   | ENSG00000160789.18_LMNA | -0.35558 | -0.48719989  | -0.20816179 | 6.94E-06 | 2.18E-04 | 3.56E-01 |
| ENSG00000150867.12_PIP4K2A | ENSG00000160789.18_LMNA | -0.19481 | -0.343363741 | -0.03675132 | 1.62E-02 | 9.26E-02 | 1.00E+00 |
| ENSG00000162923.13_WDR26   | ENSG00000160789.18_LMNA | 0.0954   | -0.064782635 | 0.250793622 | 2.42E-01 | 5.22E-01 | 1.00E+00 |
| ENSG00000108395.12_TRIM37  | ENSG00000160789.18_LMNA | -0.13941 | -0.292130445 | 0.020236344 | 8.67E-02 | 2.86E-01 | 1.00E+00 |

|                            |                         |          |              |             |          |          |          |
|----------------------------|-------------------------|----------|--------------|-------------|----------|----------|----------|
| ENSG00000131148.7_EMC8     | ENSG00000160789.18_LMNA | -0.07996 | -0.236152527 | 0.080264523 | 3.27E-01 | 6.14E-01 | 1.00E+00 |
| ENSG00000184203.6_PPP1R2   | ENSG00000160789.18_LMNA | -0.13846 | -0.291241912 | 0.021207087 | 8.89E-02 | 2.90E-01 | 1.00E+00 |
| ENSG00000146859.6_TMEM140  | ENSG00000160789.18_LMNA | 0.00175  | -0.157494758 | 0.160905695 | 9.83E-01 | 9.94E-01 | 1.00E+00 |
| ENSG00000108797.10_CNTNAP1 | ENSG00000160789.18_LMNA | 0.18293  | 0.024442509  | 0.332450196 | 2.41E-02 | 1.23E-01 | 1.00E+00 |
| ENSG00000178764.7_ZHX2     | ENSG00000160789.18_LMNA | -0.20701 | -0.354528829 | -0.04944084 | 1.05E-02 | 6.78E-02 | 1.00E+00 |
| ENSG00000159131.15_GART    | ENSG00000160789.18_LMNA | 0.02698  | -0.132793839 | 0.185381712 | 7.41E-01 | 8.91E-01 | 1.00E+00 |
| ENSG00000111605.15_CPSF6   | ENSG00000160789.18_LMNA | -0.02513 | -0.183599742 | 0.134605622 | 7.59E-01 | 8.99E-01 | 1.00E+00 |
| ENSG00000088367.19_EPB41L1 | ENSG00000160789.18_LMNA | -0.1564  | -0.307930117 | 0.002875921 | 5.43E-02 | 2.12E-01 | 1.00E+00 |
| ENSG00000188674.9_C2orf80  | ENSG00000160789.18_LMNA | -0.19836 | -0.346615746 | -0.04043716 | 1.43E-02 | 8.49E-02 | 1.00E+00 |
| ENSG00000061337.14_LZTS1   | ENSG00000160789.18_LMNA | 0.51051  | 0.382391216  | 0.619374979 | 1.83E-11 | 5.59E-09 | 9.39E-07 |
| ENSG00000113594.8_LIFR     | ENSG00000160789.18_LMNA | -0.22235 | -0.368505685 | -0.06546609 | 5.90E-03 | 4.45E-02 | 1.00E+00 |
| ENSG00000149313.9_AASDHPT  | ENSG00000160789.18_LMNA | -0.41392 | -0.537685988 | -0.27268461 | 1.15E-07 | 8.13E-06 | 5.92E-03 |
| ENSG00000133884.8_DPF2     | ENSG00000160789.18_LMNA | -0.05166 | -0.209140803 | 0.108432341 | 5.27E-01 | 7.72E-01 | 1.00E+00 |
| ENSG00000138614.13_VWA9    | ENSG00000160789.18_LMNA | 0.07944  | -0.080782468 | 0.235660215 | 3.31E-01 | 6.17E-01 | 1.00E+00 |
| ENSG00000126803.9_HSPA2    | ENSG00000160789.18_LMNA | 0.00973  | -0.14970138  | 0.168670636 | 9.05E-01 | 9.64E-01 | 1.00E+00 |
| ENSG00000155561.13_NUP205  | ENSG00000160789.18_LMNA | 0.17931  | 0.020700292  | 0.329115746 | 2.71E-02 | 1.34E-01 | 1.00E+00 |
| ENSG00000109445.9_ZNF330   | ENSG00000160789.18_LMNA | 0.21938  | 0.062362134  | 0.365809139 | 6.62E-03 | 4.83E-02 | 1.00E+00 |
| ENSG00000064545.13_TMEM161 | ENSG00000160789.18_LMNA | 0.23158  | 0.075154391  | 0.376889663 | 4.10E-03 | 3.37E-02 | 1.00E+00 |
| ENSG00000104142.9_VPS18    | ENSG00000160789.18_LMNA | 0.39417  | 0.250704336  | 0.520698246 | 5.05E-07 | 2.64E-05 | 2.59E-02 |
| ENSG00000100897.16_DCAF11  | ENSG00000160789.18_LMNA | 0.03084  | -0.128993817 | 0.189112418 | 7.06E-01 | 8.75E-01 | 1.00E+00 |
| ENSG00000109956.11_B3GAT1  | ENSG00000160789.18_LMNA | -0.20097 | -0.349001805 | -0.04314685 | 1.30E-02 | 7.93E-02 | 1.00E+00 |
| ENSG00000115520.7_COQ10B   | ENSG00000160789.18_LMNA | 0.03016  | -0.129667205 | 0.188451982 | 7.12E-01 | 8.78E-01 | 1.00E+00 |
| ENSG00000099204.17_ABLIM1  | ENSG00000160789.18_LMNA | -0.10259 | -0.257579091 | 0.057555606 | 2.09E-01 | 4.81E-01 | 1.00E+00 |
| ENSG00000156469.7_MTERF3   | ENSG00000160789.18_LMNA | -0.11385 | -0.268185359 | 0.046192592 | 1.63E-01 | 4.18E-01 | 1.00E+00 |
| ENSG00000167842.14_MIS12   | ENSG00000160789.18_LMNA | -0.20419 | -0.351948497 | -0.04649943 | 1.16E-02 | 7.30E-02 | 1.00E+00 |
| ENSG00000171621.12_SPSB1   | ENSG00000160789.18_LMNA | 0.26781  | 0.113444002  | 0.409547546 | 8.51E-04 | 1.02E-02 | 1.00E+00 |
| ENSG00000168214.19_RBPJ    | ENSG00000160789.18_LMNA | -0.36675 | -0.496936677 | -0.22041951 | 3.36E-06 | 1.21E-04 | 1.73E-01 |
| ENSG00000153310.17_FAM49B  | ENSG00000160789.18_LMNA | -0.3546  | -0.486347366 | -0.2070927  | 7.39E-06 | 2.29E-04 | 3.79E-01 |
| ENSG00000176845.11_METRNL  | ENSG00000160789.18_LMNA | 0.55216  | 0.430830874  | 0.653881488 | 1.66E-13 | 1.34E-10 | 8.50E-09 |
| ENSG00000149781.11_FERMT3  | ENSG00000160789.18_LMNA | 0.15451  | -0.004807266 | 0.30618084  | 5.73E-02 | 2.19E-01 | 1.00E+00 |
| ENSG00000104613.10_INTS10  | ENSG00000160789.18_LMNA | -0.16575 | -0.316599785 | -0.00673045 | 4.13E-02 | 1.77E-01 | 1.00E+00 |
| ENSG00000133612.17_AGAP3   | ENSG00000160789.18_LMNA | 0.01584  | -0.143719198 | 0.174604302 | 8.46E-01 | 9.40E-01 | 1.00E+00 |
| ENSG00000130714.14_POMT1   | ENSG00000160789.18_LMNA | -0.01537 | -0.174144083 | 0.144184013 | 8.51E-01 | 9.41E-01 | 1.00E+00 |

|                             |                         |          |              |             |          |          |          |
|-----------------------------|-------------------------|----------|--------------|-------------|----------|----------|----------|
| ENSG00000114745.12_GORASP1  | ENSG00000160789.18_LMNA | -0.27016 | -0.411652323 | -0.11594228 | 7.63E-04 | 9.35E-03 | 1.00E+00 |
| ENSG00000141456.13_PELP1    | ENSG00000160789.18_LMNA | 0.09938  | -0.060778177 | 0.254557249 | 2.23E-01 | 4.99E-01 | 1.00E+00 |
| ENSG00000183798.4_EMILIN3   | ENSG00000160789.18_LMNA | -0.02912 | -0.187449652 | 0.130688631 | 7.22E-01 | 8.82E-01 | 1.00E+00 |
| ENSG00000143363.14_PRUNE1   | ENSG00000160789.18_LMNA | -0.18465 | -0.334034488 | -0.02622357 | 2.28E-02 | 1.18E-01 | 1.00E+00 |
| ENSG00000171055.13_FEZ2     | ENSG00000160789.18_LMNA | -0.07163 | -0.228223702 | 0.088585433 | 3.81E-01 | 6.59E-01 | 1.00E+00 |
| ENSG00000149809.13_TM7SF2   | ENSG00000160789.18_LMNA | -0.10578 | -0.260595405 | 0.054332368 | 1.95E-01 | 4.63E-01 | 1.00E+00 |
| ENSG00000120725.11_SIL1     | ENSG00000160789.18_LMNA | 0.39225  | 0.248575602  | 0.51904159  | 5.80E-07 | 2.96E-05 | 2.97E-02 |
| ENSG00000164252.11_AGGF1    | ENSG00000160789.18_LMNA | 0.1117   | -0.048355962 | 0.266171919 | 1.71E-01 | 4.30E-01 | 1.00E+00 |
| ENSG00000172458.4_IL17D     | ENSG00000160789.18_LMNA | -0.46475 | -0.580969784 | -0.32996799 | 1.62E-09 | 2.33E-07 | 8.32E-05 |
| ENSG00000148925.9_BTBD10    | ENSG00000160789.18_LMNA | -0.11928 | -0.2732896   | 0.040695016 | 1.43E-01 | 3.87E-01 | 1.00E+00 |
| ENSG00000011295.14_TTC19    | ENSG00000160789.18_LMNA | -0.26108 | -0.403513586 | -0.10630264 | 1.16E-03 | 1.29E-02 | 1.00E+00 |
| ENSG00000031823.13_RANBP3   | ENSG00000160789.18_LMNA | 0.04777  | -0.112289493 | 0.205403847 | 5.59E-01 | 7.92E-01 | 1.00E+00 |
| ENSG00000041802.9_LSG1      | ENSG00000160789.18_LMNA | 0.15876  | -0.000455439 | 0.310119458 | 5.08E-02 | 2.03E-01 | 1.00E+00 |
| ENSG00000161091.11_MFSD12   | ENSG00000160789.18_LMNA | 0.38499  | 0.24053225   | 0.512763576 | 9.71E-07 | 4.48E-05 | 4.98E-02 |
| ENSG00000120860.9_CCDC53    | ENSG00000160789.18_LMNA | -0.17682 | -0.326823158 | -0.01813235 | 2.93E-02 | 1.41E-01 | 1.00E+00 |
| ENSG00000131652.12_THOC6    | ENSG00000160789.18_LMNA | 0.00995  | -0.149489994 | 0.168880702 | 9.03E-01 | 9.63E-01 | 1.00E+00 |
| ENSG00000116791.12_CRYZ     | ENSG00000160789.18_LMNA | 0.14549  | -0.014040299 | 0.297789083 | 7.37E-02 | 2.58E-01 | 1.00E+00 |
| ENSG00000114209.13_PDCD10   | ENSG00000160789.18_LMNA | -0.21098 | -0.358148552 | -0.05357604 | 9.08E-03 | 6.11E-02 | 1.00E+00 |
| ENSG00000275700.3_AATF      | ENSG00000160789.18_LMNA | 0.1107   | -0.049375259 | 0.265222312 | 1.75E-01 | 4.35E-01 | 1.00E+00 |
| ENSG00000178053.16_MLF1     | ENSG00000160789.18_LMNA | -0.14879 | -0.30086304  | 0.010664337 | 6.73E-02 | 2.43E-01 | 1.00E+00 |
| ENSG00000130956.12_HABP4    | ENSG00000160789.18_LMNA | 0.04458  | -0.115444474 | 0.202340278 | 5.86E-01 | 8.08E-01 | 1.00E+00 |
| ENSG00000184967.5_NOC4L     | ENSG00000160789.18_LMNA | 0.12453  | -0.035367058 | 0.278219544 | 1.26E-01 | 3.59E-01 | 1.00E+00 |
| ENSG00000138433.14_CIR1     | ENSG00000160789.18_LMNA | -0.20443 | -0.352172313 | -0.04675435 | 1.15E-02 | 7.25E-02 | 1.00E+00 |
| ENSG00000106077.17_ABHD11   | ENSG00000160789.18_LMNA | 0.25884  | 0.103922252  | 0.40149656  | 1.28E-03 | 1.40E-02 | 1.00E+00 |
| ENSG00000012232.7_EXTL3     | ENSG00000160789.18_LMNA | 0.26145  | 0.106693633  | 0.403844618 | 1.14E-03 | 1.28E-02 | 1.00E+00 |
| ENSG00000105011.7_ASF1B     | ENSG00000160789.18_LMNA | 0.17426  | 0.01548696   | 0.324457622 | 3.18E-02 | 1.49E-01 | 1.00E+00 |
| ENSG00000173153.12_ESRRA    | ENSG00000160789.18_LMNA | 0.23474  | 0.078469083  | 0.379746797 | 3.60E-03 | 3.06E-02 | 1.00E+00 |
| ENSG00000153827.12_TRIP12   | ENSG00000160789.18_LMNA | 0.20323  | 0.045505346  | 0.351075399 | 1.20E-02 | 7.49E-02 | 1.00E+00 |
| ENSG00000090520.9_DNAJB11   | ENSG00000160789.18_LMNA | 0.24418  | 0.088415822  | 0.388286131 | 2.43E-03 | 2.27E-02 | 1.00E+00 |
| ENSG00000134594.4_RAB33A    | ENSG00000160789.18_LMNA | -0.47325 | -0.588141551 | -0.33964132 | 7.41E-10 | 1.23E-07 | 3.80E-05 |
| ENSG00000251442.4_LINC01094 | ENSG00000160789.18_LMNA | -0.28268 | -0.42285319  | -0.12930047 | 4.18E-04 | 5.86E-03 | 1.00E+00 |
| ENSG00000172977.11_KAT5     | ENSG00000160789.18_LMNA | -0.13823 | -0.291026914 | 0.021441889 | 8.94E-02 | 2.91E-01 | 1.00E+00 |
| ENSG00000188765.7_TMSB4XP2  | ENSG00000160789.18_LMNA | 0.00741  | -0.151966593 | 0.166417756 | 9.28E-01 | 9.72E-01 | 1.00E+00 |

|                             |                         |          |              |             |          |          |          |
|-----------------------------|-------------------------|----------|--------------|-------------|----------|----------|----------|
| ENSG00000099977.12_DDT      | ENSG00000160789.18_LMNA | 0.0705   | -0.08970689  | 0.227151865 | 3.88E-01 | 6.66E-01 | 1.00E+00 |
| ENSG00000064666.13_CNN2     | ENSG00000160789.18_LMNA | 0.36001  | 0.213021591  | 0.491068535 | 5.22E-06 | 1.72E-04 | 2.68E-01 |
| ENSG00000038945.13_MSR1     | ENSG00000160789.18_LMNA | 0.00533  | -0.154003426 | 0.164389169 | 9.48E-01 | 9.79E-01 | 1.00E+00 |
| ENSG00000196636.7_SDHAF3    | ENSG00000160789.18_LMNA | -0.16508 | -0.315972537 | -0.0060335  | 4.21E-02 | 1.80E-01 | 1.00E+00 |
| ENSG00000135454.12_B4GALNT  | ENSG00000160789.18_LMNA | -0.28097 | -0.421325474 | -0.12747222 | 4.54E-04 | 6.26E-03 | 1.00E+00 |
| ENSG00000146676.6_PURB      | ENSG00000160789.18_LMNA | 0.15336  | -0.005990735 | 0.305107897 | 5.93E-02 | 2.24E-01 | 1.00E+00 |
| ENSG00000142583.16_SLC2A5   | ENSG00000160789.18_LMNA | -0.02301 | -0.181545315 | 0.136691783 | 7.78E-01 | 9.09E-01 | 1.00E+00 |
| ENSG00000107625.11_DDX50    | ENSG00000160789.18_LMNA | -0.05725 | -0.214496455 | 0.102887706 | 4.84E-01 | 7.41E-01 | 1.00E+00 |
| ENSG00000004534.13_RBM6     | ENSG00000160789.18_LMNA | -0.00892 | -0.16788531  | 0.150491385 | 9.13E-01 | 9.67E-01 | 1.00E+00 |
| ENSG00000248275.1_TRIM52-AS | ENSG00000160789.18_LMNA | -0.25047 | -0.393964371 | -0.09506319 | 1.86E-03 | 1.85E-02 | 1.00E+00 |
| ENSG00000137959.14_IFI44L   | ENSG00000160789.18_LMNA | -0.13065 | -0.283941926 | 0.029160252 | 1.09E-01 | 3.28E-01 | 1.00E+00 |
| ENSG00000205929.8_C21orf62  | ENSG00000160789.18_LMNA | 0.25427  | 0.099082546  | 0.397386707 | 1.57E-03 | 1.63E-02 | 1.00E+00 |
| ENSG00000166292.10_TMEM100  | ENSG00000160789.18_LMNA | -0.45166 | -0.569887563 | -0.31512317 | 5.20E-09 | 6.18E-07 | 2.67E-04 |
| ENSG00000112902.10_SEMA5A   | ENSG00000160789.18_LMNA | 0.02237  | -0.137320027 | 0.180926084 | 7.84E-01 | 9.12E-01 | 1.00E+00 |
| ENSG00000113391.15_FAM172A  | ENSG00000160789.18_LMNA | -0.03022 | -0.188511722 | 0.129606305 | 7.12E-01 | 8.77E-01 | 1.00E+00 |
| ENSG00000114480.11_GBE1     | ENSG00000160789.18_LMNA | 0.26208  | 0.107359873  | 0.404408507 | 1.11E-03 | 1.25E-02 | 1.00E+00 |
| ENSG00000148450.11_MSRB2    | ENSG00000160789.18_LMNA | -0.25785 | -0.400606601 | -0.10287305 | 1.34E-03 | 1.44E-02 | 1.00E+00 |
| ENSG00000185414.18_MRPL30   | ENSG00000160789.18_LMNA | -0.25475 | -0.39781572  | -0.09958709 | 1.54E-03 | 1.60E-02 | 1.00E+00 |
| ENSG00000111331.11_OAS3     | ENSG00000160789.18_LMNA | 0.18158  | 0.023041114  | 0.331202405 | 2.52E-02 | 1.27E-01 | 1.00E+00 |
| ENSG00000130479.9_MAP1S     | ENSG00000160789.18_LMNA | 0.19207  | 0.033908441  | 0.340850452 | 1.78E-02 | 9.91E-02 | 1.00E+00 |
| ENSG00000116337.14_AMPD2    | ENSG00000160789.18_LMNA | 0.23232  | 0.075930961  | 0.377559552 | 3.97E-03 | 3.30E-02 | 1.00E+00 |
| ENSG00000101463.5_SYNDIG1   | ENSG00000160789.18_LMNA | -0.30488 | -0.442593851 | -0.1531055  | 1.34E-04 | 2.38E-03 | 1.00E+00 |
| ENSG00000130055.12_GDPD2    | ENSG00000160789.18_LMNA | 0.17852  | 0.019883185  | 0.328386649 | 2.78E-02 | 1.36E-01 | 1.00E+00 |
| ENSG00000158019.19_BRE      | ENSG00000160789.18_LMNA | -0.10521 | -0.260050905 | 0.054914708 | 1.97E-01 | 4.67E-01 | 1.00E+00 |
| ENSG00000133874.1_RNF122    | ENSG00000160789.18_LMNA | -0.23192 | -0.377190137 | -0.07550267 | 4.04E-03 | 3.34E-02 | 1.00E+00 |
| ENSG0000012822.14_CALCOCC   | ENSG00000160789.18_LMNA | -0.30705 | -0.444518435 | -0.15544445 | 1.19E-04 | 2.18E-03 | 1.00E+00 |
| ENSG00000170502.11_NUDT9    | ENSG00000160789.18_LMNA | 0.15528  | -0.004018106 | 0.306895859 | 5.61E-02 | 2.16E-01 | 1.00E+00 |
| ENSG00000108055.9_SMC3      | ENSG00000160789.18_LMNA | 0.04808  | -0.111972904 | 0.20571092  | 5.56E-01 | 7.90E-01 | 1.00E+00 |
| ENSG00000106689.9_LHX2      | ENSG00000160789.18_LMNA | 0.14321  | -0.016363108 | 0.295670304 | 7.84E-02 | 2.69E-01 | 1.00E+00 |
| ENSG00000123240.15_OPTN     | ENSG00000160789.18_LMNA | -0.08711 | -0.24294327  | 0.073102743 | 2.86E-01 | 5.71E-01 | 1.00E+00 |
| ENSG00000103510.18_KAT8     | ENSG00000160789.18_LMNA | -0.13527 | -0.288260996 | 0.024459509 | 9.66E-02 | 3.05E-01 | 1.00E+00 |
| ENSG00000157911.8_PEX10     | ENSG00000160789.18_LMNA | 0.03075  | -0.129078983 | 0.189028905 | 7.07E-01 | 8.75E-01 | 1.00E+00 |
| ENSG00000072135.11_PTPN18   | ENSG00000160789.18_LMNA | 0.17342  | 0.014619436  | 0.32368103  | 3.26E-02 | 1.51E-01 | 1.00E+00 |

|                            |                         |          |              |             |          |          |          |
|----------------------------|-------------------------|----------|--------------|-------------|----------|----------|----------|
| ENSG00000164237.7_CMBL     | ENSG00000160789.18_LMNA | -0.19929 | -0.347466207 | -0.04140246 | 1.38E-02 | 8.28E-02 | 1.00E+00 |
| ENSG00000138777.18_PPA2    | ENSG00000160789.18_LMNA | -0.12031 | -0.274257496 | 0.039650385 | 1.40E-01 | 3.81E-01 | 1.00E+00 |
| ENSG00000119326.13_CTNNAL1 | ENSG00000160789.18_LMNA | 0.18064  | 0.022075225  | 0.330341755 | 2.59E-02 | 1.30E-01 | 1.00E+00 |
| ENSG00000181019.11_NQO1    | ENSG00000160789.18_LMNA | 0.19664  | 0.038644423  | 0.34503494  | 1.52E-02 | 8.86E-02 | 1.00E+00 |
| ENSG00000138495.5_COX17    | ENSG00000160789.18_LMNA | -0.14286 | -0.295342598 | 0.016722071 | 7.91E-02 | 2.70E-01 | 1.00E+00 |
| ENSG00000090263.14_MRPS33  | ENSG00000160789.18_LMNA | -0.20561 | -0.353250273 | -0.04798271 | 1.10E-02 | 7.03E-02 | 1.00E+00 |
| ENSG00000204482.9_LST1     | ENSG00000160789.18_LMNA | -0.17417 | -0.3243734   | -0.01539285 | 3.19E-02 | 1.49E-01 | 1.00E+00 |
| ENSG00000156453.12_PCDH1   | ENSG00000160789.18_LMNA | 0.20246  | 0.044698492  | 0.35036635  | 1.24E-02 | 7.64E-02 | 1.00E+00 |
| ENSG00000080573.6_COL5A3   | ENSG00000160789.18_LMNA | 0.34142  | 0.192697732  | 0.474816407 | 1.67E-05 | 4.45E-04 | 8.58E-01 |
| ENSG00000160410.13_SHKBP1  | ENSG00000160789.18_LMNA | 0.13279  | -0.026978712 | 0.285947918 | 1.03E-01 | 3.17E-01 | 1.00E+00 |
| ENSG00000189369.8_GSPT2    | ENSG00000160789.18_LMNA | -0.13929 | -0.29201421  | 0.020363366 | 8.70E-02 | 2.87E-01 | 1.00E+00 |
| ENSG00000056998.17_GYG2    | ENSG00000160789.18_LMNA | 0.07008  | -0.090125345 | 0.226751729 | 3.91E-01 | 6.69E-01 | 1.00E+00 |
| ENSG00000112983.16_BRD8    | ENSG00000160789.18_LMNA | -0.29463 | -0.433501483 | -0.14209923 | 2.29E-04 | 3.64E-03 | 1.00E+00 |
| ENSG00000159596.6_TMEM69   | ENSG00000160789.18_LMNA | -0.02626 | -0.184687566 | 0.133499851 | 7.48E-01 | 8.95E-01 | 1.00E+00 |
| ENSG00000165775.16_FUNDC2  | ENSG00000160789.18_LMNA | -0.38762 | -0.515042248 | -0.24344735 | 8.06E-07 | 3.83E-05 | 4.14E-02 |
| ENSG00000116260.15_QSOX1   | ENSG00000160789.18_LMNA | 0.39684  | 0.253666503  | 0.523000129 | 4.16E-07 | 2.27E-05 | 2.13E-02 |
| ENSG00000174720.14_LARP7   | ENSG00000160789.18_LMNA | -0.05048 | -0.208006799 | 0.10960383  | 5.37E-01 | 7.78E-01 | 1.00E+00 |
| ENSG00000171425.8_ZNF581   | ENSG00000160789.18_LMNA | 0.1158   | -0.044217872 | 0.270020827 | 1.55E-01 | 4.07E-01 | 1.00E+00 |
| ENSG00000119523.9_ALG2     | ENSG00000160789.18_LMNA | 0.32577  | 0.175680844  | 0.4610591   | 4.21E-05 | 9.36E-04 | 1.00E+00 |
| ENSG00000050130.16_JKAMP   | ENSG00000160789.18_LMNA | -0.11857 | -0.272623895 | 0.041413099 | 1.46E-01 | 3.91E-01 | 1.00E+00 |
| ENSG00000109787.11_KLF3    | ENSG00000160789.18_LMNA | 0.17069  | 0.011806459  | 0.321160036 | 3.55E-02 | 1.60E-01 | 1.00E+00 |
| ENSG00000132768.12_DPH2    | ENSG00000160789.18_LMNA | 0.09188  | -0.068316994 | 0.247463877 | 2.60E-01 | 5.43E-01 | 1.00E+00 |
| ENSG00000256073.3_URB1-AS1 | ENSG00000160789.18_LMNA | -0.10673 | -0.261488248 | 0.053377014 | 1.91E-01 | 4.58E-01 | 1.00E+00 |
| ENSG00000077782.18_FGFR1   | ENSG00000160789.18_LMNA | 0.55567  | 0.434948352  | 0.656772443 | 1.08E-13 | 9.24E-11 | 5.55E-09 |
| ENSG00000232472.1_EEF1B2P3 | ENSG00000160789.18_LMNA | -0.15725 | -0.308721923 | 0.00200094  | 5.30E-02 | 2.09E-01 | 1.00E+00 |
| ENSG00000085721.11_RRN3    | ENSG00000160789.18_LMNA | -0.02974 | -0.188054395 | 0.130072447 | 7.16E-01 | 8.79E-01 | 1.00E+00 |
| ENSG00000108592.15_FTSJ3   | ENSG00000160789.18_LMNA | 0.29063  | 0.137807496  | 0.429939899 | 2.81E-04 | 4.27E-03 | 1.00E+00 |
| ENSG00000122779.15_TRIM24  | ENSG00000160789.18_LMNA | 0.2056   | 0.047964268  | 0.353234097 | 1.11E-02 | 7.03E-02 | 1.00E+00 |
| ENSG00000189306.9_RRP7A    | ENSG00000160789.18_LMNA | -0.05822 | -0.215424576 | 0.101924826 | 4.76E-01 | 7.35E-01 | 1.00E+00 |
| ENSG00000123064.11_DDX54   | ENSG00000160789.18_LMNA | 0.28847  | 0.13549453   | 0.428016657 | 3.13E-04 | 4.65E-03 | 1.00E+00 |
| ENSG00000166896.6_ATP23    | ENSG00000160789.18_LMNA | -0.30967 | -0.446843719 | -0.1582747  | 1.03E-04 | 1.94E-03 | 1.00E+00 |
| ENSG00000109775.9_UFSP2    | ENSG00000160789.18_LMNA | -0.03226 | -0.190484251 | 0.127594142 | 6.93E-01 | 8.68E-01 | 1.00E+00 |
| ENSG00000125352.5_RNF113A  | ENSG00000160789.18_LMNA | -0.06472 | -0.221637152 | 0.095464231 | 4.28E-01 | 6.99E-01 | 1.00E+00 |

|                             |                         |          |              |             |          |          |          |
|-----------------------------|-------------------------|----------|--------------|-------------|----------|----------|----------|
| ENSG00000060982.13_BCAT1    | ENSG00000160789.18_LMNA | 0.25628  | 0.101213819  | 0.399198048 | 1.44E-03 | 1.52E-02 | 1.00E+00 |
| ENSG00000197713.13_RPE      | ENSG00000160789.18_LMNA | 0.02976  | -0.130059498 | 0.188067101 | 7.16E-01 | 8.79E-01 | 1.00E+00 |
| ENSG00000118200.13_CAMSAP2  | ENSG00000160789.18_LMNA | -0.2254  | -0.371280431 | -0.0686662  | 5.24E-03 | 4.06E-02 | 1.00E+00 |
| ENSG00000185880.11_TRIM69   | ENSG00000160789.18_LMNA | -0.14085 | -0.293465732 | 0.018776403 | 8.35E-02 | 2.79E-01 | 1.00E+00 |
| ENSG00000140694.15_PARN     | ENSG00000160789.18_LMNA | 0.22155  | 0.064625703  | 0.367776104 | 6.09E-03 | 4.55E-02 | 1.00E+00 |
| ENSG00000164088.16_PPM1M    | ENSG00000160789.18_LMNA | 0.11029  | -0.049788668 | 0.264836995 | 1.76E-01 | 4.37E-01 | 1.00E+00 |
| ENSG00000144231.9_POLR2D    | ENSG00000160789.18_LMNA | -0.23698 | -0.381775807 | -0.08082708 | 3.29E-03 | 2.86E-02 | 1.00E+00 |
| ENSG00000074657.12_ZNF532   | ENSG00000160789.18_LMNA | 0.13182  | -0.027962991 | 0.285043184 | 1.05E-01 | 3.22E-01 | 1.00E+00 |
| ENSG00000164902.12_PHAX     | ENSG00000160789.18_LMNA | 0.05954  | -0.100618348 | 0.216682974 | 4.66E-01 | 7.28E-01 | 1.00E+00 |
| ENSG00000135002.10_RFK      | ENSG00000160789.18_LMNA | -0.00442 | -0.163502786 | 0.154892563 | 9.57E-01 | 9.83E-01 | 1.00E+00 |
| ENSG00000210144.1_MT-TY     | ENSG00000160789.18_LMNA | -0.22889 | -0.374448538 | -0.0723276  | 4.56E-03 | 3.66E-02 | 1.00E+00 |
| ENSG00000100359.19_SGSM3    | ENSG00000160789.18_LMNA | -0.07012 | -0.226791782 | 0.090083463 | 3.91E-01 | 6.69E-01 | 1.00E+00 |
| ENSG00000197872.10_FAM49A   | ENSG00000160789.18_LMNA | -0.23843 | -0.383086676 | -0.08235229 | 3.10E-03 | 2.74E-02 | 1.00E+00 |
| ENSG00000165915.12_SLC39A13 | ENSG00000160789.18_LMNA | 0.38248  | 0.23775829   | 0.510591666 | 1.16E-06 | 5.18E-05 | 5.94E-02 |
| ENSG00000135643.4_KCNMB4    | ENSG00000160789.18_LMNA | -0.11194 | -0.266391865 | 0.048119783 | 1.70E-01 | 4.28E-01 | 1.00E+00 |
| ENSG00000137497.16_NUMA1    | ENSG00000160789.18_LMNA | 0.13418  | -0.025563509 | 0.287247776 | 9.93E-02 | 3.10E-01 | 1.00E+00 |
| ENSG00000161526.13_SAP30BP  | ENSG00000160789.18_LMNA | -0.16042 | -0.311665326 | -0.00125583 | 4.83E-02 | 1.97E-01 | 1.00E+00 |
| ENSG00000102471.12_NDFIP2   | ENSG00000160789.18_LMNA | -0.3332  | -0.467595604 | -0.18374486 | 2.73E-05 | 6.64E-04 | 1.00E+00 |
| ENSG00000135972.7_MRPS9     | ENSG00000160789.18_LMNA | -0.13628 | -0.289206701 | 0.023428384 | 9.41E-02 | 3.00E-01 | 1.00E+00 |
| ENSG00000114698.13_PLSCR4   | ENSG00000160789.18_LMNA | -0.07948 | -0.235694457 | 0.080746448 | 3.30E-01 | 6.16E-01 | 1.00E+00 |
| ENSG00000170632.12_ARMC10   | ENSG00000160789.18_LMNA | 0.05011  | -0.109964694 | 0.207657311 | 5.40E-01 | 7.80E-01 | 1.00E+00 |
| ENSG00000064300.7_NGFR      | ENSG00000160789.18_LMNA | 0.03169  | -0.1281592   | 0.189930583 | 6.98E-01 | 8.71E-01 | 1.00E+00 |
| ENSG00000135678.10_CPM      | ENSG00000160789.18_LMNA | -0.20745 | -0.354927509 | -0.04989579 | 1.03E-02 | 6.71E-02 | 1.00E+00 |
| ENSG00000116698.19_SMG7     | ENSG00000160789.18_LMNA | 0.19912  | 0.041224378  | 0.347309353 | 1.39E-02 | 8.31E-02 | 1.00E+00 |
| ENSG00000099991.15_CABIN1   | ENSG00000160789.18_LMNA | 0.11875  | -0.04122804  | 0.272795485 | 1.45E-01 | 3.90E-01 | 1.00E+00 |
| ENSG00000114544.14_SLC41A3  | ENSG00000160789.18_LMNA | -0.12023 | -0.274181257 | 0.039732693 | 1.40E-01 | 3.82E-01 | 1.00E+00 |
| ENSG00000085231.12_AK6      | ENSG00000160789.18_LMNA | 0.05158  | -0.10851502  | 0.209060797 | 5.28E-01 | 7.72E-01 | 1.00E+00 |
| ENSG00000122490.17_PQLC1    | ENSG00000160789.18_LMNA | 0.17453  | 0.015769262  | 0.324710243 | 3.15E-02 | 1.48E-01 | 1.00E+00 |
| ENSG00000070423.16_RNF126   | ENSG00000160789.18_LMNA | 0.11082  | -0.049254533 | 0.265334816 | 1.74E-01 | 4.34E-01 | 1.00E+00 |
| ENSG00000079805.15_DNM2     | ENSG00000160789.18_LMNA | 0.15084  | -0.008566792 | 0.30276969  | 6.36E-02 | 2.35E-01 | 1.00E+00 |
| ENSG00000104529.16_EEF1D    | ENSG00000160789.18_LMNA | -0.00761 | -0.166607745 | 0.151775692 | 9.26E-01 | 9.72E-01 | 1.00E+00 |
| ENSG00000078246.14_TULP3    | ENSG00000160789.18_LMNA | 0.24842  | 0.09289451   | 0.39211437  | 2.03E-03 | 1.97E-02 | 1.00E+00 |
| ENSG00000167851.12_CD300A   | ENSG00000160789.18_LMNA | -0.04027 | -0.198197461 | 0.119700733 | 6.22E-01 | 8.29E-01 | 1.00E+00 |



|                              |                         |          |              |             |          |          |          |
|------------------------------|-------------------------|----------|--------------|-------------|----------|----------|----------|
| ENSG00000213398.6_LCAT       | ENSG00000160789.18_LMNA | -0.10224 | -0.257257713 | 0.057898644 | 2.10E-01 | 4.83E-01 | 1.00E+00 |
| ENSG00000146433.8_TMEM181    | ENSG00000160789.18_LMNA | 0.06843  | -0.091769519 | 0.225178493 | 4.02E-01 | 6.78E-01 | 1.00E+00 |
| ENSG00000197329.10_PELI1     | ENSG00000160789.18_LMNA | -0.42158 | -0.54425062  | -0.28125327 | 6.34E-08 | 5.00E-06 | 3.25E-03 |
| ENSG00000063978.14_RNF4      | ENSG00000160789.18_LMNA | 0.21949  | 0.06247666   | 0.365908723 | 6.59E-03 | 4.82E-02 | 1.00E+00 |
| ENSG00000204348.8_D XO       | ENSG00000160789.18_LMNA | -0.08216 | -0.238248072 | 0.07805796  | 3.14E-01 | 6.01E-01 | 1.00E+00 |
| ENSG00000227766.1_HCG4P5     | ENSG00000160789.18_LMNA | 0.22349  | 0.066657908  | 0.369539714 | 5.65E-03 | 4.30E-02 | 1.00E+00 |
| ENSG00000184205.13_TSPYL2    | ENSG00000160789.18_LMNA | -0.16658 | -0.3173671   | -0.00758343 | 4.02E-02 | 1.74E-01 | 1.00E+00 |
| ENSG00000140092.13_FBLN5     | ENSG00000160789.18_LMNA | 0.16399  | 0.004919529  | 0.314969398 | 4.35E-02 | 1.84E-01 | 1.00E+00 |
| ENSG00000104549.10_SQLE      | ENSG00000160789.18_LMNA | 0.00121  | -0.158024032 | 0.16037692  | 9.88E-01 | 9.96E-01 | 1.00E+00 |
| ENSG00000144034.13_TPRKB     | ENSG00000160789.18_LMNA | -0.3086  | -0.445898062 | -0.15712311 | 1.10E-04 | 2.03E-03 | 1.00E+00 |
| ENSG00000184743.11_ATL3      | ENSG00000160789.18_LMNA | 0.35399  | 0.20642028   | 0.485810886 | 7.68E-06 | 2.37E-04 | 3.94E-01 |
| ENSG00000119139.15_TJP2      | ENSG00000160789.18_LMNA | -0.20507 | -0.352752187 | -0.04741501 | 1.13E-02 | 7.13E-02 | 1.00E+00 |
| ENSG00000143499.12_SMYD2     | ENSG00000160789.18_LMNA | 0.12761  | -0.032247132 | 0.281098754 | 1.17E-01 | 3.43E-01 | 1.00E+00 |
| ENSG00000279118.1_RP11-517I3 | ENSG00000160789.18_LMNA | -0.21752 | -0.364108251 | -0.06040728 | 7.10E-03 | 5.10E-02 | 1.00E+00 |
| ENSG00000179041.3_RRS1       | ENSG00000160789.18_LMNA | 0.27429  | 0.120344067  | 0.415353122 | 6.27E-04 | 8.06E-03 | 1.00E+00 |
| ENSG00000110047.16_EHD1      | ENSG00000160789.18_LMNA | 0.10605  | -0.054067176 | 0.260843299 | 1.93E-01 | 4.62E-01 | 1.00E+00 |
| ENSG00000172005.9_MAL        | ENSG00000160789.18_LMNA | -0.26503 | -0.407060004 | -0.11049622 | 9.68E-04 | 1.13E-02 | 1.00E+00 |
| ENSG00000182902.12_SLC25A18  | ENSG00000160789.18_LMNA | -0.10348 | -0.258420341 | 0.056657305 | 2.05E-01 | 4.76E-01 | 1.00E+00 |
| ENSG00000160325.13_CACFD1    | ENSG00000160789.18_LMNA | 0.01865  | -0.14096444  | 0.177328966 | 8.20E-01 | 9.30E-01 | 1.00E+00 |
| ENSG00000187068.2_C3orf70    | ENSG00000160789.18_LMNA | -0.23361 | -0.378723838 | -0.07728154 | 3.77E-03 | 3.18E-02 | 1.00E+00 |
| ENSG00000114302.14_PRKAR2A   | ENSG00000160789.18_LMNA | -0.13419 | -0.287250213 | 0.025560855 | 9.93E-02 | 3.10E-01 | 1.00E+00 |
| ENSG00000164828.16_SUN1      | ENSG00000160789.18_LMNA | 0.22014  | 0.063148993  | 0.3664932   | 6.43E-03 | 4.74E-02 | 1.00E+00 |
| ENSG00000025796.12_SEC63     | ENSG00000160789.18_LMNA | 0.04128  | -0.118705068 | 0.199167607 | 6.14E-01 | 8.24E-01 | 1.00E+00 |
| ENSG00000142552.6_RCN3       | ENSG00000160789.18_LMNA | 0.38735  | 0.243140483  | 0.514802555 | 8.22E-07 | 3.88E-05 | 4.22E-02 |
| ENSG00000066583.10_ISOC1     | ENSG00000160789.18_LMNA | -0.11122 | -0.265713376 | 0.04884824  | 1.73E-01 | 4.32E-01 | 1.00E+00 |
| ENSG00000163110.13_PDLIM5    | ENSG00000160789.18_LMNA | 0.16192  | 0.002787757  | 0.313047793 | 4.63E-02 | 1.91E-01 | 1.00E+00 |
| ENSG00000136144.10_RCBTB1    | ENSG00000160789.18_LMNA | -0.48234 | -0.595793179 | -0.35002017 | 3.13E-10 | 5.92E-08 | 1.60E-05 |
| ENSG00000143207.18_RFWD2     | ENSG00000160789.18_LMNA | -0.20954 | -0.356833388 | -0.05207238 | 9.57E-03 | 6.36E-02 | 1.00E+00 |
| ENSG00000149179.12_C11orf49  | ENSG00000160789.18_LMNA | -0.08396 | -0.239953281 | 0.076260122 | 3.04E-01 | 5.90E-01 | 1.00E+00 |
| ENSG00000234782.3_TPT1P9     | ENSG00000160789.18_LMNA | -0.08256 | -0.238628249 | 0.077657309 | 3.12E-01 | 5.98E-01 | 1.00E+00 |
| ENSG00000163132.6_MSX1       | ENSG00000160789.18_LMNA | -0.08784 | -0.243633742 | 0.072372713 | 2.82E-01 | 5.67E-01 | 1.00E+00 |
| ENSG00000157637.11_SLC38A1C  | ENSG00000160789.18_LMNA | 0.36585  | 0.219434621  | 0.496156902 | 3.57E-06 | 1.27E-04 | 1.83E-01 |
| ENSG00000168938.5_PPIC       | ENSG00000160789.18_LMNA | 0.34829  | 0.200184965  | 0.480826099 | 1.10E-05 | 3.14E-04 | 5.63E-01 |

|                             |                         |          |              |             |          |          |          |
|-----------------------------|-------------------------|----------|--------------|-------------|----------|----------|----------|
| ENSG00000160007.16_ARHGAP3  | ENSG00000160789.18_LMNA | 0.09568  | -0.064501358 | 0.251058294 | 2.41E-01 | 5.20E-01 | 1.00E+00 |
| ENSG00000183520.10_UTP11    | ENSG00000160789.18_LMNA | 0.03248  | -0.127377893 | 0.190696087 | 6.91E-01 | 8.67E-01 | 1.00E+00 |
| ENSG00000026297.14_RNASET2  | ENSG00000160789.18_LMNA | -0.01839 | -0.177076067 | 0.141220339 | 8.22E-01 | 9.30E-01 | 1.00E+00 |
| ENSG00000133731.8_IMPA1     | ENSG00000160789.18_LMNA | -0.31029 | -0.447387991 | -0.15893785 | 1.00E-04 | 1.88E-03 | 1.00E+00 |
| ENSG00000095319.13_NUP188   | ENSG00000160789.18_LMNA | 0.2643   | 0.109715216  | 0.406400206 | 1.00E-03 | 1.16E-02 | 1.00E+00 |
| ENSG00000234171.2_RNASEH1   | ENSG00000160789.18_LMNA | -0.17689 | -0.326881837 | -0.01819803 | 2.93E-02 | 1.41E-01 | 1.00E+00 |
| ENSG00000108604.14_SMARCD2  | ENSG00000160789.18_LMNA | 0.12618  | -0.033702544 | 0.279756335 | 1.21E-01 | 3.51E-01 | 1.00E+00 |
| ENSG00000218510.5_LINC00339 | ENSG00000160789.18_LMNA | -0.02781 | -0.186189809 | 0.131971519 | 7.34E-01 | 8.88E-01 | 1.00E+00 |
| ENSG00000104164.9_BLOC1S6   | ENSG00000160789.18_LMNA | -0.22167 | -0.367890828 | -0.06475782 | 6.06E-03 | 4.53E-02 | 1.00E+00 |
| ENSG00000119328.10_FAM206A  | ENSG00000160789.18_LMNA | 0.00484  | -0.154475933 | 0.16391819  | 9.53E-01 | 9.81E-01 | 1.00E+00 |
| ENSG00000181852.16_RNF41    | ENSG00000160789.18_LMNA | -0.35493 | -0.486632272 | -0.20744991 | 7.23E-06 | 2.26E-04 | 3.71E-01 |
| ENSG00000144848.9_ATG3      | ENSG00000160789.18_LMNA | -0.10509 | -0.259942331 | 0.055030801 | 1.98E-01 | 4.67E-01 | 1.00E+00 |
| ENSG00000144909.7_OSBPL11   | ENSG00000160789.18_LMNA | -0.27696 | -0.417738677 | -0.12318764 | 5.52E-04 | 7.29E-03 | 1.00E+00 |
| ENSG00000106399.10_RPA3     | ENSG00000160789.18_LMNA | -0.00699 | -0.166009952 | 0.152376271 | 9.32E-01 | 9.73E-01 | 1.00E+00 |
| ENSG00000088881.19_EBF4     | ENSG00000160789.18_LMNA | 0.01901  | -0.140613067 | 0.17767615  | 8.16E-01 | 9.28E-01 | 1.00E+00 |
| ENSG00000165029.14_ABCA1    | ENSG00000160789.18_LMNA | 0.21181  | 0.054448199  | 0.358910824 | 8.80E-03 | 5.97E-02 | 1.00E+00 |
| ENSG00000122068.11_FYTTD1   | ENSG00000160789.18_LMNA | -0.2029  | -0.35077207  | -0.04516013 | 1.22E-02 | 7.56E-02 | 1.00E+00 |
| ENSG00000167182.12_SP2      | ENSG00000160789.18_LMNA | 0.04621  | -0.113828278 | 0.203910424 | 5.72E-01 | 8.00E-01 | 1.00E+00 |
| ENSG00000166170.9_BAG5      | ENSG00000160789.18_LMNA | 0.21051  | 0.053092597  | 0.357725844 | 9.24E-03 | 6.19E-02 | 1.00E+00 |
| ENSG00000147010.16_SH3KBP1  | ENSG00000160789.18_LMNA | 0.10362  | -0.056514411 | 0.258554116 | 2.04E-01 | 4.75E-01 | 1.00E+00 |
| ENSG00000166128.11_RAB8B    | ENSG00000160789.18_LMNA | -0.03959 | -0.197549042 | 0.120365852 | 6.28E-01 | 8.33E-01 | 1.00E+00 |
| ENSG00000088888.16_MAVS     | ENSG00000160789.18_LMNA | 0.21575  | 0.058559822  | 0.362498945 | 7.60E-03 | 5.35E-02 | 1.00E+00 |
| ENSG00000171492.13_LRRC8D   | ENSG00000160789.18_LMNA | -0.35146 | -0.4836053   | -0.20365858 | 9.00E-06 | 2.67E-04 | 4.62E-01 |
| ENSG00000144711.12_IQSEC1   | ENSG00000160789.18_LMNA | 0.19952  | 0.041637465  | 0.347673184 | 1.37E-02 | 8.23E-02 | 1.00E+00 |
| ENSG00000077420.14_APBB1IP  | ENSG00000160789.18_LMNA | -0.09876 | -0.253970535 | 0.061403103 | 2.26E-01 | 5.02E-01 | 1.00E+00 |
| ENSG00000140995.15_DEF8     | ENSG00000160789.18_LMNA | 0.05426  | -0.105855765 | 0.211631932 | 5.07E-01 | 7.57E-01 | 1.00E+00 |
| ENSG00000176396.9_EID2      | ENSG00000160789.18_LMNA | 0.06786  | -0.09233689  | 0.224635219 | 4.06E-01 | 6.82E-01 | 1.00E+00 |
| ENSG00000156599.9_ZDHHC5    | ENSG00000160789.18_LMNA | 0.35469  | 0.207187442  | 0.486422936 | 7.34E-06 | 2.28E-04 | 3.77E-01 |
| ENSG00000186141.7_POLR3C    | ENSG00000160789.18_LMNA | -0.07664 | -0.232995525 | 0.083582933 | 3.48E-01 | 6.32E-01 | 1.00E+00 |
| ENSG00000143390.16_RFX5     | ENSG00000160789.18_LMNA | -0.14103 | -0.293633847 | 0.018592499 | 8.31E-02 | 2.79E-01 | 1.00E+00 |
| ENSG00000115525.15_ST3GAL5  | ENSG00000160789.18_LMNA | -0.17563 | -0.3257196   | -0.0168977  | 3.04E-02 | 1.45E-01 | 1.00E+00 |
| ENSG00000102858.11_MGRN1    | ENSG00000160789.18_LMNA | 0.11258  | -0.047473816 | 0.266993261 | 1.67E-01 | 4.25E-01 | 1.00E+00 |
| ENSG00000102030.14_NAA10    | ENSG00000160789.18_LMNA | 0.0164   | -0.143169731 | 0.175148156 | 8.41E-01 | 9.38E-01 | 1.00E+00 |

|                              |                         |          |              |             |          |          |          |
|------------------------------|-------------------------|----------|--------------|-------------|----------|----------|----------|
| ENSG00000117543.18_DPH5      | ENSG00000160789.18_LMNA | -0.31413 | -0.450790428 | -0.16308936 | 8.11E-05 | 1.59E-03 | 1.00E+00 |
| ENSG00000145362.15_ANK2      | ENSG00000160789.18_LMNA | 0.00786  | -0.151530663 | 0.166851571 | 9.23E-01 | 9.71E-01 | 1.00E+00 |
| ENSG00000102580.13_DNAJC3    | ENSG00000160789.18_LMNA | 0.28799  | 0.134977531  | 0.427586406 | 3.21E-04 | 4.74E-03 | 1.00E+00 |
| ENSG00000105419.16_MEIS3     | ENSG00000160789.18_LMNA | -0.07592 | -0.23231724  | 0.084294981 | 3.53E-01 | 6.36E-01 | 1.00E+00 |
| ENSG00000088812.16_ATRN      | ENSG00000160789.18_LMNA | 0.1388   | -0.020860026 | 0.291559643 | 8.81E-02 | 2.89E-01 | 1.00E+00 |
| ENSG00000141750.6_STAC2      | ENSG00000160789.18_LMNA | 0.05518  | -0.104939665 | 0.212516657 | 5.00E-01 | 7.52E-01 | 1.00E+00 |
| ENSG00000136541.13_ERMN      | ENSG00000160789.18_LMNA | -0.36903 | -0.498920882 | -0.22292821 | 2.89E-06 | 1.07E-04 | 1.48E-01 |
| ENSG00000167588.11_GPD1      | ENSG00000160789.18_LMNA | -0.46867 | -0.584277223 | -0.33442255 | 1.13E-09 | 1.73E-07 | 5.81E-05 |
| ENSG00000123374.9_CDK2       | ENSG00000160789.18_LMNA | 0.17805  | 0.019397157  | 0.327952797 | 2.82E-02 | 1.37E-01 | 1.00E+00 |
| ENSG00000181915.4_ADO        | ENSG00000160789.18_LMNA | -0.08402 | -0.240007542 | 0.07620288  | 3.03E-01 | 5.90E-01 | 1.00E+00 |
| ENSG00000153317.13_ASAP1     | ENSG00000160789.18_LMNA | 0.18405  | 0.025604446  | 0.333483961 | 2.32E-02 | 1.20E-01 | 1.00E+00 |
| ENSG00000254986.6_DPP3       | ENSG00000160789.18_LMNA | 0.21286  | 0.055539655  | 0.359864191 | 8.47E-03 | 5.81E-02 | 1.00E+00 |
| ENSG00000109911.16_ELP4      | ENSG00000160789.18_LMNA | -0.14229 | -0.294810104 | 0.017305183 | 8.03E-02 | 2.73E-01 | 1.00E+00 |
| ENSG00000156860.14_FBRS      | ENSG00000160789.18_LMNA | 0.28806  | 0.135049837  | 0.427646588 | 3.20E-04 | 4.73E-03 | 1.00E+00 |
| ENSG00000137693.12_YAP1      | ENSG00000160789.18_LMNA | 0.32792  | 0.178008652  | 0.462949151 | 3.72E-05 | 8.49E-04 | 1.00E+00 |
| ENSG00000114395.9_CYB561D2   | ENSG00000160789.18_LMNA | 0.03449  | -0.125402208 | 0.192630091 | 6.73E-01 | 8.57E-01 | 1.00E+00 |
| ENSG00000146463.10_ZMYM4     | ENSG00000160789.18_LMNA | -0.03719 | -0.195236706 | 0.122735418 | 6.49E-01 | 8.44E-01 | 1.00E+00 |
| ENSG00000232119.6_MCTS1      | ENSG00000160789.18_LMNA | -0.03893 | -0.196914282 | 0.121016682 | 6.34E-01 | 8.36E-01 | 1.00E+00 |
| ENSG00000154059.8_IMPACT     | ENSG00000160789.18_LMNA | -0.07421 | -0.230690015 | 0.086001888 | 3.64E-01 | 6.45E-01 | 1.00E+00 |
| ENSG00000164638.9_SLC29A4    | ENSG00000160789.18_LMNA | -0.01375 | -0.172569462 | 0.1457733   | 8.67E-01 | 9.48E-01 | 1.00E+00 |
| ENSG00000167113.9_COQ4       | ENSG00000160789.18_LMNA | 0.04631  | -0.113732213 | 0.204003701 | 5.71E-01 | 8.00E-01 | 1.00E+00 |
| ENSG00000113282.12_CLINT1    | ENSG00000160789.18_LMNA | 0.10335  | -0.056787295 | 0.258298637 | 2.05E-01 | 4.77E-01 | 1.00E+00 |
| ENSG00000167220.10_HDHD2     | ENSG00000160789.18_LMNA | -0.26883 | -0.410464892 | -0.11453239 | 8.11E-04 | 9.83E-03 | 1.00E+00 |
| ENSG00000183087.13_GAS6      | ENSG00000160789.18_LMNA | 0.27331  | 0.11929808   | 0.414474593 | 6.57E-04 | 8.35E-03 | 1.00E+00 |
| ENSG00000100324.12_TAB1      | ENSG00000160789.18_LMNA | -0.08254 | -0.238606418 | 0.077680319 | 3.12E-01 | 5.98E-01 | 1.00E+00 |
| ENSG00000100225.16_FBXO7     | ENSG00000160789.18_LMNA | -0.1261  | -0.279682365 | 0.033782702 | 1.22E-01 | 3.51E-01 | 1.00E+00 |
| ENSG00000160993.3_ALKBH4     | ENSG00000160789.18_LMNA | 0.13875  | -0.020915234 | 0.291509105 | 8.82E-02 | 2.89E-01 | 1.00E+00 |
| ENSG00000168476.10_REEP4     | ENSG00000160789.18_LMNA | 0.34652  | 0.198253035  | 0.479277939 | 1.22E-05 | 3.45E-04 | 6.28E-01 |
| ENSG00000128606.11_LRRC17    | ENSG00000160789.18_LMNA | 0.07574  | -0.084476739 | 0.232144051 | 3.54E-01 | 6.37E-01 | 1.00E+00 |
| ENSG00000090339.7_ICAM1      | ENSG00000160789.18_LMNA | 0.44661  | 0.309405774  | 0.565594443 | 8.06E-09 | 9.05E-07 | 4.13E-04 |
| ENSG00000224870.5_RP4-758J11 | ENSG00000160789.18_LMNA | 0.08414  | -0.076080428 | 0.240123609 | 3.03E-01 | 5.89E-01 | 1.00E+00 |
| ENSG00000169084.11_DHR SX    | ENSG00000160789.18_LMNA | 0.11626  | -0.043745853 | 0.270459222 | 1.54E-01 | 4.04E-01 | 1.00E+00 |
| ENSG00000182179.9_UBA7       | ENSG00000160789.18_LMNA | 0.02297  | -0.136727411 | 0.181510205 | 7.79E-01 | 9.09E-01 | 1.00E+00 |

|                            |                         |          |              |             |          |          |          |
|----------------------------|-------------------------|----------|--------------|-------------|----------|----------|----------|
| ENSG00000104490.16_NCALD   | ENSG00000160789.18_LMNA | -0.36383 | -0.49439615  | -0.21721278 | 4.08E-06 | 1.40E-04 | 2.09E-01 |
| ENSG00000143815.13_LBR     | ENSG00000160789.18_LMNA | -0.09753 | -0.252804716 | 0.062644117 | 2.32E-01 | 5.10E-01 | 1.00E+00 |
| ENSG00000131771.12_PPP1R1B | ENSG00000160789.18_LMNA | -0.36344 | -0.494058905 | -0.21678755 | 4.18E-06 | 1.44E-04 | 2.14E-01 |
| ENSG00000176046.8_NUPR1    | ENSG00000160789.18_LMNA | -0.05547 | -0.212789061 | 0.104657493 | 4.97E-01 | 7.51E-01 | 1.00E+00 |
| ENSG00000138382.12_METTL5  | ENSG00000160789.18_LMNA | -0.27483 | -0.41583513  | -0.12091823 | 6.11E-04 | 7.91E-03 | 1.00E+00 |
| ENSG00000143157.10_POGK    | ENSG00000160789.18_LMNA | 0.01741  | -0.142181038 | 0.176126259 | 8.31E-01 | 9.34E-01 | 1.00E+00 |
| ENSG00000198894.6_CIPC     | ENSG00000160789.18_LMNA | -0.18403 | -0.333458805 | -0.02557616 | 2.32E-02 | 1.20E-01 | 1.00E+00 |
| ENSG00000164609.8_SLU7     | ENSG00000160789.18_LMNA | -0.13639 | -0.289305501 | 0.023320622 | 9.38E-02 | 3.00E-01 | 1.00E+00 |
| ENSG00000182095.13_TNRC18  | ENSG00000160789.18_LMNA | 0.26627  | 0.111805224  | 0.408165178 | 9.14E-04 | 1.08E-02 | 1.00E+00 |
| ENSG00000165156.13_ZHX1    | ENSG00000160789.18_LMNA | -0.02844 | -0.186791992 | 0.131358454 | 7.28E-01 | 8.85E-01 | 1.00E+00 |
| ENSG00000075399.11_VPS9D1  | ENSG00000160789.18_LMNA | 0.21244  | 0.055107964  | 0.359487193 | 8.60E-03 | 5.87E-02 | 1.00E+00 |
| ENSG00000185085.2_INTS5    | ENSG00000160789.18_LMNA | 0.1134   | -0.046643779 | 0.267765667 | 1.64E-01 | 4.20E-01 | 1.00E+00 |
| ENSG00000120963.10_ZNF706  | ENSG00000160789.18_LMNA | -0.19177 | -0.340569673 | -0.03359115 | 1.79E-02 | 9.98E-02 | 1.00E+00 |
| ENSG00000137801.10_THBS1   | ENSG00000160789.18_LMNA | 0.33601  | 0.186797179  | 0.470061667 | 2.32E-05 | 5.81E-04 | 1.00E+00 |
| ENSG00000076043.8_REXO2    | ENSG00000160789.18_LMNA | 0.24422  | 0.088456735  | 0.388321148 | 2.43E-03 | 2.27E-02 | 1.00E+00 |
| ENSG00000125675.16_GRIA3   | ENSG00000160789.18_LMNA | -0.20662 | -0.354169595 | -0.04903102 | 1.07E-02 | 6.85E-02 | 1.00E+00 |
| ENSG00000186665.8_C17orf58 | ENSG00000160789.18_LMNA | -0.08695 | -0.242792027 | 0.073262605 | 2.87E-01 | 5.72E-01 | 1.00E+00 |
| ENSG00000164168.6_TMEM184C | ENSG00000160789.18_LMNA | 0.00171  | -0.157530832 | 0.160869662 | 9.83E-01 | 9.94E-01 | 1.00E+00 |
| ENSG00000100342.19_APOL1   | ENSG00000160789.18_LMNA | 0.18219  | 0.023679864  | 0.331771277 | 2.47E-02 | 1.25E-01 | 1.00E+00 |
| ENSG00000111906.16_HDDC2   | ENSG00000160789.18_LMNA | -0.33127 | -0.465898351 | -0.1816473  | 3.06E-05 | 7.26E-04 | 1.00E+00 |
| ENSG00000063241.6_ISOC2    | ENSG00000160789.18_LMNA | 0.04262  | -0.117374747 | 0.200462861 | 6.02E-01 | 8.17E-01 | 1.00E+00 |
| ENSG00000259956.1_RBM15B   | ENSG00000160789.18_LMNA | 0.18876  | 0.030475369  | 0.33780953  | 1.99E-02 | 1.07E-01 | 1.00E+00 |
| ENSG00000125869.8_LAMP5    | ENSG00000160789.18_LMNA | -0.16198 | -0.313108079 | -0.00285459 | 4.62E-02 | 1.91E-01 | 1.00E+00 |
| ENSG00000136436.13_CALCOCC | ENSG00000160789.18_LMNA | 0.00396  | -0.155342603 | 0.163053944 | 9.61E-01 | 9.85E-01 | 1.00E+00 |
| ENSG00000066135.11_KDM4A   | ENSG00000160789.18_LMNA | 0.10258  | -0.057558756 | 0.25757614  | 2.09E-01 | 4.81E-01 | 1.00E+00 |
| ENSG00000138386.15_NAB1    | ENSG00000160789.18_LMNA | -0.01426 | -0.173069336 | 0.145268948 | 8.62E-01 | 9.46E-01 | 1.00E+00 |
| ENSG00000229638.1_RPL4P4   | ENSG00000160789.18_LMNA | -0.01606 | -0.174809299 | 0.143512108 | 8.44E-01 | 9.39E-01 | 1.00E+00 |
| ENSG00000242616.3_GNG10    | ENSG00000160789.18_LMNA | -0.12545 | -0.279078734 | 0.034436675 | 1.24E-01 | 3.54E-01 | 1.00E+00 |
| ENSG00000231991.4_ANXA2P2  | ENSG00000160789.18_LMNA | 0.51835  | 0.391450329  | 0.6258987   | 7.92E-12 | 2.95E-09 | 4.07E-07 |
| ENSG00000007392.15_LUC7L   | ENSG00000160789.18_LMNA | -0.1615  | -0.312657494 | -0.00235511 | 4.68E-02 | 1.93E-01 | 1.00E+00 |
| ENSG00000187239.15_FNBP1   | ENSG00000160789.18_LMNA | 0.14735  | -0.012130956 | 0.299528416 | 7.00E-02 | 2.50E-01 | 1.00E+00 |
| ENSG00000186222.4_BLOC1S4  | ENSG00000160789.18_LMNA | 0.13789  | -0.021790407 | 0.290707733 | 9.03E-02 | 2.93E-01 | 1.00E+00 |
| ENSG00000146842.15_TMEM209 | ENSG00000160789.18_LMNA | 0.24733  | 0.091739197  | 0.391127836 | 2.13E-03 | 2.05E-02 | 1.00E+00 |

|                             |                         |          |              |             |          |          |          |
|-----------------------------|-------------------------|----------|--------------|-------------|----------|----------|----------|
| ENSG00000069956.10_MAPK6    | ENSG00000160789.18_LMNA | 0.09913  | -0.061038932 | 0.254312466 | 2.24E-01 | 5.00E-01 | 1.00E+00 |
| ENSG00000182979.16_MTA1     | ENSG00000160789.18_LMNA | 0.14101  | -0.018611244 | 0.293616712 | 8.31E-02 | 2.79E-01 | 1.00E+00 |
| ENSG00000005020.11_SKAP2    | ENSG00000160789.18_LMNA | -0.09743 | -0.252715254 | 0.062739308 | 2.32E-01 | 5.10E-01 | 1.00E+00 |
| ENSG00000137094.13_DNAJB5   | ENSG00000160789.18_LMNA | -0.01904 | -0.177698882 | 0.140590058 | 8.16E-01 | 9.28E-01 | 1.00E+00 |
| ENSG00000011243.16_AKAP8L   | ENSG00000160789.18_LMNA | 0.04661  | -0.113427957 | 0.204299087 | 5.68E-01 | 7.98E-01 | 1.00E+00 |
| ENSG00000113716.11_HMGXB3   | ENSG00000160789.18_LMNA | 0.41851  | 0.277820718  | 0.54162473  | 8.07E-08 | 6.02E-06 | 4.14E-03 |
| ENSG00000137504.12_CREBZF   | ENSG00000160789.18_LMNA | -0.05717 | -0.214417638 | 0.102969448 | 4.84E-01 | 7.41E-01 | 1.00E+00 |
| ENSG00000169019.10_COMMD8   | ENSG00000160789.18_LMNA | -0.18532 | -0.334647115 | -0.02691281 | 2.23E-02 | 1.17E-01 | 1.00E+00 |
| ENSG00000162944.9_RFTN2     | ENSG00000160789.18_LMNA | -0.49062 | -0.602742373 | -0.3594988  | 1.39E-10 | 2.98E-08 | 7.16E-06 |
| ENSG00000115561.13_CHMP3    | ENSG00000160789.18_LMNA | -0.01174 | -0.170625373 | 0.147733232 | 8.86E-01 | 9.56E-01 | 1.00E+00 |
| ENSG00000134049.4_IER3IP1   | ENSG00000160789.18_LMNA | -0.0675  | -0.224288313 | 0.092699074 | 4.09E-01 | 6.83E-01 | 1.00E+00 |
| ENSG00000103254.8_FAM173A   | ENSG00000160789.18_LMNA | 0.07341  | -0.086806992 | 0.229921881 | 3.69E-01 | 6.50E-01 | 1.00E+00 |
| ENSG00000179021.8_C3orf38   | ENSG00000160789.18_LMNA | -0.24714 | -0.390958493 | -0.09154096 | 2.14E-03 | 2.06E-02 | 1.00E+00 |
| ENSG00000119922.8_IFIT2     | ENSG00000160789.18_LMNA | -0.12085 | -0.274762175 | 0.039105422 | 1.38E-01 | 3.79E-01 | 1.00E+00 |
| ENSG00000137656.10_BUD13    | ENSG00000160789.18_LMNA | -0.09071 | -0.246352993 | 0.069494382 | 2.66E-01 | 5.50E-01 | 1.00E+00 |
| ENSG00000092203.12_TOX4     | ENSG00000160789.18_LMNA | 0.07816  | -0.082057367 | 0.234447717 | 3.38E-01 | 6.24E-01 | 1.00E+00 |
| ENSG00000186918.12_ZNF395   | ENSG00000160789.18_LMNA | 0.28392  | 0.130619762  | 0.42395457  | 3.93E-04 | 5.59E-03 | 1.00E+00 |
| ENSG00000087269.14_NOP14    | ENSG00000160789.18_LMNA | 0.24214  | 0.086260807  | 0.386440398 | 2.65E-03 | 2.43E-02 | 1.00E+00 |
| ENSG00000163840.8_DTX3L     | ENSG00000160789.18_LMNA | 0.27519  | 0.121307828  | 0.416162103 | 6.01E-04 | 7.79E-03 | 1.00E+00 |
| ENSG00000163683.10_SMIM14   | ENSG00000160789.18_LMNA | -0.28038 | -0.420799935 | -0.12684375 | 4.68E-04 | 6.39E-03 | 1.00E+00 |
| ENSG00000102032.11_RENBP    | ENSG00000160789.18_LMNA | 0.23525  | 0.07901306   | 0.380215135 | 3.53E-03 | 3.02E-02 | 1.00E+00 |
| ENSG00000197785.12_ATAD3A   | ENSG00000160789.18_LMNA | 0.30426  | 0.152446253  | 0.442050912 | 1.38E-04 | 2.44E-03 | 1.00E+00 |
| ENSG00000006042.10_TMEM98   | ENSG00000160789.18_LMNA | -0.16919 | -0.319779838 | -0.01026848 | 3.72E-02 | 1.65E-01 | 1.00E+00 |
| ENSG00000100325.13_ASCC2    | ENSG00000160789.18_LMNA | 0.22114  | 0.064204344  | 0.367410163 | 6.18E-03 | 4.60E-02 | 1.00E+00 |
| ENSG00000205246.7_          | ENSG00000160789.18_LMNA | -0.15705 | -0.308536288 | 0.002206117 | 5.33E-02 | 2.10E-01 | 1.00E+00 |
| ENSG00000279528.1_RP11-1148 | ENSG00000160789.18_LMNA | -0.06636 | -0.223200284 | 0.093834479 | 4.17E-01 | 6.89E-01 | 1.00E+00 |
| ENSG00000132361.15_CLUH     | ENSG00000160789.18_LMNA | 0.23253  | 0.076149425  | 0.377747947 | 3.94E-03 | 3.28E-02 | 1.00E+00 |
| ENSG00000137054.14_POLR1E   | ENSG00000160789.18_LMNA | 0.13305  | -0.026720855 | 0.286184845 | 1.02E-01 | 3.16E-01 | 1.00E+00 |
| ENSG00000010295.18_IFFO1    | ENSG00000160789.18_LMNA | 0.20646  | 0.048867002  | 0.354025796 | 1.07E-02 | 6.88E-02 | 1.00E+00 |
| ENSG00000103496.13_STX4     | ENSG00000160789.18_LMNA | 0.37686  | 0.231552069  | 0.505719779 | 1.71E-06 | 7.06E-05 | 8.75E-02 |
| ENSG00000160570.12_DEDD2    | ENSG00000160789.18_LMNA | 0.25235  | 0.09705117   | 0.3956581   | 1.71E-03 | 1.74E-02 | 1.00E+00 |
| ENSG00000164649.18_CDCA7L   | ENSG00000160789.18_LMNA | 0.15639  | -0.00288734  | 0.307919781 | 5.44E-02 | 2.12E-01 | 1.00E+00 |
| ENSG00000115207.12_GTF3C2   | ENSG00000160789.18_LMNA | -0.0531  | -0.21051677  | 0.107009704 | 5.16E-01 | 7.63E-01 | 1.00E+00 |

|                            |                         |          |              |             |          |          |          |
|----------------------------|-------------------------|----------|--------------|-------------|----------|----------|----------|
| ENSG00000115966.15_ATF2    | ENSG00000160789.18_LMNA | -0.12126 | -0.275153621 | 0.038682603 | 1.37E-01 | 3.76E-01 | 1.00E+00 |
| ENSG00000165724.5_ZMYND19  | ENSG00000160789.18_LMNA | 0.25342  | 0.098183634  | 0.396622036 | 1.63E-03 | 1.68E-02 | 1.00E+00 |
| ENSG00000130414.10_NDUFA10 | ENSG00000160789.18_LMNA | -0.06221 | -0.219240577 | 0.097959652 | 4.46E-01 | 7.13E-01 | 1.00E+00 |
| ENSG00000141279.14_NPEPPS  | ENSG00000160789.18_LMNA | -0.24708 | -0.390908588 | -0.09148255 | 2.15E-03 | 2.07E-02 | 1.00E+00 |
| ENSG00000150337.12_FCGR1A  | ENSG00000160789.18_LMNA | -0.01845 | -0.17713029  | 0.141165477 | 8.22E-01 | 9.30E-01 | 1.00E+00 |
| ENSG00000148341.16_SH3GLB2 | ENSG00000160789.18_LMNA | -0.16466 | -0.315591632 | -0.00561042 | 4.26E-02 | 1.81E-01 | 1.00E+00 |
| ENSG00000173744.16_AGFG1   | ENSG00000160789.18_LMNA | -0.24871 | -0.392372243 | -0.09319663 | 2.00E-03 | 1.95E-02 | 1.00E+00 |
| ENSG00000142599.16_RERE    | ENSG00000160789.18_LMNA | 0.07827  | -0.08194829  | 0.234551493 | 3.38E-01 | 6.23E-01 | 1.00E+00 |
| ENSG00000134250.16_NOTCH2  | ENSG00000160789.18_LMNA | 0.23321  | 0.076866442  | 0.378366101 | 3.83E-03 | 3.21E-02 | 1.00E+00 |
| ENSG00000175662.16_TOM1L2  | ENSG00000160789.18_LMNA | -0.02426 | -0.182753124 | 0.13546566  | 7.67E-01 | 9.03E-01 | 1.00E+00 |
| ENSG00000174607.9_UGT8     | ENSG00000160789.18_LMNA | -0.43162 | -0.552831949 | -0.29251789 | 2.83E-08 | 2.58E-06 | 1.45E-03 |
| ENSG00000154153.12_FAM134B | ENSG00000160789.18_LMNA | -0.01899 | -0.177658239 | 0.140631196 | 8.16E-01 | 9.28E-01 | 1.00E+00 |
| ENSG00000132716.17_DCAF8   | ENSG00000160789.18_LMNA | -0.16332 | -0.3143479   | -0.00422975 | 4.44E-02 | 1.86E-01 | 1.00E+00 |
| ENSG00000173163.9_COMMD1   | ENSG00000160789.18_LMNA | -0.24581 | -0.389755009 | -0.09013284 | 2.27E-03 | 2.16E-02 | 1.00E+00 |
| ENSG00000007376.6_RPUSD1   | ENSG00000160789.18_LMNA | 0.10799  | -0.052102904 | 0.262678153 | 1.85E-01 | 4.51E-01 | 1.00E+00 |
| ENSG00000164466.11_SFXN1   | ENSG00000160789.18_LMNA | -0.03644 | -0.19451371  | 0.123475566 | 6.56E-01 | 8.48E-01 | 1.00E+00 |
| ENSG00000141258.11_SGSM2   | ENSG00000160789.18_LMNA | 0.10382  | -0.056312924 | 0.258742724 | 2.03E-01 | 4.74E-01 | 1.00E+00 |
| ENSG00000137275.12_RIPK1   | ENSG00000160789.18_LMNA | 0.40401  | 0.261636457  | 0.529174089 | 2.45E-07 | 1.50E-05 | 1.26E-02 |
| ENSG00000214046.7_SMIM7    | ENSG00000160789.18_LMNA | -0.30317 | -0.441082395 | -0.1512709  | 1.47E-04 | 2.55E-03 | 1.00E+00 |
| ENSG00000182768.8_NGRN     | ENSG00000160789.18_LMNA | -0.1799  | -0.329654726 | -0.0213046  | 2.66E-02 | 1.32E-01 | 1.00E+00 |
| ENSG00000165092.11_ALDH1A1 | ENSG00000160789.18_LMNA | -0.11338 | -0.267750086 | 0.046660527 | 1.64E-01 | 4.20E-01 | 1.00E+00 |
| ENSG00000161533.10_ACOX1   | ENSG00000160789.18_LMNA | -0.06107 | -0.218147405 | 0.099096587 | 4.55E-01 | 7.20E-01 | 1.00E+00 |
| ENSG00000213694.3_S1PR3    | ENSG00000160789.18_LMNA | -0.00699 | -0.166009511 | 0.152376715 | 9.32E-01 | 9.73E-01 | 1.00E+00 |
| ENSG00000249353.2_NPM1P27  | ENSG00000160789.18_LMNA | 0.03567  | -0.124237908 | 0.193768672 | 6.63E-01 | 8.51E-01 | 1.00E+00 |
| ENSG00000166171.11_DPCD    | ENSG00000160789.18_LMNA | -0.05462 | -0.211980424 | 0.105494978 | 5.04E-01 | 7.55E-01 | 1.00E+00 |
| ENSG00000181588.16_MEX3D   | ENSG00000160789.18_LMNA | 0.19874  | 0.040832591  | 0.346964196 | 1.41E-02 | 8.40E-02 | 1.00E+00 |
| ENSG00000116147.15_TNR     | ENSG00000160789.18_LMNA | -0.421   | -0.543760154 | -0.28061163 | 6.63E-08 | 5.20E-06 | 3.40E-03 |
| ENSG00000196642.14_RABL6   | ENSG00000160789.18_LMNA | 0.20841  | 0.050894299  | 0.355802147 | 9.98E-03 | 6.55E-02 | 1.00E+00 |
| ENSG00000172667.9_ZMAT3    | ENSG00000160789.18_LMNA | 0.0644   | -0.095778474 | 0.221335567 | 4.31E-01 | 7.00E-01 | 1.00E+00 |
| ENSG00000038002.7_AGA      | ENSG00000160789.18_LMNA | 0.07858  | -0.081640026 | 0.234844739 | 3.36E-01 | 6.22E-01 | 1.00E+00 |
| ENSG00000163349.20_HIPK1   | ENSG00000160789.18_LMNA | 0.12759  | -0.032270528 | 0.281077184 | 1.17E-01 | 3.43E-01 | 1.00E+00 |
| ENSG00000130816.13_DNMT1   | ENSG00000160789.18_LMNA | 0.21343  | 0.056139662  | 0.360388016 | 8.29E-03 | 5.72E-02 | 1.00E+00 |
| ENSG00000205903.5_ZNF316   | ENSG00000160789.18_LMNA | 0.26314  | 0.10848012   | 0.40535615  | 1.06E-03 | 1.21E-02 | 1.00E+00 |

|                             |                         |          |              |             |          |          |          |
|-----------------------------|-------------------------|----------|--------------|-------------|----------|----------|----------|
| ENSG00000011007.11_TCEB3    | ENSG00000160789.18_LMNA | 0.16778  | 0.008814128  | 0.318473484 | 3.88E-02 | 1.70E-01 | 1.00E+00 |
| ENSG00000136986.8_DERL1     | ENSG00000160789.18_LMNA | 0.00412  | -0.155179984 | 0.163216145 | 9.60E-01 | 9.84E-01 | 1.00E+00 |
| ENSG00000175792.10_RUVBL1   | ENSG00000160789.18_LMNA | 0.0207   | -0.138962642 | 0.179305839 | 8.00E-01 | 9.20E-01 | 1.00E+00 |
| ENSG00000135823.12_STX6     | ENSG00000160789.18_LMNA | 0.08225  | -0.077974534 | 0.238327243 | 3.14E-01 | 6.00E-01 | 1.00E+00 |
| ENSG00000148660.19_CAMK2G   | ENSG00000160789.18_LMNA | -0.40296 | -0.528271558 | -0.2604691  | 2.65E-07 | 1.60E-05 | 1.36E-02 |
| ENSG00000106976.17_DNM1     | ENSG00000160789.18_LMNA | 0.08734  | -0.07287543  | 0.2431583   | 2.85E-01 | 5.70E-01 | 1.00E+00 |
| ENSG00000003756.15_RBM5     | ENSG00000160789.18_LMNA | -0.08912 | -0.244850377 | 0.071085554 | 2.75E-01 | 5.59E-01 | 1.00E+00 |
| ENSG00000171497.4_PPID      | ENSG00000160789.18_LMNA | -0.1783  | -0.328182539 | -0.01965451 | 2.80E-02 | 1.37E-01 | 1.00E+00 |
| ENSG00000133030.18_MPRIP    | ENSG00000160789.18_LMNA | 0.10835  | -0.051740671 | 0.263016271 | 1.84E-01 | 4.49E-01 | 1.00E+00 |
| ENSG00000243943.8_ZNF512    | ENSG00000160789.18_LMNA | -0.25041 | -0.393908417 | -0.09499756 | 1.86E-03 | 1.85E-02 | 1.00E+00 |
| ENSG00000137942.15_FNBP1L   | ENSG00000160789.18_LMNA | -0.00471 | -0.163790319 | 0.154604193 | 9.54E-01 | 9.82E-01 | 1.00E+00 |
| ENSG00000141644.16_MBD1     | ENSG00000160789.18_LMNA | 0.10507  | -0.055047424 | 0.259926784 | 1.98E-01 | 4.67E-01 | 1.00E+00 |
| ENSG00000174306.20_ZHX3     | ENSG00000160789.18_LMNA | 0.07997  | -0.080250244 | 0.236166097 | 3.27E-01 | 6.14E-01 | 1.00E+00 |
| ENSG00000114019.13_AMOTL2   | ENSG00000160789.18_LMNA | -0.333   | -0.467424315 | -0.18353306 | 2.77E-05 | 6.69E-04 | 1.00E+00 |
| ENSG00000010244.15_ZNF207   | ENSG00000160789.18_LMNA | -0.27535 | -0.416301066 | -0.12147343 | 5.96E-04 | 7.75E-03 | 1.00E+00 |
| ENSG00000114779.18_ABHD14B  | ENSG00000160789.18_LMNA | 0.12382  | -0.036094107 | 0.27754778  | 1.29E-01 | 3.63E-01 | 1.00E+00 |
| ENSG00000148572.13_NRBF2    | ENSG00000160789.18_LMNA | 0.14226  | -0.017332186 | 0.29478544  | 8.04E-02 | 2.73E-01 | 1.00E+00 |
| ENSG00000143258.14_USP21    | ENSG00000160789.18_LMNA | -0.05252 | -0.209969609 | 0.10757558  | 5.20E-01 | 7.66E-01 | 1.00E+00 |
| ENSG00000119185.11_ITGB1BP1 | ENSG00000160789.18_LMNA | -0.04477 | -0.202523222 | 0.115256252 | 5.84E-01 | 8.07E-01 | 1.00E+00 |
| ENSG00000110925.5_CSRNP2    | ENSG00000160789.18_LMNA | -0.12836 | -0.281806068 | 0.031479747 | 1.15E-01 | 3.39E-01 | 1.00E+00 |
| ENSG00000085433.14_WDR47    | ENSG00000160789.18_LMNA | -0.1749  | -0.325053578 | -0.01615301 | 3.11E-02 | 1.47E-01 | 1.00E+00 |
| ENSG00000067836.11_ROGDI    | ENSG00000160789.18_LMNA | -0.29407 | -0.433000435 | -0.1414948  | 2.36E-04 | 3.72E-03 | 1.00E+00 |
| ENSG00000151468.10_CCDC3    | ENSG00000160789.18_LMNA | 0.05267  | -0.107428627 | 0.210111721 | 5.19E-01 | 7.65E-01 | 1.00E+00 |
| ENSG00000061938.15_TNK2     | ENSG00000160789.18_LMNA | -0.11962 | -0.273607841 | 0.040351621 | 1.42E-01 | 3.85E-01 | 1.00E+00 |
| ENSG00000185862.6_EVI2B     | ENSG00000160789.18_LMNA | -0.13011 | -0.283440438 | 0.02970516  | 1.10E-01 | 3.31E-01 | 1.00E+00 |
| ENSG00000103168.15_TAF1C    | ENSG00000160789.18_LMNA | -0.02185 | -0.180426142 | 0.137827058 | 7.89E-01 | 9.14E-01 | 1.00E+00 |
| ENSG00000164117.11_FBXO8    | ENSG00000160789.18_LMNA | -0.17928 | -0.329090415 | -0.0206719  | 2.71E-02 | 1.34E-01 | 1.00E+00 |
| ENSG00000186635.13_ARAP1    | ENSG00000160789.18_LMNA | 0.20785  | 0.0503114    | 0.355291627 | 1.02E-02 | 6.64E-02 | 1.00E+00 |
| ENSG00000139410.13_SDSL     | ENSG00000160789.18_LMNA | 0.10091  | -0.059237812 | 0.256002436 | 2.16E-01 | 4.90E-01 | 1.00E+00 |
| ENSG00000131759.16_RARA     | ENSG00000160789.18_LMNA | 0.26378  | 0.109160061  | 0.405931017 | 1.03E-03 | 1.18E-02 | 1.00E+00 |
| ENSG00000103423.12_DNAJA3   | ENSG00000160789.18_LMNA | -0.02837 | -0.186730773 | 0.131420791 | 7.29E-01 | 8.85E-01 | 1.00E+00 |
| ENSG00000185215.7_TNFAIP2   | ENSG00000160789.18_LMNA | 0.30779  | 0.1562429    | 0.445174825 | 1.15E-04 | 2.11E-03 | 1.00E+00 |
| ENSG00000185504.15_FAAP100  | ENSG00000160789.18_LMNA | 0.14764  | -0.011836964 | 0.299796047 | 6.95E-02 | 2.48E-01 | 1.00E+00 |

|                             |                         |          |              |             |          |          |          |
|-----------------------------|-------------------------|----------|--------------|-------------|----------|----------|----------|
| ENSG00000140553.15_UNC45A   | ENSG00000160789.18_LMNA | 0.51481  | 0.387357802  | 0.622955614 | 1.16E-11 | 3.89E-09 | 5.95E-07 |
| ENSG00000171729.12_TMEM51   | ENSG00000160789.18_LMNA | 0.16211  | 0.002988669  | 0.313229006 | 4.60E-02 | 1.90E-01 | 1.00E+00 |
| ENSG00000177556.10_ATOX1    | ENSG00000160789.18_LMNA | -0.09584 | -0.251208498 | 0.064341709 | 2.40E-01 | 5.19E-01 | 1.00E+00 |
| ENSG00000137364.4_TPMT      | ENSG00000160789.18_LMNA | -0.07109 | -0.227717038 | 0.089115653 | 3.84E-01 | 6.63E-01 | 1.00E+00 |
| ENSG00000101000.4_PROCR     | ENSG00000160789.18_LMNA | 0.08646  | -0.073752285 | 0.242328654 | 2.90E-01 | 5.75E-01 | 1.00E+00 |
| ENSG00000088899.13_LZTS3    | ENSG00000160789.18_LMNA | -0.18765 | -0.336792908 | -0.02932926 | 2.06E-02 | 1.10E-01 | 1.00E+00 |
| ENSG00000011201.9_ANOS1     | ENSG00000160789.18_LMNA | -0.27961 | -0.420113739 | -0.12602352 | 4.85E-04 | 6.58E-03 | 1.00E+00 |
| ENSG00000186522.13_SEPT10   | ENSG00000160789.18_LMNA | -0.04959 | -0.207150575 | 0.110487774 | 5.44E-01 | 7.82E-01 | 1.00E+00 |
| ENSG00000113083.11_LOX      | ENSG00000160789.18_LMNA | 0.34901  | 0.200976635  | 0.481460002 | 1.05E-05 | 3.03E-04 | 5.38E-01 |
| ENSG00000004864.12_SLC25A13 | ENSG00000160789.18_LMNA | -0.0787  | -0.234956193 | 0.081522848 | 3.35E-01 | 6.21E-01 | 1.00E+00 |
| ENSG00000111832.11_RWDD1    | ENSG00000160789.18_LMNA | -0.29379 | -0.432751807 | -0.14119495 | 2.39E-04 | 3.76E-03 | 1.00E+00 |
| ENSG00000196405.11_EVL      | ENSG00000160789.18_LMNA | -0.17965 | -0.329425244 | -0.02104727 | 2.68E-02 | 1.33E-01 | 1.00E+00 |
| ENSG00000093144.17_ECHDC1   | ENSG00000160789.18_LMNA | -0.13294 | -0.286089806 | 0.026824296 | 1.03E-01 | 3.17E-01 | 1.00E+00 |
| ENSG00000138834.11_MAPK8IP3 | ENSG00000160789.18_LMNA | -0.09698 | -0.252281754 | 0.063200493 | 2.35E-01 | 5.12E-01 | 1.00E+00 |
| ENSG00000048140.16_TSPAN17  | ENSG00000160789.18_LMNA | 0.22371  | 0.06688701   | 0.369738398 | 5.60E-03 | 4.27E-02 | 1.00E+00 |
| ENSG00000217555.11_CKLF     | ENSG00000160789.18_LMNA | -0.00197 | -0.161122788 | 0.157277408 | 9.81E-01 | 9.93E-01 | 1.00E+00 |
| ENSG00000125871.12_MGME1    | ENSG00000160789.18_LMNA | 0.09694  | -0.063240279 | 0.25224435  | 2.35E-01 | 5.13E-01 | 1.00E+00 |
| ENSG00000167323.8_STIM1     | ENSG00000160789.18_LMNA | 0.26121  | 0.106437499  | 0.403627772 | 1.15E-03 | 1.29E-02 | 1.00E+00 |
| ENSG00000177981.9_ASXB      | ENSG00000160789.18_LMNA | -0.3259  | -0.461170201 | -0.17581759 | 4.18E-05 | 9.30E-04 | 1.00E+00 |
| ENSG00000148396.17_SEC16A   | ENSG00000160789.18_LMNA | 0.26603  | 0.11155617   | 0.407954972 | 9.24E-04 | 1.09E-02 | 1.00E+00 |
| ENSG00000155511.16_GRIA1    | ENSG00000160789.18_LMNA | -0.0448  | -0.202557539 | 0.115220942 | 5.84E-01 | 8.06E-01 | 1.00E+00 |
| ENSG00000085872.13_CHERP    | ENSG00000160789.18_LMNA | 0.1561   | -0.003181582 | 0.30765341  | 5.48E-02 | 2.13E-01 | 1.00E+00 |
| ENSG00000170846.14_AC093323 | ENSG00000160789.18_LMNA | -0.2383  | -0.382972511 | -0.0822194  | 3.11E-03 | 2.75E-02 | 1.00E+00 |
| ENSG00000177565.14_TBL1XR1  | ENSG00000160789.18_LMNA | -0.20902 | -0.356361293 | -0.05153296 | 9.76E-03 | 6.45E-02 | 1.00E+00 |
| ENSG00000168679.16_SLC16A4  | ENSG00000160789.18_LMNA | 0.03741  | -0.122520341 | 0.195446734 | 6.47E-01 | 8.43E-01 | 1.00E+00 |
| ENSG00000124942.12_AHNAK    | ENSG00000160789.18_LMNA | 0.31273  | 0.161575189  | 0.449550433 | 8.76E-05 | 1.70E-03 | 1.00E+00 |
| ENSG00000165782.9_TMEM55B   | ENSG00000160789.18_LMNA | -0.00862 | -0.167589538 | 0.150788813 | 9.16E-01 | 9.68E-01 | 1.00E+00 |
| ENSG00000048392.10_RRM2B    | ENSG00000160789.18_LMNA | 0.02582  | -0.133935354 | 0.184259224 | 7.52E-01 | 8.97E-01 | 1.00E+00 |
| ENSG00000011451.16_WIZ      | ENSG00000160789.18_LMNA | 0.11536  | -0.044657222 | 0.269612656 | 1.57E-01 | 4.09E-01 | 1.00E+00 |
| ENSG00000105519.11_CAPS     | ENSG00000160789.18_LMNA | 0.04344  | -0.116566189 | 0.201249563 | 5.95E-01 | 8.13E-01 | 1.00E+00 |
| ENSG00000228638.1_FCF1P2    | ENSG00000160789.18_LMNA | -0.133   | -0.286146515 | 0.026762575 | 1.02E-01 | 3.16E-01 | 1.00E+00 |
| ENSG00000181610.11_MRPS23   | ENSG00000160789.18_LMNA | -0.28068 | -0.421068784 | -0.12716523 | 4.61E-04 | 6.32E-03 | 1.00E+00 |
| ENSG00000078747.11_ITCH     | ENSG00000160789.18_LMNA | 0.07932  | -0.080905379 | 0.235543363 | 3.31E-01 | 6.17E-01 | 1.00E+00 |



|                             |                         |          |              |             |          |          |          |
|-----------------------------|-------------------------|----------|--------------|-------------|----------|----------|----------|
| ENSG00000115129.12_TP53I3   | ENSG00000160789.18_LMNA | 0.12165  | -0.038295259 | 0.275512132 | 1.35E-01 | 3.74E-01 | 1.00E+00 |
| ENSG00000123575.8_FAM199X   | ENSG00000160789.18_LMNA | -0.09214 | -0.247707933 | 0.06805821  | 2.59E-01 | 5.42E-01 | 1.00E+00 |
| ENSG00000100413.15_POLR3H   | ENSG00000160789.18_LMNA | -0.25367 | -0.396846107 | -0.09844699 | 1.61E-03 | 1.66E-02 | 1.00E+00 |
| ENSG00000204899.5_MZT1      | ENSG00000160789.18_LMNA | -0.24347 | -0.387649726 | -0.08767246 | 2.51E-03 | 2.33E-02 | 1.00E+00 |
| ENSG00000120833.12_SOCS2    | ENSG00000160789.18_LMNA | 0.12584  | -0.034047769 | 0.279437733 | 1.22E-01 | 3.52E-01 | 1.00E+00 |
| ENSG00000025800.12_KPNA6    | ENSG00000160789.18_LMNA | 0.17905  | 0.020430849  | 0.328875365 | 2.73E-02 | 1.35E-01 | 1.00E+00 |
| ENSG00000151726.12_ACSL1    | ENSG00000160789.18_LMNA | -0.07158 | -0.228181304 | 0.088629808 | 3.81E-01 | 6.60E-01 | 1.00E+00 |
| ENSG00000186470.12_BTN3A2   | ENSG00000160789.18_LMNA | 0.10886  | -0.051228259 | 0.263494438 | 1.82E-01 | 4.46E-01 | 1.00E+00 |
| ENSG00000188760.9_TMEN198   | ENSG00000160789.18_LMNA | 0.0354   | -0.124498107 | 0.193514295 | 6.65E-01 | 8.52E-01 | 1.00E+00 |
| ENSG00000228989.1_          | ENSG00000160789.18_LMNA | 0.1252   | -0.034689331 | 0.278845461 | 1.24E-01 | 3.56E-01 | 1.00E+00 |
| ENSG00000077235.16_GTF3C1   | ENSG00000160789.18_LMNA | 0.18552  | 0.027120258  | 0.334831451 | 2.21E-02 | 1.16E-01 | 1.00E+00 |
| ENSG00000234608.6_MAPKAPK5  | ENSG00000160789.18_LMNA | -0.37681 | -0.505672337 | -0.23149174 | 1.71E-06 | 7.08E-05 | 8.78E-02 |
| ENSG00000147130.13_ZMYM3    | ENSG00000160789.18_LMNA | 0.15036  | -0.009059246 | 0.302322277 | 6.45E-02 | 2.36E-01 | 1.00E+00 |
| ENSG00000101336.11_HCK      | ENSG00000160789.18_LMNA | 0.04636  | -0.113675151 | 0.204059103 | 5.71E-01 | 7.99E-01 | 1.00E+00 |
| ENSG00000266469.1_CTB-131K1 | ENSG00000160789.18_LMNA | 0.03656  | -0.123359743 | 0.194626871 | 6.55E-01 | 8.47E-01 | 1.00E+00 |
| ENSG00000169855.18_ROBO1    | ENSG00000160789.18_LMNA | 0.05023  | -0.109846396 | 0.207771889 | 5.39E-01 | 7.79E-01 | 1.00E+00 |
| ENSG00000074964.15_ARHGEF1  | ENSG00000160789.18_LMNA | 0.00437  | -0.15493937  | 0.16345611  | 9.57E-01 | 9.83E-01 | 1.00E+00 |
| ENSG00000153814.10_JAZF1    | ENSG00000160789.18_LMNA | -0.16032 | -0.311567793 | -0.00114781 | 4.85E-02 | 1.97E-01 | 1.00E+00 |
| ENSG00000169756.15_LIMS1    | ENSG00000160789.18_LMNA | 0.26822  | 0.113883556  | 0.409918094 | 8.35E-04 | 1.00E-02 | 1.00E+00 |
| ENSG00000154845.14_PPP4R1   | ENSG00000160789.18_LMNA | -0.09456 | -0.24999339  | 0.065632765 | 2.47E-01 | 5.27E-01 | 1.00E+00 |
| ENSG00000103160.10_HSDL1    | ENSG00000160789.18_LMNA | -0.30899 | -0.446240012 | -0.15753943 | 1.07E-04 | 2.00E-03 | 1.00E+00 |
| ENSG00000145685.12_LHFPL2   | ENSG00000160789.18_LMNA | 0.09741  | -0.06275931  | 0.252696456 | 2.33E-01 | 5.10E-01 | 1.00E+00 |
| ENSG00000136848.15_DAB2IP   | ENSG00000160789.18_LMNA | -0.0121  | -0.170969795 | 0.147386185 | 8.82E-01 | 9.54E-01 | 1.00E+00 |
| ENSG00000173207.11_CKS1B    | ENSG00000160789.18_LMNA | -0.06683 | -0.223646928 | 0.093368486 | 4.13E-01 | 6.87E-01 | 1.00E+00 |
| ENSG00000182247.8_UBE2E2    | ENSG00000160789.18_LMNA | -0.45834 | -0.575546789 | -0.32268826 | 2.89E-09 | 3.77E-07 | 1.48E-04 |
| ENSG00000214517.7_PPME1     | ENSG00000160789.18_LMNA | 0.07831  | -0.081915371 | 0.234582812 | 3.38E-01 | 6.23E-01 | 1.00E+00 |
| ENSG00000215114.6_UBXN2B    | ENSG00000160789.18_LMNA | -0.22885 | -0.374407667 | -0.07228032 | 4.57E-03 | 3.66E-02 | 1.00E+00 |
| ENSG00000061676.13_NCKAP1   | ENSG00000160789.18_LMNA | -0.11521 | -0.269466831 | 0.044814157 | 1.58E-01 | 4.10E-01 | 1.00E+00 |
| ENSG00000101911.11_PRPS2    | ENSG00000160789.18_LMNA | 0.42866  | 0.289195959  | 0.550307045 | 3.60E-08 | 3.14E-06 | 1.85E-03 |
| ENSG00000169169.13_CPT1C    | ENSG00000160789.18_LMNA | -0.06546 | -0.222342909 | 0.094728605 | 4.23E-01 | 6.94E-01 | 1.00E+00 |
| ENSG00000116661.9_FBXO2     | ENSG00000160789.18_LMNA | -0.28236 | -0.422562274 | -0.12895217 | 4.24E-04 | 5.94E-03 | 1.00E+00 |
| ENSG00000100364.17_KIAA0930 | ENSG00000160789.18_LMNA | -0.12458 | -0.278260688 | 0.035322518 | 1.26E-01 | 3.59E-01 | 1.00E+00 |
| ENSG00000231767.3_RP11-92K2 | ENSG00000160789.18_LMNA | -0.17653 | -0.326556858 | -0.01783433 | 2.96E-02 | 1.42E-01 | 1.00E+00 |

|                             |                         |          |              |             |          |          |          |
|-----------------------------|-------------------------|----------|--------------|-------------|----------|----------|----------|
| ENSG00000177646.16_ACAD9    | ENSG00000160789.18_LMNA | 0.19195  | 0.033783954  | 0.340740297 | 1.78E-02 | 9.94E-02 | 1.00E+00 |
| ENSG00000257727.4_CNPY2     | ENSG00000160789.18_LMNA | -0.14932 | -0.301354799 | 0.010123605 | 6.64E-02 | 2.41E-01 | 1.00E+00 |
| ENSG00000180834.6_MAP6D1    | ENSG00000160789.18_LMNA | -0.30654 | -0.44407032  | -0.15489956 | 1.23E-04 | 2.23E-03 | 1.00E+00 |
| ENSG00000198917.10_SPOUT1   | ENSG00000160789.18_LMNA | 0.11667  | -0.043338004 | 0.270837914 | 1.52E-01 | 4.02E-01 | 1.00E+00 |
| ENSG00000198815.7_FOXJ3     | ENSG00000160789.18_LMNA | 0.2677   | 0.113327479  | 0.409449299 | 8.55E-04 | 1.03E-02 | 1.00E+00 |
| ENSG00000134954.13_ETS1     | ENSG00000160789.18_LMNA | 0.01225  | -0.147235698 | 0.17111912  | 8.81E-01 | 9.54E-01 | 1.00E+00 |
| ENSG00000124357.11_NAGK     | ENSG00000160789.18_LMNA | -0.13907 | -0.291810935 | 0.020585483 | 8.75E-02 | 2.88E-01 | 1.00E+00 |
| ENSG00000122643.17_NT5C3A   | ENSG00000160789.18_LMNA | 0.05085  | -0.109238055 | 0.208360962 | 5.34E-01 | 7.76E-01 | 1.00E+00 |
| ENSG00000105281.11_SLC1A5   | ENSG00000160789.18_LMNA | 0.29069  | 0.137871144  | 0.429992784 | 2.80E-04 | 4.26E-03 | 1.00E+00 |
| ENSG00000228502.1_EEF1A1P1  | ENSG00000160789.18_LMNA | -0.16125 | -0.312431388 | -0.00210453 | 4.72E-02 | 1.94E-01 | 1.00E+00 |
| ENSG00000089154.9_GCN1      | ENSG00000160789.18_LMNA | 0.2107   | 0.0532835    | 0.357892779 | 9.17E-03 | 6.16E-02 | 1.00E+00 |
| ENSG00000168140.4_VASN      | ENSG00000160789.18_LMNA | 0.54914  | 0.427299372  | 0.651396758 | 2.38E-13 | 1.67E-10 | 1.22E-08 |
| ENSG00000137500.8_CCDC90B   | ENSG00000160789.18_LMNA | -0.30873 | -0.446011745 | -0.1572615  | 1.09E-04 | 2.02E-03 | 1.00E+00 |
| ENSG00000117226.10_GBP3     | ENSG00000160789.18_LMNA | 0.12209  | -0.037842857 | 0.275930748 | 1.34E-01 | 3.72E-01 | 1.00E+00 |
| ENSG00000140067.6_FAM181A   | ENSG00000160789.18_LMNA | 0.1012   | -0.058947157 | 0.256274973 | 2.15E-01 | 4.89E-01 | 1.00E+00 |
| ENSG00000235173.5_HGH1      | ENSG00000160789.18_LMNA | 0.26586  | 0.111371153  | 0.407798795 | 9.31E-04 | 1.10E-02 | 1.00E+00 |
| ENSG00000120889.11_TNFRSF10 | ENSG00000160789.18_LMNA | 0.38865  | 0.244581941  | 0.515928093 | 7.50E-07 | 3.64E-05 | 3.85E-02 |
| ENSG00000112149.8_CD83      | ENSG00000160789.18_LMNA | 0.0017   | -0.157544507 | 0.160856001 | 9.83E-01 | 9.94E-01 | 1.00E+00 |
| ENSG00000154229.10_PRKCA    | ENSG00000160789.18_LMNA | 0.06109  | -0.099077936 | 0.218165345 | 4.55E-01 | 7.19E-01 | 1.00E+00 |
| ENSG00000100714.14_MTHFD1   | ENSG00000160789.18_LMNA | 0.35395  | 0.206373778  | 0.485773777 | 7.70E-06 | 2.37E-04 | 3.95E-01 |
| ENSG00000197798.7_FAM118B   | ENSG00000160789.18_LMNA | -0.41127 | -0.535416151 | -0.26973159 | 1.41E-07 | 9.59E-06 | 7.25E-03 |
| ENSG00000249936.3_RAC1P2    | ENSG00000160789.18_LMNA | 0.07686  | -0.083357873 | 0.233209849 | 3.47E-01 | 6.31E-01 | 1.00E+00 |
| ENSG00000130766.4_SESN2     | ENSG00000160789.18_LMNA | 0.26343  | 0.108794583  | 0.405622046 | 1.04E-03 | 1.19E-02 | 1.00E+00 |
| ENSG00000018610.12_CXorf56  | ENSG00000160789.18_LMNA | -0.0925  | -0.248050468 | 0.067694932 | 2.57E-01 | 5.39E-01 | 1.00E+00 |
| ENSG00000178188.13_SH2B1    | ENSG00000160789.18_LMNA | 0.02396  | -0.135757599 | 0.182465633 | 7.70E-01 | 9.05E-01 | 1.00E+00 |
| ENSG00000167112.9_TRUB2     | ENSG00000160789.18_LMNA | -0.22748 | -0.373165377 | -0.07084366 | 4.83E-03 | 3.81E-02 | 1.00E+00 |
| ENSG00000158669.10_GPAT4    | ENSG00000160789.18_LMNA | 0.30548  | 0.153752678  | 0.443126643 | 1.30E-04 | 2.33E-03 | 1.00E+00 |
| ENSG00000174132.8_FAM174A   | ENSG00000160789.18_LMNA | 0.2361   | 0.079907233  | 0.380984641 | 3.41E-03 | 2.94E-02 | 1.00E+00 |
| ENSG00000176956.11_LY6H     | ENSG00000160789.18_LMNA | -0.20278 | -0.350657822 | -0.04503012 | 1.22E-02 | 7.58E-02 | 1.00E+00 |
| ENSG00000134779.13_TPGS2    | ENSG00000160789.18_LMNA | -0.06444 | -0.221368202 | 0.095744472 | 4.30E-01 | 7.00E-01 | 1.00E+00 |
| ENSG00000111412.5_C12orf49  | ENSG00000160789.18_LMNA | 0.11739  | -0.042608454 | 0.271515067 | 1.50E-01 | 3.98E-01 | 1.00E+00 |
| ENSG00000214706.9_IFRD2     | ENSG00000160789.18_LMNA | 0.26777  | 0.113402728  | 0.409512746 | 8.53E-04 | 1.02E-02 | 1.00E+00 |
| ENSG00000171453.16_POLR1C   | ENSG00000160789.18_LMNA | -0.16291 | -0.313972143 | -0.00381285 | 4.49E-02 | 1.88E-01 | 1.00E+00 |

|                             |                         |          |              |             |          |          |          |
|-----------------------------|-------------------------|----------|--------------|-------------|----------|----------|----------|
| ENSG00000183741.10_CBX6     | ENSG00000160789.18_LMNA | 0.24301  | 0.087186996  | 0.387233957 | 2.56E-03 | 2.36E-02 | 1.00E+00 |
| ENSG00000136379.10_ABHD17C  | ENSG00000160789.18_LMNA | 0.23679  | 0.080633412  | 0.381609267 | 3.31E-03 | 2.88E-02 | 1.00E+00 |
| ENSG00000107731.11_UNC5B    | ENSG00000160789.18_LMNA | 0.21084  | 0.053431774  | 0.358022423 | 9.13E-03 | 6.13E-02 | 1.00E+00 |
| ENSG00000143337.17_TOR1AIP1 | ENSG00000160789.18_LMNA | 0.01164  | -0.147833868 | 0.170525483 | 8.87E-01 | 9.56E-01 | 1.00E+00 |
| ENSG00000127526.12_SLC35E1  | ENSG00000160789.18_LMNA | 0.25893  | 0.104016917  | 0.401576829 | 1.28E-03 | 1.39E-02 | 1.00E+00 |
| ENSG00000149187.16_CELF1    | ENSG00000160789.18_LMNA | 0.2045   | 0.046825025  | 0.352234355 | 1.15E-02 | 7.24E-02 | 1.00E+00 |
| ENSG00000100908.12 EMC9     | ENSG00000160789.18_LMNA | -0.00214 | -0.161288668 | 0.157111311 | 9.79E-01 | 9.92E-01 | 1.00E+00 |
| ENSG00000126705.12_AHDC1    | ENSG00000160789.18_LMNA | 0.17781  | 0.019148758  | 0.327731014 | 2.84E-02 | 1.38E-01 | 1.00E+00 |
| ENSG00000136897.7_MRPL50    | ENSG00000160789.18_LMNA | -0.20269 | -0.350580617 | -0.04494227 | 1.23E-02 | 7.59E-02 | 1.00E+00 |
| ENSG00000060971.16_ACAA1    | ENSG00000160789.18_LMNA | -0.19427 | -0.342864063 | -0.03618572 | 1.65E-02 | 9.39E-02 | 1.00E+00 |
| ENSG00000170638.8_TRABD     | ENSG00000160789.18_LMNA | 0.19115  | 0.03295073   | 0.340002782 | 1.83E-02 | 1.01E-01 | 1.00E+00 |
| ENSG00000169139.10_UBE2V2   | ENSG00000160789.18_LMNA | -0.2385  | -0.383154359 | -0.08243108 | 3.09E-03 | 2.73E-02 | 1.00E+00 |
| ENSG00000004961.13_HCCS     | ENSG00000160789.18_LMNA | 0.14052  | -0.019108169 | 0.2931624   | 8.42E-02 | 2.81E-01 | 1.00E+00 |
| ENSG00000196998.14_WDR45    | ENSG00000160789.18_LMNA | 0.04198  | -0.118007929 | 0.199846509 | 6.08E-01 | 8.21E-01 | 1.00E+00 |
| ENSG00000170873.17_MTSS1    | ENSG00000160789.18_LMNA | -0.39632 | -0.522546795 | -0.25308273 | 4.32E-07 | 2.34E-05 | 2.22E-02 |
| ENSG00000140829.10_DHX38    | ENSG00000160789.18_LMNA | 0.22461  | 0.067839802  | 0.370564395 | 5.40E-03 | 4.15E-02 | 1.00E+00 |
| ENSG00000081087.13_OSTM1    | ENSG00000160789.18_LMNA | 0.00941  | -0.150012972 | 0.168360937 | 9.08E-01 | 9.65E-01 | 1.00E+00 |
| ENSG00000131873.5_CHSY1     | ENSG00000160789.18_LMNA | 0.50772  | 0.379171727  | 0.617048627 | 2.45E-11 | 7.11E-09 | 1.26E-06 |
| ENSG00000225973.3_PIGBOS1   | ENSG00000160789.18_LMNA | -0.03098 | -0.189245287 | 0.128858306 | 7.05E-01 | 8.74E-01 | 1.00E+00 |
| ENSG00000248333.6_CDK11B    | ENSG00000160789.18_LMNA | 0.16879  | 0.009858291  | 0.319411512 | 3.76E-02 | 1.66E-01 | 1.00E+00 |
| ENSG00000126368.5_NR1D1     | ENSG00000160789.18_LMNA | 0.21618  | 0.059014289  | 0.362894997 | 7.47E-03 | 5.28E-02 | 1.00E+00 |
| ENSG00000204347.3_BTBD17    | ENSG00000160789.18_LMNA | -0.3722  | -0.501673755 | -0.22641481 | 2.34E-06 | 8.98E-05 | 1.20E-01 |
| ENSG00000175701.9_LINC00116 | ENSG00000160789.18_LMNA | 0.01881  | -0.140817104 | 0.177474555 | 8.18E-01 | 9.29E-01 | 1.00E+00 |
| ENSG00000140905.8_GCSH      | ENSG00000160789.18_LMNA | -0.21382 | -0.360737866 | -0.05654051 | 8.17E-03 | 5.65E-02 | 1.00E+00 |
| ENSG00000166224.15_SGPL1    | ENSG00000160789.18_LMNA | -0.02475 | -0.183224873 | 0.134986492 | 7.62E-01 | 9.01E-01 | 1.00E+00 |
| ENSG00000167925.14_GHDC     | ENSG00000160789.18_LMNA | 0.31124  | 0.159961324  | 0.448227573 | 9.51E-05 | 1.81E-03 | 1.00E+00 |
| ENSG00000185000.8_DGAT1     | ENSG00000160789.18_LMNA | -0.02823 | -0.186590552 | 0.131563562 | 7.30E-01 | 8.86E-01 | 1.00E+00 |
| ENSG00000204070.8_SYS1      | ENSG00000160789.18_LMNA | -0.02926 | -0.187582612 | 0.130553177 | 7.21E-01 | 8.81E-01 | 1.00E+00 |
| ENSG00000259291.2_RP11-617F | ENSG00000160789.18_LMNA | -0.09798 | -0.253228486 | 0.062193126 | 2.30E-01 | 5.07E-01 | 1.00E+00 |
| ENSG00000167771.5_RCOR2     | ENSG00000160789.18_LMNA | -0.25309 | -0.396319027 | -0.09782757 | 1.66E-03 | 1.69E-02 | 1.00E+00 |
| ENSG00000102981.8_PARD6A    | ENSG00000160789.18_LMNA | -0.20321 | -0.351054938 | -0.04548206 | 1.20E-02 | 7.50E-02 | 1.00E+00 |
| ENSG00000064989.11_CALCRL   | ENSG00000160789.18_LMNA | -0.3345  | -0.468742949 | -0.18516428 | 2.53E-05 | 6.24E-04 | 1.00E+00 |
| ENSG00000185359.11_HGS      | ENSG00000160789.18_LMNA | 0.19698  | 0.0390031    | 0.345351354 | 1.50E-02 | 8.79E-02 | 1.00E+00 |

|                             |                         |          |              |             |          |          |          |
|-----------------------------|-------------------------|----------|--------------|-------------|----------|----------|----------|
| ENSG00000162980.15_ARL5A    | ENSG00000160789.18_LMNA | -0.2715  | -0.412852074 | -0.11736801 | 7.16E-04 | 8.92E-03 | 1.00E+00 |
| ENSG00000171533.10_MAP6     | ENSG00000160789.18_LMNA | -0.21306 | -0.360050008 | -0.05575247 | 8.40E-03 | 5.78E-02 | 1.00E+00 |
| ENSG00000067445.19_TRO      | ENSG00000160789.18_LMNA | -0.25653 | -0.39942109  | -0.10147645 | 1.42E-03 | 1.51E-02 | 1.00E+00 |
| ENSG00000163539.14_CLASP2   | ENSG00000160789.18_LMNA | -0.6127  | -0.703302154 | -0.50252007 | 4.91E-17 | 1.48E-13 | 2.52E-12 |
| ENSG00000245532.5_NEAT1     | ENSG00000160789.18_LMNA | 0.24932  | 0.093849386  | 0.392929229 | 1.95E-03 | 1.92E-02 | 1.00E+00 |
| ENSG00000198551.8_ZNF627    | ENSG00000160789.18_LMNA | -0.32071 | -0.456597789 | -0.17019887 | 5.62E-05 | 1.18E-03 | 1.00E+00 |
| ENSG00000003249.12_DBNDD1   | ENSG00000160789.18_LMNA | 0.28207  | 0.128648841  | 0.422308868 | 4.30E-04 | 6.00E-03 | 1.00E+00 |
| ENSG00000005469.10_CROT     | ENSG00000160789.18_LMNA | 0.14242  | -0.017171908 | 0.294931826 | 8.01E-02 | 2.72E-01 | 1.00E+00 |
| ENSG00000147475.13_ERLIN2   | ENSG00000160789.18_LMNA | 0.11673  | -0.043279188 | 0.270892518 | 1.52E-01 | 4.01E-01 | 1.00E+00 |
| ENSG00000237264.4_FTH1P11   | ENSG00000160789.18_LMNA | 0.02351  | -0.136199349 | 0.18203051  | 7.74E-01 | 9.07E-01 | 1.00E+00 |
| ENSG00000129071.8_MBD4      | ENSG00000160789.18_LMNA | 0.03335  | -0.126526922 | 0.191529408 | 6.83E-01 | 8.62E-01 | 1.00E+00 |
| ENSG00000159322.16_ADPGK    | ENSG00000160789.18_LMNA | 0.213    | 0.055682893  | 0.35998926  | 8.42E-03 | 5.79E-02 | 1.00E+00 |
| ENSG00000253948.1_RP11-410L | ENSG00000160789.18_LMNA | -0.20256 | -0.350456959 | -0.04480158 | 1.23E-02 | 7.62E-02 | 1.00E+00 |
| ENSG00000229453.2_SPINK8    | ENSG00000160789.18_LMNA | -0.2081  | -0.355524152 | -0.05057687 | 1.01E-02 | 6.60E-02 | 1.00E+00 |
| ENSG00000103249.16_CLCN7    | ENSG00000160789.18_LMNA | 0.17674  | 0.018042378  | 0.326742767 | 2.94E-02 | 1.41E-01 | 1.00E+00 |
| ENSG00000164574.14_GALNT10  | ENSG00000160789.18_LMNA | 0.27325  | 0.119236501  | 0.414422855 | 6.59E-04 | 8.36E-03 | 1.00E+00 |
| ENSG00000101997.11_CCDC22   | ENSG00000160789.18_LMNA | 0.13172  | -0.02807085  | 0.284944007 | 1.06E-01 | 3.23E-01 | 1.00E+00 |
| ENSG00000106780.8_MEGF9     | ENSG00000160789.18_LMNA | -0.09802 | -0.253268507 | 0.062150528 | 2.30E-01 | 5.07E-01 | 1.00E+00 |
| ENSG00000136243.15_NUPL2    | ENSG00000160789.18_LMNA | -0.21378 | -0.360705077 | -0.05650294 | 8.18E-03 | 5.66E-02 | 1.00E+00 |
| ENSG00000140395.7_WDR61     | ENSG00000160789.18_LMNA | -0.17259 | -0.322918526 | -0.0137681  | 3.35E-02 | 1.54E-01 | 1.00E+00 |
| ENSG00000176248.8_ANAPC2    | ENSG00000160789.18_LMNA | 0.19602  | 0.038006129  | 0.344471683 | 1.55E-02 | 8.99E-02 | 1.00E+00 |
| ENSG00000073060.14_SCARB1   | ENSG00000160789.18_LMNA | -0.17534 | -0.325458205 | -0.01660539 | 3.07E-02 | 1.46E-01 | 1.00E+00 |
| ENSG00000134597.12_RBMX2    | ENSG00000160789.18_LMNA | -0.02482 | -0.183295787 | 0.13491445  | 7.61E-01 | 9.01E-01 | 1.00E+00 |
| ENSG00000179364.12_PACS2    | ENSG00000160789.18_LMNA | -0.03912 | -0.19709102  | 0.120835498 | 6.32E-01 | 8.35E-01 | 1.00E+00 |
| ENSG00000108578.13_BLMH     | ENSG00000160789.18_LMNA | -0.15862 | -0.309988779 | 0.000600017 | 5.10E-02 | 2.04E-01 | 1.00E+00 |
| ENSG00000170004.15_CHD3     | ENSG00000160789.18_LMNA | -0.01662 | -0.175352374 | 0.142963355 | 8.39E-01 | 9.37E-01 | 1.00E+00 |
| ENSG00000138496.15_PARP9    | ENSG00000160789.18_LMNA | 0.15873  | -0.000482869 | 0.310094665 | 5.08E-02 | 2.03E-01 | 1.00E+00 |
| ENSG00000176783.13_RUFY1    | ENSG00000160789.18_LMNA | 0.40552  | 0.263316398  | 0.530471858 | 2.19E-07 | 1.36E-05 | 1.12E-02 |
| ENSG00000111231.7_GPN3      | ENSG00000160789.18_LMNA | -0.33845 | -0.472205568 | -0.1894552  | 2.00E-05 | 5.17E-04 | 1.00E+00 |
| ENSG00000122547.9_EEPD1     | ENSG00000160789.18_LMNA | -0.25655 | -0.399437722 | -0.10149603 | 1.42E-03 | 1.51E-02 | 1.00E+00 |
| ENSG00000162642.12_C1orf52  | ENSG00000160789.18_LMNA | -0.25838 | -0.401079342 | -0.1034303  | 1.31E-03 | 1.42E-02 | 1.00E+00 |
| ENSG00000215039.5_CD27-AS1  | ENSG00000160789.18_LMNA | -0.21713 | -0.363757779 | -0.06000477 | 7.21E-03 | 5.15E-02 | 1.00E+00 |
| ENSG00000123815.10_COQ8B    | ENSG00000160789.18_LMNA | 0.09762  | -0.06255459  | 0.252888849 | 2.32E-01 | 5.09E-01 | 1.00E+00 |

|                             |                         |          |              |             |          |          |          |
|-----------------------------|-------------------------|----------|--------------|-------------|----------|----------|----------|
| ENSG00000109184.13_DCUN1D4  | ENSG00000160789.18_LMNA | -0.1122  | -0.266636832 | 0.047856692 | 1.69E-01 | 4.27E-01 | 1.00E+00 |
| ENSG00000143374.13_TARS2    | ENSG00000160789.18_LMNA | 0.08921  | -0.070994572 | 0.244936336 | 2.74E-01 | 5.59E-01 | 1.00E+00 |
| ENSG00000118985.13_ELL2     | ENSG00000160789.18_LMNA | 0.01908  | -0.140549407 | 0.177739042 | 8.16E-01 | 9.28E-01 | 1.00E+00 |
| ENSG00000156504.15_FAM122B  | ENSG00000160789.18_LMNA | 0.04596  | -0.114075231 | 0.203670613 | 5.74E-01 | 8.01E-01 | 1.00E+00 |
| ENSG00000171475.12_WIPF2    | ENSG00000160789.18_LMNA | 0.0146   | -0.144937431 | 0.173397821 | 8.58E-01 | 9.44E-01 | 1.00E+00 |
| ENSG00000113070.7_HBEGF     | ENSG00000160789.18_LMNA | 0.32694  | 0.17694559   | 0.462086325 | 3.94E-05 | 8.90E-04 | 1.00E+00 |
| ENSG00000151491.11_EPS8     | ENSG00000160789.18_LMNA | -0.01081 | -0.169722914 | 0.148642196 | 8.95E-01 | 9.59E-01 | 1.00E+00 |
| ENSG00000141076.16_UTP4     | ENSG00000160789.18_LMNA | -0.00747 | -0.16647517  | 0.151908906 | 9.27E-01 | 9.72E-01 | 1.00E+00 |
| ENSG00000139182.12_CLSTN3   | ENSG00000160789.18_LMNA | 0.03846  | -0.121480095 | 0.19646215  | 6.38E-01 | 8.38E-01 | 1.00E+00 |
| ENSG00000162302.11_RPS6KA4  | ENSG00000160789.18_LMNA | 0.28601  | 0.132856039  | 0.425819499 | 3.54E-04 | 5.12E-03 | 1.00E+00 |
| ENSG00000130517.12_PGPEP1   | ENSG00000160789.18_LMNA | 0.34062  | 0.191823633  | 0.474113085 | 1.76E-05 | 4.64E-04 | 9.01E-01 |
| ENSG00000197976.9_AKAP17A   | ENSG00000160789.18_LMNA | 0.26845  | 0.114125972  | 0.410122412 | 8.26E-04 | 9.97E-03 | 1.00E+00 |
| ENSG00000125820.5_NKX2-2    | ENSG00000160789.18_LMNA | -0.23807 | -0.382763123 | -0.0819757  | 3.14E-03 | 2.77E-02 | 1.00E+00 |
| ENSG00000134453.14_RBM17    | ENSG00000160789.18_LMNA | -0.20478 | -0.352485305 | -0.04711092 | 1.14E-02 | 7.18E-02 | 1.00E+00 |
| ENSG00000105221.15_AKT2     | ENSG00000160789.18_LMNA | 0.15101  | -0.008390585 | 0.302929747 | 6.33E-02 | 2.34E-01 | 1.00E+00 |
| ENSG00000136840.17_ST6GALN  | ENSG00000160789.18_LMNA | 0.3003   | 0.148181702  | 0.438533607 | 1.71E-04 | 2.89E-03 | 1.00E+00 |
| ENSG00000143376.11_SNX27    | ENSG00000160789.18_LMNA | 0.01691  | -0.14267376  | 0.175638894 | 8.36E-01 | 9.37E-01 | 1.00E+00 |
| ENSG00000198585.10_NUDT16   | ENSG00000160789.18_LMNA | 0.31488  | 0.163900254  | 0.451454034 | 7.78E-05 | 1.54E-03 | 1.00E+00 |
| ENSG00000008256.14_CYTH3    | ENSG00000160789.18_LMNA | 0.12963  | -0.030191316 | 0.282992876 | 1.11E-01 | 3.33E-01 | 1.00E+00 |
| ENSG00000123728.8_RAP2C     | ENSG00000160789.18_LMNA | 0.16534  | 0.006309534  | 0.316220997 | 4.18E-02 | 1.79E-01 | 1.00E+00 |
| ENSG00000130935.8_NOL11     | ENSG00000160789.18_LMNA | -0.16015 | -0.311410992 | -0.00097416 | 4.87E-02 | 1.98E-01 | 1.00E+00 |
| ENSG00000129472.11_RAB2B    | ENSG00000160789.18_LMNA | -0.13815 | -0.290953211 | 0.021522372 | 8.96E-02 | 2.92E-01 | 1.00E+00 |
| ENSG00000070770.7_CSNK2A2   | ENSG00000160789.18_LMNA | 0.15456  | -0.004754378 | 0.306228769 | 5.73E-02 | 2.19E-01 | 1.00E+00 |
| ENSG00000280206.1_CTB-193M1 | ENSG00000160789.18_LMNA | 0.20794  | 0.050404623  | 0.355373286 | 1.02E-02 | 6.63E-02 | 1.00E+00 |
| ENSG00000152944.7_MED21     | ENSG00000160789.18_LMNA | -0.35439 | -0.48616293  | -0.2068615  | 7.48E-06 | 2.32E-04 | 3.84E-01 |
| ENSG00000165322.16_ARHGAP1  | ENSG00000160789.18_LMNA | -0.36184 | -0.492657867 | -0.21502211 | 4.64E-06 | 1.57E-04 | 2.38E-01 |
| ENSG00000204713.9_TRIM27    | ENSG00000160789.18_LMNA | -0.05945 | -0.216602708 | 0.100701715 | 4.67E-01 | 7.28E-01 | 1.00E+00 |
| ENSG00000183580.9_FBXL7     | ENSG00000160789.18_LMNA | 0.00995  | -0.149483419 | 0.168887235 | 9.03E-01 | 9.63E-01 | 1.00E+00 |
| ENSG00000197766.6_CFD       | ENSG00000160789.18_LMNA | 0.06944  | -0.090763125 | 0.226141662 | 3.95E-01 | 6.73E-01 | 1.00E+00 |
| ENSG00000152977.8_ZIC1      | ENSG00000160789.18_LMNA | 0.06493  | -0.095256816 | 0.221836179 | 4.27E-01 | 6.97E-01 | 1.00E+00 |
| ENSG00000150768.14_DLAT     | ENSG00000160789.18_LMNA | 0.07236  | -0.087849186 | 0.228926955 | 3.76E-01 | 6.56E-01 | 1.00E+00 |
| ENSG00000128609.13_NDUFA5   | ENSG00000160789.18_LMNA | -0.20058 | -0.34864514  | -0.04274152 | 1.32E-02 | 8.01E-02 | 1.00E+00 |
| ENSG00000136937.11_NCBP1    | ENSG00000160789.18_LMNA | -0.03125 | -0.189511078 | 0.128587197 | 7.02E-01 | 8.73E-01 | 1.00E+00 |

|                             |                         |          |              |             |          |          |          |
|-----------------------------|-------------------------|----------|--------------|-------------|----------|----------|----------|
| ENSG00000110536.12_PTPMT1   | ENSG00000160789.18_LMNA | -0.04358 | -0.201383411 | 0.116428581 | 5.94E-01 | 8.13E-01 | 1.00E+00 |
| ENSG00000205763.12_RP9P     | ENSG00000160789.18_LMNA | 0.16354  | 0.004458919  | 0.314554414 | 4.41E-02 | 1.85E-01 | 1.00E+00 |
| ENSG00000107862.4_GBF1      | ENSG00000160789.18_LMNA | 0.08621  | -0.074009084 | 0.242085593 | 2.91E-01 | 5.76E-01 | 1.00E+00 |
| ENSG00000178028.12_DMAP1    | ENSG00000160789.18_LMNA | 0.06386  | -0.096323533 | 0.22081232  | 4.34E-01 | 7.03E-01 | 1.00E+00 |
| ENSG00000030110.11_BAK1     | ENSG00000160789.18_LMNA | 0.14874  | -0.010716006 | 0.300816042 | 6.74E-02 | 2.43E-01 | 1.00E+00 |
| ENSG00000075234.15_TTC38    | ENSG00000160789.18_LMNA | 0.13428  | -0.025463205 | 0.287339862 | 9.91E-02 | 3.10E-01 | 1.00E+00 |
| ENSG00000169288.16_MRPL1    | ENSG00000160789.18_LMNA | -0.11108 | -0.265586171 | 0.048984775 | 1.73E-01 | 4.33E-01 | 1.00E+00 |
| ENSG00000071537.12_SEL1L    | ENSG00000160789.18_LMNA | 0.14977  | -0.009656953 | 0.301779054 | 6.55E-02 | 2.39E-01 | 1.00E+00 |
| ENSG00000133226.15_SRRM1    | ENSG00000160789.18_LMNA | 0.10346  | -0.056672141 | 0.258406451 | 2.05E-01 | 4.76E-01 | 1.00E+00 |
| ENSG00000185033.13_SEMA4B   | ENSG00000160789.18_LMNA | 0.12235  | -0.037579771 | 0.276174131 | 1.33E-01 | 3.70E-01 | 1.00E+00 |
| ENSG00000103274.9_NUBP1     | ENSG00000160789.18_LMNA | -0.05078 | -0.208295253 | 0.109305925 | 5.34E-01 | 7.76E-01 | 1.00E+00 |
| ENSG00000112992.15_NNT      | ENSG00000160789.18_LMNA | -0.13786 | -0.290678858 | 0.021821931 | 9.03E-02 | 2.93E-01 | 1.00E+00 |
| ENSG00000102606.16_ARHGEF7  | ENSG00000160789.18_LMNA | -0.35981 | -0.490887607 | -0.212794   | 5.29E-06 | 1.74E-04 | 2.72E-01 |
| ENSG00000144908.12_ALDH1L1  | ENSG00000160789.18_LMNA | -0.03808 | -0.19609001  | 0.121861416 | 6.41E-01 | 8.40E-01 | 1.00E+00 |
| ENSG00000256148.1_RP11-809N | ENSG00000160789.18_LMNA | -0.11309 | -0.267470835 | 0.046960661 | 1.65E-01 | 4.22E-01 | 1.00E+00 |
| ENSG00000178202.11_KDELC2   | ENSG00000160789.18_LMNA | 0.56132  | 0.441575692  | 0.661411965 | 5.38E-14 | 5.49E-11 | 2.76E-09 |
| ENSG00000158793.12_NIT1     | ENSG00000160789.18_LMNA | -0.13823 | -0.291027233 | 0.02144154  | 8.94E-02 | 2.91E-01 | 1.00E+00 |
| ENSG00000134371.9_CDC73     | ENSG00000160789.18_LMNA | 0.07553  | -0.084684621 | 0.231945946 | 3.55E-01 | 6.39E-01 | 1.00E+00 |
| ENSG00000181467.3_RAP2B     | ENSG00000160789.18_LMNA | 0.2278   | 0.071180212  | 0.373456492 | 4.76E-03 | 3.78E-02 | 1.00E+00 |
| ENSG00000083896.11_YTHDC1   | ENSG00000160789.18_LMNA | -0.01595 | -0.174709078 | 0.143613356 | 8.45E-01 | 9.40E-01 | 1.00E+00 |
| ENSG00000103485.16_QPRT     | ENSG00000160789.18_LMNA | 0.03481  | -0.1250848   | 0.192940573 | 6.70E-01 | 8.55E-01 | 1.00E+00 |
| ENSG00000138750.13_NUP54    | ENSG00000160789.18_LMNA | 0.06857  | -0.091627435 | 0.225314513 | 4.01E-01 | 6.78E-01 | 1.00E+00 |
| ENSG00000205981.5_DNAJC19   | ENSG00000160789.18_LMNA | -0.3473  | -0.479960014 | -0.19910392 | 1.17E-05 | 3.30E-04 | 5.99E-01 |
| ENSG00000100311.15_PDGFB    | ENSG00000160789.18_LMNA | 0.02446  | -0.135268805 | 0.182946949 | 7.65E-01 | 9.02E-01 | 1.00E+00 |
| ENSG00000007541.13_PIGQ     | ENSG00000160789.18_LMNA | 0.13161  | -0.028179846 | 0.284843778 | 1.06E-01 | 3.23E-01 | 1.00E+00 |
| ENSG00000104320.12_NBN      | ENSG00000160789.18_LMNA | -0.22533 | -0.371212351 | -0.06858761 | 5.25E-03 | 4.07E-02 | 1.00E+00 |
| ENSG00000270039.1_RP11-571M | ENSG00000160789.18_LMNA | -0.35048 | -0.482747893 | -0.20258619 | 9.57E-06 | 2.81E-04 | 4.91E-01 |
| ENSG00000169692.11_AGPAT2   | ENSG00000160789.18_LMNA | 0.49247  | 0.361622187  | 0.604294074 | 1.16E-10 | 2.52E-08 | 5.96E-06 |
| ENSG00000090674.14_MCOLN1   | ENSG00000160789.18_LMNA | 0.16014  | 0.000968431  | 0.31140582  | 4.87E-02 | 1.98E-01 | 1.00E+00 |
| ENSG00000057663.11_ATG5     | ENSG00000160789.18_LMNA | -0.16929 | -0.319872621 | -0.01037182 | 3.71E-02 | 1.65E-01 | 1.00E+00 |
| ENSG00000132376.18_INPP5K   | ENSG00000160789.18_LMNA | -0.16412 | -0.315085224 | -0.00504811 | 4.33E-02 | 1.83E-01 | 1.00E+00 |
| ENSG00000100297.14_MCM5     | ENSG00000160789.18_LMNA | 0.15456  | -0.004756205 | 0.306227114 | 5.73E-02 | 2.19E-01 | 1.00E+00 |
| ENSG00000139793.17_MBNL2    | ENSG00000160789.18_LMNA | -0.21063 | -0.357831706 | -0.05321366 | 9.20E-03 | 6.17E-02 | 1.00E+00 |

|                            |                         |          |              |             |          |          |          |
|----------------------------|-------------------------|----------|--------------|-------------|----------|----------|----------|
| ENSG00000110442.10_COMMD9  | ENSG00000160789.18_LMNA | -0.22198 | -0.368171182 | -0.06508073 | 5.99E-03 | 4.50E-02 | 1.00E+00 |
| ENSG00000083750.11_RRAGB   | ENSG00000160789.18_LMNA | -0.37262 | -0.502039234 | -0.22687823 | 2.27E-06 | 8.80E-05 | 1.17E-01 |
| ENSG00000129219.12_PLD2    | ENSG00000160789.18_LMNA | 0.13669  | -0.023006713 | 0.289593265 | 9.31E-02 | 2.98E-01 | 1.00E+00 |
| ENSG00000174446.11_SNAPC5  | ENSG00000160789.18_LMNA | -0.11365 | -0.268003108 | 0.046388535 | 1.63E-01 | 4.19E-01 | 1.00E+00 |
| ENSG00000172009.13_THOP1   | ENSG00000160789.18_LMNA | 0.05829  | -0.101857312 | 0.215489631 | 4.76E-01 | 7.34E-01 | 1.00E+00 |
| ENSG00000102100.13_SLC35A2 | ENSG00000160789.18_LMNA | 0.39176  | 0.248033233  | 0.518619175 | 6.00E-07 | 3.04E-05 | 3.08E-02 |
| ENSG00000088205.11_DDX18   | ENSG00000160789.18_LMNA | -0.15369 | -0.305415461 | 0.005651577 | 5.87E-02 | 2.22E-01 | 1.00E+00 |
| ENSG00000165476.11_REEP3   | ENSG00000160789.18_LMNA | 0.01791  | -0.141695344 | 0.176606522 | 8.27E-01 | 9.32E-01 | 1.00E+00 |
| ENSG00000180198.14_RCC1    | ENSG00000160789.18_LMNA | 0.1368   | -0.022898748 | 0.289692224 | 9.28E-02 | 2.98E-01 | 1.00E+00 |
| ENSG00000108840.14_HDAC5   | ENSG00000160789.18_LMNA | -0.01682 | -0.17554911  | 0.142764513 | 8.37E-01 | 9.37E-01 | 1.00E+00 |
| ENSG00000103353.14_UBFD1   | ENSG00000160789.18_LMNA | 0.01421  | -0.145320572 | 0.173018179 | 8.62E-01 | 9.46E-01 | 1.00E+00 |
| ENSG00000112294.11_ALDH5A1 | ENSG00000160789.18_LMNA | -0.18686 | -0.3360657   | -0.02850993 | 2.12E-02 | 1.12E-01 | 1.00E+00 |
| ENSG00000100105.16_PATZ1   | ENSG00000160789.18_LMNA | -0.16502 | -0.315917419 | -0.00597227 | 4.22E-02 | 1.80E-01 | 1.00E+00 |
| ENSG00000129691.14_ASH2L   | ENSG00000160789.18_LMNA | -0.05122 | -0.208715863 | 0.108871432 | 5.31E-01 | 7.74E-01 | 1.00E+00 |
| ENSG00000178467.16_P4HTM   | ENSG00000160789.18_LMNA | 0.09834  | -0.061830129 | 0.253569487 | 2.28E-01 | 5.05E-01 | 1.00E+00 |
| ENSG00000143771.10_CNIH4   | ENSG00000160789.18_LMNA | 0.06988  | -0.090329247 | 0.226556714 | 3.92E-01 | 6.70E-01 | 1.00E+00 |
| ENSG00000114054.12_PCCB    | ENSG00000160789.18_LMNA | -0.23845 | -0.383111878 | -0.08238163 | 3.09E-03 | 2.73E-02 | 1.00E+00 |
| ENSG00000143303.10_RRNAD1  | ENSG00000160789.18_LMNA | -0.00047 | -0.159662349 | 0.158738985 | 9.95E-01 | 9.98E-01 | 1.00E+00 |
| ENSG00000157224.14_CLDN12  | ENSG00000160789.18_LMNA | 0.09745  | -0.062718875 | 0.252734458 | 2.32E-01 | 5.10E-01 | 1.00E+00 |
| ENSG00000124641.13_MED20   | ENSG00000160789.18_LMNA | -0.24833 | -0.392028123 | -0.09279348 | 2.04E-03 | 1.98E-02 | 1.00E+00 |
| ENSG00000156709.12_AIFM1   | ENSG00000160789.18_LMNA | 0.1102   | -0.049873248 | 0.264758149 | 1.77E-01 | 4.38E-01 | 1.00E+00 |
| ENSG00000122952.15_ZWINT   | ENSG00000160789.18_LMNA | 0.0288   | -0.131005836 | 0.187138243 | 7.25E-01 | 8.83E-01 | 1.00E+00 |
| ENSG00000198901.12_PRC1    | ENSG00000160789.18_LMNA | 0.19314  | 0.035012701  | 0.341827211 | 1.71E-02 | 9.65E-02 | 1.00E+00 |
| ENSG00000163947.10_ARHGEF3 | ENSG00000160789.18_LMNA | 0.09131  | -0.068894133 | 0.246919441 | 2.63E-01 | 5.47E-01 | 1.00E+00 |
| ENSG00000177917.9_ARL6IP6  | ENSG00000160789.18_LMNA | 0.09148  | -0.068720881 | 0.247082897 | 2.62E-01 | 5.46E-01 | 1.00E+00 |
| ENSG00000118777.9_ABCG2    | ENSG00000160789.18_LMNA | -0.34883 | -0.481301678 | -0.20077887 | 1.06E-05 | 3.06E-04 | 5.44E-01 |
| ENSG00000159579.12_RSPRY1  | ENSG00000160789.18_LMNA | 0.17229  | 0.013454538  | 0.322637579 | 3.38E-02 | 1.55E-01 | 1.00E+00 |
| ENSG00000093072.14_CECR1   | ENSG00000160789.18_LMNA | 0.04351  | -0.116500797 | 0.201313169 | 5.95E-01 | 8.13E-01 | 1.00E+00 |
| ENSG00000275832.3_ARHGAP23 | ENSG00000160789.18_LMNA | 0.09267  | -0.067530365 | 0.248205612 | 2.56E-01 | 5.38E-01 | 1.00E+00 |
| ENSG00000177370.4_TIMM22   | ENSG00000160789.18_LMNA | 0.07694  | -0.083279652 | 0.233284332 | 3.46E-01 | 6.30E-01 | 1.00E+00 |
| ENSG00000247315.3_ZCCHC3   | ENSG00000160789.18_LMNA | 0.12192  | -0.038021837 | 0.275765149 | 1.35E-01 | 3.73E-01 | 1.00E+00 |
| ENSG00000178429.9_RPS3AP5  | ENSG00000160789.18_LMNA | -0.11559 | -0.269826333 | 0.044427238 | 1.56E-01 | 4.08E-01 | 1.00E+00 |
| ENSG00000121022.12_COPS5   | ENSG00000160789.18_LMNA | -0.35094 | -0.483144267 | -0.20308186 | 9.30E-06 | 2.75E-04 | 4.77E-01 |

|                             |                         |          |              |             |          |          |          |
|-----------------------------|-------------------------|----------|--------------|-------------|----------|----------|----------|
| ENSG00000099899.13_TRMT2A   | ENSG00000160789.18_LMNA | 0.06571  | -0.094476448 | 0.222584751 | 4.21E-01 | 6.93E-01 | 1.00E+00 |
| ENSG00000092020.9_PPP2R3C   | ENSG00000160789.18_LMNA | -0.23111 | -0.376460938 | -0.07465758 | 4.17E-03 | 3.43E-02 | 1.00E+00 |
| ENSG00000165271.15_NOL6     | ENSG00000160789.18_LMNA | 0.12566  | -0.034220415 | 0.279278374 | 1.23E-01 | 3.53E-01 | 1.00E+00 |
| ENSG00000125863.16_MKKS     | ENSG00000160789.18_LMNA | -0.23639 | -0.3812439   | -0.0802086  | 3.37E-03 | 2.92E-02 | 1.00E+00 |
| ENSG00000185834.10_RPL12P4  | ENSG00000160789.18_LMNA | -0.00053 | -0.159716724 | 0.158684593 | 9.95E-01 | 9.98E-01 | 1.00E+00 |
| ENSG00000100209.8_HSCB      | ENSG00000160789.18_LMNA | -0.21187 | -0.358960269 | -0.05450479 | 8.78E-03 | 5.97E-02 | 1.00E+00 |
| ENSG00000232368.1_FTL2      | ENSG00000160789.18_LMNA | -0.00755 | -0.166551851 | 0.151831856 | 9.26E-01 | 9.72E-01 | 1.00E+00 |
| ENSG00000148204.10_CRB2     | ENSG00000160789.18_LMNA | 0.23362  | 0.077289999  | 0.378731131 | 3.77E-03 | 3.17E-02 | 1.00E+00 |
| ENSG00000276045.1_ORAI1     | ENSG00000160789.18_LMNA | 0.3088   | 0.157329229  | 0.446067373 | 1.09E-04 | 2.02E-03 | 1.00E+00 |
| ENSG00000146416.15_AIG1     | ENSG00000160789.18_LMNA | -0.15988 | -0.311160579 | -0.00069688 | 4.91E-02 | 1.99E-01 | 1.00E+00 |
| ENSG00000163605.13_PPP4R2   | ENSG00000160789.18_LMNA | 0.00134  | -0.157889931 | 0.160510911 | 9.87E-01 | 9.95E-01 | 1.00E+00 |
| ENSG00000136715.16_SAP130   | ENSG00000160789.18_LMNA | 0.07633  | -0.083887769 | 0.232705181 | 3.50E-01 | 6.34E-01 | 1.00E+00 |
| ENSG00000040487.11_PQLC2    | ENSG00000160789.18_LMNA | 0.50904  | 0.380693161  | 0.618148509 | 2.14E-11 | 6.33E-09 | 1.10E-06 |
| ENSG00000185722.15_ANKFY1   | ENSG00000160789.18_LMNA | -0.00454 | -0.163624284 | 0.154770718 | 9.56E-01 | 9.82E-01 | 1.00E+00 |
| ENSG00000094880.9_CDC23     | ENSG00000160789.18_LMNA | -0.1627  | -0.313769496 | -0.00358806 | 4.52E-02 | 1.88E-01 | 1.00E+00 |
| ENSG00000100263.12_RHBDD3   | ENSG00000160789.18_LMNA | 0.24104  | 0.08510707   | 0.385451252 | 2.78E-03 | 2.52E-02 | 1.00E+00 |
| ENSG0000013583.7_HEBP1      | ENSG00000160789.18_LMNA | 0.18172  | 0.023188174  | 0.331333396 | 2.51E-02 | 1.27E-01 | 1.00E+00 |
| ENSG00000234160.1_RP11-613M | ENSG00000160789.18_LMNA | 0.14553  | -0.013994741 | 0.297830609 | 7.36E-02 | 2.58E-01 | 1.00E+00 |
| ENSG00000141127.13_PRPSAP2  | ENSG00000160789.18_LMNA | -0.55143 | -0.653277831 | -0.42997228 | 1.81E-13 | 1.37E-10 | 9.29E-09 |
| ENSG00000063245.13_EPN1     | ENSG00000160789.18_LMNA | 0.2919   | 0.139163546  | 0.431066228 | 2.63E-04 | 4.06E-03 | 1.00E+00 |
| ENSG00000165732.11_DDX21    | ENSG00000160789.18_LMNA | 0.06472  | -0.095462092 | 0.221639205 | 4.28E-01 | 6.99E-01 | 1.00E+00 |
| ENSG00000048740.16_CELF2    | ENSG00000160789.18_LMNA | -0.27056 | -0.412010865 | -0.11636823 | 7.48E-04 | 9.23E-03 | 1.00E+00 |
| ENSG00000132478.8_UNK       | ENSG00000160789.18_LMNA | -0.18037 | -0.330093328 | -0.02179653 | 2.62E-02 | 1.31E-01 | 1.00E+00 |
| ENSG00000142327.10_RNPEPL1  | ENSG00000160789.18_LMNA | 0.42433  | 0.284338095  | 0.546606107 | 5.09E-08 | 4.14E-06 | 2.61E-03 |
| ENSG00000106070.16_GRB10    | ENSG00000160789.18_LMNA | 0.40176  | 0.259138749  | 0.527242271 | 2.89E-07 | 1.71E-05 | 1.48E-02 |
| ENSG00000146109.4_ABT1      | ENSG00000160789.18_LMNA | -0.09671 | -0.25203392  | 0.063464093 | 2.36E-01 | 5.14E-01 | 1.00E+00 |
| ENSG00000142655.11_PEX14    | ENSG00000160789.18_LMNA | 0.11148  | -0.048579315 | 0.26596389  | 1.72E-01 | 4.31E-01 | 1.00E+00 |
| ENSG00000166526.15_ZNF3     | ENSG00000160789.18_LMNA | -0.11148 | -0.265958186 | 0.048585439 | 1.72E-01 | 4.31E-01 | 1.00E+00 |
| ENSG00000239779.5_WBP1      | ENSG00000160789.18_LMNA | -0.20899 | -0.356334642 | -0.05150251 | 9.77E-03 | 6.45E-02 | 1.00E+00 |
| ENSG00000169299.12_PGM2     | ENSG00000160789.18_LMNA | 0.21484  | 0.057609967  | 0.361670828 | 7.86E-03 | 5.48E-02 | 1.00E+00 |
| ENSG00000111077.16_TNS2     | ENSG00000160789.18_LMNA | -0.02891 | -0.187250373 | 0.130891627 | 7.24E-01 | 8.83E-01 | 1.00E+00 |
| ENSG00000142687.16_KIAA0319 | ENSG00000160789.18_LMNA | 0.18829  | 0.029989888  | 0.337378985 | 2.02E-02 | 1.09E-01 | 1.00E+00 |
| ENSG00000078070.10_MCCC1    | ENSG00000160789.18_LMNA | -0.22324 | -0.369317084 | -0.06640123 | 5.70E-03 | 4.33E-02 | 1.00E+00 |



|                             |                         |          |              |             |          |          |          |
|-----------------------------|-------------------------|----------|--------------|-------------|----------|----------|----------|
| ENSG00000131097.5_HIGD1B    | ENSG00000160789.18_LMNA | -0.2533  | -0.396515093 | -0.09805796 | 1.64E-03 | 1.68E-02 | 1.00E+00 |
| ENSG00000168758.9_SEMA4C    | ENSG00000160789.18_LMNA | 0.02735  | -0.132430704 | 0.185738619 | 7.38E-01 | 8.90E-01 | 1.00E+00 |
| ENSG00000225573.4_RPL35P5   | ENSG00000160789.18_LMNA | -0.03201 | -0.190243357 | 0.127840017 | 6.95E-01 | 8.69E-01 | 1.00E+00 |
| ENSG00000096401.7_CDC5L     | ENSG00000160789.18_LMNA | -0.11778 | -0.271881686 | 0.042213326 | 1.48E-01 | 3.95E-01 | 1.00E+00 |
| ENSG00000130340.13_SNX9     | ENSG00000160789.18_LMNA | 0.41886  | 0.278213441  | 0.541925423 | 7.85E-08 | 5.92E-06 | 4.03E-03 |
| ENSG00000269131.1_          | ENSG00000160789.18_LMNA | 0.05702  | -0.103114915 | 0.214277365 | 4.85E-01 | 7.42E-01 | 1.00E+00 |
| ENSG00000157456.6_CCNB2     | ENSG00000160789.18_LMNA | 0.00832  | -0.151084864 | 0.167295079 | 9.19E-01 | 9.69E-01 | 1.00E+00 |
| ENSG00000054179.10_ENTPD2   | ENSG00000160789.18_LMNA | 0.03165  | -0.128195802 | 0.189894711 | 6.99E-01 | 8.71E-01 | 1.00E+00 |
| ENSG00000109929.8_SC5D      | ENSG00000160789.18_LMNA | -0.37394 | -0.503184853 | -0.22833167 | 2.08E-06 | 8.22E-05 | 1.07E-01 |
| ENSG00000171443.6_ZNF524    | ENSG00000160789.18_LMNA | 0.21552  | 0.058322726  | 0.362292282 | 7.66E-03 | 5.38E-02 | 1.00E+00 |
| ENSG00000185386.13_MAPK11   | ENSG00000160789.18_LMNA | 0.13717  | -0.022520506 | 0.290038865 | 9.20E-02 | 2.96E-01 | 1.00E+00 |
| ENSG00000164144.13_ARFIP1   | ENSG00000160789.18_LMNA | -0.03384 | -0.192007329 | 0.126038667 | 6.79E-01 | 8.60E-01 | 1.00E+00 |
| ENSG00000009335.16_UBE3C    | ENSG00000160789.18_LMNA | 0.31841  | 0.167709057  | 0.454566771 | 6.39E-05 | 1.31E-03 | 1.00E+00 |
| ENSG00000223612.3_RP11-2891 | ENSG00000160789.18_LMNA | 0.11809  | -0.041897896 | 0.272174291 | 1.47E-01 | 3.93E-01 | 1.00E+00 |
| ENSG00000070785.15	EIF2B3   | ENSG00000160789.18_LMNA | -0.04005 | -0.197986881 | 0.119916767 | 6.24E-01 | 8.31E-01 | 1.00E+00 |
| ENSG00000187122.15_SLIT1    | ENSG00000160789.18_LMNA | -0.31724 | -0.453535575 | -0.16644632 | 6.83E-05 | 1.38E-03 | 1.00E+00 |
| ENSG00000214026.9_MRPL23    | ENSG00000160789.18_LMNA | 0.05959  | -0.100560634 | 0.21673854  | 4.66E-01 | 7.28E-01 | 1.00E+00 |
| ENSG00000204922.4_UQCC3     | ENSG00000160789.18_LMNA | -0.00086 | -0.160035155 | 0.158366022 | 9.92E-01 | 9.97E-01 | 1.00E+00 |
| ENSG00000133704.8_IPO8      | ENSG00000160789.18_LMNA | -0.07649 | -0.232856921 | 0.083728462 | 3.49E-01 | 6.33E-01 | 1.00E+00 |
| ENSG00000127511.8_SIN3B     | ENSG00000160789.18_LMNA | 0.1255   | -0.034383282 | 0.279128026 | 1.23E-01 | 3.54E-01 | 1.00E+00 |
| ENSG00000160293.15_VAV2     | ENSG00000160789.18_LMNA | 0.4575   | 0.321733516  | 0.574833908 | 3.11E-09 | 4.02E-07 | 1.60E-04 |
| ENSG00000176749.7_CDK5R1    | ENSG00000160789.18_LMNA | -0.32088 | -0.456744684 | -0.17037909 | 5.57E-05 | 1.17E-03 | 1.00E+00 |
| ENSG00000142549.9_IGLON5    | ENSG00000160789.18_LMNA | -0.21598 | -0.362705719 | -0.05879708 | 7.53E-03 | 5.31E-02 | 1.00E+00 |
| ENSG00000131013.3_PPIL4     | ENSG00000160789.18_LMNA | -0.0089  | -0.167865028 | 0.150511783 | 9.13E-01 | 9.67E-01 | 1.00E+00 |
| ENSG00000105255.9_FSD1      | ENSG00000160789.18_LMNA | -0.25299 | -0.396228811 | -0.09772157 | 1.66E-03 | 1.70E-02 | 1.00E+00 |
| ENSG00000119541.8_VPS4B     | ENSG00000160789.18_LMNA | -0.03212 | -0.190344366 | 0.127736924 | 6.94E-01 | 8.69E-01 | 1.00E+00 |
| ENSG00000108387.13_SEPT4    | ENSG00000160789.18_LMNA | -0.18961 | -0.338587691 | -0.03135319 | 1.93E-02 | 1.05E-01 | 1.00E+00 |
| ENSG00000198832.9_SELENOM   | ENSG00000160789.18_LMNA | 0.07865  | -0.08157208  | 0.234909367 | 3.35E-01 | 6.21E-01 | 1.00E+00 |
| ENSG00000126861.4_OMG       | ENSG00000160789.18_LMNA | -0.52604 | -0.632286688 | -0.40036522 | 3.41E-12 | 1.47E-09 | 1.75E-07 |
| ENSG00000169499.13_PLEKHA2  | ENSG00000160789.18_LMNA | 0.10471  | -0.055411421 | 0.259586309 | 1.99E-01 | 4.70E-01 | 1.00E+00 |
| ENSG00000178878.11_APOLD1   | ENSG00000160789.18_LMNA | -0.07269 | -0.229235799 | 0.087525743 | 3.74E-01 | 6.53E-01 | 1.00E+00 |
| ENSG00000204560.8_DHX16     | ENSG00000160789.18_LMNA | 0.23873  | 0.082672717  | 0.383361916 | 3.06E-03 | 2.71E-02 | 1.00E+00 |
| ENSG00000099282.8_TSPAN15   | ENSG00000160789.18_LMNA | -0.36173 | -0.492563048 | -0.21490269 | 4.67E-06 | 1.58E-04 | 2.40E-01 |

|                             |                         |          |              |             |          |          |          |
|-----------------------------|-------------------------|----------|--------------|-------------|----------|----------|----------|
| ENSG00000177542.9_SLC25A22  | ENSG00000160789.18_LMNA | 0.13532  | -0.02440742  | 0.288308785 | 9.65E-02 | 3.05E-01 | 1.00E+00 |
| ENSG00000145191.10	EIF2B5   | ENSG00000160789.18_LMNA | -0.17897 | -0.328804658 | -0.0203516  | 2.74E-02 | 1.35E-01 | 1.00E+00 |
| ENSG00000113161.14_HMGCR    | ENSG00000160789.18_LMNA | -0.1617  | -0.312842966 | -0.00256069 | 4.66E-02 | 1.92E-01 | 1.00E+00 |
| ENSG00000133433.9_GSTT2B    | ENSG00000160789.18_LMNA | -0.08095 | -0.237091897 | 0.079275771 | 3.22E-01 | 6.08E-01 | 1.00E+00 |
| ENSG00000243679.1_RP11-274B | ENSG00000160789.18_LMNA | 0.16446  | 0.005398081  | 0.315400422 | 4.29E-02 | 1.82E-01 | 1.00E+00 |
| ENSG00000166477.11_LEO1     | ENSG00000160789.18_LMNA | 0.26516  | 0.110631582  | 0.407174332 | 9.62E-04 | 1.13E-02 | 1.00E+00 |
| ENSG00000118946.10_PCDH17   | ENSG00000160789.18_LMNA | -0.1624  | -0.313496995 | -0.00328584 | 4.56E-02 | 1.89E-01 | 1.00E+00 |
| ENSG00000040531.13_CTNS     | ENSG00000160789.18_LMNA | 0.31203  | 0.160815378  | 0.448927784 | 9.10E-05 | 1.75E-03 | 1.00E+00 |
| ENSG00000183576.11_SETD3    | ENSG00000160789.18_LMNA | 0.04771  | -0.112343785 | 0.205351181 | 5.59E-01 | 7.92E-01 | 1.00E+00 |
| ENSG00000144847.11_IGSF11   | ENSG00000160789.18_LMNA | -0.35479 | -0.486507194 | -0.20729308 | 7.30E-06 | 2.27E-04 | 3.75E-01 |
| ENSG00000125629.13_INSIG2   | ENSG00000160789.18_LMNA | 0.04321  | -0.116794671 | 0.201027299 | 5.97E-01 | 8.14E-01 | 1.00E+00 |
| ENSG00000159592.9_GBP1L1    | ENSG00000160789.18_LMNA | 0.09147  | -0.068731461 | 0.247072916 | 2.62E-01 | 5.46E-01 | 1.00E+00 |
| ENSG00000183527.10_PSMG1    | ENSG00000160789.18_LMNA | 0.05793  | -0.102214937 | 0.215144999 | 4.78E-01 | 7.37E-01 | 1.00E+00 |
| ENSG00000167755.12_KLK6     | ENSG00000160789.18_LMNA | -0.26343 | -0.405618587 | -0.10879049 | 1.04E-03 | 1.19E-02 | 1.00E+00 |
| ENSG00000115170.12_ACVR1    | ENSG00000160789.18_LMNA | -0.03306 | -0.191255104 | 0.126807088 | 6.86E-01 | 8.64E-01 | 1.00E+00 |
| ENSG00000272391.4_POM121C   | ENSG00000160789.18_LMNA | 0.32577  | 0.175681152  | 0.46105935  | 4.21E-05 | 9.36E-04 | 1.00E+00 |
| ENSG00000129636.11_ITFG1    | ENSG00000160789.18_LMNA | 0.04206  | -0.117930624 | 0.199921772 | 6.07E-01 | 8.20E-01 | 1.00E+00 |
| ENSG00000233270.1_SNRPEP4   | ENSG00000160789.18_LMNA | -0.06437 | -0.22130229  | 0.095813144 | 4.31E-01 | 7.00E-01 | 1.00E+00 |
| ENSG00000082701.13_GSK3B    | ENSG00000160789.18_LMNA | -0.13196 | -0.285167    | 0.027828324 | 1.05E-01 | 3.22E-01 | 1.00E+00 |
| ENSG00000112592.11_TBP      | ENSG00000160789.18_LMNA | -0.10662 | -0.261384996 | 0.053487525 | 1.91E-01 | 4.59E-01 | 1.00E+00 |
| ENSG00000115839.16_RAB3GAP  | ENSG00000160789.18_LMNA | 0.04746  | -0.112591669 | 0.205110696 | 5.61E-01 | 7.93E-01 | 1.00E+00 |
| ENSG00000116266.9_STXBP3    | ENSG00000160789.18_LMNA | -0.01496 | -0.173742458 | 0.144589536 | 8.55E-01 | 9.43E-01 | 1.00E+00 |
| ENSG00000168005.7_C11orf84  | ENSG00000160789.18_LMNA | 0.13807  | -0.02160794  | 0.290874849 | 8.98E-02 | 2.92E-01 | 1.00E+00 |
| ENSG00000159231.5_CBR3      | ENSG00000160789.18_LMNA | 0.20503  | 0.04737264   | 0.352715001 | 1.13E-02 | 7.14E-02 | 1.00E+00 |
| ENSG00000143324.12_XPR1     | ENSG00000160789.18_LMNA | 0.13636  | -0.023348816 | 0.289279652 | 9.39E-02 | 3.00E-01 | 1.00E+00 |
| ENSG00000153113.22_CAST     | ENSG00000160789.18_LMNA | 0.39819  | 0.255163397  | 0.524161864 | 3.77E-07 | 2.10E-05 | 1.93E-02 |
| ENSG00000214975.4_PPIAP29   | ENSG00000160789.18_LMNA | 0.02574  | -0.134007975 | 0.184187786 | 7.53E-01 | 8.97E-01 | 1.00E+00 |
| ENSG00000007516.12_BAIAP3   | ENSG00000160789.18_LMNA | -0.05738 | -0.214618518 | 0.102761106 | 4.83E-01 | 7.40E-01 | 1.00E+00 |
| ENSG00000106351.11_AGFG2    | ENSG00000160789.18_LMNA | 0.05516  | -0.104957524 | 0.212499414 | 5.00E-01 | 7.53E-01 | 1.00E+00 |
| ENSG00000149930.16_TAOK2    | ENSG00000160789.18_LMNA | 0.17982  | 0.021225146  | 0.329583874 | 2.66E-02 | 1.32E-01 | 1.00E+00 |
| ENSG00000254682.1_RP11-660L | ENSG00000160789.18_LMNA | -0.15859 | -0.309967025 | 0.000624083 | 5.10E-02 | 2.04E-01 | 1.00E+00 |
| ENSG00000105472.11_CLEC11A  | ENSG00000160789.18_LMNA | 0.26784  | 0.113483095  | 0.409580506 | 8.50E-04 | 1.02E-02 | 1.00E+00 |
| ENSG00000172831.10_CES2     | ENSG00000160789.18_LMNA | 0.26818  | 0.113841039  | 0.409882256 | 8.36E-04 | 1.01E-02 | 1.00E+00 |

|                             |                         |          |              |             |          |          |          |
|-----------------------------|-------------------------|----------|--------------|-------------|----------|----------|----------|
| ENSG00000072501.16_SMC1A    | ENSG00000160789.18_LMNA | 0.14699  | -0.012498886 | 0.299193408 | 7.07E-02 | 2.51E-01 | 1.00E+00 |
| ENSG00000168824.13_NSQ1     | ENSG00000160789.18_LMNA | -0.18615 | -0.33541503  | -0.02777717 | 2.17E-02 | 1.14E-01 | 1.00E+00 |
| ENSG00000132382.13_MYBBP1A  | ENSG00000160789.18_LMNA | 0.20981  | 0.052357012  | 0.357082433 | 9.48E-03 | 6.31E-02 | 1.00E+00 |
| ENSG00000115325.12_DOK1     | ENSG00000160789.18_LMNA | 0.39467  | 0.251260575  | 0.521130795 | 4.87E-07 | 2.56E-05 | 2.50E-02 |
| ENSG00000155254.11_MARVELD  | ENSG00000160789.18_LMNA | 0.1675   | 0.008526921  | 0.318215364 | 3.91E-02 | 1.71E-01 | 1.00E+00 |
| ENSG00000005483.18_KMT2E    | ENSG00000160789.18_LMNA | 0.11682  | -0.043188669 | 0.270976549 | 1.52E-01 | 4.01E-01 | 1.00E+00 |
| ENSG00000084636.16_COL16A1  | ENSG00000160789.18_LMNA | 0.30694  | 0.155333224  | 0.444426976 | 1.20E-04 | 2.19E-03 | 1.00E+00 |
| ENSG00000068796.15_KIF2A    | ENSG00000160789.18_LMNA | -0.23538 | -0.380326418 | -0.07914234 | 3.51E-03 | 3.01E-02 | 1.00E+00 |
| ENSG00000256338.2_RPL41P2   | ENSG00000160789.18_LMNA | -0.14676 | -0.298973677 | 0.012740164 | 7.12E-02 | 2.52E-01 | 1.00E+00 |
| ENSG00000108961.12_RANGRF   | ENSG00000160789.18_LMNA | -0.09911 | -0.254296016 | 0.061056454 | 2.24E-01 | 5.00E-01 | 1.00E+00 |
| ENSG00000148339.11_SLC25A2  | ENSG00000160789.18_LMNA | 0.37546  | 0.230007657  | 0.50450469  | 1.88E-06 | 7.63E-05 | 9.63E-02 |
| ENSG00000150776.16_C11orf57 | ENSG00000160789.18_LMNA | -0.25614 | -0.399071257 | -0.10106454 | 1.45E-03 | 1.53E-02 | 1.00E+00 |
| ENSG00000240344.7_PPIL3     | ENSG00000160789.18_LMNA | -0.14379 | -0.296207392 | 0.015774619 | 7.72E-02 | 2.66E-01 | 1.00E+00 |
| ENSG00000091972.17_CD200    | ENSG00000160789.18_LMNA | -0.49412 | -0.605678781 | -0.36351918 | 9.84E-11 | 2.21E-08 | 5.05E-06 |
| ENSG00000237172.3_B3GNT9    | ENSG00000160789.18_LMNA | 0.52497  | 0.399130322  | 0.631403699 | 3.84E-12 | 1.62E-09 | 1.97E-07 |
| ENSG00000149639.13_SOGA1    | ENSG00000160789.18_LMNA | 0.01809  | -0.1415144   | 0.176785403 | 8.25E-01 | 9.31E-01 | 1.00E+00 |
| ENSG00000184178.14_SCFD2    | ENSG00000160789.18_LMNA | 0.00565  | -0.153691215 | 0.164700291 | 9.45E-01 | 9.78E-01 | 1.00E+00 |
| ENSG00000103148.14_NPRL3    | ENSG00000160789.18_LMNA | 0.0314   | -0.128440763 | 0.189654619 | 7.01E-01 | 8.72E-01 | 1.00E+00 |
| ENSG00000140943.15_MBTPS1   | ENSG00000160789.18_LMNA | 0.16623  | 0.007219495  | 0.317039768 | 4.07E-02 | 1.75E-01 | 1.00E+00 |
| ENSG00000172889.14_EGFL7    | ENSG00000160789.18_LMNA | -0.02956 | -0.187875733 | 0.130254515 | 7.18E-01 | 8.80E-01 | 1.00E+00 |
| ENSG00000184232.7_OAF       | ENSG00000160789.18_LMNA | 0.40134  | 0.258671396  | 0.526880496 | 2.99E-07 | 1.76E-05 | 1.53E-02 |
| ENSG00000173404.4_INSM1     | ENSG00000160789.18_LMNA | -0.24729 | -0.391096086 | -0.09170203 | 2.13E-03 | 2.05E-02 | 1.00E+00 |
| ENSG00000107902.12_LHPP     | ENSG00000160789.18_LMNA | -0.30998 | -0.447112577 | -0.15860225 | 1.02E-04 | 1.91E-03 | 1.00E+00 |
| ENSG00000135407.9_AVIL      | ENSG00000160789.18_LMNA | -0.25897 | -0.401610735 | -0.10405691 | 1.27E-03 | 1.39E-02 | 1.00E+00 |
| ENSG00000100271.15_TTLL1    | ENSG00000160789.18_LMNA | -0.13135 | -0.28460057  | 0.028444297 | 1.07E-01 | 3.25E-01 | 1.00E+00 |
| ENSG00000134186.10_PRPF38B  | ENSG00000160789.18_LMNA | 0.00369  | -0.155600957 | 0.162796219 | 9.64E-01 | 9.86E-01 | 1.00E+00 |
| ENSG00000160606.9_TLCD1     | ENSG00000160789.18_LMNA | 0.33837  | 0.189373456  | 0.472139688 | 2.01E-05 | 5.18E-04 | 1.00E+00 |
| ENSG00000115514.10_TXNDC9   | ENSG00000160789.18_LMNA | -0.21921 | -0.365653123 | -0.06218273 | 6.66E-03 | 4.85E-02 | 1.00E+00 |
| ENSG00000124486.11_USP9X    | ENSG00000160789.18_LMNA | 0.23202  | 0.075614647  | 0.377286729 | 4.02E-03 | 3.33E-02 | 1.00E+00 |
| ENSG00000183908.5_LRRC55    | ENSG00000160789.18_LMNA | -0.28662 | -0.426362021 | -0.13350715 | 3.44E-04 | 4.99E-03 | 1.00E+00 |
| ENSG00000140939.13_NOL3     | ENSG00000160789.18_LMNA | 0.25264  | 0.097351912  | 0.395914151 | 1.69E-03 | 1.72E-02 | 1.00E+00 |
| ENSG00000169398.18_PTK2     | ENSG00000160789.18_LMNA | -0.17422 | -0.324421163 | -0.01544622 | 3.18E-02 | 1.49E-01 | 1.00E+00 |
| ENSG00000162413.15_KLHL21   | ENSG00000160789.18_LMNA | 0.34091  | 0.192134163  | 0.474362986 | 1.73E-05 | 4.57E-04 | 8.85E-01 |

|                             |                         |          |              |             |          |          |          |
|-----------------------------|-------------------------|----------|--------------|-------------|----------|----------|----------|
| ENSG00000117360.11_PRPF3    | ENSG00000160789.18_LMNA | 0.08523  | -0.074985179 | 0.241161355 | 2.96E-01 | 5.82E-01 | 1.00E+00 |
| ENSG00000125503.11_PPP1R12C | ENSG00000160789.18_LMNA | 0.26421  | 0.109619229  | 0.406319094 | 1.00E-03 | 1.16E-02 | 1.00E+00 |
| ENSG00000075413.16_MARK3    | ENSG00000160789.18_LMNA | 0.18398  | 0.025524464  | 0.333412825 | 2.33E-02 | 1.20E-01 | 1.00E+00 |
| ENSG00000100796.16_PPP4R3A  | ENSG00000160789.18_LMNA | 0.19473  | 0.036667758  | 0.343289933 | 1.62E-02 | 9.28E-02 | 1.00E+00 |
| ENSG00000278133.1_RP11-196G | ENSG00000160789.18_LMNA | -0.07632 | -0.232693385 | 0.083900153 | 3.50E-01 | 6.34E-01 | 1.00E+00 |
| ENSG00000110721.10_CHKA     | ENSG00000160789.18_LMNA | -0.05037 | -0.207899988 | 0.109714127 | 5.38E-01 | 7.78E-01 | 1.00E+00 |
| ENSG00000257093.5_KIAA1147  | ENSG00000160789.18_LMNA | -0.15754 | -0.308995422 | 0.0016986   | 5.26E-02 | 2.08E-01 | 1.00E+00 |
| ENSG00000129355.6_CDKN2D    | ENSG00000160789.18_LMNA | -0.1158  | -0.270019961 | 0.044218805 | 1.55E-01 | 4.07E-01 | 1.00E+00 |
| ENSG00000140854.11_KATNB1   | ENSG00000160789.18_LMNA | -0.04924 | -0.206820005 | 0.110828911 | 5.47E-01 | 7.84E-01 | 1.00E+00 |
| ENSG00000226084.5_RP4-706A1 | ENSG00000160789.18_LMNA | -0.09423 | -0.24968319  | 0.065962184 | 2.48E-01 | 5.28E-01 | 1.00E+00 |
| ENSG00000170445.11_HARS     | ENSG00000160789.18_LMNA | 0.11881  | -0.041166497 | 0.272852544 | 1.45E-01 | 3.90E-01 | 1.00E+00 |
| ENSG00000119812.17_FAM98A   | ENSG00000160789.18_LMNA | -0.00032 | -0.15951439  | 0.158886982 | 9.97E-01 | 9.99E-01 | 1.00E+00 |
| ENSG00000137075.16_RNF38    | ENSG00000160789.18_LMNA | -0.0173  | -0.176019417 | 0.142289068 | 8.32E-01 | 9.35E-01 | 1.00E+00 |
| ENSG00000178685.12_PARP10   | ENSG00000160789.18_LMNA | 0.26996  | 0.115731952  | 0.411475242 | 7.70E-04 | 9.42E-03 | 1.00E+00 |
| ENSG00000142444.6_TIMM29    | ENSG00000160789.18_LMNA | 0.01687  | -0.142710191 | 0.175602852 | 8.37E-01 | 9.37E-01 | 1.00E+00 |
| ENSG00000110719.8_TCIRG1    | ENSG00000160789.18_LMNA | 0.38718  | 0.242958474  | 0.51466037  | 8.32E-07 | 3.92E-05 | 4.27E-02 |
| ENSG00000211829.5_TRDC      | ENSG00000160789.18_LMNA | 0.12136  | -0.038581489 | 0.275247216 | 1.36E-01 | 3.76E-01 | 1.00E+00 |
| ENSG00000140365.14_COMMD4   | ENSG00000160789.18_LMNA | 0.24529  | 0.089586666  | 0.389287931 | 2.32E-03 | 2.19E-02 | 1.00E+00 |
| ENSG00000100284.19_TOM1     | ENSG00000160789.18_LMNA | 0.12851  | -0.03132725  | 0.281946587 | 1.15E-01 | 3.38E-01 | 1.00E+00 |
| ENSG00000127554.12_GFER     | ENSG00000160789.18_LMNA | 0.00893  | -0.150486344 | 0.167890322 | 9.13E-01 | 9.67E-01 | 1.00E+00 |
| ENSG00000074582.11_BCS1L    | ENSG00000160789.18_LMNA | -0.12645 | -0.280018158 | 0.033418788 | 1.21E-01 | 3.49E-01 | 1.00E+00 |
| ENSG00000135521.8_LTV1      | ENSG00000160789.18_LMNA | 0.05617  | -0.10396451  | 0.213457844 | 4.92E-01 | 7.47E-01 | 1.00E+00 |
| ENSG00000106261.15_ZKSCAN1  | ENSG00000160789.18_LMNA | 0.06786  | -0.09234128  | 0.224631014 | 4.06E-01 | 6.82E-01 | 1.00E+00 |
| ENSG00000100519.10_PSMC6    | ENSG00000160789.18_LMNA | -0.14971 | -0.301723146 | 0.009718457 | 6.56E-02 | 2.39E-01 | 1.00E+00 |
| ENSG00000196950.12_SLC39A1C | ENSG00000160789.18_LMNA | -0.23333 | -0.37846935  | -0.07698623 | 3.82E-03 | 3.20E-02 | 1.00E+00 |
| ENSG00000257267.2_ZNF271P   | ENSG00000160789.18_LMNA | -0.24906 | -0.392688368 | -0.09356708 | 1.97E-03 | 1.93E-02 | 1.00E+00 |
| ENSG00000129473.8_BCL2L2    | ENSG00000160789.18_LMNA | 0.17731  | 0.018632503  | 0.327269966 | 2.89E-02 | 1.40E-01 | 1.00E+00 |
| ENSG00000182796.11_TMEM198  | ENSG00000160789.18_LMNA | -0.16448 | -0.315418414 | -0.00541806 | 4.29E-02 | 1.82E-01 | 1.00E+00 |
| ENSG00000168672.3_FAM84B    | ENSG00000160789.18_LMNA | -0.18979 | -0.338750894 | -0.03153735 | 1.92E-02 | 1.05E-01 | 1.00E+00 |
| ENSG00000183688.4_RFLNB     | ENSG00000160789.18_LMNA | 0.22134  | 0.064406331  | 0.367585596 | 6.14E-03 | 4.57E-02 | 1.00E+00 |
| ENSG00000126264.8_HCST      | ENSG00000160789.18_LMNA | 0.0568   | -0.103332595 | 0.214067434 | 4.87E-01 | 7.44E-01 | 1.00E+00 |
| ENSG00000121057.11_AKAP1    | ENSG00000160789.18_LMNA | -0.14476 | -0.297114869 | 0.014779803 | 7.52E-02 | 2.62E-01 | 1.00E+00 |
| ENSG00000148331.10_ASB6     | ENSG00000160789.18_LMNA | 0.33283  | 0.183345532  | 0.467272645 | 2.79E-05 | 6.75E-04 | 1.00E+00 |

|                             |                         |          |              |             |          |          |          |
|-----------------------------|-------------------------|----------|--------------|-------------|----------|----------|----------|
| ENSG00000106462.9_EZH2      | ENSG00000160789.18_LMNA | 0.06451  | -0.09567212  | 0.221437644 | 4.30E-01 | 7.00E-01 | 1.00E+00 |
| ENSG00000184613.9_NELL2     | ENSG00000160789.18_LMNA | -0.10353 | -0.258468889 | 0.056605449 | 2.04E-01 | 4.76E-01 | 1.00E+00 |
| ENSG00000152382.5_TADA1     | ENSG00000160789.18_LMNA | -0.25463 | -0.397708057 | -0.09946046 | 1.55E-03 | 1.61E-02 | 1.00E+00 |
| ENSG00000055163.17_CYFIP2   | ENSG00000160789.18_LMNA | -0.29117 | -0.430420724 | -0.13838625 | 2.73E-04 | 4.18E-03 | 1.00E+00 |
| ENSG00000085377.12_PREP     | ENSG00000160789.18_LMNA | -0.06122 | -0.218288954 | 0.098949419 | 4.54E-01 | 7.19E-01 | 1.00E+00 |
| ENSG00000183605.15_SFXN4    | ENSG00000160789.18_LMNA | -0.22455 | -0.370502216 | -0.06776806 | 5.42E-03 | 4.16E-02 | 1.00E+00 |
| ENSG00000116604.16_MEF2D    | ENSG00000160789.18_LMNA | 0.22144  | 0.064515173  | 0.36768012  | 6.11E-03 | 4.56E-02 | 1.00E+00 |
| ENSG00000110911.13_SLC11A2  | ENSG00000160789.18_LMNA | -0.45419 | -0.572030921 | -0.31798455 | 4.17E-09 | 5.13E-07 | 2.14E-04 |
| ENSG00000111358.12_GTF2H3   | ENSG00000160789.18_LMNA | 8.11E-05 | -0.159121614 | 0.159279788 | 9.99E-01 | 1.00E+00 | 1.00E+00 |
| ENSG00000117266.14_CDK18    | ENSG00000160789.18_LMNA | -0.18639 | -0.33563304  | -0.02802265 | 2.15E-02 | 1.14E-01 | 1.00E+00 |
| ENSG00000134184.11_GSTM1    | ENSG00000160789.18_LMNA | 0.09162  | -0.06858119  | 0.247214676 | 2.62E-01 | 5.45E-01 | 1.00E+00 |
| ENSG00000095303.13_PTGS1    | ENSG00000160789.18_LMNA | 0.15219  | -0.007188317 | 0.304021356 | 6.12E-02 | 2.29E-01 | 1.00E+00 |
| ENSG00000055332.15	EIF2AK2  | ENSG00000160789.18_LMNA | 0.01714  | -0.142449735 | 0.175860503 | 8.34E-01 | 9.35E-01 | 1.00E+00 |
| ENSG00000146826.13_C7orf43  | ENSG00000160789.18_LMNA | 0.14912  | -0.010321932 | 0.301174453 | 6.67E-02 | 2.42E-01 | 1.00E+00 |
| ENSG00000125107.15_CNOT1    | ENSG00000160789.18_LMNA | 0.15999  | 0.000806627  | 0.311259699 | 4.90E-02 | 1.99E-01 | 1.00E+00 |
| ENSG00000142252.9_GEMIN7    | ENSG00000160789.18_LMNA | -0.08316 | -0.239192667 | 0.077062307 | 3.08E-01 | 5.95E-01 | 1.00E+00 |
| ENSG00000156110.12_ADK      | ENSG00000160789.18_LMNA | -0.35455 | -0.486300438 | -0.20703387 | 7.41E-06 | 2.30E-04 | 3.80E-01 |
| ENSG00000127463.12 EMC1     | ENSG00000160789.18_LMNA | 0.23415  | 0.077847823  | 0.379211733 | 3.69E-03 | 3.12E-02 | 1.00E+00 |
| ENSG00000166855.8_CLPX      | ENSG00000160789.18_LMNA | 0.02187  | -0.137814577 | 0.18043845  | 7.89E-01 | 9.14E-01 | 1.00E+00 |
| ENSG00000196639.6_HRH1      | ENSG00000160789.18_LMNA | 0.5024   | 0.373032035  | 0.612600626 | 4.26E-11 | 1.13E-08 | 2.18E-06 |
| ENSG00000168743.11_NPNT     | ENSG00000160789.18_LMNA | 0.34626  | 0.197972896  | 0.479053303 | 1.24E-05 | 3.49E-04 | 6.38E-01 |
| ENSG00000106772.16_PRUNE2   | ENSG00000160789.18_LMNA | 0.09622  | -0.063957143 | 0.25157025  | 2.38E-01 | 5.17E-01 | 1.00E+00 |
| ENSG00000131773.12_KHDRBS3  | ENSG00000160789.18_LMNA | -0.2625  | -0.404781484 | -0.10780069 | 1.09E-03 | 1.23E-02 | 1.00E+00 |
| ENSG00000037474.13_NSUN2    | ENSG00000160789.18_LMNA | 0.19422  | 0.036133566  | 0.342817982 | 1.65E-02 | 9.40E-02 | 1.00E+00 |
| ENSG00000185507.18_IRF7     | ENSG00000160789.18_LMNA | 0.16176  | 0.002628183  | 0.312903849 | 4.65E-02 | 1.92E-01 | 1.00E+00 |
| ENSG00000102271.12_KLHL4    | ENSG00000160789.18_LMNA | 0.16266  | 0.003548928  | 0.313734214 | 4.53E-02 | 1.88E-01 | 1.00E+00 |
| ENSG00000135336.13_ORC3     | ENSG00000160789.18_LMNA | -0.17083 | -0.321293138 | -0.01195485 | 3.54E-02 | 1.60E-01 | 1.00E+00 |
| ENSG00000008405.10_CRY1     | ENSG00000160789.18_LMNA | 0.04252  | -0.117477222 | 0.200363127 | 6.03E-01 | 8.18E-01 | 1.00E+00 |
| ENSG00000134014.15_ELP3     | ENSG00000160789.18_LMNA | -0.0613  | -0.218372074 | 0.098862991 | 4.53E-01 | 7.18E-01 | 1.00E+00 |
| ENSG00000161036.9_LRWD1     | ENSG00000160789.18_LMNA | 0.34793  | 0.199791235  | 0.480510724 | 1.12E-05 | 3.20E-04 | 5.76E-01 |
| ENSG00000196700.6_ZNF512B   | ENSG00000160789.18_LMNA | 0.2102   | 0.052768622  | 0.357442501 | 9.34E-03 | 6.24E-02 | 1.00E+00 |
| ENSG00000162694.12_EXTL2    | ENSG00000160789.18_LMNA | -0.23039 | -0.375804792 | -0.07389753 | 4.30E-03 | 3.50E-02 | 1.00E+00 |
| ENSG00000236618.2_PITPNA-AS | ENSG00000160789.18_LMNA | -0.08902 | -0.244753763 | 0.071187806 | 2.75E-01 | 5.60E-01 | 1.00E+00 |

|                             |                         |          |              |             |          |          |          |
|-----------------------------|-------------------------|----------|--------------|-------------|----------|----------|----------|
| ENSG00000077463.13_SIRT6    | ENSG00000160789.18_LMNA | 0.06957  | -0.090636794 | 0.226262524 | 3.94E-01 | 6.72E-01 | 1.00E+00 |
| ENSG00000196628.12_TCF4     | ENSG00000160789.18_LMNA | -0.20178 | -0.349742057 | -0.04398841 | 1.27E-02 | 7.77E-02 | 1.00E+00 |
| ENSG00000155893.10_PXYLP1   | ENSG00000160789.18_LMNA | 0.17716  | 0.018482757  | 0.327136206 | 2.90E-02 | 1.40E-01 | 1.00E+00 |
| ENSG00000137642.11_SORL1    | ENSG00000160789.18_LMNA | -0.06388 | -0.220839031 | 0.096295713 | 4.34E-01 | 7.03E-01 | 1.00E+00 |
| ENSG00000115993.10_TRAK2    | ENSG00000160789.18_LMNA | -0.07517 | -0.231602452 | 0.085045    | 3.57E-01 | 6.40E-01 | 1.00E+00 |
| ENSG00000196453.7_ZNF777    | ENSG00000160789.18_LMNA | 0.27876  | 0.125111889  | 0.41935068  | 5.06E-04 | 6.81E-03 | 1.00E+00 |
| ENSG00000167721.9_TSR1      | ENSG00000160789.18_LMNA | 0.22664  | 0.069958691  | 0.372399591 | 4.99E-03 | 3.92E-02 | 1.00E+00 |
| ENSG00000154217.13_PITPNC1  | ENSG00000160789.18_LMNA | -0.08365 | -0.239654479 | 0.076575304 | 3.06E-01 | 5.92E-01 | 1.00E+00 |
| ENSG00000158106.11_RHPN1    | ENSG00000160789.18_LMNA | -0.06012 | -0.21724143  | 0.100038206 | 4.62E-01 | 7.25E-01 | 1.00E+00 |
| ENSG00000136002.15_ARHGEF4  | ENSG00000160789.18_LMNA | -0.03339 | -0.191575502 | 0.126479838 | 6.83E-01 | 8.62E-01 | 1.00E+00 |
| ENSG00000199753.1_SNORD104  | ENSG00000160789.18_LMNA | -0.06661 | -0.223438678 | 0.093585775 | 4.15E-01 | 6.88E-01 | 1.00E+00 |
| ENSG00000132004.11_FBXW9    | ENSG00000160789.18_LMNA | 0.08673  | -0.073484347 | 0.242582215 | 2.88E-01 | 5.74E-01 | 1.00E+00 |
| ENSG00000198677.9_TTC37     | ENSG00000160789.18_LMNA | 0.02904  | -0.130765069 | 0.187374617 | 7.22E-01 | 8.83E-01 | 1.00E+00 |
| ENSG00000100417.10_PMM1     | ENSG00000160789.18_LMNA | -0.07369 | -0.23018918  | 0.086526875 | 3.67E-01 | 6.48E-01 | 1.00E+00 |
| ENSG00000119699.6_TGFB3     | ENSG00000160789.18_LMNA | 0.3473   | 0.199111426  | 0.47996603  | 1.17E-05 | 3.30E-04 | 5.99E-01 |
| ENSG00000124228.13_DDX27    | ENSG00000160789.18_LMNA | 0.25517  | 0.100031152  | 0.398193202 | 1.51E-03 | 1.58E-02 | 1.00E+00 |
| ENSG00000167619.10_TMEM145  | ENSG00000160789.18_LMNA | -0.23964 | -0.384187345 | -0.08363402 | 2.94E-03 | 2.64E-02 | 1.00E+00 |
| ENSG00000102897.8_LYRM1     | ENSG00000160789.18_LMNA | -0.29801 | -0.436505248 | -0.14572732 | 1.92E-04 | 3.17E-03 | 1.00E+00 |
| ENSG00000232442.1_CTD-3184A | ENSG00000160789.18_LMNA | -0.06317 | -0.220157999 | 0.097004862 | 4.39E-01 | 7.07E-01 | 1.00E+00 |
| ENSG00000161980.5_POLR3K    | ENSG00000160789.18_LMNA | -0.24419 | -0.388293458 | -0.08842438 | 2.43E-03 | 2.27E-02 | 1.00E+00 |
| ENSG00000127252.5_HRASLS    | ENSG00000160789.18_LMNA | -0.38708 | -0.514568771 | -0.24284123 | 8.38E-07 | 3.94E-05 | 4.30E-02 |
| ENSG00000165716.8_FAM69B    | ENSG00000160789.18_LMNA | -0.15685 | -0.308348778 | 0.002413342 | 5.36E-02 | 2.10E-01 | 1.00E+00 |
| ENSG00000099822.2_HCN2      | ENSG00000160789.18_LMNA | -0.14477 | -0.297127239 | 0.014766238 | 7.51E-02 | 2.62E-01 | 1.00E+00 |
| ENSG00000137872.14_SEMA6D   | ENSG00000160789.18_LMNA | 0.07359  | -0.086626022 | 0.230094575 | 3.68E-01 | 6.48E-01 | 1.00E+00 |
| ENSG00000172348.13_RCAN2    | ENSG00000160789.18_LMNA | -0.07313 | -0.229658323 | 0.087083139 | 3.71E-01 | 6.51E-01 | 1.00E+00 |
| ENSG00000141994.14_DUS3L    | ENSG00000160789.18_LMNA | 0.01012  | -0.149316499 | 0.169053092 | 9.01E-01 | 9.62E-01 | 1.00E+00 |
| ENSG00000087263.15_OGFOD1   | ENSG00000160789.18_LMNA | 0.16456  | 0.005507746  | 0.315499176 | 4.28E-02 | 1.81E-01 | 1.00E+00 |
| ENSG00000120437.8_ACAT2     | ENSG00000160789.18_LMNA | -0.11761 | -0.271721216 | 0.042386286 | 1.49E-01 | 3.96E-01 | 1.00E+00 |
| ENSG00000115211.14_EIF2B4   | ENSG00000160789.18_LMNA | -0.03337 | -0.191553936 | 0.126501867 | 6.83E-01 | 8.62E-01 | 1.00E+00 |
| ENSG00000259943.1_RP1-39G22 | ENSG00000160789.18_LMNA | -0.29047 | -0.42979466  | -0.13763272 | 2.83E-04 | 4.30E-03 | 1.00E+00 |
| ENSG00000012171.16_SEMA3B   | ENSG00000160789.18_LMNA | 0.0688   | -0.091402062 | 0.225530239 | 4.00E-01 | 6.76E-01 | 1.00E+00 |
| ENSG00000135698.8_MPHOSPH   | ENSG00000160789.18_LMNA | -0.24813 | -0.391854925 | -0.0925906  | 2.05E-03 | 1.99E-02 | 1.00E+00 |
| ENSG00000035928.13_RFC1     | ENSG00000160789.18_LMNA | 0.09446  | -0.065734045 | 0.249898026 | 2.47E-01 | 5.27E-01 | 1.00E+00 |

|                             |                         |          |              |             |          |          |          |
|-----------------------------|-------------------------|----------|--------------|-------------|----------|----------|----------|
| ENSG00000109610.5_SOD3      | ENSG00000160789.18_LMNA | 0.23806  | 0.08196355   | 0.382752679 | 3.14E-03 | 2.77E-02 | 1.00E+00 |
| ENSG00000134077.14_THUMPD3  | ENSG00000160789.18_LMNA | -0.11723 | -0.271369791 | 0.042764999 | 1.50E-01 | 3.98E-01 | 1.00E+00 |
| ENSG00000198689.8_SLC9A6    | ENSG00000160789.18_LMNA | -0.32527 | -0.460620598 | -0.17514124 | 4.33E-05 | 9.56E-04 | 1.00E+00 |
| ENSG00000167081.15_PBX3     | ENSG00000160789.18_LMNA | -0.02781 | -0.186189004 | 0.131972339 | 7.34E-01 | 8.88E-01 | 1.00E+00 |
| ENSG00000260708.1_CTA-29F11 | ENSG00000160789.18_LMNA | -0.16279 | -0.313853561 | -0.00368131 | 4.51E-02 | 1.88E-01 | 1.00E+00 |
| ENSG00000108309.11_RUNDC3A  | ENSG00000160789.18_LMNA | -0.49151 | -0.603485815 | -0.36051583 | 1.28E-10 | 2.75E-08 | 6.55E-06 |
| ENSG00000076928.16_ARHGEF1  | ENSG00000160789.18_LMNA | 0.272    | 0.117905396  | 0.413304016 | 6.99E-04 | 8.77E-03 | 1.00E+00 |
| ENSG00000245848.2_CEBPA     | ENSG00000160789.18_LMNA | -0.09639 | -0.251725297 | 0.063792289 | 2.37E-01 | 5.16E-01 | 1.00E+00 |
| ENSG00000143110.10_C1orf162 | ENSG00000160789.18_LMNA | 0.0293   | -0.130506243 | 0.187628679 | 7.20E-01 | 8.81E-01 | 1.00E+00 |
| ENSG00000166200.13_COPS2    | ENSG00000160789.18_LMNA | 0.05413  | -0.105982845 | 0.211509162 | 5.08E-01 | 7.58E-01 | 1.00E+00 |
| ENSG00000185800.10_DMWD     | ENSG00000160789.18_LMNA | 0.19326  | 0.035145281  | 0.341944439 | 1.71E-02 | 9.63E-02 | 1.00E+00 |
| ENSG00000164300.14_SERINC5  | ENSG00000160789.18_LMNA | -0.10733 | -0.262054841 | 0.052770453 | 1.88E-01 | 4.55E-01 | 1.00E+00 |
| ENSG00000106460.17_TMEM106  | ENSG00000160789.18_LMNA | -0.24148 | -0.385850658 | -0.08557284 | 2.73E-03 | 2.48E-02 | 1.00E+00 |
| ENSG00000172172.6_MRPL13    | ENSG00000160789.18_LMNA | -0.19517 | -0.343692112 | -0.03712312 | 1.60E-02 | 9.18E-02 | 1.00E+00 |
| ENSG00000117154.10_IGSF21   | ENSG00000160789.18_LMNA | -0.26924 | -0.410834    | -0.11497052 | 7.96E-04 | 9.69E-03 | 1.00E+00 |
| ENSG00000134758.12_RNF138   | ENSG00000160789.18_LMNA | -0.15285 | -0.304637721 | 0.00650907  | 6.01E-02 | 2.26E-01 | 1.00E+00 |
| ENSG00000237541.3_HLA-DQA2  | ENSG00000160789.18_LMNA | 0.00231  | -0.156946664 | 0.161453082 | 9.77E-01 | 9.91E-01 | 1.00E+00 |
| ENSG00000072954.5_TMEM38A   | ENSG00000160789.18_LMNA | -0.2704  | -0.411872725 | -0.11620411 | 7.54E-04 | 9.28E-03 | 1.00E+00 |
| ENSG00000099940.10_SNAP29   | ENSG00000160789.18_LMNA | -0.01165 | -0.170533842 | 0.147825447 | 8.87E-01 | 9.56E-01 | 1.00E+00 |
| ENSG00000134982.15_APC      | ENSG00000160789.18_LMNA | -0.18213 | -0.331716093 | -0.02361789 | 2.47E-02 | 1.25E-01 | 1.00E+00 |
| ENSG00000188342.10_GTF2F2   | ENSG00000160789.18_LMNA | -0.1431  | -0.295569069 | 0.016474008 | 7.86E-02 | 2.69E-01 | 1.00E+00 |
| ENSG00000176731.10_C8orf59  | ENSG00000160789.18_LMNA | -0.14935 | -0.301384208 | 0.010091262 | 6.63E-02 | 2.41E-01 | 1.00E+00 |
| ENSG00000166971.15_AKTIP    | ENSG00000160789.18_LMNA | -0.37236 | -0.501810074 | -0.22658765 | 2.31E-06 | 8.91E-05 | 1.19E-01 |
| ENSG00000163812.12_ZDHHC3   | ENSG00000160789.18_LMNA | -0.28734 | -0.427007055 | -0.13428162 | 3.32E-04 | 4.85E-03 | 1.00E+00 |
| ENSG00000130147.14_SH3BP4   | ENSG00000160789.18_LMNA | 0.05343  | -0.106676078 | 0.21083927  | 5.13E-01 | 7.61E-01 | 1.00E+00 |
| ENSG00000122126.14_OCRL     | ENSG00000160789.18_LMNA | -0.00174 | -0.160894231 | 0.157506236 | 9.83E-01 | 9.94E-01 | 1.00E+00 |
| ENSG00000131941.6_RHPN2     | ENSG00000160789.18_LMNA | 0.20338  | 0.045654016  | 0.351206009 | 1.20E-02 | 7.47E-02 | 1.00E+00 |
| ENSG00000178149.15_DALRD3   | ENSG00000160789.18_LMNA | 0.09391  | -0.066284366 | 0.249379743 | 2.50E-01 | 5.30E-01 | 1.00E+00 |
| ENSG00000101146.11_RAE1     | ENSG00000160789.18_LMNA | -0.04029 | -0.198221029 | 0.119676553 | 6.22E-01 | 8.29E-01 | 1.00E+00 |
| ENSG00000120318.14_ARAP3    | ENSG00000160789.18_LMNA | 0.32311  | 0.172794664  | 0.458712079 | 4.91E-05 | 1.06E-03 | 1.00E+00 |
| ENSG00000075043.16_KCNQ2    | ENSG00000160789.18_LMNA | -0.18045 | -0.330163496 | -0.02187524 | 2.61E-02 | 1.30E-01 | 1.00E+00 |
| ENSG00000115956.9_PLEK      | ENSG00000160789.18_LMNA | -0.03127 | -0.189531595 | 0.128566266 | 7.02E-01 | 8.73E-01 | 1.00E+00 |
| ENSG00000248487.7_ABHD14A   | ENSG00000160789.18_LMNA | -0.21091 | -0.358087868 | -0.05350663 | 9.10E-03 | 6.12E-02 | 1.00E+00 |

|                             |                         |          |              |             |          |          |          |
|-----------------------------|-------------------------|----------|--------------|-------------|----------|----------|----------|
| ENSG00000105607.11_GCDH     | ENSG00000160789.18_LMNA | -0.31128 | -0.448270101 | -0.16001318 | 9.48E-05 | 1.81E-03 | 1.00E+00 |
| ENSG00000197343.9_ZNF655    | ENSG00000160789.18_LMNA | -0.0023  | -0.161443054 | 0.156956706 | 9.78E-01 | 9.92E-01 | 1.00E+00 |
| ENSG00000176623.10_RMDN1    | ENSG00000160789.18_LMNA | 0.05982  | -0.100338323 | 0.216952557 | 4.64E-01 | 7.26E-01 | 1.00E+00 |
| ENSG00000179967.11_PPP1R14I | ENSG00000160789.18_LMNA | 0.12652  | -0.033354911 | 0.28007709  | 1.20E-01 | 3.49E-01 | 1.00E+00 |
| ENSG00000131269.14_ABCB7    | ENSG00000160789.18_LMNA | 0.11206  | -0.048001914 | 0.266501619 | 1.69E-01 | 4.28E-01 | 1.00E+00 |
| ENSG00000151923.16_TIAL1    | ENSG00000160789.18_LMNA | -0.34409 | -0.477156383 | -0.19560911 | 1.42E-05 | 3.91E-04 | 7.29E-01 |
| ENSG00000143353.10_LYPLAL1  | ENSG00000160789.18_LMNA | -0.24277 | -0.387009249 | -0.08692468 | 2.58E-03 | 2.38E-02 | 1.00E+00 |
| ENSG00000143889.14_HNRNPLL  | ENSG00000160789.18_LMNA | -0.2714  | -0.412768812 | -0.11726903 | 7.19E-04 | 8.95E-03 | 1.00E+00 |
| ENSG00000132604.9_TERF2     | ENSG00000160789.18_LMNA | -0.03062 | -0.18889609  | 0.12921442  | 7.08E-01 | 8.76E-01 | 1.00E+00 |
| ENSG00000031691.6_CENPQ     | ENSG00000160789.18_LMNA | -0.22672 | -0.372475116 | -0.07004595 | 4.97E-03 | 3.91E-02 | 1.00E+00 |
| ENSG00000100918.11_REC8     | ENSG00000160789.18_LMNA | -0.13381 | -0.286901709 | 0.025940408 | 1.00E-01 | 3.12E-01 | 1.00E+00 |
| ENSG00000075240.15_GRAMD4   | ENSG00000160789.18_LMNA | 0.08985  | -0.07035561  | 0.245539884 | 2.71E-01 | 5.55E-01 | 1.00E+00 |
| ENSG00000197021.7_CXorf40B  | ENSG00000160789.18_LMNA | 0.0304   | -0.129430983 | 0.188683693 | 7.10E-01 | 8.77E-01 | 1.00E+00 |
| ENSG00000226360.5_RPL10AP6  | ENSG00000160789.18_LMNA | -0.16441 | -0.315356594 | -0.00534941 | 4.30E-02 | 1.82E-01 | 1.00E+00 |
| ENSG00000135144.6_DTX1      | ENSG00000160789.18_LMNA | -0.10516 | -0.260012077 | 0.054956226 | 1.97E-01 | 4.67E-01 | 1.00E+00 |
| ENSG00000221968.7_FADS3     | ENSG00000160789.18_LMNA | 0.16932  | 0.010395218  | 0.319893627 | 3.70E-02 | 1.64E-01 | 1.00E+00 |
| ENSG00000049323.14_LTBP1    | ENSG00000160789.18_LMNA | 0.39234  | 0.248667513  | 0.519113161 | 5.76E-07 | 2.94E-05 | 2.96E-02 |
| ENSG00000154511.10_FAM69A   | ENSG00000160789.18_LMNA | -0.38873 | -0.516000517 | -0.24467473 | 7.45E-07 | 3.62E-05 | 3.82E-02 |
| ENSG00000106266.7_SNX8      | ENSG00000160789.18_LMNA | 0.47306  | 0.339418714  | 0.587976954 | 7.54E-10 | 1.24E-07 | 3.87E-05 |
| ENSG00000184194.5_GPR173    | ENSG00000160789.18_LMNA | -0.17611 | -0.326167326 | -0.0173985  | 3.00E-02 | 1.43E-01 | 1.00E+00 |
| ENSG00000213178.3_RP11-641D | ENSG00000160789.18_LMNA | -0.0071  | -0.166116547 | 0.152269196 | 9.31E-01 | 9.73E-01 | 1.00E+00 |
| ENSG00000277632.1_CCL3      | ENSG00000160789.18_LMNA | -0.16019 | -0.311452497 | -0.00102012 | 4.87E-02 | 1.98E-01 | 1.00E+00 |
| ENSG00000163702.17_IL17RC   | ENSG00000160789.18_LMNA | 0.37013  | 0.224133974  | 0.499873536 | 2.69E-06 | 1.00E-04 | 1.38E-01 |
| ENSG00000196199.12_MPHOSP1  | ENSG00000160789.18_LMNA | -0.07988 | -0.23608205  | 0.08033868  | 3.28E-01 | 6.14E-01 | 1.00E+00 |
| ENSG00000226479.3_TMEM185B  | ENSG00000160789.18_LMNA | 0.23413  | 0.077827146  | 0.379193921 | 3.69E-03 | 3.13E-02 | 1.00E+00 |
| ENSG00000072364.11_AFF4     | ENSG00000160789.18_LMNA | 0.06717  | -0.093022474 | 0.223978488 | 4.11E-01 | 6.85E-01 | 1.00E+00 |
| ENSG00000197136.4_PCNX3     | ENSG00000160789.18_LMNA | 0.2555   | 0.100381517  | 0.398490963 | 1.49E-03 | 1.56E-02 | 1.00E+00 |
| ENSG00000107262.15_BAG1     | ENSG00000160789.18_LMNA | -0.13605 | -0.288995796 | 0.023658397 | 9.47E-02 | 3.01E-01 | 1.00E+00 |
| ENSG00000036054.11_TBC1D23  | ENSG00000160789.18_LMNA | -0.05911 | -0.216277374 | 0.101039565 | 4.69E-01 | 7.30E-01 | 1.00E+00 |
| ENSG00000188529.13_SRSF10   | ENSG00000160789.18_LMNA | 0.03749  | -0.122439149 | 0.195526013 | 6.47E-01 | 8.43E-01 | 1.00E+00 |
| ENSG00000107758.14_PPP3CB   | ENSG00000160789.18_LMNA | -0.40779 | -0.532421882 | -0.26584372 | 1.84E-07 | 1.19E-05 | 9.46E-03 |
| ENSG00000141867.16_BRD4     | ENSG00000160789.18_LMNA | 0.2482   | 0.092665085  | 0.391918516 | 2.05E-03 | 1.99E-02 | 1.00E+00 |
| ENSG00000236439.4_RP11-175B | ENSG00000160789.18_LMNA | -0.09386 | -0.249331816 | 0.066335245 | 2.50E-01 | 5.31E-01 | 1.00E+00 |



|                            |                         |          |              |             |          |          |          |
|----------------------------|-------------------------|----------|--------------|-------------|----------|----------|----------|
| ENSG00000080815.17_PSEN1   | ENSG00000160789.18_LMNA | 0.0068   | -0.152568264 | 0.165818801 | 9.34E-01 | 9.74E-01 | 1.00E+00 |
| ENSG00000163161.11_ERCC3   | ENSG00000160789.18_LMNA | -0.09533 | -0.25072815  | 0.064852207 | 2.43E-01 | 5.22E-01 | 1.00E+00 |
| ENSG00000176428.5_VPS37D   | ENSG00000160789.18_LMNA | -0.19272 | -0.341440193 | -0.03457507 | 1.74E-02 | 9.75E-02 | 1.00E+00 |
| ENSG00000104412.6 EMC2     | ENSG00000160789.18_LMNA | 0.0804   | -0.07982208  | 0.236572946 | 3.25E-01 | 6.12E-01 | 1.00E+00 |
| ENSG00000004975.10_DVL2    | ENSG00000160789.18_LMNA | 0.13033  | -0.029481794 | 0.283646026 | 1.10E-01 | 3.29E-01 | 1.00E+00 |
| ENSG00000130508.9_PXDN     | ENSG00000160789.18_LMNA | 0.31837  | 0.16767155   | 0.454536153 | 6.41E-05 | 1.31E-03 | 1.00E+00 |
| ENSG00000154319.13_FAM167A | ENSG00000160789.18_LMNA | -0.18389 | -0.333330479 | -0.02543188 | 2.33E-02 | 1.21E-01 | 1.00E+00 |
| ENSG00000146083.10_RNF44   | ENSG00000160789.18_LMNA | -0.0484  | -0.206011641 | 0.111662802 | 5.54E-01 | 7.88E-01 | 1.00E+00 |
| ENSG00000103066.11_PLA2G15 | ENSG00000160789.18_LMNA | 0.20534  | 0.047695555  | 0.352998351 | 1.12E-02 | 7.08E-02 | 1.00E+00 |
| ENSG00000169062.13_UPF3A   | ENSG00000160789.18_LMNA | -0.07321 | -0.229731829 | 0.087006126 | 3.70E-01 | 6.50E-01 | 1.00E+00 |
| ENSG00000015285.9_WAS      | ENSG00000160789.18_LMNA | 0.08196  | -0.078264685 | 0.238051872 | 3.15E-01 | 6.02E-01 | 1.00E+00 |
| ENSG00000156928.4_MALSU1   | ENSG00000160789.18_LMNA | 0.16723  | 0.008250231  | 0.317966653 | 3.95E-02 | 1.72E-01 | 1.00E+00 |
| ENSG00000167543.14_TP53I13 | ENSG00000160789.18_LMNA | 0.51299  | 0.385255543  | 0.621441205 | 1.41E-11 | 4.54E-09 | 7.22E-07 |
| ENSG00000120709.9_FAM53C   | ENSG00000160789.18_LMNA | -0.06295 | -0.219942032 | 0.097229678 | 4.41E-01 | 7.09E-01 | 1.00E+00 |
| ENSG00000072182.11_ASIC4   | ENSG00000160789.18_LMNA | -0.24601 | -0.389935615 | -0.09034408 | 2.25E-03 | 2.14E-02 | 1.00E+00 |
| ENSG00000066557.5_LRRC40   | ENSG00000160789.18_LMNA | -0.31544 | -0.451943147 | -0.16449817 | 7.54E-05 | 1.50E-03 | 1.00E+00 |
| ENSG00000170634.11_ACYP2   | ENSG00000160789.18_LMNA | -0.42991 | -0.551373972 | -0.29059891 | 3.25E-08 | 2.87E-06 | 1.67E-03 |
| ENSG00000101811.12_CSTF2   | ENSG00000160789.18_LMNA | 0.22271  | 0.065838629  | 0.368828981 | 5.82E-03 | 4.40E-02 | 1.00E+00 |
| ENSG00000155099.6_TMEM55A  | ENSG00000160789.18_LMNA | 0.02397  | -0.135753019 | 0.182470143 | 7.69E-01 | 9.05E-01 | 1.00E+00 |
| ENSG00000168569.7_TMEM223  | ENSG00000160789.18_LMNA | -0.06398 | -0.220927101 | 0.096203984 | 4.34E-01 | 7.03E-01 | 1.00E+00 |
| ENSG00000149636.14_DSN1    | ENSG00000160789.18_LMNA | 0.10091  | -0.059244552 | 0.255996115 | 2.16E-01 | 4.90E-01 | 1.00E+00 |
| ENSG00000129347.18_KRI1    | ENSG00000160789.18_LMNA | 0.14919  | -0.010252216 | 0.301237852 | 6.66E-02 | 2.41E-01 | 1.00E+00 |
| ENSG00000108733.8_PEX12    | ENSG00000160789.18_LMNA | -0.17281 | -0.323119388 | -0.01399232 | 3.33E-02 | 1.53E-01 | 1.00E+00 |
| ENSG00000109133.11_TMEM33  | ENSG00000160789.18_LMNA | -0.1689  | -0.319506433 | -0.00996399 | 3.75E-02 | 1.66E-01 | 1.00E+00 |
| ENSG00000205084.9_TMEM231  | ENSG00000160789.18_LMNA | -0.05699 | -0.214243585 | 0.103149943 | 4.86E-01 | 7.42E-01 | 1.00E+00 |
| ENSG00000144560.12_VGLL4   | ENSG00000160789.18_LMNA | 0.22867  | 0.07209242   | 0.374245253 | 4.60E-03 | 3.68E-02 | 1.00E+00 |
| ENSG00000163918.9_RFC4     | ENSG00000160789.18_LMNA | -0.11197 | -0.266420633 | 0.048088888 | 1.70E-01 | 4.28E-01 | 1.00E+00 |
| ENSG00000102699.5_PARP4    | ENSG00000160789.18_LMNA | 0.21196  | 0.054601989  | 0.359045195 | 8.75E-03 | 5.95E-02 | 1.00E+00 |
| ENSG00000071794.14_HLTF    | ENSG00000160789.18_LMNA | -0.19875 | -0.346968765 | -0.04083778 | 1.41E-02 | 8.40E-02 | 1.00E+00 |
| ENSG00000254858.8_MPV17L2  | ENSG00000160789.18_LMNA | -0.06981 | -0.22649103  | 0.090397918 | 3.93E-01 | 6.70E-01 | 1.00E+00 |
| ENSG00000198730.6_CTR9     | ENSG00000160789.18_LMNA | 0.18763  | 0.029300796  | 0.33676765  | 2.06E-02 | 1.10E-01 | 1.00E+00 |
| ENSG00000166166.11_TRMT61A | ENSG00000160789.18_LMNA | 0.30129  | 0.149251796  | 0.439417034 | 1.62E-04 | 2.77E-03 | 1.00E+00 |
| ENSG00000148296.6_SURF6    | ENSG00000160789.18_LMNA | 0.15924  | 3.90E-05     | 0.310566257 | 5.00E-02 | 2.01E-01 | 1.00E+00 |

|                             |                         |          |              |             |          |          |          |
|-----------------------------|-------------------------|----------|--------------|-------------|----------|----------|----------|
| ENSG00000196814.13_MVB12B   | ENSG00000160789.18_LMNA | -0.28136 | -0.421672137 | -0.1278869  | 4.46E-04 | 6.17E-03 | 1.00E+00 |
| ENSG00000163923.8_RPL39L    | ENSG00000160789.18_LMNA | 0.07748  | -0.082746248 | 0.233792144 | 3.43E-01 | 6.27E-01 | 1.00E+00 |
| ENSG00000236801.1_RPL24P8   | ENSG00000160789.18_LMNA | -0.15042 | -0.302379309 | 0.008996481 | 6.44E-02 | 2.36E-01 | 1.00E+00 |
| ENSG00000205060.9_SLC35B4   | ENSG00000160789.18_LMNA | -0.01175 | -0.170636082 | 0.147722443 | 8.86E-01 | 9.56E-01 | 1.00E+00 |
| ENSG00000174915.10_PTDSS2   | ENSG00000160789.18_LMNA | 0.11389  | -0.046146128 | 0.268228572 | 1.62E-01 | 4.17E-01 | 1.00E+00 |
| ENSG00000102977.12_ACD      | ENSG00000160789.18_LMNA | 0.09927  | -0.060888934 | 0.254453281 | 2.24E-01 | 4.99E-01 | 1.00E+00 |
| ENSG00000112855.13_HARS2    | ENSG00000160789.18_LMNA | 0.23392  | 0.077611724  | 0.379008339 | 3.73E-03 | 3.14E-02 | 1.00E+00 |
| ENSG00000149091.14_DGKZ     | ENSG00000160789.18_LMNA | 0.25946  | 0.104581688  | 0.402055623 | 1.25E-03 | 1.37E-02 | 1.00E+00 |
| ENSG00000158882.11_TOMM40L  | ENSG00000160789.18_LMNA | -0.09275 | -0.248288522 | 0.067442412 | 2.56E-01 | 5.38E-01 | 1.00E+00 |
| ENSG00000101255.9_TRIB3     | ENSG00000160789.18_LMNA | 0.03371  | -0.126163726 | 0.191884931 | 6.80E-01 | 8.60E-01 | 1.00E+00 |
| ENSG00000119446.12_RBM18    | ENSG00000160789.18_LMNA | -0.20296 | -0.350828353 | -0.04522418 | 1.21E-02 | 7.55E-02 | 1.00E+00 |
| ENSG00000130772.12_MED18    | ENSG00000160789.18_LMNA | -0.09834 | -0.25356739  | 0.061832361 | 2.28E-01 | 5.05E-01 | 1.00E+00 |
| ENSG00000079308.15_TNS1     | ENSG00000160789.18_LMNA | 0.21376  | 0.056484859  | 0.360689297 | 8.19E-03 | 5.66E-02 | 1.00E+00 |
| ENSG00000120699.11_EXOSC8   | ENSG00000160789.18_LMNA | -0.23714 | -0.38192036  | -0.0809952  | 3.27E-03 | 2.85E-02 | 1.00E+00 |
| ENSG00000153944.9_MSI2      | ENSG00000160789.18_LMNA | 0.03473  | -0.125167275 | 0.192859903 | 6.71E-01 | 8.56E-01 | 1.00E+00 |
| ENSG00000158092.5_NCK1      | ENSG00000160789.18_LMNA | -0.11568 | -0.269906028 | 0.044341453 | 1.56E-01 | 4.07E-01 | 1.00E+00 |
| ENSG00000116273.5_PHF13     | ENSG00000160789.18_LMNA | 0.34254  | 0.193911169  | 0.475792173 | 1.56E-05 | 4.21E-04 | 8.02E-01 |
| ENSG00000115540.13_MOB4     | ENSG00000160789.18_LMNA | -0.38784 | -0.515229487 | -0.24368711 | 7.94E-07 | 3.78E-05 | 4.07E-02 |
| ENSG00000109519.11_GRP1L    | ENSG00000160789.18_LMNA | 0.0088   | -0.150608548 | 0.167768806 | 9.14E-01 | 9.67E-01 | 1.00E+00 |
| ENSG00000076864.18_RAP1GAP  | ENSG00000160789.18_LMNA | -0.13127 | -0.284521041 | 0.028530763 | 1.07E-01 | 3.25E-01 | 1.00E+00 |
| ENSG00000122873.10_CISD1    | ENSG00000160789.18_LMNA | -0.36082 | -0.491768641 | -0.21390254 | 4.96E-06 | 1.65E-04 | 2.54E-01 |
| ENSG00000138593.7_SECISBP2L | ENSG00000160789.18_LMNA | -0.08159 | -0.237700463 | 0.07863488  | 3.18E-01 | 6.04E-01 | 1.00E+00 |
| ENSG00000011426.9_ANLN      | ENSG00000160789.18_LMNA | -0.07627 | -0.232643491 | 0.083952531 | 3.50E-01 | 6.34E-01 | 1.00E+00 |
| ENSG00000166847.8_DCTN5     | ENSG00000160789.18_LMNA | -0.27369 | -0.414820863 | -0.11971028 | 6.45E-04 | 8.24E-03 | 1.00E+00 |
| ENSG00000139842.13_CUL4A    | ENSG00000160789.18_LMNA | 0.11486  | -0.045166966 | 0.269138945 | 1.59E-01 | 4.12E-01 | 1.00E+00 |
| ENSG00000117899.9_MESDC2    | ENSG00000160789.18_LMNA | 0.30764  | 0.156080622  | 0.445041445 | 1.16E-04 | 2.12E-03 | 1.00E+00 |
| ENSG00000276043.3_UHRF1     | ENSG00000160789.18_LMNA | 0.16745  | 0.008472073  | 0.318166065 | 3.92E-02 | 1.71E-01 | 1.00E+00 |
| ENSG00000160256.11_FAM207A  | ENSG00000160789.18_LMNA | 0.33694  | 0.187812206  | 0.470880762 | 2.19E-05 | 5.56E-04 | 1.00E+00 |
| ENSG00000148384.11_INPP5E   | ENSG00000160789.18_LMNA | 0.23841  | 0.082335449  | 0.383072206 | 3.10E-03 | 2.74E-02 | 1.00E+00 |
| ENSG00000145386.8_CCNA2     | ENSG00000160789.18_LMNA | 0.02207  | -0.137610198 | 0.18063999  | 7.87E-01 | 9.13E-01 | 1.00E+00 |
| ENSG00000237310.1_GS1-124K5 | ENSG00000160789.18_LMNA | 0.03668  | -0.123243232 | 0.194740697 | 6.54E-01 | 8.47E-01 | 1.00E+00 |
| ENSG00000023228.12_NDUFS1   | ENSG00000160789.18_LMNA | -0.23926 | -0.383837639 | -0.08322668 | 2.99E-03 | 2.67E-02 | 1.00E+00 |
| ENSG00000112763.14_BTN2A1   | ENSG00000160789.18_LMNA | 0.1217   | -0.038242242 | 0.275561195 | 1.35E-01 | 3.74E-01 | 1.00E+00 |

|                             |                         |          |              |             |          |          |          |
|-----------------------------|-------------------------|----------|--------------|-------------|----------|----------|----------|
| ENSG00000076716.8_GPC4      | ENSG00000160789.18_LMNA | 0.36727  | 0.220985393  | 0.497384501 | 3.25E-06 | 1.17E-04 | 1.67E-01 |
| ENSG00000161956.11_SENP3    | ENSG00000160789.18_LMNA | -0.12638 | -0.279951775 | 0.033490736 | 1.21E-01 | 3.49E-01 | 1.00E+00 |
| ENSG00000137310.10_TCF19    | ENSG00000160789.18_LMNA | 0.34873  | 0.200667823  | 0.481212766 | 1.07E-05 | 3.07E-04 | 5.48E-01 |
| ENSG00000109065.10_NAT9     | ENSG00000160789.18_LMNA | -0.12399 | -0.277704945 | 0.035924038 | 1.28E-01 | 3.62E-01 | 1.00E+00 |
| ENSG00000101236.15_RNF24    | ENSG00000160789.18_LMNA | 0.33719  | 0.188086469  | 0.471101999 | 2.16E-05 | 5.50E-04 | 1.00E+00 |
| ENSG00000221914.7_PPP2R2A   | ENSG00000160789.18_LMNA | -0.27197 | -0.413273174 | -0.11786872 | 7.00E-04 | 8.78E-03 | 1.00E+00 |
| ENSG00000049239.11_H6PD     | ENSG00000160789.18_LMNA | 0.45594  | 0.319966325  | 0.573513375 | 3.57E-09 | 4.51E-07 | 1.83E-04 |
| ENSG00000143409.14_FAM63A   | ENSG00000160789.18_LMNA | -0.24641 | -0.390295848 | -0.0907655  | 2.21E-03 | 2.11E-02 | 1.00E+00 |
| ENSG00000241127.6_YAE1D1    | ENSG00000160789.18_LMNA | -0.2651  | -0.407118093 | -0.11056499 | 9.65E-04 | 1.13E-02 | 1.00E+00 |
| ENSG00000178904.17_DPY19L3  | ENSG00000160789.18_LMNA | 0.13402  | -0.025731924 | 0.287093148 | 9.97E-02 | 3.11E-01 | 1.00E+00 |
| ENSG00000111252.9_SH2B3     | ENSG00000160789.18_LMNA | 0.35492  | 0.207440327  | 0.486624631 | 7.24E-06 | 2.26E-04 | 3.71E-01 |
| ENSG00000136813.13_KIAA0368 | ENSG00000160789.18_LMNA | 0.29702  | 0.144655848  | 0.43561883  | 2.03E-04 | 3.29E-03 | 1.00E+00 |
| ENSG00000138650.8_PCDH10    | ENSG00000160789.18_LMNA | -0.03191 | -0.190144209 | 0.127941203 | 6.96E-01 | 8.70E-01 | 1.00E+00 |
| ENSG00000196504.14_PRPF40A  | ENSG00000160789.18_LMNA | 0.04306  | -0.116941184 | 0.200884755 | 5.98E-01 | 8.15E-01 | 1.00E+00 |
| ENSG00000198837.8_DENND4B   | ENSG00000160789.18_LMNA | 0.137    | -0.02270027  | 0.28987413  | 9.24E-02 | 2.97E-01 | 1.00E+00 |
| ENSG00000150456.9_EEF1AKMT  | ENSG00000160789.18_LMNA | -0.09373 | -0.249212833 | 0.066461552 | 2.51E-01 | 5.31E-01 | 1.00E+00 |
| ENSG00000107854.5_TNKS2     | ENSG00000160789.18_LMNA | -0.11007 | -0.264637574 | 0.050002584 | 1.77E-01 | 4.39E-01 | 1.00E+00 |
| ENSG00000101888.10_NXT2     | ENSG00000160789.18_LMNA | -0.23154 | -0.376846305 | -0.07510414 | 4.10E-03 | 3.38E-02 | 1.00E+00 |
| ENSG00000095002.11_MSH2     | ENSG00000160789.18_LMNA | 0.01495  | -0.144592803 | 0.173739221 | 8.55E-01 | 9.43E-01 | 1.00E+00 |
| ENSG00000138802.10_SEC24B   | ENSG00000160789.18_LMNA | 0.19235  | 0.034199285  | 0.341107778 | 1.76E-02 | 9.84E-02 | 1.00E+00 |
| ENSG00000093183.12_SEC22C   | ENSG00000160789.18_LMNA | -0.138   | -0.290808633 | 0.021680241 | 9.00E-02 | 2.92E-01 | 1.00E+00 |
| ENSG00000143614.7_GATAD2B   | ENSG00000160789.18_LMNA | 0.0084   | -0.151005566 | 0.167373956 | 9.18E-01 | 9.69E-01 | 1.00E+00 |
| ENSG00000115286.18_NDUFS7   | ENSG00000160789.18_LMNA | -0.11255 | -0.266967923 | 0.047501036 | 1.67E-01 | 4.25E-01 | 1.00E+00 |
| ENSG00000162670.9_BRINP3    | ENSG00000160789.18_LMNA | -0.17182 | -0.322206112 | -0.0129731  | 3.43E-02 | 1.56E-01 | 1.00E+00 |
| ENSG00000109861.14_CTSC     | ENSG00000160789.18_LMNA | 0.17246  | 0.01363725   | 0.322801292 | 3.36E-02 | 1.54E-01 | 1.00E+00 |
| ENSG00000143842.13_SOX13    | ENSG00000160789.18_LMNA | 0.03151  | -0.128333882 | 0.18975938  | 7.00E-01 | 8.72E-01 | 1.00E+00 |
| ENSG00000177098.7_SCN4B     | ENSG00000160789.18_LMNA | -0.00178 | -0.160939172 | 0.157461244 | 9.83E-01 | 9.94E-01 | 1.00E+00 |
| ENSG00000119938.8_PPP1R3C   | ENSG00000160789.18_LMNA | -0.0077  | -0.166700957 | 0.151682024 | 9.25E-01 | 9.71E-01 | 1.00E+00 |
| ENSG00000197265.7_GTF2E2    | ENSG00000160789.18_LMNA | 0.16649  | 0.007487073  | 0.317280443 | 4.04E-02 | 1.74E-01 | 1.00E+00 |
| ENSG00000101132.8_PFDN4     | ENSG00000160789.18_LMNA | -0.05751 | -0.214743343 | 0.10263163  | 4.82E-01 | 7.39E-01 | 1.00E+00 |
| ENSG00000111450.12_STX2     | ENSG00000160789.18_LMNA | 0.11535  | -0.044674301 | 0.269596787 | 1.57E-01 | 4.09E-01 | 1.00E+00 |
| ENSG00000137124.6_ALDH1B1   | ENSG00000160789.18_LMNA | 0.06814  | -0.092056653 | 0.224903578 | 4.04E-01 | 6.80E-01 | 1.00E+00 |
| ENSG00000177485.6_ZBTB33    | ENSG00000160789.18_LMNA | -0.12128 | -0.275172187 | 0.038662545 | 1.37E-01 | 3.76E-01 | 1.00E+00 |

|                             |                         |          |              |             |          |          |          |
|-----------------------------|-------------------------|----------|--------------|-------------|----------|----------|----------|
| ENSG00000132294.12_EFR3A    | ENSG00000160789.18_LMNA | -0.01699 | -0.175716577 | 0.142595233 | 8.35E-01 | 9.36E-01 | 1.00E+00 |
| ENSG00000073169.12_SELENOC  | ENSG00000160789.18_LMNA | 0.02924  | -0.130564674 | 0.187571327 | 7.21E-01 | 8.81E-01 | 1.00E+00 |
| ENSG00000237649.6_KIFC1     | ENSG00000160789.18_LMNA | 0.0453   | -0.114726143 | 0.203038344 | 5.79E-01 | 8.04E-01 | 1.00E+00 |
| ENSG00000115661.12_STK16    | ENSG00000160789.18_LMNA | -0.07058 | -0.227230436 | 0.089624709 | 3.88E-01 | 6.66E-01 | 1.00E+00 |
| ENSG00000225177.4_RP11-390P | ENSG00000160789.18_LMNA | 0.18414  | 0.025689711  | 0.333559791 | 2.32E-02 | 1.20E-01 | 1.00E+00 |
| ENSG00000011454.15_RABGAP1  | ENSG00000160789.18_LMNA | -0.08281 | -0.238859575 | 0.077413476 | 3.10E-01 | 5.97E-01 | 1.00E+00 |
| ENSG00000184182.17_UBE2F    | ENSG00000160789.18_LMNA | -0.14159 | -0.294160503 | 0.018016246 | 8.19E-02 | 2.76E-01 | 1.00E+00 |
| ENSG00000168564.5_CDKN2AIP  | ENSG00000160789.18_LMNA | -0.22124 | -0.367492956 | -0.06429967 | 6.16E-03 | 4.59E-02 | 1.00E+00 |
| ENSG00000147119.3_CHST7     | ENSG00000160789.18_LMNA | 0.45142  | 0.314848396  | 0.569681554 | 5.31E-09 | 6.30E-07 | 2.73E-04 |
| ENSG00000050393.10_MCUR1    | ENSG00000160789.18_LMNA | 0.0698   | -0.090408995 | 0.226480435 | 3.93E-01 | 6.71E-01 | 1.00E+00 |
| ENSG00000158373.8_HIST1H2B  | ENSG00000160789.18_LMNA | 0.08597  | -0.074247871 | 0.241859545 | 2.92E-01 | 5.78E-01 | 1.00E+00 |
| ENSG00000272841.1_RP3-428L1 | ENSG00000160789.18_LMNA | 0.01126  | -0.148210183 | 0.170151902 | 8.91E-01 | 9.57E-01 | 1.00E+00 |
| ENSG00000120253.12_NUP43    | ENSG00000160789.18_LMNA | -0.10359 | -0.258529343 | 0.056540874 | 2.04E-01 | 4.75E-01 | 1.00E+00 |
| ENSG00000130813.16_C19orf66 | ENSG00000160789.18_LMNA | 0.33461  | 0.185277408  | 0.468834349 | 2.52E-05 | 6.21E-04 | 1.00E+00 |
| ENSG00000102218.5_RP2       | ENSG00000160789.18_LMNA | -0.16548 | -0.316345032 | -0.00644735 | 4.16E-02 | 1.78E-01 | 1.00E+00 |
| ENSG00000132680.9_KIAA0907  | ENSG00000160789.18_LMNA | -0.10921 | -0.263825969 | 0.050872888 | 1.80E-01 | 4.44E-01 | 1.00E+00 |
| ENSG00000035403.15_VCL      | ENSG00000160789.18_LMNA | 0.43116  | 0.292003446  | 0.552441247 | 2.94E-08 | 2.66E-06 | 1.51E-03 |
| ENSG00000198960.9_ARMCX6    | ENSG00000160789.18_LMNA | -0.18826 | -0.337349199 | -0.02995631 | 2.02E-02 | 1.09E-01 | 1.00E+00 |
| ENSG00000100060.16_MFNG     | ENSG00000160789.18_LMNA | -0.2424  | -0.386674501 | -0.08653398 | 2.62E-03 | 2.40E-02 | 1.00E+00 |
| ENSG00000153574.8_RPIA      | ENSG00000160789.18_LMNA | 0.14249  | -0.017102112 | 0.294995569 | 7.99E-02 | 2.72E-01 | 1.00E+00 |
| ENSG00000177683.12_THAP5    | ENSG00000160789.18_LMNA | -0.17025 | -0.320757136 | -0.01135735 | 3.60E-02 | 1.62E-01 | 1.00E+00 |
| ENSG00000177613.8_CSTF2T    | ENSG00000160789.18_LMNA | -0.10107 | -0.256153794 | 0.059076399 | 2.15E-01 | 4.89E-01 | 1.00E+00 |
| ENSG00000160991.14_ORAI2    | ENSG00000160789.18_LMNA | 0.44073  | 0.302776825  | 0.560599408 | 1.33E-08 | 1.37E-06 | 6.81E-04 |
| ENSG00000078304.18_PPP2R5C  | ENSG00000160789.18_LMNA | -0.13393 | -0.287008053 | 0.0258246   | 1.00E-01 | 3.11E-01 | 1.00E+00 |
| ENSG00000141219.14_C17orf80 | ENSG00000160789.18_LMNA | -0.37114 | -0.500749819 | -0.22524383 | 2.51E-06 | 9.48E-05 | 1.29E-01 |
| ENSG00000138032.19_PPM1B    | ENSG00000160789.18_LMNA | -0.18028 | -0.330008571 | -0.02170145 | 2.62E-02 | 1.31E-01 | 1.00E+00 |
| ENSG00000255135.3_RP11-111M | ENSG00000160789.18_LMNA | -0.13812 | -0.290925928 | 0.021552164 | 8.97E-02 | 2.92E-01 | 1.00E+00 |
| ENSG00000169895.5_SYAP1     | ENSG00000160789.18_LMNA | 0.32986  | 0.180115987  | 0.464657959 | 3.33E-05 | 7.79E-04 | 1.00E+00 |
| ENSG00000121680.14_PEX16    | ENSG00000160789.18_LMNA | 0.00813  | -0.151270907 | 0.167110008 | 9.21E-01 | 9.70E-01 | 1.00E+00 |
| ENSG00000164823.8_OSGIN2    | ENSG00000160789.18_LMNA | -0.18198 | -0.331573812 | -0.02345811 | 2.48E-02 | 1.26E-01 | 1.00E+00 |
| ENSG00000153885.13_KCTD15   | ENSG00000160789.18_LMNA | -0.08783 | -0.243620969 | 0.072386221 | 2.82E-01 | 5.67E-01 | 1.00E+00 |
| ENSG00000180776.14_ZDHHC20  | ENSG00000160789.18_LMNA | -0.0863  | -0.242175648 | 0.073913943 | 2.90E-01 | 5.76E-01 | 1.00E+00 |
| ENSG00000183155.4_RABIF     | ENSG00000160789.18_LMNA | -0.01828 | -0.176969229 | 0.141328433 | 8.23E-01 | 9.31E-01 | 1.00E+00 |

|                             |                         |          |              |             |          |          |          |
|-----------------------------|-------------------------|----------|--------------|-------------|----------|----------|----------|
| ENSG00000113658.15_SMAD5    | ENSG00000160789.18_LMNA | -0.0604  | -0.217504566 | 0.099764775 | 4.60E-01 | 7.23E-01 | 1.00E+00 |
| ENSG00000105443.12_CYTH2    | ENSG00000160789.18_LMNA | 0.21182  | 0.054456145  | 0.358917767 | 8.80E-03 | 5.97E-02 | 1.00E+00 |
| ENSG00000139178.9_C1RL      | ENSG00000160789.18_LMNA | 0.46996  | 0.335893256  | 0.585367383 | 1.01E-09 | 1.58E-07 | 5.16E-05 |
| ENSG00000268205.1_CTC-444N2 | ENSG00000160789.18_LMNA | 0.19836  | 0.040435491  | 0.346614275 | 1.43E-02 | 8.49E-02 | 1.00E+00 |
| ENSG00000086015.19_MAST2    | ENSG00000160789.18_LMNA | 0.3426   | 0.19398042   | 0.475847839 | 1.56E-05 | 4.20E-04 | 7.99E-01 |
| ENSG00000101189.6_MRGBP     | ENSG00000160789.18_LMNA | 0.41316  | 0.271836284  | 0.537034319 | 1.22E-07 | 8.55E-06 | 6.28E-03 |
| ENSG00000092094.9_OSGEP     | ENSG00000160789.18_LMNA | 0.00734  | -0.152033625 | 0.166351038 | 9.28E-01 | 9.73E-01 | 1.00E+00 |
| ENSG00000111725.9_PRKAB1    | ENSG00000160789.18_LMNA | -0.16416 | -0.315123574 | -0.00509069 | 4.33E-02 | 1.83E-01 | 1.00E+00 |
| ENSG00000158552.11_ZFAND2B  | ENSG00000160789.18_LMNA | -0.05801 | -0.215222205 | 0.102134826 | 4.78E-01 | 7.36E-01 | 1.00E+00 |
| ENSG00000176887.6_SOX11     | ENSG00000160789.18_LMNA | -0.19087 | -0.339749077 | -0.0326642  | 1.85E-02 | 1.02E-01 | 1.00E+00 |
| ENSG00000080189.13_SLC35C2  | ENSG00000160789.18_LMNA | 0.16148  | 0.002341314  | 0.312645043 | 4.69E-02 | 1.93E-01 | 1.00E+00 |
| ENSG00000196588.13_MKL1     | ENSG00000160789.18_LMNA | 0.07794  | -0.082281578 | 0.234234378 | 3.40E-01 | 6.25E-01 | 1.00E+00 |
| ENSG00000149929.14_HIRIP3   | ENSG00000160789.18_LMNA | -0.01738 | -0.176097133 | 0.142210489 | 8.32E-01 | 9.34E-01 | 1.00E+00 |
| ENSG00000180329.12_CCDC43   | ENSG00000160789.18_LMNA | -0.03675 | -0.194810437 | 0.123171842 | 6.53E-01 | 8.46E-01 | 1.00E+00 |
| ENSG00000050820.15_BCAR1    | ENSG00000160789.18_LMNA | 0.16269  | 0.003582989  | 0.313764922 | 4.52E-02 | 1.88E-01 | 1.00E+00 |
| ENSG00000166091.18_CMTM5    | ENSG00000160789.18_LMNA | -0.38353 | -0.511500656 | -0.23891871 | 1.08E-06 | 4.87E-05 | 5.52E-02 |
| ENSG00000165948.9_IFI27L1   | ENSG00000160789.18_LMNA | 0.01142  | -0.148047424 | 0.17031349  | 8.89E-01 | 9.57E-01 | 1.00E+00 |
| ENSG00000102901.11_CENPT    | ENSG00000160789.18_LMNA | -0.12949 | -0.282862797 | 0.030332583 | 1.12E-01 | 3.34E-01 | 1.00E+00 |
| ENSG00000085760.13_MTIF2    | ENSG00000160789.18_LMNA | -0.07623 | -0.232606454 | 0.083991411 | 3.51E-01 | 6.34E-01 | 1.00E+00 |
| ENSG00000121905.8_HPCA      | ENSG00000160789.18_LMNA | -0.20025 | -0.348348568 | -0.04240456 | 1.34E-02 | 8.07E-02 | 1.00E+00 |
| ENSG00000118257.15_NRP2     | ENSG00000160789.18_LMNA | 0.37303  | 0.227334227  | 0.502398759 | 2.21E-06 | 8.62E-05 | 1.13E-01 |
| ENSG00000134690.9_CDCA8     | ENSG00000160789.18_LMNA | 0.06354  | -0.096640242 | 0.220508201 | 4.37E-01 | 7.05E-01 | 1.00E+00 |
| ENSG00000125386.13_FAM193A  | ENSG00000160789.18_LMNA | 0.05257  | -0.107532595 | 0.21001118  | 5.20E-01 | 7.66E-01 | 1.00E+00 |
| ENSG00000068028.16_RASSF1   | ENSG00000160789.18_LMNA | 0.20069  | 0.042861281  | 0.348750533 | 1.32E-02 | 7.99E-02 | 1.00E+00 |
| ENSG00000177303.8_CASKIN2   | ENSG00000160789.18_LMNA | 0.015    | -0.144541634 | 0.173789904 | 8.54E-01 | 9.43E-01 | 1.00E+00 |
| ENSG00000146938.13_NLGN4X   | ENSG00000160789.18_LMNA | 0.22435  | 0.067563212  | 0.370324662 | 5.46E-03 | 4.18E-02 | 1.00E+00 |
| ENSG00000136940.12_PDCL     | ENSG00000160789.18_LMNA | -0.22098 | -0.367260299 | -0.06403182 | 6.22E-03 | 4.62E-02 | 1.00E+00 |
| ENSG00000163154.5_TNFAIP8L2 | ENSG00000160789.18_LMNA | -0.08813 | -0.243911773 | 0.072078659 | 2.80E-01 | 5.66E-01 | 1.00E+00 |
| ENSG00000167565.11_SERTAD3  | ENSG00000160789.18_LMNA | 0.23173  | 0.075304433  | 0.377019118 | 4.07E-03 | 3.36E-02 | 1.00E+00 |
| ENSG00000167110.15_GOLGA2   | ENSG00000160789.18_LMNA | 0.28808  | 0.13507668   | 0.42766893  | 3.19E-04 | 4.72E-03 | 1.00E+00 |
| ENSG00000128487.15_SPECC1   | ENSG00000160789.18_LMNA | 0.04144  | -0.11854616  | 0.199322385 | 6.12E-01 | 8.24E-01 | 1.00E+00 |
| ENSG00000178573.6_MAF       | ENSG00000160789.18_LMNA | 0.19504  | 0.036984213  | 0.343569442 | 1.60E-02 | 9.21E-02 | 1.00E+00 |
| ENSG00000119559.14_C19orf25 | ENSG00000160789.18_LMNA | -0.23426 | -0.379314924 | -0.07796762 | 3.67E-03 | 3.11E-02 | 1.00E+00 |

|                             |                         |          |              |             |          |          |          |
|-----------------------------|-------------------------|----------|--------------|-------------|----------|----------|----------|
| ENSG00000111641.9_NOP2      | ENSG00000160789.18_LMNA | 0.2181   | 0.061019425  | 0.364641088 | 6.95E-03 | 5.02E-02 | 1.00E+00 |
| ENSG00000176624.10_MEX3C    | ENSG00000160789.18_LMNA | 0.23194  | 0.075523177  | 0.377207827 | 4.04E-03 | 3.34E-02 | 1.00E+00 |
| ENSG00000204642.12_HLA-F    | ENSG00000160789.18_LMNA | 0.14263  | -0.016955269 | 0.295129667 | 7.96E-02 | 2.71E-01 | 1.00E+00 |
| ENSG00000066136.18_NFYC     | ENSG00000160789.18_LMNA | 0.04421  | -0.115805607 | 0.201989212 | 5.89E-01 | 8.09E-01 | 1.00E+00 |
| ENSG00000081177.17_EXD2     | ENSG00000160789.18_LMNA | 0.0119   | -0.14757609  | 0.170781336 | 8.84E-01 | 9.55E-01 | 1.00E+00 |
| ENSG00000110075.13_PPP6R3   | ENSG00000160789.18_LMNA | 0.0324   | -0.127456688 | 0.190618904 | 6.92E-01 | 8.67E-01 | 1.00E+00 |
| ENSG00000182473.19_EXOC7    | ENSG00000160789.18_LMNA | 0.01873  | -0.140894188 | 0.177398386 | 8.19E-01 | 9.30E-01 | 1.00E+00 |
| ENSG00000170903.9_MSANTD4   | ENSG00000160789.18_LMNA | -0.20051 | -0.348586971 | -0.04267542 | 1.33E-02 | 8.02E-02 | 1.00E+00 |
| ENSG00000107295.9_SH3GL2    | ENSG00000160789.18_LMNA | -0.40369 | -0.528897179 | -0.26127821 | 2.51E-07 | 1.53E-05 | 1.29E-02 |
| ENSG00000103197.15_TSC2     | ENSG00000160789.18_LMNA | 0.01954  | -0.140092106 | 0.178190754 | 8.11E-01 | 9.26E-01 | 1.00E+00 |
| ENSG00000185052.10_SLC24A3  | ENSG00000160789.18_LMNA | -0.19477 | -0.343325629 | -0.03670817 | 1.62E-02 | 9.27E-02 | 1.00E+00 |
| ENSG00000138600.8_SPPL2A    | ENSG00000160789.18_LMNA | 0.21929  | 0.062257957  | 0.365718547 | 6.64E-03 | 4.85E-02 | 1.00E+00 |
| ENSG00000125450.9_NUP85     | ENSG00000160789.18_LMNA | 0.03899  | -0.120956757 | 0.196972739 | 6.33E-01 | 8.36E-01 | 1.00E+00 |
| ENSG00000168522.11_FNTA     | ENSG00000160789.18_LMNA | -0.37237 | -0.501820631 | -0.22660103 | 2.31E-06 | 8.91E-05 | 1.19E-01 |
| ENSG00000139679.14_LPAR6    | ENSG00000160789.18_LMNA | -0.01359 | -0.17242247  | 0.145921578 | 8.68E-01 | 9.48E-01 | 1.00E+00 |
| ENSG0000010626.13_LRRC23    | ENSG00000160789.18_LMNA | -0.09258 | -0.248122517 | 0.067618508 | 2.57E-01 | 5.39E-01 | 1.00E+00 |
| ENSG00000184384.12_MAML2    | ENSG00000160789.18_LMNA | -0.07749 | -0.233808565 | 0.082728995 | 3.43E-01 | 6.27E-01 | 1.00E+00 |
| ENSG00000099968.16_BCL2L13  | ENSG00000160789.18_LMNA | 0.03311  | -0.126759094 | 0.191302098 | 6.86E-01 | 8.64E-01 | 1.00E+00 |
| ENSG00000139645.9_ANKRD52   | ENSG00000160789.18_LMNA | 0.32815  | 0.178257322  | 0.463150904 | 3.67E-05 | 8.42E-04 | 1.00E+00 |
| ENSG00000141295.12_SCRN2    | ENSG00000160789.18_LMNA | 0.04291  | -0.117087495 | 0.200742395 | 6.00E-01 | 8.16E-01 | 1.00E+00 |
| ENSG00000273344.1_PAXIP1-AS | ENSG00000160789.18_LMNA | 0.00686  | -0.152506935 | 0.165879863 | 9.33E-01 | 9.74E-01 | 1.00E+00 |
| ENSG00000112062.9_MAPK14    | ENSG00000160789.18_LMNA | -0.0236  | -0.18211939  | 0.136109125 | 7.73E-01 | 9.06E-01 | 1.00E+00 |
| ENSG00000226243.1_RPL37AP1  | ENSG00000160789.18_LMNA | -0.12659 | -0.280141784 | 0.033284787 | 1.20E-01 | 3.48E-01 | 1.00E+00 |
| ENSG00000101343.13_CRNKL1   | ENSG00000160789.18_LMNA | 0.05778  | -0.102360826 | 0.215004386 | 4.80E-01 | 7.38E-01 | 1.00E+00 |
| ENSG00000064655.17_EYA2     | ENSG00000160789.18_LMNA | 0.28956  | 0.136661287  | 0.428987151 | 2.97E-04 | 4.46E-03 | 1.00E+00 |
| ENSG00000124789.10_NUP153   | ENSG00000160789.18_LMNA | 0.21699  | 0.059852378  | 0.363625072 | 7.25E-03 | 5.17E-02 | 1.00E+00 |
| ENSG00000070961.13_ATP2B1   | ENSG00000160789.18_LMNA | 0.09998  | -0.060179358 | 0.255119235 | 2.20E-01 | 4.96E-01 | 1.00E+00 |
| ENSG00000111144.8_LTA4H     | ENSG00000160789.18_LMNA | 0.03447  | -0.125422716 | 0.192610029 | 6.73E-01 | 8.57E-01 | 1.00E+00 |
| ENSG00000160194.16_NDUFV3   | ENSG00000160789.18_LMNA | -0.01084 | -0.169750932 | 0.148613984 | 8.95E-01 | 9.59E-01 | 1.00E+00 |
| ENSG00000124201.13_ZNFX1    | ENSG00000160789.18_LMNA | 0.25395  | 0.098739507  | 0.397094946 | 1.59E-03 | 1.65E-02 | 1.00E+00 |
| ENSG00000026950.15_BTN3A1   | ENSG00000160789.18_LMNA | -0.11297 | -0.267361545 | 0.047078107 | 1.66E-01 | 4.23E-01 | 1.00E+00 |
| ENSG00000146963.16_LUC7L2   | ENSG00000160789.18_LMNA | 0.10353  | -0.056604043 | 0.258470206 | 2.04E-01 | 4.76E-01 | 1.00E+00 |
| ENSG00000165233.16_CARD19   | ENSG00000160789.18_LMNA | 0.29074  | 0.137918687  | 0.430032287 | 2.79E-04 | 4.25E-03 | 1.00E+00 |

|                             |                         |          |              |             |          |          |          |
|-----------------------------|-------------------------|----------|--------------|-------------|----------|----------|----------|
| ENSG00000117523.14_PRRC2C   | ENSG00000160789.18_LMNA | 0.12959  | -0.030233443 | 0.282954087 | 1.12E-01 | 3.33E-01 | 1.00E+00 |
| ENSG00000100564.7_PIGH      | ENSG00000160789.18_LMNA | -0.22318 | -0.369262607 | -0.06633843 | 5.71E-03 | 4.33E-02 | 1.00E+00 |
| ENSG00000004897.10_CDC27    | ENSG00000160789.18_LMNA | -0.06128 | -0.218350701 | 0.098885215 | 4.53E-01 | 7.18E-01 | 1.00E+00 |
| ENSG00000197555.8_SIPA1L1   | ENSG00000160789.18_LMNA | 0.43853  | 0.300298477  | 0.558727096 | 1.60E-08 | 1.59E-06 | 8.19E-04 |
| ENSG00000164176.11_EDIL3    | ENSG00000160789.18_LMNA | -0.216   | -0.362726526 | -0.05882095 | 7.53E-03 | 5.31E-02 | 1.00E+00 |
| ENSG00000182541.16_LIMK2    | ENSG00000160789.18_LMNA | -0.05731 | -0.214555116 | 0.102826866 | 4.83E-01 | 7.40E-01 | 1.00E+00 |
| ENSG00000154553.12_PDLIM3   | ENSG00000160789.18_LMNA | 0.08939  | -0.070817761 | 0.245103372 | 2.73E-01 | 5.58E-01 | 1.00E+00 |
| ENSG00000169926.8_KLF13     | ENSG00000160789.18_LMNA | 0.03789  | -0.122047252 | 0.195908616 | 6.43E-01 | 8.41E-01 | 1.00E+00 |
| ENSG00000055118.13_KCNH2    | ENSG00000160789.18_LMNA | 0.0046   | -0.154713014 | 0.16368182  | 9.55E-01 | 9.82E-01 | 1.00E+00 |
| ENSG00000254087.6_LYN       | ENSG00000160789.18_LMNA | -0.04965 | -0.207209269 | 0.110427196 | 5.44E-01 | 7.82E-01 | 1.00E+00 |
| ENSG00000074855.9_ANO8      | ENSG00000160789.18_LMNA | 0.00165  | -0.157591291 | 0.160809267 | 9.84E-01 | 9.94E-01 | 1.00E+00 |
| ENSG00000214535.3_RPS15AP1  | ENSG00000160789.18_LMNA | -0.14535 | -0.297664784 | 0.014176661 | 7.40E-02 | 2.59E-01 | 1.00E+00 |
| ENSG00000186063.11_AIDA     | ENSG00000160789.18_LMNA | 0.17072  | 0.011844094  | 0.321193794 | 3.55E-02 | 1.60E-01 | 1.00E+00 |
| ENSG00000130734.8_ATG4D     | ENSG00000160789.18_LMNA | 0.01165  | -0.147829215 | 0.170530101 | 8.87E-01 | 9.56E-01 | 1.00E+00 |
| ENSG00000130775.14_THEMIS2  | ENSG00000160789.18_LMNA | 0.06118  | -0.098981557 | 0.218258044 | 4.54E-01 | 7.19E-01 | 1.00E+00 |
| ENSG00000091164.11_TXNL1    | ENSG00000160789.18_LMNA | -0.22139 | -0.367636651 | -0.06446512 | 6.12E-03 | 4.57E-02 | 1.00E+00 |
| ENSG00000109534.15_GAR1     | ENSG00000160789.18_LMNA | 0.25419  | 0.098999875  | 0.397316399 | 1.58E-03 | 1.63E-02 | 1.00E+00 |
| ENSG00000170312.14_CDK1     | ENSG00000160789.18_LMNA | -0.00646 | -0.165495022 | 0.152893412 | 9.37E-01 | 9.75E-01 | 1.00E+00 |
| ENSG00000277977.1_CTD-3018C | ENSG00000160789.18_LMNA | 0.03129  | -0.128554262 | 0.189543363 | 7.02E-01 | 8.73E-01 | 1.00E+00 |
| ENSG00000147044.19_CASK     | ENSG00000160789.18_LMNA | -0.04766 | -0.205307427 | 0.112388888 | 5.60E-01 | 7.92E-01 | 1.00E+00 |
| ENSG00000106785.13_TRIM14   | ENSG00000160789.18_LMNA | 0.21792  | 0.060824988  | 0.364471864 | 7.00E-03 | 5.04E-02 | 1.00E+00 |
| ENSG00000090470.13_PDCD7    | ENSG00000160789.18_LMNA | 0.19045  | 0.032225328  | 0.339360397 | 1.88E-02 | 1.03E-01 | 1.00E+00 |
| ENSG00000187079.13_TEAD1    | ENSG00000160789.18_LMNA | 0.21036  | 0.052931837  | 0.357585253 | 9.29E-03 | 6.22E-02 | 1.00E+00 |
| ENSG00000200087.1_SNORA73B  | ENSG00000160789.18_LMNA | -0.13545 | -0.288433507 | 0.024271466 | 9.61E-02 | 3.04E-01 | 1.00E+00 |
| ENSG00000105928.12_DFNA5    | ENSG00000160789.18_LMNA | 0.01472  | -0.144823437 | 0.173510756 | 8.57E-01 | 9.44E-01 | 1.00E+00 |
| ENSG00000136425.11_CIB2     | ENSG00000160789.18_LMNA | 0.02511  | -0.134629179 | 0.183576559 | 7.59E-01 | 8.99E-01 | 1.00E+00 |
| ENSG00000197771.11_MCMBP    | ENSG00000160789.18_LMNA | 0.08595  | -0.074261969 | 0.241846198 | 2.92E-01 | 5.78E-01 | 1.00E+00 |
| ENSG00000075856.10_SART3    | ENSG00000160789.18_LMNA | 0.05082  | -0.10926449  | 0.20833537  | 5.34E-01 | 7.76E-01 | 1.00E+00 |
| ENSG00000188641.11_DPYD     | ENSG00000160789.18_LMNA | 0.38924  | 0.245241122  | 0.516442492 | 7.19E-07 | 3.53E-05 | 3.69E-02 |
| ENSG00000115318.10_LOXL3    | ENSG00000160789.18_LMNA | 0.49911  | 0.369245769  | 0.609850017 | 5.96E-11 | 1.50E-08 | 3.06E-06 |
| ENSG00000140463.12_BBS4     | ENSG00000160789.18_LMNA | -0.07308 | -0.229613193 | 0.08713042  | 3.71E-01 | 6.51E-01 | 1.00E+00 |
| ENSG00000125733.16_TRIP10   | ENSG00000160789.18_LMNA | 0.59378  | 0.479950747  | 0.68794999  | 7.47E-16 | 1.60E-12 | 3.83E-11 |
| ENSG00000135930.12_EIF4E2   | ENSG00000160789.18_LMNA | -0.06797 | -0.224741209 | 0.092226214 | 4.05E-01 | 6.81E-01 | 1.00E+00 |

|                             |                         |          |              |             |          |          |          |
|-----------------------------|-------------------------|----------|--------------|-------------|----------|----------|----------|
| ENSG00000277586.1_NEFL      | ENSG00000160789.18_LMNA | -0.10966 | -0.26424639  | 0.05042212  | 1.79E-01 | 4.41E-01 | 1.00E+00 |
| ENSG00000074054.16_CLASP1   | ENSG00000160789.18_LMNA | 0.11172  | -0.048337464 | 0.266189147 | 1.71E-01 | 4.29E-01 | 1.00E+00 |
| ENSG00000226210.3_WASH7P    | ENSG00000160789.18_LMNA | 0.08242  | -0.077806537 | 0.238486659 | 3.13E-01 | 5.99E-01 | 1.00E+00 |
| ENSG00000160294.9_MCM3AP    | ENSG00000160789.18_LMNA | 0.30301  | 0.151102792  | 0.440943816 | 1.48E-04 | 2.57E-03 | 1.00E+00 |
| ENSG00000166747.11_AP1G1    | ENSG00000160789.18_LMNA | 0.01218  | -0.1473069   | 0.17104847  | 8.82E-01 | 9.54E-01 | 1.00E+00 |
| ENSG00000105810.8_CDK6      | ENSG00000160789.18_LMNA | 0.13028  | -0.029538195 | 0.283594117 | 1.10E-01 | 3.30E-01 | 1.00E+00 |
| ENSG00000101203.15_COL20A1  | ENSG00000160789.18_LMNA | -0.18935 | -0.338349793 | -0.03108477 | 1.95E-02 | 1.06E-01 | 1.00E+00 |
| ENSG00000169231.12_THBS3    | ENSG00000160789.18_LMNA | 0.42095  | 0.280545953  | 0.543709945 | 6.67E-08 | 5.22E-06 | 3.42E-03 |
| ENSG00000169188.4_APEX2     | ENSG00000160789.18_LMNA | 0.34199  | 0.193310351  | 0.475309122 | 1.62E-05 | 4.33E-04 | 8.29E-01 |
| ENSG00000120688.8_WBP4      | ENSG00000160789.18_LMNA | -0.29784 | -0.436346881 | -0.14553584 | 1.94E-04 | 3.19E-03 | 1.00E+00 |
| ENSG00000099998.16_GGT5     | ENSG00000160789.18_LMNA | 0.24757  | 0.091994955  | 0.39134629  | 2.10E-03 | 2.03E-02 | 1.00E+00 |
| ENSG00000106771.11_TMEM245  | ENSG00000160789.18_LMNA | -0.06373 | -0.22068891  | 0.09645206  | 4.35E-01 | 7.04E-01 | 1.00E+00 |
| ENSG00000197180.2_CH17-340M | ENSG00000160789.18_LMNA | -0.17242 | -0.322758098 | -0.01358904 | 3.37E-02 | 1.55E-01 | 1.00E+00 |
| ENSG00000161217.10_PCYT1A   | ENSG00000160789.18_LMNA | 0.29816  | 0.14588053   | 0.436631951 | 1.91E-04 | 3.15E-03 | 1.00E+00 |
| ENSG00000095787.20_WAC      | ENSG00000160789.18_LMNA | -0.2105  | -0.35771389  | -0.05307893 | 9.24E-03 | 6.19E-02 | 1.00E+00 |
| ENSG00000160953.13_MUM1     | ENSG00000160789.18_LMNA | -0.13513 | -0.288133634 | 0.024598325 | 9.69E-02 | 3.06E-01 | 1.00E+00 |
| ENSG00000137817.15_PARP6    | ENSG00000160789.18_LMNA | 0.01546  | -0.144098812 | 0.174228453 | 8.50E-01 | 9.41E-01 | 1.00E+00 |
| ENSG00000131089.12_ARHGEF9  | ENSG00000160789.18_LMNA | -0.33467 | -0.468891823 | -0.18534855 | 2.51E-05 | 6.19E-04 | 1.00E+00 |
| ENSG00000196123.11_KIAA0895 | ENSG00000160789.18_LMNA | -0.1736  | -0.323850994 | -0.01480926 | 3.24E-02 | 1.51E-01 | 1.00E+00 |
| ENSG00000175895.3_PLEKHF2   | ENSG00000160789.18_LMNA | 0.0089   | -0.15051296  | 0.167863857 | 9.13E-01 | 9.67E-01 | 1.00E+00 |
| ENSG00000001631.13_KRIT1    | ENSG00000160789.18_LMNA | 0.0442   | -0.115814768 | 0.201980305 | 5.89E-01 | 8.09E-01 | 1.00E+00 |
| ENSG00000099949.17_LZTR1    | ENSG00000160789.18_LMNA | 0.12021  | -0.039752512 | 0.274162899 | 1.40E-01 | 3.82E-01 | 1.00E+00 |
| ENSG00000139546.9_TARBP2    | ENSG00000160789.18_LMNA | -0.1699  | -0.32043626  | -0.01099976 | 3.64E-02 | 1.62E-01 | 1.00E+00 |
| ENSG00000196372.11_ASB13    | ENSG00000160789.18_LMNA | -0.44085 | -0.560701181 | -0.30291164 | 1.31E-08 | 1.36E-06 | 6.74E-04 |
| ENSG00000156256.13_USP16    | ENSG00000160789.18_LMNA | 0.03075  | -0.129080331 | 0.189027584 | 7.07E-01 | 8.75E-01 | 1.00E+00 |
| ENSG00000120690.12_ELF1     | ENSG00000160789.18_LMNA | -0.03126 | -0.189515855 | 0.128582323 | 7.02E-01 | 8.73E-01 | 1.00E+00 |
| ENSG00000108010.10_GLRX3    | ENSG00000160789.18_LMNA | -0.18445 | -0.333845327 | -0.02601081 | 2.29E-02 | 1.19E-01 | 1.00E+00 |
| ENSG00000160113.5_NR2F6     | ENSG00000160789.18_LMNA | 0.42087  | 0.280463948  | 0.543647246 | 6.70E-08 | 5.23E-06 | 3.44E-03 |
| ENSG00000152049.6_KCNE4     | ENSG00000160789.18_LMNA | 0.22438  | 0.067593574  | 0.37035098  | 5.45E-03 | 4.18E-02 | 1.00E+00 |
| ENSG00000269293.2_ZSCAN16-7 | ENSG00000160789.18_LMNA | -0.20177 | -0.349737255 | -0.04398295 | 1.27E-02 | 7.77E-02 | 1.00E+00 |
| ENSG00000152601.16_MBNL1    | ENSG00000160789.18_LMNA | -0.02683 | -0.185236379 | 0.132941683 | 7.43E-01 | 8.92E-01 | 1.00E+00 |
| ENSG00000159685.9_CHCHD6    | ENSG00000160789.18_LMNA | -0.2548  | -0.39786246  | -0.09964207 | 1.54E-03 | 1.60E-02 | 1.00E+00 |
| ENSG00000185104.18_FAF1     | ENSG00000160789.18_LMNA | 0.08409  | -0.076134065 | 0.24007277  | 3.03E-01 | 5.90E-01 | 1.00E+00 |



|                            |                         |          |              |             |          |          |          |
|----------------------------|-------------------------|----------|--------------|-------------|----------|----------|----------|
| ENSG00000235587.2_GAPDHP65 | ENSG00000160789.18_LMNA | 0.2452   | 0.089489021  | 0.389204411 | 2.33E-03 | 2.20E-02 | 1.00E+00 |
| ENSG00000173598.12_NUDT4   | ENSG00000160789.18_LMNA | -0.26105 | -0.403485747 | -0.10626976 | 1.16E-03 | 1.29E-02 | 1.00E+00 |
| ENSG00000241973.9_PI4KA    | ENSG00000160789.18_LMNA | 0.02986  | -0.129962473 | 0.188162302 | 7.15E-01 | 8.79E-01 | 1.00E+00 |
| ENSG00000117616.16_RSRP1   | ENSG00000160789.18_LMNA | -0.03045 | -0.188739962 | 0.129373613 | 7.10E-01 | 8.77E-01 | 1.00E+00 |
| ENSG00000235297.3_FAUP1    | ENSG00000160789.18_LMNA | -0.08871 | -0.244454587 | 0.071504402 | 2.77E-01 | 5.62E-01 | 1.00E+00 |
| ENSG00000104888.8_SLC17A7  | ENSG00000160789.18_LMNA | -0.16957 | -0.320127795 | -0.01065607 | 3.68E-02 | 1.64E-01 | 1.00E+00 |
| ENSG00000094975.12_SUCO    | ENSG00000160789.18_LMNA | 0.03177  | -0.128076826 | 0.190011308 | 6.98E-01 | 8.70E-01 | 1.00E+00 |
| ENSG00000120533.11_ENY2    | ENSG00000160789.18_LMNA | -0.10464 | -0.259513587 | 0.055489157 | 2.00E-01 | 4.70E-01 | 1.00E+00 |
| ENSG00000205765.7_C5orf51  | ENSG00000160789.18_LMNA | 0.04342  | -0.116590761 | 0.201225661 | 5.95E-01 | 8.13E-01 | 1.00E+00 |
| ENSG00000160785.12_SLC25A4 | ENSG00000160789.18_LMNA | 0.0653   | -0.094882616 | 0.222195179 | 4.24E-01 | 6.95E-01 | 1.00E+00 |
| ENSG00000141569.9_TRIM65   | ENSG00000160789.18_LMNA | 0.29638  | 0.14396866   | 0.435050029 | 2.09E-04 | 3.38E-03 | 1.00E+00 |
| ENSG00000163811.10_WDR43   | ENSG00000160789.18_LMNA | 0.02305  | -0.136652089 | 0.181584432 | 7.78E-01 | 9.09E-01 | 1.00E+00 |
| ENSG00000034152.17_MAP2K3  | ENSG00000160789.18_LMNA | 0.6766   | 0.579863294  | 0.754529553 | 1.10E-21 | 1.13E-17 | 5.65E-17 |
| ENSG00000173947.12_PIFO    | ENSG00000160789.18_LMNA | -0.00731 | -0.166316978 | 0.152067844 | 9.29E-01 | 9.73E-01 | 1.00E+00 |
| ENSG00000135063.16_FAM189A | ENSG00000160789.18_LMNA | -0.12669 | -0.280239857 | 0.033178476 | 1.20E-01 | 3.48E-01 | 1.00E+00 |
| ENSG00000170385.9_SLC30A1  | ENSG00000160789.18_LMNA | 0.11239  | -0.047660275 | 0.266819693 | 1.68E-01 | 4.26E-01 | 1.00E+00 |
| ENSG00000001497.15_LAS1L   | ENSG00000160789.18_LMNA | 0.07681  | -0.083408923 | 0.233161237 | 3.47E-01 | 6.31E-01 | 1.00E+00 |
| ENSG00000157500.9_APPL1    | ENSG00000160789.18_LMNA | -0.11187 | -0.266323378 | 0.048193328 | 1.70E-01 | 4.29E-01 | 1.00E+00 |
| ENSG00000166275.14_BORCS7  | ENSG00000160789.18_LMNA | -0.33623 | -0.470260738 | -0.18704381 | 2.28E-05 | 5.75E-04 | 1.00E+00 |
| ENSG00000180185.10_FAHD1   | ENSG00000160789.18_LMNA | 0.00683  | -0.15253639  | 0.165850536 | 9.33E-01 | 9.74E-01 | 1.00E+00 |
| ENSG00000160753.14_RUSC1   | ENSG00000160789.18_LMNA | 0.32607  | 0.1760082    | 0.461325051 | 4.14E-05 | 9.24E-04 | 1.00E+00 |
| ENSG00000166225.7_FRS2     | ENSG00000160789.18_LMNA | -0.17948 | -0.329269502 | -0.02087266 | 2.69E-02 | 1.33E-01 | 1.00E+00 |
| ENSG00000114388.11_NPRL2   | ENSG00000160789.18_LMNA | -0.15452 | -0.306186195 | 0.004801357 | 5.73E-02 | 2.19E-01 | 1.00E+00 |
| ENSG00000174276.6_ZNHIT2   | ENSG00000160789.18_LMNA | 0.20943  | 0.051962892  | 0.356737579 | 9.61E-03 | 6.38E-02 | 1.00E+00 |
| ENSG00000185009.11_AP3M1   | ENSG00000160789.18_LMNA | -0.2701  | -0.411599232 | -0.11587922 | 7.65E-04 | 9.37E-03 | 1.00E+00 |
| ENSG00000162972.9_MAIP1    | ENSG00000160789.18_LMNA | -0.10574 | -0.260552891 | 0.054377845 | 1.95E-01 | 4.64E-01 | 1.00E+00 |
| ENSG00000057252.11_SOAT1   | ENSG00000160789.18_LMNA | 0.24208  | 0.086205164  | 0.386392708 | 2.66E-03 | 2.43E-02 | 1.00E+00 |
| ENSG00000107537.12_PHYH    | ENSG00000160789.18_LMNA | 0.03615  | -0.123764014 | 0.194231851 | 6.58E-01 | 8.49E-01 | 1.00E+00 |
| ENSG00000151725.10_CENPU   | ENSG00000160789.18_LMNA | -0.02682 | -0.185230735 | 0.132947423 | 7.43E-01 | 8.92E-01 | 1.00E+00 |
| ENSG00000198753.10_PLXNB3  | ENSG00000160789.18_LMNA | -0.06796 | -0.224729035 | 0.092238927 | 4.05E-01 | 6.81E-01 | 1.00E+00 |
| ENSG00000138035.13_PNPT1   | ENSG00000160789.18_LMNA | -0.19944 | -0.347601977 | -0.04155661 | 1.38E-02 | 8.24E-02 | 1.00E+00 |
| ENSG00000128266.8_GNAZ     | ENSG00000160789.18_LMNA | -0.19087 | -0.339751347 | -0.03266676 | 1.85E-02 | 1.02E-01 | 1.00E+00 |
| ENSG00000105856.12_HBP1    | ENSG00000160789.18_LMNA | -0.10197 | -0.256996759 | 0.058177132 | 2.11E-01 | 4.85E-01 | 1.00E+00 |

|                             |                         |          |              |             |          |          |          |
|-----------------------------|-------------------------|----------|--------------|-------------|----------|----------|----------|
| ENSG00000108509.19_CAMTA2   | ENSG00000160789.18_LMNA | 0.11571  | -0.044308439 | 0.269936696 | 1.56E-01 | 4.07E-01 | 1.00E+00 |
| ENSG00000179941.6_BBS10     | ENSG00000160789.18_LMNA | -0.4638  | -0.580158937 | -0.32887762 | 1.77E-09 | 2.48E-07 | 9.08E-05 |
| ENSG00000124356.14_STAMPB   | ENSG00000160789.18_LMNA | -0.41165 | -0.535737815 | -0.27014976 | 1.37E-07 | 9.41E-06 | 7.05E-03 |
| ENSG00000165898.12_ISCA2    | ENSG00000160789.18_LMNA | -0.08521 | -0.241143368 | 0.075004169 | 2.97E-01 | 5.82E-01 | 1.00E+00 |
| ENSG00000145740.17_SLC30A5  | ENSG00000160789.18_LMNA | 0.28937  | 0.136453087  | 0.428814022 | 2.99E-04 | 4.50E-03 | 1.00E+00 |
| ENSG00000121060.13_TRIM25   | ENSG00000160789.18_LMNA | 0.21248  | 0.055144814  | 0.359519378 | 8.59E-03 | 5.87E-02 | 1.00E+00 |
| ENSG00000172732.10_MUS81    | ENSG00000160789.18_LMNA | 0.06277  | -0.097404027 | 0.219774524 | 4.42E-01 | 7.10E-01 | 1.00E+00 |
| ENSG00000047410.12_TPR      | ENSG00000160789.18_LMNA | 0.25229  | 0.09698631   | 0.395602873 | 1.71E-03 | 1.74E-02 | 1.00E+00 |
| ENSG00000004799.7_PDK4      | ENSG00000160789.18_LMNA | -0.29586 | -0.434587586 | -0.14341017 | 2.15E-04 | 3.45E-03 | 1.00E+00 |
| ENSG00000083123.13_BCKDHB   | ENSG00000160789.18_LMNA | -0.22644 | -0.372225129 | -0.06975714 | 5.03E-03 | 3.94E-02 | 1.00E+00 |
| ENSG00000168487.16_BMP1     | ENSG00000160789.18_LMNA | 0.46368  | 0.328747305  | 0.580061993 | 1.79E-09 | 2.50E-07 | 9.17E-05 |
| ENSG00000247556.5_OIP5-AS1  | ENSG00000160789.18_LMNA | -0.12196 | -0.275805989 | 0.037977698 | 1.34E-01 | 3.73E-01 | 1.00E+00 |
| ENSG00000130305.15_NSUN5    | ENSG00000160789.18_LMNA | 0.34177  | 0.193077284  | 0.475121693 | 1.64E-05 | 4.37E-04 | 8.40E-01 |
| ENSG00000144597.12_EAF1     | ENSG00000160789.18_LMNA | 0.05393  | -0.10618354  | 0.211315255 | 5.09E-01 | 7.59E-01 | 1.00E+00 |
| ENSG00000149269.8_PAK1      | ENSG00000160789.18_LMNA | -0.10714 | -0.261873629 | 0.052964473 | 1.89E-01 | 4.56E-01 | 1.00E+00 |
| ENSG00000115355.14_CCDC88A  | ENSG00000160789.18_LMNA | -0.11828 | -0.272347847 | 0.041710772 | 1.47E-01 | 3.92E-01 | 1.00E+00 |
| ENSG00000104518.9_GSDMD     | ENSG00000160789.18_LMNA | 0.31619  | 0.165308003  | 0.452605331 | 7.24E-05 | 1.45E-03 | 1.00E+00 |
| ENSG00000240024.4_LINC00888 | ENSG00000160789.18_LMNA | -0.51352 | -0.621880981 | -0.38586578 | 1.33E-11 | 4.32E-09 | 6.82E-07 |
| ENSG00000100246.11_DNAL4    | ENSG00000160789.18_LMNA | -0.12139 | -0.275270699 | 0.038556119 | 1.36E-01 | 3.76E-01 | 1.00E+00 |
| ENSG00000204439.3_C6orf47   | ENSG00000160789.18_LMNA | 0.30173  | 0.149719392  | 0.439802886 | 1.58E-04 | 2.72E-03 | 1.00E+00 |
| ENSG00000151694.11_ADAM17   | ENSG00000160789.18_LMNA | 0.14121  | -0.018407092 | 0.293803317 | 8.27E-02 | 2.78E-01 | 1.00E+00 |
| ENSG00000148153.12_INIP     | ENSG00000160789.18_LMNA | -0.28882 | -0.428328097 | -0.13586886 | 3.08E-04 | 4.60E-03 | 1.00E+00 |
| ENSG00000171456.15_ASXL1    | ENSG00000160789.18_LMNA | 0.13085  | -0.028951284 | 0.284134197 | 1.08E-01 | 3.27E-01 | 1.00E+00 |
| ENSG00000171861.9_MRM3      | ENSG00000160789.18_LMNA | 0.046    | -0.114035128 | 0.203709559 | 5.74E-01 | 8.01E-01 | 1.00E+00 |
| ENSG00000131876.15_SNRPA1   | ENSG00000160789.18_LMNA | 0.03783  | -0.122101956 | 0.195855215 | 6.44E-01 | 8.41E-01 | 1.00E+00 |
| ENSG00000162976.11_PQLC3    | ENSG00000160789.18_LMNA | 0.29117  | 0.138379576  | 0.430415177 | 2.73E-04 | 4.18E-03 | 1.00E+00 |
| ENSG00000130193.7_THEM6     | ENSG00000160789.18_LMNA | 0.05985  | -0.100307332 | 0.216982389 | 4.64E-01 | 7.26E-01 | 1.00E+00 |
| ENSG00000136280.14_CCM2     | ENSG00000160789.18_LMNA | 0.46112  | 0.325833878  | 0.577892833 | 2.25E-09 | 3.07E-07 | 1.16E-04 |
| ENSG00000010803.15_SCMH1    | ENSG00000160789.18_LMNA | 0.40015  | 0.257340746  | 0.525849913 | 3.26E-07 | 1.88E-05 | 1.67E-02 |
| ENSG00000132603.12_NIP7     | ENSG00000160789.18_LMNA | 0.08836  | -0.071848729 | 0.244129136 | 2.79E-01 | 5.64E-01 | 1.00E+00 |
| ENSG00000163406.9_SLC15A2   | ENSG00000160789.18_LMNA | -0.28134 | -0.421652577 | -0.1278635  | 4.46E-04 | 6.17E-03 | 1.00E+00 |
| ENSG00000228109.1_MELTF-AS  | ENSG00000160789.18_LMNA | 0.1137   | -0.046336874 | 0.268051161 | 1.63E-01 | 4.18E-01 | 1.00E+00 |
| ENSG00000099904.14_ZDHHC8   | ENSG00000160789.18_LMNA | 0.15881  | -0.000397853 | 0.310171504 | 5.07E-02 | 2.03E-01 | 1.00E+00 |

|                             |                         |          |              |             |          |          |          |
|-----------------------------|-------------------------|----------|--------------|-------------|----------|----------|----------|
| ENSG00000188483.7_IER5L     | ENSG00000160789.18_LMNA | 0.44774  | 0.310681602  | 0.56655365  | 7.31E-09 | 8.30E-07 | 3.75E-04 |
| ENSG00000165609.11_NUDT5    | ENSG00000160789.18_LMNA | -0.19312 | -0.341807363 | -0.03499025 | 1.71E-02 | 9.66E-02 | 1.00E+00 |
| ENSG00000235043.3_TECRP1    | ENSG00000160789.18_LMNA | 0.15365  | -0.005688043 | 0.305382395 | 5.88E-02 | 2.22E-01 | 1.00E+00 |
| ENSG00000224531.5_SMIM13    | ENSG00000160789.18_LMNA | -0.07324 | -0.22976623  | 0.086970083 | 3.70E-01 | 6.50E-01 | 1.00E+00 |
| ENSG00000109066.12_TMEM104  | ENSG00000160789.18_LMNA | 0.29003  | 0.137159279  | 0.42940117  | 2.90E-04 | 4.38E-03 | 1.00E+00 |
| ENSG00000242802.5_AP5Z1     | ENSG00000160789.18_LMNA | 0.3164   | 0.165533656  | 0.452789787 | 7.15E-05 | 1.44E-03 | 1.00E+00 |
| ENSG00000140937.12_CDH11    | ENSG00000160789.18_LMNA | 0.30778  | 0.156232082  | 0.445165934 | 1.15E-04 | 2.11E-03 | 1.00E+00 |
| ENSG00000087053.17_MTMR2    | ENSG00000160789.18_LMNA | -0.14999 | -0.301984104 | 0.009431363 | 6.51E-02 | 2.38E-01 | 1.00E+00 |
| ENSG00000124074.10_ENKD1    | ENSG00000160789.18_LMNA | 0.26498  | 0.110439606  | 0.40701219  | 9.70E-04 | 1.13E-02 | 1.00E+00 |
| ENSG00000129911.7_KLF16     | ENSG00000160789.18_LMNA | 0.51606  | 0.388806811  | 0.623998413 | 1.01E-11 | 3.50E-09 | 5.20E-07 |
| ENSG00000280237.1_MIR4697HC | ENSG00000160789.18_LMNA | -0.15819 | -0.309597698 | 0.001032615 | 5.16E-02 | 2.05E-01 | 1.00E+00 |
| ENSG00000086730.15_LAT2     | ENSG00000160789.18_LMNA | -0.07598 | -0.232369851 | 0.084239763 | 3.52E-01 | 6.36E-01 | 1.00E+00 |
| ENSG00000152133.13_GPATCH1  | ENSG00000160789.18_LMNA | -0.24031 | -0.38478631  | -0.08433194 | 2.86E-03 | 2.58E-02 | 1.00E+00 |
| ENSG00000108846.14_ABCC3    | ENSG00000160789.18_LMNA | 0.4021   | 0.259507146  | 0.527527378 | 2.82E-07 | 1.68E-05 | 1.45E-02 |
| ENSG00000180155.17_LYNX1    | ENSG00000160789.18_LMNA | 0.23326  | 0.076918055  | 0.378410588 | 3.83E-03 | 3.21E-02 | 1.00E+00 |
| ENSG00000136870.9_ZNF189    | ENSG00000160789.18_LMNA | -0.16888 | -0.319491476 | -0.00994733 | 3.75E-02 | 1.66E-01 | 1.00E+00 |
| ENSG00000204178.8_TMEM57    | ENSG00000160789.18_LMNA | -0.16651 | -0.317300486 | -0.00750936 | 4.03E-02 | 1.74E-01 | 1.00E+00 |
| ENSG00000138785.13_INTS12   | ENSG00000160789.18_LMNA | -0.1357  | -0.288666148 | 0.024017844 | 9.55E-02 | 3.03E-01 | 1.00E+00 |
| ENSG00000224861.1_YBX1P1    | ENSG00000160789.18_LMNA | 0.07207  | -0.088141535 | 0.228647747 | 3.78E-01 | 6.57E-01 | 1.00E+00 |
| ENSG00000169410.8_PTPN9     | ENSG00000160789.18_LMNA | 0.53532  | 0.411162665  | 0.639981635 | 1.20E-12 | 6.28E-10 | 6.15E-08 |
| ENSG00000163531.14_NFASC    | ENSG00000160789.18_LMNA | -0.1446  | -0.296961743 | 0.01494771  | 7.55E-02 | 2.62E-01 | 1.00E+00 |
| ENSG00000213598.4_RP11-112J | ENSG00000160789.18_LMNA | -0.08781 | -0.243602705 | 0.072405536 | 2.82E-01 | 5.67E-01 | 1.00E+00 |
| ENSG00000168556.6_ING2      | ENSG00000160789.18_LMNA | 0.02529  | -0.134449432 | 0.183753444 | 7.57E-01 | 8.99E-01 | 1.00E+00 |
| ENSG00000186866.15_POFUT2   | ENSG00000160789.18_LMNA | 0.43531  | 0.296665963  | 0.555978081 | 2.09E-08 | 2.00E-06 | 1.07E-03 |
| ENSG00000164089.7_ETNPPL    | ENSG00000160789.18_LMNA | -0.45833 | -0.575533108 | -0.32266993 | 2.89E-09 | 3.77E-07 | 1.48E-04 |
| ENSG00000101773.15_RBBP8    | ENSG00000160789.18_LMNA | 0.08927  | -0.070939395 | 0.244988465 | 2.74E-01 | 5.59E-01 | 1.00E+00 |
| ENSG00000136770.9_DNAJC1    | ENSG00000160789.18_LMNA | 0.0229   | -0.136802493 | 0.181436212 | 7.79E-01 | 9.09E-01 | 1.00E+00 |
| ENSG00000152642.9_GPD1L     | ENSG00000160789.18_LMNA | -0.30342 | -0.441307343 | -0.15154381 | 1.45E-04 | 2.53E-03 | 1.00E+00 |
| ENSG00000114742.12_WDR48    | ENSG00000160789.18_LMNA | -0.4163  | -0.539732349 | -0.27535117 | 9.59E-08 | 6.99E-06 | 4.92E-03 |
| ENSG00000100304.12_TTLL12   | ENSG00000160789.18_LMNA | 0.10667  | -0.053442929 | 0.261426663 | 1.91E-01 | 4.59E-01 | 1.00E+00 |
| ENSG00000198060.8_MARCH5    | ENSG00000160789.18_LMNA | -0.42758 | -0.54938477  | -0.28798412 | 3.92E-08 | 3.38E-06 | 2.01E-03 |
| ENSG00000188322.4_SBK1      | ENSG00000160789.18_LMNA | -0.26421 | -0.406321157 | -0.10962167 | 1.00E-03 | 1.16E-02 | 1.00E+00 |
| ENSG00000134330.17_IAH1     | ENSG00000160789.18_LMNA | 0.04619  | -0.113850658 | 0.203888693 | 5.72E-01 | 8.00E-01 | 1.00E+00 |

|                             |                         |          |              |             |          |          |          |
|-----------------------------|-------------------------|----------|--------------|-------------|----------|----------|----------|
| ENSG00000066084.11_DIP2B    | ENSG00000160789.18_LMNA | -0.19558 | -0.344067965 | -0.03754878 | 1.57E-02 | 9.08E-02 | 1.00E+00 |
| ENSG00000130349.8_C6orf203  | ENSG00000160789.18_LMNA | -0.09612 | -0.251472665 | 0.064060891 | 2.39E-01 | 5.18E-01 | 1.00E+00 |
| ENSG00000080603.15_SRCAP    | ENSG00000160789.18_LMNA | 0.16978  | 0.010872345  | 0.320321911 | 3.65E-02 | 1.63E-01 | 1.00E+00 |
| ENSG00000154473.16_BUB3     | ENSG00000160789.18_LMNA | -0.25597 | -0.398917441 | -0.10088347 | 1.46E-03 | 1.54E-02 | 1.00E+00 |
| ENSG00000136560.12_TANK     | ENSG00000160789.18_LMNA | 0.1551   | -0.004206026 | 0.306725626 | 5.64E-02 | 2.17E-01 | 1.00E+00 |
| ENSG00000105127.7_AKAP8     | ENSG00000160789.18_LMNA | 0.18352  | 0.025049894  | 0.332990674 | 2.36E-02 | 1.22E-01 | 1.00E+00 |
| ENSG00000117335.17_CD46     | ENSG00000160789.18_LMNA | 0.08181  | -0.078409031 | 0.237914861 | 3.16E-01 | 6.03E-01 | 1.00E+00 |
| ENSG00000126858.15_RHOT1    | ENSG00000160789.18_LMNA | -0.41961 | -0.542568937 | -0.27905421 | 7.40E-08 | 5.65E-06 | 3.80E-03 |
| ENSG00000139116.16_KIF21A   | ENSG00000160789.18_LMNA | -0.25974 | -0.402309209 | -0.10488089 | 1.23E-03 | 1.35E-02 | 1.00E+00 |
| ENSG00000175931.11_UBE2O    | ENSG00000160789.18_LMNA | -0.04769 | -0.205332171 | 0.112363382 | 5.60E-01 | 7.92E-01 | 1.00E+00 |
| ENSG00000106853.15_PTGR1    | ENSG00000160789.18_LMNA | 0.28419  | 0.130907934  | 0.424195029 | 3.88E-04 | 5.53E-03 | 1.00E+00 |
| ENSG00000132466.16_ANKRD17  | ENSG00000160789.18_LMNA | 0.13615  | -0.023560336 | 0.289085715 | 9.44E-02 | 3.01E-01 | 1.00E+00 |
| ENSG00000164830.16_OXR1     | ENSG00000160789.18_LMNA | -0.28573 | -0.425574197 | -0.13256172 | 3.59E-04 | 5.17E-03 | 1.00E+00 |
| ENSG00000173599.12_PC       | ENSG00000160789.18_LMNA | -0.14203 | -0.294572395 | 0.01756542  | 8.09E-02 | 2.74E-01 | 1.00E+00 |
| ENSG00000138623.8_SEMA7A    | ENSG00000160789.18_LMNA | 0.14981  | -0.009624722 | 0.301808352 | 6.55E-02 | 2.39E-01 | 1.00E+00 |
| ENSG00000163823.3_CCR1      | ENSG00000160789.18_LMNA | 0.03875  | -0.121202238 | 0.19673326  | 6.36E-01 | 8.37E-01 | 1.00E+00 |
| ENSG00000170633.15_RNF34    | ENSG00000160789.18_LMNA | -0.10729 | -0.262013788 | 0.05281441  | 1.88E-01 | 4.55E-01 | 1.00E+00 |
| ENSG00000182704.7_TSKU      | ENSG00000160789.18_LMNA | 0.39908  | 0.256152668  | 0.524929085 | 3.53E-07 | 2.00E-05 | 1.81E-02 |
| ENSG00000110237.3_ARHGEF17  | ENSG00000160789.18_LMNA | 0.1681   | 0.00914082   | 0.318767034 | 3.84E-02 | 1.69E-01 | 1.00E+00 |
| ENSG00000196586.12_MYO6     | ENSG00000160789.18_LMNA | -0.0795  | -0.235719008 | 0.080720622 | 3.30E-01 | 6.16E-01 | 1.00E+00 |
| ENSG00000163536.11_SERPINI1 | ENSG00000160789.18_LMNA | -0.24136 | -0.385739473 | -0.08544317 | 2.74E-03 | 2.49E-02 | 1.00E+00 |
| ENSG00000132300.17_PTCD3    | ENSG00000160789.18_LMNA | -0.31372 | -0.450427065 | -0.16264551 | 8.29E-05 | 1.62E-03 | 1.00E+00 |
| ENSG00000092445.10_TYRO3    | ENSG00000160789.18_LMNA | 0.25273  | 0.097453259  | 0.396000427 | 1.68E-03 | 1.72E-02 | 1.00E+00 |
| ENSG00000143442.20_POGZ     | ENSG00000160789.18_LMNA | -0.00115 | -0.160316901 | 0.158084096 | 9.89E-01 | 9.96E-01 | 1.00E+00 |
| ENSG00000117682.15_DHDDS    | ENSG00000160789.18_LMNA | 0.33289  | 0.1834065    | 0.467321958 | 2.78E-05 | 6.73E-04 | 1.00E+00 |
| ENSG00000070061.13_IKBKAP   | ENSG00000160789.18_LMNA | 0.00028  | -0.158926016 | 0.159475363 | 9.97E-01 | 9.99E-01 | 1.00E+00 |
| ENSG00000103490.13_PYCARD   | ENSG00000160789.18_LMNA | 0.03952  | -0.120440801 | 0.197475957 | 6.29E-01 | 8.33E-01 | 1.00E+00 |
| ENSG00000227036.5_LINC00511 | ENSG00000160789.18_LMNA | -0.25384 | -0.397000723 | -0.09862874 | 1.60E-03 | 1.65E-02 | 1.00E+00 |
| ENSG00000066697.13_MSANTD3  | ENSG00000160789.18_LMNA | 0.06503  | -0.095154203 | 0.221934633 | 4.26E-01 | 6.97E-01 | 1.00E+00 |
| ENSG00000104973.13_MED25    | ENSG00000160789.18_LMNA | 0.12144  | -0.038505873 | 0.275317206 | 1.36E-01 | 3.76E-01 | 1.00E+00 |
| ENSG00000131626.14_PPFIA1   | ENSG00000160789.18_LMNA | 0.11897  | -0.041012279 | 0.272995516 | 1.44E-01 | 3.89E-01 | 1.00E+00 |
| ENSG00000104894.10_CD37     | ENSG00000160789.18_LMNA | -0.04565 | -0.203369033 | 0.114385738 | 5.77E-01 | 8.03E-01 | 1.00E+00 |
| ENSG00000107362.12_ABHD17B  | ENSG00000160789.18_LMNA | -0.34732 | -0.479978752 | -0.1991273  | 1.17E-05 | 3.30E-04 | 5.98E-01 |

|                             |                         |          |              |             |          |          |          |
|-----------------------------|-------------------------|----------|--------------|-------------|----------|----------|----------|
| ENSG00000105379.8_ETFB      | ENSG00000160789.18_LMNA | 0.18048  | 0.021909279  | 0.330193838 | 2.61E-02 | 1.30E-01 | 1.00E+00 |
| ENSG00000166164.14_BRD7     | ENSG00000160789.18_LMNA | -0.01581 | -0.17456657  | 0.143757312 | 8.47E-01 | 9.40E-01 | 1.00E+00 |
| ENSG00000054983.15_GALC     | ENSG00000160789.18_LMNA | 0.16683  | 0.007838711  | 0.317596666 | 3.99E-02 | 1.73E-01 | 1.00E+00 |
| ENSG00000047932.12_GOPC     | ENSG00000160789.18_LMNA | -0.13605 | -0.288987237 | 0.023667731 | 9.47E-02 | 3.01E-01 | 1.00E+00 |
| ENSG00000124164.14_VAPB     | ENSG00000160789.18_LMNA | 0.06235  | -0.097818616 | 0.219376128 | 4.45E-01 | 7.12E-01 | 1.00E+00 |
| ENSG00000113851.12_CRBN     | ENSG00000160789.18_LMNA | -0.49257 | -0.604379372 | -0.36173898 | 1.15E-10 | 2.51E-08 | 5.90E-06 |
| ENSG00000178307.8_TMEN11    | ENSG00000160789.18_LMNA | 0.0255   | -0.134249546 | 0.183950124 | 7.55E-01 | 8.98E-01 | 1.00E+00 |
| ENSG00000111602.10_TIMELES  | ENSG00000160789.18_LMNA | 0.07883  | -0.081387851 | 0.235084586 | 3.34E-01 | 6.20E-01 | 1.00E+00 |
| ENSG00000197063.9_MAFG      | ENSG00000160789.18_LMNA | 0.27465  | 0.120722922  | 0.415671188 | 6.17E-04 | 7.96E-03 | 1.00E+00 |
| ENSG00000112685.12_EXOC2    | ENSG00000160789.18_LMNA | -0.03919 | -0.19715776  | 0.120767073 | 6.32E-01 | 8.35E-01 | 1.00E+00 |
| ENSG00000131381.11_RBSN     | ENSG00000160789.18_LMNA | -0.3144  | -0.451023487 | -0.1633741  | 7.99E-05 | 1.57E-03 | 1.00E+00 |
| ENSG00000075089.8_ACTR6     | ENSG00000160789.18_LMNA | -0.25447 | -0.397569052 | -0.09929697 | 1.56E-03 | 1.62E-02 | 1.00E+00 |
| ENSG00000118217.5_ATF6      | ENSG00000160789.18_LMNA | 0.12579  | -0.034090983 | 0.279397846 | 1.23E-01 | 3.53E-01 | 1.00E+00 |
| ENSG00000176076.7_KCNE5     | ENSG00000160789.18_LMNA | -0.14057 | -0.293205423 | 0.019061118 | 8.41E-02 | 2.81E-01 | 1.00E+00 |
| ENSG00000167720.11_SRR      | ENSG00000160789.18_LMNA | -0.1572  | -0.308676795 | 0.002050821 | 5.31E-02 | 2.09E-01 | 1.00E+00 |
| ENSG00000269028.3_MTRNR2L1  | ENSG00000160789.18_LMNA | -0.2158  | -0.362542645 | -0.05860996 | 7.58E-03 | 5.34E-02 | 1.00E+00 |
| ENSG00000107949.15_BCCIP    | ENSG00000160789.18_LMNA | -0.22767 | -0.373343186 | -0.07104921 | 4.79E-03 | 3.80E-02 | 1.00E+00 |
| ENSG00000163964.12_PIGX     | ENSG00000160789.18_LMNA | 0.06766  | -0.092540673 | 0.224440042 | 4.08E-01 | 6.83E-01 | 1.00E+00 |
| ENSG00000135838.12_NPL      | ENSG00000160789.18_LMNA | -0.10102 | -0.256099849 | 0.05913393  | 2.16E-01 | 4.90E-01 | 1.00E+00 |
| ENSG00000164818.14_DNAAF5   | ENSG00000160789.18_LMNA | 0.38587  | 0.241499622  | 0.513520175 | 9.13E-07 | 4.26E-05 | 4.69E-02 |
| ENSG00000118162.12_KPTN     | ENSG00000160789.18_LMNA | 0.0512   | -0.108887233 | 0.208700568 | 5.31E-01 | 7.74E-01 | 1.00E+00 |
| ENSG00000214391.3_TUBAP2    | ENSG00000160789.18_LMNA | -0.12394 | -0.27766097  | 0.035971625 | 1.28E-01 | 3.62E-01 | 1.00E+00 |
| ENSG00000240731.1_RP5-890O3 | ENSG00000160789.18_LMNA | 0.07311  | -0.08710174  | 0.229640568 | 3.71E-01 | 6.51E-01 | 1.00E+00 |
| ENSG00000175161.12_CADM2    | ENSG00000160789.18_LMNA | -0.50579 | -0.615437444 | -0.37694535 | 3.00E-11 | 8.31E-09 | 1.54E-06 |
| ENSG00000110031.11_LPXN     | ENSG00000160789.18_LMNA | -0.00723 | -0.166241684 | 0.152143487 | 9.30E-01 | 9.73E-01 | 1.00E+00 |
| ENSG00000112769.17_LAMA4    | ENSG00000160789.18_LMNA | 0.39668  | 0.253491428  | 0.522864188 | 4.21E-07 | 2.29E-05 | 2.16E-02 |
| ENSG00000126821.7_SGPP1     | ENSG00000160789.18_LMNA | -0.01277 | -0.171621471 | 0.146729328 | 8.76E-01 | 9.52E-01 | 1.00E+00 |
| ENSG00000198959.10_TGM2     | ENSG00000160789.18_LMNA | 0.26449  | 0.109920881  | 0.406573985 | 9.92E-04 | 1.15E-02 | 1.00E+00 |
| ENSG00000275023.3_MLLT6     | ENSG00000160789.18_LMNA | -0.0446  | -0.20236051  | 0.115423659 | 5.85E-01 | 8.07E-01 | 1.00E+00 |
| ENSG00000134046.10_MBD2     | ENSG00000160789.18_LMNA | 0.39086  | 0.247030691  | 0.517838013 | 6.41E-07 | 3.20E-05 | 3.29E-02 |
| ENSG00000164610.7_RP9       | ENSG00000160789.18_LMNA | 0.1253   | -0.034588106 | 0.278938925 | 1.24E-01 | 3.55E-01 | 1.00E+00 |
| ENSG00000170464.8_DNAJC18   | ENSG00000160789.18_LMNA | -0.52193 | -0.628876534 | -0.39560064 | 5.37E-12 | 2.13E-09 | 2.75E-07 |
| ENSG00000274712.1_RP11-147L | ENSG00000160789.18_LMNA | -0.19699 | -0.345359749 | -0.03901262 | 1.50E-02 | 8.79E-02 | 1.00E+00 |

|                             |                         |          |              |             |          |          |          |
|-----------------------------|-------------------------|----------|--------------|-------------|----------|----------|----------|
| ENSG00000086062.11_B4GALT1  | ENSG00000160789.18_LMNA | 0.33498  | 0.185686539  | 0.469164858 | 2.46E-05 | 6.11E-04 | 1.00E+00 |
| ENSG00000100321.13_SYNGR1   | ENSG00000160789.18_LMNA | -0.21865 | -0.365136593 | -0.06158889 | 6.81E-03 | 4.93E-02 | 1.00E+00 |
| ENSG00000173465.6_SSSCA1    | ENSG00000160789.18_LMNA | -0.01603 | -0.174788187 | 0.143533437 | 8.45E-01 | 9.39E-01 | 1.00E+00 |
| ENSG00000121413.11_ZSCAN18  | ENSG00000160789.18_LMNA | -0.01607 | -0.174822825 | 0.143498443 | 8.44E-01 | 9.39E-01 | 1.00E+00 |
| ENSG00000204253.4_HNRNPCP2  | ENSG00000160789.18_LMNA | -0.04748 | -0.205132081 | 0.112569628 | 5.61E-01 | 7.93E-01 | 1.00E+00 |
| ENSG00000185591.8_SP1       | ENSG00000160789.18_LMNA | 0.24924  | 0.093755092  | 0.392848782 | 1.96E-03 | 1.92E-02 | 1.00E+00 |
| ENSG00000128708.11_HAT1     | ENSG00000160789.18_LMNA | 0.03938  | -0.120572338 | 0.197347683 | 6.30E-01 | 8.34E-01 | 1.00E+00 |
| ENSG00000237214.3_RP11-12M9 | ENSG00000160789.18_LMNA | -0.04826 | -0.205882321 | 0.111796164 | 5.55E-01 | 7.89E-01 | 1.00E+00 |
| ENSG00000136699.18_SMPD4    | ENSG00000160789.18_LMNA | 0.17113  | 0.012262004  | 0.321568594 | 3.50E-02 | 1.59E-01 | 1.00E+00 |
| ENSG00000172845.12_SP3      | ENSG00000160789.18_LMNA | 0.09531  | -0.064871741 | 0.250709767 | 2.43E-01 | 5.22E-01 | 1.00E+00 |
| ENSG00000112584.12_FAM120B  | ENSG00000160789.18_LMNA | -0.01852 | -0.177198956 | 0.141095998 | 8.21E-01 | 9.30E-01 | 1.00E+00 |
| ENSG00000276269.1_RP11-403A | ENSG00000160789.18_LMNA | 0.06006  | -0.100099937 | 0.217182016 | 4.62E-01 | 7.25E-01 | 1.00E+00 |
| ENSG00000155229.19_MMS19    | ENSG00000160789.18_LMNA | 0.21939  | 0.062365299  | 0.365811891 | 6.61E-03 | 4.83E-02 | 1.00E+00 |
| ENSG00000132702.11_HAPLN2   | ENSG00000160789.18_LMNA | -0.21544 | -0.362218979 | -0.05823864 | 7.69E-03 | 5.39E-02 | 1.00E+00 |
| ENSG00000005812.9_FBXL3     | ENSG00000160789.18_LMNA | -0.24931 | -0.392919533 | -0.09383802 | 1.95E-03 | 1.92E-02 | 1.00E+00 |
| ENSG00000182810.6_DDX28     | ENSG00000160789.18_LMNA | -0.08018 | -0.236368086 | 0.080037687 | 3.26E-01 | 6.13E-01 | 1.00E+00 |
| ENSG00000100335.11_MIEF1    | ENSG00000160789.18_LMNA | -0.07427 | -0.230744631 | 0.085944629 | 3.63E-01 | 6.45E-01 | 1.00E+00 |
| ENSG00000164024.10_METAP1   | ENSG00000160789.18_LMNA | -0.1118  | -0.266256943 | 0.048264667 | 1.70E-01 | 4.29E-01 | 1.00E+00 |
| ENSG00000143797.10_MBOAT2   | ENSG00000160789.18_LMNA | -0.12843 | -0.281864221 | 0.031416639 | 1.15E-01 | 3.39E-01 | 1.00E+00 |
| ENSG00000144191.10_CNGA3    | ENSG00000160789.18_LMNA | 0.0438   | -0.116212177 | 0.201593877 | 5.92E-01 | 8.11E-01 | 1.00E+00 |
| ENSG00000198853.10_RUSC2    | ENSG00000160789.18_LMNA | -0.02166 | -0.180238088 | 0.138017736 | 7.91E-01 | 9.15E-01 | 1.00E+00 |
| ENSG00000164758.6_MED30     | ENSG00000160789.18_LMNA | -0.17188 | -0.322259785 | -0.01303298 | 3.42E-02 | 1.56E-01 | 1.00E+00 |
| ENSG00000158856.16_DMTN     | ENSG00000160789.18_LMNA | -0.05461 | -0.211968656 | 0.105507162 | 5.04E-01 | 7.55E-01 | 1.00E+00 |
| ENSG00000108256.7_NUFIP2    | ENSG00000160789.18_LMNA | 0.24928  | 0.09380264   | 0.392889349 | 1.95E-03 | 1.92E-02 | 1.00E+00 |
| ENSG00000136811.15_ODF2     | ENSG00000160789.18_LMNA | 0.26732  | 0.112921114  | 0.409106619 | 8.71E-04 | 1.04E-02 | 1.00E+00 |
| ENSG00000160208.12_RRP1B    | ENSG00000160789.18_LMNA | 0.17333  | 0.014533463  | 0.323604046 | 3.27E-02 | 1.51E-01 | 1.00E+00 |
| ENSG00000110090.11_CPT1A    | ENSG00000160789.18_LMNA | 0.02018  | -0.139468405 | 0.178806616 | 8.05E-01 | 9.22E-01 | 1.00E+00 |
| ENSG00000064042.16_LIMCH1   | ENSG00000160789.18_LMNA | -0.24649 | -0.39037141  | -0.0908539  | 2.20E-03 | 2.11E-02 | 1.00E+00 |
| ENSG00000172939.7_OXSR1     | ENSG00000160789.18_LMNA | -0.01507 | -0.173855302 | 0.144475607 | 8.54E-01 | 9.43E-01 | 1.00E+00 |
| ENSG00000068400.12_GRIPAP1  | ENSG00000160789.18_LMNA | 0.14933  | -0.010106119 | 0.301370699 | 6.63E-02 | 2.41E-01 | 1.00E+00 |
| ENSG00000233929.1_MT1XP1    | ENSG00000160789.18_LMNA | 0.11838  | -0.041607258 | 0.272443848 | 1.46E-01 | 3.92E-01 | 1.00E+00 |
| ENSG00000151414.13_NEK7     | ENSG00000160789.18_LMNA | -0.3208  | -0.45668153  | -0.17030161 | 5.59E-05 | 1.17E-03 | 1.00E+00 |
| ENSG00000186815.11_TPCN1    | ENSG00000160789.18_LMNA | 0.11843  | -0.041552634 | 0.272494504 | 1.46E-01 | 3.92E-01 | 1.00E+00 |

|                             |                         |          |              |             |          |          |          |
|-----------------------------|-------------------------|----------|--------------|-------------|----------|----------|----------|
| ENSG00000155329.10_ZCCHC10  | ENSG00000160789.18_LMNA | -0.23768 | -0.382411259 | -0.08156626 | 3.19E-03 | 2.80E-02 | 1.00E+00 |
| ENSG00000114554.10_PLXNA1   | ENSG00000160789.18_LMNA | 0.4597   | 0.324226521  | 0.576694566 | 2.56E-09 | 3.41E-07 | 1.31E-04 |
| ENSG00000214548.13_MEG3     | ENSG00000160789.18_LMNA | 0.022    | -0.137679354 | 0.180571798 | 7.88E-01 | 9.14E-01 | 1.00E+00 |
| ENSG00000134802.16_SLC43A3  | ENSG00000160789.18_LMNA | 0.44593  | 0.30863972   | 0.565018166 | 8.54E-09 | 9.44E-07 | 4.38E-04 |
| ENSG00000119929.11_CUTC     | ENSG00000160789.18_LMNA | -0.3657  | -0.496025405 | -0.21926859 | 3.60E-06 | 1.28E-04 | 1.85E-01 |
| ENSG00000153208.15_MERTK    | ENSG00000160789.18_LMNA | -0.10658 | -0.261344946 | 0.053530388 | 1.91E-01 | 4.59E-01 | 1.00E+00 |
| ENSG00000163686.12_ABHD6    | ENSG00000160789.18_LMNA | -0.43461 | -0.555382659 | -0.29588017 | 2.21E-08 | 2.11E-06 | 1.13E-03 |
| ENSG00000249264.1_EEF1A1P9  | ENSG00000160789.18_LMNA | -0.16273 | -0.31380469  | -0.0036271  | 4.52E-02 | 1.88E-01 | 1.00E+00 |
| ENSG00000023041.10_ZDHC6    | ENSG00000160789.18_LMNA | -0.01272 | -0.171572196 | 0.146779005 | 8.76E-01 | 9.52E-01 | 1.00E+00 |
| ENSG00000070047.10_PHRF1    | ENSG00000160789.18_LMNA | 0.35339  | 0.20576153   | 0.485285109 | 7.98E-06 | 2.44E-04 | 4.09E-01 |
| ENSG00000181704.10_YIPF6    | ENSG00000160789.18_LMNA | -0.25984 | -0.402395885 | -0.10498317 | 1.23E-03 | 1.35E-02 | 1.00E+00 |
| ENSG00000153066.11_TXNDC11  | ENSG00000160789.18_LMNA | 0.14812  | -0.011344453 | 0.300244286 | 6.86E-02 | 2.46E-01 | 1.00E+00 |
| ENSG00000047457.12_CP       | ENSG00000160789.18_LMNA | 0.10766  | -0.052440568 | 0.262362898 | 1.87E-01 | 4.53E-01 | 1.00E+00 |
| ENSG00000187147.16_RNF220   | ENSG00000160789.18_LMNA | -0.04056 | -0.198476798 | 0.119414114 | 6.20E-01 | 8.28E-01 | 1.00E+00 |
| ENSG00000128872.8_TMOD2     | ENSG00000160789.18_LMNA | -0.20831 | -0.355715404 | -0.05079524 | 1.00E-02 | 6.57E-02 | 1.00E+00 |
| ENSG00000088543.13_C3orf18  | ENSG00000160789.18_LMNA | -0.09887 | -0.254072813 | 0.061294182 | 2.26E-01 | 5.02E-01 | 1.00E+00 |
| ENSG00000187676.7_B3GLCT    | ENSG00000160789.18_LMNA | -0.10673 | -0.261483026 | 0.053382603 | 1.91E-01 | 4.58E-01 | 1.00E+00 |
| ENSG00000189339.10_SLC35E2F | ENSG00000160789.18_LMNA | -0.08791 | -0.243695696 | 0.072307194 | 2.82E-01 | 5.67E-01 | 1.00E+00 |
| ENSG00000141562.16_NARF     | ENSG00000160789.18_LMNA | -0.12871 | -0.282127709 | 0.031130667 | 1.14E-01 | 3.37E-01 | 1.00E+00 |
| ENSG00000165102.13_HGSNAT   | ENSG00000160789.18_LMNA | 0.33808  | 0.189053905  | 0.47188211  | 2.05E-05 | 5.27E-04 | 1.00E+00 |
| ENSG00000151689.11_INPP1    | ENSG00000160789.18_LMNA | -0.53883 | -0.64287915  | -0.41524513 | 8.02E-13 | 4.78E-10 | 4.11E-08 |
| ENSG00000167733.12_HSD11B1  | ENSG00000160789.18_LMNA | -0.279   | -0.41956337  | -0.12536594 | 5.00E-04 | 6.74E-03 | 1.00E+00 |
| ENSG00000094631.17_HDAC6    | ENSG00000160789.18_LMNA | 0.08425  | -0.075968373 | 0.240229815 | 3.02E-01 | 5.89E-01 | 1.00E+00 |
| ENSG00000065057.6_NTHL1     | ENSG00000160789.18_LMNA | -0.16489 | -0.315799097 | -0.00584084 | 4.24E-02 | 1.80E-01 | 1.00E+00 |
| ENSG00000007171.15_NOS2     | ENSG00000160789.18_LMNA | 0.11486  | -0.045171203 | 0.269135007 | 1.59E-01 | 4.12E-01 | 1.00E+00 |
| ENSG00000069399.11_BCL3     | ENSG00000160789.18_LMNA | 0.62718  | 0.519883657  | 0.714987159 | 5.39E-18 | 1.97E-14 | 2.77E-13 |
| ENSG00000025156.11_HSF2     | ENSG00000160789.18_LMNA | -0.35681 | -0.488274789 | -0.2095107  | 6.42E-06 | 2.04E-04 | 3.29E-01 |
| ENSG00000112739.15_PRPF4B   | ENSG00000160789.18_LMNA | 0.01296  | -0.146539077 | 0.17181017  | 8.74E-01 | 9.51E-01 | 1.00E+00 |
| ENSG00000131374.13_TBC1D5   | ENSG00000160789.18_LMNA | -0.10047 | -0.255585018 | 0.059682875 | 2.18E-01 | 4.93E-01 | 1.00E+00 |
| ENSG00000109083.12_IPT20    | ENSG00000160789.18_LMNA | -0.37281 | -0.50220658  | -0.22709047 | 2.24E-06 | 8.73E-05 | 1.15E-01 |
| ENSG00000141447.15_OSPL1A   | ENSG00000160789.18_LMNA | -0.20729 | -0.354783602 | -0.04973156 | 1.04E-02 | 6.73E-02 | 1.00E+00 |
| ENSG00000031081.9_ARHGAP31  | ENSG00000160789.18_LMNA | -0.19444 | -0.34301835  | -0.03636034 | 1.64E-02 | 9.35E-02 | 1.00E+00 |
| ENSG00000124571.16_XPO5     | ENSG00000160789.18_LMNA | 0.04473  | -0.115291153 | 0.202489301 | 5.84E-01 | 8.07E-01 | 1.00E+00 |

|                             |                         |          |              |             |          |          |          |
|-----------------------------|-------------------------|----------|--------------|-------------|----------|----------|----------|
| ENSG00000203993.4_ARRDC1-A  | ENSG00000160789.18_LMNA | -0.06524 | -0.222136922 | 0.094943346 | 4.25E-01 | 6.95E-01 | 1.00E+00 |
| ENSG00000068305.16_MEF2A    | ENSG00000160789.18_LMNA | 0.06674  | -0.093451743 | 0.223567138 | 4.14E-01 | 6.87E-01 | 1.00E+00 |
| ENSG00000233016.5_SNHG7     | ENSG00000160789.18_LMNA | -0.00581 | -0.164853573 | 0.153537373 | 9.43E-01 | 9.77E-01 | 1.00E+00 |
| ENSG00000170242.16_USP47    | ENSG00000160789.18_LMNA | 0.04636  | -0.113674974 | 0.204059275 | 5.71E-01 | 7.99E-01 | 1.00E+00 |
| ENSG00000147526.18_TACC1    | ENSG00000160789.18_LMNA | 0.28447  | 0.131213679  | 0.424450106 | 3.82E-04 | 5.46E-03 | 1.00E+00 |
| ENSG00000159079.17_C21orf59 | ENSG00000160789.18_LMNA | 0.33011  | 0.180384112  | 0.464875226 | 3.28E-05 | 7.68E-04 | 1.00E+00 |
| ENSG00000146828.16_SLC12A9  | ENSG00000160789.18_LMNA | 0.337    | 0.187882526  | 0.47093749  | 2.18E-05 | 5.54E-04 | 1.00E+00 |
| ENSG00000169592.13_INO80E   | ENSG00000160789.18_LMNA | 0.05798  | -0.10215879  | 0.215199111 | 4.78E-01 | 7.36E-01 | 1.00E+00 |
| ENSG00000080546.12_SESN1    | ENSG00000160789.18_LMNA | -0.41616 | -0.539614174 | -0.27519707 | 9.69E-08 | 7.03E-06 | 4.97E-03 |
| ENSG00000137714.2_FDX1      | ENSG00000160789.18_LMNA | -0.02472 | -0.183200973 | 0.135010771 | 7.62E-01 | 9.01E-01 | 1.00E+00 |
| ENSG00000111445.12_RFC5     | ENSG00000160789.18_LMNA | -0.15703 | -0.308515276 | 0.00222934  | 5.34E-02 | 2.10E-01 | 1.00E+00 |
| ENSG00000139192.10_TAPBPL   | ENSG00000160789.18_LMNA | 0.13578  | -0.023939252 | 0.288738231 | 9.53E-02 | 3.02E-01 | 1.00E+00 |
| ENSG00000162373.11_BEND5    | ENSG00000160789.18_LMNA | -0.20226 | -0.350183147 | -0.04449008 | 1.25E-02 | 7.68E-02 | 1.00E+00 |
| ENSG00000108582.10_CPD      | ENSG00000160789.18_LMNA | 0.20893  | 0.051443863  | 0.356283304 | 9.79E-03 | 6.46E-02 | 1.00E+00 |
| ENSG00000143457.9_GOLPH3L   | ENSG00000160789.18_LMNA | -0.05644 | -0.21372082  | 0.103691935 | 4.90E-01 | 7.46E-01 | 1.00E+00 |
| ENSG00000231584.7_FAHD2CP   | ENSG00000160789.18_LMNA | -0.14358 | -0.296015948 | 0.01598441  | 7.76E-02 | 2.67E-01 | 1.00E+00 |
| ENSG00000071242.10_RPS6KA2  | ENSG00000160789.18_LMNA | 0.20296  | 0.045217491  | 0.350822477 | 1.22E-02 | 7.55E-02 | 1.00E+00 |
| ENSG00000197601.11_FAR1     | ENSG00000160789.18_LMNA | -0.13094 | -0.284218964 | 0.028859147 | 1.08E-01 | 3.27E-01 | 1.00E+00 |
| ENSG00000114416.16_FXR1     | ENSG00000160789.18_LMNA | -0.00962 | -0.168565291 | 0.149807376 | 9.06E-01 | 9.64E-01 | 1.00E+00 |
| ENSG00000164209.15_SLC25A4  | ENSG00000160789.18_LMNA | -0.33441 | -0.468663329 | -0.18506574 | 2.54E-05 | 6.26E-04 | 1.00E+00 |
| ENSG00000105993.13_DNAJB6   | ENSG00000160789.18_LMNA | 0.08497  | -0.075246498 | 0.240913821 | 2.98E-01 | 5.84E-01 | 1.00E+00 |
| ENSG00000130635.14_COL5A1   | ENSG00000160789.18_LMNA | 0.48209  | 0.349727629  | 0.595578119 | 3.21E-10 | 6.05E-08 | 1.64E-05 |
| ENSG00000121481.9_RNF2      | ENSG00000160789.18_LMNA | -0.21476 | -0.361594729 | -0.05752271 | 7.89E-03 | 5.50E-02 | 1.00E+00 |
| ENSG00000160214.11_RRP1     | ENSG00000160789.18_LMNA | 0.32933  | 0.179539454  | 0.464190667 | 3.43E-05 | 7.97E-04 | 1.00E+00 |
| ENSG00000198791.10_CNOT7    | ENSG00000160789.18_LMNA | -0.37518 | -0.504263763 | -0.2297016  | 1.91E-06 | 7.71E-05 | 9.81E-02 |
| ENSG00000126005.14_MMP24-A  | ENSG00000160789.18_LMNA | 0.05928  | -0.100875694 | 0.216435183 | 4.68E-01 | 7.29E-01 | 1.00E+00 |
| ENSG00000126603.7_GLIS2     | ENSG00000160789.18_LMNA | 0.10153  | -0.058622183 | 0.256579632 | 2.13E-01 | 4.87E-01 | 1.00E+00 |
| ENSG00000125755.17_SYMPK    | ENSG00000160789.18_LMNA | 0.19502  | 0.036971501  | 0.343558215 | 1.61E-02 | 9.21E-02 | 1.00E+00 |
| ENSG00000009844.14_VTA1     | ENSG00000160789.18_LMNA | -0.30174 | -0.439810924 | -0.14972913 | 1.58E-04 | 2.72E-03 | 1.00E+00 |
| ENSG00000126903.14_SLC10A3  | ENSG00000160789.18_LMNA | 0.50193  | 0.372498657  | 0.612213493 | 4.46E-11 | 1.17E-08 | 2.29E-06 |
| ENSG00000101407.11_TTI1     | ENSG00000160789.18_LMNA | 0.1162   | -0.043806437 | 0.270402962 | 1.54E-01 | 4.04E-01 | 1.00E+00 |
| ENSG00000103479.13_RBL2     | ENSG00000160789.18_LMNA | -0.07854 | -0.234807936 | 0.081678717 | 3.36E-01 | 6.22E-01 | 1.00E+00 |
| ENSG00000152127.7_MGAT5     | ENSG00000160789.18_LMNA | 0.00083  | -0.158388874 | 0.160012315 | 9.92E-01 | 9.97E-01 | 1.00E+00 |



|                            |                         |          |              |             |          |          |          |
|----------------------------|-------------------------|----------|--------------|-------------|----------|----------|----------|
| ENSG00000114982.16_KANSL3  | ENSG00000160789.18_LMNA | -0.00854 | -0.16750891  | 0.150869883 | 9.17E-01 | 9.68E-01 | 1.00E+00 |
| ENSG00000177108.5_ZDHC22   | ENSG00000160789.18_LMNA | -0.38911 | -0.516328856 | -0.24509548 | 7.26E-07 | 3.55E-05 | 3.72E-02 |
| ENSG00000175137.10_SH3BP5L | ENSG00000160789.18_LMNA | 0.09546  | -0.064720187 | 0.250852388 | 2.42E-01 | 5.21E-01 | 1.00E+00 |
| ENSG00000239887.4_C1orf226 | ENSG00000160789.18_LMNA | -0.04933 | -0.206901647 | 0.110744667 | 5.46E-01 | 7.84E-01 | 1.00E+00 |
| ENSG00000198783.5_ZNF830   | ENSG00000160789.18_LMNA | 0.13314  | -0.026621269 | 0.286276337 | 1.02E-01 | 3.15E-01 | 1.00E+00 |
| ENSG00000135164.17_DMTF1   | ENSG00000160789.18_LMNA | -0.0164  | -0.175140166 | 0.143177805 | 8.41E-01 | 9.38E-01 | 1.00E+00 |
| ENSG00000171368.11_TPPP    | ENSG00000160789.18_LMNA | -0.18234 | -0.331905747 | -0.02383089 | 2.46E-02 | 1.25E-01 | 1.00E+00 |
| ENSG00000186818.11_LILRB4  | ENSG00000160789.18_LMNA | -0.08634 | -0.242209462 | 0.073878219 | 2.90E-01 | 5.76E-01 | 1.00E+00 |
| ENSG00000102870.5_ZNF629   | ENSG00000160789.18_LMNA | 0.21729  | 0.060166168  | 0.363898325 | 7.17E-03 | 5.12E-02 | 1.00E+00 |
| ENSG00000134697.11_GNL2    | ENSG00000160789.18_LMNA | 0.29978  | 0.147629619  | 0.438077611 | 1.75E-04 | 2.94E-03 | 1.00E+00 |
| ENSG00000176853.14_FAM91A1 | ENSG00000160789.18_LMNA | 0.20337  | 0.045644743  | 0.351197863 | 1.20E-02 | 7.47E-02 | 1.00E+00 |
| ENSG00000186625.12_KATNA1  | ENSG00000160789.18_LMNA | -0.00197 | -0.161119665 | 0.157280535 | 9.81E-01 | 9.93E-01 | 1.00E+00 |
| ENSG00000169241.16_SLC50A1 | ENSG00000160789.18_LMNA | 0.20145  | 0.043646176  | 0.349441066 | 1.28E-02 | 7.84E-02 | 1.00E+00 |
| ENSG00000163563.7_MNDA     | ENSG00000160789.18_LMNA | -0.02737 | -0.185764732 | 0.132404133 | 7.38E-01 | 8.90E-01 | 1.00E+00 |
| ENSG00000101019.20_UQCC1   | ENSG00000160789.18_LMNA | -0.15494 | -0.306581815 | 0.004364761 | 5.66E-02 | 2.18E-01 | 1.00E+00 |
| ENSG00000132164.8_SLC6A11  | ENSG00000160789.18_LMNA | -0.08076 | -0.236912294 | 0.079464864 | 3.23E-01 | 6.09E-01 | 1.00E+00 |
| ENSG00000166479.8_TMX3     | ENSG00000160789.18_LMNA | 0.27631  | 0.122496205  | 0.417158985 | 5.69E-04 | 7.45E-03 | 1.00E+00 |
| ENSG00000142459.7_EVI5L    | ENSG00000160789.18_LMNA | -0.12401 | -0.277731158 | 0.03589567  | 1.28E-01 | 3.62E-01 | 1.00E+00 |
| ENSG00000088038.16_CNOT3   | ENSG00000160789.18_LMNA | 0.27145  | 0.117323566  | 0.412814687 | 7.17E-04 | 8.94E-03 | 1.00E+00 |
| ENSG00000197062.10_ZSCAN26 | ENSG00000160789.18_LMNA | -0.37253 | -0.501963967 | -0.22678278 | 2.29E-06 | 8.83E-05 | 1.17E-01 |
| ENSG00000175182.12_FAM131A | ENSG00000160789.18_LMNA | -0.02643 | -0.184854792 | 0.133329795 | 7.47E-01 | 8.94E-01 | 1.00E+00 |
| ENSG00000175906.4_ARL4D    | ENSG00000160789.18_LMNA | -0.0068  | -0.165819962 | 0.152567098 | 9.34E-01 | 9.74E-01 | 1.00E+00 |
| ENSG00000277972.1_CISD3    | ENSG00000160789.18_LMNA | 0.06069  | -0.099474282 | 0.217784073 | 4.58E-01 | 7.22E-01 | 1.00E+00 |
| ENSG00000100320.21_RBFOX2  | ENSG00000160789.18_LMNA | -0.09968 | -0.254836408 | 0.06048075  | 2.22E-01 | 4.97E-01 | 1.00E+00 |
| ENSG00000228929.1_RPS13P2  | ENSG00000160789.18_LMNA | -0.16164 | -0.312796058 | -0.0025087  | 4.66E-02 | 1.92E-01 | 1.00E+00 |
| ENSG00000173110.7_HSPA6    | ENSG00000160789.18_LMNA | 0.31302  | 0.161891916  | 0.449809901 | 8.62E-05 | 1.67E-03 | 1.00E+00 |
| ENSG00000142945.11_KIF2C   | ENSG00000160789.18_LMNA | 0.11376  | -0.046275356 | 0.268108381 | 1.63E-01 | 4.18E-01 | 1.00E+00 |
| ENSG00000138074.13_SLC5A6  | ENSG00000160789.18_LMNA | 0.22368  | 0.066858273  | 0.369713478 | 5.60E-03 | 4.27E-02 | 1.00E+00 |
| ENSG00000163807.5_KIAA1143 | ENSG00000160789.18_LMNA | -0.14217 | -0.294697836 | 0.017428096 | 8.06E-02 | 2.73E-01 | 1.00E+00 |
| ENSG00000148335.13_NTMT1   | ENSG00000160789.18_LMNA | 0.08697  | -0.073249722 | 0.242804216 | 2.87E-01 | 5.72E-01 | 1.00E+00 |
| ENSG00000197442.9_MAP3K5   | ENSG00000160789.18_LMNA | 0.01922  | -0.140409695 | 0.177877061 | 8.14E-01 | 9.27E-01 | 1.00E+00 |
| ENSG00000164323.11_CFAP97  | ENSG00000160789.18_LMNA | 0.01525  | -0.144301153 | 0.17402808  | 8.52E-01 | 9.42E-01 | 1.00E+00 |
| ENSG00000063854.11_HAGH    | ENSG00000160789.18_LMNA | -0.34202 | -0.475340583 | -0.19334948 | 1.61E-05 | 4.32E-04 | 8.27E-01 |

|                            |                         |          |              |             |          |          |          |
|----------------------------|-------------------------|----------|--------------|-------------|----------|----------|----------|
| ENSG00000100226.14_GTPBP1  | ENSG00000160789.18_LMNA | -0.03578 | -0.193878751 | 0.124125296 | 6.62E-01 | 8.51E-01 | 1.00E+00 |
| ENSG00000116809.10_ZBTB17  | ENSG00000160789.18_LMNA | 0.13714  | -0.022556345 | 0.290006023 | 9.20E-02 | 2.96E-01 | 1.00E+00 |
| ENSG00000085449.13_WDFY1   | ENSG00000160789.18_LMNA | 0.12773  | -0.032128652 | 0.281207981 | 1.17E-01 | 3.42E-01 | 1.00E+00 |
| ENSG00000228716.5_DHFR     | ENSG00000160789.18_LMNA | -0.06843 | -0.225177791 | 0.091770253 | 4.02E-01 | 6.78E-01 | 1.00E+00 |
| ENSG00000281649.1_EBLN3P   | ENSG00000160789.18_LMNA | -0.12207 | -0.27590613  | 0.037869466 | 1.34E-01 | 3.72E-01 | 1.00E+00 |
| ENSG00000109458.7_GAB1     | ENSG00000160789.18_LMNA | -0.08912 | -0.244842752 | 0.071093624 | 2.75E-01 | 5.59E-01 | 1.00E+00 |
| ENSG00000196547.13_MAN2A2  | ENSG00000160789.18_LMNA | 0.0675   | -0.092692015 | 0.224295075 | 4.09E-01 | 6.83E-01 | 1.00E+00 |
| ENSG00000100365.13_NCF4    | ENSG00000160789.18_LMNA | 0.02809  | -0.131695272 | 0.186461183 | 7.31E-01 | 8.87E-01 | 1.00E+00 |
| ENSG00000162222.12_TTC9C   | ENSG00000160789.18_LMNA | -0.16482 | -0.315733927 | -0.00576846 | 4.24E-02 | 1.80E-01 | 1.00E+00 |
| ENSG00000171724.2_VAT1L    | ENSG00000160789.18_LMNA | -0.24979 | -0.393347373 | -0.09433959 | 1.91E-03 | 1.89E-02 | 1.00E+00 |
| ENSG00000112367.9_FIG4     | ENSG00000160789.18_LMNA | -0.33496 | -0.469144212 | -0.18566098 | 2.46E-05 | 6.12E-04 | 1.00E+00 |
| ENSG00000171103.9_TRMT61B  | ENSG00000160789.18_LMNA | -0.36679 | -0.496973628 | -0.2204662  | 3.35E-06 | 1.20E-04 | 1.72E-01 |
| ENSG00000198795.9_ZNF521   | ENSG00000160789.18_LMNA | 0.14141  | -0.018202711 | 0.293990107 | 8.23E-02 | 2.77E-01 | 1.00E+00 |
| ENSG00000124786.9_SLC35B3  | ENSG00000160789.18_LMNA | 0.19398  | 0.035884607  | 0.342597977 | 1.66E-02 | 9.46E-02 | 1.00E+00 |
| ENSG00000108389.8_MTMR4    | ENSG00000160789.18_LMNA | -0.00906 | -0.16801833  | 0.150357601 | 9.12E-01 | 9.66E-01 | 1.00E+00 |
| ENSG00000046647.12_GEMIN8  | ENSG00000160789.18_LMNA | -0.00937 | -0.168318144 | 0.150056023 | 9.09E-01 | 9.65E-01 | 1.00E+00 |
| ENSG00000099910.15_KLHL22  | ENSG00000160789.18_LMNA | -0.00121 | -0.160382607 | 0.15801834  | 9.88E-01 | 9.96E-01 | 1.00E+00 |
| ENSG00000115159.14_GPD2    | ENSG00000160789.18_LMNA | 0.06027  | -0.099886608 | 0.217387326 | 4.61E-01 | 7.24E-01 | 1.00E+00 |
| ENSG00000107816.16_LZTS2   | ENSG00000160789.18_LMNA | 0.20384  | 0.046135423  | 0.351628856 | 1.18E-02 | 7.37E-02 | 1.00E+00 |
| ENSG00000154429.9_CCAP     | ENSG00000160789.18_LMNA | -0.23448 | -0.379512521 | -0.07819704 | 3.64E-03 | 3.09E-02 | 1.00E+00 |
| ENSG00000126777.16_KTN1    | ENSG00000160789.18_LMNA | 0.25083  | 0.095443263  | 0.394288345 | 1.83E-03 | 1.83E-02 | 1.00E+00 |
| ENSG00000134278.13_SPIRE1  | ENSG00000160789.18_LMNA | -0.01816 | -0.176848014 | 0.141451062 | 8.24E-01 | 9.31E-01 | 1.00E+00 |
| ENSG00000122971.7_ACADS    | ENSG00000160789.18_LMNA | 0.17016  | 0.011266389  | 0.320675522 | 3.61E-02 | 1.62E-01 | 1.00E+00 |
| ENSG00000176407.16_KCMF1   | ENSG00000160789.18_LMNA | 0.03145  | -0.128396144 | 0.189698354 | 7.01E-01 | 8.72E-01 | 1.00E+00 |
| ENSG00000116954.7_RRAGC    | ENSG00000160789.18_LMNA | 0.09611  | -0.064067064 | 0.251466859 | 2.39E-01 | 5.18E-01 | 1.00E+00 |
| ENSG00000161395.11_PGAP3   | ENSG00000160789.18_LMNA | 0.11887  | -0.041112418 | 0.272902681 | 1.45E-01 | 3.89E-01 | 1.00E+00 |
| ENSG00000211896.5_IGHG1    | ENSG00000160789.18_LMNA | 0.07294  | -0.087270118 | 0.229479841 | 3.72E-01 | 6.52E-01 | 1.00E+00 |
| ENSG00000168890.12_TMEN150 | ENSG00000160789.18_LMNA | 0.13275  | -0.027025355 | 0.285905058 | 1.03E-01 | 3.18E-01 | 1.00E+00 |
| ENSG00000176209.10_SMIM19  | ENSG00000160789.18_LMNA | -0.08886 | -0.244598809 | 0.07135179  | 2.76E-01 | 5.61E-01 | 1.00E+00 |
| ENSG00000128513.13_POT1    | ENSG00000160789.18_LMNA | -0.01768 | -0.176386591 | 0.141917781 | 8.29E-01 | 9.33E-01 | 1.00E+00 |
| ENSG00000100347.13_SAMM50  | ENSG00000160789.18_LMNA | -0.20151 | -0.34949962  | -0.04371275 | 1.28E-02 | 7.83E-02 | 1.00E+00 |
| ENSG00000122863.5_CHST3    | ENSG00000160789.18_LMNA | 0.24526  | 0.089555591  | 0.389261351 | 2.32E-03 | 2.19E-02 | 1.00E+00 |
| ENSG00000198055.9_GRK6     | ENSG00000160789.18_LMNA | 0.11607  | -0.043940736 | 0.270278237 | 1.54E-01 | 4.05E-01 | 1.00E+00 |

|                            |                         |          |              |             |          |          |          |
|----------------------------|-------------------------|----------|--------------|-------------|----------|----------|----------|
| ENSG00000164253.11_WDR41   | ENSG00000160789.18_LMNA | 0.11677  | -0.043231999 | 0.270936325 | 1.52E-01 | 4.01E-01 | 1.00E+00 |
| ENSG00000130713.14_EXOSC2  | ENSG00000160789.18_LMNA | -0.09021 | -0.245879571 | 0.069995878 | 2.69E-01 | 5.53E-01 | 1.00E+00 |
| ENSG00000184164.13_CRELD2  | ENSG00000160789.18_LMNA | 0.46446  | 0.329636777  | 0.58072353  | 1.67E-09 | 2.37E-07 | 8.54E-05 |
| ENSG00000147535.15_PLPP5   | ENSG00000160789.18_LMNA | 0.06006  | -0.100098598 | 0.217183305 | 4.62E-01 | 7.25E-01 | 1.00E+00 |
| ENSG00000163032.10_VSNL1   | ENSG00000160789.18_LMNA | -0.04135 | -0.199241861 | 0.118628835 | 6.13E-01 | 8.24E-01 | 1.00E+00 |
| ENSG00000186132.13_C2orf76 | ENSG00000160789.18_LMNA | -0.34839 | -0.480916981 | -0.20029844 | 1.09E-05 | 3.13E-04 | 5.60E-01 |
| ENSG00000071994.9_PDCD2    | ENSG00000160789.18_LMNA | -0.10969 | -0.264279317 | 0.050386811 | 1.79E-01 | 4.41E-01 | 1.00E+00 |
| ENSG00000014919.11_COX15   | ENSG00000160789.18_LMNA | -0.35053 | -0.482792268 | -0.20264167 | 9.54E-06 | 2.81E-04 | 4.90E-01 |
| ENSG00000065882.14_TBC1D1  | ENSG00000160789.18_LMNA | 0.3      | 0.147861157  | 0.438268869 | 1.73E-04 | 2.92E-03 | 1.00E+00 |
| ENSG00000011422.10_PLAUR   | ENSG00000160789.18_LMNA | 0.3917   | 0.247960709  | 0.518562681 | 6.03E-07 | 3.05E-05 | 3.09E-02 |
| ENSG00000018280.15_SLC11A1 | ENSG00000160789.18_LMNA | 0.12178  | -0.038162067 | 0.275635389 | 1.35E-01 | 3.74E-01 | 1.00E+00 |
| ENSG00000037757.12_MRI1    | ENSG00000160789.18_LMNA | 0.05009  | -0.109986276 | 0.207636406 | 5.40E-01 | 7.80E-01 | 1.00E+00 |
| ENSG00000143751.9_SDE2     | ENSG00000160789.18_LMNA | 0.04182  | -0.118168037 | 0.199690616 | 6.09E-01 | 8.21E-01 | 1.00E+00 |
| ENSG00000182518.12_FAM104B | ENSG00000160789.18_LMNA | -0.39823 | -0.524193309 | -0.25520393 | 3.76E-07 | 2.10E-05 | 1.93E-02 |
| ENSG00000117676.12_RPS6KA1 | ENSG00000160789.18_LMNA | -0.00463 | -0.163714287 | 0.154680452 | 9.55E-01 | 9.82E-01 | 1.00E+00 |
| ENSG00000139505.11_MTMR6   | ENSG00000160789.18_LMNA | -0.31848 | -0.454633859 | -0.16779124 | 6.37E-05 | 1.30E-03 | 1.00E+00 |
| ENSG00000145982.10_FARS2   | ENSG00000160789.18_LMNA | 0.06558  | -0.094607112 | 0.222459437 | 4.22E-01 | 6.93E-01 | 1.00E+00 |
| ENSG00000151332.17_MBIP    | ENSG00000160789.18_LMNA | -0.14348 | -0.295923391 | 0.016085828 | 7.78E-02 | 2.67E-01 | 1.00E+00 |
| ENSG00000162618.11_ADGRL4  | ENSG00000160789.18_LMNA | -0.10405 | -0.258956947 | 0.056084042 | 2.02E-01 | 4.73E-01 | 1.00E+00 |
| ENSG00000109814.10_UGDH    | ENSG00000160789.18_LMNA | 0.06223  | -0.097940946 | 0.219258556 | 4.46E-01 | 7.13E-01 | 1.00E+00 |
| ENSG00000135503.11_ACVR1B  | ENSG00000160789.18_LMNA | -0.17199 | -0.322366371 | -0.0131519  | 3.41E-02 | 1.56E-01 | 1.00E+00 |
| ENSG00000221838.8_AP4M1    | ENSG00000160789.18_LMNA | 0.22456  | 0.067778849  | 0.370511567 | 5.41E-03 | 4.16E-02 | 1.00E+00 |
| ENSG00000154767.13_XPC     | ENSG00000160789.18_LMNA | 0.19453  | 0.036455116  | 0.343102085 | 1.63E-02 | 9.33E-02 | 1.00E+00 |
| ENSG00000143252.13_SDHC    | ENSG00000160789.18_LMNA | -0.32041 | -0.456330289 | -0.16987074 | 5.72E-05 | 1.19E-03 | 1.00E+00 |
| ENSG00000143319.15_ISG20L2 | ENSG00000160789.18_LMNA | 0.22543  | 0.068689808  | 0.37130088  | 5.23E-03 | 4.06E-02 | 1.00E+00 |
| ENSG00000008382.14_MPND    | ENSG00000160789.18_LMNA | -0.06997 | -0.226646116 | 0.090235774 | 3.92E-01 | 6.70E-01 | 1.00E+00 |
| ENSG00000091879.12_ANGPT2  | ENSG00000160789.18_LMNA | 0.18653  | 0.028166499  | 0.335760781 | 2.14E-02 | 1.13E-01 | 1.00E+00 |
| ENSG00000167962.11_ZNF598  | ENSG00000160789.18_LMNA | 0.2938   | 0.14119962   | 0.432755677 | 2.39E-04 | 3.76E-03 | 1.00E+00 |
| ENSG00000095739.10_BAMBI   | ENSG00000160789.18_LMNA | -0.11088 | -0.265400173 | 0.049184396 | 1.74E-01 | 4.34E-01 | 1.00E+00 |
| ENSG00000102302.7_FGD1     | ENSG00000160789.18_LMNA | 0.12107  | -0.038877831 | 0.274972891 | 1.37E-01 | 3.77E-01 | 1.00E+00 |
| ENSG00000100865.13_CINP    | ENSG00000160789.18_LMNA | -0.053   | -0.210425088 | 0.107104537 | 5.17E-01 | 7.63E-01 | 1.00E+00 |
| ENSG00000102910.12_LONP2   | ENSG00000160789.18_LMNA | 0.05832  | -0.101830321 | 0.215515638 | 4.75E-01 | 7.34E-01 | 1.00E+00 |
| ENSG00000180581.7_SRP9P1   | ENSG00000160789.18_LMNA | -0.18044 | -0.330160175 | -0.02187151 | 2.61E-02 | 1.30E-01 | 1.00E+00 |

|                             |                         |          |              |             |          |          |          |
|-----------------------------|-------------------------|----------|--------------|-------------|----------|----------|----------|
| ENSG00000130513.6_GDF15     | ENSG00000160789.18_LMNA | 0.55432  | 0.433361357  | 0.655658958 | 1.28E-13 | 1.07E-10 | 6.54E-09 |
| ENSG00000151322.17_NPAS3    | ENSG00000160789.18_LMNA | 0.09917  | -0.060994235 | 0.254354428 | 2.24E-01 | 5.00E-01 | 1.00E+00 |
| ENSG00000157184.5_CPT2      | ENSG00000160789.18_LMNA | 0.10169  | -0.058460913 | 0.256730796 | 2.13E-01 | 4.86E-01 | 1.00E+00 |
| ENSG00000110080.17_ST3GAL4  | ENSG00000160789.18_LMNA | 0.19143  | 0.033243989  | 0.340262399 | 1.82E-02 | 1.01E-01 | 1.00E+00 |
| ENSG00000152332.14_UHMK1    | ENSG00000160789.18_LMNA | 0.12706  | -0.032801298 | 0.280587756 | 1.19E-01 | 3.46E-01 | 1.00E+00 |
| ENSG00000131788.14_PIAS3    | ENSG00000160789.18_LMNA | 0.23675  | 0.080589174  | 0.381571223 | 3.32E-03 | 2.88E-02 | 1.00E+00 |
| ENSG00000122584.11_NXPH1    | ENSG00000160789.18_LMNA | -0.35554 | -0.487161794 | -0.20811401 | 6.96E-06 | 2.19E-04 | 3.57E-01 |
| ENSG00000143845.13_ETNK2    | ENSG00000160789.18_LMNA | 0.02739  | -0.132385492 | 0.18578305  | 7.38E-01 | 8.90E-01 | 1.00E+00 |
| ENSG00000204564.10_C6orf136 | ENSG00000160789.18_LMNA | -0.19853 | -0.346774027 | -0.04061677 | 1.42E-02 | 8.46E-02 | 1.00E+00 |
| ENSG00000115364.12_MRPL19   | ENSG00000160789.18_LMNA | -0.03648 | -0.194555252 | 0.123433047 | 6.55E-01 | 8.47E-01 | 1.00E+00 |
| ENSG00000078674.16_PCM1     | ENSG00000160789.18_LMNA | 0.12883  | -0.031007012 | 0.282241628 | 1.14E-01 | 3.37E-01 | 1.00E+00 |
| ENSG00000161904.10_LEMD2    | ENSG00000160789.18_LMNA | 0.30654  | 0.154896934  | 0.444068157 | 1.23E-04 | 2.23E-03 | 1.00E+00 |
| ENSG00000118689.13_FOXO3    | ENSG00000160789.18_LMNA | 0.03074  | -0.129094578 | 0.189013613 | 7.07E-01 | 8.75E-01 | 1.00E+00 |
| ENSG00000164631.17_ZNF12    | ENSG00000160789.18_LMNA | 0.22043  | 0.063455092  | 0.366759221 | 6.36E-03 | 4.70E-02 | 1.00E+00 |
| ENSG00000115271.9_GCA       | ENSG00000160789.18_LMNA | -0.08319 | -0.239226803 | 0.077026314 | 3.08E-01 | 5.95E-01 | 1.00E+00 |
| ENSG00000111335.11_OAS2     | ENSG00000160789.18_LMNA | 0.04075  | -0.119225081 | 0.198661    | 6.18E-01 | 8.27E-01 | 1.00E+00 |
| ENSG00000116663.9_FBXO6     | ENSG00000160789.18_LMNA | 0.09755  | -0.062623188 | 0.252824384 | 2.32E-01 | 5.10E-01 | 1.00E+00 |
| ENSG00000132122.10_SPATA6   | ENSG00000160789.18_LMNA | 0.13826  | -0.021417022 | 0.291049685 | 8.94E-02 | 2.91E-01 | 1.00E+00 |
| ENSG00000165792.16_METTL17  | ENSG00000160789.18_LMNA | -0.06359 | -0.220560122 | 0.096586176 | 4.36E-01 | 7.04E-01 | 1.00E+00 |
| ENSG00000173334.3_TRIB1     | ENSG00000160789.18_LMNA | 0.33701  | 0.187890932  | 0.47094427  | 2.18E-05 | 5.54E-04 | 1.00E+00 |
| ENSG00000167363.12_FN3K     | ENSG00000160789.18_LMNA | -0.10906 | -0.263686237 | 0.051022677 | 1.81E-01 | 4.45E-01 | 1.00E+00 |
| ENSG00000198841.3_KTI12     | ENSG00000160789.18_LMNA | 0.23064  | 0.074158921  | 0.376030485 | 4.25E-03 | 3.47E-02 | 1.00E+00 |
| ENSG00000127922.8_SHFM1     | ENSG00000160789.18_LMNA | 0.07748  | -0.082739466 | 0.233798599 | 3.43E-01 | 6.27E-01 | 1.00E+00 |
| ENSG00000230330.1_HMGN2P3   | ENSG00000160789.18_LMNA | -0.06241 | -0.219434447 | 0.097757933 | 4.45E-01 | 7.12E-01 | 1.00E+00 |
| ENSG00000174996.10_KLC2     | ENSG00000160789.18_LMNA | 0.02678  | -0.132987904 | 0.18519094  | 7.43E-01 | 8.92E-01 | 1.00E+00 |
| ENSG00000184207.8_PGP       | ENSG00000160789.18_LMNA | -0.0978  | -0.253061817 | 0.062370517 | 2.31E-01 | 5.08E-01 | 1.00E+00 |
| ENSG00000140682.17_TGFB111  | ENSG00000160789.18_LMNA | 0.53484  | 0.410598428  | 0.639580657 | 1.27E-12 | 6.57E-10 | 6.51E-08 |
| ENSG00000064932.14_SBNO2    | ENSG00000160789.18_LMNA | 0.54076  | 0.417504798  | 0.644480146 | 6.40E-13 | 4.01E-10 | 3.29E-08 |
| ENSG00000184220.9_CMSS1     | ENSG00000160789.18_LMNA | -0.29596 | -0.434676843 | -0.14351795 | 2.14E-04 | 3.43E-03 | 1.00E+00 |
| ENSG00000139163.14_ETNK1    | ENSG00000160789.18_LMNA | -0.43858 | -0.558766649 | -0.3003508  | 1.59E-08 | 1.59E-06 | 8.16E-04 |
| ENSG00000186998.14_EMID1    | ENSG00000160789.18_LMNA | 0.37119  | 0.225305227  | 0.50079828  | 2.50E-06 | 9.47E-05 | 1.28E-01 |
| ENSG00000155256.16_ZFYVE27  | ENSG00000160789.18_LMNA | -0.15497 | -0.30660859  | 0.004335209 | 5.66E-02 | 2.17E-01 | 1.00E+00 |
| ENSG00000141873.9_SLC39A3   | ENSG00000160789.18_LMNA | 0.1154   | -0.044623848 | 0.269643665 | 1.57E-01 | 4.09E-01 | 1.00E+00 |

|                             |                         |          |              |             |          |          |          |
|-----------------------------|-------------------------|----------|--------------|-------------|----------|----------|----------|
| ENSG00000256673.1_RP11-599J | ENSG00000160789.18_LMNA | -0.23739 | -0.382147482 | -0.08125939 | 3.23E-03 | 2.82E-02 | 1.00E+00 |
| ENSG00000110900.13_TSPAN11  | ENSG00000160789.18_LMNA | 0.00621  | -0.153137538 | 0.16525188  | 9.39E-01 | 9.76E-01 | 1.00E+00 |
| ENSG00000176435.6_CLEC14A   | ENSG00000160789.18_LMNA | 0.05968  | -0.10047521  | 0.216820781 | 4.65E-01 | 7.27E-01 | 1.00E+00 |
| ENSG00000143061.16_IGSF3    | ENSG00000160789.18_LMNA | 0.04729  | -0.11275504  | 0.204952181 | 5.63E-01 | 7.94E-01 | 1.00E+00 |
| ENSG00000125703.13_ATG4C    | ENSG00000160789.18_LMNA | -0.36712 | -0.497255606 | -0.2208225  | 3.28E-06 | 1.18E-04 | 1.68E-01 |
| ENSG00000111581.8_NUP107    | ENSG00000160789.18_LMNA | -0.02701 | -0.185415458 | 0.132759507 | 7.41E-01 | 8.91E-01 | 1.00E+00 |
| ENSG00000198625.11_MDM4     | ENSG00000160789.18_LMNA | -0.1811  | -0.330762136 | -0.02254694 | 2.56E-02 | 1.28E-01 | 1.00E+00 |
| ENSG00000197380.9_DACT3     | ENSG00000160789.18_LMNA | -0.32615 | -0.461394777 | -0.17609403 | 4.12E-05 | 9.21E-04 | 1.00E+00 |
| ENSG00000181291.5_TMEN132E  | ENSG00000160789.18_LMNA | -0.00758 | -0.166576631 | 0.151806957 | 9.26E-01 | 9.72E-01 | 1.00E+00 |
| ENSG00000116667.11_C1orf21  | ENSG00000160789.18_LMNA | 0.0612   | -0.098961282 | 0.218277544 | 4.54E-01 | 7.19E-01 | 1.00E+00 |
| ENSG00000121361.3_KCNJ8     | ENSG00000160789.18_LMNA | -0.01871 | -0.177377774 | 0.140915048 | 8.19E-01 | 9.30E-01 | 1.00E+00 |
| ENSG00000119718.9_EIF2B2    | ENSG00000160789.18_LMNA | 0.09754  | -0.062629638 | 0.252818323 | 2.32E-01 | 5.10E-01 | 1.00E+00 |
| ENSG00000163636.9_PSMD6     | ENSG00000160789.18_LMNA | -0.2012  | -0.349218423 | -0.04339307 | 1.29E-02 | 7.89E-02 | 1.00E+00 |
| ENSG00000186193.8_SAPCD2    | ENSG00000160789.18_LMNA | -0.12477 | -0.278435745 | 0.035132994 | 1.26E-01 | 3.58E-01 | 1.00E+00 |
| ENSG00000166471.9_TMEN41B   | ENSG00000160789.18_LMNA | 0.01696  | -0.142624525 | 0.1756876   | 8.36E-01 | 9.36E-01 | 1.00E+00 |
| ENSG00000163608.13_NEPRO    | ENSG00000160789.18_LMNA | -0.28722 | -0.426903819 | -0.13415764 | 3.33E-04 | 4.87E-03 | 1.00E+00 |
| ENSG00000186350.9_RXRA      | ENSG00000160789.18_LMNA | 0.2008   | 0.042976504  | 0.348851924 | 1.31E-02 | 7.96E-02 | 1.00E+00 |
| ENSG00000256537.3_SMIM10L1  | ENSG00000160789.18_LMNA | -0.20428 | -0.352029888 | -0.04659212 | 1.16E-02 | 7.28E-02 | 1.00E+00 |
| ENSG00000166938.11_DIS3L    | ENSG00000160789.18_LMNA | 0.02513  | -0.134607588 | 0.183597807 | 7.59E-01 | 8.99E-01 | 1.00E+00 |
| ENSG00000152700.12_SAR1B    | ENSG00000160789.18_LMNA | -0.08237 | -0.238443434 | 0.07785209  | 3.13E-01 | 6.00E-01 | 1.00E+00 |
| ENSG00000197712.10_FAM114A  | ENSG00000160789.18_LMNA | 0.36604  | 0.219638956  | 0.496318717 | 3.53E-06 | 1.25E-04 | 1.81E-01 |
| ENSG00000100372.13_SLC25A17 | ENSG00000160789.18_LMNA | -0.2577  | -0.400469031 | -0.10271093 | 1.35E-03 | 1.45E-02 | 1.00E+00 |
| ENSG00000104859.13_CLASRP   | ENSG00000160789.18_LMNA | 0.07867  | -0.081554382 | 0.2349262   | 3.35E-01 | 6.21E-01 | 1.00E+00 |
| ENSG00000052723.10_SIKE1    | ENSG00000160789.18_LMNA | -0.0628  | -0.219806458 | 0.097370791 | 4.42E-01 | 7.10E-01 | 1.00E+00 |
| ENSG00000213753.9_CENPBD1F  | ENSG00000160789.18_LMNA | 0.15764  | -0.00160409  | 0.309080907 | 5.24E-02 | 2.07E-01 | 1.00E+00 |
| ENSG00000109089.7_CDR2L     | ENSG00000160789.18_LMNA | 0.20004  | 0.04218428   | 0.348154656 | 1.35E-02 | 8.12E-02 | 1.00E+00 |
| ENSG00000254726.2_MEX3A     | ENSG00000160789.18_LMNA | -0.15855 | -0.309929155 | 0.000665978 | 5.11E-02 | 2.04E-01 | 1.00E+00 |
| ENSG00000143554.12_SLC27A3  | ENSG00000160789.18_LMNA | 0.55648  | 0.435897184  | 0.657437712 | 9.79E-14 | 8.66E-11 | 5.02E-09 |
| ENSG00000039123.14_SKIV2L2  | ENSG00000160789.18_LMNA | -0.10371 | -0.258642495 | 0.056420001 | 2.04E-01 | 4.74E-01 | 1.00E+00 |
| ENSG00000173226.15_IQCB1    | ENSG00000160789.18_LMNA | -0.0931  | -0.248618546 | 0.067092268 | 2.54E-01 | 5.36E-01 | 1.00E+00 |
| ENSG00000186184.14_POLR1D   | ENSG00000160789.18_LMNA | 0.07025  | -0.089952154 | 0.226917351 | 3.90E-01 | 6.68E-01 | 1.00E+00 |
| ENSG00000136878.11_USP20    | ENSG00000160789.18_LMNA | 0.02427  | -0.135453807 | 0.182764795 | 7.67E-01 | 9.03E-01 | 1.00E+00 |
| ENSG00000127824.12_TUBA4A   | ENSG00000160789.18_LMNA | 0.1762   | 0.017492219  | 0.3262511   | 2.99E-02 | 1.43E-01 | 1.00E+00 |

|                             |                         |          |              |             |          |          |          |
|-----------------------------|-------------------------|----------|--------------|-------------|----------|----------|----------|
| ENSG00000103111.13_MON1B    | ENSG00000160789.18_LMNA | 0.10557  | -0.054542773 | 0.260398695 | 1.95E-01 | 4.64E-01 | 1.00E+00 |
| ENSG00000169718.16_DUS1L    | ENSG00000160789.18_LMNA | 0.18223  | 0.023715646  | 0.331803138 | 2.46E-02 | 1.25E-01 | 1.00E+00 |
| ENSG00000155363.17_MOV10    | ENSG00000160789.18_LMNA | 0.32905  | 0.17923382   | 0.46394288  | 3.49E-05 | 8.09E-04 | 1.00E+00 |
| ENSG00000137074.17_APTX     | ENSG00000160789.18_LMNA | -0.11497 | -0.269246736 | 0.04505099  | 1.58E-01 | 4.11E-01 | 1.00E+00 |
| ENSG00000144591.16_GMPA     | ENSG00000160789.18_LMNA | 0.49485  | 0.364358615  | 0.606291057 | 9.15E-11 | 2.10E-08 | 4.69E-06 |
| ENSG00000158062.19_UBXN11   | ENSG00000160789.18_LMNA | 0.21499  | 0.057762739  | 0.361804053 | 7.82E-03 | 5.46E-02 | 1.00E+00 |
| ENSG00000141526.13_SLC16A3  | ENSG00000160789.18_LMNA | 0.36416  | 0.217569143  | 0.494678711 | 3.99E-06 | 1.38E-04 | 2.05E-01 |
| ENSG00000174177.11_CTU2     | ENSG00000160789.18_LMNA | -0.03323 | -0.191415961 | 0.126642799 | 6.84E-01 | 8.63E-01 | 1.00E+00 |
| ENSG00000198824.5_CHAMP1    | ENSG00000160789.18_LMNA | -0.01587 | -0.174630252 | 0.143692984 | 8.46E-01 | 9.40E-01 | 1.00E+00 |
| ENSG00000110514.17_MADD     | ENSG00000160789.18_LMNA | 0.05027  | -0.109813616 | 0.207803637 | 5.39E-01 | 7.79E-01 | 1.00E+00 |
| ENSG00000119537.14_KDSR     | ENSG00000160789.18_LMNA | 0.07974  | -0.080482981 | 0.235944901 | 3.29E-01 | 6.15E-01 | 1.00E+00 |
| ENSG00000119616.10_FCF1     | ENSG00000160789.18_LMNA | 0.10587  | -0.054246832 | 0.260675367 | 1.94E-01 | 4.63E-01 | 1.00E+00 |
| ENSG00000198722.11_UNC13B   | ENSG00000160789.18_LMNA | 0.1378   | -0.021884776 | 0.290621295 | 9.05E-02 | 2.93E-01 | 1.00E+00 |
| ENSG00000169508.6_GPR183    | ENSG00000160789.18_LMNA | 0.02688  | -0.132890876 | 0.185286324 | 7.42E-01 | 8.92E-01 | 1.00E+00 |
| ENSG00000136021.16_SCYL2    | ENSG00000160789.18_LMNA | 0.00709  | -0.152279538 | 0.166106253 | 9.31E-01 | 9.73E-01 | 1.00E+00 |
| ENSG00000234147.1_RP3-460G2 | ENSG00000160789.18_LMNA | 0.01299  | -0.146508838 | 0.17184016  | 8.74E-01 | 9.51E-01 | 1.00E+00 |
| ENSG00000144524.16_COPS7B   | ENSG00000160789.18_LMNA | 0.05374  | -0.106371102 | 0.211134014 | 5.11E-01 | 7.60E-01 | 1.00E+00 |
| ENSG00000073008.13_PVR      | ENSG00000160789.18_LMNA | 0.53888  | 0.415312691  | 0.642927046 | 7.96E-13 | 4.78E-10 | 4.09E-08 |
| ENSG00000130830.13_MPP1     | ENSG00000160789.18_LMNA | -0.07072 | -0.227362138 | 0.089486946 | 3.87E-01 | 6.65E-01 | 1.00E+00 |
| ENSG00000130803.13_ZNF317   | ENSG00000160789.18_LMNA | 0.09257  | -0.067630772 | 0.248110956 | 2.57E-01 | 5.39E-01 | 1.00E+00 |
| ENSG00000106992.16_AK1      | ENSG00000160789.18_LMNA | -0.1108  | -0.265321809 | 0.049268491 | 1.74E-01 | 4.34E-01 | 1.00E+00 |
| ENSG00000163428.3_LRRC58    | ENSG00000160789.18_LMNA | -0.01645 | -0.175188428 | 0.143129035 | 8.41E-01 | 9.38E-01 | 1.00E+00 |
| ENSG00000198836.7_OPA1      | ENSG00000160789.18_LMNA | -0.02865 | -0.186993037 | 0.131153722 | 7.26E-01 | 8.84E-01 | 1.00E+00 |
| ENSG00000237457.5_LINC01351 | ENSG00000160789.18_LMNA | -0.28544 | -0.425316427 | -0.1322525  | 3.64E-04 | 5.24E-03 | 1.00E+00 |
| ENSG00000257923.8_CUX1      | ENSG00000160789.18_LMNA | 0.17331  | 0.014509736  | 0.323582798 | 3.27E-02 | 1.51E-01 | 1.00E+00 |
| ENSG00000196116.7_TDRD7     | ENSG00000160789.18_LMNA | -0.14051 | -0.29315376  | 0.019117618 | 8.42E-02 | 2.81E-01 | 1.00E+00 |
| ENSG00000213866.3_YBX1P10   | ENSG00000160789.18_LMNA | 0.0384   | -0.121548044 | 0.196395845 | 6.39E-01 | 8.38E-01 | 1.00E+00 |
| ENSG00000253341.1_RP11-730G | ENSG00000160789.18_LMNA | -0.10866 | -0.263308834 | 0.051427175 | 1.83E-01 | 4.47E-01 | 1.00E+00 |
| ENSG00000129484.12_PARP2    | ENSG00000160789.18_LMNA | -0.04948 | -0.207047568 | 0.110594083 | 5.45E-01 | 7.83E-01 | 1.00E+00 |
| ENSG00000138166.5_DUSP5     | ENSG00000160789.18_LMNA | 0.49903  | 0.369152427  | 0.609782134 | 6.01E-11 | 1.50E-08 | 3.08E-06 |
| ENSG00000100852.11_ARHGAP5  | ENSG00000160789.18_LMNA | -0.02816 | -0.186528293 | 0.131626949 | 7.31E-01 | 8.86E-01 | 1.00E+00 |
| ENSG00000176410.7_DNAJC30   | ENSG00000160789.18_LMNA | 0.17308  | 0.014272254  | 0.323370122 | 3.30E-02 | 1.52E-01 | 1.00E+00 |
| ENSG00000180104.14_EXOC3    | ENSG00000160789.18_LMNA | 0.07024  | -0.089965409 | 0.226904676 | 3.90E-01 | 6.68E-01 | 1.00E+00 |

|                             |                         |          |              |             |          |          |          |
|-----------------------------|-------------------------|----------|--------------|-------------|----------|----------|----------|
| ENSG00000127995.15_CASD1    | ENSG00000160789.18_LMNA | -0.18643 | -0.335671503 | -0.02806596 | 2.15E-02 | 1.13E-01 | 1.00E+00 |
| ENSG00000106546.11_AHR      | ENSG00000160789.18_LMNA | 0.12146  | -0.038488947 | 0.275332872 | 1.36E-01 | 3.75E-01 | 1.00E+00 |
| ENSG00000221829.8_FANCG     | ENSG00000160789.18_LMNA | -0.00688 | -0.165901679 | 0.152485024 | 9.33E-01 | 9.74E-01 | 1.00E+00 |
| ENSG00000168924.13_LETM1    | ENSG00000160789.18_LMNA | 0.25285  | 0.097581503  | 0.396109594 | 1.67E-03 | 1.71E-02 | 1.00E+00 |
| ENSG00000228205.1_RP11-778D | ENSG00000160789.18_LMNA | -0.16643 | -0.317221389 | -0.00742141 | 4.04E-02 | 1.75E-01 | 1.00E+00 |
| ENSG00000232346.1_SC22CB-1E | ENSG00000160789.18_LMNA | 0.00875  | -0.15066207  | 0.167715582 | 9.15E-01 | 9.68E-01 | 1.00E+00 |
| ENSG00000131943.16_C19orf12 | ENSG00000160789.18_LMNA | -0.07675 | -0.233105864 | 0.083467071 | 3.47E-01 | 6.31E-01 | 1.00E+00 |
| ENSG00000116641.14_DOCK7    | ENSG00000160789.18_LMNA | 0.20079  | 0.042961016  | 0.348838296 | 1.31E-02 | 7.97E-02 | 1.00E+00 |
| ENSG00000135249.6_RINT1     | ENSG00000160789.18_LMNA | 0.05772  | -0.102422363 | 0.214945071 | 4.80E-01 | 7.38E-01 | 1.00E+00 |
| ENSG00000207554.1_MIR647    | ENSG00000160789.18_LMNA | 0.03841  | -0.121531387 | 0.196412099 | 6.38E-01 | 8.38E-01 | 1.00E+00 |
| ENSG00000214199.3_EEF1A1P12 | ENSG00000160789.18_LMNA | -0.1551  | -0.306726771 | 0.004204762 | 5.64E-02 | 2.17E-01 | 1.00E+00 |
| ENSG0000007047.13_MARK4     | ENSG00000160789.18_LMNA | 0.13586  | -0.023859334 | 0.288811526 | 9.51E-02 | 3.02E-01 | 1.00E+00 |
| ENSG00000169122.10_FAM110B  | ENSG00000160789.18_LMNA | -0.30812 | -0.445468135 | -0.15659981 | 1.13E-04 | 2.08E-03 | 1.00E+00 |
| ENSG00000110619.15_CARS     | ENSG00000160789.18_LMNA | 0.32123  | 0.170758922  | 0.457054227 | 5.46E-05 | 1.15E-03 | 1.00E+00 |
| ENSG00000129194.6_SOX15     | ENSG00000160789.18_LMNA | 0.036    | -0.123910447 | 0.194088745 | 6.60E-01 | 8.50E-01 | 1.00E+00 |
| ENSG00000173221.12_GLRX     | ENSG00000160789.18_LMNA | -0.02038 | -0.178998502 | 0.139274025 | 8.03E-01 | 9.21E-01 | 1.00E+00 |
| ENSG00000138138.12_ATAD1    | ENSG00000160789.18_LMNA | 0.00841  | -0.150992832 | 0.167386623 | 9.18E-01 | 9.69E-01 | 1.00E+00 |
| ENSG00000095261.12_PSMC5    | ENSG00000160789.18_LMNA | 0.08189  | -0.078331257 | 0.237988685 | 3.16E-01 | 6.03E-01 | 1.00E+00 |
| ENSG00000167680.14_SEMA6B   | ENSG00000160789.18_LMNA | -0.07585 | -0.232247656 | 0.084368011 | 3.53E-01 | 6.37E-01 | 1.00E+00 |
| ENSG00000116199.10_FAM20B   | ENSG00000160789.18_LMNA | 0.002    | -0.157252837 | 0.161147328 | 9.81E-01 | 9.93E-01 | 1.00E+00 |
| ENSG00000174943.8_KCTD13    | ENSG00000160789.18_LMNA | -0.10676 | -0.261511334 | 0.053352304 | 1.91E-01 | 4.58E-01 | 1.00E+00 |
| ENSG00000157833.11_GAREM2   | ENSG00000160789.18_LMNA | -0.09666 | -0.251982413 | 0.063518872 | 2.36E-01 | 5.14E-01 | 1.00E+00 |
| ENSG00000198720.11_ANKRD13  | ENSG00000160789.18_LMNA | -0.26726 | -0.409059619 | -0.11286539 | 8.73E-04 | 1.04E-02 | 1.00E+00 |
| ENSG00000125351.9_UPF3B     | ENSG00000160789.18_LMNA | -0.00623 | -0.16526342  | 0.153125952 | 9.39E-01 | 9.76E-01 | 1.00E+00 |
| ENSG00000179151.10_EDC3     | ENSG00000160789.18_LMNA | 0.01127  | -0.148197191 | 0.170164801 | 8.90E-01 | 9.57E-01 | 1.00E+00 |
| ENSG00000186716.18_BCR      | ENSG00000160789.18_LMNA | -0.04186 | -0.199729619 | 0.118127981 | 6.09E-01 | 8.21E-01 | 1.00E+00 |
| ENSG00000101040.18_ZMYND8   | ENSG00000160789.18_LMNA | 0.09955  | -0.060615092 | 0.254710323 | 2.22E-01 | 4.98E-01 | 1.00E+00 |
| ENSG00000130640.12_TUBGCP2  | ENSG00000160789.18_LMNA | 0.15618  | -0.003099972 | 0.307727295 | 5.47E-02 | 2.13E-01 | 1.00E+00 |
| ENSG00000176102.10_CSTF3    | ENSG00000160789.18_LMNA | -0.19778 | -0.346086129 | -0.03983632 | 1.46E-02 | 8.62E-02 | 1.00E+00 |
| ENSG00000163482.10_STK36    | ENSG00000160789.18_LMNA | 0.17386  | 0.015078865  | 0.324092354 | 3.22E-02 | 1.50E-01 | 1.00E+00 |
| ENSG00000099330.7_OCEL1     | ENSG00000160789.18_LMNA | 0.15326  | -0.006085558 | 0.305021896 | 5.94E-02 | 2.24E-01 | 1.00E+00 |
| ENSG00000150907.6_FOXO1     | ENSG00000160789.18_LMNA | -0.08737 | -0.243187051 | 0.072845033 | 2.84E-01 | 5.70E-01 | 1.00E+00 |
| ENSG00000105879.10_CBLL1    | ENSG00000160789.18_LMNA | 0.07876  | -0.081463948 | 0.235012213 | 3.35E-01 | 6.21E-01 | 1.00E+00 |

|                            |                         |          |              |             |          |          |          |
|----------------------------|-------------------------|----------|--------------|-------------|----------|----------|----------|
| ENSG00000137814.8_HAUS2    | ENSG00000160789.18_LMNA | 0.1353   | -0.024424295 | 0.288293303 | 9.65E-02 | 3.05E-01 | 1.00E+00 |
| ENSG00000198746.11_GPATCH3 | ENSG00000160789.18_LMNA | 0.0076   | -0.151786437 | 0.166597052 | 9.26E-01 | 9.72E-01 | 1.00E+00 |
| ENSG00000248008.2_NRAV     | ENSG00000160789.18_LMNA | 0.03937  | -0.120588511 | 0.197331911 | 6.30E-01 | 8.34E-01 | 1.00E+00 |
| ENSG00000100124.11_ANKRD54 | ENSG00000160789.18_LMNA | -0.09323 | -0.248742216 | 0.066961037 | 2.53E-01 | 5.35E-01 | 1.00E+00 |
| ENSG00000214485.6_RPL7P1   | ENSG00000160789.18_LMNA | -0.05072 | -0.208242822 | 0.109360079 | 5.35E-01 | 7.76E-01 | 1.00E+00 |
| ENSG00000162337.10_LRP5    | ENSG00000160789.18_LMNA | 0.1018   | -0.058343801 | 0.256840561 | 2.12E-01 | 4.86E-01 | 1.00E+00 |
| ENSG00000211893.3_IGHG2    | ENSG00000160789.18_LMNA | 0.04079  | -0.11918185  | 0.198703123 | 6.18E-01 | 8.27E-01 | 1.00E+00 |
| ENSG00000169964.5_TMEN42   | ENSG00000160789.18_LMNA | -0.16326 | -0.314289483 | -0.00416493 | 4.45E-02 | 1.86E-01 | 1.00E+00 |
| ENSG00000115884.9_SDC1     | ENSG00000160789.18_LMNA | 0.49709  | 0.366924746  | 0.608160994 | 7.31E-11 | 1.76E-08 | 3.75E-06 |
| ENSG00000164197.10_RNF180  | ENSG00000160789.18_LMNA | 0.05833  | -0.101815339 | 0.215530074 | 4.75E-01 | 7.34E-01 | 1.00E+00 |
| ENSG00000175264.6_CHST1    | ENSG00000160789.18_LMNA | 0.01218  | -0.147309935 | 0.171045458 | 8.82E-01 | 9.54E-01 | 1.00E+00 |
| ENSG00000163104.16_SMARCA1 | ENSG00000160789.18_LMNA | -0.27793 | -0.418609819 | -0.12422725 | 5.27E-04 | 7.02E-03 | 1.00E+00 |
| ENSG00000099917.16_MED15   | ENSG00000160789.18_LMNA | 0.35744  | 0.210202102  | 0.488825413 | 6.16E-06 | 1.97E-04 | 3.16E-01 |
| ENSG00000115504.13_EHBP1   | ENSG00000160789.18_LMNA | 0.23021  | 0.073706399  | 0.375639747 | 4.33E-03 | 3.52E-02 | 1.00E+00 |
| ENSG00000102931.6_ARL2BP   | ENSG00000160789.18_LMNA | -0.05177 | -0.209247773 | 0.108321789 | 5.26E-01 | 7.71E-01 | 1.00E+00 |
| ENSG00000160446.17_ZDHC12  | ENSG00000160789.18_LMNA | 0.39302  | 0.249424332  | 0.519702346 | 5.49E-07 | 2.82E-05 | 2.81E-02 |
| ENSG00000141452.8_C18orf8  | ENSG00000160789.18_LMNA | 0.06871  | -0.091496231 | 0.225440105 | 4.00E-01 | 6.77E-01 | 1.00E+00 |
| ENSG00000113580.13_NR3C1   | ENSG00000160789.18_LMNA | -0.02413 | -0.182625591 | 0.135595173 | 7.68E-01 | 9.04E-01 | 1.00E+00 |
| ENSG00000172315.5_TP53RK   | ENSG00000160789.18_LMNA | 0.00023  | -0.158977875 | 0.159423513 | 9.98E-01 | 9.99E-01 | 1.00E+00 |
| ENSG00000118046.13_STK11   | ENSG00000160789.18_LMNA | 0.32129  | 0.170826672  | 0.457109432 | 5.44E-05 | 1.15E-03 | 1.00E+00 |
| ENSG00000115392.10_FANCL   | ENSG00000160789.18_LMNA | -0.33765 | -0.471505751 | -0.1885871  | 2.10E-05 | 5.38E-04 | 1.00E+00 |
| ENSG00000087266.14_SH3BP2  | ENSG00000160789.18_LMNA | 0.3023   | 0.150334486  | 0.440310287 | 1.54E-04 | 2.65E-03 | 1.00E+00 |
| ENSG00000137955.14_RABGGTE | ENSG00000160789.18_LMNA | -0.16012 | -0.31138169  | -0.00094171 | 4.88E-02 | 1.98E-01 | 1.00E+00 |
| ENSG00000166199.11_ALKBH3  | ENSG00000160789.18_LMNA | 0.0103   | -0.149149582 | 0.169218927 | 9.00E-01 | 9.61E-01 | 1.00E+00 |
| ENSG00000102996.4_MMP15    | ENSG00000160789.18_LMNA | -0.02899 | -0.187326052 | 0.130814539 | 7.23E-01 | 8.83E-01 | 1.00E+00 |
| ENSG00000126091.18_ST3GAL3 | ENSG00000160789.18_LMNA | 0.00615  | -0.153202591 | 0.165187082 | 9.40E-01 | 9.76E-01 | 1.00E+00 |
| ENSG00000154122.11_ANKH    | ENSG00000160789.18_LMNA | 0.1041   | -0.056029057 | 0.259008405 | 2.02E-01 | 4.73E-01 | 1.00E+00 |
| ENSG00000135596.16_MICAL1  | ENSG00000160789.18_LMNA | -0.15362 | -0.305351087 | 0.00572257  | 5.88E-02 | 2.23E-01 | 1.00E+00 |
| ENSG00000140718.17_FTO     | ENSG00000160789.18_LMNA | -0.13822 | -0.291015683 | 0.021454153 | 8.95E-02 | 2.91E-01 | 1.00E+00 |
| ENSG00000117305.13_HMGCL   | ENSG00000160789.18_LMNA | 0.2364   | 0.080218989  | 0.381252832 | 3.37E-03 | 2.92E-02 | 1.00E+00 |
| ENSG00000109917.9_ZPR1     | ENSG00000160789.18_LMNA | 0.1581   | -0.001131405 | 0.309508374 | 5.17E-02 | 2.06E-01 | 1.00E+00 |
| ENSG00000123130.15_ACOT9   | ENSG00000160789.18_LMNA | 0.25038  | 0.094963848  | 0.39387968  | 1.86E-03 | 1.85E-02 | 1.00E+00 |
| ENSG00000130304.15_SLC27A1 | ENSG00000160789.18_LMNA | 0.38814  | 0.244022806  | 0.515491613 | 7.77E-07 | 3.74E-05 | 3.99E-02 |



|                            |                         |          |              |             |          |          |          |
|----------------------------|-------------------------|----------|--------------|-------------|----------|----------|----------|
| ENSG00000187954.11_CYHR1   | ENSG00000160789.18_LMNA | 0.08717  | -0.073039594 | 0.243003009 | 2.86E-01 | 5.71E-01 | 1.00E+00 |
| ENSG00000123395.13_ATG101  | ENSG00000160789.18_LMNA | 0.07463  | -0.085585143 | 0.23108747  | 3.61E-01 | 6.43E-01 | 1.00E+00 |
| ENSG00000133789.13_SWAP70  | ENSG00000160789.18_LMNA | 0.47087  | 0.336930846  | 0.586135952 | 9.24E-10 | 1.47E-07 | 4.74E-05 |
| ENSG00000163888.3_CAMK2N2  | ENSG00000160789.18_LMNA | -0.08541 | -0.241324641 | 0.074812775 | 2.95E-01 | 5.81E-01 | 1.00E+00 |
| ENSG00000174652.16_ZNF266  | ENSG00000160789.18_LMNA | -0.14224 | -0.294764677 | 0.017354918 | 8.05E-02 | 2.73E-01 | 1.00E+00 |
| ENSG00000163629.11_PTPN13  | ENSG00000160789.18_LMNA | 0.13317  | -0.026590553 | 0.286304556 | 1.02E-01 | 3.15E-01 | 1.00E+00 |
| ENSG00000082684.13_SEMA5B  | ENSG00000160789.18_LMNA | -0.11253 | -0.266952808 | 0.047517275 | 1.67E-01 | 4.25E-01 | 1.00E+00 |
| ENSG00000099250.16_NRP1    | ENSG00000160789.18_LMNA | 0.44976  | 0.312968144  | 0.568271011 | 6.14E-09 | 7.14E-07 | 3.15E-04 |
| ENSG00000166484.18_MAPK7   | ENSG00000160789.18_LMNA | 0.13532  | -0.024403601 | 0.288312288 | 9.65E-02 | 3.05E-01 | 1.00E+00 |
| ENSG00000120899.16_PTK2B   | ENSG00000160789.18_LMNA | 0.23596  | 0.079751134  | 0.380850336 | 3.43E-03 | 2.95E-02 | 1.00E+00 |
| ENSG00000123353.8_ORMDL2   | ENSG00000160789.18_LMNA | -0.08614 | -0.242019516 | 0.074078888 | 2.91E-01 | 5.77E-01 | 1.00E+00 |
| ENSG00000152284.4_TCF7L1   | ENSG00000160789.18_LMNA | -0.18697 | -0.336164382 | -0.02862108 | 2.11E-02 | 1.12E-01 | 1.00E+00 |
| ENSG00000153046.16_CDYL    | ENSG00000160789.18_LMNA | -0.07213 | -0.228700758 | 0.088086033 | 3.77E-01 | 6.57E-01 | 1.00E+00 |
| ENSG00000131368.6_MRPS25   | ENSG00000160789.18_LMNA | -0.10961 | -0.264204724 | 0.0504668   | 1.79E-01 | 4.41E-01 | 1.00E+00 |
| ENSG00000115935.15_WIPF1   | ENSG00000160789.18_LMNA | 0.20242  | 0.044659613  | 0.350332174 | 1.24E-02 | 7.65E-02 | 1.00E+00 |
| ENSG00000106608.15_URGCP   | ENSG00000160789.18_LMNA | 0.25817  | 0.10321396   | 0.400895829 | 1.32E-03 | 1.43E-02 | 1.00E+00 |
| ENSG00000103365.14_GGA2    | ENSG00000160789.18_LMNA | 0.02166  | -0.138016239 | 0.180239564 | 7.91E-01 | 9.15E-01 | 1.00E+00 |
| ENSG00000112146.15_FBXO9   | ENSG00000160789.18_LMNA | -0.25318 | -0.396405449 | -0.09792911 | 1.65E-03 | 1.69E-02 | 1.00E+00 |
| ENSG00000166822.11_TMEM170 | ENSG00000160789.18_LMNA | -0.02808 | -0.186444973 | 0.131711775 | 7.31E-01 | 8.87E-01 | 1.00E+00 |
| ENSG00000242732.4_RGAG4    | ENSG00000160789.18_LMNA | 0.3044   | 0.15259695   | 0.442175041 | 1.37E-04 | 2.43E-03 | 1.00E+00 |
| ENSG00000146232.13_NFKBIE  | ENSG00000160789.18_LMNA | 0.28186  | 0.128420523  | 0.422118099 | 4.35E-04 | 6.05E-03 | 1.00E+00 |
| ENSG00000163257.9_DCAF16   | ENSG00000160789.18_LMNA | -0.25816 | -0.400881624 | -0.10319721 | 1.32E-03 | 1.43E-02 | 1.00E+00 |
| ENSG00000161542.15_PRPSAP1 | ENSG00000160789.18_LMNA | -0.36489 | -0.495319233 | -0.21837723 | 3.80E-06 | 1.33E-04 | 1.95E-01 |
| ENSG00000184584.11_TMEM173 | ENSG00000160789.18_LMNA | 0.11981  | -0.040152576 | 0.273792273 | 1.41E-01 | 3.84E-01 | 1.00E+00 |
| ENSG00000178999.11_AURKB   | ENSG00000160789.18_LMNA | -0.02173 | -0.180310436 | 0.137944381 | 7.90E-01 | 9.15E-01 | 1.00E+00 |
| ENSG00000034693.13_PEX3    | ENSG00000160789.18_LMNA | -0.22983 | -0.375295277 | -0.07330756 | 4.39E-03 | 3.55E-02 | 1.00E+00 |
| ENSG00000135317.11_SNX14   | ENSG00000160789.18_LMNA | -0.20639 | -0.353956972 | -0.04878851 | 1.07E-02 | 6.89E-02 | 1.00E+00 |
| ENSG00000122386.9_ZNF205   | ENSG00000160789.18_LMNA | 0.17676  | 0.018066557  | 0.326764372 | 2.94E-02 | 1.41E-01 | 1.00E+00 |
| ENSG00000148985.18_PGAP2   | ENSG00000160789.18_LMNA | 0.10937  | -0.050715561 | 0.263972718 | 1.80E-01 | 4.43E-01 | 1.00E+00 |
| ENSG00000188566.10_NDOR1   | ENSG00000160789.18_LMNA | 0.24856  | 0.093037711  | 0.392236602 | 2.02E-03 | 1.96E-02 | 1.00E+00 |
| ENSG00000134058.9_CDK7     | ENSG00000160789.18_LMNA | 0.0379   | -0.122040727 | 0.195914985 | 6.43E-01 | 8.41E-01 | 1.00E+00 |
| ENSG00000150938.8_CRIM1    | ENSG00000160789.18_LMNA | 0.3283   | 0.178421827  | 0.463284356 | 3.64E-05 | 8.35E-04 | 1.00E+00 |
| ENSG00000103994.15_ZNF106  | ENSG00000160789.18_LMNA | 0.11585  | -0.044163366 | 0.270071457 | 1.55E-01 | 4.06E-01 | 1.00E+00 |

|                              |                         |          |              |             |          |          |          |
|------------------------------|-------------------------|----------|--------------|-------------|----------|----------|----------|
| ENSG00000091039.15_OSBPL8    | ENSG00000160789.18_LMNA | -0.26264 | -0.404911522 | -0.10795441 | 1.08E-03 | 1.23E-02 | 1.00E+00 |
| ENSG00000277531.1_LLNLF-187I | ENSG00000160789.18_LMNA | -0.16683 | -0.317591088 | -0.00783251 | 4.00E-02 | 1.73E-01 | 1.00E+00 |
| ENSG00000143801.15_PSEN2     | ENSG00000160789.18_LMNA | 0.21117  | 0.053778457  | 0.358325501 | 9.01E-03 | 6.08E-02 | 1.00E+00 |
| ENSG00000187049.8_TMEN216    | ENSG00000160789.18_LMNA | -0.1282  | -0.281654709 | 0.031643992 | 1.15E-01 | 3.40E-01 | 1.00E+00 |
| ENSG00000148219.15_ASTN2     | ENSG00000160789.18_LMNA | -0.18459 | -0.333977609 | -0.02615959 | 2.28E-02 | 1.19E-01 | 1.00E+00 |
| ENSG00000184634.14_MED12     | ENSG00000160789.18_LMNA | 0.17658  | 0.017884058  | 0.326601297 | 2.95E-02 | 1.42E-01 | 1.00E+00 |
| ENSG00000108039.16_XPNPEP1   | ENSG00000160789.18_LMNA | 0.03999  | -0.119975189 | 0.19792993  | 6.25E-01 | 8.31E-01 | 1.00E+00 |
| ENSG00000240857.1_RDH14      | ENSG00000160789.18_LMNA | 0.10579  | -0.054324968 | 0.260602323 | 1.95E-01 | 4.63E-01 | 1.00E+00 |
| ENSG00000158863.20_FAM160B   | ENSG00000160789.18_LMNA | 0.16536  | 0.006321443  | 0.316231716 | 4.18E-02 | 1.79E-01 | 1.00E+00 |
| ENSG00000175274.17_TP53I11   | ENSG00000160789.18_LMNA | 0.05448  | -0.10563595  | 0.211844265 | 5.05E-01 | 7.56E-01 | 1.00E+00 |
| ENSG00000084693.14_AGBL5     | ENSG00000160789.18_LMNA | 0.0205   | -0.139150662 | 0.17912027  | 8.02E-01 | 9.21E-01 | 1.00E+00 |
| ENSG00000118762.6_PKD2       | ENSG00000160789.18_LMNA | 0.43841  | 0.300157315  | 0.558620373 | 1.61E-08 | 1.61E-06 | 8.28E-04 |
| ENSG00000198642.6_KLHL9      | ENSG00000160789.18_LMNA | -0.19283 | -0.341544053 | -0.0346925  | 1.73E-02 | 9.73E-02 | 1.00E+00 |
| ENSG00000064102.13_ASUN      | ENSG00000160789.18_LMNA | -0.11384 | -0.268178563 | 0.046199898 | 1.63E-01 | 4.18E-01 | 1.00E+00 |
| ENSG00000134480.12_CCNH      | ENSG00000160789.18_LMNA | -0.27987 | -0.420345137 | -0.12630008 | 4.79E-04 | 6.52E-03 | 1.00E+00 |
| ENSG00000159899.13_NPR2      | ENSG00000160789.18_LMNA | 0.27347  | 0.119470976  | 0.414619847 | 6.52E-04 | 8.30E-03 | 1.00E+00 |
| ENSG00000078237.5_TIGAR      | ENSG00000160789.18_LMNA | -0.08854 | -0.244300585 | 0.071667346 | 2.78E-01 | 5.63E-01 | 1.00E+00 |
| ENSG00000084774.12_CAD       | ENSG00000160789.18_LMNA | 0.30359  | 0.151726684  | 0.441458052 | 1.43E-04 | 2.51E-03 | 1.00E+00 |
| ENSG00000067334.12_DNTTIP2   | ENSG00000160789.18_LMNA | 0.08612  | -0.074096668 | 0.242002685 | 2.91E-01 | 5.77E-01 | 1.00E+00 |
| ENSG00000076554.14_TPD52     | ENSG00000160789.18_LMNA | -0.21143 | -0.358562776 | -0.05404992 | 8.93E-03 | 6.04E-02 | 1.00E+00 |
| ENSG00000256269.5_HMBS       | ENSG00000160789.18_LMNA | -0.23046 | -0.375872501 | -0.07397594 | 4.28E-03 | 3.49E-02 | 1.00E+00 |
| ENSG00000137776.15_SLTM      | ENSG00000160789.18_LMNA | 0.27142  | 0.117287989  | 0.412784761 | 7.19E-04 | 8.95E-03 | 1.00E+00 |
| ENSG00000223496.2_EXOSC6     | ENSG00000160789.18_LMNA | 0.00711  | -0.152267796 | 0.166117942 | 9.31E-01 | 9.73E-01 | 1.00E+00 |
| ENSG00000173706.11_HEG1      | ENSG00000160789.18_LMNA | 0.24848  | 0.092953642  | 0.392164845 | 2.02E-03 | 1.97E-02 | 1.00E+00 |
| ENSG00000110435.10_PDHX      | ENSG00000160789.18_LMNA | -0.09703 | -0.252329399 | 0.063149812 | 2.34E-01 | 5.12E-01 | 1.00E+00 |
| ENSG00000105204.12_DYRK1B    | ENSG00000160789.18_LMNA | -0.11037 | -0.264912992 | 0.049707139 | 1.76E-01 | 4.37E-01 | 1.00E+00 |
| ENSG00000158480.9_SPATA2     | ENSG00000160789.18_LMNA | -0.07231 | -0.228876688 | 0.087901824 | 3.76E-01 | 6.56E-01 | 1.00E+00 |
| ENSG00000164815.9_ORC5       | ENSG00000160789.18_LMNA | -0.03987 | -0.197814062 | 0.12009404  | 6.26E-01 | 8.31E-01 | 1.00E+00 |
| ENSG00000012779.9_ALOX5      | ENSG00000160789.18_LMNA | 0.10699  | -0.053111192 | 0.261736581 | 1.90E-01 | 4.57E-01 | 1.00E+00 |
| ENSG00000186106.10_ANKRD46   | ENSG00000160789.18_LMNA | -0.63737 | -0.723185588 | -0.5321633  | 1.06E-18 | 4.86E-15 | 5.44E-14 |
| ENSG00000211455.6_STK38L     | ENSG00000160789.18_LMNA | -0.13852 | -0.291295572 | 0.021148479 | 8.88E-02 | 2.90E-01 | 1.00E+00 |
| ENSG00000164307.11_ERAP1     | ENSG00000160789.18_LMNA | 0.21625  | 0.059079692  | 0.362951984 | 7.46E-03 | 5.27E-02 | 1.00E+00 |
| ENSG00000104381.11_GDAP1     | ENSG00000160789.18_LMNA | -0.35332 | -0.485223893 | -0.20568485 | 8.01E-06 | 2.44E-04 | 4.11E-01 |

|                              |                         |          |              |             |          |          |          |
|------------------------------|-------------------------|----------|--------------|-------------|----------|----------|----------|
| ENSG00000176386.7_CDC26      | ENSG00000160789.18_LMNA | 0.02215  | -0.137536214 | 0.180712939 | 7.87E-01 | 9.13E-01 | 1.00E+00 |
| ENSG00000127951.5_FGL2       | ENSG00000160789.18_LMNA | -0.07728 | -0.233609882 | 0.082937715 | 3.44E-01 | 6.29E-01 | 1.00E+00 |
| ENSG00000175376.7	EIF1AD     | ENSG00000160789.18_LMNA | 0.30532  | 0.15358      | 0.442984505 | 1.31E-04 | 2.34E-03 | 1.00E+00 |
| ENSG00000111266.7_DUSP16     | ENSG00000160789.18_LMNA | -0.04641 | -0.2041059   | 0.113626952 | 5.70E-01 | 7.99E-01 | 1.00E+00 |
| ENSG00000023287.11_RB1CC1    | ENSG00000160789.18_LMNA | -0.1269  | -0.280433183 | 0.032968891 | 1.19E-01 | 3.47E-01 | 1.00E+00 |
| ENSG00000147642.15_SYBU      | ENSG00000160789.18_LMNA | -0.25834 | -0.401045104 | -0.10338993 | 1.31E-03 | 1.42E-02 | 1.00E+00 |
| ENSG00000143416.19_SELENBP   | ENSG00000160789.18_LMNA | -0.03454 | -0.192676943 | 0.125354315 | 6.73E-01 | 8.56E-01 | 1.00E+00 |
| ENSG00000139990.16_DCAF5     | ENSG00000160789.18_LMNA | 0.14233  | -0.017257726 | 0.294853448 | 8.02E-02 | 2.73E-01 | 1.00E+00 |
| ENSG00000128973.10_CLN6      | ENSG00000160789.18_LMNA | 0.41932  | 0.278731354  | 0.542321865 | 7.57E-08 | 5.75E-06 | 3.89E-03 |
| ENSG00000203724.9_C1orf53    | ENSG00000160789.18_LMNA | -0.16624 | -0.317051027 | -0.00723201 | 4.07E-02 | 1.75E-01 | 1.00E+00 |
| ENSG00000100888.11_CHD8      | ENSG00000160789.18_LMNA | 0.12871  | -0.03112668  | 0.282131383 | 1.14E-01 | 3.37E-01 | 1.00E+00 |
| ENSG00000226137.5_BAIAP2-AS  | ENSG00000160789.18_LMNA | 0.17119  | 0.012325368  | 0.321625413 | 3.50E-02 | 1.59E-01 | 1.00E+00 |
| ENSG00000110218.7_PANX1      | ENSG00000160789.18_LMNA | 0.0085   | -0.150900988 | 0.167477974 | 9.17E-01 | 9.69E-01 | 1.00E+00 |
| ENSG00000119431.8_HDHD3      | ENSG00000160789.18_LMNA | 0.26032  | 0.105496467  | 0.402830796 | 1.20E-03 | 1.33E-02 | 1.00E+00 |
| ENSG00000125447.15_GGA3      | ENSG00000160789.18_LMNA | -0.02732 | -0.185714607 | 0.132455137 | 7.38E-01 | 8.90E-01 | 1.00E+00 |
| ENSG00000237976.1_RP11-126K  | ENSG00000160789.18_LMNA | -0.40981 | -0.534163548 | -0.26810411 | 1.58E-07 | 1.04E-05 | 8.11E-03 |
| ENSG00000155849.14_ELMO1     | ENSG00000160789.18_LMNA | -0.37075 | -0.500417375 | -0.22482269 | 2.58E-06 | 9.67E-05 | 1.32E-01 |
| ENSG00000160050.13_CCDC28B   | ENSG00000160789.18_LMNA | -0.24609 | -0.390009137 | -0.09043008 | 2.24E-03 | 2.14E-02 | 1.00E+00 |
| ENSG00000144320.12_LNPK      | ENSG00000160789.18_LMNA | -0.00201 | -0.161162088 | 0.157238058 | 9.80E-01 | 9.93E-01 | 1.00E+00 |
| ENSG00000011105.10_TSPAN9    | ENSG00000160789.18_LMNA | 0.37111  | 0.225213898  | 0.500726196 | 2.52E-06 | 9.49E-05 | 1.29E-01 |
| ENSG00000133943.19_C14orf159 | ENSG00000160789.18_LMNA | 0.12388  | -0.036029205 | 0.27760776  | 1.28E-01 | 3.63E-01 | 1.00E+00 |
| ENSG00000180628.13_PCGF5     | ENSG00000160789.18_LMNA | -0.06219 | -0.219220088 | 0.097980968 | 4.47E-01 | 7.13E-01 | 1.00E+00 |
| ENSG00000163946.12_FAM208A   | ENSG00000160789.18_LMNA | 0.02088  | -0.138780032 | 0.179486047 | 7.98E-01 | 9.19E-01 | 1.00E+00 |
| ENSG00000169612.3_FAM103A1   | ENSG00000160789.18_LMNA | 0.02001  | -0.139630746 | 0.178646339 | 8.07E-01 | 9.23E-01 | 1.00E+00 |
| ENSG00000101473.15_ACOT8     | ENSG00000160789.18_LMNA | -0.10173 | -0.25676784  | 0.058421391 | 2.12E-01 | 4.86E-01 | 1.00E+00 |
| ENSG00000011376.8_LARS2      | ENSG00000160789.18_LMNA | 0.12697  | -0.032892402 | 0.280503732 | 1.19E-01 | 3.46E-01 | 1.00E+00 |
| ENSG00000113734.16_BNIP1     | ENSG00000160789.18_LMNA | -0.23501 | -0.379991333 | -0.07875309 | 3.56E-03 | 3.04E-02 | 1.00E+00 |
| ENSG00000121058.4_COIL       | ENSG00000160789.18_LMNA | -0.38448 | -0.512324083 | -0.23997057 | 1.01E-06 | 4.62E-05 | 5.16E-02 |
| ENSG00000106610.13_STAG3L4   | ENSG00000160789.18_LMNA | -0.07682 | -0.233169153 | 0.083400611 | 3.47E-01 | 6.31E-01 | 1.00E+00 |
| ENSG00000143373.16_ZNF687    | ENSG00000160789.18_LMNA | 0.16689  | 0.007899278  | 0.317651126 | 3.99E-02 | 1.73E-01 | 1.00E+00 |
| ENSG00000060339.12_CCAR1     | ENSG00000160789.18_LMNA | -0.08336 | -0.239387811 | 0.076856537 | 3.07E-01 | 5.94E-01 | 1.00E+00 |
| ENSG00000144233.8_AMMECR1    | ENSG00000160789.18_LMNA | -0.01717 | -0.175890272 | 0.142419639 | 8.34E-01 | 9.35E-01 | 1.00E+00 |
| ENSG00000166341.7_DCHS1      | ENSG00000160789.18_LMNA | 0.21437  | 0.057123123  | 0.361246194 | 8.00E-03 | 5.56E-02 | 1.00E+00 |

|                             |                         |          |              |             |          |          |          |
|-----------------------------|-------------------------|----------|--------------|-------------|----------|----------|----------|
| ENSG00000245556.2_SCAMP1-A  | ENSG00000160789.18_LMNA | -0.27394 | -0.415044278 | -0.11997628 | 6.38E-04 | 8.17E-03 | 1.00E+00 |
| ENSG00000125814.16_NAPB     | ENSG00000160789.18_LMNA | -0.24909 | -0.392714876 | -0.09359815 | 1.97E-03 | 1.93E-02 | 1.00E+00 |
| ENSG00000213025.2_COX20P1   | ENSG00000160789.18_LMNA | -0.15324 | -0.305001448 | 0.006108103 | 5.95E-02 | 2.24E-01 | 1.00E+00 |
| ENSG00000126522.15_AS_L     | ENSG00000160789.18_LMNA | 0.35243  | 0.204719119  | 0.484452703 | 8.47E-06 | 2.55E-04 | 4.35E-01 |
| ENSG00000229604.2_MTATP8P2  | ENSG00000160789.18_LMNA | -0.12832 | -0.281764277 | 0.031525098 | 1.15E-01 | 3.39E-01 | 1.00E+00 |
| ENSG00000153561.11_RMND5A   | ENSG00000160789.18_LMNA | -0.32744 | -0.462532731 | -0.17749551 | 3.83E-05 | 8.68E-04 | 1.00E+00 |
| ENSG00000072518.19_MARK2    | ENSG00000160789.18_LMNA | 0.11391  | -0.04613207  | 0.268241647 | 1.62E-01 | 4.17E-01 | 1.00E+00 |
| ENSG00000178234.11_GALNT11  | ENSG00000160789.18_LMNA | 0.36858  | 0.222435949  | 0.498531769 | 2.98E-06 | 1.09E-04 | 1.53E-01 |
| ENSG00000136928.4_GABBR2    | ENSG00000160789.18_LMNA | -0.17376 | -0.323999825 | -0.0149755  | 3.23E-02 | 1.50E-01 | 1.00E+00 |
| ENSG00000198680.4_TUSC1     | ENSG00000160789.18_LMNA | -0.08017 | -0.236355626 | 0.0800508   | 3.26E-01 | 6.13E-01 | 1.00E+00 |
| ENSG00000109466.12_KLHL2    | ENSG00000160789.18_LMNA | -0.03671 | -0.194770817 | 0.1232124   | 6.53E-01 | 8.47E-01 | 1.00E+00 |
| ENSG00000139278.8_GLIPR1    | ENSG00000160789.18_LMNA | 0.16581  | 0.006785509  | 0.316649331 | 4.12E-02 | 1.77E-01 | 1.00E+00 |
| ENSG00000170365.8_SMAD1     | ENSG00000160789.18_LMNA | 0.27135  | 0.117215907  | 0.412724126 | 7.21E-04 | 8.97E-03 | 1.00E+00 |
| ENSG00000172269.15_DPAGT1   | ENSG00000160789.18_LMNA | 0.2337   | 0.077378039  | 0.378806995 | 3.76E-03 | 3.17E-02 | 1.00E+00 |
| ENSG00000089041.15_P2RX7    | ENSG00000160789.18_LMNA | -0.51643 | -0.624303805 | -0.38923139 | 9.74E-12 | 3.47E-09 | 5.00E-07 |
| ENSG00000165118.13_C9orf64  | ENSG00000160789.18_LMNA | 0.37862  | 0.23349008   | 0.507242998 | 1.51E-06 | 6.47E-05 | 7.76E-02 |
| ENSG00000173272.12_MZT2A    | ENSG00000160789.18_LMNA | 0.24571  | 0.090026447  | 0.389664034 | 2.28E-03 | 2.16E-02 | 1.00E+00 |
| ENSG00000182580.2_EPHB3     | ENSG00000160789.18_LMNA | 0.04275  | -0.117252522 | 0.200581808 | 6.01E-01 | 8.17E-01 | 1.00E+00 |
| ENSG00000087995.14_METTL2A  | ENSG00000160789.18_LMNA | -0.28691 | -0.426626644 | -0.13382483 | 3.39E-04 | 4.93E-03 | 1.00E+00 |
| ENSG00000137040.9_RANBP6    | ENSG00000160789.18_LMNA | -0.07203 | -0.228610302 | 0.088180738 | 3.78E-01 | 6.57E-01 | 1.00E+00 |
| ENSG00000008735.13_MAPK8IP2 | ENSG00000160789.18_LMNA | -0.26682 | -0.408658138 | -0.11238944 | 8.91E-04 | 1.06E-02 | 1.00E+00 |
| ENSG00000159884.10_CCDC107  | ENSG00000160789.18_LMNA | 0.22437  | 0.067583979  | 0.370342663 | 5.45E-03 | 4.18E-02 | 1.00E+00 |
| ENSG00000196083.8_IL1RAP    | ENSG00000160789.18_LMNA | 0.26459  | 0.110021652  | 0.406659124 | 9.88E-04 | 1.15E-02 | 1.00E+00 |
| ENSG00000115761.14_NOL10    | ENSG00000160789.18_LMNA | 0.19578  | 0.037755052  | 0.344250062 | 1.56E-02 | 9.03E-02 | 1.00E+00 |
| ENSG00000168887.9_C2orf68   | ENSG00000160789.18_LMNA | -0.12618 | -0.279757974 | 0.033700768 | 1.21E-01 | 3.51E-01 | 1.00E+00 |
| ENSG00000197122.10_SRC      | ENSG00000160789.18_LMNA | -0.09348 | -0.24897929  | 0.06670944  | 2.52E-01 | 5.33E-01 | 1.00E+00 |
| ENSG00000171307.17_ZDHHC16  | ENSG00000160789.18_LMNA | 0.11077  | -0.049296468 | 0.265295738 | 1.74E-01 | 4.35E-01 | 1.00E+00 |
| ENSG00000117600.11_PLPPR4   | ENSG00000160789.18_LMNA | -0.06361 | -0.220576206 | 0.096569427 | 4.36E-01 | 7.04E-01 | 1.00E+00 |
| ENSG00000166260.9_COX11     | ENSG00000160789.18_LMNA | -0.39281 | -0.519520396 | -0.24919058 | 5.57E-07 | 2.86E-05 | 2.86E-02 |
| ENSG00000163528.11_CHCHD4   | ENSG00000160789.18_LMNA | -0.05669 | -0.213963607 | 0.103440242 | 4.88E-01 | 7.44E-01 | 1.00E+00 |
| ENSG00000175206.9_NPPA      | ENSG00000160789.18_LMNA | -0.42321 | -0.545647143 | -0.28308155 | 5.57E-08 | 4.46E-06 | 2.86E-03 |
| ENSG00000137462.6_TLR2      | ENSG00000160789.18_LMNA | 7.25E-05 | -0.159130031 | 0.159271371 | 9.99E-01 | 1.00E+00 | 1.00E+00 |
| ENSG00000227376.1_FTH1P16   | ENSG00000160789.18_LMNA | -0.01549 | -0.174261786 | 0.144065148 | 8.50E-01 | 9.41E-01 | 1.00E+00 |

|                             |                         |          |              |             |          |          |          |
|-----------------------------|-------------------------|----------|--------------|-------------|----------|----------|----------|
| ENSG00000101138.10_CSTF1    | ENSG00000160789.18_LMNA | 0.1233   | -0.036623747 | 0.277058221 | 1.30E-01 | 3.66E-01 | 1.00E+00 |
| ENSG00000165055.14_METTL2B  | ENSG00000160789.18_LMNA | 0.01156  | -0.147917671 | 0.170442297 | 8.88E-01 | 9.56E-01 | 1.00E+00 |
| ENSG00000131791.7_PRKAB2    | ENSG00000160789.18_LMNA | -0.28526 | -0.425155658 | -0.13205967 | 3.68E-04 | 5.27E-03 | 1.00E+00 |
| ENSG00000264148.1_RP11-848P | ENSG00000160789.18_LMNA | -0.25514 | -0.398172203 | -0.10000645 | 1.51E-03 | 1.58E-02 | 1.00E+00 |
| ENSG00000142409.5_ZNF787    | ENSG00000160789.18_LMNA | 0.39536  | 0.252027275  | 0.521726779 | 4.63E-07 | 2.47E-05 | 2.37E-02 |
| ENSG00000151498.10_ACAD8    | ENSG00000160789.18_LMNA | -0.33361 | -0.467957299 | -0.1841922  | 2.67E-05 | 6.52E-04 | 1.00E+00 |
| ENSG00000123545.5_NDUFAF4   | ENSG00000160789.18_LMNA | -0.30441 | -0.442185409 | -0.15260954 | 1.37E-04 | 2.43E-03 | 1.00E+00 |
| ENSG00000187391.16_MAGI2    | ENSG00000160789.18_LMNA | -0.22211 | -0.368291612 | -0.06521946 | 5.96E-03 | 4.48E-02 | 1.00E+00 |
| ENSG00000185049.11_NELFA    | ENSG00000160789.18_LMNA | 0.13858  | -0.02108945  | 0.291349615 | 8.86E-02 | 2.90E-01 | 1.00E+00 |
| ENSG00000153015.14_CWC27    | ENSG00000160789.18_LMNA | -0.12805 | -0.281507551 | 0.031803661 | 1.16E-01 | 3.40E-01 | 1.00E+00 |
| ENSG00000148399.10_DPH7     | ENSG00000160789.18_LMNA | -0.06445 | -0.221381125 | 0.095731009 | 4.30E-01 | 7.00E-01 | 1.00E+00 |
| ENSG00000103544.13_C16orf62 | ENSG00000160789.18_LMNA | -0.01795 | -0.176648416 | 0.141652969 | 8.26E-01 | 9.32E-01 | 1.00E+00 |
| ENSG00000143369.13_ECM1     | ENSG00000160789.18_LMNA | 0.37096  | 0.225049316  | 0.500596283 | 2.54E-06 | 9.58E-05 | 1.30E-01 |
| ENSG00000119638.11_NEK9     | ENSG00000160789.18_LMNA | 0.30688  | 0.155267593  | 0.444373005 | 1.20E-04 | 2.20E-03 | 1.00E+00 |
| ENSG00000161847.12_RAVR1    | ENSG00000160789.18_LMNA | 0.19832  | 0.040394277  | 0.346577953 | 1.43E-02 | 8.50E-02 | 1.00E+00 |
| ENSG00000105705.14_SUGP1    | ENSG00000160789.18_LMNA | -0.02195 | -0.180520831 | 0.137731039 | 7.88E-01 | 9.14E-01 | 1.00E+00 |
| ENSG00000129757.11_CDKN1C   | ENSG00000160789.18_LMNA | -0.23729 | -0.382059225 | -0.08115672 | 3.24E-03 | 2.83E-02 | 1.00E+00 |
| ENSG00000171163.14_ZNF692   | ENSG00000160789.18_LMNA | -0.03067 | -0.188950866 | 0.129158564 | 7.08E-01 | 8.76E-01 | 1.00E+00 |
| ENSG00000132323.7_ILKAP     | ENSG00000160789.18_LMNA | -0.27694 | -0.417719274 | -0.12316449 | 5.53E-04 | 7.29E-03 | 1.00E+00 |
| ENSG00000160818.15_GPATCH4  | ENSG00000160789.18_LMNA | 0.25069  | 0.095290477  | 0.394158119 | 1.84E-03 | 1.84E-02 | 1.00E+00 |
| ENSG00000162869.14_PPP1R21  | ENSG00000160789.18_LMNA | -0.40123 | -0.526778536 | -0.2585397  | 3.01E-07 | 1.77E-05 | 1.55E-02 |
| ENSG00000203485.11_INF2     | ENSG00000160789.18_LMNA | 0.29214  | 0.139424085  | 0.431282527 | 2.60E-04 | 4.02E-03 | 1.00E+00 |
| ENSG00000106415.11_GLCCI1   | ENSG00000160789.18_LMNA | -0.37871 | -0.507321099 | -0.23358951 | 1.50E-06 | 6.43E-05 | 7.71E-02 |
| ENSG00000110583.11_NAA40    | ENSG00000160789.18_LMNA | -0.18042 | -0.330135514 | -0.02184385 | 2.61E-02 | 1.31E-01 | 1.00E+00 |
| ENSG00000168259.13_DNAJC7   | ENSG00000160789.18_LMNA | -0.02296 | -0.181497013 | 0.136740798 | 7.79E-01 | 9.09E-01 | 1.00E+00 |
| ENSG00000144306.12_SCRN3    | ENSG00000160789.18_LMNA | -0.29824 | -0.436706878 | -0.14597114 | 1.90E-04 | 3.14E-03 | 1.00E+00 |
| ENSG00000129158.9_SERGEF    | ENSG00000160789.18_LMNA | 0.01643  | -0.143141688 | 0.175175908 | 8.41E-01 | 9.38E-01 | 1.00E+00 |
| ENSG00000106560.9_GIMAP2    | ENSG00000160789.18_LMNA | 0.02905  | -0.130757043 | 0.187382496 | 7.22E-01 | 8.82E-01 | 1.00E+00 |
| ENSG00000228499.1_TMSB10P1  | ENSG00000160789.18_LMNA | 0.11358  | -0.046464995 | 0.267931985 | 1.64E-01 | 4.19E-01 | 1.00E+00 |
| ENSG00000105366.14_SIGLEC8  | ENSG00000160789.18_LMNA | -0.30124 | -0.439370461 | -0.14919537 | 1.62E-04 | 2.77E-03 | 1.00E+00 |
| ENSG00000047579.18_DTNBP1   | ENSG00000160789.18_LMNA | 0.00708  | -0.152289088 | 0.166096746 | 9.31E-01 | 9.73E-01 | 1.00E+00 |
| ENSG00000127452.7_FBXL12    | ENSG00000160789.18_LMNA | 0.14539  | -0.014142145 | 0.297696248 | 7.39E-02 | 2.59E-01 | 1.00E+00 |
| ENSG00000204438.9_GPANK1    | ENSG00000160789.18_LMNA | -0.08244 | -0.238512947 | 0.077778831 | 3.13E-01 | 5.99E-01 | 1.00E+00 |

|                             |                         |          |              |             |          |          |          |
|-----------------------------|-------------------------|----------|--------------|-------------|----------|----------|----------|
| ENSG00000066926.9_FECH      | ENSG00000160789.18_LMNA | -0.11535 | -0.269601699 | 0.044669015 | 1.57E-01 | 4.09E-01 | 1.00E+00 |
| ENSG00000072958.7_AP1M1     | ENSG00000160789.18_LMNA | 0.15341  | -0.005936227 | 0.305157332 | 5.92E-02 | 2.24E-01 | 1.00E+00 |
| ENSG00000110422.10_HIPK3    | ENSG00000160789.18_LMNA | 0.13404  | -0.025713234 | 0.287110309 | 9.97E-02 | 3.11E-01 | 1.00E+00 |
| ENSG00000167291.14_TBC1D16  | ENSG00000160789.18_LMNA | 0.18755  | 0.029221364  | 0.336697164 | 2.07E-02 | 1.10E-01 | 1.00E+00 |
| ENSG00000176595.3_KBTBD11   | ENSG00000160789.18_LMNA | -0.15231 | -0.304132219 | 0.007066165 | 6.10E-02 | 2.28E-01 | 1.00E+00 |
| ENSG00000085871.7_MGST2     | ENSG00000160789.18_LMNA | -0.03515 | -0.193269428 | 0.124748537 | 6.67E-01 | 8.53E-01 | 1.00E+00 |
| ENSG00000008710.16_PKD1     | ENSG00000160789.18_LMNA | 0.22488  | 0.068116844  | 0.370804479 | 5.35E-03 | 4.12E-02 | 1.00E+00 |
| ENSG00000113504.18_SLC12A7  | ENSG00000160789.18_LMNA | 0.47532  | 0.34199727   | 0.589882349 | 6.10E-10 | 1.05E-07 | 3.13E-05 |
| ENSG00000138231.11_DBR1     | ENSG00000160789.18_LMNA | -0.15476 | -0.3064086   | 0.004555931 | 5.69E-02 | 2.18E-01 | 1.00E+00 |
| ENSG00000162458.11_FBLIM1   | ENSG00000160789.18_LMNA | 0.40406  | 0.261697071  | 0.529220935 | 2.44E-07 | 1.49E-05 | 1.25E-02 |
| ENSG00000184060.9_ADAP2     | ENSG00000160789.18_LMNA | 0.01568  | -0.143883925 | 0.17444122  | 8.48E-01 | 9.41E-01 | 1.00E+00 |
| ENSG00000136936.9_XPA       | ENSG00000160789.18_LMNA | -0.15279 | -0.304584082 | 0.006568193 | 6.02E-02 | 2.26E-01 | 1.00E+00 |
| ENSG00000100711.12_ZFYVE21  | ENSG00000160789.18_LMNA | 0.05217  | -0.107923263 | 0.209633325 | 5.23E-01 | 7.69E-01 | 1.00E+00 |
| ENSG0000014123.9_UFL1       | ENSG00000160789.18_LMNA | -0.08523 | -0.241157419 | 0.074989334 | 2.96E-01 | 5.82E-01 | 1.00E+00 |
| ENSG00000140521.10_POLG     | ENSG00000160789.18_LMNA | 0.35757  | 0.210348274  | 0.488941795 | 6.11E-06 | 1.96E-04 | 3.14E-01 |
| ENSG00000006530.14_AGK      | ENSG00000160789.18_LMNA | 0.17309  | 0.014286976  | 0.323383307 | 3.30E-02 | 1.52E-01 | 1.00E+00 |
| ENSG00000141428.15_C18orf21 | ENSG00000160789.18_LMNA | -0.08459 | -0.240552911 | 0.075627431 | 3.00E-01 | 5.87E-01 | 1.00E+00 |
| ENSG00000101966.11_XIAP     | ENSG00000160789.18_LMNA | 0.09737  | -0.062808231 | 0.252650477 | 2.33E-01 | 5.11E-01 | 1.00E+00 |
| ENSG00000102893.14_PHKB     | ENSG00000160789.18_LMNA | -0.16506 | -0.315953616 | -0.00601248 | 4.21E-02 | 1.80E-01 | 1.00E+00 |
| ENSG00000113812.12_ACTR8    | ENSG00000160789.18_LMNA | -0.06693 | -0.223750455 | 0.093260454 | 4.13E-01 | 6.86E-01 | 1.00E+00 |
| ENSG00000138398.14_PPIG     | ENSG00000160789.18_LMNA | 0.0409   | -0.119074221 | 0.198807988 | 6.17E-01 | 8.26E-01 | 1.00E+00 |
| ENSG00000101938.13_CHRD1    | ENSG00000160789.18_LMNA | -0.37803 | -0.506732524 | -0.23284035 | 1.57E-06 | 6.66E-05 | 8.08E-02 |
| ENSG00000156475.17_PPP2R2B  | ENSG00000160789.18_LMNA | -0.32064 | -0.456538392 | -0.17012601 | 5.64E-05 | 1.18E-03 | 1.00E+00 |
| ENSG00000115368.8_WDR75     | ENSG00000160789.18_LMNA | -0.00084 | -0.160017892 | 0.158383293 | 9.92E-01 | 9.97E-01 | 1.00E+00 |
| ENSG00000101413.10_RPRD1B   | ENSG00000160789.18_LMNA | 0.15982  | 0.000632036  | 0.311102014 | 4.92E-02 | 1.99E-01 | 1.00E+00 |
| ENSG00000186575.16_NF2      | ENSG00000160789.18_LMNA | 0.16372  | 0.00464261   | 0.314719923 | 4.39E-02 | 1.85E-01 | 1.00E+00 |
| ENSG00000185324.20_CDK10    | ENSG00000160789.18_LMNA | 0.11615  | -0.043865339 | 0.27034826  | 1.54E-01 | 4.05E-01 | 1.00E+00 |
| ENSG00000206337.9_HCP5      | ENSG00000160789.18_LMNA | 0.14796  | -0.011516488 | 0.300087731 | 6.89E-02 | 2.47E-01 | 1.00E+00 |
| ENSG00000197562.8_RAB40C    | ENSG00000160789.18_LMNA | 0.13193  | -0.027858592 | 0.285139172 | 1.05E-01 | 3.22E-01 | 1.00E+00 |
| ENSG00000197119.11_SLC25A29 | ENSG00000160789.18_LMNA | 0.06269  | -0.097484428 | 0.219697272 | 4.43E-01 | 7.10E-01 | 1.00E+00 |
| ENSG00000129480.11_DTD2     | ENSG00000160789.18_LMNA | -0.32861 | -0.463559732 | -0.17876133 | 3.58E-05 | 8.24E-04 | 1.00E+00 |
| ENSG00000102524.10_TNFSF13F | ENSG00000160789.18_LMNA | -0.09499 | -0.25040589  | 0.065194601 | 2.44E-01 | 5.24E-01 | 1.00E+00 |
| ENSG00000165661.14_QSOX2    | ENSG00000160789.18_LMNA | 0.11171  | -0.048352809 | 0.266174857 | 1.71E-01 | 4.30E-01 | 1.00E+00 |

|                             |                         |          |              |             |          |          |          |
|-----------------------------|-------------------------|----------|--------------|-------------|----------|----------|----------|
| ENSG00000125772.11_GPCPD1   | ENSG00000160789.18_LMNA | -0.14349 | -0.29592994  | 0.016078652 | 7.78E-02 | 2.67E-01 | 1.00E+00 |
| ENSG00000072849.9_DERL2     | ENSG00000160789.18_LMNA | -0.01069 | -0.16960506  | 0.14876086  | 8.96E-01 | 9.59E-01 | 1.00E+00 |
| ENSG00000166685.10_COG1     | ENSG00000160789.18_LMNA | 0.08775  | -0.072465712 | 0.2435458   | 2.82E-01 | 5.68E-01 | 1.00E+00 |
| ENSG00000073584.17_SMARCE1  | ENSG00000160789.18_LMNA | -0.37479 | -0.503920678 | -0.22926585 | 1.96E-06 | 7.87E-05 | 1.01E-01 |
| ENSG00000198075.8_SULT1C4   | ENSG00000160789.18_LMNA | -0.30289 | -0.440831375 | -0.1509664  | 1.49E-04 | 2.58E-03 | 1.00E+00 |
| ENSG00000058804.11_NDC1     | ENSG00000160789.18_LMNA | -0.03386 | -0.192026107 | 0.12601948  | 6.79E-01 | 8.60E-01 | 1.00E+00 |
| ENSG00000011021.20_CLCN6    | ENSG00000160789.18_LMNA | -0.04096 | -0.198867876 | 0.119012751 | 6.16E-01 | 8.26E-01 | 1.00E+00 |
| ENSG00000145358.5_DDIT4L    | ENSG00000160789.18_LMNA | 0.22643  | 0.06974493   | 0.372214557 | 5.03E-03 | 3.94E-02 | 1.00E+00 |
| ENSG00000030066.12_NUP160   | ENSG00000160789.18_LMNA | 0.00331  | -0.155968503 | 0.162429492 | 9.68E-01 | 9.87E-01 | 1.00E+00 |
| ENSG00000207547.1_MIR25     | ENSG00000160789.18_LMNA | -0.02991 | -0.188211987 | 0.129911833 | 7.15E-01 | 8.79E-01 | 1.00E+00 |
| ENSG00000136504.10_KAT7     | ENSG00000160789.18_LMNA | -0.05629 | -0.213576499 | 0.10384153  | 4.91E-01 | 7.47E-01 | 1.00E+00 |
| ENSG00000213859.4_KCTD11    | ENSG00000160789.18_LMNA | 0.20634  | 0.048744184  | 0.353918111 | 1.08E-02 | 6.90E-02 | 1.00E+00 |
| ENSG00000121775.16_TMEM39B  | ENSG00000160789.18_LMNA | 0.25559  | 0.100474161  | 0.398569687 | 1.48E-03 | 1.56E-02 | 1.00E+00 |
| ENSG00000164808.15_SPIDR    | ENSG00000160789.18_LMNA | 0.1881   | 0.029792622  | 0.337204005 | 2.03E-02 | 1.09E-01 | 1.00E+00 |
| ENSG00000109920.11_FNBP4    | ENSG00000160789.18_LMNA | 0.03328  | -0.126588308 | 0.191469311 | 6.84E-01 | 8.63E-01 | 1.00E+00 |
| ENSG00000068615.15_REEP1    | ENSG00000160789.18_LMNA | -0.40198 | -0.527431433 | -0.25938316 | 2.85E-07 | 1.69E-05 | 1.46E-02 |
| ENSG00000027847.12_B4GALT7  | ENSG00000160789.18_LMNA | 0.24858  | 0.093063073  | 0.39225825  | 2.01E-03 | 1.96E-02 | 1.00E+00 |
| ENSG00000140416.18_TPM1     | ENSG00000160789.18_LMNA | 0.08203  | -0.078189949 | 0.238122806 | 3.15E-01 | 6.01E-01 | 1.00E+00 |
| ENSG00000170677.5_SOCS6     | ENSG00000160789.18_LMNA | -0.01742 | -0.176136292 | 0.142170894 | 8.31E-01 | 9.34E-01 | 1.00E+00 |
| ENSG00000114030.11_KPNA1    | ENSG00000160789.18_LMNA | -0.14421 | -0.296605656 | 0.015338101 | 7.63E-02 | 2.64E-01 | 1.00E+00 |
| ENSG00000181804.13_SLC9A9   | ENSG00000160789.18_LMNA | -0.23344 | -0.378567979 | -0.07710067 | 3.80E-03 | 3.19E-02 | 1.00E+00 |
| ENSG00000153446.14_C16orf89 | ENSG00000160789.18_LMNA | -0.19806 | -0.346337055 | -0.04012096 | 1.44E-02 | 8.56E-02 | 1.00E+00 |
| ENSG00000156671.11_SAMD8    | ENSG00000160789.18_LMNA | -0.09696 | -0.25227009  | 0.0632129   | 2.35E-01 | 5.13E-01 | 1.00E+00 |
| ENSG00000013016.13_EHD3     | ENSG00000160789.18_LMNA | -0.23875 | -0.383380832 | -0.08269474 | 3.05E-03 | 2.71E-02 | 1.00E+00 |
| ENSG00000168061.12_SAC3D1   | ENSG00000160789.18_LMNA | 0.1466   | -0.012903688 | 0.298824739 | 7.15E-02 | 2.53E-01 | 1.00E+00 |
| ENSG00000144283.20_PKP4     | ENSG00000160789.18_LMNA | -0.4141  | -0.537840446 | -0.27288573 | 1.14E-07 | 8.05E-06 | 5.84E-03 |
| ENSG00000112655.14_PTK7     | ENSG00000160789.18_LMNA | 0.44527  | 0.307898229  | 0.564460129 | 9.03E-09 | 9.90E-07 | 4.63E-04 |
| ENSG00000258056.2_RP11-644F | ENSG00000160789.18_LMNA | -0.22652 | -0.372294146 | -0.06983687 | 5.01E-03 | 3.93E-02 | 1.00E+00 |
| ENSG00000111961.15_SASH1    | ENSG00000160789.18_LMNA | -0.0572  | -0.214449081 | 0.102936839 | 4.84E-01 | 7.41E-01 | 1.00E+00 |
| ENSG00000254122.2_PCDHGB7   | ENSG00000160789.18_LMNA | 0.04218  | -0.117810351 | 0.200038862 | 6.06E-01 | 8.20E-01 | 1.00E+00 |
| ENSG00000126653.14_NSRP1    | ENSG00000160789.18_LMNA | 0.21669  | 0.059538589  | 0.363351768 | 7.33E-03 | 5.21E-02 | 1.00E+00 |
| ENSG00000135549.13_PKIB     | ENSG00000160789.18_LMNA | 0.17679  | 0.018103467  | 0.326797351 | 2.93E-02 | 1.41E-01 | 1.00E+00 |
| ENSG00000107521.17_HPS1     | ENSG00000160789.18_LMNA | 0.18098  | 0.022426371  | 0.330654701 | 2.57E-02 | 1.29E-01 | 1.00E+00 |

|                             |                         |          |              |             |          |          |          |
|-----------------------------|-------------------------|----------|--------------|-------------|----------|----------|----------|
| ENSG00000198435.3_NRARP     | ENSG00000160789.18_LMNA | 0.09327  | -0.066921152 | 0.248779801 | 2.53E-01 | 5.34E-01 | 1.00E+00 |
| ENSG00000137522.16_RNF121   | ENSG00000160789.18_LMNA | 0.06263  | -0.097540029 | 0.219643846 | 4.43E-01 | 7.11E-01 | 1.00E+00 |
| ENSG00000061918.11_GUCY1B3  | ENSG00000160789.18_LMNA | -0.11985 | -0.27382897  | 0.040112969 | 1.41E-01 | 3.84E-01 | 1.00E+00 |
| ENSG00000164535.13_DAGLB    | ENSG00000160789.18_LMNA | 0.04584  | -0.114191198 | 0.203557988 | 5.75E-01 | 8.02E-01 | 1.00E+00 |
| ENSG00000234009.1_RPL5P34   | ENSG00000160789.18_LMNA | -0.14549 | -0.297795261 | 0.014033522 | 7.37E-02 | 2.58E-01 | 1.00E+00 |
| ENSG00000083857.12_FAT1     | ENSG00000160789.18_LMNA | 0.2081   | 0.050576422  | 0.355523763 | 1.01E-02 | 6.60E-02 | 1.00E+00 |
| ENSG00000163904.11_SENP2    | ENSG00000160789.18_LMNA | -0.30791 | -0.445281214 | -0.15637235 | 1.14E-04 | 2.10E-03 | 1.00E+00 |
| ENSG00000197702.10_PARVA    | ENSG00000160789.18_LMNA | 0.25299  | 0.097730497  | 0.396236412 | 1.66E-03 | 1.70E-02 | 1.00E+00 |
| ENSG00000236939.2_BAALC-AS2 | ENSG00000160789.18_LMNA | -0.13269 | -0.2858519   | 0.027083202 | 1.03E-01 | 3.18E-01 | 1.00E+00 |
| ENSG00000108559.10_NUP88    | ENSG00000160789.18_LMNA | -0.19114 | -0.339995477 | -0.03294248 | 1.83E-02 | 1.01E-01 | 1.00E+00 |
| ENSG00000183828.13_NUDT14   | ENSG00000160789.18_LMNA | 0.00819  | -0.151209069 | 0.167171526 | 9.20E-01 | 9.70E-01 | 1.00E+00 |
| ENSG00000113360.15_DROSHA   | ENSG00000160789.18_LMNA | 0.07589  | -0.084328339 | 0.232285457 | 3.53E-01 | 6.36E-01 | 1.00E+00 |
| ENSG00000154928.15_EPHB1    | ENSG00000160789.18_LMNA | -0.51632 | -0.624210991 | -0.38910234 | 9.86E-12 | 3.47E-09 | 5.06E-07 |
| ENSG00000014164.6_ZC3H3     | ENSG00000160789.18_LMNA | 0.17943  | 0.020828676  | 0.329230268 | 2.70E-02 | 1.33E-01 | 1.00E+00 |
| ENSG00000117533.13_VAMP4    | ENSG00000160789.18_LMNA | -0.05736 | -0.214605006 | 0.102775121 | 4.83E-01 | 7.40E-01 | 1.00E+00 |
| ENSG00000137752.21_CASP1    | ENSG00000160789.18_LMNA | 0.16356  | 0.00447625   | 0.31457003  | 4.41E-02 | 1.85E-01 | 1.00E+00 |
| ENSG00000143093.13_STRIP1   | ENSG00000160789.18_LMNA | -0.05491 | -0.212251911 | 0.105213856 | 5.02E-01 | 7.53E-01 | 1.00E+00 |
| ENSG00000211456.9_SACM1L    | ENSG00000160789.18_LMNA | -0.20874 | -0.356106584 | -0.051242   | 9.86E-03 | 6.49E-02 | 1.00E+00 |
| ENSG00000165698.14_SPACA9   | ENSG00000160789.18_LMNA | -0.07573 | -0.232132336 | 0.084489033 | 3.54E-01 | 6.37E-01 | 1.00E+00 |
| ENSG00000234964.4_FABP5P7   | ENSG00000160789.18_LMNA | 0.12188  | -0.038057023 | 0.275732591 | 1.35E-01 | 3.73E-01 | 1.00E+00 |
| ENSG00000184574.8_LPAR5     | ENSG00000160789.18_LMNA | -0.11889 | -0.272923133 | 0.041090358 | 1.45E-01 | 3.89E-01 | 1.00E+00 |
| ENSG00000128340.13_RAC2     | ENSG00000160789.18_LMNA | 0.15149  | -0.007905892 | 0.303369925 | 6.25E-02 | 2.32E-01 | 1.00E+00 |
| ENSG00000146670.8_CDCA5     | ENSG00000160789.18_LMNA | 0.03973  | -0.120235238 | 0.197676398 | 6.27E-01 | 8.32E-01 | 1.00E+00 |
| ENSG00000124532.13_MRS2     | ENSG00000160789.18_LMNA | -0.09687 | -0.252179334 | 0.063309434 | 2.35E-01 | 5.13E-01 | 1.00E+00 |
| ENSG00000105939.11_ZC3HAV1  | ENSG00000160789.18_LMNA | 0.30337  | 0.151484408  | 0.441258382 | 1.45E-04 | 2.53E-03 | 1.00E+00 |
| ENSG00000092036.15_HAUS4    | ENSG00000160789.18_LMNA | -0.00253 | -0.16166301  | 0.156736411 | 9.75E-01 | 9.91E-01 | 1.00E+00 |
| ENSG00000167703.13_SLC43A2  | ENSG00000160789.18_LMNA | 0.03994  | -0.120025852 | 0.197880539 | 6.25E-01 | 8.31E-01 | 1.00E+00 |
| ENSG00000214174.7_AMZ2P1    | ENSG00000160789.18_LMNA | -0.49088 | -0.60296241  | -0.35979975 | 1.36E-10 | 2.92E-08 | 6.97E-06 |
| ENSG00000121871.3_SLITRK3   | ENSG00000160789.18_LMNA | -0.01662 | -0.175352787 | 0.142962937 | 8.39E-01 | 9.37E-01 | 1.00E+00 |
| ENSG00000140280.12_LYSMD2   | ENSG00000160789.18_LMNA | -0.24471 | -0.38876598  | -0.08897654 | 2.38E-03 | 2.23E-02 | 1.00E+00 |
| ENSG00000117791.14_MARC2    | ENSG00000160789.18_LMNA | 0.22753  | 0.070898745  | 0.373213027 | 4.82E-03 | 3.81E-02 | 1.00E+00 |
| ENSG00000110931.17_CAMKK2   | ENSG00000160789.18_LMNA | -0.14    | -0.292679827 | 0.019635836 | 8.54E-02 | 2.83E-01 | 1.00E+00 |
| ENSG00000104472.8_CHRAC1    | ENSG00000160789.18_LMNA | 0.03656  | -0.123354287 | 0.194632202 | 6.55E-01 | 8.47E-01 | 1.00E+00 |



|                             |                         |          |              |             |          |          |          |
|-----------------------------|-------------------------|----------|--------------|-------------|----------|----------|----------|
| ENSG00000145423.4_SFRP2     | ENSG00000160789.18_LMNA | -0.02205 | -0.180617984 | 0.137632515 | 7.87E-01 | 9.13E-01 | 1.00E+00 |
| ENSG00000164329.12_PAPD4    | ENSG00000160789.18_LMNA | -0.01032 | -0.169238848 | 0.14912953  | 9.00E-01 | 9.61E-01 | 1.00E+00 |
| ENSG00000059758.6_CDK17     | ENSG00000160789.18_LMNA | -0.2362  | -0.381072445 | -0.08000929 | 3.39E-03 | 2.93E-02 | 1.00E+00 |
| ENSG00000115756.11_HPCAL1   | ENSG00000160789.18_LMNA | 0.0928   | -0.067399095 | 0.248329354 | 2.55E-01 | 5.38E-01 | 1.00E+00 |
| ENSG00000153989.7_NUS1      | ENSG00000160789.18_LMNA | -0.00137 | -0.160536432 | 0.157864389 | 9.87E-01 | 9.95E-01 | 1.00E+00 |
| ENSG00000143164.14_DCAF6    | ENSG00000160789.18_LMNA | 0.14039  | -0.019235918 | 0.293045582 | 8.45E-02 | 2.82E-01 | 1.00E+00 |
| ENSG00000110713.14_NUP98    | ENSG00000160789.18_LMNA | 0.2703   | 0.116092522  | 0.411778797 | 7.58E-04 | 9.31E-03 | 1.00E+00 |
| ENSG00000130827.6_PLXNA3    | ENSG00000160789.18_LMNA | 0.2202   | 0.063216546  | 0.366551912 | 6.41E-03 | 4.73E-02 | 1.00E+00 |
| ENSG00000151806.12_GUF1     | ENSG00000160789.18_LMNA | -0.18018 | -0.329915275 | -0.02159681 | 2.63E-02 | 1.31E-01 | 1.00E+00 |
| ENSG00000167136.6_ENDOG     | ENSG00000160789.18_LMNA | 0.10111  | -0.059039526 | 0.256188368 | 2.15E-01 | 4.89E-01 | 1.00E+00 |
| ENSG00000084092.6_NOA1      | ENSG00000160789.18_LMNA | -0.05757 | -0.214799528 | 0.102573348 | 4.81E-01 | 7.39E-01 | 1.00E+00 |
| ENSG00000253764.1_RP11-439C | ENSG00000160789.18_LMNA | -0.11525 | -0.269507172 | 0.044770744 | 1.57E-01 | 4.10E-01 | 1.00E+00 |
| ENSG00000126950.7_TMEM35A   | ENSG00000160789.18_LMNA | -0.44298 | -0.562510445 | -0.30531003 | 1.10E-08 | 1.17E-06 | 5.63E-04 |
| ENSG00000236675.1_MTX1P1    | ENSG00000160789.18_LMNA | 0.39443  | 0.250984657  | 0.52091625  | 4.96E-07 | 2.60E-05 | 2.54E-02 |
| ENSG00000132664.10_POLR3F   | ENSG00000160789.18_LMNA | -0.13084 | -0.284123776 | 0.028962611 | 1.08E-01 | 3.27E-01 | 1.00E+00 |
| ENSG00000164414.15_SLC35A1  | ENSG00000160789.18_LMNA | -0.28739 | -0.427051774 | -0.13433532 | 3.31E-04 | 4.85E-03 | 1.00E+00 |
| ENSG00000135999.10_EPC2     | ENSG00000160789.18_LMNA | -0.09374 | -0.249226096 | 0.066447473 | 2.51E-01 | 5.31E-01 | 1.00E+00 |
| ENSG00000166716.8_ZNF592    | ENSG00000160789.18_LMNA | 0.18133  | 0.022791795  | 0.3309803   | 2.54E-02 | 1.28E-01 | 1.00E+00 |
| ENSG00000135341.16_MAP3K7   | ENSG00000160789.18_LMNA | -0.08163 | -0.237738398 | 0.078594921 | 3.17E-01 | 6.04E-01 | 1.00E+00 |
| ENSG00000146067.14_FAM193B  | ENSG00000160789.18_LMNA | 0.03956  | -0.120398708 | 0.197517003 | 6.28E-01 | 8.33E-01 | 1.00E+00 |
| ENSG00000145782.11_ATG12    | ENSG00000160789.18_LMNA | -0.3266  | -0.461793849 | -0.17658539 | 4.02E-05 | 9.05E-04 | 1.00E+00 |
| ENSG00000119242.7_CCDC92    | ENSG00000160789.18_LMNA | -0.03549 | -0.193600306 | 0.124410132 | 6.64E-01 | 8.52E-01 | 1.00E+00 |
| ENSG00000148356.12_LRSAM1   | ENSG00000160789.18_LMNA | 0.07976  | -0.080461891 | 0.235964946 | 3.29E-01 | 6.15E-01 | 1.00E+00 |
| ENSG00000173914.10_RBM4B    | ENSG00000160789.18_LMNA | -0.33721 | -0.471116275 | -0.18810417 | 2.16E-05 | 5.50E-04 | 1.00E+00 |
| ENSG00000133315.9_MACROD1   | ENSG00000160789.18_LMNA | -0.0896  | -0.245302856 | 0.070606577 | 2.72E-01 | 5.57E-01 | 1.00E+00 |
| ENSG00000165819.10_METTL3   | ENSG00000160789.18_LMNA | -0.01468 | -0.173474167 | 0.14486037  | 8.58E-01 | 9.44E-01 | 1.00E+00 |
| ENSG00000127666.9_TICAM1    | ENSG00000160789.18_LMNA | 0.41835  | 0.277640651  | 0.541486838 | 8.17E-08 | 6.07E-06 | 4.19E-03 |
| ENSG00000143740.13_SNAP47   | ENSG00000160789.18_LMNA | -0.05536 | -0.21269096  | 0.104759118 | 4.98E-01 | 7.51E-01 | 1.00E+00 |
| ENSG00000111790.12_FGFR1OP  | ENSG00000160789.18_LMNA | -0.2546  | -0.397685462 | -0.09943388 | 1.55E-03 | 1.61E-02 | 1.00E+00 |
| ENSG00000122359.16_ANXA11   | ENSG00000160789.18_LMNA | 0.18531  | 0.026898031  | 0.33463398  | 2.23E-02 | 1.17E-01 | 1.00E+00 |
| ENSG00000142751.13_GPN2     | ENSG00000160789.18_LMNA | 0.18504  | 0.026628127  | 0.334394106 | 2.25E-02 | 1.17E-01 | 1.00E+00 |
| ENSG00000164011.16_ZNF691   | ENSG00000160789.18_LMNA | -0.03439 | -0.192539842 | 0.125494458 | 6.74E-01 | 8.57E-01 | 1.00E+00 |
| ENSG00000167985.5_SDHAF2    | ENSG00000160789.18_LMNA | -0.22337 | -0.369429872 | -0.06653126 | 5.67E-03 | 4.31E-02 | 1.00E+00 |

|                             |                         |          |              |             |          |          |          |
|-----------------------------|-------------------------|----------|--------------|-------------|----------|----------|----------|
| ENSG00000237765.5_FAM200B   | ENSG00000160789.18_LMNA | -0.49474 | -0.606194285 | -0.36422591 | 9.26E-11 | 2.10E-08 | 4.75E-06 |
| ENSG00000103043.13_VAC14    | ENSG00000160789.18_LMNA | 0.1799   | 0.021311779  | 0.329661129 | 2.66E-02 | 1.32E-01 | 1.00E+00 |
| ENSG00000121892.13_PDS5A    | ENSG00000160789.18_LMNA | 0.0598   | -0.100356893 | 0.216934682 | 4.64E-01 | 7.27E-01 | 1.00E+00 |
| ENSG00000181026.14_AEN      | ENSG00000160789.18_LMNA | 0.27681  | 0.123029985  | 0.41760652  | 5.56E-04 | 7.32E-03 | 1.00E+00 |
| ENSG00000065243.17_PKN2     | ENSG00000160789.18_LMNA | 0.01337  | -0.146138519 | 0.172207383 | 8.70E-01 | 9.50E-01 | 1.00E+00 |
| ENSG00000067715.12_SYT1     | ENSG00000160789.18_LMNA | -0.2031  | -0.350948623 | -0.04536105 | 1.21E-02 | 7.52E-02 | 1.00E+00 |
| ENSG00000120251.17_GRIA2    | ENSG00000160789.18_LMNA | -0.39117 | -0.518107161 | -0.24737605 | 6.26E-07 | 3.14E-05 | 3.21E-02 |
| ENSG00000118849.8_RARRES1   | ENSG00000160789.18_LMNA | 0.19773  | 0.039779369  | 0.346035918 | 1.46E-02 | 8.62E-02 | 1.00E+00 |
| ENSG00000140379.7_BCL2A1    | ENSG00000160789.18_LMNA | 0.01375  | -0.145773645 | 0.17256912  | 8.67E-01 | 9.48E-01 | 1.00E+00 |
| ENSG00000153044.8_CENPH     | ENSG00000160789.18_LMNA | -0.06997 | -0.226645334 | 0.090236591 | 3.92E-01 | 6.70E-01 | 1.00E+00 |
| ENSG00000166548.14_TK2      | ENSG00000160789.18_LMNA | 0.09778  | -0.062389102 | 0.253044354 | 2.31E-01 | 5.08E-01 | 1.00E+00 |
| ENSG00000254531.1_FLJ20021  | ENSG00000160789.18_LMNA | -0.15937 | -0.310692226 | -0.0001784  | 4.99E-02 | 2.01E-01 | 1.00E+00 |
| ENSG00000143624.12_INTS3    | ENSG00000160789.18_LMNA | 0.2061   | 0.048488273  | 0.353693704 | 1.09E-02 | 6.94E-02 | 1.00E+00 |
| ENSG00000100393.9_EP300     | ENSG00000160789.18_LMNA | 0.07059  | -0.089620598 | 0.227234367 | 3.88E-01 | 6.66E-01 | 1.00E+00 |
| ENSG00000204138.11_PHACTR4  | ENSG00000160789.18_LMNA | -0.1224  | -0.276216678 | 0.037533776 | 1.33E-01 | 3.70E-01 | 1.00E+00 |
| ENSG00000136051.12_KIAA1033 | ENSG00000160789.18_LMNA | -0.06005 | -0.21717723  | 0.100104909 | 4.62E-01 | 7.25E-01 | 1.00E+00 |
| ENSG00000102738.7_MRPS31    | ENSG00000160789.18_LMNA | -0.26092 | -0.403368583 | -0.1061314  | 1.17E-03 | 1.30E-02 | 1.00E+00 |
| ENSG00000021574.10_SPAST    | ENSG00000160789.18_LMNA | -0.53126 | -0.636620097 | -0.40643789 | 1.90E-12 | 9.18E-10 | 9.76E-08 |
| ENSG00000126581.11_BECN1    | ENSG00000160789.18_LMNA | 0.14236  | -0.017229493 | 0.294879234 | 8.02E-02 | 2.73E-01 | 1.00E+00 |
| ENSG00000151617.14_EDNRA    | ENSG00000160789.18_LMNA | 0.10404  | -0.056094262 | 0.258947382 | 2.02E-01 | 4.73E-01 | 1.00E+00 |
| ENSG00000203760.7_CENPW     | ENSG00000160789.18_LMNA | -0.04022 | -0.1981554   | 0.119743886 | 6.23E-01 | 8.30E-01 | 1.00E+00 |
| ENSG00000013375.14_PGM3     | ENSG00000160789.18_LMNA | -0.07269 | -0.229238307 | 0.087523116 | 3.73E-01 | 6.53E-01 | 1.00E+00 |
| ENSG00000214357.7_NEURL1B   | ENSG00000160789.18_LMNA | 0.02204  | -0.137641899 | 0.180608731 | 7.88E-01 | 9.13E-01 | 1.00E+00 |
| ENSG00000128594.6_LRRC4     | ENSG00000160789.18_LMNA | -0.34876 | -0.481241188 | -0.20070332 | 1.07E-05 | 3.07E-04 | 5.47E-01 |
| ENSG00000213563.5_C8orf82   | ENSG00000160789.18_LMNA | 0.06256  | -0.097617585 | 0.21956932  | 4.44E-01 | 7.11E-01 | 1.00E+00 |
| ENSG00000182667.13_NTM      | ENSG00000160789.18_LMNA | -0.28737 | -0.427037334 | -0.13431798 | 3.31E-04 | 4.85E-03 | 1.00E+00 |
| ENSG00000128482.14_RNF112   | ENSG00000160789.18_LMNA | -0.24266 | -0.386909371 | -0.0868081  | 2.59E-03 | 2.39E-02 | 1.00E+00 |
| ENSG00000136738.13_STAM     | ENSG00000160789.18_LMNA | -0.3695  | -0.499327917 | -0.22344328 | 2.80E-06 | 1.04E-04 | 1.44E-01 |
| ENSG00000197496.5_SLC2A10   | ENSG00000160789.18_LMNA | 0.41501  | 0.273901639  | 0.538620344 | 1.06E-07 | 7.59E-06 | 5.44E-03 |
| ENSG00000137103.15_TMEM8B   | ENSG00000160789.18_LMNA | -0.08708 | -0.242910363 | 0.073137526 | 2.86E-01 | 5.72E-01 | 1.00E+00 |
| ENSG00000150593.14_PDCCD4   | ENSG00000160789.18_LMNA | -0.30708 | -0.444543577 | -0.15547502 | 1.19E-04 | 2.18E-03 | 1.00E+00 |
| ENSG00000152990.12_ADGRA3   | ENSG00000160789.18_LMNA | 0.00486  | -0.154456345 | 0.163937717 | 9.53E-01 | 9.81E-01 | 1.00E+00 |
| ENSG00000132694.17_ARHGEF1  | ENSG00000160789.18_LMNA | 0.07457  | -0.085643507 | 0.231031813 | 3.61E-01 | 6.43E-01 | 1.00E+00 |

|                             |                         |          |              |             |          |          |          |
|-----------------------------|-------------------------|----------|--------------|-------------|----------|----------|----------|
| ENSG00000088970.14_KIZ      | ENSG00000160789.18_LMNA | -0.25843 | -0.401126636 | -0.10348606 | 1.31E-03 | 1.42E-02 | 1.00E+00 |
| ENSG00000131263.11_RLIM     | ENSG00000160789.18_LMNA | 0.1005   | -0.059657394 | 0.255608919 | 2.18E-01 | 4.93E-01 | 1.00E+00 |
| ENSG00000219545.8_UMAD1     | ENSG00000160789.18_LMNA | -0.08574 | -0.241642572 | 0.074477037 | 2.94E-01 | 5.79E-01 | 1.00E+00 |
| ENSG00000150782.10_IL18     | ENSG00000160789.18_LMNA | -0.14758 | -0.299734202 | 0.011904905 | 6.96E-02 | 2.49E-01 | 1.00E+00 |
| ENSG00000147180.15_ZNF711   | ENSG00000160789.18_LMNA | -0.36526 | -0.495638615 | -0.21878031 | 3.71E-06 | 1.31E-04 | 1.90E-01 |
| ENSG00000159055.3_MIS18A    | ENSG00000160789.18_LMNA | 0.07911  | -0.081108282 | 0.235350442 | 3.33E-01 | 6.18E-01 | 1.00E+00 |
| ENSG00000173846.11_PLK3     | ENSG00000160789.18_LMNA | 0.46705  | 0.33257626   | 0.58290739  | 1.32E-09 | 1.95E-07 | 6.75E-05 |
| ENSG00000087884.13_AAMDC    | ENSG00000160789.18_LMNA | -0.03605 | -0.194134487 | 0.123863643 | 6.59E-01 | 8.50E-01 | 1.00E+00 |
| ENSG00000130749.8_ZC3H4     | ENSG00000160789.18_LMNA | 0.17832  | 0.019681872  | 0.328206963 | 2.79E-02 | 1.36E-01 | 1.00E+00 |
| ENSG00000176953.9_NFATC2IP  | ENSG00000160789.18_LMNA | 0.11795  | -0.042041004 | 0.272041546 | 1.48E-01 | 3.94E-01 | 1.00E+00 |
| ENSG00000179242.14_CDH4     | ENSG00000160789.18_LMNA | 0.26999  | 0.115765191  | 0.411503228 | 7.69E-04 | 9.42E-03 | 1.00E+00 |
| ENSG00000111011.16_RSRC2    | ENSG00000160789.18_LMNA | 0.02384  | -0.135876083 | 0.182348938 | 7.71E-01 | 9.05E-01 | 1.00E+00 |
| ENSG00000013288.7_MAN2B2    | ENSG00000160789.18_LMNA | 0.32563  | 0.175528087  | 0.460934979 | 4.25E-05 | 9.41E-04 | 1.00E+00 |
| ENSG00000166979.11_EVA1C    | ENSG00000160789.18_LMNA | 0.32338  | 0.173094937  | 0.458956446 | 4.83E-05 | 1.05E-03 | 1.00E+00 |
| ENSG00000133119.11_RFC3     | ENSG00000160789.18_LMNA | -0.14566 | -0.297947227 | 0.013866791 | 7.34E-02 | 2.58E-01 | 1.00E+00 |
| ENSG00000100399.14_CHADL    | ENSG00000160789.18_LMNA | -0.37089 | -0.500535232 | -0.22497198 | 2.55E-06 | 9.61E-05 | 1.31E-01 |
| ENSG00000130988.11_RGN      | ENSG00000160789.18_LMNA | -0.06425 | -0.22118633  | 0.095933952 | 4.32E-01 | 7.01E-01 | 1.00E+00 |
| ENSG00000135473.13_PAN2     | ENSG00000160789.18_LMNA | -0.13363 | -0.286728452 | 0.026129067 | 1.01E-01 | 3.13E-01 | 1.00E+00 |
| ENSG00000168490.12_PHYHIP   | ENSG00000160789.18_LMNA | -0.15461 | -0.306271747 | 0.004706954 | 5.72E-02 | 2.19E-01 | 1.00E+00 |
| ENSG00000242861.1_RP11-285F | ENSG00000160789.18_LMNA | 0.01796  | -0.141650556 | 0.176650802 | 8.26E-01 | 9.32E-01 | 1.00E+00 |
| ENSG00000241878.8_PISD      | ENSG00000160789.18_LMNA | -0.11038 | -0.264926406 | 0.049692748 | 1.76E-01 | 4.37E-01 | 1.00E+00 |
| ENSG00000114948.11_ADAM23   | ENSG00000160789.18_LMNA | -0.16588 | -0.316712171 | -0.00685535 | 4.11E-02 | 1.77E-01 | 1.00E+00 |
| ENSG00000106823.11_ECM2     | ENSG00000160789.18_LMNA | 0.10772  | -0.052377379 | 0.262421898 | 1.87E-01 | 4.53E-01 | 1.00E+00 |
| ENSG00000185088.11_RPS27L   | ENSG00000160789.18_LMNA | 0.03816  | -0.121781428 | 0.19616808  | 6.41E-01 | 8.40E-01 | 1.00E+00 |
| ENSG00000155252.13_PI4K2A   | ENSG00000160789.18_LMNA | 0.16089  | 0.001737112  | 0.312099794 | 4.77E-02 | 1.95E-01 | 1.00E+00 |
| ENSG00000130592.12_LSP1     | ENSG00000160789.18_LMNA | 0.22893  | 0.072365957  | 0.374481689 | 4.56E-03 | 3.66E-02 | 1.00E+00 |
| ENSG00000050426.14_LETMD1   | ENSG00000160789.18_LMNA | -0.15748 | -0.30893871  | 0.001761297 | 5.27E-02 | 2.08E-01 | 1.00E+00 |
| ENSG00000166352.14_C11orf74 | ENSG00000160789.18_LMNA | -0.25741 | -0.400211407 | -0.10240736 | 1.37E-03 | 1.47E-02 | 1.00E+00 |
| ENSG00000236060.2_HSPB1P1   | ENSG00000160789.18_LMNA | 0.42672  | 0.287019614  | 0.548650276 | 4.21E-08 | 3.54E-06 | 2.16E-03 |
| ENSG00000070010.17_UFD1L    | ENSG00000160789.18_LMNA | -0.15918 | -0.310508171 | 2.53E-05    | 5.01E-02 | 2.02E-01 | 1.00E+00 |
| ENSG00000270885.1_RASL10B   | ENSG00000160789.18_LMNA | -0.29983 | -0.438118058 | -0.14767858 | 1.75E-04 | 2.94E-03 | 1.00E+00 |
| ENSG00000141458.11_NPC1     | ENSG00000160789.18_LMNA | 0.2074   | 0.049842797  | 0.354881078 | 1.04E-02 | 6.72E-02 | 1.00E+00 |
| ENSG00000001167.13_NFYA     | ENSG00000160789.18_LMNA | 0.00178  | -0.157467592 | 0.160932831 | 9.83E-01 | 9.94E-01 | 1.00E+00 |

|                             |                         |          |              |             |          |          |          |
|-----------------------------|-------------------------|----------|--------------|-------------|----------|----------|----------|
| ENSG00000197912.12_SPG7     | ENSG00000160789.18_LMNA | 0.11239  | -0.047665841 | 0.266814511 | 1.68E-01 | 4.26E-01 | 1.00E+00 |
| ENSG00000162851.7_TFB2M     | ENSG00000160789.18_LMNA | -0.11105 | -0.26555884  | 0.04901411  | 1.73E-01 | 4.33E-01 | 1.00E+00 |
| ENSG00000100526.18_CDKN3    | ENSG00000160789.18_LMNA | 0.14999  | -0.009438177 | 0.301977911 | 6.51E-02 | 2.38E-01 | 1.00E+00 |
| ENSG00000129460.14_NGDN     | ENSG00000160789.18_LMNA | -0.02514 | -0.183608845 | 0.134596372 | 7.58E-01 | 8.99E-01 | 1.00E+00 |
| ENSG00000148943.10_LIN7C    | ENSG00000160789.18_LMNA | -0.32349 | -0.459053958 | -0.17321477 | 4.80E-05 | 1.04E-03 | 1.00E+00 |
| ENSG00000134321.10_RSAD2    | ENSG00000160789.18_LMNA | -0.03112 | -0.189378472 | 0.128722462 | 7.04E-01 | 8.73E-01 | 1.00E+00 |
| ENSG00000164877.17_MICALL2  | ENSG00000160789.18_LMNA | 0.49543  | 0.365016988  | 0.606771069 | 8.64E-11 | 2.01E-08 | 4.43E-06 |
| ENSG00000087448.8_KLHL42    | ENSG00000160789.18_LMNA | -0.01452 | -0.17331703  | 0.145018974 | 8.59E-01 | 9.45E-01 | 1.00E+00 |
| ENSG00000133878.7_DUSP26    | ENSG00000160789.18_LMNA | -0.4772  | -0.591468004 | -0.34414597 | 5.11E-10 | 8.95E-08 | 2.62E-05 |
| ENSG00000132424.13_PNISR    | ENSG00000160789.18_LMNA | -0.13744 | -0.290293141 | 0.022242992 | 9.13E-02 | 2.95E-01 | 1.00E+00 |
| ENSG00000213123.9_TCTEX1D2  | ENSG00000160789.18_LMNA | -0.0003  | -0.159490761 | 0.158910615 | 9.97E-01 | 9.99E-01 | 1.00E+00 |
| ENSG00000070808.14_CAMK2A   | ENSG00000160789.18_LMNA | -0.03869 | -0.196678497 | 0.121258369 | 6.36E-01 | 8.37E-01 | 1.00E+00 |
| ENSG00000136869.13_TLR4     | ENSG00000160789.18_LMNA | -0.19007 | -0.339008793 | -0.03182842 | 1.90E-02 | 1.04E-01 | 1.00E+00 |
| ENSG00000160799.10_CCDC12   | ENSG00000160789.18_LMNA | -0.06833 | -0.225084901 | 0.091867277 | 4.03E-01 | 6.79E-01 | 1.00E+00 |
| ENSG00000197355.9_UAP1L1    | ENSG00000160789.18_LMNA | 0.30672  | 0.155096506  | 0.444232303 | 1.21E-04 | 2.21E-03 | 1.00E+00 |
| ENSG00000036672.14_USP2     | ENSG00000160789.18_LMNA | -0.30331 | -0.44120485  | -0.15141946 | 1.46E-04 | 2.53E-03 | 1.00E+00 |
| ENSG00000103742.10_IGDCC4   | ENSG00000160789.18_LMNA | 0.31142  | 0.16015454   | 0.448386015 | 9.41E-05 | 1.80E-03 | 1.00E+00 |
| ENSG00000152778.8_IFIT5     | ENSG00000160789.18_LMNA | -0.28869 | -0.428208252 | -0.13572481 | 3.10E-04 | 4.62E-03 | 1.00E+00 |
| ENSG00000157600.10_TMEN164  | ENSG00000160789.18_LMNA | 0.29646  | 0.144062328  | 0.435127575 | 2.08E-04 | 3.37E-03 | 1.00E+00 |
| ENSG00000178996.11_SNX18    | ENSG00000160789.18_LMNA | -0.02747 | -0.185862087 | 0.132305062 | 7.37E-01 | 8.89E-01 | 1.00E+00 |
| ENSG00000177854.7_TMEN187   | ENSG00000160789.18_LMNA | 0.04263  | -0.117363641 | 0.200473669 | 6.02E-01 | 8.17E-01 | 1.00E+00 |
| ENSG00000184515.9_BEX5      | ENSG00000160789.18_LMNA | -0.25364 | -0.396819241 | -0.09841541 | 1.62E-03 | 1.66E-02 | 1.00E+00 |
| ENSG00000164938.12_TP53INP1 | ENSG00000160789.18_LMNA | -0.30237 | -0.44037288  | -0.15041038 | 1.53E-04 | 2.64E-03 | 1.00E+00 |
| ENSG00000087095.11_NLK      | ENSG00000160789.18_LMNA | -0.07895 | -0.235195917 | 0.081270784 | 3.34E-01 | 6.19E-01 | 1.00E+00 |
| ENSG00000198933.8_TBKBP1    | ENSG00000160789.18_LMNA | -0.14775 | -0.299900375 | 0.011722345 | 6.93E-02 | 2.48E-01 | 1.00E+00 |
| ENSG00000220848.4_RPS18P9   | ENSG00000160789.18_LMNA | -0.10658 | -0.261343194 | 0.053532264 | 1.91E-01 | 4.59E-01 | 1.00E+00 |
| ENSG00000168765.14_GSTM4    | ENSG00000160789.18_LMNA | 0.11026  | -0.049812477 | 0.264814801 | 1.76E-01 | 4.38E-01 | 1.00E+00 |
| ENSG00000048162.18_NOP16    | ENSG00000160789.18_LMNA | 0.18916  | 0.030888045  | 0.338175406 | 1.96E-02 | 1.06E-01 | 1.00E+00 |
| ENSG00000170260.7_ZNF212    | ENSG00000160789.18_LMNA | 0.14347  | -0.016100489 | 0.29591001  | 7.78E-02 | 2.67E-01 | 1.00E+00 |
| ENSG00000087502.16_ERGIC2   | ENSG00000160789.18_LMNA | -0.09834 | -0.253569438 | 0.061830181 | 2.28E-01 | 5.05E-01 | 1.00E+00 |
| ENSG00000119899.12_SLC17A5  | ENSG00000160789.18_LMNA | -0.07784 | -0.234138143 | 0.082382707 | 3.40E-01 | 6.26E-01 | 1.00E+00 |
| ENSG00000196943.11_NOP9     | ENSG00000160789.18_LMNA | 0.20956  | 0.052096542  | 0.356854532 | 9.57E-03 | 6.35E-02 | 1.00E+00 |
| ENSG00000167994.10_RAB3IL1  | ENSG00000160789.18_LMNA | 0.1485   | -0.0109601   | 0.300593994 | 6.79E-02 | 2.44E-01 | 1.00E+00 |

|                             |                         |          |              |             |          |          |          |
|-----------------------------|-------------------------|----------|--------------|-------------|----------|----------|----------|
| ENSG00000204217.11_BMPR2    | ENSG00000160789.18_LMNA | -0.02102 | -0.179617524 | 0.13864679  | 7.97E-01 | 9.18E-01 | 1.00E+00 |
| ENSG00000105849.5_TWISTNB   | ENSG00000160789.18_LMNA | 0.16124  | 0.002087944  | 0.312416419 | 4.72E-02 | 1.94E-01 | 1.00E+00 |
| ENSG00000082212.10_ME2      | ENSG00000160789.18_LMNA | -0.25733 | -0.400138935 | -0.10232197 | 1.37E-03 | 1.47E-02 | 1.00E+00 |
| ENSG00000159086.13_PAXBP1   | ENSG00000160789.18_LMNA | 0.00725  | -0.152124745 | 0.16626034  | 9.29E-01 | 9.73E-01 | 1.00E+00 |
| ENSG00000101654.16_RNMT     | ENSG00000160789.18_LMNA | 0.03033  | -0.129493489 | 0.188622384 | 7.11E-01 | 8.77E-01 | 1.00E+00 |
| ENSG00000277203.1_F8A1      | ENSG00000160789.18_LMNA | 0.11176  | -0.04830182  | 0.266222343 | 1.70E-01 | 4.29E-01 | 1.00E+00 |
| ENSG00000103264.14_FBXO31   | ENSG00000160789.18_LMNA | 0.0372   | -0.122731608 | 0.195240427 | 6.49E-01 | 8.44E-01 | 1.00E+00 |
| ENSG00000033170.15_FUT8     | ENSG00000160789.18_LMNA | 0.04391  | -0.116100412 | 0.201702563 | 5.91E-01 | 8.11E-01 | 1.00E+00 |
| ENSG00000173120.13_KDM2A    | ENSG00000160789.18_LMNA | 0.25864  | 0.103713157  | 0.401319244 | 1.29E-03 | 1.41E-02 | 1.00E+00 |
| ENSG00000157181.13_C1orf27  | ENSG00000160789.18_LMNA | 0.05131  | -0.108779045 | 0.208805282 | 5.30E-01 | 7.73E-01 | 1.00E+00 |
| ENSG00000259623.1_RP11-156E | ENSG00000160789.18_LMNA | -0.26522 | -0.40722954  | -0.11069695 | 9.59E-04 | 1.12E-02 | 1.00E+00 |
| ENSG00000132182.10_NUP210   | ENSG00000160789.18_LMNA | 0.25856  | 0.103625991  | 0.40124532  | 1.30E-03 | 1.41E-02 | 1.00E+00 |
| ENSG00000132356.10_PRKAA1   | ENSG00000160789.18_LMNA | -0.00175 | -0.160906925 | 0.157493528 | 9.83E-01 | 9.94E-01 | 1.00E+00 |
| ENSG00000197150.11_ABCB8    | ENSG00000160789.18_LMNA | 0.29138  | 0.138610237  | 0.430606762 | 2.70E-04 | 4.14E-03 | 1.00E+00 |
| ENSG00000174939.9_ASHPD1    | ENSG00000160789.18_LMNA | 0.05497  | -0.105150484 | 0.212313104 | 5.01E-01 | 7.53E-01 | 1.00E+00 |
| ENSG00000092051.15_JPH4     | ENSG00000160789.18_LMNA | -0.37452 | -0.503688503 | -0.22897103 | 2.00E-06 | 7.98E-05 | 1.03E-01 |
| ENSG00000162755.12_KLHDC9   | ENSG00000160789.18_LMNA | 0.04539  | -0.114640006 | 0.203122029 | 5.79E-01 | 8.04E-01 | 1.00E+00 |
| ENSG00000170871.10_KIAA0232 | ENSG00000160789.18_LMNA | -0.13891 | -0.29166299  | 0.020747123 | 8.79E-02 | 2.88E-01 | 1.00E+00 |
| ENSG00000139370.9_SLC15A4   | ENSG00000160789.18_LMNA | -0.00797 | -0.166960126 | 0.151421559 | 9.22E-01 | 9.70E-01 | 1.00E+00 |
| ENSG00000127241.15_MASP1    | ENSG00000160789.18_LMNA | -0.35995 | -0.491013833 | -0.21295278 | 5.24E-06 | 1.72E-04 | 2.69E-01 |
| ENSG00000161277.10_THAP8    | ENSG00000160789.18_LMNA | -0.07378 | -0.230271338 | 0.086440767 | 3.66E-01 | 6.47E-01 | 1.00E+00 |
| ENSG00000076984.16_MAP2K7   | ENSG00000160789.18_LMNA | 0.094    | -0.066195636 | 0.249463319 | 2.49E-01 | 5.30E-01 | 1.00E+00 |
| ENSG00000141385.8_AFG3L2    | ENSG00000160789.18_LMNA | 0.21141  | 0.054031924  | 0.358547047 | 8.93E-03 | 6.04E-02 | 1.00E+00 |
| ENSG00000135974.8_C2orf49   | ENSG00000160789.18_LMNA | -0.37886 | -0.507450095 | -0.23375374 | 1.49E-06 | 6.38E-05 | 7.63E-02 |
| ENSG00000175806.13_MSRA     | ENSG00000160789.18_LMNA | -0.028   | -0.186369855 | 0.131788246 | 7.32E-01 | 8.87E-01 | 1.00E+00 |
| ENSG00000156959.8_LHFPL4    | ENSG00000160789.18_LMNA | -0.09876 | -0.253966132 | 0.061407792 | 2.26E-01 | 5.02E-01 | 1.00E+00 |
| ENSG00000249855.1_EEF1A1P1  | ENSG00000160789.18_LMNA | -0.13188 | -0.285093233 | 0.027908557 | 1.05E-01 | 3.22E-01 | 1.00E+00 |
| ENSG00000150787.6_PTS       | ENSG00000160789.18_LMNA | -0.18374 | -0.333198521 | -0.02528353 | 2.35E-02 | 1.21E-01 | 1.00E+00 |
| ENSG00000129933.19_MAU2     | ENSG00000160789.18_LMNA | 0.03825  | -0.121695963 | 0.196251491 | 6.40E-01 | 8.39E-01 | 1.00E+00 |
| ENSG00000145431.9_PDGFC     | ENSG00000160789.18_LMNA | 0.07141  | -0.088795715 | 0.228022783 | 3.82E-01 | 6.61E-01 | 1.00E+00 |
| ENSG00000102547.17_CAB39L   | ENSG00000160789.18_LMNA | -0.36817 | -0.498169821 | -0.22197819 | 3.06E-06 | 1.12E-04 | 1.57E-01 |
| ENSG00000105447.11_GRWD1    | ENSG00000160789.18_LMNA | 0.31852  | 0.167831229  | 0.454666501 | 6.35E-05 | 1.30E-03 | 1.00E+00 |
| ENSG00000154310.15_TNIK     | ENSG00000160789.18_LMNA | -0.08585 | -0.24174349  | 0.074370452 | 2.93E-01 | 5.79E-01 | 1.00E+00 |

|                             |                         |          |              |             |          |          |          |
|-----------------------------|-------------------------|----------|--------------|-------------|----------|----------|----------|
| ENSG00000110851.10_PRDM4    | ENSG00000160789.18_LMNA | 0.17093  | 0.012057886  | 0.321385544 | 3.52E-02 | 1.59E-01 | 1.00E+00 |
| ENSG00000164576.10_SAP30L   | ENSG00000160789.18_LMNA | -0.02304 | -0.18157714  | 0.136659489 | 7.78E-01 | 9.09E-01 | 1.00E+00 |
| ENSG00000140830.7_TXNL4B    | ENSG00000160789.18_LMNA | -0.11629 | -0.270484543 | 0.043718586 | 1.54E-01 | 4.04E-01 | 1.00E+00 |
| ENSG00000185238.11_PRMT3    | ENSG00000160789.18_LMNA | -0.17804 | -0.327940932 | -0.01938387 | 2.82E-02 | 1.37E-01 | 1.00E+00 |
| ENSG00000133250.12_ZNF414   | ENSG00000160789.18_LMNA | 0.04878  | -0.111286961 | 0.206376031 | 5.51E-01 | 7.87E-01 | 1.00E+00 |
| ENSG00000181991.14_MRPS11   | ENSG00000160789.18_LMNA | -0.15046 | -0.302414729 | 0.0089575   | 6.43E-02 | 2.36E-01 | 1.00E+00 |
| ENSG00000111707.10_SUDS3    | ENSG00000160789.18_LMNA | -0.01301 | -0.171850381 | 0.146498533 | 8.74E-01 | 9.51E-01 | 1.00E+00 |
| ENSG00000162174.11_ASRL1    | ENSG00000160789.18_LMNA | -0.28632 | -0.426100089 | -0.13319276 | 3.49E-04 | 5.05E-03 | 1.00E+00 |
| ENSG00000242960.1_FTH1P23   | ENSG00000160789.18_LMNA | 0.02037  | -0.139280232 | 0.178992375 | 8.03E-01 | 9.21E-01 | 1.00E+00 |
| ENSG00000261221.3_ZNF865    | ENSG00000160789.18_LMNA | 0.33785  | 0.188803081  | 0.471679896 | 2.07E-05 | 5.33E-04 | 1.00E+00 |
| ENSG00000173273.14_TNKS     | ENSG00000160789.18_LMNA | -0.0124  | -0.171260272 | 0.147093434 | 8.80E-01 | 9.53E-01 | 1.00E+00 |
| ENSG00000089048.13_ESF1     | ENSG00000160789.18_LMNA | 0.25901  | 0.104100321  | 0.401647547 | 1.27E-03 | 1.39E-02 | 1.00E+00 |
| ENSG00000066654.11_THUMPD1  | ENSG00000160789.18_LMNA | -0.16532 | -0.316197272 | -0.00628317 | 4.18E-02 | 1.79E-01 | 1.00E+00 |
| ENSG00000183955.11_KMT5A    | ENSG00000160789.18_LMNA | 0.26851  | 0.114188712  | 0.410175287 | 8.24E-04 | 9.95E-03 | 1.00E+00 |
| ENSG00000198586.12_TLK1     | ENSG00000160789.18_LMNA | 0.19003  | 0.031795273  | 0.338979425 | 1.90E-02 | 1.04E-01 | 1.00E+00 |
| ENSG00000167632.13_TRAPPC9  | ENSG00000160789.18_LMNA | -0.01142 | -0.170310652 | 0.148050283 | 8.89E-01 | 9.57E-01 | 1.00E+00 |
| ENSG00000095380.10_NANS     | ENSG00000160789.18_LMNA | 0.23836  | 0.082283881  | 0.383027904 | 3.10E-03 | 2.74E-02 | 1.00E+00 |
| ENSG00000169006.6_NTSR2     | ENSG00000160789.18_LMNA | -0.25925 | -0.401865621 | -0.10435754 | 1.26E-03 | 1.38E-02 | 1.00E+00 |
| ENSG00000145016.12_RUBCN    | ENSG00000160789.18_LMNA | 0.07064  | -0.089570543 | 0.22728222  | 3.87E-01 | 6.66E-01 | 1.00E+00 |
| ENSG00000167461.10_RAB8A    | ENSG00000160789.18_LMNA | 0.16445  | 0.005392028  | 0.31539497  | 4.29E-02 | 1.82E-01 | 1.00E+00 |
| ENSG00000105287.11_PRKD2    | ENSG00000160789.18_LMNA | 0.44862  | 0.311678691  | 0.567302811 | 6.78E-09 | 7.76E-07 | 3.48E-04 |
| ENSG00000116701.13_NCF2     | ENSG00000160789.18_LMNA | 0.04946  | -0.110610089 | 0.207032057 | 5.45E-01 | 7.83E-01 | 1.00E+00 |
| ENSG00000107960.9_STN1      | ENSG00000160789.18_LMNA | 0.07591  | -0.084313155 | 0.232299925 | 3.53E-01 | 6.36E-01 | 1.00E+00 |
| ENSG00000090316.14_MAEA     | ENSG00000160789.18_LMNA | 0.04161  | -0.118370807 | 0.199493162 | 6.11E-01 | 8.22E-01 | 1.00E+00 |
| ENSG00000139531.11_SUOX     | ENSG00000160789.18_LMNA | -0.23228 | -0.377519727 | -0.07588478 | 3.98E-03 | 3.30E-02 | 1.00E+00 |
| ENSG00000163932.12_PRKCD    | ENSG00000160789.18_LMNA | 0.06449  | -0.095688814 | 0.221421622 | 4.30E-01 | 7.00E-01 | 1.00E+00 |
| ENSG00000171160.16_MORN4    | ENSG00000160789.18_LMNA | -0.35597 | -0.487538649 | -0.20858679 | 6.77E-06 | 2.14E-04 | 3.47E-01 |
| ENSG00000162981.13_FAM84A   | ENSG00000160789.18_LMNA | 0.3471   | 0.198891432  | 0.479789715 | 1.18E-05 | 3.34E-04 | 6.06E-01 |
| ENSG00000261061.1_RP11-303E | ENSG00000160789.18_LMNA | 0.12689  | -0.032972398 | 0.280429948 | 1.19E-01 | 3.47E-01 | 1.00E+00 |
| ENSG00000100083.17_GGA1     | ENSG00000160789.18_LMNA | -0.04655 | -0.204238959 | 0.113489895 | 5.69E-01 | 7.98E-01 | 1.00E+00 |
| ENSG00000151778.9_SERP2     | ENSG00000160789.18_LMNA | -0.47384 | -0.588640368 | -0.34031608 | 7.01E-10 | 1.17E-07 | 3.60E-05 |
| ENSG00000108061.10_SHOC2    | ENSG00000160789.18_LMNA | -0.14335 | -0.295800329 | 0.01622066  | 7.81E-02 | 2.68E-01 | 1.00E+00 |
| ENSG00000114120.10_SLC25A36 | ENSG00000160789.18_LMNA | -0.29096 | -0.430235022 | -0.13816271 | 2.76E-04 | 4.21E-03 | 1.00E+00 |

|                             |                         |          |              |             |          |          |          |
|-----------------------------|-------------------------|----------|--------------|-------------|----------|----------|----------|
| ENSG00000143756.10_FBXO28   | ENSG00000160789.18_LMNA | -0.05743 | -0.214666958 | 0.102710863 | 4.82E-01 | 7.40E-01 | 1.00E+00 |
| ENSG00000039650.8_PNKP      | ENSG00000160789.18_LMNA | 0.27317  | 0.119151631  | 0.414351545 | 6.61E-04 | 8.39E-03 | 1.00E+00 |
| ENSG00000253716.4_MINCR     | ENSG00000160789.18_LMNA | -0.19855 | -0.346789353 | -0.04063416 | 1.42E-02 | 8.45E-02 | 1.00E+00 |
| ENSG00000166851.13_PLK1     | ENSG00000160789.18_LMNA | 0.1148   | -0.04522662  | 0.269083499 | 1.59E-01 | 4.12E-01 | 1.00E+00 |
| ENSG00000111371.14_SLC38A1  | ENSG00000160789.18_LMNA | -0.22992 | -0.37538037  | -0.07340608 | 4.38E-03 | 3.55E-02 | 1.00E+00 |
| ENSG00000101003.9_GINS1     | ENSG00000160789.18_LMNA | 0.01505  | -0.144500722 | 0.173830427 | 8.54E-01 | 9.43E-01 | 1.00E+00 |
| ENSG00000146757.12_ZNF92    | ENSG00000160789.18_LMNA | -0.07157 | -0.228168888 | 0.088642804 | 3.81E-01 | 6.60E-01 | 1.00E+00 |
| ENSG00000135090.12_TAOK3    | ENSG00000160789.18_LMNA | -0.05795 | -0.215165769 | 0.102193386 | 4.78E-01 | 7.36E-01 | 1.00E+00 |
| ENSG00000156795.5_WDYHV1    | ENSG00000160789.18_LMNA | -0.18309 | -0.332595108 | -0.02460534 | 2.40E-02 | 1.23E-01 | 1.00E+00 |
| ENSG00000117020.15_AKT3     | ENSG00000160789.18_LMNA | -0.21273 | -0.359742955 | -0.05540082 | 8.51E-03 | 5.83E-02 | 1.00E+00 |
| ENSG00000150760.11_DOCK1    | ENSG00000160789.18_LMNA | 0.1945   | 0.036429276  | 0.343079256 | 1.63E-02 | 9.33E-02 | 1.00E+00 |
| ENSG00000112304.9_ACOT13    | ENSG00000160789.18_LMNA | -0.08745 | -0.243261146 | 0.072766697 | 2.84E-01 | 5.70E-01 | 1.00E+00 |
| ENSG00000204852.14_TCTN1    | ENSG00000160789.18_LMNA | 0.11715  | -0.042847327 | 0.271293384 | 1.51E-01 | 3.99E-01 | 1.00E+00 |
| ENSG00000164331.8_ANKRA2    | ENSG00000160789.18_LMNA | -0.26384 | -0.405987585 | -0.10922698 | 1.02E-03 | 1.18E-02 | 1.00E+00 |
| ENSG00000177409.10_SAMD9L   | ENSG00000160789.18_LMNA | 0.17074  | 0.011861899  | 0.321209764 | 3.55E-02 | 1.60E-01 | 1.00E+00 |
| ENSG00000147592.7_LACTB2    | ENSG00000160789.18_LMNA | -0.17023 | -0.320740175 | -0.01133844 | 3.60E-02 | 1.62E-01 | 1.00E+00 |
| ENSG00000167508.9_MVD       | ENSG00000160789.18_LMNA | 0.14306  | -0.016519015 | 0.295527982 | 7.87E-02 | 2.69E-01 | 1.00E+00 |
| ENSG00000196411.8_EPHB4     | ENSG00000160789.18_LMNA | 0.60108  | 0.488643726  | 0.693885276 | 2.67E-16 | 6.85E-13 | 1.37E-11 |
| ENSG00000111801.14_BTN3A3   | ENSG00000160789.18_LMNA | 0.06207  | -0.098102645 | 0.219103132 | 4.47E-01 | 7.14E-01 | 1.00E+00 |
| ENSG00000156304.13_SCAF4    | ENSG00000160789.18_LMNA | 0.3001   | 0.147968513  | 0.43835754  | 1.72E-04 | 2.91E-03 | 1.00E+00 |
| ENSG00000169562.9_GJB1      | ENSG00000160789.18_LMNA | -0.30308 | -0.441004696 | -0.15117664 | 1.47E-04 | 2.56E-03 | 1.00E+00 |
| ENSG00000169860.6_P2RY1     | ENSG00000160789.18_LMNA | 0.15119  | -0.00820524  | 0.303098085 | 6.30E-02 | 2.33E-01 | 1.00E+00 |
| ENSG00000272821.1_CTA-384D8 | ENSG00000160789.18_LMNA | 0.01934  | -0.140290038 | 0.177995258 | 8.13E-01 | 9.26E-01 | 1.00E+00 |
| ENSG00000269044.2_CTC-429P9 | ENSG00000160789.18_LMNA | -0.17846 | -0.328330982 | -0.01982082 | 2.78E-02 | 1.36E-01 | 1.00E+00 |
| ENSG00000177519.3_RPRM      | ENSG00000160789.18_LMNA | -0.47526 | -0.589835912 | -0.34193438 | 6.13E-10 | 1.05E-07 | 3.15E-05 |
| ENSG00000160551.8_TAOK1     | ENSG00000160789.18_LMNA | -0.04075 | -0.198657313 | 0.119228865 | 6.18E-01 | 8.27E-01 | 1.00E+00 |
| ENSG00000085514.14_PILRA    | ENSG00000160789.18_LMNA | -0.03574 | -0.193841063 | 0.124163852 | 6.62E-01 | 8.51E-01 | 1.00E+00 |
| ENSG00000166173.10_LARP6    | ENSG00000160789.18_LMNA | -0.06111 | -0.218185046 | 0.099057454 | 4.55E-01 | 7.19E-01 | 1.00E+00 |
| ENSG00000175832.11_ETV4     | ENSG00000160789.18_LMNA | 0.47426  | 0.340785748  | 0.588987452 | 6.74E-10 | 1.13E-07 | 3.46E-05 |
| ENSG00000160284.13_SPATC1L  | ENSG00000160789.18_LMNA | 0.18532  | 0.026912486  | 0.334646825 | 2.23E-02 | 1.17E-01 | 1.00E+00 |
| ENSG00000131069.18_ACSS2    | ENSG00000160789.18_LMNA | 0.25106  | 0.095688376  | 0.394497239 | 1.81E-03 | 1.81E-02 | 1.00E+00 |
| ENSG00000223803.1_RPS20P14  | ENSG00000160789.18_LMNA | -0.07127 | -0.227888011 | 0.088936751 | 3.83E-01 | 6.61E-01 | 1.00E+00 |
| ENSG00000107104.17_KANK1    | ENSG00000160789.18_LMNA | 0.049    | -0.111070104 | 0.20658624  | 5.49E-01 | 7.86E-01 | 1.00E+00 |

|                            |                         |          |              |             |          |          |          |
|----------------------------|-------------------------|----------|--------------|-------------|----------|----------|----------|
| ENSG00000177875.4_CCDC184  | ENSG00000160789.18_LMNA | 0.05309  | -0.107017974 | 0.210508775 | 5.16E-01 | 7.63E-01 | 1.00E+00 |
| ENSG00000117114.18_ADGRL2  | ENSG00000160789.18_LMNA | 0.10528  | -0.054837835 | 0.260122794 | 1.97E-01 | 4.66E-01 | 1.00E+00 |
| ENSG00000123739.9_PLA2G12A | ENSG00000160789.18_LMNA | -0.07576 | -0.232164991 | 0.084454765 | 3.54E-01 | 6.37E-01 | 1.00E+00 |
| ENSG00000170271.9_FAXDC2   | ENSG00000160789.18_LMNA | -0.05554 | -0.212858837 | 0.104585207 | 4.97E-01 | 7.51E-01 | 1.00E+00 |
| ENSG00000127528.5_KLF2     | ENSG00000160789.18_LMNA | -0.10997 | -0.264540402 | 0.05010681  | 1.77E-01 | 4.39E-01 | 1.00E+00 |
| ENSG00000163781.11_TOPBP1  | ENSG00000160789.18_LMNA | -0.00655 | -0.165582208 | 0.152805865 | 9.36E-01 | 9.75E-01 | 1.00E+00 |
| ENSG00000136478.6_TEX2     | ENSG00000160789.18_LMNA | 0.08584  | -0.074376756 | 0.241737522 | 2.93E-01 | 5.79E-01 | 1.00E+00 |
| ENSG00000122299.10_ZC3H7A  | ENSG00000160789.18_LMNA | -0.04566 | -0.203378042 | 0.114376463 | 5.76E-01 | 8.03E-01 | 1.00E+00 |
| ENSG00000151445.14_VIPAS39 | ENSG00000160789.18_LMNA | -0.13514 | -0.288144926 | 0.024586017 | 9.69E-02 | 3.06E-01 | 1.00E+00 |
| ENSG00000100395.13_L3MBTL2 | ENSG00000160789.18_LMNA | -0.04096 | -0.198865252 | 0.119015445 | 6.16E-01 | 8.26E-01 | 1.00E+00 |
| ENSG00000108651.8_UTP6     | ENSG00000160789.18_LMNA | -0.22253 | -0.368670008 | -0.06565543 | 5.86E-03 | 4.43E-02 | 1.00E+00 |
| ENSG00000142002.15_DPP9    | ENSG00000160789.18_LMNA | 0.43206  | 0.293009328  | 0.553205071 | 2.73E-08 | 2.50E-06 | 1.40E-03 |
| ENSG00000134265.11_NAPG    | ENSG00000160789.18_LMNA | -0.2048  | -0.352508149 | -0.04713694 | 1.14E-02 | 7.18E-02 | 1.00E+00 |
| ENSG00000161888.10_SPC24   | ENSG00000160789.18_LMNA | -0.01348 | -0.172309275 | 0.146035752 | 8.69E-01 | 9.49E-01 | 1.00E+00 |
| ENSG00000104517.11_UBR5    | ENSG00000160789.18_LMNA | 0.1063   | -0.053811602 | 0.261082163 | 1.92E-01 | 4.61E-01 | 1.00E+00 |
| ENSG00000196367.11_TRRAP   | ENSG00000160789.18_LMNA | 0.29771  | 0.14540039   | 0.436234842 | 1.95E-04 | 3.20E-03 | 1.00E+00 |
| ENSG00000112237.11_CCNC    | ENSG00000160789.18_LMNA | -0.31296 | -0.449754941 | -0.16182482 | 8.65E-05 | 1.68E-03 | 1.00E+00 |
| ENSG00000179144.4_GIMAP7   | ENSG00000160789.18_LMNA | -0.03769 | -0.195711665 | 0.122248999 | 6.45E-01 | 8.42E-01 | 1.00E+00 |
| ENSG00000155926.12_SLA     | ENSG00000160789.18_LMNA | -0.02793 | -0.186305925 | 0.131853325 | 7.33E-01 | 8.87E-01 | 1.00E+00 |
| ENSG00000171681.11_ATF7IP  | ENSG00000160789.18_LMNA | -0.17827 | -0.328157933 | -0.01962694 | 2.80E-02 | 1.37E-01 | 1.00E+00 |
| ENSG00000117222.12_RBBP5   | ENSG00000160789.18_LMNA | -0.12134 | -0.275221064 | 0.038609743 | 1.36E-01 | 3.76E-01 | 1.00E+00 |
| ENSG00000109103.10_UNC119  | ENSG00000160789.18_LMNA | -0.35993 | -0.490997406 | -0.21293211 | 5.25E-06 | 1.72E-04 | 2.69E-01 |
| ENSG00000197070.12_ARRDC1  | ENSG00000160789.18_LMNA | 0.22011  | 0.063121936  | 0.366469683 | 6.43E-03 | 4.74E-02 | 1.00E+00 |
| ENSG00000140400.13_MAN2C1  | ENSG00000160789.18_LMNA | 0.11542  | -0.04459701  | 0.269668601 | 1.57E-01 | 4.09E-01 | 1.00E+00 |
| ENSG00000145604.14_SKP2    | ENSG00000160789.18_LMNA | 0.05496  | -0.105161227 | 0.212302731 | 5.01E-01 | 7.53E-01 | 1.00E+00 |
| ENSG00000122585.6_NPY      | ENSG00000160789.18_LMNA | -0.28249 | -0.422684157 | -0.12909809 | 4.22E-04 | 5.91E-03 | 1.00E+00 |
| ENSG00000144635.7_DYNC1LI1 | ENSG00000160789.18_LMNA | -0.21146 | -0.358590595 | -0.05408175 | 8.92E-03 | 6.04E-02 | 1.00E+00 |
| ENSG00000043514.14_TRIT1   | ENSG00000160789.18_LMNA | -0.25744 | -0.400238402 | -0.10243916 | 1.37E-03 | 1.46E-02 | 1.00E+00 |
| ENSG00000156162.15_DPY19L4 | ENSG00000160789.18_LMNA | -0.11853 | -0.272591279 | 0.041448273 | 1.46E-01 | 3.91E-01 | 1.00E+00 |
| ENSG00000118707.8_TGIF2    | ENSG00000160789.18_LMNA | 0.01778  | -0.141822571 | 0.176480732 | 8.28E-01 | 9.33E-01 | 1.00E+00 |
| ENSG00000105617.3_LENG1    | ENSG00000160789.18_LMNA | 0.08162  | -0.078604072 | 0.23772971  | 3.17E-01 | 6.04E-01 | 1.00E+00 |
| ENSG00000135845.8_PIGC     | ENSG00000160789.18_LMNA | -0.19729 | -0.345636049 | -0.03932589 | 1.48E-02 | 8.73E-02 | 1.00E+00 |
| ENSG00000144354.12_CDCA7   | ENSG00000160789.18_LMNA | -0.01811 | -0.176799188 | 0.141500456 | 8.25E-01 | 9.31E-01 | 1.00E+00 |



|                             |                         |          |              |             |          |          |          |
|-----------------------------|-------------------------|----------|--------------|-------------|----------|----------|----------|
| ENSG00000090924.13_PLEKHG2  | ENSG00000160789.18_LMNA | 0.29429  | 0.141731107  | 0.433196346 | 2.33E-04 | 3.69E-03 | 1.00E+00 |
| ENSG00000099889.12_ARVCF    | ENSG00000160789.18_LMNA | -0.15659 | -0.308112852 | 0.002674032 | 5.40E-02 | 2.11E-01 | 1.00E+00 |
| ENSG00000226396.1_RP5-1056L | ENSG00000160789.18_LMNA | -0.03049 | -0.18877207  | 0.129340876 | 7.09E-01 | 8.76E-01 | 1.00E+00 |
| ENSG00000171793.12_CTPS1    | ENSG00000160789.18_LMNA | 0.06243  | -0.097741183 | 0.219450545 | 4.45E-01 | 7.12E-01 | 1.00E+00 |
| ENSG00000215006.4_CHCHD2P2  | ENSG00000160789.18_LMNA | -0.0347  | -0.192830844 | 0.125196983 | 6.71E-01 | 8.56E-01 | 1.00E+00 |
| ENSG00000168301.11_KCTD6    | ENSG00000160789.18_LMNA | -0.32041 | -0.456331886 | -0.1698727  | 5.72E-05 | 1.19E-03 | 1.00E+00 |
| ENSG00000110002.14_VWA5A    | ENSG00000160789.18_LMNA | 0.22826  | 0.071665309  | 0.373875997 | 4.68E-03 | 3.73E-02 | 1.00E+00 |
| ENSG00000185963.12_BICD2    | ENSG00000160789.18_LMNA | 0.24005  | 0.084066482  | 0.384558522 | 2.89E-03 | 2.60E-02 | 1.00E+00 |
| ENSG00000122877.12_EGR2     | ENSG00000160789.18_LMNA | 0.35982  | 0.212804736  | 0.490896141 | 5.29E-06 | 1.74E-04 | 2.71E-01 |
| ENSG00000204856.10_FAM216A  | ENSG00000160789.18_LMNA | -0.36866 | -0.498598847 | -0.2225208  | 2.96E-06 | 1.09E-04 | 1.52E-01 |
| ENSG00000116918.12_TSNAX    | ENSG00000160789.18_LMNA | -0.26953 | -0.411086807 | -0.11527067 | 7.85E-04 | 9.59E-03 | 1.00E+00 |
| ENSG00000265415.1_CTD-2510F | ENSG00000160789.18_LMNA | 0.07609  | -0.084125186 | 0.232479012 | 3.51E-01 | 6.35E-01 | 1.00E+00 |
| ENSG00000165861.12_ZFYVE1   | ENSG00000160789.18_LMNA | 0.33202  | 0.18246836   | 0.466562965 | 2.93E-05 | 6.99E-04 | 1.00E+00 |
| ENSG00000136960.11_ENPP2    | ENSG00000160789.18_LMNA | -0.30445 | -0.442219404 | -0.15265081 | 1.37E-04 | 2.42E-03 | 1.00E+00 |
| ENSG00000067248.8_DHX29     | ENSG00000160789.18_LMNA | 0.16261  | 0.003501969  | 0.313691875 | 4.53E-02 | 1.89E-01 | 1.00E+00 |
| ENSG00000132842.12_AP3B1    | ENSG00000160789.18_LMNA | 0.17755  | 0.018881559  | 0.327492407 | 2.86E-02 | 1.39E-01 | 1.00E+00 |
| ENSG00000065559.13_MAP2K4   | ENSG00000160789.18_LMNA | -0.40005 | -0.525762955 | -0.25722852 | 3.29E-07 | 1.89E-05 | 1.69E-02 |
| ENSG00000133561.14_GIMAP6   | ENSG00000160789.18_LMNA | -0.01305 | -0.171897508 | 0.146451013 | 8.73E-01 | 9.51E-01 | 1.00E+00 |
| ENSG00000238142.1_RP11-108M | ENSG00000160789.18_LMNA | 0.04996  | -0.110118518 | 0.207508311 | 5.41E-01 | 7.81E-01 | 1.00E+00 |
| ENSG00000166002.5_SMCO4     | ENSG00000160789.18_LMNA | -0.17182 | -0.322203447 | -0.01297013 | 3.43E-02 | 1.56E-01 | 1.00E+00 |
| ENSG00000011405.12_PIK3C2A  | ENSG00000160789.18_LMNA | 0.017    | -0.142586095 | 0.175725617 | 8.35E-01 | 9.36E-01 | 1.00E+00 |
| ENSG00000214655.9_ZSWIM8    | ENSG00000160789.18_LMNA | 0.06206  | -0.098111512 | 0.219094608 | 4.48E-01 | 7.14E-01 | 1.00E+00 |
| ENSG00000104312.7_RIPK2     | ENSG00000160789.18_LMNA | -0.05349 | -0.210896055 | 0.106617326 | 5.13E-01 | 7.61E-01 | 1.00E+00 |
| ENSG00000116747.11_TROVE2   | ENSG00000160789.18_LMNA | -0.01674 | -0.175473825 | 0.142840606 | 8.38E-01 | 9.37E-01 | 1.00E+00 |
| ENSG00000166326.6_TRIM44    | ENSG00000160789.18_LMNA | 0.12974  | -0.0300799   | 0.283095459 | 1.11E-01 | 3.32E-01 | 1.00E+00 |
| ENSG00000184144.8_CNTN2     | ENSG00000160789.18_LMNA | -0.25589 | -0.398846687 | -0.10080018 | 1.46E-03 | 1.54E-02 | 1.00E+00 |
| ENSG00000168818.8_STX18     | ENSG00000160789.18_LMNA | -0.23645 | -0.381294147 | -0.08026702 | 3.36E-03 | 2.91E-02 | 1.00E+00 |
| ENSG00000068366.18_ACSL4    | ENSG00000160789.18_LMNA | -0.02057 | -0.179184479 | 0.139085607 | 8.01E-01 | 9.20E-01 | 1.00E+00 |
| ENSG00000007384.14_RHBDF1   | ENSG00000160789.18_LMNA | 0.32347  | 0.173182965  | 0.459028076 | 4.81E-05 | 1.04E-03 | 1.00E+00 |
| ENSG00000163510.12_CWC22    | ENSG00000160789.18_LMNA | 0.06798  | -0.092220245 | 0.224746926 | 4.05E-01 | 6.81E-01 | 1.00E+00 |
| ENSG00000151692.13_RNF144A  | ENSG00000160789.18_LMNA | -0.19345 | -0.34211056  | -0.03533318 | 1.69E-02 | 9.58E-02 | 1.00E+00 |
| ENSG00000138443.14_ABI2     | ENSG00000160789.18_LMNA | -0.05257 | -0.210012295 | 0.107531442 | 5.20E-01 | 7.66E-01 | 1.00E+00 |
| ENSG00000121864.8_ZNF639    | ENSG00000160789.18_LMNA | -0.30153 | -0.439631151 | -0.14951126 | 1.60E-04 | 2.74E-03 | 1.00E+00 |

|                             |                         |          |              |             |          |          |          |
|-----------------------------|-------------------------|----------|--------------|-------------|----------|----------|----------|
| ENSG00000181585.3_TMIE      | ENSG00000160789.18_LMNA | -0.08168 | -0.237791217 | 0.078539283 | 3.17E-01 | 6.04E-01 | 1.00E+00 |
| ENSG00000198874.11_TYW1     | ENSG00000160789.18_LMNA | 0.31712  | 0.166320486  | 0.453432775 | 6.87E-05 | 1.39E-03 | 1.00E+00 |
| ENSG00000119673.13_ACOT2    | ENSG00000160789.18_LMNA | 0.19928  | 0.04139189   | 0.347456901 | 1.38E-02 | 8.28E-02 | 1.00E+00 |
| ENSG00000155906.15_RMND1    | ENSG00000160789.18_LMNA | -0.13635 | -0.289269113 | 0.023360312 | 9.39E-02 | 3.00E-01 | 1.00E+00 |
| ENSG00000135631.14_RAB11FIP | ENSG00000160789.18_LMNA | 0.31739  | 0.166609595  | 0.453668957 | 6.77E-05 | 1.37E-03 | 1.00E+00 |
| ENSG00000105229.5_PIAS4     | ENSG00000160789.18_LMNA | 0.11555  | -0.044468703 | 0.26978781  | 1.56E-01 | 4.08E-01 | 1.00E+00 |
| ENSG00000175110.10_MRPS22   | ENSG00000160789.18_LMNA | -0.29632 | -0.435000492 | -0.14390882 | 2.10E-04 | 3.39E-03 | 1.00E+00 |
| ENSG00000144840.7_RABL3     | ENSG00000160789.18_LMNA | -0.0209  | -0.179499086 | 0.138766818 | 7.98E-01 | 9.19E-01 | 1.00E+00 |
| ENSG00000196313.10_POM121   | ENSG00000160789.18_LMNA | 0.24004  | 0.084050176  | 0.384544528 | 2.90E-03 | 2.60E-02 | 1.00E+00 |
| ENSG00000163655.14_GMPS     | ENSG00000160789.18_LMNA | 0.27523  | 0.121344595  | 0.416192956 | 6.00E-04 | 7.79E-03 | 1.00E+00 |
| ENSG00000177169.8_ULK1      | ENSG00000160789.18_LMNA | 0.13385  | -0.025905987 | 0.286933317 | 1.00E-01 | 3.12E-01 | 1.00E+00 |
| ENSG00000141736.12_ERBB2    | ENSG00000160789.18_LMNA | 0.37929  | 0.234234383  | 0.507827545 | 1.44E-06 | 6.23E-05 | 7.41E-02 |
| ENSG00000068724.14_TTC7A    | ENSG00000160789.18_LMNA | 0.17335  | 0.014550507  | 0.323619308 | 3.27E-02 | 1.51E-01 | 1.00E+00 |
| ENSG00000155465.17_SLC7A7   | ENSG00000160789.18_LMNA | -0.01468 | -0.173477834 | 0.144856668 | 8.58E-01 | 9.44E-01 | 1.00E+00 |
| ENSG00000102934.8_PLLP      | ENSG00000160789.18_LMNA | -0.23951 | -0.384062843 | -0.08348899 | 2.96E-03 | 2.65E-02 | 1.00E+00 |
| ENSG00000176476.7_SGF29     | ENSG00000160789.18_LMNA | -0.18371 | -0.333171028 | -0.02525263 | 2.35E-02 | 1.21E-01 | 1.00E+00 |
| ENSG00000120837.6_NFYB      | ENSG00000160789.18_LMNA | -0.18236 | -0.331924434 | -0.02385188 | 2.45E-02 | 1.25E-01 | 1.00E+00 |
| ENSG00000166881.8_NEMP1     | ENSG00000160789.18_LMNA | 0.10333  | -0.056809363 | 0.258277974 | 2.05E-01 | 4.77E-01 | 1.00E+00 |
| ENSG00000148297.14_MED22    | ENSG00000160789.18_LMNA | 0.22589  | 0.069174827  | 0.371720952 | 5.14E-03 | 4.01E-02 | 1.00E+00 |
| ENSG00000102125.14_TAZ      | ENSG00000160789.18_LMNA | 0.00103  | -0.158193838 | 0.160207235 | 9.90E-01 | 9.96E-01 | 1.00E+00 |
| ENSG00000011566.13_MAP4K3   | ENSG00000160789.18_LMNA | -0.20352 | -0.351334359 | -0.04580013 | 1.19E-02 | 7.44E-02 | 1.00E+00 |
| ENSG00000158717.9_RNF166    | ENSG00000160789.18_LMNA | 0.09775  | -0.062417088 | 0.253018057 | 2.31E-01 | 5.09E-01 | 1.00E+00 |
| ENSG00000103005.10_USB1     | ENSG00000160789.18_LMNA | 0.30429  | 0.152471414  | 0.442071639 | 1.38E-04 | 2.44E-03 | 1.00E+00 |
| ENSG00000198363.14_ASPH     | ENSG00000160789.18_LMNA | 0.10958  | -0.050506661 | 0.264167549 | 1.79E-01 | 4.41E-01 | 1.00E+00 |
| ENSG00000122729.17_ACO1     | ENSG00000160789.18_LMNA | 0.03078  | -0.129055964 | 0.189051478 | 7.07E-01 | 8.75E-01 | 1.00E+00 |
| ENSG00000105875.12_WDR91    | ENSG00000160789.18_LMNA | 0.12698  | -0.032889009 | 0.280506861 | 1.19E-01 | 3.46E-01 | 1.00E+00 |
| ENSG00000100294.11_MCAT     | ENSG00000160789.18_LMNA | -0.01088 | -0.169782944 | 0.14858175  | 8.94E-01 | 9.59E-01 | 1.00E+00 |
| ENSG00000138794.8_CASP6     | ENSG00000160789.18_LMNA | 0.27899  | 0.125360945  | 0.419559188 | 5.00E-04 | 6.74E-03 | 1.00E+00 |
| ENSG00000119688.19_ABCD4    | ENSG00000160789.18_LMNA | 0.13394  | -0.025811739 | 0.287019862 | 9.99E-02 | 3.11E-01 | 1.00E+00 |
| ENSG00000124383.7_MPHOSPH   | ENSG00000160789.18_LMNA | 0.08856  | -0.071651939 | 0.244315147 | 2.78E-01 | 5.63E-01 | 1.00E+00 |
| ENSG00000173193.12_PARP14   | ENSG00000160789.18_LMNA | 0.21202  | 0.054669363  | 0.359104058 | 8.73E-03 | 5.94E-02 | 1.00E+00 |
| ENSG00000114013.14_CD86     | ENSG00000160789.18_LMNA | -0.08249 | -0.238561398 | 0.077727768 | 3.12E-01 | 5.99E-01 | 1.00E+00 |
| ENSG00000157240.3_FZD1      | ENSG00000160789.18_LMNA | 0.48816  | 0.356678669  | 0.60067866  | 1.78E-10 | 3.62E-08 | 9.12E-06 |

|                             |                         |          |              |             |          |          |          |
|-----------------------------|-------------------------|----------|--------------|-------------|----------|----------|----------|
| ENSG00000032389.11_TSSC1    | ENSG00000160789.18_LMNA | -0.35118 | -0.483358524 | -0.20334986 | 9.16E-06 | 2.72E-04 | 4.70E-01 |
| ENSG00000089876.10_DHX32    | ENSG00000160789.18_LMNA | 0.1058   | -0.054313692 | 0.260612864 | 1.95E-01 | 4.63E-01 | 1.00E+00 |
| ENSG00000155100.9_OTUD6B    | ENSG00000160789.18_LMNA | -0.13622 | -0.289148912 | 0.023491412 | 9.43E-02 | 3.01E-01 | 1.00E+00 |
| ENSG00000116353.14_MECR     | ENSG00000160789.18_LMNA | #####    | -0.159252152 | 0.159149251 | 9.99E-01 | 1.00E+00 | 1.00E+00 |
| ENSG00000217094.2_PPIAP31   | ENSG00000160789.18_LMNA | 0.09331  | -0.066881522 | 0.248817145 | 2.53E-01 | 5.34E-01 | 1.00E+00 |
| ENSG00000138613.12_APH1B    | ENSG00000160789.18_LMNA | -0.2639  | -0.406042875 | -0.1092924  | 1.02E-03 | 1.18E-02 | 1.00E+00 |
| ENSG00000182606.13_TRAK1    | ENSG00000160789.18_LMNA | -0.15519 | -0.306811489 | 0.004111245 | 5.62E-02 | 2.17E-01 | 1.00E+00 |
| ENSG00000150433.8_TMEN218   | ENSG00000160789.18_LMNA | -0.34153 | -0.474910178 | -0.19281431 | 1.66E-05 | 4.43E-04 | 8.52E-01 |
| ENSG00000188783.5_PRELP     | ENSG00000160789.18_LMNA | -0.0975  | -0.252774792 | 0.062675958 | 2.32E-01 | 5.10E-01 | 1.00E+00 |
| ENSG00000173436.12_MINOS1   | ENSG00000160789.18_LMNA | -0.07048 | -0.227127747 | 0.089732116 | 3.88E-01 | 6.66E-01 | 1.00E+00 |
| ENSG00000156831.6_NSMCE2    | ENSG00000160789.18_LMNA | -0.13778 | -0.29060665  | 0.021900764 | 9.05E-02 | 2.93E-01 | 1.00E+00 |
| ENSG00000154997.8_SEPT14    | ENSG00000160789.18_LMNA | 0.02223  | -0.137453387 | 0.180794604 | 7.86E-01 | 9.13E-01 | 1.00E+00 |
| ENSG00000128159.10_TUBGCP6  | ENSG00000160789.18_LMNA | -0.01598 | -0.174733746 | 0.143588436 | 8.45E-01 | 9.40E-01 | 1.00E+00 |
| ENSG00000233429.8_HOTAIRM1  | ENSG00000160789.18_LMNA | -0.0158  | -0.174564892 | 0.143759007 | 8.47E-01 | 9.40E-01 | 1.00E+00 |
| ENSG00000072163.17_LIMS2    | ENSG00000160789.18_LMNA | -0.37125 | -0.500845918 | -0.22536558 | 2.49E-06 | 9.45E-05 | 1.28E-01 |
| ENSG00000165474.5_GJB2      | ENSG00000160789.18_LMNA | 0.17133  | 0.012473815  | 0.321758518 | 3.48E-02 | 1.58E-01 | 1.00E+00 |
| ENSG00000129521.12_EGLN3    | ENSG00000160789.18_LMNA | -0.07487 | -0.231309305 | 0.085352492 | 3.59E-01 | 6.42E-01 | 1.00E+00 |
| ENSG00000163697.15_APBB2    | ENSG00000160789.18_LMNA | -0.28633 | -0.426104727 | -0.13319832 | 3.49E-04 | 5.05E-03 | 1.00E+00 |
| ENSG00000167766.17_ZNF83    | ENSG00000160789.18_LMNA | -0.05585 | -0.213152109 | 0.104281346 | 4.94E-01 | 7.49E-01 | 1.00E+00 |
| ENSG00000100949.13_RABGGT   | ENSG00000160789.18_LMNA | 0.18429  | 0.025849758  | 0.333702118 | 2.30E-02 | 1.19E-01 | 1.00E+00 |
| ENSG00000108599.13_AKAP10   | ENSG00000160789.18_LMNA | -0.18801 | -0.337120416 | -0.0296984  | 2.04E-02 | 1.09E-01 | 1.00E+00 |
| ENSG00000139880.18_CDH24    | ENSG00000160789.18_LMNA | 0.14129  | -0.018327138 | 0.293876393 | 8.25E-02 | 2.77E-01 | 1.00E+00 |
| ENSG00000257218.4_GATC      | ENSG00000160789.18_LMNA | -0.34019 | -0.473730387 | -0.1913482  | 1.80E-05 | 4.73E-04 | 9.25E-01 |
| ENSG00000198301.10_SDAD1    | ENSG00000160789.18_LMNA | 0.12283  | -0.037098282 | 0.276619458 | 1.32E-01 | 3.68E-01 | 1.00E+00 |
| ENSG00000243422.1_RPL23AP4  | ENSG00000160789.18_LMNA | -0.19706 | -0.345421681 | -0.03908283 | 1.50E-02 | 8.77E-02 | 1.00E+00 |
| ENSG00000184304.13_PRKD1    | ENSG00000160789.18_LMNA | 0.00755  | -0.151832383 | 0.166551328 | 9.26E-01 | 9.72E-01 | 1.00E+00 |
| ENSG00000265808.3_SEC22B    | ENSG00000160789.18_LMNA | 0.03755  | -0.122378341 | 0.195585385 | 6.46E-01 | 8.43E-01 | 1.00E+00 |
| ENSG00000272990.1_RP11-305K | ENSG00000160789.18_LMNA | -0.14448 | -0.296849759 | 0.015070492 | 7.58E-02 | 2.63E-01 | 1.00E+00 |
| ENSG00000062725.8_APPBP2    | ENSG00000160789.18_LMNA | -0.31137 | -0.448346491 | -0.16010634 | 9.44E-05 | 1.80E-03 | 1.00E+00 |
| ENSG00000178567.7_EPM2AIP1  | ENSG00000160789.18_LMNA | -0.28016 | -0.420597226 | -0.12660141 | 4.73E-04 | 6.45E-03 | 1.00E+00 |
| ENSG00000126249.6_PDCD2L    | ENSG00000160789.18_LMNA | -0.20836 | -0.355759614 | -0.05084573 | 1.00E-02 | 6.56E-02 | 1.00E+00 |
| ENSG00000157734.12_SNX22    | ENSG00000160789.18_LMNA | -0.34431 | -0.477349174 | -0.1958492  | 1.40E-05 | 3.86E-04 | 7.19E-01 |
| ENSG00000197879.13_MYO1C    | ENSG00000160789.18_LMNA | 0.52579  | 0.40008145   | 0.63208384  | 3.51E-12 | 1.50E-09 | 1.80E-07 |

|                             |                         |          |              |             |          |          |          |
|-----------------------------|-------------------------|----------|--------------|-------------|----------|----------|----------|
| ENSG00000188820.11_FAM26F   | ENSG00000160789.18_LMNA | -0.03784 | -0.195856734 | 0.1221004   | 6.44E-01 | 8.41E-01 | 1.00E+00 |
| ENSG00000048540.13_LMO3     | ENSG00000160789.18_LMNA | -0.14506 | -0.297394283 | 0.014473372 | 7.46E-02 | 2.60E-01 | 1.00E+00 |
| ENSG00000123415.13_SMUG1    | ENSG00000160789.18_LMNA | -0.30474 | -0.442477239 | -0.15296389 | 1.35E-04 | 2.39E-03 | 1.00E+00 |
| ENSG00000222041.9_CYTOR     | ENSG00000160789.18_LMNA | 0.34956  | 0.201573392  | 0.481937642 | 1.01E-05 | 2.94E-04 | 5.20E-01 |
| ENSG00000181830.8_SLC35C1   | ENSG00000160789.18_LMNA | 0.4809   | 0.3483696    | 0.594579302 | 3.59E-10 | 6.61E-08 | 1.84E-05 |
| ENSG00000142892.13_PIGK     | ENSG00000160789.18_LMNA | -0.00464 | -0.163719681 | 0.154675042 | 9.55E-01 | 9.82E-01 | 1.00E+00 |
| ENSG00000171877.18_FRMD5    | ENSG00000160789.18_LMNA | -0.12143 | -0.2753065   | 0.03851744  | 1.36E-01 | 3.76E-01 | 1.00E+00 |
| ENSG00000101098.11_RIMS4    | ENSG00000160789.18_LMNA | -0.19484 | -0.343387665 | -0.0367784  | 1.62E-02 | 9.26E-02 | 1.00E+00 |
| ENSG00000178602.6_OTOS      | ENSG00000160789.18_LMNA | -0.10465 | -0.259526156 | 0.05547572  | 1.99E-01 | 4.70E-01 | 1.00E+00 |
| ENSG00000065883.13_CDK13    | ENSG00000160789.18_LMNA | 0.26331  | 0.108665067  | 0.405512539 | 1.05E-03 | 1.20E-02 | 1.00E+00 |
| ENSG00000272034.1_SNORD14A  | ENSG00000160789.18_LMNA | -0.00251 | -0.161645193 | 0.156754257 | 9.76E-01 | 9.91E-01 | 1.00E+00 |
| ENSG00000254004.5_ZNF260    | ENSG00000160789.18_LMNA | -0.22865 | -0.374231417 | -0.07207641 | 4.61E-03 | 3.68E-02 | 1.00E+00 |
| ENSG00000239559.2_RPL37P2   | ENSG00000160789.18_LMNA | -0.12026 | -0.274214919 | 0.039696351 | 1.40E-01 | 3.82E-01 | 1.00E+00 |
| ENSG00000124209.3_RAB22A    | ENSG00000160789.18_LMNA | 0.21794  | 0.060845713  | 0.364489902 | 6.99E-03 | 5.04E-02 | 1.00E+00 |
| ENSG00000008517.15_IL32     | ENSG00000160789.18_LMNA | 0.08533  | -0.074891504 | 0.241250078 | 2.96E-01 | 5.82E-01 | 1.00E+00 |
| ENSG00000131188.10_PRR7     | ENSG00000160789.18_LMNA | 0.30622  | 0.154555532  | 0.443787312 | 1.25E-04 | 2.26E-03 | 1.00E+00 |
| ENSG00000179776.16_CDH5     | ENSG00000160789.18_LMNA | 0.18439  | 0.025949368  | 0.333790692 | 2.30E-02 | 1.19E-01 | 1.00E+00 |
| ENSG00000063587.13_ZNF275   | ENSG00000160789.18_LMNA | 0.00675  | -0.152614422 | 0.165772841 | 9.34E-01 | 9.74E-01 | 1.00E+00 |
| ENSG00000173230.14_GOLGB1   | ENSG00000160789.18_LMNA | 0.08692  | -0.073297248 | 0.24275925  | 2.87E-01 | 5.72E-01 | 1.00E+00 |
| ENSG00000160959.6_LRRC14    | ENSG00000160789.18_LMNA | 0.09757  | -0.062599997 | 0.252846178 | 2.32E-01 | 5.09E-01 | 1.00E+00 |
| ENSG00000143702.14_CEP170   | ENSG00000160789.18_LMNA | -0.16328 | -0.314306315 | -0.00418361 | 4.44E-02 | 1.86E-01 | 1.00E+00 |
| ENSG00000167613.14_LAIR1    | ENSG00000160789.18_LMNA | 0.08962  | -0.070586004 | 0.245322288 | 2.72E-01 | 5.57E-01 | 1.00E+00 |
| ENSG00000272523.1_LINC01023 | ENSG00000160789.18_LMNA | -0.0077  | -0.166691605 | 0.151691423 | 9.25E-01 | 9.71E-01 | 1.00E+00 |
| ENSG00000101181.16_MTG2     | ENSG00000160789.18_LMNA | 0.17501  | 0.016266081  | 0.325154721 | 3.10E-02 | 1.47E-01 | 1.00E+00 |
| ENSG00000141556.19_TBCE     | ENSG00000160789.18_LMNA | 0.09629  | -0.063888011 | 0.251635272 | 2.38E-01 | 5.17E-01 | 1.00E+00 |
| ENSG00000231234.2_SKP1P1    | ENSG00000160789.18_LMNA | -0.23562 | -0.3805454   | -0.07939677 | 3.48E-03 | 2.99E-02 | 1.00E+00 |
| ENSG00000134759.12_ELP2     | ENSG00000160789.18_LMNA | -0.28161 | -0.421900077 | -0.12815963 | 4.40E-04 | 6.11E-03 | 1.00E+00 |
| ENSG00000011198.6_ABHD5     | ENSG00000160789.18_LMNA | -0.10612 | -0.260916187 | 0.053989193 | 1.93E-01 | 4.62E-01 | 1.00E+00 |
| ENSG00000139998.13_RAB15    | ENSG00000160789.18_LMNA | 0.2611   | 0.10631924   | 0.403527641 | 1.16E-03 | 1.29E-02 | 1.00E+00 |
| ENSG00000090020.9_SLC9A1    | ENSG00000160789.18_LMNA | 0.5262   | 0.400554521  | 0.632421995 | 3.35E-12 | 1.46E-09 | 1.72E-07 |
| ENSG00000162378.11_ZYG11B   | ENSG00000160789.18_LMNA | -0.21977 | -0.366158118 | -0.06276351 | 6.52E-03 | 4.79E-02 | 1.00E+00 |
| ENSG00000105983.18_LMBR1    | ENSG00000160789.18_LMNA | 0.0284   | -0.131391306 | 0.18675973  | 7.28E-01 | 8.85E-01 | 1.00E+00 |
| ENSG00000083099.9_LYRM2     | ENSG00000160789.18_LMNA | -0.28742 | -0.427080209 | -0.13436947 | 3.30E-04 | 4.85E-03 | 1.00E+00 |

|                             |                         |          |              |             |          |          |          |
|-----------------------------|-------------------------|----------|--------------|-------------|----------|----------|----------|
| ENSG00000182362.12_YBEY     | ENSG00000160789.18_LMNA | -0.09201 | -0.247583263 | 0.068190409 | 2.60E-01 | 5.43E-01 | 1.00E+00 |
| ENSG00000140299.10_BNIP2    | ENSG00000160789.18_LMNA | 0.23653  | 0.080352522  | 0.381367691 | 3.35E-03 | 2.90E-02 | 1.00E+00 |
| ENSG00000115840.12_SLC25A12 | ENSG00000160789.18_LMNA | -0.18646 | -0.335692182 | -0.02808925 | 2.14E-02 | 1.13E-01 | 1.00E+00 |
| ENSG00000198646.12_NCOA6    | ENSG00000160789.18_LMNA | 0.154    | -0.0053265   | 0.305710195 | 5.82E-02 | 2.21E-01 | 1.00E+00 |
| ENSG00000063601.15_MTMR1    | ENSG00000160789.18_LMNA | 0.04444  | -0.115576333 | 0.202212104 | 5.87E-01 | 8.08E-01 | 1.00E+00 |
| ENSG00000145216.14_FIP1L1   | ENSG00000160789.18_LMNA | -0.01975 | -0.178388433 | 0.139891939 | 8.09E-01 | 9.24E-01 | 1.00E+00 |
| ENSG00000112167.8_SAYSD1    | ENSG00000160789.18_LMNA | -0.20687 | -0.354401219 | -0.04929525 | 1.06E-02 | 6.81E-02 | 1.00E+00 |
| ENSG00000137411.15_VARS2    | ENSG00000160789.18_LMNA | -0.01528 | -0.174055539 | 0.144273426 | 8.52E-01 | 9.42E-01 | 1.00E+00 |
| ENSG00000173801.15_JUP      | ENSG00000160789.18_LMNA | 0.18937  | 0.031103505  | 0.338366395 | 1.95E-02 | 1.06E-01 | 1.00E+00 |
| ENSG00000162616.8_DNAJB4    | ENSG00000160789.18_LMNA | -0.08148 | -0.237599845 | 0.078740861 | 3.18E-01 | 6.05E-01 | 1.00E+00 |
| ENSG00000109854.12_HTATIP2  | ENSG00000160789.18_LMNA | 0.02981  | -0.130005785 | 0.188119805 | 7.15E-01 | 8.79E-01 | 1.00E+00 |
| ENSG00000204576.10_PRR3     | ENSG00000160789.18_LMNA | -0.18106 | -0.330728506 | -0.0225092  | 2.56E-02 | 1.28E-01 | 1.00E+00 |
| ENSG00000035681.6_NSMAF     | ENSG00000160789.18_LMNA | 0.08168  | -0.078546095 | 0.23778475  | 3.17E-01 | 6.04E-01 | 1.00E+00 |
| ENSG00000131373.13_HACL1    | ENSG00000160789.18_LMNA | -0.27967 | -0.420159639 | -0.12607838 | 4.84E-04 | 6.58E-03 | 1.00E+00 |
| ENSG00000101104.11_PABPC1L  | ENSG00000160789.18_LMNA | 0.16066  | 0.00149446   | 0.311880761 | 4.80E-02 | 1.96E-01 | 1.00E+00 |
| ENSG00000166402.7_TUB       | ENSG00000160789.18_LMNA | -0.369   | -0.498896753 | -0.22289768 | 2.90E-06 | 1.07E-04 | 1.49E-01 |
| ENSG00000101542.8_CDH20     | ENSG00000160789.18_LMNA | -0.45442 | -0.572224273 | -0.3182429  | 4.09E-09 | 5.04E-07 | 2.10E-04 |
| ENSG00000105662.14_CRTC1    | ENSG00000160789.18_LMNA | -0.08324 | -0.239273209 | 0.076977383 | 3.08E-01 | 5.95E-01 | 1.00E+00 |
| ENSG00000130021.12_PUDP     | ENSG00000160789.18_LMNA | 0.11395  | -0.046083629 | 0.268286697 | 1.62E-01 | 4.17E-01 | 1.00E+00 |
| ENSG00000011478.10_QPCTL    | ENSG00000160789.18_LMNA | 0.23881  | 0.08275671   | 0.383434057 | 3.05E-03 | 2.71E-02 | 1.00E+00 |
| ENSG00000146376.9_ARHGAP18  | ENSG00000160789.18_LMNA | 0.09737  | -0.062803973 | 0.252654479 | 2.33E-01 | 5.11E-01 | 1.00E+00 |
| ENSG00000107829.12_FBXW4    | ENSG00000160789.18_LMNA | 0.01814  | -0.14146721  | 0.176832052 | 8.24E-01 | 9.31E-01 | 1.00E+00 |
| ENSG00000233369.6_GTF2IP4   | ENSG00000160789.18_LMNA | -0.17708 | -0.327061921 | -0.0183996  | 2.91E-02 | 1.40E-01 | 1.00E+00 |
| ENSG00000145715.13_RASA1    | ENSG00000160789.18_LMNA | 0.11828  | -0.041703905 | 0.272354217 | 1.47E-01 | 3.92E-01 | 1.00E+00 |
| ENSG00000136159.3_NUDT15    | ENSG00000160789.18_LMNA | -0.15755 | -0.308999998 | 0.001693541 | 5.26E-02 | 2.08E-01 | 1.00E+00 |
| ENSG00000171612.6_SLC25A33  | ENSG00000160789.18_LMNA | -0.25056 | -0.39404234  | -0.09515465 | 1.85E-03 | 1.85E-02 | 1.00E+00 |
| ENSG00000120910.13_PPP3CC   | ENSG00000160789.18_LMNA | 0.00592  | -0.153426814 | 0.16496372  | 9.42E-01 | 9.77E-01 | 1.00E+00 |
| ENSG00000127955.14_GNAI1    | ENSG00000160789.18_LMNA | -0.35306 | -0.485003771 | -0.20540914 | 8.14E-06 | 2.47E-04 | 4.18E-01 |
| ENSG00000164051.12_CCDC51   | ENSG00000160789.18_LMNA | -0.0261  | -0.184536029 | 0.133653935 | 7.50E-01 | 8.95E-01 | 1.00E+00 |
| ENSG00000220842.6_RPL21P16  | ENSG00000160789.18_LMNA | -0.27867 | -0.419273126 | -0.12501926 | 5.08E-04 | 6.82E-03 | 1.00E+00 |
| ENSG00000147813.14_NAPRT    | ENSG00000160789.18_LMNA | 0.21018  | 0.052747594  | 0.357424108 | 9.35E-03 | 6.24E-02 | 1.00E+00 |
| ENSG00000160685.12_ZBTB7B   | ENSG00000160789.18_LMNA | 0.42843  | 0.288940677  | 0.550112815 | 3.66E-08 | 3.19E-06 | 1.88E-03 |
| ENSG00000065809.12_FAM107B  | ENSG00000160789.18_LMNA | -0.49014 | -0.60233933  | -0.35894768 | 1.46E-10 | 3.09E-08 | 7.50E-06 |

|                             |                         |          |              |             |          |          |          |
|-----------------------------|-------------------------|----------|--------------|-------------|----------|----------|----------|
| ENSG00000171109.17_MFN1     | ENSG00000160789.18_LMNA | -0.21725 | -0.36386415  | -0.06012692 | 7.18E-03 | 5.13E-02 | 1.00E+00 |
| ENSG00000089234.14_BRAP     | ENSG00000160789.18_LMNA | -0.06467 | -0.221587098 | 0.095516391 | 4.29E-01 | 6.99E-01 | 1.00E+00 |
| ENSG00000070404.8_FSTL3     | ENSG00000160789.18_LMNA | 0.29157  | 0.138817061  | 0.430778526 | 2.68E-04 | 4.11E-03 | 1.00E+00 |
| ENSG00000235605.1_RP5-827C2 | ENSG00000160789.18_LMNA | 0.03157  | -0.128272865 | 0.189819183 | 6.99E-01 | 8.71E-01 | 1.00E+00 |
| ENSG00000092108.19_SCFD1    | ENSG00000160789.18_LMNA | 0.02136  | -0.138310709 | 0.1799491   | 7.94E-01 | 9.17E-01 | 1.00E+00 |
| ENSG00000158966.12_CACHD1   | ENSG00000160789.18_LMNA | -0.08042 | -0.23659076  | 0.07980333  | 3.25E-01 | 6.11E-01 | 1.00E+00 |
| ENSG00000105697.6_HAMP      | ENSG00000160789.18_LMNA | 0.1004   | -0.059759227 | 0.255513397 | 2.18E-01 | 4.93E-01 | 1.00E+00 |
| ENSG00000155016.16_CYP2U1   | ENSG00000160789.18_LMNA | -0.20112 | -0.349145929 | -0.04331066 | 1.30E-02 | 7.90E-02 | 1.00E+00 |
| ENSG00000158301.17_GPRASP2  | ENSG00000160789.18_LMNA | -0.26117 | -0.40359411  | -0.10639774 | 1.15E-03 | 1.29E-02 | 1.00E+00 |
| ENSG00000137492.6_THAP12    | ENSG00000160789.18_LMNA | -0.36524 | -0.495621741 | -0.21875901 | 3.72E-06 | 1.31E-04 | 1.91E-01 |
| ENSG00000108799.11_EZH1     | ENSG00000160789.18_LMNA | -0.05878 | -0.215958224 | 0.101370923 | 4.72E-01 | 7.32E-01 | 1.00E+00 |
| ENSG00000165140.8_FBP1      | ENSG00000160789.18_LMNA | 0.02946  | -0.13035636  | 0.187775783 | 7.19E-01 | 8.80E-01 | 1.00E+00 |
| ENSG00000103335.18_PIEZO1   | ENSG00000160789.18_LMNA | 0.52172  | 0.395360684  | 0.628704554 | 5.49E-12 | 2.17E-09 | 2.82E-07 |
| ENSG00000215251.3_FASTKD5   | ENSG00000160789.18_LMNA | 0.14604  | -0.013474155 | 0.298305033 | 7.26E-02 | 2.56E-01 | 1.00E+00 |
| ENSG00000184939.14_ZFP90    | ENSG00000160789.18_LMNA | -0.11193 | -0.266382932 | 0.048129376 | 1.70E-01 | 4.28E-01 | 1.00E+00 |
| ENSG00000230777.1_RPS29P5   | ENSG00000160789.18_LMNA | -0.14427 | -0.296658245 | 0.015280451 | 7.62E-02 | 2.64E-01 | 1.00E+00 |
| ENSG00000115825.8_PRKD3     | ENSG00000160789.18_LMNA | -0.13558 | -0.288554275 | 0.024139811 | 9.58E-02 | 3.04E-01 | 1.00E+00 |
| ENSG00000104524.12_PYCRL    | ENSG00000160789.18_LMNA | 0.01628  | -0.143288399 | 0.175030716 | 8.42E-01 | 9.39E-01 | 1.00E+00 |
| ENSG00000163359.14_COL6A3   | ENSG00000160789.18_LMNA | 0.32094  | 0.170450517  | 0.456802896 | 5.55E-05 | 1.17E-03 | 1.00E+00 |
| ENSG00000188493.13_C19orf54 | ENSG00000160789.18_LMNA | 0.16659  | 0.007586663  | 0.31737001  | 4.02E-02 | 1.74E-01 | 1.00E+00 |
| ENSG00000167670.14_CHAF1A   | ENSG00000160789.18_LMNA | 0.21638  | 0.059220816  | 0.36307494  | 7.42E-03 | 5.25E-02 | 1.00E+00 |
| ENSG00000261526.2_CTB-31O2C | ENSG00000160789.18_LMNA | -0.16117 | -0.312356022 | -0.00202102 | 4.73E-02 | 1.94E-01 | 1.00E+00 |
| ENSG00000099284.12_H2AFY2   | ENSG00000160789.18_LMNA | -0.23577 | -0.3806791   | -0.07955213 | 3.45E-03 | 2.97E-02 | 1.00E+00 |
| ENSG00000197852.9_FAM212B   | ENSG00000160789.18_LMNA | -0.14058 | -0.293218923 | 0.019046352 | 8.41E-02 | 2.81E-01 | 1.00E+00 |
| ENSG00000221909.2_FAM200A   | ENSG00000160789.18_LMNA | -0.13056 | -0.283864183 | 0.029244738 | 1.09E-01 | 3.28E-01 | 1.00E+00 |
| ENSG00000109689.13_STIM2    | ENSG00000160789.18_LMNA | 0.16677  | 0.007776737  | 0.317540939 | 4.00E-02 | 1.73E-01 | 1.00E+00 |
| ENSG00000181481.12_RNF135   | ENSG00000160789.18_LMNA | 0.28432  | 0.131052134  | 0.424315338 | 3.85E-04 | 5.50E-03 | 1.00E+00 |
| ENSG00000165804.14_ZNF219   | ENSG00000160789.18_LMNA | 0.16851  | 0.009561233  | 0.319144711 | 3.80E-02 | 1.67E-01 | 1.00E+00 |
| ENSG00000204381.10_LAYN     | ENSG00000160789.18_LMNA | -0.01338 | -0.172211335 | 0.146134533 | 8.70E-01 | 9.50E-01 | 1.00E+00 |
| ENSG00000181555.18_SETD2    | ENSG00000160789.18_LMNA | -0.0356  | -0.193701074 | 0.124307057 | 6.63E-01 | 8.51E-01 | 1.00E+00 |
| ENSG00000139291.12_TMEM19   | ENSG00000160789.18_LMNA | -0.31943 | -0.455469762 | -0.16881558 | 6.04E-05 | 1.25E-03 | 1.00E+00 |
| ENSG00000144029.10_MRPS5    | ENSG00000160789.18_LMNA | 0.08457  | -0.075651224 | 0.240530365 | 3.00E-01 | 5.87E-01 | 1.00E+00 |
| ENSG00000125449.5_ARMC7     | ENSG00000160789.18_LMNA | -0.00612 | -0.16516288  | 0.153226889 | 9.40E-01 | 9.76E-01 | 1.00E+00 |

|                             |                         |          |              |             |          |          |          |
|-----------------------------|-------------------------|----------|--------------|-------------|----------|----------|----------|
| ENSG00000253910.2_PCDHGB2   | ENSG00000160789.18_LMNA | 0.00771  | -0.151676655 | 0.1667063   | 9.25E-01 | 9.71E-01 | 1.00E+00 |
| ENSG00000154305.15_MIA3     | ENSG00000160789.18_LMNA | 0.0485   | -0.111561801 | 0.206109573 | 5.53E-01 | 7.88E-01 | 1.00E+00 |
| ENSG00000160124.8_CCDC58    | ENSG00000160789.18_LMNA | -0.11895 | -0.272977192 | 0.041032045 | 1.44E-01 | 3.89E-01 | 1.00E+00 |
| ENSG00000166407.12_LMO1     | ENSG00000160789.18_LMNA | -0.17343 | -0.32369405  | -0.01463398 | 3.26E-02 | 1.51E-01 | 1.00E+00 |
| ENSG00000168538.14_TRAPPC1  | ENSG00000160789.18_LMNA | 0.00406  | -0.155237399 | 0.16315888  | 9.60E-01 | 9.84E-01 | 1.00E+00 |
| ENSG00000168040.4_FADD      | ENSG00000160789.18_LMNA | 0.30681  | 0.155188099  | 0.444307631 | 1.21E-04 | 2.20E-03 | 1.00E+00 |
| ENSG00000167987.9_VPS37C    | ENSG00000160789.18_LMNA | 0.21204  | 0.054687139  | 0.359119588 | 8.73E-03 | 5.94E-02 | 1.00E+00 |
| ENSG00000197498.11_RPF2     | ENSG00000160789.18_LMNA | 0.07683  | -0.083392772 | 0.233176617 | 3.47E-01 | 6.31E-01 | 1.00E+00 |
| ENSG00000106144.18_CASP2    | ENSG00000160789.18_LMNA | 0.24958  | 0.094121808  | 0.393161619 | 1.93E-03 | 1.90E-02 | 1.00E+00 |
| ENSG00000157014.9_TATDN2    | ENSG00000160789.18_LMNA | 0.08209  | -0.078136074 | 0.238173938 | 3.15E-01 | 6.01E-01 | 1.00E+00 |
| ENSG00000215256.3_DHRS4-AS  | ENSG00000160789.18_LMNA | -0.07698 | -0.233323865 | 0.083238133 | 3.46E-01 | 6.30E-01 | 1.00E+00 |
| ENSG00000092531.8_SNAP23    | ENSG00000160789.18_LMNA | -0.11674 | -0.270902971 | 0.043267928 | 1.52E-01 | 4.01E-01 | 1.00E+00 |
| ENSG00000005882.10_PDK2     | ENSG00000160789.18_LMNA | -0.11194 | -0.266390911 | 0.048120807 | 1.70E-01 | 4.28E-01 | 1.00E+00 |
| ENSG00000204261.7_PSMB8-AS  | ENSG00000160789.18_LMNA | 0.07146  | -0.088748153 | 0.228068229 | 3.82E-01 | 6.60E-01 | 1.00E+00 |
| ENSG00000023516.8_AKAP11    | ENSG00000160789.18_LMNA | -0.24573 | -0.389683779 | -0.09004954 | 2.28E-03 | 2.16E-02 | 1.00E+00 |
| ENSG00000162129.11_CLPB     | ENSG00000160789.18_LMNA | 0.14496  | -0.01457735  | 0.297299478 | 7.48E-02 | 2.61E-01 | 1.00E+00 |
| ENSG00000044090.7_CUL7      | ENSG00000160789.18_LMNA | 0.4683   | 0.334004882  | 0.583967466 | 1.17E-09 | 1.77E-07 | 6.01E-05 |
| ENSG00000136824.17_SMC2     | ENSG00000160789.18_LMNA | 0.02503  | -0.134707301 | 0.183499674 | 7.60E-01 | 9.00E-01 | 1.00E+00 |
| ENSG00000186566.10_GPATCH8  | ENSG00000160789.18_LMNA | 0.00865  | -0.150755305 | 0.167622863 | 9.16E-01 | 9.68E-01 | 1.00E+00 |
| ENSG00000004866.17_ST7      | ENSG00000160789.18_LMNA | -0.09082 | -0.246459035 | 0.06938203  | 2.66E-01 | 5.50E-01 | 1.00E+00 |
| ENSG00000157540.18_DYRK1A   | ENSG00000160789.18_LMNA | 0.06141  | -0.098757206 | 0.218473806 | 4.52E-01 | 7.18E-01 | 1.00E+00 |
| ENSG00000278611.1_CTC-543D1 | ENSG00000160789.18_LMNA | -0.27035 | -0.41182493  | -0.11614733 | 7.56E-04 | 9.30E-03 | 1.00E+00 |
| ENSG00000105771.12_SMG9     | ENSG00000160789.18_LMNA | 0.12844  | -0.031401878 | 0.281877822 | 1.15E-01 | 3.38E-01 | 1.00E+00 |
| ENSG00000119707.12_RBM25    | ENSG00000160789.18_LMNA | 0.08397  | -0.076253764 | 0.239959308 | 3.04E-01 | 5.90E-01 | 1.00E+00 |
| ENSG00000168916.14_ZNF608   | ENSG00000160789.18_LMNA | 0.09427  | -0.065918984 | 0.249723873 | 2.48E-01 | 5.28E-01 | 1.00E+00 |
| ENSG00000136856.16_SLC2A8   | ENSG00000160789.18_LMNA | 0.03633  | -0.123590207 | 0.194401694 | 6.57E-01 | 8.48E-01 | 1.00E+00 |
| ENSG00000197930.11_ERO1A    | ENSG00000160789.18_LMNA | 0.35502  | 0.207545839  | 0.486708775 | 7.19E-06 | 2.25E-04 | 3.69E-01 |
| ENSG00000163798.12_SLC4A1AI | ENSG00000160789.18_LMNA | 0.14245  | -0.017142728 | 0.294958476 | 8.00E-02 | 2.72E-01 | 1.00E+00 |
| ENSG00000153443.11_UBALD1   | ENSG00000160789.18_LMNA | -0.04598 | -0.203686601 | 0.114058769 | 5.74E-01 | 8.01E-01 | 1.00E+00 |
| ENSG00000182118.5_FAM89A    | ENSG00000160789.18_LMNA | -0.39309 | -0.519765921 | -0.24950602 | 5.46E-07 | 2.81E-05 | 2.80E-02 |
| ENSG00000251580.1_RP11-539L | ENSG00000160789.18_LMNA | -0.15347 | -0.305211756 | 0.005876216 | 5.91E-02 | 2.23E-01 | 1.00E+00 |
| ENSG00000087842.9_PIR       | ENSG00000160789.18_LMNA | 0.09769  | -0.062484649 | 0.252954572 | 2.31E-01 | 5.09E-01 | 1.00E+00 |
| ENSG00000162377.5_COA7      | ENSG00000160789.18_LMNA | 0.14453  | -0.015014987 | 0.296900384 | 7.56E-02 | 2.63E-01 | 1.00E+00 |

|                              |                         |          |              |             |          |          |          |
|------------------------------|-------------------------|----------|--------------|-------------|----------|----------|----------|
| ENSG00000249119.1_MTND6P4    | ENSG00000160789.18_LMNA | -0.12457 | -0.278249224 | 0.035334928 | 1.26E-01 | 3.59E-01 | 1.00E+00 |
| ENSG00000251022.5_THAP9-AS1  | ENSG00000160789.18_LMNA | 0.00506  | -0.15426109  | 0.164132356 | 9.51E-01 | 9.80E-01 | 1.00E+00 |
| ENSG00000259969.1_RP11-999E  | ENSG00000160789.18_LMNA | -0.28136 | -0.421671381 | -0.127886   | 4.46E-04 | 6.17E-03 | 1.00E+00 |
| ENSG00000243554.1_AC004967.1 | ENSG00000160789.18_LMNA | 0.02305  | -0.136655423 | 0.181581147 | 7.78E-01 | 9.09E-01 | 1.00E+00 |
| ENSG00000163719.17_MTMR14    | ENSG00000160789.18_LMNA | -0.00435 | -0.163441955 | 0.154953565 | 9.58E-01 | 9.83E-01 | 1.00E+00 |
| ENSG00000087157.17_PGS1      | ENSG00000160789.18_LMNA | -0.0432  | -0.201018629 | 0.116803582 | 5.97E-01 | 8.14E-01 | 1.00E+00 |
| ENSG00000168763.14_CNNM3     | ENSG00000160789.18_LMNA | 0.04003  | -0.119938745 | 0.197965457 | 6.24E-01 | 8.31E-01 | 1.00E+00 |
| ENSG00000128342.4_LIF        | ENSG00000160789.18_LMNA | 0.56157  | 0.441874224  | 0.661620559 | 5.22E-14 | 5.46E-11 | 2.68E-09 |
| ENSG00000164087.6_POC1A      | ENSG00000160789.18_LMNA | 0.01376  | -0.145757621 | 0.172585004 | 8.66E-01 | 9.48E-01 | 1.00E+00 |
| ENSG00000181192.10_DHTKD1    | ENSG00000160789.18_LMNA | -0.20974 | -0.357017869 | -0.05228322 | 9.50E-03 | 6.32E-02 | 1.00E+00 |
| ENSG00000142082.13_SIRT3     | ENSG00000160789.18_LMNA | 0.15707  | -0.002184476 | 0.308555869 | 5.33E-02 | 2.09E-01 | 1.00E+00 |
| ENSG00000179029.13_TMEM107   | ENSG00000160789.18_LMNA | 0.16587  | 0.006848039  | 0.316705592 | 4.11E-02 | 1.77E-01 | 1.00E+00 |
| ENSG00000148719.13_DNAJB12   | ENSG00000160789.18_LMNA | -0.02509 | -0.183556719 | 0.134649338 | 7.59E-01 | 8.99E-01 | 1.00E+00 |
| ENSG00000227008.2_RP3-417G1  | ENSG00000160789.18_LMNA | -0.12411 | -0.277820844 | 0.03579861  | 1.28E-01 | 3.62E-01 | 1.00E+00 |
| ENSG00000051009.9_FAM160A2   | ENSG00000160789.18_LMNA | 0.23859  | 0.082527783  | 0.383237427 | 3.07E-03 | 2.72E-02 | 1.00E+00 |
| ENSG00000153071.13_DAB2      | ENSG00000160789.18_LMNA | 0.07587  | -0.084353981 | 0.232261025 | 3.53E-01 | 6.37E-01 | 1.00E+00 |
| ENSG00000144048.9_DUSP11     | ENSG00000160789.18_LMNA | -0.22694 | -0.372677553 | -0.07027986 | 4.93E-03 | 3.88E-02 | 1.00E+00 |
| ENSG00000100461.16_RBM23     | ENSG00000160789.18_LMNA | 0.01865  | -0.140966152 | 0.177327274 | 8.20E-01 | 9.30E-01 | 1.00E+00 |
| ENSG00000061273.16_HDAC7     | ENSG00000160789.18_LMNA | 0.43435  | 0.29559292   | 0.555164937 | 2.26E-08 | 2.14E-06 | 1.16E-03 |
| ENSG00000254615.2_RP11-395G  | ENSG00000160789.18_LMNA | 0.22106  | 0.064118512  | 0.367335608 | 6.20E-03 | 4.61E-02 | 1.00E+00 |
| ENSG00000132405.17_TBC1D14   | ENSG00000160789.18_LMNA | -0.1892  | -0.338213017 | -0.03093047 | 1.96E-02 | 1.06E-01 | 1.00E+00 |
| ENSG00000184408.8_KCND2      | ENSG00000160789.18_LMNA | -0.31423 | -0.450877082 | -0.16319523 | 8.06E-05 | 1.58E-03 | 1.00E+00 |
| ENSG00000236819.1_LINC01563  | ENSG00000160789.18_LMNA | -0.3071  | -0.444569117 | -0.15550608 | 1.19E-04 | 2.18E-03 | 1.00E+00 |
| ENSG00000168993.13_CPLX1     | ENSG00000160789.18_LMNA | -0.27527 | -0.416227191 | -0.12138539 | 5.99E-04 | 7.77E-03 | 1.00E+00 |
| ENSG00000165417.10_GTF2A1    | ENSG00000160789.18_LMNA | -0.04983 | -0.207381151 | 0.110249783 | 5.42E-01 | 7.81E-01 | 1.00E+00 |
| ENSG00000203705.9_TATDN3     | ENSG00000160789.18_LMNA | -0.36925 | -0.49911212  | -0.22317019 | 2.85E-06 | 1.06E-04 | 1.46E-01 |
| ENSG00000163155.10_LYSMD1    | ENSG00000160789.18_LMNA | -0.23627 | -0.381136148 | -0.08008334 | 3.38E-03 | 2.93E-02 | 1.00E+00 |
| ENSG00000096070.18_BRPF3     | ENSG00000160789.18_LMNA | 0.01562  | -0.143938946 | 0.174386744 | 8.49E-01 | 9.41E-01 | 1.00E+00 |
| ENSG00000115652.13_UXS1      | ENSG00000160789.18_LMNA | -0.17332 | -0.323594232 | -0.0145225  | 3.27E-02 | 1.51E-01 | 1.00E+00 |
| ENSG00000179562.2_GCC1       | ENSG00000160789.18_LMNA | 0.3909   | 0.247071156  | 0.517869552 | 6.39E-07 | 3.19E-05 | 3.28E-02 |
| ENSG00000147654.13_EBAG9     | ENSG00000160789.18_LMNA | -0.23903 | -0.383636378 | -0.0829923  | 3.02E-03 | 2.69E-02 | 1.00E+00 |
| ENSG00000161791.12_FMN13     | ENSG00000160789.18_LMNA | 0.10697  | -0.053139689 | 0.261709961 | 1.90E-01 | 4.57E-01 | 1.00E+00 |
| ENSG00000112679.13_DUSP22    | ENSG00000160789.18_LMNA | -0.01778 | -0.176479962 | 0.14182335  | 8.28E-01 | 9.33E-01 | 1.00E+00 |



|                              |                         |          |              |             |          |          |          |
|------------------------------|-------------------------|----------|--------------|-------------|----------|----------|----------|
| ENSG00000078124.10_ACER3     | ENSG00000160789.18_LMNA | -0.1025  | -0.257498661 | 0.057641464 | 2.09E-01 | 4.82E-01 | 1.00E+00 |
| ENSG00000113838.11_TBCCD1    | ENSG00000160789.18_LMNA | -0.21239 | -0.359439586 | -0.05505346 | 8.61E-03 | 5.88E-02 | 1.00E+00 |
| ENSG00000129667.11_RHBDF2    | ENSG00000160789.18_LMNA | 0.14688  | -0.01261711  | 0.299085747 | 7.10E-02 | 2.52E-01 | 1.00E+00 |
| ENSG00000177453.6_NIM1K      | ENSG00000160789.18_LMNA | -0.20458 | -0.352306877 | -0.04690764 | 1.15E-02 | 7.22E-02 | 1.00E+00 |
| ENSG00000155307.16_SAMSN1    | ENSG00000160789.18_LMNA | -0.08796 | -0.243745598 | 0.072254417 | 2.81E-01 | 5.67E-01 | 1.00E+00 |
| ENSG00000206172.7_HBA1       | ENSG00000160789.18_LMNA | -0.0926  | -0.248137892 | 0.0676022   | 2.57E-01 | 5.39E-01 | 1.00E+00 |
| ENSG00000135966.11_TGFBRAP   | ENSG00000160789.18_LMNA | 0.07769  | -0.08252977  | 0.233998185 | 3.41E-01 | 6.26E-01 | 1.00E+00 |
| ENSG00000115289.11_PCGF1     | ENSG00000160789.18_LMNA | 0.1702   | 0.011301813  | 0.320707308 | 3.61E-02 | 1.62E-01 | 1.00E+00 |
| ENSG00000163714.16_U2SURP    | ENSG00000160789.18_LMNA | -0.10184 | -0.256874725 | 0.058307348 | 2.12E-01 | 4.86E-01 | 1.00E+00 |
| ENSG00000185813.9_PCYT2      | ENSG00000160789.18_LMNA | 0.14967  | -0.009760165 | 0.30168523  | 6.57E-02 | 2.39E-01 | 1.00E+00 |
| ENSG00000151292.16_CSNK1G3   | ENSG00000160789.18_LMNA | -0.17159 | -0.321998375 | -0.01274135 | 3.45E-02 | 1.57E-01 | 1.00E+00 |
| ENSG00000163162.7_RNF149     | ENSG00000160789.18_LMNA | 0.07542  | -0.084800502 | 0.231835503 | 3.56E-01 | 6.39E-01 | 1.00E+00 |
| ENSG00000172731.12_LRRC20    | ENSG00000160789.18_LMNA | -0.17231 | -0.322663823 | -0.01348383 | 3.38E-02 | 1.55E-01 | 1.00E+00 |
| ENSG00000103671.8_TRIP4      | ENSG00000160789.18_LMNA | 0.36627  | 0.219896186  | 0.496522395 | 3.47E-06 | 1.24E-04 | 1.78E-01 |
| ENSG00000155961.4_RAB39B     | ENSG00000160789.18_LMNA | -0.23593 | -0.380827124 | -0.07972416 | 3.43E-03 | 2.96E-02 | 1.00E+00 |
| ENSG00000154727.9_GABPA      | ENSG00000160789.18_LMNA | 0.01332  | -0.146194501 | 0.172151875 | 8.71E-01 | 9.50E-01 | 1.00E+00 |
| ENSG00000166532.14_RIMKLB    | ENSG00000160789.18_LMNA | -0.24628 | -0.390178332 | -0.09062801 | 2.22E-03 | 2.12E-02 | 1.00E+00 |
| ENSG00000081307.11_UBA5      | ENSG00000160789.18_LMNA | -0.15297 | -0.304746329 | 0.006389353 | 5.99E-02 | 2.25E-01 | 1.00E+00 |
| ENSG00000176986.13_SEC24C    | ENSG00000160789.18_LMNA | 0.00628  | -0.153075585 | 0.165313587 | 9.39E-01 | 9.76E-01 | 1.00E+00 |
| ENSG00000165025.13_SYK       | ENSG00000160789.18_LMNA | 0.00089  | -0.158330649 | 0.160070508 | 9.91E-01 | 9.97E-01 | 1.00E+00 |
| ENSG00000106012.16_IQCE      | ENSG00000160789.18_LMNA | 0.18361  | 0.025145444  | 0.333075679 | 2.36E-02 | 1.21E-01 | 1.00E+00 |
| ENSG00000179889.17_PDXDC1    | ENSG00000160789.18_LMNA | 0.14777  | -0.011704302 | 0.299916797 | 6.92E-02 | 2.48E-01 | 1.00E+00 |
| ENSG00000089639.9_GMIP       | ENSG00000160789.18_LMNA | -0.02658 | -0.185002579 | 0.133179492 | 7.45E-01 | 8.93E-01 | 1.00E+00 |
| ENSG00000114062.16_UBE3A     | ENSG00000160789.18_LMNA | 0.1144   | -0.045632741 | 0.268705962 | 1.61E-01 | 4.14E-01 | 1.00E+00 |
| ENSG00000233223.2_AC113189.1 | ENSG00000160789.18_LMNA | -0.2156  | -0.362361269 | -0.05840187 | 7.64E-03 | 5.37E-02 | 1.00E+00 |
| ENSG00000164603.10_BMT2      | ENSG00000160789.18_LMNA | -0.32804 | -0.463054722 | -0.17813877 | 3.70E-05 | 8.46E-04 | 1.00E+00 |
| ENSG00000148444.14_COMMD3    | ENSG00000160789.18_LMNA | -0.471   | -0.586243162 | -0.33707563 | 9.14E-10 | 1.46E-07 | 4.69E-05 |
| ENSG00000104884.13_ERCC2     | ENSG00000160789.18_LMNA | 0.16223  | 0.003105314  | 0.313334204 | 4.58E-02 | 1.90E-01 | 1.00E+00 |
| ENSG00000254545.1_RP11-84A1  | ENSG00000160789.18_LMNA | 0.3931   | 0.249512201  | 0.519770735 | 5.45E-07 | 2.81E-05 | 2.80E-02 |
| ENSG00000130702.12_LAMA5     | ENSG00000160789.18_LMNA | 0.48323  | 0.351029939  | 0.59653524  | 2.87E-10 | 5.52E-08 | 1.47E-05 |
| ENSG00000179912.18_R3HDM2    | ENSG00000160789.18_LMNA | -0.1302  | -0.283528099 | 0.029609922 | 1.10E-01 | 3.30E-01 | 1.00E+00 |
| ENSG00000135040.14_NAA35     | ENSG00000160789.18_LMNA | 0.06199  | -0.098176716 | 0.21903193  | 4.48E-01 | 7.14E-01 | 1.00E+00 |
| ENSG00000143437.19_ARNT      | ENSG00000160789.18_LMNA | 0.26032  | 0.105494624  | 0.402829235 | 1.20E-03 | 1.33E-02 | 1.00E+00 |

|                             |                         |          |              |             |          |          |          |
|-----------------------------|-------------------------|----------|--------------|-------------|----------|----------|----------|
| ENSG00000140320.10_BAHD1    | ENSG00000160789.18_LMNA | 0.23422  | 0.077921569  | 0.379275258 | 3.68E-03 | 3.12E-02 | 1.00E+00 |
| ENSG00000264918.1_          | ENSG00000160789.18_LMNA | 0.02087  | -0.13878829  | 0.179477898 | 7.99E-01 | 9.19E-01 | 1.00E+00 |
| ENSG00000109738.9_GLRB      | ENSG00000160789.18_LMNA | -0.31764 | -0.453884308 | -0.16687325 | 6.68E-05 | 1.36E-03 | 1.00E+00 |
| ENSG00000215908.6_CROCCP2   | ENSG00000160789.18_LMNA | -0.11302 | -0.267409007 | 0.047027105 | 1.66E-01 | 4.22E-01 | 1.00E+00 |
| ENSG00000171823.6_FBXL14    | ENSG00000160789.18_LMNA | 0.06571  | -0.094480535 | 0.222580832 | 4.21E-01 | 6.93E-01 | 1.00E+00 |
| ENSG00000260025.1_RP11-490M | ENSG00000160789.18_LMNA | -0.17564 | -0.325733399 | -0.01691313 | 3.04E-02 | 1.45E-01 | 1.00E+00 |
| ENSG00000182700.4_IGIP      | ENSG00000160789.18_LMNA | -0.04759 | -0.205235794 | 0.112462727 | 5.60E-01 | 7.93E-01 | 1.00E+00 |
| ENSG00000124784.7_RIOK1     | ENSG00000160789.18_LMNA | -0.07547 | -0.231888862 | 0.084744517 | 3.55E-01 | 6.39E-01 | 1.00E+00 |
| ENSG00000244716.3_RP11-20O2 | ENSG00000160789.18_LMNA | -0.07932 | -0.235548677 | 0.08089979  | 3.31E-01 | 6.17E-01 | 1.00E+00 |
| ENSG00000158156.7_XKR8      | ENSG00000160789.18_LMNA | 0.27691  | 0.123140805  | 0.417699417 | 5.53E-04 | 7.30E-03 | 1.00E+00 |
| ENSG00000166483.9_WEE1      | ENSG00000160789.18_LMNA | 0.35563  | 0.208218833  | 0.48724536  | 6.92E-06 | 2.18E-04 | 3.55E-01 |
| ENSG00000054282.14_SDCCAG8  | ENSG00000160789.18_LMNA | -0.18761 | -0.336752976 | -0.02928426 | 2.06E-02 | 1.10E-01 | 1.00E+00 |
| ENSG00000130669.16_PAK4     | ENSG00000160789.18_LMNA | 0.23524  | 0.079000108  | 0.380203986 | 3.53E-03 | 3.02E-02 | 1.00E+00 |
| ENSG00000153560.10_UBP1     | ENSG00000160789.18_LMNA | -0.06289 | -0.219892879 | 0.09728084  | 4.41E-01 | 7.09E-01 | 1.00E+00 |
| ENSG00000230733.2_AC092171. | ENSG00000160789.18_LMNA | 0.19114  | 0.032943195  | 0.339996111 | 1.83E-02 | 1.01E-01 | 1.00E+00 |
| ENSG00000174738.11_NR1D2    | ENSG00000160789.18_LMNA | -0.25245 | -0.395746813 | -0.09715536 | 1.70E-03 | 1.73E-02 | 1.00E+00 |
| ENSG00000068137.13_PLEKHH3  | ENSG00000160789.18_LMNA | 0.23869  | 0.082627179  | 0.383322804 | 3.06E-03 | 2.72E-02 | 1.00E+00 |
| ENSG00000125611.14_CHCHD5   | ENSG00000160789.18_LMNA | -0.13252 | -0.285692289 | 0.027256879 | 1.04E-01 | 3.19E-01 | 1.00E+00 |
| ENSG00000129932.6_DOHH      | ENSG00000160789.18_LMNA | 0.21447  | 0.057221314  | 0.361331848 | 7.97E-03 | 5.55E-02 | 1.00E+00 |
| ENSG00000177426.19_TGIF1    | ENSG00000160789.18_LMNA | 0.3488   | 0.200751677  | 0.481279905 | 1.06E-05 | 3.06E-04 | 5.45E-01 |
| ENSG00000112333.10_NR2E1    | ENSG00000160789.18_LMNA | 0.28232  | 0.128915339  | 0.422531505 | 4.25E-04 | 5.95E-03 | 1.00E+00 |
| ENSG00000125812.14_GZF1     | ENSG00000160789.18_LMNA | 0.03871  | -0.12123311  | 0.19670314  | 6.36E-01 | 8.37E-01 | 1.00E+00 |
| ENSG00000160999.10_SH2B2    | ENSG00000160789.18_LMNA | 0.14728  | -0.012210297 | 0.299456181 | 7.02E-02 | 2.50E-01 | 1.00E+00 |
| ENSG00000230199.1_RP11-331N | ENSG00000160789.18_LMNA | -0.11993 | -0.2738988   | 0.040037598 | 1.41E-01 | 3.83E-01 | 1.00E+00 |
| ENSG00000090615.11_GOLGA3   | ENSG00000160789.18_LMNA | 0.26971  | 0.115469767  | 0.411254475 | 7.79E-04 | 9.52E-03 | 1.00E+00 |
| ENSG00000127774.6 EMC6      | ENSG00000160789.18_LMNA | 0.082    | -0.078224013 | 0.238090476 | 3.15E-01 | 6.02E-01 | 1.00E+00 |
| ENSG00000274956.2_UG0898H0: | ENSG00000160789.18_LMNA | -0.34384 | -0.476934249 | -0.19533252 | 1.44E-05 | 3.96E-04 | 7.41E-01 |
| ENSG00000168918.12_INPP5D   | ENSG00000160789.18_LMNA | -0.03902 | -0.196995068 | 0.120933866 | 6.33E-01 | 8.35E-01 | 1.00E+00 |
| ENSG00000273014.1_RP11-225B | ENSG00000160789.18_LMNA | 0.17284  | 0.014022722  | 0.32314662  | 3.32E-02 | 1.53E-01 | 1.00E+00 |
| ENSG00000230076.1_RPL10P6   | ENSG00000160789.18_LMNA | -0.07637 | -0.23274074  | 0.083850439 | 3.50E-01 | 6.33E-01 | 1.00E+00 |
| ENSG00000110060.7_PUS3      | ENSG00000160789.18_LMNA | -0.31107 | -0.448076592 | -0.15977723 | 9.59E-05 | 1.82E-03 | 1.00E+00 |
| ENSG00000124194.14_GDAP1L1  | ENSG00000160789.18_LMNA | -0.43534 | -0.556008866 | -0.2967066  | 2.08E-08 | 2.00E-06 | 1.07E-03 |
| ENSG00000168612.4_ZSWIM1    | ENSG00000160789.18_LMNA | -0.08848 | -0.244237641 | 0.07173394  | 2.78E-01 | 5.64E-01 | 1.00E+00 |

|                            |                         |          |              |             |          |          |          |
|----------------------------|-------------------------|----------|--------------|-------------|----------|----------|----------|
| ENSG00000131153.7_GINS2    | ENSG00000160789.18_LMNA | -0.00103 | -0.160202645 | 0.158198431 | 9.90E-01 | 9.96E-01 | 1.00E+00 |
| ENSG00000119650.11_IFT43   | ENSG00000160789.18_LMNA | 0.15014  | -0.009283177 | 0.302118783 | 6.49E-02 | 2.37E-01 | 1.00E+00 |
| ENSG00000257365.6_FNTB     | ENSG00000160789.18_LMNA | 0.02766  | -0.132122883 | 0.186041096 | 7.35E-01 | 8.89E-01 | 1.00E+00 |
| ENSG00000185619.16_PCGF3   | ENSG00000160789.18_LMNA | 0.00624  | -0.153115884 | 0.165273449 | 9.39E-01 | 9.76E-01 | 1.00E+00 |
| ENSG00000128309.15_MPST    | ENSG00000160789.18_LMNA | -0.18269 | -0.332231174 | -0.02419644 | 2.43E-02 | 1.24E-01 | 1.00E+00 |
| ENSG00000102081.12_FMR1    | ENSG00000160789.18_LMNA | -0.07229 | -0.228855111 | 0.087924417 | 3.76E-01 | 6.56E-01 | 1.00E+00 |
| ENSG00000180425.9_C11orf71 | ENSG00000160789.18_LMNA | -0.35155 | -0.48367934  | -0.20375122 | 8.95E-06 | 2.66E-04 | 4.59E-01 |
| ENSG00000198742.8_SMURF1   | ENSG00000160789.18_LMNA | 0.23223  | 0.075833556  | 0.377475545 | 3.99E-03 | 3.31E-02 | 1.00E+00 |
| ENSG00000058404.18_CAMK2B  | ENSG00000160789.18_LMNA | 0.22374  | 0.066923305  | 0.369769872 | 5.59E-03 | 4.27E-02 | 1.00E+00 |
| ENSG00000154639.17_CXADR   | ENSG00000160789.18_LMNA | -0.05603 | -0.213323467 | 0.104103774 | 4.93E-01 | 7.48E-01 | 1.00E+00 |
| ENSG00000145920.13_CPLX2   | ENSG00000160789.18_LMNA | -0.24814 | -0.391859865 | -0.09259639 | 2.05E-03 | 1.99E-02 | 1.00E+00 |
| ENSG00000169258.6_GPRIN1   | ENSG00000160789.18_LMNA | 0.00783  | -0.151562908 | 0.166819486 | 9.24E-01 | 9.71E-01 | 1.00E+00 |
| ENSG00000115548.15_KDM3A   | ENSG00000160789.18_LMNA | -0.05133 | -0.208827448 | 0.108756143 | 5.30E-01 | 7.73E-01 | 1.00E+00 |
| ENSG00000134574.10_DDB2    | ENSG00000160789.18_LMNA | 0.37292  | 0.227213829  | 0.502303841 | 2.23E-06 | 8.68E-05 | 1.14E-01 |
| ENSG00000237928.4_NFIA-AS2 | ENSG00000160789.18_LMNA | -0.28901 | -0.428494724 | -0.13606918 | 3.05E-04 | 4.56E-03 | 1.00E+00 |
| ENSG00000134042.11_MRO     | ENSG00000160789.18_LMNA | -0.27195 | -0.413257636 | -0.11785024 | 7.01E-04 | 8.79E-03 | 1.00E+00 |
| ENSG00000164306.9_PRIMPOL  | ENSG00000160789.18_LMNA | -0.07028 | -0.226943927 | 0.089924362 | 3.90E-01 | 6.68E-01 | 1.00E+00 |
| ENSG00000105556.9_MIER2    | ENSG00000160789.18_LMNA | 0.26273  | 0.108049547  | 0.404991994 | 1.08E-03 | 1.23E-02 | 1.00E+00 |
| ENSG00000169925.15_BRD3    | ENSG00000160789.18_LMNA | -0.03721 | -0.195251012 | 0.122720769 | 6.49E-01 | 8.44E-01 | 1.00E+00 |
| ENSG00000130559.17_CAMSAP1 | ENSG00000160789.18_LMNA | 0.1025   | -0.057645139 | 0.257495218 | 2.09E-01 | 4.82E-01 | 1.00E+00 |
| ENSG00000145632.13_PLK2    | ENSG00000160789.18_LMNA | 0.04505  | -0.114976738 | 0.202794856 | 5.82E-01 | 8.05E-01 | 1.00E+00 |
| ENSG00000175287.17_PHYHD1  | ENSG00000160789.18_LMNA | -0.07427 | -0.230743919 | 0.085945375 | 3.63E-01 | 6.45E-01 | 1.00E+00 |
| ENSG00000094841.12_UPRT    | ENSG00000160789.18_LMNA | 0.17834  | 0.019694595  | 0.32821832  | 2.79E-02 | 1.36E-01 | 1.00E+00 |
| ENSG00000180867.10_PDIA3P1 | ENSG00000160789.18_LMNA | 0.40718  | 0.265167739  | 0.531900586 | 1.93E-07 | 1.23E-05 | 9.90E-03 |
| ENSG00000121417.12_ZNF211  | ENSG00000160789.18_LMNA | 0.11813  | -0.041860987 | 0.272208526 | 1.47E-01 | 3.93E-01 | 1.00E+00 |
| ENSG00000065526.9_SPEN     | ENSG00000160789.18_LMNA | 0.06344  | -0.096735296 | 0.220416914 | 4.37E-01 | 7.06E-01 | 1.00E+00 |
| ENSG00000185515.13_BRCC3   | ENSG00000160789.18_LMNA | 0.1219   | -0.038039425 | 0.275748874 | 1.35E-01 | 3.73E-01 | 1.00E+00 |
| ENSG00000081870.10_HSPB11  | ENSG00000160789.18_LMNA | 0.04786  | -0.112195465 | 0.205495055 | 5.58E-01 | 7.91E-01 | 1.00E+00 |
| ENSG00000163909.7_HEYL     | ENSG00000160789.18_LMNA | 0.09381  | -0.066385986 | 0.249284019 | 2.50E-01 | 5.31E-01 | 1.00E+00 |
| ENSG00000183036.9_PCP4     | ENSG00000160789.18_LMNA | -0.37471 | -0.503853333 | -0.22918033 | 1.97E-06 | 7.90E-05 | 1.01E-01 |
| ENSG00000213079.8_SCAF8    | ENSG00000160789.18_LMNA | 0.03004  | -0.129777618 | 0.188343665 | 7.13E-01 | 8.78E-01 | 1.00E+00 |
| ENSG00000067596.9_DHX8     | ENSG00000160789.18_LMNA | 0.19852  | 0.040604771  | 0.346763453 | 1.42E-02 | 8.46E-02 | 1.00E+00 |
| ENSG00000154734.13_ADAMTS1 | ENSG00000160789.18_LMNA | 0.47428  | 0.340814336  | 0.589008576 | 6.73E-10 | 1.13E-07 | 3.45E-05 |

|                             |                         |          |              |             |          |          |          |
|-----------------------------|-------------------------|----------|--------------|-------------|----------|----------|----------|
| ENSG00000154133.13_ROBO4    | ENSG00000160789.18_LMNA | -0.0047  | -0.163779946 | 0.154614597 | 9.54E-01 | 9.82E-01 | 1.00E+00 |
| ENSG00000182379.9_NXPH4     | ENSG00000160789.18_LMNA | 0.1469   | -0.012593181 | 0.299107538 | 7.09E-02 | 2.52E-01 | 1.00E+00 |
| ENSG00000234961.1_RP11-124N | ENSG00000160789.18_LMNA | 0.55741  | 0.43698459   | 0.658199717 | 8.74E-14 | 8.00E-11 | 4.48E-09 |
| ENSG00000117461.13_PIK3R3   | ENSG00000160789.18_LMNA | -0.32427 | -0.45973813  | -0.17405582 | 4.59E-05 | 1.00E-03 | 1.00E+00 |
| ENSG00000116675.14_DNAJC6   | ENSG00000160789.18_LMNA | -0.32386 | -0.459379191 | -0.17361453 | 4.70E-05 | 1.02E-03 | 1.00E+00 |
| ENSG00000121957.11_GPSM2    | ENSG00000160789.18_LMNA | -0.27771 | -0.418415356 | -0.12399512 | 5.32E-04 | 7.08E-03 | 1.00E+00 |
| ENSG00000204366.3_ZBTB12    | ENSG00000160789.18_LMNA | -0.02446 | -0.18295188  | 0.135263796 | 7.65E-01 | 9.02E-01 | 1.00E+00 |
| ENSG00000272686.1_RP11-390E | ENSG00000160789.18_LMNA | -0.25571 | -0.398684634 | -0.10060944 | 1.47E-03 | 1.55E-02 | 1.00E+00 |
| ENSG00000092148.11_HECTD1   | ENSG00000160789.18_LMNA | 0.13686  | -0.022833621 | 0.289751916 | 9.27E-02 | 2.98E-01 | 1.00E+00 |
| ENSG00000149474.12_KAT14    | ENSG00000160789.18_LMNA | 0.04938  | -0.110690121 | 0.206954505 | 5.46E-01 | 7.84E-01 | 1.00E+00 |
| ENSG00000171451.13_DSEL     | ENSG00000160789.18_LMNA | -0.22865 | -0.374232607 | -0.07207779 | 4.61E-03 | 3.68E-02 | 1.00E+00 |
| ENSG00000134072.9_CAMK1     | ENSG00000160789.18_LMNA | 0.24444  | 0.088692106  | 0.38852259  | 2.41E-03 | 2.25E-02 | 1.00E+00 |
| ENSG00000138031.13_ADCY3    | ENSG00000160789.18_LMNA | 0.31081  | 0.159500262  | 0.447849415 | 9.73E-05 | 1.84E-03 | 1.00E+00 |
| ENSG00000110697.11_PITPNM1  | ENSG00000160789.18_LMNA | 0.38251  | 0.237784827  | 0.51061246  | 1.16E-06 | 5.18E-05 | 5.93E-02 |
| ENSG00000116128.8_BCL9      | ENSG00000160789.18_LMNA | 0.22225  | 0.065357068  | 0.368411056 | 5.92E-03 | 4.46E-02 | 1.00E+00 |
| ENSG00000153822.12_KCNJ16   | ENSG00000160789.18_LMNA | -0.18372 | -0.333174471 | -0.0252565  | 2.35E-02 | 1.21E-01 | 1.00E+00 |
| ENSG00000149782.10_PLCB3    | ENSG00000160789.18_LMNA | 0.43592  | 0.297350095  | 0.556496253 | 1.99E-08 | 1.92E-06 | 1.02E-03 |
| ENSG00000036257.11_CUL3     | ENSG00000160789.18_LMNA | -0.15755 | -0.308999558 | 0.001694028 | 5.26E-02 | 2.08E-01 | 1.00E+00 |
| ENSG00000174365.18_SNHG11   | ENSG00000160789.18_LMNA | 0.17852  | 0.019879344  | 0.328383221 | 2.78E-02 | 1.36E-01 | 1.00E+00 |
| ENSG00000119574.11_ZBTB45   | ENSG00000160789.18_LMNA | 0.25821  | 0.103255544  | 0.400931106 | 1.32E-03 | 1.43E-02 | 1.00E+00 |
| ENSG00000167702.10_KIFC2    | ENSG00000160789.18_LMNA | 0.11608  | -0.043932127 | 0.270286233 | 1.54E-01 | 4.05E-01 | 1.00E+00 |
| ENSG00000166189.7_HPS6      | ENSG00000160789.18_LMNA | 0.22485  | 0.068085368  | 0.370777203 | 5.35E-03 | 4.13E-02 | 1.00E+00 |
| ENSG00000149761.7_NUDT22    | ENSG00000160789.18_LMNA | 0.35225  | 0.204521076  | 0.484294501 | 8.57E-06 | 2.57E-04 | 4.40E-01 |
| ENSG00000149577.14_SIDT2    | ENSG00000160789.18_LMNA | 0.20427  | 0.046586965  | 0.352025358 | 1.16E-02 | 7.28E-02 | 1.00E+00 |
| ENSG00000198793.11_MTOR     | ENSG00000160789.18_LMNA | 0.07319  | -0.087028337 | 0.22971063  | 3.70E-01 | 6.51E-01 | 1.00E+00 |
| ENSG00000038358.13_EDC4     | ENSG00000160789.18_LMNA | 0.12509  | -0.034808429 | 0.278735487 | 1.25E-01 | 3.56E-01 | 1.00E+00 |
| ENSG00000138303.16_ASCC1    | ENSG00000160789.18_LMNA | -0.50872 | -0.617880762 | -0.38032268 | 2.21E-11 | 6.48E-09 | 1.13E-06 |
| ENSG00000143379.11_SETDB1   | ENSG00000160789.18_LMNA | -0.05704 | -0.214291858 | 0.103099886 | 4.85E-01 | 7.42E-01 | 1.00E+00 |
| ENSG00000110660.13_SLC35F2  | ENSG00000160789.18_LMNA | 0.23214  | 0.075738039  | 0.377393162 | 4.00E-03 | 3.32E-02 | 1.00E+00 |
| ENSG00000196591.10_HDAC2    | ENSG00000160789.18_LMNA | -0.2167  | -0.363364033 | -0.05955267 | 7.33E-03 | 5.21E-02 | 1.00E+00 |
| ENSG00000137337.13_MDC1     | ENSG00000160789.18_LMNA | 0.08217  | -0.078052045 | 0.238253685 | 3.14E-01 | 6.01E-01 | 1.00E+00 |
| ENSG00000157510.12_AFAP1L1  | ENSG00000160789.18_LMNA | 0.13044  | -0.029370323 | 0.283748614 | 1.09E-01 | 3.29E-01 | 1.00E+00 |
| ENSG00000168917.8_SLC35G2   | ENSG00000160789.18_LMNA | 0.13441  | -0.025328781 | 0.287463261 | 9.87E-02 | 3.09E-01 | 1.00E+00 |

|                             |                         |          |              |             |          |          |          |
|-----------------------------|-------------------------|----------|--------------|-------------|----------|----------|----------|
| ENSG00000100485.10_SOS2     | ENSG00000160789.18_LMNA | -0.0939  | -0.249372469 | 0.066292088 | 2.50E-01 | 5.30E-01 | 1.00E+00 |
| ENSG00000169403.10_PTAFR    | ENSG00000160789.18_LMNA | -0.07234 | -0.228906479 | 0.087870627 | 3.76E-01 | 6.56E-01 | 1.00E+00 |
| ENSG00000180098.8_TRNAU1AF  | ENSG00000160789.18_LMNA | -0.11419 | -0.268512432 | 0.045840885 | 1.61E-01 | 4.16E-01 | 1.00E+00 |
| ENSG00000272779.1_LL22NC03- | ENSG00000160789.18_LMNA | -0.00846 | -0.167438025 | 0.150941153 | 9.18E-01 | 9.69E-01 | 1.00E+00 |
| ENSG00000124104.17_SNX21    | ENSG00000160789.18_LMNA | 0.36462  | 0.21807748   | 0.495081673 | 3.87E-06 | 1.35E-04 | 1.99E-01 |
| ENSG00000276855.1_CTD-3157E | ENSG00000160789.18_LMNA | 0.07057  | -0.089633315 | 0.227222209 | 3.88E-01 | 6.66E-01 | 1.00E+00 |
| ENSG00000173805.14_HAP1     | ENSG00000160789.18_LMNA | 0.24743  | 0.091851158  | 0.391223471 | 2.12E-03 | 2.04E-02 | 1.00E+00 |
| ENSG00000267317.2_CTB-25B13 | ENSG00000160789.18_LMNA | 0.44974  | 0.312940645  | 0.568250371 | 6.15E-09 | 7.14E-07 | 3.16E-04 |
| ENSG00000100934.13_SEC23A   | ENSG00000160789.18_LMNA | 0.23948  | 0.083459904  | 0.384037874 | 2.96E-03 | 2.65E-02 | 1.00E+00 |
| ENSG00000071626.15_DAZAP1   | ENSG00000160789.18_LMNA | 0.1828   | 0.024305513  | 0.332328264 | 2.42E-02 | 1.24E-01 | 1.00E+00 |
| ENSG00000217027.1_TPT1P4    | ENSG00000160789.18_LMNA | -0.0651  | -0.221998214 | 0.095087931 | 4.26E-01 | 6.96E-01 | 1.00E+00 |
| ENSG00000117505.11_DR1      | ENSG00000160789.18_LMNA | -0.10278 | -0.257759408 | 0.057363104 | 2.08E-01 | 4.80E-01 | 1.00E+00 |
| ENSG00000164109.12_MAD2L1   | ENSG00000160789.18_LMNA | -0.18027 | -0.330001005 | -0.02169297 | 2.63E-02 | 1.31E-01 | 1.00E+00 |
| ENSG00000164347.16_GFM2     | ENSG00000160789.18_LMNA | -0.37335 | -0.502673318 | -0.22768254 | 2.16E-06 | 8.46E-05 | 1.11E-01 |
| ENSG00000152942.17_RAD17    | ENSG00000160789.18_LMNA | -0.23471 | -0.379719298 | -0.07843715 | 3.61E-03 | 3.07E-02 | 1.00E+00 |
| ENSG00000154359.11_LONRF1   | ENSG00000160789.18_LMNA | 0.03146  | -0.128380869 | 0.189713326 | 7.00E-01 | 8.72E-01 | 1.00E+00 |
| ENSG00000181666.16_HKR1     | ENSG00000160789.18_LMNA | -0.01926 | -0.177911843 | 0.140374484 | 8.14E-01 | 9.27E-01 | 1.00E+00 |
| ENSG00000178802.16_MPI      | ENSG00000160789.18_LMNA | 0.07876  | -0.081459478 | 0.235016465 | 3.35E-01 | 6.21E-01 | 1.00E+00 |
| ENSG00000126464.12_PRR12    | ENSG00000160789.18_LMNA | 0.21651  | 0.059351712  | 0.363188977 | 7.38E-03 | 5.23E-02 | 1.00E+00 |
| ENSG00000105486.12_LIG1     | ENSG00000160789.18_LMNA | 0.11357  | -0.046466308 | 0.267930764 | 1.64E-01 | 4.19E-01 | 1.00E+00 |
| ENSG00000166912.15_MTMR10   | ENSG00000160789.18_LMNA | -0.08975 | -0.24544644  | 0.070454554 | 2.71E-01 | 5.56E-01 | 1.00E+00 |
| ENSG00000168872.14_DDX19A   | ENSG00000160789.18_LMNA | 0.21091  | 0.053506101  | 0.358087407 | 9.10E-03 | 6.12E-02 | 1.00E+00 |
| ENSG00000151353.13_TMEN18   | ENSG00000160789.18_LMNA | -0.17896 | -0.32879669  | -0.02034267 | 2.74E-02 | 1.35E-01 | 1.00E+00 |
| ENSG0000019549.7_SNAI2      | ENSG00000160789.18_LMNA | 0.20227  | 0.044502371  | 0.35019395  | 1.25E-02 | 7.68E-02 | 1.00E+00 |
| ENSG00000138379.4_MSTN      | ENSG00000160789.18_LMNA | -0.50001 | -0.610607012 | -0.37028699 | 5.43E-11 | 1.39E-08 | 2.79E-06 |
| ENSG0000014914.18_MTMR11    | ENSG00000160789.18_LMNA | 0.37635  | 0.230990921  | 0.505278414 | 1.77E-06 | 7.27E-05 | 9.06E-02 |
| ENSG00000169554.15_ZEB2     | ENSG00000160789.18_LMNA | -0.22322 | -0.369295835 | -0.06637674 | 5.70E-03 | 4.33E-02 | 1.00E+00 |
| ENSG00000168827.13_GFM1     | ENSG00000160789.18_LMNA | 0.02712  | -0.13265079  | 0.185522317 | 7.40E-01 | 8.91E-01 | 1.00E+00 |
| ENSG00000164494.10_PDSS2    | ENSG00000160789.18_LMNA | 0.03444  | -0.125445064 | 0.192588166 | 6.74E-01 | 8.57E-01 | 1.00E+00 |
| ENSG00000116711.9_PLA2G4A   | ENSG00000160789.18_LMNA | -0.30512 | -0.442814122 | -0.15337303 | 1.32E-04 | 2.36E-03 | 1.00E+00 |
| ENSG00000117859.17_OSBPL9   | ENSG00000160789.18_LMNA | -0.01816 | -0.176848808 | 0.141450259 | 8.24E-01 | 9.31E-01 | 1.00E+00 |
| ENSG00000225791.5_TRAM2-AS  | ENSG00000160789.18_LMNA | -0.19944 | -0.347605164 | -0.04156023 | 1.38E-02 | 8.24E-02 | 1.00E+00 |
| ENSG00000163660.10_CCNL1    | ENSG00000160789.18_LMNA | -0.01557 | -0.174337415 | 0.143988768 | 8.49E-01 | 9.41E-01 | 1.00E+00 |

|                            |                         |          |              |             |          |          |          |
|----------------------------|-------------------------|----------|--------------|-------------|----------|----------|----------|
| ENSG00000120254.14_MTHFD1L | ENSG00000160789.18_LMNA | 0.10639  | -0.053722398 | 0.261165526 | 1.92E-01 | 4.60E-01 | 1.00E+00 |
| ENSG00000075336.10_TIMM21  | ENSG00000160789.18_LMNA | -0.1815  | -0.331129443 | -0.02295921 | 2.52E-02 | 1.27E-01 | 1.00E+00 |
| ENSG00000118579.10_MED28   | ENSG00000160789.18_LMNA | -0.3644  | -0.494894496 | -0.21784134 | 3.93E-06 | 1.36E-04 | 2.01E-01 |
| ENSG00000100162.13_CENPM   | ENSG00000160789.18_LMNA | -0.01121 | -0.170105789 | 0.148256627 | 8.91E-01 | 9.57E-01 | 1.00E+00 |
| ENSG00000165304.6_MELK     | ENSG00000160789.18_LMNA | 0.16559  | 0.006559819  | 0.316446247 | 4.15E-02 | 1.78E-01 | 1.00E+00 |
| ENSG00000205356.8_TECPR1   | ENSG00000160789.18_LMNA | 0.17369  | 0.014898307  | 0.323930715 | 3.24E-02 | 1.51E-01 | 1.00E+00 |
| ENSG00000224578.4_HNRNPA1F | ENSG00000160789.18_LMNA | 0.05804  | -0.102107597 | 0.215248447 | 4.78E-01 | 7.36E-01 | 1.00E+00 |
| ENSG00000166801.14_FAM111A | ENSG00000160789.18_LMNA | 0.15917  | -3.59E-05    | 0.310498622 | 5.02E-02 | 2.02E-01 | 1.00E+00 |
| ENSG00000102805.12_CLN5    | ENSG00000160789.18_LMNA | -0.15268 | -0.30447598  | 0.00668734  | 6.04E-02 | 2.27E-01 | 1.00E+00 |
| ENSG00000156253.5_RWDD2B   | ENSG00000160789.18_LMNA | -0.08347 | -0.239486531 | 0.076752431 | 3.07E-01 | 5.93E-01 | 1.00E+00 |
| ENSG00000154930.13_ACSS1   | ENSG00000160789.18_LMNA | -0.0842  | -0.240185235 | 0.076015409 | 3.02E-01 | 5.89E-01 | 1.00E+00 |
| ENSG00000110344.8_UBE4A    | ENSG00000160789.18_LMNA | -0.02422 | -0.182713967 | 0.135505425 | 7.67E-01 | 9.03E-01 | 1.00E+00 |
| ENSG00000121749.14_TBC1D15 | ENSG00000160789.18_LMNA | -0.23118 | -0.376520421 | -0.0747265  | 4.16E-03 | 3.42E-02 | 1.00E+00 |
| ENSG00000117385.14_P3H1    | ENSG00000160789.18_LMNA | 0.54264  | 0.419699741  | 0.64603338  | 5.14E-13 | 3.38E-10 | 2.64E-08 |
| ENSG00000138463.8_DIRC2    | ENSG00000160789.18_LMNA | -0.01384 | -0.17266044  | 0.14568152  | 8.66E-01 | 9.47E-01 | 1.00E+00 |
| ENSG00000171469.9_ZNF561   | ENSG00000160789.18_LMNA | -0.01817 | -0.17685737  | 0.141441598 | 8.24E-01 | 9.31E-01 | 1.00E+00 |
| ENSG00000167447.11_SMG8    | ENSG00000160789.18_LMNA | -0.10138 | -0.256440085 | 0.058771044 | 2.14E-01 | 4.88E-01 | 1.00E+00 |
| ENSG00000079313.10_REXO1   | ENSG00000160789.18_LMNA | 0.10034  | -0.059816327 | 0.255459832 | 2.19E-01 | 4.94E-01 | 1.00E+00 |
| ENSG00000130348.10_QRSL1   | ENSG00000160789.18_LMNA | -0.19231 | -0.34106996  | -0.03415654 | 1.76E-02 | 9.85E-02 | 1.00E+00 |
| ENSG00000126243.7_LRFN3    | ENSG00000160789.18_LMNA | 0.19611  | 0.038093702  | 0.344548974 | 1.55E-02 | 8.98E-02 | 1.00E+00 |
| ENSG00000185551.11_NR2F2   | ENSG00000160789.18_LMNA | 0.20117  | 0.043354246  | 0.349184271 | 1.30E-02 | 7.89E-02 | 1.00E+00 |
| ENSG00000204099.10_NEU4    | ENSG00000160789.18_LMNA | -0.37556 | -0.504593304 | -0.23012024 | 1.86E-06 | 7.60E-05 | 9.56E-02 |
| ENSG00000214110.3_LDHAP4   | ENSG00000160789.18_LMNA | 0.30461  | 0.15282474   | 0.44236265  | 1.36E-04 | 2.40E-03 | 1.00E+00 |
| ENSG00000139438.5_FAM222A  | ENSG00000160789.18_LMNA | -0.38039 | -0.508776168 | -0.23544295 | 1.34E-06 | 5.85E-05 | 6.87E-02 |
| ENSG00000107959.14_PITRM1  | ENSG00000160789.18_LMNA | -0.06369 | -0.220654549 | 0.096487844 | 4.36E-01 | 7.04E-01 | 1.00E+00 |
| ENSG00000149582.14_TMEM25  | ENSG00000160789.18_LMNA | -0.30492 | -0.442633916 | -0.15315416 | 1.34E-04 | 2.38E-03 | 1.00E+00 |
| ENSG00000159147.16_DONSON  | ENSG00000160789.18_LMNA | 0.32572  | 0.175626072  | 0.461014596 | 4.22E-05 | 9.38E-04 | 1.00E+00 |
| ENSG00000110042.6_DTX4     | ENSG00000160789.18_LMNA | -0.28765 | -0.427283021 | -0.13461307 | 3.26E-04 | 4.81E-03 | 1.00E+00 |
| ENSG00000004700.14_RECQL   | ENSG00000160789.18_LMNA | 0.19429  | 0.036212322  | 0.342887571 | 1.65E-02 | 9.39E-02 | 1.00E+00 |
| ENSG00000103966.8_EHD4     | ENSG00000160789.18_LMNA | 0.4186   | 0.277918063  | 0.54169927  | 8.02E-08 | 5.99E-06 | 4.11E-03 |
| ENSG00000123737.11_EXOSC9  | ENSG00000160789.18_LMNA | 0.07198  | -0.088235923 | 0.22855759  | 3.78E-01 | 6.57E-01 | 1.00E+00 |
| ENSG00000150347.13_ARID5B  | ENSG00000160789.18_LMNA | 0.37533  | 0.229860909  | 0.504389178 | 1.89E-06 | 7.68E-05 | 9.71E-02 |
| ENSG00000183723.11_CMTM4   | ENSG00000160789.18_LMNA | -0.11891 | -0.272942747 | 0.0410692   | 1.45E-01 | 3.89E-01 | 1.00E+00 |

|                             |                         |          |              |             |          |          |          |
|-----------------------------|-------------------------|----------|--------------|-------------|----------|----------|----------|
| ENSG00000070718.10_AP3M2    | ENSG00000160789.18_LMNA | -0.29158 | -0.43078615  | -0.13882624 | 2.68E-04 | 4.11E-03 | 1.00E+00 |
| ENSG00000141027.19_NCOR1    | ENSG00000160789.18_LMNA | 0.04599  | -0.114044746 | 0.203700219 | 5.74E-01 | 8.01E-01 | 1.00E+00 |
| ENSG00000140948.10_ZCCHC14  | ENSG00000160789.18_LMNA | -0.01384 | -0.172661215 | 0.145680737 | 8.66E-01 | 9.47E-01 | 1.00E+00 |
| ENSG00000111859.15_NEDD9    | ENSG00000160789.18_LMNA | 0.42225  | 0.282002386  | 0.544823004 | 6.01E-08 | 4.77E-06 | 3.09E-03 |
| ENSG00000155897.8_ADCY8     | ENSG00000160789.18_LMNA | -0.13086 | -0.284145825 | 0.028938646 | 1.08E-01 | 3.27E-01 | 1.00E+00 |
| ENSG00000139636.14_LMBR1L   | ENSG00000160789.18_LMNA | -0.26298 | -0.405217381 | -0.10831603 | 1.06E-03 | 1.21E-02 | 1.00E+00 |
| ENSG00000105643.8_ARRDC2    | ENSG00000160789.18_LMNA | 0.01557  | -0.143984095 | 0.174342042 | 8.49E-01 | 9.41E-01 | 1.00E+00 |
| ENSG00000169871.11_TRIM56   | ENSG00000160789.18_LMNA | 0.45828  | 0.322617253  | 0.575493786 | 2.90E-09 | 3.77E-07 | 1.49E-04 |
| ENSG00000114346.12_ECT2     | ENSG00000160789.18_LMNA | -0.05047 | -0.207995516 | 0.109615482 | 5.37E-01 | 7.78E-01 | 1.00E+00 |
| ENSG00000174891.11_RSRC1    | ENSG00000160789.18_LMNA | -0.19248 | -0.341220192 | -0.03432636 | 1.75E-02 | 9.81E-02 | 1.00E+00 |
| ENSG00000138119.15_MYOF     | ENSG00000160789.18_LMNA | 0.54056  | 0.417273444  | 0.644316321 | 6.55E-13 | 4.05E-10 | 3.36E-08 |
| ENSG00000155393.11_HEATR3   | ENSG00000160789.18_LMNA | 0.06229  | -0.097881664 | 0.219315533 | 4.46E-01 | 7.12E-01 | 1.00E+00 |
| ENSG00000124615.16_MOCS1    | ENSG00000160789.18_LMNA | -0.01677 | -0.175497827 | 0.142816347 | 8.38E-01 | 9.37E-01 | 1.00E+00 |
| ENSG00000028203.16_VEZT     | ENSG00000160789.18_LMNA | -0.26426 | -0.406367138 | -0.10967608 | 1.00E-03 | 1.16E-02 | 1.00E+00 |
| ENSG00000137513.8_NARS2     | ENSG00000160789.18_LMNA | -0.38766 | -0.515070571 | -0.24348362 | 8.05E-07 | 3.83E-05 | 4.13E-02 |
| ENSG00000166444.16_ST5      | ENSG00000160789.18_LMNA | 0.27283  | 0.118786243  | 0.414044497 | 6.72E-04 | 8.50E-03 | 1.00E+00 |
| ENSG00000187866.7_FAM122A   | ENSG00000160789.18_LMNA | 0.06077  | -0.09939266  | 0.217862599 | 4.57E-01 | 7.21E-01 | 1.00E+00 |
| ENSG00000213064.8_SFT2D2    | ENSG00000160789.18_LMNA | 0.20507  | 0.047416636  | 0.35275361  | 1.13E-02 | 7.13E-02 | 1.00E+00 |
| ENSG00000165572.7_KBTBD6    | ENSG00000160789.18_LMNA | -0.36793 | -0.497961329 | -0.22171456 | 3.11E-06 | 1.13E-04 | 1.60E-01 |
| ENSG00000095794.18_CREM     | ENSG00000160789.18_LMNA | -0.04138 | -0.199270837 | 0.118599086 | 6.13E-01 | 8.24E-01 | 1.00E+00 |
| ENSG00000275342.3_SGK223    | ENSG00000160789.18_LMNA | 0.38579  | 0.241412626  | 0.513452151 | 9.18E-07 | 4.27E-05 | 4.71E-02 |
| ENSG00000178691.9_SUZ12     | ENSG00000160789.18_LMNA | 0.11898  | -0.040997207 | 0.273009488 | 1.44E-01 | 3.89E-01 | 1.00E+00 |
| ENSG00000164933.10_SLC25A32 | ENSG00000160789.18_LMNA | 0.0825   | -0.07772434  | 0.238564651 | 3.12E-01 | 5.99E-01 | 1.00E+00 |
| ENSG00000165097.12_KDM1B    | ENSG00000160789.18_LMNA | -0.02377 | -0.182284666 | 0.135941337 | 7.71E-01 | 9.05E-01 | 1.00E+00 |
| ENSG00000182173.11_TSEN54   | ENSG00000160789.18_LMNA | -0.14775 | -0.299897295 | 0.011725729 | 6.93E-02 | 2.48E-01 | 1.00E+00 |
| ENSG00000138821.11_SLC39A8  | ENSG00000160789.18_LMNA | 0.09934  | -0.060817935 | 0.254519929 | 2.23E-01 | 4.99E-01 | 1.00E+00 |
| ENSG00000133193.11_FAM104A  | ENSG00000160789.18_LMNA | -0.09361 | -0.249101554 | 0.066579672 | 2.51E-01 | 5.32E-01 | 1.00E+00 |
| ENSG00000275620.1_FLJ16779  | ENSG00000160789.18_LMNA | -0.37711 | -0.505931939 | -0.23182187 | 1.68E-06 | 6.97E-05 | 8.60E-02 |
| ENSG00000110446.8_SLC15A3   | ENSG00000160789.18_LMNA | 0.12222  | -0.037715574 | 0.276048503 | 1.34E-01 | 3.71E-01 | 1.00E+00 |
| ENSG00000198912.9_C1orf174  | ENSG00000160789.18_LMNA | -0.10466 | -0.259535282 | 0.055465966 | 1.99E-01 | 4.70E-01 | 1.00E+00 |
| ENSG00000102312.19_PORCN    | ENSG00000160789.18_LMNA | 0.15734  | -0.001904707 | 0.308808982 | 5.29E-02 | 2.09E-01 | 1.00E+00 |
| ENSG00000173267.12_SNCG     | ENSG00000160789.18_LMNA | -0.25794 | -0.4006881   | -0.10296911 | 1.34E-03 | 1.44E-02 | 1.00E+00 |
| ENSG00000152253.7_SPC25     | ENSG00000160789.18_LMNA | -0.08611 | -0.24199382  | 0.074106033 | 2.91E-01 | 5.77E-01 | 1.00E+00 |

|                             |                         |          |              |             |          |          |          |
|-----------------------------|-------------------------|----------|--------------|-------------|----------|----------|----------|
| ENSG00000256463.7_SALL3     | ENSG00000160789.18_LMNA | -0.26759 | -0.409349789 | -0.11320947 | 8.60E-04 | 1.03E-02 | 1.00E+00 |
| ENSG00000151779.11_NBAS     | ENSG00000160789.18_LMNA | 0.17904  | 0.020424801  | 0.328869969 | 2.73E-02 | 1.35E-01 | 1.00E+00 |
| ENSG00000152578.11_GRIA4    | ENSG00000160789.18_LMNA | -0.44602 | -0.565092833 | -0.30873896 | 8.48E-09 | 9.39E-07 | 4.35E-04 |
| ENSG00000065491.8_TBC1D22B  | ENSG00000160789.18_LMNA | 0.05773  | -0.102408948 | 0.214958002 | 4.80E-01 | 7.38E-01 | 1.00E+00 |
| ENSG00000127993.13_RBM48    | ENSG00000160789.18_LMNA | -0.09871 | -0.253917579 | 0.061459496 | 2.26E-01 | 5.03E-01 | 1.00E+00 |
| ENSG00000151116.15_UEVLD    | ENSG00000160789.18_LMNA | -0.05459 | -0.211946989 | 0.105529597 | 5.04E-01 | 7.55E-01 | 1.00E+00 |
| ENSG00000075914.11_EXOSC7   | ENSG00000160789.18_LMNA | -0.24314 | -0.387344883 | -0.0873165  | 2.54E-03 | 2.35E-02 | 1.00E+00 |
| ENSG00000125633.9_CCDC93    | ENSG00000160789.18_LMNA | 0.07714  | -0.083078651 | 0.23347571  | 3.45E-01 | 6.29E-01 | 1.00E+00 |
| ENSG00000008283.14_CYB561   | ENSG00000160789.18_LMNA | 0.37242  | 0.226655414  | 0.501863519 | 2.31E-06 | 8.89E-05 | 1.18E-01 |
| ENSG00000076108.10_BAZ2A    | ENSG00000160789.18_LMNA | 0.11513  | -0.044892511 | 0.269394018 | 1.58E-01 | 4.11E-01 | 1.00E+00 |
| ENSG00000137221.13_TJAP1    | ENSG00000160789.18_LMNA | -0.05132 | -0.208816537 | 0.108767416 | 5.30E-01 | 7.73E-01 | 1.00E+00 |
| ENSG00000189221.8_MAOA      | ENSG00000160789.18_LMNA | -0.15344 | -0.30518559  | 0.005905068 | 5.91E-02 | 2.23E-01 | 1.00E+00 |
| ENSG00000025293.14_PHF20    | ENSG00000160789.18_LMNA | 0.01131  | -0.148156249 | 0.170205449 | 8.90E-01 | 9.57E-01 | 1.00E+00 |
| ENSG00000183578.5_TNFAIP8L3 | ENSG00000160789.18_LMNA | -0.08418 | -0.240165934 | 0.076035773 | 3.02E-01 | 5.89E-01 | 1.00E+00 |
| ENSG00000188070.9_C11orf95  | ENSG00000160789.18_LMNA | -0.15038 | -0.302338396 | 0.009041507 | 6.44E-02 | 2.36E-01 | 1.00E+00 |
| ENSG00000271122.1_RP11-379H | ENSG00000160789.18_LMNA | 0.12094  | -0.039014164 | 0.27484667  | 1.38E-01 | 3.78E-01 | 1.00E+00 |
| ENSG00000110074.9_FOXRED1   | ENSG00000160789.18_LMNA | -0.17511 | -0.325244866 | -0.01636686 | 3.09E-02 | 1.46E-01 | 1.00E+00 |
| ENSG00000171224.8_C10orf35  | ENSG00000160789.18_LMNA | -0.00385 | -0.162952509 | 0.155444291 | 9.62E-01 | 9.85E-01 | 1.00E+00 |
| ENSG00000213326.4_RPS7P11   | ENSG00000160789.18_LMNA | -0.1563  | -0.307843366 | 0.002971756 | 5.45E-02 | 2.13E-01 | 1.00E+00 |
| ENSG00000186162.9_CIDECP    | ENSG00000160789.18_LMNA | -0.13986 | -0.292549055 | 0.019778798 | 8.57E-02 | 2.84E-01 | 1.00E+00 |
| ENSG00000059122.15_FLYWCH1  | ENSG00000160789.18_LMNA | 0.05477  | -0.105344405 | 0.212125843 | 5.03E-01 | 7.54E-01 | 1.00E+00 |
| ENSG00000066468.19_FGFR2    | ENSG00000160789.18_LMNA | -0.33268 | -0.46713854  | -0.18317974 | 2.82E-05 | 6.80E-04 | 1.00E+00 |
| ENSG00000123096.10_SSPN     | ENSG00000160789.18_LMNA | -0.01455 | -0.173348641 | 0.14498707  | 8.59E-01 | 9.44E-01 | 1.00E+00 |
| ENSG00000160746.11_ANO10    | ENSG00000160789.18_LMNA | -0.06045 | -0.217554917 | 0.099712449 | 4.59E-01 | 7.23E-01 | 1.00E+00 |
| ENSG00000065029.13_ZNF76    | ENSG00000160789.18_LMNA | -0.12456 | -0.278242009 | 0.035342739 | 1.26E-01 | 3.59E-01 | 1.00E+00 |
| ENSG00000122783.15_C7orf49  | ENSG00000160789.18_LMNA | 0.19373  | 0.035625256  | 0.342368754 | 1.68E-02 | 9.52E-02 | 1.00E+00 |
| ENSG00000126226.20_PCID2    | ENSG00000160789.18_LMNA | -0.13747 | -0.290316372 | 0.022217635 | 9.12E-02 | 2.95E-01 | 1.00E+00 |
| ENSG00000135547.7_HEY2      | ENSG00000160789.18_LMNA | -0.1502  | -0.302172369 | 0.009224212 | 6.48E-02 | 2.37E-01 | 1.00E+00 |
| ENSG00000133773.10_CCDC59   | ENSG00000160789.18_LMNA | -0.12133 | -0.275214976 | 0.038616319 | 1.36E-01 | 3.76E-01 | 1.00E+00 |
| ENSG00000101190.11_TCFL5    | ENSG00000160789.18_LMNA | 0.08066  | -0.079559057 | 0.23682282  | 3.23E-01 | 6.10E-01 | 1.00E+00 |
| ENSG00000184517.10_ZFP1     | ENSG00000160789.18_LMNA | -0.22532 | -0.371209124 | -0.06858389 | 5.25E-03 | 4.07E-02 | 1.00E+00 |
| ENSG00000174579.3_MSL2      | ENSG00000160789.18_LMNA | -0.04462 | -0.202383349 | 0.115400163 | 5.85E-01 | 8.07E-01 | 1.00E+00 |
| ENSG00000115145.8_STAM2     | ENSG00000160789.18_LMNA | -0.16941 | -0.319982364 | -0.01049406 | 3.69E-02 | 1.64E-01 | 1.00E+00 |



|                             |                         |          |              |             |          |          |          |
|-----------------------------|-------------------------|----------|--------------|-------------|----------|----------|----------|
| ENSG00000167371.15_PRRT2    | ENSG00000160789.18_LMNA | -0.06738 | -0.224180525 | 0.092811592 | 4.09E-01 | 6.84E-01 | 1.00E+00 |
| ENSG00000168495.11_POLR3D   | ENSG00000160789.18_LMNA | 0.15262  | -0.006748964 | 0.304420065 | 6.05E-02 | 2.27E-01 | 1.00E+00 |
| ENSG00000165526.7_RPUSD4    | ENSG00000160789.18_LMNA | -0.27926 | -0.419798166 | -0.12564644 | 4.94E-04 | 6.67E-03 | 1.00E+00 |
| ENSG00000230979.3_AC079250. | ENSG00000160789.18_LMNA | -0.1761  | -0.32615598  | -0.0173858  | 3.00E-02 | 1.43E-01 | 1.00E+00 |
| ENSG00000239569.3_KMT2E-AS  | ENSG00000160789.18_LMNA | -0.04581 | -0.20352352  | 0.114226685 | 5.75E-01 | 8.02E-01 | 1.00E+00 |
| ENSG00000225472.1_RP11-120J | ENSG00000160789.18_LMNA | -0.37517 | -0.504250245 | -0.22968442 | 1.91E-06 | 7.71E-05 | 9.82E-02 |
| ENSG0000023572.7_GLRX2      | ENSG00000160789.18_LMNA | 0.17906  | 0.020441814  | 0.328885148 | 2.73E-02 | 1.35E-01 | 1.00E+00 |
| ENSG00000111679.15_PTPN6    | ENSG00000160789.18_LMNA | 0.06041  | -0.099750712 | 0.217518098 | 4.60E-01 | 7.23E-01 | 1.00E+00 |
| ENSG00000119402.15_FBXW2    | ENSG00000160789.18_LMNA | 0.28009  | 0.126531554  | 0.420538792 | 4.74E-04 | 6.47E-03 | 1.00E+00 |
| ENSG00000135842.15_FAM129A  | ENSG00000160789.18_LMNA | 0.37963  | 0.234611234  | 0.508123413 | 1.41E-06 | 6.12E-05 | 7.23E-02 |
| ENSG00000187513.8_GJA4      | ENSG00000160789.18_LMNA | 0.11085  | -0.04921853  | 0.265368366 | 1.74E-01 | 4.34E-01 | 1.00E+00 |
| ENSG00000102362.14_SYTL4    | ENSG00000160789.18_LMNA | 0.14425  | -0.015299359 | 0.296640997 | 7.62E-02 | 2.64E-01 | 1.00E+00 |
| ENSG00000174028.6_FAM3C2    | ENSG00000160789.18_LMNA | 0.36627  | 0.219886484  | 0.496514713 | 3.47E-06 | 1.24E-04 | 1.78E-01 |
| ENSG00000005339.11_CREBBP   | ENSG00000160789.18_LMNA | 0.10584  | -0.054277121 | 0.260647052 | 1.94E-01 | 4.63E-01 | 1.00E+00 |
| ENSG00000131375.8_CAPN7     | ENSG00000160789.18_LMNA | -0.23631 | -0.381171317 | -0.08012423 | 3.38E-03 | 2.92E-02 | 1.00E+00 |
| ENSG00000182853.10_VMO1     | ENSG00000160789.18_LMNA | 0.08565  | -0.074563955 | 0.241560271 | 2.94E-01 | 5.80E-01 | 1.00E+00 |
| ENSG00000213614.8_HEXA      | ENSG00000160789.18_LMNA | 0.25727  | 0.102259026  | 0.400085507 | 1.38E-03 | 1.47E-02 | 1.00E+00 |
| ENSG00000169826.7_CSGALNAC  | ENSG00000160789.18_LMNA | 0.14187  | -0.017727865 | 0.294423992 | 8.12E-02 | 2.75E-01 | 1.00E+00 |
| ENSG00000141627.12_DYM      | ENSG00000160789.18_LMNA | -0.08567 | -0.241576125 | 0.074547212 | 2.94E-01 | 5.80E-01 | 1.00E+00 |
| ENSG00000130758.6_MAP3K10   | ENSG00000160789.18_LMNA | -0.04421 | -0.201991141 | 0.115803623 | 5.89E-01 | 8.09E-01 | 1.00E+00 |
| ENSG00000145916.17_RMND5B   | ENSG00000160789.18_LMNA | -0.08979 | -0.245485561 | 0.070413132 | 2.71E-01 | 5.56E-01 | 1.00E+00 |
| ENSG00000253368.3_TRNP1     | ENSG00000160789.18_LMNA | -0.02281 | -0.181353725 | 0.136886189 | 7.80E-01 | 9.10E-01 | 1.00E+00 |
| ENSG00000113742.11_CPEB4    | ENSG00000160789.18_LMNA | -0.16075 | -0.311967046 | -0.00159005 | 4.79E-02 | 1.96E-01 | 1.00E+00 |
| ENSG00000127603.22_MACF1    | ENSG00000160789.18_LMNA | 0.35312  | 0.205470828  | 0.485053023 | 8.11E-06 | 2.46E-04 | 4.16E-01 |
| ENSG00000261829.1_RP11-2231 | ENSG00000160789.18_LMNA | -0.02881 | -0.187149945 | 0.130993917 | 7.25E-01 | 8.83E-01 | 1.00E+00 |
| ENSG00000138172.9_CALHM2    | ENSG00000160789.18_LMNA | 0.33797  | 0.188939824  | 0.471790141 | 2.06E-05 | 5.29E-04 | 1.00E+00 |
| ENSG00000174456.12_C12orf76 | ENSG00000160789.18_LMNA | -0.47325 | -0.5881389   | -0.33963773 | 7.41E-10 | 1.23E-07 | 3.80E-05 |
| ENSG00000143786.6_CNIH3     | ENSG00000160789.18_LMNA | 0.50246  | 0.373103513  | 0.612652497 | 4.23E-11 | 1.12E-08 | 2.17E-06 |
| ENSG00000070540.11_WIP1     | ENSG00000160789.18_LMNA | 0.34705  | 0.198829599  | 0.479740154 | 1.19E-05 | 3.35E-04 | 6.08E-01 |
| ENSG00000134030.12_CTIF     | ENSG00000160789.18_LMNA | -0.21804 | -0.364589655 | -0.06096033 | 6.96E-03 | 5.02E-02 | 1.00E+00 |
| ENSG00000146476.9_ARMT1     | ENSG00000160789.18_LMNA | 0.09549  | -0.064698655 | 0.25087265  | 2.42E-01 | 5.21E-01 | 1.00E+00 |
| ENSG00000106459.13_NRF1     | ENSG00000160789.18_LMNA | 0.08703  | -0.073186657 | 0.242863882 | 2.86E-01 | 5.72E-01 | 1.00E+00 |
| ENSG00000205363.5_C15orf59  | ENSG00000160789.18_LMNA | -0.03614 | -0.194225105 | 0.123770918 | 6.58E-01 | 8.49E-01 | 1.00E+00 |

|                             |                         |          |              |             |          |          |          |
|-----------------------------|-------------------------|----------|--------------|-------------|----------|----------|----------|
| ENSG00000174233.10_ADCY6    | ENSG00000160789.18_LMNA | 0.20491  | 0.047246406  | 0.352604219 | 1.13E-02 | 7.16E-02 | 1.00E+00 |
| ENSG00000005238.18_FAM214B  | ENSG00000160789.18_LMNA | 0.28805  | 0.135045874  | 0.42764329  | 3.20E-04 | 4.73E-03 | 1.00E+00 |
| ENSG00000263001.4_GTF2I     | ENSG00000160789.18_LMNA | 0.04296  | -0.11704221  | 0.200786459 | 5.99E-01 | 8.16E-01 | 1.00E+00 |
| ENSG00000162604.11_TM2D1    | ENSG00000160789.18_LMNA | -0.1854  | -0.334717242 | -0.02699173 | 2.22E-02 | 1.16E-01 | 1.00E+00 |
| ENSG00000162227.6_TAF6L     | ENSG00000160789.18_LMNA | -0.07797 | -0.2342647   | 0.082249713 | 3.40E-01 | 6.25E-01 | 1.00E+00 |
| ENSG00000086827.7_ZW10      | ENSG00000160789.18_LMNA | 0.08833  | -0.071879564 | 0.244099989 | 2.79E-01 | 5.65E-01 | 1.00E+00 |
| ENSG00000189114.6_BLOC1S3   | ENSG00000160789.18_LMNA | 0.23584  | 0.079625894  | 0.380742571 | 3.44E-03 | 2.97E-02 | 1.00E+00 |
| ENSG00000196652.10_ZKSCAN5  | ENSG00000160789.18_LMNA | 0.13739  | -0.022295744 | 0.290244809 | 9.14E-02 | 2.95E-01 | 1.00E+00 |
| ENSG00000136935.12_GOLGA1   | ENSG00000160789.18_LMNA | 0.1181   | -0.041885981 | 0.272185343 | 1.47E-01 | 3.93E-01 | 1.00E+00 |
| ENSG00000186594.11_MIR22HG  | ENSG00000160789.18_LMNA | 0.20056  | 0.042720081  | 0.348626273 | 1.32E-02 | 8.01E-02 | 1.00E+00 |
| ENSG00000182158.13_CREB3L2  | ENSG00000160789.18_LMNA | 0.2308   | 0.074328191  | 0.376176616 | 4.23E-03 | 3.46E-02 | 1.00E+00 |
| ENSG00000170779.10_CDCA4    | ENSG00000160789.18_LMNA | 0.20822  | 0.050698736  | 0.355630887 | 1.00E-02 | 6.58E-02 | 1.00E+00 |
| ENSG00000162551.12_ALPL     | ENSG00000160789.18_LMNA | -0.04412 | -0.201899547 | 0.115897829 | 5.89E-01 | 8.09E-01 | 1.00E+00 |
| ENSG00000117593.9_DARS2     | ENSG00000160789.18_LMNA | 0.12808  | -0.031764132 | 0.281543984 | 1.16E-01 | 3.40E-01 | 1.00E+00 |
| ENSG00000155816.18_FMN2     | ENSG00000160789.18_LMNA | -0.00064 | -0.159823144 | 0.158578133 | 9.94E-01 | 9.98E-01 | 1.00E+00 |
| ENSG00000198300.11_PEG3     | ENSG00000160789.18_LMNA | -0.25871 | -0.401380953 | -0.10378592 | 1.29E-03 | 1.40E-02 | 1.00E+00 |
| ENSG00000278540.3_ACACA     | ENSG00000160789.18_LMNA | -0.06221 | -0.219237108 | 0.09796326  | 4.46E-01 | 7.13E-01 | 1.00E+00 |
| ENSG00000162733.15_DDR2     | ENSG00000160789.18_LMNA | 0.0222   | -0.137481843 | 0.180766549 | 7.86E-01 | 9.13E-01 | 1.00E+00 |
| ENSG00000143603.17_KCNN3    | ENSG00000160789.18_LMNA | -0.3205  | -0.456414972 | -0.16997461 | 5.69E-05 | 1.19E-03 | 1.00E+00 |
| ENSG00000184785.5_SMIM10    | ENSG00000160789.18_LMNA | 0.26534  | 0.110816264  | 0.407330296 | 9.54E-04 | 1.12E-02 | 1.00E+00 |
| ENSG00000167513.7_CDT1      | ENSG00000160789.18_LMNA | 0.14456  | -0.014988769 | 0.296924295 | 7.56E-02 | 2.63E-01 | 1.00E+00 |
| ENSG00000097046.11_CDC7     | ENSG00000160789.18_LMNA | -0.07205 | -0.228624995 | 0.088165355 | 3.78E-01 | 6.57E-01 | 1.00E+00 |
| ENSG00000133739.14_LRRCC1   | ENSG00000160789.18_LMNA | 0.1626   | 0.003488217  | 0.313679477 | 4.53E-02 | 1.89E-01 | 1.00E+00 |
| ENSG00000157538.12_DSCR3    | ENSG00000160789.18_LMNA | 0.09207  | -0.068129814 | 0.247640408 | 2.59E-01 | 5.42E-01 | 1.00E+00 |
| ENSG00000173065.12_FAM222B  | ENSG00000160789.18_LMNA | 0.02647  | -0.133288297 | 0.184895597 | 7.46E-01 | 8.94E-01 | 1.00E+00 |
| ENSG00000118961.13_LDAH     | ENSG00000160789.18_LMNA | -0.30675 | -0.44425809  | -0.15512786 | 1.21E-04 | 2.21E-03 | 1.00E+00 |
| ENSG00000165023.5_DIRAS2    | ENSG00000160789.18_LMNA | -0.18197 | -0.331567673 | -0.02345122 | 2.48E-02 | 1.26E-01 | 1.00E+00 |
| ENSG00000181045.13_SLC26A11 | ENSG00000160789.18_LMNA | 0.05223  | -0.107866499 | 0.209688233 | 5.23E-01 | 7.68E-01 | 1.00E+00 |
| ENSG00000110768.10_GTF2H1   | ENSG00000160789.18_LMNA | -0.10242 | -0.257420947 | 0.057724418 | 2.09E-01 | 4.82E-01 | 1.00E+00 |
| ENSG00000099381.15_SETD1A   | ENSG00000160789.18_LMNA | 0.20049  | 0.042654524  | 0.348568577 | 1.33E-02 | 8.02E-02 | 1.00E+00 |
| ENSG00000155755.17_TMEM237  | ENSG00000160789.18_LMNA | -0.13497 | -0.287982019 | 0.024763557 | 9.73E-02 | 3.07E-01 | 1.00E+00 |
| ENSG00000019144.15_PHLDB1   | ENSG00000160789.18_LMNA | 0.1012   | -0.058949282 | 0.256272981 | 2.15E-01 | 4.89E-01 | 1.00E+00 |
| ENSG00000166266.12_CUL5     | ENSG00000160789.18_LMNA | -0.18633 | -0.335576967 | -0.02795951 | 2.15E-02 | 1.14E-01 | 1.00E+00 |

|                              |                         |          |              |             |          |          |          |
|------------------------------|-------------------------|----------|--------------|-------------|----------|----------|----------|
| ENSG00000108771.11_DHX58     | ENSG00000160789.18_LMNA | 0.18798  | 0.029663252  | 0.337089239 | 2.04E-02 | 1.09E-01 | 1.00E+00 |
| ENSG00000129197.13_RPAIN     | ENSG00000160789.18_LMNA | -0.42038 | -0.543228235 | -0.27991601 | 6.97E-08 | 5.40E-06 | 3.57E-03 |
| ENSG00000120594.15_PLXDC2    | ENSG00000160789.18_LMNA | -0.01501 | -0.173798478 | 0.144532978 | 8.54E-01 | 9.43E-01 | 1.00E+00 |
| ENSG00000101544.7_ADNP2      | ENSG00000160789.18_LMNA | -0.01897 | -0.177629482 | 0.140660302 | 8.17E-01 | 9.28E-01 | 1.00E+00 |
| ENSG00000158792.14_SPATA2L   | ENSG00000160789.18_LMNA | 0.41624  | 0.275286282  | 0.539682588 | 9.63E-08 | 7.00E-06 | 4.94E-03 |
| ENSG00000185614.4_FAM212A    | ENSG00000160789.18_LMNA | -0.22155 | -0.367782698 | -0.0646333  | 6.09E-03 | 4.55E-02 | 1.00E+00 |
| ENSG00000176720.4_BOK        | ENSG00000160789.18_LMNA | -0.30488 | -0.442596165 | -0.15310831 | 1.34E-04 | 2.38E-03 | 1.00E+00 |
| ENSG00000122482.19_ZNF644    | ENSG00000160789.18_LMNA | -0.04157 | -0.199448239 | 0.118416935 | 6.11E-01 | 8.23E-01 | 1.00E+00 |
| ENSG00000145248.6_SLC10A4    | ENSG00000160789.18_LMNA | 0.13469  | -0.025046866 | 0.287722024 | 9.80E-02 | 3.08E-01 | 1.00E+00 |
| ENSG00000166130.13_IKBIP     | ENSG00000160789.18_LMNA | 0.33625  | 0.18705829   | 0.470272423 | 2.28E-05 | 5.75E-04 | 1.00E+00 |
| ENSG00000168297.14_PXK       | ENSG00000160789.18_LMNA | -0.03466 | -0.192796187 | 0.125232414 | 6.72E-01 | 8.56E-01 | 1.00E+00 |
| ENSG00000104365.12_IKBKB     | ENSG00000160789.18_LMNA | 0.11808  | -0.041910875 | 0.272162253 | 1.47E-01 | 3.93E-01 | 1.00E+00 |
| ENSG00000217716.3_RPS10P3    | ENSG00000160789.18_LMNA | -0.11543 | -0.269671327 | 0.044594077 | 1.57E-01 | 4.09E-01 | 1.00E+00 |
| ENSG00000100319.12_ZMAT5     | ENSG00000160789.18_LMNA | -0.16918 | -0.319768908 | -0.0102563  | 3.72E-02 | 1.65E-01 | 1.00E+00 |
| ENSG00000100596.5_SPTLC2     | ENSG00000160789.18_LMNA | -0.06917 | -0.225882612 | 0.091033864 | 3.97E-01 | 6.74E-01 | 1.00E+00 |
| ENSG00000225200.2_AB019441.2 | ENSG00000160789.18_LMNA | -0.09875 | -0.253959365 | 0.061414998 | 2.26E-01 | 5.02E-01 | 1.00E+00 |
| ENSG00000143079.13_CTTNBP2   | ENSG00000160789.18_LMNA | 0.17413  | 0.015352134  | 0.324336955 | 3.19E-02 | 1.49E-01 | 1.00E+00 |
| ENSG00000198373.11_WWP2      | ENSG00000160789.18_LMNA | -0.1487  | -0.30077675  | 0.010759202 | 6.75E-02 | 2.44E-01 | 1.00E+00 |
| ENSG00000124444.14_ZNF576    | ENSG00000160789.18_LMNA | 0.09197  | -0.068232677 | 0.247543399 | 2.60E-01 | 5.43E-01 | 1.00E+00 |
| ENSG00000182973.17_CNOT10    | ENSG00000160789.18_LMNA | -0.04565 | -0.203376374 | 0.11437818  | 5.77E-01 | 8.03E-01 | 1.00E+00 |
| ENSG00000169857.6_AVEN       | ENSG00000160789.18_LMNA | 0.17293  | 0.014114668  | 0.323228979 | 3.31E-02 | 1.53E-01 | 1.00E+00 |
| ENSG00000183853.16_KIRREL    | ENSG00000160789.18_LMNA | 0.41402  | 0.272796127  | 0.537771634 | 1.14E-07 | 8.08E-06 | 5.87E-03 |
| ENSG00000119787.12_ATL2      | ENSG00000160789.18_LMNA | -0.19301 | -0.341714403 | -0.03488513 | 1.72E-02 | 9.69E-02 | 1.00E+00 |
| ENSG00000116922.13_C1orf109  | ENSG00000160789.18_LMNA | -0.06398 | -0.220930417 | 0.096200529 | 4.34E-01 | 7.03E-01 | 1.00E+00 |
| ENSG00000108590.9_MED31      | ENSG00000160789.18_LMNA | -0.1905  | -0.339404144 | -0.03227472 | 1.87E-02 | 1.03E-01 | 1.00E+00 |
| ENSG00000256053.6_APOPT1     | ENSG00000160789.18_LMNA | 0.10794  | -0.05215784  | 0.262626867 | 1.86E-01 | 4.52E-01 | 1.00E+00 |
| ENSG00000109016.16_DHRS7B    | ENSG00000160789.18_LMNA | -0.19829 | -0.346552236 | -0.0403651  | 1.43E-02 | 8.51E-02 | 1.00E+00 |
| ENSG00000126746.16_ZNF384    | ENSG00000160789.18_LMNA | 0.00274  | -0.156526932 | 0.161872138 | 9.73E-01 | 9.90E-01 | 1.00E+00 |
| ENSG00000232956.7_SNHG15     | ENSG00000160789.18_LMNA | -0.06873 | -0.225460605 | 0.091474814 | 4.00E-01 | 6.77E-01 | 1.00E+00 |
| ENSG00000183751.13_TBL3      | ENSG00000160789.18_LMNA | 0.1794   | 0.020797595  | 0.329202544 | 2.70E-02 | 1.33E-01 | 1.00E+00 |
| ENSG00000136731.11_UGGT1     | ENSG00000160789.18_LMNA | 0.25568  | 0.100574767  | 0.39865517  | 1.48E-03 | 1.55E-02 | 1.00E+00 |
| ENSG00000158122.10_AAED1     | ENSG00000160789.18_LMNA | 0.3426   | 0.193983045  | 0.475849949 | 1.56E-05 | 4.20E-04 | 7.99E-01 |
| ENSG00000090889.11_KIF4A     | ENSG00000160789.18_LMNA | 0.14068  | -0.018940053 | 0.293316116 | 8.39E-02 | 2.80E-01 | 1.00E+00 |

|                             |                         |          |              |             |          |          |          |
|-----------------------------|-------------------------|----------|--------------|-------------|----------|----------|----------|
| ENSG00000175634.13_RPS6KB2  | ENSG00000160789.18_LMNA | 0.10176  | -0.058390649 | 0.256796653 | 2.12E-01 | 4.86E-01 | 1.00E+00 |
| ENSG00000108852.13_MPP2     | ENSG00000160789.18_LMNA | -0.23786 | -0.382576704 | -0.08175877 | 3.17E-03 | 2.78E-02 | 1.00E+00 |
| ENSG00000007923.14_DNAJC11  | ENSG00000160789.18_LMNA | 0.08164  | -0.078584616 | 0.237748181 | 3.17E-01 | 6.04E-01 | 1.00E+00 |
| ENSG00000119682.15_AREL1    | ENSG00000160789.18_LMNA | 0.17528  | 0.016538924  | 0.325398762 | 3.08E-02 | 1.46E-01 | 1.00E+00 |
| ENSG00000113108.16_APBB3    | ENSG00000160789.18_LMNA | -0.11076 | -0.265285904 | 0.049307021 | 1.74E-01 | 4.35E-01 | 1.00E+00 |
| ENSG00000121940.14_CLCC1    | ENSG00000160789.18_LMNA | 0.05908  | -0.10106761  | 0.216250365 | 4.70E-01 | 7.30E-01 | 1.00E+00 |
| ENSG00000168795.4_ZBTB5     | ENSG00000160789.18_LMNA | -0.20467 | -0.352385445 | -0.04699715 | 1.14E-02 | 7.21E-02 | 1.00E+00 |
| ENSG00000173171.13_MTX1     | ENSG00000160789.18_LMNA | 0.09014  | -0.070069965 | 0.245809619 | 2.69E-01 | 5.54E-01 | 1.00E+00 |
| ENSG00000186908.13_ZDHC17   | ENSG00000160789.18_LMNA | -0.30367 | -0.441529544 | -0.15181344 | 1.43E-04 | 2.50E-03 | 1.00E+00 |
| ENSG00000273611.3_ZNHIT3    | ENSG00000160789.18_LMNA | -0.3657  | -0.496024068 | -0.2192669  | 3.60E-06 | 1.28E-04 | 1.85E-01 |
| ENSG00000005100.11_DHX33    | ENSG00000160789.18_LMNA | 0.03251  | -0.127352603 | 0.19072086  | 6.91E-01 | 8.67E-01 | 1.00E+00 |
| ENSG00000127870.15_RNF6     | ENSG00000160789.18_LMNA | 0.10993  | -0.050152691 | 0.264497623 | 1.78E-01 | 4.39E-01 | 1.00E+00 |
| ENSG00000164008.12_C1orf50  | ENSG00000160789.18_LMNA | -0.11492 | -0.269194642 | 0.045107041 | 1.59E-01 | 4.12E-01 | 1.00E+00 |
| ENSG00000141646.12_SMAD4    | ENSG00000160789.18_LMNA | -0.13561 | -0.288584124 | 0.02410727  | 9.57E-02 | 3.03E-01 | 1.00E+00 |
| ENSG00000166783.18_KIAA0430 | ENSG00000160789.18_LMNA | -0.09841 | -0.253641039 | 0.06175395  | 2.28E-01 | 5.04E-01 | 1.00E+00 |
| ENSG00000112941.11_PAPD7    | ENSG00000160789.18_LMNA | 0.13087  | -0.028932579 | 0.284151406 | 1.08E-01 | 3.27E-01 | 1.00E+00 |
| ENSG00000180035.9_ZNF48     | ENSG00000160789.18_LMNA | -0.00411 | -0.1631994   | 0.155196773 | 9.60E-01 | 9.84E-01 | 1.00E+00 |
| ENSG00000104723.19_TUSC3    | ENSG00000160789.18_LMNA | -0.11272 | -0.267131617 | 0.047325168 | 1.67E-01 | 4.24E-01 | 1.00E+00 |
| ENSG00000269190.4_FBXO17    | ENSG00000160789.18_LMNA | 0.30616  | 0.154494409  | 0.443737025 | 1.25E-04 | 2.26E-03 | 1.00E+00 |
| ENSG00000138135.6_CH25H     | ENSG00000160789.18_LMNA | 0.07742  | -0.082803878 | 0.233737286 | 3.43E-01 | 6.28E-01 | 1.00E+00 |
| ENSG00000116983.11_HPCAL4   | ENSG00000160789.18_LMNA | -0.39801 | -0.52400617  | -0.25496271 | 3.82E-07 | 2.12E-05 | 1.96E-02 |
| ENSG00000126016.12_AMOT     | ENSG00000160789.18_LMNA | -0.23395 | -0.379032876 | -0.07764021 | 3.72E-03 | 3.14E-02 | 1.00E+00 |
| ENSG00000128512.18_DOCK4    | ENSG00000160789.18_LMNA | -0.10964 | -0.264232594 | 0.050436914 | 1.79E-01 | 4.41E-01 | 1.00E+00 |
| ENSG00000204160.10_ZDHC18   | ENSG00000160789.18_LMNA | 0.49764  | 0.367553418  | 0.608618699 | 6.92E-11 | 1.67E-08 | 3.55E-06 |
| ENSG00000075711.19_DLG1     | ENSG00000160789.18_LMNA | 0.03259  | -0.127267678 | 0.190804043 | 6.90E-01 | 8.67E-01 | 1.00E+00 |
| ENSG00000183665.5_TRMT12    | ENSG00000160789.18_LMNA | -0.16022 | -0.311477764 | -0.0010481  | 4.86E-02 | 1.98E-01 | 1.00E+00 |
| ENSG00000111596.10_CNOT2    | ENSG00000160789.18_LMNA | 0.01482  | -0.144721048 | 0.173612186 | 8.56E-01 | 9.43E-01 | 1.00E+00 |
| ENSG00000100196.9_KDEL3     | ENSG00000160789.18_LMNA | 0.48097  | 0.348455444  | 0.594642462 | 3.57E-10 | 6.60E-08 | 1.83E-05 |
| ENSG00000164975.14_SNAPC3   | ENSG00000160789.18_LMNA | -0.03906 | -0.197037178 | 0.120890697 | 6.33E-01 | 8.35E-01 | 1.00E+00 |
| ENSG00000265519.1_CTD-3157E | ENSG00000160789.18_LMNA | 0.08019  | -0.080034409 | 0.236371201 | 3.26E-01 | 6.13E-01 | 1.00E+00 |
| ENSG00000196526.9_AFAP1     | ENSG00000160789.18_LMNA | 0.16996  | 0.011061246  | 0.32049144  | 3.63E-02 | 1.62E-01 | 1.00E+00 |
| ENSG00000108091.10_CCDC6    | ENSG00000160789.18_LMNA | 0.02295  | -0.136749967 | 0.181487977 | 7.79E-01 | 9.09E-01 | 1.00E+00 |
| ENSG00000140749.8_IGSF6     | ENSG00000160789.18_LMNA | -0.24267 | -0.386926493 | -0.08682808 | 2.59E-03 | 2.39E-02 | 1.00E+00 |

|                             |                         |          |              |             |          |          |          |
|-----------------------------|-------------------------|----------|--------------|-------------|----------|----------|----------|
| ENSG00000091490.9_SEL1L3    | ENSG00000160789.18_LMNA | 0.31492  | 0.163935152  | 0.451482586 | 7.77E-05 | 1.54E-03 | 1.00E+00 |
| ENSG00000157985.16_AGAP1    | ENSG00000160789.18_LMNA | 0.0669   | -0.093290138 | 0.22372201  | 4.13E-01 | 6.86E-01 | 1.00E+00 |
| ENSG00000136100.11_VPS36    | ENSG00000160789.18_LMNA | -0.20906 | -0.356398095 | -0.051575   | 9.74E-03 | 6.44E-02 | 1.00E+00 |
| ENSG00000163788.12_SNRK     | ENSG00000160789.18_LMNA | -0.20174 | -0.34971203  | -0.04395427 | 1.27E-02 | 7.77E-02 | 1.00E+00 |
| ENSG00000075568.15_TMEM131  | ENSG00000160789.18_LMNA | 0.31238  | 0.161197474  | 0.449240939 | 8.93E-05 | 1.72E-03 | 1.00E+00 |
| ENSG00000133678.12_TMEM254  | ENSG00000160789.18_LMNA | -0.07501 | -0.231443477 | 0.085211762 | 3.58E-01 | 6.41E-01 | 1.00E+00 |
| ENSG00000175768.11_TOMM5    | ENSG00000160789.18_LMNA | -0.08476 | -0.240713973 | 0.075457445 | 2.99E-01 | 5.86E-01 | 1.00E+00 |
| ENSG00000170802.14_FOXN2    | ENSG00000160789.18_LMNA | -0.44976 | -0.568273674 | -0.31297169 | 6.14E-09 | 7.14E-07 | 3.15E-04 |
| ENSG00000101391.19_CDK5RAP  | ENSG00000160789.18_LMNA | -0.05756 | -0.214791614 | 0.102581558 | 4.81E-01 | 7.39E-01 | 1.00E+00 |
| ENSG00000150403.16_TMCO3    | ENSG00000160789.18_LMNA | 0.17265  | 0.013826962  | 0.322971257 | 3.34E-02 | 1.54E-01 | 1.00E+00 |
| ENSG00000064652.9_SNX24     | ENSG00000160789.18_LMNA | -0.0883  | -0.244067634 | 0.07191379  | 2.79E-01 | 5.65E-01 | 1.00E+00 |
| ENSG00000114439.17_BBX      | ENSG00000160789.18_LMNA | -0.03918 | -0.197146369 | 0.120778752 | 6.32E-01 | 8.35E-01 | 1.00E+00 |
| ENSG00000062822.11_POLD1    | ENSG00000160789.18_LMNA | 0.25054  | 0.095130208  | 0.394021502 | 1.85E-03 | 1.85E-02 | 1.00E+00 |
| ENSG00000271869.1_RP11-51J9 | ENSG00000160789.18_LMNA | -0.28401 | -0.424037163 | -0.13071874 | 3.91E-04 | 5.57E-03 | 1.00E+00 |
| ENSG00000150756.12_FAM173B  | ENSG00000160789.18_LMNA | -0.31139 | -0.448360141 | -0.16012299 | 9.43E-05 | 1.80E-03 | 1.00E+00 |
| ENSG00000169249.11_ZRSR2    | ENSG00000160789.18_LMNA | 0.24952  | 0.094055619  | 0.39310516  | 1.93E-03 | 1.90E-02 | 1.00E+00 |
| ENSG00000176261.14_ZBTB8OS  | ENSG00000160789.18_LMNA | -0.05049 | -0.208019385 | 0.109590834 | 5.37E-01 | 7.78E-01 | 1.00E+00 |
| ENSG00000164167.8_LSM6      | ENSG00000160789.18_LMNA | 0.03448  | -0.125404221 | 0.192628122 | 6.73E-01 | 8.57E-01 | 1.00E+00 |
| ENSG00000182957.14_SPATA13  | ENSG00000160789.18_LMNA | 0.19597  | 0.037953356  | 0.344425104 | 1.55E-02 | 9.00E-02 | 1.00E+00 |
| ENSG00000106004.4_HOXA5     | ENSG00000160789.18_LMNA | -0.11974 | -0.273720559 | 0.040229975 | 1.42E-01 | 3.84E-01 | 1.00E+00 |
| ENSG00000163785.11_RYK      | ENSG00000160789.18_LMNA | -0.10649 | -0.261257485 | 0.053623989 | 1.92E-01 | 4.59E-01 | 1.00E+00 |
| ENSG00000214063.9_TSPAN4    | ENSG00000160789.18_LMNA | 0.50449  | 0.375440931  | 0.614347601 | 3.43E-11 | 9.32E-09 | 1.76E-06 |
| ENSG00000087586.16_AURKA    | ENSG00000160789.18_LMNA | 0.17471  | 0.015952059  | 0.324873798 | 3.13E-02 | 1.48E-01 | 1.00E+00 |
| ENSG00000100109.15_TFIP11   | ENSG00000160789.18_LMNA | 0.14792  | -0.011553175 | 0.300054343 | 6.90E-02 | 2.47E-01 | 1.00E+00 |
| ENSG00000120256.8_LRP11     | ENSG00000160789.18_LMNA | 0.17441  | 0.015642291  | 0.324596627 | 3.16E-02 | 1.48E-01 | 1.00E+00 |
| ENSG00000121671.10_CRY2     | ENSG00000160789.18_LMNA | -0.14113 | -0.293729583 | 0.018487763 | 8.29E-02 | 2.78E-01 | 1.00E+00 |
| ENSG00000109320.10_NFKB1    | ENSG00000160789.18_LMNA | 0.46234  | 0.327227253  | 0.5789307   | 2.02E-09 | 2.79E-07 | 1.04E-04 |
| ENSG00000086102.17_NFX1     | ENSG00000160789.18_LMNA | 0.05731  | -0.10282906  | 0.214553001 | 4.83E-01 | 7.40E-01 | 1.00E+00 |
| ENSG00000080608.9_PUM3      | ENSG00000160789.18_LMNA | 0.36272  | 0.215986518  | 0.493423393 | 4.38E-06 | 1.49E-04 | 2.25E-01 |
| ENSG00000076321.9_KLHL20    | ENSG00000160789.18_LMNA | -0.04663 | -0.204315771 | 0.11341077  | 5.68E-01 | 7.98E-01 | 1.00E+00 |
| ENSG00000198887.8_SMC5      | ENSG00000160789.18_LMNA | 0.31122  | 0.159948154  | 0.448216772 | 9.51E-05 | 1.81E-03 | 1.00E+00 |
| ENSG00000152684.10_PELO     | ENSG00000160789.18_LMNA | 0.29815  | 0.145872211  | 0.436625071 | 1.91E-04 | 3.15E-03 | 1.00E+00 |
| ENSG00000171208.8_NETO2     | ENSG00000160789.18_LMNA | -0.02942 | -0.187737213 | 0.130395661 | 7.19E-01 | 8.81E-01 | 1.00E+00 |

|                             |                         |          |              |             |          |          |          |
|-----------------------------|-------------------------|----------|--------------|-------------|----------|----------|----------|
| ENSG00000169972.10_PUSL1    | ENSG00000160789.18_LMNA | 0.15558  | -0.003707979 | 0.307176755 | 5.56E-02 | 2.15E-01 | 1.00E+00 |
| ENSG00000248593.3_DSTNP2    | ENSG00000160789.18_LMNA | 0.11067  | -0.049403644 | 0.265195859 | 1.75E-01 | 4.35E-01 | 1.00E+00 |
| ENSG00000166888.9_STAT6     | ENSG00000160789.18_LMNA | 0.14154  | -0.01807104  | 0.294110433 | 8.20E-02 | 2.76E-01 | 1.00E+00 |
| ENSG00000063176.14_SPHK2    | ENSG00000160789.18_LMNA | 0.04531  | -0.114721673 | 0.203042687 | 5.79E-01 | 8.04E-01 | 1.00E+00 |
| ENSG00000168434.11_COG7     | ENSG00000160789.18_LMNA | 0.13859  | -0.021077712 | 0.291360362 | 8.86E-02 | 2.90E-01 | 1.00E+00 |
| ENSG00000174953.12_DHX36    | ENSG00000160789.18_LMNA | -0.11462 | -0.268915987 | 0.045406827 | 1.60E-01 | 4.13E-01 | 1.00E+00 |
| ENSG00000235912.1_RP1-159A1 | ENSG00000160789.18_LMNA | -0.12514 | -0.27878597  | 0.034753759 | 1.25E-01 | 3.56E-01 | 1.00E+00 |
| ENSG00000279088.1_RP11-574K | ENSG00000160789.18_LMNA | -0.15979 | -0.311073383 | -0.00060034 | 4.93E-02 | 1.99E-01 | 1.00E+00 |
| ENSG00000196227.9_FAM217B   | ENSG00000160789.18_LMNA | -0.41424 | -0.537965766 | -0.27304894 | 1.13E-07 | 7.97E-06 | 5.77E-03 |
| ENSG00000140577.14_CRTC3    | ENSG00000160789.18_LMNA | 0.20814  | 0.050613282  | 0.355556046 | 1.01E-02 | 6.60E-02 | 1.00E+00 |
| ENSG00000164284.13_GRPEL2   | ENSG00000160789.18_LMNA | 0.0761   | -0.084120598 | 0.232483383 | 3.51E-01 | 6.35E-01 | 1.00E+00 |
| ENSG00000082213.16_C5orf22  | ENSG00000160789.18_LMNA | -0.05402 | -0.211400417 | 0.106095401 | 5.09E-01 | 7.58E-01 | 1.00E+00 |
| ENSG00000219747.1_RP1-292B1 | ENSG00000160789.18_LMNA | -0.09933 | -0.254502526 | 0.060836475 | 2.23E-01 | 4.99E-01 | 1.00E+00 |
| ENSG00000182400.13_TRAPPC6  | ENSG00000160789.18_LMNA | -0.15705 | -0.308540493 | 0.00220147  | 5.33E-02 | 2.10E-01 | 1.00E+00 |
| ENSG00000170037.12_CNTROB   | ENSG00000160789.18_LMNA | 0.1659   | 0.006883435  | 0.31673744  | 4.11E-02 | 1.77E-01 | 1.00E+00 |
| ENSG00000134900.10_TPP2     | ENSG00000160789.18_LMNA | -0.16509 | -0.315982382 | -0.00604444 | 4.21E-02 | 1.80E-01 | 1.00E+00 |
| ENSG00000157077.13_ZFYVE9   | ENSG00000160789.18_LMNA | -0.04108 | -0.198983676 | 0.118893887 | 6.15E-01 | 8.26E-01 | 1.00E+00 |
| ENSG00000116745.6_RPE65     | ENSG00000160789.18_LMNA | -0.10215 | -0.257167586 | 0.057994832 | 2.10E-01 | 4.84E-01 | 1.00E+00 |
| ENSG00000175489.9_LRRC25    | ENSG00000160789.18_LMNA | 0.09048  | -0.069721146 | 0.246138942 | 2.68E-01 | 5.52E-01 | 1.00E+00 |
| ENSG00000160584.14_SIK3     | ENSG00000160789.18_LMNA | -0.03974 | -0.197694126 | 0.120217056 | 6.27E-01 | 8.32E-01 | 1.00E+00 |
| ENSG00000158545.14_ZC3H18   | ENSG00000160789.18_LMNA | 0.2123   | 0.054952151  | 0.359351096 | 8.65E-03 | 5.90E-02 | 1.00E+00 |
| ENSG00000164976.8_KIAA1161  | ENSG00000160789.18_LMNA | -0.11572 | -0.269948914 | 0.044295287 | 1.56E-01 | 4.07E-01 | 1.00E+00 |
| ENSG00000123810.6_B9D2      | ENSG00000160789.18_LMNA | 0.07817  | -0.082050825 | 0.234453941 | 3.38E-01 | 6.24E-01 | 1.00E+00 |
| ENSG00000115084.11_SLC35F5  | ENSG00000160789.18_LMNA | 0.10864  | -0.051453054 | 0.263284686 | 1.83E-01 | 4.47E-01 | 1.00E+00 |
| ENSG00000248092.6_NNT-AS1   | ENSG00000160789.18_LMNA | -0.28736 | -0.427023754 | -0.13430167 | 3.31E-04 | 4.85E-03 | 1.00E+00 |
| ENSG00000196422.9_PPP1R26   | ENSG00000160789.18_LMNA | 0.19536  | 0.0373242    | 0.343869676 | 1.59E-02 | 9.14E-02 | 1.00E+00 |
| ENSG00000169371.12_SNUPN    | ENSG00000160789.18_LMNA | 0.08529  | -0.074930969 | 0.2412127   | 2.96E-01 | 5.82E-01 | 1.00E+00 |
| ENSG00000247903.1_RP11-421F | ENSG00000160789.18_LMNA | -0.00244 | -0.161577623 | 0.156821934 | 9.76E-01 | 9.91E-01 | 1.00E+00 |
| ENSG00000143891.15_GALM     | ENSG00000160789.18_LMNA | 0.22978  | 0.073260023  | 0.37525421  | 4.40E-03 | 3.56E-02 | 1.00E+00 |
| ENSG00000152219.4_ARL14EP   | ENSG00000160789.18_LMNA | -0.41104 | -0.535213136 | -0.26946771 | 1.44E-07 | 9.74E-06 | 7.39E-03 |
| ENSG00000117308.13_GALE     | ENSG00000160789.18_LMNA | 0.14831  | -0.011156129 | 0.300415645 | 6.82E-02 | 2.45E-01 | 1.00E+00 |
| ENSG00000121068.12_TBX2     | ENSG00000160789.18_LMNA | 0.39492  | 0.251534351  | 0.521343641 | 4.78E-07 | 2.53E-05 | 2.45E-02 |
| ENSG00000011332.18_DPF1     | ENSG00000160789.18_LMNA | -0.24228 | -0.386569467 | -0.08641141 | 2.64E-03 | 2.41E-02 | 1.00E+00 |

|                            |                         |          |              |             |          |          |          |
|----------------------------|-------------------------|----------|--------------|-------------|----------|----------|----------|
| ENSG00000160767.19_FAM189B | ENSG00000160789.18_LMNA | 0.25689  | 0.101852091  | 0.399740055 | 1.40E-03 | 1.49E-02 | 1.00E+00 |
| ENSG00000186687.14_LYRM7   | ENSG00000160789.18_LMNA | -0.51362 | -0.621966609 | -0.38598462 | 1.32E-11 | 4.32E-09 | 6.75E-07 |
| ENSG00000237991.3_RPL35P1  | ENSG00000160789.18_LMNA | -0.05903 | -0.216197056 | 0.101122962 | 4.70E-01 | 7.30E-01 | 1.00E+00 |
| ENSG00000137767.12_SQRDL   | ENSG00000160789.18_LMNA | 0.07644  | -0.083778138 | 0.232809607 | 3.49E-01 | 6.33E-01 | 1.00E+00 |
| ENSG00000105171.8_POP4     | ENSG00000160789.18_LMNA | -0.10533 | -0.260167581 | 0.054789941 | 1.97E-01 | 4.66E-01 | 1.00E+00 |
| ENSG00000184857.7_TMEN186  | ENSG00000160789.18_LMNA | -0.25433 | -0.397436608 | -0.09914122 | 1.57E-03 | 1.62E-02 | 1.00E+00 |
| ENSG00000081189.12_MEF2C   | ENSG00000160789.18_LMNA | -0.26226 | -0.404573266 | -0.10755459 | 1.10E-03 | 1.25E-02 | 1.00E+00 |
| ENSG00000104228.11_TRIM35  | ENSG00000160789.18_LMNA | 0.16368  | 0.004602043  | 0.314683373 | 4.39E-02 | 1.85E-01 | 1.00E+00 |
| ENSG00000165660.7_FAM175B  | ENSG00000160789.18_LMNA | -0.21725 | -0.363868914 | -0.06013239 | 7.18E-03 | 5.13E-02 | 1.00E+00 |
| ENSG00000118454.11_ANKRD13 | ENSG00000160789.18_LMNA | 0.15235  | -0.007017865 | 0.304176052 | 6.10E-02 | 2.28E-01 | 1.00E+00 |
| ENSG00000214578.5_HMGN2P15 | ENSG00000160789.18_LMNA | -0.31873 | -0.454847494 | -0.16805298 | 6.28E-05 | 1.29E-03 | 1.00E+00 |
| ENSG00000130449.5_ZSWIM6   | ENSG00000160789.18_LMNA | -0.19547 | -0.343969167 | -0.03743688 | 1.58E-02 | 9.11E-02 | 1.00E+00 |
| ENSG00000163083.5_INHBB    | ENSG00000160789.18_LMNA | 0.25646  | 0.101398261  | 0.399354694 | 1.43E-03 | 1.51E-02 | 1.00E+00 |
| ENSG00000153201.14_RANBP2  | ENSG00000160789.18_LMNA | 0.10042  | -0.059733063 | 0.255537939 | 2.18E-01 | 4.93E-01 | 1.00E+00 |
| ENSG00000047230.13_CTPS2   | ENSG00000160789.18_LMNA | -0.05709 | -0.214341784 | 0.103048113 | 4.85E-01 | 7.42E-01 | 1.00E+00 |
| ENSG00000198825.10_INPP5F  | ENSG00000160789.18_LMNA | 0.02041  | -0.139242592 | 0.179029529 | 8.03E-01 | 9.21E-01 | 1.00E+00 |
| ENSG00000142733.13_MAP3K6  | ENSG00000160789.18_LMNA | 0.55202  | 0.430667939  | 0.653766954 | 1.68E-13 | 1.34E-10 | 8.64E-09 |
| ENSG00000099364.15_FBXL19  | ENSG00000160789.18_LMNA | 0.19529  | 0.03724511   | 0.34379984  | 1.59E-02 | 9.15E-02 | 1.00E+00 |
| ENSG00000137055.13_PLAA    | ENSG00000160789.18_LMNA | 0.00353  | -0.155760133 | 0.162637409 | 9.66E-01 | 9.87E-01 | 1.00E+00 |
| ENSG00000143502.13_SUSD4   | ENSG00000160789.18_LMNA | -0.17988 | -0.32964501  | -0.0212937  | 2.66E-02 | 1.32E-01 | 1.00E+00 |
| ENSG00000197530.11_MIB2    | ENSG00000160789.18_LMNA | 0.22324  | 0.066396412  | 0.369312901 | 5.70E-03 | 4.33E-02 | 1.00E+00 |
| ENSG00000164010.12_ERMAP   | ENSG00000160789.18_LMNA | 0.08411  | -0.076108162 | 0.240097323 | 3.03E-01 | 5.89E-01 | 1.00E+00 |
| ENSG00000137574.9_TGS1     | ENSG00000160789.18_LMNA | 0.03438  | -0.125508155 | 0.192526442 | 6.74E-01 | 8.57E-01 | 1.00E+00 |
| ENSG00000087206.15_UIMC1   | ENSG00000160789.18_LMNA | 0.0092   | -0.150217399 | 0.168157719 | 9.10E-01 | 9.66E-01 | 1.00E+00 |
| ENSG00000047621.10_C12orf4 | ENSG00000160789.18_LMNA | -0.31983 | -0.455825833 | -0.1692521  | 5.90E-05 | 1.23E-03 | 1.00E+00 |
| ENSG00000158321.14_AUTS2   | ENSG00000160789.18_LMNA | 0.09812  | -0.062047796 | 0.253365019 | 2.29E-01 | 5.06E-01 | 1.00E+00 |
| ENSG00000104967.6_NOVA2    | ENSG00000160789.18_LMNA | -0.05647 | -0.213749894 | 0.103661796 | 4.90E-01 | 7.46E-01 | 1.00E+00 |
| ENSG00000106443.13_PHF14   | ENSG00000160789.18_LMNA | 0.006    | -0.153345989 | 0.165044238 | 9.42E-01 | 9.77E-01 | 1.00E+00 |
| ENSG00000138642.13_HERC6   | ENSG00000160789.18_LMNA | -0.04373 | -0.201531915 | 0.11627589  | 5.93E-01 | 8.12E-01 | 1.00E+00 |
| ENSG00000150471.14_ADGRL3  | ENSG00000160789.18_LMNA | -0.14601 | -0.298277003 | 0.013504918 | 7.27E-02 | 2.56E-01 | 1.00E+00 |
| ENSG00000163125.14_RPRD2   | ENSG00000160789.18_LMNA | 0.07014  | -0.090066928 | 0.226807595 | 3.91E-01 | 6.69E-01 | 1.00E+00 |
| ENSG00000198863.6_RUNDC1   | ENSG00000160789.18_LMNA | 0.02092  | -0.138744725 | 0.179520888 | 7.98E-01 | 9.19E-01 | 1.00E+00 |
| ENSG00000108094.13_CUL2    | ENSG00000160789.18_LMNA | -0.31056 | -0.447627027 | -0.15922918 | 9.86E-05 | 1.86E-03 | 1.00E+00 |

|                              |                         |          |              |             |          |          |          |
|------------------------------|-------------------------|----------|--------------|-------------|----------|----------|----------|
| ENSG00000213366.11_GSTM2     | ENSG00000160789.18_LMNA | -0.2242  | -0.370187986 | -0.06740554 | 5.49E-03 | 4.20E-02 | 1.00E+00 |
| ENSG00000011638.9_TMEM159    | ENSG00000160789.18_LMNA | 0.1259   | -0.033977488 | 0.279502599 | 1.22E-01 | 3.52E-01 | 1.00E+00 |
| ENSG000000151287.15_TEX30    | ENSG00000160789.18_LMNA | -0.2401  | -0.384598523 | -0.08411309 | 2.89E-03 | 2.60E-02 | 1.00E+00 |
| ENSG000000120029.11_C10orf76 | ENSG00000160789.18_LMNA | -0.20998 | -0.357240475 | -0.05253766 | 9.42E-03 | 6.28E-02 | 1.00E+00 |
| ENSG00000076513.15_ANKRD13   | ENSG00000160789.18_LMNA | -0.28758 | -0.42722209  | -0.13453988 | 3.28E-04 | 4.82E-03 | 1.00E+00 |
| ENSG00000089195.13_TRMT6     | ENSG00000160789.18_LMNA | -0.01521 | -0.173984828 | 0.144344827 | 8.53E-01 | 9.42E-01 | 1.00E+00 |
| ENSG000000229809.7_ZNF688    | ENSG00000160789.18_LMNA | -0.10156 | -0.256608786 | 0.058591081 | 2.13E-01 | 4.87E-01 | 1.00E+00 |
| ENSG000000133422.11_MORC2    | ENSG00000160789.18_LMNA | 0.16993  | 0.011022608  | 0.320456766 | 3.64E-02 | 1.62E-01 | 1.00E+00 |
| ENSG000000213420.6_GPC2      | ENSG00000160789.18_LMNA | -0.21747 | -0.364066409 | -0.06035922 | 7.12E-03 | 5.10E-02 | 1.00E+00 |
| ENSG000000112242.13_E2F3     | ENSG00000160789.18_LMNA | -0.00265 | -0.161785541 | 0.156613679 | 9.74E-01 | 9.90E-01 | 1.00E+00 |
| ENSG000000100532.10_CGRRF1   | ENSG00000160789.18_LMNA | -0.2487  | -0.392362673 | -0.09318542 | 2.00E-03 | 1.96E-02 | 1.00E+00 |
| ENSG000000178715.8_RP11-169K | ENSG00000160789.18_LMNA | -0.14683 | -0.299038877 | 0.012668575 | 7.11E-02 | 2.52E-01 | 1.00E+00 |
| ENSG000000272333.4_KMT2B     | ENSG00000160789.18_LMNA | 0.15452  | -0.004798399 | 0.306188876 | 5.73E-02 | 2.19E-01 | 1.00E+00 |
| ENSG000000170145.4_SIK2      | ENSG00000160789.18_LMNA | 0.11243  | -0.047620959 | 0.266856291 | 1.68E-01 | 4.26E-01 | 1.00E+00 |
| ENSG000000169129.13_AFAP1L2  | ENSG00000160789.18_LMNA | -0.28358 | -0.423652999 | -0.13025842 | 4.00E-04 | 5.66E-03 | 1.00E+00 |
| ENSG00000013523.8_ANGEL1     | ENSG00000160789.18_LMNA | -0.1771  | -0.327082009 | -0.01842209 | 2.91E-02 | 1.40E-01 | 1.00E+00 |
| ENSG000000148057.14_IDNK     | ENSG00000160789.18_LMNA | -0.09871 | -0.253924478 | 0.061452149 | 2.26E-01 | 5.03E-01 | 1.00E+00 |
| ENSG000000171100.13_MTM1     | ENSG00000160789.18_LMNA | 0.1115   | -0.048559441 | 0.265982402 | 1.71E-01 | 4.31E-01 | 1.00E+00 |
| ENSG00000018510.11_AGPS      | ENSG00000160789.18_LMNA | -0.03256 | -0.190770098 | 0.127302334 | 6.90E-01 | 8.67E-01 | 1.00E+00 |
| ENSG000000122390.16_NAA60    | ENSG00000160789.18_LMNA | 0.04467  | -0.115353449 | 0.202428753 | 5.85E-01 | 8.07E-01 | 1.00E+00 |
| ENSG000000120159.10_CAAP1    | ENSG00000160789.18_LMNA | -0.00031 | -0.159502054 | 0.15889932  | 9.97E-01 | 9.99E-01 | 1.00E+00 |
| ENSG00000078401.6_EDN1       | ENSG00000160789.18_LMNA | -0.08037 | -0.236541808 | 0.079854854 | 3.25E-01 | 6.12E-01 | 1.00E+00 |
| ENSG000000205423.10_CNEP1R1  | ENSG00000160789.18_LMNA | -0.11623 | -0.270428084 | 0.043779384 | 1.54E-01 | 4.04E-01 | 1.00E+00 |
| ENSG000000198315.9_ZKSCAN8   | ENSG00000160789.18_LMNA | -0.03569 | -0.1937854   | 0.124220795 | 6.62E-01 | 8.51E-01 | 1.00E+00 |
| ENSG000000120942.12_UBIAD1   | ENSG00000160789.18_LMNA | -0.04078 | -0.198692626 | 0.119192624 | 6.18E-01 | 8.27E-01 | 1.00E+00 |
| ENSG000000213144.2_RP11-64B1 | ENSG00000160789.18_LMNA | -0.07719 | -0.233521127 | 0.083030946 | 3.45E-01 | 6.29E-01 | 1.00E+00 |
| ENSG000000119321.7_FKBP15    | ENSG00000160789.18_LMNA | 0.20225  | 0.044486111  | 0.350179655 | 1.25E-02 | 7.68E-02 | 1.00E+00 |
| ENSG00000084072.15_PPIE      | ENSG00000160789.18_LMNA | -0.0003  | -0.159497933 | 0.158903442 | 9.97E-01 | 9.99E-01 | 1.00E+00 |
| ENSG000000175356.11_SCUBE2   | ENSG00000160789.18_LMNA | -0.22506 | -0.370966387 | -0.0683037  | 5.31E-03 | 4.10E-02 | 1.00E+00 |
| ENSG000000113300.10_CNOT6    | ENSG00000160789.18_LMNA | -0.12985 | -0.283192118 | 0.029974911 | 1.11E-01 | 3.32E-01 | 1.00E+00 |
| ENSG00000065802.10_ASB1      | ENSG00000160789.18_LMNA | 0.08596  | -0.074261637 | 0.241846512 | 2.92E-01 | 5.78E-01 | 1.00E+00 |
| ENSG000000240225.9_ZNF542P   | ENSG00000160789.18_LMNA | -0.18832 | -0.337403167 | -0.03001715 | 2.02E-02 | 1.09E-01 | 1.00E+00 |
| ENSG000000230124.5_ACBD6     | ENSG00000160789.18_LMNA | 0.02148  | -0.13819006  | 0.180068115 | 7.93E-01 | 9.16E-01 | 1.00E+00 |



|                             |                         |          |              |             |          |          |          |
|-----------------------------|-------------------------|----------|--------------|-------------|----------|----------|----------|
| ENSG00000263753.5_LINC00667 | ENSG00000160789.18_LMNA | -0.16203 | -0.313156045 | -0.00290777 | 4.61E-02 | 1.91E-01 | 1.00E+00 |
| ENSG00000255529.6_POLR2M    | ENSG00000160789.18_LMNA | -0.1006  | -0.255707805 | 0.059551969 | 2.17E-01 | 4.92E-01 | 1.00E+00 |
| ENSG00000139131.11_YARS2    | ENSG00000160789.18_LMNA | 0.112    | -0.048061178 | 0.266446436 | 1.70E-01 | 4.28E-01 | 1.00E+00 |
| ENSG00000134452.18_FBXO18   | ENSG00000160789.18_LMNA | 0.00735  | -0.152026481 | 0.166358148 | 9.28E-01 | 9.72E-01 | 1.00E+00 |
| ENSG00000135093.11_USP30    | ENSG00000160789.18_LMNA | -0.38834 | -0.515662647 | -0.24424188 | 7.66E-07 | 3.70E-05 | 3.93E-02 |
| ENSG00000143486.14_EIF2D    | ENSG00000160789.18_LMNA | 0.08361  | -0.076609238 | 0.239622305 | 3.06E-01 | 5.92E-01 | 1.00E+00 |
| ENSG00000150687.10_PRSS23   | ENSG00000160789.18_LMNA | 0.31545  | 0.164514848  | 0.451956784 | 7.54E-05 | 1.50E-03 | 1.00E+00 |
| ENSG00000169016.15_E2F6     | ENSG00000160789.18_LMNA | -0.04571 | -0.203427475 | 0.114325571 | 5.76E-01 | 8.02E-01 | 1.00E+00 |
| ENSG00000116406.17_EDEM3    | ENSG00000160789.18_LMNA | 0.32847  | 0.17861314   | 0.463439539 | 3.60E-05 | 8.29E-04 | 1.00E+00 |
| ENSG00000008853.15_RHOBTB2  | ENSG00000160789.18_LMNA | 0.08207  | -0.078154366 | 0.238156578 | 3.15E-01 | 6.01E-01 | 1.00E+00 |
| ENSG00000196914.7_ARHGEF12  | ENSG00000160789.18_LMNA | 0.11716  | -0.042841378 | 0.271298905 | 1.51E-01 | 3.99E-01 | 1.00E+00 |
| ENSG00000228623.3_ZNF883    | ENSG00000160789.18_LMNA | -0.21087 | -0.358054588 | -0.05346856 | 9.11E-03 | 6.13E-02 | 1.00E+00 |
| ENSG00000163050.15_COQ8A    | ENSG00000160789.18_LMNA | 0.12555  | -0.034337085 | 0.279170674 | 1.23E-01 | 3.54E-01 | 1.00E+00 |
| ENSG00000068354.14_TBC1D25  | ENSG00000160789.18_LMNA | 0.21585  | 0.058667736  | 0.362592998 | 7.57E-03 | 5.33E-02 | 1.00E+00 |
| ENSG00000143493.11_INTS7    | ENSG00000160789.18_LMNA | -0.21359 | -0.360527541 | -0.05629952 | 8.24E-03 | 5.69E-02 | 1.00E+00 |
| ENSG00000163517.13_HDAC11   | ENSG00000160789.18_LMNA | -0.22499 | -0.370905735 | -0.0682337  | 5.32E-03 | 4.11E-02 | 1.00E+00 |
| ENSG00000108669.15_CYTH1    | ENSG00000160789.18_LMNA | -0.18755 | -0.336697833 | -0.02922212 | 2.07E-02 | 1.10E-01 | 1.00E+00 |
| ENSG00000144677.13_CTDSP1   | ENSG00000160789.18_LMNA | -0.12725 | -0.280764819 | 0.032609299 | 1.18E-01 | 3.45E-01 | 1.00E+00 |
| ENSG00000079257.6_LXN       | ENSG00000160789.18_LMNA | -0.04803 | -0.20565814  | 0.112027325 | 5.57E-01 | 7.90E-01 | 1.00E+00 |
| ENSG00000123200.15_ZC3H13   | ENSG00000160789.18_LMNA | -0.00878 | -0.167743844 | 0.15063365  | 9.15E-01 | 9.67E-01 | 1.00E+00 |
| ENSG00000197008.8_ZNF138    | ENSG00000160789.18_LMNA | -0.21025 | -0.357480428 | -0.05281198 | 9.33E-03 | 6.23E-02 | 1.00E+00 |
| ENSG00000163872.14_YEATS2   | ENSG00000160789.18_LMNA | -0.01628 | -0.175030826 | 0.143288288 | 8.42E-01 | 9.39E-01 | 1.00E+00 |
| ENSG00000167186.9_COQ7      | ENSG00000160789.18_LMNA | -0.28352 | -0.423597835 | -0.13019233 | 4.01E-04 | 5.67E-03 | 1.00E+00 |
| ENSG00000178974.8_FBXO34    | ENSG00000160789.18_LMNA | -0.01542 | -0.174196507 | 0.144131073 | 8.50E-01 | 9.41E-01 | 1.00E+00 |
| ENSG00000137496.16_IL18BP   | ENSG00000160789.18_LMNA | 0.02036  | -0.139291693 | 0.178981061 | 8.03E-01 | 9.21E-01 | 1.00E+00 |
| ENSG00000101752.10_MIB1     | ENSG00000160789.18_LMNA | -0.14676 | -0.29897428  | 0.012739503 | 7.12E-02 | 2.52E-01 | 1.00E+00 |
| ENSG00000232815.1_DUX4L50   | ENSG00000160789.18_LMNA | -0.14059 | -0.293232131 | 0.019031907 | 8.41E-02 | 2.81E-01 | 1.00E+00 |
| ENSG00000182749.5_PAQR7     | ENSG00000160789.18_LMNA | 0.19183  | 0.033656202  | 0.340627243 | 1.79E-02 | 9.97E-02 | 1.00E+00 |
| ENSG00000213160.8_KLHL23    | ENSG00000160789.18_LMNA | -0.52741 | -0.633425729 | -0.40195945 | 2.93E-12 | 1.33E-09 | 1.50E-07 |
| ENSG00000173011.11_TADA2B   | ENSG00000160789.18_LMNA | 0.04722  | -0.11282833  | 0.204881063 | 5.63E-01 | 7.95E-01 | 1.00E+00 |
| ENSG00000196756.10_SNHG17   | ENSG00000160789.18_LMNA | 0.1416   | -0.018003242 | 0.294172385 | 8.18E-02 | 2.76E-01 | 1.00E+00 |
| ENSG00000137070.16_IL11RA   | ENSG00000160789.18_LMNA | -0.24321 | -0.387410833 | -0.0873935  | 2.53E-03 | 2.35E-02 | 1.00E+00 |
| ENSG00000169442.7_CD52      | ENSG00000160789.18_LMNA | -0.0682  | -0.224955658 | 0.092002263 | 4.04E-01 | 6.80E-01 | 1.00E+00 |

|                             |                         |          |              |             |          |          |          |
|-----------------------------|-------------------------|----------|--------------|-------------|----------|----------|----------|
| ENSG00000196767.6_POU3F4    | ENSG00000160789.18_LMNA | -0.18263 | -0.332168693 | -0.02412625 | 2.43E-02 | 1.24E-01 | 1.00E+00 |
| ENSG00000006756.14_ARSD     | ENSG00000160789.18_LMNA | 0.47644  | 0.343281712  | 0.590830445 | 5.49E-10 | 9.51E-08 | 2.82E-05 |
| ENSG00000123609.9_NMI       | ENSG00000160789.18_LMNA | 0.16392  | 0.004840787  | 0.314898464 | 4.36E-02 | 1.84E-01 | 1.00E+00 |
| ENSG00000265298.1_RP13-104F | ENSG00000160789.18_LMNA | -0.02954 | -0.187857738 | 0.130272851 | 7.18E-01 | 8.80E-01 | 1.00E+00 |
| ENSG00000270001.1_RP11-218C | ENSG00000160789.18_LMNA | -0.06639 | -0.223227115 | 0.093806489 | 4.16E-01 | 6.89E-01 | 1.00E+00 |
| ENSG00000198133.7_TMEN229B  | ENSG00000160789.18_LMNA | -0.18499 | -0.334346769 | -0.02657487 | 2.25E-02 | 1.17E-01 | 1.00E+00 |
| ENSG00000165434.7_PGM2L1    | ENSG00000160789.18_LMNA | 0.27014  | 0.115925929  | 0.411638555 | 7.63E-04 | 9.36E-03 | 1.00E+00 |
| ENSG00000116062.13_MSH6     | ENSG00000160789.18_LMNA | 0.11728  | -0.042713801 | 0.271417305 | 1.50E-01 | 3.98E-01 | 1.00E+00 |
| ENSG00000126804.12_ZBTB1    | ENSG00000160789.18_LMNA | 0.20903  | 0.051545794  | 0.35637253  | 9.75E-03 | 6.45E-02 | 1.00E+00 |
| ENSG00000133703.10_KRAS     | ENSG00000160789.18_LMNA | -0.28105 | -0.421393482 | -0.12755356 | 4.53E-04 | 6.24E-03 | 1.00E+00 |
| ENSG00000163743.12_RCHY1    | ENSG00000160789.18_LMNA | -0.3958  | -0.522101578 | -0.25250961 | 4.49E-07 | 2.41E-05 | 2.30E-02 |
| ENSG00000154654.13_NCAM2    | ENSG00000160789.18_LMNA | -0.21727 | -0.363886051 | -0.06015207 | 7.17E-03 | 5.12E-02 | 1.00E+00 |
| ENSG00000048991.15_R3HDM1   | ENSG00000160789.18_LMNA | -0.15076 | -0.302697169 | 0.008646624 | 6.37E-02 | 2.35E-01 | 1.00E+00 |
| ENSG00000166348.16_USP54    | ENSG00000160789.18_LMNA | -0.32649 | -0.461691251 | -0.17645905 | 4.04E-05 | 9.10E-04 | 1.00E+00 |
| ENSG00000213315.5_CTD-3035D | ENSG00000160789.18_LMNA | -0.08451 | -0.240478475 | 0.075705984 | 3.01E-01 | 5.87E-01 | 1.00E+00 |
| ENSG00000133316.14_WDR74    | ENSG00000160789.18_LMNA | 0.02114  | -0.138527226 | 0.179735493 | 7.96E-01 | 9.18E-01 | 1.00E+00 |
| ENSG00000232677.5_LINC00665 | ENSG00000160789.18_LMNA | -0.22632 | -0.372116035 | -0.06963112 | 5.05E-03 | 3.95E-02 | 1.00E+00 |
| ENSG00000114796.14_KLHL24   | ENSG00000160789.18_LMNA | -0.37794 | -0.506659513 | -0.23274745 | 1.58E-06 | 6.69E-05 | 8.12E-02 |
| ENSG00000273559.3_CWC25     | ENSG00000160789.18_LMNA | 0.07912  | -0.081106956 | 0.235351702 | 3.33E-01 | 6.18E-01 | 1.00E+00 |
| ENSG00000026103.18_FAS      | ENSG00000160789.18_LMNA | 0.24034  | 0.084369153  | 0.384818244 | 2.86E-03 | 2.58E-02 | 1.00E+00 |
| ENSG00000185630.17_PBX1     | ENSG00000160789.18_LMNA | -0.2485  | -0.392182499 | -0.09297432 | 2.02E-03 | 1.97E-02 | 1.00E+00 |
| ENSG00000243056.1	EIF4EBP3  | ENSG00000160789.18_LMNA | 0.0702   | -0.090002243 | 0.226869453 | 3.90E-01 | 6.68E-01 | 1.00E+00 |
| ENSG00000269834.4_ZNF528-AS | ENSG00000160789.18_LMNA | -0.06777 | -0.224548528 | 0.092427407 | 4.07E-01 | 6.82E-01 | 1.00E+00 |
| ENSG00000123094.14_RASSF8   | ENSG00000160789.18_LMNA | 0.38255  | 0.237835162  | 0.510651901 | 1.15E-06 | 5.16E-05 | 5.91E-02 |
| ENSG00000147799.10_ARHGAP3  | ENSG00000160789.18_LMNA | 0.03324  | -0.126627314 | 0.191431123 | 6.84E-01 | 8.63E-01 | 1.00E+00 |
| ENSG00000107290.12_SETX     | ENSG00000160789.18_LMNA | 0.18254  | 0.024033134  | 0.332085804 | 2.44E-02 | 1.24E-01 | 1.00E+00 |
| ENSG00000205309.12_NT5M     | ENSG00000160789.18_LMNA | 0.03616  | -0.123751985 | 0.194243608 | 6.58E-01 | 8.49E-01 | 1.00E+00 |
| ENSG00000113595.13_TRIM23   | ENSG00000160789.18_LMNA | -0.32416 | -0.45964051  | -0.17393579 | 4.62E-05 | 1.01E-03 | 1.00E+00 |
| ENSG00000243302.3_RP11-274B | ENSG00000160789.18_LMNA | 0.1346   | -0.02514053  | 0.287636058 | 9.83E-02 | 3.08E-01 | 1.00E+00 |
| ENSG00000121440.13_PDZRN3   | ENSG00000160789.18_LMNA | -0.17492 | -0.325067341 | -0.0161684  | 3.11E-02 | 1.47E-01 | 1.00E+00 |
| ENSG00000128944.12_KNSTRN   | ENSG00000160789.18_LMNA | -0.02625 | -0.18468163  | 0.133505887 | 7.48E-01 | 8.95E-01 | 1.00E+00 |
| ENSG00000171262.10_FAM98B   | ENSG00000160789.18_LMNA | 0.10985  | -0.050231721 | 0.264423935 | 1.78E-01 | 4.40E-01 | 1.00E+00 |
| ENSG00000105829.10_BET1     | ENSG00000160789.18_LMNA | 0.06528  | -0.094906199 | 0.222172557 | 4.24E-01 | 6.95E-01 | 1.00E+00 |

|                            |                         |          |              |             |          |          |          |
|----------------------------|-------------------------|----------|--------------|-------------|----------|----------|----------|
| ENSG00000106588.9_PSMA2    | ENSG00000160789.18_LMNA | -0.16269 | -0.313763141 | -0.00358101 | 4.52E-02 | 1.88E-01 | 1.00E+00 |
| ENSG00000161513.10_FDXR    | ENSG00000160789.18_LMNA | 0.17972  | 0.021122656  | 0.329492473 | 2.67E-02 | 1.33E-01 | 1.00E+00 |
| ENSG00000101986.11_ABCD1   | ENSG00000160789.18_LMNA | 0.31572  | 0.164797832  | 0.452188209 | 7.43E-05 | 1.48E-03 | 1.00E+00 |
| ENSG00000166949.14_SMAD3   | ENSG00000160789.18_LMNA | 0.19281  | 0.034673633  | 0.341527363 | 1.73E-02 | 9.73E-02 | 1.00E+00 |
| ENSG00000110013.11_SIAE    | ENSG00000160789.18_LMNA | 0.24969  | 0.09423653   | 0.393259471 | 1.92E-03 | 1.89E-02 | 1.00E+00 |
| ENSG00000226525.5_RPS7P10  | ENSG00000160789.18_LMNA | -0.16138 | -0.312548891 | -0.00223475 | 4.70E-02 | 1.93E-01 | 1.00E+00 |
| ENSG00000198420.8_TCAF1    | ENSG00000160789.18_LMNA | 0.09362  | -0.066570053 | 0.249110616 | 2.51E-01 | 5.32E-01 | 1.00E+00 |
| ENSG00000145743.14_FBXL17  | ENSG00000160789.18_LMNA | -0.26259 | -0.404862071 | -0.10789596 | 1.08E-03 | 1.23E-02 | 1.00E+00 |
| ENSG00000152683.13_SLC30A6 | ENSG00000160789.18_LMNA | -0.07859 | -0.23484973  | 0.081634779 | 3.36E-01 | 6.22E-01 | 1.00E+00 |
| ENSG00000231770.4_TMEM44-A | ENSG00000160789.18_LMNA | -0.06035 | -0.217464512 | 0.099806399 | 4.60E-01 | 7.24E-01 | 1.00E+00 |
| ENSG00000183018.7_SPNS2    | ENSG00000160789.18_LMNA | -0.15262 | -0.304427184 | 0.006741119 | 6.05E-02 | 2.27E-01 | 1.00E+00 |
| ENSG00000138660.10_AP1AR   | ENSG00000160789.18_LMNA | -0.25472 | -0.397785474 | -0.09955151 | 1.54E-03 | 1.60E-02 | 1.00E+00 |
| ENSG00000175213.2_ZNF408   | ENSG00000160789.18_LMNA | 0.23837  | 0.082295993  | 0.38303831  | 3.10E-03 | 2.74E-02 | 1.00E+00 |
| ENSG00000224543.4_SNRPGP15 | ENSG00000160789.18_LMNA | -0.17512 | -0.325252506 | -0.0163754  | 3.09E-02 | 1.46E-01 | 1.00E+00 |
| ENSG00000172346.13_CSDC2   | ENSG00000160789.18_LMNA | -0.48128 | -0.59490197  | -0.3488082  | 3.46E-10 | 6.44E-08 | 1.78E-05 |
| ENSG00000275302.1_CCL4     | ENSG00000160789.18_LMNA | -0.15593 | -0.307500622 | 0.003350334 | 5.51E-02 | 2.14E-01 | 1.00E+00 |
| ENSG00000138435.13_CHRNA1  | ENSG00000160789.18_LMNA | 0.12269  | -0.037235773 | 0.276492307 | 1.32E-01 | 3.69E-01 | 1.00E+00 |
| ENSG00000198040.9_ZNF84    | ENSG00000160789.18_LMNA | -0.25866 | -0.401333848 | -0.10373038 | 1.29E-03 | 1.41E-02 | 1.00E+00 |
| ENSG00000183735.8_TBK1     | ENSG00000160789.18_LMNA | 0.05636  | -0.103771412 | 0.213644146 | 4.90E-01 | 7.46E-01 | 1.00E+00 |
| ENSG00000107566.12_ERLIN1  | ENSG00000160789.18_LMNA | 0.13095  | -0.028856338 | 0.284221548 | 1.08E-01 | 3.27E-01 | 1.00E+00 |
| ENSG00000182022.16_CHST15  | ENSG00000160789.18_LMNA | -0.03718 | -0.195221121 | 0.122751377 | 6.49E-01 | 8.44E-01 | 1.00E+00 |
| ENSG00000125347.12_IRF1    | ENSG00000160789.18_LMNA | 0.32008  | 0.169520569  | 0.456044772 | 5.82E-05 | 1.21E-03 | 1.00E+00 |
| ENSG00000064999.13_ANKS1A  | ENSG00000160789.18_LMNA | -0.08111 | -0.237246052 | 0.079113452 | 3.21E-01 | 6.07E-01 | 1.00E+00 |
| ENSG00000205213.12_LGR4    | ENSG00000160789.18_LMNA | 0.01367  | -0.145849929 | 0.172493499 | 8.67E-01 | 9.48E-01 | 1.00E+00 |
| ENSG00000172888.10_ZNF621  | ENSG00000160789.18_LMNA | -0.08965 | -0.245347527 | 0.070559282 | 2.72E-01 | 5.57E-01 | 1.00E+00 |
| ENSG00000235238.1_SUMO2P1  | ENSG00000160789.18_LMNA | -0.19886 | -0.3470755   | -0.04095892 | 1.40E-02 | 8.38E-02 | 1.00E+00 |
| ENSG00000167074.13_TEF     | ENSG00000160789.18_LMNA | -0.25256 | -0.395848937 | -0.09727531 | 1.69E-03 | 1.72E-02 | 1.00E+00 |
| ENSG00000129422.12_MTUS1   | ENSG00000160789.18_LMNA | -0.09473 | -0.250157409 | 0.065458556 | 2.46E-01 | 5.25E-01 | 1.00E+00 |
| ENSG00000145687.14_SSBP2   | ENSG00000160789.18_LMNA | 0.08401  | -0.076210596 | 0.240000228 | 3.03E-01 | 5.90E-01 | 1.00E+00 |
| ENSG00000103528.15_SYT17   | ENSG00000160789.18_LMNA | 0.00938  | -0.150043435 | 0.168330656 | 9.09E-01 | 9.65E-01 | 1.00E+00 |
| ENSG00000196455.6_PIK3R4   | ENSG00000160789.18_LMNA | 0.13038  | -0.029436111 | 0.283688069 | 1.09E-01 | 3.29E-01 | 1.00E+00 |
| ENSG00000160957.11_RECQL4  | ENSG00000160789.18_LMNA | 0.17995  | 0.021362214  | 0.329706103 | 2.65E-02 | 1.32E-01 | 1.00E+00 |
| ENSG00000188807.11_TMEM201 | ENSG00000160789.18_LMNA | 0.12187  | -0.038069048 | 0.275721463 | 1.35E-01 | 3.73E-01 | 1.00E+00 |

|                             |                         |          |              |             |          |          |          |
|-----------------------------|-------------------------|----------|--------------|-------------|----------|----------|----------|
| ENSG00000107185.9_RGP1      | ENSG00000160789.18_LMNA | 0.21128  | 0.053888152  | 0.358421386 | 8.98E-03 | 6.07E-02 | 1.00E+00 |
| ENSG00000151876.11_FBXO4    | ENSG00000160789.18_LMNA | 0.09646  | -0.063716666 | 0.251796415 | 2.37E-01 | 5.16E-01 | 1.00E+00 |
| ENSG00000112320.10_SOBP     | ENSG00000160789.18_LMNA | -0.17439 | -0.324575485 | -0.01561867 | 3.17E-02 | 1.49E-01 | 1.00E+00 |
| ENSG00000105246.5_EBI3      | ENSG00000160789.18_LMNA | -0.08894 | -0.244679214 | 0.071266702 | 2.76E-01 | 5.61E-01 | 1.00E+00 |
| ENSG00000213762.9_ZNF134    | ENSG00000160789.18_LMNA | 0.09627  | -0.063914163 | 0.251610675 | 2.38E-01 | 5.17E-01 | 1.00E+00 |
| ENSG00000259775.1_RP11-45P1 | ENSG00000160789.18_LMNA | 0.09157  | -0.068633818 | 0.24716503  | 2.62E-01 | 5.45E-01 | 1.00E+00 |
| ENSG00000198324.13_FAM109A  | ENSG00000160789.18_LMNA | 0.18672  | 0.028367244  | 0.335939025 | 2.13E-02 | 1.13E-01 | 1.00E+00 |
| ENSG00000180537.11_RNF182   | ENSG00000160789.18_LMNA | -0.28098 | -0.421333019 | -0.12748124 | 4.54E-04 | 6.26E-03 | 1.00E+00 |
| ENSG00000253276.2_CCDC71L   | ENSG00000160789.18_LMNA | 0.08125  | -0.078973323 | 0.237379121 | 3.20E-01 | 6.06E-01 | 1.00E+00 |
| ENSG00000274561.1_RP11-147L | ENSG00000160789.18_LMNA | 0.09466  | -0.065527959 | 0.250092068 | 2.46E-01 | 5.26E-01 | 1.00E+00 |
| ENSG00000203805.9_PLPP4     | ENSG00000160789.18_LMNA | -0.11737 | -0.271495213 | 0.042629849 | 1.50E-01 | 3.98E-01 | 1.00E+00 |
| ENSG00000197223.10_C1D      | ENSG00000160789.18_LMNA | -0.3064  | -0.443949578 | -0.15475278 | 1.23E-04 | 2.24E-03 | 1.00E+00 |
| ENSG00000184708.16	EIF4ENIF | ENSG00000160789.18_LMNA | -0.0749  | -0.231344352 | 0.085315733 | 3.59E-01 | 6.42E-01 | 1.00E+00 |
| ENSG00000264247.1_LINC00909 | ENSG00000160789.18_LMNA | -0.27729 | -0.418036609 | -0.12354312 | 5.43E-04 | 7.20E-03 | 1.00E+00 |
| ENSG00000116106.10_EPHA4    | ENSG00000160789.18_LMNA | -0.09632 | -0.251665511 | 0.063855858 | 2.38E-01 | 5.16E-01 | 1.00E+00 |
| ENSG00000184986.9_TMEM121   | ENSG00000160789.18_LMNA | 0.04729  | -0.112757277 | 0.20495001  | 5.63E-01 | 7.94E-01 | 1.00E+00 |
| ENSG00000213763.4_ACTBP2    | ENSG00000160789.18_LMNA | 0.32262  | 0.17226983   | 0.458284859 | 5.04E-05 | 1.08E-03 | 1.00E+00 |
| ENSG00000072415.7_MPP5      | ENSG00000160789.18_LMNA | 0.00705  | -0.15232646  | 0.166059541 | 9.31E-01 | 9.73E-01 | 1.00E+00 |
| ENSG00000130939.17_UBE4B    | ENSG00000160789.18_LMNA | 0.01666  | -0.142919181 | 0.175396082 | 8.39E-01 | 9.37E-01 | 1.00E+00 |
| ENSG00000197296.5_FITM2     | ENSG00000160789.18_LMNA | -0.10828 | -0.262952099 | 0.051809426 | 1.84E-01 | 4.50E-01 | 1.00E+00 |
| ENSG00000135272.8_MDFIC     | ENSG00000160789.18_LMNA | 0.29789  | 0.14559074   | 0.436392289 | 1.94E-04 | 3.18E-03 | 1.00E+00 |
| ENSG00000100023.16_PPIL2    | ENSG00000160789.18_LMNA | 0.07373  | -0.086485482 | 0.230228674 | 3.67E-01 | 6.48E-01 | 1.00E+00 |
| ENSG00000013619.12_MAMLD1   | ENSG00000160789.18_LMNA | -0.00786 | -0.166852845 | 0.151529382 | 9.23E-01 | 9.71E-01 | 1.00E+00 |
| ENSG00000090686.14_USP48    | ENSG00000160789.18_LMNA | 0.21433  | 0.057079945  | 0.361208527 | 8.01E-03 | 5.57E-02 | 1.00E+00 |
| ENSG00000054356.12_PTPRN    | ENSG00000160789.18_LMNA | -0.00316 | -0.162276999 | 0.15612131  | 9.69E-01 | 9.88E-01 | 1.00E+00 |
| ENSG00000185985.8_SLITRK2   | ENSG00000160789.18_LMNA | -0.26929 | -0.41087232  | -0.11501602 | 7.94E-04 | 9.68E-03 | 1.00E+00 |
| ENSG00000220472.1_RP11-69L1 | ENSG00000160789.18_LMNA | -0.14661 | -0.298836226 | 0.012891076 | 7.15E-02 | 2.53E-01 | 1.00E+00 |
| ENSG00000080802.17_CNOT4    | ENSG00000160789.18_LMNA | 0.14434  | -0.015205183 | 0.296726904 | 7.60E-02 | 2.64E-01 | 1.00E+00 |
| ENSG00000164654.14_MIOS     | ENSG00000160789.18_LMNA | -0.03455 | -0.192691762 | 0.125339166 | 6.73E-01 | 8.56E-01 | 1.00E+00 |
| ENSG00000175592.7_FOSL1     | ENSG00000160789.18_LMNA | 0.64854  | 0.545682391  | 0.732149697 | 1.66E-19 | 1.07E-15 | 8.52E-15 |
| ENSG00000204315.3_FKBPL     | ENSG00000160789.18_LMNA | 0.0115   | -0.147969692 | 0.170390657 | 8.88E-01 | 9.57E-01 | 1.00E+00 |
| ENSG00000163170.10_BOLA3    | ENSG00000160789.18_LMNA | 0.02333  | -0.136377568 | 0.181854929 | 7.75E-01 | 9.08E-01 | 1.00E+00 |
| ENSG00000159788.17_RGS12    | ENSG00000160789.18_LMNA | 0.07727  | -0.082947275 | 0.233600782 | 3.44E-01 | 6.29E-01 | 1.00E+00 |

|                              |                         |          |              |             |          |          |          |
|------------------------------|-------------------------|----------|--------------|-------------|----------|----------|----------|
| ENSG00000107201.8_DDX58      | ENSG00000160789.18_LMNA | -0.05473 | -0.212085011 | 0.105386686 | 5.03E-01 | 7.54E-01 | 1.00E+00 |
| ENSG00000207383.1_Y_RNA      | ENSG00000160789.18_LMNA | -0.0999  | -0.25504105  | 0.060262681 | 2.21E-01 | 4.96E-01 | 1.00E+00 |
| ENSG00000227671.4_RP11-488L  | ENSG00000160789.18_LMNA | -0.16046 | -0.311695106 | -0.00128882 | 4.83E-02 | 1.97E-01 | 1.00E+00 |
| ENSG00000181523.11_SGSH      | ENSG00000160789.18_LMNA | 0.3993   | 0.256399347  | 0.525120327 | 3.47E-07 | 1.98E-05 | 1.78E-02 |
| ENSG00000270607.1_RP11-359E  | ENSG00000160789.18_LMNA | 0.34718  | 0.198981473  | 0.479861882 | 1.18E-05 | 3.32E-04 | 6.03E-01 |
| ENSG00000197081.11_IGF2R     | ENSG00000160789.18_LMNA | 0.26651  | 0.112061903  | 0.408381785 | 9.04E-04 | 1.07E-02 | 1.00E+00 |
| ENSG00000070367.14_EXOC5     | ENSG00000160789.18_LMNA | -0.006   | -0.165045206 | 0.153345017 | 9.41E-01 | 9.77E-01 | 1.00E+00 |
| ENSG00000127527.12_EPS15L1   | ENSG00000160789.18_LMNA | 0.11002  | -0.050058517 | 0.264585428 | 1.77E-01 | 4.39E-01 | 1.00E+00 |
| ENSG00000205704.6_LINC00634  | ENSG00000160789.18_LMNA | -0.51496 | -0.623079594 | -0.38753002 | 1.14E-11 | 3.85E-09 | 5.85E-07 |
| ENSG00000255284.1_AP006621.1 | ENSG00000160789.18_LMNA | 0.08879  | -0.071417254 | 0.244536946 | 2.77E-01 | 5.61E-01 | 1.00E+00 |
| ENSG00000168778.10_TCTN2     | ENSG00000160789.18_LMNA | 0.32916  | 0.1793568    | 0.464042589 | 3.46E-05 | 8.04E-04 | 1.00E+00 |
| ENSG00000095485.15_CWF19L1   | ENSG00000160789.18_LMNA | -0.35328 | -0.485190423 | -0.20564292 | 8.03E-06 | 2.44E-04 | 4.12E-01 |
| ENSG00000166398.11_KIAA0355  | ENSG00000160789.18_LMNA | 0.02914  | -0.130670239 | 0.187467706 | 7.22E-01 | 8.82E-01 | 1.00E+00 |
| ENSG00000178921.12_PFAS      | ENSG00000160789.18_LMNA | 0.08107  | -0.079148506 | 0.237212763 | 3.21E-01 | 6.07E-01 | 1.00E+00 |
| ENSG00000139350.10_NEDD1     | ENSG00000160789.18_LMNA | 0.07016  | -0.090046831 | 0.226826814 | 3.90E-01 | 6.69E-01 | 1.00E+00 |
| ENSG00000167920.7_TMEN99     | ENSG00000160789.18_LMNA | -0.32643 | -0.461637906 | -0.17639337 | 4.06E-05 | 9.12E-04 | 1.00E+00 |
| ENSG00000145220.12_LYAR      | ENSG00000160789.18_LMNA | 0.14483  | -0.014709108 | 0.297179335 | 7.50E-02 | 2.61E-01 | 1.00E+00 |
| ENSG00000167578.15_RAB4B     | ENSG00000160789.18_LMNA | -0.1956  | -0.344085552 | -0.0375687  | 1.57E-02 | 9.08E-02 | 1.00E+00 |
| ENSG00000197885.9_NKIRAS1    | ENSG00000160789.18_LMNA | -0.5428  | -0.646161305 | -0.41988064 | 5.05E-13 | 3.36E-10 | 2.59E-08 |
| ENSG00000146918.18_NCAPG2    | ENSG00000160789.18_LMNA | 0.21109  | 0.053697519  | 0.358254749 | 9.04E-03 | 6.10E-02 | 1.00E+00 |
| ENSG00000178951.7_ZBTB7A     | ENSG00000160789.18_LMNA | 0.36864  | 0.222499816  | 0.49858226  | 2.97E-06 | 1.09E-04 | 1.52E-01 |
| ENSG00000151690.13_MFSD6     | ENSG00000160789.18_LMNA | -0.21177 | -0.358871558 | -0.05440326 | 8.82E-03 | 5.98E-02 | 1.00E+00 |
| ENSG00000113460.11_BRX1      | ENSG00000160789.18_LMNA | -0.0057  | -0.164750805 | 0.153640518 | 9.44E-01 | 9.78E-01 | 1.00E+00 |
| ENSG00000258199.1_RP11-977G  | ENSG00000160789.18_LMNA | -0.20741 | -0.354892249 | -0.04985555 | 1.03E-02 | 6.72E-02 | 1.00E+00 |
| ENSG00000110046.11_ATG2A     | ENSG00000160789.18_LMNA | 0.16041  | 0.001239864  | 0.31165091  | 4.84E-02 | 1.97E-01 | 1.00E+00 |
| ENSG00000132773.10_TOE1      | ENSG00000160789.18_LMNA | 0.14357  | -0.015993521 | 0.296007633 | 7.76E-02 | 2.67E-01 | 1.00E+00 |
| ENSG00000059377.14_TBXAS1    | ENSG00000160789.18_LMNA | -0.0054  | -0.164457304 | 0.153935058 | 9.47E-01 | 9.79E-01 | 1.00E+00 |
| ENSG00000161618.8_ALDH16A1   | ENSG00000160789.18_LMNA | 0.29549  | 0.143021539  | 0.434265696 | 2.19E-04 | 3.51E-03 | 1.00E+00 |
| ENSG00000271447.4_MMP28      | ENSG00000160789.18_LMNA | -0.14943 | -0.301459061 | 0.010008937 | 6.61E-02 | 2.40E-01 | 1.00E+00 |
| ENSG00000108510.8_MED13      | ENSG00000160789.18_LMNA | 0.00882  | -0.150591205 | 0.167786052 | 9.14E-01 | 9.67E-01 | 1.00E+00 |
| ENSG00000136603.12_SKIL      | ENSG00000160789.18_LMNA | -0.19317 | -0.341855612 | -0.03504482 | 1.71E-02 | 9.65E-02 | 1.00E+00 |
| ENSG00000160972.8_PPP1R16A   | ENSG00000160789.18_LMNA | 0.32133  | 0.17086908   | 0.457143987 | 5.43E-05 | 1.15E-03 | 1.00E+00 |
| ENSG00000107672.13_NSMCE4A   | ENSG00000160789.18_LMNA | -0.41289 | -0.536808559 | -0.27154249 | 1.25E-07 | 8.68E-06 | 6.40E-03 |

|                             |                         |          |              |             |          |          |          |
|-----------------------------|-------------------------|----------|--------------|-------------|----------|----------|----------|
| ENSG00000141568.18_FOXK2    | ENSG00000160789.18_LMNA | 0.19611  | 0.038095706  | 0.344550742 | 1.55E-02 | 8.98E-02 | 1.00E+00 |
| ENSG00000104856.12_RELB     | ENSG00000160789.18_LMNA | 0.48318  | 0.350975975  | 0.596495593 | 2.89E-10 | 5.52E-08 | 1.48E-05 |
| ENSG00000182208.11_MOB2     | ENSG00000160789.18_LMNA | 0.22109  | 0.064149978  | 0.36736294  | 6.20E-03 | 4.61E-02 | 1.00E+00 |
| ENSG00000106078.16_COBL     | ENSG00000160789.18_LMNA | 0.11003  | -0.050045746 | 0.264597334 | 1.77E-01 | 4.39E-01 | 1.00E+00 |
| ENSG00000160539.4_PLPP7     | ENSG00000160789.18_LMNA | -0.37942 | -0.507941362 | -0.23437934 | 1.43E-06 | 6.20E-05 | 7.34E-02 |
| ENSG00000136048.12_DRAM1    | ENSG00000160789.18_LMNA | 0.34434  | 0.195873441  | 0.477368635 | 1.40E-05 | 3.86E-04 | 7.18E-01 |
| ENSG00000174839.11_DENND6A  | ENSG00000160789.18_LMNA | -0.09546 | -0.250851055 | 0.064721603 | 2.42E-01 | 5.21E-01 | 1.00E+00 |
| ENSG00000050748.16_MAPK9    | ENSG00000160789.18_LMNA | -0.31851 | -0.454659989 | -0.16782325 | 6.36E-05 | 1.30E-03 | 1.00E+00 |
| ENSG00000155111.13_CDK19    | ENSG00000160789.18_LMNA | -0.15117 | -0.303076763 | 0.008228717 | 6.30E-02 | 2.33E-01 | 1.00E+00 |
| ENSG00000122257.17_RBBP6    | ENSG00000160789.18_LMNA | 0.04785  | -0.112202518 | 0.205488214 | 5.58E-01 | 7.91E-01 | 1.00E+00 |
| ENSG00000110400.9_NECTIN1   | ENSG00000160789.18_LMNA | -0.11993 | -0.273902582 | 0.040033516 | 1.41E-01 | 3.83E-01 | 1.00E+00 |
| ENSG00000001084.9_GCLC      | ENSG00000160789.18_LMNA | -0.4683  | -0.583964816 | -0.33400131 | 1.17E-09 | 1.77E-07 | 6.02E-05 |
| ENSG00000134780.8_DAGLA     | ENSG00000160789.18_LMNA | 0.00429  | -0.155015865 | 0.163379825 | 9.58E-01 | 9.83E-01 | 1.00E+00 |
| ENSG00000266032.1_          | ENSG00000160789.18_LMNA | -0.21532 | -0.362109704 | -0.05811329 | 7.72E-03 | 5.41E-02 | 1.00E+00 |
| ENSG00000128191.12_DGCR8    | ENSG00000160789.18_LMNA | 0.11291  | -0.047138722 | 0.267305137 | 1.66E-01 | 4.23E-01 | 1.00E+00 |
| ENSG00000087085.12_ACHE     | ENSG00000160789.18_LMNA | 0.14664  | -0.012864491 | 0.298860441 | 7.14E-02 | 2.53E-01 | 1.00E+00 |
| ENSG00000184271.14_POU6F1   | ENSG00000160789.18_LMNA | -0.11976 | -0.273741868 | 0.040206978 | 1.42E-01 | 3.84E-01 | 1.00E+00 |
| ENSG00000075292.17_ZNF638   | ENSG00000160789.18_LMNA | 0.03018  | -0.129644282 | 0.188474469 | 7.12E-01 | 8.78E-01 | 1.00E+00 |
| ENSG00000233901.4_LINC01503 | ENSG00000160789.18_LMNA | 0.29412  | 0.141549537  | 0.433045818 | 2.35E-04 | 3.72E-03 | 1.00E+00 |
| ENSG00000143224.16_PPOX     | ENSG00000160789.18_LMNA | -0.18751 | -0.336662494 | -0.0291823  | 2.07E-02 | 1.11E-01 | 1.00E+00 |
| ENSG00000198223.13_CSF2RA   | ENSG00000160789.18_LMNA | -0.24604 | -0.389968182 | -0.09038218 | 2.25E-03 | 2.14E-02 | 1.00E+00 |
| ENSG00000173041.10_ZNF680   | ENSG00000160789.18_LMNA | -0.24568 | -0.389636535 | -0.08999429 | 2.28E-03 | 2.16E-02 | 1.00E+00 |
| ENSG00000137507.10_LRRC32   | ENSG00000160789.18_LMNA | 0.27463  | 0.120708095  | 0.415658742 | 6.17E-04 | 7.96E-03 | 1.00E+00 |
| ENSG00000111670.13_GNPTAB   | ENSG00000160789.18_LMNA | -0.21658 | -0.363256321 | -0.05942902 | 7.36E-03 | 5.22E-02 | 1.00E+00 |
| ENSG00000183248.10_PRR36    | ENSG00000160789.18_LMNA | -0.23114 | -0.376482992 | -0.07468313 | 4.17E-03 | 3.43E-02 | 1.00E+00 |
| ENSG00000165282.12_PIGO     | ENSG00000160789.18_LMNA | 0.29008  | 0.137216589  | 0.429448808 | 2.89E-04 | 4.37E-03 | 1.00E+00 |
| ENSG00000233670.6_PIRT      | ENSG00000160789.18_LMNA | 0.00833  | -0.151070836 | 0.167309033 | 9.19E-01 | 9.69E-01 | 1.00E+00 |
| ENSG00000133794.16_ARNTL    | ENSG00000160789.18_LMNA | 0.19549  | 0.037458836  | 0.343988553 | 1.58E-02 | 9.11E-02 | 1.00E+00 |
| ENSG00000147408.13_CSGALNA  | ENSG00000160789.18_LMNA | -0.08091 | -0.237060821 | 0.07930849  | 3.22E-01 | 6.08E-01 | 1.00E+00 |
| ENSG00000159714.9_ZDHHC1    | ENSG00000160789.18_LMNA | 0.40613  | 0.263994833  | 0.5309956   | 2.09E-07 | 1.32E-05 | 1.07E-02 |
| ENSG00000166133.16_RPUSD2   | ENSG00000160789.18_LMNA | 0.09827  | -0.061897702 | 0.253506014 | 2.28E-01 | 5.05E-01 | 1.00E+00 |
| ENSG00000278311.3_GGNBP2    | ENSG00000160789.18_LMNA | 0.06465  | -0.095536976 | 0.221567343 | 4.29E-01 | 6.99E-01 | 1.00E+00 |
| ENSG00000157881.12_PANK4    | ENSG00000160789.18_LMNA | -0.01509 | -0.173872205 | 0.144458541 | 8.54E-01 | 9.43E-01 | 1.00E+00 |

|                              |                         |          |              |             |          |          |          |
|------------------------------|-------------------------|----------|--------------|-------------|----------|----------|----------|
| ENSG00000242259.7_C22orf39   | ENSG00000160789.18_LMNA | -0.3347  | -0.46891613  | -0.18537863 | 2.50E-05 | 6.18E-04 | 1.00E+00 |
| ENSG00000099365.8_STX1B      | ENSG00000160789.18_LMNA | -0.23269 | -0.377890271 | -0.07631448 | 3.92E-03 | 3.27E-02 | 1.00E+00 |
| ENSG00000040731.9_CDH10      | ENSG00000160789.18_LMNA | -0.20804 | -0.355466032 | -0.05051051 | 1.01E-02 | 6.61E-02 | 1.00E+00 |
| ENSG00000070882.11_OSBPL3    | ENSG00000160789.18_LMNA | 0.37791  | 0.232708929  | 0.506629243 | 1.59E-06 | 6.69E-05 | 8.14E-02 |
| ENSG00000132846.5_ZBED3      | ENSG00000160789.18_LMNA | -0.13283 | -0.285984008 | 0.026939438 | 1.03E-01 | 3.17E-01 | 1.00E+00 |
| ENSG00000136643.10_RPS6KC1   | ENSG00000160789.18_LMNA | -0.1875  | -0.336654894 | -0.02917373 | 2.07E-02 | 1.11E-01 | 1.00E+00 |
| ENSG00000227157.1_AC068535.1 | ENSG00000160789.18_LMNA | -0.1682  | -0.318859067 | -0.00924326 | 3.83E-02 | 1.68E-01 | 1.00E+00 |
| ENSG00000065665.19_SEC61A2   | ENSG00000160789.18_LMNA | -0.43042 | -0.551810163 | -0.2911728  | 3.12E-08 | 2.77E-06 | 1.60E-03 |
| ENSG00000172765.15_TMCC1     | ENSG00000160789.18_LMNA | -0.16564 | -0.316498755 | -0.00661817 | 4.14E-02 | 1.77E-01 | 1.00E+00 |
| ENSG00000112773.14_FAM46A    | ENSG00000160789.18_LMNA | 0.35525  | 0.207800579  | 0.486911907 | 7.09E-06 | 2.22E-04 | 3.64E-01 |
| ENSG00000171853.14_TRAPPC1   | ENSG00000160789.18_LMNA | -0.05508 | -0.212416428 | 0.105043476 | 5.00E-01 | 7.53E-01 | 1.00E+00 |
| ENSG00000265763.3_ZNF488     | ENSG00000160789.18_LMNA | -0.51154 | -0.620232938 | -0.38358002 | 1.64E-11 | 5.10E-09 | 8.42E-07 |
| ENSG00000101928.11_MOSPD1    | ENSG00000160789.18_LMNA | -0.17561 | -0.325706338 | -0.01688287 | 3.05E-02 | 1.45E-01 | 1.00E+00 |
| ENSG00000159921.13_GNE       | ENSG00000160789.18_LMNA | -0.09703 | -0.252328698 | 0.063150558 | 2.34E-01 | 5.12E-01 | 1.00E+00 |
| ENSG00000109685.16_WHSC1     | ENSG00000160789.18_LMNA | 0.05956  | -0.100593036 | 0.216707345 | 4.66E-01 | 7.28E-01 | 1.00E+00 |
| ENSG00000165516.9_KLHDC2     | ENSG00000160789.18_LMNA | -0.27928 | -0.419811345 | -0.12566219 | 4.93E-04 | 6.67E-03 | 1.00E+00 |
| ENSG00000143952.18_VPS54     | ENSG00000160789.18_LMNA | -0.05881 | -0.215985541 | 0.101342564 | 4.72E-01 | 7.32E-01 | 1.00E+00 |
| ENSG00000096093.13_EFHC1     | ENSG00000160789.18_LMNA | 0.10839  | -0.051701459 | 0.263052868 | 1.84E-01 | 4.49E-01 | 1.00E+00 |
| ENSG00000109171.13_SLAIN2    | ENSG00000160789.18_LMNA | 0.36976  | 0.22372903   | 0.499553672 | 2.75E-06 | 1.02E-04 | 1.41E-01 |
| ENSG00000158747.12_NBL1      | ENSG00000160789.18_LMNA | 0.14271  | -0.016872489 | 0.295205256 | 7.94E-02 | 2.71E-01 | 1.00E+00 |
| ENSG00000089820.14_ARHGAP4   | ENSG00000160789.18_LMNA | 0.17953  | 0.020931147  | 0.329321669 | 2.69E-02 | 1.33E-01 | 1.00E+00 |
| ENSG00000174059.15_CD34      | ENSG00000160789.18_LMNA | 0.17404  | 0.015265534  | 0.324259445 | 3.20E-02 | 1.50E-01 | 1.00E+00 |
| ENSG00000228589.3_SPCS2P4    | ENSG00000160789.18_LMNA | -0.07471 | -0.231156921 | 0.085512309 | 3.60E-01 | 6.43E-01 | 1.00E+00 |
| ENSG00000090857.12_PDPR      | ENSG00000160789.18_LMNA | 0.12572  | -0.034161054 | 0.279333168 | 1.23E-01 | 3.53E-01 | 1.00E+00 |
| ENSG00000136490.7_LIMD2      | ENSG00000160789.18_LMNA | -0.22645 | -0.372233678 | -0.06976702 | 5.03E-03 | 3.94E-02 | 1.00E+00 |
| ENSG00000125484.10_GTF3C4    | ENSG00000160789.18_LMNA | 0.04855  | -0.111515978 | 0.206154002 | 5.53E-01 | 7.88E-01 | 1.00E+00 |
| ENSG00000261115.4_TMEM178B   | ENSG00000160789.18_LMNA | -0.04965 | -0.207208285 | 0.110428212 | 5.44E-01 | 7.82E-01 | 1.00E+00 |
| ENSG00000082516.8_GEMIN5     | ENSG00000160789.18_LMNA | 0.0712   | -0.089008022 | 0.227819901 | 3.83E-01 | 6.62E-01 | 1.00E+00 |
| ENSG00000233954.6_UQCRHL     | ENSG00000160789.18_LMNA | -0.19777 | -0.34607652  | -0.03982542 | 1.46E-02 | 8.62E-02 | 1.00E+00 |
| ENSG00000153140.7_CETN3      | ENSG00000160789.18_LMNA | -0.23353 | -0.378657027 | -0.077204   | 3.78E-03 | 3.18E-02 | 1.00E+00 |
| ENSG00000178966.14_RMI1      | ENSG00000160789.18_LMNA | -0.13945 | -0.292164207 | 0.020199446 | 8.66E-02 | 2.86E-01 | 1.00E+00 |
| ENSG00000203644.3_RP11-332M  | ENSG00000160789.18_LMNA | 0.05303  | -0.107074906 | 0.210453735 | 5.16E-01 | 7.63E-01 | 1.00E+00 |
| ENSG00000067048.15_DDX3Y     | ENSG00000160789.18_LMNA | -0.06535 | -0.222234509 | 0.094841616 | 4.24E-01 | 6.95E-01 | 1.00E+00 |

|                             |                         |          |              |             |          |          |          |
|-----------------------------|-------------------------|----------|--------------|-------------|----------|----------|----------|
| ENSG00000204267.12_TAP2     | ENSG00000160789.18_LMNA | 0.15652  | -0.002744304 | 0.30804925  | 5.41E-02 | 2.12E-01 | 1.00E+00 |
| ENSG00000189319.12_FAM53B   | ENSG00000160789.18_LMNA | -0.05018 | -0.207720875 | 0.109899067 | 5.39E-01 | 7.79E-01 | 1.00E+00 |
| ENSG00000165506.13_DNAAF2   | ENSG00000160789.18_LMNA | -0.19953 | -0.347683991 | -0.04164974 | 1.37E-02 | 8.23E-02 | 1.00E+00 |
| ENSG00000093000.17_NUP50    | ENSG00000160789.18_LMNA | 0.02975  | -0.13007137  | 0.188055452 | 7.16E-01 | 8.79E-01 | 1.00E+00 |
| ENSG00000018699.10_TTC27    | ENSG00000160789.18_LMNA | -0.00458 | -0.163657451 | 0.154737454 | 9.55E-01 | 9.82E-01 | 1.00E+00 |
| ENSG00000145391.12_SETD7    | ENSG00000160789.18_LMNA | 0.01803  | -0.141581851 | 0.176718724 | 8.26E-01 | 9.32E-01 | 1.00E+00 |
| ENSG00000163815.5_CLEC3B    | ENSG00000160789.18_LMNA | -0.08106 | -0.237195747 | 0.079166423 | 3.21E-01 | 6.07E-01 | 1.00E+00 |
| ENSG00000124920.12_MYRF     | ENSG00000160789.18_LMNA | -0.25248 | -0.395776171 | -0.09718984 | 1.70E-03 | 1.73E-02 | 1.00E+00 |
| ENSG00000164294.12_GPX8     | ENSG00000160789.18_LMNA | 0.43626  | 0.297736081  | 0.556788516 | 1.93E-08 | 1.87E-06 | 9.90E-04 |
| ENSG00000213088.8_ACKR1     | ENSG00000160789.18_LMNA | -0.1306  | -0.283893368 | 0.029213022 | 1.09E-01 | 3.28E-01 | 1.00E+00 |
| ENSG00000145439.10_CBR4     | ENSG00000160789.18_LMNA | -0.45627 | -0.573789013 | -0.32033505 | 3.47E-09 | 4.39E-07 | 1.78E-04 |
| ENSG00000272047.1_GTF2H5    | ENSG00000160789.18_LMNA | -0.25335 | -0.396557501 | -0.09810779 | 1.64E-03 | 1.68E-02 | 1.00E+00 |
| ENSG00000148950.8_IMMP1L    | ENSG00000160789.18_LMNA | -0.30485 | -0.442573476 | -0.15308076 | 1.34E-04 | 2.38E-03 | 1.00E+00 |
| ENSG00000163516.12_ANKZF1   | ENSG00000160789.18_LMNA | -0.01814 | -0.176831539 | 0.141467729 | 8.24E-01 | 9.31E-01 | 1.00E+00 |
| ENSG00000170185.8_USP38     | ENSG00000160789.18_LMNA | 0.1166   | -0.04341085  | 0.270770283 | 1.53E-01 | 4.02E-01 | 1.00E+00 |
| ENSG00000069122.17_ADGRF5   | ENSG00000160789.18_LMNA | 0.00662  | -0.152738596 | 0.165649195 | 9.35E-01 | 9.75E-01 | 1.00E+00 |
| ENSG00000113212.6_PCDHB7    | ENSG00000160789.18_LMNA | -0.01821 | -0.176896082 | 0.141402434 | 8.24E-01 | 9.31E-01 | 1.00E+00 |
| ENSG00000279117.1_CTD-2562J | ENSG00000160789.18_LMNA | -0.25381 | -0.396971604 | -0.09859451 | 1.60E-03 | 1.65E-02 | 1.00E+00 |
| ENSG00000245694.7_CRNDE     | ENSG00000160789.18_LMNA | -0.08816 | -0.243934333 | 0.072054796 | 2.80E-01 | 5.66E-01 | 1.00E+00 |
| ENSG00000163866.8_SMIM12    | ENSG00000160789.18_LMNA | -0.02652 | -0.184939432 | 0.133243716 | 7.46E-01 | 8.94E-01 | 1.00E+00 |
| ENSG00000141469.15_SLC14A1  | ENSG00000160789.18_LMNA | -0.38156 | -0.509791717 | -0.23673772 | 1.23E-06 | 5.46E-05 | 6.33E-02 |
| ENSG00000138685.11_FGF2     | ENSG00000160789.18_LMNA | 0.07466  | -0.08556101  | 0.231110482 | 3.61E-01 | 6.43E-01 | 1.00E+00 |
| ENSG00000104219.11_ZDHHC2   | ENSG00000160789.18_LMNA | -0.34917 | -0.481601965 | -0.20115398 | 1.04E-05 | 3.00E-04 | 5.33E-01 |
| ENSG00000104885.16_DOT1L    | ENSG00000160789.18_LMNA | 0.15221  | -0.007165856 | 0.304041741 | 6.12E-02 | 2.29E-01 | 1.00E+00 |
| ENSG00000172663.7_TMEM134   | ENSG00000160789.18_LMNA | 0.12967  | -0.030157644 | 0.283023879 | 1.11E-01 | 3.33E-01 | 1.00E+00 |
| ENSG00000110063.7_DCPS      | ENSG00000160789.18_LMNA | 0.32871  | 0.178868677  | 0.463646789 | 3.56E-05 | 8.21E-04 | 1.00E+00 |
| ENSG00000182552.13_RWDD4    | ENSG00000160789.18_LMNA | -0.17363 | -0.323881951 | -0.01484384 | 3.24E-02 | 1.51E-01 | 1.00E+00 |
| ENSG00000141026.5_MED9      | ENSG00000160789.18_LMNA | 0.12293  | -0.036991242 | 0.27671844  | 1.31E-01 | 3.67E-01 | 1.00E+00 |
| ENSG00000171735.17_CAMTA1   | ENSG00000160789.18_LMNA | -0.31139 | -0.44836278  | -0.1601262  | 9.43E-05 | 1.80E-03 | 1.00E+00 |
| ENSG00000101246.18_ARFRP1   | ENSG00000160789.18_LMNA | 0.36203  | 0.215239689  | 0.492830616 | 4.58E-06 | 1.55E-04 | 2.35E-01 |
| ENSG00000133657.13_ATP13A3  | ENSG00000160789.18_LMNA | 0.35203  | 0.204280124  | 0.484101996 | 8.69E-06 | 2.60E-04 | 4.46E-01 |
| ENSG00000176182.5_MYPOP     | ENSG00000160789.18_LMNA | 0.28968  | 0.136784734  | 0.429089794 | 2.95E-04 | 4.44E-03 | 1.00E+00 |
| ENSG00000015532.8_XYLT2     | ENSG00000160789.18_LMNA | 0.49696  | 0.366775382  | 0.608052226 | 7.41E-11 | 1.77E-08 | 3.80E-06 |



|                             |                         |          |              |             |          |          |          |
|-----------------------------|-------------------------|----------|--------------|-------------|----------|----------|----------|
| ENSG00000242498.6_ARPIN     | ENSG00000160789.18_LMNA | 0.26987  | 0.115639263  | 0.411397199 | 7.73E-04 | 9.46E-03 | 1.00E+00 |
| ENSG00000031003.9_FAM13B    | ENSG00000160789.18_LMNA | -0.1879  | -0.337015802 | -0.02958048 | 2.04E-02 | 1.10E-01 | 1.00E+00 |
| ENSG00000161813.19_LARP4    | ENSG00000160789.18_LMNA | 0.02263  | -0.137066886 | 0.181175624 | 7.82E-01 | 9.11E-01 | 1.00E+00 |
| ENSG00000166037.9_CEP57     | ENSG00000160789.18_LMNA | -0.2306  | -0.376000591 | -0.0741243  | 4.26E-03 | 3.48E-02 | 1.00E+00 |
| ENSG00000276234.3_TADA2A    | ENSG00000160789.18_LMNA | -0.28275 | -0.422911521 | -0.12937032 | 4.16E-04 | 5.85E-03 | 1.00E+00 |
| ENSG00000227372.9_TP73-AS1  | ENSG00000160789.18_LMNA | 0.29903  | 0.146820574  | 0.437409104 | 1.82E-04 | 3.04E-03 | 1.00E+00 |
| ENSG00000151376.15_ME3      | ENSG00000160789.18_LMNA | -0.27939 | -0.419911962 | -0.12578241 | 4.91E-04 | 6.64E-03 | 1.00E+00 |
| ENSG00000183196.7_CHST6     | ENSG00000160789.18_LMNA | 0.17006  | 0.011164823  | 0.320584386 | 3.62E-02 | 1.62E-01 | 1.00E+00 |
| ENSG00000082074.14_FYB      | ENSG00000160789.18_LMNA | -0.06772 | -0.224499102 | 0.092479012 | 4.07E-01 | 6.82E-01 | 1.00E+00 |
| ENSG00000143507.16_DUSP10   | ENSG00000160789.18_LMNA | 0.0138   | -0.145718931 | 0.172623356 | 8.66E-01 | 9.48E-01 | 1.00E+00 |
| ENSG00000157326.17_DHRS4    | ENSG00000160789.18_LMNA | 0.30934  | 0.157915563  | 0.446548877 | 1.05E-04 | 1.97E-03 | 1.00E+00 |
| ENSG00000132967.9_HMGB1P5   | ENSG00000160789.18_LMNA | -0.08033 | -0.23650484  | 0.079893762 | 3.25E-01 | 6.12E-01 | 1.00E+00 |
| ENSG00000107789.14_MINPP1   | ENSG00000160789.18_LMNA | 0.03883  | -0.12111596  | 0.196817433 | 6.35E-01 | 8.36E-01 | 1.00E+00 |
| ENSG00000166025.16_AMOTL1   | ENSG00000160789.18_LMNA | 0.14389  | -0.015670633 | 0.296302276 | 7.70E-02 | 2.66E-01 | 1.00E+00 |
| ENSG00000068878.13_PSME4    | ENSG00000160789.18_LMNA | 0.12459  | -0.035315545 | 0.278267129 | 1.26E-01 | 3.59E-01 | 1.00E+00 |
| ENSG00000213965.3_NUDT19    | ENSG00000160789.18_LMNA | 0.49537  | 0.364953684  | 0.606724922 | 8.69E-11 | 2.02E-08 | 4.46E-06 |
| ENSG00000132821.10_VSTM2L   | ENSG00000160789.18_LMNA | -0.18287 | -0.33238958  | -0.0243744  | 2.41E-02 | 1.23E-01 | 1.00E+00 |
| ENSG00000188690.11_UROS     | ENSG00000160789.18_LMNA | -0.29331 | -0.432324939 | -0.14068027 | 2.45E-04 | 3.84E-03 | 1.00E+00 |
| ENSG00000163933.8_RFT1      | ENSG00000160789.18_LMNA | 0.2063   | 0.048700806  | 0.353880075 | 1.08E-02 | 6.91E-02 | 1.00E+00 |
| ENSG00000181396.11_OGFOD3   | ENSG00000160789.18_LMNA | 0.26251  | 0.107812072  | 0.40479111  | 1.09E-03 | 1.23E-02 | 1.00E+00 |
| ENSG00000137845.13_ADAM10   | ENSG00000160789.18_LMNA | 0.24939  | 0.093916215  | 0.392986241 | 1.95E-03 | 1.91E-02 | 1.00E+00 |
| ENSG00000172594.11_SMPDL3A  | ENSG00000160789.18_LMNA | 0.01455  | -0.144988158 | 0.173347563 | 8.59E-01 | 9.44E-01 | 1.00E+00 |
| ENSG00000110066.13_KMT5B    | ENSG00000160789.18_LMNA | -0.16942 | -0.31999347  | -0.01050644 | 3.69E-02 | 1.64E-01 | 1.00E+00 |
| ENSG00000142867.11_BCL10    | ENSG00000160789.18_LMNA | 0.31109  | 0.15980569   | 0.448099935 | 9.58E-05 | 1.82E-03 | 1.00E+00 |
| ENSG00000274828.1_RP11-567M | ENSG00000160789.18_LMNA | -0.2972  | -0.435783197 | -0.14485448 | 2.01E-04 | 3.27E-03 | 1.00E+00 |
| ENSG00000126775.8_ATG14     | ENSG00000160789.18_LMNA | -0.05551 | -0.212825128 | 0.104620128 | 4.97E-01 | 7.51E-01 | 1.00E+00 |
| ENSG00000115828.14_QPCT     | ENSG00000160789.18_LMNA | -0.07764 | -0.233946681 | 0.082583886 | 3.42E-01 | 6.27E-01 | 1.00E+00 |
| ENSG00000077522.11_ACTN2    | ENSG00000160789.18_LMNA | -0.03136 | -0.189615875 | 0.128480289 | 7.01E-01 | 8.72E-01 | 1.00E+00 |
| ENSG00000139625.11_MAP3K12  | ENSG00000160789.18_LMNA | 0.08755  | -0.072664943 | 0.243357386 | 2.83E-01 | 5.69E-01 | 1.00E+00 |
| ENSG00000166682.9_TMPRSS5   | ENSG00000160789.18_LMNA | -0.30333 | -0.441221424 | -0.15143957 | 1.45E-04 | 2.53E-03 | 1.00E+00 |
| ENSG00000112561.16_TFEB     | ENSG00000160789.18_LMNA | 0.02725  | -0.132528809 | 0.185642205 | 7.39E-01 | 8.90E-01 | 1.00E+00 |
| ENSG00000246705.4_H2AFJ     | ENSG00000160789.18_LMNA | 0.1172   | -0.042803712 | 0.271333863 | 1.50E-01 | 3.99E-01 | 1.00E+00 |
| ENSG00000126883.15_NUP214   | ENSG00000160789.18_LMNA | 0.13278  | -0.026988646 | 0.285938791 | 1.03E-01 | 3.17E-01 | 1.00E+00 |

|                              |                         |          |              |             |          |          |          |
|------------------------------|-------------------------|----------|--------------|-------------|----------|----------|----------|
| ENSG00000122882.9_ECD        | ENSG00000160789.18_LMNA | -0.09053 | -0.246186467 | 0.069670801 | 2.67E-01 | 5.51E-01 | 1.00E+00 |
| ENSG00000178104.18_PDE4DIP   | ENSG00000160789.18_LMNA | -0.17015 | -0.320660153 | -0.01124926 | 3.61E-02 | 1.62E-01 | 1.00E+00 |
| ENSG00000175866.14_BAIAP2    | ENSG00000160789.18_LMNA | 0.36083  | 0.213922037  | 0.491784134 | 4.95E-06 | 1.65E-04 | 2.54E-01 |
| ENSG00000144730.15_IL17RD    | ENSG00000160789.18_LMNA | 0.02891  | -0.130890097 | 0.187251875 | 7.24E-01 | 8.83E-01 | 1.00E+00 |
| ENSG00000056972.17_TRAF3IP2  | ENSG00000160789.18_LMNA | 0.15674  | -0.002527365 | 0.308245591 | 5.38E-02 | 2.11E-01 | 1.00E+00 |
| ENSG00000180182.9_MED14      | ENSG00000160789.18_LMNA | 0.26188  | 0.107143038  | 0.404225009 | 1.12E-03 | 1.26E-02 | 1.00E+00 |
| ENSG00000154001.12_PPP2R5E   | ENSG00000160789.18_LMNA | 0.05574  | -0.104387144 | 0.213050005 | 4.95E-01 | 7.50E-01 | 1.00E+00 |
| ENSG00000007866.17_TEAD3     | ENSG00000160789.18_LMNA | 0.5166   | 0.389422585  | 0.624441309 | 9.57E-12 | 3.43E-09 | 4.91E-07 |
| ENSG00000241370.4_RPP21      | ENSG00000160789.18_LMNA | -0.05221 | -0.209668743 | 0.107886648 | 5.23E-01 | 7.68E-01 | 1.00E+00 |
| ENSG00000153037.11_SRP19     | ENSG00000160789.18_LMNA | -0.13943 | -0.29214583  | 0.02021953  | 8.67E-02 | 2.86E-01 | 1.00E+00 |
| ENSG00000156735.9_BAG4       | ENSG00000160789.18_LMNA | -0.16983 | -0.320369797 | -0.0109257  | 3.65E-02 | 1.63E-01 | 1.00E+00 |
| ENSG00000122986.12_HVCN1     | ENSG00000160789.18_LMNA | 0.07951  | -0.080716873 | 0.235722573 | 3.30E-01 | 6.16E-01 | 1.00E+00 |
| ENSG00000001561.6_ENPP4      | ENSG00000160789.18_LMNA | -0.25234 | -0.395646072 | -0.09703704 | 1.71E-03 | 1.74E-02 | 1.00E+00 |
| ENSG00000180448.9_ARHGAP45   | ENSG00000160789.18_LMNA | 0.20378  | 0.046078501  | 0.351578865 | 1.18E-02 | 7.38E-02 | 1.00E+00 |
| ENSG00000132423.9_COQ3       | ENSG00000160789.18_LMNA | -0.38377 | -0.511704999 | -0.23917968 | 1.06E-06 | 4.81E-05 | 5.43E-02 |
| ENSG00000227077.3_AC107983.4 | ENSG00000160789.18_LMNA | -0.02074 | -0.179343831 | 0.138924145 | 8.00E-01 | 9.20E-01 | 1.00E+00 |
| ENSG00000005302.16_MSL3      | ENSG00000160789.18_LMNA | -0.179   | -0.328832408 | -0.0203827  | 2.73E-02 | 1.35E-01 | 1.00E+00 |
| ENSG00000120685.18_PROSER1   | ENSG00000160789.18_LMNA | -0.1307  | -0.283994584 | 0.029103023 | 1.08E-01 | 3.28E-01 | 1.00E+00 |
| ENSG00000112874.8_NUDT12     | ENSG00000160789.18_LMNA | -0.19869 | -0.346915794 | -0.04077766 | 1.41E-02 | 8.42E-02 | 1.00E+00 |
| ENSG00000100139.12_MICALL1   | ENSG00000160789.18_LMNA | 0.11806  | -0.041928974 | 0.272145464 | 1.47E-01 | 3.94E-01 | 1.00E+00 |
| ENSG00000164934.12_DCAF13    | ENSG00000160789.18_LMNA | -0.13972 | -0.292417693 | 0.019922392 | 8.60E-02 | 2.85E-01 | 1.00E+00 |
| ENSG00000267519.3_MIR24-2    | ENSG00000160789.18_LMNA | 0.2792   | 0.12558156   | 0.419743858 | 4.95E-04 | 6.68E-03 | 1.00E+00 |
| ENSG00000116539.9_ASH1L      | ENSG00000160789.18_LMNA | 0.11328  | -0.046762675 | 0.267655052 | 1.65E-01 | 4.21E-01 | 1.00E+00 |
| ENSG00000105298.12_CACTIN    | ENSG00000160789.18_LMNA | 0.23102  | 0.074560143  | 0.376376838 | 4.19E-03 | 3.44E-02 | 1.00E+00 |
| ENSG00000135469.12_COQ10A    | ENSG00000160789.18_LMNA | -0.25117 | -0.394595512 | -0.0958037  | 1.80E-03 | 1.81E-02 | 1.00E+00 |
| ENSG00000165449.10_SLC16A9   | ENSG00000160789.18_LMNA | -0.45252 | -0.570612397 | -0.3160903  | 4.83E-09 | 5.83E-07 | 2.48E-04 |
| ENSG00000119820.9_YIPF4      | ENSG00000160789.18_LMNA | -0.44218 | -0.561829688 | -0.30440723 | 1.18E-08 | 1.24E-06 | 6.03E-04 |
| ENSG00000147883.10_CDKN2B    | ENSG00000160789.18_LMNA | 0.00023  | -0.158976203 | 0.159425184 | 9.98E-01 | 9.99E-01 | 1.00E+00 |
| ENSG00000244165.1_P2RY11     | ENSG00000160789.18_LMNA | 0.25962  | 0.104746586  | 0.402195387 | 1.24E-03 | 1.36E-02 | 1.00E+00 |
| ENSG00000139567.11_ACVRL1    | ENSG00000160789.18_LMNA | 0.08513  | -0.075086459 | 0.241065423 | 2.97E-01 | 5.83E-01 | 1.00E+00 |
| ENSG00000132952.10_USPL1     | ENSG00000160789.18_LMNA | -0.1195  | -0.273492922 | 0.040475632 | 1.43E-01 | 3.86E-01 | 1.00E+00 |
| ENSG00000143793.11_C1orf35   | ENSG00000160789.18_LMNA | 0.08869  | -0.071517182 | 0.244442509 | 2.77E-01 | 5.62E-01 | 1.00E+00 |
| ENSG00000135414.8_GDF11      | ENSG00000160789.18_LMNA | -0.17048 | -0.320969066 | -0.01159357 | 3.57E-02 | 1.61E-01 | 1.00E+00 |

|                              |                         |          |              |             |          |          |          |
|------------------------------|-------------------------|----------|--------------|-------------|----------|----------|----------|
| ENSG00000059378.11_PARP12    | ENSG00000160789.18_LMNA | 0.15499  | -0.004315897 | 0.306626087 | 5.66E-02 | 2.17E-01 | 1.00E+00 |
| ENSG00000075340.21_ADD2      | ENSG00000160789.18_LMNA | -0.24557 | -0.389545323 | -0.08988762 | 2.29E-03 | 2.17E-02 | 1.00E+00 |
| ENSG000000215712.9_TMEM242   | ENSG00000160789.18_LMNA | -0.1966  | -0.344998264 | -0.03860285 | 1.52E-02 | 8.87E-02 | 1.00E+00 |
| ENSG00000087008.14_ACOX3     | ENSG00000160789.18_LMNA | 0.17705  | 0.018368182  | 0.327033853 | 2.91E-02 | 1.40E-01 | 1.00E+00 |
| ENSG000000115267.5_IFIH1     | ENSG00000160789.18_LMNA | 0.06363  | -0.096552517 | 0.220592445 | 4.36E-01 | 7.04E-01 | 1.00E+00 |
| ENSG000000113593.10_PPWD1    | ENSG00000160789.18_LMNA | 0.06262  | -0.097557908 | 0.219626666 | 4.43E-01 | 7.11E-01 | 1.00E+00 |
| ENSG000000101849.14_TBL1X    | ENSG00000160789.18_LMNA | 0.28976  | 0.136875691  | 0.429165417 | 2.94E-04 | 4.42E-03 | 1.00E+00 |
| ENSG000000121152.8_NCAPH     | ENSG00000160789.18_LMNA | 0.00641  | -0.152943351 | 0.165445288 | 9.37E-01 | 9.75E-01 | 1.00E+00 |
| ENSG00000080819.5_CPOX       | ENSG00000160789.18_LMNA | 0.07354  | -0.086672471 | 0.230050252 | 3.68E-01 | 6.49E-01 | 1.00E+00 |
| ENSG000000113231.12_PDE8B    | ENSG00000160789.18_LMNA | -0.147   | -0.299195904 | 0.012496145 | 7.07E-02 | 2.51E-01 | 1.00E+00 |
| ENSG000000142235.7_LMTK3     | ENSG00000160789.18_LMNA | -0.04379 | -0.201585696 | 0.116220589 | 5.92E-01 | 8.11E-01 | 1.00E+00 |
| ENSG000000173327.6_MAP3K11   | ENSG00000160789.18_LMNA | 0.28138  | 0.127911717  | 0.421692878 | 4.45E-04 | 6.16E-03 | 1.00E+00 |
| ENSG000000184056.13_VPS33B   | ENSG00000160789.18_LMNA | -0.01311 | -0.171954847 | 0.146393194 | 8.73E-01 | 9.51E-01 | 1.00E+00 |
| ENSG000000115904.11_SOS1     | ENSG00000160789.18_LMNA | -0.0506  | -0.208127236 | 0.109479454 | 5.36E-01 | 7.77E-01 | 1.00E+00 |
| ENSG000000162402.11_USP24    | ENSG00000160789.18_LMNA | 0.01296  | -0.146538551 | 0.171810692 | 8.74E-01 | 9.51E-01 | 1.00E+00 |
| ENSG000000168314.16_MOBP     | ENSG00000160789.18_LMNA | -0.38104 | -0.509345901 | -0.23616921 | 1.28E-06 | 5.63E-05 | 6.56E-02 |
| ENSG000000164916.10_FOXK1    | ENSG00000160789.18_LMNA | 0.31724  | 0.166448042  | 0.453536985 | 6.83E-05 | 1.38E-03 | 1.00E+00 |
| ENSG000000166140.16_ZFYVE19  | ENSG00000160789.18_LMNA | 0.13793  | -0.021746962 | 0.290747524 | 9.02E-02 | 2.92E-01 | 1.00E+00 |
| ENSG00000006704.9_GTF2IRD1   | ENSG00000160789.18_LMNA | 0.13161  | -0.028181009 | 0.284842709 | 1.06E-01 | 3.23E-01 | 1.00E+00 |
| ENSG000000102871.14_TRADD    | ENSG00000160789.18_LMNA | 0.43807  | 0.299780152  | 0.558335185 | 1.66E-08 | 1.64E-06 | 8.51E-04 |
| ENSG000000005249.11_PRKAR2B  | ENSG00000160789.18_LMNA | -0.06223 | -0.219260073 | 0.097939368 | 4.46E-01 | 7.13E-01 | 1.00E+00 |
| ENSG000000154447.13_SH3RF1   | ENSG00000160789.18_LMNA | 0.08463  | -0.075591116 | 0.240587321 | 3.00E-01 | 5.86E-01 | 1.00E+00 |
| ENSG000000236287.6_ZBED5     | ENSG00000160789.18_LMNA | -0.28284 | -0.422992745 | -0.12946758 | 4.15E-04 | 5.83E-03 | 1.00E+00 |
| ENSG000000075303.11_SLC25A4C | ENSG00000160789.18_LMNA | -0.01341 | -0.172247158 | 0.146098404 | 8.70E-01 | 9.49E-01 | 1.00E+00 |
| ENSG000000233328.3_PFN1P1    | ENSG00000160789.18_LMNA | 0.20499  | 0.04733493   | 0.352681908 | 1.13E-02 | 7.14E-02 | 1.00E+00 |
| ENSG000000146802.11_TMEM168  | ENSG00000160789.18_LMNA | -0.00549 | -0.164548407 | 0.153843638 | 9.46E-01 | 9.79E-01 | 1.00E+00 |
| ENSG000000239305.5_RNF103    | ENSG00000160789.18_LMNA | -0.221   | -0.367277938 | -0.06405212 | 6.22E-03 | 4.62E-02 | 1.00E+00 |
| ENSG000000011143.15_MKS1     | ENSG00000160789.18_LMNA | -0.11861 | -0.272658117 | 0.041376194 | 1.46E-01 | 3.91E-01 | 1.00E+00 |
| ENSG000000151914.16_DST      | ENSG00000160789.18_LMNA | -0.00744 | -0.166442655 | 0.151941575 | 9.28E-01 | 9.72E-01 | 1.00E+00 |
| ENSG000000198093.9_ZNF649    | ENSG00000160789.18_LMNA | -0.15428 | -0.305965939 | 0.005044374 | 5.77E-02 | 2.20E-01 | 1.00E+00 |
| ENSG000000101417.10_PXMP4    | ENSG00000160789.18_LMNA | 0.08046  | -0.079759298 | 0.236632593 | 3.24E-01 | 6.11E-01 | 1.00E+00 |
| ENSG000000163249.8_CCNYL1    | ENSG00000160789.18_LMNA | 0.15454  | -0.004780616 | 0.306204991 | 5.73E-02 | 2.19E-01 | 1.00E+00 |
| ENSG000000148082.8_SHC3      | ENSG00000160789.18_LMNA | -0.12148 | -0.275355753 | 0.038464226 | 1.36E-01 | 3.75E-01 | 1.00E+00 |

|                            |                         |          |              |             |          |          |          |
|----------------------------|-------------------------|----------|--------------|-------------|----------|----------|----------|
| ENSG00000141564.12_RPTOR   | ENSG00000160789.18_LMNA | 0.28232  | 0.128913367  | 0.422529857 | 4.25E-04 | 5.95E-03 | 1.00E+00 |
| ENSG00000197535.13_MYO5A   | ENSG00000160789.18_LMNA | -0.08148 | -0.237601917 | 0.078738678 | 3.18E-01 | 6.05E-01 | 1.00E+00 |
| ENSG00000145945.5_FAM50B   | ENSG00000160789.18_LMNA | 0.11004  | -0.050042009 | 0.264600818 | 1.77E-01 | 4.39E-01 | 1.00E+00 |
| ENSG00000244005.11_NFS1    | ENSG00000160789.18_LMNA | 0.05917  | -0.100979789 | 0.216334941 | 4.69E-01 | 7.30E-01 | 1.00E+00 |
| ENSG00000128641.16_MYO1B   | ENSG00000160789.18_LMNA | 0.22334  | 0.066503313  | 0.369405628 | 5.68E-03 | 4.31E-02 | 1.00E+00 |
| ENSG00000254635.4_WAC-AS1  | ENSG00000160789.18_LMNA | -0.05731 | -0.214556705 | 0.102825218 | 4.83E-01 | 7.40E-01 | 1.00E+00 |
| ENSG00000157045.7_NTAN1    | ENSG00000160789.18_LMNA | 0.38376  | 0.23917046   | 0.511697779 | 1.06E-06 | 4.81E-05 | 5.43E-02 |
| ENSG00000146592.15_CREB5   | ENSG00000160789.18_LMNA | 0.03779  | -0.122145888 | 0.195812328 | 6.44E-01 | 8.42E-01 | 1.00E+00 |
| ENSG00000142798.15_HSPG2   | ENSG00000160789.18_LMNA | 0.37693  | 0.231625054  | 0.505777173 | 1.70E-06 | 7.04E-05 | 8.71E-02 |
| ENSG00000196850.5_PPTC7    | ENSG00000160789.18_LMNA | 0.05015  | -0.109925033 | 0.207695726 | 5.39E-01 | 7.79E-01 | 1.00E+00 |
| ENSG00000129038.14_LOXL1   | ENSG00000160789.18_LMNA | 0.50443  | 0.375373369  | 0.614298636 | 3.45E-11 | 9.32E-09 | 1.77E-06 |
| ENSG00000049130.12_KITLG   | ENSG00000160789.18_LMNA | 0.08559  | -0.074632181 | 0.241495665 | 2.94E-01 | 5.80E-01 | 1.00E+00 |
| ENSG00000198162.11_MAN1A2  | ENSG00000160789.18_LMNA | -0.06418 | -0.221123828 | 0.095999062 | 4.32E-01 | 7.01E-01 | 1.00E+00 |
| ENSG00000200714.1_Y_RNA    | ENSG00000160789.18_LMNA | -0.10983 | -0.264404953 | 0.050252078 | 1.78E-01 | 4.40E-01 | 1.00E+00 |
| ENSG00000152443.11_ZNF776  | ENSG00000160789.18_LMNA | -0.0899  | -0.245585794 | 0.070306996 | 2.71E-01 | 5.55E-01 | 1.00E+00 |
| ENSG00000168386.17_FILIP1L | ENSG00000160789.18_LMNA | 0.1231   | -0.036824215 | 0.276872881 | 1.31E-01 | 3.67E-01 | 1.00E+00 |
| ENSG00000164597.12_COG5    | ENSG00000160789.18_LMNA | 0.06207  | -0.098104317 | 0.219101524 | 4.47E-01 | 7.14E-01 | 1.00E+00 |
| ENSG00000187474.4_FPR3     | ENSG00000160789.18_LMNA | 0.01508  | -0.144469899 | 0.173860956 | 8.54E-01 | 9.43E-01 | 1.00E+00 |
| ENSG00000168273.6_SMIM4    | ENSG00000160789.18_LMNA | 0.11174  | -0.048321077 | 0.266204409 | 1.71E-01 | 4.29E-01 | 1.00E+00 |
| ENSG00000143318.11_CASQ1   | ENSG00000160789.18_LMNA | -0.32541 | -0.46074319  | -0.17529208 | 4.30E-05 | 9.49E-04 | 1.00E+00 |
| ENSG00000184481.15_FOXO4   | ENSG00000160789.18_LMNA | -0.20505 | -0.352732086 | -0.04739211 | 1.13E-02 | 7.13E-02 | 1.00E+00 |
| ENSG00000110328.5_GALNT18  | ENSG00000160789.18_LMNA | 0.13592  | -0.023794459 | 0.288871023 | 9.50E-02 | 3.02E-01 | 1.00E+00 |
| ENSG00000107771.14_CCER2   | ENSG00000160789.18_LMNA | -0.30116 | -0.439296149 | -0.14910533 | 1.63E-04 | 2.78E-03 | 1.00E+00 |
| ENSG00000142700.10_DMRTA2  | ENSG00000160789.18_LMNA | 0.40361  | 0.261192097  | 0.528830607 | 2.52E-07 | 1.54E-05 | 1.29E-02 |
| ENSG00000110906.11_KCTD10  | ENSG00000160789.18_LMNA | 0.08797  | -0.072246907 | 0.243752699 | 2.81E-01 | 5.67E-01 | 1.00E+00 |
| ENSG00000188015.8_S100A3   | ENSG00000160789.18_LMNA | 0.09723  | -0.062946511 | 0.252520505 | 2.33E-01 | 5.11E-01 | 1.00E+00 |
| ENSG00000172932.13_ANKRD13 | ENSG00000160789.18_LMNA | 0.25908  | 0.104177132  | 0.401712671 | 1.27E-03 | 1.39E-02 | 1.00E+00 |
| ENSG00000183655.12_KLHL25  | ENSG00000160789.18_LMNA | -0.10146 | -0.256516119 | 0.058689936 | 2.14E-01 | 4.88E-01 | 1.00E+00 |
| ENSG00000107186.15_MPDZ    | ENSG00000160789.18_LMNA | -0.01221 | -0.171074966 | 0.147280197 | 8.81E-01 | 9.54E-01 | 1.00E+00 |
| ENSG00000115486.10_GGCX    | ENSG00000160789.18_LMNA | 0.22559  | 0.068864173  | 0.37145191  | 5.20E-03 | 4.04E-02 | 1.00E+00 |
| ENSG00000167967.14_E4F1    | ENSG00000160789.18_LMNA | 0.11605  | -0.04396522  | 0.270255498 | 1.55E-01 | 4.05E-01 | 1.00E+00 |
| ENSG00000077279.15_DCX     | ENSG00000160789.18_LMNA | -0.33014 | -0.464905483 | -0.18042145 | 3.27E-05 | 7.67E-04 | 1.00E+00 |
| ENSG00000125686.10_MED1    | ENSG00000160789.18_LMNA | 0.00619  | -0.153165022 | 0.165224505 | 9.40E-01 | 9.76E-01 | 1.00E+00 |

|                             |                         |          |              |             |          |          |          |
|-----------------------------|-------------------------|----------|--------------|-------------|----------|----------|----------|
| ENSG00000170471.13_RALGAPB  | ENSG00000160789.18_LMNA | 0.12963  | -0.030191261 | 0.282992926 | 1.11E-01 | 3.33E-01 | 1.00E+00 |
| ENSG00000204397.6_CARD16    | ENSG00000160789.18_LMNA | 0.19593  | 0.037914537  | 0.34439084  | 1.56E-02 | 9.01E-02 | 1.00E+00 |
| ENSG00000247271.5_ZBED5-AS1 | ENSG00000160789.18_LMNA | -0.23037 | -0.375788968 | -0.0738792  | 4.30E-03 | 3.50E-02 | 1.00E+00 |
| ENSG00000075188.7_NUP37     | ENSG00000160789.18_LMNA | 0.0475   | -0.11254979  | 0.205151328 | 5.61E-01 | 7.93E-01 | 1.00E+00 |
| ENSG00000262484.1_CCER2     | ENSG00000160789.18_LMNA | -0.24883 | -0.39248422  | -0.09332784 | 1.99E-03 | 1.95E-02 | 1.00E+00 |
| ENSG00000165752.15_STK32C   | ENSG00000160789.18_LMNA | -0.25009 | -0.393623192 | -0.09466303 | 1.89E-03 | 1.87E-02 | 1.00E+00 |
| ENSG00000140678.15_ITGAX    | ENSG00000160789.18_LMNA | -0.09185 | -0.247436935 | 0.06834556  | 2.60E-01 | 5.43E-01 | 1.00E+00 |
| ENSG00000109339.17_MAPK10   | ENSG00000160789.18_LMNA | -0.38833 | -0.51564929  | -0.24422477 | 7.67E-07 | 3.70E-05 | 3.94E-02 |
| ENSG00000280800.1_CH507-513 | ENSG00000160789.18_LMNA | -0.04148 | -0.199364383 | 0.118503038 | 6.12E-01 | 8.23E-01 | 1.00E+00 |
| ENSG00000205643.9_CDPF1     | ENSG00000160789.18_LMNA | -0.0502  | -0.207743267 | 0.109875948 | 5.39E-01 | 7.79E-01 | 1.00E+00 |
| ENSG00000137171.13_KLC4     | ENSG00000160789.18_LMNA | -0.17118 | -0.321618171 | -0.01231729 | 3.50E-02 | 1.59E-01 | 1.00E+00 |
| ENSG00000106089.10_STX1A    | ENSG00000160789.18_LMNA | 0.00232  | -0.156942313 | 0.161457426 | 9.77E-01 | 9.91E-01 | 1.00E+00 |
| ENSG00000128268.11_MGAT3    | ENSG00000160789.18_LMNA | -0.10643 | -0.261201954 | 0.053683415 | 1.92E-01 | 4.60E-01 | 1.00E+00 |
| ENSG00000177042.13_TMEM80   | ENSG00000160789.18_LMNA | 0.05164  | -0.10845112  | 0.209122632 | 5.27E-01 | 7.72E-01 | 1.00E+00 |
| ENSG00000221988.11_PPT2     | ENSG00000160789.18_LMNA | -0.09402 | -0.249490226 | 0.066167068 | 2.49E-01 | 5.30E-01 | 1.00E+00 |
| ENSG00000169375.14_SIN3A    | ENSG00000160789.18_LMNA | 0.23061  | 0.07413261   | 0.376007769 | 4.26E-03 | 3.48E-02 | 1.00E+00 |
| ENSG00000213516.8_RBMXL1    | ENSG00000160789.18_LMNA | -0.15785 | -0.309275097 | 0.001389376 | 5.21E-02 | 2.07E-01 | 1.00E+00 |
| ENSG00000161179.12_YDJC     | ENSG00000160789.18_LMNA | 0.36928  | 0.223197383  | 0.499133612 | 2.84E-06 | 1.05E-04 | 1.46E-01 |
| ENSG00000151093.6_OXSM      | ENSG00000160789.18_LMNA | -0.29916 | -0.437520781 | -0.1469557  | 1.81E-04 | 3.02E-03 | 1.00E+00 |
| ENSG00000119596.16_YLPM1    | ENSG00000160789.18_LMNA | 0.14082  | -0.018802384 | 0.29344198  | 8.36E-02 | 2.80E-01 | 1.00E+00 |
| ENSG00000173950.14_XXYLT1   | ENSG00000160789.18_LMNA | 0.13267  | -0.027106446 | 0.285830539 | 1.03E-01 | 3.18E-01 | 1.00E+00 |
| ENSG00000180211.5_RP1-278E1 | ENSG00000160789.18_LMNA | -0.14902 | -0.301079471 | 0.010426375 | 6.69E-02 | 2.42E-01 | 1.00E+00 |
| ENSG00000173848.17_NET1     | ENSG00000160789.18_LMNA | -0.39046 | -0.517489127 | -0.24658312 | 6.59E-07 | 3.27E-05 | 3.38E-02 |
| ENSG00000167685.13_ZNF444   | ENSG00000160789.18_LMNA | 0.15481  | -0.004502224 | 0.306457265 | 5.69E-02 | 2.18E-01 | 1.00E+00 |
| ENSG00000145833.14_DDX46    | ENSG00000160789.18_LMNA | -0.04514 | -0.202885754 | 0.114883191 | 5.81E-01 | 8.05E-01 | 1.00E+00 |
| ENSG00000229097.1_CALM2P2   | ENSG00000160789.18_LMNA | -0.16942 | -0.31999095  | -0.01050363 | 3.69E-02 | 1.64E-01 | 1.00E+00 |
| ENSG00000105552.13_BCAT2    | ENSG00000160789.18_LMNA | 0.2871   | 0.134030211  | 0.426797698 | 3.35E-04 | 4.90E-03 | 1.00E+00 |
| ENSG00000139746.14_RBM26    | ENSG00000160789.18_LMNA | -0.0706  | -0.227249356 | 0.089604919 | 3.87E-01 | 6.66E-01 | 1.00E+00 |
| ENSG00000140743.6_CDR2      | ENSG00000160789.18_LMNA | 0.37908  | 0.233998356  | 0.507642206 | 1.46E-06 | 6.30E-05 | 7.52E-02 |
| ENSG00000137764.18_MAP2K5   | ENSG00000160789.18_LMNA | -0.05454 | -0.21190133  | 0.10557687  | 5.05E-01 | 7.55E-01 | 1.00E+00 |
| ENSG00000187164.16_SHTN1    | ENSG00000160789.18_LMNA | -0.33526 | -0.469406306 | -0.18598549 | 2.42E-05 | 6.03E-04 | 1.00E+00 |
| ENSG00000134369.14_NAV1     | ENSG00000160789.18_LMNA | -0.0984  | -0.253627611 | 0.061768247 | 2.28E-01 | 5.04E-01 | 1.00E+00 |
| ENSG00000235437.6_LINC01278 | ENSG00000160789.18_LMNA | -0.01373 | -0.172556567 | 0.145786308 | 8.67E-01 | 9.48E-01 | 1.00E+00 |

|                             |                         |          |              |             |          |          |          |
|-----------------------------|-------------------------|----------|--------------|-------------|----------|----------|----------|
| ENSG00000157303.9_SUSD3     | ENSG00000160789.18_LMNA | -0.1483  | -0.30040642  | 0.011166268 | 6.83E-02 | 2.45E-01 | 1.00E+00 |
| ENSG00000169814.11_BTD      | ENSG00000160789.18_LMNA | -0.44653 | -0.565528001 | -0.30931744 | 8.11E-09 | 9.07E-07 | 4.16E-04 |
| ENSG00000169762.15_TAPT1    | ENSG00000160789.18_LMNA | -0.41883 | -0.54190069  | -0.27818114 | 7.87E-08 | 5.92E-06 | 4.04E-03 |
| ENSG00000090905.16_TNRC6A   | ENSG00000160789.18_LMNA | 0.10964  | -0.050440322 | 0.264229416 | 1.79E-01 | 4.41E-01 | 1.00E+00 |
| ENSG00000145908.11_ZNF300   | ENSG00000160789.18_LMNA | -0.17777 | -0.327693774 | -0.01910705 | 2.84E-02 | 1.38E-01 | 1.00E+00 |
| ENSG00000164151.10_ICE1     | ENSG00000160789.18_LMNA | 0.16318  | 0.004085197  | 0.314217624 | 4.46E-02 | 1.87E-01 | 1.00E+00 |
| ENSG00000187257.13_RSB1L    | ENSG00000160789.18_LMNA | -0.24283 | -0.38706723  | -0.08699236 | 2.58E-03 | 2.38E-02 | 1.00E+00 |
| ENSG00000123836.13_PFKFB2   | ENSG00000160789.18_LMNA | -0.29124 | -0.430479668 | -0.13845722 | 2.72E-04 | 4.17E-03 | 1.00E+00 |
| ENSG00000187630.13_DHRS4L2  | ENSG00000160789.18_LMNA | 0.24544  | 0.089750117  | 0.389427727 | 2.31E-03 | 2.18E-02 | 1.00E+00 |
| ENSG00000158270.11_COLEC12  | ENSG00000160789.18_LMNA | 0.21215  | 0.054796441  | 0.359215076 | 8.69E-03 | 5.92E-02 | 1.00E+00 |
| ENSG00000130023.14_ERMARD   | ENSG00000160789.18_LMNA | -0.00022 | -0.159410379 | 0.158991011 | 9.98E-01 | 9.99E-01 | 1.00E+00 |
| ENSG00000125247.14_TMTC4    | ENSG00000160789.18_LMNA | -0.17365 | -0.323892709 | -0.01485586 | 3.24E-02 | 1.51E-01 | 1.00E+00 |
| ENSG00000096063.13_SRPK1    | ENSG00000160789.18_LMNA | -0.15354 | -0.305275587 | 0.005805828 | 5.90E-02 | 2.23E-01 | 1.00E+00 |
| ENSG00000165494.9_PCF11     | ENSG00000160789.18_LMNA | 0.02822  | -0.131573308 | 0.186580979 | 7.30E-01 | 8.86E-01 | 1.00E+00 |
| ENSG00000143924.17_EML4     | ENSG00000160789.18_LMNA | 0.04639  | -0.113651209 | 0.204082349 | 5.70E-01 | 7.99E-01 | 1.00E+00 |
| ENSG00000147454.12_SLC25A37 | ENSG00000160789.18_LMNA | 0.17751  | 0.018845455  | 0.327460163 | 2.87E-02 | 1.39E-01 | 1.00E+00 |
| ENSG00000180389.6_ATP5EP2   | ENSG00000160789.18_LMNA | -0.03458 | -0.192717103 | 0.125313262 | 6.72E-01 | 8.56E-01 | 1.00E+00 |
| ENSG00000139631.17_CSAD     | ENSG00000160789.18_LMNA | -0.08291 | -0.238960972 | 0.077306585 | 3.10E-01 | 5.96E-01 | 1.00E+00 |
| ENSG00000156802.11_ATAD2    | ENSG00000160789.18_LMNA | 0.08712  | -0.073094856 | 0.24295073  | 2.86E-01 | 5.71E-01 | 1.00E+00 |
| ENSG00000120675.5_DNAJC15   | ENSG00000160789.18_LMNA | -0.24655 | -0.390422928 | -0.09091418 | 2.20E-03 | 2.10E-02 | 1.00E+00 |
| ENSG00000117139.15_KDM5B    | ENSG00000160789.18_LMNA | -0.04412 | -0.201898423 | 0.115898985 | 5.89E-01 | 8.09E-01 | 1.00E+00 |
| ENSG00000149177.11_PTPRJ    | ENSG00000160789.18_LMNA | 0.04372  | -0.11629497  | 0.201513359 | 5.93E-01 | 8.12E-01 | 1.00E+00 |
| ENSG00000127328.20_RAB3IP   | ENSG00000160789.18_LMNA | -0.20075 | -0.34880532  | -0.04292354 | 1.31E-02 | 7.97E-02 | 1.00E+00 |
| ENSG00000272667.1_RP11-395A | ENSG00000160789.18_LMNA | -0.13825 | -0.291042365 | 0.021425015 | 8.94E-02 | 2.91E-01 | 1.00E+00 |
| ENSG00000086712.11_TXLNG    | ENSG00000160789.18_LMNA | 0.09209  | -0.068113363 | 0.247655923 | 2.59E-01 | 5.42E-01 | 1.00E+00 |
| ENSG00000101945.15_SUV39H1  | ENSG00000160789.18_LMNA | 0.2268   | 0.070128402  | 0.372546477 | 4.96E-03 | 3.90E-02 | 1.00E+00 |
| ENSG00000134874.16_DZIP1    | ENSG00000160789.18_LMNA | -0.06467 | -0.221586984 | 0.095516509 | 4.29E-01 | 6.99E-01 | 1.00E+00 |
| ENSG00000181472.4_ZBTB2     | ENSG00000160789.18_LMNA | 0.2151   | 0.057880785  | 0.361906986 | 7.78E-03 | 5.44E-02 | 1.00E+00 |
| ENSG00000023892.10_DEF6     | ENSG00000160789.18_LMNA | 0.08958  | -0.070631478 | 0.245279336 | 2.72E-01 | 5.57E-01 | 1.00E+00 |
| ENSG00000154222.13_CC2D1B   | ENSG00000160789.18_LMNA | 0.27254  | 0.118483556  | 0.413790088 | 6.81E-04 | 8.59E-03 | 1.00E+00 |
| ENSG00000138646.7_HERC5     | ENSG00000160789.18_LMNA | 0.1031   | -0.057034499 | 0.258067161 | 2.06E-01 | 4.78E-01 | 1.00E+00 |
| ENSG00000214455.4_RCN1P2    | ENSG00000160789.18_LMNA | 0.10066  | -0.059493788 | 0.255762374 | 2.17E-01 | 4.92E-01 | 1.00E+00 |
| ENSG00000112406.4_HECA      | ENSG00000160789.18_LMNA | -0.051   | -0.208512315 | 0.109081713 | 5.33E-01 | 7.75E-01 | 1.00E+00 |

|                             |                         |          |              |             |          |          |          |
|-----------------------------|-------------------------|----------|--------------|-------------|----------|----------|----------|
| ENSG00000271895.2_RP4-635E1 | ENSG00000160789.18_LMNA | -0.16118 | -0.312369069 | -0.00203547 | 4.73E-02 | 1.94E-01 | 1.00E+00 |
| ENSG00000125967.15_NECAB3   | ENSG00000160789.18_LMNA | 0.26027  | 0.105437353  | 0.402780717 | 1.20E-03 | 1.33E-02 | 1.00E+00 |
| ENSG00000105880.4_DLX5      | ENSG00000160789.18_LMNA | -0.30149 | -0.439595096 | -0.14946757 | 1.60E-04 | 2.74E-03 | 1.00E+00 |
| ENSG00000198380.11_GFPT1    | ENSG00000160789.18_LMNA | -0.05069 | -0.208215254 | 0.109388551 | 5.35E-01 | 7.76E-01 | 1.00E+00 |
| ENSG00000081320.9_STK17B    | ENSG00000160789.18_LMNA | -0.16003 | -0.311300103 | -0.00085137 | 4.89E-02 | 1.98E-01 | 1.00E+00 |
| ENSG00000132906.16_CASP9    | ENSG00000160789.18_LMNA | -0.27664 | -0.417459215 | -0.12285427 | 5.60E-04 | 7.36E-03 | 1.00E+00 |
| ENSG00000139083.9_ETV6      | ENSG00000160789.18_LMNA | 0.37605  | 0.230663709  | 0.505020981 | 1.80E-06 | 7.39E-05 | 9.24E-02 |
| ENSG00000085644.12_ZNF213   | ENSG00000160789.18_LMNA | 0.03305  | -0.126820733 | 0.191241744 | 6.86E-01 | 8.64E-01 | 1.00E+00 |
| ENSG00000118873.14_RAB3GAP  | ENSG00000160789.18_LMNA | 0.22882  | 0.072254776  | 0.374385592 | 4.57E-03 | 3.66E-02 | 1.00E+00 |
| ENSG00000170653.17_ATF7     | ENSG00000160789.18_LMNA | 0.14945  | -0.009988871 | 0.301477305 | 6.61E-02 | 2.40E-01 | 1.00E+00 |
| ENSG00000114268.10_PFKFB4   | ENSG00000160789.18_LMNA | 0.27051  | 0.116319649  | 0.411969976 | 7.50E-04 | 9.25E-03 | 1.00E+00 |
| ENSG00000269837.1_IPO5P1    | ENSG00000160789.18_LMNA | -0.51244 | -0.620983225 | -0.38462027 | 1.49E-11 | 4.69E-09 | 7.65E-07 |
| ENSG00000100744.13_GSKIP    | ENSG00000160789.18_LMNA | -0.1767  | -0.326710611 | -0.01800639 | 2.94E-02 | 1.41E-01 | 1.00E+00 |
| ENSG00000183077.14_AFMID    | ENSG00000160789.18_LMNA | -0.33662 | -0.470603035 | -0.18746798 | 2.23E-05 | 5.64E-04 | 1.00E+00 |
| ENSG00000109881.15_CCDC34   | ENSG00000160789.18_LMNA | -0.04832 | -0.205937785 | 0.111738967 | 5.54E-01 | 7.89E-01 | 1.00E+00 |
| ENSG00000162490.6_DRAXIN    | ENSG00000160789.18_LMNA | 0.0985   | -0.061669329 | 0.253720517 | 2.27E-01 | 5.04E-01 | 1.00E+00 |
| ENSG00000244486.6_SCARF2    | ENSG00000160789.18_LMNA | 0.31893  | 0.168273118  | 0.455027154 | 6.21E-05 | 1.28E-03 | 1.00E+00 |
| ENSG00000109118.12_PHF12    | ENSG00000160789.18_LMNA | 0.09576  | -0.064421526 | 0.251133406 | 2.41E-01 | 5.20E-01 | 1.00E+00 |
| ENSG00000118655.4_DCLRE1B   | ENSG00000160789.18_LMNA | 0.18537  | 0.026964856  | 0.334693363 | 2.22E-02 | 1.16E-01 | 1.00E+00 |
| ENSG00000175581.12_MRPL48   | ENSG00000160789.18_LMNA | -0.42012 | -0.543005371 | -0.27962465 | 7.11E-08 | 5.48E-06 | 3.65E-03 |
| ENSG00000099290.14_FAM21A   | ENSG00000160789.18_LMNA | 0.07682  | -0.083401711 | 0.233168105 | 3.47E-01 | 6.31E-01 | 1.00E+00 |
| ENSG00000171385.8_KCND3     | ENSG00000160789.18_LMNA | -0.04237 | -0.200224232 | 0.117619922 | 6.04E-01 | 8.18E-01 | 1.00E+00 |
| ENSG00000116035.2_VAX2      | ENSG00000160789.18_LMNA | -0.33234 | -0.466839647 | -0.18281029 | 2.88E-05 | 6.88E-04 | 1.00E+00 |
| ENSG00000106688.10_SLC1A1   | ENSG00000160789.18_LMNA | -0.27591 | -0.41679927  | -0.12206729 | 5.81E-04 | 7.57E-03 | 1.00E+00 |
| ENSG00000163463.10_KRTCAP2  | ENSG00000160789.18_LMNA | 0.10462  | -0.055502842 | 0.259500783 | 2.00E-01 | 4.70E-01 | 1.00E+00 |
| ENSG00000243335.7_KCTD7     | ENSG00000160789.18_LMNA | -0.06085 | -0.217940767 | 0.099311405 | 4.56E-01 | 7.21E-01 | 1.00E+00 |
| ENSG00000164244.19_PRRC1    | ENSG00000160789.18_LMNA | 0.20946  | 0.051987869  | 0.356759436 | 9.60E-03 | 6.37E-02 | 1.00E+00 |
| ENSG00000196535.13_MYO18A   | ENSG00000160789.18_LMNA | 0.04245  | -0.117540376 | 0.200301659 | 6.04E-01 | 8.18E-01 | 1.00E+00 |
| ENSG00000106603.16_COA1     | ENSG00000160789.18_LMNA | -0.18118 | -0.330837424 | -0.02263143 | 2.55E-02 | 1.28E-01 | 1.00E+00 |
| ENSG00000260428.2_SCX       | ENSG00000160789.18_LMNA | 0.0379   | -0.122032518 | 0.195922999 | 6.43E-01 | 8.41E-01 | 1.00E+00 |
| ENSG00000000971.14_CFH      | ENSG00000160789.18_LMNA | 0.14992  | -0.009506054 | 0.301916218 | 6.53E-02 | 2.38E-01 | 1.00E+00 |
| ENSG00000275494.1_RP11-266L | ENSG00000160789.18_LMNA | -0.18521 | -0.334542255 | -0.02679482 | 2.24E-02 | 1.17E-01 | 1.00E+00 |
| ENSG00000119630.12_PGF      | ENSG00000160789.18_LMNA | -0.25961 | -0.402192461 | -0.10474313 | 1.24E-03 | 1.36E-02 | 1.00E+00 |

|                              |                         |          |              |             |          |          |          |
|------------------------------|-------------------------|----------|--------------|-------------|----------|----------|----------|
| ENSG00000052841.13_TTC17     | ENSG00000160789.18_LMNA | 0.12857  | -0.031275267 | 0.281994484 | 1.14E-01 | 3.38E-01 | 1.00E+00 |
| ENSG00000033011.10_ALG1      | ENSG00000160789.18_LMNA | 0.26251  | 0.107818721  | 0.404796735 | 1.09E-03 | 1.23E-02 | 1.00E+00 |
| ENSG00000144649.7_FAM198A    | ENSG00000160789.18_LMNA | -0.16869 | -0.319311894 | -0.00974737 | 3.78E-02 | 1.67E-01 | 1.00E+00 |
| ENSG00000164077.12_MON1A     | ENSG00000160789.18_LMNA | -0.2094  | -0.356705611 | -0.05192636 | 9.62E-03 | 6.38E-02 | 1.00E+00 |
| ENSG00000170322.13_NFRKB     | ENSG00000160789.18_LMNA | -0.00029 | -0.15948598  | 0.158915398 | 9.97E-01 | 9.99E-01 | 1.00E+00 |
| ENSG00000223768.1_LINC00205  | ENSG00000160789.18_LMNA | 0.18434  | 0.025903435  | 0.333749848 | 2.30E-02 | 1.19E-01 | 1.00E+00 |
| ENSG00000112701.16_SENP6     | ENSG00000160789.18_LMNA | 0.00593  | -0.1534115   | 0.164978976 | 9.42E-01 | 9.77E-01 | 1.00E+00 |
| ENSG00000140332.14_TLE3      | ENSG00000160789.18_LMNA | -0.08733 | -0.243151512 | 0.072882606 | 2.85E-01 | 5.70E-01 | 1.00E+00 |
| ENSG00000180818.4_HOXC10     | ENSG00000160789.18_LMNA | -0.03258 | -0.190792154 | 0.127279816 | 6.90E-01 | 8.67E-01 | 1.00E+00 |
| ENSG00000166012.13_TAF1D     | ENSG00000160789.18_LMNA | -0.25334 | -0.396548655 | -0.0980974  | 1.64E-03 | 1.68E-02 | 1.00E+00 |
| ENSG00000100228.11_RAB36     | ENSG00000160789.18_LMNA | 0.37887  | 0.233771164  | 0.50746378  | 1.49E-06 | 6.38E-05 | 7.62E-02 |
| ENSG00000043462.10_LCP2      | ENSG00000160789.18_LMNA | 0.05719  | -0.102951343 | 0.214435096 | 4.84E-01 | 7.41E-01 | 1.00E+00 |
| ENSG00000171444.16_MCC       | ENSG00000160789.18_LMNA | 0.2669   | 0.112474238  | 0.408729679 | 8.88E-04 | 1.06E-02 | 1.00E+00 |
| ENSG00000196569.10_LAMA2     | ENSG00000160789.18_LMNA | 0.42086  | 0.280451199  | 0.543637498 | 6.71E-08 | 5.23E-06 | 3.44E-03 |
| ENSG00000188917.13_TRMT2B    | ENSG00000160789.18_LMNA | 0.19945  | 0.041572589  | 0.34761605  | 1.38E-02 | 8.24E-02 | 1.00E+00 |
| ENSG00000127980.14_PEX1      | ENSG00000160789.18_LMNA | -0.06467 | -0.221587658 | 0.095515807 | 4.29E-01 | 6.99E-01 | 1.00E+00 |
| ENSG00000170340.10_B3GNT2    | ENSG00000160789.18_LMNA | 0.07991  | -0.080308919 | 0.236110335 | 3.28E-01 | 6.14E-01 | 1.00E+00 |
| ENSG00000106993.10_CDC37L1   | ENSG00000160789.18_LMNA | -0.15336 | -0.30511591  | 0.0059819   | 5.92E-02 | 2.24E-01 | 1.00E+00 |
| ENSG00000229043.2_AC091729.1 | ENSG00000160789.18_LMNA | 0.03228  | -0.127572435 | 0.190505516 | 6.93E-01 | 8.68E-01 | 1.00E+00 |
| ENSG00000280789.1_PAGR1      | ENSG00000160789.18_LMNA | 0.17289  | 0.014075358  | 0.323193768 | 3.32E-02 | 1.53E-01 | 1.00E+00 |
| ENSG00000249115.7_HAUS5      | ENSG00000160789.18_LMNA | 0.05901  | -0.101145324 | 0.216175518 | 4.70E-01 | 7.31E-01 | 1.00E+00 |
| ENSG00000106479.9_ZNF862     | ENSG00000160789.18_LMNA | 0.13979  | -0.019852284 | 0.29248183  | 8.59E-02 | 2.84E-01 | 1.00E+00 |
| ENSG00000120278.13_PLEKHG1   | ENSG00000160789.18_LMNA | 0.40739  | 0.265405298  | 0.532083806 | 1.90E-07 | 1.22E-05 | 9.74E-03 |
| ENSG00000196204.10_RNF216P   | ENSG00000160789.18_LMNA | 0.08828  | -0.07192844  | 0.244053786 | 2.79E-01 | 5.65E-01 | 1.00E+00 |
| ENSG00000110497.13_AMBRA1    | ENSG00000160789.18_LMNA | 0.10374  | -0.056390328 | 0.25867027  | 2.03E-01 | 4.74E-01 | 1.00E+00 |
| ENSG00000149231.10_CCDC82    | ENSG00000160789.18_LMNA | -0.27808 | -0.418743825 | -0.12438723 | 5.23E-04 | 6.99E-03 | 1.00E+00 |
| ENSG00000197579.6_TOPORS     | ENSG00000160789.18_LMNA | -0.00706 | -0.166078475 | 0.152307441 | 9.31E-01 | 9.73E-01 | 1.00E+00 |
| ENSG00000130244.11_FAM98C    | ENSG00000160789.18_LMNA | 0.03204  | -0.127808784 | 0.190273959 | 6.95E-01 | 8.69E-01 | 1.00E+00 |
| ENSG00000076382.15_SPAG5     | ENSG00000160789.18_LMNA | 0.0573   | -0.102836597 | 0.214545734 | 4.83E-01 | 7.41E-01 | 1.00E+00 |
| ENSG00000158201.8_ABHD3      | ENSG00000160789.18_LMNA | 0.13356  | -0.02620002  | 0.286663286 | 1.01E-01 | 3.13E-01 | 1.00E+00 |
| ENSG00000163558.11_PRKCI     | ENSG00000160789.18_LMNA | 0.09031  | -0.06989755  | 0.245972406 | 2.69E-01 | 5.53E-01 | 1.00E+00 |
| ENSG00000057019.14_DCBLD2    | ENSG00000160789.18_LMNA | 0.44944  | 0.312607504  | 0.568000292 | 6.31E-09 | 7.29E-07 | 3.24E-04 |
| ENSG00000140525.16_FANCI     | ENSG00000160789.18_LMNA | 0.07185  | -0.088366286 | 0.228433063 | 3.79E-01 | 6.58E-01 | 1.00E+00 |



|                              |                         |          |              |             |          |          |          |
|------------------------------|-------------------------|----------|--------------|-------------|----------|----------|----------|
| ENSG00000184402.13_SS18L1    | ENSG00000160789.18_LMNA | -0.15446 | -0.306133604 | 0.004859386 | 5.74E-02 | 2.19E-01 | 1.00E+00 |
| ENSG00000159110.18_IFNAR2    | ENSG00000160789.18_LMNA | 0.00902  | -0.150399569 | 0.167976603 | 9.12E-01 | 9.67E-01 | 1.00E+00 |
| ENSG00000132256.17_TRIM5     | ENSG00000160789.18_LMNA | 0.2511   | 0.095726284  | 0.394529543 | 1.81E-03 | 1.81E-02 | 1.00E+00 |
| ENSG00000223705.8_NSUN5P1    | ENSG00000160789.18_LMNA | -0.05436 | -0.211728671 | 0.105755621 | 5.06E-01 | 7.57E-01 | 1.00E+00 |
| ENSG00000102900.11_NUP93     | ENSG00000160789.18_LMNA | 0.03626  | -0.123653777 | 0.194339577 | 6.57E-01 | 8.49E-01 | 1.00E+00 |
| ENSG00000169660.14_HEXDC     | ENSG00000160789.18_LMNA | 0.02942  | -0.13039152  | 0.187741276 | 7.19E-01 | 8.81E-01 | 1.00E+00 |
| ENSG00000112996.8_MRPS30     | ENSG00000160789.18_LMNA | 0.08338  | -0.076841087 | 0.239402462 | 3.07E-01 | 5.94E-01 | 1.00E+00 |
| ENSG00000240849.9_TMEM189    | ENSG00000160789.18_LMNA | 0.23888  | 0.08283368   | 0.383500162 | 3.04E-03 | 2.70E-02 | 1.00E+00 |
| ENSG00000179902.11_C1orf194  | ENSG00000160789.18_LMNA | -0.12562 | -0.279240413 | 0.034261539 | 1.23E-01 | 3.53E-01 | 1.00E+00 |
| ENSG00000134318.12_ROCK2     | ENSG00000160789.18_LMNA | 0.21309  | 0.055778118  | 0.3600724   | 8.39E-03 | 5.77E-02 | 1.00E+00 |
| ENSG00000118246.12_FASTKD2   | ENSG00000160789.18_LMNA | -0.01171 | -0.170590585 | 0.147768281 | 8.86E-01 | 9.56E-01 | 1.00E+00 |
| ENSG00000166803.9_KIAA0101   | ENSG00000160789.18_LMNA | 0.04988  | -0.110194122 | 0.207435072 | 5.42E-01 | 7.81E-01 | 1.00E+00 |
| ENSG00000104691.13_UBXN8     | ENSG00000160789.18_LMNA | -0.14202 | -0.294556444 | 0.01758288  | 8.09E-02 | 2.74E-01 | 1.00E+00 |
| ENSG00000101191.15_DIDO1     | ENSG00000160789.18_LMNA | 0.21589  | 0.0587087    | 0.362628699 | 7.56E-03 | 5.32E-02 | 1.00E+00 |
| ENSG00000155975.8_VPS37A     | ENSG00000160789.18_LMNA | 0.00749  | -0.151894823 | 0.166489186 | 9.27E-01 | 9.72E-01 | 1.00E+00 |
| ENSG0000012983.10_MAP4K5     | ENSG00000160789.18_LMNA | -0.01772 | -0.176424883 | 0.141879055 | 8.28E-01 | 9.33E-01 | 1.00E+00 |
| ENSG00000102921.6_N4BP1      | ENSG00000160789.18_LMNA | 0.16471  | 0.005657576  | 0.315634091 | 4.26E-02 | 1.81E-01 | 1.00E+00 |
| ENSG00000112984.10_KIF20A    | ENSG00000160789.18_LMNA | 0.15244  | -0.00692646  | 0.304259002 | 6.08E-02 | 2.28E-01 | 1.00E+00 |
| ENSG00000185986.11_SDHAP3    | ENSG00000160789.18_LMNA | -0.09949 | -0.254656524 | 0.060672412 | 2.23E-01 | 4.98E-01 | 1.00E+00 |
| ENSG00000178950.15_GAK       | ENSG00000160789.18_LMNA | 0.23248  | 0.076091325  | 0.377697846 | 3.95E-03 | 3.29E-02 | 1.00E+00 |
| ENSG00000131437.14_KIF3A     | ENSG00000160789.18_LMNA | -0.39716 | -0.523275393 | -0.25402106 | 4.06E-07 | 2.23E-05 | 2.08E-02 |
| ENSG00000065970.7_FOXJ2      | ENSG00000160789.18_LMNA | 0.12057  | -0.039384659 | 0.274503601 | 1.39E-01 | 3.80E-01 | 1.00E+00 |
| ENSG00000224470.6_ATXN1L     | ENSG00000160789.18_LMNA | 0.15872  | -0.000495131 | 0.310083583 | 5.08E-02 | 2.03E-01 | 1.00E+00 |
| ENSG00000181751.8_C5orf30    | ENSG00000160789.18_LMNA | -0.34376 | -0.476863385 | -0.19524429 | 1.45E-05 | 3.98E-04 | 7.44E-01 |
| ENSG00000123268.7_ATF1       | ENSG00000160789.18_LMNA | -0.03543 | -0.193534981 | 0.124476949 | 6.65E-01 | 8.52E-01 | 1.00E+00 |
| ENSG00000173209.21_AHSA2     | ENSG00000160789.18_LMNA | 0.06824  | -0.091958779 | 0.224997293 | 4.04E-01 | 6.79E-01 | 1.00E+00 |
| ENSG00000148737.14_TCF7L2    | ENSG00000160789.18_LMNA | -0.12918 | -0.282568707 | 0.030651925 | 1.13E-01 | 3.35E-01 | 1.00E+00 |
| ENSG00000239467.4_AC007405.1 | ENSG00000160789.18_LMNA | -0.01817 | -0.176858084 | 0.141440876 | 8.24E-01 | 9.31E-01 | 1.00E+00 |
| ENSG00000122678.13_POLM      | ENSG00000160789.18_LMNA | 0.23838  | 0.082297861  | 0.383039915 | 3.10E-03 | 2.74E-02 | 1.00E+00 |
| ENSG00000171246.5_NPTX1      | ENSG00000160789.18_LMNA | -0.02564 | -0.184088808 | 0.134108585 | 7.54E-01 | 8.98E-01 | 1.00E+00 |
| ENSG00000213839.4_TMX2P1     | ENSG00000160789.18_LMNA | 0.02065  | -0.139009164 | 0.179259925 | 8.01E-01 | 9.20E-01 | 1.00E+00 |
| ENSG00000137573.12_SULF1     | ENSG00000160789.18_LMNA | -0.16959 | -0.320147678 | -0.01067823 | 3.67E-02 | 1.64E-01 | 1.00E+00 |
| ENSG00000166833.18_NAV2      | ENSG00000160789.18_LMNA | 0.25817  | 0.103207985  | 0.40089076  | 1.32E-03 | 1.43E-02 | 1.00E+00 |

|                             |                         |          |              |             |          |          |          |
|-----------------------------|-------------------------|----------|--------------|-------------|----------|----------|----------|
| ENSG00000267390.1_RP11-635N | ENSG00000160789.18_LMNA | -0.22578 | -0.371623298 | -0.06906206 | 5.16E-03 | 4.02E-02 | 1.00E+00 |
| ENSG00000168481.7_LGI3      | ENSG00000160789.18_LMNA | -0.3749  | -0.504014364 | -0.22938483 | 1.95E-06 | 7.83E-05 | 1.00E-01 |
| ENSG00000230896.1_RP11-767N | ENSG00000160789.18_LMNA | -0.06242 | -0.219437679 | 0.097754571 | 4.45E-01 | 7.12E-01 | 1.00E+00 |
| ENSG00000154134.13_ROBO3    | ENSG00000160789.18_LMNA | 0.02112  | -0.138543806 | 0.179719135 | 7.96E-01 | 9.18E-01 | 1.00E+00 |
| ENSG00000104299.13_INTS9    | ENSG00000160789.18_LMNA | -0.06915 | -0.225859682 | 0.091057827 | 3.97E-01 | 6.74E-01 | 1.00E+00 |
| ENSG00000122824.9_NUDT10    | ENSG00000160789.18_LMNA | -0.45185 | -0.570048146 | -0.31533739 | 5.12E-09 | 6.11E-07 | 2.63E-04 |
| ENSG00000170955.9_PRKCDBP   | ENSG00000160789.18_LMNA | 0.36029  | 0.213328565  | 0.491312534 | 5.13E-06 | 1.69E-04 | 2.63E-01 |
| ENSG00000006194.9_ZNF263    | ENSG00000160789.18_LMNA | 0.13034  | -0.029472337 | 0.28365473  | 1.09E-01 | 3.29E-01 | 1.00E+00 |
| ENSG00000101298.12_SNPB     | ENSG00000160789.18_LMNA | -0.00549 | -0.164551035 | 0.153841001 | 9.46E-01 | 9.79E-01 | 1.00E+00 |
| ENSG00000132964.10_CDK8     | ENSG00000160789.18_LMNA | -0.35074 | -0.482970967 | -0.20286513 | 9.42E-06 | 2.78E-04 | 4.83E-01 |
| ENSG00000215041.8_NEURL4    | ENSG00000160789.18_LMNA | 0.02488  | -0.134859726 | 0.183349652 | 7.61E-01 | 9.00E-01 | 1.00E+00 |
| ENSG00000138375.11_SMARCA1  | ENSG00000160789.18_LMNA | 0.28042  | 0.126884536  | 0.420834044 | 4.67E-04 | 6.38E-03 | 1.00E+00 |
| ENSG00000105971.13_CAV2     | ENSG00000160789.18_LMNA | 0.16521  | 0.006167583  | 0.31609323  | 4.20E-02 | 1.79E-01 | 1.00E+00 |
| ENSG00000218891.4_ZNF579    | ENSG00000160789.18_LMNA | 0.26432  | 0.109735772  | 0.406417576 | 1.00E-03 | 1.16E-02 | 1.00E+00 |
| ENSG00000175395.14_ZNF25    | ENSG00000160789.18_LMNA | -0.39335 | -0.519989547 | -0.24979337 | 5.36E-07 | 2.77E-05 | 2.75E-02 |
| ENSG00000115183.12_TANC1    | ENSG00000160789.18_LMNA | 0.04595  | -0.114083174 | 0.2036629   | 5.74E-01 | 8.01E-01 | 1.00E+00 |
| ENSG00000108433.14_GOSR2    | ENSG00000160789.18_LMNA | -0.16164 | -0.31278728  | -0.00249897 | 4.67E-02 | 1.92E-01 | 1.00E+00 |
| ENSG00000157570.10_TSPAN18  | ENSG00000160789.18_LMNA | -0.07549 | -0.231900019 | 0.08473281  | 3.55E-01 | 6.39E-01 | 1.00E+00 |
| ENSG00000204837.3_FGF7P3    | ENSG00000160789.18_LMNA | -0.16694 | -0.317698472 | -0.00795194 | 3.98E-02 | 1.73E-01 | 1.00E+00 |
| ENSG00000137273.3_FOXP2     | ENSG00000160789.18_LMNA | 0.05431  | -0.105801352 | 0.211684495 | 5.06E-01 | 7.57E-01 | 1.00E+00 |
| ENSG00000243749.1_TMEN35B   | ENSG00000160789.18_LMNA | 0.19155  | 0.033361709  | 0.3403666   | 1.81E-02 | 1.00E-01 | 1.00E+00 |
| ENSG00000120137.6_PANK3     | ENSG00000160789.18_LMNA | -0.12576 | -0.2793656   | 0.034125918 | 1.23E-01 | 3.53E-01 | 1.00E+00 |
| ENSG00000027001.8_MIPEP     | ENSG00000160789.18_LMNA | 0.1178   | -0.042188794 | 0.271904444 | 1.48E-01 | 3.95E-01 | 1.00E+00 |
| ENSG00000167566.15_NCKAP5L  | ENSG00000160789.18_LMNA | 0.06727  | -0.092928826 | 0.224068211 | 4.10E-01 | 6.84E-01 | 1.00E+00 |
| ENSG00000155629.13_PIK3AP1  | ENSG00000160789.18_LMNA | -0.0336  | -0.191774079 | 0.12627698  | 6.81E-01 | 8.61E-01 | 1.00E+00 |
| ENSG00000247828.6_TMEN161B  | ENSG00000160789.18_LMNA | -0.24277 | -0.387015443 | -0.08693191 | 2.58E-03 | 2.38E-02 | 1.00E+00 |
| ENSG00000041988.14_THAP3    | ENSG00000160789.18_LMNA | -0.12869 | -0.282109227 | 0.031150728 | 1.14E-01 | 3.37E-01 | 1.00E+00 |
| ENSG00000198056.12_PRIM1    | ENSG00000160789.18_LMNA | -0.13973 | -0.292422373 | 0.019917277 | 8.60E-02 | 2.85E-01 | 1.00E+00 |
| ENSG00000153815.15_CMIP     | ENSG00000160789.18_LMNA | 0.09942  | -0.060745296 | 0.254588113 | 2.23E-01 | 4.99E-01 | 1.00E+00 |
| ENSG00000103356.14_EARS2    | ENSG00000160789.18_LMNA | 0.09142  | -0.068779077 | 0.247027994 | 2.63E-01 | 5.46E-01 | 1.00E+00 |
| ENSG00000119231.9_SENP5     | ENSG00000160789.18_LMNA | -0.05591 | -0.213208643 | 0.104222765 | 4.94E-01 | 7.49E-01 | 1.00E+00 |
| ENSG00000108963.16_DPH1     | ENSG00000160789.18_LMNA | -0.00802 | -0.167009043 | 0.151372393 | 9.22E-01 | 9.70E-01 | 1.00E+00 |
| ENSG00000119401.10_TRIM32   | ENSG00000160789.18_LMNA | -0.01134 | -0.170228894 | 0.148132635 | 8.90E-01 | 9.57E-01 | 1.00E+00 |

|                             |                         |          |              |             |          |          |          |
|-----------------------------|-------------------------|----------|--------------|-------------|----------|----------|----------|
| ENSG00000118507.14_AKAP7    | ENSG00000160789.18_LMNA | -0.22478 | -0.370715634 | -0.06801432 | 5.37E-03 | 4.13E-02 | 1.00E+00 |
| ENSG00000148798.8_INA       | ENSG00000160789.18_LMNA | -0.36403 | -0.494565249 | -0.21742604 | 4.02E-06 | 1.39E-04 | 2.06E-01 |
| ENSG00000115419.11_GLS      | ENSG00000160789.18_LMNA | -0.10233 | -0.257342363 | 0.057808297 | 2.10E-01 | 4.82E-01 | 1.00E+00 |
| ENSG00000168528.10_SERINC2  | ENSG00000160789.18_LMNA | 0.01596  | -0.143603351 | 0.174718982 | 8.45E-01 | 9.40E-01 | 1.00E+00 |
| ENSG00000114107.7_CEP70     | ENSG00000160789.18_LMNA | -0.37394 | -0.50318286  | -0.22832914 | 2.08E-06 | 8.22E-05 | 1.07E-01 |
| ENSG00000125354.21_SEPT6    | ENSG00000160789.18_LMNA | 0.00947  | -0.149958698 | 0.168414887 | 9.08E-01 | 9.65E-01 | 1.00E+00 |
| ENSG00000240509.1_RPL34P18  | ENSG00000160789.18_LMNA | -0.10876 | -0.263402002 | 0.051327328 | 1.82E-01 | 4.47E-01 | 1.00E+00 |
| ENSG00000009830.10_POMT2    | ENSG00000160789.18_LMNA | 0.18607  | 0.027686054  | 0.335334097 | 2.17E-02 | 1.14E-01 | 1.00E+00 |
| ENSG00000198846.5_TOX       | ENSG00000160789.18_LMNA | -0.15067 | -0.302610036 | 0.008742536 | 6.39E-02 | 2.35E-01 | 1.00E+00 |
| ENSG00000237854.3_LINC00674 | ENSG00000160789.18_LMNA | -0.05766 | -0.214886496 | 0.102483131 | 4.80E-01 | 7.38E-01 | 1.00E+00 |
| ENSG00000119862.11_LGALSL   | ENSG00000160789.18_LMNA | -0.07613 | -0.232511379 | 0.084091212 | 3.51E-01 | 6.35E-01 | 1.00E+00 |
| ENSG00000266028.6_SRGP2     | ENSG00000160789.18_LMNA | 0.15307  | -0.006282115 | 0.304843609 | 5.97E-02 | 2.25E-01 | 1.00E+00 |
| ENSG00000150712.9_MTMR12    | ENSG00000160789.18_LMNA | -0.13039 | -0.283702457 | 0.029420478 | 1.09E-01 | 3.29E-01 | 1.00E+00 |
| ENSG00000070495.13_JMJD6    | ENSG00000160789.18_LMNA | 0.25584  | 0.100737702  | 0.398793605 | 1.47E-03 | 1.54E-02 | 1.00E+00 |
| ENSG00000224032.5_EPB41L4A- | ENSG00000160789.18_LMNA | -0.24425 | -0.388345952 | -0.08848571 | 2.43E-03 | 2.27E-02 | 1.00E+00 |
| ENSG00000108641.13_B9D1     | ENSG00000160789.18_LMNA | -0.09591 | -0.25127694  | 0.064268958 | 2.40E-01 | 5.19E-01 | 1.00E+00 |
| ENSG00000141574.6_SECTM1    | ENSG00000160789.18_LMNA | 0.37638  | 0.231022852  | 0.505303532 | 1.76E-06 | 7.26E-05 | 9.04E-02 |
| ENSG00000125834.11_STK35    | ENSG00000160789.18_LMNA | 0.28884  | 0.135890834  | 0.428346373 | 3.07E-04 | 4.60E-03 | 1.00E+00 |
| ENSG00000151208.15_DLG5     | ENSG00000160789.18_LMNA | 0.21016  | 0.052725051  | 0.35740439  | 9.36E-03 | 6.24E-02 | 1.00E+00 |
| ENSG00000071243.14_ING3     | ENSG00000160789.18_LMNA | -0.32948 | -0.464328708 | -0.17970975 | 3.40E-05 | 7.91E-04 | 1.00E+00 |
| ENSG00000177189.11_RPS6KA3  | ENSG00000160789.18_LMNA | 0.34743  | 0.199245173  | 0.480073211 | 1.16E-05 | 3.29E-04 | 5.94E-01 |
| ENSG00000152117.16_AC093838 | ENSG00000160789.18_LMNA | -0.04484 | -0.20259017  | 0.115187366 | 5.83E-01 | 8.06E-01 | 1.00E+00 |
| ENSG00000096654.14_ZNF184   | ENSG00000160789.18_LMNA | -0.14133 | -0.293918182 | 0.018281413 | 8.24E-02 | 2.77E-01 | 1.00E+00 |
| ENSG00000181754.6_AMIGO1    | ENSG00000160789.18_LMNA | -0.06234 | -0.21936097  | 0.097834388 | 4.45E-01 | 7.12E-01 | 1.00E+00 |
| ENSG00000152484.12_USP12    | ENSG00000160789.18_LMNA | 0.04804  | -0.112021021 | 0.205664253 | 5.57E-01 | 7.90E-01 | 1.00E+00 |
| ENSG00000128294.14_TPST2    | ENSG00000160789.18_LMNA | 0.2441   | 0.088331828  | 0.388214236 | 2.44E-03 | 2.28E-02 | 1.00E+00 |
| ENSG00000196663.14_TECPR2   | ENSG00000160789.18_LMNA | 0.10024  | -0.059917711 | 0.255364721 | 2.19E-01 | 4.94E-01 | 1.00E+00 |
| ENSG00000272886.4_DCP1A     | ENSG00000160789.18_LMNA | -0.12045 | -0.274392037 | 0.039505123 | 1.39E-01 | 3.81E-01 | 1.00E+00 |
| ENSG00000124302.11_CHST8    | ENSG00000160789.18_LMNA | -0.07727 | -0.233599691 | 0.082948421 | 3.44E-01 | 6.29E-01 | 1.00E+00 |
| ENSG00000226328.5_NUP50-AS  | ENSG00000160789.18_LMNA | -0.27461 | -0.415638348 | -0.1206838  | 6.18E-04 | 7.97E-03 | 1.00E+00 |
| ENSG00000170584.9_NUDCD2    | ENSG00000160789.18_LMNA | -0.20539 | -0.353044885 | -0.04774859 | 1.11E-02 | 7.07E-02 | 1.00E+00 |
| ENSG00000253797.2_UTP14C    | ENSG00000160789.18_LMNA | -0.26589 | -0.407831834 | -0.11141029 | 9.30E-04 | 1.10E-02 | 1.00E+00 |
| ENSG00000177363.4_LRRN4CL   | ENSG00000160789.18_LMNA | 0.16385  | 0.004772877  | 0.314837285 | 4.37E-02 | 1.84E-01 | 1.00E+00 |

|                             |                         |          |              |             |          |          |          |
|-----------------------------|-------------------------|----------|--------------|-------------|----------|----------|----------|
| ENSG00000188002.9_RP11-43F1 | ENSG00000160789.18_LMNA | -0.12493 | -0.278593749 | 0.034961914 | 1.25E-01 | 3.57E-01 | 1.00E+00 |
| ENSG00000077713.17_SLC25A43 | ENSG00000160789.18_LMNA | 0.41007  | 0.268389555  | 0.534383329 | 1.55E-07 | 1.03E-05 | 7.95E-03 |
| ENSG00000168411.12_RFWD3    | ENSG00000160789.18_LMNA | 0.18548  | 0.027081711  | 0.3347972   | 2.21E-02 | 1.16E-01 | 1.00E+00 |
| ENSG00000139146.12_FAM60A   | ENSG00000160789.18_LMNA | -0.29639 | -0.435060048 | -0.14398076 | 2.09E-04 | 3.38E-03 | 1.00E+00 |
| ENSG00000122965.9_RBM19     | ENSG00000160789.18_LMNA | 0.16311  | 0.004012862  | 0.314152428 | 4.47E-02 | 1.87E-01 | 1.00E+00 |
| ENSG00000137449.14_CPEB2    | ENSG00000160789.18_LMNA | 0.09134  | -0.068865919 | 0.246946061 | 2.63E-01 | 5.46E-01 | 1.00E+00 |
| ENSG00000177302.13_TOP3A    | ENSG00000160789.18_LMNA | 0.15267  | -0.006693242 | 0.304470625 | 6.04E-02 | 2.27E-01 | 1.00E+00 |
| ENSG00000103932.10_RPAP1    | ENSG00000160789.18_LMNA | 0.18684  | 0.028490447  | 0.336048407 | 2.12E-02 | 1.12E-01 | 1.00E+00 |
| ENSG00000110324.8_IL10RA    | ENSG00000160789.18_LMNA | 0.04766  | -0.112389131 | 0.205307191 | 5.60E-01 | 7.92E-01 | 1.00E+00 |
| ENSG00000157152.15_SYN2     | ENSG00000160789.18_LMNA | -0.22898 | -0.374528615 | -0.07242025 | 4.55E-03 | 3.65E-02 | 1.00E+00 |
| ENSG00000185163.8_DDX51     | ENSG00000160789.18_LMNA | 0.07874  | -0.081477797 | 0.234999041 | 3.35E-01 | 6.21E-01 | 1.00E+00 |
| ENSG00000160179.17_ABCG1    | ENSG00000160789.18_LMNA | -0.29275 | -0.431821856 | -0.1400739  | 2.52E-04 | 3.93E-03 | 1.00E+00 |
| ENSG00000280120.1_RP11-546D | ENSG00000160789.18_LMNA | -0.29283 | -0.431892849 | -0.14015946 | 2.51E-04 | 3.91E-03 | 1.00E+00 |
| ENSG00000008311.13_AASS     | ENSG00000160789.18_LMNA | 0.13125  | -0.028545516 | 0.284507472 | 1.07E-01 | 3.25E-01 | 1.00E+00 |
| ENSG00000125630.14_POLR1B   | ENSG00000160789.18_LMNA | -0.04294 | -0.200765004 | 0.11706426  | 5.99E-01 | 8.16E-01 | 1.00E+00 |
| ENSG00000135365.14_PHF21A   | ENSG00000160789.18_LMNA | 0.0639   | -0.096284427 | 0.220849868 | 4.34E-01 | 7.03E-01 | 1.00E+00 |
| ENSG00000118298.9_CA14      | ENSG00000160789.18_LMNA | -0.30637 | -0.443922522 | -0.15471989 | 1.24E-04 | 2.24E-03 | 1.00E+00 |
| ENSG00000182378.11_PLCXD1   | ENSG00000160789.18_LMNA | 0.12213  | -0.037801694 | 0.275968831 | 1.34E-01 | 3.71E-01 | 1.00E+00 |
| ENSG00000276550.3_HERC2P2   | ENSG00000160789.18_LMNA | -0.15693 | -0.308421216 | 0.00233329  | 5.35E-02 | 2.10E-01 | 1.00E+00 |
| ENSG00000124275.13_MTRR     | ENSG00000160789.18_LMNA | -0.05272 | -0.210159549 | 0.107379167 | 5.19E-01 | 7.65E-01 | 1.00E+00 |
| ENSG00000127249.13_ATP13A4  | ENSG00000160789.18_LMNA | -0.00791 | -0.166903314 | 0.151478659 | 9.23E-01 | 9.70E-01 | 1.00E+00 |
| ENSG00000124831.17_LRRFIP1  | ENSG00000160789.18_LMNA | 0.38751  | 0.243315673  | 0.514939399 | 8.13E-07 | 3.85E-05 | 4.17E-02 |
| ENSG00000163364.8_LINC01116 | ENSG00000160789.18_LMNA | -0.24604 | -0.389962126 | -0.09037509 | 2.25E-03 | 2.14E-02 | 1.00E+00 |
| ENSG00000101546.11_RBFA     | ENSG00000160789.18_LMNA | -0.05715 | -0.214400115 | 0.10298762  | 4.84E-01 | 7.41E-01 | 1.00E+00 |
| ENSG00000136114.14_THSD1    | ENSG00000160789.18_LMNA | 0.16177  | 0.002635051  | 0.312910044 | 4.65E-02 | 1.92E-01 | 1.00E+00 |
| ENSG00000078295.14_ADCY2    | ENSG00000160789.18_LMNA | -0.35347 | -0.485354213 | -0.2058481  | 7.94E-06 | 2.43E-04 | 4.07E-01 |
| ENSG00000173653.6_RCE1      | ENSG00000160789.18_LMNA | 0.22833  | 0.071734045  | 0.373935428 | 4.67E-03 | 3.72E-02 | 1.00E+00 |
| ENSG00000100084.13_HIRA     | ENSG00000160789.18_LMNA | 0.08748  | -0.072735405 | 0.243290743 | 2.84E-01 | 5.69E-01 | 1.00E+00 |
| ENSG00000059915.15_PSD      | ENSG00000160789.18_LMNA | -0.26691 | -0.408741702 | -0.11248849 | 8.87E-04 | 1.06E-02 | 1.00E+00 |
| ENSG00000100604.11_CHGA     | ENSG00000160789.18_LMNA | -0.23545 | -0.380387984 | -0.07921387 | 3.50E-03 | 3.00E-02 | 1.00E+00 |
| ENSG00000167785.7_ZNF558    | ENSG00000160789.18_LMNA | -0.02526 | -0.183724103 | 0.134479249 | 7.57E-01 | 8.99E-01 | 1.00E+00 |
| ENSG00000125482.11_TTF1     | ENSG00000160789.18_LMNA | -0.04011 | -0.198043463 | 0.119858723 | 6.24E-01 | 8.30E-01 | 1.00E+00 |
| ENSG00000166188.2_ZNF319    | ENSG00000160789.18_LMNA | 0.14919  | -0.010255575 | 0.301234797 | 6.66E-02 | 2.41E-01 | 1.00E+00 |

|                              |                         |          |              |             |          |          |          |
|------------------------------|-------------------------|----------|--------------|-------------|----------|----------|----------|
| ENSG00000171806.10_METTL18   | ENSG00000160789.18_LMNA | -0.08072 | -0.236881145 | 0.079497656 | 3.23E-01 | 6.09E-01 | 1.00E+00 |
| ENSG00000104133.13_SPG11     | ENSG00000160789.18_LMNA | 0.15006  | -0.009361988 | 0.302047157 | 6.50E-02 | 2.38E-01 | 1.00E+00 |
| ENSG00000156983.14_BRPF1     | ENSG00000160789.18_LMNA | 0.16815  | 0.00919816   | 0.318818551 | 3.84E-02 | 1.69E-01 | 1.00E+00 |
| ENSG00000108854.14_SMURF2    | ENSG00000160789.18_LMNA | 0.0762   | -0.084024261 | 0.23257516  | 3.51E-01 | 6.34E-01 | 1.00E+00 |
| ENSG00000117475.12_BLZF1     | ENSG00000160789.18_LMNA | -0.00081 | -0.159990497 | 0.158410703 | 9.92E-01 | 9.97E-01 | 1.00E+00 |
| ENSG00000157873.16_TNFRSF1   | ENSG00000160789.18_LMNA | 0.25977  | 0.104907505  | 0.402331765 | 1.23E-03 | 1.35E-02 | 1.00E+00 |
| ENSG00000188404.7_SELL       | ENSG00000160789.18_LMNA | -0.14598 | -0.298253499 | 0.013530711 | 7.27E-02 | 2.56E-01 | 1.00E+00 |
| ENSG00000175505.10_CLCF1     | ENSG00000160789.18_LMNA | 0.52628  | 0.400652351  | 0.632491913 | 3.32E-12 | 1.46E-09 | 1.70E-07 |
| ENSG00000025434.17_NR1H3     | ENSG00000160789.18_LMNA | 0.0788   | -0.081417259 | 0.235056618 | 3.35E-01 | 6.20E-01 | 1.00E+00 |
| ENSG000000229152.2_ANKRD10-I | ENSG00000160789.18_LMNA | -0.01663 | -0.175368578 | 0.142946978 | 8.39E-01 | 9.37E-01 | 1.00E+00 |
| ENSG00000132510.9_KDM6B      | ENSG00000160789.18_LMNA | 0.03423  | -0.125650929 | 0.192386753 | 6.75E-01 | 8.58E-01 | 1.00E+00 |
| ENSG00000140859.14_KIFC3     | ENSG00000160789.18_LMNA | 0.3209   | 0.170401846  | 0.456763229 | 5.56E-05 | 1.17E-03 | 1.00E+00 |
| ENSG00000100014.18_SPECC1L   | ENSG00000160789.18_LMNA | 0.17993  | 0.021339221  | 0.329685599 | 2.65E-02 | 1.32E-01 | 1.00E+00 |
| ENSG00000165566.12_AMER2     | ENSG00000160789.18_LMNA | -0.46478 | -0.580992686 | -0.3299988  | 1.62E-09 | 2.33E-07 | 8.30E-05 |
| ENSG00000188599.16_NPIPP1    | ENSG00000160789.18_LMNA | 0.00905  | -0.15036253  | 0.16801343  | 9.12E-01 | 9.66E-01 | 1.00E+00 |
| ENSG00000173917.10_HOXB2     | ENSG00000160789.18_LMNA | 0.02629  | -0.133467333 | 0.184719544 | 7.48E-01 | 8.95E-01 | 1.00E+00 |
| ENSG00000068383.17_INPP5A    | ENSG00000160789.18_LMNA | -0.22271 | -0.368836726 | -0.06584755 | 5.82E-03 | 4.40E-02 | 1.00E+00 |
| ENSG00000133818.11_RRAS2     | ENSG00000160789.18_LMNA | -0.17861 | -0.328467499 | -0.01997377 | 2.77E-02 | 1.36E-01 | 1.00E+00 |
| ENSG00000134323.10_MYCN      | ENSG00000160789.18_LMNA | -0.24586 | -0.38980086  | -0.09018647 | 2.26E-03 | 2.15E-02 | 1.00E+00 |
| ENSG00000062582.12_MRPS24    | ENSG00000160789.18_LMNA | 0.12856  | -0.031277203 | 0.281992701 | 1.14E-01 | 3.38E-01 | 1.00E+00 |
| ENSG00000066248.13_NGEF      | ENSG00000160789.18_LMNA | -0.02095 | -0.179549408 | 0.138715822 | 7.98E-01 | 9.19E-01 | 1.00E+00 |
| ENSG00000127415.11_IDUA      | ENSG00000160789.18_LMNA | 0.26937  | 0.115103921  | 0.410946363 | 7.91E-04 | 9.65E-03 | 1.00E+00 |
| ENSG00000172164.12_SNTB1     | ENSG00000160789.18_LMNA | 0.06266  | -0.097514803 | 0.219668086 | 4.43E-01 | 7.10E-01 | 1.00E+00 |
| ENSG00000160191.16_PDE9A     | ENSG00000160789.18_LMNA | -0.14712 | -0.299313074 | 0.01236747  | 7.05E-02 | 2.51E-01 | 1.00E+00 |
| ENSG00000175938.6_ORAI3      | ENSG00000160789.18_LMNA | 0.14905  | -0.010402176 | 0.301101479 | 6.69E-02 | 2.42E-01 | 1.00E+00 |
| ENSG00000170954.10_ZNF415    | ENSG00000160789.18_LMNA | -0.13486 | -0.287882679 | 0.024871811 | 9.76E-02 | 3.07E-01 | 1.00E+00 |
| ENSG00000110756.16_HPS5      | ENSG00000160789.18_LMNA | -0.1063  | -0.261081238 | 0.053812592 | 1.92E-01 | 4.61E-01 | 1.00E+00 |
| ENSG00000172830.11_SSH3      | ENSG00000160789.18_LMNA | 0.35637  | 0.20903365   | 0.487894739 | 6.60E-06 | 2.09E-04 | 3.39E-01 |
| ENSG00000171723.14_GPHN      | ENSG00000160789.18_LMNA | -0.13998 | -0.292662941 | 0.019654296 | 8.54E-02 | 2.84E-01 | 1.00E+00 |
| ENSG00000197818.10_SLC9A8    | ENSG00000160789.18_LMNA | 0.14199  | -0.01760835  | 0.294533177 | 8.10E-02 | 2.74E-01 | 1.00E+00 |
| ENSG00000113649.10_TCERG1    | ENSG00000160789.18_LMNA | -0.07539 | -0.231804096 | 0.084833454 | 3.56E-01 | 6.39E-01 | 1.00E+00 |
| ENSG00000156531.15_PHF6      | ENSG00000160789.18_LMNA | -0.17648 | -0.326510664 | -0.01778264 | 2.96E-02 | 1.42E-01 | 1.00E+00 |
| ENSG00000104626.13_ERI1      | ENSG00000160789.18_LMNA | 0.51935  | 0.392614193  | 0.626734459 | 7.11E-12 | 2.66E-09 | 3.65E-07 |

|                             |                         |          |              |             |          |          |          |
|-----------------------------|-------------------------|----------|--------------|-------------|----------|----------|----------|
| ENSG00000171574.16_ZNF584   | ENSG00000160789.18_LMNA | 0.13762  | -0.022069145 | 0.290452407 | 9.09E-02 | 2.94E-01 | 1.00E+00 |
| ENSG00000168303.6_MPLKIP    | ENSG00000160789.18_LMNA | 0.02769  | -0.132096319 | 0.186067195 | 7.35E-01 | 8.89E-01 | 1.00E+00 |
| ENSG00000166821.7_PEX11A    | ENSG00000160789.18_LMNA | -0.05484 | -0.212188436 | 0.105279588 | 5.02E-01 | 7.54E-01 | 1.00E+00 |
| ENSG00000272288.4_RP11-140K | ENSG00000160789.18_LMNA | -0.21511 | -0.36192031  | -0.05789607 | 7.78E-03 | 5.44E-02 | 1.00E+00 |
| ENSG00000188647.11_PTAR1    | ENSG00000160789.18_LMNA | 0.12774  | -0.032108725 | 0.281226352 | 1.17E-01 | 3.42E-01 | 1.00E+00 |
| ENSG00000119522.14_DENND1A  | ENSG00000160789.18_LMNA | 0.27245  | 0.118389076  | 0.413710668 | 6.84E-04 | 8.62E-03 | 1.00E+00 |
| ENSG00000149679.10_CABLES2  | ENSG00000160789.18_LMNA | 0.17418  | 0.015401797  | 0.324381404 | 3.19E-02 | 1.49E-01 | 1.00E+00 |
| ENSG00000253570.1_RNF5P1    | ENSG00000160789.18_LMNA | -0.27841 | -0.419038203 | -0.12473871 | 5.15E-04 | 6.90E-03 | 1.00E+00 |
| ENSG00000142207.6_URB1      | ENSG00000160789.18_LMNA | 0.15557  | -0.003727948 | 0.307158669 | 5.56E-02 | 2.15E-01 | 1.00E+00 |
| ENSG00000197386.9_HTTP      | ENSG00000160789.18_LMNA | 0.20888  | 0.05138323   | 0.356230226 | 9.81E-03 | 6.47E-02 | 1.00E+00 |
| ENSG00000189184.10_PCDH18   | ENSG00000160789.18_LMNA | 0.25893  | 0.104015588  | 0.401575702 | 1.28E-03 | 1.39E-02 | 1.00E+00 |
| ENSG00000123154.10_WDR83    | ENSG00000160789.18_LMNA | -0.03836 | -0.196366115 | 0.121578509 | 6.39E-01 | 8.39E-01 | 1.00E+00 |
| ENSG00000173442.10_EHBP1L1  | ENSG00000160789.18_LMNA | 0.4161   | 0.27512002   | 0.539555083 | 9.75E-08 | 7.06E-06 | 5.00E-03 |
| ENSG00000125779.20_PANK2    | ENSG00000160789.18_LMNA | 0.29351  | 0.140896414  | 0.432504219 | 2.43E-04 | 3.81E-03 | 1.00E+00 |
| ENSG00000070501.10_POLB     | ENSG00000160789.18_LMNA | -0.40364 | -0.528858937 | -0.26122874 | 2.52E-07 | 1.53E-05 | 1.29E-02 |
| ENSG00000124608.4_AARS2     | ENSG00000160789.18_LMNA | 0.20675  | 0.049166286  | 0.354288173 | 1.06E-02 | 6.83E-02 | 1.00E+00 |
| ENSG00000114251.12_WNT5A    | ENSG00000160789.18_LMNA | -0.23541 | -0.380354801 | -0.07917532 | 3.51E-03 | 3.01E-02 | 1.00E+00 |
| ENSG00000089060.10_SLC8B1   | ENSG00000160789.18_LMNA | 0.25143  | 0.09607291   | 0.394824891 | 1.78E-03 | 1.79E-02 | 1.00E+00 |
| ENSG00000113638.11_TTC33    | ENSG00000160789.18_LMNA | -0.39247 | -0.519229399 | -0.2488168  | 5.71E-07 | 2.92E-05 | 2.93E-02 |
| ENSG00000156697.11_UTP14A   | ENSG00000160789.18_LMNA | 0.29553  | 0.143063968  | 0.434300842 | 2.19E-04 | 3.50E-03 | 1.00E+00 |
| ENSG00000171862.8_PTEN      | ENSG00000160789.18_LMNA | -0.028   | -0.18637317  | 0.131784871 | 7.32E-01 | 8.87E-01 | 1.00E+00 |
| ENSG00000237350.1_CDC42P6   | ENSG00000160789.18_LMNA | -0.00295 | -0.162076563 | 0.156322136 | 9.71E-01 | 9.89E-01 | 1.00E+00 |
| ENSG00000143179.11_UCK2     | ENSG00000160789.18_LMNA | 0.22186  | 0.064956249  | 0.36806311  | 6.01E-03 | 4.51E-02 | 1.00E+00 |
| ENSG00000170175.9_CHRNB1    | ENSG00000160789.18_LMNA | 0.0205   | -0.139153837 | 0.179117136 | 8.02E-01 | 9.21E-01 | 1.00E+00 |
| ENSG00000128285.4_MCHR1     | ENSG00000160789.18_LMNA | 0.17075  | 0.011867798  | 0.321215055 | 3.54E-02 | 1.60E-01 | 1.00E+00 |
| ENSG00000262089.1_RP11-589P | ENSG00000160789.18_LMNA | -0.04254 | -0.20038654  | 0.117453166 | 6.03E-01 | 8.18E-01 | 1.00E+00 |
| ENSG00000117122.12_MFAP2    | ENSG00000160789.18_LMNA | 0.1669   | 0.007909646  | 0.317660448 | 3.99E-02 | 1.73E-01 | 1.00E+00 |
| ENSG00000254612.2_RP11-676M | ENSG00000160789.18_LMNA | -0.02024 | -0.178869067 | 0.139405145 | 8.04E-01 | 9.22E-01 | 1.00E+00 |
| ENSG00000185291.9_IL3RA     | ENSG00000160789.18_LMNA | 0.06847  | -0.091727475 | 0.225218745 | 4.02E-01 | 6.78E-01 | 1.00E+00 |
| ENSG00000100425.17_BRD1     | ENSG00000160789.18_LMNA | 0.06223  | -0.097938978 | 0.219260447 | 4.46E-01 | 7.13E-01 | 1.00E+00 |
| ENSG00000175575.11_PAAF1    | ENSG00000160789.18_LMNA | -0.30483 | -0.442550636 | -0.15305302 | 1.34E-04 | 2.39E-03 | 1.00E+00 |
| ENSG00000133055.7_MYBPH     | ENSG00000160789.18_LMNA | 0.41971  | 0.279163482  | 0.542652553 | 7.35E-08 | 5.62E-06 | 3.77E-03 |
| ENSG00000167378.7_IRGQ      | ENSG00000160789.18_LMNA | 0.10598  | -0.054135564 | 0.260779376 | 1.94E-01 | 4.62E-01 | 1.00E+00 |

|                            |                         |          |              |             |          |          |          |
|----------------------------|-------------------------|----------|--------------|-------------|----------|----------|----------|
| ENSG00000173575.17_CHD2    | ENSG00000160789.18_LMNA | 0.15982  | 0.000634758  | 0.311104473 | 4.92E-02 | 1.99E-01 | 1.00E+00 |
| ENSG00000243477.4_NAT6     | ENSG00000160789.18_LMNA | -0.13607 | -0.289014253 | 0.023638269 | 9.46E-02 | 3.01E-01 | 1.00E+00 |
| ENSG00000020577.12_SAMD4A  | ENSG00000160789.18_LMNA | 0.27235  | 0.118277923  | 0.413617227 | 6.88E-04 | 8.65E-03 | 1.00E+00 |
| ENSG00000068097.13_HEATR6  | ENSG00000160789.18_LMNA | 0.01479  | -0.144753477 | 0.173580062 | 8.57E-01 | 9.43E-01 | 1.00E+00 |
| ENSG00000170961.6_HAS2     | ENSG00000160789.18_LMNA | 0.15626  | -0.003013642 | 0.307805448 | 5.45E-02 | 2.13E-01 | 1.00E+00 |
| ENSG00000143036.15_SLC44A3 | ENSG00000160789.18_LMNA | -0.04865 | -0.206249282 | 0.111417703 | 5.52E-01 | 7.87E-01 | 1.00E+00 |
| ENSG00000123009.4_NME2P1   | ENSG00000160789.18_LMNA | -0.05143 | -0.208916219 | 0.108664419 | 5.29E-01 | 7.73E-01 | 1.00E+00 |
| ENSG00000077238.12_IL4R    | ENSG00000160789.18_LMNA | 0.21755  | 0.060446729  | 0.364142597 | 7.09E-03 | 5.09E-02 | 1.00E+00 |
| ENSG00000138081.18_FBXO11  | ENSG00000160789.18_LMNA | -0.0687  | -0.225431174 | 0.091505561 | 4.00E-01 | 6.77E-01 | 1.00E+00 |
| ENSG00000230798.4_FOXD3-AS | ENSG00000160789.18_LMNA | -0.06695 | -0.223764461 | 0.093245839 | 4.12E-01 | 6.86E-01 | 1.00E+00 |
| ENSG00000271605.4_MILR1    | ENSG00000160789.18_LMNA | -0.07372 | -0.230219638 | 0.086494953 | 3.67E-01 | 6.48E-01 | 1.00E+00 |
| ENSG00000204859.10_ZBTB48  | ENSG00000160789.18_LMNA | 0.09172  | -0.068484469 | 0.247305912 | 2.61E-01 | 5.44E-01 | 1.00E+00 |
| ENSG00000006757.10_PNPLA4  | ENSG00000160789.18_LMNA | 0.11953  | -0.040435454 | 0.273530155 | 1.42E-01 | 3.85E-01 | 1.00E+00 |
| ENSG00000179292.4_TMEN151A | ENSG00000160789.18_LMNA | -0.30641 | -0.443954401 | -0.15475864 | 1.23E-04 | 2.24E-03 | 1.00E+00 |
| ENSG00000108587.13_GOSR1   | ENSG00000160789.18_LMNA | 0.03218  | -0.1276776   | 0.190402488 | 6.94E-01 | 8.68E-01 | 1.00E+00 |
| ENSG00000167840.12_ZNF232  | ENSG00000160789.18_LMNA | -0.12688 | -0.280419304 | 0.032983938 | 1.19E-01 | 3.47E-01 | 1.00E+00 |
| ENSG00000137700.15_SLC37A4 | ENSG00000160789.18_LMNA | 0.08599  | -0.074229051 | 0.241877362 | 2.92E-01 | 5.78E-01 | 1.00E+00 |
| ENSG00000085978.20_ATG16L1 | ENSG00000160789.18_LMNA | 0.22665  | 0.069978459  | 0.372416701 | 4.99E-03 | 3.91E-02 | 1.00E+00 |
| ENSG00000172071.10	EIF2AK3 | ENSG00000160789.18_LMNA | 0.13247  | -0.027303645 | 0.285649307 | 1.04E-01 | 3.19E-01 | 1.00E+00 |
| ENSG00000265491.4_RNF115   | ENSG00000160789.18_LMNA | -0.18565 | -0.334954527 | -0.02725878 | 2.20E-02 | 1.16E-01 | 1.00E+00 |
| ENSG00000161265.13_U2AF1L4 | ENSG00000160789.18_LMNA | -0.0719  | -0.22848419  | 0.088312764 | 3.79E-01 | 6.58E-01 | 1.00E+00 |
| ENSG00000154803.11_FLCN    | ENSG00000160789.18_LMNA | 0.01357  | -0.145943933 | 0.172400307 | 8.68E-01 | 9.48E-01 | 1.00E+00 |
| ENSG00000166529.13_ZSCAN21 | ENSG00000160789.18_LMNA | 0.0216   | -0.138077562 | 0.18017908  | 7.92E-01 | 9.16E-01 | 1.00E+00 |
| ENSG00000139180.9_NDUFA9   | ENSG00000160789.18_LMNA | -0.24237 | -0.386655206 | -0.08651147 | 2.63E-03 | 2.41E-02 | 1.00E+00 |
| ENSG00000140464.18_PML     | ENSG00000160789.18_LMNA | 0.46681  | 0.332302819  | 0.582704392 | 1.34E-09 | 1.98E-07 | 6.90E-05 |
| ENSG00000154781.14_CCDC174 | ENSG00000160789.18_LMNA | -0.00453 | -0.163611847 | 0.154783191 | 9.56E-01 | 9.82E-01 | 1.00E+00 |
| ENSG00000118482.10_PHF3    | ENSG00000160789.18_LMNA | 0.13907  | -0.020584298 | 0.29181202  | 8.75E-02 | 2.88E-01 | 1.00E+00 |
| ENSG00000119953.11_SMNDC1  | ENSG00000160789.18_LMNA | -0.13813 | -0.290929837 | 0.021547896 | 8.97E-02 | 2.92E-01 | 1.00E+00 |
| ENSG00000109189.11_USP46   | ENSG00000160789.18_LMNA | -0.30658 | -0.44410337  | -0.15493974 | 1.22E-04 | 2.22E-03 | 1.00E+00 |
| ENSG00000164124.9_TMEN144  | ENSG00000160789.18_LMNA | -0.39812 | -0.524102121 | -0.25508639 | 3.79E-07 | 2.11E-05 | 1.94E-02 |
| ENSG00000198042.9_MAK16    | ENSG00000160789.18_LMNA | 0.02625  | -0.133507508 | 0.184680036 | 7.48E-01 | 8.95E-01 | 1.00E+00 |
| ENSG00000117625.12_RCOR3   | ENSG00000160789.18_LMNA | -0.17341 | -0.323673294 | -0.0146108  | 3.26E-02 | 1.51E-01 | 1.00E+00 |
| ENSG00000121858.9_TNFSF10  | ENSG00000160789.18_LMNA | 0.01514  | -0.144407982 | 0.17392228  | 8.53E-01 | 9.42E-01 | 1.00E+00 |

|                              |                         |          |              |             |          |          |          |
|------------------------------|-------------------------|----------|--------------|-------------|----------|----------|----------|
| ENSG00000005175.8_RPAP3      | ENSG00000160789.18_LMNA | 0.0015   | -0.157738583 | 0.160662123 | 9.85E-01 | 9.94E-01 | 1.00E+00 |
| ENSG00000023909.8_GCLM       | ENSG00000160789.18_LMNA | 0.27742  | 0.123686397  | 0.418156678 | 5.40E-04 | 7.15E-03 | 1.00E+00 |
| ENSG000000180914.9_OXTR      | ENSG00000160789.18_LMNA | 0.26182  | 0.107087371  | 0.404177895 | 1.12E-03 | 1.26E-02 | 1.00E+00 |
| ENSG000000151327.11_FAM177A  | ENSG00000160789.18_LMNA | -0.06151 | -0.218572599 | 0.098654469 | 4.52E-01 | 7.17E-01 | 1.00E+00 |
| ENSG000000148481.12_FAM188A  | ENSG00000160789.18_LMNA | -0.47828 | -0.592378192 | -0.34538053 | 4.61E-10 | 8.24E-08 | 2.37E-05 |
| ENSG000000272760.1_RP11-5C23 | ENSG00000160789.18_LMNA | 0.19578  | 0.037759452  | 0.344253946 | 1.56E-02 | 9.03E-02 | 1.00E+00 |
| ENSG00000068654.14_POLR1A    | ENSG00000160789.18_LMNA | 0.11498  | -0.045043551 | 0.26925365  | 1.58E-01 | 4.11E-01 | 1.00E+00 |
| ENSG000000114670.12_NEK11    | ENSG00000160789.18_LMNA | 0.07962  | -0.080597821 | 0.235835743 | 3.29E-01 | 6.15E-01 | 1.00E+00 |
| ENSG000000128059.7_PPAT      | ENSG00000160789.18_LMNA | 0.02767  | -0.132110373 | 0.186053388 | 7.35E-01 | 8.89E-01 | 1.00E+00 |
| ENSG000000126790.10_L3HYPDH  | ENSG00000160789.18_LMNA | 0.09481  | -0.065375812 | 0.250235307 | 2.45E-01 | 5.25E-01 | 1.00E+00 |
| ENSG000000156103.14_MMP16    | ENSG00000160789.18_LMNA | -0.20241 | -0.350318681 | -0.04464426 | 1.24E-02 | 7.65E-02 | 1.00E+00 |
| ENSG000000103343.11_ZNF174   | ENSG00000160789.18_LMNA | -0.23671 | -0.381534402 | -0.08054636 | 3.32E-03 | 2.89E-02 | 1.00E+00 |
| ENSG000000163755.7_HPS3      | ENSG00000160789.18_LMNA | -0.06413 | -0.221071849 | 0.09605321  | 4.33E-01 | 7.02E-01 | 1.00E+00 |
| ENSG000000131931.7_THAP1     | ENSG00000160789.18_LMNA | -0.1519  | -0.30375715  | 0.007479389 | 6.17E-02 | 2.30E-01 | 1.00E+00 |
| ENSG000000176049.14_JAKMIP2  | ENSG00000160789.18_LMNA | -0.06093 | -0.218012122 | 0.099237229 | 4.56E-01 | 7.20E-01 | 1.00E+00 |
| ENSG000000124370.9_MCEE      | ENSG00000160789.18_LMNA | -0.27872 | -0.419313975 | -0.12506805 | 5.07E-04 | 6.82E-03 | 1.00E+00 |
| ENSG000000102096.9_PIM2      | ENSG00000160789.18_LMNA | 0.19607  | 0.038056258  | 0.344515927 | 1.55E-02 | 8.98E-02 | 1.00E+00 |
| ENSG000000089199.8_CHGB      | ENSG00000160789.18_LMNA | -0.20069 | -0.348748366 | -0.04285882 | 1.32E-02 | 7.99E-02 | 1.00E+00 |
| ENSG000000143850.11_PLEKHA6  | ENSG00000160789.18_LMNA | -0.17525 | -0.325372359 | -0.0165094  | 3.08E-02 | 1.46E-01 | 1.00E+00 |
| ENSG000000147548.15_WHSC1L1  | ENSG00000160789.18_LMNA | 0.01592  | -0.143643061 | 0.174679673 | 8.46E-01 | 9.40E-01 | 1.00E+00 |
| ENSG000000164308.15_ERAP2    | ENSG00000160789.18_LMNA | 0.16902  | 0.010091413  | 0.319620855 | 3.74E-02 | 1.65E-01 | 1.00E+00 |
| ENSG000000179409.9_GEMIN4    | ENSG00000160789.18_LMNA | 0.08405  | -0.076165979 | 0.24004252  | 3.03E-01 | 5.90E-01 | 1.00E+00 |
| ENSG000000103126.13_AXIN1    | ENSG00000160789.18_LMNA | 0.29509  | 0.142589572  | 0.433907827 | 2.24E-04 | 3.57E-03 | 1.00E+00 |
| ENSG000000164283.11_ESM1     | ENSG00000160789.18_LMNA | 0.23502  | 0.078765222  | 0.380001778 | 3.56E-03 | 3.04E-02 | 1.00E+00 |
| ENSG000000276291.3_FRG1HP    | ENSG00000160789.18_LMNA | -0.2332  | -0.378355203 | -0.0768538  | 3.84E-03 | 3.21E-02 | 1.00E+00 |
| ENSG00000065135.8_GNAI3      | ENSG00000160789.18_LMNA | 0.10564  | -0.054480359 | 0.260457049 | 1.95E-01 | 4.64E-01 | 1.00E+00 |
| ENSG000000149503.11_INCENP   | ENSG00000160789.18_LMNA | 0.0849   | -0.075320447 | 0.240843766 | 2.98E-01 | 5.84E-01 | 1.00E+00 |
| ENSG000000214114.7_MYCBP     | ENSG00000160789.18_LMNA | 0.16339  | 0.004297401  | 0.314408867 | 4.43E-02 | 1.86E-01 | 1.00E+00 |
| ENSG000000139218.16_SCAF11   | ENSG00000160789.18_LMNA | 0.04558  | -0.114455155 | 0.203301603 | 5.77E-01 | 8.03E-01 | 1.00E+00 |
| ENSG000000268087.1_CTC-429P9 | ENSG00000160789.18_LMNA | -0.15603 | -0.307587503 | 0.003254378 | 5.49E-02 | 2.14E-01 | 1.00E+00 |
| ENSG000000143748.16_NVL      | ENSG00000160789.18_LMNA | -0.04495 | -0.202700334 | 0.115074007 | 5.82E-01 | 8.06E-01 | 1.00E+00 |
| ENSG000000133111.3_RFXAP     | ENSG00000160789.18_LMNA | -0.30462 | -0.44236862  | -0.15283199 | 1.36E-04 | 2.40E-03 | 1.00E+00 |
| ENSG000000187522.12_HSPA14   | ENSG00000160789.18_LMNA | -0.33486 | -0.469058534 | -0.18555491 | 2.48E-05 | 6.14E-04 | 1.00E+00 |



|                              |                         |          |              |             |          |          |          |
|------------------------------|-------------------------|----------|--------------|-------------|----------|----------|----------|
| ENSG00000115947.12_ORC4      | ENSG00000160789.18_LMNA | -0.53713 | -0.641475258 | -0.41326596 | 9.75E-13 | 5.53E-10 | 5.00E-08 |
| ENSG00000125538.10_IL1B      | ENSG00000160789.18_LMNA | 0.04922  | -0.110847545 | 0.206801947 | 5.47E-01 | 7.84E-01 | 1.00E+00 |
| ENSG00000180694.12_TMEM64    | ENSG00000160789.18_LMNA | 0.18942  | 0.031157637  | 0.338414375 | 1.94E-02 | 1.06E-01 | 1.00E+00 |
| ENSG00000117724.11_CENPF     | ENSG00000160789.18_LMNA | 0.15076  | -0.008644897 | 0.302698738 | 6.37E-02 | 2.35E-01 | 1.00E+00 |
| ENSG00000114098.16_ARMC8     | ENSG00000160789.18_LMNA | -0.22869 | -0.374268486 | -0.0721193  | 4.60E-03 | 3.68E-02 | 1.00E+00 |
| ENSG00000174013.7_FBXO45     | ENSG00000160789.18_LMNA | -0.10326 | -0.258215177 | 0.05687643  | 2.06E-01 | 4.77E-01 | 1.00E+00 |
| ENSG00000166788.8_SAAL1      | ENSG00000160789.18_LMNA | -0.03484 | -0.192969317 | 0.125055411 | 6.70E-01 | 8.55E-01 | 1.00E+00 |
| ENSG00000128039.9_SRD5A3     | ENSG00000160789.18_LMNA | 0.09474  | -0.065452568 | 0.250163046 | 2.46E-01 | 5.25E-01 | 1.00E+00 |
| ENSG00000158006.12_PAFAH2    | ENSG00000160789.18_LMNA | 0.03439  | -0.125502119 | 0.192532347 | 6.74E-01 | 8.57E-01 | 1.00E+00 |
| ENSG00000122376.10_FAM35A    | ENSG00000160789.18_LMNA | -0.14417 | -0.296567926 | 0.01537946  | 7.64E-02 | 2.64E-01 | 1.00E+00 |
| ENSG00000089169.13_RPH3A     | ENSG00000160789.18_LMNA | -0.14821 | -0.300328359 | 0.01125206  | 6.84E-02 | 2.46E-01 | 1.00E+00 |
| ENSG00000228106.4_RP11-452F  | ENSG00000160789.18_LMNA | -0.26787 | -0.4096015   | -0.113508   | 8.49E-04 | 1.02E-02 | 1.00E+00 |
| ENSG00000101844.16_ATG4A     | ENSG00000160789.18_LMNA | -0.10781 | -0.26250364  | 0.052289831 | 1.86E-01 | 4.52E-01 | 1.00E+00 |
| ENSG00000088451.9_TGDS       | ENSG00000160789.18_LMNA | -0.27536 | -0.41631432  | -0.12148923 | 5.96E-04 | 7.75E-03 | 1.00E+00 |
| ENSG00000120693.12_SMAD9     | ENSG00000160789.18_LMNA | -0.43171 | -0.552909814 | -0.29262043 | 2.81E-08 | 2.57E-06 | 1.44E-03 |
| ENSG00000100055.19_CYTH4     | ENSG00000160789.18_LMNA | 0.1053   | -0.054819978 | 0.260139493 | 1.97E-01 | 4.66E-01 | 1.00E+00 |
| ENSG00000144199.10_FAHD2B    | ENSG00000160789.18_LMNA | -0.0236  | -0.182115363 | 0.136113213 | 7.73E-01 | 9.06E-01 | 1.00E+00 |
| ENSG00000174106.2_LEMD3      | ENSG00000160789.18_LMNA | -0.06322 | -0.220204307 | 0.096956652 | 4.39E-01 | 7.07E-01 | 1.00E+00 |
| ENSG00000162585.15_FAAP20    | ENSG00000160789.18_LMNA | 0.17113  | 0.012259973  | 0.321566772 | 3.50E-02 | 1.59E-01 | 1.00E+00 |
| ENSG00000171984.13_C20orf196 | ENSG00000160789.18_LMNA | -0.38899 | -0.516226427 | -0.24496421 | 7.32E-07 | 3.58E-05 | 3.75E-02 |
| ENSG00000072864.11_NDE1      | ENSG00000160789.18_LMNA | 0.10324  | -0.05689566  | 0.258197171 | 2.06E-01 | 4.77E-01 | 1.00E+00 |
| ENSG00000158406.3_HIST1H4H   | ENSG00000160789.18_LMNA | -0.04793 | -0.205561746 | 0.112126709 | 5.58E-01 | 7.91E-01 | 1.00E+00 |
| ENSG00000187699.9_C2orf88    | ENSG00000160789.18_LMNA | -0.42611 | -0.548126069 | -0.28633157 | 4.42E-08 | 3.67E-06 | 2.27E-03 |
| ENSG00000180190.10_TDRP      | ENSG00000160789.18_LMNA | -0.17503 | -0.325168424 | -0.0162814  | 3.10E-02 | 1.47E-01 | 1.00E+00 |
| ENSG00000111752.9_PHC1       | ENSG00000160789.18_LMNA | -0.13994 | -0.292625016 | 0.019695758 | 8.55E-02 | 2.84E-01 | 1.00E+00 |
| ENSG00000162522.9_KIAA1522   | ENSG00000160789.18_LMNA | 0.35526  | 0.207807758  | 0.486917631 | 7.09E-06 | 2.22E-04 | 3.64E-01 |
| ENSG00000047644.16_WWC3      | ENSG00000160789.18_LMNA | 0.30478  | 0.153000145  | 0.442507098 | 1.35E-04 | 2.39E-03 | 1.00E+00 |
| ENSG00000135540.10_NHSL1     | ENSG00000160789.18_LMNA | 0.11191  | -0.048153484 | 0.266360482 | 1.70E-01 | 4.29E-01 | 1.00E+00 |
| ENSG00000132781.16_MUTYH     | ENSG00000160789.18_LMNA | 0.18888  | 0.030595788  | 0.337916302 | 1.98E-02 | 1.07E-01 | 1.00E+00 |
| ENSG00000101216.9_GMEB2      | ENSG00000160789.18_LMNA | 0.30268  | 0.150746891  | 0.440650384 | 1.51E-04 | 2.60E-03 | 1.00E+00 |
| ENSG00000137441.7_FGFBP2     | ENSG00000160789.18_LMNA | -0.25658 | -0.399459965 | -0.10152222 | 1.42E-03 | 1.51E-02 | 1.00E+00 |
| ENSG00000112309.9_B3GAT2     | ENSG00000160789.18_LMNA | -0.39456 | -0.521034786 | -0.2511371  | 4.91E-07 | 2.58E-05 | 2.52E-02 |
| ENSG00000136861.16_CDK5RAP   | ENSG00000160789.18_LMNA | 0.18783  | 0.029511215  | 0.336954352 | 2.05E-02 | 1.10E-01 | 1.00E+00 |

|                             |                         |          |              |             |          |          |          |
|-----------------------------|-------------------------|----------|--------------|-------------|----------|----------|----------|
| ENSG00000152214.11_RIT2     | ENSG00000160789.18_LMNA | -0.31596 | -0.452400383 | -0.16505732 | 7.33E-05 | 1.47E-03 | 1.00E+00 |
| ENSG00000164951.14_PDP1     | ENSG00000160789.18_LMNA | 0.00133  | -0.157904132 | 0.160496723 | 9.87E-01 | 9.95E-01 | 1.00E+00 |
| ENSG00000065457.9_ADAT1     | ENSG00000160789.18_LMNA | -0.02666 | -0.185072991 | 0.133107877 | 7.44E-01 | 8.93E-01 | 1.00E+00 |
| ENSG00000111731.11_C2CD5    | ENSG00000160789.18_LMNA | -0.20974 | -0.35701607  | -0.05228116 | 9.50E-03 | 6.32E-02 | 1.00E+00 |
| ENSG00000144674.15_GOLGA4   | ENSG00000160789.18_LMNA | 0.13887  | -0.020786346 | 0.291627087 | 8.80E-02 | 2.89E-01 | 1.00E+00 |
| ENSG00000138696.9_BMPR1B    | ENSG00000160789.18_LMNA | -0.06712 | -0.223924151 | 0.093079184 | 4.11E-01 | 6.85E-01 | 1.00E+00 |
| ENSG00000108219.13_TSPAN14  | ENSG00000160789.18_LMNA | -0.08682 | -0.242666096 | 0.0733957   | 2.88E-01 | 5.73E-01 | 1.00E+00 |
| ENSG00000147905.16_ZCCHC7   | ENSG00000160789.18_LMNA | -0.14284 | -0.295322102 | 0.01674452  | 7.92E-02 | 2.70E-01 | 1.00E+00 |
| ENSG00000106868.15_SUSD1    | ENSG00000160789.18_LMNA | -0.11256 | -0.266977754 | 0.047490475 | 1.67E-01 | 4.25E-01 | 1.00E+00 |
| ENSG00000083168.8_KAT6A     | ENSG00000160789.18_LMNA | 0.05546  | -0.104666828 | 0.21278005  | 4.97E-01 | 7.51E-01 | 1.00E+00 |
| ENSG00000123352.16_SPATS2   | ENSG00000160789.18_LMNA | -0.13822 | -0.291020374 | 0.021449031 | 8.95E-02 | 2.91E-01 | 1.00E+00 |
| ENSG00000092208.15_GEMIN2   | ENSG00000160789.18_LMNA | -0.19219 | -0.340956713 | -0.03402854 | 1.77E-02 | 9.88E-02 | 1.00E+00 |
| ENSG00000227640.2_SOX21-AS1 | ENSG00000160789.18_LMNA | -0.2427  | -0.386950415 | -0.08685601 | 2.59E-03 | 2.38E-02 | 1.00E+00 |
| ENSG00000092470.10_WDR76    | ENSG00000160789.18_LMNA | 0.16214  | 0.003017823  | 0.3132553   | 4.60E-02 | 1.90E-01 | 1.00E+00 |
| ENSG00000196792.10_STRN3    | ENSG00000160789.18_LMNA | 0.02813  | -0.131658188 | 0.186497609 | 7.31E-01 | 8.86E-01 | 1.00E+00 |
| ENSG00000166946.12_CCNDP1   | ENSG00000160789.18_LMNA | -0.15589 | -0.307455753 | 0.003399886 | 5.51E-02 | 2.14E-01 | 1.00E+00 |
| ENSG00000162702.7_ZNF281    | ENSG00000160789.18_LMNA | -0.17444 | -0.324629315 | -0.01567882 | 3.16E-02 | 1.48E-01 | 1.00E+00 |
| ENSG00000114904.11_NEK4     | ENSG00000160789.18_LMNA | 0.05653  | -0.103600963 | 0.213808577 | 4.89E-01 | 7.45E-01 | 1.00E+00 |
| ENSG00000040341.16_STAU2    | ENSG00000160789.18_LMNA | -0.41848 | -0.541600907 | -0.27778961 | 8.09E-08 | 6.02E-06 | 4.15E-03 |
| ENSG00000180530.8_N RIP1    | ENSG00000160789.18_LMNA | 0.17317  | 0.014362126  | 0.32345061  | 3.29E-02 | 1.52E-01 | 1.00E+00 |
| ENSG00000144724.17_PTPRG    | ENSG00000160789.18_LMNA | -0.12016 | -0.27411715  | 0.039801899 | 1.40E-01 | 3.82E-01 | 1.00E+00 |
| ENSG00000144959.8_NCEH1     | ENSG00000160789.18_LMNA | 0.19721  | 0.039238483  | 0.345558965 | 1.49E-02 | 8.74E-02 | 1.00E+00 |
| ENSG00000130347.11_RTN4IP1  | ENSG00000160789.18_LMNA | -0.0513  | -0.208794967 | 0.108789702 | 5.30E-01 | 7.73E-01 | 1.00E+00 |
| ENSG00000167716.17_WDR81    | ENSG00000160789.18_LMNA | 0.29643  | 0.144024009  | 0.435095852 | 2.09E-04 | 3.37E-03 | 1.00E+00 |
| ENSG00000001461.15_NIPAL3   | ENSG00000160789.18_LMNA | 0.12288  | -0.037043168 | 0.276670424 | 1.32E-01 | 3.68E-01 | 1.00E+00 |
| ENSG00000179833.4_SERTAD2   | ENSG00000160789.18_LMNA | 0.1741   | 0.015321155  | 0.324309228 | 3.19E-02 | 1.49E-01 | 1.00E+00 |
| ENSG00000081041.8_CXCL2     | ENSG00000160789.18_LMNA | 0.12367  | -0.036247857 | 0.277405682 | 1.29E-01 | 3.64E-01 | 1.00E+00 |
| ENSG00000072401.13_UBE2D1   | ENSG00000160789.18_LMNA | -0.24218 | -0.386480585 | -0.0863077  | 2.65E-03 | 2.42E-02 | 1.00E+00 |
| ENSG00000188573.7_FBLL1     | ENSG00000160789.18_LMNA | -0.34561 | -0.478488176 | -0.19726834 | 1.29E-05 | 3.61E-04 | 6.64E-01 |
| ENSG00000242125.3_SNHG3     | ENSG00000160789.18_LMNA | -0.10281 | -0.257795916 | 0.057324126 | 2.08E-01 | 4.80E-01 | 1.00E+00 |
| ENSG00000157107.12_FCHO2    | ENSG00000160789.18_LMNA | -0.05384 | -0.211231318 | 0.106270408 | 5.10E-01 | 7.59E-01 | 1.00E+00 |
| ENSG00000136147.15_PHF11    | ENSG00000160789.18_LMNA | 0.06991  | -0.090293102 | 0.226591285 | 3.92E-01 | 6.70E-01 | 1.00E+00 |
| ENSG00000143515.15_ATP8B2   | ENSG00000160789.18_LMNA | 0.34264  | 0.194019811  | 0.475879502 | 1.55E-05 | 4.20E-04 | 7.97E-01 |

|                              |                         |          |              |             |          |          |          |
|------------------------------|-------------------------|----------|--------------|-------------|----------|----------|----------|
| ENSG00000162654.8_GBP4       | ENSG00000160789.18_LMNA | 0.0857   | -0.074519091 | 0.241602752 | 2.94E-01 | 5.80E-01 | 1.00E+00 |
| ENSG00000162714.11_ZNF496    | ENSG00000160789.18_LMNA | 0.14066  | -0.018963978 | 0.293294241 | 8.39E-02 | 2.80E-01 | 1.00E+00 |
| ENSG00000161682.13_FAM171A   | ENSG00000160789.18_LMNA | -0.14003 | -0.292705529 | 0.019607737 | 8.53E-02 | 2.83E-01 | 1.00E+00 |
| ENSG00000280670.1_CCDC163    | ENSG00000160789.18_LMNA | -0.27423 | -0.415300272 | -0.12028112 | 6.29E-04 | 8.08E-03 | 1.00E+00 |
| ENSG00000088854.12_C20orf194 | ENSG00000160789.18_LMNA | -0.06182 | -0.218870254 | 0.098344893 | 4.49E-01 | 7.15E-01 | 1.00E+00 |
| ENSG00000113522.12_RAD50     | ENSG00000160789.18_LMNA | 0.10856  | -0.051534348 | 0.263208824 | 1.83E-01 | 4.48E-01 | 1.00E+00 |
| ENSG00000269242.1_CTD-2192J  | ENSG00000160789.18_LMNA | -0.13171 | -0.284936922 | 0.028078555 | 1.06E-01 | 3.23E-01 | 1.00E+00 |
| ENSG00000160908.14_ZNF394    | ENSG00000160789.18_LMNA | 0.28431  | 0.131038162  | 0.424303681 | 3.86E-04 | 5.50E-03 | 1.00E+00 |
| ENSG00000101311.14_FERMT1    | ENSG00000160789.18_LMNA | -0.42319 | -0.545633359 | -0.28306349 | 5.58E-08 | 4.46E-06 | 2.86E-03 |
| ENSG00000163602.9_RYBP       | ENSG00000160789.18_LMNA | -0.02949 | -0.18780489  | 0.130326702 | 7.18E-01 | 8.80E-01 | 1.00E+00 |
| ENSG00000158292.6_GPR153     | ENSG00000160789.18_LMNA | -0.00614 | -0.165177906 | 0.153211804 | 9.40E-01 | 9.76E-01 | 1.00E+00 |
| ENSG00000127580.14_WDR24     | ENSG00000160789.18_LMNA | 0.19068  | 0.032464122  | 0.339571895 | 1.86E-02 | 1.02E-01 | 1.00E+00 |
| ENSG00000125676.18_THOC2     | ENSG00000160789.18_LMNA | 0.16588  | 0.006858081  | 0.316714628 | 4.11E-02 | 1.77E-01 | 1.00E+00 |
| ENSG00000100522.7_GNPAT1     | ENSG00000160789.18_LMNA | 0.23472  | 0.078450835  | 0.379731084 | 3.61E-03 | 3.07E-02 | 1.00E+00 |
| ENSG00000136999.4_NOV        | ENSG00000160789.18_LMNA | 0.1274   | -0.032457301 | 0.280904977 | 1.18E-01 | 3.44E-01 | 1.00E+00 |
| ENSG00000108064.9_TFAM       | ENSG00000160789.18_LMNA | -0.30408 | -0.441886415 | -0.15224657 | 1.40E-04 | 2.46E-03 | 1.00E+00 |
| ENSG00000231663.1_RP5-827C2  | ENSG00000160789.18_LMNA | -0.16316 | -0.314198176 | -0.00406362 | 4.46E-02 | 1.87E-01 | 1.00E+00 |
| ENSG00000138764.12_CCNG2     | ENSG00000160789.18_LMNA | -0.32134 | -0.457154036 | -0.17088141 | 5.42E-05 | 1.15E-03 | 1.00E+00 |
| ENSG00000250571.5_GLI4       | ENSG00000160789.18_LMNA | -0.01257 | -0.171427985 | 0.146924382 | 8.78E-01 | 9.53E-01 | 1.00E+00 |
| ENSG00000151012.12_SLC7A11   | ENSG00000160789.18_LMNA | 0.10855  | -0.051546125 | 0.263197834 | 1.83E-01 | 4.48E-01 | 1.00E+00 |
| ENSG00000068489.11_PRR11     | ENSG00000160789.18_LMNA | 0.05746  | -0.102675841 | 0.214700722 | 4.82E-01 | 7.40E-01 | 1.00E+00 |
| ENSG00000133624.12_ZNF767P   | ENSG00000160789.18_LMNA | -0.02944 | -0.187763318 | 0.130369062 | 7.19E-01 | 8.81E-01 | 1.00E+00 |
| ENSG00000120324.6_PCDHB10    | ENSG00000160789.18_LMNA | -0.01457 | -0.173366765 | 0.144968777 | 8.59E-01 | 9.44E-01 | 1.00E+00 |
| ENSG00000279672.1_CMB9-55F2  | ENSG00000160789.18_LMNA | 0.12897  | -0.030865366 | 0.28237211  | 1.13E-01 | 3.36E-01 | 1.00E+00 |
| ENSG00000173875.12_ZNF791    | ENSG00000160789.18_LMNA | -0.12296 | -0.276743448 | 0.036964197 | 1.31E-01 | 3.67E-01 | 1.00E+00 |
| ENSG00000198932.11_GPRASP1   | ENSG00000160789.18_LMNA | 0.10418  | -0.055945079 | 0.259086994 | 2.01E-01 | 4.72E-01 | 1.00E+00 |
| ENSG00000156273.14_BACH1     | ENSG00000160789.18_LMNA | 0.26825  | 0.113914533  | 0.409944204 | 8.34E-04 | 1.00E-02 | 1.00E+00 |
| ENSG00000066379.13_ZNRD1     | ENSG00000160789.18_LMNA | -0.13187 | -0.285086022 | 0.027916399 | 1.05E-01 | 3.22E-01 | 1.00E+00 |
| ENSG00000152147.9_GEMIN6     | ENSG00000160789.18_LMNA | -0.20845 | -0.355839267 | -0.05093669 | 9.96E-03 | 6.54E-02 | 1.00E+00 |
| ENSG00000164403.13_SHROOM    | ENSG00000160789.18_LMNA | 0.2972   | 0.144856748  | 0.435785076 | 2.01E-04 | 3.27E-03 | 1.00E+00 |
| ENSG00000187535.12_IFT140    | ENSG00000160789.18_LMNA | 0.09106  | -0.069142978 | 0.246684635 | 2.65E-01 | 5.48E-01 | 1.00E+00 |
| ENSG00000062650.16_WAPL      | ENSG00000160789.18_LMNA | 0.02775  | -0.132030928 | 0.186131442 | 7.34E-01 | 8.88E-01 | 1.00E+00 |
| ENSG00000204536.12_CCHCR1    | ENSG00000160789.18_LMNA | 0.31436  | 0.163330084  | 0.450987461 | 8.01E-05 | 1.57E-03 | 1.00E+00 |

|                             |                         |          |              |             |          |          |          |
|-----------------------------|-------------------------|----------|--------------|-------------|----------|----------|----------|
| ENSG00000118260.13_CREB1    | ENSG00000160789.18_LMNA | -0.11647 | -0.270654894 | 0.043535129 | 1.53E-01 | 4.03E-01 | 1.00E+00 |
| ENSG00000198160.13_MIER1    | ENSG00000160789.18_LMNA | -0.07785 | -0.23414602  | 0.08237443  | 3.40E-01 | 6.26E-01 | 1.00E+00 |
| ENSG00000163026.10_WDCP     | ENSG00000160789.18_LMNA | -0.13685 | -0.289738902 | 0.02284782  | 9.27E-02 | 2.98E-01 | 1.00E+00 |
| ENSG00000180008.8_SOCS4     | ENSG00000160789.18_LMNA | -0.01834 | -0.177022232 | 0.141274808 | 8.23E-01 | 9.31E-01 | 1.00E+00 |
| ENSG00000126003.6_PLAGL2    | ENSG00000160789.18_LMNA | 0.23001  | 0.073503211  | 0.375464266 | 4.36E-03 | 3.54E-02 | 1.00E+00 |
| ENSG00000164944.10_KIAA1429 | ENSG00000160789.18_LMNA | 0.04245  | -0.117549604 | 0.200292677 | 6.04E-01 | 8.18E-01 | 1.00E+00 |
| ENSG00000157613.9_CREB3L1   | ENSG00000160789.18_LMNA | 0.26398  | 0.109378681  | 0.406115802 | 1.02E-03 | 1.17E-02 | 1.00E+00 |
| ENSG00000006634.6_DBF4      | ENSG00000160789.18_LMNA | 0.00165  | -0.157587281 | 0.160813273 | 9.84E-01 | 9.94E-01 | 1.00E+00 |
| ENSG00000093009.8_CDC45     | ENSG00000160789.18_LMNA | 0.02475  | -0.13498174  | 0.18322955  | 7.62E-01 | 9.01E-01 | 1.00E+00 |
| ENSG00000115109.12_EPB41L5  | ENSG00000160789.18_LMNA | -0.15923 | -0.310558131 | -3.00E-05   | 5.01E-02 | 2.01E-01 | 1.00E+00 |
| ENSG00000214293.7_APTR      | ENSG00000160789.18_LMNA | -0.06021 | -0.217326138 | 0.099950188 | 4.61E-01 | 7.25E-01 | 1.00E+00 |
| ENSG00000170836.10_PPM1D    | ENSG00000160789.18_LMNA | -0.20633 | -0.353906247 | -0.04873065 | 1.08E-02 | 6.91E-02 | 1.00E+00 |
| ENSG00000221923.7_ZNF880    | ENSG00000160789.18_LMNA | 0.23566  | 0.079438659  | 0.380581449 | 3.47E-03 | 2.98E-02 | 1.00E+00 |
| ENSG00000196730.11_DAPK1    | ENSG00000160789.18_LMNA | -0.2371  | -0.381889514 | -0.08095933 | 3.27E-03 | 2.85E-02 | 1.00E+00 |
| ENSG00000127481.13_UBR4     | ENSG00000160789.18_LMNA | 0.14142  | -0.018185774 | 0.294005585 | 8.22E-02 | 2.77E-01 | 1.00E+00 |
| ENSG00000055483.18_USP36    | ENSG00000160789.18_LMNA | 0.27933  | 0.125715274  | 0.419855774 | 4.92E-04 | 6.66E-03 | 1.00E+00 |
| ENSG00000144589.19_STK11IP  | ENSG00000160789.18_LMNA | 0.12265  | -0.037282534 | 0.27644906  | 1.32E-01 | 3.69E-01 | 1.00E+00 |
| ENSG00000106080.9_FKBP14    | ENSG00000160789.18_LMNA | 0.19717  | 0.039201787  | 0.345526601 | 1.49E-02 | 8.75E-02 | 1.00E+00 |
| ENSG00000197429.9_IPP       | ENSG00000160789.18_LMNA | 0.01529  | -0.144259558 | 0.174069273 | 8.52E-01 | 9.42E-01 | 1.00E+00 |
| ENSG00000163939.17_PBRM1    | ENSG00000160789.18_LMNA | -0.16189 | -0.313022372 | -0.00275957 | 4.63E-02 | 1.91E-01 | 1.00E+00 |
| ENSG00000182325.9_FBXL6     | ENSG00000160789.18_LMNA | 0.16893  | 0.009997796  | 0.319536791 | 3.75E-02 | 1.66E-01 | 1.00E+00 |
| ENSG00000121931.14_LRIF1    | ENSG00000160789.18_LMNA | -0.1019  | -0.256934054 | 0.058244042 | 2.12E-01 | 4.85E-01 | 1.00E+00 |
| ENSG00000143228.11_NUF2     | ENSG00000160789.18_LMNA | -0.03898 | -0.196961053 | 0.120968737 | 6.33E-01 | 8.36E-01 | 1.00E+00 |
| ENSG00000174606.11_ANGEL2   | ENSG00000160789.18_LMNA | -0.23253 | -0.377749367 | -0.07615107 | 3.94E-03 | 3.28E-02 | 1.00E+00 |
| ENSG00000197860.8_SGTB      | ENSG00000160789.18_LMNA | -0.12782 | -0.281301265 | 0.03202746  | 1.17E-01 | 3.42E-01 | 1.00E+00 |
| ENSG00000148840.9_PPRC1     | ENSG00000160789.18_LMNA | 0.22186  | 0.064955612  | 0.368062557 | 6.01E-03 | 4.51E-02 | 1.00E+00 |
| ENSG00000123178.13_SPRYD7   | ENSG00000160789.18_LMNA | -0.23959 | -0.384138788 | -0.08357746 | 2.95E-03 | 2.64E-02 | 1.00E+00 |
| ENSG00000112029.8_FBXO5     | ENSG00000160789.18_LMNA | -0.0136  | -0.172431344 | 0.145912626 | 8.68E-01 | 9.48E-01 | 1.00E+00 |
| ENSG00000271503.4_CCL5      | ENSG00000160789.18_LMNA | 0.13457  | -0.025169648 | 0.287609331 | 9.83E-02 | 3.08E-01 | 1.00E+00 |
| ENSG00000101447.12_FAM83D   | ENSG00000160789.18_LMNA | 0.06752  | -0.092674057 | 0.224312277 | 4.08E-01 | 6.83E-01 | 1.00E+00 |
| ENSG00000131725.12_WDR44    | ENSG00000160789.18_LMNA | 0.23301  | 0.076654931  | 0.378183782 | 3.87E-03 | 3.23E-02 | 1.00E+00 |
| ENSG00000138795.8_LEF1      | ENSG00000160789.18_LMNA | 0.37837  | 0.233219926  | 0.507030768 | 1.54E-06 | 6.55E-05 | 7.89E-02 |
| ENSG00000152128.13_TMEM163  | ENSG00000160789.18_LMNA | -0.22244 | -0.36859158  | -0.06556506 | 5.88E-03 | 4.44E-02 | 1.00E+00 |

|                             |                         |          |              |             |          |          |          |
|-----------------------------|-------------------------|----------|--------------|-------------|----------|----------|----------|
| ENSG00000175229.6_GAL3ST3   | ENSG00000160789.18_LMNA | -0.19449 | -0.343066594 | -0.03641494 | 1.64E-02 | 9.34E-02 | 1.00E+00 |
| ENSG00000037637.9_FBXO42    | ENSG00000160789.18_LMNA | 0.04334  | -0.116662197 | 0.201156172 | 5.96E-01 | 8.14E-01 | 1.00E+00 |
| ENSG00000173085.12_COQ2     | ENSG00000160789.18_LMNA | 0.08706  | -0.073152294 | 0.242896392 | 2.86E-01 | 5.72E-01 | 1.00E+00 |
| ENSG00000169683.6_LRRC45    | ENSG00000160789.18_LMNA | 0.2973   | 0.144955727  | 0.435866974 | 2.00E-04 | 3.26E-03 | 1.00E+00 |
| ENSG00000102309.11_PIN4     | ENSG00000160789.18_LMNA | -0.06477 | -0.221687932 | 0.095411314 | 4.28E-01 | 6.98E-01 | 1.00E+00 |
| ENSG00000177051.5_FBXO46    | ENSG00000160789.18_LMNA | 0.24758  | 0.092010719  | 0.391359753 | 2.10E-03 | 2.03E-02 | 1.00E+00 |
| ENSG00000133619.16_KRBA1    | ENSG00000160789.18_LMNA | 0.27799  | 0.124294859  | 0.418666455 | 5.25E-04 | 7.01E-03 | 1.00E+00 |
| ENSG00000074603.17_DPP8     | ENSG00000160789.18_LMNA | -0.0307  | -0.188973654 | 0.129135326 | 7.07E-01 | 8.76E-01 | 1.00E+00 |
| ENSG00000071073.11_MGAT4A   | ENSG00000160789.18_LMNA | -0.19304 | -0.341739551 | -0.03491357 | 1.72E-02 | 9.68E-02 | 1.00E+00 |
| ENSG00000197989.12_SNHG12   | ENSG00000160789.18_LMNA | -0.05311 | -0.210528653 | 0.106997413 | 5.16E-01 | 7.63E-01 | 1.00E+00 |
| ENSG00000257270.1_RP11-521B | ENSG00000160789.18_LMNA | 0.03512  | -0.124782353 | 0.19323636  | 6.68E-01 | 8.54E-01 | 1.00E+00 |
| ENSG00000135912.9_TTLL4     | ENSG00000160789.18_LMNA | 0.23005  | 0.073539681  | 0.375495764 | 4.36E-03 | 3.54E-02 | 1.00E+00 |
| ENSG00000165806.18_CASP7    | ENSG00000160789.18_LMNA | 0.4187   | 0.278035429  | 0.541789134 | 7.95E-08 | 5.96E-06 | 4.08E-03 |
| ENSG00000135119.13_RNFT2    | ENSG00000160789.18_LMNA | -0.24823 | -0.391939568 | -0.09268974 | 2.05E-03 | 1.99E-02 | 1.00E+00 |
| ENSG00000152894.13_PTPRK    | ENSG00000160789.18_LMNA | -0.06719 | -0.223996034 | 0.093004161 | 4.11E-01 | 6.85E-01 | 1.00E+00 |
| ENSG00000181220.14_ZNF746   | ENSG00000160789.18_LMNA | 0.23327  | 0.076920919  | 0.378413056 | 3.83E-03 | 3.21E-02 | 1.00E+00 |
| ENSG00000182919.13_C11orf54 | ENSG00000160789.18_LMNA | -0.42648 | -0.548443983 | -0.28674881 | 4.29E-08 | 3.58E-06 | 2.20E-03 |
| ENSG00000269246.1_CTC-246B1 | ENSG00000160789.18_LMNA | -0.14319 | -0.295654239 | 0.016380708 | 7.84E-02 | 2.69E-01 | 1.00E+00 |
| ENSG00000070081.14_NUCB2    | ENSG00000160789.18_LMNA | 0.24733  | 0.091741895  | 0.39113014  | 2.13E-03 | 2.05E-02 | 1.00E+00 |
| ENSG00000095209.10_TMEM38B  | ENSG00000160789.18_LMNA | -0.09947 | -0.254637252 | 0.060692944 | 2.23E-01 | 4.98E-01 | 1.00E+00 |
| ENSG00000114126.16_TFDP2    | ENSG00000160789.18_LMNA | -0.19726 | -0.345607627 | -0.03929366 | 1.49E-02 | 8.73E-02 | 1.00E+00 |
| ENSG00000261295.1_RP11-524D | ENSG00000160789.18_LMNA | 0.56105  | 0.441264596  | 0.661194555 | 5.56E-14 | 5.49E-11 | 2.86E-09 |
| ENSG00000244045.9_TMEM199   | ENSG00000160789.18_LMNA | -0.35581 | -0.487397807 | -0.20841008 | 6.84E-06 | 2.16E-04 | 3.51E-01 |
| ENSG00000171150.7_SOCS5     | ENSG00000160789.18_LMNA | 0.02399  | -0.135728817 | 0.182493978 | 7.69E-01 | 9.04E-01 | 1.00E+00 |
| ENSG00000174989.11_FBXW8    | ENSG00000160789.18_LMNA | -0.00421 | -0.163297574 | 0.155098339 | 9.59E-01 | 9.84E-01 | 1.00E+00 |
| ENSG00000054611.12_TBC1D22  | ENSG00000160789.18_LMNA | 0.06344  | -0.0967417   | 0.220410763 | 4.38E-01 | 7.06E-01 | 1.00E+00 |
| ENSG00000067177.13_PHKA1    | ENSG00000160789.18_LMNA | 0.04665  | -0.113395933 | 0.204330174 | 5.68E-01 | 7.98E-01 | 1.00E+00 |
| ENSG00000175482.7_POLD4     | ENSG00000160789.18_LMNA | 0.22971  | 0.073188824  | 0.375192706 | 4.41E-03 | 3.57E-02 | 1.00E+00 |
| ENSG00000267454.4_ZNF582-AS | ENSG00000160789.18_LMNA | -0.23709 | -0.38187319  | -0.08094034 | 3.27E-03 | 2.85E-02 | 1.00E+00 |
| ENSG00000175093.4_SPSB4     | ENSG00000160789.18_LMNA | -0.12504 | -0.27869103  | 0.034856572 | 1.25E-01 | 3.57E-01 | 1.00E+00 |
| ENSG00000151023.15_ENKUR    | ENSG00000160789.18_LMNA | -0.17571 | -0.325793407 | -0.01698024 | 3.04E-02 | 1.44E-01 | 1.00E+00 |
| ENSG00000104866.9_PPP1R37   | ENSG00000160789.18_LMNA | 0.33703  | 0.187913476  | 0.470962457 | 2.18E-05 | 5.54E-04 | 1.00E+00 |
| ENSG00000114999.7_TTL       | ENSG00000160789.18_LMNA | 0.07995  | -0.080272313 | 0.236145124 | 3.28E-01 | 6.14E-01 | 1.00E+00 |

|                             |                         |          |              |             |          |          |          |
|-----------------------------|-------------------------|----------|--------------|-------------|----------|----------|----------|
| ENSG00000092068.17_SLC7A8   | ENSG00000160789.18_LMNA | 0.01502  | -0.144521802 | 0.173809547 | 8.54E-01 | 9.43E-01 | 1.00E+00 |
| ENSG00000002822.14_MAD1L1   | ENSG00000160789.18_LMNA | 0.22871  | 0.072139811  | 0.374286219 | 4.59E-03 | 3.68E-02 | 1.00E+00 |
| ENSG00000196670.12_ZFP62    | ENSG00000160789.18_LMNA | -0.01986 | -0.178494347 | 0.139784681 | 8.08E-01 | 9.24E-01 | 1.00E+00 |
| ENSG00000100281.12_HMGXB4   | ENSG00000160789.18_LMNA | -0.10591 | -0.260717604 | 0.054201647 | 1.94E-01 | 4.63E-01 | 1.00E+00 |
| ENSG00000103245.12_NARFL    | ENSG00000160789.18_LMNA | -0.09253 | -0.248080204 | 0.067663391 | 2.57E-01 | 5.39E-01 | 1.00E+00 |
| ENSG00000185246.16_PRPF39   | ENSG00000160789.18_LMNA | -0.05606 | -0.213359148 | 0.104066797 | 4.93E-01 | 7.48E-01 | 1.00E+00 |
| ENSG00000103319.10_EEF2K    | ENSG00000160789.18_LMNA | 0.33165  | 0.18206685   | 0.466237999 | 2.99E-05 | 7.12E-04 | 1.00E+00 |
| ENSG00000099326.7_MZF1      | ENSG00000160789.18_LMNA | 0.04504  | -0.114984341 | 0.202787467 | 5.82E-01 | 8.05E-01 | 1.00E+00 |
| ENSG00000084628.8_NKAIN1    | ENSG00000160789.18_LMNA | -0.40863 | -0.533144195 | -0.26678081 | 1.73E-07 | 1.12E-05 | 8.87E-03 |
| ENSG00000156990.13_RPUSD3   | ENSG00000160789.18_LMNA | -0.16419 | -0.315152853 | -0.0051232  | 4.32E-02 | 1.83E-01 | 1.00E+00 |
| ENSG00000170364.11_SETMAR   | ENSG00000160789.18_LMNA | -0.45503 | -0.572739092 | -0.31893097 | 3.87E-09 | 4.85E-07 | 1.99E-04 |
| ENSG00000060642.9_PIGV      | ENSG00000160789.18_LMNA | 0.04565  | -0.114378213 | 0.203376342 | 5.77E-01 | 8.03E-01 | 1.00E+00 |
| ENSG00000155545.18_MIER3    | ENSG00000160789.18_LMNA | -0.11711 | -0.271257395 | 0.042886103 | 1.51E-01 | 3.99E-01 | 1.00E+00 |
| ENSG00000118503.13_TNFAIP3  | ENSG00000160789.18_LMNA | 0.28156  | 0.128100359  | 0.421850546 | 4.41E-04 | 6.12E-03 | 1.00E+00 |
| ENSG00000203883.6_SOX18     | ENSG00000160789.18_LMNA | -0.01636 | -0.175100377 | 0.143218011 | 8.41E-01 | 9.38E-01 | 1.00E+00 |
| ENSG00000260822.1_GS1-358P8 | ENSG00000160789.18_LMNA | 0.27399  | 0.120020708  | 0.41508159  | 6.36E-04 | 8.15E-03 | 1.00E+00 |
| ENSG00000136273.10_HUS1     | ENSG00000160789.18_LMNA | 0.09656  | -0.063613913 | 0.251893043 | 2.37E-01 | 5.15E-01 | 1.00E+00 |
| ENSG00000198771.9_RCSD1     | ENSG00000160789.18_LMNA | -0.14275 | -0.295237612 | 0.016837054 | 7.94E-02 | 2.71E-01 | 1.00E+00 |
| ENSG00000174721.9_FGFBP3    | ENSG00000160789.18_LMNA | -0.00227 | -0.161416619 | 0.15698318  | 9.78E-01 | 9.92E-01 | 1.00E+00 |
| ENSG00000170542.5_SERPINB9  | ENSG00000160789.18_LMNA | 0.03898  | -0.120974971 | 0.196954972 | 6.34E-01 | 8.36E-01 | 1.00E+00 |
| ENSG00000118900.13_UBN1     | ENSG00000160789.18_LMNA | 0.20098  | 0.043157528  | 0.349011204 | 1.30E-02 | 7.93E-02 | 1.00E+00 |
| ENSG00000277075.1_HIST1H2AE | ENSG00000160789.18_LMNA | -0.04914 | -0.20672698  | 0.110924897 | 5.48E-01 | 7.85E-01 | 1.00E+00 |
| ENSG00000111671.8_SPSB2     | ENSG00000160789.18_LMNA | 0.10422  | -0.055907888 | 0.259121798 | 2.01E-01 | 4.72E-01 | 1.00E+00 |
| ENSG00000198682.11_PAPSS2   | ENSG00000160789.18_LMNA | 0.03178  | -0.128067001 | 0.190020937 | 6.98E-01 | 8.70E-01 | 1.00E+00 |
| ENSG00000184979.9_USP18     | ENSG00000160789.18_LMNA | 0.03544  | -0.12445903  | 0.1935525   | 6.65E-01 | 8.52E-01 | 1.00E+00 |
| ENSG00000197283.11_SYNGAP1  | ENSG00000160789.18_LMNA | 0.02124  | -0.138432422 | 0.179829027 | 7.95E-01 | 9.18E-01 | 1.00E+00 |
| ENSG00000177595.16_PID1     | ENSG00000160789.18_LMNA | 0.15709  | -0.002168671 | 0.308570169 | 5.33E-02 | 2.09E-01 | 1.00E+00 |
| ENSG00000101109.10_STK4     | ENSG00000160789.18_LMNA | 0.04305  | -0.116949204 | 0.200876952 | 5.98E-01 | 8.15E-01 | 1.00E+00 |
| ENSG00000181264.7_TM136     | ENSG00000160789.18_LMNA | -0.41002 | -0.53434275  | -0.26833685 | 1.56E-07 | 1.03E-05 | 7.98E-03 |
| ENSG00000235354.1_RPS29P16  | ENSG00000160789.18_LMNA | -0.13464 | -0.28767469  | 0.025098439 | 9.82E-02 | 3.08E-01 | 1.00E+00 |
| ENSG00000163848.17_ZNF148   | ENSG00000160789.18_LMNA | 0.08109  | -0.079134043 | 0.237226498 | 3.21E-01 | 6.07E-01 | 1.00E+00 |
| ENSG00000110987.7_BCL7A     | ENSG00000160789.18_LMNA | -0.34866 | -0.481151598 | -0.20059143 | 1.07E-05 | 3.08E-04 | 5.50E-01 |
| ENSG00000046651.13_OFD1     | ENSG00000160789.18_LMNA | 0.06618  | -0.094008003 | 0.223033931 | 4.18E-01 | 6.90E-01 | 1.00E+00 |

|                             |                         |          |              |             |          |          |          |
|-----------------------------|-------------------------|----------|--------------|-------------|----------|----------|----------|
| ENSG00000179981.9_TSHZ1     | ENSG00000160789.18_LMNA | -0.17593 | -0.325998804 | -0.01720998 | 3.02E-02 | 1.44E-01 | 1.00E+00 |
| ENSG00000165655.15_ZNF503   | ENSG00000160789.18_LMNA | 0.27469  | 0.120770235  | 0.415710905 | 6.15E-04 | 7.95E-03 | 1.00E+00 |
| ENSG00000198081.9_ZBTB14    | ENSG00000160789.18_LMNA | -0.15476 | -0.306412421 | 0.004551715 | 5.69E-02 | 2.18E-01 | 1.00E+00 |
| ENSG00000171812.9_COL8A2    | ENSG00000160789.18_LMNA | 0.27652  | 0.122726506  | 0.417352093 | 5.64E-04 | 7.40E-03 | 1.00E+00 |
| ENSG00000145335.14_SNCA     | ENSG00000160789.18_LMNA | -0.21547 | -0.362243722 | -0.05826702 | 7.68E-03 | 5.39E-02 | 1.00E+00 |
| ENSG00000213463.4_SYNJ2BP   | ENSG00000160789.18_LMNA | 0.00702  | -0.152353241 | 0.166032879 | 9.32E-01 | 9.73E-01 | 1.00E+00 |
| ENSG00000105321.11_CCDC9    | ENSG00000160789.18_LMNA | 0.5205   | 0.393946279  | 0.627690356 | 6.27E-12 | 2.40E-09 | 3.22E-07 |
| ENSG00000166924.7_NYAP1     | ENSG00000160789.18_LMNA | -0.20257 | -0.350468406 | -0.0448146  | 1.23E-02 | 7.62E-02 | 1.00E+00 |
| ENSG00000173548.8_SNX33     | ENSG00000160789.18_LMNA | 0.4891   | 0.357758216  | 0.601469033 | 1.62E-10 | 3.36E-08 | 8.31E-06 |
| ENSG00000262877.4_RP11-1055 | ENSG00000160789.18_LMNA | -0.13787 | -0.29068805  | 0.021811896 | 9.03E-02 | 2.93E-01 | 1.00E+00 |
| ENSG00000278768.1_BACE1-AS  | ENSG00000160789.18_LMNA | 0.00793  | -0.15146488  | 0.166917023 | 9.23E-01 | 9.70E-01 | 1.00E+00 |
| ENSG00000099308.9_MAST3     | ENSG00000160789.18_LMNA | -0.15811 | -0.309520285 | 0.001118231 | 5.17E-02 | 2.06E-01 | 1.00E+00 |
| ENSG00000110395.4_CBL       | ENSG00000160789.18_LMNA | 0.14681  | -0.012682244 | 0.299026428 | 7.11E-02 | 2.52E-01 | 1.00E+00 |
| ENSG00000144455.12_SUMF1    | ENSG00000160789.18_LMNA | 0.22316  | 0.066317154  | 0.369244149 | 5.72E-03 | 4.34E-02 | 1.00E+00 |
| ENSG00000255389.1_C6orf3    | ENSG00000160789.18_LMNA | -0.33541 | -0.469541485 | -0.18615288 | 2.40E-05 | 5.99E-04 | 1.00E+00 |
| ENSG00000136381.11_IREB2    | ENSG00000160789.18_LMNA | 0.01669  | -0.142892135 | 0.175422843 | 8.38E-01 | 9.37E-01 | 1.00E+00 |
| ENSG00000121741.15_ZMYM2    | ENSG00000160789.18_LMNA | -0.27006 | -0.411566428 | -0.11584026 | 7.66E-04 | 9.39E-03 | 1.00E+00 |
| ENSG00000169228.12_RAB24    | ENSG00000160789.18_LMNA | -0.0029  | -0.162027482 | 0.156371309 | 9.72E-01 | 9.89E-01 | 1.00E+00 |
| ENSG00000058272.14_PPP1R12  | ENSG00000160789.18_LMNA | -0.01735 | -0.176061676 | 0.142246341 | 8.32E-01 | 9.35E-01 | 1.00E+00 |
| ENSG00000100614.16_PPM1A    | ENSG00000160789.18_LMNA | -0.16807 | -0.318737974 | -0.00910848 | 3.85E-02 | 1.69E-01 | 1.00E+00 |
| ENSG00000119314.14_PTBP3    | ENSG00000160789.18_LMNA | 0.06901  | -0.09119608  | 0.225727379 | 3.98E-01 | 6.75E-01 | 1.00E+00 |
| ENSG00000232640.1_RP1-266L2 | ENSG00000160789.18_LMNA | -0.28276 | -0.422918865 | -0.12937911 | 4.16E-04 | 5.85E-03 | 1.00E+00 |
| ENSG00000101442.9_ACTR5     | ENSG00000160789.18_LMNA | -0.07867 | -0.234929948 | 0.081550442 | 3.35E-01 | 6.21E-01 | 1.00E+00 |
| ENSG00000165832.5_TRUB1     | ENSG00000160789.18_LMNA | -0.40552 | -0.530474353 | -0.26331963 | 2.19E-07 | 1.36E-05 | 1.12E-02 |
| ENSG00000139155.7_SLCO1C1   | ENSG00000160789.18_LMNA | -0.32105 | -0.456899148 | -0.17056862 | 5.51E-05 | 1.16E-03 | 1.00E+00 |
| ENSG00000161654.8_LSM12     | ENSG00000160789.18_LMNA | 0.11312  | -0.046922916 | 0.267505956 | 1.65E-01 | 4.22E-01 | 1.00E+00 |
| ENSG00000153902.12_LGI4     | ENSG00000160789.18_LMNA | -0.05897 | -0.216142653 | 0.101179448 | 4.70E-01 | 7.31E-01 | 1.00E+00 |
| ENSG00000126453.8_BCL2L12   | ENSG00000160789.18_LMNA | 0.41033  | 0.268682676  | 0.534608982 | 1.52E-07 | 1.01E-05 | 7.79E-03 |
| ENSG00000011523.12_CEP68    | ENSG00000160789.18_LMNA | -0.20045 | -0.348532031 | -0.042613   | 1.33E-02 | 8.03E-02 | 1.00E+00 |
| ENSG00000113615.11_SEC24A   | ENSG00000160789.18_LMNA | 0.20223  | 0.044465456  | 0.350161497 | 1.25E-02 | 7.68E-02 | 1.00E+00 |
| ENSG00000100151.14_PICK1    | ENSG00000160789.18_LMNA | 0.09273  | -0.067469195 | 0.248263276 | 2.56E-01 | 5.38E-01 | 1.00E+00 |
| ENSG00000135723.12_FHOD1    | ENSG00000160789.18_LMNA | 0.4012   | 0.258513676  | 0.526758384 | 3.02E-07 | 1.78E-05 | 1.55E-02 |
| ENSG00000181458.9_TMEM45A   | ENSG00000160789.18_LMNA | 0.1071   | -0.053005939 | 0.261834898 | 1.89E-01 | 4.56E-01 | 1.00E+00 |

|                              |                         |          |              |             |          |          |          |
|------------------------------|-------------------------|----------|--------------|-------------|----------|----------|----------|
| ENSG00000118965.13_WDR35     | ENSG00000160789.18_LMNA | 0.02715  | -0.132627145 | 0.185545557 | 7.40E-01 | 8.91E-01 | 1.00E+00 |
| ENSG00000104863.10_LIN7B     | ENSG00000160789.18_LMNA | -0.1755  | -0.325605779 | -0.01677041 | 3.06E-02 | 1.45E-01 | 1.00E+00 |
| ENSG00000146281.5_PM20D2     | ENSG00000160789.18_LMNA | -0.19227 | -0.341033687 | -0.03411554 | 1.76E-02 | 9.86E-02 | 1.00E+00 |
| ENSG00000136891.12_TEX10     | ENSG00000160789.18_LMNA | -0.16795 | -0.31863168  | -0.00899018 | 3.86E-02 | 1.69E-01 | 1.00E+00 |
| ENSG00000135392.14_DNAJC14   | ENSG00000160789.18_LMNA | 0.08124  | -0.078984087 | 0.2373689   | 3.20E-01 | 6.06E-01 | 1.00E+00 |
| ENSG00000083814.11_ZNF671    | ENSG00000160789.18_LMNA | -0.08899 | -0.244723962 | 0.071219346 | 2.76E-01 | 5.60E-01 | 1.00E+00 |
| ENSG00000116885.17_OSCP1     | ENSG00000160789.18_LMNA | 0.07406  | -0.086154954 | 0.230544009 | 3.65E-01 | 6.46E-01 | 1.00E+00 |
| ENSG00000223361.5_FTH1P10    | ENSG00000160789.18_LMNA | -0.02806 | -0.186430117 | 0.131726898 | 7.31E-01 | 8.87E-01 | 1.00E+00 |
| ENSG00000117174.9_ZNHIT6     | ENSG00000160789.18_LMNA | 0.07234  | -0.087874505 | 0.228902776 | 3.76E-01 | 6.56E-01 | 1.00E+00 |
| ENSG00000272143.1_FGF14-AS2  | ENSG00000160789.18_LMNA | -0.26545 | -0.407428507 | -0.11093257 | 9.49E-04 | 1.12E-02 | 1.00E+00 |
| ENSG00000253696.2_KBTBD11-C  | ENSG00000160789.18_LMNA | -0.19594 | -0.344395811 | -0.03792017 | 1.56E-02 | 9.01E-02 | 1.00E+00 |
| ENSG00000171105.12_INSR      | ENSG00000160789.18_LMNA | 0.16506  | 0.006016039  | 0.315956816 | 4.21E-02 | 1.80E-01 | 1.00E+00 |
| ENSG00000164741.13_DLC1      | ENSG00000160789.18_LMNA | 0.45217  | 0.315695927  | 0.570316872 | 4.98E-09 | 5.98E-07 | 2.55E-04 |
| ENSG00000254685.5_FPGT       | ENSG00000160789.18_LMNA | -0.02745 | -0.185834805 | 0.132332826 | 7.37E-01 | 8.89E-01 | 1.00E+00 |
| ENSG00000249751.3_ECSCR      | ENSG00000160789.18_LMNA | -0.10508 | -0.25992776  | 0.055046381 | 1.98E-01 | 4.67E-01 | 1.00E+00 |
| ENSG00000174227.14_PIGG      | ENSG00000160789.18_LMNA | 0.16611  | 0.007099086  | 0.316931452 | 4.08E-02 | 1.76E-01 | 1.00E+00 |
| ENSG00000164850.13_GPER1     | ENSG00000160789.18_LMNA | 0.03543  | -0.124474937 | 0.193536948 | 6.65E-01 | 8.52E-01 | 1.00E+00 |
| ENSG00000123338.11_NCKAP1L   | ENSG00000160789.18_LMNA | 0.00659  | -0.152768778 | 0.165619139 | 9.36E-01 | 9.75E-01 | 1.00E+00 |
| ENSG00000175084.10_DES       | ENSG00000160789.18_LMNA | 0.3002   | 0.14808063   | 0.438450137 | 1.72E-04 | 2.89E-03 | 1.00E+00 |
| ENSG00000103042.7_SLC38A7    | ENSG00000160789.18_LMNA | 0.27133  | 0.117195956  | 0.412707342 | 7.21E-04 | 8.97E-03 | 1.00E+00 |
| ENSG00000269386.4_RAB11B-AS  | ENSG00000160789.18_LMNA | -0.24849 | -0.392175691 | -0.09296635 | 2.02E-03 | 1.97E-02 | 1.00E+00 |
| ENSG00000197323.9_TRIM33     | ENSG00000160789.18_LMNA | -0.12712 | -0.280638546 | 0.032746225 | 1.19E-01 | 3.46E-01 | 1.00E+00 |
| ENSG00000263740.2_RN7SL4P    | ENSG00000160789.18_LMNA | 0.00508  | -0.154242804 | 0.164150583 | 9.50E-01 | 9.80E-01 | 1.00E+00 |
| ENSG00000105732.11_ZNF574    | ENSG00000160789.18_LMNA | 0.22822  | 0.071623311  | 0.373839682 | 4.69E-03 | 3.73E-02 | 1.00E+00 |
| ENSG00000147121.14_KRBOX4    | ENSG00000160789.18_LMNA | -0.116   | -0.270206836 | 0.044017614 | 1.55E-01 | 4.06E-01 | 1.00E+00 |
| ENSG00000115042.8_FAHD2A     | ENSG00000160789.18_LMNA | -0.19144 | -0.340269189 | -0.03325166 | 1.81E-02 | 1.01E-01 | 1.00E+00 |
| ENSG00000120162.9_MOB3B      | ENSG00000160789.18_LMNA | -0.43665 | -0.557119398 | -0.29817317 | 1.87E-08 | 1.82E-06 | 9.59E-04 |
| ENSG00000151131.8_C12orf45   | ENSG00000160789.18_LMNA | 0.03698  | -0.122948279 | 0.195028813 | 6.51E-01 | 8.45E-01 | 1.00E+00 |
| ENSG00000184083.10_FAM120C   | ENSG00000160789.18_LMNA | 0.19375  | 0.035646996  | 0.34238797  | 1.68E-02 | 9.51E-02 | 1.00E+00 |
| ENSG00000172366.18_MCRIP2    | ENSG00000160789.18_LMNA | -0.02001 | -0.178639805 | 0.139637364 | 8.07E-01 | 9.23E-01 | 1.00E+00 |
| ENSG00000135045.6_C9orf40    | ENSG00000160789.18_LMNA | 0.12994  | -0.029877386 | 0.283281899 | 1.11E-01 | 3.32E-01 | 1.00E+00 |
| ENSG00000228798.1_AP000473.1 | ENSG00000160789.18_LMNA | -0.08398 | -0.239972629 | 0.076239711 | 3.04E-01 | 5.90E-01 | 1.00E+00 |
| ENSG00000161048.10_NAPEPLD   | ENSG00000160789.18_LMNA | -0.03134 | -0.189591388 | 0.12850527  | 7.02E-01 | 8.72E-01 | 1.00E+00 |



|                             |                         |          |              |             |          |          |          |
|-----------------------------|-------------------------|----------|--------------|-------------|----------|----------|----------|
| ENSG00000142627.12_EPHA2    | ENSG00000160789.18_LMNA | 0.51287  | 0.385111507  | 0.621337381 | 1.43E-11 | 4.57E-09 | 7.32E-07 |
| ENSG00000242612.5_DECR2     | ENSG00000160789.18_LMNA | -0.02946 | -0.187783948 | 0.130348041 | 7.19E-01 | 8.80E-01 | 1.00E+00 |
| ENSG00000186185.12_KIF18B   | ENSG00000160789.18_LMNA | 0.0184   | -0.141211886 | 0.177084423 | 8.22E-01 | 9.30E-01 | 1.00E+00 |
| ENSG00000138246.14_DNAJC13  | ENSG00000160789.18_LMNA | 0.17106  | 0.012196157  | 0.321509545 | 3.51E-02 | 1.59E-01 | 1.00E+00 |
| ENSG00000169515.5_CCDC8     | ENSG00000160789.18_LMNA | 0.35701  | 0.209726681  | 0.488446816 | 6.34E-06 | 2.02E-04 | 3.25E-01 |
| ENSG00000164134.11_NAA15    | ENSG00000160789.18_LMNA | 0.21664  | 0.059486414  | 0.36330632  | 7.35E-03 | 5.22E-02 | 1.00E+00 |
| ENSG00000264229.1_RNU4ATAC  | ENSG00000160789.18_LMNA | -0.18164 | -0.33126005  | -0.02310583 | 2.51E-02 | 1.27E-01 | 1.00E+00 |
| ENSG00000148343.17_MIGA2    | ENSG00000160789.18_LMNA | 0.12189  | -0.038053656 | 0.275735707 | 1.35E-01 | 3.73E-01 | 1.00E+00 |
| ENSG00000157349.14_DDX19B   | ENSG00000160789.18_LMNA | -0.03334 | -0.191523672 | 0.126532781 | 6.83E-01 | 8.63E-01 | 1.00E+00 |
| ENSG00000133641.16_C12orf29 | ENSG00000160789.18_LMNA | -0.30523 | -0.442909104 | -0.15348841 | 1.31E-04 | 2.35E-03 | 1.00E+00 |
| ENSG00000167522.13_ANKRD11  | ENSG00000160789.18_LMNA | 0.23329  | 0.076951981  | 0.378439828 | 3.82E-03 | 3.20E-02 | 1.00E+00 |
| ENSG00000122512.13_PMS2     | ENSG00000160789.18_LMNA | 0.127    | -0.032867754 | 0.280526464 | 1.19E-01 | 3.46E-01 | 1.00E+00 |
| ENSG00000006062.12_MAP3K14  | ENSG00000160789.18_LMNA | 0.21253  | 0.055193175  | 0.359561616 | 8.57E-03 | 5.86E-02 | 1.00E+00 |
| ENSG00000107937.17_GTPBP4   | ENSG00000160789.18_LMNA | -0.02016 | -0.178787283 | 0.139487988 | 8.05E-01 | 9.22E-01 | 1.00E+00 |
| ENSG00000237758.1_BANF1P3   | ENSG00000160789.18_LMNA | -0.10299 | -0.257963884 | 0.057144782 | 2.07E-01 | 4.79E-01 | 1.00E+00 |
| ENSG00000253738.1_OTUD6B-A  | ENSG00000160789.18_LMNA | -0.26196 | -0.404302706 | -0.10723485 | 1.11E-03 | 1.26E-02 | 1.00E+00 |
| ENSG00000243829.1_CTB-33G1C | ENSG00000160789.18_LMNA | -0.15278 | -0.304574488 | 0.006578768 | 6.02E-02 | 2.26E-01 | 1.00E+00 |
| ENSG00000112787.11_FBRSL1   | ENSG00000160789.18_LMNA | -0.01856 | -0.17724181  | 0.141052635 | 8.20E-01 | 9.30E-01 | 1.00E+00 |
| ENSG00000007944.13_MYLIP    | ENSG00000160789.18_LMNA | -0.29219 | -0.431327997 | -0.13947886 | 2.60E-04 | 4.01E-03 | 1.00E+00 |
| ENSG00000185610.6_DBX2      | ENSG00000160789.18_LMNA | 0.17968  | 0.021080392  | 0.32945478  | 2.68E-02 | 1.33E-01 | 1.00E+00 |
| ENSG00000140382.13_HMG20A   | ENSG00000160789.18_LMNA | -0.14789 | -0.300022717 | 0.011587925 | 6.90E-02 | 2.47E-01 | 1.00E+00 |
| ENSG00000114026.20_OGG1     | ENSG00000160789.18_LMNA | -0.14239 | -0.294902352 | 0.017204181 | 8.01E-02 | 2.72E-01 | 1.00E+00 |
| ENSG00000080986.11_NDC80    | ENSG00000160789.18_LMNA | 0.07331  | -0.086900778 | 0.229832375 | 3.69E-01 | 6.50E-01 | 1.00E+00 |
| ENSG00000280798.1_LINC00294 | ENSG00000160789.18_LMNA | -0.29368 | -0.432653963 | -0.14107697 | 2.40E-04 | 3.78E-03 | 1.00E+00 |
| ENSG00000198001.12_IRAK4    | ENSG00000160789.18_LMNA | -0.08793 | -0.24372192  | 0.072279459 | 2.81E-01 | 5.67E-01 | 1.00E+00 |
| ENSG00000247774.5_PCED1B-A  | ENSG00000160789.18_LMNA | 0.01263  | -0.146863872 | 0.171488012 | 8.77E-01 | 9.52E-01 | 1.00E+00 |
| ENSG00000103091.13_WDR59    | ENSG00000160789.18_LMNA | -0.11212 | -0.266563237 | 0.047935736 | 1.69E-01 | 4.28E-01 | 1.00E+00 |
| ENSG00000235957.1_COX7CP1   | ENSG00000160789.18_LMNA | -0.06913 | -0.225847851 | 0.091070191 | 3.97E-01 | 6.74E-01 | 1.00E+00 |
| ENSG00000271870.1_RP11-97C1 | ENSG00000160789.18_LMNA | -0.20683 | -0.354363695 | -0.04925244 | 1.06E-02 | 6.81E-02 | 1.00E+00 |
| ENSG00000214530.6_STARD10   | ENSG00000160789.18_LMNA | -0.34134 | -0.474744457 | -0.19260829 | 1.68E-05 | 4.47E-04 | 8.62E-01 |
| ENSG00000188428.15_BLOC1S5  | ENSG00000160789.18_LMNA | -0.00183 | -0.160985769 | 0.157414593 | 9.82E-01 | 9.93E-01 | 1.00E+00 |
| ENSG00000124787.12_RPP40    | ENSG00000160789.18_LMNA | -0.10864 | -0.263284348 | 0.051453415 | 1.83E-01 | 4.47E-01 | 1.00E+00 |
| ENSG00000183309.10_ZNF623   | ENSG00000160789.18_LMNA | -0.0053  | -0.164360858 | 0.154031833 | 9.48E-01 | 9.79E-01 | 1.00E+00 |

|                             |                         |          |              |             |          |          |          |
|-----------------------------|-------------------------|----------|--------------|-------------|----------|----------|----------|
| ENSG00000067601.7_PMS2P4    | ENSG00000160789.18_LMNA | -0.19764 | -0.345959765 | -0.039693   | 1.47E-02 | 8.64E-02 | 1.00E+00 |
| ENSG00000135597.17_REPS1    | ENSG00000160789.18_LMNA | -0.01716 | -0.175877943 | 0.142432104 | 8.34E-01 | 9.35E-01 | 1.00E+00 |
| ENSG00000039560.12_RAI14    | ENSG00000160789.18_LMNA | 0.18205  | 0.023534856  | 0.331642151 | 2.48E-02 | 1.26E-01 | 1.00E+00 |
| ENSG00000104177.16_MYEF2    | ENSG00000160789.18_LMNA | -0.17905 | -0.328872156 | -0.02042725 | 2.73E-02 | 1.35E-01 | 1.00E+00 |
| ENSG00000185798.7_WDR53     | ENSG00000160789.18_LMNA | -0.01057 | -0.169482787 | 0.148883963 | 8.97E-01 | 9.60E-01 | 1.00E+00 |
| ENSG00000125740.12_FOSB     | ENSG00000160789.18_LMNA | 0.06415  | -0.096029749 | 0.221094371 | 4.32E-01 | 7.02E-01 | 1.00E+00 |
| ENSG00000139428.10_MMAB     | ENSG00000160789.18_LMNA | -0.14606 | -0.298321858 | 0.01345569  | 7.26E-02 | 2.56E-01 | 1.00E+00 |
| ENSG00000197217.11_ENTPD4   | ENSG00000160789.18_LMNA | 0.07981  | -0.080408691 | 0.23601551  | 3.28E-01 | 6.14E-01 | 1.00E+00 |
| ENSG00000213280.2_RP11-212P | ENSG00000160789.18_LMNA | -0.08074 | -0.236896683 | 0.079481299 | 3.23E-01 | 6.09E-01 | 1.00E+00 |
| ENSG00000073417.13_PDE8A    | ENSG00000160789.18_LMNA | 0.0596   | -0.100557826 | 0.216741244 | 4.66E-01 | 7.28E-01 | 1.00E+00 |
| ENSG00000148090.10_AUH      | ENSG00000160789.18_LMNA | -0.23813 | -0.382816847 | -0.08203823 | 3.13E-03 | 2.76E-02 | 1.00E+00 |
| ENSG00000143643.11_TTC13    | ENSG00000160789.18_LMNA | -0.13467 | -0.287706629 | 0.02506364  | 9.81E-02 | 3.08E-01 | 1.00E+00 |
| ENSG00000171940.12_ZNF217   | ENSG00000160789.18_LMNA | 0.45732  | 0.321531695  | 0.574683164 | 3.16E-09 | 4.04E-07 | 1.62E-04 |
| ENSG00000231503.4_PTMAP4    | ENSG00000160789.18_LMNA | 0.04667  | -0.113377443 | 0.204348123 | 5.68E-01 | 7.98E-01 | 1.00E+00 |
| ENSG00000172159.14_FRMD3    | ENSG00000160789.18_LMNA | 0.13537  | -0.024353643 | 0.28835812  | 9.63E-02 | 3.05E-01 | 1.00E+00 |
| ENSG00000140750.15_ARHGAP1  | ENSG00000160789.18_LMNA | 0.17444  | 0.01567254   | 0.324623695 | 3.16E-02 | 1.48E-01 | 1.00E+00 |
| ENSG00000104415.12_WISP1    | ENSG00000160789.18_LMNA | 0.07227  | -0.087938243 | 0.228841906 | 3.76E-01 | 6.56E-01 | 1.00E+00 |
| ENSG00000188997.6_KCTD21    | ENSG00000160789.18_LMNA | 0.04935  | -0.110720425 | 0.206925139 | 5.46E-01 | 7.84E-01 | 1.00E+00 |
| ENSG00000112039.3_FANCE     | ENSG00000160789.18_LMNA | -0.01115 | -0.170044761 | 0.14831809  | 8.92E-01 | 9.57E-01 | 1.00E+00 |
| ENSG00000147324.9_MFHAS1    | ENSG00000160789.18_LMNA | 0.32424  | 0.174024304  | 0.459712501 | 4.60E-05 | 1.00E-03 | 1.00E+00 |
| ENSG00000138018.16_SELENOI  | ENSG00000160789.18_LMNA | 0.01801  | -0.141592872 | 0.176707829 | 8.26E-01 | 9.32E-01 | 1.00E+00 |
| ENSG00000171097.12_KYAT1    | ENSG00000160789.18_LMNA | -0.14421 | -0.296600908 | 0.015343305 | 7.63E-02 | 2.64E-01 | 1.00E+00 |
| ENSG00000114473.12_IQCG     | ENSG00000160789.18_LMNA | 0.15435  | -0.004972872 | 0.306030747 | 5.76E-02 | 2.20E-01 | 1.00E+00 |
| ENSG00000137842.5_TMEM62    | ENSG00000160789.18_LMNA | -0.04249 | -0.200339114 | 0.117501894 | 6.03E-01 | 8.18E-01 | 1.00E+00 |
| ENSG00000149531.13_FRG1BP   | ENSG00000160789.18_LMNA | -0.06752 | -0.224306956 | 0.092679612 | 4.09E-01 | 6.83E-01 | 1.00E+00 |
| ENSG00000172409.5_CLP1      | ENSG00000160789.18_LMNA | 0.03564  | -0.124270359 | 0.193736949 | 6.63E-01 | 8.51E-01 | 1.00E+00 |
| ENSG00000136514.2_RTP4      | ENSG00000160789.18_LMNA | -0.02725 | -0.185643962 | 0.132527021 | 7.39E-01 | 8.90E-01 | 1.00E+00 |
| ENSG00000169896.15_ITGAM    | ENSG00000160789.18_LMNA | 0.16121  | 0.00206138   | 0.312392448 | 4.72E-02 | 1.94E-01 | 1.00E+00 |
| ENSG00000023608.4_SNAPC1    | ENSG00000160789.18_LMNA | -0.02504 | -0.183513925 | 0.134692821 | 7.59E-01 | 9.00E-01 | 1.00E+00 |
| ENSG00000111885.6_MAN1A1    | ENSG00000160789.18_LMNA | 0.10444  | -0.055688338 | 0.259327234 | 2.00E-01 | 4.71E-01 | 1.00E+00 |
| ENSG00000131149.16_GSE1     | ENSG00000160789.18_LMNA | -0.0964  | -0.251736048 | 0.063780857 | 2.37E-01 | 5.16E-01 | 1.00E+00 |
| ENSG00000181631.6_P2RY13    | ENSG00000160789.18_LMNA | -0.21824 | -0.364771416 | -0.06116919 | 6.91E-03 | 5.00E-02 | 1.00E+00 |
| ENSG00000198517.8_MAFK      | ENSG00000160789.18_LMNA | 0.49839  | 0.368424803  | 0.609252845 | 6.41E-11 | 1.58E-08 | 3.29E-06 |

|                              |                         |          |              |             |          |          |          |
|------------------------------|-------------------------|----------|--------------|-------------|----------|----------|----------|
| ENSG00000172965.13_MIR4435-2 | ENSG00000160789.18_LMNA | 0.31912  | 0.168473579  | 0.455190732 | 6.15E-05 | 1.27E-03 | 1.00E+00 |
| ENSG00000128585.16_MKLN1     | ENSG00000160789.18_LMNA | 0.04694  | -0.113104948 | 0.204612616 | 5.66E-01 | 7.96E-01 | 1.00E+00 |
| ENSG00000137501.15_SYTL2     | ENSG00000160789.18_LMNA | 0.11878  | -0.041197526 | 0.272823776 | 1.45E-01 | 3.90E-01 | 1.00E+00 |
| ENSG00000121897.12_LIAS      | ENSG00000160789.18_LMNA | -0.38447 | -0.512317036 | -0.23996157 | 1.01E-06 | 4.62E-05 | 5.17E-02 |
| ENSG00000149418.9_ST14       | ENSG00000160789.18_LMNA | 0.06666  | -0.09353208  | 0.223490142 | 4.15E-01 | 6.88E-01 | 1.00E+00 |
| ENSG00000133961.18_NUMB      | ENSG00000160789.18_LMNA | 0.2545   | 0.099323353  | 0.397591482 | 1.56E-03 | 1.61E-02 | 1.00E+00 |
| ENSG00000186130.4_ZBTB6      | ENSG00000160789.18_LMNA | -0.19254 | -0.341281259 | -0.03439539 | 1.75E-02 | 9.79E-02 | 1.00E+00 |
| ENSG00000157350.11_ST3GAL2   | ENSG00000160789.18_LMNA | 0.39977  | 0.256923159  | 0.525526332 | 3.35E-07 | 1.92E-05 | 1.72E-02 |
| ENSG00000159409.13_CELF3     | ENSG00000160789.18_LMNA | -0.34221 | -0.475507643 | -0.19355725 | 1.59E-05 | 4.27E-04 | 8.18E-01 |
| ENSG00000128052.8_KDR        | ENSG00000160789.18_LMNA | 0.13366  | -0.026096504 | 0.286758359 | 1.01E-01 | 3.13E-01 | 1.00E+00 |
| ENSG00000100916.12_BRMS1L    | ENSG00000160789.18_LMNA | -0.2249  | -0.370824152 | -0.06813955 | 5.34E-03 | 4.12E-02 | 1.00E+00 |
| ENSG00000116704.7_SLC35D1    | ENSG00000160789.18_LMNA | 0.44784  | 0.310800998  | 0.56664338  | 7.25E-09 | 8.26E-07 | 3.72E-04 |
| ENSG00000057704.9_TMCC3      | ENSG00000160789.18_LMNA | -0.37486 | -0.503983258 | -0.22934532 | 1.95E-06 | 7.84E-05 | 1.00E-01 |
| ENSG00000111247.13_RAD51AP   | ENSG00000160789.18_LMNA | -0.22661 | -0.372379372 | -0.06993533 | 4.99E-03 | 3.92E-02 | 1.00E+00 |
| ENSG00000060718.17_COL11A1   | ENSG00000160789.18_LMNA | -0.15563 | -0.307215087 | 0.003665652 | 5.56E-02 | 2.15E-01 | 1.00E+00 |
| ENSG00000144278.13_GALNT13   | ENSG00000160789.18_LMNA | -0.36218 | -0.492961172 | -0.21540415 | 4.54E-06 | 1.54E-04 | 2.33E-01 |
| ENSG00000177427.11_MIEF2     | ENSG00000160789.18_LMNA | -0.04286 | -0.200693396 | 0.117137851 | 6.00E-01 | 8.16E-01 | 1.00E+00 |
| ENSG00000260027.4_HOXB7      | ENSG00000160789.18_LMNA | 0.13551  | -0.024209669 | 0.288490195 | 9.60E-02 | 3.04E-01 | 1.00E+00 |
| ENSG00000221963.5_APOL6      | ENSG00000160789.18_LMNA | 0.14339  | -0.016181161 | 0.295836381 | 7.80E-02 | 2.68E-01 | 1.00E+00 |
| ENSG00000178074.5_C2orf69    | ENSG00000160789.18_LMNA | -0.09133 | -0.246936073 | 0.068876505 | 2.63E-01 | 5.46E-01 | 1.00E+00 |
| ENSG00000238103.4_RPL9P7     | ENSG00000160789.18_LMNA | -0.17569 | -0.32577677  | -0.01696164 | 3.04E-02 | 1.45E-01 | 1.00E+00 |
| ENSG00000123104.10_ITPR2     | ENSG00000160789.18_LMNA | 0.15545  | -0.003847897 | 0.307050031 | 5.58E-02 | 2.16E-01 | 1.00E+00 |
| ENSG00000160226.14_C21orf2   | ENSG00000160789.18_LMNA | 0.17013  | 0.011236373  | 0.32064859  | 3.61E-02 | 1.62E-01 | 1.00E+00 |
| ENSG00000150656.13_CNDP1     | ENSG00000160789.18_LMNA | -0.22555 | -0.371416068 | -0.06882279 | 5.21E-03 | 4.05E-02 | 1.00E+00 |
| ENSG00000116525.12_TRIM62    | ENSG00000160789.18_LMNA | -0.1201  | -0.274061863 | 0.039861583 | 1.41E-01 | 3.82E-01 | 1.00E+00 |
| ENSG00000124802.10_EEF1E1    | ENSG00000160789.18_LMNA | -0.23402 | -0.379099879 | -0.07771798 | 3.71E-03 | 3.13E-02 | 1.00E+00 |
| ENSG00000165912.14_PACSIN3   | ENSG00000160789.18_LMNA | 0.38823  | 0.244113825  | 0.515562675 | 7.73E-07 | 3.72E-05 | 3.96E-02 |
| ENSG00000145996.10_CDKAL1    | ENSG00000160789.18_LMNA | -0.10206 | -0.257079847 | 0.058088466 | 2.11E-01 | 4.84E-01 | 1.00E+00 |
| ENSG00000077044.8_DGKD       | ENSG00000160789.18_LMNA | 0.11866  | -0.041323846 | 0.272706654 | 1.45E-01 | 3.90E-01 | 1.00E+00 |
| ENSG00000120327.6_PCDHB14    | ENSG00000160789.18_LMNA | 0.09163  | -0.068571302 | 0.247224003 | 2.62E-01 | 5.45E-01 | 1.00E+00 |
| ENSG00000117000.8_RLF        | ENSG00000160789.18_LMNA | 0.05305  | -0.107051849 | 0.210476026 | 5.16E-01 | 7.63E-01 | 1.00E+00 |
| ENSG00000116141.14_MARK1     | ENSG00000160789.18_LMNA | -0.11794 | -0.272028996 | 0.042054533 | 1.48E-01 | 3.94E-01 | 1.00E+00 |
| ENSG00000130703.14_OSBPL2    | ENSG00000160789.18_LMNA | -0.08969 | -0.245390463 | 0.070513823 | 2.72E-01 | 5.56E-01 | 1.00E+00 |

|                              |                         |          |              |             |          |          |          |
|------------------------------|-------------------------|----------|--------------|-------------|----------|----------|----------|
| ENSG00000137338.5_PGBD1      | ENSG00000160789.18_LMNA | -0.17504 | -0.325174911 | -0.01628865 | 3.10E-02 | 1.47E-01 | 1.00E+00 |
| ENSG00000242419.4_PCDHGC4    | ENSG00000160789.18_LMNA | -0.04834 | -0.205958666 | 0.111717434 | 5.54E-01 | 7.89E-01 | 1.00E+00 |
| ENSG00000173960.11_UBXN2A    | ENSG00000160789.18_LMNA | -0.02477 | -0.183243634 | 0.134967433 | 7.62E-01 | 9.01E-01 | 1.00E+00 |
| ENSG00000084710.12_EFR3B     | ENSG00000160789.18_LMNA | 0.02542  | -0.134326957 | 0.183873958 | 7.56E-01 | 8.98E-01 | 1.00E+00 |
| ENSG00000183401.10_CCDC159   | ENSG00000160789.18_LMNA | -0.19328 | -0.341955185 | -0.03515743 | 1.70E-02 | 9.63E-02 | 1.00E+00 |
| ENSG00000079974.16_RABL2B    | ENSG00000160789.18_LMNA | -0.03714 | -0.19518863  | 0.122784646 | 6.50E-01 | 8.44E-01 | 1.00E+00 |
| ENSG00000162426.13_SLC45A1   | ENSG00000160789.18_LMNA | 0.00091  | -0.158309456 | 0.160091688 | 9.91E-01 | 9.97E-01 | 1.00E+00 |
| ENSG00000153767.8_GTF2E1     | ENSG00000160789.18_LMNA | -0.2432  | -0.38740301  | -0.08738437 | 2.54E-03 | 2.35E-02 | 1.00E+00 |
| ENSG00000171189.15_GRIK1     | ENSG00000160789.18_LMNA | 0.14452  | -0.015023901 | 0.296892254 | 7.57E-02 | 2.63E-01 | 1.00E+00 |
| ENSG00000181409.10_AATK      | ENSG00000160789.18_LMNA | -0.28068 | -0.421064507 | -0.12716011 | 4.61E-04 | 6.32E-03 | 1.00E+00 |
| ENSG00000186153.15_WWOX      | ENSG00000160789.18_LMNA | -0.03878 | -0.196768505 | 0.121166112 | 6.35E-01 | 8.37E-01 | 1.00E+00 |
| ENSG00000128596.15_CCDC136   | ENSG00000160789.18_LMNA | -0.24821 | -0.391926959 | -0.09267498 | 2.05E-03 | 1.99E-02 | 1.00E+00 |
| ENSG00000225507.1_AC069282.1 | ENSG00000160789.18_LMNA | 0.11066  | -0.049407518 | 0.265192249 | 1.75E-01 | 4.35E-01 | 1.00E+00 |
| ENSG00000153339.12_TRAPPC8   | ENSG00000160789.18_LMNA | -0.36504 | -0.49544453  | -0.21853535 | 3.77E-06 | 1.32E-04 | 1.93E-01 |
| ENSG00000172508.9_CARNS1     | ENSG00000160789.18_LMNA | -0.2713  | -0.412674226 | -0.11715659 | 7.23E-04 | 8.98E-03 | 1.00E+00 |
| ENSG00000105821.13_DNAJC2    | ENSG00000160789.18_LMNA | 0.30047  | 0.148367819  | 0.438687298 | 1.69E-04 | 2.86E-03 | 1.00E+00 |
| ENSG00000162928.8_PEX13      | ENSG00000160789.18_LMNA | -0.06262 | -0.219628053 | 0.097556465 | 4.43E-01 | 7.11E-01 | 1.00E+00 |
| ENSG00000005801.15_ZNF195    | ENSG00000160789.18_LMNA | -0.32136 | -0.457174433 | -0.17090645 | 5.42E-05 | 1.15E-03 | 1.00E+00 |
| ENSG00000163644.13_PPM1K     | ENSG00000160789.18_LMNA | -0.44403 | -0.563402432 | -0.30649367 | 1.00E-08 | 1.08E-06 | 5.15E-04 |
| ENSG00000174521.7_TTC9B      | ENSG00000160789.18_LMNA | -0.28745 | -0.427108096 | -0.13440297 | 3.30E-04 | 4.85E-03 | 1.00E+00 |
| ENSG00000111321.9_LTBR       | ENSG00000160789.18_LMNA | 0.17363  | 0.014838188  | 0.323876892 | 3.24E-02 | 1.51E-01 | 1.00E+00 |
| ENSG00000167173.17_C15orf39  | ENSG00000160789.18_LMNA | 0.25925  | 0.104356826  | 0.401865012 | 1.26E-03 | 1.38E-02 | 1.00E+00 |
| ENSG00000135185.10_TMEM243   | ENSG00000160789.18_LMNA | 0.09502  | -0.065163231 | 0.250435418 | 2.44E-01 | 5.24E-01 | 1.00E+00 |
| ENSG00000186517.12_ARHGAP3   | ENSG00000160789.18_LMNA | 0.13585  | -0.023863048 | 0.28880812  | 9.51E-02 | 3.02E-01 | 1.00E+00 |
| ENSG00000106392.9_C1GALT1    | ENSG00000160789.18_LMNA | -0.11703 | -0.271177237 | 0.042972466 | 1.51E-01 | 4.00E-01 | 1.00E+00 |
| ENSG0000014138.7_POLA2       | ENSG00000160789.18_LMNA | 0.05777  | -0.102367492 | 0.214997961 | 4.80E-01 | 7.38E-01 | 1.00E+00 |
| ENSG00000152953.11_STK32B    | ENSG00000160789.18_LMNA | 0.16418  | 0.005110648  | 0.31514155  | 4.33E-02 | 1.83E-01 | 1.00E+00 |
| ENSG00000138036.17_DYNC2LI1  | ENSG00000160789.18_LMNA | -0.11279 | -0.267190697 | 0.04726169  | 1.67E-01 | 4.24E-01 | 1.00E+00 |
| ENSG00000274605.1_RP11-12G1  | ENSG00000160789.18_LMNA | 0.02109  | -0.13857422  | 0.179689127 | 7.96E-01 | 9.18E-01 | 1.00E+00 |
| ENSG00000221886.3_ZBED8      | ENSG00000160789.18_LMNA | -0.20928 | -0.35659828  | -0.05180372 | 9.67E-03 | 6.40E-02 | 1.00E+00 |
| ENSG00000150990.6_DHX37      | ENSG00000160789.18_LMNA | 0.2935   | 0.140877568  | 0.432488589 | 2.43E-04 | 3.81E-03 | 1.00E+00 |
| ENSG00000120925.12_RNF170    | ENSG00000160789.18_LMNA | -0.26691 | -0.408744208 | -0.11249146 | 8.87E-04 | 1.06E-02 | 1.00E+00 |
| ENSG00000205758.10_CRYZL1    | ENSG00000160789.18_LMNA | -0.33446 | -0.468702464 | -0.18511418 | 2.54E-05 | 6.25E-04 | 1.00E+00 |

|                             |                         |          |              |             |          |          |          |
|-----------------------------|-------------------------|----------|--------------|-------------|----------|----------|----------|
| ENSG00000197961.10_ZNF121   | ENSG00000160789.18_LMNA | -0.0354  | -0.193508346 | 0.124504192 | 6.65E-01 | 8.52E-01 | 1.00E+00 |
| ENSG00000180340.6_FZD2      | ENSG00000160789.18_LMNA | 0.15055  | -0.008859126 | 0.30250411  | 6.41E-02 | 2.36E-01 | 1.00E+00 |
| ENSG00000135451.11_TROAP    | ENSG00000160789.18_LMNA | 0.00166  | -0.157579122 | 0.160821423 | 9.84E-01 | 9.94E-01 | 1.00E+00 |
| ENSG00000145545.10_SRD5A1   | ENSG00000160789.18_LMNA | 0.22338  | 0.066550417  | 0.369446484 | 5.67E-03 | 4.31E-02 | 1.00E+00 |
| ENSG00000078114.17_NEBL     | ENSG00000160789.18_LMNA | -0.16744 | -0.318163389 | -0.0084691  | 3.92E-02 | 1.71E-01 | 1.00E+00 |
| ENSG00000244026.5_FAM86DP   | ENSG00000160789.18_LMNA | 0.19783  | 0.039886837  | 0.346130665 | 1.46E-02 | 8.61E-02 | 1.00E+00 |
| ENSG00000188060.6_RAB42     | ENSG00000160789.18_LMNA | 0.10844  | -0.051656163 | 0.263095141 | 1.84E-01 | 4.49E-01 | 1.00E+00 |
| ENSG00000119041.9_GTF3C3    | ENSG00000160789.18_LMNA | -0.03848 | -0.196479885 | 0.121461921 | 6.38E-01 | 8.38E-01 | 1.00E+00 |
| ENSG00000197050.9_ZNF420    | ENSG00000160789.18_LMNA | -0.35023 | -0.482524109 | -0.2023064  | 9.73E-06 | 2.85E-04 | 4.99E-01 |
| ENSG00000120832.8_MTERF2    | ENSG00000160789.18_LMNA | -0.23396 | -0.379045791 | -0.0776552  | 3.72E-03 | 3.14E-02 | 1.00E+00 |
| ENSG00000104290.9_FZD3      | ENSG00000160789.18_LMNA | -0.01301 | -0.171850291 | 0.146498623 | 8.74E-01 | 9.51E-01 | 1.00E+00 |
| ENSG00000198948.10_MFAP3L   | ENSG00000160789.18_LMNA | 0.04047  | -0.119499003 | 0.19839407  | 6.21E-01 | 8.28E-01 | 1.00E+00 |
| ENSG00000165501.15_LRR1     | ENSG00000160789.18_LMNA | -0.02194 | -0.180507681 | 0.137744374 | 7.88E-01 | 9.14E-01 | 1.00E+00 |
| ENSG00000127804.11_METTL16  | ENSG00000160789.18_LMNA | 0.00812  | -0.151280394 | 0.16710057  | 9.21E-01 | 9.70E-01 | 1.00E+00 |
| ENSG00000161955.15_TNFSF13  | ENSG00000160789.18_LMNA | 0.09102  | -0.069182351 | 0.24664748  | 2.65E-01 | 5.48E-01 | 1.00E+00 |
| ENSG00000259865.1_RP11-488L | ENSG00000160789.18_LMNA | -0.17682 | -0.326824256 | -0.01813358 | 2.93E-02 | 1.41E-01 | 1.00E+00 |
| ENSG00000182511.10_FES      | ENSG00000160789.18_LMNA | 0.41575  | 0.274734481  | 0.539259369 | 1.00E-07 | 7.23E-06 | 5.14E-03 |
| ENSG00000223969.4_AC002456. | ENSG00000160789.18_LMNA | 0.0569   | -0.103235006 | 0.214161552 | 4.86E-01 | 7.43E-01 | 1.00E+00 |
| ENSG00000114405.9_C3orf14   | ENSG00000160789.18_LMNA | -0.16244 | -0.313529699 | -0.0033221  | 4.56E-02 | 1.89E-01 | 1.00E+00 |
| ENSG00000077150.16_NFKB2    | ENSG00000160789.18_LMNA | 0.43315  | 0.294236847  | 0.554136604 | 2.49E-08 | 2.33E-06 | 1.28E-03 |
| ENSG00000115998.6_C2orf42   | ENSG00000160789.18_LMNA | -0.1899  | -0.338855348 | -0.03165524 | 1.91E-02 | 1.04E-01 | 1.00E+00 |
| ENSG00000105053.9_VRK3      | ENSG00000160789.18_LMNA | -0.08697 | -0.242808548 | 0.073245143 | 2.87E-01 | 5.72E-01 | 1.00E+00 |
| ENSG00000123485.10_HJURP    | ENSG00000160789.18_LMNA | 0.16694  | 0.007949541  | 0.317696319 | 3.98E-02 | 1.73E-01 | 1.00E+00 |
| ENSG00000112796.8_ENPP5     | ENSG00000160789.18_LMNA | -0.17631 | -0.326349451 | -0.01760226 | 2.98E-02 | 1.43E-01 | 1.00E+00 |
| ENSG00000249307.4_LINC01088 | ENSG00000160789.18_LMNA | -0.33265 | -0.467117213 | -0.18315338 | 2.82E-05 | 6.80E-04 | 1.00E+00 |
| ENSG00000205659.9_LIN52     | ENSG00000160789.18_LMNA | -0.10724 | -0.261970349 | 0.05286092  | 1.88E-01 | 4.55E-01 | 1.00E+00 |
| ENSG00000166579.14_NDEL1    | ENSG00000160789.18_LMNA | 0.16923  | 0.010302701  | 0.319810566 | 3.71E-02 | 1.65E-01 | 1.00E+00 |
| ENSG00000198513.10_ATL1     | ENSG00000160789.18_LMNA | -0.42084 | -0.543623298 | -0.28043263 | 6.72E-08 | 5.23E-06 | 3.45E-03 |
| ENSG00000156853.10_ZNF689   | ENSG00000160789.18_LMNA | -0.08638 | -0.242245978 | 0.073839638 | 2.90E-01 | 5.75E-01 | 1.00E+00 |
| ENSG00000169131.9_ZNF354A   | ENSG00000160789.18_LMNA | -0.06892 | -0.225640913 | 0.091286428 | 3.99E-01 | 6.76E-01 | 1.00E+00 |
| ENSG00000107984.8_DKK1      | ENSG00000160789.18_LMNA | 0.20509  | 0.047442868  | 0.352776629 | 1.13E-02 | 7.13E-02 | 1.00E+00 |
| ENSG00000130150.10_MOSPD2   | ENSG00000160789.18_LMNA | 0.02789  | -0.131897628 | 0.186262401 | 7.33E-01 | 8.88E-01 | 1.00E+00 |
| ENSG00000156931.14_VPS8     | ENSG00000160789.18_LMNA | -0.26051 | -0.403000575 | -0.10569689 | 1.19E-03 | 1.32E-02 | 1.00E+00 |

|                              |                         |          |              |             |          |          |          |
|------------------------------|-------------------------|----------|--------------|-------------|----------|----------|----------|
| ENSG00000099625.11_CBARP     | ENSG00000160789.18_LMNA | 0.20647  | 0.048876243  | 0.354033899 | 1.07E-02 | 6.88E-02 | 1.00E+00 |
| ENSG00000134901.11_KDELC1    | ENSG00000160789.18_LMNA | 0.01273  | -0.146763827 | 0.171587252 | 8.76E-01 | 9.52E-01 | 1.00E+00 |
| ENSG00000162437.13_RAVR2     | ENSG00000160789.18_LMNA | -0.11658 | -0.270757303 | 0.043424831 | 1.53E-01 | 4.02E-01 | 1.00E+00 |
| ENSG00000185112.5_FAM43A     | ENSG00000160789.18_LMNA | 0.23954  | 0.083519991  | 0.384089457 | 2.96E-03 | 2.65E-02 | 1.00E+00 |
| ENSG00000176454.12_LPCAT4    | ENSG00000160789.18_LMNA | 0.1453   | -0.014227981 | 0.297618001 | 7.41E-02 | 2.59E-01 | 1.00E+00 |
| ENSG00000100749.6_VRK1       | ENSG00000160789.18_LMNA | -0.03449 | -0.192634205 | 0.125398003 | 6.73E-01 | 8.57E-01 | 1.00E+00 |
| ENSG00000140598.12_EFL1      | ENSG00000160789.18_LMNA | 0.27996  | 0.126393023  | 0.4204229   | 4.77E-04 | 6.50E-03 | 1.00E+00 |
| ENSG00000180011.6_ZADH2      | ENSG00000160789.18_LMNA | -0.34616 | -0.478969309 | -0.19786816 | 1.25E-05 | 3.51E-04 | 6.42E-01 |
| ENSG00000142396.9_ERVK3-1    | ENSG00000160789.18_LMNA | -0.1678  | -0.318494029 | -0.00883699 | 3.88E-02 | 1.70E-01 | 1.00E+00 |
| ENSG00000077232.15_DNAJC10   | ENSG00000160789.18_LMNA | 0.17613  | 0.017417193  | 0.326184038 | 3.00E-02 | 1.43E-01 | 1.00E+00 |
| ENSG00000093167.16_LRRFIP2   | ENSG00000160789.18_LMNA | 0.01577  | -0.143789844 | 0.174534363 | 8.47E-01 | 9.40E-01 | 1.00E+00 |
| ENSG00000138002.13_IPT172    | ENSG00000160789.18_LMNA | 0.09318  | -0.067019488 | 0.248687134 | 2.54E-01 | 5.35E-01 | 1.00E+00 |
| ENSG00000156502.12_SUPV3L1   | ENSG00000160789.18_LMNA | -0.16071 | -0.311930751 | -0.00154984 | 4.79E-02 | 1.96E-01 | 1.00E+00 |
| ENSG0000010282.13_HHATL      | ENSG00000160789.18_LMNA | -0.32124 | -0.457067291 | -0.17077495 | 5.45E-05 | 1.15E-03 | 1.00E+00 |
| ENSG00000112357.11_PEX7      | ENSG00000160789.18_LMNA | -0.21464 | -0.361491197 | -0.057404   | 7.92E-03 | 5.52E-02 | 1.00E+00 |
| ENSG00000107249.20_GLIS3     | ENSG00000160789.18_LMNA | 0.2074   | 0.049842054  | 0.354880427 | 1.04E-02 | 6.72E-02 | 1.00E+00 |
| ENSG00000091127.12_PUS7      | ENSG00000160789.18_LMNA | 0.15099  | -0.00841456  | 0.302907971 | 6.33E-02 | 2.34E-01 | 1.00E+00 |
| ENSG00000053254.14_FOXN3     | ENSG00000160789.18_LMNA | -0.03671 | -0.194776208 | 0.123206881 | 6.53E-01 | 8.47E-01 | 1.00E+00 |
| ENSG00000102230.12_PCYT1B    | ENSG00000160789.18_LMNA | -0.13972 | -0.292414646 | 0.019925723 | 8.60E-02 | 2.85E-01 | 1.00E+00 |
| ENSG00000126216.11_TUBGCP3   | ENSG00000160789.18_LMNA | -0.03488 | -0.193005921 | 0.125017986 | 6.70E-01 | 8.55E-01 | 1.00E+00 |
| ENSG00000204120.13_GIGYF2    | ENSG00000160789.18_LMNA | 0.09032  | -0.069889194 | 0.245980296 | 2.68E-01 | 5.53E-01 | 1.00E+00 |
| ENSG00000174977.8_AC026271.4 | ENSG00000160789.18_LMNA | -0.05841 | -0.215603528 | 0.101739104 | 4.75E-01 | 7.34E-01 | 1.00E+00 |
| ENSG00000106404.12_CLDN15    | ENSG00000160789.18_LMNA | 0.06096  | -0.099201553 | 0.21804644  | 4.56E-01 | 7.20E-01 | 1.00E+00 |
| ENSG00000113456.17_RAD1      | ENSG00000160789.18_LMNA | -0.23778 | -0.382500946 | -0.08167062 | 3.18E-03 | 2.79E-02 | 1.00E+00 |
| ENSG00000141084.9_RANBP10    | ENSG00000160789.18_LMNA | 0.16633  | 0.007323873  | 0.317133656 | 4.06E-02 | 1.75E-01 | 1.00E+00 |
| ENSG00000129315.8_CCNT1      | ENSG00000160789.18_LMNA | -0.04652 | -0.204211648 | 0.113518027 | 5.69E-01 | 7.99E-01 | 1.00E+00 |
| ENSG00000110675.11_ELMOD1    | ENSG00000160789.18_LMNA | 0.16467  | 0.005615309  | 0.315596032 | 4.26E-02 | 1.81E-01 | 1.00E+00 |
| ENSG00000122507.19_BBS9      | ENSG00000160789.18_LMNA | 0.07461  | -0.085611609 | 0.231062232 | 3.61E-01 | 6.43E-01 | 1.00E+00 |
| ENSG00000123124.12_WWP1      | ENSG00000160789.18_LMNA | 0.11355  | -0.046489818 | 0.267908894 | 1.64E-01 | 4.19E-01 | 1.00E+00 |
| ENSG00000072786.11_STK10     | ENSG00000160789.18_LMNA | 0.22627  | 0.069571041  | 0.372064019 | 5.06E-03 | 3.96E-02 | 1.00E+00 |
| ENSG00000132003.8_ZSWIM4     | ENSG00000160789.18_LMNA | 0.15509  | -0.004219141 | 0.306713745 | 5.64E-02 | 2.17E-01 | 1.00E+00 |
| ENSG00000224389.7_C4B        | ENSG00000160789.18_LMNA | 0.11107  | -0.048999568 | 0.265572388 | 1.73E-01 | 4.33E-01 | 1.00E+00 |
| ENSG00000135074.14_ADAM19    | ENSG00000160789.18_LMNA | 0.39199  | 0.248283753  | 0.518814305 | 5.91E-07 | 3.00E-05 | 3.03E-02 |

|                             |                         |          |              |             |          |          |          |
|-----------------------------|-------------------------|----------|--------------|-------------|----------|----------|----------|
| ENSG00000134815.17_DHX34    | ENSG00000160789.18_LMNA | 0.17094  | 0.01206274   | 0.321389897 | 3.52E-02 | 1.59E-01 | 1.00E+00 |
| ENSG00000172661.16_FAM21C   | ENSG00000160789.18_LMNA | 0.02374  | -0.135973971 | 0.182252522 | 7.72E-01 | 9.06E-01 | 1.00E+00 |
| ENSG00000107562.15_CXCL12   | ENSG00000160789.18_LMNA | -0.01003 | -0.168964996 | 0.149405162 | 9.02E-01 | 9.62E-01 | 1.00E+00 |
| ENSG00000153707.14_PTPRD    | ENSG00000160789.18_LMNA | -0.22734 | -0.373041069 | -0.07069998 | 4.85E-03 | 3.83E-02 | 1.00E+00 |
| ENSG00000066056.12_TIE1     | ENSG00000160789.18_LMNA | -0.07514 | -0.231572472 | 0.08507645  | 3.58E-01 | 6.41E-01 | 1.00E+00 |
| ENSG00000124279.10_FASTKD3  | ENSG00000160789.18_LMNA | -0.34619 | -0.478995136 | -0.19790036 | 1.25E-05 | 3.50E-04 | 6.41E-01 |
| ENSG00000055147.16_FAM114A  | ENSG00000160789.18_LMNA | -0.11842 | -0.272485036 | 0.041562843 | 1.46E-01 | 3.92E-01 | 1.00E+00 |
| ENSG00000066651.16_TRMT11   | ENSG00000160789.18_LMNA | -0.09908 | -0.254274631 | 0.061079233 | 2.25E-01 | 5.01E-01 | 1.00E+00 |
| ENSG00000135049.14_AGTPBP1  | ENSG00000160789.18_LMNA | -0.22986 | -0.375325944 | -0.07334307 | 4.39E-03 | 3.55E-02 | 1.00E+00 |
| ENSG00000197149.5_RP11-452G | ENSG00000160789.18_LMNA | -0.03583 | -0.193927124 | 0.124075807 | 6.61E-01 | 8.50E-01 | 1.00E+00 |
| ENSG00000013392.7_RWDD2A    | ENSG00000160789.18_LMNA | -0.43256 | -0.553638664 | -0.29358058 | 2.62E-08 | 2.43E-06 | 1.34E-03 |
| ENSG00000102078.14_SLC25A14 | ENSG00000160789.18_LMNA | -0.209   | -0.356345649 | -0.05151509 | 9.76E-03 | 6.45E-02 | 1.00E+00 |
| ENSG00000077514.7_POLD3     | ENSG00000160789.18_LMNA | 0.04851  | -0.111552527 | 0.206118565 | 5.53E-01 | 7.88E-01 | 1.00E+00 |
| ENSG00000055609.16_KMT2C    | ENSG00000160789.18_LMNA | 0.16411  | 0.005036764  | 0.315075002 | 4.34E-02 | 1.83E-01 | 1.00E+00 |
| ENSG00000005700.13_IBTK     | ENSG00000160789.18_LMNA | -0.00619 | -0.165228301 | 0.15316121  | 9.40E-01 | 9.76E-01 | 1.00E+00 |
| ENSG00000189050.13_RNFT1    | ENSG00000160789.18_LMNA | -0.17645 | -0.326481241 | -0.01774972 | 2.97E-02 | 1.42E-01 | 1.00E+00 |
| ENSG00000141314.11_RHBDL3   | ENSG00000160789.18_LMNA | -0.28436 | -0.424350487 | -0.13109427 | 3.85E-04 | 5.49E-03 | 1.00E+00 |
| ENSG00000170791.16_CHCHD7   | ENSG00000160789.18_LMNA | -0.00911 | -0.168062313 | 0.150313363 | 9.11E-01 | 9.66E-01 | 1.00E+00 |
| ENSG00000188321.12_ZNF559   | ENSG00000160789.18_LMNA | -0.2098  | -0.357069786 | -0.05234256 | 9.48E-03 | 6.31E-02 | 1.00E+00 |
| ENSG00000156345.16_CDK20    | ENSG00000160789.18_LMNA | 0.07454  | -0.085677753 | 0.230999155 | 3.61E-01 | 6.43E-01 | 1.00E+00 |
| ENSG00000171865.8_RNASEH1   | ENSG00000160789.18_LMNA | 0.07798  | -0.082236885 | 0.234276906 | 3.40E-01 | 6.25E-01 | 1.00E+00 |
| ENSG00000172469.13_MANEA    | ENSG00000160789.18_LMNA | -0.15818 | -0.309583588 | 0.00104822  | 5.16E-02 | 2.06E-01 | 1.00E+00 |
| ENSG00000065183.14_WDR3     | ENSG00000160789.18_LMNA | 0.03135  | -0.128493716 | 0.189602713 | 7.01E-01 | 8.72E-01 | 1.00E+00 |
| ENSG00000198919.11_DZIP3    | ENSG00000160789.18_LMNA | -0.31022 | -0.447326184 | -0.15886253 | 1.00E-04 | 1.89E-03 | 1.00E+00 |
| ENSG00000036549.11_ZZZ3     | ENSG00000160789.18_LMNA | -0.07696 | -0.233305946 | 0.083256952 | 3.46E-01 | 6.30E-01 | 1.00E+00 |
| ENSG00000221946.6_FXYD7     | ENSG00000160789.18_LMNA | -0.29919 | -0.437553433 | -0.14699521 | 1.81E-04 | 3.02E-03 | 1.00E+00 |
| ENSG00000142347.15_MYO1F    | ENSG00000160789.18_LMNA | 0.12018  | -0.039785543 | 0.274132301 | 1.40E-01 | 3.82E-01 | 1.00E+00 |
| ENSG00000088035.14_ALG6     | ENSG00000160789.18_LMNA | -0.13392 | -0.287004073 | 0.025828933 | 1.00E-01 | 3.11E-01 | 1.00E+00 |
| ENSG00000141013.13_GAS8     | ENSG00000160789.18_LMNA | 0.32187  | 0.171452572  | 0.45761934  | 5.26E-05 | 1.12E-03 | 1.00E+00 |
| ENSG00000106829.17_TLE4     | ENSG00000160789.18_LMNA | 0.03581  | -0.124096883 | 0.193906523 | 6.61E-01 | 8.50E-01 | 1.00E+00 |
| ENSG00000085982.12_USP40    | ENSG00000160789.18_LMNA | 0.17422  | 0.015448664  | 0.324423349 | 3.18E-02 | 1.49E-01 | 1.00E+00 |
| ENSG00000235065.1_RPL24P2   | ENSG00000160789.18_LMNA | -0.15153 | -0.303413483 | 0.007857922 | 6.24E-02 | 2.31E-01 | 1.00E+00 |
| ENSG00000164086.9_DUSP7     | ENSG00000160789.18_LMNA | -0.02173 | -0.180307936 | 0.137946916 | 7.90E-01 | 9.15E-01 | 1.00E+00 |

|                             |                         |          |              |             |          |          |          |
|-----------------------------|-------------------------|----------|--------------|-------------|----------|----------|----------|
| ENSG00000137673.7_MMP7      | ENSG00000160789.18_LMNA | 0.1373   | -0.022394247 | 0.290154557 | 9.17E-02 | 2.95E-01 | 1.00E+00 |
| ENSG00000143443.9_C1orf56   | ENSG00000160789.18_LMNA | 0.05039  | -0.109695136 | 0.20791838  | 5.38E-01 | 7.78E-01 | 1.00E+00 |
| ENSG00000095015.5_MAP3K1    | ENSG00000160789.18_LMNA | -0.05115 | -0.208650632 | 0.108938824 | 5.31E-01 | 7.74E-01 | 1.00E+00 |
| ENSG00000127191.16_TRAF2    | ENSG00000160789.18_LMNA | 0.34047  | 0.191659921  | 0.473981319 | 1.77E-05 | 4.67E-04 | 9.09E-01 |
| ENSG00000223804.4_CH17-472G | ENSG00000160789.18_LMNA | -0.17713 | -0.327109396 | -0.01845275 | 2.90E-02 | 1.40E-01 | 1.00E+00 |
| ENSG00000060558.3_GNA15     | ENSG00000160789.18_LMNA | 0.21795  | 0.060859254  | 0.364501688 | 6.99E-03 | 5.04E-02 | 1.00E+00 |
| ENSG00000163913.10_IFT122   | ENSG00000160789.18_LMNA | 0.25982  | 0.104957562  | 0.402374186 | 1.23E-03 | 1.35E-02 | 1.00E+00 |
| ENSG00000232480.1_TGFB2-AS1 | ENSG00000160789.18_LMNA | 0.03677  | -0.123151224 | 0.194830578 | 6.53E-01 | 8.46E-01 | 1.00E+00 |
| ENSG00000108443.12_RPS6KB1  | ENSG00000160789.18_LMNA | 0.01379  | -0.145731076 | 0.172611318 | 8.66E-01 | 9.48E-01 | 1.00E+00 |
| ENSG00000061936.8_SFSWAP    | ENSG00000160789.18_LMNA | 0.06401  | -0.096167892 | 0.220961752 | 4.33E-01 | 7.03E-01 | 1.00E+00 |
| ENSG00000135905.17_DOCK10   | ENSG00000160789.18_LMNA | -0.12361 | -0.277353568 | 0.03630424  | 1.29E-01 | 3.64E-01 | 1.00E+00 |
| ENSG00000175426.9_PCSK1     | ENSG00000160789.18_LMNA | 0.20038  | 0.042533014  | 0.348461632 | 1.33E-02 | 8.05E-02 | 1.00E+00 |
| ENSG00000141378.14_PTRH2    | ENSG00000160789.18_LMNA | -0.12296 | -0.276744837 | 0.036962695 | 1.31E-01 | 3.67E-01 | 1.00E+00 |
| ENSG00000204219.8_TCEA3     | ENSG00000160789.18_LMNA | 0.39732  | 0.254193378  | 0.523409149 | 4.02E-07 | 2.21E-05 | 2.06E-02 |
| ENSG00000126814.6_TRMT5     | ENSG00000160789.18_LMNA | -0.24322 | -0.387422685 | -0.08740734 | 2.53E-03 | 2.35E-02 | 1.00E+00 |
| ENSG00000196151.9_WDSUB1    | ENSG00000160789.18_LMNA | -0.28858 | -0.428108884 | -0.13560537 | 3.12E-04 | 4.64E-03 | 1.00E+00 |
| ENSG00000116750.12_UCHL5    | ENSG00000160789.18_LMNA | -0.09424 | -0.24969591  | 0.065948678 | 2.48E-01 | 5.28E-01 | 1.00E+00 |
| ENSG00000085788.12_DDHD2    | ENSG00000160789.18_LMNA | -0.25835 | -0.401057373 | -0.1034044  | 1.31E-03 | 1.42E-02 | 1.00E+00 |
| ENSG00000137770.12_CTDSP12  | ENSG00000160789.18_LMNA | -0.05514 | -0.212479201 | 0.10497846  | 5.00E-01 | 7.53E-01 | 1.00E+00 |
| ENSG00000126870.14_WDR60    | ENSG00000160789.18_LMNA | 0.16891  | 0.009976489  | 0.319517658 | 3.75E-02 | 1.66E-01 | 1.00E+00 |
| ENSG00000177463.14_NR2C2    | ENSG00000160789.18_LMNA | -0.08767 | -0.243472131 | 0.072543614 | 2.83E-01 | 5.68E-01 | 1.00E+00 |
| ENSG00000160097.14_FNDC5    | ENSG00000160789.18_LMNA | -0.39489 | -0.521313747 | -0.2514959  | 4.79E-07 | 2.54E-05 | 2.46E-02 |
| ENSG00000100601.8_ALKBH1    | ENSG00000160789.18_LMNA | 0.00399  | -0.155314021 | 0.163082454 | 9.61E-01 | 9.84E-01 | 1.00E+00 |
| ENSG00000249242.6_TMEM150C  | ENSG00000160789.18_LMNA | -0.04469 | -0.202452777 | 0.115328732 | 5.85E-01 | 8.07E-01 | 1.00E+00 |
| ENSG00000259038.1_CTD-2325P | ENSG00000160789.18_LMNA | -0.03014 | -0.188440596 | 0.129678811 | 7.12E-01 | 8.78E-01 | 1.00E+00 |
| ENSG00000235217.6_TSPY26P   | ENSG00000160789.18_LMNA | -0.02663 | -0.185046136 | 0.133135192 | 7.45E-01 | 8.93E-01 | 1.00E+00 |
| ENSG00000179387.8_ELMOD2    | ENSG00000160789.18_LMNA | 0.11796  | -0.042029387 | 0.272052322 | 1.48E-01 | 3.94E-01 | 1.00E+00 |
| ENSG00000118197.12_DDX59    | ENSG00000160789.18_LMNA | -0.08446 | -0.240429285 | 0.075757893 | 3.01E-01 | 5.87E-01 | 1.00E+00 |
| ENSG00000143195.11_ILDR2    | ENSG00000160789.18_LMNA | 0.09716  | -0.063017712 | 0.252453578 | 2.34E-01 | 5.11E-01 | 1.00E+00 |
| ENSG00000243517.1_RP11-627K | ENSG00000160789.18_LMNA | -0.11036 | -0.264906896 | 0.049713679 | 1.76E-01 | 4.37E-01 | 1.00E+00 |
| ENSG00000166503.7_RP11-382A | ENSG00000160789.18_LMNA | -0.29243 | -0.431543011 | -0.1397379  | 2.56E-04 | 3.97E-03 | 1.00E+00 |
| ENSG00000060749.13_QSER1    | ENSG00000160789.18_LMNA | 0.04655  | -0.113490821 | 0.20423806  | 5.69E-01 | 7.98E-01 | 1.00E+00 |
| ENSG00000228409.4_CCT6P1    | ENSG00000160789.18_LMNA | -0.09349 | -0.248989016 | 0.066699118 | 2.52E-01 | 5.33E-01 | 1.00E+00 |



|                             |                         |          |              |             |          |          |          |
|-----------------------------|-------------------------|----------|--------------|-------------|----------|----------|----------|
| ENSG00000100889.10_PCK2     | ENSG00000160789.18_LMNA | 0.15666  | -0.002601588 | 0.308178418 | 5.39E-02 | 2.11E-01 | 1.00E+00 |
| ENSG00000120370.11_GORAB    | ENSG00000160789.18_LMNA | 0.10612  | -0.05399561  | 0.26091019  | 1.93E-01 | 4.62E-01 | 1.00E+00 |
| ENSG00000110200.7_ANAPC15   | ENSG00000160789.18_LMNA | -0.18752 | -0.336673633 | -0.02919485 | 2.07E-02 | 1.11E-01 | 1.00E+00 |
| ENSG00000173281.4_PPP1R3B   | ENSG00000160789.18_LMNA | 0.40877  | 0.266939795  | 0.533266706 | 1.71E-07 | 1.11E-05 | 8.78E-03 |
| ENSG00000130396.19_AFDN     | ENSG00000160789.18_LMNA | -0.04282 | -0.200648862 | 0.117183616 | 6.00E-01 | 8.16E-01 | 1.00E+00 |
| ENSG00000009780.14_FAM76A   | ENSG00000160789.18_LMNA | -0.02309 | -0.181618329 | 0.13661769  | 7.78E-01 | 9.09E-01 | 1.00E+00 |
| ENSG00000186417.12_GLDN     | ENSG00000160789.18_LMNA | -0.13734 | -0.2901961   | 0.022348907 | 9.16E-02 | 2.95E-01 | 1.00E+00 |
| ENSG00000232931.4_LINC00342 | ENSG00000160789.18_LMNA | 0.01492  | -0.144621115 | 0.173711177 | 8.55E-01 | 9.43E-01 | 1.00E+00 |
| ENSG00000244274.6_DBNDD2    | ENSG00000160789.18_LMNA | -0.24022 | -0.384708562 | -0.08424133 | 2.87E-03 | 2.59E-02 | 1.00E+00 |
| ENSG00000064313.10_TAF2     | ENSG00000160789.18_LMNA | 0.07205  | -0.088166023 | 0.228624357 | 3.78E-01 | 6.57E-01 | 1.00E+00 |
| ENSG00000125744.10_RTN2     | ENSG00000160789.18_LMNA | -0.18944 | -0.338434085 | -0.03117988 | 1.94E-02 | 1.06E-01 | 1.00E+00 |
| ENSG00000177663.12_IL17RA   | ENSG00000160789.18_LMNA | 0.21735  | 0.060237368  | 0.363960319 | 7.15E-03 | 5.12E-02 | 1.00E+00 |
| ENSG00000151490.12_PTPRO    | ENSG00000160789.18_LMNA | -0.35015 | -0.482453197 | -0.20221775 | 9.78E-06 | 2.86E-04 | 5.02E-01 |
| ENSG00000026652.12_AGPAT4   | ENSG00000160789.18_LMNA | -0.23717 | -0.381948325 | -0.08102773 | 3.26E-03 | 2.84E-02 | 1.00E+00 |
| ENSG00000124459.10_ZNF45    | ENSG00000160789.18_LMNA | 0.07552  | -0.08469642  | 0.231934701 | 3.55E-01 | 6.39E-01 | 1.00E+00 |
| ENSG00000276529.1_AP001505  | ENSG00000160789.18_LMNA | 0.17029  | 0.01139727   | 0.320792954 | 3.60E-02 | 1.61E-01 | 1.00E+00 |
| ENSG00000079482.12_OPHN1    | ENSG00000160789.18_LMNA | -0.29794 | -0.43643948  | -0.1456478  | 1.93E-04 | 3.18E-03 | 1.00E+00 |
| ENSG00000130779.18_CLIP1    | ENSG00000160789.18_LMNA | 0.2865   | 0.133386444  | 0.426261463 | 3.46E-04 | 5.02E-03 | 1.00E+00 |
| ENSG00000177311.9_ZBTB38    | ENSG00000160789.18_LMNA | 0.24525  | 0.089542542  | 0.38925019  | 2.32E-03 | 2.19E-02 | 1.00E+00 |
| ENSG00000234456.6_MAGI2-AS3 | ENSG00000160789.18_LMNA | 0.03945  | -0.120507736 | 0.197410683 | 6.29E-01 | 8.33E-01 | 1.00E+00 |
| ENSG00000082258.11_CCNT2    | ENSG00000160789.18_LMNA | -0.27416 | -0.415233976 | -0.12020217 | 6.31E-04 | 8.10E-03 | 1.00E+00 |
| ENSG00000079277.18_MKNK1    | ENSG00000160789.18_LMNA | 0.03194  | -0.127914277 | 0.190170594 | 6.96E-01 | 8.70E-01 | 1.00E+00 |
| ENSG00000138185.15_ENTPD1   | ENSG00000160789.18_LMNA | -0.16218 | -0.313294453 | -0.00306124 | 4.59E-02 | 1.90E-01 | 1.00E+00 |
| ENSG00000187094.10_CCK      | ENSG00000160789.18_LMNA | -0.3186  | -0.454734317 | -0.16791431 | 6.33E-05 | 1.30E-03 | 1.00E+00 |
| ENSG00000163002.11_NUP35    | ENSG00000160789.18_LMNA | -0.38494 | -0.512720387 | -0.24047705 | 9.74E-07 | 4.50E-05 | 5.00E-02 |
| ENSG00000205413.6_SAMD9     | ENSG00000160789.18_LMNA | 0.17015  | 0.011253539  | 0.320663992 | 3.61E-02 | 1.62E-01 | 1.00E+00 |
| ENSG00000172602.8_RND1      | ENSG00000160789.18_LMNA | -0.32884 | -0.463765491 | -0.17901505 | 3.53E-05 | 8.17E-04 | 1.00E+00 |
| ENSG00000169991.9_IFFO2     | ENSG00000160789.18_LMNA | 0.31878  | 0.168111268  | 0.454895069 | 6.26E-05 | 1.29E-03 | 1.00E+00 |
| ENSG00000166167.16_BTRC     | ENSG00000160789.18_LMNA | -0.26533 | -0.407325236 | -0.11081027 | 9.54E-04 | 1.12E-02 | 1.00E+00 |
| ENSG00000181404.15_WASH1    | ENSG00000160789.18_LMNA | 0.07647  | -0.08375392  | 0.232832674 | 3.49E-01 | 6.33E-01 | 1.00E+00 |
| ENSG00000166428.11_PLD4     | ENSG00000160789.18_LMNA | -0.29608 | -0.434785591 | -0.14364928 | 2.13E-04 | 3.42E-03 | 1.00E+00 |
| ENSG00000056586.14_RC3H2    | ENSG00000160789.18_LMNA | -0.07525 | -0.231677127 | 0.084966661 | 3.57E-01 | 6.40E-01 | 1.00E+00 |
| ENSG00000247134.5_RP11-11N9 | ENSG00000160789.18_LMNA | -0.15904 | -0.310380171 | 0.000166958 | 5.03E-02 | 2.02E-01 | 1.00E+00 |

|                             |                         |          |              |             |          |          |          |
|-----------------------------|-------------------------|----------|--------------|-------------|----------|----------|----------|
| ENSG00000175309.13_PHYKPL   | ENSG00000160789.18_LMNA | 0.10364  | -0.05648989  | 0.258577071 | 2.04E-01 | 4.75E-01 | 1.00E+00 |
| ENSG00000257621.6_PSMA3-AS  | ENSG00000160789.18_LMNA | -0.03641 | -0.194484469 | 0.123505493 | 6.56E-01 | 8.48E-01 | 1.00E+00 |
| ENSG00000181027.9_FKRP      | ENSG00000160789.18_LMNA | 0.29336  | 0.140733681  | 0.432369241 | 2.44E-04 | 3.83E-03 | 1.00E+00 |
| ENSG00000260018.1_RP11-505K | ENSG00000160789.18_LMNA | 0.00935  | -0.150072862 | 0.168301405 | 9.09E-01 | 9.65E-01 | 1.00E+00 |
| ENSG00000125843.9_AP5S1     | ENSG00000160789.18_LMNA | 0.11259  | -0.047463929 | 0.267002463 | 1.67E-01 | 4.25E-01 | 1.00E+00 |
| ENSG00000073536.16_NLE1     | ENSG00000160789.18_LMNA | -0.02157 | -0.180149962 | 0.138107083 | 7.92E-01 | 9.16E-01 | 1.00E+00 |
| ENSG00000121289.16_CEP89    | ENSG00000160789.18_LMNA | 0.18136  | 0.022821223  | 0.331006517 | 2.53E-02 | 1.28E-01 | 1.00E+00 |
| ENSG00000171634.15_BPTF     | ENSG00000160789.18_LMNA | -0.02629 | -0.184721474 | 0.13346537  | 7.48E-01 | 8.95E-01 | 1.00E+00 |
| ENSG00000183943.5_PRKX      | ENSG00000160789.18_LMNA | -0.2877  | -0.427329359 | -0.13466873 | 3.26E-04 | 4.80E-03 | 1.00E+00 |
| ENSG00000101868.9_POLA1     | ENSG00000160789.18_LMNA | 0.13877  | -0.020887805 | 0.291534214 | 8.82E-02 | 2.89E-01 | 1.00E+00 |
| ENSG00000170222.11_ADPRM    | ENSG00000160789.18_LMNA | -0.34242 | -0.475688337 | -0.193782   | 1.57E-05 | 4.23E-04 | 8.08E-01 |
| ENSG00000214182.5_PTMAP5    | ENSG00000160789.18_LMNA | 0.07342  | -0.086798513 | 0.229929972 | 3.69E-01 | 6.50E-01 | 1.00E+00 |
| ENSG00000254415.3_SIGLEC14  | ENSG00000160789.18_LMNA | 0.0076   | -0.151780821 | 0.166602641 | 9.26E-01 | 9.72E-01 | 1.00E+00 |
| ENSG00000143776.17_CDC42BP  | ENSG00000160789.18_LMNA | 0.20447  | 0.046788903  | 0.352202645 | 1.15E-02 | 7.24E-02 | 1.00E+00 |
| ENSG00000164076.15_CAMKV    | ENSG00000160789.18_LMNA | -0.40528 | -0.530264055 | -0.26304729 | 2.23E-07 | 1.39E-05 | 1.14E-02 |
| ENSG00000157450.14_RNF111   | ENSG00000160789.18_LMNA | 0.10493  | -0.055197373 | 0.259786535 | 1.98E-01 | 4.68E-01 | 1.00E+00 |
| ENSG00000119986.6_AVPI1     | ENSG00000160789.18_LMNA | -0.2026  | -0.35049836  | -0.04484868 | 1.23E-02 | 7.61E-02 | 1.00E+00 |
| ENSG00000127663.13_KDM4B    | ENSG00000160789.18_LMNA | 0.00687  | -0.152492942 | 0.165893795 | 9.33E-01 | 9.74E-01 | 1.00E+00 |
| ENSG00000169302.13_STK32A   | ENSG00000160789.18_LMNA | -0.07986 | -0.236060726 | 0.080361117 | 3.28E-01 | 6.14E-01 | 1.00E+00 |
| ENSG00000138092.9_CENPO     | ENSG00000160789.18_LMNA | 0.03024  | -0.129586964 | 0.188530694 | 7.12E-01 | 8.77E-01 | 1.00E+00 |
| ENSG00000185305.9_ARL15     | ENSG00000160789.18_LMNA | -0.44487 | -0.564114935 | -0.30743971 | 9.35E-09 | 1.01E-06 | 4.80E-04 |
| ENSG00000103326.9_CAPN15    | ENSG00000160789.18_LMNA | 0.26248  | 0.107787557  | 0.404770371 | 1.09E-03 | 1.23E-02 | 1.00E+00 |
| ENSG00000144747.13_TMF1     | ENSG00000160789.18_LMNA | 0.16601  | 0.006991269  | 0.316834456 | 4.10E-02 | 1.76E-01 | 1.00E+00 |
| ENSG00000070476.13_ZXDC     | ENSG00000160789.18_LMNA | 0.0955   | -0.064686184 | 0.250884385 | 2.42E-01 | 5.21E-01 | 1.00E+00 |
| ENSG00000073464.10_CLCN4    | ENSG00000160789.18_LMNA | -0.22257 | -0.368707261 | -0.06569836 | 5.85E-03 | 4.42E-02 | 1.00E+00 |
| ENSG00000124120.9_TTPAL     | ENSG00000160789.18_LMNA | 0.17846  | 0.019825556  | 0.328335213 | 2.78E-02 | 1.36E-01 | 1.00E+00 |
| ENSG00000188242.4_PP7080    | ENSG00000160789.18_LMNA | 0.20282  | 0.045076236  | 0.350698348 | 1.22E-02 | 7.57E-02 | 1.00E+00 |
| ENSG00000140022.8_STON2     | ENSG00000160789.18_LMNA | -0.05833 | -0.215531512 | 0.101813847 | 4.75E-01 | 7.34E-01 | 1.00E+00 |
| ENSG00000121316.9_PLBD1     | ENSG00000160789.18_LMNA | 0.10367  | -0.056457661 | 0.258607241 | 2.04E-01 | 4.75E-01 | 1.00E+00 |
| ENSG00000065833.8_ME1       | ENSG00000160789.18_LMNA | -0.06373 | -0.220691421 | 0.096449444 | 4.35E-01 | 7.04E-01 | 1.00E+00 |
| ENSG00000225138.6_CTD-2228K | ENSG00000160789.18_LMNA | 0.11464  | -0.045388065 | 0.268933429 | 1.60E-01 | 4.13E-01 | 1.00E+00 |
| ENSG00000126561.15_STAT5A   | ENSG00000160789.18_LMNA | 0.22534  | 0.068600899  | 0.371223863 | 5.25E-03 | 4.07E-02 | 1.00E+00 |
| ENSG00000174165.6_ZDHHC24   | ENSG00000160789.18_LMNA | 0.26575  | 0.11125329   | 0.407699295 | 9.36E-04 | 1.10E-02 | 1.00E+00 |

|                              |                         |          |              |             |          |          |          |
|------------------------------|-------------------------|----------|--------------|-------------|----------|----------|----------|
| ENSG00000144857.13_BOC       | ENSG00000160789.18_LMNA | 0.27838  | 0.124710817  | 0.419014843 | 5.15E-04 | 6.91E-03 | 1.00E+00 |
| ENSG00000144868.12_TMEM108   | ENSG00000160789.18_LMNA | -0.30354 | -0.441413335 | -0.15167242 | 1.44E-04 | 2.51E-03 | 1.00E+00 |
| ENSG00000148803.10_FUOM      | ENSG00000160789.18_LMNA | -0.01302 | -0.171866279 | 0.146482502 | 8.73E-01 | 9.51E-01 | 1.00E+00 |
| ENSG00000163638.12_ADAMTS9   | ENSG00000160789.18_LMNA | 0.31907  | 0.168426065  | 0.455151963 | 6.16E-05 | 1.27E-03 | 1.00E+00 |
| ENSG00000244242.1_IFITM10    | ENSG00000160789.18_LMNA | 0.00896  | -0.150452514 | 0.16792396  | 9.13E-01 | 9.67E-01 | 1.00E+00 |
| ENSG00000110888.16_CAPRIN2   | ENSG00000160789.18_LMNA | 0.12216  | -0.037779285 | 0.275989562 | 1.34E-01 | 3.71E-01 | 1.00E+00 |
| ENSG00000179922.5_ZNF784     | ENSG00000160789.18_LMNA | 0.23378  | 0.077462449  | 0.378879726 | 3.75E-03 | 3.16E-02 | 1.00E+00 |
| ENSG00000129450.7_SIGLEC9    | ENSG00000160789.18_LMNA | 0.11562  | -0.044400545 | 0.269851131 | 1.56E-01 | 4.08E-01 | 1.00E+00 |
| ENSG00000215018.8_COL28A1    | ENSG00000160789.18_LMNA | -0.13838 | -0.291162227 | 0.021294115 | 8.91E-02 | 2.91E-01 | 1.00E+00 |
| ENSG00000260766.1_RP11-226L  | ENSG00000160789.18_LMNA | -0.14236 | -0.294880889 | 0.017227682 | 8.02E-02 | 2.73E-01 | 1.00E+00 |
| ENSG00000172716.15_SLFN11    | ENSG00000160789.18_LMNA | 0.04658  | -0.113461186 | 0.204266829 | 5.69E-01 | 7.98E-01 | 1.00E+00 |
| ENSG00000132334.15_PTPRE     | ENSG00000160789.18_LMNA | 0.25118  | 0.095808562  | 0.394599655 | 1.80E-03 | 1.81E-02 | 1.00E+00 |
| ENSG00000156299.11_TIAM1     | ENSG00000160789.18_LMNA | 0.05122  | -0.108873093 | 0.208714254 | 5.31E-01 | 7.74E-01 | 1.00E+00 |
| ENSG00000150281.6_CTF1       | ENSG00000160789.18_LMNA | 0.29618  | 0.143760715  | 0.434877863 | 2.11E-04 | 3.41E-03 | 1.00E+00 |
| ENSG00000128829.10	EIF2AK4   | ENSG00000160789.18_LMNA | 0.22191  | 0.065009904  | 0.368109693 | 6.00E-03 | 4.50E-02 | 1.00E+00 |
| ENSG00000272086.1_CTD-2186M  | ENSG00000160789.18_LMNA | -0.22971 | -0.375187826 | -0.07318318 | 4.42E-03 | 3.57E-02 | 1.00E+00 |
| ENSG00000123213.21_NLN       | ENSG00000160789.18_LMNA | 0.24356  | 0.087765728  | 0.38772959  | 2.50E-03 | 2.32E-02 | 1.00E+00 |
| ENSG00000184277.11_TM2D3     | ENSG00000160789.18_LMNA | -0.22598 | -0.37180771  | -0.06927502 | 5.12E-03 | 4.00E-02 | 1.00E+00 |
| ENSG00000111261.12_MANSC1    | ENSG00000160789.18_LMNA | -0.15296 | -0.304744006 | 0.006391914 | 5.99E-02 | 2.25E-01 | 1.00E+00 |
| ENSG00000212978.6_AC016747.1 | ENSG00000160789.18_LMNA | -0.0797  | -0.23590484  | 0.080525127 | 3.29E-01 | 6.15E-01 | 1.00E+00 |
| ENSG00000138160.5_KIF11      | ENSG00000160789.18_LMNA | 0.02959  | -0.130223721 | 0.187905952 | 7.17E-01 | 8.80E-01 | 1.00E+00 |
| ENSG00000004838.12_ZMYND10   | ENSG00000160789.18_LMNA | 0.17475  | 0.015995457  | 0.324912625 | 3.13E-02 | 1.47E-01 | 1.00E+00 |
| ENSG00000204520.11_MICA      | ENSG00000160789.18_LMNA | 0.36494  | 0.218434939  | 0.49536496  | 3.79E-06 | 1.33E-04 | 1.94E-01 |
| ENSG00000043355.9_ZIC2       | ENSG00000160789.18_LMNA | 0.11667  | -0.043334615 | 0.270841061 | 1.52E-01 | 4.02E-01 | 1.00E+00 |
| ENSG00000180787.5_ZFP3       | ENSG00000160789.18_LMNA | -0.09923 | -0.254407999 | 0.060937171 | 2.24E-01 | 5.00E-01 | 1.00E+00 |
| ENSG00000148841.14_ITPRIP    | ENSG00000160789.18_LMNA | 0.47408  | 0.34057947   | 0.588835023 | 6.86E-10 | 1.15E-07 | 3.52E-05 |
| ENSG00000196653.10_ZNF502    | ENSG00000160789.18_LMNA | -0.25707 | -0.399908121 | -0.10205006 | 1.39E-03 | 1.48E-02 | 1.00E+00 |
| ENSG00000136250.10_AOAH      | ENSG00000160789.18_LMNA | -0.1198  | -0.273781453 | 0.040164254 | 1.42E-01 | 3.84E-01 | 1.00E+00 |
| ENSG00000100445.15_SDR39U1   | ENSG00000160789.18_LMNA | -0.12689 | -0.280425336 | 0.032977398 | 1.19E-01 | 3.47E-01 | 1.00E+00 |
| ENSG00000184863.9_RBM33      | ENSG00000160789.18_LMNA | 0.11554  | -0.044478255 | 0.269778936 | 1.56E-01 | 4.08E-01 | 1.00E+00 |
| ENSG00000164038.13_SLC9B2    | ENSG00000160789.18_LMNA | -0.29036 | -0.429694195 | -0.13751183 | 2.85E-04 | 4.32E-03 | 1.00E+00 |
| ENSG00000187688.13_TRPV2     | ENSG00000160789.18_LMNA | 0.16943  | 0.010510348  | 0.319996983 | 3.69E-02 | 1.64E-01 | 1.00E+00 |
| ENSG00000064692.17_SNCAIP    | ENSG00000160789.18_LMNA | -0.32871 | -0.463645067 | -0.17886655 | 3.56E-05 | 8.21E-04 | 1.00E+00 |

|                             |                         |          |              |             |          |          |          |
|-----------------------------|-------------------------|----------|--------------|-------------|----------|----------|----------|
| ENSG00000229132.2_EIF4A1P10 | ENSG00000160789.18_LMNA | 0.04947  | -0.110600383 | 0.207041463 | 5.45E-01 | 7.83E-01 | 1.00E+00 |
| ENSG00000165699.12_TSC1     | ENSG00000160789.18_LMNA | -0.03917 | -0.197144098 | 0.12078108  | 6.32E-01 | 8.35E-01 | 1.00E+00 |
| ENSG00000165684.3_SNAPC4    | ENSG00000160789.18_LMNA | 0.15505  | -0.004255164 | 0.30668111  | 5.65E-02 | 2.17E-01 | 1.00E+00 |
| ENSG00000234545.6_FAM133B   | ENSG00000160789.18_LMNA | -0.10927 | -0.263880124 | 0.050814831 | 1.80E-01 | 4.43E-01 | 1.00E+00 |
| ENSG00000159256.11_MORC3    | ENSG00000160789.18_LMNA | 0.01097  | -0.148489357 | 0.169874696 | 8.93E-01 | 9.58E-01 | 1.00E+00 |
| ENSG00000170734.10_POLH     | ENSG00000160789.18_LMNA | 0.08934  | -0.070871355 | 0.245052743 | 2.74E-01 | 5.58E-01 | 1.00E+00 |
| ENSG00000255571.5_MIR9-3HG  | ENSG00000160789.18_LMNA | -0.30491 | -0.442625627 | -0.15314409 | 1.34E-04 | 2.38E-03 | 1.00E+00 |
| ENSG00000110811.18_P3H3     | ENSG00000160789.18_LMNA | 0.41215  | 0.2707152    | 0.536172632 | 1.32E-07 | 9.11E-06 | 6.78E-03 |
| ENSG00000154975.12_CA10     | ENSG00000160789.18_LMNA | -0.41707 | -0.540387225 | -0.27620539 | 9.04E-08 | 6.61E-06 | 4.64E-03 |
| ENSG00000153982.9_GDPD1     | ENSG00000160789.18_LMNA | -0.4816  | -0.595169461 | -0.34917188 | 3.36E-10 | 6.29E-08 | 1.72E-05 |
| ENSG00000136068.13_FLNB     | ENSG00000160789.18_LMNA | 0.09609  | -0.064093292 | 0.251442188 | 2.39E-01 | 5.18E-01 | 1.00E+00 |
| ENSG00000141577.12_CEP131   | ENSG00000160789.18_LMNA | 0.17498  | 0.016234381  | 0.325126365 | 3.11E-02 | 1.47E-01 | 1.00E+00 |
| ENSG00000183049.11_CAMK1D   | ENSG00000160789.18_LMNA | -0.1655  | -0.316363641 | -0.00646803 | 4.16E-02 | 1.78E-01 | 1.00E+00 |
| ENSG00000255823.2_MTRNR2L8  | ENSG00000160789.18_LMNA | -0.25865 | -0.401325973 | -0.10372109 | 1.29E-03 | 1.41E-02 | 1.00E+00 |
| ENSG00000149476.13_TKFC     | ENSG00000160789.18_LMNA | 0.11298  | -0.047068486 | 0.267370498 | 1.66E-01 | 4.23E-01 | 1.00E+00 |
| ENSG00000172493.19_AFF1     | ENSG00000160789.18_LMNA | 0.09163  | -0.068571066 | 0.247224227 | 2.62E-01 | 5.45E-01 | 1.00E+00 |
| ENSG00000082805.18_ERC1     | ENSG00000160789.18_LMNA | -0.00748 | -0.166483542 | 0.151900494 | 9.27E-01 | 9.72E-01 | 1.00E+00 |
| ENSG00000113810.14_SMC4     | ENSG00000160789.18_LMNA | 0.2043   | 0.046617885  | 0.352052504 | 1.16E-02 | 7.28E-02 | 1.00E+00 |
| ENSG00000080371.5_RAB21     | ENSG00000160789.18_LMNA | 0.09986  | -0.060299848 | 0.255006174 | 2.21E-01 | 4.96E-01 | 1.00E+00 |
| ENSG00000170893.3_TRH       | ENSG00000160789.18_LMNA | 0.04183  | -0.118156867 | 0.199701492 | 6.09E-01 | 8.21E-01 | 1.00E+00 |
| ENSG00000161835.9_GRASP     | ENSG00000160789.18_LMNA | -0.08603 | -0.241917005 | 0.074187176 | 2.92E-01 | 5.78E-01 | 1.00E+00 |
| ENSG00000244567.1_          | ENSG00000160789.18_LMNA | -0.08276 | -0.238817073 | 0.077458279 | 3.11E-01 | 5.97E-01 | 1.00E+00 |
| ENSG00000100056.10_DGCR14   | ENSG00000160789.18_LMNA | -0.01821 | -0.176898224 | 0.141400267 | 8.24E-01 | 9.31E-01 | 1.00E+00 |
| ENSG00000113761.10_ZNF346   | ENSG00000160789.18_LMNA | -0.22606 | -0.37187312  | -0.06935056 | 5.10E-03 | 3.99E-02 | 1.00E+00 |
| ENSG00000198909.6_MAP3K3    | ENSG00000160789.18_LMNA | 0.05076  | -0.109327984 | 0.208273896 | 5.35E-01 | 7.76E-01 | 1.00E+00 |
| ENSG00000151881.13_TMEM267  | ENSG00000160789.18_LMNA | -0.12507 | -0.278721684 | 0.034823377 | 1.25E-01 | 3.56E-01 | 1.00E+00 |
| ENSG00000113555.5_PCDH12    | ENSG00000160789.18_LMNA | 0.12338  | -0.036536777 | 0.277138621 | 1.30E-01 | 3.65E-01 | 1.00E+00 |
| ENSG00000266402.3_SNHG25    | ENSG00000160789.18_LMNA | -0.15497 | -0.306608361 | 0.004335462 | 5.66E-02 | 2.17E-01 | 1.00E+00 |
| ENSG00000073792.14_IGF2BP2  | ENSG00000160789.18_LMNA | 0.21905  | 0.062009459  | 0.365502432 | 6.70E-03 | 4.88E-02 | 1.00E+00 |
| ENSG00000219023.1_RP3-340B1 | ENSG00000160789.18_LMNA | -0.14752 | -0.299682842 | 0.011961326 | 6.97E-02 | 2.49E-01 | 1.00E+00 |
| ENSG00000220583.1_RPL35P2   | ENSG00000160789.18_LMNA | 0.0803   | -0.079921492 | 0.236478493 | 3.25E-01 | 6.12E-01 | 1.00E+00 |
| ENSG00000043093.12_DCUN1D1  | ENSG00000160789.18_LMNA | -0.44162 | -0.561356695 | -0.30378022 | 1.23E-08 | 1.28E-06 | 6.32E-04 |
| ENSG00000261685.2_          | ENSG00000160789.18_LMNA | -0.29704 | -0.435640251 | -0.14468173 | 2.02E-04 | 3.29E-03 | 1.00E+00 |

|                             |                         |          |              |             |          |          |          |
|-----------------------------|-------------------------|----------|--------------|-------------|----------|----------|----------|
| ENSG00000196091.11_MYBPC1   | ENSG00000160789.18_LMNA | -0.26946 | -0.411032263 | -0.11520591 | 7.88E-04 | 9.61E-03 | 1.00E+00 |
| ENSG00000115282.18_TTC31    | ENSG00000160789.18_LMNA | 0.08128  | -0.078940201 | 0.237410572 | 3.19E-01 | 6.06E-01 | 1.00E+00 |
| ENSG00000114491.12_UMPS     | ENSG00000160789.18_LMNA | 0.02688  | -0.132890083 | 0.185287103 | 7.42E-01 | 8.92E-01 | 1.00E+00 |
| ENSG00000247081.6_BAALC-AS  | ENSG00000160789.18_LMNA | -0.1745  | -0.324678179 | -0.01573343 | 3.15E-02 | 1.48E-01 | 1.00E+00 |
| ENSG00000170647.3_TMEN133   | ENSG00000160789.18_LMNA | -0.06241 | -0.219433114 | 0.097759321 | 4.45E-01 | 7.12E-01 | 1.00E+00 |
| ENSG00000113163.14_COL4A3B  | ENSG00000160789.18_LMNA | 0.03954  | -0.120422967 | 0.197493347 | 6.29E-01 | 8.33E-01 | 1.00E+00 |
| ENSG00000172985.10_SH3RF3   | ENSG00000160789.18_LMNA | -0.08159 | -0.23770781  | 0.07862714  | 3.18E-01 | 6.04E-01 | 1.00E+00 |
| ENSG00000145041.14_DCAF1    | ENSG00000160789.18_LMNA | 0.04334  | -0.116661139 | 0.2011572   | 5.96E-01 | 8.14E-01 | 1.00E+00 |
| ENSG00000277161.1_PIGW      | ENSG00000160789.18_LMNA | -0.04287 | -0.200697944 | 0.117133177 | 6.00E-01 | 8.16E-01 | 1.00E+00 |
| ENSG00000183114.7_FAM43B    | ENSG00000160789.18_LMNA | 0.29316  | 0.140517373  | 0.432189806 | 2.47E-04 | 3.86E-03 | 1.00E+00 |
| ENSG00000178458.5_H3F3AP6   | ENSG00000160789.18_LMNA | -0.14622 | -0.298471018 | 0.01329198  | 7.23E-02 | 2.55E-01 | 1.00E+00 |
| ENSG00000176018.11_LYSMD3   | ENSG00000160789.18_LMNA | 0.01901  | -0.140620475 | 0.177668831 | 8.16E-01 | 9.28E-01 | 1.00E+00 |
| ENSG00000130590.12_SAMD10   | ENSG00000160789.18_LMNA | -0.00237 | -0.161508372 | 0.156891291 | 9.77E-01 | 9.91E-01 | 1.00E+00 |
| ENSG00000119737.5_GPR75     | ENSG00000160789.18_LMNA | -0.15659 | -0.308114208 | 0.002672535 | 5.40E-02 | 2.11E-01 | 1.00E+00 |
| ENSG00000188747.7_NOXA1     | ENSG00000160789.18_LMNA | 0.13092  | -0.028887285 | 0.284193077 | 1.08E-01 | 3.27E-01 | 1.00E+00 |
| ENSG00000177096.7_FAM109B   | ENSG00000160789.18_LMNA | 0.21715  | 0.060019991  | 0.363771038 | 7.21E-03 | 5.14E-02 | 1.00E+00 |
| ENSG00000272325.1_NUDT3     | ENSG00000160789.18_LMNA | -0.22759 | -0.373270207 | -0.07096485 | 4.80E-03 | 3.80E-02 | 1.00E+00 |
| ENSG00000163877.9_SNIP1     | ENSG00000160789.18_LMNA | 0.08962  | -0.070584124 | 0.245324064 | 2.72E-01 | 5.57E-01 | 1.00E+00 |
| ENSG00000120526.9_NUDCD1    | ENSG00000160789.18_LMNA | 0.01689  | -0.14269224  | 0.175620612 | 8.36E-01 | 9.37E-01 | 1.00E+00 |
| ENSG00000132205.9_EMILIN2   | ENSG00000160789.18_LMNA | 0.25572  | 0.100613397  | 0.398687993 | 1.47E-03 | 1.55E-02 | 1.00E+00 |
| ENSG00000175265.16_GOLGA8A  | ENSG00000160789.18_LMNA | -0.07586 | -0.232253581 | 0.084361792 | 3.53E-01 | 6.37E-01 | 1.00E+00 |
| ENSG00000140548.8_ZNF710    | ENSG00000160789.18_LMNA | 0.16672  | 0.007720202  | 0.3174901   | 4.01E-02 | 1.74E-01 | 1.00E+00 |
| ENSG00000196812.4_ZSCAN16   | ENSG00000160789.18_LMNA | -0.34742 | -0.480067415 | -0.19923794 | 1.16E-05 | 3.29E-04 | 5.94E-01 |
| ENSG00000205593.10_DENND6E  | ENSG00000160789.18_LMNA | 0.01456  | -0.144973614 | 0.173361972 | 8.59E-01 | 9.44E-01 | 1.00E+00 |
| ENSG00000256806.3_C17orf100 | ENSG00000160789.18_LMNA | -0.34274 | -0.475967488 | -0.19412928 | 1.54E-05 | 4.19E-04 | 7.92E-01 |
| ENSG00000133800.7_LYVE1     | ENSG00000160789.18_LMNA | 0.10266  | -0.057481954 | 0.257648083 | 2.08E-01 | 4.81E-01 | 1.00E+00 |
| ENSG00000163818.15_LZTFL1   | ENSG00000160789.18_LMNA | -0.17864 | -0.328496557 | -0.02000633 | 2.77E-02 | 1.36E-01 | 1.00E+00 |
| ENSG00000256164.1_CCND2-AS  | ENSG00000160789.18_LMNA | -0.29047 | -0.429795742 | -0.13763402 | 2.83E-04 | 4.30E-03 | 1.00E+00 |
| ENSG00000153207.13_AHCTF1   | ENSG00000160789.18_LMNA | 0.18857  | 0.030275146  | 0.337631979 | 2.00E-02 | 1.08E-01 | 1.00E+00 |
| ENSG00000151612.14_ZNF827   | ENSG00000160789.18_LMNA | 0.0057   | -0.153642653 | 0.164748677 | 9.44E-01 | 9.78E-01 | 1.00E+00 |
| ENSG00000151240.14_DIP2C    | ENSG00000160789.18_LMNA | -0.05566 | -0.212975379 | 0.104464464 | 4.96E-01 | 7.50E-01 | 1.00E+00 |
| ENSG00000175727.12_MLXIP    | ENSG00000160789.18_LMNA | 0.15258  | -0.006785536 | 0.30438688  | 6.06E-02 | 2.27E-01 | 1.00E+00 |
| ENSG00000197121.13_PGAP1    | ENSG00000160789.18_LMNA | -0.06671 | -0.223532301 | 0.093488092 | 4.14E-01 | 6.87E-01 | 1.00E+00 |

|                             |                         |          |              |             |          |          |          |
|-----------------------------|-------------------------|----------|--------------|-------------|----------|----------|----------|
| ENSG00000135801.8_TAF5L     | ENSG00000160789.18_LMNA | -0.11825 | -0.272323743 | 0.041736763 | 1.47E-01 | 3.93E-01 | 1.00E+00 |
| ENSG00000166073.7_GPR176    | ENSG00000160789.18_LMNA | 0.12819  | -0.03165232  | 0.281647033 | 1.16E-01 | 3.40E-01 | 1.00E+00 |
| ENSG00000128908.14_INO80    | ENSG00000160789.18_LMNA | 0.31213  | 0.160921083  | 0.449014425 | 9.05E-05 | 1.75E-03 | 1.00E+00 |
| ENSG00000139496.14_NUP58    | ENSG00000160789.18_LMNA | -0.05901 | -0.21618129  | 0.101139332 | 4.70E-01 | 7.31E-01 | 1.00E+00 |
| ENSG00000146006.7_LRRTM2    | ENSG00000160789.18_LMNA | -0.21504 | -0.361855727 | -0.057822   | 7.80E-03 | 5.45E-02 | 1.00E+00 |
| ENSG00000135709.11_KIAA0513 | ENSG00000160789.18_LMNA | -0.07546 | -0.23187476  | 0.084759313 | 3.56E-01 | 6.39E-01 | 1.00E+00 |
| ENSG00000108591.8_DRG2      | ENSG00000160789.18_LMNA | 0.23317  | 0.076817562  | 0.378323969 | 3.84E-03 | 3.22E-02 | 1.00E+00 |
| ENSG00000127314.16_RAP1B    | ENSG00000160789.18_LMNA | 0.02039  | -0.139264636 | 0.179007769 | 8.03E-01 | 9.21E-01 | 1.00E+00 |
| ENSG00000100034.12_PPM1F    | ENSG00000160789.18_LMNA | 0.21753  | 0.060420869  | 0.364120083 | 7.10E-03 | 5.10E-02 | 1.00E+00 |
| ENSG00000176058.10_TPRN     | ENSG00000160789.18_LMNA | 0.00791  | -0.151482342 | 0.16689965  | 9.23E-01 | 9.70E-01 | 1.00E+00 |
| ENSG00000112981.4_NME5      | ENSG00000160789.18_LMNA | -0.18376 | -0.333216043 | -0.02530323 | 2.34E-02 | 1.21E-01 | 1.00E+00 |
| ENSG00000086200.15_IPO11    | ENSG00000160789.18_LMNA | -0.24205 | -0.386359631 | -0.08616657 | 2.66E-03 | 2.43E-02 | 1.00E+00 |
| ENSG000000259431.4_THTPA    | ENSG00000160789.18_LMNA | -0.16834 | -0.318989797 | -0.00938878 | 3.82E-02 | 1.68E-01 | 1.00E+00 |
| ENSG00000164164.14_OTUD4    | ENSG00000160789.18_LMNA | 0.22545  | 0.068720264  | 0.371327261 | 5.23E-03 | 4.06E-02 | 1.00E+00 |
| ENSG00000123684.11_LPGAT1   | ENSG00000160789.18_LMNA | 0.00713  | -0.152238794 | 0.166146812 | 9.30E-01 | 9.73E-01 | 1.00E+00 |
| ENSG00000092871.15_RFFL     | ENSG00000160789.18_LMNA | 0.21031  | 0.052875307  | 0.357535812 | 9.31E-03 | 6.22E-02 | 1.00E+00 |
| ENSG00000230084.4_RP4-613B2 | ENSG00000160789.18_LMNA | -0.36565 | -0.495978293 | -0.21920911 | 3.62E-06 | 1.28E-04 | 1.86E-01 |
| ENSG00000099377.12_HSD3B7   | ENSG00000160789.18_LMNA | 0.48531  | 0.35341734   | 0.598288029 | 2.35E-10 | 4.63E-08 | 1.20E-05 |
| ENSG00000113597.16_TRAPPC1  | ENSG00000160789.18_LMNA | -0.38842 | -0.515726152 | -0.24432323 | 7.62E-07 | 3.69E-05 | 3.91E-02 |
| ENSG00000171311.11_EXOSC1   | ENSG00000160789.18_LMNA | -0.17078 | -0.321243132 | -0.0118991  | 3.54E-02 | 1.60E-01 | 1.00E+00 |
| ENSG00000104728.14_ARHGEF1  | ENSG00000160789.18_LMNA | 0.15837  | -0.000856497 | 0.309756926 | 5.13E-02 | 2.05E-01 | 1.00E+00 |
| ENSG00000136152.13_COG3     | ENSG00000160789.18_LMNA | -0.194   | -0.342622259 | -0.03591208 | 1.66E-02 | 9.45E-02 | 1.00E+00 |
| ENSG00000125845.6_BMP2      | ENSG00000160789.18_LMNA | -0.30352 | -0.441388455 | -0.15164223 | 1.44E-04 | 2.52E-03 | 1.00E+00 |
| ENSG00000112144.14_ICK      | ENSG00000160789.18_LMNA | -0.24684 | -0.390684664 | -0.09122047 | 2.17E-03 | 2.08E-02 | 1.00E+00 |
| ENSG00000174007.7_CEP19     | ENSG00000160789.18_LMNA | 0.09062  | -0.069581407 | 0.24627085  | 2.67E-01 | 5.51E-01 | 1.00E+00 |
| ENSG00000137841.10_PLCB2    | ENSG00000160789.18_LMNA | 0.0161   | -0.143472222 | 0.174848779 | 8.44E-01 | 9.39E-01 | 1.00E+00 |
| ENSG00000082068.7_WDR70     | ENSG00000160789.18_LMNA | -0.22989 | -0.375351136 | -0.07337223 | 4.38E-03 | 3.55E-02 | 1.00E+00 |
| ENSG00000117155.15_SSX2IP   | ENSG00000160789.18_LMNA | 0.31832  | 0.167618492  | 0.454492839 | 6.42E-05 | 1.31E-03 | 1.00E+00 |
| ENSG00000181826.8_RELL1     | ENSG00000160789.18_LMNA | 0.07281  | -0.08740662  | 0.229349529 | 3.73E-01 | 6.53E-01 | 1.00E+00 |
| ENSG00000198146.4_ZNF770    | ENSG00000160789.18_LMNA | 0.02531  | -0.134433977 | 0.183768652 | 7.57E-01 | 8.99E-01 | 1.00E+00 |
| ENSG00000134716.8_CYP2J2    | ENSG00000160789.18_LMNA | -0.07174 | -0.228333658 | 0.088470341 | 3.80E-01 | 6.59E-01 | 1.00E+00 |
| ENSG00000119906.10_SLF2     | ENSG00000160789.18_LMNA | -0.01305 | -0.171889117 | 0.146459474 | 8.73E-01 | 9.51E-01 | 1.00E+00 |
| ENSG00000163762.5_TM4SF18   | ENSG00000160789.18_LMNA | -0.15436 | -0.306037572 | 0.004965342 | 5.76E-02 | 2.20E-01 | 1.00E+00 |

|                              |                         |          |              |             |          |          |          |
|------------------------------|-------------------------|----------|--------------|-------------|----------|----------|----------|
| ENSG00000082515.15_MRPL22    | ENSG00000160789.18_LMNA | -0.14048 | -0.293121734 | 0.019152642 | 8.43E-02 | 2.81E-01 | 1.00E+00 |
| ENSG00000144036.13_EXOC6B    | ENSG00000160789.18_LMNA | -0.11469 | -0.268982185 | 0.045335614 | 1.59E-01 | 4.13E-01 | 1.00E+00 |
| ENSG00000175785.11_PRIMA1    | ENSG00000160789.18_LMNA | -0.15016 | -0.302133495 | 0.009266988 | 6.48E-02 | 2.37E-01 | 1.00E+00 |
| ENSG00000134873.8_CLDN10     | ENSG00000160789.18_LMNA | 0.02466  | -0.135067908 | 0.183144728 | 7.63E-01 | 9.01E-01 | 1.00E+00 |
| ENSG00000143971.7_ETAA1      | ENSG00000160789.18_LMNA | 0.07689  | -0.083330674 | 0.233235749 | 3.46E-01 | 6.31E-01 | 1.00E+00 |
| ENSG00000117479.11_SLC19A2   | ENSG00000160789.18_LMNA | -0.18481 | -0.33418275  | -0.02639035 | 2.26E-02 | 1.18E-01 | 1.00E+00 |
| ENSG00000137266.13_SLC22A2   | ENSG00000160789.18_LMNA | 0.25133  | 0.095970394  | 0.394737547 | 1.79E-03 | 1.80E-02 | 1.00E+00 |
| ENSG00000134109.9_EDEM1      | ENSG00000160789.18_LMNA | 0.29888  | 0.146660357  | 0.43727668  | 1.84E-04 | 3.05E-03 | 1.00E+00 |
| ENSG00000058729.9_RIOK2      | ENSG00000160789.18_LMNA | 0.0064   | -0.152953947 | 0.165434736 | 9.38E-01 | 9.75E-01 | 1.00E+00 |
| ENSG00000177150.11_FAM210A   | ENSG00000160789.18_LMNA | 0.03784  | -0.122098131 | 0.195858949 | 6.43E-01 | 8.41E-01 | 1.00E+00 |
| ENSG00000163138.17_PACRGL    | ENSG00000160789.18_LMNA | -0.26736 | -0.409148801 | -0.11297113 | 8.69E-04 | 1.04E-02 | 1.00E+00 |
| ENSG00000151748.13_SAV1      | ENSG00000160789.18_LMNA | 0.17714  | 0.018460147  | 0.327116008 | 2.90E-02 | 1.40E-01 | 1.00E+00 |
| ENSG00000105656.11_ELL       | ENSG00000160789.18_LMNA | 0.30886  | 0.157400084  | 0.446125569 | 1.08E-04 | 2.01E-03 | 1.00E+00 |
| ENSG00000116497.16_S100PBP   | ENSG00000160789.18_LMNA | 0.05505  | -0.105070507 | 0.212390328 | 5.01E-01 | 7.53E-01 | 1.00E+00 |
| ENSG00000149262.15_INTS4     | ENSG00000160789.18_LMNA | 0.10167  | -0.058473922 | 0.256718603 | 2.13E-01 | 4.86E-01 | 1.00E+00 |
| ENSG00000151917.16_BEND6     | ENSG00000160789.18_LMNA | -0.21043 | -0.357646315 | -0.05300166 | 9.27E-03 | 6.20E-02 | 1.00E+00 |
| ENSG00000048342.14_CC2D2A    | ENSG00000160789.18_LMNA | -0.22635 | -0.372143766 | -0.06966316 | 5.05E-03 | 3.95E-02 | 1.00E+00 |
| ENSG00000146063.17_TRIM41    | ENSG00000160789.18_LMNA | 0.12836  | -0.031479072 | 0.28180669  | 1.15E-01 | 3.39E-01 | 1.00E+00 |
| ENSG00000068650.17_ATP11A    | ENSG00000160789.18_LMNA | 0.16481  | 0.005765087  | 0.315730891 | 4.24E-02 | 1.80E-01 | 1.00E+00 |
| ENSG00000114626.16_ABTB1     | ENSG00000160789.18_LMNA | -0.02298 | -0.181517636 | 0.136719871 | 7.79E-01 | 9.09E-01 | 1.00E+00 |
| ENSG00000118960.11_HS1BP3    | ENSG00000160789.18_LMNA | 0.09364  | -0.066550705 | 0.249128844 | 2.51E-01 | 5.32E-01 | 1.00E+00 |
| ENSG00000132600.15_PRMT7     | ENSG00000160789.18_LMNA | -0.06299 | -0.219984875 | 0.097185083 | 4.41E-01 | 7.08E-01 | 1.00E+00 |
| ENSG00000183597.14_TANGO2    | ENSG00000160789.18_LMNA | 0.00375  | -0.155543876 | 0.162853165 | 9.63E-01 | 9.85E-01 | 1.00E+00 |
| ENSG00000152520.12_PAN3      | ENSG00000160789.18_LMNA | -0.13933 | -0.292048348 | 0.020326061 | 8.69E-02 | 2.86E-01 | 1.00E+00 |
| ENSG000000273619.1_RP5-908M1 | ENSG00000160789.18_LMNA | 0.01622  | -0.143346306 | 0.174973406 | 8.43E-01 | 9.39E-01 | 1.00E+00 |
| ENSG00000057935.12_MTA3      | ENSG00000160789.18_LMNA | -0.19722 | -0.345574831 | -0.03925647 | 1.49E-02 | 8.73E-02 | 1.00E+00 |
| ENSG00000133069.13_TMCC2     | ENSG00000160789.18_LMNA | -0.30126 | -0.439391125 | -0.1492204  | 1.62E-04 | 2.77E-03 | 1.00E+00 |
| ENSG000000273576.1_RP11-390P | ENSG00000160789.18_LMNA | -0.09331 | -0.248812465 | 0.066886489 | 2.53E-01 | 5.34E-01 | 1.00E+00 |
| ENSG00000107872.11_FBXL15    | ENSG00000160789.18_LMNA | -0.07701 | -0.233349882 | 0.083210808 | 3.46E-01 | 6.30E-01 | 1.00E+00 |
| ENSG00000148498.14_PARD3     | ENSG00000160789.18_LMNA | 0.08919  | -0.071018735 | 0.244913507 | 2.75E-01 | 5.59E-01 | 1.00E+00 |
| ENSG00000065308.4_TRAM2      | ENSG00000160789.18_LMNA | 0.53581  | 0.411725269  | 0.640381328 | 1.14E-12 | 6.00E-10 | 5.82E-08 |
| ENSG00000179152.17_TCAIM     | ENSG00000160789.18_LMNA | -0.42734 | -0.549180963 | -0.28771643 | 4.00E-08 | 3.43E-06 | 2.05E-03 |
| ENSG000000204136.9_GGTA1P    | ENSG00000160789.18_LMNA | -0.30253 | -0.440513071 | -0.15058037 | 1.52E-04 | 2.62E-03 | 1.00E+00 |

|                             |                         |          |              |             |          |          |          |
|-----------------------------|-------------------------|----------|--------------|-------------|----------|----------|----------|
| ENSG00000197563.8_PIGN      | ENSG00000160789.18_LMNA | -0.18729 | -0.336462125 | -0.02895652 | 2.09E-02 | 1.11E-01 | 1.00E+00 |
| ENSG00000270504.1_RP11-420L | ENSG00000160789.18_LMNA | 0.42872  | 0.289264174  | 0.550358942 | 3.58E-08 | 3.13E-06 | 1.84E-03 |
| ENSG00000170832.11_USP32    | ENSG00000160789.18_LMNA | 0.1079   | -0.052192941 | 0.262594098 | 1.86E-01 | 4.52E-01 | 1.00E+00 |
| ENSG00000076685.17_NT5C2    | ENSG00000160789.18_LMNA | -0.30662 | -0.444136627 | -0.15498018 | 1.22E-04 | 2.22E-03 | 1.00E+00 |
| ENSG00000087338.4_GMCL1     | ENSG00000160789.18_LMNA | -0.17545 | -0.325556197 | -0.01671496 | 3.06E-02 | 1.45E-01 | 1.00E+00 |
| ENSG00000258227.5_CLEC5A    | ENSG00000160789.18_LMNA | 0.3384   | 0.189404694  | 0.472164865 | 2.01E-05 | 5.18E-04 | 1.00E+00 |
| ENSG00000069424.13_KCNAB2   | ENSG00000160789.18_LMNA | 0.01601  | -0.143553345 | 0.174768481 | 8.45E-01 | 9.39E-01 | 1.00E+00 |
| ENSG00000235162.7_C12orf75  | ENSG00000160789.18_LMNA | -0.0758  | -0.232196037 | 0.084422184 | 3.53E-01 | 6.37E-01 | 1.00E+00 |
| ENSG00000204054.10_LINC0096 | ENSG00000160789.18_LMNA | 0.13585  | -0.023869652 | 0.288802063 | 9.52E-02 | 3.02E-01 | 1.00E+00 |
| ENSG00000113645.12_WWC1     | ENSG00000160789.18_LMNA | -0.09553 | -0.250910696 | 0.064658223 | 2.42E-01 | 5.21E-01 | 1.00E+00 |
| ENSG00000168792.4_ABHD15    | ENSG00000160789.18_LMNA | 0.36039  | 0.213432126  | 0.49139484  | 5.10E-06 | 1.69E-04 | 2.62E-01 |
| ENSG00000250222.1_CTC-338M1 | ENSG00000160789.18_LMNA | -0.10418 | -0.259087563 | 0.055944472 | 2.01E-01 | 4.72E-01 | 1.00E+00 |
| ENSG00000183161.4_FANCF     | ENSG00000160789.18_LMNA | 0.08093  | -0.079287796 | 0.237080476 | 3.22E-01 | 6.08E-01 | 1.00E+00 |
| ENSG00000169967.15_MAP3K2   | ENSG00000160789.18_LMNA | 0.04347  | -0.116538427 | 0.201276567 | 5.95E-01 | 8.13E-01 | 1.00E+00 |
| ENSG00000165219.20_GAPVD1   | ENSG00000160789.18_LMNA | 0.0247   | -0.135030079 | 0.183181967 | 7.63E-01 | 9.01E-01 | 1.00E+00 |
| ENSG00000101596.13_SMCHD1   | ENSG00000160789.18_LMNA | 0.11473  | -0.045295428 | 0.26901954  | 1.59E-01 | 4.13E-01 | 1.00E+00 |
| ENSG00000157379.12_DHRS1    | ENSG00000160789.18_LMNA | -0.00383 | -0.162927449 | 0.155469412 | 9.63E-01 | 9.85E-01 | 1.00E+00 |
| ENSG00000139372.13_TDG      | ENSG00000160789.18_LMNA | -0.25725 | -0.400061793 | -0.10223109 | 1.38E-03 | 1.47E-02 | 1.00E+00 |
| ENSG00000256771.2_ZNF253    | ENSG00000160789.18_LMNA | -0.40088 | -0.526480787 | -0.25815519 | 3.09E-07 | 1.80E-05 | 1.59E-02 |
| ENSG00000112530.10_PACRG    | ENSG00000160789.18_LMNA | -0.23381 | -0.37891097  | -0.07749871 | 3.74E-03 | 3.16E-02 | 1.00E+00 |
| ENSG00000229320.3_KRT8P12   | ENSG00000160789.18_LMNA | 0.44011  | 0.302068904  | 0.560064866 | 1.40E-08 | 1.42E-06 | 7.18E-04 |
| ENSG00000196378.10_ZNF34    | ENSG00000160789.18_LMNA | -0.21976 | -0.366148752 | -0.06275274 | 6.52E-03 | 4.79E-02 | 1.00E+00 |
| ENSG00000111647.11_UHRF1BP  | ENSG00000160789.18_LMNA | -0.16016 | -0.311420291 | -0.00098446 | 4.87E-02 | 1.98E-01 | 1.00E+00 |
| ENSG00000198839.8_ZNF277    | ENSG00000160789.18_LMNA | -0.15409 | -0.305784719 | 0.005244293 | 5.80E-02 | 2.21E-01 | 1.00E+00 |
| ENSG00000166401.12_SERPINB8 | ENSG00000160789.18_LMNA | 0.2631   | 0.108446697  | 0.405327886 | 1.06E-03 | 1.21E-02 | 1.00E+00 |
| ENSG00000118894.13_EEF2KMT  | ENSG00000160789.18_LMNA | -0.00532 | -0.164380216 | 0.154012409 | 9.48E-01 | 9.79E-01 | 1.00E+00 |
| ENSG00000198498.8_TMA16     | ENSG00000160789.18_LMNA | 0.02001  | -0.139637597 | 0.178639575 | 8.07E-01 | 9.23E-01 | 1.00E+00 |
| ENSG00000205791.3_LOH12CR2  | ENSG00000160789.18_LMNA | -0.32395 | -0.459456149 | -0.17370913 | 4.67E-05 | 1.02E-03 | 1.00E+00 |
| ENSG00000104231.9_ZFAND1    | ENSG00000160789.18_LMNA | -0.22029 | -0.366629678 | -0.06330602 | 6.39E-03 | 4.71E-02 | 1.00E+00 |
| ENSG00000144120.11_TMEM177  | ENSG00000160789.18_LMNA | -0.01436 | -0.173164609 | 0.145172803 | 8.61E-01 | 9.45E-01 | 1.00E+00 |
| ENSG00000169981.9_ZNF35     | ENSG00000160789.18_LMNA | -0.25701 | -0.399853771 | -0.10198603 | 1.39E-03 | 1.48E-02 | 1.00E+00 |
| ENSG00000184208.10_C22orf46 | ENSG00000160789.18_LMNA | 0.1832   | 0.024719909  | 0.332697064 | 2.39E-02 | 1.23E-01 | 1.00E+00 |
| ENSG00000221944.4_TIGD1     | ENSG00000160789.18_LMNA | -0.16903 | -0.319629024 | -0.01010051 | 3.74E-02 | 1.65E-01 | 1.00E+00 |



|                             |                         |          |              |             |          |          |          |
|-----------------------------|-------------------------|----------|--------------|-------------|----------|----------|----------|
| ENSG00000167280.15_ENGASE   | ENSG00000160789.18_LMNA | 0.08862  | -0.071586223 | 0.244377258 | 2.78E-01 | 5.63E-01 | 1.00E+00 |
| ENSG00000028310.16_BRD9     | ENSG00000160789.18_LMNA | 0.03903  | -0.120926263 | 0.197002485 | 6.33E-01 | 8.35E-01 | 1.00E+00 |
| ENSG00000198134.3_RP11-267J | ENSG00000160789.18_LMNA | 0.0891   | -0.071107095 | 0.244830024 | 2.75E-01 | 5.59E-01 | 1.00E+00 |
| ENSG00000139190.15_VAMP1    | ENSG00000160789.18_LMNA | -0.17397 | -0.324195166 | -0.01519372 | 3.21E-02 | 1.50E-01 | 1.00E+00 |
| ENSG00000000938.11_FGR      | ENSG00000160789.18_LMNA | 0.00728  | -0.152095462 | 0.166289487 | 9.29E-01 | 9.73E-01 | 1.00E+00 |
| ENSG00000264107.1_RP11-848P | ENSG00000160789.18_LMNA | -0.15495 | -0.306587821 | 0.004358132 | 5.66E-02 | 2.18E-01 | 1.00E+00 |
| ENSG00000006747.13_SCIN     | ENSG00000160789.18_LMNA | -0.08619 | -0.242069507 | 0.074026078 | 2.91E-01 | 5.77E-01 | 1.00E+00 |
| ENSG00000142556.17_ZNF614   | ENSG00000160789.18_LMNA | -0.22956 | -0.375054618 | -0.07302898 | 4.44E-03 | 3.58E-02 | 1.00E+00 |
| ENSG00000084444.12_FAM234B  | ENSG00000160789.18_LMNA | -0.05949 | -0.216634676 | 0.100668512 | 4.67E-01 | 7.28E-01 | 1.00E+00 |
| ENSG00000256060.2_TRAPPC2B  | ENSG00000160789.18_LMNA | 0.0531   | -0.107008683 | 0.210517757 | 5.16E-01 | 7.63E-01 | 1.00E+00 |
| ENSG00000161021.10_MAML1    | ENSG00000160789.18_LMNA | 0.21656  | 0.059409887  | 0.363239656 | 7.37E-03 | 5.23E-02 | 1.00E+00 |
| ENSG00000119844.13_AFTPH    | ENSG00000160789.18_LMNA | -0.12253 | -0.276343041 | 0.037397162 | 1.33E-01 | 3.69E-01 | 1.00E+00 |
| ENSG00000233426.3	EIF3FP3   | ENSG00000160789.18_LMNA | 0.02189  | -0.137788535 | 0.180464132 | 7.89E-01 | 9.14E-01 | 1.00E+00 |
| ENSG00000157823.15_AP3S2    | ENSG00000160789.18_LMNA | -0.04511 | -0.202853985 | 0.114915886 | 5.81E-01 | 8.05E-01 | 1.00E+00 |
| ENSG00000160345.11_C9orf116 | ENSG00000160789.18_LMNA | 0.16304  | 0.003936877  | 0.314083939 | 4.48E-02 | 1.87E-01 | 1.00E+00 |
| ENSG00000135048.12_TMEM2    | ENSG00000160789.18_LMNA | 0.37028  | 0.224299175  | 0.500004006 | 2.66E-06 | 9.93E-05 | 1.37E-01 |
| ENSG00000101452.13_DHX35    | ENSG00000160789.18_LMNA | 0.01956  | -0.140080169 | 0.178202543 | 8.11E-01 | 9.26E-01 | 1.00E+00 |
| ENSG00000225439.2_BOLA3-AS  | ENSG00000160789.18_LMNA | -0.13108 | -0.284344187 | 0.028723027 | 1.07E-01 | 3.26E-01 | 1.00E+00 |
| ENSG00000089902.9_RCOR1     | ENSG00000160789.18_LMNA | 0.27167  | 0.117557127  | 0.413011136 | 7.10E-04 | 8.88E-03 | 1.00E+00 |
| ENSG00000109686.15_SH3D19   | ENSG00000160789.18_LMNA | -0.08811 | -0.243890056 | 0.072101629 | 2.80E-01 | 5.66E-01 | 1.00E+00 |
| ENSG00000145337.4_PYURF     | ENSG00000160789.18_LMNA | -0.1279  | -0.281374102 | 0.031948443 | 1.16E-01 | 3.41E-01 | 1.00E+00 |
| ENSG00000214401.4_KANSL1-AS | ENSG00000160789.18_LMNA | -0.06411 | -0.221052296 | 0.096073577 | 4.33E-01 | 7.02E-01 | 1.00E+00 |
| ENSG00000101017.12_CD40     | ENSG00000160789.18_LMNA | 0.17121  | 0.012343819  | 0.321641958 | 3.49E-02 | 1.58E-01 | 1.00E+00 |
| ENSG00000115255.9_REEP6     | ENSG00000160789.18_LMNA | 0.09333  | -0.066867389 | 0.248830464 | 2.53E-01 | 5.34E-01 | 1.00E+00 |
| ENSG00000172943.17_PHF8     | ENSG00000160789.18_LMNA | 0.09118  | -0.06902295  | 0.246797896 | 2.64E-01 | 5.47E-01 | 1.00E+00 |
| ENSG00000138399.16_FASTKD1  | ENSG00000160789.18_LMNA | -0.23867 | -0.383307586 | -0.08260946 | 3.06E-03 | 2.72E-02 | 1.00E+00 |
| ENSG00000144810.14_COL8A1   | ENSG00000160789.18_LMNA | 0.42707  | 0.287415583  | 0.548951865 | 4.09E-08 | 3.48E-06 | 2.10E-03 |
| ENSG00000007062.10_PROM1    | ENSG00000160789.18_LMNA | -0.18413 | -0.333556382 | -0.02568588 | 2.32E-02 | 1.20E-01 | 1.00E+00 |
| ENSG00000174669.10_SLC29A2  | ENSG00000160789.18_LMNA | -0.05193 | -0.209404092 | 0.108160222 | 5.25E-01 | 7.70E-01 | 1.00E+00 |
| ENSG00000100902.9_PSMA6     | ENSG00000160789.18_LMNA | -0.10868 | -0.263324237 | 0.051410669 | 1.83E-01 | 4.47E-01 | 1.00E+00 |
| ENSG00000159082.16_SYNJ1    | ENSG00000160789.18_LMNA | -0.0547  | -0.212052056 | 0.105420809 | 5.03E-01 | 7.55E-01 | 1.00E+00 |
| ENSG00000260563.3_RP13-516M | ENSG00000160789.18_LMNA | 0.10602  | -0.054092794 | 0.260819354 | 1.94E-01 | 4.62E-01 | 1.00E+00 |
| ENSG00000185022.10_MAFF     | ENSG00000160789.18_LMNA | 0.39792  | 0.254865733  | 0.523930928 | 3.84E-07 | 2.13E-05 | 1.97E-02 |

|                             |                         |          |              |             |          |          |          |
|-----------------------------|-------------------------|----------|--------------|-------------|----------|----------|----------|
| ENSG00000105711.9_SCN1B     | ENSG00000160789.18_LMNA | -0.00508 | -0.164148787 | 0.154244605 | 9.50E-01 | 9.80E-01 | 1.00E+00 |
| ENSG00000111880.14_RNGTT    | ENSG00000160789.18_LMNA | -0.19621 | -0.344646021 | -0.03820367 | 1.54E-02 | 8.95E-02 | 1.00E+00 |
| ENSG00000185585.18_OLFML2A  | ENSG00000160789.18_LMNA | 0.39001  | 0.246087321  | 0.517102545 | 6.81E-07 | 3.36E-05 | 3.49E-02 |
| ENSG00000176142.11_TMEN39A  | ENSG00000160789.18_LMNA | -0.01138 | -0.170276305 | 0.14808488  | 8.89E-01 | 9.57E-01 | 1.00E+00 |
| ENSG00000142102.14_PGGHG    | ENSG00000160789.18_LMNA | 0.24984  | 0.094391986  | 0.393392056 | 1.91E-03 | 1.89E-02 | 1.00E+00 |
| ENSG00000251322.6_SHANK3    | ENSG00000160789.18_LMNA | -0.0699  | -0.226583251 | 0.090301502 | 3.92E-01 | 6.70E-01 | 1.00E+00 |
| ENSG00000196975.13_ANXA4    | ENSG00000160789.18_LMNA | 0.0658   | -0.094387728 | 0.222669833 | 4.21E-01 | 6.92E-01 | 1.00E+00 |
| ENSG00000239922.1_RP11-71N1 | ENSG00000160789.18_LMNA | 0.1492   | -0.010247424 | 0.301242209 | 6.66E-02 | 2.41E-01 | 1.00E+00 |
| ENSG00000081237.17_PTPRC    | ENSG00000160789.18_LMNA | -0.03245 | -0.190669397 | 0.127405142 | 6.91E-01 | 8.67E-01 | 1.00E+00 |
| ENSG00000134262.11_AP4B1    | ENSG00000160789.18_LMNA | -0.18552 | -0.334831294 | -0.02712008 | 2.21E-02 | 1.16E-01 | 1.00E+00 |
| ENSG00000157483.7_MYO1E     | ENSG00000160789.18_LMNA | 0.40413  | 0.261766968  | 0.529274955 | 2.43E-07 | 1.49E-05 | 1.25E-02 |
| ENSG00000107371.11_EXOSC3   | ENSG00000160789.18_LMNA | 0.10344  | -0.056692236 | 0.258387638 | 2.05E-01 | 4.76E-01 | 1.00E+00 |
| ENSG00000008277.13_ADAM22   | ENSG00000160789.18_LMNA | -0.37613 | -0.505082396 | -0.23074177 | 1.79E-06 | 7.36E-05 | 9.20E-02 |
| ENSG00000274211.3_SOCS7     | ENSG00000160789.18_LMNA | -0.06225 | -0.219276557 | 0.097922217 | 4.46E-01 | 7.13E-01 | 1.00E+00 |
| ENSG00000165671.17_NSD1     | ENSG00000160789.18_LMNA | 0.14427  | -0.015277579 | 0.296660865 | 7.62E-02 | 2.64E-01 | 1.00E+00 |
| ENSG00000117152.12_RGS4     | ENSG00000160789.18_LMNA | 0.06474  | -0.095449015 | 0.221651754 | 4.28E-01 | 6.99E-01 | 1.00E+00 |
| ENSG00000100599.14_RIN3     | ENSG00000160789.18_LMNA | 0.10115  | -0.059004866 | 0.256220866 | 2.15E-01 | 4.89E-01 | 1.00E+00 |
| ENSG00000260081.1_RP11-66N1 | ENSG00000160789.18_LMNA | -0.23225 | -0.377492467 | -0.07585318 | 3.99E-03 | 3.31E-02 | 1.00E+00 |
| ENSG00000175455.13_CCDC14   | ENSG00000160789.18_LMNA | -0.08332 | -0.239344755 | 0.07690194  | 3.07E-01 | 5.94E-01 | 1.00E+00 |
| ENSG00000066855.14_MTFR1    | ENSG00000160789.18_LMNA | -0.14698 | -0.299179886 | 0.012513735 | 7.08E-02 | 2.51E-01 | 1.00E+00 |
| ENSG00000230037.1_UBBP1     | ENSG00000160789.18_LMNA | 0.00828  | -0.151121442 | 0.167258694 | 9.19E-01 | 9.69E-01 | 1.00E+00 |
| ENSG00000139508.13_SLC46A3  | ENSG00000160789.18_LMNA | -0.03355 | -0.191728526 | 0.126323518 | 6.82E-01 | 8.61E-01 | 1.00E+00 |
| ENSG00000157693.13_TMEN268  | ENSG00000160789.18_LMNA | -0.11374 | -0.268083224 | 0.046302403 | 1.63E-01 | 4.18E-01 | 1.00E+00 |
| ENSG00000131115.14_ZNF227   | ENSG00000160789.18_LMNA | 0.01667  | -0.142912934 | 0.175402263 | 8.39E-01 | 9.37E-01 | 1.00E+00 |
| ENSG00000151276.22_MAGI1    | ENSG00000160789.18_LMNA | -0.17479 | -0.324950905 | -0.01603824 | 3.13E-02 | 1.47E-01 | 1.00E+00 |
| ENSG00000166333.12_ILK      | ENSG00000160789.18_LMNA | 0.18622  | 0.027842425  | 0.335472984 | 2.16E-02 | 1.14E-01 | 1.00E+00 |
| ENSG00000140968.9_IRF8      | ENSG00000160789.18_LMNA | -0.13438 | -0.287429731 | 0.025365308 | 9.88E-02 | 3.09E-01 | 1.00E+00 |
| ENSG00000081377.15_CDC14B   | ENSG00000160789.18_LMNA | -0.06826 | -0.225012954 | 0.091942423 | 4.03E-01 | 6.79E-01 | 1.00E+00 |
| ENSG00000186166.7_CCDC84    | ENSG00000160789.18_LMNA | -0.07687 | -0.233218475 | 0.083348815 | 3.47E-01 | 6.31E-01 | 1.00E+00 |
| ENSG00000174136.10_RGMB     | ENSG00000160789.18_LMNA | -0.08982 | -0.24551331  | 0.070383749 | 2.71E-01 | 5.55E-01 | 1.00E+00 |
| ENSG00000239246.3_RP11-464D | ENSG00000160789.18_LMNA | -0.04536 | -0.203098845 | 0.114663869 | 5.79E-01 | 8.04E-01 | 1.00E+00 |
| ENSG00000087301.7_TXNDC16   | ENSG00000160789.18_LMNA | -0.24535 | -0.389345337 | -0.08965378 | 2.31E-03 | 2.19E-02 | 1.00E+00 |
| ENSG00000263563.4_UBBP4     | ENSG00000160789.18_LMNA | -0.1466  | -0.298824157 | 0.012904327 | 7.15E-02 | 2.53E-01 | 1.00E+00 |

|                             |                         |          |              |             |          |          |          |
|-----------------------------|-------------------------|----------|--------------|-------------|----------|----------|----------|
| ENSG00000077684.14_JADE1    | ENSG00000160789.18_LMNA | 0.05085  | -0.109235582 | 0.208363357 | 5.34E-01 | 7.76E-01 | 1.00E+00 |
| ENSG00000185681.11_MORN5    | ENSG00000160789.18_LMNA | -0.17064 | -0.32111491  | -0.01175615 | 3.56E-02 | 1.60E-01 | 1.00E+00 |
| ENSG00000270419.1_CAHM      | ENSG00000160789.18_LMNA | -0.28582 | -0.425653868 | -0.13265731 | 3.58E-04 | 5.16E-03 | 1.00E+00 |
| ENSG00000171450.5_CDK5R2    | ENSG00000160789.18_LMNA | -0.14884 | -0.300907834 | 0.01061509  | 6.72E-02 | 2.43E-01 | 1.00E+00 |
| ENSG00000234465.9_PINLYP    | ENSG00000160789.18_LMNA | 0.18893  | 0.030647028  | 0.337961733 | 1.98E-02 | 1.07E-01 | 1.00E+00 |
| ENSG00000121578.11_B4GALT4  | ENSG00000160789.18_LMNA | 0.1305   | -0.029307951 | 0.283806013 | 1.09E-01 | 3.29E-01 | 1.00E+00 |
| ENSG00000196104.9_SPOCK3    | ENSG00000160789.18_LMNA | -0.38239 | -0.510511264 | -0.23765569 | 1.16E-06 | 5.19E-05 | 5.98E-02 |
| ENSG00000116852.13_KIF21B   | ENSG00000160789.18_LMNA | -0.3883  | -0.515626241 | -0.24419525 | 7.69E-07 | 3.71E-05 | 3.94E-02 |
| ENSG00000114770.15_ABCC5    | ENSG00000160789.18_LMNA | -0.28261 | -0.422789521 | -0.12922424 | 4.19E-04 | 5.88E-03 | 1.00E+00 |
| ENSG00000110852.4_CLEC2B    | ENSG00000160789.18_LMNA | 0.23275  | 0.076383689  | 0.37794994  | 3.91E-03 | 3.26E-02 | 1.00E+00 |
| ENSG00000104899.5_AMH       | ENSG00000160789.18_LMNA | -0.09632 | -0.251658772 | 0.063863024 | 2.38E-01 | 5.16E-01 | 1.00E+00 |
| ENSG00000198246.7_SLC29A3   | ENSG00000160789.18_LMNA | -0.23824 | -0.382913894 | -0.08215118 | 3.12E-03 | 2.75E-02 | 1.00E+00 |
| ENSG00000185338.4_SOCS1     | ENSG00000160789.18_LMNA | 0.306    | 0.154321828  | 0.44359503  | 1.26E-04 | 2.28E-03 | 1.00E+00 |
| ENSG00000124151.17_NCOA3    | ENSG00000160789.18_LMNA | 0.07517  | -0.085044851 | 0.231602595 | 3.57E-01 | 6.40E-01 | 1.00E+00 |
| ENSG00000141499.15_WRAP53   | ENSG00000160789.18_LMNA | 0.00415  | -0.155150358 | 0.163245694 | 9.60E-01 | 9.84E-01 | 1.00E+00 |
| ENSG00000134283.16_PPHLN1   | ENSG00000160789.18_LMNA | -0.32134 | -0.457151201 | -0.17087793 | 5.42E-05 | 1.15E-03 | 1.00E+00 |
| ENSG00000123358.18_NR4A1    | ENSG00000160789.18_LMNA | -0.0754  | -0.231813283 | 0.084823815 | 3.56E-01 | 6.39E-01 | 1.00E+00 |
| ENSG00000131845.13_ZNF304   | ENSG00000160789.18_LMNA | 0.02999  | -0.129825739 | 0.188296455 | 7.14E-01 | 8.78E-01 | 1.00E+00 |
| ENSG00000234912.8_SNHG20    | ENSG00000160789.18_LMNA | -0.17842 | -0.328291252 | -0.0197763  | 2.79E-02 | 1.36E-01 | 1.00E+00 |
| ENSG00000134152.9_KATNBL1   | ENSG00000160789.18_LMNA | -0.2179  | -0.364461154 | -0.06081268 | 7.00E-03 | 5.04E-02 | 1.00E+00 |
| ENSG00000162396.5_PARS2     | ENSG00000160789.18_LMNA | 0.06661  | -0.093587133 | 0.223437376 | 4.15E-01 | 6.88E-01 | 1.00E+00 |
| ENSG00000146872.16_TLK2     | ENSG00000160789.18_LMNA | 0.00642  | -0.152941652 | 0.16544698  | 9.37E-01 | 9.75E-01 | 1.00E+00 |
| ENSG00000204301.6_NOTCH4    | ENSG00000160789.18_LMNA | 0.06269  | -0.097483702 | 0.21969797  | 4.43E-01 | 7.10E-01 | 1.00E+00 |
| ENSG00000173540.11_GMPPB    | ENSG00000160789.18_LMNA | 0.24215  | 0.086280028  | 0.386456871 | 2.65E-03 | 2.42E-02 | 1.00E+00 |
| ENSG00000160404.16_TOR2A    | ENSG00000160789.18_LMNA | -0.03213 | -0.190352495 | 0.127728627 | 6.94E-01 | 8.69E-01 | 1.00E+00 |
| ENSG00000115163.13_CENPA    | ENSG00000160789.18_LMNA | 0.061    | -0.099163507 | 0.218083037 | 4.55E-01 | 7.20E-01 | 1.00E+00 |
| ENSG00000153179.10_RASSF3   | ENSG00000160789.18_LMNA | 0.12822  | -0.031621818 | 0.281675144 | 1.15E-01 | 3.40E-01 | 1.00E+00 |
| ENSG00000119782.12_FKBP1B   | ENSG00000160789.18_LMNA | -0.10749 | -0.262203507 | 0.052611261 | 1.87E-01 | 4.54E-01 | 1.00E+00 |
| ENSG00000157796.16_WDR19    | ENSG00000160789.18_LMNA | 0.08307  | -0.077152193 | 0.239107415 | 3.09E-01 | 5.95E-01 | 1.00E+00 |
| ENSG00000079950.12_STX7     | ENSG00000160789.18_LMNA | -0.35349 | -0.485379237 | -0.20587944 | 7.92E-06 | 2.43E-04 | 4.06E-01 |
| ENSG00000213757.3_CTC-451P1 | ENSG00000160789.18_LMNA | -0.16652 | -0.317309968 | -0.0075199  | 4.03E-02 | 1.74E-01 | 1.00E+00 |
| ENSG00000266916.4_ZNF793-AS | ENSG00000160789.18_LMNA | -0.41209 | -0.536117331 | -0.27064328 | 1.33E-07 | 9.15E-06 | 6.81E-03 |
| ENSG00000184545.9_DUSP8     | ENSG00000160789.18_LMNA | -0.14527 | -0.297585888 | 0.014263207 | 7.42E-02 | 2.59E-01 | 1.00E+00 |

|                             |                         |          |              |             |          |          |          |
|-----------------------------|-------------------------|----------|--------------|-------------|----------|----------|----------|
| ENSG00000109436.7_TBC1D9    | ENSG00000160789.18_LMNA | -0.10886 | -0.26349376  | 0.051228986 | 1.82E-01 | 4.46E-01 | 1.00E+00 |
| ENSG00000196757.6_ZNF700    | ENSG00000160789.18_LMNA | 0.00574  | -0.153601834 | 0.164789348 | 9.44E-01 | 9.78E-01 | 1.00E+00 |
| ENSG00000105976.13_MET      | ENSG00000160789.18_LMNA | 0.26382  | 0.109210699  | 0.40597382  | 1.02E-03 | 1.18E-02 | 1.00E+00 |
| ENSG00000225470.5_JPX       | ENSG00000160789.18_LMNA | 0.01022  | -0.149219245 | 0.169149717 | 9.01E-01 | 9.61E-01 | 1.00E+00 |
| ENSG00000217130.1_RP3-375P9 | ENSG00000160789.18_LMNA | -0.08338 | -0.239405521 | 0.076837861 | 3.07E-01 | 5.94E-01 | 1.00E+00 |
| ENSG00000171503.10_ETFDH    | ENSG00000160789.18_LMNA | -0.04632 | -0.204018424 | 0.113717049 | 5.71E-01 | 7.99E-01 | 1.00E+00 |
| ENSG00000267080.4_ASB16-AS1 | ENSG00000160789.18_LMNA | -0.0523  | -0.209757504 | 0.107794884 | 5.22E-01 | 7.68E-01 | 1.00E+00 |
| ENSG00000139154.13_AEBP2    | ENSG00000160789.18_LMNA | 0.21498  | 0.057759582  | 0.361801299 | 7.82E-03 | 5.46E-02 | 1.00E+00 |
| ENSG00000134897.12_BIVM     | ENSG00000160789.18_LMNA | -0.26059 | -0.403064696 | -0.10577259 | 1.19E-03 | 1.32E-02 | 1.00E+00 |
| ENSG00000156011.15_PSD3     | ENSG00000160789.18_LMNA | 8.88E-05 | -0.159114155 | 0.159287246 | 9.99E-01 | 1.00E+00 | 1.00E+00 |
| ENSG00000153214.8_TMEN87B   | ENSG00000160789.18_LMNA | 0.17877  | 0.020139715  | 0.328615588 | 2.76E-02 | 1.35E-01 | 1.00E+00 |
| ENSG00000150961.13_SEC24D   | ENSG00000160789.18_LMNA | 0.34273  | 0.194116221  | 0.475956994 | 1.55E-05 | 4.19E-04 | 7.93E-01 |
| ENSG00000260257.2_RP5-1085F | ENSG00000160789.18_LMNA | 0.00211  | -0.157139322 | 0.161260695 | 9.79E-01 | 9.92E-01 | 1.00E+00 |
| ENSG00000130164.10_LDLR     | ENSG00000160789.18_LMNA | 0.51461  | 0.387124157  | 0.62278739  | 1.18E-11 | 3.95E-09 | 6.08E-07 |
| ENSG00000172795.14_DCP2     | ENSG00000160789.18_LMNA | -0.14438 | -0.296761102 | 0.015167692 | 7.60E-02 | 2.64E-01 | 1.00E+00 |
| ENSG00000163214.19_DHX57    | ENSG00000160789.18_LMNA | -0.07376 | -0.230257145 | 0.086455642 | 3.66E-01 | 6.47E-01 | 1.00E+00 |
| ENSG00000263470.1_          | ENSG00000160789.18_LMNA | -0.15277 | -0.304567738 | 0.006586208 | 6.02E-02 | 2.26E-01 | 1.00E+00 |
| ENSG00000198483.11_ANKRD35  | ENSG00000160789.18_LMNA | 0.10733  | -0.05277323  | 0.262052248 | 1.88E-01 | 4.55E-01 | 1.00E+00 |
| ENSG00000135776.4_ABCB10    | ENSG00000160789.18_LMNA | 0.14538  | -0.014150296 | 0.297688818 | 7.39E-02 | 2.59E-01 | 1.00E+00 |
| ENSG00000234327.6_AC012146. | ENSG00000160789.18_LMNA | -0.1585  | -0.30988426  | 0.000715642 | 5.11E-02 | 2.04E-01 | 1.00E+00 |
| ENSG00000152404.14_CWF19L2  | ENSG00000160789.18_LMNA | -0.08744 | -0.243255612 | 0.072772548 | 2.84E-01 | 5.70E-01 | 1.00E+00 |
| ENSG00000154957.12_ZNF18    | ENSG00000160789.18_LMNA | 0.1832   | 0.024715178  | 0.332692854 | 2.39E-02 | 1.23E-01 | 1.00E+00 |
| ENSG00000100764.12_PSMC1    | ENSG00000160789.18_LMNA | 0.06097  | -0.099192931 | 0.218054734 | 4.56E-01 | 7.20E-01 | 1.00E+00 |
| ENSG00000101901.9_ALG13     | ENSG00000160789.18_LMNA | -0.33438 | -0.46863514  | -0.18503086 | 2.55E-05 | 6.27E-04 | 1.00E+00 |
| ENSG00000250786.1_SNHG18    | ENSG00000160789.18_LMNA | 0.09211  | -0.068093304 | 0.247674839 | 2.59E-01 | 5.42E-01 | 1.00E+00 |
| ENSG00000261474.1_RP11-452L | ENSG00000160789.18_LMNA | 0.05345  | -0.106660692 | 0.210854142 | 5.13E-01 | 7.61E-01 | 1.00E+00 |
| ENSG00000197299.9_BLM       | ENSG00000160789.18_LMNA | 0.23513  | 0.078884421  | 0.380104397 | 3.55E-03 | 3.03E-02 | 1.00E+00 |
| ENSG00000151092.15_NGLY1    | ENSG00000160789.18_LMNA | -0.1204  | -0.274346327 | 0.039554476 | 1.40E-01 | 3.81E-01 | 1.00E+00 |
| ENSG00000243199.1_RP11-408P | ENSG00000160789.18_LMNA | -0.09624 | -0.251581447 | 0.063945238 | 2.38E-01 | 5.17E-01 | 1.00E+00 |
| ENSG00000219200.9_RNASEK    | ENSG00000160789.18_LMNA | 0.02179  | -0.13788575  | 0.18036826  | 7.90E-01 | 9.15E-01 | 1.00E+00 |
| ENSG00000169679.13_BUB1     | ENSG00000160789.18_LMNA | 0.07858  | -0.081642478 | 0.234842407 | 3.36E-01 | 6.22E-01 | 1.00E+00 |
| ENSG00000188811.11_NHLRC3   | ENSG00000160789.18_LMNA | -0.07549 | -0.231901403 | 0.084731358 | 3.55E-01 | 6.39E-01 | 1.00E+00 |
| ENSG00000082196.19_C1QTNF3  | ENSG00000160789.18_LMNA | -0.2544  | -0.397500623 | -0.0992165  | 1.56E-03 | 1.62E-02 | 1.00E+00 |

|                             |                         |          |              |             |          |          |          |
|-----------------------------|-------------------------|----------|--------------|-------------|----------|----------|----------|
| ENSG00000116874.10_WARS2    | ENSG00000160789.18_LMNA | -0.05981 | -0.216941447 | 0.100349865 | 4.64E-01 | 7.27E-01 | 1.00E+00 |
| ENSG00000085274.14_MYNN     | ENSG00000160789.18_LMNA | -0.21183 | -0.358923876 | -0.05446314 | 8.80E-03 | 5.97E-02 | 1.00E+00 |
| ENSG00000033178.11_UBA6     | ENSG00000160789.18_LMNA | -0.02514 | -0.183601847 | 0.134603482 | 7.59E-01 | 8.99E-01 | 1.00E+00 |
| ENSG00000204334.7_ERICH2    | ENSG00000160789.18_LMNA | 0.15421  | -0.005111323 | 0.305905254 | 5.78E-02 | 2.20E-01 | 1.00E+00 |
| ENSG00000187135.7_VSTM2B    | ENSG00000160789.18_LMNA | -0.44549 | -0.56464063  | -0.30813804 | 8.87E-09 | 9.77E-07 | 4.55E-04 |
| ENSG00000186462.8_NAP1L2    | ENSG00000160789.18_LMNA | -0.29771 | -0.436233881 | -0.14539923 | 1.95E-04 | 3.20E-03 | 1.00E+00 |
| ENSG00000077080.8_ACTL6B    | ENSG00000160789.18_LMNA | -0.35837 | -0.489633241 | -0.21121697 | 5.81E-06 | 1.88E-04 | 2.98E-01 |
| ENSG00000153029.13_MR1      | ENSG00000160789.18_LMNA | 0.11142  | -0.048641299 | 0.265906153 | 1.72E-01 | 4.31E-01 | 1.00E+00 |
| ENSG00000251493.3_FOXD1     | ENSG00000160789.18_LMNA | -0.1531  | -0.304871571 | 0.006251288 | 5.97E-02 | 2.25E-01 | 1.00E+00 |
| ENSG00000186814.11_ZSCAN30  | ENSG00000160789.18_LMNA | -0.07875 | -0.23500709  | 0.081469334 | 3.35E-01 | 6.21E-01 | 1.00E+00 |
| ENSG00000187742.13_SECISBP2 | ENSG00000160789.18_LMNA | -0.07554 | -0.23195261  | 0.084677628 | 3.55E-01 | 6.38E-01 | 1.00E+00 |
| ENSG00000279673.1_RP11-185E | ENSG00000160789.18_LMNA | -0.30692 | -0.444403668 | -0.15530488 | 1.20E-04 | 2.19E-03 | 1.00E+00 |
| ENSG00000145882.9_PCYOX1L   | ENSG00000160789.18_LMNA | 0.13588  | -0.023838685 | 0.288830464 | 9.51E-02 | 3.02E-01 | 1.00E+00 |
| ENSG00000102189.15_EEA1     | ENSG00000160789.18_LMNA | 0.22533  | 0.068594115  | 0.371217986 | 5.25E-03 | 4.07E-02 | 1.00E+00 |
| ENSG00000167912.5_RP11-25K1 | ENSG00000160789.18_LMNA | -0.23872 | -0.383349583 | -0.08265836 | 3.06E-03 | 2.71E-02 | 1.00E+00 |
| ENSG00000024048.9_UBR2      | ENSG00000160789.18_LMNA | -0.05086 | -0.208373248 | 0.109225365 | 5.34E-01 | 7.76E-01 | 1.00E+00 |
| ENSG00000152464.13_RPP38    | ENSG00000160789.18_LMNA | -0.17356 | -0.323809509 | -0.01476293 | 3.25E-02 | 1.51E-01 | 1.00E+00 |
| ENSG00000197905.7_TEAD4     | ENSG00000160789.18_LMNA | 0.15392  | -0.005409462 | 0.305634982 | 5.83E-02 | 2.21E-01 | 1.00E+00 |
| ENSG00000184154.11_LRTOMT   | ENSG00000160789.18_LMNA | -0.20294 | -0.350803318 | -0.04519569 | 1.22E-02 | 7.55E-02 | 1.00E+00 |
| ENSG00000137166.13_FOXP4    | ENSG00000160789.18_LMNA | 0.16314  | 0.004042266  | 0.31417893  | 4.46E-02 | 1.87E-01 | 1.00E+00 |
| ENSG00000083817.8_ZNF416    | ENSG00000160789.18_LMNA | 0.03419  | -0.125689947 | 0.192348576 | 6.76E-01 | 8.58E-01 | 1.00E+00 |
| ENSG00000168497.4_SDPR      | ENSG00000160789.18_LMNA | -0.23421 | -0.379266552 | -0.07791146 | 3.68E-03 | 3.12E-02 | 1.00E+00 |
| ENSG00000197892.11_KIF13B   | ENSG00000160789.18_LMNA | 0.33108  | 0.18144658   | 0.465735827 | 3.10E-05 | 7.32E-04 | 1.00E+00 |
| ENSG00000187231.12_SESTD1   | ENSG00000160789.18_LMNA | -0.30085 | -0.439026874 | -0.14877911 | 1.66E-04 | 2.82E-03 | 1.00E+00 |
| ENSG00000276180.1_HIST1H4I  | ENSG00000160789.18_LMNA | 0.0189   | -0.140721591 | 0.177568928 | 8.17E-01 | 9.29E-01 | 1.00E+00 |
| ENSG00000100416.11_TRMU     | ENSG00000160789.18_LMNA | -0.1074  | -0.2621228   | 0.052697685 | 1.88E-01 | 4.54E-01 | 1.00E+00 |
| ENSG00000147894.13_C9orf72  | ENSG00000160789.18_LMNA | -0.27325 | -0.414421892 | -0.11923536 | 6.59E-04 | 8.36E-03 | 1.00E+00 |
| ENSG00000179388.8_EGR3      | ENSG00000160789.18_LMNA | 0.10659  | -0.053523545 | 0.26135134  | 1.91E-01 | 4.59E-01 | 1.00E+00 |
| ENSG00000144451.17_SPAG16   | ENSG00000160789.18_LMNA | -0.14228 | -0.294803793 | 0.017312092 | 8.04E-02 | 2.73E-01 | 1.00E+00 |
| ENSG00000071539.12_TRIP13   | ENSG00000160789.18_LMNA | 0.07188  | -0.088335265 | 0.228462696 | 3.79E-01 | 6.58E-01 | 1.00E+00 |
| ENSG00000021762.18_OSBPL5   | ENSG00000160789.18_LMNA | 0.42523  | 0.2853419    | 0.547371691 | 4.74E-08 | 3.91E-06 | 2.43E-03 |
| ENSG00000280088.1_RP11-135F | ENSG00000160789.18_LMNA | -0.1829  | -0.332425863 | -0.02441517 | 2.41E-02 | 1.23E-01 | 1.00E+00 |
| ENSG00000067369.12_TP53BP1  | ENSG00000160789.18_LMNA | 0.17364  | 0.014849324  | 0.323886862 | 3.24E-02 | 1.51E-01 | 1.00E+00 |

|                             |                         |          |              |             |          |          |          |
|-----------------------------|-------------------------|----------|--------------|-------------|----------|----------|----------|
| ENSG00000188677.13_PARVB    | ENSG00000160789.18_LMNA | 0.2067   | 0.049118346  | 0.354246148 | 1.06E-02 | 6.84E-02 | 1.00E+00 |
| ENSG00000167333.11_TRIM68   | ENSG00000160789.18_LMNA | -0.09227 | -0.247828842 | 0.067929988 | 2.58E-01 | 5.41E-01 | 1.00E+00 |
| ENSG00000161381.12_PLXDC1   | ENSG00000160789.18_LMNA | 0.13885  | -0.020814606 | 0.291601219 | 8.80E-02 | 2.89E-01 | 1.00E+00 |
| ENSG00000233830.2	EIF4HP1   | ENSG00000160789.18_LMNA | 0.25028  | 0.094861156  | 0.393792127 | 1.87E-03 | 1.86E-02 | 1.00E+00 |
| ENSG00000197024.7_ZNF398    | ENSG00000160789.18_LMNA | 0.23165  | 0.075222651  | 0.376948559 | 4.08E-03 | 3.37E-02 | 1.00E+00 |
| ENSG00000154144.11_TBRG1    | ENSG00000160789.18_LMNA | -0.11485 | -0.269129544 | 0.045177081 | 1.59E-01 | 4.12E-01 | 1.00E+00 |
| ENSG00000172262.10_ZNF131   | ENSG00000160789.18_LMNA | -0.15787 | -0.309301302 | 0.001360398 | 5.21E-02 | 2.07E-01 | 1.00E+00 |
| ENSG00000140691.15_ARMC5    | ENSG00000160789.18_LMNA | 0.15243  | -0.006934347 | 0.304251845 | 6.08E-02 | 2.28E-01 | 1.00E+00 |
| ENSG00000145569.5_FAM105A   | ENSG00000160789.18_LMNA | -0.29416 | -0.433079184 | -0.14158978 | 2.35E-04 | 3.71E-03 | 1.00E+00 |
| ENSG00000083457.10_ITGAE    | ENSG00000160789.18_LMNA | -0.30775 | -0.445141208 | -0.156202   | 1.15E-04 | 2.11E-03 | 1.00E+00 |
| ENSG00000147601.12_TERF1    | ENSG00000160789.18_LMNA | -0.23959 | -0.384139457 | -0.08357824 | 2.95E-03 | 2.64E-02 | 1.00E+00 |
| ENSG00000159239.10_C2orf81  | ENSG00000160789.18_LMNA | 0.17907  | 0.020455796  | 0.328897623 | 2.73E-02 | 1.34E-01 | 1.00E+00 |
| ENSG00000178127.11_NDUFV2   | ENSG00000160789.18_LMNA | -0.13182 | -0.285039268 | 0.027967249 | 1.05E-01 | 3.22E-01 | 1.00E+00 |
| ENSG00000016391.9_CHDH      | ENSG00000160789.18_LMNA | 0.1537   | -0.005638494 | 0.305427325 | 5.87E-02 | 2.22E-01 | 1.00E+00 |
| ENSG00000204934.9_ATP6V0E2  | ENSG00000160789.18_LMNA | 0.04002  | -0.119945647 | 0.197958728 | 6.24E-01 | 8.31E-01 | 1.00E+00 |
| ENSG00000166478.8_ZNF143    | ENSG00000160789.18_LMNA | -0.11815 | -0.272232561 | 0.041835074 | 1.47E-01 | 3.93E-01 | 1.00E+00 |
| ENSG00000149256.13_TENM4    | ENSG00000160789.18_LMNA | 0.14213  | -0.017469625 | 0.294659901 | 8.07E-02 | 2.74E-01 | 1.00E+00 |
| ENSG00000163625.14_WDFY3    | ENSG00000160789.18_LMNA | -0.11973 | -0.273716794 | 0.040234039 | 1.42E-01 | 3.84E-01 | 1.00E+00 |
| ENSG00000139651.10_ZNF740   | ENSG00000160789.18_LMNA | -0.08553 | -0.241440041 | 0.07469092  | 2.95E-01 | 5.81E-01 | 1.00E+00 |
| ENSG00000203797.8_DDO       | ENSG00000160789.18_LMNA | 0.02915  | -0.130658585 | 0.187479146 | 7.21E-01 | 8.82E-01 | 1.00E+00 |
| ENSG00000078053.15_AMPH     | ENSG00000160789.18_LMNA | -0.37079 | -0.500451662 | -0.22486612 | 2.57E-06 | 9.65E-05 | 1.32E-01 |
| ENSG00000170854.16_MINA     | ENSG00000160789.18_LMNA | 0.00895  | -0.150465178 | 0.167911368 | 9.13E-01 | 9.67E-01 | 1.00E+00 |
| ENSG00000148688.12_RPP30    | ENSG00000160789.18_LMNA | -0.25142 | -0.394820143 | -0.09606734 | 1.78E-03 | 1.79E-02 | 1.00E+00 |
| ENSG00000171227.6_TMEM37    | ENSG00000160789.18_LMNA | 0.12534  | -0.034545964 | 0.278977834 | 1.24E-01 | 3.55E-01 | 1.00E+00 |
| ENSG00000163728.9_TTC14     | ENSG00000160789.18_LMNA | -0.23529 | -0.380246115 | -0.07904905 | 3.52E-03 | 3.02E-02 | 1.00E+00 |
| ENSG00000259407.1_RP11-158M | ENSG00000160789.18_LMNA | -0.32249 | -0.458170533 | -0.17212941 | 5.08E-05 | 1.09E-03 | 1.00E+00 |
| ENSG00000073803.12_MAP3K13  | ENSG00000160789.18_LMNA | -0.34066 | -0.474149318 | -0.19186865 | 1.75E-05 | 4.63E-04 | 8.98E-01 |
| ENSG00000011132.10_APBA3    | ENSG00000160789.18_LMNA | 0.13213  | -0.027652293 | 0.285328833 | 1.05E-01 | 3.21E-01 | 1.00E+00 |
| ENSG00000253250.2_C8orf88   | ENSG00000160789.18_LMNA | -0.12227 | -0.276094188 | 0.037666191 | 1.33E-01 | 3.71E-01 | 1.00E+00 |
| ENSG00000164073.8_MFSD8     | ENSG00000160789.18_LMNA | -0.01114 | -0.170038389 | 0.148324508 | 8.92E-01 | 9.57E-01 | 1.00E+00 |
| ENSG00000100360.13_IFT27    | ENSG00000160789.18_LMNA | -0.22553 | -0.371396992 | -0.06880077 | 5.21E-03 | 4.05E-02 | 1.00E+00 |
| ENSG00000165406.14_MARCH8   | ENSG00000160789.18_LMNA | -0.21006 | -0.357308516 | -0.05261545 | 9.39E-03 | 6.26E-02 | 1.00E+00 |
| ENSG00000119640.7_ACYP1     | ENSG00000160789.18_LMNA | -0.00811 | -0.167092654 | 0.15128835  | 9.21E-01 | 9.70E-01 | 1.00E+00 |

|                             |                         |          |              |             |          |          |          |
|-----------------------------|-------------------------|----------|--------------|-------------|----------|----------|----------|
| ENSG00000138061.10_CYP1B1   | ENSG00000160789.18_LMNA | 0.22747  | 0.070837685  | 0.373160205 | 4.83E-03 | 3.82E-02 | 1.00E+00 |
| ENSG00000144357.15_UBR3     | ENSG00000160789.18_LMNA | -0.00914 | -0.168100493 | 0.15027496  | 9.11E-01 | 9.66E-01 | 1.00E+00 |
| ENSG00000168395.13_ING5     | ENSG00000160789.18_LMNA | 0.01399  | -0.145536618 | 0.172804063 | 8.64E-01 | 9.47E-01 | 1.00E+00 |
| ENSG00000131323.13_TRAF3    | ENSG00000160789.18_LMNA | 0.29746  | 0.14512699   | 0.43600867  | 1.98E-04 | 3.24E-03 | 1.00E+00 |
| ENSG00000163328.12_GPR155   | ENSG00000160789.18_LMNA | -0.30682 | -0.444318186 | -0.15520093 | 1.21E-04 | 2.20E-03 | 1.00E+00 |
| ENSG00000119535.16_CSF3R    | ENSG00000160789.18_LMNA | -0.01677 | -0.175502904 | 0.142811216 | 8.38E-01 | 9.37E-01 | 1.00E+00 |
| ENSG00000120875.7_DUSP4     | ENSG00000160789.18_LMNA | 0.41938  | 0.278794405  | 0.54237012  | 7.54E-08 | 5.73E-06 | 3.87E-03 |
| ENSG00000164418.18_GRIK2    | ENSG00000160789.18_LMNA | -0.27701 | -0.417788013 | -0.1232465  | 5.50E-04 | 7.28E-03 | 1.00E+00 |
| ENSG00000206560.9_ANKRD28   | ENSG00000160789.18_LMNA | -0.14721 | -0.299396327 | 0.012276035 | 7.03E-02 | 2.50E-01 | 1.00E+00 |
| ENSG00000165934.11_CPSF2    | ENSG00000160789.18_LMNA | 0.10784  | -0.052256873 | 0.26253441  | 1.86E-01 | 4.52E-01 | 1.00E+00 |
| ENSG00000111785.17_RIC8B    | ENSG00000160789.18_LMNA | -0.25648 | -0.399377368 | -0.10142496 | 1.42E-03 | 1.51E-02 | 1.00E+00 |
| ENSG00000113569.14_NUP155   | ENSG00000160789.18_LMNA | 0.04313  | -0.116876747 | 0.200947449 | 5.98E-01 | 8.15E-01 | 1.00E+00 |
| ENSG00000221990.4_EXOC3-AS  | ENSG00000160789.18_LMNA | 0.01643  | -0.143143197 | 0.175174414 | 8.41E-01 | 9.38E-01 | 1.00E+00 |
| ENSG00000112339.13_HBS1L    | ENSG00000160789.18_LMNA | -0.15468 | -0.30634115  | 0.004630366 | 5.71E-02 | 2.18E-01 | 1.00E+00 |
| ENSG00000071189.20_SNX13    | ENSG00000160789.18_LMNA | -0.01981 | -0.178444996 | 0.139834658 | 8.09E-01 | 9.24E-01 | 1.00E+00 |
| ENSG00000075218.17_GTSE1    | ENSG00000160789.18_LMNA | 0.06458  | -0.095606444 | 0.221500675 | 4.29E-01 | 6.99E-01 | 1.00E+00 |
| ENSG00000106617.12_PRKAG2   | ENSG00000160789.18_LMNA | -0.33702 | -0.470949241 | -0.18789709 | 2.18E-05 | 5.54E-04 | 1.00E+00 |
| ENSG00000196456.7_ZNF775    | ENSG00000160789.18_LMNA | -0.0738  | -0.230296914 | 0.086413961 | 3.66E-01 | 6.47E-01 | 1.00E+00 |
| ENSG00000149483.10_TMEM138  | ENSG00000160789.18_LMNA | 0.01212  | -0.147367226 | 0.170988608 | 8.82E-01 | 9.54E-01 | 1.00E+00 |
| ENSG00000008083.12_JARID2   | ENSG00000160789.18_LMNA | -0.05959 | -0.216731397 | 0.100568054 | 4.66E-01 | 7.28E-01 | 1.00E+00 |
| ENSG00000181894.13_ZNF329   | ENSG00000160789.18_LMNA | -0.09539 | -0.250778663 | 0.064798531 | 2.42E-01 | 5.22E-01 | 1.00E+00 |
| ENSG00000082397.14_EPB41L3  | ENSG00000160789.18_LMNA | -0.13646 | -0.289372961 | 0.023247039 | 9.37E-02 | 2.99E-01 | 1.00E+00 |
| ENSG00000196954.11_CASP4    | ENSG00000160789.18_LMNA | 0.19645  | 0.038453085  | 0.344866119 | 1.53E-02 | 8.90E-02 | 1.00E+00 |
| ENSG00000133059.15_DSTYK    | ENSG00000160789.18_LMNA | 0.01784  | -0.141763341 | 0.176539295 | 8.27E-01 | 9.32E-01 | 1.00E+00 |
| ENSG00000269888.1_RP11-3P17 | ENSG00000160789.18_LMNA | -0.16235 | -0.313450834 | -0.00323464 | 4.57E-02 | 1.90E-01 | 1.00E+00 |
| ENSG00000198169.7_ZNF251    | ENSG00000160789.18_LMNA | -0.149   | -0.301056719 | 0.010451393 | 6.69E-02 | 2.42E-01 | 1.00E+00 |
| ENSG00000125846.14_ZNF133   | ENSG00000160789.18_LMNA | 0.00126  | -0.157971812 | 0.160429099 | 9.88E-01 | 9.95E-01 | 1.00E+00 |
| ENSG00000114859.13_CLCN2    | ENSG00000160789.18_LMNA | 0.17762  | 0.018950494  | 0.327553969 | 2.86E-02 | 1.39E-01 | 1.00E+00 |
| ENSG00000165275.8_TRMT10B   | ENSG00000160789.18_LMNA | -0.12039 | -0.274334666 | 0.039567067 | 1.40E-01 | 3.81E-01 | 1.00E+00 |
| ENSG00000176390.11_CRLF3    | ENSG00000160789.18_LMNA | -0.15407 | -0.305773344 | 0.005256842 | 5.81E-02 | 2.21E-01 | 1.00E+00 |
| ENSG00000081692.11_JMJD4    | ENSG00000160789.18_LMNA | -0.03997 | -0.197913365 | 0.11999218  | 6.25E-01 | 8.31E-01 | 1.00E+00 |
| ENSG00000075131.8_TIPIN     | ENSG00000160789.18_LMNA | 0.24517  | 0.089464481  | 0.38918342  | 2.33E-03 | 2.20E-02 | 1.00E+00 |
| ENSG00000135587.7_SMPD2     | ENSG00000160789.18_LMNA | -0.0861  | -0.24198148  | 0.074119068 | 2.92E-01 | 5.77E-01 | 1.00E+00 |

|                              |                         |          |              |             |          |          |          |
|------------------------------|-------------------------|----------|--------------|-------------|----------|----------|----------|
| ENSG00000258441.1_LINC00641  | ENSG00000160789.18_LMNA | -0.30238 | -0.440378066 | -0.15041667 | 1.53E-04 | 2.64E-03 | 1.00E+00 |
| ENSG00000114021.10_NIT2      | ENSG00000160789.18_LMNA | -0.24938 | -0.392977432 | -0.09390589 | 1.95E-03 | 1.91E-02 | 1.00E+00 |
| ENSG00000214612.3_RPS19P1    | ENSG00000160789.18_LMNA | -0.02726 | -0.185652134 | 0.132518706 | 7.39E-01 | 8.90E-01 | 1.00E+00 |
| ENSG00000123965.13_PMS2P5    | ENSG00000160789.18_LMNA | 0.02058  | -0.139076005 | 0.179193956 | 8.01E-01 | 9.20E-01 | 1.00E+00 |
| ENSG00000148773.11_MKI67     | ENSG00000160789.18_LMNA | 0.1482   | -0.011269252 | 0.300312716 | 6.84E-02 | 2.46E-01 | 1.00E+00 |
| ENSG00000189376.10_C8orf76   | ENSG00000160789.18_LMNA | -0.08852 | -0.244276189 | 0.071693157 | 2.78E-01 | 5.63E-01 | 1.00E+00 |
| ENSG00000151746.12_BICD1     | ENSG00000160789.18_LMNA | 0.34654  | 0.198273313  | 0.479294198 | 1.22E-05 | 3.45E-04 | 6.28E-01 |
| ENSG00000079150.16_FKBP7     | ENSG00000160789.18_LMNA | -0.00503 | -0.164100703 | 0.154292845 | 9.51E-01 | 9.80E-01 | 1.00E+00 |
| ENSG00000095574.10_IKZF5     | ENSG00000160789.18_LMNA | -0.50875 | -0.617900371 | -0.38034981 | 2.20E-11 | 6.48E-09 | 1.13E-06 |
| ENSG00000235508.3_RPS2P7     | ENSG00000160789.18_LMNA | -0.00459 | -0.163667689 | 0.154727187 | 9.55E-01 | 9.82E-01 | 1.00E+00 |
| ENSG00000166278.13_C2        | ENSG00000160789.18_LMNA | 0.01124  | -0.148226749 | 0.170135454 | 8.91E-01 | 9.57E-01 | 1.00E+00 |
| ENSG00000178726.6_THBD       | ENSG00000160789.18_LMNA | 0.26576  | 0.111269472  | 0.407712956 | 9.36E-04 | 1.10E-02 | 1.00E+00 |
| ENSG00000155868.7_MED7       | ENSG00000160789.18_LMNA | -0.17847 | -0.328341373 | -0.01983246 | 2.78E-02 | 1.36E-01 | 1.00E+00 |
| ENSG00000187556.7_NANOS3     | ENSG00000160789.18_LMNA | -0.21645 | -0.363136357 | -0.05929131 | 7.40E-03 | 5.24E-02 | 1.00E+00 |
| ENSG00000246695.6_RASSF8-AS1 | ENSG00000160789.18_LMNA | -0.0493  | -0.206879714 | 0.1107673   | 5.46E-01 | 7.84E-01 | 1.00E+00 |
| ENSG00000136040.7_PLXNC1     | ENSG00000160789.18_LMNA | -0.21847 | -0.364978084 | -0.0614067  | 6.85E-03 | 4.96E-02 | 1.00E+00 |
| ENSG00000134326.10_CMPK2     | ENSG00000160789.18_LMNA | -0.06561 | -0.222490164 | 0.094575075 | 4.22E-01 | 6.93E-01 | 1.00E+00 |
| ENSG00000163710.6_PCOLCE2    | ENSG00000160789.18_LMNA | -0.00399 | -0.163086675 | 0.15530979  | 9.61E-01 | 9.84E-01 | 1.00E+00 |
| ENSG00000109756.7_RAPGEF2    | ENSG00000160789.18_LMNA | -0.24755 | -0.391330463 | -0.09197642 | 2.11E-03 | 2.03E-02 | 1.00E+00 |
| ENSG00000103222.17_ABCC1     | ENSG00000160789.18_LMNA | 0.16775  | 0.008780307  | 0.31844309  | 3.89E-02 | 1.70E-01 | 1.00E+00 |
| ENSG00000213885.3_RPL13AP7   | ENSG00000160789.18_LMNA | -0.1495  | -0.301520656 | 0.009941189 | 6.60E-02 | 2.40E-01 | 1.00E+00 |
| ENSG00000143476.16_DTL       | ENSG00000160789.18_LMNA | 0.06896  | -0.091243788 | 0.225681721 | 3.99E-01 | 6.75E-01 | 1.00E+00 |
| ENSG00000185753.11_CXorf38   | ENSG00000160789.18_LMNA | 0.22492  | 0.06815951   | 0.370841449 | 5.34E-03 | 4.12E-02 | 1.00E+00 |
| ENSG00000177548.11_RABEP2    | ENSG00000160789.18_LMNA | 0.27898  | 0.125351685  | 0.419551436 | 5.00E-04 | 6.74E-03 | 1.00E+00 |
| ENSG00000128694.10_OSGEPL1   | ENSG00000160789.18_LMNA | -0.46564 | -0.581714002 | -0.33096935 | 1.50E-09 | 2.19E-07 | 7.68E-05 |
| ENSG00000198000.10_NOL8      | ENSG00000160789.18_LMNA | 0.16592  | 0.006906425  | 0.316758123 | 4.11E-02 | 1.76E-01 | 1.00E+00 |
| ENSG00000114331.11_ACAP2     | ENSG00000160789.18_LMNA | -0.09265 | -0.248189658 | 0.067547289 | 2.56E-01 | 5.39E-01 | 1.00E+00 |
| ENSG00000263422.1_           | ENSG00000160789.18_LMNA | -0.01914 | -0.177796528 | 0.140491218 | 8.15E-01 | 9.28E-01 | 1.00E+00 |
| ENSG00000198464.12_ZNF480    | ENSG00000160789.18_LMNA | -0.08274 | -0.238793538 | 0.077483087 | 3.11E-01 | 5.97E-01 | 1.00E+00 |
| ENSG00000108666.8_C17orf75   | ENSG00000160789.18_LMNA | -0.38067 | -0.50902312  | -0.23575771 | 1.31E-06 | 5.75E-05 | 6.73E-02 |
| ENSG00000115020.15_PIKFYVE   | ENSG00000160789.18_LMNA | 0.03516  | -0.124740622 | 0.193277167 | 6.67E-01 | 8.53E-01 | 1.00E+00 |
| ENSG00000225377.4_NRSN2-AS1  | ENSG00000160789.18_LMNA | 0.04248  | -0.117513805 | 0.20032752  | 6.03E-01 | 8.18E-01 | 1.00E+00 |
| ENSG00000109576.12_AADAT     | ENSG00000160789.18_LMNA | -0.15409 | -0.30578483  | 0.00524417  | 5.80E-02 | 2.21E-01 | 1.00E+00 |



|                              |                         |          |              |             |          |          |          |
|------------------------------|-------------------------|----------|--------------|-------------|----------|----------|----------|
| ENSG00000181035.12_SLC25A42  | ENSG00000160789.18_LMNA | -0.13858 | -0.291357312 | 0.021081042 | 8.86E-02 | 2.90E-01 | 1.00E+00 |
| ENSG00000170776.18_AKAP13    | ENSG00000160789.18_LMNA | 0.30023  | 0.148106387  | 0.438471409 | 1.71E-04 | 2.89E-03 | 1.00E+00 |
| ENSG00000122970.14_IFT81     | ENSG00000160789.18_LMNA | 0.01753  | -0.142067833 | 0.176238212 | 8.30E-01 | 9.34E-01 | 1.00E+00 |
| ENSG00000197147.11_LRRC8B    | ENSG00000160789.18_LMNA | -0.31164 | -0.448585177 | -0.16039744 | 9.30E-05 | 1.78E-03 | 1.00E+00 |
| ENSG00000258297.1_RP11-658F  | ENSG00000160789.18_LMNA | -0.28851 | -0.428050079 | -0.1355347  | 3.13E-04 | 4.65E-03 | 1.00E+00 |
| ENSG00000169840.4_GSX1       | ENSG00000160789.18_LMNA | -0.20518 | -0.352853902 | -0.04753093 | 1.12E-02 | 7.11E-02 | 1.00E+00 |
| ENSG00000066777.7_ARFGEF1    | ENSG00000160789.18_LMNA | -0.03405 | -0.192208862 | 0.12583273  | 6.77E-01 | 8.59E-01 | 1.00E+00 |
| ENSG00000160188.8_RSPH1      | ENSG00000160789.18_LMNA | -0.03244 | -0.190655513 | 0.127419315 | 6.92E-01 | 8.67E-01 | 1.00E+00 |
| ENSG00000124198.8_ARFGEF2    | ENSG00000160789.18_LMNA | 0.0604   | -0.099760105 | 0.217509061 | 4.60E-01 | 7.23E-01 | 1.00E+00 |
| ENSG00000048028.10_USP28     | ENSG00000160789.18_LMNA | -0.0572  | -0.214450875 | 0.102934978 | 4.84E-01 | 7.41E-01 | 1.00E+00 |
| ENSG00000173821.18_RNF213    | ENSG00000160789.18_LMNA | 0.21563  | 0.058434116  | 0.362389378 | 7.63E-03 | 5.36E-02 | 1.00E+00 |
| ENSG00000162542.12_TMCO4     | ENSG00000160789.18_LMNA | 0.37513  | 0.229641676  | 0.50421659  | 1.92E-06 | 7.73E-05 | 9.85E-02 |
| ENSG00000099219.12_ERMP1     | ENSG00000160789.18_LMNA | -0.15199 | -0.303837418 | 0.007390963 | 6.16E-02 | 2.29E-01 | 1.00E+00 |
| ENSG00000104332.10_SFRP1     | ENSG00000160789.18_LMNA | -0.22076 | -0.367062443 | -0.06380407 | 6.27E-03 | 4.65E-02 | 1.00E+00 |
| ENSG00000237187.7_NR2F1-AS1  | ENSG00000160789.18_LMNA | -0.32783 | -0.462875292 | -0.17791763 | 3.74E-05 | 8.51E-04 | 1.00E+00 |
| ENSG00000081019.12_RSNB1     | ENSG00000160789.18_LMNA | -0.30914 | -0.446368114 | -0.15769542 | 1.07E-04 | 1.98E-03 | 1.00E+00 |
| ENSG00000070778.11_PTPN21    | ENSG00000160789.18_LMNA | 0.15529  | -0.004012548 | 0.306900894 | 5.61E-02 | 2.16E-01 | 1.00E+00 |
| ENSG00000147679.10_UTP23     | ENSG00000160789.18_LMNA | -0.29346 | -0.432456088 | -0.14083838 | 2.43E-04 | 3.82E-03 | 1.00E+00 |
| ENSG00000200534.1_SNORA33    | ENSG00000160789.18_LMNA | -0.05123 | -0.208725448 | 0.108861528 | 5.31E-01 | 7.74E-01 | 1.00E+00 |
| ENSG00000099814.14_CEP170B   | ENSG00000160789.18_LMNA | 0.23401  | 0.077704165  | 0.379087978 | 3.71E-03 | 3.14E-02 | 1.00E+00 |
| ENSG00000169359.12_SLC33A1   | ENSG00000160789.18_LMNA | 0.10244  | -0.057701827 | 0.257442111 | 2.09E-01 | 4.82E-01 | 1.00E+00 |
| ENSG00000141524.14_TMC6      | ENSG00000160789.18_LMNA | -0.21733 | -0.363934276 | -0.06020746 | 7.16E-03 | 5.12E-02 | 1.00E+00 |
| ENSG00000121542.10_SEC22A    | ENSG00000160789.18_LMNA | -0.23097 | -0.376335814 | -0.07451262 | 4.20E-03 | 3.44E-02 | 1.00E+00 |
| ENSG00000181513.13_ACBD4     | ENSG00000160789.18_LMNA | 0.06282  | -0.097359288 | 0.219817509 | 4.42E-01 | 7.09E-01 | 1.00E+00 |
| ENSG00000234498.3_RPL13AP2   | ENSG00000160789.18_LMNA | -0.09959 | -0.254751185 | 0.060571555 | 2.22E-01 | 4.98E-01 | 1.00E+00 |
| ENSG00000153250.16_RBMS1     | ENSG00000160789.18_LMNA | 0.3894   | 0.245408957  | 0.516573432 | 7.11E-07 | 3.50E-05 | 3.65E-02 |
| ENSG00000216775.2_RP1-152L7  | ENSG00000160789.18_LMNA | -0.15544 | -0.307038987 | 0.003860091 | 5.59E-02 | 2.16E-01 | 1.00E+00 |
| ENSG00000166451.12_CENPN     | ENSG00000160789.18_LMNA | -0.02037 | -0.178989474 | 0.13928317  | 8.03E-01 | 9.21E-01 | 1.00E+00 |
| ENSG00000019169.10_MARCO     | ENSG00000160789.18_LMNA | 0.24614  | 0.090488131  | 0.390058761 | 2.24E-03 | 2.13E-02 | 1.00E+00 |
| ENSG00000157087.15_ATP2B2    | ENSG00000160789.18_LMNA | -0.28315 | -0.423270506 | -0.12980023 | 4.08E-04 | 5.75E-03 | 1.00E+00 |
| ENSG00000235859.5_AC006978.1 | ENSG00000160789.18_LMNA | 0.07089  | -0.0893185   | 0.227523157 | 3.85E-01 | 6.64E-01 | 1.00E+00 |
| ENSG00000112305.13_SMAP1     | ENSG00000160789.18_LMNA | -0.14777 | -0.299914826 | 0.011706468 | 6.93E-02 | 2.48E-01 | 1.00E+00 |
| ENSG00000135945.8_REV1       | ENSG00000160789.18_LMNA | -0.10963 | -0.264216416 | 0.050454262 | 1.79E-01 | 4.41E-01 | 1.00E+00 |

|                             |                         |          |              |             |          |          |          |
|-----------------------------|-------------------------|----------|--------------|-------------|----------|----------|----------|
| ENSG00000183298.5_RPSAP19   | ENSG00000160789.18_LMNA | -0.18504 | -0.334391738 | -0.02662546 | 2.25E-02 | 1.17E-01 | 1.00E+00 |
| ENSG00000164190.15_NIPBL    | ENSG00000160789.18_LMNA | 0.04922  | -0.110851913 | 0.206797713 | 5.47E-01 | 7.85E-01 | 1.00E+00 |
| ENSG00000175029.15_CTBP2    | ENSG00000160789.18_LMNA | -0.26121 | -0.40362658  | -0.10643609 | 1.15E-03 | 1.29E-02 | 1.00E+00 |
| ENSG00000128604.17_IRF5     | ENSG00000160789.18_LMNA | -0.02545 | -0.183906587 | 0.134293795 | 7.56E-01 | 8.98E-01 | 1.00E+00 |
| ENSG00000109805.8_NCAPG     | ENSG00000160789.18_LMNA | 0.06301  | -0.097164499 | 0.220004648 | 4.41E-01 | 7.08E-01 | 1.00E+00 |
| ENSG00000142303.12_ADAMTS1  | ENSG00000160789.18_LMNA | 0.00838  | -0.151021122 | 0.167358483 | 9.18E-01 | 9.69E-01 | 1.00E+00 |
| ENSG00000213362.3_FTH1P12   | ENSG00000160789.18_LMNA | 0.02454  | -0.135189233 | 0.183025288 | 7.64E-01 | 9.02E-01 | 1.00E+00 |
| ENSG00000151665.11_PIGF     | ENSG00000160789.18_LMNA | -0.34096 | -0.474406691 | -0.19218848 | 1.72E-05 | 4.56E-04 | 8.83E-01 |
| ENSG00000169181.11_GSG1L    | ENSG00000160789.18_LMNA | -0.30297 | -0.440908113 | -0.15105948 | 1.48E-04 | 2.57E-03 | 1.00E+00 |
| ENSG00000100697.13_DICER1   | ENSG00000160789.18_LMNA | 0.14102  | -0.018594598 | 0.293631929 | 8.31E-02 | 2.79E-01 | 1.00E+00 |
| ENSG00000147874.9_HAUS6     | ENSG00000160789.18_LMNA | 0.00042  | -0.158795228 | 0.159606122 | 9.96E-01 | 9.98E-01 | 1.00E+00 |
| ENSG00000156265.14_MAP3K7C  | ENSG00000160789.18_LMNA | 0.17102  | 0.012151421  | 0.321469428 | 3.51E-02 | 1.59E-01 | 1.00E+00 |
| ENSG00000170962.11_PDGFD    | ENSG00000160789.18_LMNA | 0.14028  | -0.019353308 | 0.29293823  | 8.48E-02 | 2.82E-01 | 1.00E+00 |
| ENSG00000158769.16_F11R     | ENSG00000160789.18_LMNA | 0.30787  | 0.15633016   | 0.445246541 | 1.14E-04 | 2.10E-03 | 1.00E+00 |
| ENSG00000171988.16_JMJD1C   | ENSG00000160789.18_LMNA | -0.14732 | -0.299492    | 0.012170955 | 7.01E-02 | 2.50E-01 | 1.00E+00 |
| ENSG00000122691.11_TWIST1   | ENSG00000160789.18_LMNA | 0.04196  | -0.118032139 | 0.199822936 | 6.08E-01 | 8.21E-01 | 1.00E+00 |
| ENSG00000177464.4_GPR4      | ENSG00000160789.18_LMNA | 0.20423  | 0.046542551  | 0.351986362 | 1.16E-02 | 7.29E-02 | 1.00E+00 |
| ENSG00000122574.9_WIPF3     | ENSG00000160789.18_LMNA | -0.00391 | -0.163008769 | 0.155387892 | 9.62E-01 | 9.85E-01 | 1.00E+00 |
| ENSG00000167555.12_ZNF528   | ENSG00000160789.18_LMNA | -0.02987 | -0.188179697 | 0.129944744 | 7.15E-01 | 8.79E-01 | 1.00E+00 |
| ENSG00000168300.12_PCMTD1   | ENSG00000160789.18_LMNA | -0.24401 | -0.388131215 | -0.08823484 | 2.45E-03 | 2.29E-02 | 1.00E+00 |
| ENSG00000087495.15_PHACTR3  | ENSG00000160789.18_LMNA | -0.52648 | -0.63265111  | -0.40087512 | 3.25E-12 | 1.44E-09 | 1.67E-07 |
| ENSG00000117650.11_NEK2     | ENSG00000160789.18_LMNA | 0.03789  | -0.122045561 | 0.195910267 | 6.43E-01 | 8.41E-01 | 1.00E+00 |
| ENSG00000072952.17_MRVI1    | ENSG00000160789.18_LMNA | -0.27315 | -0.414329422 | -0.1191253  | 6.62E-04 | 8.39E-03 | 1.00E+00 |
| ENSG00000179523.4	EIF3J-AS1 | ENSG00000160789.18_LMNA | -0.17593 | -0.326002181 | -0.01721376 | 3.02E-02 | 1.44E-01 | 1.00E+00 |
| ENSG00000104343.18_UBE2W    | ENSG00000160789.18_LMNA | -0.24136 | -0.385740976 | -0.08544492 | 2.74E-03 | 2.49E-02 | 1.00E+00 |
| ENSG00000127399.13_LRRC61   | ENSG00000160789.18_LMNA | 0.06116  | -0.099005944 | 0.218234589 | 4.54E-01 | 7.19E-01 | 1.00E+00 |
| ENSG00000173926.5_MARCH3    | ENSG00000160789.18_LMNA | -0.32427 | -0.459740821 | -0.17405912 | 4.59E-05 | 1.00E-03 | 1.00E+00 |
| ENSG00000213853.8_EMP2      | ENSG00000160789.18_LMNA | 0.32443  | 0.174226001  | 0.459876531 | 4.55E-05 | 9.96E-04 | 1.00E+00 |
| ENSG00000229644.6_NAMPTP1   | ENSG00000160789.18_LMNA | 0.29541  | 0.142929959  | 0.434189833 | 2.20E-04 | 3.52E-03 | 1.00E+00 |
| ENSG00000243964.1_RPL23AP6  | ENSG00000160789.18_LMNA | -0.05053 | -0.20806156  | 0.10954728  | 5.36E-01 | 7.77E-01 | 1.00E+00 |
| ENSG00000280649.1_AC245100  | ENSG00000160789.18_LMNA | 0.10041  | -0.059741022 | 0.255530474 | 2.18E-01 | 4.93E-01 | 1.00E+00 |
| ENSG00000083290.18_ULK2     | ENSG00000160789.18_LMNA | -0.14641 | -0.298652008 | 0.013093313 | 7.19E-02 | 2.54E-01 | 1.00E+00 |
| ENSG00000152760.8_TCTEX1D1  | ENSG00000160789.18_LMNA | 0.08448  | -0.07574124  | 0.240445066 | 3.01E-01 | 5.87E-01 | 1.00E+00 |

|                             |                         |          |              |             |          |          |          |
|-----------------------------|-------------------------|----------|--------------|-------------|----------|----------|----------|
| ENSG00000100104.11_SRRD     | ENSG00000160789.18_LMNA | -0.13062 | -0.283916118 | 0.029188299 | 1.09E-01 | 3.28E-01 | 1.00E+00 |
| ENSG00000230916.2_MTCO1P53  | ENSG00000160789.18_LMNA | -0.09231 | -0.247868408 | 0.067888027 | 2.58E-01 | 5.41E-01 | 1.00E+00 |
| ENSG00000123685.7_BATF3     | ENSG00000160789.18_LMNA | 0.253    | 0.097733626  | 0.396239075 | 1.66E-03 | 1.70E-02 | 1.00E+00 |
| ENSG00000049769.11_PPP1R3F  | ENSG00000160789.18_LMNA | 0.01872  | -0.140900878 | 0.177391775 | 8.19E-01 | 9.30E-01 | 1.00E+00 |
| ENSG00000111727.10_HCFC2    | ENSG00000160789.18_LMNA | -0.2893  | -0.428754831 | -0.13638191 | 3.00E-04 | 4.51E-03 | 1.00E+00 |
| ENSG00000124596.15_OARD1    | ENSG00000160789.18_LMNA | -0.26655 | -0.408416381 | -0.1121029  | 9.02E-04 | 1.07E-02 | 1.00E+00 |
| ENSG00000133997.10_MED6     | ENSG00000160789.18_LMNA | 0.0837   | -0.076522601 | 0.239704448 | 3.05E-01 | 5.92E-01 | 1.00E+00 |
| ENSG00000240682.8_ISY1      | ENSG00000160789.18_LMNA | 0.28755  | 0.13450979   | 0.427197036 | 3.28E-04 | 4.83E-03 | 1.00E+00 |
| ENSG00000245937.6_LINC01184 | ENSG00000160789.18_LMNA | -0.13893 | -0.291678912 | 0.020729728 | 8.78E-02 | 2.88E-01 | 1.00E+00 |
| ENSG00000266282.1_UBL5P2    | ENSG00000160789.18_LMNA | -0.07354 | -0.230044279 | 0.08667873  | 3.68E-01 | 6.49E-01 | 1.00E+00 |
| ENSG00000213551.4_DNAJC9    | ENSG00000160789.18_LMNA | -0.01953 | -0.178175693 | 0.140107355 | 8.11E-01 | 9.26E-01 | 1.00E+00 |
| ENSG00000150401.13_DCUN1D2  | ENSG00000160789.18_LMNA | -0.33777 | -0.471609718 | -0.18871604 | 2.08E-05 | 5.34E-04 | 1.00E+00 |
| ENSG00000173542.7_MOB1B     | ENSG00000160789.18_LMNA | 0.13731  | -0.022379502 | 0.290168067 | 9.16E-02 | 2.95E-01 | 1.00E+00 |
| ENSG00000179104.7_TMTC2     | ENSG00000160789.18_LMNA | 0.0365   | -0.12342181  | 0.194566232 | 6.55E-01 | 8.47E-01 | 1.00E+00 |
| ENSG00000167257.9_RNF214    | ENSG00000160789.18_LMNA | 0.00316  | -0.156119128 | 0.162279177 | 9.69E-01 | 9.88E-01 | 1.00E+00 |
| ENSG00000051382.7_PIK3CB    | ENSG00000160789.18_LMNA | 0.05908  | -0.101072674 | 0.216245488 | 4.70E-01 | 7.30E-01 | 1.00E+00 |
| ENSG00000184319.14_RPL23AP1 | ENSG00000160789.18_LMNA | -0.07855 | -0.234812918 | 0.08167348  | 3.36E-01 | 6.22E-01 | 1.00E+00 |
| ENSG00000129028.7_THAP10    | ENSG00000160789.18_LMNA | -0.13052 | -0.283820784 | 0.029291899 | 1.09E-01 | 3.29E-01 | 1.00E+00 |
| ENSG00000269640.4_          | ENSG00000160789.18_LMNA | 0.01934  | -0.140288513 | 0.177996764 | 8.13E-01 | 9.26E-01 | 1.00E+00 |
| ENSG00000146950.11_SHROOM3  | ENSG00000160789.18_LMNA | 0.24055  | 0.084592846  | 0.385010165 | 2.83E-03 | 2.56E-02 | 1.00E+00 |
| ENSG00000217128.10_FNIP1    | ENSG00000160789.18_LMNA | -0.02153 | -0.180109076 | 0.138148533 | 7.92E-01 | 9.16E-01 | 1.00E+00 |
| ENSG00000174840.8_PDE12     | ENSG00000160789.18_LMNA | -0.03828 | -0.196284496 | 0.121662144 | 6.40E-01 | 8.39E-01 | 1.00E+00 |
| ENSG00000244731.6_C4A       | ENSG00000160789.18_LMNA | 0.14235  | -0.01724383  | 0.29486614  | 8.02E-02 | 2.73E-01 | 1.00E+00 |
| ENSG00000126787.11_DLGAP5   | ENSG00000160789.18_LMNA | 0.12904  | -0.030792788 | 0.282438964 | 1.13E-01 | 3.36E-01 | 1.00E+00 |
| ENSG00000178026.11_LRRRC75B | ENSG00000160789.18_LMNA | -0.02186 | -0.180434666 | 0.137818415 | 7.89E-01 | 9.14E-01 | 1.00E+00 |
| ENSG00000138594.11_TMOD3    | ENSG00000160789.18_LMNA | 0.43046  | 0.291221754  | 0.551847362 | 3.11E-08 | 2.77E-06 | 1.59E-03 |
| ENSG00000155008.12_APOOL    | ENSG00000160789.18_LMNA | -0.16119 | -0.312372656 | -0.00203945 | 4.73E-02 | 1.94E-01 | 1.00E+00 |
| ENSG00000169760.16_NLGN1    | ENSG00000160789.18_LMNA | -0.18593 | -0.33520842  | -0.02754457 | 2.18E-02 | 1.15E-01 | 1.00E+00 |
| ENSG00000172613.6_RAD9A     | ENSG00000160789.18_LMNA | 0.0783   | -0.081923698 | 0.234574889 | 3.38E-01 | 6.23E-01 | 1.00E+00 |
| ENSG00000183715.12_OPCML    | ENSG00000160789.18_LMNA | -0.44034 | -0.560262026 | -0.30232998 | 1.37E-08 | 1.40E-06 | 7.04E-04 |
| ENSG00000168062.8_BATF2     | ENSG00000160789.18_LMNA | 0.16533  | 0.006294792  | 0.316207729 | 4.18E-02 | 1.79E-01 | 1.00E+00 |
| ENSG00000151148.12_UBE3B    | ENSG00000160789.18_LMNA | 0.10637  | -0.053745327 | 0.261144098 | 1.92E-01 | 4.60E-01 | 1.00E+00 |
| ENSG00000196981.3_WDR5B     | ENSG00000160789.18_LMNA | -0.22169 | -0.367906892 | -0.06477632 | 6.05E-03 | 4.53E-02 | 1.00E+00 |

|                             |                         |          |              |             |          |          |          |
|-----------------------------|-------------------------|----------|--------------|-------------|----------|----------|----------|
| ENSG00000133056.12_PIK3C2B  | ENSG00000160789.18_LMNA | -0.24248 | -0.386754246 | -0.08662705 | 2.61E-03 | 2.40E-02 | 1.00E+00 |
| ENSG00000167380.15_ZNF226   | ENSG00000160789.18_LMNA | -0.09003 | -0.245706459 | 0.070179216 | 2.70E-01 | 5.54E-01 | 1.00E+00 |
| ENSG00000004468.11_CD38     | ENSG00000160789.18_LMNA | -0.37118 | -0.500792258 | -0.2252976  | 2.50E-06 | 9.47E-05 | 1.28E-01 |
| ENSG00000104221.11_BRF2     | ENSG00000160789.18_LMNA | -0.121   | -0.274904644 | 0.038951548 | 1.38E-01 | 3.78E-01 | 1.00E+00 |
| ENSG00000244701.1_RP5-894A1 | ENSG00000160789.18_LMNA | -0.10159 | -0.256641489 | 0.058556193 | 2.13E-01 | 4.87E-01 | 1.00E+00 |
| ENSG00000160326.12_SLC2A6   | ENSG00000160789.18_LMNA | 0.0212   | -0.138471866 | 0.179790112 | 7.95E-01 | 9.18E-01 | 1.00E+00 |
| ENSG00000148843.12_PDCD11   | ENSG00000160789.18_LMNA | 0.07258  | -0.087632634 | 0.22913374  | 3.74E-01 | 6.54E-01 | 1.00E+00 |
| ENSG00000165312.6_OTUD1     | ENSG00000160789.18_LMNA | -0.20944 | -0.356749982 | -0.05197706 | 9.61E-03 | 6.37E-02 | 1.00E+00 |
| ENSG00000169379.14_ARL13B   | ENSG00000160789.18_LMNA | 0.27337  | 0.119360595  | 0.414527115 | 6.55E-04 | 8.33E-03 | 1.00E+00 |
| ENSG00000003096.12_KLHL13   | ENSG00000160789.18_LMNA | -0.18246 | -0.332019785 | -0.02395898 | 2.45E-02 | 1.25E-01 | 1.00E+00 |
| ENSG00000172974.11_AC007318 | ENSG00000160789.18_LMNA | -0.08821 | -0.243980135 | 0.072006348 | 2.80E-01 | 5.65E-01 | 1.00E+00 |
| ENSG00000110429.12_FBXO3    | ENSG00000160789.18_LMNA | -0.25186 | -0.395215239 | -0.09653114 | 1.75E-03 | 1.77E-02 | 1.00E+00 |
| ENSG00000139826.5_ABHD13    | ENSG00000160789.18_LMNA | -0.21974 | -0.366130932 | -0.06273224 | 6.53E-03 | 4.79E-02 | 1.00E+00 |
| ENSG00000135094.9_SDS       | ENSG00000160789.18_LMNA | -0.07805 | -0.234342326 | 0.082168132 | 3.39E-01 | 6.24E-01 | 1.00E+00 |
| ENSG00000176974.16_SHMT1    | ENSG00000160789.18_LMNA | 0.1224   | -0.037533643 | 0.276216801 | 1.33E-01 | 3.70E-01 | 1.00E+00 |
| ENSG00000145794.15_MEGF10   | ENSG00000160789.18_LMNA | -0.09165 | -0.247243554 | 0.068550576 | 2.61E-01 | 5.45E-01 | 1.00E+00 |
| ENSG00000166448.13_TMEM130  | ENSG00000160789.18_LMNA | -0.16823 | -0.318888385 | -0.00927589 | 3.83E-02 | 1.68E-01 | 1.00E+00 |
| ENSG00000117036.10_ETV3     | ENSG00000160789.18_LMNA | 0.19343  | 0.035316     | 0.342095375 | 1.70E-02 | 9.58E-02 | 1.00E+00 |
| ENSG00000197921.5_HES5      | ENSG00000160789.18_LMNA | -0.34856 | -0.481069994 | -0.20048952 | 1.08E-05 | 3.10E-04 | 5.53E-01 |
| ENSG00000164930.10_FZD6     | ENSG00000160789.18_LMNA | 0.08472  | -0.075500334 | 0.240673337 | 2.99E-01 | 5.86E-01 | 1.00E+00 |
| ENSG00000225190.7_PLEKHM1   | ENSG00000160789.18_LMNA | 0.18956  | 0.031308426  | 0.338548018 | 1.93E-02 | 1.05E-01 | 1.00E+00 |
| ENSG00000115808.10_STRN     | ENSG00000160789.18_LMNA | -0.24745 | -0.391241667 | -0.09187246 | 2.12E-03 | 2.04E-02 | 1.00E+00 |
| ENSG00000118263.13_KLF7     | ENSG00000160789.18_LMNA | 0.14556  | -0.013962163 | 0.297860303 | 7.36E-02 | 2.58E-01 | 1.00E+00 |
| ENSG00000258947.5_TUBB3     | ENSG00000160789.18_LMNA | 0.11872  | -0.041255936 | 0.272769621 | 1.45E-01 | 3.90E-01 | 1.00E+00 |
| ENSG00000165480.14_SKA3     | ENSG00000160789.18_LMNA | -0.00337 | -0.162484928 | 0.155912949 | 9.67E-01 | 9.87E-01 | 1.00E+00 |
| ENSG00000279453.1_RP3-425C1 | ENSG00000160789.18_LMNA | -0.0783  | -0.2345746   | 0.081924002 | 3.38E-01 | 6.23E-01 | 1.00E+00 |
| ENSG00000103740.8_ACSBG1    | ENSG00000160789.18_LMNA | 0.04134  | -0.118638032 | 0.199232903 | 6.13E-01 | 8.24E-01 | 1.00E+00 |
| ENSG00000078699.20_CBFA2T2  | ENSG00000160789.18_LMNA | 0.01594  | -0.143625307 | 0.174697248 | 8.45E-01 | 9.40E-01 | 1.00E+00 |
| ENSG00000171649.10_ZIK1     | ENSG00000160789.18_LMNA | -0.04804 | -0.205668518 | 0.112016624 | 5.57E-01 | 7.90E-01 | 1.00E+00 |
| ENSG00000157800.16_SLC37A3  | ENSG00000160789.18_LMNA | 0.10439  | -0.055741098 | 0.259277868 | 2.01E-01 | 4.71E-01 | 1.00E+00 |
| ENSG00000184903.8_IMMP2L    | ENSG00000160789.18_LMNA | -0.06796 | -0.224733754 | 0.092234    | 4.05E-01 | 6.81E-01 | 1.00E+00 |
| ENSG00000163040.13_CCDC74A  | ENSG00000160789.18_LMNA | 0.2418   | 0.085905821  | 0.386136127 | 2.69E-03 | 2.45E-02 | 1.00E+00 |
| ENSG00000204344.13_STK19    | ENSG00000160789.18_LMNA | 0.09303  | -0.067161732 | 0.248553079 | 2.54E-01 | 5.36E-01 | 1.00E+00 |

|                             |                         |          |              |             |          |          |          |
|-----------------------------|-------------------------|----------|--------------|-------------|----------|----------|----------|
| ENSG00000180902.15_D2HGDH   | ENSG00000160789.18_LMNA | 0.14599  | -0.013527768 | 0.298256181 | 7.27E-02 | 2.56E-01 | 1.00E+00 |
| ENSG00000145214.12_DGKQ     | ENSG00000160789.18_LMNA | 0.19069  | 0.032470146  | 0.33957723  | 1.86E-02 | 1.02E-01 | 1.00E+00 |
| ENSG00000236603.2_RANP1     | ENSG00000160789.18_LMNA | -0.03718 | -0.195227036 | 0.122745321 | 6.49E-01 | 8.44E-01 | 1.00E+00 |
| ENSG00000164187.6_LMBRD2    | ENSG00000160789.18_LMNA | -0.17362 | -0.32386808  | -0.01482835 | 3.24E-02 | 1.51E-01 | 1.00E+00 |
| ENSG00000135298.12_ADGRB3   | ENSG00000160789.18_LMNA | -0.2504  | -0.393902114 | -0.09499016 | 1.86E-03 | 1.85E-02 | 1.00E+00 |
| ENSG00000119772.15_DNMT3A   | ENSG00000160789.18_LMNA | 0.21032  | 0.052893151  | 0.357551419 | 9.30E-03 | 6.22E-02 | 1.00E+00 |
| ENSG00000198855.5_FICD      | ENSG00000160789.18_LMNA | 0.19514  | 0.037093309  | 0.343665789 | 1.60E-02 | 9.19E-02 | 1.00E+00 |
| ENSG00000158714.9_SLAMF8    | ENSG00000160789.18_LMNA | 0.12511  | -0.034782006 | 0.278759887 | 1.25E-01 | 3.56E-01 | 1.00E+00 |
| ENSG00000135778.10_NTPCR    | ENSG00000160789.18_LMNA | -0.40713 | -0.531860907 | -0.2651163  | 1.94E-07 | 1.23E-05 | 9.93E-03 |
| ENSG00000143412.8_ANXA9     | ENSG00000160789.18_LMNA | -0.22813 | -0.373758643 | -0.07152959 | 4.70E-03 | 3.74E-02 | 1.00E+00 |
| ENSG00000130299.15_GTPBP3   | ENSG00000160789.18_LMNA | 0.08692  | -0.073292996 | 0.242763273 | 2.87E-01 | 5.72E-01 | 1.00E+00 |
| ENSG00000185955.4_C7orf61   | ENSG00000160789.18_LMNA | -0.26034 | -0.40284512  | -0.10551337 | 1.20E-03 | 1.33E-02 | 1.00E+00 |
| ENSG00000116213.14_WRAP73   | ENSG00000160789.18_LMNA | 0.02531  | -0.13443163  | 0.183770961 | 7.57E-01 | 8.99E-01 | 1.00E+00 |
| ENSG00000011347.8_SYT7      | ENSG00000160789.18_LMNA | 0.02965  | -0.130161966 | 0.187966554 | 7.17E-01 | 8.80E-01 | 1.00E+00 |
| ENSG00000214113.9_LYRM4     | ENSG00000160789.18_LMNA | -0.29612 | -0.434822196 | -0.14369349 | 2.12E-04 | 3.41E-03 | 1.00E+00 |
| ENSG00000067900.6_ROCK1     | ENSG00000160789.18_LMNA | 0.15236  | -0.007009406 | 0.304183729 | 6.09E-02 | 2.28E-01 | 1.00E+00 |
| ENSG00000138442.8_WDR12     | ENSG00000160789.18_LMNA | -0.21027 | -0.35750669  | -0.05284201 | 9.32E-03 | 6.23E-02 | 1.00E+00 |
| ENSG00000005889.14_ZFX      | ENSG00000160789.18_LMNA | 0.16142  | 0.002278895  | 0.312588723 | 4.69E-02 | 1.93E-01 | 1.00E+00 |
| ENSG00000167487.10_KLHL26   | ENSG00000160789.18_LMNA | 0.20308  | 0.045342987  | 0.350932749 | 1.21E-02 | 7.52E-02 | 1.00E+00 |
| ENSG00000133216.15_EPHB2    | ENSG00000160789.18_LMNA | -0.03697 | -0.195022155 | 0.122955096 | 6.51E-01 | 8.45E-01 | 1.00E+00 |
| ENSG00000120008.14_WDR11    | ENSG00000160789.18_LMNA | -0.19254 | -0.34127942  | -0.03439331 | 1.75E-02 | 9.79E-02 | 1.00E+00 |
| ENSG00000123444.12_KBTBD4   | ENSG00000160789.18_LMNA | -0.09987 | -0.255019915 | 0.060285204 | 2.21E-01 | 4.96E-01 | 1.00E+00 |
| ENSG00000188026.10_RILPL1   | ENSG00000160789.18_LMNA | 0.30087  | 0.148792504  | 0.439037929 | 1.66E-04 | 2.82E-03 | 1.00E+00 |
| ENSG00000188603.15_CLN3     | ENSG00000160789.18_LMNA | 0.24036  | 0.08438646   | 0.384833094 | 2.86E-03 | 2.58E-02 | 1.00E+00 |
| ENSG00000112249.12_ASCC3    | ENSG00000160789.18_LMNA | 0.21787  | 0.060774763  | 0.364428148 | 7.01E-03 | 5.05E-02 | 1.00E+00 |
| ENSG00000196388.7_INCA1     | ENSG00000160789.18_LMNA | -0.06259 | -0.219600763 | 0.097584864 | 4.44E-01 | 7.11E-01 | 1.00E+00 |
| ENSG00000124177.13_CHD6     | ENSG00000160789.18_LMNA | 0.01737  | -0.142219193 | 0.176088525 | 8.32E-01 | 9.35E-01 | 1.00E+00 |
| ENSG00000153487.12_ING1     | ENSG00000160789.18_LMNA | -0.02924 | -0.187569584 | 0.13056645  | 7.21E-01 | 8.81E-01 | 1.00E+00 |
| ENSG00000227502.2_LINC01268 | ENSG00000160789.18_LMNA | -0.2714  | -0.412769429 | -0.11726976 | 7.19E-04 | 8.95E-03 | 1.00E+00 |
| ENSG00000165675.15_ENOX2    | ENSG00000160789.18_LMNA | -0.02999 | -0.188287231 | 0.12983514  | 7.14E-01 | 8.78E-01 | 1.00E+00 |
| ENSG00000180357.8_ZNF609    | ENSG00000160789.18_LMNA | -0.03648 | -0.194553966 | 0.123434363 | 6.55E-01 | 8.47E-01 | 1.00E+00 |
| ENSG00000257151.1_PWAR6     | ENSG00000160789.18_LMNA | -0.32216 | -0.45787931  | -0.17177177 | 5.18E-05 | 1.11E-03 | 1.00E+00 |
| ENSG00000151503.11_NCAPD3   | ENSG00000160789.18_LMNA | -0.00276 | -0.161891324 | 0.156507713 | 9.73E-01 | 9.90E-01 | 1.00E+00 |

|                            |                         |          |              |             |          |          |          |
|----------------------------|-------------------------|----------|--------------|-------------|----------|----------|----------|
| ENSG00000178922.15_HYI     | ENSG00000160789.18_LMNA | 0.17919  | 0.020575267  | 0.329004211 | 2.72E-02 | 1.34E-01 | 1.00E+00 |
| ENSG00000001617.10_SEMA3F  | ENSG00000160789.18_LMNA | 0.30144  | 0.149412811  | 0.439549913 | 1.61E-04 | 2.75E-03 | 1.00E+00 |
| ENSG00000076641.4_PAG1     | ENSG00000160789.18_LMNA | -0.17894 | -0.328770264 | -0.02031305 | 2.74E-02 | 1.35E-01 | 1.00E+00 |
| ENSG00000140455.15_USP3    | ENSG00000160789.18_LMNA | -0.27413 | -0.415213454 | -0.12017773 | 6.32E-04 | 8.10E-03 | 1.00E+00 |
| ENSG00000138028.13_CGREF1  | ENSG00000160789.18_LMNA | -0.18266 | -0.332195865 | -0.02415677 | 2.43E-02 | 1.24E-01 | 1.00E+00 |
| ENSG00000205090.7_TMEN240  | ENSG00000160789.18_LMNA | -0.04195 | -0.199815215 | 0.11804007  | 6.08E-01 | 8.21E-01 | 1.00E+00 |
| ENSG00000188916.7_FAM196A  | ENSG00000160789.18_LMNA | 0.20453  | 0.04685639   | 0.352261888 | 1.15E-02 | 7.23E-02 | 1.00E+00 |
| ENSG00000204071.8_TCEAL6   | ENSG00000160789.18_LMNA | -0.24458 | -0.388647436 | -0.088838   | 2.39E-03 | 2.24E-02 | 1.00E+00 |
| ENSG00000243364.6_EFNA4    | ENSG00000160789.18_LMNA | 0.27158  | 0.117454364  | 0.412924705 | 7.13E-04 | 8.90E-03 | 1.00E+00 |
| ENSG00000164983.7_TMEN65   | ENSG00000160789.18_LMNA | 0.10193  | -0.058211571 | 0.256964484 | 2.11E-01 | 4.85E-01 | 1.00E+00 |
| ENSG00000174672.14_BRSK2   | ENSG00000160789.18_LMNA | -0.28545 | -0.425324426 | -0.13226209 | 3.64E-04 | 5.23E-03 | 1.00E+00 |
| ENSG00000159167.10_STC1    | ENSG00000160789.18_LMNA | 0.27232  | 0.118242119  | 0.413587127 | 6.89E-04 | 8.66E-03 | 1.00E+00 |
| ENSG00000109323.7_MANBA    | ENSG00000160789.18_LMNA | 0.2875   | 0.134457875  | 0.427153812 | 3.29E-04 | 4.84E-03 | 1.00E+00 |
| ENSG00000164188.7_RANBP3L  | ENSG00000160789.18_LMNA | -0.31235 | -0.449214907 | -0.16116571 | 8.94E-05 | 1.73E-03 | 1.00E+00 |
| ENSG00000151117.7_TMEN86A  | ENSG00000160789.18_LMNA | -0.12738 | -0.280888696 | 0.032474958 | 1.18E-01 | 3.44E-01 | 1.00E+00 |
| ENSG00000196968.9_FUT11    | ENSG00000160789.18_LMNA | 0.20328  | 0.045553718  | 0.351117896 | 1.20E-02 | 7.49E-02 | 1.00E+00 |
| ENSG00000120071.11_KANSL1  | ENSG00000160789.18_LMNA | -0.08222 | -0.238299125 | 0.078004164 | 3.14E-01 | 6.00E-01 | 1.00E+00 |
| ENSG00000118007.11_STAG1   | ENSG00000160789.18_LMNA | 0.10105  | -0.059105721 | 0.256126299 | 2.15E-01 | 4.90E-01 | 1.00E+00 |
| ENSG00000125459.13_MSTO1   | ENSG00000160789.18_LMNA | 0.31688  | 0.166061815  | 0.453221425 | 6.96E-05 | 1.40E-03 | 1.00E+00 |
| ENSG00000047056.13_WDR37   | ENSG00000160789.18_LMNA | -0.06699 | -0.223806835 | 0.093201619 | 4.12E-01 | 6.86E-01 | 1.00E+00 |
| ENSG00000196922.9_ZNF252P  | ENSG00000160789.18_LMNA | -0.30345 | -0.441333708 | -0.1515758  | 1.44E-04 | 2.52E-03 | 1.00E+00 |
| ENSG00000145868.15_FBXO38  | ENSG00000160789.18_LMNA | -0.03838 | -0.196379345 | 0.121564951 | 6.39E-01 | 8.39E-01 | 1.00E+00 |
| ENSG00000092931.10_MFSD11  | ENSG00000160789.18_LMNA | -0.20783 | -0.355278739 | -0.05029669 | 1.02E-02 | 6.64E-02 | 1.00E+00 |
| ENSG00000239911.2_PRKAG2-A | ENSG00000160789.18_LMNA | -0.26271 | -0.404969589 | -0.10802306 | 1.08E-03 | 1.23E-02 | 1.00E+00 |
| ENSG00000149451.16_ADAM33  | ENSG00000160789.18_LMNA | 0.14546  | -0.014064385 | 0.297767129 | 7.38E-02 | 2.58E-01 | 1.00E+00 |
| ENSG00000133067.16_LGR6    | ENSG00000160789.18_LMNA | 0.15264  | -0.006726227 | 0.304440696 | 6.05E-02 | 2.27E-01 | 1.00E+00 |
| ENSG00000163281.10_GNPDA2  | ENSG00000160789.18_LMNA | -0.25333 | -0.396537669 | -0.09808449 | 1.64E-03 | 1.68E-02 | 1.00E+00 |
| ENSG00000158560.13_DYNC111 | ENSG00000160789.18_LMNA | -0.39773 | -0.523768272 | -0.25465611 | 3.90E-07 | 2.16E-05 | 2.00E-02 |
| ENSG00000181649.5_PHLDA2   | ENSG00000160789.18_LMNA | 0.46953  | 0.335401487  | 0.585002961 | 1.05E-09 | 1.63E-07 | 5.37E-05 |
| ENSG00000091428.16_RAPGEF4 | ENSG00000160789.18_LMNA | -0.39738 | -0.523465706 | -0.25426624 | 4.00E-07 | 2.20E-05 | 2.05E-02 |
| ENSG00000164068.14_RNF123  | ENSG00000160789.18_LMNA | 0.0359   | -0.124006981 | 0.193994396 | 6.61E-01 | 8.50E-01 | 1.00E+00 |
| ENSG00000224152.1_AC009506 | ENSG00000160789.18_LMNA | -0.23534 | -0.380291022 | -0.07910122 | 3.52E-03 | 3.01E-02 | 1.00E+00 |
| ENSG00000164761.7_TNFRSF11 | ENSG00000160789.18_LMNA | 0.3289   | 0.179077448  | 0.463816087 | 3.52E-05 | 8.15E-04 | 1.00E+00 |

|                             |                          |          |              |             |          |          |          |
|-----------------------------|--------------------------|----------|--------------|-------------|----------|----------|----------|
| ENSG00000010219.12_DYRK4    | ENSG000000160789.18_LMNA | -0.30407 | -0.441883588 | -0.15224314 | 1.40E-04 | 2.46E-03 | 1.00E+00 |
| ENSG00000047578.11_KIAA0556 | ENSG000000160789.18_LMNA | -0.03753 | -0.195561938 | 0.122402355 | 6.46E-01 | 8.43E-01 | 1.00E+00 |
| ENSG000000198015.11_MRPL42  | ENSG000000160789.18_LMNA | -0.31066 | -0.447718597 | -0.15934079 | 9.81E-05 | 1.85E-03 | 1.00E+00 |
| ENSG000000198729.4_PPP1R14C | ENSG000000160789.18_LMNA | 0.01402  | -0.145504942 | 0.172835458 | 8.64E-01 | 9.47E-01 | 1.00E+00 |
| ENSG000000111364.14_DDX55   | ENSG000000160789.18_LMNA | -0.0508  | -0.208317737 | 0.109282703 | 5.34E-01 | 7.76E-01 | 1.00E+00 |
| ENSG000000162852.12_CNST    | ENSG000000160789.18_LMNA | -0.2159  | -0.362639389 | -0.05872097 | 7.55E-03 | 5.32E-02 | 1.00E+00 |
| ENSG000000182372.6_CLN8     | ENSG000000160789.18_LMNA | -0.19099 | -0.339859337 | -0.03278872 | 1.84E-02 | 1.02E-01 | 1.00E+00 |
| ENSG000000183891.5_TTC32    | ENSG000000160789.18_LMNA | -0.07031 | -0.226968579 | 0.089898581 | 3.89E-01 | 6.68E-01 | 1.00E+00 |
| ENSG000000132436.10_FIGNL1  | ENSG000000160789.18_LMNA | -0.01651 | -0.175253781 | 0.143062993 | 8.40E-01 | 9.38E-01 | 1.00E+00 |
| ENSG000000101445.8_PPP1R16B | ENSG000000160789.18_LMNA | -0.34944 | -0.481836128 | -0.20144654 | 1.02E-05 | 2.96E-04 | 5.24E-01 |
| ENSG00000008869.10_HEATR5B  | ENSG000000160789.18_LMNA | -0.08683 | -0.242674539 | 0.073386777 | 2.87E-01 | 5.73E-01 | 1.00E+00 |
| ENSG000000197841.13_ZNF181  | ENSG000000160789.18_LMNA | -0.20415 | -0.35191121  | -0.04645696 | 1.16E-02 | 7.31E-02 | 1.00E+00 |
| ENSG000000146094.12_DOK3    | ENSG000000160789.18_LMNA | 0.20236  | 0.044592609  | 0.350273276 | 1.24E-02 | 7.66E-02 | 1.00E+00 |
| ENSG000000065485.16_PDIA5   | ENSG000000160789.18_LMNA | 0.40391  | 0.261528532  | 0.529090673 | 2.47E-07 | 1.51E-05 | 1.27E-02 |
| ENSG000000205269.5_TMEM170B | ENSG000000160789.18_LMNA | -0.39436 | -0.520859755 | -0.25091201 | 4.98E-07 | 2.61E-05 | 2.55E-02 |
| ENSG000000275074.1_NUDT18   | ENSG000000160789.18_LMNA | -0.07515 | -0.231579148 | 0.085069446 | 3.57E-01 | 6.41E-01 | 1.00E+00 |
| ENSG000000165495.14_PKNOX2  | ENSG000000160789.18_LMNA | -0.32268 | -0.458334305 | -0.17233057 | 5.03E-05 | 1.08E-03 | 1.00E+00 |
| ENSG000000100099.19_HPS4    | ENSG000000160789.18_LMNA | -0.09504 | -0.250448678 | 0.065149144 | 2.44E-01 | 5.24E-01 | 1.00E+00 |
| ENSG000000103642.10_LACTB   | ENSG000000160789.18_LMNA | 0.12843  | -0.03141416  | 0.281866506 | 1.15E-01 | 3.39E-01 | 1.00E+00 |
| ENSG00000013563.12_DNASE1L  | ENSG000000160789.18_LMNA | 0.22751  | 0.070878311  | 0.37319535  | 4.82E-03 | 3.81E-02 | 1.00E+00 |
| ENSG000000226781.1_TBCAP1   | ENSG000000160789.18_LMNA | -0.02071 | -0.179321037 | 0.138947242 | 8.00E-01 | 9.20E-01 | 1.00E+00 |
| ENSG000000204842.13_ATXN2   | ENSG000000160789.18_LMNA | 0.11039  | -0.049685531 | 0.264933132 | 1.76E-01 | 4.37E-01 | 1.00E+00 |
| ENSG000000167705.10_RILP    | ENSG000000160789.18_LMNA | 0.14172  | -0.017888511 | 0.294277218 | 8.16E-02 | 2.75E-01 | 1.00E+00 |
| ENSG000000106733.19_NMRK1   | ENSG000000160789.18_LMNA | -0.00713 | -0.16614507  | 0.152240545 | 9.30E-01 | 9.73E-01 | 1.00E+00 |
| ENSG000000160703.14_NLRX1   | ENSG000000160789.18_LMNA | 0.21206  | 0.054708346  | 0.359138115 | 8.72E-03 | 5.94E-02 | 1.00E+00 |
| ENSG000000134905.15_CARS2   | ENSG000000160789.18_LMNA | 0.05065  | -0.109431434 | 0.208173733 | 5.35E-01 | 7.77E-01 | 1.00E+00 |
| ENSG000000164647.7_STEAP1   | ENSG000000160789.18_LMNA | 0.20895  | 0.051462444  | 0.35629957  | 9.78E-03 | 6.46E-02 | 1.00E+00 |
| ENSG000000092098.15_RNF31   | ENSG000000160789.18_LMNA | 0.22819  | 0.071590097  | 0.373810963 | 4.69E-03 | 3.74E-02 | 1.00E+00 |
| ENSG000000160193.10_WDR4    | ENSG000000160789.18_LMNA | 0.42028  | 0.279796688  | 0.543136968 | 7.03E-08 | 5.43E-06 | 3.60E-03 |
| ENSG000000242173.7_ARHGDIG  | ENSG000000160789.18_LMNA | -0.23075 | -0.37613744  | -0.07428281 | 4.23E-03 | 3.46E-02 | 1.00E+00 |
| ENSG000000140263.12_SORD    | ENSG000000160789.18_LMNA | -0.06087 | -0.217958692 | 0.099292771 | 4.56E-01 | 7.21E-01 | 1.00E+00 |
| ENSG000000158161.14_EYA3    | ENSG000000160789.18_LMNA | 0.16207  | 0.002946452  | 0.313190931 | 4.61E-02 | 1.91E-01 | 1.00E+00 |
| ENSG000000124313.11_IQSEC2  | ENSG000000160789.18_LMNA | -0.02686 | -0.185263753 | 0.132913836 | 7.43E-01 | 8.92E-01 | 1.00E+00 |

|                             |                         |          |              |             |          |          |          |
|-----------------------------|-------------------------|----------|--------------|-------------|----------|----------|----------|
| ENSG00000197859.8_ADAMTSL2  | ENSG00000160789.18_LMNA | -0.07164 | -0.228235464 | 0.088573122 | 3.80E-01 | 6.59E-01 | 1.00E+00 |
| ENSG00000153006.13_SREK1IP1 | ENSG00000160789.18_LMNA | -0.31427 | -0.450906699 | -0.16323141 | 8.05E-05 | 1.58E-03 | 1.00E+00 |
| ENSG00000158411.9_MITD1     | ENSG00000160789.18_LMNA | -0.0932  | -0.2487089   | 0.066996391 | 2.53E-01 | 5.35E-01 | 1.00E+00 |
| ENSG00000114857.16_NKTR     | ENSG00000160789.18_LMNA | -0.10543 | -0.260264916 | 0.054685849 | 1.96E-01 | 4.65E-01 | 1.00E+00 |
| ENSG00000163389.9_POGLUT1   | ENSG00000160789.18_LMNA | -0.01061 | -0.169526553 | 0.148839901 | 8.97E-01 | 9.60E-01 | 1.00E+00 |
| ENSG00000122591.10_FAM126A  | ENSG00000160789.18_LMNA | 0.15893  | -0.000282335 | 0.310275905 | 5.05E-02 | 2.03E-01 | 1.00E+00 |
| ENSG00000140006.10_WDR89    | ENSG00000160789.18_LMNA | 0.0331   | -0.126764334 | 0.191296967 | 6.86E-01 | 8.64E-01 | 1.00E+00 |
| ENSG00000125775.13_SDCBP2   | ENSG00000160789.18_LMNA | 0.01217  | -0.147311787 | 0.171043621 | 8.82E-01 | 9.54E-01 | 1.00E+00 |
| ENSG00000176170.12_SPHK1    | ENSG00000160789.18_LMNA | 0.20799  | 0.050462804  | 0.355424248 | 1.01E-02 | 6.62E-02 | 1.00E+00 |
| ENSG00000247095.2_MIR210HG  | ENSG00000160789.18_LMNA | 0.36227  | 0.215502738  | 0.493039434 | 4.51E-06 | 1.53E-04 | 2.31E-01 |
| ENSG00000196387.8_ZNF140    | ENSG00000160789.18_LMNA | -0.20152 | -0.349507139 | -0.0437213  | 1.28E-02 | 7.83E-02 | 1.00E+00 |
| ENSG00000170909.12_OSCAR    | ENSG00000160789.18_LMNA | 0.12469  | -0.035206219 | 0.278368112 | 1.26E-01 | 3.59E-01 | 1.00E+00 |
| ENSG00000166411.12_IDH3A    | ENSG00000160789.18_LMNA | 0.05258  | -0.107522384 | 0.210021054 | 5.20E-01 | 7.66E-01 | 1.00E+00 |
| ENSG00000143315.6_PIGM      | ENSG00000160789.18_LMNA | -0.17476 | -0.324921004 | -0.01600482 | 3.13E-02 | 1.47E-01 | 1.00E+00 |
| ENSG00000173898.10_SPTBN2   | ENSG00000160789.18_LMNA | -0.18087 | -0.330551827 | -0.02231093 | 2.58E-02 | 1.29E-01 | 1.00E+00 |
| ENSG00000128534.6_LSM8      | ENSG00000160789.18_LMNA | 0.15414  | -0.005192427 | 0.305831736 | 5.80E-02 | 2.21E-01 | 1.00E+00 |
| ENSG00000137713.14_PPP2R1B  | ENSG00000160789.18_LMNA | -0.14783 | -0.299975107 | 0.011640237 | 6.91E-02 | 2.48E-01 | 1.00E+00 |
| ENSG00000047365.10_ARAP2    | ENSG00000160789.18_LMNA | 0.03917  | -0.120782249 | 0.197142958 | 6.32E-01 | 8.35E-01 | 1.00E+00 |
| ENSG00000198910.11_L1CAM    | ENSG00000160789.18_LMNA | -0.16693 | -0.317689687 | -0.00794216 | 3.98E-02 | 1.73E-01 | 1.00E+00 |
| ENSG00000101825.7_MXRA5     | ENSG00000160789.18_LMNA | 0.39568  | 0.252375825  | 0.521997633 | 4.52E-07 | 2.43E-05 | 2.32E-02 |
| ENSG00000278615.3_C11orf98  | ENSG00000160789.18_LMNA | -0.34732 | -0.479979586 | -0.19912834 | 1.17E-05 | 3.30E-04 | 5.98E-01 |
| ENSG00000256968.1_SNRPEP2   | ENSG00000160789.18_LMNA | -0.05566 | -0.2129766   | 0.104463199 | 4.96E-01 | 7.50E-01 | 1.00E+00 |
| ENSG00000050555.16_LAMC3    | ENSG00000160789.18_LMNA | 0.17946  | 0.020859399  | 0.329257673 | 2.69E-02 | 1.33E-01 | 1.00E+00 |
| ENSG00000187730.7_GABRD     | ENSG00000160789.18_LMNA | -0.06033 | -0.217446994 | 0.099824604 | 4.60E-01 | 7.24E-01 | 1.00E+00 |
| ENSG00000165244.6_ZNF367    | ENSG00000160789.18_LMNA | 0.17758  | 0.018914424  | 0.327521757 | 2.86E-02 | 1.39E-01 | 1.00E+00 |
| ENSG00000109381.18_ELF2     | ENSG00000160789.18_LMNA | 0.04661  | -0.113431069 | 0.204296066 | 5.69E-01 | 7.98E-01 | 1.00E+00 |
| ENSG00000149798.4_CDC42EP2  | ENSG00000160789.18_LMNA | -0.00371 | -0.162818139 | 0.155578985 | 9.64E-01 | 9.86E-01 | 1.00E+00 |
| ENSG00000077063.9_CTTNBP2   | ENSG00000160789.18_LMNA | -0.40338 | -0.528633179 | -0.26093674 | 2.57E-07 | 1.56E-05 | 1.32E-02 |
| ENSG00000136982.5_DSCC1     | ENSG00000160789.18_LMNA | -0.06845 | -0.225194118 | 0.091753198 | 4.02E-01 | 6.78E-01 | 1.00E+00 |
| ENSG00000163512.12_AZI2     | ENSG00000160789.18_LMNA | -0.23478 | -0.37978864  | -0.07851768 | 3.60E-03 | 3.06E-02 | 1.00E+00 |
| ENSG00000105778.16_AVL9     | ENSG00000160789.18_LMNA | 0.27789  | 0.124178546  | 0.41856902  | 5.28E-04 | 7.03E-03 | 1.00E+00 |
| ENSG00000155729.11_KCTD18   | ENSG00000160789.18_LMNA | -0.08595 | -0.241838864 | 0.074269715 | 2.92E-01 | 5.78E-01 | 1.00E+00 |
| ENSG00000272674.3_PCDHB16   | ENSG00000160789.18_LMNA | 0.02867  | -0.131130442 | 0.187015896 | 7.26E-01 | 8.84E-01 | 1.00E+00 |



|                             |                         |          |              |             |          |          |          |
|-----------------------------|-------------------------|----------|--------------|-------------|----------|----------|----------|
| ENSG00000180233.10_ZNRF2    | ENSG00000160789.18_LMNA | -0.07408 | -0.230560114 | 0.086138071 | 3.64E-01 | 6.46E-01 | 1.00E+00 |
| ENSG00000198157.9_HMGN5     | ENSG00000160789.18_LMNA | -0.18838 | -0.337458053 | -0.03007903 | 2.01E-02 | 1.08E-01 | 1.00E+00 |
| ENSG00000144741.16_SLC25A26 | ENSG00000160789.18_LMNA | -0.28158 | -0.421869565 | -0.12812312 | 4.41E-04 | 6.12E-03 | 1.00E+00 |
| ENSG00000197548.11_ATG7     | ENSG00000160789.18_LMNA | -0.01822 | -0.176910426 | 0.141387924 | 8.24E-01 | 9.31E-01 | 1.00E+00 |
| ENSG00000116731.21_PRDM2    | ENSG00000160789.18_LMNA | -0.1113  | -0.265787925 | 0.048768216 | 1.72E-01 | 4.31E-01 | 1.00E+00 |
| ENSG00000130921.6_C12orf65  | ENSG00000160789.18_LMNA | -0.17911 | -0.328932409 | -0.02049479 | 2.73E-02 | 1.34E-01 | 1.00E+00 |
| ENSG00000048405.8_ZNF800    | ENSG00000160789.18_LMNA | 0.33437  | 0.185014475  | 0.468621902 | 2.55E-05 | 6.27E-04 | 1.00E+00 |
| ENSG00000133131.13_MORC4    | ENSG00000160789.18_LMNA | 0.23274  | 0.076371582  | 0.377939502 | 3.91E-03 | 3.26E-02 | 1.00E+00 |
| ENSG00000136297.13_MMD2     | ENSG00000160789.18_LMNA | -0.41947 | -0.542444784 | -0.27889197 | 7.49E-08 | 5.70E-06 | 3.84E-03 |
| ENSG00000265531.2_FCGR1CP   | ENSG00000160789.18_LMNA | -0.05697 | -0.214226999 | 0.103167143 | 4.86E-01 | 7.42E-01 | 1.00E+00 |
| ENSG00000133740.9_E2F5      | ENSG00000160789.18_LMNA | -0.08419 | -0.240171178 | 0.076030241 | 3.02E-01 | 5.89E-01 | 1.00E+00 |
| ENSG00000120915.12_EPHX2    | ENSG00000160789.18_LMNA | -0.00088 | -0.160061305 | 0.158339857 | 9.91E-01 | 9.97E-01 | 1.00E+00 |
| ENSG00000148848.13_ADAM12   | ENSG00000160789.18_LMNA | 0.52234  | 0.396079133  | 0.629219414 | 5.13E-12 | 2.06E-09 | 2.63E-07 |
| ENSG00000113209.8_PCDHB5    | ENSG00000160789.18_LMNA | 0.00958  | -0.149852999 | 0.168519946 | 9.07E-01 | 9.64E-01 | 1.00E+00 |
| ENSG00000113272.12_THG1L    | ENSG00000160789.18_LMNA | -0.02414 | -0.182640841 | 0.135579686 | 7.68E-01 | 9.04E-01 | 1.00E+00 |
| ENSG00000132522.14_GPS2     | ENSG00000160789.18_LMNA | -0.03221 | -0.190435141 | 0.12764427  | 6.94E-01 | 8.68E-01 | 1.00E+00 |
| ENSG00000145703.14_IQGAP2   | ENSG00000160789.18_LMNA | 0.25322  | 0.097973927  | 0.396443586 | 1.65E-03 | 1.69E-02 | 1.00E+00 |
| ENSG00000123066.6_MED13L    | ENSG00000160789.18_LMNA | -0.06858 | -0.225318789 | 0.091622968 | 4.01E-01 | 6.78E-01 | 1.00E+00 |
| ENSG00000188153.11_COL4A5   | ENSG00000160789.18_LMNA | -0.02618 | -0.184608989 | 0.133579751 | 7.49E-01 | 8.95E-01 | 1.00E+00 |
| ENSG00000175354.17_PTPN2    | ENSG00000160789.18_LMNA | 0.07111  | -0.089100073 | 0.227731928 | 3.84E-01 | 6.63E-01 | 1.00E+00 |
| ENSG00000075420.11_FNDC3B   | ENSG00000160789.18_LMNA | 0.46909  | 0.33490072   | 0.584631767 | 1.09E-09 | 1.68E-07 | 5.59E-05 |
| ENSG00000169955.7_ZNF747    | ENSG00000160789.18_LMNA | 0.07699  | -0.08322622  | 0.233335208 | 3.46E-01 | 6.30E-01 | 1.00E+00 |
| ENSG00000230910.2_RP3-525N1 | ENSG00000160789.18_LMNA | -0.27453 | -0.415571403 | -0.12060406 | 6.20E-04 | 7.99E-03 | 1.00E+00 |
| ENSG00000085511.18_MAP3K4   | ENSG00000160789.18_LMNA | -0.01457 | -0.173373128 | 0.144962354 | 8.59E-01 | 9.44E-01 | 1.00E+00 |
| ENSG00000149089.11_APIP     | ENSG00000160789.18_LMNA | -0.15559 | -0.307184611 | 0.003699304 | 5.56E-02 | 2.15E-01 | 1.00E+00 |
| ENSG00000182963.8_GJC1      | ENSG00000160789.18_LMNA | 0.16837  | 0.009419351  | 0.319017262 | 3.81E-02 | 1.68E-01 | 1.00E+00 |
| ENSG00000163864.13_NMNAT3   | ENSG00000160789.18_LMNA | 0.07979  | -0.080437279 | 0.235988339 | 3.29E-01 | 6.15E-01 | 1.00E+00 |
| ENSG00000249774.1_CTD-2206C | ENSG00000160789.18_LMNA | 0.02669  | -0.133079884 | 0.185100513 | 7.44E-01 | 8.93E-01 | 1.00E+00 |
| ENSG00000006576.15_PHTF2    | ENSG00000160789.18_LMNA | 0.00453  | -0.15478332  | 0.163611718 | 9.56E-01 | 9.82E-01 | 1.00E+00 |
| ENSG00000269352.1_PTOV1-AS2 | ENSG00000160789.18_LMNA | 0.04362  | -0.11638484  | 0.201425954 | 5.94E-01 | 8.12E-01 | 1.00E+00 |
| ENSG00000085415.14_SEH1L    | ENSG00000160789.18_LMNA | -0.0424  | -0.200253598 | 0.117589752 | 6.04E-01 | 8.18E-01 | 1.00E+00 |
| ENSG00000174842.15_GLMN     | ENSG00000160789.18_LMNA | -0.12358 | -0.277324783 | 0.036335383 | 1.29E-01 | 3.64E-01 | 1.00E+00 |
| ENSG00000176915.13_ANKLE2   | ENSG00000160789.18_LMNA | 0.26363  | 0.109001301  | 0.405796811 | 1.03E-03 | 1.19E-02 | 1.00E+00 |

|                             |                         |          |              |             |          |          |          |
|-----------------------------|-------------------------|----------|--------------|-------------|----------|----------|----------|
| ENSG00000105708.8_ZNF14     | ENSG00000160789.18_LMNA | -0.17656 | -0.326581147 | -0.01786151 | 2.96E-02 | 1.42E-01 | 1.00E+00 |
| ENSG00000139718.9_SETD1B    | ENSG00000160789.18_LMNA | 0.12877  | -0.03106972  | 0.282183859 | 1.14E-01 | 3.37E-01 | 1.00E+00 |
| ENSG00000179886.5_TIGD5     | ENSG00000160789.18_LMNA | 0.20347  | 0.045749043  | 0.351289487 | 1.19E-02 | 7.45E-02 | 1.00E+00 |
| ENSG00000133103.15_COG6     | ENSG00000160789.18_LMNA | -0.225   | -0.370918567 | -0.06824851 | 5.32E-03 | 4.11E-02 | 1.00E+00 |
| ENSG00000253676.1_TAGLN2P1  | ENSG00000160789.18_LMNA | 0.51603  | 0.388763222  | 0.623967055 | 1.02E-11 | 3.50E-09 | 5.22E-07 |
| ENSG00000134698.10_38200    | ENSG00000160789.18_LMNA | -0.17411 | -0.324320417 | -0.01533366 | 3.19E-02 | 1.49E-01 | 1.00E+00 |
| ENSG00000256087.5_ZNF432    | ENSG00000160789.18_LMNA | -0.03843 | -0.196430462 | 0.121512569 | 6.38E-01 | 8.38E-01 | 1.00E+00 |
| ENSG00000064763.9_FAR2      | ENSG00000160789.18_LMNA | 0.05899  | -0.101158209 | 0.216163108 | 4.70E-01 | 7.31E-01 | 1.00E+00 |
| ENSG00000158234.11_FAIM     | ENSG00000160789.18_LMNA | -0.12071 | -0.274633711 | 0.039244158 | 1.39E-01 | 3.79E-01 | 1.00E+00 |
| ENSG00000136709.10_WDR33    | ENSG00000160789.18_LMNA | 0.07357  | -0.086640716 | 0.230080554 | 3.68E-01 | 6.48E-01 | 1.00E+00 |
| ENSG00000117016.8_RIMS3     | ENSG00000160789.18_LMNA | -0.25721 | -0.400029952 | -0.10219358 | 1.38E-03 | 1.48E-02 | 1.00E+00 |
| ENSG00000095370.18_SH2D3C   | ENSG00000160789.18_LMNA | -0.06243 | -0.219446986 | 0.097744886 | 4.45E-01 | 7.12E-01 | 1.00E+00 |
| ENSG00000100580.7_TMED8     | ENSG00000160789.18_LMNA | 0.0198   | -0.139839476 | 0.178440239 | 8.09E-01 | 9.24E-01 | 1.00E+00 |
| ENSG00000058600.14_POLR3E   | ENSG00000160789.18_LMNA | 0.04418  | -0.115832472 | 0.201963093 | 5.89E-01 | 8.09E-01 | 1.00E+00 |
| ENSG00000179743.3_FLJ37453  | ENSG00000160789.18_LMNA | -0.29418 | -0.433100613 | -0.14161563 | 2.34E-04 | 3.71E-03 | 1.00E+00 |
| ENSG00000135775.12_COG2     | ENSG00000160789.18_LMNA | -0.37776 | -0.506500395 | -0.23254498 | 1.60E-06 | 6.74E-05 | 8.23E-02 |
| ENSG00000137936.15_BCAR3    | ENSG00000160789.18_LMNA | 0.19712  | 0.039150045  | 0.345480965 | 1.49E-02 | 8.76E-02 | 1.00E+00 |
| ENSG00000198692.8	EIF1AY    | ENSG00000160789.18_LMNA | -0.08766 | -0.243458966 | 0.072557534 | 2.83E-01 | 5.68E-01 | 1.00E+00 |
| ENSG00000175087.8_PDIK1L    | ENSG00000160789.18_LMNA | -0.11594 | -0.270157261 | 0.044070989 | 1.55E-01 | 4.06E-01 | 1.00E+00 |
| ENSG00000270696.1_RP11-342K | ENSG00000160789.18_LMNA | 0.04174  | -0.11824486  | 0.19961581  | 6.10E-01 | 8.22E-01 | 1.00E+00 |
| ENSG00000154645.12_CHODL    | ENSG00000160789.18_LMNA | 0.06683  | -0.09336625  | 0.223649071 | 4.13E-01 | 6.87E-01 | 1.00E+00 |
| ENSG00000163106.9_HPGDS     | ENSG00000160789.18_LMNA | -0.17984 | -0.329607017 | -0.0212511  | 2.66E-02 | 1.32E-01 | 1.00E+00 |
| ENSG00000115568.14_ZNF142   | ENSG00000160789.18_LMNA | 0.09089  | -0.06931329  | 0.24652391  | 2.65E-01 | 5.49E-01 | 1.00E+00 |
| ENSG00000143434.14_SEMA6C   | ENSG00000160789.18_LMNA | -0.04291 | -0.20073912  | 0.117090861 | 6.00E-01 | 8.16E-01 | 1.00E+00 |
| ENSG00000106346.10_USP42    | ENSG00000160789.18_LMNA | 0.12666  | -0.033212078 | 0.28020886  | 1.20E-01 | 3.48E-01 | 1.00E+00 |
| ENSG00000267565.1_CTC-559E9 | ENSG00000160789.18_LMNA | -0.43961 | -0.559646342 | -0.30151483 | 1.46E-08 | 1.48E-06 | 7.48E-04 |
| ENSG00000157895.10_C12orf43 | ENSG00000160789.18_LMNA | -0.3105  | -0.447572155 | -0.1591623  | 9.90E-05 | 1.87E-03 | 1.00E+00 |
| ENSG00000096717.10_SIRT1    | ENSG00000160789.18_LMNA | -0.22607 | -0.371886191 | -0.06936565 | 5.10E-03 | 3.99E-02 | 1.00E+00 |
| ENSG00000131732.10_ZCCHC9   | ENSG00000160789.18_LMNA | 0.18091  | 0.022357188  | 0.33059305  | 2.57E-02 | 1.29E-01 | 1.00E+00 |
| ENSG00000205129.7_C4orf47   | ENSG00000160789.18_LMNA | 0.20664  | 0.049057804  | 0.354193074 | 1.06E-02 | 6.85E-02 | 1.00E+00 |
| ENSG00000143768.10_LEFTY2   | ENSG00000160789.18_LMNA | 0.09091  | -0.069295533 | 0.246540669 | 2.65E-01 | 5.49E-01 | 1.00E+00 |
| ENSG00000140044.11_JDP2     | ENSG00000160789.18_LMNA | 0.00667  | -0.152697084 | 0.165690531 | 9.35E-01 | 9.74E-01 | 1.00E+00 |
| ENSG00000188343.11_FAM92A   | ENSG00000160789.18_LMNA | -0.1209  | -0.274808023 | 0.039055906 | 1.38E-01 | 3.78E-01 | 1.00E+00 |

|                             |                         |          |              |             |          |          |          |
|-----------------------------|-------------------------|----------|--------------|-------------|----------|----------|----------|
| ENSG00000167693.15_NXN      | ENSG00000160789.18_LMNA | -0.20503 | -0.35272064  | -0.04737907 | 1.13E-02 | 7.14E-02 | 1.00E+00 |
| ENSG00000137177.17_KIF13A   | ENSG00000160789.18_LMNA | -0.04676 | -0.204437114 | 0.113285764 | 5.67E-01 | 7.97E-01 | 1.00E+00 |
| ENSG00000205133.10_TRIQK    | ENSG00000160789.18_LMNA | -0.25285 | -0.396109187 | -0.09758103 | 1.67E-03 | 1.71E-02 | 1.00E+00 |
| ENSG00000267534.2_S1PR2     | ENSG00000160789.18_LMNA | 0.24769  | 0.092122751  | 0.391455433 | 2.09E-03 | 2.02E-02 | 1.00E+00 |
| ENSG0000039319.15_ZFYVE16   | ENSG00000160789.18_LMNA | -0.36656 | -0.496769178 | -0.22020791 | 3.41E-06 | 1.22E-04 | 1.75E-01 |
| ENSG00000230521.1_HCG4P7    | ENSG00000160789.18_LMNA | 0.24333  | 0.087524673  | 0.387523168 | 2.52E-03 | 2.34E-02 | 1.00E+00 |
| ENSG00000163472.17_TMEN79   | ENSG00000160789.18_LMNA | 0.2224   | 0.065524159  | 0.36855608  | 5.89E-03 | 4.44E-02 | 1.00E+00 |
| ENSG00000230844.2_ZNF674-AS | ENSG00000160789.18_LMNA | -0.13486 | -0.28787847  | 0.024876397 | 9.76E-02 | 3.07E-01 | 1.00E+00 |
| ENSG00000148948.6_LRR4C     | ENSG00000160789.18_LMNA | -0.09704 | -0.252345808 | 0.063132357 | 2.34E-01 | 5.12E-01 | 1.00E+00 |
| ENSG00000198478.7_SH3BGL2   | ENSG00000160789.18_LMNA | -0.41984 | -0.542762765 | -0.27930753 | 7.27E-08 | 5.57E-06 | 3.73E-03 |
| ENSG00000198131.12_ZNF544   | ENSG00000160789.18_LMNA | -0.09326 | -0.248763563 | 0.066938385 | 2.53E-01 | 5.35E-01 | 1.00E+00 |
| ENSG00000133195.10_SLC39A11 | ENSG00000160789.18_LMNA | -0.16342 | -0.314444482 | -0.00433692 | 4.42E-02 | 1.86E-01 | 1.00E+00 |
| ENSG00000169436.15_COL22A1  | ENSG00000160789.18_LMNA | 0.30242  | 0.150465163  | 0.440418061 | 1.53E-04 | 2.64E-03 | 1.00E+00 |
| ENSG00000164162.11_ANAPC10  | ENSG00000160789.18_LMNA | -0.04365 | -0.201452605 | 0.116357438 | 5.93E-01 | 8.12E-01 | 1.00E+00 |
| ENSG00000113273.14_ARSB     | ENSG00000160789.18_LMNA | 0.21086  | 0.05345708   | 0.358044548 | 9.12E-03 | 6.13E-02 | 1.00E+00 |
| ENSG00000121297.6_TSHZ3     | ENSG00000160789.18_LMNA | 0.22711  | 0.070458391  | 0.372832043 | 4.90E-03 | 3.86E-02 | 1.00E+00 |
| ENSG00000179943.7_FIZ1      | ENSG00000160789.18_LMNA | 0.09341  | -0.06677993  | 0.248912873 | 2.52E-01 | 5.33E-01 | 1.00E+00 |
| ENSG00000095066.10_HOOK2    | ENSG00000160789.18_LMNA | 0.13877  | -0.020889937 | 0.291532263 | 8.82E-02 | 2.89E-01 | 1.00E+00 |
| ENSG00000275964.1_RP11-61K9 | ENSG00000160789.18_LMNA | -0.01378 | -0.172601004 | 0.14574148  | 8.66E-01 | 9.48E-01 | 1.00E+00 |
| ENSG00000132005.7_RFX1      | ENSG00000160789.18_LMNA | 0.28963  | 0.136733779  | 0.429047427 | 2.96E-04 | 4.44E-03 | 1.00E+00 |
| ENSG00000128045.6_RASL11B   | ENSG00000160789.18_LMNA | -0.38404 | -0.511941338 | -0.23948156 | 1.04E-06 | 4.74E-05 | 5.33E-02 |
| ENSG00000204822.6_MRPL53    | ENSG00000160789.18_LMNA | -0.11076 | -0.265282767 | 0.049310387 | 1.74E-01 | 4.35E-01 | 1.00E+00 |
| ENSG00000064703.10_DDX20    | ENSG00000160789.18_LMNA | -0.00705 | -0.166059968 | 0.152326031 | 9.31E-01 | 9.73E-01 | 1.00E+00 |
| ENSG00000159674.10_SPON2    | ENSG00000160789.18_LMNA | 0.36686  | 0.220539194  | 0.497031401 | 3.34E-06 | 1.20E-04 | 1.71E-01 |
| ENSG00000138030.11_KHK      | ENSG00000160789.18_LMNA | -0.00483 | -0.163902511 | 0.15449166  | 9.53E-01 | 9.81E-01 | 1.00E+00 |
| ENSG00000172687.12_ZNF738   | ENSG00000160789.18_LMNA | -0.38667 | -0.514216564 | -0.24239049 | 8.63E-07 | 4.04E-05 | 4.43E-02 |
| ENSG00000213380.12_COG8     | ENSG00000160789.18_LMNA | 0.08508  | -0.075135889 | 0.2410186   | 2.97E-01 | 5.83E-01 | 1.00E+00 |
| ENSG00000065361.13_ERBB3    | ENSG00000160789.18_LMNA | -0.36312 | -0.493773237 | -0.21642743 | 4.27E-06 | 1.46E-04 | 2.19E-01 |
| ENSG00000165349.10_SLC7A3   | ENSG00000160789.18_LMNA | -0.12122 | -0.27511147  | 0.038728137 | 1.37E-01 | 3.77E-01 | 1.00E+00 |
| ENSG00000146587.16_RBAK     | ENSG00000160789.18_LMNA | 0.26661  | 0.11216964   | 0.408472694 | 9.00E-04 | 1.07E-02 | 1.00E+00 |
| ENSG00000124731.11_TREM1    | ENSG00000160789.18_LMNA | 0.13201  | -0.027778602 | 0.285212714 | 1.05E-01 | 3.21E-01 | 1.00E+00 |
| ENSG00000228532.4_RP1-241P1 | ENSG00000160789.18_LMNA | -0.0487  | -0.206305109 | 0.111360118 | 5.51E-01 | 7.87E-01 | 1.00E+00 |
| ENSG00000184677.15_ZBTB40   | ENSG00000160789.18_LMNA | 0.0047   | -0.154619951 | 0.163774608 | 9.54E-01 | 9.82E-01 | 1.00E+00 |

|                             |                         |          |              |             |          |          |          |
|-----------------------------|-------------------------|----------|--------------|-------------|----------|----------|----------|
| ENSG00000196872.9_KIAA1211L | ENSG00000160789.18_LMNA | 0.28019  | 0.126640778  | 0.420630159 | 4.72E-04 | 6.44E-03 | 1.00E+00 |
| ENSG00000171953.14_ATPAF2   | ENSG00000160789.18_LMNA | -0.16351 | -0.314522099 | -0.00442306 | 4.41E-02 | 1.85E-01 | 1.00E+00 |
| ENSG00000009413.14_REV3L    | ENSG00000160789.18_LMNA | -0.13193 | -0.285139196 | 0.027858565 | 1.05E-01 | 3.22E-01 | 1.00E+00 |
| ENSG00000163597.13_SNHG16   | ENSG00000160789.18_LMNA | -0.1104  | -0.264947746 | 0.049669854 | 1.76E-01 | 4.37E-01 | 1.00E+00 |
| ENSG00000162300.10_ZFPL1    | ENSG00000160789.18_LMNA | -0.04248 | -0.200328099 | 0.117513211 | 6.03E-01 | 8.18E-01 | 1.00E+00 |
| ENSG00000083520.13_DIS3     | ENSG00000160789.18_LMNA | -0.05376 | -0.211152794 | 0.106351669 | 5.11E-01 | 7.59E-01 | 1.00E+00 |
| ENSG00000181744.7_C3orf58   | ENSG00000160789.18_LMNA | 0.19301  | 0.034883267  | 0.341712757 | 1.72E-02 | 9.69E-02 | 1.00E+00 |
| ENSG00000143156.12_NME7     | ENSG00000160789.18_LMNA | -0.05132 | -0.208816209 | 0.108767755 | 5.30E-01 | 7.73E-01 | 1.00E+00 |
| ENSG00000113532.11_ST8SIA4  | ENSG00000160789.18_LMNA | 0.13162  | -0.028168905 | 0.28485384  | 1.06E-01 | 3.23E-01 | 1.00E+00 |
| ENSG00000100441.8_KHNYN     | ENSG00000160789.18_LMNA | 0.45842  | 0.322781136  | 0.57561612  | 2.87E-09 | 3.75E-07 | 1.47E-04 |
| ENSG00000257017.7_HP        | ENSG00000160789.18_LMNA | 0.06368  | -0.096495792 | 0.220646916 | 4.36E-01 | 7.04E-01 | 1.00E+00 |
| ENSG00000106692.12_FKTN     | ENSG00000160789.18_LMNA | 0.11135  | -0.048718447 | 0.265834288 | 1.72E-01 | 4.31E-01 | 1.00E+00 |
| ENSG00000076067.10_RBMS2    | ENSG00000160789.18_LMNA | 0.10156  | -0.058585942 | 0.256613603 | 2.13E-01 | 4.87E-01 | 1.00E+00 |
| ENSG0000015413.8_DPEP1      | ENSG00000160789.18_LMNA | -0.07484 | -0.231287501 | 0.085375361 | 3.59E-01 | 6.42E-01 | 1.00E+00 |
| ENSG00000165355.7_FBXO33    | ENSG00000160789.18_LMNA | -0.19078 | -0.339661897 | -0.03256575 | 1.86E-02 | 1.02E-01 | 1.00E+00 |
| ENSG00000198130.13_HIBCH    | ENSG00000160789.18_LMNA | -0.34931 | -0.481723515 | -0.20130584 | 1.03E-05 | 2.98E-04 | 5.28E-01 |
| ENSG00000126106.12_TMEM53   | ENSG00000160789.18_LMNA | 0.32832  | 0.178450352  | 0.463307495 | 3.64E-05 | 8.35E-04 | 1.00E+00 |
| ENSG00000174348.12_PODN     | ENSG00000160789.18_LMNA | -0.118   | -0.272090534 | 0.041988193 | 1.48E-01 | 3.94E-01 | 1.00E+00 |
| ENSG00000267673.5_FDX2      | ENSG00000160789.18_LMNA | -0.09825 | -0.253481874 | 0.061923401 | 2.29E-01 | 5.05E-01 | 1.00E+00 |
| ENSG00000130818.9_ZNF426    | ENSG00000160789.18_LMNA | -0.04015 | -0.198080765 | 0.119820455 | 6.23E-01 | 8.30E-01 | 1.00E+00 |
| ENSG00000223313.1_RNU6-516F | ENSG00000160789.18_LMNA | -0.09189 | -0.247469696 | 0.068310825 | 2.60E-01 | 5.43E-01 | 1.00E+00 |
| ENSG00000167107.11_ACSF2    | ENSG00000160789.18_LMNA | 0.13797  | -0.021703417 | 0.290787406 | 9.01E-02 | 2.92E-01 | 1.00E+00 |
| ENSG00000169057.18_MECP2    | ENSG00000160789.18_LMNA | 0.1055   | -0.054615229 | 0.260330949 | 1.96E-01 | 4.65E-01 | 1.00E+00 |
| ENSG00000273437.1_RP11-434H | ENSG00000160789.18_LMNA | -0.08366 | -0.239667812 | 0.076561242 | 3.06E-01 | 5.92E-01 | 1.00E+00 |
| ENSG00000156970.11_BUB1B    | ENSG00000160789.18_LMNA | 0.10913  | -0.05095967  | 0.263745016 | 1.81E-01 | 4.44E-01 | 1.00E+00 |
| ENSG00000121486.10_TRMT1L   | ENSG00000160789.18_LMNA | -0.18946 | -0.33845003  | -0.03119786 | 1.94E-02 | 1.06E-01 | 1.00E+00 |
| ENSG00000182771.16_GRID1    | ENSG00000160789.18_LMNA | -0.15713 | -0.30860877  | 0.002126008 | 5.32E-02 | 2.09E-01 | 1.00E+00 |
| ENSG00000254027.1_RP11-363E | ENSG00000160789.18_LMNA | 0.14258  | -0.017002559 | 0.295086482 | 7.97E-02 | 2.71E-01 | 1.00E+00 |
| ENSG00000112130.15_RNF8     | ENSG00000160789.18_LMNA | -0.06297 | -0.2199641   | 0.097206708 | 4.41E-01 | 7.09E-01 | 1.00E+00 |
| ENSG00000142961.13_MOB3C    | ENSG00000160789.18_LMNA | 0.22167  | 0.064757645  | 0.367890673 | 6.06E-03 | 4.53E-02 | 1.00E+00 |
| ENSG00000162408.10_NOL9     | ENSG00000160789.18_LMNA | 0.1077   | -0.052399042 | 0.262401671 | 1.87E-01 | 4.53E-01 | 1.00E+00 |
| ENSG00000182108.8_DEXI      | ENSG00000160789.18_LMNA | -0.10458 | -0.259464003 | 0.055542156 | 2.00E-01 | 4.70E-01 | 1.00E+00 |
| ENSG00000152818.17_UTRN     | ENSG00000160789.18_LMNA | 0.23059  | 0.074112844  | 0.375990704 | 4.26E-03 | 3.48E-02 | 1.00E+00 |

|                              |                         |          |              |             |          |          |          |
|------------------------------|-------------------------|----------|--------------|-------------|----------|----------|----------|
| ENSG00000253954.3_HMG1P38    | ENSG00000160789.18_LMNA | 0.1665   | 0.007500392  | 0.317292422 | 4.03E-02 | 1.74E-01 | 1.00E+00 |
| ENSG00000101493.9_ZNF516     | ENSG00000160789.18_LMNA | -0.08681 | -0.242659461 | 0.073402712 | 2.88E-01 | 5.73E-01 | 1.00E+00 |
| ENSG00000113739.9_STC2       | ENSG00000160789.18_LMNA | -0.02841 | -0.186765358 | 0.131385574 | 7.28E-01 | 8.85E-01 | 1.00E+00 |
| ENSG00000156873.14_PHKG2     | ENSG00000160789.18_LMNA | 0.00598  | -0.153369044 | 0.165021271 | 9.42E-01 | 9.77E-01 | 1.00E+00 |
| ENSG00000141012.11_GALNS     | ENSG00000160789.18_LMNA | 0.46891  | 0.334697551  | 0.584481138 | 1.11E-09 | 1.70E-07 | 5.69E-05 |
| ENSG00000028839.8_TBPL1      | ENSG00000160789.18_LMNA | -0.46948 | -0.584961063 | -0.33534496 | 1.05E-09 | 1.63E-07 | 5.39E-05 |
| ENSG00000068784.11_SRBD1     | ENSG00000160789.18_LMNA | -0.07099 | -0.227620334 | 0.089216832 | 3.85E-01 | 6.63E-01 | 1.00E+00 |
| ENSG00000101222.11_SPEF1     | ENSG00000160789.18_LMNA | 0.06372  | -0.096463289 | 0.220678127 | 4.35E-01 | 7.04E-01 | 1.00E+00 |
| ENSG00000059769.18_DNAJC25   | ENSG00000160789.18_LMNA | 0.12932  | -0.030506135 | 0.282702977 | 1.12E-01 | 3.34E-01 | 1.00E+00 |
| ENSG00000103852.11_TTC23     | ENSG00000160789.18_LMNA | 0.29764  | 0.145330524  | 0.436177049 | 1.96E-04 | 3.21E-03 | 1.00E+00 |
| ENSG00000174442.10_ZWILCH    | ENSG00000160789.18_LMNA | 0.03124  | -0.128598953 | 0.189499553 | 7.02E-01 | 8.73E-01 | 1.00E+00 |
| ENSG00000049618.20_ARID1B    | ENSG00000160789.18_LMNA | -0.02625 | -0.184674419 | 0.133513219 | 7.48E-01 | 8.95E-01 | 1.00E+00 |
| ENSG00000065613.12_SLK       | ENSG00000160789.18_LMNA | 0.23795  | 0.081854139  | 0.382658662 | 3.16E-03 | 2.78E-02 | 1.00E+00 |
| ENSG00000162695.10_SLC30A7   | ENSG00000160789.18_LMNA | 0.32943  | 0.179655038  | 0.464284363 | 3.41E-05 | 7.93E-04 | 1.00E+00 |
| ENSG00000230204.1_FTH1P5     | ENSG00000160789.18_LMNA | 0.01086  | -0.148601107 | 0.169763721 | 8.94E-01 | 9.59E-01 | 1.00E+00 |
| ENSG00000274180.1_NATD1      | ENSG00000160789.18_LMNA | 0.15191  | -0.00747151  | 0.303764301 | 6.17E-02 | 2.30E-01 | 1.00E+00 |
| ENSG00000104147.7_OIP5       | ENSG00000160789.18_LMNA | 0.00272  | -0.15655308  | 0.161846036 | 9.74E-01 | 9.90E-01 | 1.00E+00 |
| ENSG00000176222.8_ZNF404     | ENSG00000160789.18_LMNA | -0.14318 | -0.295645662 | 0.016390104 | 7.84E-02 | 2.69E-01 | 1.00E+00 |
| ENSG00000233325.3_MIPEPP3    | ENSG00000160789.18_LMNA | -0.14663 | -0.298854348 | 0.012871181 | 7.14E-02 | 2.53E-01 | 1.00E+00 |
| ENSG00000227946.1_AC007383.1 | ENSG00000160789.18_LMNA | 0.04519  | -0.114835476 | 0.202932116 | 5.80E-01 | 8.04E-01 | 1.00E+00 |
| ENSG00000247626.4_MARS2      | ENSG00000160789.18_LMNA | -0.10658 | -0.261343313 | 0.053532136 | 1.91E-01 | 4.59E-01 | 1.00E+00 |
| ENSG00000174600.12_CMKLR1    | ENSG00000160789.18_LMNA | 0.06009  | -0.100070006 | 0.217210823 | 4.62E-01 | 7.25E-01 | 1.00E+00 |
| ENSG00000073614.10_KDM5A     | ENSG00000160789.18_LMNA | 0.12207  | -0.037868686 | 0.275906851 | 1.34E-01 | 3.72E-01 | 1.00E+00 |
| ENSG00000231414.1_AC016700.1 | ENSG00000160789.18_LMNA | -0.05134 | -0.208834566 | 0.108748788 | 5.30E-01 | 7.73E-01 | 1.00E+00 |
| ENSG00000237493.3_RP11-603J1 | ENSG00000160789.18_LMNA | 0.45455  | 0.318384245  | 0.572330047 | 4.04E-09 | 5.00E-07 | 2.07E-04 |
| ENSG00000165733.7_BMS1       | ENSG00000160789.18_LMNA | 0.2265   | 0.069812858  | 0.372273359 | 5.02E-03 | 3.93E-02 | 1.00E+00 |
| ENSG00000256745.1_RP11-680H  | ENSG00000160789.18_LMNA | -0.12375 | -0.277485492 | 0.036161504 | 1.29E-01 | 3.64E-01 | 1.00E+00 |
| ENSG00000269867.1_CTD-2583A  | ENSG00000160789.18_LMNA | 0.00371  | -0.155581705 | 0.162815425 | 9.64E-01 | 9.86E-01 | 1.00E+00 |
| ENSG00000040933.14_INPP4A    | ENSG00000160789.18_LMNA | -0.01937 | -0.17802422  | 0.140260717 | 8.13E-01 | 9.26E-01 | 1.00E+00 |
| ENSG00000141098.11_GFOD2     | ENSG00000160789.18_LMNA | -0.06178 | -0.218830723 | 0.098386011 | 4.50E-01 | 7.15E-01 | 1.00E+00 |
| ENSG00000117480.14_FAAH      | ENSG00000160789.18_LMNA | -0.35699 | -0.488430309 | -0.20970595 | 6.34E-06 | 2.02E-04 | 3.25E-01 |
| ENSG00000105613.8_MAST1      | ENSG00000160789.18_LMNA | -0.28716 | -0.426844403 | -0.13408629 | 3.35E-04 | 4.89E-03 | 1.00E+00 |
| ENSG00000185019.15_UBOX5     | ENSG00000160789.18_LMNA | 0.10298  | -0.057162126 | 0.257947641 | 2.07E-01 | 4.79E-01 | 1.00E+00 |

|                              |                         |          |              |             |          |          |          |
|------------------------------|-------------------------|----------|--------------|-------------|----------|----------|----------|
| ENSG00000224318.4_CHL1-AS2   | ENSG00000160789.18_LMNA | 0.06941  | -0.090793062 | 0.22611302  | 3.95E-01 | 6.73E-01 | 1.00E+00 |
| ENSG00000003436.13_TFPI      | ENSG00000160789.18_LMNA | -0.10398 | -0.258892011 | 0.056153425 | 2.02E-01 | 4.73E-01 | 1.00E+00 |
| ENSG00000105738.9_SIPA1L3    | ENSG00000160789.18_LMNA | 0.15787  | -0.001360339 | 0.309301355 | 5.21E-02 | 2.07E-01 | 1.00E+00 |
| ENSG00000230487.6_PSMG3-AS   | ENSG00000160789.18_LMNA | 0.13752  | -0.022170568 | 0.290359492 | 9.11E-02 | 2.94E-01 | 1.00E+00 |
| ENSG00000197629.5_MPEG1      | ENSG00000160789.18_LMNA | -0.02594 | -0.184380278 | 0.133812288 | 7.51E-01 | 8.96E-01 | 1.00E+00 |
| ENSG00000205208.4_C4orf46    | ENSG00000160789.18_LMNA | -0.13387 | -0.286957785 | 0.025879342 | 1.00E-01 | 3.12E-01 | 1.00E+00 |
| ENSG00000264538.5_SUZ12P1    | ENSG00000160789.18_LMNA | -0.35668 | -0.488156935 | -0.20936275 | 6.47E-06 | 2.06E-04 | 3.32E-01 |
| ENSG00000004766.14_VPS50     | ENSG00000160789.18_LMNA | -0.13838 | -0.291165489 | 0.021290554 | 8.91E-02 | 2.91E-01 | 1.00E+00 |
| ENSG00000276085.1_CCL3L3     | ENSG00000160789.18_LMNA | -0.10405 | -0.258958118 | 0.05608279  | 2.02E-01 | 4.73E-01 | 1.00E+00 |
| ENSG00000178761.13_FAM219B   | ENSG00000160789.18_LMNA | -0.14545 | -0.297754871 | 0.014077833 | 7.38E-02 | 2.58E-01 | 1.00E+00 |
| ENSG00000020181.16_ADGRA2    | ENSG00000160789.18_LMNA | 0.28055  | 0.127024007  | 0.420950687 | 4.64E-04 | 6.35E-03 | 1.00E+00 |
| ENSG00000137185.10_ZSCAN9    | ENSG00000160789.18_LMNA | -0.14996 | -0.301952086 | 0.00946659  | 6.52E-02 | 2.38E-01 | 1.00E+00 |
| ENSG00000074590.12_NUAK1     | ENSG00000160789.18_LMNA | -0.07356 | -0.230069678 | 0.086652113 | 3.68E-01 | 6.48E-01 | 1.00E+00 |
| ENSG00000159208.14_CIART     | ENSG00000160789.18_LMNA | -0.08145 | -0.237566387 | 0.0787761   | 3.19E-01 | 6.05E-01 | 1.00E+00 |
| ENSG00000138111.13_MFSD13A   | ENSG00000160789.18_LMNA | -0.24369 | -0.387843297 | -0.08789853 | 2.48E-03 | 2.31E-02 | 1.00E+00 |
| ENSG00000170522.8_ELOVL6     | ENSG00000160789.18_LMNA | 0.36117  | 0.214290913  | 0.492077176 | 4.85E-06 | 1.62E-04 | 2.49E-01 |
| ENSG00000107815.6_TWNK       | ENSG00000160789.18_LMNA | -0.14392 | -0.296331858 | 0.015638212 | 7.69E-02 | 2.66E-01 | 1.00E+00 |
| ENSG00000173145.10_NOC3L     | ENSG00000160789.18_LMNA | -0.09134 | -0.246947605 | 0.068864283 | 2.63E-01 | 5.46E-01 | 1.00E+00 |
| ENSG00000104883.6_PEX11G     | ENSG00000160789.18_LMNA | 0.04022  | -0.119743039 | 0.198156225 | 6.23E-01 | 8.30E-01 | 1.00E+00 |
| ENSG00000110195.10_FOLR1     | ENSG00000160789.18_LMNA | 0.07548  | -0.084740423 | 0.231892763 | 3.55E-01 | 6.39E-01 | 1.00E+00 |
| ENSG00000276600.3_RAB7B      | ENSG00000160789.18_LMNA | 0.31622  | 0.165347717  | 0.452637796 | 7.22E-05 | 1.45E-03 | 1.00E+00 |
| ENSG00000163017.12_ACTG2     | ENSG00000160789.18_LMNA | 0.26556  | 0.111054965  | 0.407531853 | 9.44E-04 | 1.11E-02 | 1.00E+00 |
| ENSG00000166347.17_CYB5A     | ENSG00000160789.18_LMNA | -0.27021 | -0.411696081 | -0.11599426 | 7.61E-04 | 9.34E-03 | 1.00E+00 |
| ENSG00000166265.10_CYYR1     | ENSG00000160789.18_LMNA | -0.12462 | -0.278295057 | 0.03528531  | 1.26E-01 | 3.59E-01 | 1.00E+00 |
| ENSG00000131470.13_PSMC3IP   | ENSG00000160789.18_LMNA | 0.14138  | -0.018228987 | 0.293966095 | 8.23E-02 | 2.77E-01 | 1.00E+00 |
| ENSG00000148826.8_NKX6-2     | ENSG00000160789.18_LMNA | -0.27573 | -0.416641504 | -0.12187921 | 5.85E-04 | 7.63E-03 | 1.00E+00 |
| ENSG00000188785.10_ZNF548    | ENSG00000160789.18_LMNA | 0.06963  | -0.090577434 | 0.22631931  | 3.94E-01 | 6.72E-01 | 1.00E+00 |
| ENSG00000080709.13_KCNN2     | ENSG00000160789.18_LMNA | -0.35363 | -0.485500765 | -0.2060317  | 7.85E-06 | 2.41E-04 | 4.03E-01 |
| ENSG00000229413.2_RP11-274B  | ENSG00000160789.18_LMNA | 0.14343  | -0.016144006 | 0.295870292 | 7.79E-02 | 2.68E-01 | 1.00E+00 |
| ENSG00000184922.12_FMNL1     | ENSG00000160789.18_LMNA | 0.19603  | 0.038013905  | 0.344478546 | 1.55E-02 | 8.99E-02 | 1.00E+00 |
| ENSG00000214135.7_AC024560.1 | ENSG00000160789.18_LMNA | -0.03573 | -0.193832662 | 0.124172446 | 6.62E-01 | 8.51E-01 | 1.00E+00 |
| ENSG00000170113.14_NIPA1     | ENSG00000160789.18_LMNA | 0.00916  | -0.150256375 | 0.16811897  | 9.11E-01 | 9.66E-01 | 1.00E+00 |
| ENSG00000164221.11_CCDC112   | ENSG00000160789.18_LMNA | 0.02396  | -0.13576246  | 0.182460845 | 7.70E-01 | 9.05E-01 | 1.00E+00 |

|                             |                         |          |              |             |          |          |          |
|-----------------------------|-------------------------|----------|--------------|-------------|----------|----------|----------|
| ENSG00000198740.7_ZNF652    | ENSG00000160789.18_LMNA | -0.18217 | -0.331749373 | -0.02365526 | 2.47E-02 | 1.25E-01 | 1.00E+00 |
| ENSG00000188549.11_C15orf52 | ENSG00000160789.18_LMNA | 0.20916  | 0.051677476  | 0.35648779  | 9.71E-03 | 6.43E-02 | 1.00E+00 |
| ENSG00000198690.8_FAN1      | ENSG00000160789.18_LMNA | -0.0736  | -0.230099975 | 0.086620363 | 3.68E-01 | 6.48E-01 | 1.00E+00 |
| ENSG00000107669.16_ATE1     | ENSG00000160789.18_LMNA | -0.31606 | -0.452496377 | -0.16517473 | 7.29E-05 | 1.46E-03 | 1.00E+00 |
| ENSG00000175048.15_ZDHHC14  | ENSG00000160789.18_LMNA | 0.02572  | -0.134029235 | 0.184166871 | 7.53E-01 | 8.97E-01 | 1.00E+00 |
| ENSG00000120314.17_WDR55    | ENSG00000160789.18_LMNA | 0.31004  | 0.158666548  | 0.447165351 | 1.01E-04 | 1.90E-03 | 1.00E+00 |
| ENSG00000111012.8_CYP27B1   | ENSG00000160789.18_LMNA | -0.20686 | -0.354387148 | -0.0492792  | 1.06E-02 | 6.81E-02 | 1.00E+00 |
| ENSG00000125966.9_MMP24     | ENSG00000160789.18_LMNA | -0.17378 | -0.324012269 | -0.0149894  | 3.23E-02 | 1.50E-01 | 1.00E+00 |
| ENSG00000006695.9_COX10     | ENSG00000160789.18_LMNA | -0.0837  | -0.239705294 | 0.076521708 | 3.05E-01 | 5.92E-01 | 1.00E+00 |
| ENSG00000215190.7_LINC00680 | ENSG00000160789.18_LMNA | -0.28818 | -0.427755059 | -0.13518017 | 3.18E-04 | 4.71E-03 | 1.00E+00 |
| ENSG00000170949.16_ZNF160   | ENSG00000160789.18_LMNA | 0.18242  | 0.023908796  | 0.331975109 | 2.45E-02 | 1.25E-01 | 1.00E+00 |
| ENSG0000020426.9_MNAT1      | ENSG00000160789.18_LMNA | -0.06466 | -0.221582985 | 0.095520677 | 4.29E-01 | 6.99E-01 | 1.00E+00 |
| ENSG00000108384.13_RAD51C   | ENSG00000160789.18_LMNA | -0.14752 | -0.299678225 | 0.011966398 | 6.97E-02 | 2.49E-01 | 1.00E+00 |
| ENSG00000160055.18_TMEM234  | ENSG00000160789.18_LMNA | 0.13109  | -0.028705588 | 0.284360229 | 1.07E-01 | 3.26E-01 | 1.00E+00 |
| ENSG00000103351.11_CLUAP1   | ENSG00000160789.18_LMNA | 0.05281  | -0.107290568 | 0.21024522  | 5.18E-01 | 7.65E-01 | 1.00E+00 |
| ENSG00000171587.13_DSCAM    | ENSG00000160789.18_LMNA | -0.27266 | -0.413890783 | -0.11860335 | 6.78E-04 | 8.56E-03 | 1.00E+00 |
| ENSG00000134324.10_LPIN1    | ENSG00000160789.18_LMNA | -0.06666 | -0.223490168 | 0.093532052 | 4.15E-01 | 6.88E-01 | 1.00E+00 |
| ENSG00000116198.11_CEP104   | ENSG00000160789.18_LMNA | 0.16931  | 0.010389008  | 0.319888051 | 3.70E-02 | 1.65E-01 | 1.00E+00 |
| ENSG00000087253.10_LPCAT2   | ENSG00000160789.18_LMNA | -0.14837 | -0.300471193 | 0.011095078 | 6.81E-02 | 2.45E-01 | 1.00E+00 |
| ENSG00000102445.17_RUBCNL   | ENSG00000160789.18_LMNA | 0.2023   | 0.044532833  | 0.350220728 | 1.24E-02 | 7.67E-02 | 1.00E+00 |
| ENSG00000147257.12_GPC3     | ENSG00000160789.18_LMNA | -0.14038 | -0.293029574 | 0.019253424 | 8.45E-02 | 2.82E-01 | 1.00E+00 |
| ENSG00000204954.8_C12orf73  | ENSG00000160789.18_LMNA | -0.29384 | -0.432796563 | -0.14124892 | 2.39E-04 | 3.76E-03 | 1.00E+00 |
| ENSG00000167861.14_HID1     | ENSG00000160789.18_LMNA | -0.28377 | -0.423819415 | -0.13045781 | 3.96E-04 | 5.62E-03 | 1.00E+00 |
| ENSG00000212664.5_RP11-592N | ENSG00000160789.18_LMNA | -0.11218 | -0.266614904 | 0.047880244 | 1.69E-01 | 4.27E-01 | 1.00E+00 |
| ENSG00000125746.13_EML2     | ENSG00000160789.18_LMNA | 0.28279  | 0.129410826  | 0.422945348 | 4.16E-04 | 5.84E-03 | 1.00E+00 |
| ENSG00000162066.13_AMDHD2   | ENSG00000160789.18_LMNA | 0.23058  | 0.074102786  | 0.37598202  | 4.26E-03 | 3.48E-02 | 1.00E+00 |
| ENSG00000119661.13_DNAL1    | ENSG00000160789.18_LMNA | 0.12289  | -0.037036417 | 0.276676666 | 1.31E-01 | 3.68E-01 | 1.00E+00 |
| ENSG00000177034.13_MTX3     | ENSG00000160789.18_LMNA | 0.17708  | 0.018401528  | 0.327063643 | 2.91E-02 | 1.40E-01 | 1.00E+00 |
| ENSG00000102575.9_ACP5      | ENSG00000160789.18_LMNA | -0.01779 | -0.176486255 | 0.141816986 | 8.28E-01 | 9.33E-01 | 1.00E+00 |
| ENSG00000188766.11_SPRED3   | ENSG00000160789.18_LMNA | 0.47932  | 0.346565864  | 0.593251497 | 4.18E-10 | 7.56E-08 | 2.14E-05 |
| ENSG00000012174.10_MBTSP2   | ENSG00000160789.18_LMNA | 0.17384  | 0.015059269  | 0.324074812 | 3.22E-02 | 1.50E-01 | 1.00E+00 |
| ENSG00000244754.7_N4BP2L2   | ENSG00000160789.18_LMNA | -0.19793 | -0.346218074 | -0.03998599 | 1.45E-02 | 8.59E-02 | 1.00E+00 |
| ENSG00000206562.10_METTL6   | ENSG00000160789.18_LMNA | -0.37739 | -0.50618231  | -0.23214032 | 1.64E-06 | 6.89E-05 | 8.44E-02 |

|                             |                         |          |              |             |          |          |          |
|-----------------------------|-------------------------|----------|--------------|-------------|----------|----------|----------|
| ENSG00000275066.3_SYNRG     | ENSG00000160789.18_LMNA | -0.14523 | -0.297548983 | 0.014303689 | 7.42E-02 | 2.60E-01 | 1.00E+00 |
| ENSG00000130540.12_SULT4A1  | ENSG00000160789.18_LMNA | -0.11009 | -0.264654425 | 0.049984509 | 1.77E-01 | 4.38E-01 | 1.00E+00 |
| ENSG00000133466.12_C1QTNF6  | ENSG00000160789.18_LMNA | 0.40916  | 0.267380499  | 0.53360624  | 1.66E-07 | 1.09E-05 | 8.52E-03 |
| ENSG00000174791.9_RIN1      | ENSG00000160789.18_LMNA | 0.69029  | 0.596661588  | 0.765381293 | 7.76E-23 | 9.95E-19 | 3.98E-18 |
| ENSG00000157353.15_FUK      | ENSG00000160789.18_LMNA | 0.10578  | -0.054334444 | 0.260593465 | 1.95E-01 | 4.63E-01 | 1.00E+00 |
| ENSG00000108557.16_RAI1     | ENSG00000160789.18_LMNA | 0.25063  | 0.095224954  | 0.394102267 | 1.84E-03 | 1.84E-02 | 1.00E+00 |
| ENSG00000225217.1_HSPA7     | ENSG00000160789.18_LMNA | 0.3364   | 0.187230679  | 0.470411548 | 2.26E-05 | 5.71E-04 | 1.00E+00 |
| ENSG00000103089.7_FA2H      | ENSG00000160789.18_LMNA | -0.3947  | -0.521153537 | -0.25128983 | 4.86E-07 | 2.56E-05 | 2.49E-02 |
| ENSG00000122435.8_TRMT13    | ENSG00000160789.18_LMNA | -0.18999 | -0.338939046 | -0.0317497  | 1.91E-02 | 1.04E-01 | 1.00E+00 |
| ENSG00000102710.18_SUPT20H  | ENSG00000160789.18_LMNA | -0.10878 | -0.263423153 | 0.05130466  | 1.82E-01 | 4.46E-01 | 1.00E+00 |
| ENSG00000274265.3_CH17-189H | ENSG00000160789.18_LMNA | -0.06574 | -0.22261386  | 0.094446095 | 4.21E-01 | 6.93E-01 | 1.00E+00 |
| ENSG00000070018.7_LRP6      | ENSG00000160789.18_LMNA | -0.25905 | -0.401687694 | -0.10414767 | 1.27E-03 | 1.39E-02 | 1.00E+00 |
| ENSG00000166557.11_TMED3    | ENSG00000160789.18_LMNA | 0.16187  | 0.002740879  | 0.313005508 | 4.63E-02 | 1.91E-01 | 1.00E+00 |
| ENSG00000131389.15_SLC6A6   | ENSG00000160789.18_LMNA | 0.18412  | 0.025669197  | 0.333541547 | 2.32E-02 | 1.20E-01 | 1.00E+00 |
| ENSG00000064933.15_PMS1     | ENSG00000160789.18_LMNA | -0.18191 | -0.331512307 | -0.02338905 | 2.49E-02 | 1.26E-01 | 1.00E+00 |
| ENSG00000104756.14_KCTD9    | ENSG00000160789.18_LMNA | 0.28738  | 0.134322261  | 0.427040897 | 3.31E-04 | 4.85E-03 | 1.00E+00 |
| ENSG00000151461.18_UPF2     | ENSG00000160789.18_LMNA | -0.02477 | -0.183249142 | 0.134961837 | 7.62E-01 | 9.01E-01 | 1.00E+00 |
| ENSG00000006016.9_CRLF1     | ENSG00000160789.18_LMNA | -0.03071 | -0.188989256 | 0.129119416 | 7.07E-01 | 8.76E-01 | 1.00E+00 |
| ENSG00000255224.1_CTD-3065J | ENSG00000160789.18_LMNA | -0.09771 | -0.252973692 | 0.062464303 | 2.31E-01 | 5.09E-01 | 1.00E+00 |
| ENSG00000113318.9_MSH3      | ENSG00000160789.18_LMNA | 0.18247  | 0.023966287  | 0.332026293 | 2.44E-02 | 1.25E-01 | 1.00E+00 |
| ENSG00000174405.12_LIG4     | ENSG00000160789.18_LMNA | -0.25708 | -0.399917262 | -0.10206082 | 1.39E-03 | 1.48E-02 | 1.00E+00 |
| ENSG00000182986.11_ZNF320   | ENSG00000160789.18_LMNA | -0.09078 | -0.246417364 | 0.069426181 | 2.66E-01 | 5.50E-01 | 1.00E+00 |
| ENSG00000053900.9_ANAPC4    | ENSG00000160789.18_LMNA | -0.09386 | -0.249338146 | 0.066328525 | 2.50E-01 | 5.31E-01 | 1.00E+00 |
| ENSG00000246022.2_ALDH1L1-A | ENSG00000160789.18_LMNA | -0.02236 | -0.180919146 | 0.137327064 | 7.84E-01 | 9.12E-01 | 1.00E+00 |
| ENSG00000204946.8_ZNF783    | ENSG00000160789.18_LMNA | 0.14201  | -0.017588017 | 0.294551752 | 8.09E-02 | 2.74E-01 | 1.00E+00 |
| ENSG00000110934.9_BIN2      | ENSG00000160789.18_LMNA | -0.06815 | -0.224911106 | 0.092048792 | 4.04E-01 | 6.80E-01 | 1.00E+00 |
| ENSG00000261701.5_HPR       | ENSG00000160789.18_LMNA | -0.29256 | -0.431659842 | -0.13987867 | 2.55E-04 | 3.96E-03 | 1.00E+00 |
| ENSG00000037749.10_MFAP3    | ENSG00000160789.18_LMNA | -0.02637 | -0.184799174 | 0.133386356 | 7.47E-01 | 8.94E-01 | 1.00E+00 |
| ENSG00000186260.15_MKL2     | ENSG00000160789.18_LMNA | 0.15897  | -0.000235508 | 0.310318223 | 5.04E-02 | 2.02E-01 | 1.00E+00 |
| ENSG00000140104.12_C14orf79 | ENSG00000160789.18_LMNA | 0.22162  | 0.064706595  | 0.367846346 | 6.07E-03 | 4.54E-02 | 1.00E+00 |
| ENSG00000214274.8_ANG       | ENSG00000160789.18_LMNA | 0.34255  | 0.193921158  | 0.475800202 | 1.56E-05 | 4.21E-04 | 8.01E-01 |
| ENSG00000166432.13_ZMAT1    | ENSG00000160789.18_LMNA | -0.04693 | -0.204599843 | 0.113118108 | 5.66E-01 | 7.96E-01 | 1.00E+00 |
| ENSG00000168116.12_KIAA1586 | ENSG00000160789.18_LMNA | -0.30052 | -0.438726951 | -0.14841584 | 1.69E-04 | 2.86E-03 | 1.00E+00 |



|                            |                         |          |              |             |          |          |          |
|----------------------------|-------------------------|----------|--------------|-------------|----------|----------|----------|
| ENSG00000198142.4_SOWAHC   | ENSG00000160789.18_LMNA | 0.10555  | -0.054562862 | 0.260379913 | 1.96E-01 | 4.65E-01 | 1.00E+00 |
| ENSG00000184508.9_HDDC3    | ENSG00000160789.18_LMNA | 0.1288   | -0.03103735  | 0.282213679 | 1.14E-01 | 3.37E-01 | 1.00E+00 |
| ENSG00000138468.14_SENP7   | ENSG00000160789.18_LMNA | -0.29045 | -0.429776839 | -0.13761127 | 2.84E-04 | 4.30E-03 | 1.00E+00 |
| ENSG00000187398.10_LUZIP2  | ENSG00000160789.18_LMNA | -0.33236 | -0.466860748 | -0.18283637 | 2.87E-05 | 6.88E-04 | 1.00E+00 |
| ENSG00000166289.5_PLEKHF1  | ENSG00000160789.18_LMNA | 0.36056  | 0.213620887  | 0.491544847 | 5.04E-06 | 1.67E-04 | 2.59E-01 |
| ENSG00000072756.15_TRNT1   | ENSG00000160789.18_LMNA | -0.29682 | -0.435445497 | -0.14444641 | 2.05E-04 | 3.32E-03 | 1.00E+00 |
| ENSG00000164251.4_F2RL1    | ENSG00000160789.18_LMNA | 0.1979   | 0.039955552  | 0.346191243 | 1.45E-02 | 8.59E-02 | 1.00E+00 |
| ENSG00000139977.12_NAA30   | ENSG00000160789.18_LMNA | 0.0622   | -0.097973857 | 0.219226923 | 4.47E-01 | 7.13E-01 | 1.00E+00 |
| ENSG00000114279.12_FGF12   | ENSG00000160789.18_LMNA | -0.37337 | -0.502687422 | -0.22770043 | 2.16E-06 | 8.46E-05 | 1.11E-01 |
| ENSG00000128731.14_HERC2   | ENSG00000160789.18_LMNA | 0.14534  | -0.014192751 | 0.297650116 | 7.40E-02 | 2.59E-01 | 1.00E+00 |
| ENSG00000127989.12_MTERF1  | ENSG00000160789.18_LMNA | -0.12428 | -0.277980865 | 0.035625418 | 1.27E-01 | 3.61E-01 | 1.00E+00 |
| ENSG00000129493.13_HEATR5A | ENSG00000160789.18_LMNA | -0.02334 | -0.181869675 | 0.136362601 | 7.75E-01 | 9.08E-01 | 1.00E+00 |
| ENSG00000138376.9_BARD1    | ENSG00000160789.18_LMNA | 0.11732  | -0.042676453 | 0.271451964 | 1.50E-01 | 3.98E-01 | 1.00E+00 |
| ENSG00000169193.10_CCDC126 | ENSG00000160789.18_LMNA | -0.23203 | -0.377294738 | -0.07562393 | 4.02E-03 | 3.33E-02 | 1.00E+00 |
| ENSG00000126749.13_EMG1    | ENSG00000160789.18_LMNA | -0.18122 | -0.33087612  | -0.02267486 | 2.55E-02 | 1.28E-01 | 1.00E+00 |
| ENSG00000223547.8_ZNF844   | ENSG00000160789.18_LMNA | -0.1586  | -0.309977265 | 0.000612754 | 5.10E-02 | 2.04E-01 | 1.00E+00 |
| ENSG00000137825.9_ITPKA    | ENSG00000160789.18_LMNA | 0.28662  | 0.133515902  | 0.426369313 | 3.44E-04 | 4.99E-03 | 1.00E+00 |
| ENSG00000065989.14_PDE4A   | ENSG00000160789.18_LMNA | 0.02784  | -0.131944577 | 0.186216278 | 7.33E-01 | 8.88E-01 | 1.00E+00 |
| ENSG00000128709.11_HOXD9   | ENSG00000160789.18_LMNA | -0.10176 | -0.256800549 | 0.058386492 | 2.12E-01 | 4.86E-01 | 1.00E+00 |
| ENSG00000152766.5_ANKRD22  | ENSG00000160789.18_LMNA | -0.19325 | -0.341927492 | -0.03512611 | 1.71E-02 | 9.63E-02 | 1.00E+00 |
| ENSG00000267855.4_NDUFA7   | ENSG00000160789.18_LMNA | -0.17454 | -0.324715938 | -0.01577563 | 3.15E-02 | 1.48E-01 | 1.00E+00 |
| ENSG00000157426.12_AASDH   | ENSG00000160789.18_LMNA | -0.20387 | -0.351657317 | -0.04616783 | 1.18E-02 | 7.37E-02 | 1.00E+00 |
| ENSG00000163521.14_GLB1L   | ENSG00000160789.18_LMNA | 0.25317  | 0.097919255  | 0.396397059 | 1.65E-03 | 1.69E-02 | 1.00E+00 |
| ENSG00000106477.17_CEP41   | ENSG00000160789.18_LMNA | 0.10576  | -0.054353624 | 0.260575534 | 1.95E-01 | 4.63E-01 | 1.00E+00 |
| ENSG00000147133.14_TAF1    | ENSG00000160789.18_LMNA | 0.20552  | 0.047886513  | 0.353165885 | 1.11E-02 | 7.05E-02 | 1.00E+00 |
| ENSG00000182197.9_EXT1     | ENSG00000160789.18_LMNA | 0.27107  | 0.116910889  | 0.412467516 | 7.31E-04 | 9.06E-03 | 1.00E+00 |
| ENSG00000173210.18_ABLIM3  | ENSG00000160789.18_LMNA | -0.15906 | -0.310401838 | 0.000142981 | 5.03E-02 | 2.02E-01 | 1.00E+00 |
| ENSG00000198252.10_STYX    | ENSG00000160789.18_LMNA | 0.24153  | 0.085622237  | 0.385893011 | 2.72E-03 | 2.48E-02 | 1.00E+00 |
| ENSG00000171467.14_ZNF318  | ENSG00000160789.18_LMNA | 0.03295  | -0.126912824 | 0.191151567 | 6.87E-01 | 8.64E-01 | 1.00E+00 |
| ENSG00000196353.10_CPNE4   | ENSG00000160789.18_LMNA | 0.21349  | 0.056197821  | 0.360438781 | 8.27E-03 | 5.71E-02 | 1.00E+00 |
| ENSG00000141968.6_VAV1     | ENSG00000160789.18_LMNA | 0.06959  | -0.090616289 | 0.22628214  | 3.94E-01 | 6.72E-01 | 1.00E+00 |
| ENSG00000149016.14_TUT1    | ENSG00000160789.18_LMNA | 0.0884   | -0.071809282 | 0.244166425 | 2.79E-01 | 5.64E-01 | 1.00E+00 |
| ENSG00000126970.14_ZC4H2   | ENSG00000160789.18_LMNA | -0.28917 | -0.428636725 | -0.1362399  | 3.02E-04 | 4.53E-03 | 1.00E+00 |

|                             |                         |          |              |             |          |          |          |
|-----------------------------|-------------------------|----------|--------------|-------------|----------|----------|----------|
| ENSG00000177200.14_CHD9     | ENSG00000160789.18_LMNA | -0.02606 | -0.184494069 | 0.133696598 | 7.50E-01 | 8.96E-01 | 1.00E+00 |
| ENSG00000134987.10_WDR36    | ENSG00000160789.18_LMNA | 0.16683  | 0.007839007  | 0.317596932 | 3.99E-02 | 1.73E-01 | 1.00E+00 |
| ENSG00000186312.9_CA5BP1    | ENSG00000160789.18_LMNA | 0.14469  | -0.014856835 | 0.29704462  | 7.53E-02 | 2.62E-01 | 1.00E+00 |
| ENSG00000198868.3_MTND4LP3  | ENSG00000160789.18_LMNA | -0.15281 | -0.304599396 | 0.006551314 | 6.02E-02 | 2.26E-01 | 1.00E+00 |
| ENSG00000151247.11_EIF4E    | ENSG00000160789.18_LMNA | -0.19452 | -0.343092961 | -0.03644479 | 1.63E-02 | 9.33E-02 | 1.00E+00 |
| ENSG00000166169.15_POLL     | ENSG00000160789.18_LMNA | -0.10645 | -0.261227892 | 0.053655658 | 1.92E-01 | 4.60E-01 | 1.00E+00 |
| ENSG00000197183.11_NOL4L    | ENSG00000160789.18_LMNA | -0.1201  | -0.274063929 | 0.039859352 | 1.41E-01 | 3.82E-01 | 1.00E+00 |
| ENSG00000116761.10_CTH      | ENSG00000160789.18_LMNA | 0.08001  | -0.080208436 | 0.236205829 | 3.27E-01 | 6.14E-01 | 1.00E+00 |
| ENSG00000156966.6_B3GNT7    | ENSG00000160789.18_LMNA | 0.2021   | 0.044325015  | 0.350038026 | 1.25E-02 | 7.70E-02 | 1.00E+00 |
| ENSG00000119147.8_C2orf40   | ENSG00000160789.18_LMNA | -0.15946 | -0.310772061 | -0.00026677 | 4.97E-02 | 2.01E-01 | 1.00E+00 |
| ENSG00000147687.15_TATDN1   | ENSG00000160789.18_LMNA | -0.29758 | -0.436118683 | -0.14525997 | 1.97E-04 | 3.22E-03 | 1.00E+00 |
| ENSG00000167202.10_TBC1D2B  | ENSG00000160789.18_LMNA | 0.23577  | 0.079551928  | 0.380678923 | 3.45E-03 | 2.97E-02 | 1.00E+00 |
| ENSG00000164972.11_C9orf24  | ENSG00000160789.18_LMNA | -0.02816 | -0.186526591 | 0.131628681 | 7.31E-01 | 8.86E-01 | 1.00E+00 |
| ENSG00000115425.12_PECR     | ENSG00000160789.18_LMNA | -0.00846 | -0.167430854 | 0.150948362 | 9.18E-01 | 9.69E-01 | 1.00E+00 |
| ENSG00000168876.7_ANKRD49   | ENSG00000160789.18_LMNA | -0.37429 | -0.503486659 | -0.22871477 | 2.03E-06 | 8.09E-05 | 1.04E-01 |
| ENSG00000244055.1_AC007566  | ENSG00000160789.18_LMNA | -0.04849 | -0.206099952 | 0.111571723 | 5.53E-01 | 7.88E-01 | 1.00E+00 |
| ENSG00000182575.7_NXPH3     | ENSG00000160789.18_LMNA | -0.09552 | -0.25090922  | 0.064659792 | 2.42E-01 | 5.21E-01 | 1.00E+00 |
| ENSG00000181274.6_FRAT2     | ENSG00000160789.18_LMNA | -0.16449 | -0.315431596 | -0.0054327  | 4.29E-02 | 1.82E-01 | 1.00E+00 |
| ENSG0000015153.13_YAF2      | ENSG00000160789.18_LMNA | -0.52807 | -0.633974285 | -0.40272773 | 2.72E-12 | 1.27E-09 | 1.40E-07 |
| ENSG00000204977.8_TRIM13    | ENSG00000160789.18_LMNA | -0.4265  | -0.548458743 | -0.28676819 | 4.28E-08 | 3.58E-06 | 2.20E-03 |
| ENSG00000279348.1_RP11-566E | ENSG00000160789.18_LMNA | -0.25257 | -0.395850384 | -0.09727701 | 1.69E-03 | 1.72E-02 | 1.00E+00 |
| ENSG00000137720.6_C11orf1   | ENSG00000160789.18_LMNA | -0.27665 | -0.417464604 | -0.1228607  | 5.60E-04 | 7.36E-03 | 1.00E+00 |
| ENSG00000136404.14_TM6SF1   | ENSG00000160789.18_LMNA | -0.20585 | -0.353467129 | -0.04822993 | 1.10E-02 | 6.99E-02 | 1.00E+00 |
| ENSG00000176994.10_SMCR8    | ENSG00000160789.18_LMNA | 0.08374  | -0.076475992 | 0.239748636 | 3.05E-01 | 5.92E-01 | 1.00E+00 |
| ENSG00000128849.10_CGNL1    | ENSG00000160789.18_LMNA | 0.2785   | 0.124828855  | 0.41911369  | 5.12E-04 | 6.88E-03 | 1.00E+00 |
| ENSG00000167528.11_ZNF641   | ENSG00000160789.18_LMNA | -0.2119  | -0.358987234 | -0.05453565 | 8.77E-03 | 5.96E-02 | 1.00E+00 |
| ENSG00000103227.17_LMF1     | ENSG00000160789.18_LMNA | 0.1027   | -0.057442673 | 0.257684878 | 2.08E-01 | 4.80E-01 | 1.00E+00 |
| ENSG00000197557.6_TTC30A    | ENSG00000160789.18_LMNA | -0.03066 | -0.188940637 | 0.129168995 | 7.08E-01 | 8.76E-01 | 1.00E+00 |
| ENSG00000115942.7_ORC2      | ENSG00000160789.18_LMNA | -0.1091  | -0.263718373 | 0.05098823  | 1.81E-01 | 4.44E-01 | 1.00E+00 |
| ENSG00000197362.12_ZNF786   | ENSG00000160789.18_LMNA | 0.26755  | 0.113169005  | 0.409315671 | 8.61E-04 | 1.03E-02 | 1.00E+00 |
| ENSG00000143033.16_MTF2     | ENSG00000160789.18_LMNA | -0.11923 | -0.27324174  | 0.040746652 | 1.43E-01 | 3.87E-01 | 1.00E+00 |
| ENSG00000196187.10_TM63A    | ENSG00000160789.18_LMNA | -0.10431 | -0.25920865  | 0.055815072 | 2.01E-01 | 4.71E-01 | 1.00E+00 |
| ENSG00000003393.13_ALS2     | ENSG00000160789.18_LMNA | 0.17173  | 0.012884965  | 0.322127113 | 3.44E-02 | 1.57E-01 | 1.00E+00 |

|                             |                         |          |              |             |          |          |          |
|-----------------------------|-------------------------|----------|--------------|-------------|----------|----------|----------|
| ENSG00000076356.6_PLXNA2    | ENSG00000160789.18_LMNA | 0.16646  | 0.007457646  | 0.317253977 | 4.04E-02 | 1.74E-01 | 1.00E+00 |
| ENSG00000198604.9_BAZ1A     | ENSG00000160789.18_LMNA | 0.18717  | 0.028823649  | 0.336344191 | 2.09E-02 | 1.11E-01 | 1.00E+00 |
| ENSG00000198026.7_ZNF335    | ENSG00000160789.18_LMNA | 0.21592  | 0.058738483  | 0.362654655 | 7.55E-03 | 5.32E-02 | 1.00E+00 |
| ENSG00000218582.2_GAPDHP63  | ENSG00000160789.18_LMNA | 0.22918  | 0.072629021  | 0.374709034 | 4.51E-03 | 3.63E-02 | 1.00E+00 |
| ENSG00000251050.1_RP11-168A | ENSG00000160789.18_LMNA | -0.11847 | -0.2725336   | 0.041510474 | 1.46E-01 | 3.91E-01 | 1.00E+00 |
| ENSG00000067221.12_STOML1   | ENSG00000160789.18_LMNA | 0.0909   | -0.069305949 | 0.246530838 | 2.65E-01 | 5.49E-01 | 1.00E+00 |
| ENSG00000281490.1_CICP14    | ENSG00000160789.18_LMNA | 0.10411  | -0.056022427 | 0.25901461  | 2.02E-01 | 4.72E-01 | 1.00E+00 |
| ENSG00000112893.8_MAN2A1    | ENSG00000160789.18_LMNA | 0.25444  | 0.09926154   | 0.397538921 | 1.56E-03 | 1.62E-02 | 1.00E+00 |
| ENSG00000167642.11_SPINT2   | ENSG00000160789.18_LMNA | -0.10575 | -0.260563038 | 0.05436699  | 1.95E-01 | 4.64E-01 | 1.00E+00 |
| ENSG00000139324.10_TMTC3    | ENSG00000160789.18_LMNA | 0.18021  | 0.021627846  | 0.329942948 | 2.63E-02 | 1.31E-01 | 1.00E+00 |
| ENSG00000226742.3_HSBP1L1   | ENSG00000160789.18_LMNA | -0.13841 | -0.291194916 | 0.021258414 | 8.90E-02 | 2.90E-01 | 1.00E+00 |
| ENSG00000278053.3_DDX52     | ENSG00000160789.18_LMNA | -0.22481 | -0.370740502 | -0.06804301 | 5.36E-03 | 4.13E-02 | 1.00E+00 |
| ENSG00000138604.8_GLCE      | ENSG00000160789.18_LMNA | 0.00631  | -0.153040478 | 0.165348553 | 9.38E-01 | 9.76E-01 | 1.00E+00 |
| ENSG00000174343.5_CHRNA9    | ENSG00000160789.18_LMNA | 0.42575  | 0.285926288  | 0.547817192 | 4.55E-08 | 3.77E-06 | 2.33E-03 |
| ENSG00000140443.12_IGF1R    | ENSG00000160789.18_LMNA | 0.17889  | 0.020265218  | 0.32872758  | 2.74E-02 | 1.35E-01 | 1.00E+00 |
| ENSG00000141391.12_PRELID3A | ENSG00000160789.18_LMNA | 0.02697  | -0.132800408 | 0.185375254 | 7.42E-01 | 8.92E-01 | 1.00E+00 |
| ENSG00000163808.15_KIF15    | ENSG00000160789.18_LMNA | -0.03016 | -0.188454902 | 0.129664228 | 7.12E-01 | 8.78E-01 | 1.00E+00 |
| ENSG00000156968.8_MPV17L    | ENSG00000160789.18_LMNA | -0.02545 | -0.183905929 | 0.134294463 | 7.56E-01 | 8.98E-01 | 1.00E+00 |
| ENSG00000150764.12_DIXDC1   | ENSG00000160789.18_LMNA | -0.2316  | -0.376901117 | -0.07516767 | 4.09E-03 | 3.37E-02 | 1.00E+00 |
| ENSG00000143942.4_CHAC2     | ENSG00000160789.18_LMNA | -0.27754 | -0.4182599   | -0.12380958 | 5.37E-04 | 7.13E-03 | 1.00E+00 |
| ENSG00000140396.11_NCOA2    | ENSG00000160789.18_LMNA | -0.2363  | -0.381160259 | -0.08011137 | 3.38E-03 | 2.92E-02 | 1.00E+00 |
| ENSG00000225770.1_RPS29P3   | ENSG00000160789.18_LMNA | -0.12858 | -0.28200384  | 0.031265113 | 1.14E-01 | 3.38E-01 | 1.00E+00 |
| ENSG00000240356.5_RPL23AP7  | ENSG00000160789.18_LMNA | 0.06539  | -0.094802047 | 0.222272465 | 4.24E-01 | 6.95E-01 | 1.00E+00 |
| ENSG00000089472.15_HEPH     | ENSG00000160789.18_LMNA | 0.09187  | -0.068333422 | 0.247448383 | 2.60E-01 | 5.43E-01 | 1.00E+00 |
| ENSG00000269374.1_CTB-50E14 | ENSG00000160789.18_LMNA | 0.07221  | -0.088004049 | 0.22877906  | 3.77E-01 | 6.56E-01 | 1.00E+00 |
| ENSG00000162817.6_C1orf115  | ENSG00000160789.18_LMNA | -0.05095 | -0.208456199 | 0.109139682 | 5.33E-01 | 7.75E-01 | 1.00E+00 |
| ENSG00000064651.12_SLC12A2  | ENSG00000160789.18_LMNA | -0.00325 | -0.162367796 | 0.156030328 | 9.68E-01 | 9.88E-01 | 1.00E+00 |
| ENSG00000074755.13_ZZEF1    | ENSG00000160789.18_LMNA | 0.14268  | -0.016901864 | 0.295178433 | 7.95E-02 | 2.71E-01 | 1.00E+00 |
| ENSG00000153253.14_SCN3A    | ENSG00000160789.18_LMNA | -0.48675 | -0.599491466 | -0.35505834 | 2.04E-10 | 4.09E-08 | 1.05E-05 |
| ENSG00000182240.14_BACE2    | ENSG00000160789.18_LMNA | 0.26875  | 0.114442624  | 0.410389253 | 8.15E-04 | 9.85E-03 | 1.00E+00 |
| ENSG00000128203.6_ASPhD2    | ENSG00000160789.18_LMNA | 0.17559  | 0.016863279  | 0.325688823 | 3.05E-02 | 1.45E-01 | 1.00E+00 |
| ENSG00000169905.11_TOR1AIP2 | ENSG00000160789.18_LMNA | 0.2457   | 0.090022298  | 0.389660486 | 2.28E-03 | 2.16E-02 | 1.00E+00 |
| ENSG00000109586.10_GALNT7   | ENSG00000160789.18_LMNA | 0.19394  | 0.035848842  | 0.342566369 | 1.67E-02 | 9.46E-02 | 1.00E+00 |

|                             |                         |          |              |             |          |          |          |
|-----------------------------|-------------------------|----------|--------------|-------------|----------|----------|----------|
| ENSG00000152193.7_RNF219    | ENSG00000160789.18_LMNA | -0.26356 | -0.405738084 | -0.10893183 | 1.04E-03 | 1.19E-02 | 1.00E+00 |
| ENSG00000177283.5_FZD8      | ENSG00000160789.18_LMNA | 0.25239  | 0.097093017  | 0.395693732 | 1.71E-03 | 1.73E-02 | 1.00E+00 |
| ENSG00000088992.16_TESC     | ENSG00000160789.18_LMNA | -0.05486 | -0.212207288 | 0.105260066 | 5.02E-01 | 7.54E-01 | 1.00E+00 |
| ENSG00000196741.5_LINC01560 | ENSG00000160789.18_LMNA | -0.29755 | -0.43609295  | -0.14522886 | 1.97E-04 | 3.22E-03 | 1.00E+00 |
| ENSG00000141854.6_MISP3     | ENSG00000160789.18_LMNA | 0.0368   | -0.123124056 | 0.194857117 | 6.53E-01 | 8.46E-01 | 1.00E+00 |
| ENSG00000145246.12_ATP10D   | ENSG00000160789.18_LMNA | 0.18536  | 0.026954316  | 0.334683997 | 2.22E-02 | 1.16E-01 | 1.00E+00 |
| ENSG00000273270.1_RP11-212P | ENSG00000160789.18_LMNA | 0.0561   | -0.104029022 | 0.213395598 | 4.92E-01 | 7.48E-01 | 1.00E+00 |
| ENSG00000279413.1_AC112497. | ENSG00000160789.18_LMNA | 0.23235  | 0.07596262   | 0.377586855 | 3.97E-03 | 3.30E-02 | 1.00E+00 |
| ENSG00000083635.7_NUFIP1    | ENSG00000160789.18_LMNA | -0.2034  | -0.351227874 | -0.0456789  | 1.20E-02 | 7.46E-02 | 1.00E+00 |
| ENSG00000051620.9_HEBP2     | ENSG00000160789.18_LMNA | 0.12238  | -0.037553389 | 0.276198536 | 1.33E-01 | 3.70E-01 | 1.00E+00 |
| ENSG00000130844.15_ZNF331   | ENSG00000160789.18_LMNA | -0.04066 | -0.19857114  | 0.119317301 | 6.19E-01 | 8.27E-01 | 1.00E+00 |
| ENSG00000139719.8_VPS33A    | ENSG00000160789.18_LMNA | -0.28881 | -0.428321153 | -0.13586052 | 3.08E-04 | 4.60E-03 | 1.00E+00 |
| ENSG00000196990.7_FAM163B   | ENSG00000160789.18_LMNA | -0.24944 | -0.393032283 | -0.09397019 | 1.94E-03 | 1.91E-02 | 1.00E+00 |
| ENSG00000179277.9_MEIS3P1   | ENSG00000160789.18_LMNA | 0.08477  | -0.075452692 | 0.240718476 | 2.99E-01 | 5.86E-01 | 1.00E+00 |
| ENSG00000124507.9_PACIN1    | ENSG00000160789.18_LMNA | -0.22501 | -0.370927642 | -0.06825899 | 5.32E-03 | 4.11E-02 | 1.00E+00 |
| ENSG00000139697.10_SBNO1    | ENSG00000160789.18_LMNA | 0.01688  | -0.142703678 | 0.175609295 | 8.36E-01 | 9.37E-01 | 1.00E+00 |
| ENSG00000153975.8_ZUFSP     | ENSG00000160789.18_LMNA | -0.19664 | -0.345035104 | -0.03864461 | 1.52E-02 | 8.86E-02 | 1.00E+00 |
| ENSG00000134070.4_IRAK2     | ENSG00000160789.18_LMNA | 0.48755  | 0.355976589  | 0.600164387 | 1.89E-10 | 3.83E-08 | 9.68E-06 |
| ENSG00000172243.16_CLEC7A   | ENSG00000160789.18_LMNA | -0.04179 | -0.199660742 | 0.118198717 | 6.09E-01 | 8.22E-01 | 1.00E+00 |
| ENSG00000136932.12_TRMO     | ENSG00000160789.18_LMNA | -0.22101 | -0.367290268 | -0.06406632 | 6.21E-03 | 4.61E-02 | 1.00E+00 |
| ENSG00000205730.6_ITPRIPL2  | ENSG00000160789.18_LMNA | 0.43687  | 0.298424259  | 0.557309434 | 1.83E-08 | 1.80E-06 | 9.41E-04 |
| ENSG00000102781.12_KATNAL1  | ENSG00000160789.18_LMNA | 0.15042  | -0.008996657 | 0.302379149 | 6.44E-02 | 2.36E-01 | 1.00E+00 |
| ENSG00000064199.5_SPA17     | ENSG00000160789.18_LMNA | -0.0066  | -0.165621923 | 0.152765983 | 9.36E-01 | 9.75E-01 | 1.00E+00 |
| ENSG00000259417.2_LINC01314 | ENSG00000160789.18_LMNA | -0.11015 | -0.264710092 | 0.049924799 | 1.77E-01 | 4.38E-01 | 1.00E+00 |
| ENSG00000151835.12_SACS     | ENSG00000160789.18_LMNA | 0.05747  | -0.102666729 | 0.214709506 | 4.82E-01 | 7.40E-01 | 1.00E+00 |
| ENSG00000160392.12_C19orf47 | ENSG00000160789.18_LMNA | 0.04733  | -0.11272091  | 0.204985297 | 5.63E-01 | 7.94E-01 | 1.00E+00 |
| ENSG00000163961.4_RNF168    | ENSG00000160789.18_LMNA | 0.17772  | 0.019059924  | 0.32765169  | 2.85E-02 | 1.38E-01 | 1.00E+00 |
| ENSG00000163960.10_UBXN7    | ENSG00000160789.18_LMNA | 0.08015  | -0.080070698 | 0.236336719 | 3.26E-01 | 6.13E-01 | 1.00E+00 |
| ENSG00000141446.9_ESCO1     | ENSG00000160789.18_LMNA | -0.02268 | -0.181223866 | 0.137017943 | 7.82E-01 | 9.10E-01 | 1.00E+00 |
| ENSG00000162623.14_TYW3     | ENSG00000160789.18_LMNA | 0.13673  | -0.022969996 | 0.28962692  | 9.30E-02 | 2.98E-01 | 1.00E+00 |
| ENSG00000245067.5_IGFBP7-AS | ENSG00000160789.18_LMNA | 0.05433  | -0.105789598 | 0.21169585  | 5.06E-01 | 7.57E-01 | 1.00E+00 |
| ENSG00000067208.13_EVI5     | ENSG00000160789.18_LMNA | -0.05797 | -0.215185102 | 0.102173326 | 4.78E-01 | 7.36E-01 | 1.00E+00 |
| ENSG00000250321.1_RP11-478C | ENSG00000160789.18_LMNA | -0.0883  | -0.244068113 | 0.071913284 | 2.79E-01 | 5.65E-01 | 1.00E+00 |

|                             |                         |          |              |             |          |          |          |
|-----------------------------|-------------------------|----------|--------------|-------------|----------|----------|----------|
| ENSG00000213453.3_FTH1P3    | ENSG00000160789.18_LMNA | -0.02097 | -0.179574719 | 0.13869017  | 7.98E-01 | 9.19E-01 | 1.00E+00 |
| ENSG00000180801.12_ARSJ     | ENSG00000160789.18_LMNA | 0.60754  | 0.496347896  | 0.699122227 | 1.05E-16 | 3.00E-13 | 5.39E-12 |
| ENSG00000133401.14_PDZD2    | ENSG00000160789.18_LMNA | 0.03267  | -0.127192852 | 0.19087733  | 6.89E-01 | 8.66E-01 | 1.00E+00 |
| ENSG00000107651.11_SEC23IP  | ENSG00000160789.18_LMNA | 0.1565   | -0.002764851 | 0.308030652 | 5.42E-02 | 2.12E-01 | 1.00E+00 |
| ENSG00000116977.17_LGALS8   | ENSG00000160789.18_LMNA | 0.31116  | 0.159882524  | 0.448162949 | 9.54E-05 | 1.82E-03 | 1.00E+00 |
| ENSG00000268006.1_PTOV1-AS  | ENSG00000160789.18_LMNA | 0.21712  | 0.059993002  | 0.363747535 | 7.21E-03 | 5.15E-02 | 1.00E+00 |
| ENSG00000198743.5_SLC5A3    | ENSG00000160789.18_LMNA | 0.27233  | 0.118259024  | 0.413601339 | 6.88E-04 | 8.66E-03 | 1.00E+00 |
| ENSG00000140265.11_ZSCAN29  | ENSG00000160789.18_LMNA | 0.02865  | -0.131146944 | 0.186999692 | 7.26E-01 | 8.84E-01 | 1.00E+00 |
| ENSG00000212694.7_LINC01089 | ENSG00000160789.18_LMNA | -0.31561 | -0.452094039 | -0.16468268 | 7.47E-05 | 1.49E-03 | 1.00E+00 |
| ENSG00000175198.13_PCCA     | ENSG00000160789.18_LMNA | -0.32887 | -0.463788639 | -0.1790436  | 3.52E-05 | 8.16E-04 | 1.00E+00 |
| ENSG00000102755.9_FLT1      | ENSG00000160789.18_LMNA | 0.15512  | -0.00418098  | 0.306748316 | 5.64E-02 | 2.17E-01 | 1.00E+00 |
| ENSG00000168779.18_SHOX2    | ENSG00000160789.18_LMNA | 0.13209  | -0.027697715 | 0.285287076 | 1.05E-01 | 3.21E-01 | 1.00E+00 |
| ENSG00000240204.2_SMKR1     | ENSG00000160789.18_LMNA | 0.07359  | -0.086628591 | 0.230092123 | 3.68E-01 | 6.48E-01 | 1.00E+00 |
| ENSG00000147854.15_UHRF2    | ENSG00000160789.18_LMNA | 0.22633  | 0.069634653  | 0.372119091 | 5.05E-03 | 3.95E-02 | 1.00E+00 |
| ENSG00000233184.5_RP11-421L | ENSG00000160789.18_LMNA | -0.31314 | -0.449907664 | -0.16201127 | 8.57E-05 | 1.66E-03 | 1.00E+00 |
| ENSG00000166900.13_STX3     | ENSG00000160789.18_LMNA | 0.09213  | -0.068064685 | 0.247701827 | 2.59E-01 | 5.42E-01 | 1.00E+00 |
| ENSG00000182903.14_ZNF721   | ENSG00000160789.18_LMNA | 0.06049  | -0.099667388 | 0.217598276 | 4.59E-01 | 7.23E-01 | 1.00E+00 |
| ENSG00000125454.10_SLC25A19 | ENSG00000160789.18_LMNA | 0.09622  | -0.0639567   | 0.251570667 | 2.38E-01 | 5.17E-01 | 1.00E+00 |
| ENSG00000185917.12_SETD4    | ENSG00000160789.18_LMNA | -0.03981 | -0.197754879 | 0.120154744 | 6.26E-01 | 8.32E-01 | 1.00E+00 |
| ENSG00000103707.8_MTFMT     | ENSG00000160789.18_LMNA | 0.06086  | -0.099301025 | 0.217950752 | 4.56E-01 | 7.21E-01 | 1.00E+00 |
| ENSG00000128011.4_LRFN1     | ENSG00000160789.18_LMNA | -0.05695 | -0.214208011 | 0.103186833 | 4.86E-01 | 7.43E-01 | 1.00E+00 |
| ENSG00000115459.16_ELMOD3   | ENSG00000160789.18_LMNA | -0.14147 | -0.294050553 | 0.018136567 | 8.21E-02 | 2.77E-01 | 1.00E+00 |
| ENSG00000083799.16_CYLD     | ENSG00000160789.18_LMNA | 0.12631  | -0.033567013 | 0.279881395 | 1.21E-01 | 3.50E-01 | 1.00E+00 |
| ENSG00000092847.9_37104     | ENSG00000160789.18_LMNA | 0.06142  | -0.098743113 | 0.218487359 | 4.52E-01 | 7.17E-01 | 1.00E+00 |
| ENSG00000137274.11_BPHL     | ENSG00000160789.18_LMNA | -0.26609 | -0.408009775 | -0.1116211  | 9.21E-04 | 1.09E-02 | 1.00E+00 |
| ENSG00000213609.3_RPL7AP50  | ENSG00000160789.18_LMNA | -0.17147 | -0.321880893 | -0.01261031 | 3.47E-02 | 1.57E-01 | 1.00E+00 |
| ENSG00000138587.5_MNS1      | ENSG00000160789.18_LMNA | 0.12725  | -0.032612132 | 0.280762206 | 1.18E-01 | 3.45E-01 | 1.00E+00 |
| ENSG00000166816.12_LDHD     | ENSG00000160789.18_LMNA | -0.14107 | -0.29367896  | 0.018543146 | 8.30E-02 | 2.78E-01 | 1.00E+00 |
| ENSG00000186364.10_NUDT17   | ENSG00000160789.18_LMNA | -0.07414 | -0.230614747 | 0.086080797 | 3.64E-01 | 6.46E-01 | 1.00E+00 |
| ENSG00000213930.10_GALT     | ENSG00000160789.18_LMNA | -0.228   | -0.373640698 | -0.0713932  | 4.73E-03 | 3.76E-02 | 1.00E+00 |
| ENSG00000087903.11_RFX2     | ENSG00000160789.18_LMNA | 0.30896  | 0.157510084  | 0.446215911 | 1.08E-04 | 2.00E-03 | 1.00E+00 |
| ENSG00000175643.8_RMI2      | ENSG00000160789.18_LMNA | 0.16112  | 0.001967283  | 0.31230753  | 4.74E-02 | 1.94E-01 | 1.00E+00 |
| ENSG00000105499.12_PLA2G4C  | ENSG00000160789.18_LMNA | -0.21925 | -0.365682564 | -0.06221658 | 6.65E-03 | 4.85E-02 | 1.00E+00 |

|                             |                         |          |              |             |          |          |          |
|-----------------------------|-------------------------|----------|--------------|-------------|----------|----------|----------|
| ENSG00000277998.1_RP11-452N | ENSG00000160789.18_LMNA | -0.09549 | -0.250879715 | 0.064691147 | 2.42E-01 | 5.21E-01 | 1.00E+00 |
| ENSG00000183495.12_EP400    | ENSG00000160789.18_LMNA | 0.13391  | -0.025839116 | 0.286994723 | 1.00E-01 | 3.12E-01 | 1.00E+00 |
| ENSG00000034533.10_ASTE1    | ENSG00000160789.18_LMNA | 0.04823  | -0.111824916 | 0.205854438 | 5.55E-01 | 7.89E-01 | 1.00E+00 |
| ENSG00000120049.17_KCNIP2   | ENSG00000160789.18_LMNA | -0.44236 | -0.561981415 | -0.3046084  | 1.16E-08 | 1.22E-06 | 5.94E-04 |
| ENSG00000048707.12_VPS13D   | ENSG00000160789.18_LMNA | -0.1246  | -0.278277247 | 0.035304591 | 1.26E-01 | 3.59E-01 | 1.00E+00 |
| ENSG00000112210.10_RAB23    | ENSG00000160789.18_LMNA | -0.00749 | -0.16649688  | 0.151887092 | 9.27E-01 | 9.72E-01 | 1.00E+00 |
| ENSG00000140406.3_MESDC1    | ENSG00000160789.18_LMNA | 0.21359  | 0.056298915  | 0.360527016 | 8.24E-03 | 5.69E-02 | 1.00E+00 |
| ENSG00000104427.10_ZC2HC1A  | ENSG00000160789.18_LMNA | -0.31433 | -0.45095968  | -0.16329614 | 8.02E-05 | 1.58E-03 | 1.00E+00 |
| ENSG00000159267.13_HLCS     | ENSG00000160789.18_LMNA | 0.35941  | 0.212357207  | 0.490540298 | 5.43E-06 | 1.78E-04 | 2.79E-01 |
| ENSG00000184209.14_SNRNP35  | ENSG00000160789.18_LMNA | -0.1316  | -0.284836751 | 0.028187488 | 1.06E-01 | 3.23E-01 | 1.00E+00 |
| ENSG00000163794.6_UCN       | ENSG00000160789.18_LMNA | -0.07046 | -0.227112491 | 0.089748071 | 3.88E-01 | 6.67E-01 | 1.00E+00 |
| ENSG00000177839.6_PCDHB9    | ENSG00000160789.18_LMNA | 0.04513  | -0.114900105 | 0.202869319 | 5.81E-01 | 8.05E-01 | 1.00E+00 |
| ENSG00000206535.6_LNP1      | ENSG00000160789.18_LMNA | -0.29928 | -0.437626579 | -0.14708373 | 1.80E-04 | 3.01E-03 | 1.00E+00 |
| ENSG00000142856.15_ITGB3BP  | ENSG00000160789.18_LMNA | -0.18957 | -0.338552023 | -0.03131294 | 1.93E-02 | 1.05E-01 | 1.00E+00 |
| ENSG00000132275.9_RRP8      | ENSG00000160789.18_LMNA | 0.21115  | 0.053755627  | 0.358305544 | 9.02E-03 | 6.09E-02 | 1.00E+00 |
| ENSG00000253661.1_ZFHx4-AS1 | ENSG00000160789.18_LMNA | -0.0759  | -0.232293495 | 0.084319902 | 3.53E-01 | 6.36E-01 | 1.00E+00 |
| ENSG00000103154.8_NECAB2    | ENSG00000160789.18_LMNA | -0.26472 | -0.406779276 | -0.11016387 | 9.82E-04 | 1.14E-02 | 1.00E+00 |
| ENSG00000103876.10_FAH      | ENSG00000160789.18_LMNA | 0.17067  | 0.011788309  | 0.321143756 | 3.55E-02 | 1.60E-01 | 1.00E+00 |
| ENSG00000221866.8_PLXNA4    | ENSG00000160789.18_LMNA | -0.00734 | -0.166343571 | 0.152041126 | 9.29E-01 | 9.73E-01 | 1.00E+00 |
| ENSG00000186001.11_LRCH3    | ENSG00000160789.18_LMNA | -0.09045 | -0.246109617 | 0.06975221  | 2.68E-01 | 5.52E-01 | 1.00E+00 |
| ENSG00000164941.12_INTS8    | ENSG00000160789.18_LMNA | -0.00884 | -0.16780549  | 0.150571658 | 9.14E-01 | 9.67E-01 | 1.00E+00 |
| ENSG00000171608.14_PIK3CD   | ENSG00000160789.18_LMNA | 0.1548   | -0.00451138  | 0.306448968 | 5.69E-02 | 2.18E-01 | 1.00E+00 |
| ENSG00000067066.15_SP100    | ENSG00000160789.18_LMNA | 0.10939  | -0.050696888 | 0.263990134 | 1.80E-01 | 4.43E-01 | 1.00E+00 |
| ENSG00000173269.12_MMRN2    | ENSG00000160789.18_LMNA | 0.12432  | -0.035580362 | 0.278022492 | 1.27E-01 | 3.61E-01 | 1.00E+00 |
| ENSG00000204305.12_AGER     | ENSG00000160789.18_LMNA | 0.00315  | -0.156130734 | 0.162267594 | 9.69E-01 | 9.88E-01 | 1.00E+00 |
| ENSG00000135763.8_URB2      | ENSG00000160789.18_LMNA | 0.098    | -0.06216702  | 0.253253014 | 2.30E-01 | 5.07E-01 | 1.00E+00 |
| ENSG00000167536.12_DHRS13   | ENSG00000160789.18_LMNA | 0.16469  | 0.005637823  | 0.315616305 | 4.26E-02 | 1.81E-01 | 1.00E+00 |
| ENSG00000054690.12_PLEKHH1  | ENSG00000160789.18_LMNA | -0.34664 | -0.4793854   | -0.19838706 | 1.22E-05 | 3.43E-04 | 6.24E-01 |
| ENSG00000072195.13_SPEG     | ENSG00000160789.18_LMNA | 0.2457   | 0.090019581  | 0.389658163 | 2.28E-03 | 2.16E-02 | 1.00E+00 |
| ENSG00000274070.1_GATSL2    | ENSG00000160789.18_LMNA | -0.07857 | -0.234837432 | 0.081647709 | 3.36E-01 | 6.22E-01 | 1.00E+00 |
| ENSG00000134909.17_ARHGAP3  | ENSG00000160789.18_LMNA | -0.04143 | -0.199319196 | 0.118549435 | 6.12E-01 | 8.24E-01 | 1.00E+00 |
| ENSG00000266490.1_CTD-2349P | ENSG00000160789.18_LMNA | -0.1956  | -0.344082953 | -0.03756576 | 1.57E-02 | 9.08E-02 | 1.00E+00 |
| ENSG00000153914.14_SREK1    | ENSG00000160789.18_LMNA | 0.10982  | -0.050261268 | 0.264396384 | 1.78E-01 | 4.40E-01 | 1.00E+00 |

|                              |                         |          |              |             |          |          |          |
|------------------------------|-------------------------|----------|--------------|-------------|----------|----------|----------|
| ENSG00000112282.16_MED23     | ENSG00000160789.18_LMNA | -0.08286 | -0.238911149 | 0.077359109 | 3.10E-01 | 5.97E-01 | 1.00E+00 |
| ENSG00000100207.17_TCF20     | ENSG00000160789.18_LMNA | 0.00638  | -0.152980961 | 0.165407831 | 9.38E-01 | 9.75E-01 | 1.00E+00 |
| ENSG00000204104.10_TRAF3IP1  | ENSG00000160789.18_LMNA | 0.24095  | 0.085013973  | 0.385371406 | 2.79E-03 | 2.53E-02 | 1.00E+00 |
| ENSG00000213347.9_MXD3       | ENSG00000160789.18_LMNA | -0.04956 | -0.207124322 | 0.110514869 | 5.44E-01 | 7.82E-01 | 1.00E+00 |
| ENSG00000197037.9_ZSCAN25    | ENSG00000160789.18_LMNA | 0.2344   | 0.078112753  | 0.37943993  | 3.65E-03 | 3.10E-02 | 1.00E+00 |
| ENSG00000176401.5_EID2B      | ENSG00000160789.18_LMNA | -0.17043 | -0.320926443 | -0.01154606 | 3.58E-02 | 1.61E-01 | 1.00E+00 |
| ENSG00000081803.14_CADPS2    | ENSG00000160789.18_LMNA | 0.25486  | 0.099701101  | 0.397912648 | 1.53E-03 | 1.60E-02 | 1.00E+00 |
| ENSG00000100426.6_ZBED4      | ENSG00000160789.18_LMNA | -0.01103 | -0.169935348 | 0.148428279 | 8.93E-01 | 9.58E-01 | 1.00E+00 |
| ENSG00000084093.14_REST      | ENSG00000160789.18_LMNA | 0.3261   | 0.176042657  | 0.461353042 | 4.13E-05 | 9.23E-04 | 1.00E+00 |
| ENSG00000139323.12_POC1B     | ENSG00000160789.18_LMNA | -0.14568 | -0.297971381 | 0.01384029  | 7.33E-02 | 2.57E-01 | 1.00E+00 |
| ENSG00000232838.3_PET117     | ENSG00000160789.18_LMNA | -0.00561 | -0.164662803 | 0.153728837 | 9.45E-01 | 9.78E-01 | 1.00E+00 |
| ENSG00000108176.13_DNAJC12   | ENSG00000160789.18_LMNA | -0.47059 | -0.585898792 | -0.33661061 | 9.49E-10 | 1.50E-07 | 4.87E-05 |
| ENSG00000153832.10_FBXO36    | ENSG00000160789.18_LMNA | -0.08916 | -0.244885852 | 0.071048007 | 2.75E-01 | 5.59E-01 | 1.00E+00 |
| ENSG00000137218.9_FRS3       | ENSG00000160789.18_LMNA | -0.16137 | -0.312543362 | -0.00222862 | 4.70E-02 | 1.93E-01 | 1.00E+00 |
| ENSG00000115750.15_TAF1B     | ENSG00000160789.18_LMNA | -0.1199  | -0.273868786 | 0.040069994 | 1.41E-01 | 3.84E-01 | 1.00E+00 |
| ENSG00000163319.9_MRPS18C    | ENSG00000160789.18_LMNA | -0.18194 | -0.331533493 | -0.02341284 | 2.49E-02 | 1.26E-01 | 1.00E+00 |
| ENSG00000176054.6_RPL23P2    | ENSG00000160789.18_LMNA | 0.00159  | -0.157648145 | 0.160752471 | 9.84E-01 | 9.94E-01 | 1.00E+00 |
| ENSG00000241741.1_RPL7AP30   | ENSG00000160789.18_LMNA | -0.10443 | -0.259317678 | 0.055698551 | 2.00E-01 | 4.71E-01 | 1.00E+00 |
| ENSG00000198168.7_SVIP       | ENSG00000160789.18_LMNA | -0.04897 | -0.206559825 | 0.111097356 | 5.49E-01 | 7.86E-01 | 1.00E+00 |
| ENSG00000085224.19_ATRX      | ENSG00000160789.18_LMNA | 0.08682  | -0.073398412 | 0.24266353  | 2.88E-01 | 5.73E-01 | 1.00E+00 |
| ENSG00000174460.3_ZCCHC12    | ENSG00000160789.18_LMNA | -0.22235 | -0.368508094 | -0.06546887 | 5.90E-03 | 4.45E-02 | 1.00E+00 |
| ENSG00000261799.1_RP11-283I3 | ENSG00000160789.18_LMNA | -0.09189 | -0.247472305 | 0.068308058 | 2.60E-01 | 5.43E-01 | 1.00E+00 |
| ENSG00000164715.5_LMTK2      | ENSG00000160789.18_LMNA | 0.11654  | -0.043471213 | 0.270714239 | 1.53E-01 | 4.02E-01 | 1.00E+00 |
| ENSG00000167874.6_TMEM88     | ENSG00000160789.18_LMNA | -0.22708 | -0.372807109 | -0.07042958 | 4.90E-03 | 3.86E-02 | 1.00E+00 |
| ENSG00000235823.1_OLMALINC   | ENSG00000160789.18_LMNA | -0.12587 | -0.279465902 | 0.034017249 | 1.22E-01 | 3.52E-01 | 1.00E+00 |
| ENSG00000116580.17_GON4L     | ENSG00000160789.18_LMNA | 0.2104   | 0.052971605  | 0.357620033 | 9.28E-03 | 6.21E-02 | 1.00E+00 |
| ENSG00000137601.14_NEK1      | ENSG00000160789.18_LMNA | 0.03119  | -0.128653449 | 0.18944613  | 7.03E-01 | 8.73E-01 | 1.00E+00 |
| ENSG00000105186.13_ANKRD27   | ENSG00000160789.18_LMNA | 0.04423  | -0.115782694 | 0.202011489 | 5.88E-01 | 8.09E-01 | 1.00E+00 |
| ENSG00000197620.9_CXorf40A   | ENSG00000160789.18_LMNA | 0.31107  | 0.159783879  | 0.448082047 | 9.59E-05 | 1.82E-03 | 1.00E+00 |
| ENSG00000184992.10_BRI3BP    | ENSG00000160789.18_LMNA | -0.00751 | -0.166513666 | 0.151870225 | 9.27E-01 | 9.72E-01 | 1.00E+00 |
| ENSG00000205808.5_PLPP6      | ENSG00000160789.18_LMNA | -0.04758 | -0.20522499  | 0.112473864 | 5.61E-01 | 7.93E-01 | 1.00E+00 |
| ENSG00000064547.12_LPAR2     | ENSG00000160789.18_LMNA | -0.09284 | -0.24836588  | 0.067360345 | 2.55E-01 | 5.37E-01 | 1.00E+00 |
| ENSG00000211899.6_IGHM       | ENSG00000160789.18_LMNA | 0.05486  | -0.105260871 | 0.212206511 | 5.02E-01 | 7.54E-01 | 1.00E+00 |

|                              |                         |          |              |             |          |          |          |
|------------------------------|-------------------------|----------|--------------|-------------|----------|----------|----------|
| ENSG00000214765.7_SEPT7P2    | ENSG00000160789.18_LMNA | -0.05383 | -0.211219216 | 0.106282932 | 5.10E-01 | 7.59E-01 | 1.00E+00 |
| ENSG00000151304.5_SRFBP1     | ENSG00000160789.18_LMNA | -0.09083 | -0.246469155 | 0.069371307 | 2.66E-01 | 5.50E-01 | 1.00E+00 |
| ENSG00000144791.8_LIMD1      | ENSG00000160789.18_LMNA | 0.01467  | -0.14486569  | 0.173468897 | 8.58E-01 | 9.44E-01 | 1.00E+00 |
| ENSG00000137145.19_DENND4C   | ENSG00000160789.18_LMNA | 0.03737  | -0.122556335 | 0.195411587 | 6.48E-01 | 8.43E-01 | 1.00E+00 |
| ENSG00000173614.12_NMNAT1    | ENSG00000160789.18_LMNA | 0.05273  | -0.107371326 | 0.210167131 | 5.19E-01 | 7.65E-01 | 1.00E+00 |
| ENSG00000139364.9_TMEM132B   | ENSG00000160789.18_LMNA | -0.3404  | -0.47392141  | -0.19158549 | 1.78E-05 | 4.68E-04 | 9.13E-01 |
| ENSG00000267510.1_CTC-325H2  | ENSG00000160789.18_LMNA | -0.03662 | -0.194688787 | 0.123296367 | 6.54E-01 | 8.47E-01 | 1.00E+00 |
| ENSG00000237181.1_AC147651.4 | ENSG00000160789.18_LMNA | 0.22852  | 0.071935657  | 0.374109736 | 4.63E-03 | 3.70E-02 | 1.00E+00 |
| ENSG00000048649.12_RSF1      | ENSG00000160789.18_LMNA | -0.02022 | -0.17884602  | 0.139428491 | 8.05E-01 | 9.22E-01 | 1.00E+00 |
| ENSG00000171316.10_CHD7      | ENSG00000160789.18_LMNA | -0.21288 | -0.359885954 | -0.05556458 | 8.46E-03 | 5.81E-02 | 1.00E+00 |
| ENSG00000180917.15_CMTR2     | ENSG00000160789.18_LMNA | -0.09045 | -0.246104288 | 0.069757855 | 2.68E-01 | 5.52E-01 | 1.00E+00 |
| ENSG00000119285.9_HEATR1     | ENSG00000160789.18_LMNA | 0.14603  | -0.013483542 | 0.29829648  | 7.26E-02 | 2.56E-01 | 1.00E+00 |
| ENSG00000171606.16_ZNF274    | ENSG00000160789.18_LMNA | 0.09256  | -0.067632689 | 0.248109149 | 2.57E-01 | 5.39E-01 | 1.00E+00 |
| ENSG00000254416.4_RP11-347E  | ENSG00000160789.18_LMNA | -0.10496 | -0.259819104 | 0.055162552 | 1.98E-01 | 4.68E-01 | 1.00E+00 |
| ENSG00000165533.17_TTC8      | ENSG00000160789.18_LMNA | -0.08834 | -0.244104026 | 0.071875293 | 2.79E-01 | 5.65E-01 | 1.00E+00 |
| ENSG00000155850.7_SLC26A2    | ENSG00000160789.18_LMNA | 0.24598  | 0.090316705  | 0.38991221  | 2.25E-03 | 2.14E-02 | 1.00E+00 |
| ENSG00000127586.15_CHTF18    | ENSG00000160789.18_LMNA | 0.08141  | -0.078816091 | 0.237528416 | 3.19E-01 | 6.05E-01 | 1.00E+00 |
| ENSG00000053918.14_KCNQ1     | ENSG00000160789.18_LMNA | 0.07815  | -0.082068607 | 0.234437023 | 3.39E-01 | 6.24E-01 | 1.00E+00 |
| ENSG00000254901.6_BORCS8     | ENSG00000160789.18_LMNA | -0.19974 | -0.347876388 | -0.04186822 | 1.36E-02 | 8.18E-02 | 1.00E+00 |
| ENSG00000135525.17_MAP7      | ENSG00000160789.18_LMNA | -0.13419 | -0.28725142  | 0.025559541 | 9.93E-02 | 3.10E-01 | 1.00E+00 |
| ENSG00000183072.9_NKX2-5     | ENSG00000160789.18_LMNA | 0.21509  | 0.05786835   | 0.361896143 | 7.79E-03 | 5.45E-02 | 1.00E+00 |
| ENSG00000196839.11_ADA       | ENSG00000160789.18_LMNA | 0.07821  | -0.082010938 | 0.23449189  | 3.38E-01 | 6.24E-01 | 1.00E+00 |
| ENSG00000145476.14_CYP4V2    | ENSG00000160789.18_LMNA | 0.2369   | 0.080743161  | 0.381703645 | 3.30E-03 | 2.87E-02 | 1.00E+00 |
| ENSG00000263874.1_LINC00672  | ENSG00000160789.18_LMNA | -0.35753 | -0.488898537 | -0.21029394 | 6.13E-06 | 1.96E-04 | 3.15E-01 |
| ENSG00000021776.9_AQR        | ENSG00000160789.18_LMNA | 0.13297  | -0.026795639 | 0.286116136 | 1.02E-01 | 3.16E-01 | 1.00E+00 |
| ENSG00000166825.12_ANPEP     | ENSG00000160789.18_LMNA | 0.36447  | 0.217914431  | 0.494952436 | 3.91E-06 | 1.36E-04 | 2.01E-01 |
| ENSG00000171928.12_TVP23B    | ENSG00000160789.18_LMNA | 0.09817  | -0.061994929 | 0.253414683 | 2.29E-01 | 5.06E-01 | 1.00E+00 |
| ENSG00000081386.11_ZNF510    | ENSG00000160789.18_LMNA | -0.13003 | -0.283361556 | 0.029790855 | 1.10E-01 | 3.31E-01 | 1.00E+00 |
| ENSG00000074266.16_EED       | ENSG00000160789.18_LMNA | -0.14622 | -0.298471254 | 0.013291721 | 7.23E-02 | 2.55E-01 | 1.00E+00 |
| ENSG00000169372.11_CRADD     | ENSG00000160789.18_LMNA | -0.2726  | -0.413837747 | -0.11854025 | 6.80E-04 | 8.58E-03 | 1.00E+00 |
| ENSG00000169116.10_PARM1     | ENSG00000160789.18_LMNA | 0.05294  | -0.107159704 | 0.21037175  | 5.17E-01 | 7.64E-01 | 1.00E+00 |
| ENSG00000198521.10_ZNF43     | ENSG00000160789.18_LMNA | -0.18454 | -0.333927894 | -0.02610368 | 2.29E-02 | 1.19E-01 | 1.00E+00 |
| ENSG00000175538.9_KCNE3      | ENSG00000160789.18_LMNA | -0.00985 | -0.168781527 | 0.149589796 | 9.04E-01 | 9.63E-01 | 1.00E+00 |



|                             |                         |          |              |             |          |          |          |
|-----------------------------|-------------------------|----------|--------------|-------------|----------|----------|----------|
| ENSG00000111058.6_ACSS3     | ENSG00000160789.18_LMNA | 0.36759  | 0.221339973  | 0.497665033 | 3.18E-06 | 1.15E-04 | 1.63E-01 |
| ENSG00000174099.9_MSRB3     | ENSG00000160789.18_LMNA | 0.13362  | -0.026132237 | 0.286725541 | 1.01E-01 | 3.13E-01 | 1.00E+00 |
| ENSG00000128923.9_FAM63B    | ENSG00000160789.18_LMNA | 0.25687  | 0.101833669  | 0.399724414 | 1.40E-03 | 1.49E-02 | 1.00E+00 |
| ENSG00000053770.10_AP5M1    | ENSG00000160789.18_LMNA | -0.12917 | -0.282558815 | 0.030662665 | 1.13E-01 | 3.35E-01 | 1.00E+00 |
| ENSG00000105866.12_SP4      | ENSG00000160789.18_LMNA | -0.22175 | -0.367956346 | -0.06483328 | 6.04E-03 | 4.52E-02 | 1.00E+00 |
| ENSG00000182831.10_C16orf72 | ENSG00000160789.18_LMNA | 0.29628  | 0.143865934  | 0.434964981 | 2.10E-04 | 3.39E-03 | 1.00E+00 |
| ENSG00000186897.4_C1QL4     | ENSG00000160789.18_LMNA | 0.06595  | -0.094243601 | 0.222808039 | 4.20E-01 | 6.91E-01 | 1.00E+00 |
| ENSG00000006025.10_OSBPL7   | ENSG00000160789.18_LMNA | -0.04013 | -0.198064383 | 0.119837262 | 6.24E-01 | 8.30E-01 | 1.00E+00 |
| ENSG00000134255.12_CEPT1    | ENSG00000160789.18_LMNA | -0.192   | -0.340782678 | -0.03383185 | 1.78E-02 | 9.93E-02 | 1.00E+00 |
| ENSG00000003509.14_NDUFAF7  | ENSG00000160789.18_LMNA | -0.12912 | -0.282515253 | 0.030709961 | 1.13E-01 | 3.35E-01 | 1.00E+00 |
| ENSG00000240087.3_RPSAP12   | ENSG00000160789.18_LMNA | -0.19419 | -0.342796644 | -0.03610942 | 1.65E-02 | 9.41E-02 | 1.00E+00 |
| ENSG00000272645.2_GTF2IP20  | ENSG00000160789.18_LMNA | -0.02831 | -0.1866732   | 0.131479413 | 7.29E-01 | 8.85E-01 | 1.00E+00 |
| ENSG00000124788.16_ATXN1    | ENSG00000160789.18_LMNA | 0.32055  | 0.170028892  | 0.456459225 | 5.67E-05 | 1.19E-03 | 1.00E+00 |
| ENSG00000226067.5_LINC00623 | ENSG00000160789.18_LMNA | 0.08035  | -0.07987615  | 0.236521574 | 3.25E-01 | 6.12E-01 | 1.00E+00 |
| ENSG00000133028.9_SCO1      | ENSG00000160789.18_LMNA | -0.00343 | -0.16253817  | 0.155859592 | 9.67E-01 | 9.87E-01 | 1.00E+00 |
| ENSG00000228594.3_FNDC10    | ENSG00000160789.18_LMNA | -0.05492 | -0.212260286 | 0.105205183 | 5.02E-01 | 7.53E-01 | 1.00E+00 |
| ENSG00000117151.11_CTBS     | ENSG00000160789.18_LMNA | 0.11864  | -0.041341521 | 0.272690266 | 1.45E-01 | 3.91E-01 | 1.00E+00 |
| ENSG00000050344.8_NFE2L3    | ENSG00000160789.18_LMNA | 0.15898  | -0.000228146 | 0.310324876 | 5.04E-02 | 2.02E-01 | 1.00E+00 |
| ENSG00000135362.12_PRR5L    | ENSG00000160789.18_LMNA | -0.03699 | -0.19504089  | 0.122935915 | 6.51E-01 | 8.45E-01 | 1.00E+00 |
| ENSG00000185453.11_C19orf68 | ENSG00000160789.18_LMNA | 0.28165  | 0.128202749  | 0.421936115 | 4.39E-04 | 6.10E-03 | 1.00E+00 |
| ENSG00000270223.1_RP13-36G1 | ENSG00000160789.18_LMNA | -0.12102 | -0.274923658 | 0.03893101  | 1.37E-01 | 3.78E-01 | 1.00E+00 |
| ENSG00000135686.11_KLHL36   | ENSG00000160789.18_LMNA | 0.2364   | 0.080219149  | 0.381252971 | 3.37E-03 | 2.92E-02 | 1.00E+00 |
| ENSG00000155313.14_USP25    | ENSG00000160789.18_LMNA | 0.12397  | -0.035936151 | 0.277693752 | 1.28E-01 | 3.62E-01 | 1.00E+00 |
| ENSG00000059728.9_MXD1      | ENSG00000160789.18_LMNA | -0.01231 | -0.171179705 | 0.147174637 | 8.80E-01 | 9.54E-01 | 1.00E+00 |
| ENSG00000101871.13_MID1     | ENSG00000160789.18_LMNA | 0.25157  | 0.096224602  | 0.394954124 | 1.77E-03 | 1.78E-02 | 1.00E+00 |
| ENSG00000162688.14_AGL      | ENSG00000160789.18_LMNA | -0.1009  | -0.25598964  | 0.059251458 | 2.16E-01 | 4.90E-01 | 1.00E+00 |
| ENSG00000223658.6_C1GALT1C  | ENSG00000160789.18_LMNA | -0.15755 | -0.308997372 | 0.001696445 | 5.26E-02 | 2.08E-01 | 1.00E+00 |
| ENSG00000120458.8_MSANTD2   | ENSG00000160789.18_LMNA | -0.07803 | -0.234320611 | 0.082190954 | 3.39E-01 | 6.25E-01 | 1.00E+00 |
| ENSG00000259045.1_MTCO1P2   | ENSG00000160789.18_LMNA | -0.1245  | -0.278190969 | 0.035397992 | 1.26E-01 | 3.59E-01 | 1.00E+00 |
| ENSG00000112562.17_SMOC2    | ENSG00000160789.18_LMNA | 0.03021  | -0.12961114  | 0.188506979 | 7.12E-01 | 8.77E-01 | 1.00E+00 |
| ENSG00000176381.5_PRR18     | ENSG00000160789.18_LMNA | -0.24903 | -0.392666985 | -0.09354202 | 1.98E-03 | 1.93E-02 | 1.00E+00 |
| ENSG00000137628.15_DDX60    | ENSG00000160789.18_LMNA | 0.13066  | -0.029151404 | 0.283950067 | 1.09E-01 | 3.28E-01 | 1.00E+00 |
| ENSG00000236859.5_NIFK-AS1  | ENSG00000160789.18_LMNA | -0.4453  | -0.564481563 | -0.3079267  | 9.01E-09 | 9.90E-07 | 4.62E-04 |

|                              |                         |          |              |             |          |          |          |
|------------------------------|-------------------------|----------|--------------|-------------|----------|----------|----------|
| ENSG00000072422.15_RHOBTB1   | ENSG00000160789.18_LMNA | 0.07524  | -0.084975897 | 0.231668324 | 3.57E-01 | 6.40E-01 | 1.00E+00 |
| ENSG00000242992.3_FTH1P4     | ENSG00000160789.18_LMNA | 0.00305  | -0.156228136 | 0.162170384 | 9.70E-01 | 9.88E-01 | 1.00E+00 |
| ENSG00000267152.1_CTD-2528L  | ENSG00000160789.18_LMNA | -0.19006 | -0.339004227 | -0.03182327 | 1.90E-02 | 1.04E-01 | 1.00E+00 |
| ENSG00000225492.5_GBP1P1     | ENSG00000160789.18_LMNA | 0.08448  | -0.075735862 | 0.240450163 | 3.01E-01 | 5.87E-01 | 1.00E+00 |
| ENSG00000196132.10_MYT1      | ENSG00000160789.18_LMNA | -0.37186 | -0.501376697 | -0.22603824 | 2.39E-06 | 9.16E-05 | 1.23E-01 |
| ENSG00000174928.14_C3orf33   | ENSG00000160789.18_LMNA | -0.25697 | -0.399810003 | -0.10193448 | 1.39E-03 | 1.49E-02 | 1.00E+00 |
| ENSG00000232177.1_MTND4P24   | ENSG00000160789.18_LMNA | -0.06197 | -0.219009052 | 0.098200514 | 4.48E-01 | 7.14E-01 | 1.00E+00 |
| ENSG00000131023.11_LATS1     | ENSG00000160789.18_LMNA | -0.1069  | -0.261645239 | 0.053208972 | 1.90E-01 | 4.57E-01 | 1.00E+00 |
| ENSG00000182685.6_BRICD5     | ENSG00000160789.18_LMNA | -0.09863 | -0.253845879 | 0.061535846 | 2.27E-01 | 5.03E-01 | 1.00E+00 |
| ENSG00000149599.14_DUSP15    | ENSG00000160789.18_LMNA | -0.046   | -0.203705001 | 0.114039822 | 5.74E-01 | 8.01E-01 | 1.00E+00 |
| ENSG00000217930.6_PAM16      | ENSG00000160789.18_LMNA | -0.16164 | -0.312793377 | -0.00250573 | 4.66E-02 | 1.92E-01 | 1.00E+00 |
| ENSG00000076053.9_RBM7       | ENSG00000160789.18_LMNA | 0.02821  | -0.13157839  | 0.186575988 | 7.30E-01 | 8.86E-01 | 1.00E+00 |
| ENSG00000090530.8_P3H2       | ENSG00000160789.18_LMNA | 0.33102  | 0.181374707  | 0.465677627 | 3.11E-05 | 7.33E-04 | 1.00E+00 |
| ENSG00000091436.15_AC013461  | ENSG00000160789.18_LMNA | 0.18736  | 0.029028659  | 0.336526149 | 2.08E-02 | 1.11E-01 | 1.00E+00 |
| ENSG00000273271.1_AP000254.1 | ENSG00000160789.18_LMNA | -0.02368 | -0.182193508 | 0.136033882 | 7.72E-01 | 9.06E-01 | 1.00E+00 |
| ENSG00000173727.10_CMB9-22F  | ENSG00000160789.18_LMNA | -0.01587 | -0.174630314 | 0.143692922 | 8.46E-01 | 9.40E-01 | 1.00E+00 |
| ENSG00000196659.9_TTC30B     | ENSG00000160789.18_LMNA | -0.06163 | -0.218687952 | 0.098534503 | 4.51E-01 | 7.16E-01 | 1.00E+00 |
| ENSG00000231327.1_AC016700.1 | ENSG00000160789.18_LMNA | -0.30571 | -0.443337146 | -0.15400844 | 1.28E-04 | 2.31E-03 | 1.00E+00 |
| ENSG00000276966.1_HIST1H4E   | ENSG00000160789.18_LMNA | -0.07919 | -0.235427028 | 0.081027736 | 3.32E-01 | 6.18E-01 | 1.00E+00 |
| ENSG00000122966.12_CIT       | ENSG00000160789.18_LMNA | -0.16388 | -0.314867653 | -0.00480658 | 4.36E-02 | 1.84E-01 | 1.00E+00 |
| ENSG00000268713.1_CTC-444N2  | ENSG00000160789.18_LMNA | 0.24885  | 0.093346679  | 0.392500294 | 1.99E-03 | 1.95E-02 | 1.00E+00 |
| ENSG00000139233.5_LLPH       | ENSG00000160789.18_LMNA | -0.12455 | -0.278237113 | 0.035348039 | 1.26E-01 | 3.59E-01 | 1.00E+00 |
| ENSG00000070814.16_TCOF1     | ENSG00000160789.18_LMNA | 0.21013  | 0.052696322  | 0.357379261 | 9.37E-03 | 6.25E-02 | 1.00E+00 |
| ENSG00000159214.11_CCDC24    | ENSG00000160789.18_LMNA | 0.08767  | -0.072545437 | 0.243470406 | 2.83E-01 | 5.68E-01 | 1.00E+00 |
| ENSG00000145020.13_AMT       | ENSG00000160789.18_LMNA | 0.0374   | -0.122530075 | 0.19543723  | 6.47E-01 | 8.43E-01 | 1.00E+00 |
| ENSG00000178665.13_ZNF713    | ENSG00000160789.18_LMNA | -0.0254  | -0.183861047 | 0.134340078 | 7.56E-01 | 8.98E-01 | 1.00E+00 |
| ENSG00000137831.13_UACA      | ENSG00000160789.18_LMNA | 0.33015  | 0.18043596   | 0.464917236 | 3.27E-05 | 7.67E-04 | 1.00E+00 |
| ENSG00000183397.5_C19orf71   | ENSG00000160789.18_LMNA | 0.16333  | 0.004241024  | 0.314358061 | 4.44E-02 | 1.86E-01 | 1.00E+00 |
| ENSG00000128714.5_HOXD13     | ENSG00000160789.18_LMNA | -0.12862 | -0.282044752 | 0.031220709 | 1.14E-01 | 3.38E-01 | 1.00E+00 |
| ENSG00000100503.22_NIN       | ENSG00000160789.18_LMNA | 0.01657  | -0.143011762 | 0.175304476 | 8.39E-01 | 9.38E-01 | 1.00E+00 |
| ENSG00000029639.9_TFB1M      | ENSG00000160789.18_LMNA | -0.02049 | -0.179102591 | 0.139168573 | 8.02E-01 | 9.21E-01 | 1.00E+00 |
| ENSG00000111196.8_MAGOHB     | ENSG00000160789.18_LMNA | -0.08474 | -0.240692458 | 0.075480153 | 2.99E-01 | 5.86E-01 | 1.00E+00 |
| ENSG00000197363.8_ZNF517     | ENSG00000160789.18_LMNA | 0.00992  | -0.149512553 | 0.168858285 | 9.03E-01 | 9.63E-01 | 1.00E+00 |

|                             |                         |          |              |             |          |          |          |
|-----------------------------|-------------------------|----------|--------------|-------------|----------|----------|----------|
| ENSG00000187626.8_ZKSCAN4   | ENSG00000160789.18_LMNA | -0.11897 | -0.273002313 | 0.041004947 | 1.44E-01 | 3.89E-01 | 1.00E+00 |
| ENSG00000165060.10_FXN      | ENSG00000160789.18_LMNA | -0.18731 | -0.336478579 | -0.02897506 | 2.08E-02 | 1.11E-01 | 1.00E+00 |
| ENSG00000185418.14_TARSL2   | ENSG00000160789.18_LMNA | -0.07491 | -0.231351446 | 0.085308292 | 3.59E-01 | 6.42E-01 | 1.00E+00 |
| ENSG00000163431.12_LMOD1    | ENSG00000160789.18_LMNA | -0.03175 | -0.18999409  | 0.128094396 | 6.98E-01 | 8.71E-01 | 1.00E+00 |
| ENSG00000122741.14_DCAF10   | ENSG00000160789.18_LMNA | -0.0151  | -0.17388587  | 0.144444745 | 8.53E-01 | 9.43E-01 | 1.00E+00 |
| ENSG00000173276.12_ZBTB21   | ENSG00000160789.18_LMNA | 0.31044  | 0.159099015  | 0.447520234 | 9.93E-05 | 1.87E-03 | 1.00E+00 |
| ENSG00000183150.6_GPR19     | ENSG00000160789.18_LMNA | -0.32619 | -0.461426394 | -0.17613296 | 4.11E-05 | 9.20E-04 | 1.00E+00 |
| ENSG00000167535.6_CACNB3    | ENSG00000160789.18_LMNA | 0.04574  | -0.114292172 | 0.203459915 | 5.76E-01 | 8.02E-01 | 1.00E+00 |
| ENSG00000155792.8_DEPTOR    | ENSG00000160789.18_LMNA | -0.29294 | -0.431995946 | -0.14028371 | 2.50E-04 | 3.89E-03 | 1.00E+00 |
| ENSG00000277283.1_RP1-267D1 | ENSG00000160789.18_LMNA | -0.14852 | -0.300613117 | 0.01093908  | 6.78E-02 | 2.44E-01 | 1.00E+00 |
| ENSG00000257303.1_RP11-977G | ENSG00000160789.18_LMNA | -0.21839 | -0.364900638 | -0.06131769 | 6.87E-03 | 4.97E-02 | 1.00E+00 |
| ENSG00000125149.10_C16orf70 | ENSG00000160789.18_LMNA | -0.07994 | -0.2361365   | 0.080281388 | 3.28E-01 | 6.14E-01 | 1.00E+00 |
| ENSG00000184898.6_RBM43     | ENSG00000160789.18_LMNA | -0.06344 | -0.220416632 | 0.096735589 | 4.37E-01 | 7.06E-01 | 1.00E+00 |
| ENSG00000102743.13_SLC25A15 | ENSG00000160789.18_LMNA | -0.07806 | -0.23434566  | 0.082164629 | 3.39E-01 | 6.24E-01 | 1.00E+00 |
| ENSG00000121310.15_ECHDC2   | ENSG00000160789.18_LMNA | 0.25421  | 0.099020597  | 0.397334023 | 1.58E-03 | 1.63E-02 | 1.00E+00 |
| ENSG00000150977.10_RILPL2   | ENSG00000160789.18_LMNA | 0.21486  | 0.057628848  | 0.361687294 | 7.86E-03 | 5.48E-02 | 1.00E+00 |
| ENSG00000163637.10_PRICKLE2 | ENSG00000160789.18_LMNA | 0.17013  | 0.011237378  | 0.320649491 | 3.61E-02 | 1.62E-01 | 1.00E+00 |
| ENSG00000143590.12_EFNA3    | ENSG00000160789.18_LMNA | -0.22887 | -0.374432201 | -0.0723087  | 4.57E-03 | 3.66E-02 | 1.00E+00 |
| ENSG00000171914.13_TLN2     | ENSG00000160789.18_LMNA | 0.1761   | 0.017388923  | 0.326158768 | 3.00E-02 | 1.43E-01 | 1.00E+00 |
| ENSG00000138686.8_BBS7      | ENSG00000160789.18_LMNA | -0.05965 | -0.216789495 | 0.100507707 | 4.65E-01 | 7.27E-01 | 1.00E+00 |
| ENSG00000241852.8_C8orf58   | ENSG00000160789.18_LMNA | 0.38845  | 0.244355547  | 0.515751379 | 7.61E-07 | 3.69E-05 | 3.90E-02 |
| ENSG00000232818.2_RPS2P32   | ENSG00000160789.18_LMNA | 0.16566  | 0.006636727  | 0.316515454 | 4.14E-02 | 1.77E-01 | 1.00E+00 |
| ENSG00000251495.1_PPIAP11   | ENSG00000160789.18_LMNA | 0.06127  | -0.09889988  | 0.218336598 | 4.53E-01 | 7.18E-01 | 1.00E+00 |
| ENSG00000176473.12_WDR25    | ENSG00000160789.18_LMNA | -0.07856 | -0.234824325 | 0.081661487 | 3.36E-01 | 6.22E-01 | 1.00E+00 |
| ENSG00000144468.15_RHBDD1   | ENSG00000160789.18_LMNA | 0.00809  | -0.151307149 | 0.167073952 | 9.21E-01 | 9.70E-01 | 1.00E+00 |
| ENSG00000249780.1_RP11-352E | ENSG00000160789.18_LMNA | -0.03405 | -0.192205539 | 0.125836126 | 6.77E-01 | 8.59E-01 | 1.00E+00 |
| ENSG00000118496.4_FBXO30    | ENSG00000160789.18_LMNA | -0.15122 | -0.30312687  | 0.008173545 | 6.29E-02 | 2.33E-01 | 1.00E+00 |
| ENSG00000130158.12_DOCK6    | ENSG00000160789.18_LMNA | 0.20729  | 0.049726526  | 0.354779194 | 1.04E-02 | 6.73E-02 | 1.00E+00 |
| ENSG00000152242.9_C18orf25  | ENSG00000160789.18_LMNA | 0.15999  | 0.000808907  | 0.311261758 | 4.90E-02 | 1.99E-01 | 1.00E+00 |
| ENSG00000185774.13_KCNIP4   | ENSG00000160789.18_LMNA | -0.42668 | -0.548611183 | -0.28696829 | 4.22E-08 | 3.54E-06 | 2.17E-03 |
| ENSG00000059588.8_TARBP1    | ENSG00000160789.18_LMNA | -0.09296 | -0.248481002 | 0.067238207 | 2.55E-01 | 5.36E-01 | 1.00E+00 |
| ENSG00000119042.15_SATB2    | ENSG00000160789.18_LMNA | 0.0784   | -0.081825407 | 0.234668396 | 3.37E-01 | 6.22E-01 | 1.00E+00 |
| ENSG00000005436.12_GCFC2    | ENSG00000160789.18_LMNA | -0.0794  | -0.235625261 | 0.080819235 | 3.31E-01 | 6.17E-01 | 1.00E+00 |

|                              |                         |          |              |             |          |          |          |
|------------------------------|-------------------------|----------|--------------|-------------|----------|----------|----------|
| ENSG00000130695.12_CEP85     | ENSG00000160789.18_LMNA | -0.06056 | -0.217664334 | 0.099598734 | 4.59E-01 | 7.22E-01 | 1.00E+00 |
| ENSG00000054267.19_ARID4B    | ENSG00000160789.18_LMNA | -0.06969 | -0.226383396 | 0.090510441 | 3.94E-01 | 6.71E-01 | 1.00E+00 |
| ENSG00000133106.13_EPST11    | ENSG00000160789.18_LMNA | -0.10173 | -0.256768315 | 0.058420884 | 2.12E-01 | 4.86E-01 | 1.00E+00 |
| ENSG00000166575.15_TMEM135   | ENSG00000160789.18_LMNA | -0.20643 | -0.353993511 | -0.04883018 | 1.07E-02 | 6.89E-02 | 1.00E+00 |
| ENSG00000110841.12_PPFIBP1   | ENSG00000160789.18_LMNA | 0.0614   | -0.098769659 | 0.218461831 | 4.52E-01 | 7.18E-01 | 1.00E+00 |
| ENSG00000186020.11_ZNF529    | ENSG00000160789.18_LMNA | -0.34585 | -0.478691116 | -0.19752132 | 1.28E-05 | 3.56E-04 | 6.55E-01 |
| ENSG00000166704.10_ZNF606    | ENSG00000160789.18_LMNA | -0.04433 | -0.202102723 | 0.11568885  | 5.88E-01 | 8.08E-01 | 1.00E+00 |
| ENSG00000064225.11_ST3GAL6   | ENSG00000160789.18_LMNA | -0.43947 | -0.559525738 | -0.3013552  | 1.48E-08 | 1.49E-06 | 7.57E-04 |
| ENSG00000107882.10_SUFU      | ENSG00000160789.18_LMNA | -0.10123 | -0.256297776 | 0.058922836 | 2.15E-01 | 4.89E-01 | 1.00E+00 |
| ENSG00000052749.12_RRP12     | ENSG00000160789.18_LMNA | 0.2998   | 0.147651386  | 0.438095592 | 1.75E-04 | 2.94E-03 | 1.00E+00 |
| ENSG00000095397.12_WHRN      | ENSG00000160789.18_LMNA | 0.22557  | 0.068837294  | 0.371428629 | 5.20E-03 | 4.05E-02 | 1.00E+00 |
| ENSG00000272849.1_RP11-34711 | ENSG00000160789.18_LMNA | -0.15806 | -0.309476129 | 0.001167066 | 5.18E-02 | 2.06E-01 | 1.00E+00 |
| ENSG00000275835.3_TUBGCP5    | ENSG00000160789.18_LMNA | 0.20138  | 0.043572767  | 0.349376497 | 1.29E-02 | 7.85E-02 | 1.00E+00 |
| ENSG00000040275.15_SPDL1     | ENSG00000160789.18_LMNA | -0.04526 | -0.202998711 | 0.114766936 | 5.80E-01 | 8.04E-01 | 1.00E+00 |
| ENSG00000141542.9_RAB40B     | ENSG00000160789.18_LMNA | -0.29939 | -0.43772982  | -0.14720866 | 1.79E-04 | 2.99E-03 | 1.00E+00 |
| ENSG00000279496.1_           | ENSG00000160789.18_LMNA | 0.09134  | -0.068863852 | 0.246948011 | 2.63E-01 | 5.46E-01 | 1.00E+00 |
| ENSG00000149554.11_CHEK1     | ENSG00000160789.18_LMNA | 0.09101  | -0.069197515 | 0.24663317  | 2.65E-01 | 5.49E-01 | 1.00E+00 |
| ENSG00000104643.8_MTMR9      | ENSG00000160789.18_LMNA | -0.25129 | -0.394704668 | -0.09593181 | 1.79E-03 | 1.80E-02 | 1.00E+00 |
| ENSG00000145332.12_KLHL8     | ENSG00000160789.18_LMNA | -0.1217  | -0.275565318 | 0.038237788 | 1.35E-01 | 3.74E-01 | 1.00E+00 |
| ENSG00000181773.6_GPR3       | ENSG00000160789.18_LMNA | 0.60321  | 0.491171964  | 0.695606256 | 1.97E-16 | 5.32E-13 | 1.01E-11 |
| ENSG00000181090.16_EHMT1     | ENSG00000160789.18_LMNA | 0.22482  | 0.068055036  | 0.37075092  | 5.36E-03 | 4.13E-02 | 1.00E+00 |
| ENSG00000188185.10_LINC0026  | ENSG00000160789.18_LMNA | -0.03693 | -0.19498538  | 0.122992747 | 6.51E-01 | 8.46E-01 | 1.00E+00 |
| ENSG00000258655.2_ARHGAP5-   | ENSG00000160789.18_LMNA | -0.32615 | -0.461396615 | -0.1760963  | 4.12E-05 | 9.21E-04 | 1.00E+00 |
| ENSG00000123908.10_37469     | ENSG00000160789.18_LMNA | 0.15078  | -0.008629276 | 0.302712928 | 6.37E-02 | 2.35E-01 | 1.00E+00 |
| ENSG00000211448.10_DIO2      | ENSG00000160789.18_LMNA | -0.03989 | -0.197838271 | 0.120069209 | 6.26E-01 | 8.31E-01 | 1.00E+00 |
| ENSG00000163449.9_TMEM169    | ENSG00000160789.18_LMNA | -0.31437 | -0.450995369 | -0.16333975 | 8.01E-05 | 1.57E-03 | 1.00E+00 |
| ENSG00000215386.9_MIR99AHG   | ENSG00000160789.18_LMNA | -0.24505 | -0.389072957 | -0.08933535 | 2.34E-03 | 2.21E-02 | 1.00E+00 |
| ENSG00000147421.16_HMBOX1    | ENSG00000160789.18_LMNA | -0.03941 | -0.197375391 | 0.120543926 | 6.30E-01 | 8.33E-01 | 1.00E+00 |
| ENSG00000135299.15_ANKRD6    | ENSG00000160789.18_LMNA | -0.40268 | -0.528033287 | -0.26016104 | 2.70E-07 | 1.63E-05 | 1.39E-02 |
| ENSG00000197208.5_SLC22A4    | ENSG00000160789.18_LMNA | 0.13829  | -0.021377788 | 0.291085612 | 8.93E-02 | 2.91E-01 | 1.00E+00 |
| ENSG00000161010.13_MRNP      | ENSG00000160789.18_LMNA | -0.04399 | -0.201775765 | 0.116025133 | 5.91E-01 | 8.10E-01 | 1.00E+00 |
| ENSG00000163219.10_ARHGAP2   | ENSG00000160789.18_LMNA | -0.00348 | -0.162586953 | 0.155810701 | 9.66E-01 | 9.87E-01 | 1.00E+00 |
| ENSG00000198406.7_BZW1P2     | ENSG00000160789.18_LMNA | 0.05044  | -0.109645651 | 0.207966301 | 5.37E-01 | 7.78E-01 | 1.00E+00 |

|                              |                         |          |              |             |          |          |          |
|------------------------------|-------------------------|----------|--------------|-------------|----------|----------|----------|
| ENSG00000198924.6_DCLRE1A    | ENSG00000160789.18_LMNA | -0.29084 | -0.430121784 | -0.1380264  | 2.78E-04 | 4.24E-03 | 1.00E+00 |
| ENSG00000140403.11_DNAJA4    | ENSG00000160789.18_LMNA | -0.0327  | -0.190906166 | 0.127163409 | 6.89E-01 | 8.66E-01 | 1.00E+00 |
| ENSG00000168772.10_CXXC4     | ENSG00000160789.18_LMNA | -0.42053 | -0.543355651 | -0.28008262 | 6.89E-08 | 5.34E-06 | 3.53E-03 |
| ENSG00000214870.7_AC004540.1 | ENSG00000160789.18_LMNA | -0.25795 | -0.400692032 | -0.10297374 | 1.33E-03 | 1.44E-02 | 1.00E+00 |
| ENSG00000197013.8_ZNF429     | ENSG00000160789.18_LMNA | -0.56476 | -0.664239146 | -0.44562599 | 3.50E-14 | 3.82E-11 | 1.79E-09 |
| ENSG00000267523.1_CTD-2537K  | ENSG00000160789.18_LMNA | 0.07202  | -0.088190649 | 0.228600835 | 3.78E-01 | 6.57E-01 | 1.00E+00 |
| ENSG00000261478.1_RP11-429B  | ENSG00000160789.18_LMNA | -0.35469 | -0.486420503 | -0.20718439 | 7.35E-06 | 2.28E-04 | 3.77E-01 |
| ENSG00000152359.13_POC5      | ENSG00000160789.18_LMNA | -0.25717 | -0.399991361 | -0.10214811 | 1.38E-03 | 1.48E-02 | 1.00E+00 |
| ENSG00000107779.10_BMPR1A    | ENSG00000160789.18_LMNA | -0.11183 | -0.266289985 | 0.048229187 | 1.70E-01 | 4.29E-01 | 1.00E+00 |
| ENSG00000205683.10_DPF3      | ENSG00000160789.18_LMNA | 0.31998  | 0.169412059  | 0.455956284 | 5.85E-05 | 1.22E-03 | 1.00E+00 |
| ENSG00000160199.13_PKNOX1    | ENSG00000160789.18_LMNA | 0.04541  | -0.114619514 | 0.203141938 | 5.79E-01 | 8.04E-01 | 1.00E+00 |
| ENSG00000153094.20_BCL2L11   | ENSG00000160789.18_LMNA | 0.05951  | -0.100644572 | 0.216657726 | 4.66E-01 | 7.28E-01 | 1.00E+00 |
| ENSG00000271971.1_CTD-2006H  | ENSG00000160789.18_LMNA | 0.01695  | -0.142639198 | 0.175673085 | 8.36E-01 | 9.36E-01 | 1.00E+00 |
| ENSG00000214784.4_AC010468.1 | ENSG00000160789.18_LMNA | -0.13296 | -0.28610434  | 0.026808476 | 1.02E-01 | 3.17E-01 | 1.00E+00 |
| ENSG00000225968.6_ELFN1      | ENSG00000160789.18_LMNA | 0.08358  | -0.076643718 | 0.239589613 | 3.06E-01 | 5.93E-01 | 1.00E+00 |
| ENSG00000272335.1_RP11-53O1  | ENSG00000160789.18_LMNA | 0.1398   | -0.019842791 | 0.292490515 | 8.58E-02 | 2.84E-01 | 1.00E+00 |
| ENSG00000267280.4_TBX2-AS1   | ENSG00000160789.18_LMNA | 0.13765  | -0.022037671 | 0.290481239 | 9.08E-02 | 2.94E-01 | 1.00E+00 |
| ENSG00000169744.11_LDB2      | ENSG00000160789.18_LMNA | -0.15322 | -0.304984152 | 0.006127172 | 5.95E-02 | 2.24E-01 | 1.00E+00 |
| ENSG00000112659.12_CUL9      | ENSG00000160789.18_LMNA | 0.0713   | -0.088914422 | 0.227909349 | 3.83E-01 | 6.61E-01 | 1.00E+00 |
| ENSG00000143578.14_CREB3L4   | ENSG00000160789.18_LMNA | 0.05418  | -0.105930355 | 0.211559873 | 5.07E-01 | 7.57E-01 | 1.00E+00 |
| ENSG00000122778.8_KIAA1549   | ENSG00000160789.18_LMNA | -0.21231 | -0.359361061 | -0.05496356 | 8.64E-03 | 5.89E-02 | 1.00E+00 |
| ENSG00000263272.1_CTC-524C5  | ENSG00000160789.18_LMNA | -0.14877 | -0.300841064 | 0.010688497 | 6.74E-02 | 2.43E-01 | 1.00E+00 |
| ENSG00000235863.3_B3GALT4    | ENSG00000160789.18_LMNA | 0.1061   | -0.054008238 | 0.260898387 | 1.93E-01 | 4.62E-01 | 1.00E+00 |
| ENSG00000171448.8_ZBTB26     | ENSG00000160789.18_LMNA | -0.25707 | -0.39990639  | -0.10204802 | 1.39E-03 | 1.48E-02 | 1.00E+00 |
| ENSG00000105699.15_LSR       | ENSG00000160789.18_LMNA | -0.26086 | -0.403310547 | -0.10606287 | 1.17E-03 | 1.30E-02 | 1.00E+00 |
| ENSG00000100307.11_CBX7      | ENSG00000160789.18_LMNA | -0.08106 | -0.237200964 | 0.07916093  | 3.21E-01 | 6.07E-01 | 1.00E+00 |
| ENSG00000140326.11_CDAN1     | ENSG00000160789.18_LMNA | 0.15321  | -0.00614424  | 0.304968671 | 5.95E-02 | 2.24E-01 | 1.00E+00 |
| ENSG00000177337.6_DLGAP1-A   | ENSG00000160789.18_LMNA | 0.06446  | -0.095721978 | 0.221389793 | 4.30E-01 | 7.00E-01 | 1.00E+00 |
| ENSG00000132950.17_ZMYM5     | ENSG00000160789.18_LMNA | 0.00237  | -0.156890303 | 0.161509358 | 9.77E-01 | 9.91E-01 | 1.00E+00 |
| ENSG00000186812.11_ZNF397    | ENSG00000160789.18_LMNA | -0.14157 | -0.294138159 | 0.018040698 | 8.19E-02 | 2.76E-01 | 1.00E+00 |
| ENSG00000079691.16_CARMIL1   | ENSG00000160789.18_LMNA | 0.3396   | 0.190708638  | 0.473215409 | 1.87E-05 | 4.87E-04 | 9.58E-01 |
| ENSG00000133627.16_ACTR3B    | ENSG00000160789.18_LMNA | 0.06643  | -0.09376341  | 0.22326841  | 4.16E-01 | 6.89E-01 | 1.00E+00 |
| ENSG00000214106.6_PAXIP1-AS  | ENSG00000160789.18_LMNA | 0.23103  | 0.07456692   | 0.376382687 | 4.19E-03 | 3.44E-02 | 1.00E+00 |

|                              |                         |          |              |             |          |          |          |
|------------------------------|-------------------------|----------|--------------|-------------|----------|----------|----------|
| ENSG00000277358.1_RP11-321C  | ENSG00000160789.18_LMNA | 0.1479   | -0.011570862 | 0.300038246 | 6.90E-02 | 2.47E-01 | 1.00E+00 |
| ENSG00000155542.10_SETD9     | ENSG00000160789.18_LMNA | -0.10626 | -0.261042125 | 0.053854444 | 1.93E-01 | 4.61E-01 | 1.00E+00 |
| ENSG00000167393.15_PPP2R3B   | ENSG00000160789.18_LMNA | -0.08902 | -0.244753153 | 0.071188452 | 2.75E-01 | 5.60E-01 | 1.00E+00 |
| ENSG00000156172.5_C8orf37    | ENSG00000160789.18_LMNA | -0.16429 | -0.315244329 | -0.00522476 | 4.31E-02 | 1.82E-01 | 1.00E+00 |
| ENSG00000038210.12_P14K2B    | ENSG00000160789.18_LMNA | 0.47739  | 0.344364116  | 0.591628878 | 5.02E-10 | 8.88E-08 | 2.57E-05 |
| ENSG00000160447.6_PKN3       | ENSG00000160789.18_LMNA | 0.24146  | 0.085547593  | 0.385829012 | 2.73E-03 | 2.48E-02 | 1.00E+00 |
| ENSG00000158859.9_ADAMTS4    | ENSG00000160789.18_LMNA | 0.21265  | 0.055320623  | 0.359672922 | 8.53E-03 | 5.84E-02 | 1.00E+00 |
| ENSG00000179119.13_SPTY2D1   | ENSG00000160789.18_LMNA | 0.26521  | 0.110680808  | 0.407215906 | 9.60E-04 | 1.12E-02 | 1.00E+00 |
| ENSG00000115760.12_BIRC6     | ENSG00000160789.18_LMNA | -0.01059 | -0.169505405 | 0.148861193 | 8.97E-01 | 9.60E-01 | 1.00E+00 |
| ENSG00000263335.1_AF001548.5 | ENSG00000160789.18_LMNA | -0.0021  | -0.161243574 | 0.157156466 | 9.80E-01 | 9.92E-01 | 1.00E+00 |
| ENSG00000152954.10_NRSN1     | ENSG00000160789.18_LMNA | -0.29565 | -0.434402374 | -0.14318655 | 2.17E-04 | 3.48E-03 | 1.00E+00 |
| ENSG00000164171.9_ITGA2      | ENSG00000160789.18_LMNA | 0.32983  | 0.180082682  | 0.464630969 | 3.33E-05 | 7.79E-04 | 1.00E+00 |
| ENSG00000254093.7_PINX1      | ENSG00000160789.18_LMNA | -0.13848 | -0.291255796 | 0.021191923 | 8.89E-02 | 2.90E-01 | 1.00E+00 |
| ENSG00000116793.14_PHTF1     | ENSG00000160789.18_LMNA | 0.27319  | 0.1191702    | 0.414367147 | 6.61E-04 | 8.38E-03 | 1.00E+00 |
| ENSG00000148459.14_PDSS1     | ENSG00000160789.18_LMNA | -0.33167 | -0.466250786 | -0.18208265 | 2.99E-05 | 7.12E-04 | 1.00E+00 |
| ENSG00000122085.15_MTERF4    | ENSG00000160789.18_LMNA | -0.25002 | -0.39355631  | -0.09458459 | 1.89E-03 | 1.88E-02 | 1.00E+00 |
| ENSG00000183111.10_ARHGEF3   | ENSG00000160789.18_LMNA | -0.01395 | -0.172762956 | 0.145578093 | 8.65E-01 | 9.47E-01 | 1.00E+00 |
| ENSG00000144182.15_LIPT1     | ENSG00000160789.18_LMNA | -0.27341 | -0.414563951 | -0.11940444 | 6.54E-04 | 8.32E-03 | 1.00E+00 |
| ENSG00000163626.15_COX18     | ENSG00000160789.18_LMNA | -0.24245 | -0.386723495 | -0.08659116 | 2.62E-03 | 2.40E-02 | 1.00E+00 |
| ENSG00000125485.16_DDX31     | ENSG00000160789.18_LMNA | 0.13375  | -0.026003501 | 0.286843769 | 1.00E-01 | 3.12E-01 | 1.00E+00 |
| ENSG00000160299.15_PCNT      | ENSG00000160789.18_LMNA | 0.15938  | 0.000184878  | 0.310698078 | 4.98E-02 | 2.01E-01 | 1.00E+00 |
| ENSG00000100968.12_NFATC4    | ENSG00000160789.18_LMNA | 0.39478  | 0.251383448  | 0.521226327 | 4.83E-07 | 2.55E-05 | 2.48E-02 |
| ENSG00000173933.18_RBM4      | ENSG00000160789.18_LMNA | -0.31071 | -0.447759681 | -0.15939087 | 9.78E-05 | 1.85E-03 | 1.00E+00 |
| ENSG00000247092.5_SNHG10     | ENSG00000160789.18_LMNA | -0.10484 | -0.259703094 | 0.055286577 | 1.99E-01 | 4.69E-01 | 1.00E+00 |
| ENSG00000261934.2_PCDHGA9    | ENSG00000160789.18_LMNA | 0.21313  | 0.055822266  | 0.360110943 | 8.38E-03 | 5.77E-02 | 1.00E+00 |
| ENSG00000105948.12_TTC26     | ENSG00000160789.18_LMNA | 0.29179  | 0.139052696  | 0.430974191 | 2.65E-04 | 4.07E-03 | 1.00E+00 |
| ENSG00000183475.11_ASXB7     | ENSG00000160789.18_LMNA | 0.12633  | -0.033549811 | 0.279897268 | 1.21E-01 | 3.50E-01 | 1.00E+00 |
| ENSG00000198496.9_NBR2       | ENSG00000160789.18_LMNA | -0.12    | -0.273968046 | 0.039962854 | 1.41E-01 | 3.83E-01 | 1.00E+00 |
| ENSG00000100092.19_SH3BP1    | ENSG00000160789.18_LMNA | 0.02432  | -0.135407253 | 0.182810634 | 7.66E-01 | 9.03E-01 | 1.00E+00 |
| ENSG00000114648.10_KLHL18    | ENSG00000160789.18_LMNA | 0.0779   | -0.082321428 | 0.234196457 | 3.40E-01 | 6.25E-01 | 1.00E+00 |
| ENSG00000105483.15_CARD8     | ENSG00000160789.18_LMNA | 0.1061   | -0.054013863 | 0.260893129 | 1.93E-01 | 4.62E-01 | 1.00E+00 |
| ENSG00000123106.9_CCDC91     | ENSG00000160789.18_LMNA | -0.18111 | -0.330775101 | -0.02256149 | 2.56E-02 | 1.28E-01 | 1.00E+00 |
| ENSG00000129696.11_TTI2      | ENSG00000160789.18_LMNA | -0.1999  | -0.348022204 | -0.04203383 | 1.35E-02 | 8.14E-02 | 1.00E+00 |

|                             |                         |          |              |             |          |          |          |
|-----------------------------|-------------------------|----------|--------------|-------------|----------|----------|----------|
| ENSG00000161798.6_AQP5      | ENSG00000160789.18_LMNA | 0.0726   | -0.087611516 | 0.229153904 | 3.74E-01 | 6.54E-01 | 1.00E+00 |
| ENSG00000169641.12_LUZP1    | ENSG00000160789.18_LMNA | 0.29729  | 0.144945182  | 0.435858249 | 2.00E-04 | 3.26E-03 | 1.00E+00 |
| ENSG00000215217.5_C5orf49   | ENSG00000160789.18_LMNA | -0.06473 | -0.221648578 | 0.095452325 | 4.28E-01 | 6.99E-01 | 1.00E+00 |
| ENSG00000224858.5_RPL29P11  | ENSG00000160789.18_LMNA | -0.14515 | -0.297480298 | 0.014379029 | 7.44E-02 | 2.60E-01 | 1.00E+00 |
| ENSG00000091009.7_RBM27     | ENSG00000160789.18_LMNA | 0.03571  | -0.124194812 | 0.193810799 | 6.62E-01 | 8.51E-01 | 1.00E+00 |
| ENSG00000175782.9_SLC35E3   | ENSG00000160789.18_LMNA | -0.06744 | -0.224237616 | 0.092751997 | 4.09E-01 | 6.83E-01 | 1.00E+00 |
| ENSG00000171763.16_SPATA5L  | ENSG00000160789.18_LMNA | 0.20211  | 0.044331018  | 0.350043304 | 1.25E-02 | 7.70E-02 | 1.00E+00 |
| ENSG00000175741.5_RWDD4P2   | ENSG00000160789.18_LMNA | -0.11219 | -0.26663305  | 0.047860754 | 1.69E-01 | 4.27E-01 | 1.00E+00 |
| ENSG00000138286.13_FAM149B  | ENSG00000160789.18_LMNA | -0.30872 | -0.445997092 | -0.15724366 | 1.09E-04 | 2.02E-03 | 1.00E+00 |
| ENSG00000149403.10_GRIK4    | ENSG00000160789.18_LMNA | -0.20284 | -0.350712349 | -0.04509217 | 1.22E-02 | 7.57E-02 | 1.00E+00 |
| ENSG00000258890.5_CEP95     | ENSG00000160789.18_LMNA | -0.15424 | -0.305926944 | 0.005087394 | 5.78E-02 | 2.20E-01 | 1.00E+00 |
| ENSG00000163013.10_FBXO41   | ENSG00000160789.18_LMNA | -0.02054 | -0.179158414 | 0.139112016 | 8.02E-01 | 9.20E-01 | 1.00E+00 |
| ENSG00000162572.18_SCNN1D   | ENSG00000160789.18_LMNA | 0.01737  | -0.142224579 | 0.176083198 | 8.32E-01 | 9.35E-01 | 1.00E+00 |
| ENSG00000205871.5_RPS3AP47  | ENSG00000160789.18_LMNA | -0.15873 | -0.31009361  | 0.000484037 | 5.08E-02 | 2.03E-01 | 1.00E+00 |
| ENSG00000225649.4_AC064875. | ENSG00000160789.18_LMNA | 0.22907  | 0.072511929  | 0.374607844 | 4.53E-03 | 3.64E-02 | 1.00E+00 |
| ENSG00000163064.6_EN1       | ENSG00000160789.18_LMNA | -0.10622 | -0.261010381 | 0.05388841  | 1.93E-01 | 4.61E-01 | 1.00E+00 |
| ENSG00000084112.13_SSH1     | ENSG00000160789.18_LMNA | 0.17774  | 0.019074889  | 0.327665053 | 2.85E-02 | 1.38E-01 | 1.00E+00 |
| ENSG00000147099.18_HDAC8    | ENSG00000160789.18_LMNA | 0.07922  | -0.08099842  | 0.235454902 | 3.32E-01 | 6.18E-01 | 1.00E+00 |
| ENSG00000171241.7_SHCBP1    | ENSG00000160789.18_LMNA | 0.31482  | 0.16382967   | 0.451396284 | 7.81E-05 | 1.55E-03 | 1.00E+00 |
| ENSG00000153922.9_CHD1      | ENSG00000160789.18_LMNA | 0.25773  | 0.102744812  | 0.400497786 | 1.35E-03 | 1.45E-02 | 1.00E+00 |
| ENSG00000254910.1_RP11-326C | ENSG00000160789.18_LMNA | 0.23081  | 0.074337825  | 0.376184934 | 4.23E-03 | 3.46E-02 | 1.00E+00 |
| ENSG00000187531.12_SIRT7    | ENSG00000160789.18_LMNA | 0.16415  | 0.005086124  | 0.315119461 | 4.33E-02 | 1.83E-01 | 1.00E+00 |
| ENSG00000216866.5_RPS2P55   | ENSG00000160789.18_LMNA | 0.13482  | -0.024920322 | 0.287838161 | 9.77E-02 | 3.07E-01 | 1.00E+00 |
| ENSG00000103723.11_AP3B2    | ENSG00000160789.18_LMNA | -0.18738 | -0.336538389 | -0.02904245 | 2.08E-02 | 1.11E-01 | 1.00E+00 |
| ENSG00000259456.3_ADNP-AS1  | ENSG00000160789.18_LMNA | -0.17928 | -0.329091383 | -0.02067298 | 2.71E-02 | 1.34E-01 | 1.00E+00 |
| ENSG00000104447.10_TRPS1    | ENSG00000160789.18_LMNA | 0.22555  | 0.068815456  | 0.371409715 | 5.21E-03 | 4.05E-02 | 1.00E+00 |
| ENSG00000215218.3_UBE2QL1   | ENSG00000160789.18_LMNA | -0.39837 | -0.524322325 | -0.25537025 | 3.72E-07 | 2.08E-05 | 1.91E-02 |
| ENSG00000189337.14_KAZN     | ENSG00000160789.18_LMNA | -0.04041 | -0.198332251 | 0.119562436 | 6.21E-01 | 8.29E-01 | 1.00E+00 |
| ENSG00000079156.15_OSBPL6   | ENSG00000160789.18_LMNA | 0.24122  | 0.08529833   | 0.385615275 | 2.76E-03 | 2.50E-02 | 1.00E+00 |
| ENSG00000142920.15_AZIN2    | ENSG00000160789.18_LMNA | -0.06488 | -0.221790209 | 0.095304726 | 4.27E-01 | 6.98E-01 | 1.00E+00 |
| ENSG00000116984.11_MTR      | ENSG00000160789.18_LMNA | 0.20959  | 0.052127896  | 0.356881967 | 9.56E-03 | 6.35E-02 | 1.00E+00 |
| ENSG00000198382.7_UVRAG     | ENSG00000160789.18_LMNA | -0.2746  | -0.415630735 | -0.12067473 | 6.18E-04 | 7.97E-03 | 1.00E+00 |
| ENSG00000184227.6_ACOT1     | ENSG00000160789.18_LMNA | 0.12529  | -0.034601138 | 0.278926892 | 1.24E-01 | 3.55E-01 | 1.00E+00 |

|                             |                         |          |              |             |          |          |          |
|-----------------------------|-------------------------|----------|--------------|-------------|----------|----------|----------|
| ENSG00000118939.16_UCHL3    | ENSG00000160789.18_LMNA | -0.17521 | -0.325338674 | -0.01647174 | 3.08E-02 | 1.46E-01 | 1.00E+00 |
| ENSG00000164684.12_ZNF704   | ENSG00000160789.18_LMNA | -0.20663 | -0.354182317 | -0.04904553 | 1.06E-02 | 6.85E-02 | 1.00E+00 |
| ENSG00000156384.13_SFR1     | ENSG00000160789.18_LMNA | -0.31661 | -0.452981763 | -0.16576854 | 7.07E-05 | 1.42E-03 | 1.00E+00 |
| ENSG00000130589.15_HELZ2    | ENSG00000160789.18_LMNA | 0.36435  | 0.2177827    | 0.494848014 | 3.94E-06 | 1.37E-04 | 2.02E-01 |
| ENSG00000264112.1_RP11-159D | ENSG00000160789.18_LMNA | 0.02623  | -0.133529097 | 0.184658805 | 7.48E-01 | 8.95E-01 | 1.00E+00 |
| ENSG00000183337.15_BCOR     | ENSG00000160789.18_LMNA | -0.05216 | -0.209616366 | 0.107940795 | 5.23E-01 | 7.69E-01 | 1.00E+00 |
| ENSG0000010818.7_HIVEP2     | ENSG00000160789.18_LMNA | 0.11775  | -0.04223815  | 0.271858655 | 1.49E-01 | 3.95E-01 | 1.00E+00 |
| ENSG00000175691.8_ZNF77     | ENSG00000160789.18_LMNA | -0.20147 | -0.349460974 | -0.04366881 | 1.28E-02 | 7.83E-02 | 1.00E+00 |
| ENSG00000079134.10_THOC1    | ENSG00000160789.18_LMNA | -0.04954 | -0.207110011 | 0.110529639 | 5.44E-01 | 7.83E-01 | 1.00E+00 |
| ENSG00000172007.5_RAB33B    | ENSG00000160789.18_LMNA | -0.00678 | -0.165802306 | 0.15258483  | 9.34E-01 | 9.74E-01 | 1.00E+00 |
| ENSG00000138744.13_NAAA     | ENSG00000160789.18_LMNA | 0.1262   | -0.033677699 | 0.279779262 | 1.21E-01 | 3.51E-01 | 1.00E+00 |
| ENSG00000157617.15_C2CD2    | ENSG00000160789.18_LMNA | 0.20755  | 0.050005608  | 0.355023733 | 1.03E-02 | 6.69E-02 | 1.00E+00 |
| ENSG00000112031.14_MTRF1L   | ENSG00000160789.18_LMNA | -0.0757  | -0.232102853 | 0.084519973 | 3.54E-01 | 6.38E-01 | 1.00E+00 |
| ENSG00000085563.13_ABCB1    | ENSG00000160789.18_LMNA | -0.11759 | -0.271707442 | 0.042401131 | 1.49E-01 | 3.96E-01 | 1.00E+00 |
| ENSG00000139597.15_N4BP2L1  | ENSG00000160789.18_LMNA | -0.3274  | -0.462496694 | -0.17745111 | 3.83E-05 | 8.69E-04 | 1.00E+00 |
| ENSG00000076344.14_RGS11    | ENSG00000160789.18_LMNA | -0.0284  | -0.186755517 | 0.131395595 | 7.28E-01 | 8.85E-01 | 1.00E+00 |
| ENSG00000213199.6_ASIC3     | ENSG00000160789.18_LMNA | -0.09205 | -0.247621897 | 0.068149443 | 2.59E-01 | 5.42E-01 | 1.00E+00 |
| ENSG00000197162.9_ZNF785    | ENSG00000160789.18_LMNA | -0.15513 | -0.306753751 | 0.004174981 | 5.63E-02 | 2.17E-01 | 1.00E+00 |
| ENSG00000135124.13_P2RX4    | ENSG00000160789.18_LMNA | 0.05289  | -0.107216785 | 0.210316561 | 5.18E-01 | 7.64E-01 | 1.00E+00 |
| ENSG00000186416.11_NKRF     | ENSG00000160789.18_LMNA | -0.17143 | -0.321847908 | -0.01257352 | 3.47E-02 | 1.58E-01 | 1.00E+00 |
| ENSG00000078725.11_BRINP1   | ENSG00000160789.18_LMNA | -0.23274 | -0.377932805 | -0.07636381 | 3.91E-03 | 3.26E-02 | 1.00E+00 |
| ENSG00000164048.12_ZNF589   | ENSG00000160789.18_LMNA | -0.12129 | -0.275178243 | 0.038656003 | 1.37E-01 | 3.76E-01 | 1.00E+00 |
| ENSG00000231721.5_LINC-PINT | ENSG00000160789.18_LMNA | -0.17348 | -0.323741906 | -0.01468742 | 3.26E-02 | 1.51E-01 | 1.00E+00 |
| ENSG00000213862.4_CTD-2270N | ENSG00000160789.18_LMNA | -0.04607 | -0.203776433 | 0.113966265 | 5.73E-01 | 8.01E-01 | 1.00E+00 |
| ENSG00000185252.16_ZNF74    | ENSG00000160789.18_LMNA | -0.13631 | -0.289233914 | 0.023398703 | 9.40E-02 | 3.00E-01 | 1.00E+00 |
| ENSG00000228288.5_PCAT6     | ENSG00000160789.18_LMNA | -0.05212 | -0.209582825 | 0.107975468 | 5.24E-01 | 7.69E-01 | 1.00E+00 |
| ENSG00000205189.10_ZBTB10   | ENSG00000160789.18_LMNA | -0.02429 | -0.182779927 | 0.135438439 | 7.66E-01 | 9.03E-01 | 1.00E+00 |
| ENSG00000147050.13_KDM6A    | ENSG00000160789.18_LMNA | 0.10119  | -0.058960992 | 0.256262002 | 2.15E-01 | 4.89E-01 | 1.00E+00 |
| ENSG00000070366.12_SMG6     | ENSG00000160789.18_LMNA | 0.16741  | 0.00843136   | 0.318129471 | 3.93E-02 | 1.71E-01 | 1.00E+00 |
| ENSG00000174151.13_CYB561D  | ENSG00000160789.18_LMNA | 0.20397  | 0.046268636  | 0.351745842 | 1.17E-02 | 7.34E-02 | 1.00E+00 |
| ENSG00000240764.3_PCDHGC5   | ENSG00000160789.18_LMNA | 0.20363  | 0.045921603  | 0.351441061 | 1.19E-02 | 7.41E-02 | 1.00E+00 |
| ENSG00000111729.11_CLEC4A   | ENSG00000160789.18_LMNA | -0.15118 | -0.303089633 | 0.008214547 | 6.30E-02 | 2.33E-01 | 1.00E+00 |
| ENSG00000113361.11_CDH6     | ENSG00000160789.18_LMNA | 0.19195  | 0.033782429  | 0.340738947 | 1.78E-02 | 9.94E-02 | 1.00E+00 |



|                             |                         |          |              |             |          |          |          |
|-----------------------------|-------------------------|----------|--------------|-------------|----------|----------|----------|
| ENSG00000275367.1_RP11-266K | ENSG00000160789.18_LMNA | -0.0894  | -0.245113102 | 0.070807462 | 2.73E-01 | 5.58E-01 | 1.00E+00 |
| ENSG00000170500.11_LONRF2   | ENSG00000160789.18_LMNA | 0.14301  | -0.016566307 | 0.295484808 | 7.88E-02 | 2.69E-01 | 1.00E+00 |
| ENSG00000025423.10_HSD17B6  | ENSG00000160789.18_LMNA | 0.13849  | -0.021179693 | 0.291266993 | 8.88E-02 | 2.90E-01 | 1.00E+00 |
| ENSG00000175414.6_ARL10     | ENSG00000160789.18_LMNA | -0.04739 | -0.205040146 | 0.112664382 | 5.62E-01 | 7.94E-01 | 1.00E+00 |
| ENSG00000144712.10_CAND2    | ENSG00000160789.18_LMNA | -0.02029 | -0.178908777 | 0.139364919 | 8.04E-01 | 9.22E-01 | 1.00E+00 |
| ENSG00000186174.11_BCL9L    | ENSG00000160789.18_LMNA | 0.14213  | -0.017467266 | 0.294662056 | 8.07E-02 | 2.74E-01 | 1.00E+00 |
| ENSG00000250318.1_CTA-963H5 | ENSG00000160789.18_LMNA | 0.0827   | -0.077520782 | 0.238757777 | 3.11E-01 | 5.98E-01 | 1.00E+00 |
| ENSG00000168675.17_LDLRAD4  | ENSG00000160789.18_LMNA | -0.38467 | -0.512483522 | -0.24017432 | 9.93E-07 | 4.57E-05 | 5.10E-02 |
| ENSG00000013503.8_POLR3B    | ENSG00000160789.18_LMNA | -0.32872 | -0.463657213 | -0.17888153 | 3.55E-05 | 8.21E-04 | 1.00E+00 |
| ENSG00000135736.5_CCDC102A  | ENSG00000160789.18_LMNA | 0.48334  | 0.351154885  | 0.596627031 | 2.84E-10 | 5.48E-08 | 1.46E-05 |
| ENSG00000078142.10_PIK3C3   | ENSG00000160789.18_LMNA | -0.17015 | -0.320666008 | -0.01125579 | 3.61E-02 | 1.62E-01 | 1.00E+00 |
| ENSG00000125898.11_FAM110A  | ENSG00000160789.18_LMNA | -0.25966 | -0.402229859 | -0.10478726 | 1.24E-03 | 1.36E-02 | 1.00E+00 |
| ENSG00000111271.13_ACAD10   | ENSG00000160789.18_LMNA | 0.11462  | -0.045405489 | 0.268917231 | 1.60E-01 | 4.13E-01 | 1.00E+00 |
| ENSG00000245205.3_EEF1A1P4  | ENSG00000160789.18_LMNA | -0.15151 | -0.303392184 | 0.007881379 | 6.24E-02 | 2.32E-01 | 1.00E+00 |
| ENSG00000185499.15_MUC1     | ENSG00000160789.18_LMNA | 0.42695  | 0.287273239  | 0.548843457 | 4.13E-08 | 3.51E-06 | 2.12E-03 |
| ENSG00000197177.14_ADGRA1   | ENSG00000160789.18_LMNA | -0.17624 | -0.32628707  | -0.01753246 | 2.99E-02 | 1.43E-01 | 1.00E+00 |
| ENSG00000182732.15_RGS6     | ENSG00000160789.18_LMNA | 0.29626  | 0.14384719   | 0.434949462 | 2.11E-04 | 3.39E-03 | 1.00E+00 |
| ENSG00000198908.10_BHLHB9   | ENSG00000160789.18_LMNA | -0.18831 | -0.337394519 | -0.0300074  | 2.02E-02 | 1.09E-01 | 1.00E+00 |
| ENSG00000118402.5_ELOVL4    | ENSG00000160789.18_LMNA | -0.24698 | -0.390810647 | -0.09136791 | 2.16E-03 | 2.07E-02 | 1.00E+00 |
| ENSG00000163312.9_HELQ      | ENSG00000160789.18_LMNA | -0.16863 | -0.319260127 | -0.00968973 | 3.78E-02 | 1.67E-01 | 1.00E+00 |
| ENSG00000156170.11_NDUFAF6  | ENSG00000160789.18_LMNA | -0.30276 | -0.440719617 | -0.15083086 | 1.50E-04 | 2.60E-03 | 1.00E+00 |
| ENSG00000156374.13_PCGF6    | ENSG00000160789.18_LMNA | -0.16604 | -0.316861709 | -0.00702156 | 4.09E-02 | 1.76E-01 | 1.00E+00 |
| ENSG00000133256.11_PDE6B    | ENSG00000160789.18_LMNA | 0.01246  | -0.147034067 | 0.171319171 | 8.79E-01 | 9.53E-01 | 1.00E+00 |
| ENSG00000182568.15_SATB1    | ENSG00000160789.18_LMNA | -0.33644 | -0.470445398 | -0.18727262 | 2.26E-05 | 5.70E-04 | 1.00E+00 |
| ENSG00000038532.13_CLEC16A  | ENSG00000160789.18_LMNA | 0.00962  | -0.149808102 | 0.16856457  | 9.06E-01 | 9.64E-01 | 1.00E+00 |
| ENSG00000104998.3_IL27RA    | ENSG00000160789.18_LMNA | 0.33518  | 0.185904043  | 0.469340532 | 2.43E-05 | 6.05E-04 | 1.00E+00 |
| ENSG00000060069.15_CTDTP1   | ENSG00000160789.18_LMNA | 0.22513  | 0.068379903  | 0.371032408 | 5.29E-03 | 4.09E-02 | 1.00E+00 |
| ENSG00000168067.10_MAP4K2   | ENSG00000160789.18_LMNA | 0.05952  | -0.100630696 | 0.216671086 | 4.66E-01 | 7.28E-01 | 1.00E+00 |
| ENSG00000133812.13_SBF2     | ENSG00000160789.18_LMNA | 0.05915  | -0.100997344 | 0.216318035 | 4.69E-01 | 7.30E-01 | 1.00E+00 |
| ENSG00000092607.12_TBX15    | ENSG00000160789.18_LMNA | 0.02426  | -0.135464233 | 0.182754529 | 7.67E-01 | 9.03E-01 | 1.00E+00 |
| ENSG00000146216.10_TTBK1    | ENSG00000160789.18_LMNA | -0.07737 | -0.233693773 | 0.08284959  | 3.43E-01 | 6.28E-01 | 1.00E+00 |
| ENSG00000066422.4_ZBTB11    | ENSG00000160789.18_LMNA | -0.16182 | -0.312954737 | -0.00268459 | 4.64E-02 | 1.92E-01 | 1.00E+00 |
| ENSG00000169248.11_CXCL11   | ENSG00000160789.18_LMNA | 0.07644  | -0.083775606 | 0.232812019 | 3.49E-01 | 6.33E-01 | 1.00E+00 |

|                              |                         |          |              |             |          |          |          |
|------------------------------|-------------------------|----------|--------------|-------------|----------|----------|----------|
| ENSG00000267481.1_CTC-559E9  | ENSG00000160789.18_LMNA | -0.26683 | -0.408670587 | -0.11240419 | 8.91E-04 | 1.06E-02 | 1.00E+00 |
| ENSG00000204314.9_PRRT1      | ENSG00000160789.18_LMNA | -0.22603 | -0.371850764 | -0.06932474 | 5.11E-03 | 3.99E-02 | 1.00E+00 |
| ENSG00000115295.18_CLIP4     | ENSG00000160789.18_LMNA | -0.13125 | -0.284506793 | 0.028546254 | 1.07E-01 | 3.25E-01 | 1.00E+00 |
| ENSG00000148344.10_PTGES     | ENSG00000160789.18_LMNA | 0.28867  | 0.135708238  | 0.428194467 | 3.10E-04 | 4.62E-03 | 1.00E+00 |
| ENSG00000105514.6_RAB3D      | ENSG00000160789.18_LMNA | 0.45189  | 0.315375292  | 0.570076556 | 5.10E-09 | 6.10E-07 | 2.62E-04 |
| ENSG00000075539.12_FRYL      | ENSG00000160789.18_LMNA | 0.05021  | -0.109873699 | 0.207745445 | 5.39E-01 | 7.79E-01 | 1.00E+00 |
| ENSG00000002587.8_HS3ST1     | ENSG00000160789.18_LMNA | -0.195   | -0.343531762 | -0.03694155 | 1.61E-02 | 9.22E-02 | 1.00E+00 |
| ENSG00000148482.10_SLC39A12  | ENSG00000160789.18_LMNA | -0.17396 | -0.324182708 | -0.0151798  | 3.21E-02 | 1.50E-01 | 1.00E+00 |
| ENSG00000229953.1_RP11-284F  | ENSG00000160789.18_LMNA | -0.02866 | -0.187005323 | 0.13114121  | 7.26E-01 | 8.84E-01 | 1.00E+00 |
| ENSG00000159459.10_UBR1      | ENSG00000160789.18_LMNA | 0.11745  | -0.0425452   | 0.271573762 | 1.50E-01 | 3.97E-01 | 1.00E+00 |
| ENSG00000196136.15_SERPINA3  | ENSG00000160789.18_LMNA | 0.22486  | 0.068094374  | 0.370785008 | 5.35E-03 | 4.13E-02 | 1.00E+00 |
| ENSG00000148143.11_ZNF462    | ENSG00000160789.18_LMNA | -0.01729 | -0.176010195 | 0.142298392 | 8.33E-01 | 9.35E-01 | 1.00E+00 |
| ENSG00000168172.7_HOOK3      | ENSG00000160789.18_LMNA | -0.0604  | -0.217510507 | 0.099758601 | 4.60E-01 | 7.23E-01 | 1.00E+00 |
| ENSG00000254837.2_AP001372.2 | ENSG00000160789.18_LMNA | -0.32693 | -0.462076357 | -0.17693331 | 3.94E-05 | 8.90E-04 | 1.00E+00 |
| ENSG00000107338.9_SHB        | ENSG00000160789.18_LMNA | 0.21938  | 0.062352001  | 0.365800327 | 6.62E-03 | 4.83E-02 | 1.00E+00 |
| ENSG00000175470.17_PPP2R2D   | ENSG00000160789.18_LMNA | -0.18408 | -0.33350586  | -0.02562907 | 2.32E-02 | 1.20E-01 | 1.00E+00 |
| ENSG00000179915.19_NRXN1     | ENSG00000160789.18_LMNA | -0.47001 | -0.585406018 | -0.3359454  | 1.00E-09 | 1.58E-07 | 5.14E-05 |
| ENSG00000170419.9_VSTM2A     | ENSG00000160789.18_LMNA | -0.24685 | -0.390700308 | -0.09123878 | 2.17E-03 | 2.08E-02 | 1.00E+00 |
| ENSG00000159445.11_THEM4     | ENSG00000160789.18_LMNA | 0.03754  | -0.122393847 | 0.195570246 | 6.46E-01 | 8.43E-01 | 1.00E+00 |
| ENSG00000141642.7_ELAC1      | ENSG00000160789.18_LMNA | -0.1752  | -0.325323886 | -0.01645521 | 3.09E-02 | 1.46E-01 | 1.00E+00 |
| ENSG00000164303.9_ENPP6      | ENSG00000160789.18_LMNA | -0.48466 | -0.597740892 | -0.35267177 | 2.50E-10 | 4.91E-08 | 1.28E-05 |
| ENSG00000042429.9_MED17      | ENSG00000160789.18_LMNA | -0.10305 | -0.258019317 | 0.057085589 | 2.06E-01 | 4.78E-01 | 1.00E+00 |
| ENSG00000141570.9_CBX8       | ENSG00000160789.18_LMNA | -0.19761 | -0.345925715 | -0.03965438 | 1.47E-02 | 8.65E-02 | 1.00E+00 |
| ENSG00000167100.13_SAMD14    | ENSG00000160789.18_LMNA | -0.18761 | -0.336753021 | -0.02928431 | 2.06E-02 | 1.10E-01 | 1.00E+00 |
| ENSG00000185008.16_ROBO2     | ENSG00000160789.18_LMNA | -0.25409 | -0.397218051 | -0.09888424 | 1.58E-03 | 1.64E-02 | 1.00E+00 |
| ENSG00000170430.9_MGMT       | ENSG00000160789.18_LMNA | -0.05732 | -0.214563934 | 0.10281772  | 4.83E-01 | 7.40E-01 | 1.00E+00 |
| ENSG00000136104.17_RNASEH2   | ENSG00000160789.18_LMNA | -0.36031 | -0.491327152 | -0.21334696 | 5.12E-06 | 1.69E-04 | 2.63E-01 |
| ENSG00000186187.10_ZNRF1     | ENSG00000160789.18_LMNA | 0.0028   | -0.15647076  | 0.161928212 | 9.73E-01 | 9.89E-01 | 1.00E+00 |
| ENSG00000198546.13_ZNF511    | ENSG00000160789.18_LMNA | -0.0386  | -0.196590963 | 0.121348083 | 6.37E-01 | 8.38E-01 | 1.00E+00 |
| ENSG00000111684.9_LPCAT3     | ENSG00000160789.18_LMNA | 0.01569  | -0.143869629 | 0.174455373 | 8.48E-01 | 9.41E-01 | 1.00E+00 |
| ENSG00000275632.1_RP5-967N2  | ENSG00000160789.18_LMNA | -0.07365 | -0.230149097 | 0.086568883 | 3.67E-01 | 6.48E-01 | 1.00E+00 |
| ENSG00000267939.1_CTD-2325M  | ENSG00000160789.18_LMNA | -0.08173 | -0.237839638 | 0.078488275 | 3.17E-01 | 6.04E-01 | 1.00E+00 |
| ENSG00000196352.12_CD55      | ENSG00000160789.18_LMNA | -0.04597 | -0.203683294 | 0.114062174 | 5.74E-01 | 8.01E-01 | 1.00E+00 |

|                             |                         |          |              |             |          |          |          |
|-----------------------------|-------------------------|----------|--------------|-------------|----------|----------|----------|
| ENSG00000103037.10_SETD6    | ENSG00000160789.18_LMNA | 0.04934  | -0.110726756 | 0.206919004 | 5.46E-01 | 7.84E-01 | 1.00E+00 |
| ENSG00000067992.11_PDK3     | ENSG00000160789.18_LMNA | 0.33587  | 0.186647948  | 0.469941202 | 2.33E-05 | 5.85E-04 | 1.00E+00 |
| ENSG00000204599.13_TRIM39   | ENSG00000160789.18_LMNA | 0.20204  | 0.044260391  | 0.349981207 | 1.26E-02 | 7.71E-02 | 1.00E+00 |
| ENSG00000213920.7_MDP1      | ENSG00000160789.18_LMNA | -0.15891 | -0.310265882 | 0.000293426 | 5.05E-02 | 2.03E-01 | 1.00E+00 |
| ENSG00000183963.17_SMTN     | ENSG00000160789.18_LMNA | 0.16431  | 0.005248719  | 0.315265908 | 4.31E-02 | 1.82E-01 | 1.00E+00 |
| ENSG00000204444.9_APOM      | ENSG00000160789.18_LMNA | -0.17582 | -0.325897107 | -0.01709623 | 3.03E-02 | 1.44E-01 | 1.00E+00 |
| ENSG00000176244.6_ACBD7     | ENSG00000160789.18_LMNA | -0.30958 | -0.446765003 | -0.15817881 | 1.04E-04 | 1.95E-03 | 1.00E+00 |
| ENSG00000165416.13_SUGT1    | ENSG00000160789.18_LMNA | -0.24281 | -0.387048407 | -0.08697039 | 2.58E-03 | 2.38E-02 | 1.00E+00 |
| ENSG00000083093.8_PALB2     | ENSG00000160789.18_LMNA | 0.02544  | -0.134302111 | 0.183898404 | 7.56E-01 | 8.98E-01 | 1.00E+00 |
| ENSG00000120798.15_NR2C1    | ENSG00000160789.18_LMNA | -0.31527 | -0.451791753 | -0.16431308 | 7.62E-05 | 1.51E-03 | 1.00E+00 |
| ENSG00000117481.9_NSUN4     | ENSG00000160789.18_LMNA | 0.01277  | -0.14672447  | 0.17162629  | 8.76E-01 | 9.52E-01 | 1.00E+00 |
| ENSG00000011258.14_MBTD1    | ENSG00000160789.18_LMNA | -0.32069 | -0.456578603 | -0.17017534 | 5.63E-05 | 1.18E-03 | 1.00E+00 |
| ENSG00000033800.12_PIAS1    | ENSG00000160789.18_LMNA | -0.09689 | -0.252204813 | 0.063282334 | 2.35E-01 | 5.13E-01 | 1.00E+00 |
| ENSG00000183876.8_ARSI      | ENSG00000160789.18_LMNA | 0.43407  | 0.295273095  | 0.55492248  | 2.31E-08 | 2.18E-06 | 1.19E-03 |
| ENSG00000165997.4_ARL5B     | ENSG00000160789.18_LMNA | -0.20992 | -0.357181133 | -0.05246983 | 9.44E-03 | 6.29E-02 | 1.00E+00 |
| ENSG00000131080.13_EDA2R    | ENSG00000160789.18_LMNA | 0.26459  | 0.110024073  | 0.406661169 | 9.87E-04 | 1.15E-02 | 1.00E+00 |
| ENSG00000095564.12_BTAF1    | ENSG00000160789.18_LMNA | -0.00803 | -0.167016563 | 0.151364833 | 9.22E-01 | 9.70E-01 | 1.00E+00 |
| ENSG00000213462.4_ERV3-1    | ENSG00000160789.18_LMNA | -0.0001  | -0.159298621 | 0.15910278  | 9.99E-01 | 1.00E+00 | 1.00E+00 |
| ENSG00000033867.15_SLC4A7   | ENSG00000160789.18_LMNA | 0.28034  | 0.126802541  | 0.420765465 | 4.68E-04 | 6.41E-03 | 1.00E+00 |
| ENSG00000006128.10_TAC1     | ENSG00000160789.18_LMNA | -0.15785 | -0.309278317 | 0.001385815 | 5.21E-02 | 2.07E-01 | 1.00E+00 |
| ENSG00000274020.1_LINC01138 | ENSG00000160789.18_LMNA | 0.00638  | -0.152974867 | 0.1654139   | 9.38E-01 | 9.75E-01 | 1.00E+00 |
| ENSG00000094804.8_CDC6      | ENSG00000160789.18_LMNA | 0.1267   | -0.033171535 | 0.28024626  | 1.20E-01 | 3.48E-01 | 1.00E+00 |
| ENSG00000181938.12_GINS3    | ENSG00000160789.18_LMNA | -0.23546 | -0.380403683 | -0.07923211 | 3.50E-03 | 3.00E-02 | 1.00E+00 |
| ENSG00000174529.7_TMEM81    | ENSG00000160789.18_LMNA | 0.04005  | -0.119917718 | 0.197985955 | 6.24E-01 | 8.31E-01 | 1.00E+00 |
| ENSG00000151065.12_DCP1B    | ENSG00000160789.18_LMNA | -0.01461 | -0.173404525 | 0.144930664 | 8.58E-01 | 9.44E-01 | 1.00E+00 |
| ENSG00000258754.6_LINC01579 | ENSG00000160789.18_LMNA | -0.034   | -0.192160799 | 0.125881846 | 6.78E-01 | 8.59E-01 | 1.00E+00 |
| ENSG00000165209.17_STRBP    | ENSG00000160789.18_LMNA | -0.10467 | -0.259542209 | 0.055458562 | 1.99E-01 | 4.70E-01 | 1.00E+00 |
| ENSG00000270067.1_CTC-487M2 | ENSG00000160789.18_LMNA | -0.18277 | -0.332304134 | -0.0242784  | 2.42E-02 | 1.24E-01 | 1.00E+00 |
| ENSG00000166813.13_KIF7     | ENSG00000160789.18_LMNA | 0.26131  | 0.106540285  | 0.403714796 | 1.15E-03 | 1.28E-02 | 1.00E+00 |
| ENSG00000183346.6_C10orf107 | ENSG00000160789.18_LMNA | 0.04256  | -0.117431542 | 0.200407586 | 6.03E-01 | 8.18E-01 | 1.00E+00 |
| ENSG00000107554.14_DNMBP    | ENSG00000160789.18_LMNA | 0.35663  | 0.209314088  | 0.488118167 | 6.49E-06 | 2.06E-04 | 3.33E-01 |
| ENSG00000183354.10_KIAA2026 | ENSG00000160789.18_LMNA | 0.0318   | -0.128051352 | 0.190036272 | 6.97E-01 | 8.70E-01 | 1.00E+00 |
| ENSG00000137502.8_RAB30     | ENSG00000160789.18_LMNA | -0.28632 | -0.426102579 | -0.13319575 | 3.49E-04 | 5.05E-03 | 1.00E+00 |

|                              |                         |          |              |             |          |          |          |
|------------------------------|-------------------------|----------|--------------|-------------|----------|----------|----------|
| ENSG00000144681.9_STAC       | ENSG00000160789.18_LMNA | 0.2198   | 0.062792566  | 0.366183379 | 6.51E-03 | 4.78E-02 | 1.00E+00 |
| ENSG00000142330.18_CAPN10    | ENSG00000160789.18_LMNA | 0.14267  | -0.016918738 | 0.295163025 | 7.95E-02 | 2.71E-01 | 1.00E+00 |
| ENSG00000277782.1_RP11-775C  | ENSG00000160789.18_LMNA | 0.1658   | 0.006773186  | 0.316638243 | 4.12E-02 | 1.77E-01 | 1.00E+00 |
| ENSG00000111203.10_ITFG2     | ENSG00000160789.18_LMNA | -0.10351 | -0.258451605 | 0.056623911 | 2.04E-01 | 4.76E-01 | 1.00E+00 |
| ENSG00000127564.15_PKMYT1    | ENSG00000160789.18_LMNA | -0.02869 | -0.187038374 | 0.131107549 | 7.26E-01 | 8.84E-01 | 1.00E+00 |
| ENSG00000108469.13_RECQL5    | ENSG00000160789.18_LMNA | 0.09328  | -0.066909914 | 0.248790392 | 2.53E-01 | 5.34E-01 | 1.00E+00 |
| ENSG00000249087.5_ZNF436-AS  | ENSG00000160789.18_LMNA | 0.29377  | 0.1411736    | 0.4327341   | 2.39E-04 | 3.77E-03 | 1.00E+00 |
| ENSG00000187266.12_EPOR      | ENSG00000160789.18_LMNA | 0.24443  | 0.088679289  | 0.388511621 | 2.41E-03 | 2.25E-02 | 1.00E+00 |
| ENSG00000259065.1_RP5-1021I2 | ENSG00000160789.18_LMNA | -0.02257 | -0.181122262 | 0.137121021 | 7.83E-01 | 9.11E-01 | 1.00E+00 |
| ENSG00000185361.7_TNFAIP8L1  | ENSG00000160789.18_LMNA | 0.1706   | 0.011713725  | 0.321076853 | 3.56E-02 | 1.60E-01 | 1.00E+00 |
| ENSG00000151893.13_CACUL1    | ENSG00000160789.18_LMNA | -0.13353 | -0.286634068 | 0.026231833 | 1.01E-01 | 3.13E-01 | 1.00E+00 |
| ENSG00000158158.10_CNNM4     | ENSG00000160789.18_LMNA | 0.23033  | 0.073835328  | 0.375751084 | 4.31E-03 | 3.51E-02 | 1.00E+00 |
| ENSG00000203685.8_STUM       | ENSG00000160789.18_LMNA | -0.25687 | -0.399721438 | -0.10183016 | 1.40E-03 | 1.49E-02 | 1.00E+00 |
| ENSG00000198862.12_LTN1      | ENSG00000160789.18_LMNA | 0.06     | -0.100156947 | 0.217127144 | 4.63E-01 | 7.26E-01 | 1.00E+00 |
| ENSG00000128683.12_GAD1      | ENSG00000160789.18_LMNA | -0.19475 | -0.343304693 | -0.03668447 | 1.62E-02 | 9.28E-02 | 1.00E+00 |
| ENSG00000133985.2_TTC9       | ENSG00000160789.18_LMNA | 0.00904  | -0.150376081 | 0.167999957 | 9.12E-01 | 9.66E-01 | 1.00E+00 |
| ENSG00000138592.12_USP8      | ENSG00000160789.18_LMNA | 0.16605  | 0.007035076  | 0.316873867 | 4.09E-02 | 1.76E-01 | 1.00E+00 |
| ENSG00000138767.11_CNOT6L    | ENSG00000160789.18_LMNA | -0.04717 | -0.204829774 | 0.112881184 | 5.64E-01 | 7.95E-01 | 1.00E+00 |
| ENSG00000281327.1_LINC01338  | ENSG00000160789.18_LMNA | -0.45033 | -0.568756271 | -0.31361477 | 5.84E-09 | 6.89E-07 | 3.00E-04 |
| ENSG00000010671.14_BTK       | ENSG00000160789.18_LMNA | -0.13611 | -0.289044053 | 0.023605771 | 9.45E-02 | 3.01E-01 | 1.00E+00 |
| ENSG00000124508.15_BTN2A2    | ENSG00000160789.18_LMNA | 0.01084  | -0.148613985 | 0.169750931 | 8.95E-01 | 9.59E-01 | 1.00E+00 |
| ENSG00000168306.11_ACOX2     | ENSG00000160789.18_LMNA | 0.16615  | 0.007136588  | 0.316965188 | 4.08E-02 | 1.76E-01 | 1.00E+00 |
| ENSG00000165138.15_ANKS6     | ENSG00000160789.18_LMNA | 0.16435  | 0.005289386  | 0.315302533 | 4.30E-02 | 1.82E-01 | 1.00E+00 |
| ENSG00000137941.15_TTLL7     | ENSG00000160789.18_LMNA | -0.17995 | -0.329702911 | -0.02135863 | 2.65E-02 | 1.32E-01 | 1.00E+00 |
| ENSG00000187953.9_PMS2CL     | ENSG00000160789.18_LMNA | 0.09311  | -0.067088591 | 0.248622011 | 2.54E-01 | 5.36E-01 | 1.00E+00 |
| ENSG00000198826.9_ARHGAP11   | ENSG00000160789.18_LMNA | 0.2009   | 0.043076652  | 0.348940045 | 1.31E-02 | 7.94E-02 | 1.00E+00 |
| ENSG00000099985.3_OSM        | ENSG00000160789.18_LMNA | 0.08732  | -0.072896024 | 0.24313882  | 2.85E-01 | 5.70E-01 | 1.00E+00 |
| ENSG00000152926.13_ZNF117    | ENSG00000160789.18_LMNA | -0.02947 | -0.187784977 | 0.130346993 | 7.19E-01 | 8.80E-01 | 1.00E+00 |
| ENSG00000279812.1_CTD-2545C  | ENSG00000160789.18_LMNA | 0.06273  | -0.097441413 | 0.219738602 | 4.43E-01 | 7.10E-01 | 1.00E+00 |
| ENSG00000153551.12_CMTM7     | ENSG00000160789.18_LMNA | -0.02796 | -0.186330853 | 0.131827949 | 7.32E-01 | 8.87E-01 | 1.00E+00 |
| ENSG00000179862.6_CITED4     | ENSG00000160789.18_LMNA | 0.06475  | -0.095430942 | 0.221669097 | 4.28E-01 | 6.99E-01 | 1.00E+00 |
| ENSG00000157036.11_EXOG      | ENSG00000160789.18_LMNA | -0.27349 | -0.414639813 | -0.11949474 | 6.51E-04 | 8.30E-03 | 1.00E+00 |
| ENSG00000170468.7_C14orf169  | ENSG00000160789.18_LMNA | 0.38403  | 0.239470208  | 0.511932447 | 1.04E-06 | 4.74E-05 | 5.33E-02 |

|                             |                         |          |              |             |          |          |          |
|-----------------------------|-------------------------|----------|--------------|-------------|----------|----------|----------|
| ENSG00000101665.7_SMAD7     | ENSG00000160789.18_LMNA | -0.10479 | -0.259662495 | 0.055329979 | 1.99E-01 | 4.69E-01 | 1.00E+00 |
| ENSG00000002016.15_RAD52    | ENSG00000160789.18_LMNA | -0.1339  | -0.286980445 | 0.025854665 | 1.00E-01 | 3.12E-01 | 1.00E+00 |
| ENSG00000145416.12_MARCH1   | ENSG00000160789.18_LMNA | -0.33015 | -0.464914475 | -0.18043255 | 3.27E-05 | 7.67E-04 | 1.00E+00 |
| ENSG00000184470.18_TXNRD2   | ENSG00000160789.18_LMNA | 0.06884  | -0.091359296 | 0.225571172 | 3.99E-01 | 6.76E-01 | 1.00E+00 |
| ENSG00000117620.11_SLC35A3  | ENSG00000160789.18_LMNA | 0.01872  | -0.140898093 | 0.177394528 | 8.19E-01 | 9.30E-01 | 1.00E+00 |
| ENSG00000174640.11_SLCO2A1  | ENSG00000160789.18_LMNA | 0.10187  | -0.058271042 | 0.25690875  | 2.12E-01 | 4.85E-01 | 1.00E+00 |
| ENSG00000162728.4_KCNJ9     | ENSG00000160789.18_LMNA | -0.31814 | -0.454332682 | -0.16742232 | 6.49E-05 | 1.32E-03 | 1.00E+00 |
| ENSG00000112699.9_GMDS      | ENSG00000160789.18_LMNA | 0.20422  | 0.046530216  | 0.351975532 | 1.16E-02 | 7.29E-02 | 1.00E+00 |
| ENSG00000112936.17_C7       | ENSG00000160789.18_LMNA | 0.16937  | 0.010446479  | 0.319939646 | 3.70E-02 | 1.64E-01 | 1.00E+00 |
| ENSG00000116138.11_DNAJC16  | ENSG00000160789.18_LMNA | 0.01531  | -0.144245065 | 0.174083625 | 8.52E-01 | 9.42E-01 | 1.00E+00 |
| ENSG00000128710.5_HOXD10    | ENSG00000160789.18_LMNA | -0.07433 | -0.230799936 | 0.085886644 | 3.63E-01 | 6.44E-01 | 1.00E+00 |
| ENSG00000272711.1_RP11-259N | ENSG00000160789.18_LMNA | 0.04281  | -0.117186071 | 0.200646474 | 6.00E-01 | 8.16E-01 | 1.00E+00 |
| ENSG00000187123.13_LYPD6    | ENSG00000160789.18_LMNA | 0.00889  | -0.150522783 | 0.167854089 | 9.13E-01 | 9.67E-01 | 1.00E+00 |
| ENSG00000105339.9_DENND3    | ENSG00000160789.18_LMNA | 0.0586   | -0.101545993 | 0.215789576 | 4.73E-01 | 7.33E-01 | 1.00E+00 |
| ENSG00000174516.13_PELI3    | ENSG00000160789.18_LMNA | -0.02598 | -0.184413165 | 0.133778854 | 7.51E-01 | 8.96E-01 | 1.00E+00 |
| ENSG00000170921.13_TANC2    | ENSG00000160789.18_LMNA | 0.0344   | -0.125486501 | 0.192547627 | 6.74E-01 | 8.57E-01 | 1.00E+00 |
| ENSG00000152422.14_XRCC4    | ENSG00000160789.18_LMNA | -0.25492 | -0.397971036 | -0.09976978 | 1.53E-03 | 1.59E-02 | 1.00E+00 |
| ENSG00000066629.15_EML1     | ENSG00000160789.18_LMNA | 0.22083  | 0.063876864  | 0.367125688 | 6.26E-03 | 4.64E-02 | 1.00E+00 |
| ENSG00000272831.1_RP11-792A | ENSG00000160789.18_LMNA | -0.05021 | -0.207745798 | 0.109873335 | 5.39E-01 | 7.79E-01 | 1.00E+00 |
| ENSG00000158825.5_CDA       | ENSG00000160789.18_LMNA | -0.1132  | -0.267576774 | 0.046846807 | 1.65E-01 | 4.21E-01 | 1.00E+00 |
| ENSG00000103121.7_CMC2      | ENSG00000160789.18_LMNA | -0.26057 | -0.403053236 | -0.10575906 | 1.19E-03 | 1.32E-02 | 1.00E+00 |
| ENSG00000160305.16_DIP2A    | ENSG00000160789.18_LMNA | 0.11325  | -0.046795775 | 0.267624255 | 1.65E-01 | 4.21E-01 | 1.00E+00 |
| ENSG00000142185.15_TRPM2    | ENSG00000160789.18_LMNA | 0.09251  | -0.067691989 | 0.248053242 | 2.57E-01 | 5.39E-01 | 1.00E+00 |
| ENSG00000102572.13_STK24    | ENSG00000160789.18_LMNA | 0.12415  | -0.035753628 | 0.277862407 | 1.28E-01 | 3.62E-01 | 1.00E+00 |
| ENSG00000159259.7_CHAF1B    | ENSG00000160789.18_LMNA | 0.29387  | 0.141276965  | 0.432819815 | 2.38E-04 | 3.75E-03 | 1.00E+00 |
| ENSG00000175104.13_TRAF6    | ENSG00000160789.18_LMNA | 0.08352  | -0.076701673 | 0.239534661 | 3.06E-01 | 5.93E-01 | 1.00E+00 |
| ENSG00000164366.3_CCDC127   | ENSG00000160789.18_LMNA | 0.03928  | -0.120676383 | 0.197246212 | 6.31E-01 | 8.34E-01 | 1.00E+00 |
| ENSG00000104450.11_SPAG1    | ENSG00000160789.18_LMNA | 0.034    | -0.125878926 | 0.192163656 | 6.77E-01 | 8.59E-01 | 1.00E+00 |
| ENSG00000243498.2_UBA52P5   | ENSG00000160789.18_LMNA | 0.09852  | -0.061647856 | 0.253740684 | 2.27E-01 | 5.04E-01 | 1.00E+00 |
| ENSG00000197928.9_ZNF677    | ENSG00000160789.18_LMNA | -0.15768 | -0.309119883 | 0.001560996 | 5.24E-02 | 2.07E-01 | 1.00E+00 |
| ENSG00000278619.3_MRM1      | ENSG00000160789.18_LMNA | 0.21344  | 0.056149901  | 0.360396953 | 8.28E-03 | 5.72E-02 | 1.00E+00 |
| ENSG00000065534.17_MYLK     | ENSG00000160789.18_LMNA | 0.03091  | -0.128928008 | 0.189176946 | 7.05E-01 | 8.75E-01 | 1.00E+00 |
| ENSG00000080839.10_RBL1     | ENSG00000160789.18_LMNA | 0.14589  | -0.013631863 | 0.298161326 | 7.29E-02 | 2.56E-01 | 1.00E+00 |

|                             |                         |          |              |             |          |          |          |
|-----------------------------|-------------------------|----------|--------------|-------------|----------|----------|----------|
| ENSG00000186448.13_ZNF197   | ENSG00000160789.18_LMNA | -0.06074 | -0.217829927 | 0.099426621 | 4.57E-01 | 7.22E-01 | 1.00E+00 |
| ENSG00000174125.6_TLR1      | ENSG00000160789.18_LMNA | -0.01087 | -0.169774039 | 0.148590717 | 8.94E-01 | 9.59E-01 | 1.00E+00 |
| ENSG00000146909.6_NOM1      | ENSG00000160789.18_LMNA | 0.37083  | 0.224905289  | 0.500482586 | 2.56E-06 | 9.64E-05 | 1.32E-01 |
| ENSG00000078403.15_MLLT10   | ENSG00000160789.18_LMNA | -0.19327 | -0.341951645 | -0.03515343 | 1.70E-02 | 9.63E-02 | 1.00E+00 |
| ENSG00000186642.14_PDE2A    | ENSG00000160789.18_LMNA | -0.336   | -0.470056695 | -0.18679102 | 2.32E-05 | 5.81E-04 | 1.00E+00 |
| ENSG00000272870.1_RP11-798M | ENSG00000160789.18_LMNA | -0.13855 | -0.291320611 | 0.02112113  | 8.87E-02 | 2.90E-01 | 1.00E+00 |
| ENSG00000167264.16_DUS2     | ENSG00000160789.18_LMNA | 0.0496   | -0.110475803 | 0.207162174 | 5.44E-01 | 7.82E-01 | 1.00E+00 |
| ENSG00000163735.6_CXCL5     | ENSG00000160789.18_LMNA | 0.22106  | 0.064115758  | 0.367333215 | 6.20E-03 | 4.61E-02 | 1.00E+00 |
| ENSG00000134138.18_MEIS2    | ENSG00000160789.18_LMNA | -0.12268 | -0.27648458  | 0.037244128 | 1.32E-01 | 3.69E-01 | 1.00E+00 |
| ENSG00000183856.9_IQGAP3    | ENSG00000160789.18_LMNA | 0.2711   | 0.116951623  | 0.412501788 | 7.29E-04 | 9.04E-03 | 1.00E+00 |
| ENSG00000260231.1_JHDM1D-A  | ENSG00000160789.18_LMNA | -0.14236 | -0.294874057 | 0.017235162 | 8.02E-02 | 2.73E-01 | 1.00E+00 |
| ENSG00000273492.4_AP000230  | ENSG00000160789.18_LMNA | -0.18364 | -0.333104341 | -0.02517766 | 2.35E-02 | 1.21E-01 | 1.00E+00 |
| ENSG00000119227.6_PIGZ      | ENSG00000160789.18_LMNA | -0.04639 | -0.204084697 | 0.113648791 | 5.70E-01 | 7.99E-01 | 1.00E+00 |
| ENSG00000077458.11_FAM76B   | ENSG00000160789.18_LMNA | -0.22165 | -0.367867121 | -0.06473052 | 6.06E-03 | 4.53E-02 | 1.00E+00 |
| ENSG00000279207.1_RP11-159D | ENSG00000160789.18_LMNA | 0.02244  | -0.137246472 | 0.180998597 | 7.84E-01 | 9.11E-01 | 1.00E+00 |
| ENSG00000124440.14_HIF3A    | ENSG00000160789.18_LMNA | -0.2207  | -0.367002581 | -0.06373517 | 6.29E-03 | 4.66E-02 | 1.00E+00 |
| ENSG00000139173.8_TMEM117   | ENSG00000160789.18_LMNA | -0.28819 | -0.427765045 | -0.13519217 | 3.18E-04 | 4.71E-03 | 1.00E+00 |
| ENSG00000130119.14_GNL3L    | ENSG00000160789.18_LMNA | 0.11036  | -0.049716856 | 0.264903934 | 1.76E-01 | 4.37E-01 | 1.00E+00 |
| ENSG00000043143.19_JADE2    | ENSG00000160789.18_LMNA | 0.27031  | 0.116105218  | 0.411789484 | 7.57E-04 | 9.31E-03 | 1.00E+00 |
| ENSG00000162664.15_ZNF326   | ENSG00000160789.18_LMNA | -0.05644 | -0.213718986 | 0.103693836 | 4.90E-01 | 7.46E-01 | 1.00E+00 |
| ENSG00000080298.14_RFX3     | ENSG00000160789.18_LMNA | -0.08906 | -0.24479455  | 0.07114464  | 2.75E-01 | 5.60E-01 | 1.00E+00 |
| ENSG00000269858.4_EGLN2     | ENSG00000160789.18_LMNA | 0.21783  | 0.060738253  | 0.364396369 | 7.02E-03 | 5.05E-02 | 1.00E+00 |
| ENSG00000136925.13_TSTD2    | ENSG00000160789.18_LMNA | -0.17101 | -0.32145949  | -0.01214034 | 3.52E-02 | 1.59E-01 | 1.00E+00 |
| ENSG00000048471.12_SNX29    | ENSG00000160789.18_LMNA | -0.02316 | -0.181695395 | 0.13653948  | 7.77E-01 | 9.08E-01 | 1.00E+00 |
| ENSG00000125170.9_DOK4      | ENSG00000160789.18_LMNA | 0.0339   | -0.125976202 | 0.192068461 | 6.78E-01 | 8.60E-01 | 1.00E+00 |
| ENSG00000136111.11_TBC1D4   | ENSG00000160789.18_LMNA | -0.27193 | -0.413241946 | -0.11783158 | 7.01E-04 | 8.79E-03 | 1.00E+00 |
| ENSG00000198598.5_MMP17     | ENSG00000160789.18_LMNA | -0.1919  | -0.340694237 | -0.03373191 | 1.79E-02 | 9.95E-02 | 1.00E+00 |
| ENSG00000156030.11_ELMSAN1  | ENSG00000160789.18_LMNA | 0.32476  | 0.174584192  | 0.46016778  | 4.46E-05 | 9.80E-04 | 1.00E+00 |
| ENSG00000168944.14_CEP120   | ENSG00000160789.18_LMNA | -0.05742 | -0.214653956 | 0.102724349 | 4.82E-01 | 7.40E-01 | 1.00E+00 |
| ENSG00000052795.11_FNIP2    | ENSG00000160789.18_LMNA | -0.25555 | -0.398536432 | -0.10043503 | 1.49E-03 | 1.56E-02 | 1.00E+00 |
| ENSG00000106571.11_GLI3     | ENSG00000160789.18_LMNA | 0.25721  | 0.102197511  | 0.400033292 | 1.38E-03 | 1.48E-02 | 1.00E+00 |
| ENSG00000272655.1_POLR2J4   | ENSG00000160789.18_LMNA | -0.01169 | -0.170575223 | 0.147783758 | 8.86E-01 | 9.56E-01 | 1.00E+00 |
| ENSG00000213846.4_AC098614  | ENSG00000160789.18_LMNA | 0.23571  | 0.079489351  | 0.380625073 | 3.46E-03 | 2.98E-02 | 1.00E+00 |

|                             |                         |          |              |             |          |          |          |
|-----------------------------|-------------------------|----------|--------------|-------------|----------|----------|----------|
| ENSG00000196544.7_BORCS6    | ENSG00000160789.18_LMNA | 0.07886  | -0.081362095 | 0.235109081 | 3.34E-01 | 6.20E-01 | 1.00E+00 |
| ENSG00000103047.6_TANGO6    | ENSG00000160789.18_LMNA | 0.12881  | -0.031022588 | 0.282227279 | 1.14E-01 | 3.37E-01 | 1.00E+00 |
| ENSG00000054598.6_FOXC1     | ENSG00000160789.18_LMNA | 0.27825  | 0.124572648  | 0.418899128 | 5.18E-04 | 6.94E-03 | 1.00E+00 |
| ENSG00000155962.11_CLIC2    | ENSG00000160789.18_LMNA | -0.04209 | -0.199949137 | 0.117902516 | 6.07E-01 | 8.20E-01 | 1.00E+00 |
| ENSG00000163704.10_PRRT3    | ENSG00000160789.18_LMNA | 0.00508  | -0.15424941  | 0.164143998 | 9.51E-01 | 9.80E-01 | 1.00E+00 |
| ENSG00000187961.12_KLHL17   | ENSG00000160789.18_LMNA | -0.09568 | -0.251059875 | 0.064499678 | 2.41E-01 | 5.20E-01 | 1.00E+00 |
| ENSG00000179859.7_AC025335  | ENSG00000160789.18_LMNA | -0.07139 | -0.22799523  | 0.088824549 | 3.82E-01 | 6.61E-01 | 1.00E+00 |
| ENSG00000233966.1_UBE2SP1   | ENSG00000160789.18_LMNA | 0.07685  | -0.083368663 | 0.233199574 | 3.47E-01 | 6.31E-01 | 1.00E+00 |
| ENSG00000136237.17_RAPGEF5  | ENSG00000160789.18_LMNA | -0.28797 | -0.42756444  | -0.13495114 | 3.21E-04 | 4.74E-03 | 1.00E+00 |
| ENSG00000185129.5_PURA      | ENSG00000160789.18_LMNA | -0.09511 | -0.250520293 | 0.065073059 | 2.44E-01 | 5.23E-01 | 1.00E+00 |
| ENSG00000141040.13_ZNF287   | ENSG00000160789.18_LMNA | -0.09379 | -0.249265069 | 0.066406102 | 2.50E-01 | 5.31E-01 | 1.00E+00 |
| ENSG00000170801.8_HTRA3     | ENSG00000160789.18_LMNA | 0.32054  | 0.170020567  | 0.456452439 | 5.67E-05 | 1.19E-03 | 1.00E+00 |
| ENSG00000215375.5_MYL5      | ENSG00000160789.18_LMNA | 0.24353  | 0.087730235  | 0.387699198 | 2.50E-03 | 2.32E-02 | 1.00E+00 |
| ENSG00000177721.4_ANXA2R    | ENSG00000160789.18_LMNA | 0.16328  | 0.0041881    | 0.314310366 | 4.44E-02 | 1.86E-01 | 1.00E+00 |
| ENSG00000197646.7_PDCD1LG2  | ENSG00000160789.18_LMNA | 0.14624  | -0.013267597 | 0.298493233 | 7.22E-02 | 2.55E-01 | 1.00E+00 |
| ENSG00000150457.8_LATS2     | ENSG00000160789.18_LMNA | 0.48305  | 0.350832966  | 0.596390521 | 2.92E-10 | 5.57E-08 | 1.50E-05 |
| ENSG00000169951.8_ZNF764    | ENSG00000160789.18_LMNA | -0.03905 | -0.19702662  | 0.120901521 | 6.33E-01 | 8.35E-01 | 1.00E+00 |
| ENSG00000118600.10_TMEM5    | ENSG00000160789.18_LMNA | -0.1381  | -0.290905672 | 0.021574283 | 8.98E-02 | 2.92E-01 | 1.00E+00 |
| ENSG00000101882.8_NKAP      | ENSG00000160789.18_LMNA | -0.02596 | -0.184402588 | 0.133789607 | 7.51E-01 | 8.96E-01 | 1.00E+00 |
| ENSG00000263050.1_RP11-667K | ENSG00000160789.18_LMNA | -0.21215 | -0.359219939 | -0.05480201 | 8.69E-03 | 5.92E-02 | 1.00E+00 |
| ENSG00000162144.8_CYB561A3  | ENSG00000160789.18_LMNA | 0.14706  | -0.012433321 | 0.299253112 | 7.06E-02 | 2.51E-01 | 1.00E+00 |
| ENSG00000278834.1_RP11-458J | ENSG00000160789.18_LMNA | -0.27193 | -0.413243632 | -0.11783359 | 7.01E-04 | 8.79E-03 | 1.00E+00 |
| ENSG00000109265.11_KIAA1211 | ENSG00000160789.18_LMNA | -0.05314 | -0.210556846 | 0.10696825  | 5.16E-01 | 7.63E-01 | 1.00E+00 |
| ENSG00000170425.3_ADORA2B   | ENSG00000160789.18_LMNA | 0.23976  | 0.083754584  | 0.384290832 | 2.93E-03 | 2.63E-02 | 1.00E+00 |
| ENSG00000163297.15_ANTXR2   | ENSG00000160789.18_LMNA | 0.25906  | 0.10415848   | 0.401696857 | 1.27E-03 | 1.39E-02 | 1.00E+00 |
| ENSG00000163618.16_CADPS    | ENSG00000160789.18_LMNA | -0.1869  | -0.336097038 | -0.02854522 | 2.11E-02 | 1.12E-01 | 1.00E+00 |
| ENSG00000188295.13_ZNF669   | ENSG00000160789.18_LMNA | -0.15268 | -0.304475574 | 0.006687788 | 6.04E-02 | 2.27E-01 | 1.00E+00 |
| ENSG00000145388.13_METTL14  | ENSG00000160789.18_LMNA | 0.00102  | -0.158204108 | 0.160196971 | 9.90E-01 | 9.96E-01 | 1.00E+00 |
| ENSG00000182134.14_TDRKH    | ENSG00000160789.18_LMNA | -0.17433 | -0.324519729 | -0.01555636 | 3.17E-02 | 1.49E-01 | 1.00E+00 |
| ENSG00000198739.9_LRRTM3    | ENSG00000160789.18_LMNA | -0.246   | -0.389933435 | -0.09034153 | 2.25E-03 | 2.14E-02 | 1.00E+00 |
| ENSG00000102383.12_ZDHHC15  | ENSG00000160789.18_LMNA | -0.05996 | -0.217084715 | 0.100201028 | 4.63E-01 | 7.26E-01 | 1.00E+00 |
| ENSG00000083642.17_PDS5B    | ENSG00000160789.18_LMNA | -0.00713 | -0.166144059 | 0.15224156  | 9.31E-01 | 9.73E-01 | 1.00E+00 |
| ENSG00000154114.11_TBCEL    | ENSG00000160789.18_LMNA | -0.16996 | -0.3204903   | -0.01105998 | 3.63E-02 | 1.62E-01 | 1.00E+00 |

|                             |                         |          |              |             |          |          |          |
|-----------------------------|-------------------------|----------|--------------|-------------|----------|----------|----------|
| ENSG00000127561.13_SYNGR3   | ENSG00000160789.18_LMNA | -0.13136 | -0.284604313 | 0.028440228 | 1.07E-01 | 3.25E-01 | 1.00E+00 |
| ENSG00000144843.10_ADPRH    | ENSG00000160789.18_LMNA | 0.18021  | 0.021626117  | 0.329941407 | 2.63E-02 | 1.31E-01 | 1.00E+00 |
| ENSG00000186907.6_RTN4RL2   | ENSG00000160789.18_LMNA | -0.14707 | -0.299265097 | 0.012420159 | 7.06E-02 | 2.51E-01 | 1.00E+00 |
| ENSG00000179772.7_FOXS1     | ENSG00000160789.18_LMNA | 0.19759  | 0.039634694  | 0.345908359 | 1.47E-02 | 8.65E-02 | 1.00E+00 |
| ENSG00000227199.1_ST7-AS1   | ENSG00000160789.18_LMNA | -0.11681 | -0.270972257 | 0.043193292 | 1.52E-01 | 4.01E-01 | 1.00E+00 |
| ENSG00000156239.10_N6AMT1   | ENSG00000160789.18_LMNA | -0.17884 | -0.328686404 | -0.02021907 | 2.75E-02 | 1.35E-01 | 1.00E+00 |
| ENSG00000165113.11_GKAP1    | ENSG00000160789.18_LMNA | -0.34872 | -0.48120992  | -0.20066427 | 1.07E-05 | 3.07E-04 | 5.48E-01 |
| ENSG00000273702.1_RP11-758H | ENSG00000160789.18_LMNA | -0.37518 | -0.504259532 | -0.22969622 | 1.91E-06 | 7.71E-05 | 9.81E-02 |
| ENSG00000186198.3_SLC51B    | ENSG00000160789.18_LMNA | -0.33761 | -0.471469581 | -0.18854225 | 2.10E-05 | 5.39E-04 | 1.00E+00 |
| ENSG00000171291.7_ZNF439    | ENSG00000160789.18_LMNA | -0.2026  | -0.350498503 | -0.04484884 | 1.23E-02 | 7.61E-02 | 1.00E+00 |
| ENSG00000124588.18_NQO2     | ENSG00000160789.18_LMNA | 0.15312  | -0.006236472 | 0.304885011 | 5.97E-02 | 2.25E-01 | 1.00E+00 |
| ENSG00000134955.10_SLC37A2  | ENSG00000160789.18_LMNA | -0.02257 | -0.181117793 | 0.137125555 | 7.83E-01 | 9.11E-01 | 1.00E+00 |
| ENSG00000185482.6_STAC3     | ENSG00000160789.18_LMNA | 0.04823  | -0.111833081 | 0.205846521 | 5.55E-01 | 7.89E-01 | 1.00E+00 |
| ENSG00000196810.4_CTBP1-AS2 | ENSG00000160789.18_LMNA | 0.20818  | 0.050654812  | 0.355592419 | 1.01E-02 | 6.59E-02 | 1.00E+00 |
| ENSG00000139211.6_AMIGO2    | ENSG00000160789.18_LMNA | 0.06704  | -0.093156775 | 0.223849805 | 4.12E-01 | 6.86E-01 | 1.00E+00 |
| ENSG00000198920.8_KIAA0753  | ENSG00000160789.18_LMNA | 0.12736  | -0.032496355 | 0.280868967 | 1.18E-01 | 3.44E-01 | 1.00E+00 |
| ENSG00000266338.5_NBPF15    | ENSG00000160789.18_LMNA | 0.18484  | 0.026419377  | 0.334208555 | 2.26E-02 | 1.18E-01 | 1.00E+00 |
| ENSG00000232859.8_LYRM9     | ENSG00000160789.18_LMNA | -0.28656 | -0.426311772 | -0.13344683 | 3.45E-04 | 5.00E-03 | 1.00E+00 |
| ENSG00000166592.10_RRAD     | ENSG00000160789.18_LMNA | 0.18811  | 0.029802174  | 0.337212478 | 2.03E-02 | 1.09E-01 | 1.00E+00 |
| ENSG00000240036.4_RP11-587D | ENSG00000160789.18_LMNA | -0.2421  | -0.386407441 | -0.08622235 | 2.66E-03 | 2.43E-02 | 1.00E+00 |
| ENSG00000196646.10_ZNF136   | ENSG00000160789.18_LMNA | -0.10106 | -0.256135076 | 0.059096361 | 2.15E-01 | 4.90E-01 | 1.00E+00 |
| ENSG00000171840.10_NINJ2    | ENSG00000160789.18_LMNA | -0.30611 | -0.443686728 | -0.15443328 | 1.25E-04 | 2.27E-03 | 1.00E+00 |
| ENSG00000215440.10_NPEPL1   | ENSG00000160789.18_LMNA | 0.31437  | 0.163342388  | 0.450997531 | 8.00E-05 | 1.57E-03 | 1.00E+00 |
| ENSG00000235568.5_NFAM1     | ENSG00000160789.18_LMNA | 0.08449  | -0.075724552 | 0.24046088  | 3.01E-01 | 5.87E-01 | 1.00E+00 |
| ENSG00000100296.12_THOC5    | ENSG00000160789.18_LMNA | -0.03898 | -0.196962863 | 0.120966882 | 6.33E-01 | 8.36E-01 | 1.00E+00 |
| ENSG00000164465.17_DCBLD1   | ENSG00000160789.18_LMNA | -0.02702 | -0.185426357 | 0.132748419 | 7.41E-01 | 8.91E-01 | 1.00E+00 |
| ENSG00000185658.12_BRWD1    | ENSG00000160789.18_LMNA | -0.2743  | -0.415362161 | -0.12035483 | 6.27E-04 | 8.06E-03 | 1.00E+00 |
| ENSG00000137393.9_RNF144B   | ENSG00000160789.18_LMNA | 0.06695  | -0.093249013 | 0.223761419 | 4.13E-01 | 6.86E-01 | 1.00E+00 |
| ENSG00000137802.12_MAPKBP1  | ENSG00000160789.18_LMNA | 0.21253  | 0.055192488  | 0.359561016 | 8.57E-03 | 5.86E-02 | 1.00E+00 |
| ENSG00000250462.7_LRRC37BP  | ENSG00000160789.18_LMNA | -0.20709 | -0.354598915 | -0.04952081 | 1.05E-02 | 6.77E-02 | 1.00E+00 |
| ENSG00000213341.9_CHUK      | ENSG00000160789.18_LMNA | -0.1928  | -0.341517673 | -0.03466268 | 1.73E-02 | 9.73E-02 | 1.00E+00 |
| ENSG00000272010.1_CTD-3025N | ENSG00000160789.18_LMNA | -0.14458 | -0.296949682 | 0.014960935 | 7.55E-02 | 2.63E-01 | 1.00E+00 |
| ENSG00000140199.10_SLC12A6  | ENSG00000160789.18_LMNA | -0.01864 | -0.177312246 | 0.140981359 | 8.20E-01 | 9.30E-01 | 1.00E+00 |



|                             |                         |          |              |             |          |          |          |
|-----------------------------|-------------------------|----------|--------------|-------------|----------|----------|----------|
| ENSG00000259877.2_RP11-46C2 | ENSG00000160789.18_LMNA | -0.20785 | -0.355295512 | -0.05031583 | 1.02E-02 | 6.64E-02 | 1.00E+00 |
| ENSG00000106948.15_AKNA     | ENSG00000160789.18_LMNA | 0.072    | -0.088211195 | 0.22858121  | 3.78E-01 | 6.57E-01 | 1.00E+00 |
| ENSG00000020256.18_ZFP64    | ENSG00000160789.18_LMNA | 0.12104  | -0.038912659 | 0.274940647 | 1.37E-01 | 3.78E-01 | 1.00E+00 |
| ENSG00000151553.13_FAM160B  | ENSG00000160789.18_LMNA | -0.20657 | -0.354120357 | -0.04897486 | 1.07E-02 | 6.86E-02 | 1.00E+00 |
| ENSG00000215252.10_GOLGA8E  | ENSG00000160789.18_LMNA | -0.06234 | -0.219364402 | 0.097830817 | 4.45E-01 | 7.12E-01 | 1.00E+00 |
| ENSG00000062096.13_ARSF     | ENSG00000160789.18_LMNA | 0.08402  | -0.076201441 | 0.240008906 | 3.03E-01 | 5.90E-01 | 1.00E+00 |
| ENSG00000263072.4_ZNF213-AS | ENSG00000160789.18_LMNA | -0.13582 | -0.288776047 | 0.02389802  | 9.52E-02 | 3.02E-01 | 1.00E+00 |
| ENSG00000182141.8_ZNF708    | ENSG00000160789.18_LMNA | -0.45314 | -0.57113465  | -0.31678746 | 4.58E-09 | 5.56E-07 | 2.35E-04 |
| ENSG00000196459.12_TRAPPC2  | ENSG00000160789.18_LMNA | -0.19988 | -0.348004921 | -0.04201421 | 1.36E-02 | 8.15E-02 | 1.00E+00 |
| ENSG00000101846.6_STS       | ENSG00000160789.18_LMNA | 0.26468  | 0.110115124  | 0.406738092 | 9.84E-04 | 1.14E-02 | 1.00E+00 |
| ENSG00000087303.15_NID2     | ENSG00000160789.18_LMNA | 0.15767  | -0.001566211 | 0.309115167 | 5.24E-02 | 2.07E-01 | 1.00E+00 |
| ENSG00000187994.12_RINL     | ENSG00000160789.18_LMNA | -0.00935 | -0.168303764 | 0.150070489 | 9.09E-01 | 9.65E-01 | 1.00E+00 |
| ENSG00000104064.15_GABPB1   | ENSG00000160789.18_LMNA | -0.1332  | -0.286329189 | 0.026563739 | 1.02E-01 | 3.15E-01 | 1.00E+00 |
| ENSG00000243547.1_HNRNPKP2  | ENSG00000160789.18_LMNA | 0.04416  | -0.115856634 | 0.2019396   | 5.89E-01 | 8.09E-01 | 1.00E+00 |
| ENSG00000234906.7_APOC2     | ENSG00000160789.18_LMNA | -0.20331 | -0.351148245 | -0.04558826 | 1.20E-02 | 7.48E-02 | 1.00E+00 |
| ENSG00000125375.13_ATP5S    | ENSG00000160789.18_LMNA | -0.27965 | -0.420148721 | -0.12606533 | 4.84E-04 | 6.58E-03 | 1.00E+00 |
| ENSG00000236698.1	EIF1AXP1  | ENSG00000160789.18_LMNA | 0.08849  | -0.071722227 | 0.244248712 | 2.78E-01 | 5.64E-01 | 1.00E+00 |
| ENSG00000164045.10_CDC25A   | ENSG00000160789.18_LMNA | -0.10942 | -0.264025419 | 0.050659058 | 1.80E-01 | 4.42E-01 | 1.00E+00 |
| ENSG00000183340.6_JRKL      | ENSG00000160789.18_LMNA | 0.17797  | 0.019319814  | 0.327883745 | 2.83E-02 | 1.38E-01 | 1.00E+00 |
| ENSG00000103021.8_CCDC113   | ENSG00000160789.18_LMNA | 0.04537  | -0.114662057 | 0.203100607 | 5.79E-01 | 8.04E-01 | 1.00E+00 |
| ENSG00000054967.11_RELT     | ENSG00000160789.18_LMNA | 0.27497  | 0.12106771   | 0.415960591 | 6.07E-04 | 7.86E-03 | 1.00E+00 |
| ENSG00000245680.8_ZNF585B   | ENSG00000160789.18_LMNA | 0.01126  | -0.148209179 | 0.170152899 | 8.91E-01 | 9.57E-01 | 1.00E+00 |
| ENSG00000151967.17_SCHIP1   | ENSG00000160789.18_LMNA | -0.39309 | -0.519766339 | -0.24950655 | 5.46E-07 | 2.81E-05 | 2.80E-02 |
| ENSG00000278784.1_RP11-468E | ENSG00000160789.18_LMNA | -0.03472 | -0.192850615 | 0.125176771 | 6.71E-01 | 8.56E-01 | 1.00E+00 |
| ENSG00000137073.19_UBAP2    | ENSG00000160789.18_LMNA | 0.00565  | -0.153688119 | 0.164703376 | 9.45E-01 | 9.78E-01 | 1.00E+00 |
| ENSG00000089094.15_KDM2B    | ENSG00000160789.18_LMNA | -0.07771 | -0.23401821  | 0.08250873  | 3.41E-01 | 6.26E-01 | 1.00E+00 |
| ENSG00000157193.13_LRP8     | ENSG00000160789.18_LMNA | -0.01387 | -0.172687723 | 0.145653995 | 8.65E-01 | 9.47E-01 | 1.00E+00 |
| ENSG00000164211.11_STARD4   | ENSG00000160789.18_LMNA | -0.03271 | -0.190919769 | 0.12714952  | 6.89E-01 | 8.66E-01 | 1.00E+00 |
| ENSG00000126773.11_PCNX4    | ENSG00000160789.18_LMNA | 0.04224  | -0.117750478 | 0.200097147 | 6.05E-01 | 8.19E-01 | 1.00E+00 |
| ENSG00000067533.5_RRP15     | ENSG00000160789.18_LMNA | 0.03779  | -0.122150406 | 0.195807918 | 6.44E-01 | 8.42E-01 | 1.00E+00 |
| ENSG00000047346.11_FAM214A  | ENSG00000160789.18_LMNA | -0.24781 | -0.391561066 | -0.09224645 | 2.08E-03 | 2.02E-02 | 1.00E+00 |
| ENSG00000183098.9_GPC6      | ENSG00000160789.18_LMNA | -0.15379 | -0.305511577 | 0.005545573 | 5.85E-02 | 2.22E-01 | 1.00E+00 |
| ENSG00000119004.13_CYP20A1  | ENSG00000160789.18_LMNA | -0.10134 | -0.256403099 | 0.058810495 | 2.14E-01 | 4.88E-01 | 1.00E+00 |

|                              |                         |          |              |             |          |          |          |
|------------------------------|-------------------------|----------|--------------|-------------|----------|----------|----------|
| ENSG00000128617.2_OPN1SW     | ENSG00000160789.18_LMNA | 0.22495  | 0.068190107  | 0.370867962 | 5.33E-03 | 4.11E-02 | 1.00E+00 |
| ENSG00000231167.3_YBX1P2     | ENSG00000160789.18_LMNA | 0.03167  | -0.12818019  | 0.189910011 | 6.99E-01 | 8.71E-01 | 1.00E+00 |
| ENSG00000144355.13_DLX1      | ENSG00000160789.18_LMNA | -0.11813 | -0.272213044 | 0.041856116 | 1.47E-01 | 3.93E-01 | 1.00E+00 |
| ENSG00000177888.7_ZBTB41     | ENSG00000160789.18_LMNA | -0.10182 | -0.256860828 | 0.058322176 | 2.12E-01 | 4.86E-01 | 1.00E+00 |
| ENSG00000105357.14_MYH14     | ENSG00000160789.18_LMNA | 0.03656  | -0.12335926  | 0.194627343 | 6.55E-01 | 8.47E-01 | 1.00E+00 |
| ENSG00000136918.6_WDR38      | ENSG00000160789.18_LMNA | 0.08422  | -0.075996774 | 0.240202897 | 3.02E-01 | 5.89E-01 | 1.00E+00 |
| ENSG00000188130.12_MAPK12    | ENSG00000160789.18_LMNA | -0.02474 | -0.183223224 | 0.134988167 | 7.62E-01 | 9.01E-01 | 1.00E+00 |
| ENSG00000122035.6_RASL11A    | ENSG00000160789.18_LMNA | -0.29432 | -0.433221191 | -0.14176108 | 2.33E-04 | 3.69E-03 | 1.00E+00 |
| ENSG00000111696.10_NT5DC3    | ENSG00000160789.18_LMNA | -0.13539 | -0.288375888 | 0.024334276 | 9.63E-02 | 3.05E-01 | 1.00E+00 |
| ENSG00000111912.17_NCOA7     | ENSG00000160789.18_LMNA | -0.17047 | -0.320962591 | -0.01158635 | 3.57E-02 | 1.61E-01 | 1.00E+00 |
| ENSG00000163093.10_BBS5      | ENSG00000160789.18_LMNA | 0.22029  | 0.063305763  | 0.36662945  | 6.39E-03 | 4.71E-02 | 1.00E+00 |
| ENSG00000032219.17_ARID4A    | ENSG00000160789.18_LMNA | -0.08124 | -0.237374999 | 0.078977663 | 3.20E-01 | 6.06E-01 | 1.00E+00 |
| ENSG00000198538.9_ZNF28      | ENSG00000160789.18_LMNA | -0.09326 | -0.248769734 | 0.066931836 | 2.53E-01 | 5.35E-01 | 1.00E+00 |
| ENSG00000198556.12_ZNF789    | ENSG00000160789.18_LMNA | -0.08104 | -0.237180062 | 0.079182939 | 3.21E-01 | 6.07E-01 | 1.00E+00 |
| ENSG00000172292.13_CERS6     | ENSG00000160789.18_LMNA | -0.0725  | -0.229054183 | 0.087715952 | 3.75E-01 | 6.55E-01 | 1.00E+00 |
| ENSG00000107968.8_MAP3K8     | ENSG00000160789.18_LMNA | 0.04846  | -0.111601658 | 0.206070928 | 5.53E-01 | 7.88E-01 | 1.00E+00 |
| ENSG00000175879.8_HOXD8      | ENSG00000160789.18_LMNA | -0.32615 | -0.461392116 | -0.17609076 | 4.12E-05 | 9.21E-04 | 1.00E+00 |
| ENSG00000235098.7_ANKRD65    | ENSG00000160789.18_LMNA | 0.14292  | -0.0166585   | 0.29540064  | 7.90E-02 | 2.70E-01 | 1.00E+00 |
| ENSG00000168438.13_CDC40     | ENSG00000160789.18_LMNA | -0.18944 | -0.338437409 | -0.03118363 | 1.94E-02 | 1.06E-01 | 1.00E+00 |
| ENSG00000102034.15_ELF4      | ENSG00000160789.18_LMNA | 0.42478  | 0.284837826  | 0.546987298 | 4.92E-08 | 4.02E-06 | 2.52E-03 |
| ENSG00000156381.7_ANKRD9     | ENSG00000160789.18_LMNA | 0.38791  | 0.243758082  | 0.515284912 | 7.91E-07 | 3.77E-05 | 4.06E-02 |
| ENSG00000168874.11_ATOH8     | ENSG00000160789.18_LMNA | -0.38527 | -0.513006734 | -0.24084309 | 9.52E-07 | 4.42E-05 | 4.88E-02 |
| ENSG00000147251.14_DOCK11    | ENSG00000160789.18_LMNA | -0.07171 | -0.22830792  | 0.088497282 | 3.80E-01 | 6.59E-01 | 1.00E+00 |
| ENSG00000219451.3_AC005251.5 | ENSG00000160789.18_LMNA | -0.18593 | -0.335207946 | -0.02754404 | 2.18E-02 | 1.15E-01 | 1.00E+00 |
| ENSG00000245573.6_BDNF-AS    | ENSG00000160789.18_LMNA | -0.34935 | -0.481760683 | -0.20135228 | 1.03E-05 | 2.98E-04 | 5.27E-01 |
| ENSG00000199024.1_MIR103A2   | ENSG00000160789.18_LMNA | 0.03011  | -0.129712695 | 0.188407356 | 7.13E-01 | 8.78E-01 | 1.00E+00 |
| ENSG00000120784.14_ZFP30     | ENSG00000160789.18_LMNA | -0.20935 | -0.356664268 | -0.05187912 | 9.64E-03 | 6.39E-02 | 1.00E+00 |
| ENSG00000137269.13_LRRC1     | ENSG00000160789.18_LMNA | -0.35491 | -0.486615853 | -0.20742932 | 7.24E-06 | 2.26E-04 | 3.72E-01 |
| ENSG00000138180.14_CEP55     | ENSG00000160789.18_LMNA | 0.28175  | 0.128308998  | 0.422024906 | 4.37E-04 | 6.08E-03 | 1.00E+00 |
| ENSG00000250067.10_YJEFN3    | ENSG00000160789.18_LMNA | -0.11336 | -0.267733427 | 0.046678433 | 1.64E-01 | 4.20E-01 | 1.00E+00 |
| ENSG00000123342.14_MMP19     | ENSG00000160789.18_LMNA | 0.22873  | 0.072152106  | 0.374296847 | 4.59E-03 | 3.68E-02 | 1.00E+00 |
| ENSG00000185219.14_ZNF445    | ENSG00000160789.18_LMNA | -0.06864 | -0.225374629 | 0.091564634 | 4.01E-01 | 6.77E-01 | 1.00E+00 |
| ENSG00000154309.8_DISP1      | ENSG00000160789.18_LMNA | -0.03083 | -0.189106021 | 0.129000341 | 7.06E-01 | 8.75E-01 | 1.00E+00 |

|                              |                         |          |              |             |          |          |          |
|------------------------------|-------------------------|----------|--------------|-------------|----------|----------|----------|
| ENSG00000240463.1_RPS19P3    | ENSG00000160789.18_LMNA | 0.0474   | -0.112654069 | 0.205050152 | 5.62E-01 | 7.94E-01 | 1.00E+00 |
| ENSG00000159023.17_EPB41     | ENSG00000160789.18_LMNA | -0.22881 | -0.374376183 | -0.07224389 | 4.58E-03 | 3.67E-02 | 1.00E+00 |
| ENSG00000105374.8_NKG7       | ENSG00000160789.18_LMNA | 0.04296  | -0.117040921 | 0.200787713 | 5.99E-01 | 8.16E-01 | 1.00E+00 |
| ENSG00000174206.11_C12orf66  | ENSG00000160789.18_LMNA | -0.10007 | -0.255203249 | 0.060089817 | 2.20E-01 | 4.95E-01 | 1.00E+00 |
| ENSG00000171466.8_ZNF562     | ENSG00000160789.18_LMNA | -0.1872  | -0.336373904 | -0.02885712 | 2.09E-02 | 1.11E-01 | 1.00E+00 |
| ENSG00000204556.4_CTD-2514C  | ENSG00000160789.18_LMNA | -0.04769 | -0.205327276 | 0.112368428 | 5.60E-01 | 7.92E-01 | 1.00E+00 |
| ENSG00000108448.19_TRIM16L   | ENSG00000160789.18_LMNA | -0.03218 | -0.190401447 | 0.127678663 | 6.94E-01 | 8.68E-01 | 1.00E+00 |
| ENSG00000095713.12_CRTAC1    | ENSG00000160789.18_LMNA | -0.32249 | -0.458171739 | -0.17213089 | 5.08E-05 | 1.09E-03 | 1.00E+00 |
| ENSG00000152503.8_TRIM36     | ENSG00000160789.18_LMNA | -0.24558 | -0.389552524 | -0.08989605 | 2.29E-03 | 2.17E-02 | 1.00E+00 |
| ENSG00000256525.5_POLG2      | ENSG00000160789.18_LMNA | -0.16467 | -0.315600011 | -0.00561973 | 4.26E-02 | 1.81E-01 | 1.00E+00 |
| ENSG00000252965.1_Y_RNA      | ENSG00000160789.18_LMNA | -0.26345 | -0.405637988 | -0.10881344 | 1.04E-03 | 1.19E-02 | 1.00E+00 |
| ENSG00000196323.10_ZBTB44    | ENSG00000160789.18_LMNA | -0.30832 | -0.445643458 | -0.15681319 | 1.11E-04 | 2.06E-03 | 1.00E+00 |
| ENSG00000259051.1_HNRNPUP    | ENSG00000160789.18_LMNA | 0.18361  | 0.02514343   | 0.333073887 | 2.36E-02 | 1.21E-01 | 1.00E+00 |
| ENSG00000072571.18_HMMR      | ENSG00000160789.18_LMNA | 0.02683  | -0.1329348   | 0.185243145 | 7.43E-01 | 8.92E-01 | 1.00E+00 |
| ENSG00000185904.10_LINC0083  | ENSG00000160789.18_LMNA | -0.20896 | -0.356303775 | -0.05146725 | 9.78E-03 | 6.46E-02 | 1.00E+00 |
| ENSG00000070950.8_RAD18      | ENSG00000160789.18_LMNA | 0.03526  | -0.12464408  | 0.193371569 | 6.66E-01 | 8.53E-01 | 1.00E+00 |
| ENSG00000120647.8_CCDC77     | ENSG00000160789.18_LMNA | -0.09298 | -0.248506783 | 0.067210853 | 2.55E-01 | 5.36E-01 | 1.00E+00 |
| ENSG00000138606.18_SHF       | ENSG00000160789.18_LMNA | -0.31779 | -0.454019034 | -0.16703821 | 6.62E-05 | 1.35E-03 | 1.00E+00 |
| ENSG00000248508.5_SRP14-AS1  | ENSG00000160789.18_LMNA | -0.1115  | -0.26597778  | 0.048564402 | 1.71E-01 | 4.31E-01 | 1.00E+00 |
| ENSG00000061656.8_SPAG4      | ENSG00000160789.18_LMNA | 0.32117  | 0.170699496  | 0.457005802 | 5.47E-05 | 1.16E-03 | 1.00E+00 |
| ENSG00000196911.8_KPNA5      | ENSG00000160789.18_LMNA | -0.41188 | -0.535938031 | -0.2704101  | 1.35E-07 | 9.26E-06 | 6.92E-03 |
| ENSG00000204316.11_MRPL38    | ENSG00000160789.18_LMNA | -0.13366 | -0.286757646 | 0.026097279 | 1.01E-01 | 3.13E-01 | 1.00E+00 |
| ENSG00000224272.2_AC114730.1 | ENSG00000160789.18_LMNA | -0.33307 | -0.467484574 | -0.18360757 | 2.75E-05 | 6.67E-04 | 1.00E+00 |
| ENSG00000123119.10_NECAB1    | ENSG00000160789.18_LMNA | -0.37675 | -0.505620722 | -0.23142611 | 1.72E-06 | 7.09E-05 | 8.82E-02 |
| ENSG00000100592.14_DAAM1     | ENSG00000160789.18_LMNA | 0.04587  | -0.114160006 | 0.203588282 | 5.75E-01 | 8.02E-01 | 1.00E+00 |
| ENSG00000163291.13_PAQR3     | ENSG00000160789.18_LMNA | -0.15354 | -0.305280502 | 0.005800408 | 5.89E-02 | 2.23E-01 | 1.00E+00 |
| ENSG00000261188.1_CTA-445C9  | ENSG00000160789.18_LMNA | -0.31855 | -0.454691794 | -0.16786222 | 6.34E-05 | 1.30E-03 | 1.00E+00 |
| ENSG00000157064.9_NMNAT2     | ENSG00000160789.18_LMNA | -0.2398  | -0.384325036 | -0.08379443 | 2.92E-03 | 2.62E-02 | 1.00E+00 |
| ENSG00000161914.8_ZNF653     | ENSG00000160789.18_LMNA | 0.08545  | -0.074763419 | 0.241371383 | 2.95E-01 | 5.81E-01 | 1.00E+00 |
| ENSG00000188419.12_CHM       | ENSG00000160789.18_LMNA | 0.09569  | -0.064495688 | 0.25106363  | 2.41E-01 | 5.20E-01 | 1.00E+00 |
| ENSG00000108021.18_FAM208B   | ENSG00000160789.18_LMNA | -0.10651 | -0.261283483 | 0.053596167 | 1.92E-01 | 4.59E-01 | 1.00E+00 |
| ENSG00000083535.14_PIBF1     | ENSG00000160789.18_LMNA | -0.11543 | -0.269673782 | 0.044591434 | 1.57E-01 | 4.09E-01 | 1.00E+00 |
| ENSG00000270804.1_CTD-2583A  | ENSG00000160789.18_LMNA | 0.02522  | -0.134517437 | 0.183686524 | 7.58E-01 | 8.99E-01 | 1.00E+00 |

|                             |                         |          |              |             |          |          |          |
|-----------------------------|-------------------------|----------|--------------|-------------|----------|----------|----------|
| ENSG00000112852.6_PCDHB2    | ENSG00000160789.18_LMNA | -0.00728 | -0.166292679 | 0.152092256 | 9.29E-01 | 9.73E-01 | 1.00E+00 |
| ENSG00000196428.11_TSC22D2  | ENSG00000160789.18_LMNA | -0.05987 | -0.216998684 | 0.100290404 | 4.64E-01 | 7.26E-01 | 1.00E+00 |
| ENSG00000173894.9_CBX2      | ENSG00000160789.18_LMNA | -0.10777 | -0.262472111 | 0.0523236   | 1.86E-01 | 4.52E-01 | 1.00E+00 |
| ENSG00000243244.4_STON1     | ENSG00000160789.18_LMNA | -0.1333  | -0.286426452 | 0.026457861 | 1.02E-01 | 3.15E-01 | 1.00E+00 |
| ENSG00000103489.10_XYLT1    | ENSG00000160789.18_LMNA | 0.04965  | -0.110425982 | 0.207210445 | 5.44E-01 | 7.82E-01 | 1.00E+00 |
| ENSG00000134376.13_CRB1     | ENSG00000160789.18_LMNA | -0.40006 | -0.525772247 | -0.25724051 | 3.28E-07 | 1.89E-05 | 1.68E-02 |
| ENSG00000058453.15_CROCC    | ENSG00000160789.18_LMNA | 0.14558  | -0.013947934 | 0.297873272 | 7.35E-02 | 2.58E-01 | 1.00E+00 |
| ENSG00000169696.14_ASPSCR1  | ENSG00000160789.18_LMNA | -0.11075 | -0.265272599 | 0.049321299 | 1.74E-01 | 4.35E-01 | 1.00E+00 |
| ENSG00000089022.12_MAPKAPK  | ENSG00000160789.18_LMNA | -0.13521 | -0.288202757 | 0.024522987 | 9.68E-02 | 3.05E-01 | 1.00E+00 |
| ENSG00000213928.7_IRF9      | ENSG00000160789.18_LMNA | 0.00295  | -0.156326873 | 0.162071836 | 9.71E-01 | 9.89E-01 | 1.00E+00 |
| ENSG00000181350.10_LRRC75A  | ENSG00000160789.18_LMNA | 0.07332  | -0.086899443 | 0.229833649 | 3.69E-01 | 6.50E-01 | 1.00E+00 |
| ENSG00000112624.11_GLTSCR1  | ENSG00000160789.18_LMNA | 0.02189  | -0.137790446 | 0.180462248 | 7.89E-01 | 9.14E-01 | 1.00E+00 |
| ENSG00000157404.14_KIT      | ENSG00000160789.18_LMNA | -0.45287 | -0.570913761 | -0.31649256 | 4.68E-09 | 5.66E-07 | 2.40E-04 |
| ENSG00000264575.1_LINC00526 | ENSG00000160789.18_LMNA | -0.28469 | -0.424646429 | -0.13144904 | 3.78E-04 | 5.41E-03 | 1.00E+00 |
| ENSG00000240950.1_RP11-372E | ENSG00000160789.18_LMNA | 0.05107  | -0.109013591 | 0.208578259 | 5.32E-01 | 7.75E-01 | 1.00E+00 |
| ENSG00000056558.9_TRAF1     | ENSG00000160789.18_LMNA | 0.27748  | 0.123742104  | 0.418203358 | 5.38E-04 | 7.14E-03 | 1.00E+00 |
| ENSG00000140153.16_WDR20    | ENSG00000160789.18_LMNA | 0.1008   | -0.059352135 | 0.255895226 | 2.17E-01 | 4.91E-01 | 1.00E+00 |
| ENSG00000118922.15_KLF12    | ENSG00000160789.18_LMNA | -0.18831 | -0.337398041 | -0.03001137 | 2.02E-02 | 1.09E-01 | 1.00E+00 |
| ENSG00000058866.13_DGKG     | ENSG00000160789.18_LMNA | -0.06424 | -0.22117538  | 0.095945359 | 4.32E-01 | 7.01E-01 | 1.00E+00 |
| ENSG00000140543.12_DET1     | ENSG00000160789.18_LMNA | -0.24342 | -0.387601764 | -0.08761645 | 2.51E-03 | 2.33E-02 | 1.00E+00 |
| ENSG00000188488.12_SERPINA  | ENSG00000160789.18_LMNA | 0.21556  | 0.058365722  | 0.362329762 | 7.65E-03 | 5.37E-02 | 1.00E+00 |
| ENSG00000226532.1_RP5-1052M | ENSG00000160789.18_LMNA | -0.11152 | -0.266000401 | 0.048540117 | 1.71E-01 | 4.31E-01 | 1.00E+00 |
| ENSG00000198822.9_GRM3      | ENSG00000160789.18_LMNA | -0.39869 | -0.524589727 | -0.25571502 | 3.63E-07 | 2.05E-05 | 1.86E-02 |
| ENSG00000234882.1	EIF3EP1   | ENSG00000160789.18_LMNA | -0.21156 | -0.358682297 | -0.05418668 | 8.88E-03 | 6.02E-02 | 1.00E+00 |
| ENSG00000100376.10_FAM118A  | ENSG00000160789.18_LMNA | 0.01638  | -0.143196412 | 0.175121751 | 8.41E-01 | 9.38E-01 | 1.00E+00 |
| ENSG00000225783.5_MIAT      | ENSG00000160789.18_LMNA | -0.02608 | -0.184519436 | 0.133670806 | 7.50E-01 | 8.95E-01 | 1.00E+00 |
| ENSG00000158805.10_ZNF276   | ENSG00000160789.18_LMNA | -0.00742 | -0.166421292 | 0.15196304  | 9.28E-01 | 9.72E-01 | 1.00E+00 |
| ENSG00000121879.3_PIK3CA    | ENSG00000160789.18_LMNA | 0.02858  | -0.131212952 | 0.186934876 | 7.27E-01 | 8.84E-01 | 1.00E+00 |
| ENSG00000099840.12_IZUMO4   | ENSG00000160789.18_LMNA | -0.13585 | -0.288804311 | 0.023867201 | 9.52E-02 | 3.02E-01 | 1.00E+00 |
| ENSG00000196712.15_NF1      | ENSG00000160789.18_LMNA | -0.16658 | -0.317367017 | -0.00758334 | 4.03E-02 | 1.74E-01 | 1.00E+00 |
| ENSG00000260314.2_MRC1      | ENSG00000160789.18_LMNA | 0.16835  | 0.009406274  | 0.319005516 | 3.81E-02 | 1.68E-01 | 1.00E+00 |
| ENSG00000272172.1_RP13-582O | ENSG00000160789.18_LMNA | 0.10906  | -0.051030212 | 0.263679209 | 1.81E-01 | 4.45E-01 | 1.00E+00 |
| ENSG00000162878.11_PKDCC    | ENSG00000160789.18_LMNA | -0.17924 | -0.329052772 | -0.0206297  | 2.71E-02 | 1.34E-01 | 1.00E+00 |

|                             |                         |          |              |             |          |          |          |
|-----------------------------|-------------------------|----------|--------------|-------------|----------|----------|----------|
| ENSG00000068885.13_IFT80    | ENSG00000160789.18_LMNA | -0.04023 | -0.198161002 | 0.119738139 | 6.23E-01 | 8.30E-01 | 1.00E+00 |
| ENSG00000106344.7_RBM28     | ENSG00000160789.18_LMNA | 0.19632  | 0.038312139  | 0.344741746 | 1.54E-02 | 8.93E-02 | 1.00E+00 |
| ENSG00000241680.1_RPL31P49  | ENSG00000160789.18_LMNA | -0.07202 | -0.228602849 | 0.088188541 | 3.78E-01 | 6.57E-01 | 1.00E+00 |
| ENSG00000171115.3_GIMAP8    | ENSG00000160789.18_LMNA | 0.09113  | -0.069071461 | 0.246752121 | 2.64E-01 | 5.48E-01 | 1.00E+00 |
| ENSG00000271976.1_RP11-884K | ENSG00000160789.18_LMNA | -0.14949 | -0.301516227 | 0.009946062 | 6.60E-02 | 2.40E-01 | 1.00E+00 |
| ENSG00000260442.4_ATP2A1-AS | ENSG00000160789.18_LMNA | 0.00596  | -0.153386038 | 0.165004342 | 9.42E-01 | 9.77E-01 | 1.00E+00 |
| ENSG00000147576.14_ADHFE1   | ENSG00000160789.18_LMNA | -0.25736 | -0.400167726 | -0.10235589 | 1.37E-03 | 1.47E-02 | 1.00E+00 |
| ENSG00000113966.8_ARL6      | ENSG00000160789.18_LMNA | -0.31665 | -0.453015295 | -0.16580957 | 7.05E-05 | 1.42E-03 | 1.00E+00 |
| ENSG00000140992.17_PDPK1    | ENSG00000160789.18_LMNA | 0.06142  | -0.098750285 | 0.218480461 | 4.52E-01 | 7.18E-01 | 1.00E+00 |
| ENSG00000082482.12_KCNK2    | ENSG00000160789.18_LMNA | -0.27658 | -0.417403602 | -0.12278794 | 5.62E-04 | 7.38E-03 | 1.00E+00 |
| ENSG00000127325.17_BEST3    | ENSG00000160789.18_LMNA | -0.26874 | -0.410380965 | -0.11443279 | 8.15E-04 | 9.86E-03 | 1.00E+00 |
| ENSG00000183444.10_OR7E38P  | ENSG00000160789.18_LMNA | -0.10118 | -0.256255474 | 0.058967954 | 2.15E-01 | 4.89E-01 | 1.00E+00 |
| ENSG00000032742.16_IFT88    | ENSG00000160789.18_LMNA | -0.17765 | -0.327584029 | -0.01898415 | 2.86E-02 | 1.39E-01 | 1.00E+00 |
| ENSG00000141034.8_GID4      | ENSG00000160789.18_LMNA | 0.07897  | -0.081247503 | 0.235218055 | 3.33E-01 | 6.19E-01 | 1.00E+00 |
| ENSG00000164169.11_PRMT9    | ENSG00000160789.18_LMNA | -0.14318 | -0.295638794 | 0.016397628 | 7.85E-02 | 2.69E-01 | 1.00E+00 |
| ENSG00000130052.12_STARD8   | ENSG00000160789.18_LMNA | -0.05057 | -0.208094878 | 0.109512872 | 5.36E-01 | 7.77E-01 | 1.00E+00 |
| ENSG00000180979.8_LRRC57    | ENSG00000160789.18_LMNA | -0.12422 | -0.277924051 | 0.035686911 | 1.27E-01 | 3.61E-01 | 1.00E+00 |
| ENSG00000164219.8_PGGT1B    | ENSG00000160789.18_LMNA | 0.14147  | -0.018135276 | 0.294051733 | 8.21E-02 | 2.77E-01 | 1.00E+00 |
| ENSG00000203761.5_MSTO2P    | ENSG00000160789.18_LMNA | 0.05522  | -0.104901468 | 0.212553535 | 4.99E-01 | 7.52E-01 | 1.00E+00 |
| ENSG00000107957.15_SH3PXD2  | ENSG00000160789.18_LMNA | 0.06896  | -0.091239177 | 0.225686134 | 3.99E-01 | 6.75E-01 | 1.00E+00 |
| ENSG00000263528.6_IKBKE     | ENSG00000160789.18_LMNA | 0.11985  | -0.040114827 | 0.273827249 | 1.41E-01 | 3.84E-01 | 1.00E+00 |
| ENSG00000144802.10_NFKBIZ   | ENSG00000160789.18_LMNA | 0.3755   | 0.230053746  | 0.504540967 | 1.87E-06 | 7.62E-05 | 9.60E-02 |
| ENSG00000139926.14_FRMD6    | ENSG00000160789.18_LMNA | 0.09515  | -0.065040135 | 0.250551282 | 2.44E-01 | 5.23E-01 | 1.00E+00 |
| ENSG00000237749.4_RP3-423B2 | ENSG00000160789.18_LMNA | -0.11381 | -0.268151989 | 0.046228471 | 1.63E-01 | 4.18E-01 | 1.00E+00 |
| ENSG00000044446.10_PHKA2    | ENSG00000160789.18_LMNA | 0.13654  | -0.023164478 | 0.289448647 | 9.35E-02 | 2.99E-01 | 1.00E+00 |
| ENSG00000168000.13_BSCL2    | ENSG00000160789.18_LMNA | 0.14539  | -0.014137064 | 0.297700879 | 7.39E-02 | 2.59E-01 | 1.00E+00 |
| ENSG00000127589.4_TUBBP1    | ENSG00000160789.18_LMNA | 0.08675  | -0.073469391 | 0.242596367 | 2.88E-01 | 5.73E-01 | 1.00E+00 |
| ENSG00000146143.16_PRIM2    | ENSG00000160789.18_LMNA | -0.08385 | -0.239853284 | 0.076365608 | 3.04E-01 | 5.91E-01 | 1.00E+00 |
| ENSG00000164114.17_MAP9     | ENSG00000160789.18_LMNA | -0.0735  | -0.230005345 | 0.086719531 | 3.68E-01 | 6.49E-01 | 1.00E+00 |
| ENSG00000107929.13_LARP4B   | ENSG00000160789.18_LMNA | 0.09472  | -0.065466153 | 0.250150257 | 2.46E-01 | 5.25E-01 | 1.00E+00 |
| ENSG00000106819.10_ASPN     | ENSG00000160789.18_LMNA | 0.20427  | 0.046585778  | 0.352024315 | 1.16E-02 | 7.28E-02 | 1.00E+00 |
| ENSG00000072682.17_P4HA2    | ENSG00000160789.18_LMNA | 0.43072  | 0.291507547  | 0.552064522 | 3.04E-08 | 2.72E-06 | 1.56E-03 |
| ENSG00000154839.8_SKA1      | ENSG00000160789.18_LMNA | 0.06389  | -0.096285164 | 0.220849159 | 4.34E-01 | 7.03E-01 | 1.00E+00 |

|                             |                         |          |              |             |          |          |          |
|-----------------------------|-------------------------|----------|--------------|-------------|----------|----------|----------|
| ENSG00000164080.12_RAD54L2  | ENSG00000160789.18_LMNA | 0.11115  | -0.048911527 | 0.265654415 | 1.73E-01 | 4.32E-01 | 1.00E+00 |
| ENSG00000264522.4_OTUD7B    | ENSG00000160789.18_LMNA | 0.27877  | 0.125126415  | 0.419362842 | 5.06E-04 | 6.80E-03 | 1.00E+00 |
| ENSG00000197769.5_MAP1LC3C  | ENSG00000160789.18_LMNA | 0.3346   | 0.18526646   | 0.468825504 | 2.52E-05 | 6.21E-04 | 1.00E+00 |
| ENSG00000122696.11_SLC25A51 | ENSG00000160789.18_LMNA | -0.03937 | -0.197336306 | 0.120584004 | 6.30E-01 | 8.34E-01 | 1.00E+00 |
| ENSG00000126953.5_TIMM8A    | ENSG00000160789.18_LMNA | -0.06686 | -0.223678715 | 0.093335317 | 4.13E-01 | 6.86E-01 | 1.00E+00 |
| ENSG00000231768.1_LINC01354 | ENSG00000160789.18_LMNA | -0.19354 | -0.342199734 | -0.03543405 | 1.69E-02 | 9.56E-02 | 1.00E+00 |
| ENSG00000120800.4_UTP20     | ENSG00000160789.18_LMNA | 0.16991  | 0.011003077  | 0.320439239 | 3.64E-02 | 1.62E-01 | 1.00E+00 |
| ENSG00000137413.14_TAF8     | ENSG00000160789.18_LMNA | -0.11109 | -0.265594759 | 0.048975558 | 1.73E-01 | 4.33E-01 | 1.00E+00 |
| ENSG00000172878.12_METAP1D  | ENSG00000160789.18_LMNA | -0.22418 | -0.370167531 | -0.06738195 | 5.50E-03 | 4.20E-02 | 1.00E+00 |
| ENSG00000229994.1_RPL5P4    | ENSG00000160789.18_LMNA | -0.13728 | -0.290141825 | 0.022408142 | 9.17E-02 | 2.95E-01 | 1.00E+00 |
| ENSG00000074356.15_NCBP3    | ENSG00000160789.18_LMNA | 0.02026  | -0.139385998 | 0.178887968 | 8.04E-01 | 9.22E-01 | 1.00E+00 |
| ENSG00000070444.13_MNT      | ENSG00000160789.18_LMNA | 0.23525  | 0.07901292   | 0.380215015 | 3.53E-03 | 3.02E-02 | 1.00E+00 |
| ENSG00000083838.14_ZNF446   | ENSG00000160789.18_LMNA | 0.15468  | -0.004633472 | 0.306338336 | 5.71E-02 | 2.18E-01 | 1.00E+00 |
| ENSG00000177380.12_PPFIA3   | ENSG00000160789.18_LMNA | -0.13606 | -0.289002802 | 0.023650756 | 9.46E-02 | 3.01E-01 | 1.00E+00 |
| ENSG00000189423.10_USP32P3  | ENSG00000160789.18_LMNA | -0.14314 | -0.29560101  | 0.016439018 | 7.85E-02 | 2.69E-01 | 1.00E+00 |
| ENSG00000115274.13_INO80B   | ENSG00000160789.18_LMNA | -0.06218 | -0.21921165  | 0.097989747 | 4.47E-01 | 7.13E-01 | 1.00E+00 |
| ENSG00000142046.13_TMEM91   | ENSG00000160789.18_LMNA | -0.02078 | -0.179382809 | 0.138884649 | 7.99E-01 | 9.19E-01 | 1.00E+00 |
| ENSG00000165868.11_HSPA12A  | ENSG00000160789.18_LMNA | -0.22558 | -0.371443734 | -0.06885473 | 5.20E-03 | 4.04E-02 | 1.00E+00 |
| ENSG00000172113.7_NME6      | ENSG00000160789.18_LMNA | -0.14098 | -0.293590076 | 0.018640383 | 8.32E-02 | 2.79E-01 | 1.00E+00 |
| ENSG00000226403.1_RP11-31F1 | ENSG00000160789.18_LMNA | -0.27363 | -0.414758843 | -0.11963644 | 6.47E-04 | 8.26E-03 | 1.00E+00 |
| ENSG00000178700.6_DHFR2     | ENSG00000160789.18_LMNA | -0.05665 | -0.213920966 | 0.103484449 | 4.88E-01 | 7.44E-01 | 1.00E+00 |
| ENSG00000102221.12_JADE3    | ENSG00000160789.18_LMNA | -0.35198 | -0.484052532 | -0.20421822 | 8.72E-06 | 2.60E-04 | 4.47E-01 |
| ENSG00000173482.15_PTPRM    | ENSG00000160789.18_LMNA | -0.21542 | -0.362201993 | -0.05821915 | 7.69E-03 | 5.40E-02 | 1.00E+00 |
| ENSG00000144339.10_TMEFF2   | ENSG00000160789.18_LMNA | -0.29978 | -0.438075985 | -0.14762765 | 1.75E-04 | 2.94E-03 | 1.00E+00 |
| ENSG00000182600.8_C2orf82   | ENSG00000160789.18_LMNA | -0.26588 | -0.407821712 | -0.1113983  | 9.30E-04 | 1.10E-02 | 1.00E+00 |
| ENSG00000110171.17_TRIM3    | ENSG00000160789.18_LMNA | 0.05697  | -0.10316367  | 0.214230348 | 4.86E-01 | 7.42E-01 | 1.00E+00 |
| ENSG00000124217.4_MOCS3     | ENSG00000160789.18_LMNA | 0.1024   | -0.057738839 | 0.257407437 | 2.09E-01 | 4.82E-01 | 1.00E+00 |
| ENSG00000229891.1_LINC01315 | ENSG00000160789.18_LMNA | -0.42249 | -0.545032192 | -0.28227624 | 5.90E-08 | 4.69E-06 | 3.03E-03 |
| ENSG00000143633.11_C1orf131 | ENSG00000160789.18_LMNA | -0.0715  | -0.228099665 | 0.088715253 | 3.81E-01 | 6.60E-01 | 1.00E+00 |
| ENSG00000239713.6_APOBEC3C  | ENSG00000160789.18_LMNA | 0.16761  | 0.008643419  | 0.318320069 | 3.90E-02 | 1.71E-01 | 1.00E+00 |
| ENSG00000160051.10_IQCC     | ENSG00000160789.18_LMNA | 0.05884  | -0.101306045 | 0.216020717 | 4.71E-01 | 7.31E-01 | 1.00E+00 |
| ENSG00000003402.18_CFLAR    | ENSG00000160789.18_LMNA | 0.28238  | 0.128974874  | 0.422581236 | 4.24E-04 | 5.94E-03 | 1.00E+00 |
| ENSG00000149926.12_FAM57B   | ENSG00000160789.18_LMNA | -0.37258 | -0.50200269  | -0.22683189 | 2.28E-06 | 8.81E-05 | 1.17E-01 |

|                             |                         |          |              |             |          |          |          |
|-----------------------------|-------------------------|----------|--------------|-------------|----------|----------|----------|
| ENSG00000118058.19_KMT2A    | ENSG00000160789.18_LMNA | -0.00847 | -0.16744556  | 0.150933577 | 9.18E-01 | 9.69E-01 | 1.00E+00 |
| ENSG00000106123.10_EPHB6    | ENSG00000160789.18_LMNA | -0.06773 | -0.224508505 | 0.092469194 | 4.07E-01 | 6.82E-01 | 1.00E+00 |
| ENSG00000167850.3_CD300C    | ENSG00000160789.18_LMNA | 0.03325  | -0.126617493 | 0.191440738 | 6.84E-01 | 8.63E-01 | 1.00E+00 |
| ENSG00000167548.13_KMT2D    | ENSG00000160789.18_LMNA | 0.1587   | -0.000512493 | 0.31006789  | 5.08E-02 | 2.03E-01 | 1.00E+00 |
| ENSG00000247516.4_MIR4458HC | ENSG00000160789.18_LMNA | -0.04972 | -0.207278472 | 0.110355769 | 5.43E-01 | 7.82E-01 | 1.00E+00 |
| ENSG00000189057.9_FAM111B   | ENSG00000160789.18_LMNA | 0.16014  | 0.000968733  | 0.311406092 | 4.87E-02 | 1.98E-01 | 1.00E+00 |
| ENSG00000166261.9_ZNF202    | ENSG00000160789.18_LMNA | -0.10451 | -0.259396362 | 0.055614454 | 2.00E-01 | 4.70E-01 | 1.00E+00 |
| ENSG00000106018.12_VIPR2    | ENSG00000160789.18_LMNA | -0.49835 | -0.609213687 | -0.36837098 | 6.44E-11 | 1.58E-08 | 3.30E-06 |
| ENSG00000146250.6_PRSS35    | ENSG00000160789.18_LMNA | -0.28921 | -0.428671135 | -0.13628127 | 3.02E-04 | 4.53E-03 | 1.00E+00 |
| ENSG00000104983.7_CCDC61    | ENSG00000160789.18_LMNA | 0.28312  | 0.129769864  | 0.42324515  | 4.09E-04 | 5.76E-03 | 1.00E+00 |
| ENSG00000105173.12_CCNE1    | ENSG00000160789.18_LMNA | 0.1746   | 0.015840205  | 0.324773721 | 3.14E-02 | 1.48E-01 | 1.00E+00 |
| ENSG00000125741.4_OPA3      | ENSG00000160789.18_LMNA | 0.36255  | 0.215803921  | 0.493278484 | 4.43E-06 | 1.51E-04 | 2.27E-01 |
| ENSG00000111224.12_PARP11   | ENSG00000160789.18_LMNA | -0.28599 | -0.425805318 | -0.13283902 | 3.55E-04 | 5.12E-03 | 1.00E+00 |
| ENSG00000108423.13_TUBD1    | ENSG00000160789.18_LMNA | -0.37939 | -0.507912863 | -0.23434305 | 1.43E-06 | 6.21E-05 | 7.36E-02 |
| ENSG00000134285.9_FKBP11    | ENSG00000160789.18_LMNA | 0.29416  | 0.141591077  | 0.433080258 | 2.35E-04 | 3.71E-03 | 1.00E+00 |
| ENSG00000198814.11_GK       | ENSG00000160789.18_LMNA | 0.00653  | -0.152829227 | 0.165558942 | 9.36E-01 | 9.75E-01 | 1.00E+00 |
| ENSG00000133424.19_LARGE1   | ENSG00000160789.18_LMNA | -0.17032 | -0.320820494 | -0.01142796 | 3.59E-02 | 1.61E-01 | 1.00E+00 |
| ENSG00000214021.14_TTLL3    | ENSG00000160789.18_LMNA | 0.01387  | -0.145648627 | 0.172693043 | 8.65E-01 | 9.47E-01 | 1.00E+00 |
| ENSG00000266274.2_RN7SL138F | ENSG00000160789.18_LMNA | 0.07107  | -0.089143759 | 0.227690176 | 3.84E-01 | 6.63E-01 | 1.00E+00 |
| ENSG00000121552.3_CSTA      | ENSG00000160789.18_LMNA | 0.17157  | 0.012718513  | 0.321977901 | 3.46E-02 | 1.57E-01 | 1.00E+00 |
| ENSG00000115594.10_IL1R1    | ENSG00000160789.18_LMNA | 0.19997  | 0.042108475  | 0.348087919 | 1.35E-02 | 8.13E-02 | 1.00E+00 |
| ENSG00000067191.14_CACNB1   | ENSG00000160789.18_LMNA | -0.019   | -0.17766001  | 0.140629404 | 8.16E-01 | 9.28E-01 | 1.00E+00 |
| ENSG00000183763.7_TRAIP     | ENSG00000160789.18_LMNA | -0.1522  | -0.304030458 | 0.007178288 | 6.12E-02 | 2.29E-01 | 1.00E+00 |
| ENSG00000170234.11_PWWP2A   | ENSG00000160789.18_LMNA | 0.0569   | -0.103237478 | 0.214159168 | 4.86E-01 | 7.43E-01 | 1.00E+00 |
| ENSG00000204084.11_INPP5B   | ENSG00000160789.18_LMNA | 0.12206  | -0.037875383 | 0.275900654 | 1.34E-01 | 3.72E-01 | 1.00E+00 |
| ENSG00000242814.2_RP11-436H | ENSG00000160789.18_LMNA | 0.15392  | -0.005411205 | 0.305633402 | 5.83E-02 | 2.21E-01 | 1.00E+00 |
| ENSG00000090975.11_PITPNM2  | ENSG00000160789.18_LMNA | 0.17208  | 0.013240247  | 0.322445546 | 3.40E-02 | 1.56E-01 | 1.00E+00 |
| ENSG00000134852.13_CLOCK    | ENSG00000160789.18_LMNA | 0.11447  | -0.045559485 | 0.26877407  | 1.60E-01 | 4.14E-01 | 1.00E+00 |
| ENSG00000138617.13_PARP16   | ENSG00000160789.18_LMNA | 0.12001  | -0.039957574 | 0.273972937 | 1.41E-01 | 3.83E-01 | 1.00E+00 |
| ENSG00000234268.1_AP000936. | ENSG00000160789.18_LMNA | -0.01648 | -0.175221092 | 0.143096027 | 8.40E-01 | 9.38E-01 | 1.00E+00 |
| ENSG00000091651.7_ORC6      | ENSG00000160789.18_LMNA | -0.09807 | -0.253316385 | 0.062099565 | 2.29E-01 | 5.06E-01 | 1.00E+00 |
| ENSG00000243680.1_RPL37P23  | ENSG00000160789.18_LMNA | -0.04924 | -0.206822378 | 0.110826463 | 5.47E-01 | 7.84E-01 | 1.00E+00 |
| ENSG00000239268.2_RP11-384F | ENSG00000160789.18_LMNA | -0.02308 | -0.181614374 | 0.136621704 | 7.78E-01 | 9.09E-01 | 1.00E+00 |

|                             |                         |          |              |             |          |          |          |
|-----------------------------|-------------------------|----------|--------------|-------------|----------|----------|----------|
| ENSG00000185559.12_DLK1     | ENSG00000160789.18_LMNA | -0.03676 | -0.194824129 | 0.123157826 | 6.53E-01 | 8.46E-01 | 1.00E+00 |
| ENSG00000175175.5_PPM1E     | ENSG00000160789.18_LMNA | -0.28936 | -0.428809506 | -0.13644766 | 3.00E-04 | 4.50E-03 | 1.00E+00 |
| ENSG00000138835.21_RGS3     | ENSG00000160789.18_LMNA | 0.18964  | 0.031382543  | 0.338613703 | 1.93E-02 | 1.05E-01 | 1.00E+00 |
| ENSG00000171791.11_BCL2     | ENSG00000160789.18_LMNA | -0.20702 | -0.354537378 | -0.0494506  | 1.05E-02 | 6.78E-02 | 1.00E+00 |
| ENSG00000082458.10_DLG3     | ENSG00000160789.18_LMNA | 0.06364  | -0.09653636  | 0.22060796  | 4.36E-01 | 7.04E-01 | 1.00E+00 |
| ENSG00000171169.8_NAIF1     | ENSG00000160789.18_LMNA | 0.12285  | -0.037074995 | 0.276640992 | 1.32E-01 | 3.68E-01 | 1.00E+00 |
| ENSG00000102796.9_DHRS12    | ENSG00000160789.18_LMNA | -0.18634 | -0.335588558 | -0.02797256 | 2.15E-02 | 1.14E-01 | 1.00E+00 |
| ENSG00000196139.10_AKR1C3   | ENSG00000160789.18_LMNA | -0.30402 | -0.441834167 | -0.15218315 | 1.40E-04 | 2.46E-03 | 1.00E+00 |
| ENSG00000197808.10_ZNF461   | ENSG00000160789.18_LMNA | -0.25871 | -0.401376254 | -0.10378038 | 1.29E-03 | 1.40E-02 | 1.00E+00 |
| ENSG00000152465.16_NMT2     | ENSG00000160789.18_LMNA | -0.32268 | -0.458334432 | -0.17233072 | 5.03E-05 | 1.08E-03 | 1.00E+00 |
| ENSG00000158711.12_ELK4     | ENSG00000160789.18_LMNA | 0.23418  | 0.077883324  | 0.379242314 | 3.69E-03 | 3.12E-02 | 1.00E+00 |
| ENSG00000161940.9_BCL6B     | ENSG00000160789.18_LMNA | -0.0155  | -0.174269861 | 0.144056993 | 8.50E-01 | 9.41E-01 | 1.00E+00 |
| ENSG00000203497.2_PDCD4-AS  | ENSG00000160789.18_LMNA | -0.329   | -0.463901896 | -0.17918327 | 3.50E-05 | 8.11E-04 | 1.00E+00 |
| ENSG00000159216.17_RUNX1    | ENSG00000160789.18_LMNA | 0.54141  | 0.418260504  | 0.645015126 | 5.94E-13 | 3.76E-10 | 3.05E-08 |
| ENSG00000119912.14_IDE      | ENSG00000160789.18_LMNA | 0.12084  | -0.039111253 | 0.274756777 | 1.38E-01 | 3.79E-01 | 1.00E+00 |
| ENSG00000213139.6_CRYGS     | ENSG00000160789.18_LMNA | -0.29889 | -0.437282276 | -0.14666713 | 1.84E-04 | 3.05E-03 | 1.00E+00 |
| ENSG00000204789.4_ZNF204P   | ENSG00000160789.18_LMNA | 0.02841  | -0.131382902 | 0.186767983 | 7.28E-01 | 8.85E-01 | 1.00E+00 |
| ENSG00000231419.5_LINC00689 | ENSG00000160789.18_LMNA | -0.48337 | -0.596652476 | -0.35118952 | 2.83E-10 | 5.48E-08 | 1.45E-05 |
| ENSG00000135114.11_OASL     | ENSG00000160789.18_LMNA | 0.02444  | -0.135286126 | 0.182929895 | 7.65E-01 | 9.02E-01 | 1.00E+00 |
| ENSG00000050438.15_SLC4A8   | ENSG00000160789.18_LMNA | -0.03186 | -0.190100068 | 0.12798625  | 6.97E-01 | 8.70E-01 | 1.00E+00 |
| ENSG00000065923.8_SLC9A7    | ENSG00000160789.18_LMNA | 0.20753  | 0.049976106  | 0.354997884 | 1.03E-02 | 6.70E-02 | 1.00E+00 |
| ENSG00000172890.10_NADSYN1  | ENSG00000160789.18_LMNA | 0.17733  | 0.018652321  | 0.327287667 | 2.88E-02 | 1.40E-01 | 1.00E+00 |
| ENSG00000160336.13_ZNF761   | ENSG00000160789.18_LMNA | 0.14795  | -0.011523363 | 0.300081474 | 6.89E-02 | 2.47E-01 | 1.00E+00 |
| ENSG00000224616.1_RTCA-AS1  | ENSG00000160789.18_LMNA | -0.27608 | -0.416952594 | -0.1222501  | 5.76E-04 | 7.52E-03 | 1.00E+00 |
| ENSG00000112742.8_TTK       | ENSG00000160789.18_LMNA | -0.03298 | -0.191174564 | 0.12688934  | 6.87E-01 | 8.64E-01 | 1.00E+00 |
| ENSG00000049167.12_ERCC8    | ENSG00000160789.18_LMNA | -0.24453 | -0.38860488  | -0.08878827 | 2.40E-03 | 2.25E-02 | 1.00E+00 |
| ENSG00000137486.15_ARRB1    | ENSG00000160789.18_LMNA | -0.34238 | -0.475653303 | -0.19373842 | 1.58E-05 | 4.23E-04 | 8.10E-01 |
| ENSG00000008513.13_ST3GAL1  | ENSG00000160789.18_LMNA | 0.2125   | 0.055167911  | 0.359539551 | 8.58E-03 | 5.86E-02 | 1.00E+00 |
| ENSG00000167395.10_ZNF646   | ENSG00000160789.18_LMNA | 0.1099   | -0.050181849 | 0.264470437 | 1.78E-01 | 4.40E-01 | 1.00E+00 |
| ENSG00000117598.10_PLPPR5   | ENSG00000160789.18_LMNA | -0.13883 | -0.291588938 | 0.020828022 | 8.80E-02 | 2.89E-01 | 1.00E+00 |
| ENSG00000156232.7_WHAMM     | ENSG00000160789.18_LMNA | 0.34346  | 0.194915227  | 0.476599045 | 1.48E-05 | 4.03E-04 | 7.58E-01 |
| ENSG00000089123.14_TASP1    | ENSG00000160789.18_LMNA | 0.34988  | 0.201922425  | 0.482216927 | 9.94E-06 | 2.90E-04 | 5.10E-01 |
| ENSG00000170412.15_GPRC5C   | ENSG00000160789.18_LMNA | -0.01238 | -0.171247225 | 0.147106584 | 8.80E-01 | 9.53E-01 | 1.00E+00 |



|                             |                         |          |              |             |          |          |          |
|-----------------------------|-------------------------|----------|--------------|-------------|----------|----------|----------|
| ENSG00000269556.6_TMEM185A  | ENSG00000160789.18_LMNA | -0.06915 | -0.225866721 | 0.091050471 | 3.97E-01 | 6.74E-01 | 1.00E+00 |
| ENSG00000248180.1_GAPDHP6C  | ENSG00000160789.18_LMNA | 0.25211  | 0.096793811  | 0.395438949 | 1.73E-03 | 1.75E-02 | 1.00E+00 |
| ENSG00000102543.13_CDADC1   | ENSG00000160789.18_LMNA | -0.23947 | -0.384032769 | -0.08345396 | 2.96E-03 | 2.65E-02 | 1.00E+00 |
| ENSG00000006534.14_ALDH3B1  | ENSG00000160789.18_LMNA | 0.32407  | 0.173839513  | 0.459562204 | 4.64E-05 | 1.01E-03 | 1.00E+00 |
| ENSG00000258986.5_TMEM179   | ENSG00000160789.18_LMNA | -0.08525 | -0.241179919 | 0.074965579 | 2.96E-01 | 5.82E-01 | 1.00E+00 |
| ENSG00000254893.4_AC113404. | ENSG00000160789.18_LMNA | 0.00387  | -0.155423618 | 0.162973131 | 9.62E-01 | 9.85E-01 | 1.00E+00 |
| ENSG00000236773.1_RP11-365O | ENSG00000160789.18_LMNA | 0.00179  | -0.157451635 | 0.160948771 | 9.82E-01 | 9.94E-01 | 1.00E+00 |
| ENSG00000176463.12_SLCO3A1  | ENSG00000160789.18_LMNA | -0.1207  | -0.27462104  | 0.039257841 | 1.39E-01 | 3.79E-01 | 1.00E+00 |
| ENSG00000133805.14_AMPD3    | ENSG00000160789.18_LMNA | -0.03967 | -0.197625069 | 0.120287881 | 6.27E-01 | 8.32E-01 | 1.00E+00 |
| ENSG00000138780.13_GSTCD    | ENSG00000160789.18_LMNA | -0.20479 | -0.352501262 | -0.0471291  | 1.14E-02 | 7.18E-02 | 1.00E+00 |
| ENSG00000179627.9_ZBTB42    | ENSG00000160789.18_LMNA | 0.50755  | 0.378973576  | 0.61690531  | 2.50E-11 | 7.16E-09 | 1.28E-06 |
| ENSG00000188315.6_C3orf62   | ENSG00000160789.18_LMNA | -0.22335 | -0.369419246 | -0.06651901 | 5.67E-03 | 4.31E-02 | 1.00E+00 |
| ENSG00000104972.13_LILRB1   | ENSG00000160789.18_LMNA | 0.03435  | -0.125538521 | 0.192496733 | 6.74E-01 | 8.57E-01 | 1.00E+00 |
| ENSG00000180953.10_ST20     | ENSG00000160789.18_LMNA | 0.11881  | -0.041171739 | 0.272847684 | 1.45E-01 | 3.90E-01 | 1.00E+00 |
| ENSG00000267002.1_RP11-242D | ENSG00000160789.18_LMNA | -0.2428  | -0.387041292 | -0.08696208 | 2.58E-03 | 2.38E-02 | 1.00E+00 |
| ENSG00000088827.11_SIGLEC1  | ENSG00000160789.18_LMNA | -0.00663 | -0.165654377 | 0.152733392 | 9.35E-01 | 9.75E-01 | 1.00E+00 |
| ENSG00000187764.10_SEMA4D   | ENSG00000160789.18_LMNA | -0.28221 | -0.422431813 | -0.128796   | 4.28E-04 | 5.97E-03 | 1.00E+00 |
| ENSG00000134444.12_KIAA1468 | ENSG00000160789.18_LMNA | -0.20342 | -0.351243503 | -0.0456967  | 1.20E-02 | 7.46E-02 | 1.00E+00 |
| ENSG00000198185.10_ZNF334   | ENSG00000160789.18_LMNA | 0.18726  | 0.028917868  | 0.336427819 | 2.09E-02 | 1.11E-01 | 1.00E+00 |
| ENSG00000135837.14_CEP350   | ENSG00000160789.18_LMNA | 0.07275  | -0.087463175 | 0.229295536 | 3.73E-01 | 6.53E-01 | 1.00E+00 |
| ENSG00000166831.7_RBPMS2    | ENSG00000160789.18_LMNA | 0.31637  | 0.165507751  | 0.452768613 | 7.16E-05 | 1.44E-03 | 1.00E+00 |
| ENSG00000129003.14_VPS13C   | ENSG00000160789.18_LMNA | 0.09083  | -0.069369866 | 0.246470515 | 2.66E-01 | 5.50E-01 | 1.00E+00 |
| ENSG00000131849.10_ZNF132   | ENSG00000160789.18_LMNA | -0.00999 | -0.168919988 | 0.149450458 | 9.03E-01 | 9.62E-01 | 1.00E+00 |
| ENSG00000138964.15_PARVG    | ENSG00000160789.18_LMNA | -0.00189 | -0.161040957 | 0.15735934  | 9.82E-01 | 9.93E-01 | 1.00E+00 |
| ENSG00000249014.2_HMGN2P4   | ENSG00000160789.18_LMNA | -0.01231 | -0.171177814 | 0.147176543 | 8.80E-01 | 9.54E-01 | 1.00E+00 |
| ENSG00000214212.7_C19orf38  | ENSG00000160789.18_LMNA | -0.18385 | -0.333291033 | -0.02538754 | 2.34E-02 | 1.21E-01 | 1.00E+00 |
| ENSG00000088538.12_DOCK3    | ENSG00000160789.18_LMNA | -0.27199 | -0.413293165 | -0.11789249 | 7.00E-04 | 8.78E-03 | 1.00E+00 |
| ENSG00000135324.5_MRAP2     | ENSG00000160789.18_LMNA | -0.03651 | -0.194576576 | 0.123411222 | 6.55E-01 | 8.47E-01 | 1.00E+00 |
| ENSG00000134215.14_VAV3     | ENSG00000160789.18_LMNA | 0.38372  | 0.239128217  | 0.511664705 | 1.06E-06 | 4.81E-05 | 5.45E-02 |
| ENSG00000103381.10_CPPED1   | ENSG00000160789.18_LMNA | 0.03604  | -0.123866537 | 0.194131658 | 6.59E-01 | 8.50E-01 | 1.00E+00 |
| ENSG00000100302.6_RASD2     | ENSG00000160789.18_LMNA | -0.02412 | -0.18261469  | 0.135606242 | 7.68E-01 | 9.04E-01 | 1.00E+00 |
| ENSG00000274104.1_CTD-2553L | ENSG00000160789.18_LMNA | -0.25599 | -0.39893522  | -0.1009044  | 1.46E-03 | 1.54E-02 | 1.00E+00 |
| ENSG00000120279.6_MYCT1     | ENSG00000160789.18_LMNA | -0.08219 | -0.238273188 | 0.078031494 | 3.14E-01 | 6.00E-01 | 1.00E+00 |

|                             |                         |          |              |             |          |          |          |
|-----------------------------|-------------------------|----------|--------------|-------------|----------|----------|----------|
| ENSG00000186088.14_GSAP     | ENSG00000160789.18_LMNA | 0.25286  | 0.097587646  | 0.396114822 | 1.67E-03 | 1.71E-02 | 1.00E+00 |
| ENSG00000066294.13_CD84     | ENSG00000160789.18_LMNA | -0.11463 | -0.268919828 | 0.045402695 | 1.60E-01 | 4.13E-01 | 1.00E+00 |
| ENSG00000159885.12_ZNF222   | ENSG00000160789.18_LMNA | -0.11669 | -0.270862465 | 0.043311559 | 1.52E-01 | 4.01E-01 | 1.00E+00 |
| ENSG00000204604.8_ZNF468    | ENSG00000160789.18_LMNA | -0.02713 | -0.185530332 | 0.132642636 | 7.40E-01 | 8.91E-01 | 1.00E+00 |
| ENSG00000172273.11_HINFP    | ENSG00000160789.18_LMNA | -0.32029 | -0.456230684 | -0.16974857 | 5.75E-05 | 1.20E-03 | 1.00E+00 |
| ENSG00000177000.9_MTHFR     | ENSG00000160789.18_LMNA | 0.1253   | -0.034595755 | 0.278931863 | 1.24E-01 | 3.55E-01 | 1.00E+00 |
| ENSG00000161082.11_CELF5    | ENSG00000160789.18_LMNA | -0.32272 | -0.458367331 | -0.17237113 | 5.02E-05 | 1.08E-03 | 1.00E+00 |
| ENSG00000130477.13_UNC13A   | ENSG00000160789.18_LMNA | -0.21261 | -0.359635355 | -0.05527761 | 8.55E-03 | 5.85E-02 | 1.00E+00 |
| ENSG00000126882.11_FAM78A   | ENSG00000160789.18_LMNA | -0.00198 | -0.161125843 | 0.157274349 | 9.81E-01 | 9.93E-01 | 1.00E+00 |
| ENSG00000241511.1_RPS15AP2  | ENSG00000160789.18_LMNA | -0.13262 | -0.285782911 | 0.027158273 | 1.03E-01 | 3.18E-01 | 1.00E+00 |
| ENSG00000273314.1_RP5-1136G | ENSG00000160789.18_LMNA | 0.26002  | 0.105172519  | 0.402556335 | 1.22E-03 | 1.34E-02 | 1.00E+00 |
| ENSG00000125510.14_OPRL1    | ENSG00000160789.18_LMNA | 0.10683  | -0.053275319 | 0.261583257 | 1.90E-01 | 4.58E-01 | 1.00E+00 |
| ENSG00000228834.1_RP11-249L | ENSG00000160789.18_LMNA | -0.11357 | -0.267925685 | 0.046471768 | 1.64E-01 | 4.19E-01 | 1.00E+00 |
| ENSG00000162063.11_CCNF     | ENSG00000160789.18_LMNA | 0.07428  | -0.085939988 | 0.230749057 | 3.63E-01 | 6.45E-01 | 1.00E+00 |
| ENSG00000254198.1_RP11-598P | ENSG00000160789.18_LMNA | 0.05468  | -0.105441895 | 0.212031691 | 5.03E-01 | 7.55E-01 | 1.00E+00 |
| ENSG00000167889.11_MGAT5B   | ENSG00000160789.18_LMNA | -0.12249 | -0.276307034 | 0.037436091 | 1.33E-01 | 3.70E-01 | 1.00E+00 |
| ENSG00000226179.4_LINC00685 | ENSG00000160789.18_LMNA | 0.11163  | -0.048431608 | 0.266101467 | 1.71E-01 | 4.30E-01 | 1.00E+00 |
| ENSG00000122481.15_RWDD3    | ENSG00000160789.18_LMNA | -0.13595 | -0.288898556 | 0.023764435 | 9.49E-02 | 3.02E-01 | 1.00E+00 |
| ENSG00000140030.5_GPR65     | ENSG00000160789.18_LMNA | -0.03527 | -0.193380136 | 0.124635319 | 6.66E-01 | 8.53E-01 | 1.00E+00 |
| ENSG00000196664.4_TLR7      | ENSG00000160789.18_LMNA | -0.10358 | -0.258519006 | 0.056551915 | 2.04E-01 | 4.75E-01 | 1.00E+00 |
| ENSG00000152455.14_SUV39H2  | ENSG00000160789.18_LMNA | -0.27834 | -0.418972355 | -0.12466008 | 5.16E-04 | 6.92E-03 | 1.00E+00 |
| ENSG00000169607.11_CKAP2L   | ENSG00000160789.18_LMNA | 0.03458  | -0.125314681 | 0.192715714 | 6.72E-01 | 8.56E-01 | 1.00E+00 |
| ENSG00000241081.1_RP11-488C | ENSG00000160789.18_LMNA | 0.08013  | -0.080094149 | 0.236314434 | 3.26E-01 | 6.13E-01 | 1.00E+00 |
| ENSG00000186532.10_SMYD4    | ENSG00000160789.18_LMNA | 0.16695  | 0.007961631  | 0.31770719  | 3.98E-02 | 1.73E-01 | 1.00E+00 |
| ENSG00000170456.13_DENND5E  | ENSG00000160789.18_LMNA | -0.04493 | -0.202683473 | 0.115091358 | 5.83E-01 | 8.06E-01 | 1.00E+00 |
| ENSG00000132016.10_C19orf57 | ENSG00000160789.18_LMNA | -0.03398 | -0.192142227 | 0.125900824 | 6.78E-01 | 8.59E-01 | 1.00E+00 |
| ENSG00000101327.7_PDYN      | ENSG00000160789.18_LMNA | -0.17992 | -0.329678769 | -0.02133156 | 2.66E-02 | 1.32E-01 | 1.00E+00 |
| ENSG00000196177.11_ACADSB   | ENSG00000160789.18_LMNA | -0.37855 | -0.50718774  | -0.23341974 | 1.52E-06 | 6.48E-05 | 7.79E-02 |
| ENSG00000116903.7_EXOC8     | ENSG00000160789.18_LMNA | 0.08638  | -0.073838476 | 0.242247078 | 2.90E-01 | 5.75E-01 | 1.00E+00 |
| ENSG00000108239.8_TBC1D12   | ENSG00000160789.18_LMNA | -0.33153 | -0.466132741 | -0.18193682 | 3.02E-05 | 7.17E-04 | 1.00E+00 |
| ENSG00000246985.6_SOCS2-AS  | ENSG00000160789.18_LMNA | 0.10433  | -0.055794309 | 0.259228079 | 2.01E-01 | 4.71E-01 | 1.00E+00 |
| ENSG00000147124.11_ZNF41    | ENSG00000160789.18_LMNA | -0.05631 | -0.213598727 | 0.10381849  | 4.91E-01 | 7.47E-01 | 1.00E+00 |
| ENSG00000079387.12_SENP1    | ENSG00000160789.18_LMNA | 0.0116   | -0.147870666 | 0.170488956 | 8.87E-01 | 9.56E-01 | 1.00E+00 |

|                             |                         |          |              |             |          |          |          |
|-----------------------------|-------------------------|----------|--------------|-------------|----------|----------|----------|
| ENSG00000198353.7_HOXC4     | ENSG00000160789.18_LMNA | -0.29381 | -0.43277099  | -0.14121809 | 2.39E-04 | 3.76E-03 | 1.00E+00 |
| ENSG00000177576.9_C18orf32  | ENSG00000160789.18_LMNA | -0.47127 | -0.586471155 | -0.33738357 | 8.91E-10 | 1.42E-07 | 4.57E-05 |
| ENSG00000225194.2_LINC00092 | ENSG00000160789.18_LMNA | 0.0311   | -0.128735994 | 0.189365205 | 7.04E-01 | 8.74E-01 | 1.00E+00 |
| ENSG00000166676.13_TVP23A   | ENSG00000160789.18_LMNA | -0.06653 | -0.22336207  | 0.0936657   | 4.15E-01 | 6.88E-01 | 1.00E+00 |
| ENSG00000157978.10_LDLRAP1  | ENSG00000160789.18_LMNA | 0.11462  | -0.045409048 | 0.268913923 | 1.60E-01 | 4.13E-01 | 1.00E+00 |
| ENSG00000160801.12_PTH1R    | ENSG00000160789.18_LMNA | -0.03513 | -0.193253015 | 0.124765321 | 6.67E-01 | 8.54E-01 | 1.00E+00 |
| ENSG00000162600.10_OMA1     | ENSG00000160789.18_LMNA | 0.07983  | -0.080395277 | 0.23602826  | 3.28E-01 | 6.14E-01 | 1.00E+00 |
| ENSG00000104093.12_DMXL2    | ENSG00000160789.18_LMNA | -0.11636 | -0.270549778 | 0.043648335 | 1.53E-01 | 4.04E-01 | 1.00E+00 |
| ENSG00000042088.12_TDP1     | ENSG00000160789.18_LMNA | 0.08714  | -0.07307419  | 0.242970281 | 2.86E-01 | 5.71E-01 | 1.00E+00 |
| ENSG00000227345.7_PARG      | ENSG00000160789.18_LMNA | -0.11107 | -0.265574125 | 0.048997704 | 1.73E-01 | 4.33E-01 | 1.00E+00 |
| ENSG00000065609.13_SNAP91   | ENSG00000160789.18_LMNA | -0.41892 | -0.541974582 | -0.27827765 | 7.82E-08 | 5.90E-06 | 4.01E-03 |
| ENSG00000178538.8_CA8       | ENSG00000160789.18_LMNA | -0.38112 | -0.509415166 | -0.23625752 | 1.27E-06 | 5.61E-05 | 6.52E-02 |
| ENSG00000164031.15_DNAJB14  | ENSG00000160789.18_LMNA | -0.11419 | -0.268513123 | 0.045840142 | 1.61E-01 | 4.16E-01 | 1.00E+00 |
| ENSG00000196656.7_AC004057. | ENSG00000160789.18_LMNA | -0.1746  | -0.324774781 | -0.01584139 | 3.14E-02 | 1.48E-01 | 1.00E+00 |
| ENSG00000156521.12_TYSND1   | ENSG00000160789.18_LMNA | -0.01295 | -0.171795685 | 0.146553682 | 8.74E-01 | 9.51E-01 | 1.00E+00 |
| ENSG00000163607.13_GTPBP8   | ENSG00000160789.18_LMNA | -0.30049 | -0.438702268 | -0.14838595 | 1.69E-04 | 2.86E-03 | 1.00E+00 |
| ENSG00000100154.13_TTC28    | ENSG00000160789.18_LMNA | 0.00533  | -0.154003837 | 0.164388759 | 9.48E-01 | 9.79E-01 | 1.00E+00 |
| ENSG00000185716.10_C16orf52 | ENSG00000160789.18_LMNA | -0.18648 | -0.335711267 | -0.02811074 | 2.14E-02 | 1.13E-01 | 1.00E+00 |
| ENSG00000119681.10_LTBP2    | ENSG00000160789.18_LMNA | 0.32946  | 0.17968594   | 0.464309412 | 3.40E-05 | 7.92E-04 | 1.00E+00 |
| ENSG00000174804.3_FZD4      | ENSG00000160789.18_LMNA | 0.01999  | -0.139659046 | 0.178618398 | 8.07E-01 | 9.23E-01 | 1.00E+00 |
| ENSG00000107643.14_MAPK8    | ENSG00000160789.18_LMNA | -0.48867 | -0.601105044 | -0.35726097 | 1.69E-10 | 3.47E-08 | 8.67E-06 |
| ENSG00000204149.8_AGAP6     | ENSG00000160789.18_LMNA | -0.0398  | -0.197743648 | 0.120166264 | 6.26E-01 | 8.32E-01 | 1.00E+00 |
| ENSG00000232352.1_SEMA3B-A  | ENSG00000160789.18_LMNA | -0.17678 | -0.326782069 | -0.01808636 | 2.94E-02 | 1.41E-01 | 1.00E+00 |
| ENSG00000104081.12_BMF      | ENSG00000160789.18_LMNA | -0.10232 | -0.257328247 | 0.057823363 | 2.10E-01 | 4.83E-01 | 1.00E+00 |
| ENSG00000225022.1_UBE2D3P1  | ENSG00000160789.18_LMNA | -0.02533 | -0.183788408 | 0.1344139   | 7.57E-01 | 8.99E-01 | 1.00E+00 |
| ENSG00000072201.12_LNX1     | ENSG00000160789.18_LMNA | -0.27255 | -0.413793728 | -0.11848789 | 6.81E-04 | 8.59E-03 | 1.00E+00 |
| ENSG00000144115.15_THNSL2   | ENSG00000160789.18_LMNA | 0.16504  | 0.006001463  | 0.315943694 | 4.22E-02 | 1.80E-01 | 1.00E+00 |
| ENSG00000168661.13_ZNF30    | ENSG00000160789.18_LMNA | -0.15807 | -0.309486226 | 0.001155898 | 5.18E-02 | 2.06E-01 | 1.00E+00 |
| ENSG00000163739.4_CXCL1     | ENSG00000160789.18_LMNA | 0.14396  | -0.015597408 | 0.296369086 | 7.68E-02 | 2.65E-01 | 1.00E+00 |
| ENSG00000177989.12_ODF3B    | ENSG00000160789.18_LMNA | 0.08917  | -0.071038354 | 0.244894972 | 2.75E-01 | 5.59E-01 | 1.00E+00 |
| ENSG00000120158.10_RCL1     | ENSG00000160789.18_LMNA | -0.20279 | -0.350669492 | -0.0450434  | 1.22E-02 | 7.58E-02 | 1.00E+00 |
| ENSG00000272505.1_RP11-981G | ENSG00000160789.18_LMNA | -0.17775 | -0.327674944 | -0.01908597 | 2.85E-02 | 1.38E-01 | 1.00E+00 |
| ENSG00000132622.9_HSPA12B   | ENSG00000160789.18_LMNA | -0.03126 | -0.189521488 | 0.128576577 | 7.02E-01 | 8.73E-01 | 1.00E+00 |

|                             |                         |          |              |             |          |          |          |
|-----------------------------|-------------------------|----------|--------------|-------------|----------|----------|----------|
| ENSG00000215105.4_TTC3P1    | ENSG00000160789.18_LMNA | 0.02347  | -0.136241427 | 0.181989056 | 7.74E-01 | 9.07E-01 | 1.00E+00 |
| ENSG00000083223.16_ZCCHC6   | ENSG00000160789.18_LMNA | 0.29337  | 0.140746466  | 0.432379846 | 2.44E-04 | 3.83E-03 | 1.00E+00 |
| ENSG00000172819.15_RARG     | ENSG00000160789.18_LMNA | 0.31665  | 0.165803685  | 0.453010485 | 7.06E-05 | 1.42E-03 | 1.00E+00 |
| ENSG00000234106.3_RP11-288E | ENSG00000160789.18_LMNA | -0.04908 | -0.206670058 | 0.110983627 | 5.48E-01 | 7.85E-01 | 1.00E+00 |
| ENSG00000163545.7_NUAK2     | ENSG00000160789.18_LMNA | 0.4335   | 0.294627521  | 0.55443294  | 2.42E-08 | 2.27E-06 | 1.24E-03 |
| ENSG00000233170.4_RP11-863K | ENSG00000160789.18_LMNA | -0.10085 | -0.255939289 | 0.059305149 | 2.16E-01 | 4.91E-01 | 1.00E+00 |
| ENSG00000121089.4_NACA3P    | ENSG00000160789.18_LMNA | -0.04846 | -0.20606863  | 0.111604027 | 5.53E-01 | 7.88E-01 | 1.00E+00 |
| ENSG00000165630.12_PRPF18   | ENSG00000160789.18_LMNA | -0.10429 | -0.259187298 | 0.055837891 | 2.01E-01 | 4.71E-01 | 1.00E+00 |
| ENSG00000215012.7_C22orf29  | ENSG00000160789.18_LMNA | 0.10584  | -0.054280118 | 0.26064425  | 1.94E-01 | 4.63E-01 | 1.00E+00 |
| ENSG00000005810.16_MYCBP2   | ENSG00000160789.18_LMNA | -0.19435 | -0.342939983 | -0.03627164 | 1.64E-02 | 9.37E-02 | 1.00E+00 |
| ENSG00000140839.10_CLEC18B  | ENSG00000160789.18_LMNA | 0.20008  | 0.042225872  | 0.34819127  | 1.35E-02 | 8.11E-02 | 1.00E+00 |
| ENSG00000187624.8_C17orf97  | ENSG00000160789.18_LMNA | 0.18226  | 0.023746319  | 0.331830448 | 2.46E-02 | 1.25E-01 | 1.00E+00 |
| ENSG00000181827.13_RFX7     | ENSG00000160789.18_LMNA | -0.00746 | -0.166464731 | 0.151919394 | 9.27E-01 | 9.72E-01 | 1.00E+00 |
| ENSG00000076650.5_GPATCH1   | ENSG00000160789.18_LMNA | 0.08063  | -0.079590981 | 0.236792494 | 3.23E-01 | 6.10E-01 | 1.00E+00 |
| ENSG00000157368.9_IL34      | ENSG00000160789.18_LMNA | -0.03832 | -0.196320023 | 0.12162574  | 6.39E-01 | 8.39E-01 | 1.00E+00 |
| ENSG00000185634.10_SHC4     | ENSG00000160789.18_LMNA | 0.14035  | -0.019282114 | 0.293003337 | 8.46E-02 | 2.82E-01 | 1.00E+00 |
| ENSG00000146556.13_WASH2P   | ENSG00000160789.18_LMNA | -0.0242  | -0.182695848 | 0.135523826 | 7.67E-01 | 9.04E-01 | 1.00E+00 |
| ENSG00000233621.1_LINC01137 | ENSG00000160789.18_LMNA | 0.16939  | 0.010475057  | 0.319965302 | 3.70E-02 | 1.64E-01 | 1.00E+00 |
| ENSG00000141068.12_KSR1     | ENSG00000160789.18_LMNA | -0.0604  | -0.217504537 | 0.099764806 | 4.60E-01 | 7.23E-01 | 1.00E+00 |
| ENSG00000177106.13_EPS8L2   | ENSG00000160789.18_LMNA | 0.27875  | 0.125101862  | 0.419342285 | 5.06E-04 | 6.81E-03 | 1.00E+00 |
| ENSG00000198885.8_ITPRIPL1  | ENSG00000160789.18_LMNA | 0.27856  | 0.124893414  | 0.419167751 | 5.11E-04 | 6.86E-03 | 1.00E+00 |
| ENSG00000268471.4_MIR4453   | ENSG00000160789.18_LMNA | -0.10841 | -0.26307334  | 0.051679524 | 1.84E-01 | 4.49E-01 | 1.00E+00 |
| ENSG00000127957.15_PMS2P3   | ENSG00000160789.18_LMNA | 0.00347  | -0.15581493  | 0.162582733 | 9.66E-01 | 9.87E-01 | 1.00E+00 |
| ENSG00000145348.15_TBCK     | ENSG00000160789.18_LMNA | -0.1999  | -0.348024776 | -0.04203676 | 1.35E-02 | 8.14E-02 | 1.00E+00 |
| ENSG00000185875.11_THNSL1   | ENSG00000160789.18_LMNA | -0.33991 | -0.473492293 | -0.19105248 | 1.83E-05 | 4.79E-04 | 9.40E-01 |
| ENSG00000151458.10_ANKRD50  | ENSG00000160789.18_LMNA | 0.10749  | -0.052615437 | 0.262199607 | 1.87E-01 | 4.54E-01 | 1.00E+00 |
| ENSG00000236494.1_RP11-89N1 | ENSG00000160789.18_LMNA | -0.42476 | -0.546969139 | -0.28481402 | 4.92E-08 | 4.02E-06 | 2.53E-03 |
| ENSG00000120696.8_KBTBD7    | ENSG00000160789.18_LMNA | -0.34976 | -0.482116934 | -0.20179745 | 1.00E-05 | 2.92E-04 | 5.14E-01 |
| ENSG00000173137.10_ADCK5    | ENSG00000160789.18_LMNA | 0.13865  | -0.021012023 | 0.291420499 | 8.85E-02 | 2.90E-01 | 1.00E+00 |
| ENSG00000166106.3_ADAMTS15  | ENSG00000160789.18_LMNA | 0.00825  | -0.151145444 | 0.167234818 | 9.20E-01 | 9.69E-01 | 1.00E+00 |
| ENSG00000213096.8_ZNF254    | ENSG00000160789.18_LMNA | -0.21147 | -0.358594919 | -0.0540867  | 8.92E-03 | 6.04E-02 | 1.00E+00 |
| ENSG00000135205.13_CCDC146  | ENSG00000160789.18_LMNA | -0.00308 | -0.162205088 | 0.156193365 | 9.70E-01 | 9.88E-01 | 1.00E+00 |
| ENSG00000232629.7_HLA-DQB2  | ENSG00000160789.18_LMNA | -0.03364 | -0.191817022 | 0.126233108 | 6.81E-01 | 8.61E-01 | 1.00E+00 |

|                              |                         |          |              |             |          |          |          |
|------------------------------|-------------------------|----------|--------------|-------------|----------|----------|----------|
| ENSG00000152413.13_HOMER1    | ENSG00000160789.18_LMNA | 0.16771  | 0.008742262  | 0.3184089   | 3.89E-02 | 1.70E-01 | 1.00E+00 |
| ENSG00000162086.13_ZNF75A    | ENSG00000160789.18_LMNA | -0.10133 | -0.256398985 | 0.058814884 | 2.14E-01 | 4.88E-01 | 1.00E+00 |
| ENSG00000196754.9_S100A2     | ENSG00000160789.18_LMNA | 0.18202  | 0.023501107  | 0.331612098 | 2.48E-02 | 1.26E-01 | 1.00E+00 |
| ENSG00000160712.11_IL6R      | ENSG00000160789.18_LMNA | 0.16625  | 0.007243153  | 0.317061049 | 4.07E-02 | 1.75E-01 | 1.00E+00 |
| ENSG00000198964.12_SGMS1     | ENSG00000160789.18_LMNA | -0.36281 | -0.493507153 | -0.21609207 | 4.36E-06 | 1.49E-04 | 2.23E-01 |
| ENSG00000196247.10_ZNF107    | ENSG00000160789.18_LMNA | -0.07446 | -0.230927274 | 0.085753127 | 3.62E-01 | 6.44E-01 | 1.00E+00 |
| ENSG00000132359.12_RAP1GAP   | ENSG00000160789.18_LMNA | 0.27442  | 0.120479485  | 0.415466821 | 6.23E-04 | 8.03E-03 | 1.00E+00 |
| ENSG00000156026.13_MCU       | ENSG00000160789.18_LMNA | -0.16269 | -0.313760804 | -0.00357842 | 4.52E-02 | 1.88E-01 | 1.00E+00 |
| ENSG00000065060.15_UHRF1BP   | ENSG00000160789.18_LMNA | -0.0272  | -0.185597173 | 0.132574628 | 7.39E-01 | 8.91E-01 | 1.00E+00 |
| ENSG00000175893.10_ZDHHC21   | ENSG00000160789.18_LMNA | -0.16819 | -0.318857383 | -0.00924138 | 3.83E-02 | 1.68E-01 | 1.00E+00 |
| ENSG00000170837.2_GPR27      | ENSG00000160789.18_LMNA | -0.24348 | -0.387652756 | -0.087676   | 2.51E-03 | 2.33E-02 | 1.00E+00 |
| ENSG00000147439.10_BIN3      | ENSG00000160789.18_LMNA | 0.26342  | 0.108777094  | 0.40560726  | 1.04E-03 | 1.19E-02 | 1.00E+00 |
| ENSG00000137807.12_KIF23     | ENSG00000160789.18_LMNA | 0.23111  | 0.074657851  | 0.376461171 | 4.17E-03 | 3.43E-02 | 1.00E+00 |
| ENSG00000254473.1_RP11-522I2 | ENSG00000160789.18_LMNA | -0.16978 | -0.320320703 | -0.010871   | 3.65E-02 | 1.63E-01 | 1.00E+00 |
| ENSG00000204624.7_DISP3      | ENSG00000160789.18_LMNA | -0.30109 | -0.439232871 | -0.14902866 | 1.64E-04 | 2.79E-03 | 1.00E+00 |
| ENSG00000162065.10_TBC1D24   | ENSG00000160789.18_LMNA | -0.11269 | -0.267096984 | 0.047362378 | 1.67E-01 | 4.24E-01 | 1.00E+00 |
| ENSG00000051180.15_RAD51     | ENSG00000160789.18_LMNA | 0.02775  | -0.132036465 | 0.186126002 | 7.34E-01 | 8.88E-01 | 1.00E+00 |
| ENSG00000170088.12_TMEM192   | ENSG00000160789.18_LMNA | -0.00378 | -0.162882276 | 0.155514695 | 9.63E-01 | 9.85E-01 | 1.00E+00 |
| ENSG00000059691.10_GATB      | ENSG00000160789.18_LMNA | -0.23499 | -0.379979478 | -0.07873932 | 3.57E-03 | 3.04E-02 | 1.00E+00 |
| ENSG00000165650.10_PDZD8     | ENSG00000160789.18_LMNA | 0.05459  | -0.105531852 | 0.211944811 | 5.04E-01 | 7.55E-01 | 1.00E+00 |
| ENSG00000152804.9_HHEX       | ENSG00000160789.18_LMNA | -0.16324 | -0.314274698 | -0.00414852 | 4.45E-02 | 1.86E-01 | 1.00E+00 |
| ENSG00000074660.14_SCARF1    | ENSG00000160789.18_LMNA | 0.12922  | -0.030611748 | 0.28260571  | 1.13E-01 | 3.35E-01 | 1.00E+00 |
| ENSG00000152454.3_ZNF256     | ENSG00000160789.18_LMNA | 0.08575  | -0.074462813 | 0.24165604  | 2.94E-01 | 5.79E-01 | 1.00E+00 |
| ENSG00000154822.14_PLCL2     | ENSG00000160789.18_LMNA | -0.26009 | -0.402617305 | -0.10524448 | 1.21E-03 | 1.34E-02 | 1.00E+00 |
| ENSG00000170469.9_SPATA24    | ENSG00000160789.18_LMNA | -0.16251 | -0.31359822  | -0.0033981  | 4.55E-02 | 1.89E-01 | 1.00E+00 |
| ENSG00000224046.1_AC005076.1 | ENSG00000160789.18_LMNA | -0.21269 | -0.359712876 | -0.05536637 | 8.52E-03 | 5.84E-02 | 1.00E+00 |
| ENSG00000173156.5_RHOD       | ENSG00000160789.18_LMNA | 0.21527  | 0.058059652  | 0.362062939 | 7.73E-03 | 5.42E-02 | 1.00E+00 |
| ENSG00000121211.6_MND1       | ENSG00000160789.18_LMNA | -0.06754 | -0.224324216 | 0.092661593 | 4.08E-01 | 6.83E-01 | 1.00E+00 |
| ENSG00000241399.5_CD302      | ENSG00000160789.18_LMNA | -0.11274 | -0.267149714 | 0.047305724 | 1.67E-01 | 4.24E-01 | 1.00E+00 |
| ENSG00000178814.14_OPLAH     | ENSG00000160789.18_LMNA | 0.29246  | 0.139765205  | 0.431565673 | 2.56E-04 | 3.97E-03 | 1.00E+00 |
| ENSG00000198455.4_ZXDB       | ENSG00000160789.18_LMNA | -0.09522 | -0.250625049 | 0.064961757 | 2.43E-01 | 5.23E-01 | 1.00E+00 |
| ENSG00000154027.17_AK5       | ENSG00000160789.18_LMNA | -0.19801 | -0.346298003 | -0.04007666 | 1.45E-02 | 8.57E-02 | 1.00E+00 |
| ENSG00000123219.11_CENPK     | ENSG00000160789.18_LMNA | 0.03692  | -0.123004805 | 0.194973601 | 6.52E-01 | 8.46E-01 | 1.00E+00 |

|                              |                         |          |              |             |          |          |          |
|------------------------------|-------------------------|----------|--------------|-------------|----------|----------|----------|
| ENSG00000132031.11_MATN3     | ENSG00000160789.18_LMNA | 0.03843  | -0.12151604  | 0.196427075 | 6.38E-01 | 8.38E-01 | 1.00E+00 |
| ENSG00000270673.1_YTHDF3-AS1 | ENSG00000160789.18_LMNA | -0.08534 | -0.241265131 | 0.07487561  | 2.96E-01 | 5.82E-01 | 1.00E+00 |
| ENSG00000100731.14_PCNX1     | ENSG00000160789.18_LMNA | 0.27369  | 0.119709763  | 0.414820433 | 6.45E-04 | 8.24E-03 | 1.00E+00 |
| ENSG00000213300.5_HNRNPA3F1  | ENSG00000160789.18_LMNA | 0.12282  | -0.037102214 | 0.276615821 | 1.32E-01 | 3.68E-01 | 1.00E+00 |
| ENSG00000268001.1_CARD8-AS   | ENSG00000160789.18_LMNA | -0.23748 | -0.38222543  | -0.08135006 | 3.22E-03 | 2.82E-02 | 1.00E+00 |
| ENSG00000103540.15_CCP110    | ENSG00000160789.18_LMNA | -0.11403 | -0.26835505  | 0.046010129 | 1.62E-01 | 4.17E-01 | 1.00E+00 |
| ENSG00000103569.8_AQP9       | ENSG00000160789.18_LMNA | 0.11171  | -0.04834825  | 0.266179102 | 1.71E-01 | 4.30E-01 | 1.00E+00 |
| ENSG00000270728.1_RP4-657E1  | ENSG00000160789.18_LMNA | -0.00682 | -0.165836805 | 0.152550182 | 9.34E-01 | 9.74E-01 | 1.00E+00 |
| ENSG00000227986.1_TRIM60P18  | ENSG00000160789.18_LMNA | -0.09548 | -0.250868405 | 0.064703166 | 2.42E-01 | 5.21E-01 | 1.00E+00 |
| ENSG00000126214.19_KLC1      | ENSG00000160789.18_LMNA | 0.15535  | -0.003951371 | 0.306956309 | 5.60E-02 | 2.16E-01 | 1.00E+00 |
| ENSG00000197619.12_ZNF615    | ENSG00000160789.18_LMNA | 0.05558  | -0.104541339 | 0.212901179 | 4.96E-01 | 7.51E-01 | 1.00E+00 |
| ENSG00000151743.9_AMN1       | ENSG00000160789.18_LMNA | -0.58697 | -0.68240613  | -0.47186779 | 1.91E-15 | 3.49E-12 | 9.78E-11 |
| ENSG00000134201.9_GSTM5      | ENSG00000160789.18_LMNA | 0.02438  | -0.135341654 | 0.182875223 | 7.66E-01 | 9.03E-01 | 1.00E+00 |
| ENSG00000266173.4_STRADA     | ENSG00000160789.18_LMNA | -0.20148 | -0.34947572  | -0.04368558 | 1.28E-02 | 7.83E-02 | 1.00E+00 |
| ENSG00000101574.13_METTL4    | ENSG00000160789.18_LMNA | -0.14842 | -0.300517739 | 0.011043918 | 6.80E-02 | 2.45E-01 | 1.00E+00 |
| ENSG00000149633.10_KIAA1755  | ENSG00000160789.18_LMNA | -0.34476 | -0.477740827 | -0.19633705 | 1.36E-05 | 3.77E-04 | 7.00E-01 |
| ENSG00000255197.4_RP11-750H  | ENSG00000160789.18_LMNA | -0.08259 | -0.238651449 | 0.077632857 | 3.12E-01 | 5.98E-01 | 1.00E+00 |
| ENSG00000235453.6_TOPORS-A   | ENSG00000160789.18_LMNA | -0.15075 | -0.302683292 | 0.008661899 | 6.38E-02 | 2.35E-01 | 1.00E+00 |
| ENSG00000270953.1_RP11-2E11  | ENSG00000160789.18_LMNA | 0.07312  | -0.08709174  | 0.229650113 | 3.71E-01 | 6.51E-01 | 1.00E+00 |
| ENSG00000078687.15_TNRC6C    | ENSG00000160789.18_LMNA | -0.08851 | -0.244273221 | 0.071696297 | 2.78E-01 | 5.63E-01 | 1.00E+00 |
| ENSG00000105072.7_C19orf44   | ENSG00000160789.18_LMNA | 0.17298  | 0.014171402  | 0.323279795 | 3.31E-02 | 1.53E-01 | 1.00E+00 |
| ENSG00000248626.1_GAPDHP4C   | ENSG00000160789.18_LMNA | 0.22884  | 0.072269858  | 0.374398628 | 4.57E-03 | 3.66E-02 | 1.00E+00 |
| ENSG00000125257.12_ABCC4     | ENSG00000160789.18_LMNA | -0.29017 | -0.429530516 | -0.13731489 | 2.88E-04 | 4.35E-03 | 1.00E+00 |
| ENSG00000178971.12_CTC1      | ENSG00000160789.18_LMNA | -0.00169 | -0.160850641 | 0.157549873 | 9.83E-01 | 9.94E-01 | 1.00E+00 |
| ENSG00000103269.12_RHBDL1    | ENSG00000160789.18_LMNA | 0.04861  | -0.111456423 | 0.206211742 | 5.52E-01 | 7.88E-01 | 1.00E+00 |
| ENSG00000058063.14_ATP11B    | ENSG00000160789.18_LMNA | 0.10485  | -0.055271965 | 0.259716763 | 1.99E-01 | 4.69E-01 | 1.00E+00 |
| ENSG00000131055.4_COX4I2     | ENSG00000160789.18_LMNA | -0.07448 | -0.230943482 | 0.085736132 | 3.62E-01 | 6.44E-01 | 1.00E+00 |
| ENSG00000103550.12_KNOP1     | ENSG00000160789.18_LMNA | -0.12767 | -0.281158251 | 0.032182595 | 1.17E-01 | 3.42E-01 | 1.00E+00 |
| ENSG00000163462.16_TRIM46    | ENSG00000160789.18_LMNA | -0.03577 | -0.193863894 | 0.124140495 | 6.62E-01 | 8.51E-01 | 1.00E+00 |
| ENSG00000197142.9_ACSL5      | ENSG00000160789.18_LMNA | -0.07452 | -0.230984306 | 0.085693324 | 3.62E-01 | 6.43E-01 | 1.00E+00 |
| ENSG00000179796.10_LRRC3B    | ENSG00000160789.18_LMNA | -0.24292 | -0.387149505 | -0.0870884  | 2.57E-03 | 2.37E-02 | 1.00E+00 |
| ENSG00000240652.1_RP11-832N  | ENSG00000160789.18_LMNA | 0.00741  | -0.151973841 | 0.166410541 | 9.28E-01 | 9.72E-01 | 1.00E+00 |
| ENSG00000223478.1_RP11-545E  | ENSG00000160789.18_LMNA | 0.15193  | -0.00745199  | 0.303782022 | 6.17E-02 | 2.30E-01 | 1.00E+00 |

|                              |                         |          |              |             |          |          |          |
|------------------------------|-------------------------|----------|--------------|-------------|----------|----------|----------|
| ENSG00000235449.2_RP11-480I1 | ENSG00000160789.18_LMNA | -0.15414 | -0.305831101 | 0.005193128 | 5.80E-02 | 2.21E-01 | 1.00E+00 |
| ENSG00000165195.12_PIGA      | ENSG00000160789.18_LMNA | 0.06849  | -0.091706892 | 0.225238449 | 4.02E-01 | 6.78E-01 | 1.00E+00 |
| ENSG00000273142.1_RP11-458F  | ENSG00000160789.18_LMNA | 0.15305  | -0.006299389 | 0.304827939 | 5.98E-02 | 2.25E-01 | 1.00E+00 |
| ENSG00000163900.9_TMEN41A    | ENSG00000160789.18_LMNA | 0.00553  | -0.153805218 | 0.164586693 | 9.46E-01 | 9.78E-01 | 1.00E+00 |
| ENSG00000100483.12_VCPKMT    | ENSG00000160789.18_LMNA | -0.03974 | -0.19768952  | 0.120221779 | 6.27E-01 | 8.32E-01 | 1.00E+00 |
| ENSG00000205978.5_NYNRIN     | ENSG00000160789.18_LMNA | -0.08457 | -0.240529616 | 0.075652014 | 3.00E-01 | 5.87E-01 | 1.00E+00 |
| ENSG00000144228.7_SPOPL      | ENSG00000160789.18_LMNA | -0.10887 | -0.263499817 | 0.051222494 | 1.82E-01 | 4.46E-01 | 1.00E+00 |
| ENSG00000095383.18_TBC1D2    | ENSG00000160789.18_LMNA | 0.14169  | -0.017918647 | 0.294249683 | 8.16E-02 | 2.76E-01 | 1.00E+00 |
| ENSG00000109670.12_FBXW7     | ENSG00000160789.18_LMNA | -0.21832 | -0.364841657 | -0.06124991 | 6.89E-03 | 4.98E-02 | 1.00E+00 |
| ENSG00000170191.4_NANP       | ENSG00000160789.18_LMNA | 0.22331  | 0.066470154  | 0.369376866 | 5.69E-03 | 4.32E-02 | 1.00E+00 |
| ENSG00000159640.13_ACE       | ENSG00000160789.18_LMNA | 0.16218  | 0.003062927  | 0.313295978 | 4.59E-02 | 1.90E-01 | 1.00E+00 |
| ENSG00000196196.2_HRCT1      | ENSG00000160789.18_LMNA | 0.0665   | -0.093689888 | 0.223338885 | 4.16E-01 | 6.88E-01 | 1.00E+00 |
| ENSG00000180638.16_SLC47A2   | ENSG00000160789.18_LMNA | 0.07033  | -0.08987809  | 0.226988173 | 3.89E-01 | 6.67E-01 | 1.00E+00 |
| ENSG00000275180.1_RP11-631N  | ENSG00000160789.18_LMNA | -0.13353 | -0.286638252 | 0.026227277 | 1.01E-01 | 3.13E-01 | 1.00E+00 |
| ENSG00000035115.20_SH3YL1    | ENSG00000160789.18_LMNA | -0.35533 | -0.486987009 | -0.20789477 | 7.05E-06 | 2.21E-04 | 3.62E-01 |
| ENSG00000109794.12_FAM149A   | ENSG00000160789.18_LMNA | -0.24971 | -0.393275929 | -0.09425583 | 1.92E-03 | 1.89E-02 | 1.00E+00 |
| ENSG00000167904.13_TMEN68    | ENSG00000160789.18_LMNA | -0.14909 | -0.301138373 | 0.010361607 | 6.68E-02 | 2.42E-01 | 1.00E+00 |
| ENSG00000145819.14_ARHGAP2   | ENSG00000160789.18_LMNA | 0.22477  | 0.06799773   | 0.37070126  | 5.37E-03 | 4.13E-02 | 1.00E+00 |
| ENSG00000224597.8_SVIL-AS1   | ENSG00000160789.18_LMNA | -0.09069 | -0.246329981 | 0.069518762 | 2.67E-01 | 5.50E-01 | 1.00E+00 |
| ENSG00000156050.7_FAM161B    | ENSG00000160789.18_LMNA | -0.05586 | -0.213162078 | 0.104271017 | 4.94E-01 | 7.49E-01 | 1.00E+00 |
| ENSG00000185596.15_WASH3P    | ENSG00000160789.18_LMNA | -0.03469 | -0.192826822 | 0.125201095 | 6.71E-01 | 8.56E-01 | 1.00E+00 |
| ENSG00000215193.11_PEX26     | ENSG00000160789.18_LMNA | -0.10196 | -0.256993356 | 0.058180763 | 2.11E-01 | 4.85E-01 | 1.00E+00 |
| ENSG00000162374.15_ELAVL4    | ENSG00000160789.18_LMNA | -0.35393 | -0.485763099 | -0.2063604  | 7.70E-06 | 2.37E-04 | 3.95E-01 |
| ENSG00000161996.16_WDR90     | ENSG00000160789.18_LMNA | 0.15403  | -0.005305715 | 0.305729038 | 5.81E-02 | 2.21E-01 | 1.00E+00 |
| ENSG00000168724.13_DNAJC21   | ENSG00000160789.18_LMNA | 0.16705  | 0.008068105  | 0.31780292  | 3.97E-02 | 1.73E-01 | 1.00E+00 |
| ENSG00000111554.13_MDM1      | ENSG00000160789.18_LMNA | -0.20798 | -0.355410366 | -0.05044695 | 1.01E-02 | 6.62E-02 | 1.00E+00 |
| ENSG00000101638.12_ST8SIA5   | ENSG00000160789.18_LMNA | 0.09052  | -0.069685198 | 0.246172877 | 2.67E-01 | 5.51E-01 | 1.00E+00 |
| ENSG00000113119.11_TMCO6     | ENSG00000160789.18_LMNA | 0.11253  | -0.047518779 | 0.266951408 | 1.67E-01 | 4.25E-01 | 1.00E+00 |
| ENSG00000233527.7_ZNF529-AS  | ENSG00000160789.18_LMNA | -0.09256 | -0.248108817 | 0.067633041 | 2.57E-01 | 5.39E-01 | 1.00E+00 |
| ENSG00000111615.11_KRR1      | ENSG00000160789.18_LMNA | -0.05715 | -0.214396342 | 0.102991534 | 4.84E-01 | 7.41E-01 | 1.00E+00 |
| ENSG00000255310.2_AF131215.2 | ENSG00000160789.18_LMNA | -0.22769 | -0.373358261 | -0.07106664 | 4.79E-03 | 3.79E-02 | 1.00E+00 |
| ENSG00000141179.12_PCTP      | ENSG00000160789.18_LMNA | -0.28877 | -0.428278828 | -0.13580964 | 3.09E-04 | 4.60E-03 | 1.00E+00 |
| ENSG00000148288.10_GBGT1     | ENSG00000160789.18_LMNA | 0.01998  | -0.139668212 | 0.178609347 | 8.07E-01 | 9.23E-01 | 1.00E+00 |

|                              |                         |          |              |             |          |          |          |
|------------------------------|-------------------------|----------|--------------|-------------|----------|----------|----------|
| ENSG00000165617.13_DACT1     | ENSG00000160789.18_LMNA | 0.17174  | 0.012894683  | 0.322135824 | 3.44E-02 | 1.57E-01 | 1.00E+00 |
| ENSG00000134253.8_TRIM45     | ENSG00000160789.18_LMNA | 0.10041  | -0.059750163 | 0.255521899 | 2.18E-01 | 4.93E-01 | 1.00E+00 |
| ENSG00000144815.13_NXPE3     | ENSG00000160789.18_LMNA | -0.14795 | -0.300084197 | 0.011520371 | 6.89E-02 | 2.47E-01 | 1.00E+00 |
| ENSG00000273893.1_RP1-101A2  | ENSG00000160789.18_LMNA | -0.02585 | -0.184287531 | 0.133906577 | 7.52E-01 | 8.97E-01 | 1.00E+00 |
| ENSG00000205268.9_PDE7A      | ENSG00000160789.18_LMNA | -0.12925 | -0.282637445 | 0.03057729  | 1.13E-01 | 3.35E-01 | 1.00E+00 |
| ENSG00000174718.10_KIAA1551  | ENSG00000160789.18_LMNA | 0.07385  | -0.08636507  | 0.230343559 | 3.66E-01 | 6.47E-01 | 1.00E+00 |
| ENSG00000115970.17_THADA     | ENSG00000160789.18_LMNA | 0.17565  | 0.016926752  | 0.325745578 | 3.04E-02 | 1.45E-01 | 1.00E+00 |
| ENSG00000120539.13_MASTL     | ENSG00000160789.18_LMNA | -0.08718 | -0.243010744 | 0.073031418 | 2.86E-01 | 5.71E-01 | 1.00E+00 |
| ENSG00000179832.16_MROH1     | ENSG00000160789.18_LMNA | 0.28358  | 0.130262784  | 0.42365664  | 4.00E-04 | 5.66E-03 | 1.00E+00 |
| ENSG00000174567.7_GOLT1A     | ENSG00000160789.18_LMNA | -0.04186 | -0.19973442  | 0.11812305  | 6.09E-01 | 8.21E-01 | 1.00E+00 |
| ENSG00000137434.10_C6orf52   | ENSG00000160789.18_LMNA | -0.03629 | -0.194372521 | 0.123620062 | 6.57E-01 | 8.48E-01 | 1.00E+00 |
| ENSG00000004848.6_ARX        | ENSG00000160789.18_LMNA | 0.13832  | -0.021355052 | 0.29110643  | 8.92E-02 | 2.91E-01 | 1.00E+00 |
| ENSG00000135314.11_KHDC1     | ENSG00000160789.18_LMNA | -0.07824 | -0.234517118 | 0.081984421 | 3.38E-01 | 6.24E-01 | 1.00E+00 |
| ENSG00000213939.4_RP11-314A  | ENSG00000160789.18_LMNA | -0.1482  | -0.300319297 | 0.011262018 | 6.84E-02 | 2.46E-01 | 1.00E+00 |
| ENSG00000171798.16_KNDC1     | ENSG00000160789.18_LMNA | 0.10957  | -0.050511407 | 0.264163124 | 1.79E-01 | 4.41E-01 | 1.00E+00 |
| ENSG00000149289.9_ZC3H12C    | ENSG00000160789.18_LMNA | -0.11364 | -0.26799107  | 0.046401476 | 1.63E-01 | 4.19E-01 | 1.00E+00 |
| ENSG00000184792.14_OSBP2     | ENSG00000160789.18_LMNA | 0.28663  | 0.133521025  | 0.42637358  | 3.44E-04 | 4.99E-03 | 1.00E+00 |
| ENSG00000213390.9_ARHGAP19   | ENSG00000160789.18_LMNA | 0.19396  | 0.035863613  | 0.342579424 | 1.67E-02 | 9.46E-02 | 1.00E+00 |
| ENSG00000077454.14_LRCH4     | ENSG00000160789.18_LMNA | 0.12838  | -0.031463574 | 0.281820971 | 1.15E-01 | 3.39E-01 | 1.00E+00 |
| ENSG00000164619.7_BMPER      | ENSG00000160789.18_LMNA | -0.25064 | -0.394117321 | -0.09524261 | 1.84E-03 | 1.84E-02 | 1.00E+00 |
| ENSG00000255455.2_RP11-890B  | ENSG00000160789.18_LMNA | -0.04693 | -0.204606257 | 0.113111499 | 5.66E-01 | 7.96E-01 | 1.00E+00 |
| ENSG00000163820.13_FYCO1     | ENSG00000160789.18_LMNA | 0.27182  | 0.117708988  | 0.413138853 | 7.05E-04 | 8.83E-03 | 1.00E+00 |
| ENSG00000270093.1_AP000473.8 | ENSG00000160789.18_LMNA | -0.12326 | -0.277024008 | 0.036660754 | 1.30E-01 | 3.66E-01 | 1.00E+00 |
| ENSG00000184381.17_PLA2G6    | ENSG00000160789.18_LMNA | -0.26426 | -0.406362579 | -0.10967069 | 1.00E-03 | 1.16E-02 | 1.00E+00 |
| ENSG00000198182.11_ZNF607    | ENSG00000160789.18_LMNA | -0.02929 | -0.187619654 | 0.130515438 | 7.20E-01 | 8.81E-01 | 1.00E+00 |
| ENSG00000165121.10_RP11-213  | ENSG00000160789.18_LMNA | -0.14959 | -0.301607886 | 0.009845243 | 6.59E-02 | 2.40E-01 | 1.00E+00 |
| ENSG00000198265.10_HELZ      | ENSG00000160789.18_LMNA | 0.05209  | -0.108001771 | 0.209557381 | 5.24E-01 | 7.69E-01 | 1.00E+00 |
| ENSG00000162650.14_ATXN7L2   | ENSG00000160789.18_LMNA | -0.04644 | -0.204134417 | 0.113597578 | 5.70E-01 | 7.99E-01 | 1.00E+00 |
| ENSG00000120658.11_ENOX1     | ENSG00000160789.18_LMNA | -0.35885 | -0.490054927 | -0.21174696 | 5.63E-06 | 1.83E-04 | 2.89E-01 |
| ENSG00000101247.16_NDUFAF5   | ENSG00000160789.18_LMNA | -0.33998 | -0.473549286 | -0.19112326 | 1.82E-05 | 4.78E-04 | 9.36E-01 |
| ENSG00000181004.8_BBS12      | ENSG00000160789.18_LMNA | -0.02684 | -0.185251234 | 0.132926571 | 7.43E-01 | 8.92E-01 | 1.00E+00 |
| ENSG00000115464.13_USP34     | ENSG00000160789.18_LMNA | 0.02747  | -0.13230739  | 0.1858598   | 7.37E-01 | 8.89E-01 | 1.00E+00 |
| ENSG00000186446.10_ZNF501    | ENSG00000160789.18_LMNA | -0.21995 | -0.366326614 | -0.06295734 | 6.47E-03 | 4.76E-02 | 1.00E+00 |



|                             |                         |          |              |             |          |          |          |
|-----------------------------|-------------------------|----------|--------------|-------------|----------|----------|----------|
| ENSG00000231889.6_TRAF3IP2- | ENSG00000160789.18_LMNA | -0.42274 | -0.54524886  | -0.28255994 | 5.78E-08 | 4.61E-06 | 2.97E-03 |
| ENSG00000270015.1_RP11-540B | ENSG00000160789.18_LMNA | 0.1093   | -0.05078882  | 0.263904387 | 1.80E-01 | 4.43E-01 | 1.00E+00 |
| ENSG00000140853.14_NLRC5    | ENSG00000160789.18_LMNA | 0.24495  | 0.089224681  | 0.388978284 | 2.35E-03 | 2.22E-02 | 1.00E+00 |
| ENSG00000180773.13_SLC36A4  | ENSG00000160789.18_LMNA | 0.03947  | -0.120483642 | 0.197434179 | 6.29E-01 | 8.33E-01 | 1.00E+00 |
| ENSG00000128578.8_STRIP2    | ENSG00000160789.18_LMNA | -0.12549 | -0.279109917 | 0.034402899 | 1.23E-01 | 3.54E-01 | 1.00E+00 |
| ENSG00000261461.1_UBE2MP1   | ENSG00000160789.18_LMNA | 0.1551   | -0.004203859 | 0.306727589 | 5.64E-02 | 2.17E-01 | 1.00E+00 |
| ENSG00000132744.6_ACY3      | ENSG00000160789.18_LMNA | -0.18078 | -0.330472748 | -0.0222222  | 2.58E-02 | 1.29E-01 | 1.00E+00 |
| ENSG00000249673.5_NOP14-AS  | ENSG00000160789.18_LMNA | -0.04314 | -0.200963093 | 0.116860667 | 5.98E-01 | 8.14E-01 | 1.00E+00 |
| ENSG00000131187.8_F12       | ENSG00000160789.18_LMNA | 0.08433  | -0.075886996 | 0.240306938 | 3.02E-01 | 5.88E-01 | 1.00E+00 |
| ENSG00000147234.9_FRMPD3    | ENSG00000160789.18_LMNA | -0.2617  | -0.404061806 | -0.10695021 | 1.13E-03 | 1.27E-02 | 1.00E+00 |
| ENSG00000063169.9_GLTSCR1   | ENSG00000160789.18_LMNA | 0.18605  | 0.027667273  | 0.335317415 | 2.17E-02 | 1.15E-01 | 1.00E+00 |
| ENSG00000108352.10_RAPGEFL  | ENSG00000160789.18_LMNA | -0.10758 | -0.262284326 | 0.052524714 | 1.87E-01 | 4.53E-01 | 1.00E+00 |
| ENSG00000242294.5_STAG3L5P  | ENSG00000160789.18_LMNA | 0.05589  | -0.104233516 | 0.213198268 | 4.94E-01 | 7.49E-01 | 1.00E+00 |
| ENSG00000163053.9_SLC16A14  | ENSG00000160789.18_LMNA | -0.40732 | -0.532022977 | -0.26532642 | 1.91E-07 | 1.22E-05 | 9.79E-03 |
| ENSG00000132763.13_MMACHC   | ENSG00000160789.18_LMNA | -0.04817 | -0.205787899 | 0.11189353  | 5.56E-01 | 7.90E-01 | 1.00E+00 |
| ENSG00000176912.3_TYMSOS    | ENSG00000160789.18_LMNA | -0.00878 | -0.167746822 | 0.150630656 | 9.15E-01 | 9.67E-01 | 1.00E+00 |
| ENSG00000147113.15_CXorf36  | ENSG00000160789.18_LMNA | -0.0056  | -0.16465212  | 0.153739558 | 9.45E-01 | 9.78E-01 | 1.00E+00 |
| ENSG00000220749.4_RPL21P28  | ENSG00000160789.18_LMNA | -0.23787 | -0.382584273 | -0.08176757 | 3.17E-03 | 2.78E-02 | 1.00E+00 |
| ENSG00000166135.12_HIF1AN   | ENSG00000160789.18_LMNA | 0.04979  | -0.110280026 | 0.207351852 | 5.42E-01 | 7.81E-01 | 1.00E+00 |
| ENSG00000047188.14_YTHDC2   | ENSG00000160789.18_LMNA | -0.07718 | -0.233512629 | 0.083039871 | 3.45E-01 | 6.29E-01 | 1.00E+00 |
| ENSG00000206573.7_THUMPD3-  | ENSG00000160789.18_LMNA | -0.26006 | -0.40259507  | -0.10521823 | 1.21E-03 | 1.34E-02 | 1.00E+00 |
| ENSG00000105926.14_MPP6     | ENSG00000160789.18_LMNA | -0.00794 | -0.166930451 | 0.151451385 | 9.23E-01 | 9.70E-01 | 1.00E+00 |
| ENSG00000101639.17_CEP192   | ENSG00000160789.18_LMNA | -0.0122  | -0.171067017 | 0.147288208 | 8.81E-01 | 9.54E-01 | 1.00E+00 |
| ENSG00000204271.9_SPIN3     | ENSG00000160789.18_LMNA | -0.4133  | -0.537155336 | -0.27199379 | 1.21E-07 | 8.48E-06 | 6.21E-03 |
| ENSG00000130224.13_LRCH2    | ENSG00000160789.18_LMNA | -0.3535  | -0.485384281 | -0.20588576 | 7.92E-06 | 2.43E-04 | 4.06E-01 |
| ENSG00000224415.1_RP11-401L | ENSG00000160789.18_LMNA | -0.1883  | -0.337388475 | -0.03000059 | 2.02E-02 | 1.09E-01 | 1.00E+00 |
| ENSG00000103657.12_HERC1    | ENSG00000160789.18_LMNA | -0.01752 | -0.176230721 | 0.142075408 | 8.30E-01 | 9.34E-01 | 1.00E+00 |
| ENSG00000164291.15_ARSK     | ENSG00000160789.18_LMNA | 0.15935  | 0.000156324  | 0.31067228  | 4.99E-02 | 2.01E-01 | 1.00E+00 |
| ENSG00000077092.17_RARB     | ENSG00000160789.18_LMNA | -0.28275 | -0.422912779 | -0.12937183 | 4.16E-04 | 5.85E-03 | 1.00E+00 |
| ENSG00000216624.2_GAPDHP72  | ENSG00000160789.18_LMNA | 0.25575  | 0.100648856  | 0.39871812  | 1.47E-03 | 1.55E-02 | 1.00E+00 |
| ENSG00000187955.10_COL14A1  | ENSG00000160789.18_LMNA | 0.10697  | -0.053132993 | 0.261716216 | 1.90E-01 | 4.57E-01 | 1.00E+00 |
| ENSG00000170370.11_EMX2     | ENSG00000160789.18_LMNA | -0.03749 | -0.19552055  | 0.122444744 | 6.47E-01 | 8.43E-01 | 1.00E+00 |
| ENSG00000254470.2_AP5B1     | ENSG00000160789.18_LMNA | 0.24086  | 0.084912353  | 0.385284246 | 2.80E-03 | 2.53E-02 | 1.00E+00 |

|                             |                         |          |              |             |          |          |          |
|-----------------------------|-------------------------|----------|--------------|-------------|----------|----------|----------|
| ENSG00000188352.11_FOCAD    | ENSG00000160789.18_LMNA | -0.00791 | -0.166900454 | 0.151481533 | 9.23E-01 | 9.70E-01 | 1.00E+00 |
| ENSG00000173064.9_HECTD4    | ENSG00000160789.18_LMNA | -0.08628 | -0.242150751 | 0.073940247 | 2.91E-01 | 5.76E-01 | 1.00E+00 |
| ENSG00000166965.11_RCCD1    | ENSG00000160789.18_LMNA | 0.10115  | -0.059000622 | 0.256224845 | 2.15E-01 | 4.89E-01 | 1.00E+00 |
| ENSG00000226752.6_PSMD5-AS  | ENSG00000160789.18_LMNA | 0.00534  | -0.153988803 | 0.164403742 | 9.48E-01 | 9.79E-01 | 1.00E+00 |
| ENSG00000147255.16_IGSF1    | ENSG00000160789.18_LMNA | -0.12593 | -0.279526684 | 0.033951392 | 1.22E-01 | 3.52E-01 | 1.00E+00 |
| ENSG00000175886.10_RPL7AP6  | ENSG00000160789.18_LMNA | -0.12909 | -0.28248207  | 0.030745988 | 1.13E-01 | 3.36E-01 | 1.00E+00 |
| ENSG00000104903.4_LYL1      | ENSG00000160789.18_LMNA | -0.04421 | -0.201991303 | 0.115803456 | 5.89E-01 | 8.09E-01 | 1.00E+00 |
| ENSG00000204130.11_RUFY2    | ENSG00000160789.18_LMNA | -0.27996 | -0.420421685 | -0.12639157 | 4.77E-04 | 6.50E-03 | 1.00E+00 |
| ENSG00000188859.6_FAM78B    | ENSG00000160789.18_LMNA | 0.12402  | -0.035888521 | 0.277737765 | 1.28E-01 | 3.62E-01 | 1.00E+00 |
| ENSG00000141298.16_SSH2     | ENSG00000160789.18_LMNA | -0.26671 | -0.408561326 | -0.11227469 | 8.96E-04 | 1.06E-02 | 1.00E+00 |
| ENSG00000266074.7_BAHCC1    | ENSG00000160789.18_LMNA | -0.02063 | -0.179238616 | 0.139030756 | 8.01E-01 | 9.20E-01 | 1.00E+00 |
| ENSG00000243069.6_ARHGEF26  | ENSG00000160789.18_LMNA | -0.41728 | -0.540570193 | -0.27644412 | 8.89E-08 | 6.51E-06 | 4.56E-03 |
| ENSG00000096968.11_JAK2     | ENSG00000160789.18_LMNA | -0.05624 | -0.213529768 | 0.103889965 | 4.91E-01 | 7.47E-01 | 1.00E+00 |
| ENSG00000188786.9_MTF1      | ENSG00000160789.18_LMNA | 0.23091  | 0.074442447  | 0.376275246 | 4.21E-03 | 3.45E-02 | 1.00E+00 |
| ENSG00000172171.9_TEFM      | ENSG00000160789.18_LMNA | -0.35826 | -0.489542693 | -0.21110318 | 5.85E-06 | 1.89E-04 | 3.00E-01 |
| ENSG00000100276.9_RASL10A   | ENSG00000160789.18_LMNA | -0.41089 | -0.535088096 | -0.26930521 | 1.46E-07 | 9.80E-06 | 7.47E-03 |
| ENSG00000013573.15_DDX11    | ENSG00000160789.18_LMNA | 0.01831  | -0.141303396 | 0.176993976 | 8.23E-01 | 9.31E-01 | 1.00E+00 |
| ENSG00000241764.3_AC002467. | ENSG00000160789.18_LMNA | -0.08676 | -0.242606178 | 0.073459023 | 2.88E-01 | 5.73E-01 | 1.00E+00 |
| ENSG00000186787.7_SPIN2B    | ENSG00000160789.18_LMNA | -0.30405 | -0.441864114 | -0.1522195  | 1.40E-04 | 2.46E-03 | 1.00E+00 |
| ENSG00000123570.3_RAB9B     | ENSG00000160789.18_LMNA | -0.38799 | -0.51535893  | -0.24385287 | 7.86E-07 | 3.76E-05 | 4.03E-02 |
| ENSG00000228459.3_LINC01546 | ENSG00000160789.18_LMNA | -0.33483 | -0.469028316 | -0.1855175  | 2.48E-05 | 6.15E-04 | 1.00E+00 |
| ENSG00000148158.15_SNX30    | ENSG00000160789.18_LMNA | -0.10681 | -0.261561222 | 0.053298906 | 1.90E-01 | 4.58E-01 | 1.00E+00 |
| ENSG00000172766.17_NAA16    | ENSG00000160789.18_LMNA | -0.25548 | -0.398471055 | -0.10035809 | 1.49E-03 | 1.56E-02 | 1.00E+00 |
| ENSG00000234093.3_RPS15AP1  | ENSG00000160789.18_LMNA | -0.06513 | -0.222029048 | 0.095055793 | 4.25E-01 | 6.96E-01 | 1.00E+00 |
| ENSG00000219626.7_FAM228B   | ENSG00000160789.18_LMNA | -0.13868 | -0.291448209 | 0.020981755 | 8.84E-02 | 2.89E-01 | 1.00E+00 |
| ENSG00000188051.6_TMEM221   | ENSG00000160789.18_LMNA | 0.2834   | 0.130066863  | 0.4234931   | 4.03E-04 | 5.70E-03 | 1.00E+00 |
| ENSG00000103199.12_ZNF500   | ENSG00000160789.18_LMNA | -0.01896 | -0.177624112 | 0.140665738 | 8.17E-01 | 9.28E-01 | 1.00E+00 |
| ENSG00000108950.10_FAM20A   | ENSG00000160789.18_LMNA | 0.21704  | 0.059912954  | 0.363677826 | 7.23E-03 | 5.16E-02 | 1.00E+00 |
| ENSG00000262049.1_RP13-1032 | ENSG00000160789.18_LMNA | -0.07445 | -0.230909153 | 0.085772128 | 3.62E-01 | 6.44E-01 | 1.00E+00 |
| ENSG00000184047.14_DIABLO   | ENSG00000160789.18_LMNA | -0.30972 | -0.446887973 | -0.15832861 | 1.03E-04 | 1.94E-03 | 1.00E+00 |
| ENSG00000178105.8_DDX10     | ENSG00000160789.18_LMNA | 0.00167  | -0.157570779 | 0.160829757 | 9.84E-01 | 9.94E-01 | 1.00E+00 |
| ENSG00000103174.10_NAGPA    | ENSG00000160789.18_LMNA | 0.30359  | 0.151721272  | 0.441453592 | 1.43E-04 | 2.51E-03 | 1.00E+00 |
| ENSG00000272455.1_RP4-758J1 | ENSG00000160789.18_LMNA | 0.0279   | -0.131887315 | 0.186272534 | 7.33E-01 | 8.88E-01 | 1.00E+00 |

|                             |                         |          |              |             |          |          |          |
|-----------------------------|-------------------------|----------|--------------|-------------|----------|----------|----------|
| ENSG00000101751.9_POLI      | ENSG00000160789.18_LMNA | -0.05157 | -0.209050396 | 0.108525769 | 5.28E-01 | 7.72E-01 | 1.00E+00 |
| ENSG00000248049.5_UBA6-AS1  | ENSG00000160789.18_LMNA | -0.19195 | -0.340737321 | -0.03378059 | 1.78E-02 | 9.94E-02 | 1.00E+00 |
| ENSG00000176597.10_B3GNT5   | ENSG00000160789.18_LMNA | 0.41154  | 0.270034391  | 0.535649079 | 1.38E-07 | 9.45E-06 | 7.10E-03 |
| ENSG00000189129.12_PLAC9    | ENSG00000160789.18_LMNA | 0.03518  | -0.124715165 | 0.193302061 | 6.67E-01 | 8.53E-01 | 1.00E+00 |
| ENSG00000124574.13_ABCC10   | ENSG00000160789.18_LMNA | 0.12216  | -0.037780387 | 0.275988543 | 1.34E-01 | 3.71E-01 | 1.00E+00 |
| ENSG00000175664.8_TEX26     | ENSG00000160789.18_LMNA | 0.22923  | 0.072678133  | 0.374751473 | 4.50E-03 | 3.63E-02 | 1.00E+00 |
| ENSG00000148606.11_POLR3A   | ENSG00000160789.18_LMNA | 0.0856   | -0.074619952 | 0.241507245 | 2.94E-01 | 5.80E-01 | 1.00E+00 |
| ENSG00000197948.9_FCHSD1    | ENSG00000160789.18_LMNA | 0.26415  | 0.109558175  | 0.406267499 | 1.01E-03 | 1.17E-02 | 1.00E+00 |
| ENSG00000136052.8_SLC41A2   | ENSG00000160789.18_LMNA | 0.08702  | -0.073198806 | 0.242852388 | 2.86E-01 | 5.72E-01 | 1.00E+00 |
| ENSG00000151651.14_ADAM8    | ENSG00000160789.18_LMNA | 0.22658  | 0.069899696  | 0.372348527 | 5.00E-03 | 3.92E-02 | 1.00E+00 |
| ENSG00000270189.1_RP11-258C | ENSG00000160789.18_LMNA | -0.13137 | -0.284621095 | 0.028421982 | 1.07E-01 | 3.25E-01 | 1.00E+00 |
| ENSG00000261652.2_C15orf65  | ENSG00000160789.18_LMNA | -0.01603 | -0.174787849 | 0.143533779 | 8.45E-01 | 9.39E-01 | 1.00E+00 |
| ENSG00000103888.14_CEMIP    | ENSG00000160789.18_LMNA | 0.49641  | 0.366141902  | 0.60759082  | 7.83E-11 | 1.85E-08 | 4.02E-06 |
| ENSG00000140511.10_HAPLN3   | ENSG00000160789.18_LMNA | 0.2245   | 0.067722795  | 0.370462985 | 5.43E-03 | 4.17E-02 | 1.00E+00 |
| ENSG00000257815.4_LINC01481 | ENSG00000160789.18_LMNA | -0.1614  | -0.312566287 | -0.00225403 | 4.70E-02 | 1.93E-01 | 1.00E+00 |
| ENSG00000058056.7_USP13     | ENSG00000160789.18_LMNA | -0.02941 | -0.187729512 | 0.130403507 | 7.19E-01 | 8.81E-01 | 1.00E+00 |
| ENSG00000147394.17_ZNF185   | ENSG00000160789.18_LMNA | 0.02487  | -0.13486244  | 0.183346981 | 7.61E-01 | 9.00E-01 | 1.00E+00 |
| ENSG00000275764.1_RP11-582E | ENSG00000160789.18_LMNA | -0.12596 | -0.279557909 | 0.03391756  | 1.22E-01 | 3.52E-01 | 1.00E+00 |
| ENSG00000110693.14_SOX6     | ENSG00000160789.18_LMNA | -0.41745 | -0.540714473 | -0.2766324  | 8.77E-08 | 6.45E-06 | 4.50E-03 |
| ENSG00000068976.12_PYGM     | ENSG00000160789.18_LMNA | -0.1128  | -0.267204347 | 0.047247024 | 1.66E-01 | 4.24E-01 | 1.00E+00 |
| ENSG00000100122.5_CRYBB1    | ENSG00000160789.18_LMNA | -0.15802 | -0.309436356 | 0.001211051 | 5.19E-02 | 2.06E-01 | 1.00E+00 |
| ENSG00000152409.8_JMY       | ENSG00000160789.18_LMNA | -0.15457 | -0.306235508 | 0.004746942 | 5.73E-02 | 2.19E-01 | 1.00E+00 |
| ENSG00000142197.11_DOPEY2   | ENSG00000160789.18_LMNA | 0.11202  | -0.048033343 | 0.266472354 | 1.69E-01 | 4.28E-01 | 1.00E+00 |
| ENSG00000123643.11_SLC36A1  | ENSG00000160789.18_LMNA | 0.29207  | 0.139347033  | 0.431218562 | 2.61E-04 | 4.03E-03 | 1.00E+00 |
| ENSG00000176834.12_VSIG10   | ENSG00000160789.18_LMNA | 0.15014  | -0.009284871 | 0.302117243 | 6.49E-02 | 2.37E-01 | 1.00E+00 |
| ENSG00000102935.10_ZNF423   | ENSG00000160789.18_LMNA | -0.21164 | -0.358751124 | -0.05426544 | 8.86E-03 | 6.00E-02 | 1.00E+00 |
| ENSG00000160883.9_HK3       | ENSG00000160789.18_LMNA | 0.23656  | 0.080387239  | 0.381397551 | 3.34E-03 | 2.90E-02 | 1.00E+00 |
| ENSG00000012817.14_KDM5D    | ENSG00000160789.18_LMNA | -0.06849 | -0.22523841  | 0.091706932 | 4.02E-01 | 6.78E-01 | 1.00E+00 |
| ENSG00000144935.13_TRPC1    | ENSG00000160789.18_LMNA | -0.11028 | -0.264826723 | 0.049799687 | 1.76E-01 | 4.38E-01 | 1.00E+00 |
| ENSG00000268089.2_GABRQ     | ENSG00000160789.18_LMNA | -0.24382 | -0.387960494 | -0.08803542 | 2.47E-03 | 2.30E-02 | 1.00E+00 |
| ENSG00000234444.8_ZNF736    | ENSG00000160789.18_LMNA | 0.00552  | -0.153817186 | 0.164574766 | 9.46E-01 | 9.78E-01 | 1.00E+00 |
| ENSG00000185920.14_PTCH1    | ENSG00000160789.18_LMNA | -0.13928 | -0.292003138 | 0.020375466 | 8.70E-02 | 2.87E-01 | 1.00E+00 |
| ENSG00000179178.9_TMEM125   | ENSG00000160789.18_LMNA | -0.3716  | -0.501152152 | -0.22575364 | 2.44E-06 | 9.28E-05 | 1.25E-01 |

|                             |                         |          |              |             |          |          |          |
|-----------------------------|-------------------------|----------|--------------|-------------|----------|----------|----------|
| ENSG00000177192.12_PUS1     | ENSG00000160789.18_LMNA | 0.20824  | 0.050719046  | 0.355648674 | 1.00E-02 | 6.58E-02 | 1.00E+00 |
| ENSG00000099999.13_RNF215   | ENSG00000160789.18_LMNA | 0.12985  | -0.029973573 | 0.28319335  | 1.11E-01 | 3.32E-01 | 1.00E+00 |
| ENSG00000143995.18_MEIS1    | ENSG00000160789.18_LMNA | -0.0215  | -0.180088571 | 0.138169322 | 7.93E-01 | 9.16E-01 | 1.00E+00 |
| ENSG00000147127.7_RAB41     | ENSG00000160789.18_LMNA | -0.23619 | -0.381061537 | -0.07999661 | 3.40E-03 | 2.93E-02 | 1.00E+00 |
| ENSG00000146247.13_PHIP     | ENSG00000160789.18_LMNA | -0.10032 | -0.255441717 | 0.059835637 | 2.19E-01 | 4.94E-01 | 1.00E+00 |
| ENSG00000196152.9_ZNF79     | ENSG00000160789.18_LMNA | 0.16813  | 0.00917543   | 0.31879813  | 3.84E-02 | 1.69E-01 | 1.00E+00 |
| ENSG00000168646.11_AXIN2    | ENSG00000160789.18_LMNA | -0.20618 | -0.353768183 | -0.0485732  | 1.08E-02 | 6.93E-02 | 1.00E+00 |
| ENSG00000166405.13_RIC3     | ENSG00000160789.18_LMNA | -0.29501 | -0.433832064 | -0.14249814 | 2.25E-04 | 3.58E-03 | 1.00E+00 |
| ENSG00000143147.13_GPR161   | ENSG00000160789.18_LMNA | 0.07712  | -0.08309907  | 0.233456269 | 3.45E-01 | 6.29E-01 | 1.00E+00 |
| ENSG00000116985.9_BMP8B     | ENSG00000160789.18_LMNA | -0.01463 | -0.173424742 | 0.144910258 | 8.58E-01 | 9.44E-01 | 1.00E+00 |
| ENSG00000213621.3_RPSAP54   | ENSG00000160789.18_LMNA | -0.18711 | -0.336294776 | -0.02876798 | 2.10E-02 | 1.12E-01 | 1.00E+00 |
| ENSG00000134207.13_SYT6     | ENSG00000160789.18_LMNA | -0.35314 | -0.485066411 | -0.2054876  | 8.10E-06 | 2.46E-04 | 4.16E-01 |
| ENSG00000151693.8_ASAP2     | ENSG00000160789.18_LMNA | 0.21706  | 0.059934752  | 0.36369681  | 7.23E-03 | 5.15E-02 | 1.00E+00 |
| ENSG00000111052.6_LIN7A     | ENSG00000160789.18_LMNA | 0.04846  | -0.111600497 | 0.206072054 | 5.53E-01 | 7.88E-01 | 1.00E+00 |
| ENSG00000196437.9_ZNF569    | ENSG00000160789.18_LMNA | -0.11156 | -0.266038259 | 0.048499472 | 1.71E-01 | 4.30E-01 | 1.00E+00 |
| ENSG00000140945.14_CDH13    | ENSG00000160789.18_LMNA | -0.33079 | -0.465478112 | -0.18112834 | 3.15E-05 | 7.42E-04 | 1.00E+00 |
| ENSG00000163520.12_FBLN2    | ENSG00000160789.18_LMNA | 0.1023   | -0.057840564 | 0.257312131 | 2.10E-01 | 4.83E-01 | 1.00E+00 |
| ENSG00000153291.14_SLC25A27 | ENSG00000160789.18_LMNA | -0.2689  | -0.410522191 | -0.1146004  | 8.09E-04 | 9.81E-03 | 1.00E+00 |
| ENSG0000020922.11_MRE11     | ENSG00000160789.18_LMNA | -0.19828 | -0.346538109 | -0.04034907 | 1.43E-02 | 8.51E-02 | 1.00E+00 |
| ENSG00000060656.18_PTPRU    | ENSG00000160789.18_LMNA | 0.33088  | 0.181222299  | 0.465554204 | 3.13E-05 | 7.39E-04 | 1.00E+00 |
| ENSG00000184985.15_SORCS2   | ENSG00000160789.18_LMNA | 0.22429  | 0.067500691  | 0.370270467 | 5.47E-03 | 4.19E-02 | 1.00E+00 |
| ENSG00000166233.11_ARIH1    | ENSG00000160789.18_LMNA | 0.21077  | 0.053356448  | 0.357956563 | 9.15E-03 | 6.15E-02 | 1.00E+00 |
| ENSG00000242615.1_CTC-359D2 | ENSG00000160789.18_LMNA | -0.11718 | -0.27131917  | 0.042819543 | 1.51E-01 | 3.99E-01 | 1.00E+00 |
| ENSG00000135622.11_SEMA4F   | ENSG00000160789.18_LMNA | 0.1334   | -0.026356358 | 0.28651969  | 1.01E-01 | 3.14E-01 | 1.00E+00 |
| ENSG00000160766.13_GBAP1    | ENSG00000160789.18_LMNA | -0.01953 | -0.178179664 | 0.140103335 | 8.11E-01 | 9.26E-01 | 1.00E+00 |
| ENSG00000163378.12_EOGT     | ENSG00000160789.18_LMNA | 0.33313  | 0.18367382   | 0.467538153 | 2.74E-05 | 6.65E-04 | 1.00E+00 |
| ENSG00000160072.18_ATAD3B   | ENSG00000160789.18_LMNA | 0.10449  | -0.055635847 | 0.259376346 | 2.00E-01 | 4.71E-01 | 1.00E+00 |
| ENSG00000246560.2_RP11-10L1 | ENSG00000160789.18_LMNA | -0.18    | -0.32974823  | -0.02140946 | 2.65E-02 | 1.32E-01 | 1.00E+00 |
| ENSG00000171943.10_SRGAP2C  | ENSG00000160789.18_LMNA | 0.16718  | 0.008199965  | 0.317921465 | 3.95E-02 | 1.72E-01 | 1.00E+00 |
| ENSG00000110274.13_CEP164   | ENSG00000160789.18_LMNA | 0.23971  | 0.083702565  | 0.384246182 | 2.94E-03 | 2.63E-02 | 1.00E+00 |
| ENSG00000168096.13_ANKS3    | ENSG00000160789.18_LMNA | 0.02847  | -0.131323037 | 0.186826773 | 7.28E-01 | 8.85E-01 | 1.00E+00 |
| ENSG00000197044.9_ZNF441    | ENSG00000160789.18_LMNA | -0.16713 | -0.317871654 | -0.00814456 | 3.96E-02 | 1.72E-01 | 1.00E+00 |
| ENSG00000101745.14_ANKRD12  | ENSG00000160789.18_LMNA | -0.08735 | -0.243165168 | 0.072868168 | 2.85E-01 | 5.70E-01 | 1.00E+00 |

|                              |                         |          |              |             |          |          |          |
|------------------------------|-------------------------|----------|--------------|-------------|----------|----------|----------|
| ENSG00000272913.1_RP11-440D  | ENSG00000160789.18_LMNA | -0.04066 | -0.198572059 | 0.119316357 | 6.19E-01 | 8.27E-01 | 1.00E+00 |
| ENSG00000044524.9_EPHA3      | ENSG00000160789.18_LMNA | 0.02328  | -0.136423915 | 0.181809265 | 7.76E-01 | 9.08E-01 | 1.00E+00 |
| ENSG00000232098.3_CTD-2619J  | ENSG00000160789.18_LMNA | 0.26357  | 0.108940519  | 0.405745427 | 1.03E-03 | 1.19E-02 | 1.00E+00 |
| ENSG00000269918.1_AF131215.5 | ENSG00000160789.18_LMNA | -0.24642 | -0.39030586  | -0.09077721 | 2.21E-03 | 2.11E-02 | 1.00E+00 |
| ENSG00000157764.11_BRAF      | ENSG00000160789.18_LMNA | 0.10282  | -0.057323823 | 0.2577962   | 2.07E-01 | 4.80E-01 | 1.00E+00 |
| ENSG00000240489.1_SETP14     | ENSG00000160789.18_LMNA | 0.04488  | -0.115147455 | 0.202628957 | 5.83E-01 | 8.06E-01 | 1.00E+00 |
| ENSG00000173818.15_ENDOV     | ENSG00000160789.18_LMNA | -0.06856 | -0.225305782 | 0.091636556 | 4.01E-01 | 6.78E-01 | 1.00E+00 |
| ENSG00000068831.17_RASGRP2   | ENSG00000160789.18_LMNA | -0.02384 | -0.18234617  | 0.135878894 | 7.71E-01 | 9.05E-01 | 1.00E+00 |
| ENSG00000258645.2_HSPE1P2    | ENSG00000160789.18_LMNA | -0.12771 | -0.281191648 | 0.032146369 | 1.17E-01 | 3.42E-01 | 1.00E+00 |
| ENSG00000241990.4_PRR34-AS1  | ENSG00000160789.18_LMNA | -0.09554 | -0.250924067 | 0.064644013 | 2.42E-01 | 5.21E-01 | 1.00E+00 |
| ENSG00000074527.10_NTN4      | ENSG00000160789.18_LMNA | -0.38747 | -0.514905745 | -0.24327259 | 8.16E-07 | 3.86E-05 | 4.18E-02 |
| ENSG00000122674.10_CCZ1      | ENSG00000160789.18_LMNA | 0.01842  | -0.141197633 | 0.177098509 | 8.22E-01 | 9.30E-01 | 1.00E+00 |
| ENSG00000007372.19_PAX6      | ENSG00000160789.18_LMNA | -0.07539 | -0.23181123  | 0.084825969 | 3.56E-01 | 6.39E-01 | 1.00E+00 |
| ENSG00000204947.7_ZNF425     | ENSG00000160789.18_LMNA | 0.12088  | -0.039074676 | 0.274790643 | 1.38E-01 | 3.78E-01 | 1.00E+00 |
| ENSG00000145014.16_TMEM44    | ENSG00000160789.18_LMNA | 0.3535   | 0.205885955  | 0.485384434 | 7.92E-06 | 2.43E-04 | 4.06E-01 |
| ENSG00000242114.4_MTFP1      | ENSG00000160789.18_LMNA | 0.26444  | 0.109866876  | 0.406528354 | 9.94E-04 | 1.15E-02 | 1.00E+00 |
| ENSG00000273080.1_RP11-301O  | ENSG00000160789.18_LMNA | -0.12661 | -0.28016363  | 0.033261107 | 1.20E-01 | 3.48E-01 | 1.00E+00 |
| ENSG00000136874.9_STX17      | ENSG00000160789.18_LMNA | 0.04844  | -0.111626251 | 0.206047082 | 5.53E-01 | 7.88E-01 | 1.00E+00 |
| ENSG00000220563.1_PKMP3      | ENSG00000160789.18_LMNA | -0.29208 | -0.431226427 | -0.13935651 | 2.61E-04 | 4.03E-03 | 1.00E+00 |
| ENSG00000111665.10_CDCA3     | ENSG00000160789.18_LMNA | -0.00723 | -0.166241744 | 0.152143427 | 9.30E-01 | 9.73E-01 | 1.00E+00 |
| ENSG00000185187.11_SIGIRR    | ENSG00000160789.18_LMNA | 0.06633  | -0.093858524 | 0.223177233 | 4.17E-01 | 6.89E-01 | 1.00E+00 |
| ENSG00000111404.5_RERGL      | ENSG00000160789.18_LMNA | -0.31082 | -0.447860469 | -0.15951374 | 9.72E-05 | 1.84E-03 | 1.00E+00 |
| ENSG00000171813.12_PWWP2B    | ENSG00000160789.18_LMNA | 0.04747  | -0.112582482 | 0.20511961  | 5.61E-01 | 7.93E-01 | 1.00E+00 |
| ENSG00000151702.15_FLI1      | ENSG00000160789.18_LMNA | -0.03517 | -0.193290077 | 0.124727421 | 6.67E-01 | 8.53E-01 | 1.00E+00 |
| ENSG00000158887.14_MPZ       | ENSG00000160789.18_LMNA | -0.21091 | -0.358088579 | -0.05350744 | 9.10E-03 | 6.12E-02 | 1.00E+00 |
| ENSG00000268996.3_MAN1B1-A1  | ENSG00000160789.18_LMNA | -0.11387 | -0.268210908 | 0.046165121 | 1.62E-01 | 4.17E-01 | 1.00E+00 |
| ENSG00000172575.10_RASGRP1   | ENSG00000160789.18_LMNA | 0.14737  | -0.012112894 | 0.29954486  | 7.00E-02 | 2.50E-01 | 1.00E+00 |
| ENSG00000173517.9_PEAK1      | ENSG00000160789.18_LMNA | 0.08607  | -0.074146709 | 0.241955314 | 2.92E-01 | 5.77E-01 | 1.00E+00 |
| ENSG00000168806.7_LCMT2      | ENSG00000160789.18_LMNA | 0.00682  | -0.152550451 | 0.165836536 | 9.34E-01 | 9.74E-01 | 1.00E+00 |
| ENSG00000100802.13_C14orf93  | ENSG00000160789.18_LMNA | -0.06005 | -0.2171745   | 0.100107746 | 4.62E-01 | 7.25E-01 | 1.00E+00 |
| ENSG00000240137.4_ERICH6-AS1 | ENSG00000160789.18_LMNA | -0.07409 | -0.230571508 | 0.086126127 | 3.64E-01 | 6.46E-01 | 1.00E+00 |
| ENSG00000138621.10_PPCDC     | ENSG00000160789.18_LMNA | 0.05508  | -0.105045273 | 0.212414693 | 5.00E-01 | 7.53E-01 | 1.00E+00 |
| ENSG00000164746.12_C7orf57   | ENSG00000160789.18_LMNA | 0.11045  | -0.049619805 | 0.264994395 | 1.76E-01 | 4.36E-01 | 1.00E+00 |

|                             |                         |          |              |             |          |          |          |
|-----------------------------|-------------------------|----------|--------------|-------------|----------|----------|----------|
| ENSG00000266865.5_RP11-848P | ENSG00000160789.18_LMNA | -0.05887 | -0.216048847 | 0.101276841 | 4.71E-01 | 7.31E-01 | 1.00E+00 |
| ENSG00000167258.12_CDK12    | ENSG00000160789.18_LMNA | 0.11486  | -0.04516337  | 0.269142288 | 1.59E-01 | 4.12E-01 | 1.00E+00 |
| ENSG00000140538.15_NTRK3    | ENSG00000160789.18_LMNA | -0.05553 | -0.212853717 | 0.10459051  | 4.97E-01 | 7.51E-01 | 1.00E+00 |
| ENSG00000228452.1_RP5-994D1 | ENSG00000160789.18_LMNA | -0.26405 | -0.406172303 | -0.10944553 | 1.01E-03 | 1.17E-02 | 1.00E+00 |
| ENSG00000258675.1_RP11-299L | ENSG00000160789.18_LMNA | -0.21732 | -0.363926576 | -0.06019861 | 7.16E-03 | 5.12E-02 | 1.00E+00 |
| ENSG00000102984.13_ZNF821   | ENSG00000160789.18_LMNA | -0.32103 | -0.456878437 | -0.17054321 | 5.52E-05 | 1.16E-03 | 1.00E+00 |
| ENSG00000162104.8_ADCY9     | ENSG00000160789.18_LMNA | 0.25286  | 0.097587938  | 0.396115071 | 1.67E-03 | 1.71E-02 | 1.00E+00 |
| ENSG00000103253.16_HAGHL    | ENSG00000160789.18_LMNA | 0.04221  | -0.117777659 | 0.200070688 | 6.06E-01 | 8.19E-01 | 1.00E+00 |
| ENSG00000237506.3_RPSAP15   | ENSG00000160789.18_LMNA | -0.18478 | -0.334151459 | -0.02635515 | 2.27E-02 | 1.18E-01 | 1.00E+00 |
| ENSG00000246067.6_RAB30-AS1 | ENSG00000160789.18_LMNA | -0.26004 | -0.402578489 | -0.10519866 | 1.21E-03 | 1.34E-02 | 1.00E+00 |
| ENSG00000167523.12_SPATA33  | ENSG00000160789.18_LMNA | 0.11075  | -0.049320728 | 0.265273131 | 1.74E-01 | 4.35E-01 | 1.00E+00 |
| ENSG00000128917.6_DLL4      | ENSG00000160789.18_LMNA | 0.17979  | 0.021197045  | 0.329558814 | 2.67E-02 | 1.32E-01 | 1.00E+00 |
| ENSG00000145681.9_HAPLN1    | ENSG00000160789.18_LMNA | -0.09705 | -0.252348355 | 0.063129647 | 2.34E-01 | 5.12E-01 | 1.00E+00 |
| ENSG00000204611.5_ZNF616    | ENSG00000160789.18_LMNA | 0.04452  | -0.115497491 | 0.202288744 | 5.86E-01 | 8.08E-01 | 1.00E+00 |
| ENSG00000119686.8_FLVCR2    | ENSG00000160789.18_LMNA | 0.00673  | -0.152634    | 0.165753347 | 9.34E-01 | 9.74E-01 | 1.00E+00 |
| ENSG00000091073.18_DTX2     | ENSG00000160789.18_LMNA | 0.40612  | 0.263990241  | 0.530992056 | 2.09E-07 | 1.32E-05 | 1.07E-02 |
| ENSG00000154642.9_C21orf91  | ENSG00000160789.18_LMNA | -0.24087 | -0.3852946   | -0.08492443 | 2.80E-03 | 2.53E-02 | 1.00E+00 |
| ENSG00000061987.13_MON2     | ENSG00000160789.18_LMNA | -0.19331 | -0.341989644 | -0.03519641 | 1.70E-02 | 9.62E-02 | 1.00E+00 |
| ENSG00000142528.14_ZNF473   | ENSG00000160789.18_LMNA | 0.09161  | -0.068592264 | 0.24720423  | 2.62E-01 | 5.45E-01 | 1.00E+00 |
| ENSG00000168807.15_SNTB2    | ENSG00000160789.18_LMNA | 0.45982  | 0.324360578  | 0.576794546 | 2.53E-09 | 3.38E-07 | 1.30E-04 |
| ENSG00000248485.1_PCP4L1    | ENSG00000160789.18_LMNA | -0.25623 | -0.399152889 | -0.10116065 | 1.44E-03 | 1.52E-02 | 1.00E+00 |
| ENSG00000253978.1_CTB-178M2 | ENSG00000160789.18_LMNA | -0.21668 | -0.36334365  | -0.05952927 | 7.33E-03 | 5.21E-02 | 1.00E+00 |
| ENSG00000240616.1_RPS6P25   | ENSG00000160789.18_LMNA | -0.23086 | -0.376230046 | -0.07439008 | 4.22E-03 | 3.45E-02 | 1.00E+00 |
| ENSG00000211897.6_IGHG3     | ENSG00000160789.18_LMNA | -0.01397 | -0.172785232 | 0.145555618 | 8.64E-01 | 9.47E-01 | 1.00E+00 |
| ENSG00000184260.5_HIST2H2AC | ENSG00000160789.18_LMNA | 0.07456  | -0.085655196 | 0.231020666 | 3.61E-01 | 6.43E-01 | 1.00E+00 |
| ENSG00000188994.11_ZNF292   | ENSG00000160789.18_LMNA | -0.12066 | -0.274588674 | 0.039292793 | 1.39E-01 | 3.80E-01 | 1.00E+00 |
| ENSG00000149308.15_NPAT     | ENSG00000160789.18_LMNA | -0.0748  | -0.231245493 | 0.085419419 | 3.60E-01 | 6.42E-01 | 1.00E+00 |
| ENSG00000259802.1_CTD-2256P | ENSG00000160789.18_LMNA | -0.23265 | -0.377851688 | -0.07626974 | 3.92E-03 | 3.27E-02 | 1.00E+00 |
| ENSG00000175073.7_VCIPI1    | ENSG00000160789.18_LMNA | 0.0538   | -0.106311926 | 0.211191199 | 5.10E-01 | 7.59E-01 | 1.00E+00 |
| ENSG00000257740.1_RP11-977G | ENSG00000160789.18_LMNA | -0.23006 | -0.375506174 | -0.07355173 | 4.35E-03 | 3.54E-02 | 1.00E+00 |
| ENSG00000144736.12_SHQ1     | ENSG00000160789.18_LMNA | 0.05504  | -0.105081217 | 0.212379987 | 5.01E-01 | 7.53E-01 | 1.00E+00 |
| ENSG00000256940.1_RP11-783K | ENSG00000160789.18_LMNA | 0.26175  | 0.107013707  | 0.404115549 | 1.12E-03 | 1.27E-02 | 1.00E+00 |
| ENSG00000139675.11_HNRNPA1  | ENSG00000160789.18_LMNA | -0.03019 | -0.18848644  | 0.129632078 | 7.12E-01 | 8.78E-01 | 1.00E+00 |

|                             |                         |          |              |             |          |          |          |
|-----------------------------|-------------------------|----------|--------------|-------------|----------|----------|----------|
| ENSG00000100577.17_GSTZ1    | ENSG00000160789.18_LMNA | -0.01671 | -0.175444519 | 0.142870226 | 8.38E-01 | 9.37E-01 | 1.00E+00 |
| ENSG00000213713.3_PIGCP1    | ENSG00000160789.18_LMNA | -0.19621 | -0.344648597 | -0.03820659 | 1.54E-02 | 8.95E-02 | 1.00E+00 |
| ENSG00000123329.16_ARHGAP5  | ENSG00000160789.18_LMNA | 0.09051  | -0.0696999   | 0.246158998 | 2.67E-01 | 5.52E-01 | 1.00E+00 |
| ENSG00000198934.4_MAGEE1    | ENSG00000160789.18_LMNA | -0.16015 | -0.311407903 | -0.00097074 | 4.87E-02 | 1.98E-01 | 1.00E+00 |
| ENSG00000146090.14_RASGEF1  | ENSG00000160789.18_LMNA | -0.41627 | -0.539707397 | -0.27531863 | 9.61E-08 | 6.99E-06 | 4.93E-03 |
| ENSG00000132881.10_RSG1     | ENSG00000160789.18_LMNA | 0.0745   | -0.085716656 | 0.230962056 | 3.62E-01 | 6.44E-01 | 1.00E+00 |
| ENSG00000184428.11_TOP1MT   | ENSG00000160789.18_LMNA | 0.19425  | 0.036172273  | 0.342852184 | 1.65E-02 | 9.39E-02 | 1.00E+00 |
| ENSG00000109762.14_SNX25    | ENSG00000160789.18_LMNA | 0.23746  | 0.081329778  | 0.382207992 | 3.22E-03 | 2.82E-02 | 1.00E+00 |
| ENSG00000100767.14_PAPLN    | ENSG00000160789.18_LMNA | 0.20595  | 0.048329682  | 0.353554619 | 1.09E-02 | 6.97E-02 | 1.00E+00 |
| ENSG00000267119.1_RPL10P15  | ENSG00000160789.18_LMNA | -0.01013 | -0.169061651 | 0.149307885 | 9.01E-01 | 9.62E-01 | 1.00E+00 |
| ENSG00000151883.15_PARP8    | ENSG00000160789.18_LMNA | -0.22872 | -0.37429604  | -0.07215117 | 4.59E-03 | 3.68E-02 | 1.00E+00 |
| ENSG00000134504.11_KCTD1    | ENSG00000160789.18_LMNA | -0.2217  | -0.367911054 | -0.06478112 | 6.05E-03 | 4.53E-02 | 1.00E+00 |
| ENSG00000278974.1_RP11-756P | ENSG00000160789.18_LMNA | -0.03836 | -0.196362301 | 0.121582417 | 6.39E-01 | 8.39E-01 | 1.00E+00 |
| ENSG00000049759.15_NEDD4L   | ENSG00000160789.18_LMNA | -0.13843 | -0.291217148 | 0.021234134 | 8.90E-02 | 2.90E-01 | 1.00E+00 |
| ENSG00000197647.10_ZNF433   | ENSG00000160789.18_LMNA | -0.1525  | -0.304311489 | 0.006868621 | 6.07E-02 | 2.27E-01 | 1.00E+00 |
| ENSG00000272267.2_RP11-375N | ENSG00000160789.18_LMNA | 0.18686  | 0.028506233  | 0.336062422 | 2.12E-02 | 1.12E-01 | 1.00E+00 |
| ENSG00000174004.5_NRROS     | ENSG00000160789.18_LMNA | 0.03438  | -0.125507178 | 0.192527397 | 6.74E-01 | 8.57E-01 | 1.00E+00 |
| ENSG00000132740.7_IGHMBP2   | ENSG00000160789.18_LMNA | 0.21871  | 0.061656499  | 0.365195411 | 6.79E-03 | 4.92E-02 | 1.00E+00 |
| ENSG00000128242.11_GAL3ST1  | ENSG00000160789.18_LMNA | -0.32541 | -0.46074001  | -0.17528816 | 4.30E-05 | 9.49E-04 | 1.00E+00 |
| ENSG00000225131.2_PSME2P2   | ENSG00000160789.18_LMNA | 0.15362  | -0.005719504 | 0.305353867 | 5.88E-02 | 2.23E-01 | 1.00E+00 |
| ENSG00000267106.4_ZNF561-AS | ENSG00000160789.18_LMNA | -0.32289 | -0.458522264 | -0.17256146 | 4.97E-05 | 1.07E-03 | 1.00E+00 |
| ENSG00000164338.8_UTP15     | ENSG00000160789.18_LMNA | 0.15068  | -0.008732648 | 0.302619018 | 6.39E-02 | 2.35E-01 | 1.00E+00 |
| ENSG00000117425.12_PTCH2    | ENSG00000160789.18_LMNA | 0.16094  | 0.001783229  | 0.312141419 | 4.76E-02 | 1.95E-01 | 1.00E+00 |
| ENSG00000130413.14_STK33    | ENSG00000160789.18_LMNA | -0.12288 | -0.276664136 | 0.037049968 | 1.32E-01 | 3.68E-01 | 1.00E+00 |
| ENSG00000201302.1_SNORA65   | ENSG00000160789.18_LMNA | -0.00329 | -0.162405037 | 0.155993009 | 9.68E-01 | 9.87E-01 | 1.00E+00 |
| ENSG00000120093.10_HOXB3    | ENSG00000160789.18_LMNA | 0.23788  | 0.081774715  | 0.382590409 | 3.17E-03 | 2.78E-02 | 1.00E+00 |
| ENSG00000249042.4_CTD-2015H | ENSG00000160789.18_LMNA | -0.09029 | -0.245959037 | 0.069911711 | 2.69E-01 | 5.53E-01 | 1.00E+00 |
| ENSG00000170293.7_CMTM8     | ENSG00000160789.18_LMNA | 0.05631  | -0.103819989 | 0.213597281 | 4.91E-01 | 7.47E-01 | 1.00E+00 |
| ENSG00000163684.10_RPP14    | ENSG00000160789.18_LMNA | -0.19376 | -0.342399907 | -0.0356605  | 1.68E-02 | 9.51E-02 | 1.00E+00 |
| ENSG00000153391.14_INO80C   | ENSG00000160789.18_LMNA | -0.29279 | -0.431859828 | -0.14011966 | 2.52E-04 | 3.92E-03 | 1.00E+00 |
| ENSG00000167414.4_GNG8      | ENSG00000160789.18_LMNA | -0.20118 | -0.349197583 | -0.04336938 | 1.29E-02 | 7.89E-02 | 1.00E+00 |
| ENSG00000279332.1_RP11-799B | ENSG00000160789.18_LMNA | 0.04893  | -0.111136853 | 0.20652154  | 5.49E-01 | 7.86E-01 | 1.00E+00 |
| ENSG00000138050.13_THUMPD2  | ENSG00000160789.18_LMNA | -0.10168 | -0.256729632 | 0.058462156 | 2.13E-01 | 4.86E-01 | 1.00E+00 |

|                              |                         |          |              |             |          |          |          |
|------------------------------|-------------------------|----------|--------------|-------------|----------|----------|----------|
| ENSG00000168010.9_ATG16L2    | ENSG00000160789.18_LMNA | -0.02684 | -0.185249076 | 0.132928767 | 7.43E-01 | 8.92E-01 | 1.00E+00 |
| ENSG00000248923.1_MTND5P11   | ENSG00000160789.18_LMNA | -0.07501 | -0.231448558 | 0.085206432 | 3.58E-01 | 6.41E-01 | 1.00E+00 |
| ENSG00000230207.1_RPL4P5     | ENSG00000160789.18_LMNA | -0.06197 | -0.21901321  | 0.09819619  | 4.48E-01 | 7.14E-01 | 1.00E+00 |
| ENSG00000180611.6_MB21D2     | ENSG00000160789.18_LMNA | -0.31193 | -0.448841549 | -0.16071017 | 9.15E-05 | 1.76E-03 | 1.00E+00 |
| ENSG00000104881.13_PPP1R13L  | ENSG00000160789.18_LMNA | 0.34956  | 0.201580427  | 0.481943271 | 1.01E-05 | 2.94E-04 | 5.20E-01 |
| ENSG00000185274.10_WBSCR17   | ENSG00000160789.18_LMNA | -0.07608 | -0.232463714 | 0.084141244 | 3.52E-01 | 6.35E-01 | 1.00E+00 |
| ENSG00000178947.8_SMIM10L2   | ENSG00000160789.18_LMNA | -0.19737 | -0.345708429 | -0.03940796 | 1.48E-02 | 8.71E-02 | 1.00E+00 |
| ENSG00000144134.17_RABL2A    | ENSG00000160789.18_LMNA | -0.13447 | -0.287518932 | 0.025268134 | 9.86E-02 | 3.09E-01 | 1.00E+00 |
| ENSG00000162415.6_ZSWIM5     | ENSG00000160789.18_LMNA | -0.20904 | -0.356382618 | -0.05155732 | 9.75E-03 | 6.44E-02 | 1.00E+00 |
| ENSG00000167302.8_TEPSIN     | ENSG00000160789.18_LMNA | 0.02265  | -0.137045164 | 0.181197035 | 7.82E-01 | 9.10E-01 | 1.00E+00 |
| ENSG00000277734.3_TRAC       | ENSG00000160789.18_LMNA | 0.26713  | 0.112720042  | 0.408937027 | 8.78E-04 | 1.05E-02 | 1.00E+00 |
| ENSG00000238072.1_RP11-305M  | ENSG00000160789.18_LMNA | -0.02577 | -0.184212099 | 0.133983259 | 7.53E-01 | 8.97E-01 | 1.00E+00 |
| ENSG00000184226.13_PCDH9     | ENSG00000160789.18_LMNA | 0.15247  | -0.006900262 | 0.304282776 | 6.08E-02 | 2.28E-01 | 1.00E+00 |
| ENSG00000086619.12_ERO1B     | ENSG00000160789.18_LMNA | -0.27271 | -0.413941863 | -0.11866413 | 6.76E-04 | 8.54E-03 | 1.00E+00 |
| ENSG00000150636.14_CCDC102   | ENSG00000160789.18_LMNA | 0.16375  | 0.004672248  | 0.314746626 | 4.38E-02 | 1.84E-01 | 1.00E+00 |
| ENSG00000197261.10_C6orf141  | ENSG00000160789.18_LMNA | 0.37141  | 0.225542651  | 0.500985658 | 2.47E-06 | 9.36E-05 | 1.27E-01 |
| ENSG00000225127.2_LINC00237  | ENSG00000160789.18_LMNA | -0.41828 | -0.541424703 | -0.27755952 | 8.22E-08 | 6.09E-06 | 4.22E-03 |
| ENSG00000176125.4_UFSP1      | ENSG00000160789.18_LMNA | 0.26303  | 0.108369127  | 0.405262287 | 1.06E-03 | 1.21E-02 | 1.00E+00 |
| ENSG00000272970.1_RP11-329B  | ENSG00000160789.18_LMNA | -0.09046 | -0.246120505 | 0.069740676 | 2.68E-01 | 5.52E-01 | 1.00E+00 |
| ENSG00000038219.11_BOD1L1    | ENSG00000160789.18_LMNA | 0.06104  | -0.099124469 | 0.218120587 | 4.55E-01 | 7.20E-01 | 1.00E+00 |
| ENSG00000139946.8_PELI2      | ENSG00000160789.18_LMNA | -0.12824 | -0.281692957 | 0.031602489 | 1.15E-01 | 3.39E-01 | 1.00E+00 |
| ENSG00000280128.1_XXbac-BPG  | ENSG00000160789.18_LMNA | -0.10878 | -0.263418767 | 0.051309361 | 1.82E-01 | 4.46E-01 | 1.00E+00 |
| ENSG00000224646.2_AC007387.1 | ENSG00000160789.18_LMNA | -0.06318 | -0.220168299 | 0.09699414  | 4.39E-01 | 7.07E-01 | 1.00E+00 |
| ENSG00000136098.15_NEK3      | ENSG00000160789.18_LMNA | -0.32722 | -0.462335901 | -0.17725302 | 3.88E-05 | 8.77E-04 | 1.00E+00 |
| ENSG00000115827.12_DCAF17    | ENSG00000160789.18_LMNA | -0.11616 | -0.270363985 | 0.043848406 | 1.54E-01 | 4.05E-01 | 1.00E+00 |
| ENSG00000145979.16_TBC1D7    | ENSG00000160789.18_LMNA | -0.23198 | -0.377252485 | -0.07557495 | 4.03E-03 | 3.33E-02 | 1.00E+00 |
| ENSG00000188559.12_RALGAPA   | ENSG00000160789.18_LMNA | 0.09718  | -0.062996201 | 0.252473798 | 2.34E-01 | 5.11E-01 | 1.00E+00 |
| ENSG00000196263.6_ZNF471     | ENSG00000160789.18_LMNA | 0.08723  | -0.072988439 | 0.243051401 | 2.85E-01 | 5.71E-01 | 1.00E+00 |
| ENSG00000180543.4_TSPYL5     | ENSG00000160789.18_LMNA | -0.1325  | -0.285676293 | 0.027274282 | 1.04E-01 | 3.19E-01 | 1.00E+00 |
| ENSG00000169155.8_ZBTB43     | ENSG00000160789.18_LMNA | 0.20486  | 0.047203422  | 0.352566495 | 1.13E-02 | 7.17E-02 | 1.00E+00 |
| ENSG00000125430.7_HS3ST3B1   | ENSG00000160789.18_LMNA | 0.31477  | 0.163772088  | 0.451349169 | 7.83E-05 | 1.55E-03 | 1.00E+00 |
| ENSG00000151025.9_GPR158     | ENSG00000160789.18_LMNA | -0.2969  | -0.435516329 | -0.14453199 | 2.04E-04 | 3.31E-03 | 1.00E+00 |
| ENSG00000110628.12_SLC22A1   | ENSG00000160789.18_LMNA | 0.51591  | 0.388630517  | 0.623871585 | 1.03E-11 | 3.52E-09 | 5.29E-07 |



|                             |                         |          |              |             |          |          |          |
|-----------------------------|-------------------------|----------|--------------|-------------|----------|----------|----------|
| ENSG00000141376.19_BCAS3    | ENSG00000160789.18_LMNA | -0.29545 | -0.434224887 | -0.14297227 | 2.20E-04 | 3.51E-03 | 1.00E+00 |
| ENSG00000174599.5_TRAM1L1   | ENSG00000160789.18_LMNA | -0.34106 | -0.474497924 | -0.19230186 | 1.71E-05 | 4.53E-04 | 8.77E-01 |
| ENSG00000281896.1_RP11-274B | ENSG00000160789.18_LMNA | 0.10113  | -0.059017307 | 0.2562092   | 2.15E-01 | 4.89E-01 | 1.00E+00 |
| ENSG00000230409.3_TCEA1P2   | ENSG00000160789.18_LMNA | 0.03321  | -0.126663993 | 0.191395211 | 6.85E-01 | 8.63E-01 | 1.00E+00 |
| ENSG00000240230.4_COX19     | ENSG00000160789.18_LMNA | 0.19781  | 0.039861989  | 0.346108759 | 1.46E-02 | 8.61E-02 | 1.00E+00 |
| ENSG00000181418.7_DDN       | ENSG00000160789.18_LMNA | -0.05553 | -0.212848359 | 0.104596062 | 4.97E-01 | 7.51E-01 | 1.00E+00 |
| ENSG00000078487.16_ZCWPW1   | ENSG00000160789.18_LMNA | -0.00952 | -0.168467902 | 0.149905361 | 9.07E-01 | 9.64E-01 | 1.00E+00 |
| ENSG00000214300.7_SPDYE3    | ENSG00000160789.18_LMNA | 0.21112  | 0.053727788  | 0.358281209 | 9.03E-03 | 6.09E-02 | 1.00E+00 |
| ENSG00000147364.15_FBXO25   | ENSG00000160789.18_LMNA | -0.20773 | -0.355188257 | -0.0501934  | 1.02E-02 | 6.66E-02 | 1.00E+00 |
| ENSG00000165152.7_TMEN246   | ENSG00000160789.18_LMNA | -0.36081 | -0.491763882 | -0.21389655 | 4.96E-06 | 1.65E-04 | 2.55E-01 |
| ENSG00000246263.2_UBR5-AS1  | ENSG00000160789.18_LMNA | -0.25432 | -0.397430319 | -0.09913383 | 1.57E-03 | 1.62E-02 | 1.00E+00 |
| ENSG00000139354.9_GAS2L3    | ENSG00000160789.18_LMNA | -0.07952 | -0.235733596 | 0.080705277 | 3.30E-01 | 6.16E-01 | 1.00E+00 |
| ENSG00000183199.6_HSP90AB3  | ENSG00000160789.18_LMNA | 0.01368  | -0.145842966 | 0.172500402 | 8.67E-01 | 9.48E-01 | 1.00E+00 |
| ENSG00000236017.6_ASMTL-AS  | ENSG00000160789.18_LMNA | 0.09661  | -0.063564177 | 0.251939812 | 2.36E-01 | 5.15E-01 | 1.00E+00 |
| ENSG00000180644.6_PRF1      | ENSG00000160789.18_LMNA | 0.25326  | 0.098010297  | 0.396474537 | 1.64E-03 | 1.69E-02 | 1.00E+00 |
| ENSG00000134744.12_ZCCHC11  | ENSG00000160789.18_LMNA | 0.00882  | -0.150587408 | 0.167789828 | 9.14E-01 | 9.67E-01 | 1.00E+00 |
| ENSG00000144152.11_FBLN7    | ENSG00000160789.18_LMNA | 0.59579  | 0.482341227  | 0.689584911 | 5.64E-16 | 1.26E-12 | 2.90E-11 |
| ENSG00000119927.12_GPAM     | ENSG00000160789.18_LMNA | -0.09717 | -0.252461296 | 0.063009501 | 2.34E-01 | 5.11E-01 | 1.00E+00 |
| ENSG00000203666.11_EFCAB2   | ENSG00000160789.18_LMNA | -0.14731 | -0.299489248 | 0.012173977 | 7.01E-02 | 2.50E-01 | 1.00E+00 |
| ENSG00000137992.13_DBT      | ENSG00000160789.18_LMNA | -0.3142  | -0.450852464 | -0.16316515 | 8.08E-05 | 1.58E-03 | 1.00E+00 |
| ENSG00000162630.5_B3GALT2   | ENSG00000160789.18_LMNA | -0.41841 | -0.541535438 | -0.27770411 | 8.14E-08 | 6.05E-06 | 4.18E-03 |
| ENSG00000138688.14_KIAA1109 | ENSG00000160789.18_LMNA | -0.00872 | -0.167683622 | 0.150694209 | 9.15E-01 | 9.68E-01 | 1.00E+00 |
| ENSG00000143322.18_ABL2     | ENSG00000160789.18_LMNA | 0.32184  | 0.171424387  | 0.457596382 | 5.27E-05 | 1.12E-03 | 1.00E+00 |
| ENSG00000198835.3_GJC2      | ENSG00000160789.18_LMNA | -0.21598 | -0.362705707 | -0.05879706 | 7.53E-03 | 5.31E-02 | 1.00E+00 |
| ENSG00000075223.12_SEMA3C   | ENSG00000160789.18_LMNA | -0.02583 | -0.184270709 | 0.133923678 | 7.52E-01 | 8.97E-01 | 1.00E+00 |
| ENSG00000130810.18_PPAN     | ENSG00000160789.18_LMNA | 0.28637  | 0.133240998  | 0.426140283 | 3.48E-04 | 5.04E-03 | 1.00E+00 |
| ENSG00000120868.12_APAF1    | ENSG00000160789.18_LMNA | -0.18107 | -0.330738418 | -0.02252032 | 2.56E-02 | 1.28E-01 | 1.00E+00 |
| ENSG00000160961.10_ZNF333   | ENSG00000160789.18_LMNA | -0.16593 | -0.316764462 | -0.00691347 | 4.10E-02 | 1.76E-01 | 1.00E+00 |
| ENSG00000117707.14_PROX1    | ENSG00000160789.18_LMNA | 0.04449  | -0.115524625 | 0.202262369 | 5.86E-01 | 8.08E-01 | 1.00E+00 |
| ENSG00000278126.1_RP11-454E | ENSG00000160789.18_LMNA | -0.4148  | -0.538443946 | -0.27367181 | 1.08E-07 | 7.68E-06 | 5.53E-03 |
| ENSG00000168453.13_HR       | ENSG00000160789.18_LMNA | -0.14712 | -0.299312146 | 0.01236849  | 7.05E-02 | 2.51E-01 | 1.00E+00 |
| ENSG00000234017.1_RP11-214N | ENSG00000160789.18_LMNA | -0.13963 | -0.292332091 | 0.020015959 | 8.62E-02 | 2.85E-01 | 1.00E+00 |
| ENSG00000223382.3_RP5-1125N | ENSG00000160789.18_LMNA | -0.22384 | -0.369864292 | -0.06703219 | 5.57E-03 | 4.25E-02 | 1.00E+00 |

|                             |                         |          |              |             |          |          |          |
|-----------------------------|-------------------------|----------|--------------|-------------|----------|----------|----------|
| ENSG00000198113.2_TOR4A     | ENSG00000160789.18_LMNA | 0.36832  | 0.22214094   | 0.49829852  | 3.03E-06 | 1.11E-04 | 1.56E-01 |
| ENSG00000121104.6_FAM117A   | ENSG00000160789.18_LMNA | 0.15491  | -0.004399479 | 0.30655036  | 5.67E-02 | 2.18E-01 | 1.00E+00 |
| ENSG00000186889.8_TMEM17    | ENSG00000160789.18_LMNA | -0.21916 | -0.365600357 | -0.06212205 | 6.67E-03 | 4.86E-02 | 1.00E+00 |
| ENSG00000276026.1_RP4-545L1 | ENSG00000160789.18_LMNA | -0.08034 | -0.236515213 | 0.079882844 | 3.25E-01 | 6.12E-01 | 1.00E+00 |
| ENSG00000105793.14_GTPBP10  | ENSG00000160789.18_LMNA | -0.02368 | -0.182196821 | 0.136030519 | 7.72E-01 | 9.06E-01 | 1.00E+00 |
| ENSG00000237668.1_RPS15AP3  | ENSG00000160789.18_LMNA | -0.15675 | -0.308260805 | 0.002510553 | 5.38E-02 | 2.11E-01 | 1.00E+00 |
| ENSG00000273253.2_RP3-402G1 | ENSG00000160789.18_LMNA | -0.10271 | -0.257692884 | 0.057434126 | 2.08E-01 | 4.80E-01 | 1.00E+00 |
| ENSG00000109255.10_NMU      | ENSG00000160789.18_LMNA | -0.22897 | -0.374515957 | -0.07240561 | 4.55E-03 | 3.65E-02 | 1.00E+00 |
| ENSG00000132196.12_HSD17B7  | ENSG00000160789.18_LMNA | -0.09643 | -0.25176474  | 0.063750348 | 2.37E-01 | 5.16E-01 | 1.00E+00 |
| ENSG00000181284.2_TMEM102   | ENSG00000160789.18_LMNA | 0.30945  | 0.158037942  | 0.446649356 | 1.05E-04 | 1.96E-03 | 1.00E+00 |
| ENSG00000278107.1_RP11-162A | ENSG00000160789.18_LMNA | 0.1887   | 0.030413834  | 0.337754965 | 1.99E-02 | 1.08E-01 | 1.00E+00 |
| ENSG00000085840.11_ORC1     | ENSG00000160789.18_LMNA | 0.03723  | -0.122698207 | 0.195273046 | 6.49E-01 | 8.44E-01 | 1.00E+00 |
| ENSG00000274471.1_RP11-228M | ENSG00000160789.18_LMNA | -0.08399 | -0.239977212 | 0.076234876 | 3.04E-01 | 5.90E-01 | 1.00E+00 |
| ENSG00000230291.5_RP11-244J | ENSG00000160789.18_LMNA | -0.12284 | -0.276632352 | 0.037084338 | 1.32E-01 | 3.68E-01 | 1.00E+00 |
| ENSG00000182923.15_CEP63    | ENSG00000160789.18_LMNA | -0.17254 | -0.322869905 | -0.01371383 | 3.35E-02 | 1.54E-01 | 1.00E+00 |
| ENSG00000223745.6_CCDC18-A  | ENSG00000160789.18_LMNA | -0.10019 | -0.255317454 | 0.059968093 | 2.19E-01 | 4.94E-01 | 1.00E+00 |
| ENSG00000182109.6_RP11-69E1 | ENSG00000160789.18_LMNA | 0.08675  | -0.073465461 | 0.242600086 | 2.88E-01 | 5.73E-01 | 1.00E+00 |
| ENSG00000085999.10_RAD54L   | ENSG00000160789.18_LMNA | 0.09472  | -0.06547194  | 0.250144809 | 2.46E-01 | 5.25E-01 | 1.00E+00 |
| ENSG00000103316.9_CRYM      | ENSG00000160789.18_LMNA | -0.20477 | -0.352478386 | -0.04710303 | 1.14E-02 | 7.18E-02 | 1.00E+00 |
| ENSG00000099849.13_RASSF7   | ENSG00000160789.18_LMNA | 0.28661  | 0.133500839  | 0.426356764 | 3.44E-04 | 4.99E-03 | 1.00E+00 |
| ENSG00000170579.13_DLGAP1   | ENSG00000160789.18_LMNA | -0.39158 | -0.518464239 | -0.24783434 | 6.08E-07 | 3.06E-05 | 3.12E-02 |
| ENSG00000269176.2_RP11-727F | ENSG00000160789.18_LMNA | -0.05311 | -0.210533006 | 0.10699291  | 5.16E-01 | 7.63E-01 | 1.00E+00 |
| ENSG00000078269.12_SYNJ2    | ENSG00000160789.18_LMNA | 0.23794  | 0.08184269   | 0.382648824 | 3.16E-03 | 2.78E-02 | 1.00E+00 |
| ENSG00000124216.3_SNAI1     | ENSG00000160789.18_LMNA | 0.30705  | 0.155448021  | 0.444521373 | 1.19E-04 | 2.18E-03 | 1.00E+00 |
| ENSG00000265735.2_RN7SL5P   | ENSG00000160789.18_LMNA | -0.00228 | -0.161422707 | 0.156977083 | 9.78E-01 | 9.92E-01 | 1.00E+00 |
| ENSG00000139974.14_SLC38A6  | ENSG00000160789.18_LMNA | 0.10643  | -0.053679525 | 0.261205589 | 1.92E-01 | 4.60E-01 | 1.00E+00 |
| ENSG00000164674.14_SYTL3    | ENSG00000160789.18_LMNA | -0.0073  | -0.166304233 | 0.152080648 | 9.29E-01 | 9.73E-01 | 1.00E+00 |
| ENSG00000132825.6_PPP1R3D   | ENSG00000160789.18_LMNA | 0.2177   | 0.06060289   | 0.36427854  | 7.05E-03 | 5.07E-02 | 1.00E+00 |
| ENSG00000270558.1_CTD-2124B | ENSG00000160789.18_LMNA | -0.06729 | -0.224089889 | 0.0929062   | 4.10E-01 | 6.84E-01 | 1.00E+00 |
| ENSG00000267049.1_AC002398  | ENSG00000160789.18_LMNA | 0.24176  | 0.085864069  | 0.386100335 | 2.69E-03 | 2.46E-02 | 1.00E+00 |
| ENSG00000220785.6_MTMR9LP   | ENSG00000160789.18_LMNA | -0.14964 | -0.301658076 | 0.009790035 | 6.58E-02 | 2.39E-01 | 1.00E+00 |
| ENSG00000139437.16_TCHP     | ENSG00000160789.18_LMNA | -0.011   | -0.169902736 | 0.148461121 | 8.93E-01 | 9.58E-01 | 1.00E+00 |
| ENSG00000167964.11_RAB26    | ENSG00000160789.18_LMNA | -0.31659 | -0.452963979 | -0.16574678 | 7.08E-05 | 1.42E-03 | 1.00E+00 |

|                             |                         |          |              |             |          |          |          |
|-----------------------------|-------------------------|----------|--------------|-------------|----------|----------|----------|
| ENSG00000033030.12_ZCCHC8   | ENSG00000160789.18_LMNA | 0.11216  | -0.047897969 | 0.266598401 | 1.69E-01 | 4.27E-01 | 1.00E+00 |
| ENSG00000166501.11_PRKCB    | ENSG00000160789.18_LMNA | -0.1665  | -0.317293598 | -0.0075017  | 4.03E-02 | 1.74E-01 | 1.00E+00 |
| ENSG00000113763.9_UNC5A     | ENSG00000160789.18_LMNA | -0.19126 | -0.340102629 | -0.03306351 | 1.83E-02 | 1.01E-01 | 1.00E+00 |
| ENSG00000023171.13_GRAMD1E  | ENSG00000160789.18_LMNA | -0.18864 | -0.337702959 | -0.03035519 | 1.99E-02 | 1.08E-01 | 1.00E+00 |
| ENSG00000184730.9_APOBR     | ENSG00000160789.18_LMNA | 0.27105  | 0.116892557  | 0.412452092 | 7.31E-04 | 9.06E-03 | 1.00E+00 |
| ENSG00000137463.4_MGARP     | ENSG00000160789.18_LMNA | 0.10984  | -0.050236701 | 0.264419292 | 1.78E-01 | 4.40E-01 | 1.00E+00 |
| ENSG00000139263.10_LRIG3    | ENSG00000160789.18_LMNA | 0.08257  | -0.077651597 | 0.238633669 | 3.12E-01 | 5.98E-01 | 1.00E+00 |
| ENSG00000104218.12_CSPP1    | ENSG00000160789.18_LMNA | -0.00947 | -0.168412962 | 0.149960634 | 9.08E-01 | 9.65E-01 | 1.00E+00 |
| ENSG00000133247.12_KMT5C    | ENSG00000160789.18_LMNA | 0.09474  | -0.065446113 | 0.250169124 | 2.46E-01 | 5.25E-01 | 1.00E+00 |
| ENSG00000267023.4_LRRC37A1  | ENSG00000160789.18_LMNA | 0.00899  | -0.150429056 | 0.167947285 | 9.13E-01 | 9.67E-01 | 1.00E+00 |
| ENSG00000187534.6_PRR13P5   | ENSG00000160789.18_LMNA | -0.02605 | -0.184483164 | 0.133707685 | 7.50E-01 | 8.96E-01 | 1.00E+00 |
| ENSG00000128284.18_APOL3    | ENSG00000160789.18_LMNA | 0.12051  | -0.039451086 | 0.274442083 | 1.39E-01 | 3.80E-01 | 1.00E+00 |
| ENSG00000107560.9_RAB11FIP2 | ENSG00000160789.18_LMNA | -0.17703 | -0.327017985 | -0.01835042 | 2.91E-02 | 1.40E-01 | 1.00E+00 |
| ENSG00000162444.11_RBP7     | ENSG00000160789.18_LMNA | -0.23546 | -0.380396938 | -0.07922427 | 3.50E-03 | 3.00E-02 | 1.00E+00 |
| ENSG00000185344.12_ATP6V0A  | ENSG00000160789.18_LMNA | -0.14148 | -0.294059925 | 0.018126311 | 8.21E-02 | 2.77E-01 | 1.00E+00 |
| ENSG00000090539.14_CHRD     | ENSG00000160789.18_LMNA | 0.03488  | -0.125010888 | 0.193012863 | 6.70E-01 | 8.55E-01 | 1.00E+00 |
| ENSG00000232434.2_C9orf172  | ENSG00000160789.18_LMNA | 0.19078  | 0.032568288  | 0.339664144 | 1.86E-02 | 1.02E-01 | 1.00E+00 |
| ENSG00000166016.5_ABTB2     | ENSG00000160789.18_LMNA | 0.1947   | 0.036639779  | 0.343265217 | 1.62E-02 | 9.29E-02 | 1.00E+00 |
| ENSG00000270028.1_RP11-380L | ENSG00000160789.18_LMNA | 0.04272  | -0.117278016 | 0.200556999 | 6.01E-01 | 8.17E-01 | 1.00E+00 |
| ENSG00000113240.11_CLK4     | ENSG00000160789.18_LMNA | -0.20088 | -0.348919988 | -0.04305386 | 1.31E-02 | 7.95E-02 | 1.00E+00 |
| ENSG00000166147.12_FBN1     | ENSG00000160789.18_LMNA | 0.37371  | 0.22807339   | 0.502981344 | 2.11E-06 | 8.31E-05 | 1.08E-01 |
| ENSG00000003147.16_ICA1     | ENSG00000160789.18_LMNA | -0.43273 | -0.553781026 | -0.29376819 | 2.58E-08 | 2.40E-06 | 1.32E-03 |
| ENSG00000166024.12_R3HCC1L  | ENSG00000160789.18_LMNA | -0.08948 | -0.245184787 | 0.070731574 | 2.73E-01 | 5.57E-01 | 1.00E+00 |
| ENSG00000145194.16_ECE2     | ENSG00000160789.18_LMNA | -0.09633 | -0.251669582 | 0.06385153  | 2.38E-01 | 5.16E-01 | 1.00E+00 |
| ENSG00000103460.15_TOX3     | ENSG00000160789.18_LMNA | -0.21937 | -0.365798516 | -0.06234992 | 6.62E-03 | 4.83E-02 | 1.00E+00 |
| ENSG00000130962.16_PRRG1    | ENSG00000160789.18_LMNA | -0.14574 | -0.298029441 | 0.013776583 | 7.32E-02 | 2.57E-01 | 1.00E+00 |
| ENSG00000163029.14_SMC6     | ENSG00000160789.18_LMNA | 0.14733  | -0.01215508  | 0.299506453 | 7.01E-02 | 2.50E-01 | 1.00E+00 |
| ENSG00000113441.14_LNPEP    | ENSG00000160789.18_LMNA | 0.17328  | 0.014473738  | 0.323550563 | 3.28E-02 | 1.52E-01 | 1.00E+00 |
| ENSG00000186792.14_HYAL3    | ENSG00000160789.18_LMNA | 0.05723  | -0.102905248 | 0.214479541 | 4.84E-01 | 7.41E-01 | 1.00E+00 |
| ENSG00000267896.1_          | ENSG00000160789.18_LMNA | 0.04944  | -0.110635318 | 0.207007611 | 5.45E-01 | 7.83E-01 | 1.00E+00 |
| ENSG00000005379.14_TSPOAP1  | ENSG00000160789.18_LMNA | -0.23916 | -0.383746442 | -0.08312047 | 3.00E-03 | 2.68E-02 | 1.00E+00 |
| ENSG00000167799.8_NUDT8     | ENSG00000160789.18_LMNA | 0.2433   | 0.087489005  | 0.387492622 | 2.52E-03 | 2.34E-02 | 1.00E+00 |
| ENSG00000167196.12_FBXO22   | ENSG00000160789.18_LMNA | 0.17398  | 0.01519839   | 0.324199345 | 3.21E-02 | 1.50E-01 | 1.00E+00 |

|                              |                         |          |              |             |          |          |          |
|------------------------------|-------------------------|----------|--------------|-------------|----------|----------|----------|
| ENSG00000011114.13_BTBD7     | ENSG00000160789.18_LMNA | 0.25002  | 0.094581399  | 0.393553587 | 1.89E-03 | 1.88E-02 | 1.00E+00 |
| ENSG00000176714.9_CCDC121    | ENSG00000160789.18_LMNA | -0.32631 | -0.461535718 | -0.17626755 | 4.08E-05 | 9.17E-04 | 1.00E+00 |
| ENSG00000186017.13_ZNF566    | ENSG00000160789.18_LMNA | -0.27681 | -0.417609057 | -0.12303301 | 5.56E-04 | 7.32E-03 | 1.00E+00 |
| ENSG00000254719.1_RP11-351I2 | ENSG00000160789.18_LMNA | -0.03225 | -0.190477509 | 0.127601024 | 6.93E-01 | 8.68E-01 | 1.00E+00 |
| ENSG00000185973.9_TMLHE      | ENSG00000160789.18_LMNA | -0.25527 | -0.398287848 | -0.10014251 | 1.50E-03 | 1.57E-02 | 1.00E+00 |
| ENSG00000251867.3_RP11-48B3  | ENSG00000160789.18_LMNA | -0.21538 | -0.362165277 | -0.05817704 | 7.70E-03 | 5.40E-02 | 1.00E+00 |
| ENSG00000204428.11_LY6G5C    | ENSG00000160789.18_LMNA | -0.19309 | -0.341786383 | -0.03496653 | 1.72E-02 | 9.67E-02 | 1.00E+00 |
| ENSG00000117091.8_CD48       | ENSG00000160789.18_LMNA | -0.05707 | -0.21432076  | 0.103069915 | 4.85E-01 | 7.42E-01 | 1.00E+00 |
| ENSG00000224094.1_RPS24P8    | ENSG00000160789.18_LMNA | -0.10504 | -0.25989889  | 0.055077249 | 1.98E-01 | 4.67E-01 | 1.00E+00 |
| ENSG00000183826.15_BTBD9     | ENSG00000160789.18_LMNA | 0.08667  | -0.073547468 | 0.242522485 | 2.88E-01 | 5.74E-01 | 1.00E+00 |
| ENSG00000100058.11_CRYBB2P   | ENSG00000160789.18_LMNA | 0.00492  | -0.154398035 | 0.163995846 | 9.52E-01 | 9.81E-01 | 1.00E+00 |
| ENSG00000171045.13_TSNARE1   | ENSG00000160789.18_LMNA | -0.08052 | -0.236684866 | 0.079704275 | 3.24E-01 | 6.11E-01 | 1.00E+00 |
| ENSG00000171786.5_NHLH1      | ENSG00000160789.18_LMNA | -0.25147 | -0.394864156 | -0.096119   | 1.78E-03 | 1.79E-02 | 1.00E+00 |
| ENSG00000197927.11_C2orf27A  | ENSG00000160789.18_LMNA | -0.42068 | -0.543484632 | -0.28025128 | 6.80E-08 | 5.29E-06 | 3.49E-03 |
| ENSG00000177614.8_PGBD5      | ENSG00000160789.18_LMNA | -0.17923 | -0.329037577 | -0.02061267 | 2.72E-02 | 1.34E-01 | 1.00E+00 |
| ENSG00000124406.15_ATP8A1    | ENSG00000160789.18_LMNA | -0.5098  | -0.618778105 | -0.38156464 | 1.97E-11 | 5.95E-09 | 1.01E-06 |
| ENSG00000168014.15_C2CD3     | ENSG00000160789.18_LMNA | 0.09647  | -0.063706052 | 0.251806397 | 2.37E-01 | 5.16E-01 | 1.00E+00 |
| ENSG00000277072.3_STAG3L2    | ENSG00000160789.18_LMNA | -0.06459 | -0.221511455 | 0.095595212 | 4.29E-01 | 6.99E-01 | 1.00E+00 |
| ENSG00000278535.3_DHRS11     | ENSG00000160789.18_LMNA | 0.11982  | -0.040142423 | 0.27380168  | 1.41E-01 | 3.84E-01 | 1.00E+00 |
| ENSG00000185250.14_PPIL6     | ENSG00000160789.18_LMNA | -0.00366 | -0.162769664 | 0.155627574 | 9.64E-01 | 9.86E-01 | 1.00E+00 |
| ENSG00000063761.14_ADCK1     | ENSG00000160789.18_LMNA | -0.03471 | -0.192842192 | 0.125185382 | 6.71E-01 | 8.56E-01 | 1.00E+00 |
| ENSG00000183530.12_PRR14L    | ENSG00000160789.18_LMNA | 0.01247  | -0.147022783 | 0.171330365 | 8.79E-01 | 9.53E-01 | 1.00E+00 |
| ENSG00000230424.1_RP1-43E13  | ENSG00000160789.18_LMNA | -0.17097 | -0.321418524 | -0.01209466 | 3.52E-02 | 1.59E-01 | 1.00E+00 |
| ENSG00000147509.12_RGS20     | ENSG00000160789.18_LMNA | 0.1038   | -0.056328899 | 0.258727771 | 2.03E-01 | 4.74E-01 | 1.00E+00 |
| ENSG00000268357.1_VN1R81P    | ENSG00000160789.18_LMNA | -0.24471 | -0.388763666 | -0.08897383 | 2.38E-03 | 2.23E-02 | 1.00E+00 |
| ENSG00000270547.4_LINC01235  | ENSG00000160789.18_LMNA | -0.38258 | -0.510672667 | -0.23786166 | 1.15E-06 | 5.16E-05 | 5.90E-02 |
| ENSG00000204634.11_TBC1D8    | ENSG00000160789.18_LMNA | 0.07696  | -0.083256931 | 0.233305966 | 3.46E-01 | 6.30E-01 | 1.00E+00 |
| ENSG00000269378.1_ITGB1P1    | ENSG00000160789.18_LMNA | 0.27799  | 0.124291904  | 0.418663979 | 5.25E-04 | 7.01E-03 | 1.00E+00 |
| ENSG00000274565.1_CTD-3035K  | ENSG00000160789.18_LMNA | 0.43733  | 0.298944345  | 0.557702979 | 1.76E-08 | 1.73E-06 | 9.05E-04 |
| ENSG00000129566.11_TEP1      | ENSG00000160789.18_LMNA | 0.23185  | 0.075430024  | 0.377127467 | 4.05E-03 | 3.35E-02 | 1.00E+00 |
| ENSG00000047634.13_SCML1     | ENSG00000160789.18_LMNA | 0.14051  | -0.019121645 | 0.293150078 | 8.42E-02 | 2.81E-01 | 1.00E+00 |
| ENSG00000080345.16_RIF1      | ENSG00000160789.18_LMNA | 0.08406  | -0.076160825 | 0.240047405 | 3.03E-01 | 5.90E-01 | 1.00E+00 |
| ENSG00000230074.1_RP11-195F  | ENSG00000160789.18_LMNA | 0.02506  | -0.134678077 | 0.183528436 | 7.59E-01 | 9.00E-01 | 1.00E+00 |

|                              |                         |          |              |             |          |          |          |
|------------------------------|-------------------------|----------|--------------|-------------|----------|----------|----------|
| ENSG00000260095.1_RP11-715J: | ENSG00000160789.18_LMNA | 0.07851  | -0.08171162  | 0.234776638 | 3.36E-01 | 6.22E-01 | 1.00E+00 |
| ENSG00000241061.3_RPL5P1     | ENSG00000160789.18_LMNA | -0.18649 | -0.335727101 | -0.02812857 | 2.14E-02 | 1.13E-01 | 1.00E+00 |
| ENSG00000231684.3	EIF1P3     | ENSG00000160789.18_LMNA | 0.14719  | -0.012298983 | 0.299375434 | 7.04E-02 | 2.50E-01 | 1.00E+00 |
| ENSG00000155636.13_RBM45     | ENSG00000160789.18_LMNA | -0.15946 | -0.310766828 | -0.00026098 | 4.97E-02 | 2.01E-01 | 1.00E+00 |
| ENSG00000133246.10_PRAM1     | ENSG00000160789.18_LMNA | -0.02712 | -0.185524107 | 0.132648969 | 7.40E-01 | 8.91E-01 | 1.00E+00 |
| ENSG00000197056.8_ZMYM1      | ENSG00000160789.18_LMNA | -0.05982 | -0.216956342 | 0.100334391 | 4.64E-01 | 7.26E-01 | 1.00E+00 |
| ENSG00000171004.16_HS6ST2    | ENSG00000160789.18_LMNA | -0.12026 | -0.274213701 | 0.039697667 | 1.40E-01 | 3.82E-01 | 1.00E+00 |
| ENSG00000110801.12_PSMD9     | ENSG00000160789.18_LMNA | 0.04853  | -0.111528844 | 0.206141528 | 5.53E-01 | 7.88E-01 | 1.00E+00 |
| ENSG00000143479.14_DYRK3     | ENSG00000160789.18_LMNA | 0.38986  | 0.245923687  | 0.516974932 | 6.88E-07 | 3.40E-05 | 3.53E-02 |
| ENSG00000165392.8_WRN        | ENSG00000160789.18_LMNA | 0.05136  | -0.10873435  | 0.208848539 | 5.30E-01 | 7.73E-01 | 1.00E+00 |
| ENSG00000198003.10_CCDC151   | ENSG00000160789.18_LMNA | 0.23631  | 0.080128127  | 0.381174673 | 3.38E-03 | 2.92E-02 | 1.00E+00 |
| ENSG00000132801.6_ZSWIM3     | ENSG00000160789.18_LMNA | -0.22024 | -0.366586283 | -0.06325609 | 6.40E-03 | 4.72E-02 | 1.00E+00 |
| ENSG00000175105.5_ZNF654     | ENSG00000160789.18_LMNA | 0.14313  | -0.016448496 | 0.295592358 | 7.86E-02 | 2.69E-01 | 1.00E+00 |
| ENSG00000105327.14_BBC3      | ENSG00000160789.18_LMNA | 0.11348  | -0.046566009 | 0.267838017 | 1.64E-01 | 4.20E-01 | 1.00E+00 |
| ENSG00000134363.10_FST       | ENSG00000160789.18_LMNA | 0.06951  | -0.090697852 | 0.226204111 | 3.95E-01 | 6.72E-01 | 1.00E+00 |
| ENSG00000259891.1_CTA-204B4  | ENSG00000160789.18_LMNA | -0.03598 | -0.194072354 | 0.123927218 | 6.60E-01 | 8.50E-01 | 1.00E+00 |
| ENSG00000167625.9_ZNF526     | ENSG00000160789.18_LMNA | 0.31935  | 0.168726539  | 0.455397123 | 6.07E-05 | 1.25E-03 | 1.00E+00 |
| ENSG00000273456.1_RP11-686C  | ENSG00000160789.18_LMNA | -0.27137 | -0.412735302 | -0.11722919 | 7.20E-04 | 8.96E-03 | 1.00E+00 |
| ENSG00000165757.8_KIAA1462   | ENSG00000160789.18_LMNA | -0.124   | -0.277713789 | 0.035914466 | 1.28E-01 | 3.62E-01 | 1.00E+00 |
| ENSG00000187902.10_SHISA7    | ENSG00000160789.18_LMNA | -0.30838 | -0.44570041  | -0.15688251 | 1.11E-04 | 2.05E-03 | 1.00E+00 |
| ENSG00000173083.13_HPSE      | ENSG00000160789.18_LMNA | -0.03659 | -0.194657386 | 0.123328509 | 6.54E-01 | 8.47E-01 | 1.00E+00 |
| ENSG00000267904.1_CTC-429P9  | ENSG00000160789.18_LMNA | -0.13385 | -0.286939377 | 0.025899389 | 1.00E-01 | 3.12E-01 | 1.00E+00 |
| ENSG00000224945.1_RP11-82L1: | ENSG00000160789.18_LMNA | -0.02018 | -0.178806939 | 0.139468077 | 8.05E-01 | 9.22E-01 | 1.00E+00 |
| ENSG00000118369.11_USP35     | ENSG00000160789.18_LMNA | 0.03678  | -0.123143971 | 0.194837663 | 6.53E-01 | 8.46E-01 | 1.00E+00 |
| ENSG00000162636.14_FAM102B   | ENSG00000160789.18_LMNA | -0.16213 | -0.31324617  | -0.0030077  | 4.60E-02 | 1.90E-01 | 1.00E+00 |
| ENSG00000083812.10_ZNF324    | ENSG00000160789.18_LMNA | 0.20925  | 0.051769416  | 0.356568258 | 9.68E-03 | 6.41E-02 | 1.00E+00 |
| ENSG00000121210.14_KIAA0922  | ENSG00000160789.18_LMNA | 0.01526  | -0.144293529 | 0.174035631 | 8.52E-01 | 9.42E-01 | 1.00E+00 |
| ENSG00000225616.2_RP4-604A2  | ENSG00000160789.18_LMNA | -0.13789 | -0.290706397 | 0.021791865 | 9.03E-02 | 2.93E-01 | 1.00E+00 |
| ENSG00000147231.12_CXorf57   | ENSG00000160789.18_LMNA | -0.17911 | -0.328929886 | -0.02049196 | 2.73E-02 | 1.34E-01 | 1.00E+00 |
| ENSG00000092439.12_TRPM7     | ENSG00000160789.18_LMNA | 0.15913  | -7.48E-05    | 0.310463425 | 5.02E-02 | 2.02E-01 | 1.00E+00 |
| ENSG00000135636.12_DYSF      | ENSG00000160789.18_LMNA | 0.08756  | -0.072652419 | 0.243369231 | 2.83E-01 | 5.69E-01 | 1.00E+00 |
| ENSG00000204060.5_FOXO6      | ENSG00000160789.18_LMNA | -0.1637  | -0.314701751 | -0.00462244 | 4.39E-02 | 1.85E-01 | 1.00E+00 |
| ENSG00000251333.3_RTN3P1     | ENSG00000160789.18_LMNA | -0.22419 | -0.370182325 | -0.06739901 | 5.49E-03 | 4.20E-02 | 1.00E+00 |

|                             |                         |          |              |             |          |          |          |
|-----------------------------|-------------------------|----------|--------------|-------------|----------|----------|----------|
| ENSG00000069974.14_RAB27A   | ENSG00000160789.18_LMNA | 0.41142  | 0.26990013   | 0.535545806 | 1.40E-07 | 9.51E-06 | 7.17E-03 |
| ENSG00000073756.10_PTGS2    | ENSG00000160789.18_LMNA | 0.15909  | -0.000111127 | 0.310430623 | 5.03E-02 | 2.02E-01 | 1.00E+00 |
| ENSG00000072121.14_ZFYVE26  | ENSG00000160789.18_LMNA | 0.24223  | 0.086361074  | 0.386526327 | 2.64E-03 | 2.42E-02 | 1.00E+00 |
| ENSG00000154889.15_MPPE1    | ENSG00000160789.18_LMNA | -0.03593 | -0.194017879 | 0.123982955 | 6.60E-01 | 8.50E-01 | 1.00E+00 |
| ENSG00000100314.3_CABP7     | ENSG00000160789.18_LMNA | -0.17933 | -0.329135449 | -0.02072238 | 2.71E-02 | 1.34E-01 | 1.00E+00 |
| ENSG00000144554.9_FANCD2    | ENSG00000160789.18_LMNA | -0.119   | -0.273030997 | 0.040974005 | 1.44E-01 | 3.89E-01 | 1.00E+00 |
| ENSG00000241547.1_ACTG1P20  | ENSG00000160789.18_LMNA | 0.1901   | 0.031867382  | 0.33904331  | 1.90E-02 | 1.04E-01 | 1.00E+00 |
| ENSG00000099992.14_TBC1D10  | ENSG00000160789.18_LMNA | -0.05182 | -0.209296672 | 0.108271251 | 5.26E-01 | 7.71E-01 | 1.00E+00 |
| ENSG00000183621.14_ZNF438   | ENSG00000160789.18_LMNA | -0.10538 | -0.260214155 | 0.054740135 | 1.96E-01 | 4.66E-01 | 1.00E+00 |
| ENSG00000104951.14_IL4I1    | ENSG00000160789.18_LMNA | 0.11917  | -0.040804671 | 0.273187963 | 1.44E-01 | 3.88E-01 | 1.00E+00 |
| ENSG00000007545.14_CRAMP1   | ENSG00000160789.18_LMNA | 0.05966  | -0.100498606 | 0.216798257 | 4.65E-01 | 7.27E-01 | 1.00E+00 |
| ENSG00000100815.11_TRIP11   | ENSG00000160789.18_LMNA | 0.22918  | 0.072633939  | 0.374713283 | 4.51E-03 | 3.63E-02 | 1.00E+00 |
| ENSG00000010072.14_SPRTN    | ENSG00000160789.18_LMNA | -0.24524 | -0.389245592 | -0.08953717 | 2.33E-03 | 2.19E-02 | 1.00E+00 |
| ENSG00000051596.8_THOC3     | ENSG00000160789.18_LMNA | 0.01687  | -0.142714133 | 0.175598952 | 8.37E-01 | 9.37E-01 | 1.00E+00 |
| ENSG00000172375.11_C2CD2L   | ENSG00000160789.18_LMNA | -0.07988 | -0.236082528 | 0.080338177 | 3.28E-01 | 6.14E-01 | 1.00E+00 |
| ENSG00000029153.13_ARNTL2   | ENSG00000160789.18_LMNA | 0.40977  | 0.268056309  | 0.534126741 | 1.59E-07 | 1.05E-05 | 8.13E-03 |
| ENSG00000197128.10_ZNF772   | ENSG00000160789.18_LMNA | -0.11907 | -0.273093892 | 0.040906156 | 1.44E-01 | 3.88E-01 | 1.00E+00 |
| ENSG00000196470.10_SIAH1    | ENSG00000160789.18_LMNA | -0.19699 | -0.345363917 | -0.03901734 | 1.50E-02 | 8.79E-02 | 1.00E+00 |
| ENSG00000244119.1_PDCL3P4   | ENSG00000160789.18_LMNA | -0.04884 | -0.206436951 | 0.111224117 | 5.50E-01 | 7.87E-01 | 1.00E+00 |
| ENSG00000147481.12_SNTG1    | ENSG00000160789.18_LMNA | -0.17958 | -0.32936454  | -0.02097921 | 2.68E-02 | 1.33E-01 | 1.00E+00 |
| ENSG00000254860.4_TMEM9B-A  | ENSG00000160789.18_LMNA | 0.16823  | 0.009281975  | 0.318893851 | 3.83E-02 | 1.68E-01 | 1.00E+00 |
| ENSG00000126217.19_MCF2L    | ENSG00000160789.18_LMNA | -0.28328 | -0.423387809 | -0.12994074 | 4.06E-04 | 5.72E-03 | 1.00E+00 |
| ENSG00000104213.11_PDGFRL   | ENSG00000160789.18_LMNA | 0.14765  | -0.01182977  | 0.299802595 | 6.95E-02 | 2.48E-01 | 1.00E+00 |
| ENSG00000204815.7_TTC25     | ENSG00000160789.18_LMNA | 0.13171  | -0.028084493 | 0.284931462 | 1.06E-01 | 3.23E-01 | 1.00E+00 |
| ENSG00000101898.5_MCTS2P    | ENSG00000160789.18_LMNA | -0.13365 | -0.2867474   | 0.026108436 | 1.01E-01 | 3.13E-01 | 1.00E+00 |
| ENSG00000185686.16_PRAME    | ENSG00000160789.18_LMNA | -0.03514 | -0.193261593 | 0.124756549 | 6.67E-01 | 8.53E-01 | 1.00E+00 |
| ENSG00000182968.4_SOX1      | ENSG00000160789.18_LMNA | -0.30555 | -0.443193239 | -0.15383359 | 1.29E-04 | 2.32E-03 | 1.00E+00 |
| ENSG00000154370.12_TRIM11   | ENSG00000160789.18_LMNA | 0.09409  | -0.066102658 | 0.249550892 | 2.49E-01 | 5.29E-01 | 1.00E+00 |
| ENSG00000238058.1_RP11-432J | ENSG00000160789.18_LMNA | 0.11022  | -0.049855268 | 0.26477491  | 1.76E-01 | 4.38E-01 | 1.00E+00 |
| ENSG00000160949.15_TONSL    | ENSG00000160789.18_LMNA | 0.17972  | 0.021128394  | 0.32949759  | 2.67E-02 | 1.33E-01 | 1.00E+00 |
| ENSG00000168228.13_ZCCHC4   | ENSG00000160789.18_LMNA | -0.09959 | -0.254754704 | 0.060567806 | 2.22E-01 | 4.98E-01 | 1.00E+00 |
| ENSG00000253293.4_HOXA10    | ENSG00000160789.18_LMNA | -0.26461 | -0.406679777 | -0.1100461  | 9.87E-04 | 1.15E-02 | 1.00E+00 |
| ENSG00000188803.13_SHISA6   | ENSG00000160789.18_LMNA | 0.00397  | -0.155328595 | 0.163067917 | 9.61E-01 | 9.85E-01 | 1.00E+00 |

|                             |                         |          |              |             |          |          |          |
|-----------------------------|-------------------------|----------|--------------|-------------|----------|----------|----------|
| ENSG00000147852.14_VLDLR    | ENSG00000160789.18_LMNA | 0.16775  | 0.008783833  | 0.318446259 | 3.89E-02 | 1.70E-01 | 1.00E+00 |
| ENSG00000133114.16_GPALPP1  | ENSG00000160789.18_LMNA | -0.32738 | -0.462476216 | -0.17742588 | 3.84E-05 | 8.70E-04 | 1.00E+00 |
| ENSG00000123607.13_TTC21B   | ENSG00000160789.18_LMNA | -0.15254 | -0.304348055 | 0.006828324 | 6.06E-02 | 2.27E-01 | 1.00E+00 |
| ENSG00000261159.1_RP11-723O | ENSG00000160789.18_LMNA | -0.22552 | -0.371389629 | -0.06879227 | 5.21E-03 | 4.05E-02 | 1.00E+00 |
| ENSG00000085491.14_SLC25A24 | ENSG00000160789.18_LMNA | 0.28247  | 0.129075074  | 0.422664933 | 4.22E-04 | 5.92E-03 | 1.00E+00 |
| ENSG00000120334.14_CENPL    | ENSG00000160789.18_LMNA | -0.06299 | -0.219988134 | 0.09718169  | 4.41E-01 | 7.08E-01 | 1.00E+00 |
| ENSG00000141682.11_PMAIP1   | ENSG00000160789.18_LMNA | 0.04626  | -0.113778021 | 0.203959223 | 5.71E-01 | 8.00E-01 | 1.00E+00 |
| ENSG00000163596.15_ICA1L    | ENSG00000160789.18_LMNA | -0.21631 | -0.363008276 | -0.0591443  | 7.44E-03 | 5.26E-02 | 1.00E+00 |
| ENSG00000265688.1_MAFG-AS1  | ENSG00000160789.18_LMNA | 0.23382  | 0.077505049  | 0.37891643  | 3.74E-03 | 3.16E-02 | 1.00E+00 |
| ENSG00000177707.9_NECTIN3   | ENSG00000160789.18_LMNA | 0.02082  | -0.138839175 | 0.179427684 | 7.99E-01 | 9.19E-01 | 1.00E+00 |
| ENSG00000166839.15_ANKDD1A  | ENSG00000160789.18_LMNA | 0.15804  | -0.00119204  | 0.309453546 | 5.18E-02 | 2.06E-01 | 1.00E+00 |
| ENSG00000254941.1_RP11-677M | ENSG00000160789.18_LMNA | 0.02491  | -0.134825222 | 0.183383613 | 7.61E-01 | 9.00E-01 | 1.00E+00 |
| ENSG00000165644.9_COMTD1    | ENSG00000160789.18_LMNA | 0.21996  | 0.06296861   | 0.366336412 | 6.47E-03 | 4.76E-02 | 1.00E+00 |
| ENSG00000162341.14_TPCN2    | ENSG00000160789.18_LMNA | -0.03188 | -0.190119217 | 0.127966708 | 6.97E-01 | 8.70E-01 | 1.00E+00 |
| ENSG00000174485.13_DENND4A  | ENSG00000160789.18_LMNA | -0.05412 | -0.211498054 | 0.105994343 | 5.08E-01 | 7.58E-01 | 1.00E+00 |
| ENSG00000213949.7_ITGA1     | ENSG00000160789.18_LMNA | 0.18739  | 0.029051756  | 0.336546647 | 2.08E-02 | 1.11E-01 | 1.00E+00 |
| ENSG00000225265.1_TAF1A-AS1 | ENSG00000160789.18_LMNA | -0.22601 | -0.371834877 | -0.06930639 | 5.11E-03 | 3.99E-02 | 1.00E+00 |
| ENSG00000147316.11_MCPH1    | ENSG00000160789.18_LMNA | -0.178   | -0.327911928 | -0.01935138 | 2.82E-02 | 1.37E-01 | 1.00E+00 |
| ENSG00000145365.10_TIFA     | ENSG00000160789.18_LMNA | -0.00569 | -0.164739961 | 0.153651401 | 9.45E-01 | 9.78E-01 | 1.00E+00 |
| ENSG00000231084.2_CTA-253N1 | ENSG00000160789.18_LMNA | -0.04862 | -0.206223911 | 0.111443871 | 5.52E-01 | 7.88E-01 | 1.00E+00 |
| ENSG00000010704.17_HFE      | ENSG00000160789.18_LMNA | 0.27367  | 0.119680833  | 0.414796133 | 6.46E-04 | 8.25E-03 | 1.00E+00 |
| ENSG00000221926.10_TRIM16   | ENSG00000160789.18_LMNA | -0.07909 | -0.235326387 | 0.081133579 | 3.33E-01 | 6.18E-01 | 1.00E+00 |
| ENSG00000189308.9_LIN54     | ENSG00000160789.18_LMNA | -0.02593 | -0.184368934 | 0.133823821 | 7.51E-01 | 8.96E-01 | 1.00E+00 |
| ENSG00000165633.11_VSTM4    | ENSG00000160789.18_LMNA | 0.1102   | -0.049871834 | 0.264759468 | 1.77E-01 | 4.38E-01 | 1.00E+00 |
| ENSG00000234618.1_RPSAP9    | ENSG00000160789.18_LMNA | -0.07564 | -0.232043718 | 0.084582028 | 3.54E-01 | 6.38E-01 | 1.00E+00 |
| ENSG00000151320.9_AKAP6     | ENSG00000160789.18_LMNA | -0.19205 | -0.34082667  | -0.03388156 | 1.78E-02 | 9.92E-02 | 1.00E+00 |
| ENSG00000138101.17_DTNB     | ENSG00000160789.18_LMNA | -0.15627 | -0.307815476 | 0.003002565 | 5.45E-02 | 2.13E-01 | 1.00E+00 |
| ENSG00000111300.8_NAA25     | ENSG00000160789.18_LMNA | 0.08571  | -0.0745056   | 0.241615527 | 2.94E-01 | 5.80E-01 | 1.00E+00 |
| ENSG00000138193.13_PLCE1    | ENSG00000160789.18_LMNA | 0.10931  | -0.050774785 | 0.263917478 | 1.80E-01 | 4.43E-01 | 1.00E+00 |
| ENSG00000163235.14_TGFA     | ENSG00000160789.18_LMNA | -0.23512 | -0.380094985 | -0.07887349 | 3.55E-03 | 3.03E-02 | 1.00E+00 |
| ENSG00000218208.1_RPS27AP1  | ENSG00000160789.18_LMNA | -0.1287  | -0.2821173   | 0.031141965 | 1.14E-01 | 3.37E-01 | 1.00E+00 |
| ENSG00000197020.9_ZNF100    | ENSG00000160789.18_LMNA | -0.37875 | -0.507361498 | -0.23364094 | 1.50E-06 | 6.42E-05 | 7.68E-02 |
| ENSG00000197774.11_EME2     | ENSG00000160789.18_LMNA | 0.02615  | -0.133606604 | 0.184582579 | 7.49E-01 | 8.95E-01 | 1.00E+00 |

|                             |                         |          |              |             |          |          |          |
|-----------------------------|-------------------------|----------|--------------|-------------|----------|----------|----------|
| ENSG00000248161.4_RP11-499E | ENSG00000160789.18_LMNA | -0.04975 | -0.20730593  | 0.110327427 | 5.43E-01 | 7.82E-01 | 1.00E+00 |
| ENSG00000161267.10_BDH1     | ENSG00000160789.18_LMNA | 0.18482  | 0.026392464  | 0.334184631 | 2.26E-02 | 1.18E-01 | 1.00E+00 |
| ENSG00000099994.10_SUSD2    | ENSG00000160789.18_LMNA | 0.34995  | 0.202007553  | 0.482285035 | 9.89E-06 | 2.89E-04 | 5.08E-01 |
| ENSG00000186076.5_RP11-887P | ENSG00000160789.18_LMNA | 0.05626  | -0.103872359 | 0.213546755 | 4.91E-01 | 7.47E-01 | 1.00E+00 |
| ENSG00000179715.11_PCED1B   | ENSG00000160789.18_LMNA | 0.09868  | -0.061484467 | 0.253894129 | 2.26E-01 | 5.03E-01 | 1.00E+00 |
| ENSG00000143630.8_HCN3      | ENSG00000160789.18_LMNA | -0.18254 | -0.33208639  | -0.02403379 | 2.44E-02 | 1.24E-01 | 1.00E+00 |
| ENSG00000108506.10_INTS2    | ENSG00000160789.18_LMNA | -0.12439 | -0.278083375 | 0.035514461 | 1.27E-01 | 3.60E-01 | 1.00E+00 |
| ENSG00000157106.15_SMG1     | ENSG00000160789.18_LMNA | 0.06472  | -0.095468383 | 0.221633168 | 4.28E-01 | 6.99E-01 | 1.00E+00 |
| ENSG00000157890.16_MEGF11   | ENSG00000160789.18_LMNA | -0.29992 | -0.438201613 | -0.14777973 | 1.74E-04 | 2.93E-03 | 1.00E+00 |
| ENSG00000173531.14_MST1     | ENSG00000160789.18_LMNA | 0.03681  | -0.123114841 | 0.194866119 | 6.53E-01 | 8.46E-01 | 1.00E+00 |
| ENSG00000104722.12_NEFM     | ENSG00000160789.18_LMNA | -0.09142 | -0.247025089 | 0.068782156 | 2.63E-01 | 5.46E-01 | 1.00E+00 |
| ENSG00000121964.13_GTDC1    | ENSG00000160789.18_LMNA | -0.36128 | -0.492173515 | -0.2144122  | 4.81E-06 | 1.61E-04 | 2.47E-01 |
| ENSG00000275160.1_RP11-187C | ENSG00000160789.18_LMNA | -0.29139 | -0.430610984 | -0.13861532 | 2.70E-04 | 4.14E-03 | 1.00E+00 |
| ENSG00000105516.9_DBP       | ENSG00000160789.18_LMNA | -0.08085 | -0.236999334 | 0.079373227 | 3.22E-01 | 6.09E-01 | 1.00E+00 |
| ENSG00000122254.6_HS3ST2    | ENSG00000160789.18_LMNA | -0.06853 | -0.225270627 | 0.091673278 | 4.02E-01 | 6.78E-01 | 1.00E+00 |
| ENSG00000035499.11_DEPDC1B  | ENSG00000160789.18_LMNA | -0.11644 | -0.270624093 | 0.043568302 | 1.53E-01 | 4.03E-01 | 1.00E+00 |
| ENSG00000104731.12_KLHDC4   | ENSG00000160789.18_LMNA | 0.10899  | -0.051101565 | 0.263612641 | 1.81E-01 | 4.45E-01 | 1.00E+00 |
| ENSG00000168803.13_ADAL     | ENSG00000160789.18_LMNA | -0.00382 | -0.162919498 | 0.155477383 | 9.63E-01 | 9.85E-01 | 1.00E+00 |
| ENSG00000069482.6_GAL       | ENSG00000160789.18_LMNA | 0.08793  | -0.072284015 | 0.243717613 | 2.81E-01 | 5.67E-01 | 1.00E+00 |
| ENSG00000177932.6_ZNF354C   | ENSG00000160789.18_LMNA | -0.07504 | -0.231472126 | 0.085181711 | 3.58E-01 | 6.41E-01 | 1.00E+00 |
| ENSG00000136141.13_LRCH1    | ENSG00000160789.18_LMNA | 0.04197  | -0.118022161 | 0.199832651 | 6.08E-01 | 8.21E-01 | 1.00E+00 |
| ENSG00000185730.6_ZNF696    | ENSG00000160789.18_LMNA | 0.12717  | -0.032688936 | 0.280691379 | 1.18E-01 | 3.45E-01 | 1.00E+00 |
| ENSG00000115657.11_ABCB6    | ENSG00000160789.18_LMNA | 0.00908  | -0.150333692 | 0.168042101 | 9.12E-01 | 9.66E-01 | 1.00E+00 |
| ENSG00000125848.9_FLRT3     | ENSG00000160789.18_LMNA | -0.11198 | -0.266428929 | 0.048079979 | 1.70E-01 | 4.28E-01 | 1.00E+00 |
| ENSG00000166257.7_SCN3B     | ENSG00000160789.18_LMNA | -0.33283 | -0.467269651 | -0.18334183 | 2.79E-05 | 6.75E-04 | 1.00E+00 |
| ENSG00000197951.7_ZNF71     | ENSG00000160789.18_LMNA | 0.08221  | -0.078016653 | 0.238287273 | 3.14E-01 | 6.00E-01 | 1.00E+00 |
| ENSG00000120616.14_EPC1     | ENSG00000160789.18_LMNA | -0.29713 | -0.435717265 | -0.1447748  | 2.01E-04 | 3.28E-03 | 1.00E+00 |
| ENSG00000102763.14_VWA8     | ENSG00000160789.18_LMNA | -0.10806 | -0.262736793 | 0.052040087 | 1.85E-01 | 4.51E-01 | 1.00E+00 |
| ENSG00000203965.11_EFCAB7   | ENSG00000160789.18_LMNA | -0.39384 | -0.520414042 | -0.25033896 | 5.17E-07 | 2.69E-05 | 2.65E-02 |
| ENSG00000132326.10_PER2     | ENSG00000160789.18_LMNA | -0.02729 | -0.185688382 | 0.132481823 | 7.39E-01 | 8.90E-01 | 1.00E+00 |
| ENSG00000167554.13_ZNF610   | ENSG00000160789.18_LMNA | -0.12037 | -0.274317457 | 0.039585647 | 1.40E-01 | 3.81E-01 | 1.00E+00 |
| ENSG00000224307.1_RP11-344B | ENSG00000160789.18_LMNA | -0.0837  | -0.239702303 | 0.076524863 | 3.05E-01 | 5.92E-01 | 1.00E+00 |
| ENSG00000273156.1_RP11-127B | ENSG00000160789.18_LMNA | -0.29954 | -0.437861668 | -0.14736824 | 1.78E-04 | 2.97E-03 | 1.00E+00 |



|                              |                         |          |              |             |          |          |          |
|------------------------------|-------------------------|----------|--------------|-------------|----------|----------|----------|
| ENSG00000266094.5_RASSF5     | ENSG00000160789.18_LMNA | 0.18203  | 0.023514185  | 0.331623744 | 2.48E-02 | 1.26E-01 | 1.00E+00 |
| ENSG00000067606.14_PRKCZ     | ENSG00000160789.18_LMNA | -0.38515 | -0.51290239  | -0.24070969 | 9.60E-07 | 4.44E-05 | 4.93E-02 |
| ENSG00000104129.8_DNAJC17    | ENSG00000160789.18_LMNA | 0.26768  | 0.11330768   | 0.409432605 | 8.56E-04 | 1.03E-02 | 1.00E+00 |
| ENSG00000115421.11_PAPOLG    | ENSG00000160789.18_LMNA | -0.33729 | -0.471192654 | -0.18819886 | 2.14E-05 | 5.48E-04 | 1.00E+00 |
| ENSG00000165525.16_NEMF      | ENSG00000160789.18_LMNA | 0.04381  | -0.116199811 | 0.201605902 | 5.92E-01 | 8.11E-01 | 1.00E+00 |
| ENSG00000116883.8_RP11-268J  | ENSG00000160789.18_LMNA | 0.23992  | 0.083927205  | 0.384438992 | 2.91E-03 | 2.61E-02 | 1.00E+00 |
| ENSG00000134532.14_SOX5      | ENSG00000160789.18_LMNA | -0.18586 | -0.335145665 | -0.02747393 | 2.19E-02 | 1.15E-01 | 1.00E+00 |
| ENSG00000255857.4_PXN-AS1    | ENSG00000160789.18_LMNA | -0.28114 | -0.421475446 | -0.12765161 | 4.51E-04 | 6.22E-03 | 1.00E+00 |
| ENSG00000223960.5_AC009948.1 | ENSG00000160789.18_LMNA | -0.30654 | -0.444068905 | -0.15489784 | 1.23E-04 | 2.23E-03 | 1.00E+00 |
| ENSG00000165194.13_PCDH19    | ENSG00000160789.18_LMNA | 0.15749  | -0.001750407 | 0.308948561 | 5.26E-02 | 2.08E-01 | 1.00E+00 |
| ENSG00000081181.6_ARG2       | ENSG00000160789.18_LMNA | -0.21565 | -0.362406489 | -0.05845375 | 7.63E-03 | 5.36E-02 | 1.00E+00 |
| ENSG00000156535.12_CD109     | ENSG00000160789.18_LMNA | 0.33598  | 0.186770364  | 0.470040023 | 2.32E-05 | 5.81E-04 | 1.00E+00 |
| ENSG00000272654.1_RP11-422P  | ENSG00000160789.18_LMNA | -0.2366  | -0.381434567 | -0.08043028 | 3.34E-03 | 2.90E-02 | 1.00E+00 |
| ENSG00000148120.13_C9orf3    | ENSG00000160789.18_LMNA | -0.02528 | -0.183738722 | 0.134464392 | 7.57E-01 | 8.99E-01 | 1.00E+00 |
| ENSG00000147118.9_ZNF182     | ENSG00000160789.18_LMNA | 0.00487  | -0.154451645 | 0.163942403 | 9.53E-01 | 9.81E-01 | 1.00E+00 |
| ENSG00000186352.7_ANKRD37    | ENSG00000160789.18_LMNA | 0.09956  | -0.060598688 | 0.25472572  | 2.22E-01 | 4.98E-01 | 1.00E+00 |
| ENSG00000227775.3_RP1-283E3  | ENSG00000160789.18_LMNA | -0.0287  | -0.187042854 | 0.131102987 | 7.26E-01 | 8.84E-01 | 1.00E+00 |
| ENSG00000223722.3_RP11-467L  | ENSG00000160789.18_LMNA | 0.34499  | 0.196581188  | 0.477936784 | 1.35E-05 | 3.72E-04 | 6.90E-01 |
| ENSG00000196220.14_SRGAP3    | ENSG00000160789.18_LMNA | -0.28968 | -0.429091278 | -0.13678652 | 2.95E-04 | 4.44E-03 | 1.00E+00 |
| ENSG00000158050.4_DUSP2      | ENSG00000160789.18_LMNA | 0.07777  | -0.082448365 | 0.234075659 | 3.41E-01 | 6.26E-01 | 1.00E+00 |
| ENSG00000133858.14_ZFC3H1    | ENSG00000160789.18_LMNA | -0.06564 | -0.222517896 | 0.094546159 | 4.22E-01 | 6.93E-01 | 1.00E+00 |
| ENSG00000241556.1_RP11-490G  | ENSG00000160789.18_LMNA | -0.1906  | -0.339494734 | -0.032377   | 1.87E-02 | 1.03E-01 | 1.00E+00 |
| ENSG00000213707.2_HMGB1P10   | ENSG00000160789.18_LMNA | -0.16623 | -0.317040952 | -0.00722081 | 4.07E-02 | 1.75E-01 | 1.00E+00 |
| ENSG00000132953.15_XPO4      | ENSG00000160789.18_LMNA | -0.03677 | -0.194833976 | 0.123147746 | 6.53E-01 | 8.46E-01 | 1.00E+00 |
| ENSG00000258427.3_RBM8B      | ENSG00000160789.18_LMNA | 0.18733  | 0.028995362  | 0.336496597 | 2.08E-02 | 1.11E-01 | 1.00E+00 |
| ENSG00000277462.1_ZNF670     | ENSG00000160789.18_LMNA | -0.34472 | -0.477701167 | -0.19628764 | 1.37E-05 | 3.78E-04 | 7.02E-01 |
| ENSG00000245970.2_KB-1208A1  | ENSG00000160789.18_LMNA | -0.2129  | -0.359898627 | -0.05557909 | 8.45E-03 | 5.80E-02 | 1.00E+00 |
| ENSG00000143970.15_ASXL2     | ENSG00000160789.18_LMNA | 0.06791  | -0.092287881 | 0.224682154 | 4.06E-01 | 6.81E-01 | 1.00E+00 |
| ENSG00000197016.10_ZNF470    | ENSG00000160789.18_LMNA | 0.16514  | 0.006096864  | 0.316029573 | 4.20E-02 | 1.79E-01 | 1.00E+00 |
| ENSG00000119979.14_FAM45A    | ENSG00000160789.18_LMNA | -0.24049 | -0.384948692 | -0.08452119 | 2.84E-03 | 2.57E-02 | 1.00E+00 |
| ENSG00000141441.14_GAREM1    | ENSG00000160789.18_LMNA | -0.02741 | -0.185804144 | 0.132364027 | 7.37E-01 | 8.90E-01 | 1.00E+00 |
| ENSG00000267254.4_ZNF790-AS  | ENSG00000160789.18_LMNA | -0.17956 | -0.329345169 | -0.0209575  | 2.69E-02 | 1.33E-01 | 1.00E+00 |
| ENSG00000168995.12_SIGLEC7   | ENSG00000160789.18_LMNA | 0.01151  | -0.14796611  | 0.170394212 | 8.88E-01 | 9.57E-01 | 1.00E+00 |

|                             |                         |          |              |             |          |          |          |
|-----------------------------|-------------------------|----------|--------------|-------------|----------|----------|----------|
| ENSG00000112425.12_EPM2A    | ENSG00000160789.18_LMNA | -0.24463 | -0.388692509 | -0.08889067 | 2.39E-03 | 2.24E-02 | 1.00E+00 |
| ENSG00000196793.12_ZNF239   | ENSG00000160789.18_LMNA | -0.1812  | -0.330860585 | -0.02265743 | 2.55E-02 | 1.28E-01 | 1.00E+00 |
| ENSG00000162601.8_MYSM1     | ENSG00000160789.18_LMNA | 0.00799  | -0.151400114 | 0.166981462 | 9.22E-01 | 9.70E-01 | 1.00E+00 |
| ENSG00000261824.5_LINC00662 | ENSG00000160789.18_LMNA | -0.31746 | -0.453729048 | -0.16668316 | 6.74E-05 | 1.37E-03 | 1.00E+00 |
| ENSG00000136826.13_KLF4     | ENSG00000160789.18_LMNA | 0.0515   | -0.108592577 | 0.208985745 | 5.29E-01 | 7.73E-01 | 1.00E+00 |
| ENSG00000235194.7_PPP1R3E   | ENSG00000160789.18_LMNA | -0.08609 | -0.241972338 | 0.074128726 | 2.92E-01 | 5.77E-01 | 1.00E+00 |
| ENSG00000201772.1_SNORA5C   | ENSG00000160789.18_LMNA | 0.06929  | -0.090918328 | 0.225993166 | 3.96E-01 | 6.73E-01 | 1.00E+00 |
| ENSG00000161544.8_CYGB      | ENSG00000160789.18_LMNA | 0.17002  | 0.011116655  | 0.320541163 | 3.63E-02 | 1.62E-01 | 1.00E+00 |
| ENSG00000158246.7_FAM46B    | ENSG00000160789.18_LMNA | 0.3034   | 0.151520944  | 0.441288495 | 1.45E-04 | 2.53E-03 | 1.00E+00 |
| ENSG00000213087.3_RP11-613F | ENSG00000160789.18_LMNA | -0.14079 | -0.293410345 | 0.018836987 | 8.36E-02 | 2.80E-01 | 1.00E+00 |
| ENSG00000272602.4_ZNF595    | ENSG00000160789.18_LMNA | -0.04498 | -0.202732705 | 0.115040696 | 5.82E-01 | 8.06E-01 | 1.00E+00 |
| ENSG00000162062.13_C16orf59 | ENSG00000160789.18_LMNA | 0.0207   | -0.138963    | 0.179305486 | 8.00E-01 | 9.20E-01 | 1.00E+00 |
| ENSG00000135519.6_KCNH3     | ENSG00000160789.18_LMNA | -0.01312 | -0.171962288 | 0.146385691 | 8.73E-01 | 9.51E-01 | 1.00E+00 |
| ENSG00000163681.13_SLMAP    | ENSG00000160789.18_LMNA | 0.13841  | -0.021258794 | 0.291194568 | 8.90E-02 | 2.90E-01 | 1.00E+00 |
| ENSG00000238278.3_ALG1L6P   | ENSG00000160789.18_LMNA | 0.19945  | 0.041571761  | 0.34761532  | 1.38E-02 | 8.24E-02 | 1.00E+00 |
| ENSG00000234645.3_YWHAEP5   | ENSG00000160789.18_LMNA | -0.19566 | -0.344140214 | -0.03763062 | 1.57E-02 | 9.07E-02 | 1.00E+00 |
| ENSG00000112137.15_PHACTR1  | ENSG00000160789.18_LMNA | -0.29958 | -0.437899358 | -0.14741385 | 1.77E-04 | 2.97E-03 | 1.00E+00 |
| ENSG00000086205.15_FOLH1    | ENSG00000160789.18_LMNA | -0.25763 | -0.400406006 | -0.10263666 | 1.35E-03 | 1.46E-02 | 1.00E+00 |
| ENSG00000151233.9_GXYLT1    | ENSG00000160789.18_LMNA | 0.21407  | 0.056806387  | 0.360969863 | 8.09E-03 | 5.61E-02 | 1.00E+00 |
| ENSG00000241494.1_RP11-796G | ENSG00000160789.18_LMNA | -0.08696 | -0.242796645 | 0.073257724 | 2.87E-01 | 5.72E-01 | 1.00E+00 |
| ENSG00000172175.11_MALT1    | ENSG00000160789.18_LMNA | 0.12883  | -0.031011657 | 0.282237349 | 1.14E-01 | 3.37E-01 | 1.00E+00 |
| ENSG00000102967.10_DHODH    | ENSG00000160789.18_LMNA | 0.1617   | 0.002565219  | 0.312847049 | 4.66E-02 | 1.92E-01 | 1.00E+00 |
| ENSG00000176884.13_GRIN1    | ENSG00000160789.18_LMNA | -0.17208 | -0.322446182 | -0.01324096 | 3.40E-02 | 1.56E-01 | 1.00E+00 |
| ENSG00000187824.7_TMEM220   | ENSG00000160789.18_LMNA | -0.01631 | -0.175057687 | 0.143261147 | 8.42E-01 | 9.38E-01 | 1.00E+00 |
| ENSG00000130699.15_TAF4     | ENSG00000160789.18_LMNA | 0.12478  | -0.035115601 | 0.278451809 | 1.26E-01 | 3.58E-01 | 1.00E+00 |
| ENSG00000141338.12_ABCA8    | ENSG00000160789.18_LMNA | 0.00715  | -0.152228392 | 0.166157167 | 9.30E-01 | 9.73E-01 | 1.00E+00 |
| ENSG00000198087.7_CD2AP     | ENSG00000160789.18_LMNA | 0.34903  | 0.200999918  | 0.481478641 | 1.05E-05 | 3.03E-04 | 5.38E-01 |
| ENSG00000186666.5_BCDIN3D   | ENSG00000160789.18_LMNA | -0.22042 | -0.366750194 | -0.0634447  | 6.36E-03 | 4.70E-02 | 1.00E+00 |
| ENSG00000119684.14_MLH3     | ENSG00000160789.18_LMNA | 0.30506  | 0.15330833   | 0.442760853 | 1.33E-04 | 2.37E-03 | 1.00E+00 |
| ENSG00000243701.4_DUBR      | ENSG00000160789.18_LMNA | -0.10078 | -0.255875549 | 0.059373115 | 2.17E-01 | 4.91E-01 | 1.00E+00 |
| ENSG00000163535.16_SGO2     | ENSG00000160789.18_LMNA | 0.04682  | -0.113222655 | 0.20449837  | 5.67E-01 | 7.97E-01 | 1.00E+00 |
| ENSG00000227939.1_RPL3P2    | ENSG00000160789.18_LMNA | -0.08807 | -0.243850758 | 0.072143195 | 2.81E-01 | 5.66E-01 | 1.00E+00 |
| ENSG00000116194.11_ANGPTL1  | ENSG00000160789.18_LMNA | -0.05888 | -0.216058718 | 0.101266592 | 4.71E-01 | 7.31E-01 | 1.00E+00 |

|                             |                         |          |              |             |          |          |          |
|-----------------------------|-------------------------|----------|--------------|-------------|----------|----------|----------|
| ENSG00000136319.10_TTC5     | ENSG00000160789.18_LMNA | -0.22227 | -0.368429772 | -0.06537863 | 5.92E-03 | 4.46E-02 | 1.00E+00 |
| ENSG00000003989.15_SLC7A2   | ENSG00000160789.18_LMNA | -0.24527 | -0.389269765 | -0.08956543 | 2.32E-03 | 2.19E-02 | 1.00E+00 |
| ENSG00000174498.12_IGDCC3   | ENSG00000160789.18_LMNA | -0.11963 | -0.273618386 | 0.04034024  | 1.42E-01 | 3.85E-01 | 1.00E+00 |
| ENSG00000135447.15_PPP1R1A  | ENSG00000160789.18_LMNA | -0.40896 | -0.533434156 | -0.26715713 | 1.69E-07 | 1.10E-05 | 8.65E-03 |
| ENSG00000273820.1_USP27X    | ENSG00000160789.18_LMNA | 0.07148  | -0.088735357 | 0.228080456 | 3.82E-01 | 6.60E-01 | 1.00E+00 |
| ENSG00000258634.3_RP4-773N1 | ENSG00000160789.18_LMNA | 0.02558  | -0.134171954 | 0.184026464 | 7.54E-01 | 8.98E-01 | 1.00E+00 |
| ENSG00000197608.10_ZNF841   | ENSG00000160789.18_LMNA | 0.14587  | -0.013650391 | 0.298144442 | 7.30E-02 | 2.56E-01 | 1.00E+00 |
| ENSG00000109618.10_SEPSECS  | ENSG00000160789.18_LMNA | -0.17382 | -0.324054355 | -0.01503642 | 3.22E-02 | 1.50E-01 | 1.00E+00 |
| ENSG00000049246.13_PER3     | ENSG00000160789.18_LMNA | -0.05228 | -0.209736614 | 0.107816481 | 5.22E-01 | 7.68E-01 | 1.00E+00 |
| ENSG00000095585.15_BLNK     | ENSG00000160789.18_LMNA | -0.13996 | -0.29264354  | 0.019675506 | 8.55E-02 | 2.84E-01 | 1.00E+00 |
| ENSG00000112378.11_PERP     | ENSG00000160789.18_LMNA | 0.1766   | 0.01790563   | 0.326620574 | 2.95E-02 | 1.42E-01 | 1.00E+00 |
| ENSG00000123411.13_IKZF4    | ENSG00000160789.18_LMNA | -0.0917  | -0.247293737 | 0.068497377 | 2.61E-01 | 5.44E-01 | 1.00E+00 |
| ENSG00000081665.12_ZNF506   | ENSG00000160789.18_LMNA | -0.33353 | -0.467882408 | -0.18409957 | 2.68E-05 | 6.54E-04 | 1.00E+00 |
| ENSG00000108379.8_WNT3      | ENSG00000160789.18_LMNA | -0.10991 | -0.264486182 | 0.050164962 | 1.78E-01 | 4.39E-01 | 1.00E+00 |
| ENSG00000135269.16_TES      | ENSG00000160789.18_LMNA | 0.13487  | -0.024869352 | 0.287884936 | 9.76E-02 | 3.07E-01 | 1.00E+00 |
| ENSG00000198624.11_CCDC69   | ENSG00000160789.18_LMNA | -0.1209  | -0.274813265 | 0.039050244 | 1.38E-01 | 3.78E-01 | 1.00E+00 |
| ENSG00000170448.10_NFXL1    | ENSG00000160789.18_LMNA | -0.06467 | -0.221590343 | 0.095513009 | 4.29E-01 | 6.99E-01 | 1.00E+00 |
| ENSG00000165895.16_ARHGAP4  | ENSG00000160789.18_LMNA | -0.0207  | -0.179307463 | 0.138960997 | 8.00E-01 | 9.20E-01 | 1.00E+00 |
| ENSG00000250982.2_GAPDHP35  | ENSG00000160789.18_LMNA | 0.23635  | 0.080160949  | 0.381202907 | 3.37E-03 | 2.92E-02 | 1.00E+00 |
| ENSG00000165714.9_BORCS5    | ENSG00000160789.18_LMNA | -0.14785 | -0.299993736 | 0.011619769 | 6.91E-02 | 2.48E-01 | 1.00E+00 |
| ENSG00000168135.4_KCNJ4     | ENSG00000160789.18_LMNA | -0.08561 | -0.241516329 | 0.07461036  | 2.94E-01 | 5.80E-01 | 1.00E+00 |
| ENSG00000247416.2_RP11-629G | ENSG00000160789.18_LMNA | -0.2115  | -0.358628299 | -0.05412489 | 8.90E-03 | 6.03E-02 | 1.00E+00 |
| ENSG00000261786.1_RP4-555D2 | ENSG00000160789.18_LMNA | -0.30442 | -0.442189057 | -0.15261397 | 1.37E-04 | 2.43E-03 | 1.00E+00 |
| ENSG00000155903.10_RASA2    | ENSG00000160789.18_LMNA | 0.13018  | -0.029638834 | 0.283501487 | 1.10E-01 | 3.30E-01 | 1.00E+00 |
| ENSG00000125388.18_GRK4     | ENSG00000160789.18_LMNA | -0.1283  | -0.281745574 | 0.031545393 | 1.15E-01 | 3.39E-01 | 1.00E+00 |
| ENSG00000167384.9_ZNF180    | ENSG00000160789.18_LMNA | 0.13121  | -0.028592529 | 0.284464229 | 1.07E-01 | 3.25E-01 | 1.00E+00 |
| ENSG00000203667.8_COX20     | ENSG00000160789.18_LMNA | -0.21468 | -0.361522595 | -0.05744    | 7.91E-03 | 5.51E-02 | 1.00E+00 |
| ENSG00000130529.14_TRPM4    | ENSG00000160789.18_LMNA | 0.38118  | 0.236319678  | 0.509463912 | 1.27E-06 | 5.59E-05 | 6.50E-02 |
| ENSG00000083844.9_ZNF264    | ENSG00000160789.18_LMNA | 0.18834  | 0.030042054  | 0.337425255 | 2.01E-02 | 1.09E-01 | 1.00E+00 |
| ENSG00000103248.16_MTHFSD   | ENSG00000160789.18_LMNA | 0.145    | -0.014539224 | 0.297334242 | 7.47E-02 | 2.60E-01 | 1.00E+00 |
| ENSG00000225889.6_AC074289  | ENSG00000160789.18_LMNA | -0.35526 | -0.486921039 | -0.20781203 | 7.08E-06 | 2.22E-04 | 3.63E-01 |
| ENSG00000250616.2_RP11-455F | ENSG00000160789.18_LMNA | -0.25516 | -0.398182453 | -0.10001851 | 1.51E-03 | 1.58E-02 | 1.00E+00 |
| ENSG00000078043.14_PIAS2    | ENSG00000160789.18_LMNA | -0.08418 | -0.240159529 | 0.076042531 | 3.03E-01 | 5.89E-01 | 1.00E+00 |

|                              |                         |          |              |             |          |          |          |
|------------------------------|-------------------------|----------|--------------|-------------|----------|----------|----------|
| ENSG00000241058.2_NSUN6      | ENSG00000160789.18_LMNA | -0.31953 | -0.455553817 | -0.16891861 | 6.01E-05 | 1.24E-03 | 1.00E+00 |
| ENSG00000268412.2_TRMT112P   | ENSG00000160789.18_LMNA | 0.13895  | -0.020705173 | 0.291701387 | 8.78E-02 | 2.88E-01 | 1.00E+00 |
| ENSG00000125089.15_SH3TC1    | ENSG00000160789.18_LMNA | 0.12185  | -0.038086906 | 0.275704939 | 1.35E-01 | 3.73E-01 | 1.00E+00 |
| ENSG00000130584.9_ZBTB46     | ENSG00000160789.18_LMNA | 0.22277  | 0.065907581  | 0.36888881  | 5.81E-03 | 4.39E-02 | 1.00E+00 |
| ENSG00000256223.4_ZNF10      | ENSG00000160789.18_LMNA | -0.31572 | -0.452189241 | -0.16479909 | 7.43E-05 | 1.48E-03 | 1.00E+00 |
| ENSG00000120662.14_MTRF1     | ENSG00000160789.18_LMNA | -0.27074 | -0.412171152 | -0.11655869 | 7.42E-04 | 9.17E-03 | 1.00E+00 |
| ENSG00000126215.12_XRCC3     | ENSG00000160789.18_LMNA | 0.21365  | 0.056363225  | 0.360583145 | 8.22E-03 | 5.68E-02 | 1.00E+00 |
| ENSG00000257605.2_RP11-680A  | ENSG00000160789.18_LMNA | 0.18564  | 0.027242832  | 0.334940359 | 2.20E-02 | 1.16E-01 | 1.00E+00 |
| ENSG00000189180.14_ZNF33A    | ENSG00000160789.18_LMNA | -0.18675 | -0.335961043 | -0.02839204 | 2.12E-02 | 1.13E-01 | 1.00E+00 |
| ENSG00000129534.12_MIS18BP1  | ENSG00000160789.18_LMNA | -0.03375 | -0.191923522 | 0.126124298 | 6.80E-01 | 8.60E-01 | 1.00E+00 |
| ENSG00000167617.2_CDC42EP5   | ENSG00000160789.18_LMNA | 0.27484  | 0.120931912  | 0.415846614 | 6.11E-04 | 7.91E-03 | 1.00E+00 |
| ENSG00000171408.12_PDE7B     | ENSG00000160789.18_LMNA | -0.01713 | -0.175847631 | 0.142462748 | 8.34E-01 | 9.36E-01 | 1.00E+00 |
| ENSG00000146574.14_CCZ1B     | ENSG00000160789.18_LMNA | -0.08254 | -0.238604158 | 0.077682701 | 3.12E-01 | 5.98E-01 | 1.00E+00 |
| ENSG00000188171.13_ZNF626    | ENSG00000160789.18_LMNA | -0.20801 | -0.355444717 | -0.05048617 | 1.01E-02 | 6.62E-02 | 1.00E+00 |
| ENSG00000182858.12_ALG12     | ENSG00000160789.18_LMNA | 0.22916  | 0.072608465  | 0.37469127  | 4.51E-03 | 3.63E-02 | 1.00E+00 |
| ENSG00000275557.1_RP11-353N  | ENSG00000160789.18_LMNA | 0.08625  | -0.073961631 | 0.24213051  | 2.91E-01 | 5.76E-01 | 1.00E+00 |
| ENSG00000271737.1_CTB-113I2C | ENSG00000160789.18_LMNA | 0.01067  | -0.148788023 | 0.169578081 | 8.96E-01 | 9.59E-01 | 1.00E+00 |
| ENSG00000124635.8_HIST1H2BJ  | ENSG00000160789.18_LMNA | -0.03518 | -0.193299794 | 0.124717483 | 6.67E-01 | 8.53E-01 | 1.00E+00 |
| ENSG00000278238.1_RP11-245D  | ENSG00000160789.18_LMNA | -0.35821 | -0.489493454 | -0.21104131 | 5.87E-06 | 1.89E-04 | 3.01E-01 |
| ENSG00000123600.17_METTL8    | ENSG00000160789.18_LMNA | 0.02466  | -0.135071982 | 0.183140718 | 7.63E-01 | 9.01E-01 | 1.00E+00 |
| ENSG00000111907.19_TPD52L1   | ENSG00000160789.18_LMNA | -0.13596 | -0.288907923 | 0.023754221 | 9.49E-02 | 3.02E-01 | 1.00E+00 |
| ENSG00000169087.9_HSPBAP1    | ENSG00000160789.18_LMNA | -0.30091 | -0.43908026  | -0.14884378 | 1.65E-04 | 2.81E-03 | 1.00E+00 |
| ENSG00000110921.10_MVK       | ENSG00000160789.18_LMNA | 0.08109  | -0.079127415 | 0.237232792 | 3.21E-01 | 6.07E-01 | 1.00E+00 |
| ENSG00000161960.13_EIF4A1    | ENSG00000160789.18_LMNA | 0.06351  | -0.09666529  | 0.220484146 | 4.37E-01 | 7.05E-01 | 1.00E+00 |
| ENSG00000074935.12_TUBE1     | ENSG00000160789.18_LMNA | -0.18531 | -0.334636436 | -0.02690079 | 2.23E-02 | 1.17E-01 | 1.00E+00 |
| ENSG00000088727.11_KIF9      | ENSG00000160789.18_LMNA | -0.05864 | -0.215826092 | 0.101508089 | 4.73E-01 | 7.33E-01 | 1.00E+00 |
| ENSG00000155265.9_GOLGA7B    | ENSG00000160789.18_LMNA | -0.14974 | -0.301746901 | 0.009692325 | 6.56E-02 | 2.39E-01 | 1.00E+00 |
| ENSG00000126001.14_CEP250    | ENSG00000160789.18_LMNA | 0.25715  | 0.102132106  | 0.399977772 | 1.38E-03 | 1.48E-02 | 1.00E+00 |
| ENSG00000162419.11_GMEB1     | ENSG00000160789.18_LMNA | 0.10248  | -0.057662491 | 0.257478963 | 2.09E-01 | 4.82E-01 | 1.00E+00 |
| ENSG00000185010.12_F8        | ENSG00000160789.18_LMNA | -0.02628 | -0.184710715 | 0.133476312 | 7.48E-01 | 8.95E-01 | 1.00E+00 |
| ENSG00000179979.8_CRIPAK     | ENSG00000160789.18_LMNA | 0.19587  | 0.037846004  | 0.344330348 | 1.56E-02 | 9.02E-02 | 1.00E+00 |
| ENSG00000172840.5_PDP2       | ENSG00000160789.18_LMNA | -0.11687 | -0.271031093 | 0.043129911 | 1.52E-01 | 4.00E-01 | 1.00E+00 |
| ENSG00000147912.11_FBXO10    | ENSG00000160789.18_LMNA | -0.10497 | -0.2598246   | 0.055156676 | 1.98E-01 | 4.68E-01 | 1.00E+00 |

|                             |                         |          |              |             |          |          |          |
|-----------------------------|-------------------------|----------|--------------|-------------|----------|----------|----------|
| ENSG00000256683.5_ZNF350    | ENSG00000160789.18_LMNA | -0.0055  | -0.164558318 | 0.153833693 | 9.46E-01 | 9.79E-01 | 1.00E+00 |
| ENSG00000004660.13_CAMKK1   | ENSG00000160789.18_LMNA | -0.27698 | -0.417756674 | -0.12320911 | 5.51E-04 | 7.29E-03 | 1.00E+00 |
| ENSG00000272425.1_RP11-363E | ENSG00000160789.18_LMNA | 0.16481  | 0.005761474  | 0.315727638 | 4.25E-02 | 1.80E-01 | 1.00E+00 |
| ENSG00000244879.4_GABPB1-A  | ENSG00000160789.18_LMNA | -0.07609 | -0.232475829 | 0.084128527 | 3.51E-01 | 6.35E-01 | 1.00E+00 |
| ENSG00000081026.17_MAGI3    | ENSG00000160789.18_LMNA | -0.16056 | -0.311788277 | -0.00139202 | 4.82E-02 | 1.96E-01 | 1.00E+00 |
| ENSG00000163590.12_PPM1L    | ENSG00000160789.18_LMNA | -0.28028 | -0.420706113 | -0.12673158 | 4.70E-04 | 6.42E-03 | 1.00E+00 |
| ENSG00000255320.1_RP11-755F | ENSG00000160789.18_LMNA | 0.11723  | -0.042764739 | 0.271370032 | 1.50E-01 | 3.98E-01 | 1.00E+00 |
| ENSG00000168237.16_GLYCTK   | ENSG00000160789.18_LMNA | -0.21636 | -0.363054376 | -0.05919721 | 7.42E-03 | 5.26E-02 | 1.00E+00 |
| ENSG00000189079.14_ARID2    | ENSG00000160789.18_LMNA | -0.11092 | -0.265428914 | 0.049153551 | 1.74E-01 | 4.34E-01 | 1.00E+00 |
| ENSG00000225697.9_SLC26A6   | ENSG00000160789.18_LMNA | 0.14226  | -0.017336125 | 0.294781842 | 8.04E-02 | 2.73E-01 | 1.00E+00 |
| ENSG00000139537.9_CCDC65    | ENSG00000160789.18_LMNA | -0.0301  | -0.188401285 | 0.129718883 | 7.13E-01 | 8.78E-01 | 1.00E+00 |
| ENSG00000142544.6_CTU1      | ENSG00000160789.18_LMNA | 0.23197  | 0.075562855  | 0.377242054 | 4.03E-03 | 3.33E-02 | 1.00E+00 |
| ENSG00000088387.16_DOCK9    | ENSG00000160789.18_LMNA | -0.19931 | -0.347481551 | -0.04141988 | 1.38E-02 | 8.28E-02 | 1.00E+00 |
| ENSG00000135750.13_KCNK1    | ENSG00000160789.18_LMNA | -0.31316 | -0.449930751 | -0.16203946 | 8.55E-05 | 1.66E-03 | 1.00E+00 |
| ENSG00000267809.1_NDUFV2P1  | ENSG00000160789.18_LMNA | -0.09873 | -0.253942373 | 0.061433093 | 2.26E-01 | 5.02E-01 | 1.00E+00 |
| ENSG00000079435.8_LIPE      | ENSG00000160789.18_LMNA | -0.28989 | -0.429279348 | -0.13701273 | 2.92E-04 | 4.40E-03 | 1.00E+00 |
| ENSG00000235314.1_LINC00957 | ENSG00000160789.18_LMNA | 0.01133  | -0.148140652 | 0.170220935 | 8.90E-01 | 9.57E-01 | 1.00E+00 |
| ENSG00000235776.2_AC000089. | ENSG00000160789.18_LMNA | -0.14362 | -0.296051978 | 0.01594493  | 7.75E-02 | 2.67E-01 | 1.00E+00 |
| ENSG00000050767.14_COL23A1  | ENSG00000160789.18_LMNA | 0.09527  | -0.064916037 | 0.250668079 | 2.43E-01 | 5.22E-01 | 1.00E+00 |
| ENSG00000162769.11_FLVCR1   | ENSG00000160789.18_LMNA | -0.13889 | -0.2916397   | 0.020772567 | 8.79E-02 | 2.88E-01 | 1.00E+00 |
| ENSG00000213189.5_BTFL3L4P2 | ENSG00000160789.18_LMNA | -0.2004  | -0.348485461 | -0.04256009 | 1.33E-02 | 8.04E-02 | 1.00E+00 |
| ENSG00000262246.4_CORO7     | ENSG00000160789.18_LMNA | -0.12938 | -0.282757809 | 0.030446594 | 1.12E-01 | 3.34E-01 | 1.00E+00 |
| ENSG00000164035.8_EMCN      | ENSG00000160789.18_LMNA | -0.23572 | -0.380633206 | -0.0794988  | 3.46E-03 | 2.98E-02 | 1.00E+00 |
| ENSG00000157399.13_ARSE     | ENSG00000160789.18_LMNA | 0.24138  | 0.085468447  | 0.385761149 | 2.74E-03 | 2.49E-02 | 1.00E+00 |
| ENSG00000124523.13_SIRT5    | ENSG00000160789.18_LMNA | -0.05539 | -0.212719625 | 0.104729424 | 4.98E-01 | 7.51E-01 | 1.00E+00 |
| ENSG00000245849.5_RAD51-AS  | ENSG00000160789.18_LMNA | -0.12459 | -0.278273616 | 0.035308522 | 1.26E-01 | 3.59E-01 | 1.00E+00 |
| ENSG00000205726.12_ITSN1    | ENSG00000160789.18_LMNA | -0.00147 | -0.160632411 | 0.157768323 | 9.86E-01 | 9.94E-01 | 1.00E+00 |
| ENSG00000132357.12_CARD6    | ENSG00000160789.18_LMNA | 0.01717  | -0.14241883  | 0.175891072 | 8.34E-01 | 9.35E-01 | 1.00E+00 |
| ENSG00000171680.19_PLEKHG5  | ENSG00000160789.18_LMNA | 0.13203  | -0.027751429 | 0.285237696 | 1.05E-01 | 3.21E-01 | 1.00E+00 |
| ENSG00000277494.1_GPIHBP1   | ENSG00000160789.18_LMNA | -0.32364 | -0.459186087 | -0.17337717 | 4.76E-05 | 1.03E-03 | 1.00E+00 |
| ENSG00000280123.1_RP11-267M | ENSG00000160789.18_LMNA | -0.12755 | -0.281046258 | 0.032304072 | 1.17E-01 | 3.43E-01 | 1.00E+00 |
| ENSG00000179965.10_ZNF771   | ENSG00000160789.18_LMNA | 0.0183   | -0.141317159 | 0.176980372 | 8.23E-01 | 9.31E-01 | 1.00E+00 |
| ENSG00000105538.7_RASIP1    | ENSG00000160789.18_LMNA | 0.00149  | -0.157743433 | 0.160657278 | 9.85E-01 | 9.94E-01 | 1.00E+00 |

|                             |                         |          |              |             |          |          |          |
|-----------------------------|-------------------------|----------|--------------|-------------|----------|----------|----------|
| ENSG00000134461.14_ANKRD16  | ENSG00000160789.18_LMNA | -0.20651 | -0.354069775 | -0.04891716 | 1.07E-02 | 6.87E-02 | 1.00E+00 |
| ENSG00000135870.10_RC3H1    | ENSG00000160789.18_LMNA | -0.00895 | -0.167912618 | 0.150463921 | 9.13E-01 | 9.67E-01 | 1.00E+00 |
| ENSG00000101443.16_WFDC2    | ENSG00000160789.18_LMNA | 0.15296  | -0.006395214 | 0.304741012 | 5.99E-02 | 2.25E-01 | 1.00E+00 |
| ENSG00000183307.3_CECR6     | ENSG00000160789.18_LMNA | -0.26221 | -0.404520322 | -0.10749201 | 1.10E-03 | 1.25E-02 | 1.00E+00 |
| ENSG00000165632.7_TAF3      | ENSG00000160789.18_LMNA | -0.05931 | -0.216465225 | 0.100844495 | 4.68E-01 | 7.29E-01 | 1.00E+00 |
| ENSG00000165730.13_STOX1    | ENSG00000160789.18_LMNA | -0.36052 | -0.491507139 | -0.21357344 | 5.06E-06 | 1.67E-04 | 2.59E-01 |
| ENSG00000228962.1_HCG23     | ENSG00000160789.18_LMNA | -0.16402 | -0.314996585 | -0.00494971 | 4.35E-02 | 1.83E-01 | 1.00E+00 |
| ENSG00000062370.15_ZNF112   | ENSG00000160789.18_LMNA | -0.10016 | -0.255287239 | 0.060000298 | 2.20E-01 | 4.95E-01 | 1.00E+00 |
| ENSG00000136244.10_IL6      | ENSG00000160789.18_LMNA | 0.14274  | -0.016844838 | 0.295230504 | 7.94E-02 | 2.71E-01 | 1.00E+00 |
| ENSG00000164542.11_KIAA0895 | ENSG00000160789.18_LMNA | 0.07479  | -0.085431447 | 0.231234024 | 3.60E-01 | 6.42E-01 | 1.00E+00 |
| ENSG00000149970.13_CNKSR2   | ENSG00000160789.18_LMNA | -0.09269 | -0.24822843  | 0.06750616  | 2.56E-01 | 5.38E-01 | 1.00E+00 |
| ENSG00000188906.12_LRRK2    | ENSG00000160789.18_LMNA | -0.30628 | -0.443837902 | -0.15461702 | 1.24E-04 | 2.25E-03 | 1.00E+00 |
| ENSG00000264278.1_RP11-162A | ENSG00000160789.18_LMNA | 0.24988  | 0.094434713  | 0.393428495 | 1.90E-03 | 1.88E-02 | 1.00E+00 |
| ENSG00000130338.11_TULP4    | ENSG00000160789.18_LMNA | -0.04716 | -0.204826677 | 0.112884375 | 5.64E-01 | 7.95E-01 | 1.00E+00 |
| ENSG00000130363.10_RSHP3    | ENSG00000160789.18_LMNA | 0.09455  | -0.065633758 | 0.249992456 | 2.47E-01 | 5.27E-01 | 1.00E+00 |
| ENSG00000105825.10_TFPI2    | ENSG00000160789.18_LMNA | 0.17611  | 0.017394212  | 0.326163496 | 3.00E-02 | 1.43E-01 | 1.00E+00 |
| ENSG00000196214.9_ZNF766    | ENSG00000160789.18_LMNA | 0.14308  | -0.016494414 | 0.295550441 | 7.87E-02 | 2.69E-01 | 1.00E+00 |
| ENSG00000138439.11_FAM117B  | ENSG00000160789.18_LMNA | -0.43897 | -0.559102408 | -0.30079499 | 1.54E-08 | 1.55E-06 | 7.89E-04 |
| ENSG00000171827.9_ZNF570    | ENSG00000160789.18_LMNA | -0.22609 | -0.371905337 | -0.06938776 | 5.10E-03 | 3.98E-02 | 1.00E+00 |
| ENSG00000151470.11_C4orf33  | ENSG00000160789.18_LMNA | -0.41089 | -0.535090017 | -0.2693077  | 1.46E-07 | 9.80E-06 | 7.47E-03 |
| ENSG00000164118.11_CEP44    | ENSG00000160789.18_LMNA | -0.25877 | -0.401431043 | -0.10384499 | 1.29E-03 | 1.40E-02 | 1.00E+00 |
| ENSG00000105865.9_DUS4L     | ENSG00000160789.18_LMNA | -0.08393 | -0.239921331 | 0.076293826 | 3.04E-01 | 5.91E-01 | 1.00E+00 |
| ENSG00000122008.14_POLK     | ENSG00000160789.18_LMNA | -0.0679  | -0.224675901 | 0.09229441  | 4.06E-01 | 6.81E-01 | 1.00E+00 |
| ENSG00000236144.5_TMEN147-1 | ENSG00000160789.18_LMNA | -0.13409 | -0.287160332 | 0.025658753 | 9.96E-02 | 3.11E-01 | 1.00E+00 |
| ENSG00000076944.13_STXBP2   | ENSG00000160789.18_LMNA | 0.04411  | -0.115903695 | 0.201893844 | 5.89E-01 | 8.09E-01 | 1.00E+00 |
| ENSG00000171295.11_ZNF440   | ENSG00000160789.18_LMNA | -0.22131 | -0.367556213 | -0.0643725  | 6.14E-03 | 4.58E-02 | 1.00E+00 |
| ENSG00000179598.5_PLD6      | ENSG00000160789.18_LMNA | -0.28859 | -0.428121994 | -0.13562113 | 3.11E-04 | 4.64E-03 | 1.00E+00 |
| ENSG00000214367.6_HAUS3     | ENSG00000160789.18_LMNA | -0.10182 | -0.256858526 | 0.058324632 | 2.12E-01 | 4.86E-01 | 1.00E+00 |
| ENSG00000164953.14_TMEN67   | ENSG00000160789.18_LMNA | 0.03183  | -0.128022966 | 0.190064089 | 6.97E-01 | 8.70E-01 | 1.00E+00 |
| ENSG00000279457.2_FO538757  | ENSG00000160789.18_LMNA | 0.04043  | -0.119540369 | 0.198353757 | 6.21E-01 | 8.28E-01 | 1.00E+00 |
| ENSG00000133121.19_STARD13  | ENSG00000160789.18_LMNA | 0.16187  | 0.002735659  | 0.3130008   | 4.63E-02 | 1.91E-01 | 1.00E+00 |
| ENSG00000172954.12_LCLAT1   | ENSG00000160789.18_LMNA | -0.12395 | -0.277669745 | 0.035962129 | 1.28E-01 | 3.62E-01 | 1.00E+00 |
| ENSG00000169253.3_RP11-220D | ENSG00000160789.18_LMNA | 0.01829  | -0.141326514 | 0.176971125 | 8.23E-01 | 9.31E-01 | 1.00E+00 |

|                             |                         |          |              |             |          |          |          |
|-----------------------------|-------------------------|----------|--------------|-------------|----------|----------|----------|
| ENSG00000272168.4_CASC15    | ENSG00000160789.18_LMNA | -0.40589 | -0.530795237 | -0.26373526 | 2.13E-07 | 1.33E-05 | 1.09E-02 |
| ENSG00000138755.5_CXCL9     | ENSG00000160789.18_LMNA | 0.05379  | -0.106321272 | 0.211182167 | 5.10E-01 | 7.59E-01 | 1.00E+00 |
| ENSG00000119965.11_C10orf88 | ENSG00000160789.18_LMNA | -0.32385 | -0.459370666 | -0.17360405 | 4.70E-05 | 1.02E-03 | 1.00E+00 |
| ENSG00000132549.17_VPS13B   | ENSG00000160789.18_LMNA | -0.00184 | -0.160995285 | 0.157405066 | 9.82E-01 | 9.93E-01 | 1.00E+00 |
| ENSG0000018869.15_ZNF582    | ENSG00000160789.18_LMNA | -0.23874 | -0.38336842  | -0.08268029 | 3.06E-03 | 2.71E-02 | 1.00E+00 |
| ENSG00000172318.5_B3GALT1   | ENSG00000160789.18_LMNA | 0.04563  | -0.114406247 | 0.203349111 | 5.77E-01 | 8.03E-01 | 1.00E+00 |
| ENSG00000130544.10_ZNF557   | ENSG00000160789.18_LMNA | -0.16132 | -0.312492684 | -0.00217246 | 4.71E-02 | 1.93E-01 | 1.00E+00 |
| ENSG00000216895.7_AC009403. | ENSG00000160789.18_LMNA | 0.09434  | -0.065849303 | 0.249789492 | 2.48E-01 | 5.28E-01 | 1.00E+00 |
| ENSG00000141497.12_ZMYND15  | ENSG00000160789.18_LMNA | 0.01271  | -0.146791664 | 0.171559639 | 8.77E-01 | 9.52E-01 | 1.00E+00 |
| ENSG00000096872.14_IIFT74   | ENSG00000160789.18_LMNA | 0.06326  | -0.096915496 | 0.220243839 | 4.39E-01 | 7.07E-01 | 1.00E+00 |
| ENSG00000165246.11_NLGN4Y   | ENSG00000160789.18_LMNA | -0.04194 | -0.199806661 | 0.118048856 | 6.08E-01 | 8.21E-01 | 1.00E+00 |
| ENSG00000258584.1_FAM181A-A | ENSG00000160789.18_LMNA | -0.03626 | -0.19434247  | 0.123650816 | 6.57E-01 | 8.49E-01 | 1.00E+00 |
| ENSG00000173715.14_C11orf80 | ENSG00000160789.18_LMNA | 0.18266  | 0.024162609  | 0.332201062 | 2.43E-02 | 1.24E-01 | 1.00E+00 |
| ENSG00000117594.8_HSD11B1   | ENSG00000160789.18_LMNA | 0.00202  | -0.157234106 | 0.161166035 | 9.80E-01 | 9.93E-01 | 1.00E+00 |
| ENSG00000235082.2_SUMO1P3   | ENSG00000160789.18_LMNA | -0.17061 | -0.321090756 | -0.01172922 | 3.56E-02 | 1.60E-01 | 1.00E+00 |
| ENSG00000228214.5_          | ENSG00000160789.18_LMNA | -0.55164 | -0.65345502  | -0.43022426 | 1.76E-13 | 1.35E-10 | 9.05E-09 |
| ENSG00000153956.14_CACNA2D  | ENSG00000160789.18_LMNA | -0.18568 | -0.334975671 | -0.02728258 | 2.20E-02 | 1.16E-01 | 1.00E+00 |
| ENSG00000239213.4_NCK1-AS1  | ENSG00000160789.18_LMNA | -0.29538 | -0.434163184 | -0.14289779 | 2.20E-04 | 3.52E-03 | 1.00E+00 |
| ENSG00000183765.19_CHEK2    | ENSG00000160789.18_LMNA | -0.1477  | -0.299850914 | 0.011776686 | 6.94E-02 | 2.48E-01 | 1.00E+00 |
| ENSG00000068024.15_HDAC4    | ENSG00000160789.18_LMNA | -0.12144 | -0.275318628 | 0.038504337 | 1.36E-01 | 3.76E-01 | 1.00E+00 |
| ENSG00000105136.18_ZNF419   | ENSG00000160789.18_LMNA | -0.0906  | -0.246251828 | 0.06960156  | 2.67E-01 | 5.51E-01 | 1.00E+00 |
| ENSG00000112276.12_BVES     | ENSG00000160789.18_LMNA | -0.0995  | -0.254671128 | 0.060656853 | 2.23E-01 | 4.98E-01 | 1.00E+00 |
| ENSG00000154920.13_EME1     | ENSG00000160789.18_LMNA | -0.00548 | -0.164539045 | 0.153853033 | 9.47E-01 | 9.79E-01 | 1.00E+00 |
| ENSG00000065615.12_CYB5R4   | ENSG00000160789.18_LMNA | -0.31106 | -0.448075069 | -0.15977537 | 9.59E-05 | 1.82E-03 | 1.00E+00 |
| ENSG00000234224.2_TMEM229A  | ENSG00000160789.18_LMNA | -0.0309  | -0.189174715 | 0.128930282 | 7.05E-01 | 8.75E-01 | 1.00E+00 |
| ENSG00000156017.11_CARNMT1  | ENSG00000160789.18_LMNA | 0.17768  | 0.019015817  | 0.327612303 | 2.85E-02 | 1.38E-01 | 1.00E+00 |
| ENSG00000184988.7_TMEM106A  | ENSG00000160789.18_LMNA | 0.06658  | -0.093615891 | 0.223409813 | 4.15E-01 | 6.88E-01 | 1.00E+00 |
| ENSG00000172062.15_SMN1     | ENSG00000160789.18_LMNA | -0.00945 | -0.168394718 | 0.149978988 | 9.08E-01 | 9.65E-01 | 1.00E+00 |
| ENSG00000071282.10_LMCD1    | ENSG00000160789.18_LMNA | 0.08621  | -0.074004715 | 0.242089729 | 2.91E-01 | 5.76E-01 | 1.00E+00 |
| ENSG00000173638.17_SLC19A1  | ENSG00000160789.18_LMNA | 0.21637  | 0.059207677  | 0.363063494 | 7.42E-03 | 5.25E-02 | 1.00E+00 |
| ENSG00000005844.16_ITGAL    | ENSG00000160789.18_LMNA | -0.05475 | -0.212103333 | 0.105367714 | 5.03E-01 | 7.54E-01 | 1.00E+00 |
| ENSG00000179750.14_APOBEC3  | ENSG00000160789.18_LMNA | 0.30563  | 0.153918774  | 0.443263349 | 1.29E-04 | 2.31E-03 | 1.00E+00 |
| ENSG00000270532.1_PEBP1P2   | ENSG00000160789.18_LMNA | -0.06315 | -0.220139334 | 0.097024293 | 4.40E-01 | 7.08E-01 | 1.00E+00 |

|                              |                         |          |              |             |          |          |          |
|------------------------------|-------------------------|----------|--------------|-------------|----------|----------|----------|
| ENSG00000277363.3_SRCIN1     | ENSG00000160789.18_LMNA | -0.30589 | -0.443495227 | -0.15420054 | 1.27E-04 | 2.29E-03 | 1.00E+00 |
| ENSG00000233846.2_RP11-307L  | ENSG00000160789.18_LMNA | -0.1574  | -0.308859452 | 0.001848915 | 5.28E-02 | 2.08E-01 | 1.00E+00 |
| ENSG00000227540.1_DNAJC9-A   | ENSG00000160789.18_LMNA | -0.24902 | -0.392654901 | -0.09352786 | 1.98E-03 | 1.93E-02 | 1.00E+00 |
| ENSG00000198208.10_RPS6KL1   | ENSG00000160789.18_LMNA | -0.35942 | -0.490549812 | -0.21236917 | 5.43E-06 | 1.77E-04 | 2.78E-01 |
| ENSG00000266962.2_RP11-400F  | ENSG00000160789.18_LMNA | -0.00094 | -0.160112507 | 0.158288626 | 9.91E-01 | 9.97E-01 | 1.00E+00 |
| ENSG00000263004.1_RP11-166P  | ENSG00000160789.18_LMNA | -0.2739  | -0.41500041  | -0.11992405 | 6.39E-04 | 8.18E-03 | 1.00E+00 |
| ENSG00000175352.9_NRIP3      | ENSG00000160789.18_LMNA | -0.25803 | -0.400765132 | -0.1030599  | 1.33E-03 | 1.44E-02 | 1.00E+00 |
| ENSG00000269910.1_RP11-73M1  | ENSG00000160789.18_LMNA | 0.24241  | 0.086549989  | 0.386688217 | 2.62E-03 | 2.40E-02 | 1.00E+00 |
| ENSG00000273403.1_RP11-329B  | ENSG00000160789.18_LMNA | -0.16191 | -0.313045692 | -0.00278543 | 4.63E-02 | 1.91E-01 | 1.00E+00 |
| ENSG00000143847.14_PPFIA4    | ENSG00000160789.18_LMNA | 0.03939  | -0.120563807 | 0.197356002 | 6.30E-01 | 8.34E-01 | 1.00E+00 |
| ENSG00000137760.13_ALKBH8    | ENSG00000160789.18_LMNA | 0.09537  | -0.064818496 | 0.250759874 | 2.43E-01 | 5.22E-01 | 1.00E+00 |
| ENSG00000046889.17_PREX2     | ENSG00000160789.18_LMNA | -0.10501 | -0.259866123 | 0.055112283 | 1.98E-01 | 4.68E-01 | 1.00E+00 |
| ENSG00000170571.10_EMB       | ENSG00000160789.18_LMNA | 0.0852   | -0.075022439 | 0.241126063 | 2.97E-01 | 5.83E-01 | 1.00E+00 |
| ENSG00000256229.6_ZNF486     | ENSG00000160789.18_LMNA | -0.22064 | -0.366955353 | -0.06368081 | 6.30E-03 | 4.66E-02 | 1.00E+00 |
| ENSG00000012048.18_BRCA1     | ENSG00000160789.18_LMNA | 0.02348  | -0.136225548 | 0.182004699 | 7.74E-01 | 9.07E-01 | 1.00E+00 |
| ENSG00000277744.1_CTC-435M1  | ENSG00000160789.18_LMNA | -0.04106 | -0.198963013 | 0.118915097 | 6.15E-01 | 8.26E-01 | 1.00E+00 |
| ENSG00000153714.5_LURAP1L    | ENSG00000160789.18_LMNA | -0.1098  | -0.264377074 | 0.050281977 | 1.78E-01 | 4.40E-01 | 1.00E+00 |
| ENSG00000151014.5_NOCT       | ENSG00000160789.18_LMNA | 0.37996  | 0.234970433  | 0.508405362 | 1.38E-06 | 5.99E-05 | 7.07E-02 |
| ENSG00000169220.16_RGS14     | ENSG00000160789.18_LMNA | 0.19282  | 0.034683268  | 0.341535885 | 1.73E-02 | 9.73E-02 | 1.00E+00 |
| ENSG00000198198.12_SZT2      | ENSG00000160789.18_LMNA | 0.18024  | 0.021662297  | 0.329973662 | 2.63E-02 | 1.31E-01 | 1.00E+00 |
| ENSG00000100926.13_TM9SF1    | ENSG00000160789.18_LMNA | 0.5161   | 0.388850273  | 0.624029677 | 1.01E-11 | 3.50E-09 | 5.18E-07 |
| ENSG00000219481.9_NBPF1      | ENSG00000160789.18_LMNA | -0.06737 | -0.224167039 | 0.09282567  | 4.10E-01 | 6.84E-01 | 1.00E+00 |
| ENSG00000270091.1_RP11-78O7  | ENSG00000160789.18_LMNA | -0.07642 | -0.232787174 | 0.083801689 | 3.49E-01 | 6.33E-01 | 1.00E+00 |
| ENSG00000186104.9_CYP2R1     | ENSG00000160789.18_LMNA | -0.19457 | -0.343138327 | -0.03649614 | 1.63E-02 | 9.32E-02 | 1.00E+00 |
| ENSG00000154124.4_OTULIN     | ENSG00000160789.18_LMNA | 0.16354  | 0.004453826  | 0.314549824 | 4.41E-02 | 1.85E-01 | 1.00E+00 |
| ENSG00000228305.2_AC016734.1 | ENSG00000160789.18_LMNA | 0.12307  | -0.036849107 | 0.276849865 | 1.31E-01 | 3.67E-01 | 1.00E+00 |
| ENSG00000005156.10_LIG3      | ENSG00000160789.18_LMNA | -0.08077 | -0.236927704 | 0.07944864  | 3.23E-01 | 6.09E-01 | 1.00E+00 |
| ENSG00000083544.12_TDRD3     | ENSG00000160789.18_LMNA | -0.12581 | -0.279411539 | 0.034076148 | 1.22E-01 | 3.52E-01 | 1.00E+00 |
| ENSG00000137968.15_SLC44A5   | ENSG00000160789.18_LMNA | -0.24131 | -0.38569441  | -0.08539061 | 2.75E-03 | 2.50E-02 | 1.00E+00 |
| ENSG00000102595.17_UGGT2     | ENSG00000160789.18_LMNA | 0.09811  | -0.062064508 | 0.253349319 | 2.29E-01 | 5.06E-01 | 1.00E+00 |
| ENSG00000152217.15_SETBP1    | ENSG00000160789.18_LMNA | 0.12404  | -0.035867474 | 0.277757213 | 1.28E-01 | 3.62E-01 | 1.00E+00 |
| ENSG00000177738.3_CTD-2201E  | ENSG00000160789.18_LMNA | 0.05348  | -0.106626464 | 0.210887223 | 5.13E-01 | 7.61E-01 | 1.00E+00 |
| ENSG00000181444.11_ZNF467    | ENSG00000160789.18_LMNA | 0.08944  | -0.070768347 | 0.245150051 | 2.73E-01 | 5.58E-01 | 1.00E+00 |



|                             |                         |          |              |             |          |          |          |
|-----------------------------|-------------------------|----------|--------------|-------------|----------|----------|----------|
| ENSG00000108306.10_FBXL20   | ENSG00000160789.18_LMNA | -0.26162 | -0.403991358 | -0.10686698 | 1.13E-03 | 1.27E-02 | 1.00E+00 |
| ENSG00000166707.9_ZCCHC18   | ENSG00000160789.18_LMNA | -0.47216 | -0.58721949  | -0.33839468 | 8.20E-10 | 1.33E-07 | 4.21E-05 |
| ENSG00000141252.18_VPS53    | ENSG00000160789.18_LMNA | 0.05577  | -0.104354088 | 0.213081908 | 4.95E-01 | 7.50E-01 | 1.00E+00 |
| ENSG00000151576.9_QTRT2     | ENSG00000160789.18_LMNA | 0.25869  | 0.103759748  | 0.401358757 | 1.29E-03 | 1.40E-02 | 1.00E+00 |
| ENSG00000180596.7_HIST1H2BC | ENSG00000160789.18_LMNA | 0.03544  | -0.124467778 | 0.193543947 | 6.65E-01 | 8.52E-01 | 1.00E+00 |
| ENSG00000132872.10_SYT4     | ENSG00000160789.18_LMNA | -0.33345 | -0.467818966 | -0.1840211  | 2.69E-05 | 6.56E-04 | 1.00E+00 |
| ENSG00000138641.14_HERC3    | ENSG00000160789.18_LMNA | -0.03246 | -0.190679012 | 0.127395326 | 6.91E-01 | 8.67E-01 | 1.00E+00 |
| ENSG00000138823.11_MTTP     | ENSG00000160789.18_LMNA | 0.17722  | 0.018538495  | 0.327185995 | 2.90E-02 | 1.40E-01 | 1.00E+00 |
| ENSG00000198466.11_ZNF587   | ENSG00000160789.18_LMNA | 0.00113  | -0.158101133 | 0.160299876 | 9.89E-01 | 9.96E-01 | 1.00E+00 |
| ENSG00000187605.14_TET3     | ENSG00000160789.18_LMNA | -0.01962 | -0.178261921 | 0.140020046 | 8.10E-01 | 9.25E-01 | 1.00E+00 |
| ENSG00000069966.17_GNB5     | ENSG00000160789.18_LMNA | 0.1      | -0.060153581 | 0.255143421 | 2.20E-01 | 4.95E-01 | 1.00E+00 |
| ENSG00000271133.4_CTA-293F1 | ENSG00000160789.18_LMNA | -0.12362 | -0.277363781 | 0.036293191 | 1.29E-01 | 3.64E-01 | 1.00E+00 |
| ENSG00000275111.3_ZNF2      | ENSG00000160789.18_LMNA | -0.03663 | -0.19469473  | 0.123290285 | 6.54E-01 | 8.47E-01 | 1.00E+00 |
| ENSG00000174371.15_EXO1     | ENSG00000160789.18_LMNA | 0.03749  | -0.122446158 | 0.19551917  | 6.47E-01 | 8.43E-01 | 1.00E+00 |
| ENSG00000233461.4_RP11-295G | ENSG00000160789.18_LMNA | 0.04759  | -0.112458717 | 0.205239684 | 5.60E-01 | 7.93E-01 | 1.00E+00 |
| ENSG00000107282.6_APBA1     | ENSG00000160789.18_LMNA | -0.12637 | -0.279942325 | 0.033500978 | 1.21E-01 | 3.50E-01 | 1.00E+00 |
| ENSG00000251994.1_RNU2-27P  | ENSG00000160789.18_LMNA | 0.06209  | -0.098084911 | 0.219120178 | 4.47E-01 | 7.14E-01 | 1.00E+00 |
| ENSG00000182504.9_CEP97     | ENSG00000160789.18_LMNA | -0.30561 | -0.443243023 | -0.15389408 | 1.29E-04 | 2.31E-03 | 1.00E+00 |
| ENSG00000239523.4_MYLK-AS1  | ENSG00000160789.18_LMNA | -0.29111 | -0.430364559 | -0.13831864 | 2.74E-04 | 4.19E-03 | 1.00E+00 |
| ENSG00000152767.14_FARP1    | ENSG00000160789.18_LMNA | 0.01375  | -0.145770039 | 0.172572695 | 8.66E-01 | 9.48E-01 | 1.00E+00 |
| ENSG00000179399.12_GPC5     | ENSG00000160789.18_LMNA | -0.06672 | -0.223542801 | 0.093477136 | 4.14E-01 | 6.87E-01 | 1.00E+00 |
| ENSG00000272556.1_GTF2IP13  | ENSG00000160789.18_LMNA | 0.10505  | -0.055071926 | 0.259903868 | 1.98E-01 | 4.67E-01 | 1.00E+00 |
| ENSG00000213433.5_RPLP1P6   | ENSG00000160789.18_LMNA | 0.04332  | -0.116690313 | 0.201128821 | 5.96E-01 | 8.14E-01 | 1.00E+00 |
| ENSG00000117569.17_PTBP2    | ENSG00000160789.18_LMNA | -0.48184 | -0.595370566 | -0.34944535 | 3.28E-10 | 6.17E-08 | 1.68E-05 |
| ENSG00000085185.14_BCORL1   | ENSG00000160789.18_LMNA | 0.1402   | -0.019431376 | 0.292866833 | 8.49E-02 | 2.82E-01 | 1.00E+00 |
| ENSG00000228393.3_LINC01004 | ENSG00000160789.18_LMNA | 0.04808  | -0.111980422 | 0.205703629 | 5.56E-01 | 7.90E-01 | 1.00E+00 |
| ENSG00000138792.8_ENPEP     | ENSG00000160789.18_LMNA | 0.24968  | 0.094220238  | 0.393245575 | 1.92E-03 | 1.89E-02 | 1.00E+00 |
| ENSG00000268516.2_CTD-3138B | ENSG00000160789.18_LMNA | 0.43452  | 0.295777836  | 0.555305101 | 2.23E-08 | 2.11E-06 | 1.14E-03 |
| ENSG00000110427.13_KIAA1549 | ENSG00000160789.18_LMNA | -0.0165  | -0.175240069 | 0.14307685  | 8.40E-01 | 9.38E-01 | 1.00E+00 |
| ENSG00000134899.16_ERCC5    | ENSG00000160789.18_LMNA | -0.05326 | -0.210675141 | 0.106845879 | 5.15E-01 | 7.62E-01 | 1.00E+00 |
| ENSG00000139117.12_CPNE8    | ENSG00000160789.18_LMNA | 0.23752  | 0.081396833  | 0.382265631 | 3.21E-03 | 2.81E-02 | 1.00E+00 |
| ENSG00000227203.3_SUB1P1    | ENSG00000160789.18_LMNA | -0.21899 | -0.36545218  | -0.06195168 | 6.72E-03 | 4.88E-02 | 1.00E+00 |
| ENSG00000175387.14_SMAD2    | ENSG00000160789.18_LMNA | -0.02209 | -0.180652366 | 0.137597647 | 7.87E-01 | 9.13E-01 | 1.00E+00 |

|                             |                         |          |              |             |          |          |          |
|-----------------------------|-------------------------|----------|--------------|-------------|----------|----------|----------|
| ENSG00000149346.13_SLX4IP   | ENSG00000160789.18_LMNA | 0.04979  | -0.110289733 | 0.207342449 | 5.42E-01 | 7.81E-01 | 1.00E+00 |
| ENSG00000167434.8_CA4       | ENSG00000160789.18_LMNA | -0.33723 | -0.471134863 | -0.18812721 | 2.15E-05 | 5.49E-04 | 1.00E+00 |
| ENSG00000256124.4_LINC01152 | ENSG00000160789.18_LMNA | -0.10505 | -0.259905218 | 0.055070483 | 1.98E-01 | 4.67E-01 | 1.00E+00 |
| ENSG00000114541.13_FRMD4B   | ENSG00000160789.18_LMNA | -0.17568 | -0.325766725 | -0.0169504  | 3.04E-02 | 1.45E-01 | 1.00E+00 |
| ENSG00000170049.8_KCNAB3    | ENSG00000160789.18_LMNA | 0.09152  | -0.068679469 | 0.247121965 | 2.62E-01 | 5.45E-01 | 1.00E+00 |
| ENSG00000177946.5_CENPBD1   | ENSG00000160789.18_LMNA | 0.12795  | -0.031896424 | 0.281422051 | 1.16E-01 | 3.41E-01 | 1.00E+00 |
| ENSG00000144057.14_ST6GAL2  | ENSG00000160789.18_LMNA | -0.29855 | -0.436978768 | -0.14629997 | 1.87E-04 | 3.10E-03 | 1.00E+00 |
| ENSG00000267751.4_AC009005. | ENSG00000160789.18_LMNA | 0.24766  | 0.092090663  | 0.391428029 | 2.10E-03 | 2.03E-02 | 1.00E+00 |
| ENSG00000258824.2_CTD-2555C | ENSG00000160789.18_LMNA | -0.13173 | -0.284958619 | 0.028054959 | 1.06E-01 | 3.23E-01 | 1.00E+00 |
| ENSG00000259917.1_HNRNPLP2  | ENSG00000160789.18_LMNA | -0.01269 | -0.171545326 | 0.146806093 | 8.77E-01 | 9.52E-01 | 1.00E+00 |
| ENSG00000164691.15_TAGAP    | ENSG00000160789.18_LMNA | -0.20016 | -0.348266994 | -0.04231189 | 1.34E-02 | 8.09E-02 | 1.00E+00 |
| ENSG00000100722.17_ZC3H14   | ENSG00000160789.18_LMNA | 0.18335  | 0.024879947  | 0.332839468 | 2.38E-02 | 1.22E-01 | 1.00E+00 |
| ENSG00000143669.12_LYST     | ENSG00000160789.18_LMNA | 0.17548  | 0.016750709  | 0.325588162 | 3.06E-02 | 1.45E-01 | 1.00E+00 |
| ENSG00000123243.13_ITIH5    | ENSG00000160789.18_LMNA | -0.02557 | -0.184025161 | 0.134173278 | 7.54E-01 | 8.98E-01 | 1.00E+00 |
| ENSG00000259494.1_MRPL46    | ENSG00000160789.18_LMNA | -0.16223 | -0.313341934 | -0.00311389 | 4.58E-02 | 1.90E-01 | 1.00E+00 |
| ENSG00000198879.10_SFMBT2   | ENSG00000160789.18_LMNA | -0.10529 | -0.260131181 | 0.054828866 | 1.97E-01 | 4.66E-01 | 1.00E+00 |
| ENSG00000279375.1_CH17-140K | ENSG00000160789.18_LMNA | -0.0002  | -0.159393112 | 0.15900828  | 9.98E-01 | 9.99E-01 | 1.00E+00 |
| ENSG00000099617.3_EFNA2     | ENSG00000160789.18_LMNA | -0.08958 | -0.245284767 | 0.070625729 | 2.72E-01 | 5.57E-01 | 1.00E+00 |
| ENSG00000151422.11_FER      | ENSG00000160789.18_LMNA | 0.006    | -0.153345577 | 0.165044649 | 9.42E-01 | 9.77E-01 | 1.00E+00 |
| ENSG00000226696.4_LENG8-AS  | ENSG00000160789.18_LMNA | 0.00854  | -0.15086401  | 0.167514751 | 9.17E-01 | 9.68E-01 | 1.00E+00 |
| ENSG00000166823.5_MESP1     | ENSG00000160789.18_LMNA | 0.00169  | -0.157551283 | 0.160849233 | 9.83E-01 | 9.94E-01 | 1.00E+00 |
| ENSG00000102878.14_HSF4     | ENSG00000160789.18_LMNA | 0.01272  | -0.146782145 | 0.171569082 | 8.76E-01 | 9.52E-01 | 1.00E+00 |
| ENSG00000260747.1_RP11-421N | ENSG00000160789.18_LMNA | -0.19234 | -0.341095928 | -0.03418589 | 1.76E-02 | 9.85E-02 | 1.00E+00 |
| ENSG00000127334.10_DYRK2    | ENSG00000160789.18_LMNA | 0.08077  | -0.079449296 | 0.236927081 | 3.23E-01 | 6.09E-01 | 1.00E+00 |
| ENSG00000215067.8_ALOX12-AS | ENSG00000160789.18_LMNA | -0.22755 | -0.373229277 | -0.07091753 | 4.81E-03 | 3.81E-02 | 1.00E+00 |
| ENSG00000148187.16_MRRF     | ENSG00000160789.18_LMNA | 0.08679  | -0.073430007 | 0.242633634 | 2.88E-01 | 5.73E-01 | 1.00E+00 |
| ENSG00000115041.11_KCNIP3   | ENSG00000160789.18_LMNA | -0.32783 | -0.462876384 | -0.17791897 | 3.74E-05 | 8.51E-04 | 1.00E+00 |
| ENSG00000197635.8_DPP4      | ENSG00000160789.18_LMNA | 0.21018  | 0.052743847  | 0.357420831 | 9.35E-03 | 6.24E-02 | 1.00E+00 |
| ENSG00000180423.4_HARBI1    | ENSG00000160789.18_LMNA | -0.31472 | -0.45130912  | -0.16372314 | 7.85E-05 | 1.55E-03 | 1.00E+00 |
| ENSG00000186074.17_CD300LF  | ENSG00000160789.18_LMNA | -0.1052  | -0.260049367 | 0.054916353 | 1.97E-01 | 4.67E-01 | 1.00E+00 |
| ENSG00000158528.10_PPP1R9A  | ENSG00000160789.18_LMNA | -0.17171 | -0.322102519 | -0.01285753 | 3.44E-02 | 1.57E-01 | 1.00E+00 |
| ENSG00000229671.1_LINC01150 | ENSG00000160789.18_LMNA | -0.12876 | -0.282178125 | 0.031075944 | 1.14E-01 | 3.37E-01 | 1.00E+00 |
| ENSG00000163738.17_MTHFD2L  | ENSG00000160789.18_LMNA | -0.35272 | -0.484699784 | -0.20502847 | 8.32E-06 | 2.51E-04 | 4.27E-01 |

|                             |                         |          |              |             |          |          |          |
|-----------------------------|-------------------------|----------|--------------|-------------|----------|----------|----------|
| ENSG00000152061.20_RABGAP1  | ENSG00000160789.18_LMNA | -0.15391 | -0.305624553 | 0.005420966 | 5.83E-02 | 2.21E-01 | 1.00E+00 |
| ENSG00000251661.3_RP11-326C | ENSG00000160789.18_LMNA | 0.1362   | -0.023511525 | 0.28913047  | 9.43E-02 | 3.01E-01 | 1.00E+00 |
| ENSG00000204650.12_CRHR1-IT | ENSG00000160789.18_LMNA | -0.47518 | -0.58976448  | -0.34183765 | 6.18E-10 | 1.05E-07 | 3.17E-05 |
| ENSG00000135541.19_AHI1     | ENSG00000160789.18_LMNA | -0.0253  | -0.183759263 | 0.134443518 | 7.57E-01 | 8.99E-01 | 1.00E+00 |
| ENSG00000185158.11_LRRC37B  | ENSG00000160789.18_LMNA | -0.19349 | -0.342151588 | -0.03537959 | 1.69E-02 | 9.57E-02 | 1.00E+00 |
| ENSG00000273604.1_C17orf96  | ENSG00000160789.18_LMNA | -0.09684 | -0.252151529 | 0.063339008 | 2.35E-01 | 5.13E-01 | 1.00E+00 |
| ENSG00000188732.9_FAM221A   | ENSG00000160789.18_LMNA | -0.04032 | -0.198244677 | 0.11965229  | 6.22E-01 | 8.29E-01 | 1.00E+00 |
| ENSG00000150893.10_FREM2    | ENSG00000160789.18_LMNA | 0.11338  | -0.046661046 | 0.267749604 | 1.64E-01 | 4.20E-01 | 1.00E+00 |
| ENSG00000059145.17_UNKL     | ENSG00000160789.18_LMNA | -0.04257 | -0.200414466 | 0.117424473 | 6.03E-01 | 8.18E-01 | 1.00E+00 |
| ENSG00000196867.6_ZFP28     | ENSG00000160789.18_LMNA | 0.06312  | -0.097054975 | 0.220109861 | 4.40E-01 | 7.08E-01 | 1.00E+00 |
| ENSG00000143367.14_TUFT1    | ENSG00000160789.18_LMNA | 0.17083  | 0.01195094   | 0.321289627 | 3.54E-02 | 1.60E-01 | 1.00E+00 |
| ENSG00000182263.12_FIGN     | ENSG00000160789.18_LMNA | -0.15051 | -0.302461075 | 0.008906491 | 6.42E-02 | 2.36E-01 | 1.00E+00 |
| ENSG00000165178.9_NCF1C     | ENSG00000160789.18_LMNA | 0.02749  | -0.132293087 | 0.185873854 | 7.37E-01 | 8.89E-01 | 1.00E+00 |
| ENSG00000100558.7_PLEK2     | ENSG00000160789.18_LMNA | 0.1343   | -0.025448869 | 0.287353022 | 9.90E-02 | 3.10E-01 | 1.00E+00 |
| ENSG00000154743.16_TSEN2    | ENSG00000160789.18_LMNA | -0.21945 | -0.365870809 | -0.06243306 | 6.60E-03 | 4.82E-02 | 1.00E+00 |
| ENSG00000144401.13_METTL21  | ENSG00000160789.18_LMNA | -0.13304 | -0.286182774 | 0.02672311  | 1.02E-01 | 3.16E-01 | 1.00E+00 |
| ENSG00000163935.12_SFMBT1   | ENSG00000160789.18_LMNA | 0.03794  | -0.12199621  | 0.19595844  | 6.43E-01 | 8.41E-01 | 1.00E+00 |
| ENSG00000185485.13_SDHAP1   | ENSG00000160789.18_LMNA | 0.17211  | 0.013277503  | 0.322478934 | 3.40E-02 | 1.56E-01 | 1.00E+00 |
| ENSG00000164742.13_ADCY1    | ENSG00000160789.18_LMNA | 0.08245  | -0.077770099 | 0.238521233 | 3.13E-01 | 5.99E-01 | 1.00E+00 |
| ENSG00000108924.12_HLF      | ENSG00000160789.18_LMNA | -0.3973  | -0.523394348 | -0.25417431 | 4.02E-07 | 2.21E-05 | 2.06E-02 |
| ENSG00000224837.1_GCSHP5    | ENSG00000160789.18_LMNA | -0.17738 | -0.327336993 | -0.01870755 | 2.88E-02 | 1.39E-01 | 1.00E+00 |
| ENSG00000186231.15_KLHL32   | ENSG00000160789.18_LMNA | -0.46461 | -0.580846101 | -0.32980163 | 1.64E-09 | 2.36E-07 | 8.43E-05 |
| ENSG00000188452.12_CERKL    | ENSG00000160789.18_LMNA | 0.00442  | -0.154884912 | 0.163510416 | 9.57E-01 | 9.83E-01 | 1.00E+00 |
| ENSG00000127903.13_ZNF835   | ENSG00000160789.18_LMNA | -0.0118  | -0.170675597 | 0.14768263  | 8.85E-01 | 9.56E-01 | 1.00E+00 |
| ENSG00000139971.14_C14orf37 | ENSG00000160789.18_LMNA | -0.08297 | -0.239016864 | 0.077247661 | 3.09E-01 | 5.96E-01 | 1.00E+00 |
| ENSG00000165879.8_FRAT1     | ENSG00000160789.18_LMNA | -0.28062 | -0.421011036 | -0.12709617 | 4.62E-04 | 6.33E-03 | 1.00E+00 |
| ENSG00000100626.15_GALNT16  | ENSG00000160789.18_LMNA | 0.05624  | -0.103886871 | 0.213532754 | 4.91E-01 | 7.47E-01 | 1.00E+00 |
| ENSG00000167595.13_PROSER3  | ENSG00000160789.18_LMNA | 0.24331  | 0.087498065  | 0.387500381 | 2.52E-03 | 2.34E-02 | 1.00E+00 |
| ENSG00000151849.13_CENPJ    | ENSG00000160789.18_LMNA | -0.16893 | -0.319540476 | -0.0100019  | 3.75E-02 | 1.66E-01 | 1.00E+00 |
| ENSG00000233593.5_RP4-665J2 | ENSG00000160789.18_LMNA | 0.12528  | -0.034607809 | 0.278920733 | 1.24E-01 | 3.55E-01 | 1.00E+00 |
| ENSG00000196503.2_ARL9      | ENSG00000160789.18_LMNA | 0.15986  | 0.000678914  | 0.311144355 | 4.91E-02 | 1.99E-01 | 1.00E+00 |
| ENSG00000113211.5_PCDHB6    | ENSG00000160789.18_LMNA | 0.01727  | -0.142326494 | 0.175982401 | 8.33E-01 | 9.35E-01 | 1.00E+00 |
| ENSG00000144445.14_KANSL1L  | ENSG00000160789.18_LMNA | -0.30179 | -0.439854945 | -0.14978249 | 1.58E-04 | 2.72E-03 | 1.00E+00 |

|                              |                         |          |              |             |          |          |          |
|------------------------------|-------------------------|----------|--------------|-------------|----------|----------|----------|
| ENSG00000198963.9_RORB       | ENSG00000160789.18_LMNA | 0.17007  | 0.011166773  | 0.320586136 | 3.62E-02 | 1.62E-01 | 1.00E+00 |
| ENSG00000237651.5_C2orf74    | ENSG00000160789.18_LMNA | -0.13046 | -0.283764772 | 0.029352766 | 1.09E-01 | 3.29E-01 | 1.00E+00 |
| ENSG00000185947.13_ZNF267    | ENSG00000160789.18_LMNA | 0.17605  | 0.017332701  | 0.326108511 | 3.00E-02 | 1.43E-01 | 1.00E+00 |
| ENSG00000267475.1_CTD-2538C  | ENSG00000160789.18_LMNA | 0.09788  | -0.062295145 | 0.253132636 | 2.30E-01 | 5.08E-01 | 1.00E+00 |
| ENSG00000253251.2_CTC-534A2  | ENSG00000160789.18_LMNA | -0.33614 | -0.470178479 | -0.18694189 | 2.30E-05 | 5.77E-04 | 1.00E+00 |
| ENSG00000100478.13_AP4S1     | ENSG00000160789.18_LMNA | -0.19157 | -0.340385534 | -0.0333831  | 1.81E-02 | 1.00E-01 | 1.00E+00 |
| ENSG00000228439.4_TSTD3      | ENSG00000160789.18_LMNA | -0.14677 | -0.298983433 | 0.012729453 | 7.12E-02 | 2.52E-01 | 1.00E+00 |
| ENSG00000228887.3_EEF1DP1    | ENSG00000160789.18_LMNA | -0.00365 | -0.162753587 | 0.155643688 | 9.64E-01 | 9.86E-01 | 1.00E+00 |
| ENSG00000117597.16_DIEXF     | ENSG00000160789.18_LMNA | 0.20584  | 0.048224121  | 0.353462033 | 1.10E-02 | 6.99E-02 | 1.00E+00 |
| ENSG00000273015.2_RP11-352M  | ENSG00000160789.18_LMNA | -0.3456  | -0.47847532  | -0.19725232 | 1.30E-05 | 3.61E-04 | 6.65E-01 |
| ENSG00000223309.1_RNU6-722F  | ENSG00000160789.18_LMNA | -0.00785 | -0.166841447 | 0.151540838 | 9.24E-01 | 9.71E-01 | 1.00E+00 |
| ENSG00000167858.11_TEKT1     | ENSG00000160789.18_LMNA | 0.10578  | -0.054337696 | 0.260590424 | 1.95E-01 | 4.63E-01 | 1.00E+00 |
| ENSG00000238832.1_snoU109    | ENSG00000160789.18_LMNA | 0.27541  | 0.121543381  | 0.416359755 | 5.94E-04 | 7.73E-03 | 1.00E+00 |
| ENSG00000082269.15_FAM135A   | ENSG00000160789.18_LMNA | -0.12919 | -0.282580444 | 0.030639181 | 1.13E-01 | 3.35E-01 | 1.00E+00 |
| ENSG00000272173.1_U47924.31  | ENSG00000160789.18_LMNA | -0.05496 | -0.212299943 | 0.105164114 | 5.01E-01 | 7.53E-01 | 1.00E+00 |
| ENSG00000069011.14_PITX1     | ENSG00000160789.18_LMNA | 0.16344  | 0.004351435  | 0.31445756  | 4.42E-02 | 1.86E-01 | 1.00E+00 |
| ENSG00000164296.6_TIGD6      | ENSG00000160789.18_LMNA | 0.19454  | 0.03646553   | 0.343111285 | 1.63E-02 | 9.33E-02 | 1.00E+00 |
| ENSG00000241015.2_TPM3P9     | ENSG00000160789.18_LMNA | 0.02877  | -0.13103242  | 0.187112142 | 7.25E-01 | 8.83E-01 | 1.00E+00 |
| ENSG00000148019.11_CEP78     | ENSG00000160789.18_LMNA | -0.06401 | -0.220960426 | 0.096169273 | 4.33E-01 | 7.03E-01 | 1.00E+00 |
| ENSG00000221883.2_ARIH2OS    | ENSG00000160789.18_LMNA | -0.26889 | -0.410517777 | -0.11459516 | 8.09E-04 | 9.81E-03 | 1.00E+00 |
| ENSG00000180346.3_TIGD2      | ENSG00000160789.18_LMNA | -0.13448 | -0.287526402 | 0.025259996 | 9.86E-02 | 3.09E-01 | 1.00E+00 |
| ENSG00000214541.3_RPS4XP3    | ENSG00000160789.18_LMNA | -0.02727 | -0.185665852 | 0.132504747 | 7.39E-01 | 8.90E-01 | 1.00E+00 |
| ENSG00000147789.14_ZNF7      | ENSG00000160789.18_LMNA | -0.05701 | -0.214268742 | 0.103123857 | 4.85E-01 | 7.42E-01 | 1.00E+00 |
| ENSG00000164440.13_TXLNB     | ENSG00000160789.18_LMNA | 0.16463  | 0.005575889  | 0.315560538 | 4.27E-02 | 1.81E-01 | 1.00E+00 |
| ENSG00000232320.6_AC009299.1 | ENSG00000160789.18_LMNA | 0.194    | 0.0359077    | 0.342618386 | 1.66E-02 | 9.45E-02 | 1.00E+00 |
| ENSG00000154188.8_ANGPT1     | ENSG00000160789.18_LMNA | 0.20213  | 0.044359939  | 0.350068731 | 1.25E-02 | 7.70E-02 | 1.00E+00 |
| ENSG00000262165.1_RP11-81A2  | ENSG00000160789.18_LMNA | -0.06279 | -0.219792183 | 0.097385648 | 4.42E-01 | 7.10E-01 | 1.00E+00 |
| ENSG00000174428.15_GTF2IRD2  | ENSG00000160789.18_LMNA | -0.15586 | -0.307435165 | 0.003422623 | 5.52E-02 | 2.14E-01 | 1.00E+00 |
| ENSG00000197863.7_ZNF790     | ENSG00000160789.18_LMNA | 0.19956  | 0.041684005  | 0.347714168 | 1.37E-02 | 8.22E-02 | 1.00E+00 |
| ENSG00000275457.1_RP1-198K1  | ENSG00000160789.18_LMNA | 0.38815  | 0.244033756  | 0.515500162 | 7.77E-07 | 3.74E-05 | 3.99E-02 |
| ENSG00000214309.4_MBLAC1     | ENSG00000160789.18_LMNA | 0.12488  | -0.035019596 | 0.278540478 | 1.25E-01 | 3.58E-01 | 1.00E+00 |
| ENSG00000129292.19_PHF20L1   | ENSG00000160789.18_LMNA | -0.06742 | -0.224214976 | 0.09277563  | 4.09E-01 | 6.83E-01 | 1.00E+00 |
| ENSG00000166863.10_TAC3      | ENSG00000160789.18_LMNA | -0.13442 | -0.287471949 | 0.025319317 | 9.87E-02 | 3.09E-01 | 1.00E+00 |

|                             |                         |          |              |             |          |          |          |
|-----------------------------|-------------------------|----------|--------------|-------------|----------|----------|----------|
| ENSG00000074211.12_PPP2R2C  | ENSG00000160789.18_LMNA | -0.32227 | -0.457976898 | -0.1718916  | 5.14E-05 | 1.10E-03 | 1.00E+00 |
| ENSG00000163171.7_CDC42EP3  | ENSG00000160789.18_LMNA | 0.00207  | -0.157182938 | 0.161217136 | 9.80E-01 | 9.93E-01 | 1.00E+00 |
| ENSG00000042286.13_AIFM2    | ENSG00000160789.18_LMNA | 0.47239  | 0.338654088  | 0.587411411 | 8.03E-10 | 1.30E-07 | 4.12E-05 |
| ENSG00000167995.14_BEST1    | ENSG00000160789.18_LMNA | -0.35017 | -0.482477723 | -0.20224841 | 9.76E-06 | 2.86E-04 | 5.01E-01 |
| ENSG00000102057.8_KCND1     | ENSG00000160789.18_LMNA | -0.05471 | -0.212059556 | 0.105413043 | 5.03E-01 | 7.54E-01 | 1.00E+00 |
| ENSG00000106809.9_OGN       | ENSG00000160789.18_LMNA | 0.01805  | -0.141557812 | 0.176742488 | 8.25E-01 | 9.32E-01 | 1.00E+00 |
| ENSG00000197959.12_DNM3     | ENSG00000160789.18_LMNA | -0.3186  | -0.454734038 | -0.16791397 | 6.33E-05 | 1.30E-03 | 1.00E+00 |
| ENSG00000187650.3_VMAC      | ENSG00000160789.18_LMNA | 0.01288  | -0.14662063  | 0.171729286 | 8.75E-01 | 9.51E-01 | 1.00E+00 |
| ENSG00000171016.10_PYGO1    | ENSG00000160789.18_LMNA | -0.0366  | -0.19466349  | 0.123322262 | 6.54E-01 | 8.47E-01 | 1.00E+00 |
| ENSG00000164070.10_HSPA4L   | ENSG00000160789.18_LMNA | 0.06061  | -0.099551144 | 0.217710122 | 4.58E-01 | 7.22E-01 | 1.00E+00 |
| ENSG00000277806.1_RP11-15A1 | ENSG00000160789.18_LMNA | -0.08721 | -0.243039581 | 0.073000934 | 2.85E-01 | 5.71E-01 | 1.00E+00 |
| ENSG00000128915.10_ICE2     | ENSG00000160789.18_LMNA | -0.1889  | -0.337933315 | -0.03061498 | 1.98E-02 | 1.07E-01 | 1.00E+00 |
| ENSG00000185839.3_RP4-592A1 | ENSG00000160789.18_LMNA | 0.0945   | -0.065691395 | 0.249938185 | 2.47E-01 | 5.27E-01 | 1.00E+00 |
| ENSG00000158169.10_FANCC    | ENSG00000160789.18_LMNA | 0.08717  | -0.073049088 | 0.242994028 | 2.86E-01 | 5.71E-01 | 1.00E+00 |
| ENSG00000184731.5_FAM110C   | ENSG00000160789.18_LMNA | 0.0227   | -0.136993349 | 0.181248107 | 7.81E-01 | 9.10E-01 | 1.00E+00 |
| ENSG00000279059.1_RP11-257O | ENSG00000160789.18_LMNA | -0.25816 | -0.400881468 | -0.10319703 | 1.32E-03 | 1.43E-02 | 1.00E+00 |
| ENSG00000164845.15_FAM86FP  | ENSG00000160789.18_LMNA | 0.2203   | 0.063317652  | 0.366639783 | 6.39E-03 | 4.71E-02 | 1.00E+00 |
| ENSG00000141506.12_PIK3R5   | ENSG00000160789.18_LMNA | 0.02747  | -0.132308999 | 0.185858219 | 7.37E-01 | 8.89E-01 | 1.00E+00 |
| ENSG00000165669.12_FAM204A  | ENSG00000160789.18_LMNA | -0.3935  | -0.52011571  | -0.2499555  | 5.30E-07 | 2.75E-05 | 2.72E-02 |
| ENSG00000187546.12_AGMO     | ENSG00000160789.18_LMNA | 0.29461  | 0.142074105  | 0.43348066  | 2.29E-04 | 3.64E-03 | 1.00E+00 |
| ENSG00000109680.9_TBC1D19   | ENSG00000160789.18_LMNA | 0.09933  | -0.060834299 | 0.254504568 | 2.23E-01 | 4.99E-01 | 1.00E+00 |
| ENSG00000253846.2_PCDHGA1C  | ENSG00000160789.18_LMNA | -0.05568 | -0.212993546 | 0.104445642 | 4.96E-01 | 7.50E-01 | 1.00E+00 |
| ENSG00000136213.9_CHST12    | ENSG00000160789.18_LMNA | 0.35506  | 0.207591711  | 0.486745356 | 7.17E-06 | 2.24E-04 | 3.68E-01 |
| ENSG00000161551.11_ZNF577   | ENSG00000160789.18_LMNA | -0.02559 | -0.184044677 | 0.134153441 | 7.54E-01 | 8.98E-01 | 1.00E+00 |
| ENSG00000231789.2_PIK3CD-AS | ENSG00000160789.18_LMNA | 0.09669  | -0.063485134 | 0.252014136 | 2.36E-01 | 5.14E-01 | 1.00E+00 |
| ENSG00000163507.12_KIAA1524 | ENSG00000160789.18_LMNA | -0.03209 | -0.190320328 | 0.127761458 | 6.95E-01 | 8.69E-01 | 1.00E+00 |
| ENSG00000163734.4_CXCL3     | ENSG00000160789.18_LMNA | 0.25114  | 0.095770623  | 0.394567326 | 1.80E-03 | 1.81E-02 | 1.00E+00 |
| ENSG00000263002.6_ZNF234    | ENSG00000160789.18_LMNA | 0.02078  | -0.138884975 | 0.179382487 | 7.99E-01 | 9.19E-01 | 1.00E+00 |
| ENSG00000149328.13_GLB1L2   | ENSG00000160789.18_LMNA | -0.03207 | -0.190295964 | 0.127786325 | 6.95E-01 | 8.69E-01 | 1.00E+00 |
| ENSG00000281332.1_LINC00997 | ENSG00000160789.18_LMNA | 0.27065  | 0.116472656  | 0.412098751 | 7.45E-04 | 9.20E-03 | 1.00E+00 |
| ENSG00000197857.12_ZNF44    | ENSG00000160789.18_LMNA | -0.05044 | -0.207975054 | 0.109636613 | 5.37E-01 | 7.78E-01 | 1.00E+00 |
| ENSG00000180667.9_YOD1      | ENSG00000160789.18_LMNA | -0.02113 | -0.179729088 | 0.138533718 | 7.96E-01 | 9.18E-01 | 1.00E+00 |
| ENSG00000158258.14_CLSTN2   | ENSG00000160789.18_LMNA | -0.31847 | -0.454625011 | -0.1677804  | 6.37E-05 | 1.30E-03 | 1.00E+00 |

|                              |                         |          |              |             |          |          |          |
|------------------------------|-------------------------|----------|--------------|-------------|----------|----------|----------|
| ENSG00000276075.1_CTD-2012K  | ENSG00000160789.18_LMNA | -0.02398 | -0.182488835 | 0.135734039 | 7.69E-01 | 9.05E-01 | 1.00E+00 |
| ENSG00000134508.11_CABLES1   | ENSG00000160789.18_LMNA | -0.25793 | -0.400682299 | -0.10296227 | 1.34E-03 | 1.44E-02 | 1.00E+00 |
| ENSG00000158402.17_CDC25C    | ENSG00000160789.18_LMNA | -0.0494  | -0.206976313 | 0.110667616 | 5.46E-01 | 7.83E-01 | 1.00E+00 |
| ENSG00000186767.5_SPIN4      | ENSG00000160789.18_LMNA | -0.04944 | -0.207006857 | 0.110636095 | 5.45E-01 | 7.83E-01 | 1.00E+00 |
| ENSG00000234616.7_JRK        | ENSG00000160789.18_LMNA | 0.01412  | -0.145409423 | 0.172930125 | 8.63E-01 | 9.46E-01 | 1.00E+00 |
| ENSG00000104497.12_SNX16     | ENSG00000160789.18_LMNA | -0.06991 | -0.226587736 | 0.090296812 | 3.92E-01 | 6.70E-01 | 1.00E+00 |
| ENSG00000219891.2_ZSCAN12P   | ENSG00000160789.18_LMNA | -0.00773 | -0.166721965 | 0.151660913 | 9.25E-01 | 9.71E-01 | 1.00E+00 |
| ENSG00000142731.9_PLK4       | ENSG00000160789.18_LMNA | 0.10239  | -0.057749421 | 0.257397523 | 2.09E-01 | 4.82E-01 | 1.00E+00 |
| ENSG00000230415.1_RP5-902P8  | ENSG00000160789.18_LMNA | -0.04404 | -0.201822771 | 0.115976791 | 5.90E-01 | 8.10E-01 | 1.00E+00 |
| ENSG00000019995.6_ZRANB1     | ENSG00000160789.18_LMNA | -0.10416 | -0.25906733  | 0.055966093 | 2.02E-01 | 4.72E-01 | 1.00E+00 |
| ENSG00000185404.15_SP140L    | ENSG00000160789.18_LMNA | 0.29312  | 0.140478554  | 0.432157601 | 2.47E-04 | 3.86E-03 | 1.00E+00 |
| ENSG00000237729.2_AC002075.4 | ENSG00000160789.18_LMNA | -0.0519  | -0.20936855  | 0.10819696  | 5.25E-01 | 7.70E-01 | 1.00E+00 |
| ENSG00000241464.3_RPL39P38   | ENSG00000160789.18_LMNA | -0.07525 | -0.231672042 | 0.084971996 | 3.57E-01 | 6.40E-01 | 1.00E+00 |
| ENSG00000221716.1_SNORA11    | ENSG00000160789.18_LMNA | -0.27678 | -0.417582295 | -0.12300109 | 5.57E-04 | 7.33E-03 | 1.00E+00 |
| ENSG00000169598.14_DFFB      | ENSG00000160789.18_LMNA | -0.15787 | -0.309298367 | 0.001363643 | 5.21E-02 | 2.07E-01 | 1.00E+00 |
| ENSG00000112234.7_FBXL4      | ENSG00000160789.18_LMNA | -0.2119  | -0.358992685 | -0.05454189 | 8.77E-03 | 5.96E-02 | 1.00E+00 |
| ENSG00000275441.1_RP11-666O  | ENSG00000160789.18_LMNA | -0.11208 | -0.266521739 | 0.047980305 | 1.69E-01 | 4.28E-01 | 1.00E+00 |
| ENSG00000115641.17_FHL2      | ENSG00000160789.18_LMNA | 0.36518  | 0.218688791  | 0.495566104 | 3.73E-06 | 1.31E-04 | 1.91E-01 |
| ENSG00000183793.12_NPIPA5    | ENSG00000160789.18_LMNA | -0.12604 | -0.279627899 | 0.033841721 | 1.22E-01 | 3.51E-01 | 1.00E+00 |
| ENSG00000140398.12_NEIL1     | ENSG00000160789.18_LMNA | 0.00329  | -0.155989519 | 0.16240852  | 9.68E-01 | 9.87E-01 | 1.00E+00 |
| ENSG00000186960.9_LINC01551  | ENSG00000160789.18_LMNA | 0.11874  | -0.041238039 | 0.272786214 | 1.45E-01 | 3.90E-01 | 1.00E+00 |
| ENSG00000239998.4_LILRA2     | ENSG00000160789.18_LMNA | -0.17814 | -0.328041729 | -0.01949677 | 2.81E-02 | 1.37E-01 | 1.00E+00 |
| ENSG00000277476.1_RP11-147L  | ENSG00000160789.18_LMNA | 0.26133  | 0.106567764  | 0.403738059 | 1.15E-03 | 1.28E-02 | 1.00E+00 |
| ENSG00000072840.11_EVC       | ENSG00000160789.18_LMNA | 0.44469  | 0.307238728  | 0.563963599 | 9.50E-09 | 1.03E-06 | 4.87E-04 |
| ENSG00000147650.10_LRP12     | ENSG00000160789.18_LMNA | 0.02328  | -0.136426487 | 0.18180673  | 7.76E-01 | 9.08E-01 | 1.00E+00 |
| ENSG00000141933.8_TPGS1      | ENSG00000160789.18_LMNA | 0.11992  | -0.040043969 | 0.273892897 | 1.41E-01 | 3.83E-01 | 1.00E+00 |
| ENSG00000197483.9_ZNF628     | ENSG00000160789.18_LMNA | 0.26258  | 0.10789428   | 0.404860654 | 1.08E-03 | 1.23E-02 | 1.00E+00 |
| ENSG00000042980.11_ADAM28    | ENSG00000160789.18_LMNA | -0.11366 | -0.268011056 | 0.046379991 | 1.63E-01 | 4.19E-01 | 1.00E+00 |
| ENSG00000158423.15_RIBC1     | ENSG00000160789.18_LMNA | 0.00529  | -0.154043398 | 0.164349332 | 9.48E-01 | 9.79E-01 | 1.00E+00 |
| ENSG00000141401.10_IMPA2     | ENSG00000160789.18_LMNA | 0.29974  | 0.147579891  | 0.43803653  | 1.76E-04 | 2.95E-03 | 1.00E+00 |
| ENSG00000196878.11_LAMB3     | ENSG00000160789.18_LMNA | 0.35895  | 0.211856369  | 0.490141958 | 5.59E-06 | 1.82E-04 | 2.87E-01 |
| ENSG00000260136.4_CTD-2270L  | ENSG00000160789.18_LMNA | -0.08099 | -0.23713268  | 0.07923283  | 3.21E-01 | 6.08E-01 | 1.00E+00 |
| ENSG00000259032.2_ENSAP2     | ENSG00000160789.18_LMNA | 0.12661  | -0.03326523  | 0.280159827 | 1.20E-01 | 3.48E-01 | 1.00E+00 |

|                              |                         |          |              |             |          |          |          |
|------------------------------|-------------------------|----------|--------------|-------------|----------|----------|----------|
| ENSG00000267796.6_LIN37      | ENSG00000160789.18_LMNA | -0.15157 | -0.30344879  | 0.007819037 | 6.23E-02 | 2.31E-01 | 1.00E+00 |
| ENSG00000167971.15_CASKIN1   | ENSG00000160789.18_LMNA | -0.2395  | -0.384054143 | -0.08347885 | 2.96E-03 | 2.65E-02 | 1.00E+00 |
| ENSG00000169118.14_CSNK1G1   | ENSG00000160789.18_LMNA | 0.31145  | 0.160193006  | 0.448417556 | 9.39E-05 | 1.80E-03 | 1.00E+00 |
| ENSG00000226332.2_RP11-157P  | ENSG00000160789.18_LMNA | 0.31974  | 0.169149642  | 0.455742263 | 5.93E-05 | 1.23E-03 | 1.00E+00 |
| ENSG00000183549.9_ACSM5      | ENSG00000160789.18_LMNA | -0.33852 | -0.47227066  | -0.18953596 | 1.99E-05 | 5.15E-04 | 1.00E+00 |
| ENSG00000169397.3_RNASE3     | ENSG00000160789.18_LMNA | 0.06593  | -0.094261181 | 0.222791182 | 4.20E-01 | 6.91E-01 | 1.00E+00 |
| ENSG00000213399.3_AC022210.1 | ENSG00000160789.18_LMNA | 0.04651  | -0.113534819 | 0.204195347 | 5.69E-01 | 7.99E-01 | 1.00E+00 |
| ENSG00000172869.13_DMXL1     | ENSG00000160789.18_LMNA | -0.07157 | -0.228171005 | 0.088640588 | 3.81E-01 | 6.60E-01 | 1.00E+00 |
| ENSG00000114127.9_XRN1       | ENSG00000160789.18_LMNA | -0.14379 | -0.296213699 | 0.015767707 | 7.72E-02 | 2.66E-01 | 1.00E+00 |
| ENSG00000083828.14_ZNF586    | ENSG00000160789.18_LMNA | -0.15694 | -0.308437845 | 0.002314913 | 5.35E-02 | 2.10E-01 | 1.00E+00 |
| ENSG00000006607.12_FARP2     | ENSG00000160789.18_LMNA | 0.02587  | -0.133884878 | 0.184308876 | 7.52E-01 | 8.97E-01 | 1.00E+00 |
| ENSG00000145088.7_EAF2       | ENSG00000160789.18_LMNA | -0.14368 | -0.296109182 | 0.015882245 | 7.74E-02 | 2.67E-01 | 1.00E+00 |
| ENSG00000235919.4_ASH1L-AS1  | ENSG00000160789.18_LMNA | -0.13816 | -0.290958714 | 0.021516364 | 8.96E-02 | 2.92E-01 | 1.00E+00 |
| ENSG00000138400.11_MDH1B     | ENSG00000160789.18_LMNA | -0.06743 | -0.224219229 | 0.092771191 | 4.09E-01 | 6.83E-01 | 1.00E+00 |
| ENSG00000168566.11_SNRNP48   | ENSG00000160789.18_LMNA | -0.03609 | -0.194177355 | 0.123819779 | 6.59E-01 | 8.49E-01 | 1.00E+00 |
| ENSG00000184445.10_KNTC1     | ENSG00000160789.18_LMNA | 0.14816  | -0.011307277 | 0.300278115 | 6.85E-02 | 2.46E-01 | 1.00E+00 |
| ENSG00000177943.12_MAMDC4    | ENSG00000160789.18_LMNA | 0.15435  | -0.00497608  | 0.30602784  | 5.76E-02 | 2.20E-01 | 1.00E+00 |
| ENSG00000158691.13_ZSCAN12   | ENSG00000160789.18_LMNA | -0.101   | -0.256082282 | 0.059152663 | 2.16E-01 | 4.90E-01 | 1.00E+00 |
| ENSG00000112200.15_ZNF451    | ENSG00000160789.18_LMNA | -0.20168 | -0.349653438 | -0.04388764 | 1.27E-02 | 7.79E-02 | 1.00E+00 |
| ENSG00000166860.2_ZBTB39     | ENSG00000160789.18_LMNA | -0.04549 | -0.203219146 | 0.114540037 | 5.78E-01 | 8.03E-01 | 1.00E+00 |
| ENSG00000107036.10_RIC1      | ENSG00000160789.18_LMNA | 0.08309  | -0.077129807 | 0.239128648 | 3.09E-01 | 5.95E-01 | 1.00E+00 |
| ENSG00000166920.9_C15orf48   | ENSG00000160789.18_LMNA | 0.07998  | -0.080238186 | 0.236177556 | 3.27E-01 | 6.14E-01 | 1.00E+00 |
| ENSG00000136371.8_MTHFS      | ENSG00000160789.18_LMNA | 0.21887  | 0.061818556  | 0.365336384 | 6.75E-03 | 4.90E-02 | 1.00E+00 |
| ENSG00000100234.11_TIMP3     | ENSG00000160789.18_LMNA | 0.07165  | -0.088563404 | 0.228244748 | 3.80E-01 | 6.59E-01 | 1.00E+00 |
| ENSG00000005108.14_THSD7A    | ENSG00000160789.18_LMNA | -0.37604 | -0.505008085 | -0.23064732 | 1.80E-06 | 7.39E-05 | 9.25E-02 |
| ENSG00000115507.8_OTX1       | ENSG00000160789.18_LMNA | 0.18166  | 0.02312893   | 0.331280627 | 2.51E-02 | 1.27E-01 | 1.00E+00 |
| ENSG00000246731.2_MGC16275   | ENSG00000160789.18_LMNA | -0.17443 | -0.324614431 | -0.01566219 | 3.16E-02 | 1.48E-01 | 1.00E+00 |
| ENSG00000180998.10_GPR137C   | ENSG00000160789.18_LMNA | -0.25175 | -0.395112977 | -0.09641108 | 1.76E-03 | 1.77E-02 | 1.00E+00 |
| ENSG00000139668.8_WDFY2      | ENSG00000160789.18_LMNA | 0.10695  | -0.053151705 | 0.261698737 | 1.90E-01 | 4.57E-01 | 1.00E+00 |
| ENSG00000146070.15_PLA2G7    | ENSG00000160789.18_LMNA | -0.17796 | -0.32787119  | -0.01930575 | 2.83E-02 | 1.38E-01 | 1.00E+00 |
| ENSG00000157625.14_TAB3      | ENSG00000160789.18_LMNA | 0.0175   | -0.142091907 | 0.176214405 | 8.31E-01 | 9.34E-01 | 1.00E+00 |
| ENSG00000225093.1_RPL3P7     | ENSG00000160789.18_LMNA | -0.12542 | -0.27905154  | 0.034466131 | 1.24E-01 | 3.55E-01 | 1.00E+00 |
| ENSG00000252481.1_SCARNA13   | ENSG00000160789.18_LMNA | -0.15444 | -0.306110026 | 0.004885401 | 5.75E-02 | 2.19E-01 | 1.00E+00 |

|                             |                         |          |              |             |          |          |          |
|-----------------------------|-------------------------|----------|--------------|-------------|----------|----------|----------|
| ENSG00000122335.12_SERAC1   | ENSG00000160789.18_LMNA | -0.19922 | -0.347404597 | -0.04133251 | 1.39E-02 | 8.29E-02 | 1.00E+00 |
| ENSG00000214460.3_TPT1P6    | ENSG00000160789.18_LMNA | -0.12606 | -0.279651549 | 0.033816094 | 1.22E-01 | 3.51E-01 | 1.00E+00 |
| ENSG00000181982.16_CCDC149  | ENSG00000160789.18_LMNA | 0.04947  | -0.110597882 | 0.207043885 | 5.45E-01 | 7.83E-01 | 1.00E+00 |
| ENSG00000119599.15_DCAF4    | ENSG00000160789.18_LMNA | 0.08878  | -0.071428504 | 0.244526315 | 2.77E-01 | 5.62E-01 | 1.00E+00 |
| ENSG00000180488.13_MIGA1    | ENSG00000160789.18_LMNA | -0.07001 | -0.22668565  | 0.090194438 | 3.91E-01 | 6.69E-01 | 1.00E+00 |
| ENSG00000122707.10_RECK     | ENSG00000160789.18_LMNA | 0.1068   | -0.053308233 | 0.261552508 | 1.90E-01 | 4.58E-01 | 1.00E+00 |
| ENSG00000168813.15_ZNF507   | ENSG00000160789.18_LMNA | 0.01795  | -0.141651848 | 0.176649523 | 8.26E-01 | 9.32E-01 | 1.00E+00 |
| ENSG00000134595.7_SOX3      | ENSG00000160789.18_LMNA | -0.10094 | -0.256025562 | 0.05921315  | 2.16E-01 | 4.90E-01 | 1.00E+00 |
| ENSG00000066185.11_ZMYND12  | ENSG00000160789.18_LMNA | -0.03346 | -0.191635586 | 0.126418462 | 6.82E-01 | 8.62E-01 | 1.00E+00 |
| ENSG00000154548.8_SRSF12    | ENSG00000160789.18_LMNA | -0.27808 | -0.418739013 | -0.12438148 | 5.23E-04 | 6.99E-03 | 1.00E+00 |
| ENSG00000005189.18_AC004381 | ENSG00000160789.18_LMNA | -0.25271 | -0.395983361 | -0.09743321 | 1.68E-03 | 1.72E-02 | 1.00E+00 |
| ENSG00000234589.4_RP11-253E | ENSG00000160789.18_LMNA | -0.10428 | -0.259176879 | 0.055849026 | 2.01E-01 | 4.72E-01 | 1.00E+00 |
| ENSG00000168826.14_ZBTB49   | ENSG00000160789.18_LMNA | -0.14858 | -0.300669186 | 0.010877448 | 6.77E-02 | 2.44E-01 | 1.00E+00 |
| ENSG00000281404.1_LINC01176 | ENSG00000160789.18_LMNA | -0.07976 | -0.235962937 | 0.080464005 | 3.29E-01 | 6.15E-01 | 1.00E+00 |
| ENSG00000111817.15_DSE      | ENSG00000160789.18_LMNA | 0.16262  | 0.003509038  | 0.31369825  | 4.53E-02 | 1.89E-01 | 1.00E+00 |
| ENSG00000225067.4_RPL23AP2  | ENSG00000160789.18_LMNA | -0.0563  | -0.213585355 | 0.103832351 | 4.91E-01 | 7.47E-01 | 1.00E+00 |
| ENSG00000265458.1_RP13-20L1 | ENSG00000160789.18_LMNA | 0.0093   | -0.150124477 | 0.168250096 | 9.09E-01 | 9.65E-01 | 1.00E+00 |
| ENSG00000167895.13_TMC8     | ENSG00000160789.18_LMNA | 0.01627  | -0.143298436 | 0.175020783 | 8.42E-01 | 9.39E-01 | 1.00E+00 |
| ENSG00000172935.8_MRGPFR    | ENSG00000160789.18_LMNA | 0.18036  | 0.021789926  | 0.330087444 | 2.62E-02 | 1.31E-01 | 1.00E+00 |
| ENSG00000239961.2_LILRA4    | ENSG00000160789.18_LMNA | -0.32028 | -0.456221481 | -0.16973728 | 5.76E-05 | 1.20E-03 | 1.00E+00 |
| ENSG00000188542.8_DUSP28    | ENSG00000160789.18_LMNA | -0.46763 | -0.583397734 | -0.33323693 | 1.25E-09 | 1.87E-07 | 6.40E-05 |
| ENSG00000138640.13_FAM13A   | ENSG00000160789.18_LMNA | -0.24112 | -0.385520718 | -0.08518807 | 2.77E-03 | 2.51E-02 | 1.00E+00 |
| ENSG00000137962.11_ARHGAP2  | ENSG00000160789.18_LMNA | 0.42088  | 0.280472851  | 0.543654053 | 6.70E-08 | 5.23E-06 | 3.44E-03 |
| ENSG00000182983.13_ZNF662   | ENSG00000160789.18_LMNA | -0.08469 | -0.240643011 | 0.07553234  | 3.00E-01 | 5.86E-01 | 1.00E+00 |
| ENSG00000278318.3_ZNF229    | ENSG00000160789.18_LMNA | 0.07442  | -0.085795289 | 0.230887064 | 3.62E-01 | 6.44E-01 | 1.00E+00 |
| ENSG00000126500.3_FLRT1     | ENSG00000160789.18_LMNA | -0.29225 | -0.431379003 | -0.13954031 | 2.59E-04 | 4.01E-03 | 1.00E+00 |
| ENSG00000129474.14_AJUBA    | ENSG00000160789.18_LMNA | 0.44343  | 0.305816286  | 0.562892029 | 1.06E-08 | 1.13E-06 | 5.42E-04 |
| ENSG00000229944.3	EIF4EP2   | ENSG00000160789.18_LMNA | -0.03136 | -0.189611816 | 0.12848443  | 7.01E-01 | 8.72E-01 | 1.00E+00 |
| ENSG00000197430.9_OPALIN    | ENSG00000160789.18_LMNA | -0.37234 | -0.501796659 | -0.22657064 | 2.32E-06 | 8.91E-05 | 1.19E-01 |
| ENSG00000137098.12_SPAG8    | ENSG00000160789.18_LMNA | -0.10768 | -0.262384999 | 0.052416898 | 1.87E-01 | 4.53E-01 | 1.00E+00 |
| ENSG00000155621.13_C9orf85  | ENSG00000160789.18_LMNA | -0.16463 | -0.315559484 | -0.00557472 | 4.27E-02 | 1.81E-01 | 1.00E+00 |
| ENSG00000074047.19_GLI2     | ENSG00000160789.18_LMNA | 0.31391  | 0.16285293   | 0.450596882 | 8.21E-05 | 1.60E-03 | 1.00E+00 |
| ENSG00000205579.3_DYNLL1P1  | ENSG00000160789.18_LMNA | -0.19463 | -0.343192511 | -0.03655747 | 1.63E-02 | 9.31E-02 | 1.00E+00 |



|                             |                         |          |              |             |          |          |          |
|-----------------------------|-------------------------|----------|--------------|-------------|----------|----------|----------|
| ENSG00000136828.17_RALGPS1  | ENSG00000160789.18_LMNA | -0.34788 | -0.480473683 | -0.199745   | 1.13E-05 | 3.21E-04 | 5.77E-01 |
| ENSG00000152749.7_GPR180    | ENSG00000160789.18_LMNA | -0.37121 | -0.500811856 | -0.22532243 | 2.50E-06 | 9.47E-05 | 1.28E-01 |
| ENSG00000111728.9_ST8SIA1   | ENSG00000160789.18_LMNA | -0.0776  | -0.233914409 | 0.082617794 | 3.42E-01 | 6.27E-01 | 1.00E+00 |
| ENSG00000236735.3_RPL31P63  | ENSG00000160789.18_LMNA | -0.02336 | -0.181885052 | 0.136346994 | 7.75E-01 | 9.07E-01 | 1.00E+00 |
| ENSG00000088836.11_SLC4A11  | ENSG00000160789.18_LMNA | 0.2286   | 0.072017023  | 0.374180076 | 4.62E-03 | 3.69E-02 | 1.00E+00 |
| ENSG00000163412.11_EIF4E3   | ENSG00000160789.18_LMNA | -0.17422 | -0.324426134 | -0.01545178 | 3.18E-02 | 1.49E-01 | 1.00E+00 |
| ENSG00000183690.12_EFHC2    | ENSG00000160789.18_LMNA | 0.16113  | 0.001978974  | 0.312318082 | 4.74E-02 | 1.94E-01 | 1.00E+00 |
| ENSG00000134028.13_ADAMDE   | ENSG00000160789.18_LMNA | -0.14744 | -0.299605582 | 0.012046195 | 6.99E-02 | 2.49E-01 | 1.00E+00 |
| ENSG00000239763.2_AC009120. | ENSG00000160789.18_LMNA | -0.05408 | -0.2114594   | 0.106034352 | 5.08E-01 | 7.58E-01 | 1.00E+00 |
| ENSG00000183323.11_CCDC125  | ENSG00000160789.18_LMNA | 0.02879  | -0.131015431 | 0.187128822 | 7.25E-01 | 8.83E-01 | 1.00E+00 |
| ENSG00000174628.15_IQCK     | ENSG00000160789.18_LMNA | -0.02149 | -0.180071654 | 0.138186472 | 7.93E-01 | 9.16E-01 | 1.00E+00 |
| ENSG00000268751.1_SCGB1B2P  | ENSG00000160789.18_LMNA | -0.03962 | -0.197574323 | 0.120339924 | 6.28E-01 | 8.33E-01 | 1.00E+00 |
| ENSG00000279382.1_RP11-449J | ENSG00000160789.18_LMNA | -0.0179  | -0.176602068 | 0.141699849 | 8.27E-01 | 9.32E-01 | 1.00E+00 |
| ENSG00000230747.1_AC021188. | ENSG00000160789.18_LMNA | 0.01952  | -0.140119691 | 0.17816351  | 8.11E-01 | 9.26E-01 | 1.00E+00 |
| ENSG00000275765.3_RP11-54C4 | ENSG00000160789.18_LMNA | -0.11753 | -0.271651542 | 0.042461377 | 1.49E-01 | 3.97E-01 | 1.00E+00 |
| ENSG00000198873.11_GRK5     | ENSG00000160789.18_LMNA | 0.28808  | 0.135073432  | 0.427666227 | 3.19E-04 | 4.72E-03 | 1.00E+00 |
| ENSG00000149311.16_ATM      | ENSG00000160789.18_LMNA | -0.13749 | -0.290337895 | 0.022194142 | 9.12E-02 | 2.94E-01 | 1.00E+00 |
| ENSG00000269427.1_CTC-429P9 | ENSG00000160789.18_LMNA | -0.15007 | -0.302057384 | 0.009350735 | 6.50E-02 | 2.38E-01 | 1.00E+00 |
| ENSG00000276259.1_RP11-481J | ENSG00000160789.18_LMNA | -0.1476  | -0.299755029 | 0.011882025 | 6.96E-02 | 2.49E-01 | 1.00E+00 |
| ENSG00000177103.12_DSCAML1  | ENSG00000160789.18_LMNA | -0.39623 | -0.522475337 | -0.25299073 | 4.35E-07 | 2.35E-05 | 2.23E-02 |
| ENSG00000213942.3_RP1-102E2 | ENSG00000160789.18_LMNA | -0.09668 | -0.252000589 | 0.063499542 | 2.36E-01 | 5.14E-01 | 1.00E+00 |
| ENSG00000072609.16_CHFR     | ENSG00000160789.18_LMNA | 0.11293  | -0.04711794  | 0.267324477 | 1.66E-01 | 4.23E-01 | 1.00E+00 |
| ENSG00000227544.7_AC018647. | ENSG00000160789.18_LMNA | -0.43306 | -0.554063205 | -0.2941401  | 2.51E-08 | 2.34E-06 | 1.29E-03 |
| ENSG00000198580.7_RP11-611L | ENSG00000160789.18_LMNA | -0.00513 | -0.164200439 | 0.154192786 | 9.50E-01 | 9.80E-01 | 1.00E+00 |
| ENSG00000163331.9_DAPL1     | ENSG00000160789.18_LMNA | -0.36857 | -0.498517261 | -0.2224176  | 2.98E-06 | 1.09E-04 | 1.53E-01 |
| ENSG00000197124.10_ZNF682   | ENSG00000160789.18_LMNA | -0.23119 | -0.376529779 | -0.07473735 | 4.16E-03 | 3.42E-02 | 1.00E+00 |
| ENSG00000166750.8_SLFN5     | ENSG00000160789.18_LMNA | 0.13427  | -0.02547233  | 0.287331485 | 9.91E-02 | 3.10E-01 | 1.00E+00 |
| ENSG00000145649.7_GZMA      | ENSG00000160789.18_LMNA | 0.02309  | -0.136608236 | 0.181627645 | 7.78E-01 | 9.09E-01 | 1.00E+00 |
| ENSG00000185164.13_NOMO2    | ENSG00000160789.18_LMNA | 0.10533  | -0.054789831 | 0.260167685 | 1.97E-01 | 4.66E-01 | 1.00E+00 |
| ENSG00000008300.13_CELSR3   | ENSG00000160789.18_LMNA | -0.19086 | -0.339735376 | -0.03264873 | 1.85E-02 | 1.02E-01 | 1.00E+00 |
| ENSG00000173530.5_TNFRSF10I | ENSG00000160789.18_LMNA | 0.24027  | 0.084296664  | 0.384756046 | 2.87E-03 | 2.58E-02 | 1.00E+00 |
| ENSG00000144161.11_ZC3H8    | ENSG00000160789.18_LMNA | -0.30941 | -0.446608336 | -0.15798798 | 1.05E-04 | 1.96E-03 | 1.00E+00 |
| ENSG00000267128.1_RP11-449J | ENSG00000160789.18_LMNA | -0.0622  | -0.219231876 | 0.097968704 | 4.46E-01 | 7.13E-01 | 1.00E+00 |

|                              |                         |          |              |             |          |          |          |
|------------------------------|-------------------------|----------|--------------|-------------|----------|----------|----------|
| ENSG00000159761.13_C16orf86  | ENSG00000160789.18_LMNA | 0.02829  | -0.13150326  | 0.186649779 | 7.29E-01 | 8.86E-01 | 1.00E+00 |
| ENSG00000125885.12_MCM8      | ENSG00000160789.18_LMNA | 0.0599   | -0.100254657 | 0.217033094 | 4.64E-01 | 7.26E-01 | 1.00E+00 |
| ENSG00000170089.14_RP11-423  | ENSG00000160789.18_LMNA | 0.00258  | -0.156683265 | 0.16171607  | 9.75E-01 | 9.90E-01 | 1.00E+00 |
| ENSG00000251615.3_RP11-774O  | ENSG00000160789.18_LMNA | -0.13994 | -0.292620642 | 0.01970054  | 8.55E-02 | 2.84E-01 | 1.00E+00 |
| ENSG00000250988.6_SNHG21     | ENSG00000160789.18_LMNA | -0.057   | -0.214253299 | 0.103139871 | 4.86E-01 | 7.42E-01 | 1.00E+00 |
| ENSG00000273117.1_AC144652.  | ENSG00000160789.18_LMNA | 0.04006  | -0.11990739  | 0.197996022 | 6.24E-01 | 8.31E-01 | 1.00E+00 |
| ENSG00000134548.8_SPX        | ENSG00000160789.18_LMNA | -0.35246 | -0.484474284 | -0.20474614 | 8.46E-06 | 2.55E-04 | 4.34E-01 |
| ENSG00000106246.16_PTCD1     | ENSG00000160789.18_LMNA | 0.23924  | 0.083208505  | 0.383822033 | 2.99E-03 | 2.67E-02 | 1.00E+00 |
| ENSG00000280216.1_RP3-333H2  | ENSG00000160789.18_LMNA | -0.22776 | -0.373423234 | -0.07114176 | 4.77E-03 | 3.79E-02 | 1.00E+00 |
| ENSG00000133136.4_GNG5P2     | ENSG00000160789.18_LMNA | 0.19921  | 0.041315179  | 0.347389335 | 1.39E-02 | 8.29E-02 | 1.00E+00 |
| ENSG00000132530.15_XAF1      | ENSG00000160789.18_LMNA | 0.08984  | -0.070366452 | 0.245529645 | 2.71E-01 | 5.55E-01 | 1.00E+00 |
| ENSG00000104611.10_SH2D4A    | ENSG00000160789.18_LMNA | 0.31074  | 0.15942864   | 0.447790663 | 9.76E-05 | 1.85E-03 | 1.00E+00 |
| ENSG00000164398.11_ACSL6     | ENSG00000160789.18_LMNA | -0.47728 | -0.591536528 | -0.34423889 | 5.07E-10 | 8.91E-08 | 2.60E-05 |
| ENSG00000229358.3_DPY19L1P   | ENSG00000160789.18_LMNA | 0.1031   | -0.057034338 | 0.258067311 | 2.06E-01 | 4.78E-01 | 1.00E+00 |
| ENSG00000160190.12_SLC37A1   | ENSG00000160789.18_LMNA | -0.12142 | -0.275295433 | 0.038529397 | 1.36E-01 | 3.76E-01 | 1.00E+00 |
| ENSG00000261534.1_RP11-244O  | ENSG00000160789.18_LMNA | -0.06579 | -0.222662654 | 0.094395214 | 4.21E-01 | 6.92E-01 | 1.00E+00 |
| ENSG00000145936.7_KCNMB1     | ENSG00000160789.18_LMNA | 0.14802  | -0.011448505 | 0.300149599 | 6.88E-02 | 2.47E-01 | 1.00E+00 |
| ENSG00000152223.11_EPG5      | ENSG00000160789.18_LMNA | 0.03915  | -0.120803567 | 0.197122165 | 6.32E-01 | 8.35E-01 | 1.00E+00 |
| ENSG00000244363.3_RPL7P23    | ENSG00000160789.18_LMNA | -0.1221  | -0.275939931 | 0.037832931 | 1.34E-01 | 3.72E-01 | 1.00E+00 |
| ENSG00000276846.1_CTD-3220F  | ENSG00000160789.18_LMNA | -0.17949 | -0.329282899 | -0.02088768 | 2.69E-02 | 1.33E-01 | 1.00E+00 |
| ENSG00000255142.1_AP006621.f | ENSG00000160789.18_LMNA | 0.15838  | -0.000837274 | 0.309774305 | 5.13E-02 | 2.05E-01 | 1.00E+00 |
| ENSG00000241506.1_PSMC1P1    | ENSG00000160789.18_LMNA | 0.09353  | -0.066661447 | 0.249024509 | 2.52E-01 | 5.33E-01 | 1.00E+00 |
| ENSG00000234177.4_LINC01114  | ENSG00000160789.18_LMNA | 0.03829  | -0.121657195 | 0.196289326 | 6.40E-01 | 8.39E-01 | 1.00E+00 |
| ENSG00000222009.7_BTBD19     | ENSG00000160789.18_LMNA | 0.27646  | 0.122661403  | 0.417297506 | 5.65E-04 | 7.41E-03 | 1.00E+00 |
| ENSG00000171843.14_MLLT3     | ENSG00000160789.18_LMNA | -0.13946 | -0.29217484  | 0.020187826 | 8.66E-02 | 2.86E-01 | 1.00E+00 |
| ENSG00000255769.6_GOLGA2P1   | ENSG00000160789.18_LMNA | -0.05002 | -0.207568548 | 0.110056333 | 5.41E-01 | 7.80E-01 | 1.00E+00 |
| ENSG00000156574.8_NODAL      | ENSG00000160789.18_LMNA | -0.14255 | -0.295056027 | 0.01703591  | 7.98E-02 | 2.72E-01 | 1.00E+00 |
| ENSG00000167232.12_ZNF91     | ENSG00000160789.18_LMNA | -0.21725 | -0.363864978 | -0.06012787 | 7.18E-03 | 5.13E-02 | 1.00E+00 |
| ENSG00000134460.14_IL2RA     | ENSG00000160789.18_LMNA | 0.22241  | 0.065530945  | 0.36856197  | 5.89E-03 | 4.44E-02 | 1.00E+00 |
| ENSG00000277511.1_CTD-2095E  | ENSG00000160789.18_LMNA | -0.23362 | -0.378738834 | -0.07729894 | 3.77E-03 | 3.17E-02 | 1.00E+00 |
| ENSG00000169083.14_AR        | ENSG00000160789.18_LMNA | -0.10086 | -0.25595427  | 0.059289174 | 2.16E-01 | 4.91E-01 | 1.00E+00 |
| ENSG00000203896.8_LIME1      | ENSG00000160789.18_LMNA | 0.06387  | -0.096313972 | 0.2208215   | 4.34E-01 | 7.03E-01 | 1.00E+00 |
| ENSG00000231747.1_AC079922.  | ENSG00000160789.18_LMNA | -0.04162 | -0.199503386 | 0.118360308 | 6.11E-01 | 8.22E-01 | 1.00E+00 |

|                              |                         |          |              |             |          |          |          |
|------------------------------|-------------------------|----------|--------------|-------------|----------|----------|----------|
| ENSG00000151229.11_SLC2A13   | ENSG00000160789.18_LMNA | -0.18869 | -0.337741143 | -0.03039825 | 1.99E-02 | 1.08E-01 | 1.00E+00 |
| ENSG00000139436.19_GIT2      | ENSG00000160789.18_LMNA | 0.07727  | -0.082954112 | 0.233594273 | 3.44E-01 | 6.29E-01 | 1.00E+00 |
| ENSG00000163874.8_ZC3H12A    | ENSG00000160789.18_LMNA | 0.38792  | 0.243769583  | 0.515293892 | 7.90E-07 | 3.77E-05 | 4.05E-02 |
| ENSG00000179335.17_CLK3      | ENSG00000160789.18_LMNA | 0.16609  | 0.007080165  | 0.31691443  | 4.08E-02 | 1.76E-01 | 1.00E+00 |
| ENSG00000227854.1_RP11-307O  | ENSG00000160789.18_LMNA | -0.11728 | -0.271417672 | 0.042713405 | 1.50E-01 | 3.98E-01 | 1.00E+00 |
| ENSG00000088876.10_ZNF343    | ENSG00000160789.18_LMNA | 0.33068  | 0.181005381  | 0.465378521 | 3.17E-05 | 7.46E-04 | 1.00E+00 |
| ENSG00000001630.14_CYP51A1   | ENSG00000160789.18_LMNA | 0.17654  | 0.017843785  | 0.326565308 | 2.96E-02 | 1.42E-01 | 1.00E+00 |
| ENSG00000270084.1_GAS5-AS1   | ENSG00000160789.18_LMNA | -0.20027 | -0.348361077 | -0.04241877 | 1.34E-02 | 8.07E-02 | 1.00E+00 |
| ENSG00000131015.4_ULBP2      | ENSG00000160789.18_LMNA | 0.26093  | 0.106133323  | 0.40337021  | 1.17E-03 | 1.30E-02 | 1.00E+00 |
| ENSG00000131591.16_C1orf159  | ENSG00000160789.18_LMNA | 0.02573  | -0.13401611  | 0.184179782 | 7.53E-01 | 8.97E-01 | 1.00E+00 |
| ENSG00000271646.1_RP11-326I1 | ENSG00000160789.18_LMNA | 0.14625  | -0.013256688 | 0.298503172 | 7.22E-02 | 2.55E-01 | 1.00E+00 |
| ENSG00000223529.1_EEF1A1P8   | ENSG00000160789.18_LMNA | -0.09098 | -0.246612035 | 0.069219911 | 2.65E-01 | 5.49E-01 | 1.00E+00 |
| ENSG00000153363.11_LINC0046  | ENSG00000160789.18_LMNA | -0.20504 | -0.352730652 | -0.04739047 | 1.13E-02 | 7.13E-02 | 1.00E+00 |
| ENSG00000267355.2_RPL9P29    | ENSG00000160789.18_LMNA | -0.11392 | -0.268256054 | 0.046116579 | 1.62E-01 | 4.17E-01 | 1.00E+00 |
| ENSG00000135968.18_GCC2      | ENSG00000160789.18_LMNA | -0.05128 | -0.208779916 | 0.108805253 | 5.30E-01 | 7.73E-01 | 1.00E+00 |
| ENSG00000178184.14_PARD6G    | ENSG00000160789.18_LMNA | -0.10485 | -0.259718832 | 0.055269753 | 1.99E-01 | 4.69E-01 | 1.00E+00 |
| ENSG00000230163.1_RP5-997D1  | ENSG00000160789.18_LMNA | 0.28292  | 0.129554441  | 0.423065277 | 4.13E-04 | 5.81E-03 | 1.00E+00 |
| ENSG00000260244.1_RP11-588K  | ENSG00000160789.18_LMNA | -0.09324 | -0.248750241 | 0.066952522 | 2.53E-01 | 5.35E-01 | 1.00E+00 |
| ENSG00000138190.15_EXOC6     | ENSG00000160789.18_LMNA | -0.28745 | -0.427107106 | -0.13440178 | 3.30E-04 | 4.85E-03 | 1.00E+00 |
| ENSG00000242262.1_RP11-100N  | ENSG00000160789.18_LMNA | -0.18723 | -0.336407524 | -0.028895   | 2.09E-02 | 1.11E-01 | 1.00E+00 |
| ENSG00000158483.14_FAM86C1   | ENSG00000160789.18_LMNA | 0.26823  | 0.113888313  | 0.409922104 | 8.35E-04 | 1.00E-02 | 1.00E+00 |
| ENSG00000178338.9_ZNF354B    | ENSG00000160789.18_LMNA | 0.01563  | -0.143928427 | 0.174397159 | 8.48E-01 | 9.41E-01 | 1.00E+00 |
| ENSG00000121989.13_ACVR2A    | ENSG00000160789.18_LMNA | -0.37747 | -0.506251206 | -0.23222796 | 1.64E-06 | 6.85E-05 | 8.39E-02 |
| ENSG00000154330.11_PGM5      | ENSG00000160789.18_LMNA | -0.26395 | -0.406087168 | -0.1093448  | 1.02E-03 | 1.17E-02 | 1.00E+00 |
| ENSG00000104361.8_NIPAL2     | ENSG00000160789.18_LMNA | 0.04     | -0.119963406 | 0.197941416 | 6.25E-01 | 8.31E-01 | 1.00E+00 |
| ENSG00000204519.9_ZNF551     | ENSG00000160789.18_LMNA | -0.06546 | -0.222347455 | 0.094723866 | 4.23E-01 | 6.94E-01 | 1.00E+00 |
| ENSG00000196236.11_XPNPEP3   | ENSG00000160789.18_LMNA | -0.09802 | -0.253268786 | 0.062150232 | 2.30E-01 | 5.07E-01 | 1.00E+00 |
| ENSG00000104313.16_EYA1      | ENSG00000160789.18_LMNA | -0.30596 | -0.443553548 | -0.15427141 | 1.26E-04 | 2.28E-03 | 1.00E+00 |
| ENSG00000204851.6_PNMAL2     | ENSG00000160789.18_LMNA | -0.17566 | -0.32574945  | -0.01693108 | 3.04E-02 | 1.45E-01 | 1.00E+00 |
| ENSG00000185615.14_PDIA2     | ENSG00000160789.18_LMNA | -0.22191 | -0.368108031 | -0.06500799 | 6.00E-03 | 4.50E-02 | 1.00E+00 |
| ENSG00000163617.9_CCDC191    | ENSG00000160789.18_LMNA | 0.14396  | -0.015598288 | 0.296368284 | 7.68E-02 | 2.65E-01 | 1.00E+00 |
| ENSG00000231113.2_RP3-475N1  | ENSG00000160789.18_LMNA | -0.08154 | -0.237660159 | 0.078677333 | 3.18E-01 | 6.05E-01 | 1.00E+00 |
| ENSG00000166897.13_ELFN2     | ENSG00000160789.18_LMNA | -0.29448 | -0.433365761 | -0.14193548 | 2.31E-04 | 3.66E-03 | 1.00E+00 |

|                             |                         |          |              |             |          |          |          |
|-----------------------------|-------------------------|----------|--------------|-------------|----------|----------|----------|
| ENSG00000160716.4_CHRNB2    | ENSG00000160789.18_LMNA | -0.28485 | -0.424784812 | -0.13161495 | 3.75E-04 | 5.37E-03 | 1.00E+00 |
| ENSG00000273058.2_RP11-385F | ENSG00000160789.18_LMNA | -0.04369 | -0.201492039 | 0.116316892 | 5.93E-01 | 8.12E-01 | 1.00E+00 |
| ENSG00000173641.16_HSPB7    | ENSG00000160789.18_LMNA | -0.01966 | -0.178304139 | 0.139977296 | 8.10E-01 | 9.25E-01 | 1.00E+00 |
| ENSG00000215447.6_BX322557. | ENSG00000160789.18_LMNA | 0.15604  | -0.003240786 | 0.307599809 | 5.49E-02 | 2.14E-01 | 1.00E+00 |
| ENSG00000266964.4_FXYD1     | ENSG00000160789.18_LMNA | 0.01043  | -0.149017956 | 0.169349687 | 8.99E-01 | 9.61E-01 | 1.00E+00 |
| ENSG00000212719.9_C17orf51  | ENSG00000160789.18_LMNA | -0.10056 | -0.255666049 | 0.059596486 | 2.18E-01 | 4.93E-01 | 1.00E+00 |
| ENSG00000170011.12_MYRIP    | ENSG00000160789.18_LMNA | -0.22674 | -0.372496776 | -0.07007098 | 4.97E-03 | 3.90E-02 | 1.00E+00 |
| ENSG00000250144.1_RP11-553P | ENSG00000160789.18_LMNA | -0.12905 | -0.282444258 | 0.030787039 | 1.13E-01 | 3.36E-01 | 1.00E+00 |
| ENSG00000255883.1_FUNDC2P1  | ENSG00000160789.18_LMNA | -0.28397 | -0.424006368 | -0.13068183 | 3.92E-04 | 5.57E-03 | 1.00E+00 |
| ENSG00000162148.9_PPP1R32   | ENSG00000160789.18_LMNA | -0.12295 | -0.276730069 | 0.036978666 | 1.31E-01 | 3.67E-01 | 1.00E+00 |
| ENSG00000101746.14_NOL4     | ENSG00000160789.18_LMNA | -0.43525 | -0.555928952 | -0.29660111 | 2.10E-08 | 2.01E-06 | 1.08E-03 |
| ENSG00000135828.10_RNASEL   | ENSG00000160789.18_LMNA | 0.18778  | 0.029457134  | 0.336906369 | 2.05E-02 | 1.10E-01 | 1.00E+00 |
| ENSG00000226824.5_RP4-756H1 | ENSG00000160789.18_LMNA | -0.00157 | -0.160727144 | 0.157673498 | 9.85E-01 | 9.94E-01 | 1.00E+00 |
| ENSG00000269899.1_RP11-589N | ENSG00000160789.18_LMNA | 0.06743  | -0.092763547 | 0.224226551 | 4.09E-01 | 6.83E-01 | 1.00E+00 |
| ENSG00000118412.11_CASP8AP  | ENSG00000160789.18_LMNA | 0.00663  | -0.152728914 | 0.165658836 | 9.35E-01 | 9.75E-01 | 1.00E+00 |
| ENSG00000215271.7_HOMEZ     | ENSG00000160789.18_LMNA | 0.12349  | -0.036424295 | 0.277242598 | 1.30E-01 | 3.65E-01 | 1.00E+00 |
| ENSG00000154080.11_CHST9    | ENSG00000160789.18_LMNA | -0.32889 | -0.46380485  | -0.17906359 | 3.52E-05 | 8.15E-04 | 1.00E+00 |
| ENSG00000085382.10_HACE1    | ENSG00000160789.18_LMNA | -0.23641 | -0.381260275 | -0.08022764 | 3.36E-03 | 2.92E-02 | 1.00E+00 |
| ENSG00000145012.11_LPP      | ENSG00000160789.18_LMNA | 0.41304  | 0.271701876  | 0.53693104  | 1.23E-07 | 8.60E-06 | 6.33E-03 |
| ENSG00000268912.1_CTD-2619J | ENSG00000160789.18_LMNA | -0.03633 | -0.194408972 | 0.123582758 | 6.57E-01 | 8.48E-01 | 1.00E+00 |
| ENSG00000157110.14_RBPMS    | ENSG00000160789.18_LMNA | 0.25399  | 0.098779941  | 0.397129339 | 1.59E-03 | 1.64E-02 | 1.00E+00 |
| ENSG00000175155.7_YPEL2     | ENSG00000160789.18_LMNA | -0.31613 | -0.452553961 | -0.16524517 | 7.26E-05 | 1.46E-03 | 1.00E+00 |
| ENSG00000170631.13_ZNF16    | ENSG00000160789.18_LMNA | 0.02715  | -0.132624565 | 0.185548093 | 7.40E-01 | 8.91E-01 | 1.00E+00 |
| ENSG00000165071.13_TMEM71   | ENSG00000160789.18_LMNA | 0.18418  | 0.025732985  | 0.333598275 | 2.31E-02 | 1.20E-01 | 1.00E+00 |
| ENSG00000162775.13_RBM15    | ENSG00000160789.18_LMNA | 0.17577  | 0.017043295  | 0.325849781 | 3.03E-02 | 1.44E-01 | 1.00E+00 |
| ENSG00000163635.16_ATXN7    | ENSG00000160789.18_LMNA | 0.18363  | 0.025168981  | 0.333096619 | 2.35E-02 | 1.21E-01 | 1.00E+00 |
| ENSG00000152076.17_CCDC74B  | ENSG00000160789.18_LMNA | 0.20322  | 0.045491966  | 0.351063644 | 1.20E-02 | 7.50E-02 | 1.00E+00 |
| ENSG00000056487.14_PHF21B   | ENSG00000160789.18_LMNA | -0.21752 | -0.364108832 | -0.06040795 | 7.10E-03 | 5.10E-02 | 1.00E+00 |
| ENSG00000108370.14_RGS9     | ENSG00000160789.18_LMNA | -0.39647 | -0.522677412 | -0.25325091 | 4.27E-07 | 2.32E-05 | 2.19E-02 |
| ENSG00000197114.10_ZGPAT    | ENSG00000160789.18_LMNA | 0.24601  | 0.090343895  | 0.389935455 | 2.25E-03 | 2.14E-02 | 1.00E+00 |
| ENSG00000197763.11_TXNRD3   | ENSG00000160789.18_LMNA | 0.08011  | -0.080107993 | 0.236301279 | 3.27E-01 | 6.13E-01 | 1.00E+00 |
| ENSG00000105497.6_ZNF175    | ENSG00000160789.18_LMNA | -0.08979 | -0.24548145  | 0.070417484 | 2.71E-01 | 5.56E-01 | 1.00E+00 |
| ENSG00000091157.12_WDR7     | ENSG00000160789.18_LMNA | -0.15849 | -0.309868149 | 0.000733465 | 5.12E-02 | 2.04E-01 | 1.00E+00 |

|                              |                         |          |              |             |          |          |          |
|------------------------------|-------------------------|----------|--------------|-------------|----------|----------|----------|
| ENSG00000173208.3_ABCD2      | ENSG00000160789.18_LMNA | -0.08979 | -0.245478759 | 0.070420334 | 2.71E-01 | 5.56E-01 | 1.00E+00 |
| ENSG00000173175.13_ADCY5     | ENSG00000160789.18_LMNA | -0.30742 | -0.444851945 | -0.15585009 | 1.17E-04 | 2.14E-03 | 1.00E+00 |
| ENSG00000143498.16_TAF1A     | ENSG00000160789.18_LMNA | 0.08654  | -0.073680434 | 0.242396653 | 2.89E-01 | 5.74E-01 | 1.00E+00 |
| ENSG00000179454.12_KLHL28    | ENSG00000160789.18_LMNA | -0.21199 | -0.359076845 | -0.05463821 | 8.74E-03 | 5.95E-02 | 1.00E+00 |
| ENSG00000173705.7_SUSD5      | ENSG00000160789.18_LMNA | -0.36838 | -0.498353496 | -0.22221047 | 3.02E-06 | 1.10E-04 | 1.55E-01 |
| ENSG00000189042.12_ZNF567    | ENSG00000160789.18_LMNA | -0.10288 | -0.257857503 | 0.05725837  | 2.07E-01 | 4.79E-01 | 1.00E+00 |
| ENSG00000139572.3_GPR84      | ENSG00000160789.18_LMNA | 0.25335  | 0.098107658  | 0.396557387 | 1.64E-03 | 1.68E-02 | 1.00E+00 |
| ENSG00000100479.11_POLE2     | ENSG00000160789.18_LMNA | 0.10947  | -0.050610806 | 0.264070422 | 1.79E-01 | 4.42E-01 | 1.00E+00 |
| ENSG00000178233.16_TMEN151   | ENSG00000160789.18_LMNA | -0.30311 | -0.441029498 | -0.15120673 | 1.47E-04 | 2.56E-03 | 1.00E+00 |
| ENSG00000204427.10_ABHD16A   | ENSG00000160789.18_LMNA | 0.0546   | -0.105521745 | 0.211954572 | 5.04E-01 | 7.55E-01 | 1.00E+00 |
| ENSG00000106086.17_PLEKHA8   | ENSG00000160789.18_LMNA | 0.01005  | -0.149394064 | 0.168976023 | 9.02E-01 | 9.62E-01 | 1.00E+00 |
| ENSG00000092929.10_UNC13D    | ENSG00000160789.18_LMNA | 0.14576  | -0.013759009 | 0.298045457 | 7.32E-02 | 2.57E-01 | 1.00E+00 |
| ENSG00000006638.10_TBXA2R    | ENSG00000160789.18_LMNA | 0.30608  | 0.154400073  | 0.44365941  | 1.26E-04 | 2.27E-03 | 1.00E+00 |
| ENSG00000129990.13_SYT5      | ENSG00000160789.18_LMNA | -0.14984 | -0.30184     | 0.009589906 | 6.54E-02 | 2.39E-01 | 1.00E+00 |
| ENSG00000260541.1_LA16c-429E | ENSG00000160789.18_LMNA | -0.16446 | -0.315400231 | -0.00539787 | 4.29E-02 | 1.82E-01 | 1.00E+00 |
| ENSG00000196150.12_ZNF250    | ENSG00000160789.18_LMNA | -0.16125 | -0.312430106 | -0.00210311 | 4.72E-02 | 1.94E-01 | 1.00E+00 |
| ENSG00000119685.18_TTLL5     | ENSG00000160789.18_LMNA | 0.26473  | 0.110175206  | 0.406788849 | 9.81E-04 | 1.14E-02 | 1.00E+00 |
| ENSG00000262879.4_RP11-156P  | ENSG00000160789.18_LMNA | -0.24813 | -0.391853598 | -0.09258905 | 2.05E-03 | 1.99E-02 | 1.00E+00 |
| ENSG00000180855.14_ZNF443    | ENSG00000160789.18_LMNA | -0.13754 | -0.290379042 | 0.022149229 | 9.11E-02 | 2.94E-01 | 1.00E+00 |
| ENSG00000270959.1_LPP-AS2    | ENSG00000160789.18_LMNA | 0.11606  | -0.043954369 | 0.270265576 | 1.54E-01 | 4.05E-01 | 1.00E+00 |
| ENSG00000255153.1_TOLLIP-AS  | ENSG00000160789.18_LMNA | -0.07154 | -0.228143067 | 0.088669829 | 3.81E-01 | 6.60E-01 | 1.00E+00 |
| ENSG00000173013.5_CCDC96     | ENSG00000160789.18_LMNA | 0.24628  | 0.090635457  | 0.390184698 | 2.22E-03 | 2.12E-02 | 1.00E+00 |
| ENSG00000198270.11_TMEN116   | ENSG00000160789.18_LMNA | 0.00082  | -0.158400689 | 0.160000506 | 9.92E-01 | 9.97E-01 | 1.00E+00 |
| ENSG00000274602.3_PI4KAP1    | ENSG00000160789.18_LMNA | -0.10444 | -0.259329891 | 0.055685499 | 2.00E-01 | 4.71E-01 | 1.00E+00 |
| ENSG00000280254.1_RP11-81A2  | ENSG00000160789.18_LMNA | -0.01455 | -0.173350085 | 0.144985612 | 8.59E-01 | 9.44E-01 | 1.00E+00 |
| ENSG00000198718.11_FAM179B   | ENSG00000160789.18_LMNA | 0.09168  | -0.068522963 | 0.247269602 | 2.61E-01 | 5.45E-01 | 1.00E+00 |
| ENSG00000273226.1_RP11-513M  | ENSG00000160789.18_LMNA | -0.22158 | -0.367807648 | -0.06466203 | 6.08E-03 | 4.54E-02 | 1.00E+00 |
| ENSG00000120913.22_PDLIM2    | ENSG00000160789.18_LMNA | 0.20237  | 0.044607301  | 0.350286191 | 1.24E-02 | 7.66E-02 | 1.00E+00 |
| ENSG00000197933.11_ZNF823    | ENSG00000160789.18_LMNA | -0.25378 | -0.396940032 | -0.0985574  | 1.61E-03 | 1.66E-02 | 1.00E+00 |
| ENSG00000244921.2_MTCYBP18   | ENSG00000160789.18_LMNA | -0.04601 | -0.20372148  | 0.114022853 | 5.74E-01 | 8.01E-01 | 1.00E+00 |
| ENSG00000135749.17_PCNX2     | ENSG00000160789.18_LMNA | 0.21051  | 0.053090626  | 0.357724121 | 9.24E-03 | 6.19E-02 | 1.00E+00 |
| ENSG00000135655.12_USP15     | ENSG00000160789.18_LMNA | -0.15693 | -0.3084256   | 0.002328445 | 5.35E-02 | 2.10E-01 | 1.00E+00 |
| ENSG00000222011.7_FAM185A    | ENSG00000160789.18_LMNA | -0.01367 | -0.172499294 | 0.145844084 | 8.67E-01 | 9.48E-01 | 1.00E+00 |

|                              |                         |          |              |             |          |          |          |
|------------------------------|-------------------------|----------|--------------|-------------|----------|----------|----------|
| ENSG00000183496.5_MEX3B      | ENSG00000160789.18_LMNA | -0.23886 | -0.383475738 | -0.08280524 | 3.04E-03 | 2.70E-02 | 1.00E+00 |
| ENSG00000128274.14_A4GALT    | ENSG00000160789.18_LMNA | 0.25629  | 0.101224312  | 0.399206961 | 1.44E-03 | 1.52E-02 | 1.00E+00 |
| ENSG00000232858.1_RPL34P27   | ENSG00000160789.18_LMNA | -0.1032  | -0.258161028 | 0.056934259 | 2.06E-01 | 4.77E-01 | 1.00E+00 |
| ENSG00000172733.11_PURG      | ENSG00000160789.18_LMNA | -0.41687 | -0.540217342 | -0.27598375 | 9.18E-08 | 6.70E-06 | 4.71E-03 |
| ENSG00000239719.1_RP4-800G7  | ENSG00000160789.18_LMNA | -0.04621 | -0.203908866 | 0.113829882 | 5.72E-01 | 8.00E-01 | 1.00E+00 |
| ENSG00000037280.14_FLT4      | ENSG00000160789.18_LMNA | 0.03968  | -0.120284365 | 0.197628497 | 6.27E-01 | 8.32E-01 | 1.00E+00 |
| ENSG00000267372.2_AC005330.1 | ENSG00000160789.18_LMNA | 0.01601  | -0.143554768 | 0.174767072 | 8.45E-01 | 9.39E-01 | 1.00E+00 |
| ENSG00000268225.1_CTD-2331H  | ENSG00000160789.18_LMNA | -0.13537 | -0.288360402 | 0.024351155 | 9.63E-02 | 3.05E-01 | 1.00E+00 |
| ENSG00000277978.1_RP11-403P  | ENSG00000160789.18_LMNA | -0.07802 | -0.234314839 | 0.08219702  | 3.39E-01 | 6.25E-01 | 1.00E+00 |
| ENSG00000163814.6_CDCP1      | ENSG00000160789.18_LMNA | 0.3353   | 0.186033967  | 0.469445459 | 2.41E-05 | 6.02E-04 | 1.00E+00 |
| ENSG00000178860.8_MSC        | ENSG00000160789.18_LMNA | 0.12676  | -0.033104223 | 0.280308353 | 1.20E-01 | 3.48E-01 | 1.00E+00 |
| ENSG00000122912.13_SLC25A16  | ENSG00000160789.18_LMNA | -0.21338 | -0.360343281 | -0.05608841 | 8.30E-03 | 5.73E-02 | 1.00E+00 |
| ENSG00000203952.8_CCDC160    | ENSG00000160789.18_LMNA | -0.33131 | -0.465938152 | -0.18169646 | 3.05E-05 | 7.25E-04 | 1.00E+00 |
| ENSG00000226499.1_RP5-882O7  | ENSG00000160789.18_LMNA | -0.07393 | -0.230417032 | 0.086288057 | 3.65E-01 | 6.47E-01 | 1.00E+00 |
| ENSG00000185379.19_RAD51D    | ENSG00000160789.18_LMNA | 0.19202  | 0.033859059  | 0.340806756 | 1.78E-02 | 9.92E-02 | 1.00E+00 |
| ENSG00000124097.7_HMGB1P1    | ENSG00000160789.18_LMNA | -0.07775 | -0.234049478 | 0.082475875 | 3.41E-01 | 6.26E-01 | 1.00E+00 |
| ENSG00000083097.13_DOPEY1    | ENSG00000160789.18_LMNA | -0.17839 | -0.32826994  | -0.01975243 | 2.79E-02 | 1.36E-01 | 1.00E+00 |
| ENSG00000198799.10_LRIG2     | ENSG00000160789.18_LMNA | -0.04434 | -0.202111391 | 0.115679934 | 5.88E-01 | 8.08E-01 | 1.00E+00 |
| ENSG00000170946.13_DNAJC24   | ENSG00000160789.18_LMNA | -0.3158  | -0.452263002 | -0.1648893  | 7.39E-05 | 1.48E-03 | 1.00E+00 |
| ENSG00000019505.6_SYT13      | ENSG00000160789.18_LMNA | -0.2513  | -0.394707662 | -0.09593532 | 1.79E-03 | 1.80E-02 | 1.00E+00 |
| ENSG00000179406.6_LINC00174  | ENSG00000160789.18_LMNA | 0.05536  | -0.104763384 | 0.212686842 | 4.98E-01 | 7.51E-01 | 1.00E+00 |
| ENSG00000126822.14_PLEKHG3   | ENSG00000160789.18_LMNA | -0.06912 | -0.225833028 | 0.09108568  | 3.97E-01 | 6.74E-01 | 1.00E+00 |
| ENSG00000136099.12_PCDH8     | ENSG00000160789.18_LMNA | 0.06875  | -0.091450053 | 0.225484306 | 4.00E-01 | 6.77E-01 | 1.00E+00 |
| ENSG00000183628.11_DGCR6     | ENSG00000160789.18_LMNA | -0.07887 | -0.235118985 | 0.08135168  | 3.34E-01 | 6.20E-01 | 1.00E+00 |
| ENSG00000205485.12_AC004980  | ENSG00000160789.18_LMNA | 0.16055  | 0.001386274  | 0.311783094 | 4.82E-02 | 1.96E-01 | 1.00E+00 |
| ENSG00000066382.15_MPPED2    | ENSG00000160789.18_LMNA | -0.4455  | -0.564653322 | -0.3081549  | 8.86E-09 | 9.77E-07 | 4.55E-04 |
| ENSG00000235706.6_DICER1-AS  | ENSG00000160789.18_LMNA | -0.17691 | -0.326902887 | -0.01822159 | 2.92E-02 | 1.41E-01 | 1.00E+00 |
| ENSG00000272077.1_RP11-348P  | ENSG00000160789.18_LMNA | -0.20726 | -0.35475575  | -0.04969977 | 1.04E-02 | 6.74E-02 | 1.00E+00 |
| ENSG00000109743.9_BST1       | ENSG00000160789.18_LMNA | 0.02176  | -0.137918372 | 0.180336088 | 7.90E-01 | 9.15E-01 | 1.00E+00 |
| ENSG00000204516.8_MICB       | ENSG00000160789.18_LMNA | 0.04689  | -0.113156286 | 0.204562789 | 5.66E-01 | 7.97E-01 | 1.00E+00 |
| ENSG00000137494.12_ANKRD42   | ENSG00000160789.18_LMNA | 0.26154  | 0.10678741   | 0.403924002 | 1.14E-03 | 1.27E-02 | 1.00E+00 |
| ENSG00000090612.19_ZNF268    | ENSG00000160789.18_LMNA | 0.02488  | -0.134859542 | 0.183349833 | 7.61E-01 | 9.00E-01 | 1.00E+00 |
| ENSG00000177084.15_POLE      | ENSG00000160789.18_LMNA | 0.14925  | -0.010190534 | 0.301293941 | 6.65E-02 | 2.41E-01 | 1.00E+00 |

|                              |                         |          |              |             |          |          |          |
|------------------------------|-------------------------|----------|--------------|-------------|----------|----------|----------|
| ENSG00000154127.8_UBASH3B    | ENSG00000160789.18_LMNA | 0.24068  | 0.084729381  | 0.385127295 | 2.82E-03 | 2.55E-02 | 1.00E+00 |
| ENSG00000228118.3_MYL6P5     | ENSG00000160789.18_LMNA | 0.01176  | -0.147720296 | 0.170638212 | 8.86E-01 | 9.56E-01 | 1.00E+00 |
| ENSG00000224411.3_HSP90AA2   | ENSG00000160789.18_LMNA | 0.09696  | -0.063216812 | 0.252266412 | 2.35E-01 | 5.13E-01 | 1.00E+00 |
| ENSG00000235944.6_ZNF815P    | ENSG00000160789.18_LMNA | -0.20029 | -0.348380796 | -0.04244118 | 1.34E-02 | 8.07E-02 | 1.00E+00 |
| ENSG00000230478.1_RP1-52D1.1 | ENSG00000160789.18_LMNA | 0.17364  | 0.014852974  | 0.32389013  | 3.24E-02 | 1.51E-01 | 1.00E+00 |
| ENSG00000136630.12_HLX       | ENSG00000160789.18_LMNA | 0.18183  | 0.023304598  | 0.331437091 | 2.50E-02 | 1.26E-01 | 1.00E+00 |
| ENSG00000203791.12_METTL10   | ENSG00000160789.18_LMNA | -0.26544 | -0.407420563 | -0.11092316 | 9.50E-04 | 1.12E-02 | 1.00E+00 |
| ENSG00000127914.15_AKAP9     | ENSG00000160789.18_LMNA | 0.08627  | -0.073945382 | 0.242145891 | 2.91E-01 | 5.76E-01 | 1.00E+00 |
| ENSG00000235734.4_HMGN1P36   | ENSG00000160789.18_LMNA | 0.06895  | -0.091256185 | 0.225669857 | 3.99E-01 | 6.75E-01 | 1.00E+00 |
| ENSG00000224924.5_LINC00320  | ENSG00000160789.18_LMNA | -0.40592 | -0.530814311 | -0.26375997 | 2.12E-07 | 1.33E-05 | 1.09E-02 |
| ENSG00000101276.13_SLC52A3   | ENSG00000160789.18_LMNA | -0.23621 | -0.381079699 | -0.08001773 | 3.39E-03 | 2.93E-02 | 1.00E+00 |
| ENSG00000234118.1_RPL13AP6   | ENSG00000160789.18_LMNA | -0.13864 | -0.291411865 | 0.021021455 | 8.85E-02 | 2.90E-01 | 1.00E+00 |
| ENSG00000230383.1_AC009245.1 | ENSG00000160789.18_LMNA | -0.0864  | -0.242264739 | 0.073819816 | 2.90E-01 | 5.75E-01 | 1.00E+00 |
| ENSG00000183718.5_TRIM52     | ENSG00000160789.18_LMNA | 0.02583  | -0.133924061 | 0.184270333 | 7.52E-01 | 8.97E-01 | 1.00E+00 |
| ENSG00000129680.14_MAP7D3    | ENSG00000160789.18_LMNA | 0.28473  | 0.131490403  | 0.424680931 | 3.78E-04 | 5.40E-03 | 1.00E+00 |
| ENSG00000215482.3_CALM2P3    | ENSG00000160789.18_LMNA | -0.27667 | -0.417483466 | -0.1228832  | 5.60E-04 | 7.36E-03 | 1.00E+00 |
| ENSG00000198947.13_DMD       | ENSG00000160789.18_LMNA | -0.00688 | -0.165897827 | 0.152488893 | 9.33E-01 | 9.74E-01 | 1.00E+00 |
| ENSG00000108958.4_AC016292.1 | ENSG00000160789.18_LMNA | -0.17276 | -0.323071699 | -0.01393908 | 3.33E-02 | 1.53E-01 | 1.00E+00 |
| ENSG00000111834.11_RSPH4A    | ENSG00000160789.18_LMNA | -0.08823 | -0.244002197 | 0.071983012 | 2.80E-01 | 5.65E-01 | 1.00E+00 |
| ENSG00000165695.8_AK8        | ENSG00000160789.18_LMNA | -0.06946 | -0.226157235 | 0.090746848 | 3.95E-01 | 6.72E-01 | 1.00E+00 |
| ENSG00000170745.10_KCNS3     | ENSG00000160789.18_LMNA | -0.23899 | -0.383599938 | -0.08294986 | 3.02E-03 | 2.69E-02 | 1.00E+00 |
| ENSG00000153790.10_C7orf31   | ENSG00000160789.18_LMNA | -0.03028 | -0.188567223 | 0.129549725 | 7.11E-01 | 8.77E-01 | 1.00E+00 |
| ENSG00000174197.15_MGA       | ENSG00000160789.18_LMNA | 0.04981  | -0.110266339 | 0.207365112 | 5.42E-01 | 7.81E-01 | 1.00E+00 |
| ENSG00000179909.14_ZNF154    | ENSG00000160789.18_LMNA | -0.17047 | -0.320960525 | -0.01158405 | 3.58E-02 | 1.61E-01 | 1.00E+00 |
| ENSG00000091656.14_ZFHX4     | ENSG00000160789.18_LMNA | 0.1327   | -0.027070173 | 0.285863873 | 1.03E-01 | 3.18E-01 | 1.00E+00 |
| ENSG00000105642.14_KCNN1     | ENSG00000160789.18_LMNA | -0.26042 | -0.402914132 | -0.10559484 | 1.19E-03 | 1.33E-02 | 1.00E+00 |
| ENSG00000198589.9_LRBA       | ENSG00000160789.18_LMNA | 0.18793  | 0.02961814   | 0.337049217 | 2.04E-02 | 1.10E-01 | 1.00E+00 |
| ENSG00000228436.2_RP5-864K1  | ENSG00000160789.18_LMNA | -0.02876 | -0.187100627 | 0.131044148 | 7.25E-01 | 8.83E-01 | 1.00E+00 |
| ENSG00000272777.1_RP11-571L  | ENSG00000160789.18_LMNA | -0.36889 | -0.498800808 | -0.22277629 | 2.92E-06 | 1.07E-04 | 1.50E-01 |
| ENSG00000107099.14_DOCK8     | ENSG00000160789.18_LMNA | -0.02042 | -0.179043276 | 0.139228665 | 8.03E-01 | 9.21E-01 | 1.00E+00 |
| ENSG00000214222.2_TUBBP2     | ENSG00000160789.18_LMNA | 0.02519  | -0.134553135 | 0.183651395 | 7.58E-01 | 8.99E-01 | 1.00E+00 |
| ENSG00000115009.10_CCL20     | ENSG00000160789.18_LMNA | 0.10762  | -0.052484275 | 0.262322087 | 1.87E-01 | 4.53E-01 | 1.00E+00 |
| ENSG00000134516.14_DOCK2     | ENSG00000160789.18_LMNA | 0.01549  | -0.144064133 | 0.174262792 | 8.50E-01 | 9.41E-01 | 1.00E+00 |

|                             |                         |          |              |             |          |          |          |
|-----------------------------|-------------------------|----------|--------------|-------------|----------|----------|----------|
| ENSG00000006459.9_KDM7A     | ENSG00000160789.18_LMNA | -0.08668 | -0.242537459 | 0.073531644 | 2.88E-01 | 5.74E-01 | 1.00E+00 |
| ENSG00000231884.1_NDUFB1P1  | ENSG00000160789.18_LMNA | -0.11144 | -0.265922803 | 0.048623424 | 1.72E-01 | 4.31E-01 | 1.00E+00 |
| ENSG00000160796.15_NBEAL2   | ENSG00000160789.18_LMNA | 0.24937  | 0.093893269  | 0.392966666 | 1.95E-03 | 1.91E-02 | 1.00E+00 |
| ENSG00000176024.15_ZNF613   | ENSG00000160789.18_LMNA | -0.07314 | -0.229664468 | 0.087076701 | 3.71E-01 | 6.51E-01 | 1.00E+00 |
| ENSG00000175305.15_CCNE2    | ENSG00000160789.18_LMNA | -0.09988 | -0.255025217 | 0.060279553 | 2.21E-01 | 4.96E-01 | 1.00E+00 |
| ENSG00000168234.11_TTC39C   | ENSG00000160789.18_LMNA | 0.12489  | -0.035007656 | 0.278551505 | 1.25E-01 | 3.58E-01 | 1.00E+00 |
| ENSG00000111799.19_COL12A1  | ENSG00000160789.18_LMNA | 0.34841  | 0.200316008  | 0.480931048 | 1.09E-05 | 3.12E-04 | 5.59E-01 |
| ENSG00000048052.20_HDAC9    | ENSG00000160789.18_LMNA | -0.07927 | -0.2354964   | 0.080954774 | 3.32E-01 | 6.17E-01 | 1.00E+00 |
| ENSG00000213700.3_RPL17P50  | ENSG00000160789.18_LMNA | 0.05415  | -0.105961891 | 0.211529407 | 5.08E-01 | 7.58E-01 | 1.00E+00 |
| ENSG00000223749.6_MIR503HG  | ENSG00000160789.18_LMNA | -0.03834 | -0.196345638 | 0.121599492 | 6.39E-01 | 8.39E-01 | 1.00E+00 |
| ENSG00000176593.6_CTD-2368P | ENSG00000160789.18_LMNA | 0.01057  | -0.148882976 | 0.169483767 | 8.97E-01 | 9.60E-01 | 1.00E+00 |
| ENSG00000168904.13_LRRC28   | ENSG00000160789.18_LMNA | -0.17085 | -0.321312789 | -0.01197676 | 3.53E-02 | 1.60E-01 | 1.00E+00 |
| ENSG00000279329.1_CTD-2553L | ENSG00000160789.18_LMNA | -0.16421 | -0.315169943 | -0.00514217 | 4.32E-02 | 1.83E-01 | 1.00E+00 |
| ENSG00000092850.10_TEKT2    | ENSG00000160789.18_LMNA | 0.04441  | -0.115607019 | 0.202182274 | 5.87E-01 | 8.08E-01 | 1.00E+00 |
| ENSG00000188873.4_RPL10AP2  | ENSG00000160789.18_LMNA | -0.10269 | -0.257682628 | 0.057445076 | 2.08E-01 | 4.80E-01 | 1.00E+00 |
| ENSG00000163251.3_FZD5      | ENSG00000160789.18_LMNA | 0.46916  | 0.334976026  | 0.584687595 | 1.08E-09 | 1.67E-07 | 5.56E-05 |
| ENSG00000101187.14_SLCO4A1  | ENSG00000160789.18_LMNA | 0.03326  | -0.1266145   | 0.191443668 | 6.84E-01 | 8.63E-01 | 1.00E+00 |
| ENSG00000161243.7_FBXO27    | ENSG00000160789.18_LMNA | -0.02751 | -0.185894711 | 0.132271862 | 7.37E-01 | 8.89E-01 | 1.00E+00 |
| ENSG00000176148.14_TCP11L1  | ENSG00000160789.18_LMNA | 0.01664  | -0.142942324 | 0.175373183 | 8.39E-01 | 9.37E-01 | 1.00E+00 |
| ENSG00000162139.8_NEU3      | ENSG00000160789.18_LMNA | -0.29267 | -0.431752274 | -0.13999005 | 2.53E-04 | 3.94E-03 | 1.00E+00 |
| ENSG00000164463.11_CREBRF   | ENSG00000160789.18_LMNA | -0.19719 | -0.345545256 | -0.03922294 | 1.49E-02 | 8.74E-02 | 1.00E+00 |
| ENSG00000173480.9_ZNF417    | ENSG00000160789.18_LMNA | -0.01128 | -0.170178465 | 0.148183428 | 8.90E-01 | 9.57E-01 | 1.00E+00 |
| ENSG00000130643.7_CALY      | ENSG00000160789.18_LMNA | -0.21298 | -0.359976741 | -0.05566855 | 8.43E-03 | 5.79E-02 | 1.00E+00 |
| ENSG00000142065.12_ZFP14    | ENSG00000160789.18_LMNA | -0.40251 | -0.527881715 | -0.25996511 | 2.74E-07 | 1.64E-05 | 1.41E-02 |
| ENSG00000177125.5_ZBTB34    | ENSG00000160789.18_LMNA | -0.02142 | -0.18000588  | 0.13825315  | 7.93E-01 | 9.16E-01 | 1.00E+00 |
| ENSG00000160298.16_C21orf58 | ENSG00000160789.18_LMNA | 0.16104  | 0.001888193  | 0.312236153 | 4.75E-02 | 1.94E-01 | 1.00E+00 |
| ENSG00000083807.8_SLC27A5   | ENSG00000160789.18_LMNA | -0.09105 | -0.246679596 | 0.069148318 | 2.65E-01 | 5.48E-01 | 1.00E+00 |
| ENSG00000217241.1_CBX3P9    | ENSG00000160789.18_LMNA | -0.0008  | -0.159982882 | 0.158418322 | 9.92E-01 | 9.97E-01 | 1.00E+00 |
| ENSG00000187609.14_EXD3     | ENSG00000160789.18_LMNA | 0.10417  | -0.055960285 | 0.259072765 | 2.02E-01 | 4.72E-01 | 1.00E+00 |
| ENSG00000131831.16_RAI2     | ENSG00000160789.18_LMNA | -0.46844 | -0.584085274 | -0.33416372 | 1.16E-09 | 1.76E-07 | 5.94E-05 |
| ENSG00000134775.14_FHOD3    | ENSG00000160789.18_LMNA | -0.1101  | -0.264658537 | 0.049980099 | 1.77E-01 | 4.38E-01 | 1.00E+00 |
| ENSG00000112365.4_ZBTB24    | ENSG00000160789.18_LMNA | -0.03089 | -0.189161521 | 0.128943739 | 7.06E-01 | 8.75E-01 | 1.00E+00 |
| ENSG00000117010.14_ZNF684   | ENSG00000160789.18_LMNA | -0.23395 | -0.379037535 | -0.07764561 | 3.72E-03 | 3.14E-02 | 1.00E+00 |



|                               |                         |          |              |             |          |          |          |
|-------------------------------|-------------------------|----------|--------------|-------------|----------|----------|----------|
| ENSG00000170485.15_NPAS2      | ENSG00000160789.18_LMNA | 0.2224   | 0.065518673  | 0.36855132  | 5.89E-03 | 4.44E-02 | 1.00E+00 |
| ENSG00000196865.4_NHLRC2      | ENSG00000160789.18_LMNA | -0.07478 | -0.231226457 | 0.085439384 | 3.60E-01 | 6.42E-01 | 1.00E+00 |
| ENSG00000116990.10_MYCL       | ENSG00000160789.18_LMNA | -0.37264 | -0.5020573   | -0.22690114 | 2.27E-06 | 8.79E-05 | 1.16E-01 |
| ENSG00000259972.2_AC009120.6  | ENSG00000160789.18_LMNA | -0.03757 | -0.19559706  | 0.122366383 | 6.46E-01 | 8.43E-01 | 1.00E+00 |
| ENSG00000144285.14_SCN1A      | ENSG00000160789.18_LMNA | -0.21271 | -0.359730749 | -0.05538684 | 8.51E-03 | 5.83E-02 | 1.00E+00 |
| ENSG00000185100.9_ADSSL1      | ENSG00000160789.18_LMNA | 0.33532  | 0.186053422  | 0.46946117  | 2.41E-05 | 6.01E-04 | 1.00E+00 |
| ENSG00000177025.3_C19orf18    | ENSG00000160789.18_LMNA | 0.06483  | -0.095351114 | 0.221745698 | 4.27E-01 | 6.98E-01 | 1.00E+00 |
| ENSG00000188215.8_DCUN1D3     | ENSG00000160789.18_LMNA | 0.29151  | 0.138750575  | 0.430723313 | 2.69E-04 | 4.12E-03 | 1.00E+00 |
| ENSG00000262223.5_RP11-1055I  | ENSG00000160789.18_LMNA | -0.39907 | -0.524919924 | -0.25614085 | 3.53E-07 | 2.00E-05 | 1.81E-02 |
| ENSG00000270441.1_RP11-694I1  | ENSG00000160789.18_LMNA | -0.04224 | -0.20009181  | 0.117755961 | 6.05E-01 | 8.19E-01 | 1.00E+00 |
| ENSG00000135931.16_ARMC9      | ENSG00000160789.18_LMNA | 0.29001  | 0.137142085  | 0.429386877 | 2.90E-04 | 4.38E-03 | 1.00E+00 |
| ENSG00000224189.5_HAGLR       | ENSG00000160789.18_LMNA | -0.39737 | -0.523456542 | -0.25425444 | 4.00E-07 | 2.20E-05 | 2.05E-02 |
| ENSG00000244245.1_RP11-120B   | ENSG00000160789.18_LMNA | -0.13039 | -0.283704503 | 0.029418254 | 1.09E-01 | 3.29E-01 | 1.00E+00 |
| ENSG00000261716.1_RP11-196G   | ENSG00000160789.18_LMNA | -0.1294  | -0.282779871 | 0.030422636 | 1.12E-01 | 3.34E-01 | 1.00E+00 |
| ENSG00000270820.4_RP11-355B   | ENSG00000160789.18_LMNA | -0.27444 | -0.415489372 | -0.12050635 | 6.23E-04 | 8.02E-03 | 1.00E+00 |
| ENSG00000164116.15_GUCY1A3    | ENSG00000160789.18_LMNA | -0.12286 | -0.276646077 | 0.037069497 | 1.32E-01 | 3.68E-01 | 1.00E+00 |
| ENSG00000237676.1_RPL30P4     | ENSG00000160789.18_LMNA | -0.13547 | -0.288450455 | 0.024252991 | 9.61E-02 | 3.04E-01 | 1.00E+00 |
| ENSG00000156395.11_SORCS3     | ENSG00000160789.18_LMNA | -0.38803 | -0.515395484 | -0.24389969 | 7.83E-07 | 3.76E-05 | 4.02E-02 |
| ENSG00000176715.14_ACSF3      | ENSG00000160789.18_LMNA | 0.28646  | 0.13333979   | 0.426222593 | 3.46E-04 | 5.02E-03 | 1.00E+00 |
| ENSG00000145725.18_PPIP5K2    | ENSG00000160789.18_LMNA | -0.20033 | -0.34842014  | -0.04248587 | 1.33E-02 | 8.06E-02 | 1.00E+00 |
| ENSG00000066739.10_ATG2B      | ENSG00000160789.18_LMNA | 0.03613  | -0.123785166 | 0.194211181 | 6.59E-01 | 8.49E-01 | 1.00E+00 |
| ENSG00000263011.1_RP11-473M   | ENSG00000160789.18_LMNA | -0.13662 | -0.289523248 | 0.023083096 | 9.33E-02 | 2.99E-01 | 1.00E+00 |
| ENSG00000211772.7_TRBC2       | ENSG00000160789.18_LMNA | 0.07441  | -0.08580545  | 0.230877374 | 3.62E-01 | 6.44E-01 | 1.00E+00 |
| ENSG00000232065.1_LINC01063   | ENSG00000160789.18_LMNA | -0.24123 | -0.385620973 | -0.08530497 | 2.75E-03 | 2.50E-02 | 1.00E+00 |
| ENSG00000214654.6_RP11-27I1.6 | ENSG00000160789.18_LMNA | -0.10596 | -0.260758292 | 0.05415812  | 1.94E-01 | 4.63E-01 | 1.00E+00 |
| ENSG00000228175.3_GEMIN8P4    | ENSG00000160789.18_LMNA | -0.33043 | -0.465156832 | -0.1807317  | 3.22E-05 | 7.56E-04 | 1.00E+00 |
| ENSG00000272927.1_RP11-1191.6 | ENSG00000160789.18_LMNA | 0.05307  | -0.107034802 | 0.210492507 | 5.16E-01 | 7.63E-01 | 1.00E+00 |
| ENSG00000231549.1_USMG5P1     | ENSG00000160789.18_LMNA | -0.10435 | -0.25924771  | 0.055773329 | 2.01E-01 | 4.71E-01 | 1.00E+00 |
| ENSG00000231551.5_RP11-495P   | ENSG00000160789.18_LMNA | -0.33111 | -0.465763195 | -0.18148038 | 3.09E-05 | 7.31E-04 | 1.00E+00 |
| ENSG00000197935.6_ZNF311      | ENSG00000160789.18_LMNA | 0.05391  | -0.10620077  | 0.211298607 | 5.09E-01 | 7.59E-01 | 1.00E+00 |
| ENSG00000119509.11_INVS       | ENSG00000160789.18_LMNA | 0.19328  | 0.035164208  | 0.341961174 | 1.70E-02 | 9.62E-02 | 1.00E+00 |
| ENSG00000152689.16_RASGRP3    | ENSG00000160789.18_LMNA | -0.20252 | -0.350423468 | -0.04476347 | 1.23E-02 | 7.63E-02 | 1.00E+00 |
| ENSG00000156650.11_KAT6B      | ENSG00000160789.18_LMNA | -0.08754 | -0.243349755 | 0.072673011 | 2.84E-01 | 5.69E-01 | 1.00E+00 |

|                              |                         |          |              |             |          |          |          |
|------------------------------|-------------------------|----------|--------------|-------------|----------|----------|----------|
| ENSG00000150995.16_ITPR1     | ENSG00000160789.18_LMNA | 0.05497  | -0.105155811 | 0.212307961 | 5.01E-01 | 7.53E-01 | 1.00E+00 |
| ENSG00000105464.3_GRIN2D     | ENSG00000160789.18_LMNA | 0.09189  | -0.068308412 | 0.247471971 | 2.60E-01 | 5.43E-01 | 1.00E+00 |
| ENSG00000092140.13_G2E3      | ENSG00000160789.18_LMNA | -0.12805 | -0.281512127 | 0.031798696 | 1.16E-01 | 3.40E-01 | 1.00E+00 |
| ENSG00000087494.14_PTHLH     | ENSG00000160789.18_LMNA | 0.24862  | 0.093100868  | 0.392290509 | 2.01E-03 | 1.96E-02 | 1.00E+00 |
| ENSG00000161929.13_SCIMP     | ENSG00000160789.18_LMNA | -0.0213  | -0.179893326 | 0.138367246 | 7.94E-01 | 9.17E-01 | 1.00E+00 |
| ENSG00000108231.10_LGI1      | ENSG00000160789.18_LMNA | -0.09997 | -0.255109743 | 0.060189474 | 2.20E-01 | 4.96E-01 | 1.00E+00 |
| ENSG00000166387.10_PPFIBP2   | ENSG00000160789.18_LMNA | -0.14454 | -0.296911727 | 0.01500255  | 7.56E-02 | 2.63E-01 | 1.00E+00 |
| ENSG00000198554.10_WDHD1     | ENSG00000160789.18_LMNA | 0.20576  | 0.048135362  | 0.353384181 | 1.10E-02 | 7.01E-02 | 1.00E+00 |
| ENSG00000154118.11_JPH3      | ENSG00000160789.18_LMNA | -0.36307 | -0.493733763 | -0.21637768 | 4.28E-06 | 1.46E-04 | 2.20E-01 |
| ENSG00000125962.13_ARMCX5    | ENSG00000160789.18_LMNA | -0.17422 | -0.324421958 | -0.01544711 | 3.18E-02 | 1.49E-01 | 1.00E+00 |
| ENSG00000182901.14_RGS7      | ENSG00000160789.18_LMNA | -0.28021 | -0.420649493 | -0.12666389 | 4.71E-04 | 6.44E-03 | 1.00E+00 |
| ENSG00000233230.1_AC079807.1 | ENSG00000160789.18_LMNA | -0.23823 | -0.382905152 | -0.082141   | 3.12E-03 | 2.75E-02 | 1.00E+00 |
| ENSG00000186654.19_PRR5      | ENSG00000160789.18_LMNA | 0.09448  | -0.065711682 | 0.249919083 | 2.47E-01 | 5.27E-01 | 1.00E+00 |
| ENSG00000261840.2_RP11-146F  | ENSG00000160789.18_LMNA | -0.12216 | -0.275990803 | 0.037777944 | 1.34E-01 | 3.71E-01 | 1.00E+00 |
| ENSG00000183186.6_C2CD4C     | ENSG00000160789.18_LMNA | 0.02432  | -0.135404926 | 0.182812926 | 7.66E-01 | 9.03E-01 | 1.00E+00 |
| ENSG00000099260.9_PALMD      | ENSG00000160789.18_LMNA | -0.13725 | -0.290113431 | 0.02243913  | 9.18E-02 | 2.95E-01 | 1.00E+00 |
| ENSG00000179071.4_CCDC89     | ENSG00000160789.18_LMNA | -0.02796 | -0.186330255 | 0.131828557 | 7.32E-01 | 8.87E-01 | 1.00E+00 |
| ENSG00000137821.10_LRRC49    | ENSG00000160789.18_LMNA | -0.30492 | -0.442633245 | -0.15315334 | 1.34E-04 | 2.38E-03 | 1.00E+00 |
| ENSG00000169914.5_OTUD3      | ENSG00000160789.18_LMNA | 0.20694  | 0.049369213  | 0.354466047 | 1.05E-02 | 6.80E-02 | 1.00E+00 |
| ENSG00000023445.12_BIRC3     | ENSG00000160789.18_LMNA | 0.24871  | 0.093196376  | 0.392372023 | 2.00E-03 | 1.95E-02 | 1.00E+00 |
| ENSG00000178235.7_SLITRK1    | ENSG00000160789.18_LMNA | -0.41382 | -0.537599408 | -0.27257187 | 1.16E-07 | 8.18E-06 | 5.97E-03 |
| ENSG00000160791.13_CCR5      | ENSG00000160789.18_LMNA | 0.14088  | -0.018744811 | 0.293494613 | 8.34E-02 | 2.79E-01 | 1.00E+00 |
| ENSG00000180769.7_WDFY3-AS   | ENSG00000160789.18_LMNA | -0.30688 | -0.444370782 | -0.15526489 | 1.20E-04 | 2.20E-03 | 1.00E+00 |
| ENSG00000273466.1_RP11-548H  | ENSG00000160789.18_LMNA | 0.14515  | -0.014379696 | 0.29747969  | 7.44E-02 | 2.60E-01 | 1.00E+00 |
| ENSG00000178078.10_STAP2     | ENSG00000160789.18_LMNA | 0.16173  | 0.002596689  | 0.312875438 | 4.65E-02 | 1.92E-01 | 1.00E+00 |
| ENSG00000188375.4_H3F3C      | ENSG00000160789.18_LMNA | 0.03976  | -0.120198858 | 0.197711869 | 6.27E-01 | 8.32E-01 | 1.00E+00 |
| ENSG00000140807.5_NKD1       | ENSG00000160789.18_LMNA | -0.39487 | -0.521302457 | -0.25148137 | 4.80E-07 | 2.54E-05 | 2.46E-02 |
| ENSG00000108622.9_ICAM2      | ENSG00000160789.18_LMNA | -0.23658 | -0.381413461 | -0.08040574 | 3.34E-03 | 2.90E-02 | 1.00E+00 |
| ENSG00000152256.12_PDK1      | ENSG00000160789.18_LMNA | 0.06699  | -0.093204663 | 0.223803917 | 4.12E-01 | 6.86E-01 | 1.00E+00 |
| ENSG00000184661.12_CDCA2     | ENSG00000160789.18_LMNA | 0.17156  | 0.012702044  | 0.321963136 | 3.46E-02 | 1.57E-01 | 1.00E+00 |
| ENSG00000239528.1_RPS14P8    | ENSG00000160789.18_LMNA | 0.07796  | -0.082266534 | 0.234248694 | 3.40E-01 | 6.25E-01 | 1.00E+00 |
| ENSG00000176809.9_LRRC37A3   | ENSG00000160789.18_LMNA | 0.12795  | -0.031896531 | 0.281421952 | 1.16E-01 | 3.41E-01 | 1.00E+00 |
| ENSG00000250896.1_RNPS1P1    | ENSG00000160789.18_LMNA | 0.03116  | -0.128674808 | 0.18942519  | 7.03E-01 | 8.73E-01 | 1.00E+00 |

|                              |                         |          |              |             |          |          |          |
|------------------------------|-------------------------|----------|--------------|-------------|----------|----------|----------|
| ENSG00000223797.4_ENTPD3-A1  | ENSG00000160789.18_LMNA | -0.35844 | -0.489693339 | -0.21129249 | 5.78E-06 | 1.87E-04 | 2.97E-01 |
| ENSG00000065357.18_DGKA      | ENSG00000160789.18_LMNA | 0.10666  | -0.053443977 | 0.261425684 | 1.91E-01 | 4.59E-01 | 1.00E+00 |
| ENSG00000111110.10_PPM1H     | ENSG00000160789.18_LMNA | -0.31087 | -0.447903476 | -0.15956617 | 9.70E-05 | 1.84E-03 | 1.00E+00 |
| ENSG00000105996.6_HOXA2      | ENSG00000160789.18_LMNA | -0.13732 | -0.290179528 | 0.022366994 | 9.16E-02 | 2.95E-01 | 1.00E+00 |
| ENSG00000154814.12_OXNAD1    | ENSG00000160789.18_LMNA | -0.06942 | -0.226121257 | 0.090784453 | 3.95E-01 | 6.73E-01 | 1.00E+00 |
| ENSG00000164659.13_KIAA1324  | ENSG00000160789.18_LMNA | -0.46445 | -0.580712071 | -0.32962137 | 1.67E-09 | 2.37E-07 | 8.55E-05 |
| ENSG00000089177.16_KIF16B    | ENSG00000160789.18_LMNA | 0.41527  | 0.27420197   | 0.538850818 | 1.04E-07 | 7.47E-06 | 5.33E-03 |
| ENSG00000272894.4_RP5-1159O  | ENSG00000160789.18_LMNA | -0.07483 | -0.231277982 | 0.085385344 | 3.60E-01 | 6.42E-01 | 1.00E+00 |
| ENSG00000186376.13_ZNF75D    | ENSG00000160789.18_LMNA | 0.00434  | -0.154969308 | 0.163426255 | 9.58E-01 | 9.83E-01 | 1.00E+00 |
| ENSG00000130035.5_GALNT8     | ENSG00000160789.18_LMNA | -0.36669 | -0.496880904 | -0.22034905 | 3.38E-06 | 1.21E-04 | 1.73E-01 |
| ENSG00000212916.4_MAP10      | ENSG00000160789.18_LMNA | 0.06578  | -0.094406095 | 0.222652219 | 4.21E-01 | 6.92E-01 | 1.00E+00 |
| ENSG00000234354.3_RPS26P47   | ENSG00000160789.18_LMNA | -0.14338 | -0.295825452 | 0.016193135 | 7.80E-02 | 2.68E-01 | 1.00E+00 |
| ENSG00000228775.6_WEE2-AS1   | ENSG00000160789.18_LMNA | -0.08345 | -0.239466943 | 0.076773088 | 3.07E-01 | 5.93E-01 | 1.00E+00 |
| ENSG00000164764.10_SBSPON    | ENSG00000160789.18_LMNA | -0.07786 | -0.234160686 | 0.082359018 | 3.40E-01 | 6.25E-01 | 1.00E+00 |
| ENSG00000162992.3_NEUROD1    | ENSG00000160789.18_LMNA | -0.34157 | -0.474945868 | -0.19285868 | 1.66E-05 | 4.42E-04 | 8.50E-01 |
| ENSG00000178301.3_AQP11      | ENSG00000160789.18_LMNA | -0.22299 | -0.369087627 | -0.06613673 | 5.76E-03 | 4.36E-02 | 1.00E+00 |
| ENSG00000207357.1_RNU6-2     | ENSG00000160789.18_LMNA | -0.13092 | -0.284201487 | 0.028878144 | 1.08E-01 | 3.27E-01 | 1.00E+00 |
| ENSG00000175279.20_CENPS     | ENSG00000160789.18_LMNA | 0.01952  | -0.140119195 | 0.178163999 | 8.11E-01 | 9.26E-01 | 1.00E+00 |
| ENSG00000261662.1_RP5-104218 | ENSG00000160789.18_LMNA | 0.09916  | -0.061004673 | 0.254344629 | 2.24E-01 | 5.00E-01 | 1.00E+00 |
| ENSG00000245317.2_CTC-241N9  | ENSG00000160789.18_LMNA | -0.07103 | -0.227654882 | 0.089180687 | 3.85E-01 | 6.63E-01 | 1.00E+00 |
| ENSG00000075702.15_WDR62     | ENSG00000160789.18_LMNA | 0.06105  | -0.099118975 | 0.218125872 | 4.55E-01 | 7.20E-01 | 1.00E+00 |
| ENSG00000218502.3_H2AFZP3    | ENSG00000160789.18_LMNA | -0.0046  | -0.163685246 | 0.154709579 | 9.55E-01 | 9.82E-01 | 1.00E+00 |
| ENSG00000198225.5_FKBP1C     | ENSG00000160789.18_LMNA | 0.17356  | 0.014768296  | 0.323814316 | 3.25E-02 | 1.51E-01 | 1.00E+00 |
| ENSG00000172059.9_KLF11      | ENSG00000160789.18_LMNA | 0.00102  | -0.158206075 | 0.160195005 | 9.90E-01 | 9.96E-01 | 1.00E+00 |
| ENSG00000183807.7_FAM162B    | ENSG00000160789.18_LMNA | -0.19259 | -0.341325259 | -0.03444513 | 1.74E-02 | 9.78E-02 | 1.00E+00 |
| ENSG00000171757.14_LRRC34    | ENSG00000160789.18_LMNA | -0.05097 | -0.208482615 | 0.109112394 | 5.33E-01 | 7.75E-01 | 1.00E+00 |
| ENSG00000181315.9_ZNF322     | ENSG00000160789.18_LMNA | -0.18387 | -0.333313707 | -0.02541303 | 2.34E-02 | 1.21E-01 | 1.00E+00 |
| ENSG00000227850.1_SEPT2P1    | ENSG00000160789.18_LMNA | -0.0943  | -0.249753152 | 0.065887893 | 2.48E-01 | 5.28E-01 | 1.00E+00 |
| ENSG00000241255.1_RP1-89D4.1 | ENSG00000160789.18_LMNA | -0.20253 | -0.35043474  | -0.0447763  | 1.23E-02 | 7.63E-02 | 1.00E+00 |
| ENSG00000163694.13_RBM47     | ENSG00000160789.18_LMNA | 0.33505  | 0.185753063  | 0.469218591 | 2.45E-05 | 6.09E-04 | 1.00E+00 |
| ENSG00000000457.12_SCYL3     | ENSG00000160789.18_LMNA | -0.26626 | -0.408157633 | -0.11179628 | 9.14E-04 | 1.08E-02 | 1.00E+00 |
| ENSG00000159314.10_ARHGAP2   | ENSG00000160789.18_LMNA | 0.09827  | -0.061897077 | 0.253506601 | 2.28E-01 | 5.05E-01 | 1.00E+00 |
| ENSG00000042062.10_FAM65C    | ENSG00000160789.18_LMNA | 0.34144  | 0.192715112  | 0.474830388 | 1.67E-05 | 4.45E-04 | 8.57E-01 |

|                             |                         |          |              |             |          |          |          |
|-----------------------------|-------------------------|----------|--------------|-------------|----------|----------|----------|
| ENSG00000036530.7_CYP46A1   | ENSG00000160789.18_LMNA | -0.22407 | -0.370071293 | -0.06727094 | 5.52E-03 | 4.22E-02 | 1.00E+00 |
| ENSG00000065413.15_ANKRD44  | ENSG00000160789.18_LMNA | -0.39844 | -0.52438227  | -0.25544754 | 3.70E-07 | 2.08E-05 | 1.90E-02 |
| ENSG00000117477.11_CCDC181  | ENSG00000160789.18_LMNA | -0.15077 | -0.302709091 | 0.0086335   | 6.37E-02 | 2.35E-01 | 1.00E+00 |
| ENSG00000244617.2_ASPRV1    | ENSG00000160789.18_LMNA | -0.24123 | -0.385621613 | -0.08530572 | 2.75E-03 | 2.50E-02 | 1.00E+00 |
| ENSG00000110172.10_CHORDC   | ENSG00000160789.18_LMNA | 0.02353  | -0.136183586 | 0.182046038 | 7.74E-01 | 9.07E-01 | 1.00E+00 |
| ENSG00000128965.10_CHAC1    | ENSG00000160789.18_LMNA | 0.20052  | 0.042679713  | 0.348590746 | 1.33E-02 | 8.02E-02 | 1.00E+00 |
| ENSG00000101096.18_NFATC2   | ENSG00000160789.18_LMNA | 0.27927  | 0.125661064  | 0.419810402 | 4.93E-04 | 6.67E-03 | 1.00E+00 |
| ENSG00000007968.6_E2F2      | ENSG00000160789.18_LMNA | -0.05012 | -0.207667033 | 0.109954657 | 5.40E-01 | 7.80E-01 | 1.00E+00 |
| ENSG00000145414.7_NAF1      | ENSG00000160789.18_LMNA | 0.11094  | -0.04913027  | 0.265450607 | 1.74E-01 | 4.33E-01 | 1.00E+00 |
| ENSG00000152208.10_GRID2    | ENSG00000160789.18_LMNA | -0.46475 | -0.580962398 | -0.32995806 | 1.62E-09 | 2.33E-07 | 8.33E-05 |
| ENSG00000250303.3_RP11-356J | ENSG00000160789.18_LMNA | -0.32246 | -0.458138774 | -0.1720904  | 5.09E-05 | 1.09E-03 | 1.00E+00 |
| ENSG00000235961.5_PNMA6A    | ENSG00000160789.18_LMNA | -0.1286  | -0.282026629 | 0.031240379 | 1.14E-01 | 3.38E-01 | 1.00E+00 |
| ENSG00000148832.13_PAOX     | ENSG00000160789.18_LMNA | 0.22964  | 0.073115343  | 0.375129227 | 4.43E-03 | 3.57E-02 | 1.00E+00 |
| ENSG00000186205.11_MARC1    | ENSG00000160789.18_LMNA | -0.13545 | -0.288434549 | 0.02427033  | 9.61E-02 | 3.04E-01 | 1.00E+00 |
| ENSG00000197106.6_SLC6A17   | ENSG00000160789.18_LMNA | -0.11871 | -0.272759254 | 0.041267116 | 1.45E-01 | 3.90E-01 | 1.00E+00 |
| ENSG00000143919.13_CAMKMT   | ENSG00000160789.18_LMNA | -0.15768 | -0.309120078 | 0.001560781 | 5.24E-02 | 2.07E-01 | 1.00E+00 |
| ENSG00000119397.15_CNTRL    | ENSG00000160789.18_LMNA | 0.14965  | -0.009786275 | 0.301661494 | 6.57E-02 | 2.39E-01 | 1.00E+00 |
| ENSG00000188523.7_CFAP77    | ENSG00000160789.18_LMNA | 0.12212  | -0.037818016 | 0.27595373  | 1.34E-01 | 3.72E-01 | 1.00E+00 |
| ENSG00000173451.5_THAP2     | ENSG00000160789.18_LMNA | -0.29705 | -0.435648951 | -0.14469225 | 2.02E-04 | 3.29E-03 | 1.00E+00 |
| ENSG00000124593.13_PRICKLE4 | ENSG00000160789.18_LMNA | 0.03327  | -0.126599157 | 0.19145869  | 6.84E-01 | 8.63E-01 | 1.00E+00 |
| ENSG00000112139.13_MDGA1    | ENSG00000160789.18_LMNA | 0.23485  | 0.078583994  | 0.379845743 | 3.59E-03 | 3.06E-02 | 1.00E+00 |
| ENSG00000126778.8_SIX1      | ENSG00000160789.18_LMNA | -0.1557  | -0.30728397  | 0.00358959  | 5.54E-02 | 2.15E-01 | 1.00E+00 |
| ENSG00000183801.6_OLFML1    | ENSG00000160789.18_LMNA | -0.0592  | -0.216365124 | 0.100948446 | 4.69E-01 | 7.30E-01 | 1.00E+00 |
| ENSG00000271576.1_RP11-486G | ENSG00000160789.18_LMNA | -0.25657 | -0.399458199 | -0.10152014 | 1.42E-03 | 1.51E-02 | 1.00E+00 |
| ENSG00000260114.2_CTD-2574D | ENSG00000160789.18_LMNA | -0.2073  | -0.354791859 | -0.04974098 | 1.04E-02 | 6.73E-02 | 1.00E+00 |
| ENSG00000125434.9_SLC25A35  | ENSG00000160789.18_LMNA | 0.05056  | -0.109520661 | 0.208087336 | 5.36E-01 | 7.77E-01 | 1.00E+00 |
| ENSG00000179593.14_ALOX15B  | ENSG00000160789.18_LMNA | -0.03266 | -0.190872092 | 0.1271982   | 6.90E-01 | 8.66E-01 | 1.00E+00 |
| ENSG00000268521.1_VN1R83P   | ENSG00000160789.18_LMNA | -0.21571 | -0.3624601   | -0.05851525 | 7.61E-03 | 5.35E-02 | 1.00E+00 |
| ENSG00000106327.11_TFR2     | ENSG00000160789.18_LMNA | 0.25025  | 0.094826019  | 0.393762169 | 1.87E-03 | 1.86E-02 | 1.00E+00 |
| ENSG00000024526.15_DEPDC1   | ENSG00000160789.18_LMNA | 0.18299  | 0.024506552  | 0.332507195 | 2.40E-02 | 1.23E-01 | 1.00E+00 |
| ENSG00000147168.11_IL2RG    | ENSG00000160789.18_LMNA | 0.04006  | -0.119905001 | 0.197998352 | 6.24E-01 | 8.31E-01 | 1.00E+00 |
| ENSG00000221916.3_C19orf73  | ENSG00000160789.18_LMNA | -0.17227 | -0.322623368 | -0.01343868 | 3.38E-02 | 1.55E-01 | 1.00E+00 |
| ENSG00000086848.13_ALG9     | ENSG00000160789.18_LMNA | -0.24943 | -0.393022425 | -0.09395863 | 1.94E-03 | 1.91E-02 | 1.00E+00 |

|                              |                         |          |              |             |          |          |          |
|------------------------------|-------------------------|----------|--------------|-------------|----------|----------|----------|
| ENSG00000248925.1_CTD-2083E  | ENSG00000160789.18_LMNA | -0.23768 | -0.38240709  | -0.08156141 | 3.19E-03 | 2.80E-02 | 1.00E+00 |
| ENSG00000126246.8_IGFLR1     | ENSG00000160789.18_LMNA | 0.03751  | -0.122422739 | 0.195542036 | 6.46E-01 | 8.43E-01 | 1.00E+00 |
| ENSG00000269940.1_RP11-73M1  | ENSG00000160789.18_LMNA | 0.24065  | 0.084697188  | 0.385099678 | 2.82E-03 | 2.55E-02 | 1.00E+00 |
| ENSG00000069869.14_NEDD4     | ENSG00000160789.18_LMNA | 0.1201   | -0.039863666 | 0.274059933 | 1.41E-01 | 3.82E-01 | 1.00E+00 |
| ENSG00000178163.6_ZNF518B    | ENSG00000160789.18_LMNA | -0.10342 | -0.258363466 | 0.056718054 | 2.05E-01 | 4.76E-01 | 1.00E+00 |
| ENSG00000171970.11_ZNF57     | ENSG00000160789.18_LMNA | 0.03668  | -0.123236459 | 0.194747314 | 6.54E-01 | 8.47E-01 | 1.00E+00 |
| ENSG00000240370.5_U47924.6   | ENSG00000160789.18_LMNA | 0.10045  | -0.059707995 | 0.255561454 | 2.18E-01 | 4.93E-01 | 1.00E+00 |
| ENSG00000115165.8_CYTIP      | ENSG00000160789.18_LMNA | 0.07814  | -0.082081458 | 0.234424795 | 3.39E-01 | 6.24E-01 | 1.00E+00 |
| ENSG00000274750.1_HIST1H3E   | ENSG00000160789.18_LMNA | 0.00465  | -0.154662016 | 0.163732668 | 9.55E-01 | 9.82E-01 | 1.00E+00 |
| ENSG00000272525.1_RP11-79P5  | ENSG00000160789.18_LMNA | -0.20545 | -0.353103457 | -0.04781535 | 1.11E-02 | 7.06E-02 | 1.00E+00 |
| ENSG00000203772.7_SPRN       | ENSG00000160789.18_LMNA | 0.02116  | -0.13850775  | 0.179754709 | 7.96E-01 | 9.18E-01 | 1.00E+00 |
| ENSG00000164342.11_TLR3      | ENSG00000160789.18_LMNA | -0.07045 | -0.227101241 | 0.089759837 | 3.88E-01 | 6.67E-01 | 1.00E+00 |
| ENSG00000198399.13_ITSN2     | ENSG00000160789.18_LMNA | 0.15168  | -0.007711062 | 0.303546825 | 6.21E-02 | 2.31E-01 | 1.00E+00 |
| ENSG00000040608.12_RTN4R     | ENSG00000160789.18_LMNA | -0.08602 | -0.241908254 | 0.07419642  | 2.92E-01 | 5.78E-01 | 1.00E+00 |
| ENSG00000184916.7_JAG2       | ENSG00000160789.18_LMNA | 0.1373   | -0.022394705 | 0.290154137 | 9.17E-02 | 2.95E-01 | 1.00E+00 |
| ENSG00000259366.1_CTD-2647L  | ENSG00000160789.18_LMNA | 0.01272  | -0.14677328  | 0.171577875 | 8.76E-01 | 9.52E-01 | 1.00E+00 |
| ENSG00000120217.12_CD274     | ENSG00000160789.18_LMNA | 0.40525  | 0.263018675  | 0.530241956 | 2.23E-07 | 1.39E-05 | 1.14E-02 |
| ENSG00000178718.6_RPP25      | ENSG00000160789.18_LMNA | 0.14447  | -0.015076139 | 0.296844608 | 7.58E-02 | 2.63E-01 | 1.00E+00 |
| ENSG00000127084.16_FGD3      | ENSG00000160789.18_LMNA | -0.23211 | -0.377367917 | -0.07570877 | 4.01E-03 | 3.32E-02 | 1.00E+00 |
| ENSG00000197191.4_CYSRT1     | ENSG00000160789.18_LMNA | 0.12983  | -0.029990046 | 0.283178184 | 1.11E-01 | 3.32E-01 | 1.00E+00 |
| ENSG00000072736.17_NFATC3    | ENSG00000160789.18_LMNA | 0.08722  | -0.072992182 | 0.24304786  | 2.85E-01 | 5.71E-01 | 1.00E+00 |
| ENSG00000092978.9_GPATCH2    | ENSG00000160789.18_LMNA | 0.04122  | -0.118763275 | 0.199110909 | 6.14E-01 | 8.25E-01 | 1.00E+00 |
| ENSG00000182310.11_SPACA6    | ENSG00000160789.18_LMNA | 0.03856  | -0.121383245 | 0.196556654 | 6.37E-01 | 8.38E-01 | 1.00E+00 |
| ENSG00000243746.1_EEF1A1P1   | ENSG00000160789.18_LMNA | -0.11316 | -0.267537473 | 0.046889045 | 1.65E-01 | 4.21E-01 | 1.00E+00 |
| ENSG00000258926.1_RP11-47I22 | ENSG00000160789.18_LMNA | -0.35616 | -0.487705305 | -0.20879591 | 6.69E-06 | 2.12E-04 | 3.43E-01 |
| ENSG00000131351.13_HAUS8     | ENSG00000160789.18_LMNA | 0.06516  | -0.095027478 | 0.222056212 | 4.25E-01 | 6.96E-01 | 1.00E+00 |
| ENSG00000100077.13_GRK3      | ENSG00000160789.18_LMNA | -0.31965 | -0.455664916 | -0.16905481 | 5.96E-05 | 1.23E-03 | 1.00E+00 |
| ENSG00000188372.13_ZP3       | ENSG00000160789.18_LMNA | 0.12118  | -0.038772245 | 0.275070639 | 1.37E-01 | 3.77E-01 | 1.00E+00 |
| ENSG00000165185.13_KIAA1958  | ENSG00000160789.18_LMNA | -0.05146 | -0.208945217 | 0.108634455 | 5.29E-01 | 7.73E-01 | 1.00E+00 |
| ENSG00000214290.6_COLCA2     | ENSG00000160789.18_LMNA | -0.11717 | -0.271307504 | 0.042832113 | 1.51E-01 | 3.99E-01 | 1.00E+00 |
| ENSG00000153132.11_CLGN      | ENSG00000160789.18_LMNA | -0.33061 | -0.465323688 | -0.18093768 | 3.18E-05 | 7.48E-04 | 1.00E+00 |
| ENSG00000101974.13_ATP11C    | ENSG00000160789.18_LMNA | 0.21542  | 0.058220184  | 0.362202892 | 7.69E-03 | 5.40E-02 | 1.00E+00 |
| ENSG00000204390.9_HSPA1L     | ENSG00000160789.18_LMNA | 0.05014  | -0.109940396 | 0.207680845 | 5.40E-01 | 7.79E-01 | 1.00E+00 |

|                               |                         |          |              |             |          |          |          |
|-------------------------------|-------------------------|----------|--------------|-------------|----------|----------|----------|
| ENSG00000101004.13_NINL       | ENSG00000160789.18_LMNA | 0.08937  | -0.070834955 | 0.245087129 | 2.74E-01 | 5.58E-01 | 1.00E+00 |
| ENSG00000116668.11_SWT1       | ENSG00000160789.18_LMNA | -0.24504 | -0.389062711 | -0.08932337 | 2.35E-03 | 2.21E-02 | 1.00E+00 |
| ENSG00000120322.3_PCDHB8      | ENSG00000160789.18_LMNA | 0.16736  | 0.008385855  | 0.318088568 | 3.93E-02 | 1.71E-01 | 1.00E+00 |
| ENSG00000100429.16_HDAC10     | ENSG00000160789.18_LMNA | 0.14142  | -0.018194928 | 0.29399722  | 8.22E-02 | 2.77E-01 | 1.00E+00 |
| ENSG00000172361.5_CFAP53      | ENSG00000160789.18_LMNA | 0.06167  | -0.098493736 | 0.21872715  | 4.50E-01 | 7.16E-01 | 1.00E+00 |
| ENSG00000273899.3_NOL12       | ENSG00000160789.18_LMNA | -0.22017 | -0.366524394 | -0.06318488 | 6.42E-03 | 4.73E-02 | 1.00E+00 |
| ENSG00000064012.20_CASP8      | ENSG00000160789.18_LMNA | 0.25897  | 0.104055279  | 0.401609357 | 1.28E-03 | 1.39E-02 | 1.00E+00 |
| ENSG00000236058.3_RPL17P36    | ENSG00000160789.18_LMNA | -0.10259 | -0.257587624 | 0.057546497 | 2.08E-01 | 4.81E-01 | 1.00E+00 |
| ENSG00000264577.1_AC010761.1  | ENSG00000160789.18_LMNA | -0.04458 | -0.202342491 | 0.115442197 | 5.86E-01 | 8.08E-01 | 1.00E+00 |
| ENSG00000197937.11_ZNF347     | ENSG00000160789.18_LMNA | 0.21335  | 0.056054466  | 0.360313649 | 8.31E-03 | 5.73E-02 | 1.00E+00 |
| ENSG00000270175.1_RP11-793H   | ENSG00000160789.18_LMNA | -0.28868 | -0.428204383 | -0.13572016 | 3.10E-04 | 4.62E-03 | 1.00E+00 |
| ENSG00000181638.16_ZFP41      | ENSG00000160789.18_LMNA | 0.11151  | -0.048553588 | 0.265987853 | 1.71E-01 | 4.31E-01 | 1.00E+00 |
| ENSG00000119636.14_BBOF1      | ENSG00000160789.18_LMNA | 0.26114  | 0.106364032  | 0.403565568 | 1.16E-03 | 1.29E-02 | 1.00E+00 |
| ENSG00000142698.13_C1orf94    | ENSG00000160789.18_LMNA | -0.01637 | -0.175116021 | 0.143202203 | 8.41E-01 | 9.38E-01 | 1.00E+00 |
| ENSG00000260918.1_RP11-731J.1 | ENSG00000160789.18_LMNA | -0.22217 | -0.368339611 | -0.06527476 | 5.94E-03 | 4.47E-02 | 1.00E+00 |
| ENSG00000233057.1_EEF1A1P1.1  | ENSG00000160789.18_LMNA | -0.11004 | -0.264602264 | 0.050040458 | 1.77E-01 | 4.39E-01 | 1.00E+00 |
| ENSG00000183814.14_LIN9       | ENSG00000160789.18_LMNA | -0.13094 | -0.28421879  | 0.028859337 | 1.08E-01 | 3.27E-01 | 1.00E+00 |
| ENSG00000105988.6_NHP2P1      | ENSG00000160789.18_LMNA | -0.16407 | -0.315037285 | -0.00499489 | 4.34E-02 | 1.83E-01 | 1.00E+00 |
| ENSG00000235280.2_MCF2L-AS.1  | ENSG00000160789.18_LMNA | -0.0651  | -0.221997825 | 0.095088337 | 4.26E-01 | 6.96E-01 | 1.00E+00 |
| ENSG00000112159.10_MDN1       | ENSG00000160789.18_LMNA | -0.04815 | -0.205768694 | 0.111913333 | 5.56E-01 | 7.90E-01 | 1.00E+00 |
| ENSG00000004139.12_SARM1      | ENSG00000160789.18_LMNA | -0.08782 | -0.243611017 | 0.072396746 | 2.82E-01 | 5.67E-01 | 1.00E+00 |
| ENSG00000251369.7_ZNF550      | ENSG00000160789.18_LMNA | -0.02863 | -0.186975282 | 0.131171804 | 7.26E-01 | 8.84E-01 | 1.00E+00 |
| ENSG00000152315.4_KCNK13      | ENSG00000160789.18_LMNA | -0.13921 | -0.291938137 | 0.020446494 | 8.72E-02 | 2.87E-01 | 1.00E+00 |
| ENSG00000120156.19_TEK        | ENSG00000160789.18_LMNA | -0.06182 | -0.218867203 | 0.098348066 | 4.49E-01 | 7.15E-01 | 1.00E+00 |
| ENSG00000254595.1_CTD-2010I.1 | ENSG00000160789.18_LMNA | -0.0323  | -0.190523547 | 0.12755403  | 6.93E-01 | 8.68E-01 | 1.00E+00 |
| ENSG00000157212.17_PAXIP1     | ENSG00000160789.18_LMNA | 0.30425  | 0.152432824  | 0.44203985  | 1.39E-04 | 2.44E-03 | 1.00E+00 |
| ENSG00000213222.3_AC093724.1  | ENSG00000160789.18_LMNA | -0.13545 | -0.28842657  | 0.024279028 | 9.62E-02 | 3.04E-01 | 1.00E+00 |
| ENSG00000169026.11_MFSD7      | ENSG00000160789.18_LMNA | 0.24155  | 0.085646988  | 0.385914232 | 2.72E-03 | 2.48E-02 | 1.00E+00 |
| ENSG00000188735.11_TMEM120    | ENSG00000160789.18_LMNA | 0.05914  | -0.101016454 | 0.216299631 | 4.69E-01 | 7.30E-01 | 1.00E+00 |
| ENSG00000187815.8_ZFP69       | ENSG00000160789.18_LMNA | -0.26662 | -0.408485387 | -0.11218468 | 8.99E-04 | 1.07E-02 | 1.00E+00 |
| ENSG00000196312.10_MFSD14C    | ENSG00000160789.18_LMNA | 0.17698  | 0.018298805  | 0.326971874 | 2.92E-02 | 1.41E-01 | 1.00E+00 |
| ENSG00000269694.1_AC005197.1  | ENSG00000160789.18_LMNA | -0.12439 | -0.278088422 | 0.035508998 | 1.27E-01 | 3.60E-01 | 1.00E+00 |
| ENSG00000204685.6_STARD7-A.1  | ENSG00000160789.18_LMNA | 0.14388  | -0.015675324 | 0.296297995 | 7.70E-02 | 2.66E-01 | 1.00E+00 |

|                             |                         |          |              |             |          |          |          |
|-----------------------------|-------------------------|----------|--------------|-------------|----------|----------|----------|
| ENSG00000164074.13_ABHD18   | ENSG00000160789.18_LMNA | -0.17623 | -0.3262767   | -0.01752086 | 2.99E-02 | 1.43E-01 | 1.00E+00 |
| ENSG00000160219.10_GAB3     | ENSG00000160789.18_LMNA | 0.06557  | -0.094621549 | 0.222445591 | 4.22E-01 | 6.94E-01 | 1.00E+00 |
| ENSG00000145734.17_BDP1     | ENSG00000160789.18_LMNA | 0.08782  | -0.072388542 | 0.243618774 | 2.82E-01 | 5.67E-01 | 1.00E+00 |
| ENSG00000183048.10_SLC25A1C | ENSG00000160789.18_LMNA | -0.03247 | -0.190685845 | 0.127388349 | 6.91E-01 | 8.67E-01 | 1.00E+00 |
| ENSG00000113248.5_PCDHB15   | ENSG00000160789.18_LMNA | -0.05279 | -0.210227608 | 0.107308783 | 5.18E-01 | 7.65E-01 | 1.00E+00 |
| ENSG00000069702.9_TGFBR3    | ENSG00000160789.18_LMNA | -0.1476  | -0.299754288 | 0.011882839 | 6.96E-02 | 2.49E-01 | 1.00E+00 |
| ENSG00000105122.11_RASAL3   | ENSG00000160789.18_LMNA | 0.10606  | -0.054058176 | 0.260851711 | 1.93E-01 | 4.62E-01 | 1.00E+00 |
| ENSG00000081818.3_PCDHB4    | ENSG00000160789.18_LMNA | -0.12347 | -0.277218145 | 0.036450749 | 1.30E-01 | 3.65E-01 | 1.00E+00 |
| ENSG00000077984.5_CST7      | ENSG00000160789.18_LMNA | 0.12841  | -0.031430297 | 0.281851635 | 1.15E-01 | 3.39E-01 | 1.00E+00 |
| ENSG00000184616.8_SPDYE12P  | ENSG00000160789.18_LMNA | 0.08582  | -0.074392516 | 0.241722599 | 2.93E-01 | 5.79E-01 | 1.00E+00 |
| ENSG00000273230.1_RP11-1246 | ENSG00000160789.18_LMNA | 0.34633  | 0.198054359  | 0.47911863  | 1.24E-05 | 3.48E-04 | 6.35E-01 |
| ENSG00000141198.12_TOM1L1   | ENSG00000160789.18_LMNA | 0.25995  | 0.105094449  | 0.402490184 | 1.22E-03 | 1.34E-02 | 1.00E+00 |
| ENSG00000158636.15_EMSY     | ENSG00000160789.18_LMNA | -0.13807 | -0.290877947 | 0.021604557 | 8.98E-02 | 2.92E-01 | 1.00E+00 |
| ENSG00000009950.14_MLXIPL   | ENSG00000160789.18_LMNA | -0.11446 | -0.268759584 | 0.045575066 | 1.60E-01 | 4.14E-01 | 1.00E+00 |
| ENSG00000198780.10_FAM169A  | ENSG00000160789.18_LMNA | -0.35844 | -0.489694131 | -0.21129349 | 5.78E-06 | 1.87E-04 | 2.97E-01 |
| ENSG00000175054.13_ATR      | ENSG00000160789.18_LMNA | 0.04846  | -0.111606284 | 0.206066442 | 5.53E-01 | 7.88E-01 | 1.00E+00 |
| ENSG00000247400.3_DNAJC3-A5 | ENSG00000160789.18_LMNA | -0.32082 | -0.456693522 | -0.17031632 | 5.58E-05 | 1.17E-03 | 1.00E+00 |
| ENSG00000272696.1_RP11-339B | ENSG00000160789.18_LMNA | -0.23224 | -0.377485632 | -0.07584525 | 3.99E-03 | 3.31E-02 | 1.00E+00 |
| ENSG00000124374.8_PAIP2B    | ENSG00000160789.18_LMNA | -0.44177 | -0.561481169 | -0.30394521 | 1.22E-08 | 1.27E-06 | 6.24E-04 |
| ENSG00000273680.1_RP11-996F | ENSG00000160789.18_LMNA | -0.13276 | -0.285917914 | 0.027011365 | 1.03E-01 | 3.18E-01 | 1.00E+00 |
| ENSG00000253159.2_PCDHGA12  | ENSG00000160789.18_LMNA | 0.00154  | -0.157699399 | 0.160701269 | 9.85E-01 | 9.94E-01 | 1.00E+00 |
| ENSG00000112343.10_TRIM38   | ENSG00000160789.18_LMNA | 0.13226  | -0.027518217 | 0.285452082 | 1.04E-01 | 3.20E-01 | 1.00E+00 |
| ENSG00000125851.8_PCSK2     | ENSG00000160789.18_LMNA | -0.37338 | -0.502696041 | -0.22771137 | 2.16E-06 | 8.46E-05 | 1.11E-01 |
| ENSG00000280077.1_RP11-87H9 | ENSG00000160789.18_LMNA | -0.17249 | -0.322830109 | -0.01366941 | 3.36E-02 | 1.54E-01 | 1.00E+00 |
| ENSG00000176155.17_CCDC57   | ENSG00000160789.18_LMNA | 0.04593  | -0.114100752 | 0.203645828 | 5.74E-01 | 8.01E-01 | 1.00E+00 |
| ENSG00000260418.1_RP3-406A7 | ENSG00000160789.18_LMNA | -0.08386 | -0.239857972 | 0.076360663 | 3.04E-01 | 5.91E-01 | 1.00E+00 |
| ENSG00000124191.16_TOX2     | ENSG00000160789.18_LMNA | -0.02386 | -0.18236894  | 0.135855775 | 7.70E-01 | 9.05E-01 | 1.00E+00 |
| ENSG00000280153.1_RP11-876N | ENSG00000160789.18_LMNA | 0.12113  | -0.038816322 | 0.275029835 | 1.37E-01 | 3.77E-01 | 1.00E+00 |
| ENSG00000213865.6_C8orf44   | ENSG00000160789.18_LMNA | -0.25489 | -0.397941625 | -0.09973519 | 1.53E-03 | 1.59E-02 | 1.00E+00 |
| ENSG00000167216.15_KATNAL2  | ENSG00000160789.18_LMNA | 0.21789  | 0.060796473  | 0.364447044 | 7.00E-03 | 5.05E-02 | 1.00E+00 |
| ENSG00000144535.18_DIS3L2   | ENSG00000160789.18_LMNA | 0.05144  | -0.108654703 | 0.208925622 | 5.29E-01 | 7.73E-01 | 1.00E+00 |
| ENSG00000246089.3_RP11-115C | ENSG00000160789.18_LMNA | -0.221   | -0.367279314 | -0.06405371 | 6.22E-03 | 4.62E-02 | 1.00E+00 |
| ENSG00000172339.9_ALG14     | ENSG00000160789.18_LMNA | -0.13933 | -0.292048684 | 0.020325694 | 8.69E-02 | 2.86E-01 | 1.00E+00 |

|                              |                         |          |              |             |          |          |          |
|------------------------------|-------------------------|----------|--------------|-------------|----------|----------|----------|
| ENSG00000175595.13_ERCC4     | ENSG00000160789.18_LMNA | -0.12814 | -0.281599235 | 0.031704184 | 1.16E-01 | 3.40E-01 | 1.00E+00 |
| ENSG00000137822.11_TUBGCP4   | ENSG00000160789.18_LMNA | 0.03657  | -0.123349534 | 0.194636846 | 6.55E-01 | 8.47E-01 | 1.00E+00 |
| ENSG00000105639.17_JAK3      | ENSG00000160789.18_LMNA | 0.18795  | 0.029634401  | 0.337063643 | 2.04E-02 | 1.09E-01 | 1.00E+00 |
| ENSG00000100147.12_CCDC134   | ENSG00000160789.18_LMNA | 0.07797  | -0.082253754 | 0.234260854 | 3.40E-01 | 6.25E-01 | 1.00E+00 |
| ENSG00000149716.11_ORAOV1    | ENSG00000160789.18_LMNA | -0.00939 | -0.168336006 | 0.150038054 | 9.09E-01 | 9.65E-01 | 1.00E+00 |
| ENSG00000186272.11_ZNF17     | ENSG00000160789.18_LMNA | 0.17384  | 0.015053423  | 0.324069579 | 3.22E-02 | 1.50E-01 | 1.00E+00 |
| ENSG00000168505.6_GBX2       | ENSG00000160789.18_LMNA | -0.24527 | -0.389271931 | -0.08956796 | 2.32E-03 | 2.19E-02 | 1.00E+00 |
| ENSG00000231764.7_DLX6-AS1   | ENSG00000160789.18_LMNA | -0.29493 | -0.433760089 | -0.14241128 | 2.26E-04 | 3.59E-03 | 1.00E+00 |
| ENSG00000235423.7_RP11-282O  | ENSG00000160789.18_LMNA | -0.23492 | -0.379910767 | -0.07865951 | 3.58E-03 | 3.05E-02 | 1.00E+00 |
| ENSG00000248690.5_HAS2-AS1   | ENSG00000160789.18_LMNA | -0.20843 | -0.355828117 | -0.05092396 | 9.97E-03 | 6.55E-02 | 1.00E+00 |
| ENSG00000089916.16_GPATCH2   | ENSG00000160789.18_LMNA | 0.07534  | -0.084881098 | 0.231758685 | 3.56E-01 | 6.40E-01 | 1.00E+00 |
| ENSG00000273447.1_AC004067.1 | ENSG00000160789.18_LMNA | 0.28063  | 0.127105193  | 0.421018582 | 4.62E-04 | 6.33E-03 | 1.00E+00 |
| ENSG00000164327.11_RICTOR    | ENSG00000160789.18_LMNA | -0.46784 | -0.583573815 | -0.33347424 | 1.22E-09 | 1.84E-07 | 6.28E-05 |
| ENSG00000278259.3_MYO19      | ENSG00000160789.18_LMNA | 0.21692  | 0.059782074  | 0.363563844 | 7.27E-03 | 5.17E-02 | 1.00E+00 |
| ENSG00000107951.11_MTPAP     | ENSG00000160789.18_LMNA | -0.25678 | -0.399644188 | -0.10173918 | 1.41E-03 | 1.50E-02 | 1.00E+00 |
| ENSG00000107443.14_CCNJ      | ENSG00000160789.18_LMNA | -0.11342 | -0.267782837 | 0.046625323 | 1.64E-01 | 4.20E-01 | 1.00E+00 |
| ENSG00000260916.4_CCPG1      | ENSG00000160789.18_LMNA | 0.26648  | 0.112035061  | 0.408359135 | 9.05E-04 | 1.07E-02 | 1.00E+00 |
| ENSG00000100285.9_NEFH       | ENSG00000160789.18_LMNA | -0.20702 | -0.354531766 | -0.04944419 | 1.05E-02 | 6.78E-02 | 1.00E+00 |
| ENSG00000188827.9_SLX4       | ENSG00000160789.18_LMNA | 0.08537  | -0.074849444 | 0.241289913 | 2.96E-01 | 5.82E-01 | 1.00E+00 |
| ENSG00000067365.13_METTL22   | ENSG00000160789.18_LMNA | -0.147   | -0.299197967 | 0.012493879 | 7.07E-02 | 2.51E-01 | 1.00E+00 |
| ENSG00000137474.18_MYO7A     | ENSG00000160789.18_LMNA | 0.04513  | -0.114891471 | 0.202877708 | 5.81E-01 | 8.05E-01 | 1.00E+00 |
| ENSG00000158715.5_SLC45A3    | ENSG00000160789.18_LMNA | -0.21225 | -0.359306466 | -0.05490106 | 8.66E-03 | 5.90E-02 | 1.00E+00 |
| ENSG00000236850.4_BMS1P20    | ENSG00000160789.18_LMNA | -0.07509 | -0.231526352 | 0.08512483  | 3.58E-01 | 6.41E-01 | 1.00E+00 |
| ENSG00000172006.10_ZNF554    | ENSG00000160789.18_LMNA | -0.0769  | -0.23324249  | 0.083323594 | 3.46E-01 | 6.31E-01 | 1.00E+00 |
| ENSG00000262001.1_DLGAP1-A1  | ENSG00000160789.18_LMNA | 0.24088  | 0.084939458  | 0.385307495 | 2.79E-03 | 2.53E-02 | 1.00E+00 |
| ENSG00000269946.1_RP11-2B6.1 | ENSG00000160789.18_LMNA | 0.34515  | 0.196762605  | 0.478082381 | 1.33E-05 | 3.69E-04 | 6.83E-01 |
| ENSG00000196678.12_ERI2      | ENSG00000160789.18_LMNA | -0.18849 | -0.337565021 | -0.03019964 | 2.00E-02 | 1.08E-01 | 1.00E+00 |
| ENSG00000152475.6_ZNF837     | ENSG00000160789.18_LMNA | 0.32051  | 0.16998587   | 0.456424153 | 5.68E-05 | 1.19E-03 | 1.00E+00 |
| ENSG00000184254.15_ALDH1A3   | ENSG00000160789.18_LMNA | 0.11466  | -0.045371268 | 0.268949042 | 1.60E-01 | 4.13E-01 | 1.00E+00 |
| ENSG00000145428.13_RNF175    | ENSG00000160789.18_LMNA | -0.29806 | -0.436545119 | -0.14577553 | 1.92E-04 | 3.16E-03 | 1.00E+00 |
| ENSG00000169184.5_MN1        | ENSG00000160789.18_LMNA | -0.11918 | -0.27320135  | 0.040790228 | 1.44E-01 | 3.87E-01 | 1.00E+00 |
| ENSG00000170264.11_FAM161A   | ENSG00000160789.18_LMNA | -0.06753 | -0.224316176 | 0.092669987 | 4.08E-01 | 6.83E-01 | 1.00E+00 |
| ENSG00000272829.1_XXbac-B13  | ENSG00000160789.18_LMNA | -0.09393 | -0.249403576 | 0.066259063 | 2.50E-01 | 5.30E-01 | 1.00E+00 |



|                             |                         |          |              |             |          |          |          |
|-----------------------------|-------------------------|----------|--------------|-------------|----------|----------|----------|
| ENSG00000161896.9_IP6K3     | ENSG00000160789.18_LMNA | -0.27987 | -0.420342245 | -0.12629662 | 4.79E-04 | 6.52E-03 | 1.00E+00 |
| ENSG00000136267.12_DGKB     | ENSG00000160789.18_LMNA | -0.56848 | -0.667288868 | -0.45000516 | 2.18E-14 | 2.70E-11 | 1.12E-09 |
| ENSG00000150681.8_RGS18     | ENSG00000160789.18_LMNA | -0.12392 | -0.277639934 | 0.035994389 | 1.28E-01 | 3.63E-01 | 1.00E+00 |
| ENSG00000138311.14_ZNF365   | ENSG00000160789.18_LMNA | -0.1451  | -0.297430298 | 0.014433871 | 7.45E-02 | 2.60E-01 | 1.00E+00 |
| ENSG00000228801.5_RP11-110G | ENSG00000160789.18_LMNA | -0.10256 | -0.257554329 | 0.05758204  | 2.09E-01 | 4.81E-01 | 1.00E+00 |
| ENSG00000234743.1	EIF5AP4   | ENSG00000160789.18_LMNA | -0.05552 | -0.212838835 | 0.104605928 | 4.97E-01 | 7.51E-01 | 1.00E+00 |
| ENSG00000169519.18_METTL15  | ENSG00000160789.18_LMNA | 0.07637  | -0.083852603 | 0.232738678 | 3.50E-01 | 6.33E-01 | 1.00E+00 |
| ENSG00000179044.14_EXOC3L1  | ENSG00000160789.18_LMNA | 0.13253  | -0.027240932 | 0.285706944 | 1.04E-01 | 3.19E-01 | 1.00E+00 |
| ENSG00000196605.6_ZNF846    | ENSG00000160789.18_LMNA | -0.1629  | -0.313954665 | -0.00379346 | 4.49E-02 | 1.88E-01 | 1.00E+00 |
| ENSG00000179101.5_RP11-349N | ENSG00000160789.18_LMNA | -0.1958  | -0.344266525 | -0.0377737  | 1.56E-02 | 9.03E-02 | 1.00E+00 |
| ENSG00000196345.11_ZKSCAN7  | ENSG00000160789.18_LMNA | -0.30861 | -0.44590206  | -0.15712797 | 1.10E-04 | 2.03E-03 | 1.00E+00 |
| ENSG00000106633.14_GCK      | ENSG00000160789.18_LMNA | 0.16958  | 0.010663269  | 0.320134254 | 3.67E-02 | 1.64E-01 | 1.00E+00 |
| ENSG00000255633.4_MTRNR2L9  | ENSG00000160789.18_LMNA | -0.23548 | -0.380421621 | -0.07925295 | 3.50E-03 | 3.00E-02 | 1.00E+00 |
| ENSG00000119723.14_COQ6     | ENSG00000160789.18_LMNA | -0.10206 | -0.257084397 | 0.058083611 | 2.11E-01 | 4.84E-01 | 1.00E+00 |
| ENSG00000177054.12_ZDHHC13  | ENSG00000160789.18_LMNA | -0.10541 | -0.260246463 | 0.054705584 | 1.96E-01 | 4.65E-01 | 1.00E+00 |
| ENSG00000266714.5_MYO15B    | ENSG00000160789.18_LMNA | 0.02441  | -0.135312837 | 0.182903596 | 7.65E-01 | 9.03E-01 | 1.00E+00 |
| ENSG00000168071.20_CCDC88B  | ENSG00000160789.18_LMNA | 0.10154  | -0.058606934 | 0.256593926 | 2.13E-01 | 4.87E-01 | 1.00E+00 |
| ENSG00000272405.1_RP11-284F | ENSG00000160789.18_LMNA | 0.1989   | 0.040996873  | 0.347108936 | 1.40E-02 | 8.37E-02 | 1.00E+00 |
| ENSG00000215612.6_HMX1      | ENSG00000160789.18_LMNA | -0.35162 | -0.483741091 | -0.20382848 | 8.91E-06 | 2.65E-04 | 4.57E-01 |
| ENSG00000278129.1_ZNF8      | ENSG00000160789.18_LMNA | -0.09015 | -0.245827387 | 0.070051147 | 2.69E-01 | 5.54E-01 | 1.00E+00 |
| ENSG00000151090.16_THRB     | ENSG00000160789.18_LMNA | -0.14765 | -0.299799899 | 0.011832733 | 6.95E-02 | 2.48E-01 | 1.00E+00 |
| ENSG00000168016.12_TRANK1   | ENSG00000160789.18_LMNA | 0.23733  | 0.081201613  | 0.382097816 | 3.24E-03 | 2.83E-02 | 1.00E+00 |
| ENSG00000172530.18_BANP     | ENSG00000160789.18_LMNA | 0.22731  | 0.070662431  | 0.373008586 | 4.86E-03 | 3.83E-02 | 1.00E+00 |
| ENSG00000228981.3_RP11-364L | ENSG00000160789.18_LMNA | -0.02013 | -0.178758225 | 0.139517421 | 8.06E-01 | 9.22E-01 | 1.00E+00 |
| ENSG00000154274.13_C4orf19  | ENSG00000160789.18_LMNA | -0.03138 | -0.189629418 | 0.128466472 | 7.01E-01 | 8.72E-01 | 1.00E+00 |
| ENSG00000138709.16_LARP1B   | ENSG00000160789.18_LMNA | 0.1441   | -0.015452985 | 0.296500851 | 7.65E-02 | 2.65E-01 | 1.00E+00 |
| ENSG00000267532.3_MIR497HG  | ENSG00000160789.18_LMNA | -0.19437 | -0.342953675 | -0.03628714 | 1.64E-02 | 9.37E-02 | 1.00E+00 |
| ENSG00000103196.10_CRISPLD2 | ENSG00000160789.18_LMNA | 0.33125  | 0.181622742  | 0.465878467 | 3.07E-05 | 7.27E-04 | 1.00E+00 |
| ENSG00000164620.7_RELL2     | ENSG00000160789.18_LMNA | -0.07637 | -0.232742096 | 0.083849015 | 3.50E-01 | 6.33E-01 | 1.00E+00 |
| ENSG00000173320.8_STOX2     | ENSG00000160789.18_LMNA | -0.28234 | -0.422547423 | -0.12893439 | 4.25E-04 | 5.95E-03 | 1.00E+00 |
| ENSG00000244687.10_UBE2V1   | ENSG00000160789.18_LMNA | 0.03166  | -0.128184998 | 0.189905299 | 6.99E-01 | 8.71E-01 | 1.00E+00 |
| ENSG00000145390.10_USP53    | ENSG00000160789.18_LMNA | 0.1257   | -0.034181911 | 0.279313916 | 1.23E-01 | 3.53E-01 | 1.00E+00 |
| ENSG00000259612.1_EEF1A1P2  | ENSG00000160789.18_LMNA | -0.13369 | -0.286790758 | 0.026061224 | 1.01E-01 | 3.12E-01 | 1.00E+00 |

|                              |                         |          |              |             |          |          |          |
|------------------------------|-------------------------|----------|--------------|-------------|----------|----------|----------|
| ENSG00000188011.5_RTP5       | ENSG00000160789.18_LMNA | -0.33327 | -0.467657577 | -0.1838215  | 2.72E-05 | 6.62E-04 | 1.00E+00 |
| ENSG00000116095.9_PLEKHA3    | ENSG00000160789.18_LMNA | -0.06241 | -0.219432111 | 0.097760364 | 4.45E-01 | 7.12E-01 | 1.00E+00 |
| ENSG00000184635.12_ZNF93     | ENSG00000160789.18_LMNA | -0.14843 | -0.300528013 | 0.011032625 | 6.80E-02 | 2.45E-01 | 1.00E+00 |
| ENSG00000102904.13_TSNAXIP1  | ENSG00000160789.18_LMNA | 0.01328  | -0.146234668 | 0.172112046 | 8.71E-01 | 9.50E-01 | 1.00E+00 |
| ENSG00000185670.7_ZBTB3      | ENSG00000160789.18_LMNA | -0.16779 | -0.318482657 | -0.00882434 | 3.88E-02 | 1.70E-01 | 1.00E+00 |
| ENSG00000187867.7_PALM3      | ENSG00000160789.18_LMNA | 0.47735  | 0.344315948  | 0.591593357 | 5.04E-10 | 8.88E-08 | 2.58E-05 |
| ENSG00000155034.17_FBXL18    | ENSG00000160789.18_LMNA | 0.1766   | 0.017904905  | 0.326619926 | 2.95E-02 | 1.42E-01 | 1.00E+00 |
| ENSG00000168004.8_HRASLS5    | ENSG00000160789.18_LMNA | 0.08901  | -0.071194981 | 0.244746984 | 2.75E-01 | 5.60E-01 | 1.00E+00 |
| ENSG00000115556.12_PLCD4     | ENSG00000160789.18_LMNA | -0.08312 | -0.239153219 | 0.0771039   | 3.09E-01 | 5.95E-01 | 1.00E+00 |
| ENSG00000156113.19_KCNMA1    | ENSG00000160789.18_LMNA | -0.07072 | -0.227359245 | 0.089489972 | 3.87E-01 | 6.65E-01 | 1.00E+00 |
| ENSG00000250966.2_RP11-402J1 | ENSG00000160789.18_LMNA | -0.2652  | -0.40720995  | -0.11067376 | 9.60E-04 | 1.12E-02 | 1.00E+00 |
| ENSG0000012211.11_PRICKLE3   | ENSG00000160789.18_LMNA | 0.53672  | 0.412785102  | 0.641133934 | 1.02E-12 | 5.54E-10 | 5.25E-08 |
| ENSG00000121350.14_PYROXD1   | ENSG00000160789.18_LMNA | -0.255   | -0.398040588 | -0.0998516  | 1.52E-03 | 1.59E-02 | 1.00E+00 |
| ENSG00000171132.12_PRKCE     | ENSG00000160789.18_LMNA | -0.33666 | -0.470639123 | -0.1875127  | 2.23E-05 | 5.63E-04 | 1.00E+00 |
| ENSG00000187800.12_PEAR1     | ENSG00000160789.18_LMNA | 0.01309  | -0.146415326 | 0.171932898 | 8.73E-01 | 9.51E-01 | 1.00E+00 |
| ENSG00000177045.7_SIX5       | ENSG00000160789.18_LMNA | 0.53698  | 0.413093407  | 0.641352784 | 9.92E-13 | 5.53E-10 | 5.09E-08 |
| ENSG00000232134.1_RPS15AP1   | ENSG00000160789.18_LMNA | -0.15219 | -0.304027209 | 0.007181867 | 6.12E-02 | 2.29E-01 | 1.00E+00 |
| ENSG00000237036.4_ZEB1-AS1   | ENSG00000160789.18_LMNA | -0.18136 | -0.331001466 | -0.02281555 | 2.53E-02 | 1.28E-01 | 1.00E+00 |
| ENSG00000118276.10_B4GALT6   | ENSG00000160789.18_LMNA | -0.40081 | -0.526417574 | -0.25807356 | 3.11E-07 | 1.81E-05 | 1.59E-02 |
| ENSG00000213903.7_LTB4R      | ENSG00000160789.18_LMNA | 0.20555  | 0.047922311  | 0.35319729  | 1.11E-02 | 7.04E-02 | 1.00E+00 |
| ENSG00000231609.4_AC009501.4 | ENSG00000160789.18_LMNA | 0.08095  | -0.079268298 | 0.237098994 | 3.21E-01 | 6.08E-01 | 1.00E+00 |
| ENSG00000257842.4_NOVA1-AS   | ENSG00000160789.18_LMNA | -0.41443 | -0.538122331 | -0.27325285 | 1.11E-07 | 7.87E-06 | 5.69E-03 |
| ENSG00000128805.13_ARHGAP2   | ENSG00000160789.18_LMNA | -0.09011 | -0.245780741 | 0.070100549 | 2.70E-01 | 5.54E-01 | 1.00E+00 |
| ENSG00000269743.2_SLC25A53   | ENSG00000160789.18_LMNA | -0.37731 | -0.506107264 | -0.23204486 | 1.65E-06 | 6.91E-05 | 8.49E-02 |
| ENSG00000213799.9_ZNF845     | ENSG00000160789.18_LMNA | 0.09691  | -0.063266469 | 0.252219728 | 2.35E-01 | 5.13E-01 | 1.00E+00 |
| ENSG00000182484.13_WASH6P    | ENSG00000160789.18_LMNA | 0.1771   | 0.01842078   | 0.327080841 | 2.91E-02 | 1.40E-01 | 1.00E+00 |
| ENSG00000105085.9_MED26      | ENSG00000160789.18_LMNA | 0.14157  | -0.018037862 | 0.294140751 | 8.19E-02 | 2.76E-01 | 1.00E+00 |
| ENSG00000162946.19_DISC1     | ENSG00000160789.18_LMNA | -0.14027 | -0.292931347 | 0.019360835 | 8.48E-02 | 2.82E-01 | 1.00E+00 |
| ENSG00000260920.2_RP1-228H1  | ENSG00000160789.18_LMNA | -0.02133 | -0.17992313  | 0.138337035 | 7.94E-01 | 9.17E-01 | 1.00E+00 |
| ENSG00000260219.2_RP11-347C  | ENSG00000160789.18_LMNA | -0.01398 | -0.172796959 | 0.145543786 | 8.64E-01 | 9.47E-01 | 1.00E+00 |
| ENSG00000170276.5_HSPB2      | ENSG00000160789.18_LMNA | -0.10073 | -0.255824528 | 0.059427518 | 2.17E-01 | 4.92E-01 | 1.00E+00 |
| ENSG00000157343.7_ARMC12     | ENSG00000160789.18_LMNA | -0.0923  | -0.247859769 | 0.067897189 | 2.58E-01 | 5.41E-01 | 1.00E+00 |
| ENSG00000164778.4_EN2        | ENSG00000160789.18_LMNA | 0.00823  | -0.151166069 | 0.167214302 | 9.20E-01 | 9.69E-01 | 1.00E+00 |

|                              |                         |          |              |             |          |          |          |
|------------------------------|-------------------------|----------|--------------|-------------|----------|----------|----------|
| ENSG00000154678.15_PDE1C     | ENSG00000160789.18_LMNA | 0.10547  | -0.054647152 | 0.2603011   | 1.96E-01 | 4.65E-01 | 1.00E+00 |
| ENSG00000151623.13_NR3C2     | ENSG00000160789.18_LMNA | -0.0296  | -0.18791985  | 0.130209559 | 7.17E-01 | 8.80E-01 | 1.00E+00 |
| ENSG00000088808.15_PPP1R13I  | ENSG00000160789.18_LMNA | 0.02931  | -0.130501044 | 0.187633782 | 7.20E-01 | 8.81E-01 | 1.00E+00 |
| ENSG00000213983.10_AP1G2     | ENSG00000160789.18_LMNA | 0.05892  | -0.101226591 | 0.216097246 | 4.71E-01 | 7.31E-01 | 1.00E+00 |
| ENSG00000279369.1_RP11-51F1  | ENSG00000160789.18_LMNA | -0.12072 | -0.274641546 | 0.039235697 | 1.38E-01 | 3.79E-01 | 1.00E+00 |
| ENSG00000255517.5_CTD-3074C  | ENSG00000160789.18_LMNA | -0.12305 | -0.276823354 | 0.03687778  | 1.31E-01 | 3.67E-01 | 1.00E+00 |
| ENSG00000198939.6_ZFP2       | ENSG00000160789.18_LMNA | -0.19203 | -0.340814346 | -0.03386764 | 1.78E-02 | 9.92E-02 | 1.00E+00 |
| ENSG00000232044.6_LINC01105  | ENSG00000160789.18_LMNA | -0.45664 | -0.574105253 | -0.32075818 | 3.36E-09 | 4.26E-07 | 1.72E-04 |
| ENSG00000204116.10_CHIC1     | ENSG00000160789.18_LMNA | -0.0552  | -0.212534551 | 0.104921131 | 4.99E-01 | 7.52E-01 | 1.00E+00 |
| ENSG00000131944.8_FAAP24     | ENSG00000160789.18_LMNA | 0.04472  | -0.115305374 | 0.202475479 | 5.84E-01 | 8.07E-01 | 1.00E+00 |
| ENSG00000172748.11_ZNF596    | ENSG00000160789.18_LMNA | -0.01889 | -0.177555589 | 0.140735091 | 8.17E-01 | 9.29E-01 | 1.00E+00 |
| ENSG00000123473.14_STIL      | ENSG00000160789.18_LMNA | 0.12209  | -0.037850636 | 0.27592355  | 1.34E-01 | 3.72E-01 | 1.00E+00 |
| ENSG00000260088.1_RP11-92G1  | ENSG00000160789.18_LMNA | -0.02962 | -0.187932604 | 0.130196562 | 7.17E-01 | 8.80E-01 | 1.00E+00 |
| ENSG00000158104.10_HPD       | ENSG00000160789.18_LMNA | 0.14436  | -0.01518941  | 0.296741292 | 7.60E-02 | 2.64E-01 | 1.00E+00 |
| ENSG00000166845.12_C18orf54  | ENSG00000160789.18_LMNA | -0.0947  | -0.250126715 | 0.065491158 | 2.46E-01 | 5.26E-01 | 1.00E+00 |
| ENSG00000231369.1_RP1-40G4F  | ENSG00000160789.18_LMNA | -0.17497 | -0.32511778  | -0.01622478 | 3.11E-02 | 1.47E-01 | 1.00E+00 |
| ENSG00000110455.12_ACCS      | ENSG00000160789.18_LMNA | 0.22809  | 0.071485768  | 0.373720747 | 4.71E-03 | 3.75E-02 | 1.00E+00 |
| ENSG00000272153.1_RP1-286D6  | ENSG00000160789.18_LMNA | -0.02706 | -0.185463264 | 0.132710871 | 7.41E-01 | 8.91E-01 | 1.00E+00 |
| ENSG00000245571.5_AP001258.4 | ENSG00000160789.18_LMNA | -0.00539 | -0.164445265 | 0.153947138 | 9.47E-01 | 9.79E-01 | 1.00E+00 |
| ENSG00000141837.17_CACNA1A   | ENSG00000160789.18_LMNA | -0.16836 | -0.319008511 | -0.00940961 | 3.81E-02 | 1.68E-01 | 1.00E+00 |
| ENSG00000212123.3_PRR22      | ENSG00000160789.18_LMNA | -0.11339 | -0.267753732 | 0.046656608 | 1.64E-01 | 4.20E-01 | 1.00E+00 |
| ENSG00000172456.15_FGGY      | ENSG00000160789.18_LMNA | 0.11785  | -0.042145082 | 0.271944996 | 1.48E-01 | 3.95E-01 | 1.00E+00 |
| ENSG00000268222.1_EEF1A1P7   | ENSG00000160789.18_LMNA | -0.13799 | -0.290806034 | 0.021683078 | 9.00E-02 | 2.92E-01 | 1.00E+00 |
| ENSG00000125895.5_TMEM74B    | ENSG00000160789.18_LMNA | -0.18218 | -0.331761818 | -0.02366924 | 2.47E-02 | 1.25E-01 | 1.00E+00 |
| ENSG00000177855.8_CACYBPP2   | ENSG00000160789.18_LMNA | -0.18487 | -0.334234817 | -0.02644892 | 2.26E-02 | 1.18E-01 | 1.00E+00 |
| ENSG00000125319.13_C17orf53  | ENSG00000160789.18_LMNA | 0.13387  | -0.025887024 | 0.286950731 | 1.00E-01 | 3.12E-01 | 1.00E+00 |
| ENSG00000131196.16_NFATC1    | ENSG00000160789.18_LMNA | 0.12433  | -0.035575876 | 0.278026636 | 1.27E-01 | 3.61E-01 | 1.00E+00 |
| ENSG00000228519.3_RP11-298C  | ENSG00000160789.18_LMNA | -0.04742 | -0.205073305 | 0.112630207 | 5.62E-01 | 7.93E-01 | 1.00E+00 |
| ENSG00000178075.18_GRAMD1C   | ENSG00000160789.18_LMNA | -0.0328  | -0.191003182 | 0.127064349 | 6.88E-01 | 8.66E-01 | 1.00E+00 |
| ENSG00000135406.12_PRPH      | ENSG00000160789.18_LMNA | 0.09261  | -0.067586854 | 0.248152359 | 2.56E-01 | 5.39E-01 | 1.00E+00 |
| ENSG00000169946.12_ZFPM2     | ENSG00000160789.18_LMNA | -0.35931 | -0.490457903 | -0.2122536  | 5.47E-06 | 1.78E-04 | 2.80E-01 |
| ENSG00000161692.16_DBF4B     | ENSG00000160789.18_LMNA | -0.10628 | -0.261060068 | 0.053835245 | 1.93E-01 | 4.61E-01 | 1.00E+00 |
| ENSG00000263731.1_RP11-498C  | ENSG00000160789.18_LMNA | 0.02916  | -0.130645721 | 0.187491773 | 7.21E-01 | 8.82E-01 | 1.00E+00 |

|                             |                         |          |              |             |          |          |          |
|-----------------------------|-------------------------|----------|--------------|-------------|----------|----------|----------|
| ENSG00000164002.10_EXO5     | ENSG00000160789.18_LMNA | -0.1371  | -0.289969562 | 0.022596133 | 9.21E-02 | 2.96E-01 | 1.00E+00 |
| ENSG00000253305.2_PCDHGB6   | ENSG00000160789.18_LMNA | -0.06262 | -0.219635744 | 0.09754846  | 4.43E-01 | 7.11E-01 | 1.00E+00 |
| ENSG00000263956.4_NBPF11    | ENSG00000160789.18_LMNA | 0.00594  | -0.153410225 | 0.164980246 | 9.42E-01 | 9.77E-01 | 1.00E+00 |
| ENSG00000170085.16_SIMC1    | ENSG00000160789.18_LMNA | 0.16123  | 0.002077794  | 0.312407259 | 4.72E-02 | 1.94E-01 | 1.00E+00 |
| ENSG00000106804.7_C5        | ENSG00000160789.18_LMNA | 0.22914  | 0.072592335  | 0.374677331 | 4.52E-03 | 3.63E-02 | 1.00E+00 |
| ENSG00000276980.1_CTD-3128C | ENSG00000160789.18_LMNA | -0.03401 | -0.192170677 | 0.125871752 | 6.77E-01 | 8.59E-01 | 1.00E+00 |
| ENSG00000229932.3_YWHAZP3   | ENSG00000160789.18_LMNA | 0.0153   | -0.14425612  | 0.174072677 | 8.52E-01 | 9.42E-01 | 1.00E+00 |
| ENSG00000163827.11_LRRC2    | ENSG00000160789.18_LMNA | 0.07002  | -0.090182319 | 0.22669724  | 3.91E-01 | 6.69E-01 | 1.00E+00 |
| ENSG00000140043.10_PTGR2    | ENSG00000160789.18_LMNA | -0.07802 | -0.234314845 | 0.082197014 | 3.39E-01 | 6.25E-01 | 1.00E+00 |
| ENSG00000256594.6_RP11-705C | ENSG00000160789.18_LMNA | -0.25807 | -0.400805458 | -0.10310743 | 1.33E-03 | 1.43E-02 | 1.00E+00 |
| ENSG00000108785.7_HSD17B1P  | ENSG00000160789.18_LMNA | -0.01553 | -0.174303614 | 0.144022905 | 8.49E-01 | 9.41E-01 | 1.00E+00 |
| ENSG00000110786.16_PTPN5    | ENSG00000160789.18_LMNA | -0.18113 | -0.330788463 | -0.02257648 | 2.55E-02 | 1.28E-01 | 1.00E+00 |
| ENSG00000010539.10_ZNF200   | ENSG00000160789.18_LMNA | -0.00451 | -0.163588392 | 0.154806714 | 9.56E-01 | 9.82E-01 | 1.00E+00 |
| ENSG00000157856.9_DRC1      | ENSG00000160789.18_LMNA | 0.18846  | 0.030164453  | 0.337533812 | 2.01E-02 | 1.08E-01 | 1.00E+00 |
| ENSG00000147144.11_CCDC120  | ENSG00000160789.18_LMNA | -0.20849 | -0.355877724 | -0.05098061 | 9.95E-03 | 6.54E-02 | 1.00E+00 |
| ENSG00000227473.1_TSSK5P    | ENSG00000160789.18_LMNA | 0.13362  | -0.026137324 | 0.286720869 | 1.01E-01 | 3.13E-01 | 1.00E+00 |
| ENSG00000236992.2_RPL12P12  | ENSG00000160789.18_LMNA | -0.16188 | -0.31301481  | -0.00275119 | 4.63E-02 | 1.91E-01 | 1.00E+00 |
| ENSG00000147256.9_ARHGAP36  | ENSG00000160789.18_LMNA | -0.12289 | -0.276673541 | 0.037039797 | 1.31E-01 | 3.68E-01 | 1.00E+00 |
| ENSG00000257511.1_RP11-278C | ENSG00000160789.18_LMNA | -0.13797 | -0.290785066 | 0.021705972 | 9.01E-02 | 2.92E-01 | 1.00E+00 |
| ENSG00000142684.7_ZNF593    | ENSG00000160789.18_LMNA | 0.08885  | -0.071361946 | 0.244589212 | 2.76E-01 | 5.61E-01 | 1.00E+00 |
| ENSG00000248489.1_CTD-2007H | ENSG00000160789.18_LMNA | -0.10822 | -0.262890195 | 0.051875749 | 1.84E-01 | 4.50E-01 | 1.00E+00 |
| ENSG00000263142.4_LRRC37A1  | ENSG00000160789.18_LMNA | 0.06941  | -0.09079542  | 0.226110764 | 3.95E-01 | 6.73E-01 | 1.00E+00 |
| ENSG00000258016.1_HIGD1AP1  | ENSG00000160789.18_LMNA | -0.24057 | -0.385027816 | -0.08461342 | 2.83E-03 | 2.56E-02 | 1.00E+00 |
| ENSG00000185046.17_ANKS1B   | ENSG00000160789.18_LMNA | -0.33404 | -0.468333174 | -0.1846572  | 2.60E-05 | 6.38E-04 | 1.00E+00 |
| ENSG00000178401.13_DNAJC22  | ENSG00000160789.18_LMNA | 0.3362   | 0.187003604  | 0.470228285 | 2.29E-05 | 5.76E-04 | 1.00E+00 |
| ENSG00000179583.16_CIITA    | ENSG00000160789.18_LMNA | 0.1941   | 0.036013001  | 0.342711443 | 1.66E-02 | 9.43E-02 | 1.00E+00 |
| ENSG00000103241.6_FOXF1     | ENSG00000160789.18_LMNA | -0.09185 | -0.247429755 | 0.068353172 | 2.60E-01 | 5.44E-01 | 1.00E+00 |
| ENSG00000185024.14_BRF1     | ENSG00000160789.18_LMNA | 0.13654  | -0.023160006 | 0.289452747 | 9.35E-02 | 2.99E-01 | 1.00E+00 |
| ENSG00000146242.7_TPBG      | ENSG00000160789.18_LMNA | 0.09284  | -0.06735607  | 0.24836991  | 2.55E-01 | 5.37E-01 | 1.00E+00 |
| ENSG00000151474.18_FRMD4A   | ENSG00000160789.18_LMNA | -0.08396 | -0.239957891 | 0.076255258 | 3.04E-01 | 5.90E-01 | 1.00E+00 |
| ENSG00000183137.13_CEP57L1  | ENSG00000160789.18_LMNA | -0.1111  | -0.265602366 | 0.048967393 | 1.73E-01 | 4.33E-01 | 1.00E+00 |
| ENSG00000156313.11_RPGR     | ENSG00000160789.18_LMNA | 0.23623  | 0.080038669  | 0.381097717 | 3.39E-03 | 2.93E-02 | 1.00E+00 |
| ENSG00000184307.12_ZDHHC23  | ENSG00000160789.18_LMNA | 0.16355  | 0.004466567  | 0.314561305 | 4.41E-02 | 1.85E-01 | 1.00E+00 |

|                             |                         |          |              |             |          |          |          |
|-----------------------------|-------------------------|----------|--------------|-------------|----------|----------|----------|
| ENSG00000166377.18_ATP9B    | ENSG00000160789.18_LMNA | -0.03276 | -0.190962471 | 0.127105918 | 6.89E-01 | 8.66E-01 | 1.00E+00 |
| ENSG00000243445.1_RP11-715J | ENSG00000160789.18_LMNA | -0.0959  | -0.251262919 | 0.064283862 | 2.40E-01 | 5.19E-01 | 1.00E+00 |
| ENSG00000165323.14_FAT3     | ENSG00000160789.18_LMNA | -0.12108 | -0.274981733 | 0.038868281 | 1.37E-01 | 3.77E-01 | 1.00E+00 |
| ENSG00000204248.9_COL11A2   | ENSG00000160789.18_LMNA | -0.16966 | -0.320209661 | -0.01074728 | 3.67E-02 | 1.63E-01 | 1.00E+00 |
| ENSG00000266208.1_CTD-2267D | ENSG00000160789.18_LMNA | 0.24678  | 0.091160446  | 0.390633376 | 2.18E-03 | 2.09E-02 | 1.00E+00 |
| ENSG00000166596.13_CFAP52   | ENSG00000160789.18_LMNA | -0.07561 | -0.232020203 | 0.084606703 | 3.55E-01 | 6.38E-01 | 1.00E+00 |
| ENSG00000142494.12_SLC47A1  | ENSG00000160789.18_LMNA | 0.00053  | -0.158683662 | 0.159717655 | 9.95E-01 | 9.98E-01 | 1.00E+00 |
| ENSG00000232453.4_RP4-794H1 | ENSG00000160789.18_LMNA | 0.00993  | -0.149504072 | 0.168866713 | 9.03E-01 | 9.63E-01 | 1.00E+00 |
| ENSG00000072694.17_FCGR2B   | ENSG00000160789.18_LMNA | 0.27522  | 0.121335851  | 0.416185618 | 6.00E-04 | 7.79E-03 | 1.00E+00 |
| ENSG00000140386.11_SCAPER   | ENSG00000160789.18_LMNA | -0.0986  | -0.253819924 | 0.061563484 | 2.27E-01 | 5.03E-01 | 1.00E+00 |
| ENSG00000261737.1_RP4-612B1 | ENSG00000160789.18_LMNA | -0.06693 | -0.223746193 | 0.093264902 | 4.13E-01 | 6.86E-01 | 1.00E+00 |
| ENSG00000232176.1_RP11-146N | ENSG00000160789.18_LMNA | -0.15422 | -0.305913798 | 0.005101898 | 5.78E-02 | 2.20E-01 | 1.00E+00 |
| ENSG00000256211.1_RP11-1018 | ENSG00000160789.18_LMNA | -0.18958 | -0.338560996 | -0.03132307 | 1.93E-02 | 1.05E-01 | 1.00E+00 |
| ENSG00000124212.5_PTGIS     | ENSG00000160789.18_LMNA | 0.05945  | -0.100701642 | 0.216602777 | 4.67E-01 | 7.28E-01 | 1.00E+00 |
| ENSG00000142408.2_CACNG8    | ENSG00000160789.18_LMNA | 0.02087  | -0.138792611 | 0.179473634 | 7.99E-01 | 9.19E-01 | 1.00E+00 |
| ENSG00000137691.11_C11orf70 | ENSG00000160789.18_LMNA | 0.03218  | -0.127677357 | 0.190402726 | 6.94E-01 | 8.68E-01 | 1.00E+00 |
| ENSG00000125122.13_LRRC29   | ENSG00000160789.18_LMNA | -0.00356 | -0.162666927 | 0.155730548 | 9.65E-01 | 9.86E-01 | 1.00E+00 |
| ENSG00000224831.3_RP11-651P | ENSG00000160789.18_LMNA | -0.04062 | -0.198539811 | 0.119349451 | 6.19E-01 | 8.28E-01 | 1.00E+00 |
| ENSG00000174032.15_SLC25A3C | ENSG00000160789.18_LMNA | -0.072   | -0.228576432 | 0.088216197 | 3.78E-01 | 6.57E-01 | 1.00E+00 |
| ENSG00000171962.16_DRC3     | ENSG00000160789.18_LMNA | -0.10111 | -0.256185265 | 0.059042835 | 2.15E-01 | 4.89E-01 | 1.00E+00 |
| ENSG00000052126.13_PLEKHA5  | ENSG00000160789.18_LMNA | -0.1031  | -0.258061415 | 0.057040635 | 2.06E-01 | 4.78E-01 | 1.00E+00 |
| ENSG00000138771.13_SHROOM3  | ENSG00000160789.18_LMNA | 0.43646  | 0.297962397  | 0.556959849 | 1.90E-08 | 1.84E-06 | 9.74E-04 |
| ENSG00000230359.4_TPI1P2    | ENSG00000160789.18_LMNA | 0.0584   | -0.101751422 | 0.21559166  | 4.75E-01 | 7.34E-01 | 1.00E+00 |
| ENSG00000167711.12_SERPINF2 | ENSG00000160789.18_LMNA | -0.12713 | -0.280650119 | 0.032733677 | 1.19E-01 | 3.46E-01 | 1.00E+00 |
| ENSG00000075213.9_SEMA3A    | ENSG00000160789.18_LMNA | 0.20024  | 0.042392749  | 0.34833817  | 1.34E-02 | 8.07E-02 | 1.00E+00 |
| ENSG00000234742.1_AC144530  | ENSG00000160789.18_LMNA | -0.08589 | -0.241780078 | 0.074331808 | 2.93E-01 | 5.79E-01 | 1.00E+00 |
| ENSG00000131042.12_LILRB2   | ENSG00000160789.18_LMNA | 0.19963  | 0.041760745  | 0.347781746 | 1.37E-02 | 8.20E-02 | 1.00E+00 |
| ENSG00000156127.6_BATF      | ENSG00000160789.18_LMNA | 0.13767  | -0.022009788 | 0.290506782 | 9.08E-02 | 2.94E-01 | 1.00E+00 |
| ENSG00000245958.5_RP11-33B1 | ENSG00000160789.18_LMNA | -0.28265 | -0.422823973 | -0.12926549 | 4.18E-04 | 5.87E-03 | 1.00E+00 |
| ENSG00000268043.6_NBPF12    | ENSG00000160789.18_LMNA | -0.02615 | -0.18458316  | 0.133606013 | 7.49E-01 | 8.95E-01 | 1.00E+00 |
| ENSG00000129295.7_LRRC6     | ENSG00000160789.18_LMNA | 0.0584   | -0.101750889 | 0.215592173 | 4.75E-01 | 7.34E-01 | 1.00E+00 |
| ENSG00000136866.12_ZFP37    | ENSG00000160789.18_LMNA | -0.13805 | -0.290858707 | 0.021625566 | 8.99E-02 | 2.92E-01 | 1.00E+00 |
| ENSG00000149150.7_SLC43A1   | ENSG00000160789.18_LMNA | -0.04282 | -0.200653435 | 0.117178918 | 6.00E-01 | 8.16E-01 | 1.00E+00 |

|                             |                         |          |              |             |          |          |          |
|-----------------------------|-------------------------|----------|--------------|-------------|----------|----------|----------|
| ENSG00000215788.8_TNFRSF25  | ENSG00000160789.18_LMNA | 0.08182  | -0.078400669 | 0.237922799 | 3.16E-01 | 6.03E-01 | 1.00E+00 |
| ENSG00000233514.1_RP11-570P | ENSG00000160789.18_LMNA | -0.08782 | -0.243615197 | 0.072392325 | 2.82E-01 | 5.67E-01 | 1.00E+00 |
| ENSG00000238150.1_AC008753. | ENSG00000160789.18_LMNA | 0.10427  | -0.055859692 | 0.259166898 | 2.01E-01 | 4.72E-01 | 1.00E+00 |
| ENSG00000259985.1_RP11-549B | ENSG00000160789.18_LMNA | -0.38404 | -0.511936689 | -0.23947563 | 1.04E-06 | 4.74E-05 | 5.33E-02 |
| ENSG00000164199.14_ADGRV1   | ENSG00000160789.18_LMNA | -0.30156 | -0.439655423 | -0.14954067 | 1.60E-04 | 2.74E-03 | 1.00E+00 |
| ENSG00000260290.2_CTD-2033A | ENSG00000160789.18_LMNA | 0.0779   | -0.082323743 | 0.234194254 | 3.40E-01 | 6.25E-01 | 1.00E+00 |
| ENSG00000143190.20_POU2F1   | ENSG00000160789.18_LMNA | -0.00702 | -0.166033809 | 0.152352308 | 9.32E-01 | 9.73E-01 | 1.00E+00 |
| ENSG00000158008.8_EXTL1     | ENSG00000160789.18_LMNA | -0.34198 | -0.475299491 | -0.19329837 | 1.62E-05 | 4.33E-04 | 8.30E-01 |
| ENSG00000182318.5_ZSCAN22   | ENSG00000160789.18_LMNA | 0.24676  | 0.091135694  | 0.390612225 | 2.18E-03 | 2.09E-02 | 1.00E+00 |
| ENSG00000182621.15_PLCB1    | ENSG00000160789.18_LMNA | -0.46503 | -0.58119961  | -0.33027717 | 1.58E-09 | 2.29E-07 | 8.12E-05 |
| ENSG00000275888.1_RP13-516M | ENSG00000160789.18_LMNA | 0.16968  | 0.010769728  | 0.320229809 | 3.66E-02 | 1.63E-01 | 1.00E+00 |
| ENSG00000054654.14_SYNE2    | ENSG00000160789.18_LMNA | 0.14574  | -0.013779745 | 0.298026559 | 7.32E-02 | 2.57E-01 | 1.00E+00 |
| ENSG00000127124.12_HIVEP3   | ENSG00000160789.18_LMNA | 0.63694  | 0.531652633  | 0.722845714 | 1.14E-18 | 4.86E-15 | 5.83E-14 |
| ENSG00000146858.7_ZC3HAV1L  | ENSG00000160789.18_LMNA | 0.12876  | -0.031073771 | 0.282180126 | 1.14E-01 | 3.37E-01 | 1.00E+00 |
| ENSG00000007341.17_ST7L     | ENSG00000160789.18_LMNA | -0.06823 | -0.22498536  | 0.091971242 | 4.04E-01 | 6.79E-01 | 1.00E+00 |
| ENSG00000224078.11_SNHG14   | ENSG00000160789.18_LMNA | -0.11973 | -0.273714654 | 0.040236348 | 1.42E-01 | 3.84E-01 | 1.00E+00 |
| ENSG00000104356.9_POP1      | ENSG00000160789.18_LMNA | 0.01823  | -0.141376502 | 0.176921715 | 8.24E-01 | 9.31E-01 | 1.00E+00 |
| ENSG00000278058.1_RP11-70D2 | ENSG00000160789.18_LMNA | 0.02838  | -0.131411147 | 0.186739927 | 7.29E-01 | 8.85E-01 | 1.00E+00 |
| ENSG00000279095.1_AC092066. | ENSG00000160789.18_LMNA | 0.34007  | 0.191217515  | 0.473625176 | 1.82E-05 | 4.76E-04 | 9.31E-01 |
| ENSG00000198865.8_CCDC152   | ENSG00000160789.18_LMNA | -0.06627 | -0.223120878 | 0.09391731  | 4.17E-01 | 6.90E-01 | 1.00E+00 |
| ENSG00000162520.13_SYNC     | ENSG00000160789.18_LMNA | 0.33198  | 0.18242237   | 0.466525746 | 2.94E-05 | 7.01E-04 | 1.00E+00 |
| ENSG00000223959.7_AFG3L1P   | ENSG00000160789.18_LMNA | 0.09563  | -0.064554024 | 0.251008741 | 2.41E-01 | 5.20E-01 | 1.00E+00 |
| ENSG00000128000.14_ZNF780B  | ENSG00000160789.18_LMNA | -0.24958 | -0.393158895 | -0.09411862 | 1.93E-03 | 1.90E-02 | 1.00E+00 |
| ENSG00000197321.13_SVIL     | ENSG00000160789.18_LMNA | 0.38835  | 0.244245884  | 0.515665773 | 7.66E-07 | 3.70E-05 | 3.93E-02 |
| ENSG00000163362.9_C1orf106  | ENSG00000160789.18_LMNA | -0.20899 | -0.356330682 | -0.05149799 | 9.77E-03 | 6.45E-02 | 1.00E+00 |
| ENSG00000183023.17_SLC8A1   | ENSG00000160789.18_LMNA | -0.03504 | -0.193159851 | 0.12486059  | 6.68E-01 | 8.54E-01 | 1.00E+00 |
| ENSG00000148429.13_USP6NL   | ENSG00000160789.18_LMNA | -0.15012 | -0.302102839 | 0.00930072  | 6.49E-02 | 2.37E-01 | 1.00E+00 |
| ENSG00000213261.3_EEF1B2P6  | ENSG00000160789.18_LMNA | -0.13204 | -0.285248719 | 0.027739438 | 1.05E-01 | 3.21E-01 | 1.00E+00 |
| ENSG00000124613.7_ZNF391    | ENSG00000160789.18_LMNA | -0.0693  | -0.226003695 | 0.090907324 | 3.96E-01 | 6.73E-01 | 1.00E+00 |
| ENSG00000184110.13_EIF3C    | ENSG00000160789.18_LMNA | 0.13498  | -0.024756412 | 0.287988576 | 9.73E-02 | 3.07E-01 | 1.00E+00 |
| ENSG00000006283.16_CACNA1G  | ENSG00000160789.18_LMNA | 0.05085  | -0.109238314 | 0.208360711 | 5.34E-01 | 7.76E-01 | 1.00E+00 |
| ENSG00000270681.1_RP11-372K | ENSG00000160789.18_LMNA | -0.27652 | -0.417350969 | -0.12272517 | 5.64E-04 | 7.40E-03 | 1.00E+00 |
| ENSG00000176658.15_MYO1D    | ENSG00000160789.18_LMNA | 0.04803  | -0.112022742 | 0.205662584 | 5.57E-01 | 7.90E-01 | 1.00E+00 |

|                              |                         |          |              |             |          |          |          |
|------------------------------|-------------------------|----------|--------------|-------------|----------|----------|----------|
| ENSG00000113205.4_PCDHB3     | ENSG00000160789.18_LMNA | 0.03746  | -0.122471653 | 0.195494275 | 6.47E-01 | 8.43E-01 | 1.00E+00 |
| ENSG00000183647.9_ZNF530     | ENSG00000160789.18_LMNA | -0.13812 | -0.29092771  | 0.021550219 | 8.97E-02 | 2.92E-01 | 1.00E+00 |
| ENSG00000240759.1_RP11-25115 | ENSG00000160789.18_LMNA | -0.03673 | -0.194790937 | 0.123191804 | 6.53E-01 | 8.47E-01 | 1.00E+00 |
| ENSG00000100578.13_KIAA0586  | ENSG00000160789.18_LMNA | 0.10244  | -0.057701189 | 0.257442709 | 2.09E-01 | 4.82E-01 | 1.00E+00 |
| ENSG00000188283.10_ZNF383    | ENSG00000160789.18_LMNA | -0.22198 | -0.368170949 | -0.06508046 | 5.99E-03 | 4.50E-02 | 1.00E+00 |
| ENSG00000258920.1_FOXN3-AS   | ENSG00000160789.18_LMNA | -0.01812 | -0.176812099 | 0.141487394 | 8.25E-01 | 9.31E-01 | 1.00E+00 |
| ENSG00000069943.8_PIGB       | ENSG00000160789.18_LMNA | 0.24714  | 0.091538847  | 0.390956685 | 2.14E-03 | 2.06E-02 | 1.00E+00 |
| ENSG00000138316.9_ADAMTS14   | ENSG00000160789.18_LMNA | 0.35048  | 0.202577805  | 0.482741189 | 9.58E-06 | 2.81E-04 | 4.91E-01 |
| ENSG00000213337.7_ANKRD39    | ENSG00000160789.18_LMNA | -0.21971 | -0.366105745 | -0.06270327 | 6.53E-03 | 4.79E-02 | 1.00E+00 |
| ENSG00000176531.9_PHLDB3     | ENSG00000160789.18_LMNA | 0.33693  | 0.187804857  | 0.470874833 | 2.19E-05 | 5.56E-04 | 1.00E+00 |
| ENSG00000170537.11_TMC7      | ENSG00000160789.18_LMNA | 0.10089  | -0.059264257 | 0.255977637 | 2.16E-01 | 4.91E-01 | 1.00E+00 |
| ENSG00000204514.8_ZNF814     | ENSG00000160789.18_LMNA | -0.05638 | -0.21366512  | 0.103749672 | 4.90E-01 | 7.46E-01 | 1.00E+00 |
| ENSG00000228408.4_RP1-111D6  | ENSG00000160789.18_LMNA | -0.38241 | -0.510533417 | -0.23768396 | 1.16E-06 | 5.19E-05 | 5.97E-02 |
| ENSG00000174514.11_MFSD4A    | ENSG00000160789.18_LMNA | -0.26123 | -0.403641632 | -0.10645387 | 1.15E-03 | 1.29E-02 | 1.00E+00 |
| ENSG00000187097.11_ENTPD5    | ENSG00000160789.18_LMNA | 0.23847  | 0.082402736  | 0.38313001  | 3.09E-03 | 2.73E-02 | 1.00E+00 |
| ENSG00000168152.11_THAP9     | ENSG00000160789.18_LMNA | -0.25086 | -0.394310826 | -0.09546964 | 1.83E-03 | 1.83E-02 | 1.00E+00 |
| ENSG00000129951.17_PLPPR3    | ENSG00000160789.18_LMNA | -0.29669 | -0.435330458 | -0.14430742 | 2.06E-04 | 3.34E-03 | 1.00E+00 |
| ENSG00000180257.11_ZNF816    | ENSG00000160789.18_LMNA | 0.03849  | -0.121450236 | 0.196491287 | 6.38E-01 | 8.38E-01 | 1.00E+00 |
| ENSG00000280187.1_CTC-351M1  | ENSG00000160789.18_LMNA | -0.06468 | -0.221594317 | 0.095508868 | 4.29E-01 | 6.99E-01 | 1.00E+00 |
| ENSG00000270231.3_NBPF8      | ENSG00000160789.18_LMNA | 0.10308  | -0.057060586 | 0.258042731 | 2.06E-01 | 4.78E-01 | 1.00E+00 |
| ENSG00000184809.11_B3GALT5   | ENSG00000160789.18_LMNA | -0.12424 | -0.27794368  | 0.035665665 | 1.27E-01 | 3.61E-01 | 1.00E+00 |
| ENSG00000240449.1_RP4-584D1  | ENSG00000160789.18_LMNA | -0.14851 | -0.300602471 | 0.010950782 | 6.79E-02 | 2.44E-01 | 1.00E+00 |
| ENSG00000109674.3_NEIL3      | ENSG00000160789.18_LMNA | 0.04437  | -0.115649679 | 0.202140803 | 5.87E-01 | 8.08E-01 | 1.00E+00 |
| ENSG00000158079.13_PTPDC1    | ENSG00000160789.18_LMNA | 0.08517  | -0.075044758 | 0.241104922 | 2.97E-01 | 5.83E-01 | 1.00E+00 |
| ENSG00000129810.13_SGO1      | ENSG00000160789.18_LMNA | -0.09823 | -0.253462292 | 0.061944247 | 2.29E-01 | 5.06E-01 | 1.00E+00 |
| ENSG00000135482.5_ZC3H10     | ENSG00000160789.18_LMNA | -0.22558 | -0.371442668 | -0.0688535  | 5.20E-03 | 4.04E-02 | 1.00E+00 |
| ENSG00000170381.11_SEMA3E    | ENSG00000160789.18_LMNA | -0.09825 | -0.25348747  | 0.061917443 | 2.28E-01 | 5.05E-01 | 1.00E+00 |
| ENSG00000163867.15_ZMYM6     | ENSG00000160789.18_LMNA | -0.18378 | -0.33323327  | -0.0253226  | 2.34E-02 | 1.21E-01 | 1.00E+00 |
| ENSG00000198453.11_ZNF568    | ENSG00000160789.18_LMNA | -0.05417 | -0.211546644 | 0.105944048 | 5.07E-01 | 7.57E-01 | 1.00E+00 |
| ENSG00000171522.5_PTGER4     | ENSG00000160789.18_LMNA | 0.11358  | -0.046462989 | 0.267933852 | 1.64E-01 | 4.19E-01 | 1.00E+00 |
| ENSG00000198429.8_ZNF69      | ENSG00000160789.18_LMNA | -0.22851 | -0.374105762 | -0.07193106 | 4.63E-03 | 3.70E-02 | 1.00E+00 |
| ENSG00000144362.10_PHOSPHO   | ENSG00000160789.18_LMNA | -0.2986  | -0.437025887 | -0.14635697 | 1.87E-04 | 3.09E-03 | 1.00E+00 |
| ENSG00000273391.1_RP11-634H  | ENSG00000160789.18_LMNA | 0.05992  | -0.100235922 | 0.217051128 | 4.63E-01 | 7.26E-01 | 1.00E+00 |

|                              |                         |          |              |             |          |          |          |
|------------------------------|-------------------------|----------|--------------|-------------|----------|----------|----------|
| ENSG00000134020.7_PEBP4      | ENSG00000160789.18_LMNA | -0.32695 | -0.462102244 | -0.1769652  | 3.93E-05 | 8.89E-04 | 1.00E+00 |
| ENSG00000146910.10_CNPY1     | ENSG00000160789.18_LMNA | -0.06116 | -0.218237911 | 0.099002489 | 4.54E-01 | 7.19E-01 | 1.00E+00 |
| ENSG00000217648.1_RP1-95L4.4 | ENSG00000160789.18_LMNA | -0.01618 | -0.174925849 | 0.143394356 | 8.43E-01 | 9.39E-01 | 1.00E+00 |
| ENSG00000176225.11_RTTN      | ENSG00000160789.18_LMNA | -0.17256 | -0.322893778 | -0.01374048 | 3.35E-02 | 1.54E-01 | 1.00E+00 |
| ENSG00000124243.16_BCAS4     | ENSG00000160789.18_LMNA | -0.04966 | -0.207218873 | 0.110417284 | 5.44E-01 | 7.82E-01 | 1.00E+00 |
| ENSG00000104783.10_KCNN4     | ENSG00000160789.18_LMNA | 0.49443  | 0.363875223  | 0.605938511 | 9.54E-11 | 2.16E-08 | 4.90E-06 |
| ENSG00000122733.12_PHF24     | ENSG00000160789.18_LMNA | -0.15067 | -0.302615493 | 0.008736529 | 6.39E-02 | 2.35E-01 | 1.00E+00 |
| ENSG00000267419.1_CTC-559E9  | ENSG00000160789.18_LMNA | -0.18478 | -0.334150578 | -0.02635416 | 2.27E-02 | 1.18E-01 | 1.00E+00 |
| ENSG00000249637.1_CTC-329D1  | ENSG00000160789.18_LMNA | -0.26877 | -0.410411427 | -0.11446894 | 8.14E-04 | 9.85E-03 | 1.00E+00 |
| ENSG00000142910.14_TINAGL1   | ENSG00000160789.18_LMNA | 0.02452  | -0.135209776 | 0.183005064 | 7.64E-01 | 9.02E-01 | 1.00E+00 |
| ENSG00000100150.15_DEPDC5    | ENSG00000160789.18_LMNA | -0.03599 | -0.194082344 | 0.123916996 | 6.60E-01 | 8.50E-01 | 1.00E+00 |
| ENSG00000082512.13_TRAF5     | ENSG00000160789.18_LMNA | 0.24673  | 0.091110298  | 0.390590524 | 2.18E-03 | 2.09E-02 | 1.00E+00 |
| ENSG00000163577.6	EIF5A2     | ENSG00000160789.18_LMNA | -0.15505 | -0.306680673 | 0.004255646 | 5.65E-02 | 2.17E-01 | 1.00E+00 |
| ENSG00000223508.5_RPL23AP5   | ENSG00000160789.18_LMNA | 0.14157  | -0.018033375 | 0.29414485  | 8.19E-02 | 2.76E-01 | 1.00E+00 |
| ENSG00000070269.12_TMEM260   | ENSG00000160789.18_LMNA | 0.16234  | 0.003222193  | 0.313439605 | 4.57E-02 | 1.90E-01 | 1.00E+00 |
| ENSG00000173991.5_TCAP       | ENSG00000160789.18_LMNA | -0.10182 | -0.256854042 | 0.058329417 | 2.12E-01 | 4.86E-01 | 1.00E+00 |
| ENSG00000120280.5_CXorf21    | ENSG00000160789.18_LMNA | -0.09681 | -0.252125148 | 0.063367067 | 2.35E-01 | 5.13E-01 | 1.00E+00 |
| ENSG00000238165.1_AC007560   | ENSG00000160789.18_LMNA | 0.0162   | -0.143368722 | 0.17495122  | 8.43E-01 | 9.39E-01 | 1.00E+00 |
| ENSG00000114737.14_CISH      | ENSG00000160789.18_LMNA | 0.41113  | 0.269578233  | 0.535298171 | 1.43E-07 | 9.68E-06 | 7.33E-03 |
| ENSG00000155592.14_ZKSCAN2   | ENSG00000160789.18_LMNA | -0.06749 | -0.224280092 | 0.092707656 | 4.09E-01 | 6.83E-01 | 1.00E+00 |
| ENSG00000189164.13_ZNF527    | ENSG00000160789.18_LMNA | -0.19849 | -0.346730847 | -0.04056777 | 1.42E-02 | 8.47E-02 | 1.00E+00 |
| ENSG00000196724.11_ZNF418    | ENSG00000160789.18_LMNA | -0.06086 | -0.217953781 | 0.099297877 | 4.56E-01 | 7.21E-01 | 1.00E+00 |
| ENSG00000130176.6_CNN1       | ENSG00000160789.18_LMNA | 0.33811  | 0.189089897  | 0.471911124 | 2.04E-05 | 5.26E-04 | 1.00E+00 |
| ENSG00000115977.17_AAK1      | ENSG00000160789.18_LMNA | 0.03987  | -0.12009031  | 0.197817699 | 6.26E-01 | 8.31E-01 | 1.00E+00 |
| ENSG00000167083.5_GNGT2      | ENSG00000160789.18_LMNA | -0.12513 | -0.278775856 | 0.034764712 | 1.25E-01 | 3.56E-01 | 1.00E+00 |
| ENSG00000272669.1_RP3-508I15 | ENSG00000160789.18_LMNA | -0.00562 | -0.164676477 | 0.153715114 | 9.45E-01 | 9.78E-01 | 1.00E+00 |
| ENSG00000198286.8_CARD11     | ENSG00000160789.18_LMNA | 0.01666  | -0.142921936 | 0.175393356 | 8.39E-01 | 9.37E-01 | 1.00E+00 |
| ENSG00000272275.1_RP11-791G  | ENSG00000160789.18_LMNA | 0.10489  | -0.055228634 | 0.259757294 | 1.98E-01 | 4.68E-01 | 1.00E+00 |
| ENSG00000196358.9_NTNG2      | ENSG00000160789.18_LMNA | -0.26381 | -0.405964705 | -0.10919992 | 1.02E-03 | 1.18E-02 | 1.00E+00 |
| ENSG00000196436.8_NPIPB15    | ENSG00000160789.18_LMNA | -0.08316 | -0.23919634  | 0.077058435 | 3.08E-01 | 5.95E-01 | 1.00E+00 |
| ENSG00000067646.10_ZFY       | ENSG00000160789.18_LMNA | -0.08202 | -0.238115182 | 0.078197983 | 3.15E-01 | 6.01E-01 | 1.00E+00 |
| ENSG00000131398.12_KCNC3     | ENSG00000160789.18_LMNA | 0.02576  | -0.133994864 | 0.184200683 | 7.53E-01 | 8.97E-01 | 1.00E+00 |
| ENSG00000100354.19_TNRC6B    | ENSG00000160789.18_LMNA | 0.03108  | -0.128755929 | 0.189345661 | 7.04E-01 | 8.74E-01 | 1.00E+00 |



|                             |                         |          |              |             |          |          |          |
|-----------------------------|-------------------------|----------|--------------|-------------|----------|----------|----------|
| ENSG00000272663.1_RP11-191L | ENSG00000160789.18_LMNA | -0.22165 | -0.367868949 | -0.06473263 | 6.06E-03 | 4.53E-02 | 1.00E+00 |
| ENSG00000107821.13_KAZALD1  | ENSG00000160789.18_LMNA | 0.23128  | 0.074835251  | 0.376614274 | 4.15E-03 | 3.41E-02 | 1.00E+00 |
| ENSG00000073150.12_PANX2    | ENSG00000160789.18_LMNA | 0.32639  | 0.176356553  | 0.461608005 | 4.06E-05 | 9.14E-04 | 1.00E+00 |
| ENSG00000213080.3_RP11-312J | ENSG00000160789.18_LMNA | 0.4126   | 0.271216283  | 0.536557843 | 1.28E-07 | 8.85E-06 | 6.55E-03 |
| ENSG00000169418.9_NPR1      | ENSG00000160789.18_LMNA | 0.24912  | 0.093627683  | 0.392740077 | 1.97E-03 | 1.93E-02 | 1.00E+00 |
| ENSG00000215414.4_PSMA6P1   | ENSG00000160789.18_LMNA | -0.04638 | -0.204072425 | 0.11366143  | 5.70E-01 | 7.99E-01 | 1.00E+00 |
| ENSG00000214223.4_HNRNPA1F  | ENSG00000160789.18_LMNA | -0.10097 | -0.256053118 | 0.059183765 | 2.16E-01 | 4.90E-01 | 1.00E+00 |
| ENSG00000227992.1_AC108463. | ENSG00000160789.18_LMNA | 0.39132  | 0.247542357  | 0.51823675  | 6.20E-07 | 3.12E-05 | 3.18E-02 |
| ENSG00000214263.2_RPSAP53   | ENSG00000160789.18_LMNA | -0.10942 | -0.264025454 | 0.050659019 | 1.80E-01 | 4.42E-01 | 1.00E+00 |
| ENSG00000136383.6_ALPK3     | ENSG00000160789.18_LMNA | 0.16881  | 0.00987391   | 0.319425538 | 3.76E-02 | 1.66E-01 | 1.00E+00 |
| ENSG00000277969.1_CTB-58E17 | ENSG00000160789.18_LMNA | -0.18597 | -0.335244164 | -0.02758481 | 2.18E-02 | 1.15E-01 | 1.00E+00 |
| ENSG00000131979.17_GCH1     | ENSG00000160789.18_LMNA | 0.03016  | -0.129666565 | 0.18845261  | 7.12E-01 | 8.78E-01 | 1.00E+00 |
| ENSG00000227034.1_RP11-234N | ENSG00000160789.18_LMNA | -0.13674 | -0.28963538  | 0.022960766 | 9.30E-02 | 2.98E-01 | 1.00E+00 |
| ENSG00000087237.9_CETP      | ENSG00000160789.18_LMNA | -0.15365 | -0.305381376 | 0.005689167 | 5.88E-02 | 2.22E-01 | 1.00E+00 |
| ENSG00000007174.16_DNAH9    | ENSG00000160789.18_LMNA | 0.21762  | 0.060515841  | 0.364202763 | 7.08E-03 | 5.08E-02 | 1.00E+00 |
| ENSG00000153896.16_ZNF599   | ENSG00000160789.18_LMNA | -0.13531 | -0.288303383 | 0.024413308 | 9.65E-02 | 3.05E-01 | 1.00E+00 |
| ENSG00000155886.10_SLC24A2  | ENSG00000160789.18_LMNA | -0.19486 | -0.343404055 | -0.03679696 | 1.61E-02 | 9.25E-02 | 1.00E+00 |
| ENSG00000150722.9_PPP1R1C   | ENSG00000160789.18_LMNA | -0.24863 | -0.392304308 | -0.09311704 | 2.01E-03 | 1.96E-02 | 1.00E+00 |
| ENSG00000269892.1_RP4-761J1 | ENSG00000160789.18_LMNA | -0.05964 | -0.216784448 | 0.10051295  | 4.65E-01 | 7.27E-01 | 1.00E+00 |
| ENSG00000162882.13_HAAO     | ENSG00000160789.18_LMNA | -0.02018 | -0.178809295 | 0.139465691 | 8.05E-01 | 9.22E-01 | 1.00E+00 |
| ENSG00000073910.18_FRY      | ENSG00000160789.18_LMNA | -0.41201 | -0.536048589 | -0.27055388 | 1.34E-07 | 9.19E-06 | 6.86E-03 |
| ENSG00000275131.1_CH17-472G | ENSG00000160789.18_LMNA | -0.23323 | -0.378385382 | -0.07688881 | 3.83E-03 | 3.21E-02 | 1.00E+00 |
| ENSG00000181381.12_DDX60L   | ENSG00000160789.18_LMNA | 0.07463  | -0.085590893 | 0.231081987 | 3.61E-01 | 6.43E-01 | 1.00E+00 |
| ENSG00000102886.13_GDPD3    | ENSG00000160789.18_LMNA | 0.0035   | -0.155782851 | 0.162614741 | 9.66E-01 | 9.87E-01 | 1.00E+00 |
| ENSG00000185946.14_RNPC3    | ENSG00000160789.18_LMNA | -0.20728 | -0.354769135 | -0.04971505 | 1.04E-02 | 6.73E-02 | 1.00E+00 |
| ENSG00000143382.12_ADAMTSL  | ENSG00000160789.18_LMNA | 0.34243  | 0.193790296  | 0.475695006 | 1.57E-05 | 4.23E-04 | 8.07E-01 |
| ENSG00000181896.10_ZNF101   | ENSG00000160789.18_LMNA | -0.21666 | -0.363326533 | -0.05950962 | 7.34E-03 | 5.21E-02 | 1.00E+00 |
| ENSG00000070759.15_TESK2    | ENSG00000160789.18_LMNA | -0.26123 | -0.403645176 | -0.10645806 | 1.15E-03 | 1.29E-02 | 1.00E+00 |
| ENSG00000180626.9_ZNF594    | ENSG00000160789.18_LMNA | 0.13398  | -0.025774128 | 0.287054397 | 9.99E-02 | 3.11E-01 | 1.00E+00 |
| ENSG00000198707.13_CEP290   | ENSG00000160789.18_LMNA | 0.10145  | -0.058698012 | 0.256508549 | 2.14E-01 | 4.88E-01 | 1.00E+00 |
| ENSG00000125378.14_BMP4     | ENSG00000160789.18_LMNA | -0.18196 | -0.331559922 | -0.02344252 | 2.49E-02 | 1.26E-01 | 1.00E+00 |
| ENSG00000073670.12_ADAM11   | ENSG00000160789.18_LMNA | -0.17938 | -0.329175665 | -0.02076746 | 2.70E-02 | 1.34E-01 | 1.00E+00 |
| ENSG00000077157.19_PPP1R12I | ENSG00000160789.18_LMNA | -0.11912 | -0.273145312 | 0.040850685 | 1.44E-01 | 3.88E-01 | 1.00E+00 |

|                              |                         |          |              |             |          |          |          |
|------------------------------|-------------------------|----------|--------------|-------------|----------|----------|----------|
| ENSG00000158517.12_NCF1      | ENSG00000160789.18_LMNA | 0.0448   | -0.115225405 | 0.202553201 | 5.84E-01 | 8.06E-01 | 1.00E+00 |
| ENSG00000172915.17_NBEA      | ENSG00000160789.18_LMNA | -0.23003 | -0.375476213 | -0.07351704 | 4.36E-03 | 3.54E-02 | 1.00E+00 |
| ENSG00000161911.10_TREML1    | ENSG00000160789.18_LMNA | -0.02557 | -0.184017695 | 0.134180867 | 7.55E-01 | 8.98E-01 | 1.00E+00 |
| ENSG00000155970.10_MICU3     | ENSG00000160789.18_LMNA | -0.39637 | -0.522594777 | -0.25314451 | 4.30E-07 | 2.33E-05 | 2.21E-02 |
| ENSG00000051825.13_MPHOSP    | ENSG00000160789.18_LMNA | -0.13455 | -0.287591116 | 0.025189493 | 9.84E-02 | 3.09E-01 | 1.00E+00 |
| ENSG00000249072.1_RP11-777B  | ENSG00000160789.18_LMNA | -0.2307  | -0.376091244 | -0.0742293  | 4.24E-03 | 3.47E-02 | 1.00E+00 |
| ENSG00000198105.10_ZNF248    | ENSG00000160789.18_LMNA | -0.41919 | -0.54220609  | -0.27858009 | 7.65E-08 | 5.80E-06 | 3.93E-03 |
| ENSG00000261087.1_KB-1460A1  | ENSG00000160789.18_LMNA | -0.108   | -0.262685973 | 0.052094527 | 1.85E-01 | 4.51E-01 | 1.00E+00 |
| ENSG00000174010.9_KLHL15     | ENSG00000160789.18_LMNA | 0.11221  | -0.047844228 | 0.266648436 | 1.69E-01 | 4.27E-01 | 1.00E+00 |
| ENSG00000272341.1_RP1-151F1  | ENSG00000160789.18_LMNA | 0.05977  | -0.100385841 | 0.216906815 | 4.64E-01 | 7.27E-01 | 1.00E+00 |
| ENSG00000213203.2_GIMAP1     | ENSG00000160789.18_LMNA | 0.15892  | -0.00029282  | 0.310266429 | 5.05E-02 | 2.03E-01 | 1.00E+00 |
| ENSG00000248367.1_CTB-129O4  | ENSG00000160789.18_LMNA | -0.05955 | -0.216695799 | 0.100605028 | 4.66E-01 | 7.28E-01 | 1.00E+00 |
| ENSG00000241352.3_RP11-392P  | ENSG00000160789.18_LMNA | -0.15748 | -0.30893276  | 0.001767875 | 5.27E-02 | 2.08E-01 | 1.00E+00 |
| ENSG0000028277.19_POU2F2     | ENSG00000160789.18_LMNA | -0.03057 | -0.188854938 | 0.129256381 | 7.08E-01 | 8.76E-01 | 1.00E+00 |
| ENSG00000042317.15_SPATA7    | ENSG00000160789.18_LMNA | -0.17947 | -0.329264338 | -0.02086687 | 2.69E-02 | 1.33E-01 | 1.00E+00 |
| ENSG00000226686.6_LINC01535  | ENSG00000160789.18_LMNA | -0.17915 | -0.328965718 | -0.02053212 | 2.72E-02 | 1.34E-01 | 1.00E+00 |
| ENSG00000249249.1_AC010226.4 | ENSG00000160789.18_LMNA | 0.066    | -0.094194782 | 0.222854849 | 4.19E-01 | 6.91E-01 | 1.00E+00 |
| ENSG00000196972.7_SMIM10L2E  | ENSG00000160789.18_LMNA | -0.12572 | -0.279332781 | 0.034161473 | 1.23E-01 | 3.53E-01 | 1.00E+00 |
| ENSG00000173275.11_ZNF449    | ENSG00000160789.18_LMNA | 0.03622  | -0.123692977 | 0.19430127  | 6.58E-01 | 8.49E-01 | 1.00E+00 |
| ENSG00000036448.8_MYOM2      | ENSG00000160789.18_LMNA | -0.27827 | -0.418910366 | -0.12458607 | 5.18E-04 | 6.94E-03 | 1.00E+00 |
| ENSG00000158458.18_NRG2      | ENSG00000160789.18_LMNA | -0.1154  | -0.269650859 | 0.044616106 | 1.57E-01 | 4.09E-01 | 1.00E+00 |
| ENSG00000273107.1_RP11-165A  | ENSG00000160789.18_LMNA | -0.16589 | -0.316728719 | -0.00687374 | 4.11E-02 | 1.77E-01 | 1.00E+00 |
| ENSG00000105997.21_HOXA3     | ENSG00000160789.18_LMNA | -0.01757 | -0.176273899 | 0.142031745 | 8.30E-01 | 9.34E-01 | 1.00E+00 |
| ENSG00000101489.17_CELF4     | ENSG00000160789.18_LMNA | -0.2798  | -0.420280621 | -0.12622297 | 4.81E-04 | 6.54E-03 | 1.00E+00 |
| ENSG00000115290.8_GRB14      | ENSG00000160789.18_LMNA | -0.25381 | -0.396973528 | -0.09859677 | 1.60E-03 | 1.65E-02 | 1.00E+00 |
| ENSG00000214013.8_GANC       | ENSG00000160789.18_LMNA | -0.06474 | -0.221654997 | 0.095445635 | 4.28E-01 | 6.99E-01 | 1.00E+00 |
| ENSG00000233971.1_RPS20P10   | ENSG00000160789.18_LMNA | -0.03811 | -0.196117103 | 0.121833659 | 6.41E-01 | 8.40E-01 | 1.00E+00 |
| ENSG00000161860.7_SYCE2      | ENSG00000160789.18_LMNA | -0.1607  | -0.31191694  | -0.00153454 | 4.80E-02 | 1.96E-01 | 1.00E+00 |
| ENSG00000254332.1_GS1-44D20  | ENSG00000160789.18_LMNA | 0.30047  | 0.148368593  | 0.438687938 | 1.69E-04 | 2.86E-03 | 1.00E+00 |
| ENSG00000134490.12_TMEM241   | ENSG00000160789.18_LMNA | -0.15906 | -0.310400404 | 0.000144568 | 5.03E-02 | 2.02E-01 | 1.00E+00 |
| ENSG00000181234.9_TMEM132C   | ENSG00000160789.18_LMNA | -0.25617 | -0.399094322 | -0.1010917  | 1.44E-03 | 1.53E-02 | 1.00E+00 |
| ENSG00000188580.12_NKAIN2    | ENSG00000160789.18_LMNA | -0.40808 | -0.53267481  | -0.2661718  | 1.80E-07 | 1.17E-05 | 9.25E-03 |
| ENSG00000130201.6_EXOC3L2    | ENSG00000160789.18_LMNA | 0.33673  | 0.187587168  | 0.470699206 | 2.22E-05 | 5.62E-04 | 1.00E+00 |

|                              |                         |          |              |             |          |          |          |
|------------------------------|-------------------------|----------|--------------|-------------|----------|----------|----------|
| ENSG00000138639.16_ARHGAP2   | ENSG00000160789.18_LMNA | -0.02157 | -0.180155601 | 0.138101366 | 7.92E-01 | 9.16E-01 | 1.00E+00 |
| ENSG00000177679.15_SRRM3     | ENSG00000160789.18_LMNA | -0.227   | -0.372729234 | -0.07033958 | 4.92E-03 | 3.87E-02 | 1.00E+00 |
| ENSG00000178752.14_ERFE      | ENSG00000160789.18_LMNA | 0.03909  | -0.120864703 | 0.197062533 | 6.33E-01 | 8.35E-01 | 1.00E+00 |
| ENSG00000196209.11_SIRPB2    | ENSG00000160789.18_LMNA | -0.00703 | -0.166049708 | 0.152336337 | 9.31E-01 | 9.73E-01 | 1.00E+00 |
| ENSG00000250299.4_MRPS31P4   | ENSG00000160789.18_LMNA | -0.31444 | -0.45105885  | -0.16341731 | 7.97E-05 | 1.57E-03 | 1.00E+00 |
| ENSG00000242445.1_RPL7AP11   | ENSG00000160789.18_LMNA | -0.14911 | -0.301163255 | 0.010334246 | 6.67E-02 | 2.42E-01 | 1.00E+00 |
| ENSG00000269793.4_ZIM2-AS1   | ENSG00000160789.18_LMNA | -0.24317 | -0.38737873  | -0.08735602 | 2.54E-03 | 2.35E-02 | 1.00E+00 |
| ENSG00000225706.1_PTPRD-AS   | ENSG00000160789.18_LMNA | -0.27643 | -0.417265396 | -0.12262311 | 5.66E-04 | 7.42E-03 | 1.00E+00 |
| ENSG00000162994.14_CLHC1     | ENSG00000160789.18_LMNA | -0.25617 | -0.39909329  | -0.10109048 | 1.44E-03 | 1.53E-02 | 1.00E+00 |
| ENSG00000167992.11_VWCE      | ENSG00000160789.18_LMNA | -0.30005 | -0.438316873 | -0.14791928 | 1.73E-04 | 2.91E-03 | 1.00E+00 |
| ENSG00000260238.4_PMF1-BGL   | ENSG00000160789.18_LMNA | -0.19041 | -0.339327048 | -0.03218768 | 1.88E-02 | 1.03E-01 | 1.00E+00 |
| ENSG00000165490.11_DDIAS     | ENSG00000160789.18_LMNA | -0.11261 | -0.267019965 | 0.047445127 | 1.67E-01 | 4.25E-01 | 1.00E+00 |
| ENSG00000224020.1_MIR181A2   | ENSG00000160789.18_LMNA | -0.29295 | -0.432000384 | -0.14028906 | 2.50E-04 | 3.89E-03 | 1.00E+00 |
| ENSG00000154764.5_WNT7A      | ENSG00000160789.18_LMNA | -0.13742 | -0.290272517 | 0.022265502 | 9.14E-02 | 2.95E-01 | 1.00E+00 |
| ENSG00000162639.14_HENMT1    | ENSG00000160789.18_LMNA | -0.22987 | -0.375332078 | -0.07335017 | 4.39E-03 | 3.55E-02 | 1.00E+00 |
| ENSG00000166578.8_IQCD       | ENSG00000160789.18_LMNA | -0.07036 | -0.227015044 | 0.089849987 | 3.89E-01 | 6.67E-01 | 1.00E+00 |
| ENSG00000164180.12_TMEM161   | ENSG00000160789.18_LMNA | -0.09204 | -0.247616644 | 0.068155012 | 2.59E-01 | 5.42E-01 | 1.00E+00 |
| ENSG00000140600.15_SH3GL3    | ENSG00000160789.18_LMNA | -0.42338 | -0.54579271  | -0.28327223 | 5.50E-08 | 4.42E-06 | 2.82E-03 |
| ENSG00000152969.15_JAKMIP1   | ENSG00000160789.18_LMNA | -0.30812 | -0.445465211 | -0.15659625 | 1.13E-04 | 2.08E-03 | 1.00E+00 |
| ENSG00000162836.10_ACP6      | ENSG00000160789.18_LMNA | 0.32457  | 0.174377438  | 0.459999674 | 4.51E-05 | 9.89E-04 | 1.00E+00 |
| ENSG00000101306.9_MYLK2      | ENSG00000160789.18_LMNA | -0.26485 | -0.406892184 | -0.11029753 | 9.76E-04 | 1.14E-02 | 1.00E+00 |
| ENSG00000221994.9_ZNF630     | ENSG00000160789.18_LMNA | -0.05788 | -0.215094144 | 0.102267702 | 4.79E-01 | 7.37E-01 | 1.00E+00 |
| ENSG00000236682.1_AC068282.1 | ENSG00000160789.18_LMNA | -0.14951 | -0.301528946 | 0.009932072 | 6.60E-02 | 2.40E-01 | 1.00E+00 |
| ENSG00000279252.1_           | ENSG00000160789.18_LMNA | -0.07196 | -0.228539169 | 0.088255209 | 3.78E-01 | 6.58E-01 | 1.00E+00 |
| ENSG00000232630.1_PRPS1P2    | ENSG00000160789.18_LMNA | -0.04053 | -0.198446181 | 0.119445532 | 6.20E-01 | 8.28E-01 | 1.00E+00 |
| ENSG00000171903.15_CYP4F11   | ENSG00000160789.18_LMNA | 0.03344  | -0.126430914 | 0.191623396 | 6.83E-01 | 8.62E-01 | 1.00E+00 |
| ENSG00000215093.3_EEF1A1P2   | ENSG00000160789.18_LMNA | -0.14801 | -0.300136021 | 0.011463425 | 6.88E-02 | 2.47E-01 | 1.00E+00 |
| ENSG00000174796.11_THAP6     | ENSG00000160789.18_LMNA | -0.11963 | -0.273614876 | 0.040344028 | 1.42E-01 | 3.85E-01 | 1.00E+00 |
| ENSG00000247796.2_CTD-2366F  | ENSG00000160789.18_LMNA | -0.23447 | -0.379507422 | -0.07819112 | 3.64E-03 | 3.09E-02 | 1.00E+00 |
| ENSG00000160460.14_SPTBN4    | ENSG00000160789.18_LMNA | 0.00585  | -0.153493437 | 0.164897345 | 9.43E-01 | 9.77E-01 | 1.00E+00 |
| ENSG00000232024.2_LSM12P1    | ENSG00000160789.18_LMNA | 0.03181  | -0.128042755 | 0.190044697 | 6.97E-01 | 8.70E-01 | 1.00E+00 |
| ENSG00000153234.12_NR4A2     | ENSG00000160789.18_LMNA | -0.05152 | -0.209002662 | 0.108575095 | 5.28E-01 | 7.72E-01 | 1.00E+00 |
| ENSG00000183250.10_LINC0154  | ENSG00000160789.18_LMNA | 0.10846  | -0.051634689 | 0.263115182 | 1.84E-01 | 4.48E-01 | 1.00E+00 |

|                             |                         |          |              |             |          |          |          |
|-----------------------------|-------------------------|----------|--------------|-------------|----------|----------|----------|
| ENSG00000009694.12_TENM1    | ENSG00000160789.18_LMNA | -0.00892 | -0.167884894 | 0.150491803 | 9.13E-01 | 9.67E-01 | 1.00E+00 |
| ENSG00000104835.13_SARS2    | ENSG00000160789.18_LMNA | -0.03034 | -0.188630708 | 0.129485003 | 7.11E-01 | 8.77E-01 | 1.00E+00 |
| ENSG00000141519.13_CCDC40   | ENSG00000160789.18_LMNA | 0.12532  | -0.034569251 | 0.278956333 | 1.24E-01 | 3.55E-01 | 1.00E+00 |
| ENSG00000112214.9_FHL5      | ENSG00000160789.18_LMNA | -0.16704 | -0.317790037 | -0.00805378 | 3.97E-02 | 1.73E-01 | 1.00E+00 |
| ENSG00000140950.14_TLDC1    | ENSG00000160789.18_LMNA | 0.2711   | 0.116944493  | 0.412495789 | 7.30E-04 | 9.05E-03 | 1.00E+00 |
| ENSG00000229939.1_RP11-111F | ENSG00000160789.18_LMNA | -0.0137  | -0.172524419 | 0.145818739 | 8.67E-01 | 9.48E-01 | 1.00E+00 |
| ENSG00000148690.11_FRA10AC  | ENSG00000160789.18_LMNA | -0.15118 | -0.303085724 | 0.008218851 | 6.30E-02 | 2.33E-01 | 1.00E+00 |
| ENSG00000281468.1_CTC-459F4 | ENSG00000160789.18_LMNA | -0.20714 | -0.354647333 | -0.04957606 | 1.05E-02 | 6.76E-02 | 1.00E+00 |
| ENSG00000213023.8_SYT3      | ENSG00000160789.18_LMNA | -0.07751 | -0.233829091 | 0.082707432 | 3.43E-01 | 6.27E-01 | 1.00E+00 |
| ENSG00000189227.5_C15orf61  | ENSG00000160789.18_LMNA | -0.2014  | -0.349396853 | -0.04359591 | 1.28E-02 | 7.85E-02 | 1.00E+00 |
| ENSG00000161558.9_TMEM143   | ENSG00000160789.18_LMNA | 0.05978  | -0.100377817 | 0.216914539 | 4.64E-01 | 7.27E-01 | 1.00E+00 |
| ENSG00000226124.5_FTCNDL1   | ENSG00000160789.18_LMNA | -0.25916 | -0.401784282 | -0.1042616  | 1.26E-03 | 1.38E-02 | 1.00E+00 |
| ENSG00000248668.2_OXCT1-AS  | ENSG00000160789.18_LMNA | -0.27622 | -0.417077779 | -0.12239937 | 5.72E-04 | 7.48E-03 | 1.00E+00 |
| ENSG0000028116.15_VRK2      | ENSG00000160789.18_LMNA | -0.0721  | -0.228676255 | 0.088111688 | 3.77E-01 | 6.57E-01 | 1.00E+00 |
| ENSG00000150510.14_FAM124A  | ENSG00000160789.18_LMNA | -0.31414 | -0.45079915  | -0.16310002 | 8.10E-05 | 1.59E-03 | 1.00E+00 |
| ENSG00000057657.13_PRDM1    | ENSG00000160789.18_LMNA | 0.24821  | 0.092669942  | 0.391922662 | 2.05E-03 | 1.99E-02 | 1.00E+00 |
| ENSG00000173588.13_CEP83    | ENSG00000160789.18_LMNA | -0.15142 | -0.303308655 | 0.007973368 | 6.26E-02 | 2.32E-01 | 1.00E+00 |
| ENSG00000237436.1_RP11-312B | ENSG00000160789.18_LMNA | -0.14604 | -0.298305599 | 0.013473534 | 7.26E-02 | 2.56E-01 | 1.00E+00 |
| ENSG00000176343.5_RPL37AP8  | ENSG00000160789.18_LMNA | -0.13042 | -0.283727378 | 0.029393399 | 1.09E-01 | 3.29E-01 | 1.00E+00 |
| ENSG00000198944.5_SOWAHA    | ENSG00000160789.18_LMNA | -0.21281 | -0.359821033 | -0.05549023 | 8.48E-03 | 5.82E-02 | 1.00E+00 |
| ENSG00000137871.18_ZNF280D  | ENSG00000160789.18_LMNA | -0.19331 | -0.341983818 | -0.03518982 | 1.70E-02 | 9.62E-02 | 1.00E+00 |
| ENSG00000136231.12_IGF2BP3  | ENSG00000160789.18_LMNA | -0.00059 | -0.159778856 | 0.158622438 | 9.94E-01 | 9.98E-01 | 1.00E+00 |
| ENSG00000174799.9_CEP135    | ENSG00000160789.18_LMNA | 0.01936  | -0.140277894 | 0.178007253 | 8.13E-01 | 9.26E-01 | 1.00E+00 |
| ENSG00000230082.1_PRRT3-AS  | ENSG00000160789.18_LMNA | 0.09254  | -0.06765991  | 0.248083486 | 2.57E-01 | 5.39E-01 | 1.00E+00 |
| ENSG00000272644.1_RP11-33O4 | ENSG00000160789.18_LMNA | 0.17812  | 0.019475893  | 0.328023089 | 2.81E-02 | 1.37E-01 | 1.00E+00 |
| ENSG00000099953.8_MMP11     | ENSG00000160789.18_LMNA | 0.427    | 0.287329094  | 0.548885997 | 4.11E-08 | 3.50E-06 | 2.11E-03 |
| ENSG00000105383.13_CD33     | ENSG00000160789.18_LMNA | -0.00816 | -0.167144044 | 0.151236693 | 9.21E-01 | 9.70E-01 | 1.00E+00 |
| ENSG00000169239.11_CA5B     | ENSG00000160789.18_LMNA | -0.09522 | -0.25062524  | 0.064961555 | 2.43E-01 | 5.23E-01 | 1.00E+00 |
| ENSG00000204991.9_SPIRE2    | ENSG00000160789.18_LMNA | 0.06626  | -0.093926665 | 0.22311191  | 4.17E-01 | 6.90E-01 | 1.00E+00 |
| ENSG00000101440.8_ASIP      | ENSG00000160789.18_LMNA | 0.05027  | -0.109812395 | 0.207804819 | 5.39E-01 | 7.79E-01 | 1.00E+00 |
| ENSG00000145241.9_CENPC     | ENSG00000160789.18_LMNA | -0.14714 | -0.299324985 | 0.012354389 | 7.05E-02 | 2.51E-01 | 1.00E+00 |
| ENSG00000069020.17_MAST4    | ENSG00000160789.18_LMNA | 0.24379  | 0.088005803  | 0.387935142 | 2.47E-03 | 2.30E-02 | 1.00E+00 |
| ENSG00000112379.8_ARFGEF3   | ENSG00000160789.18_LMNA | -0.28627 | -0.42604965  | -0.13313222 | 3.50E-04 | 5.06E-03 | 1.00E+00 |

|                              |                         |          |              |             |          |          |          |
|------------------------------|-------------------------|----------|--------------|-------------|----------|----------|----------|
| ENSG00000102452.14_NALCN     | ENSG00000160789.18_LMNA | -0.49704 | -0.608118862 | -0.36686689 | 7.35E-11 | 1.76E-08 | 3.77E-06 |
| ENSG00000197444.8_OGDHL      | ENSG00000160789.18_LMNA | 0.0535   | -0.10660748  | 0.210905572 | 5.13E-01 | 7.61E-01 | 1.00E+00 |
| ENSG00000260426.1_RP5-912I13 | ENSG00000160789.18_LMNA | -0.02125 | -0.179838755 | 0.138422562 | 7.95E-01 | 9.17E-01 | 1.00E+00 |
| ENSG00000197375.11_SLC22A5   | ENSG00000160789.18_LMNA | 0.03165  | -0.128197024 | 0.189893513 | 6.99E-01 | 8.71E-01 | 1.00E+00 |
| ENSG00000054803.3_CBLN4      | ENSG00000160789.18_LMNA | 0.19792  | 0.039980241  | 0.346213007 | 1.45E-02 | 8.59E-02 | 1.00E+00 |
| ENSG00000131242.14_RAB11FIP  | ENSG00000160789.18_LMNA | -0.30178 | -0.439845833 | -0.14977145 | 1.58E-04 | 2.72E-03 | 1.00E+00 |
| ENSG00000147202.16_DIAPH2    | ENSG00000160789.18_LMNA | 0.02013  | -0.139517201 | 0.178758443 | 8.06E-01 | 9.22E-01 | 1.00E+00 |
| ENSG00000198019.11_FCGR1B    | ENSG00000160789.18_LMNA | -0.11216 | -0.266596846 | 0.047899639 | 1.69E-01 | 4.27E-01 | 1.00E+00 |
| ENSG00000236534.1_H3F3BP1    | ENSG00000160789.18_LMNA | -0.28349 | -0.423575656 | -0.13016576 | 4.01E-04 | 5.68E-03 | 1.00E+00 |
| ENSG00000135476.10_ESPL1     | ENSG00000160789.18_LMNA | 0.08078  | -0.079441075 | 0.23693489  | 3.22E-01 | 6.09E-01 | 1.00E+00 |
| ENSG00000238113.5_LINC01410  | ENSG00000160789.18_LMNA | -0.1222  | -0.276034133 | 0.037731108 | 1.34E-01 | 3.71E-01 | 1.00E+00 |
| ENSG00000260664.2_AC004158.1 | ENSG00000160789.18_LMNA | -0.11657 | -0.270748827 | 0.04343396  | 1.53E-01 | 4.02E-01 | 1.00E+00 |
| ENSG00000225071.1_GS1-184P1  | ENSG00000160789.18_LMNA | -0.18695 | -0.336143694 | -0.02859778 | 2.11E-02 | 1.12E-01 | 1.00E+00 |
| ENSG00000166689.13_PLEKHA7   | ENSG00000160789.18_LMNA | 0.2091   | 0.051620317  | 0.35643776  | 9.73E-03 | 6.43E-02 | 1.00E+00 |
| ENSG00000100106.18_TRIOBP    | ENSG00000160789.18_LMNA | 0.30186  | 0.149863635  | 0.439921891 | 1.57E-04 | 2.71E-03 | 1.00E+00 |
| ENSG00000228794.7_LINC01128  | ENSG00000160789.18_LMNA | 0.08658  | -0.073632925 | 0.242441614 | 2.89E-01 | 5.74E-01 | 1.00E+00 |
| ENSG00000183808.10_RBM12B    | ENSG00000160789.18_LMNA | 0.06416  | -0.096021349 | 0.221102434 | 4.32E-01 | 7.02E-01 | 1.00E+00 |
| ENSG00000276148.1_RP11-278C  | ENSG00000160789.18_LMNA | -0.17635 | -0.326388735 | -0.01764621 | 2.98E-02 | 1.42E-01 | 1.00E+00 |
| ENSG00000214193.8_SH3D21     | ENSG00000160789.18_LMNA | 0.35173  | 0.203944598  | 0.48383389  | 8.86E-06 | 2.64E-04 | 4.54E-01 |
| ENSG00000121797.9_CCRL2      | ENSG00000160789.18_LMNA | -0.18439 | -0.333788136 | -0.02594649 | 2.30E-02 | 1.19E-01 | 1.00E+00 |
| ENSG00000113327.13_GABRG2    | ENSG00000160789.18_LMNA | -0.24313 | -0.38733608  | -0.08730623 | 2.54E-03 | 2.35E-02 | 1.00E+00 |
| ENSG00000196458.9_ZNF605     | ENSG00000160789.18_LMNA | -0.07519 | -0.231619863 | 0.085026735 | 3.57E-01 | 6.40E-01 | 1.00E+00 |
| ENSG00000113790.9_EHHADH     | ENSG00000160789.18_LMNA | -0.08352 | -0.239538226 | 0.076697913 | 3.06E-01 | 5.93E-01 | 1.00E+00 |
| ENSG00000237753.1_AC079922.1 | ENSG00000160789.18_LMNA | 0.15936  | 0.000162512  | 0.310677871 | 4.99E-02 | 2.01E-01 | 1.00E+00 |
| ENSG00000163995.17_ABLIM2    | ENSG00000160789.18_LMNA | -0.25248 | -0.395770203 | -0.09718283 | 1.70E-03 | 1.73E-02 | 1.00E+00 |
| ENSG00000177842.10_ZNF620    | ENSG00000160789.18_LMNA | -0.25745 | -0.400245025 | -0.10244697 | 1.36E-03 | 1.46E-02 | 1.00E+00 |
| ENSG00000278828.1_HIST1H3H   | ENSG00000160789.18_LMNA | 0.01368  | -0.145838415 | 0.172504913 | 8.67E-01 | 9.48E-01 | 1.00E+00 |
| ENSG00000254064.1_CTD-2530N  | ENSG00000160789.18_LMNA | 0.07516  | -0.085055263 | 0.231592669 | 3.57E-01 | 6.40E-01 | 1.00E+00 |
| ENSG00000121716.17_PILRB     | ENSG00000160789.18_LMNA | 0.06738  | -0.092818424 | 0.224173981 | 4.10E-01 | 6.84E-01 | 1.00E+00 |
| ENSG00000270157.1_RP5-894A1  | ENSG00000160789.18_LMNA | -0.07287 | -0.22940856  | 0.087344787 | 3.72E-01 | 6.52E-01 | 1.00E+00 |
| ENSG00000197312.10_DDI2      | ENSG00000160789.18_LMNA | 0.11967  | -0.040301272 | 0.273654495 | 1.42E-01 | 3.85E-01 | 1.00E+00 |
| ENSG00000162711.15_NLRP3     | ENSG00000160789.18_LMNA | -0.04304 | -0.20086489  | 0.116961602 | 5.99E-01 | 8.15E-01 | 1.00E+00 |
| ENSG00000089163.4_SIRT4      | ENSG00000160789.18_LMNA | -0.33924 | -0.472903354 | -0.19032121 | 1.91E-05 | 4.97E-04 | 9.79E-01 |

|                              |                         |          |              |             |          |          |          |
|------------------------------|-------------------------|----------|--------------|-------------|----------|----------|----------|
| ENSG00000203668.1_CHML       | ENSG00000160789.18_LMNA | -0.027   | -0.185399327 | 0.132775917 | 7.41E-01 | 8.91E-01 | 1.00E+00 |
| ENSG00000269896.2_RP4-740C4  | ENSG00000160789.18_LMNA | 0.20713  | 0.049559231  | 0.354632586 | 1.05E-02 | 6.76E-02 | 1.00E+00 |
| ENSG00000109906.12_ZBTB16    | ENSG00000160789.18_LMNA | -0.18123 | -0.330882356 | -0.02268186 | 2.55E-02 | 1.28E-01 | 1.00E+00 |
| ENSG00000139714.11_MORN3     | ENSG00000160789.18_LMNA | 0.10536  | -0.054763737 | 0.260192085 | 1.96E-01 | 4.66E-01 | 1.00E+00 |
| ENSG00000125650.4_PSPN       | ENSG00000160789.18_LMNA | 0.18418  | 0.025738384  | 0.333603076 | 2.31E-02 | 1.20E-01 | 1.00E+00 |
| ENSG00000204161.12_C10orf128 | ENSG00000160789.18_LMNA | -0.25784 | -0.400599569 | -0.10286477 | 1.34E-03 | 1.44E-02 | 1.00E+00 |
| ENSG00000271147.6_ARMCX5-G   | ENSG00000160789.18_LMNA | -0.17646 | -0.326490121 | -0.01775965 | 2.97E-02 | 1.42E-01 | 1.00E+00 |
| ENSG00000228506.1_RP11-98I9. | ENSG00000160789.18_LMNA | -0.24908 | -0.392704356 | -0.09358582 | 1.97E-03 | 1.93E-02 | 1.00E+00 |
| ENSG00000234636.2_MED14OS    | ENSG00000160789.18_LMNA | -0.07121 | -0.227829956 | 0.088997501 | 3.83E-01 | 6.62E-01 | 1.00E+00 |
| ENSG00000185607.5_ACTBP7     | ENSG00000160789.18_LMNA | 0.37275  | 0.227021201  | 0.502151967 | 2.25E-06 | 8.75E-05 | 1.16E-01 |
| ENSG00000168447.9_SCNN1B     | ENSG00000160789.18_LMNA | 0.2768   | 0.123022672  | 0.41760039  | 5.56E-04 | 7.32E-03 | 1.00E+00 |
| ENSG00000204653.8_ASPDH      | ENSG00000160789.18_LMNA | -0.18948 | -0.338472813 | -0.03122357 | 1.94E-02 | 1.06E-01 | 1.00E+00 |
| ENSG00000279716.1_AC006128.  | ENSG00000160789.18_LMNA | -0.01679 | -0.175517776 | 0.142796184 | 8.37E-01 | 9.37E-01 | 1.00E+00 |
| ENSG00000132199.17_ENOSF1    | ENSG00000160789.18_LMNA | -0.03276 | -0.190966915 | 0.127101381 | 6.89E-01 | 8.66E-01 | 1.00E+00 |
| ENSG00000154710.14_RABGEF1   | ENSG00000160789.18_LMNA | 0.07503  | -0.085191501 | 0.231462793 | 3.58E-01 | 6.41E-01 | 1.00E+00 |
| ENSG00000250312.5_ZNF718     | ENSG00000160789.18_LMNA | 0.02705  | -0.132719938 | 0.185454352 | 7.41E-01 | 8.91E-01 | 1.00E+00 |
| ENSG00000150455.12_TIRAP     | ENSG00000160789.18_LMNA | 0.20428  | 0.046593482  | 0.352031079 | 1.16E-02 | 7.28E-02 | 1.00E+00 |
| ENSG00000171873.7_ADRA1D     | ENSG00000160789.18_LMNA | 0.54997  | 0.428266829  | 0.652077929 | 2.16E-13 | 1.56E-10 | 1.11E-08 |
| ENSG00000134864.9_GGACT      | ENSG00000160789.18_LMNA | 0.1229   | -0.037030191 | 0.276682424 | 1.31E-01 | 3.68E-01 | 1.00E+00 |
| ENSG00000230216.1_HSPB1P2    | ENSG00000160789.18_LMNA | 0.43201  | 0.292962771  | 0.553169727 | 2.74E-08 | 2.51E-06 | 1.40E-03 |
| ENSG00000218980.2_FTH1P15    | ENSG00000160789.18_LMNA | 0.04481  | -0.115213943 | 0.202564341 | 5.84E-01 | 8.06E-01 | 1.00E+00 |
| ENSG00000244968.5_LIFR-AS1   | ENSG00000160789.18_LMNA | -0.42244 | -0.544984512 | -0.28221382 | 5.92E-08 | 4.70E-06 | 3.04E-03 |
| ENSG00000124496.11_TRERF1    | ENSG00000160789.18_LMNA | -0.13411 | -0.287178082 | 0.02563942  | 9.95E-02 | 3.11E-01 | 1.00E+00 |
| ENSG00000225828.1_FAM229A    | ENSG00000160789.18_LMNA | 0.1025   | -0.057645957 | 0.257494452 | 2.09E-01 | 4.82E-01 | 1.00E+00 |
| ENSG00000216819.1_TUBB2BP1   | ENSG00000160789.18_LMNA | 0.06121  | -0.098958089 | 0.218280615 | 4.54E-01 | 7.19E-01 | 1.00E+00 |
| ENSG00000182742.5_HOXB4      | ENSG00000160789.18_LMNA | 0.17512  | 0.016372789  | 0.32525017  | 3.09E-02 | 1.46E-01 | 1.00E+00 |
| ENSG00000116544.10_DLGAP3    | ENSG00000160789.18_LMNA | -0.2446  | -0.388663675 | -0.08885698 | 2.39E-03 | 2.24E-02 | 1.00E+00 |
| ENSG00000261557.1_EEF1A1P3   | ENSG00000160789.18_LMNA | -0.17959 | -0.329372314 | -0.02098793 | 2.68E-02 | 1.33E-01 | 1.00E+00 |
| ENSG00000078900.13_TP73      | ENSG00000160789.18_LMNA | 0.02016  | -0.139486802 | 0.178788453 | 8.05E-01 | 9.22E-01 | 1.00E+00 |
| ENSG00000176909.10_MAMSTR    | ENSG00000160789.18_LMNA | 0.11924  | -0.040730826 | 0.273256409 | 1.43E-01 | 3.87E-01 | 1.00E+00 |
| ENSG00000233247.3_GS1-257G1  | ENSG00000160789.18_LMNA | -0.24408 | -0.388196453 | -0.08831105 | 2.44E-03 | 2.28E-02 | 1.00E+00 |
| ENSG00000173889.14_PHC3      | ENSG00000160789.18_LMNA | 0.13273  | -0.027045751 | 0.285886315 | 1.03E-01 | 3.18E-01 | 1.00E+00 |
| ENSG00000144026.10_ZNF514    | ENSG00000160789.18_LMNA | 0.06721  | -0.09298633  | 0.224013118 | 4.11E-01 | 6.85E-01 | 1.00E+00 |

|                             |                         |          |              |             |          |          |          |
|-----------------------------|-------------------------|----------|--------------|-------------|----------|----------|----------|
| ENSG00000105750.13_ZNF85    | ENSG00000160789.18_LMNA | -0.27375 | -0.414873792 | -0.11977329 | 6.43E-04 | 8.23E-03 | 1.00E+00 |
| ENSG00000158296.12_SLC13A3  | ENSG00000160789.18_LMNA | 0.04025  | -0.119717189 | 0.198181422 | 6.22E-01 | 8.29E-01 | 1.00E+00 |
| ENSG00000109819.7_PPARGC1A  | ENSG00000160789.18_LMNA | 0.02141  | -0.138262618 | 0.179996541 | 7.93E-01 | 9.16E-01 | 1.00E+00 |
| ENSG00000164743.4_C8orf48   | ENSG00000160789.18_LMNA | 0.13975  | -0.019891025 | 0.292446389 | 8.59E-02 | 2.85E-01 | 1.00E+00 |
| ENSG00000149571.9_KIRREL3   | ENSG00000160789.18_LMNA | -0.26361 | -0.405778106 | -0.10897917 | 1.03E-03 | 1.19E-02 | 1.00E+00 |
| ENSG00000261678.2_SCRT1     | ENSG00000160789.18_LMNA | -0.31505 | -0.451601698 | -0.16408074 | 7.71E-05 | 1.53E-03 | 1.00E+00 |
| ENSG00000008516.15_MMP25    | ENSG00000160789.18_LMNA | -0.02499 | -0.183461628 | 0.134745958 | 7.60E-01 | 9.00E-01 | 1.00E+00 |
| ENSG00000156140.7_ADAMTS3   | ENSG00000160789.18_LMNA | 0.32031  | 0.169765088  | 0.456244152 | 5.75E-05 | 1.20E-03 | 1.00E+00 |
| ENSG00000229122.1_AGBL5-IT1 | ENSG00000160789.18_LMNA | -0.04555 | -0.203277324 | 0.114480149 | 5.77E-01 | 8.03E-01 | 1.00E+00 |
| ENSG00000160172.9_FAM86C2P  | ENSG00000160789.18_LMNA | 0.17562  | 0.016896162  | 0.325718226 | 3.04E-02 | 1.45E-01 | 1.00E+00 |
| ENSG00000008118.8_CAMK1G    | ENSG00000160789.18_LMNA | -0.14555 | -0.297844679 | 0.013979304 | 7.36E-02 | 2.58E-01 | 1.00E+00 |
| ENSG00000197372.8_ZNF675    | ENSG00000160789.18_LMNA | -0.40265 | -0.52800352  | -0.26012256 | 2.71E-07 | 1.63E-05 | 1.39E-02 |
| ENSG00000128692.8	EIF2S2P4  | ENSG00000160789.18_LMNA | 0.00944  | -0.149985084 | 0.168388659 | 9.08E-01 | 9.65E-01 | 1.00E+00 |
| ENSG00000118620.11_ZNF430   | ENSG00000160789.18_LMNA | -0.22085 | -0.367140854 | -0.06389432 | 6.25E-03 | 4.64E-02 | 1.00E+00 |
| ENSG00000257702.3_LBX2-AS1  | ENSG00000160789.18_LMNA | 0.42682  | 0.287133183  | 0.548736783 | 4.17E-08 | 3.52E-06 | 2.14E-03 |
| ENSG00000214413.6_BBIP1     | ENSG00000160789.18_LMNA | -0.43094 | -0.552256941 | -0.29176082 | 2.99E-08 | 2.68E-06 | 1.53E-03 |
| ENSG00000273373.1_RP5-1074L | ENSG00000160789.18_LMNA | -0.09572 | -0.251093368 | 0.064464081 | 2.41E-01 | 5.20E-01 | 1.00E+00 |
| ENSG00000113448.15_PDE4D    | ENSG00000160789.18_LMNA | -0.11221 | -0.266650888 | 0.047841595 | 1.69E-01 | 4.27E-01 | 1.00E+00 |
| ENSG00000116830.10_TTF2     | ENSG00000160789.18_LMNA | -0.09628 | -0.251625617 | 0.063898276 | 2.38E-01 | 5.17E-01 | 1.00E+00 |
| ENSG00000123700.4_KCNJ2     | ENSG00000160789.18_LMNA | -0.16083 | -0.312040693 | -0.00167163 | 4.78E-02 | 1.95E-01 | 1.00E+00 |
| ENSG00000187607.14_ZNF286A  | ENSG00000160789.18_LMNA | -0.21826 | -0.364782399 | -0.06118181 | 6.91E-03 | 4.99E-02 | 1.00E+00 |
| ENSG00000246451.2_RP11-894P | ENSG00000160789.18_LMNA | 0.03346  | -0.126412373 | 0.191641546 | 6.82E-01 | 8.62E-01 | 1.00E+00 |
| ENSG00000225855.5_RUSC1-AS  | ENSG00000160789.18_LMNA | 0.10086  | -0.059297529 | 0.255946435 | 2.16E-01 | 4.91E-01 | 1.00E+00 |
| ENSG00000224126.2_UBE2SP2   | ENSG00000160789.18_LMNA | 0.06988  | -0.09032332  | 0.226562383 | 3.92E-01 | 6.70E-01 | 1.00E+00 |
| ENSG00000092054.12_MYH7     | ENSG00000160789.18_LMNA | -0.04038 | -0.198306592 | 0.119588764 | 6.21E-01 | 8.29E-01 | 1.00E+00 |
| ENSG00000164318.16_EGFLAM   | ENSG00000160789.18_LMNA | 0.18805  | 0.029736452  | 0.337154177 | 2.03E-02 | 1.09E-01 | 1.00E+00 |
| ENSG00000172244.7_C5orf34   | ENSG00000160789.18_LMNA | -0.06052 | -0.217624009 | 0.099640644 | 4.59E-01 | 7.23E-01 | 1.00E+00 |
| ENSG00000240053.8_LY6G5B    | ENSG00000160789.18_LMNA | -0.08974 | -0.245437517 | 0.070464002 | 2.72E-01 | 5.56E-01 | 1.00E+00 |
| ENSG00000228653.2_HNRNPCP   | ENSG00000160789.18_LMNA | 0.00648  | -0.152877776 | 0.165510594 | 9.37E-01 | 9.75E-01 | 1.00E+00 |
| ENSG00000145723.15_GIN1     | ENSG00000160789.18_LMNA | -0.36149 | -0.49235789  | -0.21464434 | 4.75E-06 | 1.60E-04 | 2.44E-01 |
| ENSG00000223668.1_EEF1A1P2  | ENSG00000160789.18_LMNA | -0.11362 | -0.267971998 | 0.04642198  | 1.63E-01 | 4.19E-01 | 1.00E+00 |
| ENSG00000214016.3_RPSAP61   | ENSG00000160789.18_LMNA | -0.14272 | -0.295210037 | 0.016867253 | 7.94E-02 | 2.71E-01 | 1.00E+00 |
| ENSG00000140961.11_OSGIN1   | ENSG00000160789.18_LMNA | 0.27691  | 0.123137949  | 0.417697023 | 5.53E-04 | 7.30E-03 | 1.00E+00 |

|                             |                         |          |              |             |          |          |          |
|-----------------------------|-------------------------|----------|--------------|-------------|----------|----------|----------|
| ENSG00000197603.12_C5orf42  | ENSG00000160789.18_LMNA | 0.0504   | -0.109678437 | 0.207934551 | 5.37E-01 | 7.78E-01 | 1.00E+00 |
| ENSG00000108381.9_ASPA      | ENSG00000160789.18_LMNA | -0.35288 | -0.48484486  | -0.20521013 | 8.23E-06 | 2.49E-04 | 4.22E-01 |
| ENSG00000247679.2_RP11-1277 | ENSG00000160789.18_LMNA | 0.08353  | -0.076687355 | 0.239548237 | 3.06E-01 | 5.93E-01 | 1.00E+00 |
| ENSG00000173376.12_NDNF     | ENSG00000160789.18_LMNA | -0.1639  | -0.314884321 | -0.00482509 | 4.36E-02 | 1.84E-01 | 1.00E+00 |
| ENSG00000169851.14_PCDH7    | ENSG00000160789.18_LMNA | -0.29883 | -0.437232753 | -0.14660721 | 1.84E-04 | 3.06E-03 | 1.00E+00 |
| ENSG00000248124.6_RRN3P1    | ENSG00000160789.18_LMNA | -0.18449 | -0.333884132 | -0.02605446 | 2.29E-02 | 1.19E-01 | 1.00E+00 |
| ENSG00000159263.14_SIM2     | ENSG00000160789.18_LMNA | -0.25798 | -0.400719743 | -0.1030064  | 1.33E-03 | 1.44E-02 | 1.00E+00 |
| ENSG00000196705.7_ZNF431    | ENSG00000160789.18_LMNA | -0.36853 | -0.498487692 | -0.2223802  | 2.99E-06 | 1.09E-04 | 1.53E-01 |
| ENSG00000272345.1_RP1-30M3  | ENSG00000160789.18_LMNA | -0.00526 | -0.164326037 | 0.154066771 | 9.49E-01 | 9.79E-01 | 1.00E+00 |
| ENSG00000174373.14_RALGAPA  | ENSG00000160789.18_LMNA | -0.10291 | -0.257887873 | 0.057225943 | 2.07E-01 | 4.79E-01 | 1.00E+00 |
| ENSG00000253506.2_NACA2     | ENSG00000160789.18_LMNA | -0.06908 | -0.225798597 | 0.091121661 | 3.98E-01 | 6.75E-01 | 1.00E+00 |
| ENSG00000253549.4_CA3-AS1   | ENSG00000160789.18_LMNA | 0.05227  | -0.107824024 | 0.209729318 | 5.22E-01 | 7.68E-01 | 1.00E+00 |
| ENSG00000114423.17_CBLB     | ENSG00000160789.18_LMNA | -0.09766 | -0.252932081 | 0.062508584 | 2.31E-01 | 5.09E-01 | 1.00E+00 |
| ENSG00000261609.3_GAN       | ENSG00000160789.18_LMNA | -0.01613 | -0.174877256 | 0.143443452 | 8.44E-01 | 9.39E-01 | 1.00E+00 |
| ENSG00000262692.1_CTD-3195  | ENSG00000160789.18_LMNA | -0.16784 | -0.318531574 | -0.00887877 | 3.87E-02 | 1.70E-01 | 1.00E+00 |
| ENSG00000235109.6_ZSCAN31   | ENSG00000160789.18_LMNA | -0.37798 | -0.506692642 | -0.2327896  | 1.58E-06 | 6.67E-05 | 8.10E-02 |
| ENSG00000236753.4_MKLN1-AS  | ENSG00000160789.18_LMNA | 0.0099   | -0.14953834  | 0.16883266  | 9.04E-01 | 9.63E-01 | 1.00E+00 |
| ENSG00000225125.2_RANP4     | ENSG00000160789.18_LMNA | -0.24435 | -0.388440425 | -0.0885961  | 2.41E-03 | 2.26E-02 | 1.00E+00 |
| ENSG00000128891.14_C15orf57 | ENSG00000160789.18_LMNA | -0.25151 | -0.394903099 | -0.09616471 | 1.77E-03 | 1.79E-02 | 1.00E+00 |
| ENSG00000142530.9_FAM71E1   | ENSG00000160789.18_LMNA | -0.11837 | -0.272432946 | 0.041619013 | 1.46E-01 | 3.92E-01 | 1.00E+00 |
| ENSG00000108515.16_ENO3     | ENSG00000160789.18_LMNA | 0.09479  | -0.065394186 | 0.250218009 | 2.45E-01 | 5.25E-01 | 1.00E+00 |
| ENSG00000131370.14_SH3BP5   | ENSG00000160789.18_LMNA | 0.21261  | 0.055285385  | 0.359642148 | 8.54E-03 | 5.85E-02 | 1.00E+00 |
| ENSG00000112303.12_VNN2     | ENSG00000160789.18_LMNA | -0.07383 | -0.23032378  | 0.086385801 | 3.66E-01 | 6.47E-01 | 1.00E+00 |
| ENSG00000202058.1_RN7SKP80  | ENSG00000160789.18_LMNA | -0.04905 | -0.206632678 | 0.111022193 | 5.48E-01 | 7.85E-01 | 1.00E+00 |
| ENSG00000165548.9_TMEM63C   | ENSG00000160789.18_LMNA | -0.29116 | -0.43041027  | -0.13837367 | 2.73E-04 | 4.18E-03 | 1.00E+00 |
| ENSG00000121895.7_TMEM156   | ENSG00000160789.18_LMNA | -0.30876 | -0.446035395 | -0.1572903  | 1.09E-04 | 2.02E-03 | 1.00E+00 |
| ENSG00000173681.15_CXorf23  | ENSG00000160789.18_LMNA | -0.00656 | -0.16558421  | 0.152803855 | 9.36E-01 | 9.75E-01 | 1.00E+00 |
| ENSG00000213780.9_GTF2H4    | ENSG00000160789.18_LMNA | -0.0903  | -0.245965182 | 0.069905202 | 2.69E-01 | 5.53E-01 | 1.00E+00 |
| ENSG00000258738.1_RP11-73E1 | ENSG00000160789.18_LMNA | 0.20952  | 0.052050457  | 0.356814205 | 9.58E-03 | 6.36E-02 | 1.00E+00 |
| ENSG00000165891.14_E2F7     | ENSG00000160789.18_LMNA | 0.31685  | 0.166025976  | 0.453192141 | 6.98E-05 | 1.41E-03 | 1.00E+00 |
| ENSG00000075391.15_RASAL2   | ENSG00000160789.18_LMNA | 0.06548  | -0.094711966 | 0.222358869 | 4.23E-01 | 6.94E-01 | 1.00E+00 |
| ENSG00000147443.11_DOK2     | ENSG00000160789.18_LMNA | 0.17955  | 0.020947368  | 0.329336137 | 2.69E-02 | 1.33E-01 | 1.00E+00 |
| ENSG00000197776.6_KLHDC1    | ENSG00000160789.18_LMNA | -0.15196 | -0.303810688 | 0.007420411 | 6.16E-02 | 2.30E-01 | 1.00E+00 |



|                             |                         |          |              |             |          |          |          |
|-----------------------------|-------------------------|----------|--------------|-------------|----------|----------|----------|
| ENSG00000273137.1_RP3-402G1 | ENSG00000160789.18_LMNA | 0.03749  | -0.122438162 | 0.195526977 | 6.47E-01 | 8.43E-01 | 1.00E+00 |
| ENSG00000278962.1_RP11-399B | ENSG00000160789.18_LMNA | 0.50717  | 0.378533207  | 0.616586748 | 2.60E-11 | 7.32E-09 | 1.33E-06 |
| ENSG00000198089.13_SF11     | ENSG00000160789.18_LMNA | 0.09457  | -0.065616094 | 0.250009087 | 2.46E-01 | 5.27E-01 | 1.00E+00 |
| ENSG00000178425.12_NT5DC1   | ENSG00000160789.18_LMNA | -0.19578 | -0.344251915 | -0.03775715 | 1.56E-02 | 9.03E-02 | 1.00E+00 |
| ENSG00000076351.11_SLC46A1  | ENSG00000160789.18_LMNA | -0.07235 | -0.228913809 | 0.087862952 | 3.76E-01 | 6.56E-01 | 1.00E+00 |
| ENSG00000268049.1_CTD-2619J | ENSG00000160789.18_LMNA | -0.08026 | -0.236435806 | 0.079966418 | 3.26E-01 | 6.12E-01 | 1.00E+00 |
| ENSG00000065328.15_MCM10    | ENSG00000160789.18_LMNA | -0.06138 | -0.218448581 | 0.098783437 | 4.53E-01 | 7.18E-01 | 1.00E+00 |
| ENSG00000263781.3_RP11-321A | ENSG00000160789.18_LMNA | -0.03254 | -0.19074831  | 0.127324579 | 6.91E-01 | 8.67E-01 | 1.00E+00 |
| ENSG00000258429.1_PDF       | ENSG00000160789.18_LMNA | 0.27637  | 0.122565987  | 0.417217499 | 5.68E-04 | 7.44E-03 | 1.00E+00 |
| ENSG00000178229.7_ZNF543    | ENSG00000160789.18_LMNA | 0.08161  | -0.078607234 | 0.237726709 | 3.18E-01 | 6.04E-01 | 1.00E+00 |
| ENSG00000267493.3_CIRBP-AS1 | ENSG00000160789.18_LMNA | 0.05585  | -0.104276382 | 0.2131569   | 4.94E-01 | 7.49E-01 | 1.00E+00 |
| ENSG00000268403.2_CTD-2371C | ENSG00000160789.18_LMNA | -0.13262 | -0.28578546  | 0.027155499 | 1.03E-01 | 3.18E-01 | 1.00E+00 |
| ENSG00000099954.17_CECR2    | ENSG00000160789.18_LMNA | -0.19421 | -0.342808529 | -0.03612287 | 1.65E-02 | 9.41E-02 | 1.00E+00 |
| ENSG00000116117.16_PARD3B   | ENSG00000160789.18_LMNA | 0.02121  | -0.138456265 | 0.179805504 | 7.95E-01 | 9.18E-01 | 1.00E+00 |
| ENSG00000146678.8_IGFBP1    | ENSG00000160789.18_LMNA | -0.11586 | -0.270082249 | 0.044151748 | 1.55E-01 | 4.06E-01 | 1.00E+00 |
| ENSG00000169047.5_IRS1      | ENSG00000160789.18_LMNA | 0.21183  | 0.054464847  | 0.35892537  | 8.80E-03 | 5.97E-02 | 1.00E+00 |
| ENSG00000008128.21_CDK11A   | ENSG00000160789.18_LMNA | 0.10324  | -0.056896224 | 0.258196643 | 2.06E-01 | 4.77E-01 | 1.00E+00 |
| ENSG00000231074.7_HCG18     | ENSG00000160789.18_LMNA | -0.24531 | -0.389303586 | -0.08960497 | 2.32E-03 | 2.19E-02 | 1.00E+00 |
| ENSG00000110848.7_CD69      | ENSG00000160789.18_LMNA | -0.14022 | -0.292879213 | 0.019417839 | 8.49E-02 | 2.82E-01 | 1.00E+00 |
| ENSG00000115523.15_GNLY     | ENSG00000160789.18_LMNA | -0.06416 | -0.221107062 | 0.096016528 | 4.32E-01 | 7.02E-01 | 1.00E+00 |
| ENSG00000152763.15_WDR78    | ENSG00000160789.18_LMNA | 0.1117   | -0.048363629 | 0.266164779 | 1.71E-01 | 4.30E-01 | 1.00E+00 |
| ENSG00000105963.12_ADAP1    | ENSG00000160789.18_LMNA | -0.23784 | -0.38255705  | -0.0817359  | 3.17E-03 | 2.78E-02 | 1.00E+00 |
| ENSG00000241889.1_RP11-435F | ENSG00000160789.18_LMNA | 0.08428  | -0.075934729 | 0.240261701 | 3.02E-01 | 5.89E-01 | 1.00E+00 |
| ENSG00000265666.1_RARA-AS1  | ENSG00000160789.18_LMNA | 0.04084  | -0.119132621 | 0.198751089 | 6.17E-01 | 8.27E-01 | 1.00E+00 |
| ENSG00000120457.10_KCNJ5    | ENSG00000160789.18_LMNA | -0.07159 | -0.228190185 | 0.088620514 | 3.81E-01 | 6.60E-01 | 1.00E+00 |
| ENSG00000152348.14_ATG10    | ENSG00000160789.18_LMNA | -0.04057 | -0.198493488 | 0.119396987 | 6.20E-01 | 8.28E-01 | 1.00E+00 |
| ENSG00000250565.5_ATP6V1E2  | ENSG00000160789.18_LMNA | -0.29253 | -0.431630754 | -0.13984362 | 2.55E-04 | 3.96E-03 | 1.00E+00 |
| ENSG00000279253.1_RP4-614O4 | ENSG00000160789.18_LMNA | 0.14986  | -0.009573805 | 0.301854635 | 6.54E-02 | 2.39E-01 | 1.00E+00 |
| ENSG00000227694.1_RPL23AP7  | ENSG00000160789.18_LMNA | -0.00171 | -0.160868391 | 0.157532104 | 9.83E-01 | 9.94E-01 | 1.00E+00 |
| ENSG00000162614.17_NEXN     | ENSG00000160789.18_LMNA | 0.19702  | 0.039043418  | 0.345386917 | 1.50E-02 | 8.78E-02 | 1.00E+00 |
| ENSG00000105376.4_ICAM5     | ENSG00000160789.18_LMNA | -0.0016  | -0.160756149 | 0.157644464 | 9.84E-01 | 9.94E-01 | 1.00E+00 |
| ENSG00000271228.1_CTC-336P1 | ENSG00000160789.18_LMNA | -0.46027 | -0.577176976 | -0.32487345 | 2.43E-09 | 3.28E-07 | 1.25E-04 |
| ENSG00000073711.9_PPP2R3A   | ENSG00000160789.18_LMNA | -0.25134 | -0.394743813 | -0.09597775 | 1.79E-03 | 1.80E-02 | 1.00E+00 |

|                             |                         |          |              |              |          |          |          |
|-----------------------------|-------------------------|----------|--------------|--------------|----------|----------|----------|
| ENSG00000081760.15_AACS     | ENSG00000160789.18_LMNA | 0.02807  | -0.131721509 | 0.186435411  | 7.31E-01 | 8.87E-01 | 1.00E+00 |
| ENSG00000276698.1_RP11-468E | ENSG00000160789.18_LMNA | 0.0149   | -0.144644929 | 0.173687588  | 8.55E-01 | 9.43E-01 | 1.00E+00 |
| ENSG00000171488.13_LRRC8C   | ENSG00000160789.18_LMNA | -0.07166 | -0.228254723 | 0.088552964  | 3.80E-01 | 6.59E-01 | 1.00E+00 |
| ENSG00000146555.17_SDK1     | ENSG00000160789.18_LMNA | 0.37631  | 0.230944155  | 0.505241623  | 1.77E-06 | 7.29E-05 | 9.08E-02 |
| ENSG00000258608.1_DNAJC19P  | ENSG00000160789.18_LMNA | -0.2517  | -0.395068363 | -0.09635871  | 1.76E-03 | 1.78E-02 | 1.00E+00 |
| ENSG00000225137.1_DYNC1I2P1 | ENSG00000160789.18_LMNA | -0.12868 | -0.282101076 | 0.031159575  | 1.14E-01 | 3.37E-01 | 1.00E+00 |
| ENSG00000206190.10_ATP10A   | ENSG00000160789.18_LMNA | -0.01204 | -0.170908274 | 0.147448181  | 8.83E-01 | 9.55E-01 | 1.00E+00 |
| ENSG00000186951.15_PPARA    | ENSG00000160789.18_LMNA | -0.02384 | -0.182346318 | 0.135878743  | 7.71E-01 | 9.05E-01 | 1.00E+00 |
| ENSG00000266967.5_AARSD1    | ENSG00000160789.18_LMNA | -0.03307 | -0.191267391 | 0.126794539  | 6.86E-01 | 8.64E-01 | 1.00E+00 |
| ENSG0000020633.17_RUNX3     | ENSG00000160789.18_LMNA | 0.19096  | 0.032750001  | 0.339825054  | 1.84E-02 | 1.02E-01 | 1.00E+00 |
| ENSG00000139132.13_FGD4     | ENSG00000160789.18_LMNA | -0.19212 | -0.340897808 | -0.03396196  | 1.77E-02 | 9.90E-02 | 1.00E+00 |
| ENSG00000168769.11_TET2     | ENSG00000160789.18_LMNA | -0.11953 | -0.273521062 | 0.040445265  | 1.42E-01 | 3.85E-01 | 1.00E+00 |
| ENSG00000271918.1_CTD-2287C | ENSG00000160789.18_LMNA | -0.09518 | -0.25058686  | 0.065002333  | 2.43E-01 | 5.23E-01 | 1.00E+00 |
| ENSG00000260160.1_CTC-471J1 | ENSG00000160789.18_LMNA | 0.08928  | -0.07092768  | 0.244999532  | 2.74E-01 | 5.59E-01 | 1.00E+00 |
| ENSG00000176826.14_FKBP9P1  | ENSG00000160789.18_LMNA | 0.3181   | 0.167378297  | 0.454296736  | 6.51E-05 | 1.32E-03 | 1.00E+00 |
| ENSG00000162929.12_KIAA1841 | ENSG00000160789.18_LMNA | -0.08748 | -0.243292637 | 0.072733403  | 2.84E-01 | 5.69E-01 | 1.00E+00 |
| ENSG00000175857.7_GAPT      | ENSG00000160789.18_LMNA | 0.07098  | -0.089227666 | 0.22760998   | 3.85E-01 | 6.63E-01 | 1.00E+00 |
| ENSG00000269713.6_NBPF9     | ENSG00000160789.18_LMNA | 0.10316  | -0.056971771 | 0.258125901  | 2.06E-01 | 4.78E-01 | 1.00E+00 |
| ENSG00000182873.5_RP11-181G | ENSG00000160789.18_LMNA | -0.07798 | -0.234276664 | 0.082237139  | 3.40E-01 | 6.25E-01 | 1.00E+00 |
| ENSG00000182359.13_KBTBD3   | ENSG00000160789.18_LMNA | -0.37915 | -0.507703024 | -0.2340758   | 1.46E-06 | 6.28E-05 | 7.48E-02 |
| ENSG00000180739.13_S1PR5    | ENSG00000160789.18_LMNA | -0.17468 | -0.324850212 | -0.0159257   | 3.14E-02 | 1.48E-01 | 1.00E+00 |
| ENSG00000198039.10_ZNF273   | ENSG00000160789.18_LMNA | -0.23681 | -0.381622194 | -0.08064844  | 3.31E-03 | 2.88E-02 | 1.00E+00 |
| ENSG00000232611.1_RP11-1114 | ENSG00000160789.18_LMNA | -0.18135 | -0.330997614 | -0.02281123  | 2.54E-02 | 1.28E-01 | 1.00E+00 |
| ENSG00000162849.14_KIF26B   | ENSG00000160789.18_LMNA | 0.08876  | -0.071447242 | 0.244508606  | 2.77E-01 | 5.62E-01 | 1.00E+00 |
| ENSG00000187486.5_KCNJ11    | ENSG00000160789.18_LMNA | -0.3327  | -0.467157449 | -0.18320312  | 2.82E-05 | 6.79E-04 | 1.00E+00 |
| ENSG00000188460.4_ACTBP11   | ENSG00000160789.18_LMNA | 0.30502  | 0.15325988   | 0.442720963  | 1.33E-04 | 2.37E-03 | 1.00E+00 |
| ENSG00000172803.16_SNX32    | ENSG00000160789.18_LMNA | -0.15267 | -0.304467712 | 0.006696452  | 6.04E-02 | 2.27E-01 | 1.00E+00 |
| ENSG00000144559.9_TAMM41    | ENSG00000160789.18_LMNA | -0.11776 | -0.271865391 | 0.04223089   | 1.48E-01 | 3.95E-01 | 1.00E+00 |
| ENSG00000081014.9_AP4E1     | ENSG00000160789.18_LMNA | 0.22396  | 0.0671543    | 0.369970166  | 5.54E-03 | 4.23E-02 | 1.00E+00 |
| ENSG00000231252.1_RP11-436K | ENSG00000160789.18_LMNA | -0.47162 | -0.586762912 | -0.337777771 | 8.63E-10 | 1.39E-07 | 4.43E-05 |
| ENSG00000116824.4_CD2       | ENSG00000160789.18_LMNA | 0.04294  | -0.117061641 | 0.200767552  | 5.99E-01 | 8.16E-01 | 1.00E+00 |
| ENSG00000163082.9_SGPP2     | ENSG00000160789.18_LMNA | -0.25251 | -0.395803633 | -0.0972221   | 1.70E-03 | 1.73E-02 | 1.00E+00 |
| ENSG00000111087.8_GLI1      | ENSG00000160789.18_LMNA | 0.12103  | -0.03892179  | 0.274932194  | 1.37E-01 | 3.78E-01 | 1.00E+00 |

|                              |                         |          |              |             |          |          |          |
|------------------------------|-------------------------|----------|--------------|-------------|----------|----------|----------|
| ENSG00000185621.10_LMLN      | ENSG00000160789.18_LMNA | 0.37117  | 0.225276453  | 0.50077557  | 2.51E-06 | 9.47E-05 | 1.29E-01 |
| ENSG00000121621.6_KIF18A     | ENSG00000160789.18_LMNA | 0.12197  | -0.03796318  | 0.275819422 | 1.34E-01 | 3.72E-01 | 1.00E+00 |
| ENSG00000235225.1_AC016712.1 | ENSG00000160789.18_LMNA | -0.02862 | -0.186965954 | 0.131181303 | 7.26E-01 | 8.84E-01 | 1.00E+00 |
| ENSG00000112319.16_EYA4      | ENSG00000160789.18_LMNA | 0.10662  | -0.053486176 | 0.261386256 | 1.91E-01 | 4.59E-01 | 1.00E+00 |
| ENSG00000163624.5_CDS1       | ENSG00000160789.18_LMNA | -0.0814  | -0.237519707 | 0.078825264 | 3.19E-01 | 6.06E-01 | 1.00E+00 |
| ENSG00000232415.1_CTB-51J22  | ENSG00000160789.18_LMNA | 0.27336  | 0.119349657  | 0.414517925 | 6.56E-04 | 8.33E-03 | 1.00E+00 |
| ENSG00000136110.11_LECT1     | ENSG00000160789.18_LMNA | -0.05006 | -0.207607968 | 0.110015636 | 5.40E-01 | 7.80E-01 | 1.00E+00 |
| ENSG00000213235.3_EEF1A1P1   | ENSG00000160789.18_LMNA | -0.14136 | -0.293949121 | 0.018247559 | 8.24E-02 | 2.77E-01 | 1.00E+00 |
| ENSG00000150773.9_PIH1D2     | ENSG00000160789.18_LMNA | -0.06329 | -0.220274385 | 0.096883694 | 4.39E-01 | 7.07E-01 | 1.00E+00 |
| ENSG00000179331.2_RAB39A     | ENSG00000160789.18_LMNA | 0.07459  | -0.085627352 | 0.231047219 | 3.61E-01 | 6.43E-01 | 1.00E+00 |
| ENSG00000244041.6_LINC01011  | ENSG00000160789.18_LMNA | -0.12981 | -0.283159184 | 0.030010684 | 1.11E-01 | 3.32E-01 | 1.00E+00 |
| ENSG00000231409.3_RP11-83J1  | ENSG00000160789.18_LMNA | -0.09585 | -0.251216302 | 0.064333414 | 2.40E-01 | 5.19E-01 | 1.00E+00 |
| ENSG00000179455.7_MKRN3      | ENSG00000160789.18_LMNA | -0.34321 | -0.476380408 | -0.1946431  | 1.50E-05 | 4.08E-04 | 7.70E-01 |
| ENSG00000175600.14_SUGCT     | ENSG00000160789.18_LMNA | 0.13907  | -0.020585662 | 0.291810772 | 8.75E-02 | 2.88E-01 | 1.00E+00 |
| ENSG00000143127.11_ITGA10    | ENSG00000160789.18_LMNA | 0.13658  | -0.023126427 | 0.289483528 | 9.34E-02 | 2.99E-01 | 1.00E+00 |
| ENSG00000187118.11_CMC1      | ENSG00000160789.18_LMNA | -0.21466 | -0.361506601 | -0.05742166 | 7.91E-03 | 5.52E-02 | 1.00E+00 |
| ENSG00000206432.4_TMEM200C   | ENSG00000160789.18_LMNA | -0.18917 | -0.338187061 | -0.03090119 | 1.96E-02 | 1.06E-01 | 1.00E+00 |
| ENSG00000140876.10_NUDT7     | ENSG00000160789.18_LMNA | -0.19888 | -0.347095502 | -0.04098163 | 1.40E-02 | 8.37E-02 | 1.00E+00 |
| ENSG00000237440.7_ZNF737     | ENSG00000160789.18_LMNA | -0.31066 | -0.447718299 | -0.15934043 | 9.81E-05 | 1.85E-03 | 1.00E+00 |
| ENSG00000134256.11_CD101     | ENSG00000160789.18_LMNA | 0.06492  | -0.095269426 | 0.22182408  | 4.27E-01 | 6.98E-01 | 1.00E+00 |
| ENSG00000133816.12_MICAL2    | ENSG00000160789.18_LMNA | 0.24659  | 0.09096035   | 0.390462382 | 2.19E-03 | 2.10E-02 | 1.00E+00 |
| ENSG00000164604.11_GPR85     | ENSG00000160789.18_LMNA | -0.51751 | -0.625201992 | -0.39048068 | 8.67E-12 | 3.18E-09 | 4.45E-07 |
| ENSG00000123636.16_BAZ2B     | ENSG00000160789.18_LMNA | -0.2314  | -0.376725491 | -0.07496413 | 4.13E-03 | 3.40E-02 | 1.00E+00 |
| ENSG00000160963.12_COL26A1   | ENSG00000160789.18_LMNA | -0.22575 | -0.371598432 | -0.06903335 | 5.17E-03 | 4.03E-02 | 1.00E+00 |
| ENSG00000167604.12_NFKBID    | ENSG00000160789.18_LMNA | 0.05604  | -0.104086131 | 0.213340492 | 4.93E-01 | 7.48E-01 | 1.00E+00 |
| ENSG00000214881.4_TMEM14DF   | ENSG00000160789.18_LMNA | -0.12885 | -0.282260268 | 0.030986778 | 1.14E-01 | 3.37E-01 | 1.00E+00 |
| ENSG00000099251.13_HSD17B7   | ENSG00000160789.18_LMNA | -0.28894 | -0.428432698 | -0.13599461 | 3.06E-04 | 4.58E-03 | 1.00E+00 |
| ENSG00000187186.13_RP11-195  | ENSG00000160789.18_LMNA | 0.12287  | -0.037058326 | 0.276656407 | 1.32E-01 | 3.68E-01 | 1.00E+00 |
| ENSG00000281912.1_LINC01144  | ENSG00000160789.18_LMNA | 0.03059  | -0.129244373 | 0.188866714 | 7.08E-01 | 8.76E-01 | 1.00E+00 |
| ENSG00000235954.5_TTC28-AS1  | ENSG00000160789.18_LMNA | -0.28791 | -0.427514149 | -0.13489072 | 3.22E-04 | 4.75E-03 | 1.00E+00 |
| ENSG00000253626.3_EIF5AL1    | ENSG00000160789.18_LMNA | 0.15979  | 0.000605966  | 0.311078467 | 4.92E-02 | 1.99E-01 | 1.00E+00 |
| ENSG00000189283.8_FHIT       | ENSG00000160789.18_LMNA | -0.42101 | -0.543768998 | -0.28062319 | 6.63E-08 | 5.20E-06 | 3.40E-03 |
| ENSG00000107518.15_ATRNL1    | ENSG00000160789.18_LMNA | -0.44256 | -0.562157065 | -0.30484133 | 1.14E-08 | 1.21E-06 | 5.84E-04 |

|                              |                         |          |              |             |          |          |          |
|------------------------------|-------------------------|----------|--------------|-------------|----------|----------|----------|
| ENSG00000269973.1_RP11-95D1  | ENSG00000160789.18_LMNA | -0.17031 | -0.320812177 | -0.0114187  | 3.59E-02 | 1.61E-01 | 1.00E+00 |
| ENSG00000181135.14_ZNF707    | ENSG00000160789.18_LMNA | 0.13729  | -0.022398794 | 0.290150391 | 9.17E-02 | 2.95E-01 | 1.00E+00 |
| ENSG00000278041.1_RP5-984P4  | ENSG00000160789.18_LMNA | -0.23916 | -0.383749831 | -0.08312442 | 3.00E-03 | 2.68E-02 | 1.00E+00 |
| ENSG00000152402.9_GUCY1A2    | ENSG00000160789.18_LMNA | -0.31195 | -0.448861454 | -0.16073446 | 9.14E-05 | 1.76E-03 | 1.00E+00 |
| ENSG00000066279.15_ASPM      | ENSG00000160789.18_LMNA | 0.13103  | -0.028772575 | 0.284298607 | 1.08E-01 | 3.26E-01 | 1.00E+00 |
| ENSG00000130822.14_PNCK      | ENSG00000160789.18_LMNA | -0.13301 | -0.28615556  | 0.02675273  | 1.02E-01 | 3.16E-01 | 1.00E+00 |
| ENSG00000164061.4_BSN        | ENSG00000160789.18_LMNA | -0.22899 | -0.37453945  | -0.07243279 | 4.54E-03 | 3.65E-02 | 1.00E+00 |
| ENSG00000224908.1_TIMM8BP2   | ENSG00000160789.18_LMNA | -0.22421 | -0.370199601 | -0.06741894 | 5.49E-03 | 4.20E-02 | 1.00E+00 |
| ENSG00000095951.15_HIVEP1    | ENSG00000160789.18_LMNA | 0.0993   | -0.060863412 | 0.25447724  | 2.24E-01 | 4.99E-01 | 1.00E+00 |
| ENSG00000075407.16_ZNF37A    | ENSG00000160789.18_LMNA | 0.03825  | -0.12169019  | 0.196257125 | 6.40E-01 | 8.39E-01 | 1.00E+00 |
| ENSG00000162777.15_DENND2C   | ENSG00000160789.18_LMNA | 0.05677  | -0.103369138 | 0.214032189 | 4.87E-01 | 7.44E-01 | 1.00E+00 |
| ENSG00000152433.13_ZNF547    | ENSG00000160789.18_LMNA | -0.13651 | -0.289420523 | 0.023195157 | 9.35E-02 | 2.99E-01 | 1.00E+00 |
| ENSG00000237429.1_RP1-159A1  | ENSG00000160789.18_LMNA | -0.15017 | -0.302151429 | 0.009247254 | 6.48E-02 | 2.37E-01 | 1.00E+00 |
| ENSG00000230673.3_PABPC1P3   | ENSG00000160789.18_LMNA | 0.13531  | -0.024418836 | 0.288298311 | 9.65E-02 | 3.05E-01 | 1.00E+00 |
| ENSG00000135297.14_MTO1      | ENSG00000160789.18_LMNA | -0.03488 | -0.193010796 | 0.125013001 | 6.70E-01 | 8.55E-01 | 1.00E+00 |
| ENSG00000107938.16_EDRF1     | ENSG00000160789.18_LMNA | -0.15017 | -0.302147235 | 0.009251869 | 6.48E-02 | 2.37E-01 | 1.00E+00 |
| ENSG00000140451.11_PIF1      | ENSG00000160789.18_LMNA | -0.01135 | -0.1702468   | 0.148114599 | 8.90E-01 | 9.57E-01 | 1.00E+00 |
| ENSG00000263345.1_RP1-59D14  | ENSG00000160789.18_LMNA | 0.06782  | -0.092380722 | 0.22459324  | 4.06E-01 | 6.82E-01 | 1.00E+00 |
| ENSG00000127081.12_ZNF484    | ENSG00000160789.18_LMNA | -0.1414  | -0.293980375 | 0.01821336  | 8.23E-02 | 2.77E-01 | 1.00E+00 |
| ENSG00000281538.1_RP4-669P1  | ENSG00000160789.18_LMNA | -0.17179 | -0.322180465 | -0.01294448 | 3.43E-02 | 1.57E-01 | 1.00E+00 |
| ENSG00000198331.9_HYLS1      | ENSG00000160789.18_LMNA | -0.12357 | -0.277318883 | 0.036341766 | 1.29E-01 | 3.64E-01 | 1.00E+00 |
| ENSG00000111913.14_FAM65B    | ENSG00000160789.18_LMNA | 0.01975  | -0.139892346 | 0.178388031 | 8.09E-01 | 9.24E-01 | 1.00E+00 |
| ENSG00000204682.5_CASC10     | ENSG00000160789.18_LMNA | 0.06636  | -0.093833228 | 0.223201483 | 4.17E-01 | 6.89E-01 | 1.00E+00 |
| ENSG00000267680.4_ZNF224     | ENSG00000160789.18_LMNA | 0.00771  | -0.15167342  | 0.166709519 | 9.25E-01 | 9.71E-01 | 1.00E+00 |
| ENSG00000138756.16_BMP2K     | ENSG00000160789.18_LMNA | -0.00964 | -0.168584244 | 0.149788306 | 9.06E-01 | 9.64E-01 | 1.00E+00 |
| ENSG00000138207.11_RBP4      | ENSG00000160789.18_LMNA | -0.04695 | -0.204622739 | 0.113094517 | 5.66E-01 | 7.96E-01 | 1.00E+00 |
| ENSG00000236942.1_RP11-6B6.3 | ENSG00000160789.18_LMNA | -0.19123 | -0.340073797 | -0.03303094 | 1.83E-02 | 1.01E-01 | 1.00E+00 |
| ENSG00000280332.1_CTD-2013N  | ENSG00000160789.18_LMNA | 0.00211  | -0.157139966 | 0.161260051 | 9.79E-01 | 9.92E-01 | 1.00E+00 |
| ENSG00000196935.7_SRGP1      | ENSG00000160789.18_LMNA | -0.01292 | -0.17176299  | 0.146586647 | 8.75E-01 | 9.51E-01 | 1.00E+00 |
| ENSG00000185480.10_PARPBP    | ENSG00000160789.18_LMNA | -0.15173 | -0.303597588 | 0.00765515  | 6.20E-02 | 2.31E-01 | 1.00E+00 |
| ENSG00000164181.12_ELOVL7    | ENSG00000160789.18_LMNA | -0.29185 | -0.431027639 | -0.13911707 | 2.64E-04 | 4.06E-03 | 1.00E+00 |
| ENSG00000143194.11_MAEL      | ENSG00000160789.18_LMNA | 0.12575  | -0.034130865 | 0.279361034 | 1.23E-01 | 3.53E-01 | 1.00E+00 |
| ENSG00000242193.8_RP11-568K  | ENSG00000160789.18_LMNA | 0.19647  | 0.038472284  | 0.344883059 | 1.53E-02 | 8.90E-02 | 1.00E+00 |

|                              |                         |          |              |             |          |          |          |
|------------------------------|-------------------------|----------|--------------|-------------|----------|----------|----------|
| ENSG00000166523.6_CLEC4E     | ENSG00000160789.18_LMNA | -0.15034 | -0.302309837 | 0.009072937 | 6.45E-02 | 2.36E-01 | 1.00E+00 |
| ENSG00000228672.3_PROB1      | ENSG00000160789.18_LMNA | 0.37412  | 0.228527241  | 0.503338931 | 2.06E-06 | 8.16E-05 | 1.05E-01 |
| ENSG00000197258.5	EIF4BP6    | ENSG00000160789.18_LMNA | 0.05057  | -0.109510543 | 0.208097134 | 5.36E-01 | 7.77E-01 | 1.00E+00 |
| ENSG00000239881.1_RPS27P25   | ENSG00000160789.18_LMNA | 0.01283  | -0.14666735  | 0.171682946 | 8.75E-01 | 9.52E-01 | 1.00E+00 |
| ENSG00000216285.5_RP11-490H  | ENSG00000160789.18_LMNA | 0.05265  | -0.107455309 | 0.210085919 | 5.19E-01 | 7.66E-01 | 1.00E+00 |
| ENSG00000183831.6_ANKRD45    | ENSG00000160789.18_LMNA | 0.14711  | -0.012383697 | 0.299298298 | 7.05E-02 | 2.51E-01 | 1.00E+00 |
| ENSG00000149634.4_SPATA25    | ENSG00000160789.18_LMNA | -0.04898 | -0.20656569  | 0.111091305 | 5.49E-01 | 7.86E-01 | 1.00E+00 |
| ENSG00000054277.11_OPN3      | ENSG00000160789.18_LMNA | 0.15469  | -0.004625224 | 0.30634581  | 5.71E-02 | 2.18E-01 | 1.00E+00 |
| ENSG00000157741.13_UBN2      | ENSG00000160789.18_LMNA | 0.01632  | -0.143252529 | 0.175066217 | 8.42E-01 | 9.38E-01 | 1.00E+00 |
| ENSG00000198046.10_ZNF667    | ENSG00000160789.18_LMNA | -0.01851 | -0.177191245 | 0.141103801 | 8.21E-01 | 9.30E-01 | 1.00E+00 |
| ENSG00000152467.8_ZSCAN1     | ENSG00000160789.18_LMNA | -0.2498  | -0.393359308 | -0.09435359 | 1.91E-03 | 1.89E-02 | 1.00E+00 |
| ENSG00000148541.11_FAM13C    | ENSG00000160789.18_LMNA | -0.52271 | -0.629522616 | -0.39650236 | 4.93E-12 | 1.99E-09 | 2.53E-07 |
| ENSG00000165914.13_TTC7B     | ENSG00000160789.18_LMNA | 0.06419  | -0.095986923 | 0.221135481 | 4.32E-01 | 7.01E-01 | 1.00E+00 |
| ENSG00000177853.13_ZNF518A   | ENSG00000160789.18_LMNA | -0.21385 | -0.360770437 | -0.05657784 | 8.16E-03 | 5.65E-02 | 1.00E+00 |
| ENSG00000172197.10_MBOAT1    | ENSG00000160789.18_LMNA | 0.2285   | 0.071912497  | 0.374089714 | 4.63E-03 | 3.70E-02 | 1.00E+00 |
| ENSG00000135315.10_CEP162    | ENSG00000160789.18_LMNA | 0.03872  | -0.12123129  | 0.196704916 | 6.36E-01 | 8.37E-01 | 1.00E+00 |
| ENSG00000132849.17_PATJ      | ENSG00000160789.18_LMNA | -0.03126 | -0.189519622 | 0.12857848  | 7.02E-01 | 8.73E-01 | 1.00E+00 |
| ENSG00000261496.1_RP13-514E  | ENSG00000160789.18_LMNA | -0.42526 | -0.547397997 | -0.2853764  | 4.73E-08 | 3.91E-06 | 2.43E-03 |
| ENSG00000136378.13_ADAMTS7   | ENSG00000160789.18_LMNA | 0.06761  | -0.092591503 | 0.224391354 | 4.08E-01 | 6.83E-01 | 1.00E+00 |
| ENSG00000170323.7_FABP4      | ENSG00000160789.18_LMNA | -0.07541 | -0.231830537 | 0.084805712 | 3.56E-01 | 6.39E-01 | 1.00E+00 |
| ENSG00000228477.1_RP3-342P2  | ENSG00000160789.18_LMNA | 0.03351  | -0.126369496 | 0.191683518 | 6.82E-01 | 8.62E-01 | 1.00E+00 |
| ENSG00000144792.8_ZNF660     | ENSG00000160789.18_LMNA | -0.1961  | -0.344540995 | -0.03808466 | 1.55E-02 | 8.98E-02 | 1.00E+00 |
| ENSG00000158352.14_SHROOM    | ENSG00000160789.18_LMNA | -0.11488 | -0.26915821  | 0.04514624  | 1.59E-01 | 4.12E-01 | 1.00E+00 |
| ENSG00000183837.9_PNMA3      | ENSG00000160789.18_LMNA | -0.14178 | -0.294339448 | 0.017820401 | 8.14E-02 | 2.75E-01 | 1.00E+00 |
| ENSG00000261353.1_CTA-14H9.1 | ENSG00000160789.18_LMNA | -0.02212 | -0.18068153  | 0.137568069 | 7.87E-01 | 9.13E-01 | 1.00E+00 |
| ENSG00000185697.15_MYBL1     | ENSG00000160789.18_LMNA | -0.07237 | -0.228935732 | 0.087839995 | 3.76E-01 | 6.56E-01 | 1.00E+00 |
| ENSG00000156958.13_GALK2     | ENSG00000160789.18_LMNA | 0.22997  | 0.073458463  | 0.375425617 | 4.37E-03 | 3.54E-02 | 1.00E+00 |
| ENSG00000183666.15_GUSBP1    | ENSG00000160789.18_LMNA | -0.37149 | -0.501059948 | -0.22563679 | 2.45E-06 | 9.33E-05 | 1.26E-01 |
| ENSG00000000460.15_C1orf112  | ENSG00000160789.18_LMNA | -0.13631 | -0.289229759 | 0.023403235 | 9.40E-02 | 3.00E-01 | 1.00E+00 |
| ENSG00000237846.1_RP11-216M  | ENSG00000160789.18_LMNA | -0.02478 | -0.183260102 | 0.134950703 | 7.62E-01 | 9.01E-01 | 1.00E+00 |
| ENSG00000172986.11_GXYLT2    | ENSG00000160789.18_LMNA | 0.27405  | 0.120090438  | 0.415140149 | 6.34E-04 | 8.13E-03 | 1.00E+00 |
| ENSG00000145331.12_TRMT10A   | ENSG00000160789.18_LMNA | -0.18046 | -0.330174324 | -0.02188739 | 2.61E-02 | 1.30E-01 | 1.00E+00 |
| ENSG00000135637.12_CCDC142   | ENSG00000160789.18_LMNA | 0.03613  | -0.123780358 | 0.19421588  | 6.59E-01 | 8.49E-01 | 1.00E+00 |

|                              |                         |          |              |             |          |          |          |
|------------------------------|-------------------------|----------|--------------|-------------|----------|----------|----------|
| ENSG00000108474.15_PIGL      | ENSG00000160789.18_LMNA | -0.05763 | -0.214857306 | 0.102513412 | 4.81E-01 | 7.38E-01 | 1.00E+00 |
| ENSG00000189320.7_FAM180A    | ENSG00000160789.18_LMNA | -0.05006 | -0.20760237  | 0.110021415 | 5.40E-01 | 7.80E-01 | 1.00E+00 |
| ENSG00000170325.13_PRDM10    | ENSG00000160789.18_LMNA | 0.01121  | -0.148254345 | 0.170108055 | 8.91E-01 | 9.57E-01 | 1.00E+00 |
| ENSG00000267811.1_RP11-727F  | ENSG00000160789.18_LMNA | -0.01545 | -0.174222805 | 0.144104515 | 8.50E-01 | 9.41E-01 | 1.00E+00 |
| ENSG00000224975.1_INE1       | ENSG00000160789.18_LMNA | 0.02761  | -0.132171197 | 0.185993625 | 7.36E-01 | 8.89E-01 | 1.00E+00 |
| ENSG00000204052.4_LRRC73     | ENSG00000160789.18_LMNA | 0.12831  | -0.031530211 | 0.281759564 | 1.15E-01 | 3.39E-01 | 1.00E+00 |
| ENSG00000251474.5_RPL32P3    | ENSG00000160789.18_LMNA | -0.15324 | -0.305000516 | 0.00610913  | 5.95E-02 | 2.24E-01 | 1.00E+00 |
| ENSG00000234883.3_MIR155HG   | ENSG00000160789.18_LMNA | 0.36365  | 0.217015241  | 0.494239494 | 4.12E-06 | 1.42E-04 | 2.12E-01 |
| ENSG00000187741.13_FANCA     | ENSG00000160789.18_LMNA | 0.17358  | 0.014783258  | 0.323827712 | 3.25E-02 | 1.51E-01 | 1.00E+00 |
| ENSG00000134061.5_CD180      | ENSG00000160789.18_LMNA | -0.06363 | -0.220593275 | 0.096551653 | 4.36E-01 | 7.04E-01 | 1.00E+00 |
| ENSG00000116191.16_RALGPS2   | ENSG00000160789.18_LMNA | -0.31098 | -0.448002654 | -0.15968708 | 9.64E-05 | 1.83E-03 | 1.00E+00 |
| ENSG00000186301.8_MST1P2     | ENSG00000160789.18_LMNA | 0.08431  | -0.075910707 | 0.240284467 | 3.02E-01 | 5.88E-01 | 1.00E+00 |
| ENSG00000239445.4_ST3GAL6-A  | ENSG00000160789.18_LMNA | -0.29892 | -0.437305505 | -0.14669523 | 1.83E-04 | 3.05E-03 | 1.00E+00 |
| ENSG00000146700.8_SSC4D      | ENSG00000160789.18_LMNA | 0.07458  | -0.085638919 | 0.231036188 | 3.61E-01 | 6.43E-01 | 1.00E+00 |
| ENSG00000271344.1_RP11-274B  | ENSG00000160789.18_LMNA | -0.11642 | -0.270606484 | 0.043587265 | 1.53E-01 | 4.03E-01 | 1.00E+00 |
| ENSG00000175170.13_FAM182B   | ENSG00000160789.18_LMNA | -0.12024 | -0.274196623 | 0.039716104 | 1.40E-01 | 3.82E-01 | 1.00E+00 |
| ENSG00000272031.2_ANKRD34A   | ENSG00000160789.18_LMNA | -0.03024 | -0.188534459 | 0.129583126 | 7.11E-01 | 8.77E-01 | 1.00E+00 |
| ENSG00000242060.1_RPS3AP49   | ENSG00000160789.18_LMNA | -0.10406 | -0.258970988 | 0.056069039 | 2.02E-01 | 4.73E-01 | 1.00E+00 |
| ENSG00000130475.13_FCHO1     | ENSG00000160789.18_LMNA | -0.20855 | -0.35593172  | -0.05104228 | 9.93E-03 | 6.53E-02 | 1.00E+00 |
| ENSG00000181007.8_ZFP82      | ENSG00000160789.18_LMNA | -0.15976 | -0.311051557 | -0.00057617 | 4.93E-02 | 1.99E-01 | 1.00E+00 |
| ENSG00000230551.4_CTB-89H12  | ENSG00000160789.18_LMNA | 0.07852  | -0.081703489 | 0.234784373 | 3.36E-01 | 6.22E-01 | 1.00E+00 |
| ENSG00000256210.3_AC005255.1 | ENSG00000160789.18_LMNA | -0.09712 | -0.252415123 | 0.063058621 | 2.34E-01 | 5.12E-01 | 1.00E+00 |
| ENSG00000076258.8_FMO4       | ENSG00000160789.18_LMNA | 0.03225  | -0.127610233 | 0.190468487 | 6.93E-01 | 8.68E-01 | 1.00E+00 |
| ENSG00000177508.11_IRX3      | ENSG00000160789.18_LMNA | 0.25512  | 0.099984163  | 0.398153263 | 1.51E-03 | 1.58E-02 | 1.00E+00 |
| ENSG00000172728.14_FUT10     | ENSG00000160789.18_LMNA | -0.20505 | -0.352737096 | -0.04739782 | 1.13E-02 | 7.13E-02 | 1.00E+00 |
| ENSG00000115232.12_ITGA4     | ENSG00000160789.18_LMNA | 0.21301  | 0.055694615  | 0.359999495 | 8.42E-03 | 5.79E-02 | 1.00E+00 |
| ENSG00000136689.17_IL1RN     | ENSG00000160789.18_LMNA | 0.09254  | -0.067659347 | 0.248084016 | 2.57E-01 | 5.39E-01 | 1.00E+00 |
| ENSG00000149575.5_SCN2B      | ENSG00000160789.18_LMNA | -0.18939 | -0.338390856 | -0.0311311  | 1.94E-02 | 1.06E-01 | 1.00E+00 |
| ENSG00000269335.4_IKBKG      | ENSG00000160789.18_LMNA | 0.21324  | 0.055941637  | 0.360215155 | 8.35E-03 | 5.75E-02 | 1.00E+00 |
| ENSG00000169609.12_C15orf40  | ENSG00000160789.18_LMNA | -0.12569 | -0.279298252 | 0.03419888  | 1.23E-01 | 3.53E-01 | 1.00E+00 |
| ENSG00000149292.15_TTC12     | ENSG00000160789.18_LMNA | 0.28596  | 0.13280602   | 0.425777814 | 3.55E-04 | 5.13E-03 | 1.00E+00 |
| ENSG00000196584.2_XRCC2      | ENSG00000160789.18_LMNA | 0.07608  | -0.084138088 | 0.232466721 | 3.52E-01 | 6.35E-01 | 1.00E+00 |
| ENSG00000256663.1_RP11-424C  | ENSG00000160789.18_LMNA | 0.14411  | -0.015440978 | 0.296511804 | 7.65E-02 | 2.65E-01 | 1.00E+00 |

|                             |                         |          |              |             |          |          |          |
|-----------------------------|-------------------------|----------|--------------|-------------|----------|----------|----------|
| ENSG00000273027.1_LL21NC02- | ENSG00000160789.18_LMNA | 0.15522  | -0.004079465 | 0.306840277 | 5.62E-02 | 2.17E-01 | 1.00E+00 |
| ENSG00000104205.11_SGK3     | ENSG00000160789.18_LMNA | -0.40319 | -0.52846543  | -0.26071979 | 2.60E-07 | 1.58E-05 | 1.34E-02 |
| ENSG00000183691.4_NOG       | ENSG00000160789.18_LMNA | -0.41064 | -0.534871904 | -0.26902427 | 1.48E-07 | 9.95E-06 | 7.61E-03 |
| ENSG00000228247.1_UBBP2     | ENSG00000160789.18_LMNA | -0.04532 | -0.203057547 | 0.114706378 | 5.79E-01 | 8.04E-01 | 1.00E+00 |
| ENSG00000188501.10_LCTL     | ENSG00000160789.18_LMNA | 0.31431  | 0.163274737  | 0.450942162 | 8.03E-05 | 1.58E-03 | 1.00E+00 |
| ENSG00000183486.11_MX2      | ENSG00000160789.18_LMNA | -0.03942 | -0.197377548 | 0.120541715 | 6.30E-01 | 8.33E-01 | 1.00E+00 |
| ENSG00000242951.1_RP11-507E | ENSG00000160789.18_LMNA | -0.18265 | -0.332188695 | -0.02414872 | 2.43E-02 | 1.24E-01 | 1.00E+00 |
| ENSG00000260329.1_RP11-412D | ENSG00000160789.18_LMNA | -0.30285 | -0.440796334 | -0.1509239  | 1.49E-04 | 2.58E-03 | 1.00E+00 |
| ENSG00000197381.14_ADARB1   | ENSG00000160789.18_LMNA | 0.17328  | 0.014474358  | 0.323551117 | 3.28E-02 | 1.52E-01 | 1.00E+00 |
| ENSG00000277200.1_RP11-74E2 | ENSG00000160789.18_LMNA | -0.30928 | -0.44649834  | -0.15785401 | 1.06E-04 | 1.97E-03 | 1.00E+00 |
| ENSG00000107105.13_ELAVL2   | ENSG00000160789.18_LMNA | -0.34167 | -0.475035179 | -0.19296972 | 1.65E-05 | 4.40E-04 | 8.45E-01 |
| ENSG00000206077.9_ZDHHC11B  | ENSG00000160789.18_LMNA | -0.11777 | -0.271870021 | 0.042225899 | 1.48E-01 | 3.95E-01 | 1.00E+00 |
| ENSG00000270195.1_RP11-572O | ENSG00000160789.18_LMNA | -0.06749 | -0.224283637 | 0.092703955 | 4.09E-01 | 6.83E-01 | 1.00E+00 |
| ENSG00000188206.6_          | ENSG00000160789.18_LMNA | -0.03284 | -0.19103794  | 0.127028857 | 6.88E-01 | 8.65E-01 | 1.00E+00 |
| ENSG00000205105.6_COX17P1   | ENSG00000160789.18_LMNA | -0.06945 | -0.226151984 | 0.090752336 | 3.95E-01 | 6.72E-01 | 1.00E+00 |
| ENSG00000253540.4_FAM86HP   | ENSG00000160789.18_LMNA | 0.12647  | -0.033408138 | 0.280027983 | 1.21E-01 | 3.49E-01 | 1.00E+00 |
| ENSG00000091844.6_RGS17     | ENSG00000160789.18_LMNA | 0.16867  | 0.009730739  | 0.319296958 | 3.78E-02 | 1.67E-01 | 1.00E+00 |
| ENSG00000155330.8_C16orf87  | ENSG00000160789.18_LMNA | -0.23172 | -0.377012969 | -0.07529731 | 4.07E-03 | 3.36E-02 | 1.00E+00 |
| ENSG00000136169.15_SETDB2   | ENSG00000160789.18_LMNA | -0.22532 | -0.371204365 | -0.06857839 | 5.26E-03 | 4.07E-02 | 1.00E+00 |
| ENSG00000277149.3_TYW1B     | ENSG00000160789.18_LMNA | 0.16281  | 0.003704187  | 0.313874185 | 4.51E-02 | 1.88E-01 | 1.00E+00 |
| ENSG00000118898.14_PPL      | ENSG00000160789.18_LMNA | 0.37767  | 0.232447822  | 0.506424027 | 1.61E-06 | 6.78E-05 | 8.28E-02 |
| ENSG00000260917.1_RP11-57H1 | ENSG00000160789.18_LMNA | -0.07655 | -0.232911012 | 0.083671671 | 3.49E-01 | 6.33E-01 | 1.00E+00 |
| ENSG00000113356.9_POLR3G    | ENSG00000160789.18_LMNA | -0.16588 | -0.316712493 | -0.00685571 | 4.11E-02 | 1.77E-01 | 1.00E+00 |
| ENSG00000154479.11_CCDC173  | ENSG00000160789.18_LMNA | -0.10013 | -0.25525784  | 0.060031633 | 2.20E-01 | 4.95E-01 | 1.00E+00 |
| ENSG00000259746.1_HSPE1P3   | ENSG00000160789.18_LMNA | -0.12155 | -0.275416703 | 0.038398372 | 1.36E-01 | 3.75E-01 | 1.00E+00 |
| ENSG00000173218.13_VANGL1   | ENSG00000160789.18_LMNA | -0.07326 | -0.229782126 | 0.086953428 | 3.70E-01 | 6.50E-01 | 1.00E+00 |
| ENSG00000163945.14_UVSSA    | ENSG00000160789.18_LMNA | 0.12539  | -0.034498691 | 0.279021479 | 1.24E-01 | 3.55E-01 | 1.00E+00 |
| ENSG00000184005.10_ST6GALN  | ENSG00000160789.18_LMNA | -0.51354 | -0.621897224 | -0.38588832 | 1.33E-11 | 4.32E-09 | 6.81E-07 |
| ENSG00000254139.1_CTD-2339F | ENSG00000160789.18_LMNA | -0.31979 | -0.455789648 | -0.16920774 | 5.92E-05 | 1.23E-03 | 1.00E+00 |
| ENSG00000163666.7_HESX1     | ENSG00000160789.18_LMNA | -0.07756 | -0.233873168 | 0.082661123 | 3.42E-01 | 6.27E-01 | 1.00E+00 |
| ENSG00000249471.6_ZNF324B   | ENSG00000160789.18_LMNA | 0.28328  | 0.129937797  | 0.423385354 | 4.06E-04 | 5.72E-03 | 1.00E+00 |
| ENSG00000197417.7_SHPK      | ENSG00000160789.18_LMNA | 0.16445  | 0.005388815  | 0.315392077 | 4.29E-02 | 1.82E-01 | 1.00E+00 |
| ENSG00000276649.1_RP5-858L1 | ENSG00000160789.18_LMNA | -0.14159 | -0.294157354 | 0.018019692 | 8.19E-02 | 2.76E-01 | 1.00E+00 |

|                              |                         |          |              |             |          |          |          |
|------------------------------|-------------------------|----------|--------------|-------------|----------|----------|----------|
| ENSG00000211451.10_GNRHR2    | ENSG00000160789.18_LMNA | -0.3034  | -0.441281898 | -0.15151294 | 1.45E-04 | 2.53E-03 | 1.00E+00 |
| ENSG00000186710.10_CFAP73    | ENSG00000160789.18_LMNA | 0.09643  | -0.063749538 | 0.251765502 | 2.37E-01 | 5.16E-01 | 1.00E+00 |
| ENSG00000260077.1_RP11-254F  | ENSG00000160789.18_LMNA | -0.11277 | -0.267169484 | 0.047284483 | 1.67E-01 | 4.24E-01 | 1.00E+00 |
| ENSG00000242477.1_CTD-2161E  | ENSG00000160789.18_LMNA | -0.1408  | -0.293425669 | 0.018820226 | 8.36E-02 | 2.80E-01 | 1.00E+00 |
| ENSG00000148824.17_MTG1      | ENSG00000160789.18_LMNA | 0.0175   | -0.14209709  | 0.176209279 | 8.31E-01 | 9.34E-01 | 1.00E+00 |
| ENSG00000152784.14_PRDM8     | ENSG00000160789.18_LMNA | -0.16464 | -0.315571797 | -0.00558839 | 4.27E-02 | 1.81E-01 | 1.00E+00 |
| ENSG00000271551.1_RP11-230C  | ENSG00000160789.18_LMNA | -0.31336 | -0.450101864 | -0.16224838 | 8.46E-05 | 1.65E-03 | 1.00E+00 |
| ENSG00000274272.1_RP11-44M6  | ENSG00000160789.18_LMNA | 0.15726  | -0.001989975 | 0.308731843 | 5.30E-02 | 2.09E-01 | 1.00E+00 |
| ENSG00000142959.4_BEST4      | ENSG00000160789.18_LMNA | 0.07632  | -0.083899256 | 0.232694239 | 3.50E-01 | 6.34E-01 | 1.00E+00 |
| ENSG00000152104.10_PTPN14    | ENSG00000160789.18_LMNA | 0.43639  | 0.297878993  | 0.55689671  | 1.91E-08 | 1.85E-06 | 9.80E-04 |
| ENSG00000238000.1_RP11-274E  | ENSG00000160789.18_LMNA | 0.0965   | -0.06368257  | 0.25182848  | 2.37E-01 | 5.15E-01 | 1.00E+00 |
| ENSG00000248280.1_           | ENSG00000160789.18_LMNA | -0.19662 | -0.345016736 | -0.03862379 | 1.52E-02 | 8.87E-02 | 1.00E+00 |
| ENSG00000204291.9_COL15A1    | ENSG00000160789.18_LMNA | 0.29274  | 0.14006651   | 0.431815723 | 2.52E-04 | 3.93E-03 | 1.00E+00 |
| ENSG00000135953.9_MFSD9      | ENSG00000160789.18_LMNA | 0.01329  | -0.146219009 | 0.172127573 | 8.71E-01 | 9.50E-01 | 1.00E+00 |
| ENSG00000168781.20_PPIP5K1   | ENSG00000160789.18_LMNA | -0.04911 | -0.206691604 | 0.110961397 | 5.48E-01 | 7.85E-01 | 1.00E+00 |
| ENSG00000253200.1_RP11-582J  | ENSG00000160789.18_LMNA | 0.16263  | 0.003523323  | 0.313711129 | 4.53E-02 | 1.88E-01 | 1.00E+00 |
| ENSG00000121577.12_POPDC2    | ENSG00000160789.18_LMNA | 0.15435  | -0.004969124 | 0.306034145 | 5.76E-02 | 2.20E-01 | 1.00E+00 |
| ENSG00000178694.8_NSUN3      | ENSG00000160789.18_LMNA | -0.30089 | -0.439056825 | -0.14881539 | 1.65E-04 | 2.81E-03 | 1.00E+00 |
| ENSG00000197182.11_MIRLET7E  | ENSG00000160789.18_LMNA | 0.04191  | -0.118077227 | 0.199779037 | 6.08E-01 | 8.21E-01 | 1.00E+00 |
| ENSG00000260230.2_FRRS1L     | ENSG00000160789.18_LMNA | -0.37572 | -0.504726802 | -0.23028986 | 1.84E-06 | 7.54E-05 | 9.46E-02 |
| ENSG00000197782.13_ZNF780A   | ENSG00000160789.18_LMNA | -0.00502 | -0.164089058 | 0.154304527 | 9.51E-01 | 9.80E-01 | 1.00E+00 |
| ENSG00000102385.11_DRP2      | ENSG00000160789.18_LMNA | -0.34782 | -0.480417119 | -0.19967439 | 1.13E-05 | 3.22E-04 | 5.80E-01 |
| ENSG00000164220.6_F2RL2      | ENSG00000160789.18_LMNA | 0.14515  | -0.014384743 | 0.297475088 | 7.44E-02 | 2.60E-01 | 1.00E+00 |
| ENSG00000135604.9_STX11      | ENSG00000160789.18_LMNA | 0.12922  | -0.030614639 | 0.282603047 | 1.13E-01 | 3.35E-01 | 1.00E+00 |
| ENSG00000102802.8_MEDAG      | ENSG00000160789.18_LMNA | 0.31317  | 0.162047928  | 0.44993769  | 8.55E-05 | 1.66E-03 | 1.00E+00 |
| ENSG00000116205.9_TCEANC2    | ENSG00000160789.18_LMNA | -0.04197 | -0.199831311 | 0.118023538 | 6.08E-01 | 8.21E-01 | 1.00E+00 |
| ENSG00000181908.5_AP003774.4 | ENSG00000160789.18_LMNA | -0.13148 | -0.2847167   | 0.02831803  | 1.06E-01 | 3.24E-01 | 1.00E+00 |
| ENSG00000186230.6_ZNF749     | ENSG00000160789.18_LMNA | -0.01982 | -0.178457368 | 0.139822129 | 8.09E-01 | 9.24E-01 | 1.00E+00 |
| ENSG00000278948.1_RP5-1039K  | ENSG00000160789.18_LMNA | 0.03431  | -0.125576487 | 0.192459588 | 6.75E-01 | 8.58E-01 | 1.00E+00 |
| ENSG00000165240.16_ATP7A     | ENSG00000160789.18_LMNA | 0.01487  | -0.144676425 | 0.17365639  | 8.56E-01 | 9.43E-01 | 1.00E+00 |
| ENSG00000100678.17_SLC8A3    | ENSG00000160789.18_LMNA | -0.3283  | -0.463290812 | -0.17842979 | 3.64E-05 | 8.35E-04 | 1.00E+00 |
| ENSG00000184828.8_ZBTB7C     | ENSG00000160789.18_LMNA | -0.02008 | -0.178711349 | 0.139564901 | 8.06E-01 | 9.23E-01 | 1.00E+00 |
| ENSG00000220008.3_LINGO3     | ENSG00000160789.18_LMNA | -0.00319 | -0.162309829 | 0.156088414 | 9.69E-01 | 9.88E-01 | 1.00E+00 |



|                             |                         |          |              |             |          |          |          |
|-----------------------------|-------------------------|----------|--------------|-------------|----------|----------|----------|
| ENSG00000160218.11_TRAPPC1  | ENSG00000160789.18_LMNA | 0.14056  | -0.019064178 | 0.293202625 | 8.41E-02 | 2.81E-01 | 1.00E+00 |
| ENSG00000154175.15_ABI3BP   | ENSG00000160789.18_LMNA | -0.17346 | -0.323721001 | -0.01466408 | 3.26E-02 | 1.51E-01 | 1.00E+00 |
| ENSG00000066923.16_STAG3    | ENSG00000160789.18_LMNA | -0.19362 | -0.342272923 | -0.03551684 | 1.68E-02 | 9.54E-02 | 1.00E+00 |
| ENSG00000273033.2_RP11-67L2 | ENSG00000160789.18_LMNA | 0.06812  | -0.092077724 | 0.224883402 | 4.04E-01 | 6.80E-01 | 1.00E+00 |
| ENSG00000069712.10_KIAA1107 | ENSG00000160789.18_LMNA | -0.2881  | -0.4276845   | -0.13509539 | 3.19E-04 | 4.72E-03 | 1.00E+00 |
| ENSG00000226648.1_PLCG1-AS  | ENSG00000160789.18_LMNA | 0.05667  | -0.10346038  | 0.213944183 | 4.88E-01 | 7.44E-01 | 1.00E+00 |
| ENSG00000139517.7_LNX2      | ENSG00000160789.18_LMNA | 0.12967  | -0.030153227 | 0.283027946 | 1.11E-01 | 3.33E-01 | 1.00E+00 |
| ENSG00000272899.2_RP11-309L | ENSG00000160789.18_LMNA | 0.02092  | -0.138738138 | 0.179527388 | 7.98E-01 | 9.19E-01 | 1.00E+00 |
| ENSG00000148634.14_HERC4    | ENSG00000160789.18_LMNA | -0.06355 | -0.220518554 | 0.096629461 | 4.37E-01 | 7.05E-01 | 1.00E+00 |
| ENSG00000128394.15_APOBEC3  | ENSG00000160789.18_LMNA | 0.241    | 0.085066107  | 0.385416121 | 2.78E-03 | 2.52E-02 | 1.00E+00 |
| ENSG00000176055.9_MBLAC2    | ENSG00000160789.18_LMNA | -0.45728 | -0.574650974 | -0.3214886  | 3.17E-09 | 4.04E-07 | 1.63E-04 |
| ENSG00000168517.9_HEXIM2    | ENSG00000160789.18_LMNA | -0.06882 | -0.225547534 | 0.091383993 | 4.00E-01 | 6.76E-01 | 1.00E+00 |
| ENSG00000168477.16_TNXB     | ENSG00000160789.18_LMNA | 0.26102  | 0.10623694   | 0.403457953 | 1.16E-03 | 1.30E-02 | 1.00E+00 |
| ENSG00000128833.11_MYO5C    | ENSG00000160789.18_LMNA | 0.16082  | 0.001658591  | 0.312028919 | 4.78E-02 | 1.95E-01 | 1.00E+00 |
| ENSG00000254505.7_CHMP4A    | ENSG00000160789.18_LMNA | 0.11811  | -0.041878874 | 0.272191935 | 1.47E-01 | 3.93E-01 | 1.00E+00 |
| ENSG00000089847.11_ANKRD24  | ENSG00000160789.18_LMNA | 0.19745  | 0.039487077  | 0.345778195 | 1.48E-02 | 8.68E-02 | 1.00E+00 |
| ENSG00000101670.10_LIPG     | ENSG00000160789.18_LMNA | 0.03418  | -0.125707422 | 0.192331478 | 6.76E-01 | 8.58E-01 | 1.00E+00 |
| ENSG00000138722.8_MMRN1     | ENSG00000160789.18_LMNA | -0.05513 | -0.212467035 | 0.104991061 | 5.00E-01 | 7.53E-01 | 1.00E+00 |
| ENSG00000258810.1_RP11-219E | ENSG00000160789.18_LMNA | -0.05418 | -0.211560106 | 0.105930114 | 5.07E-01 | 7.57E-01 | 1.00E+00 |
| ENSG00000121406.7_ZNF549    | ENSG00000160789.18_LMNA | 0.01621  | -0.143356175 | 0.174963638 | 8.43E-01 | 9.39E-01 | 1.00E+00 |
| ENSG00000240914.1_RPL15P2   | ENSG00000160789.18_LMNA | -0.18039 | -0.330112633 | -0.02181818 | 2.62E-02 | 1.31E-01 | 1.00E+00 |
| ENSG00000116039.10_ATP6V1B  | ENSG00000160789.18_LMNA | -0.17999 | -0.329740613 | -0.02140092 | 2.65E-02 | 1.32E-01 | 1.00E+00 |
| ENSG00000187554.10_TLR5     | ENSG00000160789.18_LMNA | -0.0739  | -0.2303934   | 0.086312828 | 3.66E-01 | 6.47E-01 | 1.00E+00 |
| ENSG00000120519.13_SLC10A7  | ENSG00000160789.18_LMNA | -0.00319 | -0.16230346  | 0.156094796 | 9.69E-01 | 9.88E-01 | 1.00E+00 |
| ENSG00000135338.12_LCA5     | ENSG00000160789.18_LMNA | -0.14919 | -0.301235862 | 0.010254404 | 6.66E-02 | 2.41E-01 | 1.00E+00 |
| ENSG00000266563.1	EIF1P5    | ENSG00000160789.18_LMNA | -0.00059 | -0.159773115 | 0.158628181 | 9.94E-01 | 9.98E-01 | 1.00E+00 |
| ENSG00000172183.13_ISG20    | ENSG00000160789.18_LMNA | 0.43027  | 0.291005818  | 0.551683259 | 3.16E-08 | 2.80E-06 | 1.62E-03 |
| ENSG00000261971.5_MMP25-AS  | ENSG00000160789.18_LMNA | 0.01768  | -0.141924435 | 0.176380012 | 8.29E-01 | 9.33E-01 | 1.00E+00 |
| ENSG00000019991.14_HGF      | ENSG00000160789.18_LMNA | 0.10511  | -0.055009594 | 0.259962165 | 1.97E-01 | 4.67E-01 | 1.00E+00 |
| ENSG00000151136.13_BTBD11   | ENSG00000160789.18_LMNA | 0.09604  | -0.064140662 | 0.25139763  | 2.39E-01 | 5.18E-01 | 1.00E+00 |
| ENSG00000197077.11_KIAA1671 | ENSG00000160789.18_LMNA | 0.14877  | -0.010685795 | 0.300843522 | 6.74E-02 | 2.43E-01 | 1.00E+00 |
| ENSG00000269481.1_CTD-2521M | ENSG00000160789.18_LMNA | -0.20516 | -0.352836597 | -0.04751121 | 1.12E-02 | 7.11E-02 | 1.00E+00 |
| ENSG00000258733.4_CTD-2341M | ENSG00000160789.18_LMNA | 0.02071  | -0.138946689 | 0.179321583 | 8.00E-01 | 9.20E-01 | 1.00E+00 |

|                             |                         |          |              |             |          |          |          |
|-----------------------------|-------------------------|----------|--------------|-------------|----------|----------|----------|
| ENSG00000255150.1_EID3      | ENSG00000160789.18_LMNA | 0.18166  | 0.023129341  | 0.331280992 | 2.51E-02 | 1.27E-01 | 1.00E+00 |
| ENSG00000240898.1_RP11-48B1 | ENSG00000160789.18_LMNA | -0.18303 | -0.332536802 | -0.02453982 | 2.40E-02 | 1.23E-01 | 1.00E+00 |
| ENSG00000229180.5_GS1-124K5 | ENSG00000160789.18_LMNA | 0.09209  | -0.068112238 | 0.247656983 | 2.59E-01 | 5.42E-01 | 1.00E+00 |
| ENSG00000117242.7_PINK1-AS  | ENSG00000160789.18_LMNA | 0.15826  | -0.000969229 | 0.309655007 | 5.15E-02 | 2.05E-01 | 1.00E+00 |
| ENSG00000145861.7_C1QTNF2   | ENSG00000160789.18_LMNA | 0.06202  | -0.098146119 | 0.219061342 | 4.48E-01 | 7.14E-01 | 1.00E+00 |
| ENSG00000182218.8_HHIPL1    | ENSG00000160789.18_LMNA | 0.11204  | -0.048020815 | 0.266484019 | 1.69E-01 | 4.28E-01 | 1.00E+00 |
| ENSG00000187098.13_MITF     | ENSG00000160789.18_LMNA | -0.04094 | -0.198848836 | 0.119032294 | 6.16E-01 | 8.26E-01 | 1.00E+00 |
| ENSG00000257086.1_RP11-783K | ENSG00000160789.18_LMNA | 0.08133  | -0.078889934 | 0.237458303 | 3.19E-01 | 6.06E-01 | 1.00E+00 |
| ENSG00000165929.11_TC2N     | ENSG00000160789.18_LMNA | 0.11921  | -0.040765759 | 0.273224031 | 1.44E-01 | 3.87E-01 | 1.00E+00 |
| ENSG00000270006.2_RP11-178L | ENSG00000160789.18_LMNA | -0.07549 | -0.231899381 | 0.08473348  | 3.55E-01 | 6.39E-01 | 1.00E+00 |
| ENSG00000167701.12_GPT      | ENSG00000160789.18_LMNA | -0.05931 | -0.216465834 | 0.100843863 | 4.68E-01 | 7.29E-01 | 1.00E+00 |
| ENSG00000272660.1_RP11-145M | ENSG00000160789.18_LMNA | -0.18441 | -0.333811292 | -0.02597254 | 2.29E-02 | 1.19E-01 | 1.00E+00 |
| ENSG00000233654.1_AC093388. | ENSG00000160789.18_LMNA | 0.28816  | 0.135156908  | 0.4277357   | 3.18E-04 | 4.72E-03 | 1.00E+00 |
| ENSG00000160221.15_C21orf33 | ENSG00000160789.18_LMNA | -0.00558 | -0.164632545 | 0.153759203 | 9.46E-01 | 9.78E-01 | 1.00E+00 |
| ENSG00000249210.1_GAPDHP3E  | ENSG00000160789.18_LMNA | 0.21381  | 0.056535244  | 0.360733266 | 8.17E-03 | 5.65E-02 | 1.00E+00 |
| ENSG00000100884.8_CPNE6     | ENSG00000160789.18_LMNA | -0.26019 | -0.402709236 | -0.10535298 | 1.21E-03 | 1.33E-02 | 1.00E+00 |
| ENSG00000047648.20_ARHGAP6  | ENSG00000160789.18_LMNA | 0.01717  | -0.14242081  | 0.175889113 | 8.34E-01 | 9.35E-01 | 1.00E+00 |
| ENSG00000234335.1_RPS4XP11  | ENSG00000160789.18_LMNA | 0.03298  | -0.126891795 | 0.19117216  | 6.87E-01 | 8.64E-01 | 1.00E+00 |
| ENSG00000278192.1_RP5-1056H | ENSG00000160789.18_LMNA | -0.50261 | -0.612777834 | -0.37327624 | 4.17E-11 | 1.11E-08 | 2.14E-06 |
| ENSG00000188512.6_RP1-273G1 | ENSG00000160789.18_LMNA | -0.09795 | -0.253202888 | 0.062220373 | 2.30E-01 | 5.07E-01 | 1.00E+00 |
| ENSG00000250486.3_FAM218A   | ENSG00000160789.18_LMNA | -0.14066 | -0.29329405  | 0.018964187 | 8.39E-02 | 2.80E-01 | 1.00E+00 |
| ENSG00000260793.2_RP5-882C2 | ENSG00000160789.18_LMNA | -0.06299 | -0.219985036 | 0.097184915 | 4.41E-01 | 7.08E-01 | 1.00E+00 |
| ENSG00000053702.13_NRIP2    | ENSG00000160789.18_LMNA | -0.15702 | -0.308510522 | 0.002234594 | 5.34E-02 | 2.10E-01 | 1.00E+00 |
| ENSG00000239282.6_GATSL3    | ENSG00000160789.18_LMNA | -0.13529 | -0.288277777 | 0.024441219 | 9.66E-02 | 3.05E-01 | 1.00E+00 |
| ENSG00000254343.2_RP11-760H | ENSG00000160789.18_LMNA | -0.34128 | -0.474690426 | -0.19254113 | 1.69E-05 | 4.48E-04 | 8.65E-01 |
| ENSG00000167550.9_RHEBL1    | ENSG00000160789.18_LMNA | 0.01928  | -0.140347013 | 0.177938979 | 8.14E-01 | 9.27E-01 | 1.00E+00 |
| ENSG00000151532.12_VTI1A    | ENSG00000160789.18_LMNA | -0.14202 | -0.294559826 | 0.017579179 | 8.09E-02 | 2.74E-01 | 1.00E+00 |
| ENSG00000088179.7_PTPN4     | ENSG00000160789.18_LMNA | -0.39129 | -0.518210343 | -0.24750847 | 6.21E-07 | 3.12E-05 | 3.19E-02 |
| ENSG00000115137.10_DNAJC27  | ENSG00000160789.18_LMNA | -0.20616 | -0.353748057 | -0.04855025 | 1.08E-02 | 6.94E-02 | 1.00E+00 |
| ENSG00000213169.3_RP11-393N | ENSG00000160789.18_LMNA | 0.03413  | -0.125752344 | 0.192287522 | 6.76E-01 | 8.59E-01 | 1.00E+00 |
| ENSG00000224940.7_PRRT4     | ENSG00000160789.18_LMNA | -0.10793 | -0.262616868 | 0.05216855  | 1.86E-01 | 4.52E-01 | 1.00E+00 |
| ENSG00000157927.15_RADIL    | ENSG00000160789.18_LMNA | 0.0961   | -0.064081219 | 0.251453544 | 2.39E-01 | 5.18E-01 | 1.00E+00 |
| ENSG00000266053.2_NDUFV2-A  | ENSG00000160789.18_LMNA | -0.06328 | -0.220264769 | 0.096893705 | 4.39E-01 | 7.07E-01 | 1.00E+00 |

|                              |                         |          |              |             |          |          |          |
|------------------------------|-------------------------|----------|--------------|-------------|----------|----------|----------|
| ENSG00000111879.17_FAM184A   | ENSG00000160789.18_LMNA | 0.0561   | -0.104032272 | 0.213392462 | 4.92E-01 | 7.48E-01 | 1.00E+00 |
| ENSG00000148600.13_CDHR1     | ENSG00000160789.18_LMNA | -0.36954 | -0.499363845 | -0.22348876 | 2.80E-06 | 1.04E-04 | 1.43E-01 |
| ENSG00000095539.14_SEMA4G    | ENSG00000160789.18_LMNA | -0.107   | -0.261743939 | 0.053103315 | 1.89E-01 | 4.57E-01 | 1.00E+00 |
| ENSG00000151413.15_NUBPL     | ENSG00000160789.18_LMNA | -0.22221 | -0.368379709 | -0.06532095 | 5.93E-03 | 4.47E-02 | 1.00E+00 |
| ENSG00000162894.10_FCMR      | ENSG00000160789.18_LMNA | -0.06052 | -0.217620832 | 0.099643946 | 4.59E-01 | 7.23E-01 | 1.00E+00 |
| ENSG00000118308.13_LRMP      | ENSG00000160789.18_LMNA | -0.26185 | -0.404205196 | -0.10711963 | 1.12E-03 | 1.26E-02 | 1.00E+00 |
| ENSG00000228501.2_RPL15P18   | ENSG00000160789.18_LMNA | -0.22529 | -0.371181755 | -0.06855229 | 5.26E-03 | 4.07E-02 | 1.00E+00 |
| ENSG00000137727.11_ARHGAP2   | ENSG00000160789.18_LMNA | 0.2119   | 0.054543938  | 0.358994475 | 8.77E-03 | 5.96E-02 | 1.00E+00 |
| ENSG00000278231.1_RP5-906C1  | ENSG00000160789.18_LMNA | -0.06337 | -0.220343795 | 0.096811427 | 4.38E-01 | 7.06E-01 | 1.00E+00 |
| ENSG00000204622.9_HLA-J      | ENSG00000160789.18_LMNA | 0.21942  | 0.062396895  | 0.365839366 | 6.61E-03 | 4.83E-02 | 1.00E+00 |
| ENSG00000135502.15_SLC26A1C  | ENSG00000160789.18_LMNA | -0.19626 | -0.344687232 | -0.03825036 | 1.54E-02 | 8.94E-02 | 1.00E+00 |
| ENSG00000260317.1_RP11-48B3  | ENSG00000160789.18_LMNA | 0.10693  | -0.053175054 | 0.261676925 | 1.90E-01 | 4.57E-01 | 1.00E+00 |
| ENSG00000185347.16_C14orf80  | ENSG00000160789.18_LMNA | 0.09136  | -0.068837769 | 0.24697262  | 2.63E-01 | 5.46E-01 | 1.00E+00 |
| ENSG00000245648.1_RP11-277P  | ENSG00000160789.18_LMNA | -0.40955 | -0.533936148 | -0.26780882 | 1.61E-07 | 1.06E-05 | 8.27E-03 |
| ENSG00000185808.12_PIGP      | ENSG00000160789.18_LMNA | 0.03145  | -0.128398428 | 0.189696116 | 7.01E-01 | 8.72E-01 | 1.00E+00 |
| ENSG00000234284.5_ZNF879     | ENSG00000160789.18_LMNA | -0.21028 | -0.357510472 | -0.05284633 | 9.32E-03 | 6.23E-02 | 1.00E+00 |
| ENSG00000229692.3_SOS1-IT1   | ENSG00000160789.18_LMNA | -0.03171 | -0.189947271 | 0.128142171 | 6.98E-01 | 8.71E-01 | 1.00E+00 |
| ENSG00000226853.2_AC010894.1 | ENSG00000160789.18_LMNA | -0.06426 | -0.221195068 | 0.095924849 | 4.32E-01 | 7.01E-01 | 1.00E+00 |
| ENSG00000274964.1_RP11-817I4 | ENSG00000160789.18_LMNA | 0.39518  | 0.251824798  | 0.521569412 | 4.69E-07 | 2.49E-05 | 2.41E-02 |
| ENSG00000270659.1_RP11-105N  | ENSG00000160789.18_LMNA | -0.28844 | -0.427988831 | -0.13546109 | 3.14E-04 | 4.66E-03 | 1.00E+00 |
| ENSG00000271780.1_RP11-1017  | ENSG00000160789.18_LMNA | -0.04522 | -0.202957377 | 0.114809478 | 5.80E-01 | 8.04E-01 | 1.00E+00 |
| ENSG00000269814.1_CTC-273B1  | ENSG00000160789.18_LMNA | -0.23677 | -0.381587069 | -0.0806076  | 3.32E-03 | 2.88E-02 | 1.00E+00 |
| ENSG00000251669.4_FAM86EP    | ENSG00000160789.18_LMNA | 0.35733  | 0.210081478  | 0.488729366 | 6.21E-06 | 1.98E-04 | 3.18E-01 |
| ENSG00000121904.16_CSMD2     | ENSG00000160789.18_LMNA | -0.02249 | -0.181040846 | 0.137203614 | 7.83E-01 | 9.11E-01 | 1.00E+00 |
| ENSG00000100031.17_GGT1      | ENSG00000160789.18_LMNA | 0.10692  | -0.053181301 | 0.261671089 | 1.90E-01 | 4.57E-01 | 1.00E+00 |
| ENSG00000273802.1_HIST1H2BC  | ENSG00000160789.18_LMNA | -0.08187 | -0.23797166  | 0.078349193 | 3.16E-01 | 6.03E-01 | 1.00E+00 |
| ENSG00000260912.1_RP11-363E  | ENSG00000160789.18_LMNA | 0.02132  | -0.138352603 | 0.179907772 | 7.94E-01 | 9.17E-01 | 1.00E+00 |
| ENSG00000181450.16_ZNF678    | ENSG00000160789.18_LMNA | -0.30665 | -0.444167283 | -0.15501745 | 1.22E-04 | 2.22E-03 | 1.00E+00 |
| ENSG00000175267.13_VWA3A     | ENSG00000160789.18_LMNA | -0.09554 | -0.250922665 | 0.064645503 | 2.42E-01 | 5.21E-01 | 1.00E+00 |
| ENSG00000258477.1_PPIAP6     | ENSG00000160789.18_LMNA | 0.06176  | -0.09840366  | 0.218813755 | 4.50E-01 | 7.15E-01 | 1.00E+00 |
| ENSG00000080854.13_IGSF9B    | ENSG00000160789.18_LMNA | -0.13135 | -0.284594856 | 0.02845051  | 1.07E-01 | 3.25E-01 | 1.00E+00 |
| ENSG00000198945.6_L3MBTL3    | ENSG00000160789.18_LMNA | 0.13979  | -0.019852538 | 0.292481598 | 8.59E-02 | 2.84E-01 | 1.00E+00 |
| ENSG00000183773.14_AIFM3     | ENSG00000160789.18_LMNA | -0.14005 | -0.292726869 | 0.019584406 | 8.53E-02 | 2.83E-01 | 1.00E+00 |

|                              |                         |          |              |             |          |          |          |
|------------------------------|-------------------------|----------|--------------|-------------|----------|----------|----------|
| ENSG00000267281.2_RP11-793H  | ENSG00000160789.18_LMNA | -0.05809 | -0.215300687 | 0.102053389 | 4.77E-01 | 7.36E-01 | 1.00E+00 |
| ENSG00000228847.1_ATP5G2P4   | ENSG00000160789.18_LMNA | -0.17502 | -0.325157664 | -0.01626937 | 3.10E-02 | 1.47E-01 | 1.00E+00 |
| ENSG00000163630.9_SYNPR      | ENSG00000160789.18_LMNA | -0.27603 | -0.416909403 | -0.1221986  | 5.77E-04 | 7.54E-03 | 1.00E+00 |
| ENSG00000271936.1_RP11-443B  | ENSG00000160789.18_LMNA | 0.10538  | -0.05473842  | 0.260215759 | 1.96E-01 | 4.66E-01 | 1.00E+00 |
| ENSG00000141337.11_ARSG      | ENSG00000160789.18_LMNA | 0.29652  | 0.144120865  | 0.435176033 | 2.08E-04 | 3.36E-03 | 1.00E+00 |
| ENSG00000158445.7_KCNB1      | ENSG00000160789.18_LMNA | -0.41475 | -0.538398126 | -0.27361211 | 1.08E-07 | 7.70E-06 | 5.55E-03 |
| ENSG00000132000.10_PODNL1    | ENSG00000160789.18_LMNA | 0.46718  | 0.332725794  | 0.583018388 | 1.30E-09 | 1.93E-07 | 6.67E-05 |
| ENSG00000247240.6_UBL7-AS1   | ENSG00000160789.18_LMNA | -0.21521 | -0.362009496 | -0.05799835 | 7.75E-03 | 5.43E-02 | 1.00E+00 |
| ENSG00000183615.5_FAM167B    | ENSG00000160789.18_LMNA | 0.33933  | 0.190412973  | 0.472977272 | 1.90E-05 | 4.95E-04 | 9.74E-01 |
| ENSG00000162631.17_NTNG1     | ENSG00000160789.18_LMNA | -0.01838 | -0.177059731 | 0.141236868 | 8.22E-01 | 9.31E-01 | 1.00E+00 |
| ENSG00000229931.1_RP1-151F1  | ENSG00000160789.18_LMNA | 0.11869  | -0.041294131 | 0.272734207 | 1.45E-01 | 3.90E-01 | 1.00E+00 |
| ENSG00000235597.1_LINC01102  | ENSG00000160789.18_LMNA | -0.27702 | -0.417793939 | -0.12325357 | 5.50E-04 | 7.28E-03 | 1.00E+00 |
| ENSG00000279400.1_CTD-2353F  | ENSG00000160789.18_LMNA | 0.12111  | -0.038841814 | 0.275006236 | 1.37E-01 | 3.77E-01 | 1.00E+00 |
| ENSG00000276334.1_AL133243.1 | ENSG00000160789.18_LMNA | -0.19685 | -0.345228898 | -0.03886428 | 1.51E-02 | 8.82E-02 | 1.00E+00 |
| ENSG00000205078.5_SYCE1L     | ENSG00000160789.18_LMNA | 0.18148  | 0.02294098   | 0.331113204 | 2.52E-02 | 1.27E-01 | 1.00E+00 |
| ENSG00000198440.8_ZNF583     | ENSG00000160789.18_LMNA | 0.03438  | -0.125509248 | 0.192525373 | 6.74E-01 | 8.57E-01 | 1.00E+00 |
| ENSG00000269001.1_CTD-2245F  | ENSG00000160789.18_LMNA | -0.10044 | -0.255556147 | 0.059713653 | 2.18E-01 | 4.93E-01 | 1.00E+00 |
| ENSG00000184786.5_TCTE3      | ENSG00000160789.18_LMNA | -0.14741 | -0.299584158 | 0.012069728 | 6.99E-02 | 2.49E-01 | 1.00E+00 |
| ENSG00000269936.3_           | ENSG00000160789.18_LMNA | 0.09299  | -0.067209366 | 0.248508185 | 2.55E-01 | 5.36E-01 | 1.00E+00 |
| ENSG00000027075.12_PRKCH     | ENSG00000160789.18_LMNA | -0.01606 | -0.174817253 | 0.143504073 | 8.44E-01 | 9.39E-01 | 1.00E+00 |
| ENSG00000144218.17_AFF3      | ENSG00000160789.18_LMNA | -0.30559 | -0.443224497 | -0.15387157 | 1.29E-04 | 2.32E-03 | 1.00E+00 |
| ENSG00000146192.13_FGD2      | ENSG00000160789.18_LMNA | -0.11036 | -0.264904628 | 0.049716112 | 1.76E-01 | 4.37E-01 | 1.00E+00 |
| ENSG00000237517.7_DGCR5      | ENSG00000160789.18_LMNA | -0.22167 | -0.367883953 | -0.0647499  | 6.06E-03 | 4.53E-02 | 1.00E+00 |
| ENSG00000261643.1_RP11-529E  | ENSG00000160789.18_LMNA | -0.02652 | -0.184938545 | 0.133244618 | 7.46E-01 | 8.94E-01 | 1.00E+00 |
| ENSG00000148835.10_TAF5      | ENSG00000160789.18_LMNA | -0.16773 | -0.318429554 | -0.00876524 | 3.89E-02 | 1.70E-01 | 1.00E+00 |
| ENSG00000270587.1_RP11-51F1  | ENSG00000160789.18_LMNA | -0.1268  | -0.280346162 | 0.033063234 | 1.20E-01 | 3.47E-01 | 1.00E+00 |
| ENSG00000185811.15_IKZF1     | ENSG00000160789.18_LMNA | -0.00404 | -0.163135962 | 0.155260376 | 9.61E-01 | 9.84E-01 | 1.00E+00 |
| ENSG00000242100.2_RPL9P32    | ENSG00000160789.18_LMNA | -0.194   | -0.342620973 | -0.03591063 | 1.66E-02 | 9.45E-02 | 1.00E+00 |
| ENSG00000104047.13_DTWD1     | ENSG00000160789.18_LMNA | -0.11361 | -0.26796023  | 0.046434632 | 1.63E-01 | 4.19E-01 | 1.00E+00 |
| ENSG00000166793.9_YPEL4      | ENSG00000160789.18_LMNA | -0.29879 | -0.437191221 | -0.14655697 | 1.85E-04 | 3.06E-03 | 1.00E+00 |
| ENSG00000131018.21_SYNE1     | ENSG00000160789.18_LMNA | -0.04905 | -0.206633805 | 0.111021031 | 5.48E-01 | 7.85E-01 | 1.00E+00 |
| ENSG00000204406.10_MBD5      | ENSG00000160789.18_LMNA | -0.13403 | -0.287102212 | 0.025722052 | 9.97E-02 | 3.11E-01 | 1.00E+00 |
| ENSG00000224383.6_PRR29      | ENSG00000160789.18_LMNA | 0.13906  | -0.020597403 | 0.291800026 | 8.75E-02 | 2.88E-01 | 1.00E+00 |

|                             |                         |          |              |             |          |          |          |
|-----------------------------|-------------------------|----------|--------------|-------------|----------|----------|----------|
| ENSG00000188707.5_ZBED6CL   | ENSG00000160789.18_LMNA | 0.08784  | -0.072368553 | 0.243637676 | 2.82E-01 | 5.67E-01 | 1.00E+00 |
| ENSG0000010438.15_PRSS3     | ENSG00000160789.18_LMNA | -0.32416 | -0.45963894  | -0.17393386 | 4.62E-05 | 1.01E-03 | 1.00E+00 |
| ENSG00000117877.9_CD3EAP    | ENSG00000160789.18_LMNA | 0.21254  | 0.055205127  | 0.359572055 | 8.57E-03 | 5.86E-02 | 1.00E+00 |
| ENSG00000129317.13_PUS7L    | ENSG00000160789.18_LMNA | -0.20853 | -0.355916116 | -0.05102445 | 9.93E-03 | 6.53E-02 | 1.00E+00 |
| ENSG00000249859.6_PVT1      | ENSG00000160789.18_LMNA | 0.20626  | 0.04865317   | 0.353838305 | 1.08E-02 | 6.92E-02 | 1.00E+00 |
| ENSG00000102174.8_PHEX      | ENSG00000160789.18_LMNA | -0.06687 | -0.223687116 | 0.09332655  | 4.13E-01 | 6.86E-01 | 1.00E+00 |
| ENSG00000124140.11_SLC12A5  | ENSG00000160789.18_LMNA | -0.17756 | -0.32750477  | -0.0188954  | 2.86E-02 | 1.39E-01 | 1.00E+00 |
| ENSG00000227082.1_CH17-437K | ENSG00000160789.18_LMNA | -0.04637 | -0.204065215 | 0.113668857 | 5.71E-01 | 7.99E-01 | 1.00E+00 |
| ENSG00000248866.1_USP46-AS1 | ENSG00000160789.18_LMNA | -0.07909 | -0.23532658  | 0.081133377 | 3.33E-01 | 6.18E-01 | 1.00E+00 |
| ENSG00000223825.5_DAZAP2P1  | ENSG00000160789.18_LMNA | -0.22551 | -0.371379568 | -0.06878065 | 5.22E-03 | 4.05E-02 | 1.00E+00 |
| ENSG00000114735.8_HEMK1     | ENSG00000160789.18_LMNA | -0.07805 | -0.234342754 | 0.082167683 | 3.39E-01 | 6.24E-01 | 1.00E+00 |
| ENSG00000117602.10_RCAN3    | ENSG00000160789.18_LMNA | 0.28327  | 0.12993165   | 0.423380222 | 4.06E-04 | 5.72E-03 | 1.00E+00 |
| ENSG00000182150.14_ERCC6L2  | ENSG00000160789.18_LMNA | -0.10427 | -0.25916495  | 0.055861773 | 2.01E-01 | 4.72E-01 | 1.00E+00 |
| ENSG00000163611.10_SPICE1   | ENSG00000160789.18_LMNA | 0.06219  | -0.097982018 | 0.219219079 | 4.47E-01 | 7.13E-01 | 1.00E+00 |
| ENSG00000178201.4_VN1R1     | ENSG00000160789.18_LMNA | -0.08122 | -0.237352581 | 0.079001272 | 3.20E-01 | 6.06E-01 | 1.00E+00 |
| ENSG00000100027.13_YPEL1    | ENSG00000160789.18_LMNA | -0.32955 | -0.464386719 | -0.17978131 | 3.39E-05 | 7.90E-04 | 1.00E+00 |
| ENSG00000203706.7_SERTAD4-7 | ENSG00000160789.18_LMNA | -0.00013 | -0.159328645 | 0.159072753 | 9.99E-01 | 9.99E-01 | 1.00E+00 |
| ENSG00000108932.10_SLC16A6  | ENSG00000160789.18_LMNA | 0.15407  | -0.005264013 | 0.305766842 | 5.81E-02 | 2.21E-01 | 1.00E+00 |
| ENSG00000204152.9_TIMM23B   | ENSG00000160789.18_LMNA | -0.19353 | -0.342190078 | -0.03542313 | 1.69E-02 | 9.56E-02 | 1.00E+00 |
| ENSG00000189298.12_ZKSCAN3  | ENSG00000160789.18_LMNA | -0.11699 | -0.27113628  | 0.043016592 | 1.51E-01 | 4.00E-01 | 1.00E+00 |
| ENSG00000080823.20_MOK      | ENSG00000160789.18_LMNA | 0.10687  | -0.053233512 | 0.261622314 | 1.90E-01 | 4.57E-01 | 1.00E+00 |
| ENSG00000160352.14_ZNF714   | ENSG00000160789.18_LMNA | -0.30872 | -0.446003866 | -0.15725191 | 1.09E-04 | 2.02E-03 | 1.00E+00 |
| ENSG00000198482.9_ZNF808    | ENSG00000160789.18_LMNA | 0.04031  | -0.119663063 | 0.198234176 | 6.22E-01 | 8.29E-01 | 1.00E+00 |
| ENSG00000102908.19_NFAT5    | ENSG00000160789.18_LMNA | 0.12452  | -0.035384731 | 0.278203219 | 1.26E-01 | 3.59E-01 | 1.00E+00 |
| ENSG00000278291.1_RP11-172H | ENSG00000160789.18_LMNA | -0.3533  | -0.48520918  | -0.20566642 | 8.02E-06 | 2.44E-04 | 4.11E-01 |
| ENSG00000243403.1_RP11-330L | ENSG00000160789.18_LMNA | -0.14945 | -0.301475187 | 0.0099912   | 6.61E-02 | 2.40E-01 | 1.00E+00 |
| ENSG00000136010.12_ALDH1L2  | ENSG00000160789.18_LMNA | -0.0748  | -0.231243706 | 0.085421293 | 3.60E-01 | 6.42E-01 | 1.00E+00 |
| ENSG00000132429.8_POPDC3    | ENSG00000160789.18_LMNA | -0.0999  | -0.255040111 | 0.060263681 | 2.21E-01 | 4.96E-01 | 1.00E+00 |
| ENSG00000205476.7_CCDC85C   | ENSG00000160789.18_LMNA | 0.00148  | -0.157753634 | 0.160647086 | 9.86E-01 | 9.94E-01 | 1.00E+00 |
| ENSG00000114861.17_FOXP1    | ENSG00000160789.18_LMNA | 0.05675  | -0.103384599 | 0.214017276 | 4.87E-01 | 7.44E-01 | 1.00E+00 |
| ENSG00000206149.9_HERC2P9   | ENSG00000160789.18_LMNA | -0.09491 | -0.25033185  | 0.065273256 | 2.45E-01 | 5.25E-01 | 1.00E+00 |
| ENSG00000172031.6_EPHX4     | ENSG00000160789.18_LMNA | -0.12377 | -0.27750082  | 0.03614492  | 1.29E-01 | 3.63E-01 | 1.00E+00 |
| ENSG00000164651.15_SP8      | ENSG00000160789.18_LMNA | -0.10586 | -0.260670506 | 0.054252031 | 1.94E-01 | 4.63E-01 | 1.00E+00 |

|                              |                         |          |              |             |          |          |          |
|------------------------------|-------------------------|----------|--------------|-------------|----------|----------|----------|
| ENSG00000146426.16_TIAM2     | ENSG00000160789.18_LMNA | 0.04496  | -0.115067098 | 0.202707049 | 5.82E-01 | 8.06E-01 | 1.00E+00 |
| ENSG00000154240.15_CEP112    | ENSG00000160789.18_LMNA | 0.39911  | 0.256188107  | 0.524956561 | 3.52E-07 | 2.00E-05 | 1.81E-02 |
| ENSG00000100033.15_PRODHD    | ENSG00000160789.18_LMNA | -0.13669 | -0.289587408 | 0.023013102 | 9.31E-02 | 2.98E-01 | 1.00E+00 |
| ENSG00000010030.12_ETV7      | ENSG00000160789.18_LMNA | 0.26225  | 0.107534196  | 0.404556014 | 1.10E-03 | 1.25E-02 | 1.00E+00 |
| ENSG00000104154.6_SLC30A4    | ENSG00000160789.18_LMNA | 0.14234  | -0.017252044 | 0.294858638 | 8.02E-02 | 2.73E-01 | 1.00E+00 |
| ENSG00000112297.13_AIM1      | ENSG00000160789.18_LMNA | 0.37331  | 0.227638529  | 0.502638631 | 2.17E-06 | 8.48E-05 | 1.11E-01 |
| ENSG00000106100.9_NOD1       | ENSG00000160789.18_LMNA | 0.36728  | 0.221004061  | 0.497399273 | 3.25E-06 | 1.17E-04 | 1.67E-01 |
| ENSG00000225285.1_RP4-758J11 | ENSG00000160789.18_LMNA | 0.30082  | 0.148744742  | 0.4389985   | 1.66E-04 | 2.82E-03 | 1.00E+00 |
| ENSG00000164663.12_USP49     | ENSG00000160789.18_LMNA | -0.32549 | -0.460814027 | -0.17537924 | 4.28E-05 | 9.47E-04 | 1.00E+00 |
| ENSG00000261612.1_SUB1P3     | ENSG00000160789.18_LMNA | -0.22034 | -0.36667883  | -0.06336258 | 6.38E-03 | 4.71E-02 | 1.00E+00 |
| ENSG00000175764.13_TTLL11    | ENSG00000160789.18_LMNA | -0.12866 | -0.28208427  | 0.031177817 | 1.14E-01 | 3.37E-01 | 1.00E+00 |
| ENSG00000273084.1_RP11-1275  | ENSG00000160789.18_LMNA | -0.01311 | -0.171950196 | 0.146397884 | 8.73E-01 | 9.51E-01 | 1.00E+00 |
| ENSG00000268970.1_CTD-3099C  | ENSG00000160789.18_LMNA | -0.13727 | -0.290133465 | 0.022417265 | 9.17E-02 | 2.95E-01 | 1.00E+00 |
| ENSG00000255622.3_PCDHB17P   | ENSG00000160789.18_LMNA | 0.11199  | -0.048070856 | 0.266437424 | 1.70E-01 | 4.28E-01 | 1.00E+00 |
| ENSG00000205517.11_RGL3      | ENSG00000160789.18_LMNA | 0.21853  | 0.061465082  | 0.36502888  | 6.84E-03 | 4.95E-02 | 1.00E+00 |
| ENSG00000204172.10_AGAP9     | ENSG00000160789.18_LMNA | -0.12854 | -0.281973559 | 0.031297977 | 1.15E-01 | 3.38E-01 | 1.00E+00 |
| ENSG00000121274.11_PAPD5     | ENSG00000160789.18_LMNA | 0.06502  | -0.095166356 | 0.221922973 | 4.26E-01 | 6.97E-01 | 1.00E+00 |
| ENSG00000099974.7_DDTL       | ENSG00000160789.18_LMNA | 0.03067  | -0.129163324 | 0.188946198 | 7.08E-01 | 8.76E-01 | 1.00E+00 |
| ENSG00000229204.3_PTGES3P3   | ENSG00000160789.18_LMNA | -0.18929 | -0.338296537 | -0.03102469 | 1.95E-02 | 1.06E-01 | 1.00E+00 |
| ENSG00000184156.14_KCNQ3     | ENSG00000160789.18_LMNA | -0.04595 | -0.203658613 | 0.114087588 | 5.74E-01 | 8.01E-01 | 1.00E+00 |
| ENSG00000152910.17_CNTNAP4   | ENSG00000160789.18_LMNA | -0.29969 | -0.437996881 | -0.1475319  | 1.76E-04 | 2.96E-03 | 1.00E+00 |
| ENSG00000251247.8_ZNF345     | ENSG00000160789.18_LMNA | -0.1593  | -0.310619017 | -9.74E-05   | 5.00E-02 | 2.01E-01 | 1.00E+00 |
| ENSG00000267169.1_CTB-55O6   | ENSG00000160789.18_LMNA | -0.06791 | -0.224680458 | 0.092289651 | 4.06E-01 | 6.81E-01 | 1.00E+00 |
| ENSG00000147536.10_GINS4     | ENSG00000160789.18_LMNA | 0.18958  | 0.03132515   | 0.338562841 | 1.93E-02 | 1.05E-01 | 1.00E+00 |
| ENSG00000106701.10_FSD1L     | ENSG00000160789.18_LMNA | -0.19002 | -0.338968359 | -0.03178278 | 1.90E-02 | 1.04E-01 | 1.00E+00 |
| ENSG00000248098.9_BCKDHA     | ENSG00000160789.18_LMNA | 0.00279  | -0.156475662 | 0.161923319 | 9.73E-01 | 9.89E-01 | 1.00E+00 |
| ENSG00000241935.7_HOGA1      | ENSG00000160789.18_LMNA | -0.19892 | -0.347129772 | -0.04102052 | 1.40E-02 | 8.36E-02 | 1.00E+00 |
| ENSG00000230091.5_TMEN254-7  | ENSG00000160789.18_LMNA | -0.36141 | -0.492289565 | -0.21455831 | 4.77E-06 | 1.60E-04 | 2.45E-01 |
| ENSG00000233597.3_RP11-343B  | ENSG00000160789.18_LMNA | -0.24995 | -0.393492089 | -0.09450928 | 1.90E-03 | 1.88E-02 | 1.00E+00 |
| ENSG00000278882.1_           | ENSG00000160789.18_LMNA | 0.17518  | 0.016442221  | 0.325312272 | 3.09E-02 | 1.46E-01 | 1.00E+00 |
| ENSG00000170214.3_ADRA1B     | ENSG00000160789.18_LMNA | 0.00683  | -0.152537385 | 0.165849546 | 9.33E-01 | 9.74E-01 | 1.00E+00 |
| ENSG00000100036.12_SLC35E4   | ENSG00000160789.18_LMNA | 0.48911  | 0.357769812  | 0.60147752  | 1.62E-10 | 3.36E-08 | 8.30E-06 |
| ENSG00000160323.17_ADAMTS1   | ENSG00000160789.18_LMNA | 0.17015  | 0.011249461  | 0.320660333 | 3.61E-02 | 1.62E-01 | 1.00E+00 |

|                              |                         |          |              |             |          |          |          |
|------------------------------|-------------------------|----------|--------------|-------------|----------|----------|----------|
| ENSG00000171084.14_FAM86JP   | ENSG00000160789.18_LMNA | -0.00215 | -0.16129498  | 0.15710499  | 9.79E-01 | 9.92E-01 | 1.00E+00 |
| ENSG00000156876.9_SASS6      | ENSG00000160789.18_LMNA | -0.08566 | -0.241565445 | 0.074558491 | 2.94E-01 | 5.80E-01 | 1.00E+00 |
| ENSG00000273061.1_CDC37L1-A  | ENSG00000160789.18_LMNA | -0.13466 | -0.287690592 | 0.025081113 | 9.81E-02 | 3.08E-01 | 1.00E+00 |
| ENSG00000170100.12_ZNF778    | ENSG00000160789.18_LMNA | -0.202   | -0.34995059  | -0.04422557 | 1.26E-02 | 7.72E-02 | 1.00E+00 |
| ENSG00000144290.15_SLC4A10   | ENSG00000160789.18_LMNA | -0.1985  | -0.34674652  | -0.04058556 | 1.42E-02 | 8.46E-02 | 1.00E+00 |
| ENSG00000239969.4_RP11-163E  | ENSG00000160789.18_LMNA | 0.03876  | -0.121184422 | 0.196750642 | 6.35E-01 | 8.37E-01 | 1.00E+00 |
| ENSG00000162885.11_B3GALNT   | ENSG00000160789.18_LMNA | 0.13363  | -0.02612756  | 0.286729836 | 1.01E-01 | 3.13E-01 | 1.00E+00 |
| ENSG00000234072.1_AC074117.  | ENSG00000160789.18_LMNA | 0.00121  | -0.158016686 | 0.16038426  | 9.88E-01 | 9.96E-01 | 1.00E+00 |
| ENSG00000115257.14_PCSK4     | ENSG00000160789.18_LMNA | 0.16733  | 0.008351497  | 0.318057683 | 3.94E-02 | 1.72E-01 | 1.00E+00 |
| ENSG00000163975.10_MELTF     | ENSG00000160789.18_LMNA | 0.33568  | 0.186444114  | 0.469776641 | 2.36E-05 | 5.90E-04 | 1.00E+00 |
| ENSG00000128346.9_C22orf23   | ENSG00000160789.18_LMNA | -0.02769 | -0.186072872 | 0.132090542 | 7.35E-01 | 8.89E-01 | 1.00E+00 |
| ENSG00000274213.1_RP11-670E  | ENSG00000160789.18_LMNA | 0.05357  | -0.106540863 | 0.210969956 | 5.12E-01 | 7.61E-01 | 1.00E+00 |
| ENSG00000259250.1_RP11-50C1  | ENSG00000160789.18_LMNA | 0.25174  | 0.096406983  | 0.395109485 | 1.76E-03 | 1.77E-02 | 1.00E+00 |
| ENSG00000223401.1_RP11-211G  | ENSG00000160789.18_LMNA | 0.04105  | -0.118930397 | 0.198948108 | 6.16E-01 | 8.26E-01 | 1.00E+00 |
| ENSG00000086991.11_NOX4      | ENSG00000160789.18_LMNA | 0.17258  | 0.013756487  | 0.32290812  | 3.35E-02 | 1.54E-01 | 1.00E+00 |
| ENSG00000151364.14_KCTD14    | ENSG00000160789.18_LMNA | 0.17529  | 0.016554752  | 0.325412918 | 3.08E-02 | 1.46E-01 | 1.00E+00 |
| ENSG00000234500.1_GS1-124K5  | ENSG00000160789.18_LMNA | -0.0138  | -0.172625465 | 0.145716804 | 8.66E-01 | 9.48E-01 | 1.00E+00 |
| ENSG00000185345.17_PARK2     | ENSG00000160789.18_LMNA | -0.15468 | -0.306337477 | 0.00463442  | 5.71E-02 | 2.18E-01 | 1.00E+00 |
| ENSG00000150627.14_WDR17     | ENSG00000160789.18_LMNA | -0.40437 | -0.529487759 | -0.26204235 | 2.38E-07 | 1.47E-05 | 1.22E-02 |
| ENSG00000168589.13_DYNLRB2   | ENSG00000160789.18_LMNA | -0.07841 | -0.234680446 | 0.081812741 | 3.37E-01 | 6.22E-01 | 1.00E+00 |
| ENSG00000280852.1_CTD-2319I1 | ENSG00000160789.18_LMNA | 0.21748  | 0.060370967  | 0.364076638 | 7.11E-03 | 5.10E-02 | 1.00E+00 |
| ENSG00000171357.5_LURAP1     | ENSG00000160789.18_LMNA | -0.07551 | -0.231919116 | 0.084712773 | 3.55E-01 | 6.39E-01 | 1.00E+00 |
| ENSG00000279392.1_RP11-665C  | ENSG00000160789.18_LMNA | -0.09753 | -0.252802684 | 0.062646279 | 2.32E-01 | 5.10E-01 | 1.00E+00 |
| ENSG00000114270.14_COL7A1    | ENSG00000160789.18_LMNA | 0.25803  | 0.103067236  | 0.400771355 | 1.33E-03 | 1.44E-02 | 1.00E+00 |
| ENSG00000269194.1_AC006942.  | ENSG00000160789.18_LMNA | 0.14189  | -0.017711    | 0.2944394   | 8.12E-02 | 2.75E-01 | 1.00E+00 |
| ENSG00000178662.14_CSRNP3    | ENSG00000160789.18_LMNA | -0.3889  | -0.516148497 | -0.24486435 | 7.36E-07 | 3.59E-05 | 3.78E-02 |
| ENSG00000254427.1_RP11-430H  | ENSG00000160789.18_LMNA | -0.09734 | -0.252626897 | 0.062833319 | 2.33E-01 | 5.11E-01 | 1.00E+00 |
| ENSG00000144031.10_ANKRD53   | ENSG00000160789.18_LMNA | 0.08959  | -0.070619864 | 0.245290306 | 2.72E-01 | 5.57E-01 | 1.00E+00 |
| ENSG00000241269.1_AC093620.  | ENSG00000160789.18_LMNA | -0.10799 | -0.262672348 | 0.052109122 | 1.85E-01 | 4.51E-01 | 1.00E+00 |
| ENSG00000274818.1_RP1-292L2  | ENSG00000160789.18_LMNA | 0.07388  | -0.086334687 | 0.230372546 | 3.66E-01 | 6.47E-01 | 1.00E+00 |
| ENSG00000236810.4_TCEB3-AS1  | ENSG00000160789.18_LMNA | -0.10976 | -0.264345812 | 0.050315503 | 1.78E-01 | 4.40E-01 | 1.00E+00 |
| ENSG00000136122.14_BORA      | ENSG00000160789.18_LMNA | -0.04301 | -0.20083686  | 0.11699041  | 5.99E-01 | 8.15E-01 | 1.00E+00 |
| ENSG00000188177.12_ZC3H6     | ENSG00000160789.18_LMNA | -0.13965 | -0.292353161 | 0.019992929 | 8.62E-02 | 2.85E-01 | 1.00E+00 |

|                             |                         |          |              |             |          |          |          |
|-----------------------------|-------------------------|----------|--------------|-------------|----------|----------|----------|
| ENSG00000089775.10_ZBTB25   | ENSG00000160789.18_LMNA | -0.01115 | -0.170046088 | 0.148316754 | 8.92E-01 | 9.57E-01 | 1.00E+00 |
| ENSG00000196284.12_SUPT3H   | ENSG00000160789.18_LMNA | -0.23001 | -0.375463166 | -0.07350194 | 4.36E-03 | 3.54E-02 | 1.00E+00 |
| ENSG00000143171.11_RXRG     | ENSG00000160789.18_LMNA | -0.52405 | -0.630636852 | -0.39805854 | 4.25E-12 | 1.77E-09 | 2.18E-07 |
| ENSG00000165511.6_C10orf25  | ENSG00000160789.18_LMNA | -0.32695 | -0.462100782 | -0.1769634  | 3.94E-05 | 8.89E-04 | 1.00E+00 |
| ENSG00000196502.10_SULT1A1  | ENSG00000160789.18_LMNA | -0.16977 | -0.32031435  | -0.01086392 | 3.65E-02 | 1.63E-01 | 1.00E+00 |
| ENSG00000136531.12_SCN2A    | ENSG00000160789.18_LMNA | -0.31391 | -0.450592585 | -0.16284768 | 8.21E-05 | 1.60E-03 | 1.00E+00 |
| ENSG00000170919.14_TPT1-AS1 | ENSG00000160789.18_LMNA | -0.22773 | -0.373394619 | -0.07110868 | 4.78E-03 | 3.79E-02 | 1.00E+00 |
| ENSG00000118160.12_SLC8A2   | ENSG00000160789.18_LMNA | -0.22558 | -0.371441721 | -0.06885241 | 5.20E-03 | 4.04E-02 | 1.00E+00 |
| ENSG00000261485.1_PAN3-AS1  | ENSG00000160789.18_LMNA | -0.23787 | -0.382578736 | -0.08176113 | 3.17E-03 | 2.78E-02 | 1.00E+00 |
| ENSG00000188368.8_PRR19     | ENSG00000160789.18_LMNA | 0.00655  | -0.152811636 | 0.16557646  | 9.36E-01 | 9.75E-01 | 1.00E+00 |
| ENSG00000141505.10_ASGR1    | ENSG00000160789.18_LMNA | 0.01388  | -0.145641647 | 0.172699962 | 8.65E-01 | 9.47E-01 | 1.00E+00 |
| ENSG00000186648.13_CARMIL3  | ENSG00000160789.18_LMNA | -0.24033 | -0.38480871  | -0.08435804 | 2.86E-03 | 2.58E-02 | 1.00E+00 |
| ENSG00000066933.14_MYO9A    | ENSG00000160789.18_LMNA | 0.05451  | -0.105602902 | 0.211876187 | 5.05E-01 | 7.56E-01 | 1.00E+00 |
| ENSG00000268836.1_LA16c-OS1 | ENSG00000160789.18_LMNA | -0.11321 | -0.267583235 | 0.046839862 | 1.65E-01 | 4.21E-01 | 1.00E+00 |
| ENSG00000133302.11_SLF1     | ENSG00000160789.18_LMNA | 0.07206  | -0.088153319 | 0.228636491 | 3.78E-01 | 6.57E-01 | 1.00E+00 |
| ENSG00000164099.3_PRSS12    | ENSG00000160789.18_LMNA | -0.2681  | -0.409807674 | -0.11375256 | 8.40E-04 | 1.01E-02 | 1.00E+00 |
| ENSG00000259495.2_RP11-210M | ENSG00000160789.18_LMNA | -0.05757 | -0.214801519 | 0.102571283 | 4.81E-01 | 7.39E-01 | 1.00E+00 |
| ENSG00000227398.3_KIF9-AS1  | ENSG00000160789.18_LMNA | -0.03357 | -0.191744664 | 0.126307031 | 6.81E-01 | 8.61E-01 | 1.00E+00 |
| ENSG00000225912.1_RP13-258O | ENSG00000160789.18_LMNA | -0.08858 | -0.244338821 | 0.071626891 | 2.78E-01 | 5.63E-01 | 1.00E+00 |
| ENSG00000196739.13_COL27A1  | ENSG00000160789.18_LMNA | 0.33554  | 0.186292569  | 0.469654282 | 2.38E-05 | 5.95E-04 | 1.00E+00 |
| ENSG00000228665.2_RP11-20O2 | ENSG00000160789.18_LMNA | -0.07999 | -0.236183551 | 0.080231879 | 3.27E-01 | 6.14E-01 | 1.00E+00 |
| ENSG00000021826.13_CPS1     | ENSG00000160789.18_LMNA | -0.23404 | -0.379112165 | -0.07773224 | 3.71E-03 | 3.13E-02 | 1.00E+00 |
| ENSG00000224993.3_RPL29P12  | ENSG00000160789.18_LMNA | -0.13806 | -0.290869003 | 0.021614324 | 8.98E-02 | 2.92E-01 | 1.00E+00 |
| ENSG00000273723.1_RP11-93H2 | ENSG00000160789.18_LMNA | -0.27858 | -0.419190643 | -0.12492075 | 5.10E-04 | 6.85E-03 | 1.00E+00 |
| ENSG00000166046.9_TCP11L2   | ENSG00000160789.18_LMNA | -0.22606 | -0.37187913  | -0.0693575  | 5.10E-03 | 3.99E-02 | 1.00E+00 |
| ENSG00000196632.9_WNK3      | ENSG00000160789.18_LMNA | -0.20788 | -0.355324504 | -0.05034893 | 1.02E-02 | 6.64E-02 | 1.00E+00 |
| ENSG00000178093.13_TSSK6    | ENSG00000160789.18_LMNA | 0.02566  | -0.134088883 | 0.184108191 | 7.54E-01 | 8.98E-01 | 1.00E+00 |
| ENSG00000267319.1_CTD-2528L | ENSG00000160789.18_LMNA | -0.20188 | -0.349839069 | -0.04409874 | 1.26E-02 | 7.75E-02 | 1.00E+00 |
| ENSG00000170153.9_RNF150    | ENSG00000160789.18_LMNA | -0.29142 | -0.43064452  | -0.1386557  | 2.70E-04 | 4.14E-03 | 1.00E+00 |
| ENSG00000272338.2_RP11-722E | ENSG00000160789.18_LMNA | -0.21528 | -0.362072889 | -0.05807106 | 7.73E-03 | 5.42E-02 | 1.00E+00 |
| ENSG00000217442.3_SYCE3     | ENSG00000160789.18_LMNA | 0.15811  | -0.001122104 | 0.309516784 | 5.17E-02 | 2.06E-01 | 1.00E+00 |
| ENSG00000178935.5_ZNF552    | ENSG00000160789.18_LMNA | -0.08022 | -0.236402173 | 0.080001814 | 3.26E-01 | 6.12E-01 | 1.00E+00 |
| ENSG00000261342.1_AC006538  | ENSG00000160789.18_LMNA | 0.12408  | -0.035830028 | 0.277791815 | 1.28E-01 | 3.62E-01 | 1.00E+00 |



|                             |                         |          |              |             |          |          |          |
|-----------------------------|-------------------------|----------|--------------|-------------|----------|----------|----------|
| ENSG00000167011.7_NAT16     | ENSG00000160789.18_LMNA | -0.17856 | -0.328423646 | -0.01992464 | 2.77E-02 | 1.36E-01 | 1.00E+00 |
| ENSG00000152527.12_PLEKHH2  | ENSG00000160789.18_LMNA | 0.17652  | 0.01782425   | 0.32654785  | 2.96E-02 | 1.42E-01 | 1.00E+00 |
| ENSG00000278864.1_RP11-45M2 | ENSG00000160789.18_LMNA | -0.01262 | -0.171473331 | 0.14687867  | 8.77E-01 | 9.52E-01 | 1.00E+00 |
| ENSG00000219607.3_PPP1R3G   | ENSG00000160789.18_LMNA | 0.26898  | 0.114693232  | 0.410600404 | 8.06E-04 | 9.79E-03 | 1.00E+00 |
| ENSG00000122484.8_RPAP2     | ENSG00000160789.18_LMNA | -0.16258 | -0.313663899 | -0.00347094 | 4.54E-02 | 1.89E-01 | 1.00E+00 |
| ENSG00000185519.8_FAM131C   | ENSG00000160789.18_LMNA | -0.39528 | -0.52164966  | -0.25192805 | 4.66E-07 | 2.48E-05 | 2.39E-02 |
| ENSG00000262251.1_RP11-199F | ENSG00000160789.18_LMNA | -0.0821  | -0.23818877  | 0.078120446 | 3.15E-01 | 6.01E-01 | 1.00E+00 |
| ENSG00000170629.13_DPY19L2F | ENSG00000160789.18_LMNA | 0.12387  | -0.036036814 | 0.277600728 | 1.28E-01 | 3.63E-01 | 1.00E+00 |
| ENSG00000172995.15_ARPP21   | ENSG00000160789.18_LMNA | -0.37784 | -0.506566435 | -0.23262901 | 1.60E-06 | 6.71E-05 | 8.18E-02 |
| ENSG00000177599.11_ZNF491   | ENSG00000160789.18_LMNA | -0.33858 | -0.472321759 | -0.18959937 | 1.99E-05 | 5.14E-04 | 1.00E+00 |
| ENSG00000262333.1_HNRNPA1F  | ENSG00000160789.18_LMNA | 0.00221  | -0.157044771 | 0.161355116 | 9.78E-01 | 9.92E-01 | 1.00E+00 |
| ENSG00000104059.4_FAM189A1  | ENSG00000160789.18_LMNA | -0.03558 | -0.193685029 | 0.124323469 | 6.63E-01 | 8.51E-01 | 1.00E+00 |
| ENSG00000156219.15_ART3     | ENSG00000160789.18_LMNA | 0.00895  | -0.150465206 | 0.16791134  | 9.13E-01 | 9.67E-01 | 1.00E+00 |
| ENSG00000100523.13_DDHD1    | ENSG00000160789.18_LMNA | -0.07525 | -0.231677435 | 0.084966338 | 3.57E-01 | 6.40E-01 | 1.00E+00 |
| ENSG00000198400.10_NTRK1    | ENSG00000160789.18_LMNA | 0.11531  | -0.044715694 | 0.269558326 | 1.57E-01 | 4.09E-01 | 1.00E+00 |
| ENSG00000225892.3_          | ENSG00000160789.18_LMNA | 0.17741  | 0.018739326  | 0.327365378 | 2.88E-02 | 1.39E-01 | 1.00E+00 |
| ENSG00000064687.11_ABCA7    | ENSG00000160789.18_LMNA | 0.20205  | 0.044272015  | 0.349991428 | 1.26E-02 | 7.71E-02 | 1.00E+00 |
| ENSG00000272994.1_RP11-332H | ENSG00000160789.18_LMNA | -0.15956 | -0.310860468 | -0.00036463 | 4.96E-02 | 2.00E-01 | 1.00E+00 |
| ENSG00000254054.2_RP11-156K | ENSG00000160789.18_LMNA | -0.21434 | -0.361214372 | -0.05708665 | 8.01E-03 | 5.57E-02 | 1.00E+00 |
| ENSG00000106069.19_CHN2     | ENSG00000160789.18_LMNA | -0.41569 | -0.53920298  | -0.27466097 | 1.01E-07 | 7.26E-06 | 5.16E-03 |
| ENSG00000170417.13_TMEM182  | ENSG00000160789.18_LMNA | -0.34204 | -0.475352347 | -0.19336411 | 1.61E-05 | 4.32E-04 | 8.27E-01 |
| ENSG00000213950.2_RPS10P2   | ENSG00000160789.18_LMNA | -0.08351 | -0.23952953  | 0.076707084 | 3.06E-01 | 5.93E-01 | 1.00E+00 |
| ENSG00000185220.10_PGBD2    | ENSG00000160789.18_LMNA | 0.08716  | -0.073051187 | 0.242992042 | 2.86E-01 | 5.71E-01 | 1.00E+00 |
| ENSG00000226945.1_RP11-564A | ENSG00000160789.18_LMNA | -0.02274 | -0.181281416 | 0.136959555 | 7.81E-01 | 9.10E-01 | 1.00E+00 |
| ENSG00000139767.7_SRRM4     | ENSG00000160789.18_LMNA | -0.36512 | -0.495520106 | -0.21863074 | 3.74E-06 | 1.31E-04 | 1.92E-01 |
| ENSG00000073905.8_VDAC1P1   | ENSG00000160789.18_LMNA | 0.17289  | 0.014076052  | 0.32319439  | 3.32E-02 | 1.53E-01 | 1.00E+00 |
| ENSG00000177181.13_RIMKLA   | ENSG00000160789.18_LMNA | -0.25146 | -0.394854727 | -0.09610793 | 1.78E-03 | 1.79E-02 | 1.00E+00 |
| ENSG00000075826.15_SEC31B   | ENSG00000160789.18_LMNA | -0.22128 | -0.367532971 | -0.06434574 | 6.15E-03 | 4.58E-02 | 1.00E+00 |
| ENSG00000228328.2_RP11-516A | ENSG00000160789.18_LMNA | 0.15664  | -0.002626166 | 0.308156174 | 5.40E-02 | 2.11E-01 | 1.00E+00 |
| ENSG00000228692.2_RP5-826L7 | ENSG00000160789.18_LMNA | -0.15658 | -0.3081009   | 0.002687239 | 5.41E-02 | 2.11E-01 | 1.00E+00 |
| ENSG00000162366.6_PDZK1IP1  | ENSG00000160789.18_LMNA | 0.03188  | -0.12797331  | 0.190112748 | 6.97E-01 | 8.70E-01 | 1.00E+00 |
| ENSG00000266904.4_CTC-559E9 | ENSG00000160789.18_LMNA | -0.10772 | -0.262423984 | 0.052375145 | 1.87E-01 | 4.53E-01 | 1.00E+00 |
| ENSG00000275183.1_LENG9     | ENSG00000160789.18_LMNA | 0.48149  | 0.349039698  | 0.595072247 | 3.40E-10 | 6.34E-08 | 1.74E-05 |

|                             |                         |          |              |             |          |          |          |
|-----------------------------|-------------------------|----------|--------------|-------------|----------|----------|----------|
| ENSG00000177873.11_ZNF619   | ENSG00000160789.18_LMNA | -0.0242  | -0.182697014 | 0.135522642 | 7.67E-01 | 9.04E-01 | 1.00E+00 |
| ENSG00000163072.13_NOSTRIN  | ENSG00000160789.18_LMNA | -0.32499 | -0.460370517 | -0.17483357 | 4.41E-05 | 9.68E-04 | 1.00E+00 |
| ENSG00000148935.9_GAS2      | ENSG00000160789.18_LMNA | -0.04372 | -0.201515945 | 0.116292311 | 5.93E-01 | 8.12E-01 | 1.00E+00 |
| ENSG00000116127.16_ALMS1    | ENSG00000160789.18_LMNA | 0.12753  | -0.032324717 | 0.281027223 | 1.17E-01 | 3.43E-01 | 1.00E+00 |
| ENSG00000141622.12_RNF165   | ENSG00000160789.18_LMNA | -0.29189 | -0.431058938 | -0.13915477 | 2.64E-04 | 4.06E-03 | 1.00E+00 |
| ENSG00000142449.11_FBN3     | ENSG00000160789.18_LMNA | -0.15774 | -0.30917334  | 0.00150189  | 5.23E-02 | 2.07E-01 | 1.00E+00 |
| ENSG00000270021.1_CTC-203F4 | ENSG00000160789.18_LMNA | -0.27953 | -0.420036558 | -0.12593129 | 4.87E-04 | 6.60E-03 | 1.00E+00 |
| ENSG00000183888.4_C1orf64   | ENSG00000160789.18_LMNA | -0.28198 | -0.422227951 | -0.12855199 | 4.32E-04 | 6.02E-03 | 1.00E+00 |
| ENSG00000131730.14_CKMT2    | ENSG00000160789.18_LMNA | -0.14149 | -0.294071326 | 0.018113835 | 8.21E-02 | 2.76E-01 | 1.00E+00 |
| ENSG00000218336.6_TENM3     | ENSG00000160789.18_LMNA | -0.02781 | -0.186187475 | 0.131973895 | 7.34E-01 | 8.88E-01 | 1.00E+00 |
| ENSG00000129226.12_CD68     | ENSG00000160789.18_LMNA | 0.1357   | -0.024023726 | 0.288660753 | 9.55E-02 | 3.03E-01 | 1.00E+00 |
| ENSG00000182196.12_ARL6IP4  | ENSG00000160789.18_LMNA | 0.03856  | -0.121388759 | 0.196551274 | 6.37E-01 | 8.38E-01 | 1.00E+00 |
| ENSG00000142794.17_NBPF3    | ENSG00000160789.18_LMNA | 0.00374  | -0.155556951 | 0.162840121 | 9.64E-01 | 9.85E-01 | 1.00E+00 |
| ENSG0000022567.8_SLC45A4    | ENSG00000160789.18_LMNA | 0.05559  | -0.104535271 | 0.212907036 | 4.96E-01 | 7.51E-01 | 1.00E+00 |
| ENSG00000135437.8_RDH5      | ENSG00000160789.18_LMNA | 0.23879  | 0.082733473  | 0.383414099 | 3.05E-03 | 2.71E-02 | 1.00E+00 |
| ENSG00000007129.16_CEACAM2  | ENSG00000160789.18_LMNA | -0.04067 | -0.198589389 | 0.119298573 | 6.19E-01 | 8.27E-01 | 1.00E+00 |
| ENSG00000151151.5_IPMK      | ENSG00000160789.18_LMNA | -0.20624 | -0.353819339 | -0.04863154 | 1.08E-02 | 6.92E-02 | 1.00E+00 |
| ENSG00000264920.1_RP11-6N17 | ENSG00000160789.18_LMNA | -0.19598 | -0.344430348 | -0.0379593  | 1.55E-02 | 9.00E-02 | 1.00E+00 |
| ENSG00000131697.16_NPHP4    | ENSG00000160789.18_LMNA | 0.06547  | -0.09472276  | 0.222348516 | 4.23E-01 | 6.94E-01 | 1.00E+00 |
| ENSG00000230555.2_RP11-517P | ENSG00000160789.18_LMNA | 0.03511  | -0.124783631 | 0.19323511  | 6.68E-01 | 8.54E-01 | 1.00E+00 |
| ENSG00000254023.1_PKMP4     | ENSG00000160789.18_LMNA | 0.3365   | 0.187338854  | 0.470498842 | 2.25E-05 | 5.68E-04 | 1.00E+00 |
| ENSG00000136682.13_CBWD2    | ENSG00000160789.18_LMNA | 0.05276  | -0.107347029 | 0.210190625 | 5.19E-01 | 7.65E-01 | 1.00E+00 |
| ENSG00000142149.7_HUNK      | ENSG00000160789.18_LMNA | -0.05076 | -0.208281581 | 0.109320046 | 5.35E-01 | 7.76E-01 | 1.00E+00 |
| ENSG00000120820.11_GLT8D2   | ENSG00000160789.18_LMNA | 0.17189  | 0.013050338  | 0.322275343 | 3.42E-02 | 1.56E-01 | 1.00E+00 |
| ENSG00000175066.14_GK5      | ENSG00000160789.18_LMNA | -0.08511 | -0.24104389  | 0.075109191 | 2.97E-01 | 5.83E-01 | 1.00E+00 |
| ENSG00000139174.9_PRICKLE1  | ENSG00000160789.18_LMNA | -0.14161 | -0.294174261 | 0.018001189 | 8.18E-02 | 2.76E-01 | 1.00E+00 |
| ENSG00000104375.14_STK3     | ENSG00000160789.18_LMNA | 0.10678  | -0.053322636 | 0.261539052 | 1.90E-01 | 4.58E-01 | 1.00E+00 |
| ENSG00000244073.1_RPS4XP6   | ENSG00000160789.18_LMNA | -0.02047 | -0.179085348 | 0.139186042 | 8.02E-01 | 9.21E-01 | 1.00E+00 |
| ENSG00000259146.3_RP1-261D1 | ENSG00000160789.18_LMNA | 0.23762  | 0.081503329  | 0.382357169 | 3.20E-03 | 2.80E-02 | 1.00E+00 |
| ENSG00000279227.1_AC009303. | ENSG00000160789.18_LMNA | -0.24601 | -0.389943235 | -0.09035299 | 2.25E-03 | 2.14E-02 | 1.00E+00 |
| ENSG00000236869.1_RP11-944L | ENSG00000160789.18_LMNA | -0.30521 | -0.442886948 | -0.15346149 | 1.32E-04 | 2.35E-03 | 1.00E+00 |
| ENSG00000178977.3_LINC00324 | ENSG00000160789.18_LMNA | -0.1197  | -0.273683535 | 0.040269932 | 1.42E-01 | 3.85E-01 | 1.00E+00 |
| ENSG00000263990.1_CTC-542B2 | ENSG00000160789.18_LMNA | -0.10538 | -0.260215876 | 0.054738294 | 1.96E-01 | 4.66E-01 | 1.00E+00 |

|                             |                         |          |              |             |          |          |          |
|-----------------------------|-------------------------|----------|--------------|-------------|----------|----------|----------|
| ENSG00000247572.6_CKMT2-AS  | ENSG00000160789.18_LMNA | 0.05127  | -0.108819578 | 0.208766051 | 5.30E-01 | 7.73E-01 | 1.00E+00 |
| ENSG00000163006.10_CCDC138  | ENSG00000160789.18_LMNA | -0.34095 | -0.474402398 | -0.19218314 | 1.72E-05 | 4.56E-04 | 8.83E-01 |
| ENSG00000224849.2_          | ENSG00000160789.18_LMNA | -0.20286 | -0.350732589 | -0.0451152  | 1.22E-02 | 7.56E-02 | 1.00E+00 |
| ENSG00000143458.10_GABPB2   | ENSG00000160789.18_LMNA | 0.09423  | -0.065957846 | 0.249687276 | 2.48E-01 | 5.28E-01 | 1.00E+00 |
| ENSG00000196557.9_CACNA1H   | ENSG00000160789.18_LMNA | 0.08006  | -0.080164274 | 0.236247796 | 3.27E-01 | 6.13E-01 | 1.00E+00 |
| ENSG00000196693.13_ZNF33B   | ENSG00000160789.18_LMNA | -0.20111 | -0.34912891  | -0.04329132 | 1.30E-02 | 7.90E-02 | 1.00E+00 |
| ENSG00000254966.1_RP11-1081 | ENSG00000160789.18_LMNA | -0.20674 | -0.354278641 | -0.04915541 | 1.06E-02 | 6.83E-02 | 1.00E+00 |
| ENSG00000267221.1_CTD-2132N | ENSG00000160789.18_LMNA | -0.15456 | -0.306226143 | 0.004757277 | 5.73E-02 | 2.19E-01 | 1.00E+00 |
| ENSG00000167394.11_ZNF668   | ENSG00000160789.18_LMNA | 0.1567   | -0.002560201 | 0.308215875 | 5.39E-02 | 2.11E-01 | 1.00E+00 |
| ENSG00000205181.5_LINC00654 | ENSG00000160789.18_LMNA | -0.07178 | -0.22836647  | 0.088435995 | 3.80E-01 | 6.58E-01 | 1.00E+00 |
| ENSG00000151718.14_WWC2     | ENSG00000160789.18_LMNA | 0.10667  | -0.053437803 | 0.261431453 | 1.91E-01 | 4.59E-01 | 1.00E+00 |
| ENSG00000235565.1_          | ENSG00000160789.18_LMNA | 0.03823  | -0.121710676 | 0.196237133 | 6.40E-01 | 8.39E-01 | 1.00E+00 |
| ENSG00000087299.10_L2HGDH   | ENSG00000160789.18_LMNA | -0.04882 | -0.206417863 | 0.111243808 | 5.50E-01 | 7.87E-01 | 1.00E+00 |
| ENSG00000138131.3_LOXL4     | ENSG00000160789.18_LMNA | 0.3924   | 0.248737737  | 0.519167841 | 5.74E-07 | 2.93E-05 | 2.94E-02 |
| ENSG00000156711.15_MAPK13   | ENSG00000160789.18_LMNA | 0.17316  | 0.014354643  | 0.323443909 | 3.29E-02 | 1.52E-01 | 1.00E+00 |
| ENSG00000258943.1_RP11-696D | ENSG00000160789.18_LMNA | 0.20783  | 0.050295832  | 0.355277989 | 1.02E-02 | 6.64E-02 | 1.00E+00 |
| ENSG00000132570.13_PCBD2    | ENSG00000160789.18_LMNA | 0.03554  | -0.124366144 | 0.19364331  | 6.64E-01 | 8.52E-01 | 1.00E+00 |
| ENSG00000111664.9_GNB3      | ENSG00000160789.18_LMNA | -0.05939 | -0.216543916 | 0.100762773 | 4.67E-01 | 7.29E-01 | 1.00E+00 |
| ENSG00000099139.12_PCSK5    | ENSG00000160789.18_LMNA | 0.46989  | 0.335812772  | 0.585307748 | 1.01E-09 | 1.59E-07 | 5.19E-05 |
| ENSG00000069667.14_RORA     | ENSG00000160789.18_LMNA | 0.17609  | 0.017374333  | 0.326145726 | 3.00E-02 | 1.43E-01 | 1.00E+00 |
| ENSG00000112877.7_CEP72     | ENSG00000160789.18_LMNA | -0.0071  | -0.16611177  | 0.152273995 | 9.31E-01 | 9.73E-01 | 1.00E+00 |
| ENSG00000137101.11_CD72     | ENSG00000160789.18_LMNA | 0.11834  | -0.041645366 | 0.272408507 | 1.46E-01 | 3.92E-01 | 1.00E+00 |
| ENSG00000177791.11_MYOZ1    | ENSG00000160789.18_LMNA | -0.39251 | -0.519265596 | -0.24886329 | 5.69E-07 | 2.91E-05 | 2.92E-02 |
| ENSG00000148814.16_LRRC27   | ENSG00000160789.18_LMNA | -0.16874 | -0.319357892 | -0.00979859 | 3.77E-02 | 1.66E-01 | 1.00E+00 |
| ENSG00000198838.10_RYR3     | ENSG00000160789.18_LMNA | 0.20261  | 0.044853544  | 0.350502634 | 1.23E-02 | 7.61E-02 | 1.00E+00 |
| ENSG00000170545.15_SMAGP    | ENSG00000160789.18_LMNA | 0.30969  | 0.158293317  | 0.446859006 | 1.03E-04 | 1.94E-03 | 1.00E+00 |
| ENSG00000179058.6_C9orf50   | ENSG00000160789.18_LMNA | 0.12231  | -0.037621492 | 0.276135538 | 1.33E-01 | 3.71E-01 | 1.00E+00 |
| ENSG00000235387.1_LINC00961 | ENSG00000160789.18_LMNA | -0.07972 | -0.235922724 | 0.080506313 | 3.29E-01 | 6.15E-01 | 1.00E+00 |
| ENSG00000279789.1_CTD-2574D | ENSG00000160789.18_LMNA | -0.12086 | -0.274777136 | 0.039089264 | 1.38E-01 | 3.79E-01 | 1.00E+00 |
| ENSG00000198844.9_ARHGEF15  | ENSG00000160789.18_LMNA | 0.05654  | -0.103592409 | 0.213816828 | 4.89E-01 | 7.45E-01 | 1.00E+00 |
| ENSG00000106952.6_TNFSF8    | ENSG00000160789.18_LMNA | -0.0698  | -0.226479696 | 0.090409768 | 3.93E-01 | 6.71E-01 | 1.00E+00 |
| ENSG00000187796.12_CARD9    | ENSG00000160789.18_LMNA | 0.23243  | 0.076040184  | 0.377653745 | 3.96E-03 | 3.29E-02 | 1.00E+00 |
| ENSG00000185420.17_SMYD3    | ENSG00000160789.18_LMNA | -0.20017 | -0.348268237 | -0.0423133  | 1.34E-02 | 8.09E-02 | 1.00E+00 |

|                              |                         |          |              |             |          |          |          |
|------------------------------|-------------------------|----------|--------------|-------------|----------|----------|----------|
| ENSG00000269343.5_ZNF587B    | ENSG00000160789.18_LMNA | 0.15451  | -0.004807563 | 0.30618057  | 5.73E-02 | 2.19E-01 | 1.00E+00 |
| ENSG00000196440.10_ARMCX4    | ENSG00000160789.18_LMNA | -0.12674 | -0.280282729 | 0.033132001 | 1.20E-01 | 3.48E-01 | 1.00E+00 |
| ENSG00000261269.1_RP11-389C  | ENSG00000160789.18_LMNA | -0.12334 | -0.277098863 | 0.036579784 | 1.30E-01 | 3.66E-01 | 1.00E+00 |
| ENSG00000186994.10_KANK3     | ENSG00000160789.18_LMNA | -0.11679 | -0.270956581 | 0.043210179 | 1.52E-01 | 4.01E-01 | 1.00E+00 |
| ENSG00000275202.1_RP11-156K  | ENSG00000160789.18_LMNA | 0.16392  | 0.004841528  | 0.314899132 | 4.36E-02 | 1.84E-01 | 1.00E+00 |
| ENSG00000133460.18_SLC2A11   | ENSG00000160789.18_LMNA | -0.12115 | -0.275043146 | 0.038801943 | 1.37E-01 | 3.77E-01 | 1.00E+00 |
| ENSG00000231025.1_           | ENSG00000160789.18_LMNA | 0.02342  | -0.136292409 | 0.181938829 | 7.75E-01 | 9.07E-01 | 1.00E+00 |
| ENSG00000165983.13_PTER      | ENSG00000160789.18_LMNA | -0.09809 | -0.253337616 | 0.062076966 | 2.29E-01 | 5.06E-01 | 1.00E+00 |
| ENSG00000186827.9_TNFRSF4    | ENSG00000160789.18_LMNA | 0.06595  | -0.094242766 | 0.22280884  | 4.20E-01 | 6.91E-01 | 1.00E+00 |
| ENSG00000184599.12_FAM19A3   | ENSG00000160789.18_LMNA | 0.1691   | 0.010176903  | 0.319697617 | 3.73E-02 | 1.65E-01 | 1.00E+00 |
| ENSG00000196542.7_SPTSSB     | ENSG00000160789.18_LMNA | 0.23516  | 0.078918181  | 0.380133461 | 3.54E-03 | 3.03E-02 | 1.00E+00 |
| ENSG00000107954.9_NEURL1     | ENSG00000160789.18_LMNA | -0.2474  | -0.391191104 | -0.09181327 | 2.12E-03 | 2.04E-02 | 1.00E+00 |
| ENSG00000178177.13_LCORL     | ENSG00000160789.18_LMNA | -0.29075 | -0.430046616 | -0.13793593 | 2.79E-04 | 4.25E-03 | 1.00E+00 |
| ENSG00000136867.9_SLC31A2    | ENSG00000160789.18_LMNA | -0.16525 | -0.31613766  | -0.00621694 | 4.19E-02 | 1.79E-01 | 1.00E+00 |
| ENSG00000260118.1_RP6-201G1  | ENSG00000160789.18_LMNA | -0.47558 | -0.590103345 | -0.34229658 | 5.95E-10 | 1.02E-07 | 3.05E-05 |
| ENSG00000049883.13_PTCD2     | ENSG00000160789.18_LMNA | -0.04586 | -0.203570812 | 0.114177993 | 5.75E-01 | 8.02E-01 | 1.00E+00 |
| ENSG00000226751.2_AF127936.5 | ENSG00000160789.18_LMNA | -0.31399 | -0.450664526 | -0.16293556 | 8.17E-05 | 1.60E-03 | 1.00E+00 |
| ENSG00000243970.1_PPIEL      | ENSG00000160789.18_LMNA | 0.03417  | -0.125719287 | 0.192319868 | 6.76E-01 | 8.58E-01 | 1.00E+00 |
| ENSG00000234936.1_AC010883.4 | ENSG00000160789.18_LMNA | -0.0329  | -0.191100058 | 0.126965425 | 6.87E-01 | 8.65E-01 | 1.00E+00 |
| ENSG00000162004.15_CCDC78    | ENSG00000160789.18_LMNA | 0.02392  | -0.135800124 | 0.18242375  | 7.70E-01 | 9.05E-01 | 1.00E+00 |
| ENSG00000123360.10_PDE1B     | ENSG00000160789.18_LMNA | -0.19858 | -0.346818912 | -0.04066771 | 1.42E-02 | 8.45E-02 | 1.00E+00 |
| ENSG00000273355.1_RP11-672L  | ENSG00000160789.18_LMNA | -0.11663 | -0.270806535 | 0.043371803 | 1.52E-01 | 4.02E-01 | 1.00E+00 |
| ENSG00000205744.8_DENND1C    | ENSG00000160789.18_LMNA | 0.05896  | -0.101194724 | 0.21612794  | 4.71E-01 | 7.31E-01 | 1.00E+00 |
| ENSG00000250251.5_PKD1P6     | ENSG00000160789.18_LMNA | 0.13176  | -0.028026298 | 0.284984973 | 1.06E-01 | 3.23E-01 | 1.00E+00 |
| ENSG00000179855.5_GIPC3      | ENSG00000160789.18_LMNA | 0.11699  | -0.043015615 | 0.271137187 | 1.51E-01 | 4.00E-01 | 1.00E+00 |
| ENSG00000171540.7_OTP        | ENSG00000160789.18_LMNA | -0.14205 | -0.29458767  | 0.017548698 | 8.09E-02 | 2.74E-01 | 1.00E+00 |
| ENSG00000234771.3_SLC25A25-  | ENSG00000160789.18_LMNA | -0.04574 | -0.203457401 | 0.114294761 | 5.76E-01 | 8.02E-01 | 1.00E+00 |
| ENSG00000242660.1_RP11-1094I | ENSG00000160789.18_LMNA | -0.10442 | -0.259314057 | 0.055702422 | 2.00E-01 | 4.71E-01 | 1.00E+00 |
| ENSG00000153558.12_FBXL2     | ENSG00000160789.18_LMNA | -0.35811 | -0.489410812 | -0.21093747 | 5.90E-06 | 1.90E-04 | 3.03E-01 |
| ENSG00000006611.14_USH1C     | ENSG00000160789.18_LMNA | -0.53131 | -0.636662071 | -0.40649681 | 1.89E-12 | 9.18E-10 | 9.70E-08 |
| ENSG00000254221.2_PCDHGB1    | ENSG00000160789.18_LMNA | -0.0353  | -0.193413486 | 0.124601211 | 6.66E-01 | 8.53E-01 | 1.00E+00 |
| ENSG00000108700.4_CCL8       | ENSG00000160789.18_LMNA | 0.09877  | -0.061397571 | 0.25397573  | 2.26E-01 | 5.02E-01 | 1.00E+00 |
| ENSG00000122477.11_LRRC39    | ENSG00000160789.18_LMNA | -0.26714 | -0.40894687  | -0.11273171 | 8.78E-04 | 1.05E-02 | 1.00E+00 |

|                             |                         |          |              |             |          |          |          |
|-----------------------------|-------------------------|----------|--------------|-------------|----------|----------|----------|
| ENSG00000136059.13_VILL     | ENSG00000160789.18_LMNA | -0.13563 | -0.28859812  | 0.024092011 | 9.57E-02 | 3.03E-01 | 1.00E+00 |
| ENSG00000104814.11_MAP4K1   | ENSG00000160789.18_LMNA | 0.11843  | -0.041549262 | 0.272497631 | 1.46E-01 | 3.92E-01 | 1.00E+00 |
| ENSG00000181656.6_GPR88     | ENSG00000160789.18_LMNA | -0.29115 | -0.430399108 | -0.13836023 | 2.74E-04 | 4.18E-03 | 1.00E+00 |
| ENSG00000262587.2_RP11-266L | ENSG00000160789.18_LMNA | -0.14346 | -0.295898942 | 0.016112616 | 7.79E-02 | 2.67E-01 | 1.00E+00 |
| ENSG00000149573.7_MPZL2     | ENSG00000160789.18_LMNA | 0.33257  | 0.183059723  | 0.46704145  | 2.84E-05 | 6.82E-04 | 1.00E+00 |
| ENSG00000259020.3_RP11-529H | ENSG00000160789.18_LMNA | 0.02676  | -0.133009273 | 0.185169932 | 7.43E-01 | 8.92E-01 | 1.00E+00 |
| ENSG00000278600.1_RP11-81A1 | ENSG00000160789.18_LMNA | 0.00033  | -0.158874984 | 0.159526385 | 9.97E-01 | 9.99E-01 | 1.00E+00 |
| ENSG00000114374.11_USP9Y    | ENSG00000160789.18_LMNA | -0.08867 | -0.24441754  | 0.071543601 | 2.77E-01 | 5.62E-01 | 1.00E+00 |
| ENSG00000276182.1_RP11-872J | ENSG00000160789.18_LMNA | -0.38337 | -0.511356747 | -0.23873494 | 1.09E-06 | 4.92E-05 | 5.58E-02 |
| ENSG00000272462.2_U91328.19 | ENSG00000160789.18_LMNA | -0.16852 | -0.319158102 | -0.00957614 | 3.80E-02 | 1.67E-01 | 1.00E+00 |
| ENSG00000269609.4_RPARP-AS  | ENSG00000160789.18_LMNA | -0.32744 | -0.46252705  | -0.17748851 | 3.83E-05 | 8.68E-04 | 1.00E+00 |
| ENSG00000140471.15_LINS1    | ENSG00000160789.18_LMNA | 0.03534  | -0.124558242 | 0.193455499 | 6.66E-01 | 8.53E-01 | 1.00E+00 |
| ENSG00000225938.1_RP4-575N6 | ENSG00000160789.18_LMNA | -0.2406  | -0.385052164 | -0.0846418  | 2.83E-03 | 2.56E-02 | 1.00E+00 |
| ENSG00000271581.1_XXbac-BPG | ENSG00000160789.18_LMNA | 0.29607  | 0.143634721  | 0.434773537 | 2.13E-04 | 3.42E-03 | 1.00E+00 |
| ENSG00000272368.2_RP4-605O3 | ENSG00000160789.18_LMNA | -0.35298 | -0.484927943 | -0.20531418 | 8.18E-06 | 2.47E-04 | 4.20E-01 |
| ENSG00000100288.18_CHKB     | ENSG00000160789.18_LMNA | -0.1187  | -0.272743498 | 0.04128411  | 1.45E-01 | 3.90E-01 | 1.00E+00 |
| ENSG00000273183.1_RP11-5C23 | ENSG00000160789.18_LMNA | 0.29224  | 0.139528837  | 0.431369482 | 2.59E-04 | 4.01E-03 | 1.00E+00 |
| ENSG00000196267.11_ZNF836   | ENSG00000160789.18_LMNA | -0.02652 | -0.184940075 | 0.133243062 | 7.46E-01 | 8.94E-01 | 1.00E+00 |
| ENSG00000260083.1_MIR762HG  | ENSG00000160789.18_LMNA | -0.20268 | -0.350570768 | -0.04493107 | 1.23E-02 | 7.60E-02 | 1.00E+00 |
| ENSG00000224660.1_SH3BP5-A5 | ENSG00000160789.18_LMNA | -0.0468  | -0.204474041 | 0.113247721 | 5.67E-01 | 7.97E-01 | 1.00E+00 |
| ENSG00000258789.1_RP11-507K | ENSG00000160789.18_LMNA | -0.34646 | -0.47923236  | -0.19819619 | 1.23E-05 | 3.46E-04 | 6.30E-01 |
| ENSG00000146243.12_IRAK1BP1 | ENSG00000160789.18_LMNA | -0.32864 | -0.463583387 | -0.1787905  | 3.57E-05 | 8.23E-04 | 1.00E+00 |
| ENSG00000141664.8_ZCCHC2    | ENSG00000160789.18_LMNA | 0.07402  | -0.08619281  | 0.230507896 | 3.65E-01 | 6.46E-01 | 1.00E+00 |
| ENSG00000230734.1_RPL10P3   | ENSG00000160789.18_LMNA | -0.02834 | -0.186696698 | 0.131455487 | 7.29E-01 | 8.85E-01 | 1.00E+00 |
| ENSG00000272842.1_RP11-513M | ENSG00000160789.18_LMNA | -0.32197 | -0.457709708 | -0.17156352 | 5.23E-05 | 1.12E-03 | 1.00E+00 |
| ENSG00000177301.12_KCNA2    | ENSG00000160789.18_LMNA | -0.24677 | -0.390623369 | -0.09114874 | 2.18E-03 | 2.09E-02 | 1.00E+00 |
| ENSG00000168702.15_LRP1B    | ENSG00000160789.18_LMNA | -0.04397 | -0.201755976 | 0.116045484 | 5.91E-01 | 8.10E-01 | 1.00E+00 |
| ENSG00000112280.14_COL9A1   | ENSG00000160789.18_LMNA | -0.15188 | -0.303736133 | 0.007502539 | 6.18E-02 | 2.30E-01 | 1.00E+00 |
| ENSG00000272447.1_RP11-182L | ENSG00000160789.18_LMNA | -0.19192 | -0.34071422  | -0.03375449 | 1.78E-02 | 9.94E-02 | 1.00E+00 |
| ENSG00000275055.1_CTC-471J1 | ENSG00000160789.18_LMNA | -0.17736 | -0.327319991 | -0.01868851 | 2.88E-02 | 1.39E-01 | 1.00E+00 |
| ENSG00000267194.1_RP1-193H1 | ENSG00000160789.18_LMNA | -0.40866 | -0.533174096 | -0.26681961 | 1.72E-07 | 1.12E-05 | 8.85E-03 |
| ENSG00000165995.17_CACNB2   | ENSG00000160789.18_LMNA | -0.09898 | -0.254176366 | 0.061183895 | 2.25E-01 | 5.01E-01 | 1.00E+00 |
| ENSG00000232093.1_RP11-307C | ENSG00000160789.18_LMNA | 0.20535  | 0.047712959  | 0.353013621 | 1.11E-02 | 7.08E-02 | 1.00E+00 |

|                              |                         |          |              |             |          |          |          |
|------------------------------|-------------------------|----------|--------------|-------------|----------|----------|----------|
| ENSG00000213309.3_RPL9P18    | ENSG00000160789.18_LMNA | -0.18845 | -0.337524328 | -0.03015376 | 2.01E-02 | 1.08E-01 | 1.00E+00 |
| ENSG00000260966.1_RP11-690D  | ENSG00000160789.18_LMNA | -0.35303 | -0.484971199 | -0.20536835 | 8.16E-06 | 2.47E-04 | 4.19E-01 |
| ENSG00000228360.1_RP11-365F  | ENSG00000160789.18_LMNA | -0.02401 | -0.182517594 | 0.135704838 | 7.69E-01 | 9.04E-01 | 1.00E+00 |
| ENSG00000257337.5_RP11-983P  | ENSG00000160789.18_LMNA | -0.19516 | -0.34368103  | -0.03711057 | 1.60E-02 | 9.18E-02 | 1.00E+00 |
| ENSG00000242282.5_AC108488.4 | ENSG00000160789.18_LMNA | -0.07021 | -0.226879139 | 0.089992114 | 3.90E-01 | 6.68E-01 | 1.00E+00 |
| ENSG00000130751.8_NPAS1      | ENSG00000160789.18_LMNA | 0.17209  | 0.013254611  | 0.32245842  | 3.40E-02 | 1.56E-01 | 1.00E+00 |
| ENSG00000206567.8_AC022007.1 | ENSG00000160789.18_LMNA | 0.04359  | -0.11641911  | 0.201392623 | 5.94E-01 | 8.13E-01 | 1.00E+00 |
| ENSG00000147804.8_SLC39A4    | ENSG00000160789.18_LMNA | 0.14855  | -0.010908459 | 0.300640974 | 6.78E-02 | 2.44E-01 | 1.00E+00 |
| ENSG00000240758.2_RP11-155G  | ENSG00000160789.18_LMNA | 0.18596  | 0.027570575  | 0.335231521 | 2.18E-02 | 1.15E-01 | 1.00E+00 |
| ENSG00000115112.7_TFCP2L1    | ENSG00000160789.18_LMNA | 0.23884  | 0.082786468  | 0.383459615 | 3.04E-03 | 2.70E-02 | 1.00E+00 |
| ENSG00000241644.2_INMT       | ENSG00000160789.18_LMNA | -0.01807 | -0.176762133 | 0.14153794  | 8.25E-01 | 9.31E-01 | 1.00E+00 |
| ENSG00000184465.14_WDR27     | ENSG00000160789.18_LMNA | -0.0537  | -0.211096765 | 0.106409648 | 5.11E-01 | 7.60E-01 | 1.00E+00 |
| ENSG00000272986.1_RP11-46J2  | ENSG00000160789.18_LMNA | -0.10932 | -0.263929347 | 0.050762059 | 1.80E-01 | 4.43E-01 | 1.00E+00 |
| ENSG00000125246.14_CLYBL     | ENSG00000160789.18_LMNA | -0.04806 | -0.205684686 | 0.111999954 | 5.57E-01 | 7.90E-01 | 1.00E+00 |
| ENSG00000212829.8_RPS26P3    | ENSG00000160789.18_LMNA | -0.14686 | -0.299070921 | 0.012633389 | 7.10E-02 | 2.52E-01 | 1.00E+00 |
| ENSG00000270010.1_           | ENSG00000160789.18_LMNA | -0.23328 | -0.378428494 | -0.07693883 | 3.82E-03 | 3.21E-02 | 1.00E+00 |
| ENSG00000236540.6_AC006547.1 | ENSG00000160789.18_LMNA | -0.01968 | -0.178323484 | 0.139957708 | 8.10E-01 | 9.25E-01 | 1.00E+00 |
| ENSG00000100368.12_CSF2RB    | ENSG00000160789.18_LMNA | 0.08975  | -0.070458254 | 0.245442946 | 2.72E-01 | 5.56E-01 | 1.00E+00 |
| ENSG00000164867.9_NOS3       | ENSG00000160789.18_LMNA | 0.17836  | 0.019714072  | 0.328235705 | 2.79E-02 | 1.36E-01 | 1.00E+00 |
| ENSG00000271452.1_RP11-342K  | ENSG00000160789.18_LMNA | -0.04529 | -0.203028385 | 0.114736393 | 5.80E-01 | 8.04E-01 | 1.00E+00 |
| ENSG00000138162.16_TACC2     | ENSG00000160789.18_LMNA | -0.11174 | -0.266207993 | 0.048317228 | 1.71E-01 | 4.29E-01 | 1.00E+00 |
| ENSG00000236814.1_RP11-446E  | ENSG00000160789.18_LMNA | -0.17671 | -0.326716478 | -0.01801296 | 2.94E-02 | 1.41E-01 | 1.00E+00 |
| ENSG00000153012.10_LGI2      | ENSG00000160789.18_LMNA | -0.07286 | -0.229395068 | 0.08735892  | 3.72E-01 | 6.53E-01 | 1.00E+00 |
| ENSG00000119943.9_PYROXD2    | ENSG00000160789.18_LMNA | 0.16616  | 0.007143417  | 0.316971332 | 4.08E-02 | 1.76E-01 | 1.00E+00 |
| ENSG00000172461.9_FUT9       | ENSG00000160789.18_LMNA | -0.39107 | -0.518019419 | -0.24726346 | 6.31E-07 | 3.16E-05 | 3.24E-02 |
| ENSG00000156049.6_GNA14      | ENSG00000160789.18_LMNA | 0.15173  | -0.007656486 | 0.303596374 | 6.20E-02 | 2.31E-01 | 1.00E+00 |
| ENSG00000154783.9_FGD5       | ENSG00000160789.18_LMNA | 0.14355  | -0.016020472 | 0.295983038 | 7.77E-02 | 2.67E-01 | 1.00E+00 |
| ENSG00000180376.15_CCDC66    | ENSG00000160789.18_LMNA | -0.22772 | -0.373388498 | -0.0711016  | 4.78E-03 | 3.79E-02 | 1.00E+00 |
| ENSG00000237424.1_FOXD2-AS1  | ENSG00000160789.18_LMNA | 0.28154  | 0.128083662  | 0.421836591 | 4.42E-04 | 6.12E-03 | 1.00E+00 |
| ENSG00000196381.9_ZNF781     | ENSG00000160789.18_LMNA | -0.19985 | -0.34797601  | -0.04198137 | 1.36E-02 | 8.16E-02 | 1.00E+00 |
| ENSG00000263400.5_TMEM220-1  | ENSG00000160789.18_LMNA | 0.09761  | -0.062560893 | 0.252882926 | 2.32E-01 | 5.09E-01 | 1.00E+00 |
| ENSG00000261663.1_RP11-304L  | ENSG00000160789.18_LMNA | -0.08272 | -0.238772528 | 0.077505234 | 3.11E-01 | 5.97E-01 | 1.00E+00 |
| ENSG00000022355.13_GABRA1    | ENSG00000160789.18_LMNA | -0.21771 | -0.364287641 | -0.06061334 | 7.05E-03 | 5.07E-02 | 1.00E+00 |

|                             |                         |          |              |             |          |          |          |
|-----------------------------|-------------------------|----------|--------------|-------------|----------|----------|----------|
| ENSG00000092853.12_CLSPN    | ENSG00000160789.18_LMNA | 0.19104  | 0.032843017  | 0.339907415 | 1.84E-02 | 1.02E-01 | 1.00E+00 |
| ENSG00000203288.3_RP11-98D1 | ENSG00000160789.18_LMNA | -0.4452  | -0.564400785 | -0.30781939 | 9.09E-09 | 9.92E-07 | 4.66E-04 |
| ENSG00000078177.12_N4BP2    | ENSG00000160789.18_LMNA | 0.00355  | -0.155740556 | 0.162656941 | 9.65E-01 | 9.86E-01 | 1.00E+00 |
| ENSG00000151657.10_KIN      | ENSG00000160789.18_LMNA | -0.2629  | -0.405141252 | -0.10822601 | 1.07E-03 | 1.22E-02 | 1.00E+00 |
| ENSG00000085276.16_MECOM    | ENSG00000160789.18_LMNA | -0.12969 | -0.283043008 | 0.030136869 | 1.11E-01 | 3.33E-01 | 1.00E+00 |
| ENSG00000169682.16_SPNS1    | ENSG00000160789.18_LMNA | 0.24771  | 0.092147206  | 0.391476318 | 2.09E-03 | 2.02E-02 | 1.00E+00 |
| ENSG00000154620.5_TMSB4Y    | ENSG00000160789.18_LMNA | -0.15578 | -0.307357462 | 0.003508434 | 5.53E-02 | 2.15E-01 | 1.00E+00 |
| ENSG00000213293.4_CTD-266L  | ENSG00000160789.18_LMNA | 0.09326  | -0.066937142 | 0.248764733 | 2.53E-01 | 5.35E-01 | 1.00E+00 |
| ENSG00000224043.6_CCNT2-AS  | ENSG00000160789.18_LMNA | -0.31987 | -0.455857141 | -0.16929049 | 5.89E-05 | 1.22E-03 | 1.00E+00 |
| ENSG00000179588.7_ZFPM1     | ENSG00000160789.18_LMNA | 0.307    | 0.155398689  | 0.444480809 | 1.20E-04 | 2.19E-03 | 1.00E+00 |
| ENSG00000188856.6_RPSAP47   | ENSG00000160789.18_LMNA | -0.14025 | -0.292912616 | 0.019381316 | 8.48E-02 | 2.82E-01 | 1.00E+00 |
| ENSG00000248079.2_DPH6-AS1  | ENSG00000160789.18_LMNA | -0.05992 | -0.217051247 | 0.100235798 | 4.63E-01 | 7.26E-01 | 1.00E+00 |
| ENSG00000171777.14_RASGRP4  | ENSG00000160789.18_LMNA | -0.00973 | -0.168673292 | 0.149698708 | 9.05E-01 | 9.64E-01 | 1.00E+00 |
| ENSG00000076826.8_CAMSAP3   | ENSG00000160789.18_LMNA | -0.28891 | -0.428405766 | -0.13596223 | 3.06E-04 | 4.58E-03 | 1.00E+00 |
| ENSG00000176422.12_SPRYD4   | ENSG00000160789.18_LMNA | -0.30694 | -0.444428079 | -0.15533456 | 1.20E-04 | 2.19E-03 | 1.00E+00 |
| ENSG00000241360.1_PDXP      | ENSG00000160789.18_LMNA | -0.20118 | -0.349200537 | -0.04337274 | 1.29E-02 | 7.89E-02 | 1.00E+00 |
| ENSG00000157470.10_FAM81A   | ENSG00000160789.18_LMNA | 0.01799  | -0.14161794  | 0.176683046 | 8.26E-01 | 9.32E-01 | 1.00E+00 |
| ENSG00000112539.13_C6orf118 | ENSG00000160789.18_LMNA | 0.08331  | -0.076910565 | 0.239336576 | 3.08E-01 | 5.94E-01 | 1.00E+00 |
| ENSG00000131044.15_TTLL9    | ENSG00000160789.18_LMNA | -0.15364 | -0.30536963  | 0.005702121 | 5.88E-02 | 2.23E-01 | 1.00E+00 |
| ENSG00000229133.1_RPS7P4    | ENSG00000160789.18_LMNA | -0.13369 | -0.286787138 | 0.026065167 | 1.01E-01 | 3.12E-01 | 1.00E+00 |
| ENSG00000258102.2_MAP1LC3B  | ENSG00000160789.18_LMNA | -0.19498 | -0.343518225 | -0.03692622 | 1.61E-02 | 9.22E-02 | 1.00E+00 |
| ENSG00000269696.1_AC007228  | ENSG00000160789.18_LMNA | -0.01405 | -0.172863044 | 0.145477108 | 8.64E-01 | 9.47E-01 | 1.00E+00 |
| ENSG00000160318.5_CLDND2    | ENSG00000160789.18_LMNA | -0.0657  | -0.222571593 | 0.094490169 | 4.21E-01 | 6.93E-01 | 1.00E+00 |
| ENSG00000232385.2_RPS3AP25  | ENSG00000160789.18_LMNA | -0.08031 | -0.236483308 | 0.079916424 | 3.25E-01 | 6.12E-01 | 1.00E+00 |
| ENSG00000135083.13_CCNJL    | ENSG00000160789.18_LMNA | 0.01208  | -0.147401276 | 0.17095482  | 8.83E-01 | 9.55E-01 | 1.00E+00 |
| ENSG00000186300.10_ZNF555   | ENSG00000160789.18_LMNA | -0.21133 | -0.358469143 | -0.05394279 | 8.96E-03 | 6.06E-02 | 1.00E+00 |
| ENSG00000128881.15_TTBK2    | ENSG00000160789.18_LMNA | -0.07174 | -0.228335851 | 0.088468045 | 3.80E-01 | 6.59E-01 | 1.00E+00 |
| ENSG00000224081.6_LINC01057 | ENSG00000160789.18_LMNA | 0.10333  | -0.056809917 | 0.258277455 | 2.05E-01 | 4.77E-01 | 1.00E+00 |
| ENSG00000226786.2_          | ENSG00000160789.18_LMNA | -0.12217 | -0.275998318 | 0.037769821 | 1.34E-01 | 3.71E-01 | 1.00E+00 |
| ENSG00000224281.4_SLC25A5-A | ENSG00000160789.18_LMNA | -0.2888  | -0.428312336 | -0.13584992 | 3.08E-04 | 4.60E-03 | 1.00E+00 |
| ENSG00000198520.9_C1orf228  | ENSG00000160789.18_LMNA | 0.04179  | -0.118198166 | 0.199661279 | 6.09E-01 | 8.22E-01 | 1.00E+00 |
| ENSG00000230177.1_RP5-1112D | ENSG00000160789.18_LMNA | 0.01891  | -0.140710337 | 0.177580047 | 8.17E-01 | 9.29E-01 | 1.00E+00 |
| ENSG00000224546.2	EIF4BP3   | ENSG00000160789.18_LMNA | 0.08527  | -0.074949903 | 0.241194767 | 2.96E-01 | 5.82E-01 | 1.00E+00 |

|                              |                         |          |              |             |          |          |          |
|------------------------------|-------------------------|----------|--------------|-------------|----------|----------|----------|
| ENSG00000165171.9_WBSCR27    | ENSG00000160789.18_LMNA | 0.26758  | 0.113205549  | 0.409346486 | 8.60E-04 | 1.03E-02 | 1.00E+00 |
| ENSG00000135218.16_CD36      | ENSG00000160789.18_LMNA | -0.00184 | -0.160990258 | 0.157410099 | 9.82E-01 | 9.93E-01 | 1.00E+00 |
| ENSG00000231908.1_IDH1-AS1   | ENSG00000160789.18_LMNA | -0.12113 | -0.27502712  | 0.038819254 | 1.37E-01 | 3.77E-01 | 1.00E+00 |
| ENSG00000240231.1_RPS27P29   | ENSG00000160789.18_LMNA | -0.09658 | -0.251910138 | 0.063595734 | 2.37E-01 | 5.15E-01 | 1.00E+00 |
| ENSG00000131002.10_TXLNGY    | ENSG00000160789.18_LMNA | -0.13475 | -0.287781219 | 0.024982367 | 9.79E-02 | 3.08E-01 | 1.00E+00 |
| ENSG00000171365.14_CLCN5     | ENSG00000160789.18_LMNA | 0.00861  | -0.150795641 | 0.167582748 | 9.16E-01 | 9.68E-01 | 1.00E+00 |
| ENSG00000087116.12_ADAMTS2   | ENSG00000160789.18_LMNA | 0.29958  | 0.147406188  | 0.437893024 | 1.77E-04 | 2.97E-03 | 1.00E+00 |
| ENSG00000164430.14_MB21D1    | ENSG00000160789.18_LMNA | 0.23423  | 0.077935882  | 0.379287587 | 3.68E-03 | 3.12E-02 | 1.00E+00 |
| ENSG00000130856.14_ZNF236    | ENSG00000160789.18_LMNA | 0.14556  | -0.013959891 | 0.297862374 | 7.36E-02 | 2.58E-01 | 1.00E+00 |
| ENSG00000166342.17_NETO1     | ENSG00000160789.18_LMNA | -0.35375 | -0.485601602 | -0.20615804 | 7.80E-06 | 2.40E-04 | 4.00E-01 |
| ENSG00000230982.1_DSTNP1     | ENSG00000160789.18_LMNA | 0.15742  | -0.001826021 | 0.308880162 | 5.28E-02 | 2.08E-01 | 1.00E+00 |
| ENSG00000179954.13_SSC5D     | ENSG00000160789.18_LMNA | 0.35667  | 0.209356104  | 0.488151638 | 6.47E-06 | 2.06E-04 | 3.32E-01 |
| ENSG00000176293.18_ZNF135    | ENSG00000160789.18_LMNA | -0.05668 | -0.213954789 | 0.103449384 | 4.88E-01 | 7.44E-01 | 1.00E+00 |
| ENSG00000213918.9_DNASE1     | ENSG00000160789.18_LMNA | 0.0088   | -0.150610519 | 0.167766846 | 9.14E-01 | 9.67E-01 | 1.00E+00 |
| ENSG00000125726.9_CD70       | ENSG00000160789.18_LMNA | 0.30539  | 0.153663259  | 0.443053041 | 1.30E-04 | 2.33E-03 | 1.00E+00 |
| ENSG00000271855.1_RP11-214N  | ENSG00000160789.18_LMNA | -0.3275  | -0.462586464 | -0.17756171 | 3.81E-05 | 8.67E-04 | 1.00E+00 |
| ENSG00000237515.7_SHISA9     | ENSG00000160789.18_LMNA | -0.12103 | -0.274931213 | 0.038922849 | 1.37E-01 | 3.78E-01 | 1.00E+00 |
| ENSG00000239617.1_RP11-302B  | ENSG00000160789.18_LMNA | -0.10065 | -0.255751456 | 0.059505428 | 2.17E-01 | 4.92E-01 | 1.00E+00 |
| ENSG00000183060.14_LYSMD4    | ENSG00000160789.18_LMNA | 0.09485  | -0.065338391 | 0.250270534 | 2.45E-01 | 5.25E-01 | 1.00E+00 |
| ENSG00000157554.17_ERG       | ENSG00000160789.18_LMNA | 0.02435  | -0.135377965 | 0.182839471 | 7.66E-01 | 9.03E-01 | 1.00E+00 |
| ENSG00000167664.7_TMIGD2     | ENSG00000160789.18_LMNA | -0.33992 | -0.473494487 | -0.1910552  | 1.83E-05 | 4.79E-04 | 9.40E-01 |
| ENSG00000267309.1_CTD-2630F  | ENSG00000160789.18_LMNA | -0.0043  | -0.163388516 | 0.155007151 | 9.58E-01 | 9.83E-01 | 1.00E+00 |
| ENSG00000007350.15_TKTL1     | ENSG00000160789.18_LMNA | -0.38228 | -0.510418818 | -0.23753772 | 1.17E-06 | 5.22E-05 | 6.02E-02 |
| ENSG00000272079.2_LA16c-380F | ENSG00000160789.18_LMNA | -0.11708 | -0.271227184 | 0.042918653 | 1.51E-01 | 3.99E-01 | 1.00E+00 |
| ENSG00000229950.1_TFAP2A-AS  | ENSG00000160789.18_LMNA | -0.18429 | -0.333702299 | -0.02584996 | 2.30E-02 | 1.19E-01 | 1.00E+00 |
| ENSG00000231365.4_RP11-418J  | ENSG00000160789.18_LMNA | -0.15955 | -0.310852362 | -0.00035566 | 4.96E-02 | 2.00E-01 | 1.00E+00 |
| ENSG00000236565.3_HNRNPA3F   | ENSG00000160789.18_LMNA | 0.20687  | 0.049291345  | 0.354397795 | 1.06E-02 | 6.81E-02 | 1.00E+00 |
| ENSG00000196295.10_AC005154  | ENSG00000160789.18_LMNA | -0.03351 | -0.19168534  | 0.126367636 | 6.82E-01 | 8.62E-01 | 1.00E+00 |
| ENSG00000243802.2_RP11-390K  | ENSG00000160789.18_LMNA | -0.00373 | -0.16283331  | 0.155563777 | 9.64E-01 | 9.86E-01 | 1.00E+00 |
| ENSG00000108187.14_PBLD      | ENSG00000160789.18_LMNA | -0.10015 | -0.255284109 | 0.060003635 | 2.20E-01 | 4.95E-01 | 1.00E+00 |
| ENSG00000185015.6_CA13       | ENSG00000160789.18_LMNA | 0.13061  | -0.029197252 | 0.283907879 | 1.09E-01 | 3.28E-01 | 1.00E+00 |
| ENSG00000267980.1_AC007292   | ENSG00000160789.18_LMNA | -0.14828 | -0.300389298 | 0.011185086 | 6.83E-02 | 2.45E-01 | 1.00E+00 |
| ENSG00000184451.5_CCR10      | ENSG00000160789.18_LMNA | 0.18188  | 0.02335957   | 0.33148605  | 2.49E-02 | 1.26E-01 | 1.00E+00 |



|                             |                         |          |              |             |          |          |          |
|-----------------------------|-------------------------|----------|--------------|-------------|----------|----------|----------|
| ENSG00000104714.12_ERICH1   | ENSG00000160789.18_LMNA | 0.23836  | 0.082281366  | 0.383025744 | 3.10E-03 | 2.74E-02 | 1.00E+00 |
| ENSG00000234420.6_ZNF37BP   | ENSG00000160789.18_LMNA | 0.02611  | -0.133643155 | 0.184546632 | 7.49E-01 | 8.95E-01 | 1.00E+00 |
| ENSG00000076555.14_ACACB    | ENSG00000160789.18_LMNA | 0.13862  | -0.021040679 | 0.291394266 | 8.85E-02 | 2.90E-01 | 1.00E+00 |
| ENSG00000235475.1_LINC01372 | ENSG00000160789.18_LMNA | -0.01969 | -0.178328244 | 0.139952888 | 8.10E-01 | 9.25E-01 | 1.00E+00 |
| ENSG00000235001.3	EIF4A1P2  | ENSG00000160789.18_LMNA | 0.08074  | -0.079482566 | 0.236895479 | 3.23E-01 | 6.09E-01 | 1.00E+00 |
| ENSG00000162804.12_SNED1    | ENSG00000160789.18_LMNA | 0.26224  | 0.10753159   | 0.404553808 | 1.10E-03 | 1.25E-02 | 1.00E+00 |
| ENSG00000143067.4_ZNF697    | ENSG00000160789.18_LMNA | -0.01221 | -0.171080971 | 0.147274145 | 8.81E-01 | 9.54E-01 | 1.00E+00 |
| ENSG00000270225.1_MTCO2P22  | ENSG00000160789.18_LMNA | -0.1324  | -0.285579811 | 0.027379256 | 1.04E-01 | 3.19E-01 | 1.00E+00 |
| ENSG00000136546.12_SCN7A    | ENSG00000160789.18_LMNA | 0.06752  | -0.092672066 | 0.224314184 | 4.08E-01 | 6.83E-01 | 1.00E+00 |
| ENSG00000239374.1_RP11-407P | ENSG00000160789.18_LMNA | -0.22572 | -0.371567049 | -0.06899711 | 5.17E-03 | 4.03E-02 | 1.00E+00 |
| ENSG00000006071.10_ABCC8    | ENSG00000160789.18_LMNA | -0.24506 | -0.389081231 | -0.08934502 | 2.34E-03 | 2.21E-02 | 1.00E+00 |
| ENSG00000236972.2_FABP5P1   | ENSG00000160789.18_LMNA | 0.09062  | -0.069583745 | 0.246268643 | 2.67E-01 | 5.51E-01 | 1.00E+00 |
| ENSG00000196189.11_SEMA4A   | ENSG00000160789.18_LMNA | -0.11314 | -0.267525071 | 0.046902373 | 1.65E-01 | 4.22E-01 | 1.00E+00 |
| ENSG00000236901.4_MIR600HG  | ENSG00000160789.18_LMNA | -0.06866 | -0.225397859 | 0.091540365 | 4.01E-01 | 6.77E-01 | 1.00E+00 |
| ENSG00000155666.10_KDM8     | ENSG00000160789.18_LMNA | -0.19825 | -0.346512635 | -0.04032017 | 1.44E-02 | 8.51E-02 | 1.00E+00 |
| ENSG00000273026.1_RP11-422P | ENSG00000160789.18_LMNA | 0.09626  | -0.063921419 | 0.25160385  | 2.38E-01 | 5.17E-01 | 1.00E+00 |
| ENSG00000163803.11_PLB1     | ENSG00000160789.18_LMNA | 0.18643  | 0.028060079  | 0.335666279 | 2.15E-02 | 1.13E-01 | 1.00E+00 |
| ENSG00000137812.18_KNL1     | ENSG00000160789.18_LMNA | 0.01898  | -0.140641409 | 0.177648149 | 8.16E-01 | 9.28E-01 | 1.00E+00 |
| ENSG00000258682.1_CTD-2002H | ENSG00000160789.18_LMNA | -0.00614 | -0.165178529 | 0.153211178 | 9.40E-01 | 9.76E-01 | 1.00E+00 |
| ENSG00000159733.12_ZFYVE28  | ENSG00000160789.18_LMNA | 0.16507  | 0.006025412  | 0.315965253 | 4.21E-02 | 1.80E-01 | 1.00E+00 |
| ENSG00000013588.5_GPRC5A    | ENSG00000160789.18_LMNA | 0.45247  | 0.316036237  | 0.570571885 | 4.85E-09 | 5.84E-07 | 2.49E-04 |
| ENSG00000269947.1_RP11-849F | ENSG00000160789.18_LMNA | 0.05206  | -0.108038831 | 0.20952153  | 5.24E-01 | 7.69E-01 | 1.00E+00 |
| ENSG00000177058.10_SLC38A9  | ENSG00000160789.18_LMNA | -0.32292 | -0.458548137 | -0.17259324 | 4.96E-05 | 1.07E-03 | 1.00E+00 |
| ENSG00000273148.1_RP5-1068E | ENSG00000160789.18_LMNA | -0.14602 | -0.298283579 | 0.013497701 | 7.27E-02 | 2.56E-01 | 1.00E+00 |
| ENSG00000162367.10_TAL1     | ENSG00000160789.18_LMNA | -0.28023 | -0.420667179 | -0.12668504 | 4.71E-04 | 6.43E-03 | 1.00E+00 |
| ENSG00000246273.5_SBF2-AS1  | ENSG00000160789.18_LMNA | 0.14948  | -0.009957883 | 0.301505479 | 6.61E-02 | 2.40E-01 | 1.00E+00 |
| ENSG00000244151.1_RP11-148K | ENSG00000160789.18_LMNA | 0.23985  | 0.083851537  | 0.384374049 | 2.92E-03 | 2.62E-02 | 1.00E+00 |
| ENSG00000079335.16_CDC14A   | ENSG00000160789.18_LMNA | -0.22289 | -0.36899773  | -0.06603311 | 5.78E-03 | 4.37E-02 | 1.00E+00 |
| ENSG00000150967.16_ABCB9    | ENSG00000160789.18_LMNA | 0.13481  | -0.024926601 | 0.287832398 | 9.77E-02 | 3.07E-01 | 1.00E+00 |
| ENSG00000237004.3_ZNRF2P1   | ENSG00000160789.18_LMNA | 0.22279  | 0.065931797  | 0.368909823 | 5.80E-03 | 4.39E-02 | 1.00E+00 |
| ENSG00000122417.14_ODF2L    | ENSG00000160789.18_LMNA | -0.03713 | -0.195173651 | 0.122799983 | 6.50E-01 | 8.44E-01 | 1.00E+00 |
| ENSG00000026559.12_KCNG1    | ENSG00000160789.18_LMNA | 0.08547  | -0.074749555 | 0.241384514 | 2.95E-01 | 5.81E-01 | 1.00E+00 |
| ENSG00000165338.15_HECTD2   | ENSG00000160789.18_LMNA | 0.04976  | -0.110314215 | 0.20731873  | 5.43E-01 | 7.82E-01 | 1.00E+00 |

|                              |                         |          |              |             |          |          |          |
|------------------------------|-------------------------|----------|--------------|-------------|----------|----------|----------|
| ENSG00000182841.11_RRP7BP    | ENSG00000160789.18_LMNA | -0.14106 | -0.293666416 | 0.018556869 | 8.30E-02 | 2.78E-01 | 1.00E+00 |
| ENSG00000167065.12_DUSP18    | ENSG00000160789.18_LMNA | 0.09075  | -0.06944963  | 0.246395232 | 2.66E-01 | 5.50E-01 | 1.00E+00 |
| ENSG00000153107.10_ANAPC1    | ENSG00000160789.18_LMNA | 0.07111  | -0.089097938 | 0.227733969 | 3.84E-01 | 6.63E-01 | 1.00E+00 |
| ENSG00000102466.14_FGF14     | ENSG00000160789.18_LMNA | -0.19081 | -0.339687887 | -0.0325951  | 1.85E-02 | 1.02E-01 | 1.00E+00 |
| ENSG00000233111.1_RAB1C      | ENSG00000160789.18_LMNA | 0.04279  | -0.117205398 | 0.200627667 | 6.01E-01 | 8.16E-01 | 1.00E+00 |
| ENSG00000267575.5_CTC-459F4  | ENSG00000160789.18_LMNA | -0.15199 | -0.303842279 | 0.007385608 | 6.16E-02 | 2.29E-01 | 1.00E+00 |
| ENSG00000196268.10_ZNF493    | ENSG00000160789.18_LMNA | -0.35375 | -0.485600719 | -0.20615693 | 7.80E-06 | 2.40E-04 | 4.00E-01 |
| ENSG00000140836.13_ZFHX3     | ENSG00000160789.18_LMNA | 0.18033  | 0.021752093  | 0.330053717 | 2.62E-02 | 1.31E-01 | 1.00E+00 |
| ENSG00000260572.1_RP11-16N1  | ENSG00000160789.18_LMNA | -0.4468  | -0.5657607   | -0.30962684 | 7.92E-09 | 8.92E-07 | 4.07E-04 |
| ENSG00000165966.13_PDZRN4    | ENSG00000160789.18_LMNA | -0.40602 | -0.530905432 | -0.26387801 | 2.11E-07 | 1.32E-05 | 1.08E-02 |
| ENSG00000079337.14_RAPGEF3   | ENSG00000160789.18_LMNA | -0.30549 | -0.44313751  | -0.15376588 | 1.30E-04 | 2.32E-03 | 1.00E+00 |
| ENSG00000204920.9_ZNF155     | ENSG00000160789.18_LMNA | 0.11193  | -0.04812782  | 0.26638438  | 1.70E-01 | 4.28E-01 | 1.00E+00 |
| ENSG00000226711.5_FAM66C     | ENSG00000160789.18_LMNA | -0.36095 | -0.491887632 | -0.21405231 | 4.92E-06 | 1.64E-04 | 2.52E-01 |
| ENSG00000236312.3_RPL34P34   | ENSG00000160789.18_LMNA | -0.1341  | -0.287166437 | 0.025652103 | 9.95E-02 | 3.11E-01 | 1.00E+00 |
| ENSG00000233337.1_UBE2FP3    | ENSG00000160789.18_LMNA | -0.28701 | -0.426713671 | -0.13392932 | 3.37E-04 | 4.91E-03 | 1.00E+00 |
| ENSG00000249348.1_UGDH-AS1   | ENSG00000160789.18_LMNA | -0.14503 | -0.297366035 | 0.014504355 | 7.46E-02 | 2.60E-01 | 1.00E+00 |
| ENSG00000182890.4_GLUD2      | ENSG00000160789.18_LMNA | -0.11202 | -0.266464814 | 0.048041441 | 1.69E-01 | 4.28E-01 | 1.00E+00 |
| ENSG00000258741.3_RP11-386M  | ENSG00000160789.18_LMNA | 0.12888  | -0.030956662 | 0.282288011 | 1.14E-01 | 3.37E-01 | 1.00E+00 |
| ENSG00000256694.1_RP11-598F  | ENSG00000160789.18_LMNA | 0.05548  | -0.104647668 | 0.212798545 | 4.97E-01 | 7.51E-01 | 1.00E+00 |
| ENSG00000272953.1_RP11-1275I | ENSG00000160789.18_LMNA | -0.18381 | -0.33326241  | -0.02535536 | 2.34E-02 | 1.21E-01 | 1.00E+00 |
| ENSG00000231233.1_CFAP58-AS1 | ENSG00000160789.18_LMNA | -0.20412 | -0.351889123 | -0.0464318  | 1.17E-02 | 7.31E-02 | 1.00E+00 |
| ENSG00000178150.7_ZNF114     | ENSG00000160789.18_LMNA | 0.0847   | -0.075522161 | 0.240652656 | 3.00E-01 | 5.86E-01 | 1.00E+00 |
| ENSG00000257907.2_EEF1A1P17  | ENSG00000160789.18_LMNA | -0.10275 | -0.257736587 | 0.057387468 | 2.08E-01 | 4.80E-01 | 1.00E+00 |
| ENSG00000155858.5_LSM11      | ENSG00000160789.18_LMNA | -0.06504 | -0.221946573 | 0.095141758 | 4.26E-01 | 6.97E-01 | 1.00E+00 |
| ENSG00000111788.10_RP11-22B  | ENSG00000160789.18_LMNA | -0.09894 | -0.25413555  | 0.061227366 | 2.25E-01 | 5.01E-01 | 1.00E+00 |
| ENSG00000169570.8_DTWD2      | ENSG00000160789.18_LMNA | -0.2596  | -0.402183289 | -0.10473231 | 1.24E-03 | 1.36E-02 | 1.00E+00 |
| ENSG00000227347.1_HNRNPKP2   | ENSG00000160789.18_LMNA | 0.03705  | -0.122873999 | 0.195101363 | 6.50E-01 | 8.45E-01 | 1.00E+00 |
| ENSG00000183092.14_BEGAIN    | ENSG00000160789.18_LMNA | 0.07664  | -0.083579472 | 0.232998821 | 3.48E-01 | 6.32E-01 | 1.00E+00 |
| ENSG00000188064.8_WNT7B      | ENSG00000160789.18_LMNA | -0.04453 | -0.202298577 | 0.115487375 | 5.86E-01 | 8.08E-01 | 1.00E+00 |
| ENSG00000166250.10_CLMP      | ENSG00000160789.18_LMNA | 0.1399   | -0.019743731 | 0.292581133 | 8.56E-02 | 2.84E-01 | 1.00E+00 |
| ENSG00000278376.1_RP11-158IS | ENSG00000160789.18_LMNA | -0.18476 | -0.334130647 | -0.02633174 | 2.27E-02 | 1.18E-01 | 1.00E+00 |
| ENSG00000166192.13_SENP8     | ENSG00000160789.18_LMNA | -0.31798 | -0.454184985 | -0.16724143 | 6.55E-05 | 1.33E-03 | 1.00E+00 |
| ENSG00000103064.12_SLC7A6    | ENSG00000160789.18_LMNA | -0.06429 | -0.221224358 | 0.095894335 | 4.31E-01 | 7.01E-01 | 1.00E+00 |

|                              |                         |          |              |             |          |          |          |
|------------------------------|-------------------------|----------|--------------|-------------|----------|----------|----------|
| ENSG00000261094.2_RP11-355O  | ENSG00000160789.18_LMNA | -0.17499 | -0.325130571 | -0.01623908 | 3.11E-02 | 1.47E-01 | 1.00E+00 |
| ENSG00000266910.1_CTC-448F2  | ENSG00000160789.18_LMNA | -0.0703  | -0.226964781 | 0.089902553 | 3.89E-01 | 6.68E-01 | 1.00E+00 |
| ENSG00000103494.11_RPGRIP1I  | ENSG00000160789.18_LMNA | -0.05893 | -0.21610663  | 0.101216849 | 4.71E-01 | 7.31E-01 | 1.00E+00 |
| ENSG00000120549.14_KIAA1217  | ENSG00000160789.18_LMNA | 0.30149  | 0.149466676  | 0.439594362 | 1.60E-04 | 2.74E-03 | 1.00E+00 |
| ENSG00000150672.15_DLG2      | ENSG00000160789.18_LMNA | -0.39122 | -0.518150432 | -0.24743158 | 6.24E-07 | 3.14E-05 | 3.20E-02 |
| ENSG00000187240.12_DYNC2H1   | ENSG00000160789.18_LMNA | -0.00138 | -0.160546872 | 0.157853939 | 9.87E-01 | 9.95E-01 | 1.00E+00 |
| ENSG00000237950.1_RP11-7O11  | ENSG00000160789.18_LMNA | 0.05329  | -0.106820629 | 0.210699548 | 5.14E-01 | 7.62E-01 | 1.00E+00 |
| ENSG00000219951.4_RP11-378G  | ENSG00000160789.18_LMNA | 0.20748  | 0.049933244  | 0.354960329 | 1.03E-02 | 6.70E-02 | 1.00E+00 |
| ENSG00000229659.1_RPL26P6    | ENSG00000160789.18_LMNA | -0.18201 | -0.331604731 | -0.02349284 | 2.48E-02 | 1.26E-01 | 1.00E+00 |
| ENSG00000167286.8_CD3D       | ENSG00000160789.18_LMNA | 0.03792  | -0.122019111 | 0.195936086 | 6.43E-01 | 8.41E-01 | 1.00E+00 |
| ENSG00000276445.1_LLNL-268   | ENSG00000160789.18_LMNA | -0.05899 | -0.216159303 | 0.101162161 | 4.70E-01 | 7.31E-01 | 1.00E+00 |
| ENSG00000243753.4_HLA-L      | ENSG00000160789.18_LMNA | 0.20482  | 0.047154373  | 0.352523446 | 1.14E-02 | 7.18E-02 | 1.00E+00 |
| ENSG00000198108.3_CHSY3      | ENSG00000160789.18_LMNA | 0.19051  | 0.032286671  | 0.339414731 | 1.87E-02 | 1.03E-01 | 1.00E+00 |
| ENSG00000185442.11_FAM174B   | ENSG00000160789.18_LMNA | -0.00234 | -0.161482281 | 0.156917421 | 9.77E-01 | 9.91E-01 | 1.00E+00 |
| ENSG00000234899.8_SOX9-AS1   | ENSG00000160789.18_LMNA | -0.0863  | -0.242177106 | 0.073912403 | 2.90E-01 | 5.76E-01 | 1.00E+00 |
| ENSG00000040199.17_PHLPP2    | ENSG00000160789.18_LMNA | 0.06742  | -0.092775608 | 0.224214997 | 4.09E-01 | 6.83E-01 | 1.00E+00 |
| ENSG00000274536.3_MIR223     | ENSG00000160789.18_LMNA | -0.09333 | -0.248831182 | 0.066866627 | 2.53E-01 | 5.34E-01 | 1.00E+00 |
| ENSG00000241431.1_RPL37P6    | ENSG00000160789.18_LMNA | -0.02857 | -0.186917631 | 0.131230515 | 7.27E-01 | 8.84E-01 | 1.00E+00 |
| ENSG00000270127.2_RP11-526I2 | ENSG00000160789.18_LMNA | -0.0656  | -0.222476737 | 0.094589075 | 4.22E-01 | 6.93E-01 | 1.00E+00 |
| ENSG00000255642.1_PABPC1P4   | ENSG00000160789.18_LMNA | -0.02539 | -0.183845438 | 0.134355941 | 7.56E-01 | 8.98E-01 | 1.00E+00 |
| ENSG00000115363.12_EVA1A     | ENSG00000160789.18_LMNA | 0.03037  | -0.129459933 | 0.188655298 | 7.10E-01 | 8.77E-01 | 1.00E+00 |
| ENSG00000103061.10_SLC7A6O   | ENSG00000160789.18_LMNA | -0.15192 | -0.30377772  | 0.007456728 | 6.17E-02 | 2.30E-01 | 1.00E+00 |
| ENSG00000164330.15_EBF1      | ENSG00000160789.18_LMNA | -0.00393 | -0.16302635  | 0.155370267 | 9.62E-01 | 9.85E-01 | 1.00E+00 |
| ENSG00000271270.4_TMCC1-AS   | ENSG00000160789.18_LMNA | -0.30586 | -0.443471016 | -0.15417112 | 1.27E-04 | 2.29E-03 | 1.00E+00 |
| ENSG00000280071.2_CH507-9B2  | ENSG00000160789.18_LMNA | 0.11502  | -0.045001829 | 0.269292426 | 1.58E-01 | 4.11E-01 | 1.00E+00 |
| ENSG00000165731.16_RET       | ENSG00000160789.18_LMNA | -0.05105 | -0.208560009 | 0.109032444 | 5.32E-01 | 7.75E-01 | 1.00E+00 |
| ENSG00000236199.1_RP11-264I1 | ENSG00000160789.18_LMNA | 0.00583  | -0.153517349 | 0.164873522 | 9.43E-01 | 9.77E-01 | 1.00E+00 |
| ENSG00000140993.9_TIGD7      | ENSG00000160789.18_LMNA | -0.07317 | -0.229691813 | 0.087048052 | 3.70E-01 | 6.51E-01 | 1.00E+00 |
| ENSG00000261740.4_RP11-345J  | ENSG00000160789.18_LMNA | -0.16737 | -0.318090496 | -0.008388   | 3.93E-02 | 1.71E-01 | 1.00E+00 |
| ENSG00000143851.14_PTPN7     | ENSG00000160789.18_LMNA | 0.24584  | 0.090170078  | 0.389786846 | 2.27E-03 | 2.15E-02 | 1.00E+00 |
| ENSG00000161681.14_SHANK1    | ENSG00000160789.18_LMNA | -0.17178 | -0.322168993 | -0.01293169 | 3.43E-02 | 1.57E-01 | 1.00E+00 |
| ENSG00000101331.14_CCM2L     | ENSG00000160789.18_LMNA | -0.1634  | -0.314418669 | -0.00430828 | 4.43E-02 | 1.86E-01 | 1.00E+00 |
| ENSG00000126070.17_37834     | ENSG00000160789.18_LMNA | -0.16111 | -0.312297488 | -0.00195615 | 4.74E-02 | 1.94E-01 | 1.00E+00 |

|                             |                         |          |              |             |          |          |          |
|-----------------------------|-------------------------|----------|--------------|-------------|----------|----------|----------|
| ENSG00000154655.13_L3MBTL4  | ENSG00000160789.18_LMNA | -0.13795 | -0.290762021 | 0.021731134 | 9.01E-02 | 2.92E-01 | 1.00E+00 |
| ENSG00000186675.6_MAGEE2    | ENSG00000160789.18_LMNA | -0.19127 | -0.340113394 | -0.03307567 | 1.83E-02 | 1.01E-01 | 1.00E+00 |
| ENSG00000167600.12_CYP2S1   | ENSG00000160789.18_LMNA | 0.21852  | 0.061458245  | 0.365022932 | 6.84E-03 | 4.95E-02 | 1.00E+00 |
| ENSG00000112208.11_BAG2     | ENSG00000160789.18_LMNA | -0.16539 | -0.316265383 | -0.00635885 | 4.17E-02 | 1.78E-01 | 1.00E+00 |
| ENSG00000138380.16_CARF     | ENSG00000160789.18_LMNA | -0.26555 | -0.407518041 | -0.11103861 | 9.45E-04 | 1.11E-02 | 1.00E+00 |
| ENSG00000196357.10_ZNF565   | ENSG00000160789.18_LMNA | -0.2464  | -0.390294794 | -0.09076426 | 2.21E-03 | 2.11E-02 | 1.00E+00 |
| ENSG00000115896.14_PLCL1    | ENSG00000160789.18_LMNA | -0.44333 | -0.562805738 | -0.30570179 | 1.07E-08 | 1.14E-06 | 5.47E-04 |
| ENSG00000174327.6_SLC16A13  | ENSG00000160789.18_LMNA | 0.40036  | 0.257574957  | 0.526031366 | 3.21E-07 | 1.86E-05 | 1.65E-02 |
| ENSG00000022976.14_ZNF839   | ENSG00000160789.18_LMNA | 0.03669  | -0.123235311 | 0.194748435 | 6.54E-01 | 8.47E-01 | 1.00E+00 |
| ENSG00000101935.8_AMMECR1   | ENSG00000160789.18_LMNA | 0.17862  | 0.019992537  | 0.328484244 | 2.77E-02 | 1.36E-01 | 1.00E+00 |
| ENSG00000090447.10_TFAP4    | ENSG00000160789.18_LMNA | -0.0938  | -0.249274899 | 0.066395667 | 2.50E-01 | 5.31E-01 | 1.00E+00 |
| ENSG00000096433.9_ITPR3     | ENSG00000160789.18_LMNA | 0.5368   | 0.412880059  | 0.641201343 | 1.01E-12 | 5.54E-10 | 5.20E-08 |
| ENSG00000280374.1_RP11-337N | ENSG00000160789.18_LMNA | -0.26088 | -0.40333386  | -0.1060904  | 1.17E-03 | 1.30E-02 | 1.00E+00 |
| ENSG00000240776.1_RP11-435F | ENSG00000160789.18_LMNA | -0.11472 | -0.269006252 | 0.045309723 | 1.59E-01 | 4.13E-01 | 1.00E+00 |
| ENSG00000224892.5_RPS4XP16  | ENSG00000160789.18_LMNA | -0.04088 | -0.198791458 | 0.119091188 | 6.17E-01 | 8.26E-01 | 1.00E+00 |
| ENSG00000105784.14_RUNDC3E  | ENSG00000160789.18_LMNA | -0.39624 | -0.522484969 | -0.25300313 | 4.34E-07 | 2.35E-05 | 2.23E-02 |
| ENSG00000234546.2_RP3-510D1 | ENSG00000160789.18_LMNA | 0.29168  | 0.138935744  | 0.43087708  | 2.66E-04 | 4.09E-03 | 1.00E+00 |
| ENSG00000203943.7_SAMD13    | ENSG00000160789.18_LMNA | -0.25222 | -0.395537345 | -0.09690936 | 1.72E-03 | 1.74E-02 | 1.00E+00 |
| ENSG00000257043.1_RP11-137N | ENSG00000160789.18_LMNA | -0.2077  | -0.355153218 | -0.0501534  | 1.02E-02 | 6.67E-02 | 1.00E+00 |
| ENSG00000141294.8_LRRC46    | ENSG00000160789.18_LMNA | 0.07117  | -0.089042978 | 0.227786494 | 3.84E-01 | 6.62E-01 | 1.00E+00 |
| ENSG00000144214.8_LYG1      | ENSG00000160789.18_LMNA | -0.18274 | -0.332273417 | -0.02424389 | 2.42E-02 | 1.24E-01 | 1.00E+00 |
| ENSG00000255561.5_FDXACB1   | ENSG00000160789.18_LMNA | -0.31271 | -0.449533823 | -0.16155492 | 8.77E-05 | 1.70E-03 | 1.00E+00 |
| ENSG00000133687.14_TMTC1    | ENSG00000160789.18_LMNA | 0.11301  | -0.047036751 | 0.267400031 | 1.66E-01 | 4.22E-01 | 1.00E+00 |
| ENSG00000225975.5_LINC01534 | ENSG00000160789.18_LMNA | -0.17515 | -0.325279455 | -0.01640553 | 3.09E-02 | 1.46E-01 | 1.00E+00 |
| ENSG00000178568.12_ERBB4    | ENSG00000160789.18_LMNA | -0.26497 | -0.407003632 | -0.11042947 | 9.70E-04 | 1.13E-02 | 1.00E+00 |
| ENSG00000256294.6_ZNF225    | ENSG00000160789.18_LMNA | 0.00525  | -0.154076937 | 0.164315905 | 9.49E-01 | 9.79E-01 | 1.00E+00 |
| ENSG00000162951.9_LRRTM1    | ENSG00000160789.18_LMNA | -0.39418 | -0.520706539 | -0.250715   | 5.04E-07 | 2.64E-05 | 2.59E-02 |
| ENSG00000168502.16_MTCL1    | ENSG00000160789.18_LMNA | 0.2566   | 0.101550184  | 0.399483708 | 1.42E-03 | 1.50E-02 | 1.00E+00 |
| ENSG00000272512.1_RP11-54O7 | ENSG00000160789.18_LMNA | -0.12597 | -0.279567639 | 0.033907017 | 1.22E-01 | 3.52E-01 | 1.00E+00 |
| ENSG00000157021.9_FAM92A1P  | ENSG00000160789.18_LMNA | -0.02987 | -0.188176609 | 0.129947892 | 7.15E-01 | 8.79E-01 | 1.00E+00 |
| ENSG00000089091.15_DZANK1   | ENSG00000160789.18_LMNA | 0.02664  | -0.13312607  | 0.185055104 | 7.45E-01 | 8.93E-01 | 1.00E+00 |
| ENSG00000235459.5_RPS26P31  | ENSG00000160789.18_LMNA | -0.13009 | -0.283425599 | 0.029721281 | 1.10E-01 | 3.31E-01 | 1.00E+00 |
| ENSG00000198018.6_ENTPD7    | ENSG00000160789.18_LMNA | 0.22778  | 0.07116389   | 0.373442375 | 4.77E-03 | 3.78E-02 | 1.00E+00 |

|                              |                         |          |              |             |          |          |          |
|------------------------------|-------------------------|----------|--------------|-------------|----------|----------|----------|
| ENSG00000160602.12_NEK8      | ENSG00000160789.18_LMNA | 0.23979  | 0.083789984  | 0.384321217 | 2.93E-03 | 2.62E-02 | 1.00E+00 |
| ENSG00000105146.11_AURKC     | ENSG00000160789.18_LMNA | -0.06009 | -0.217215732 | 0.100064906 | 4.62E-01 | 7.25E-01 | 1.00E+00 |
| ENSG00000228158.2_TLE1P1     | ENSG00000160789.18_LMNA | 0.10917  | -0.050914168 | 0.263787462 | 1.81E-01 | 4.44E-01 | 1.00E+00 |
| ENSG00000176387.6_HSD11B2    | ENSG00000160789.18_LMNA | -0.08148 | -0.23759548  | 0.078745458 | 3.18E-01 | 6.05E-01 | 1.00E+00 |
| ENSG00000259918.1_NDUFA5P1   | ENSG00000160789.18_LMNA | -0.05206 | -0.209526375 | 0.108033823 | 5.24E-01 | 7.69E-01 | 1.00E+00 |
| ENSG00000119508.16_NR4A3     | ENSG00000160789.18_LMNA | 0.0788   | -0.081419888 | 0.235054116 | 3.35E-01 | 6.20E-01 | 1.00E+00 |
| ENSG00000101353.13_MROH8     | ENSG00000160789.18_LMNA | -0.13244 | -0.285617125 | 0.02733866  | 1.04E-01 | 3.19E-01 | 1.00E+00 |
| ENSG00000215769.7_RP13-104F  | ENSG00000160789.18_LMNA | -0.07243 | -0.228991744 | 0.08778134  | 3.75E-01 | 6.55E-01 | 1.00E+00 |
| ENSG00000101624.9_CEP76      | ENSG00000160789.18_LMNA | -0.27425 | -0.415319205 | -0.12030367 | 6.28E-04 | 8.07E-03 | 1.00E+00 |
| ENSG00000170379.18_TCAF2     | ENSG00000160789.18_LMNA | 0.35763  | 0.210412309  | 0.488992777 | 6.09E-06 | 1.95E-04 | 3.12E-01 |
| ENSG00000231999.5_FLJ27354   | ENSG00000160789.18_LMNA | -0.5278  | -0.633750535 | -0.40241432 | 2.81E-12 | 1.30E-09 | 1.44E-07 |
| ENSG00000134146.10_DPH6      | ENSG00000160789.18_LMNA | -0.19636 | -0.34478648  | -0.03836283 | 1.53E-02 | 8.92E-02 | 1.00E+00 |
| ENSG00000214121.4_PRDX1P1    | ENSG00000160789.18_LMNA | -0.07704 | -0.233377951 | 0.083181328 | 3.45E-01 | 6.30E-01 | 1.00E+00 |
| ENSG00000204950.3_LRRC10B    | ENSG00000160789.18_LMNA | -0.16193 | -0.313059863 | -0.00280114 | 4.63E-02 | 1.91E-01 | 1.00E+00 |
| ENSG00000167261.12_DPEP2     | ENSG00000160789.18_LMNA | -0.11665 | -0.270816925 | 0.043360612 | 1.52E-01 | 4.02E-01 | 1.00E+00 |
| ENSG00000220201.6_ZGLP1      | ENSG00000160789.18_LMNA | -0.01161 | -0.170498056 | 0.147861499 | 8.87E-01 | 9.56E-01 | 1.00E+00 |
| ENSG00000198930.11_CSAG1     | ENSG00000160789.18_LMNA | -0.17378 | -0.324018491 | -0.01499635 | 3.23E-02 | 1.50E-01 | 1.00E+00 |
| ENSG00000225259.4_ST13P6     | ENSG00000160789.18_LMNA | -0.06548 | -0.222367064 | 0.094703422 | 4.23E-01 | 6.94E-01 | 1.00E+00 |
| ENSG00000272807.1_RP11-260M  | ENSG00000160789.18_LMNA | -0.13803 | -0.290838542 | 0.021647584 | 8.99E-02 | 2.92E-01 | 1.00E+00 |
| ENSG00000084453.15_SLCO1A2   | ENSG00000160789.18_LMNA | -0.52494 | -0.631377622 | -0.39909386 | 3.85E-12 | 1.62E-09 | 1.98E-07 |
| ENSG00000134463.13_ECHDC3    | ENSG00000160789.18_LMNA | -0.10569 | -0.260506382 | 0.054427593 | 1.95E-01 | 4.64E-01 | 1.00E+00 |
| ENSG00000154102.9_C16orf74   | ENSG00000160789.18_LMNA | -0.01143 | -0.170317834 | 0.148043048 | 8.89E-01 | 9.57E-01 | 1.00E+00 |
| ENSG00000158473.6_CD1D       | ENSG00000160789.18_LMNA | 0.07771  | -0.082508795 | 0.234018148 | 3.41E-01 | 6.26E-01 | 1.00E+00 |
| ENSG00000244560.5_RP4-800G7  | ENSG00000160789.18_LMNA | 0.07497  | -0.0852467   | 0.231410168 | 3.59E-01 | 6.41E-01 | 1.00E+00 |
| ENSG00000162723.8_SLAMF9     | ENSG00000160789.18_LMNA | 0.06013  | -0.100025723 | 0.217253443 | 4.62E-01 | 7.25E-01 | 1.00E+00 |
| ENSG00000231305.3_RP11-723C  | ENSG00000160789.18_LMNA | -0.1524  | -0.304222206 | 0.006967008 | 6.09E-02 | 2.28E-01 | 1.00E+00 |
| ENSG00000217165.1_ANKRD18E   | ENSG00000160789.18_LMNA | -0.09302 | -0.248541075 | 0.067174469 | 2.54E-01 | 5.36E-01 | 1.00E+00 |
| ENSG00000260778.3_MIR940     | ENSG00000160789.18_LMNA | 0.01498  | -0.144562534 | 0.173769203 | 8.55E-01 | 9.43E-01 | 1.00E+00 |
| ENSG00000148225.14_WDR31     | ENSG00000160789.18_LMNA | 0.11605  | -0.043962835 | 0.270257713 | 1.55E-01 | 4.05E-01 | 1.00E+00 |
| ENSG00000236480.1_PKMP1      | ENSG00000160789.18_LMNA | 0.37143  | 0.225564564  | 0.501002951 | 2.46E-06 | 9.36E-05 | 1.26E-01 |
| ENSG00000255145.2_STX17-AS1  | ENSG00000160789.18_LMNA | -0.19399 | -0.342612427 | -0.03590096 | 1.66E-02 | 9.45E-02 | 1.00E+00 |
| ENSG00000171657.5_GPR82      | ENSG00000160789.18_LMNA | -0.08466 | -0.240622227 | 0.075554276 | 3.00E-01 | 5.86E-01 | 1.00E+00 |
| ENSG00000143429.8_AC027612.1 | ENSG00000160789.18_LMNA | -0.00844 | -0.167418951 | 0.15096033  | 9.18E-01 | 9.69E-01 | 1.00E+00 |

|                             |                         |          |              |             |          |          |          |
|-----------------------------|-------------------------|----------|--------------|-------------|----------|----------|----------|
| ENSG00000213376.4_GAPDHP71  | ENSG00000160789.18_LMNA | 0.21108  | 0.053678669  | 0.358238271 | 9.05E-03 | 6.10E-02 | 1.00E+00 |
| ENSG00000160145.14_KALRN    | ENSG00000160789.18_LMNA | 0.08971  | -0.070494214 | 0.245408983 | 2.72E-01 | 5.56E-01 | 1.00E+00 |
| ENSG00000241429.1_EEF1A1P2  | ENSG00000160789.18_LMNA | -0.15015 | -0.302125025 | 0.009276307 | 6.48E-02 | 2.37E-01 | 1.00E+00 |
| ENSG00000077264.13_PAK3     | ENSG00000160789.18_LMNA | -0.32337 | -0.45894259  | -0.17307791 | 4.83E-05 | 1.05E-03 | 1.00E+00 |
| ENSG00000234036.4_TXNP6     | ENSG00000160789.18_LMNA | 0.13803  | -0.021647265 | 0.290838834 | 8.99E-02 | 2.92E-01 | 1.00E+00 |
| ENSG00000154556.16_SORBS2   | ENSG00000160789.18_LMNA | -0.19065 | -0.339541218 | -0.03242948 | 1.86E-02 | 1.02E-01 | 1.00E+00 |
| ENSG00000223460.1_GAPDHP6   | ENSG00000160789.18_LMNA | 0.27694  | 0.123171666  | 0.417725285 | 5.52E-04 | 7.29E-03 | 1.00E+00 |
| ENSG00000219755.1_RP1-199J3 | ENSG00000160789.18_LMNA | -0.01195 | -0.170826532 | 0.147530549 | 8.84E-01 | 9.55E-01 | 1.00E+00 |
| ENSG00000184068.2_RP5-821D1 | ENSG00000160789.18_LMNA | -0.00675 | -0.165768389 | 0.152618894 | 9.34E-01 | 9.74E-01 | 1.00E+00 |
| ENSG00000228335.1_AC073063  | ENSG00000160789.18_LMNA | -0.17353 | -0.323783689 | -0.01473409 | 3.25E-02 | 1.51E-01 | 1.00E+00 |
| ENSG00000267102.1_RP11-686D | ENSG00000160789.18_LMNA | 0.1487   | -0.010759818 | 0.30077619  | 6.75E-02 | 2.44E-01 | 1.00E+00 |
| ENSG00000166439.5_RNF169    | ENSG00000160789.18_LMNA | 0.14188  | -0.017720348 | 0.294430859 | 8.12E-02 | 2.75E-01 | 1.00E+00 |
| ENSG00000230438.6_SERPINB9  | ENSG00000160789.18_LMNA | 0.02044  | -0.139217188 | 0.179054605 | 8.03E-01 | 9.21E-01 | 1.00E+00 |
| ENSG00000104880.16_ARHGEF1  | ENSG00000160789.18_LMNA | 0.16208  | 0.002959302  | 0.31320252  | 4.60E-02 | 1.91E-01 | 1.00E+00 |
| ENSG00000213020.7_ZNF611    | ENSG00000160789.18_LMNA | -0.10714 | -0.261877611 | 0.05296021  | 1.89E-01 | 4.56E-01 | 1.00E+00 |
| ENSG00000075275.15_CELSR1   | ENSG00000160789.18_LMNA | 0.35404  | 0.206474852  | 0.485854433 | 7.65E-06 | 2.36E-04 | 3.93E-01 |
| ENSG00000176723.8_ZNF843    | ENSG00000160789.18_LMNA | -0.18767 | -0.336810077 | -0.02934861 | 2.06E-02 | 1.10E-01 | 1.00E+00 |
| ENSG00000234585.5_CCT6P3    | ENSG00000160789.18_LMNA | 0.01717  | -0.142421675 | 0.175888258 | 8.34E-01 | 9.35E-01 | 1.00E+00 |
| ENSG00000135697.8_BCO1      | ENSG00000160789.18_LMNA | -0.16101 | -0.312207967 | -0.00185696 | 4.75E-02 | 1.94E-01 | 1.00E+00 |
| ENSG00000255794.5_RMST      | ENSG00000160789.18_LMNA | -0.21022 | -0.357456051 | -0.05278411 | 9.34E-03 | 6.24E-02 | 1.00E+00 |
| ENSG00000164749.10_HNF4G    | ENSG00000160789.18_LMNA | 0.06282  | -0.097357381 | 0.219819342 | 4.42E-01 | 7.09E-01 | 1.00E+00 |
| ENSG00000127329.13_PTPRB    | ENSG00000160789.18_LMNA | -0.15835 | -0.309740834 | 0.000874297 | 5.14E-02 | 2.05E-01 | 1.00E+00 |
| ENSG00000152439.11_ZNF773   | ENSG00000160789.18_LMNA | 0.06828  | -0.091923981 | 0.225030611 | 4.03E-01 | 6.79E-01 | 1.00E+00 |
| ENSG00000104974.9_LILRA1    | ENSG00000160789.18_LMNA | -0.08979 | -0.245484556 | 0.070414196 | 2.71E-01 | 5.56E-01 | 1.00E+00 |
| ENSG00000189223.12_PAX8-AS1 | ENSG00000160789.18_LMNA | 0.02519  | -0.13455439  | 0.183650159 | 7.58E-01 | 8.99E-01 | 1.00E+00 |
| ENSG00000171174.12_RBKS     | ENSG00000160789.18_LMNA | 0.02851  | -0.131287995 | 0.186861185 | 7.27E-01 | 8.85E-01 | 1.00E+00 |
| ENSG00000272087.1_RP11-379F | ENSG00000160789.18_LMNA | 0.00589  | -0.153456258 | 0.164934386 | 9.43E-01 | 9.77E-01 | 1.00E+00 |
| ENSG00000176204.12_LRRTM4   | ENSG00000160789.18_LMNA | -0.33037 | -0.465106565 | -0.18066965 | 3.23E-05 | 7.58E-04 | 1.00E+00 |
| ENSG00000175874.8_CREG2     | ENSG00000160789.18_LMNA | -0.09722 | -0.252514676 | 0.062952713 | 2.33E-01 | 5.11E-01 | 1.00E+00 |
| ENSG00000228878.6_SEPT7-AS1 | ENSG00000160789.18_LMNA | -0.03881 | -0.196792159 | 0.121141866 | 6.35E-01 | 8.36E-01 | 1.00E+00 |
| ENSG00000204186.6_ZDBF2     | ENSG00000160789.18_LMNA | -0.24737 | -0.391169349 | -0.0917878  | 2.12E-03 | 2.05E-02 | 1.00E+00 |
| ENSG00000166436.14_TRIM66   | ENSG00000160789.18_LMNA | 0.0976   | -0.062571612 | 0.252872852 | 2.32E-01 | 5.09E-01 | 1.00E+00 |
| ENSG00000173928.2_SWSAP1    | ENSG00000160789.18_LMNA | -0.04364 | -0.201438653 | 0.116371783 | 5.93E-01 | 8.12E-01 | 1.00E+00 |

|                              |                         |          |              |             |          |          |          |
|------------------------------|-------------------------|----------|--------------|-------------|----------|----------|----------|
| ENSG00000188681.10_TEKT4P2   | ENSG00000160789.18_LMNA | 0.01618  | -0.143386977 | 0.174933152 | 8.43E-01 | 9.39E-01 | 1.00E+00 |
| ENSG00000118473.20_SGIP1     | ENSG00000160789.18_LMNA | -0.32279 | -0.458434268 | -0.17245336 | 4.99E-05 | 1.08E-03 | 1.00E+00 |
| ENSG00000172123.11_SLFN12    | ENSG00000160789.18_LMNA | 0.00538  | -0.153947942 | 0.164444463 | 9.48E-01 | 9.79E-01 | 1.00E+00 |
| ENSG00000167524.13_SGK494    | ENSG00000160789.18_LMNA | -0.13488 | -0.287899122 | 0.024853893 | 9.76E-02 | 3.07E-01 | 1.00E+00 |
| ENSG00000229806.1_RPS15P5    | ENSG00000160789.18_LMNA | -0.0126  | -0.171455362 | 0.146896785 | 8.78E-01 | 9.52E-01 | 1.00E+00 |
| ENSG00000260625.2_RP11-452L  | ENSG00000160789.18_LMNA | -0.28187 | -0.422129715 | -0.12843443 | 4.35E-04 | 6.05E-03 | 1.00E+00 |
| ENSG00000162591.14_MEGF6     | ENSG00000160789.18_LMNA | -0.18032 | -0.330042597 | -0.02173962 | 2.62E-02 | 1.31E-01 | 1.00E+00 |
| ENSG00000256802.2_RP11-680F  | ENSG00000160789.18_LMNA | 0.27162  | 0.117500671  | 0.412963653 | 7.12E-04 | 8.89E-03 | 1.00E+00 |
| ENSG00000145491.10_ROPN1L    | ENSG00000160789.18_LMNA | 0.01049  | -0.148959977 | 0.169407281 | 8.98E-01 | 9.60E-01 | 1.00E+00 |
| ENSG00000135111.13_TBX3      | ENSG00000160789.18_LMNA | -0.22864 | -0.37421777  | -0.07206063 | 4.61E-03 | 3.68E-02 | 1.00E+00 |
| ENSG00000242088.1_AC090602.1 | ENSG00000160789.18_LMNA | -0.10547 | -0.260295527 | 0.054653113 | 1.96E-01 | 4.65E-01 | 1.00E+00 |
| ENSG00000271430.1_RP3-368A4  | ENSG00000160789.18_LMNA | 0.03871  | -0.121234691 | 0.196701598 | 6.36E-01 | 8.37E-01 | 1.00E+00 |
| ENSG00000138778.10_CENPE     | ENSG00000160789.18_LMNA | 0.16489  | 0.005839344  | 0.315797746 | 4.24E-02 | 1.80E-01 | 1.00E+00 |
| ENSG00000270194.1_RP11-259K  | ENSG00000160789.18_LMNA | 0.14678  | -0.012716853 | 0.298994909 | 7.12E-02 | 2.52E-01 | 1.00E+00 |
| ENSG00000270906.1_MTND4P35   | ENSG00000160789.18_LMNA | -0.04886 | -0.206457164 | 0.111203265 | 5.50E-01 | 7.86E-01 | 1.00E+00 |
| ENSG00000223791.1_UBE2E1-AS1 | ENSG00000160789.18_LMNA | -0.34274 | -0.475972401 | -0.19413539 | 1.54E-05 | 4.19E-04 | 7.92E-01 |
| ENSG00000163071.9_SPATA18    | ENSG00000160789.18_LMNA | 0.14056  | -0.019070939 | 0.293196442 | 8.41E-02 | 2.81E-01 | 1.00E+00 |
| ENSG00000188039.12_NWD1      | ENSG00000160789.18_LMNA | 0.0103   | -0.149149532 | 0.169218977 | 9.00E-01 | 9.61E-01 | 1.00E+00 |
| ENSG00000262686.1_GLIS2-AS1  | ENSG00000160789.18_LMNA | -0.12324 | -0.277010444 | 0.036675426 | 1.30E-01 | 3.66E-01 | 1.00E+00 |
| ENSG00000153162.8_BMP6       | ENSG00000160789.18_LMNA | -0.25489 | -0.397941315 | -0.09973482 | 1.53E-03 | 1.59E-02 | 1.00E+00 |
| ENSG00000229847.7_EMX2OS     | ENSG00000160789.18_LMNA | -0.04761 | -0.205258981 | 0.112438826 | 5.60E-01 | 7.93E-01 | 1.00E+00 |
| ENSG00000175536.6_LIPT2      | ENSG00000160789.18_LMNA | -0.08997 | -0.245652156 | 0.070236722 | 2.70E-01 | 5.55E-01 | 1.00E+00 |
| ENSG00000227232.5_WASH7P     | ENSG00000160789.18_LMNA | 0.068    | -0.092203209 | 0.22476324  | 4.05E-01 | 6.81E-01 | 1.00E+00 |
| ENSG00000151611.12_MMAA      | ENSG00000160789.18_LMNA | 0.18504  | 0.026627601  | 0.334393638 | 2.25E-02 | 1.17E-01 | 1.00E+00 |
| ENSG00000260296.1_RP11-395L6 | ENSG00000160789.18_LMNA | -0.19169 | -0.340501321 | -0.03351392 | 1.80E-02 | 1.00E-01 | 1.00E+00 |
| ENSG00000186369.8_LINC00643  | ENSG00000160789.18_LMNA | -0.48646 | -0.599252395 | -0.35473222 | 2.10E-10 | 4.18E-08 | 1.08E-05 |
| ENSG00000224397.4_LINC01272  | ENSG00000160789.18_LMNA | 0.11512  | -0.044904296 | 0.269383066 | 1.58E-01 | 4.11E-01 | 1.00E+00 |
| ENSG00000188613.6_NANOS1     | ENSG00000160789.18_LMNA | -0.24602 | -0.389945824 | -0.09035602 | 2.25E-03 | 2.14E-02 | 1.00E+00 |
| ENSG00000183506.15_PI4KAP2   | ENSG00000160789.18_LMNA | -0.01025 | -0.169179265 | 0.149189504 | 9.00E-01 | 9.61E-01 | 1.00E+00 |
| ENSG00000125637.14_PSD4      | ENSG00000160789.18_LMNA | 0.11001  | -0.050064139 | 0.264580185 | 1.77E-01 | 4.39E-01 | 1.00E+00 |
| ENSG00000229539.1_RP11-119B  | ENSG00000160789.18_LMNA | -0.11802 | -0.272110023 | 0.041967182 | 1.48E-01 | 3.94E-01 | 1.00E+00 |
| ENSG00000167981.5_ZNF597     | ENSG00000160789.18_LMNA | 0.02296  | -0.136744641 | 0.181493225 | 7.79E-01 | 9.09E-01 | 1.00E+00 |
| ENSG00000262903.1_RP11-235E  | ENSG00000160789.18_LMNA | 0.10909  | -0.05099447  | 0.263712552 | 1.81E-01 | 4.44E-01 | 1.00E+00 |

|                             |                         |          |              |             |          |          |          |
|-----------------------------|-------------------------|----------|--------------|-------------|----------|----------|----------|
| ENSG00000236088.8_COX10-AS  | ENSG00000160789.18_LMNA | -0.21071 | -0.357904883 | -0.05329734 | 9.17E-03 | 6.16E-02 | 1.00E+00 |
| ENSG00000226964.1_RHEBP2    | ENSG00000160789.18_LMNA | -0.2294  | -0.374911055 | -0.07286282 | 4.47E-03 | 3.60E-02 | 1.00E+00 |
| ENSG00000132321.15_IQCA1    | ENSG00000160789.18_LMNA | -0.15767 | -0.309114916 | 0.001566488 | 5.24E-02 | 2.07E-01 | 1.00E+00 |
| ENSG00000118193.10_KIF14    | ENSG00000160789.18_LMNA | 0.1214   | -0.03855024  | 0.275276141 | 1.36E-01 | 3.76E-01 | 1.00E+00 |
| ENSG00000172572.6_PDE3A     | ENSG00000160789.18_LMNA | 0.06235  | -0.097818515 | 0.219376225 | 4.45E-01 | 7.12E-01 | 1.00E+00 |
| ENSG00000255366.1_RP11-1134 | ENSG00000160789.18_LMNA | -0.25824 | -0.400955999 | -0.10328489 | 1.32E-03 | 1.43E-02 | 1.00E+00 |
| ENSG00000174776.9_WDR49     | ENSG00000160789.18_LMNA | -0.12805 | -0.28150773  | 0.031803467 | 1.16E-01 | 3.40E-01 | 1.00E+00 |
| ENSG00000223822.2_EEF1A1P1  | ENSG00000160789.18_LMNA | -0.07194 | -0.228523467 | 0.088271646 | 3.78E-01 | 6.58E-01 | 1.00E+00 |
| ENSG00000197083.10_ZNF300P1 | ENSG00000160789.18_LMNA | -0.21418 | -0.361065639 | -0.05691616 | 8.06E-03 | 5.59E-02 | 1.00E+00 |
| ENSG00000180616.7_SSTR2     | ENSG00000160789.18_LMNA | -0.48011 | -0.593918704 | -0.34747199 | 3.87E-10 | 7.07E-08 | 1.99E-05 |
| ENSG00000168546.9_GFRA2     | ENSG00000160789.18_LMNA | -0.21443 | -0.361296215 | -0.05718046 | 7.98E-03 | 5.55E-02 | 1.00E+00 |
| ENSG00000236120.5_RP11-733O | ENSG00000160789.18_LMNA | -0.15119 | -0.303092648 | 0.008211227 | 6.30E-02 | 2.33E-01 | 1.00E+00 |
| ENSG00000267871.4_CTC-444N2 | ENSG00000160789.18_LMNA | -0.09738 | -0.252666232 | 0.062791468 | 2.33E-01 | 5.11E-01 | 1.00E+00 |
| ENSG00000280294.1_RP11-177H | ENSG00000160789.18_LMNA | -0.09632 | -0.251657492 | 0.063864385 | 2.38E-01 | 5.16E-01 | 1.00E+00 |
| ENSG00000277147.3_LINC00869 | ENSG00000160789.18_LMNA | -0.19911 | -0.347298411 | -0.04121196 | 1.39E-02 | 8.32E-02 | 1.00E+00 |
| ENSG00000230337.1_RP4-635E1 | ENSG00000160789.18_LMNA | -0.08779 | -0.243583786 | 0.072425543 | 2.82E-01 | 5.67E-01 | 1.00E+00 |
| ENSG00000157657.13_ZNF618   | ENSG00000160789.18_LMNA | 0.11475  | -0.045278583 | 0.269035198 | 1.59E-01 | 4.12E-01 | 1.00E+00 |
| ENSG00000261556.7_SMG1P7    | ENSG00000160789.18_LMNA | -0.05132 | -0.208811011 | 0.108773126 | 5.30E-01 | 7.73E-01 | 1.00E+00 |
| ENSG00000267249.1_RP11-973H | ENSG00000160789.18_LMNA | -0.29024 | -0.429591354 | -0.13738809 | 2.87E-04 | 4.34E-03 | 1.00E+00 |
| ENSG00000135899.15_SP110    | ENSG00000160789.18_LMNA | 0.07511  | -0.08511318  | 0.231537457 | 3.58E-01 | 6.41E-01 | 1.00E+00 |
| ENSG00000103056.10_SMPD3    | ENSG00000160789.18_LMNA | -0.37523 | -0.504307745 | -0.22975746 | 1.91E-06 | 7.70E-05 | 9.78E-02 |
| ENSG00000142611.15_PRDM16   | ENSG00000160789.18_LMNA | 0.20805  | 0.05052336   | 0.355477288 | 1.01E-02 | 6.61E-02 | 1.00E+00 |
| ENSG00000139800.8_ZIC5      | ENSG00000160789.18_LMNA | 0.15532  | -0.003983732 | 0.306926996 | 5.60E-02 | 2.16E-01 | 1.00E+00 |
| ENSG00000166206.12_GABRB3   | ENSG00000160789.18_LMNA | -0.36908 | -0.498960548 | -0.22297839 | 2.88E-06 | 1.07E-04 | 1.48E-01 |
| ENSG00000111181.11_SLC6A12  | ENSG00000160789.18_LMNA | -0.28345 | -0.423534834 | -0.13011686 | 4.02E-04 | 5.69E-03 | 1.00E+00 |
| ENSG00000280079.1_CTC-260E6 | ENSG00000160789.18_LMNA | -0.15144 | -0.303324953 | 0.00795542  | 6.25E-02 | 2.32E-01 | 1.00E+00 |
| ENSG00000271914.1_RP4-789D1 | ENSG00000160789.18_LMNA | -0.21655 | -0.363231357 | -0.05940036 | 7.37E-03 | 5.23E-02 | 1.00E+00 |
| ENSG00000102384.12_CENPI    | ENSG00000160789.18_LMNA | 0.13554  | -0.024184923 | 0.288512895 | 9.59E-02 | 3.04E-01 | 1.00E+00 |
| ENSG00000166145.13_SPINT1   | ENSG00000160789.18_LMNA | 0.14957  | -0.009865556 | 0.301589419 | 6.59E-02 | 2.40E-01 | 1.00E+00 |
| ENSG00000163633.9_C4orf36   | ENSG00000160789.18_LMNA | -0.12022 | -0.274170749 | 0.039744037 | 1.40E-01 | 3.82E-01 | 1.00E+00 |
| ENSG00000145287.9_PLAC8     | ENSG00000160789.18_LMNA | -0.11183 | -0.266293551 | 0.048225357 | 1.70E-01 | 4.29E-01 | 1.00E+00 |
| ENSG00000117245.11_KIF17    | ENSG00000160789.18_LMNA | -0.07186 | -0.228448807 | 0.088349804 | 3.79E-01 | 6.58E-01 | 1.00E+00 |
| ENSG00000235545.1_RP11-230B | ENSG00000160789.18_LMNA | -0.09271 | -0.248247076 | 0.067486379 | 2.56E-01 | 5.38E-01 | 1.00E+00 |



|                              |                         |          |              |             |          |          |          |
|------------------------------|-------------------------|----------|--------------|-------------|----------|----------|----------|
| ENSG00000232810.3_TNF        | ENSG00000160789.18_LMNA | -0.14337 | -0.295817036 | 0.016202355 | 7.81E-02 | 2.68E-01 | 1.00E+00 |
| ENSG00000149654.8_CDH22      | ENSG00000160789.18_LMNA | -0.28367 | -0.423737537 | -0.13035971 | 3.98E-04 | 5.64E-03 | 1.00E+00 |
| ENSG00000236397.3_DDX11L2    | ENSG00000160789.18_LMNA | -0.07735 | -0.233674708 | 0.082869618 | 3.44E-01 | 6.28E-01 | 1.00E+00 |
| ENSG00000272677.1_RP11-127B  | ENSG00000160789.18_LMNA | -0.1561  | -0.307654627 | 0.003180238 | 5.48E-02 | 2.13E-01 | 1.00E+00 |
| ENSG00000270147.1_RP11-646I6 | ENSG00000160789.18_LMNA | -0.12895 | -0.282351203 | 0.030888063 | 1.13E-01 | 3.36E-01 | 1.00E+00 |
| ENSG00000165238.15_WNK2      | ENSG00000160789.18_LMNA | -0.34605 | -0.478868918 | -0.19774299 | 1.26E-05 | 3.53E-04 | 6.47E-01 |
| ENSG00000258777.1_HIF1A-AS1  | ENSG00000160789.18_LMNA | 0.00627  | -0.153083265 | 0.165305938 | 9.39E-01 | 9.76E-01 | 1.00E+00 |
| ENSG00000149927.16_DOC2A     | ENSG00000160789.18_LMNA | -0.17954 | -0.329328373 | -0.02093866 | 2.69E-02 | 1.33E-01 | 1.00E+00 |
| ENSG00000144645.12_OSBPL10   | ENSG00000160789.18_LMNA | 0.52393  | 0.397925239  | 0.630541444 | 4.31E-12 | 1.77E-09 | 2.21E-07 |
| ENSG00000257074.3_RPL29P33   | ENSG00000160789.18_LMNA | -0.13211 | -0.285311853 | 0.027670764 | 1.05E-01 | 3.21E-01 | 1.00E+00 |
| ENSG00000234494.6_SP2-AS1    | ENSG00000160789.18_LMNA | -0.33418 | -0.468458363 | -0.1848121  | 2.58E-05 | 6.33E-04 | 1.00E+00 |
| ENSG00000231416.1_RP11-422P  | ENSG00000160789.18_LMNA | -0.14585 | -0.298131779 | 0.013664287 | 7.30E-02 | 2.56E-01 | 1.00E+00 |
| ENSG00000152078.8_TMEN56     | ENSG00000160789.18_LMNA | -0.08839 | -0.244156656 | 0.071819617 | 2.79E-01 | 5.64E-01 | 1.00E+00 |
| ENSG00000165288.10_BRWD3     | ENSG00000160789.18_LMNA | -0.04621 | -0.203907199 | 0.1138316   | 5.72E-01 | 8.00E-01 | 1.00E+00 |
| ENSG00000198915.10_RASGEF1   | ENSG00000160789.18_LMNA | 0.11268  | -0.0473726   | 0.267087471 | 1.67E-01 | 4.24E-01 | 1.00E+00 |
| ENSG00000226833.4_AC097724.1 | ENSG00000160789.18_LMNA | -0.25053 | -0.394015013 | -0.0951226  | 1.85E-03 | 1.85E-02 | 1.00E+00 |
| ENSG00000227852.1_RPS29P17   | ENSG00000160789.18_LMNA | -0.10309 | -0.258052126 | 0.057050554 | 2.06E-01 | 4.78E-01 | 1.00E+00 |
| ENSG00000264016.2_CTC-297N7  | ENSG00000160789.18_LMNA | 0.08182  | -0.078400327 | 0.237923124 | 3.16E-01 | 6.03E-01 | 1.00E+00 |
| ENSG00000129159.6_KCNC1      | ENSG00000160789.18_LMNA | -0.23721 | -0.381988201 | -0.08107411 | 3.26E-03 | 2.84E-02 | 1.00E+00 |
| ENSG00000111846.14_GCNT2     | ENSG00000160789.18_LMNA | -0.19833 | -0.346591198 | -0.04040931 | 1.43E-02 | 8.50E-02 | 1.00E+00 |
| ENSG00000160062.13_ZBTB8A    | ENSG00000160789.18_LMNA | -0.19087 | -0.339742517 | -0.03265679 | 1.85E-02 | 1.02E-01 | 1.00E+00 |
| ENSG00000223886.3_RP11-251G  | ENSG00000160789.18_LMNA | -0.03824 | -0.196246597 | 0.121700978 | 6.40E-01 | 8.39E-01 | 1.00E+00 |
| ENSG00000010318.18_PHF7      | ENSG00000160789.18_LMNA | 0.0053   | -0.154027958 | 0.16436472  | 9.48E-01 | 9.79E-01 | 1.00E+00 |
| ENSG00000273259.2_SERPINA3   | ENSG00000160789.18_LMNA | 0.171    | 0.01212587   | 0.321446513 | 3.52E-02 | 1.59E-01 | 1.00E+00 |
| ENSG00000213867.4_RP11-829H  | ENSG00000160789.18_LMNA | -0.17828 | -0.328170806 | -0.01964137 | 2.80E-02 | 1.37E-01 | 1.00E+00 |
| ENSG00000101680.12_LAMA1     | ENSG00000160789.18_LMNA | 0.04196  | -0.118030341 | 0.199824687 | 6.08E-01 | 8.21E-01 | 1.00E+00 |
| ENSG00000263013.1_RP11-876N  | ENSG00000160789.18_LMNA | 0.08276  | -0.077457211 | 0.238818086 | 3.11E-01 | 5.97E-01 | 1.00E+00 |
| ENSG00000179630.9_LACC1      | ENSG00000160789.18_LMNA | -0.03248 | -0.190697216 | 0.127376741 | 6.91E-01 | 8.67E-01 | 1.00E+00 |
| ENSG00000187634.9_SAMD11     | ENSG00000160789.18_LMNA | -0.15575 | -0.307326845 | 0.003542244 | 5.54E-02 | 2.15E-01 | 1.00E+00 |
| ENSG00000126583.9_PRKCG      | ENSG00000160789.18_LMNA | -0.20698 | -0.35450234  | -0.04941062 | 1.05E-02 | 6.79E-02 | 1.00E+00 |
| ENSG00000117262.17_GPR89A    | ENSG00000160789.18_LMNA | 0.11478  | -0.04524435  | 0.269067018 | 1.59E-01 | 4.12E-01 | 1.00E+00 |
| ENSG00000226085.3_UQCRFS1F   | ENSG00000160789.18_LMNA | -0.06493 | -0.221837759 | 0.09525517  | 4.27E-01 | 6.97E-01 | 1.00E+00 |
| ENSG00000270055.1_CTD-3092A  | ENSG00000160789.18_LMNA | 0.26552  | 0.111008816  | 0.407492887 | 9.46E-04 | 1.11E-02 | 1.00E+00 |

|                              |                         |          |              |             |          |          |          |
|------------------------------|-------------------------|----------|--------------|-------------|----------|----------|----------|
| ENSG00000116690.10_PRG4      | ENSG00000160789.18_LMNA | 0.23109  | 0.074631558  | 0.376438477 | 4.18E-03 | 3.43E-02 | 1.00E+00 |
| ENSG00000140368.11_PSTPIP1   | ENSG00000160789.18_LMNA | 0.06927  | -0.090932231 | 0.225979862 | 3.96E-01 | 6.73E-01 | 1.00E+00 |
| ENSG00000233006.5_AC034220.1 | ENSG00000160789.18_LMNA | -0.374   | -0.503237887 | -0.22839898 | 2.07E-06 | 8.20E-05 | 1.06E-01 |
| ENSG00000244682.6_FCGR2C     | ENSG00000160789.18_LMNA | 0.33065  | 0.180977473  | 0.465355916 | 3.18E-05 | 7.47E-04 | 1.00E+00 |
| ENSG00000178882.12_RFLNA     | ENSG00000160789.18_LMNA | -0.19349 | -0.342150191 | -0.03537801 | 1.69E-02 | 9.57E-02 | 1.00E+00 |
| ENSG00000260259.1_RP11-368I7 | ENSG00000160789.18_LMNA | 0.18908  | 0.03080403   | 0.338100926 | 1.97E-02 | 1.07E-01 | 1.00E+00 |
| ENSG00000223482.6_NUTM2A-A   | ENSG00000160789.18_LMNA | -0.2124  | -0.35944966  | -0.05506499 | 8.61E-03 | 5.88E-02 | 1.00E+00 |
| ENSG00000251602.5_RP11-521B  | ENSG00000160789.18_LMNA | 0.13749  | -0.022195716 | 0.290336454 | 9.12E-02 | 2.94E-01 | 1.00E+00 |
| ENSG00000122870.10_BICC1     | ENSG00000160789.18_LMNA | 0.30868  | 0.157204228  | 0.445964699 | 1.09E-04 | 2.02E-03 | 1.00E+00 |
| ENSG00000226855.1_RPSAP17    | ENSG00000160789.18_LMNA | -0.175   | -0.325138538 | -0.01624799 | 3.11E-02 | 1.47E-01 | 1.00E+00 |
| ENSG00000272323.1_CTD-2517C  | ENSG00000160789.18_LMNA | -0.15256 | -0.304371113 | 0.006802894 | 6.06E-02 | 2.27E-01 | 1.00E+00 |
| ENSG00000223416.3_RPS26P15   | ENSG00000160789.18_LMNA | -0.17263 | -0.32295421  | -0.01380793 | 3.34E-02 | 1.54E-01 | 1.00E+00 |
| ENSG00000239470.3_RP11-16F1  | ENSG00000160789.18_LMNA | -0.23027 | -0.375696163 | -0.07377173 | 4.32E-03 | 3.51E-02 | 1.00E+00 |
| ENSG00000242588.5_RP11-274B  | ENSG00000160789.18_LMNA | 0.08708  | -0.073137894 | 0.242910015 | 2.86E-01 | 5.72E-01 | 1.00E+00 |
| ENSG00000238228.1_OR7E7P     | ENSG00000160789.18_LMNA | -0.11133 | -0.265823375 | 0.048730162 | 1.72E-01 | 4.31E-01 | 1.00E+00 |
| ENSG00000248890.1_HHIP-AS1   | ENSG00000160789.18_LMNA | -0.10933 | -0.263940269 | 0.050750351 | 1.80E-01 | 4.43E-01 | 1.00E+00 |
| ENSG00000276231.3_PIK3R6     | ENSG00000160789.18_LMNA | 0.02562  | -0.134124184 | 0.184073461 | 7.54E-01 | 8.98E-01 | 1.00E+00 |
| ENSG00000137203.9_TFAP2A     | ENSG00000160789.18_LMNA | -0.19777 | -0.346072633 | -0.03982101 | 1.46E-02 | 8.62E-02 | 1.00E+00 |
| ENSG00000176472.9_ZNF575     | ENSG00000160789.18_LMNA | -0.02067 | -0.179280232 | 0.138988589 | 8.00E-01 | 9.20E-01 | 1.00E+00 |
| ENSG00000158865.11_SLC5A11   | ENSG00000160789.18_LMNA | -0.26884 | -0.410474974 | -0.11454436 | 8.11E-04 | 9.83E-03 | 1.00E+00 |
| ENSG00000279461.1_AC005480.1 | ENSG00000160789.18_LMNA | -0.02831 | -0.186666701 | 0.13148603  | 7.29E-01 | 8.85E-01 | 1.00E+00 |
| ENSG00000196172.9_ZNF681     | ENSG00000160789.18_LMNA | -0.13607 | -0.289014476 | 0.023638026 | 9.46E-02 | 3.01E-01 | 1.00E+00 |
| ENSG00000256667.5_KLRA1P     | ENSG00000160789.18_LMNA | -0.18986 | -0.338820841 | -0.03161629 | 1.91E-02 | 1.05E-01 | 1.00E+00 |
| ENSG00000267422.1_CTD-2554C  | ENSG00000160789.18_LMNA | -0.05153 | -0.209016558 | 0.108560736 | 5.28E-01 | 7.72E-01 | 1.00E+00 |
| ENSG00000184838.13_PRR16     | ENSG00000160789.18_LMNA | 0.19599  | 0.037976502  | 0.344445533 | 1.55E-02 | 9.00E-02 | 1.00E+00 |
| ENSG00000214826.5_DDX12P     | ENSG00000160789.18_LMNA | -0.07759 | -0.233903413 | 0.082629347 | 3.42E-01 | 6.27E-01 | 1.00E+00 |
| ENSG00000123552.16_USP45     | ENSG00000160789.18_LMNA | -0.27634 | -0.417191076 | -0.12253448 | 5.68E-04 | 7.45E-03 | 1.00E+00 |
| ENSG00000276547.1_PCDHGB5    | ENSG00000160789.18_LMNA | 0.03337  | -0.126500525 | 0.191555251 | 6.83E-01 | 8.62E-01 | 1.00E+00 |
| ENSG00000259768.5_RP5-991G2  | ENSG00000160789.18_LMNA | 0.19273  | 0.0345875    | 0.341451183 | 1.74E-02 | 9.75E-02 | 1.00E+00 |
| ENSG00000244219.5_GS1-259H1  | ENSG00000160789.18_LMNA | -0.08466 | -0.24061559  | 0.075561281 | 3.00E-01 | 5.86E-01 | 1.00E+00 |
| ENSG00000198205.6_ZXDA       | ENSG00000160789.18_LMNA | 0.11118  | -0.048888306 | 0.265676049 | 1.73E-01 | 4.32E-01 | 1.00E+00 |
| ENSG00000176732.6_PFN4       | ENSG00000160789.18_LMNA | 0.11179  | -0.048264831 | 0.26625679  | 1.70E-01 | 4.29E-01 | 1.00E+00 |
| ENSG00000230939.1_RP11-314C  | ENSG00000160789.18_LMNA | -0.2338  | -0.378902225 | -0.07748856 | 3.74E-03 | 3.16E-02 | 1.00E+00 |

|                             |                         |          |              |             |          |          |          |
|-----------------------------|-------------------------|----------|--------------|-------------|----------|----------|----------|
| ENSG00000174469.16_CNTNAP2  | ENSG00000160789.18_LMNA | -0.36795 | -0.497977046 | -0.22173443 | 3.11E-06 | 1.13E-04 | 1.59E-01 |
| ENSG00000172426.14_RSPH9    | ENSG00000160789.18_LMNA | -0.04272 | -0.200553418 | 0.117281696 | 6.01E-01 | 8.17E-01 | 1.00E+00 |
| ENSG00000196418.11_ZNF124   | ENSG00000160789.18_LMNA | -0.36718 | -0.49730857  | -0.22088943 | 3.27E-06 | 1.18E-04 | 1.68E-01 |
| ENSG00000213772.3_EIF1P7    | ENSG00000160789.18_LMNA | -0.01816 | -0.176852369 | 0.141446657 | 8.24E-01 | 9.31E-01 | 1.00E+00 |
| ENSG00000197291.7_RAMP2-AS  | ENSG00000160789.18_LMNA | -0.33105 | -0.46570655  | -0.18141042 | 3.10E-05 | 7.33E-04 | 1.00E+00 |
| ENSG00000152213.3_ARL11     | ENSG00000160789.18_LMNA | -0.0483  | -0.205915507 | 0.111761941 | 5.55E-01 | 7.89E-01 | 1.00E+00 |
| ENSG00000213236.3_YWHAZP2   | ENSG00000160789.18_LMNA | 0.074    | -0.086213044 | 0.230488594 | 3.65E-01 | 6.46E-01 | 1.00E+00 |
| ENSG00000117069.13_ST6GALN  | ENSG00000160789.18_LMNA | 0.00057  | -0.15864798  | 0.159753324 | 9.94E-01 | 9.98E-01 | 1.00E+00 |
| ENSG00000215221.2_UBA52P6   | ENSG00000160789.18_LMNA | 0.14725  | -0.012234426 | 0.299434212 | 7.02E-02 | 2.50E-01 | 1.00E+00 |
| ENSG00000228701.1_TNKS2-AS  | ENSG00000160789.18_LMNA | -0.10651 | -0.261283518 | 0.05359613  | 1.92E-01 | 4.59E-01 | 1.00E+00 |
| ENSG00000115844.9_DLX2      | ENSG00000160789.18_LMNA | -0.12476 | -0.27842618  | 0.03514335  | 1.26E-01 | 3.58E-01 | 1.00E+00 |
| ENSG00000109771.14_LRP2BP   | ENSG00000160789.18_LMNA | -0.17242 | -0.322756705 | -0.01358749 | 3.37E-02 | 1.55E-01 | 1.00E+00 |
| ENSG00000117586.9_TNFSF4    | ENSG00000160789.18_LMNA | 0.31338  | 0.162270867  | 0.45012028  | 8.45E-05 | 1.64E-03 | 1.00E+00 |
| ENSG00000134470.18_IL15RA   | ENSG00000160789.18_LMNA | 0.21066  | 0.053245838  | 0.357859847 | 9.19E-03 | 6.16E-02 | 1.00E+00 |
| ENSG00000261338.2_RP11-378A | ENSG00000160789.18_LMNA | -0.21332 | -0.360287937 | -0.05602501 | 8.32E-03 | 5.73E-02 | 1.00E+00 |
| ENSG00000127423.9_AUNIP     | ENSG00000160789.18_LMNA | -0.06407 | -0.221017085 | 0.096110255 | 4.33E-01 | 7.02E-01 | 1.00E+00 |
| ENSG00000180479.12_ZNF571   | ENSG00000160789.18_LMNA | -0.20463 | -0.352347695 | -0.04695414 | 1.14E-02 | 7.21E-02 | 1.00E+00 |
| ENSG00000090376.7_IRAK3     | ENSG00000160789.18_LMNA | -0.11547 | -0.269713664 | 0.04454851  | 1.57E-01 | 4.09E-01 | 1.00E+00 |
| ENSG00000275854.1_RP11-278C | ENSG00000160789.18_LMNA | -0.12501 | -0.278669021 | 0.034880406 | 1.25E-01 | 3.57E-01 | 1.00E+00 |
| ENSG00000267082.1_CTC-510F1 | ENSG00000160789.18_LMNA | 0.0243   | -0.135427125 | 0.182791067 | 7.66E-01 | 9.03E-01 | 1.00E+00 |
| ENSG00000249485.1_RBBP4P1   | ENSG00000160789.18_LMNA | -0.09167 | -0.247265556 | 0.068527252 | 2.61E-01 | 5.45E-01 | 1.00E+00 |
| ENSG00000275476.1_RP11-996F | ENSG00000160789.18_LMNA | -0.24372 | -0.387872369 | -0.08793248 | 2.48E-03 | 2.31E-02 | 1.00E+00 |
| ENSG00000253988.1_RP11-489C | ENSG00000160789.18_LMNA | -0.3546  | -0.486341253 | -0.20708504 | 7.39E-06 | 2.29E-04 | 3.79E-01 |
| ENSG00000225159.1_NPM1P39   | ENSG00000160789.18_LMNA | 0.02658  | -0.133181987 | 0.185000127 | 7.45E-01 | 8.93E-01 | 1.00E+00 |
| ENSG00000043591.5_ADRB1     | ENSG00000160789.18_LMNA | -0.04099 | -0.19888902  | 0.118991048 | 6.16E-01 | 8.26E-01 | 1.00E+00 |
| ENSG00000215915.8_ATAD3C    | ENSG00000160789.18_LMNA | -0.07488 | -0.231320516 | 0.085340733 | 3.59E-01 | 6.42E-01 | 1.00E+00 |
| ENSG00000250568.1_RP11-333E | ENSG00000160789.18_LMNA | -0.10165 | -0.25669404  | 0.058500128 | 2.13E-01 | 4.86E-01 | 1.00E+00 |
| ENSG00000146267.11_FAXC     | ENSG00000160789.18_LMNA | -0.3156  | -0.452081888 | -0.16466782 | 7.48E-05 | 1.49E-03 | 1.00E+00 |
| ENSG00000085465.12_OVGP1    | ENSG00000160789.18_LMNA | -0.20846 | -0.355847158 | -0.0509457  | 9.96E-03 | 6.54E-02 | 1.00E+00 |
| ENSG00000167525.12_PROCA1   | ENSG00000160789.18_LMNA | 0.19201  | 0.033839808  | 0.34078972  | 1.78E-02 | 9.93E-02 | 1.00E+00 |
| ENSG00000213888.3_LINC01521 | ENSG00000160789.18_LMNA | -0.08259 | -0.238656012 | 0.077628047 | 3.12E-01 | 5.98E-01 | 1.00E+00 |
| ENSG00000197302.9_ZNF720    | ENSG00000160789.18_LMNA | -0.11094 | -0.2654529   | 0.04912781  | 1.74E-01 | 4.33E-01 | 1.00E+00 |
| ENSG00000276805.1_RP11-291L | ENSG00000160789.18_LMNA | -0.03925 | -0.197221975 | 0.120701234 | 6.31E-01 | 8.34E-01 | 1.00E+00 |

|                              |                         |          |              |             |          |          |          |
|------------------------------|-------------------------|----------|--------------|-------------|----------|----------|----------|
| ENSG00000149596.6_JPH2       | ENSG00000160789.18_LMNA | -0.09632 | -0.25165898  | 0.063862802 | 2.38E-01 | 5.16E-01 | 1.00E+00 |
| ENSG00000196505.9_GDAP2      | ENSG00000160789.18_LMNA | 0.16899  | 0.010063369  | 0.319595674 | 3.74E-02 | 1.66E-01 | 1.00E+00 |
| ENSG00000138670.15_RASGEF1   | ENSG00000160789.18_LMNA | -0.43454 | -0.555326663 | -0.29580628 | 2.22E-08 | 2.11E-06 | 1.14E-03 |
| ENSG00000160613.11_PCSK7     | ENSG00000160789.18_LMNA | 0.26072  | 0.105913943  | 0.403184419 | 1.18E-03 | 1.31E-02 | 1.00E+00 |
| ENSG00000254373.1_RP11-34P1  | ENSG00000160789.18_LMNA | -0.03833 | -0.196334141 | 0.121611273 | 6.39E-01 | 8.39E-01 | 1.00E+00 |
| ENSG00000260293.2_RP11-715J  | ENSG00000160789.18_LMNA | -0.02878 | -0.187124521 | 0.131019811 | 7.25E-01 | 8.83E-01 | 1.00E+00 |
| ENSG00000258311.4_RP11-644F  | ENSG00000160789.18_LMNA | -0.01341 | -0.172244201 | 0.146101385 | 8.70E-01 | 9.49E-01 | 1.00E+00 |
| ENSG00000262468.4_LINC01569  | ENSG00000160789.18_LMNA | 0.12984  | -0.029983716 | 0.283184012 | 1.11E-01 | 3.32E-01 | 1.00E+00 |
| ENSG00000163376.10_KBTBD8    | ENSG00000160789.18_LMNA | -0.33548 | -0.469601621 | -0.18622735 | 2.39E-05 | 5.96E-04 | 1.00E+00 |
| ENSG00000272070.1_AC005618.1 | ENSG00000160789.18_LMNA | -0.15403 | -0.305738065 | 0.005295758 | 5.81E-02 | 2.21E-01 | 1.00E+00 |
| ENSG00000124713.5_GNMT       | ENSG00000160789.18_LMNA | -0.22244 | -0.368585404 | -0.06555795 | 5.88E-03 | 4.44E-02 | 1.00E+00 |
| ENSG00000159882.11_ZNF230    | ENSG00000160789.18_LMNA | -0.0159  | -0.174654956 | 0.143668029 | 8.46E-01 | 9.40E-01 | 1.00E+00 |
| ENSG00000069431.9_ABCC9      | ENSG00000160789.18_LMNA | -0.08033 | -0.236507924 | 0.079890516 | 3.25E-01 | 6.12E-01 | 1.00E+00 |
| ENSG00000255468.5_RP11-867G  | ENSG00000160789.18_LMNA | -0.01857 | -0.177242506 | 0.14105193  | 8.20E-01 | 9.30E-01 | 1.00E+00 |
| ENSG00000056277.14_ZNF280C   | ENSG00000160789.18_LMNA | -0.00929 | -0.168239122 | 0.150135516 | 9.10E-01 | 9.65E-01 | 1.00E+00 |
| ENSG00000139187.8_KLRG1      | ENSG00000160789.18_LMNA | -0.33405 | -0.46834024  | -0.18466594 | 2.60E-05 | 6.38E-04 | 1.00E+00 |
| ENSG00000073737.15_DHRS9     | ENSG00000160789.18_LMNA | -0.40737 | -0.532065784 | -0.26538193 | 1.90E-07 | 1.22E-05 | 9.76E-03 |
| ENSG00000168398.6_BDKRB2     | ENSG00000160789.18_LMNA | 0.4473   | 0.310190786  | 0.566184721 | 7.59E-09 | 8.60E-07 | 3.89E-04 |
| ENSG00000243989.6_ACY1       | ENSG00000160789.18_LMNA | -0.08343 | -0.239451134 | 0.07678976  | 3.07E-01 | 5.93E-01 | 1.00E+00 |
| ENSG00000179611.3_DGKZP1     | ENSG00000160789.18_LMNA | 0.21885  | 0.061806107  | 0.365325555 | 6.75E-03 | 4.90E-02 | 1.00E+00 |
| ENSG00000220793.5_RPL21P11.5 | ENSG00000160789.18_LMNA | -0.2348  | -0.379807335 | -0.07853939 | 3.59E-03 | 3.06E-02 | 1.00E+00 |
| ENSG00000253958.1_CLDN23     | ENSG00000160789.18_LMNA | 0.38007  | 0.235099194  | 0.508506417 | 1.37E-06 | 5.96E-05 | 7.02E-02 |
| ENSG00000242858.1_CTC-484M2  | ENSG00000160789.18_LMNA | -0.07546 | -0.231875186 | 0.084758866 | 3.56E-01 | 6.39E-01 | 1.00E+00 |
| ENSG00000221955.9_SLC12A8    | ENSG00000160789.18_LMNA | -0.06628 | -0.223129817 | 0.093907986 | 4.17E-01 | 6.89E-01 | 1.00E+00 |
| ENSG00000230953.2_RP4-631H1  | ENSG00000160789.18_LMNA | 0.06233  | -0.09784442  | 0.219351329 | 4.46E-01 | 7.12E-01 | 1.00E+00 |
| ENSG00000103404.13_USP31     | ENSG00000160789.18_LMNA | 0.13087  | -0.028931355 | 0.284152533 | 1.08E-01 | 3.27E-01 | 1.00E+00 |
| ENSG00000162543.5_UBXN10     | ENSG00000160789.18_LMNA | 0.09885  | -0.061312217 | 0.254055878 | 2.26E-01 | 5.02E-01 | 1.00E+00 |
| ENSG00000212994.5_RPS26P6    | ENSG00000160789.18_LMNA | -0.14959 | -0.301605057 | 0.009848355 | 6.59E-02 | 2.40E-01 | 1.00E+00 |
| ENSG00000064309.13_CDON      | ENSG00000160789.18_LMNA | -0.09152 | -0.247124364 | 0.068676926 | 2.62E-01 | 5.45E-01 | 1.00E+00 |
| ENSG00000233287.1_AC009362.1 | ENSG00000160789.18_LMNA | -0.12304 | -0.276822175 | 0.036879055 | 1.31E-01 | 3.67E-01 | 1.00E+00 |
| ENSG00000155275.17_TRMT44    | ENSG00000160789.18_LMNA | 0.13873  | -0.020932146 | 0.291493623 | 8.83E-02 | 2.89E-01 | 1.00E+00 |
| ENSG00000139835.12_GRTP1     | ENSG00000160789.18_LMNA | -0.00671 | -0.165733381 | 0.152654052 | 9.35E-01 | 9.74E-01 | 1.00E+00 |
| ENSG00000185838.12_GNB1L     | ENSG00000160789.18_LMNA | 0.09161  | -0.068589629 | 0.247206716 | 2.62E-01 | 5.45E-01 | 1.00E+00 |

|                              |                         |          |              |             |          |          |          |
|------------------------------|-------------------------|----------|--------------|-------------|----------|----------|----------|
| ENSG00000251141.4_RP11-53O1  | ENSG00000160789.18_LMNA | -0.18074 | -0.330436204 | -0.02218119 | 2.59E-02 | 1.29E-01 | 1.00E+00 |
| ENSG00000142632.15_ARHGEF1   | ENSG00000160789.18_LMNA | 0.0416   | -0.11838128  | 0.199482963 | 6.11E-01 | 8.22E-01 | 1.00E+00 |
| ENSG00000267778.1_AC004221.1 | ENSG00000160789.18_LMNA | -0.14347 | -0.295907319 | 0.016103438 | 7.79E-02 | 2.67E-01 | 1.00E+00 |
| ENSG00000184497.11_TMEN255   | ENSG00000160789.18_LMNA | 0.19943  | 0.041550992  | 0.347597029 | 1.38E-02 | 8.24E-02 | 1.00E+00 |
| ENSG00000182648.10_LINC01001 | ENSG00000160789.18_LMNA | -0.20526 | -0.352923938 | -0.04761075 | 1.12E-02 | 7.10E-02 | 1.00E+00 |
| ENSG00000177335.9_C8orf31    | ENSG00000160789.18_LMNA | -0.06925 | -0.225957541 | 0.090955559 | 3.97E-01 | 6.73E-01 | 1.00E+00 |
| ENSG00000127507.16_ADGRE2    | ENSG00000160789.18_LMNA | 0.19346  | 0.035348809  | 0.34212438  | 1.69E-02 | 9.58E-02 | 1.00E+00 |
| ENSG00000171631.13_P2RY6     | ENSG00000160789.18_LMNA | 0.21623  | 0.05906123   | 0.362935897 | 7.46E-03 | 5.27E-02 | 1.00E+00 |
| ENSG00000106034.16_CPED1     | ENSG00000160789.18_LMNA | -0.02416 | -0.182657568 | 0.1355627   | 7.68E-01 | 9.04E-01 | 1.00E+00 |
| ENSG00000229852.2_RP11-398K  | ENSG00000160789.18_LMNA | -0.23822 | -0.382903502 | -0.08213908 | 3.12E-03 | 2.75E-02 | 1.00E+00 |
| ENSG00000228451.3_SDAD1P1    | ENSG00000160789.18_LMNA | 0.02878  | -0.131017656 | 0.187126638 | 7.25E-01 | 8.83E-01 | 1.00E+00 |
| ENSG00000244251.1_RP11-64K1  | ENSG00000160789.18_LMNA | -0.1001  | -0.255235592 | 0.060055346 | 2.20E-01 | 4.95E-01 | 1.00E+00 |
| ENSG00000272145.1_NFYC-AS1   | ENSG00000160789.18_LMNA | -0.16038 | -0.311625609 | -0.00121184 | 4.84E-02 | 1.97E-01 | 1.00E+00 |
| ENSG00000196967.9_ZNF585A    | ENSG00000160789.18_LMNA | -0.08135 | -0.237475938 | 0.078871361 | 3.19E-01 | 6.06E-01 | 1.00E+00 |
| ENSG00000271380.1_RP11-307C  | ENSG00000160789.18_LMNA | 0.03103  | -0.128802826 | 0.189299682 | 7.04E-01 | 8.74E-01 | 1.00E+00 |
| ENSG00000258548.4_LINC00645  | ENSG00000160789.18_LMNA | -0.33757 | -0.471432918 | -0.18849678 | 2.11E-05 | 5.40E-04 | 1.00E+00 |
| ENSG00000041353.8_RAB27B     | ENSG00000160789.18_LMNA | -0.37676 | -0.505636381 | -0.23144602 | 1.72E-06 | 7.09E-05 | 8.81E-02 |
| ENSG00000247763.2_RP11-447H  | ENSG00000160789.18_LMNA | -0.23636 | -0.381211962 | -0.08017148 | 3.37E-03 | 2.92E-02 | 1.00E+00 |
| ENSG00000217026.3_RPL10P1    | ENSG00000160789.18_LMNA | -0.04244 | -0.200291806 | 0.117550498 | 6.04E-01 | 8.18E-01 | 1.00E+00 |
| ENSG00000214593.3_RP11-65N1  | ENSG00000160789.18_LMNA | -0.15634 | -0.307878358 | 0.002933101 | 5.44E-02 | 2.12E-01 | 1.00E+00 |
| ENSG00000271714.1_CTD-2377C  | ENSG00000160789.18_LMNA | -0.3843  | -0.512170036 | -0.23977374 | 1.02E-06 | 4.67E-05 | 5.23E-02 |
| ENSG00000132793.10_LPIN3     | ENSG00000160789.18_LMNA | 0.111    | -0.04907087  | 0.265505955 | 1.73E-01 | 4.33E-01 | 1.00E+00 |
| ENSG00000101438.3_SLC32A1    | ENSG00000160789.18_LMNA | -0.17873 | -0.328577403 | -0.02009692 | 2.76E-02 | 1.35E-01 | 1.00E+00 |
| ENSG00000215241.3_RP11-266K  | ENSG00000160789.18_LMNA | -0.0867  | -0.242549608 | 0.073518806 | 2.88E-01 | 5.74E-01 | 1.00E+00 |
| ENSG00000234684.5_SDCBP2-A1  | ENSG00000160789.18_LMNA | -0.16839 | -0.319036252 | -0.00944049 | 3.81E-02 | 1.68E-01 | 1.00E+00 |
| ENSG00000151892.13_GFRA1     | ENSG00000160789.18_LMNA | -0.30911 | -0.446342959 | -0.15766479 | 1.07E-04 | 1.99E-03 | 1.00E+00 |
| ENSG00000255062.1_RP11-712L  | ENSG00000160789.18_LMNA | 0.17113  | 0.012260768  | 0.321567486 | 3.50E-02 | 1.59E-01 | 1.00E+00 |
| ENSG00000238197.4_PAXBP1-A1  | ENSG00000160789.18_LMNA | -0.33347 | -0.467830861 | -0.18403581 | 2.69E-05 | 6.56E-04 | 1.00E+00 |
| ENSG00000164690.6_SHH        | ENSG00000160789.18_LMNA | 0.3226   | 0.172247117  | 0.458266368 | 5.05E-05 | 1.08E-03 | 1.00E+00 |
| ENSG00000219133.2_RP11-203F  | ENSG00000160789.18_LMNA | -0.18331 | -0.332798773 | -0.02483421 | 2.38E-02 | 1.22E-01 | 1.00E+00 |
| ENSG00000171320.13_ESCO2     | ENSG00000160789.18_LMNA | -0.08128 | -0.237404414 | 0.078946686 | 3.20E-01 | 6.06E-01 | 1.00E+00 |
| ENSG00000119771.13_KLHL29    | ENSG00000160789.18_LMNA | 0.27236  | 0.118293286  | 0.413630142 | 6.87E-04 | 8.65E-03 | 1.00E+00 |
| ENSG00000225383.5_SFTA1P     | ENSG00000160789.18_LMNA | -0.13086 | -0.284138793 | 0.028946288 | 1.08E-01 | 3.27E-01 | 1.00E+00 |

|                              |                         |          |              |             |          |          |          |
|------------------------------|-------------------------|----------|--------------|-------------|----------|----------|----------|
| ENSG00000116017.9_ARID3A     | ENSG00000160789.18_LMNA | 0.20313  | 0.04539347   | 0.350977105 | 1.21E-02 | 7.52E-02 | 1.00E+00 |
| ENSG00000088320.3_REM1       | ENSG00000160789.18_LMNA | -0.27966 | -0.420154362 | -0.12607207 | 4.84E-04 | 6.58E-03 | 1.00E+00 |
| ENSG00000204652.6_RPS26P8    | ENSG00000160789.18_LMNA | -0.1504  | -0.302361725 | 0.009015833 | 6.44E-02 | 2.36E-01 | 1.00E+00 |
| ENSG00000225338.1_RPL23AP1   | ENSG00000160789.18_LMNA | -0.00494 | -0.164007835 | 0.154386008 | 9.52E-01 | 9.81E-01 | 1.00E+00 |
| ENSG00000261373.1_VPS9D1-AS1 | ENSG00000160789.18_LMNA | 0.20464  | 0.046973001  | 0.35236425  | 1.14E-02 | 7.21E-02 | 1.00E+00 |
| ENSG00000260400.1_RP11-119F  | ENSG00000160789.18_LMNA | -0.10123 | -0.256304507 | 0.058915657 | 2.15E-01 | 4.89E-01 | 1.00E+00 |
| ENSG00000100330.14_MTMR3     | ENSG00000160789.18_LMNA | -0.02027 | -0.1788915   | 0.13938242  | 8.04E-01 | 9.22E-01 | 1.00E+00 |
| ENSG00000099810.17_MTAP      | ENSG00000160789.18_LMNA | -0.00239 | -0.16153179  | 0.156867837 | 9.77E-01 | 9.91E-01 | 1.00E+00 |
| ENSG00000267858.4_MZF1-AS1   | ENSG00000160789.18_LMNA | 0.12136  | -0.038585925 | 0.27524311  | 1.36E-01 | 3.76E-01 | 1.00E+00 |
| ENSG00000238041.3_RP11-59K5  | ENSG00000160789.18_LMNA | -0.03138 | -0.189634499 | 0.128461289 | 7.01E-01 | 8.72E-01 | 1.00E+00 |
| ENSG00000186026.6_ZNF284     | ENSG00000160789.18_LMNA | -0.03894 | -0.196917592 | 0.12101329  | 6.34E-01 | 8.36E-01 | 1.00E+00 |
| ENSG00000258900.1_HNRNPCP    | ENSG00000160789.18_LMNA | 0.20121  | 0.043403218  | 0.349227352 | 1.29E-02 | 7.89E-02 | 1.00E+00 |
| ENSG00000278922.1_AC002310   | ENSG00000160789.18_LMNA | 0.18082  | 0.022260949  | 0.330507283 | 2.58E-02 | 1.29E-01 | 1.00E+00 |
| ENSG00000165359.13_INTS6L    | ENSG00000160789.18_LMNA | -0.14452 | -0.296889554 | 0.015026861 | 7.57E-02 | 2.63E-01 | 1.00E+00 |
| ENSG00000175548.7_ALG10B     | ENSG00000160789.18_LMNA | -0.19155 | -0.340374573 | -0.03337072 | 1.81E-02 | 1.00E-01 | 1.00E+00 |
| ENSG00000272308.1_RP11-231G  | ENSG00000160789.18_LMNA | 0.03314  | -0.126732782 | 0.19132786  | 6.85E-01 | 8.64E-01 | 1.00E+00 |
| ENSG00000167208.13_SNX20     | ENSG00000160789.18_LMNA | 0.1503   | -0.009117806 | 0.302269064 | 6.46E-02 | 2.37E-01 | 1.00E+00 |
| ENSG00000213638.5_ADAT3      | ENSG00000160789.18_LMNA | 0.04623  | -0.113807067 | 0.20393102  | 5.72E-01 | 8.00E-01 | 1.00E+00 |
| ENSG00000158806.12_NPM2      | ENSG00000160789.18_LMNA | -0.37226 | -0.501728536 | -0.22648426 | 2.33E-06 | 8.94E-05 | 1.20E-01 |
| ENSG00000278492.1_RP11-15A1  | ENSG00000160789.18_LMNA | -0.15018 | -0.302154566 | 0.009243802 | 6.48E-02 | 2.37E-01 | 1.00E+00 |
| ENSG00000204323.5_SMIM5      | ENSG00000160789.18_LMNA | -0.09976 | -0.254915452 | 0.060396524 | 2.21E-01 | 4.97E-01 | 1.00E+00 |
| ENSG00000244932.2_RP11-529F  | ENSG00000160789.18_LMNA | -0.00677 | -0.165790711 | 0.152596475 | 9.34E-01 | 9.74E-01 | 1.00E+00 |
| ENSG00000131061.12_ZNF341    | ENSG00000160789.18_LMNA | 0.12866  | -0.031179838 | 0.282082408 | 1.14E-01 | 3.37E-01 | 1.00E+00 |
| ENSG00000271614.1_LINC00936  | ENSG00000160789.18_LMNA | -0.12851 | -0.281938808 | 0.031335692 | 1.15E-01 | 3.38E-01 | 1.00E+00 |
| ENSG00000180822.10_PSMG4     | ENSG00000160789.18_LMNA | 0.08235  | -0.077873956 | 0.238422685 | 3.13E-01 | 6.00E-01 | 1.00E+00 |
| ENSG00000278921.2_EPB41L4A   | ENSG00000160789.18_LMNA | -0.16746 | -0.318175769 | -0.00848287 | 3.92E-02 | 1.71E-01 | 1.00E+00 |
| ENSG00000179348.10_GATA2     | ENSG00000160789.18_LMNA | -0.17964 | -0.329423339 | -0.02104514 | 2.68E-02 | 1.33E-01 | 1.00E+00 |
| ENSG00000111860.12_CEP85L    | ENSG00000160789.18_LMNA | 0.07767  | -0.082555334 | 0.233973855 | 3.42E-01 | 6.26E-01 | 1.00E+00 |
| ENSG00000103044.9_HAS3       | ENSG00000160789.18_LMNA | 0.39592  | 0.252644189  | 0.522206138 | 4.45E-07 | 2.39E-05 | 2.28E-02 |
| ENSG00000106133.16_NSUN5P2   | ENSG00000160789.18_LMNA | -0.11788 | -0.271978622 | 0.042108835 | 1.48E-01 | 3.94E-01 | 1.00E+00 |
| ENSG00000185684.11_EP400NL   | ENSG00000160789.18_LMNA | -0.00053 | -0.159718494 | 0.158682822 | 9.95E-01 | 9.98E-01 | 1.00E+00 |
| ENSG00000243431.1_RPL5P30    | ENSG00000160789.18_LMNA | -0.22417 | -0.370162961 | -0.06737668 | 5.50E-03 | 4.20E-02 | 1.00E+00 |
| ENSG00000264885.1_RP11-815I  | ENSG00000160789.18_LMNA | -0.07137 | -0.227979834 | 0.088840661 | 3.82E-01 | 6.61E-01 | 1.00E+00 |

|                              |                         |          |              |             |          |          |          |
|------------------------------|-------------------------|----------|--------------|-------------|----------|----------|----------|
| ENSG00000273145.1_CITF22-92A | ENSG00000160789.18_LMNA | 0.11638  | -0.043632619 | 0.270564372 | 1.53E-01 | 4.03E-01 | 1.00E+00 |
| ENSG00000266970.1_RP11-806H  | ENSG00000160789.18_LMNA | 0.28879  | 0.135832312  | 0.428297689 | 3.08E-04 | 4.60E-03 | 1.00E+00 |
| ENSG00000204618.7_RNF39      | ENSG00000160789.18_LMNA | -0.07975 | -0.235951095 | 0.080476464 | 3.29E-01 | 6.15E-01 | 1.00E+00 |
| ENSG00000197536.9_C5orf56    | ENSG00000160789.18_LMNA | -0.15203 | -0.303876241 | 0.007348194 | 6.15E-02 | 2.29E-01 | 1.00E+00 |
| ENSG00000178409.12_BEND3     | ENSG00000160789.18_LMNA | 0.07656  | -0.083660793 | 0.232921372 | 3.49E-01 | 6.33E-01 | 1.00E+00 |
| ENSG00000271851.1_RP11-565F  | ENSG00000160789.18_LMNA | -0.23065 | -0.376045471 | -0.07417628 | 4.25E-03 | 3.47E-02 | 1.00E+00 |
| ENSG00000230580.1_AC021016   | ENSG00000160789.18_LMNA | -0.18257 | -0.332120035 | -0.02407159 | 2.44E-02 | 1.24E-01 | 1.00E+00 |
| ENSG00000003400.13_CASP10    | ENSG00000160789.18_LMNA | -0.07528 | -0.23170716  | 0.084935154 | 3.57E-01 | 6.40E-01 | 1.00E+00 |
| ENSG00000173535.12_TNFRSF1   | ENSG00000160789.18_LMNA | 0.1409   | -0.018720739 | 0.293516619 | 8.34E-02 | 2.79E-01 | 1.00E+00 |
| ENSG00000115252.17_PDE1A     | ENSG00000160789.18_LMNA | -0.35756 | -0.488931139 | -0.21033489 | 6.12E-06 | 1.96E-04 | 3.14E-01 |
| ENSG00000118307.17_CASC1     | ENSG00000160789.18_LMNA | -0.08963 | -0.245330793 | 0.070577    | 2.72E-01 | 5.57E-01 | 1.00E+00 |
| ENSG00000066735.13_KIF26A    | ENSG00000160789.18_LMNA | -0.18809 | -0.337192828 | -0.02978002 | 2.03E-02 | 1.09E-01 | 1.00E+00 |
| ENSG00000234825.3_XRCC6P2    | ENSG00000160789.18_LMNA | -0.1164  | -0.270590912 | 0.043604036 | 1.53E-01 | 4.03E-01 | 1.00E+00 |
| ENSG00000080561.12_MID2      | ENSG00000160789.18_LMNA | -0.05402 | -0.211402855 | 0.106092877 | 5.09E-01 | 7.58E-01 | 1.00E+00 |
| ENSG00000247746.4_USP51      | ENSG00000160789.18_LMNA | -0.20001 | -0.348122753 | -0.04214804 | 1.35E-02 | 8.13E-02 | 1.00E+00 |
| ENSG00000212443.1_SNORA53    | ENSG00000160789.18_LMNA | -0.10401 | -0.258922514 | 0.056120833 | 2.02E-01 | 4.73E-01 | 1.00E+00 |
| ENSG00000115239.20_ASXB3     | ENSG00000160789.18_LMNA | -0.41255 | -0.536509796 | -0.27115378 | 1.28E-07 | 8.88E-06 | 6.58E-03 |
| ENSG00000187912.10_CLEC17A   | ENSG00000160789.18_LMNA | -0.138   | -0.290809321 | 0.02167949  | 9.00E-02 | 2.92E-01 | 1.00E+00 |
| ENSG00000196275.12_GTF2IRD2  | ENSG00000160789.18_LMNA | -0.13459 | -0.287623661 | 0.025154036 | 9.83E-02 | 3.08E-01 | 1.00E+00 |
| ENSG00000230581.2_ACTG1P14   | ENSG00000160789.18_LMNA | 0.31121  | 0.159930919  | 0.448202638 | 9.52E-05 | 1.81E-03 | 1.00E+00 |
| ENSG00000162746.13_FCRLB     | ENSG00000160789.18_LMNA | 0.05604  | -0.104090088 | 0.213336674 | 4.93E-01 | 7.48E-01 | 1.00E+00 |
| ENSG00000227603.1_RP11-165J  | ENSG00000160789.18_LMNA | -0.03395 | -0.192115916 | 0.125927711 | 6.78E-01 | 8.59E-01 | 1.00E+00 |
| ENSG00000137460.7_FHDC1      | ENSG00000160789.18_LMNA | -0.04349 | -0.2012978   | 0.116516598 | 5.95E-01 | 8.13E-01 | 1.00E+00 |
| ENSG00000268034.1_AC005795   | ENSG00000160789.18_LMNA | 0.19373  | 0.035626487  | 0.342369842 | 1.68E-02 | 9.52E-02 | 1.00E+00 |
| ENSG00000278175.2_GLIDR      | ENSG00000160789.18_LMNA | -0.37997 | -0.508412606 | -0.23497966 | 1.38E-06 | 5.99E-05 | 7.07E-02 |
| ENSG00000067798.12_NAV3      | ENSG00000160789.18_LMNA | -0.325   | -0.460377318 | -0.17484194 | 4.40E-05 | 9.68E-04 | 1.00E+00 |
| ENSG00000174586.9_ZNF497     | ENSG00000160789.18_LMNA | 0.16807  | 0.009113851  | 0.318742803 | 3.85E-02 | 1.69E-01 | 1.00E+00 |
| ENSG00000228395.1_RP11-216B  | ENSG00000160789.18_LMNA | -0.36821 | -0.498204737 | -0.22202234 | 3.05E-06 | 1.11E-04 | 1.57E-01 |
| ENSG00000265542.4_RP11-60A2  | ENSG00000160789.18_LMNA | -0.18759 | -0.336733826 | -0.02926268 | 2.07E-02 | 1.10E-01 | 1.00E+00 |
| ENSG00000158315.9_RHBDL2     | ENSG00000160789.18_LMNA | 0.05533  | -0.104794115 | 0.212657175 | 4.98E-01 | 7.52E-01 | 1.00E+00 |
| ENSG00000119969.13_HELLS     | ENSG00000160789.18_LMNA | 0.17079  | 0.011912927  | 0.321255533 | 3.54E-02 | 1.60E-01 | 1.00E+00 |
| ENSG00000186638.14_KIF24     | ENSG00000160789.18_LMNA | 0.04528  | -0.114748505 | 0.203016618 | 5.80E-01 | 8.04E-01 | 1.00E+00 |
| ENSG00000133101.8_CCNA1      | ENSG00000160789.18_LMNA | -0.03487 | -0.192995176 | 0.125028972 | 6.70E-01 | 8.55E-01 | 1.00E+00 |

|                             |                         |          |              |             |          |          |          |
|-----------------------------|-------------------------|----------|--------------|-------------|----------|----------|----------|
| ENSG00000123453.15_SARDH    | ENSG00000160789.18_LMNA | 0.3403   | 0.19147408   | 0.473831725 | 1.79E-05 | 4.71E-04 | 9.18E-01 |
| ENSG00000171714.10_ANO5     | ENSG00000160789.18_LMNA | -0.22155 | -0.367776789 | -0.06462649 | 6.09E-03 | 4.55E-02 | 1.00E+00 |
| ENSG00000242667.1_RP11-745A | ENSG00000160789.18_LMNA | -0.10552 | -0.260351043 | 0.054593738 | 1.96E-01 | 4.65E-01 | 1.00E+00 |
| ENSG00000234176.1_HSPA8P1   | ENSG00000160789.18_LMNA | -0.04718 | -0.20484161  | 0.112868987 | 5.64E-01 | 7.95E-01 | 1.00E+00 |
| ENSG00000234925.2_ATP5HP4   | ENSG00000160789.18_LMNA | -0.06736 | -0.224159408 | 0.092833635 | 4.10E-01 | 6.84E-01 | 1.00E+00 |
| ENSG00000066827.14_ZFAT     | ENSG00000160789.18_LMNA | 0.17193  | 0.013089302  | 0.322310265 | 3.42E-02 | 1.56E-01 | 1.00E+00 |
| ENSG00000196782.11_MAML3    | ENSG00000160789.18_LMNA | 0.10311  | -0.057031132 | 0.258070314 | 2.06E-01 | 4.78E-01 | 1.00E+00 |
| ENSG00000141934.8_PLPP2     | ENSG00000160789.18_LMNA | -0.13152 | -0.284763015 | 0.028267668 | 1.06E-01 | 3.24E-01 | 1.00E+00 |
| ENSG00000246100.3_LINC00900 | ENSG00000160789.18_LMNA | 0.15982  | 0.000634588  | 0.311104319 | 4.92E-02 | 1.99E-01 | 1.00E+00 |
| ENSG00000168282.5_MGAT2     | ENSG00000160789.18_LMNA | 0.26328  | 0.108633166  | 0.405485566 | 1.05E-03 | 1.20E-02 | 1.00E+00 |
| ENSG00000239269.1_RPSAP4    | ENSG00000160789.18_LMNA | -0.16352 | -0.314535275 | -0.00443768 | 4.41E-02 | 1.85E-01 | 1.00E+00 |
| ENSG00000073605.17_GSDMB    | ENSG00000160789.18_LMNA | -0.07624 | -0.232614073 | 0.083983413 | 3.51E-01 | 6.34E-01 | 1.00E+00 |
| ENSG00000256618.2_MTRNR2L1  | ENSG00000160789.18_LMNA | -0.13042 | -0.283730756 | 0.029389728 | 1.09E-01 | 3.29E-01 | 1.00E+00 |
| ENSG00000276564.1_CTA-276F8 | ENSG00000160789.18_LMNA | -0.18088 | -0.330559509 | -0.02231955 | 2.57E-02 | 1.29E-01 | 1.00E+00 |
| ENSG00000224953.1_SRIP3     | ENSG00000160789.18_LMNA | 0.04396  | -0.116053377 | 0.201748301 | 5.91E-01 | 8.10E-01 | 1.00E+00 |
| ENSG00000131127.12_ZNF141   | ENSG00000160789.18_LMNA | -0.06521 | -0.222107    | 0.094974537 | 4.25E-01 | 6.96E-01 | 1.00E+00 |
| ENSG00000146410.10_MTFR2    | ENSG00000160789.18_LMNA | -0.05537 | -0.212695025 | 0.104754906 | 4.98E-01 | 7.51E-01 | 1.00E+00 |
| ENSG00000091106.17_NLRC4    | ENSG00000160789.18_LMNA | -0.12806 | -0.281521123 | 0.031788936 | 1.16E-01 | 3.40E-01 | 1.00E+00 |
| ENSG00000173825.6_TIGD3     | ENSG00000160789.18_LMNA | -0.16922 | -0.319806535 | -0.01029821 | 3.71E-02 | 1.65E-01 | 1.00E+00 |
| ENSG00000176771.14_NCKAP5   | ENSG00000160789.18_LMNA | -0.39251 | -0.519260722 | -0.24885703 | 5.69E-07 | 2.91E-05 | 2.92E-02 |
| ENSG00000204282.4_TNRC6C-A  | ENSG00000160789.18_LMNA | -0.30026 | -0.438498651 | -0.14813937 | 1.71E-04 | 2.89E-03 | 1.00E+00 |
| ENSG00000174123.9_TLR10     | ENSG00000160789.18_LMNA | -0.2599  | -0.402452979 | -0.10505054 | 1.22E-03 | 1.35E-02 | 1.00E+00 |
| ENSG00000152932.7_RAB3C     | ENSG00000160789.18_LMNA | -0.38898 | -0.516212729 | -0.24494666 | 7.33E-07 | 3.58E-05 | 3.76E-02 |
| ENSG00000273568.1_RP11-417L | ENSG00000160789.18_LMNA | 0.09542  | -0.064764856 | 0.250810353 | 2.42E-01 | 5.21E-01 | 1.00E+00 |
| ENSG00000248415.1_GAPDHP61  | ENSG00000160789.18_LMNA | 0.22713  | 0.070477174  | 0.372848296 | 4.89E-03 | 3.86E-02 | 1.00E+00 |
| ENSG00000109944.9_C11orf63  | ENSG00000160789.18_LMNA | 0.25874  | 0.10381559   | 0.401406112 | 1.29E-03 | 1.40E-02 | 1.00E+00 |
| ENSG00000267260.1_CTD-2162K | ENSG00000160789.18_LMNA | -0.11771 | -0.271814543 | 0.042285697 | 1.49E-01 | 3.95E-01 | 1.00E+00 |
| ENSG00000272933.1_RP11-47A8 | ENSG00000160789.18_LMNA | -0.01615 | -0.174903573 | 0.143416863 | 8.43E-01 | 9.39E-01 | 1.00E+00 |
| ENSG00000140323.5_DISP2     | ENSG00000160789.18_LMNA | -0.18719 | -0.336371108 | -0.02885397 | 2.09E-02 | 1.11E-01 | 1.00E+00 |
| ENSG00000145990.9_GFOD1     | ENSG00000160789.18_LMNA | -0.10166 | -0.256705072 | 0.058488358 | 2.13E-01 | 4.86E-01 | 1.00E+00 |
| ENSG00000138738.9_PRDM5     | ENSG00000160789.18_LMNA | 0.01291  | -0.146595119 | 0.171754588 | 8.75E-01 | 9.51E-01 | 1.00E+00 |
| ENSG00000180929.5_GPR62     | ENSG00000160789.18_LMNA | -0.29639 | -0.435061101 | -0.14398203 | 2.09E-04 | 3.38E-03 | 1.00E+00 |
| ENSG00000205559.3_CHKBA-S1  | ENSG00000160789.18_LMNA | -0.09104 | -0.246666816 | 0.06916186  | 2.65E-01 | 5.48E-01 | 1.00E+00 |



|                              |                         |          |              |             |          |          |          |
|------------------------------|-------------------------|----------|--------------|-------------|----------|----------|----------|
| ENSG00000213290.4_PGK1P2     | ENSG00000160789.18_LMNA | 0.15284  | -0.006522226 | 0.304625786 | 6.01E-02 | 2.26E-01 | 1.00E+00 |
| ENSG00000259762.1_RP11-158M  | ENSG00000160789.18_LMNA | -0.08463 | -0.240584947 | 0.075593621 | 3.00E-01 | 5.86E-01 | 1.00E+00 |
| ENSG00000228407.2_RP4-800M2  | ENSG00000160789.18_LMNA | -0.07435 | -0.230822974 | 0.085862489 | 3.63E-01 | 6.44E-01 | 1.00E+00 |
| ENSG00000230508.1_RPL19P21   | ENSG00000160789.18_LMNA | -0.15995 | -0.311229502 | -0.00077319 | 4.90E-02 | 1.99E-01 | 1.00E+00 |
| ENSG00000165685.7_TM52B      | ENSG00000160789.18_LMNA | -0.10553 | -0.260352623 | 0.054592048 | 1.96E-01 | 4.65E-01 | 1.00E+00 |
| ENSG00000133063.14_CHIT1     | ENSG00000160789.18_LMNA | -0.06665 | -0.223479044 | 0.093543659 | 4.15E-01 | 6.88E-01 | 1.00E+00 |
| ENSG00000244349.1_HCG16      | ENSG00000160789.18_LMNA | 0.10874  | -0.051353316 | 0.263377753 | 1.82E-01 | 4.47E-01 | 1.00E+00 |
| ENSG00000188672.15_RHCE      | ENSG00000160789.18_LMNA | 0.02746  | -0.132321472 | 0.185845961 | 7.37E-01 | 8.89E-01 | 1.00E+00 |
| ENSG00000196183.5_RPS2P4     | ENSG00000160789.18_LMNA | 0.06184  | -0.098324978 | 0.2188894   | 4.49E-01 | 7.15E-01 | 1.00E+00 |
| ENSG00000272468.1_RP1-86C11  | ENSG00000160789.18_LMNA | 0.03619  | -0.123723009 | 0.194271923 | 6.58E-01 | 8.49E-01 | 1.00E+00 |
| ENSG00000162241.11_SLC25A45  | ENSG00000160789.18_LMNA | 0.10783  | -0.052267378 | 0.262524603 | 1.86E-01 | 4.52E-01 | 1.00E+00 |
| ENSG00000237883.1_DGUOK-AS   | ENSG00000160789.18_LMNA | 0.1846   | 0.026165644  | 0.333982987 | 2.28E-02 | 1.19E-01 | 1.00E+00 |
| ENSG00000138829.9_FBN2       | ENSG00000160789.18_LMNA | 0.03173  | -0.128121292 | 0.189967733 | 6.98E-01 | 8.71E-01 | 1.00E+00 |
| ENSG00000187210.11_GCNT1     | ENSG00000160789.18_LMNA | 0.30865  | 0.157171852  | 0.445938105 | 1.09E-04 | 2.03E-03 | 1.00E+00 |
| ENSG00000224057.1_EGFR-AS1   | ENSG00000160789.18_LMNA | 0.03457  | -0.125321702 | 0.192708847 | 6.72E-01 | 8.56E-01 | 1.00E+00 |
| ENSG00000146776.13_ATXN7L1   | ENSG00000160789.18_LMNA | -0.01122 | -0.170112506 | 0.148249862 | 8.91E-01 | 9.57E-01 | 1.00E+00 |
| ENSG00000134533.5_RERG       | ENSG00000160789.18_LMNA | -0.28943 | -0.428871658 | -0.1365224  | 2.98E-04 | 4.49E-03 | 1.00E+00 |
| ENSG00000267508.4_ZNF285     | ENSG00000160789.18_LMNA | -0.15381 | -0.305529865 | 0.005525403 | 5.85E-02 | 2.22E-01 | 1.00E+00 |
| ENSG00000124782.18_RREB1     | ENSG00000160789.18_LMNA | 0.36468  | 0.218139647  | 0.495130944 | 3.86E-06 | 1.35E-04 | 1.98E-01 |
| ENSG00000279865.1_RP11-69M1  | ENSG00000160789.18_LMNA | -0.2467  | -0.390562298 | -0.09107727 | 2.18E-03 | 2.09E-02 | 1.00E+00 |
| ENSG00000203865.8_ATP1A1-AS  | ENSG00000160789.18_LMNA | -0.35186 | -0.483949582 | -0.20408938 | 8.78E-06 | 2.62E-04 | 4.51E-01 |
| ENSG00000118004.16_COLEC11   | ENSG00000160789.18_LMNA | -0.16529 | -0.316169909 | -0.00625277 | 4.18E-02 | 1.79E-01 | 1.00E+00 |
| ENSG00000226948.1_RPS4XP2    | ENSG00000160789.18_LMNA | -0.05775 | -0.214972623 | 0.10239378  | 4.80E-01 | 7.38E-01 | 1.00E+00 |
| ENSG00000151790.7_TDO2       | ENSG00000160789.18_LMNA | 0.19181  | 0.033640043  | 0.340612943 | 1.79E-02 | 9.97E-02 | 1.00E+00 |
| ENSG00000162687.15_KCNT2     | ENSG00000160789.18_LMNA | -0.37433 | -0.50352375  | -0.22876186 | 2.03E-06 | 8.08E-05 | 1.04E-01 |
| ENSG00000158163.13_DZIP1L    | ENSG00000160789.18_LMNA | 0.26651  | 0.112064272  | 0.408383785 | 9.04E-04 | 1.07E-02 | 1.00E+00 |
| ENSG00000155744.8_FAM126B    | ENSG00000160789.18_LMNA | -0.30585 | -0.443454488 | -0.15415103 | 1.27E-04 | 2.29E-03 | 1.00E+00 |
| ENSG00000280149.1_RP4-751H1  | ENSG00000160789.18_LMNA | 0.19692  | 0.038940838  | 0.345296433 | 1.50E-02 | 8.80E-02 | 1.00E+00 |
| ENSG00000260565.5_CTD-2270P  | ENSG00000160789.18_LMNA | -0.11195 | -0.266404353 | 0.048106372 | 1.70E-01 | 4.28E-01 | 1.00E+00 |
| ENSG00000262766.1_RP11-196G  | ENSG00000160789.18_LMNA | 0.04431  | -0.115707578 | 0.202084516 | 5.88E-01 | 8.08E-01 | 1.00E+00 |
| ENSG00000272293.1_RP11-91J11 | ENSG00000160789.18_LMNA | 0.06399  | -0.096189095 | 0.220941395 | 4.33E-01 | 7.03E-01 | 1.00E+00 |
| ENSG00000163393.11_SLC22A15  | ENSG00000160789.18_LMNA | -0.1148  | -0.269084668 | 0.045225361 | 1.59E-01 | 4.12E-01 | 1.00E+00 |
| ENSG00000187801.13_ZFP69B    | ENSG00000160789.18_LMNA | -0.06248 | -0.219495728 | 0.097694167 | 4.44E-01 | 7.12E-01 | 1.00E+00 |

|                             |                         |          |              |             |          |          |          |
|-----------------------------|-------------------------|----------|--------------|-------------|----------|----------|----------|
| ENSG00000213684.4_LDHP2     | ENSG00000160789.18_LMNA | -0.2245  | -0.370456372 | -0.06771517 | 5.43E-03 | 4.17E-02 | 1.00E+00 |
| ENSG00000261428.2_RP11-16P6 | ENSG00000160789.18_LMNA | -0.22744 | -0.373132703 | -0.07080589 | 4.83E-03 | 3.82E-02 | 1.00E+00 |
| ENSG00000044459.13_CNTLN    | ENSG00000160789.18_LMNA | 0.1399   | -0.019740114 | 0.292584441 | 8.56E-02 | 2.84E-01 | 1.00E+00 |
| ENSG00000183833.15_MAATS1   | ENSG00000160789.18_LMNA | 0.19728  | 0.039308986  | 0.345621144 | 1.48E-02 | 8.73E-02 | 1.00E+00 |
| ENSG00000233509.2_ZNF197-AS | ENSG00000160789.18_LMNA | -0.43146 | -0.552694991 | -0.29233754 | 2.86E-08 | 2.61E-06 | 1.47E-03 |
| ENSG00000186280.6_KDM4D     | ENSG00000160789.18_LMNA | -0.16571 | -0.31655623  | -0.00668204 | 4.13E-02 | 1.77E-01 | 1.00E+00 |
| ENSG00000196371.3_FUT4      | ENSG00000160789.18_LMNA | 0.07021  | -0.089999163 | 0.226872398 | 3.90E-01 | 6.68E-01 | 1.00E+00 |
| ENSG00000262576.2_PCDHGA4   | ENSG00000160789.18_LMNA | 0.1424   | -0.017190378 | 0.294914958 | 8.01E-02 | 2.72E-01 | 1.00E+00 |
| ENSG00000179168.13_GGN      | ENSG00000160789.18_LMNA | 0.49273  | 0.361914134  | 0.604507275 | 1.13E-10 | 2.48E-08 | 5.81E-06 |
| ENSG00000270060.1_RP11-390K | ENSG00000160789.18_LMNA | -0.02661 | -0.185028446 | 0.133153183 | 7.45E-01 | 8.93E-01 | 1.00E+00 |
| ENSG00000162757.4_C1orf74   | ENSG00000160789.18_LMNA | 0.01227  | -0.147214264 | 0.171140387 | 8.81E-01 | 9.54E-01 | 1.00E+00 |
| ENSG00000254585.2_MAGEL2    | ENSG00000160789.18_LMNA | -0.20376 | -0.351554588 | -0.04605086 | 1.18E-02 | 7.39E-02 | 1.00E+00 |
| ENSG00000196417.11_ZNF765   | ENSG00000160789.18_LMNA | -0.02293 | -0.181471961 | 0.136766218 | 7.79E-01 | 9.09E-01 | 1.00E+00 |
| ENSG00000230191.1_RP4-725G1 | ENSG00000160789.18_LMNA | 0.25011  | 0.094683663  | 0.393640789 | 1.89E-03 | 1.87E-02 | 1.00E+00 |
| ENSG00000272636.3_DOC2B     | ENSG00000160789.18_LMNA | -0.24578 | -0.389730068 | -0.09010367 | 2.27E-03 | 2.16E-02 | 1.00E+00 |
| ENSG00000145832.11_SLC25A4  | ENSG00000160789.18_LMNA | -0.47639 | -0.590782086 | -0.34321618 | 5.52E-10 | 9.53E-08 | 2.83E-05 |
| ENSG00000219470.1_RP3-337H4 | ENSG00000160789.18_LMNA | 0.0434   | -0.116606385 | 0.201210463 | 5.95E-01 | 8.13E-01 | 1.00E+00 |
| ENSG00000158055.14_GRHL3    | ENSG00000160789.18_LMNA | -0.22444 | -0.370403245 | -0.06765387 | 5.44E-03 | 4.17E-02 | 1.00E+00 |
| ENSG00000278383.1_RP4-694B1 | ENSG00000160789.18_LMNA | 0.10859  | -0.051497623 | 0.263243095 | 1.83E-01 | 4.48E-01 | 1.00E+00 |
| ENSG00000226284.1_ARPC3P1   | ENSG00000160789.18_LMNA | -0.12375 | -0.277483486 | 0.036163675 | 1.29E-01 | 3.64E-01 | 1.00E+00 |
| ENSG00000242571.1_RPL21P11  | ENSG00000160789.18_LMNA | -0.26127 | -0.40368195  | -0.10650149 | 1.15E-03 | 1.29E-02 | 1.00E+00 |
| ENSG00000279536.1_RP11-445N | ENSG00000160789.18_LMNA | 0.19403  | 0.035938684  | 0.342645768 | 1.66E-02 | 9.45E-02 | 1.00E+00 |
| ENSG00000140025.14_EFCAB11  | ENSG00000160789.18_LMNA | -0.20889 | -0.356245017 | -0.05140013 | 9.80E-03 | 6.47E-02 | 1.00E+00 |
| ENSG00000119125.15_GDA      | ENSG00000160789.18_LMNA | -0.087   | -0.242837716 | 0.073214314 | 2.87E-01 | 5.72E-01 | 1.00E+00 |
| ENSG00000090061.16_CCNK     | ENSG00000160789.18_LMNA | 0.05491  | -0.105212082 | 0.212253625 | 5.02E-01 | 7.53E-01 | 1.00E+00 |
| ENSG00000231043.3_AC007238  | ENSG00000160789.18_LMNA | 0.0485   | -0.111562634 | 0.206108765 | 5.53E-01 | 7.88E-01 | 1.00E+00 |
| ENSG00000185567.6_AHNAK2    | ENSG00000160789.18_LMNA | 0.53784  | 0.414097986  | 0.642065626 | 8.98E-13 | 5.24E-10 | 4.61E-08 |
| ENSG00000261351.2_CTD-3185P | ENSG00000160789.18_LMNA | -0.19379 | -0.342425942 | -0.03568996 | 1.67E-02 | 9.50E-02 | 1.00E+00 |
| ENSG00000212695.5_RP11-134K | ENSG00000160789.18_LMNA | -0.12717 | -0.280688112 | 0.03269248  | 1.18E-01 | 3.45E-01 | 1.00E+00 |
| ENSG00000149050.8_ZNF214    | ENSG00000160789.18_LMNA | 0.0392   | -0.120750395 | 0.197174026 | 6.32E-01 | 8.35E-01 | 1.00E+00 |
| ENSG00000173227.12_SYT12    | ENSG00000160789.18_LMNA | 0.3773   | 0.23203763   | 0.506101575 | 1.65E-06 | 6.91E-05 | 8.49E-02 |
| ENSG00000272922.1_RP11-329B | ENSG00000160789.18_LMNA | -0.20609 | -0.353682501 | -0.0484755  | 1.09E-02 | 6.95E-02 | 1.00E+00 |
| ENSG00000168405.13_CMAHP    | ENSG00000160789.18_LMNA | 0.16944  | 0.010521346  | 0.320006855 | 3.69E-02 | 1.64E-01 | 1.00E+00 |

|                              |                         |          |              |             |          |          |          |
|------------------------------|-------------------------|----------|--------------|-------------|----------|----------|----------|
| ENSG00000111057.9_KRT18      | ENSG00000160789.18_LMNA | 0.38134  | 0.236492726  | 0.509599617 | 1.25E-06 | 5.54E-05 | 6.43E-02 |
| ENSG00000116819.6_TFAP2E     | ENSG00000160789.18_LMNA | -0.08896 | -0.244692127 | 0.071253037 | 2.76E-01 | 5.60E-01 | 1.00E+00 |
| ENSG00000261326.2_LINC01355  | ENSG00000160789.18_LMNA | -0.03453 | -0.192673947 | 0.125357378 | 6.73E-01 | 8.56E-01 | 1.00E+00 |
| ENSG00000010319.5_SEMA3G     | ENSG00000160789.18_LMNA | -0.0622  | -0.219231515 | 0.09796908  | 4.46E-01 | 7.13E-01 | 1.00E+00 |
| ENSG00000126259.18_KIRREL2   | ENSG00000160789.18_LMNA | 0.24093  | 0.084990051  | 0.385350888 | 2.79E-03 | 2.53E-02 | 1.00E+00 |
| ENSG00000187792.4_ZNF70      | ENSG00000160789.18_LMNA | 0.0558   | -0.10432826  | 0.213106834 | 4.95E-01 | 7.50E-01 | 1.00E+00 |
| ENSG00000197566.8_ZNF624     | ENSG00000160789.18_LMNA | -0.14097 | -0.293583209 | 0.018647895 | 8.32E-02 | 2.79E-01 | 1.00E+00 |
| ENSG00000109832.11_DDX25     | ENSG00000160789.18_LMNA | -0.36867 | -0.498603323 | -0.22252646 | 2.96E-06 | 1.09E-04 | 1.52E-01 |
| ENSG00000167306.17_MYO5B     | ENSG00000160789.18_LMNA | 0.15543  | -0.003868817 | 0.307031084 | 5.59E-02 | 2.16E-01 | 1.00E+00 |
| ENSG00000175497.15_DPP10     | ENSG00000160789.18_LMNA | -0.55657 | -0.657515107 | -0.4360076  | 9.68E-14 | 8.66E-11 | 4.97E-09 |
| ENSG00000272812.1_RP5-855D2  | ENSG00000160789.18_LMNA | -0.07627 | -0.232649564 | 0.083946156 | 3.50E-01 | 6.34E-01 | 1.00E+00 |
| ENSG00000236264.4_RPL26P30   | ENSG00000160789.18_LMNA | -0.05626 | -0.213543507 | 0.103875726 | 4.91E-01 | 7.47E-01 | 1.00E+00 |
| ENSG00000100890.14_KIAA0391  | ENSG00000160789.18_LMNA | -0.10652 | -0.261288277 | 0.053591036 | 1.92E-01 | 4.59E-01 | 1.00E+00 |
| ENSG00000159871.13_LYPD5     | ENSG00000160789.18_LMNA | -0.24906 | -0.39268741  | -0.09356596 | 1.97E-03 | 1.93E-02 | 1.00E+00 |
| ENSG00000239486.1_RP11-163E  | ENSG00000160789.18_LMNA | 0.02553  | -0.134219991 | 0.183979203 | 7.55E-01 | 8.98E-01 | 1.00E+00 |
| ENSG00000179818.12_PCBP1-AS1 | ENSG00000160789.18_LMNA | -0.38034 | -0.508733572 | -0.23538866 | 1.34E-06 | 5.86E-05 | 6.89E-02 |
| ENSG00000186047.9_DLEU7      | ENSG00000160789.18_LMNA | -0.28581 | -0.425639099 | -0.13263959 | 3.58E-04 | 5.16E-03 | 1.00E+00 |
| ENSG00000188878.15_FBF1      | ENSG00000160789.18_LMNA | 0.23106  | 0.074607153  | 0.376417413 | 4.18E-03 | 3.43E-02 | 1.00E+00 |
| ENSG00000157214.12_STEAP2    | ENSG00000160789.18_LMNA | 0.0518   | -0.108294664 | 0.209274018 | 5.26E-01 | 7.71E-01 | 1.00E+00 |
| ENSG00000157782.8_CABP1      | ENSG00000160789.18_LMNA | -0.1937  | -0.342343128 | -0.03559626 | 1.68E-02 | 9.52E-02 | 1.00E+00 |
| ENSG00000115353.9_TACR1      | ENSG00000160789.18_LMNA | -0.15608 | -0.307633667 | 0.003203389 | 5.48E-02 | 2.13E-01 | 1.00E+00 |
| ENSG00000276728.1_AC142472.1 | ENSG00000160789.18_LMNA | -0.15659 | -0.308113584 | 0.002673224 | 5.40E-02 | 2.11E-01 | 1.00E+00 |
| ENSG00000138735.14_PDE5A     | ENSG00000160789.18_LMNA | 0.04993  | -0.110145776 | 0.207481906 | 5.41E-01 | 7.81E-01 | 1.00E+00 |
| ENSG00000267348.2_CTB-179K2  | ENSG00000160789.18_LMNA | -0.06684 | -0.223665459 | 0.09334915  | 4.13E-01 | 6.86E-01 | 1.00E+00 |
| ENSG00000111850.9_SMIM8      | ENSG00000160789.18_LMNA | -0.41077 | -0.534988436 | -0.2691757  | 1.47E-07 | 9.86E-06 | 7.54E-03 |
| ENSG00000174326.10_SLC16A11  | ENSG00000160789.18_LMNA | 0.28198  | 0.128546884  | 0.422223682 | 4.32E-04 | 6.02E-03 | 1.00E+00 |
| ENSG00000235245.1_RP11-122K  | ENSG00000160789.18_LMNA | 0.12959  | -0.030235678 | 0.282952029 | 1.12E-01 | 3.33E-01 | 1.00E+00 |
| ENSG00000239917.3_RPS10P16   | ENSG00000160789.18_LMNA | -0.02974 | -0.188048369 | 0.130078589 | 7.16E-01 | 8.79E-01 | 1.00E+00 |
| ENSG00000270872.2_SRGP2D     | ENSG00000160789.18_LMNA | -0.09647 | -0.251805926 | 0.063706553 | 2.37E-01 | 5.16E-01 | 1.00E+00 |
| ENSG00000188921.13_HACD4     | ENSG00000160789.18_LMNA | -0.011   | -0.169898627 | 0.148465258 | 8.93E-01 | 9.58E-01 | 1.00E+00 |
| ENSG00000214783.8_POLR2J4    | ENSG00000160789.18_LMNA | 0.03641  | -0.12350926  | 0.194480788 | 6.56E-01 | 8.48E-01 | 1.00E+00 |
| ENSG00000213397.9_HAUS7      | ENSG00000160789.18_LMNA | 0.04144  | -0.118538013 | 0.19933032  | 6.12E-01 | 8.24E-01 | 1.00E+00 |
| ENSG00000249565.2_SERBP1P5   | ENSG00000160789.18_LMNA | 0.26243  | 0.107733839  | 0.404724925 | 1.09E-03 | 1.24E-02 | 1.00E+00 |

|                              |                         |          |              |             |          |          |          |
|------------------------------|-------------------------|----------|--------------|-------------|----------|----------|----------|
| ENSG00000178502.5_KLHL11     | ENSG00000160789.18_LMNA | -0.19287 | -0.341583448 | -0.03473705 | 1.73E-02 | 9.72E-02 | 1.00E+00 |
| ENSG00000174837.13_ADGRE1    | ENSG00000160789.18_LMNA | 0.09492  | -0.065271154 | 0.250333829 | 2.45E-01 | 5.25E-01 | 1.00E+00 |
| ENSG00000151466.10_SCLT1     | ENSG00000160789.18_LMNA | -0.10198 | -0.257012347 | 0.058160497 | 2.11E-01 | 4.85E-01 | 1.00E+00 |
| ENSG00000224261.2_RPSAP18    | ENSG00000160789.18_LMNA | -0.15337 | -0.305118513 | 0.00597903  | 5.92E-02 | 2.24E-01 | 1.00E+00 |
| ENSG00000129646.12_QRICH2    | ENSG00000160789.18_LMNA | -0.11065 | -0.265177583 | 0.049423255 | 1.75E-01 | 4.35E-01 | 1.00E+00 |
| ENSG00000127720.6_METTL25    | ENSG00000160789.18_LMNA | -0.01182 | -0.170704315 | 0.147653695 | 8.85E-01 | 9.55E-01 | 1.00E+00 |
| ENSG00000136895.17_GARNL3    | ENSG00000160789.18_LMNA | -0.24436 | -0.388447885 | -0.08860481 | 2.41E-03 | 2.26E-02 | 1.00E+00 |
| ENSG00000275580.1_RP11-295H  | ENSG00000160789.18_LMNA | -0.11001 | -0.264573547 | 0.050071259 | 1.77E-01 | 4.39E-01 | 1.00E+00 |
| ENSG00000135917.12_SLC19A3   | ENSG00000160789.18_LMNA | -0.11074 | -0.265263416 | 0.049331153 | 1.74E-01 | 4.35E-01 | 1.00E+00 |
| ENSG00000237149.5_ZNF503-AS  | ENSG00000160789.18_LMNA | 0.08827  | -0.071942065 | 0.244040906 | 2.80E-01 | 5.65E-01 | 1.00E+00 |
| ENSG00000183878.14_UTY       | ENSG00000160789.18_LMNA | -0.07172 | -0.228315726 | 0.088489111 | 3.80E-01 | 6.59E-01 | 1.00E+00 |
| ENSG00000078098.12_FAP       | ENSG00000160789.18_LMNA | 0.28804  | 0.13502616   | 0.427626881 | 3.20E-04 | 4.73E-03 | 1.00E+00 |
| ENSG00000178607.14_ERN1      | ENSG00000160789.18_LMNA | 0.2597   | 0.104837509  | 0.402272446 | 1.23E-03 | 1.36E-02 | 1.00E+00 |
| ENSG00000134917.9_ADAMTS8    | ENSG00000160789.18_LMNA | -0.24595 | -0.389885218 | -0.09028513 | 2.26E-03 | 2.14E-02 | 1.00E+00 |
| ENSG00000115590.12_IL1R2     | ENSG00000160789.18_LMNA | 0.04358  | -0.116429024 | 0.20138298  | 5.94E-01 | 8.13E-01 | 1.00E+00 |
| ENSG00000091622.14_PITPNM3   | ENSG00000160789.18_LMNA | 0.10779  | -0.052312238 | 0.262482719 | 1.86E-01 | 4.52E-01 | 1.00E+00 |
| ENSG00000069493.13_CLEC2D    | ENSG00000160789.18_LMNA | -0.1186  | -0.272654595 | 0.041379992 | 1.46E-01 | 3.91E-01 | 1.00E+00 |
| ENSG00000271335.4_RP11-324I2 | ENSG00000160789.18_LMNA | -0.05376 | -0.211150068 | 0.106354489 | 5.11E-01 | 7.59E-01 | 1.00E+00 |
| ENSG00000184368.14_MAP7D2    | ENSG00000160789.18_LMNA | -0.12035 | -0.274297369 | 0.039607336 | 1.40E-01 | 3.81E-01 | 1.00E+00 |
| ENSG00000185737.11_NRG3      | ENSG00000160789.18_LMNA | -0.2108  | -0.357991355 | -0.05339624 | 9.14E-03 | 6.14E-02 | 1.00E+00 |
| ENSG00000196118.10_CCDC189   | ENSG00000160789.18_LMNA | 0.14738  | -0.012102954 | 0.299553909 | 7.00E-02 | 2.50E-01 | 1.00E+00 |
| ENSG00000279312.1_RP3-331H2  | ENSG00000160789.18_LMNA | -0.12799 | -0.281460285 | 0.031854942 | 1.16E-01 | 3.41E-01 | 1.00E+00 |
| ENSG00000260643.1_RP11-303E  | ENSG00000160789.18_LMNA | -0.10749 | -0.262203561 | 0.052611204 | 1.87E-01 | 4.54E-01 | 1.00E+00 |
| ENSG00000234390.4_USP27X-A5  | ENSG00000160789.18_LMNA | 0.09191  | -0.068294789 | 0.24748482  | 2.60E-01 | 5.43E-01 | 1.00E+00 |
| ENSG00000204620.3_RP11-1148I | ENSG00000160789.18_LMNA | 0.08796  | -0.072254631 | 0.243745396 | 2.81E-01 | 5.67E-01 | 1.00E+00 |
| ENSG00000129437.8_KLK14      | ENSG00000160789.18_LMNA | 0.11711  | -0.042893681 | 0.271250361 | 1.51E-01 | 3.99E-01 | 1.00E+00 |
| ENSG00000267185.1_PTP4A2P1   | ENSG00000160789.18_LMNA | 0.27499  | 0.121089649  | 0.415979004 | 6.07E-04 | 7.86E-03 | 1.00E+00 |
| ENSG00000186806.5_VSIG10L    | ENSG00000160789.18_LMNA | 0.14108  | -0.018534053 | 0.293687271 | 8.30E-02 | 2.78E-01 | 1.00E+00 |
| ENSG00000073331.16_ALPK1     | ENSG00000160789.18_LMNA | 0.1231   | -0.036818817 | 0.276877872 | 1.31E-01 | 3.67E-01 | 1.00E+00 |
| ENSG00000145375.7_SPATA5     | ENSG00000160789.18_LMNA | 0.08514  | -0.075073701 | 0.241077507 | 2.97E-01 | 5.83E-01 | 1.00E+00 |
| ENSG00000162461.7_SLC25A34   | ENSG00000160789.18_LMNA | -0.00973 | -0.168666656 | 0.149705385 | 9.05E-01 | 9.64E-01 | 1.00E+00 |
| ENSG00000243014.1_PTMAP8     | ENSG00000160789.18_LMNA | 0.08096  | -0.079259191 | 0.237107643 | 3.21E-01 | 6.08E-01 | 1.00E+00 |
| ENSG00000074621.12_SLC24A1   | ENSG00000160789.18_LMNA | 0.25734  | 0.102329596  | 0.400145407 | 1.37E-03 | 1.47E-02 | 1.00E+00 |

|                             |                         |          |              |             |          |          |          |
|-----------------------------|-------------------------|----------|--------------|-------------|----------|----------|----------|
| ENSG00000240395.1_RPL5P23   | ENSG00000160789.18_LMNA | -0.15098 | -0.302901436 | 0.008421754 | 6.34E-02 | 2.34E-01 | 1.00E+00 |
| ENSG00000272142.1_RP11-428J | ENSG00000160789.18_LMNA | 0.12235  | -0.037584098 | 0.276170129 | 1.33E-01 | 3.70E-01 | 1.00E+00 |
| ENSG00000196787.3_HIST1H2AC | ENSG00000160789.18_LMNA | -0.00377 | -0.162869451 | 0.155527551 | 9.63E-01 | 9.85E-01 | 1.00E+00 |
| ENSG00000171094.14_ALK      | ENSG00000160789.18_LMNA | 0.21052  | 0.053097123  | 0.357729802 | 9.23E-03 | 6.19E-02 | 1.00E+00 |
| ENSG00000240970.1_RPL23AP6  | ENSG00000160789.18_LMNA | -0.06988 | -0.226557626 | 0.090328293 | 3.92E-01 | 6.70E-01 | 1.00E+00 |
| ENSG00000214189.7_ZNF788    | ENSG00000160789.18_LMNA | 0.13556  | -0.024161956 | 0.288533962 | 9.59E-02 | 3.04E-01 | 1.00E+00 |
| ENSG00000162971.9_TYW5      | ENSG00000160789.18_LMNA | -0.21112 | -0.358277411 | -0.05372344 | 9.03E-03 | 6.09E-02 | 1.00E+00 |
| ENSG00000176371.12_ZSCAN2   | ENSG00000160789.18_LMNA | -0.2088  | -0.356159437 | -0.05130237 | 9.84E-03 | 6.48E-02 | 1.00E+00 |
| ENSG00000214575.8_CPEB1     | ENSG00000160789.18_LMNA | -0.17826 | -0.328149977 | -0.01961803 | 2.80E-02 | 1.37E-01 | 1.00E+00 |
| ENSG00000134297.6_PLEKHA8P  | ENSG00000160789.18_LMNA | 0.20849  | 0.050978737  | 0.355876085 | 9.95E-03 | 6.54E-02 | 1.00E+00 |
| ENSG00000162747.8_FCGR3B    | ENSG00000160789.18_LMNA | -0.05645 | -0.213729934 | 0.103682486 | 4.90E-01 | 7.46E-01 | 1.00E+00 |
| ENSG00000215397.3_SCRT2     | ENSG00000160789.18_LMNA | -0.37799 | -0.506700209 | -0.23279923 | 1.58E-06 | 6.67E-05 | 8.10E-02 |
| ENSG00000187116.12_LILRA5   | ENSG00000160789.18_LMNA | 0.07016  | -0.09005109  | 0.226822741 | 3.90E-01 | 6.69E-01 | 1.00E+00 |
| ENSG00000185669.5_SNAI3     | ENSG00000160789.18_LMNA | -0.07438 | -0.230850907 | 0.085833201 | 3.62E-01 | 6.44E-01 | 1.00E+00 |
| ENSG00000147655.9_RSPO2     | ENSG00000160789.18_LMNA | -0.0083  | -0.167275286 | 0.151104763 | 9.19E-01 | 9.69E-01 | 1.00E+00 |
| ENSG00000250588.5_          | ENSG00000160789.18_LMNA | -0.21261 | -0.359634358 | -0.05527647 | 8.55E-03 | 5.85E-02 | 1.00E+00 |
| ENSG00000259673.4_IQCH-AS1  | ENSG00000160789.18_LMNA | -0.24689 | -0.390733575 | -0.09127771 | 2.17E-03 | 2.08E-02 | 1.00E+00 |
| ENSG00000277290.1_RP11-326C | ENSG00000160789.18_LMNA | 0.12441  | -0.035489766 | 0.278106189 | 1.27E-01 | 3.60E-01 | 1.00E+00 |
| ENSG00000260490.2_MYL12BP1  | ENSG00000160789.18_LMNA | 0.01186  | -0.147615737 | 0.170741988 | 8.85E-01 | 9.55E-01 | 1.00E+00 |
| ENSG00000231259.4_AC125232  | ENSG00000160789.18_LMNA | -0.25402 | -0.397155082 | -0.09881021 | 1.59E-03 | 1.64E-02 | 1.00E+00 |
| ENSG00000231120.3_BTF3P10   | ENSG00000160789.18_LMNA | -0.15074 | -0.302681419 | 0.008663961 | 6.38E-02 | 2.35E-01 | 1.00E+00 |
| ENSG00000183426.14_NPIPA1   | ENSG00000160789.18_LMNA | 0.05706  | -0.103075703 | 0.214315178 | 4.85E-01 | 7.42E-01 | 1.00E+00 |
| ENSG00000214491.7_SEC14L6   | ENSG00000160789.18_LMNA | -0.01444 | -0.173244422 | 0.145092255 | 8.60E-01 | 9.45E-01 | 1.00E+00 |
| ENSG00000124257.6_NEURL2    | ENSG00000160789.18_LMNA | 0.0534   | -0.106712521 | 0.210804045 | 5.14E-01 | 7.62E-01 | 1.00E+00 |
| ENSG00000144061.11_NPHP1    | ENSG00000160789.18_LMNA | 0.08837  | -0.071839414 | 0.244137942 | 2.79E-01 | 5.64E-01 | 1.00E+00 |
| ENSG00000156510.12_HKDC1    | ENSG00000160789.18_LMNA | 0.19327  | 0.035147301  | 0.341946225 | 1.71E-02 | 9.63E-02 | 1.00E+00 |
| ENSG00000135835.9_KIAA1614  | ENSG00000160789.18_LMNA | 0.27774  | 0.124019898  | 0.418436112 | 5.32E-04 | 7.08E-03 | 1.00E+00 |
| ENSG00000243725.5_TTC4      | ENSG00000160789.18_LMNA | 0.04805  | -0.112003842 | 0.205680915 | 5.57E-01 | 7.90E-01 | 1.00E+00 |
| ENSG00000099957.15_P2RX6    | ENSG00000160789.18_LMNA | -0.02644 | -0.18486068  | 0.133323808 | 7.46E-01 | 8.94E-01 | 1.00E+00 |
| ENSG00000214756.6_METTL12   | ENSG00000160789.18_LMNA | -0.23642 | -0.381269748 | -0.08023865 | 3.36E-03 | 2.92E-02 | 1.00E+00 |
| ENSG00000267370.1_CTD-2623N | ENSG00000160789.18_LMNA | -0.20684 | -0.354369683 | -0.04925927 | 1.06E-02 | 6.81E-02 | 1.00E+00 |
| ENSG00000121281.11_ADCY7    | ENSG00000160789.18_LMNA | 0.02734  | -0.132438438 | 0.185731018 | 7.38E-01 | 8.90E-01 | 1.00E+00 |
| ENSG00000134198.8_TSPAN2    | ENSG00000160789.18_LMNA | -0.10123 | -0.256300447 | 0.058919987 | 2.15E-01 | 4.89E-01 | 1.00E+00 |

|                             |                         |          |              |             |          |          |          |
|-----------------------------|-------------------------|----------|--------------|-------------|----------|----------|----------|
| ENSG00000140650.10_PMM2     | ENSG00000160789.18_LMNA | 0.2291   | 0.072547407  | 0.374638505 | 4.52E-03 | 3.64E-02 | 1.00E+00 |
| ENSG00000198523.5_PLN       | ENSG00000160789.18_LMNA | 0.00313  | -0.156145757 | 0.162252601 | 9.69E-01 | 9.88E-01 | 1.00E+00 |
| ENSG00000110844.12_PRPF40B  | ENSG00000160789.18_LMNA | 0.00831  | -0.151087983 | 0.167291977 | 9.19E-01 | 9.69E-01 | 1.00E+00 |
| ENSG00000248932.4_RP11-319G | ENSG00000160789.18_LMNA | -0.12911 | -0.282501083 | 0.030725346 | 1.13E-01 | 3.35E-01 | 1.00E+00 |
| ENSG00000099337.4_KCNK6     | ENSG00000160789.18_LMNA | 0.21285  | 0.05552939   | 0.359855228 | 8.47E-03 | 5.81E-02 | 1.00E+00 |
| ENSG00000231160.8_KLF3-AS1  | ENSG00000160789.18_LMNA | -0.10266 | -0.257648913 | 0.057481069 | 2.08E-01 | 4.81E-01 | 1.00E+00 |
| ENSG00000104953.17_TLE6     | ENSG00000160789.18_LMNA | 0.06528  | -0.094902753 | 0.222175863 | 4.24E-01 | 6.95E-01 | 1.00E+00 |
| ENSG00000228265.4_RALY-AS1  | ENSG00000160789.18_LMNA | 0.0249   | -0.134835901 | 0.183373103 | 7.61E-01 | 9.00E-01 | 1.00E+00 |
| ENSG00000254270.1_ERHP1     | ENSG00000160789.18_LMNA | -0.07651 | -0.232871472 | 0.083713186 | 3.49E-01 | 6.33E-01 | 1.00E+00 |
| ENSG00000273265.1_RP11-353K | ENSG00000160789.18_LMNA | -0.26188 | -0.404228381 | -0.10714702 | 1.12E-03 | 1.26E-02 | 1.00E+00 |
| ENSG00000268858.2_RP4-591C2 | ENSG00000160789.18_LMNA | 0.1676   | 0.008629169  | 0.318307262 | 3.90E-02 | 1.71E-01 | 1.00E+00 |
| ENSG00000196208.12_GREB1    | ENSG00000160789.18_LMNA | 0.06811  | -0.092092337 | 0.22486941  | 4.04E-01 | 6.80E-01 | 1.00E+00 |
| ENSG00000213860.4_RPL21P75  | ENSG00000160789.18_LMNA | -0.23231 | -0.377543871 | -0.07591278 | 3.98E-03 | 3.30E-02 | 1.00E+00 |
| ENSG00000176542.8_USF3      | ENSG00000160789.18_LMNA | 0.03441  | -0.125482246 | 0.192551789 | 6.74E-01 | 8.57E-01 | 1.00E+00 |
| ENSG00000130948.8_HSD17B3   | ENSG00000160789.18_LMNA | 0.00977  | -0.149665423 | 0.168706371 | 9.05E-01 | 9.63E-01 | 1.00E+00 |
| ENSG00000166446.13_CDYL2    | ENSG00000160789.18_LMNA | -0.15815 | -0.309558688 | 0.001075759 | 5.17E-02 | 2.06E-01 | 1.00E+00 |
| ENSG00000255100.1_RP11-21L2 | ENSG00000160789.18_LMNA | 0.06806  | -0.092135759 | 0.22482783  | 4.05E-01 | 6.80E-01 | 1.00E+00 |
| ENSG00000164309.13_CMYA5    | ENSG00000160789.18_LMNA | 0.30442  | 0.152611837  | 0.442187303 | 1.37E-04 | 2.43E-03 | 1.00E+00 |
| ENSG00000197969.10_VPS13A   | ENSG00000160789.18_LMNA | 0.04293  | -0.117071111 | 0.200758337 | 5.99E-01 | 8.16E-01 | 1.00E+00 |
| ENSG00000213976.4_CTD-2561J | ENSG00000160789.18_LMNA | -0.12483 | -0.278498214 | 0.035065357 | 1.25E-01 | 3.58E-01 | 1.00E+00 |
| ENSG00000172349.15_IL16     | ENSG00000160789.18_LMNA | -0.04132 | -0.199211565 | 0.118659939 | 6.13E-01 | 8.24E-01 | 1.00E+00 |
| ENSG00000154265.14_ABCA5    | ENSG00000160789.18_LMNA | 0.00706  | -0.152312247 | 0.166073691 | 9.31E-01 | 9.73E-01 | 1.00E+00 |
| ENSG00000119778.13_ATAD2B   | ENSG00000160789.18_LMNA | -0.0245  | -0.182983103 | 0.135232082 | 7.65E-01 | 9.02E-01 | 1.00E+00 |
| ENSG00000269439.4_CTD-3131K | ENSG00000160789.18_LMNA | -0.01102 | -0.169924096 | 0.148439611 | 8.93E-01 | 9.58E-01 | 1.00E+00 |
| ENSG00000156500.13_FAM122C  | ENSG00000160789.18_LMNA | -0.17603 | -0.326094514 | -0.01731704 | 3.01E-02 | 1.43E-01 | 1.00E+00 |
| ENSG00000159917.13_ZNF235   | ENSG00000160789.18_LMNA | -0.13976 | -0.292453695 | 0.019883039 | 8.59E-02 | 2.84E-01 | 1.00E+00 |
| ENSG00000041515.14_MYO16    | ENSG00000160789.18_LMNA | -0.16265 | -0.313729751 | -0.00354398 | 4.53E-02 | 1.88E-01 | 1.00E+00 |
| ENSG00000230311.2_TOMM20P4  | ENSG00000160789.18_LMNA | -0.0567  | -0.213969413 | 0.103434222 | 4.88E-01 | 7.44E-01 | 1.00E+00 |
| ENSG00000280161.1_CTC-205M  | ENSG00000160789.18_LMNA | -0.21453 | -0.361389593 | -0.05728751 | 7.95E-03 | 5.54E-02 | 1.00E+00 |
| ENSG00000272795.1_RP11-602N | ENSG00000160789.18_LMNA | -0.27032 | -0.411801528 | -0.11611953 | 7.57E-04 | 9.31E-03 | 1.00E+00 |
| ENSG00000272752.4_STAG3L5P  | ENSG00000160789.18_LMNA | 0.03741  | -0.122519013 | 0.195448031 | 6.47E-01 | 8.43E-01 | 1.00E+00 |
| ENSG00000136286.13_MYO1G    | ENSG00000160789.18_LMNA | 0.28979  | 0.136907484  | 0.429191849 | 2.93E-04 | 4.42E-03 | 1.00E+00 |
| ENSG00000237748.1_UQCRBP1   | ENSG00000160789.18_LMNA | -0.06392 | -0.220868789 | 0.096264719 | 4.34E-01 | 7.03E-01 | 1.00E+00 |

|                              |                         |          |              |             |          |          |          |
|------------------------------|-------------------------|----------|--------------|-------------|----------|----------|----------|
| ENSG00000231006.1_RPL7P32    | ENSG00000160789.18_LMNA | -0.12406 | -0.277778003 | 0.035844975 | 1.28E-01 | 3.62E-01 | 1.00E+00 |
| ENSG00000157766.14_ACAN      | ENSG00000160789.18_LMNA | -0.00028 | -0.159470726 | 0.158930654 | 9.97E-01 | 9.99E-01 | 1.00E+00 |
| ENSG00000179299.15_NSUN7     | ENSG00000160789.18_LMNA | 0.20519  | 0.047540604  | 0.352862393 | 1.12E-02 | 7.11E-02 | 1.00E+00 |
| ENSG00000260805.2_RP11-61J1  | ENSG00000160789.18_LMNA | -0.05118 | -0.208678096 | 0.10891045  | 5.31E-01 | 7.74E-01 | 1.00E+00 |
| ENSG00000239415.1_AP001469.5 | ENSG00000160789.18_LMNA | -0.15952 | -0.31082782  | -0.00032849 | 4.96E-02 | 2.00E-01 | 1.00E+00 |
| ENSG00000178295.13_36892     | ENSG00000160789.18_LMNA | -0.03193 | -0.19016545  | 0.127919526 | 6.96E-01 | 8.70E-01 | 1.00E+00 |
| ENSG00000152229.17_PSTPIP2   | ENSG00000160789.18_LMNA | 0.01484  | -0.144702004 | 0.173631051 | 8.56E-01 | 9.43E-01 | 1.00E+00 |
| ENSG00000182870.11_GALNT9    | ENSG00000160789.18_LMNA | -0.14138 | -0.293960822 | 0.018234756 | 8.23E-02 | 2.77E-01 | 1.00E+00 |
| ENSG00000281091.1_RP13-349C  | ENSG00000160789.18_LMNA | 0.04321  | -0.116796055 | 0.201025952 | 5.97E-01 | 8.14E-01 | 1.00E+00 |
| ENSG00000241057.1_AC004985.  | ENSG00000160789.18_LMNA | -0.01467 | -0.173462873 | 0.14487177  | 8.58E-01 | 9.44E-01 | 1.00E+00 |
| ENSG00000101278.6_RPS10P5    | ENSG00000160789.18_LMNA | -0.17135 | -0.321776487 | -0.01249386 | 3.48E-02 | 1.58E-01 | 1.00E+00 |
| ENSG00000272501.1_XXbac-BPG  | ENSG00000160789.18_LMNA | -0.18271 | -0.332242305 | -0.02420894 | 2.43E-02 | 1.24E-01 | 1.00E+00 |
| ENSG00000151655.16_ITIH2     | ENSG00000160789.18_LMNA | -0.04092 | -0.198827813 | 0.119053873 | 6.17E-01 | 8.26E-01 | 1.00E+00 |
| ENSG00000168404.11_MLKL      | ENSG00000160789.18_LMNA | 0.14493  | -0.014606134 | 0.297273233 | 7.48E-02 | 2.61E-01 | 1.00E+00 |
| ENSG00000241155.1_ARHGAP31   | ENSG00000160789.18_LMNA | -0.19828 | -0.346538307 | -0.04034929 | 1.43E-02 | 8.51E-02 | 1.00E+00 |
| ENSG00000183067.5_IGSF5      | ENSG00000160789.18_LMNA | -0.35102 | -0.483216294 | -0.20317195 | 9.26E-06 | 2.74E-04 | 4.75E-01 |
| ENSG00000185760.14_KCNQ5     | ENSG00000160789.18_LMNA | -0.24937 | -0.392968968 | -0.09389597 | 1.95E-03 | 1.91E-02 | 1.00E+00 |
| ENSG00000166573.5_GALR1      | ENSG00000160789.18_LMNA | -0.14348 | -0.295922992 | 0.016086265 | 7.78E-02 | 2.67E-01 | 1.00E+00 |
| ENSG00000256234.1_RP11-283G  | ENSG00000160789.18_LMNA | 0.10561  | -0.054510696 | 0.260428686 | 1.95E-01 | 4.64E-01 | 1.00E+00 |
| ENSG00000270714.1_MINOS1P2   | ENSG00000160789.18_LMNA | 0.06543  | -0.094757933 | 0.222314778 | 4.23E-01 | 6.94E-01 | 1.00E+00 |
| ENSG00000254528.6_RP11-728F  | ENSG00000160789.18_LMNA | -0.35956 | -0.490677108 | -0.21252925 | 5.38E-06 | 1.76E-04 | 2.76E-01 |
| ENSG00000225032.4_RP11-228B  | ENSG00000160789.18_LMNA | 0.0959   | -0.06428315  | 0.251263589 | 2.40E-01 | 5.19E-01 | 1.00E+00 |
| ENSG00000167562.10_ZNF701    | ENSG00000160789.18_LMNA | -0.07762 | -0.233933088 | 0.082598168 | 3.42E-01 | 6.27E-01 | 1.00E+00 |
| ENSG00000265451.1_RP11-204L  | ENSG00000160789.18_LMNA | 0.0123   | -0.147192692 | 0.171161791 | 8.80E-01 | 9.54E-01 | 1.00E+00 |
| ENSG00000226015.2_CCT8P1     | ENSG00000160789.18_LMNA | -0.12559 | -0.279211246 | 0.034293134 | 1.23E-01 | 3.54E-01 | 1.00E+00 |
| ENSG00000198346.9_ZNF813     | ENSG00000160789.18_LMNA | -0.05845 | -0.215645614 | 0.101695422 | 4.74E-01 | 7.34E-01 | 1.00E+00 |
| ENSG00000102098.16_SCML2     | ENSG00000160789.18_LMNA | -0.23225 | -0.377496783 | -0.07585818 | 3.99E-03 | 3.31E-02 | 1.00E+00 |
| ENSG00000198393.6_ZNF26      | ENSG00000160789.18_LMNA | -0.05955 | -0.216693297 | 0.100607627 | 4.66E-01 | 7.28E-01 | 1.00E+00 |
| ENSG00000197943.8_PLCG2      | ENSG00000160789.18_LMNA | -0.00455 | -0.16363223  | 0.154762749 | 9.56E-01 | 9.82E-01 | 1.00E+00 |
| ENSG00000130653.14_PNPLA7    | ENSG00000160789.18_LMNA | 0.20522  | 0.04757146   | 0.352889467 | 1.12E-02 | 7.11E-02 | 1.00E+00 |
| ENSG00000246859.2_STARD4-A   | ENSG00000160789.18_LMNA | -0.12035 | -0.274295951 | 0.039608866 | 1.40E-01 | 3.81E-01 | 1.00E+00 |
| ENSG00000145506.12_NKD2      | ENSG00000160789.18_LMNA | -0.03434 | -0.192492035 | 0.125543323 | 6.74E-01 | 8.57E-01 | 1.00E+00 |
| ENSG00000114933.14_INO80D    | ENSG00000160789.18_LMNA | -0.0037  | -0.162801987 | 0.155595175 | 9.64E-01 | 9.86E-01 | 1.00E+00 |

|                              |                         |          |              |             |          |          |          |
|------------------------------|-------------------------|----------|--------------|-------------|----------|----------|----------|
| ENSG00000238045.8_AC009133.  | ENSG00000160789.18_LMNA | 0.23682  | 0.080657021  | 0.38162957  | 3.31E-03 | 2.88E-02 | 1.00E+00 |
| ENSG00000169282.16_KCNAB1    | ENSG00000160789.18_LMNA | -0.47282 | -0.587777217 | -0.33914863 | 7.71E-10 | 1.26E-07 | 3.96E-05 |
| ENSG00000003137.7_CYP26B1    | ENSG00000160789.18_LMNA | -0.16388 | -0.314867823 | -0.00480677 | 4.36E-02 | 1.84E-01 | 1.00E+00 |
| ENSG00000115687.12_PASK      | ENSG00000160789.18_LMNA | 0.13205  | -0.02773766  | 0.285250354 | 1.05E-01 | 3.21E-01 | 1.00E+00 |
| ENSG00000241404.5_EGFL8      | ENSG00000160789.18_LMNA | -0.03025 | -0.188541196 | 0.129576258 | 7.11E-01 | 8.77E-01 | 1.00E+00 |
| ENSG00000239830.1_RPS4XP22   | ENSG00000160789.18_LMNA | -0.10385 | -0.258774831 | 0.056278622 | 2.03E-01 | 4.74E-01 | 1.00E+00 |
| ENSG00000081059.18_TCF7      | ENSG00000160789.18_LMNA | 0.05006  | -0.110019567 | 0.207604161 | 5.40E-01 | 7.80E-01 | 1.00E+00 |
| ENSG00000240038.5_AMY2B      | ENSG00000160789.18_LMNA | -0.1352  | -0.288193053 | 0.024533563 | 9.68E-02 | 3.05E-01 | 1.00E+00 |
| ENSG00000172403.9_SYNPO2     | ENSG00000160789.18_LMNA | -0.12371 | -0.277446878 | 0.036203285 | 1.29E-01 | 3.64E-01 | 1.00E+00 |
| ENSG00000177602.5_GSG2       | ENSG00000160789.18_LMNA | 0.04045  | -0.119520446 | 0.198373174 | 6.21E-01 | 8.28E-01 | 1.00E+00 |
| ENSG00000234409.6_CCDC188    | ENSG00000160789.18_LMNA | 0.11424  | -0.045793406 | 0.26855658  | 1.61E-01 | 4.16E-01 | 1.00E+00 |
| ENSG00000117013.13_KCNQ4     | ENSG00000160789.18_LMNA | -0.03593 | -0.194024511 | 0.123976169 | 6.60E-01 | 8.50E-01 | 1.00E+00 |
| ENSG00000105967.14_TFEC      | ENSG00000160789.18_LMNA | -0.11371 | -0.268058734 | 0.046328732 | 1.63E-01 | 4.18E-01 | 1.00E+00 |
| ENSG00000214402.6_LCNL1      | ENSG00000160789.18_LMNA | -0.12265 | -0.276450859 | 0.037280589 | 1.32E-01 | 3.69E-01 | 1.00E+00 |
| ENSG00000260404.2_RP11-384K  | ENSG00000160789.18_LMNA | 0.15424  | -0.005088088 | 0.305926315 | 5.78E-02 | 2.20E-01 | 1.00E+00 |
| ENSG00000171428.12_NAT1      | ENSG00000160789.18_LMNA | 0.01267  | -0.14682759  | 0.171524002 | 8.77E-01 | 9.52E-01 | 1.00E+00 |
| ENSG00000224138.1_AC000123.  | ENSG00000160789.18_LMNA | 0.1041   | -0.056031857 | 0.259005785 | 2.02E-01 | 4.73E-01 | 1.00E+00 |
| ENSG00000239264.7_TXNDC5     | ENSG00000160789.18_LMNA | 0.32845  | 0.178587543  | 0.463418776 | 3.61E-05 | 8.30E-04 | 1.00E+00 |
| ENSG00000257660.4_RP11-579D  | ENSG00000160789.18_LMNA | -0.21108 | -0.358238746 | -0.05367921 | 9.05E-03 | 6.10E-02 | 1.00E+00 |
| ENSG00000162999.11_DUSP19    | ENSG00000160789.18_LMNA | -0.37719 | -0.506009088 | -0.23191999 | 1.67E-06 | 6.95E-05 | 8.55E-02 |
| ENSG00000184343.9_SRPK3      | ENSG00000160789.18_LMNA | -0.16438 | -0.315328679 | -0.00531842 | 4.30E-02 | 1.82E-01 | 1.00E+00 |
| ENSG00000174740.7_PABPC5     | ENSG00000160789.18_LMNA | -0.33263 | -0.467093855 | -0.1831245  | 2.83E-05 | 6.80E-04 | 1.00E+00 |
| ENSG00000105227.13_PRX       | ENSG00000160789.18_LMNA | 0.29075  | 0.13792985   | 0.430041562 | 2.79E-04 | 4.25E-03 | 1.00E+00 |
| ENSG00000082438.14_COBLL1    | ENSG00000160789.18_LMNA | -0.06223 | -0.219253756 | 0.09794594  | 4.46E-01 | 7.13E-01 | 1.00E+00 |
| ENSG00000185436.10_IFNLR1    | ENSG00000160789.18_LMNA | -0.04557 | -0.203299912 | 0.114456896 | 5.77E-01 | 8.03E-01 | 1.00E+00 |
| ENSG00000279026.1_RP3-414A1  | ENSG00000160789.18_LMNA | 0.05938  | -0.100769729 | 0.216537219 | 4.67E-01 | 7.29E-01 | 1.00E+00 |
| ENSG00000280832.1_ST3GAL4-A  | ENSG00000160789.18_LMNA | -0.07127 | -0.227887977 | 0.088936786 | 3.83E-01 | 6.61E-01 | 1.00E+00 |
| ENSG00000102890.13_ELMO3     | ENSG00000160789.18_LMNA | -0.05239 | -0.209844933 | 0.107704491 | 5.21E-01 | 7.67E-01 | 1.00E+00 |
| ENSG00000173890.15_GPR160    | ENSG00000160789.18_LMNA | -0.10434 | -0.259235003 | 0.055786909 | 2.01E-01 | 4.71E-01 | 1.00E+00 |
| ENSG00000232727.2_YWHAEP1    | ENSG00000160789.18_LMNA | -0.15809 | -0.309498859 | 0.001141927 | 5.18E-02 | 2.06E-01 | 1.00E+00 |
| ENSG00000224856.2_RP4-796I17 | ENSG00000160789.18_LMNA | -0.00028 | -0.159477985 | 0.158923394 | 9.97E-01 | 9.99E-01 | 1.00E+00 |
| ENSG00000075884.11_ARHGAP1   | ENSG00000160789.18_LMNA | -0.04245 | -0.200293261 | 0.117549004 | 6.04E-01 | 8.18E-01 | 1.00E+00 |
| ENSG00000109758.7_HGFAC      | ENSG00000160789.18_LMNA | -0.07441 | -0.230878597 | 0.085804167 | 3.62E-01 | 6.44E-01 | 1.00E+00 |



|                              |                         |          |              |             |          |          |          |
|------------------------------|-------------------------|----------|--------------|-------------|----------|----------|----------|
| ENSG00000200693.2_U3         | ENSG00000160789.18_LMNA | -0.22355 | -0.369599167 | -0.06672646 | 5.63E-03 | 4.29E-02 | 1.00E+00 |
| ENSG00000129173.11_E2F8      | ENSG00000160789.18_LMNA | 0.22175  | 0.064839792  | 0.367962    | 6.04E-03 | 4.52E-02 | 1.00E+00 |
| ENSG00000183783.6_KCTD8      | ENSG00000160789.18_LMNA | -0.30743 | -0.444855312 | -0.15585419 | 1.17E-04 | 2.14E-03 | 1.00E+00 |
| ENSG00000257167.2_TMPO-AS1   | ENSG00000160789.18_LMNA | 0.05647  | -0.103663459 | 0.21374829  | 4.90E-01 | 7.46E-01 | 1.00E+00 |
| ENSG00000101916.11_TLR8      | ENSG00000160789.18_LMNA | -0.07131 | -0.227920269 | 0.088902994 | 3.83E-01 | 6.61E-01 | 1.00E+00 |
| ENSG00000139734.16_DIAPH3    | ENSG00000160789.18_LMNA | -0.01828 | -0.176966719 | 0.141330972 | 8.23E-01 | 9.31E-01 | 1.00E+00 |
| ENSG00000147145.11_LPAR4     | ENSG00000160789.18_LMNA | -0.44644 | -0.565451532 | -0.30921577 | 8.18E-09 | 9.12E-07 | 4.19E-04 |
| ENSG00000233205.1_AC108479.1 | ENSG00000160789.18_LMNA | -0.10214 | -0.257155956 | 0.058007244 | 2.11E-01 | 4.84E-01 | 1.00E+00 |
| ENSG00000260000.2_RP3-467N1  | ENSG00000160789.18_LMNA | -0.19761 | -0.345927537 | -0.03965644 | 1.47E-02 | 8.65E-02 | 1.00E+00 |
| ENSG00000130720.11_FIBCD1    | ENSG00000160789.18_LMNA | 0.14221  | -0.017383708 | 0.294738381 | 8.05E-02 | 2.73E-01 | 1.00E+00 |
| ENSG00000180481.9_GLIPR1L2   | ENSG00000160789.18_LMNA | -0.15173 | -0.303593167 | 0.00766002  | 6.20E-02 | 2.31E-01 | 1.00E+00 |
| ENSG00000054392.11_HHAT      | ENSG00000160789.18_LMNA | 0.10699  | -0.053112109 | 0.261735725 | 1.90E-01 | 4.57E-01 | 1.00E+00 |
| ENSG00000235436.9_DPY19L2P2  | ENSG00000160789.18_LMNA | -0.2536  | -0.396779645 | -0.09836887 | 1.62E-03 | 1.66E-02 | 1.00E+00 |
| ENSG00000275120.1_RP11-182J  | ENSG00000160789.18_LMNA | -0.35315 | -0.485077454 | -0.20550143 | 8.10E-06 | 2.46E-04 | 4.15E-01 |
| ENSG00000065675.13_PRKCQ     | ENSG00000160789.18_LMNA | -0.14257 | -0.295069242 | 0.017021438 | 7.98E-02 | 2.72E-01 | 1.00E+00 |
| ENSG00000230565.1_ZNF32-AS2  | ENSG00000160789.18_LMNA | -0.12039 | -0.274333541 | 0.039568282 | 1.40E-01 | 3.81E-01 | 1.00E+00 |
| ENSG00000148655.13_C10orf11  | ENSG00000160789.18_LMNA | -0.09092 | -0.246553788 | 0.069281632 | 2.65E-01 | 5.49E-01 | 1.00E+00 |
| ENSG00000130054.4_FAM155B    | ENSG00000160789.18_LMNA | -0.41901 | -0.542054306 | -0.2783818  | 7.76E-08 | 5.87E-06 | 3.98E-03 |
| ENSG00000254035.1_RP11-281C  | ENSG00000160789.18_LMNA | 0.01568  | -0.14387531  | 0.174449749 | 8.48E-01 | 9.41E-01 | 1.00E+00 |
| ENSG00000250305.7_KIAA1456   | ENSG00000160789.18_LMNA | 0.16568  | 0.006653633  | 0.316530667 | 4.14E-02 | 1.77E-01 | 1.00E+00 |
| ENSG00000256103.2_ATP5J2P5   | ENSG00000160789.18_LMNA | -0.04972 | -0.207281354 | 0.110352793 | 5.43E-01 | 7.82E-01 | 1.00E+00 |
| ENSG00000111490.11_TBC1D30   | ENSG00000160789.18_LMNA | -0.19078 | -0.339668085 | -0.03257274 | 1.86E-02 | 1.02E-01 | 1.00E+00 |
| ENSG00000230626.3_RP11-286H  | ENSG00000160789.18_LMNA | 0.06932  | -0.090882355 | 0.226027586 | 3.96E-01 | 6.73E-01 | 1.00E+00 |
| ENSG00000196876.12_SCN8A     | ENSG00000160789.18_LMNA | -0.07516 | -0.231591922 | 0.085056046 | 3.57E-01 | 6.40E-01 | 1.00E+00 |
| ENSG00000273486.1_RP11-731C  | ENSG00000160789.18_LMNA | -0.18211 | -0.331691514 | -0.02359029 | 2.47E-02 | 1.25E-01 | 1.00E+00 |
| ENSG00000243156.6_MICAL3     | ENSG00000160789.18_LMNA | -0.0848  | -0.240746044 | 0.075423594 | 2.99E-01 | 5.85E-01 | 1.00E+00 |
| ENSG00000250959.2_GLUD1P3    | ENSG00000160789.18_LMNA | -0.25705 | -0.399884601 | -0.10202235 | 1.39E-03 | 1.48E-02 | 1.00E+00 |
| ENSG00000279259.1_RP11-334C  | ENSG00000160789.18_LMNA | -0.05643 | -0.213710678 | 0.103702447 | 4.90E-01 | 7.46E-01 | 1.00E+00 |
| ENSG00000260837.1_RP11-434B  | ENSG00000160789.18_LMNA | -0.30558 | -0.443217718 | -0.15386333 | 1.29E-04 | 2.32E-03 | 1.00E+00 |
| ENSG00000241014.1_RP11-244H  | ENSG00000160789.18_LMNA | 0.20225  | 0.044483286  | 0.350177172 | 1.25E-02 | 7.68E-02 | 1.00E+00 |
| ENSG00000206417.7_H1FX-AS1   | ENSG00000160789.18_LMNA | -0.03012 | -0.188417448 | 0.129702408 | 7.13E-01 | 8.78E-01 | 1.00E+00 |
| ENSG00000214796.7_RP11-480I1 | ENSG00000160789.18_LMNA | -0.18958 | -0.338566314 | -0.03132907 | 1.93E-02 | 1.05E-01 | 1.00E+00 |
| ENSG00000227001.3_NBPF2P     | ENSG00000160789.18_LMNA | -0.10588 | -0.260683181 | 0.054238473 | 1.94E-01 | 4.63E-01 | 1.00E+00 |

|                             |                         |          |              |             |          |          |          |
|-----------------------------|-------------------------|----------|--------------|-------------|----------|----------|----------|
| ENSG00000229605.5_RPL21P93  | ENSG00000160789.18_LMNA | -0.14239 | -0.294909401 | 0.017196463 | 8.01E-02 | 2.72E-01 | 1.00E+00 |
| ENSG00000182487.11_NCF1B    | ENSG00000160789.18_LMNA | 0.00219  | -0.157066189 | 0.161333728 | 9.79E-01 | 9.92E-01 | 1.00E+00 |
| ENSG00000272430.1_RP11-38L1 | ENSG00000160789.18_LMNA | -0.20588 | -0.353495696 | -0.0482625  | 1.09E-02 | 6.98E-02 | 1.00E+00 |
| ENSG00000212789.4_ST13P5    | ENSG00000160789.18_LMNA | -0.07986 | -0.236056561 | 0.0803655   | 3.28E-01 | 6.14E-01 | 1.00E+00 |
| ENSG00000244331.1_CTB-47B8  | ENSG00000160789.18_LMNA | 0.0386   | -0.121347577 | 0.196591456 | 6.37E-01 | 8.38E-01 | 1.00E+00 |
| ENSG00000231312.5_AC007246  | ENSG00000160789.18_LMNA | -0.10696 | -0.261708829 | 0.053140901 | 1.90E-01 | 4.57E-01 | 1.00E+00 |
| ENSG00000173040.11_EVC2     | ENSG00000160789.18_LMNA | 0.43885  | 0.300652937  | 0.558995041 | 1.56E-08 | 1.56E-06 | 7.98E-04 |
| ENSG00000166394.13_CYB5R2   | ENSG00000160789.18_LMNA | 0.08319  | -0.077028329 | 0.239224892 | 3.08E-01 | 5.95E-01 | 1.00E+00 |
| ENSG00000272148.1_RP11-195B | ENSG00000160789.18_LMNA | -0.10404 | -0.258952932 | 0.056088332 | 2.02E-01 | 4.73E-01 | 1.00E+00 |
| ENSG00000272459.1_RP11-1277 | ENSG00000160789.18_LMNA | 0.11064  | -0.049427042 | 0.265174054 | 1.75E-01 | 4.35E-01 | 1.00E+00 |
| ENSG00000153531.11_ADPRHL1  | ENSG00000160789.18_LMNA | -0.20054 | -0.34861468  | -0.04270691 | 1.32E-02 | 8.01E-02 | 1.00E+00 |
| ENSG00000261879.4_RP11-333E | ENSG00000160789.18_LMNA | -0.0805  | -0.236667302 | 0.079722764 | 3.24E-01 | 6.11E-01 | 1.00E+00 |
| ENSG00000168026.15_TTC21A   | ENSG00000160789.18_LMNA | -0.05816 | -0.215367816 | 0.101983729 | 4.77E-01 | 7.35E-01 | 1.00E+00 |
| ENSG00000220875.1_HIST1H3P5 | ENSG00000160789.18_LMNA | -0.24582 | -0.389764585 | -0.09014404 | 2.27E-03 | 2.15E-02 | 1.00E+00 |
| ENSG00000150048.9_CLEC1A    | ENSG00000160789.18_LMNA | -0.07208 | -0.228660365 | 0.088128324 | 3.77E-01 | 6.57E-01 | 1.00E+00 |
| ENSG00000138182.13_KIF20B   | ENSG00000160789.18_LMNA | 0.10497  | -0.055156035 | 0.2598252   | 1.98E-01 | 4.68E-01 | 1.00E+00 |
| ENSG00000138134.10_STAMBPL  | ENSG00000160789.18_LMNA | -0.24565 | -0.389617005 | -0.08997145 | 2.28E-03 | 2.16E-02 | 1.00E+00 |
| ENSG00000180938.5_ZNF572    | ENSG00000160789.18_LMNA | -0.23936 | -0.383926789 | -0.08333051 | 2.98E-03 | 2.66E-02 | 1.00E+00 |
| ENSG00000120645.10_IQSEC3   | ENSG00000160789.18_LMNA | -0.16162 | -0.312776477 | -0.00248699 | 4.67E-02 | 1.92E-01 | 1.00E+00 |
| ENSG00000273329.1_RP11-448A | ENSG00000160789.18_LMNA | 0.01685  | -0.142734014 | 0.175579284 | 8.37E-01 | 9.37E-01 | 1.00E+00 |
| ENSG00000263155.4_MYZAP     | ENSG00000160789.18_LMNA | -0.12084 | -0.27475214  | 0.03911626  | 1.38E-01 | 3.79E-01 | 1.00E+00 |
| ENSG00000177406.4_RP11-218M | ENSG00000160789.18_LMNA | 0.04437  | -0.115647178 | 0.202143235 | 5.87E-01 | 8.08E-01 | 1.00E+00 |
| ENSG00000118495.17_PLAGL1   | ENSG00000160789.18_LMNA | 0.10237  | -0.057777234 | 0.257371465 | 2.10E-01 | 4.82E-01 | 1.00E+00 |
| ENSG00000224738.1_AC099850  | ENSG00000160789.18_LMNA | -0.31466 | -0.451255715 | -0.16365788 | 7.88E-05 | 1.56E-03 | 1.00E+00 |
| ENSG00000139899.9_CBLN3     | ENSG00000160789.18_LMNA | 0.45006  | 0.313305993  | 0.568524573 | 5.98E-09 | 7.02E-07 | 3.07E-04 |
| ENSG00000276007.1_RP11-358L | ENSG00000160789.18_LMNA | -0.19792 | -0.34620935  | -0.03997609 | 1.45E-02 | 8.59E-02 | 1.00E+00 |
| ENSG00000186073.10_C15orf41 | ENSG00000160789.18_LMNA | -0.11533 | -0.269583564 | 0.044688532 | 1.57E-01 | 4.09E-01 | 1.00E+00 |
| ENSG00000177990.10_DPY19L2  | ENSG00000160789.18_LMNA | -0.11516 | -0.269421046 | 0.044863426 | 1.58E-01 | 4.10E-01 | 1.00E+00 |
| ENSG00000249572.1_CTD-2203K | ENSG00000160789.18_LMNA | -0.11668 | -0.270853015 | 0.043321739 | 1.52E-01 | 4.01E-01 | 1.00E+00 |
| ENSG00000152457.16_DCLRE1C  | ENSG00000160789.18_LMNA | -0.27366 | -0.414786859 | -0.11966979 | 6.46E-04 | 8.25E-03 | 1.00E+00 |
| ENSG00000213430.6_HSPD1P1   | ENSG00000160789.18_LMNA | 0.07171  | -0.088499395 | 0.228305901 | 3.80E-01 | 6.59E-01 | 1.00E+00 |
| ENSG00000276644.3_DACH1     | ENSG00000160789.18_LMNA | -0.31104 | -0.448056682 | -0.15975295 | 9.61E-05 | 1.82E-03 | 1.00E+00 |
| ENSG00000213970.3_RP11-264F | ENSG00000160789.18_LMNA | 0.02548  | -0.134260654 | 0.183939195 | 7.55E-01 | 8.98E-01 | 1.00E+00 |

|                              |                         |          |              |             |          |          |          |
|------------------------------|-------------------------|----------|--------------|-------------|----------|----------|----------|
| ENSG00000089505.16_CMTM1     | ENSG00000160789.18_LMNA | 0.05146  | -0.108633589 | 0.208946056 | 5.29E-01 | 7.73E-01 | 1.00E+00 |
| ENSG00000204442.3_FAM155A    | ENSG00000160789.18_LMNA | -0.27174 | -0.413066501 | -0.11762296 | 7.08E-04 | 8.86E-03 | 1.00E+00 |
| ENSG00000164066.11_INTU      | ENSG00000160789.18_LMNA | 0.24044  | 0.084468406  | 0.384903403 | 2.85E-03 | 2.57E-02 | 1.00E+00 |
| ENSG00000160808.8_MYL3       | ENSG00000160789.18_LMNA | -0.13816 | -0.290959538 | 0.021515464 | 8.96E-02 | 2.92E-01 | 1.00E+00 |
| ENSG00000259863.1_SH3RF3-A5  | ENSG00000160789.18_LMNA | -0.26409 | -0.406215674 | -0.10949685 | 1.01E-03 | 1.17E-02 | 1.00E+00 |
| ENSG00000226823.1_SUGT1P1    | ENSG00000160789.18_LMNA | -0.28814 | -0.427724127 | -0.135143   | 3.18E-04 | 4.72E-03 | 1.00E+00 |
| ENSG00000170684.7_ZNF296     | ENSG00000160789.18_LMNA | 0.23879  | 0.082732426  | 0.3834132   | 3.05E-03 | 2.71E-02 | 1.00E+00 |
| ENSG00000230042.1_AK3P3      | ENSG00000160789.18_LMNA | -0.19701 | -0.345381753 | -0.03903756 | 1.50E-02 | 8.78E-02 | 1.00E+00 |
| ENSG00000134627.10_PIWIL4    | ENSG00000160789.18_LMNA | -0.01103 | -0.169930952 | 0.148432706 | 8.93E-01 | 9.58E-01 | 1.00E+00 |
| ENSG00000107077.16_KDM4C     | ENSG00000160789.18_LMNA | 0.1236   | -0.036318921 | 0.277339999 | 1.29E-01 | 3.64E-01 | 1.00E+00 |
| ENSG00000105889.13_STEAP1B   | ENSG00000160789.18_LMNA | -0.22788 | -0.373525021 | -0.07125945 | 4.75E-03 | 3.78E-02 | 1.00E+00 |
| ENSG00000273796.1_LL21NC02-  | ENSG00000160789.18_LMNA | 0.40356  | 0.26113563   | 0.528786954 | 2.53E-07 | 1.54E-05 | 1.30E-02 |
| ENSG00000177374.11_HIC1      | ENSG00000160789.18_LMNA | 0.42685  | 0.287158201  | 0.548755838 | 4.16E-08 | 3.52E-06 | 2.14E-03 |
| ENSG00000112182.13_BACH2     | ENSG00000160789.18_LMNA | -0.06377 | -0.220730487 | 0.09640876  | 4.35E-01 | 7.04E-01 | 1.00E+00 |
| ENSG00000175611.10_LINC0047  | ENSG00000160789.18_LMNA | -0.38659 | -0.514149932 | -0.24230523 | 8.67E-07 | 4.06E-05 | 4.45E-02 |
| ENSG00000228084.1_RP5-884G6  | ENSG00000160789.18_LMNA | -0.18409 | -0.333520357 | -0.02564537 | 2.32E-02 | 1.20E-01 | 1.00E+00 |
| ENSG00000237451.3_CDK2AP2P   | ENSG00000160789.18_LMNA | -0.20728 | -0.3547695   | -0.04971546 | 1.04E-02 | 6.73E-02 | 1.00E+00 |
| ENSG00000224713.4_AC025165.1 | ENSG00000160789.18_LMNA | -0.27038 | -0.411856497 | -0.11618483 | 7.54E-04 | 9.29E-03 | 1.00E+00 |
| ENSG00000271032.1_CTD-252712 | ENSG00000160789.18_LMNA | -0.00873 | -0.16769341  | 0.150684366 | 9.15E-01 | 9.68E-01 | 1.00E+00 |
| ENSG00000182389.17_CACNB4    | ENSG00000160789.18_LMNA | -0.43838 | -0.558596798 | -0.30012613 | 1.62E-08 | 1.61E-06 | 8.30E-04 |
| ENSG00000105048.15_TNNT1     | ENSG00000160789.18_LMNA | 0.232    | 0.075595272  | 0.377270017 | 4.03E-03 | 3.33E-02 | 1.00E+00 |
| ENSG00000272604.1_RP11-251G  | ENSG00000160789.18_LMNA | 0.01507  | -0.144481544 | 0.173849422 | 8.54E-01 | 9.43E-01 | 1.00E+00 |
| ENSG00000254012.1_RPL10P8    | ENSG00000160789.18_LMNA | -0.07389 | -0.230383582 | 0.08632312  | 3.66E-01 | 6.47E-01 | 1.00E+00 |
| ENSG00000232803.1_SLCO4A1-1  | ENSG00000160789.18_LMNA | -0.04002 | -0.197961466 | 0.119942838 | 6.24E-01 | 8.31E-01 | 1.00E+00 |
| ENSG00000080200.8_CRYBG3     | ENSG00000160789.18_LMNA | 0.00952  | -0.149906463 | 0.168466807 | 9.07E-01 | 9.64E-01 | 1.00E+00 |
| ENSG00000169635.8_HIC2       | ENSG00000160789.18_LMNA | 0.05391  | -0.106202684 | 0.211296758 | 5.09E-01 | 7.59E-01 | 1.00E+00 |
| ENSG00000182405.5_PGBD4      | ENSG00000160789.18_LMNA | -0.1894  | -0.338399712 | -0.03114109 | 1.94E-02 | 1.06E-01 | 1.00E+00 |
| ENSG00000164946.18_FREM1     | ENSG00000160789.18_LMNA | -0.0166  | -0.175341438 | 0.142974407 | 8.39E-01 | 9.37E-01 | 1.00E+00 |
| ENSG00000171847.9_FAM90A1    | ENSG00000160789.18_LMNA | -0.12959 | -0.282957433 | 0.030229808 | 1.12E-01 | 3.33E-01 | 1.00E+00 |
| ENSG00000054938.14_CHRDL2    | ENSG00000160789.18_LMNA | 0.21661  | 0.059462233  | 0.363285256 | 7.35E-03 | 5.22E-02 | 1.00E+00 |
| ENSG00000253833.1_RP11-367E  | ENSG00000160789.18_LMNA | -0.06824 | -0.225000639 | 0.091955284 | 4.03E-01 | 6.79E-01 | 1.00E+00 |
| ENSG00000261795.1_RP11-90P1  | ENSG00000160789.18_LMNA | -0.16582 | -0.316660646 | -0.00679809 | 4.12E-02 | 1.77E-01 | 1.00E+00 |
| ENSG00000184454.6_NCMAP      | ENSG00000160789.18_LMNA | 0.08453  | -0.075694147 | 0.240489692 | 3.01E-01 | 5.87E-01 | 1.00E+00 |

|                              |                         |          |              |             |          |          |          |
|------------------------------|-------------------------|----------|--------------|-------------|----------|----------|----------|
| ENSG00000231848.1_AC012354.1 | ENSG00000160789.18_LMNA | 0.10109  | -0.05906058  | 0.256168627 | 2.15E-01 | 4.89E-01 | 1.00E+00 |
| ENSG00000183971.5_NPW        | ENSG00000160789.18_LMNA | 0.05692  | -0.103215848 | 0.214180028 | 4.86E-01 | 7.43E-01 | 1.00E+00 |
| ENSG00000046604.11_DSG2      | ENSG00000160789.18_LMNA | 0.26827  | 0.113940364  | 0.409965977 | 8.33E-04 | 1.00E-02 | 1.00E+00 |
| ENSG00000100065.13_CARD10    | ENSG00000160789.18_LMNA | 0.17969  | 0.02109599   | 0.329468691 | 2.67E-02 | 1.33E-01 | 1.00E+00 |
| ENSG00000228218.1_ATF4P3     | ENSG00000160789.18_LMNA | -0.13857 | -0.291346291 | 0.021093081 | 8.86E-02 | 2.90E-01 | 1.00E+00 |
| ENSG00000179899.8_PHC1P1     | ENSG00000160789.18_LMNA | 0.00795  | -0.151443503 | 0.166938293 | 9.23E-01 | 9.70E-01 | 1.00E+00 |
| ENSG00000173611.16_SCAI      | ENSG00000160789.18_LMNA | -0.20731 | -0.354799944 | -0.04975021 | 1.04E-02 | 6.73E-02 | 1.00E+00 |
| ENSG00000131019.9_ULBP3      | ENSG00000160789.18_LMNA | 0.32545  | 0.175330567  | 0.460774469 | 4.29E-05 | 9.48E-04 | 1.00E+00 |
| ENSG00000138346.13_DNA2      | ENSG00000160789.18_LMNA | -0.17249 | -0.322827231 | -0.0136662  | 3.36E-02 | 1.54E-01 | 1.00E+00 |
| ENSG00000279108.1_CTC-490E2  | ENSG00000160789.18_LMNA | 0.03802  | -0.121917862 | 0.196034916 | 6.42E-01 | 8.40E-01 | 1.00E+00 |
| ENSG00000239857.5_GET4       | ENSG00000160789.18_LMNA | 0.12801  | -0.031836013 | 0.281477733 | 1.16E-01 | 3.41E-01 | 1.00E+00 |
| ENSG00000238085.1_RP11-435F  | ENSG00000160789.18_LMNA | -0.03799 | -0.196002629 | 0.12195094  | 6.42E-01 | 8.41E-01 | 1.00E+00 |
| ENSG00000092529.21_CAPN3     | ENSG00000160789.18_LMNA | -0.35558 | -0.487203836 | -0.20816674 | 6.94E-06 | 2.18E-04 | 3.56E-01 |
| ENSG00000228889.5_UBAC2-AS   | ENSG00000160789.18_LMNA | -0.42371 | -0.546073586 | -0.28364021 | 5.35E-08 | 4.33E-06 | 2.75E-03 |
| ENSG00000107242.16_PIP5K1B   | ENSG00000160789.18_LMNA | -0.37399 | -0.503232727 | -0.22839243 | 2.07E-06 | 8.20E-05 | 1.06E-01 |
| ENSG00000230269.5_RP1-40E16  | ENSG00000160789.18_LMNA | 0.20278  | 0.04503341   | 0.350660712 | 1.22E-02 | 7.58E-02 | 1.00E+00 |
| ENSG00000267277.1_CTD-2342J  | ENSG00000160789.18_LMNA | -0.19319 | -0.341879008 | -0.03507128 | 1.71E-02 | 9.64E-02 | 1.00E+00 |
| ENSG00000237248.4_LINC00987  | ENSG00000160789.18_LMNA | -0.27533 | -0.416284932 | -0.12145421 | 5.97E-04 | 7.76E-03 | 1.00E+00 |
| ENSG00000114757.17_PEX5L     | ENSG00000160789.18_LMNA | -0.33448 | -0.468718222 | -0.18513368 | 2.54E-05 | 6.25E-04 | 1.00E+00 |
| ENSG00000132170.18_PPARG     | ENSG00000160789.18_LMNA | -0.06614 | -0.222995173 | 0.094048429 | 4.18E-01 | 6.90E-01 | 1.00E+00 |
| ENSG00000240399.1_RP1-228P1  | ENSG00000160789.18_LMNA | -0.1664  | -0.317193994 | -0.00739096 | 4.05E-02 | 1.75E-01 | 1.00E+00 |
| ENSG00000272764.1_RP11-318E  | ENSG00000160789.18_LMNA | -0.0791  | -0.235339067 | 0.081120244 | 3.33E-01 | 6.18E-01 | 1.00E+00 |
| ENSG00000268182.4_SMIM17     | ENSG00000160789.18_LMNA | -0.37274 | -0.502144052 | -0.22701116 | 2.26E-06 | 8.75E-05 | 1.16E-01 |
| ENSG00000177511.5_ST8SIA3    | ENSG00000160789.18_LMNA | -0.31693 | -0.453259122 | -0.16610795 | 6.95E-05 | 1.40E-03 | 1.00E+00 |
| ENSG00000155158.19_TTC39B    | ENSG00000160789.18_LMNA | 0.30468  | 0.152894917  | 0.442420443 | 1.35E-04 | 2.40E-03 | 1.00E+00 |
| ENSG00000118322.11_ATP10B    | ENSG00000160789.18_LMNA | -0.21987 | -0.366247378 | -0.06286619 | 6.49E-03 | 4.77E-02 | 1.00E+00 |
| ENSG00000099958.13_DERL3     | ENSG00000160789.18_LMNA | 0.33419  | 0.184821297  | 0.468465794 | 2.58E-05 | 6.33E-04 | 1.00E+00 |
| ENSG00000262227.1_RP5-1050D  | ENSG00000160789.18_LMNA | -0.02305 | -0.181583563 | 0.136652971 | 7.78E-01 | 9.09E-01 | 1.00E+00 |
| ENSG00000260233.3_SSSCA1-A3  | ENSG00000160789.18_LMNA | -0.16148 | -0.312641068 | -0.00233691 | 4.69E-02 | 1.93E-01 | 1.00E+00 |
| ENSG00000089682.15_RBM41     | ENSG00000160789.18_LMNA | -0.05333 | -0.210744896 | 0.106773716 | 5.14E-01 | 7.62E-01 | 1.00E+00 |
| ENSG00000268201.1_CTD-3138B  | ENSG00000160789.18_LMNA | -0.10296 | -0.25793491  | 0.057175718 | 2.07E-01 | 4.79E-01 | 1.00E+00 |
| ENSG00000273352.1_RP11-61L1  | ENSG00000160789.18_LMNA | 0.07072  | -0.089485769 | 0.227363264 | 3.87E-01 | 6.65E-01 | 1.00E+00 |
| ENSG00000179361.16_ARID3B    | ENSG00000160789.18_LMNA | 0.09716  | -0.063017033 | 0.252454217 | 2.34E-01 | 5.11E-01 | 1.00E+00 |

|                              |                         |          |              |             |          |          |          |
|------------------------------|-------------------------|----------|--------------|-------------|----------|----------|----------|
| ENSG00000214192.3_UBE2V1P2   | ENSG00000160789.18_LMNA | 0.19543  | 0.037394387  | 0.343931649 | 1.58E-02 | 9.12E-02 | 1.00E+00 |
| ENSG00000213478.2_CFL1P2     | ENSG00000160789.18_LMNA | 0.0499   | -0.110180219 | 0.207448541 | 5.42E-01 | 7.81E-01 | 1.00E+00 |
| ENSG00000164506.13_STXBP5    | ENSG00000160789.18_LMNA | -0.20289 | -0.350758647 | -0.04514485 | 1.22E-02 | 7.56E-02 | 1.00E+00 |
| ENSG00000204241.6_RP11-713P  | ENSG00000160789.18_LMNA | -0.44062 | -0.560499363 | -0.30264431 | 1.34E-08 | 1.38E-06 | 6.88E-04 |
| ENSG00000165810.15_BTNL9     | ENSG00000160789.18_LMNA | -0.2242  | -0.370191616 | -0.06740973 | 5.49E-03 | 4.20E-02 | 1.00E+00 |
| ENSG00000197415.10_VEPH1     | ENSG00000160789.18_LMNA | -0.37696 | -0.505810167 | -0.23166701 | 1.69E-06 | 7.03E-05 | 8.69E-02 |
| ENSG00000169507.8_SLC38A11   | ENSG00000160789.18_LMNA | -0.087   | -0.242837023 | 0.073215046 | 2.87E-01 | 5.72E-01 | 1.00E+00 |
| ENSG00000158987.18_RAPGEF6   | ENSG00000160789.18_LMNA | -0.36038 | -0.491388303 | -0.2134239  | 5.10E-06 | 1.69E-04 | 2.62E-01 |
| ENSG00000206561.11_COLQ      | ENSG00000160789.18_LMNA | -0.29396 | -0.432898013 | -0.14137127 | 2.37E-04 | 3.74E-03 | 1.00E+00 |
| ENSG00000247982.5_LINC00926  | ENSG00000160789.18_LMNA | 0.00816  | -0.151238096 | 0.167142649 | 9.21E-01 | 9.70E-01 | 1.00E+00 |
| ENSG00000146856.13_AGBL3     | ENSG00000160789.18_LMNA | -0.17147 | -0.32188643  | -0.01261648 | 3.47E-02 | 1.57E-01 | 1.00E+00 |
| ENSG00000260267.1_RP11-452L  | ENSG00000160789.18_LMNA | 0.16568  | 0.006654845  | 0.316531758 | 4.14E-02 | 1.77E-01 | 1.00E+00 |
| ENSG00000180096.10_SEPT1     | ENSG00000160789.18_LMNA | 0.24377  | 0.087981128  | 0.387914017 | 2.48E-03 | 2.30E-02 | 1.00E+00 |
| ENSG00000153930.9_ANKFN1     | ENSG00000160789.18_LMNA | -0.09744 | -0.252718781 | 0.062735556 | 2.32E-01 | 5.10E-01 | 1.00E+00 |
| ENSG00000144668.10_ITGA9     | ENSG00000160789.18_LMNA | -0.06703 | -0.223843736 | 0.093163109 | 4.12E-01 | 6.86E-01 | 1.00E+00 |
| ENSG00000180881.18_CAPS2     | ENSG00000160789.18_LMNA | -0.24395 | -0.388079878 | -0.08817487 | 2.46E-03 | 2.29E-02 | 1.00E+00 |
| ENSG00000235115.3_CHCHD2P8   | ENSG00000160789.18_LMNA | -0.04612 | -0.203827222 | 0.113913963 | 5.73E-01 | 8.00E-01 | 1.00E+00 |
| ENSG00000241923.2_RPL14P3    | ENSG00000160789.18_LMNA | -0.15443 | -0.306103684 | 0.004892399 | 5.75E-02 | 2.19E-01 | 1.00E+00 |
| ENSG00000177425.9_PAWR       | ENSG00000160789.18_LMNA | 0.00918  | -0.150235542 | 0.168139682 | 9.11E-01 | 9.66E-01 | 1.00E+00 |
| ENSG00000233225.3_AC004987.1 | ENSG00000160789.18_LMNA | -0.11804 | -0.272127898 | 0.041947912 | 1.48E-01 | 3.94E-01 | 1.00E+00 |
| ENSG00000253854.1_RP11-10N2  | ENSG00000160789.18_LMNA | 0.01097  | -0.148491304 | 0.169872763 | 8.93E-01 | 9.58E-01 | 1.00E+00 |
| ENSG00000177692.10_DNAJC28   | ENSG00000160789.18_LMNA | -0.19009 | -0.339031789 | -0.03185438 | 1.90E-02 | 1.04E-01 | 1.00E+00 |
| ENSG00000225400.1_RAB28P5    | ENSG00000160789.18_LMNA | -0.19462 | -0.343190201 | -0.03655486 | 1.63E-02 | 9.31E-02 | 1.00E+00 |
| ENSG00000266405.3_CBX3P2     | ENSG00000160789.18_LMNA | -0.02423 | -0.18272753  | 0.135491652 | 7.67E-01 | 9.03E-01 | 1.00E+00 |
| ENSG00000213026.4_CFL1P4     | ENSG00000160789.18_LMNA | 0.04663  | -0.113417111 | 0.204309616 | 5.68E-01 | 7.98E-01 | 1.00E+00 |
| ENSG00000204839.7_MROH6      | ENSG00000160789.18_LMNA | 0.35199  | 0.204238663  | 0.48406887  | 8.71E-06 | 2.60E-04 | 4.47E-01 |
| ENSG00000274349.3_ZNF658     | ENSG00000160789.18_LMNA | -0.03161 | -0.189858323 | 0.12823293  | 6.99E-01 | 8.71E-01 | 1.00E+00 |
| ENSG00000183208.11_GDPGP1    | ENSG00000160789.18_LMNA | 0.02529  | -0.134455831 | 0.183747147 | 7.57E-01 | 8.99E-01 | 1.00E+00 |
| ENSG00000146350.12_TBC1D32   | ENSG00000160789.18_LMNA | -0.24548 | -0.3894606   | -0.08978856 | 2.30E-03 | 2.18E-02 | 1.00E+00 |
| ENSG00000231050.1_RP1-140A9  | ENSG00000160789.18_LMNA | -0.11167 | -0.2661423   | 0.048387765 | 1.71E-01 | 4.30E-01 | 1.00E+00 |
| ENSG00000196218.10_RYR1      | ENSG00000160789.18_LMNA | -0.21432 | -0.361196819 | -0.05706652 | 8.02E-03 | 5.57E-02 | 1.00E+00 |
| ENSG00000255435.5_RP11-770J  | ENSG00000160789.18_LMNA | -0.23576 | -0.380674354 | -0.07954662 | 3.46E-03 | 2.97E-02 | 1.00E+00 |
| ENSG00000213066.10_FGFR1OP   | ENSG00000160789.18_LMNA | -0.05911 | -0.216271716 | 0.10104544  | 4.69E-01 | 7.30E-01 | 1.00E+00 |

|                              |                         |          |              |             |          |          |          |
|------------------------------|-------------------------|----------|--------------|-------------|----------|----------|----------|
| ENSG00000180089.5_TMEM86B    | ENSG00000160789.18_LMNA | 0.26398  | 0.10937469   | 0.406112429 | 1.02E-03 | 1.17E-02 | 1.00E+00 |
| ENSG00000178965.12_ERICH3    | ENSG00000160789.18_LMNA | 0.10516  | -0.054961922 | 0.26000675  | 1.97E-01 | 4.67E-01 | 1.00E+00 |
| ENSG00000185513.13_L3MBTL1   | ENSG00000160789.18_LMNA | -0.12675 | -0.280293219 | 0.03312063  | 1.20E-01 | 3.48E-01 | 1.00E+00 |
| ENSG00000102287.15_GABRE     | ENSG00000160789.18_LMNA | -0.07461 | -0.231068077 | 0.085605479 | 3.61E-01 | 6.43E-01 | 1.00E+00 |
| ENSG00000235272.1_FAM103A2I  | ENSG00000160789.18_LMNA | 0.08233  | -0.077889634 | 0.238407808 | 3.13E-01 | 6.00E-01 | 1.00E+00 |
| ENSG00000280047.1_CTC-463A1  | ENSG00000160789.18_LMNA | -0.09245 | -0.24799859  | 0.067749957 | 2.57E-01 | 5.40E-01 | 1.00E+00 |
| ENSG00000188227.11_ZNF793    | ENSG00000160789.18_LMNA | -0.12044 | -0.274381963 | 0.039516    | 1.39E-01 | 3.81E-01 | 1.00E+00 |
| ENSG00000196110.6_ZNF699     | ENSG00000160789.18_LMNA | -0.03789 | -0.195906261 | 0.122049665 | 6.43E-01 | 8.41E-01 | 1.00E+00 |
| ENSG00000224376.1_AC017104.1 | ENSG00000160789.18_LMNA | -0.01136 | -0.170256022 | 0.148105311 | 8.89E-01 | 9.57E-01 | 1.00E+00 |
| ENSG00000256894.1_RP11-283G  | ENSG00000160789.18_LMNA | 0.19321  | 0.035086498  | 0.341892464 | 1.71E-02 | 9.64E-02 | 1.00E+00 |
| ENSG00000197245.4_FAM110D    | ENSG00000160789.18_LMNA | 0.02567  | -0.134077253 | 0.184119633 | 7.54E-01 | 8.98E-01 | 1.00E+00 |
| ENSG00000161647.17_MPP3      | ENSG00000160789.18_LMNA | 0.12069  | -0.039263704 | 0.274615611 | 1.39E-01 | 3.79E-01 | 1.00E+00 |
| ENSG00000180884.9_ZNF792     | ENSG00000160789.18_LMNA | -0.03248 | -0.19069364  | 0.127380392 | 6.91E-01 | 8.67E-01 | 1.00E+00 |
| ENSG00000235652.6_RP11-545I5 | ENSG00000160789.18_LMNA | -0.2339  | -0.378986779 | -0.0775867  | 3.73E-03 | 3.15E-02 | 1.00E+00 |
| ENSG00000253320.4_AZIN1-AS1  | ENSG00000160789.18_LMNA | -0.20025 | -0.348347054 | -0.04240284 | 1.34E-02 | 8.07E-02 | 1.00E+00 |
| ENSG00000230630.2_DNM3OS     | ENSG00000160789.18_LMNA | 0.07136  | -0.088849364 | 0.227971518 | 3.82E-01 | 6.61E-01 | 1.00E+00 |
| ENSG00000113971.17_NPHP3     | ENSG00000160789.18_LMNA | 0.03495  | -0.12495049  | 0.193071933 | 6.69E-01 | 8.54E-01 | 1.00E+00 |
| ENSG00000237943.5_PRKCQ-AS   | ENSG00000160789.18_LMNA | -0.2649  | -0.406935829 | -0.1103492  | 9.74E-04 | 1.14E-02 | 1.00E+00 |
| ENSG00000269416.4_LINC01224  | ENSG00000160789.18_LMNA | -0.13123 | -0.284490294 | 0.028564191 | 1.07E-01 | 3.25E-01 | 1.00E+00 |
| ENSG00000198851.8_CD3E       | ENSG00000160789.18_LMNA | 0.08694  | -0.073277481 | 0.242777952 | 2.87E-01 | 5.72E-01 | 1.00E+00 |
| ENSG00000184349.11_EFNA5     | ENSG00000160789.18_LMNA | 0.07093  | -0.089276613 | 0.227563195 | 3.85E-01 | 6.64E-01 | 1.00E+00 |
| ENSG00000129595.11_EPB41L4   | ENSG00000160789.18_LMNA | -0.09976 | -0.254912868 | 0.060399276 | 2.21E-01 | 4.97E-01 | 1.00E+00 |
| ENSG00000279265.1_AC000123.1 | ENSG00000160789.18_LMNA | 0.13927  | -0.020379043 | 0.291999865 | 8.70E-02 | 2.87E-01 | 1.00E+00 |
| ENSG00000162409.9_PRKAA2     | ENSG00000160789.18_LMNA | -0.0666  | -0.22342752  | 0.093597416 | 4.15E-01 | 6.88E-01 | 1.00E+00 |
| ENSG00000255121.2_RP11-110I1 | ENSG00000160789.18_LMNA | 0.09987  | -0.060288131 | 0.255017168 | 2.21E-01 | 4.96E-01 | 1.00E+00 |
| ENSG00000185869.12_ZNF829    | ENSG00000160789.18_LMNA | -0.06152 | -0.218576593 | 0.098650316 | 4.52E-01 | 7.17E-01 | 1.00E+00 |
| ENSG00000242970.2_AC068522.1 | ENSG00000160789.18_LMNA | -0.24309 | -0.387305197 | -0.08727017 | 2.55E-03 | 2.35E-02 | 1.00E+00 |
| ENSG00000236762.1_RPL19P16   | ENSG00000160789.18_LMNA | -0.13176 | -0.284982731 | 0.028028736 | 1.06E-01 | 3.23E-01 | 1.00E+00 |
| ENSG00000152669.8_CCNO       | ENSG00000160789.18_LMNA | 0.17172  | 0.012874585  | 0.322117808 | 3.44E-02 | 1.57E-01 | 1.00E+00 |
| ENSG00000218537.1_MIF-AS1    | ENSG00000160789.18_LMNA | -0.00554 | -0.164600165 | 0.153791698 | 9.46E-01 | 9.78E-01 | 1.00E+00 |
| ENSG00000162959.12_MEMO1     | ENSG00000160789.18_LMNA | -0.32083 | -0.456704064 | -0.17032926 | 5.58E-05 | 1.17E-03 | 1.00E+00 |
| ENSG00000259953.1_RP11-4O1.1 | ENSG00000160789.18_LMNA | -0.16276 | -0.31382636  | -0.00365114 | 4.51E-02 | 1.88E-01 | 1.00E+00 |
| ENSG00000130684.12_ZNF337    | ENSG00000160789.18_LMNA | 0.16047  | 0.00130114   | 0.311706234 | 4.83E-02 | 1.97E-01 | 1.00E+00 |

|                               |                         |          |              |             |          |          |          |
|-------------------------------|-------------------------|----------|--------------|-------------|----------|----------|----------|
| ENSG00000240392.1_RPL9P3      | ENSG00000160789.18_LMNA | -0.13434 | -0.287395021 | 0.025403119 | 9.89E-02 | 3.10E-01 | 1.00E+00 |
| ENSG00000170396.7_ZNF804A     | ENSG00000160789.18_LMNA | -0.42393 | -0.546266783 | -0.28389337 | 5.26E-08 | 4.26E-06 | 2.70E-03 |
| ENSG00000182327.7_GLTPD2      | ENSG00000160789.18_LMNA | 0.01934  | -0.140295329 | 0.177990032 | 8.13E-01 | 9.26E-01 | 1.00E+00 |
| ENSG00000151575.13_TEX9       | ENSG00000160789.18_LMNA | 0.04342  | -0.116585134 | 0.201231134 | 5.95E-01 | 8.13E-01 | 1.00E+00 |
| ENSG00000196466.9_ZNF799      | ENSG00000160789.18_LMNA | -0.24928 | -0.392889329 | -0.09380262 | 1.95E-03 | 1.92E-02 | 1.00E+00 |
| ENSG00000112419.13_PHACTR2    | ENSG00000160789.18_LMNA | 0.18524  | 0.026826447  | 0.334570364 | 2.23E-02 | 1.17E-01 | 1.00E+00 |
| ENSG00000039068.17_CDH1       | ENSG00000160789.18_LMNA | -0.13897 | -0.291718784 | 0.020686166 | 8.77E-02 | 2.88E-01 | 1.00E+00 |
| ENSG000000272871.1_RP11-408A  | ENSG00000160789.18_LMNA | -0.05945 | -0.216602401 | 0.100702032 | 4.67E-01 | 7.28E-01 | 1.00E+00 |
| ENSG000000269952.1_RP11-324I2 | ENSG00000160789.18_LMNA | -0.03025 | -0.188539676 | 0.129577808 | 7.11E-01 | 8.77E-01 | 1.00E+00 |
| ENSG000000111877.16_MCM9      | ENSG00000160789.18_LMNA | -0.08131 | -0.237439972 | 0.078909239 | 3.19E-01 | 6.06E-01 | 1.00E+00 |
| ENSG000000161328.10_LRRC56    | ENSG00000160789.18_LMNA | 0.28539  | 0.132195081  | 0.425268557 | 3.65E-04 | 5.24E-03 | 1.00E+00 |
| ENSG000000123892.10_RAB38     | ENSG00000160789.18_LMNA | 0.2474   | 0.091811809  | 0.391189861 | 2.12E-03 | 2.04E-02 | 1.00E+00 |
| ENSG000000187566.4_NHLRC1     | ENSG00000160789.18_LMNA | -0.16474 | -0.315665783 | -0.00569277 | 4.25E-02 | 1.81E-01 | 1.00E+00 |
| ENSG000000181195.9_PENK       | ENSG00000160789.18_LMNA | 0.02284  | -0.136855649 | 0.181383824 | 7.80E-01 | 9.10E-01 | 1.00E+00 |
| ENSG000000223345.3_HIST2H2BA  | ENSG00000160789.18_LMNA | 0.00051  | -0.15870653  | 0.159694794 | 9.95E-01 | 9.98E-01 | 1.00E+00 |
| ENSG000000187323.10_DCC       | ENSG00000160789.18_LMNA | -0.37146 | -0.501035309 | -0.22560557 | 2.46E-06 | 9.34E-05 | 1.26E-01 |
| ENSG000000186496.9_ZNF396     | ENSG00000160789.18_LMNA | -0.1592  | -0.310531923 | -9.81E-07   | 5.01E-02 | 2.02E-01 | 1.00E+00 |
| ENSG000000072858.9_SIDT1      | ENSG00000160789.18_LMNA | -0.35088 | -0.483091081 | -0.20301534 | 9.34E-06 | 2.76E-04 | 4.79E-01 |
| ENSG000000164406.7_LEAP2      | ENSG00000160789.18_LMNA | -0.1197  | -0.27368251  | 0.040271039 | 1.42E-01 | 3.85E-01 | 1.00E+00 |
| ENSG000000161509.12_GRIN2C    | ENSG00000160789.18_LMNA | -0.29836 | -0.436815191 | -0.14610213 | 1.89E-04 | 3.12E-03 | 1.00E+00 |
| ENSG000000138356.12_AOX1      | ENSG00000160789.18_LMNA | -0.03018 | -0.18847928  | 0.129639377 | 7.12E-01 | 8.78E-01 | 1.00E+00 |
| ENSG000000198468.6_FLVCR1-AS1 | ENSG00000160789.18_LMNA | -0.15763 | -0.30907467  | 0.001610985 | 5.24E-02 | 2.07E-01 | 1.00E+00 |
| ENSG000000257576.1_HSPD1P4    | ENSG00000160789.18_LMNA | 0.07373  | -0.086487649 | 0.230226607 | 3.67E-01 | 6.48E-01 | 1.00E+00 |
| ENSG000000229729.5_           | ENSG00000160789.18_LMNA | 0.0363   | -0.123612426 | 0.194379983 | 6.57E-01 | 8.48E-01 | 1.00E+00 |
| ENSG000000180385.7 EMC3-AS1   | ENSG00000160789.18_LMNA | 0.05532  | -0.104799637 | 0.212651844 | 4.98E-01 | 7.52E-01 | 1.00E+00 |
| ENSG000000135378.3_PRRG4      | ENSG00000160789.18_LMNA | -0.10559 | -0.260409074 | 0.054531672 | 1.95E-01 | 4.64E-01 | 1.00E+00 |
| ENSG000000156787.15_TBC1D31   | ENSG00000160789.18_LMNA | -0.12569 | -0.279304323 | 0.034192304 | 1.23E-01 | 3.53E-01 | 1.00E+00 |
| ENSG000000272240.1_RP5-855D2  | ENSG00000160789.18_LMNA | -0.06283 | -0.219829734 | 0.097346564 | 4.42E-01 | 7.09E-01 | 1.00E+00 |
| ENSG000000165626.15_BEND7     | ENSG00000160789.18_LMNA | -0.25689 | -0.399742585 | -0.10185507 | 1.40E-03 | 1.49E-02 | 1.00E+00 |
| ENSG000000237886.1_NALT1      | ENSG00000160789.18_LMNA | 0.02241  | -0.137280054 | 0.180965491 | 7.84E-01 | 9.12E-01 | 1.00E+00 |
| ENSG000000135116.8_HRK        | ENSG00000160789.18_LMNA | -0.22429 | -0.370273669 | -0.06750438 | 5.47E-03 | 4.19E-02 | 1.00E+00 |
| ENSG000000225234.1_TRAPPC12   | ENSG00000160789.18_LMNA | 0.00256  | -0.156699845 | 0.161699518 | 9.75E-01 | 9.90E-01 | 1.00E+00 |
| ENSG000000256092.2_RP13-942N  | ENSG00000160789.18_LMNA | -0.03147 | -0.189721783 | 0.128372241 | 7.00E-01 | 8.72E-01 | 1.00E+00 |

|                              |                         |          |              |             |          |          |          |
|------------------------------|-------------------------|----------|--------------|-------------|----------|----------|----------|
| ENSG00000224167.1_RP3-522D1  | ENSG00000160789.18_LMNA | -0.36556 | -0.49589675  | -0.21910616 | 3.64E-06 | 1.29E-04 | 1.87E-01 |
| ENSG00000280255.1_RP5-1007F  | ENSG00000160789.18_LMNA | -0.39828 | -0.524242668 | -0.25526756 | 3.74E-07 | 2.09E-05 | 1.92E-02 |
| ENSG00000215237.6_RP11-54D1  | ENSG00000160789.18_LMNA | -0.04194 | -0.199802328 | 0.118053305 | 6.08E-01 | 8.21E-01 | 1.00E+00 |
| ENSG00000242086.7_LINC00969  | ENSG00000160789.18_LMNA | 0.02369  | -0.136025952 | 0.18220132  | 7.72E-01 | 9.06E-01 | 1.00E+00 |
| ENSG00000213047.10_DENND1E   | ENSG00000160789.18_LMNA | -0.23885 | -0.383465035 | -0.08279278 | 3.04E-03 | 2.70E-02 | 1.00E+00 |
| ENSG00000176208.7_ATAD5      | ENSG00000160789.18_LMNA | -0.105   | -0.259858186 | 0.055120768 | 1.98E-01 | 4.68E-01 | 1.00E+00 |
| ENSG00000169891.16_REPS2     | ENSG00000160789.18_LMNA | -0.35426 | -0.486050649 | -0.20672076 | 7.55E-06 | 2.33E-04 | 3.87E-01 |
| ENSG00000272768.1_RP4-673M1  | ENSG00000160789.18_LMNA | 0.2736   | 0.119604012  | 0.414731603 | 6.48E-04 | 8.27E-03 | 1.00E+00 |
| ENSG00000243181.2_RP11-734J  | ENSG00000160789.18_LMNA | -0.24235 | -0.386636142 | -0.08648922 | 2.63E-03 | 2.41E-02 | 1.00E+00 |
| ENSG00000279861.1_RP11-43N1  | ENSG00000160789.18_LMNA | 0.02592  | -0.133830992 | 0.184361881 | 7.51E-01 | 8.96E-01 | 1.00E+00 |
| ENSG00000237977.1	EIF4HP2    | ENSG00000160789.18_LMNA | 0.0006   | -0.158612974 | 0.159788317 | 9.94E-01 | 9.98E-01 | 1.00E+00 |
| ENSG00000254489.1_RP5-1024C  | ENSG00000160789.18_LMNA | -0.18964 | -0.33861519  | -0.03138422 | 1.93E-02 | 1.05E-01 | 1.00E+00 |
| ENSG00000214872.7_SMTNL1     | ENSG00000160789.18_LMNA | -0.06844 | -0.225187139 | 0.091760489 | 4.02E-01 | 6.78E-01 | 1.00E+00 |
| ENSG00000258315.4_C17orf49   | ENSG00000160789.18_LMNA | -0.03557 | -0.193677024 | 0.124331658 | 6.63E-01 | 8.52E-01 | 1.00E+00 |
| ENSG00000196369.9_SRGP2B     | ENSG00000160789.18_LMNA | 0.03373  | -0.126150053 | 0.191898314 | 6.80E-01 | 8.60E-01 | 1.00E+00 |
| ENSG00000168811.5_IL12A      | ENSG00000160789.18_LMNA | 0.00671  | -0.1526573   | 0.165730146 | 9.35E-01 | 9.74E-01 | 1.00E+00 |
| ENSG00000100450.11_GZMH      | ENSG00000160789.18_LMNA | 0.09706  | -0.063115139 | 0.252361994 | 2.34E-01 | 5.12E-01 | 1.00E+00 |
| ENSG00000130812.9_ANGPTL6    | ENSG00000160789.18_LMNA | -0.14914 | -0.301191101 | 0.010303626 | 6.67E-02 | 2.42E-01 | 1.00E+00 |
| ENSG00000236197.2_AC002429.1 | ENSG00000160789.18_LMNA | -0.36242 | -0.493164424 | -0.21566021 | 4.47E-06 | 1.52E-04 | 2.29E-01 |
| ENSG00000188985.6_DHFRP1     | ENSG00000160789.18_LMNA | 0.02071  | -0.138952792 | 0.17931556  | 8.00E-01 | 9.20E-01 | 1.00E+00 |
| ENSG00000171817.15_ZNF540    | ENSG00000160789.18_LMNA | -0.43225 | -0.55337088  | -0.29322776 | 2.69E-08 | 2.48E-06 | 1.38E-03 |
| ENSG00000270230.1_MTND6P22   | ENSG00000160789.18_LMNA | -0.09177 | -0.247353167 | 0.068434371 | 2.61E-01 | 5.44E-01 | 1.00E+00 |
| ENSG00000268543.1_CTD-2619J  | ENSG00000160789.18_LMNA | 0.06559  | -0.09459373  | 0.222472272 | 4.22E-01 | 6.93E-01 | 1.00E+00 |
| ENSG00000136492.7_BRIP1      | ENSG00000160789.18_LMNA | 0.0308   | -0.129032036 | 0.189074942 | 7.06E-01 | 8.75E-01 | 1.00E+00 |
| ENSG00000237730.1_RP11-459A  | ENSG00000160789.18_LMNA | -0.10605 | -0.260848178 | 0.054061957 | 1.93E-01 | 4.62E-01 | 1.00E+00 |
| ENSG00000249930.1_AC007016.1 | ENSG00000160789.18_LMNA | 0.27663  | 0.122834919  | 0.417442988 | 5.61E-04 | 7.37E-03 | 1.00E+00 |
| ENSG00000213857.3_RP11-12M9  | ENSG00000160789.18_LMNA | 0.27164  | 0.117520033  | 0.412979938 | 7.11E-04 | 8.88E-03 | 1.00E+00 |
| ENSG00000260372.5_AQP4-AS1   | ENSG00000160789.18_LMNA | -0.28835 | -0.427904624 | -0.13535989 | 3.15E-04 | 4.68E-03 | 1.00E+00 |
| ENSG00000214176.8_PLEKHM1F   | ENSG00000160789.18_LMNA | 0.10166  | -0.058485886 | 0.256707389 | 2.13E-01 | 4.86E-01 | 1.00E+00 |
| ENSG00000155367.14_PPM1J     | ENSG00000160789.18_LMNA | 0.31723  | 0.166438343  | 0.453529061 | 6.83E-05 | 1.38E-03 | 1.00E+00 |
| ENSG00000269399.2_CTD-3222D  | ENSG00000160789.18_LMNA | -0.13652 | -0.289430561 | 0.023184207 | 9.35E-02 | 2.99E-01 | 1.00E+00 |
| ENSG00000259420.4_RP11-307C  | ENSG00000160789.18_LMNA | -0.3374  | -0.471282878 | -0.18831073 | 2.13E-05 | 5.45E-04 | 1.00E+00 |
| ENSG00000118690.11_ARMC2     | ENSG00000160789.18_LMNA | -0.02987 | -0.188171854 | 0.129952738 | 7.15E-01 | 8.79E-01 | 1.00E+00 |



|                              |                         |          |              |             |          |          |          |
|------------------------------|-------------------------|----------|--------------|-------------|----------|----------|----------|
| ENSG00000127080.8_IPPK       | ENSG00000160789.18_LMNA | 0.21901  | 0.061967719  | 0.365466128 | 6.71E-03 | 4.88E-02 | 1.00E+00 |
| ENSG00000214203.4_RPS4XP1    | ENSG00000160789.18_LMNA | 0.01899  | -0.140638484 | 0.177651039 | 8.16E-01 | 9.28E-01 | 1.00E+00 |
| ENSG00000148604.12_RGR       | ENSG00000160789.18_LMNA | -0.36104 | -0.491965258 | -0.21415002 | 4.89E-06 | 1.63E-04 | 2.51E-01 |
| ENSG00000129465.14_RIPK3     | ENSG00000160789.18_LMNA | -0.01631 | -0.175055656 | 0.143263199 | 8.42E-01 | 9.38E-01 | 1.00E+00 |
| ENSG00000204311.10_DFNB59    | ENSG00000160789.18_LMNA | -0.14609 | -0.298354487 | 0.01341988  | 7.25E-02 | 2.55E-01 | 1.00E+00 |
| ENSG00000259070.4_LINC00639  | ENSG00000160789.18_LMNA | 0.15574  | -0.003544608 | 0.307324705 | 5.54E-02 | 2.15E-01 | 1.00E+00 |
| ENSG00000271743.1_CTD-2541M  | ENSG00000160789.18_LMNA | -0.1977  | -0.346009465 | -0.03974937 | 1.46E-02 | 8.63E-02 | 1.00E+00 |
| ENSG00000242110.6_AMACR      | ENSG00000160789.18_LMNA | -0.05591 | -0.21321191  | 0.104219379 | 4.94E-01 | 7.49E-01 | 1.00E+00 |
| ENSG00000244485.1_RPL18P13   | ENSG00000160789.18_LMNA | -0.01636 | -0.175102435 | 0.143215931 | 8.41E-01 | 9.38E-01 | 1.00E+00 |
| ENSG00000228071.4_RPL7P47    | ENSG00000160789.18_LMNA | -0.06869 | -0.225423216 | 0.091513875 | 4.00E-01 | 6.77E-01 | 1.00E+00 |
| ENSG00000162482.4_AKR7A3     | ENSG00000160789.18_LMNA | 0.02943  | -0.130377522 | 0.187755015 | 7.19E-01 | 8.81E-01 | 1.00E+00 |
| ENSG00000187808.4_SOWAHD     | ENSG00000160789.18_LMNA | -0.12291 | -0.276695028 | 0.03701656  | 1.31E-01 | 3.68E-01 | 1.00E+00 |
| ENSG00000240747.6_KRBOX1     | ENSG00000160789.18_LMNA | -0.12719 | -0.280705854 | 0.032673241 | 1.18E-01 | 3.45E-01 | 1.00E+00 |
| ENSG00000260686.1_CTB-36H16  | ENSG00000160789.18_LMNA | -0.46098 | -0.577779519 | -0.32568182 | 2.28E-09 | 3.10E-07 | 1.17E-04 |
| ENSG00000149295.12_DRD2      | ENSG00000160789.18_LMNA | -0.13318 | -0.286313387 | 0.02658094  | 1.02E-01 | 3.15E-01 | 1.00E+00 |
| ENSG00000232310.5_RP11-557H  | ENSG00000160789.18_LMNA | -0.34595 | -0.478777819 | -0.19762941 | 1.27E-05 | 3.55E-04 | 6.51E-01 |
| ENSG00000121236.18_TRIM6     | ENSG00000160789.18_LMNA | 0.11443  | -0.045605834 | 0.268730978 | 1.60E-01 | 4.14E-01 | 1.00E+00 |
| ENSG00000019485.11_PRDM11    | ENSG00000160789.18_LMNA | -0.19183 | -0.34062752  | -0.03365651 | 1.79E-02 | 9.97E-02 | 1.00E+00 |
| ENSG00000137868.17_STRAT6    | ENSG00000160789.18_LMNA | 0.26882  | 0.114524196  | 0.410457985 | 8.12E-04 | 9.83E-03 | 1.00E+00 |
| ENSG00000268061.4_NAPA-AS1   | ENSG00000160789.18_LMNA | -0.25022 | -0.393733004 | -0.09479181 | 1.88E-03 | 1.86E-02 | 1.00E+00 |
| ENSG00000214855.8_APOC1P1    | ENSG00000160789.18_LMNA | -0.2879  | -0.427502439 | -0.13487665 | 3.22E-04 | 4.76E-03 | 1.00E+00 |
| ENSG00000158555.13_GDPD5     | ENSG00000160789.18_LMNA | 0.0178   | -0.141799173 | 0.176503867 | 8.28E-01 | 9.33E-01 | 1.00E+00 |
| ENSG00000169989.2_TIGD4      | ENSG00000160789.18_LMNA | -0.0847  | -0.240657932 | 0.075516593 | 2.99E-01 | 5.86E-01 | 1.00E+00 |
| ENSG00000264456.1_RP11-848P  | ENSG00000160789.18_LMNA | 0.05528  | -0.10484771  | 0.212605434 | 4.99E-01 | 7.52E-01 | 1.00E+00 |
| ENSG00000230825.1_AC005532.1 | ENSG00000160789.18_LMNA | -0.12599 | -0.27958025  | 0.033893351 | 1.22E-01 | 3.52E-01 | 1.00E+00 |
| ENSG00000161653.9_NAGS       | ENSG00000160789.18_LMNA | 0.08677  | -0.073445501 | 0.242618973 | 2.88E-01 | 5.73E-01 | 1.00E+00 |
| ENSG00000104369.4_JPH1       | ENSG00000160789.18_LMNA | 0.26431  | 0.109728463  | 0.4064114   | 1.00E-03 | 1.16E-02 | 1.00E+00 |
| ENSG00000188305.5_C19orf35   | ENSG00000160789.18_LMNA | 0.05112  | -0.108969424 | 0.208621012 | 5.32E-01 | 7.74E-01 | 1.00E+00 |
| ENSG00000256690.1_RP11-727F  | ENSG00000160789.18_LMNA | 0.08347  | -0.076747346 | 0.239491353 | 3.07E-01 | 5.93E-01 | 1.00E+00 |
| ENSG00000258559.2_AC005519.4 | ENSG00000160789.18_LMNA | -0.04537 | -0.203104052 | 0.11465851  | 5.79E-01 | 8.04E-01 | 1.00E+00 |
| ENSG00000269921.1_RP11-6461C | ENSG00000160789.18_LMNA | -0.14874 | -0.300818545 | 0.010713255 | 6.74E-02 | 2.43E-01 | 1.00E+00 |
| ENSG00000259137.1_RP11-305B  | ENSG00000160789.18_LMNA | -0.13521 | -0.288207929 | 0.02451735  | 9.67E-02 | 3.05E-01 | 1.00E+00 |
| ENSG00000165959.10_CLMN      | ENSG00000160789.18_LMNA | 0.16751  | 0.008533859  | 0.3182216   | 3.91E-02 | 1.71E-01 | 1.00E+00 |

|                              |                         |          |              |             |          |          |          |
|------------------------------|-------------------------|----------|--------------|-------------|----------|----------|----------|
| ENSG00000124813.19_RUNX2     | ENSG00000160789.18_LMNA | 0.16834  | 0.009386713  | 0.318987943 | 3.82E-02 | 1.68E-01 | 1.00E+00 |
| ENSG00000121207.10_LRAT      | ENSG00000160789.18_LMNA | 0.21125  | 0.053864663  | 0.358400855 | 8.99E-03 | 6.07E-02 | 1.00E+00 |
| ENSG00000173406.14_DAB1      | ENSG00000160789.18_LMNA | -0.21735 | -0.363957885 | -0.06023457 | 7.15E-03 | 5.12E-02 | 1.00E+00 |
| ENSG00000224424.7_PRKAR2A-   | ENSG00000160789.18_LMNA | -0.12049 | -0.274422287 | 0.039472461 | 1.39E-01 | 3.81E-01 | 1.00E+00 |
| ENSG00000254944.1_ATP5F1P5   | ENSG00000160789.18_LMNA | 0.07824  | -0.08198452  | 0.234517024 | 3.38E-01 | 6.24E-01 | 1.00E+00 |
| ENSG00000076770.13_MBNL3     | ENSG00000160789.18_LMNA | -0.07276 | -0.229307985 | 0.087450135 | 3.73E-01 | 6.53E-01 | 1.00E+00 |
| ENSG00000116254.16_CHD5      | ENSG00000160789.18_LMNA | -0.08846 | -0.244219478 | 0.071753155 | 2.78E-01 | 5.64E-01 | 1.00E+00 |
| ENSG00000165028.10_NIPSNAP   | ENSG00000160789.18_LMNA | -0.2088  | -0.356160923 | -0.05130407 | 9.84E-03 | 6.48E-02 | 1.00E+00 |
| ENSG00000230721.1_RP4-612B1  | ENSG00000160789.18_LMNA | -0.10512 | -0.259973752 | 0.054997205 | 1.97E-01 | 4.67E-01 | 1.00E+00 |
| ENSG00000250132.5_RP11-359B  | ENSG00000160789.18_LMNA | -0.31891 | -0.455007886 | -0.16824951 | 6.22E-05 | 1.28E-03 | 1.00E+00 |
| ENSG00000185483.10_ROR1      | ENSG00000160789.18_LMNA | 0.23377  | 0.077450816  | 0.378869703 | 3.75E-03 | 3.16E-02 | 1.00E+00 |
| ENSG00000153563.14_CD8A      | ENSG00000160789.18_LMNA | 0.04508  | -0.114943156 | 0.202827487 | 5.81E-01 | 8.05E-01 | 1.00E+00 |
| ENSG00000188868.12_ZNF563    | ENSG00000160789.18_LMNA | -0.03646 | -0.194526908 | 0.123462058 | 6.56E-01 | 8.48E-01 | 1.00E+00 |
| ENSG00000225313.4_RP11-415J  | ENSG00000160789.18_LMNA | 0.19316  | 0.035040594  | 0.341851875 | 1.71E-02 | 9.65E-02 | 1.00E+00 |
| ENSG00000249489.1_GAPDHP7C   | ENSG00000160789.18_LMNA | 0.23151  | 0.075079329  | 0.376824896 | 4.11E-03 | 3.38E-02 | 1.00E+00 |
| ENSG00000227337.1_RPL23AP4   | ENSG00000160789.18_LMNA | -0.06712 | -0.223932138 | 0.093070848 | 4.11E-01 | 6.85E-01 | 1.00E+00 |
| ENSG00000226314.6_ZNF192P1   | ENSG00000160789.18_LMNA | -0.29102 | -0.430288427 | -0.13822699 | 2.75E-04 | 4.20E-03 | 1.00E+00 |
| ENSG00000071205.10_ARHGAP1   | ENSG00000160789.18_LMNA | 0.08736  | -0.072851982 | 0.243180479 | 2.85E-01 | 5.70E-01 | 1.00E+00 |
| ENSG00000254614.2_AP003068.1 | ENSG00000160789.18_LMNA | 0.13225  | -0.027532869 | 0.285438614 | 1.04E-01 | 3.20E-01 | 1.00E+00 |
| ENSG00000259705.1_RP11-227D  | ENSG00000160789.18_LMNA | 0.05972  | -0.100438356 | 0.21685626  | 4.65E-01 | 7.27E-01 | 1.00E+00 |
| ENSG00000187860.9_CCDC157    | ENSG00000160789.18_LMNA | -0.13204 | -0.285240401 | 0.027748485 | 1.05E-01 | 3.21E-01 | 1.00E+00 |
| ENSG00000233406.5_RP11-296A  | ENSG00000160789.18_LMNA | 0.07156  | -0.088648697 | 0.228163257 | 3.81E-01 | 6.60E-01 | 1.00E+00 |
| ENSG00000090554.11_FLT3LG    | ENSG00000160789.18_LMNA | 0.32059  | 0.17006394   | 0.456487796 | 5.66E-05 | 1.19E-03 | 1.00E+00 |
| ENSG00000149922.9_TBX6       | ENSG00000160789.18_LMNA | 0.16729  | 0.008310405  | 0.318020745 | 3.94E-02 | 1.72E-01 | 1.00E+00 |
| ENSG00000239223.3_RPL34P31   | ENSG00000160789.18_LMNA | -0.1     | -0.255141838 | 0.060155269 | 2.20E-01 | 4.95E-01 | 1.00E+00 |
| ENSG00000267547.1_RP11-686D  | ENSG00000160789.18_LMNA | 0.07511  | -0.085107165 | 0.231543192 | 3.58E-01 | 6.41E-01 | 1.00E+00 |
| ENSG00000241170.2_RP11-147I3 | ENSG00000160789.18_LMNA | -0.16358 | -0.314586932 | -0.00449501 | 4.40E-02 | 1.85E-01 | 1.00E+00 |
| ENSG00000226754.1_RP5-1024G  | ENSG00000160789.18_LMNA | -0.04556 | -0.203288812 | 0.114468322 | 5.77E-01 | 8.03E-01 | 1.00E+00 |
| ENSG00000267034.1_RP11-384O  | ENSG00000160789.18_LMNA | -0.38126 | -0.509533022 | -0.2364078  | 1.26E-06 | 5.56E-05 | 6.46E-02 |
| ENSG00000234031.1_RPS3AP44   | ENSG00000160789.18_LMNA | -0.1312  | -0.284461624 | 0.02859536  | 1.07E-01 | 3.25E-01 | 1.00E+00 |
| ENSG00000144406.17_UNC80     | ENSG00000160789.18_LMNA | -0.31034 | -0.44743482  | -0.15899492 | 9.98E-05 | 1.88E-03 | 1.00E+00 |
| ENSG00000153976.2_HS3ST3A1   | ENSG00000160789.18_LMNA | 0.22923  | 0.072685312  | 0.374757676 | 4.50E-03 | 3.63E-02 | 1.00E+00 |
| ENSG00000240291.1_RP11-499P  | ENSG00000160789.18_LMNA | -0.32573 | -0.461023841 | -0.17563745 | 4.22E-05 | 9.38E-04 | 1.00E+00 |

|                             |                         |          |              |             |          |          |          |
|-----------------------------|-------------------------|----------|--------------|-------------|----------|----------|----------|
| ENSG00000196407.10_THEM5    | ENSG00000160789.18_LMNA | 0.13535  | -0.024375986 | 0.288337623 | 9.64E-02 | 3.05E-01 | 1.00E+00 |
| ENSG00000268941.2_RP5-907D1 | ENSG00000160789.18_LMNA | 0.5308   | 0.40589993   | 0.636236801 | 2.00E-12 | 9.52E-10 | 1.03E-07 |
| ENSG00000136634.5_IL10      | ENSG00000160789.18_LMNA | 0.01684  | -0.142744558 | 0.175568853 | 8.37E-01 | 9.37E-01 | 1.00E+00 |
| ENSG00000160439.14_RDH13    | ENSG00000160789.18_LMNA | 0.21647  | 0.05931285   | 0.363155121 | 7.39E-03 | 5.24E-02 | 1.00E+00 |
| ENSG00000184719.10_RNLS     | ENSG00000160789.18_LMNA | -0.01617 | -0.174916902 | 0.143403395 | 8.43E-01 | 9.39E-01 | 1.00E+00 |
| ENSG00000178343.4_SHISA3    | ENSG00000160789.18_LMNA | -0.30097 | -0.439129728 | -0.14890371 | 1.65E-04 | 2.81E-03 | 1.00E+00 |
| ENSG00000265511.1_RP11-524F | ENSG00000160789.18_LMNA | -0.07129 | -0.227900297 | 0.088923895 | 3.83E-01 | 6.61E-01 | 1.00E+00 |
| ENSG00000001460.16_STPG1    | ENSG00000160789.18_LMNA | 0.25533  | 0.100200682  | 0.398337286 | 1.50E-03 | 1.57E-02 | 1.00E+00 |
| ENSG00000230316.5_FEZF1-AS1 | ENSG00000160789.18_LMNA | 0.08609  | -0.074131333 | 0.24196987  | 2.92E-01 | 5.77E-01 | 1.00E+00 |
| ENSG00000274031.1_RP11-413H | ENSG00000160789.18_LMNA | -0.14224 | -0.29476401  | 0.017355648 | 8.05E-02 | 2.73E-01 | 1.00E+00 |
| ENSG00000189362.10_NEMP2    | ENSG00000160789.18_LMNA | 0.30922  | 0.157788033  | 0.446444163 | 1.06E-04 | 1.98E-03 | 1.00E+00 |
| ENSG00000243660.8_ZNF487    | ENSG00000160789.18_LMNA | -0.02427 | -0.182768857 | 0.135449681 | 7.67E-01 | 9.03E-01 | 1.00E+00 |
| ENSG00000187260.14_WDR86    | ENSG00000160789.18_LMNA | -0.11617 | -0.270368085 | 0.043843992 | 1.54E-01 | 4.05E-01 | 1.00E+00 |
| ENSG00000240371.1_RPS4XP13  | ENSG00000160789.18_LMNA | -0.0256  | -0.184048322 | 0.134149737 | 7.54E-01 | 8.98E-01 | 1.00E+00 |
| ENSG00000223403.3_MEG9      | ENSG00000160789.18_LMNA | 0.11415  | -0.045882286 | 0.268473933 | 1.61E-01 | 4.16E-01 | 1.00E+00 |
| ENSG00000272909.1_CTD-2555C | ENSG00000160789.18_LMNA | 0.02943  | -0.130378848 | 0.187753714 | 7.19E-01 | 8.81E-01 | 1.00E+00 |
| ENSG00000260274.1_RP11-817O | ENSG00000160789.18_LMNA | 0.0408   | -0.119177596 | 0.198707268 | 6.18E-01 | 8.27E-01 | 1.00E+00 |
| ENSG00000128815.16_WDFY4    | ENSG00000160789.18_LMNA | 0.02343  | -0.136281176 | 0.181949896 | 7.75E-01 | 9.07E-01 | 1.00E+00 |
| ENSG00000259088.1_CTD-2017C | ENSG00000160789.18_LMNA | -0.08018 | -0.236364673 | 0.080041279 | 3.26E-01 | 6.13E-01 | 1.00E+00 |
| ENSG00000103184.10_SEC14L5  | ENSG00000160789.18_LMNA | -0.29535 | -0.434134788 | -0.14286351 | 2.21E-04 | 3.52E-03 | 1.00E+00 |
| ENSG00000273136.4_NBPF26    | ENSG00000160789.18_LMNA | 0.20772  | 0.05017867   | 0.355175353 | 1.02E-02 | 6.66E-02 | 1.00E+00 |
| ENSG00000229728.1_RP11-314N | ENSG00000160789.18_LMNA | -0.05775 | -0.214974731 | 0.102391593 | 4.80E-01 | 7.38E-01 | 1.00E+00 |
| ENSG00000237669.1_HCG4P3    | ENSG00000160789.18_LMNA | 0.03578  | -0.124128084 | 0.193876025 | 6.62E-01 | 8.51E-01 | 1.00E+00 |
| ENSG00000168685.13_IL7R     | ENSG00000160789.18_LMNA | 0.15347  | -0.005869518 | 0.30521783  | 5.91E-02 | 2.23E-01 | 1.00E+00 |
| ENSG00000131650.12_KREMEN2  | ENSG00000160789.18_LMNA | -0.11023 | -0.264782085 | 0.049847572 | 1.76E-01 | 4.38E-01 | 1.00E+00 |
| ENSG00000256628.3_ZBTB11-AS | ENSG00000160789.18_LMNA | 0.049    | -0.111064859 | 0.206591324 | 5.49E-01 | 7.86E-01 | 1.00E+00 |
| ENSG00000205085.7_FAM71F2   | ENSG00000160789.18_LMNA | -0.01361 | -0.172436044 | 0.145907885 | 8.68E-01 | 9.48E-01 | 1.00E+00 |
| ENSG00000241043.1_GVQW1     | ENSG00000160789.18_LMNA | -0.11932 | -0.273332726 | 0.040648486 | 1.43E-01 | 3.87E-01 | 1.00E+00 |
| ENSG00000230658.1_KLHL7-AS1 | ENSG00000160789.18_LMNA | -0.22785 | -0.373501559 | -0.07123232 | 4.76E-03 | 3.78E-02 | 1.00E+00 |
| ENSG00000225880.5_LINC00115 | ENSG00000160789.18_LMNA | -0.01624 | -0.17498593  | 0.143333652 | 8.43E-01 | 9.39E-01 | 1.00E+00 |
| ENSG00000102786.13_INTS6    | ENSG00000160789.18_LMNA | -0.05998 | -0.217106893 | 0.100177987 | 4.63E-01 | 7.26E-01 | 1.00E+00 |
| ENSG00000267107.5_PCAT19    | ENSG00000160789.18_LMNA | -0.13947 | -0.292184585 | 0.020177175 | 8.66E-02 | 2.86E-01 | 1.00E+00 |
| ENSG00000260236.1_RP11-708J | ENSG00000160789.18_LMNA | 0.02246  | -0.137234818 | 0.181010085 | 7.84E-01 | 9.11E-01 | 1.00E+00 |

|                             |                         |          |              |             |          |          |          |
|-----------------------------|-------------------------|----------|--------------|-------------|----------|----------|----------|
| ENSG00000260448.4_LCMT1-AS  | ENSG00000160789.18_LMNA | -0.34526 | -0.478177997 | -0.19688176 | 1.32E-05 | 3.67E-04 | 6.79E-01 |
| ENSG00000233859.2_ADH5P4    | ENSG00000160789.18_LMNA | -0.01148 | -0.170370356 | 0.147990141 | 8.88E-01 | 9.57E-01 | 1.00E+00 |
| ENSG00000196597.10_ZNF782   | ENSG00000160789.18_LMNA | 0.1264   | -0.033476323 | 0.279965073 | 1.21E-01 | 3.49E-01 | 1.00E+00 |
| ENSG00000272370.1_RP11-307L | ENSG00000160789.18_LMNA | -0.2976  | -0.436134246 | -0.14527878 | 1.97E-04 | 3.22E-03 | 1.00E+00 |
| ENSG00000150630.3_VEGFC     | ENSG00000160789.18_LMNA | 0.2935   | 0.140885886  | 0.432495488 | 2.43E-04 | 3.81E-03 | 1.00E+00 |
| ENSG00000187187.12_ZNF546   | ENSG00000160789.18_LMNA | -0.0986  | -0.253817637 | 0.061565919 | 2.27E-01 | 5.03E-01 | 1.00E+00 |
| ENSG00000182168.13_UNC5C    | ENSG00000160789.18_LMNA | 0.15228  | -0.00709333  | 0.304107565 | 6.11E-02 | 2.28E-01 | 1.00E+00 |
| ENSG00000254806.4_SYS1-DBNI | ENSG00000160789.18_LMNA | 0.03666  | -0.123255766 | 0.194728452 | 6.54E-01 | 8.47E-01 | 1.00E+00 |
| ENSG00000227354.5_RBM26-AS  | ENSG00000160789.18_LMNA | -0.22094 | -0.367226993 | -0.06399348 | 6.23E-03 | 4.62E-02 | 1.00E+00 |
| ENSG00000253641.4_LINCR-000 | ENSG00000160789.18_LMNA | -0.12428 | -0.27798423  | 0.035621777 | 1.27E-01 | 3.61E-01 | 1.00E+00 |
| ENSG00000217624.2_RP11-204C | ENSG00000160789.18_LMNA | -0.02993 | -0.188230294 | 0.129893174 | 7.14E-01 | 8.79E-01 | 1.00E+00 |
| ENSG00000279722.1_RP11-44F1 | ENSG00000160789.18_LMNA | -0.32983 | -0.464630181 | -0.18008171 | 3.33E-05 | 7.79E-04 | 1.00E+00 |
| ENSG00000274026.1_FAM27E3   | ENSG00000160789.18_LMNA | -0.07419 | -0.23066695  | 0.08602607  | 3.64E-01 | 6.45E-01 | 1.00E+00 |
| ENSG00000152207.6_CYSLTR2   | ENSG00000160789.18_LMNA | -0.12654 | -0.280102562 | 0.033327302 | 1.20E-01 | 3.49E-01 | 1.00E+00 |
| ENSG00000227214.2_HCG15     | ENSG00000160789.18_LMNA | 0.08676  | -0.073453175 | 0.242611712 | 2.88E-01 | 5.73E-01 | 1.00E+00 |
| ENSG00000128298.15_BAIAP2L2 | ENSG00000160789.18_LMNA | -0.06678 | -0.223607869 | 0.093409242 | 4.14E-01 | 6.87E-01 | 1.00E+00 |
| ENSG00000251400.1_ALDH7A1P  | ENSG00000160789.18_LMNA | 0.10165  | -0.058492625 | 0.256701073 | 2.13E-01 | 4.86E-01 | 1.00E+00 |
| ENSG00000165813.15_CCDC186  | ENSG00000160789.18_LMNA | -0.13248 | -0.285658274 | 0.027293888 | 1.04E-01 | 3.19E-01 | 1.00E+00 |
| ENSG00000162927.12_PUS10    | ENSG00000160789.18_LMNA | -0.17407 | -0.324283539 | -0.01529245 | 3.20E-02 | 1.49E-01 | 1.00E+00 |
| ENSG00000176933.5_TOB2P1    | ENSG00000160789.18_LMNA | 0.13203  | -0.027752671 | 0.285236553 | 1.05E-01 | 3.21E-01 | 1.00E+00 |
| ENSG00000234062.6_RP11-308D | ENSG00000160789.18_LMNA | -0.04586 | -0.203577378 | 0.114171233 | 5.75E-01 | 8.02E-01 | 1.00E+00 |
| ENSG00000154493.16_C10orf90 | ENSG00000160789.18_LMNA | -0.01023 | -0.169157431 | 0.149211481 | 9.00E-01 | 9.61E-01 | 1.00E+00 |
| ENSG00000138944.7_KIAA1644  | ENSG00000160789.18_LMNA | -0.20887 | -0.356224363 | -0.05137653 | 9.81E-03 | 6.47E-02 | 1.00E+00 |
| ENSG00000112599.8_GUCA1B    | ENSG00000160789.18_LMNA | -0.02993 | -0.188229737 | 0.129893742 | 7.14E-01 | 8.79E-01 | 1.00E+00 |
| ENSG00000254461.1_RP11-755F | ENSG00000160789.18_LMNA | 0.00728  | -0.152093668 | 0.166291273 | 9.29E-01 | 9.73E-01 | 1.00E+00 |
| ENSG00000277534.1_RP11-9E17 | ENSG00000160789.18_LMNA | -0.059   | -0.216166939 | 0.101154232 | 4.70E-01 | 7.31E-01 | 1.00E+00 |
| ENSG00000279522.1_CTC-487M2 | ENSG00000160789.18_LMNA | -0.27558 | -0.416503445 | -0.12171464 | 5.90E-04 | 7.68E-03 | 1.00E+00 |
| ENSG00000258153.1_HSPE1P4   | ENSG00000160789.18_LMNA | -0.12604 | -0.279629633 | 0.033839843 | 1.22E-01 | 3.51E-01 | 1.00E+00 |
| ENSG00000123870.10_ZNF137P  | ENSG00000160789.18_LMNA | -0.1417  | -0.294263512 | 0.017903512 | 8.16E-02 | 2.75E-01 | 1.00E+00 |
| ENSG00000236562.4_RP11-396M | ENSG00000160789.18_LMNA | 0.24685  | 0.091233419  | 0.39069573  | 2.17E-03 | 2.08E-02 | 1.00E+00 |
| ENSG00000203326.8_ZNF525    | ENSG00000160789.18_LMNA | 0.14778  | -0.01169541  | 0.299924891 | 6.92E-02 | 2.48E-01 | 1.00E+00 |
| ENSG00000272910.1_RP11-15L1 | ENSG00000160789.18_LMNA | -0.32227 | -0.457978313 | -0.17189334 | 5.14E-05 | 1.10E-03 | 1.00E+00 |
| ENSG00000276900.1_RP11-467L | ENSG00000160789.18_LMNA | -0.18077 | -0.330458297 | -0.02220598 | 2.58E-02 | 1.29E-01 | 1.00E+00 |

|                             |                         |          |              |             |          |          |          |
|-----------------------------|-------------------------|----------|--------------|-------------|----------|----------|----------|
| ENSG00000123999.4_INHA      | ENSG00000160789.18_LMNA | 0.24583  | 0.090160365  | 0.389778541 | 2.27E-03 | 2.15E-02 | 1.00E+00 |
| ENSG00000165072.9_MAMDC2    | ENSG00000160789.18_LMNA | 0.17652  | 0.017818451  | 0.326542668 | 2.96E-02 | 1.42E-01 | 1.00E+00 |
| ENSG00000262050.1_RP11-74E2 | ENSG00000160789.18_LMNA | 0.12592  | -0.03395713  | 0.279521388 | 1.22E-01 | 3.52E-01 | 1.00E+00 |
| ENSG00000140534.12_TICRR    | ENSG00000160789.18_LMNA | 0.06664  | -0.093551276 | 0.223471744 | 4.15E-01 | 6.88E-01 | 1.00E+00 |
| ENSG00000203362.2_RP3-337H4 | ENSG00000160789.18_LMNA | -0.20822 | -0.35563439  | -0.05070274 | 1.00E-02 | 6.58E-02 | 1.00E+00 |
| ENSG00000110318.12_CEP126   | ENSG00000160789.18_LMNA | -0.18273 | -0.332266786 | -0.02423645 | 2.42E-02 | 1.24E-01 | 1.00E+00 |
| ENSG00000269982.1_RP11-1020 | ENSG00000160789.18_LMNA | -0.16286 | -0.313920153 | -0.00375518 | 4.50E-02 | 1.88E-01 | 1.00E+00 |
| ENSG00000163322.12_FAM175A  | ENSG00000160789.18_LMNA | -0.18328 | -0.332769467 | -0.02480128 | 2.38E-02 | 1.22E-01 | 1.00E+00 |
| ENSG00000178187.6_ZNF454    | ENSG00000160789.18_LMNA | -0.03966 | -0.197611903 | 0.120301384 | 6.28E-01 | 8.32E-01 | 1.00E+00 |
| ENSG00000257354.2_RP11-631N | ENSG00000160789.18_LMNA | -0.08396 | -0.239952311 | 0.076261146 | 3.04E-01 | 5.90E-01 | 1.00E+00 |
| ENSG00000276791.1_CTD-2270P | ENSG00000160789.18_LMNA | -0.18509 | -0.334439888 | -0.02667964 | 2.24E-02 | 1.17E-01 | 1.00E+00 |
| ENSG00000250091.2_DNAH100S  | ENSG00000160789.18_LMNA | 0.05162  | -0.108475022 | 0.209099503 | 5.28E-01 | 7.72E-01 | 1.00E+00 |
| ENSG00000172543.6_CTSW      | ENSG00000160789.18_LMNA | 0.08877  | -0.071437633 | 0.244517687 | 2.77E-01 | 5.62E-01 | 1.00E+00 |
| ENSG00000281205.1_LINC00950 | ENSG00000160789.18_LMNA | -0.16148 | -0.312640194 | -0.00233594 | 4.69E-02 | 1.93E-01 | 1.00E+00 |
| ENSG00000227525.4_RPL7P6    | ENSG00000160789.18_LMNA | -0.04857 | -0.206178587 | 0.111490621 | 5.52E-01 | 7.88E-01 | 1.00E+00 |
| ENSG00000183484.10_GPR132   | ENSG00000160789.18_LMNA | 0.17921  | 0.020598314  | 0.329024772 | 2.72E-02 | 1.34E-01 | 1.00E+00 |
| ENSG00000131848.8_ZSCAN5A   | ENSG00000160789.18_LMNA | -0.06715 | -0.223955375 | 0.093046596 | 4.11E-01 | 6.85E-01 | 1.00E+00 |
| ENSG00000215326.3_GPX1P2    | ENSG00000160789.18_LMNA | -0.06843 | -0.225179917 | 0.091768032 | 4.02E-01 | 6.78E-01 | 1.00E+00 |
| ENSG00000162881.6_OXER1     | ENSG00000160789.18_LMNA | 0.10812  | -0.051975813 | 0.262796792 | 1.85E-01 | 4.51E-01 | 1.00E+00 |
| ENSG00000231940.1_RPS7P3    | ENSG00000160789.18_LMNA | -0.13185 | -0.285064415 | 0.027939899 | 1.05E-01 | 3.22E-01 | 1.00E+00 |
| ENSG00000197358.9_BNIP3P1   | ENSG00000160789.18_LMNA | 0.06414  | -0.096044536 | 0.221080175 | 4.32E-01 | 7.02E-01 | 1.00E+00 |
| ENSG00000224195.1_RP11-574K | ENSG00000160789.18_LMNA | -0.29643 | -0.435095989 | -0.14402417 | 2.09E-04 | 3.37E-03 | 1.00E+00 |
| ENSG00000239382.9_ALKBH6    | ENSG00000160789.18_LMNA | -0.01395 | -0.172763806 | 0.145577235 | 8.65E-01 | 9.47E-01 | 1.00E+00 |
| ENSG00000214050.6_FBXO16    | ENSG00000160789.18_LMNA | -0.28822 | -0.427791662 | -0.13522415 | 3.17E-04 | 4.71E-03 | 1.00E+00 |
| ENSG00000163347.5_CLDN1     | ENSG00000160789.18_LMNA | 0.24993  | 0.094490738  | 0.393476273 | 1.90E-03 | 1.88E-02 | 1.00E+00 |
| ENSG00000213996.11_TM6SF2   | ENSG00000160789.18_LMNA | 0.15734  | -0.001913395 | 0.308801122 | 5.29E-02 | 2.09E-01 | 1.00E+00 |
| ENSG00000204410.13_MSH5     | ENSG00000160789.18_LMNA | 0.01567  | -0.143894545 | 0.174430705 | 8.48E-01 | 9.41E-01 | 1.00E+00 |
| ENSG00000243716.9_NPIP5     | ENSG00000160789.18_LMNA | 0.0574   | -0.102743946 | 0.214635063 | 4.82E-01 | 7.40E-01 | 1.00E+00 |
| ENSG00000259207.6_ITGB3     | ENSG00000160789.18_LMNA | 0.38179  | 0.236998936  | 0.509996512 | 1.21E-06 | 5.38E-05 | 6.23E-02 |
| ENSG00000234513.1_AC073072. | ENSG00000160789.18_LMNA | -0.1527  | -0.304502806 | 0.006657774 | 6.04E-02 | 2.27E-01 | 1.00E+00 |
| ENSG00000149548.13_CCDC15   | ENSG00000160789.18_LMNA | 0.049    | -0.11106899  | 0.20658732  | 5.49E-01 | 7.86E-01 | 1.00E+00 |
| ENSG00000227279.1_AC015933. | ENSG00000160789.18_LMNA | 0.13549  | -0.024234087 | 0.288467796 | 9.60E-02 | 3.04E-01 | 1.00E+00 |
| ENSG00000168952.14_STXBP6   | ENSG00000160789.18_LMNA | -0.2318  | -0.377082618 | -0.07537804 | 4.06E-03 | 3.35E-02 | 1.00E+00 |

|                              |                         |          |              |             |          |          |          |
|------------------------------|-------------------------|----------|--------------|-------------|----------|----------|----------|
| ENSG00000224914.2_LINC00863  | ENSG00000160789.18_LMNA | -0.25439 | -0.397490111 | -0.09920414 | 1.56E-03 | 1.62E-02 | 1.00E+00 |
| ENSG00000236021.1_RP11-195C  | ENSG00000160789.18_LMNA | -0.2323  | -0.377540805 | -0.07590922 | 3.98E-03 | 3.30E-02 | 1.00E+00 |
| ENSG00000230772.1_VN1R108P   | ENSG00000160789.18_LMNA | -0.29671 | -0.43534914  | -0.14432999 | 2.06E-04 | 3.34E-03 | 1.00E+00 |
| ENSG00000268895.4_A1BG-AS1   | ENSG00000160789.18_LMNA | -0.01329 | -0.172124038 | 0.146222575 | 8.71E-01 | 9.50E-01 | 1.00E+00 |
| ENSG00000269038.1_AP001462.1 | ENSG00000160789.18_LMNA | -0.06977 | -0.226457181 | 0.090433306 | 3.93E-01 | 6.71E-01 | 1.00E+00 |
| ENSG00000234785.1_EEF1GP5    | ENSG00000160789.18_LMNA | -0.05668 | -0.213950214 | 0.103454128 | 4.88E-01 | 7.44E-01 | 1.00E+00 |
| ENSG00000188993.3_LRRC66     | ENSG00000160789.18_LMNA | 0.03216  | -0.127696219 | 0.190384246 | 6.94E-01 | 8.69E-01 | 1.00E+00 |
| ENSG00000228727.7_SAPCD1     | ENSG00000160789.18_LMNA | -0.04493 | -0.202676207 | 0.115098834 | 5.83E-01 | 8.06E-01 | 1.00E+00 |
| ENSG00000144481.15_TRPM8     | ENSG00000160789.18_LMNA | 0.34422  | 0.195746644  | 0.477266822 | 1.41E-05 | 3.88E-04 | 7.24E-01 |
| ENSG00000128262.7_POM121L9   | ENSG00000160789.18_LMNA | 0.20906  | 0.051571167  | 0.356394739 | 9.74E-03 | 6.44E-02 | 1.00E+00 |
| ENSG00000258839.2_MC1R       | ENSG00000160789.18_LMNA | 0.31794  | 0.167198855  | 0.454150216 | 6.57E-05 | 1.34E-03 | 1.00E+00 |
| ENSG00000196668.3_LINC00173  | ENSG00000160789.18_LMNA | -0.29679 | -0.435414332 | -0.14440875 | 2.05E-04 | 3.33E-03 | 1.00E+00 |
| ENSG00000272081.1_CTD-2376I4 | ENSG00000160789.18_LMNA | 0.15315  | -0.006201595 | 0.304916647 | 5.96E-02 | 2.25E-01 | 1.00E+00 |
| ENSG00000108984.12_MAP2K6    | ENSG00000160789.18_LMNA | -0.46229 | -0.578890428 | -0.32717317 | 2.03E-09 | 2.79E-07 | 1.04E-04 |
| ENSG00000167637.15_ZNF283    | ENSG00000160789.18_LMNA | 0.01114  | -0.148319512 | 0.170043349 | 8.92E-01 | 9.57E-01 | 1.00E+00 |
| ENSG00000006837.10_CDKL3     | ENSG00000160789.18_LMNA | -0.20974 | -0.357019789 | -0.05228541 | 9.50E-03 | 6.32E-02 | 1.00E+00 |
| ENSG00000278356.1_RP11-372B  | ENSG00000160789.18_LMNA | -0.22854 | -0.374127317 | -0.07195599 | 4.63E-03 | 3.70E-02 | 1.00E+00 |
| ENSG00000116771.5_AGMAT      | ENSG00000160789.18_LMNA | -0.12542 | -0.279050906 | 0.034466817 | 1.24E-01 | 3.55E-01 | 1.00E+00 |
| ENSG00000204778.4_CBWD4P     | ENSG00000160789.18_LMNA | -0.03038 | -0.188665297 | 0.129449738 | 7.10E-01 | 8.77E-01 | 1.00E+00 |
| ENSG00000225591.2_RP11-360D  | ENSG00000160789.18_LMNA | -0.02167 | -0.180252951 | 0.138002666 | 7.91E-01 | 9.15E-01 | 1.00E+00 |
| ENSG00000132141.12_CCT6B     | ENSG00000160789.18_LMNA | -0.10014 | -0.255269788 | 0.060018899 | 2.20E-01 | 4.95E-01 | 1.00E+00 |
| ENSG00000231607.7_DLEU2      | ENSG00000160789.18_LMNA | -0.2065  | -0.354057578 | -0.04890325 | 1.07E-02 | 6.87E-02 | 1.00E+00 |
| ENSG00000172260.12_NEGR1     | ENSG00000160789.18_LMNA | -0.1393  | -0.292025929 | 0.02035056  | 8.70E-02 | 2.87E-01 | 1.00E+00 |
| ENSG00000173868.10_PHOSPHO1  | ENSG00000160789.18_LMNA | -0.01165 | -0.170529594 | 0.147829727 | 8.87E-01 | 9.56E-01 | 1.00E+00 |
| ENSG00000267395.4_AC074212.1 | ENSG00000160789.18_LMNA | 0.24341  | 0.087601972  | 0.387589365 | 2.51E-03 | 2.33E-02 | 1.00E+00 |
| ENSG00000255262.3_TCEB2P2    | ENSG00000160789.18_LMNA | -0.16342 | -0.314442918 | -0.00433519 | 4.42E-02 | 1.86E-01 | 1.00E+00 |
| ENSG00000165409.14_TSHR      | ENSG00000160789.18_LMNA | -0.4692  | -0.584724736 | -0.33502613 | 1.08E-09 | 1.67E-07 | 5.54E-05 |
| ENSG00000270248.1_CTC-471J1  | ENSG00000160789.18_LMNA | -0.21136 | -0.358493376 | -0.05397052 | 8.95E-03 | 6.05E-02 | 1.00E+00 |
| ENSG00000213574.2_LDHAP5     | ENSG00000160789.18_LMNA | 0.22467  | 0.067894351  | 0.37061167  | 5.39E-03 | 4.15E-02 | 1.00E+00 |
| ENSG00000231007.5_CDC20P1    | ENSG00000160789.18_LMNA | 0.15609  | -0.003190637 | 0.307645213 | 5.48E-02 | 2.13E-01 | 1.00E+00 |
| ENSG00000171303.6_KCNK3      | ENSG00000160789.18_LMNA | -0.1539  | -0.305608957 | 0.005438168 | 5.84E-02 | 2.21E-01 | 1.00E+00 |
| ENSG00000157680.14_DGKI      | ENSG00000160789.18_LMNA | -0.26169 | -0.404057879 | -0.10694557 | 1.13E-03 | 1.27E-02 | 1.00E+00 |
| ENSG00000213790.2_OLA1P1     | ENSG00000160789.18_LMNA | -0.13782 | -0.290639621 | 0.021864769 | 9.04E-02 | 2.93E-01 | 1.00E+00 |

|                              |                         |          |              |             |          |          |          |
|------------------------------|-------------------------|----------|--------------|-------------|----------|----------|----------|
| ENSG00000272158.1_RP11-840I1 | ENSG00000160789.18_LMNA | -0.0576  | -0.214826245 | 0.102545633 | 4.81E-01 | 7.39E-01 | 1.00E+00 |
| ENSG00000175711.7_B3GNTL1    | ENSG00000160789.18_LMNA | 0.12468  | -0.035216612 | 0.278358512 | 1.26E-01 | 3.59E-01 | 1.00E+00 |
| ENSG00000145934.14_TENM2     | ENSG00000160789.18_LMNA | -0.07084 | -0.22747683  | 0.089366966 | 3.86E-01 | 6.64E-01 | 1.00E+00 |
| ENSG00000101333.15_PLCB4     | ENSG00000160789.18_LMNA | -0.36933 | -0.499181937 | -0.22325854 | 2.83E-06 | 1.05E-04 | 1.45E-01 |
| ENSG00000215790.5_SLC35E2    | ENSG00000160789.18_LMNA | -0.15602 | -0.30758138  | 0.003261141 | 5.49E-02 | 2.14E-01 | 1.00E+00 |
| ENSG00000249592.4_RP11-440L  | ENSG00000160789.18_LMNA | 0.14994  | -0.009486206 | 0.301934257 | 6.52E-02 | 2.38E-01 | 1.00E+00 |
| ENSG00000008226.18_DLEC1     | ENSG00000160789.18_LMNA | -0.23409 | -0.379162661 | -0.07779086 | 3.70E-03 | 3.13E-02 | 1.00E+00 |
| ENSG00000156398.11_SFXN2     | ENSG00000160789.18_LMNA | -0.22328 | -0.369353604 | -0.06644334 | 5.69E-03 | 4.32E-02 | 1.00E+00 |
| ENSG00000237882.1_PPIAP13    | ENSG00000160789.18_LMNA | 0.00939  | -0.150033151 | 0.168340879 | 9.09E-01 | 9.65E-01 | 1.00E+00 |
| ENSG00000230513.1_THAP7-AS1  | ENSG00000160789.18_LMNA | -0.10189 | -0.25692038  | 0.058258633 | 2.12E-01 | 4.85E-01 | 1.00E+00 |
| ENSG00000269397.1_CTB-92J24  | ENSG00000160789.18_LMNA | -0.20893 | -0.356283407 | -0.05144398 | 9.79E-03 | 6.46E-02 | 1.00E+00 |
| ENSG00000279267.1_RP11-395L  | ENSG00000160789.18_LMNA | 0.021    | -0.13865969  | 0.179604795 | 7.97E-01 | 9.19E-01 | 1.00E+00 |
| ENSG00000165046.11_LETM2     | ENSG00000160789.18_LMNA | 0.23939  | 0.08336882   | 0.383959676 | 2.97E-03 | 2.66E-02 | 1.00E+00 |
| ENSG00000198929.11_NOS1AP    | ENSG00000160789.18_LMNA | -0.14441 | -0.296787478 | 0.015138775 | 7.59E-02 | 2.63E-01 | 1.00E+00 |
| ENSG00000228938.3_SNRPD2P1   | ENSG00000160789.18_LMNA | -0.04267 | -0.200505246 | 0.117331195 | 6.02E-01 | 8.17E-01 | 1.00E+00 |
| ENSG00000185518.10_SV2B      | ENSG00000160789.18_LMNA | -0.12381 | -0.277536468 | 0.036106347 | 1.29E-01 | 3.63E-01 | 1.00E+00 |
| ENSG00000183960.7_KCNH8      | ENSG00000160789.18_LMNA | -0.45488 | -0.572615851 | -0.31876623 | 3.92E-09 | 4.89E-07 | 2.01E-04 |
| ENSG00000217239.3_RP1-182O1  | ENSG00000160789.18_LMNA | 0.0246   | -0.13512851  | 0.183085069 | 7.64E-01 | 9.02E-01 | 1.00E+00 |
| ENSG00000203780.9_FANK1      | ENSG00000160789.18_LMNA | 0.17912  | 0.02050817   | 0.328944351 | 2.72E-02 | 1.34E-01 | 1.00E+00 |
| ENSG00000274897.2_PANO1      | ENSG00000160789.18_LMNA | 0.05929  | -0.100858028 | 0.216452194 | 4.68E-01 | 7.29E-01 | 1.00E+00 |
| ENSG00000103942.11_HOMER2    | ENSG00000160789.18_LMNA | 0.41194  | 0.270477695  | 0.535990009 | 1.34E-07 | 9.23E-06 | 6.89E-03 |
| ENSG00000281183.1_NPTN-IT1   | ENSG00000160789.18_LMNA | 0.02317  | -0.136529625 | 0.181705106 | 7.77E-01 | 9.08E-01 | 1.00E+00 |
| ENSG00000226986.4_RP11-543B  | ENSG00000160789.18_LMNA | 0.06527  | -0.094917476 | 0.222161739 | 4.24E-01 | 6.95E-01 | 1.00E+00 |
| ENSG00000136153.18_LMO7      | ENSG00000160789.18_LMNA | 0.04937  | -0.110702322 | 0.206942681 | 5.46E-01 | 7.84E-01 | 1.00E+00 |
| ENSG00000164379.5_FOXQ1      | ENSG00000160789.18_LMNA | -0.1506  | -0.302547986 | 0.008810834 | 6.40E-02 | 2.36E-01 | 1.00E+00 |
| ENSG00000086159.11_AQP6      | ENSG00000160789.18_LMNA | -0.14611 | -0.298374536 | 0.013397875 | 7.25E-02 | 2.55E-01 | 1.00E+00 |
| ENSG00000234040.3_RPL10P12   | ENSG00000160789.18_LMNA | -0.0478  | -0.205436106 | 0.112256238 | 5.59E-01 | 7.92E-01 | 1.00E+00 |
| ENSG00000271020.1_RP11-10C2  | ENSG00000160789.18_LMNA | 0.25664  | 0.101593027  | 0.399520089 | 1.41E-03 | 1.50E-02 | 1.00E+00 |
| ENSG00000260285.1_RP11-600F  | ENSG00000160789.18_LMNA | 0.0969   | -0.063281194 | 0.252205884 | 2.35E-01 | 5.13E-01 | 1.00E+00 |
| ENSG00000189007.14_ADAT2     | ENSG00000160789.18_LMNA | -0.05304 | -0.210463354 | 0.107064957 | 5.16E-01 | 7.63E-01 | 1.00E+00 |
| ENSG00000215421.8_ZNF407     | ENSG00000160789.18_LMNA | 0.19193  | 0.033765768  | 0.340724204 | 1.78E-02 | 9.94E-02 | 1.00E+00 |
| ENSG00000268362.4_CTD-2017D  | ENSG00000160789.18_LMNA | -0.19164 | -0.34045227  | -0.0334585  | 1.80E-02 | 1.00E-01 | 1.00E+00 |
| ENSG00000273987.1_RP11-585P  | ENSG00000160789.18_LMNA | -0.28125 | -0.4215706   | -0.12776543 | 4.48E-04 | 6.19E-03 | 1.00E+00 |

|                              |                         |          |              |             |          |          |          |
|------------------------------|-------------------------|----------|--------------|-------------|----------|----------|----------|
| ENSG00000232587.1_EEF1A1P3   | ENSG00000160789.18_LMNA | -0.10856 | -0.263214094 | 0.0515287   | 1.83E-01 | 4.48E-01 | 1.00E+00 |
| ENSG00000279519.1_RP11-288C  | ENSG00000160789.18_LMNA | -0.07375 | -0.230248794 | 0.086464395 | 3.67E-01 | 6.47E-01 | 1.00E+00 |
| ENSG00000257027.1_RP11-705C  | ENSG00000160789.18_LMNA | -0.15331 | -0.305061176 | 0.00604225  | 5.93E-02 | 2.24E-01 | 1.00E+00 |
| ENSG00000243504.1_RPS23P1    | ENSG00000160789.18_LMNA | -0.11584 | -0.270058962 | 0.044176818 | 1.55E-01 | 4.07E-01 | 1.00E+00 |
| ENSG00000174963.16_ZIC4      | ENSG00000160789.18_LMNA | 0.01094  | -0.148523442 | 0.169840849 | 8.94E-01 | 9.58E-01 | 1.00E+00 |
| ENSG00000121690.8_DEPDC7     | ENSG00000160789.18_LMNA | -0.36143 | -0.492304045 | -0.21457654 | 4.77E-06 | 1.60E-04 | 2.44E-01 |
| ENSG00000137809.15_ITGA11    | ENSG00000160789.18_LMNA | 0.28204  | 0.128608962  | 0.422275549 | 4.31E-04 | 6.01E-03 | 1.00E+00 |
| ENSG00000206228.4_HNRNPA1F   | ENSG00000160789.18_LMNA | -0.01911 | -0.177769047 | 0.140519035 | 8.15E-01 | 9.28E-01 | 1.00E+00 |
| ENSG00000242687.2_AC004893.  | ENSG00000160789.18_LMNA | 0.15919  | -1.45E-05    | 0.310517971 | 5.01E-02 | 2.02E-01 | 1.00E+00 |
| ENSG00000105851.9_PIK3CG     | ENSG00000160789.18_LMNA | -0.01689 | -0.175619385 | 0.14269348  | 8.36E-01 | 9.37E-01 | 1.00E+00 |
| ENSG00000267470.4_ZNF571-AS  | ENSG00000160789.18_LMNA | -0.26464 | -0.40670996  | -0.11008182 | 9.85E-04 | 1.15E-02 | 1.00E+00 |
| ENSG00000150594.6_ADRA2A     | ENSG00000160789.18_LMNA | -0.07879 | -0.235045762 | 0.081428672 | 3.35E-01 | 6.20E-01 | 1.00E+00 |
| ENSG00000250474.1_WBP1LP2    | ENSG00000160789.18_LMNA | 0.24991  | 0.09446709   | 0.393456107 | 1.90E-03 | 1.88E-02 | 1.00E+00 |
| ENSG00000205609.11_EIF3CL    | ENSG00000160789.18_LMNA | 0.16611  | 0.007100701  | 0.316932905 | 4.08E-02 | 1.76E-01 | 1.00E+00 |
| ENSG00000131797.11_CLUHP3    | ENSG00000160789.18_LMNA | -0.17454 | -0.324718742 | -0.01577876 | 3.15E-02 | 1.48E-01 | 1.00E+00 |
| ENSG00000139220.15_PPFIA2    | ENSG00000160789.18_LMNA | -0.13834 | -0.291131965 | 0.021327165 | 8.92E-02 | 2.91E-01 | 1.00E+00 |
| ENSG00000128536.14_CDHR3     | ENSG00000160789.18_LMNA | -0.10337 | -0.258317798 | 0.056766829 | 2.05E-01 | 4.76E-01 | 1.00E+00 |
| ENSG00000197520.9_FAM177B    | ENSG00000160789.18_LMNA | -0.02329 | -0.18181277  | 0.136420357 | 7.76E-01 | 9.08E-01 | 1.00E+00 |
| ENSG00000233155.1_HMGA1P8    | ENSG00000160789.18_LMNA | 0.25815  | 0.103192175  | 0.400877348 | 1.32E-03 | 1.43E-02 | 1.00E+00 |
| ENSG00000248208.1_RP11-153M  | ENSG00000160789.18_LMNA | 0.03649  | -0.1234257   | 0.194562431 | 6.55E-01 | 8.47E-01 | 1.00E+00 |
| ENSG00000279520.1_RP11-20I23 | ENSG00000160789.18_LMNA | 0.07154  | -0.088670859 | 0.228142083 | 3.81E-01 | 6.60E-01 | 1.00E+00 |
| ENSG00000007402.10_CACNA2D   | ENSG00000160789.18_LMNA | -0.20374 | -0.351538302 | -0.04603232 | 1.18E-02 | 7.39E-02 | 1.00E+00 |
| ENSG00000049192.13_ADAMTS6   | ENSG00000160789.18_LMNA | -0.09516 | -0.250561743 | 0.06502902  | 2.44E-01 | 5.23E-01 | 1.00E+00 |
| ENSG00000213881.3_NPM1P6     | ENSG00000160789.18_LMNA | 0.07372  | -0.086496848 | 0.23021783  | 3.67E-01 | 6.48E-01 | 1.00E+00 |
| ENSG00000160401.13_CFAP157   | ENSG00000160789.18_LMNA | 0.08722  | -0.07299513  | 0.243045071 | 2.85E-01 | 5.71E-01 | 1.00E+00 |
| ENSG00000254703.2_SENCR      | ENSG00000160789.18_LMNA | -0.15757 | -0.309021383 | 0.001669899 | 5.25E-02 | 2.08E-01 | 1.00E+00 |
| ENSG00000277447.1_RP11-193E  | ENSG00000160789.18_LMNA | 0.09108  | -0.069119658 | 0.246706641 | 2.64E-01 | 5.48E-01 | 1.00E+00 |
| ENSG00000234917.2_RP5-994D1  | ENSG00000160789.18_LMNA | -0.44462 | -0.5639059   | -0.30716211 | 9.55E-09 | 1.03E-06 | 4.90E-04 |
| ENSG00000225808.1_DNAJC19P   | ENSG00000160789.18_LMNA | 0.03264  | -0.127218133 | 0.190852569 | 6.90E-01 | 8.66E-01 | 1.00E+00 |
| ENSG00000137880.5_GCHFR      | ENSG00000160789.18_LMNA | 0.12374  | -0.036177868 | 0.277470368 | 1.29E-01 | 3.64E-01 | 1.00E+00 |
| ENSG00000239556.2_AC004951.  | ENSG00000160789.18_LMNA | 0.10684  | -0.053270553 | 0.26158771  | 1.90E-01 | 4.58E-01 | 1.00E+00 |
| ENSG00000138411.9_HECW2      | ENSG00000160789.18_LMNA | -0.13149 | -0.284726872 | 0.028306969 | 1.06E-01 | 3.24E-01 | 1.00E+00 |
| ENSG00000172794.18_RAB37     | ENSG00000160789.18_LMNA | -0.04538 | -0.203110633 | 0.114651736 | 5.79E-01 | 8.04E-01 | 1.00E+00 |



|                             |                         |          |              |             |          |          |          |
|-----------------------------|-------------------------|----------|--------------|-------------|----------|----------|----------|
| ENSG00000205464.10_ATP6AP11 | ENSG00000160789.18_LMNA | 0.13553  | -0.024195579 | 0.28850312  | 9.60E-02 | 3.04E-01 | 1.00E+00 |
| ENSG00000151650.7_VENTX     | ENSG00000160789.18_LMNA | 0.2807   | 0.127187171  | 0.421087134 | 4.60E-04 | 6.32E-03 | 1.00E+00 |
| ENSG00000107679.13_PLEKHA1  | ENSG00000160789.18_LMNA | -0.31642 | -0.452813856 | -0.1655631  | 7.14E-05 | 1.44E-03 | 1.00E+00 |
| ENSG00000273350.1_RP4-539M6 | ENSG00000160789.18_LMNA | 0.09451  | -0.065674012 | 0.249954553 | 2.47E-01 | 5.27E-01 | 1.00E+00 |
| ENSG00000272269.1_RP11-500C | ENSG00000160789.18_LMNA | 0.3047   | 0.152916914  | 0.442438558 | 1.35E-04 | 2.40E-03 | 1.00E+00 |
| ENSG00000169252.5_ADRB2     | ENSG00000160789.18_LMNA | -0.21811 | -0.364645996 | -0.06102506 | 6.95E-03 | 5.02E-02 | 1.00E+00 |
| ENSG00000206530.7_CFAP44    | ENSG00000160789.18_LMNA | -0.09761 | -0.25288418  | 0.062559558 | 2.32E-01 | 5.09E-01 | 1.00E+00 |
| ENSG00000272491.1_RP5-1024N | ENSG00000160789.18_LMNA | 0.20218  | 0.044410913  | 0.350113546 | 1.25E-02 | 7.69E-02 | 1.00E+00 |
| ENSG00000111186.11_WNT5B    | ENSG00000160789.18_LMNA | -0.04173 | -0.199604069 | 0.118256917 | 6.10E-01 | 8.22E-01 | 1.00E+00 |
| ENSG00000281398.1_SNHG4     | ENSG00000160789.18_LMNA | -0.04971 | -0.20727317  | 0.110361242 | 5.43E-01 | 7.82E-01 | 1.00E+00 |
| ENSG00000013293.5_SLC7A14   | ENSG00000160789.18_LMNA | -0.3151  | -0.451641625 | -0.16412955 | 7.69E-05 | 1.53E-03 | 1.00E+00 |
| ENSG00000260947.1_RP11-384P | ENSG00000160789.18_LMNA | -0.34291 | -0.476114831 | -0.19431261 | 1.53E-05 | 4.15E-04 | 7.84E-01 |
| ENSG00000114739.12_ACVR2B   | ENSG00000160789.18_LMNA | -0.17038 | -0.320877616 | -0.01149163 | 3.59E-02 | 1.61E-01 | 1.00E+00 |
| ENSG00000248278.1_SUMO2P17  | ENSG00000160789.18_LMNA | -0.08024 | -0.236421987 | 0.079980962 | 3.26E-01 | 6.12E-01 | 1.00E+00 |
| ENSG00000177685.15_CRACR2E  | ENSG00000160789.18_LMNA | 0.3553   | 0.207861379  | 0.486960384 | 7.06E-06 | 2.22E-04 | 3.62E-01 |
| ENSG00000105427.8_CNFN      | ENSG00000160789.18_LMNA | 0.04046  | -0.119515285 | 0.198378203 | 6.21E-01 | 8.28E-01 | 1.00E+00 |
| ENSG00000143178.11_TBX19    | ENSG00000160789.18_LMNA | 0.2088   | 0.051308264  | 0.356164599 | 9.84E-03 | 6.48E-02 | 1.00E+00 |
| ENSG00000272277.1_RP1-40E16 | ENSG00000160789.18_LMNA | -0.04602 | -0.203730227 | 0.114013846 | 5.73E-01 | 8.01E-01 | 1.00E+00 |
| ENSG00000243649.7_CFB       | ENSG00000160789.18_LMNA | 0.23035  | 0.073858329  | 0.375770945 | 4.30E-03 | 3.50E-02 | 1.00E+00 |
| ENSG00000115339.12_GALNT3   | ENSG00000160789.18_LMNA | -0.04347 | -0.20127914  | 0.116535782 | 5.95E-01 | 8.13E-01 | 1.00E+00 |
| ENSG00000224689.6_ZNF812P   | ENSG00000160789.18_LMNA | -0.2154  | -0.362183782 | -0.05819826 | 7.70E-03 | 5.40E-02 | 1.00E+00 |
| ENSG00000272905.1_RP11-265E | ENSG00000160789.18_LMNA | -0.11233 | -0.266755967 | 0.047728727 | 1.68E-01 | 4.26E-01 | 1.00E+00 |
| ENSG00000270210.1_RP11-373D | ENSG00000160789.18_LMNA | 0.39485  | 0.251455423  | 0.521282283 | 4.81E-07 | 2.54E-05 | 2.47E-02 |
| ENSG00000253552.6_HOXA-AS2  | ENSG00000160789.18_LMNA | -0.08997 | -0.245654018 | 0.07023475  | 2.70E-01 | 5.55E-01 | 1.00E+00 |
| ENSG00000111254.6_AKAP3     | ENSG00000160789.18_LMNA | -0.21871 | -0.365196887 | -0.0616582  | 6.79E-03 | 4.92E-02 | 1.00E+00 |
| ENSG00000111644.6_ACRBP     | ENSG00000160789.18_LMNA | -0.02093 | -0.179528318 | 0.138737195 | 7.98E-01 | 9.19E-01 | 1.00E+00 |
| ENSG00000238082.1_AC009948. | ENSG00000160789.18_LMNA | 0.09476  | -0.065426202 | 0.250187868 | 2.46E-01 | 5.25E-01 | 1.00E+00 |
| ENSG00000235560.3_AC002310. | ENSG00000160789.18_LMNA | -0.32259 | -0.45825781  | -0.17223661 | 5.05E-05 | 1.08E-03 | 1.00E+00 |
| ENSG00000236764.4_COX7A2P2  | ENSG00000160789.18_LMNA | -0.11965 | -0.273633786 | 0.040323621 | 1.42E-01 | 3.85E-01 | 1.00E+00 |
| ENSG00000108001.12_EBF3     | ENSG00000160789.18_LMNA | -0.27499 | -0.415981592 | -0.12109273 | 6.07E-04 | 7.86E-03 | 1.00E+00 |
| ENSG00000196497.14_IPO4     | ENSG00000160789.18_LMNA | 0.396    | 0.252733358  | 0.52227541  | 4.42E-07 | 2.38E-05 | 2.27E-02 |
| ENSG00000182463.14_TSHZ2    | ENSG00000160789.18_LMNA | 0.15478  | -0.004531956 | 0.306430325 | 5.69E-02 | 2.18E-01 | 1.00E+00 |
| ENSG00000135722.7_FBXL8     | ENSG00000160789.18_LMNA | 0.2873   | 0.134241407  | 0.426973571 | 3.32E-04 | 4.86E-03 | 1.00E+00 |

|                              |                         |          |              |             |          |          |          |
|------------------------------|-------------------------|----------|--------------|-------------|----------|----------|----------|
| ENSG00000171462.13_DLK2      | ENSG00000160789.18_LMNA | -0.12363 | -0.27737446  | 0.036281637 | 1.29E-01 | 3.64E-01 | 1.00E+00 |
| ENSG00000088305.17_DNMT3B    | ENSG00000160789.18_LMNA | -0.01841 | -0.17709639  | 0.141199778 | 8.22E-01 | 9.30E-01 | 1.00E+00 |
| ENSG00000272750.1_RP11-378J  | ENSG00000160789.18_LMNA | 0.09463  | -0.065560852 | 0.250061098 | 2.46E-01 | 5.26E-01 | 1.00E+00 |
| ENSG00000198848.11_CES1      | ENSG00000160789.18_LMNA | 0.18208  | 0.023561424  | 0.33166581  | 2.48E-02 | 1.26E-01 | 1.00E+00 |
| ENSG00000229091.2_HSPA8P8    | ENSG00000160789.18_LMNA | -0.06652 | -0.223352378 | 0.093675811 | 4.16E-01 | 6.88E-01 | 1.00E+00 |
| ENSG00000264589.1_MAPT-AS1   | ENSG00000160789.18_LMNA | -0.44696 | -0.565896113 | -0.30980692 | 7.82E-09 | 8.81E-07 | 4.01E-04 |
| ENSG00000186567.11_CEACAM1   | ENSG00000160789.18_LMNA | 0.00203  | -0.157222028 | 0.161178098 | 9.80E-01 | 9.93E-01 | 1.00E+00 |
| ENSG00000087589.15_CASS4     | ENSG00000160789.18_LMNA | -0.07632 | -0.232694324 | 0.083899167 | 3.50E-01 | 6.34E-01 | 1.00E+00 |
| ENSG00000248785.1_HIGD1AP1   | ENSG00000160789.18_LMNA | -0.25365 | -0.396826239 | -0.09842364 | 1.62E-03 | 1.66E-02 | 1.00E+00 |
| ENSG00000070371.14_CLTCL1    | ENSG00000160789.18_LMNA | 0.074    | -0.08621791  | 0.230483952 | 3.65E-01 | 6.46E-01 | 1.00E+00 |
| ENSG00000074370.16_ATP2A3    | ENSG00000160789.18_LMNA | 0.17176  | 0.012908022  | 0.322147781 | 3.44E-02 | 1.57E-01 | 1.00E+00 |
| ENSG00000214089.3_RPL9P21    | ENSG00000160789.18_LMNA | -0.1077  | -0.262397603 | 0.052403399 | 1.87E-01 | 4.53E-01 | 1.00E+00 |
| ENSG00000226054.2_MEMO1P1    | ENSG00000160789.18_LMNA | -0.12018 | -0.274133103 | 0.039784678 | 1.40E-01 | 3.82E-01 | 1.00E+00 |
| ENSG00000267251.2_AC139100.1 | ENSG00000160789.18_LMNA | 0.05352  | -0.106588224 | 0.210924182 | 5.13E-01 | 7.61E-01 | 1.00E+00 |
| ENSG00000139055.5_ERP27      | ENSG00000160789.18_LMNA | -0.22711 | -0.372832981 | -0.07045947 | 4.90E-03 | 3.86E-02 | 1.00E+00 |
| ENSG00000213432.2_RPL17P34   | ENSG00000160789.18_LMNA | -0.07756 | -0.23387158  | 0.082662792 | 3.42E-01 | 6.27E-01 | 1.00E+00 |
| ENSG00000114841.16_DNAH1     | ENSG00000160789.18_LMNA | -0.03775 | -0.195774138 | 0.122185008 | 6.44E-01 | 8.42E-01 | 1.00E+00 |
| ENSG00000246922.7_UBAP1L     | ENSG00000160789.18_LMNA | -0.00081 | -0.1599881   | 0.158413101 | 9.92E-01 | 9.97E-01 | 1.00E+00 |
| ENSG00000227124.7_ZNF717     | ENSG00000160789.18_LMNA | -0.14372 | -0.296144593 | 0.01584344  | 7.73E-02 | 2.66E-01 | 1.00E+00 |
| ENSG00000069696.6_DRD4       | ENSG00000160789.18_LMNA | 0.19026  | 0.032024895  | 0.339182852 | 1.89E-02 | 1.04E-01 | 1.00E+00 |
| ENSG00000259448.2_RP11-16E1  | ENSG00000160789.18_LMNA | -0.09897 | -0.254164432 | 0.061196605 | 2.25E-01 | 5.01E-01 | 1.00E+00 |
| ENSG00000241007.1_SEPT7P6    | ENSG00000160789.18_LMNA | 0.05133  | -0.108763536 | 0.208820293 | 5.30E-01 | 7.73E-01 | 1.00E+00 |
| ENSG00000213740.2_SERBP1P1   | ENSG00000160789.18_LMNA | 0.25821  | 0.103251501  | 0.400927676 | 1.32E-03 | 1.43E-02 | 1.00E+00 |
| ENSG00000197471.10_SPN       | ENSG00000160789.18_LMNA | -0.02444 | -0.182928961 | 0.135287074 | 7.65E-01 | 9.02E-01 | 1.00E+00 |
| ENSG00000272732.1_RP5-1159O  | ENSG00000160789.18_LMNA | -0.14159 | -0.294158231 | 0.018018732 | 8.19E-02 | 2.76E-01 | 1.00E+00 |
| ENSG00000273343.1_XXbac-B44  | ENSG00000160789.18_LMNA | -0.17052 | -0.321007793 | -0.01163674 | 3.57E-02 | 1.61E-01 | 1.00E+00 |
| ENSG00000096996.14_IL12RB1   | ENSG00000160789.18_LMNA | -0.03637 | -0.194441484 | 0.123549485 | 6.56E-01 | 8.48E-01 | 1.00E+00 |
| ENSG00000273478.1_RP11-465N  | ENSG00000160789.18_LMNA | 0.01861  | -0.141005186 | 0.177288701 | 8.20E-01 | 9.30E-01 | 1.00E+00 |
| ENSG00000227973.1_PIN4P1     | ENSG00000160789.18_LMNA | -0.01895 | -0.17761295  | 0.140677035 | 8.17E-01 | 9.28E-01 | 1.00E+00 |
| ENSG00000229807.8_XIST       | ENSG00000160789.18_LMNA | 0.01845  | -0.141162334 | 0.177133396 | 8.21E-01 | 9.30E-01 | 1.00E+00 |
| ENSG00000188092.13_GPR89B    | ENSG00000160789.18_LMNA | -0.09727 | -0.252563484 | 0.062900786 | 2.33E-01 | 5.11E-01 | 1.00E+00 |
| ENSG00000257179.1_HMG2P6     | ENSG00000160789.18_LMNA | -0.24128 | -0.385662185 | -0.08535303 | 2.75E-03 | 2.50E-02 | 1.00E+00 |
| ENSG00000188659.8_SAXO2      | ENSG00000160789.18_LMNA | -0.00714 | -0.166155842 | 0.152229723 | 9.30E-01 | 9.73E-01 | 1.00E+00 |

|                              |                         |          |              |             |          |          |          |
|------------------------------|-------------------------|----------|--------------|-------------|----------|----------|----------|
| ENSG00000151834.14_GABRA2    | ENSG00000160789.18_LMNA | -0.21749 | -0.364085908 | -0.06038161 | 7.11E-03 | 5.10E-02 | 1.00E+00 |
| ENSG00000144366.14_GULP1     | ENSG00000160789.18_LMNA | -0.3271  | -0.462234662 | -0.1771283  | 3.90E-05 | 8.83E-04 | 1.00E+00 |
| ENSG00000214552.4_COPS8P2    | ENSG00000160789.18_LMNA | 0.03029  | -0.1295307   | 0.188585885 | 7.11E-01 | 8.77E-01 | 1.00E+00 |
| ENSG00000275582.1_RP4-681N2  | ENSG00000160789.18_LMNA | -0.00688 | -0.16589537  | 0.152491361 | 9.33E-01 | 9.74E-01 | 1.00E+00 |
| ENSG00000183935.5_HTR7P1     | ENSG00000160789.18_LMNA | 0.14231  | -0.017287172 | 0.294826554 | 8.03E-02 | 2.73E-01 | 1.00E+00 |
| ENSG00000278982.1_RP5-1031D  | ENSG00000160789.18_LMNA | -0.0982  | -0.253440734 | 0.061967197 | 2.29E-01 | 5.06E-01 | 1.00E+00 |
| ENSG00000231969.1_AC144449.  | ENSG00000160789.18_LMNA | -0.31541 | -0.451914383 | -0.16446301 | 7.56E-05 | 1.50E-03 | 1.00E+00 |
| ENSG00000172167.6_MTBP       | ENSG00000160789.18_LMNA | -0.01927 | -0.177924823 | 0.140361343 | 8.14E-01 | 9.27E-01 | 1.00E+00 |
| ENSG00000175544.12_CABP4     | ENSG00000160789.18_LMNA | 0.12968  | -0.030141813 | 0.283038455 | 1.11E-01 | 3.33E-01 | 1.00E+00 |
| ENSG00000171611.8_PTCRA      | ENSG00000160789.18_LMNA | -0.20318 | -0.3510237   | -0.0454465  | 1.21E-02 | 7.51E-02 | 1.00E+00 |
| ENSG00000144504.14_ANKMY1    | ENSG00000160789.18_LMNA | 0.16268  | 0.003571119  | 0.313754221 | 4.52E-02 | 1.88E-01 | 1.00E+00 |
| ENSG00000226624.1_CTA-351J1  | ENSG00000160789.18_LMNA | -0.07521 | -0.231639356 | 0.085006286 | 3.57E-01 | 6.40E-01 | 1.00E+00 |
| ENSG00000139908.13_TSSK4     | ENSG00000160789.18_LMNA | 0.07454  | -0.08567974  | 0.23099726  | 3.61E-01 | 6.43E-01 | 1.00E+00 |
| ENSG00000229980.4_TOB1-AS1   | ENSG00000160789.18_LMNA | -0.37507 | -0.504168059 | -0.22958003 | 1.93E-06 | 7.75E-05 | 9.88E-02 |
| ENSG00000119866.19_BCL11A    | ENSG00000160789.18_LMNA | -0.35648 | -0.487988737 | -0.20915163 | 6.55E-06 | 2.08E-04 | 3.36E-01 |
| ENSG00000268568.1_AC007228.  | ENSG00000160789.18_LMNA | -0.18617 | -0.335432693 | -0.02779706 | 2.16E-02 | 1.14E-01 | 1.00E+00 |
| ENSG00000119720.16_NRDE2     | ENSG00000160789.18_LMNA | 0.0995   | -0.060657542 | 0.254670481 | 2.23E-01 | 4.98E-01 | 1.00E+00 |
| ENSG00000227039.5_ITGB2-AS1  | ENSG00000160789.18_LMNA | -0.02116 | -0.17975283  | 0.138509655 | 7.96E-01 | 9.18E-01 | 1.00E+00 |
| ENSG00000135903.17_PAX3      | ENSG00000160789.18_LMNA | -0.10942 | -0.264024111 | 0.05066046  | 1.80E-01 | 4.42E-01 | 1.00E+00 |
| ENSG00000143867.6_OSR1       | ENSG00000160789.18_LMNA | -0.12469 | -0.278365872 | 0.035208645 | 1.26E-01 | 3.59E-01 | 1.00E+00 |
| ENSG00000232362.1_ATP5LP2    | ENSG00000160789.18_LMNA | -0.10474 | -0.259612001 | 0.055383957 | 1.99E-01 | 4.69E-01 | 1.00E+00 |
| ENSG00000155085.14_AK9       | ENSG00000160789.18_LMNA | -0.44511 | -0.564321374 | -0.30771391 | 9.16E-09 | 9.94E-07 | 4.70E-04 |
| ENSG00000139292.11_LGR5      | ENSG00000160789.18_LMNA | -0.31176 | -0.448690439 | -0.16052584 | 9.24E-05 | 1.77E-03 | 1.00E+00 |
| ENSG00000279660.1_RP11-849N  | ENSG00000160789.18_LMNA | 0.28287  | 0.129503144  | 0.423022441 | 4.14E-04 | 5.82E-03 | 1.00E+00 |
| ENSG00000129535.11_NRL       | ENSG00000160789.18_LMNA | -0.1455  | -0.297803221 | 0.014024788 | 7.37E-02 | 2.58E-01 | 1.00E+00 |
| ENSG00000272273.1_XXbac-BPG  | ENSG00000160789.18_LMNA | -0.04402 | -0.201803595 | 0.115996512 | 5.90E-01 | 8.10E-01 | 1.00E+00 |
| ENSG00000268262.1_CTC-246B1  | ENSG00000160789.18_LMNA | -0.08682 | -0.24266251  | 0.07339949  | 2.88E-01 | 5.73E-01 | 1.00E+00 |
| ENSG00000228274.3_RP3-508I15 | ENSG00000160789.18_LMNA | -0.19004 | -0.338988343 | -0.03180534 | 1.90E-02 | 1.04E-01 | 1.00E+00 |
| ENSG00000179476.6_C14orf28   | ENSG00000160789.18_LMNA | -0.1484  | -0.300498252 | 0.011065336 | 6.81E-02 | 2.45E-01 | 1.00E+00 |
| ENSG00000182383.8_RPL27AP5   | ENSG00000160789.18_LMNA | -0.09652 | -0.251847545 | 0.063662296 | 2.37E-01 | 5.15E-01 | 1.00E+00 |
| ENSG00000266920.1_ACTBP9     | ENSG00000160789.18_LMNA | 0.27744  | 0.123705661  | 0.41817282  | 5.39E-04 | 7.15E-03 | 1.00E+00 |
| ENSG00000280809.1_LINC00836  | ENSG00000160789.18_LMNA | -0.49898 | -0.609744719 | -0.36910098 | 6.03E-11 | 1.50E-08 | 3.10E-06 |
| ENSG00000231878.1_SNRFPF1    | ENSG00000160789.18_LMNA | -0.01455 | -0.173347636 | 0.144988084 | 8.59E-01 | 9.44E-01 | 1.00E+00 |

|                             |                         |          |              |             |          |          |          |
|-----------------------------|-------------------------|----------|--------------|-------------|----------|----------|----------|
| ENSG00000272056.1_RP11-503P | ENSG00000160789.18_LMNA | -0.17803 | -0.327939014 | -0.01938172 | 2.82E-02 | 1.37E-01 | 1.00E+00 |
| ENSG00000261490.1_RP11-448G | ENSG00000160789.18_LMNA | -0.06491 | -0.221818778 | 0.095274951 | 4.27E-01 | 6.98E-01 | 1.00E+00 |
| ENSG00000227855.3_DPY19L2P  | ENSG00000160789.18_LMNA | -0.10643 | -0.261201305 | 0.05368411  | 1.92E-01 | 4.60E-01 | 1.00E+00 |
| ENSG00000225171.2_DUTP6     | ENSG00000160789.18_LMNA | 0.06991  | -0.090296087 | 0.22658843  | 3.92E-01 | 6.70E-01 | 1.00E+00 |
| ENSG00000120729.8_MYOT      | ENSG00000160789.18_LMNA | -0.48433 | -0.597463757 | -0.35229424 | 2.58E-10 | 5.03E-08 | 1.32E-05 |
| ENSG00000243811.6_APOBEC3C  | ENSG00000160789.18_LMNA | 0.26396  | 0.109359404  | 0.406099509 | 1.02E-03 | 1.17E-02 | 1.00E+00 |
| ENSG00000179988.12_PSTK     | ENSG00000160789.18_LMNA | -0.44615 | -0.565201418 | -0.30888328 | 8.38E-09 | 9.31E-07 | 4.30E-04 |
| ENSG00000263214.1_          | ENSG00000160789.18_LMNA | -0.04594 | -0.203648783 | 0.11409771  | 5.74E-01 | 8.01E-01 | 1.00E+00 |
| ENSG00000261220.2_RP11-629O | ENSG00000160789.18_LMNA | 0.03935  | -0.12060617  | 0.197314688 | 6.30E-01 | 8.34E-01 | 1.00E+00 |
| ENSG00000166535.18_A2ML1    | ENSG00000160789.18_LMNA | -0.21422 | -0.361102352 | -0.05695824 | 8.05E-03 | 5.58E-02 | 1.00E+00 |
| ENSG00000275993.2_CH507-42P | ENSG00000160789.18_LMNA | 0.10519  | -0.054933581 | 0.260033255 | 1.97E-01 | 4.67E-01 | 1.00E+00 |
| ENSG00000100218.10_RSPH14   | ENSG00000160789.18_LMNA | 0.07631  | -0.083907391 | 0.23268649  | 3.50E-01 | 6.34E-01 | 1.00E+00 |
| ENSG00000230457.3_PA2G4P4   | ENSG00000160789.18_LMNA | 0.01918  | -0.140451962 | 0.177835308 | 8.15E-01 | 9.27E-01 | 1.00E+00 |
| ENSG00000165259.12_HDX      | ENSG00000160789.18_LMNA | -0.25048 | -0.393974244 | -0.09507477 | 1.86E-03 | 1.85E-02 | 1.00E+00 |
| ENSG00000271755.1_RP1-153G1 | ENSG00000160789.18_LMNA | -0.26479 | -0.406844354 | -0.11024091 | 9.78E-04 | 1.14E-02 | 1.00E+00 |
| ENSG00000227218.6_RP11-203J | ENSG00000160789.18_LMNA | 0.17178  | 0.012935976  | 0.322172838 | 3.43E-02 | 1.57E-01 | 1.00E+00 |
| ENSG00000173811.9_CCDC13-A  | ENSG00000160789.18_LMNA | -0.31849 | -0.454635479 | -0.16779323 | 6.37E-05 | 1.30E-03 | 1.00E+00 |
| ENSG00000100583.4_SAMD15    | ENSG00000160789.18_LMNA | 0.20539  | 0.047754636  | 0.353050187 | 1.11E-02 | 7.07E-02 | 1.00E+00 |
| ENSG00000271984.1_RP3-337O1 | ENSG00000160789.18_LMNA | 0.22178  | 0.064867323  | 0.367985904 | 6.03E-03 | 4.52E-02 | 1.00E+00 |
| ENSG00000236533.1_AC009413. | ENSG00000160789.18_LMNA | -0.1573  | -0.308768886 | 0.001949029 | 5.29E-02 | 2.09E-01 | 1.00E+00 |
| ENSG00000172382.8_PRSS27    | ENSG00000160789.18_LMNA | -0.04195 | -0.199812978 | 0.118042367 | 6.08E-01 | 8.21E-01 | 1.00E+00 |
| ENSG00000260121.1_RP5-1142A | ENSG00000160789.18_LMNA | 0.24136  | 0.085437773  | 0.385734848 | 2.74E-03 | 2.49E-02 | 1.00E+00 |
| ENSG00000162194.11_LBHD1    | ENSG00000160789.18_LMNA | -0.05957 | -0.216715844 | 0.100584208 | 4.66E-01 | 7.28E-01 | 1.00E+00 |
| ENSG00000243071.1_RP11-613M | ENSG00000160789.18_LMNA | -0.21465 | -0.361500313 | -0.05741445 | 7.92E-03 | 5.52E-02 | 1.00E+00 |
| ENSG00000146147.13_MLIP     | ENSG00000160789.18_LMNA | -0.41762 | -0.540863929 | -0.27682746 | 8.65E-08 | 6.38E-06 | 4.44E-03 |
| ENSG00000260526.1_RP11-73K9 | ENSG00000160789.18_LMNA | -0.25208 | -0.3954113   | -0.09676134 | 1.73E-03 | 1.75E-02 | 1.00E+00 |
| ENSG00000118804.8_STBD1     | ENSG00000160789.18_LMNA | 0.3411   | 0.192346038  | 0.474533469 | 1.71E-05 | 4.52E-04 | 8.75E-01 |
| ENSG00000213988.8_ZNF90     | ENSG00000160789.18_LMNA | -0.1909  | -0.339771528 | -0.03268955 | 1.85E-02 | 1.02E-01 | 1.00E+00 |
| ENSG00000272432.1_RP3-465N2 | ENSG00000160789.18_LMNA | -0.0177  | -0.176402656 | 0.141901534 | 8.29E-01 | 9.33E-01 | 1.00E+00 |
| ENSG00000232671.4_RP11-126K | ENSG00000160789.18_LMNA | 0.09561  | -0.064575343 | 0.250988681 | 2.41E-01 | 5.20E-01 | 1.00E+00 |
| ENSG00000154451.13_GBP5     | ENSG00000160789.18_LMNA | 0.31209  | 0.160887197  | 0.448986651 | 9.07E-05 | 1.75E-03 | 1.00E+00 |
| ENSG00000166455.12_C16orf46 | ENSG00000160789.18_LMNA | 0.00475  | -0.154563304 | 0.163831085 | 9.54E-01 | 9.81E-01 | 1.00E+00 |
| ENSG00000153721.16_CNKSR3   | ENSG00000160789.18_LMNA | 0.15032  | -0.009096811 | 0.302288142 | 6.45E-02 | 2.37E-01 | 1.00E+00 |

|                              |                         |          |              |             |          |          |          |
|------------------------------|-------------------------|----------|--------------|-------------|----------|----------|----------|
| ENSG00000165186.10_PTCHD1    | ENSG00000160789.18_LMNA | 0.15796  | -0.00127415  | 0.309379297 | 5.19E-02 | 2.06E-01 | 1.00E+00 |
| ENSG00000248641.1_HMGA1P2    | ENSG00000160789.18_LMNA | 0.12667  | -0.033202553 | 0.280217646 | 1.20E-01 | 3.48E-01 | 1.00E+00 |
| ENSG00000162814.9_SPATA17    | ENSG00000160789.18_LMNA | 0.08813  | -0.072082847 | 0.243907813 | 2.80E-01 | 5.66E-01 | 1.00E+00 |
| ENSG00000062038.12_CDH3      | ENSG00000160789.18_LMNA | -0.21742 | -0.36401924  | -0.06030504 | 7.13E-03 | 5.11E-02 | 1.00E+00 |
| ENSG00000239473.1_RPL7P38    | ENSG00000160789.18_LMNA | -0.28739 | -0.427055493 | -0.13433979 | 3.31E-04 | 4.85E-03 | 1.00E+00 |
| ENSG00000234380.1_LINC01426  | ENSG00000160789.18_LMNA | 0.14083  | -0.018791319 | 0.293452096 | 8.35E-02 | 2.80E-01 | 1.00E+00 |
| ENSG00000259838.1_TCEB1P2    | ENSG00000160789.18_LMNA | 0.0124   | -0.147086833 | 0.17126682  | 8.79E-01 | 9.53E-01 | 1.00E+00 |
| ENSG00000135537.15_LACE1     | ENSG00000160789.18_LMNA | -0.0945  | -0.249943158 | 0.065686113 | 2.47E-01 | 5.27E-01 | 1.00E+00 |
| ENSG00000249626.1_RP11-496H  | ENSG00000160789.18_LMNA | 0.18001  | 0.021425794  | 0.329762796 | 2.65E-02 | 1.32E-01 | 1.00E+00 |
| ENSG00000215187.8_FAM166B    | ENSG00000160789.18_LMNA | -0.33606 | -0.470113498 | -0.18686139 | 2.31E-05 | 5.79E-04 | 1.00E+00 |
| ENSG00000236963.4_LINC01141  | ENSG00000160789.18_LMNA | -0.18498 | -0.33433808  | -0.02656509 | 2.25E-02 | 1.17E-01 | 1.00E+00 |
| ENSG00000213971.6_           | ENSG00000160789.18_LMNA | -0.49342 | -0.605089749 | -0.36271198 | 1.06E-10 | 2.33E-08 | 5.42E-06 |
| ENSG00000259642.2_ST20-AS1   | ENSG00000160789.18_LMNA | 0.12717  | -0.032691183 | 0.280689307 | 1.18E-01 | 3.45E-01 | 1.00E+00 |
| ENSG00000241746.1_RP11-941H  | ENSG00000160789.18_LMNA | -0.08189 | -0.237991935 | 0.078327834 | 3.16E-01 | 6.02E-01 | 1.00E+00 |
| ENSG00000272864.1_RP11-17E1  | ENSG00000160789.18_LMNA | -0.04093 | -0.198838141 | 0.119043273 | 6.17E-01 | 8.26E-01 | 1.00E+00 |
| ENSG00000145147.18_SLIT2     | ENSG00000160789.18_LMNA | -0.08418 | -0.240165319 | 0.076036422 | 3.02E-01 | 5.89E-01 | 1.00E+00 |
| ENSG00000238018.2_AC093110.1 | ENSG00000160789.18_LMNA | -0.05189 | -0.209364858 | 0.108200776 | 5.25E-01 | 7.70E-01 | 1.00E+00 |
| ENSG00000224238.2_WARS2-IT1  | ENSG00000160789.18_LMNA | 0.03601  | -0.123899326 | 0.194099613 | 6.60E-01 | 8.50E-01 | 1.00E+00 |
| ENSG00000271533.1_RP3-368A4  | ENSG00000160789.18_LMNA | -0.13829 | -0.291083207 | 0.021380414 | 8.93E-02 | 2.91E-01 | 1.00E+00 |
| ENSG00000078328.18_RBFOX1    | ENSG00000160789.18_LMNA | -0.25019 | -0.3937051   | -0.09475909 | 1.88E-03 | 1.87E-02 | 1.00E+00 |
| ENSG00000015133.17_CCDC88C   | ENSG00000160789.18_LMNA | 0.08043  | -0.079792067 | 0.236601461 | 3.25E-01 | 6.11E-01 | 1.00E+00 |
| ENSG00000254389.3_RHPN1-AS   | ENSG00000160789.18_LMNA | 0.14063  | -0.018997844 | 0.293263276 | 8.40E-02 | 2.80E-01 | 1.00E+00 |
| ENSG00000161912.16_ADCY10P   | ENSG00000160789.18_LMNA | -0.19187 | -0.340663223 | -0.03369686 | 1.79E-02 | 9.96E-02 | 1.00E+00 |
| ENSG00000259376.1_RP11-505E  | ENSG00000160789.18_LMNA | 0.24148  | 0.085572853  | 0.38585067  | 2.73E-03 | 2.48E-02 | 1.00E+00 |
| ENSG00000139629.14_GALNT6    | ENSG00000160789.18_LMNA | 0.00713  | -0.152244491 | 0.166141141 | 9.31E-01 | 9.73E-01 | 1.00E+00 |
| ENSG00000174130.11_TLR6      | ENSG00000160789.18_LMNA | -0.01562 | -0.174383559 | 0.143942163 | 8.49E-01 | 9.41E-01 | 1.00E+00 |
| ENSG00000145242.12_EPHA5     | ENSG00000160789.18_LMNA | -0.0158  | -0.174564209 | 0.143759697 | 8.47E-01 | 9.40E-01 | 1.00E+00 |
| ENSG00000232450.1_RP4-730K3  | ENSG00000160789.18_LMNA | 0.10466  | -0.055464547 | 0.259536609 | 1.99E-01 | 4.70E-01 | 1.00E+00 |
| ENSG00000187672.11_ERC2      | ENSG00000160789.18_LMNA | -0.3643  | -0.494803221 | -0.2177262  | 3.95E-06 | 1.37E-04 | 2.03E-01 |
| ENSG00000234773.5_CTD-2666L  | ENSG00000160789.18_LMNA | 0.05898  | -0.101167328 | 0.216154326 | 4.70E-01 | 7.31E-01 | 1.00E+00 |
| ENSG00000243663.1_RPS4XP14   | ENSG00000160789.18_LMNA | -0.07592 | -0.232313722 | 0.084298674 | 3.53E-01 | 6.36E-01 | 1.00E+00 |
| ENSG00000102554.12_KLF5      | ENSG00000160789.18_LMNA | 0.36158  | 0.214743102  | 0.49243632  | 4.72E-06 | 1.59E-04 | 2.42E-01 |
| ENSG00000242952.1_RPSAP3     | ENSG00000160789.18_LMNA | -0.19678 | -0.345167045 | -0.03879416 | 1.51E-02 | 8.83E-02 | 1.00E+00 |

|                              |                         |          |              |             |          |          |          |
|------------------------------|-------------------------|----------|--------------|-------------|----------|----------|----------|
| ENSG00000261604.1_CTD-2636A  | ENSG00000160789.18_LMNA | -0.12763 | -0.281114528 | 0.032230022 | 1.17E-01 | 3.43E-01 | 1.00E+00 |
| ENSG00000273055.1_CTB-13F3.1 | ENSG00000160789.18_LMNA | 0.14398  | -0.015581391 | 0.2963837   | 7.68E-02 | 2.65E-01 | 1.00E+00 |
| ENSG00000213650.3_RP11-760D  | ENSG00000160789.18_LMNA | -0.27633 | -0.417175417 | -0.1225158  | 5.69E-04 | 7.45E-03 | 1.00E+00 |
| ENSG00000151789.8_ZNF385D    | ENSG00000160789.18_LMNA | 0.13121  | -0.028590057 | 0.284466502 | 1.07E-01 | 3.25E-01 | 1.00E+00 |
| ENSG00000166246.12_C16orf71  | ENSG00000160789.18_LMNA | -0.04845 | -0.206064691 | 0.11160809  | 5.53E-01 | 7.88E-01 | 1.00E+00 |
| ENSG00000231871.4_IPO9-AS1   | ENSG00000160789.18_LMNA | -0.03897 | -0.196948926 | 0.120981169 | 6.34E-01 | 8.36E-01 | 1.00E+00 |
| ENSG00000104055.13_TGM5      | ENSG00000160789.18_LMNA | -0.05991 | -0.217040476 | 0.100246988 | 4.63E-01 | 7.26E-01 | 1.00E+00 |
| ENSG00000213904.7_LIPE-AS1   | ENSG00000160789.18_LMNA | -0.20923 | -0.35655031  | -0.05174891 | 9.68E-03 | 6.41E-02 | 1.00E+00 |
| ENSG00000167968.11_DNASE1L   | ENSG00000160789.18_LMNA | -0.24567 | -0.389634187 | -0.08999154 | 2.28E-03 | 2.16E-02 | 1.00E+00 |
| ENSG00000241282.1_RPL34P33   | ENSG00000160789.18_LMNA | -0.15614 | -0.307691629 | 0.003139368 | 5.47E-02 | 2.13E-01 | 1.00E+00 |
| ENSG00000277342.1_RP11-843B  | ENSG00000160789.18_LMNA | -0.08317 | -0.239198924 | 0.07705571  | 3.08E-01 | 5.95E-01 | 1.00E+00 |
| ENSG00000159556.8_ISL2       | ENSG00000160789.18_LMNA | -0.12193 | -0.275774956 | 0.038011238 | 1.35E-01 | 3.73E-01 | 1.00E+00 |
| ENSG00000279069.1_RP11-159D  | ENSG00000160789.18_LMNA | -0.00017 | -0.159364634 | 0.159036761 | 9.98E-01 | 9.99E-01 | 1.00E+00 |
| ENSG00000166435.14_XRRA1     | ENSG00000160789.18_LMNA | 0.05884  | -0.101308038 | 0.216018797 | 4.71E-01 | 7.31E-01 | 1.00E+00 |
| ENSG00000213085.8_CFAP45     | ENSG00000160789.18_LMNA | 0.42451  | 0.28453407   | 0.546755608 | 5.02E-08 | 4.09E-06 | 2.58E-03 |
| ENSG00000215492.6_HNRNPA1F   | ENSG00000160789.18_LMNA | -0.00783 | -0.16682233  | 0.15156005  | 9.24E-01 | 9.71E-01 | 1.00E+00 |
| ENSG00000170577.7_SIX2       | ENSG00000160789.18_LMNA | 0.01552  | -0.144038379 | 0.174288292 | 8.50E-01 | 9.41E-01 | 1.00E+00 |
| ENSG00000159958.4_TNFRSF13I  | ENSG00000160789.18_LMNA | -0.29065 | -0.429953081 | -0.13782336 | 2.81E-04 | 4.27E-03 | 1.00E+00 |
| ENSG00000248559.1_RP11-215P  | ENSG00000160789.18_LMNA | -0.30555 | -0.443191603 | -0.1538316  | 1.29E-04 | 2.32E-03 | 1.00E+00 |
| ENSG00000233668.1_RP11-571F  | ENSG00000160789.18_LMNA | -0.09926 | -0.254437445 | 0.060905804 | 2.24E-01 | 5.00E-01 | 1.00E+00 |
| ENSG00000151846.8_PABPC3     | ENSG00000160789.18_LMNA | 0.01547  | -0.144081816 | 0.174245282 | 8.50E-01 | 9.41E-01 | 1.00E+00 |
| ENSG00000214960.8_ISPD       | ENSG00000160789.18_LMNA | -0.11443 | -0.268730704 | 0.045606129 | 1.60E-01 | 4.14E-01 | 1.00E+00 |
| ENSG00000124549.13_BTN2A3P   | ENSG00000160789.18_LMNA | 0.10581  | -0.054301098 | 0.260624637 | 1.94E-01 | 4.63E-01 | 1.00E+00 |
| ENSG00000178773.13_CPNE7     | ENSG00000160789.18_LMNA | -0.02628 | -0.184712034 | 0.13347497  | 7.48E-01 | 8.95E-01 | 1.00E+00 |
| ENSG00000251192.6_ZNF674     | ENSG00000160789.18_LMNA | -0.07015 | -0.226819282 | 0.090054706 | 3.90E-01 | 6.69E-01 | 1.00E+00 |
| ENSG00000136750.10_GAD2      | ENSG00000160789.18_LMNA | -0.2173  | -0.363912708 | -0.06018269 | 7.16E-03 | 5.12E-02 | 1.00E+00 |
| ENSG00000140479.15_PCSK6     | ENSG00000160789.18_LMNA | -0.26439 | -0.406477086 | -0.1098062  | 9.97E-04 | 1.16E-02 | 1.00E+00 |
| ENSG00000267498.1_CTB-32O4.1 | ENSG00000160789.18_LMNA | -0.32546 | -0.460789022 | -0.17534847 | 4.29E-05 | 9.48E-04 | 1.00E+00 |
| ENSG00000072818.10_ACAP1     | ENSG00000160789.18_LMNA | 0.19486  | 0.036801225  | 0.343407824 | 1.61E-02 | 9.25E-02 | 1.00E+00 |
| ENSG00000271784.1_RP1-28H20  | ENSG00000160789.18_LMNA | 0.13455  | -0.025188576 | 0.287591958 | 9.84E-02 | 3.09E-01 | 1.00E+00 |
| ENSG00000225614.2_ZNF469     | ENSG00000160789.18_LMNA | -0.01326 | -0.172098754 | 0.146248074 | 8.71E-01 | 9.50E-01 | 1.00E+00 |
| ENSG00000164736.5_SOX17      | ENSG00000160789.18_LMNA | -0.06067 | -0.217771078 | 0.099487789 | 4.58E-01 | 7.22E-01 | 1.00E+00 |
| ENSG00000270605.1_RP5-1092A  | ENSG00000160789.18_LMNA | -0.26145 | -0.403842452 | -0.10669108 | 1.14E-03 | 1.28E-02 | 1.00E+00 |

|                              |                         |          |              |             |          |          |          |
|------------------------------|-------------------------|----------|--------------|-------------|----------|----------|----------|
| ENSG00000183569.16_SERHL2    | ENSG00000160789.18_LMNA | 0.12322  | -0.036699426 | 0.276988255 | 1.30E-01 | 3.66E-01 | 1.00E+00 |
| ENSG00000197565.14_COL4A6    | ENSG00000160789.18_LMNA | -0.01302 | -0.171868438 | 0.146480325 | 8.73E-01 | 9.51E-01 | 1.00E+00 |
| ENSG00000273001.1_RP11-118K  | ENSG00000160789.18_LMNA | -0.01009 | -0.169014485 | 0.149355355 | 9.02E-01 | 9.62E-01 | 1.00E+00 |
| ENSG00000225695.1_HNRNPA1F   | ENSG00000160789.18_LMNA | -0.05469 | -0.212043014 | 0.105430172 | 5.03E-01 | 7.55E-01 | 1.00E+00 |
| ENSG00000235374.2_SSR4P1     | ENSG00000160789.18_LMNA | 0.26175  | 0.107005892  | 0.404108934 | 1.12E-03 | 1.27E-02 | 1.00E+00 |
| ENSG00000224786.1_CETN4P     | ENSG00000160789.18_LMNA | -0.17229 | -0.322638558 | -0.01345563 | 3.38E-02 | 1.55E-01 | 1.00E+00 |
| ENSG00000147003.5_TMEN27     | ENSG00000160789.18_LMNA | -0.09932 | -0.254493918 | 0.060845645 | 2.23E-01 | 4.99E-01 | 1.00E+00 |
| ENSG00000141965.4_FEM1A      | ENSG00000160789.18_LMNA | 0.09775  | -0.062427038 | 0.253008707 | 2.31E-01 | 5.09E-01 | 1.00E+00 |
| ENSG00000253204.1_RP5-1009N  | ENSG00000160789.18_LMNA | -0.08011 | -0.23629395  | 0.080115706 | 3.27E-01 | 6.13E-01 | 1.00E+00 |
| ENSG00000277715.1_RP11-651L  | ENSG00000160789.18_LMNA | -0.08016 | -0.236343655 | 0.080063398 | 3.26E-01 | 6.13E-01 | 1.00E+00 |
| ENSG00000166004.13_CEP295    | ENSG00000160789.18_LMNA | -0.00257 | -0.161703389 | 0.156695968 | 9.75E-01 | 9.90E-01 | 1.00E+00 |
| ENSG00000179532.11_DNHD1     | ENSG00000160789.18_LMNA | 0.08471  | -0.07550637  | 0.240667618 | 2.99E-01 | 5.86E-01 | 1.00E+00 |
| ENSG00000133958.12_UNC79     | ENSG00000160789.18_LMNA | -0.24437 | -0.388461985 | -0.08862129 | 2.41E-03 | 2.26E-02 | 1.00E+00 |
| ENSG00000244627.4_RP3-449O1  | ENSG00000160789.18_LMNA | -0.23566 | -0.380586793 | -0.07944487 | 3.47E-03 | 2.98E-02 | 1.00E+00 |
| ENSG00000277877.3_           | ENSG00000160789.18_LMNA | -0.00034 | -0.159531669 | 0.158869699 | 9.97E-01 | 9.99E-01 | 1.00E+00 |
| ENSG00000268030.1_AC005253.  | ENSG00000160789.18_LMNA | -0.04074 | -0.198652899 | 0.119233395 | 6.18E-01 | 8.27E-01 | 1.00E+00 |
| ENSG00000256742.1_RP13-941N  | ENSG00000160789.18_LMNA | -0.09949 | -0.25465676  | 0.060672161 | 2.23E-01 | 4.98E-01 | 1.00E+00 |
| ENSG00000219201.4_RP11-181C  | ENSG00000160789.18_LMNA | 0.04865  | -0.111415761 | 0.206251165 | 5.52E-01 | 7.87E-01 | 1.00E+00 |
| ENSG00000158113.11_LRRC43    | ENSG00000160789.18_LMNA | 0.15581  | -0.00347303  | 0.307389521 | 5.53E-02 | 2.14E-01 | 1.00E+00 |
| ENSG00000143375.13_CGN       | ENSG00000160789.18_LMNA | 0.07011  | -0.090094051 | 0.226781656 | 3.91E-01 | 6.69E-01 | 1.00E+00 |
| ENSG00000235609.7_AF127936.  | ENSG00000160789.18_LMNA | 0.03169  | -0.12815926  | 0.189930524 | 6.98E-01 | 8.71E-01 | 1.00E+00 |
| ENSG00000186891.12_TNFRSF1   | ENSG00000160789.18_LMNA | 0.45173  | 0.315196322  | 0.5699424   | 5.17E-09 | 6.16E-07 | 2.65E-04 |
| ENSG00000260942.1_CAPN10-A   | ENSG00000160789.18_LMNA | -0.11009 | -0.264648234 | 0.04999115  | 1.77E-01 | 4.38E-01 | 1.00E+00 |
| ENSG00000168038.9_ULK4       | ENSG00000160789.18_LMNA | 0.10358  | -0.056556767 | 0.258514465 | 2.04E-01 | 4.75E-01 | 1.00E+00 |
| ENSG00000105991.7_HOXA1      | ENSG00000160789.18_LMNA | 0.07511  | -0.085112934 | 0.231537692 | 3.58E-01 | 6.41E-01 | 1.00E+00 |
| ENSG00000124224.15_PPP4R1L   | ENSG00000160789.18_LMNA | 0.09104  | -0.069158579 | 0.246669913 | 2.65E-01 | 5.48E-01 | 1.00E+00 |
| ENSG00000248596.5_RP11-844P  | ENSG00000160789.18_LMNA | -0.3041  | -0.441907779 | -0.1522725  | 1.40E-04 | 2.46E-03 | 1.00E+00 |
| ENSG00000233558.1_RP3-486I3. | ENSG00000160789.18_LMNA | -0.14178 | -0.294339818 | 0.017819997 | 8.14E-02 | 2.75E-01 | 1.00E+00 |
| ENSG00000160207.7_HSF2BP     | ENSG00000160789.18_LMNA | -0.05419 | -0.211562313 | 0.10592783  | 5.07E-01 | 7.57E-01 | 1.00E+00 |
| ENSG00000185742.6_C11orf87   | ENSG00000160789.18_LMNA | -0.08333 | -0.239355408 | 0.076890706 | 3.07E-01 | 5.94E-01 | 1.00E+00 |
| ENSG00000146477.5_SLC22A3    | ENSG00000160789.18_LMNA | -0.33282 | -0.467266911 | -0.18333844 | 2.80E-05 | 6.75E-04 | 1.00E+00 |
| ENSG00000278000.1_AC139100.  | ENSG00000160789.18_LMNA | 0.10736  | -0.052739675 | 0.262083585 | 1.88E-01 | 4.55E-01 | 1.00E+00 |
| ENSG00000224536.1_RP11-134G  | ENSG00000160789.18_LMNA | -0.00011 | -0.159305411 | 0.159095989 | 9.99E-01 | 1.00E+00 | 1.00E+00 |

|                             |                         |          |              |             |          |          |          |
|-----------------------------|-------------------------|----------|--------------|-------------|----------|----------|----------|
| ENSG00000233045.1_AC097523. | ENSG00000160789.18_LMNA | -0.17836 | -0.328243906 | -0.01972326 | 2.79E-02 | 1.36E-01 | 1.00E+00 |
| ENSG00000105717.12_PBX4     | ENSG00000160789.18_LMNA | 0.04433  | -0.115691609 | 0.202100041 | 5.88E-01 | 8.08E-01 | 1.00E+00 |
| ENSG00000177082.11_WDR73    | ENSG00000160789.18_LMNA | -0.09535 | -0.250748379 | 0.064830712 | 2.43E-01 | 5.22E-01 | 1.00E+00 |
| ENSG00000166321.12_NUDT13   | ENSG00000160789.18_LMNA | -0.16712 | -0.317860537 | -0.00813219 | 3.96E-02 | 1.72E-01 | 1.00E+00 |
| ENSG00000176896.8_TCEANC    | ENSG00000160789.18_LMNA | -0.4462  | -0.565246088 | -0.30894266 | 8.35E-09 | 9.29E-07 | 4.28E-04 |
| ENSG00000100079.6_LGALS2    | ENSG00000160789.18_LMNA | 0.19012  | 0.031884672  | 0.339058629 | 1.90E-02 | 1.04E-01 | 1.00E+00 |
| ENSG00000206147.5_RPL23AP5  | ENSG00000160789.18_LMNA | -0.03724 | -0.195278803 | 0.122692312 | 6.49E-01 | 8.44E-01 | 1.00E+00 |
| ENSG00000181619.11_GPR135   | ENSG00000160789.18_LMNA | 0.27949  | 0.125892024  | 0.420003696 | 4.88E-04 | 6.61E-03 | 1.00E+00 |
| ENSG00000268189.2_AC005785. | ENSG00000160789.18_LMNA | 0.11404  | -0.045993551 | 0.268370467 | 1.62E-01 | 4.17E-01 | 1.00E+00 |
| ENSG00000163121.8_NEURL3    | ENSG00000160789.18_LMNA | 0.02133  | -0.138341819 | 0.17991841  | 7.94E-01 | 9.17E-01 | 1.00E+00 |
| ENSG00000273237.1_CTB-119C2 | ENSG00000160789.18_LMNA | -0.33256 | -0.467032407 | -0.18304854 | 2.84E-05 | 6.82E-04 | 1.00E+00 |
| ENSG00000143125.5_PROK1     | ENSG00000160789.18_LMNA | -0.271   | -0.412403995 | -0.11683539 | 7.33E-04 | 9.08E-03 | 1.00E+00 |
| ENSG00000147041.10_SYTL5    | ENSG00000160789.18_LMNA | 0.39763  | 0.254538398  | 0.523676925 | 3.93E-07 | 2.17E-05 | 2.01E-02 |
| ENSG00000227507.2_LTB       | ENSG00000160789.18_LMNA | 0.17284  | 0.014026234  | 0.323149767 | 3.32E-02 | 1.53E-01 | 1.00E+00 |
| ENSG00000226540.2_GAPDHP73  | ENSG00000160789.18_LMNA | 0.14323  | -0.016341894 | 0.29568967  | 7.83E-02 | 2.69E-01 | 1.00E+00 |
| ENSG00000269388.1_AC018755. | ENSG00000160789.18_LMNA | -0.03298 | -0.191175361 | 0.126888526 | 6.87E-01 | 8.64E-01 | 1.00E+00 |
| ENSG00000166262.14_FAM227B  | ENSG00000160789.18_LMNA | -0.13516 | -0.288162492 | 0.024566872 | 9.69E-02 | 3.06E-01 | 1.00E+00 |
| ENSG00000232699.3_BDH2P1    | ENSG00000160789.18_LMNA | -0.07303 | -0.229561663 | 0.087184403 | 3.71E-01 | 6.52E-01 | 1.00E+00 |
| ENSG00000253106.1_RP11-158K | ENSG00000160789.18_LMNA | -0.04257 | -0.200412671 | 0.117426317 | 6.03E-01 | 8.18E-01 | 1.00E+00 |
| ENSG00000213352.3_GAPDHP44  | ENSG00000160789.18_LMNA | 0.25253  | 0.097234976  | 0.395814598 | 1.70E-03 | 1.73E-02 | 1.00E+00 |
| ENSG00000188312.12_CENPP    | ENSG00000160789.18_LMNA | 0.08014  | -0.080077531 | 0.236330225 | 3.26E-01 | 6.13E-01 | 1.00E+00 |
| ENSG00000243859.3_RPL5P17   | ENSG00000160789.18_LMNA | -0.14915 | -0.301195682 | 0.010298589 | 6.67E-02 | 2.42E-01 | 1.00E+00 |
| ENSG00000271843.1_RP11-245J | ENSG00000160789.18_LMNA | -0.3738  | -0.503061554 | -0.22817518 | 2.10E-06 | 8.28E-05 | 1.08E-01 |
| ENSG00000256356.1_HSPA8P5   | ENSG00000160789.18_LMNA | -0.01829 | -0.176972138 | 0.141325489 | 8.23E-01 | 9.31E-01 | 1.00E+00 |
| ENSG00000272182.1_RP11-802O | ENSG00000160789.18_LMNA | -0.10662 | -0.261385289 | 0.053487212 | 1.91E-01 | 4.59E-01 | 1.00E+00 |
| ENSG00000165272.13_AQP3     | ENSG00000160789.18_LMNA | 0.19275  | 0.0346084    | 0.341469668 | 1.74E-02 | 9.74E-02 | 1.00E+00 |
| ENSG00000163288.12_GABRB1   | ENSG00000160789.18_LMNA | -0.22683 | -0.372577857 | -0.07016466 | 4.95E-03 | 3.89E-02 | 1.00E+00 |
| ENSG00000164920.8_OSR2      | ENSG00000160789.18_LMNA | 0.08991  | -0.070301134 | 0.24559133  | 2.71E-01 | 5.55E-01 | 1.00E+00 |
| ENSG00000198221.8_AFDN-AS1  | ENSG00000160789.18_LMNA | -0.23163 | -0.376933125 | -0.07520476 | 4.09E-03 | 3.37E-02 | 1.00E+00 |
| ENSG00000240809.1_RP11-550F | ENSG00000160789.18_LMNA | 0.0943   | -0.065889824 | 0.249751334 | 2.48E-01 | 5.28E-01 | 1.00E+00 |
| ENSG00000233297.4_RASA4DP   | ENSG00000160789.18_LMNA | 0.02555  | -0.13420026  | 0.183998616 | 7.55E-01 | 8.98E-01 | 1.00E+00 |
| ENSG00000133019.10_CHRM3    | ENSG00000160789.18_LMNA | 0.13732  | -0.022374068 | 0.290173046 | 9.16E-02 | 2.95E-01 | 1.00E+00 |
| ENSG00000185532.13_PRKG1    | ENSG00000160789.18_LMNA | -0.01115 | -0.170047671 | 0.148315159 | 8.92E-01 | 9.57E-01 | 1.00E+00 |



|                              |                         |          |              |             |          |          |          |
|------------------------------|-------------------------|----------|--------------|-------------|----------|----------|----------|
| ENSG00000272720.1_CTA-228A9  | ENSG00000160789.18_LMNA | -0.15236 | -0.304184603 | 0.007008443 | 6.09E-02 | 2.28E-01 | 1.00E+00 |
| ENSG00000212127.5_TAS2R14    | ENSG00000160789.18_LMNA | -0.26461 | -0.406680917 | -0.11004745 | 9.86E-04 | 1.15E-02 | 1.00E+00 |
| ENSG00000150667.6_FSIP1      | ENSG00000160789.18_LMNA | 0.19406  | 0.035969767  | 0.342673237 | 1.66E-02 | 9.44E-02 | 1.00E+00 |
| ENSG00000217801.8_RP11-465B  | ENSG00000160789.18_LMNA | 0.05091  | -0.109176344 | 0.208420706 | 5.33E-01 | 7.75E-01 | 1.00E+00 |
| ENSG00000095752.5_IL11       | ENSG00000160789.18_LMNA | 0.47686  | 0.343758611  | 0.591182288 | 5.28E-10 | 9.17E-08 | 2.71E-05 |
| ENSG00000278396.1_RP11-120E  | ENSG00000160789.18_LMNA | -0.07153 | -0.228134209 | 0.088679099 | 3.81E-01 | 6.60E-01 | 1.00E+00 |
| ENSG00000250327.1_RPSAP70    | ENSG00000160789.18_LMNA | -0.09547 | -0.250861503 | 0.0647105   | 2.42E-01 | 5.21E-01 | 1.00E+00 |
| ENSG00000228169.3_PPIAP19    | ENSG00000160789.18_LMNA | 0.06181  | -0.098356905 | 0.218858705 | 4.49E-01 | 7.15E-01 | 1.00E+00 |
| ENSG00000185278.13_ZBTB37    | ENSG00000160789.18_LMNA | -0.10158 | -0.256629619 | 0.058568856 | 2.13E-01 | 4.87E-01 | 1.00E+00 |
| ENSG00000236330.1_RPL5P9     | ENSG00000160789.18_LMNA | -0.13448 | -0.287528104 | 0.025258142 | 9.86E-02 | 3.09E-01 | 1.00E+00 |
| ENSG00000147485.11_PXDNL     | ENSG00000160789.18_LMNA | 0.12798  | -0.031871448 | 0.281445072 | 1.16E-01 | 3.41E-01 | 1.00E+00 |
| ENSG00000232104.3_RFX3-AS1   | ENSG00000160789.18_LMNA | 0.03687  | -0.123050977 | 0.194928502 | 6.52E-01 | 8.46E-01 | 1.00E+00 |
| ENSG00000214688.4_C10orf105  | ENSG00000160789.18_LMNA | -0.11233 | -0.266757172 | 0.047727433 | 1.68E-01 | 4.26E-01 | 1.00E+00 |
| ENSG00000150275.16_PCDH15    | ENSG00000160789.18_LMNA | -0.38873 | -0.515994839 | -0.24466746 | 7.46E-07 | 3.62E-05 | 3.83E-02 |
| ENSG00000151388.9_ADAMTS12   | ENSG00000160789.18_LMNA | 0.13407  | -0.025680925 | 0.287139974 | 9.96E-02 | 3.11E-01 | 1.00E+00 |
| ENSG00000112394.15_SLC16A1C  | ENSG00000160789.18_LMNA | -0.01472 | -0.173510741 | 0.144823452 | 8.57E-01 | 9.44E-01 | 1.00E+00 |
| ENSG00000101194.16_SLC17A9   | ENSG00000160789.18_LMNA | 0.28516  | 0.131946483  | 0.425061281 | 3.70E-04 | 5.30E-03 | 1.00E+00 |
| ENSG00000242692.1_RPS27AP1   | ENSG00000160789.18_LMNA | -0.146   | -0.29827083  | 0.013511692 | 7.27E-02 | 2.56E-01 | 1.00E+00 |
| ENSG00000188234.12_AGAP4     | ENSG00000160789.18_LMNA | -0.10861 | -0.263259005 | 0.051480574 | 1.83E-01 | 4.47E-01 | 1.00E+00 |
| ENSG00000224971.1_SUMO2P3    | ENSG00000160789.18_LMNA | -0.18374 | -0.333192514 | -0.02527678 | 2.35E-02 | 1.21E-01 | 1.00E+00 |
| ENSG00000184669.7_OR7E14P    | ENSG00000160789.18_LMNA | 0.15619  | -0.003088349 | 0.307737818 | 5.47E-02 | 2.13E-01 | 1.00E+00 |
| ENSG00000173295.6_FAM86B3P   | ENSG00000160789.18_LMNA | 0.27567  | 0.121818307  | 0.41659041  | 5.87E-04 | 7.65E-03 | 1.00E+00 |
| ENSG00000177197.7_PCNP5      | ENSG00000160789.18_LMNA | 0.0176   | -0.14199734  | 0.176307921 | 8.30E-01 | 9.33E-01 | 1.00E+00 |
| ENSG00000215883.8_CYB5RL     | ENSG00000160789.18_LMNA | 0.01573  | -0.143831426 | 0.174493197 | 8.47E-01 | 9.40E-01 | 1.00E+00 |
| ENSG00000250802.5_ZBED3-AS1  | ENSG00000160789.18_LMNA | -0.19025 | -0.339175265 | -0.03201633 | 1.89E-02 | 1.04E-01 | 1.00E+00 |
| ENSG00000178125.13_PPP1R42   | ENSG00000160789.18_LMNA | -0.20954 | -0.356833845 | -0.0520729  | 9.57E-03 | 6.36E-02 | 1.00E+00 |
| ENSG00000213186.6_TRIM59     | ENSG00000160789.18_LMNA | -0.07273 | -0.229271788 | 0.087488048 | 3.73E-01 | 6.53E-01 | 1.00E+00 |
| ENSG00000254481.1_PTP4A2P2   | ENSG00000160789.18_LMNA | 0.15224  | -0.007137986 | 0.304067036 | 6.12E-02 | 2.29E-01 | 1.00E+00 |
| ENSG00000130433.6_CACNG6     | ENSG00000160789.18_LMNA | 0.19369  | 0.035582178  | 0.342330677 | 1.68E-02 | 9.53E-02 | 1.00E+00 |
| ENSG00000215068.6_AC025171.1 | ENSG00000160789.18_LMNA | 0.01776  | -0.141844478 | 0.176459072 | 8.28E-01 | 9.33E-01 | 1.00E+00 |
| ENSG00000174353.16_STAG3L3   | ENSG00000160789.18_LMNA | 0.08567  | -0.074550791 | 0.241572736 | 2.94E-01 | 5.80E-01 | 1.00E+00 |
| ENSG00000186479.4_RGS7BP     | ENSG00000160789.18_LMNA | -0.23471 | -0.379717684 | -0.07843527 | 3.61E-03 | 3.07E-02 | 1.00E+00 |
| ENSG00000232273.1_FTH1P1     | ENSG00000160789.18_LMNA | 0.01444  | -0.145095178 | 0.173241525 | 8.60E-01 | 9.45E-01 | 1.00E+00 |

|                              |                         |          |              |             |          |          |          |
|------------------------------|-------------------------|----------|--------------|-------------|----------|----------|----------|
| ENSG00000147724.10_FAM135B   | ENSG00000160789.18_LMNA | -0.32317 | -0.458770388 | -0.17286631 | 4.89E-05 | 1.06E-03 | 1.00E+00 |
| ENSG00000279569.1_RP11-394B  | ENSG00000160789.18_LMNA | 0.02307  | -0.136631313 | 0.181604905 | 7.78E-01 | 9.09E-01 | 1.00E+00 |
| ENSG00000165996.12_HACD1     | ENSG00000160789.18_LMNA | -0.04996 | -0.207513922 | 0.110112726 | 5.41E-01 | 7.81E-01 | 1.00E+00 |
| ENSG00000255059.1_AP000620.  | ENSG00000160789.18_LMNA | 0.0654   | -0.094789795 | 0.222284217 | 4.23E-01 | 6.94E-01 | 1.00E+00 |
| ENSG00000108018.14_SORCS1    | ENSG00000160789.18_LMNA | -0.18691 | -0.33611058  | -0.02856048 | 2.11E-02 | 1.12E-01 | 1.00E+00 |
| ENSG00000152782.15_PANK1     | ENSG00000160789.18_LMNA | -0.19827 | -0.346528977 | -0.04033871 | 1.43E-02 | 8.51E-02 | 1.00E+00 |
| ENSG00000274460.1_CTD-2649C  | ENSG00000160789.18_LMNA | -0.15919 | -0.310521405 | 1.07E-05    | 5.01E-02 | 2.02E-01 | 1.00E+00 |
| ENSG00000182010.9_RTKN2      | ENSG00000160789.18_LMNA | -0.17805 | -0.327959132 | -0.01940425 | 2.82E-02 | 1.37E-01 | 1.00E+00 |
| ENSG00000203739.3_RP11-296C  | ENSG00000160789.18_LMNA | -0.06034 | -0.217451878 | 0.099819529 | 4.60E-01 | 7.24E-01 | 1.00E+00 |
| ENSG00000257790.1_EIF4A1P4   | ENSG00000160789.18_LMNA | 0.0845   | -0.075719611 | 0.240465562 | 3.01E-01 | 5.87E-01 | 1.00E+00 |
| ENSG00000276115.1_RP11-817I4 | ENSG00000160789.18_LMNA | 0.21998  | 0.062984539  | 0.366350258 | 6.47E-03 | 4.76E-02 | 1.00E+00 |
| ENSG00000213569.4_RP13-383K  | ENSG00000160789.18_LMNA | -0.09209 | -0.247658632 | 0.068110489 | 2.59E-01 | 5.42E-01 | 1.00E+00 |
| ENSG00000280734.1_LINC01232  | ENSG00000160789.18_LMNA | -0.00636 | -0.165390309 | 0.152998554 | 9.38E-01 | 9.75E-01 | 1.00E+00 |
| ENSG00000185055.9_EFCAB10    | ENSG00000160789.18_LMNA | -0.04296 | -0.200789466 | 0.117039119 | 5.99E-01 | 8.16E-01 | 1.00E+00 |
| ENSG00000178162.7_FAR2P2     | ENSG00000160789.18_LMNA | -0.05048 | -0.208011837 | 0.109598628 | 5.37E-01 | 7.78E-01 | 1.00E+00 |
| ENSG00000270996.1_RP11-342K  | ENSG00000160789.18_LMNA | -0.24602 | -0.389946774 | -0.09035713 | 2.25E-03 | 2.14E-02 | 1.00E+00 |
| ENSG00000263164.1_RP11-333E  | ENSG00000160789.18_LMNA | -0.05385 | -0.211242745 | 0.106258582 | 5.10E-01 | 7.59E-01 | 1.00E+00 |
| ENSG00000080947.13_CROCCP3   | ENSG00000160789.18_LMNA | -0.00598 | -0.165019068 | 0.153371256 | 9.42E-01 | 9.77E-01 | 1.00E+00 |
| ENSG00000231841.1_RP11-206F  | ENSG00000160789.18_LMNA | -0.03679 | -0.194845416 | 0.123136035 | 6.53E-01 | 8.46E-01 | 1.00E+00 |
| ENSG00000101958.12_GLRA2     | ENSG00000160789.18_LMNA | -0.25745 | -0.400243436 | -0.1024451  | 1.36E-03 | 1.46E-02 | 1.00E+00 |
| ENSG00000145779.7_TNFAIP8    | ENSG00000160789.18_LMNA | 0.18604  | 0.027659714  | 0.335310701 | 2.17E-02 | 1.15E-01 | 1.00E+00 |
| ENSG00000185900.8_POMK       | ENSG00000160789.18_LMNA | 0.01148  | -0.147994596 | 0.170365934 | 8.88E-01 | 9.57E-01 | 1.00E+00 |
| ENSG00000221995.5_TIAF1      | ENSG00000160789.18_LMNA | -0.06223 | -0.219259559 | 0.097939903 | 4.46E-01 | 7.13E-01 | 1.00E+00 |
| ENSG00000122483.16_CCDC18    | ENSG00000160789.18_LMNA | 0.19789  | 0.039944958  | 0.346181903 | 1.45E-02 | 8.59E-02 | 1.00E+00 |
| ENSG00000270629.4_NBPF14     | ENSG00000160789.18_LMNA | 0.35546  | 0.208026458  | 0.487091999 | 7.00E-06 | 2.20E-04 | 3.59E-01 |
| ENSG00000101605.11_MYOM1     | ENSG00000160789.18_LMNA | -0.04027 | -0.198203181 | 0.119694865 | 6.22E-01 | 8.29E-01 | 1.00E+00 |
| ENSG00000271992.1_RP11-42O1  | ENSG00000160789.18_LMNA | 0.14066  | -0.018962156 | 0.293295906 | 8.39E-02 | 2.80E-01 | 1.00E+00 |
| ENSG00000007264.12_MATK      | ENSG00000160789.18_LMNA | -0.15681 | -0.308314039 | 0.002451729 | 5.37E-02 | 2.11E-01 | 1.00E+00 |
| ENSG00000273759.1_RP4-563E1  | ENSG00000160789.18_LMNA | 0.05116  | -0.108927891 | 0.208661215 | 5.31E-01 | 7.74E-01 | 1.00E+00 |
| ENSG00000185477.4_GPRIN3     | ENSG00000160789.18_LMNA | 0.05137  | -0.108718619 | 0.208863764 | 5.30E-01 | 7.73E-01 | 1.00E+00 |
| ENSG00000129467.12_ADCY4     | ENSG00000160789.18_LMNA | 0.00635  | -0.153009775 | 0.165379134 | 9.38E-01 | 9.76E-01 | 1.00E+00 |
| ENSG00000267890.1_CTD-2126E  | ENSG00000160789.18_LMNA | -0.10422 | -0.25912048  | 0.055909296 | 2.01E-01 | 4.72E-01 | 1.00E+00 |
| ENSG00000185561.9_TLCD2      | ENSG00000160789.18_LMNA | 0.48532  | 0.353427948  | 0.598295812 | 2.34E-10 | 4.63E-08 | 1.20E-05 |

|                              |                         |          |              |             |          |          |          |
|------------------------------|-------------------------|----------|--------------|-------------|----------|----------|----------|
| ENSG00000263823.1_RP11-326K  | ENSG00000160789.18_LMNA | -0.13635 | -0.289269423 | 0.023359973 | 9.39E-02 | 3.00E-01 | 1.00E+00 |
| ENSG00000264176.1_MAGOH2P    | ENSG00000160789.18_LMNA | 0.03649  | -0.123426812 | 0.194561345 | 6.55E-01 | 8.47E-01 | 1.00E+00 |
| ENSG00000224982.3_TM233      | ENSG00000160789.18_LMNA | -0.05617 | -0.213459973 | 0.103962303 | 4.92E-01 | 7.47E-01 | 1.00E+00 |
| ENSG00000100433.14_KCNK10    | ENSG00000160789.18_LMNA | -0.13223 | -0.285425502 | 0.027547133 | 1.04E-01 | 3.20E-01 | 1.00E+00 |
| ENSG00000196090.11_PTPRT     | ENSG00000160789.18_LMNA | -0.33107 | -0.46572009  | -0.18142715 | 3.10E-05 | 7.33E-04 | 1.00E+00 |
| ENSG00000260196.1_RP1-239B2  | ENSG00000160789.18_LMNA | -0.25008 | -0.393606379 | -0.09464331 | 1.89E-03 | 1.87E-02 | 1.00E+00 |
| ENSG00000234337.4_RP11-297L  | ENSG00000160789.18_LMNA | 0.27965  | 0.126059736  | 0.420144041 | 4.85E-04 | 6.58E-03 | 1.00E+00 |
| ENSG00000146411.5_SLC2A12    | ENSG00000160789.18_LMNA | 0.04243  | -0.117563511 | 0.200279141 | 6.04E-01 | 8.18E-01 | 1.00E+00 |
| ENSG00000165115.13_KIF27     | ENSG00000160789.18_LMNA | 0.05088  | -0.109208271 | 0.208389797 | 5.34E-01 | 7.76E-01 | 1.00E+00 |
| ENSG00000232160.5_RAP2C-AS   | ENSG00000160789.18_LMNA | -0.02857 | -0.186919088 | 0.13122903  | 7.27E-01 | 8.84E-01 | 1.00E+00 |
| ENSG00000146215.12_CRIP3     | ENSG00000160789.18_LMNA | -0.27162 | -0.412966963 | -0.11750461 | 7.12E-04 | 8.89E-03 | 1.00E+00 |
| ENSG00000229743.2_LINC01159  | ENSG00000160789.18_LMNA | 0.10488  | -0.055247942 | 0.259739234 | 1.98E-01 | 4.68E-01 | 1.00E+00 |
| ENSG00000267248.1_CTD-2319I1 | ENSG00000160789.18_LMNA | -0.22177 | -0.367976184 | -0.06485613 | 6.04E-03 | 4.52E-02 | 1.00E+00 |
| ENSG00000205323.7_SARNP      | ENSG00000160789.18_LMNA | -0.33474 | -0.468953654 | -0.18542508 | 2.50E-05 | 6.17E-04 | 1.00E+00 |
| ENSG00000235016.1_SEMA3F-AS  | ENSG00000160789.18_LMNA | -0.10107 | -0.256147257 | 0.059083371 | 2.15E-01 | 4.89E-01 | 1.00E+00 |
| ENSG00000213363.4_RPS3P6     | ENSG00000160789.18_LMNA | -0.19526 | -0.343772781 | -0.03721447 | 1.59E-02 | 9.16E-02 | 1.00E+00 |
| ENSG00000112183.13_RBM24     | ENSG00000160789.18_LMNA | -0.07326 | -0.229780842 | 0.086954773 | 3.70E-01 | 6.50E-01 | 1.00E+00 |
| ENSG00000115841.18_RMDN2     | ENSG00000160789.18_LMNA | -0.20141 | -0.349407439 | -0.04360795 | 1.28E-02 | 7.84E-02 | 1.00E+00 |
| ENSG00000182324.6_KCNJ14     | ENSG00000160789.18_LMNA | 0.14044  | -0.019189018 | 0.293088471 | 8.44E-02 | 2.81E-01 | 1.00E+00 |
| ENSG00000179935.8_LINC00652  | ENSG00000160789.18_LMNA | -0.23703 | -0.381822024 | -0.08088083 | 3.28E-03 | 2.86E-02 | 1.00E+00 |
| ENSG00000204632.10_HLA-G     | ENSG00000160789.18_LMNA | 0.14257  | -0.017020605 | 0.295070003 | 7.98E-02 | 2.72E-01 | 1.00E+00 |
| ENSG00000124171.7_PARD6B     | ENSG00000160789.18_LMNA | 0.01154  | -0.147931308 | 0.17042876  | 8.88E-01 | 9.56E-01 | 1.00E+00 |
| ENSG00000180263.12_FGD6      | ENSG00000160789.18_LMNA | -0.09177 | -0.247357464 | 0.068429816 | 2.61E-01 | 5.44E-01 | 1.00E+00 |
| ENSG00000170917.12_NUDT6     | ENSG00000160789.18_LMNA | -0.04558 | -0.203307005 | 0.114449594 | 5.77E-01 | 8.03E-01 | 1.00E+00 |
| ENSG00000008086.9_CDKL5      | ENSG00000160789.18_LMNA | -0.10347 | -0.258413608 | 0.056664497 | 2.05E-01 | 4.76E-01 | 1.00E+00 |
| ENSG00000271913.4_RP1-111C2  | ENSG00000160789.18_LMNA | -0.38911 | -0.51632977  | -0.24509665 | 7.26E-07 | 3.55E-05 | 3.72E-02 |
| ENSG00000225756.1_DBH-AS1    | ENSG00000160789.18_LMNA | 0.23925  | 0.083215072  | 0.383827671 | 2.99E-03 | 2.67E-02 | 1.00E+00 |
| ENSG00000135740.15_SLC9A5    | ENSG00000160789.18_LMNA | -0.01532 | -0.174100125 | 0.144228403 | 8.51E-01 | 9.42E-01 | 1.00E+00 |
| ENSG00000272853.1_RP11-398C  | ENSG00000160789.18_LMNA | -0.23122 | -0.376555931 | -0.07476765 | 4.16E-03 | 3.42E-02 | 1.00E+00 |
| ENSG00000187134.11_AKR1C1    | ENSG00000160789.18_LMNA | -0.45742 | -0.574764729 | -0.32164089 | 3.14E-09 | 4.03E-07 | 1.61E-04 |
| ENSG00000082497.10_SERTAD4   | ENSG00000160789.18_LMNA | -0.02141 | -0.179997291 | 0.138261858 | 7.93E-01 | 9.16E-01 | 1.00E+00 |
| ENSG00000180172.6_RPS12P23   | ENSG00000160789.18_LMNA | -0.14775 | -0.299898414 | 0.011724499 | 6.93E-02 | 2.48E-01 | 1.00E+00 |
| ENSG00000119514.6_GALNT12    | ENSG00000160789.18_LMNA | 0.20642  | 0.048825235  | 0.353989177 | 1.07E-02 | 6.89E-02 | 1.00E+00 |

|                              |                         |          |              |             |          |          |          |
|------------------------------|-------------------------|----------|--------------|-------------|----------|----------|----------|
| ENSG00000275004.2_ZNF280B    | ENSG00000160789.18_LMNA | -0.10455 | -0.259429316 | 0.055579232 | 2.00E-01 | 4.70E-01 | 1.00E+00 |
| ENSG00000213695.3_RPS7P14    | ENSG00000160789.18_LMNA | -0.15929 | -0.310611153 | -8.87E-05   | 5.00E-02 | 2.01E-01 | 1.00E+00 |
| ENSG00000255129.4_RP11-839D  | ENSG00000160789.18_LMNA | -0.02086 | -0.179465741 | 0.138800611 | 7.99E-01 | 9.19E-01 | 1.00E+00 |
| ENSG00000161298.15_ZNF382    | ENSG00000160789.18_LMNA | -0.08915 | -0.244877108 | 0.071057261 | 2.75E-01 | 5.59E-01 | 1.00E+00 |
| ENSG00000217275.2_RP1-34B20  | ENSG00000160789.18_LMNA | -0.13873 | -0.291491665 | 0.020934285 | 8.83E-02 | 2.89E-01 | 1.00E+00 |
| ENSG00000232445.1_RP11-132A  | ENSG00000160789.18_LMNA | -0.00729 | -0.166302252 | 0.152082639 | 9.29E-01 | 9.73E-01 | 1.00E+00 |
| ENSG00000272129.1_RP11-250B  | ENSG00000160789.18_LMNA | -0.17358 | -0.323829245 | -0.01478497 | 3.25E-02 | 1.51E-01 | 1.00E+00 |
| ENSG00000166928.9_MS4A14     | ENSG00000160789.18_LMNA | 0.11505  | -0.044970545 | 0.269321499 | 1.58E-01 | 4.11E-01 | 1.00E+00 |
| ENSG00000130598.14_TNNI2     | ENSG00000160789.18_LMNA | -0.00657 | -0.165601684 | 0.152786306 | 9.36E-01 | 9.75E-01 | 1.00E+00 |
| ENSG00000100181.20_TPTEP1    | ENSG00000160789.18_LMNA | -0.42428 | -0.546561502 | -0.28427963 | 5.12E-08 | 4.15E-06 | 2.62E-03 |
| ENSG00000272217.1_XXbac-BPG  | ENSG00000160789.18_LMNA | -0.06038 | -0.217487144 | 0.099782881 | 4.60E-01 | 7.23E-01 | 1.00E+00 |
| ENSG00000258472.7_RP11-192H  | ENSG00000160789.18_LMNA | -0.02156 | -0.180145439 | 0.138111668 | 7.92E-01 | 9.16E-01 | 1.00E+00 |
| ENSG00000172250.13_SERHL     | ENSG00000160789.18_LMNA | -0.08754 | -0.243351852 | 0.072670794 | 2.84E-01 | 5.69E-01 | 1.00E+00 |
| ENSG00000273306.1_RP11-527Ji | ENSG00000160789.18_LMNA | -0.02479 | -0.183263519 | 0.134947232 | 7.62E-01 | 9.01E-01 | 1.00E+00 |
| ENSG00000137261.12_KIAA0319  | ENSG00000160789.18_LMNA | -0.13632 | -0.28924119  | 0.023390767 | 9.40E-02 | 3.00E-01 | 1.00E+00 |
| ENSG00000277383.1_CTD-3001H  | ENSG00000160789.18_LMNA | 0.09961  | -0.060550059 | 0.254771361 | 2.22E-01 | 4.98E-01 | 1.00E+00 |
| ENSG00000235636.1_NUS1P1     | ENSG00000160789.18_LMNA | 0.03277  | -0.1270895   | 0.190978551 | 6.89E-01 | 8.66E-01 | 1.00E+00 |
| ENSG00000075651.14_PLD1      | ENSG00000160789.18_LMNA | -0.15092 | -0.302848461 | 0.008480075 | 6.35E-02 | 2.34E-01 | 1.00E+00 |
| ENSG00000147459.16_DOCK5     | ENSG00000160789.18_LMNA | -0.09418 | -0.249637787 | 0.066010394 | 2.48E-01 | 5.29E-01 | 1.00E+00 |
| ENSG00000233125.2_ACTBP12    | ENSG00000160789.18_LMNA | 0.10306  | -0.057074336 | 0.258029855 | 2.06E-01 | 4.78E-01 | 1.00E+00 |
| ENSG00000228223.2_HCG11      | ENSG00000160789.18_LMNA | 0.00279  | -0.156483606 | 0.161915388 | 9.73E-01 | 9.89E-01 | 1.00E+00 |
| ENSG00000185133.12_INPP5J    | ENSG00000160789.18_LMNA | -0.09005 | -0.245731822 | 0.070152356 | 2.70E-01 | 5.54E-01 | 1.00E+00 |
| ENSG00000215808.2_LINC01139  | ENSG00000160789.18_LMNA | -0.12529 | -0.278926221 | 0.034601866 | 1.24E-01 | 3.55E-01 | 1.00E+00 |
| ENSG00000113319.10_RASGRF2   | ENSG00000160789.18_LMNA | -0.16832 | -0.318976219 | -0.00937366 | 3.82E-02 | 1.68E-01 | 1.00E+00 |
| ENSG00000227782.2 CTC-529I1C | ENSG00000160789.18_LMNA | 0.0844   | -0.075818035 | 0.240372293 | 3.01E-01 | 5.88E-01 | 1.00E+00 |
| ENSG00000114805.15_PLCH1     | ENSG00000160789.18_LMNA | 0.14878  | -0.010677004 | 0.300851518 | 6.74E-02 | 2.43E-01 | 1.00E+00 |
| ENSG00000184675.8_AMER1      | ENSG00000160789.18_LMNA | -0.06835 | -0.225099837 | 0.091851677 | 4.03E-01 | 6.79E-01 | 1.00E+00 |
| ENSG00000170743.15_SYT9      | ENSG00000160789.18_LMNA | -0.36535 | -0.495716893 | -0.21887912 | 3.69E-06 | 1.30E-04 | 1.89E-01 |
| ENSG00000232909.1_RP3-510O8  | ENSG00000160789.18_LMNA | -0.1146  | -0.268898317 | 0.045425835 | 1.60E-01 | 4.13E-01 | 1.00E+00 |
| ENSG00000244053.1_RPL13AP2   | ENSG00000160789.18_LMNA | -0.09495 | -0.250367414 | 0.065235476 | 2.45E-01 | 5.24E-01 | 1.00E+00 |
| ENSG00000261512.2_RP11-46D6  | ENSG00000160789.18_LMNA | 0.37378  | 0.228160648  | 0.503050102 | 2.10E-06 | 8.28E-05 | 1.08E-01 |
| ENSG00000256540.1_RP11-598F  | ENSG00000160789.18_LMNA | 0.00771  | -0.151672256 | 0.166710678 | 9.25E-01 | 9.71E-01 | 1.00E+00 |
| ENSG00000107890.15_ANKRD26   | ENSG00000160789.18_LMNA | -0.03726 | -0.195302493 | 0.122668053 | 6.49E-01 | 8.44E-01 | 1.00E+00 |

|                              |                         |          |              |             |          |          |          |
|------------------------------|-------------------------|----------|--------------|-------------|----------|----------|----------|
| ENSG00000178631.7_ACTG1P1    | ENSG00000160789.18_LMNA | 0.1038   | -0.056330311 | 0.258726449 | 2.03E-01 | 4.74E-01 | 1.00E+00 |
| ENSG00000172671.18_ZFAND4    | ENSG00000160789.18_LMNA | -0.19826 | -0.346523545 | -0.04033254 | 1.43E-02 | 8.51E-02 | 1.00E+00 |
| ENSG00000142279.11_WTIP      | ENSG00000160789.18_LMNA | 0.37808  | 0.232901246  | 0.506780373 | 1.57E-06 | 6.66E-05 | 8.05E-02 |
| ENSG00000181873.11_IBA57     | ENSG00000160789.18_LMNA | 0.02362  | -0.136091497 | 0.182136755 | 7.73E-01 | 9.06E-01 | 1.00E+00 |
| ENSG00000186615.9_KTN1-AS1   | ENSG00000160789.18_LMNA | -0.13932 | -0.29204402  | 0.020330791 | 8.69E-02 | 2.86E-01 | 1.00E+00 |
| ENSG00000276995.1_           | ENSG00000160789.18_LMNA | -0.07369 | -0.230188771 | 0.086527303 | 3.67E-01 | 6.48E-01 | 1.00E+00 |
| ENSG00000240875.4_LINC00886  | ENSG00000160789.18_LMNA | 0.11637  | -0.043642115 | 0.270555554 | 1.53E-01 | 4.03E-01 | 1.00E+00 |
| ENSG00000172738.10_TMEN217   | ENSG00000160789.18_LMNA | 0.09073  | -0.069475727 | 0.246370601 | 2.66E-01 | 5.50E-01 | 1.00E+00 |
| ENSG00000277954.1_RP11-679B  | ENSG00000160789.18_LMNA | -0.04133 | -0.199222659 | 0.118648549 | 6.13E-01 | 8.24E-01 | 1.00E+00 |
| ENSG00000269069.1_CTC-471F3  | ENSG00000160789.18_LMNA | 0.09477  | -0.065413265 | 0.250200048 | 2.45E-01 | 5.25E-01 | 1.00E+00 |
| ENSG00000119703.13_ZC2HC1C   | ENSG00000160789.18_LMNA | 0.06995  | -0.090258952 | 0.226623948 | 3.92E-01 | 6.70E-01 | 1.00E+00 |
| ENSG00000174944.7_P2RY14     | ENSG00000160789.18_LMNA | -0.33081 | -0.465496467 | -0.18115101 | 3.15E-05 | 7.41E-04 | 1.00E+00 |
| ENSG00000227799.1_AC012358.4 | ENSG00000160789.18_LMNA | 0.13241  | -0.027370036 | 0.285588286 | 1.04E-01 | 3.19E-01 | 1.00E+00 |
| ENSG00000177133.9_LINC00982  | ENSG00000160789.18_LMNA | -0.0377  | -0.195728553 | 0.122231701 | 6.45E-01 | 8.42E-01 | 1.00E+00 |
| ENSG00000183671.11_GPR1      | ENSG00000160789.18_LMNA | 0.02333  | -0.136376139 | 0.181856336 | 7.75E-01 | 9.08E-01 | 1.00E+00 |
| ENSG00000270108.1_RP11-73M1  | ENSG00000160789.18_LMNA | -0.09075 | -0.246389954 | 0.069455223 | 2.66E-01 | 5.50E-01 | 1.00E+00 |
| ENSG00000172548.13_NIPAL4    | ENSG00000160789.18_LMNA | -0.1436  | -0.296037291 | 0.015961024 | 7.76E-02 | 2.67E-01 | 1.00E+00 |
| ENSG00000242327.1_CTD-2184D  | ENSG00000160789.18_LMNA | -0.17677 | -0.326776686 | -0.01808034 | 2.94E-02 | 1.41E-01 | 1.00E+00 |
| ENSG00000176641.9_RNF152     | ENSG00000160789.18_LMNA | -0.01081 | -0.169718671 | 0.148646469 | 8.95E-01 | 9.59E-01 | 1.00E+00 |
| ENSG00000184441.4_AP001062.7 | ENSG00000160789.18_LMNA | 0.36033  | 0.213366175  | 0.491342426 | 5.12E-06 | 1.69E-04 | 2.63E-01 |
| ENSG00000270307.1_MTATP6P2   | ENSG00000160789.18_LMNA | -0.11572 | -0.269951358 | 0.044292656 | 1.56E-01 | 4.07E-01 | 1.00E+00 |
| ENSG00000160200.16_CBS       | ENSG00000160789.18_LMNA | 0.00098  | -0.158245791 | 0.160155316 | 9.90E-01 | 9.96E-01 | 1.00E+00 |
| ENSG00000187944.2_C2orf66    | ENSG00000160789.18_LMNA | 0.18393  | 0.025475548  | 0.333369318 | 2.33E-02 | 1.20E-01 | 1.00E+00 |
| ENSG00000259408.2_RP11-3D4.5 | ENSG00000160789.18_LMNA | 0.04947  | -0.110602446 | 0.207039463 | 5.45E-01 | 7.83E-01 | 1.00E+00 |
| ENSG00000231313.2_CLIC1P1    | ENSG00000160789.18_LMNA | 0.3139   | 0.162841964  | 0.450587905 | 8.21E-05 | 1.60E-03 | 1.00E+00 |
| ENSG00000242759.5_LINC00882  | ENSG00000160789.18_LMNA | -0.16111 | -0.312299832 | -0.00195875 | 4.74E-02 | 1.94E-01 | 1.00E+00 |
| ENSG00000171049.8_FPR2       | ENSG00000160789.18_LMNA | 0.07882  | -0.081400306 | 0.23507274  | 3.34E-01 | 6.20E-01 | 1.00E+00 |
| ENSG00000257135.4_RP11-320M  | ENSG00000160789.18_LMNA | -0.13771 | -0.290544712 | 0.021968382 | 9.07E-02 | 2.93E-01 | 1.00E+00 |
| ENSG00000213275.2_IFITM9P    | ENSG00000160789.18_LMNA | 0.36054  | 0.213603296  | 0.491530868 | 5.05E-06 | 1.67E-04 | 2.59E-01 |
| ENSG00000271811.1_RP1-79C4.4 | ENSG00000160789.18_LMNA | 0.11672  | -0.043281143 | 0.270890703 | 1.52E-01 | 4.01E-01 | 1.00E+00 |
| ENSG00000275464.2_CH507-9B2  | ENSG00000160789.18_LMNA | 0.14237  | -0.017222324 | 0.294885782 | 8.02E-02 | 2.73E-01 | 1.00E+00 |
| ENSG00000173714.7_WFIKKN2    | ENSG00000160789.18_LMNA | -0.12573 | -0.279336689 | 0.03415724  | 1.23E-01 | 3.53E-01 | 1.00E+00 |
| ENSG00000238084.4_RP3-469D2  | ENSG00000160789.18_LMNA | -0.08523 | -0.241159977 | 0.074986634 | 2.96E-01 | 5.82E-01 | 1.00E+00 |

|                              |                         |          |              |             |          |          |          |
|------------------------------|-------------------------|----------|--------------|-------------|----------|----------|----------|
| ENSG00000135913.9_USP37      | ENSG00000160789.18_LMNA | 0.04946  | -0.110610002 | 0.207032141 | 5.45E-01 | 7.83E-01 | 1.00E+00 |
| ENSG00000090659.16_CD209     | ENSG00000160789.18_LMNA | 0.07168  | -0.08852758  | 0.228278974 | 3.80E-01 | 6.59E-01 | 1.00E+00 |
| ENSG00000151948.10_GLT1D1    | ENSG00000160789.18_LMNA | -0.22879 | -0.374356988 | -0.07222168 | 4.58E-03 | 3.67E-02 | 1.00E+00 |
| ENSG00000164849.8_GPR146     | ENSG00000160789.18_LMNA | 0.00394  | -0.155355307 | 0.163041272 | 9.62E-01 | 9.85E-01 | 1.00E+00 |
| ENSG00000236914.3_RP11-1008  | ENSG00000160789.18_LMNA | 0.13859  | -0.021075401 | 0.291362477 | 8.86E-02 | 2.90E-01 | 1.00E+00 |
| ENSG00000157992.11_KRTCAP3   | ENSG00000160789.18_LMNA | 0.0325   | -0.127358573 | 0.190715012 | 6.91E-01 | 8.67E-01 | 1.00E+00 |
| ENSG00000217643.1_PTGES3P2   | ENSG00000160789.18_LMNA | 0.04511  | -0.114919137 | 0.202850827 | 5.81E-01 | 8.05E-01 | 1.00E+00 |
| ENSG00000235207.1_TUBBP6     | ENSG00000160789.18_LMNA | 0.05144  | -0.10864738  | 0.208932709 | 5.29E-01 | 7.73E-01 | 1.00E+00 |
| ENSG00000138658.14_ZGRF1     | ENSG00000160789.18_LMNA | -0.07642 | -0.232784687 | 0.083804301 | 3.49E-01 | 6.33E-01 | 1.00E+00 |
| ENSG00000181652.17_ATG9B     | ENSG00000160789.18_LMNA | -0.00959 | -0.168537077 | 0.149835764 | 9.07E-01 | 9.64E-01 | 1.00E+00 |
| ENSG00000231856.2_RP11-327P  | ENSG00000160789.18_LMNA | -0.28543 | -0.425302286 | -0.13223554 | 3.65E-04 | 5.24E-03 | 1.00E+00 |
| ENSG00000257918.1_RP11-482D  | ENSG00000160789.18_LMNA | -0.25447 | -0.397561323 | -0.09928788 | 1.56E-03 | 1.62E-02 | 1.00E+00 |
| ENSG00000272701.2_MESTIT1    | ENSG00000160789.18_LMNA | 0.00685  | -0.152520093 | 0.165866763 | 9.33E-01 | 9.74E-01 | 1.00E+00 |
| ENSG00000262209.2_PCDHGB3    | ENSG00000160789.18_LMNA | 0.11625  | -0.043760109 | 0.270445984 | 1.54E-01 | 4.04E-01 | 1.00E+00 |
| ENSG00000272511.1_           | ENSG00000160789.18_LMNA | 0.09839  | -0.061777709 | 0.253618723 | 2.28E-01 | 5.05E-01 | 1.00E+00 |
| ENSG00000266651.1_RP11-138I1 | ENSG00000160789.18_LMNA | -0.10539 | -0.260223521 | 0.054730119 | 1.96E-01 | 4.65E-01 | 1.00E+00 |
| ENSG00000186871.6_ERCC6L     | ENSG00000160789.18_LMNA | 0.2326   | 0.076219945  | 0.377808756 | 3.93E-03 | 3.28E-02 | 1.00E+00 |
| ENSG00000271200.1_RP11-430G  | ENSG00000160789.18_LMNA | -0.06785 | -0.224620102 | 0.092352674 | 4.06E-01 | 6.82E-01 | 1.00E+00 |
| ENSG00000124134.7_KCNS1      | ENSG00000160789.18_LMNA | 0.01515  | -0.144399245 | 0.173930933 | 8.53E-01 | 9.42E-01 | 1.00E+00 |
| ENSG00000196933.5_RPS26P11   | ENSG00000160789.18_LMNA | -0.11975 | -0.273735537 | 0.04021381  | 1.42E-01 | 3.84E-01 | 1.00E+00 |
| ENSG00000253173.3_RP11-152C  | ENSG00000160789.18_LMNA | -0.00052 | -0.159705866 | 0.158695454 | 9.95E-01 | 9.98E-01 | 1.00E+00 |
| ENSG00000047662.4_FAM184B    | ENSG00000160789.18_LMNA | 0.02897  | -0.130836601 | 0.187304393 | 7.23E-01 | 8.83E-01 | 1.00E+00 |
| ENSG00000151062.13_CACNA2D   | ENSG00000160789.18_LMNA | 0.08364  | -0.07658536  | 0.239644945 | 3.06E-01 | 5.92E-01 | 1.00E+00 |
| ENSG00000166263.12_STXBP4    | ENSG00000160789.18_LMNA | -0.23538 | -0.380326144 | -0.07914202 | 3.51E-03 | 3.01E-02 | 1.00E+00 |
| ENSG00000164241.12_C5orf63   | ENSG00000160789.18_LMNA | -0.17857 | -0.328438148 | -0.01994089 | 2.77E-02 | 1.36E-01 | 1.00E+00 |
| ENSG00000221986.5_MYBPHL     | ENSG00000160789.18_LMNA | -0.09282 | -0.248349895 | 0.067377304 | 2.55E-01 | 5.37E-01 | 1.00E+00 |
| ENSG00000253304.1_TMEM200B   | ENSG00000160789.18_LMNA | 0.43001  | 0.290706261  | 0.551455575 | 3.22E-08 | 2.86E-06 | 1.65E-03 |
| ENSG00000260948.1_RP11-552M  | ENSG00000160789.18_LMNA | -0.22862 | -0.374203048 | -0.0720436  | 4.61E-03 | 3.69E-02 | 1.00E+00 |
| ENSG00000221953.5_C1orf229   | ENSG00000160789.18_LMNA | -0.05459 | -0.211953143 | 0.105523225 | 5.04E-01 | 7.55E-01 | 1.00E+00 |
| ENSG00000154914.15_USP43     | ENSG00000160789.18_LMNA | -0.365   | -0.495412694 | -0.21849518 | 3.78E-06 | 1.32E-04 | 1.94E-01 |
| ENSG00000099984.9_GSTT2      | ENSG00000160789.18_LMNA | 0.0593   | -0.100855296 | 0.216454825 | 4.68E-01 | 7.29E-01 | 1.00E+00 |
| ENSG00000240695.1_RP11-102M  | ENSG00000160789.18_LMNA | -0.16136 | -0.312535472 | -0.00221988 | 4.70E-02 | 1.93E-01 | 1.00E+00 |
| ENSG00000235092.4_ID2-AS1    | ENSG00000160789.18_LMNA | -0.06057 | -0.217668763 | 0.099594131 | 4.59E-01 | 7.22E-01 | 1.00E+00 |

|                              |                         |          |              |             |          |          |          |
|------------------------------|-------------------------|----------|--------------|-------------|----------|----------|----------|
| ENSG00000232600.3_TONSL-AS   | ENSG00000160789.18_LMNA | 0.21759  | 0.060486926  | 0.364177591 | 7.08E-03 | 5.09E-02 | 1.00E+00 |
| ENSG00000278627.1_RP11-506H  | ENSG00000160789.18_LMNA | -0.1382  | -0.290999204 | 0.021472149 | 8.95E-02 | 2.91E-01 | 1.00E+00 |
| ENSG00000100453.11_GZMB      | ENSG00000160789.18_LMNA | 0.10735  | -0.052756362 | 0.262068001 | 1.88E-01 | 4.55E-01 | 1.00E+00 |
| ENSG00000256576.2_RP13-977J  | ENSG00000160789.18_LMNA | 0.0748   | -0.085416306 | 0.231248461 | 3.60E-01 | 6.42E-01 | 1.00E+00 |
| ENSG00000274925.1_CTD-2547C  | ENSG00000160789.18_LMNA | -0.02424 | -0.182732351 | 0.135486756 | 7.67E-01 | 9.03E-01 | 1.00E+00 |
| ENSG00000244625.4_MIATNB     | ENSG00000160789.18_LMNA | -0.01126 | -0.170159666 | 0.148202363 | 8.90E-01 | 9.57E-01 | 1.00E+00 |
| ENSG00000235513.1_RP4-756G2  | ENSG00000160789.18_LMNA | 0.10785  | -0.052250233 | 0.262540609 | 1.86E-01 | 4.52E-01 | 1.00E+00 |
| ENSG00000258301.3_RP11-488C  | ENSG00000160789.18_LMNA | -0.1852  | -0.334535569 | -0.02678729 | 2.24E-02 | 1.17E-01 | 1.00E+00 |
| ENSG00000197275.11_RAD54B    | ENSG00000160789.18_LMNA | -0.08257 | -0.238630822 | 0.077654598 | 3.12E-01 | 5.98E-01 | 1.00E+00 |
| ENSG00000255909.1_PDCD5P1    | ENSG00000160789.18_LMNA | 0.02421  | -0.135515081 | 0.182704459 | 7.67E-01 | 9.04E-01 | 1.00E+00 |
| ENSG00000237188.3_RP11-337C  | ENSG00000160789.18_LMNA | -0.1468  | -0.299013447 | 0.012696498 | 7.11E-02 | 2.52E-01 | 1.00E+00 |
| ENSG00000180287.15_PLD5      | ENSG00000160789.18_LMNA | -0.14726 | -0.29944216  | 0.012225697 | 7.02E-02 | 2.50E-01 | 1.00E+00 |
| ENSG00000220267.1_ACTBP8     | ENSG00000160789.18_LMNA | 0.26171  | 0.106967747  | 0.404076648 | 1.13E-03 | 1.27E-02 | 1.00E+00 |
| ENSG00000268603.1_RP11-316C  | ENSG00000160789.18_LMNA | 0.29912  | 0.14691902   | 0.437490467 | 1.81E-04 | 3.02E-03 | 1.00E+00 |
| ENSG00000250241.4_RP11-9G1.  | ENSG00000160789.18_LMNA | -0.37169 | -0.50122898  | -0.22585101 | 2.42E-06 | 9.24E-05 | 1.24E-01 |
| ENSG00000270069.1_MIR222HG   | ENSG00000160789.18_LMNA | 0.38957  | 0.245600564  | 0.516722904 | 7.02E-07 | 3.46E-05 | 3.60E-02 |
| ENSG00000215452.3_ZNF663P    | ENSG00000160789.18_LMNA | -0.25103 | -0.394466785 | -0.09565264 | 1.81E-03 | 1.82E-02 | 1.00E+00 |
| ENSG00000214595.10_EML6      | ENSG00000160789.18_LMNA | -0.03415 | -0.192300778 | 0.125738797 | 6.76E-01 | 8.58E-01 | 1.00E+00 |
| ENSG00000225511.5_LINC00475  | ENSG00000160789.18_LMNA | 0.153    | -0.006352309 | 0.304779934 | 5.99E-02 | 2.25E-01 | 1.00E+00 |
| ENSG00000154237.11_LRRK1     | ENSG00000160789.18_LMNA | 0.06463  | -0.095558016 | 0.221547151 | 4.29E-01 | 6.99E-01 | 1.00E+00 |
| ENSG00000164484.10_TMEM200   | ENSG00000160789.18_LMNA | -0.28727 | -0.426942783 | -0.13420443 | 3.33E-04 | 4.87E-03 | 1.00E+00 |
| ENSG00000137672.11_TRPC6     | ENSG00000160789.18_LMNA | 0.0693   | -0.090904615 | 0.226006287 | 3.96E-01 | 6.73E-01 | 1.00E+00 |
| ENSG00000120328.6_PCDHB12    | ENSG00000160789.18_LMNA | 0.09314  | -0.067050535 | 0.248657876 | 2.54E-01 | 5.35E-01 | 1.00E+00 |
| ENSG00000274987.1_RP11-2951E | ENSG00000160789.18_LMNA | -0.19578 | -0.344247794 | -0.03775248 | 1.56E-02 | 9.03E-02 | 1.00E+00 |
| ENSG00000228201.1_AL022341.3 | ENSG00000160789.18_LMNA | -0.05023 | -0.207767786 | 0.109850632 | 5.39E-01 | 7.79E-01 | 1.00E+00 |
| ENSG00000121898.11_CPXM2     | ENSG00000160789.18_LMNA | -0.16305 | -0.314100099 | -0.00395481 | 4.47E-02 | 1.87E-01 | 1.00E+00 |
| ENSG00000273032.1_DGCR9      | ENSG00000160789.18_LMNA | -0.21736 | -0.363962659 | -0.06024006 | 7.15E-03 | 5.12E-02 | 1.00E+00 |
| ENSG00000213216.2_RP11-355C  | ENSG00000160789.18_LMNA | -0.18605 | -0.335322278 | -0.02767275 | 2.17E-02 | 1.15E-01 | 1.00E+00 |
| ENSG00000230592.2_RPSAP8     | ENSG00000160789.18_LMNA | -0.17102 | -0.321468278 | -0.01215014 | 3.52E-02 | 1.59E-01 | 1.00E+00 |
| ENSG00000235582.2_RP11-448G  | ENSG00000160789.18_LMNA | -0.13565 | -0.288615037 | 0.024073568 | 9.57E-02 | 3.03E-01 | 1.00E+00 |
| ENSG00000166111.8_SVOP       | ENSG00000160789.18_LMNA | -0.3047  | -0.442436363 | -0.15291425 | 1.35E-04 | 2.40E-03 | 1.00E+00 |
| ENSG00000251593.1_MSNP1      | ENSG00000160789.18_LMNA | 0.43551  | 0.296894221  | 0.55615099  | 2.05E-08 | 1.98E-06 | 1.05E-03 |
| ENSG00000071991.7_CDH19      | ENSG00000160789.18_LMNA | -0.12661 | -0.280160469 | 0.033264533 | 1.20E-01 | 3.48E-01 | 1.00E+00 |

|                              |                         |          |              |             |          |          |          |
|------------------------------|-------------------------|----------|--------------|-------------|----------|----------|----------|
| ENSG00000184058.11_TBX1      | ENSG00000160789.18_LMNA | 0.16292  | 0.0038188    | 0.313977505 | 4.49E-02 | 1.88E-01 | 1.00E+00 |
| ENSG00000267787.4_RP11-35G9  | ENSG00000160789.18_LMNA | -0.01524 | -0.174022706 | 0.144306579 | 8.52E-01 | 9.42E-01 | 1.00E+00 |
| ENSG00000254759.1_NAP1L1P1   | ENSG00000160789.18_LMNA | -0.16517 | -0.316059226 | -0.00612981 | 4.20E-02 | 1.79E-01 | 1.00E+00 |
| ENSG00000176273.13_SLC35G1   | ENSG00000160789.18_LMNA | -0.27444 | -0.415485805 | -0.1205021  | 6.23E-04 | 8.02E-03 | 1.00E+00 |
| ENSG00000241106.5_HLA-DOB    | ENSG00000160789.18_LMNA | -0.04286 | -0.200692759 | 0.117138505 | 6.00E-01 | 8.16E-01 | 1.00E+00 |
| ENSG00000180229.11_HERC2P3   | ENSG00000160789.18_LMNA | -0.19481 | -0.343361886 | -0.03674922 | 1.62E-02 | 9.26E-02 | 1.00E+00 |
| ENSG00000197815.4_RP1-253P7  | ENSG00000160789.18_LMNA | -0.0319  | -0.19013431  | 0.127951306 | 6.96E-01 | 8.70E-01 | 1.00E+00 |
| ENSG00000189120.4_SP6        | ENSG00000160789.18_LMNA | 0.15965  | 0.000456108  | 0.310943104 | 4.95E-02 | 2.00E-01 | 1.00E+00 |
| ENSG00000204524.6_ZNF805     | ENSG00000160789.18_LMNA | 0.20689  | 0.049309787  | 0.35441396  | 1.05E-02 | 6.81E-02 | 1.00E+00 |
| ENSG00000261505.1_LA16c-358E | ENSG00000160789.18_LMNA | 0.07829  | -0.081935005 | 0.234564133 | 3.38E-01 | 6.23E-01 | 1.00E+00 |
| ENSG00000272420.1_RP4-740C4  | ENSG00000160789.18_LMNA | 0.07998  | -0.080246173 | 0.236169966 | 3.27E-01 | 6.14E-01 | 1.00E+00 |
| ENSG00000272695.1_GAS6-AS2   | ENSG00000160789.18_LMNA | 0.09429  | -0.065902297 | 0.249739589 | 2.48E-01 | 5.28E-01 | 1.00E+00 |
| ENSG00000242067.1_RPL9P28    | ENSG00000160789.18_LMNA | -0.11823 | -0.272304664 | 0.041757333 | 1.47E-01 | 3.93E-01 | 1.00E+00 |
| ENSG00000261504.1_RP11-317P  | ENSG00000160789.18_LMNA | 0.00172  | -0.157526378 | 0.160874111 | 9.83E-01 | 9.94E-01 | 1.00E+00 |
| ENSG00000273356.1_RP11-804H  | ENSG00000160789.18_LMNA | -0.2582  | -0.400921254 | -0.10324393 | 1.32E-03 | 1.43E-02 | 1.00E+00 |
| ENSG00000274220.1_RP11-77K1  | ENSG00000160789.18_LMNA | -0.21153 | -0.358654816 | -0.05415523 | 8.89E-03 | 6.02E-02 | 1.00E+00 |
| ENSG00000239650.4_GUSBP4     | ENSG00000160789.18_LMNA | -0.26744 | -0.409219617 | -0.1130551  | 8.66E-04 | 1.04E-02 | 1.00E+00 |
| ENSG00000182993.3_C12orf60   | ENSG00000160789.18_LMNA | -0.30907 | -0.446306593 | -0.1576205  | 1.07E-04 | 1.99E-03 | 1.00E+00 |
| ENSG00000277829.1_RP5-1054A  | ENSG00000160789.18_LMNA | -0.14943 | -0.301457259 | 0.010010918 | 6.62E-02 | 2.40E-01 | 1.00E+00 |
| ENSG00000270604.4_HCG17      | ENSG00000160789.18_LMNA | -0.13035 | -0.283661938 | 0.029464505 | 1.09E-01 | 3.29E-01 | 1.00E+00 |
| ENSG00000095203.13_EPB41L4E  | ENSG00000160789.18_LMNA | -0.16909 | -0.319689163 | -0.01016749 | 3.73E-02 | 1.65E-01 | 1.00E+00 |
| ENSG00000273483.1_RP4-671G1  | ENSG00000160789.18_LMNA | -0.06933 | -0.22603341  | 0.090876267 | 3.96E-01 | 6.73E-01 | 1.00E+00 |
| ENSG00000227740.1_RP11-318C  | ENSG00000160789.18_LMNA | -0.22903 | -0.374574463 | -0.0724733  | 4.54E-03 | 3.65E-02 | 1.00E+00 |
| ENSG00000177359.16_OVOS2     | ENSG00000160789.18_LMNA | -0.26698 | -0.40880412  | -0.11256248 | 8.84E-04 | 1.05E-02 | 1.00E+00 |
| ENSG00000178082.6_TWF1P1     | ENSG00000160789.18_LMNA | -0.05566 | -0.212974213 | 0.104465672 | 4.96E-01 | 7.50E-01 | 1.00E+00 |
| ENSG00000170161.6_RP11-262H  | ENSG00000160789.18_LMNA | -0.36639 | -0.496625675 | -0.22002664 | 3.44E-06 | 1.23E-04 | 1.77E-01 |
| ENSG00000272979.1_RP11-647K  | ENSG00000160789.18_LMNA | 0.26797  | 0.113612203  | 0.409689353 | 8.45E-04 | 1.02E-02 | 1.00E+00 |
| ENSG00000277053.3_GTF2IP1    | ENSG00000160789.18_LMNA | -0.18009 | -0.329837732 | -0.02150984 | 2.64E-02 | 1.31E-01 | 1.00E+00 |
| ENSG00000177788.5_RP5-1061H  | ENSG00000160789.18_LMNA | -0.11476 | -0.269042844 | 0.045270357 | 1.59E-01 | 4.12E-01 | 1.00E+00 |
| ENSG00000254598.2_CSNK2A3    | ENSG00000160789.18_LMNA | 0.0727   | -0.087512305 | 0.229248629 | 3.73E-01 | 6.53E-01 | 1.00E+00 |
| ENSG00000159708.16_LRRC36    | ENSG00000160789.18_LMNA | -0.17305 | -0.323338775 | -0.01423725 | 3.30E-02 | 1.52E-01 | 1.00E+00 |
| ENSG00000271721.1_           | ENSG00000160789.18_LMNA | 0.03591  | -0.12400186  | 0.1939994   | 6.61E-01 | 8.50E-01 | 1.00E+00 |
| ENSG00000260853.1_RP11-264B  | ENSG00000160789.18_LMNA | -0.06212 | -0.219149335 | 0.098054578 | 4.47E-01 | 7.13E-01 | 1.00E+00 |



|                              |                         |          |              |             |          |          |          |
|------------------------------|-------------------------|----------|--------------|-------------|----------|----------|----------|
| ENSG00000138615.5_CILP       | ENSG00000160789.18_LMNA | 0.12334  | -0.036582215 | 0.277096616 | 1.30E-01 | 3.66E-01 | 1.00E+00 |
| ENSG00000080166.14_DCT       | ENSG00000160789.18_LMNA | -0.45312 | -0.571124342 | -0.3167737  | 4.58E-09 | 5.56E-07 | 2.35E-04 |
| ENSG00000278765.1_RP5-890E1  | ENSG00000160789.18_LMNA | -0.0264  | -0.184823096 | 0.133362029 | 7.47E-01 | 8.94E-01 | 1.00E+00 |
| ENSG00000186523.13_FAM86B1   | ENSG00000160789.18_LMNA | 0.30566  | 0.153952546  | 0.443291144 | 1.28E-04 | 2.31E-03 | 1.00E+00 |
| ENSG00000132554.18_RGS22     | ENSG00000160789.18_LMNA | 0.0148   | -0.14474427  | 0.173589182 | 8.56E-01 | 9.43E-01 | 1.00E+00 |
| ENSG00000164161.8_HHIP       | ENSG00000160789.18_LMNA | -0.19585 | -0.344312643 | -0.03782595 | 1.56E-02 | 9.02E-02 | 1.00E+00 |
| ENSG00000259834.1_RP11-284N  | ENSG00000160789.18_LMNA | -0.21484 | -0.361669248 | -0.05760815 | 7.86E-03 | 5.48E-02 | 1.00E+00 |
| ENSG00000198658.4_ABHD17AP   | ENSG00000160789.18_LMNA | 0.04017  | -0.119799463 | 0.198101228 | 6.23E-01 | 8.30E-01 | 1.00E+00 |
| ENSG00000198597.7_ZNF536     | ENSG00000160789.18_LMNA | -0.36299 | -0.493666871 | -0.21629337 | 4.30E-06 | 1.47E-04 | 2.21E-01 |
| ENSG00000111344.10_RASAL1    | ENSG00000160789.18_LMNA | -0.11959 | -0.273579551 | 0.04038215  | 1.42E-01 | 3.85E-01 | 1.00E+00 |
| ENSG00000124749.15_COL21A1   | ENSG00000160789.18_LMNA | 0.14426  | -0.015290748 | 0.296648852 | 7.62E-02 | 2.64E-01 | 1.00E+00 |
| ENSG00000236281.1_NDUFB9P2   | ENSG00000160789.18_LMNA | -0.25299 | -0.396230121 | -0.09772311 | 1.66E-03 | 1.70E-02 | 1.00E+00 |
| ENSG00000258101.2_RP11-977B  | ENSG00000160789.18_LMNA | 0.0493   | -0.110766325 | 0.206880659 | 5.46E-01 | 7.84E-01 | 1.00E+00 |
| ENSG00000240889.1_NDUFB2-A   | ENSG00000160789.18_LMNA | 0.06086  | -0.099298402 | 0.217953276 | 4.56E-01 | 7.21E-01 | 1.00E+00 |
| ENSG00000173338.11_KCNK7     | ENSG00000160789.18_LMNA | -0.09065 | -0.2462924   | 0.069558577 | 2.67E-01 | 5.51E-01 | 1.00E+00 |
| ENSG00000173559.11_NABP1     | ENSG00000160789.18_LMNA | 0.01002  | -0.149420389 | 0.168949866 | 9.03E-01 | 9.62E-01 | 1.00E+00 |
| ENSG00000123191.12_ATP7B     | ENSG00000160789.18_LMNA | -0.16882 | -0.319436962 | -0.00988663 | 3.76E-02 | 1.66E-01 | 1.00E+00 |
| ENSG00000164023.13_SGMS2     | ENSG00000160789.18_LMNA | 0.42454  | 0.284575066  | 0.54678688  | 5.01E-08 | 4.09E-06 | 2.57E-03 |
| ENSG00000275318.1_RP11-526D  | ENSG00000160789.18_LMNA | 0.02398  | -0.135737061 | 0.182485859 | 7.69E-01 | 9.05E-01 | 1.00E+00 |
| ENSG00000235884.3_LINC00941  | ENSG00000160789.18_LMNA | 0.42517  | 0.285276682  | 0.547321964 | 4.76E-08 | 3.92E-06 | 2.44E-03 |
| ENSG00000273783.1_CTD-2506P  | ENSG00000160789.18_LMNA | -0.14854 | -0.300635335 | 0.010914658 | 6.78E-02 | 2.44E-01 | 1.00E+00 |
| ENSG00000249031.1_SUMO2P6    | ENSG00000160789.18_LMNA | -0.11395 | -0.268285452 | 0.046084968 | 1.62E-01 | 4.17E-01 | 1.00E+00 |
| ENSG00000232883.1_RP11-302I1 | ENSG00000160789.18_LMNA | 0.01833  | -0.141283076 | 0.17701406  | 8.23E-01 | 9.31E-01 | 1.00E+00 |
| ENSG00000167178.14_ISLR2     | ENSG00000160789.18_LMNA | 0.0188   | -0.140823893 | 0.177467846 | 8.18E-01 | 9.29E-01 | 1.00E+00 |
| ENSG00000213830.3_CFL1P5     | ENSG00000160789.18_LMNA | 0.18249  | 0.023987475  | 0.332045156 | 2.44E-02 | 1.24E-01 | 1.00E+00 |
| ENSG00000226476.2_RP11-776H  | ENSG00000160789.18_LMNA | -0.31601 | -0.452448639 | -0.16511634 | 7.31E-05 | 1.46E-03 | 1.00E+00 |
| ENSG00000163623.8_NKX6-1     | ENSG00000160789.18_LMNA | -0.17494 | -0.325087521 | -0.01619096 | 3.11E-02 | 1.47E-01 | 1.00E+00 |
| ENSG00000270580.4_PKD1P6-NF  | ENSG00000160789.18_LMNA | 0.10795  | -0.052151604 | 0.262632688 | 1.86E-01 | 4.51E-01 | 1.00E+00 |
| ENSG00000261777.4_RP11-529K  | ENSG00000160789.18_LMNA | -0.15493 | -0.306570378 | 0.004377384 | 5.67E-02 | 2.18E-01 | 1.00E+00 |
| ENSG00000226701.1_RPL15P14   | ENSG00000160789.18_LMNA | -0.25559 | -0.398576867 | -0.10048261 | 1.48E-03 | 1.56E-02 | 1.00E+00 |
| ENSG00000143882.8_ATP6V1C2   | ENSG00000160789.18_LMNA | 0.34885  | 0.20080181   | 0.481320043 | 1.06E-05 | 3.06E-04 | 5.44E-01 |
| ENSG00000197054.10_ZNF763    | ENSG00000160789.18_LMNA | -0.16861 | -0.319244973 | -0.00967286 | 3.78E-02 | 1.67E-01 | 1.00E+00 |
| ENSG00000196511.12_TPK1      | ENSG00000160789.18_LMNA | -0.06644 | -0.223275843 | 0.093755656 | 4.16E-01 | 6.89E-01 | 1.00E+00 |

|                             |                         |          |              |             |          |          |          |
|-----------------------------|-------------------------|----------|--------------|-------------|----------|----------|----------|
| ENSG00000134602.14_STK26    | ENSG00000160789.18_LMNA | -0.11181 | -0.266271347 | 0.0482492   | 1.70E-01 | 4.29E-01 | 1.00E+00 |
| ENSG00000261533.2_          | ENSG00000160789.18_LMNA | -0.34351 | -0.476648674 | -0.194977   | 1.47E-05 | 4.02E-04 | 7.55E-01 |
| ENSG00000141956.12_PRDM15   | ENSG00000160789.18_LMNA | 0.19698  | 0.039007241  | 0.345355008 | 1.50E-02 | 8.79E-02 | 1.00E+00 |
| ENSG00000183474.14_GTF2H2C  | ENSG00000160789.18_LMNA | -0.08858 | -0.244334152 | 0.071631831 | 2.78E-01 | 5.63E-01 | 1.00E+00 |
| ENSG00000102048.14_ASB9     | ENSG00000160789.18_LMNA | -0.02967 | -0.187983129 | 0.130145074 | 7.17E-01 | 8.80E-01 | 1.00E+00 |
| ENSG00000157445.13_CACNA2D  | ENSG00000160789.18_LMNA | -0.30157 | -0.439665386 | -0.14955275 | 1.60E-04 | 2.74E-03 | 1.00E+00 |
| ENSG00000230499.1_AC108463. | ENSG00000160789.18_LMNA | 0.39872  | 0.255756114  | 0.524621593 | 3.62E-07 | 2.04E-05 | 1.86E-02 |
| ENSG00000249459.7_ZNF286B   | ENSG00000160789.18_LMNA | -0.13771 | -0.290538728 | 0.021974914 | 9.07E-02 | 2.93E-01 | 1.00E+00 |
| ENSG00000261377.4_PDCD6IPP  | ENSG00000160789.18_LMNA | -0.03499 | -0.193117186 | 0.124904217 | 6.69E-01 | 8.54E-01 | 1.00E+00 |
| ENSG00000124019.9_FAM124B   | ENSG00000160789.18_LMNA | -0.08948 | -0.245190814 | 0.070725194 | 2.73E-01 | 5.57E-01 | 1.00E+00 |
| ENSG00000225224.1_RPS27AP1  | ENSG00000160789.18_LMNA | -0.15666 | -0.308173468 | 0.002607058 | 5.39E-02 | 2.11E-01 | 1.00E+00 |
| ENSG00000143632.13_ACTA1    | ENSG00000160789.18_LMNA | 0.14287  | -0.016711901 | 0.295351883 | 7.91E-02 | 2.70E-01 | 1.00E+00 |
| ENSG00000227487.3_NCAM1-AS  | ENSG00000160789.18_LMNA | -0.18644 | -0.335679107 | -0.02807452 | 2.15E-02 | 1.13E-01 | 1.00E+00 |
| ENSG00000246339.5_EXTL3-AS1 | ENSG00000160789.18_LMNA | -0.02003 | -0.178661545 | 0.139615345 | 8.07E-01 | 9.23E-01 | 1.00E+00 |
| ENSG00000268798.1_CTB-25B13 | ENSG00000160789.18_LMNA | -0.25233 | -0.39563336  | -0.09702211 | 1.71E-03 | 1.74E-02 | 1.00E+00 |
| ENSG00000178723.7_GLULP4    | ENSG00000160789.18_LMNA | 0.05504  | -0.105080687 | 0.212380499 | 5.01E-01 | 7.53E-01 | 1.00E+00 |
| ENSG00000179131.7_RP11-458F | ENSG00000160789.18_LMNA | -0.13576 | -0.28872336  | 0.023955466 | 9.54E-02 | 3.03E-01 | 1.00E+00 |
| ENSG00000228462.1_RPS19P7   | ENSG00000160789.18_LMNA | -0.00455 | -0.163627912 | 0.15476708  | 9.56E-01 | 9.82E-01 | 1.00E+00 |
| ENSG00000138798.10_EGF      | ENSG00000160789.18_LMNA | 0.33265  | 0.183153831  | 0.46711758  | 2.82E-05 | 6.80E-04 | 1.00E+00 |
| ENSG00000279419.1_RP5-907C1 | ENSG00000160789.18_LMNA | -0.15184 | -0.303697664 | 0.007544916 | 6.18E-02 | 2.30E-01 | 1.00E+00 |
| ENSG00000242474.1_AC093627. | ENSG00000160789.18_LMNA | -0.06851 | -0.225249254 | 0.091695605 | 4.02E-01 | 6.78E-01 | 1.00E+00 |
| ENSG00000216490.3_IFI30     | ENSG00000160789.18_LMNA | 0.09841  | -0.061757074 | 0.253638105 | 2.28E-01 | 5.04E-01 | 1.00E+00 |
| ENSG00000242276.2_RPL5P3    | ENSG00000160789.18_LMNA | -0.1651  | -0.315996721 | -0.00606037 | 4.21E-02 | 1.79E-01 | 1.00E+00 |
| ENSG00000176124.10_DLEU1    | ENSG00000160789.18_LMNA | -0.30427 | -0.442054744 | -0.1524509  | 1.38E-04 | 2.44E-03 | 1.00E+00 |
| ENSG00000180044.4_C3orf80   | ENSG00000160789.18_LMNA | 0.28743  | 0.134379495  | 0.427088552 | 3.30E-04 | 4.85E-03 | 1.00E+00 |
| ENSG00000272744.1_RP11-367N | ENSG00000160789.18_LMNA | -0.07413 | -0.230606161 | 0.086089799 | 3.64E-01 | 6.46E-01 | 1.00E+00 |
| ENSG00000280132.1_RP11-452L | ENSG00000160789.18_LMNA | 0.15592  | -0.003359857 | 0.307491999 | 5.51E-02 | 2.14E-01 | 1.00E+00 |
| ENSG00000181016.8_LSMEM1    | ENSG00000160789.18_LMNA | 0.18145  | 0.022915299  | 0.331090326 | 2.53E-02 | 1.27E-01 | 1.00E+00 |
| ENSG00000223773.5_CD99P1    | ENSG00000160789.18_LMNA | 0.1243   | -0.035609315 | 0.277995742 | 1.27E-01 | 3.61E-01 | 1.00E+00 |
| ENSG00000164112.11_TMEM155  | ENSG00000160789.18_LMNA | -0.16803 | -0.318705936 | -0.00907282 | 3.85E-02 | 1.69E-01 | 1.00E+00 |
| ENSG00000080031.8_PTPRH     | ENSG00000160789.18_LMNA | 0.31484  | 0.163852636  | 0.451415074 | 7.80E-05 | 1.54E-03 | 1.00E+00 |
| ENSG00000073350.12_LLGL2    | ENSG00000160789.18_LMNA | -0.08409 | -0.240081389 | 0.076124973 | 3.03E-01 | 5.90E-01 | 1.00E+00 |
| ENSG00000139160.12_ETFBKMT  | ENSG00000160789.18_LMNA | -0.30364 | -0.441498792 | -0.15177612 | 1.43E-04 | 2.51E-03 | 1.00E+00 |

|                              |                         |          |              |             |          |          |          |
|------------------------------|-------------------------|----------|--------------|-------------|----------|----------|----------|
| ENSG00000178623.10_GPR35     | ENSG00000160789.18_LMNA | -0.04029 | -0.198219064 | 0.119678569 | 6.22E-01 | 8.29E-01 | 1.00E+00 |
| ENSG00000116299.15_KIAA1324  | ENSG00000160789.18_LMNA | -0.09236 | -0.247914017 | 0.067839656 | 2.58E-01 | 5.40E-01 | 1.00E+00 |
| ENSG00000228486.8_LINC01125  | ENSG00000160789.18_LMNA | 0.01493  | -0.144616791 | 0.173715461 | 8.55E-01 | 9.43E-01 | 1.00E+00 |
| ENSG00000181322.12_NME9      | ENSG00000160789.18_LMNA | -0.24903 | -0.392662362 | -0.0935366  | 1.98E-03 | 1.93E-02 | 1.00E+00 |
| ENSG00000243721.1_RPL23AP6   | ENSG00000160789.18_LMNA | -0.0747  | -0.231155728 | 0.08551356  | 3.60E-01 | 6.43E-01 | 1.00E+00 |
| ENSG00000125657.4_TNFSF9     | ENSG00000160789.18_LMNA | 0.02469  | -0.135039497 | 0.183172696 | 7.63E-01 | 9.01E-01 | 1.00E+00 |
| ENSG00000264772.4_RP11-186B  | ENSG00000160789.18_LMNA | -0.055   | -0.212343597 | 0.105118905 | 5.01E-01 | 7.53E-01 | 1.00E+00 |
| ENSG00000223459.5_TCAF1P1    | ENSG00000160789.18_LMNA | 0.09595  | -0.064230558 | 0.251313064 | 2.40E-01 | 5.18E-01 | 1.00E+00 |
| ENSG00000189410.10_SH2D5     | ENSG00000160789.18_LMNA | 0.04107  | -0.118909925 | 0.198968052 | 6.15E-01 | 8.26E-01 | 1.00E+00 |
| ENSG00000175787.15_ZNF169    | ENSG00000160789.18_LMNA | -0.23973 | -0.384267037 | -0.08372686 | 2.93E-03 | 2.63E-02 | 1.00E+00 |
| ENSG00000244582.2_RPL21P12C  | ENSG00000160789.18_LMNA | -0.1977  | -0.346014959 | -0.0397556  | 1.46E-02 | 8.63E-02 | 1.00E+00 |
| ENSG00000280010.1_AP001350.4 | ENSG00000160789.18_LMNA | -0.08539 | -0.241312907 | 0.074825165 | 2.96E-01 | 5.82E-01 | 1.00E+00 |
| ENSG00000236015.1_AC011290.1 | ENSG00000160789.18_LMNA | -0.0594  | -0.216548695 | 0.10075781  | 4.67E-01 | 7.29E-01 | 1.00E+00 |
| ENSG00000260806.1_RP11-872J  | ENSG00000160789.18_LMNA | -0.01713 | -0.175850413 | 0.142459936 | 8.34E-01 | 9.36E-01 | 1.00E+00 |
| ENSG00000259687.1_LINC01220  | ENSG00000160789.18_LMNA | 0.15786  | -0.001372507 | 0.309290351 | 5.21E-02 | 2.07E-01 | 1.00E+00 |
| ENSG00000077943.7_ITGA8      | ENSG00000160789.18_LMNA | 0.11219  | -0.047866576 | 0.26662763  | 1.69E-01 | 4.27E-01 | 1.00E+00 |
| ENSG00000250771.2_RP11-153M  | ENSG00000160789.18_LMNA | -0.00889 | -0.167857217 | 0.150519637 | 9.13E-01 | 9.67E-01 | 1.00E+00 |
| ENSG00000204335.3_SP5        | ENSG00000160789.18_LMNA | 0.30421  | 0.152392895  | 0.442006959 | 1.39E-04 | 2.44E-03 | 1.00E+00 |
| ENSG00000104043.13_ATP8B4    | ENSG00000160789.18_LMNA | -0.09066 | -0.246309305 | 0.069540668 | 2.67E-01 | 5.51E-01 | 1.00E+00 |
| ENSG00000225193.5_RPS12P26   | ENSG00000160789.18_LMNA | -0.21579 | -0.362538168 | -0.05860482 | 7.58E-03 | 5.34E-02 | 1.00E+00 |
| ENSG00000173452.12_TMEM196   | ENSG00000160789.18_LMNA | -0.44721 | -0.566108465 | -0.31008935 | 7.65E-09 | 8.65E-07 | 3.92E-04 |
| ENSG00000261069.3_RP11-701H  | ENSG00000160789.18_LMNA | -0.1215  | -0.275377859 | 0.038440342 | 1.36E-01 | 3.75E-01 | 1.00E+00 |
| ENSG00000214973.3_CHCHD3P3   | ENSG00000160789.18_LMNA | 0.28707  | 0.133994362  | 0.426767842 | 3.36E-04 | 4.90E-03 | 1.00E+00 |
| ENSG00000137135.16_ARHGEF3   | ENSG00000160789.18_LMNA | 0.10562  | -0.054494643 | 0.260443694 | 1.95E-01 | 4.64E-01 | 1.00E+00 |
| ENSG00000116678.17_LEPR      | ENSG00000160789.18_LMNA | -0.04241 | -0.200257468 | 0.117585777 | 6.04E-01 | 8.18E-01 | 1.00E+00 |
| ENSG00000128510.9_CPA4       | ENSG00000160789.18_LMNA | 0.23743  | 0.081298631  | 0.382181217 | 3.23E-03 | 2.82E-02 | 1.00E+00 |
| ENSG00000146233.6_CYP39A1    | ENSG00000160789.18_LMNA | -0.19656 | -0.344966469 | -0.03856682 | 1.52E-02 | 8.88E-02 | 1.00E+00 |
| ENSG00000234488.1_AC096664.1 | ENSG00000160789.18_LMNA | -0.1306  | -0.283895337 | 0.029210883 | 1.09E-01 | 3.28E-01 | 1.00E+00 |
| ENSG00000267414.1_RP11-456K  | ENSG00000160789.18_LMNA | 0.17127  | 0.012404986  | 0.321696804 | 3.49E-02 | 1.58E-01 | 1.00E+00 |
| ENSG00000275769.1_RP11-771K  | ENSG00000160789.18_LMNA | -0.14279 | -0.29527766  | 0.016793193 | 7.93E-02 | 2.71E-01 | 1.00E+00 |
| ENSG00000267219.1_AC010504.1 | ENSG00000160789.18_LMNA | -0.06844 | -0.22518477  | 0.091762963 | 4.02E-01 | 6.78E-01 | 1.00E+00 |
| ENSG00000172578.10_KLHL6     | ENSG00000160789.18_LMNA | -0.14331 | -0.295761836 | 0.016262832 | 7.82E-02 | 2.68E-01 | 1.00E+00 |
| ENSG00000157765.10_SLC34A2   | ENSG00000160789.18_LMNA | 0.02463  | -0.135102257 | 0.183110914 | 7.63E-01 | 9.01E-01 | 1.00E+00 |

|                              |                         |          |              |             |          |          |          |
|------------------------------|-------------------------|----------|--------------|-------------|----------|----------|----------|
| ENSG00000215835.2_RP11-9L18  | ENSG00000160789.18_LMNA | 0.02161  | -0.138069591 | 0.180186942 | 7.92E-01 | 9.16E-01 | 1.00E+00 |
| ENSG00000196696.11_PDXDC2P   | ENSG00000160789.18_LMNA | -0.03743 | -0.19546742  | 0.122499157 | 6.47E-01 | 8.43E-01 | 1.00E+00 |
| ENSG00000198298.11_ZNF485    | ENSG00000160789.18_LMNA | -0.13668 | -0.289575932 | 0.023025622 | 9.31E-02 | 2.98E-01 | 1.00E+00 |
| ENSG00000100473.14_COCH      | ENSG00000160789.18_LMNA | -0.0396  | -0.197560027 | 0.120354585 | 6.28E-01 | 8.33E-01 | 1.00E+00 |
| ENSG00000144583.4_MARCH4     | ENSG00000160789.18_LMNA | -0.12886 | -0.282265417 | 0.030981189 | 1.14E-01 | 3.37E-01 | 1.00E+00 |
| ENSG00000069188.15_SDK2      | ENSG00000160789.18_LMNA | -0.07827 | -0.234546686 | 0.081953343 | 3.38E-01 | 6.23E-01 | 1.00E+00 |
| ENSG00000271643.1_RP11-10C2  | ENSG00000160789.18_LMNA | 0.34431  | 0.19584969   | 0.477349564 | 1.40E-05 | 3.86E-04 | 7.19E-01 |
| ENSG00000259079.1_RP1-261D1  | ENSG00000160789.18_LMNA | 0.04518  | -0.114844142 | 0.202923696 | 5.80E-01 | 8.04E-01 | 1.00E+00 |
| ENSG00000269907.1_RP11-330M  | ENSG00000160789.18_LMNA | -0.06833 | -0.225079113 | 0.091873323 | 4.03E-01 | 6.79E-01 | 1.00E+00 |
| ENSG00000089101.16_CFAP61    | ENSG00000160789.18_LMNA | -0.0156  | -0.17436536  | 0.143960544 | 8.49E-01 | 9.41E-01 | 1.00E+00 |
| ENSG00000267244.4_CTB-31O2C  | ENSG00000160789.18_LMNA | 0.02316  | -0.136548448 | 0.181686559 | 7.77E-01 | 9.08E-01 | 1.00E+00 |
| ENSG00000258605.1_DYNLL1P2   | ENSG00000160789.18_LMNA | -0.0971  | -0.252400079 | 0.063074625 | 2.34E-01 | 5.12E-01 | 1.00E+00 |
| ENSG00000240388.2_CTD-2061E  | ENSG00000160789.18_LMNA | -0.04605 | -0.203754609 | 0.113988739 | 5.73E-01 | 8.01E-01 | 1.00E+00 |
| ENSG00000260630.5_SNAI3-AS1  | ENSG00000160789.18_LMNA | 0.00219  | -0.157063359 | 0.161336553 | 9.79E-01 | 9.92E-01 | 1.00E+00 |
| ENSG00000273387.1_RP3-412A9  | ENSG00000160789.18_LMNA | 0.22483  | 0.068062472  | 0.370757363 | 5.36E-03 | 4.13E-02 | 1.00E+00 |
| ENSG00000234719.7_NPIPB2     | ENSG00000160789.18_LMNA | -0.04791 | -0.205543398 | 0.112145626 | 5.58E-01 | 7.91E-01 | 1.00E+00 |
| ENSG00000170006.10_TMEM154   | ENSG00000160789.18_LMNA | 0.24777  | 0.09220242   | 0.391523469 | 2.09E-03 | 2.02E-02 | 1.00E+00 |
| ENSG00000196233.10_LCOR      | ENSG00000160789.18_LMNA | -0.14956 | -0.30158072  | 0.009875125 | 6.59E-02 | 2.40E-01 | 1.00E+00 |
| ENSG00000253873.4_PCDHGA11   | ENSG00000160789.18_LMNA | -0.13844 | -0.29122221  | 0.021228605 | 8.90E-02 | 2.90E-01 | 1.00E+00 |
| ENSG00000235828.5_RPL36AP2f  | ENSG00000160789.18_LMNA | -0.02485 | -0.183327273 | 0.134882462 | 7.61E-01 | 9.00E-01 | 1.00E+00 |
| ENSG00000162989.4_KCNJ3      | ENSG00000160789.18_LMNA | -0.38798 | -0.515349734 | -0.2438411  | 7.86E-07 | 3.76E-05 | 4.03E-02 |
| ENSG00000231351.2_AC111200.1 | ENSG00000160789.18_LMNA | -0.15319 | -0.304956629 | 0.006157516 | 5.95E-02 | 2.24E-01 | 1.00E+00 |
| ENSG00000141404.14_GNAL      | ENSG00000160789.18_LMNA | -0.31451 | -0.451120695 | -0.16349288 | 7.94E-05 | 1.57E-03 | 1.00E+00 |
| ENSG00000167646.12_DNAAF3    | ENSG00000160789.18_LMNA | 0.18225  | 0.023735984  | 0.331821246 | 2.46E-02 | 1.25E-01 | 1.00E+00 |
| ENSG00000247934.4_RP11-967K  | ENSG00000160789.18_LMNA | -0.07473 | -0.231176206 | 0.085492085 | 3.60E-01 | 6.42E-01 | 1.00E+00 |
| ENSG00000188158.13_NHS       | ENSG00000160789.18_LMNA | 0.19259  | 0.034440547  | 0.341321202 | 1.75E-02 | 9.78E-02 | 1.00E+00 |
| ENSG00000158089.13_GALNT14   | ENSG00000160789.18_LMNA | -0.29696 | -0.435568982 | -0.14459561 | 2.03E-04 | 3.30E-03 | 1.00E+00 |
| ENSG00000150477.13_KIAA1328  | ENSG00000160789.18_LMNA | -0.18418 | -0.333597217 | -0.0257318  | 2.31E-02 | 1.20E-01 | 1.00E+00 |
| ENSG00000253785.1_CTC-308K2  | ENSG00000160789.18_LMNA | -0.31223 | -0.449110883 | -0.16103878 | 9.00E-05 | 1.74E-03 | 1.00E+00 |
| ENSG00000224420.3_ADM5       | ENSG00000160789.18_LMNA | 0.00817  | -0.151224288 | 0.167156385 | 9.20E-01 | 9.70E-01 | 1.00E+00 |
| ENSG00000246982.5_RP1-179N1  | ENSG00000160789.18_LMNA | -0.09093 | -0.246559523 | 0.069275555 | 2.65E-01 | 5.49E-01 | 1.00E+00 |
| ENSG00000260992.1_DOCK9-AS   | ENSG00000160789.18_LMNA | -0.11547 | -0.269711374 | 0.044550974 | 1.57E-01 | 4.09E-01 | 1.00E+00 |
| ENSG00000165105.9_RASEF      | ENSG00000160789.18_LMNA | 0.2616   | 0.106844439  | 0.403972277 | 1.13E-03 | 1.27E-02 | 1.00E+00 |

|                             |                         |          |              |             |          |          |          |
|-----------------------------|-------------------------|----------|--------------|-------------|----------|----------|----------|
| ENSG00000262583.1_RP11-77K1 | ENSG00000160789.18_LMNA | 0.03308  | -0.126788582 | 0.191273224 | 6.86E-01 | 8.64E-01 | 1.00E+00 |
| ENSG00000135824.11_RGS8     | ENSG00000160789.18_LMNA | -0.13605 | -0.288992322 | 0.023662185 | 9.47E-02 | 3.01E-01 | 1.00E+00 |
| ENSG00000267655.1_CTD-2286N | ENSG00000160789.18_LMNA | 0.01717  | -0.142423366 | 0.175886585 | 8.34E-01 | 9.35E-01 | 1.00E+00 |
| ENSG00000103150.5_MLYCD     | ENSG00000160789.18_LMNA | -0.07255 | -0.229105369 | 0.087662347 | 3.74E-01 | 6.54E-01 | 1.00E+00 |
| ENSG00000263535.1_AK4P1     | ENSG00000160789.18_LMNA | 0.10329  | -0.056846693 | 0.258243021 | 2.05E-01 | 4.77E-01 | 1.00E+00 |
| ENSG00000213967.9_ZNF726    | ENSG00000160789.18_LMNA | -0.2795  | -0.420009933 | -0.12589948 | 4.88E-04 | 6.61E-03 | 1.00E+00 |
| ENSG00000239809.1_RP11-51L5 | ENSG00000160789.18_LMNA | 0.06238  | -0.097788469 | 0.219405101 | 4.45E-01 | 7.12E-01 | 1.00E+00 |
| ENSG00000236811.1_GAPDHP2   | ENSG00000160789.18_LMNA | 0.29395  | 0.141365575  | 0.43289329  | 2.37E-04 | 3.74E-03 | 1.00E+00 |
| ENSG00000139219.16_COL2A1   | ENSG00000160789.18_LMNA | 0.00102  | -0.158206135 | 0.160194945 | 9.90E-01 | 9.96E-01 | 1.00E+00 |
| ENSG00000172785.17_CBWD1    | ENSG00000160789.18_LMNA | 0.07917  | -0.081055077 | 0.235401032 | 3.32E-01 | 6.18E-01 | 1.00E+00 |
| ENSG00000223861.1_RP11-74C1 | ENSG00000160789.18_LMNA | -0.06897 | -0.225693874 | 0.09123109  | 3.98E-01 | 6.75E-01 | 1.00E+00 |
| ENSG00000159433.10_STARD9   | ENSG00000160789.18_LMNA | 0.09807  | -0.062098039 | 0.253317819 | 2.29E-01 | 5.06E-01 | 1.00E+00 |
| ENSG00000213082.3_PPP1R14B  | ENSG00000160789.18_LMNA | 0.00948  | -0.149948861 | 0.168424665 | 9.08E-01 | 9.65E-01 | 1.00E+00 |
| ENSG00000258469.1_CHMP4BP1  | ENSG00000160789.18_LMNA | 0.13088  | -0.028920546 | 0.284162477 | 1.08E-01 | 3.27E-01 | 1.00E+00 |
| ENSG00000242252.1_BGLAP     | ENSG00000160789.18_LMNA | -0.00131 | -0.160479797 | 0.157921072 | 9.87E-01 | 9.95E-01 | 1.00E+00 |
| ENSG00000259959.1_RP11-121C | ENSG00000160789.18_LMNA | -0.17343 | -0.323697061 | -0.01463734 | 3.26E-02 | 1.51E-01 | 1.00E+00 |
| ENSG00000016402.11_IL20RA   | ENSG00000160789.18_LMNA | -0.0523  | -0.209757494 | 0.107794894 | 5.22E-01 | 7.68E-01 | 1.00E+00 |
| ENSG00000180871.6_CXCR2     | ENSG00000160789.18_LMNA | -0.07402 | -0.230499733 | 0.086201367 | 3.65E-01 | 6.46E-01 | 1.00E+00 |
| ENSG00000232059.3_RP11-173A | ENSG00000160789.18_LMNA | -0.12303 | -0.27680484  | 0.036897803 | 1.31E-01 | 3.67E-01 | 1.00E+00 |
| ENSG00000254132.1_MTND6P3   | ENSG00000160789.18_LMNA | -0.14089 | -0.293503151 | 0.018735471 | 8.34E-02 | 2.79E-01 | 1.00E+00 |
| ENSG00000131781.11_FMO5     | ENSG00000160789.18_LMNA | -0.35505 | -0.486741847 | -0.20758731 | 7.18E-06 | 2.24E-04 | 3.68E-01 |
| ENSG00000197575.6_RPS17P2   | ENSG00000160789.18_LMNA | -0.0538  | -0.211194665 | 0.106308338 | 5.10E-01 | 7.59E-01 | 1.00E+00 |
| ENSG00000233396.6_RP11-458D | ENSG00000160789.18_LMNA | -0.36113 | -0.492044476 | -0.21424975 | 4.86E-06 | 1.62E-04 | 2.49E-01 |
| ENSG00000246082.2_NUDT16P1  | ENSG00000160789.18_LMNA | -0.07751 | -0.233830079 | 0.082706393 | 3.43E-01 | 6.27E-01 | 1.00E+00 |
| ENSG00000261549.2_RP11-320A | ENSG00000160789.18_LMNA | -0.07352 | -0.230026856 | 0.086696989 | 3.68E-01 | 6.49E-01 | 1.00E+00 |
| ENSG00000236824.1_BCYRN1    | ENSG00000160789.18_LMNA | -0.38813 | -0.515475706 | -0.24400243 | 7.78E-07 | 3.74E-05 | 3.99E-02 |
| ENSG00000215016.2_RPL24P7   | ENSG00000160789.18_LMNA | -0.11505 | -0.269318758 | 0.044973495 | 1.58E-01 | 4.11E-01 | 1.00E+00 |
| ENSG00000260578.1_CTD-2541J | ENSG00000160789.18_LMNA | -0.00746 | -0.166460669 | 0.151923475 | 9.27E-01 | 9.72E-01 | 1.00E+00 |
| ENSG00000238003.1_RPL10P4   | ENSG00000160789.18_LMNA | 0.00027  | -0.15893411  | 0.15946727  | 9.97E-01 | 9.99E-01 | 1.00E+00 |
| ENSG00000226268.3_RP11-61N2 | ENSG00000160789.18_LMNA | -0.19378 | -0.342415664 | -0.03567833 | 1.68E-02 | 9.51E-02 | 1.00E+00 |
| ENSG00000278989.1_RP11-762L | ENSG00000160789.18_LMNA | -0.2721  | -0.413395645 | -0.11801437 | 6.96E-04 | 8.74E-03 | 1.00E+00 |
| ENSG00000185668.6_POU3F1    | ENSG00000160789.18_LMNA | 0.14037  | -0.01925759  | 0.293025764 | 8.45E-02 | 2.82E-01 | 1.00E+00 |
| ENSG00000274315.1_RP11-996F | ENSG00000160789.18_LMNA | -0.0635  | -0.220475407 | 0.09667439  | 4.37E-01 | 7.05E-01 | 1.00E+00 |

|                              |                         |          |              |             |          |          |          |
|------------------------------|-------------------------|----------|--------------|-------------|----------|----------|----------|
| ENSG00000265107.2_GJA5       | ENSG00000160789.18_LMNA | 0.13676  | -0.022937209 | 0.289656972 | 9.29E-02 | 2.98E-01 | 1.00E+00 |
| ENSG00000233038.4_AC011899.1 | ENSG00000160789.18_LMNA | 0.01766  | -0.1419367   | 0.176367884 | 8.29E-01 | 9.33E-01 | 1.00E+00 |
| ENSG00000182224.10_CYB5D1    | ENSG00000160789.18_LMNA | 0.12668  | -0.033187688 | 0.280231359 | 1.20E-01 | 3.48E-01 | 1.00E+00 |
| ENSG00000235381.1_RP11-477D  | ENSG00000160789.18_LMNA | -0.22914 | -0.37467466  | -0.07258924 | 4.52E-03 | 3.63E-02 | 1.00E+00 |
| ENSG00000141433.11_ADCYAP1   | ENSG00000160789.18_LMNA | -0.18238 | -0.331942947 | -0.02387267 | 2.45E-02 | 1.25E-01 | 1.00E+00 |
| ENSG00000178386.11_ZNF223    | ENSG00000160789.18_LMNA | -0.15944 | -0.310749777 | -0.0002421  | 4.98E-02 | 2.01E-01 | 1.00E+00 |
| ENSG00000185905.3_C16orf54   | ENSG00000160789.18_LMNA | -0.00188 | -0.161033829 | 0.157366476 | 9.82E-01 | 9.93E-01 | 1.00E+00 |
| ENSG00000108786.9_HSD17B1    | ENSG00000160789.18_LMNA | 0.02046  | -0.13919251  | 0.179078963 | 8.02E-01 | 9.21E-01 | 1.00E+00 |
| ENSG00000237793.3_RPL18AP1   | ENSG00000160789.18_LMNA | -0.12132 | -0.275205177 | 0.038626905 | 1.37E-01 | 3.76E-01 | 1.00E+00 |
| ENSG00000185495.9_RP11-504P  | ENSG00000160789.18_LMNA | -0.26734 | -0.409127794 | -0.11294622 | 8.70E-04 | 1.04E-02 | 1.00E+00 |
| ENSG00000269906.1_RP11-248J  | ENSG00000160789.18_LMNA | 0.23552  | 0.079297202  | 0.380459707 | 3.49E-03 | 3.00E-02 | 1.00E+00 |
| ENSG00000270983.1_RP11-137J  | ENSG00000160789.18_LMNA | -0.08958 | -0.24527938  | 0.070631432 | 2.72E-01 | 5.57E-01 | 1.00E+00 |
| ENSG00000228427.1_RP5-1091N  | ENSG00000160789.18_LMNA | -0.08202 | -0.238109758 | 0.078203697 | 3.15E-01 | 6.01E-01 | 1.00E+00 |
| ENSG00000132840.8_BHMT2      | ENSG00000160789.18_LMNA | 0.02964  | -0.130179112 | 0.187949728 | 7.17E-01 | 8.80E-01 | 1.00E+00 |
| ENSG00000213872.3_AC092798.1 | ENSG00000160789.18_LMNA | -0.07047 | -0.22712641  | 0.089733514 | 3.88E-01 | 6.66E-01 | 1.00E+00 |
| ENSG00000276952.1_RP5-965G2  | ENSG00000160789.18_LMNA | 0.10901  | -0.051080601 | 0.2636322   | 1.81E-01 | 4.45E-01 | 1.00E+00 |
| ENSG00000107864.13_CPEB3     | ENSG00000160789.18_LMNA | -0.39983 | -0.525580239 | -0.25699272 | 3.34E-07 | 1.92E-05 | 1.71E-02 |
| ENSG00000132514.12_CLEC10A   | ENSG00000160789.18_LMNA | 0.07472  | -0.085497595 | 0.231170952 | 3.60E-01 | 6.42E-01 | 1.00E+00 |
| ENSG00000197779.12_ZNF81     | ENSG00000160789.18_LMNA | -0.03942 | -0.197381607 | 0.120537552 | 6.30E-01 | 8.33E-01 | 1.00E+00 |
| ENSG00000241612.1_RP13-585F  | ENSG00000160789.18_LMNA | -0.21591 | -0.362648783 | -0.05873174 | 7.55E-03 | 5.32E-02 | 1.00E+00 |
| ENSG00000204577.10_LILRB3    | ENSG00000160789.18_LMNA | 0.15863  | -0.000582808 | 0.310004334 | 5.09E-02 | 2.04E-01 | 1.00E+00 |
| ENSG00000188739.13_RBM34     | ENSG00000160789.18_LMNA | -0.1762  | -0.326252193 | -0.01749344 | 2.99E-02 | 1.43E-01 | 1.00E+00 |
| ENSG00000245281.5_CTD-2547L  | ENSG00000160789.18_LMNA | -0.39945 | -0.525246784 | -0.25656248 | 3.43E-07 | 1.96E-05 | 1.76E-02 |
| ENSG00000161640.14_SIGLEC11  | ENSG00000160789.18_LMNA | -0.11063 | -0.265156756 | 0.049445602 | 1.75E-01 | 4.35E-01 | 1.00E+00 |
| ENSG00000109667.10_SLC2A9    | ENSG00000160789.18_LMNA | -0.14406 | -0.296460295 | 0.015497438 | 7.66E-02 | 2.65E-01 | 1.00E+00 |
| ENSG00000260927.1_RP11-459F  | ENSG00000160789.18_LMNA | -0.14104 | -0.293647415 | 0.018577656 | 8.31E-02 | 2.79E-01 | 1.00E+00 |
| ENSG00000182601.6_HS3ST4     | ENSG00000160789.18_LMNA | -0.31101 | -0.448024398 | -0.15971359 | 9.62E-05 | 1.83E-03 | 1.00E+00 |
| ENSG00000215283.3_HMGB3P24   | ENSG00000160789.18_LMNA | -0.00572 | -0.164771283 | 0.153619965 | 9.44E-01 | 9.78E-01 | 1.00E+00 |
| ENSG00000243824.1_RPL12P6    | ENSG00000160789.18_LMNA | 0.0684   | -0.091803255 | 0.225146196 | 4.02E-01 | 6.78E-01 | 1.00E+00 |
| ENSG00000237686.5_RP5-1120P  | ENSG00000160789.18_LMNA | 0.07239  | -0.087822398 | 0.228952537 | 3.75E-01 | 6.55E-01 | 1.00E+00 |
| ENSG00000179546.4_HTR1D      | ENSG00000160789.18_LMNA | 0.28851  | 0.135537995  | 0.428052822 | 3.13E-04 | 4.65E-03 | 1.00E+00 |
| ENSG00000120149.8_MSX2       | ENSG00000160789.18_LMNA | -0.19997 | -0.3480928   | -0.04211402 | 1.35E-02 | 8.13E-02 | 1.00E+00 |
| ENSG00000246375.2_RP11-10L7  | ENSG00000160789.18_LMNA | -0.29916 | -0.437527167 | -0.14696343 | 1.81E-04 | 3.02E-03 | 1.00E+00 |

|                             |                         |          |              |             |          |          |          |
|-----------------------------|-------------------------|----------|--------------|-------------|----------|----------|----------|
| ENSG00000277879.1_RP11-129M | ENSG00000160789.18_LMNA | -0.05771 | -0.214931663 | 0.102436273 | 4.80E-01 | 7.38E-01 | 1.00E+00 |
| ENSG00000205664.9_RP11-706O | ENSG00000160789.18_LMNA | -0.22851 | -0.374099967 | -0.07192436 | 4.63E-03 | 3.70E-02 | 1.00E+00 |
| ENSG00000172296.11_SPTLC3   | ENSG00000160789.18_LMNA | -0.01682 | -0.175555461 | 0.142758094 | 8.37E-01 | 9.37E-01 | 1.00E+00 |
| ENSG00000279561.1_RP11-4L24 | ENSG00000160789.18_LMNA | -0.30287 | -0.440817053 | -0.15094903 | 1.49E-04 | 2.58E-03 | 1.00E+00 |
| ENSG00000246898.1_LINC00920 | ENSG00000160789.18_LMNA | -0.0124  | -0.171264983 | 0.147088685 | 8.79E-01 | 9.53E-01 | 1.00E+00 |
| ENSG00000181885.17_CLDN7    | ENSG00000160789.18_LMNA | 0.13645  | -0.023251588 | 0.28936879  | 9.37E-02 | 2.99E-01 | 1.00E+00 |
| ENSG00000273038.2_RP11-479G | ENSG00000160789.18_LMNA | 0.35153  | 0.203731092  | 0.483663257 | 8.96E-06 | 2.66E-04 | 4.60E-01 |
| ENSG00000103522.14_IL21R    | ENSG00000160789.18_LMNA | 0.13267  | -0.027104396 | 0.285832423 | 1.03E-01 | 3.18E-01 | 1.00E+00 |
| ENSG00000251595.6_ABCA11P   | ENSG00000160789.18_LMNA | -0.17854 | -0.328409638 | -0.01990894 | 2.78E-02 | 1.36E-01 | 1.00E+00 |
| ENSG00000145708.9_CRHBP     | ENSG00000160789.18_LMNA | -0.23181 | -0.377093608 | -0.07539078 | 4.06E-03 | 3.35E-02 | 1.00E+00 |
| ENSG00000003987.12_MTMR7    | ENSG00000160789.18_LMNA | -0.46504 | -0.58121213  | -0.33029401 | 1.58E-09 | 2.29E-07 | 8.11E-05 |
| ENSG00000265100.1_RP11-147L | ENSG00000160789.18_LMNA | -0.02876 | -0.187103818 | 0.131040898 | 7.25E-01 | 8.83E-01 | 1.00E+00 |
| ENSG00000235044.1_PPIAP3    | ENSG00000160789.18_LMNA | 0.03675  | -0.123169812 | 0.19481242  | 6.53E-01 | 8.46E-01 | 1.00E+00 |
| ENSG00000228010.4_AC073343  | ENSG00000160789.18_LMNA | -0.05174 | -0.209213681 | 0.108357024 | 5.27E-01 | 7.71E-01 | 1.00E+00 |
| ENSG00000215424.8_MCM3AP-A  | ENSG00000160789.18_LMNA | -0.04491 | -0.202663912 | 0.115111487 | 5.83E-01 | 8.06E-01 | 1.00E+00 |
| ENSG00000086717.17_PPEF1    | ENSG00000160789.18_LMNA | 0.07481  | -0.085403657 | 0.231260522 | 3.60E-01 | 6.42E-01 | 1.00E+00 |
| ENSG00000227848.1_SUCLA2-A5 | ENSG00000160789.18_LMNA | -0.27299 | -0.414186833 | -0.11895561 | 6.67E-04 | 8.45E-03 | 1.00E+00 |
| ENSG00000178226.9_PRSS36    | ENSG00000160789.18_LMNA | 0.24162  | 0.085721097  | 0.385977768 | 2.71E-03 | 2.47E-02 | 1.00E+00 |
| ENSG00000223561.5_AC003090  | ENSG00000160789.18_LMNA | -0.21698 | -0.363616069 | -0.05984204 | 7.25E-03 | 5.17E-02 | 1.00E+00 |
| ENSG00000176438.11_SYNE3    | ENSG00000160789.18_LMNA | 0.24832  | 0.092790966  | 0.39202598  | 2.04E-03 | 1.98E-02 | 1.00E+00 |
| ENSG00000248636.5_RP11-768F | ENSG00000160789.18_LMNA | -0.19489 | -0.343436921 | -0.03683417 | 1.61E-02 | 9.24E-02 | 1.00E+00 |
| ENSG00000271966.1_RP11-7F18 | ENSG00000160789.18_LMNA | -0.22381 | -0.369833621 | -0.06699682 | 5.57E-03 | 4.26E-02 | 1.00E+00 |
| ENSG00000142748.11_FCN3     | ENSG00000160789.18_LMNA | 0.18961  | 0.031357931  | 0.338591892 | 1.93E-02 | 1.05E-01 | 1.00E+00 |
| ENSG00000058335.14_RASGRF1  | ENSG00000160789.18_LMNA | -0.2647  | -0.406757641 | -0.11013826 | 9.83E-04 | 1.14E-02 | 1.00E+00 |
| ENSG00000164185.4_ZNF474    | ENSG00000160789.18_LMNA | 0.13313  | -0.026631461 | 0.286266974 | 1.02E-01 | 3.15E-01 | 1.00E+00 |
| ENSG00000173762.6_CD7       | ENSG00000160789.18_LMNA | 0.23228  | 0.075886872  | 0.377521528 | 3.98E-03 | 3.30E-02 | 1.00E+00 |
| ENSG00000151572.15_ANO4     | ENSG00000160789.18_LMNA | -0.16094 | -0.312143008 | -0.00178499 | 4.76E-02 | 1.95E-01 | 1.00E+00 |
| ENSG00000271553.1_RP11-274B | ENSG00000160789.18_LMNA | 0.00978  | -0.149656395 | 0.168715342 | 9.05E-01 | 9.63E-01 | 1.00E+00 |
| ENSG00000250899.3_RP11-253E | ENSG00000160789.18_LMNA | 0.19981  | 0.041941771  | 0.347941145 | 1.36E-02 | 8.16E-02 | 1.00E+00 |
| ENSG00000120262.9_CCDC170   | ENSG00000160789.18_LMNA | 0.1276   | -0.032254729 | 0.281091749 | 1.17E-01 | 3.43E-01 | 1.00E+00 |
| ENSG00000232940.4_HCG25     | ENSG00000160789.18_LMNA | -0.13341 | -0.286523976 | 0.026351692 | 1.01E-01 | 3.14E-01 | 1.00E+00 |
| ENSG00000144824.18_PHLDB2   | ENSG00000160789.18_LMNA | 0.12751  | -0.032346128 | 0.281007482 | 1.17E-01 | 3.43E-01 | 1.00E+00 |
| ENSG00000110944.7_IL23A     | ENSG00000160789.18_LMNA | 0.01719  | -0.142403251 | 0.175906481 | 8.34E-01 | 9.35E-01 | 1.00E+00 |

|                              |                         |          |              |             |          |          |          |
|------------------------------|-------------------------|----------|--------------|-------------|----------|----------|----------|
| ENSG00000260461.1_RP11-541N  | ENSG00000160789.18_LMNA | 0.09349  | -0.066699443 | 0.24898871  | 2.52E-01 | 5.33E-01 | 1.00E+00 |
| ENSG00000278943.1_RP11-142A  | ENSG00000160789.18_LMNA | -0.31115 | -0.448154113 | -0.15987175 | 9.55E-05 | 1.82E-03 | 1.00E+00 |
| ENSG00000183570.15_PCBP3     | ENSG00000160789.18_LMNA | -0.22602 | -0.371841456 | -0.06931399 | 5.11E-03 | 3.99E-02 | 1.00E+00 |
| ENSG00000231437.3_RP11-88H9  | ENSG00000160789.18_LMNA | -0.13631 | -0.289235115 | 0.023397394 | 9.40E-02 | 3.00E-01 | 1.00E+00 |
| ENSG00000249167.1_CTB-118N6  | ENSG00000160789.18_LMNA | -0.29903 | -0.437406637 | -0.14681759 | 1.82E-04 | 3.04E-03 | 1.00E+00 |
| ENSG00000213864.3_EEF1B2P2   | ENSG00000160789.18_LMNA | -0.12677 | -0.280313248 | 0.033098916 | 1.20E-01 | 3.47E-01 | 1.00E+00 |
| ENSG00000280173.1_RP11-447D  | ENSG00000160789.18_LMNA | -0.03124 | -0.189495411 | 0.128603178 | 7.02E-01 | 8.73E-01 | 1.00E+00 |
| ENSG00000232713.2_AC010733.1 | ENSG00000160789.18_LMNA | -0.03548 | -0.193587149 | 0.124423589 | 6.64E-01 | 8.52E-01 | 1.00E+00 |
| ENSG00000167207.10_NOD2      | ENSG00000160789.18_LMNA | 0.09869  | -0.061472967 | 0.253904928 | 2.26E-01 | 5.03E-01 | 1.00E+00 |
| ENSG00000167984.15_NLRC3     | ENSG00000160789.18_LMNA | -0.02758 | -0.185959765 | 0.132205657 | 7.36E-01 | 8.89E-01 | 1.00E+00 |
| ENSG00000154736.5_ADAMTS5    | ENSG00000160789.18_LMNA | 0.08707  | -0.073147123 | 0.242901284 | 2.86E-01 | 5.72E-01 | 1.00E+00 |
| ENSG00000230185.4_C9orf147   | ENSG00000160789.18_LMNA | -0.12488 | -0.278540206 | 0.03501989  | 1.25E-01 | 3.58E-01 | 1.00E+00 |
| ENSG00000255031.4_RP11-802E  | ENSG00000160789.18_LMNA | 0.34961  | 0.201636965  | 0.481988515 | 1.01E-05 | 2.94E-04 | 5.18E-01 |
| ENSG00000214331.7_RP11-252A  | ENSG00000160789.18_LMNA | 0.08117  | -0.079049246 | 0.237307025 | 3.20E-01 | 6.07E-01 | 1.00E+00 |
| ENSG00000182162.8_P2RY8      | ENSG00000160789.18_LMNA | 0.06141  | -0.098755007 | 0.218475921 | 4.52E-01 | 7.18E-01 | 1.00E+00 |
| ENSG00000270049.1_RP11-297D  | ENSG00000160789.18_LMNA | -0.12524 | -0.278877693 | 0.034654424 | 1.24E-01 | 3.56E-01 | 1.00E+00 |
| ENSG00000121988.16_ZRANB3    | ENSG00000160789.18_LMNA | -0.11491 | -0.269184878 | 0.045117546 | 1.59E-01 | 4.12E-01 | 1.00E+00 |
| ENSG00000258674.5_CTC-260F2  | ENSG00000160789.18_LMNA | -0.09482 | -0.25024383  | 0.065366758 | 2.45E-01 | 5.25E-01 | 1.00E+00 |
| ENSG00000247950.5_SEC24B-AS  | ENSG00000160789.18_LMNA | -0.24564 | -0.389601161 | -0.08995292 | 2.29E-03 | 2.17E-02 | 1.00E+00 |
| ENSG00000214362.2_RPS3AP36   | ENSG00000160789.18_LMNA | -0.08943 | -0.245136244 | 0.070782963 | 2.73E-01 | 5.58E-01 | 1.00E+00 |
| ENSG00000189190.8_ZNF600     | ENSG00000160789.18_LMNA | 0.13902  | -0.020640808 | 0.291760299 | 8.76E-02 | 2.88E-01 | 1.00E+00 |
| ENSG00000226029.1_RP4-798A1  | ENSG00000160789.18_LMNA | -0.1507  | -0.302643353 | 0.008705862 | 6.38E-02 | 2.35E-01 | 1.00E+00 |
| ENSG00000235027.1_AC068580.1 | ENSG00000160789.18_LMNA | 0.19124  | 0.033045992  | 0.340087121 | 1.83E-02 | 1.01E-01 | 1.00E+00 |
| ENSG00000269155.2_RP3-431P2  | ENSG00000160789.18_LMNA | -0.08793 | -0.243717706 | 0.072283916 | 2.81E-01 | 5.67E-01 | 1.00E+00 |
| ENSG00000251396.5_LINC01301  | ENSG00000160789.18_LMNA | 0.03174  | -0.12811153  | 0.1899773   | 6.98E-01 | 8.71E-01 | 1.00E+00 |
| ENSG00000177465.4_ACOT4      | ENSG00000160789.18_LMNA | -0.06698 | -0.223792094 | 0.093217002 | 4.12E-01 | 6.86E-01 | 1.00E+00 |
| ENSG00000114654.7_EFCC1      | ENSG00000160789.18_LMNA | 0.03575  | -0.124157939 | 0.193846842 | 6.62E-01 | 8.51E-01 | 1.00E+00 |
| ENSG00000271040.1_RP5-933K2  | ENSG00000160789.18_LMNA | -0.04874 | -0.206338659 | 0.111325511 | 5.51E-01 | 7.87E-01 | 1.00E+00 |
| ENSG00000249898.6_MCPH1-AS   | ENSG00000160789.18_LMNA | -0.09717 | -0.252464474 | 0.063006121 | 2.34E-01 | 5.11E-01 | 1.00E+00 |
| ENSG00000215014.4_RP5-832C2  | ENSG00000160789.18_LMNA | -0.04215 | -0.200004057 | 0.117846103 | 6.06E-01 | 8.20E-01 | 1.00E+00 |
| ENSG00000187372.11_PCDHB13   | ENSG00000160789.18_LMNA | 0.11224  | -0.047816706 | 0.26667406  | 1.69E-01 | 4.27E-01 | 1.00E+00 |
| ENSG00000154040.19_CABYR     | ENSG00000160789.18_LMNA | -0.17291 | -0.323212723 | -0.01409652 | 3.32E-02 | 1.53E-01 | 1.00E+00 |
| ENSG00000185352.8_HS6ST3     | ENSG00000160789.18_LMNA | -0.0565  | -0.213776949 | 0.10363375  | 4.89E-01 | 7.45E-01 | 1.00E+00 |



|                              |                         |          |              |             |          |          |          |
|------------------------------|-------------------------|----------|--------------|-------------|----------|----------|----------|
| ENSG00000188004.8_C1orf204   | ENSG00000160789.18_LMNA | 0.06311  | -0.097070022 | 0.220095407 | 4.40E-01 | 7.08E-01 | 1.00E+00 |
| ENSG00000168060.13_NAALADL   | ENSG00000160789.18_LMNA | 0.00122  | -0.15800852  | 0.16039242  | 9.88E-01 | 9.96E-01 | 1.00E+00 |
| ENSG00000196081.8_ZNF724     | ENSG00000160789.18_LMNA | -0.14143 | -0.294010477 | 0.018180421 | 8.22E-02 | 2.77E-01 | 1.00E+00 |
| ENSG00000226972.2_RPL12P19   | ENSG00000160789.18_LMNA | -0.09705 | -0.252350748 | 0.063127102 | 2.34E-01 | 5.12E-01 | 1.00E+00 |
| ENSG00000233380.1_RPS2P48    | ENSG00000160789.18_LMNA | 0.0322   | -0.127651924 | 0.190427643 | 6.94E-01 | 8.68E-01 | 1.00E+00 |
| ENSG00000215464.4_AP000354.2 | ENSG00000160789.18_LMNA | -0.05338 | -0.210793593 | 0.106723335 | 5.14E-01 | 7.62E-01 | 1.00E+00 |
| ENSG00000250917.1_RP4-785G1  | ENSG00000160789.18_LMNA | -0.03632 | -0.194398917 | 0.123593049 | 6.57E-01 | 8.48E-01 | 1.00E+00 |
| ENSG00000062282.13_DGAT2     | ENSG00000160789.18_LMNA | -0.13872 | -0.291483685 | 0.020943002 | 8.83E-02 | 2.89E-01 | 1.00E+00 |
| ENSG00000118420.15_UBE3D     | ENSG00000160789.18_LMNA | -0.40378 | -0.528977583 | -0.26138222 | 2.49E-07 | 1.52E-05 | 1.28E-02 |
| ENSG00000233493.3_TMEN238    | ENSG00000160789.18_LMNA | 0.3332   | 0.183742313  | 0.467593542 | 2.73E-05 | 6.64E-04 | 1.00E+00 |
| ENSG00000214820.3_MPRIPP1    | ENSG00000160789.18_LMNA | 0.04022  | -0.11974341  | 0.198155864 | 6.23E-01 | 8.30E-01 | 1.00E+00 |
| ENSG00000225721.4_RP11-269F  | ENSG00000160789.18_LMNA | -0.18914 | -0.338157813 | -0.0308682  | 1.96E-02 | 1.06E-01 | 1.00E+00 |
| ENSG00000258581.2_RP11-638I2 | ENSG00000160789.18_LMNA | -0.01022 | -0.169141652 | 0.149227364 | 9.01E-01 | 9.61E-01 | 1.00E+00 |
| ENSG00000240445.3_FOXO3B     | ENSG00000160789.18_LMNA | 0.02773  | -0.132058092 | 0.186104755 | 7.35E-01 | 8.88E-01 | 1.00E+00 |
| ENSG00000197497.9_ZNF665     | ENSG00000160789.18_LMNA | 0.05681  | -0.103323683 | 0.214076028 | 4.87E-01 | 7.44E-01 | 1.00E+00 |
| ENSG00000213303.3_CTC-398G3  | ENSG00000160789.18_LMNA | -0.21612 | -0.362835323 | -0.05894581 | 7.49E-03 | 5.29E-02 | 1.00E+00 |
| ENSG00000101470.8_TNNC2      | ENSG00000160789.18_LMNA | 0.19775  | 0.039805499  | 0.346058955 | 1.46E-02 | 8.62E-02 | 1.00E+00 |
| ENSG00000244021.4_RP11-50D9  | ENSG00000160789.18_LMNA | -0.19372 | -0.342365394 | -0.03562146 | 1.68E-02 | 9.52E-02 | 1.00E+00 |
| ENSG00000167034.9_NKX3-1     | ENSG00000160789.18_LMNA | 0.10753  | -0.052572479 | 0.262239723 | 1.87E-01 | 4.54E-01 | 1.00E+00 |
| ENSG00000241478.1_HSPA8P9    | ENSG00000160789.18_LMNA | -0.00063 | -0.15981235  | 0.158588932 | 9.94E-01 | 9.98E-01 | 1.00E+00 |
| ENSG00000259706.1_HSP90B2P   | ENSG00000160789.18_LMNA | 0.31209  | 0.160882981  | 0.448983196 | 9.07E-05 | 1.75E-03 | 1.00E+00 |
| ENSG00000233585.1_AC115617.2 | ENSG00000160789.18_LMNA | 0.04902  | -0.111043945 | 0.206611595 | 5.49E-01 | 7.86E-01 | 1.00E+00 |
| ENSG00000081923.9_ATP8B1     | ENSG00000160789.18_LMNA | 0.36171  | 0.214887913  | 0.492551313 | 4.68E-06 | 1.58E-04 | 2.40E-01 |
| ENSG00000174808.10_BTC       | ENSG00000160789.18_LMNA | -0.0438  | -0.201598867 | 0.116207046 | 5.92E-01 | 8.11E-01 | 1.00E+00 |
| ENSG00000150873.10_C2orf50   | ENSG00000160789.18_LMNA | 0.27695  | 0.123181563  | 0.417733581 | 5.52E-04 | 7.29E-03 | 1.00E+00 |
| ENSG00000237489.2_LINC00959  | ENSG00000160789.18_LMNA | -0.09503 | -0.250438799 | 0.06515964  | 2.44E-01 | 5.24E-01 | 1.00E+00 |
| ENSG00000163285.7_GABRG1     | ENSG00000160789.18_LMNA | -0.38616 | -0.513776839 | -0.24182791 | 8.94E-07 | 4.17E-05 | 4.59E-02 |
| ENSG00000180061.8_TMEN150B   | ENSG00000160789.18_LMNA | 0.15026  | -0.009161482 | 0.302229375 | 6.46E-02 | 2.37E-01 | 1.00E+00 |
| ENSG00000248712.6_CCDC153    | ENSG00000160789.18_LMNA | 0.0442   | -0.115817466 | 0.201977682 | 5.89E-01 | 8.09E-01 | 1.00E+00 |
| ENSG00000125910.5_S1PR4      | ENSG00000160789.18_LMNA | 0.09294  | -0.067251258 | 0.248468701 | 2.55E-01 | 5.36E-01 | 1.00E+00 |
| ENSG00000101049.13_SGK2      | ENSG00000160789.18_LMNA | -0.25539 | -0.39839142  | -0.10026438 | 1.50E-03 | 1.57E-02 | 1.00E+00 |
| ENSG00000182185.17_RAD51B    | ENSG00000160789.18_LMNA | -0.12339 | -0.277145908 | 0.036528894 | 1.30E-01 | 3.65E-01 | 1.00E+00 |
| ENSG00000225264.3_ZNRF2P2    | ENSG00000160789.18_LMNA | -0.04963 | -0.207194287 | 0.11044266  | 5.44E-01 | 7.82E-01 | 1.00E+00 |

|                              |                         |          |              |             |          |          |          |
|------------------------------|-------------------------|----------|--------------|-------------|----------|----------|----------|
| ENSG00000089692.7_LAG3       | ENSG00000160789.18_LMNA | -0.03077 | -0.189041401 | 0.12906624  | 7.07E-01 | 8.75E-01 | 1.00E+00 |
| ENSG00000215467.2_RPL27AP    | ENSG00000160789.18_LMNA | -0.04709 | -0.204751685 | 0.112961652 | 5.65E-01 | 7.95E-01 | 1.00E+00 |
| ENSG00000279307.1_RP11-130L  | ENSG00000160789.18_LMNA | -0.21805 | -0.364596872 | -0.06096862 | 6.96E-03 | 5.02E-02 | 1.00E+00 |
| ENSG00000226138.4_RP1-228P1  | ENSG00000160789.18_LMNA | -0.03158 | -0.189824374 | 0.12826757  | 6.99E-01 | 8.71E-01 | 1.00E+00 |
| ENSG00000174226.7_SNX31      | ENSG00000160789.18_LMNA | -0.25227 | -0.395586314 | -0.09696686 | 1.72E-03 | 1.74E-02 | 1.00E+00 |
| ENSG00000256271.1_CACNA1C-   | ENSG00000160789.18_LMNA | -0.31431 | -0.450947576 | -0.16328135 | 8.03E-05 | 1.58E-03 | 1.00E+00 |
| ENSG00000223799.1_IL10RB-AS  | ENSG00000160789.18_LMNA | 0.1082   | -0.051895822 | 0.262871458 | 1.85E-01 | 4.50E-01 | 1.00E+00 |
| ENSG00000272150.4_NBPF25P    | ENSG00000160789.18_LMNA | 0.09032  | -0.069889583 | 0.245979928 | 2.68E-01 | 5.53E-01 | 1.00E+00 |
| ENSG00000261559.1_FSCN1P1    | ENSG00000160789.18_LMNA | 0.05269  | -0.107409734 | 0.210129991 | 5.19E-01 | 7.65E-01 | 1.00E+00 |
| ENSG00000250220.1_RP11-692D  | ENSG00000160789.18_LMNA | -0.18009 | -0.329835954 | -0.02150784 | 2.64E-02 | 1.31E-01 | 1.00E+00 |
| ENSG00000077616.9_NAALAD2    | ENSG00000160789.18_LMNA | -0.14399 | -0.296396251 | 0.015567635 | 7.68E-02 | 2.65E-01 | 1.00E+00 |
| ENSG00000263843.1_RP11-649A  | ENSG00000160789.18_LMNA | -0.04635 | -0.204044456 | 0.113690237 | 5.71E-01 | 7.99E-01 | 1.00E+00 |
| ENSG00000133107.13_TRPC4     | ENSG00000160789.18_LMNA | -0.15954 | -0.310846258 | -0.0003489  | 4.96E-02 | 2.00E-01 | 1.00E+00 |
| ENSG00000259826.1_RP11-467D  | ENSG00000160789.18_LMNA | 0.00721  | -0.152160521 | 0.166224728 | 9.30E-01 | 9.73E-01 | 1.00E+00 |
| ENSG00000272944.1_CTD-2308L  | ENSG00000160789.18_LMNA | 0.02107  | -0.138595517 | 0.179668115 | 7.97E-01 | 9.18E-01 | 1.00E+00 |
| ENSG00000268442.1_CTD-2027I1 | ENSG00000160789.18_LMNA | -0.03677 | -0.194833398 | 0.123147742 | 6.53E-01 | 8.46E-01 | 1.00E+00 |
| ENSG00000230593.3_AC090804.  | ENSG00000160789.18_LMNA | 0.1148   | -0.045228038 | 0.26908218  | 1.59E-01 | 4.12E-01 | 1.00E+00 |
| ENSG00000233937.5_CTC-338M1  | ENSG00000160789.18_LMNA | 0.0392   | -0.120749843 | 0.197174565 | 6.32E-01 | 8.35E-01 | 1.00E+00 |
| ENSG00000256061.6_DYX1C1     | ENSG00000160789.18_LMNA | 0.05101  | -0.109078147 | 0.208515768 | 5.33E-01 | 7.75E-01 | 1.00E+00 |
| ENSG00000280303.2_ERICD      | ENSG00000160789.18_LMNA | 0.30384  | 0.151992992  | 0.441677495 | 1.42E-04 | 2.48E-03 | 1.00E+00 |
| ENSG00000147174.10_ACRC      | ENSG00000160789.18_LMNA | -0.01256 | -0.171416057 | 0.146936406 | 8.78E-01 | 9.53E-01 | 1.00E+00 |
| ENSG00000265702.1_RP11-156L  | ENSG00000160789.18_LMNA | 0.06105  | -0.099118978 | 0.218125869 | 4.55E-01 | 7.20E-01 | 1.00E+00 |
| ENSG00000273487.1_RP4-621B1  | ENSG00000160789.18_LMNA | -0.17167 | -0.322072322 | -0.01282384 | 3.44E-02 | 1.57E-01 | 1.00E+00 |
| ENSG00000103995.12_CEP152    | ENSG00000160789.18_LMNA | 0.04645  | -0.113593965 | 0.204137925 | 5.70E-01 | 7.99E-01 | 1.00E+00 |
| ENSG00000272040.1_CTC-366B1  | ENSG00000160789.18_LMNA | 0.10259  | -0.057547127 | 0.257587034 | 2.08E-01 | 4.81E-01 | 1.00E+00 |
| ENSG00000233237.5_LINC00472  | ENSG00000160789.18_LMNA | -0.40943 | -0.533838754 | -0.26768236 | 1.63E-07 | 1.07E-05 | 8.34E-03 |
| ENSG00000235847.2_LDHAP7     | ENSG00000160789.18_LMNA | 0.27757  | 0.123845023  | 0.418289594 | 5.36E-04 | 7.12E-03 | 1.00E+00 |
| ENSG00000105672.13_ETV2      | ENSG00000160789.18_LMNA | -0.07978 | -0.235980384 | 0.080445649 | 3.29E-01 | 6.15E-01 | 1.00E+00 |
| ENSG00000120337.8_TNFSF18    | ENSG00000160789.18_LMNA | -0.29397 | -0.432910438 | -0.14138626 | 2.37E-04 | 3.74E-03 | 1.00E+00 |
| ENSG00000242083.2_RPL7AP31   | ENSG00000160789.18_LMNA | -0.14838 | -0.300480479 | 0.011084871 | 6.81E-02 | 2.45E-01 | 1.00E+00 |
| ENSG00000152380.8_FAM151B    | ENSG00000160789.18_LMNA | -0.07547 | -0.231886991 | 0.08474648  | 3.55E-01 | 6.39E-01 | 1.00E+00 |
| ENSG00000175697.9_GPR156     | ENSG00000160789.18_LMNA | -0.03545 | -0.193561688 | 0.124449632 | 6.65E-01 | 8.52E-01 | 1.00E+00 |
| ENSG00000143494.14_VASH2     | ENSG00000160789.18_LMNA | -0.19927 | -0.347449148 | -0.04138309 | 1.38E-02 | 8.28E-02 | 1.00E+00 |

|                             |                         |          |              |             |          |          |          |
|-----------------------------|-------------------------|----------|--------------|-------------|----------|----------|----------|
| ENSG00000168754.12_FAM178B  | ENSG00000160789.18_LMNA | -0.27984 | -0.420318553 | -0.1262683  | 4.80E-04 | 6.53E-03 | 1.00E+00 |
| ENSG00000141655.14_TNFRSF1  | ENSG00000160789.18_LMNA | 0.18588  | 0.027495483  | 0.335164816 | 2.19E-02 | 1.15E-01 | 1.00E+00 |
| ENSG00000213931.4_HBE1      | ENSG00000160789.18_LMNA | -0.03971 | -0.197663249 | 0.120248724 | 6.27E-01 | 8.32E-01 | 1.00E+00 |
| ENSG00000232150.3_ST13P4    | ENSG00000160789.18_LMNA | -0.08842 | -0.244180936 | 0.07179393  | 2.79E-01 | 5.64E-01 | 1.00E+00 |
| ENSG00000227953.5_LINC01341 | ENSG00000160789.18_LMNA | -0.10782 | -0.262511359 | 0.052281562 | 1.86E-01 | 4.52E-01 | 1.00E+00 |
| ENSG00000267342.1_RP11-552F | ENSG00000160789.18_LMNA | -0.1095  | -0.264093835 | 0.050585702 | 1.79E-01 | 4.42E-01 | 1.00E+00 |
| ENSG00000242516.1_LINC00960 | ENSG00000160789.18_LMNA | -0.22799 | -0.373633193 | -0.07138452 | 4.73E-03 | 3.76E-02 | 1.00E+00 |
| ENSG00000167037.17_SGSM1    | ENSG00000160789.18_LMNA | -0.20817 | -0.355584142 | -0.05064536 | 1.01E-02 | 6.59E-02 | 1.00E+00 |
| ENSG00000136542.7_GALNT5    | ENSG00000160789.18_LMNA | 0.42201  | 0.281732868  | 0.544617099 | 6.13E-08 | 4.85E-06 | 3.14E-03 |
| ENSG00000242540.2_AC010729  | ENSG00000160789.18_LMNA | -0.18199 | -0.331580242 | -0.02346534 | 2.48E-02 | 1.26E-01 | 1.00E+00 |
| ENSG00000144642.19_RBMS3    | ENSG00000160789.18_LMNA | -0.25425 | -0.39737078  | -0.09906382 | 1.57E-03 | 1.63E-02 | 1.00E+00 |
| ENSG00000151067.19_CACNA1C  | ENSG00000160789.18_LMNA | 0.11644  | -0.043571984 | 0.270620673 | 1.53E-01 | 4.03E-01 | 1.00E+00 |
| ENSG00000214297.3_ALDOAP2   | ENSG00000160789.18_LMNA | 0.22277  | 0.065903069  | 0.368884896 | 5.81E-03 | 4.39E-02 | 1.00E+00 |
| ENSG00000066427.20_ATXN3    | ENSG00000160789.18_LMNA | -0.03714 | -0.195183921 | 0.122789467 | 6.50E-01 | 8.44E-01 | 1.00E+00 |
| ENSG00000227586.5_RPS26P39  | ENSG00000160789.18_LMNA | -0.2177  | -0.364273096 | -0.06059663 | 7.06E-03 | 5.07E-02 | 1.00E+00 |
| ENSG00000228544.1_CCDC183-7 | ENSG00000160789.18_LMNA | 0.07298  | -0.087235809 | 0.229512593 | 3.72E-01 | 6.52E-01 | 1.00E+00 |
| ENSG00000226439.3_RP11-621K | ENSG00000160789.18_LMNA | -0.2275  | -0.373181417 | -0.07086221 | 4.82E-03 | 3.81E-02 | 1.00E+00 |
| ENSG00000225471.4_RP11-262D | ENSG00000160789.18_LMNA | -0.02911 | -0.187437481 | 0.130701029 | 7.22E-01 | 8.82E-01 | 1.00E+00 |
| ENSG00000272030.1_RP1-178F1 | ENSG00000160789.18_LMNA | 0.07237  | -0.087841197 | 0.228934585 | 3.76E-01 | 6.56E-01 | 1.00E+00 |
| ENSG00000172824.13_CES4A    | ENSG00000160789.18_LMNA | -0.13216 | -0.285355657 | 0.027623113 | 1.05E-01 | 3.21E-01 | 1.00E+00 |
| ENSG00000127366.5_TAS2R5    | ENSG00000160789.18_LMNA | -0.16341 | -0.314431844 | -0.0043229  | 4.43E-02 | 1.86E-01 | 1.00E+00 |
| ENSG00000233382.6_NKAPP1    | ENSG00000160789.18_LMNA | -0.13396 | -0.287041963 | 0.025787669 | 9.99E-02 | 3.11E-01 | 1.00E+00 |
| ENSG00000241472.5_PTPRG-AS  | ENSG00000160789.18_LMNA | -0.1515  | -0.303386796 | 0.007887313 | 6.24E-02 | 2.32E-01 | 1.00E+00 |
| ENSG00000229417.1_NPM1P25   | ENSG00000160789.18_LMNA | -0.14921 | -0.301252351 | 0.010236271 | 6.66E-02 | 2.41E-01 | 1.00E+00 |
| ENSG00000213542.3_RP11-467H | ENSG00000160789.18_LMNA | -0.16619 | -0.317003873 | -0.00717959 | 4.07E-02 | 1.76E-01 | 1.00E+00 |
| ENSG00000186529.13_CYP4F3   | ENSG00000160789.18_LMNA | -0.14909 | -0.301142645 | 0.01035691  | 6.68E-02 | 2.42E-01 | 1.00E+00 |
| ENSG00000272138.1_LINC01607 | ENSG00000160789.18_LMNA | 0.02387  | -0.135847982 | 0.182376615 | 7.70E-01 | 9.05E-01 | 1.00E+00 |
| ENSG00000272941.1_RP11-134L | ENSG00000160789.18_LMNA | 0.04799  | -0.112064073 | 0.205622498 | 5.57E-01 | 7.91E-01 | 1.00E+00 |
| ENSG00000280594.1_AP000432  | ENSG00000160789.18_LMNA | 0.03002  | -0.129804271 | 0.188317517 | 7.14E-01 | 8.78E-01 | 1.00E+00 |
| ENSG00000130528.10_HRC      | ENSG00000160789.18_LMNA | -0.01317 | -0.17200716  | 0.146340442 | 8.72E-01 | 9.50E-01 | 1.00E+00 |
| ENSG00000116151.12_MORN1    | ENSG00000160789.18_LMNA | 0.15451  | -0.004808963 | 0.306179302 | 5.74E-02 | 2.19E-01 | 1.00E+00 |
| ENSG00000228347.1_FTLTP17   | ENSG00000160789.18_LMNA | -0.03536 | -0.193475935 | 0.124537341 | 6.65E-01 | 8.53E-01 | 1.00E+00 |
| ENSG00000150051.12_MKX      | ENSG00000160789.18_LMNA | -0.24975 | -0.393311256 | -0.09429725 | 1.92E-03 | 1.89E-02 | 1.00E+00 |

|                              |                         |          |              |             |          |          |          |
|------------------------------|-------------------------|----------|--------------|-------------|----------|----------|----------|
| ENSG00000265749.4_RP11-849F  | ENSG00000160789.18_LMNA | -0.10302 | -0.257986046 | 0.057121116 | 2.07E-01 | 4.78E-01 | 1.00E+00 |
| ENSG00000205702.9_CYP2D7     | ENSG00000160789.18_LMNA | -0.17396 | -0.324185525 | -0.01518295 | 3.21E-02 | 1.50E-01 | 1.00E+00 |
| ENSG00000235105.1_RP11-329A  | ENSG00000160789.18_LMNA | -0.02546 | -0.183914457 | 0.134285796 | 7.56E-01 | 8.98E-01 | 1.00E+00 |
| ENSG00000131620.16_ANO1      | ENSG00000160789.18_LMNA | 0.33573  | 0.186497107  | 0.469819426 | 2.35E-05 | 5.89E-04 | 1.00E+00 |
| ENSG00000204666.3_CTD-2126E  | ENSG00000160789.18_LMNA | -0.0682  | -0.224960964 | 0.091996721 | 4.04E-01 | 6.80E-01 | 1.00E+00 |
| ENSG00000228782.6_CTD-2026D  | ENSG00000160789.18_LMNA | -0.22702 | -0.372752173 | -0.07036609 | 4.91E-03 | 3.87E-02 | 1.00E+00 |
| ENSG00000166546.12_BEAN1     | ENSG00000160789.18_LMNA | 0.31917  | 0.168535658  | 0.455241386 | 6.13E-05 | 1.26E-03 | 1.00E+00 |
| ENSG00000254978.2_ALG1L9P    | ENSG00000160789.18_LMNA | 0.16742  | 0.008439656  | 0.318136928 | 3.92E-02 | 1.71E-01 | 1.00E+00 |
| ENSG00000267058.1_RP11-15A1  | ENSG00000160789.18_LMNA | -0.18791 | -0.337031028 | -0.02959764 | 2.04E-02 | 1.10E-01 | 1.00E+00 |
| ENSG00000186007.8_LEMD1      | ENSG00000160789.18_LMNA | -0.06292 | -0.219922551 | 0.097249956 | 4.41E-01 | 7.09E-01 | 1.00E+00 |
| ENSG00000122641.9_INHBA      | ENSG00000160789.18_LMNA | 0.16684  | 0.007846071  | 0.317603284 | 3.99E-02 | 1.73E-01 | 1.00E+00 |
| ENSG00000161664.5_ASB16      | ENSG00000160789.18_LMNA | -0.06694 | -0.223756335 | 0.093254319 | 4.13E-01 | 6.86E-01 | 1.00E+00 |
| ENSG00000277117.3_CH507-9B2  | ENSG00000160789.18_LMNA | 0.21644  | 0.059279641  | 0.36312619  | 7.40E-03 | 5.24E-02 | 1.00E+00 |
| ENSG00000168032.7_ENTPD3     | ENSG00000160789.18_LMNA | 0.02058  | -0.13907818  | 0.17919181  | 8.01E-01 | 9.20E-01 | 1.00E+00 |
| ENSG00000104808.6_DHDH       | ENSG00000160789.18_LMNA | -0.04251 | -0.200351343 | 0.117489329 | 6.03E-01 | 8.18E-01 | 1.00E+00 |
| ENSG00000260924.2_LINC01311  | ENSG00000160789.18_LMNA | -0.01581 | -0.17457503  | 0.143748766 | 8.47E-01 | 9.40E-01 | 1.00E+00 |
| ENSG00000260615.1_RPL23AP9   | ENSG00000160789.18_LMNA | -0.151   | -0.302923349 | 0.008397629 | 6.33E-02 | 2.34E-01 | 1.00E+00 |
| ENSG00000277763.1_CTD-2588E  | ENSG00000160789.18_LMNA | -0.12058 | -0.274515136 | 0.039372203 | 1.39E-01 | 3.80E-01 | 1.00E+00 |
| ENSG00000236152.1_MRPS36P1   | ENSG00000160789.18_LMNA | -0.16861 | -0.319243006 | -0.00967067 | 3.78E-02 | 1.67E-01 | 1.00E+00 |
| ENSG00000149948.12_HMGA2     | ENSG00000160789.18_LMNA | 0.32088  | 0.170377929  | 0.456743735 | 5.57E-05 | 1.17E-03 | 1.00E+00 |
| ENSG00000259994.1_RP11-305E  | ENSG00000160789.18_LMNA | -0.29126 | -0.430503249 | -0.13848561 | 2.72E-04 | 4.16E-03 | 1.00E+00 |
| ENSG00000272540.1_XXbac-BPG  | ENSG00000160789.18_LMNA | 0.06771  | -0.092486412 | 0.224492014 | 4.07E-01 | 6.82E-01 | 1.00E+00 |
| ENSG00000270964.1_RP11-502I4 | ENSG00000160789.18_LMNA | -0.23228 | -0.377517403 | -0.07588209 | 3.98E-03 | 3.30E-02 | 1.00E+00 |
| ENSG00000111424.9_VDR        | ENSG00000160789.18_LMNA | 0.39547  | 0.252142543  | 0.521816358 | 4.59E-07 | 2.46E-05 | 2.36E-02 |
| ENSG00000247121.5_CTD-2260A  | ENSG00000160789.18_LMNA | -0.20059 | -0.348653176 | -0.04275065 | 1.32E-02 | 8.01E-02 | 1.00E+00 |
| ENSG00000131203.11_IDO1      | ENSG00000160789.18_LMNA | 0.16679  | 0.007795441  | 0.317557757 | 4.00E-02 | 1.73E-01 | 1.00E+00 |
| ENSG00000180574.3	EIF2S3L    | ENSG00000160789.18_LMNA | 0.26594  | 0.111462833  | 0.407876187 | 9.28E-04 | 1.09E-02 | 1.00E+00 |
| ENSG00000196391.9_ZNF774     | ENSG00000160789.18_LMNA | -0.22424 | -0.370228388 | -0.06745215 | 5.48E-03 | 4.19E-02 | 1.00E+00 |
| ENSG00000124602.8_UNC5CL     | ENSG00000160789.18_LMNA | -0.1362  | -0.289127442 | 0.023514828 | 9.43E-02 | 3.01E-01 | 1.00E+00 |
| ENSG00000104689.8_TNFRSF10   | ENSG00000160789.18_LMNA | 0.26923  | 0.114958261  | 0.410823671 | 7.96E-04 | 9.69E-03 | 1.00E+00 |
| ENSG00000272367.1_CTC-428H1  | ENSG00000160789.18_LMNA | -0.19232 | -0.341074267 | -0.03416141 | 1.76E-02 | 9.85E-02 | 1.00E+00 |
| ENSG00000232504.4_ST3GAL5-A  | ENSG00000160789.18_LMNA | -0.31205 | -0.448945217 | -0.16083665 | 9.09E-05 | 1.75E-03 | 1.00E+00 |
| ENSG00000236090.2_LDHAP3     | ENSG00000160789.18_LMNA | 0.2559   | 0.10080612   | 0.39885173  | 1.46E-03 | 1.54E-02 | 1.00E+00 |

|                             |                         |          |              |             |          |          |          |
|-----------------------------|-------------------------|----------|--------------|-------------|----------|----------|----------|
| ENSG00000101230.5_ISM1      | ENSG00000160789.18_LMNA | -0.29957 | -0.437886904 | -0.14739878 | 1.77E-04 | 2.97E-03 | 1.00E+00 |
| ENSG00000260852.1_FBXL19-AS | ENSG00000160789.18_LMNA | 0.09447  | -0.065715267 | 0.249915708 | 2.47E-01 | 5.27E-01 | 1.00E+00 |
| ENSG00000165061.13_ZMAT4    | ENSG00000160789.18_LMNA | 0.02859  | -0.131206864 | 0.186940855 | 7.27E-01 | 8.84E-01 | 1.00E+00 |
| ENSG00000230189.5_GS1-124K5 | ENSG00000160789.18_LMNA | -0.04321 | -0.20102577  | 0.116796242 | 5.97E-01 | 8.14E-01 | 1.00E+00 |
| ENSG00000260645.1_RP11-250B | ENSG00000160789.18_LMNA | -0.10576 | -0.260577042 | 0.05435201  | 1.95E-01 | 4.63E-01 | 1.00E+00 |
| ENSG00000262222.1_RP11-876N | ENSG00000160789.18_LMNA | 0.0644   | -0.095779849 | 0.221334247 | 4.31E-01 | 7.00E-01 | 1.00E+00 |
| ENSG00000265206.3_MIR142    | ENSG00000160789.18_LMNA | 0.07961  | -0.080617362 | 0.235817168 | 3.30E-01 | 6.16E-01 | 1.00E+00 |
| ENSG00000140832.8_MARVELD3  | ENSG00000160789.18_LMNA | 0.00143  | -0.157811008 | 0.160589765 | 9.86E-01 | 9.95E-01 | 1.00E+00 |
| ENSG00000236739.3_CLIC4P1   | ENSG00000160789.18_LMNA | 0.19103  | 0.032829695  | 0.339895619 | 1.84E-02 | 1.02E-01 | 1.00E+00 |
| ENSG00000214439.3_FAM185BP  | ENSG00000160789.18_LMNA | -0.06035 | -0.217462816 | 0.099808162 | 4.60E-01 | 7.24E-01 | 1.00E+00 |
| ENSG00000266983.1_CTC-232P5 | ENSG00000160789.18_LMNA | -0.04828 | -0.205899379 | 0.111778573 | 5.55E-01 | 7.89E-01 | 1.00E+00 |
| ENSG00000236308.1_RP11-316M | ENSG00000160789.18_LMNA | -0.16534 | -0.316219919 | -0.00630834 | 4.18E-02 | 1.79E-01 | 1.00E+00 |
| ENSG00000146373.15_RNF217   | ENSG00000160789.18_LMNA | 0.08559  | -0.074624872 | 0.241502586 | 2.94E-01 | 5.80E-01 | 1.00E+00 |
| ENSG00000197594.10_ENPP1    | ENSG00000160789.18_LMNA | 0.02704  | -0.132735233 | 0.185439318 | 7.41E-01 | 8.91E-01 | 1.00E+00 |
| ENSG00000254783.1_RP11-320L | ENSG00000160789.18_LMNA | -0.16951 | -0.320070923 | -0.01059272 | 3.68E-02 | 1.64E-01 | 1.00E+00 |
| ENSG00000271860.4_RP11-436D | ENSG00000160789.18_LMNA | -0.00521 | -0.164276965 | 0.154116007 | 9.49E-01 | 9.80E-01 | 1.00E+00 |
| ENSG00000154760.12_SLFN13   | ENSG00000160789.18_LMNA | 0.11447  | -0.045561974 | 0.268771756 | 1.60E-01 | 4.14E-01 | 1.00E+00 |
| ENSG00000180921.6_FAM83H    | ENSG00000160789.18_LMNA | 0.22146  | 0.06453071   | 0.367693612 | 6.11E-03 | 4.56E-02 | 1.00E+00 |
| ENSG00000245025.2_RP11-875O | ENSG00000160789.18_LMNA | 0.10848  | -0.051616587 | 0.263132076 | 1.83E-01 | 4.48E-01 | 1.00E+00 |
| ENSG00000180764.13_PIPSL    | ENSG00000160789.18_LMNA | 0.11325  | -0.046798572 | 0.267621653 | 1.65E-01 | 4.21E-01 | 1.00E+00 |
| ENSG00000231739.2_GAPDHP59  | ENSG00000160789.18_LMNA | 0.05388  | -0.106235147 | 0.21126539  | 5.10E-01 | 7.59E-01 | 1.00E+00 |
| ENSG00000162641.17_AKNAD1   | ENSG00000160789.18_LMNA | -0.29962 | -0.437928539 | -0.14744917 | 1.77E-04 | 2.96E-03 | 1.00E+00 |
| ENSG00000277270.1_RP5-827E2 | ENSG00000160789.18_LMNA | 0.04659  | -0.113451568 | 0.204276166 | 5.69E-01 | 7.98E-01 | 1.00E+00 |
| ENSG00000111981.4_ULBP1     | ENSG00000160789.18_LMNA | -0.00164 | -0.160803308 | 0.157597256 | 9.84E-01 | 9.94E-01 | 1.00E+00 |
| ENSG00000108839.10_ALOX12   | ENSG00000160789.18_LMNA | 0.08521  | -0.075006296 | 0.241141353 | 2.97E-01 | 5.82E-01 | 1.00E+00 |
| ENSG00000145736.13_GTF2H2   | ENSG00000160789.18_LMNA | 0.08423  | -0.075989516 | 0.240209776 | 3.02E-01 | 5.89E-01 | 1.00E+00 |
| ENSG00000229431.1_RP1-92O14 | ENSG00000160789.18_LMNA | 0.18099  | 0.022439783  | 0.330666652 | 2.56E-02 | 1.29E-01 | 1.00E+00 |
| ENSG00000115194.9_SLC30A3   | ENSG00000160789.18_LMNA | -0.14013 | -0.292798892 | 0.019505661 | 8.51E-02 | 2.83E-01 | 1.00E+00 |
| ENSG00000262580.4_RP11-334C | ENSG00000160789.18_LMNA | -0.07018 | -0.226842246 | 0.090030693 | 3.90E-01 | 6.69E-01 | 1.00E+00 |
| ENSG00000021645.16_NRXN3    | ENSG00000160789.18_LMNA | -0.08647 | -0.242339388 | 0.073740943 | 2.89E-01 | 5.75E-01 | 1.00E+00 |
| ENSG00000272791.1_RP11-464F | ENSG00000160789.18_LMNA | -0.24292 | -0.387145226 | -0.08708341 | 2.57E-03 | 2.37E-02 | 1.00E+00 |
| ENSG00000227311.3_RP1-228H1 | ENSG00000160789.18_LMNA | -0.20987 | -0.357141801 | -0.05242487 | 9.46E-03 | 6.30E-02 | 1.00E+00 |
| ENSG00000103226.16_NOMO3    | ENSG00000160789.18_LMNA | 0.06359  | -0.096583918 | 0.22056229  | 4.36E-01 | 7.04E-01 | 1.00E+00 |

|                             |                         |          |              |             |          |          |          |
|-----------------------------|-------------------------|----------|--------------|-------------|----------|----------|----------|
| ENSG00000204173.9_LRRC37A5  | ENSG00000160789.18_LMNA | -0.09531 | -0.250703622 | 0.06487827  | 2.43E-01 | 5.22E-01 | 1.00E+00 |
| ENSG00000213774.3_AC010904  | ENSG00000160789.18_LMNA | -0.02966 | -0.187971954 | 0.130156462 | 7.17E-01 | 8.80E-01 | 1.00E+00 |
| ENSG00000233594.2_BT3P5     | ENSG00000160789.18_LMNA | -0.01844 | -0.177116133 | 0.141179801 | 8.22E-01 | 9.30E-01 | 1.00E+00 |
| ENSG00000215840.3_RP11-122G | ENSG00000160789.18_LMNA | 0.02536  | -0.134387097 | 0.183814781 | 7.57E-01 | 8.99E-01 | 1.00E+00 |
| ENSG00000218265.1_RPS4XP7   | ENSG00000160789.18_LMNA | 0.00552  | -0.153815815 | 0.164576133 | 9.46E-01 | 9.78E-01 | 1.00E+00 |
| ENSG00000277406.1_CH17-385C | ENSG00000160789.18_LMNA | -0.16826 | -0.318916005 | -0.00930663 | 3.83E-02 | 1.68E-01 | 1.00E+00 |
| ENSG00000272170.1_RP11-387M | ENSG00000160789.18_LMNA | -0.01706 | -0.175788048 | 0.142522983 | 8.35E-01 | 9.36E-01 | 1.00E+00 |
| ENSG00000137834.13_SMAD6    | ENSG00000160789.18_LMNA | 0.14591  | -0.01360291  | 0.298187709 | 7.29E-02 | 2.56E-01 | 1.00E+00 |
| ENSG00000238083.6_LRRC37A2  | ENSG00000160789.18_LMNA | -0.013   | -0.171849717 | 0.146499202 | 8.74E-01 | 9.51E-01 | 1.00E+00 |
| ENSG00000175471.18_MCTP1    | ENSG00000160789.18_LMNA | 0.01574  | -0.143822857 | 0.17450168  | 8.47E-01 | 9.40E-01 | 1.00E+00 |
| ENSG00000100385.12_IL2RB    | ENSG00000160789.18_LMNA | 0.27246  | 0.118397501  | 0.41371775  | 6.84E-04 | 8.62E-03 | 1.00E+00 |
| ENSG00000126218.10_F10      | ENSG00000160789.18_LMNA | -0.10248 | -0.257480375 | 0.057660983 | 2.09E-01 | 4.82E-01 | 1.00E+00 |
| ENSG00000188763.4_FZD9      | ENSG00000160789.18_LMNA | -0.014   | -0.17281575  | 0.145524826 | 8.64E-01 | 9.47E-01 | 1.00E+00 |
| ENSG00000272599.2_RP11-152N | ENSG00000160789.18_LMNA | 4.09E-06 | -0.159196714 | 0.15920469  | 1.00E+00 | 1.00E+00 | 1.00E+00 |
| ENSG00000165807.6_PPP1R36   | ENSG00000160789.18_LMNA | 0.0174   | -0.142198217 | 0.17610927  | 8.32E-01 | 9.34E-01 | 1.00E+00 |
| ENSG00000244480.1_AC005154  | ENSG00000160789.18_LMNA | -0.08702 | -0.24285667  | 0.07319428  | 2.86E-01 | 5.72E-01 | 1.00E+00 |
| ENSG00000151150.19_ANK3     | ENSG00000160789.18_LMNA | -0.31146 | -0.448424503 | -0.16020148 | 9.39E-05 | 1.80E-03 | 1.00E+00 |
| ENSG00000162390.16_ACOT11   | ENSG00000160789.18_LMNA | 0.17485  | 0.016102351  | 0.325008256 | 3.12E-02 | 1.47E-01 | 1.00E+00 |
| ENSG00000271387.1_RP11-382D | ENSG00000160789.18_LMNA | 0.02903  | -0.13077855  | 0.187361383 | 7.23E-01 | 8.83E-01 | 1.00E+00 |
| ENSG00000253878.4_RP11-347C | ENSG00000160789.18_LMNA | 0.00381  | -0.155485875 | 0.162911026 | 9.63E-01 | 9.85E-01 | 1.00E+00 |
| ENSG00000175463.10_TBC1D10C | ENSG00000160789.18_LMNA | 0.20762  | 0.05006945   | 0.355079667 | 1.03E-02 | 6.68E-02 | 1.00E+00 |
| ENSG00000175556.15_LONRF3   | ENSG00000160789.18_LMNA | 0.01377  | -0.145751448 | 0.172591124 | 8.66E-01 | 9.48E-01 | 1.00E+00 |
| ENSG00000224905.5_AP001347  | ENSG00000160789.18_LMNA | -0.19638 | -0.344801102 | -0.0383794  | 1.53E-02 | 8.92E-02 | 1.00E+00 |
| ENSG00000219665.7_CTD-2006C | ENSG00000160789.18_LMNA | -0.27276 | -0.413987473 | -0.11871839 | 6.74E-04 | 8.52E-03 | 1.00E+00 |
| ENSG00000249492.1_RP11-159F | ENSG00000160789.18_LMNA | -0.10462 | -0.259497223 | 0.055506648 | 2.00E-01 | 4.70E-01 | 1.00E+00 |
| ENSG00000184414.2_IRS3P     | ENSG00000160789.18_LMNA | 0.02717  | -0.132605926 | 0.185566413 | 7.40E-01 | 8.91E-01 | 1.00E+00 |
| ENSG00000112964.12_GHR      | ENSG00000160789.18_LMNA | -0.13092 | -0.284200867 | 0.028878818 | 1.08E-01 | 3.27E-01 | 1.00E+00 |
| ENSG00000271967.1_RP11-134K | ENSG00000160789.18_LMNA | -0.28318 | -0.4233008   | -0.12983652 | 4.08E-04 | 5.74E-03 | 1.00E+00 |
| ENSG00000181031.14_RPH3AL   | ENSG00000160789.18_LMNA | -0.21556 | -0.362330163 | -0.05836618 | 7.65E-03 | 5.37E-02 | 1.00E+00 |
| ENSG00000005471.14_ABCB4    | ENSG00000160789.18_LMNA | -0.02987 | -0.188177726 | 0.129946753 | 7.15E-01 | 8.79E-01 | 1.00E+00 |
| ENSG00000105219.7_CNTD2     | ENSG00000160789.18_LMNA | 0.07305  | -0.08716532  | 0.229579879 | 3.71E-01 | 6.51E-01 | 1.00E+00 |
| ENSG00000183166.9_CALN1     | ENSG00000160789.18_LMNA | -0.43267 | -0.553728657 | -0.29369917 | 2.59E-08 | 2.41E-06 | 1.33E-03 |
| ENSG00000137869.12_CYP19A1  | ENSG00000160789.18_LMNA | -0.02997 | -0.188271158 | 0.129851524 | 7.14E-01 | 8.78E-01 | 1.00E+00 |

|                             |                         |          |              |             |          |          |          |
|-----------------------------|-------------------------|----------|--------------|-------------|----------|----------|----------|
| ENSG00000269313.4_MAGIX     | ENSG00000160789.18_LMNA | -0.12747 | -0.28096742  | 0.032389579 | 1.18E-01 | 3.44E-01 | 1.00E+00 |
| ENSG00000159625.13_DRC7     | ENSG00000160789.18_LMNA | 0.15216  | -0.007220149 | 0.303992464 | 6.13E-02 | 2.29E-01 | 1.00E+00 |
| ENSG00000176692.5_FOXC2     | ENSG00000160789.18_LMNA | 0.22809  | 0.071483386  | 0.373718687 | 4.71E-03 | 3.75E-02 | 1.00E+00 |
| ENSG00000228592.1_D21S2088E | ENSG00000160789.18_LMNA | -0.37397 | -0.503212536 | -0.22836681 | 2.08E-06 | 8.21E-05 | 1.06E-01 |
| ENSG00000144893.11_MED12L   | ENSG00000160789.18_LMNA | -0.15032 | -0.302284721 | 0.009100576 | 6.45E-02 | 2.37E-01 | 1.00E+00 |
| ENSG00000236106.1_AC010729. | ENSG00000160789.18_LMNA | -0.05509 | -0.212429426 | 0.105030014 | 5.00E-01 | 7.53E-01 | 1.00E+00 |
| ENSG00000244459.2_RP11-1398 | ENSG00000160789.18_LMNA | 0.20618  | 0.04857359   | 0.353768522 | 1.08E-02 | 6.93E-02 | 1.00E+00 |
| ENSG00000226791.5_AC109826. | ENSG00000160789.18_LMNA | -0.04087 | -0.198779884 | 0.119103067 | 6.17E-01 | 8.26E-01 | 1.00E+00 |
| ENSG00000267745.1_RP11-686D | ENSG00000160789.18_LMNA | 0.15121  | -0.008186063 | 0.303115502 | 6.29E-02 | 2.33E-01 | 1.00E+00 |
| ENSG00000261114.1_RP11-325K | ENSG00000160789.18_LMNA | -0.04715 | -0.204817499 | 0.112893833 | 5.64E-01 | 7.95E-01 | 1.00E+00 |
| ENSG00000167608.10_TMC4     | ENSG00000160789.18_LMNA | 0.12345  | -0.036464503 | 0.277205431 | 1.30E-01 | 3.65E-01 | 1.00E+00 |
| ENSG00000276663.1_RP11-407G | ENSG00000160789.18_LMNA | -0.2337  | -0.378810042 | -0.07738158 | 3.76E-03 | 3.17E-02 | 1.00E+00 |
| ENSG00000215895.4_RP11-334L | ENSG00000160789.18_LMNA | 0.31859  | 0.167907662  | 0.454728889 | 6.33E-05 | 1.30E-03 | 1.00E+00 |
| ENSG00000239797.1_RPL21P39  | ENSG00000160789.18_LMNA | -0.20662 | -0.354167813 | -0.04902899 | 1.07E-02 | 6.85E-02 | 1.00E+00 |
| ENSG00000220804.7_AC093642. | ENSG00000160789.18_LMNA | 0.05815  | -0.101997526 | 0.21535452  | 4.77E-01 | 7.35E-01 | 1.00E+00 |
| ENSG00000126562.15_WNK4     | ENSG00000160789.18_LMNA | 0.24353  | 0.087727053  | 0.387696473 | 2.50E-03 | 2.32E-02 | 1.00E+00 |
| ENSG00000180785.8_OR51E1    | ENSG00000160789.18_LMNA | 0.25617  | 0.101092418  | 0.399094934 | 1.44E-03 | 1.53E-02 | 1.00E+00 |
| ENSG00000260276.2_RP11-77H9 | ENSG00000160789.18_LMNA | -0.00378 | -0.162880582 | 0.155516393 | 9.63E-01 | 9.85E-01 | 1.00E+00 |
| ENSG00000230228.2_RP11-4M23 | ENSG00000160789.18_LMNA | -0.21916 | -0.365603486 | -0.06212565 | 6.67E-03 | 4.86E-02 | 1.00E+00 |
| ENSG00000256552.2_RP11-113C | ENSG00000160789.18_LMNA | -0.31582 | -0.45227809  | -0.16490775 | 7.39E-05 | 1.48E-03 | 1.00E+00 |
| ENSG00000236844.1_AC091633. | ENSG00000160789.18_LMNA | -0.03071 | -0.188987927 | 0.129120771 | 7.07E-01 | 8.76E-01 | 1.00E+00 |
| ENSG00000228979.4_CTD-2501B | ENSG00000160789.18_LMNA | 0.0292   | -0.130607423 | 0.187529366 | 7.21E-01 | 8.82E-01 | 1.00E+00 |
| ENSG00000156042.16_CFAP70   | ENSG00000160789.18_LMNA | -0.00755 | -0.166555326 | 0.151828365 | 9.26E-01 | 9.72E-01 | 1.00E+00 |
| ENSG00000205795.4_CYS1      | ENSG00000160789.18_LMNA | -0.08874 | -0.24448889  | 0.071468105 | 2.77E-01 | 5.62E-01 | 1.00E+00 |
| ENSG00000239344.1_RP11-771F | ENSG00000160789.18_LMNA | -0.09572 | -0.251098018 | 0.064459139 | 2.41E-01 | 5.20E-01 | 1.00E+00 |
| ENSG00000109705.7_NKX3-2    | ENSG00000160789.18_LMNA | -0.04568 | -0.203399498 | 0.114354374 | 5.76E-01 | 8.02E-01 | 1.00E+00 |
| ENSG00000254662.1_RP11-872D | ENSG00000160789.18_LMNA | 0.20399  | 0.046289337  | 0.351764021 | 1.17E-02 | 7.34E-02 | 1.00E+00 |
| ENSG00000253161.4_LINC01605 | ENSG00000160789.18_LMNA | 0.25098  | 0.095596449  | 0.394418899 | 1.82E-03 | 1.82E-02 | 1.00E+00 |
| ENSG00000215154.5_AC141586. | ENSG00000160789.18_LMNA | 0.09354  | -0.066650504 | 0.24903482  | 2.52E-01 | 5.33E-01 | 1.00E+00 |
| ENSG00000187951.9_ARHGAP11  | ENSG00000160789.18_LMNA | 0.1007   | -0.059449194 | 0.255804199 | 2.17E-01 | 4.92E-01 | 1.00E+00 |
| ENSG00000139133.5_ALG10     | ENSG00000160789.18_LMNA | -0.12344 | -0.27719708  | 0.036473537 | 1.30E-01 | 3.65E-01 | 1.00E+00 |
| ENSG00000204147.8_ASAH2B    | ENSG00000160789.18_LMNA | -0.12908 | -0.282476096 | 0.030752474 | 1.13E-01 | 3.36E-01 | 1.00E+00 |
| ENSG00000261578.1_RP11-21L2 | ENSG00000160789.18_LMNA | 0.23604  | 0.079843719  | 0.380929996 | 3.42E-03 | 2.95E-02 | 1.00E+00 |

|                              |                         |          |              |             |          |          |          |
|------------------------------|-------------------------|----------|--------------|-------------|----------|----------|----------|
| ENSG00000267544.1_AC007229.  | ENSG00000160789.18_LMNA | -0.18472 | -0.334095307 | -0.02629198 | 2.27E-02 | 1.18E-01 | 1.00E+00 |
| ENSG00000152270.7_PDE3B      | ENSG00000160789.18_LMNA | -0.43083 | -0.552158885 | -0.29163175 | 3.02E-08 | 2.70E-06 | 1.55E-03 |
| ENSG00000279355.1_AGPAT4-IT  | ENSG00000160789.18_LMNA | -0.11375 | -0.268094604 | 0.046290168 | 1.63E-01 | 4.18E-01 | 1.00E+00 |
| ENSG00000151715.6_TMEM45B    | ENSG00000160789.18_LMNA | -0.36175 | -0.49257917  | -0.214923   | 4.67E-06 | 1.58E-04 | 2.40E-01 |
| ENSG00000186188.9_FFAR4      | ENSG00000160789.18_LMNA | -0.04979 | -0.207345246 | 0.110286845 | 5.42E-01 | 7.81E-01 | 1.00E+00 |
| ENSG00000178297.11_TMPRSS9   | ENSG00000160789.18_LMNA | -0.16336 | -0.3143814   | -0.00426692 | 4.43E-02 | 1.86E-01 | 1.00E+00 |
| ENSG00000168255.17_POLR2J3   | ENSG00000160789.18_LMNA | -0.02816 | -0.186522456 | 0.131632892 | 7.31E-01 | 8.86E-01 | 1.00E+00 |
| ENSG00000241563.3_CORT       | ENSG00000160789.18_LMNA | -0.07707 | -0.233405084 | 0.08315283  | 3.45E-01 | 6.30E-01 | 1.00E+00 |
| ENSG00000228903.5_RASA4CP    | ENSG00000160789.18_LMNA | 0.00592  | -0.15342931  | 0.164961233 | 9.42E-01 | 9.77E-01 | 1.00E+00 |
| ENSG00000101307.14_SIRPB1    | ENSG00000160789.18_LMNA | 0.05372  | -0.106386644 | 0.211118996 | 5.11E-01 | 7.60E-01 | 1.00E+00 |
| ENSG00000109927.8_TECTA      | ENSG00000160789.18_LMNA | -0.13405 | -0.287119353 | 0.025703384 | 9.97E-02 | 3.11E-01 | 1.00E+00 |
| ENSG00000104432.11_IL7       | ENSG00000160789.18_LMNA | 0.20081  | 0.042986186  | 0.348860444 | 1.31E-02 | 7.96E-02 | 1.00E+00 |
| ENSG00000273654.1_CTB-52I2.4 | ENSG00000160789.18_LMNA | 0.01986  | -0.139780709 | 0.178498269 | 8.08E-01 | 9.24E-01 | 1.00E+00 |
| ENSG00000160117.13_ANKLE1    | ENSG00000160789.18_LMNA | -0.0634  | -0.220376709 | 0.096777157 | 4.38E-01 | 7.06E-01 | 1.00E+00 |
| ENSG00000050030.12_KIAA2022  | ENSG00000160789.18_LMNA | -0.1604  | -0.311641082 | -0.00122898 | 4.84E-02 | 1.97E-01 | 1.00E+00 |
| ENSG00000136367.13_ZFHX2     | ENSG00000160789.18_LMNA | 0.03727  | -0.122658092 | 0.19531222  | 6.48E-01 | 8.44E-01 | 1.00E+00 |
| ENSG00000267270.4_PARD6G-A   | ENSG00000160789.18_LMNA | 0.07758  | -0.082637822 | 0.233895346 | 3.42E-01 | 6.27E-01 | 1.00E+00 |
| ENSG00000250859.1_HNRNPKP1   | ENSG00000160789.18_LMNA | 0.09157  | -0.068635491 | 0.247163452 | 2.62E-01 | 5.45E-01 | 1.00E+00 |
| ENSG00000267041.4_ZNF850     | ENSG00000160789.18_LMNA | -0.01842 | -0.177097936 | 0.141198213 | 8.22E-01 | 9.30E-01 | 1.00E+00 |
| ENSG00000244607.4_CCDC13     | ENSG00000160789.18_LMNA | -0.12345 | -0.277202648 | 0.036467514 | 1.30E-01 | 3.65E-01 | 1.00E+00 |
| ENSG00000272758.4_RP11-299J  | ENSG00000160789.18_LMNA | -0.26499 | -0.407018409 | -0.11044697 | 9.70E-04 | 1.13E-02 | 1.00E+00 |
| ENSG00000213468.3_FIRRE      | ENSG00000160789.18_LMNA | -0.23306 | -0.378228879 | -0.07670725 | 3.86E-03 | 3.23E-02 | 1.00E+00 |
| ENSG00000140987.18_ZSCAN32   | ENSG00000160789.18_LMNA | -0.1425  | -0.295008423 | 0.017088037 | 7.99E-02 | 2.72E-01 | 1.00E+00 |
| ENSG00000107611.13_CUBN      | ENSG00000160789.18_LMNA | 0.09474  | -0.065444413 | 0.250170724 | 2.46E-01 | 5.25E-01 | 1.00E+00 |
| ENSG00000236496.2_GPS2P1     | ENSG00000160789.18_LMNA | 0.18545  | 0.02704623   | 0.334765673 | 2.22E-02 | 1.16E-01 | 1.00E+00 |
| ENSG00000060709.12_RIMBP2    | ENSG00000160789.18_LMNA | -0.12047 | -0.274406348 | 0.039489671 | 1.39E-01 | 3.81E-01 | 1.00E+00 |
| ENSG00000248569.1_CTC-512J1  | ENSG00000160789.18_LMNA | -0.0265  | -0.184921059 | 0.133262402 | 7.46E-01 | 8.94E-01 | 1.00E+00 |
| ENSG00000260855.1_RP11-439E  | ENSG00000160789.18_LMNA | -0.1361  | -0.28903854  | 0.023611783 | 9.45E-02 | 3.01E-01 | 1.00E+00 |
| ENSG00000228192.6_RP11-342M  | ENSG00000160789.18_LMNA | 0.09333  | -0.06686411  | 0.248833553 | 2.53E-01 | 5.34E-01 | 1.00E+00 |
| ENSG00000273729.1_RP11-7F17  | ENSG00000160789.18_LMNA | -0.18383 | -0.333277298 | -0.02537209 | 2.34E-02 | 1.21E-01 | 1.00E+00 |
| ENSG00000164591.12_MYOZ3     | ENSG00000160789.18_LMNA | 0.04595  | -0.114084951 | 0.203661174 | 5.74E-01 | 8.01E-01 | 1.00E+00 |
| ENSG00000253731.2_PCDHGA6    | ENSG00000160789.18_LMNA | 0.04745  | -0.112601796 | 0.205100871 | 5.62E-01 | 7.93E-01 | 1.00E+00 |
| ENSG00000244097.1_RPS4XP17   | ENSG00000160789.18_LMNA | -0.0272  | -0.185592504 | 0.132579379 | 7.39E-01 | 8.91E-01 | 1.00E+00 |



|                             |                         |          |              |             |          |          |          |
|-----------------------------|-------------------------|----------|--------------|-------------|----------|----------|----------|
| ENSG00000266258.1_RP11-41O4 | ENSG00000160789.18_LMNA | -0.1549  | -0.306543687 | 0.004406844 | 5.67E-02 | 2.18E-01 | 1.00E+00 |
| ENSG00000237887.1_RPL23AP3  | ENSG00000160789.18_LMNA | -0.13673 | -0.289627296 | 0.022969586 | 9.30E-02 | 2.98E-01 | 1.00E+00 |
| ENSG00000175564.11_UCP3     | ENSG00000160789.18_LMNA | 0.01807  | -0.141539387 | 0.176760703 | 8.25E-01 | 9.31E-01 | 1.00E+00 |
| ENSG00000030419.15_IKZF2    | ENSG00000160789.18_LMNA | -0.15862 | -0.30999334  | 0.000594971 | 5.10E-02 | 2.04E-01 | 1.00E+00 |
| ENSG00000120664.9_SPG20-AS  | ENSG00000160789.18_LMNA | -0.13806 | -0.290867514 | 0.021615948 | 8.98E-02 | 2.92E-01 | 1.00E+00 |
| ENSG00000225178.4_RPSAP58   | ENSG00000160789.18_LMNA | -0.23426 | -0.379310424 | -0.07796239 | 3.68E-03 | 3.11E-02 | 1.00E+00 |
| ENSG00000237456.3_RP11-154D | ENSG00000160789.18_LMNA | -0.2774  | -0.41813243  | -0.12365746 | 5.40E-04 | 7.16E-03 | 1.00E+00 |
| ENSG00000243819.4_RN7SL832f | ENSG00000160789.18_LMNA | -0.04062 | -0.198532833 | 0.119356612 | 6.19E-01 | 8.28E-01 | 1.00E+00 |
| ENSG00000213394.3_RPSAP46   | ENSG00000160789.18_LMNA | -0.12288 | -0.276668383 | 0.037045375 | 1.32E-01 | 3.68E-01 | 1.00E+00 |
| ENSG00000271303.1_SRXN1     | ENSG00000160789.18_LMNA | 0.23989  | 0.083897476  | 0.384413477 | 2.91E-03 | 2.62E-02 | 1.00E+00 |
| ENSG00000235554.1_AC005822  | ENSG00000160789.18_LMNA | -0.00749 | -0.166487669 | 0.151896347 | 9.27E-01 | 9.72E-01 | 1.00E+00 |
| ENSG00000253710.2_ALG11     | ENSG00000160789.18_LMNA | -0.18801 | -0.337123838 | -0.02970225 | 2.04E-02 | 1.09E-01 | 1.00E+00 |
| ENSG00000254604.1_AP000487  | ENSG00000160789.18_LMNA | -0.08245 | -0.238523964 | 0.077767221 | 3.13E-01 | 5.99E-01 | 1.00E+00 |
| ENSG00000214810.4_CYCSP55   | ENSG00000160789.18_LMNA | -0.04926 | -0.206834279 | 0.110814183 | 5.47E-01 | 7.84E-01 | 1.00E+00 |
| ENSG00000259429.4_UBE2Q2P2  | ENSG00000160789.18_LMNA | -0.08451 | -0.240478472 | 0.075705987 | 3.01E-01 | 5.87E-01 | 1.00E+00 |
| ENSG00000135333.12_EPHA7    | ENSG00000160789.18_LMNA | -0.20608 | -0.353673133 | -0.04846482 | 1.09E-02 | 6.95E-02 | 1.00E+00 |
| ENSG00000143951.14_WDPCP    | ENSG00000160789.18_LMNA | -0.37349 | -0.502794237 | -0.22783596 | 2.14E-06 | 8.41E-05 | 1.10E-01 |
| ENSG00000126460.9_PRRG2     | ENSG00000160789.18_LMNA | 0.05355  | -0.106555552 | 0.210955759 | 5.12E-01 | 7.61E-01 | 1.00E+00 |
| ENSG00000268758.4_ADGRE4P   | ENSG00000160789.18_LMNA | -0.05283 | -0.210257898 | 0.107277456 | 5.18E-01 | 7.64E-01 | 1.00E+00 |
| ENSG00000148842.16_CNNM2    | ENSG00000160789.18_LMNA | -0.16432 | -0.315271313 | -0.00525472 | 4.31E-02 | 1.82E-01 | 1.00E+00 |
| ENSG00000244192.1_RP11-114H | ENSG00000160789.18_LMNA | 0.03436  | -0.125528958 | 0.192506089 | 6.74E-01 | 8.57E-01 | 1.00E+00 |
| ENSG00000167549.17_CORO6    | ENSG00000160789.18_LMNA | -0.13153 | -0.284772029 | 0.028257867 | 1.06E-01 | 3.24E-01 | 1.00E+00 |
| ENSG00000234432.4_RP11-1275 | ENSG00000160789.18_LMNA | 0.14002  | -0.019614036 | 0.292699767 | 8.53E-02 | 2.83E-01 | 1.00E+00 |
| ENSG00000276166.1_CTD-2600C | ENSG00000160789.18_LMNA | 0.0035   | -0.15579092  | 0.16260669  | 9.66E-01 | 9.87E-01 | 1.00E+00 |
| ENSG00000253559.1_OSGEPL1   | ENSG00000160789.18_LMNA | -0.23861 | -0.383248904 | -0.08254115 | 3.07E-03 | 2.72E-02 | 1.00E+00 |
| ENSG00000141384.10_TAF4B    | ENSG00000160789.18_LMNA | -0.05339 | -0.210799001 | 0.106717741 | 5.14E-01 | 7.62E-01 | 1.00E+00 |
| ENSG00000101695.7_RNF125    | ENSG00000160789.18_LMNA | -0.39849 | -0.524424685 | -0.25550222 | 3.68E-07 | 2.07E-05 | 1.89E-02 |
| ENSG00000157578.12_LCA5L    | ENSG00000160789.18_LMNA | 0.06533  | -0.094857718 | 0.222219063 | 4.24E-01 | 6.95E-01 | 1.00E+00 |
| ENSG00000227543.4_SPAG5-AS  | ENSG00000160789.18_LMNA | -0.03837 | -0.196367243 | 0.121577353 | 6.39E-01 | 8.39E-01 | 1.00E+00 |
| ENSG00000276863.1_CTD-2047H | ENSG00000160789.18_LMNA | -0.13922 | -0.291953823 | 0.020429354 | 8.71E-02 | 2.87E-01 | 1.00E+00 |
| ENSG00000250526.1_CCT6P2    | ENSG00000160789.18_LMNA | 0.09157  | -0.068628896 | 0.247169673 | 2.62E-01 | 5.45E-01 | 1.00E+00 |
| ENSG00000279198.1_CTD-2231E | ENSG00000160789.18_LMNA | 0.04294  | -0.117062072 | 0.200767133 | 5.99E-01 | 8.16E-01 | 1.00E+00 |
| ENSG00000181029.8_TRAPPC5   | ENSG00000160789.18_LMNA | 0.01311  | -0.146393307 | 0.171954735 | 8.73E-01 | 9.51E-01 | 1.00E+00 |

|                              |                         |          |              |             |          |          |          |
|------------------------------|-------------------------|----------|--------------|-------------|----------|----------|----------|
| ENSG00000198342.8_ZNF442     | ENSG00000160789.18_LMNA | -0.03363 | -0.191799445 | 0.126251065 | 6.81E-01 | 8.61E-01 | 1.00E+00 |
| ENSG00000174370.8_C11orf45   | ENSG00000160789.18_LMNA | -0.07585 | -0.232246778 | 0.084368932 | 3.53E-01 | 6.37E-01 | 1.00E+00 |
| ENSG00000234231.3_AC093616.4 | ENSG00000160789.18_LMNA | 0.27601  | 0.122179231  | 0.416893157 | 5.78E-04 | 7.54E-03 | 1.00E+00 |
| ENSG00000272068.1_RP11-284F  | ENSG00000160789.18_LMNA | 0.26922  | 0.114940657  | 0.410808841 | 7.97E-04 | 9.70E-03 | 1.00E+00 |
| ENSG00000243024.5_RPS11P6    | ENSG00000160789.18_LMNA | -0.27064 | -0.412083544 | -0.11645459 | 7.46E-04 | 9.20E-03 | 1.00E+00 |
| ENSG00000107614.20_TRDMT1    | ENSG00000160789.18_LMNA | -0.14965 | -0.301663327 | 0.009784259 | 6.57E-02 | 2.39E-01 | 1.00E+00 |
| ENSG00000225465.8_RFPL1S     | ENSG00000160789.18_LMNA | -0.36349 | -0.494098783 | -0.21683783 | 4.17E-06 | 1.43E-04 | 2.14E-01 |
| ENSG00000176857.5_GJA1P1     | ENSG00000160789.18_LMNA | -0.0877  | -0.243501673 | 0.072512374 | 2.83E-01 | 5.68E-01 | 1.00E+00 |
| ENSG00000267364.1_RP11-47L3  | ENSG00000160789.18_LMNA | 0.0132   | -0.14631066  | 0.172036692 | 8.72E-01 | 9.50E-01 | 1.00E+00 |
| ENSG00000139044.9_B4GALNT3   | ENSG00000160789.18_LMNA | 0.17575  | 0.017020658  | 0.325829542 | 3.03E-02 | 1.44E-01 | 1.00E+00 |
| ENSG00000219932.6_RPL12P8    | ENSG00000160789.18_LMNA | -0.08684 | -0.24268748  | 0.0733731   | 2.87E-01 | 5.73E-01 | 1.00E+00 |
| ENSG00000140090.16_SLC24A4   | ENSG00000160789.18_LMNA | -0.26617 | -0.408076129 | -0.11169971 | 9.18E-04 | 1.09E-02 | 1.00E+00 |
| ENSG00000130307.10_USHBP1    | ENSG00000160789.18_LMNA | -0.23943 | -0.383997221 | -0.08341255 | 2.97E-03 | 2.66E-02 | 1.00E+00 |
| ENSG00000169071.13_ROR2      | ENSG00000160789.18_LMNA | 0.00039  | -0.158824859 | 0.159576499 | 9.96E-01 | 9.98E-01 | 1.00E+00 |
| ENSG00000070190.11_DAPP1     | ENSG00000160789.18_LMNA | -0.08407 | -0.240057239 | 0.07615045  | 3.03E-01 | 5.90E-01 | 1.00E+00 |
| ENSG00000100625.8_SIX4       | ENSG00000160789.18_LMNA | -0.02907 | -0.187406667 | 0.13073242  | 7.22E-01 | 8.82E-01 | 1.00E+00 |
| ENSG00000265055.1_AC145343.1 | ENSG00000160789.18_LMNA | 0.19631  | 0.038302565  | 0.344733298 | 1.54E-02 | 8.93E-02 | 1.00E+00 |
| ENSG00000009724.15_MASP2     | ENSG00000160789.18_LMNA | -0.07395 | -0.230440808 | 0.086263135 | 3.65E-01 | 6.47E-01 | 1.00E+00 |
| ENSG00000172322.12_CLEC12A   | ENSG00000160789.18_LMNA | -0.05253 | -0.209971461 | 0.107573665 | 5.20E-01 | 7.66E-01 | 1.00E+00 |
| ENSG00000259668.4_RP11-707P  | ENSG00000160789.18_LMNA | -0.11305 | -0.267433105 | 0.047001207 | 1.66E-01 | 4.22E-01 | 1.00E+00 |
| ENSG00000160588.8_MPZL3      | ENSG00000160789.18_LMNA | 0.15478  | -0.004531322 | 0.306430899 | 5.69E-02 | 2.18E-01 | 1.00E+00 |
| ENSG00000183508.4_FAM46C     | ENSG00000160789.18_LMNA | -0.00673 | -0.165751241 | 0.152636115 | 9.34E-01 | 9.74E-01 | 1.00E+00 |
| ENSG00000251136.7_RP11-37B2  | ENSG00000160789.18_LMNA | -0.16168 | -0.312831596 | -0.00254809 | 4.66E-02 | 1.92E-01 | 1.00E+00 |
| ENSG00000223343.1_RP13-131K  | ENSG00000160789.18_LMNA | -0.12845 | -0.281881636 | 0.03139774  | 1.15E-01 | 3.38E-01 | 1.00E+00 |
| ENSG00000242689.2_CNTF       | ENSG00000160789.18_LMNA | -0.16419 | -0.315151621 | -0.00512183 | 4.33E-02 | 1.83E-01 | 1.00E+00 |
| ENSG00000270362.1_HMGN3-AS   | ENSG00000160789.18_LMNA | -0.06562 | -0.222495954 | 0.094569038 | 4.22E-01 | 6.93E-01 | 1.00E+00 |
| ENSG00000173214.5_MFSD4B     | ENSG00000160789.18_LMNA | 0.25799  | 0.103016914  | 0.400728662 | 1.33E-03 | 1.44E-02 | 1.00E+00 |
| ENSG00000204540.9_PSORS1C1   | ENSG00000160789.18_LMNA | 0.39958  | 0.256705012  | 0.525357262 | 3.40E-07 | 1.95E-05 | 1.75E-02 |
| ENSG00000125735.9_TNFSF14    | ENSG00000160789.18_LMNA | 0.20755  | 0.049999389  | 0.355018284 | 1.03E-02 | 6.69E-02 | 1.00E+00 |
| ENSG00000260101.1_RP11-568N  | ENSG00000160789.18_LMNA | 0.08397  | -0.076245976 | 0.23996669  | 3.04E-01 | 5.90E-01 | 1.00E+00 |
| ENSG00000224165.4_DNAJC27-1  | ENSG00000160789.18_LMNA | -0.37941 | -0.507928046 | -0.23436238 | 1.43E-06 | 6.20E-05 | 7.35E-02 |
| ENSG00000143355.14_LHX9      | ENSG00000160789.18_LMNA | -0.26115 | -0.403570826 | -0.10637024 | 1.16E-03 | 1.29E-02 | 1.00E+00 |
| ENSG00000266989.1_FTLF5      | ENSG00000160789.18_LMNA | -0.07513 | -0.231559959 | 0.085089576 | 3.58E-01 | 6.41E-01 | 1.00E+00 |

|                              |                         |          |              |             |          |          |          |
|------------------------------|-------------------------|----------|--------------|-------------|----------|----------|----------|
| ENSG00000213533.10_TMEM110   | ENSG00000160789.18_LMNA | -0.04119 | -0.199086413 | 0.118788422 | 6.14E-01 | 8.25E-01 | 1.00E+00 |
| ENSG00000197279.3_ZNF165     | ENSG00000160789.18_LMNA | -0.04792 | -0.205548968 | 0.112139883 | 5.58E-01 | 7.91E-01 | 1.00E+00 |
| ENSG00000174945.12_AMZ1      | ENSG00000160789.18_LMNA | -0.07029 | -0.226947961 | 0.089920143 | 3.90E-01 | 6.68E-01 | 1.00E+00 |
| ENSG00000231711.2_LINC00899  | ENSG00000160789.18_LMNA | -0.04846 | -0.206068772 | 0.111603881 | 5.53E-01 | 7.88E-01 | 1.00E+00 |
| ENSG00000260001.5_TGFBR3L    | ENSG00000160789.18_LMNA | -0.05896 | -0.216133225 | 0.101189236 | 4.71E-01 | 7.31E-01 | 1.00E+00 |
| ENSG00000203684.5_IBA57-AS1  | ENSG00000160789.18_LMNA | -0.11747 | -0.271594413 | 0.042522945 | 1.49E-01 | 3.97E-01 | 1.00E+00 |
| ENSG00000177076.5_ACER2      | ENSG00000160789.18_LMNA | 0.02665  | -0.133117566 | 0.185063464 | 7.45E-01 | 8.93E-01 | 1.00E+00 |
| ENSG00000185527.10_PDE6G     | ENSG00000160789.18_LMNA | 0.05087  | -0.109215423 | 0.208382873 | 5.34E-01 | 7.76E-01 | 1.00E+00 |
| ENSG00000182612.9_TSPAN10    | ENSG00000160789.18_LMNA | -0.05313 | -0.210551378 | 0.106973906 | 5.16E-01 | 7.63E-01 | 1.00E+00 |
| ENSG00000270012.1_LL0XNC01-  | ENSG00000160789.18_LMNA | 0.01395  | -0.145569886 | 0.17277109  | 8.65E-01 | 9.47E-01 | 1.00E+00 |
| ENSG00000263503.1_RP11-707C  | ENSG00000160789.18_LMNA | -0.12167 | -0.275530366 | 0.038275556 | 1.35E-01 | 3.74E-01 | 1.00E+00 |
| ENSG00000271751.1_RP11-1101  | ENSG00000160789.18_LMNA | -0.11215 | -0.266589534 | 0.047907492 | 1.69E-01 | 4.27E-01 | 1.00E+00 |
| ENSG00000166530.8_HSBP1P2    | ENSG00000160789.18_LMNA | -0.16254 | -0.313629703 | -0.00343301 | 4.54E-02 | 1.89E-01 | 1.00E+00 |
| ENSG00000243007.1_RPL12P35   | ENSG00000160789.18_LMNA | -0.01495 | -0.173732613 | 0.144599474 | 8.55E-01 | 9.43E-01 | 1.00E+00 |
| ENSG00000145198.13_VWA5B2    | ENSG00000160789.18_LMNA | -0.21669 | -0.363359373 | -0.05954732 | 7.33E-03 | 5.21E-02 | 1.00E+00 |
| ENSG00000171056.7_SOX7       | ENSG00000160789.18_LMNA | -0.11871 | -0.272752249 | 0.041274672 | 1.45E-01 | 3.90E-01 | 1.00E+00 |
| ENSG00000244722.1_RPSAP29    | ENSG00000160789.18_LMNA | -0.12634 | -0.279906127 | 0.033540209 | 1.21E-01 | 3.50E-01 | 1.00E+00 |
| ENSG00000232807.2_RP11-536K  | ENSG00000160789.18_LMNA | -0.09488 | -0.250295559 | 0.065311809 | 2.45E-01 | 5.25E-01 | 1.00E+00 |
| ENSG00000226419.5_SLC16A1-A  | ENSG00000160789.18_LMNA | 0.13415  | -0.025600696 | 0.287213635 | 9.94E-02 | 3.10E-01 | 1.00E+00 |
| ENSG00000271207.1_MTCO1P22   | ENSG00000160789.18_LMNA | -0.13008 | -0.283406941 | 0.02974155  | 1.10E-01 | 3.31E-01 | 1.00E+00 |
| ENSG00000134830.5_C5AR2      | ENSG00000160789.18_LMNA | -0.03564 | -0.193740842 | 0.124266377 | 6.63E-01 | 8.51E-01 | 1.00E+00 |
| ENSG00000229145.1_ACTBP1     | ENSG00000160789.18_LMNA | 0.26828  | 0.113946382  | 0.409971049 | 8.33E-04 | 1.00E-02 | 1.00E+00 |
| ENSG00000272250.1_RP11-346C  | ENSG00000160789.18_LMNA | 0.18871  | 0.030427382  | 0.337766978 | 1.99E-02 | 1.08E-01 | 1.00E+00 |
| ENSG00000163576.16_EFHB      | ENSG00000160789.18_LMNA | -0.24677 | -0.390620621 | -0.09114552 | 2.18E-03 | 2.09E-02 | 1.00E+00 |
| ENSG00000213213.12_CCDC183   | ENSG00000160789.18_LMNA | 0.05419  | -0.105919751 | 0.211570117 | 5.07E-01 | 7.57E-01 | 1.00E+00 |
| ENSG00000231125.2_AF129075.5 | ENSG00000160789.18_LMNA | -0.16919 | -0.319780113 | -0.01026878 | 3.72E-02 | 1.65E-01 | 1.00E+00 |
| ENSG00000268027.4_AC006129.1 | ENSG00000160789.18_LMNA | -0.14036 | -0.293015176 | 0.019269169 | 8.46E-02 | 2.82E-01 | 1.00E+00 |
| ENSG00000139193.3_CD27       | ENSG00000160789.18_LMNA | 0.13633  | -0.023379515 | 0.289251507 | 9.40E-02 | 3.00E-01 | 1.00E+00 |
| ENSG00000236993.2_GAPDHP21   | ENSG00000160789.18_LMNA | 0.18046  | 0.021883097  | 0.3301705   | 2.61E-02 | 1.30E-01 | 1.00E+00 |
| ENSG00000159251.6_ACTC1      | ENSG00000160789.18_LMNA | -0.09403 | -0.249498719 | 0.066158052 | 2.49E-01 | 5.30E-01 | 1.00E+00 |
| ENSG00000261460.1_RP11-106M  | ENSG00000160789.18_LMNA | 0.17801  | 0.019356075  | 0.327916119 | 2.82E-02 | 1.37E-01 | 1.00E+00 |
| ENSG00000233994.2_GDI2P2     | ENSG00000160789.18_LMNA | -0.12459 | -0.278271626 | 0.035310676 | 1.26E-01 | 3.59E-01 | 1.00E+00 |
| ENSG00000245651.2_RP11-620J  | ENSG00000160789.18_LMNA | -0.16986 | -0.320396398 | -0.01095534 | 3.64E-02 | 1.63E-01 | 1.00E+00 |

|                              |                         |          |              |             |          |          |          |
|------------------------------|-------------------------|----------|--------------|-------------|----------|----------|----------|
| ENSG00000154016.12_GRAP      | ENSG00000160789.18_LMNA | -0.04902 | -0.206611914 | 0.111043616 | 5.49E-01 | 7.86E-01 | 1.00E+00 |
| ENSG00000236200.4_KDM4A-AS   | ENSG00000160789.18_LMNA | 0.13228  | -0.027498986 | 0.28546976  | 1.04E-01 | 3.20E-01 | 1.00E+00 |
| ENSG00000213782.6_DDX47      | ENSG00000160789.18_LMNA | -0.10986 | -0.264431902 | 0.050223176 | 1.78E-01 | 4.40E-01 | 1.00E+00 |
| ENSG00000280310.1_RP11-326I1 | ENSG00000160789.18_LMNA | -0.47141 | -0.586588032 | -0.33754145 | 8.79E-10 | 1.41E-07 | 4.51E-05 |
| ENSG00000145217.12_SLC26A1   | ENSG00000160789.18_LMNA | 0.05353  | -0.106581911 | 0.210930284 | 5.13E-01 | 7.61E-01 | 1.00E+00 |
| ENSG00000131471.5_AOC3       | ENSG00000160789.18_LMNA | 0.15796  | -0.001269262 | 0.309383717 | 5.19E-02 | 2.06E-01 | 1.00E+00 |
| ENSG00000226432.3_CTD-2015B  | ENSG00000160789.18_LMNA | -0.15735 | -0.308811004 | 0.001902471 | 5.29E-02 | 2.09E-01 | 1.00E+00 |
| ENSG00000273784.3_RP11-78J2  | ENSG00000160789.18_LMNA | -0.02891 | -0.187245128 | 0.130896969 | 7.24E-01 | 8.83E-01 | 1.00E+00 |
| ENSG00000144331.17_ZNF385B   | ENSG00000160789.18_LMNA | -0.29024 | -0.429594111 | -0.1373914  | 2.86E-04 | 4.34E-03 | 1.00E+00 |
| ENSG00000267279.1_RP11-879F  | ENSG00000160789.18_LMNA | 0.18164  | 0.023105925  | 0.331260135 | 2.51E-02 | 1.27E-01 | 1.00E+00 |
| ENSG00000243926.1_TIPARP-AS  | ENSG00000160789.18_LMNA | -0.19608 | -0.344524914 | -0.03806644 | 1.55E-02 | 8.98E-02 | 1.00E+00 |
| ENSG00000197599.11_CCDC154   | ENSG00000160789.18_LMNA | 0.02151  | -0.13816854  | 0.180089342 | 7.93E-01 | 9.16E-01 | 1.00E+00 |
| ENSG00000235257.7_ITGA9-AS1  | ENSG00000160789.18_LMNA | -0.24344 | -0.387615832 | -0.08763288 | 2.51E-03 | 2.33E-02 | 1.00E+00 |
| ENSG00000148200.15_NR6A1     | ENSG00000160789.18_LMNA | -0.07845 | -0.234715034 | 0.081776382 | 3.37E-01 | 6.22E-01 | 1.00E+00 |
| ENSG00000273320.1_RP11-22N1  | ENSG00000160789.18_LMNA | -0.0554  | -0.212729085 | 0.104719624 | 4.98E-01 | 7.51E-01 | 1.00E+00 |
| ENSG00000165124.16_SVEP1     | ENSG00000160789.18_LMNA | 0.14371  | -0.015850419 | 0.296138225 | 7.73E-02 | 2.66E-01 | 1.00E+00 |
| ENSG00000175322.10_ZNF519    | ENSG00000160789.18_LMNA | -0.41028 | -0.534560819 | -0.26862011 | 1.53E-07 | 1.02E-05 | 7.83E-03 |
| ENSG00000230797.2_YY2        | ENSG00000160789.18_LMNA | 0.24917  | 0.09368546   | 0.392789374 | 1.96E-03 | 1.93E-02 | 1.00E+00 |
| ENSG00000271525.1_ARF4P1     | ENSG00000160789.18_LMNA | 0.04276  | -0.11723627  | 0.200597624 | 6.01E-01 | 8.17E-01 | 1.00E+00 |
| ENSG00000237709.1_EEF1A1P2   | ENSG00000160789.18_LMNA | -0.12672 | -0.280264491 | 0.033151772 | 1.20E-01 | 3.48E-01 | 1.00E+00 |
| ENSG00000156687.9_UNC5D      | ENSG00000160789.18_LMNA | -0.14365 | -0.296080498 | 0.015913677 | 7.75E-02 | 2.67E-01 | 1.00E+00 |
| ENSG00000149527.16_PLCH2     | ENSG00000160789.18_LMNA | -0.22907 | -0.374610651 | -0.07251518 | 4.53E-03 | 3.64E-02 | 1.00E+00 |
| ENSG00000234338.1_RP11-797H  | ENSG00000160789.18_LMNA | -0.19958 | -0.347734225 | -0.04170678 | 1.37E-02 | 8.21E-02 | 1.00E+00 |
| ENSG00000274425.1_AC114271.1 | ENSG00000160789.18_LMNA | 0.11371  | -0.046334365 | 0.268053495 | 1.63E-01 | 4.18E-01 | 1.00E+00 |
| ENSG00000272931.1_RP5-943J3  | ENSG00000160789.18_LMNA | -0.19582 | -0.344287044 | -0.03779695 | 1.56E-02 | 9.03E-02 | 1.00E+00 |
| ENSG00000243759.1_ST13P15    | ENSG00000160789.18_LMNA | -0.1163  | -0.270495129 | 0.043707187 | 1.54E-01 | 4.04E-01 | 1.00E+00 |
| ENSG00000233839.1_RP11-389O  | ENSG00000160789.18_LMNA | -0.10028 | -0.255399975 | 0.059880132 | 2.19E-01 | 4.94E-01 | 1.00E+00 |
| ENSG00000270890.1_RP3-468K1  | ENSG00000160789.18_LMNA | -0.21525 | -0.362042013 | -0.05803565 | 7.74E-03 | 5.42E-02 | 1.00E+00 |
| ENSG00000278867.1_RP11-640N  | ENSG00000160789.18_LMNA | -0.23456 | -0.379588552 | -0.07828532 | 3.63E-03 | 3.08E-02 | 1.00E+00 |
| ENSG00000272263.1_RP11-767C  | ENSG00000160789.18_LMNA | -0.28754 | -0.427183172 | -0.13449314 | 3.28E-04 | 4.83E-03 | 1.00E+00 |
| ENSG00000186150.4_UBL4B      | ENSG00000160789.18_LMNA | -0.0434  | -0.201211171 | 0.116605658 | 5.95E-01 | 8.13E-01 | 1.00E+00 |
| ENSG00000183734.4_ASCL2      | ENSG00000160789.18_LMNA | 0.0259   | -0.133851086 | 0.184342116 | 7.51E-01 | 8.96E-01 | 1.00E+00 |
| ENSG00000277182.1_CTB-58E17  | ENSG00000160789.18_LMNA | -0.17223 | -0.32259025  | -0.01340172 | 3.39E-02 | 1.55E-01 | 1.00E+00 |

|                              |                         |          |              |             |          |          |          |
|------------------------------|-------------------------|----------|--------------|-------------|----------|----------|----------|
| ENSG00000090534.16_THPO      | ENSG00000160789.18_LMNA | -0.00824 | -0.16722206  | 0.15115827  | 9.20E-01 | 9.69E-01 | 1.00E+00 |
| ENSG00000179603.16_GRM8      | ENSG00000160789.18_LMNA | -0.03757 | -0.195597116 | 0.122366327 | 6.46E-01 | 8.43E-01 | 1.00E+00 |
| ENSG00000213539.4_YBX1P6     | ENSG00000160789.18_LMNA | 0.05703  | -0.103107638 | 0.214284383 | 4.85E-01 | 7.42E-01 | 1.00E+00 |
| ENSG00000255508.6_RP11-864I4 | ENSG00000160789.18_LMNA | 0.1412   | -0.01841747  | 0.293793831 | 8.27E-02 | 2.78E-01 | 1.00E+00 |
| ENSG00000267421.5_AC005498.  | ENSG00000160789.18_LMNA | -0.10771 | -0.262407324 | 0.052392988 | 1.87E-01 | 4.53E-01 | 1.00E+00 |
| ENSG00000122367.18_LDB3      | ENSG00000160789.18_LMNA | -0.26177 | -0.404128574 | -0.1070291  | 1.12E-03 | 1.27E-02 | 1.00E+00 |
| ENSG00000233895.1_RP1-122P2  | ENSG00000160789.18_LMNA | 0.22668  | 0.07000218   | 0.372437233 | 4.98E-03 | 3.91E-02 | 1.00E+00 |
| ENSG00000237821.1_AC083873.  | ENSG00000160789.18_LMNA | -0.11161 | -0.26608173  | 0.048452799 | 1.71E-01 | 4.30E-01 | 1.00E+00 |
| ENSG00000181227.3_DLSTP1     | ENSG00000160789.18_LMNA | 0.12778  | -0.032077676 | 0.281254974 | 1.17E-01 | 3.42E-01 | 1.00E+00 |
| ENSG00000224429.6_LINC00539  | ENSG00000160789.18_LMNA | -0.20981 | -0.35708423  | -0.05235907 | 9.48E-03 | 6.31E-02 | 1.00E+00 |
| ENSG00000174483.18_BBS1      | ENSG00000160789.18_LMNA | 0.01427  | -0.145259312 | 0.173078885 | 8.61E-01 | 9.46E-01 | 1.00E+00 |
| ENSG00000236861.5_AC006378.  | ENSG00000160789.18_LMNA | -0.08531 | -0.241234413 | 0.074908044 | 2.96E-01 | 5.82E-01 | 1.00E+00 |
| ENSG00000101850.11_GPR143    | ENSG00000160789.18_LMNA | -0.16292 | -0.313973769 | -0.00381466 | 4.49E-02 | 1.88E-01 | 1.00E+00 |
| ENSG00000180758.11_GPR157    | ENSG00000160789.18_LMNA | 0.43663  | 0.298153462  | 0.557104478 | 1.87E-08 | 1.82E-06 | 9.60E-04 |
| ENSG00000231443.2_AC024937.  | ENSG00000160789.18_LMNA | 0.07817  | -0.082056603 | 0.234448443 | 3.38E-01 | 6.24E-01 | 1.00E+00 |
| ENSG00000239407.4_LLOXNC01-  | ENSG00000160789.18_LMNA | 0.02565  | -0.134097363 | 0.184099848 | 7.54E-01 | 8.98E-01 | 1.00E+00 |
| ENSG00000273173.4_SNURF      | ENSG00000160789.18_LMNA | -0.37181 | -0.501333507 | -0.22598349 | 2.40E-06 | 9.18E-05 | 1.23E-01 |
| ENSG00000228126.1_FALEC      | ENSG00000160789.18_LMNA | -0.13817 | -0.290974055 | 0.021499611 | 8.96E-02 | 2.91E-01 | 1.00E+00 |
| ENSG00000145864.11_GABRB2    | ENSG00000160789.18_LMNA | -0.12483 | -0.278492466 | 0.035071581 | 1.25E-01 | 3.58E-01 | 1.00E+00 |
| ENSG00000155530.2_LRGUK      | ENSG00000160789.18_LMNA | 0.07835  | -0.081874225 | 0.234621956 | 3.37E-01 | 6.23E-01 | 1.00E+00 |
| ENSG00000254016.2_ALG1L10P   | ENSG00000160789.18_LMNA | 0.0754   | -0.084814839 | 0.231821839 | 3.56E-01 | 6.39E-01 | 1.00E+00 |
| ENSG00000147437.8_GNRH1      | ENSG00000160789.18_LMNA | 0.04933  | -0.110744497 | 0.206901812 | 5.46E-01 | 7.84E-01 | 1.00E+00 |
| ENSG00000280143.1_AP000892.  | ENSG00000160789.18_LMNA | 0.34052  | 0.191714473  | 0.474025227 | 1.77E-05 | 4.66E-04 | 9.06E-01 |
| ENSG00000157388.12_CACNA1D   | ENSG00000160789.18_LMNA | -0.22031 | -0.36665461  | -0.06333471 | 6.38E-03 | 4.71E-02 | 1.00E+00 |
| ENSG00000229036.6_VDAC1P8    | ENSG00000160789.18_LMNA | 0.09807  | -0.062102419 | 0.253313704 | 2.29E-01 | 5.06E-01 | 1.00E+00 |
| ENSG00000178796.11_RIIAD1    | ENSG00000160789.18_LMNA | -0.32202 | -0.457751429 | -0.17161475 | 5.22E-05 | 1.11E-03 | 1.00E+00 |
| ENSG00000267533.1_RP11-815J. | ENSG00000160789.18_LMNA | 0.37081  | 0.224888426  | 0.500469273 | 2.57E-06 | 9.64E-05 | 1.32E-01 |
| ENSG00000186603.5_HPDL       | ENSG00000160789.18_LMNA | 0.26538  | 0.110864847  | 0.407371322 | 9.52E-04 | 1.12E-02 | 1.00E+00 |
| ENSG00000238251.2_RP11-172F  | ENSG00000160789.18_LMNA | -0.05229 | -0.209749105 | 0.107803567 | 5.22E-01 | 7.68E-01 | 1.00E+00 |
| ENSG00000135127.10_BICDL1    | ENSG00000160789.18_LMNA | -0.04061 | -0.198526415 | 0.119363198 | 6.19E-01 | 8.28E-01 | 1.00E+00 |
| ENSG00000216480.2_RP3-393E1  | ENSG00000160789.18_LMNA | -0.15696 | -0.308449502 | 0.002302031 | 5.35E-02 | 2.10E-01 | 1.00E+00 |
| ENSG00000232004.1_CAP1P2     | ENSG00000160789.18_LMNA | 0.04263  | -0.117367076 | 0.200470327 | 6.02E-01 | 8.17E-01 | 1.00E+00 |
| ENSG00000247363.2_RP11-637A  | ENSG00000160789.18_LMNA | -0.22302 | -0.3691126   | -0.06616551 | 5.75E-03 | 4.36E-02 | 1.00E+00 |

|                             |                         |          |              |             |          |          |          |
|-----------------------------|-------------------------|----------|--------------|-------------|----------|----------|----------|
| ENSG00000225416.1_AC104843. | ENSG00000160789.18_LMNA | 0.01519  | -0.144360843 | 0.173968965 | 8.53E-01 | 9.42E-01 | 1.00E+00 |
| ENSG00000271383.5_NBPF19    | ENSG00000160789.18_LMNA | 0.2099   | 0.052448156  | 0.357162171 | 9.45E-03 | 6.29E-02 | 1.00E+00 |
| ENSG00000093217.8_XYLB      | ENSG00000160789.18_LMNA | -0.06871 | -0.22544266  | 0.091493562 | 4.00E-01 | 6.77E-01 | 1.00E+00 |
| ENSG00000258813.2_RP11-109N | ENSG00000160789.18_LMNA | -0.02736 | -0.185752371 | 0.132416711 | 7.38E-01 | 8.90E-01 | 1.00E+00 |
| ENSG00000164122.7_ASB5      | ENSG00000160789.18_LMNA | -0.41142 | -0.535543701 | -0.26989739 | 1.40E-07 | 9.51E-06 | 7.17E-03 |
| ENSG00000246223.7_LINC01550 | ENSG00000160789.18_LMNA | -0.22503 | -0.370946262 | -0.06828048 | 5.31E-03 | 4.11E-02 | 1.00E+00 |
| ENSG00000142606.14_MMEL1    | ENSG00000160789.18_LMNA | 0.12139  | -0.038556641 | 0.275270216 | 1.36E-01 | 3.76E-01 | 1.00E+00 |
| ENSG00000261801.4_LOXL1-AS1 | ENSG00000160789.18_LMNA | 0.2567   | 0.101654571  | 0.399572348 | 1.41E-03 | 1.50E-02 | 1.00E+00 |
| ENSG00000168970.19_JMJD7-PL | ENSG00000160789.18_LMNA | 0.05422  | -0.105890863 | 0.211598025 | 5.07E-01 | 7.57E-01 | 1.00E+00 |
| ENSG00000254995.4_STX16-NPE | ENSG00000160789.18_LMNA | -0.04859 | -0.206195926 | 0.111472737 | 5.52E-01 | 7.88E-01 | 1.00E+00 |
| ENSG00000267776.1_AC006116. | ENSG00000160789.18_LMNA | -0.17343 | -0.323697762 | -0.01463812 | 3.26E-02 | 1.51E-01 | 1.00E+00 |
| ENSG00000281376.1_ABALON    | ENSG00000160789.18_LMNA | 0.04165  | -0.118332837 | 0.199530138 | 6.10E-01 | 8.22E-01 | 1.00E+00 |
| ENSG00000215493.3_XXbac-B56 | ENSG00000160789.18_LMNA | 0.16038  | 0.001207944  | 0.31162209  | 4.84E-02 | 1.97E-01 | 1.00E+00 |
| ENSG00000162032.14_SPSB3    | ENSG00000160789.18_LMNA | -0.19997 | -0.34809168  | -0.04211275 | 1.35E-02 | 8.13E-02 | 1.00E+00 |
| ENSG00000267325.1_LINC01415 | ENSG00000160789.18_LMNA | -0.23193 | -0.377207559 | -0.07552287 | 4.04E-03 | 3.34E-02 | 1.00E+00 |
| ENSG00000243167.1_RPS10P28  | ENSG00000160789.18_LMNA | -0.07647 | -0.232835761 | 0.083750679 | 3.49E-01 | 6.33E-01 | 1.00E+00 |
| ENSG00000204956.5_PCDHGA1   | ENSG00000160789.18_LMNA | 0.04435  | -0.115672118 | 0.202118989 | 5.87E-01 | 8.08E-01 | 1.00E+00 |
| ENSG00000246379.5_RP11-461O | ENSG00000160789.18_LMNA | -0.2712  | -0.412588119 | -0.11705424 | 7.26E-04 | 9.01E-03 | 1.00E+00 |
| ENSG00000279696.1_RP11-178H | ENSG00000160789.18_LMNA | -0.29328 | -0.432299903 | -0.14065009 | 2.45E-04 | 3.84E-03 | 1.00E+00 |
| ENSG00000215210.3_RBMXP2    | ENSG00000160789.18_LMNA | -0.08795 | -0.243736295 | 0.072264256 | 2.81E-01 | 5.67E-01 | 1.00E+00 |
| ENSG00000278997.1_RP11-131M | ENSG00000160789.18_LMNA | 0.00888  | -0.150535852 | 0.167841094 | 9.14E-01 | 9.67E-01 | 1.00E+00 |
| ENSG00000235531.8_MSC-AS1   | ENSG00000160789.18_LMNA | -0.11581 | -0.27003371  | 0.044204003 | 1.55E-01 | 4.07E-01 | 1.00E+00 |
| ENSG00000277873.1_RP11-33N1 | ENSG00000160789.18_LMNA | -0.04478 | -0.202536245 | 0.115242851 | 5.84E-01 | 8.07E-01 | 1.00E+00 |
| ENSG00000213406.3_ANXA2P1   | ENSG00000160789.18_LMNA | 0.42022  | 0.279730146  | 0.54308607  | 7.06E-08 | 5.45E-06 | 3.62E-03 |
| ENSG00000122121.9_XPNPEP2   | ENSG00000160789.18_LMNA | 0.13873  | -0.020934962 | 0.291491045 | 8.83E-02 | 2.89E-01 | 1.00E+00 |
| ENSG00000230362.1_ACTG1P23  | ENSG00000160789.18_LMNA | 0.25461  | 0.099442949  | 0.397693173 | 1.55E-03 | 1.61E-02 | 1.00E+00 |
| ENSG00000115361.6_ACADL     | ENSG00000160789.18_LMNA | -0.24978 | -0.393339814 | -0.09433073 | 1.91E-03 | 1.89E-02 | 1.00E+00 |
| ENSG00000274922.1_RP11-88E1 | ENSG00000160789.18_LMNA | -0.06703 | -0.223842591 | 0.093164303 | 4.12E-01 | 6.86E-01 | 1.00E+00 |
| ENSG00000164236.10_ANKRD33  | ENSG00000160789.18_LMNA | 0.13121  | -0.028586456 | 0.284469814 | 1.07E-01 | 3.25E-01 | 1.00E+00 |
| ENSG00000162997.14_PRORS1   | ENSG00000160789.18_LMNA | -0.13773 | -0.29056253  | 0.02194893  | 9.06E-02 | 2.93E-01 | 1.00E+00 |
| ENSG00000183022.5_TPM3P8    | ENSG00000160789.18_LMNA | 0.24016  | 0.084182223  | 0.384657845 | 2.88E-03 | 2.59E-02 | 1.00E+00 |
| ENSG00000163701.17_IL17RE   | ENSG00000160789.18_LMNA | 0.29336  | 0.140731415  | 0.432367362 | 2.44E-04 | 3.83E-03 | 1.00E+00 |
| ENSG00000233254.1_RPL21P13  | ENSG00000160789.18_LMNA | -0.14358 | -0.296012219 | 0.015988496 | 7.76E-02 | 2.67E-01 | 1.00E+00 |

|                               |                         |          |              |             |          |          |          |
|-------------------------------|-------------------------|----------|--------------|-------------|----------|----------|----------|
| ENSG00000214027.3_ARPC3P5     | ENSG00000160789.18_LMNA | -0.12302 | -0.276799955 | 0.036903086 | 1.31E-01 | 3.67E-01 | 1.00E+00 |
| ENSG00000225031.1	EIF4BP7     | ENSG00000160789.18_LMNA | 0.03105  | -0.128787876 | 0.18931434  | 7.04E-01 | 8.74E-01 | 1.00E+00 |
| ENSG00000074706.12_IPCEF1     | ENSG00000160789.18_LMNA | -0.25595 | -0.398896271 | -0.10085855 | 1.46E-03 | 1.54E-02 | 1.00E+00 |
| ENSG00000221817.8_PPP3CB-A:   | ENSG00000160789.18_LMNA | -0.07024 | -0.226901261 | 0.08996898  | 3.90E-01 | 6.68E-01 | 1.00E+00 |
| ENSG00000271862.1_RP11-343L:  | ENSG00000160789.18_LMNA | -0.04406 | -0.201842054 | 0.115956959 | 5.90E-01 | 8.10E-01 | 1.00E+00 |
| ENSG00000235033.6_RP11-61113: | ENSG00000160789.18_LMNA | -0.33263 | -0.467091444 | -0.18312152 | 2.83E-05 | 6.80E-04 | 1.00E+00 |
| ENSG00000149243.14_KLHL35     | ENSG00000160789.18_LMNA | -0.27364 | -0.41476885  | -0.11964835 | 6.47E-04 | 8.26E-03 | 1.00E+00 |
| ENSG00000164404.7_GDF9        | ENSG00000160789.18_LMNA | -0.21504 | -0.361848523 | -0.05781374 | 7.80E-03 | 5.45E-02 | 1.00E+00 |
| ENSG00000277728.1_RP11-143K   | ENSG00000160789.18_LMNA | 0.02272  | -0.136974547 | 0.181266639 | 7.81E-01 | 9.10E-01 | 1.00E+00 |
| ENSG00000279713.1_CTD-3035K   | ENSG00000160789.18_LMNA | 0.48686  | 0.355185988  | 0.59958503  | 2.02E-10 | 4.06E-08 | 1.04E-05 |
| ENSG00000168939.9_SPRY3       | ENSG00000160789.18_LMNA | -0.1096  | -0.264188129 | 0.050484595 | 1.79E-01 | 4.41E-01 | 1.00E+00 |
| ENSG00000220105.2_RP11-30711: | ENSG00000160789.18_LMNA | -0.02483 | -0.183309923 | 0.134900088 | 7.61E-01 | 9.01E-01 | 1.00E+00 |
| ENSG00000257122.4_RRN3P3      | ENSG00000160789.18_LMNA | 0.16129  | 0.00214871   | 0.312471254 | 4.71E-02 | 1.93E-01 | 1.00E+00 |
| ENSG00000226131.1_AC073465.:  | ENSG00000160789.18_LMNA | 0.06747  | -0.092724441 | 0.224264013 | 4.09E-01 | 6.83E-01 | 1.00E+00 |
| ENSG00000224321.1_RPL12P14    | ENSG00000160789.18_LMNA | 0.03205  | -0.127804514 | 0.190278143 | 6.95E-01 | 8.69E-01 | 1.00E+00 |
| ENSG00000267296.2_CEBPA-AS    | ENSG00000160789.18_LMNA | 0.07209  | -0.088125025 | 0.228663516 | 3.77E-01 | 6.57E-01 | 1.00E+00 |
| ENSG00000179841.8_AKAP5       | ENSG00000160789.18_LMNA | -0.0453  | -0.203039325 | 0.114725133 | 5.79E-01 | 8.04E-01 | 1.00E+00 |
| ENSG00000273151.1_RP11-449P   | ENSG00000160789.18_LMNA | 0.11721  | -0.04278411  | 0.271352055 | 1.50E-01 | 3.99E-01 | 1.00E+00 |
| ENSG00000152495.9_CAMK4       | ENSG00000160789.18_LMNA | -0.08819 | -0.243966062 | 0.072021234 | 2.80E-01 | 5.65E-01 | 1.00E+00 |
| ENSG00000237037.8_NDUFA6-A:   | ENSG00000160789.18_LMNA | -0.37314 | -0.502489258 | -0.22744903 | 2.20E-06 | 8.57E-05 | 1.13E-01 |
| ENSG00000215086.2_NPM1P24     | ENSG00000160789.18_LMNA | -0.0383  | -0.196301464 | 0.121644757 | 6.39E-01 | 8.39E-01 | 1.00E+00 |
| ENSG00000170624.12_SGCD       | ENSG00000160789.18_LMNA | -0.2945  | -0.433379171 | -0.14195166 | 2.31E-04 | 3.66E-03 | 1.00E+00 |
| ENSG00000112414.13_ADGRG6     | ENSG00000160789.18_LMNA | -0.13579 | -0.288746475 | 0.023930263 | 9.53E-02 | 3.02E-01 | 1.00E+00 |
| ENSG00000140932.8_CMTM2       | ENSG00000160789.18_LMNA | -0.10204 | -0.257067926 | 0.058101188 | 2.11E-01 | 4.84E-01 | 1.00E+00 |
| ENSG00000109452.11_INPP4B     | ENSG00000160789.18_LMNA | 0.0608   | -0.09935796  | 0.217895981 | 4.57E-01 | 7.21E-01 | 1.00E+00 |
| ENSG00000113805.8_CNTN3       | ENSG00000160789.18_LMNA | -0.46744 | -0.583234385 | -0.33301682 | 1.27E-09 | 1.90E-07 | 6.51E-05 |
| ENSG00000119725.16_ZNF410     | ENSG00000160789.18_LMNA | -0.02833 | -0.186690678 | 0.131461616 | 7.29E-01 | 8.85E-01 | 1.00E+00 |
| ENSG00000237476.1_XXbac-B13:  | ENSG00000160789.18_LMNA | 0.05675  | -0.103380722 | 0.214021015 | 4.87E-01 | 7.44E-01 | 1.00E+00 |
| ENSG00000196159.10_FAT4       | ENSG00000160789.18_LMNA | 0.00625  | -0.153102294 | 0.165286985 | 9.39E-01 | 9.76E-01 | 1.00E+00 |
| ENSG00000139973.14_SYT16      | ENSG00000160789.18_LMNA | -0.44973 | -0.568248749 | -0.31293848 | 6.15E-09 | 7.14E-07 | 3.16E-04 |
| ENSG00000085552.15_IGSF9      | ENSG00000160789.18_LMNA | -0.16609 | -0.316906879 | -0.00707177 | 4.09E-02 | 1.76E-01 | 1.00E+00 |
| ENSG00000019102.10_VSIG2      | ENSG00000160789.18_LMNA | 0.04907  | -0.111002361 | 0.2066519   | 5.48E-01 | 7.85E-01 | 1.00E+00 |
| ENSG00000166343.8_MSS51       | ENSG00000160789.18_LMNA | -0.18017 | -0.329904915 | -0.02158519 | 2.63E-02 | 1.31E-01 | 1.00E+00 |

|                              |                         |          |              |             |          |          |          |
|------------------------------|-------------------------|----------|--------------|-------------|----------|----------|----------|
| ENSG00000229589.1_ACVR2B-A   | ENSG00000160789.18_LMNA | -0.20623 | -0.353810439 | -0.04862139 | 1.08E-02 | 6.92E-02 | 1.00E+00 |
| ENSG00000259394.2_RP11-244F  | ENSG00000160789.18_LMNA | 0.06073  | -0.099433125 | 0.217823669 | 4.57E-01 | 7.22E-01 | 1.00E+00 |
| ENSG00000205572.8_SERF1B     | ENSG00000160789.18_LMNA | -0.37039 | -0.500102571 | -0.22442399 | 2.64E-06 | 9.88E-05 | 1.35E-01 |
| ENSG00000259321.1_RP11-468E  | ENSG00000160789.18_LMNA | -0.14831 | -0.300421579 | 0.011149607 | 6.82E-02 | 2.45E-01 | 1.00E+00 |
| ENSG00000213131.3_YWHAZP4    | ENSG00000160789.18_LMNA | -0.06133 | -0.218399373 | 0.098834605 | 4.53E-01 | 7.18E-01 | 1.00E+00 |
| ENSG00000226784.2_PGAM4      | ENSG00000160789.18_LMNA | 0.06095  | -0.099212345 | 0.218036059 | 4.56E-01 | 7.20E-01 | 1.00E+00 |
| ENSG00000280351.2_CTD-2561B  | ENSG00000160789.18_LMNA | 0.13723  | -0.02245846  | 0.290095719 | 9.18E-02 | 2.96E-01 | 1.00E+00 |
| ENSG00000196169.13_KIF19     | ENSG00000160789.18_LMNA | -0.27548 | -0.416418347 | -0.12161321 | 5.92E-04 | 7.71E-03 | 1.00E+00 |
| ENSG00000154065.15_ANKRD29   | ENSG00000160789.18_LMNA | 0.06228  | -0.097891781 | 0.219305809 | 4.46E-01 | 7.13E-01 | 1.00E+00 |
| ENSG00000223573.5_TINCR      | ENSG00000160789.18_LMNA | -0.16746 | -0.31817842  | -0.00848582 | 3.92E-02 | 1.71E-01 | 1.00E+00 |
| ENSG00000007312.11_CD79B     | ENSG00000160789.18_LMNA | -0.02694 | -0.185345145 | 0.132831039 | 7.42E-01 | 8.92E-01 | 1.00E+00 |
| ENSG00000111405.7_ENDOU      | ENSG00000160789.18_LMNA | -0.33344 | -0.467806687 | -0.18400591 | 2.70E-05 | 6.56E-04 | 1.00E+00 |
| ENSG00000182183.13_FAM159A   | ENSG00000160789.18_LMNA | -0.049   | -0.20659127  | 0.111064915 | 5.49E-01 | 7.86E-01 | 1.00E+00 |
| ENSG00000108602.16_ALDH3A1   | ENSG00000160789.18_LMNA | 0.23209  | 0.075685873  | 0.377348167 | 4.01E-03 | 3.32E-02 | 1.00E+00 |
| ENSG00000206052.9_DOK6       | ENSG00000160789.18_LMNA | -0.34047 | -0.473983514 | -0.19166265 | 1.77E-05 | 4.67E-04 | 9.09E-01 |
| ENSG00000272518.1_RP11-26J3  | ENSG00000160789.18_LMNA | 0.0749   | -0.085318273 | 0.231341931 | 3.59E-01 | 6.42E-01 | 1.00E+00 |
| ENSG00000258591.2_RP11-545M  | ENSG00000160789.18_LMNA | 0.03137  | -0.128471534 | 0.189624456 | 7.01E-01 | 8.72E-01 | 1.00E+00 |
| ENSG00000267940.1_RP11-290F  | ENSG00000160789.18_LMNA | 0.05312  | -0.106983779 | 0.210541833 | 5.16E-01 | 7.63E-01 | 1.00E+00 |
| ENSG00000233622.1_CYP2T1P    | ENSG00000160789.18_LMNA | -0.15055 | -0.302501687 | 0.008861793 | 6.41E-02 | 2.36E-01 | 1.00E+00 |
| ENSG00000232284.6_GNG12-AS   | ENSG00000160789.18_LMNA | 0.03761  | -0.122319993 | 0.195642353 | 6.45E-01 | 8.42E-01 | 1.00E+00 |
| ENSG00000279926.1_RP3-406P2  | ENSG00000160789.18_LMNA | 0.04931  | -0.11075616  | 0.206890509 | 5.46E-01 | 7.84E-01 | 1.00E+00 |
| ENSG00000178031.14_ADAMTSL   | ENSG00000160789.18_LMNA | 0.06439  | -0.095797193 | 0.2213176   | 4.31E-01 | 7.00E-01 | 1.00E+00 |
| ENSG00000070731.8_ST6GALNA   | ENSG00000160789.18_LMNA | 0.11363  | -0.046407285 | 0.267985668 | 1.63E-01 | 4.19E-01 | 1.00E+00 |
| ENSG00000227379.2_PPIAP2     | ENSG00000160789.18_LMNA | 0.04563  | -0.114398119 | 0.203357007 | 5.77E-01 | 8.03E-01 | 1.00E+00 |
| ENSG00000214725.6_CDIPT-AS1  | ENSG00000160789.18_LMNA | 0.00074  | -0.158476748 | 0.159924485 | 9.93E-01 | 9.97E-01 | 1.00E+00 |
| ENSG00000233885.6_YEATS2-AS  | ENSG00000160789.18_LMNA | -0.04495 | -0.202704236 | 0.115069991 | 5.82E-01 | 8.06E-01 | 1.00E+00 |
| ENSG00000163885.10_CFAP100   | ENSG00000160789.18_LMNA | -0.041   | -0.198902292 | 0.118977425 | 6.16E-01 | 8.26E-01 | 1.00E+00 |
| ENSG00000146352.11_CLVS2     | ENSG00000160789.18_LMNA | -0.39414 | -0.520667613 | -0.25066495 | 5.06E-07 | 2.64E-05 | 2.60E-02 |
| ENSG00000214719.10_AC005562  | ENSG00000160789.18_LMNA | -0.11128 | -0.265773029 | 0.048784207 | 1.72E-01 | 4.31E-01 | 1.00E+00 |
| ENSG00000161643.11_SIGLEC16  | ENSG00000160789.18_LMNA | 0.10072  | -0.059437824 | 0.255814862 | 2.17E-01 | 4.92E-01 | 1.00E+00 |
| ENSG00000161958.9_FGF11      | ENSG00000160789.18_LMNA | 0.18058  | 0.022016708  | 0.330289598 | 2.60E-02 | 1.30E-01 | 1.00E+00 |
| ENSG00000126759.11_CFP       | ENSG00000160789.18_LMNA | 0.09011  | -0.070098486 | 0.245782688 | 2.70E-01 | 5.54E-01 | 1.00E+00 |
| ENSG00000250602.4_RP11-517I3 | ENSG00000160789.18_LMNA | -0.22752 | -0.37319918  | -0.07088274 | 4.82E-03 | 3.81E-02 | 1.00E+00 |



|                                |                         |          |              |             |          |          |          |
|--------------------------------|-------------------------|----------|--------------|-------------|----------|----------|----------|
| ENSG00000227165.6_WDR11-AS     | ENSG00000160789.18_LMNA | -0.56799 | -0.666883928 | -0.44942309 | 2.32E-14 | 2.71E-11 | 1.19E-09 |
| ENSG00000174680.8_GRIK1-AS1    | ENSG00000160789.18_LMNA | -0.16375 | -0.314750154 | -0.00467616 | 4.38E-02 | 1.84E-01 | 1.00E+00 |
| ENSG00000246763.5_RGMB-AS1     | ENSG00000160789.18_LMNA | -0.12285 | -0.276641207 | 0.037074763 | 1.32E-01 | 3.68E-01 | 1.00E+00 |
| ENSG00000099866.13_MADCAM      | ENSG00000160789.18_LMNA | 0.06989  | -0.090312154 | 0.226573063 | 3.92E-01 | 6.70E-01 | 1.00E+00 |
| ENSG00000186377.7_CYP4X1       | ENSG00000160789.18_LMNA | -0.27015 | -0.411650718 | -0.11594038 | 7.63E-04 | 9.35E-03 | 1.00E+00 |
| ENSG00000247595.2_SPTY2D1-AS   | ENSG00000160789.18_LMNA | 0.07979  | -0.080434232 | 0.235991235 | 3.29E-01 | 6.15E-01 | 1.00E+00 |
| ENSG00000260464.1_RP4-561L2    | ENSG00000160789.18_LMNA | -0.10939 | -0.263992944 | 0.050693876 | 1.80E-01 | 4.43E-01 | 1.00E+00 |
| ENSG00000146263.10_MMS22L      | ENSG00000160789.18_LMNA | -0.0174  | -0.176116766 | 0.142190637 | 8.31E-01 | 9.34E-01 | 1.00E+00 |
| ENSG00000111199.9_TRPV4        | ENSG00000160789.18_LMNA | 0.25259  | 0.097298738  | 0.395868883 | 1.69E-03 | 1.72E-02 | 1.00E+00 |
| ENSG00000137561.4_TTPA         | ENSG00000160789.18_LMNA | -0.27744 | -0.418173657 | -0.12370666 | 5.39E-04 | 7.15E-03 | 1.00E+00 |
| ENSG00000224916.7_APOC4-AP     | ENSG00000160789.18_LMNA | -0.23621 | -0.38108184  | -0.08002021 | 3.39E-03 | 2.93E-02 | 1.00E+00 |
| ENSG00000261596.2_CTB-31N19    | ENSG00000160789.18_LMNA | -0.35331 | -0.485219856 | -0.20567979 | 8.01E-06 | 2.44E-04 | 4.11E-01 |
| ENSG00000156869.11_FRRS1       | ENSG00000160789.18_LMNA | 0.00426  | -0.155046348 | 0.163349425 | 9.58E-01 | 9.83E-01 | 1.00E+00 |
| ENSG00000255458.4_RP11-539G    | ENSG00000160789.18_LMNA | -0.33027 | -0.465023621 | -0.18056727 | 3.25E-05 | 7.62E-04 | 1.00E+00 |
| ENSG00000160867.13_FGFR4       | ENSG00000160789.18_LMNA | 0.10269  | -0.057454256 | 0.257674028 | 2.08E-01 | 4.81E-01 | 1.00E+00 |
| ENSG00000278709.1_NKILA        | ENSG00000160789.18_LMNA | 0.26011  | 0.10527138   | 0.4026401   | 1.21E-03 | 1.34E-02 | 1.00E+00 |
| ENSG00000268947.1_AD000684-AS1 | ENSG00000160789.18_LMNA | -0.05833 | -0.215530068 | 0.101815345 | 4.75E-01 | 7.34E-01 | 1.00E+00 |
| ENSG00000164694.15_FNDC1       | ENSG00000160789.18_LMNA | 0.12125  | -0.038698036 | 0.275139334 | 1.37E-01 | 3.76E-01 | 1.00E+00 |
| ENSG00000145911.5_N4BP3        | ENSG00000160789.18_LMNA | -0.11468 | -0.268971514 | 0.045347094 | 1.59E-01 | 4.13E-01 | 1.00E+00 |
| ENSG00000145087.11_STXBP5L     | ENSG00000160789.18_LMNA | -0.40088 | -0.526483381 | -0.25815854 | 3.09E-07 | 1.80E-05 | 1.58E-02 |
| ENSG00000120088.13_CRHR1       | ENSG00000160789.18_LMNA | -0.32744 | -0.462532241 | -0.17749491 | 3.83E-05 | 8.68E-04 | 1.00E+00 |
| ENSG00000213152.5_RPL7AP60     | ENSG00000160789.18_LMNA | -0.05386 | -0.211247925 | 0.106253221 | 5.10E-01 | 7.59E-01 | 1.00E+00 |
| ENSG00000172817.3_CYP7B1       | ENSG00000160789.18_LMNA | -0.15963 | -0.31092712  | -0.00043841 | 4.95E-02 | 2.00E-01 | 1.00E+00 |
| ENSG00000272746.1_RP11-53B2    | ENSG00000160789.18_LMNA | -0.02955 | -0.187865625 | 0.130264815 | 7.18E-01 | 8.80E-01 | 1.00E+00 |
| ENSG00000197467.12_COL13A1     | ENSG00000160789.18_LMNA | 0.34988  | 0.201928293  | 0.482221622 | 9.94E-06 | 2.90E-04 | 5.10E-01 |
| ENSG00000176601.10_MAP3K19     | ENSG00000160789.18_LMNA | -0.05106 | -0.208563592 | 0.109028743 | 5.32E-01 | 7.75E-01 | 1.00E+00 |
| ENSG00000226174.5_TEX22        | ENSG00000160789.18_LMNA | 0.10714  | -0.052963532 | 0.261874508 | 1.89E-01 | 4.56E-01 | 1.00E+00 |
| ENSG00000213793.4_ZNF888       | ENSG00000160789.18_LMNA | 0.13165  | -0.028145103 | 0.284875728 | 1.06E-01 | 3.23E-01 | 1.00E+00 |
| ENSG00000261408.4_TEN1-CDK1    | ENSG00000160789.18_LMNA | -0.01217 | -0.17103777  | 0.147317683 | 8.82E-01 | 9.54E-01 | 1.00E+00 |
| ENSG00000279452.1_AC006277-AS1 | ENSG00000160789.18_LMNA | -0.19749 | -0.345813623 | -0.03952725 | 1.47E-02 | 8.68E-02 | 1.00E+00 |
| ENSG00000225355.1_ARL6IP1P2    | ENSG00000160789.18_LMNA | -0.10999 | -0.264554926 | 0.050091232 | 1.77E-01 | 4.39E-01 | 1.00E+00 |
| ENSG00000258727.1_RP11-66N2    | ENSG00000160789.18_LMNA | 0.12592  | -0.033961267 | 0.27951757  | 1.22E-01 | 3.52E-01 | 1.00E+00 |
| ENSG00000231177.4_LINC00852    | ENSG00000160789.18_LMNA | 0.09699  | -0.06319058  | 0.252291073 | 2.35E-01 | 5.12E-01 | 1.00E+00 |

|                              |                         |          |              |             |          |          |          |
|------------------------------|-------------------------|----------|--------------|-------------|----------|----------|----------|
| ENSG00000103472.8_RRN3P2     | ENSG00000160789.18_LMNA | 0.0118   | -0.147678431 | 0.170679765 | 8.85E-01 | 9.56E-01 | 1.00E+00 |
| ENSG00000185924.6_RTN4RL1    | ENSG00000160789.18_LMNA | -0.02684 | -0.185253424 | 0.132924343 | 7.43E-01 | 8.92E-01 | 1.00E+00 |
| ENSG00000089723.8_OTUB2      | ENSG00000160789.18_LMNA | -0.06124 | -0.218310701 | 0.098926806 | 4.54E-01 | 7.19E-01 | 1.00E+00 |
| ENSG00000266947.1_RP11-799D  | ENSG00000160789.18_LMNA | -0.07056 | -0.227211293 | 0.089644732 | 3.88E-01 | 6.66E-01 | 1.00E+00 |
| ENSG00000228224.3_NACAP1     | ENSG00000160789.18_LMNA | -0.07853 | -0.234793348 | 0.081694053 | 3.36E-01 | 6.22E-01 | 1.00E+00 |
| ENSG00000250895.1_CTD-2158P  | ENSG00000160789.18_LMNA | -0.13051 | -0.28380981  | 0.029303825 | 1.09E-01 | 3.29E-01 | 1.00E+00 |
| ENSG00000184100.6_BRD7P2     | ENSG00000160789.18_LMNA | 0.02455  | -0.13518187  | 0.183032538 | 7.64E-01 | 9.02E-01 | 1.00E+00 |
| ENSG00000254244.1_PAICSP4    | ENSG00000160789.18_LMNA | 0.07034  | -0.089863288 | 0.227002326 | 3.89E-01 | 6.67E-01 | 1.00E+00 |
| ENSG00000181798.2_LINC00471  | ENSG00000160789.18_LMNA | 0.01692  | -0.142661959 | 0.175650568 | 8.36E-01 | 9.36E-01 | 1.00E+00 |
| ENSG00000254003.1_CTB-167B5  | ENSG00000160789.18_LMNA | -0.13002 | -0.283360045 | 0.029792496 | 1.10E-01 | 3.31E-01 | 1.00E+00 |
| ENSG00000243155.1_RP11-46A1  | ENSG00000160789.18_LMNA | -0.05668 | -0.213949919 | 0.103454433 | 4.88E-01 | 7.44E-01 | 1.00E+00 |
| ENSG00000213963.5_AC074286   | ENSG00000160789.18_LMNA | -0.19679 | -0.345180262 | -0.03880915 | 1.51E-02 | 8.83E-02 | 1.00E+00 |
| ENSG00000187790.9_FANCM      | ENSG00000160789.18_LMNA | 0.01105  | -0.148412503 | 0.169951013 | 8.93E-01 | 9.58E-01 | 1.00E+00 |
| ENSG00000117472.8_TSPAN1     | ENSG00000160789.18_LMNA | -0.07788 | -0.234175011 | 0.082343965 | 3.40E-01 | 6.25E-01 | 1.00E+00 |
| ENSG00000232499.2_RP11-512F  | ENSG00000160789.18_LMNA | 0.14962  | -0.009816671 | 0.301633861 | 6.58E-02 | 2.40E-01 | 1.00E+00 |
| ENSG00000054219.10_LY75      | ENSG00000160789.18_LMNA | 0.04693  | -0.113115054 | 0.204602807 | 5.66E-01 | 7.96E-01 | 1.00E+00 |
| ENSG00000214456.7_PLIN5      | ENSG00000160789.18_LMNA | -0.23533 | -0.380285519 | -0.07909483 | 3.52E-03 | 3.01E-02 | 1.00E+00 |
| ENSG00000280239.1_CTB-50L17  | ENSG00000160789.18_LMNA | #####    | -0.159273051 | 0.159128351 | 9.99E-01 | 1.00E+00 | 1.00E+00 |
| ENSG00000188277.9_C15orf62   | ENSG00000160789.18_LMNA | 0.16049  | 0.00132361   | 0.31172652  | 4.83E-02 | 1.97E-01 | 1.00E+00 |
| ENSG00000279923.1_CTD-2008E  | ENSG00000160789.18_LMNA | -0.1118  | -0.266261748 | 0.048259508 | 1.70E-01 | 4.29E-01 | 1.00E+00 |
| ENSG00000232060.3_SLC4A1AP   | ENSG00000160789.18_LMNA | 0.1506   | -0.008814776 | 0.302544404 | 6.40E-02 | 2.36E-01 | 1.00E+00 |
| ENSG00000175318.10_GRAMD2    | ENSG00000160789.18_LMNA | 0.0151   | -0.144451286 | 0.173879391 | 8.54E-01 | 9.43E-01 | 1.00E+00 |
| ENSG00000255874.2_LINC00346  | ENSG00000160789.18_LMNA | 0.20238  | 0.044620023  | 0.350297374 | 1.24E-02 | 7.65E-02 | 1.00E+00 |
| ENSG00000120756.11_PLS1      | ENSG00000160789.18_LMNA | -0.15373 | -0.305458127 | 0.005604523 | 5.86E-02 | 2.22E-01 | 1.00E+00 |
| ENSG00000234981.1_RP11-534L  | ENSG00000160789.18_LMNA | -0.09698 | -0.252282158 | 0.063200063 | 2.35E-01 | 5.12E-01 | 1.00E+00 |
| ENSG00000237433.1_RPSAP11    | ENSG00000160789.18_LMNA | -0.17729 | -0.327253186 | -0.01861372 | 2.89E-02 | 1.40E-01 | 1.00E+00 |
| ENSG00000267801.1_RP11-552F  | ENSG00000160789.18_LMNA | 0.27823  | 0.124550318  | 0.418880426 | 5.19E-04 | 6.95E-03 | 1.00E+00 |
| ENSG00000272767.1_JMJD1C-A5  | ENSG00000160789.18_LMNA | -0.10014 | -0.255266926 | 0.060021949 | 2.20E-01 | 4.95E-01 | 1.00E+00 |
| ENSG00000261064.1_RP11-1000I | ENSG00000160789.18_LMNA | 0.17315  | 0.014347665  | 0.32343766  | 3.29E-02 | 1.52E-01 | 1.00E+00 |
| ENSG00000006740.15_ARHGAP4   | ENSG00000160789.18_LMNA | -0.21222 | -0.359283248 | -0.05487448 | 8.67E-03 | 5.91E-02 | 1.00E+00 |
| ENSG00000196660.9_SLC30A10   | ENSG00000160789.18_LMNA | -0.32792 | -0.462950705 | -0.17801057 | 3.72E-05 | 8.49E-04 | 1.00E+00 |
| ENSG00000206195.9_DUXAP8     | ENSG00000160789.18_LMNA | -0.04963 | -0.20719583  | 0.110441067 | 5.44E-01 | 7.82E-01 | 1.00E+00 |
| ENSG00000176678.5_FOXL1      | ENSG00000160789.18_LMNA | 0.15903  | -0.000171379 | 0.310376176 | 5.03E-02 | 2.02E-01 | 1.00E+00 |

|                              |                         |          |              |             |          |          |          |
|------------------------------|-------------------------|----------|--------------|-------------|----------|----------|----------|
| ENSG00000178038.15_ALS2CL    | ENSG00000160789.18_LMNA | 0.17553  | 0.01679951   | 0.325631801 | 3.05E-02 | 1.45E-01 | 1.00E+00 |
| ENSG00000273311.1_DGCR11     | ENSG00000160789.18_LMNA | -0.02773 | -0.186112171 | 0.132050544 | 7.34E-01 | 8.88E-01 | 1.00E+00 |
| ENSG00000198216.9_CACNA1E    | ENSG00000160789.18_LMNA | -0.24605 | -0.389973238 | -0.09038809 | 2.25E-03 | 2.14E-02 | 1.00E+00 |
| ENSG00000280385.1_AP000648.1 | ENSG00000160789.18_LMNA | -0.0844  | -0.240370222 | 0.075820219 | 3.01E-01 | 5.88E-01 | 1.00E+00 |
| ENSG00000140519.11_RHCG      | ENSG00000160789.18_LMNA | -0.14895 | -0.301008245 | 0.010504691 | 6.70E-02 | 2.42E-01 | 1.00E+00 |
| ENSG00000007952.16_NOX1      | ENSG00000160789.18_LMNA | -0.04462 | -0.202387301 | 0.115396097 | 5.85E-01 | 8.07E-01 | 1.00E+00 |
| ENSG00000242622.1_RP11-18H7  | ENSG00000160789.18_LMNA | -0.18909 | -0.338108803 | -0.03081291 | 1.96E-02 | 1.07E-01 | 1.00E+00 |
| ENSG00000183117.16_CSMD1     | ENSG00000160789.18_LMNA | -0.27468 | -0.415703321 | -0.1207612  | 6.16E-04 | 7.95E-03 | 1.00E+00 |
| ENSG00000243368.2_MCCC1-AS   | ENSG00000160789.18_LMNA | -0.02588 | -0.184323009 | 0.133870511 | 7.52E-01 | 8.96E-01 | 1.00E+00 |
| ENSG00000189144.12_ZNF573    | ENSG00000160789.18_LMNA | -0.15195 | -0.303804157 | 0.007427605 | 6.17E-02 | 2.30E-01 | 1.00E+00 |
| ENSG00000273108.1_RP11-416N  | ENSG00000160789.18_LMNA | -0.22987 | -0.375335916 | -0.07335461 | 4.39E-03 | 3.55E-02 | 1.00E+00 |
| ENSG00000151164.17_RAD9B     | ENSG00000160789.18_LMNA | -0.23285 | -0.378037894 | -0.0764857  | 3.89E-03 | 3.25E-02 | 1.00E+00 |
| ENSG00000250471.2_GMPSP1     | ENSG00000160789.18_LMNA | 0.19121  | 0.033018538  | 0.340062815 | 1.83E-02 | 1.01E-01 | 1.00E+00 |
| ENSG00000280195.1_XX-FW835f  | ENSG00000160789.18_LMNA | 0.10153  | -0.05861453  | 0.256586805 | 2.13E-01 | 4.87E-01 | 1.00E+00 |
| ENSG00000215284.2_RP11-198M  | ENSG00000160789.18_LMNA | -0.0391  | -0.197072036 | 0.12085496  | 6.32E-01 | 8.35E-01 | 1.00E+00 |
| ENSG00000183230.15_CTNNA3    | ENSG00000160789.18_LMNA | -0.4343  | -0.555117156 | -0.29552989 | 2.27E-08 | 2.14E-06 | 1.16E-03 |
| ENSG00000228251.1_AC012442.1 | ENSG00000160789.18_LMNA | -0.17852 | -0.328391197 | -0.01988828 | 2.78E-02 | 1.36E-01 | 1.00E+00 |
| ENSG00000278023.3_RDM1       | ENSG00000160789.18_LMNA | 0.07054  | -0.089666868 | 0.22719013  | 3.88E-01 | 6.66E-01 | 1.00E+00 |
| ENSG00000137558.6_PI15       | ENSG00000160789.18_LMNA | 0.02857  | -0.131225537 | 0.186922518 | 7.27E-01 | 8.84E-01 | 1.00E+00 |
| ENSG00000120332.14_TNN       | ENSG00000160789.18_LMNA | 0.15912  | -8.51E-05    | 0.310454103 | 5.02E-02 | 2.02E-01 | 1.00E+00 |
| ENSG00000275734.1_RP11-368I7 | ENSG00000160789.18_LMNA | -0.03826 | -0.196264127 | 0.121683016 | 6.40E-01 | 8.39E-01 | 1.00E+00 |
| ENSG00000264235.4_RP13-270P  | ENSG00000160789.18_LMNA | -0.1003  | -0.255423779 | 0.059854758 | 2.19E-01 | 4.94E-01 | 1.00E+00 |
| ENSG00000132623.14_ANKEF1    | ENSG00000160789.18_LMNA | -0.01803 | -0.17671992  | 0.141580641 | 8.26E-01 | 9.32E-01 | 1.00E+00 |
| ENSG00000135773.11_CAPN9     | ENSG00000160789.18_LMNA | -0.22081 | -0.367104856 | -0.06385289 | 6.26E-03 | 4.64E-02 | 1.00E+00 |
| ENSG00000257497.2_RP11-585P  | ENSG00000160789.18_LMNA | 0.1687   | 0.009762083  | 0.319325109 | 3.77E-02 | 1.67E-01 | 1.00E+00 |
| ENSG00000270177.1_CTD-2410N  | ENSG00000160789.18_LMNA | 0.01693  | -0.142652205 | 0.175660217 | 8.36E-01 | 9.36E-01 | 1.00E+00 |
| ENSG00000235159.1_RP6-109B7  | ENSG00000160789.18_LMNA | -0.16663 | -0.317408442 | -0.0076294  | 4.02E-02 | 1.74E-01 | 1.00E+00 |
| ENSG00000274627.1_RP11-104N  | ENSG00000160789.18_LMNA | 0.11062  | -0.049450415 | 0.265152271 | 1.75E-01 | 4.35E-01 | 1.00E+00 |
| ENSG00000197978.9_GOLGA6L9   | ENSG00000160789.18_LMNA | -0.10261 | -0.257603024 | 0.057530057 | 2.08E-01 | 4.81E-01 | 1.00E+00 |
| ENSG00000246203.2_RP11-29H2  | ENSG00000160789.18_LMNA | -0.04243 | -0.200279138 | 0.117563513 | 6.04E-01 | 8.18E-01 | 1.00E+00 |
| ENSG00000227173.1_MYL6P3     | ENSG00000160789.18_LMNA | -0.09533 | -0.250721359 | 0.064859423 | 2.43E-01 | 5.22E-01 | 1.00E+00 |
| ENSG00000261575.2_RP11-259G  | ENSG00000160789.18_LMNA | -0.13517 | -0.288173048 | 0.024555367 | 9.68E-02 | 3.05E-01 | 1.00E+00 |
| ENSG00000154099.16_DNAAF1    | ENSG00000160789.18_LMNA | -0.01014 | -0.169071153 | 0.149298321 | 9.01E-01 | 9.62E-01 | 1.00E+00 |

|                              |                         |          |              |             |          |          |          |
|------------------------------|-------------------------|----------|--------------|-------------|----------|----------|----------|
| ENSG00000269486.2_CTC-360G5  | ENSG00000160789.18_LMNA | 0.11128  | -0.048783637 | 0.26577356  | 1.72E-01 | 4.31E-01 | 1.00E+00 |
| ENSG00000224282.3_CTD-2290C  | ENSG00000160789.18_LMNA | -0.15627 | -0.307816827 | 0.003001072 | 5.45E-02 | 2.13E-01 | 1.00E+00 |
| ENSG00000183134.4_PTGDR2     | ENSG00000160789.18_LMNA | -0.32852 | -0.463482939 | -0.17866665 | 3.59E-05 | 8.28E-04 | 1.00E+00 |
| ENSG00000188818.11_ZDHC11    | ENSG00000160789.18_LMNA | 0.0341   | -0.125786394 | 0.192254203 | 6.77E-01 | 8.59E-01 | 1.00E+00 |
| ENSG00000242457.1_RBP4P2     | ENSG00000160789.18_LMNA | -0.15149 | -0.303373528 | 0.007901925 | 6.25E-02 | 2.32E-01 | 1.00E+00 |
| ENSG00000257315.1_ZBED6      | ENSG00000160789.18_LMNA | 0.06766  | -0.0925355   | 0.224444997 | 4.08E-01 | 6.83E-01 | 1.00E+00 |
| ENSG00000214353.6_VAC14-AS1  | ENSG00000160789.18_LMNA | 0.17419  | 0.015421363  | 0.324398915 | 3.18E-02 | 1.49E-01 | 1.00E+00 |
| ENSG00000227682.2_ATP5A1P2   | ENSG00000160789.18_LMNA | -0.05529 | -0.212621201 | 0.104831378 | 4.99E-01 | 7.52E-01 | 1.00E+00 |
| ENSG00000118407.13_FILIP1    | ENSG00000160789.18_LMNA | 0.01808  | -0.141525551 | 0.17677438  | 8.25E-01 | 9.31E-01 | 1.00E+00 |
| ENSG00000236432.6_AC097662.1 | ENSG00000160789.18_LMNA | -0.45492 | -0.572647786 | -0.31880892 | 3.91E-09 | 4.88E-07 | 2.01E-04 |
| ENSG00000255139.1_AP000442.1 | ENSG00000160789.18_LMNA | -0.04269 | -0.200526396 | 0.117309463 | 6.02E-01 | 8.17E-01 | 1.00E+00 |
| ENSG00000206344.6_HCG27      | ENSG00000160789.18_LMNA | -0.06455 | -0.221471394 | 0.095636955 | 4.30E-01 | 6.99E-01 | 1.00E+00 |
| ENSG00000228661.1_AC090587.1 | ENSG00000160789.18_LMNA | -0.00315 | -0.162267011 | 0.156131319 | 9.69E-01 | 9.88E-01 | 1.00E+00 |
| ENSG00000169918.8_OTUD7A     | ENSG00000160789.18_LMNA | -0.25283 | -0.396089427 | -0.09755781 | 1.67E-03 | 1.71E-02 | 1.00E+00 |
| ENSG00000114378.15_HYAL1     | ENSG00000160789.18_LMNA | -0.00639 | -0.165424747 | 0.152963976 | 9.38E-01 | 9.75E-01 | 1.00E+00 |
| ENSG00000197992.5_CLEC9A     | ENSG00000160789.18_LMNA | -0.27569 | -0.416603106 | -0.12183344 | 5.87E-04 | 7.65E-03 | 1.00E+00 |
| ENSG00000047597.5_XK         | ENSG00000160789.18_LMNA | -0.18418 | -0.333601344 | -0.02573644 | 2.31E-02 | 1.20E-01 | 1.00E+00 |
| ENSG00000259251.2_RP11-643M  | ENSG00000160789.18_LMNA | -0.13633 | -0.289250195 | 0.023380946 | 9.40E-02 | 3.00E-01 | 1.00E+00 |
| ENSG00000177182.9_CLVS1      | ENSG00000160789.18_LMNA | -0.29307 | -0.432106884 | -0.14041742 | 2.48E-04 | 3.87E-03 | 1.00E+00 |
| ENSG00000233347.1_ERP29P1    | ENSG00000160789.18_LMNA | 0.18227  | 0.02375834   | 0.331841152 | 2.46E-02 | 1.25E-01 | 1.00E+00 |
| ENSG00000186409.13_CCDC30    | ENSG00000160789.18_LMNA | -0.02393 | -0.182437305 | 0.135786362 | 7.70E-01 | 9.05E-01 | 1.00E+00 |
| ENSG00000121903.13_ZSCAN20   | ENSG00000160789.18_LMNA | 0.26904  | 0.114757331  | 0.410654405 | 8.03E-04 | 9.76E-03 | 1.00E+00 |
| ENSG00000260342.2_RP11-1035  | ENSG00000160789.18_LMNA | 0.00489  | -0.154433801 | 0.163960191 | 9.52E-01 | 9.81E-01 | 1.00E+00 |
| ENSG00000270638.1_RP3-466P1  | ENSG00000160789.18_LMNA | -0.31864 | -0.454771327 | -0.16795965 | 6.31E-05 | 1.29E-03 | 1.00E+00 |
| ENSG00000277232.2_GTSE1-AS1  | ENSG00000160789.18_LMNA | -0.14539 | -0.297704149 | 0.014133477 | 7.39E-02 | 2.59E-01 | 1.00E+00 |
| ENSG00000231181.1_RP13-15M1  | ENSG00000160789.18_LMNA | -0.13411 | -0.287183809 | 0.025633183 | 9.95E-02 | 3.11E-01 | 1.00E+00 |
| ENSG00000226856.4_AC093901.1 | ENSG00000160789.18_LMNA | -0.1062  | -0.260989656 | 0.053910586 | 1.93E-01 | 4.61E-01 | 1.00E+00 |
| ENSG00000267040.5_RP11-35G9  | ENSG00000160789.18_LMNA | -0.13597 | -0.288917356 | 0.023743935 | 9.49E-02 | 3.02E-01 | 1.00E+00 |
| ENSG00000261118.1_RP11-104N  | ENSG00000160789.18_LMNA | 0.01236  | -0.147132186 | 0.171221824 | 8.80E-01 | 9.53E-01 | 1.00E+00 |
| ENSG00000243256.1_RPL30P14   | ENSG00000160789.18_LMNA | -0.1141  | -0.268428326 | 0.045931333 | 1.62E-01 | 4.16E-01 | 1.00E+00 |
| ENSG00000182557.6_SPNS3      | ENSG00000160789.18_LMNA | -0.16888 | -0.319488089 | -0.00994356 | 3.75E-02 | 1.66E-01 | 1.00E+00 |
| ENSG00000242697.2_RPL5P12    | ENSG00000160789.18_LMNA | -0.15735 | -0.308817108 | 0.001895724 | 5.29E-02 | 2.09E-01 | 1.00E+00 |
| ENSG00000163075.11_CFAP221   | ENSG00000160789.18_LMNA | 0.01765  | -0.141949615 | 0.176355114 | 8.29E-01 | 9.33E-01 | 1.00E+00 |

|                              |                         |          |              |             |          |          |          |
|------------------------------|-------------------------|----------|--------------|-------------|----------|----------|----------|
| ENSG00000186487.16_MYT1L     | ENSG00000160789.18_LMNA | -0.31108 | -0.448089748 | -0.15979327 | 9.59E-05 | 1.82E-03 | 1.00E+00 |
| ENSG00000237774.3_RP11-129B  | ENSG00000160789.18_LMNA | -0.06806 | -0.224824328 | 0.092139416 | 4.05E-01 | 6.80E-01 | 1.00E+00 |
| ENSG00000236111.5_RP11-630I5 | ENSG00000160789.18_LMNA | -0.07378 | -0.230280321 | 0.086431352 | 3.66E-01 | 6.47E-01 | 1.00E+00 |
| ENSG00000187984.11_ANKRD19   | ENSG00000160789.18_LMNA | -0.05115 | -0.208651423 | 0.108938006 | 5.31E-01 | 7.74E-01 | 1.00E+00 |
| ENSG00000269019.1_AC005932   | ENSG00000160789.18_LMNA | -0.01449 | -0.173294223 | 0.145041993 | 8.59E-01 | 9.45E-01 | 1.00E+00 |
| ENSG00000243648.1_RP11-215P  | ENSG00000160789.18_LMNA | -0.01624 | -0.174990946 | 0.143328584 | 8.43E-01 | 9.39E-01 | 1.00E+00 |
| ENSG00000146021.13_KLHL3     | ENSG00000160789.18_LMNA | -0.17825 | -0.32814348  | -0.01961075 | 2.80E-02 | 1.37E-01 | 1.00E+00 |
| ENSG00000256967.1_RP11-273B  | ENSG00000160789.18_LMNA | 0.268    | 0.113649501  | 0.409720795 | 8.43E-04 | 1.01E-02 | 1.00E+00 |
| ENSG00000184949.14_FAM227A   | ENSG00000160789.18_LMNA | -0.11489 | -0.269170649 | 0.045132856 | 1.59E-01 | 4.12E-01 | 1.00E+00 |
| ENSG00000029534.18_ANK1      | ENSG00000160789.18_LMNA | 0.1705   | 0.011612666  | 0.320986197 | 3.57E-02 | 1.61E-01 | 1.00E+00 |
| ENSG00000223473.2_GS1-124K5  | ENSG00000160789.18_LMNA | 0.01618  | -0.14338968  | 0.174930477 | 8.43E-01 | 9.39E-01 | 1.00E+00 |
| ENSG00000213051.3_RPL5P5     | ENSG00000160789.18_LMNA | -0.16121 | -0.31239175  | -0.00206061 | 4.72E-02 | 1.94E-01 | 1.00E+00 |
| ENSG00000264707.1_L3MBTL4-A  | ENSG00000160789.18_LMNA | -0.22345 | -0.369502793 | -0.06661534 | 5.65E-03 | 4.30E-02 | 1.00E+00 |
| ENSG00000172828.11_CES3      | ENSG00000160789.18_LMNA | 0.07427  | -0.085943016 | 0.230746169 | 3.63E-01 | 6.45E-01 | 1.00E+00 |
| ENSG00000239665.7_RP11-295P  | ENSG00000160789.18_LMNA | -0.16472 | -0.315644716 | -0.00566938 | 4.26E-02 | 1.81E-01 | 1.00E+00 |
| ENSG00000184188.6_CTC-512J1  | ENSG00000160789.18_LMNA | 0.20481  | 0.047145784  | 0.352515907 | 1.14E-02 | 7.18E-02 | 1.00E+00 |
| ENSG00000274276.3_CBSL       | ENSG00000160789.18_LMNA | -0.00518 | -0.16424051  | 0.154152583 | 9.50E-01 | 9.80E-01 | 1.00E+00 |
| ENSG00000228797.2_FAM207BP   | ENSG00000160789.18_LMNA | 0.16655  | 0.007547934  | 0.317335179 | 4.03E-02 | 1.74E-01 | 1.00E+00 |
| ENSG00000239636.1_RP4-728D4  | ENSG00000160789.18_LMNA | -0.01505 | -0.173832486 | 0.144498644 | 8.54E-01 | 9.43E-01 | 1.00E+00 |
| ENSG00000226457.1_RP11-430L  | ENSG00000160789.18_LMNA | -0.0416  | -0.199476999 | 0.118387403 | 6.11E-01 | 8.23E-01 | 1.00E+00 |
| ENSG00000245213.5_RP11-10K1  | ENSG00000160789.18_LMNA | -0.03234 | -0.190564001 | 0.127512734 | 6.92E-01 | 8.68E-01 | 1.00E+00 |
| ENSG00000187715.12_KBTBD12   | ENSG00000160789.18_LMNA | -0.15577 | -0.307351226 | 0.00351532  | 5.53E-02 | 2.15E-01 | 1.00E+00 |
| ENSG00000183458.12_RP11-958I | ENSG00000160789.18_LMNA | 0.06963  | -0.090573145 | 0.226323413 | 3.94E-01 | 6.72E-01 | 1.00E+00 |
| ENSG00000235903.6_CPB2-AS1   | ENSG00000160789.18_LMNA | -0.49667 | -0.607809397 | -0.36644197 | 7.63E-11 | 1.81E-08 | 3.91E-06 |
| ENSG00000248202.1_RP11-455B  | ENSG00000160789.18_LMNA | 0.09009  | -0.07011538  | 0.245766736 | 2.70E-01 | 5.54E-01 | 1.00E+00 |
| ENSG00000196155.11_PLEKHG4   | ENSG00000160789.18_LMNA | -0.03026 | -0.1885505   | 0.129566773 | 7.11E-01 | 8.77E-01 | 1.00E+00 |
| ENSG00000232977.5_LINC00327  | ENSG00000160789.18_LMNA | 0.10849  | -0.051597209 | 0.26315016  | 1.83E-01 | 4.48E-01 | 1.00E+00 |
| ENSG00000226180.3_RP11-278A  | ENSG00000160789.18_LMNA | -0.01171 | -0.170593937 | 0.147764903 | 8.86E-01 | 9.56E-01 | 1.00E+00 |
| ENSG00000205771.5_CATSPER2   | ENSG00000160789.18_LMNA | 0.23467  | 0.078396999  | 0.379684725 | 3.61E-03 | 3.07E-02 | 1.00E+00 |
| ENSG00000169994.17_MYO7B     | ENSG00000160789.18_LMNA | -0.29395 | -0.432894096 | -0.14136655 | 2.37E-04 | 3.74E-03 | 1.00E+00 |
| ENSG00000166507.15_NDST2     | ENSG00000160789.18_LMNA | 0.06193  | -0.098238557 | 0.218972482 | 4.48E-01 | 7.15E-01 | 1.00E+00 |
| ENSG00000236723.2_RP5-1024G  | ENSG00000160789.18_LMNA | -0.10207 | -0.257097686 | 0.058069429 | 2.11E-01 | 4.84E-01 | 1.00E+00 |
| ENSG00000263126.1_CTC-479C5  | ENSG00000160789.18_LMNA | 0.06672  | -0.093475795 | 0.223544086 | 4.14E-01 | 6.87E-01 | 1.00E+00 |

|                              |                         |          |              |             |          |          |          |
|------------------------------|-------------------------|----------|--------------|-------------|----------|----------|----------|
| ENSG00000145075.10_CCDC39    | ENSG00000160789.18_LMNA | -0.2129  | -0.359902283 | -0.05558328 | 8.45E-03 | 5.80E-02 | 1.00E+00 |
| ENSG00000117407.15_ARTN      | ENSG00000160789.18_LMNA | 0.09845  | -0.061720566 | 0.253672394 | 2.28E-01 | 5.04E-01 | 1.00E+00 |
| ENSG00000170190.14_SLC16A5   | ENSG00000160789.18_LMNA | 0.01128  | -0.148185166 | 0.17017674  | 8.90E-01 | 9.57E-01 | 1.00E+00 |
| ENSG00000213889.9_PPM1N      | ENSG00000160789.18_LMNA | 0.03221  | -0.127646148 | 0.190433302 | 6.94E-01 | 8.68E-01 | 1.00E+00 |
| ENSG00000089356.15_FXYD3     | ENSG00000160789.18_LMNA | -0.21169 | -0.358802761 | -0.05432453 | 8.84E-03 | 5.99E-02 | 1.00E+00 |
| ENSG00000241627.3_UBQLN4P1   | ENSG00000160789.18_LMNA | -0.05947 | -0.216616516 | 0.100687373 | 4.67E-01 | 7.28E-01 | 1.00E+00 |
| ENSG00000213791.4_RP11-941H  | ENSG00000160789.18_LMNA | -0.0445  | -0.202267128 | 0.115519729 | 5.86E-01 | 8.08E-01 | 1.00E+00 |
| ENSG00000224781.1	EIF4A2P4   | ENSG00000160789.18_LMNA | -0.23617 | -0.381042116 | -0.07997404 | 3.40E-03 | 2.93E-02 | 1.00E+00 |
| ENSG00000159197.3_KCNE2      | ENSG00000160789.18_LMNA | -0.07697 | -0.233311263 | 0.083251368 | 3.46E-01 | 6.30E-01 | 1.00E+00 |
| ENSG00000186732.12_MPPED1    | ENSG00000160789.18_LMNA | -0.17652 | -0.326546739 | -0.01782301 | 2.96E-02 | 1.42E-01 | 1.00E+00 |
| ENSG00000153246.10_PLA2R1    | ENSG00000160789.18_LMNA | 0.21707  | 0.059941866  | 0.363703004 | 7.23E-03 | 5.15E-02 | 1.00E+00 |
| ENSG00000012124.13_CD22      | ENSG00000160789.18_LMNA | -0.23452 | -0.379552639 | -0.07824362 | 3.64E-03 | 3.09E-02 | 1.00E+00 |
| ENSG00000225419.1_RPL21P3    | ENSG00000160789.18_LMNA | -0.1864  | -0.335638981 | -0.02802934 | 2.15E-02 | 1.14E-01 | 1.00E+00 |
| ENSG00000175449.12_RFESD     | ENSG00000160789.18_LMNA | -0.10122 | -0.256287999 | 0.058933264 | 2.15E-01 | 4.89E-01 | 1.00E+00 |
| ENSG00000280106.1_CTC-523E2  | ENSG00000160789.18_LMNA | 0.08763  | -0.07258652  | 0.243431554 | 2.83E-01 | 5.68E-01 | 1.00E+00 |
| ENSG00000255182.2_CTD-2517M  | ENSG00000160789.18_LMNA | -0.0131  | -0.171944368 | 0.146403761 | 8.73E-01 | 9.51E-01 | 1.00E+00 |
| ENSG00000161149.10_TUBA3FP   | ENSG00000160789.18_LMNA | -0.15662 | -0.308135103 | 0.002649448 | 5.40E-02 | 2.11E-01 | 1.00E+00 |
| ENSG00000185267.8_CDNF       | ENSG00000160789.18_LMNA | -0.17273 | -0.323045736 | -0.0139101  | 3.33E-02 | 1.53E-01 | 1.00E+00 |
| ENSG00000265798.5_RP11-271K  | ENSG00000160789.18_LMNA | -0.29886 | -0.437255254 | -0.14663444 | 1.84E-04 | 3.05E-03 | 1.00E+00 |
| ENSG00000249700.7_SRD5A3-A5  | ENSG00000160789.18_LMNA | -0.11378 | -0.268123742 | 0.04625884  | 1.63E-01 | 4.18E-01 | 1.00E+00 |
| ENSG00000228818.1_RP11-567G  | ENSG00000160789.18_LMNA | 0.02753  | -0.132252199 | 0.185914032 | 7.36E-01 | 8.89E-01 | 1.00E+00 |
| ENSG00000224839.1_RPL12P17   | ENSG00000160789.18_LMNA | -0.02116 | -0.179751659 | 0.138510841 | 7.96E-01 | 9.18E-01 | 1.00E+00 |
| ENSG00000062524.14_LTK       | ENSG00000160789.18_LMNA | 0.08327  | -0.076948295 | 0.239300795 | 3.08E-01 | 5.94E-01 | 1.00E+00 |
| ENSG00000108823.14_SGCA      | ENSG00000160789.18_LMNA | -0.07269 | -0.22923977  | 0.087521585 | 3.73E-01 | 6.53E-01 | 1.00E+00 |
| ENSG00000279196.1_RP11-1072  | ENSG00000160789.18_LMNA | 0.14339  | -0.016175291 | 0.295841738 | 7.80E-02 | 2.68E-01 | 1.00E+00 |
| ENSG00000205930.7_C21orf62-A | ENSG00000160789.18_LMNA | -0.14972 | -0.301732634 | 0.009708019 | 6.56E-02 | 2.39E-01 | 1.00E+00 |
| ENSG00000112293.13_GPLD1     | ENSG00000160789.18_LMNA | -0.15025 | -0.302217874 | 0.009174138 | 6.47E-02 | 2.37E-01 | 1.00E+00 |
| ENSG00000228057.1_SEC63P1    | ENSG00000160789.18_LMNA | 0.07017  | -0.090036131 | 0.226837046 | 3.90E-01 | 6.69E-01 | 1.00E+00 |
| ENSG00000250397.2_RP11-1391  | ENSG00000160789.18_LMNA | 0.14985  | -0.00957975  | 0.301849231 | 6.54E-02 | 2.39E-01 | 1.00E+00 |
| ENSG00000205089.6_CCNI2      | ENSG00000160789.18_LMNA | -0.18993 | -0.338879645 | -0.03168266 | 1.91E-02 | 1.04E-01 | 1.00E+00 |
| ENSG00000261186.2_RP11-341N  | ENSG00000160789.18_LMNA | -0.20215 | -0.350084304 | -0.04437765 | 1.25E-02 | 7.70E-02 | 1.00E+00 |
| ENSG00000280417.1_RP11-5O17  | ENSG00000160789.18_LMNA | 0.03002  | -0.129801367 | 0.188320366 | 7.14E-01 | 8.78E-01 | 1.00E+00 |
| ENSG00000214093.3_RP11-24711 | ENSG00000160789.18_LMNA | -0.0989  | -0.254097703 | 0.061267673 | 2.25E-01 | 5.01E-01 | 1.00E+00 |

|                             |                         |          |              |             |          |          |          |
|-----------------------------|-------------------------|----------|--------------|-------------|----------|----------|----------|
| ENSG00000230667.5_SETSIP    | ENSG00000160789.18_LMNA | 0.07437  | -0.085851789 | 0.230833179 | 3.63E-01 | 6.44E-01 | 1.00E+00 |
| ENSG00000223855.1_HRAT92    | ENSG00000160789.18_LMNA | 0.11611  | -0.04390242  | 0.270313823 | 1.54E-01 | 4.05E-01 | 1.00E+00 |
| ENSG00000243830.2_RP11-113C | ENSG00000160789.18_LMNA | -0.20031 | -0.348404557 | -0.04246817 | 1.33E-02 | 8.06E-02 | 1.00E+00 |
| ENSG00000272195.1_RP11-156E | ENSG00000160789.18_LMNA | -0.22366 | -0.36969349  | -0.06683522 | 5.61E-03 | 4.28E-02 | 1.00E+00 |
| ENSG00000204923.3_FBXO48    | ENSG00000160789.18_LMNA | 0.00558  | -0.153754641 | 0.16463709  | 9.46E-01 | 9.78E-01 | 1.00E+00 |
| ENSG00000261098.1_RP11-819C | ENSG00000160789.18_LMNA | -0.13753 | -0.290377462 | 0.022150953 | 9.11E-02 | 2.94E-01 | 1.00E+00 |
| ENSG00000273247.4_RP11-83A2 | ENSG00000160789.18_LMNA | -0.05829 | -0.215493596 | 0.101853198 | 4.76E-01 | 7.34E-01 | 1.00E+00 |
| ENSG00000242169.2_RP11-219G | ENSG00000160789.18_LMNA | -0.17053 | -0.321014166 | -0.01164384 | 3.57E-02 | 1.61E-01 | 1.00E+00 |
| ENSG00000184347.13_SLIT3    | ENSG00000160789.18_LMNA | 0.11045  | -0.049618831 | 0.264995304 | 1.76E-01 | 4.36E-01 | 1.00E+00 |
| ENSG00000259515.1_RP11-365N | ENSG00000160789.18_LMNA | 0.08937  | -0.070840408 | 0.245081978 | 2.74E-01 | 5.58E-01 | 1.00E+00 |
| ENSG00000139618.13_BRCA2    | ENSG00000160789.18_LMNA | 0.03545  | -0.124451009 | 0.193560342 | 6.65E-01 | 8.52E-01 | 1.00E+00 |
| ENSG00000129214.13_SHBG     | ENSG00000160789.18_LMNA | -0.06376 | -0.220723438 | 0.096416102 | 4.35E-01 | 7.04E-01 | 1.00E+00 |
| ENSG00000203727.3_SAMD5     | ENSG00000160789.18_LMNA | -0.23667 | -0.381500268 | -0.08050667 | 3.33E-03 | 2.89E-02 | 1.00E+00 |
| ENSG00000246174.6_KCTD21-AS | ENSG00000160789.18_LMNA | -0.09865 | -0.25385979  | 0.061521033 | 2.27E-01 | 5.03E-01 | 1.00E+00 |
| ENSG00000223509.7_RP11-632K | ENSG00000160789.18_LMNA | 0.25111  | 0.095735232  | 0.394537168 | 1.81E-03 | 1.81E-02 | 1.00E+00 |
| ENSG00000105278.9_ZFR2      | ENSG00000160789.18_LMNA | -0.15551 | -0.307106362 | 0.003785703 | 5.57E-02 | 2.16E-01 | 1.00E+00 |
| ENSG00000165084.14_C8orf34  | ENSG00000160789.18_LMNA | -0.19639 | -0.344810593 | -0.03839016 | 1.53E-02 | 8.92E-02 | 1.00E+00 |
| ENSG00000102468.9_HTR2A     | ENSG00000160789.18_LMNA | -0.3278  | -0.462845492 | -0.1778809  | 3.75E-05 | 8.52E-04 | 1.00E+00 |
| ENSG00000236444.3_UBE2L5P   | ENSG00000160789.18_LMNA | 0.10699  | -0.053112847 | 0.261735035 | 1.90E-01 | 4.57E-01 | 1.00E+00 |
| ENSG00000273382.1_RP5-1065J | ENSG00000160789.18_LMNA | 0.01734  | -0.142257155 | 0.17605098  | 8.32E-01 | 9.35E-01 | 1.00E+00 |
| ENSG00000100068.10_LRP5L    | ENSG00000160789.18_LMNA | 0.00833  | -0.151068588 | 0.167311269 | 9.19E-01 | 9.69E-01 | 1.00E+00 |
| ENSG00000228412.5_RP4-625H1 | ENSG00000160789.18_LMNA | -0.02546 | -0.183916403 | 0.134283818 | 7.56E-01 | 8.98E-01 | 1.00E+00 |
| ENSG00000179363.6_TMEN31    | ENSG00000160789.18_LMNA | -0.22298 | -0.369082616 | -0.06613095 | 5.76E-03 | 4.36E-02 | 1.00E+00 |
| ENSG00000231169.4_EEF1B2P1  | ENSG00000160789.18_LMNA | -0.16404 | -0.315015642 | -0.00497087 | 4.34E-02 | 1.83E-01 | 1.00E+00 |
| ENSG00000239198.1_RPL5P22   | ENSG00000160789.18_LMNA | -0.12854 | -0.28196937  | 0.031302524 | 1.15E-01 | 3.38E-01 | 1.00E+00 |
| ENSG00000130518.15_KIAA1683 | ENSG00000160789.18_LMNA | 0.15111  | -0.008289136 | 0.30302189  | 6.31E-02 | 2.33E-01 | 1.00E+00 |
| ENSG00000247675.5_LRP4-AS1  | ENSG00000160789.18_LMNA | -0.19997 | -0.348089194 | -0.04210992 | 1.35E-02 | 8.13E-02 | 1.00E+00 |
| ENSG00000259479.5_SORD2P    | ENSG00000160789.18_LMNA | -0.15288 | -0.304664334 | 0.006479737 | 6.01E-02 | 2.26E-01 | 1.00E+00 |
| ENSG00000272659.1_          | ENSG00000160789.18_LMNA | -0.12198 | -0.275826533 | 0.037955495 | 1.34E-01 | 3.72E-01 | 1.00E+00 |
| ENSG00000242028.4_HYPK      | ENSG00000160789.18_LMNA | 0.03698  | -0.122942341 | 0.195034613 | 6.51E-01 | 8.45E-01 | 1.00E+00 |
| ENSG00000178033.5_FAM26E    | ENSG00000160789.18_LMNA | 0.10789  | -0.052208649 | 0.262579433 | 1.86E-01 | 4.52E-01 | 1.00E+00 |
| ENSG00000146038.10_DCDC2    | ENSG00000160789.18_LMNA | 0.12882  | -0.031019438 | 0.282230181 | 1.14E-01 | 3.37E-01 | 1.00E+00 |
| ENSG00000164037.15_SLC9B1   | ENSG00000160789.18_LMNA | -0.34263 | -0.475872185 | -0.19401071 | 1.55E-05 | 4.20E-04 | 7.97E-01 |

|                             |                         |          |              |             |          |          |          |
|-----------------------------|-------------------------|----------|--------------|-------------|----------|----------|----------|
| ENSG00000177640.14_CASC2    | ENSG00000160789.18_LMNA | -0.07561 | -0.232014188 | 0.084613014 | 3.55E-01 | 6.38E-01 | 1.00E+00 |
| ENSG00000176700.18_SCAND2P  | ENSG00000160789.18_LMNA | -0.17741 | -0.327366046 | -0.01874007 | 2.88E-02 | 1.39E-01 | 1.00E+00 |
| ENSG00000272316.1_XXbac-BPG | ENSG00000160789.18_LMNA | -0.3922  | -0.518992863 | -0.24851303 | 5.82E-07 | 2.97E-05 | 2.99E-02 |
| ENSG00000243297.2_RPL31P61  | ENSG00000160789.18_LMNA | -0.13371 | -0.286802801 | 0.026048112 | 1.01E-01 | 3.12E-01 | 1.00E+00 |
| ENSG00000132837.13_DMGDH    | ENSG00000160789.18_LMNA | -0.13121 | -0.284468753 | 0.02858761  | 1.07E-01 | 3.25E-01 | 1.00E+00 |
| ENSG00000109063.13_MYH3     | ENSG00000160789.18_LMNA | -0.01192 | -0.170797827 | 0.147559474 | 8.84E-01 | 9.55E-01 | 1.00E+00 |
| ENSG00000231852.5_CYP21A2   | ENSG00000160789.18_LMNA | -0.0615  | -0.218556943 | 0.098670751 | 4.52E-01 | 7.17E-01 | 1.00E+00 |
| ENSG00000280087.1_CTB-129P6 | ENSG00000160789.18_LMNA | -0.21458 | -0.361431624 | -0.0573357  | 7.94E-03 | 5.53E-02 | 1.00E+00 |
| ENSG00000112299.7_VNN1      | ENSG00000160789.18_LMNA | -0.05169 | -0.209166338 | 0.108405952 | 5.27E-01 | 7.72E-01 | 1.00E+00 |
| ENSG00000176945.15_MUC20    | ENSG00000160789.18_LMNA | -0.07235 | -0.228916407 | 0.087860232 | 3.76E-01 | 6.56E-01 | 1.00E+00 |
| ENSG00000236255.1_AC009404. | ENSG00000160789.18_LMNA | -0.06702 | -0.223829719 | 0.093177737 | 4.12E-01 | 6.86E-01 | 1.00E+00 |
| ENSG00000232801.1_SDCBPP3   | ENSG00000160789.18_LMNA | 0.04672  | -0.113319602 | 0.204404269 | 5.68E-01 | 7.98E-01 | 1.00E+00 |
| ENSG00000213985.4_AC078899. | ENSG00000160789.18_LMNA | 0.01904  | -0.140582928 | 0.177705925 | 8.16E-01 | 9.28E-01 | 1.00E+00 |
| ENSG00000260261.1_RP11-480A | ENSG00000160789.18_LMNA | 0.01632  | -0.143254069 | 0.175064692 | 8.42E-01 | 9.38E-01 | 1.00E+00 |
| ENSG00000197748.11_CFAP43   | ENSG00000160789.18_LMNA | 0.04244  | -0.11755166  | 0.200290676 | 6.04E-01 | 8.18E-01 | 1.00E+00 |
| ENSG00000079263.17_SP140    | ENSG00000160789.18_LMNA | -0.02465 | -0.18313574  | 0.135077038 | 7.63E-01 | 9.01E-01 | 1.00E+00 |
| ENSG00000272716.1_RP11-563N | ENSG00000160789.18_LMNA | -0.17469 | -0.324856089 | -0.01593227 | 3.14E-02 | 1.48E-01 | 1.00E+00 |
| ENSG00000277449.1_CEBPB-AS  | ENSG00000160789.18_LMNA | 0.22832  | 0.071729275  | 0.373931304 | 4.67E-03 | 3.72E-02 | 1.00E+00 |
| ENSG00000258057.4_BCDIN3D-A | ENSG00000160789.18_LMNA | -0.35683 | -0.488294159 | -0.20953502 | 6.41E-06 | 2.04E-04 | 3.29E-01 |
| ENSG00000232229.4_LINC00865 | ENSG00000160789.18_LMNA | -0.12261 | -0.276418557 | 0.037315515 | 1.32E-01 | 3.69E-01 | 1.00E+00 |
| ENSG00000187720.13_THSD4    | ENSG00000160789.18_LMNA | -0.2211  | -0.367373268 | -0.06416187 | 6.19E-03 | 4.60E-02 | 1.00E+00 |
| ENSG00000233662.1_CALM2P4   | ENSG00000160789.18_LMNA | -0.19773 | -0.346037835 | -0.03978154 | 1.46E-02 | 8.62E-02 | 1.00E+00 |
| ENSG00000259520.4_CTD-2651B | ENSG00000160789.18_LMNA | -0.08808 | -0.243863664 | 0.072129544 | 2.81E-01 | 5.66E-01 | 1.00E+00 |
| ENSG00000236947.4_RP11-98G7 | ENSG00000160789.18_LMNA | -0.04599 | -0.203698095 | 0.114046933 | 5.74E-01 | 8.01E-01 | 1.00E+00 |
| ENSG00000243742.4_RPLP0P2   | ENSG00000160789.18_LMNA | 0.25824  | 0.103282268  | 0.400953776 | 1.32E-03 | 1.43E-02 | 1.00E+00 |
| ENSG00000255326.1_CTD-2530H | ENSG00000160789.18_LMNA | -0.07611 | -0.232494096 | 0.084109353 | 3.51E-01 | 6.35E-01 | 1.00E+00 |
| ENSG00000235316.1_DUSP8P5   | ENSG00000160789.18_LMNA | -0.00728 | -0.166289571 | 0.152095378 | 9.29E-01 | 9.73E-01 | 1.00E+00 |
| ENSG00000130997.15_POLN     | ENSG00000160789.18_LMNA | -0.17363 | -0.323873838 | -0.01483478 | 3.24E-02 | 1.51E-01 | 1.00E+00 |
| ENSG00000188610.11_FAM72B   | ENSG00000160789.18_LMNA | 0.08659  | -0.073629196 | 0.242445143 | 2.89E-01 | 5.74E-01 | 1.00E+00 |
| ENSG00000260521.2_CTD-2576F | ENSG00000160789.18_LMNA | 0.10385  | -0.05628218  | 0.2587715   | 2.03E-01 | 4.74E-01 | 1.00E+00 |
| ENSG00000232333.1_RPS27AP2  | ENSG00000160789.18_LMNA | -0.08769 | -0.243495658 | 0.072518736 | 2.83E-01 | 5.68E-01 | 1.00E+00 |
| ENSG00000167281.17_RBFOX3   | ENSG00000160789.18_LMNA | -0.10696 | -0.261708445 | 0.053141312 | 1.90E-01 | 4.57E-01 | 1.00E+00 |
| ENSG00000189420.8_ZFP92     | ENSG00000160789.18_LMNA | 0.0897   | -0.07050977  | 0.245394291 | 2.72E-01 | 5.56E-01 | 1.00E+00 |



|                              |                         |          |              |             |          |          |          |
|------------------------------|-------------------------|----------|--------------|-------------|----------|----------|----------|
| ENSG00000279602.1_CTD-3014M  | ENSG00000160789.18_LMNA | -0.19504 | -0.343570748 | -0.03698569 | 1.60E-02 | 9.21E-02 | 1.00E+00 |
| ENSG00000234028.3_AC062029.  | ENSG00000160789.18_LMNA | 0.00015  | -0.159054911 | 0.159346486 | 9.99E-01 | 9.99E-01 | 1.00E+00 |
| ENSG00000166359.9_WDR88      | ENSG00000160789.18_LMNA | -0.11029 | -0.264836411 | 0.049789294 | 1.76E-01 | 4.37E-01 | 1.00E+00 |
| ENSG00000272977.1_CTA-390C1  | ENSG00000160789.18_LMNA | -0.12285 | -0.276640876 | 0.037075121 | 1.32E-01 | 3.68E-01 | 1.00E+00 |
| ENSG00000237888.1_AC087650.  | ENSG00000160789.18_LMNA | -0.05732 | -0.214566063 | 0.102815513 | 4.83E-01 | 7.40E-01 | 1.00E+00 |
| ENSG00000224687.1_RASAL2-A5  | ENSG00000160789.18_LMNA | -0.19621 | -0.344641197 | -0.0381982  | 1.54E-02 | 8.96E-02 | 1.00E+00 |
| ENSG00000265750.1_RP11-799B  | ENSG00000160789.18_LMNA | -0.14665 | -0.298875688 | 0.012847751 | 7.14E-02 | 2.53E-01 | 1.00E+00 |
| ENSG00000231119.2_RP4-569M2  | ENSG00000160789.18_LMNA | 0.14987  | -0.00955458  | 0.30187211  | 6.53E-02 | 2.38E-01 | 1.00E+00 |
| ENSG00000176358.14_TAC4      | ENSG00000160789.18_LMNA | -0.15895 | -0.310302601 | 0.000252796 | 5.05E-02 | 2.02E-01 | 1.00E+00 |
| ENSG00000154258.15_ABCA9     | ENSG00000160789.18_LMNA | -0.00164 | -0.160800241 | 0.157600326 | 9.84E-01 | 9.94E-01 | 1.00E+00 |
| ENSG00000119283.14_TRIM67    | ENSG00000160789.18_LMNA | -0.45374 | -0.571648624 | -0.31747384 | 4.34E-09 | 5.31E-07 | 2.23E-04 |
| ENSG00000226327.3_RPSAP49    | ENSG00000160789.18_LMNA | -0.25298 | -0.396222189 | -0.09771379 | 1.66E-03 | 1.70E-02 | 1.00E+00 |
| ENSG00000263766.4_RP11-580I1 | ENSG00000160789.18_LMNA | -0.2814  | -0.421704911 | -0.12792611 | 4.45E-04 | 6.16E-03 | 1.00E+00 |
| ENSG00000081853.14_PCDHGA2   | ENSG00000160789.18_LMNA | 0.11177  | -0.048286978 | 0.266236166 | 1.70E-01 | 4.29E-01 | 1.00E+00 |
| ENSG00000230224.1_PHBP9      | ENSG00000160789.18_LMNA | -0.077   | -0.233344204 | 0.083216772 | 3.46E-01 | 6.30E-01 | 1.00E+00 |
| ENSG00000226038.5_PPIAP21    | ENSG00000160789.18_LMNA | -0.0751  | -0.231533951 | 0.085116858 | 3.58E-01 | 6.41E-01 | 1.00E+00 |
| ENSG00000272918.1_CTB-152G1  | ENSG00000160789.18_LMNA | -0.35167 | -0.483787587 | -0.20388666 | 8.88E-06 | 2.64E-04 | 4.56E-01 |
| ENSG00000251259.1_AC004069.  | ENSG00000160789.18_LMNA | 0.04357  | -0.116440135 | 0.201372172 | 5.94E-01 | 8.13E-01 | 1.00E+00 |
| ENSG00000258646.1_RP11-950C  | ENSG00000160789.18_LMNA | 0.09691  | -0.063269658 | 0.25221673  | 2.35E-01 | 5.13E-01 | 1.00E+00 |
| ENSG00000219773.1_RPSAP45    | ENSG00000160789.18_LMNA | -0.12015 | -0.27411156  | 0.039807934 | 1.40E-01 | 3.82E-01 | 1.00E+00 |
| ENSG00000276449.1_AC004076.  | ENSG00000160789.18_LMNA | -0.08761 | -0.243419912 | 0.07259883  | 2.83E-01 | 5.69E-01 | 1.00E+00 |
| ENSG00000267226.2_RP11-126O  | ENSG00000160789.18_LMNA | -0.08654 | -0.242402597 | 0.073674154 | 2.89E-01 | 5.74E-01 | 1.00E+00 |
| ENSG00000250326.1_RP11-284M  | ENSG00000160789.18_LMNA | -0.2633  | -0.405502787 | -0.10865353 | 1.05E-03 | 1.20E-02 | 1.00E+00 |
| ENSG00000139269.2_INHBE      | ENSG00000160789.18_LMNA | -0.1065  | -0.261272158 | 0.053608286 | 1.92E-01 | 4.59E-01 | 1.00E+00 |
| ENSG00000159873.8_CCDC117    | ENSG00000160789.18_LMNA | -0.08349 | -0.239505665 | 0.076732252 | 3.06E-01 | 5.93E-01 | 1.00E+00 |
| ENSG00000234807.5_LINC01135  | ENSG00000160789.18_LMNA | -0.25746 | -0.400258887 | -0.1024633  | 1.36E-03 | 1.46E-02 | 1.00E+00 |
| ENSG00000261167.1_RP11-517B  | ENSG00000160789.18_LMNA | -0.16187 | -0.313002677 | -0.00273774 | 4.63E-02 | 1.91E-01 | 1.00E+00 |
| ENSG00000051341.12_POLQ      | ENSG00000160789.18_LMNA | 0.04239  | -0.117599984 | 0.20024364  | 6.04E-01 | 8.18E-01 | 1.00E+00 |
| ENSG00000112541.12_PDE10A    | ENSG00000160789.18_LMNA | -0.3763  | -0.505229263 | -0.23092844 | 1.77E-06 | 7.29E-05 | 9.09E-02 |
| ENSG00000168421.11_RHOH      | ENSG00000160789.18_LMNA | -0.0033  | -0.162418366 | 0.155979652 | 9.68E-01 | 9.87E-01 | 1.00E+00 |
| ENSG00000255090.4_           | ENSG00000160789.18_LMNA | -0.20447 | -0.352204291 | -0.04679078 | 1.15E-02 | 7.24E-02 | 1.00E+00 |
| ENSG00000188517.13_COL25A1   | ENSG00000160789.18_LMNA | -0.0348  | -0.192930015 | 0.125095594 | 6.70E-01 | 8.55E-01 | 1.00E+00 |
| ENSG00000231205.10_ZNF826P   | ENSG00000160789.18_LMNA | -0.15076 | -0.302697352 | 0.008646422 | 6.37E-02 | 2.35E-01 | 1.00E+00 |

|                             |                         |          |              |             |          |          |          |
|-----------------------------|-------------------------|----------|--------------|-------------|----------|----------|----------|
| ENSG00000160013.7_PTGIR     | ENSG00000160789.18_LMNA | 0.30489  | 0.153120042  | 0.442605825 | 1.34E-04 | 2.38E-03 | 1.00E+00 |
| ENSG00000235962.5_RPL7AP53  | ENSG00000160789.18_LMNA | -0.06328 | -0.220266201 | 0.096892214 | 4.39E-01 | 7.07E-01 | 1.00E+00 |
| ENSG00000260456.5_C16orf95  | ENSG00000160789.18_LMNA | 0.21883  | 0.061784329  | 0.365306611 | 6.76E-03 | 4.90E-02 | 1.00E+00 |
| ENSG00000183154.1_RP11-863K | ENSG00000160789.18_LMNA | -0.22183 | -0.3680316   | -0.06491995 | 6.02E-03 | 4.51E-02 | 1.00E+00 |
| ENSG00000262061.4_RP11-1260 | ENSG00000160789.18_LMNA | -0.37271 | -0.502120331 | -0.22698108 | 2.26E-06 | 8.76E-05 | 1.16E-01 |
| ENSG00000169064.11_ZBBX     | ENSG00000160789.18_LMNA | -0.08719 | -0.243015913 | 0.073025953 | 2.85E-01 | 5.71E-01 | 1.00E+00 |
| ENSG00000179083.6_FAM133A   | ENSG00000160789.18_LMNA | -0.37856 | -0.507197137 | -0.2334317  | 1.52E-06 | 6.48E-05 | 7.79E-02 |
| ENSG00000231672.5_DIRC3     | ENSG00000160789.18_LMNA | -0.26604 | -0.407965553 | -0.11156871 | 9.24E-04 | 1.09E-02 | 1.00E+00 |
| ENSG00000237757.2_EEF1A1P3  | ENSG00000160789.18_LMNA | -0.12089 | -0.274797798 | 0.039066948 | 1.38E-01 | 3.78E-01 | 1.00E+00 |
| ENSG00000221818.7_EBF2      | ENSG00000160789.18_LMNA | 0.17042  | 0.011535345  | 0.320916832 | 3.58E-02 | 1.61E-01 | 1.00E+00 |
| ENSG00000187243.15_MAGED4E  | ENSG00000160789.18_LMNA | -0.12752 | -0.281013875 | 0.032339194 | 1.17E-01 | 3.43E-01 | 1.00E+00 |
| ENSG00000271537.1_RP11-365F | ENSG00000160789.18_LMNA | 0.01857  | -0.141043938 | 0.177250405 | 8.20E-01 | 9.30E-01 | 1.00E+00 |
| ENSG00000261819.1_RP11-680G | ENSG00000160789.18_LMNA | 0.35129  | 0.203471874  | 0.483456063 | 9.10E-06 | 2.70E-04 | 4.67E-01 |
| ENSG00000245614.3_DDX11-AS1 | ENSG00000160789.18_LMNA | 0.00569  | -0.15364704  | 0.164744306 | 9.45E-01 | 9.78E-01 | 1.00E+00 |
| ENSG00000277938.1_RP5-965G2 | ENSG00000160789.18_LMNA | -0.03289 | -0.191086707 | 0.126979059 | 6.88E-01 | 8.65E-01 | 1.00E+00 |
| ENSG00000157017.14_GHRL     | ENSG00000160789.18_LMNA | -0.32527 | -0.460615474 | -0.17513493 | 4.34E-05 | 9.56E-04 | 1.00E+00 |
| ENSG00000214289.2_RPL39P5   | ENSG00000160789.18_LMNA | -0.26554 | -0.407509733 | -0.11102877 | 9.45E-04 | 1.11E-02 | 1.00E+00 |
| ENSG00000204352.2_C9orf129  | ENSG00000160789.18_LMNA | -0.18948 | -0.338469598 | -0.03121994 | 1.94E-02 | 1.06E-01 | 1.00E+00 |
| ENSG00000272097.1_RP11-421M | ENSG00000160789.18_LMNA | -0.21116 | -0.358319357 | -0.05377143 | 9.02E-03 | 6.08E-02 | 1.00E+00 |
| ENSG00000225871.2_RP11-495P | ENSG00000160789.18_LMNA | 0.10041  | -0.059750256 | 0.255521812 | 2.18E-01 | 4.93E-01 | 1.00E+00 |
| ENSG00000250198.1_RP11-143A | ENSG00000160789.18_LMNA | -0.17264 | -0.322959715 | -0.01381408 | 3.34E-02 | 1.54E-01 | 1.00E+00 |
| ENSG00000101213.6_PTK6      | ENSG00000160789.18_LMNA | 0.09734  | -0.062835451 | 0.252624894 | 2.33E-01 | 5.11E-01 | 1.00E+00 |
| ENSG00000118596.10_SLC16A7  | ENSG00000160789.18_LMNA | -0.14694 | -0.299146315 | 0.0125506   | 7.08E-02 | 2.51E-01 | 1.00E+00 |
| ENSG00000009790.13_TRAF3IP3 | ENSG00000160789.18_LMNA | -0.06714 | -0.223950861 | 0.093051308 | 4.11E-01 | 6.85E-01 | 1.00E+00 |
| ENSG00000259298.1_RP11-562A | ENSG00000160789.18_LMNA | 0.01083  | -0.148624602 | 0.169740387 | 8.95E-01 | 9.59E-01 | 1.00E+00 |
| ENSG00000213174.3_RP11-373E | ENSG00000160789.18_LMNA | 0.01403  | -0.145498842 | 0.172841503 | 8.64E-01 | 9.47E-01 | 1.00E+00 |
| ENSG00000154545.15_MAGED4   | ENSG00000160789.18_LMNA | -0.07393 | -0.23041713  | 0.086287955 | 3.65E-01 | 6.47E-01 | 1.00E+00 |
| ENSG00000217325.2_PRELID1P1 | ENSG00000160789.18_LMNA | 0.06699  | -0.093206577 | 0.223802084 | 4.12E-01 | 6.86E-01 | 1.00E+00 |
| ENSG00000220744.1_RPL5P18   | ENSG00000160789.18_LMNA | -0.20176 | -0.34972528  | -0.04396934 | 1.27E-02 | 7.77E-02 | 1.00E+00 |
| ENSG00000250644.2_RP11-295K | ENSG00000160789.18_LMNA | 0.34264  | 0.194018402  | 0.475878369 | 1.55E-05 | 4.20E-04 | 7.97E-01 |
| ENSG00000229124.5_VIM-AS1   | ENSG00000160789.18_LMNA | 0.21946  | 0.062437341  | 0.365874534 | 6.60E-03 | 4.82E-02 | 1.00E+00 |
| ENSG00000138678.9_GPAT3     | ENSG00000160789.18_LMNA | 0.3052   | 0.153459119  | 0.442884995 | 1.32E-04 | 2.35E-03 | 1.00E+00 |
| ENSG00000198542.12_ITGBL1   | ENSG00000160789.18_LMNA | 0.03302  | -0.126850771 | 0.191212331 | 6.86E-01 | 8.64E-01 | 1.00E+00 |

|                              |                         |          |              |             |          |          |          |
|------------------------------|-------------------------|----------|--------------|-------------|----------|----------|----------|
| ENSG00000103175.9_WFDC1      | ENSG00000160789.18_LMNA | -0.18715 | -0.336328139 | -0.02880556 | 2.10E-02 | 1.11E-01 | 1.00E+00 |
| ENSG00000275294.3_RP11-428O  | ENSG00000160789.18_LMNA | -0.0477  | -0.205338246 | 0.112357119 | 5.60E-01 | 7.92E-01 | 1.00E+00 |
| ENSG00000136943.9_CTSV       | ENSG00000160789.18_LMNA | -0.02401 | -0.182516426 | 0.135706024 | 7.69E-01 | 9.04E-01 | 1.00E+00 |
| ENSG00000269887.1_RP11-477H  | ENSG00000160789.18_LMNA | -0.0583  | -0.21550197  | 0.101844507 | 4.76E-01 | 7.34E-01 | 1.00E+00 |
| ENSG00000143450.13_OAZ3      | ENSG00000160789.18_LMNA | -0.07928 | -0.23550532  | 0.080945392 | 3.32E-01 | 6.17E-01 | 1.00E+00 |
| ENSG00000257176.2_RP11-996F  | ENSG00000160789.18_LMNA | -0.26926 | -0.410849754 | -0.11498923 | 7.95E-04 | 9.69E-03 | 1.00E+00 |
| ENSG00000255471.1_RP11-736K  | ENSG00000160789.18_LMNA | -0.05605 | -0.213349045 | 0.104077267 | 4.93E-01 | 7.48E-01 | 1.00E+00 |
| ENSG00000245105.2_A2M-AS1    | ENSG00000160789.18_LMNA | -0.02503 | -0.183497582 | 0.134709426 | 7.60E-01 | 9.00E-01 | 1.00E+00 |
| ENSG00000240859.1_AC093627.  | ENSG00000160789.18_LMNA | 0.06424  | -0.095937897 | 0.221182543 | 4.32E-01 | 7.01E-01 | 1.00E+00 |
| ENSG00000249825.4_CTD-220111 | ENSG00000160789.18_LMNA | -0.0511  | -0.208599746 | 0.108991394 | 5.32E-01 | 7.74E-01 | 1.00E+00 |
| ENSG00000271797.1_CTC-428G2  | ENSG00000160789.18_LMNA | 0.01414  | -0.145388687 | 0.172950675 | 8.63E-01 | 9.46E-01 | 1.00E+00 |
| ENSG00000177675.7_CD163L1    | ENSG00000160789.18_LMNA | -0.05065 | -0.208170337 | 0.109434941 | 5.35E-01 | 7.77E-01 | 1.00E+00 |
| ENSG00000249526.1_CTB-35F21  | ENSG00000160789.18_LMNA | 0.03691  | -0.12301282  | 0.194965773 | 6.52E-01 | 8.46E-01 | 1.00E+00 |
| ENSG00000234801.3_MORF4      | ENSG00000160789.18_LMNA | -0.13113 | -0.28439472  | 0.028668093 | 1.07E-01 | 3.26E-01 | 1.00E+00 |
| ENSG00000279495.1_RP11-521B  | ENSG00000160789.18_LMNA | 0.08927  | -0.070943552 | 0.244984538 | 2.74E-01 | 5.59E-01 | 1.00E+00 |
| ENSG00000104327.6_CALB1      | ENSG00000160789.18_LMNA | -0.03588 | -0.193976539 | 0.12402525  | 6.61E-01 | 8.50E-01 | 1.00E+00 |
| ENSG00000238184.1_CD81-AS1   | ENSG00000160789.18_LMNA | 0.29937  | 0.147185358  | 0.437710561 | 1.79E-04 | 2.99E-03 | 1.00E+00 |
| ENSG00000182866.15_LCK       | ENSG00000160789.18_LMNA | 0.09319  | -0.067002717 | 0.248702939 | 2.53E-01 | 5.35E-01 | 1.00E+00 |
| ENSG00000172425.9_TTC36      | ENSG00000160789.18_LMNA | -0.16026 | -0.311512539 | -0.00108661 | 4.86E-02 | 1.98E-01 | 1.00E+00 |
| ENSG00000258673.1_LINC01397  | ENSG00000160789.18_LMNA | -0.08094 | -0.237085827 | 0.079282161 | 3.22E-01 | 6.08E-01 | 1.00E+00 |
| ENSG00000249986.1_YWHAQP6    | ENSG00000160789.18_LMNA | -0.13509 | -0.288097818 | 0.024637359 | 9.70E-02 | 3.06E-01 | 1.00E+00 |
| ENSG00000213260.3_YWHAZP5    | ENSG00000160789.18_LMNA | 0.1176   | -0.042391417 | 0.271716455 | 1.49E-01 | 3.96E-01 | 1.00E+00 |
| ENSG00000133392.15_MYH11     | ENSG00000160789.18_LMNA | 0.1278   | -0.032048736 | 0.281281651 | 1.17E-01 | 3.42E-01 | 1.00E+00 |
| ENSG00000168658.17_VWA3B     | ENSG00000160789.18_LMNA | 0.13821  | -0.021458711 | 0.29101151  | 8.95E-02 | 2.91E-01 | 1.00E+00 |
| ENSG00000226666.1_HSPA9P1    | ENSG00000160789.18_LMNA | 0.1006   | -0.059556609 | 0.255703453 | 2.18E-01 | 4.92E-01 | 1.00E+00 |
| ENSG00000241458.1_RPL7P19    | ENSG00000160789.18_LMNA | 0.05836  | -0.10178307  | 0.215561166 | 4.75E-01 | 7.34E-01 | 1.00E+00 |
| ENSG00000259138.1_RP11-950C  | ENSG00000160789.18_LMNA | -0.2515  | -0.394891661 | -0.09615128 | 1.77E-03 | 1.79E-02 | 1.00E+00 |
| ENSG00000204758.6_CTC-308K2  | ENSG00000160789.18_LMNA | -0.06768 | -0.224463393 | 0.092516293 | 4.07E-01 | 6.82E-01 | 1.00E+00 |
| ENSG00000235831.5_BHLHE40-4  | ENSG00000160789.18_LMNA | 0.17368  | 0.014895564  | 0.32392826  | 3.24E-02 | 1.51E-01 | 1.00E+00 |
| ENSG00000213592.4_AP000662.5 | ENSG00000160789.18_LMNA | 0.06493  | -0.095255726 | 0.221837225 | 4.27E-01 | 6.97E-01 | 1.00E+00 |
| ENSG00000253330.1_RP11-697N  | ENSG00000160789.18_LMNA | 0.22586  | 0.069150136  | 0.37169957  | 5.14E-03 | 4.01E-02 | 1.00E+00 |
| ENSG00000111796.3_KLRB1      | ENSG00000160789.18_LMNA | -0.08784 | -0.243633524 | 0.072372944 | 2.82E-01 | 5.67E-01 | 1.00E+00 |
| ENSG00000229251.3_HNRNPA1F   | ENSG00000160789.18_LMNA | -0.0542  | -0.211575781 | 0.105913888 | 5.07E-01 | 7.57E-01 | 1.00E+00 |

|                             |                         |          |              |             |          |          |          |
|-----------------------------|-------------------------|----------|--------------|-------------|----------|----------|----------|
| ENSG00000113924.10_HGD      | ENSG00000160789.18_LMNA | 0.18095  | 0.022391542  | 0.330623664 | 2.57E-02 | 1.29E-01 | 1.00E+00 |
| ENSG00000147488.10_ST18     | ENSG00000160789.18_LMNA | -0.38296 | -0.511004901 | -0.23828573 | 1.12E-06 | 5.04E-05 | 5.74E-02 |
| ENSG00000272572.1_RP11-179B | ENSG00000160789.18_LMNA | -0.25714 | -0.399969621 | -0.1021225  | 1.38E-03 | 1.48E-02 | 1.00E+00 |
| ENSG00000163959.8_SLC51A    | ENSG00000160789.18_LMNA | 0.19979  | 0.041920101  | 0.347922066 | 1.36E-02 | 8.17E-02 | 1.00E+00 |
| ENSG00000183454.12_GRIN2A   | ENSG00000160789.18_LMNA | -0.12044 | -0.274377623 | 0.039520686 | 1.39E-01 | 3.81E-01 | 1.00E+00 |
| ENSG00000179284.5_DAND5     | ENSG00000160789.18_LMNA | -0.23405 | -0.379119794 | -0.0777411  | 3.71E-03 | 3.13E-02 | 1.00E+00 |
| ENSG00000152939.13_MARVELD  | ENSG00000160789.18_LMNA | 0.01289  | -0.146609616 | 0.171740209 | 8.75E-01 | 9.51E-01 | 1.00E+00 |
| ENSG00000215866.6_LINC01356 | ENSG00000160789.18_LMNA | -0.35298 | -0.484928996 | -0.2053155  | 8.18E-06 | 2.47E-04 | 4.20E-01 |
| ENSG00000237989.1_TCONS_00  | ENSG00000160789.18_LMNA | 0.02158  | -0.138092367 | 0.180164477 | 7.92E-01 | 9.16E-01 | 1.00E+00 |
| ENSG00000134242.14_PTPN22   | ENSG00000160789.18_LMNA | 0.18411  | 0.025657048  | 0.333530742 | 2.32E-02 | 1.20E-01 | 1.00E+00 |
| ENSG00000095932.6_SMIM24    | ENSG00000160789.18_LMNA | -0.14093 | -0.29354837  | 0.018686007 | 8.33E-02 | 2.79E-01 | 1.00E+00 |
| ENSG00000178660.6_ARMC10P1  | ENSG00000160789.18_LMNA | -0.0312  | -0.189464237 | 0.128634978 | 7.03E-01 | 8.73E-01 | 1.00E+00 |
| ENSG00000220157.4_HNRNPA1F  | ENSG00000160789.18_LMNA | -0.11462 | -0.268917249 | 0.04540547  | 1.60E-01 | 4.13E-01 | 1.00E+00 |
| ENSG00000234080.3_RP11-183G | ENSG00000160789.18_LMNA | 0.0498   | -0.11027685  | 0.207354929 | 5.42E-01 | 7.81E-01 | 1.00E+00 |
| ENSG00000258568.1_RHOQP1    | ENSG00000160789.18_LMNA | 0.16358  | 0.004499884  | 0.314591326 | 4.40E-02 | 1.85E-01 | 1.00E+00 |
| ENSG00000261783.1_RP11-252K | ENSG00000160789.18_LMNA | 0.02793  | -0.131854164 | 0.1863051   | 7.33E-01 | 8.87E-01 | 1.00E+00 |
| ENSG00000233588.1_CYP51A1P  | ENSG00000160789.18_LMNA | 0.1738   | 0.01501966   | 0.324039355 | 3.22E-02 | 1.50E-01 | 1.00E+00 |
| ENSG00000261884.2_CTC-479C5 | ENSG00000160789.18_LMNA | 0.01622  | -0.143347665 | 0.174972061 | 8.43E-01 | 9.39E-01 | 1.00E+00 |
| ENSG00000176532.3_PRR15     | ENSG00000160789.18_LMNA | -0.07278 | -0.229324711 | 0.087432616 | 3.73E-01 | 6.53E-01 | 1.00E+00 |
| ENSG00000232040.2_ZBED9     | ENSG00000160789.18_LMNA | 0.03092  | -0.128913672 | 0.189191002 | 7.05E-01 | 8.75E-01 | 1.00E+00 |
| ENSG00000273218.1_LLNLR-246 | ENSG00000160789.18_LMNA | 0.01299  | -0.14650902  | 0.17183998  | 8.74E-01 | 9.51E-01 | 1.00E+00 |
| ENSG00000280422.1_RP11-155D | ENSG00000160789.18_LMNA | 0.0506   | -0.109479208 | 0.208127474 | 5.36E-01 | 7.77E-01 | 1.00E+00 |
| ENSG00000111325.15_OGFOD2   | ENSG00000160789.18_LMNA | 0.139    | -0.020660647 | 0.291742141 | 8.77E-02 | 2.88E-01 | 1.00E+00 |
| ENSG00000271327.1_RP11-1109 | ENSG00000160789.18_LMNA | 0.19609  | 0.038079172  | 0.344536151 | 1.55E-02 | 8.98E-02 | 1.00E+00 |
| ENSG00000178826.9_TMEM139   | ENSG00000160789.18_LMNA | -0.17195 | -0.322322951 | -0.01310346 | 3.42E-02 | 1.56E-01 | 1.00E+00 |
| ENSG00000262477.1_AC021224  | ENSG00000160789.18_LMNA | -0.03823 | -0.196234009 | 0.121713877 | 6.40E-01 | 8.39E-01 | 1.00E+00 |
| ENSG00000186407.6_CD300E    | ENSG00000160789.18_LMNA | 0.27365  | 0.119662873  | 0.414781046 | 6.47E-04 | 8.25E-03 | 1.00E+00 |
| ENSG00000237437.1_ASS1P12   | ENSG00000160789.18_LMNA | 0.13257  | -0.027207446 | 0.28573772  | 1.04E-01 | 3.19E-01 | 1.00E+00 |
| ENSG00000277142.1_LINC00235 | ENSG00000160789.18_LMNA | 0.02288  | -0.1368201   | 0.18141886  | 7.80E-01 | 9.10E-01 | 1.00E+00 |
| ENSG00000101204.14_CHRNA4   | ENSG00000160789.18_LMNA | -0.3034  | -0.441284145 | -0.15151567 | 1.45E-04 | 2.53E-03 | 1.00E+00 |
| ENSG00000279048.1_RP11-511H | ENSG00000160789.18_LMNA | -0.03269 | -0.190897375 | 0.127172385 | 6.89E-01 | 8.66E-01 | 1.00E+00 |
| ENSG00000129910.6_CDH15     | ENSG00000160789.18_LMNA | 0.11808  | -0.041907299 | 0.272165569 | 1.47E-01 | 3.93E-01 | 1.00E+00 |
| ENSG00000236829.8_Z97634.3  | ENSG00000160789.18_LMNA | -0.19847 | -0.346717308 | -0.04055241 | 1.42E-02 | 8.47E-02 | 1.00E+00 |

|                              |                         |          |              |             |          |          |          |
|------------------------------|-------------------------|----------|--------------|-------------|----------|----------|----------|
| ENSG00000154864.10_PIEZO2    | ENSG00000160789.18_LMNA | -0.14097 | -0.293586294 | 0.018644521 | 8.32E-02 | 2.79E-01 | 1.00E+00 |
| ENSG00000177191.2_B3GNT8     | ENSG00000160789.18_LMNA | 0.29388  | 0.141288999  | 0.432829794 | 2.38E-04 | 3.75E-03 | 1.00E+00 |
| ENSG00000159374.16_M1AP      | ENSG00000160789.18_LMNA | -0.20886 | -0.356215864 | -0.05136682 | 9.81E-03 | 6.47E-02 | 1.00E+00 |
| ENSG00000263069.4_CTD-2047H  | ENSG00000160789.18_LMNA | 0.07564  | -0.084579817 | 0.232045824 | 3.54E-01 | 6.38E-01 | 1.00E+00 |
| ENSG00000276136.1_RP11-50I19 | ENSG00000160789.18_LMNA | -0.04873 | -0.206333935 | 0.111330384 | 5.51E-01 | 7.87E-01 | 1.00E+00 |
| ENSG00000226881.5_H3F3AP5    | ENSG00000160789.18_LMNA | -0.06792 | -0.224692498 | 0.09227708  | 4.06E-01 | 6.81E-01 | 1.00E+00 |
| ENSG00000272375.1_RP11-51J9  | ENSG00000160789.18_LMNA | -0.29118 | -0.430428887 | -0.13839608 | 2.73E-04 | 4.18E-03 | 1.00E+00 |
| ENSG00000213820.3_RPL13P2    | ENSG00000160789.18_LMNA | 0.04911  | -0.110959664 | 0.206693284 | 5.48E-01 | 7.85E-01 | 1.00E+00 |
| ENSG00000188730.4_VWC2       | ENSG00000160789.18_LMNA | -0.18616 | -0.335418316 | -0.02778087 | 2.17E-02 | 1.14E-01 | 1.00E+00 |
| ENSG00000247735.2_CTD-2574D  | ENSG00000160789.18_LMNA | -0.10818 | -0.262851946 | 0.051916725 | 1.85E-01 | 4.50E-01 | 1.00E+00 |
| ENSG00000159915.11_ZNF233    | ENSG00000160789.18_LMNA | -0.19084 | -0.339723624 | -0.03263546 | 1.85E-02 | 1.02E-01 | 1.00E+00 |
| ENSG00000106852.14_LHX6      | ENSG00000160789.18_LMNA | -0.05063 | -0.208157044 | 0.109448671 | 5.36E-01 | 7.77E-01 | 1.00E+00 |
| ENSG00000232186.1_RP11-311P  | ENSG00000160789.18_LMNA | 0.06158  | -0.098590328 | 0.218634275 | 4.51E-01 | 7.17E-01 | 1.00E+00 |
| ENSG00000265366.5_GLUD1P7    | ENSG00000160789.18_LMNA | -0.17678 | -0.326786434 | -0.01809125 | 2.94E-02 | 1.41E-01 | 1.00E+00 |
| ENSG00000237032.1_RPSAP7     | ENSG00000160789.18_LMNA | -0.15946 | -0.310772858 | -0.00026765 | 4.97E-02 | 2.01E-01 | 1.00E+00 |
| ENSG00000137078.7_SIT1       | ENSG00000160789.18_LMNA | 0.02429  | -0.135437331 | 0.182781018 | 7.66E-01 | 9.03E-01 | 1.00E+00 |
| ENSG00000225342.2_AC079630.4 | ENSG00000160789.18_LMNA | -0.21442 | -0.361287568 | -0.05717055 | 7.99E-03 | 5.55E-02 | 1.00E+00 |
| ENSG00000272787.1_KB-226F1.2 | ENSG00000160789.18_LMNA | 0.01161  | -0.147860569 | 0.170498979 | 8.87E-01 | 9.56E-01 | 1.00E+00 |
| ENSG00000128918.13_ALDH1A2   | ENSG00000160789.18_LMNA | -0.00231 | -0.161447075 | 0.15695268  | 9.78E-01 | 9.91E-01 | 1.00E+00 |
| ENSG00000249755.2_RP11-466G  | ENSG00000160789.18_LMNA | 0.26688  | 0.112453418  | 0.408712115 | 8.89E-04 | 1.06E-02 | 1.00E+00 |
| ENSG00000196296.12_ATP2A1    | ENSG00000160789.18_LMNA | -0.02301 | -0.181547467 | 0.1366896   | 7.78E-01 | 9.09E-01 | 1.00E+00 |
| ENSG00000233837.1	EIF3LP2    | ENSG00000160789.18_LMNA | -0.1779  | -0.327813723 | -0.01924139 | 2.83E-02 | 1.38E-01 | 1.00E+00 |
| ENSG00000228844.1_RP11-467I2 | ENSG00000160789.18_LMNA | -0.09019 | -0.245862222 | 0.070014253 | 2.69E-01 | 5.53E-01 | 1.00E+00 |
| ENSG00000101282.7_RSPO4      | ENSG00000160789.18_LMNA | -0.05787 | -0.215087321 | 0.102274781 | 4.79E-01 | 7.37E-01 | 1.00E+00 |
| ENSG00000078081.6_LAMP3      | ENSG00000160789.18_LMNA | 0.19598  | 0.037968267  | 0.344438265 | 1.55E-02 | 9.00E-02 | 1.00E+00 |
| ENSG00000259920.1_RP11-2E11  | ENSG00000160789.18_LMNA | -0.08518 | -0.241111514 | 0.075037799 | 2.97E-01 | 5.83E-01 | 1.00E+00 |
| ENSG00000072041.15_SLC6A15   | ENSG00000160789.18_LMNA | -0.10899 | -0.263618497 | 0.051095289 | 1.81E-01 | 4.45E-01 | 1.00E+00 |
| ENSG00000169684.12_CHRNA5    | ENSG00000160789.18_LMNA | 0.1425   | -0.01708621  | 0.295010092 | 7.99E-02 | 2.72E-01 | 1.00E+00 |
| ENSG00000246889.2_AP000487.1 | ENSG00000160789.18_LMNA | -0.11701 | -0.271155385 | 0.042996009 | 1.51E-01 | 4.00E-01 | 1.00E+00 |
| ENSG00000267632.1_RP11-400F  | ENSG00000160789.18_LMNA | 0.05075  | -0.109334069 | 0.208268005 | 5.35E-01 | 7.76E-01 | 1.00E+00 |
| ENSG00000223764.2_RP11-54O7  | ENSG00000160789.18_LMNA | -0.15946 | -0.310771676 | -0.00026634 | 4.97E-02 | 2.01E-01 | 1.00E+00 |
| ENSG00000240674.1_RP11-366M  | ENSG00000160789.18_LMNA | -0.18931 | -0.338316562 | -0.03104728 | 1.95E-02 | 1.06E-01 | 1.00E+00 |
| ENSG00000205746.8_RP11-1212  | ENSG00000160789.18_LMNA | 0.13008  | -0.029732611 | 0.28341517  | 1.10E-01 | 3.31E-01 | 1.00E+00 |

|                              |                         |          |              |             |          |          |          |
|------------------------------|-------------------------|----------|--------------|-------------|----------|----------|----------|
| ENSG00000257557.2_RP11-84G2  | ENSG00000160789.18_LMNA | -0.20231 | -0.35023437  | -0.04454835 | 1.24E-02 | 7.67E-02 | 1.00E+00 |
| ENSG00000220884.2_MESTP1     | ENSG00000160789.18_LMNA | 0.09307  | -0.06712859  | 0.248584314 | 2.54E-01 | 5.36E-01 | 1.00E+00 |
| ENSG00000230364.1_RPL4P3     | ENSG00000160789.18_LMNA | -0.09728 | -0.252568909 | 0.062895015 | 2.33E-01 | 5.11E-01 | 1.00E+00 |
| ENSG00000229191.1_RP11-168O  | ENSG00000160789.18_LMNA | -0.43886 | -0.559001259 | -0.30066116 | 1.55E-08 | 1.56E-06 | 7.97E-04 |
| ENSG00000259134.4_LINC00924  | ENSG00000160789.18_LMNA | -0.13163 | -0.284859582 | 0.028162661 | 1.06E-01 | 3.23E-01 | 1.00E+00 |
| ENSG00000249863.2_RP11-177C  | ENSG00000160789.18_LMNA | 0.15622  | -0.00305262  | 0.307770163 | 5.46E-02 | 2.13E-01 | 1.00E+00 |
| ENSG00000274286.1_ADRA2B     | ENSG00000160789.18_LMNA | -0.06454 | -0.221469765 | 0.095638652 | 4.30E-01 | 6.99E-01 | 1.00E+00 |
| ENSG00000228110.4_ST13P19    | ENSG00000160789.18_LMNA | -0.10745 | -0.262169641 | 0.052647527 | 1.88E-01 | 4.54E-01 | 1.00E+00 |
| ENSG00000128165.8_ADM2       | ENSG00000160789.18_LMNA | 0.18552  | 0.027117642  | 0.334829127 | 2.21E-02 | 1.16E-01 | 1.00E+00 |
| ENSG00000125965.7_GDF5       | ENSG00000160789.18_LMNA | 0.07485  | -0.085364371 | 0.231297979 | 3.59E-01 | 6.42E-01 | 1.00E+00 |
| ENSG00000244052.1_RPL5P24    | ENSG00000160789.18_LMNA | -0.13077 | -0.284057107 | 0.029035071 | 1.08E-01 | 3.27E-01 | 1.00E+00 |
| ENSG00000261888.1_AC144831.  | ENSG00000160789.18_LMNA | 0.27395  | 0.119982421  | 0.415049436 | 6.37E-04 | 8.17E-03 | 1.00E+00 |
| ENSG00000237732.8_AC010980.  | ENSG00000160789.18_LMNA | -0.39926 | -0.525087812 | -0.2563574  | 3.48E-07 | 1.98E-05 | 1.79E-02 |
| ENSG00000113396.11_SLC27A6   | ENSG00000160789.18_LMNA | 0.05389  | -0.106226427 | 0.211273815 | 5.10E-01 | 7.59E-01 | 1.00E+00 |
| ENSG00000276570.1_CTD-2587H  | ENSG00000160789.18_LMNA | 0.32465  | 0.174464046  | 0.460070095 | 4.49E-05 | 9.85E-04 | 1.00E+00 |
| ENSG00000225558.1_UBE2D3P2   | ENSG00000160789.18_LMNA | -0.04167 | -0.199549573 | 0.11831288  | 6.10E-01 | 8.22E-01 | 1.00E+00 |
| ENSG00000251583.1_AC008427.  | ENSG00000160789.18_LMNA | -0.17472 | -0.324880985 | -0.01596009 | 3.13E-02 | 1.48E-01 | 1.00E+00 |
| ENSG00000230454.1_U73166.2   | ENSG00000160789.18_LMNA | -0.01871 | -0.177385757 | 0.140906969 | 8.19E-01 | 9.30E-01 | 1.00E+00 |
| ENSG00000213856.3_VDAC1P2    | ENSG00000160789.18_LMNA | 0.12525  | -0.03464049  | 0.278890558 | 1.24E-01 | 3.55E-01 | 1.00E+00 |
| ENSG00000260063.1_RP5-968P1  | ENSG00000160789.18_LMNA | 0.18803  | 0.029723459  | 0.337142651 | 2.03E-02 | 1.09E-01 | 1.00E+00 |
| ENSG00000236148.5_RPL23AP3   | ENSG00000160789.18_LMNA | -0.07915 | -0.235387373 | 0.081069442 | 3.32E-01 | 6.18E-01 | 1.00E+00 |
| ENSG00000225712.1_ATP5G2P1   | ENSG00000160789.18_LMNA | -0.13143 | -0.284677162 | 0.02836102  | 1.07E-01 | 3.24E-01 | 1.00E+00 |
| ENSG00000230587.1_AC093609.  | ENSG00000160789.18_LMNA | -0.0711  | -0.227722463 | 0.089109977 | 3.84E-01 | 6.63E-01 | 1.00E+00 |
| ENSG00000240096.1_RP11-85G2  | ENSG00000160789.18_LMNA | -0.05678 | -0.214046961 | 0.103353821 | 4.87E-01 | 7.44E-01 | 1.00E+00 |
| ENSG00000165300.7_SLITRK5    | ENSG00000160789.18_LMNA | -0.21811 | -0.364650908 | -0.06103071 | 6.95E-03 | 5.02E-02 | 1.00E+00 |
| ENSG00000105792.18_CFAP69    | ENSG00000160789.18_LMNA | 0.06738  | -0.092819337 | 0.224173105 | 4.10E-01 | 6.84E-01 | 1.00E+00 |
| ENSG00000119714.9_GPR68      | ENSG00000160789.18_LMNA | 0.17555  | 0.016819813  | 0.325649957 | 3.05E-02 | 1.45E-01 | 1.00E+00 |
| ENSG00000278266.1_RP11-575F  | ENSG00000160789.18_LMNA | -0.10911 | -0.263731258 | 0.050974418 | 1.81E-01 | 4.44E-01 | 1.00E+00 |
| ENSG00000119698.10_PPP4R4    | ENSG00000160789.18_LMNA | -0.26772 | -0.409468714 | -0.1133505  | 8.54E-04 | 1.02E-02 | 1.00E+00 |
| ENSG00000258457.4_RP11-298I3 | ENSG00000160789.18_LMNA | 0.27084  | 0.116667881  | 0.412263041 | 7.39E-04 | 9.13E-03 | 1.00E+00 |
| ENSG00000127578.6_WFIKKN1    | ENSG00000160789.18_LMNA | -0.02327 | -0.181794049 | 0.136439358 | 7.76E-01 | 9.08E-01 | 1.00E+00 |
| ENSG00000212125.2_TAS2R15P   | ENSG00000160789.18_LMNA | -0.29248 | -0.431583364 | -0.13978652 | 2.56E-04 | 3.97E-03 | 1.00E+00 |
| ENSG00000263327.5_TAPT1-AS1  | ENSG00000160789.18_LMNA | 0.15475  | -0.004567224 | 0.306398367 | 5.70E-02 | 2.18E-01 | 1.00E+00 |

|                             |                         |          |              |             |          |          |          |
|-----------------------------|-------------------------|----------|--------------|-------------|----------|----------|----------|
| ENSG00000198870.7_STKLD1    | ENSG00000160789.18_LMNA | 0.00722  | -0.152156689 | 0.166228543 | 9.30E-01 | 9.73E-01 | 1.00E+00 |
| ENSG00000204869.7_IGFL4     | ENSG00000160789.18_LMNA | -0.07448 | -0.230938442 | 0.085741417 | 3.62E-01 | 6.44E-01 | 1.00E+00 |
| ENSG00000253537.2_PCDHGA7   | ENSG00000160789.18_LMNA | 0.27116  | 0.117006817  | 0.412548224 | 7.28E-04 | 9.03E-03 | 1.00E+00 |
| ENSG00000153993.12_SEMA3D   | ENSG00000160789.18_LMNA | -0.32636 | -0.461577949 | -0.17631955 | 4.07E-05 | 9.15E-04 | 1.00E+00 |
| ENSG00000189157.12_FAM47E   | ENSG00000160789.18_LMNA | -0.17021 | -0.320717482 | -0.01131315 | 3.60E-02 | 1.62E-01 | 1.00E+00 |
| ENSG00000170689.9_HOXB9     | ENSG00000160789.18_LMNA | 0.21418  | 0.056916791  | 0.361066189 | 8.06E-03 | 5.59E-02 | 1.00E+00 |
| ENSG00000134755.13_DSC2     | ENSG00000160789.18_LMNA | 0.08413  | -0.076093514 | 0.240111206 | 3.03E-01 | 5.89E-01 | 1.00E+00 |
| ENSG00000247137.7_RP11-727A | ENSG00000160789.18_LMNA | -0.19612 | -0.344565447 | -0.03811237 | 1.55E-02 | 8.97E-02 | 1.00E+00 |
| ENSG00000178175.10_ZNF366   | ENSG00000160789.18_LMNA | -0.08006 | -0.236252648 | 0.080159169 | 3.27E-01 | 6.13E-01 | 1.00E+00 |
| ENSG00000157429.14_ZNF19    | ENSG00000160789.18_LMNA | -0.03456 | -0.192700785 | 0.125329943 | 6.73E-01 | 8.56E-01 | 1.00E+00 |
| ENSG00000256045.2_MTRNR2L1  | ENSG00000160789.18_LMNA | -0.25827 | -0.400983661 | -0.1033175  | 1.32E-03 | 1.43E-02 | 1.00E+00 |
| ENSG00000179057.12_IGSF22   | ENSG00000160789.18_LMNA | -0.15821 | -0.309608395 | 0.001020783 | 5.16E-02 | 2.05E-01 | 1.00E+00 |
| ENSG00000226380.6_MIR29A    | ENSG00000160789.18_LMNA | 0.09509  | -0.065091917 | 0.250502543 | 2.44E-01 | 5.23E-01 | 1.00E+00 |
| ENSG00000246334.2_PRR7-AS1  | ENSG00000160789.18_LMNA | 0.21609  | 0.058912042  | 0.362805902 | 7.50E-03 | 5.29E-02 | 1.00E+00 |
| ENSG00000180592.15_SKIDA1   | ENSG00000160789.18_LMNA | -0.04531 | -0.203049247 | 0.114714921 | 5.79E-01 | 8.04E-01 | 1.00E+00 |
| ENSG00000260398.1_RP11-594N | ENSG00000160789.18_LMNA | -0.18458 | -0.333963752 | -0.02614401 | 2.28E-02 | 1.19E-01 | 1.00E+00 |
| ENSG00000274487.1_CH17-431G | ENSG00000160789.18_LMNA | -0.14276 | -0.295251114 | 0.016822266 | 7.93E-02 | 2.71E-01 | 1.00E+00 |
| ENSG00000102780.15_DGKH     | ENSG00000160789.18_LMNA | -0.08321 | -0.239240798 | 0.077011558 | 3.08E-01 | 5.95E-01 | 1.00E+00 |
| ENSG00000258701.1_LINC00638 | ENSG00000160789.18_LMNA | 0.29965  | 0.147485162  | 0.437958271 | 1.77E-04 | 2.96E-03 | 1.00E+00 |
| ENSG00000276578.1_LLNLR-285 | ENSG00000160789.18_LMNA | -0.14319 | -0.295652548 | 0.01638256  | 7.84E-02 | 2.69E-01 | 1.00E+00 |
| ENSG00000182836.8_PLCXD3    | ENSG00000160789.18_LMNA | -0.08782 | -0.243614789 | 0.072392757 | 2.82E-01 | 5.67E-01 | 1.00E+00 |
| ENSG00000269119.1_HNRNPA1F  | ENSG00000160789.18_LMNA | 0.05775  | -0.102389502 | 0.214976746 | 4.80E-01 | 7.38E-01 | 1.00E+00 |
| ENSG00000176697.17_BDNF     | ENSG00000160789.18_LMNA | 0.26147  | 0.106714917  | 0.403862636 | 1.14E-03 | 1.28E-02 | 1.00E+00 |
| ENSG00000196482.15_ESRRG    | ENSG00000160789.18_LMNA | -0.0904  | -0.24605984  | 0.069804937 | 2.68E-01 | 5.52E-01 | 1.00E+00 |
| ENSG00000229897.2_SEPT7P7   | ENSG00000160789.18_LMNA | 0.01828  | -0.141331834 | 0.176965867 | 8.23E-01 | 9.31E-01 | 1.00E+00 |
| ENSG00000187838.15_TMEM256  | ENSG00000160789.18_LMNA | -0.01417 | -0.172985323 | 0.145353726 | 8.62E-01 | 9.46E-01 | 1.00E+00 |
| ENSG00000167103.10_PIP5KL1  | ENSG00000160789.18_LMNA | -0.04681 | -0.20448295  | 0.113238543 | 5.67E-01 | 7.97E-01 | 1.00E+00 |
| ENSG00000203392.3_CTD-2026K | ENSG00000160789.18_LMNA | 0.20883  | 0.051333508  | 0.356186698 | 9.83E-03 | 6.48E-02 | 1.00E+00 |
| ENSG00000226491.1_FTOP1     | ENSG00000160789.18_LMNA | -0.0963  | -0.251644357 | 0.063878351 | 2.38E-01 | 5.16E-01 | 1.00E+00 |
| ENSG00000078579.8_FGF20     | ENSG00000160789.18_LMNA | -0.35812 | -0.489417785 | -0.21094623 | 5.90E-06 | 1.90E-04 | 3.03E-01 |
| ENSG00000144158.4_RP11-395L | ENSG00000160789.18_LMNA | 0.11429  | -0.04573953  | 0.268606673 | 1.61E-01 | 4.15E-01 | 1.00E+00 |
| ENSG00000273073.1_RP11-109E | ENSG00000160789.18_LMNA | -0.16811 | -0.318774906 | -0.00914958 | 3.84E-02 | 1.69E-01 | 1.00E+00 |
| ENSG00000121807.5_CCR2      | ENSG00000160789.18_LMNA | 0.08903  | -0.071180519 | 0.244760648 | 2.75E-01 | 5.60E-01 | 1.00E+00 |

|                             |                         |          |              |             |          |          |          |
|-----------------------------|-------------------------|----------|--------------|-------------|----------|----------|----------|
| ENSG00000140470.12_ADAMTS1  | ENSG00000160789.18_LMNA | -0.24818 | -0.391895423 | -0.09263804 | 2.05E-03 | 1.99E-02 | 1.00E+00 |
| ENSG00000142675.16_CNKSR1   | ENSG00000160789.18_LMNA | -0.22449 | -0.370453925 | -0.06771234 | 5.43E-03 | 4.17E-02 | 1.00E+00 |
| ENSG00000175730.8_BAK1P1    | ENSG00000160789.18_LMNA | 0.13134  | -0.028460146 | 0.284585994 | 1.07E-01 | 3.25E-01 | 1.00E+00 |
| ENSG00000259419.2_HNRNPCP   | ENSG00000160789.18_LMNA | -0.13843 | -0.291213437 | 0.021238187 | 8.90E-02 | 2.90E-01 | 1.00E+00 |
| ENSG00000257773.1_ST13P3    | ENSG00000160789.18_LMNA | -0.13508 | -0.288088482 | 0.024647533 | 9.71E-02 | 3.06E-01 | 1.00E+00 |
| ENSG00000273004.1_GS1-279B7 | ENSG00000160789.18_LMNA | -0.05072 | -0.208236235 | 0.109366882 | 5.35E-01 | 7.76E-01 | 1.00E+00 |
| ENSG00000268364.1_SMC5-AS1  | ENSG00000160789.18_LMNA | -0.03535 | -0.19346449  | 0.124549047 | 6.65E-01 | 8.53E-01 | 1.00E+00 |
| ENSG00000170835.13_CEL      | ENSG00000160789.18_LMNA | 0.12012  | -0.039842597 | 0.274079451 | 1.40E-01 | 3.82E-01 | 1.00E+00 |
| ENSG00000110169.9_HPX       | ENSG00000160789.18_LMNA | 0.0841   | -0.076121945 | 0.240084259 | 3.03E-01 | 5.90E-01 | 1.00E+00 |
| ENSG00000230829.3_CTD-2186M | ENSG00000160789.18_LMNA | -0.18226 | -0.331833548 | -0.0237498  | 2.46E-02 | 1.25E-01 | 1.00E+00 |
| ENSG00000064201.14_TSPAN32  | ENSG00000160789.18_LMNA | 0.19454  | 0.036470678  | 0.343115833 | 1.63E-02 | 9.33E-02 | 1.00E+00 |
| ENSG00000238198.1_RP11-31F1 | ENSG00000160789.18_LMNA | -0.4793  | -0.593232107 | -0.34653954 | 4.19E-10 | 7.56E-08 | 2.15E-05 |
| ENSG00000243904.1_RPSAP5    | ENSG00000160789.18_LMNA | -0.12114 | -0.27503415  | 0.038811661 | 1.37E-01 | 3.77E-01 | 1.00E+00 |
| ENSG00000264745.1_TTC39C-AS | ENSG00000160789.18_LMNA | -0.22628 | -0.372076498 | -0.06958545 | 5.06E-03 | 3.96E-02 | 1.00E+00 |
| ENSG00000248643.5_RBM14-RBI | ENSG00000160789.18_LMNA | -0.10676 | -0.261517144 | 0.053346086 | 1.90E-01 | 4.58E-01 | 1.00E+00 |
| ENSG00000088340.14_FER1L4   | ENSG00000160789.18_LMNA | 0.35779  | 0.210583475  | 0.489129041 | 6.03E-06 | 1.94E-04 | 3.09E-01 |
| ENSG00000127533.3_F2RL3     | ENSG00000160789.18_LMNA | 0.13705  | -0.022649003 | 0.289921113 | 9.23E-02 | 2.97E-01 | 1.00E+00 |
| ENSG00000213370.3_RANP6     | ENSG00000160789.18_LMNA | -0.14056 | -0.293201897 | 0.019064973 | 8.41E-02 | 2.81E-01 | 1.00E+00 |
| ENSG00000185736.14_ADARB2   | ENSG00000160789.18_LMNA | -0.37716 | -0.505983107 | -0.23188695 | 1.67E-06 | 6.96E-05 | 8.57E-02 |
| ENSG00000165555.8_NOXRED1   | ENSG00000160789.18_LMNA | -0.11025 | -0.264805373 | 0.04982259  | 1.76E-01 | 4.38E-01 | 1.00E+00 |
| ENSG00000267365.1_KCNJ2-AS1 | ENSG00000160789.18_LMNA | -0.2067  | -0.354243871 | -0.04911575 | 1.06E-02 | 6.84E-02 | 1.00E+00 |
| ENSG00000277767.1_RP11-365P | ENSG00000160789.18_LMNA | -0.15582 | -0.307396433 | 0.003465397 | 5.52E-02 | 2.14E-01 | 1.00E+00 |
| ENSG00000178385.12_PLEKHM3  | ENSG00000160789.18_LMNA | -0.07335 | -0.229863419 | 0.08686825  | 3.69E-01 | 6.50E-01 | 1.00E+00 |
| ENSG00000170681.6_MURC      | ENSG00000160789.18_LMNA | -0.24059 | -0.38504613  | -0.08463477 | 2.83E-03 | 2.56E-02 | 1.00E+00 |
| ENSG00000234769.7_WASH4P    | ENSG00000160789.18_LMNA | 0.04013  | -0.119836452 | 0.198065172 | 6.24E-01 | 8.30E-01 | 1.00E+00 |
| ENSG00000249465.1_RBMXP4    | ENSG00000160789.18_LMNA | -0.09468 | -0.250109344 | 0.065509609 | 2.46E-01 | 5.26E-01 | 1.00E+00 |
| ENSG00000214827.8_MTCP1     | ENSG00000160789.18_LMNA | 0.07558  | -0.084635591 | 0.231992672 | 3.55E-01 | 6.38E-01 | 1.00E+00 |
| ENSG00000197889.8_MEIG1     | ENSG00000160789.18_LMNA | -0.2203  | -0.366644024 | -0.06332253 | 6.39E-03 | 4.71E-02 | 1.00E+00 |
| ENSG00000215244.2_RP11-563J | ENSG00000160789.18_LMNA | -0.06203 | -0.219065438 | 0.098141858 | 4.48E-01 | 7.14E-01 | 1.00E+00 |
| ENSG00000215595.1_C20orf202 | ENSG00000160789.18_LMNA | -0.16024 | -0.311492153 | -0.00106404 | 4.86E-02 | 1.98E-01 | 1.00E+00 |
| ENSG00000197714.7_ZNF460    | ENSG00000160789.18_LMNA | 0.08969  | -0.070519977 | 0.245384651 | 2.72E-01 | 5.56E-01 | 1.00E+00 |
| ENSG00000263179.1_HNRNPCP   | ENSG00000160789.18_LMNA | -0.09497 | -0.250380564 | 0.065221507 | 2.45E-01 | 5.24E-01 | 1.00E+00 |
| ENSG00000253374.4_RP11-257P | ENSG00000160789.18_LMNA | -0.01293 | -0.171781376 | 0.14656811  | 8.74E-01 | 9.51E-01 | 1.00E+00 |



|                             |                         |          |              |             |          |          |          |
|-----------------------------|-------------------------|----------|--------------|-------------|----------|----------|----------|
| ENSG00000280927.1_CTBP1-AS  | ENSG00000160789.18_LMNA | 0.13601  | -0.02370857  | 0.288949787 | 9.48E-02 | 3.01E-01 | 1.00E+00 |
| ENSG00000231028.7_LINC00271 | ENSG00000160789.18_LMNA | -0.07567 | -0.232071441 | 0.084552936 | 3.54E-01 | 6.38E-01 | 1.00E+00 |
| ENSG00000266066.1_POLRMTP1  | ENSG00000160789.18_LMNA | 0.10726  | -0.052845902 | 0.261984376 | 1.88E-01 | 4.55E-01 | 1.00E+00 |
| ENSG00000169213.6_RAB3B     | ENSG00000160789.18_LMNA | -0.23554 | -0.380477726 | -0.07931814 | 3.49E-03 | 2.99E-02 | 1.00E+00 |
| ENSG0000006432.14_MAP3K9    | ENSG00000160789.18_LMNA | -0.1012  | -0.256275193 | 0.058946923 | 2.15E-01 | 4.89E-01 | 1.00E+00 |
| ENSG00000177294.6_FBXO39    | ENSG00000160789.18_LMNA | 0.38964  | 0.245682132  | 0.516786529 | 6.99E-07 | 3.45E-05 | 3.58E-02 |
| ENSG00000105131.6_EPHX3     | ENSG00000160789.18_LMNA | 0.11999  | -0.039978386 | 0.273953657 | 1.41E-01 | 3.83E-01 | 1.00E+00 |
| ENSG00000079102.15_RUNX1T1  | ENSG00000160789.18_LMNA | -0.09802 | -0.253263769 | 0.062155571 | 2.30E-01 | 5.07E-01 | 1.00E+00 |
| ENSG00000171044.9_XKR6      | ENSG00000160789.18_LMNA | -0.14106 | -0.293667661 | 0.018555507 | 8.30E-02 | 2.78E-01 | 1.00E+00 |
| ENSG00000225205.4_AC093818. | ENSG00000160789.18_LMNA | 0.12762  | -0.032230569 | 0.281114024 | 1.17E-01 | 3.43E-01 | 1.00E+00 |
| ENSG00000245146.5_LINC01024 | ENSG00000160789.18_LMNA | -0.17284 | -0.323149227 | -0.01402563 | 3.32E-02 | 1.53E-01 | 1.00E+00 |
| ENSG00000269737.1_RP11-345P | ENSG00000160789.18_LMNA | -0.02792 | -0.186294984 | 0.131864462 | 7.33E-01 | 8.87E-01 | 1.00E+00 |
| ENSG00000183778.16_B3GALT5  | ENSG00000160789.18_LMNA | -0.10359 | -0.258531451 | 0.056538622 | 2.04E-01 | 4.75E-01 | 1.00E+00 |
| ENSG00000224680.4_PLA2G12AI | ENSG00000160789.18_LMNA | 0.11977  | -0.040197493 | 0.273750656 | 1.42E-01 | 3.84E-01 | 1.00E+00 |
| ENSG00000169246.15_NPIPB3   | ENSG00000160789.18_LMNA | -0.01595 | -0.174703857 | 0.143618631 | 8.45E-01 | 9.40E-01 | 1.00E+00 |
| ENSG00000162669.14_HFM1     | ENSG00000160789.18_LMNA | -0.33738 | -0.471269526 | -0.18829418 | 2.13E-05 | 5.45E-04 | 1.00E+00 |
| ENSG00000258359.1_PCNPP1    | ENSG00000160789.18_LMNA | -0.01511 | -0.173892468 | 0.144438082 | 8.53E-01 | 9.43E-01 | 1.00E+00 |
| ENSG00000146197.8_SCUBE3    | ENSG00000160789.18_LMNA | -0.26277 | -0.405027029 | -0.10809097 | 1.07E-03 | 1.22E-02 | 1.00E+00 |
| ENSG00000111837.10_MAK      | ENSG00000160789.18_LMNA | 0.10629  | -0.053816527 | 0.26107756  | 1.92E-01 | 4.61E-01 | 1.00E+00 |
| ENSG00000226471.5_CTA-292E1 | ENSG00000160789.18_LMNA | -0.04528 | -0.203013745 | 0.114751461 | 5.80E-01 | 8.04E-01 | 1.00E+00 |
| ENSG00000225169.1_BRI3P1    | ENSG00000160789.18_LMNA | 0.0963   | -0.063878155 | 0.251644541 | 2.38E-01 | 5.16E-01 | 1.00E+00 |
| ENSG00000240125.1_RPL23AP7! | ENSG00000160789.18_LMNA | 0.07924  | -0.080987042 | 0.23546572  | 3.32E-01 | 6.18E-01 | 1.00E+00 |
| ENSG00000166669.12_ATF7IP2  | ENSG00000160789.18_LMNA | -0.19525 | -0.343763717 | -0.0372042  | 1.59E-02 | 9.16E-02 | 1.00E+00 |
| ENSG00000125409.11_TEKT3    | ENSG00000160789.18_LMNA | -0.05799 | -0.215204109 | 0.102153603 | 4.78E-01 | 7.36E-01 | 1.00E+00 |
| ENSG00000231728.3_LLOXNC01- | ENSG00000160789.18_LMNA | -0.32118 | -0.457015804 | -0.17071177 | 5.47E-05 | 1.16E-03 | 1.00E+00 |
| ENSG00000141431.8_ASXL3     | ENSG00000160789.18_LMNA | -0.47456 | -0.589239314 | -0.34112664 | 6.56E-10 | 1.11E-07 | 3.36E-05 |
| ENSG00000232369.1_RP5-882O7 | ENSG00000160789.18_LMNA | 0.07206  | -0.088154422 | 0.228635438 | 3.78E-01 | 6.57E-01 | 1.00E+00 |
| ENSG00000173068.16_BNC2     | ENSG00000160789.18_LMNA | 0.22703  | 0.07037161   | 0.37275695  | 4.91E-03 | 3.87E-02 | 1.00E+00 |
| ENSG00000236976.1_RP11-165H | ENSG00000160789.18_LMNA | -0.1269  | -0.28043672  | 0.032965056 | 1.19E-01 | 3.47E-01 | 1.00E+00 |
| ENSG00000260751.2_CTD-2196E | ENSG00000160789.18_LMNA | 0.04559  | -0.11444555  | 0.203310933 | 5.77E-01 | 8.03E-01 | 1.00E+00 |
| ENSG00000169432.13_SCN9A    | ENSG00000160789.18_LMNA | -0.03124 | -0.189502996 | 0.12859544  | 7.02E-01 | 8.73E-01 | 1.00E+00 |
| ENSG00000278916.1_CEP83-AS1 | ENSG00000160789.18_LMNA | -0.32294 | -0.458568936 | -0.1726188  | 4.95E-05 | 1.07E-03 | 1.00E+00 |
| ENSG00000249550.5_LINC01234 | ENSG00000160789.18_LMNA | -0.34375 | -0.476854414 | -0.19523313 | 1.45E-05 | 3.98E-04 | 7.45E-01 |

|                             |                         |          |              |             |          |          |          |
|-----------------------------|-------------------------|----------|--------------|-------------|----------|----------|----------|
| ENSG00000234397.3_RP11-415K | ENSG00000160789.18_LMNA | 0.01385  | -0.145675121 | 0.172666782 | 8.66E-01 | 9.47E-01 | 1.00E+00 |
| ENSG00000280339.1_RP11-736K | ENSG00000160789.18_LMNA | 0.00085  | -0.158370682 | 0.160030497 | 9.92E-01 | 9.97E-01 | 1.00E+00 |
| ENSG00000236456.1_RP4-785G1 | ENSG00000160789.18_LMNA | -0.00882 | -0.167788433 | 0.150588811 | 9.14E-01 | 9.67E-01 | 1.00E+00 |
| ENSG00000164344.14_KLKB1    | ENSG00000160789.18_LMNA | 0.03868  | -0.121269535 | 0.196667602 | 6.36E-01 | 8.37E-01 | 1.00E+00 |
| ENSG00000280433.1_CH507-9B2 | ENSG00000160789.18_LMNA | -0.02546 | -0.183915101 | 0.134285142 | 7.56E-01 | 8.98E-01 | 1.00E+00 |
| ENSG00000280063.1_RP11-295D | ENSG00000160789.18_LMNA | 0.07338  | -0.086839666 | 0.229890698 | 3.69E-01 | 6.50E-01 | 1.00E+00 |
| ENSG00000211454.12_AKR7L    | ENSG00000160789.18_LMNA | -0.00029 | -0.159487644 | 0.158913733 | 9.97E-01 | 9.99E-01 | 1.00E+00 |
| ENSG00000135480.13_KRT7     | ENSG00000160789.18_LMNA | 0.41137  | 0.269844493  | 0.535503344 | 1.40E-07 | 9.53E-06 | 7.20E-03 |
| ENSG00000106789.11_CORO2A   | ENSG00000160789.18_LMNA | 0.06211  | -0.098058354 | 0.219145706 | 4.47E-01 | 7.13E-01 | 1.00E+00 |
| ENSG00000224097.5_RP11-472B | ENSG00000160789.18_LMNA | -0.16997 | -0.320497927 | -0.01106848 | 3.63E-02 | 1.62E-01 | 1.00E+00 |
| ENSG00000151006.7_PRSS53    | ENSG00000160789.18_LMNA | 0.07186  | -0.088348484 | 0.228450068 | 3.79E-01 | 6.58E-01 | 1.00E+00 |
| ENSG00000254469.6_RP11-849H | ENSG00000160789.18_LMNA | -0.03498 | -0.193102121 | 0.124919621 | 6.69E-01 | 8.54E-01 | 1.00E+00 |
| ENSG00000174564.11_IL20RB   | ENSG00000160789.18_LMNA | 0.145    | -0.014533025 | 0.297339893 | 7.47E-02 | 2.60E-01 | 1.00E+00 |
| ENSG00000253704.1_RP11-267M | ENSG00000160789.18_LMNA | -0.32181 | -0.457570784 | -0.17139296 | 5.28E-05 | 1.13E-03 | 1.00E+00 |
| ENSG00000137819.12_PAQR5    | ENSG00000160789.18_LMNA | -0.21949 | -0.365901726 | -0.06246861 | 6.59E-03 | 4.82E-02 | 1.00E+00 |
| ENSG00000161939.17_RNASEK-1 | ENSG00000160789.18_LMNA | -0.08187 | -0.23796871  | 0.078352302 | 3.16E-01 | 6.03E-01 | 1.00E+00 |
| ENSG00000258711.2_RP11-218E | ENSG00000160789.18_LMNA | 0.11831  | -0.041671731 | 0.272384055 | 1.47E-01 | 3.92E-01 | 1.00E+00 |
| ENSG00000146414.14_SHPRH    | ENSG00000160789.18_LMNA | -0.25214 | -0.395469828 | -0.09683007 | 1.73E-03 | 1.75E-02 | 1.00E+00 |
| ENSG00000114812.11_VIPR1    | ENSG00000160789.18_LMNA | -0.22533 | -0.371216857 | -0.06859281 | 5.25E-03 | 4.07E-02 | 1.00E+00 |
| ENSG00000106258.12_CYP3A5   | ENSG00000160789.18_LMNA | -0.3129  | -0.449695585 | -0.16175237 | 8.68E-05 | 1.68E-03 | 1.00E+00 |
| ENSG00000136449.12_MYCBPAF  | ENSG00000160789.18_LMNA | 0.2067   | 0.049115041  | 0.35424325  | 1.06E-02 | 6.84E-02 | 1.00E+00 |
| ENSG00000232656.6_IDI2-AS1  | ENSG00000160789.18_LMNA | -0.37032 | -0.500041738 | -0.22434695 | 2.65E-06 | 9.91E-05 | 1.36E-01 |
| ENSG00000117595.9_IRF6      | ENSG00000160789.18_LMNA | -0.05624 | -0.213527625 | 0.103892187 | 4.91E-01 | 7.47E-01 | 1.00E+00 |
| ENSG00000219986.2_BTF3P7    | ENSG00000160789.18_LMNA | -0.0348  | -0.192929076 | 0.125096554 | 6.70E-01 | 8.55E-01 | 1.00E+00 |
| ENSG00000205940.8_HSP90AB2  | ENSG00000160789.18_LMNA | -0.0245  | -0.182983202 | 0.135231982 | 7.65E-01 | 9.02E-01 | 1.00E+00 |
| ENSG00000070526.13_ST6GALN  | ENSG00000160789.18_LMNA | -0.36069 | -0.491662058 | -0.21376839 | 5.00E-06 | 1.66E-04 | 2.56E-01 |
| ENSG00000079101.15_CLUL1    | ENSG00000160789.18_LMNA | -0.0934  | -0.248904233 | 0.0667891   | 2.52E-01 | 5.33E-01 | 1.00E+00 |
| ENSG00000109072.12_VTN      | ENSG00000160789.18_LMNA | -0.06607 | -0.222922033 | 0.094124713 | 4.19E-01 | 6.91E-01 | 1.00E+00 |
| ENSG00000261487.1_AC135048  | ENSG00000160789.18_LMNA | -0.02894 | -0.187274889 | 0.130866655 | 7.23E-01 | 8.83E-01 | 1.00E+00 |
| ENSG00000230510.5_PPP5D1    | ENSG00000160789.18_LMNA | -0.22337 | -0.369434913 | -0.06653708 | 5.67E-03 | 4.31E-02 | 1.00E+00 |
| ENSG00000124116.17_WFDC3    | ENSG00000160789.18_LMNA | -0.04181 | -0.199684292 | 0.118174532 | 6.09E-01 | 8.21E-01 | 1.00E+00 |
| ENSG00000254206.4_NPIP11    | ENSG00000160789.18_LMNA | 0.07306  | -0.087158672 | 0.229586225 | 3.71E-01 | 6.51E-01 | 1.00E+00 |
| ENSG00000157315.4_TMED6     | ENSG00000160789.18_LMNA | -0.02394 | -0.182440537 | 0.13578308  | 7.70E-01 | 9.05E-01 | 1.00E+00 |

|                              |                         |          |              |             |          |          |          |
|------------------------------|-------------------------|----------|--------------|-------------|----------|----------|----------|
| ENSG00000230615.5_RP5-1198O  | ENSG00000160789.18_LMNA | 0.17379  | 0.015000445  | 0.324022153 | 3.23E-02 | 1.50E-01 | 1.00E+00 |
| ENSG00000135426.13_TESPA1    | ENSG00000160789.18_LMNA | -0.03322 | -0.191410015 | 0.126648873 | 6.85E-01 | 8.63E-01 | 1.00E+00 |
| ENSG00000227811.2_FAM212B-A  | ENSG00000160789.18_LMNA | -0.19135 | -0.340185887 | -0.03315756 | 1.82E-02 | 1.01E-01 | 1.00E+00 |
| ENSG00000230445.4_LRRC37A6   | ENSG00000160789.18_LMNA | -0.0988  | -0.254008424 | 0.061362754 | 2.26E-01 | 5.02E-01 | 1.00E+00 |
| ENSG00000169583.12_CLIC3     | ENSG00000160789.18_LMNA | 0.12869  | -0.031145442 | 0.282114097 | 1.14E-01 | 3.37E-01 | 1.00E+00 |
| ENSG00000143028.8_SYPL2      | ENSG00000160789.18_LMNA | 0.11817  | -0.041818843 | 0.272247615 | 1.47E-01 | 3.93E-01 | 1.00E+00 |
| ENSG00000247708.6_STX18-AS1  | ENSG00000160789.18_LMNA | -0.3793  | -0.507834193 | -0.23424285 | 1.44E-06 | 6.23E-05 | 7.40E-02 |
| ENSG00000186743.2_TPI1P3     | ENSG00000160789.18_LMNA | 0.26176  | 0.107023683  | 0.404123993 | 1.12E-03 | 1.27E-02 | 1.00E+00 |
| ENSG00000125618.15_PAX8      | ENSG00000160789.18_LMNA | 0.10725  | -0.052854983 | 0.261975894 | 1.88E-01 | 4.55E-01 | 1.00E+00 |
| ENSG00000255074.1_RP11-140L  | ENSG00000160789.18_LMNA | -0.11569 | -0.269917637 | 0.044328956 | 1.56E-01 | 4.07E-01 | 1.00E+00 |
| ENSG00000159905.13_ZNF221    | ENSG00000160789.18_LMNA | 0.01481  | -0.144727774 | 0.173605523 | 8.56E-01 | 9.43E-01 | 1.00E+00 |
| ENSG00000196114.3_RP3-391O2  | ENSG00000160789.18_LMNA | 0.08697  | -0.073249394 | 0.242804526 | 2.87E-01 | 5.72E-01 | 1.00E+00 |
| ENSG00000063127.14_SLC6A16   | ENSG00000160789.18_LMNA | -0.0245  | -0.182990355 | 0.135224716 | 7.64E-01 | 9.02E-01 | 1.00E+00 |
| ENSG00000135951.13_TSGA10    | ENSG00000160789.18_LMNA | -0.10051 | -0.255616277 | 0.05964955  | 2.18E-01 | 4.93E-01 | 1.00E+00 |
| ENSG00000248323.4_LUCAT1     | ENSG00000160789.18_LMNA | 0.15274  | -0.0066249   | 0.304532633 | 6.03E-02 | 2.26E-01 | 1.00E+00 |
| ENSG00000223546.5_LINC00630  | ENSG00000160789.18_LMNA | -0.19419 | -0.34279538  | -0.03610799 | 1.65E-02 | 9.41E-02 | 1.00E+00 |
| ENSG00000244482.8_LILRA6     | ENSG00000160789.18_LMNA | 0.12188  | -0.038058837 | 0.275730912 | 1.35E-01 | 3.73E-01 | 1.00E+00 |
| ENSG00000237940.3_AC093642.1 | ENSG00000160789.18_LMNA | -0.05475 | -0.21210269  | 0.10536838  | 5.03E-01 | 7.54E-01 | 1.00E+00 |
| ENSG00000259319.1_RP11-293M  | ENSG00000160789.18_LMNA | -0.1778  | -0.327720825 | -0.01913735 | 2.84E-02 | 1.38E-01 | 1.00E+00 |
| ENSG00000035664.10_DAPK2     | ENSG00000160789.18_LMNA | -0.16162 | -0.31276916  | -0.00247888 | 4.67E-02 | 1.92E-01 | 1.00E+00 |
| ENSG00000007933.11_FMO3      | ENSG00000160789.18_LMNA | -0.07786 | -0.234158811 | 0.082360988 | 3.40E-01 | 6.25E-01 | 1.00E+00 |
| ENSG00000163395.15_IGFN1     | ENSG00000160789.18_LMNA | -0.34747 | -0.480109077 | -0.19928993 | 1.15E-05 | 3.28E-04 | 5.93E-01 |
| ENSG00000236887.1_RP11-389O  | ENSG00000160789.18_LMNA | 0.08807  | -0.072138316 | 0.243855371 | 2.81E-01 | 5.66E-01 | 1.00E+00 |
| ENSG00000215349.2_MRPL3P1    | ENSG00000160789.18_LMNA | -0.05521 | -0.212543225 | 0.104912147 | 4.99E-01 | 7.52E-01 | 1.00E+00 |
| ENSG00000279759.1_CTC-425O2  | ENSG00000160789.18_LMNA | -0.06965 | -0.226342997 | 0.090552673 | 3.94E-01 | 6.71E-01 | 1.00E+00 |
| ENSG00000197479.6_PCDHB11    | ENSG00000160789.18_LMNA | 0.13596  | -0.02375838  | 0.288904109 | 9.49E-02 | 3.02E-01 | 1.00E+00 |
| ENSG00000203814.6_HIST2H2BF  | ENSG00000160789.18_LMNA | -0.10506 | -0.259917748 | 0.055057086 | 1.98E-01 | 4.67E-01 | 1.00E+00 |
| ENSG00000272374.1_RP3-329A5  | ENSG00000160789.18_LMNA | 0.02091  | -0.138755368 | 0.179510385 | 7.98E-01 | 9.19E-01 | 1.00E+00 |
| ENSG00000214029.4_ZNF891     | ENSG00000160789.18_LMNA | -0.27378 | -0.414893702 | -0.11979699 | 6.43E-04 | 8.22E-03 | 1.00E+00 |
| ENSG00000277778.1_PGM5P2     | ENSG00000160789.18_LMNA | -0.13217 | -0.285370517 | 0.027606949 | 1.05E-01 | 3.21E-01 | 1.00E+00 |
| ENSG00000259736.1_CRTC3-AS   | ENSG00000160789.18_LMNA | -0.20444 | -0.352174345 | -0.04675667 | 1.15E-02 | 7.25E-02 | 1.00E+00 |
| ENSG00000176563.8_CNTD1      | ENSG00000160789.18_LMNA | -0.15958 | -0.310885172 | -0.00039198 | 4.95E-02 | 2.00E-01 | 1.00E+00 |
| ENSG00000176183.8_CH17-12M2  | ENSG00000160789.18_LMNA | 0.31076  | 0.15944278   | 0.447802262 | 9.76E-05 | 1.84E-03 | 1.00E+00 |

|                              |                         |          |              |             |          |          |          |
|------------------------------|-------------------------|----------|--------------|-------------|----------|----------|----------|
| ENSG00000257851.2_HNRNPA3F   | ENSG00000160789.18_LMNA | 0.14181  | -0.017787839 | 0.294369198 | 8.14E-02 | 2.75E-01 | 1.00E+00 |
| ENSG00000188266.12_HYKK      | ENSG00000160789.18_LMNA | 0.05294  | -0.107166982 | 0.210364714 | 5.17E-01 | 7.64E-01 | 1.00E+00 |
| ENSG00000259790.1_ANP32BP1   | ENSG00000160789.18_LMNA | 0.06746  | -0.092734144 | 0.224254718 | 4.09E-01 | 6.83E-01 | 1.00E+00 |
| ENSG00000260228.4_RP11-483P  | ENSG00000160789.18_LMNA | -0.28409 | -0.424110523 | -0.13080665 | 3.90E-04 | 5.54E-03 | 1.00E+00 |
| ENSG00000189212.11_DPY19L2F  | ENSG00000160789.18_LMNA | -0.1689  | -0.31950489  | -0.00996227 | 3.75E-02 | 1.66E-01 | 1.00E+00 |
| ENSG00000064489.20_BORCS8-I  | ENSG00000160789.18_LMNA | -0.06557 | -0.222446783 | 0.094620306 | 4.22E-01 | 6.94E-01 | 1.00E+00 |
| ENSG00000185070.9_FLRT2      | ENSG00000160789.18_LMNA | 0.08949  | -0.070719316 | 0.245196366 | 2.73E-01 | 5.57E-01 | 1.00E+00 |
| ENSG00000260669.2_AL136419.6 | ENSG00000160789.18_LMNA | 0.05828  | -0.101862877 | 0.215484269 | 4.76E-01 | 7.34E-01 | 1.00E+00 |
| ENSG00000265574.1_WDR45BP1   | ENSG00000160789.18_LMNA | -0.14923 | -0.301276311 | 0.010209921 | 6.65E-02 | 2.41E-01 | 1.00E+00 |
| ENSG00000107485.14_GATA3     | ENSG00000160789.18_LMNA | 0.26626  | 0.111793934  | 0.408155649 | 9.15E-04 | 1.08E-02 | 1.00E+00 |
| ENSG00000273448.1_RP11-166O  | ENSG00000160789.18_LMNA | -0.1057  | -0.26051379  | 0.054419669 | 1.95E-01 | 4.64E-01 | 1.00E+00 |
| ENSG00000132932.15_ATP8A2    | ENSG00000160789.18_LMNA | -0.17086 | -0.321317369 | -0.01198187 | 3.53E-02 | 1.60E-01 | 1.00E+00 |
| ENSG00000224628.2_RP5-854E1  | ENSG00000160789.18_LMNA | 0.1191   | -0.0408743   | 0.273123421 | 1.44E-01 | 3.88E-01 | 1.00E+00 |
| ENSG00000259305.4_ZHX1-C8orf | ENSG00000160789.18_LMNA | -0.08098 | -0.237119655 | 0.079246544 | 3.21E-01 | 6.08E-01 | 1.00E+00 |
| ENSG00000232389.1_RP11-134K  | ENSG00000160789.18_LMNA | 0.40107  | 0.258362089  | 0.526641009 | 3.05E-07 | 1.79E-05 | 1.56E-02 |
| ENSG00000166819.10_PLIN1     | ENSG00000160789.18_LMNA | -0.23798 | -0.382680529 | -0.08187959 | 3.15E-03 | 2.77E-02 | 1.00E+00 |
| ENSG00000232485.2_AC098820.3 | ENSG00000160789.18_LMNA | -0.18219 | -0.331769697 | -0.02367809 | 2.47E-02 | 1.25E-01 | 1.00E+00 |
| ENSG00000198796.6_ALPK2      | ENSG00000160789.18_LMNA | 0.03632  | -0.123598663 | 0.194393431 | 6.57E-01 | 8.48E-01 | 1.00E+00 |
| ENSG00000279204.1_RP11-175K  | ENSG00000160789.18_LMNA | 0.01703  | -0.142560517 | 0.175750919 | 8.35E-01 | 9.36E-01 | 1.00E+00 |
| ENSG00000233876.2_GAPDHP68   | ENSG00000160789.18_LMNA | 0.12331  | -0.036610353 | 0.277070603 | 1.30E-01 | 3.66E-01 | 1.00E+00 |
| ENSG00000248334.5_WHAMMP2    | ENSG00000160789.18_LMNA | 0.19777  | 0.039823972  | 0.346075242 | 1.46E-02 | 8.62E-02 | 1.00E+00 |
| ENSG00000223916.1_RP11-353H  | ENSG00000160789.18_LMNA | -0.12952 | -0.282888057 | 0.030305152 | 1.12E-01 | 3.33E-01 | 1.00E+00 |
| ENSG00000277159.1_RP11-88E1  | ENSG00000160789.18_LMNA | -0.1996  | -0.347754701 | -0.04173003 | 1.37E-02 | 8.21E-02 | 1.00E+00 |
| ENSG00000184612.8_RPL7P26    | ENSG00000160789.18_LMNA | -0.06296 | -0.219953562 | 0.097217676 | 4.41E-01 | 7.09E-01 | 1.00E+00 |
| ENSG00000272734.1_ADIRF-AS1  | ENSG00000160789.18_LMNA | 0.13537  | -0.02435518  | 0.28835671  | 9.63E-02 | 3.05E-01 | 1.00E+00 |
| ENSG00000256167.1_ATF4P4     | ENSG00000160789.18_LMNA | -0.10485 | -0.259711244 | 0.055277864 | 1.99E-01 | 4.69E-01 | 1.00E+00 |
| ENSG00000228492.2_RAB11FIP1  | ENSG00000160789.18_LMNA | 0.07777  | -0.082455998 | 0.234068395 | 3.41E-01 | 6.26E-01 | 1.00E+00 |
| ENSG00000240634.1_RP11-1348  | ENSG00000160789.18_LMNA | -0.06004 | -0.21716577  | 0.100116816 | 4.62E-01 | 7.25E-01 | 1.00E+00 |
| ENSG00000225849.1_MKRN7P     | ENSG00000160789.18_LMNA | -0.05453 | -0.21188849  | 0.105590163 | 5.05E-01 | 7.56E-01 | 1.00E+00 |
| ENSG00000242715.6_CCDC169    | ENSG00000160789.18_LMNA | -0.07977 | -0.235977114 | 0.080449089 | 3.29E-01 | 6.15E-01 | 1.00E+00 |
| ENSG00000267121.4_CTD-2020K  | ENSG00000160789.18_LMNA | -0.02498 | -0.183450947 | 0.13475681  | 7.60E-01 | 9.00E-01 | 1.00E+00 |
| ENSG00000213801.4_ZNF321P    | ENSG00000160789.18_LMNA | -0.05816 | -0.215364314 | 0.101987363 | 4.77E-01 | 7.35E-01 | 1.00E+00 |
| ENSG00000134245.16_WNT2B     | ENSG00000160789.18_LMNA | -0.01135 | -0.170241492 | 0.148119946 | 8.90E-01 | 9.57E-01 | 1.00E+00 |

|                              |                         |          |              |             |          |          |          |
|------------------------------|-------------------------|----------|--------------|-------------|----------|----------|----------|
| ENSG00000144550.11_CPNE9     | ENSG00000160789.18_LMNA | -0.08446 | -0.240431276 | 0.075755792 | 3.01E-01 | 5.87E-01 | 1.00E+00 |
| ENSG00000228285.2_LYPLA2P1   | ENSG00000160789.18_LMNA | 0.19069  | 0.032479469  | 0.339585486 | 1.86E-02 | 1.02E-01 | 1.00E+00 |
| ENSG00000184163.3_FAM132A    | ENSG00000160789.18_LMNA | -0.05915 | -0.216316663 | 0.100998768 | 4.69E-01 | 7.30E-01 | 1.00E+00 |
| ENSG00000238105.6_GOLGA2P5   | ENSG00000160789.18_LMNA | 0.19954  | 0.041664592  | 0.347697073 | 1.37E-02 | 8.22E-02 | 1.00E+00 |
| ENSG00000253882.5_RP11-61L2  | ENSG00000160789.18_LMNA | 0.26979  | 0.115552227  | 0.411323912 | 7.76E-04 | 9.49E-03 | 1.00E+00 |
| ENSG00000267698.1_AC002116   | ENSG00000160789.18_LMNA | 0.04806  | -0.11199569  | 0.205688821 | 5.57E-01 | 7.90E-01 | 1.00E+00 |
| ENSG00000169330.7_KIAA1024   | ENSG00000160789.18_LMNA | 0.10724  | -0.052864542 | 0.261966966 | 1.89E-01 | 4.55E-01 | 1.00E+00 |
| ENSG00000196074.11_SYCP2     | ENSG00000160789.18_LMNA | -0.09731 | -0.252592893 | 0.062869498 | 2.33E-01 | 5.11E-01 | 1.00E+00 |
| ENSG00000236165.1_PRADC1P1   | ENSG00000160789.18_LMNA | -0.10796 | -0.262646712 | 0.052136582 | 1.86E-01 | 4.51E-01 | 1.00E+00 |
| ENSG00000251632.1_RP11-714L  | ENSG00000160789.18_LMNA | -0.25917 | -0.401788518 | -0.1042666  | 1.26E-03 | 1.38E-02 | 1.00E+00 |
| ENSG00000063438.15_AHRR      | ENSG00000160789.18_LMNA | 0.13112  | -0.028675795 | 0.284387636 | 1.07E-01 | 3.26E-01 | 1.00E+00 |
| ENSG00000267213.4_AC007773   | ENSG00000160789.18_LMNA | -0.03719 | -0.195230428 | 0.122741847 | 6.49E-01 | 8.44E-01 | 1.00E+00 |
| ENSG00000140873.14_ADAMTS1   | ENSG00000160789.18_LMNA | 0.09967  | -0.060491238 | 0.254826565 | 2.22E-01 | 4.97E-01 | 1.00E+00 |
| ENSG00000230319.1_AL022476.2 | ENSG00000160789.18_LMNA | -0.34834 | -0.480876569 | -0.20024798 | 1.09E-05 | 3.13E-04 | 5.61E-01 |
| ENSG00000187017.13_ESPN      | ENSG00000160789.18_LMNA | 0.19811  | 0.040172632  | 0.346382599 | 1.44E-02 | 8.55E-02 | 1.00E+00 |
| ENSG00000260841.1            | ENSG00000160789.18_LMNA | 0.26896  | 0.114664611  | 0.410576291 | 8.07E-04 | 9.79E-03 | 1.00E+00 |
| ENSG00000100156.9_SLC16A8    | ENSG00000160789.18_LMNA | -0.17441 | -0.324596466 | -0.01564211 | 3.16E-02 | 1.48E-01 | 1.00E+00 |
| ENSG00000237984.3_PTENP1     | ENSG00000160789.18_LMNA | -0.26431 | -0.4064141   | -0.10973166 | 1.00E-03 | 1.16E-02 | 1.00E+00 |
| ENSG00000271858.4_CYB561D2   | ENSG00000160789.18_LMNA | -0.00461 | -0.16368716  | 0.154707659 | 9.55E-01 | 9.82E-01 | 1.00E+00 |
| ENSG00000280316.1_AL365181.1 | ENSG00000160789.18_LMNA | -0.18553 | -0.334839884 | -0.02712975 | 2.21E-02 | 1.16E-01 | 1.00E+00 |
| ENSG00000224820.2_BT3P4      | ENSG00000160789.18_LMNA | -0.00981 | -0.168748514 | 0.149623016 | 9.05E-01 | 9.63E-01 | 1.00E+00 |
| ENSG00000198821.9_CD247      | ENSG00000160789.18_LMNA | 0.01535  | -0.144203919 | 0.174124371 | 8.51E-01 | 9.42E-01 | 1.00E+00 |
| ENSG00000214922.8_HLA-F-AS1  | ENSG00000160789.18_LMNA | 0.0738   | -0.086416891 | 0.230294118 | 3.66E-01 | 6.47E-01 | 1.00E+00 |
| ENSG00000187066.7_TM262      | ENSG00000160789.18_LMNA | -0.0403  | -0.198233285 | 0.119663978 | 6.22E-01 | 8.29E-01 | 1.00E+00 |
| ENSG00000075643.5_MOCOS      | ENSG00000160789.18_LMNA | 0.32507  | 0.174923546  | 0.460443657 | 4.38E-05 | 9.65E-04 | 1.00E+00 |
| ENSG00000226763.4_SRRM5      | ENSG00000160789.18_LMNA | 0.24872  | 0.093208263  | 0.392382168 | 2.00E-03 | 1.95E-02 | 1.00E+00 |
| ENSG00000259315.1_ACTG1P17   | ENSG00000160789.18_LMNA | 0.04799  | -0.112063715 | 0.205622846 | 5.57E-01 | 7.91E-01 | 1.00E+00 |
| ENSG00000234985.2_RP11-3L10  | ENSG00000160789.18_LMNA | -0.06553 | -0.22240908  | 0.094659616 | 4.23E-01 | 6.94E-01 | 1.00E+00 |
| ENSG00000234290.2_AC116366.1 | ENSG00000160789.18_LMNA | 0.07953  | -0.080695833 | 0.235742574 | 3.30E-01 | 6.16E-01 | 1.00E+00 |
| ENSG00000102683.7_SGCG       | ENSG00000160789.18_LMNA | -0.17929 | -0.329101207 | -0.02068399 | 2.71E-02 | 1.34E-01 | 1.00E+00 |
| ENSG00000225830.9_ERCC6      | ENSG00000160789.18_LMNA | -0.13474 | -0.287770725 | 0.024993802 | 9.79E-02 | 3.08E-01 | 1.00E+00 |
| ENSG00000085831.14_TTC39A    | ENSG00000160789.18_LMNA | 0.25465  | 0.099478833  | 0.397723683 | 1.55E-03 | 1.61E-02 | 1.00E+00 |
| ENSG00000115596.3_WNT6       | ENSG00000160789.18_LMNA | -0.0395  | -0.197460491 | 0.120456661 | 6.29E-01 | 8.33E-01 | 1.00E+00 |

|                              |                         |          |              |             |          |          |          |
|------------------------------|-------------------------|----------|--------------|-------------|----------|----------|----------|
| ENSG00000219487.2_RP11-365H  | ENSG00000160789.18_LMNA | -0.07665 | -0.233008069 | 0.083569761 | 3.48E-01 | 6.32E-01 | 1.00E+00 |
| ENSG00000153233.11_PTPRR     | ENSG00000160789.18_LMNA | -0.15662 | -0.308140864 | 0.002643082 | 5.40E-02 | 2.11E-01 | 1.00E+00 |
| ENSG00000261168.1_RP11-681E  | ENSG00000160789.18_LMNA | -0.20216 | -0.350091758 | -0.04438613 | 1.25E-02 | 7.69E-02 | 1.00E+00 |
| ENSG00000153898.11_MCOLN2    | ENSG00000160789.18_LMNA | -0.00395 | -0.163052758 | 0.155343793 | 9.61E-01 | 9.85E-01 | 1.00E+00 |
| ENSG00000228242.5_AC093495.4 | ENSG00000160789.18_LMNA | 0.10356  | -0.056577958 | 0.258494626 | 2.04E-01 | 4.76E-01 | 1.00E+00 |
| ENSG00000134940.12_ACRV1     | ENSG00000160789.18_LMNA | -0.32284 | -0.458478444 | -0.17250763 | 4.98E-05 | 1.07E-03 | 1.00E+00 |
| ENSG00000251002.6_AE000661.5 | ENSG00000160789.18_LMNA | 0.08319  | -0.077031815 | 0.239221587 | 3.08E-01 | 5.95E-01 | 1.00E+00 |
| ENSG00000158813.16_EDA       | ENSG00000160789.18_LMNA | -0.2019  | -0.349858739 | -0.04412111 | 1.26E-02 | 7.74E-02 | 1.00E+00 |
| ENSG00000213145.8_CRIP1      | ENSG00000160789.18_LMNA | 0.27614  | 0.122317075  | 0.417008765 | 5.74E-04 | 7.50E-03 | 1.00E+00 |
| ENSG00000115085.12_ZAP70     | ENSG00000160789.18_LMNA | 0.09295  | -0.067242729 | 0.248476739 | 2.55E-01 | 5.36E-01 | 1.00E+00 |
| ENSG00000221949.5_LINC01465  | ENSG00000160789.18_LMNA | 0.03094  | -0.128894843 | 0.189209464 | 7.05E-01 | 8.74E-01 | 1.00E+00 |
| ENSG00000165923.14_AGBL2     | ENSG00000160789.18_LMNA | 0.26914  | 0.114862682  | 0.410743156 | 8.00E-04 | 9.72E-03 | 1.00E+00 |
| ENSG00000270720.1_RP11-84C1  | ENSG00000160789.18_LMNA | -0.2322  | -0.377447647 | -0.07580121 | 3.99E-03 | 3.31E-02 | 1.00E+00 |
| ENSG00000162739.12_SLAMF6    | ENSG00000160789.18_LMNA | 0.06306  | -0.097120595 | 0.220046825 | 4.40E-01 | 7.08E-01 | 1.00E+00 |
| ENSG00000177694.13_NAALADL   | ENSG00000160789.18_LMNA | 0.24148  | 0.085564673  | 0.385843656 | 2.73E-03 | 2.48E-02 | 1.00E+00 |
| ENSG00000247199.3_RP11-373N  | ENSG00000160789.18_LMNA | -0.34011 | -0.47366     | -0.19126077 | 1.81E-05 | 4.76E-04 | 9.29E-01 |
| ENSG00000261594.3_TPBGL      | ENSG00000160789.18_LMNA | -0.02398 | -0.182484351 | 0.135738593 | 7.69E-01 | 9.05E-01 | 1.00E+00 |
| ENSG00000120669.14_SOHLH2    | ENSG00000160789.18_LMNA | -0.1061  | -0.260898223 | 0.054008413 | 1.93E-01 | 4.62E-01 | 1.00E+00 |
| ENSG00000141665.10_FBXO15    | ENSG00000160789.18_LMNA | -0.15562 | -0.307209396 | 0.003671937 | 5.56E-02 | 2.15E-01 | 1.00E+00 |
| ENSG00000226009.1_KCNIP2-AS  | ENSG00000160789.18_LMNA | -0.2416  | -0.385958118 | -0.08569818 | 2.71E-03 | 2.47E-02 | 1.00E+00 |
| ENSG00000278156.1_TSC22D1-A  | ENSG00000160789.18_LMNA | -0.32606 | -0.461318366 | -0.17599997 | 4.14E-05 | 9.24E-04 | 1.00E+00 |
| ENSG00000067842.16_ATP2B3    | ENSG00000160789.18_LMNA | -0.17228 | -0.322630555 | -0.0134467  | 3.38E-02 | 1.55E-01 | 1.00E+00 |
| ENSG00000249743.4_RP11-60A8  | ENSG00000160789.18_LMNA | 0.01412  | -0.145408705 | 0.172930837 | 8.63E-01 | 9.46E-01 | 1.00E+00 |
| ENSG00000124251.9_TP53TG5    | ENSG00000160789.18_LMNA | -0.10178 | -0.256821633 | 0.058363996 | 2.12E-01 | 4.86E-01 | 1.00E+00 |
| ENSG00000244593.1_RP11-685B  | ENSG00000160789.18_LMNA | -0.14321 | -0.295668311 | 0.016365292 | 7.84E-02 | 2.69E-01 | 1.00E+00 |
| ENSG00000105647.13_PIK3R2    | ENSG00000160789.18_LMNA | -0.068   | -0.22476624  | 0.092200076 | 4.05E-01 | 6.81E-01 | 1.00E+00 |
| ENSG00000243232.4_PCDHAC2    | ENSG00000160789.18_LMNA | -0.15898 | -0.310322027 | 0.000231299 | 5.04E-02 | 2.02E-01 | 1.00E+00 |
| ENSG00000258846.1_EEF1A1P3   | ENSG00000160789.18_LMNA | -0.27123 | -0.41261688  | -0.11708842 | 7.25E-04 | 9.00E-03 | 1.00E+00 |
| ENSG00000214269.3_LGMNP1     | ENSG00000160789.18_LMNA | 0.01768  | -0.141918236 | 0.176386141 | 8.29E-01 | 9.33E-01 | 1.00E+00 |
| ENSG00000271978.1_RP11-428J  | ENSG00000160789.18_LMNA | -0.04048 | -0.198401092 | 0.119491798 | 6.21E-01 | 8.28E-01 | 1.00E+00 |
| ENSG00000116183.9_PAPPA2     | ENSG00000160789.18_LMNA | 0.10351  | -0.056620177 | 0.258455101 | 2.04E-01 | 4.76E-01 | 1.00E+00 |
| ENSG00000215049.3_PRDX2P1    | ENSG00000160789.18_LMNA | -0.18782 | -0.336945036 | -0.02950071 | 2.05E-02 | 1.10E-01 | 1.00E+00 |
| ENSG00000272486.1_RP11-532M  | ENSG00000160789.18_LMNA | -0.21085 | -0.358031238 | -0.05344186 | 9.12E-03 | 6.13E-02 | 1.00E+00 |

|                             |                         |          |              |             |          |          |          |
|-----------------------------|-------------------------|----------|--------------|-------------|----------|----------|----------|
| ENSG00000107736.18_CDH23    | ENSG00000160789.18_LMNA | -0.06752 | -0.224306209 | 0.092680392 | 4.09E-01 | 6.83E-01 | 1.00E+00 |
| ENSG00000279529.1_CTD-3222D | ENSG00000160789.18_LMNA | 0.04909  | -0.110980726 | 0.20667287  | 5.48E-01 | 7.85E-01 | 1.00E+00 |
| ENSG00000243417.1_RP11-555K | ENSG00000160789.18_LMNA | -0.09829 | -0.253523617 | 0.061878962 | 2.28E-01 | 5.05E-01 | 1.00E+00 |
| ENSG00000186235.9_AC016757. | ENSG00000160789.18_LMNA | -0.23804 | -0.382732974 | -0.08194062 | 3.15E-03 | 2.77E-02 | 1.00E+00 |
| ENSG00000224934.2_RP11-441O | ENSG00000160789.18_LMNA | -0.11987 | -0.273841287 | 0.040099675 | 1.41E-01 | 3.84E-01 | 1.00E+00 |
| ENSG00000103599.18_IQCH     | ENSG00000160789.18_LMNA | 0.13736  | -0.022331372 | 0.290212166 | 9.15E-02 | 2.95E-01 | 1.00E+00 |
| ENSG00000273199.1_AP000692. | ENSG00000160789.18_LMNA | 0.10042  | -0.059739478 | 0.255531922 | 2.18E-01 | 4.93E-01 | 1.00E+00 |
| ENSG00000240540.2_RPL3P9    | ENSG00000160789.18_LMNA | -0.10628 | -0.261063544 | 0.053831525 | 1.93E-01 | 4.61E-01 | 1.00E+00 |
| ENSG00000213935.3_AC092610. | ENSG00000160789.18_LMNA | -0.06366 | -0.220628152 | 0.096515333 | 4.36E-01 | 7.04E-01 | 1.00E+00 |
| ENSG00000257108.1_NHLRC4    | ENSG00000160789.18_LMNA | -0.0325  | -0.190718406 | 0.127355108 | 6.91E-01 | 8.67E-01 | 1.00E+00 |
| ENSG00000160111.11_CPAMD8   | ENSG00000160789.18_LMNA | -0.11931 | -0.273320629 | 0.040661538 | 1.43E-01 | 3.87E-01 | 1.00E+00 |
| ENSG00000083067.21_TRPM3    | ENSG00000160789.18_LMNA | 0.15508  | -0.004226661 | 0.306706932 | 5.64E-02 | 2.17E-01 | 1.00E+00 |
| ENSG00000185065.6_AC000068. | ENSG00000160789.18_LMNA | -0.18191 | -0.331513846 | -0.02339078 | 2.49E-02 | 1.26E-01 | 1.00E+00 |
| ENSG00000234751.1_AP002381. | ENSG00000160789.18_LMNA | -0.14391 | -0.296321524 | 0.015649537 | 7.69E-02 | 2.66E-01 | 1.00E+00 |
| ENSG00000225484.5_NUTM2B-A  | ENSG00000160789.18_LMNA | -0.15459 | -0.306253986 | 0.004726553 | 5.72E-02 | 2.19E-01 | 1.00E+00 |
| ENSG00000231072.1_GAPDHP64  | ENSG00000160789.18_LMNA | 0.25306  | 0.097804335  | 0.396299255 | 1.66E-03 | 1.70E-02 | 1.00E+00 |
| ENSG00000143994.12_ABHD1    | ENSG00000160789.18_LMNA | -0.11787 | -0.271970846 | 0.042117217 | 1.48E-01 | 3.94E-01 | 1.00E+00 |
| ENSG00000108556.7_CHRNE     | ENSG00000160789.18_LMNA | -0.01811 | -0.176804786 | 0.141494793 | 8.25E-01 | 9.31E-01 | 1.00E+00 |
| ENSG00000260604.2_RP1-140K8 | ENSG00000160789.18_LMNA | 0.12501  | -0.034881466 | 0.278668042 | 1.25E-01 | 3.57E-01 | 1.00E+00 |
| ENSG00000139344.6_AMDHD1    | ENSG00000160789.18_LMNA | -0.12967 | -0.283023872 | 0.030157652 | 1.11E-01 | 3.33E-01 | 1.00E+00 |
| ENSG00000232520.1_AC012507. | ENSG00000160789.18_LMNA | -0.33839 | -0.472152197 | -0.18938898 | 2.01E-05 | 5.18E-04 | 1.00E+00 |
| ENSG00000241945.6_PWP2      | ENSG00000160789.18_LMNA | 0.06681  | -0.093381595 | 0.223634365 | 4.13E-01 | 6.87E-01 | 1.00E+00 |
| ENSG00000235674.2_LDHAP2    | ENSG00000160789.18_LMNA | 0.42988  | 0.290565746  | 0.55134876  | 3.26E-08 | 2.88E-06 | 1.67E-03 |
| ENSG00000096696.12_DSP      | ENSG00000160789.18_LMNA | 0.04636  | -0.113675766 | 0.204058507 | 5.71E-01 | 7.99E-01 | 1.00E+00 |
| ENSG00000140459.16_CYP11A1  | ENSG00000160789.18_LMNA | 0.05246  | -0.107644041 | 0.209903398 | 5.21E-01 | 7.67E-01 | 1.00E+00 |
| ENSG00000269800.1_PLEKHA3P  | ENSG00000160789.18_LMNA | -0.15457 | -0.306230877 | 0.004752053 | 5.73E-02 | 2.19E-01 | 1.00E+00 |
| ENSG00000260273.1_RP11-425D | ENSG00000160789.18_LMNA | -0.29837 | -0.436823894 | -0.14611266 | 1.89E-04 | 3.12E-03 | 1.00E+00 |
| ENSG00000239827.7_SUGT1P3   | ENSG00000160789.18_LMNA | -0.4022  | -0.527619798 | -0.25962658 | 2.80E-07 | 1.67E-05 | 1.44E-02 |
| ENSG00000213683.4_AC002056. | ENSG00000160789.18_LMNA | 0.16161  | 0.002473507  | 0.312764309 | 4.67E-02 | 1.92E-01 | 1.00E+00 |
| ENSG00000213467.4_HMGB1P37  | ENSG00000160789.18_LMNA | -0.23769 | -0.382421607 | -0.0815783  | 3.19E-03 | 2.80E-02 | 1.00E+00 |
| ENSG00000270011.5_ZNF559-ZN | ENSG00000160789.18_LMNA | -0.2604  | -0.402902112 | -0.10558065 | 1.20E-03 | 1.33E-02 | 1.00E+00 |
| ENSG00000230562.3_FAM133DP  | ENSG00000160789.18_LMNA | -0.09302 | -0.248537715 | 0.067178034 | 2.54E-01 | 5.36E-01 | 1.00E+00 |
| ENSG00000226723.2_RP11-142L | ENSG00000160789.18_LMNA | 0.07708  | -0.083145752 | 0.233411824 | 3.45E-01 | 6.29E-01 | 1.00E+00 |

|                              |                         |          |              |             |          |          |          |
|------------------------------|-------------------------|----------|--------------|-------------|----------|----------|----------|
| ENSG00000162552.13_WNT4      | ENSG00000160789.18_LMNA | -0.07781 | -0.234115128 | 0.082406891 | 3.41E-01 | 6.26E-01 | 1.00E+00 |
| ENSG00000245498.5_RP11-677M  | ENSG00000160789.18_LMNA | -0.11326 | -0.267630461 | 0.046789104 | 1.65E-01 | 4.21E-01 | 1.00E+00 |
| ENSG00000105707.12_HPN       | ENSG00000160789.18_LMNA | -0.28025 | -0.420678467 | -0.12669853 | 4.71E-04 | 6.43E-03 | 1.00E+00 |
| ENSG00000247853.2_RP5-940J5  | ENSG00000160789.18_LMNA | -0.02977 | -0.188083895 | 0.130042383 | 7.16E-01 | 8.79E-01 | 1.00E+00 |
| ENSG00000100629.15_CEP128    | ENSG00000160789.18_LMNA | 0.181    | 0.022444058  | 0.330670462 | 2.56E-02 | 1.29E-01 | 1.00E+00 |
| ENSG00000185666.13_SYN3      | ENSG00000160789.18_LMNA | -0.40534 | -0.53032021  | -0.26312001 | 2.22E-07 | 1.38E-05 | 1.14E-02 |
| ENSG00000129993.13_CBFA2T3   | ENSG00000160789.18_LMNA | -0.13078 | -0.28406742  | 0.029023863 | 1.08E-01 | 3.27E-01 | 1.00E+00 |
| ENSG00000254827.4_SLC22A18   | ENSG00000160789.18_LMNA | 0.27084  | 0.116668447  | 0.412263518 | 7.39E-04 | 9.13E-03 | 1.00E+00 |
| ENSG00000049768.13_FOXP3     | ENSG00000160789.18_LMNA | 0.18826  | 0.029961741  | 0.337354019 | 2.02E-02 | 1.09E-01 | 1.00E+00 |
| ENSG00000205578.5_POM121B    | ENSG00000160789.18_LMNA | 0.13505  | -0.024685789 | 0.28805338  | 9.72E-02 | 3.06E-01 | 1.00E+00 |
| ENSG00000197584.10_KCNMB2    | ENSG00000160789.18_LMNA | -0.41348 | -0.537309735 | -0.27219476 | 1.19E-07 | 8.38E-06 | 6.12E-03 |
| ENSG00000146904.7_EPHA1      | ENSG00000160789.18_LMNA | 0.40511  | 0.262867844  | 0.530125468 | 2.25E-07 | 1.40E-05 | 1.16E-02 |
| ENSG00000263006.5_ROCK1P1    | ENSG00000160789.18_LMNA | -0.10279 | -0.257772053 | 0.057349603 | 2.08E-01 | 4.80E-01 | 1.00E+00 |
| ENSG00000183770.5_FOXL2      | ENSG00000160789.18_LMNA | -0.06375 | -0.220709123 | 0.09643101  | 4.35E-01 | 7.04E-01 | 1.00E+00 |
| ENSG00000203999.7_LINC01270  | ENSG00000160789.18_LMNA | 0.29756  | 0.145241344  | 0.436103275 | 1.97E-04 | 3.22E-03 | 1.00E+00 |
| ENSG00000271320.1_RP11-1152  | ENSG00000160789.18_LMNA | -0.22995 | -0.37541072  | -0.07344122 | 4.37E-03 | 3.54E-02 | 1.00E+00 |
| ENSG00000243667.5_WDR92      | ENSG00000160789.18_LMNA | -0.03155 | -0.189794618 | 0.12829793  | 7.00E-01 | 8.71E-01 | 1.00E+00 |
| ENSG00000224897.5_POT1-AS1   | ENSG00000160789.18_LMNA | -0.16275 | -0.313819205 | -0.0036432  | 4.51E-02 | 1.88E-01 | 1.00E+00 |
| ENSG00000278996.1_CH507-513  | ENSG00000160789.18_LMNA | 0.15733  | -0.001919098 | 0.308795963 | 5.29E-02 | 2.09E-01 | 1.00E+00 |
| ENSG00000240854.1_RP11-64K7  | ENSG00000160789.18_LMNA | 0.00098  | -0.158246725 | 0.160154382 | 9.90E-01 | 9.96E-01 | 1.00E+00 |
| ENSG00000276710.3_CSPG4P10   | ENSG00000160789.18_LMNA | -0.06402 | -0.220965592 | 0.096163892 | 4.33E-01 | 7.03E-01 | 1.00E+00 |
| ENSG00000188779.9_SKOR1      | ENSG00000160789.18_LMNA | -0.13352 | -0.286629855 | 0.02623642  | 1.01E-01 | 3.13E-01 | 1.00E+00 |
| ENSG00000138741.9_TRPC3      | ENSG00000160789.18_LMNA | -0.13287 | -0.28601773  | 0.026902738 | 1.03E-01 | 3.17E-01 | 1.00E+00 |
| ENSG00000174749.5_C4orf32    | ENSG00000160789.18_LMNA | 0.09292  | -0.067277631 | 0.248443843 | 2.55E-01 | 5.37E-01 | 1.00E+00 |
| ENSG00000173198.5_CYSLTR1    | ENSG00000160789.18_LMNA | -0.08546 | -0.241375607 | 0.074758959 | 2.95E-01 | 5.81E-01 | 1.00E+00 |
| ENSG00000250107.1_CACNA1G-   | ENSG00000160789.18_LMNA | 0.10423  | -0.055901921 | 0.259127381 | 2.01E-01 | 4.72E-01 | 1.00E+00 |
| ENSG00000130032.14_PRRG3     | ENSG00000160789.18_LMNA | -0.13267 | -0.285835856 | 0.02710066  | 1.03E-01 | 3.18E-01 | 1.00E+00 |
| ENSG00000261051.1_RP11-274H  | ENSG00000160789.18_LMNA | 0.21021  | 0.052780068  | 0.357452513 | 9.34E-03 | 6.24E-02 | 1.00E+00 |
| ENSG00000224004.2_ATP5C1P1   | ENSG00000160789.18_LMNA | -0.18131 | -0.330959104 | -0.02276801 | 2.54E-02 | 1.28E-01 | 1.00E+00 |
| ENSG00000229965.1_RP11-118H  | ENSG00000160789.18_LMNA | -0.08921 | -0.244931659 | 0.070999522 | 2.74E-01 | 5.59E-01 | 1.00E+00 |
| ENSG00000015479.16_MATR3     | ENSG00000160789.18_LMNA | -0.05847 | -0.215664325 | 0.101676001 | 4.74E-01 | 7.34E-01 | 1.00E+00 |
| ENSG000000118514.12_ALDH8A1  | ENSG00000160789.18_LMNA | -0.10866 | -0.263304171 | 0.051432172 | 1.83E-01 | 4.47E-01 | 1.00E+00 |
| ENSG000000161132.6_XXbac-B44 | ENSG00000160789.18_LMNA | 0.0135   | -0.146014356 | 0.172330488 | 8.69E-01 | 9.49E-01 | 1.00E+00 |



|                              |                         |          |              |             |          |          |          |
|------------------------------|-------------------------|----------|--------------|-------------|----------|----------|----------|
| ENSG00000165379.12_LRFN5     | ENSG00000160789.18_LMNA | -0.11852 | -0.272577064 | 0.041463603 | 1.46E-01 | 3.91E-01 | 1.00E+00 |
| ENSG00000079841.17_RIMS1     | ENSG00000160789.18_LMNA | -0.34613 | -0.47894268  | -0.19783496 | 1.25E-05 | 3.51E-04 | 6.43E-01 |
| ENSG00000183239.5_RP5-1120P  | ENSG00000160789.18_LMNA | -0.09463 | -0.250064775 | 0.065556947 | 2.46E-01 | 5.26E-01 | 1.00E+00 |
| ENSG00000213906.8_LTB4R2     | ENSG00000160789.18_LMNA | 0.10592  | -0.05419023  | 0.260728277 | 1.94E-01 | 4.63E-01 | 1.00E+00 |
| ENSG00000198125.11_MB        | ENSG00000160789.18_LMNA | -0.16048 | -0.311714679 | -0.00131049 | 4.83E-02 | 1.97E-01 | 1.00E+00 |
| ENSG00000139988.8_RDH12      | ENSG00000160789.18_LMNA | -0.24614 | -0.390052384 | -0.09048067 | 2.24E-03 | 2.13E-02 | 1.00E+00 |
| ENSG00000219392.1_ZNF602P    | ENSG00000160789.18_LMNA | -0.36098 | -0.491913675 | -0.21408509 | 4.91E-06 | 1.64E-04 | 2.52E-01 |
| ENSG00000260060.1_RP11-388M  | ENSG00000160789.18_LMNA | -0.02936 | -0.187687264 | 0.130446553 | 7.20E-01 | 8.81E-01 | 1.00E+00 |
| ENSG00000187952.9_HS6ST1P1   | ENSG00000160789.18_LMNA | 0.33163  | 0.182041329  | 0.466217341 | 3.00E-05 | 7.13E-04 | 1.00E+00 |
| ENSG00000268279.3_RP11-434D  | ENSG00000160789.18_LMNA | -0.00522 | -0.16428794  | 0.154104995 | 9.49E-01 | 9.79E-01 | 1.00E+00 |
| ENSG00000225099.1_ATP6V1E1I  | ENSG00000160789.18_LMNA | -0.05557 | -0.21289198  | 0.10455087  | 4.96E-01 | 7.51E-01 | 1.00E+00 |
| ENSG00000231595.1_AC005224.  | ENSG00000160789.18_LMNA | -0.1854  | -0.334717221 | -0.0269917  | 2.22E-02 | 1.16E-01 | 1.00E+00 |
| ENSG00000196581.9_AJAP1      | ENSG00000160789.18_LMNA | -0.42031 | -0.543161386 | -0.27982861 | 7.01E-08 | 5.42E-06 | 3.60E-03 |
| ENSG00000151773.11_CCDC122   | ENSG00000160789.18_LMNA | -0.06087 | -0.217958908 | 0.099292547 | 4.56E-01 | 7.21E-01 | 1.00E+00 |
| ENSG00000235790.6_RP11-73M7  | ENSG00000160789.18_LMNA | 0.08222  | -0.078005646 | 0.238297718 | 3.14E-01 | 6.00E-01 | 1.00E+00 |
| ENSG00000117009.10_KMO       | ENSG00000160789.18_LMNA | -0.00865 | -0.167616178 | 0.150762027 | 9.16E-01 | 9.68E-01 | 1.00E+00 |
| ENSG00000177350.6_RPL13AP3   | ENSG00000160789.18_LMNA | -0.15211 | -0.303953113 | 0.007263503 | 6.14E-02 | 2.29E-01 | 1.00E+00 |
| ENSG00000240288.6_GHRLOS     | ENSG00000160789.18_LMNA | 0.13845  | -0.021222995 | 0.291227346 | 8.89E-02 | 2.90E-01 | 1.00E+00 |
| ENSG00000101342.8_TLDC2      | ENSG00000160789.18_LMNA | -0.05832 | -0.215517252 | 0.101828646 | 4.75E-01 | 7.34E-01 | 1.00E+00 |
| ENSG00000163467.10_TSACC     | ENSG00000160789.18_LMNA | -0.00544 | -0.164495831 | 0.153896398 | 9.47E-01 | 9.79E-01 | 1.00E+00 |
| ENSG00000164627.16_KIF6      | ENSG00000160789.18_LMNA | -0.25979 | -0.402348256 | -0.10492696 | 1.23E-03 | 1.35E-02 | 1.00E+00 |
| ENSG00000260193.1_RP11-83N9  | ENSG00000160789.18_LMNA | 0.23811  | 0.08201324   | 0.382795376 | 3.14E-03 | 2.76E-02 | 1.00E+00 |
| ENSG00000230155.5_RP3-477O4  | ENSG00000160789.18_LMNA | -0.00268 | -0.161813189 | 0.156585983 | 9.74E-01 | 9.90E-01 | 1.00E+00 |
| ENSG00000225267.1_RPL8P2     | ENSG00000160789.18_LMNA | 0.02501  | -0.134729513 | 0.183477813 | 7.60E-01 | 9.00E-01 | 1.00E+00 |
| ENSG00000232742.3_RHOQP2     | ENSG00000160789.18_LMNA | -0.07728 | -0.233611337 | 0.082936187 | 3.44E-01 | 6.29E-01 | 1.00E+00 |
| ENSG00000259397.3_RP11-323I1 | ENSG00000160789.18_LMNA | 0.10783  | -0.052271303 | 0.262520938 | 1.86E-01 | 4.52E-01 | 1.00E+00 |
| ENSG00000233058.1_LINC00884  | ENSG00000160789.18_LMNA | -0.02536 | -0.183817529 | 0.134384305 | 7.56E-01 | 8.99E-01 | 1.00E+00 |
| ENSG00000157999.5_ANKRD61    | ENSG00000160789.18_LMNA | 0.09246  | -0.067738247 | 0.24800963  | 2.57E-01 | 5.40E-01 | 1.00E+00 |
| ENSG00000237877.5_LINC01473  | ENSG00000160789.18_LMNA | -0.06228 | -0.219307263 | 0.097890269 | 4.46E-01 | 7.13E-01 | 1.00E+00 |
| ENSG00000070159.12_PTPN3     | ENSG00000160789.18_LMNA | -0.0184  | -0.177079645 | 0.141216719 | 8.22E-01 | 9.30E-01 | 1.00E+00 |
| ENSG00000197580.10_BCO2      | ENSG00000160789.18_LMNA | -0.15055 | -0.302499019 | 0.00886473  | 6.41E-02 | 2.36E-01 | 1.00E+00 |
| ENSG00000281005.1_LINC00921  | ENSG00000160789.18_LMNA | -0.00939 | -0.168340164 | 0.150033871 | 9.09E-01 | 9.65E-01 | 1.00E+00 |
| ENSG00000251411.1_RP11-397E  | ENSG00000160789.18_LMNA | 0.0796   | -0.080626241 | 0.235808727 | 3.30E-01 | 6.16E-01 | 1.00E+00 |

|                             |                         |          |              |             |          |          |          |
|-----------------------------|-------------------------|----------|--------------|-------------|----------|----------|----------|
| ENSG00000189134.3_NKAPL     | ENSG00000160789.18_LMNA | -0.20271 | -0.3505931   | -0.04495648 | 1.23E-02 | 7.59E-02 | 1.00E+00 |
| ENSG00000160593.16_JAML     | ENSG00000160789.18_LMNA | 0.05718  | -0.102954982 | 0.214431586 | 4.84E-01 | 7.41E-01 | 1.00E+00 |
| ENSG00000242779.5_ZNF702P   | ENSG00000160789.18_LMNA | -0.07064 | -0.227288547 | 0.089563926 | 3.87E-01 | 6.66E-01 | 1.00E+00 |
| ENSG00000166450.11_PRTG     | ENSG00000160789.18_LMNA | 0.00234  | -0.15692111  | 0.161478598 | 9.77E-01 | 9.91E-01 | 1.00E+00 |
| ENSG00000172771.10_EFCAB12  | ENSG00000160789.18_LMNA | 0.07119  | -0.089020205 | 0.227808258 | 3.83E-01 | 6.62E-01 | 1.00E+00 |
| ENSG00000135925.7_WNT10A    | ENSG00000160789.18_LMNA | 0.10588  | -0.054234417 | 0.260686972 | 1.94E-01 | 4.63E-01 | 1.00E+00 |
| ENSG00000233822.4_HIST1H2BM | ENSG00000160789.18_LMNA | -0.17053 | -0.321013821 | -0.01164346 | 3.57E-02 | 1.61E-01 | 1.00E+00 |
| ENSG00000129749.3_CHRNA10   | ENSG00000160789.18_LMNA | 0.09769  | -0.062478058 | 0.252960766 | 2.31E-01 | 5.09E-01 | 1.00E+00 |
| ENSG00000219149.4_RP11-214N | ENSG00000160789.18_LMNA | -0.01545 | -0.174217915 | 0.144109454 | 8.50E-01 | 9.41E-01 | 1.00E+00 |
| ENSG00000177803.7_RP11-606P | ENSG00000160789.18_LMNA | -0.24245 | -0.386720519 | -0.08658769 | 2.62E-03 | 2.40E-02 | 1.00E+00 |
| ENSG00000100298.14_APOBEC3  | ENSG00000160789.18_LMNA | -0.05449 | -0.211856138 | 0.105623659 | 5.05E-01 | 7.56E-01 | 1.00E+00 |
| ENSG00000116396.12_KCNC4    | ENSG00000160789.18_LMNA | 0.04566  | -0.114375558 | 0.203378921 | 5.76E-01 | 8.03E-01 | 1.00E+00 |
| ENSG00000186019.10_AC084219 | ENSG00000160789.18_LMNA | -0.25849 | -0.401180626 | -0.10354971 | 1.30E-03 | 1.41E-02 | 1.00E+00 |
| ENSG00000273045.4_C2orf15   | ENSG00000160789.18_LMNA | -0.26959 | -0.411146746 | -0.11534184 | 7.83E-04 | 9.56E-03 | 1.00E+00 |
| ENSG00000259363.4_CTD-2054N | ENSG00000160789.18_LMNA | 0.01842  | -0.141191179 | 0.177104888 | 8.22E-01 | 9.30E-01 | 1.00E+00 |
| ENSG00000139890.8_REM2      | ENSG00000160789.18_LMNA | -0.04974 | -0.207299786 | 0.110333769 | 5.43E-01 | 7.82E-01 | 1.00E+00 |
| ENSG00000106336.11_FBXO24   | ENSG00000160789.18_LMNA | 0.26792  | 0.113563569  | 0.409648351 | 8.47E-04 | 1.02E-02 | 1.00E+00 |
| ENSG00000176406.19_RIMS2    | ENSG00000160789.18_LMNA | -0.32238 | -0.45807114  | -0.17200734 | 5.11E-05 | 1.09E-03 | 1.00E+00 |
| ENSG00000263846.1_CIAPIN1P  | ENSG00000160789.18_LMNA | -0.20208 | -0.350019191 | -0.04430359 | 1.25E-02 | 7.71E-02 | 1.00E+00 |
| ENSG00000239532.1_RP11-9D8  | ENSG00000160789.18_LMNA | -0.17427 | -0.324470889 | -0.01550178 | 3.18E-02 | 1.49E-01 | 1.00E+00 |
| ENSG00000232995.6_RGS5      | ENSG00000160789.18_LMNA | -0.27239 | -0.413652385 | -0.11831974 | 6.86E-04 | 8.64E-03 | 1.00E+00 |
| ENSG00000236882.6_LINC01554 | ENSG00000160789.18_LMNA | -0.2592  | -0.401820376 | -0.10430417 | 1.26E-03 | 1.38E-02 | 1.00E+00 |
| ENSG00000214425.5_LRRC37A4  | ENSG00000160789.18_LMNA | 0.12639  | -0.033482321 | 0.27995954  | 1.21E-01 | 3.49E-01 | 1.00E+00 |
| ENSG00000249141.1_RP11-514O | ENSG00000160789.18_LMNA | 0.06384  | -0.096342472 | 0.220794136 | 4.35E-01 | 7.03E-01 | 1.00E+00 |
| ENSG00000272631.1_RP11-359E | ENSG00000160789.18_LMNA | -0.04603 | -0.203735604 | 0.114008309 | 5.73E-01 | 8.01E-01 | 1.00E+00 |
| ENSG00000273419.1_RP4-751H1 | ENSG00000160789.18_LMNA | 0.11811  | -0.041880281 | 0.27219063  | 1.47E-01 | 3.93E-01 | 1.00E+00 |
| ENSG00000273291.4_RP11-136C | ENSG00000160789.18_LMNA | -0.17887 | -0.328709595 | -0.02024506 | 2.75E-02 | 1.35E-01 | 1.00E+00 |
| ENSG00000263063.1_RP11-388C | ENSG00000160789.18_LMNA | -0.10843 | -0.263092111 | 0.051659411 | 1.84E-01 | 4.49E-01 | 1.00E+00 |
| ENSG00000100142.13_POLR2F   | ENSG00000160789.18_LMNA | -0.44522 | -0.56441577  | -0.3078393  | 9.07E-09 | 9.92E-07 | 4.66E-04 |
| ENSG00000129673.8_AANAT     | ENSG00000160789.18_LMNA | -0.04318 | -0.200999751 | 0.116822987 | 5.97E-01 | 8.14E-01 | 1.00E+00 |
| ENSG00000181690.6_PLAG1     | ENSG00000160789.18_LMNA | 0.10479  | -0.055332826 | 0.259659832 | 1.99E-01 | 4.69E-01 | 1.00E+00 |
| ENSG00000213851.3_RP11-324J | ENSG00000160789.18_LMNA | 0.02227  | -0.137419681 | 0.180827836 | 7.85E-01 | 9.12E-01 | 1.00E+00 |
| ENSG00000155846.15_PPARGC1  | ENSG00000160789.18_LMNA | 0.21442  | 0.057174267  | 0.361290808 | 7.99E-03 | 5.55E-02 | 1.00E+00 |

|                              |                         |          |              |             |          |          |          |
|------------------------------|-------------------------|----------|--------------|-------------|----------|----------|----------|
| ENSG00000244266.1_RP11-112N  | ENSG00000160789.18_LMNA | -0.06177 | -0.218817859 | 0.098399391 | 4.50E-01 | 7.15E-01 | 1.00E+00 |
| ENSG00000267127.5_RP11-795F  | ENSG00000160789.18_LMNA | -0.12804 | -0.281500117 | 0.031811727 | 1.16E-01 | 3.40E-01 | 1.00E+00 |
| ENSG00000229349.2_ACTG1P9    | ENSG00000160789.18_LMNA | 0.19585  | 0.037826278  | 0.344312935 | 1.56E-02 | 9.02E-02 | 1.00E+00 |
| ENSG00000238057.7_ZEB2-AS1   | ENSG00000160789.18_LMNA | -0.32299 | -0.458611818 | -0.17267148 | 4.94E-05 | 1.07E-03 | 1.00E+00 |
| ENSG00000189280.3_GJB5       | ENSG00000160789.18_LMNA | 0.12163  | -0.038315422 | 0.275493471 | 1.36E-01 | 3.74E-01 | 1.00E+00 |
| ENSG00000214018.3_RRM2P3     | ENSG00000160789.18_LMNA | 0.27531  | 0.12142857   | 0.416263421 | 5.97E-04 | 7.76E-03 | 1.00E+00 |
| ENSG00000258388.6_PPT2-EGFL  | ENSG00000160789.18_LMNA | -0.00699 | -0.1660092   | 0.152377026 | 9.32E-01 | 9.73E-01 | 1.00E+00 |
| ENSG00000084734.7_GCKR       | ENSG00000160789.18_LMNA | 0.25444  | 0.099260758  | 0.397538256 | 1.56E-03 | 1.62E-02 | 1.00E+00 |
| ENSG00000279010.1_MIR6820    | ENSG00000160789.18_LMNA | -0.35722 | -0.488630538 | -0.20995737 | 6.25E-06 | 2.00E-04 | 3.21E-01 |
| ENSG00000229399.1_RP11-378J  | ENSG00000160789.18_LMNA | -0.17721 | -0.327181974 | -0.01853399 | 2.90E-02 | 1.40E-01 | 1.00E+00 |
| ENSG00000229184.2_ATP5HP2    | ENSG00000160789.18_LMNA | -0.06761 | -0.224399488 | 0.092583012 | 4.08E-01 | 6.83E-01 | 1.00E+00 |
| ENSG00000234145.1_NAP1L4P3   | ENSG00000160789.18_LMNA | -0.05009 | -0.207635636 | 0.109987071 | 5.40E-01 | 7.80E-01 | 1.00E+00 |
| ENSG00000226329.2_AC005682.1 | ENSG00000160789.18_LMNA | 0.12102  | -0.038927685 | 0.274926737 | 1.37E-01 | 3.78E-01 | 1.00E+00 |
| ENSG00000273284.1_RP11-888D  | ENSG00000160789.18_LMNA | 0.14417  | -0.015380971 | 0.296566548 | 7.64E-02 | 2.64E-01 | 1.00E+00 |
| ENSG00000235023.1_AP001626.1 | ENSG00000160789.18_LMNA | -0.04016 | -0.198091081 | 0.119809872 | 6.23E-01 | 8.30E-01 | 1.00E+00 |
| ENSG00000243697.1_RP11-463O  | ENSG00000160789.18_LMNA | -0.16103 | -0.312229639 | -0.00188098 | 4.75E-02 | 1.94E-01 | 1.00E+00 |
| ENSG00000153237.16_CCDC148   | ENSG00000160789.18_LMNA | -0.30583 | -0.443443378 | -0.15413753 | 1.27E-04 | 2.29E-03 | 1.00E+00 |
| ENSG00000223396.2_RP11-134G  | ENSG00000160789.18_LMNA | 0.11339  | -0.046655104 | 0.267755132 | 1.64E-01 | 4.20E-01 | 1.00E+00 |
| ENSG00000166148.3_AVPR1A     | ENSG00000160789.18_LMNA | 0.08505  | -0.07516612  | 0.240989963 | 2.97E-01 | 5.83E-01 | 1.00E+00 |
| ENSG00000166153.15_DEPDC4    | ENSG00000160789.18_LMNA | -0.22164 | -0.367865044 | -0.06472813 | 6.06E-03 | 4.53E-02 | 1.00E+00 |
| ENSG00000131480.7_AOC2       | ENSG00000160789.18_LMNA | -0.12269 | -0.2764893   | 0.037239024 | 1.32E-01 | 3.69E-01 | 1.00E+00 |
| ENSG00000238172.2_RPS2P35    | ENSG00000160789.18_LMNA | 0.07712  | -0.08309689  | 0.233458345 | 3.45E-01 | 6.29E-01 | 1.00E+00 |
| ENSG00000216854.2_RPL17P26   | ENSG00000160789.18_LMNA | -0.09011 | -0.245788531 | 0.070092299 | 2.70E-01 | 5.54E-01 | 1.00E+00 |
| ENSG00000197361.6_FBXL22     | ENSG00000160789.18_LMNA | -0.15824 | -0.309640081 | 0.000985738 | 5.15E-02 | 2.05E-01 | 1.00E+00 |
| ENSG00000225953.2_SATB2-AS1  | ENSG00000160789.18_LMNA | -0.0906  | -0.246246816 | 0.069606869 | 2.67E-01 | 5.51E-01 | 1.00E+00 |
| ENSG00000132330.15_SCLY      | ENSG00000160789.18_LMNA | -0.02954 | -0.187858498 | 0.130272078 | 7.18E-01 | 8.80E-01 | 1.00E+00 |
| ENSG00000225766.7_DHRS4L1    | ENSG00000160789.18_LMNA | -0.06422 | -0.221163772 | 0.095957452 | 4.32E-01 | 7.01E-01 | 1.00E+00 |
| ENSG00000147996.15_CBWD5     | ENSG00000160789.18_LMNA | -0.15783 | -0.309255889 | 0.001410615 | 5.21E-02 | 2.07E-01 | 1.00E+00 |
| ENSG00000271926.1_CTD-2376L  | ENSG00000160789.18_LMNA | 0.05327  | -0.106839447 | 0.210681358 | 5.15E-01 | 7.62E-01 | 1.00E+00 |
| ENSG00000102053.12_ZC3H12B   | ENSG00000160789.18_LMNA | -0.29052 | -0.429840205 | -0.13768752 | 2.83E-04 | 4.29E-03 | 1.00E+00 |
| ENSG00000258704.4_SRP54-AS1  | ENSG00000160789.18_LMNA | -0.06185 | -0.218892305 | 0.098321956 | 4.49E-01 | 7.15E-01 | 1.00E+00 |
| ENSG00000106125.14_FAM188B   | ENSG00000160789.18_LMNA | 0.0809   | -0.079323452 | 0.237046611 | 3.22E-01 | 6.08E-01 | 1.00E+00 |
| ENSG00000197168.10_NEK5      | ENSG00000160789.18_LMNA | -0.11245 | -0.266872748 | 0.047603281 | 1.68E-01 | 4.26E-01 | 1.00E+00 |

|                             |                         |          |              |             |          |          |          |
|-----------------------------|-------------------------|----------|--------------|-------------|----------|----------|----------|
| ENSG00000236383.6_LINC00854 | ENSG00000160789.18_LMNA | 0.14183  | -0.017767448 | 0.294387828 | 8.13E-02 | 2.75E-01 | 1.00E+00 |
| ENSG00000234322.1_ST13P18   | ENSG00000160789.18_LMNA | -0.11449 | -0.268786951 | 0.045545629 | 1.60E-01 | 4.14E-01 | 1.00E+00 |
| ENSG00000241411.1_RP11-192C | ENSG00000160789.18_LMNA | 0.18639  | 0.028025501  | 0.335635573 | 2.15E-02 | 1.14E-01 | 1.00E+00 |
| ENSG00000198829.6_SUCNR1    | ENSG00000160789.18_LMNA | -0.13752 | -0.290364181 | 0.022165451 | 9.11E-02 | 2.94E-01 | 1.00E+00 |
| ENSG00000214140.9_PRC       | ENSG00000160789.18_LMNA | -0.38804 | -0.515403926 | -0.2439105  | 7.83E-07 | 3.76E-05 | 4.02E-02 |
| ENSG00000265778.2_RP11-17M1 | ENSG00000160789.18_LMNA | -0.22346 | -0.369513565 | -0.06662776 | 5.65E-03 | 4.30E-02 | 1.00E+00 |
| ENSG00000101115.11_SALL4    | ENSG00000160789.18_LMNA | 0.38796  | 0.243821973  | 0.515334802 | 7.87E-07 | 3.76E-05 | 4.04E-02 |
| ENSG00000215912.10_TTC34    | ENSG00000160789.18_LMNA | 0.116    | -0.044011946 | 0.270212101 | 1.55E-01 | 4.06E-01 | 1.00E+00 |
| ENSG00000263232.2_ATP5A1P3  | ENSG00000160789.18_LMNA | -0.13076 | -0.284049676 | 0.029043148 | 1.08E-01 | 3.27E-01 | 1.00E+00 |
| ENSG00000140527.13_WDR93    | ENSG00000160789.18_LMNA | 0.05992  | -0.100233547 | 0.217053414 | 4.63E-01 | 7.26E-01 | 1.00E+00 |
| ENSG00000260367.2_RP11-264B | ENSG00000160789.18_LMNA | -0.00986 | -0.168793058 | 0.149578192 | 9.04E-01 | 9.63E-01 | 1.00E+00 |
| ENSG00000214019.2_RP6-218J1 | ENSG00000160789.18_LMNA | 0.11586  | -0.044159228 | 0.270075301 | 1.55E-01 | 4.06E-01 | 1.00E+00 |
| ENSG00000169291.8_SHE       | ENSG00000160789.18_LMNA | -0.0585  | -0.215696623 | 0.101642478 | 4.74E-01 | 7.34E-01 | 1.00E+00 |
| ENSG00000213177.3_PRDX2P4   | ENSG00000160789.18_LMNA | -0.12971 | -0.283061448 | 0.03011684  | 1.11E-01 | 3.33E-01 | 1.00E+00 |
| ENSG00000188385.10_JAKMIP3  | ENSG00000160789.18_LMNA | -0.25985 | -0.402400062 | -0.1049881  | 1.23E-03 | 1.35E-02 | 1.00E+00 |
| ENSG00000233428.1_AC019050  | ENSG00000160789.18_LMNA | 0.08012  | -0.080099655 | 0.236309203 | 3.26E-01 | 6.13E-01 | 1.00E+00 |
| ENSG00000169031.17_COL4A3   | ENSG00000160789.18_LMNA | -0.34555 | -0.478430028 | -0.19719586 | 1.30E-05 | 3.62E-04 | 6.67E-01 |
| ENSG00000251503.6_API       | ENSG00000160789.18_LMNA | -0.2139  | -0.360811489 | -0.05662488 | 8.14E-03 | 5.64E-02 | 1.00E+00 |
| ENSG00000250746.1_RP11-39C1 | ENSG00000160789.18_LMNA | 0.29591  | 0.143463781  | 0.434631982 | 2.14E-04 | 3.44E-03 | 1.00E+00 |
| ENSG00000203914.4_HSP90B3P  | ENSG00000160789.18_LMNA | 0.2917   | 0.138950687  | 0.430889488 | 2.66E-04 | 4.09E-03 | 1.00E+00 |
| ENSG00000117834.11_SLC5A9   | ENSG00000160789.18_LMNA | 0.16693  | 0.00793864   | 0.317686518 | 3.98E-02 | 1.73E-01 | 1.00E+00 |
| ENSG00000251066.1_CTC-534B2 | ENSG00000160789.18_LMNA | 0.17156  | 0.012711346  | 0.321971476 | 3.46E-02 | 1.57E-01 | 1.00E+00 |
| ENSG00000152292.15_SH2D6    | ENSG00000160789.18_LMNA | -0.25677 | -0.399638545 | -0.10173253 | 1.41E-03 | 1.50E-02 | 1.00E+00 |
| ENSG00000152056.15_AP1S3    | ENSG00000160789.18_LMNA | 0.32147  | 0.171026414  | 0.457272178 | 5.38E-05 | 1.14E-03 | 1.00E+00 |
| ENSG00000275784.1_RP5-1125A | ENSG00000160789.18_LMNA | 0.00343  | -0.15585602  | 0.162541733 | 9.67E-01 | 9.87E-01 | 1.00E+00 |
| ENSG00000105982.15_RNF32    | ENSG00000160789.18_LMNA | -0.05315 | -0.210568909 | 0.106955771 | 5.15E-01 | 7.63E-01 | 1.00E+00 |
| ENSG00000122735.14_DNAI1    | ENSG00000160789.18_LMNA | -0.02876 | -0.187105968 | 0.131038707 | 7.25E-01 | 8.83E-01 | 1.00E+00 |
| ENSG00000129007.13_CALML4   | ENSG00000160789.18_LMNA | 0.1667   | 0.007700258  | 0.317472165 | 4.01E-02 | 1.74E-01 | 1.00E+00 |
| ENSG00000149380.10_P4HA3    | ENSG00000160789.18_LMNA | 0.29486  | 0.142343434  | 0.433703869 | 2.26E-04 | 3.60E-03 | 1.00E+00 |
| ENSG00000116833.12_NR5A2    | ENSG00000160789.18_LMNA | -0.06247 | -0.219486076 | 0.097704211 | 4.45E-01 | 7.12E-01 | 1.00E+00 |
| ENSG00000156925.10_ZIC3     | ENSG00000160789.18_LMNA | -0.4026  | -0.527962169 | -0.26006911 | 2.72E-07 | 1.63E-05 | 1.40E-02 |
| ENSG00000259556.2_RP11-56B1 | ENSG00000160789.18_LMNA | -0.29482 | -0.433663814 | -0.1422951  | 2.27E-04 | 3.61E-03 | 1.00E+00 |
| ENSG00000125864.10_BFSP1    | ENSG00000160789.18_LMNA | 0.30505  | 0.153291474  | 0.442746976 | 1.33E-04 | 2.37E-03 | 1.00E+00 |

|                              |                         |          |              |             |          |          |          |
|------------------------------|-------------------------|----------|--------------|-------------|----------|----------|----------|
| ENSG00000260423.1_RP13-735L  | ENSG00000160789.18_LMNA | -0.27608 | -0.416956881 | -0.12225521 | 5.76E-04 | 7.52E-03 | 1.00E+00 |
| ENSG00000257433.4_RP1-197B1  | ENSG00000160789.18_LMNA | -0.31235 | -0.449214051 | -0.16116466 | 8.94E-05 | 1.73E-03 | 1.00E+00 |
| ENSG00000272037.1_KB-431C1.5 | ENSG00000160789.18_LMNA | -0.14777 | -0.299915707 | 0.0117055   | 6.92E-02 | 2.48E-01 | 1.00E+00 |
| ENSG00000178460.16_MCMDC2    | ENSG00000160789.18_LMNA | -0.41746 | -0.540725662 | -0.276647   | 8.76E-08 | 6.45E-06 | 4.50E-03 |
| ENSG00000213938.3_SEPHS1P6   | ENSG00000160789.18_LMNA | -0.26756 | -0.409325751 | -0.11318096 | 8.61E-04 | 1.03E-02 | 1.00E+00 |
| ENSG00000242208.1_RPL5P29    | ENSG00000160789.18_LMNA | -0.06388 | -0.220837521 | 0.096297286 | 4.34E-01 | 7.03E-01 | 1.00E+00 |
| ENSG00000268439.4_EMG1       | ENSG00000160789.18_LMNA | -0.12715 | -0.280666854 | 0.032715531 | 1.19E-01 | 3.45E-01 | 1.00E+00 |
| ENSG00000216412.4_RPL12P2    | ENSG00000160789.18_LMNA | 0.02511  | -0.134625729 | 0.183579954 | 7.59E-01 | 8.99E-01 | 1.00E+00 |
| ENSG00000162892.14_IL24      | ENSG00000160789.18_LMNA | 0.08289  | -0.077331663 | 0.238937183 | 3.10E-01 | 5.96E-01 | 1.00E+00 |
| ENSG00000259523.1_RP11-680F  | ENSG00000160789.18_LMNA | 0.19433  | 0.036254458  | 0.342924801 | 1.64E-02 | 9.38E-02 | 1.00E+00 |
| ENSG00000166762.15_CATSPER   | ENSG00000160789.18_LMNA | -0.10296 | -0.257930405 | 0.057180529 | 2.07E-01 | 4.79E-01 | 1.00E+00 |
| ENSG00000276814.1_RP1-228P1  | ENSG00000160789.18_LMNA | 0.0472   | -0.112848526 | 0.204861465 | 5.64E-01 | 7.95E-01 | 1.00E+00 |
| ENSG00000278934.1_CTD-2006M  | ENSG00000160789.18_LMNA | -0.17482 | -0.324976462 | -0.01606681 | 3.12E-02 | 1.47E-01 | 1.00E+00 |
| ENSG00000147117.7_ZNF157     | ENSG00000160789.18_LMNA | -0.28437 | -0.424362643 | -0.13110884 | 3.84E-04 | 5.49E-03 | 1.00E+00 |
| ENSG00000245248.6_USP2-AS1   | ENSG00000160789.18_LMNA | -0.00171 | -0.160868627 | 0.157531868 | 9.83E-01 | 9.94E-01 | 1.00E+00 |
| ENSG00000273008.1_RP11-351D  | ENSG00000160789.18_LMNA | -0.22531 | -0.371191563 | -0.06856361 | 5.26E-03 | 4.07E-02 | 1.00E+00 |
| ENSG00000165591.6_FAAH2      | ENSG00000160789.18_LMNA | -0.23719 | -0.381969044 | -0.08105183 | 3.26E-03 | 2.84E-02 | 1.00E+00 |
| ENSG00000213371.4_NAP1L1P3   | ENSG00000160789.18_LMNA | 0.02258  | -0.13711622  | 0.181126995 | 7.82E-01 | 9.11E-01 | 1.00E+00 |
| ENSG00000158286.11_RNF207    | ENSG00000160789.18_LMNA | -0.02666 | -0.185075401 | 0.133105425 | 7.44E-01 | 8.93E-01 | 1.00E+00 |
| ENSG00000239883.7_PARGP1     | ENSG00000160789.18_LMNA | -0.15843 | -0.309819893 | 0.000786846 | 5.12E-02 | 2.04E-01 | 1.00E+00 |
| ENSG00000204044.6_RP11-465L  | ENSG00000160789.18_LMNA | 0.0167   | -0.142876642 | 0.175438171 | 8.38E-01 | 9.37E-01 | 1.00E+00 |
| ENSG00000206579.8_XKR4       | ENSG00000160789.18_LMNA | -0.35301 | -0.484957746 | -0.2053515  | 8.17E-06 | 2.47E-04 | 4.19E-01 |
| ENSG00000081052.11_COL4A4    | ENSG00000160789.18_LMNA | -0.29649 | -0.435151416 | -0.14409113 | 2.08E-04 | 3.37E-03 | 1.00E+00 |
| ENSG00000228172.4_RP1-317E2  | ENSG00000160789.18_LMNA | 0.25636  | 0.101291374  | 0.399263918 | 1.43E-03 | 1.52E-02 | 1.00E+00 |
| ENSG00000236804.1_RPS3AP12   | ENSG00000160789.18_LMNA | -0.11957 | -0.273560163 | 0.040403072 | 1.42E-01 | 3.85E-01 | 1.00E+00 |
| ENSG00000205560.11_CPT1B     | ENSG00000160789.18_LMNA | -0.07625 | -0.232624885 | 0.083972063 | 3.50E-01 | 6.34E-01 | 1.00E+00 |
| ENSG00000235472.1	EIF4A1P7   | ENSG00000160789.18_LMNA | 0.1293   | -0.030531031 | 0.282680049 | 1.12E-01 | 3.34E-01 | 1.00E+00 |
| ENSG00000267265.4_CTC-550B1  | ENSG00000160789.18_LMNA | 0.19656  | 0.038566571  | 0.344966252 | 1.52E-02 | 8.88E-02 | 1.00E+00 |
| ENSG00000158516.10_CPA2      | ENSG00000160789.18_LMNA | -0.05174 | -0.209221004 | 0.108349456 | 5.27E-01 | 7.71E-01 | 1.00E+00 |
| ENSG00000137571.9_SLCO5A1    | ENSG00000160789.18_LMNA | -0.28729 | -0.426958802 | -0.13422367 | 3.32E-04 | 4.86E-03 | 1.00E+00 |
| ENSG00000156509.12_FBXO43    | ENSG00000160789.18_LMNA | 0.12891  | -0.030929082 | 0.282313418 | 1.13E-01 | 3.36E-01 | 1.00E+00 |
| ENSG00000187775.15_DNAH17    | ENSG00000160789.18_LMNA | -0.25771 | -0.400482351 | -0.10272662 | 1.35E-03 | 1.45E-02 | 1.00E+00 |
| ENSG00000232341.2_RPL4P2     | ENSG00000160789.18_LMNA | -0.05131 | -0.208808451 | 0.108775771 | 5.30E-01 | 7.73E-01 | 1.00E+00 |

|                               |                         |          |              |             |          |          |          |
|-------------------------------|-------------------------|----------|--------------|-------------|----------|----------|----------|
| ENSG00000111215.10_PRR4       | ENSG00000160789.18_LMNA | -0.08726 | -0.243080057 | 0.072958145 | 2.85E-01 | 5.71E-01 | 1.00E+00 |
| ENSG00000232110.6_RP11-149I2  | ENSG00000160789.18_LMNA | -0.38503 | -0.512796574 | -0.24057443 | 9.68E-07 | 4.48E-05 | 4.97E-02 |
| ENSG00000148735.13_PLEKHS1    | ENSG00000160789.18_LMNA | 0.09721  | -0.062961566 | 0.252506354 | 2.33E-01 | 5.11E-01 | 1.00E+00 |
| ENSG00000173401.8_GLIPR1L1    | ENSG00000160789.18_LMNA | -0.23456 | -0.379585978 | -0.07828233 | 3.63E-03 | 3.08E-02 | 1.00E+00 |
| ENSG00000271009.2_RP11-346C   | ENSG00000160789.18_LMNA | 0.15469  | -0.004621129 | 0.306349521 | 5.71E-02 | 2.18E-01 | 1.00E+00 |
| ENSG00000204745.3_AC083899.   | ENSG00000160789.18_LMNA | 0.1196   | -0.040369731 | 0.273591059 | 1.42E-01 | 3.85E-01 | 1.00E+00 |
| ENSG00000260269.4_CTD-2323K   | ENSG00000160789.18_LMNA | 0.08345  | -0.076766604 | 0.239473092 | 3.07E-01 | 5.93E-01 | 1.00E+00 |
| ENSG00000245017.2_RP11-181C   | ENSG00000160789.18_LMNA | -0.33823 | -0.472014385 | -0.189218   | 2.03E-05 | 5.22E-04 | 1.00E+00 |
| ENSG00000112218.8_GPR63       | ENSG00000160789.18_LMNA | -0.34974 | -0.48209391  | -0.20176868 | 1.00E-05 | 2.92E-04 | 5.15E-01 |
| ENSG00000244694.6_PTCHD4      | ENSG00000160789.18_LMNA | 0.08079  | -0.079434145 | 0.236941472 | 3.22E-01 | 6.09E-01 | 1.00E+00 |
| ENSG00000167676.3_PLIN4       | ENSG00000160789.18_LMNA | -0.00647 | -0.165499922 | 0.152888493 | 9.37E-01 | 9.75E-01 | 1.00E+00 |
| ENSG00000240057.4_RP11-572M   | ENSG00000160789.18_LMNA | -0.24209 | -0.386402718 | -0.08621684 | 2.66E-03 | 2.43E-02 | 1.00E+00 |
| ENSG00000171811.11_CFAP46     | ENSG00000160789.18_LMNA | 0.15656  | -0.002709161 | 0.308081058 | 5.41E-02 | 2.11E-01 | 1.00E+00 |
| ENSG00000129682.12_FGF13      | ENSG00000160789.18_LMNA | -0.2932  | -0.432226695 | -0.14056184 | 2.46E-04 | 3.85E-03 | 1.00E+00 |
| ENSG00000026036.19_RTDL1-TN   | ENSG00000160789.18_LMNA | 0.11952  | -0.040451891 | 0.273514923 | 1.42E-01 | 3.85E-01 | 1.00E+00 |
| ENSG00000249921.2_CTC-329H1   | ENSG00000160789.18_LMNA | 0.00731  | -0.15207139  | 0.166313449 | 9.29E-01 | 9.73E-01 | 1.00E+00 |
| ENSG00000151687.13_ANKAR      | ENSG00000160789.18_LMNA | -0.09194 | -0.24751993  | 0.068257562 | 2.60E-01 | 5.43E-01 | 1.00E+00 |
| ENSG00000260086.2_RP11-421I1C | ENSG00000160789.18_LMNA | -0.02832 | -0.186681037 | 0.131471433 | 7.29E-01 | 8.85E-01 | 1.00E+00 |
| ENSG00000215795.2_RP11-488L   | ENSG00000160789.18_LMNA | -0.09177 | -0.24735951  | 0.068427646 | 2.61E-01 | 5.44E-01 | 1.00E+00 |
| ENSG00000141485.14_SLC13A5    | ENSG00000160789.18_LMNA | -0.08349 | -0.2395083   | 0.076729473 | 3.06E-01 | 5.93E-01 | 1.00E+00 |
| ENSG00000278899.1_AL358852.1  | ENSG00000160789.18_LMNA | 0.0242   | -0.135523834 | 0.18269584  | 7.67E-01 | 9.04E-01 | 1.00E+00 |
| ENSG00000155749.11_ALS2CR1    | ENSG00000160789.18_LMNA | 0.05642  | -0.103712682 | 0.213700805 | 4.90E-01 | 7.46E-01 | 1.00E+00 |
| ENSG00000225806.6_RP1-309F2   | ENSG00000160789.18_LMNA | -0.0707  | -0.227341544 | 0.089508489 | 3.87E-01 | 6.65E-01 | 1.00E+00 |
| ENSG00000114204.13_SERPINI2   | ENSG00000160789.18_LMNA | -0.12755 | -0.281045601 | 0.032304784 | 1.17E-01 | 3.43E-01 | 1.00E+00 |
| ENSG00000186862.16_PDZD7      | ENSG00000160789.18_LMNA | -0.07657 | -0.232933023 | 0.08364856  | 3.48E-01 | 6.32E-01 | 1.00E+00 |
| ENSG00000178917.13_ZNF852     | ENSG00000160789.18_LMNA | -0.21574 | -0.362492973 | -0.05855297 | 7.60E-03 | 5.35E-02 | 1.00E+00 |
| ENSG00000270948.1_MTDHP1      | ENSG00000160789.18_LMNA | -0.05845 | -0.21564673  | 0.101694263 | 4.74E-01 | 7.34E-01 | 1.00E+00 |
| ENSG00000138378.16_STAT4      | ENSG00000160789.18_LMNA | -0.07842 | -0.234690224 | 0.081802461 | 3.37E-01 | 6.22E-01 | 1.00E+00 |
| ENSG00000214226.7_C17orf67    | ENSG00000160789.18_LMNA | -0.0827  | -0.238757854 | 0.077520702 | 3.11E-01 | 5.98E-01 | 1.00E+00 |
| ENSG00000237118.2_CYP2F2P     | ENSG00000160789.18_LMNA | 0.22016  | 0.063173629  | 0.366514613 | 6.42E-03 | 4.73E-02 | 1.00E+00 |
| ENSG00000167723.13_TRPV3      | ENSG00000160789.18_LMNA | -0.03845 | -0.196452587 | 0.121489896 | 6.38E-01 | 8.38E-01 | 1.00E+00 |
| ENSG00000276071.1_CTD-3234P   | ENSG00000160789.18_LMNA | -0.09401 | -0.249480413 | 0.066177488 | 2.49E-01 | 5.30E-01 | 1.00E+00 |
| ENSG00000100344.9_PNPLA3      | ENSG00000160789.18_LMNA | 0.22119  | 0.064247641  | 0.36744777  | 6.17E-03 | 4.59E-02 | 1.00E+00 |

|                              |                         |          |              |             |          |          |          |
|------------------------------|-------------------------|----------|--------------|-------------|----------|----------|----------|
| ENSG00000244171.4_PBX2P1     | ENSG00000160789.18_LMNA | 0.19114  | 0.032946102  | 0.339998685 | 1.83E-02 | 1.01E-01 | 1.00E+00 |
| ENSG00000147606.7_SLC26A7    | ENSG00000160789.18_LMNA | 0.13252  | -0.027252134 | 0.285696649 | 1.04E-01 | 3.19E-01 | 1.00E+00 |
| ENSG00000250903.7_GMDS-AS1   | ENSG00000160789.18_LMNA | -0.07012 | -0.22678817  | 0.09008724  | 3.91E-01 | 6.69E-01 | 1.00E+00 |
| ENSG00000238249.2_HMGN2P17   | ENSG00000160789.18_LMNA | -0.10285 | -0.2578285   | 0.057289337 | 2.07E-01 | 4.80E-01 | 1.00E+00 |
| ENSG00000196932.10_TMEN26    | ENSG00000160789.18_LMNA | 0.26385  | 0.109235017  | 0.405994375 | 1.02E-03 | 1.18E-02 | 1.00E+00 |
| ENSG00000213269.2_AC004386.4 | ENSG00000160789.18_LMNA | -0.14809 | -0.300209998 | 0.011382133 | 6.86E-02 | 2.46E-01 | 1.00E+00 |
| ENSG00000198673.9_FAM19A2    | ENSG00000160789.18_LMNA | -0.37512 | -0.504209355 | -0.22963249 | 1.92E-06 | 7.73E-05 | 9.85E-02 |
| ENSG00000259657.1_PIGHP1     | ENSG00000160789.18_LMNA | -0.03322 | -0.191403626 | 0.126655398 | 6.85E-01 | 8.63E-01 | 1.00E+00 |
| ENSG00000205832.7_C16orf96   | ENSG00000160789.18_LMNA | -0.16493 | -0.315840396 | -0.00588672 | 4.23E-02 | 1.80E-01 | 1.00E+00 |
| ENSG00000279233.1_RP11-158L  | ENSG00000160789.18_LMNA | 0.0124   | -0.147094797 | 0.171258919 | 8.80E-01 | 9.53E-01 | 1.00E+00 |
| ENSG00000228657.1_RPL23AP5i  | ENSG00000160789.18_LMNA | -0.07952 | -0.235739035 | 0.080699556 | 3.30E-01 | 6.16E-01 | 1.00E+00 |
| ENSG00000243388.1_RPL3P3     | ENSG00000160789.18_LMNA | -0.13266 | -0.285819636 | 0.02711831  | 1.03E-01 | 3.18E-01 | 1.00E+00 |
| ENSG00000254535.3_PABPC4L    | ENSG00000160789.18_LMNA | 0.0943   | -0.065886886 | 0.2497541   | 2.48E-01 | 5.28E-01 | 1.00E+00 |
| ENSG00000198734.9_F5         | ENSG00000160789.18_LMNA | -0.26471 | -0.406769983 | -0.11015287 | 9.82E-04 | 1.14E-02 | 1.00E+00 |
| ENSG00000280211.1_RP11-2C24  | ENSG00000160789.18_LMNA | 0.07934  | -0.080883663 | 0.235564009 | 3.31E-01 | 6.17E-01 | 1.00E+00 |
| ENSG00000260005.5_AC027601.1 | ENSG00000160789.18_LMNA | -0.00011 | -0.15930768  | 0.15909372  | 9.99E-01 | 1.00E+00 | 1.00E+00 |
| ENSG00000155011.7_DKK2       | ENSG00000160789.18_LMNA | 0.24458  | 0.088840148  | 0.388649275 | 2.39E-03 | 2.24E-02 | 1.00E+00 |
| ENSG00000186676.3_EEF1GP1    | ENSG00000160789.18_LMNA | 0.02317  | -0.136537058 | 0.181697783 | 7.77E-01 | 9.08E-01 | 1.00E+00 |
| ENSG00000273002.1_RP11-336K  | ENSG00000160789.18_LMNA | 0.01365  | -0.145870365 | 0.17247324  | 8.67E-01 | 9.48E-01 | 1.00E+00 |
| ENSG00000188033.8_ZNF490     | ENSG00000160789.18_LMNA | 0.04077  | -0.119205033 | 0.198680534 | 6.18E-01 | 8.27E-01 | 1.00E+00 |
| ENSG00000279089.1_RP11-481C  | ENSG00000160789.18_LMNA | -0.14673 | -0.298946087 | 0.012770458 | 7.13E-02 | 2.52E-01 | 1.00E+00 |
| ENSG00000279425.1_CTD-2017D  | ENSG00000160789.18_LMNA | -0.0678  | -0.224572656 | 0.092402214 | 4.07E-01 | 6.82E-01 | 1.00E+00 |
| ENSG00000186952.13_TMEN232   | ENSG00000160789.18_LMNA | -0.14259 | -0.295090961 | 0.016997655 | 7.97E-02 | 2.71E-01 | 1.00E+00 |
| ENSG00000273010.1_RP11-96K1  | ENSG00000160789.18_LMNA | -0.04786 | -0.205494248 | 0.112196298 | 5.58E-01 | 7.91E-01 | 1.00E+00 |
| ENSG00000242220.5_TCP10L     | ENSG00000160789.18_LMNA | -0.08303 | -0.23907105  | 0.077190534 | 3.09E-01 | 5.96E-01 | 1.00E+00 |
| ENSG00000217835.3_RP6-159A1  | ENSG00000160789.18_LMNA | -0.08824 | -0.244012452 | 0.071972163 | 2.80E-01 | 5.65E-01 | 1.00E+00 |
| ENSG00000185664.13_PMEL      | ENSG00000160789.18_LMNA | 0.02718  | -0.13259508  | 0.185577072 | 7.40E-01 | 8.91E-01 | 1.00E+00 |
| ENSG00000230793.1_SMARCE1F   | ENSG00000160789.18_LMNA | -0.17721 | -0.327179371 | -0.01853108 | 2.90E-02 | 1.40E-01 | 1.00E+00 |
| ENSG00000169621.8_APLF       | ENSG00000160789.18_LMNA | 0.1406   | -0.019029437 | 0.29323439  | 8.40E-02 | 2.81E-01 | 1.00E+00 |
| ENSG00000277496.1_RP11-93B1  | ENSG00000160789.18_LMNA | 0.2644   | 0.10982288   | 0.406491181 | 9.96E-04 | 1.16E-02 | 1.00E+00 |
| ENSG00000235438.6_ESRRAP2    | ENSG00000160789.18_LMNA | -0.146   | -0.298267842 | 0.013514971 | 7.27E-02 | 2.56E-01 | 1.00E+00 |
| ENSG00000137857.16_DUOX1     | ENSG00000160789.18_LMNA | -0.12356 | -0.277305609 | 0.036356127 | 1.29E-01 | 3.65E-01 | 1.00E+00 |
| ENSG00000110448.9_CD5        | ENSG00000160789.18_LMNA | -0.0118  | -0.170682838 | 0.147675335 | 8.85E-01 | 9.55E-01 | 1.00E+00 |

|                             |                         |          |              |             |          |          |          |
|-----------------------------|-------------------------|----------|--------------|-------------|----------|----------|----------|
| ENSG00000168350.7_DEGS2     | ENSG00000160789.18_LMNA | -0.15204 | -0.303889769 | 0.00733329  | 6.15E-02 | 2.29E-01 | 1.00E+00 |
| ENSG00000245552.5_RP11-712B | ENSG00000160789.18_LMNA | -0.15672 | -0.308232121 | 0.00254225  | 5.38E-02 | 2.11E-01 | 1.00E+00 |
| ENSG00000143341.10_HMCN1    | ENSG00000160789.18_LMNA | 0.10471  | -0.055417615 | 0.259580515 | 1.99E-01 | 4.70E-01 | 1.00E+00 |
| ENSG00000213197.3_AC012066  | ENSG00000160789.18_LMNA | 0.08572  | -0.074496188 | 0.241624439 | 2.94E-01 | 5.80E-01 | 1.00E+00 |
| ENSG00000204434.5_POTEKP    | ENSG00000160789.18_LMNA | 0.19536  | 0.037318915  | 0.34386501  | 1.59E-02 | 9.14E-02 | 1.00E+00 |
| ENSG00000229214.1_LINC00242 | ENSG00000160789.18_LMNA | 0.01146  | -0.148010425 | 0.17035022  | 8.89E-01 | 9.57E-01 | 1.00E+00 |
| ENSG00000256293.2_RP11-114F | ENSG00000160789.18_LMNA | -0.18971 | -0.338686066 | -0.0314642  | 1.92E-02 | 1.05E-01 | 1.00E+00 |
| ENSG00000146205.12_ANO7     | ENSG00000160789.18_LMNA | 0.11834  | -0.041643428 | 0.272410304 | 1.46E-01 | 3.92E-01 | 1.00E+00 |
| ENSG00000156222.10_SLC28A1  | ENSG00000160789.18_LMNA | -0.25844 | -0.401133998 | -0.10349474 | 1.31E-03 | 1.42E-02 | 1.00E+00 |
| ENSG00000143816.7_WNT9A     | ENSG00000160789.18_LMNA | 0.17014  | 0.011242333  | 0.320653938 | 3.61E-02 | 1.62E-01 | 1.00E+00 |
| ENSG00000275807.1_RP11-1348 | ENSG00000160789.18_LMNA | 0.03765  | -0.122282953 | 0.195678516 | 6.45E-01 | 8.42E-01 | 1.00E+00 |
| ENSG00000273891.1_RP11-500G | ENSG00000160789.18_LMNA | -0.27218 | -0.413467536 | -0.11809987 | 6.93E-04 | 8.71E-03 | 1.00E+00 |
| ENSG00000010932.14_FMO1     | ENSG00000160789.18_LMNA | 0.14259  | -0.01700153  | 0.295087422 | 7.97E-02 | 2.71E-01 | 1.00E+00 |
| ENSG00000186197.11_EDARAD   | ENSG00000160789.18_LMNA | 0.2724   | 0.1183286    | 0.41365983  | 6.86E-04 | 8.64E-03 | 1.00E+00 |
| ENSG00000085265.9_FCN1      | ENSG00000160789.18_LMNA | 0.03731  | -0.122618124 | 0.19535125  | 6.48E-01 | 8.44E-01 | 1.00E+00 |
| ENSG00000230870.2_FBXW11P1  | ENSG00000160789.18_LMNA | -0.047   | -0.204669666 | 0.113046165 | 5.65E-01 | 7.96E-01 | 1.00E+00 |
| ENSG00000263412.1_RP5-890E1 | ENSG00000160789.18_LMNA | -0.15404 | -0.305743775 | 0.005289459 | 5.81E-02 | 2.21E-01 | 1.00E+00 |
| ENSG00000213999.14_MEF2B    | ENSG00000160789.18_LMNA | 0.03332  | -0.126549391 | 0.191507411 | 6.84E-01 | 8.63E-01 | 1.00E+00 |
| ENSG00000254681.5_PKD1P5    | ENSG00000160789.18_LMNA | 0.09843  | -0.061734709 | 0.253659111 | 2.28E-01 | 5.04E-01 | 1.00E+00 |
| ENSG00000261644.1_RP11-327F | ENSG00000160789.18_LMNA | 0.09605  | -0.064129364 | 0.251408257 | 2.39E-01 | 5.18E-01 | 1.00E+00 |
| ENSG00000266921.1_RP11-15A1 | ENSG00000160789.18_LMNA | -0.12191 | -0.275760069 | 0.038027326 | 1.35E-01 | 3.73E-01 | 1.00E+00 |
| ENSG00000280287.1_RP13-554M | ENSG00000160789.18_LMNA | 0.11162  | -0.048437041 | 0.266096406 | 1.71E-01 | 4.30E-01 | 1.00E+00 |
| ENSG00000261441.1_RP11-217B | ENSG00000160789.18_LMNA | -0.13818 | -0.290976206 | 0.021497262 | 8.96E-02 | 2.91E-01 | 1.00E+00 |
| ENSG00000162105.15_SHANK2   | ENSG00000160789.18_LMNA | -0.36172 | -0.492558196 | -0.21489658 | 4.68E-06 | 1.58E-04 | 2.40E-01 |
| ENSG00000221843.3_C2orf16   | ENSG00000160789.18_LMNA | 0.03831  | -0.121629942 | 0.196315922 | 6.39E-01 | 8.39E-01 | 1.00E+00 |
| ENSG00000111249.12_CUX2     | ENSG00000160789.18_LMNA | -0.2741  | -0.415186431 | -0.12014555 | 6.33E-04 | 8.11E-03 | 1.00E+00 |
| ENSG00000228056.3_CFL1P3    | ENSG00000160789.18_LMNA | -0.00596 | -0.165005075 | 0.153385302 | 9.42E-01 | 9.77E-01 | 1.00E+00 |
| ENSG00000182584.4_ACTL10    | ENSG00000160789.18_LMNA | 0.32164  | 0.171202467  | 0.457415607 | 5.33E-05 | 1.13E-03 | 1.00E+00 |
| ENSG00000267053.5_CTD-3162L | ENSG00000160789.18_LMNA | -0.12389 | -0.277619501 | 0.0360165   | 1.28E-01 | 3.63E-01 | 1.00E+00 |
| ENSG00000259820.1_AC083843  | ENSG00000160789.18_LMNA | -0.00973 | -0.168665972 | 0.149706074 | 9.05E-01 | 9.64E-01 | 1.00E+00 |
| ENSG00000280328.1_          | ENSG00000160789.18_LMNA | 0.05944  | -0.100717483 | 0.216587525 | 4.67E-01 | 7.29E-01 | 1.00E+00 |
| ENSG00000267064.1_UXT-AS1   | ENSG00000160789.18_LMNA | -0.0917  | -0.247289657 | 0.068501702 | 2.61E-01 | 5.44E-01 | 1.00E+00 |
| ENSG00000279689.1_RP11-574K | ENSG00000160789.18_LMNA | 0.01143  | -0.148040348 | 0.170320514 | 8.89E-01 | 9.57E-01 | 1.00E+00 |



|                              |                         |          |              |             |          |          |          |
|------------------------------|-------------------------|----------|--------------|-------------|----------|----------|----------|
| ENSG00000214944.8_ARHGEF28   | ENSG00000160789.18_LMNA | 0.20096  | 0.043140741  | 0.348996433 | 1.30E-02 | 7.93E-02 | 1.00E+00 |
| ENSG00000204396.9_VWA7       | ENSG00000160789.18_LMNA | 0.01044  | -0.149003773 | 0.169363776 | 8.98E-01 | 9.60E-01 | 1.00E+00 |
| ENSG00000179528.14_LBX2      | ENSG00000160789.18_LMNA | 0.33488  | 0.185569204  | 0.469070079 | 2.48E-05 | 6.14E-04 | 1.00E+00 |
| ENSG00000243304.3_CTC-428G2  | ENSG00000160789.18_LMNA | -0.08955 | -0.245252176 | 0.070660232 | 2.73E-01 | 5.57E-01 | 1.00E+00 |
| ENSG00000140057.7_AK7        | ENSG00000160789.18_LMNA | 0.06298  | -0.097198868 | 0.219971631 | 4.41E-01 | 7.09E-01 | 1.00E+00 |
| ENSG00000185864.15_NPIPB4    | ENSG00000160789.18_LMNA | -0.00251 | -0.161648002 | 0.156751443 | 9.75E-01 | 9.91E-01 | 1.00E+00 |
| ENSG00000257195.1_HNRNPA1F   | ENSG00000160789.18_LMNA | -0.04313 | -0.200954644 | 0.116869351 | 5.98E-01 | 8.15E-01 | 1.00E+00 |
| ENSG00000130270.15_ATP8B3    | ENSG00000160789.18_LMNA | 0.20788  | 0.050348769  | 0.355324361 | 1.02E-02 | 6.64E-02 | 1.00E+00 |
| ENSG00000187987.8_ZSCAN23    | ENSG00000160789.18_LMNA | -0.22737 | -0.373068931 | -0.07073218 | 4.85E-03 | 3.83E-02 | 1.00E+00 |
| ENSG00000271029.1_RP11-849F  | ENSG00000160789.18_LMNA | -0.10959 | -0.264182774 | 0.050490336 | 1.79E-01 | 4.41E-01 | 1.00E+00 |
| ENSG00000118729.11_CASQ2     | ENSG00000160789.18_LMNA | -0.32557 | -0.460886609 | -0.17546856 | 4.26E-05 | 9.44E-04 | 1.00E+00 |
| ENSG00000258818.3_RNASE4     | ENSG00000160789.18_LMNA | 0.32321  | 0.172900984  | 0.458798609 | 4.88E-05 | 1.06E-03 | 1.00E+00 |
| ENSG00000161040.15_FBXL13    | ENSG00000160789.18_LMNA | 0.2522   | 0.096889572  | 0.395520497 | 1.72E-03 | 1.75E-02 | 1.00E+00 |
| ENSG00000231346.4_LINC01160  | ENSG00000160789.18_LMNA | -0.02978 | -0.188084167 | 0.130042106 | 7.16E-01 | 8.79E-01 | 1.00E+00 |
| ENSG00000255495.1_AC145124.1 | ENSG00000160789.18_LMNA | 0.19611  | 0.038103362  | 0.3445575   | 1.55E-02 | 8.97E-02 | 1.00E+00 |
| ENSG00000081479.11_LRP2      | ENSG00000160789.18_LMNA | -0.26375 | -0.405905091 | -0.10912939 | 1.03E-03 | 1.18E-02 | 1.00E+00 |
| ENSG00000236297.1_RP11-175P  | ENSG00000160789.18_LMNA | -0.1862  | -0.335456191 | -0.02782352 | 2.16E-02 | 1.14E-01 | 1.00E+00 |
| ENSG00000276073.1_RP5-1125A  | ENSG00000160789.18_LMNA | 0.17109  | 0.012226146  | 0.321536438 | 3.51E-02 | 1.59E-01 | 1.00E+00 |
| ENSG00000258569.1_RP11-99E1  | ENSG00000160789.18_LMNA | -0.23162 | -0.376923235 | -0.0751933  | 4.09E-03 | 3.37E-02 | 1.00E+00 |
| ENSG00000231707.4_PABPC1P1   | ENSG00000160789.18_LMNA | 0.08095  | -0.079270485 | 0.237096917 | 3.21E-01 | 6.08E-01 | 1.00E+00 |
| ENSG00000248445.4_SEMA6A-A   | ENSG00000160789.18_LMNA | -0.10796 | -0.262648072 | 0.052135125 | 1.86E-01 | 4.51E-01 | 1.00E+00 |
| ENSG00000205534.6_SMG1P2     | ENSG00000160789.18_LMNA | -0.21712 | -0.363743557 | -0.05998843 | 7.21E-03 | 5.15E-02 | 1.00E+00 |
| ENSG00000213891.3_RPL3P6     | ENSG00000160789.18_LMNA | -0.03654 | -0.194604325 | 0.12338282  | 6.55E-01 | 8.47E-01 | 1.00E+00 |
| ENSG00000236468.1_RP11-104D  | ENSG00000160789.18_LMNA | -0.04916 | -0.206738759 | 0.110912744 | 5.48E-01 | 7.85E-01 | 1.00E+00 |
| ENSG00000231187.2_RP11-38L1  | ENSG00000160789.18_LMNA | -0.24944 | -0.393036588 | -0.09397523 | 1.94E-03 | 1.91E-02 | 1.00E+00 |
| ENSG00000227741.1_RP11-536C  | ENSG00000160789.18_LMNA | -0.12124 | -0.275128683 | 0.038709542 | 1.37E-01 | 3.76E-01 | 1.00E+00 |
| ENSG00000265399.1_RP13-270P  | ENSG00000160789.18_LMNA | -0.01877 | -0.177435865 | 0.140856259 | 8.19E-01 | 9.29E-01 | 1.00E+00 |
| ENSG00000227765.4_MYL12BP2   | ENSG00000160789.18_LMNA | 0.08255  | -0.07767347  | 0.238612916 | 3.12E-01 | 5.98E-01 | 1.00E+00 |
| ENSG00000197057.7_DTHD1      | ENSG00000160789.18_LMNA | 0.10279  | -0.057351848 | 0.25776995  | 2.08E-01 | 4.80E-01 | 1.00E+00 |
| ENSG00000230479.1_AP000695.1 | ENSG00000160789.18_LMNA | 0.28357  | 0.130245407  | 0.423642136 | 4.00E-04 | 5.66E-03 | 1.00E+00 |
| ENSG00000270672.1_MTRNR2L6   | ENSG00000160789.18_LMNA | -0.18768 | -0.336817175 | -0.02935661 | 2.06E-02 | 1.10E-01 | 1.00E+00 |
| ENSG00000173258.11_ZNF483    | ENSG00000160789.18_LMNA | -0.13685 | -0.289740597 | 0.022845971 | 9.27E-02 | 2.98E-01 | 1.00E+00 |
| ENSG00000259577.1_RP11-430B  | ENSG00000160789.18_LMNA | 0.04187  | -0.118115349 | 0.199741919 | 6.09E-01 | 8.21E-01 | 1.00E+00 |

|                              |                         |          |              |             |          |          |          |
|------------------------------|-------------------------|----------|--------------|-------------|----------|----------|----------|
| ENSG00000226706.1_RP11-426A  | ENSG00000160789.18_LMNA | 0.15848  | -0.000738895 | 0.309863241 | 5.12E-02 | 2.04E-01 | 1.00E+00 |
| ENSG00000232172.1_RP11-57C1  | ENSG00000160789.18_LMNA | -0.03347 | -0.19165228  | 0.126401408 | 6.82E-01 | 8.62E-01 | 1.00E+00 |
| ENSG00000250461.1_RP11-631M  | ENSG00000160789.18_LMNA | -0.25326 | -0.396474913 | -0.09801074 | 1.64E-03 | 1.69E-02 | 1.00E+00 |
| ENSG00000205959.3_RP11-689P  | ENSG00000160789.18_LMNA | -0.14212 | -0.294655707 | 0.017474216 | 8.07E-02 | 2.74E-01 | 1.00E+00 |
| ENSG00000237499.5_RP11-356I2 | ENSG00000160789.18_LMNA | 0.00649  | -0.15287039  | 0.16551795  | 9.37E-01 | 9.75E-01 | 1.00E+00 |
| ENSG00000249853.6_HS3ST5     | ENSG00000160789.18_LMNA | -0.06804 | -0.224805966 | 0.092158591 | 4.05E-01 | 6.81E-01 | 1.00E+00 |
| ENSG00000240429.1_LRRFIP1P1  | ENSG00000160789.18_LMNA | 0.15364  | -0.005702275 | 0.30536949  | 5.88E-02 | 2.23E-01 | 1.00E+00 |
| ENSG00000181359.5_HSP90AA6   | ENSG00000160789.18_LMNA | -0.03458 | -0.19271785  | 0.125312498 | 6.72E-01 | 8.56E-01 | 1.00E+00 |
| ENSG00000243176.4_RP11-550I2 | ENSG00000160789.18_LMNA | -0.14631 | -0.298552116 | 0.013202964 | 7.21E-02 | 2.54E-01 | 1.00E+00 |
| ENSG00000187595.13_ZNF385C   | ENSG00000160789.18_LMNA | -0.04657 | -0.204257529 | 0.113470766 | 5.69E-01 | 7.98E-01 | 1.00E+00 |
| ENSG00000120949.13_TNFRSF8   | ENSG00000160789.18_LMNA | 0.04997  | -0.110105087 | 0.207521321 | 5.41E-01 | 7.81E-01 | 1.00E+00 |
| ENSG00000226887.6_ERVMER34   | ENSG00000160789.18_LMNA | -0.26009 | -0.402623713 | -0.10525204 | 1.21E-03 | 1.34E-02 | 1.00E+00 |
| ENSG00000179240.7_RP11-111M  | ENSG00000160789.18_LMNA | -0.33481 | -0.469009043 | -0.18549365 | 2.49E-05 | 6.16E-04 | 1.00E+00 |
| ENSG00000185522.7_LMNTD2     | ENSG00000160789.18_LMNA | 0.24032  | 0.084346768  | 0.384799037 | 2.86E-03 | 2.58E-02 | 1.00E+00 |
| ENSG00000249846.5_RP11-77P1  | ENSG00000160789.18_LMNA | -0.03913 | -0.197106867 | 0.120819251 | 6.32E-01 | 8.35E-01 | 1.00E+00 |
| ENSG00000266708.1_RP11-661O  | ENSG00000160789.18_LMNA | -0.01452 | -0.173323171 | 0.145012777 | 8.59E-01 | 9.45E-01 | 1.00E+00 |
| ENSG00000123405.12_NFE2      | ENSG00000160789.18_LMNA | -0.09106 | -0.246685627 | 0.069141927 | 2.65E-01 | 5.48E-01 | 1.00E+00 |
| ENSG00000244009.1_B3GAT3P1   | ENSG00000160789.18_LMNA | 0.16244  | 0.003320507  | 0.313528259 | 4.56E-02 | 1.89E-01 | 1.00E+00 |
| ENSG00000227533.4_SLC2A1-AS  | ENSG00000160789.18_LMNA | -0.03005 | -0.188348672 | 0.129772514 | 7.13E-01 | 8.78E-01 | 1.00E+00 |
| ENSG00000245156.1_RP11-867G  | ENSG00000160789.18_LMNA | -0.06366 | -0.220623819 | 0.096519845 | 4.36E-01 | 7.04E-01 | 1.00E+00 |
| ENSG00000230783.1_AC009961.  | ENSG00000160789.18_LMNA | -0.03852 | -0.196517656 | 0.121423212 | 6.38E-01 | 8.38E-01 | 1.00E+00 |
| ENSG00000107593.16_PKD2L1    | ENSG00000160789.18_LMNA | -0.16875 | -0.319368057 | -0.0098099  | 3.77E-02 | 1.66E-01 | 1.00E+00 |
| ENSG00000186564.5_FOXD2      | ENSG00000160789.18_LMNA | 0.15103  | -0.008368065 | 0.302950202 | 6.33E-02 | 2.34E-01 | 1.00E+00 |
| ENSG00000229598.1_PRDX3P1    | ENSG00000160789.18_LMNA | -0.10426 | -0.25915523  | 0.055872161 | 2.01E-01 | 4.72E-01 | 1.00E+00 |
| ENSG00000094963.12_FMO2      | ENSG00000160789.18_LMNA | -0.06434 | -0.221275512 | 0.095841042 | 4.31E-01 | 7.01E-01 | 1.00E+00 |
| ENSG00000092295.10_TGM1      | ENSG00000160789.18_LMNA | -0.03531 | -0.193421322 | 0.124593196 | 6.66E-01 | 8.53E-01 | 1.00E+00 |
| ENSG00000181722.14_ZBTB20    | ENSG00000160789.18_LMNA | -0.18077 | -0.330459705 | -0.02220756 | 2.58E-02 | 1.29E-01 | 1.00E+00 |
| ENSG00000279968.1_GVQW2      | ENSG00000160789.18_LMNA | -0.2392  | -0.383786031 | -0.08316658 | 3.00E-03 | 2.68E-02 | 1.00E+00 |
| ENSG00000272356.1_RP5-1112D  | ENSG00000160789.18_LMNA | -0.04275 | -0.200584022 | 0.117250248 | 6.01E-01 | 8.17E-01 | 1.00E+00 |
| ENSG00000215374.5_FAM66B     | ENSG00000160789.18_LMNA | 0.01765  | -0.141944999 | 0.176359678 | 8.29E-01 | 9.33E-01 | 1.00E+00 |
| ENSG00000186354.9_C9orf47    | ENSG00000160789.18_LMNA | -0.02279 | -0.181333358 | 0.136906854 | 7.80E-01 | 9.10E-01 | 1.00E+00 |
| ENSG00000241288.6_RP11-379B  | ENSG00000160789.18_LMNA | 0.0185   | -0.141118528 | 0.177176689 | 8.21E-01 | 9.30E-01 | 1.00E+00 |
| ENSG00000214908.3_RP11-229M  | ENSG00000160789.18_LMNA | -0.09827 | -0.253506474 | 0.061897213 | 2.28E-01 | 5.05E-01 | 1.00E+00 |

|                              |                         |          |              |             |          |          |          |
|------------------------------|-------------------------|----------|--------------|-------------|----------|----------|----------|
| ENSG00000271155.1_RP11-435O  | ENSG00000160789.18_LMNA | -0.06086 | -0.21794569  | 0.099306287 | 4.56E-01 | 7.21E-01 | 1.00E+00 |
| ENSG00000279434.1_RP11-85K1  | ENSG00000160789.18_LMNA | -0.08289 | -0.238936022 | 0.077332887 | 3.10E-01 | 5.96E-01 | 1.00E+00 |
| ENSG00000070601.8_FRMPD1     | ENSG00000160789.18_LMNA | -0.20748 | -0.354958355 | -0.04993099 | 1.03E-02 | 6.70E-02 | 1.00E+00 |
| ENSG00000279443.1_RP4-669K1  | ENSG00000160789.18_LMNA | 0.10026  | -0.059896049 | 0.255385043 | 2.19E-01 | 4.94E-01 | 1.00E+00 |
| ENSG00000160229.10_ZNF66     | ENSG00000160789.18_LMNA | -0.44153 | -0.561278789 | -0.30367697 | 1.24E-08 | 1.29E-06 | 6.37E-04 |
| ENSG00000174453.8_VWC2L      | ENSG00000160789.18_LMNA | -0.1972  | -0.345551859 | -0.03923043 | 1.49E-02 | 8.74E-02 | 1.00E+00 |
| ENSG00000260430.1_RP11-626G  | ENSG00000160789.18_LMNA | -0.1699  | -0.320436643 | -0.01100019 | 3.64E-02 | 1.62E-01 | 1.00E+00 |
| ENSG00000233718.4_MYCNOS     | ENSG00000160789.18_LMNA | -0.33844 | -0.472195726 | -0.18944298 | 2.00E-05 | 5.17E-04 | 1.00E+00 |
| ENSG00000115718.16_PROC      | ENSG00000160789.18_LMNA | -0.1374  | -0.290249307 | 0.022290835 | 9.14E-02 | 2.95E-01 | 1.00E+00 |
| ENSG00000226259.9_GTF2H2B    | ENSG00000160789.18_LMNA | 0.03995  | -0.120017602 | 0.197888583 | 6.25E-01 | 8.31E-01 | 1.00E+00 |
| ENSG00000226279.2_RPL12P10   | ENSG00000160789.18_LMNA | -0.10319 | -0.258150598 | 0.056945397 | 2.06E-01 | 4.77E-01 | 1.00E+00 |
| ENSG00000280721.1_AC133644.1 | ENSG00000160789.18_LMNA | 0.34836  | 0.200261727  | 0.480887576 | 1.09E-05 | 3.13E-04 | 5.61E-01 |
| ENSG00000269881.1_AC004754.1 | ENSG00000160789.18_LMNA | 0.1442   | -0.015353332 | 0.296591761 | 7.63E-02 | 2.64E-01 | 1.00E+00 |
| ENSG00000112837.15_TBX18     | ENSG00000160789.18_LMNA | 0.03708  | -0.122846734 | 0.195127992 | 6.50E-01 | 8.45E-01 | 1.00E+00 |
| ENSG00000214653.4_HNRNPA3F   | ENSG00000160789.18_LMNA | 0.10874  | -0.051348185 | 0.263382541 | 1.82E-01 | 4.47E-01 | 1.00E+00 |
| ENSG00000248429.4_RP11-597D  | ENSG00000160789.18_LMNA | -0.08398 | -0.239969773 | 0.076242724 | 3.04E-01 | 5.90E-01 | 1.00E+00 |
| ENSG00000256340.7_ABCC6P1    | ENSG00000160789.18_LMNA | -0.044   | -0.201785826 | 0.116014786 | 5.90E-01 | 8.10E-01 | 1.00E+00 |
| ENSG00000280273.1_AF131216.1 | ENSG00000160789.18_LMNA | -0.25983 | -0.402389056 | -0.10497511 | 1.23E-03 | 1.35E-02 | 1.00E+00 |
| ENSG00000171502.13_COL24A1   | ENSG00000160789.18_LMNA | 0.12991  | -0.029905591 | 0.283255935 | 1.11E-01 | 3.32E-01 | 1.00E+00 |
| ENSG00000227304.3_RP11-791G  | ENSG00000160789.18_LMNA | -0.17677 | -0.326775608 | -0.01807913 | 2.94E-02 | 1.41E-01 | 1.00E+00 |
| ENSG00000178199.12_ZC3H12D   | ENSG00000160789.18_LMNA | -0.02562 | -0.184074698 | 0.134122928 | 7.54E-01 | 8.98E-01 | 1.00E+00 |
| ENSG00000180875.4_GREM2      | ENSG00000160789.18_LMNA | -0.10797 | -0.262651459 | 0.052131497 | 1.86E-01 | 4.51E-01 | 1.00E+00 |
| ENSG00000127152.16_BCL11B    | ENSG00000160789.18_LMNA | -0.26929 | -0.41087572  | -0.11502005 | 7.94E-04 | 9.68E-03 | 1.00E+00 |
| ENSG00000127311.8_HELB       | ENSG00000160789.18_LMNA | 0.263    | 0.10833516   | 0.405233561 | 1.06E-03 | 1.21E-02 | 1.00E+00 |
| ENSG00000175920.14_DOK7      | ENSG00000160789.18_LMNA | 0.43139  | 0.292263194  | 0.55263853  | 2.88E-08 | 2.61E-06 | 1.48E-03 |
| ENSG00000110723.10_EXPH5     | ENSG00000160789.18_LMNA | -0.07459 | -0.231043982 | 0.085630746 | 3.61E-01 | 6.43E-01 | 1.00E+00 |
| ENSG00000072133.9_RPS6KA6    | ENSG00000160789.18_LMNA | -0.29799 | -0.436482846 | -0.14570023 | 1.93E-04 | 3.17E-03 | 1.00E+00 |
| ENSG00000262712.1_RP11-295D  | ENSG00000160789.18_LMNA | 0.10146  | -0.058689712 | 0.25651633  | 2.14E-01 | 4.88E-01 | 1.00E+00 |
| ENSG00000215899.3_RP11-439L  | ENSG00000160789.18_LMNA | -0.10018 | -0.255312747 | 0.05997311  | 2.19E-01 | 4.94E-01 | 1.00E+00 |
| ENSG00000189056.12_RELN      | ENSG00000160789.18_LMNA | -0.25325 | -0.396465566 | -0.09799976 | 1.64E-03 | 1.69E-02 | 1.00E+00 |
| ENSG00000239218.2_RPS20P22   | ENSG00000160789.18_LMNA | 0.31174  | 0.160508433  | 0.448676171 | 9.25E-05 | 1.78E-03 | 1.00E+00 |
| ENSG00000248309.4_MEF2C-AS   | ENSG00000160789.18_LMNA | -0.45322 | -0.571204231 | -0.31688037 | 4.54E-09 | 5.54E-07 | 2.33E-04 |
| ENSG00000152705.7_CATSPER3   | ENSG00000160789.18_LMNA | 0.03072  | -0.129108591 | 0.188999871 | 7.07E-01 | 8.75E-01 | 1.00E+00 |

|                              |                         |          |              |             |          |          |          |
|------------------------------|-------------------------|----------|--------------|-------------|----------|----------|----------|
| ENSG00000259605.3_AC074212.4 | ENSG00000160789.18_LMNA | 0.32618  | 0.176128678  | 0.461422917 | 4.11E-05 | 9.20E-04 | 1.00E+00 |
| ENSG00000002746.13_HECW1     | ENSG00000160789.18_LMNA | -0.26157 | -0.403950764 | -0.10681902 | 1.13E-03 | 1.27E-02 | 1.00E+00 |
| ENSG00000130940.13_CASZ1     | ENSG00000160789.18_LMNA | 0.37035  | 0.224380593  | 0.500068302 | 2.65E-06 | 9.89E-05 | 1.36E-01 |
| ENSG00000174827.12_PDZK1     | ENSG00000160789.18_LMNA | 0.19891  | 0.041012666  | 0.347122849 | 1.40E-02 | 8.36E-02 | 1.00E+00 |
| ENSG00000215481.7_BCRP3      | ENSG00000160789.18_LMNA | -0.12137 | -0.275254561 | 0.038573554 | 1.36E-01 | 3.76E-01 | 1.00E+00 |
| ENSG00000249684.4_RP11-423H  | ENSG00000160789.18_LMNA | -0.17547 | -0.325578303 | -0.01673968 | 3.06E-02 | 1.45E-01 | 1.00E+00 |
| ENSG00000170421.10_KRT8      | ENSG00000160789.18_LMNA | 0.41579  | 0.274777124  | 0.53929208  | 9.98E-08 | 7.22E-06 | 5.12E-03 |
| ENSG00000213742.5_ZNF337-AS  | ENSG00000160789.18_LMNA | 0.20792  | 0.050391475  | 0.35536177  | 1.02E-02 | 6.63E-02 | 1.00E+00 |
| ENSG00000164707.14_SLC13A4   | ENSG00000160789.18_LMNA | 0.17934  | 0.020727292  | 0.329139832 | 2.71E-02 | 1.34E-01 | 1.00E+00 |
| ENSG00000226086.5	EIF3LP3    | ENSG00000160789.18_LMNA | -0.18182 | -0.331423879 | -0.02328976 | 2.50E-02 | 1.26E-01 | 1.00E+00 |
| ENSG00000229022.1_RP11-553N  | ENSG00000160789.18_LMNA | -0.02001 | -0.178641066 | 0.139636087 | 8.07E-01 | 9.23E-01 | 1.00E+00 |
| ENSG00000261136.1_RP11-37C7  | ENSG00000160789.18_LMNA | 0.05294  | -0.107159974 | 0.21037149  | 5.17E-01 | 7.64E-01 | 1.00E+00 |
| ENSG00000274667.1_RP11-31H5  | ENSG00000160789.18_LMNA | -0.15725 | -0.308718621 | 0.00200459  | 5.30E-02 | 2.09E-01 | 1.00E+00 |
| ENSG00000261187.1_RP11-1007  | ENSG00000160789.18_LMNA | -0.01658 | -0.175321091 | 0.14299497  | 8.39E-01 | 9.38E-01 | 1.00E+00 |
| ENSG00000229619.3_MBNL1-AS   | ENSG00000160789.18_LMNA | 0.01476  | -0.144780767 | 0.173553027 | 8.57E-01 | 9.44E-01 | 1.00E+00 |
| ENSG00000223820.5_CFL1P1     | ENSG00000160789.18_LMNA | -0.13905 | -0.291794823 | 0.020603088 | 8.75E-02 | 2.88E-01 | 1.00E+00 |
| ENSG00000143469.15_SYT14     | ENSG00000160789.18_LMNA | -0.27896 | -0.419527099 | -0.12532261 | 5.01E-04 | 6.75E-03 | 1.00E+00 |
| ENSG00000172350.8_ABCG4      | ENSG00000160789.18_LMNA | -0.14179 | -0.294345226 | 0.017814077 | 8.14E-02 | 2.75E-01 | 1.00E+00 |
| ENSG00000124466.8_LYPD3      | ENSG00000160789.18_LMNA | 0.02534  | -0.134404932 | 0.183797232 | 7.57E-01 | 8.99E-01 | 1.00E+00 |
| ENSG00000276141.3_WHAMMP3    | ENSG00000160789.18_LMNA | 0.26236  | 0.107655466  | 0.404658619 | 1.09E-03 | 1.24E-02 | 1.00E+00 |
| ENSG00000262772.1_RP11-353N  | ENSG00000160789.18_LMNA | -0.09556 | -0.250939717 | 0.064627381 | 2.42E-01 | 5.21E-01 | 1.00E+00 |
| ENSG00000118557.14_PMFBP1    | ENSG00000160789.18_LMNA | 0.04935  | -0.110716768 | 0.206928683 | 5.46E-01 | 7.84E-01 | 1.00E+00 |
| ENSG00000258644.4_SYNJ2BP-C  | ENSG00000160789.18_LMNA | -0.11323 | -0.267605805 | 0.046815605 | 1.65E-01 | 4.21E-01 | 1.00E+00 |
| ENSG00000188211.7_NCR3LG1    | ENSG00000160789.18_LMNA | -0.2121  | -0.359168841 | -0.05474352 | 8.71E-03 | 5.93E-02 | 1.00E+00 |
| ENSG00000213661.3_RP11-510I6 | ENSG00000160789.18_LMNA | -0.05384 | -0.211226318 | 0.106275582 | 5.10E-01 | 7.59E-01 | 1.00E+00 |
| ENSG00000213493.3_ACTN4P1    | ENSG00000160789.18_LMNA | 0.44915  | 0.31227791   | 0.567752829 | 6.47E-09 | 7.46E-07 | 3.32E-04 |
| ENSG00000100490.8_CDKL1      | ENSG00000160789.18_LMNA | 0.06203  | -0.098139021 | 0.219068165 | 4.48E-01 | 7.14E-01 | 1.00E+00 |
| ENSG00000238098.7_ABCA17P    | ENSG00000160789.18_LMNA | -0.10778 | -0.262477892 | 0.052317408 | 1.86E-01 | 4.52E-01 | 1.00E+00 |
| ENSG00000186704.9_DTX2P1     | ENSG00000160789.18_LMNA | 0.23298  | 0.076624473  | 0.378157525 | 3.87E-03 | 3.23E-02 | 1.00E+00 |
| ENSG00000251417.2_RP11-1348  | ENSG00000160789.18_LMNA | -0.02259 | -0.181143814 | 0.137099157 | 7.82E-01 | 9.11E-01 | 1.00E+00 |
| ENSG00000231154.1_MORF4L2-7  | ENSG00000160789.18_LMNA | -0.15071 | -0.302644682 | 0.0087044   | 6.38E-02 | 2.35E-01 | 1.00E+00 |
| ENSG00000148408.11_CACNA1B   | ENSG00000160789.18_LMNA | -0.2707  | -0.412140228 | -0.11652194 | 7.43E-04 | 9.18E-03 | 1.00E+00 |
| ENSG00000260941.1_LINC00622  | ENSG00000160789.18_LMNA | 0.01328  | -0.1462266   | 0.172120047 | 8.71E-01 | 9.50E-01 | 1.00E+00 |

|                             |                         |          |              |             |          |          |          |
|-----------------------------|-------------------------|----------|--------------|-------------|----------|----------|----------|
| ENSG00000233695.2_GAS6-AS1  | ENSG00000160789.18_LMNA | 0.08075  | -0.079475415 | 0.236902271 | 3.23E-01 | 6.09E-01 | 1.00E+00 |
| ENSG00000244513.5_CTD-2013N | ENSG00000160789.18_LMNA | 0.21333  | 0.056028607  | 0.360291076 | 8.32E-03 | 5.73E-02 | 1.00E+00 |
| ENSG00000136197.11_C7orf25  | ENSG00000160789.18_LMNA | 0.03093  | -0.128900637 | 0.189203783 | 7.05E-01 | 8.75E-01 | 1.00E+00 |
| ENSG00000239474.5_KLHL41    | ENSG00000160789.18_LMNA | -0.1361  | -0.289040154 | 0.023610023 | 9.45E-02 | 3.01E-01 | 1.00E+00 |
| ENSG00000236349.1_SUCLG2P2  | ENSG00000160789.18_LMNA | 0.08943  | -0.070778033 | 0.245140901 | 2.73E-01 | 5.58E-01 | 1.00E+00 |
| ENSG00000279103.1_CTC-204F2 | ENSG00000160789.18_LMNA | -0.11783 | -0.271927676 | 0.042163752 | 1.48E-01 | 3.95E-01 | 1.00E+00 |
| ENSG00000241769.6_LINC00893 | ENSG00000160789.18_LMNA | 0.07051  | -0.089699428 | 0.227159    | 3.88E-01 | 6.66E-01 | 1.00E+00 |
| ENSG00000172476.3_RAB40A    | ENSG00000160789.18_LMNA | 0.02933  | -0.130480124 | 0.187654315 | 7.20E-01 | 8.81E-01 | 1.00E+00 |
| ENSG00000224066.1_RP4-622L5 | ENSG00000160789.18_LMNA | 0.06554  | -0.094646936 | 0.222421242 | 4.22E-01 | 6.94E-01 | 1.00E+00 |
| ENSG00000261438.1_RP11-399O | ENSG00000160789.18_LMNA | 0.21946  | 0.062436924  | 0.365874172 | 6.60E-03 | 4.82E-02 | 1.00E+00 |
| ENSG00000187942.10_LDLRAD2  | ENSG00000160789.18_LMNA | 0.27623  | 0.122413738  | 0.417089829 | 5.72E-04 | 7.48E-03 | 1.00E+00 |
| ENSG00000105650.20_PDE4C    | ENSG00000160789.18_LMNA | 0.0537   | -0.106413843 | 0.21109271  | 5.11E-01 | 7.60E-01 | 1.00E+00 |
| ENSG00000027644.4_INSRR     | ENSG00000160789.18_LMNA | 0.19421  | 0.036125439  | 0.342810801 | 1.65E-02 | 9.41E-02 | 1.00E+00 |
| ENSG00000163126.13_ANKRD23  | ENSG00000160789.18_LMNA | -0.18311 | -0.332611507 | -0.02462377 | 2.39E-02 | 1.23E-01 | 1.00E+00 |
| ENSG00000227252.1_AC105760. | ENSG00000160789.18_LMNA | 0.0119   | -0.147575665 | 0.170781758 | 8.84E-01 | 9.55E-01 | 1.00E+00 |
| ENSG00000236778.6_INTS6-AS1 | ENSG00000160789.18_LMNA | -0.27187 | -0.41318289  | -0.11776135 | 7.04E-04 | 8.82E-03 | 1.00E+00 |
| ENSG00000226816.2_AC005082. | ENSG00000160789.18_LMNA | -0.22784 | -0.37349127  | -0.07122042 | 4.76E-03 | 3.78E-02 | 1.00E+00 |
| ENSG00000213312.3_RPL7AP34  | ENSG00000160789.18_LMNA | -0.04836 | -0.205977555 | 0.111697954 | 5.54E-01 | 7.88E-01 | 1.00E+00 |
| ENSG00000267060.4_PTGES3L   | ENSG00000160789.18_LMNA | -0.07272 | -0.229262091 | 0.087498206 | 3.73E-01 | 6.53E-01 | 1.00E+00 |
| ENSG00000237101.1_RP11-365O | ENSG00000160789.18_LMNA | -0.02454 | -0.183021162 | 0.135193424 | 7.64E-01 | 9.02E-01 | 1.00E+00 |
| ENSG00000281721.1_LINC01080 | ENSG00000160789.18_LMNA | -0.13424 | -0.287303034 | 0.02550332  | 9.92E-02 | 3.10E-01 | 1.00E+00 |
| ENSG00000226082.2_RP11-24H1 | ENSG00000160789.18_LMNA | -0.01641 | -0.175154502 | 0.143163318 | 8.41E-01 | 9.38E-01 | 1.00E+00 |
| ENSG00000142233.10_NTN5     | ENSG00000160789.18_LMNA | 0.07088  | -0.089328928 | 0.227513189 | 3.86E-01 | 6.64E-01 | 1.00E+00 |
| ENSG00000231826.4_AC016735. | ENSG00000160789.18_LMNA | -0.11985 | -0.273828303 | 0.040113689 | 1.41E-01 | 3.84E-01 | 1.00E+00 |
| ENSG00000121743.3_GJA3      | ENSG00000160789.18_LMNA | 0.21511  | 0.057896134  | 0.361920369 | 7.78E-03 | 5.44E-02 | 1.00E+00 |
| ENSG00000162931.10_TRIM17   | ENSG00000160789.18_LMNA | -0.22979 | -0.375264219 | -0.07327161 | 4.40E-03 | 3.56E-02 | 1.00E+00 |
| ENSG00000229985.2_RP11-40H2 | ENSG00000160789.18_LMNA | -0.12337 | -0.27712342  | 0.03655322  | 1.30E-01 | 3.65E-01 | 1.00E+00 |
| ENSG00000183379.7_SYNDIG1L  | ENSG00000160789.18_LMNA | -0.27021 | -0.411696207 | -0.11599441 | 7.61E-04 | 9.34E-03 | 1.00E+00 |
| ENSG00000145949.9_MYLK4     | ENSG00000160789.18_LMNA | -0.13552 | -0.288494163 | 0.024205343 | 9.60E-02 | 3.04E-01 | 1.00E+00 |
| ENSG00000259248.4_USP3-AS1  | ENSG00000160789.18_LMNA | -0.19205 | -0.340830227 | -0.03388558 | 1.78E-02 | 9.92E-02 | 1.00E+00 |
| ENSG00000187037.7_GPR141    | ENSG00000160789.18_LMNA | 0.05643  | -0.103703345 | 0.213709812 | 4.90E-01 | 7.46E-01 | 1.00E+00 |
| ENSG00000264775.1_PPIAP14   | ENSG00000160789.18_LMNA | 0.14247  | -0.017117173 | 0.294981814 | 8.00E-02 | 2.72E-01 | 1.00E+00 |
| ENSG00000235644.1_RPL10P5   | ENSG00000160789.18_LMNA | -0.02912 | -0.187454919 | 0.130683265 | 7.22E-01 | 8.82E-01 | 1.00E+00 |

|                              |                         |          |              |             |          |          |          |
|------------------------------|-------------------------|----------|--------------|-------------|----------|----------|----------|
| ENSG00000222047.7_C10orf55   | ENSG00000160789.18_LMNA | 0.30388  | 0.152033569  | 0.441710929 | 1.41E-04 | 2.48E-03 | 1.00E+00 |
| ENSG00000230787.1_PSAT1P3    | ENSG00000160789.18_LMNA | -0.30561 | -0.443245229 | -0.15389676 | 1.29E-04 | 2.31E-03 | 1.00E+00 |
| ENSG00000176920.11_FUT2      | ENSG00000160789.18_LMNA | 0.00707  | -0.152299971 | 0.166085911 | 9.31E-01 | 9.73E-01 | 1.00E+00 |
| ENSG00000196167.8_COLCA1     | ENSG00000160789.18_LMNA | -0.18645 | -0.335690169 | -0.02808698 | 2.14E-02 | 1.13E-01 | 1.00E+00 |
| ENSG00000204055.4_RP11-247A  | ENSG00000160789.18_LMNA | -0.0826  | -0.238663458 | 0.0776202   | 3.12E-01 | 5.98E-01 | 1.00E+00 |
| ENSG00000273007.1_RP11-170N  | ENSG00000160789.18_LMNA | -0.22132 | -0.367572748 | -0.06439154 | 6.14E-03 | 4.58E-02 | 1.00E+00 |
| ENSG00000196549.9_MME        | ENSG00000160789.18_LMNA | 0.10078  | -0.05937599  | 0.255872854 | 2.17E-01 | 4.91E-01 | 1.00E+00 |
| ENSG00000225580.2_RP1-159M2  | ENSG00000160789.18_LMNA | -0.00217 | -0.161310127 | 0.157089823 | 9.79E-01 | 9.92E-01 | 1.00E+00 |
| ENSG00000229689.3_AC009237.1 | ENSG00000160789.18_LMNA | 0.07289  | -0.087325969 | 0.229426524 | 3.72E-01 | 6.52E-01 | 1.00E+00 |
| ENSG00000205838.11_TTC23L    | ENSG00000160789.18_LMNA | -0.13005 | -0.28338128  | 0.029769427 | 1.10E-01 | 3.31E-01 | 1.00E+00 |
| ENSG00000279873.2_LINC01126  | ENSG00000160789.18_LMNA | 0.0102   | -0.149242258 | 0.169126854 | 9.01E-01 | 9.62E-01 | 1.00E+00 |
| ENSG00000239388.7_ASXB14     | ENSG00000160789.18_LMNA | -0.19433 | -0.342918081 | -0.03624685 | 1.64E-02 | 9.38E-02 | 1.00E+00 |
| ENSG00000180539.7_C9orf139   | ENSG00000160789.18_LMNA | 0.0234   | -0.13630847  | 0.181923006 | 7.75E-01 | 9.07E-01 | 1.00E+00 |
| ENSG00000234982.1_RP11-280C  | ENSG00000160789.18_LMNA | -0.0192  | -0.177857074 | 0.140429928 | 8.14E-01 | 9.27E-01 | 1.00E+00 |
| ENSG00000181097.5_RP11-429J  | ENSG00000160789.18_LMNA | 0.0394   | -0.120558739 | 0.197360945 | 6.30E-01 | 8.34E-01 | 1.00E+00 |
| ENSG00000271707.1_ATP1B3P1   | ENSG00000160789.18_LMNA | 0.04321  | -0.116796822 | 0.201025206 | 5.97E-01 | 8.14E-01 | 1.00E+00 |
| ENSG00000227908.3_FLJ31104   | ENSG00000160789.18_LMNA | -0.17897 | -0.328802908 | -0.02034964 | 2.74E-02 | 1.35E-01 | 1.00E+00 |
| ENSG00000182791.4_CCDC87     | ENSG00000160789.18_LMNA | 0.19726  | 0.03928809   | 0.345602715 | 1.49E-02 | 8.73E-02 | 1.00E+00 |
| ENSG00000127324.7_TSPAN8     | ENSG00000160789.18_LMNA | -0.19915 | -0.347334128 | -0.0412525  | 1.39E-02 | 8.31E-02 | 1.00E+00 |
| ENSG00000166105.14_GLB1L3    | ENSG00000160789.18_LMNA | -0.28425 | -0.424250203 | -0.13097406 | 3.87E-04 | 5.51E-03 | 1.00E+00 |
| ENSG00000254602.1_AP000662.4 | ENSG00000160789.18_LMNA | -0.11545 | -0.269698495 | 0.044564836 | 1.57E-01 | 4.09E-01 | 1.00E+00 |
| ENSG00000280194.1_AD000864.1 | ENSG00000160789.18_LMNA | 0.06262  | -0.097556099 | 0.219628404 | 4.43E-01 | 7.11E-01 | 1.00E+00 |
| ENSG00000186281.11_GPAT2     | ENSG00000160789.18_LMNA | -0.00389 | -0.162986884 | 0.155409831 | 9.62E-01 | 9.85E-01 | 1.00E+00 |
| ENSG00000230507.5_RPL7AP8    | ENSG00000160789.18_LMNA | -0.03324 | -0.191429069 | 0.126629411 | 6.84E-01 | 8.63E-01 | 1.00E+00 |
| ENSG00000177752.13_YIPF7     | ENSG00000160789.18_LMNA | -0.22454 | -0.370492128 | -0.06775642 | 5.42E-03 | 4.16E-02 | 1.00E+00 |
| ENSG00000153933.8_DGKE       | ENSG00000160789.18_LMNA | -0.18665 | -0.335869054 | -0.02828844 | 2.13E-02 | 1.13E-01 | 1.00E+00 |
| ENSG00000273274.1_ZBTB8B     | ENSG00000160789.18_LMNA | -0.32457 | -0.460001242 | -0.17437937 | 4.51E-05 | 9.89E-04 | 1.00E+00 |
| ENSG00000242607.1_RPS3AP34   | ENSG00000160789.18_LMNA | -0.09757 | -0.25283962  | 0.062606975 | 2.32E-01 | 5.09E-01 | 1.00E+00 |
| ENSG00000242411.2_CTD-2086L  | ENSG00000160789.18_LMNA | 0.02825  | -0.131538049 | 0.18661561  | 7.30E-01 | 8.86E-01 | 1.00E+00 |
| ENSG00000177994.14_C2orf73   | ENSG00000160789.18_LMNA | -0.09263 | -0.248170901 | 0.067567186 | 2.56E-01 | 5.39E-01 | 1.00E+00 |
| ENSG00000113389.14_NPR3      | ENSG00000160789.18_LMNA | -0.06157 | -0.218631317 | 0.098593404 | 4.51E-01 | 7.17E-01 | 1.00E+00 |
| ENSG00000241316.5_SUCLG2-A   | ENSG00000160789.18_LMNA | 0.05512  | -0.104997618 | 0.212460704 | 5.00E-01 | 7.53E-01 | 1.00E+00 |
| ENSG00000233175.2_CTD-2020K  | ENSG00000160789.18_LMNA | -0.12409 | -0.277799633 | 0.035821567 | 1.28E-01 | 3.62E-01 | 1.00E+00 |

|                              |                         |          |              |             |          |          |          |
|------------------------------|-------------------------|----------|--------------|-------------|----------|----------|----------|
| ENSG00000278993.1_RP3-424M6  | ENSG00000160789.18_LMNA | -0.0551  | -0.212440089 | 0.10501897  | 5.00E-01 | 7.53E-01 | 1.00E+00 |
| ENSG00000178222.11_RNF212    | ENSG00000160789.18_LMNA | -0.06959 | -0.226288362 | 0.090609785 | 3.94E-01 | 6.72E-01 | 1.00E+00 |
| ENSG00000159753.12_CARMIL2   | ENSG00000160789.18_LMNA | -0.11143 | -0.265911132 | 0.048635954 | 1.72E-01 | 4.31E-01 | 1.00E+00 |
| ENSG00000272419.4_RP11-403I1 | ENSG00000160789.18_LMNA | 0.11122  | -0.048842209 | 0.265718994 | 1.73E-01 | 4.32E-01 | 1.00E+00 |
| ENSG00000273472.1_RP11-102N  | ENSG00000160789.18_LMNA | -0.20486 | -0.352565975 | -0.04720283 | 1.13E-02 | 7.17E-02 | 1.00E+00 |
| ENSG00000226851.1_AC004112.4 | ENSG00000160789.18_LMNA | -0.03144 | -0.18968928  | 0.128405401 | 7.01E-01 | 8.72E-01 | 1.00E+00 |
| ENSG00000111218.10_PRMT8     | ENSG00000160789.18_LMNA | -0.18189 | -0.331492091 | -0.02336635 | 2.49E-02 | 1.26E-01 | 1.00E+00 |
| ENSG00000178789.7_CD300LB    | ENSG00000160789.18_LMNA | 0.14751  | -0.011974231 | 0.299671095 | 6.98E-02 | 2.49E-01 | 1.00E+00 |
| ENSG00000163806.14_SPDYA     | ENSG00000160789.18_LMNA | 0.04491  | -0.115118328 | 0.202657264 | 5.83E-01 | 8.06E-01 | 1.00E+00 |
| ENSG00000213104.3_NPM1P46    | ENSG00000160789.18_LMNA | 0.00221  | -0.157043543 | 0.161356341 | 9.78E-01 | 9.92E-01 | 1.00E+00 |
| ENSG00000126353.3_CCR7       | ENSG00000160789.18_LMNA | 0.07939  | -0.080834375 | 0.235610868 | 3.31E-01 | 6.17E-01 | 1.00E+00 |
| ENSG00000234665.7_RP11-262H  | ENSG00000160789.18_LMNA | -0.18268 | -0.332218707 | -0.02418243 | 2.43E-02 | 1.24E-01 | 1.00E+00 |
| ENSG00000189238.5_LINC00943  | ENSG00000160789.18_LMNA | -0.31725 | -0.453541365 | -0.1664534  | 6.82E-05 | 1.38E-03 | 1.00E+00 |
| ENSG00000279406.1_RP11-327E  | ENSG00000160789.18_LMNA | -0.13206 | -0.28526663  | 0.027719956 | 1.05E-01 | 3.21E-01 | 1.00E+00 |
| ENSG00000164136.15_IL15      | ENSG00000160789.18_LMNA | 0.1336   | -0.026154698 | 0.286704912 | 1.01E-01 | 3.13E-01 | 1.00E+00 |
| ENSG00000106714.16_CNTNAP3   | ENSG00000160789.18_LMNA | 0.15728  | -0.001969618 | 0.30875026  | 5.30E-02 | 2.09E-01 | 1.00E+00 |
| ENSG00000141255.11_SPATA22   | ENSG00000160789.18_LMNA | -0.28199 | -0.422237647 | -0.1285636  | 4.32E-04 | 6.02E-03 | 1.00E+00 |
| ENSG00000148426.11_PROSER2   | ENSG00000160789.18_LMNA | -0.05284 | -0.210267168 | 0.107267869 | 5.18E-01 | 7.64E-01 | 1.00E+00 |
| ENSG00000164082.13_GRM2      | ENSG00000160789.18_LMNA | -0.10835 | -0.263009477 | 0.05174795  | 1.84E-01 | 4.49E-01 | 1.00E+00 |
| ENSG00000227725.3_GCOM2      | ENSG00000160789.18_LMNA | -0.12257 | -0.276374594 | 0.037363048 | 1.33E-01 | 3.69E-01 | 1.00E+00 |
| ENSG00000122223.11_CD244     | ENSG00000160789.18_LMNA | -0.02056 | -0.179177215 | 0.139092967 | 8.01E-01 | 9.20E-01 | 1.00E+00 |
| ENSG00000196951.9_SCOC-AS1   | ENSG00000160789.18_LMNA | -0.31423 | -0.450877614 | -0.16319587 | 8.06E-05 | 1.58E-03 | 1.00E+00 |
| ENSG00000269202.1_           | ENSG00000160789.18_LMNA | -0.04029 | -0.19821739  | 0.119680286 | 6.22E-01 | 8.29E-01 | 1.00E+00 |
| ENSG00000150628.5_SPATA4     | ENSG00000160789.18_LMNA | -0.05118 | -0.208683938 | 0.108904415 | 5.31E-01 | 7.74E-01 | 1.00E+00 |
| ENSG00000232000.2_CLCN3P1    | ENSG00000160789.18_LMNA | 0.00622  | -0.153128389 | 0.165260993 | 9.39E-01 | 9.76E-01 | 1.00E+00 |
| ENSG00000279605.1_RP11-661A  | ENSG00000160789.18_LMNA | 0.06705  | -0.093141129 | 0.223864797 | 4.12E-01 | 6.86E-01 | 1.00E+00 |
| ENSG00000269825.1_CTD-3099C  | ENSG00000160789.18_LMNA | 0.16684  | 0.007846264  | 0.317603458 | 3.99E-02 | 1.73E-01 | 1.00E+00 |
| ENSG00000247373.3_RP11-486O  | ENSG00000160789.18_LMNA | -0.02832 | -0.186682871 | 0.131469565 | 7.29E-01 | 8.85E-01 | 1.00E+00 |
| ENSG00000074276.9_CDHR2      | ENSG00000160789.18_LMNA | 0.08606  | -0.074153397 | 0.241948982 | 2.92E-01 | 5.77E-01 | 1.00E+00 |
| ENSG00000111452.11_ADGRD1    | ENSG00000160789.18_LMNA | -0.04068 | -0.198593854 | 0.119293991 | 6.19E-01 | 8.27E-01 | 1.00E+00 |
| ENSG00000204623.7_ZNRD1ASF   | ENSG00000160789.18_LMNA | -0.17274 | -0.323056264 | -0.01392185 | 3.33E-02 | 1.53E-01 | 1.00E+00 |
| ENSG00000248873.1_SERBP1P6   | ENSG00000160789.18_LMNA | 0.09937  | -0.060793961 | 0.254542433 | 2.23E-01 | 4.99E-01 | 1.00E+00 |
| ENSG00000005961.16_ITGA2B    | ENSG00000160789.18_LMNA | 0.08691  | -0.073301758 | 0.242754982 | 2.87E-01 | 5.72E-01 | 1.00E+00 |

|                              |                         |          |              |             |          |          |          |
|------------------------------|-------------------------|----------|--------------|-------------|----------|----------|----------|
| ENSG00000110025.11_SNX15     | ENSG00000160789.18_LMNA | -0.0649  | -0.221804313 | 0.095290027 | 4.27E-01 | 6.98E-01 | 1.00E+00 |
| ENSG00000242661.1_RPS3AP43   | ENSG00000160789.18_LMNA | -0.2422  | -0.38649646  | -0.08632622 | 2.64E-03 | 2.42E-02 | 1.00E+00 |
| ENSG00000230590.6_FTX        | ENSG00000160789.18_LMNA | -0.02827 | -0.186628237 | 0.131525193 | 7.30E-01 | 8.86E-01 | 1.00E+00 |
| ENSG00000144488.13_ESPNL     | ENSG00000160789.18_LMNA | 0.09182  | -0.068381528 | 0.24740301  | 2.61E-01 | 5.44E-01 | 1.00E+00 |
| ENSG00000155066.14_PROM2     | ENSG00000160789.18_LMNA | -0.07843 | -0.2347012   | 0.081790924 | 3.37E-01 | 6.22E-01 | 1.00E+00 |
| ENSG00000153064.10_BANK1     | ENSG00000160789.18_LMNA | 0.03537  | -0.124531695 | 0.193481455 | 6.65E-01 | 8.53E-01 | 1.00E+00 |
| ENSG00000134317.16_GRHL1     | ENSG00000160789.18_LMNA | -0.21569 | -0.362440833 | -0.05849315 | 7.61E-03 | 5.35E-02 | 1.00E+00 |
| ENSG00000213755.3_RP11-342F  | ENSG00000160789.18_LMNA | -0.10481 | -0.259678488 | 0.055312883 | 1.99E-01 | 4.69E-01 | 1.00E+00 |
| ENSG00000197410.11_DCHS2     | ENSG00000160789.18_LMNA | -0.08774 | -0.243540917 | 0.072470876 | 2.82E-01 | 5.68E-01 | 1.00E+00 |
| ENSG00000189143.9_CLDN4      | ENSG00000160789.18_LMNA | 0.5338   | 0.409386804  | 0.638719189 | 1.43E-12 | 7.25E-10 | 7.32E-08 |
| ENSG00000206559.6_ZCWPW2     | ENSG00000160789.18_LMNA | -0.09164 | -0.247237407 | 0.068557094 | 2.61E-01 | 5.45E-01 | 1.00E+00 |
| ENSG00000237017.1_AC012314.1 | ENSG00000160789.18_LMNA | 0.31266  | 0.161502581  | 0.449490944 | 8.79E-05 | 1.70E-03 | 1.00E+00 |
| ENSG00000129167.8_TPH1       | ENSG00000160789.18_LMNA | 0.04852  | -0.111537928 | 0.20613272  | 5.53E-01 | 7.88E-01 | 1.00E+00 |
| ENSG00000152582.11_SPEF2     | ENSG00000160789.18_LMNA | -0.04792 | -0.205552055 | 0.1121367   | 5.58E-01 | 7.91E-01 | 1.00E+00 |
| ENSG00000133138.18_TBC1D8B   | ENSG00000160789.18_LMNA | 0.13067  | -0.029133857 | 0.283966213 | 1.09E-01 | 3.28E-01 | 1.00E+00 |
| ENSG00000259516.2_ANP32AP1   | ENSG00000160789.18_LMNA | 0.06843  | -0.091766089 | 0.225181777 | 4.02E-01 | 6.78E-01 | 1.00E+00 |
| ENSG00000279821.1_RP11-1334  | ENSG00000160789.18_LMNA | 0.34359  | 0.195058888  | 0.476714454 | 1.47E-05 | 4.01E-04 | 7.52E-01 |
| ENSG00000203722.6_RAET1G     | ENSG00000160789.18_LMNA | 0.12994  | -0.02987534  | 0.283283784 | 1.11E-01 | 3.32E-01 | 1.00E+00 |
| ENSG0000013725.13_CD6        | ENSG00000160789.18_LMNA | 0.07074  | -0.08946887  | 0.227379418 | 3.86E-01 | 6.65E-01 | 1.00E+00 |
| ENSG00000137976.7_DNASE2B    | ENSG00000160789.18_LMNA | -0.27147 | -0.412832662 | -0.11734493 | 7.17E-04 | 8.93E-03 | 1.00E+00 |
| ENSG00000280739.1	EIF1B-AS1  | ENSG00000160789.18_LMNA | -0.10604 | -0.260837117 | 0.054073791 | 1.94E-01 | 4.62E-01 | 1.00E+00 |
| ENSG00000240522.1_RPL7AP10   | ENSG00000160789.18_LMNA | -0.08381 | -0.239809486 | 0.076411807 | 3.05E-01 | 5.91E-01 | 1.00E+00 |
| ENSG00000260475.1_RP11-85A1  | ENSG00000160789.18_LMNA | -0.11935 | -0.273358712 | 0.040620448 | 1.43E-01 | 3.86E-01 | 1.00E+00 |
| ENSG00000253485.2_PCDHGA5    | ENSG00000160789.18_LMNA | 0.06992  | -0.090287993 | 0.226596172 | 3.92E-01 | 6.70E-01 | 1.00E+00 |
| ENSG00000241962.8_RP11-111H  | ENSG00000160789.18_LMNA | -0.38415 | -0.512038157 | -0.23960525 | 1.03E-06 | 4.71E-05 | 5.28E-02 |
| ENSG00000111432.4_FZD10      | ENSG00000160789.18_LMNA | 0.09352  | -0.066670926 | 0.249015578 | 2.52E-01 | 5.33E-01 | 1.00E+00 |
| ENSG00000105852.9_PON3       | ENSG00000160789.18_LMNA | -0.16637 | -0.317168729 | -0.00736287 | 4.05E-02 | 1.75E-01 | 1.00E+00 |
| ENSG00000172264.15_MACROD2   | ENSG00000160789.18_LMNA | -0.2668  | -0.40864231  | -0.11237068 | 8.92E-04 | 1.06E-02 | 1.00E+00 |
| ENSG00000267322.2_SNHG22     | ENSG00000160789.18_LMNA | 0.00462  | -0.154697507 | 0.163697282 | 9.55E-01 | 9.82E-01 | 1.00E+00 |
| ENSG00000233873.1_RPL7P44    | ENSG00000160789.18_LMNA | -0.05213 | -0.209592945 | 0.107965007 | 5.24E-01 | 7.69E-01 | 1.00E+00 |
| ENSG00000255200.1_AP003068   | ENSG00000160789.18_LMNA | 0.22857  | 0.071984728  | 0.374152157 | 4.62E-03 | 3.69E-02 | 1.00E+00 |
| ENSG00000242882.1_RPL5P11    | ENSG00000160789.18_LMNA | -0.17575 | -0.325833466 | -0.01702505 | 3.03E-02 | 1.44E-01 | 1.00E+00 |
| ENSG00000271092.4_TMEN56-R   | ENSG00000160789.18_LMNA | -0.21113 | -0.358289633 | -0.05373742 | 9.03E-03 | 6.09E-02 | 1.00E+00 |



|                              |                         |          |              |             |          |          |          |
|------------------------------|-------------------------|----------|--------------|-------------|----------|----------|----------|
| ENSG00000100784.8_RPS6KA5    | ENSG00000160789.18_LMNA | -0.39079 | -0.517776083 | -0.24695123 | 6.44E-07 | 3.21E-05 | 3.30E-02 |
| ENSG00000250536.1_ABHD17AP   | ENSG00000160789.18_LMNA | -0.00448 | -0.163568039 | 0.154827125 | 9.56E-01 | 9.82E-01 | 1.00E+00 |
| ENSG00000276170.3_AC124789.  | ENSG00000160789.18_LMNA | 0.22891  | 0.072348194  | 0.374466336 | 4.56E-03 | 3.66E-02 | 1.00E+00 |
| ENSG00000234241.1_RP4-775C1  | ENSG00000160789.18_LMNA | 0.18953  | 0.031277719  | 0.338520805 | 1.94E-02 | 1.05E-01 | 1.00E+00 |
| ENSG00000247157.5_LINC01252  | ENSG00000160789.18_LMNA | -0.09858 | -0.253801036 | 0.061583595 | 2.27E-01 | 5.03E-01 | 1.00E+00 |
| ENSG00000148680.14_HTR7      | ENSG00000160789.18_LMNA | 0.01761  | -0.141989693 | 0.176315483 | 8.30E-01 | 9.33E-01 | 1.00E+00 |
| ENSG00000226913.1_BSN-AS2    | ENSG00000160789.18_LMNA | -0.02386 | -0.182366414 | 0.13585834  | 7.70E-01 | 9.05E-01 | 1.00E+00 |
| ENSG00000235703.4_LINC00894  | ENSG00000160789.18_LMNA | -0.06927 | -0.2259825   | 0.090929475 | 3.96E-01 | 6.73E-01 | 1.00E+00 |
| ENSG00000196550.9_FAM72A     | ENSG00000160789.18_LMNA | 0.07768  | -0.082546101 | 0.233982642 | 3.42E-01 | 6.26E-01 | 1.00E+00 |
| ENSG00000215022.6_RP1-257A7  | ENSG00000160789.18_LMNA | -0.29968 | -0.437983038 | -0.14751514 | 1.76E-04 | 2.96E-03 | 1.00E+00 |
| ENSG00000233609.3_RPL10P19   | ENSG00000160789.18_LMNA | -0.00245 | -0.161584919 | 0.156814627 | 9.76E-01 | 9.91E-01 | 1.00E+00 |
| ENSG00000244300.2_GATA2-AS   | ENSG00000160789.18_LMNA | -0.10504 | -0.25989713  | 0.05507913  | 1.98E-01 | 4.67E-01 | 1.00E+00 |
| ENSG00000203709.8_C1orf132   | ENSG00000160789.18_LMNA | 0.05293  | -0.107176585 | 0.21035543  | 5.17E-01 | 7.64E-01 | 1.00E+00 |
| ENSG00000232393.1_RPL5P6     | ENSG00000160789.18_LMNA | -0.06191 | -0.218949518 | 0.098262444 | 4.49E-01 | 7.15E-01 | 1.00E+00 |
| ENSG00000254815.4_RP11-496IS | ENSG00000160789.18_LMNA | 0.17224  | 0.013403765  | 0.322592082 | 3.39E-02 | 1.55E-01 | 1.00E+00 |
| ENSG00000118997.12_DNAH7     | ENSG00000160789.18_LMNA | -0.0591  | -0.216266675 | 0.101050674 | 4.70E-01 | 7.30E-01 | 1.00E+00 |
| ENSG00000231066.3_NPM1P9     | ENSG00000160789.18_LMNA | 0.11301  | -0.047036406 | 0.267400351 | 1.66E-01 | 4.22E-01 | 1.00E+00 |
| ENSG00000131969.13_ABHD12B   | ENSG00000160789.18_LMNA | -0.04956 | -0.207122619 | 0.110516627 | 5.44E-01 | 7.82E-01 | 1.00E+00 |
| ENSG00000159618.14_ADGRG5    | ENSG00000160789.18_LMNA | 0.01718  | -0.142407734 | 0.175902048 | 8.34E-01 | 9.35E-01 | 1.00E+00 |
| ENSG00000213228.5_RPL12P38   | ENSG00000160789.18_LMNA | -0.06397 | -0.220918878 | 0.096212548 | 4.34E-01 | 7.03E-01 | 1.00E+00 |
| ENSG00000166923.9_GREM1      | ENSG00000160789.18_LMNA | -0.35476 | -0.486488036 | -0.20726906 | 7.31E-06 | 2.27E-04 | 3.75E-01 |
| ENSG00000115648.12_MLPH      | ENSG00000160789.18_LMNA | 0.25367  | 0.098442342  | 0.396842152 | 1.61E-03 | 1.66E-02 | 1.00E+00 |
| ENSG00000228507.1_DAP3P2     | ENSG00000160789.18_LMNA | -0.13382 | -0.286908301 | 0.02593323  | 1.00E-01 | 3.12E-01 | 1.00E+00 |
| ENSG00000174292.11_TNK1      | ENSG00000160789.18_LMNA | -0.09239 | -0.247942945 | 0.067808975 | 2.58E-01 | 5.40E-01 | 1.00E+00 |
| ENSG00000183889.11_AC138969  | ENSG00000160789.18_LMNA | 0.00765  | -0.151736938 | 0.166646311 | 9.25E-01 | 9.71E-01 | 1.00E+00 |
| ENSG00000185269.10_NOTUM     | ENSG00000160789.18_LMNA | 0.05613  | -0.10400247  | 0.213421218 | 4.92E-01 | 7.48E-01 | 1.00E+00 |
| ENSG00000279792.1_RP11-893F  | ENSG00000160789.18_LMNA | -0.15169 | -0.303555792 | 0.007701186 | 6.21E-02 | 2.31E-01 | 1.00E+00 |
| ENSG00000107147.10_KCNT1     | ENSG00000160789.18_LMNA | -0.17854 | -0.328405026 | -0.01990378 | 2.78E-02 | 1.36E-01 | 1.00E+00 |
| ENSG00000171217.5_CLDN20     | ENSG00000160789.18_LMNA | -0.11866 | -0.272711179 | 0.041318967 | 1.45E-01 | 3.90E-01 | 1.00E+00 |
| ENSG00000250151.8_ARPC4-TTL  | ENSG00000160789.18_LMNA | -0.21784 | -0.36440358  | -0.06074654 | 7.02E-03 | 5.05E-02 | 1.00E+00 |
| ENSG00000152822.12_GRM1      | ENSG00000160789.18_LMNA | -0.20204 | -0.349982096 | -0.0442614  | 1.26E-02 | 7.71E-02 | 1.00E+00 |
| ENSG00000248019.2_FAM13A-AS  | ENSG00000160789.18_LMNA | -0.07906 | -0.235298519 | 0.081162887 | 3.33E-01 | 6.19E-01 | 1.00E+00 |
| ENSG00000091262.13_ABCC6     | ENSG00000160789.18_LMNA | -0.02248 | -0.181033429 | 0.137211138 | 7.83E-01 | 9.11E-01 | 1.00E+00 |

|                             |                         |          |              |             |          |          |          |
|-----------------------------|-------------------------|----------|--------------|-------------|----------|----------|----------|
| ENSG00000180139.11_ACTA2-AS | ENSG00000160789.18_LMNA | 0.17285  | 0.014040373  | 0.323162432 | 3.32E-02 | 1.53E-01 | 1.00E+00 |
| ENSG00000268575.1_RP1-283E3 | ENSG00000160789.18_LMNA | -0.028   | -0.186371728 | 0.131786339 | 7.32E-01 | 8.87E-01 | 1.00E+00 |
| ENSG00000162924.12_REL      | ENSG00000160789.18_LMNA | 0.02801  | -0.131775528 | 0.186382347 | 7.32E-01 | 8.87E-01 | 1.00E+00 |
| ENSG00000269693.1_CTD-2192J | ENSG00000160789.18_LMNA | -0.05196 | -0.209424379 | 0.108139254 | 5.25E-01 | 7.70E-01 | 1.00E+00 |
| ENSG00000231010.1_RP6-109B7 | ENSG00000160789.18_LMNA | -0.23642 | -0.381267346 | -0.08023586 | 3.36E-03 | 2.92E-02 | 1.00E+00 |
| ENSG00000169758.11_TMEM266  | ENSG00000160789.18_LMNA | -0.16008 | -0.311347993 | -0.0009044  | 4.88E-02 | 1.98E-01 | 1.00E+00 |
| ENSG00000267605.4_CTD-3220F | ENSG00000160789.18_LMNA | -0.02473 | -0.183205291 | 0.135006385 | 7.62E-01 | 9.01E-01 | 1.00E+00 |
| ENSG00000021488.11_SLC7A9   | ENSG00000160789.18_LMNA | -0.01904 | -0.177701229 | 0.140587682 | 8.16E-01 | 9.28E-01 | 1.00E+00 |
| ENSG00000265479.4_DTX2P1-UF | ENSG00000160789.18_LMNA | 0.03629  | -0.123629227 | 0.194363566 | 6.57E-01 | 8.48E-01 | 1.00E+00 |
| ENSG00000181856.13_SLC2A4   | ENSG00000160789.18_LMNA | -0.11423 | -0.268548843 | 0.045801726 | 1.61E-01 | 4.16E-01 | 1.00E+00 |
| ENSG00000236519.1_LINC01424 | ENSG00000160789.18_LMNA | -0.04646 | -0.204155242 | 0.113576129 | 5.70E-01 | 7.99E-01 | 1.00E+00 |
| ENSG00000236830.5_CBR3-AS1  | ENSG00000160789.18_LMNA | -0.01119 | -0.170085658 | 0.148276902 | 8.91E-01 | 9.57E-01 | 1.00E+00 |
| ENSG00000259172.1_RP11-299G | ENSG00000160789.18_LMNA | -0.1334  | -0.286513357 | 0.026363252 | 1.01E-01 | 3.14E-01 | 1.00E+00 |
| ENSG00000115919.13_KYNU     | ENSG00000160789.18_LMNA | 0.17335  | 0.014550224  | 0.323619054 | 3.27E-02 | 1.51E-01 | 1.00E+00 |
| ENSG00000261614.1_CSDAP1    | ENSG00000160789.18_LMNA | 0.38515  | 0.240704393  | 0.512898243 | 9.61E-07 | 4.44E-05 | 4.93E-02 |
| ENSG00000164675.9_IQUB      | ENSG00000160789.18_LMNA | 0.07493  | -0.08528518  | 0.231373482 | 3.59E-01 | 6.42E-01 | 1.00E+00 |
| ENSG00000213073.4_RP11-288H | ENSG00000160789.18_LMNA | 0.14272  | -0.016863043 | 0.295213881 | 7.94E-02 | 2.71E-01 | 1.00E+00 |
| ENSG00000235974.1_VN2R19P   | ENSG00000160789.18_LMNA | 0.04126  | -0.118721757 | 0.199151351 | 6.14E-01 | 8.24E-01 | 1.00E+00 |
| ENSG00000279170.1_RP1-199J3 | ENSG00000160789.18_LMNA | -0.07596 | -0.232353452 | 0.084256975 | 3.52E-01 | 6.36E-01 | 1.00E+00 |
| ENSG00000186472.18_PCLO     | ENSG00000160789.18_LMNA | -0.13619 | -0.289126725 | 0.02351561  | 9.43E-02 | 3.01E-01 | 1.00E+00 |
| ENSG00000249858.2_SNX5P1    | ENSG00000160789.18_LMNA | 0.00151  | -0.157726256 | 0.160674438 | 9.85E-01 | 9.94E-01 | 1.00E+00 |
| ENSG00000279491.1_RP11-810P | ENSG00000160789.18_LMNA | 0.10721  | -0.052897242 | 0.261936424 | 1.89E-01 | 4.56E-01 | 1.00E+00 |
| ENSG00000105808.16_RASA4    | ENSG00000160789.18_LMNA | -0.12194 | -0.275791482 | 0.037993377 | 1.34E-01 | 3.73E-01 | 1.00E+00 |
| ENSG00000281189.1_GHET1     | ENSG00000160789.18_LMNA | -0.07871 | -0.234963586 | 0.081515075 | 3.35E-01 | 6.21E-01 | 1.00E+00 |
| ENSG00000157306.13_RP11-66N | ENSG00000160789.18_LMNA | -0.3198  | -0.455797412 | -0.16921726 | 5.91E-05 | 1.23E-03 | 1.00E+00 |
| ENSG00000266896.1_RP1-266L2 | ENSG00000160789.18_LMNA | -0.02629 | -0.18472003  | 0.133466839 | 7.48E-01 | 8.95E-01 | 1.00E+00 |
| ENSG00000099338.21_CATSPER  | ENSG00000160789.18_LMNA | 0.04027  | -0.119702658 | 0.198195585 | 6.22E-01 | 8.29E-01 | 1.00E+00 |
| ENSG00000225774.2_SIRPAP1   | ENSG00000160789.18_LMNA | 0.2047   | 0.047029544  | 0.352413882 | 1.14E-02 | 7.20E-02 | 1.00E+00 |
| ENSG00000188596.8_CFAP54    | ENSG00000160789.18_LMNA | 0.13124  | -0.028561042 | 0.284493191 | 1.07E-01 | 3.25E-01 | 1.00E+00 |
| ENSG00000214821.4_HMGB1P4   | ENSG00000160789.18_LMNA | -0.05742 | -0.214659309 | 0.102718797 | 4.82E-01 | 7.40E-01 | 1.00E+00 |
| ENSG00000205209.6_SCGB2B2   | ENSG00000160789.18_LMNA | -0.17713 | -0.327110175 | -0.01845362 | 2.90E-02 | 1.40E-01 | 1.00E+00 |
| ENSG00000188389.9_PDCD1     | ENSG00000160789.18_LMNA | 0.13772  | -0.021965097 | 0.290547721 | 9.07E-02 | 2.93E-01 | 1.00E+00 |
| ENSG00000144426.17_NBEAL1   | ENSG00000160789.18_LMNA | 0.04136  | -0.118617624 | 0.19925278  | 6.13E-01 | 8.24E-01 | 1.00E+00 |

|                             |                         |          |              |             |          |          |          |
|-----------------------------|-------------------------|----------|--------------|-------------|----------|----------|----------|
| ENSG00000229474.5_PATL2     | ENSG00000160789.18_LMNA | 0.04066  | -0.119312654 | 0.198575668 | 6.19E-01 | 8.27E-01 | 1.00E+00 |
| ENSG00000088756.11_ARHGAP2  | ENSG00000160789.18_LMNA | -0.24465 | -0.388708246 | -0.08890906 | 2.38E-03 | 2.24E-02 | 1.00E+00 |
| ENSG00000226478.3_UPF3AP1   | ENSG00000160789.18_LMNA | -0.04991 | -0.207459444 | 0.110168964 | 5.41E-01 | 7.81E-01 | 1.00E+00 |
| ENSG00000197822.9_OCLN      | ENSG00000160789.18_LMNA | -0.11696 | -0.271113621 | 0.043041003 | 1.51E-01 | 4.00E-01 | 1.00E+00 |
| ENSG00000203546.6_RP11-176H | ENSG00000160789.18_LMNA | -0.36808 | -0.498092133 | -0.22187995 | 3.08E-06 | 1.12E-04 | 1.58E-01 |
| ENSG00000185988.10_PLK5     | ENSG00000160789.18_LMNA | -0.03301 | -0.191206634 | 0.126856589 | 6.86E-01 | 8.64E-01 | 1.00E+00 |
| ENSG00000233087.6_WTH3DI    | ENSG00000160789.18_LMNA | -0.17887 | -0.328708551 | -0.02024389 | 2.75E-02 | 1.35E-01 | 1.00E+00 |
| ENSG00000248780.1_ARL4AP2   | ENSG00000160789.18_LMNA | 0.13843  | -0.021242962 | 0.291209064 | 8.90E-02 | 2.90E-01 | 1.00E+00 |
| ENSG00000078814.14_MYH7B    | ENSG00000160789.18_LMNA | 0.00886  | -0.150550813 | 0.167826218 | 9.14E-01 | 9.67E-01 | 1.00E+00 |
| ENSG00000215784.5_FAM72D    | ENSG00000160789.18_LMNA | 0.16485  | 0.005804787  | 0.315766634 | 4.24E-02 | 1.80E-01 | 1.00E+00 |
| ENSG00000213522.4_RAC1P5    | ENSG00000160789.18_LMNA | 0.07102  | -0.089192544 | 0.227643549 | 3.85E-01 | 6.63E-01 | 1.00E+00 |
| ENSG00000145002.11_FAM86B2  | ENSG00000160789.18_LMNA | 0.11719  | -0.04281427  | 0.271324064 | 1.50E-01 | 3.99E-01 | 1.00E+00 |
| ENSG00000198416.9_ZNF658B   | ENSG00000160789.18_LMNA | -0.1136  | -0.26795385  | 0.04644149  | 1.63E-01 | 4.19E-01 | 1.00E+00 |
| ENSG00000232842.2_RP5-961K1 | ENSG00000160789.18_LMNA | 0.0035   | -0.155790826 | 0.162606784 | 9.66E-01 | 9.87E-01 | 1.00E+00 |
| ENSG00000130768.13_SMPDL3B  | ENSG00000160789.18_LMNA | -0.0081  | -0.167086768 | 0.151294267 | 9.21E-01 | 9.70E-01 | 1.00E+00 |
| ENSG00000124256.13_ZBP1     | ENSG00000160789.18_LMNA | -0.00814 | -0.167127062 | 0.151253764 | 9.21E-01 | 9.70E-01 | 1.00E+00 |
| ENSG00000144395.16_CCDC150  | ENSG00000160789.18_LMNA | -0.04325 | -0.201070631 | 0.116750129 | 5.97E-01 | 8.14E-01 | 1.00E+00 |
| ENSG00000228264.1_PSMD8P1   | ENSG00000160789.18_LMNA | -0.06663 | -0.223457473 | 0.093566166 | 4.15E-01 | 6.88E-01 | 1.00E+00 |
| ENSG00000138769.9_CDKL2     | ENSG00000160789.18_LMNA | -0.22079 | -0.367084229 | -0.06382914 | 6.27E-03 | 4.65E-02 | 1.00E+00 |
| ENSG00000118513.17_MYB      | ENSG00000160789.18_LMNA | -0.14956 | -0.301581152 | 0.00987465  | 6.59E-02 | 2.40E-01 | 1.00E+00 |
| ENSG00000231434.1_RP11-144L | ENSG00000160789.18_LMNA | 0.01025  | -0.149194951 | 0.169173853 | 9.00E-01 | 9.61E-01 | 1.00E+00 |
| ENSG00000119888.9_EPCAM     | ENSG00000160789.18_LMNA | -0.3362  | -0.470235024 | -0.18701195 | 2.29E-05 | 5.76E-04 | 1.00E+00 |
| ENSG00000182950.2_ODF3L1    | ENSG00000160789.18_LMNA | 0.20398  | 0.046281185  | 0.351756862 | 1.17E-02 | 7.34E-02 | 1.00E+00 |
| ENSG00000261542.1_RP11-16E1 | ENSG00000160789.18_LMNA | 0.08031  | -0.079909627 | 0.236489766 | 3.25E-01 | 6.12E-01 | 1.00E+00 |
| ENSG00000236790.4_LINC00299 | ENSG00000160789.18_LMNA | -0.18754 | -0.336685917 | -0.02920869 | 2.07E-02 | 1.10E-01 | 1.00E+00 |
| ENSG00000174501.13_ANKRD36  | ENSG00000160789.18_LMNA | -0.12576 | -0.279364979 | 0.034126591 | 1.23E-01 | 3.53E-01 | 1.00E+00 |
| ENSG00000105609.15_LILRB5   | ENSG00000160789.18_LMNA | 0.04044  | -0.119531893 | 0.198362017 | 6.21E-01 | 8.28E-01 | 1.00E+00 |
| ENSG00000247570.2_SDCBPP2   | ENSG00000160789.18_LMNA | -0.03185 | -0.190085134 | 0.12800149  | 6.97E-01 | 8.70E-01 | 1.00E+00 |
| ENSG00000091137.10_SLC26A4  | ENSG00000160789.18_LMNA | -0.05433 | -0.211704085 | 0.105781073 | 5.06E-01 | 7.57E-01 | 1.00E+00 |
| ENSG00000216657.1_GLRX3P2   | ENSG00000160789.18_LMNA | -0.1347  | -0.287727206 | 0.02504122  | 9.80E-02 | 3.08E-01 | 1.00E+00 |
| ENSG00000116329.9_OPRD1     | ENSG00000160789.18_LMNA | -0.28822 | -0.427787246 | -0.13521885 | 3.17E-04 | 4.71E-03 | 1.00E+00 |
| ENSG00000170122.5_FOXD4     | ENSG00000160789.18_LMNA | -0.09    | -0.245676415 | 0.070211033 | 2.70E-01 | 5.55E-01 | 1.00E+00 |
| ENSG00000101082.12_SLA2     | ENSG00000160789.18_LMNA | 0.14046  | -0.019165835 | 0.293109669 | 8.43E-02 | 2.81E-01 | 1.00E+00 |

|                             |                         |          |              |             |          |          |          |
|-----------------------------|-------------------------|----------|--------------|-------------|----------|----------|----------|
| ENSG00000183775.9_KCTD16    | ENSG00000160789.18_LMNA | -0.42301 | -0.54547278  | -0.28285318 | 5.66E-08 | 4.52E-06 | 2.90E-03 |
| ENSG00000255537.1_AP000708. | ENSG00000160789.18_LMNA | -0.30787 | -0.44524904  | -0.1563332  | 1.14E-04 | 2.10E-03 | 1.00E+00 |
| ENSG00000255152.7_MSH5-SAP  | ENSG00000160789.18_LMNA | -0.02603 | -0.184467042 | 0.133724077 | 7.50E-01 | 8.96E-01 | 1.00E+00 |
| ENSG00000251211.1_RP11-889L | ENSG00000160789.18_LMNA | -0.04986 | -0.207409766 | 0.110220245 | 5.42E-01 | 7.81E-01 | 1.00E+00 |
| ENSG00000214144.3_RP11-488L | ENSG00000160789.18_LMNA | 0.07856  | -0.081660444 | 0.234825317 | 3.36E-01 | 6.22E-01 | 1.00E+00 |
| ENSG00000278224.3_PRICKLE4  | ENSG00000160789.18_LMNA | -0.10901 | -0.263631345 | 0.051081517 | 1.81E-01 | 4.45E-01 | 1.00E+00 |
| ENSG00000186314.10_PRELID2  | ENSG00000160789.18_LMNA | 0.07301  | -0.087199625 | 0.229547133 | 3.71E-01 | 6.52E-01 | 1.00E+00 |
| ENSG00000235064.1_SLC25A5P2 | ENSG00000160789.18_LMNA | 0.02598  | -0.133775006 | 0.184416949 | 7.51E-01 | 8.96E-01 | 1.00E+00 |
| ENSG00000251034.1_RP11-582J | ENSG00000160789.18_LMNA | -0.06252 | -0.219538885 | 0.097649257 | 4.44E-01 | 7.11E-01 | 1.00E+00 |
| ENSG00000230067.3_HSPD1P6   | ENSG00000160789.18_LMNA | 0.11935  | -0.040626227 | 0.273353355 | 1.43E-01 | 3.86E-01 | 1.00E+00 |
| ENSG00000254503.1_CTD-2521M | ENSG00000160789.18_LMNA | 0.06256  | -0.097615858 | 0.21957098  | 4.44E-01 | 7.11E-01 | 1.00E+00 |
| ENSG00000240828.1_RPL21P4   | ENSG00000160789.18_LMNA | -0.21316 | -0.360136218 | -0.05585122 | 8.37E-03 | 5.76E-02 | 1.00E+00 |
| ENSG00000196917.5_HCAR1     | ENSG00000160789.18_LMNA | -0.30024 | -0.438478066 | -0.14811445 | 1.71E-04 | 2.89E-03 | 1.00E+00 |
| ENSG00000250120.5_PCDHA10   | ENSG00000160789.18_LMNA | -0.14304 | -0.295515284 | 0.016532924 | 7.87E-02 | 2.69E-01 | 1.00E+00 |
| ENSG00000249852.1_AC145676. | ENSG00000160789.18_LMNA | 0.49052  | 0.359382507  | 0.602657334 | 1.41E-10 | 3.00E-08 | 7.23E-06 |
| ENSG00000242849.2_ALDOAP1   | ENSG00000160789.18_LMNA | 0.26406  | 0.109459317  | 0.406183953 | 1.01E-03 | 1.17E-02 | 1.00E+00 |
| ENSG00000272320.1_RP11-506K | ENSG00000160789.18_LMNA | 0.0881   | -0.072110657 | 0.243881521 | 2.80E-01 | 5.66E-01 | 1.00E+00 |
| ENSG00000237842.2_RP11-110J | ENSG00000160789.18_LMNA | 0.05466  | -0.105457279 | 0.212016835 | 5.04E-01 | 7.55E-01 | 1.00E+00 |
| ENSG00000268628.2_RP1-122P2 | ENSG00000160789.18_LMNA | 0.11583  | -0.044182754 | 0.270053448 | 1.55E-01 | 4.07E-01 | 1.00E+00 |
| ENSG00000177570.12_SAMD12   | ENSG00000160789.18_LMNA | -0.31406 | -0.450720711 | -0.16300419 | 8.14E-05 | 1.59E-03 | 1.00E+00 |
| ENSG00000131503.19_ANKHD1   | ENSG00000160789.18_LMNA | 0.16636  | 0.007349068  | 0.317156319 | 4.05E-02 | 1.75E-01 | 1.00E+00 |
| ENSG00000224596.6_ZMIZ1-AS1 | ENSG00000160789.18_LMNA | 0.13381  | -0.025941418 | 0.286900782 | 1.00E-01 | 3.12E-01 | 1.00E+00 |
| ENSG00000232528.3_RP4-673D2 | ENSG00000160789.18_LMNA | -0.01451 | -0.173311182 | 0.145024877 | 8.59E-01 | 9.45E-01 | 1.00E+00 |
| ENSG00000171643.12_S100Z    | ENSG00000160789.18_LMNA | -0.15306 | -0.304832299 | 0.006294583 | 5.98E-02 | 2.25E-01 | 1.00E+00 |
| ENSG00000225536.2_STIP1P3   | ENSG00000160789.18_LMNA | 0.10747  | -0.052628888 | 0.262187047 | 1.88E-01 | 4.54E-01 | 1.00E+00 |
| ENSG00000180245.4_RRH       | ENSG00000160789.18_LMNA | -0.11624 | -0.270439653 | 0.043766926 | 1.54E-01 | 4.04E-01 | 1.00E+00 |
| ENSG00000261126.6_RP11-795F | ENSG00000160789.18_LMNA | -0.11252 | -0.266939692 | 0.047531365 | 1.68E-01 | 4.25E-01 | 1.00E+00 |
| ENSG00000089250.17_NOS1     | ENSG00000160789.18_LMNA | -0.15224 | -0.304066501 | 0.007138575 | 6.12E-02 | 2.29E-01 | 1.00E+00 |
| ENSG00000269559.2_RP11-629B | ENSG00000160789.18_LMNA | -0.16433 | -0.315286218 | -0.00527127 | 4.31E-02 | 1.82E-01 | 1.00E+00 |
| ENSG00000253669.3_KB-1732A1 | ENSG00000160789.18_LMNA | 0.06719  | -0.093007259 | 0.223993065 | 4.11E-01 | 6.85E-01 | 1.00E+00 |
| ENSG00000244691.1_RPL10AP1  | ENSG00000160789.18_LMNA | -0.11182 | -0.266281551 | 0.048238243 | 1.70E-01 | 4.29E-01 | 1.00E+00 |
| ENSG00000280202.1_RP5-1180D | ENSG00000160789.18_LMNA | 0.17765  | 0.018982769  | 0.327582791 | 2.86E-02 | 1.39E-01 | 1.00E+00 |
| ENSG00000258090.1_RP11-734E | ENSG00000160789.18_LMNA | -0.11734 | -0.271472048 | 0.04265481  | 1.50E-01 | 3.98E-01 | 1.00E+00 |

|                              |                         |          |              |             |          |          |          |
|------------------------------|-------------------------|----------|--------------|-------------|----------|----------|----------|
| ENSG00000236204.4_LINC01376  | ENSG00000160789.18_LMNA | -0.16856 | -0.319191943 | -0.00961382 | 3.79E-02 | 1.67E-01 | 1.00E+00 |
| ENSG00000279192.1_PWAR5      | ENSG00000160789.18_LMNA | -0.16147 | -0.312629766 | -0.00232438 | 4.69E-02 | 1.93E-01 | 1.00E+00 |
| ENSG00000188522.13_FAM83G    | ENSG00000160789.18_LMNA | 0.36167  | 0.214836424  | 0.492510427 | 4.69E-06 | 1.58E-04 | 2.41E-01 |
| ENSG00000136535.13_TBR1      | ENSG00000160789.18_LMNA | -0.18936 | -0.338363602 | -0.03110035 | 1.95E-02 | 1.06E-01 | 1.00E+00 |
| ENSG00000185245.7_GP1BA      | ENSG00000160789.18_LMNA | 0.09373  | -0.066466118 | 0.249208532 | 2.51E-01 | 5.31E-01 | 1.00E+00 |
| ENSG00000173200.11_PARP15    | ENSG00000160789.18_LMNA | -0.00186 | -0.161013196 | 0.157387134 | 9.82E-01 | 9.93E-01 | 1.00E+00 |
| ENSG00000233757.5_AC092835.1 | ENSG00000160789.18_LMNA | -0.10972 | -0.264303716 | 0.050360646 | 1.78E-01 | 4.41E-01 | 1.00E+00 |
| ENSG00000187504.6_RPL7P48    | ENSG00000160789.18_LMNA | -0.14749 | -0.29965149  | 0.011995766 | 6.98E-02 | 2.49E-01 | 1.00E+00 |
| ENSG00000215126.9_CBWD7      | ENSG00000160789.18_LMNA | -0.0732  | -0.229720749 | 0.087017735 | 3.70E-01 | 6.51E-01 | 1.00E+00 |
| ENSG00000186976.13_EFCAB6    | ENSG00000160789.18_LMNA | 0.1647   | 0.005651939  | 0.315629014 | 4.26E-02 | 1.81E-01 | 1.00E+00 |
| ENSG00000235332.2_RPSAP76    | ENSG00000160789.18_LMNA | -0.1874  | -0.33655948  | -0.02906622 | 2.08E-02 | 1.11E-01 | 1.00E+00 |
| ENSG00000213693.4_SEC14L1P   | ENSG00000160789.18_LMNA | 0.19292  | 0.0347918    | 0.341631869 | 1.73E-02 | 9.71E-02 | 1.00E+00 |
| ENSG00000250999.1_RP11-1379  | ENSG00000160789.18_LMNA | -0.1317  | -0.284927012 | 0.028089332 | 1.06E-01 | 3.23E-01 | 1.00E+00 |
| ENSG00000181392.13_SYNE4     | ENSG00000160789.18_LMNA | 0.03779  | -0.122149158 | 0.195809136 | 6.44E-01 | 8.42E-01 | 1.00E+00 |
| ENSG00000257950.3_P2RX5-TA   | ENSG00000160789.18_LMNA | -0.1618  | -0.312935802 | -0.0026636  | 4.64E-02 | 1.92E-01 | 1.00E+00 |
| ENSG00000245149.3_RNF139-AS  | ENSG00000160789.18_LMNA | -0.17057 | -0.321048261 | -0.01168185 | 3.56E-02 | 1.61E-01 | 1.00E+00 |
| ENSG00000160224.15_AIRE      | ENSG00000160789.18_LMNA | 0.1242   | -0.035704527 | 0.277907774 | 1.27E-01 | 3.61E-01 | 1.00E+00 |
| ENSG00000273669.1_RP11-405M  | ENSG00000160789.18_LMNA | 0.1697   | 0.01078569   | 0.320244136 | 3.66E-02 | 1.63E-01 | 1.00E+00 |
| ENSG00000243795.1_RP11-572M  | ENSG00000160789.18_LMNA | -0.25813 | -0.400860305 | -0.10317208 | 1.32E-03 | 1.43E-02 | 1.00E+00 |
| ENSG00000272914.1_RP11-330C  | ENSG00000160789.18_LMNA | -0.23199 | -0.377252941 | -0.07557548 | 4.03E-03 | 3.33E-02 | 1.00E+00 |
| ENSG00000215007.3_DNAJA1P3   | ENSG00000160789.18_LMNA | 0.01851  | -0.141109442 | 0.17718567  | 8.21E-01 | 9.30E-01 | 1.00E+00 |
| ENSG00000272630.1_RP11-344N  | ENSG00000160789.18_LMNA | -0.24984 | -0.393393274 | -0.09439341 | 1.91E-03 | 1.89E-02 | 1.00E+00 |
| ENSG00000278937.1_RP11-139H  | ENSG00000160789.18_LMNA | -0.42765 | -0.549445123 | -0.28806339 | 3.90E-08 | 3.36E-06 | 2.00E-03 |
| ENSG00000224729.5_PCOLCE-A   | ENSG00000160789.18_LMNA | 0.34044  | 0.191626857  | 0.473954704 | 1.77E-05 | 4.67E-04 | 9.10E-01 |
| ENSG00000226549.3_SCDP1      | ENSG00000160789.18_LMNA | 0.05824  | -0.101905236 | 0.215443453 | 4.76E-01 | 7.35E-01 | 1.00E+00 |
| ENSG00000155640.6_           | ENSG00000160789.18_LMNA | 0.1418   | -0.017802563 | 0.294355745 | 8.14E-02 | 2.75E-01 | 1.00E+00 |
| ENSG00000267679.1	EIF5AP2    | ENSG00000160789.18_LMNA | -0.04759 | -0.205239595 | 0.11245881  | 5.60E-01 | 7.93E-01 | 1.00E+00 |
| ENSG00000243744.2_CTC-232H1  | ENSG00000160789.18_LMNA | -0.06529 | -0.222185386 | 0.094892825 | 4.24E-01 | 6.95E-01 | 1.00E+00 |
| ENSG00000139547.7_RDH16      | ENSG00000160789.18_LMNA | -0.09302 | -0.248537364 | 0.067178407 | 2.54E-01 | 5.36E-01 | 1.00E+00 |
| ENSG00000227110.5_LMCD1-AS   | ENSG00000160789.18_LMNA | -0.38248 | -0.510591656 | -0.23775828 | 1.16E-06 | 5.18E-05 | 5.94E-02 |
| ENSG00000228302.2_RP11-186N  | ENSG00000160789.18_LMNA | -0.06239 | -0.219414025 | 0.097779184 | 4.45E-01 | 7.12E-01 | 1.00E+00 |
| ENSG00000246777.1_RP11-61A1  | ENSG00000160789.18_LMNA | 0.18861  | 0.03031613   | 0.337668324 | 2.00E-02 | 1.08E-01 | 1.00E+00 |
| ENSG00000138336.8_TET1       | ENSG00000160789.18_LMNA | -0.14155 | -0.294122931 | 0.018057363 | 8.19E-02 | 2.76E-01 | 1.00E+00 |

|                             |                         |          |              |             |          |          |          |
|-----------------------------|-------------------------|----------|--------------|-------------|----------|----------|----------|
| ENSG00000256546.1_AC156455. | ENSG00000160789.18_LMNA | -0.16713 | -0.317872544 | -0.00814555 | 3.96E-02 | 1.72E-01 | 1.00E+00 |
| ENSG00000251432.5_RP11-420A | ENSG00000160789.18_LMNA | -0.04113 | -0.199031509 | 0.118844785 | 6.15E-01 | 8.25E-01 | 1.00E+00 |
| ENSG00000250131.1_RP11-130F | ENSG00000160789.18_LMNA | -0.33539 | -0.469518424 | -0.18612432 | 2.40E-05 | 5.99E-04 | 1.00E+00 |
| ENSG00000174951.9_FUT1      | ENSG00000160789.18_LMNA | -0.26031 | -0.402819513 | -0.10548315 | 1.20E-03 | 1.33E-02 | 1.00E+00 |
| ENSG00000215045.7_GRID2IP   | ENSG00000160789.18_LMNA | -0.08808 | -0.243861091 | 0.072132266 | 2.81E-01 | 5.66E-01 | 1.00E+00 |
| ENSG00000279541.1_CTC-444N2 | ENSG00000160789.18_LMNA | 0.12515  | -0.034746428 | 0.27879274  | 1.24E-01 | 3.56E-01 | 1.00E+00 |
| ENSG00000231784.7_DBIL5P    | ENSG00000160789.18_LMNA | -0.02288 | -0.181423072 | 0.136815826 | 7.80E-01 | 9.09E-01 | 1.00E+00 |
| ENSG00000152931.7_PART1     | ENSG00000160789.18_LMNA | -0.21384 | -0.360761908 | -0.05656806 | 8.16E-03 | 5.65E-02 | 1.00E+00 |
| ENSG00000186094.15_AGBL4    | ENSG00000160789.18_LMNA | -0.19637 | -0.344795713 | -0.0383733  | 1.53E-02 | 8.92E-02 | 1.00E+00 |
| ENSG00000267278.4_MAP3K14-1 | ENSG00000160789.18_LMNA | 0.04744  | -0.112609913 | 0.205092995 | 5.62E-01 | 7.93E-01 | 1.00E+00 |
| ENSG00000251429.1_RP11-597D | ENSG00000160789.18_LMNA | -0.22681 | -0.37255744  | -0.07014107 | 4.96E-03 | 3.90E-02 | 1.00E+00 |
| ENSG00000196421.6_LINC00176 | ENSG00000160789.18_LMNA | -0.1121  | -0.266543306 | 0.047957142 | 1.69E-01 | 4.28E-01 | 1.00E+00 |
| ENSG00000272476.1_RP1-191J1 | ENSG00000160789.18_LMNA | 0.07043  | -0.08978163  | 0.227080405 | 3.89E-01 | 6.67E-01 | 1.00E+00 |
| ENSG00000213750.4_KB-1683C8 | ENSG00000160789.18_LMNA | 0.09932  | -0.060843878 | 0.254495577 | 2.23E-01 | 4.99E-01 | 1.00E+00 |
| ENSG00000279641.1_CTD-2545C | ENSG00000160789.18_LMNA | 0.01569  | -0.143873495 | 0.174451546 | 8.48E-01 | 9.41E-01 | 1.00E+00 |
| ENSG00000251484.3_RP5-1065J | ENSG00000160789.18_LMNA | 0.00048  | -0.158730655 | 0.159670677 | 9.95E-01 | 9.98E-01 | 1.00E+00 |
| ENSG00000135976.15_ANKRD36  | ENSG00000160789.18_LMNA | -0.11691 | -0.271062425 | 0.043096158 | 1.51E-01 | 4.00E-01 | 1.00E+00 |
| ENSG00000233503.1_HNRNPLP1  | ENSG00000160789.18_LMNA | -0.06247 | -0.219483391 | 0.097707005 | 4.45E-01 | 7.12E-01 | 1.00E+00 |
| ENSG00000079385.20_CEACAM1  | ENSG00000160789.18_LMNA | 0.0719   | -0.08831471  | 0.228482331 | 3.79E-01 | 6.58E-01 | 1.00E+00 |
| ENSG00000279863.1_RP11-521C | ENSG00000160789.18_LMNA | -0.01877 | -0.177441577 | 0.140850478 | 8.18E-01 | 9.29E-01 | 1.00E+00 |
| ENSG00000243696.4_RP5-966M1 | ENSG00000160789.18_LMNA | -0.06681 | -0.223635894 | 0.09338     | 4.13E-01 | 6.87E-01 | 1.00E+00 |
| ENSG00000173838.10_MARCH1C  | ENSG00000160789.18_LMNA | 0.14418  | -0.015375246 | 0.296571771 | 7.64E-02 | 2.64E-01 | 1.00E+00 |
| ENSG00000268388.4_FENDRR    | ENSG00000160789.18_LMNA | -0.28427 | -0.424269063 | -0.13099667 | 3.86E-04 | 5.51E-03 | 1.00E+00 |
| ENSG00000170627.8_GTSF1     | ENSG00000160789.18_LMNA | -0.06161 | -0.21866343  | 0.098560008 | 4.51E-01 | 7.16E-01 | 1.00E+00 |
| ENSG00000254996.4_ANKHD1-E  | ENSG00000160789.18_LMNA | -0.01011 | -0.169038853 | 0.14933083  | 9.02E-01 | 9.62E-01 | 1.00E+00 |
| ENSG00000052850.5_ALX4      | ENSG00000160789.18_LMNA | 0.00178  | -0.157465076 | 0.160935344 | 9.83E-01 | 9.94E-01 | 1.00E+00 |
| ENSG00000260641.1_RP11-1299 | ENSG00000160789.18_LMNA | -0.01811 | -0.176805615 | 0.141493954 | 8.25E-01 | 9.31E-01 | 1.00E+00 |
| ENSG00000270706.1_PRMT1P1   | ENSG00000160789.18_LMNA | 0.07398  | -0.086237933 | 0.23046485  | 3.65E-01 | 6.46E-01 | 1.00E+00 |
| ENSG00000179921.13_GPBAR1   | ENSG00000160789.18_LMNA | 0.13434  | -0.025406442 | 0.287391971 | 9.89E-02 | 3.10E-01 | 1.00E+00 |
| ENSG00000144619.13_CNTN4    | ENSG00000160789.18_LMNA | -0.12967 | -0.283027717 | 0.030153475 | 1.11E-01 | 3.33E-01 | 1.00E+00 |
| ENSG00000240023.1_RP11-561B | ENSG00000160789.18_LMNA | 0.07609  | -0.084132142 | 0.232472385 | 3.52E-01 | 6.35E-01 | 1.00E+00 |
| ENSG00000157653.10_C9orf43  | ENSG00000160789.18_LMNA | 0.11904  | -0.040941333 | 0.273061284 | 1.44E-01 | 3.88E-01 | 1.00E+00 |
| ENSG00000115604.9_IL18R1    | ENSG00000160789.18_LMNA | 0.09735  | -0.062822254 | 0.252637297 | 2.33E-01 | 5.11E-01 | 1.00E+00 |

|                              |                         |          |              |             |          |          |          |
|------------------------------|-------------------------|----------|--------------|-------------|----------|----------|----------|
| ENSG00000138759.16_FRAS1     | ENSG00000160789.18_LMNA | -0.09151 | -0.247107043 | 0.068695286 | 2.62E-01 | 5.45E-01 | 1.00E+00 |
| ENSG00000147036.10_LANCL3    | ENSG00000160789.18_LMNA | 0.09373  | -0.066465002 | 0.249209583 | 2.51E-01 | 5.31E-01 | 1.00E+00 |
| ENSG00000167077.11_MEI1      | ENSG00000160789.18_LMNA | -0.00398 | -0.16307509  | 0.155321404 | 9.61E-01 | 9.84E-01 | 1.00E+00 |
| ENSG00000177757.2_FAM87B     | ENSG00000160789.18_LMNA | 0.01351  | -0.146006111 | 0.172338663 | 8.69E-01 | 9.49E-01 | 1.00E+00 |
| ENSG00000055813.5_CCDC85A    | ENSG00000160789.18_LMNA | -0.39445 | -0.520935616 | -0.25100956 | 4.95E-07 | 2.60E-05 | 2.54E-02 |
| ENSG00000233487.6_RPSAP69    | ENSG00000160789.18_LMNA | -0.21064 | -0.357837025 | -0.05321974 | 9.19E-03 | 6.17E-02 | 1.00E+00 |
| ENSG00000172215.5_CXCR6      | ENSG00000160789.18_LMNA | 0.00617  | -0.153184265 | 0.165205337 | 9.40E-01 | 9.76E-01 | 1.00E+00 |
| ENSG00000188825.12_LINC0091  | ENSG00000160789.18_LMNA | -0.09847 | -0.253692249 | 0.061699427 | 2.27E-01 | 5.04E-01 | 1.00E+00 |
| ENSG00000162068.1_NTN3       | ENSG00000160789.18_LMNA | 0.04953  | -0.110544782 | 0.207095338 | 5.45E-01 | 7.83E-01 | 1.00E+00 |
| ENSG00000006453.12_BAIAP2L1  | ENSG00000160789.18_LMNA | 0.35105  | 0.203210068  | 0.483246768 | 9.24E-06 | 2.73E-04 | 4.74E-01 |
| ENSG00000228149.1_RPL3P1     | ENSG00000160789.18_LMNA | -0.11742 | -0.271546797 | 0.04257426  | 1.50E-01 | 3.97E-01 | 1.00E+00 |
| ENSG00000139549.2_DHH        | ENSG00000160789.18_LMNA | 0.23828  | 0.082199761  | 0.382955635 | 3.11E-03 | 2.75E-02 | 1.00E+00 |
| ENSG00000188511.11_C22orf34  | ENSG00000160789.18_LMNA | 0.00188  | -0.157365022 | 0.161035282 | 9.82E-01 | 9.93E-01 | 1.00E+00 |
| ENSG00000197134.10_ZNF257    | ENSG00000160789.18_LMNA | -0.31113 | -0.448130917 | -0.15984347 | 9.56E-05 | 1.82E-03 | 1.00E+00 |
| ENSG00000226642.1_ACTG1P12   | ENSG00000160789.18_LMNA | 0.12309  | -0.036836348 | 0.276861662 | 1.31E-01 | 3.67E-01 | 1.00E+00 |
| ENSG00000274270.1_RP11-34F2  | ENSG00000160789.18_LMNA | 0.05786  | -0.102280192 | 0.215082105 | 4.79E-01 | 7.37E-01 | 1.00E+00 |
| ENSG00000156427.7_FGF18      | ENSG00000160789.18_LMNA | 0.09253  | -0.067669894 | 0.248074073 | 2.57E-01 | 5.39E-01 | 1.00E+00 |
| ENSG00000267649.1_CTD-2587H  | ENSG00000160789.18_LMNA | 0.01771  | -0.141892939 | 0.176411155 | 8.29E-01 | 9.33E-01 | 1.00E+00 |
| ENSG00000150527.15_CTAGE5    | ENSG00000160789.18_LMNA | -0.24307 | -0.387285962 | -0.08724771 | 2.55E-03 | 2.36E-02 | 1.00E+00 |
| ENSG00000279278.1_CH17-264L  | ENSG00000160789.18_LMNA | -0.11057 | -0.26510248  | 0.04950384  | 1.75E-01 | 4.36E-01 | 1.00E+00 |
| ENSG00000269318.1_AC007292.1 | ENSG00000160789.18_LMNA | 0.01878  | -0.140844806 | 0.177447183 | 8.18E-01 | 9.29E-01 | 1.00E+00 |
| ENSG00000277687.1_RP11-427L  | ENSG00000160789.18_LMNA | -0.16324 | -0.314276571 | -0.0041506  | 4.45E-02 | 1.86E-01 | 1.00E+00 |
| ENSG00000236493.2	EIF2S2P3   | ENSG00000160789.18_LMNA | 0.00325  | -0.156035396 | 0.162362738 | 9.68E-01 | 9.88E-01 | 1.00E+00 |
| ENSG00000245322.5_RP11-15B1  | ENSG00000160789.18_LMNA | 0.06961  | -0.090590639 | 0.226306678 | 3.94E-01 | 6.72E-01 | 1.00E+00 |
| ENSG00000223714.1_RP5-1172N  | ENSG00000160789.18_LMNA | 0.03177  | -0.128080309 | 0.190007895 | 6.98E-01 | 8.70E-01 | 1.00E+00 |
| ENSG00000233221.5_AC133785.1 | ENSG00000160789.18_LMNA | -0.11775 | -0.271851551 | 0.042245807 | 1.49E-01 | 3.95E-01 | 1.00E+00 |
| ENSG00000281026.1_N4BP2L2-1  | ENSG00000160789.18_LMNA | -0.05228 | -0.209733889 | 0.107819298 | 5.22E-01 | 7.68E-01 | 1.00E+00 |
| ENSG00000233680.4_HNRNPA1F   | ENSG00000160789.18_LMNA | 0.21571  | 0.058522075  | 0.362466046 | 7.61E-03 | 5.35E-02 | 1.00E+00 |
| ENSG00000121410.10_A1BG      | ENSG00000160789.18_LMNA | -0.18982 | -0.338783458 | -0.0315741  | 1.92E-02 | 1.05E-01 | 1.00E+00 |
| ENSG00000197837.3_HIST4H4    | ENSG00000160789.18_LMNA | 0.00734  | -0.152038825 | 0.166345862 | 9.28E-01 | 9.73E-01 | 1.00E+00 |
| ENSG00000241749.4_RPSAP52    | ENSG00000160789.18_LMNA | 0.29306  | 0.140414869  | 0.432104767 | 2.48E-04 | 3.87E-03 | 1.00E+00 |
| ENSG00000250073.2_RP11-677M  | ENSG00000160789.18_LMNA | -0.04272 | -0.200560969 | 0.117273937 | 6.01E-01 | 8.17E-01 | 1.00E+00 |
| ENSG00000237840.5_FAM21FP    | ENSG00000160789.18_LMNA | -0.06908 | -0.225793882 | 0.091126588 | 3.98E-01 | 6.75E-01 | 1.00E+00 |

|                              |                         |          |              |             |          |          |          |
|------------------------------|-------------------------|----------|--------------|-------------|----------|----------|----------|
| ENSG00000260326.1_PHPBP21    | ENSG00000160789.18_LMNA | -0.08111 | -0.237250985 | 0.079108258 | 3.21E-01 | 6.07E-01 | 1.00E+00 |
| ENSG00000234369.1_TATDN1P1   | ENSG00000160789.18_LMNA | -0.19562 | -0.344102082 | -0.03758743 | 1.57E-02 | 9.07E-02 | 1.00E+00 |
| ENSG00000229161.2_TCP1P1     | ENSG00000160789.18_LMNA | -0.07405 | -0.230535322 | 0.08616406  | 3.65E-01 | 6.46E-01 | 1.00E+00 |
| ENSG00000206549.11_PRSS50    | ENSG00000160789.18_LMNA | -0.0863  | -0.242170791 | 0.073919075 | 2.90E-01 | 5.76E-01 | 1.00E+00 |
| ENSG00000184619.3_KRBA2      | ENSG00000160789.18_LMNA | -0.13485 | -0.28786794  | 0.024887872 | 9.76E-02 | 3.07E-01 | 1.00E+00 |
| ENSG00000239557.1_RP11-168J  | ENSG00000160789.18_LMNA | 0.02567  | -0.134077549 | 0.184119341 | 7.54E-01 | 8.98E-01 | 1.00E+00 |
| ENSG00000258841.1_EEF1A1P2   | ENSG00000160789.18_LMNA | -0.07547 | -0.231888938 | 0.084744437 | 3.55E-01 | 6.39E-01 | 1.00E+00 |
| ENSG00000215417.9_MIR17HG    | ENSG00000160789.18_LMNA | -0.12305 | -0.276825636 | 0.036875312 | 1.31E-01 | 3.67E-01 | 1.00E+00 |
| ENSG00000232203.3_SLC25A6P2  | ENSG00000160789.18_LMNA | 0.16205  | 0.002929884  | 0.313175987 | 4.61E-02 | 1.91E-01 | 1.00E+00 |
| ENSG00000241735.1_FABP5P3    | ENSG00000160789.18_LMNA | 0.08275  | -0.077471497 | 0.238804533 | 3.11E-01 | 5.97E-01 | 1.00E+00 |
| ENSG00000268093.1_AC022154.1 | ENSG00000160789.18_LMNA | -0.0275  | -0.185890031 | 0.132276625 | 7.37E-01 | 8.89E-01 | 1.00E+00 |
| ENSG00000272008.1_RP11-393I2 | ENSG00000160789.18_LMNA | -0.25605 | -0.398990218 | -0.10096914 | 1.45E-03 | 1.53E-02 | 1.00E+00 |
| ENSG00000131037.13_EPS8L1    | ENSG00000160789.18_LMNA | 0.10071  | -0.059442128 | 0.255810825 | 2.17E-01 | 4.92E-01 | 1.00E+00 |
| ENSG00000232952.1_RP11-90H3  | ENSG00000160789.18_LMNA | -0.0879  | -0.243691589 | 0.072311537 | 2.82E-01 | 5.67E-01 | 1.00E+00 |
| ENSG00000236257.1_EI24P2     | ENSG00000160789.18_LMNA | 0.01539  | -0.144162896 | 0.174164995 | 8.51E-01 | 9.41E-01 | 1.00E+00 |
| ENSG00000245750.6_DRAIC      | ENSG00000160789.18_LMNA | -0.31093 | -0.447953879 | -0.15962761 | 9.67E-05 | 1.83E-03 | 1.00E+00 |
| ENSG00000160223.15_ICOSLG    | ENSG00000160789.18_LMNA | -0.02708 | -0.185480122 | 0.13269372  | 7.41E-01 | 8.91E-01 | 1.00E+00 |
| ENSG00000253223.1_RP11-409C  | ENSG00000160789.18_LMNA | -0.07325 | -0.22977255  | 0.086963462 | 3.70E-01 | 6.50E-01 | 1.00E+00 |
| ENSG00000221947.6_XKR9       | ENSG00000160789.18_LMNA | -0.13056 | -0.283861929 | 0.029247188 | 1.09E-01 | 3.28E-01 | 1.00E+00 |
| ENSG00000175106.15_TVP23C    | ENSG00000160789.18_LMNA | 0.13063  | -0.029182312 | 0.283921627 | 1.09E-01 | 3.28E-01 | 1.00E+00 |
| ENSG00000197558.10_SSPO      | ENSG00000160789.18_LMNA | 0.13474  | -0.024994611 | 0.287769982 | 9.79E-02 | 3.08E-01 | 1.00E+00 |
| ENSG00000227896.2_RP11-77P6  | ENSG00000160789.18_LMNA | -0.18227 | -0.331845556 | -0.02376329 | 2.46E-02 | 1.25E-01 | 1.00E+00 |
| ENSG00000167476.9_JSRP1      | ENSG00000160789.18_LMNA | 0.03247  | -0.127392518 | 0.190681762 | 6.91E-01 | 8.67E-01 | 1.00E+00 |
| ENSG00000167377.16_ZNF23     | ENSG00000160789.18_LMNA | -0.0272  | -0.185600989 | 0.132570745 | 7.39E-01 | 8.91E-01 | 1.00E+00 |
| ENSG00000230203.1_CTB-1048E  | ENSG00000160789.18_LMNA | -0.10051 | -0.255616426 | 0.059649391 | 2.18E-01 | 4.93E-01 | 1.00E+00 |
| ENSG00000172780.15_RAB43     | ENSG00000160789.18_LMNA | 0.34793  | 0.199791215  | 0.480510708 | 1.12E-05 | 3.20E-04 | 5.76E-01 |
| ENSG00000128573.21_FOXP2     | ENSG00000160789.18_LMNA | -0.32867 | -0.463610761 | -0.17882425 | 3.56E-05 | 8.22E-04 | 1.00E+00 |
| ENSG00000076662.8_ICAM3      | ENSG00000160789.18_LMNA | 0.13571  | -0.024010558 | 0.288672831 | 9.55E-02 | 3.03E-01 | 1.00E+00 |
| ENSG00000139626.14_ITGB7     | ENSG00000160789.18_LMNA | -0.03074 | -0.189015386 | 0.12909277  | 7.07E-01 | 8.75E-01 | 1.00E+00 |
| ENSG00000232653.7_GOLGA8N    | ENSG00000160789.18_LMNA | 0.06548  | -0.094712197 | 0.222358648 | 4.23E-01 | 6.94E-01 | 1.00E+00 |
| ENSG00000156414.17_TDRD9     | ENSG00000160789.18_LMNA | -0.30094 | -0.439100826 | -0.1488687  | 1.65E-04 | 2.81E-03 | 1.00E+00 |
| ENSG00000177112.6_MRVI1-AS1  | ENSG00000160789.18_LMNA | -0.15581 | -0.307384547 | 0.003478524 | 5.53E-02 | 2.14E-01 | 1.00E+00 |
| ENSG00000134343.11_ANO3      | ENSG00000160789.18_LMNA | -0.46623 | -0.582213211 | -0.33164137 | 1.42E-09 | 2.08E-07 | 7.28E-05 |



|                              |                         |          |              |             |          |          |          |
|------------------------------|-------------------------|----------|--------------|-------------|----------|----------|----------|
| ENSG00000269637.1_RPL12P41   | ENSG00000160789.18_LMNA | 0.00101  | -0.158220896 | 0.160180194 | 9.90E-01 | 9.96E-01 | 1.00E+00 |
| ENSG00000280987.1_MATR3      | ENSG00000160789.18_LMNA | -0.21906 | -0.365513438 | -0.06202211 | 6.70E-03 | 4.88E-02 | 1.00E+00 |
| ENSG00000197181.10_PIWIL2    | ENSG00000160789.18_LMNA | -0.06063 | -0.217732959 | 0.099527409 | 4.58E-01 | 7.22E-01 | 1.00E+00 |
| ENSG00000149972.9_CNTN5      | ENSG00000160789.18_LMNA | -0.08738 | -0.243195911 | 0.072835667 | 2.84E-01 | 5.70E-01 | 1.00E+00 |
| ENSG00000188459.4_WASF4P     | ENSG00000160789.18_LMNA | 0.12346  | -0.036453397 | 0.277215697 | 1.30E-01 | 3.65E-01 | 1.00E+00 |
| ENSG00000267397.1_RP11-873E  | ENSG00000160789.18_LMNA | -0.03053 | -0.188815508 | 0.129296586 | 7.09E-01 | 8.76E-01 | 1.00E+00 |
| ENSG00000160161.8_CILP2      | ENSG00000160789.18_LMNA | 0.27962  | 0.126026304  | 0.420116065 | 4.85E-04 | 6.58E-03 | 1.00E+00 |
| ENSG00000140955.9_ADAD2      | ENSG00000160789.18_LMNA | -0.16578 | -0.316624894 | -0.00675835 | 4.12E-02 | 1.77E-01 | 1.00E+00 |
| ENSG00000204072.3_ARMCX7P    | ENSG00000160789.18_LMNA | -0.05147 | -0.208961713 | 0.108617409 | 5.29E-01 | 7.73E-01 | 1.00E+00 |
| ENSG00000121454.5_LHX4       | ENSG00000160789.18_LMNA | -0.22565 | -0.371506016 | -0.06892664 | 5.19E-03 | 4.04E-02 | 1.00E+00 |
| ENSG00000234750.1_CTD-2666L  | ENSG00000160789.18_LMNA | 0.00537  | -0.15395767  | 0.164434769 | 9.48E-01 | 9.79E-01 | 1.00E+00 |
| ENSG00000227827.3_RP11-958N  | ENSG00000160789.18_LMNA | 0.081    | -0.079221988 | 0.237142976 | 3.21E-01 | 6.08E-01 | 1.00E+00 |
| ENSG00000237170.3_RPS7P15    | ENSG00000160789.18_LMNA | -0.09504 | -0.250446694 | 0.065151252 | 2.44E-01 | 5.24E-01 | 1.00E+00 |
| ENSG00000214376.5_VSTM5      | ENSG00000160789.18_LMNA | -0.24498 | -0.389004586 | -0.08925543 | 2.35E-03 | 2.21E-02 | 1.00E+00 |
| ENSG00000280378.1_RP4-758J2  | ENSG00000160789.18_LMNA | -0.22196 | -0.368150795 | -0.06505725 | 5.99E-03 | 4.50E-02 | 1.00E+00 |
| ENSG00000229867.1_STEAP3-A   | ENSG00000160789.18_LMNA | 0.19674  | 0.038749719  | 0.345127837 | 1.51E-02 | 8.84E-02 | 1.00E+00 |
| ENSG00000263826.1_RP11-573D  | ENSG00000160789.18_LMNA | -0.25163 | -0.395009525 | -0.09628964 | 1.76E-03 | 1.78E-02 | 1.00E+00 |
| ENSG00000150394.12_CDH8      | ENSG00000160789.18_LMNA | -0.33492 | -0.469108759 | -0.18561709 | 2.47E-05 | 6.13E-04 | 1.00E+00 |
| ENSG00000142178.7_SIK1       | ENSG00000160789.18_LMNA | 0.15146  | -0.007936308 | 0.303342307 | 6.25E-02 | 2.32E-01 | 1.00E+00 |
| ENSG00000204584.1_RP11-304F  | ENSG00000160789.18_LMNA | -0.05195 | -0.20941498  | 0.108148968 | 5.25E-01 | 7.70E-01 | 1.00E+00 |
| ENSG00000268218.1_AC137932.4 | ENSG00000160789.18_LMNA | 0.10211  | -0.058030532 | 0.257134134 | 2.11E-01 | 4.84E-01 | 1.00E+00 |
| ENSG00000257591.4_ZNF625     | ENSG00000160789.18_LMNA | -0.15244 | -0.304255159 | 0.006930695 | 6.08E-02 | 2.28E-01 | 1.00E+00 |
| ENSG00000261019.1_RP11-111K  | ENSG00000160789.18_LMNA | -0.17211 | -0.322474547 | -0.01327261 | 3.40E-02 | 1.56E-01 | 1.00E+00 |
| ENSG00000229168.4_RPL19P20   | ENSG00000160789.18_LMNA | -0.23747 | -0.382217828 | -0.08134122 | 3.22E-03 | 2.82E-02 | 1.00E+00 |
| ENSG00000158023.8_WDR66      | ENSG00000160789.18_LMNA | 0.118    | -0.041989635 | 0.272089196 | 1.48E-01 | 3.94E-01 | 1.00E+00 |
| ENSG00000280347.1_AC000123.1 | ENSG00000160789.18_LMNA | 0.22741  | 0.070774909  | 0.373105897 | 4.84E-03 | 3.82E-02 | 1.00E+00 |
| ENSG00000213979.3_RPL7AP14   | ENSG00000160789.18_LMNA | -0.08917 | -0.24489497  | 0.071038356 | 2.75E-01 | 5.59E-01 | 1.00E+00 |
| ENSG00000197332.8_CTC-499B1  | ENSG00000160789.18_LMNA | -0.25011 | -0.393636671 | -0.09467883 | 1.89E-03 | 1.87E-02 | 1.00E+00 |
| ENSG00000273192.1_CITF22-1A  | ENSG00000160789.18_LMNA | 0.09698  | -0.06320016  | 0.252282067 | 2.35E-01 | 5.12E-01 | 1.00E+00 |
| ENSG00000216740.2_ANXA2P3    | ENSG00000160789.18_LMNA | 0.41026  | 0.268597605  | 0.534543495 | 1.53E-07 | 1.02E-05 | 7.84E-03 |
| ENSG00000272305.4_RP11-894J  | ENSG00000160789.18_LMNA | -0.11443 | -0.26873375  | 0.045602853 | 1.60E-01 | 4.14E-01 | 1.00E+00 |
| ENSG00000281162.1_LINC01127  | ENSG00000160789.18_LMNA | 0.34969  | 0.201715681  | 0.482051504 | 1.01E-05 | 2.92E-04 | 5.16E-01 |
| ENSG00000261215.1_RP11-195F  | ENSG00000160789.18_LMNA | 0.01758  | -0.142019515 | 0.176285993 | 8.30E-01 | 9.34E-01 | 1.00E+00 |

|                             |                         |          |              |             |          |          |          |
|-----------------------------|-------------------------|----------|--------------|-------------|----------|----------|----------|
| ENSG00000253636.1_RP11-531A | ENSG00000160789.18_LMNA | -0.10108 | -0.256155    | 0.059075113 | 2.15E-01 | 4.89E-01 | 1.00E+00 |
| ENSG00000270823.1_RP11-2E11 | ENSG00000160789.18_LMNA | 0.15384  | -0.005492211 | 0.30555996  | 5.84E-02 | 2.22E-01 | 1.00E+00 |
| ENSG00000213305.3_HNRNPCP   | ENSG00000160789.18_LMNA | -0.13436 | -0.287411881 | 0.025384754 | 9.89E-02 | 3.09E-01 | 1.00E+00 |
| ENSG00000108405.3_P2RX1     | ENSG00000160789.18_LMNA | -0.26152 | -0.403905011 | -0.10676497 | 1.14E-03 | 1.28E-02 | 1.00E+00 |
| ENSG00000271198.1_VDAC3P1   | ENSG00000160789.18_LMNA | -0.08361 | -0.239623085 | 0.076608416 | 3.06E-01 | 5.92E-01 | 1.00E+00 |
| ENSG00000273432.1_RP5-1165K | ENSG00000160789.18_LMNA | 0.16448  | 0.005422992  | 0.315422854 | 4.29E-02 | 1.82E-01 | 1.00E+00 |
| ENSG00000229127.1_AC007038. | ENSG00000160789.18_LMNA | -0.12495 | -0.278612899 | 0.034941177 | 1.25E-01 | 3.57E-01 | 1.00E+00 |
| ENSG00000272054.1_RP11-423P | ENSG00000160789.18_LMNA | 0.03897  | -0.120986006 | 0.196944208 | 6.34E-01 | 8.36E-01 | 1.00E+00 |
| ENSG00000215057.4_PKMP5     | ENSG00000160789.18_LMNA | 0.22984  | 0.073320075  | 0.375306083 | 4.39E-03 | 3.55E-02 | 1.00E+00 |
| ENSG00000189136.7_UBE2Q2P1  | ENSG00000160789.18_LMNA | 0.0078   | -0.15158853  | 0.166793991 | 9.24E-01 | 9.71E-01 | 1.00E+00 |
| ENSG00000120471.13_TP53AIP1 | ENSG00000160789.18_LMNA | -0.18822 | -0.337310397 | -0.02991256 | 2.02E-02 | 1.09E-01 | 1.00E+00 |
| ENSG00000122432.15_SPATA1   | ENSG00000160789.18_LMNA | 0.19003  | 0.031788801  | 0.33897369  | 1.90E-02 | 1.04E-01 | 1.00E+00 |
| ENSG00000075073.13_TACR2    | ENSG00000160789.18_LMNA | -0.00694 | -0.165959059 | 0.152427391 | 9.32E-01 | 9.74E-01 | 1.00E+00 |
| ENSG00000236404.7_VLDLR-AS  | ENSG00000160789.18_LMNA | -0.10657 | -0.261332681 | 0.053543515 | 1.91E-01 | 4.59E-01 | 1.00E+00 |
| ENSG00000232907.6_DLGA4-A   | ENSG00000160789.18_LMNA | 0.0171   | -0.142486106 | 0.175824526 | 8.34E-01 | 9.36E-01 | 1.00E+00 |
| ENSG00000175984.13_DENND2C  | ENSG00000160789.18_LMNA | -0.22199 | -0.368182894 | -0.06509422 | 5.98E-03 | 4.50E-02 | 1.00E+00 |
| ENSG00000213492.2_NT5C3AP1  | ENSG00000160789.18_LMNA | -0.0823  | -0.238376704 | 0.077922413 | 3.13E-01 | 6.00E-01 | 1.00E+00 |
| ENSG00000151632.15_AKR1C2   | ENSG00000160789.18_LMNA | -0.32167 | -0.457449126 | -0.17124361 | 5.32E-05 | 1.13E-03 | 1.00E+00 |
| ENSG00000226292.1_RP11-7G12 | ENSG00000160789.18_LMNA | -0.10305 | -0.25801505  | 0.057090146 | 2.06E-01 | 4.78E-01 | 1.00E+00 |
| ENSG00000225526.4_MKRN2OS   | ENSG00000160789.18_LMNA | -0.256   | -0.398939506 | -0.10090944 | 1.46E-03 | 1.54E-02 | 1.00E+00 |
| ENSG00000113263.11_ITK      | ENSG00000160789.18_LMNA | 0.17373  | 0.014944902  | 0.32397243  | 3.23E-02 | 1.50E-01 | 1.00E+00 |
| ENSG00000163141.17_BNIP1    | ENSG00000160789.18_LMNA | -0.12904 | -0.282434938 | 0.030797158 | 1.13E-01 | 3.36E-01 | 1.00E+00 |
| ENSG00000225963.6_AC009950. | ENSG00000160789.18_LMNA | -0.024   | -0.182503193 | 0.13571946  | 7.69E-01 | 9.04E-01 | 1.00E+00 |
| ENSG00000039139.9_DNAH5     | ENSG00000160789.18_LMNA | 0.22528  | 0.068537341  | 0.371168803 | 5.26E-03 | 4.07E-02 | 1.00E+00 |
| ENSG00000229835.2_KHSRPP1   | ENSG00000160789.18_LMNA | 0.03179  | -0.128061116 | 0.190026704 | 6.97E-01 | 8.70E-01 | 1.00E+00 |
| ENSG00000215270.3_LA16c-60H | ENSG00000160789.18_LMNA | -0.04083 | -0.198734232 | 0.119149922 | 6.18E-01 | 8.27E-01 | 1.00E+00 |
| ENSG00000235505.6_RP11-693N | ENSG00000160789.18_LMNA | -0.01535 | -0.174123951 | 0.144204344 | 8.51E-01 | 9.42E-01 | 1.00E+00 |
| ENSG00000033122.17_LRRC7    | ENSG00000160789.18_LMNA | -0.38537 | -0.513088839 | -0.24094806 | 9.46E-07 | 4.39E-05 | 4.85E-02 |
| ENSG00000235253.1_AC010240. | ENSG00000160789.18_LMNA | -0.07748 | -0.233794278 | 0.082744005 | 3.43E-01 | 6.27E-01 | 1.00E+00 |
| ENSG00000224367.5_OACYLP    | ENSG00000160789.18_LMNA | 0.23218  | 0.075782586  | 0.377431584 | 4.00E-03 | 3.31E-02 | 1.00E+00 |
| ENSG00000261067.5_RP11-264B | ENSG00000160789.18_LMNA | 0.02229  | -0.137394406 | 0.180852755 | 7.85E-01 | 9.12E-01 | 1.00E+00 |
| ENSG00000237999.2_ACTG1P19  | ENSG00000160789.18_LMNA | 0.19427  | 0.03618499   | 0.342863421 | 1.65E-02 | 9.39E-02 | 1.00E+00 |
| ENSG00000279526.1_AC011239. | ENSG00000160789.18_LMNA | -0.01376 | -0.172578788 | 0.145763893 | 8.66E-01 | 9.48E-01 | 1.00E+00 |

|                              |                         |          |              |             |          |          |          |
|------------------------------|-------------------------|----------|--------------|-------------|----------|----------|----------|
| ENSG00000268282.1_CTD-2620I2 | ENSG00000160789.18_LMNA | 0.11413  | -0.045903326 | 0.268454369 | 1.61E-01 | 4.16E-01 | 1.00E+00 |
| ENSG00000186056.8_MATN1-AS   | ENSG00000160789.18_LMNA | 0.16276  | 0.003657971  | 0.313832522 | 4.51E-02 | 1.88E-01 | 1.00E+00 |
| ENSG00000160282.12_FTCD      | ENSG00000160789.18_LMNA | 0.17211  | 0.013276202  | 0.322477769 | 3.40E-02 | 1.56E-01 | 1.00E+00 |
| ENSG00000227621.1_PHBP11     | ENSG00000160789.18_LMNA | -0.09404 | -0.24950224  | 0.066154313 | 2.49E-01 | 5.30E-01 | 1.00E+00 |
| ENSG00000261457.3_AC002519.0 | ENSG00000160789.18_LMNA | -0.06751 | -0.224301275 | 0.092685542 | 4.09E-01 | 6.83E-01 | 1.00E+00 |
| ENSG00000204177.9_BMS1P1     | ENSG00000160789.18_LMNA | -0.20578 | -0.353407664 | -0.04816213 | 1.10E-02 | 7.00E-02 | 1.00E+00 |
| ENSG00000204131.7_NHSL2      | ENSG00000160789.18_LMNA | 0.25578  | 0.100680328  | 0.398744859 | 1.47E-03 | 1.55E-02 | 1.00E+00 |
| ENSG00000161249.19_DMKN      | ENSG00000160789.18_LMNA | 0.07586  | -0.084362445 | 0.232252959 | 3.53E-01 | 6.37E-01 | 1.00E+00 |
| ENSG00000273599.1_RP11-59C5  | ENSG00000160789.18_LMNA | -0.33308 | -0.467493387 | -0.18361846 | 2.75E-05 | 6.67E-04 | 1.00E+00 |
| ENSG00000169962.4_TAS1R3     | ENSG00000160789.18_LMNA | 0.15453  | -0.00479258  | 0.306194149 | 5.73E-02 | 2.19E-01 | 1.00E+00 |
| ENSG00000206120.10_EGFEM1F   | ENSG00000160789.18_LMNA | -0.26248 | -0.404769949 | -0.10778706 | 1.09E-03 | 1.23E-02 | 1.00E+00 |
| ENSG00000244733.5_RP11-506M  | ENSG00000160789.18_LMNA | -0.17148 | -0.321897634 | -0.01262898 | 3.46E-02 | 1.57E-01 | 1.00E+00 |
| ENSG00000188693.7_CYP51A1-A  | ENSG00000160789.18_LMNA | -0.12651 | -0.280067449 | 0.033365361 | 1.20E-01 | 3.49E-01 | 1.00E+00 |
| ENSG00000228013.1_RP11-350G  | ENSG00000160789.18_LMNA | -0.24548 | -0.389459849 | -0.08978768 | 2.30E-03 | 2.18E-02 | 1.00E+00 |
| ENSG00000137877.9_SPTBN5     | ENSG00000160789.18_LMNA | 0.1865   | 0.028135518  | 0.33573327  | 2.14E-02 | 1.13E-01 | 1.00E+00 |
| ENSG00000204446.4_C9orf170   | ENSG00000160789.18_LMNA | -0.09555 | -0.250932783 | 0.06463475  | 2.42E-01 | 5.21E-01 | 1.00E+00 |
| ENSG00000260471.1_AC009120.0 | ENSG00000160789.18_LMNA | 0.08002  | -0.080201795 | 0.23621214  | 3.27E-01 | 6.14E-01 | 1.00E+00 |
| ENSG00000198336.8_MYL4       | ENSG00000160789.18_LMNA | 0.07535  | -0.084864781 | 0.231774237 | 3.56E-01 | 6.39E-01 | 1.00E+00 |
| ENSG00000243710.6_CFAP57     | ENSG00000160789.18_LMNA | 0.01212  | -0.147367254 | 0.170988581 | 8.82E-01 | 9.54E-01 | 1.00E+00 |
| ENSG00000251287.7_ALG1L2     | ENSG00000160789.18_LMNA | -0.0943  | -0.249755648 | 0.065885243 | 2.48E-01 | 5.28E-01 | 1.00E+00 |
| ENSG00000176383.8_B3GNT4     | ENSG00000160789.18_LMNA | -0.05147 | -0.208961398 | 0.108617735 | 5.29E-01 | 7.73E-01 | 1.00E+00 |
| ENSG00000203710.9_CR1        | ENSG00000160789.18_LMNA | 0.09959  | -0.060567064 | 0.254755401 | 2.22E-01 | 4.98E-01 | 1.00E+00 |
| ENSG00000227456.6_LINC00310  | ENSG00000160789.18_LMNA | -0.19091 | -0.339779102 | -0.03269811 | 1.85E-02 | 1.02E-01 | 1.00E+00 |
| ENSG00000115602.15_IL1RL1    | ENSG00000160789.18_LMNA | 0.16611  | 0.007097479  | 0.316930007 | 4.08E-02 | 1.76E-01 | 1.00E+00 |
| ENSG00000142621.18_FHAD1     | ENSG00000160789.18_LMNA | 0.24187  | 0.085975546  | 0.386195896 | 2.68E-03 | 2.45E-02 | 1.00E+00 |
| ENSG00000159217.8_IGF2BP1    | ENSG00000160789.18_LMNA | 0.17869  | 0.020063749  | 0.328547797 | 2.76E-02 | 1.36E-01 | 1.00E+00 |
| ENSG00000214629.3_RPSAP6     | ENSG00000160789.18_LMNA | -0.11488 | -0.269158505 | 0.045145922 | 1.59E-01 | 4.12E-01 | 1.00E+00 |
| ENSG00000227825.4_SLC9A7P1   | ENSG00000160789.18_LMNA | 0.00949  | -0.149938118 | 0.168435343 | 9.08E-01 | 9.65E-01 | 1.00E+00 |
| ENSG00000248578.1_NPM1P21    | ENSG00000160789.18_LMNA | -0.0568  | -0.214065527 | 0.103334572 | 4.87E-01 | 7.44E-01 | 1.00E+00 |
| ENSG00000251143.1_RP11-849H  | ENSG00000160789.18_LMNA | -0.00946 | -0.168409517 | 0.1499641   | 9.08E-01 | 9.65E-01 | 1.00E+00 |
| ENSG00000273024.4_INTS4P2    | ENSG00000160789.18_LMNA | -0.10335 | -0.258304343 | 0.0567812   | 2.05E-01 | 4.77E-01 | 1.00E+00 |
| ENSG00000258768.2_CTD-2292M  | ENSG00000160789.18_LMNA | -0.00268 | -0.161813584 | 0.156585588 | 9.74E-01 | 9.90E-01 | 1.00E+00 |
| ENSG00000184261.4_KCNK12     | ENSG00000160789.18_LMNA | -0.24898 | -0.39261664  | -0.09348302 | 1.98E-03 | 1.94E-02 | 1.00E+00 |

|                              |                         |          |              |             |          |          |          |
|------------------------------|-------------------------|----------|--------------|-------------|----------|----------|----------|
| ENSG00000119547.5_ONECUT2    | ENSG00000160789.18_LMNA | -0.32694 | -0.462090939 | -0.17695127 | 3.94E-05 | 8.90E-04 | 1.00E+00 |
| ENSG00000205885.6_C1RL-AS1   | ENSG00000160789.18_LMNA | 0.40204  | 0.259446067  | 0.527480111 | 2.84E-07 | 1.69E-05 | 1.45E-02 |
| ENSG00000271997.1_           | ENSG00000160789.18_LMNA | -0.11232 | -0.266749824 | 0.047735326 | 1.68E-01 | 4.26E-01 | 1.00E+00 |
| ENSG00000272908.1_RP11-121A  | ENSG00000160789.18_LMNA | 0.05156  | -0.108527688 | 0.209048539 | 5.28E-01 | 7.72E-01 | 1.00E+00 |
| ENSG00000164120.12_HPGD      | ENSG00000160789.18_LMNA | -0.25988 | -0.402427793 | -0.10502082 | 1.22E-03 | 1.35E-02 | 1.00E+00 |
| ENSG00000262904.1_TMPOP2     | ENSG00000160789.18_LMNA | -0.14906 | -0.301115833 | 0.010386392 | 6.68E-02 | 2.42E-01 | 1.00E+00 |
| ENSG00000246090.5_RP11-696N  | ENSG00000160789.18_LMNA | 0.01426  | -0.145267853 | 0.173070421 | 8.62E-01 | 9.46E-01 | 1.00E+00 |
| ENSG00000165568.16_AKR1E2    | ENSG00000160789.18_LMNA | -0.20396 | -0.35174289  | -0.04626527 | 1.17E-02 | 7.34E-02 | 1.00E+00 |
| ENSG00000169203.15_NPIPB12   | ENSG00000160789.18_LMNA | 0.01803  | -0.141579638 | 0.176720911 | 8.26E-01 | 9.32E-01 | 1.00E+00 |
| ENSG00000144596.10_GRIP2     | ENSG00000160789.18_LMNA | -0.06497 | -0.221871504 | 0.09522     | 4.27E-01 | 6.97E-01 | 1.00E+00 |
| ENSG00000170703.14_TTLL6     | ENSG00000160789.18_LMNA | 0.05218  | -0.107918432 | 0.209637999 | 5.23E-01 | 7.69E-01 | 1.00E+00 |
| ENSG00000250764.1_CTD-2152M  | ENSG00000160789.18_LMNA | 0.07814  | -0.082079363 | 0.234426789 | 3.39E-01 | 6.24E-01 | 1.00E+00 |
| ENSG00000006047.11_YBX2      | ENSG00000160789.18_LMNA | 0.02008  | -0.139570302 | 0.178706017 | 8.06E-01 | 9.23E-01 | 1.00E+00 |
| ENSG00000143257.10_NR1I3     | ENSG00000160789.18_LMNA | 0.09231  | -0.067890221 | 0.247866339 | 2.58E-01 | 5.41E-01 | 1.00E+00 |
| ENSG00000230417.9_LINC00856  | ENSG00000160789.18_LMNA | -0.02185 | -0.18042663  | 0.137826564 | 7.89E-01 | 9.14E-01 | 1.00E+00 |
| ENSG00000105479.14_CCDC114   | ENSG00000160789.18_LMNA | 0.17798  | 0.019330623  | 0.327893395 | 2.83E-02 | 1.37E-01 | 1.00E+00 |
| ENSG00000253955.1_CTB-33O18  | ENSG00000160789.18_LMNA | 0.01706  | -0.142528431 | 0.175782659 | 8.35E-01 | 9.36E-01 | 1.00E+00 |
| ENSG00000280355.1_RP11-119F  | ENSG00000160789.18_LMNA | -0.10851 | -0.263159988 | 0.051586679 | 1.83E-01 | 4.48E-01 | 1.00E+00 |
| ENSG00000150637.7_CD226      | ENSG00000160789.18_LMNA | -0.09019 | -0.245861515 | 0.070015002 | 2.69E-01 | 5.53E-01 | 1.00E+00 |
| ENSG00000243894.1_RP11-489M  | ENSG00000160789.18_LMNA | -0.12037 | -0.274317253 | 0.039585867 | 1.40E-01 | 3.81E-01 | 1.00E+00 |
| ENSG00000205100.2_HSP90AA4   | ENSG00000160789.18_LMNA | 0.03194  | -0.127912272 | 0.190172558 | 6.96E-01 | 8.70E-01 | 1.00E+00 |
| ENSG00000125531.6_FNDC11     | ENSG00000160789.18_LMNA | 0.40003  | 0.257210964  | 0.525749355 | 3.29E-07 | 1.89E-05 | 1.69E-02 |
| ENSG00000183844.15_FAM3B     | ENSG00000160789.18_LMNA | -0.02001 | -0.178645235 | 0.139631864 | 8.07E-01 | 9.23E-01 | 1.00E+00 |
| ENSG00000156675.14_RAB11FIP  | ENSG00000160789.18_LMNA | 0.04049  | -0.119479304 | 0.198413268 | 6.20E-01 | 8.28E-01 | 1.00E+00 |
| ENSG00000225496.1_AC104651.1 | ENSG00000160789.18_LMNA | -0.06122 | -0.218291466 | 0.098946806 | 4.54E-01 | 7.19E-01 | 1.00E+00 |
| ENSG00000176928.5_GCNT4      | ENSG00000160789.18_LMNA | 0.19366  | 0.035552548  | 0.342304485 | 1.68E-02 | 9.53E-02 | 1.00E+00 |
| ENSG00000135898.8_GPR55      | ENSG00000160789.18_LMNA | 0.05187  | -0.108226077 | 0.209340379 | 5.26E-01 | 7.71E-01 | 1.00E+00 |
| ENSG00000179397.16_C1orf101  | ENSG00000160789.18_LMNA | -0.14519 | -0.297517086 | 0.014338677 | 7.43E-02 | 2.60E-01 | 1.00E+00 |
| ENSG00000279138.1_KB-1742H1  | ENSG00000160789.18_LMNA | -0.11648 | -0.270664911 | 0.043524341 | 1.53E-01 | 4.03E-01 | 1.00E+00 |
| ENSG00000174572.3_RPL10P2    | ENSG00000160789.18_LMNA | -0.1154  | -0.269650785 | 0.044616186 | 1.57E-01 | 4.09E-01 | 1.00E+00 |
| ENSG00000146054.16_TRIM7     | ENSG00000160789.18_LMNA | 0.08207  | -0.078152476 | 0.238158372 | 3.15E-01 | 6.01E-01 | 1.00E+00 |
| ENSG00000100628.10_ASB2      | ENSG00000160789.18_LMNA | -0.21964 | -0.366040656 | -0.0626284  | 6.55E-03 | 4.80E-02 | 1.00E+00 |
| ENSG00000239323.1_CTD-2213F  | ENSG00000160789.18_LMNA | -0.11237 | -0.266793689 | 0.047688207 | 1.68E-01 | 4.26E-01 | 1.00E+00 |

|                              |                         |          |              |             |          |          |          |
|------------------------------|-------------------------|----------|--------------|-------------|----------|----------|----------|
| ENSG00000259426.4_RP11-253M  | ENSG00000160789.18_LMNA | 0.3304   | 0.180705285  | 0.465135434 | 3.22E-05 | 7.57E-04 | 1.00E+00 |
| ENSG00000144821.8_MYH15      | ENSG00000160789.18_LMNA | -0.26884 | -0.410474569 | -0.11454388 | 8.11E-04 | 9.83E-03 | 1.00E+00 |
| ENSG00000276517.1_AL133243.2 | ENSG00000160789.18_LMNA | -0.12825 | -0.281698742 | 0.031596211 | 1.15E-01 | 3.39E-01 | 1.00E+00 |
| ENSG00000234817.2_RP3-400B1  | ENSG00000160789.18_LMNA | -0.08679 | -0.242638744 | 0.073424607 | 2.88E-01 | 5.73E-01 | 1.00E+00 |
| ENSG00000110665.10_C11orf21  | ENSG00000160789.18_LMNA | 0.00975  | -0.149683893 | 0.168688015 | 9.05E-01 | 9.63E-01 | 1.00E+00 |
| ENSG00000188219.13_POTEE     | ENSG00000160789.18_LMNA | 0.25642  | 0.101357132  | 0.399319765 | 1.43E-03 | 1.51E-02 | 1.00E+00 |
| ENSG00000053747.14_LAMA3     | ENSG00000160789.18_LMNA | 0.17809  | 0.019444555  | 0.327995112 | 2.82E-02 | 1.37E-01 | 1.00E+00 |
| ENSG00000169247.10_SH3TC2    | ENSG00000160789.18_LMNA | -0.21106 | -0.358227816 | -0.05366671 | 9.05E-03 | 6.10E-02 | 1.00E+00 |
| ENSG00000164989.14_CCDC171   | ENSG00000160789.18_LMNA | 0.05389  | -0.106217799 | 0.211282153 | 5.10E-01 | 7.59E-01 | 1.00E+00 |
| ENSG00000205710.3_C17orf107  | ENSG00000160789.18_LMNA | -0.0467  | -0.204383225 | 0.113341281 | 5.68E-01 | 7.98E-01 | 1.00E+00 |
| ENSG00000070182.16_SPTB      | ENSG00000160789.18_LMNA | -0.07661 | -0.232969618 | 0.083610136 | 3.48E-01 | 6.32E-01 | 1.00E+00 |
| ENSG00000187695.6_RP11-723O  | ENSG00000160789.18_LMNA | -0.06757 | -0.224352987 | 0.092631558 | 4.08E-01 | 6.83E-01 | 1.00E+00 |
| ENSG00000253605.1_HNRNPA1F   | ENSG00000160789.18_LMNA | -0.13909 | -0.291832463 | 0.020561962 | 8.74E-02 | 2.88E-01 | 1.00E+00 |
| ENSG00000251467.1_CTC-250P2  | ENSG00000160789.18_LMNA | 0.04984  | -0.110237306 | 0.207393238 | 5.42E-01 | 7.81E-01 | 1.00E+00 |
| ENSG00000139985.6_ADAM21     | ENSG00000160789.18_LMNA | -0.0313  | -0.189559899 | 0.128537393 | 7.02E-01 | 8.73E-01 | 1.00E+00 |
| ENSG00000232593.5_KANTR      | ENSG00000160789.18_LMNA | -0.13726 | -0.290119893 | 0.022432077 | 9.17E-02 | 2.95E-01 | 1.00E+00 |
| ENSG00000274756.1_CTB-75G16  | ENSG00000160789.18_LMNA | -0.01949 | -0.178140837 | 0.140142648 | 8.12E-01 | 9.26E-01 | 1.00E+00 |
| ENSG00000248503.2_RP5-1000K  | ENSG00000160789.18_LMNA | -0.25364 | -0.396819995 | -0.0984163  | 1.62E-03 | 1.66E-02 | 1.00E+00 |
| ENSG00000268678.1_CTC-444N2  | ENSG00000160789.18_LMNA | -0.05552 | -0.212839787 | 0.104604942 | 4.97E-01 | 7.51E-01 | 1.00E+00 |
| ENSG00000261324.2_RP11-174G  | ENSG00000160789.18_LMNA | 0.06459  | -0.095594252 | 0.221512376 | 4.29E-01 | 6.99E-01 | 1.00E+00 |
| ENSG00000235590.6_GNAS-AS1   | ENSG00000160789.18_LMNA | -0.0507  | -0.208220771 | 0.109382853 | 5.35E-01 | 7.76E-01 | 1.00E+00 |
| ENSG00000240207.5_RP11-379F  | ENSG00000160789.18_LMNA | -0.0938  | -0.249276286 | 0.066394195 | 2.50E-01 | 5.31E-01 | 1.00E+00 |
| ENSG00000273888.1_FRMD6-AS   | ENSG00000160789.18_LMNA | -0.12845 | -0.281883912 | 0.031395269 | 1.15E-01 | 3.38E-01 | 1.00E+00 |
| ENSG00000230699.2_RP11-54O7  | ENSG00000160789.18_LMNA | -0.16414 | -0.315107271 | -0.00507259 | 4.33E-02 | 1.83E-01 | 1.00E+00 |
| ENSG00000198064.12_NPIPB13   | ENSG00000160789.18_LMNA | 0.04527  | -0.114760412 | 0.203005049 | 5.80E-01 | 8.04E-01 | 1.00E+00 |
| ENSG00000227268.3_KLLN       | ENSG00000160789.18_LMNA | 0.05143  | -0.108659688 | 0.208920798 | 5.29E-01 | 7.73E-01 | 1.00E+00 |
| ENSG00000235411.1_AC007041.1 | ENSG00000160789.18_LMNA | -0.14356 | -0.295996365 | 0.016005869 | 7.77E-02 | 2.67E-01 | 1.00E+00 |
| ENSG00000232862.4_RP4-665N4  | ENSG00000160789.18_LMNA | -0.03985 | -0.197797353 | 0.120111179 | 6.26E-01 | 8.31E-01 | 1.00E+00 |
| ENSG00000176236.6_C10orf111  | ENSG00000160789.18_LMNA | -0.18784 | -0.336964859 | -0.02952306 | 2.05E-02 | 1.10E-01 | 1.00E+00 |
| ENSG00000236680.1_RP11-296P  | ENSG00000160789.18_LMNA | 0.0941   | -0.066092164 | 0.249560775 | 2.49E-01 | 5.29E-01 | 1.00E+00 |
| ENSG00000265646.2_TUFMP1     | ENSG00000160789.18_LMNA | 0.11301  | -0.047032273 | 0.267404198 | 1.66E-01 | 4.22E-01 | 1.00E+00 |
| ENSG00000253741.1_CTD-2292P  | ENSG00000160789.18_LMNA | 0.10893  | -0.051160214 | 0.263557924 | 1.82E-01 | 4.46E-01 | 1.00E+00 |
| ENSG00000241549.7_GUSBP2     | ENSG00000160789.18_LMNA | -0.18012 | -0.3298655   | -0.02154098 | 2.64E-02 | 1.31E-01 | 1.00E+00 |

|                             |                         |          |              |             |          |          |          |
|-----------------------------|-------------------------|----------|--------------|-------------|----------|----------|----------|
| ENSG00000085741.11_WNT11    | ENSG00000160789.18_LMNA | -0.14687 | -0.299073332 | 0.012630742 | 7.10E-02 | 2.52E-01 | 1.00E+00 |
| ENSG00000231528.2_FAM225A   | ENSG00000160789.18_LMNA | 0.14486  | -0.014683796 | 0.297202418 | 7.50E-02 | 2.61E-01 | 1.00E+00 |
| ENSG00000213225.7_NOC2LP1   | ENSG00000160789.18_LMNA | 0.21156  | 0.054188783  | 0.358684135 | 8.88E-03 | 6.02E-02 | 1.00E+00 |
| ENSG00000255867.1_DENND5B-  | ENSG00000160789.18_LMNA | -0.16696 | -0.317713237 | -0.00796836 | 3.98E-02 | 1.73E-01 | 1.00E+00 |
| ENSG00000224699.7_LAMTOR5-  | ENSG00000160789.18_LMNA | -0.23693 | -0.381731695 | -0.08077578 | 3.29E-03 | 2.87E-02 | 1.00E+00 |
| ENSG00000203808.9_BVES-AS1  | ENSG00000160789.18_LMNA | -0.23414 | -0.379206945 | -0.07784227 | 3.69E-03 | 3.12E-02 | 1.00E+00 |
| ENSG00000248671.6_ALG1L9P   | ENSG00000160789.18_LMNA | -0.09104 | -0.246665872 | 0.069162861 | 2.65E-01 | 5.48E-01 | 1.00E+00 |
| ENSG00000065621.13_GSTO2    | ENSG00000160789.18_LMNA | -0.22042 | -0.366748103 | -0.0634423  | 6.36E-03 | 4.70E-02 | 1.00E+00 |
| ENSG00000280219.1_RP11-752L | ENSG00000160789.18_LMNA | 0.15559  | -0.003706977 | 0.307177662 | 5.56E-02 | 2.15E-01 | 1.00E+00 |
| ENSG00000279019.1_RP11-407G | ENSG00000160789.18_LMNA | 0.12892  | -0.030912933 | 0.282328293 | 1.13E-01 | 3.36E-01 | 1.00E+00 |
| ENSG00000265273.1_PGDP1     | ENSG00000160789.18_LMNA | -0.01515 | -0.173931675 | 0.144398496 | 8.53E-01 | 9.42E-01 | 1.00E+00 |
| ENSG00000179172.8_HNRNPCL1  | ENSG00000160789.18_LMNA | -0.0385  | -0.196493911 | 0.121447546 | 6.38E-01 | 8.38E-01 | 1.00E+00 |
| ENSG00000234969.1_RP13-33H1 | ENSG00000160789.18_LMNA | 0.12211  | -0.037829357 | 0.275943237 | 1.34E-01 | 3.72E-01 | 1.00E+00 |
| ENSG00000255040.1_RP11-677N | ENSG00000160789.18_LMNA | -0.17258 | -0.322904529 | -0.01375248 | 3.35E-02 | 1.54E-01 | 1.00E+00 |
| ENSG00000261423.1_RP11-1007 | ENSG00000160789.18_LMNA | 0.01558  | -0.14397854  | 0.174347542 | 8.49E-01 | 9.41E-01 | 1.00E+00 |
| ENSG00000058085.13_LAMC2    | ENSG00000160789.18_LMNA | 0.26193  | 0.10719796   | 0.404271489 | 1.12E-03 | 1.26E-02 | 1.00E+00 |
| ENSG00000105877.16_DNAH11   | ENSG00000160789.18_LMNA | 0.10866  | -0.051429107 | 0.263307031 | 1.83E-01 | 4.47E-01 | 1.00E+00 |
| ENSG00000135253.12_KCP      | ENSG00000160789.18_LMNA | 0.06502  | -0.095167542 | 0.221921835 | 4.26E-01 | 6.97E-01 | 1.00E+00 |
| ENSG00000053524.10_MCF2L2   | ENSG00000160789.18_LMNA | -0.34822 | -0.480771691 | -0.20011703 | 1.10E-05 | 3.15E-04 | 5.65E-01 |
| ENSG00000124215.15_CDH26    | ENSG00000160789.18_LMNA | -0.18928 | -0.338284175 | -0.03101075 | 1.95E-02 | 1.06E-01 | 1.00E+00 |
| ENSG00000156218.11_ADAMTSL  | ENSG00000160789.18_LMNA | -0.06829 | -0.225045901 | 0.091908012 | 4.03E-01 | 6.79E-01 | 1.00E+00 |
| ENSG00000162383.10_SLC1A7   | ENSG00000160789.18_LMNA | -0.24769 | -0.391455054 | -0.09212231 | 2.09E-03 | 2.02E-02 | 1.00E+00 |
| ENSG00000226359.1_ACTG1P24  | ENSG00000160789.18_LMNA | 0.15993  | 0.000750911  | 0.31120938  | 4.90E-02 | 1.99E-01 | 1.00E+00 |
| ENSG00000231887.5_PRH1      | ENSG00000160789.18_LMNA | -0.18504 | -0.33438813  | -0.0266214  | 2.25E-02 | 1.17E-01 | 1.00E+00 |
| ENSG00000173166.16_RAPH1    | ENSG00000160789.18_LMNA | 0.15798  | -0.001256037 | 0.309395676 | 5.19E-02 | 2.06E-01 | 1.00E+00 |
| ENSG00000223559.1_RP11-700P | ENSG00000160789.18_LMNA | 0.02254  | -0.137150654 | 0.181093052 | 7.83E-01 | 9.11E-01 | 1.00E+00 |
| ENSG00000270344.2_RP11-734K | ENSG00000160789.18_LMNA | 0.07534  | -0.084880603 | 0.231759156 | 3.56E-01 | 6.40E-01 | 1.00E+00 |
| ENSG00000138622.3_HCN4      | ENSG00000160789.18_LMNA | -0.04453 | -0.202298598 | 0.115487354 | 5.86E-01 | 8.08E-01 | 1.00E+00 |
| ENSG00000179978.11_RP11-131 | ENSG00000160789.18_LMNA | -0.06528 | -0.222170505 | 0.094908338 | 4.24E-01 | 6.95E-01 | 1.00E+00 |
| ENSG00000249437.6_NAIP      | ENSG00000160789.18_LMNA | -0.00809 | -0.167077956 | 0.151303124 | 9.21E-01 | 9.70E-01 | 1.00E+00 |
| ENSG00000253915.1_MAPRE1P1  | ENSG00000160789.18_LMNA | -0.0456  | -0.203328307 | 0.114427664 | 5.77E-01 | 8.03E-01 | 1.00E+00 |
| ENSG00000238062.4_SPATA3-A5 | ENSG00000160789.18_LMNA | -0.28333 | -0.423430546 | -0.12999193 | 4.05E-04 | 5.71E-03 | 1.00E+00 |
| ENSG00000205913.5_SRRM2-AS  | ENSG00000160789.18_LMNA | 0.00521  | -0.154120634 | 0.164272353 | 9.49E-01 | 9.80E-01 | 1.00E+00 |

|                               |                         |          |              |             |          |          |          |
|-------------------------------|-------------------------|----------|--------------|-------------|----------|----------|----------|
| ENSG00000135914.5_HTR2B       | ENSG00000160789.18_LMNA | -0.05727 | -0.21451176  | 0.102871833 | 4.83E-01 | 7.41E-01 | 1.00E+00 |
| ENSG00000125878.5_TCF15       | ENSG00000160789.18_LMNA | -0.23501 | -0.379995723 | -0.07875819 | 3.56E-03 | 3.04E-02 | 1.00E+00 |
| ENSG00000159588.13_CCDC17     | ENSG00000160789.18_LMNA | -0.02864 | -0.186991451 | 0.131155338 | 7.26E-01 | 8.84E-01 | 1.00E+00 |
| ENSG00000255967.1_HADHAP2     | ENSG00000160789.18_LMNA | -0.00656 | -0.165584427 | 0.152803636 | 9.36E-01 | 9.75E-01 | 1.00E+00 |
| ENSG00000260936.1_            | ENSG00000160789.18_LMNA | 0.05587  | -0.104254716 | 0.213177809 | 4.94E-01 | 7.49E-01 | 1.00E+00 |
| ENSG00000102349.13_KLF8       | ENSG00000160789.18_LMNA | -0.13305 | -0.286190797 | 0.026714377 | 1.02E-01 | 3.16E-01 | 1.00E+00 |
| ENSG00000256849.1_RP11-405A   | ENSG00000160789.18_LMNA | -0.15893 | -0.310282458 | 0.000275084 | 5.05E-02 | 2.03E-01 | 1.00E+00 |
| ENSG00000234690.5_AC073283.4  | ENSG00000160789.18_LMNA | -0.39862 | -0.524530438 | -0.25563857 | 3.65E-07 | 2.06E-05 | 1.87E-02 |
| ENSG00000261251.1_RP3-388M5   | ENSG00000160789.18_LMNA | -0.15616 | -0.307713321 | 0.003115408 | 5.47E-02 | 2.13E-01 | 1.00E+00 |
| ENSG00000121101.14_TEX14      | ENSG00000160789.18_LMNA | -0.31944 | -0.455480738 | -0.16882903 | 6.03E-05 | 1.25E-03 | 1.00E+00 |
| ENSG00000224773.2_HSPA8P7     | ENSG00000160789.18_LMNA | 0.0192   | -0.140434263 | 0.177852792 | 8.14E-01 | 9.27E-01 | 1.00E+00 |
| ENSG00000258373.1_SLC25A3P2   | ENSG00000160789.18_LMNA | 0.02167  | -0.138005056 | 0.180250594 | 7.91E-01 | 9.15E-01 | 1.00E+00 |
| ENSG00000226915.1_AC068137.4  | ENSG00000160789.18_LMNA | -0.2547  | -0.397770156 | -0.09953349 | 1.54E-03 | 1.60E-02 | 1.00E+00 |
| ENSG00000278949.1_RP11-46H1   | ENSG00000160789.18_LMNA | 0.03163  | -0.128212732 | 0.189878119 | 6.99E-01 | 8.71E-01 | 1.00E+00 |
| ENSG00000124839.11_RAB17      | ENSG00000160789.18_LMNA | 0.23656  | 0.080389817  | 0.381399768 | 3.34E-03 | 2.90E-02 | 1.00E+00 |
| ENSG00000237828.1_PA2G4P1     | ENSG00000160789.18_LMNA | -0.03939 | -0.197356912 | 0.120562874 | 6.30E-01 | 8.34E-01 | 1.00E+00 |
| ENSG00000229267.2_AC072062.4  | ENSG00000160789.18_LMNA | 0.09716  | -0.06301313  | 0.252457885 | 2.34E-01 | 5.11E-01 | 1.00E+00 |
| ENSG00000106686.15_SPATA6L    | ENSG00000160789.18_LMNA | -0.0837  | -0.239704224 | 0.076522837 | 3.05E-01 | 5.92E-01 | 1.00E+00 |
| ENSG00000144648.13_ACKR2      | ENSG00000160789.18_LMNA | -0.15656 | -0.308084885 | 0.002704933 | 5.41E-02 | 2.11E-01 | 1.00E+00 |
| ENSG00000188167.7_TMPPE       | ENSG00000160789.18_LMNA | 0.14366  | -0.015909239 | 0.296084549 | 7.75E-02 | 2.67E-01 | 1.00E+00 |
| ENSG00000267387.1_CTD-2240E   | ENSG00000160789.18_LMNA | 0.16702  | 0.008031732  | 0.317770218 | 3.97E-02 | 1.73E-01 | 1.00E+00 |
| ENSG00000274374.1_RP5-878I13  | ENSG00000160789.18_LMNA | -0.21193 | -0.359020073 | -0.05457324 | 8.76E-03 | 5.96E-02 | 1.00E+00 |
| ENSG00000196329.9_GIMAP5      | ENSG00000160789.18_LMNA | -0.03192 | -0.19015449  | 0.127930711 | 6.96E-01 | 8.70E-01 | 1.00E+00 |
| ENSG00000278390.3_RP11-74J13  | ENSG00000160789.18_LMNA | -0.36014 | -0.491180722 | -0.21316273 | 5.18E-06 | 1.70E-04 | 2.66E-01 |
| ENSG00000153157.11_SYCP2L     | ENSG00000160789.18_LMNA | -0.13352 | -0.286626744 | 0.026239807 | 1.01E-01 | 3.13E-01 | 1.00E+00 |
| ENSG00000178852.14_EFCAB13    | ENSG00000160789.18_LMNA | 0.00209  | -0.157160789 | 0.161239257 | 9.80E-01 | 9.92E-01 | 1.00E+00 |
| ENSG00000198711.5_SSBP3-AS1   | ENSG00000160789.18_LMNA | -0.07658 | -0.232941125 | 0.083640053 | 3.48E-01 | 6.32E-01 | 1.00E+00 |
| ENSG00000182722.5_SEPHS1P1    | ENSG00000160789.18_LMNA | -0.15709 | -0.308570067 | 0.002168784 | 5.33E-02 | 2.09E-01 | 1.00E+00 |
| ENSG00000234281.4_LANCL1-AS1  | ENSG00000160789.18_LMNA | -0.34373 | -0.476840587 | -0.19521591 | 1.45E-05 | 3.98E-04 | 7.45E-01 |
| ENSG00000228168.1_HNRNPA1F    | ENSG00000160789.18_LMNA | 0.0406   | -0.119375238 | 0.198514682 | 6.19E-01 | 8.28E-01 | 1.00E+00 |
| ENSG00000261730.1_RP4-668J2.4 | ENSG00000160789.18_LMNA | -0.09039 | -0.246050954 | 0.06981435  | 2.68E-01 | 5.52E-01 | 1.00E+00 |
| ENSG00000267302.4_RP11-178C   | ENSG00000160789.18_LMNA | -0.26838 | -0.410062602 | -0.11405501 | 8.29E-04 | 9.99E-03 | 1.00E+00 |
| ENSG00000219085.1_NPM1P37     | ENSG00000160789.18_LMNA | -0.07122 | -0.227836323 | 0.088990838 | 3.83E-01 | 6.62E-01 | 1.00E+00 |

|                              |                         |          |              |             |          |          |          |
|------------------------------|-------------------------|----------|--------------|-------------|----------|----------|----------|
| ENSG00000274292.1_RP11-347I1 | ENSG00000160789.18_LMNA | -0.12605 | -0.279639315 | 0.033829351 | 1.22E-01 | 3.51E-01 | 1.00E+00 |
| ENSG00000142765.16_SYTL1     | ENSG00000160789.18_LMNA | 0.25309  | 0.097832219  | 0.396322987 | 1.66E-03 | 1.69E-02 | 1.00E+00 |
| ENSG00000158571.9_PFKFB1     | ENSG00000160789.18_LMNA | -0.03096 | -0.189230988 | 0.12887289  | 7.05E-01 | 8.74E-01 | 1.00E+00 |
| ENSG00000241684.4_ADAMTS9-   | ENSG00000160789.18_LMNA | 0.35926  | 0.212194679  | 0.490411045 | 5.48E-06 | 1.79E-04 | 2.81E-01 |
| ENSG00000234996.3_RP11-480I1 | ENSG00000160789.18_LMNA | -0.11148 | -0.265960646 | 0.048582797 | 1.72E-01 | 4.31E-01 | 1.00E+00 |
| ENSG00000227477.1_STK4-AS1   | ENSG00000160789.18_LMNA | 0.04194  | -0.118052438 | 0.199803172 | 6.08E-01 | 8.21E-01 | 1.00E+00 |
| ENSG00000197165.9_SULT1A2    | ENSG00000160789.18_LMNA | -0.16244 | -0.31353145  | -0.00332405 | 4.56E-02 | 1.89E-01 | 1.00E+00 |
| ENSG00000214832.5_UPF3AP2    | ENSG00000160789.18_LMNA | -0.03593 | -0.194016142 | 0.123984732 | 6.60E-01 | 8.50E-01 | 1.00E+00 |
| ENSG00000233030.2_RP11-196G  | ENSG00000160789.18_LMNA | -0.13517 | -0.288167633 | 0.024561269 | 9.68E-02 | 3.06E-01 | 1.00E+00 |
| ENSG00000234558.1_API5P1     | ENSG00000160789.18_LMNA | 0.19228  | 0.034128729  | 0.341045357 | 1.76E-02 | 9.86E-02 | 1.00E+00 |
| ENSG00000267669.1_RP11-824M  | ENSG00000160789.18_LMNA | 0.04016  | -0.119804242 | 0.198096569 | 6.23E-01 | 8.30E-01 | 1.00E+00 |
| ENSG00000237126.7_AC073254.  | ENSG00000160789.18_LMNA | -0.13987 | -0.292552987 | 0.0197745   | 8.57E-02 | 2.84E-01 | 1.00E+00 |
| ENSG00000225246.1_RPS2P1     | ENSG00000160789.18_LMNA | -0.00428 | -0.163368686 | 0.155027035 | 9.58E-01 | 9.83E-01 | 1.00E+00 |
| ENSG00000095587.8_TLL2       | ENSG00000160789.18_LMNA | -0.09836 | -0.253586206 | 0.061812329 | 2.28E-01 | 5.05E-01 | 1.00E+00 |
| ENSG00000280543.1_ASAP1-IT2  | ENSG00000160789.18_LMNA | -0.06923 | -0.225945125 | 0.090968535 | 3.97E-01 | 6.74E-01 | 1.00E+00 |
| ENSG00000234371.6_RPSAP31    | ENSG00000160789.18_LMNA | 0.00121  | -0.158020455 | 0.160380494 | 9.88E-01 | 9.96E-01 | 1.00E+00 |
| ENSG00000228121.1_PHBP3      | ENSG00000160789.18_LMNA | 0.02499  | -0.13474276  | 0.183464775 | 7.60E-01 | 9.00E-01 | 1.00E+00 |
| ENSG00000224843.5_LINC00240  | ENSG00000160789.18_LMNA | -0.11282 | -0.267216711 | 0.047233739 | 1.66E-01 | 4.23E-01 | 1.00E+00 |
| ENSG00000173597.7_SULT1B1    | ENSG00000160789.18_LMNA | 0.00476  | -0.154561841 | 0.163832543 | 9.54E-01 | 9.81E-01 | 1.00E+00 |
| ENSG00000233559.1_AC016831.  | ENSG00000160789.18_LMNA | 0.03261  | -0.127253388 | 0.190818039 | 6.90E-01 | 8.66E-01 | 1.00E+00 |
| ENSG00000223723.1_BX842568.2 | ENSG00000160789.18_LMNA | 0.02625  | -0.133513124 | 0.184674512 | 7.48E-01 | 8.95E-01 | 1.00E+00 |
| ENSG00000146001.5_PCDHB18P   | ENSG00000160789.18_LMNA | 0.10766  | -0.05244157  | 0.262361962 | 1.87E-01 | 4.53E-01 | 1.00E+00 |
| ENSG00000227136.2_           | ENSG00000160789.18_LMNA | -0.21277 | -0.35978135  | -0.05544479 | 8.50E-03 | 5.82E-02 | 1.00E+00 |
| ENSG00000266777.1_SH3GL1P1   | ENSG00000160789.18_LMNA | 0.11118  | -0.048888634 | 0.265675743 | 1.73E-01 | 4.32E-01 | 1.00E+00 |
| ENSG00000262500.1_RP11-259G  | ENSG00000160789.18_LMNA | -0.03319 | -0.191381461 | 0.126678037 | 6.85E-01 | 8.63E-01 | 1.00E+00 |
| ENSG00000245812.2_RP11-175K  | ENSG00000160789.18_LMNA | 0.03377  | -0.126104596 | 0.191942805 | 6.80E-01 | 8.60E-01 | 1.00E+00 |
| ENSG00000232871.7_SEC1P      | ENSG00000160789.18_LMNA | 0.09262  | -0.067574187 | 0.248164301 | 2.56E-01 | 5.39E-01 | 1.00E+00 |
| ENSG00000278727.1_AC000403.  | ENSG00000160789.18_LMNA | 0.27529  | 0.121408407  | 0.416246502 | 5.98E-04 | 7.77E-03 | 1.00E+00 |
| ENSG00000240882.1_RP11-174O  | ENSG00000160789.18_LMNA | 0.01293  | -0.146575553 | 0.171773994 | 8.74E-01 | 9.51E-01 | 1.00E+00 |
| ENSG00000083454.20_P2RX5     | ENSG00000160789.18_LMNA | -0.12257 | -0.276376858 | 0.0373606   | 1.32E-01 | 3.69E-01 | 1.00E+00 |
| ENSG00000221930.6_FAM45BP    | ENSG00000160789.18_LMNA | 0.00272  | -0.156547562 | 0.161851545 | 9.73E-01 | 9.90E-01 | 1.00E+00 |
| ENSG00000183476.11_SH2D7     | ENSG00000160789.18_LMNA | 0.14698  | -0.01251151  | 0.299181913 | 7.08E-02 | 2.51E-01 | 1.00E+00 |
| ENSG00000104879.4_CKM        | ENSG00000160789.18_LMNA | -0.03987 | -0.1978164   | 0.120091642 | 6.26E-01 | 8.31E-01 | 1.00E+00 |



|                              |                         |          |              |             |          |          |          |
|------------------------------|-------------------------|----------|--------------|-------------|----------|----------|----------|
| ENSG00000228696.7_ARL17B     | ENSG00000160789.18_LMNA | -0.13312 | -0.286253146 | 0.026646512 | 1.02E-01 | 3.16E-01 | 1.00E+00 |
| ENSG00000230002.2_ALMS1-IT1  | ENSG00000160789.18_LMNA | 0.10011  | -0.060050957 | 0.25523971  | 2.20E-01 | 4.95E-01 | 1.00E+00 |
| ENSG00000246662.5_LINC00535  | ENSG00000160789.18_LMNA | -0.12405 | -0.277760554 | 0.035863858 | 1.28E-01 | 3.62E-01 | 1.00E+00 |
| ENSG00000189350.11_FAM179A   | ENSG00000160789.18_LMNA | -0.1208  | -0.274715226 | 0.039156127 | 1.38E-01 | 3.79E-01 | 1.00E+00 |
| ENSG00000280157.1_RP11-520H  | ENSG00000160789.18_LMNA | -0.09635 | -0.251687239 | 0.063832756 | 2.38E-01 | 5.16E-01 | 1.00E+00 |
| ENSG00000258302.2_RP11-981P  | ENSG00000160789.18_LMNA | 0.02244  | -0.137246851 | 0.180998223 | 7.84E-01 | 9.11E-01 | 1.00E+00 |
| ENSG00000168491.8_CDC110     | ENSG00000160789.18_LMNA | 0.04161  | -0.11837222  | 0.199491786 | 6.11E-01 | 8.22E-01 | 1.00E+00 |
| ENSG00000198553.7_KCNRG      | ENSG00000160789.18_LMNA | -0.31633 | -0.452728174 | -0.16545828 | 7.18E-05 | 1.44E-03 | 1.00E+00 |
| ENSG00000103313.10_MEFV      | ENSG00000160789.18_LMNA | 0.12562  | -0.034269474 | 0.279233088 | 1.23E-01 | 3.53E-01 | 1.00E+00 |
| ENSG00000104140.6_RHOV       | ENSG00000160789.18_LMNA | 0.09774  | -0.062434475 | 0.25300172  | 2.31E-01 | 5.09E-01 | 1.00E+00 |
| ENSG00000234329.1_RP11-767N  | ENSG00000160789.18_LMNA | -0.1298  | -0.283148186 | 0.03002263  | 1.11E-01 | 3.32E-01 | 1.00E+00 |
| ENSG00000280388.1_RP11-229D  | ENSG00000160789.18_LMNA | 0.13171  | -0.028076222 | 0.284939067 | 1.06E-01 | 3.23E-01 | 1.00E+00 |
| ENSG00000214544.6_GTF2IRD2F  | ENSG00000160789.18_LMNA | -0.19595 | -0.344405341 | -0.03793097 | 1.55E-02 | 9.00E-02 | 1.00E+00 |
| ENSG00000175591.10_P2RY2     | ENSG00000160789.18_LMNA | 0.11211  | -0.04795128  | 0.266548764 | 1.69E-01 | 4.28E-01 | 1.00E+00 |
| ENSG00000215388.3_ACTG1P3    | ENSG00000160789.18_LMNA | 0.20668  | 0.0490923    | 0.354223315 | 1.06E-02 | 6.84E-02 | 1.00E+00 |
| ENSG00000280160.1_RP11-196G  | ENSG00000160789.18_LMNA | 0.03339  | -0.126483628 | 0.191571792 | 6.83E-01 | 8.62E-01 | 1.00E+00 |
| ENSG00000203867.7_RBM20      | ENSG00000160789.18_LMNA | 0.20396  | 0.046256953  | 0.351735583 | 1.17E-02 | 7.34E-02 | 1.00E+00 |
| ENSG00000121053.5_EPX        | ENSG00000160789.18_LMNA | -0.15161 | -0.303485333 | 0.007778789 | 6.22E-02 | 2.31E-01 | 1.00E+00 |
| ENSG00000163435.14_ELF3      | ENSG00000160789.18_LMNA | 0.05278  | -0.10732714  | 0.210209857 | 5.18E-01 | 7.65E-01 | 1.00E+00 |
| ENSG00000279833.1_RP4-742C1  | ENSG00000160789.18_LMNA | -0.02036 | -0.178976718 | 0.139296093 | 8.03E-01 | 9.21E-01 | 1.00E+00 |
| ENSG00000179698.12_WDR97     | ENSG00000160789.18_LMNA | -0.12785 | -0.281325178 | 0.032001519 | 1.16E-01 | 3.41E-01 | 1.00E+00 |
| ENSG00000169885.8_CALML6     | ENSG00000160789.18_LMNA | 0.27383  | 0.119850128  | 0.414938329 | 6.41E-04 | 8.20E-03 | 1.00E+00 |
| ENSG00000228203.5_RNF144A-A  | ENSG00000160789.18_LMNA | -0.00956 | -0.16850744  | 0.149865582 | 9.07E-01 | 9.64E-01 | 1.00E+00 |
| ENSG00000226049.3_TLK2P1     | ENSG00000160789.18_LMNA | 0.05285  | -0.107257908 | 0.210276799 | 5.18E-01 | 7.64E-01 | 1.00E+00 |
| ENSG00000241489.6_AF011889.5 | ENSG00000160789.18_LMNA | 0.19262  | 0.034475581  | 0.341352191 | 1.74E-02 | 9.77E-02 | 1.00E+00 |
| ENSG00000157322.15_CLEC18A   | ENSG00000160789.18_LMNA | 0.0572   | -0.102941334 | 0.214444747 | 4.84E-01 | 7.41E-01 | 1.00E+00 |
| ENSG00000230071.2_RPL4P6     | ENSG00000160789.18_LMNA | 0.00228  | -0.156975833 | 0.161423955 | 9.78E-01 | 9.92E-01 | 1.00E+00 |
| ENSG00000255397.1_AC022182.1 | ENSG00000160789.18_LMNA | 0.1302   | -0.029619471 | 0.28351931  | 1.10E-01 | 3.30E-01 | 1.00E+00 |
| ENSG00000177551.5_NHLH2      | ENSG00000160789.18_LMNA | -0.24281 | -0.387051503 | -0.086974   | 2.58E-03 | 2.38E-02 | 1.00E+00 |
| ENSG00000258471.1_RP11-84C1  | ENSG00000160789.18_LMNA | -0.10108 | -0.256157073 | 0.059072902 | 2.15E-01 | 4.89E-01 | 1.00E+00 |
| ENSG00000149609.5_C20orf144  | ENSG00000160789.18_LMNA | 0.25485  | 0.099689667  | 0.397902928 | 1.53E-03 | 1.60E-02 | 1.00E+00 |
| ENSG00000181577.14_C6orf223  | ENSG00000160789.18_LMNA | 0.10454  | -0.055587068 | 0.259421984 | 2.00E-01 | 4.70E-01 | 1.00E+00 |
| ENSG00000271425.5_NBPF10     | ENSG00000160789.18_LMNA | 0.34346  | 0.194916386  | 0.476599976 | 1.48E-05 | 4.03E-04 | 7.58E-01 |

|                             |                         |          |              |             |          |          |          |
|-----------------------------|-------------------------|----------|--------------|-------------|----------|----------|----------|
| ENSG00000238164.5_RP3-395M2 | ENSG00000160789.18_LMNA | 0.10037  | -0.059784506 | 0.255489683 | 2.19E-01 | 4.93E-01 | 1.00E+00 |
| ENSG00000261254.2_          | ENSG00000160789.18_LMNA | -0.04444 | -0.202214028 | 0.115574354 | 5.87E-01 | 8.08E-01 | 1.00E+00 |
| ENSG00000227638.2_HNRNPA1F  | ENSG00000160789.18_LMNA | -0.01533 | -0.174103802 | 0.14422469  | 8.51E-01 | 9.42E-01 | 1.00E+00 |
| ENSG00000183171.5_RP11-49C9 | ENSG00000160789.18_LMNA | 0.02733  | -0.132449548 | 0.1857201   | 7.38E-01 | 8.90E-01 | 1.00E+00 |
| ENSG00000164512.16_ANKRD55  | ENSG00000160789.18_LMNA | -0.13884 | -0.291599176 | 0.020816838 | 8.80E-02 | 2.89E-01 | 1.00E+00 |
| ENSG00000248015.5_AC005329. | ENSG00000160789.18_LMNA | 0.01172  | -0.147757635 | 0.170601151 | 8.86E-01 | 9.56E-01 | 1.00E+00 |
| ENSG00000253953.2_PCDHGB4   | ENSG00000160789.18_LMNA | -0.12856 | -0.281988623 | 0.031281628 | 1.14E-01 | 3.38E-01 | 1.00E+00 |
| ENSG00000242512.7_LINC01206 | ENSG00000160789.18_LMNA | 0.26179  | 0.107048552  | 0.404145041 | 1.12E-03 | 1.27E-02 | 1.00E+00 |
| ENSG00000275149.1_          | ENSG00000160789.18_LMNA | -0.16791 | -0.31859253  | -0.00894661 | 3.87E-02 | 1.69E-01 | 1.00E+00 |
| ENSG00000261499.2_CH17-260C | ENSG00000160789.18_LMNA | -0.03533 | -0.193445604 | 0.124568362 | 6.66E-01 | 8.53E-01 | 1.00E+00 |
| ENSG00000248905.7_FMN1      | ENSG00000160789.18_LMNA | 0.02479  | -0.134946016 | 0.183264716 | 7.62E-01 | 9.01E-01 | 1.00E+00 |
| ENSG00000149506.9_ZP1       | ENSG00000160789.18_LMNA | 0.10084  | -0.059315688 | 0.255929406 | 2.16E-01 | 4.91E-01 | 1.00E+00 |
| ENSG00000137699.15_TRIM29   | ENSG00000160789.18_LMNA | -0.18643 | -0.335670261 | -0.02806456 | 2.15E-02 | 1.13E-01 | 1.00E+00 |
| ENSG00000185155.10_MIXL1    | ENSG00000160789.18_LMNA | -0.13843 | -0.291208975 | 0.02124306  | 8.90E-02 | 2.90E-01 | 1.00E+00 |
| ENSG00000233260.1_RPSAP63   | ENSG00000160789.18_LMNA | -0.1849  | -0.334265128 | -0.02648302 | 2.26E-02 | 1.18E-01 | 1.00E+00 |
| ENSG00000114786.14_ABHD14A  | ENSG00000160789.18_LMNA | -0.18596 | -0.335234362 | -0.02757377 | 2.18E-02 | 1.15E-01 | 1.00E+00 |
| ENSG00000234350.3_AC007405. | ENSG00000160789.18_LMNA | -0.08608 | -0.241963795 | 0.07413775  | 2.92E-01 | 5.77E-01 | 1.00E+00 |
| ENSG00000279838.1_RP4-635A2 | ENSG00000160789.18_LMNA | -0.10481 | -0.259681799 | 0.055309343 | 1.99E-01 | 4.69E-01 | 1.00E+00 |
| ENSG00000214837.7_LINC01347 | ENSG00000160789.18_LMNA | 0.06002  | -0.100134871 | 0.217148392 | 4.63E-01 | 7.25E-01 | 1.00E+00 |
| ENSG00000278985.1_RP11-303E | ENSG00000160789.18_LMNA | 0.05384  | -0.106273566 | 0.211228266 | 5.10E-01 | 7.59E-01 | 1.00E+00 |
| ENSG00000261770.1_CTC-459F4 | ENSG00000160789.18_LMNA | -0.0538  | -0.211193197 | 0.106309858 | 5.10E-01 | 7.59E-01 | 1.00E+00 |
| ENSG00000129204.15_USP6     | ENSG00000160789.18_LMNA | -0.0794  | -0.235625721 | 0.080818751 | 3.31E-01 | 6.17E-01 | 1.00E+00 |
| ENSG00000102387.14_TAF7L    | ENSG00000160789.18_LMNA | -0.14587 | -0.298143632 | 0.01365128  | 7.30E-02 | 2.56E-01 | 1.00E+00 |
| ENSG00000115607.8_IL18RAP   | ENSG00000160789.18_LMNA | -0.10749 | -0.262207933 | 0.052606522 | 1.87E-01 | 4.54E-01 | 1.00E+00 |
| ENSG00000176659.7_C20orf197 | ENSG00000160789.18_LMNA | -0.15337 | -0.305120608 | 0.005976719 | 5.92E-02 | 2.24E-01 | 1.00E+00 |
| ENSG00000198785.4_GRIN3A    | ENSG00000160789.18_LMNA | -0.23804 | -0.382739503 | -0.08194822 | 3.15E-03 | 2.77E-02 | 1.00E+00 |
| ENSG00000268119.4_CTD-2561J | ENSG00000160789.18_LMNA | -0.12032 | -0.274270077 | 0.039636801 | 1.40E-01 | 3.81E-01 | 1.00E+00 |
| ENSG00000258498.5_DIO3OS    | ENSG00000160789.18_LMNA | -0.16134 | -0.312511082 | -0.00219285 | 4.71E-02 | 1.93E-01 | 1.00E+00 |
| ENSG00000206262.7_FOXL2NB   | ENSG00000160789.18_LMNA | -0.14398 | -0.296389944 | 0.015574548 | 7.68E-02 | 2.65E-01 | 1.00E+00 |
| ENSG00000241163.6_LINC00877 | ENSG00000160789.18_LMNA | -0.3045  | -0.442264886 | -0.15270603 | 1.37E-04 | 2.42E-03 | 1.00E+00 |
| ENSG00000235251.2_RP11-384B | ENSG00000160789.18_LMNA | -0.09203 | -0.247602312 | 0.06817021  | 2.59E-01 | 5.43E-01 | 1.00E+00 |
| ENSG00000232672.1_ACTG1P21  | ENSG00000160789.18_LMNA | 0.19786  | 0.039915536  | 0.346155966 | 1.45E-02 | 8.60E-02 | 1.00E+00 |
| ENSG00000259904.1_ACTG1P15  | ENSG00000160789.18_LMNA | 0.24569  | 0.090010926  | 0.389650762 | 2.28E-03 | 2.16E-02 | 1.00E+00 |

|                             |                         |          |              |             |          |          |          |
|-----------------------------|-------------------------|----------|--------------|-------------|----------|----------|----------|
| ENSG00000140009.17_ESR2     | ENSG00000160789.18_LMNA | 0.3257   | 0.175608329  | 0.46100018  | 4.23E-05 | 9.38E-04 | 1.00E+00 |
| ENSG00000270589.1_RP11-348N | ENSG00000160789.18_LMNA | -0.20446 | -0.352197778 | -0.04678336 | 1.15E-02 | 7.24E-02 | 1.00E+00 |
| ENSG00000248795.1_RP11-173E | ENSG00000160789.18_LMNA | 0.15059  | -0.008823868 | 0.302536144 | 6.41E-02 | 2.36E-01 | 1.00E+00 |
| ENSG00000178562.16_CD28     | ENSG00000160789.18_LMNA | 0.00848  | -0.150920476 | 0.167458591 | 9.17E-01 | 9.69E-01 | 1.00E+00 |
| ENSG00000119715.13_ESRRB    | ENSG00000160789.18_LMNA | -0.14879 | -0.300866755 | 0.010660253 | 6.73E-02 | 2.43E-01 | 1.00E+00 |
| ENSG00000138100.12_TRIM54   | ENSG00000160789.18_LMNA | 0.07228  | -0.087930565 | 0.228849239 | 3.76E-01 | 6.56E-01 | 1.00E+00 |
| ENSG00000233251.6_AC007743  | ENSG00000160789.18_LMNA | -0.44408 | -0.563442285 | -0.30654657 | 1.00E-08 | 1.07E-06 | 5.13E-04 |
| ENSG00000157423.16_HYDIN    | ENSG00000160789.18_LMNA | 0.14186  | -0.017745349 | 0.294408018 | 8.13E-02 | 2.75E-01 | 1.00E+00 |
| ENSG00000280426.1_RP11-837J | ENSG00000160789.18_LMNA | -0.18308 | -0.332590306 | -0.02459994 | 2.40E-02 | 1.23E-01 | 1.00E+00 |
| ENSG00000281357.1_ARRDC3-A  | ENSG00000160789.18_LMNA | -0.01493 | -0.17372208  | 0.144610108 | 8.55E-01 | 9.43E-01 | 1.00E+00 |
| ENSG00000272084.1_RP5-1126H | ENSG00000160789.18_LMNA | -0.02699 | -0.18539822  | 0.132777044 | 7.41E-01 | 8.91E-01 | 1.00E+00 |
| ENSG00000257838.4_RP11-368J | ENSG00000160789.18_LMNA | -0.08919 | -0.244916135 | 0.071015954 | 2.75E-01 | 5.59E-01 | 1.00E+00 |
| ENSG00000280046.1_RP11-1099 | ENSG00000160789.18_LMNA | -0.03571 | -0.193812956 | 0.124192606 | 6.62E-01 | 8.51E-01 | 1.00E+00 |
| ENSG00000226237.1_GAS1RR    | ENSG00000160789.18_LMNA | -0.0088  | -0.167770512 | 0.150606833 | 9.14E-01 | 9.67E-01 | 1.00E+00 |
| ENSG00000229752.1_RPL7P10   | ENSG00000160789.18_LMNA | -0.11574 | -0.269970309 | 0.044272256 | 1.56E-01 | 4.07E-01 | 1.00E+00 |
| ENSG00000236570.1_RAD23BP1  | ENSG00000160789.18_LMNA | -0.04157 | -0.199454188 | 0.118410826 | 6.11E-01 | 8.23E-01 | 1.00E+00 |
| ENSG00000154358.18_OBSCN    | ENSG00000160789.18_LMNA | -0.01737 | -0.176079047 | 0.142228776 | 8.32E-01 | 9.35E-01 | 1.00E+00 |
| ENSG00000258033.1_RP11-350G | ENSG00000160789.18_LMNA | 0.00433  | -0.154976929 | 0.163418655 | 9.58E-01 | 9.83E-01 | 1.00E+00 |
| ENSG00000242852.5_ZNF709    | ENSG00000160789.18_LMNA | -0.29615 | -0.434845039 | -0.14372107 | 2.12E-04 | 3.41E-03 | 1.00E+00 |
| ENSG00000232811.1_RP11-96K1 | ENSG00000160789.18_LMNA | 0.09711  | -0.063061199 | 0.252412699 | 2.34E-01 | 5.12E-01 | 1.00E+00 |
| ENSG00000185261.12_KIAA0825 | ENSG00000160789.18_LMNA | 0.07709  | -0.083132472 | 0.233424468 | 3.45E-01 | 6.29E-01 | 1.00E+00 |
| ENSG00000171121.15_KCNMB3   | ENSG00000160789.18_LMNA | 0.08683  | -0.073380146 | 0.242680814 | 2.87E-01 | 5.73E-01 | 1.00E+00 |
| ENSG00000260971.3_RP11-504A | ENSG00000160789.18_LMNA | 0.11734  | -0.042654921 | 0.271471946 | 1.50E-01 | 3.98E-01 | 1.00E+00 |
| ENSG00000230366.8_DSCR9     | ENSG00000160789.18_LMNA | -0.04845 | -0.206064911 | 0.111607863 | 5.53E-01 | 7.88E-01 | 1.00E+00 |
| ENSG00000204929.10_AC074391 | ENSG00000160789.18_LMNA | 0.28366  | 0.130344791  | 0.423725088 | 3.98E-04 | 5.65E-03 | 1.00E+00 |
| ENSG00000167767.12_KRT80    | ENSG00000160789.18_LMNA | 0.40774  | 0.265790945  | 0.532381189 | 1.85E-07 | 1.19E-05 | 9.49E-03 |
| ENSG00000226287.6_TMEM191A  | ENSG00000160789.18_LMNA | -0.05497 | -0.212316578 | 0.105146887 | 5.01E-01 | 7.53E-01 | 1.00E+00 |
| ENSG00000239332.4_LINC01119 | ENSG00000160789.18_LMNA | -0.02671 | -0.185124549 | 0.133055435 | 7.44E-01 | 8.93E-01 | 1.00E+00 |
| ENSG00000230461.7_PROX1-AS  | ENSG00000160789.18_LMNA | -0.01232 | -0.171186973 | 0.147167312 | 8.80E-01 | 9.54E-01 | 1.00E+00 |
| ENSG00000270228.1_RP11-453E | ENSG00000160789.18_LMNA | -0.00897 | -0.167934283 | 0.150442132 | 9.13E-01 | 9.67E-01 | 1.00E+00 |
| ENSG00000232860.6_SMG7-AS1  | ENSG00000160789.18_LMNA | 0.10167  | -0.058478627 | 0.256714193 | 2.13E-01 | 4.86E-01 | 1.00E+00 |
| ENSG00000154529.13_CNTNAP3  | ENSG00000160789.18_LMNA | 0.30358  | 0.151711973  | 0.441445929 | 1.44E-04 | 2.51E-03 | 1.00E+00 |
| ENSG00000230724.8_LINC01001 | ENSG00000160789.18_LMNA | 0.05933  | -0.100825638 | 0.216483384 | 4.68E-01 | 7.29E-01 | 1.00E+00 |

|                              |                         |          |              |             |          |          |          |
|------------------------------|-------------------------|----------|--------------|-------------|----------|----------|----------|
| ENSG00000247151.5_CSTF3-AS1  | ENSG00000160789.18_LMNA | -0.11262 | -0.267036117 | 0.047427774 | 1.67E-01 | 4.25E-01 | 1.00E+00 |
| ENSG00000047617.13_ANO2      | ENSG00000160789.18_LMNA | -0.09952 | -0.254681813 | 0.060645468 | 2.23E-01 | 4.98E-01 | 1.00E+00 |
| ENSG00000215859.7_RP6-74O6.1 | ENSG00000160789.18_LMNA | -0.16947 | -0.320035171 | -0.01055289 | 3.69E-02 | 1.64E-01 | 1.00E+00 |
| ENSG00000171219.8_CDC42BPC   | ENSG00000160789.18_LMNA | 0.07399  | -0.086221905 | 0.23048014  | 3.65E-01 | 6.46E-01 | 1.00E+00 |
| ENSG00000174137.11_FAM53A    | ENSG00000160789.18_LMNA | 0.05217  | -0.107924815 | 0.209631824 | 5.23E-01 | 7.69E-01 | 1.00E+00 |
| ENSG00000249709.6_ZNF564     | ENSG00000160789.18_LMNA | -0.01771 | -0.176415381 | 0.141888665 | 8.29E-01 | 9.33E-01 | 1.00E+00 |
| ENSG00000230583.5_GTF2IRD1F  | ENSG00000160789.18_LMNA | 0.04008  | -0.119882369 | 0.198020413 | 6.24E-01 | 8.30E-01 | 1.00E+00 |
| ENSG00000239653.1_PSMD6-AS   | ENSG00000160789.18_LMNA | -0.0997  | -0.254854997 | 0.060460942 | 2.22E-01 | 4.97E-01 | 1.00E+00 |
| ENSG00000112782.14_CLIC5     | ENSG00000160789.18_LMNA | -0.23531 | -0.380269148 | -0.07907581 | 3.52E-03 | 3.01E-02 | 1.00E+00 |
| ENSG00000229570.2_GAPDHP5E   | ENSG00000160789.18_LMNA | -0.00853 | -0.16750504  | 0.150873774 | 9.17E-01 | 9.68E-01 | 1.00E+00 |
| ENSG00000073282.11_TP63      | ENSG00000160789.18_LMNA | 0.11963  | -0.04034089  | 0.273617784 | 1.42E-01 | 3.85E-01 | 1.00E+00 |
| ENSG00000154262.11_ABCA6     | ENSG00000160789.18_LMNA | -0.05697 | -0.214225509 | 0.103168688 | 4.86E-01 | 7.42E-01 | 1.00E+00 |
| ENSG00000267288.2_RP13-890H  | ENSG00000160789.18_LMNA | -0.01211 | -0.170984189 | 0.14737168  | 8.82E-01 | 9.54E-01 | 1.00E+00 |
| ENSG00000272463.1_RP11-532F  | ENSG00000160789.18_LMNA | 0.00046  | -0.158751015 | 0.159650323 | 9.95E-01 | 9.98E-01 | 1.00E+00 |
| ENSG00000204025.5_TRPC5OS    | ENSG00000160789.18_LMNA | -0.28555 | -0.42541091  | -0.13236584 | 3.63E-04 | 5.22E-03 | 1.00E+00 |
| ENSG00000270978.1_RP11-54C4  | ENSG00000160789.18_LMNA | 0.04911  | -0.110958444 | 0.206694467 | 5.48E-01 | 7.85E-01 | 1.00E+00 |
| ENSG00000279583.1_RP11-368N  | ENSG00000160789.18_LMNA | 0.01003  | -0.149411925 | 0.168958276 | 9.02E-01 | 9.62E-01 | 1.00E+00 |
| ENSG00000245275.6_SAP30L-AS  | ENSG00000160789.18_LMNA | 0.08777  | -0.072445875 | 0.24356456  | 2.82E-01 | 5.68E-01 | 1.00E+00 |
| ENSG00000227258.4_SMIM2-AS1  | ENSG00000160789.18_LMNA | -0.23554 | -0.380471984 | -0.07931147 | 3.49E-03 | 2.99E-02 | 1.00E+00 |
| ENSG00000279133.1_RP11-342K  | ENSG00000160789.18_LMNA | -0.1096  | -0.264191927 | 0.050480521 | 1.79E-01 | 4.41E-01 | 1.00E+00 |
| ENSG00000133116.7_KL         | ENSG00000160789.18_LMNA | 0.12973  | -0.030093616 | 0.283082831 | 1.11E-01 | 3.33E-01 | 1.00E+00 |
| ENSG00000100346.16_CACNA1I   | ENSG00000160789.18_LMNA | -0.14762 | -0.299771355 | 0.01186409  | 6.95E-02 | 2.49E-01 | 1.00E+00 |
| ENSG00000224722.3_RP11-255B  | ENSG00000160789.18_LMNA | 0.07929  | -0.080928388 | 0.235521487 | 3.32E-01 | 6.17E-01 | 1.00E+00 |
| ENSG00000214435.6_AS3MT      | ENSG00000160789.18_LMNA | 0.14407  | -0.015489297 | 0.296467722 | 7.66E-02 | 2.65E-01 | 1.00E+00 |
| ENSG00000267909.2_CCDC177    | ENSG00000160789.18_LMNA | -0.04067 | -0.198582716 | 0.119305421 | 6.19E-01 | 8.27E-01 | 1.00E+00 |
| ENSG00000145536.14_ADAMTS1   | ENSG00000160789.18_LMNA | 0.00385  | -0.155442352 | 0.162954443 | 9.62E-01 | 9.85E-01 | 1.00E+00 |
| ENSG00000157542.9_KCNJ6      | ENSG00000160789.18_LMNA | 0.12329  | -0.036632917 | 0.277049743 | 1.30E-01 | 3.66E-01 | 1.00E+00 |
| ENSG00000197980.10_LEKR1     | ENSG00000160789.18_LMNA | -0.26392 | -0.406055356 | -0.10930716 | 1.02E-03 | 1.17E-02 | 1.00E+00 |
| ENSG00000280213.1_UCKL1-AS1  | ENSG00000160789.18_LMNA | 0.17362  | 0.01482508   | 0.323865156 | 3.24E-02 | 1.51E-01 | 1.00E+00 |
| ENSG00000141449.13_GREB1L    | ENSG00000160789.18_LMNA | -0.33894 | -0.472639454 | -0.18999363 | 1.94E-05 | 5.05E-04 | 9.97E-01 |
| ENSG00000228315.10_GUSBP11   | ENSG00000160789.18_LMNA | -0.16997 | -0.320497655 | -0.01106817 | 3.63E-02 | 1.62E-01 | 1.00E+00 |
| ENSG00000266876.1_RP11-1148  | ENSG00000160789.18_LMNA | -0.20062 | -0.348683338 | -0.04278492 | 1.32E-02 | 8.00E-02 | 1.00E+00 |
| ENSG00000196565.11_HBG2      | ENSG00000160789.18_LMNA | -0.05471 | -0.212068347 | 0.105403941 | 5.03E-01 | 7.54E-01 | 1.00E+00 |

|                              |                         |          |              |             |          |          |          |
|------------------------------|-------------------------|----------|--------------|-------------|----------|----------|----------|
| ENSG00000234222.5_RP11-315I2 | ENSG00000160789.18_LMNA | -0.0322  | -0.190419839 | 0.127659889 | 6.94E-01 | 8.68E-01 | 1.00E+00 |
| ENSG00000070019.4_GUCY2C     | ENSG00000160789.18_LMNA | 0.11875  | -0.04122684  | 0.272796597 | 1.45E-01 | 3.90E-01 | 1.00E+00 |
| ENSG00000127954.11_STEAP4    | ENSG00000160789.18_LMNA | 0.14318  | -0.016392489 | 0.295643485 | 7.84E-02 | 2.69E-01 | 1.00E+00 |
| ENSG00000280193.1_RP13-923O  | ENSG00000160789.18_LMNA | -0.04909 | -0.206672423 | 0.110981187 | 5.48E-01 | 7.85E-01 | 1.00E+00 |
| ENSG00000131400.6_NAPSA      | ENSG00000160789.18_LMNA | -0.07911 | -0.235347937 | 0.081110916 | 3.33E-01 | 6.18E-01 | 1.00E+00 |
| ENSG00000263513.4_FAM72C     | ENSG00000160789.18_LMNA | 0.08363  | -0.076586289 | 0.239644064 | 3.06E-01 | 5.92E-01 | 1.00E+00 |
| ENSG00000278576.1_RP11-507K  | ENSG00000160789.18_LMNA | -0.29216 | -0.431298783 | -0.13944367 | 2.60E-04 | 4.02E-03 | 1.00E+00 |
| ENSG00000218418.2_RP11-296E  | ENSG00000160789.18_LMNA | -0.02988 | -0.188181856 | 0.129942543 | 7.15E-01 | 8.79E-01 | 1.00E+00 |
| ENSG00000197993.6_KEL        | ENSG00000160789.18_LMNA | -0.10364 | -0.258571994 | 0.056495314 | 2.04E-01 | 4.75E-01 | 1.00E+00 |
| ENSG00000260589.1_STAM-AS1   | ENSG00000160789.18_LMNA | -0.25269 | -0.395963779 | -0.09741021 | 1.68E-03 | 1.72E-02 | 1.00E+00 |
| ENSG00000175147.10_TM51-1    | ENSG00000160789.18_LMNA | 0.02892  | -0.130885539 | 0.187256349 | 7.24E-01 | 8.83E-01 | 1.00E+00 |
| ENSG00000226200.5_SGMS1-AS   | ENSG00000160789.18_LMNA | -0.15674 | -0.308249879 | 0.002522627 | 5.38E-02 | 2.11E-01 | 1.00E+00 |
| ENSG00000181781.8_ODF3L2     | ENSG00000160789.18_LMNA | -0.01774 | -0.176438277 | 0.141865509 | 8.28E-01 | 9.33E-01 | 1.00E+00 |
| ENSG00000178146.9_RP1-232L2  | ENSG00000160789.18_LMNA | -0.00679 | -0.16581461  | 0.152572473 | 9.34E-01 | 9.74E-01 | 1.00E+00 |
| ENSG00000217950.4_NOC2LP2    | ENSG00000160789.18_LMNA | 0.21656  | 0.059403419  | 0.363234022 | 7.37E-03 | 5.23E-02 | 1.00E+00 |
| ENSG00000153283.11_CD96      | ENSG00000160789.18_LMNA | 0.12292  | -0.037000431 | 0.276709943 | 1.31E-01 | 3.67E-01 | 1.00E+00 |
| ENSG00000234130.2_RP13-88F2  | ENSG00000160789.18_LMNA | 0.01517  | -0.144378075 | 0.173951899 | 8.53E-01 | 9.42E-01 | 1.00E+00 |
| ENSG00000235371.1_RP4-764D2  | ENSG00000160789.18_LMNA | -0.14186 | -0.294408677 | 0.017744628 | 8.13E-02 | 2.75E-01 | 1.00E+00 |
| ENSG00000232496.2_RPL3P12    | ENSG00000160789.18_LMNA | 0.01695  | -0.142634425 | 0.175677806 | 8.36E-01 | 9.36E-01 | 1.00E+00 |
| ENSG00000179869.13_ABCA13    | ENSG00000160789.18_LMNA | 0.21193  | 0.054567028  | 0.35901465  | 8.77E-03 | 5.96E-02 | 1.00E+00 |
| ENSG00000115423.17_DNAH6     | ENSG00000160789.18_LMNA | -0.04253 | -0.200369681 | 0.117470488 | 6.03E-01 | 8.18E-01 | 1.00E+00 |
| ENSG00000170092.13_SPDYE5    | ENSG00000160789.18_LMNA | 0.16325  | 0.004161884  | 0.314286739 | 4.45E-02 | 1.86E-01 | 1.00E+00 |
| ENSG00000215158.8_RP11-1023I | ENSG00000160789.18_LMNA | -0.19161 | -0.340425811 | -0.03342861 | 1.80E-02 | 1.00E-01 | 1.00E+00 |
| ENSG00000267750.4_RUNDC3A-   | ENSG00000160789.18_LMNA | -0.38555 | -0.513249779 | -0.24115384 | 9.33E-07 | 4.34E-05 | 4.79E-02 |
| ENSG00000152779.13_SLC16A12  | ENSG00000160789.18_LMNA | 0.04968  | -0.110390565 | 0.20724476  | 5.43E-01 | 7.82E-01 | 1.00E+00 |
| ENSG00000224023.9_FLJ37035   | ENSG00000160789.18_LMNA | -0.33906 | -0.472745968 | -0.19012584 | 1.93E-05 | 5.01E-04 | 9.89E-01 |
| ENSG00000247809.6_NR2F2-AS1  | ENSG00000160789.18_LMNA | -0.0081  | -0.167082388 | 0.15129867  | 9.21E-01 | 9.70E-01 | 1.00E+00 |
| ENSG00000226790.3_HNRNPA3F   | ENSG00000160789.18_LMNA | 0.10621  | -0.053898877 | 0.261000599 | 1.93E-01 | 4.61E-01 | 1.00E+00 |
| ENSG00000237804.1_HNRNPA1F   | ENSG00000160789.18_LMNA | -0.10088 | -0.255973421 | 0.059268753 | 2.16E-01 | 4.91E-01 | 1.00E+00 |
| ENSG00000106128.17_GHRHR     | ENSG00000160789.18_LMNA | -0.10104 | -0.256122114 | 0.059110184 | 2.15E-01 | 4.90E-01 | 1.00E+00 |
| ENSG00000255330.7_RP3-403A1  | ENSG00000160789.18_LMNA | -0.24912 | -0.392741287 | -0.0936291  | 1.97E-03 | 1.93E-02 | 1.00E+00 |
| ENSG00000147082.16_CCNB3     | ENSG00000160789.18_LMNA | -0.21105 | -0.35821267  | -0.05364938 | 9.06E-03 | 6.10E-02 | 1.00E+00 |
| ENSG00000204967.9_PCDHA4     | ENSG00000160789.18_LMNA | -0.21095 | -0.358122352 | -0.05354607 | 9.09E-03 | 6.12E-02 | 1.00E+00 |

|                              |                         |          |              |             |          |          |          |
|------------------------------|-------------------------|----------|--------------|-------------|----------|----------|----------|
| ENSG00000273066.4_RP11-216L  | ENSG00000160789.18_LMNA | 0.00201  | -0.15723743  | 0.161162715 | 9.80E-01 | 9.93E-01 | 1.00E+00 |
| ENSG00000228925.1_AC016722.4 | ENSG00000160789.18_LMNA | 0.05012  | -0.10995985  | 0.207662003 | 5.40E-01 | 7.80E-01 | 1.00E+00 |
| ENSG00000233452.5_STXBP5-A5  | ENSG00000160789.18_LMNA | -0.15944 | -0.310756934 | -0.00025002 | 4.98E-02 | 2.01E-01 | 1.00E+00 |
| ENSG00000118520.12_ARG1      | ENSG00000160789.18_LMNA | -0.02372 | -0.182235948 | 0.135990797 | 7.72E-01 | 9.06E-01 | 1.00E+00 |
| ENSG00000254772.8_EEF1G      | ENSG00000160789.18_LMNA | -0.06228 | -0.219308402 | 0.097889084 | 4.46E-01 | 7.13E-01 | 1.00E+00 |
| ENSG00000271687.1_MTND5P10   | ENSG00000160789.18_LMNA | -0.07925 | -0.235480137 | 0.080971879 | 3.32E-01 | 6.18E-01 | 1.00E+00 |
| ENSG00000171747.7_LGALS4     | ENSG00000160789.18_LMNA | -0.051   | -0.208507344 | 0.109086849 | 5.33E-01 | 7.75E-01 | 1.00E+00 |
| ENSG00000262155.1_RP11-266L  | ENSG00000160789.18_LMNA | -0.01077 | -0.169675493 | 0.148689944 | 8.95E-01 | 9.59E-01 | 1.00E+00 |
| ENSG00000185829.14_ARL17A    | ENSG00000160789.18_LMNA | -0.15722 | -0.308690399 | 0.002035784 | 5.31E-02 | 2.09E-01 | 1.00E+00 |
| ENSG00000218226.1_TATDN2P2   | ENSG00000160789.18_LMNA | 0.06078  | -0.099380527 | 0.217874271 | 4.57E-01 | 7.21E-01 | 1.00E+00 |
| ENSG00000218052.5_ADAMTS7F   | ENSG00000160789.18_LMNA | -0.06297 | -0.219970203 | 0.097200354 | 4.41E-01 | 7.09E-01 | 1.00E+00 |
| ENSG00000163673.6_DCLK3      | ENSG00000160789.18_LMNA | 0.0435   | -0.11651051  | 0.201303722 | 5.95E-01 | 8.13E-01 | 1.00E+00 |
| ENSG00000196604.10_POTEF     | ENSG00000160789.18_LMNA | 0.23654  | 0.080370872  | 0.381383474 | 3.35E-03 | 2.90E-02 | 1.00E+00 |
| ENSG00000163239.11_TDRD10    | ENSG00000160789.18_LMNA | -0.06605 | -0.222903941 | 0.094143583 | 4.19E-01 | 6.91E-01 | 1.00E+00 |
| ENSG00000188001.8_TPRG1      | ENSG00000160789.18_LMNA | 0.20009  | 0.042231952  | 0.348196623 | 1.35E-02 | 8.11E-02 | 1.00E+00 |
| ENSG00000269984.1_RP11-362K  | ENSG00000160789.18_LMNA | -0.02957 | -0.187888486 | 0.13024152  | 7.18E-01 | 8.80E-01 | 1.00E+00 |
| ENSG00000179362.13_HMG2P4    | ENSG00000160789.18_LMNA | 0.0007   | -0.158515356 | 0.159885895 | 9.93E-01 | 9.97E-01 | 1.00E+00 |
| ENSG00000253837.1_RP11-177H  | ENSG00000160789.18_LMNA | 0.0446   | -0.115417709 | 0.202366294 | 5.85E-01 | 8.07E-01 | 1.00E+00 |
| ENSG00000132010.14_ZNF20     | ENSG00000160789.18_LMNA | -0.06363 | -0.22059533  | 0.096549512 | 4.36E-01 | 7.04E-01 | 1.00E+00 |
| ENSG00000251364.5_CTD-2516F  | ENSG00000160789.18_LMNA | -0.05918 | -0.2163444   | 0.100969966 | 4.69E-01 | 7.30E-01 | 1.00E+00 |
| ENSG00000237491.7_RP11-206L  | ENSG00000160789.18_LMNA | -0.14007 | -0.292741267 | 0.019568664 | 8.52E-02 | 2.83E-01 | 1.00E+00 |
| ENSG00000134115.11_CNTN6     | ENSG00000160789.18_LMNA | -0.35097 | -0.483173844 | -0.20311886 | 9.28E-06 | 2.74E-04 | 4.76E-01 |
| ENSG00000216937.10_CCDC7     | ENSG00000160789.18_LMNA | -0.14766 | -0.299815842 | 0.011815217 | 6.95E-02 | 2.48E-01 | 1.00E+00 |
| ENSG00000268573.1_RP11-158H  | ENSG00000160789.18_LMNA | -0.08231 | -0.238390485 | 0.07790789  | 3.13E-01 | 6.00E-01 | 1.00E+00 |
| ENSG00000277758.3_ABC7-4240  | ENSG00000160789.18_LMNA | -0.28892 | -0.428417688 | -0.13597656 | 3.06E-04 | 4.58E-03 | 1.00E+00 |
| ENSG00000255559.1_ZNF252P-A  | ENSG00000160789.18_LMNA | -0.11595 | -0.270166119 | 0.044061452 | 1.55E-01 | 4.06E-01 | 1.00E+00 |
| ENSG00000225684.3_FAM225B    | ENSG00000160789.18_LMNA | 0.2211   | 0.064160627  | 0.36737219  | 6.19E-03 | 4.60E-02 | 1.00E+00 |
| ENSG00000268230.4_CTD-2619J  | ENSG00000160789.18_LMNA | 0.00869  | -0.150718469 | 0.167659496 | 9.15E-01 | 9.68E-01 | 1.00E+00 |
| ENSG00000122012.12_SV2C      | ENSG00000160789.18_LMNA | -0.12156 | -0.275431581 | 0.038382296 | 1.36E-01 | 3.75E-01 | 1.00E+00 |
| ENSG00000214279.11_SCART1    | ENSG00000160789.18_LMNA | -0.04161 | -0.199487204 | 0.118376924 | 6.11E-01 | 8.22E-01 | 1.00E+00 |
| ENSG00000261360.1_CTD-2165H  | ENSG00000160789.18_LMNA | 0.00805  | -0.151348031 | 0.167033279 | 9.22E-01 | 9.70E-01 | 1.00E+00 |
| ENSG00000180747.14_SMG1P3    | ENSG00000160789.18_LMNA | -0.06226 | -0.219285025 | 0.097913406 | 4.46E-01 | 7.13E-01 | 1.00E+00 |
| ENSG00000226677.3_IGBP1P1    | ENSG00000160789.18_LMNA | -0.0083  | -0.167281553 | 0.151098462 | 9.19E-01 | 9.69E-01 | 1.00E+00 |

|                              |                         |          |              |             |          |          |          |
|------------------------------|-------------------------|----------|--------------|-------------|----------|----------|----------|
| ENSG00000261420.1_RP1-168L1: | ENSG00000160789.18_LMNA | -0.13498 | -0.287993096 | 0.024751486 | 9.73E-02 | 3.07E-01 | 1.00E+00 |
| ENSG00000250021.6_C15orf38-A | ENSG00000160789.18_LMNA | 0.04863  | -0.111434751 | 0.206232753 | 5.52E-01 | 7.88E-01 | 1.00E+00 |
| ENSG00000253899.1_RP11-613H  | ENSG00000160789.18_LMNA | -0.01259 | -0.171443332 | 0.146908912 | 8.78E-01 | 9.53E-01 | 1.00E+00 |
| ENSG00000230170.1_HNRNPA1F   | ENSG00000160789.18_LMNA | 0.01426  | -0.145273244 | 0.173065079 | 8.62E-01 | 9.46E-01 | 1.00E+00 |
| ENSG00000225462.1_FDPSP1     | ENSG00000160789.18_LMNA | -0.04558 | -0.20330994  | 0.114446573 | 5.77E-01 | 8.03E-01 | 1.00E+00 |
| ENSG00000267383.5_CTC-260E6  | ENSG00000160789.18_LMNA | -0.15988 | -0.311160052 | -0.00069629 | 4.91E-02 | 1.99E-01 | 1.00E+00 |
| ENSG00000258366.6_RTEL1      | ENSG00000160789.18_LMNA | 0.22176  | 0.064846182  | 0.367967547 | 6.04E-03 | 4.52E-02 | 1.00E+00 |
| ENSG00000196912.11_ANKRD36   | ENSG00000160789.18_LMNA | 0.0262   | -0.133561976 | 0.184626469 | 7.49E-01 | 8.95E-01 | 1.00E+00 |
| ENSG00000168334.8_XIRP1      | ENSG00000160789.18_LMNA | 0.04747  | -0.112585767 | 0.205116422 | 5.61E-01 | 7.93E-01 | 1.00E+00 |
| ENSG00000261008.5_LINC01572  | ENSG00000160789.18_LMNA | -0.07766 | -0.233964417 | 0.082565251 | 3.42E-01 | 6.26E-01 | 1.00E+00 |
| ENSG00000162825.15_NBPF20    | ENSG00000160789.18_LMNA | 0.12573  | -0.034150955 | 0.27934249  | 1.23E-01 | 3.53E-01 | 1.00E+00 |
| ENSG00000154269.13_ENPP3     | ENSG00000160789.18_LMNA | -0.22811 | -0.373740646 | -0.07150878 | 4.71E-03 | 3.75E-02 | 1.00E+00 |
| ENSG00000249193.1_HSPD1P5    | ENSG00000160789.18_LMNA | 0.06865  | -0.091553367 | 0.225385414 | 4.01E-01 | 6.77E-01 | 1.00E+00 |
| ENSG00000264672.4_SEPT4-AS1  | ENSG00000160789.18_LMNA | -0.05092 | -0.208435137 | 0.109161437 | 5.33E-01 | 7.75E-01 | 1.00E+00 |
| ENSG00000279800.1_BCLAF1P2   | ENSG00000160789.18_LMNA | -0.00419 | -0.163277485 | 0.155118482 | 9.59E-01 | 9.84E-01 | 1.00E+00 |
| ENSG00000212743.2_RP11-563J: | ENSG00000160789.18_LMNA | 0.03751  | -0.122426099 | 0.195538755 | 6.46E-01 | 8.43E-01 | 1.00E+00 |
| ENSG00000257335.7_MGAM       | ENSG00000160789.18_LMNA | 0.04213  | -0.117861494 | 0.199989074 | 6.06E-01 | 8.20E-01 | 1.00E+00 |
| ENSG00000160233.7_LRRC3      | ENSG00000160789.18_LMNA | 0.11249  | -0.047559844 | 0.266913183 | 1.68E-01 | 4.25E-01 | 1.00E+00 |
| ENSG00000092200.11_RPGRIP1   | ENSG00000160789.18_LMNA | -0.211   | -0.358172927 | -0.05360392 | 9.07E-03 | 6.11E-02 | 1.00E+00 |
| ENSG00000213981.7_AC007277.: | ENSG00000160789.18_LMNA | -0.11488 | -0.269161857 | 0.045142316 | 1.59E-01 | 4.12E-01 | 1.00E+00 |
| ENSG00000164796.16_CSMD3     | ENSG00000160789.18_LMNA | -0.38315 | -0.511170438 | -0.23849706 | 1.10E-06 | 4.98E-05 | 5.67E-02 |
| ENSG00000148357.15_HMCN2     | ENSG00000160789.18_LMNA | -0.0081  | -0.167088888 | 0.151292137 | 9.21E-01 | 9.70E-01 | 1.00E+00 |
| ENSG00000172345.12_STARD5    | ENSG00000160789.18_LMNA | 0.05377  | -0.106343614 | 0.211160578 | 5.11E-01 | 7.59E-01 | 1.00E+00 |
| ENSG00000166510.12_CCDC68    | ENSG00000160789.18_LMNA | -0.24569 | -0.389652582 | -0.09001305 | 2.28E-03 | 2.16E-02 | 1.00E+00 |
| ENSG00000187105.7_HEATR4     | ENSG00000160789.18_LMNA | 0.14143  | -0.018175189 | 0.294015259 | 8.22E-02 | 2.77E-01 | 1.00E+00 |
| ENSG00000113262.13_GRM6      | ENSG00000160789.18_LMNA | -0.04213 | -0.199992302 | 0.117858178 | 6.06E-01 | 8.20E-01 | 1.00E+00 |
| ENSG00000237417.1_XRCC6P1    | ENSG00000160789.18_LMNA | -0.03319 | -0.191381231 | 0.126678272 | 6.85E-01 | 8.63E-01 | 1.00E+00 |
| ENSG00000229419.1_RALGAPA1   | ENSG00000160789.18_LMNA | -0.13688 | -0.28976714  | 0.02281701  | 9.27E-02 | 2.98E-01 | 1.00E+00 |
| ENSG00000266907.1_AC006116.: | ENSG00000160789.18_LMNA | 0.00504  | -0.154286007 | 0.164107518 | 9.51E-01 | 9.80E-01 | 1.00E+00 |
| ENSG00000001626.13_CFTR      | ENSG00000160789.18_LMNA | -0.29554 | -0.434303266 | -0.14306689 | 2.19E-04 | 3.50E-03 | 1.00E+00 |
| ENSG00000197472.13_ZNF695    | ENSG00000160789.18_LMNA | -0.09554 | -0.250928368 | 0.064639443 | 2.42E-01 | 5.21E-01 | 1.00E+00 |
| ENSG00000214776.8_RP11-726G  | ENSG00000160789.18_LMNA | -0.19917 | -0.347360334 | -0.04128226 | 1.39E-02 | 8.30E-02 | 1.00E+00 |
| ENSG00000224334.1_AP000357.: | ENSG00000160789.18_LMNA | 0.01747  | -0.142129451 | 0.176177277 | 8.31E-01 | 9.34E-01 | 1.00E+00 |

|                              |                         |          |              |             |          |          |          |
|------------------------------|-------------------------|----------|--------------|-------------|----------|----------|----------|
| ENSG00000248441.5_LINC01197  | ENSG00000160789.18_LMNA | -0.21619 | -0.362898056 | -0.0590178  | 7.47E-03 | 5.28E-02 | 1.00E+00 |
| ENSG00000064270.11_ATP2C2    | ENSG00000160789.18_LMNA | -0.3587  | -0.489922844 | -0.21158094 | 5.69E-06 | 1.84E-04 | 2.92E-01 |
| ENSG00000280407.2_RP13-516M  | ENSG00000160789.18_LMNA | 0.13507  | -0.024658772 | 0.28807817  | 9.71E-02 | 3.06E-01 | 1.00E+00 |
| ENSG00000156097.11_GPR61     | ENSG00000160789.18_LMNA | -0.22707 | -0.372790736 | -0.07041065 | 4.91E-03 | 3.86E-02 | 1.00E+00 |
| ENSG00000166323.11_C11orf65  | ENSG00000160789.18_LMNA | -0.16845 | -0.319094689 | -0.00950555 | 3.80E-02 | 1.68E-01 | 1.00E+00 |
| ENSG00000185761.9_ADAMTSL5   | ENSG00000160789.18_LMNA | 0.20325  | 0.045527156  | 0.35109456  | 1.20E-02 | 7.49E-02 | 1.00E+00 |
| ENSG00000186451.1_SPATA12    | ENSG00000160789.18_LMNA | 0.08622  | -0.074001092 | 0.242093158 | 2.91E-01 | 5.76E-01 | 1.00E+00 |
| ENSG00000254013.1_MAP2K1P1   | ENSG00000160789.18_LMNA | 0.15426  | -0.005061743 | 0.305950195 | 5.78E-02 | 2.20E-01 | 1.00E+00 |
| ENSG00000225528.1_RP3-370M2  | ENSG00000160789.18_LMNA | -0.09529 | -0.250683197 | 0.064899973 | 2.43E-01 | 5.22E-01 | 1.00E+00 |
| ENSG00000230146.1_SEPHS1P4   | ENSG00000160789.18_LMNA | 0.00044  | -0.158772208 | 0.159629136 | 9.96E-01 | 9.98E-01 | 1.00E+00 |
| ENSG00000150054.17_MPP7      | ENSG00000160789.18_LMNA | -0.06957 | -0.226268266 | 0.090630791 | 3.94E-01 | 6.72E-01 | 1.00E+00 |
| ENSG00000182308.6_DCAF4L1    | ENSG00000160789.18_LMNA | 0.00821  | -0.151185715 | 0.167194757 | 9.20E-01 | 9.70E-01 | 1.00E+00 |
| ENSG00000281392.1_LINC00506  | ENSG00000160789.18_LMNA | -0.09909 | -0.254275562 | 0.06107824  | 2.25E-01 | 5.01E-01 | 1.00E+00 |
| ENSG00000204706.13_MAMDC2-   | ENSG00000160789.18_LMNA | -0.07684 | -0.233185355 | 0.083383596 | 3.47E-01 | 6.31E-01 | 1.00E+00 |
| ENSG00000258384.1_AC068831.1 | ENSG00000160789.18_LMNA | 0.19829  | 0.040366791  | 0.346553728 | 1.43E-02 | 8.51E-02 | 1.00E+00 |
| ENSG00000022556.14_NLRP2     | ENSG00000160789.18_LMNA | 0.14828  | -0.011181789 | 0.300392298 | 6.83E-02 | 2.45E-01 | 1.00E+00 |
| ENSG00000222038.3_POTEJ      | ENSG00000160789.18_LMNA | 0.17151  | 0.012651779  | 0.321918074 | 3.46E-02 | 1.57E-01 | 1.00E+00 |
| ENSG00000226472.6_RP11-551L  | ENSG00000160789.18_LMNA | -0.02935 | -0.187678441 | 0.130455543 | 7.20E-01 | 8.81E-01 | 1.00E+00 |
| ENSG00000273079.3_GRIN2B     | ENSG00000160789.18_LMNA | -0.17337 | -0.323638597 | -0.01457205 | 3.27E-02 | 1.51E-01 | 1.00E+00 |
| ENSG00000135605.11_TEC       | ENSG00000160789.18_LMNA | 0.18436  | 0.025920662  | 0.333765166 | 2.30E-02 | 1.19E-01 | 1.00E+00 |
| ENSG00000163632.11_C3orf49   | ENSG00000160789.18_LMNA | -0.20836 | -0.355756285 | -0.05084193 | 1.00E-02 | 6.56E-02 | 1.00E+00 |
| ENSG00000256591.4_RP11-286N  | ENSG00000160789.18_LMNA | -0.28243 | -0.422626528 | -0.1290291  | 4.23E-04 | 5.93E-03 | 1.00E+00 |
| ENSG00000180673.9_EXOC5P1    | ENSG00000160789.18_LMNA | -0.10006 | -0.255196873 | 0.060096614 | 2.20E-01 | 4.95E-01 | 1.00E+00 |
| ENSG00000147465.10_STAR      | ENSG00000160789.18_LMNA | -0.24244 | -0.38671064  | -0.08657616 | 2.62E-03 | 2.40E-02 | 1.00E+00 |
| ENSG00000260495.1_RP11-55K1  | ENSG00000160789.18_LMNA | -0.07884 | -0.235086188 | 0.081386167 | 3.34E-01 | 6.20E-01 | 1.00E+00 |
| ENSG00000258334.1_RP11-161H  | ENSG00000160789.18_LMNA | -0.06969 | -0.226380066 | 0.090513923 | 3.94E-01 | 6.71E-01 | 1.00E+00 |
| ENSG00000269113.3_TRABD2B    | ENSG00000160789.18_LMNA | 0.11621  | -0.043801352 | 0.270407684 | 1.54E-01 | 4.04E-01 | 1.00E+00 |
| ENSG00000256238.1_SUPT16HP   | ENSG00000160789.18_LMNA | 0.1977   | 0.039749056  | 0.346009192 | 1.46E-02 | 8.63E-02 | 1.00E+00 |
| ENSG00000204420.7_C6orf25    | ENSG00000160789.18_LMNA | -0.02147 | -0.180058617 | 0.138199688 | 7.93E-01 | 9.16E-01 | 1.00E+00 |
| ENSG00000130783.12_CCDC62    | ENSG00000160789.18_LMNA | -0.31692 | -0.453251151 | -0.16609819 | 6.95E-05 | 1.40E-03 | 1.00E+00 |
| ENSG00000214954.7_LRRC69     | ENSG00000160789.18_LMNA | 0.02318  | -0.136526571 | 0.181708116 | 7.77E-01 | 9.08E-01 | 1.00E+00 |
| ENSG00000042832.10_TG        | ENSG00000160789.18_LMNA | -0.14923 | -0.301270787 | 0.010215996 | 6.65E-02 | 2.41E-01 | 1.00E+00 |
| ENSG00000251596.1_HADHAP1    | ENSG00000160789.18_LMNA | -0.04927 | -0.206844978 | 0.110803143 | 5.47E-01 | 7.84E-01 | 1.00E+00 |



|                             |                         |          |              |             |          |          |          |
|-----------------------------|-------------------------|----------|--------------|-------------|----------|----------|----------|
| ENSG00000235530.5_AC087294. | ENSG00000160789.18_LMNA | -0.11298 | -0.267375591 | 0.047063014 | 1.66E-01 | 4.23E-01 | 1.00E+00 |
| ENSG00000232553.3_CLK2P1    | ENSG00000160789.18_LMNA | 0.14231  | -0.017281798 | 0.294831462 | 8.03E-02 | 2.73E-01 | 1.00E+00 |
| ENSG00000187736.11_NHEJ1    | ENSG00000160789.18_LMNA | -0.02784 | -0.186214865 | 0.131946016 | 7.34E-01 | 8.88E-01 | 1.00E+00 |
| ENSG00000123612.14_ACVR1C   | ENSG00000160789.18_LMNA | -0.24541 | -0.389394426 | -0.08971118 | 2.31E-03 | 2.18E-02 | 1.00E+00 |
| ENSG00000259751.1_RP11-83J1 | ENSG00000160789.18_LMNA | -0.08417 | -0.240148561 | 0.076054103 | 3.03E-01 | 5.89E-01 | 1.00E+00 |
| ENSG00000143858.10_SYT2     | ENSG00000160789.18_LMNA | -0.22456 | -0.370512483 | -0.06777991 | 5.41E-03 | 4.16E-02 | 1.00E+00 |
| ENSG00000173698.16_ADGRG2   | ENSG00000160789.18_LMNA | -0.2326  | -0.377811215 | -0.0762228  | 3.93E-03 | 3.28E-02 | 1.00E+00 |
| ENSG00000215817.4_ZC3H11B   | ENSG00000160789.18_LMNA | 0.08894  | -0.071269419 | 0.244676647 | 2.76E-01 | 5.61E-01 | 1.00E+00 |
| ENSG00000281103.1_TRG-AS1   | ENSG00000160789.18_LMNA | -0.09564 | -0.251016234 | 0.064546061 | 2.41E-01 | 5.20E-01 | 1.00E+00 |
| ENSG00000245904.3_RP11-796E | ENSG00000160789.18_LMNA | -0.29994 | -0.438211806 | -0.14779207 | 1.74E-04 | 2.93E-03 | 1.00E+00 |
| ENSG00000249142.1_CTD-2290P | ENSG00000160789.18_LMNA | -0.0339  | -0.192065167 | 0.125979568 | 6.78E-01 | 8.60E-01 | 1.00E+00 |
| ENSG00000281207.1_SLFNL1-AS | ENSG00000160789.18_LMNA | 0.16423  | 0.0051649    | 0.315190415 | 4.32E-02 | 1.83E-01 | 1.00E+00 |
| ENSG00000237461.1_RP11-554F | ENSG00000160789.18_LMNA | -0.21146 | -0.358587987 | -0.05407877 | 8.92E-03 | 6.04E-02 | 1.00E+00 |
| ENSG00000183091.18_NEB      | ENSG00000160789.18_LMNA | -0.13424 | -0.287299071 | 0.025507637 | 9.92E-02 | 3.10E-01 | 1.00E+00 |
| ENSG00000275450.1_PTGER4P2  | ENSG00000160789.18_LMNA | -0.19024 | -0.339166624 | -0.03200658 | 1.89E-02 | 1.04E-01 | 1.00E+00 |
| ENSG00000137960.5_GIPC2     | ENSG00000160789.18_LMNA | 0.03721  | -0.122715582 | 0.195256078 | 6.49E-01 | 8.44E-01 | 1.00E+00 |
| ENSG00000163491.15_NEK10    | ENSG00000160789.18_LMNA | 0.13593  | -0.023783951 | 0.288880659 | 9.50E-02 | 3.02E-01 | 1.00E+00 |
| ENSG00000232626.3_RP11-175B | ENSG00000160789.18_LMNA | -0.00115 | -0.160321257 | 0.158079736 | 9.89E-01 | 9.96E-01 | 1.00E+00 |
| ENSG00000220937.3_HNRNPA1F  | ENSG00000160789.18_LMNA | 0.04545  | -0.114582132 | 0.203178254 | 5.78E-01 | 8.03E-01 | 1.00E+00 |
| ENSG00000165899.9_OTOGL     | ENSG00000160789.18_LMNA | -0.25607 | -0.399003558 | -0.10098484 | 1.45E-03 | 1.53E-02 | 1.00E+00 |
| ENSG00000198590.10_C3orf35  | ENSG00000160789.18_LMNA | -0.04538 | -0.203117083 | 0.114645097 | 5.79E-01 | 8.04E-01 | 1.00E+00 |
| ENSG00000159496.13_RGL4     | ENSG00000160789.18_LMNA | 0.02405  | -0.135665748 | 0.182556089 | 7.69E-01 | 9.04E-01 | 1.00E+00 |
| ENSG00000082126.16_MPP4     | ENSG00000160789.18_LMNA | 0.13758  | -0.022104897 | 0.290419655 | 9.10E-02 | 2.94E-01 | 1.00E+00 |
| ENSG00000254449.1_SF3A3P2   | ENSG00000160789.18_LMNA | 0.01947  | -0.140160266 | 0.178123436 | 8.12E-01 | 9.26E-01 | 1.00E+00 |
| ENSG00000237054.8_PRMT5-AS  | ENSG00000160789.18_LMNA | 0.09092  | -0.069283906 | 0.246551641 | 2.65E-01 | 5.49E-01 | 1.00E+00 |
| ENSG00000277150.1_F8A3      | ENSG00000160789.18_LMNA | 0.07848  | -0.08174143  | 0.234748282 | 3.37E-01 | 6.22E-01 | 1.00E+00 |
| ENSG00000140563.13_MCTP2    | ENSG00000160789.18_LMNA | 0.15632  | -0.002951777 | 0.307861452 | 5.45E-02 | 2.12E-01 | 1.00E+00 |
| ENSG00000263219.1_RYKP1     | ENSG00000160789.18_LMNA | -0.07695 | -0.233295685 | 0.083267729 | 3.46E-01 | 6.30E-01 | 1.00E+00 |
| ENSG00000116652.6_DLEU2L    | ENSG00000160789.18_LMNA | -0.08753 | -0.243344044 | 0.07267905  | 2.84E-01 | 5.69E-01 | 1.00E+00 |
| ENSG00000248830.1_ZNF807    | ENSG00000160789.18_LMNA | -0.01786 | -0.176560226 | 0.14174217  | 8.27E-01 | 9.32E-01 | 1.00E+00 |
| ENSG00000243978.7_RGAG1     | ENSG00000160789.18_LMNA | 0.0035   | -0.155783126 | 0.162614467 | 9.66E-01 | 9.87E-01 | 1.00E+00 |
| ENSG00000240303.6_ACAD11    | ENSG00000160789.18_LMNA | 0.0294   | -0.1304126   | 0.187720588 | 7.19E-01 | 8.81E-01 | 1.00E+00 |
| ENSG00000186919.11_ZACN     | ENSG00000160789.18_LMNA | 0.01328  | -0.146233852 | 0.172112856 | 8.71E-01 | 9.50E-01 | 1.00E+00 |

|                              |                         |          |              |             |          |          |          |
|------------------------------|-------------------------|----------|--------------|-------------|----------|----------|----------|
| ENSG00000277399.3_GPR179     | ENSG00000160789.18_LMNA | -0.24638 | -0.390270034 | -0.09073529 | 2.22E-03 | 2.11E-02 | 1.00E+00 |
| ENSG00000143869.6_GDF7       | ENSG00000160789.18_LMNA | -0.04536 | -0.203098343 | 0.114664387 | 5.79E-01 | 8.04E-01 | 1.00E+00 |
| ENSG00000213449.2_GAPDHP2E   | ENSG00000160789.18_LMNA | 0.19596  | 0.037940124  | 0.344413425 | 1.55E-02 | 9.00E-02 | 1.00E+00 |
| ENSG00000279730.1_SETD8P1    | ENSG00000160789.18_LMNA | 0.08983  | -0.07038123  | 0.24551569  | 2.71E-01 | 5.55E-01 | 1.00E+00 |
| ENSG00000276672.1_RP11-142E  | ENSG00000160789.18_LMNA | -0.02853 | -0.186882313 | 0.13126648  | 7.27E-01 | 8.85E-01 | 1.00E+00 |
| ENSG00000253598.1_SLC10A5    | ENSG00000160789.18_LMNA | -0.10028 | -0.255401716 | 0.059878277 | 2.19E-01 | 4.94E-01 | 1.00E+00 |
| ENSG00000205277.8_MUC12      | ENSG00000160789.18_LMNA | 0.19315  | 0.03502521   | 0.341838272 | 1.71E-02 | 9.65E-02 | 1.00E+00 |
| ENSG00000139725.6_RHOF       | ENSG00000160789.18_LMNA | 0.06717  | -0.093026391 | 0.223974735 | 4.11E-01 | 6.85E-01 | 1.00E+00 |
| ENSG00000237861.1_RP11-332L  | ENSG00000160789.18_LMNA | 0.08556  | -0.074655991 | 0.241473118 | 2.95E-01 | 5.80E-01 | 1.00E+00 |
| ENSG00000237406.1_NDUFA9P1   | ENSG00000160789.18_LMNA | -0.15056 | -0.302507208 | 0.008855717 | 6.41E-02 | 2.36E-01 | 1.00E+00 |
| ENSG00000101162.3_TUBB1      | ENSG00000160789.18_LMNA | 0.12931  | -0.030516352 | 0.282693567 | 1.12E-01 | 3.34E-01 | 1.00E+00 |
| ENSG00000240401.7_AC012358.1 | ENSG00000160789.18_LMNA | -0.09219 | -0.247753915 | 0.068009448 | 2.59E-01 | 5.42E-01 | 1.00E+00 |
| ENSG00000182752.9_PAPPA      | ENSG00000160789.18_LMNA | 0.30802  | 0.156494561  | 0.445381645 | 1.13E-04 | 2.08E-03 | 1.00E+00 |
| ENSG00000130649.8_CYP2E1     | ENSG00000160789.18_LMNA | -0.17504 | -0.325178497 | -0.01629266 | 3.10E-02 | 1.47E-01 | 1.00E+00 |
| ENSG00000214185.3_XPOTP1     | ENSG00000160789.18_LMNA | 0.02399  | -0.135727306 | 0.182495467 | 7.69E-01 | 9.04E-01 | 1.00E+00 |
| ENSG00000186854.9_TRABD2A    | ENSG00000160789.18_LMNA | 0.15892  | -0.000287228 | 0.310271484 | 5.05E-02 | 2.03E-01 | 1.00E+00 |
| ENSG00000188761.10_BCL2L15   | ENSG00000160789.18_LMNA | -0.14859 | -0.300682607 | 0.010862694 | 6.77E-02 | 2.44E-01 | 1.00E+00 |
| ENSG00000128886.10_ELL3      | ENSG00000160789.18_LMNA | 0.1174   | -0.042599068 | 0.271523776 | 1.50E-01 | 3.98E-01 | 1.00E+00 |
| ENSG00000260898.4_ADPGK-AS   | ENSG00000160789.18_LMNA | -0.15562 | -0.307208303 | 0.003673143 | 5.56E-02 | 2.15E-01 | 1.00E+00 |
| ENSG00000100867.13_DHRS2     | ENSG00000160789.18_LMNA | -0.18124 | -0.33088981  | -0.02269023 | 2.54E-02 | 1.28E-01 | 1.00E+00 |
| ENSG00000175164.12_ABO       | ENSG00000160789.18_LMNA | 0.00027  | -0.158935868 | 0.159465513 | 9.97E-01 | 9.99E-01 | 1.00E+00 |
| ENSG00000055955.14_ITIH4     | ENSG00000160789.18_LMNA | -0.08992 | -0.245602819 | 0.070288968 | 2.71E-01 | 5.55E-01 | 1.00E+00 |
| ENSG00000249026.2_CTNNA1P1   | ENSG00000160789.18_LMNA | 0.28854  | 0.13557024   | 0.428079651 | 3.12E-04 | 4.64E-03 | 1.00E+00 |
| ENSG00000254838.5_GVINP1     | ENSG00000160789.18_LMNA | -0.07891 | -0.235158963 | 0.081309643 | 3.34E-01 | 6.20E-01 | 1.00E+00 |
| ENSG00000231890.6_DARS-AS1   | ENSG00000160789.18_LMNA | 0.10208  | -0.058062083 | 0.25710457  | 2.11E-01 | 4.84E-01 | 1.00E+00 |
| ENSG00000256222.2_MTRNR2L3   | ENSG00000160789.18_LMNA | -0.24684 | -0.390683672 | -0.09121931 | 2.17E-03 | 2.08E-02 | 1.00E+00 |
| ENSG00000173077.13_DEC1      | ENSG00000160789.18_LMNA | 0.02831  | -0.131483263 | 0.186669419 | 7.29E-01 | 8.85E-01 | 1.00E+00 |
| ENSG00000223653.4_RP11-131L  | ENSG00000160789.18_LMNA | -0.02871 | -0.187054999 | 0.131090618 | 7.26E-01 | 8.84E-01 | 1.00E+00 |
| ENSG00000158683.6_PKD1L1     | ENSG00000160789.18_LMNA | 0.04441  | -0.115612344 | 0.202177098 | 5.87E-01 | 8.08E-01 | 1.00E+00 |
| ENSG00000225339.3_RP11-513I1 | ENSG00000160789.18_LMNA | 0.22728  | 0.07063024   | 0.372980735 | 4.86E-03 | 3.84E-02 | 1.00E+00 |
| ENSG00000214694.9_ARHGEF33   | ENSG00000160789.18_LMNA | -0.31573 | -0.452197956 | -0.16480975 | 7.43E-05 | 1.48E-03 | 1.00E+00 |
| ENSG00000132259.11_CNGA4     | ENSG00000160789.18_LMNA | 0.09334  | -0.066849681 | 0.24884715  | 2.53E-01 | 5.34E-01 | 1.00E+00 |
| ENSG00000228624.6_RP3-399L1  | ENSG00000160789.18_LMNA | -0.32955 | -0.464389462 | -0.1797847  | 3.39E-05 | 7.90E-04 | 1.00E+00 |

|                             |                         |          |              |             |          |          |          |
|-----------------------------|-------------------------|----------|--------------|-------------|----------|----------|----------|
| ENSG00000151882.10_CCL28    | ENSG00000160789.18_LMNA | -0.06721 | -0.224016615 | 0.09298268  | 4.11E-01 | 6.85E-01 | 1.00E+00 |
| ENSG00000232386.8_RP11-66B2 | ENSG00000160789.18_LMNA | -0.19699 | -0.345356198 | -0.03900859 | 1.50E-02 | 8.79E-02 | 1.00E+00 |
| ENSG00000184185.8_KCNJ12    | ENSG00000160789.18_LMNA | -0.15533 | -0.306940413 | 0.00396892  | 5.60E-02 | 2.16E-01 | 1.00E+00 |
| ENSG00000227963.1_RP5-1074L | ENSG00000160789.18_LMNA | -0.16017 | -0.311430727 | -0.00099601 | 4.87E-02 | 1.98E-01 | 1.00E+00 |
| ENSG00000278986.1_RP11-723J | ENSG00000160789.18_LMNA | 0.03042  | -0.129402749 | 0.188711385 | 7.10E-01 | 8.77E-01 | 1.00E+00 |
| ENSG00000138395.13_CDK15    | ENSG00000160789.18_LMNA | -0.12718 | -0.280698882 | 0.0326808   | 1.18E-01 | 3.45E-01 | 1.00E+00 |
| ENSG00000064205.9_WISP2     | ENSG00000160789.18_LMNA | -0.14642 | -0.29866036  | 0.013084145 | 7.19E-02 | 2.54E-01 | 1.00E+00 |
| ENSG00000247498.8_RP11-392P | ENSG00000160789.18_LMNA | 0.07051  | -0.089696374 | 0.227161919 | 3.88E-01 | 6.66E-01 | 1.00E+00 |
| ENSG00000197816.12_CCDC180  | ENSG00000160789.18_LMNA | -0.09455 | -0.249991013 | 0.06563529  | 2.47E-01 | 5.27E-01 | 1.00E+00 |
| ENSG00000259488.2_RP11-154J | ENSG00000160789.18_LMNA | -0.08636 | -0.242230794 | 0.073855681 | 2.90E-01 | 5.75E-01 | 1.00E+00 |
| ENSG00000154898.14_CCDC144  | ENSG00000160789.18_LMNA | -0.10257 | -0.257567047 | 0.057568463 | 2.09E-01 | 4.81E-01 | 1.00E+00 |
| ENSG00000197140.13_ADAM32   | ENSG00000160789.18_LMNA | 0.21847  | 0.061400302  | 0.364972518 | 6.85E-03 | 4.96E-02 | 1.00E+00 |
| ENSG00000251161.3_RP11-540O | ENSG00000160789.18_LMNA | -0.08305 | -0.239091065 | 0.077169432 | 3.09E-01 | 5.95E-01 | 1.00E+00 |
| ENSG00000204963.5_PCDHA7    | ENSG00000160789.18_LMNA | 0.01124  | -0.148229937 | 0.170132289 | 8.91E-01 | 9.57E-01 | 1.00E+00 |
| ENSG00000222014.5_RAB6C     | ENSG00000160789.18_LMNA | -0.25993 | -0.402478807 | -0.10508102 | 1.22E-03 | 1.35E-02 | 1.00E+00 |
| ENSG00000260896.4_PRCAT47   | ENSG00000160789.18_LMNA | -0.11228 | -0.266715912 | 0.047771752 | 1.68E-01 | 4.27E-01 | 1.00E+00 |
| ENSG00000238247.1_GS1-309P1 | ENSG00000160789.18_LMNA | -0.02782 | -0.186196616 | 0.131964591 | 7.34E-01 | 8.88E-01 | 1.00E+00 |
| ENSG00000161405.15_IKZF3    | ENSG00000160789.18_LMNA | 0.0652   | -0.09498512  | 0.222096848 | 4.25E-01 | 6.96E-01 | 1.00E+00 |
| ENSG00000182107.6_TMEM30B   | ENSG00000160789.18_LMNA | 0.13266  | -0.027112534 | 0.285824944 | 1.03E-01 | 3.18E-01 | 1.00E+00 |
| ENSG00000264215.1_RP11-283C | ENSG00000160789.18_LMNA | -0.08755 | -0.243355451 | 0.072666989 | 2.83E-01 | 5.69E-01 | 1.00E+00 |
| ENSG00000248699.1_CTD-2313D | ENSG00000160789.18_LMNA | 0.11611  | -0.043901927 | 0.27031428  | 1.54E-01 | 4.05E-01 | 1.00E+00 |
| ENSG00000240954.1_RPL4P1    | ENSG00000160789.18_LMNA | -0.05886 | -0.216036523 | 0.101289635 | 4.71E-01 | 7.31E-01 | 1.00E+00 |
| ENSG00000225489.5_RP11-390F | ENSG00000160789.18_LMNA | -0.0968  | -0.2521179   | 0.063374776 | 2.35E-01 | 5.13E-01 | 1.00E+00 |
| ENSG00000237399.6_PITRM1-AS | ENSG00000160789.18_LMNA | 0.15523  | -0.004074605 | 0.30684468  | 5.62E-02 | 2.17E-01 | 1.00E+00 |
| ENSG00000237298.7_TTN-AS1   | ENSG00000160789.18_LMNA | -0.12408 | -0.277796235 | 0.035825244 | 1.28E-01 | 3.62E-01 | 1.00E+00 |
| ENSG00000198626.14_RYR2     | ENSG00000160789.18_LMNA | -0.21564 | -0.362401163 | -0.05844764 | 7.63E-03 | 5.36E-02 | 1.00E+00 |
| ENSG00000258136.1_RP11-864J | ENSG00000160789.18_LMNA | 0.02948  | -0.130335875 | 0.187795888 | 7.18E-01 | 8.80E-01 | 1.00E+00 |
| ENSG00000158427.13_TMSB15B  | ENSG00000160789.18_LMNA | -0.27438 | -0.415436534 | -0.12044341 | 6.24E-04 | 8.04E-03 | 1.00E+00 |
| ENSG00000169629.10_RGPD8    | ENSG00000160789.18_LMNA | -0.02528 | -0.183739869 | 0.134463228 | 7.57E-01 | 8.99E-01 | 1.00E+00 |
| ENSG00000182050.12_MGAT4C   | ENSG00000160789.18_LMNA | -0.38206 | -0.510225684 | -0.2372913  | 1.19E-06 | 5.29E-05 | 6.11E-02 |
| ENSG00000215458.7_AATBC     | ENSG00000160789.18_LMNA | 0.07744  | -0.082780859 | 0.233759198 | 3.43E-01 | 6.28E-01 | 1.00E+00 |
| ENSG00000267199.1_RP11-861E | ENSG00000160789.18_LMNA | -0.08059 | -0.236750561 | 0.079635122 | 3.24E-01 | 6.10E-01 | 1.00E+00 |
| ENSG00000115155.15_OTOF     | ENSG00000160789.18_LMNA | -0.02371 | -0.182226717 | 0.136000169 | 7.72E-01 | 9.06E-01 | 1.00E+00 |

|                             |                         |          |              |             |          |          |          |
|-----------------------------|-------------------------|----------|--------------|-------------|----------|----------|----------|
| ENSG00000235489.4_DBF4P1    | ENSG00000160789.18_LMNA | -0.0232  | -0.181730127 | 0.136504232 | 7.77E-01 | 9.08E-01 | 1.00E+00 |
| ENSG00000214432.8_AC068831. | ENSG00000160789.18_LMNA | -0.03118 | -0.18944445  | 0.128655162 | 7.03E-01 | 8.73E-01 | 1.00E+00 |
| ENSG00000183742.11_MACC1    | ENSG00000160789.18_LMNA | 0.13129  | -0.028509384 | 0.284540706 | 1.07E-01 | 3.25E-01 | 1.00E+00 |
| ENSG00000236048.2_AC013470. | ENSG00000160789.18_LMNA | 0.02152  | -0.13815561  | 0.180102096 | 7.92E-01 | 9.16E-01 | 1.00E+00 |
| ENSG00000163380.14_LMOD3    | ENSG00000160789.18_LMNA | -0.0988  | -0.254002469 | 0.061369095 | 2.26E-01 | 5.02E-01 | 1.00E+00 |
| ENSG00000228748.2_RP13-39P1 | ENSG00000160789.18_LMNA | 0.09163  | -0.068571228 | 0.247224074 | 2.62E-01 | 5.45E-01 | 1.00E+00 |
| ENSG00000163631.15_ALB      | ENSG00000160789.18_LMNA | -0.10895 | -0.263576411 | 0.051140399 | 1.82E-01 | 4.45E-01 | 1.00E+00 |
| ENSG00000130038.8_CRACR2A   | ENSG00000160789.18_LMNA | 0.15717  | -0.002085502 | 0.308645418 | 5.31E-02 | 2.09E-01 | 1.00E+00 |
| ENSG00000232748.3_RP11-196G | ENSG00000160789.18_LMNA | 0.0347   | -0.125191684 | 0.192836028 | 6.71E-01 | 8.56E-01 | 1.00E+00 |
| ENSG00000233672.5_RNASEH2E  | ENSG00000160789.18_LMNA | -0.24307 | -0.387284679 | -0.08724621 | 2.55E-03 | 2.36E-02 | 1.00E+00 |
| ENSG00000144229.10_THSD7B   | ENSG00000160789.18_LMNA | -0.01393 | -0.172742913 | 0.145598314 | 8.65E-01 | 9.47E-01 | 1.00E+00 |
| ENSG00000230022.1_FNTAP2    | ENSG00000160789.18_LMNA | -0.0645  | -0.221423568 | 0.095686787 | 4.30E-01 | 7.00E-01 | 1.00E+00 |
| ENSG00000164385.7_LINC01600 | ENSG00000160789.18_LMNA | -0.02407 | -0.182569438 | 0.135652193 | 7.69E-01 | 9.04E-01 | 1.00E+00 |
| ENSG00000223984.1_HNRNPRP   | ENSG00000160789.18_LMNA | -0.02624 | -0.184667664 | 0.133520088 | 7.48E-01 | 8.95E-01 | 1.00E+00 |
| ENSG00000260816.2_RP11-319G | ENSG00000160789.18_LMNA | -0.03137 | -0.189627008 | 0.128468931 | 7.01E-01 | 8.72E-01 | 1.00E+00 |
| ENSG00000061455.10_PRDM6    | ENSG00000160789.18_LMNA | 0.03911  | -0.120838197 | 0.197088387 | 6.32E-01 | 8.35E-01 | 1.00E+00 |
| ENSG00000121270.14_ABCC11   | ENSG00000160789.18_LMNA | -0.08235 | -0.238422346 | 0.077874313 | 3.13E-01 | 6.00E-01 | 1.00E+00 |
| ENSG00000143674.9_RP5-862P8 | ENSG00000160789.18_LMNA | 0.08596  | -0.07425427  | 0.241853487 | 2.92E-01 | 5.78E-01 | 1.00E+00 |
| ENSG00000276386.1_CNTNAP3F  | ENSG00000160789.18_LMNA | 0.32311  | 0.172797487  | 0.458714377 | 4.90E-05 | 1.06E-03 | 1.00E+00 |
| ENSG00000135702.13_CHST5    | ENSG00000160789.18_LMNA | -0.08969 | -0.245382222 | 0.070522549 | 2.72E-01 | 5.56E-01 | 1.00E+00 |
| ENSG00000163145.11_C1QTNF7  | ENSG00000160789.18_LMNA | 0.14639  | -0.013115152 | 0.298632113 | 7.19E-02 | 2.54E-01 | 1.00E+00 |
| ENSG00000173567.13_ADGRF3   | ENSG00000160789.18_LMNA | 0.03742  | -0.122506968 | 0.195459792 | 6.47E-01 | 8.43E-01 | 1.00E+00 |
| ENSG00000166317.10_SYNPO2L  | ENSG00000160789.18_LMNA | -0.25959 | -0.402173053 | -0.10472023 | 1.24E-03 | 1.36E-02 | 1.00E+00 |
| ENSG00000248854.1_HNRNPH1F  | ENSG00000160789.18_LMNA | -0.00131 | -0.160475908 | 0.157924964 | 9.87E-01 | 9.95E-01 | 1.00E+00 |
| ENSG00000160201.10_U2AF1    | ENSG00000160789.18_LMNA | 0.09993  | -0.060227708 | 0.255073867 | 2.21E-01 | 4.96E-01 | 1.00E+00 |
| ENSG00000114529.11_C3orf52  | ENSG00000160789.18_LMNA | 0.10447  | -0.055658268 | 0.259355369 | 2.00E-01 | 4.71E-01 | 1.00E+00 |
| ENSG00000174225.13_ARL13A   | ENSG00000160789.18_LMNA | 0.11589  | -0.044126971 | 0.270105263 | 1.55E-01 | 4.06E-01 | 1.00E+00 |
| ENSG00000243323.4_PTPRVP    | ENSG00000160789.18_LMNA | 0.01871  | -0.140915264 | 0.17737756  | 8.19E-01 | 9.30E-01 | 1.00E+00 |
| ENSG00000248159.1_HSPA8P11  | ENSG00000160789.18_LMNA | -0.23745 | -0.382206599 | -0.08132816 | 3.22E-03 | 2.82E-02 | 1.00E+00 |
| ENSG00000268350.6_FAM156A   | ENSG00000160789.18_LMNA | 0.01318  | -0.146325923 | 0.172021557 | 8.72E-01 | 9.50E-01 | 1.00E+00 |
| ENSG00000166349.8_RAG1      | ENSG00000160789.18_LMNA | 0.40101  | 0.258293872  | 0.526588185 | 3.06E-07 | 1.79E-05 | 1.57E-02 |
| ENSG00000086967.9_MYBPC2    | ENSG00000160789.18_LMNA | 0.30696  | 0.155347116  | 0.4444384   | 1.20E-04 | 2.19E-03 | 1.00E+00 |
| ENSG00000206140.8_TMEM191C  | ENSG00000160789.18_LMNA | -0.06925 | -0.225959078 | 0.090953953 | 3.97E-01 | 6.73E-01 | 1.00E+00 |

|                              |                         |          |              |             |          |          |          |
|------------------------------|-------------------------|----------|--------------|-------------|----------|----------|----------|
| ENSG00000276975.1_HYDIN2     | ENSG00000160789.18_LMNA | 0.00852  | -0.150888191 | 0.167490701 | 9.17E-01 | 9.68E-01 | 1.00E+00 |
| ENSG00000263020.4_XXbac-BPG  | ENSG00000160789.18_LMNA | 0.05312  | -0.106980993 | 0.210544526 | 5.16E-01 | 7.63E-01 | 1.00E+00 |
| ENSG00000227295.2_ELL2P1     | ENSG00000160789.18_LMNA | 0.05931  | -0.10084489  | 0.216464845 | 4.68E-01 | 7.29E-01 | 1.00E+00 |
| ENSG00000237505.5_PKN2-AS1   | ENSG00000160789.18_LMNA | 0.16612  | 0.007105009  | 0.31693678  | 4.08E-02 | 1.76E-01 | 1.00E+00 |
| ENSG00000246366.5_LACTB2-AS  | ENSG00000160789.18_LMNA | 0.12702  | -0.032841121 | 0.280551028 | 1.19E-01 | 3.46E-01 | 1.00E+00 |
| ENSG00000183604.13_SMG1P5    | ENSG00000160789.18_LMNA | -0.07769 | -0.234000616 | 0.082527216 | 3.41E-01 | 6.26E-01 | 1.00E+00 |
| ENSG00000271816.1_BMS1P4     | ENSG00000160789.18_LMNA | 0.03365  | -0.126224457 | 0.19182549  | 6.81E-01 | 8.61E-01 | 1.00E+00 |
| ENSG00000196873.14_CBWD3     | ENSG00000160789.18_LMNA | -0.21056 | -0.357771885 | -0.05314525 | 9.22E-03 | 6.18E-02 | 1.00E+00 |
| ENSG00000235651.1_AC064850.4 | ENSG00000160789.18_LMNA | 0.09631  | -0.063873609 | 0.251648817 | 2.38E-01 | 5.16E-01 | 1.00E+00 |
| ENSG00000250444.1_CCT5P1     | ENSG00000160789.18_LMNA | -0.04902 | -0.206608395 | 0.111047247 | 5.49E-01 | 7.86E-01 | 1.00E+00 |
| ENSG00000255993.1_PSMC1P9    | ENSG00000160789.18_LMNA | 0.05567  | -0.104459132 | 0.212980525 | 4.96E-01 | 7.50E-01 | 1.00E+00 |
| ENSG00000228002.2_DHX9P1     | ENSG00000160789.18_LMNA | 0.06485  | -0.095333296 | 0.221762795 | 4.27E-01 | 6.98E-01 | 1.00E+00 |
| ENSG00000254363.5_CTB-131B5  | ENSG00000160789.18_LMNA | 0.02992  | -0.129897638 | 0.188225915 | 7.14E-01 | 8.79E-01 | 1.00E+00 |
| ENSG00000050327.13_ARHGEF5   | ENSG00000160789.18_LMNA | 0.1572   | -0.002050499 | 0.308677087 | 5.31E-02 | 2.09E-01 | 1.00E+00 |
| ENSG00000256950.2_RP11-87C1  | ENSG00000160789.18_LMNA | 0.07652  | -0.08369991  | 0.232884116 | 3.49E-01 | 6.33E-01 | 1.00E+00 |
| ENSG00000137731.12_FXYD2     | ENSG00000160789.18_LMNA | -0.23249 | -0.377709976 | -0.07610539 | 3.95E-03 | 3.29E-02 | 1.00E+00 |
| ENSG00000226091.6_LINC00937  | ENSG00000160789.18_LMNA | -0.11041 | -0.264954042 | 0.049663099 | 1.76E-01 | 4.37E-01 | 1.00E+00 |
| ENSG00000236137.1_RP11-27K1  | ENSG00000160789.18_LMNA | -0.15516 | -0.306783577 | 0.004142057 | 5.63E-02 | 2.17E-01 | 1.00E+00 |
| ENSG00000267549.4_AC006116.1 | ENSG00000160789.18_LMNA | -0.21165 | -0.358762856 | -0.05427886 | 8.86E-03 | 6.00E-02 | 1.00E+00 |
| ENSG00000105289.13_TJP3      | ENSG00000160789.18_LMNA | 0.05087  | -0.109217761 | 0.20838061  | 5.34E-01 | 7.76E-01 | 1.00E+00 |
| ENSG00000231407.4_RP11-576I2 | ENSG00000160789.18_LMNA | -0.03007 | -0.188368694 | 0.129752105 | 7.13E-01 | 8.78E-01 | 1.00E+00 |
| ENSG00000213075.7_RPL31P11   | ENSG00000160789.18_LMNA | 0.0217   | -0.13797293  | 0.18028228  | 7.91E-01 | 9.15E-01 | 1.00E+00 |
| ENSG00000197653.13_DNAH10    | ENSG00000160789.18_LMNA | -0.13851 | -0.291287738 | 0.021157035 | 8.88E-02 | 2.90E-01 | 1.00E+00 |
| ENSG00000251023.1_RP11-549J  | ENSG00000160789.18_LMNA | -0.05072 | -0.208241894 | 0.109361037 | 5.35E-01 | 7.76E-01 | 1.00E+00 |
| ENSG00000260742.1_RP11-366L  | ENSG00000160789.18_LMNA | -0.11484 | -0.269119398 | 0.045187997 | 1.59E-01 | 4.12E-01 | 1.00E+00 |
| ENSG00000238193.1_RP11-555H  | ENSG00000160789.18_LMNA | -0.05727 | -0.214513467 | 0.102870062 | 4.83E-01 | 7.41E-01 | 1.00E+00 |
| ENSG00000279738.1_RP5-1014D  | ENSG00000160789.18_LMNA | -0.17463 | -0.324802549 | -0.01587242 | 3.14E-02 | 1.48E-01 | 1.00E+00 |
| ENSG00000168454.11_TXNDC2    | ENSG00000160789.18_LMNA | 0.06698  | -0.093219217 | 0.223789971 | 4.12E-01 | 6.86E-01 | 1.00E+00 |
| ENSG00000225434.2_LINC01504  | ENSG00000160789.18_LMNA | -0.08831 | -0.244076272 | 0.071904653 | 2.79E-01 | 5.65E-01 | 1.00E+00 |
| ENSG00000183914.13_DNAH2     | ENSG00000160789.18_LMNA | -0.07518 | -0.23161211  | 0.085034869 | 3.57E-01 | 6.40E-01 | 1.00E+00 |
| ENSG00000170482.15_SLC23A1   | ENSG00000160789.18_LMNA | 0.05032  | -0.10975992  | 0.20785564  | 5.38E-01 | 7.78E-01 | 1.00E+00 |
| ENSG00000102043.14_MTMR8     | ENSG00000160789.18_LMNA | -0.26881 | -0.410447537 | -0.1145118  | 8.12E-04 | 9.83E-03 | 1.00E+00 |
| ENSG00000158220.12_ESYT3     | ENSG00000160789.18_LMNA | -0.11825 | -0.272320772 | 0.041739966 | 1.47E-01 | 3.93E-01 | 1.00E+00 |

|                              |                         |          |              |             |          |          |          |
|------------------------------|-------------------------|----------|--------------|-------------|----------|----------|----------|
| ENSG00000259529.1_RP11-468E  | ENSG00000160789.18_LMNA | 0.05193  | -0.108169683 | 0.209394939 | 5.25E-01 | 7.70E-01 | 1.00E+00 |
| ENSG00000233117.2_LINC00702  | ENSG00000160789.18_LMNA | 0.24148  | 0.085569886  | 0.385848126 | 2.73E-03 | 2.48E-02 | 1.00E+00 |
| ENSG00000224186.7_C5orf66    | ENSG00000160789.18_LMNA | 0.10427  | -0.055861933 | 0.259164801 | 2.01E-01 | 4.72E-01 | 1.00E+00 |
| ENSG00000114656.9_KIAA1257   | ENSG00000160789.18_LMNA | 0.09984  | -0.060318157 | 0.254988992 | 2.21E-01 | 4.96E-01 | 1.00E+00 |
| ENSG00000269473.1_CTD-2619J  | ENSG00000160789.18_LMNA | 0.05873  | -0.101419299 | 0.215911625 | 4.72E-01 | 7.32E-01 | 1.00E+00 |
| ENSG00000104537.15_ANXA13    | ENSG00000160789.18_LMNA | -0.07416 | -0.230633557 | 0.086061078 | 3.64E-01 | 6.45E-01 | 1.00E+00 |
| ENSG00000179846.8_NKPD1      | ENSG00000160789.18_LMNA | -0.05743 | -0.214666197 | 0.102711652 | 4.82E-01 | 7.40E-01 | 1.00E+00 |
| ENSG00000206538.6_VGLL3      | ENSG00000160789.18_LMNA | 0.25777  | 0.102792556  | 0.400538299 | 1.35E-03 | 1.45E-02 | 1.00E+00 |
| ENSG00000176681.13_LRRC37A   | ENSG00000160789.18_LMNA | 0.07727  | -0.082949834 | 0.233598346 | 3.44E-01 | 6.29E-01 | 1.00E+00 |
| ENSG00000224812.2_TMEM72-A   | ENSG00000160789.18_LMNA | -0.23017 | -0.375610567 | -0.07367261 | 4.33E-03 | 3.52E-02 | 1.00E+00 |
| ENSG00000280138.1_RP11-463O  | ENSG00000160789.18_LMNA | -0.03199 | -0.190222275 | 0.127861533 | 6.96E-01 | 8.69E-01 | 1.00E+00 |
| ENSG00000226051.5_ZNF503-AS  | ENSG00000160789.18_LMNA | -0.08399 | -0.239983352 | 0.076228399 | 3.04E-01 | 5.90E-01 | 1.00E+00 |
| ENSG00000188958.8_UTS2B      | ENSG00000160789.18_LMNA | -0.24653 | -0.390410383 | -0.09089951 | 2.20E-03 | 2.10E-02 | 1.00E+00 |
| ENSG00000162620.14_LRRIQ3    | ENSG00000160789.18_LMNA | 0.051    | -0.109081905 | 0.20851213  | 5.33E-01 | 7.75E-01 | 1.00E+00 |
| ENSG00000257390.4_RP11-762I7 | ENSG00000160789.18_LMNA | -0.19055 | -0.339452011 | -0.03232876 | 1.87E-02 | 1.03E-01 | 1.00E+00 |
| ENSG00000186105.7_LRRC70     | ENSG00000160789.18_LMNA | -0.18831 | -0.337394645 | -0.03000754 | 2.02E-02 | 1.09E-01 | 1.00E+00 |
| ENSG00000101842.12_VSIG1     | ENSG00000160789.18_LMNA | -0.12418 | -0.277886935 | 0.035727082 | 1.27E-01 | 3.61E-01 | 1.00E+00 |
| ENSG00000230568.1_SF3A3P1    | ENSG00000160789.18_LMNA | 0.03959  | -0.120364906 | 0.197549964 | 6.28E-01 | 8.33E-01 | 1.00E+00 |
| ENSG00000261451.1_RP11-981G  | ENSG00000160789.18_LMNA | -0.23567 | -0.380592251 | -0.07945121 | 3.47E-03 | 2.98E-02 | 1.00E+00 |
| ENSG00000262075.3_DKFZP434   | ENSG00000160789.18_LMNA | 0.00098  | -0.158245506 | 0.1601556   | 9.90E-01 | 9.96E-01 | 1.00E+00 |
| ENSG00000214198.6_TTC41P     | ENSG00000160789.18_LMNA | -0.07482 | -0.23126658  | 0.085397303 | 3.60E-01 | 6.42E-01 | 1.00E+00 |
| ENSG00000119121.20_TRPM6     | ENSG00000160789.18_LMNA | -0.21727 | -0.363884201 | -0.06014995 | 7.17E-03 | 5.12E-02 | 1.00E+00 |
| ENSG00000271795.1_CTC-251D1  | ENSG00000160789.18_LMNA | 0.21849  | 0.061430821  | 0.364999071 | 6.84E-03 | 4.96E-02 | 1.00E+00 |
| ENSG00000260300.4_RP11-505K  | ENSG00000160789.18_LMNA | -0.2252  | -0.371093523 | -0.06845045 | 5.28E-03 | 4.08E-02 | 1.00E+00 |
| ENSG00000132938.17_MTUS2     | ENSG00000160789.18_LMNA | -0.09543 | -0.250819506 | 0.06475513  | 2.42E-01 | 5.21E-01 | 1.00E+00 |
| ENSG00000267216.1_AC010642   | ENSG00000160789.18_LMNA | -0.00374 | -0.162845873 | 0.155551185 | 9.64E-01 | 9.85E-01 | 1.00E+00 |
| ENSG00000162510.5_MATN1      | ENSG00000160789.18_LMNA | -0.00083 | -0.160012921 | 0.158388267 | 9.92E-01 | 9.97E-01 | 1.00E+00 |
| ENSG00000235770.4_LINC00607  | ENSG00000160789.18_LMNA | 0.0159   | -0.143661303 | 0.174661615 | 8.46E-01 | 9.40E-01 | 1.00E+00 |
| ENSG00000259531.2_RP11-295H  | ENSG00000160789.18_LMNA | 0.07615  | -0.084067427 | 0.232534038 | 3.51E-01 | 6.35E-01 | 1.00E+00 |
| ENSG00000231422.2_LINC01516  | ENSG00000160789.18_LMNA | -0.13618 | -0.289108122 | 0.023535899 | 9.44E-02 | 3.01E-01 | 1.00E+00 |
| ENSG00000180336.16_MEIOC     | ENSG00000160789.18_LMNA | -0.1012  | -0.256274859 | 0.058947279 | 2.15E-01 | 4.89E-01 | 1.00E+00 |
| ENSG00000142609.16_CFAP74    | ENSG00000160789.18_LMNA | -0.04526 | -0.202999515 | 0.114766108 | 5.80E-01 | 8.04E-01 | 1.00E+00 |
| ENSG00000119608.11_PROX2     | ENSG00000160789.18_LMNA | -0.10968 | -0.264265183 | 0.050401968 | 1.79E-01 | 4.41E-01 | 1.00E+00 |

|                              |                         |          |              |             |          |          |          |
|------------------------------|-------------------------|----------|--------------|-------------|----------|----------|----------|
| ENSG00000100206.8_DMC1       | ENSG00000160789.18_LMNA | 0.15219  | -0.007180249 | 0.304028678 | 6.12E-02 | 2.29E-01 | 1.00E+00 |
| ENSG00000204764.11_RANBP17   | ENSG00000160789.18_LMNA | -0.37734 | -0.506136474 | -0.23208202 | 1.65E-06 | 6.91E-05 | 8.47E-02 |
| ENSG00000269220.1_LINC00528  | ENSG00000160789.18_LMNA | 0.01201  | -0.147468913 | 0.1708877   | 8.83E-01 | 9.55E-01 | 1.00E+00 |
| ENSG00000223519.6_KIF28P     | ENSG00000160789.18_LMNA | -0.07801 | -0.234298149 | 0.082214561 | 3.39E-01 | 6.25E-01 | 1.00E+00 |
| ENSG00000174502.17_SLC26A9   | ENSG00000160789.18_LMNA | -0.04873 | -0.20633302  | 0.111331328 | 5.51E-01 | 7.87E-01 | 1.00E+00 |
| ENSG00000273345.4_CTD-2410N  | ENSG00000160789.18_LMNA | -0.03671 | -0.19477378  | 0.123209367 | 6.53E-01 | 8.47E-01 | 1.00E+00 |
| ENSG00000091128.11_LAMB4     | ENSG00000160789.18_LMNA | 0.10253  | -0.057606307 | 0.257531596 | 2.09E-01 | 4.81E-01 | 1.00E+00 |
| ENSG00000235865.2_GSN-AS1    | ENSG00000160789.18_LMNA | 0.04879  | -0.111272884 | 0.206389676 | 5.51E-01 | 7.87E-01 | 1.00E+00 |
| ENSG00000106526.9_ACTR3C     | ENSG00000160789.18_LMNA | -0.0092  | -0.168151505 | 0.150223649 | 9.10E-01 | 9.66E-01 | 1.00E+00 |
| ENSG00000224479.4_AC136289   | ENSG00000160789.18_LMNA | -0.28778 | -0.427402156 | -0.13475618 | 3.24E-04 | 4.78E-03 | 1.00E+00 |
| ENSG00000181847.10_TIGIT     | ENSG00000160789.18_LMNA | 0.07115  | -0.089061793 | 0.227768513 | 3.84E-01 | 6.62E-01 | 1.00E+00 |
| ENSG00000157551.16_KCNJ15    | ENSG00000160789.18_LMNA | 0.20443  | 0.046748538  | 0.352167209 | 1.15E-02 | 7.25E-02 | 1.00E+00 |
| ENSG00000226121.2_AC009487   | ENSG00000160789.18_LMNA | 0.09059  | -0.069612217 | 0.246241768 | 2.67E-01 | 5.51E-01 | 1.00E+00 |
| ENSG00000246363.2_RP11-13A1  | ENSG00000160789.18_LMNA | -0.01761 | -0.176318658 | 0.141986482 | 8.29E-01 | 9.33E-01 | 1.00E+00 |
| ENSG00000149646.11_CNBD2     | ENSG00000160789.18_LMNA | -0.09298 | -0.248501019 | 0.067216969 | 2.55E-01 | 5.36E-01 | 1.00E+00 |
| ENSG00000273374.1_RP11-383I2 | ENSG00000160789.18_LMNA | -0.19122 | -0.340068325 | -0.03302476 | 1.83E-02 | 1.01E-01 | 1.00E+00 |
| ENSG00000263276.1_RP11-96D1  | ENSG00000160789.18_LMNA | 0.00439  | -0.154916026 | 0.163479388 | 9.57E-01 | 9.83E-01 | 1.00E+00 |
| ENSG00000164078.11_MST1R     | ENSG00000160789.18_LMNA | -0.26865 | -0.410298549 | -0.11433498 | 8.18E-04 | 9.89E-03 | 1.00E+00 |
| ENSG00000178809.10_TRIM73    | ENSG00000160789.18_LMNA | 0.03149  | -0.128352575 | 0.189741059 | 7.00E-01 | 8.72E-01 | 1.00E+00 |
| ENSG00000227105.1_PARP1P1    | ENSG00000160789.18_LMNA | -0.00714 | -0.166156202 | 0.152229361 | 9.30E-01 | 9.73E-01 | 1.00E+00 |
| ENSG00000081148.11_IMPG2     | ENSG00000160789.18_LMNA | -0.17767 | -0.327604474 | -0.01900705 | 2.85E-02 | 1.38E-01 | 1.00E+00 |
| ENSG00000241473.1_RP11-259P  | ENSG00000160789.18_LMNA | 0.1013   | -0.058851681 | 0.256364487 | 2.14E-01 | 4.89E-01 | 1.00E+00 |
| ENSG00000180815.13_MAP3K15   | ENSG00000160789.18_LMNA | -0.23793 | -0.382637205 | -0.08182917 | 3.16E-03 | 2.78E-02 | 1.00E+00 |
| ENSG00000180549.7_FUT7       | ENSG00000160789.18_LMNA | 0.30346  | 0.151582778  | 0.441339456 | 1.44E-04 | 2.52E-03 | 1.00E+00 |
| ENSG00000205639.8_MFSD2B     | ENSG00000160789.18_LMNA | 0.21626  | 0.059092135  | 0.362962825 | 7.45E-03 | 5.27E-02 | 1.00E+00 |
| ENSG00000269226.6_RP11-722G  | ENSG00000160789.18_LMNA | -0.17292 | -0.323226226 | -0.01411159 | 3.31E-02 | 1.53E-01 | 1.00E+00 |
| ENSG00000205918.8_PDPK2P     | ENSG00000160789.18_LMNA | 0.00169  | -0.157549716 | 0.160850798 | 9.83E-01 | 9.94E-01 | 1.00E+00 |
| ENSG00000224668.1_IPO8P1     | ENSG00000160789.18_LMNA | 7.00E-05 | -0.159132457 | 0.159268945 | 9.99E-01 | 1.00E+00 | 1.00E+00 |
| ENSG00000226688.5_ENTPD1-A3  | ENSG00000160789.18_LMNA | -0.11785 | -0.271945141 | 0.042144926 | 1.48E-01 | 3.95E-01 | 1.00E+00 |
| ENSG00000049249.7_TNFRSF9    | ENSG00000160789.18_LMNA | 0.22849  | 0.071903737  | 0.37408214  | 4.64E-03 | 3.70E-02 | 1.00E+00 |
| ENSG00000162267.11_ITIH3     | ENSG00000160789.18_LMNA | -0.07011 | -0.226780412 | 0.090095352 | 3.91E-01 | 6.69E-01 | 1.00E+00 |
| ENSG00000270878.1_CTD-2302E  | ENSG00000160789.18_LMNA | 0.09428  | -0.065911346 | 0.249731066 | 2.48E-01 | 5.28E-01 | 1.00E+00 |
| ENSG00000272983.1_RP11-508N  | ENSG00000160789.18_LMNA | -0.16147 | -0.312635125 | -0.00233032 | 4.69E-02 | 1.93E-01 | 1.00E+00 |

|                             |                         |          |              |             |          |          |          |
|-----------------------------|-------------------------|----------|--------------|-------------|----------|----------|----------|
| ENSG00000234129.6_RP11-120D | ENSG00000160789.18_LMNA | -0.07555 | -0.231960021 | 0.084669852 | 3.55E-01 | 6.38E-01 | 1.00E+00 |
| ENSG00000154608.12_CEP170P  | ENSG00000160789.18_LMNA | -0.07523 | -0.231657293 | 0.084987469 | 3.57E-01 | 6.40E-01 | 1.00E+00 |
| ENSG00000226803.6_RP11-203B | ENSG00000160789.18_LMNA | -0.08582 | -0.241721789 | 0.074393372 | 2.93E-01 | 5.79E-01 | 1.00E+00 |
| ENSG00000182048.10_TRPC2    | ENSG00000160789.18_LMNA | 0.10954  | -0.050538146 | 0.264138187 | 1.79E-01 | 4.42E-01 | 1.00E+00 |
| ENSG00000183873.14_SCN5A    | ENSG00000160789.18_LMNA | -0.18675 | -0.335961413 | -0.02839246 | 2.12E-02 | 1.13E-01 | 1.00E+00 |
| ENSG00000250208.5_FZD10-AS1 | ENSG00000160789.18_LMNA | -0.04902 | -0.206604665 | 0.111051095 | 5.49E-01 | 7.86E-01 | 1.00E+00 |
| ENSG00000228956.7_SATB1-AS1 | ENSG00000160789.18_LMNA | -0.41304 | -0.536937417 | -0.27171017 | 1.23E-07 | 8.60E-06 | 6.33E-03 |
| ENSG00000023839.9_ABCC2     | ENSG00000160789.18_LMNA | -0.02228 | -0.180843145 | 0.137404153 | 7.85E-01 | 9.12E-01 | 1.00E+00 |
| ENSG00000125046.13_SSUH2    | ENSG00000160789.18_LMNA | -0.08635 | -0.242219362 | 0.073867759 | 2.90E-01 | 5.76E-01 | 1.00E+00 |
| ENSG00000017427.14_IGF1     | ENSG00000160789.18_LMNA | -0.17086 | -0.321323002 | -0.01198815 | 3.53E-02 | 1.60E-01 | 1.00E+00 |
| ENSG00000248592.6_TMEM110-I | ENSG00000160789.18_LMNA | 0.0798   | -0.08041783  | 0.236006824 | 3.28E-01 | 6.14E-01 | 1.00E+00 |
| ENSG00000280111.1_          | ENSG00000160789.18_LMNA | 0.08038  | -0.079845159 | 0.236551019 | 3.25E-01 | 6.12E-01 | 1.00E+00 |
| ENSG00000203734.10_ECT2L    | ENSG00000160789.18_LMNA | -0.25884 | -0.401496147 | -0.10392177 | 1.28E-03 | 1.40E-02 | 1.00E+00 |
| ENSG00000242159.1_ABCF2P1   | ENSG00000160789.18_LMNA | 0.15496  | -0.004352291 | 0.306593113 | 5.66E-02 | 2.18E-01 | 1.00E+00 |
| ENSG00000260266.1_CTD-2311M | ENSG00000160789.18_LMNA | 0.02515  | -0.134586589 | 0.183618473 | 7.58E-01 | 8.99E-01 | 1.00E+00 |
| ENSG00000144452.13_ABCA12   | ENSG00000160789.18_LMNA | 0.27491  | 0.121009861  | 0.415912039 | 6.09E-04 | 7.88E-03 | 1.00E+00 |
| ENSG00000188981.9_MSANTD1   | ENSG00000160789.18_LMNA | -0.08185 | -0.237948621 | 0.078373466 | 3.16E-01 | 6.03E-01 | 1.00E+00 |
| ENSG00000188687.14_SLC4A5   | ENSG00000160789.18_LMNA | -0.18425 | -0.33366479  | -0.02580778 | 2.31E-02 | 1.19E-01 | 1.00E+00 |
| ENSG00000177483.10_RBM44    | ENSG00000160789.18_LMNA | -0.08072 | -0.236875926 | 0.07950315  | 3.23E-01 | 6.09E-01 | 1.00E+00 |
| ENSG00000172000.6_ZNF556    | ENSG00000160789.18_LMNA | -0.18914 | -0.338161367 | -0.03087221 | 1.96E-02 | 1.06E-01 | 1.00E+00 |
| ENSG00000233615.1_HNRNPA1F  | ENSG00000160789.18_LMNA | 0.09193  | -0.068273014 | 0.247505357 | 2.60E-01 | 5.43E-01 | 1.00E+00 |
| ENSG00000166664.12_CHRFAM7  | ENSG00000160789.18_LMNA | -0.0975  | -0.252774175 | 0.062676614 | 2.32E-01 | 5.10E-01 | 1.00E+00 |
| ENSG00000229956.8_ZRANB2-A  | ENSG00000160789.18_LMNA | -0.23722 | -0.381998148 | -0.08108568 | 3.25E-03 | 2.84E-02 | 1.00E+00 |
| ENSG00000091831.20_ESR1     | ENSG00000160789.18_LMNA | 0.03516  | -0.12473987  | 0.193277903 | 6.67E-01 | 8.53E-01 | 1.00E+00 |
| ENSG00000005187.10_ACSM3    | ENSG00000160789.18_LMNA | -0.06385 | -0.220809559 | 0.096326408 | 4.34E-01 | 7.03E-01 | 1.00E+00 |
| ENSG00000189014.7_FAM35DP   | ENSG00000160789.18_LMNA | -0.20124 | -0.349247813 | -0.04342648 | 1.29E-02 | 7.88E-02 | 1.00E+00 |
| ENSG00000263809.1_RP11-849F | ENSG00000160789.18_LMNA | -0.21729 | -0.36390127  | -0.06016955 | 7.17E-03 | 5.12E-02 | 1.00E+00 |
| ENSG00000227733.7_RP4-565E6 | ENSG00000160789.18_LMNA | -0.10165 | -0.25669208  | 0.05850222  | 2.13E-01 | 4.86E-01 | 1.00E+00 |
| ENSG00000204176.12_SYT15    | ENSG00000160789.18_LMNA | -0.30501 | -0.442709516 | -0.15324598 | 1.33E-04 | 2.37E-03 | 1.00E+00 |
| ENSG00000140795.11_MYLK3    | ENSG00000160789.18_LMNA | -0.2007  | -0.348759666 | -0.04287166 | 1.32E-02 | 7.99E-02 | 1.00E+00 |
| ENSG00000231752.4_EMBP1     | ENSG00000160789.18_LMNA | 0.01418  | -0.145346938 | 0.172992049 | 8.62E-01 | 9.46E-01 | 1.00E+00 |
| ENSG00000224059.1_HSPA8P16  | ENSG00000160789.18_LMNA | -0.04202 | -0.199887059 | 0.117966279 | 6.07E-01 | 8.20E-01 | 1.00E+00 |
| ENSG00000203876.8_ADD3-AS1  | ENSG00000160789.18_LMNA | -0.35811 | -0.489405217 | -0.21093044 | 5.91E-06 | 1.90E-04 | 3.03E-01 |



|                              |                         |          |              |             |          |          |          |
|------------------------------|-------------------------|----------|--------------|-------------|----------|----------|----------|
| ENSG00000250346.1_EEF1GP2    | ENSG00000160789.18_LMNA | -0.05924 | -0.216396461 | 0.100915905 | 4.68E-01 | 7.29E-01 | 1.00E+00 |
| ENSG00000132915.9_PDE6A      | ENSG00000160789.18_LMNA | -0.13652 | -0.289430306 | 0.023184485 | 9.35E-02 | 2.99E-01 | 1.00E+00 |
| ENSG00000261147.1_RP11-697E  | ENSG00000160789.18_LMNA | -0.17069 | -0.321164869 | -0.01181185 | 3.55E-02 | 1.60E-01 | 1.00E+00 |
| ENSG00000188897.7_CTD-3088C  | ENSG00000160789.18_LMNA | 0.01631  | -0.14326258  | 0.175056269 | 8.42E-01 | 9.38E-01 | 1.00E+00 |
| ENSG00000183066.13_WBP2NL    | ENSG00000160789.18_LMNA | -0.04567 | -0.203393405 | 0.114360647 | 5.76E-01 | 8.03E-01 | 1.00E+00 |
| ENSG00000233178.6_RP11-881E  | ENSG00000160789.18_LMNA | -0.24393 | -0.38806285  | -0.08815498 | 2.46E-03 | 2.29E-02 | 1.00E+00 |
| ENSG00000214711.8_CAPN14     | ENSG00000160789.18_LMNA | -0.2537  | -0.396874589 | -0.09848047 | 1.61E-03 | 1.66E-02 | 1.00E+00 |
| ENSG00000173421.15_CCDC36    | ENSG00000160789.18_LMNA | -0.14221 | -0.294738563 | 0.017383507 | 8.05E-02 | 2.73E-01 | 1.00E+00 |
| ENSG00000267272.4_LINC01140  | ENSG00000160789.18_LMNA | -0.03385 | -0.19202074  | 0.126024965 | 6.79E-01 | 8.60E-01 | 1.00E+00 |
| ENSG00000224086.5_LL22NC03-  | ENSG00000160789.18_LMNA | 0.13348  | -0.026278659 | 0.286591058 | 1.01E-01 | 3.14E-01 | 1.00E+00 |
| ENSG00000237945.6_LINC00649  | ENSG00000160789.18_LMNA | -0.14489 | -0.297232973 | 0.014650286 | 7.49E-02 | 2.61E-01 | 1.00E+00 |
| ENSG00000264343.4_NOTCH2NL   | ENSG00000160789.18_LMNA | 0.14363  | -0.015936814 | 0.296059384 | 7.75E-02 | 2.67E-01 | 1.00E+00 |
| ENSG00000135436.7_FAM186B    | ENSG00000160789.18_LMNA | 0.12491  | -0.034990034 | 0.278567779 | 1.25E-01 | 3.58E-01 | 1.00E+00 |
| ENSG00000267160.1_RP11-1072  | ENSG00000160789.18_LMNA | -0.20904 | -0.356383942 | -0.05155883 | 9.75E-03 | 6.44E-02 | 1.00E+00 |
| ENSG00000015520.13_NPC1L1    | ENSG00000160789.18_LMNA | 0.04339  | -0.116612575 | 0.201204442 | 5.96E-01 | 8.13E-01 | 1.00E+00 |
| ENSG00000226535.1_RP11-417L  | ENSG00000160789.18_LMNA | -0.06674 | -0.223569272 | 0.093449516 | 4.14E-01 | 6.87E-01 | 1.00E+00 |
| ENSG00000179304.15_FAM156B   | ENSG00000160789.18_LMNA | 0.04175  | -0.118232121 | 0.199628215 | 6.10E-01 | 8.22E-01 | 1.00E+00 |
| ENSG00000259536.4_RP11-111A  | ENSG00000160789.18_LMNA | -0.12352 | -0.277263837 | 0.036401318 | 1.30E-01 | 3.65E-01 | 1.00E+00 |
| ENSG00000271980.1_CTD-2256P  | ENSG00000160789.18_LMNA | -0.00138 | -0.160541716 | 0.1578591   | 9.87E-01 | 9.95E-01 | 1.00E+00 |
| ENSG00000181634.7_TNFSF15    | ENSG00000160789.18_LMNA | 0.25676  | 0.101715584  | 0.399624154 | 1.41E-03 | 1.50E-02 | 1.00E+00 |
| ENSG00000214770.2_RP11-544I2 | ENSG00000160789.18_LMNA | -0.03528 | -0.193389859 | 0.124625375 | 6.66E-01 | 8.53E-01 | 1.00E+00 |
| ENSG00000230584.1_CCT5P2     | ENSG00000160789.18_LMNA | -0.09812 | -0.253364756 | 0.062048076 | 2.29E-01 | 5.06E-01 | 1.00E+00 |
| ENSG00000257616.1_RP11-641A  | ENSG00000160789.18_LMNA | 0.07285  | -0.087362659 | 0.229391498 | 3.72E-01 | 6.53E-01 | 1.00E+00 |
| ENSG00000155719.15_OTOA      | ENSG00000160789.18_LMNA | -0.10095 | -0.256033706 | 0.059204466 | 2.16E-01 | 4.90E-01 | 1.00E+00 |
| ENSG00000132749.9_TESMIN     | ENSG00000160789.18_LMNA | 0.14767  | -0.011813143 | 0.299817729 | 6.95E-02 | 2.48E-01 | 1.00E+00 |
| ENSG00000152580.8_IGSF10     | ENSG00000160789.18_LMNA | -0.08129 | -0.237414111 | 0.078936475 | 3.19E-01 | 6.06E-01 | 1.00E+00 |
| ENSG00000187537.12_POTEG     | ENSG00000160789.18_LMNA | 0.1299   | -0.029918428 | 0.283244117 | 1.11E-01 | 3.32E-01 | 1.00E+00 |
| ENSG00000249464.4_LINC01091  | ENSG00000160789.18_LMNA | 0.12584  | -0.034047284 | 0.27943818  | 1.22E-01 | 3.52E-01 | 1.00E+00 |
| ENSG00000234945.6_GTF3C2-A5  | ENSG00000160789.18_LMNA | -0.12055 | -0.274479331 | 0.039410865 | 1.39E-01 | 3.80E-01 | 1.00E+00 |
| ENSG00000240132.1 ETF1P2     | ENSG00000160789.18_LMNA | 0.10604  | -0.054075368 | 0.260835642 | 1.94E-01 | 4.62E-01 | 1.00E+00 |
| ENSG00000174844.13_DNAH12    | ENSG00000160789.18_LMNA | -0.11094 | -0.265454261 | 0.049126349 | 1.74E-01 | 4.33E-01 | 1.00E+00 |
| ENSG00000235400.1_RP4-641G1  | ENSG00000160789.18_LMNA | 0.06945  | -0.09075206  | 0.226152249 | 3.95E-01 | 6.72E-01 | 1.00E+00 |
| ENSG00000111816.7_FRK        | ENSG00000160789.18_LMNA | -0.02179 | -0.18036169  | 0.137892412 | 7.90E-01 | 9.15E-01 | 1.00E+00 |

|                             |                         |          |              |             |          |          |          |
|-----------------------------|-------------------------|----------|--------------|-------------|----------|----------|----------|
| ENSG00000275895.3_U2AF1L5   | ENSG00000160789.18_LMNA | 0.04452  | -0.115498351 | 0.202287908 | 5.86E-01 | 8.08E-01 | 1.00E+00 |
| ENSG00000135423.11_GLS2     | ENSG00000160789.18_LMNA | -0.06646 | -0.223302144 | 0.093728219 | 4.16E-01 | 6.88E-01 | 1.00E+00 |
| ENSG00000137265.13_IRF4     | ENSG00000160789.18_LMNA | -0.02112 | -0.179716374 | 0.138546604 | 7.96E-01 | 9.18E-01 | 1.00E+00 |
| ENSG00000280804.1_          | ENSG00000160789.18_LMNA | -0.02113 | -0.179727478 | 0.13853535  | 7.96E-01 | 9.18E-01 | 1.00E+00 |
| ENSG00000128655.15_PDE11A   | ENSG00000160789.18_LMNA | -0.31964 | -0.45565402  | -0.16904146 | 5.97E-05 | 1.23E-03 | 1.00E+00 |
| ENSG00000262681.2_RP11-311F | ENSG00000160789.18_LMNA | -0.02459 | -0.183078687 | 0.135134992 | 7.64E-01 | 9.02E-01 | 1.00E+00 |
| ENSG00000151338.17_MIPOL1   | ENSG00000160789.18_LMNA | -0.28605 | -0.425861094 | -0.13290595 | 3.54E-04 | 5.11E-03 | 1.00E+00 |
| ENSG00000279338.1_          | ENSG00000160789.18_LMNA | 0.04887  | -0.111192509 | 0.206467591 | 5.50E-01 | 7.86E-01 | 1.00E+00 |
| ENSG00000253517.1_XRCC6P4   | ENSG00000160789.18_LMNA | 0.00779  | -0.151600655 | 0.166781926 | 9.24E-01 | 9.71E-01 | 1.00E+00 |
| ENSG00000260923.4_AC137934. | ENSG00000160789.18_LMNA | -0.03575 | -0.193847878 | 0.124156879 | 6.62E-01 | 8.51E-01 | 1.00E+00 |
| ENSG00000196335.11_STK31    | ENSG00000160789.18_LMNA | -0.09954 | -0.254700354 | 0.060625714 | 2.22E-01 | 4.98E-01 | 1.00E+00 |
| ENSG00000279159.1_RP3-394A1 | ENSG00000160789.18_LMNA | 0.08325  | -0.07697449  | 0.239275952 | 3.08E-01 | 5.95E-01 | 1.00E+00 |
| ENSG00000167483.16_FAM129C  | ENSG00000160789.18_LMNA | 0.01106  | -0.148400834 | 0.1699626   | 8.92E-01 | 9.58E-01 | 1.00E+00 |
| ENSG00000091536.15_MYO15A   | ENSG00000160789.18_LMNA | 0.07673  | -0.083493527 | 0.23308067  | 3.47E-01 | 6.32E-01 | 1.00E+00 |
| ENSG00000125731.11_SH2D3A   | ENSG00000160789.18_LMNA | 0.34251  | 0.193878366  | 0.475765804 | 1.57E-05 | 4.22E-04 | 8.03E-01 |
| ENSG00000188152.11_NUTM2G   | ENSG00000160789.18_LMNA | 0.12423  | -0.035675744 | 0.277934369 | 1.27E-01 | 3.61E-01 | 1.00E+00 |
| ENSG00000172901.18_LVRN     | ENSG00000160789.18_LMNA | 0.00045  | -0.158764156 | 0.159637185 | 9.96E-01 | 9.98E-01 | 1.00E+00 |
| ENSG00000172717.14_FAM71D   | ENSG00000160789.18_LMNA | 0.1568   | -0.002458784 | 0.308307655 | 5.37E-02 | 2.11E-01 | 1.00E+00 |
| ENSG00000279765.2_RP11-437B | ENSG00000160789.18_LMNA | 0.01753  | -0.142067711 | 0.176238333 | 8.30E-01 | 9.34E-01 | 1.00E+00 |
| ENSG00000249715.8_FER1L5    | ENSG00000160789.18_LMNA | 0.16483  | 0.005785035  | 0.31574885  | 4.24E-02 | 1.80E-01 | 1.00E+00 |
| ENSG00000196834.10_POTEI    | ENSG00000160789.18_LMNA | 0.20503  | 0.047380099  | 0.352721547 | 1.13E-02 | 7.14E-02 | 1.00E+00 |
| ENSG00000187024.12_PTRH1    | ENSG00000160789.18_LMNA | -0.08753 | -0.243335625 | 0.072687951 | 2.84E-01 | 5.69E-01 | 1.00E+00 |
| ENSG00000126838.8_PZP       | ENSG00000160789.18_LMNA | 0.04333  | -0.116676835 | 0.201141932 | 5.96E-01 | 8.14E-01 | 1.00E+00 |
| ENSG00000071909.17_MYO3B    | ENSG00000160789.18_LMNA | -0.01807 | -0.176763815 | 0.141536238 | 8.25E-01 | 9.31E-01 | 1.00E+00 |
| ENSG00000163492.12_CCDC141  | ENSG00000160789.18_LMNA | -0.35425 | -0.486037135 | -0.20670383 | 7.55E-06 | 2.33E-04 | 3.88E-01 |
| ENSG00000259295.5_CSPG4P12  | ENSG00000160789.18_LMNA | -0.05979 | -0.216927667 | 0.10036418  | 4.64E-01 | 7.27E-01 | 1.00E+00 |
| ENSG00000175985.9_PLEKHD1   | ENSG00000160789.18_LMNA | 0.01207  | -0.147412183 | 0.170943996 | 8.83E-01 | 9.55E-01 | 1.00E+00 |
| ENSG00000228791.6_THRB-AS1  | ENSG00000160789.18_LMNA | -0.25594 | -0.39888756  | -0.10084829 | 1.46E-03 | 1.54E-02 | 1.00E+00 |
| ENSG00000102001.11_CACNA1F  | ENSG00000160789.18_LMNA | -0.02466 | -0.183139282 | 0.13507344  | 7.63E-01 | 9.01E-01 | 1.00E+00 |
| ENSG00000100038.18_TOP3B    | ENSG00000160789.18_LMNA | 0.02839  | -0.131405738 | 0.186745556 | 7.28E-01 | 8.85E-01 | 1.00E+00 |
| ENSG00000179766.16_ATP8B5P  | ENSG00000160789.18_LMNA | -0.04284 | -0.200675729 | 0.117156007 | 6.00E-01 | 8.16E-01 | 1.00E+00 |
| ENSG00000233098.7_CCDC144N  | ENSG00000160789.18_LMNA | 0.02303  | -0.136668146 | 0.181568608 | 7.78E-01 | 9.09E-01 | 1.00E+00 |
| ENSG00000145113.20_MUC4     | ENSG00000160789.18_LMNA | -0.18047 | -0.33018851  | -0.0219033  | 2.61E-02 | 1.30E-01 | 1.00E+00 |

|                              |                         |          |              |             |          |          |          |
|------------------------------|-------------------------|----------|--------------|-------------|----------|----------|----------|
| ENSG00000277151.1_RP11-380B  | ENSG00000160789.18_LMNA | -0.13481 | -0.287836435 | 0.024922202 | 9.77E-02 | 3.07E-01 | 1.00E+00 |
| ENSG00000233436.6_BTBD18     | ENSG00000160789.18_LMNA | -0.13665 | -0.289550266 | 0.023053622 | 9.32E-02 | 2.99E-01 | 1.00E+00 |
| ENSG00000281903.1_AF127936.7 | ENSG00000160789.18_LMNA | -0.03675 | -0.194813208 | 0.123169006 | 6.53E-01 | 8.46E-01 | 1.00E+00 |
| ENSG00000259030.5_FPGT-TNNI  | ENSG00000160789.18_LMNA | 0.03434  | -0.125545224 | 0.192490175 | 6.74E-01 | 8.57E-01 | 1.00E+00 |
| ENSG00000145244.10_CORIN     | ENSG00000160789.18_LMNA | 0.12012  | -0.039838749 | 0.274083015 | 1.40E-01 | 3.82E-01 | 1.00E+00 |
| ENSG00000130943.6_PKDREJ     | ENSG00000160789.18_LMNA | -0.0728  | -0.229337936 | 0.087418763 | 3.73E-01 | 6.53E-01 | 1.00E+00 |
| ENSG00000143199.16_ADCY10    | ENSG00000160789.18_LMNA | -0.12618 | -0.27975918  | 0.033699461 | 1.21E-01 | 3.51E-01 | 1.00E+00 |
| ENSG00000134539.15_KLRD1     | ENSG00000160789.18_LMNA | -0.07993 | -0.236129218 | 0.08028905  | 3.28E-01 | 6.14E-01 | 1.00E+00 |
| ENSG00000185842.13_DNAH14    | ENSG00000160789.18_LMNA | -0.00724 | -0.166252211 | 0.152132912 | 9.29E-01 | 9.73E-01 | 1.00E+00 |
| ENSG00000254154.7_RP4-798P1  | ENSG00000160789.18_LMNA | 0.03226  | -0.127593334 | 0.190485042 | 6.93E-01 | 8.68E-01 | 1.00E+00 |
| ENSG00000280007.1_AC008079.  | ENSG00000160789.18_LMNA | -0.09158 | -0.247173767 | 0.068624556 | 2.62E-01 | 5.45E-01 | 1.00E+00 |
| ENSG00000155754.13_ALS2CR1   | ENSG00000160789.18_LMNA | -0.22887 | -0.374431335 | -0.0723077  | 4.57E-03 | 3.66E-02 | 1.00E+00 |
| ENSG00000165181.15_C9orf84   | ENSG00000160789.18_LMNA | -0.17347 | -0.323728391 | -0.01467233 | 3.26E-02 | 1.51E-01 | 1.00E+00 |
| ENSG00000182795.12_C1orf116  | ENSG00000160789.18_LMNA | 0.10427  | -0.055856007 | 0.259170346 | 2.01E-01 | 4.72E-01 | 1.00E+00 |
| ENSG00000108576.8_SLC6A4     | ENSG00000160789.18_LMNA | -0.07435 | -0.230816979 | 0.085868774 | 3.63E-01 | 6.44E-01 | 1.00E+00 |
| ENSG00000228113.6_AC003991.  | ENSG00000160789.18_LMNA | -0.13666 | -0.289560595 | 0.023042354 | 9.32E-02 | 2.99E-01 | 1.00E+00 |
| ENSG00000188107.12_EYS       | ENSG00000160789.18_LMNA | -0.23015 | -0.375588813 | -0.07364742 | 4.34E-03 | 3.53E-02 | 1.00E+00 |
| ENSG00000260389.1_WBP11P1    | ENSG00000160789.18_LMNA | 0.04071  | -0.119259285 | 0.198627672 | 6.18E-01 | 8.27E-01 | 1.00E+00 |
| ENSG00000155657.22_TTN       | ENSG00000160789.18_LMNA | -0.12733 | -0.280838977 | 0.032528878 | 1.18E-01 | 3.44E-01 | 1.00E+00 |
| ENSG00000103534.15_TMC5      | ENSG00000160789.18_LMNA | -0.09087 | -0.246502736 | 0.069335725 | 2.66E-01 | 5.49E-01 | 1.00E+00 |
| ENSG00000154025.14_SLC5A10   | ENSG00000160789.18_LMNA | -0.05624 | -0.213526298 | 0.103893562 | 4.91E-01 | 7.47E-01 | 1.00E+00 |
| ENSG00000269821.1_KCNQ1OT1   | ENSG00000160789.18_LMNA | 0.01483  | -0.14471455  | 0.173618623 | 8.56E-01 | 9.43E-01 | 1.00E+00 |
| ENSG00000249669.6_CARMN      | ENSG00000160789.18_LMNA | 0.05864  | -0.101505666 | 0.215828425 | 4.73E-01 | 7.33E-01 | 1.00E+00 |
| ENSG00000186714.11_CCDC73    | ENSG00000160789.18_LMNA | -0.00021 | -0.159406562 | 0.158994828 | 9.98E-01 | 9.99E-01 | 1.00E+00 |
| ENSG00000239219.2_RP11-379K  | ENSG00000160789.18_LMNA | -0.08347 | -0.23948381  | 0.076755301 | 3.07E-01 | 5.93E-01 | 1.00E+00 |
| ENSG00000227028.5_SLC8A1-AS  | ENSG00000160789.18_LMNA | -0.32957 | -0.464405314 | -0.17980426 | 3.38E-05 | 7.89E-04 | 1.00E+00 |
| ENSG00000169174.10_PCSK9     | ENSG00000160789.18_LMNA | -0.05342 | -0.210831522 | 0.106684094 | 5.13E-01 | 7.61E-01 | 1.00E+00 |
| ENSG00000236699.7_ARHGEF38   | ENSG00000160789.18_LMNA | -0.10873 | -0.263370134 | 0.051361482 | 1.82E-01 | 4.47E-01 | 1.00E+00 |
| ENSG00000188738.12_FSIP2     | ENSG00000160789.18_LMNA | -0.10907 | -0.263695243 | 0.051013025 | 1.81E-01 | 4.45E-01 | 1.00E+00 |
| ENSG00000205670.9_SMIM11A    | ENSG00000160789.18_LMNA | -0.22348 | -0.369533583 | -0.06665084 | 5.65E-03 | 4.30E-02 | 1.00E+00 |
| ENSG00000186628.11_FSD2      | ENSG00000160789.18_LMNA | -0.00595 | -0.164994796 | 0.15339562  | 9.42E-01 | 9.77E-01 | 1.00E+00 |
| ENSG00000261150.2_EPPK1      | ENSG00000160789.18_LMNA | 0.18599  | 0.027601985  | 0.335259422 | 2.18E-02 | 1.15E-01 | 1.00E+00 |
| ENSG00000279978.1_           | ENSG00000160789.18_LMNA | 0.01787  | -0.141736746 | 0.176565589 | 8.27E-01 | 9.32E-01 | 1.00E+00 |

|                             |                         |          |              |             |          |          |          |
|-----------------------------|-------------------------|----------|--------------|-------------|----------|----------|----------|
| ENSG00000074803.16_SLC12A1  | ENSG00000160789.18_LMNA | 0.04812  | -0.111941103 | 0.205741762 | 5.56E-01 | 7.90E-01 | 1.00E+00 |
| ENSG00000236539.3_HNRNPA1F  | ENSG00000160789.18_LMNA | 0.01696  | -0.14262697  | 0.175685181 | 8.36E-01 | 9.36E-01 | 1.00E+00 |
| ENSG00000279080.1_CTA-228A9 | ENSG00000160789.18_LMNA | -0.07954 | -0.235755225 | 0.080682524 | 3.30E-01 | 6.16E-01 | 1.00E+00 |
| ENSG00000281344.1_HELLPAR   | ENSG00000160789.18_LMNA | -0.19406 | -0.342675575 | -0.03597241 | 1.66E-02 | 9.44E-02 | 1.00E+00 |
| ENSG00000202538.1_RNU4-2    | ENSG00000160789.18_LMNA | -0.22719 | -0.372899671 | -0.07053655 | 4.88E-03 | 3.85E-02 | 1.00E+00 |
| ENSG00000241781.2_          | ENSG00000160789.18_LMNA | -0.04796 | -0.205589184 | 0.112098421 | 5.57E-01 | 7.91E-01 | 1.00E+00 |
| ENSG00000239776.2_          | ENSG00000160789.18_LMNA | -0.04541 | -0.203138643 | 0.114622905 | 5.79E-01 | 8.04E-01 | 1.00E+00 |
| ENSG00000229108.1_MEOX2-AS  | ENSG00000160789.18_LMNA | 0.25644  | 0.101376129  | 0.399335899 | 1.43E-03 | 1.51E-02 | 1.00E+00 |
| ENSG00000248184.1_RP11-231C | ENSG00000160789.18_LMNA | -0.46891 | -0.584480538 | -0.33469674 | 1.11E-09 | 1.70E-07 | 5.69E-05 |
| ENSG00000166426.7_CRABP1    | ENSG00000160789.18_LMNA | -0.29075 | -0.430043641 | -0.13793235 | 2.79E-04 | 4.25E-03 | 1.00E+00 |
| ENSG00000271745.1_          | ENSG00000160789.18_LMNA | -0.02504 | -0.183504571 | 0.134702325 | 7.59E-01 | 9.00E-01 | 1.00E+00 |
| ENSG00000237797.1_RP11-472N | ENSG00000160789.18_LMNA | -0.0901  | -0.24577279  | 0.070108969 | 2.70E-01 | 5.54E-01 | 1.00E+00 |
| ENSG00000268496.1_CTD-2587H | ENSG00000160789.18_LMNA | -0.02417 | -0.182667695 | 0.135552416 | 7.68E-01 | 9.04E-01 | 1.00E+00 |
| ENSG00000280527.1_          | ENSG00000160789.18_LMNA | -0.00098 | -0.160156708 | 0.158244397 | 9.90E-01 | 9.96E-01 | 1.00E+00 |
| ENSG00000170549.3_IRX1      | ENSG00000160789.18_LMNA | -0.15511 | -0.306731771 | 0.004199243 | 5.64E-02 | 2.17E-01 | 1.00E+00 |
| ENSG00000254919.1_RP11-698N | ENSG00000160789.18_LMNA | -0.19691 | -0.345283588 | -0.03892628 | 1.50E-02 | 8.80E-02 | 1.00E+00 |
| ENSG00000211679.2_IGLC3     | ENSG00000160789.18_LMNA | 0.00486  | -0.154460084 | 0.163933989 | 9.53E-01 | 9.81E-01 | 1.00E+00 |
| ENSG00000124205.14_EDN3     | ENSG00000160789.18_LMNA | -0.17103 | -0.321480984 | -0.01216431 | 3.51E-02 | 1.59E-01 | 1.00E+00 |
| ENSG00000207561.1_MIR635    | ENSG00000160789.18_LMNA | 0.18615  | 0.027775534  | 0.335413574 | 2.17E-02 | 1.14E-01 | 1.00E+00 |
| ENSG00000211892.3_IGHG4     | ENSG00000160789.18_LMNA | 0.07256  | -0.087654444 | 0.229112915 | 3.74E-01 | 6.54E-01 | 1.00E+00 |
| ENSG00000200253.1_RNU6-529F | ENSG00000160789.18_LMNA | -0.091   | -0.24662804  | 0.069202951 | 2.65E-01 | 5.49E-01 | 1.00E+00 |
| ENSG00000207650.1_MIR570    | ENSG00000160789.18_LMNA | 0.2022   | 0.044432942  | 0.350132912 | 1.25E-02 | 7.69E-02 | 1.00E+00 |
| ENSG00000265743.1_RP11-848P | ENSG00000160789.18_LMNA | 0.08937  | -0.070836597 | 0.245085578 | 2.74E-01 | 5.58E-01 | 1.00E+00 |
| ENSG00000202337.1_RNU6-8    | ENSG00000160789.18_LMNA | -0.18789 | -0.33701276  | -0.02957705 | 2.04E-02 | 1.10E-01 | 1.00E+00 |
| ENSG00000212232.1_SNORD17   | ENSG00000160789.18_LMNA | -0.07157 | -0.228175347 | 0.088636043 | 3.81E-01 | 6.60E-01 | 1.00E+00 |
| ENSG00000276070.3_CCL4L2    | ENSG00000160789.18_LMNA | -0.0744  | -0.230861704 | 0.08582188  | 3.62E-01 | 6.44E-01 | 1.00E+00 |
| ENSG00000271043.2_MTRNR2L2  | ENSG00000160789.18_LMNA | -0.18015 | -0.329893666 | -0.02157257 | 2.64E-02 | 1.31E-01 | 1.00E+00 |
| ENSG00000134339.7_SAA2      | ENSG00000160789.18_LMNA | 0.03065  | -0.12917962  | 0.188930217 | 7.08E-01 | 8.76E-01 | 1.00E+00 |
| ENSG00000157005.3_SST       | ENSG00000160789.18_LMNA | -0.21928 | -0.365711905 | -0.06225032 | 6.64E-03 | 4.85E-02 | 1.00E+00 |
| ENSG00000132465.9_JCHAIN    | ENSG00000160789.18_LMNA | -0.00436 | -0.16344603  | 0.154949478 | 9.57E-01 | 9.83E-01 | 1.00E+00 |
| ENSG00000186973.9_FAM183A   | ENSG00000160789.18_LMNA | 0.10208  | -0.058065049 | 0.25710179  | 2.11E-01 | 4.84E-01 | 1.00E+00 |
| ENSG00000140522.10_RLBP1    | ENSG00000160789.18_LMNA | -0.24212 | -0.386425082 | -0.08624294 | 2.65E-03 | 2.43E-02 | 1.00E+00 |
| ENSG00000275479.1_RP11-334C | ENSG00000160789.18_LMNA | -0.20807 | -0.355497977 | -0.05054698 | 1.01E-02 | 6.61E-02 | 1.00E+00 |

|                              |                         |          |              |             |          |          |          |
|------------------------------|-------------------------|----------|--------------|-------------|----------|----------|----------|
| ENSG00000202474.1_RNA5SP28   | ENSG00000160789.18_LMNA | 0.08823  | -0.071981345 | 0.244003772 | 2.80E-01 | 5.65E-01 | 1.00E+00 |
| ENSG00000172137.17_CALB2     | ENSG00000160789.18_LMNA | -0.02566 | -0.184106567 | 0.134090534 | 7.54E-01 | 8.98E-01 | 1.00E+00 |
| ENSG00000278219.1_           | ENSG00000160789.18_LMNA | 0.01148  | -0.147994997 | 0.170365536 | 8.88E-01 | 9.57E-01 | 1.00E+00 |
| ENSG00000077274.8_CAPN6      | ENSG00000160789.18_LMNA | 0.19151  | 0.033328233  | 0.340336969 | 1.81E-02 | 1.00E-01 | 1.00E+00 |
| ENSG00000256185.1_RP11-612B  | ENSG00000160789.18_LMNA | 0.10176  | -0.058387813 | 0.256799311 | 2.12E-01 | 4.86E-01 | 1.00E+00 |
| ENSG00000228528.1_AC068057.  | ENSG00000160789.18_LMNA | 0.10763  | -0.052467679 | 0.262337583 | 1.87E-01 | 4.53E-01 | 1.00E+00 |
| ENSG00000281527.1_AC087350.  | ENSG00000160789.18_LMNA | -0.17747 | -0.327424407 | -0.01880542 | 2.87E-02 | 1.39E-01 | 1.00E+00 |
| ENSG00000235241.1_RP11-108M  | ENSG00000160789.18_LMNA | 0.12447  | -0.035436687 | 0.278155223 | 1.27E-01 | 3.60E-01 | 1.00E+00 |
| ENSG00000272279.1_RP11-157J. | ENSG00000160789.18_LMNA | 0.09032  | -0.069889535 | 0.245979974 | 2.68E-01 | 5.53E-01 | 1.00E+00 |
| ENSG00000236924.1_RP11-390F. | ENSG00000160789.18_LMNA | -0.01113 | -0.170031828 | 0.148331116 | 8.92E-01 | 9.58E-01 | 1.00E+00 |
| ENSG00000263853.1_           | ENSG00000160789.18_LMNA | -0.21232 | -0.359371586 | -0.05497561 | 8.64E-03 | 5.89E-02 | 1.00E+00 |
| ENSG00000233384.1_RP11-100E  | ENSG00000160789.18_LMNA | 0.27859  | 0.124927352  | 0.419196168 | 5.10E-04 | 6.85E-03 | 1.00E+00 |
| ENSG00000223298.1_RNY3P8     | ENSG00000160789.18_LMNA | -0.24358 | -0.387745714 | -0.08778456 | 2.49E-03 | 2.32E-02 | 1.00E+00 |
| ENSG00000208772.1_SNORD94    | ENSG00000160789.18_LMNA | -0.09337 | -0.248873042 | 0.066822203 | 2.53E-01 | 5.34E-01 | 1.00E+00 |
| ENSG00000222894.1_           | ENSG00000160789.18_LMNA | -0.19696 | -0.34532787  | -0.03897648 | 1.50E-02 | 8.79E-02 | 1.00E+00 |
| ENSG00000180613.9_GSX2       | ENSG00000160789.18_LMNA | -0.10275 | -0.257738079 | 0.057385875 | 2.08E-01 | 4.80E-01 | 1.00E+00 |
| ENSG00000252817.2_           | ENSG00000160789.18_LMNA | 0.00496  | -0.154365553 | 0.164028225 | 9.52E-01 | 9.81E-01 | 1.00E+00 |
| ENSG00000272865.1_RP11-561I  | ENSG00000160789.18_LMNA | 0.00202  | -0.157226857 | 0.161173275 | 9.80E-01 | 9.93E-01 | 1.00E+00 |
| ENSG00000269707.1_RP11-13J1  | ENSG00000160789.18_LMNA | 0.03453  | -0.125362826 | 0.192668617 | 6.73E-01 | 8.56E-01 | 1.00E+00 |
| ENSG00000258844.1_RP11-259K  | ENSG00000160789.18_LMNA | -0.36453 | -0.495004585 | -0.21798022 | 3.89E-06 | 1.35E-04 | 2.00E-01 |
| ENSG00000230795.2_HLA-K      | ENSG00000160789.18_LMNA | 0.17314  | 0.014333635  | 0.323425095 | 3.29E-02 | 1.52E-01 | 1.00E+00 |
| ENSG00000237082.1_COX5BP6    | ENSG00000160789.18_LMNA | -0.22698 | -0.372712778 | -0.07032056 | 4.92E-03 | 3.87E-02 | 1.00E+00 |
| ENSG00000011677.11_GABRA3    | ENSG00000160789.18_LMNA | -0.43392 | -0.554792903 | -0.29510219 | 2.34E-08 | 2.20E-06 | 1.20E-03 |
| ENSG00000281789.1_           | ENSG00000160789.18_LMNA | -0.13961 | -0.292313683 | 0.020036079 | 8.63E-02 | 2.85E-01 | 1.00E+00 |
| ENSG00000241231.1_RP11-275H  | ENSG00000160789.18_LMNA | -0.23921 | -0.383792518 | -0.08317413 | 3.00E-03 | 2.67E-02 | 1.00E+00 |
| ENSG00000242686.4_RP11-1191. | ENSG00000160789.18_LMNA | 0.06185  | -0.098317686 | 0.21889641  | 4.49E-01 | 7.15E-01 | 1.00E+00 |
| ENSG00000251988.1_RNU4ATAC   | ENSG00000160789.18_LMNA | -0.1     | -0.255141907 | 0.060155195 | 2.20E-01 | 4.95E-01 | 1.00E+00 |
| ENSG00000237819.4_AC002454.  | ENSG00000160789.18_LMNA | 0.13124  | -0.028554352 | 0.284499344 | 1.07E-01 | 3.25E-01 | 1.00E+00 |
| ENSG00000273409.1_RP11-480C  | ENSG00000160789.18_LMNA | -0.25458 | -0.397659183 | -0.09940297 | 1.55E-03 | 1.61E-02 | 1.00E+00 |
| ENSG00000133937.4_GSC        | ENSG00000160789.18_LMNA | 0.1905   | 0.032277917  | 0.339406978 | 1.87E-02 | 1.03E-01 | 1.00E+00 |
| ENSG00000011052.20_NME1-NM   | ENSG00000160789.18_LMNA | -0.03813 | -0.196141141 | 0.12180903  | 6.41E-01 | 8.40E-01 | 1.00E+00 |
| ENSG00000205358.3_MT1H       | ENSG00000160789.18_LMNA | 0.16424  | 0.005170516  | 0.315195473 | 4.32E-02 | 1.83E-01 | 1.00E+00 |
| ENSG00000202343.1_SNORA2     | ENSG00000160789.18_LMNA | -0.11513 | -0.269392032 | 0.044894648 | 1.58E-01 | 4.11E-01 | 1.00E+00 |

|                              |                         |          |              |             |          |          |          |
|------------------------------|-------------------------|----------|--------------|-------------|----------|----------|----------|
| ENSG00000275713.1_HIST1H2B   | ENSG00000160789.18_LMNA | 0.14723  | -0.012257149 | 0.299413523 | 7.03E-02 | 2.50E-01 | 1.00E+00 |
| ENSG00000275645.1_RP11-817C  | ENSG00000160789.18_LMNA | 0.05799  | -0.102151556 | 0.215206083 | 4.78E-01 | 7.36E-01 | 1.00E+00 |
| ENSG00000252061.1_RNU6-415F  | ENSG00000160789.18_LMNA | -0.21263 | -0.359653849 | -0.05529878 | 8.54E-03 | 5.85E-02 | 1.00E+00 |
| ENSG00000231982.1_RP11-573D  | ENSG00000160789.18_LMNA | -0.11252 | -0.266941038 | 0.04752992  | 1.68E-01 | 4.25E-01 | 1.00E+00 |
| ENSG00000277351.1_RP11-325L  | ENSG00000160789.18_LMNA | -0.14062 | -0.293252858 | 0.019009238 | 8.40E-02 | 2.80E-01 | 1.00E+00 |
| ENSG00000255020.1_AF131216.5 | ENSG00000160789.18_LMNA | -0.25716 | -0.399984906 | -0.10214051 | 1.38E-03 | 1.48E-02 | 1.00E+00 |
| ENSG00000280816.1_           | ENSG00000160789.18_LMNA | 0.02854  | -0.13125988  | 0.186888794 | 7.27E-01 | 8.84E-01 | 1.00E+00 |
| ENSG00000223552.1_RP11-24F1  | ENSG00000160789.18_LMNA | -0.05991 | -0.217045012 | 0.100242276 | 4.63E-01 | 7.26E-01 | 1.00E+00 |
| ENSG00000201499.1_RNU6-312F  | ENSG00000160789.18_LMNA | -0.03183 | -0.190070865 | 0.128016051 | 6.97E-01 | 8.70E-01 | 1.00E+00 |
| ENSG00000243389.1_AC012442.1 | ENSG00000160789.18_LMNA | -0.19575 | -0.344223412 | -0.03772486 | 1.57E-02 | 9.04E-02 | 1.00E+00 |
| ENSG00000244538.1_RP11-10G1  | ENSG00000160789.18_LMNA | 0.05272  | -0.107380504 | 0.210158256 | 5.19E-01 | 7.65E-01 | 1.00E+00 |
| ENSG00000172247.3_C1QTNF4    | ENSG00000160789.18_LMNA | -0.1988  | -0.347013409 | -0.04088845 | 1.41E-02 | 8.39E-02 | 1.00E+00 |
| ENSG00000128713.12_HOXD11    | ENSG00000160789.18_LMNA | -0.05568 | -0.21299706  | 0.104442001 | 4.96E-01 | 7.50E-01 | 1.00E+00 |
| ENSG00000197409.7_HIST1H3D   | ENSG00000160789.18_LMNA | 0.09677  | -0.063407957 | 0.252086702 | 2.36E-01 | 5.14E-01 | 1.00E+00 |
| ENSG00000272369.1_RP11-446N  | ENSG00000160789.18_LMNA | -0.05095 | -0.208459642 | 0.109136124 | 5.33E-01 | 7.75E-01 | 1.00E+00 |
| ENSG00000279140.1_RP11-477I4 | ENSG00000160789.18_LMNA | 0.15933  | 0.000129544  | 0.310648084 | 4.99E-02 | 2.01E-01 | 1.00E+00 |
| ENSG00000238123.1_MID1IP1-AS | ENSG00000160789.18_LMNA | 0.03953  | -0.120430483 | 0.197486018 | 6.29E-01 | 8.33E-01 | 1.00E+00 |
| ENSG00000229291.1_RP4-580N2  | ENSG00000160789.18_LMNA | -0.00434 | -0.163429884 | 0.154965669 | 9.58E-01 | 9.83E-01 | 1.00E+00 |
| ENSG00000236871.5_LINC00106  | ENSG00000160789.18_LMNA | 0.0694   | -0.090803289 | 0.226103235 | 3.96E-01 | 6.73E-01 | 1.00E+00 |
| ENSG00000206838.1_SNORA5A    | ENSG00000160789.18_LMNA | 0.00115  | -0.15808238  | 0.160318615 | 9.89E-01 | 9.96E-01 | 1.00E+00 |
| ENSG00000168298.5_HIST1H1E   | ENSG00000160789.18_LMNA | -0.08769 | -0.24349092  | 0.072523745 | 2.83E-01 | 5.68E-01 | 1.00E+00 |
| ENSG00000259846.1_RP11-467L  | ENSG00000160789.18_LMNA | -0.22289 | -0.368998259 | -0.06603372 | 5.78E-03 | 4.37E-02 | 1.00E+00 |
| ENSG00000272301.1_RP11-111M  | ENSG00000160789.18_LMNA | -0.2402  | -0.384694064 | -0.08422443 | 2.88E-03 | 2.59E-02 | 1.00E+00 |
| ENSG00000229567.1_RP4-717I23 | ENSG00000160789.18_LMNA | -0.06122 | -0.218290583 | 0.098947725 | 4.54E-01 | 7.19E-01 | 1.00E+00 |
| ENSG00000229481.2_           | ENSG00000160789.18_LMNA | -0.0813  | -0.23742818  | 0.078921658 | 3.19E-01 | 6.06E-01 | 1.00E+00 |
| ENSG00000237380.5_HOXD-AS2   | ENSG00000160789.18_LMNA | -0.22122 | -0.367478866 | -0.06428344 | 6.16E-03 | 4.59E-02 | 1.00E+00 |
| ENSG00000233871.1_DLG5-AS1   | ENSG00000160789.18_LMNA | 0.04837  | -0.111692148 | 0.205983184 | 5.54E-01 | 7.88E-01 | 1.00E+00 |
| ENSG00000263064.2_           | ENSG00000160789.18_LMNA | -0.05383 | -0.211221354 | 0.106280719 | 5.10E-01 | 7.59E-01 | 1.00E+00 |
| ENSG00000234336.5_JAZF1-AS1  | ENSG00000160789.18_LMNA | -0.04993 | -0.20748396  | 0.110143656 | 5.41E-01 | 7.81E-01 | 1.00E+00 |
| ENSG00000264608.1_RP11-192H  | ENSG00000160789.18_LMNA | -0.02583 | -0.184269662 | 0.133924743 | 7.52E-01 | 8.97E-01 | 1.00E+00 |
| ENSG00000265579.1_RP11-713C  | ENSG00000160789.18_LMNA | -0.38003 | -0.508467434 | -0.23504952 | 1.37E-06 | 5.97E-05 | 7.04E-02 |
| ENSG00000168081.7_PNOC       | ENSG00000160789.18_LMNA | -0.04298 | -0.200804699 | 0.117023464 | 5.99E-01 | 8.16E-01 | 1.00E+00 |
| ENSG00000201183.1_RNVU1-3    | ENSG00000160789.18_LMNA | 0.06056  | -0.099596168 | 0.217666803 | 4.59E-01 | 7.22E-01 | 1.00E+00 |

|                              |                         |          |              |             |          |          |          |
|------------------------------|-------------------------|----------|--------------|-------------|----------|----------|----------|
| ENSG00000122592.7_HOXA7      | ENSG00000160789.18_LMNA | -0.18971 | -0.33867945  | -0.03145673 | 1.92E-02 | 1.05E-01 | 1.00E+00 |
| ENSG00000213886.3_UBD        | ENSG00000160789.18_LMNA | 0.05404  | -0.106076079 | 0.211419085 | 5.08E-01 | 7.58E-01 | 1.00E+00 |
| ENSG00000239899.3_RN7SL674F  | ENSG00000160789.18_LMNA | -0.0143  | -0.173106296 | 0.145231651 | 8.61E-01 | 9.46E-01 | 1.00E+00 |
| ENSG00000223548.1_AC034228.  | ENSG00000160789.18_LMNA | -0.20113 | -0.349150066 | -0.04331536 | 1.30E-02 | 7.90E-02 | 1.00E+00 |
| ENSG00000274641.1_HIST1H2BC  | ENSG00000160789.18_LMNA | -0.05986 | -0.21699676  | 0.100292403 | 4.64E-01 | 7.26E-01 | 1.00E+00 |
| ENSG00000205571.11_SMN2      | ENSG00000160789.18_LMNA | -0.07443 | -0.230898521 | 0.085783276 | 3.62E-01 | 6.44E-01 | 1.00E+00 |
| ENSG00000133519.11_ZDHH8P    | ENSG00000160789.18_LMNA | 0.0025   | -0.156764582 | 0.161634885 | 9.76E-01 | 9.91E-01 | 1.00E+00 |
| ENSG00000240869.3_RN7SL128F  | ENSG00000160789.18_LMNA | 0.13534  | -0.024386507 | 0.28832797  | 9.64E-02 | 3.05E-01 | 1.00E+00 |
| ENSG00000235298.1_RP11-575L  | ENSG00000160789.18_LMNA | 0.00131  | -0.157922109 | 0.160478761 | 9.87E-01 | 9.95E-01 | 1.00E+00 |
| ENSG00000228789.5_HCG22      | ENSG00000160789.18_LMNA | -0.24081 | -0.385245252 | -0.08486689 | 2.80E-03 | 2.54E-02 | 1.00E+00 |
| ENSG00000222020.2_AC062017.  | ENSG00000160789.18_LMNA | 0.07608  | -0.084141284 | 0.232463676 | 3.52E-01 | 6.35E-01 | 1.00E+00 |
| ENSG00000235034.5_C19orf81   | ENSG00000160789.18_LMNA | 0.08571  | -0.074502695 | 0.241618277 | 2.94E-01 | 5.80E-01 | 1.00E+00 |
| ENSG00000258424.1_RP11-471B  | ENSG00000160789.18_LMNA | -0.03873 | -0.19671895  | 0.121216905 | 6.36E-01 | 8.37E-01 | 1.00E+00 |
| ENSG00000239912.1_RPL39P36   | ENSG00000160789.18_LMNA | 0.03287  | -0.126995872 | 0.191070241 | 6.88E-01 | 8.65E-01 | 1.00E+00 |
| ENSG00000272382.1_CTD-2035E  | ENSG00000160789.18_LMNA | 0.24937  | 0.093898019  | 0.392970718 | 1.95E-03 | 1.91E-02 | 1.00E+00 |
| ENSG00000248256.1_OCIAD1-AS  | ENSG00000160789.18_LMNA | -0.04306 | -0.200885277 | 0.116940648 | 5.98E-01 | 8.15E-01 | 1.00E+00 |
| ENSG00000261033.1_RP11-209D  | ENSG00000160789.18_LMNA | 0.07249  | -0.087718307 | 0.229051934 | 3.75E-01 | 6.55E-01 | 1.00E+00 |
| ENSG00000226970.2_RP11-82H1  | ENSG00000160789.18_LMNA | 0.0106   | -0.148855011 | 0.169511545 | 8.97E-01 | 9.60E-01 | 1.00E+00 |
| ENSG00000233250.1_RP3-339A1  | ENSG00000160789.18_LMNA | -0.07463 | -0.231086391 | 0.085586275 | 3.61E-01 | 6.43E-01 | 1.00E+00 |
| ENSG00000230148.7_HOXB-AS1   | ENSG00000160789.18_LMNA | -0.01287 | -0.171720094 | 0.146629897 | 8.75E-01 | 9.51E-01 | 1.00E+00 |
| ENSG00000237015.1_CTA-984G1  | ENSG00000160789.18_LMNA | 0.09551  | -0.064673633 | 0.250896195 | 2.42E-01 | 5.21E-01 | 1.00E+00 |
| ENSG00000272343.1_RP11-140I1 | ENSG00000160789.18_LMNA | -0.11546 | -0.269700385 | 0.044562802 | 1.57E-01 | 4.09E-01 | 1.00E+00 |
| ENSG00000168539.3_CHRM1      | ENSG00000160789.18_LMNA | -0.26533 | -0.407328459 | -0.11081409 | 9.54E-04 | 1.12E-02 | 1.00E+00 |
| ENSG00000229230.3_MT1P3      | ENSG00000160789.18_LMNA | 0.09759  | -0.062578407 | 0.252866468 | 2.32E-01 | 5.09E-01 | 1.00E+00 |
| ENSG00000276250.1_CTD-2349P  | ENSG00000160789.18_LMNA | -0.09522 | -0.250621196 | 0.064965851 | 2.43E-01 | 5.23E-01 | 1.00E+00 |
| ENSG00000258515.1_RP11-203M  | ENSG00000160789.18_LMNA | -0.04748 | -0.205133109 | 0.112568568 | 5.61E-01 | 7.93E-01 | 1.00E+00 |
| ENSG00000260911.2_RP11-196G  | ENSG00000160789.18_LMNA | -0.14767 | -0.299821128 | 0.011809409 | 6.94E-02 | 2.48E-01 | 1.00E+00 |
| ENSG00000141744.3_PNMT       | ENSG00000160789.18_LMNA | -0.23189 | -0.377165281 | -0.07547386 | 4.05E-03 | 3.34E-02 | 1.00E+00 |
| ENSG00000232372.1_           | ENSG00000160789.18_LMNA | -0.05701 | -0.214268909 | 0.103123684 | 4.85E-01 | 7.42E-01 | 1.00E+00 |
| ENSG00000249602.1_RP11-98D1  | ENSG00000160789.18_LMNA | 0.03132  | -0.12852365  | 0.189573371 | 7.02E-01 | 8.72E-01 | 1.00E+00 |
| ENSG00000267681.1_CTD-3199J  | ENSG00000160789.18_LMNA | -0.07093 | -0.227560827 | 0.08927909  | 3.85E-01 | 6.64E-01 | 1.00E+00 |
| ENSG00000235313.1_HM13-IT1   | ENSG00000160789.18_LMNA | -0.07776 | -0.234060935 | 0.082463837 | 3.41E-01 | 6.26E-01 | 1.00E+00 |
| ENSG00000274331.1_RP11-403A  | ENSG00000160789.18_LMNA | 0.03117  | -0.128672889 | 0.189427071 | 7.03E-01 | 8.73E-01 | 1.00E+00 |

|                              |                         |          |              |             |          |          |          |
|------------------------------|-------------------------|----------|--------------|-------------|----------|----------|----------|
| ENSG00000268555.1_RP11-678G  | ENSG00000160789.18_LMNA | -0.11061 | -0.265146323 | 0.049456797 | 1.75E-01 | 4.35E-01 | 1.00E+00 |
| ENSG00000265791.1_CTD-2349P  | ENSG00000160789.18_LMNA | -0.08958 | -0.245286576 | 0.070623814 | 2.72E-01 | 5.57E-01 | 1.00E+00 |
| ENSG00000171695.9_LKAAEAR1   | ENSG00000160789.18_LMNA | 0.04321  | -0.116798431 | 0.201023641 | 5.97E-01 | 8.14E-01 | 1.00E+00 |
| ENSG00000264569.1_RP13-650J  | ENSG00000160789.18_LMNA | -0.21529 | -0.362078104 | -0.05807705 | 7.73E-03 | 5.41E-02 | 1.00E+00 |
| ENSG00000266036.1_RP11-452IE | ENSG00000160789.18_LMNA | -0.06299 | -0.21998849  | 0.09718132  | 4.41E-01 | 7.08E-01 | 1.00E+00 |
| ENSG00000253520.1_RP11-798K  | ENSG00000160789.18_LMNA | 0.13124  | -0.028557257 | 0.284496672 | 1.07E-01 | 3.25E-01 | 1.00E+00 |
| ENSG00000228399.1_RP4-575N6  | ENSG00000160789.18_LMNA | -0.10249 | -0.257485472 | 0.057655543 | 2.09E-01 | 4.82E-01 | 1.00E+00 |
| ENSG00000232702.3_RP3-437C1  | ENSG00000160789.18_LMNA | 0.00486  | -0.154457731 | 0.163936335 | 9.53E-01 | 9.81E-01 | 1.00E+00 |
| ENSG00000269068.1_RP11-256I2 | ENSG00000160789.18_LMNA | 0.02682  | -0.132943527 | 0.185234566 | 7.43E-01 | 8.92E-01 | 1.00E+00 |
| ENSG00000240005.4_RP11-293A  | ENSG00000160789.18_LMNA | -0.12353 | -0.277279585 | 0.036384281 | 1.29E-01 | 3.65E-01 | 1.00E+00 |
| ENSG00000222043.2_AC079305.  | ENSG00000160789.18_LMNA | -0.11982 | -0.273793887 | 0.040150834 | 1.41E-01 | 3.84E-01 | 1.00E+00 |
| ENSG00000185837.3_CECR5-AS   | ENSG00000160789.18_LMNA | 0.00576  | -0.153583329 | 0.164807786 | 9.44E-01 | 9.78E-01 | 1.00E+00 |
| ENSG00000250538.4_RP11-92A5  | ENSG00000160789.18_LMNA | 0.09835  | -0.061820515 | 0.253578517 | 2.28E-01 | 5.05E-01 | 1.00E+00 |
| ENSG00000184672.10_RALYL     | ENSG00000160789.18_LMNA | -0.40084 | -0.52645024  | -0.25811574 | 3.10E-07 | 1.80E-05 | 1.59E-02 |
| ENSG00000257543.1_RP11-321F  | ENSG00000160789.18_LMNA | -0.23595 | -0.380847198 | -0.07974749 | 3.43E-03 | 2.95E-02 | 1.00E+00 |
| ENSG00000179639.9_FCER1A     | ENSG00000160789.18_LMNA | -0.10961 | -0.264199147 | 0.05047278  | 1.79E-01 | 4.41E-01 | 1.00E+00 |
| ENSG00000235151.1_AC114730.  | ENSG00000160789.18_LMNA | 0.28812  | 0.135118582  | 0.427703804 | 3.19E-04 | 4.72E-03 | 1.00E+00 |
| ENSG00000187140.5_FOXD3      | ENSG00000160789.18_LMNA | -0.04759 | -0.205238373 | 0.112460069 | 5.60E-01 | 7.93E-01 | 1.00E+00 |
| ENSG00000273257.1_RP11-177J  | ENSG00000160789.18_LMNA | -0.02054 | -0.179150381 | 0.139120154 | 8.02E-01 | 9.20E-01 | 1.00E+00 |
| ENSG00000274029.1_RP11-340F  | ENSG00000160789.18_LMNA | -0.3225  | -0.458177246 | -0.17213765 | 5.08E-05 | 1.09E-03 | 1.00E+00 |
| ENSG00000249679.1_RP11-279C  | ENSG00000160789.18_LMNA | 0.08493  | -0.075286525 | 0.240875902 | 2.98E-01 | 5.84E-01 | 1.00E+00 |
| ENSG00000128422.14_KRT17     | ENSG00000160789.18_LMNA | 0.09662  | -0.06355513  | 0.251948319 | 2.36E-01 | 5.15E-01 | 1.00E+00 |
| ENSG00000167157.10_PRRX2     | ENSG00000160789.18_LMNA | 0.36105  | 0.214163335  | 0.491975833 | 4.88E-06 | 1.63E-04 | 2.51E-01 |
| ENSG00000255201.1_RP11-350N  | ENSG00000160789.18_LMNA | 0.32847  | 0.178610186  | 0.463437143 | 3.60E-05 | 8.29E-04 | 1.00E+00 |
| ENSG00000269425.1_AC007292.  | ENSG00000160789.18_LMNA | 0.01396  | -0.145567316 | 0.172773637 | 8.64E-01 | 9.47E-01 | 1.00E+00 |
| ENSG00000248794.1_CTD-2248H  | ENSG00000160789.18_LMNA | -0.03429 | -0.192442901 | 0.125593543 | 6.75E-01 | 8.58E-01 | 1.00E+00 |
| ENSG00000267374.1_RP11-244M  | ENSG00000160789.18_LMNA | -0.01433 | -0.173134085 | 0.145203608 | 8.61E-01 | 9.46E-01 | 1.00E+00 |
| ENSG00000000005.5_TNMD       | ENSG00000160789.18_LMNA | -0.00184 | -0.16098871  | 0.157411649 | 9.82E-01 | 9.93E-01 | 1.00E+00 |
| ENSG00000102854.13_MSLN      | ENSG00000160789.18_LMNA | 0.00338  | -0.155908535 | 0.162489332 | 9.67E-01 | 9.87E-01 | 1.00E+00 |
| ENSG00000269843.1_CTC-490E2  | ENSG00000160789.18_LMNA | 0.1147   | -0.045333095 | 0.268984527 | 1.59E-01 | 4.13E-01 | 1.00E+00 |
| ENSG00000265254.1_CTD-2350C  | ENSG00000160789.18_LMNA | -0.1188  | -0.272838601 | 0.041181536 | 1.45E-01 | 3.90E-01 | 1.00E+00 |
| ENSG00000176842.13_IRX5      | ENSG00000160789.18_LMNA | -0.01854 | -0.177216105 | 0.141078645 | 8.21E-01 | 9.30E-01 | 1.00E+00 |
| ENSG00000273763.1_RP11-420C  | ENSG00000160789.18_LMNA | -0.04846 | -0.206066688 | 0.111606031 | 5.53E-01 | 7.88E-01 | 1.00E+00 |



|                              |                         |          |              |             |          |          |          |
|------------------------------|-------------------------|----------|--------------|-------------|----------|----------|----------|
| ENSG00000272009.1_RP1-313I6. | ENSG00000160789.18_LMNA | -0.08395 | -0.239946813 | 0.076266945 | 3.04E-01 | 5.90E-01 | 1.00E+00 |
| ENSG00000218748.1_DBIP1      | ENSG00000160789.18_LMNA | -0.028   | -0.186365809 | 0.131792365 | 7.32E-01 | 8.87E-01 | 1.00E+00 |
| ENSG00000270164.1_LINC01480  | ENSG00000160789.18_LMNA | -0.1649  | -0.315809136 | -0.005852   | 4.23E-02 | 1.80E-01 | 1.00E+00 |
| ENSG00000272024.1_RP11-546K  | ENSG00000160789.18_LMNA | -0.12663 | -0.280178659 | 0.033244816 | 1.20E-01 | 3.48E-01 | 1.00E+00 |
| ENSG00000250956.1_CTB-88F18  | ENSG00000160789.18_LMNA | -0.06219 | -0.219222143 | 0.09797883  | 4.47E-01 | 7.13E-01 | 1.00E+00 |
| ENSG00000271882.1_KB-1410C5  | ENSG00000160789.18_LMNA | 0.10483  | -0.055296038 | 0.259694244 | 1.99E-01 | 4.69E-01 | 1.00E+00 |
| ENSG00000237807.3_RP11-400K  | ENSG00000160789.18_LMNA | 0.20834  | 0.050828032  | 0.355744117 | 1.00E-02 | 6.56E-02 | 1.00E+00 |
| ENSG00000276571.1_AC002550.I | ENSG00000160789.18_LMNA | -0.20133 | -0.349330119 | -0.04352004 | 1.29E-02 | 7.86E-02 | 1.00E+00 |
| ENSG00000277831.1_RP11-269C  | ENSG00000160789.18_LMNA | -0.27752 | -0.418245391 | -0.12379227 | 5.37E-04 | 7.13E-03 | 1.00E+00 |
| ENSG00000271952.1_RP11-245G  | ENSG00000160789.18_LMNA | -0.08462 | -0.240579282 | 0.0755996   | 3.00E-01 | 5.86E-01 | 1.00E+00 |
| ENSG00000185149.5_NPY2R      | ENSG00000160789.18_LMNA | 0.1455   | -0.014030415 | 0.297798093 | 7.37E-02 | 2.58E-01 | 1.00E+00 |
| ENSG00000232645.4_LINC01431  | ENSG00000160789.18_LMNA | -0.04364 | -0.20144006  | 0.116370336 | 5.93E-01 | 8.12E-01 | 1.00E+00 |
| ENSG00000213640.3_EEF1DP4    | ENSG00000160789.18_LMNA | -0.12343 | -0.27718279  | 0.036488996 | 1.30E-01 | 3.65E-01 | 1.00E+00 |
| ENSG00000256751.4_PLBD1-AS1  | ENSG00000160789.18_LMNA | 0.11434  | -0.045695524 | 0.26864759  | 1.61E-01 | 4.15E-01 | 1.00E+00 |
| ENSG00000272707.1_RP11-534C  | ENSG00000160789.18_LMNA | 0.03628  | -0.123638085 | 0.19435491  | 6.57E-01 | 8.48E-01 | 1.00E+00 |
| ENSG00000273210.1_AP001437.  | ENSG00000160789.18_LMNA | 0.0067   | -0.152666319 | 0.165721166 | 9.35E-01 | 9.74E-01 | 1.00E+00 |
| ENSG00000224790.1_AP000704.! | ENSG00000160789.18_LMNA | -0.05737 | -0.214613687 | 0.102766117 | 4.83E-01 | 7.40E-01 | 1.00E+00 |
| ENSG00000205106.4_DKFZp779M  | ENSG00000160789.18_LMNA | -0.14433 | -0.296714475 | 0.015218808 | 7.61E-02 | 2.64E-01 | 1.00E+00 |
| ENSG00000244586.1_WNT5A-AS   | ENSG00000160789.18_LMNA | -0.04317 | -0.200989291 | 0.116833739 | 5.97E-01 | 8.14E-01 | 1.00E+00 |
| ENSG00000233330.1_RP1-12G14  | ENSG00000160789.18_LMNA | 0.03055  | -0.129283619 | 0.188828225 | 7.09E-01 | 8.76E-01 | 1.00E+00 |
| ENSG00000275263.1_RP11-1072. | ENSG00000160789.18_LMNA | 0.01566  | -0.143901492 | 0.174423827 | 8.48E-01 | 9.41E-01 | 1.00E+00 |
| ENSG00000175793.11_SFNI      | ENSG00000160789.18_LMNA | 0.39621  | 0.252969459  | 0.522458813 | 4.35E-07 | 2.35E-05 | 2.23E-02 |
| ENSG00000269925.1_RP3-467L1. | ENSG00000160789.18_LMNA | 0.05654  | -0.103593479 | 0.213815797 | 4.89E-01 | 7.45E-01 | 1.00E+00 |
| ENSG00000273733.1_CTC-510F1  | ENSG00000160789.18_LMNA | 0.03564  | -0.12426432  | 0.193742853 | 6.63E-01 | 8.51E-01 | 1.00E+00 |
| ENSG00000272861.1_RP11-332H  | ENSG00000160789.18_LMNA | 0.05521  | -0.104910621 | 0.212544698 | 4.99E-01 | 7.52E-01 | 1.00E+00 |
| ENSG00000254911.3_SCARNA9    | ENSG00000160789.18_LMNA | -0.17595 | -0.326019839 | -0.01723351 | 3.01E-02 | 1.44E-01 | 1.00E+00 |
| ENSG00000269235.1_ZNF350-AS  | ENSG00000160789.18_LMNA | -0.20884 | -0.35619749  | -0.05134584 | 9.82E-03 | 6.47E-02 | 1.00E+00 |
| ENSG00000167914.9_GSDMA      | ENSG00000160789.18_LMNA | 0.0168   | -0.142778737 | 0.175535037 | 8.37E-01 | 9.37E-01 | 1.00E+00 |
| ENSG00000157330.8_C1orf158   | ENSG00000160789.18_LMNA | -0.09226 | -0.247817616 | 0.067941893 | 2.58E-01 | 5.41E-01 | 1.00E+00 |
| ENSG00000231245.2_C1DP1      | ENSG00000160789.18_LMNA | -0.11737 | -0.271498487 | 0.04262632  | 1.50E-01 | 3.98E-01 | 1.00E+00 |
| ENSG00000279692.1_RP11-1055I | ENSG00000160789.18_LMNA | -0.0353  | -0.193412389 | 0.124602332 | 6.66E-01 | 8.53E-01 | 1.00E+00 |
| ENSG00000230812.4_           | ENSG00000160789.18_LMNA | 0.10629  | -0.053822909 | 0.261071596 | 1.92E-01 | 4.61E-01 | 1.00E+00 |
| ENSG00000257647.1_RP11-701H  | ENSG00000160789.18_LMNA | -0.16453 | -0.315466046 | -0.00547095 | 4.28E-02 | 1.82E-01 | 1.00E+00 |

|                              |                         |          |              |             |          |          |          |
|------------------------------|-------------------------|----------|--------------|-------------|----------|----------|----------|
| ENSG00000180660.7_MAB21L1    | ENSG00000160789.18_LMNA | 0.05306  | -0.10704035  | 0.210487144 | 5.16E-01 | 7.63E-01 | 1.00E+00 |
| ENSG00000188013.6_MEIS3P2    | ENSG00000160789.18_LMNA | -0.04247 | -0.20031731  | 0.117524295 | 6.03E-01 | 8.18E-01 | 1.00E+00 |
| ENSG00000250012.1_RP11-124N  | ENSG00000160789.18_LMNA | -0.08753 | -0.243338967 | 0.072684418 | 2.84E-01 | 5.69E-01 | 1.00E+00 |
| ENSG00000242798.1_RP11-506M  | ENSG00000160789.18_LMNA | 0.09995  | -0.060208022 | 0.255092339 | 2.21E-01 | 4.96E-01 | 1.00E+00 |
| ENSG00000273188.1_RP3-402G1  | ENSG00000160789.18_LMNA | 0.11523  | -0.044793761 | 0.269485783 | 1.57E-01 | 4.10E-01 | 1.00E+00 |
| ENSG00000254854.1_CTD-2523D  | ENSG00000160789.18_LMNA | -0.09591 | -0.251270656 | 0.064275638 | 2.40E-01 | 5.19E-01 | 1.00E+00 |
| ENSG00000260884.1_AC009120.1 | ENSG00000160789.18_LMNA | 0.04788  | -0.112174329 | 0.205515557 | 5.58E-01 | 7.91E-01 | 1.00E+00 |
| ENSG00000259153.1_RP6-65G23  | ENSG00000160789.18_LMNA | -0.2208  | -0.367097121 | -0.06384398 | 6.27E-03 | 4.64E-02 | 1.00E+00 |
| ENSG00000250470.1_AP000351.1 | ENSG00000160789.18_LMNA | -0.05927 | -0.216428177 | 0.100882969 | 4.68E-01 | 7.29E-01 | 1.00E+00 |
| ENSG00000229388.1_RP11-442N  | ENSG00000160789.18_LMNA | -0.10271 | -0.257696253 | 0.05743053  | 2.08E-01 | 4.80E-01 | 1.00E+00 |
| ENSG00000274911.1_RP11-12A2  | ENSG00000160789.18_LMNA | 0.11768  | -0.042315636 | 0.271786766 | 1.49E-01 | 3.96E-01 | 1.00E+00 |
| ENSG00000231359.3_AC072052.1 | ENSG00000160789.18_LMNA | -0.09205 | -0.247619945 | 0.068151513 | 2.59E-01 | 5.42E-01 | 1.00E+00 |
| ENSG00000267045.1            | ENSG00000160789.18_LMNA | 0.28487  | 0.131642118  | 0.424807467 | 3.75E-04 | 5.37E-03 | 1.00E+00 |
| ENSG00000273335.1_RP11-61L1  | ENSG00000160789.18_LMNA | 0.00557  | -0.153764679 | 0.164627088 | 9.46E-01 | 9.78E-01 | 1.00E+00 |
| ENSG00000237410.1_AP001092.4 | ENSG00000160789.18_LMNA | -0.20972 | -0.357003587 | -0.05226689 | 9.51E-03 | 6.32E-02 | 1.00E+00 |
| ENSG00000272564.1_RP11-548P  | ENSG00000160789.18_LMNA | -0.31357 | -0.450294828 | -0.16248402 | 8.36E-05 | 1.63E-03 | 1.00E+00 |
| ENSG00000243659.1_RP11-4K3   | ENSG00000160789.18_LMNA | -0.16026 | -0.311508372 | -0.001082   | 4.86E-02 | 1.98E-01 | 1.00E+00 |
| ENSG00000274383.1_CTD-2017F  | ENSG00000160789.18_LMNA | 0.1315   | -0.02829354  | 0.284739222 | 1.06E-01 | 3.24E-01 | 1.00E+00 |
| ENSG00000257953.1_RP11-620J  | ENSG00000160789.18_LMNA | -0.26941 | -0.410985306 | -0.11515016 | 7.90E-04 | 9.63E-03 | 1.00E+00 |
| ENSG00000267147.2 CTC-548K1  | ENSG00000160789.18_LMNA | 0.3323   | 0.182762886  | 0.466801294 | 2.88E-05 | 6.90E-04 | 1.00E+00 |
| ENSG00000279225.1_RP11-2K6.1 | ENSG00000160789.18_LMNA | -0.00294 | -0.162068231 | 0.156330484 | 9.71E-01 | 9.89E-01 | 1.00E+00 |
| ENSG00000253649.2_PRSS51     | ENSG00000160789.18_LMNA | -0.05931 | -0.216465144 | 0.10084458  | 4.68E-01 | 7.29E-01 | 1.00E+00 |
| ENSG00000204278.11_TMEM235   | ENSG00000160789.18_LMNA | -0.26108 | -0.403507963 | -0.106296   | 1.16E-03 | 1.29E-02 | 1.00E+00 |
| ENSG00000237438.5_CECR7      | ENSG00000160789.18_LMNA | -0.20351 | -0.35132936  | -0.04579443 | 1.19E-02 | 7.44E-02 | 1.00E+00 |
| ENSG00000197757.7_HOXC6      | ENSG00000160789.18_LMNA | 0.02843  | -0.13136277  | 0.186787754 | 7.28E-01 | 8.85E-01 | 1.00E+00 |
| ENSG00000226445.1_XXyac-YX6  | ENSG00000160789.18_LMNA | 0.36799  | 0.221779497  | 0.49801269  | 3.10E-06 | 1.13E-04 | 1.59E-01 |
| ENSG00000255052.4_FAM66D     | ENSG00000160789.18_LMNA | -0.14293 | -0.295410038 | 0.016648205 | 7.90E-02 | 2.70E-01 | 1.00E+00 |
| ENSG00000259933.5_RP11-304L  | ENSG00000160789.18_LMNA | 0.02767  | -0.132110454 | 0.186053308 | 7.35E-01 | 8.89E-01 | 1.00E+00 |
| ENSG00000272440.1_RP11-379F  | ENSG00000160789.18_LMNA | 0.05524  | -0.104882239 | 0.2125721   | 4.99E-01 | 7.52E-01 | 1.00E+00 |
| ENSG00000172568.4_FNDC9      | ENSG00000160789.18_LMNA | -0.13153 | -0.284763404 | 0.028267246 | 1.06E-01 | 3.24E-01 | 1.00E+00 |
| ENSG00000124399.4_NDUFB4P1   | ENSG00000160789.18_LMNA | -0.01859 | -0.177269183 | 0.141024937 | 8.20E-01 | 9.30E-01 | 1.00E+00 |
| ENSG00000259683.1_RP11-182J  | ENSG00000160789.18_LMNA | -0.16079 | -0.312003037 | -0.00162992 | 4.78E-02 | 1.95E-01 | 1.00E+00 |
| ENSG00000228031.2_AC078842.1 | ENSG00000160789.18_LMNA | 0.14494  | -0.014601267 | 0.297277671 | 7.48E-02 | 2.61E-01 | 1.00E+00 |

|                              |                         |          |              |             |          |          |          |
|------------------------------|-------------------------|----------|--------------|-------------|----------|----------|----------|
| ENSG00000115008.5_IL1A       | ENSG00000160789.18_LMNA | 0.01855  | -0.14106662  | 0.17722799  | 8.21E-01 | 9.30E-01 | 1.00E+00 |
| ENSG00000235559.1_NOP56P1    | ENSG00000160789.18_LMNA | -0.01659 | -0.175328737 | 0.142987243 | 8.39E-01 | 9.38E-01 | 1.00E+00 |
| ENSG00000278017.1_RP11-120K  | ENSG00000160789.18_LMNA | -0.10525 | -0.260088887 | 0.054874093 | 1.97E-01 | 4.66E-01 | 1.00E+00 |
| ENSG00000005073.5_HOXA11     | ENSG00000160789.18_LMNA | -0.34116 | -0.474588405 | -0.19241432 | 1.70E-05 | 4.51E-04 | 8.72E-01 |
| ENSG00000253210.1_RP11-809O  | ENSG00000160789.18_LMNA | 0.05088  | -0.109200458 | 0.208397361 | 5.34E-01 | 7.75E-01 | 1.00E+00 |
| ENSG00000037965.5_HOXC8      | ENSG00000160789.18_LMNA | 0.05289  | -0.10721725  | 0.210316111 | 5.18E-01 | 7.64E-01 | 1.00E+00 |
| ENSG00000233967.5_RP11-250B  | ENSG00000160789.18_LMNA | -0.03383 | -0.191999613 | 0.126046552 | 6.79E-01 | 8.60E-01 | 1.00E+00 |
| ENSG00000227719.1_AC006042.I | ENSG00000160789.18_LMNA | -0.15711 | -0.30859677  | 0.002139271 | 5.32E-02 | 2.09E-01 | 1.00E+00 |
| ENSG00000270761.1_RP11-385F  | ENSG00000160789.18_LMNA | 0.03114  | -0.128696259 | 0.189404161 | 7.03E-01 | 8.73E-01 | 1.00E+00 |
| ENSG00000273264.1_RP11-131L  | ENSG00000160789.18_LMNA | 0.33341  | 0.183971868  | 0.467779161 | 2.70E-05 | 6.57E-04 | 1.00E+00 |
| ENSG00000225945.1_RP3-441A1  | ENSG00000160789.18_LMNA | -0.20976 | -0.357033498 | -0.05230108 | 9.50E-03 | 6.32E-02 | 1.00E+00 |
| ENSG00000272954.1_KB-1440D3  | ENSG00000160789.18_LMNA | 0.02434  | -0.135382557 | 0.18283495  | 7.66E-01 | 9.03E-01 | 1.00E+00 |
| ENSG00000255337.1_RP11-315O  | ENSG00000160789.18_LMNA | -0.04634 | -0.204040061 | 0.113694764 | 5.71E-01 | 7.99E-01 | 1.00E+00 |
| ENSG00000269961.1_CTD-2033C  | ENSG00000160789.18_LMNA | -0.08312 | -0.23915693  | 0.077099987 | 3.09E-01 | 5.95E-01 | 1.00E+00 |
| ENSG00000272186.1_RP11-110I1 | ENSG00000160789.18_LMNA | -0.0865  | -0.242365189 | 0.07371368  | 2.89E-01 | 5.75E-01 | 1.00E+00 |
| ENSG00000260318.1_COX6CP1    | ENSG00000160789.18_LMNA | -0.02544 | -0.183893815 | 0.134306776 | 7.56E-01 | 8.98E-01 | 1.00E+00 |
| ENSG00000272606.1_RP11-554J  | ENSG00000160789.18_LMNA | -0.16121 | -0.312391341 | -0.00206015 | 4.72E-02 | 1.94E-01 | 1.00E+00 |
| ENSG00000270482.1_RP11-131L  | ENSG00000160789.18_LMNA | -0.02214 | -0.180701601 | 0.137547713 | 7.87E-01 | 9.13E-01 | 1.00E+00 |
| ENSG00000253730.1_RP11-893F  | ENSG00000160789.18_LMNA | -0.17248 | -0.322817033 | -0.01365482 | 3.36E-02 | 1.54E-01 | 1.00E+00 |
| ENSG00000238260.1_RP11-46F1  | ENSG00000160789.18_LMNA | -0.02757 | -0.185954314 | 0.132211205 | 7.36E-01 | 8.89E-01 | 1.00E+00 |
| ENSG00000196666.4_FAM180B    | ENSG00000160789.18_LMNA | -0.25668 | -0.399549897 | -0.10162813 | 1.41E-03 | 1.50E-02 | 1.00E+00 |
| ENSG00000272402.1_RP1-30M3.I | ENSG00000160789.18_LMNA | -0.02647 | -0.184888315 | 0.133295703 | 7.46E-01 | 8.94E-01 | 1.00E+00 |
| ENSG00000227407.1_AC008746.I | ENSG00000160789.18_LMNA | -0.04001 | -0.197946493 | 0.119958198 | 6.25E-01 | 8.31E-01 | 1.00E+00 |
| ENSG00000132975.7_GPR12      | ENSG00000160789.18_LMNA | -0.32683 | -0.461993962 | -0.17683183 | 3.96E-05 | 8.94E-04 | 1.00E+00 |
| ENSG00000226308.1_RP4-813D1  | ENSG00000160789.18_LMNA | -0.30125 | -0.439376341 | -0.14920249 | 1.62E-04 | 2.77E-03 | 1.00E+00 |
| ENSG00000272156.1_RP11-477N  | ENSG00000160789.18_LMNA | -0.16603 | -0.316851038 | -0.0070097  | 4.09E-02 | 1.76E-01 | 1.00E+00 |
| ENSG00000130876.10_SLC7A10   | ENSG00000160789.18_LMNA | -0.00526 | -0.164320605 | 0.154072221 | 9.49E-01 | 9.79E-01 | 1.00E+00 |
| ENSG00000279989.1_RP11-158H  | ENSG00000160789.18_LMNA | -0.04893 | -0.206521749 | 0.111136637 | 5.49E-01 | 7.86E-01 | 1.00E+00 |
| ENSG00000255085.7_AF186192.I | ENSG00000160789.18_LMNA | -0.09475 | -0.250177219 | 0.065437514 | 2.46E-01 | 5.25E-01 | 1.00E+00 |
| ENSG00000257058.1_RP11-864I4 | ENSG00000160789.18_LMNA | 0.0242   | -0.135525394 | 0.182694304 | 7.67E-01 | 9.04E-01 | 1.00E+00 |
| ENSG00000273321.1_RP11-621L  | ENSG00000160789.18_LMNA | -0.01871 | -0.177386154 | 0.140906568 | 8.19E-01 | 9.30E-01 | 1.00E+00 |
| ENSG00000213013.4_RPS15AP3   | ENSG00000160789.18_LMNA | 0.0781   | -0.082119437 | 0.23438866  | 3.39E-01 | 6.24E-01 | 1.00E+00 |
| ENSG00000262410.1_RP11-388C  | ENSG00000160789.18_LMNA | -0.06542 | -0.222306335 | 0.094766735 | 4.23E-01 | 6.94E-01 | 1.00E+00 |

|                              |                         |          |              |             |          |          |          |
|------------------------------|-------------------------|----------|--------------|-------------|----------|----------|----------|
| ENSG00000258982.1_RP11-638I2 | ENSG00000160789.18_LMNA | 0.03497  | -0.124925144 | 0.19309672  | 6.69E-01 | 8.54E-01 | 1.00E+00 |
| ENSG00000259840.1_LA16c-380/ | ENSG00000160789.18_LMNA | -0.00795 | -0.166942357 | 0.151439419 | 9.23E-01 | 9.70E-01 | 1.00E+00 |
| ENSG00000101349.15_PAK5      | ENSG00000160789.18_LMNA | -0.43211 | -0.553249342 | -0.29306765 | 2.72E-08 | 2.50E-06 | 1.39E-03 |
| ENSG00000274528.1_CTD-2650P  | ENSG00000160789.18_LMNA | 0.0743   | -0.085916231 | 0.230771716 | 3.63E-01 | 6.45E-01 | 1.00E+00 |
| ENSG00000249306.4_LINC01411  | ENSG00000160789.18_LMNA | -0.28578 | -0.425620118 | -0.13261681 | 3.58E-04 | 5.16E-03 | 1.00E+00 |
| ENSG00000269051.4_           | ENSG00000160789.18_LMNA | -0.02826 | -0.186618136 | 0.131535477 | 7.30E-01 | 8.86E-01 | 1.00E+00 |
| ENSG00000229334.1_AC046143.1 | ENSG00000160789.18_LMNA | 0.25631  | 0.101236677  | 0.399217463 | 1.44E-03 | 1.52E-02 | 1.00E+00 |
| ENSG00000184844.6_CYCSP45    | ENSG00000160789.18_LMNA | -0.04618 | -0.203882351 | 0.113857189 | 5.72E-01 | 8.00E-01 | 1.00E+00 |
| ENSG00000234004.4_RP11-543B  | ENSG00000160789.18_LMNA | -0.12346 | -0.27721031  | 0.036459225 | 1.30E-01 | 3.65E-01 | 1.00E+00 |
| ENSG00000228857.2_AC104653.1 | ENSG00000160789.18_LMNA | 0.02953  | -0.130284177 | 0.187846624 | 7.18E-01 | 8.80E-01 | 1.00E+00 |
| ENSG00000273186.1_RP11-339B  | ENSG00000160789.18_LMNA | 0.21319  | 0.055881824  | 0.360162939 | 8.36E-03 | 5.76E-02 | 1.00E+00 |
| ENSG00000260091.1_RP11-33B1  | ENSG00000160789.18_LMNA | 0.032    | -0.127854947 | 0.190228728 | 6.96E-01 | 8.69E-01 | 1.00E+00 |
| ENSG00000272112.1_CTB-113P1  | ENSG00000160789.18_LMNA | -0.0446  | -0.202359541 | 0.115424657 | 5.85E-01 | 8.07E-01 | 1.00E+00 |
| ENSG00000265683.1_RP11-173M  | ENSG00000160789.18_LMNA | -0.22959 | -0.375079157 | -0.07305739 | 4.44E-03 | 3.58E-02 | 1.00E+00 |
| ENSG00000216676.2_RP1-15D7.1 | ENSG00000160789.18_LMNA | 0.02109  | -0.138578566 | 0.179684839 | 7.97E-01 | 9.18E-01 | 1.00E+00 |
| ENSG00000259562.2_RP11-762H  | ENSG00000160789.18_LMNA | 0.06933  | -0.090870343 | 0.226039079 | 3.96E-01 | 6.73E-01 | 1.00E+00 |
| ENSG00000230314.5_ELOVL2-A5  | ENSG00000160789.18_LMNA | 0.21413  | 0.056869839  | 0.361025225 | 8.07E-03 | 5.60E-02 | 1.00E+00 |
| ENSG00000267938.1_EIF1P6     | ENSG00000160789.18_LMNA | -0.00883 | -0.167796712 | 0.150580485 | 9.14E-01 | 9.67E-01 | 1.00E+00 |
| ENSG00000272384.1_RP11-44N1  | ENSG00000160789.18_LMNA | -0.29065 | -0.429953565 | -0.13782394 | 2.81E-04 | 4.27E-03 | 1.00E+00 |
| ENSG00000265678.1_RP11-1376I | ENSG00000160789.18_LMNA | 0.0692   | -0.091000791 | 0.22591426  | 3.97E-01 | 6.74E-01 | 1.00E+00 |
| ENSG00000276523.1_RP11-490B  | ENSG00000160789.18_LMNA | -0.09941 | -0.254579338 | 0.060754644 | 2.23E-01 | 4.99E-01 | 1.00E+00 |
| ENSG00000277851.1_RP11-756G  | ENSG00000160789.18_LMNA | -0.16748 | -0.318196608 | -0.00850605 | 3.92E-02 | 1.71E-01 | 1.00E+00 |
| ENSG00000231952.3_DPY19L1P2  | ENSG00000160789.18_LMNA | 0.13352  | -0.026239826 | 0.286626726 | 1.01E-01 | 3.13E-01 | 1.00E+00 |
| ENSG00000269054.1_CTD-2619J  | ENSG00000160789.18_LMNA | -0.04477 | -0.202525769 | 0.115253631 | 5.84E-01 | 8.07E-01 | 1.00E+00 |
| ENSG00000259004.1_RP11-8L8.2 | ENSG00000160789.18_LMNA | 0.02664  | -0.133120882 | 0.185060205 | 7.45E-01 | 8.93E-01 | 1.00E+00 |
| ENSG00000163568.12_AIM2      | ENSG00000160789.18_LMNA | -0.05952 | -0.216672254 | 0.100629483 | 4.66E-01 | 7.28E-01 | 1.00E+00 |
| ENSG00000225518.2_RP11-396C  | ENSG00000160789.18_LMNA | 0.29176  | 0.139019241  | 0.430946413 | 2.65E-04 | 4.08E-03 | 1.00E+00 |
| ENSG00000259022.2_DNAJC8P1   | ENSG00000160789.18_LMNA | -0.04835 | -0.205963526 | 0.111712422 | 5.54E-01 | 7.89E-01 | 1.00E+00 |
| ENSG00000229447.2_RP11-490K  | ENSG00000160789.18_LMNA | -0.15182 | -0.303684737 | 0.007559156 | 6.19E-02 | 2.30E-01 | 1.00E+00 |
| ENSG00000266313.1_RP11-173M  | ENSG00000160789.18_LMNA | -0.09917 | -0.254350509 | 0.06099841  | 2.24E-01 | 5.00E-01 | 1.00E+00 |
| ENSG00000233554.4_B4GALT1-A  | ENSG00000160789.18_LMNA | -0.106   | -0.26080346  | 0.054109798 | 1.94E-01 | 4.62E-01 | 1.00E+00 |
| ENSG00000274642.1_CH17-472G  | ENSG00000160789.18_LMNA | -0.17841 | -0.328289762 | -0.01977463 | 2.79E-02 | 1.36E-01 | 1.00E+00 |
| ENSG00000276390.1_RP1-197B1  | ENSG00000160789.18_LMNA | -0.13038 | -0.283693941 | 0.029429731 | 1.09E-01 | 3.29E-01 | 1.00E+00 |

|                              |                         |          |              |             |          |          |          |
|------------------------------|-------------------------|----------|--------------|-------------|----------|----------|----------|
| ENSG00000128408.8_RIBC2      | ENSG00000160789.18_LMNA | 0.15     | -0.009428851 | 0.301986388 | 6.51E-02 | 2.38E-01 | 1.00E+00 |
| ENSG00000180720.7_CHRM4      | ENSG00000160789.18_LMNA | -0.03476 | -0.192894267 | 0.125132142 | 6.71E-01 | 8.56E-01 | 1.00E+00 |
| ENSG00000156689.5_GLYATL2    | ENSG00000160789.18_LMNA | -0.17015 | -0.320668986 | -0.0112591  | 3.61E-02 | 1.62E-01 | 1.00E+00 |
| ENSG00000227455.2_RP11-300M  | ENSG00000160789.18_LMNA | -0.03172 | -0.18996577  | 0.128123295 | 6.98E-01 | 8.71E-01 | 1.00E+00 |
| ENSG00000273855.1_RP11-133K  | ENSG00000160789.18_LMNA | 0.00964  | -0.149791588 | 0.168580983 | 9.06E-01 | 9.64E-01 | 1.00E+00 |
| ENSG00000272509.1_RP11-347C  | ENSG00000160789.18_LMNA | -0.11476 | -0.26904622  | 0.045266726 | 1.59E-01 | 4.12E-01 | 1.00E+00 |
| ENSG00000250846.5_EPHA5-AS   | ENSG00000160789.18_LMNA | -0.02094 | -0.179545338 | 0.138719946 | 7.98E-01 | 9.19E-01 | 1.00E+00 |
| ENSG00000271788.1_CTD-2201E  | ENSG00000160789.18_LMNA | 0.00976  | -0.14967461  | 0.168697241 | 9.05E-01 | 9.63E-01 | 1.00E+00 |
| ENSG00000274363.1_RP11-104O  | ENSG00000160789.18_LMNA | -0.04899 | -0.206581992 | 0.111074486 | 5.49E-01 | 7.86E-01 | 1.00E+00 |
| ENSG00000233608.3_TWIST2     | ENSG00000160789.18_LMNA | 0.16165  | 0.002516831  | 0.312803395 | 4.66E-02 | 1.92E-01 | 1.00E+00 |
| ENSG00000237238.2_BMS1P10    | ENSG00000160789.18_LMNA | 0.06602  | -0.094168336 | 0.222880207 | 4.19E-01 | 6.91E-01 | 1.00E+00 |
| ENSG00000255503.1_RP11-113K  | ENSG00000160789.18_LMNA | -0.10173 | -0.256776719 | 0.058411917 | 2.12E-01 | 4.86E-01 | 1.00E+00 |
| ENSG00000197540.6_GZMM       | ENSG00000160789.18_LMNA | 0.11517  | -0.044848819 | 0.269434621 | 1.58E-01 | 4.10E-01 | 1.00E+00 |
| ENSG00000224183.1_SDHDP6     | ENSG00000160789.18_LMNA | -0.0303  | -0.188590897 | 0.12952559  | 7.11E-01 | 8.77E-01 | 1.00E+00 |
| ENSG00000214047.4_RPS11P7    | ENSG00000160789.18_LMNA | -0.05528 | -0.212614193 | 0.104838638 | 4.99E-01 | 7.52E-01 | 1.00E+00 |
| ENSG00000253414.2_RP11-150O  | ENSG00000160789.18_LMNA | 0.07482  | -0.085401254 | 0.231262813 | 3.60E-01 | 6.42E-01 | 1.00E+00 |
| ENSG00000281741.1_AC241377   | ENSG00000160789.18_LMNA | 0.00564  | -0.153702807 | 0.16468874  | 9.45E-01 | 9.78E-01 | 1.00E+00 |
| ENSG00000002745.11_WNT16     | ENSG00000160789.18_LMNA | 0.00072  | -0.158502132 | 0.159899112 | 9.93E-01 | 9.97E-01 | 1.00E+00 |
| ENSG00000275963.1_RP11-180M  | ENSG00000160789.18_LMNA | 0.03464  | -0.12525216  | 0.192776873 | 6.72E-01 | 8.56E-01 | 1.00E+00 |
| ENSG00000277245.1_RP11-48G1  | ENSG00000160789.18_LMNA | -0.03713 | -0.19517408  | 0.122799544 | 6.50E-01 | 8.44E-01 | 1.00E+00 |
| ENSG00000225101.4_OR52K3P    | ENSG00000160789.18_LMNA | 0.01115  | -0.148313334 | 0.170049484 | 8.92E-01 | 9.57E-01 | 1.00E+00 |
| ENSG00000277662.1_RP11-74J1  | ENSG00000160789.18_LMNA | -0.23991 | -0.384423502 | -0.08390916 | 2.91E-03 | 2.62E-02 | 1.00E+00 |
| ENSG00000227527.2_RP11-223A  | ENSG00000160789.18_LMNA | 0.14718  | -0.012314006 | 0.299361755 | 7.04E-02 | 2.50E-01 | 1.00E+00 |
| ENSG00000171243.7_SOSTDC1    | ENSG00000160789.18_LMNA | -0.0987  | -0.25390846  | 0.061469207 | 2.26E-01 | 5.03E-01 | 1.00E+00 |
| ENSG00000228606.1_RP11-574F  | ENSG00000160789.18_LMNA | 0.06488  | -0.095304577 | 0.221790352 | 4.27E-01 | 6.98E-01 | 1.00E+00 |
| ENSG00000257509.1_RP11-762I7 | ENSG00000160789.18_LMNA | -0.03956 | -0.197516089 | 0.120399645 | 6.28E-01 | 8.33E-01 | 1.00E+00 |
| ENSG00000272192.1_CTD-2532N  | ENSG00000160789.18_LMNA | 0.03365  | -0.126230496 | 0.191819579 | 6.81E-01 | 8.61E-01 | 1.00E+00 |
| ENSG00000177234.7_LINC01561  | ENSG00000160789.18_LMNA | -0.11279 | -0.267194696 | 0.047257393 | 1.67E-01 | 4.24E-01 | 1.00E+00 |
| ENSG00000187527.9_ATP13A5    | ENSG00000160789.18_LMNA | -0.51554 | -0.623561748 | -0.38819991 | 1.07E-11 | 3.64E-09 | 5.50E-07 |
| ENSG00000260038.1_RP11-407G  | ENSG00000160789.18_LMNA | 0.03735  | -0.122581965 | 0.19538656  | 6.48E-01 | 8.43E-01 | 1.00E+00 |
| ENSG00000132185.15_FCRLA     | ENSG00000160789.18_LMNA | -0.17017 | -0.320682494 | -0.01127416 | 3.61E-02 | 1.62E-01 | 1.00E+00 |
| ENSG00000251485.1_AC068134   | ENSG00000160789.18_LMNA | -0.00589 | -0.164935003 | 0.153455638 | 9.43E-01 | 9.77E-01 | 1.00E+00 |
| ENSG00000236066.4_           | ENSG00000160789.18_LMNA | -0.00304 | -0.162166786 | 0.156231741 | 9.70E-01 | 9.88E-01 | 1.00E+00 |

|                              |                         |          |              |             |          |          |          |
|------------------------------|-------------------------|----------|--------------|-------------|----------|----------|----------|
| ENSG00000272502.1_RP11-713M  | ENSG00000160789.18_LMNA | 0.25598  | 0.100894481  | 0.398926795 | 1.46E-03 | 1.54E-02 | 1.00E+00 |
| ENSG00000279667.1_RP11-656D  | ENSG00000160789.18_LMNA | -0.08405 | -0.240036216 | 0.07617263  | 3.03E-01 | 5.90E-01 | 1.00E+00 |
| ENSG00000255980.1_AP000439.  | ENSG00000160789.18_LMNA | -0.20371 | -0.351513521 | -0.0460041  | 1.18E-02 | 7.40E-02 | 1.00E+00 |
| ENSG00000223821.1_RP11-505P  | ENSG00000160789.18_LMNA | -0.01594 | -0.174698038 | 0.143624509 | 8.45E-01 | 9.40E-01 | 1.00E+00 |
| ENSG00000226508.1_AC104655.  | ENSG00000160789.18_LMNA | -0.337   | -0.470939142 | -0.18788457 | 2.18E-05 | 5.54E-04 | 1.00E+00 |
| ENSG00000260469.2_C15orf59-A | ENSG00000160789.18_LMNA | 0.02477  | -0.13496444  | 0.18324658  | 7.62E-01 | 9.01E-01 | 1.00E+00 |
| ENSG00000243538.1_RPS26P28   | ENSG00000160789.18_LMNA | -0.10119 | -0.256265746 | 0.058956998 | 2.15E-01 | 4.89E-01 | 1.00E+00 |
| ENSG00000233266.1_HMGB1P31   | ENSG00000160789.18_LMNA | 0.09955  | -0.060615163 | 0.254710257 | 2.22E-01 | 4.98E-01 | 1.00E+00 |
| ENSG00000231531.5_HINT1P1    | ENSG00000160789.18_LMNA | -0.05772 | -0.214949802 | 0.102417455 | 4.80E-01 | 7.38E-01 | 1.00E+00 |
| ENSG00000115138.9_POMC       | ENSG00000160789.18_LMNA | -0.04092 | -0.198822687 | 0.119059135 | 6.17E-01 | 8.26E-01 | 1.00E+00 |
| ENSG00000225051.5_HMGB3P22   | ENSG00000160789.18_LMNA | 0.1039   | -0.056227801 | 0.258822399 | 2.03E-01 | 4.74E-01 | 1.00E+00 |
| ENSG00000226245.1_ZNF32-AS1  | ENSG00000160789.18_LMNA | -0.16106 | -0.312253429 | -0.00190734 | 4.75E-02 | 1.94E-01 | 1.00E+00 |
| ENSG00000267417.1_CTC-239J1  | ENSG00000160789.18_LMNA | -0.2771  | -0.417867142 | -0.12334091 | 5.48E-04 | 7.25E-03 | 1.00E+00 |
| ENSG00000277959.1_RP11-45A1  | ENSG00000160789.18_LMNA | 0.00585  | -0.153490955 | 0.164899819 | 9.43E-01 | 9.77E-01 | 1.00E+00 |
| ENSG00000279799.1_AC006077.  | ENSG00000160789.18_LMNA | -0.07085 | -0.227487862 | 0.089355425 | 3.86E-01 | 6.64E-01 | 1.00E+00 |
| ENSG00000176043.5_RP1-146I3. | ENSG00000160789.18_LMNA | 0.03263  | -0.127232946 | 0.190838061 | 6.90E-01 | 8.66E-01 | 1.00E+00 |
| ENSG00000236937.2_PTGES3P4   | ENSG00000160789.18_LMNA | -0.02798 | -0.186346422 | 0.1318121   | 7.32E-01 | 8.87E-01 | 1.00E+00 |
| ENSG00000213185.5_FAM24B     | ENSG00000160789.18_LMNA | -0.086   | -0.241891652 | 0.074213956 | 2.92E-01 | 5.78E-01 | 1.00E+00 |
| ENSG00000259218.4_LINC00928  | ENSG00000160789.18_LMNA | -0.24351 | -0.38768191  | -0.08771004 | 2.50E-03 | 2.32E-02 | 1.00E+00 |
| ENSG00000183682.7_BMP8A      | ENSG00000160789.18_LMNA | 0.09967  | -0.060486848 | 0.254830685 | 2.22E-01 | 4.97E-01 | 1.00E+00 |
| ENSG00000255992.1_RP11-417L  | ENSG00000160789.18_LMNA | 0.2063   | 0.048695634  | 0.35387554  | 1.08E-02 | 6.91E-02 | 1.00E+00 |
| ENSG00000233912.1_AC026202.  | ENSG00000160789.18_LMNA | 0.08251  | -0.077715701 | 0.238572847 | 3.12E-01 | 5.99E-01 | 1.00E+00 |
| ENSG00000246308.1_RP11-685M  | ENSG00000160789.18_LMNA | -0.01861 | -0.177287415 | 0.141006487 | 8.20E-01 | 9.30E-01 | 1.00E+00 |
| ENSG00000272223.1_RP1-20C7.  | ENSG00000160789.18_LMNA | 0.10047  | -0.059683576 | 0.25558436  | 2.18E-01 | 4.93E-01 | 1.00E+00 |
| ENSG00000280828.1_RP11-274B  | ENSG00000160789.18_LMNA | 0.111    | -0.049064352 | 0.265512027 | 1.73E-01 | 4.33E-01 | 1.00E+00 |
| ENSG00000264070.1_DND1P1     | ENSG00000160789.18_LMNA | 0.07551  | -0.084709368 | 0.231922361 | 3.55E-01 | 6.39E-01 | 1.00E+00 |
| ENSG00000270781.1_RP11-501C  | ENSG00000160789.18_LMNA | -0.06359 | -0.220554324 | 0.096592214 | 4.36E-01 | 7.04E-01 | 1.00E+00 |
| ENSG00000128218.7_VPREB3     | ENSG00000160789.18_LMNA | 0.23301  | 0.076654337  | 0.378183269 | 3.87E-03 | 3.23E-02 | 1.00E+00 |
| ENSG00000269489.1_RP11-98D1  | ENSG00000160789.18_LMNA | -0.26831 | -0.409999904 | -0.11398062 | 8.31E-04 | 1.00E-02 | 1.00E+00 |
| ENSG00000251451.1_GTF2IP9    | ENSG00000160789.18_LMNA | -0.09219 | -0.24775888  | 0.068004183 | 2.59E-01 | 5.42E-01 | 1.00E+00 |
| ENSG00000241975.1_TCEB1P19   | ENSG00000160789.18_LMNA | 0.04918  | -0.110892214 | 0.206758656 | 5.47E-01 | 7.85E-01 | 1.00E+00 |
| ENSG00000153495.9_TEX29      | ENSG00000160789.18_LMNA | -0.18362 | -0.333086883 | -0.02515804 | 2.35E-02 | 1.21E-01 | 1.00E+00 |
| ENSG00000261586.2_RP11-923I1 | ENSG00000160789.18_LMNA | -0.03124 | -0.189496008 | 0.128602569 | 7.02E-01 | 8.73E-01 | 1.00E+00 |

|                              |                         |          |              |             |          |          |          |
|------------------------------|-------------------------|----------|--------------|-------------|----------|----------|----------|
| ENSG00000255568.3_BRWD1-AS   | ENSG00000160789.18_LMNA | 0.09064  | -0.069566483 | 0.246284938 | 2.67E-01 | 5.51E-01 | 1.00E+00 |
| ENSG00000273473.1_LL09NC01-  | ENSG00000160789.18_LMNA | 0.07764  | -0.08258626  | 0.233944422 | 3.42E-01 | 6.27E-01 | 1.00E+00 |
| ENSG00000171532.4_NEUROD2    | ENSG00000160789.18_LMNA | -0.26644 | -0.408321161 | -0.11199006 | 9.07E-04 | 1.07E-02 | 1.00E+00 |
| ENSG00000260213.4_RP11-303E  | ENSG00000160789.18_LMNA | -0.39751 | -0.523580184 | -0.25441374 | 3.96E-07 | 2.18E-05 | 2.03E-02 |
| ENSG00000243023.2_UBA52P3    | ENSG00000160789.18_LMNA | 0.08864  | -0.071567833 | 0.244394639 | 2.77E-01 | 5.62E-01 | 1.00E+00 |
| ENSG00000264290.1_RP11-68I3. | ENSG00000160789.18_LMNA | -0.01916 | -0.177822307 | 0.140465122 | 8.15E-01 | 9.27E-01 | 1.00E+00 |
| ENSG00000164841.4_TMEN74     | ENSG00000160789.18_LMNA | -0.1819  | -0.331498951 | -0.02337406 | 2.49E-02 | 1.26E-01 | 1.00E+00 |
| ENSG00000165973.16_NELL1     | ENSG00000160789.18_LMNA | -0.09071 | -0.246357124 | 0.069490005 | 2.66E-01 | 5.50E-01 | 1.00E+00 |
| ENSG00000269886.1_RP11-266J  | ENSG00000160789.18_LMNA | -0.18129 | -0.330940528 | -0.02274715 | 2.54E-02 | 1.28E-01 | 1.00E+00 |
| ENSG00000253633.1_KB-1980E6  | ENSG00000160789.18_LMNA | -0.00766 | -0.166662107 | 0.151721065 | 9.25E-01 | 9.71E-01 | 1.00E+00 |
| ENSG00000262454.1_MIR193BH   | ENSG00000160789.18_LMNA | 0.10622  | -0.053895002 | 0.26100422  | 1.93E-01 | 4.61E-01 | 1.00E+00 |
| ENSG00000242140.1_RP11-262M  | ENSG00000160789.18_LMNA | -0.0604  | -0.217506017 | 0.099763268 | 4.60E-01 | 7.23E-01 | 1.00E+00 |
| ENSG00000267571.1_AC104532.  | ENSG00000160789.18_LMNA | -0.1106  | -0.265131362 | 0.04947285  | 1.75E-01 | 4.36E-01 | 1.00E+00 |
| ENSG00000230929.5_RP11-395C  | ENSG00000160789.18_LMNA | -0.07291 | -0.229451271 | 0.087300046 | 3.72E-01 | 6.52E-01 | 1.00E+00 |
| ENSG00000271324.1_RP11-10C2  | ENSG00000160789.18_LMNA | 0.27426  | 0.120309037  | 0.415323709 | 6.28E-04 | 8.07E-03 | 1.00E+00 |
| ENSG00000242349.4_NPPA-AS1   | ENSG00000160789.18_LMNA | -0.02796 | -0.186333105 | 0.131825656 | 7.32E-01 | 8.87E-01 | 1.00E+00 |
| ENSG0000027869.10_SH2D2A     | ENSG00000160789.18_LMNA | 0.33983  | 0.190956057  | 0.473414655 | 1.84E-05 | 4.81E-04 | 9.45E-01 |
| ENSG00000230837.1_RPL31P2    | ENSG00000160789.18_LMNA | -0.1281  | -0.281560234 | 0.031746501 | 1.16E-01 | 3.40E-01 | 1.00E+00 |
| ENSG00000227388.2_RP11-112J  | ENSG00000160789.18_LMNA | -0.26012 | -0.402643608 | -0.10527552 | 1.21E-03 | 1.34E-02 | 1.00E+00 |
| ENSG00000261135.1_RP4-798A1  | ENSG00000160789.18_LMNA | -0.36156 | -0.492416279 | -0.21471787 | 4.73E-06 | 1.59E-04 | 2.42E-01 |
| ENSG00000231507.1_LINC01353  | ENSG00000160789.18_LMNA | -0.01701 | -0.175731509 | 0.142580139 | 8.35E-01 | 9.36E-01 | 1.00E+00 |
| ENSG00000228007.1_AC011933.  | ENSG00000160789.18_LMNA | -0.01613 | -0.174881596 | 0.143439067 | 8.44E-01 | 9.39E-01 | 1.00E+00 |
| ENSG00000170231.14_FABP6     | ENSG00000160789.18_LMNA | -0.34758 | -0.480206543 | -0.19941157 | 1.15E-05 | 3.26E-04 | 5.88E-01 |
| ENSG00000197813.5_CTC-301O7  | ENSG00000160789.18_LMNA | 0.01681  | -0.142775179 | 0.175538558 | 8.37E-01 | 9.37E-01 | 1.00E+00 |
| ENSG00000213237.4_AC008155.  | ENSG00000160789.18_LMNA | -0.03915 | -0.197121486 | 0.120804263 | 6.32E-01 | 8.35E-01 | 1.00E+00 |
| ENSG00000130829.16_DUSP9     | ENSG00000160789.18_LMNA | -0.21718 | -0.363798772 | -0.06005184 | 7.20E-03 | 5.14E-02 | 1.00E+00 |
| ENSG00000230306.1_BANF1P2    | ENSG00000160789.18_LMNA | 0.02165  | -0.138027238 | 0.180228715 | 7.91E-01 | 9.15E-01 | 1.00E+00 |
| ENSG00000255920.1_CCND2-AS   | ENSG00000160789.18_LMNA | 0.01176  | -0.147717517 | 0.170640971 | 8.86E-01 | 9.56E-01 | 1.00E+00 |
| ENSG00000268129.1_RP11-91G2  | ENSG00000160789.18_LMNA | -0.1391  | -0.291836884 | 0.020557131 | 8.74E-02 | 2.88E-01 | 1.00E+00 |
| ENSG00000181085.13_MAPK15    | ENSG00000160789.18_LMNA | -0.00028 | -0.159474805 | 0.158926574 | 9.97E-01 | 9.99E-01 | 1.00E+00 |
| ENSG00000233778.3_RP11-777J  | ENSG00000160789.18_LMNA | -0.05728 | -0.214523093 | 0.102860079 | 4.83E-01 | 7.41E-01 | 1.00E+00 |
| ENSG00000281358.1_RASSF1-A   | ENSG00000160789.18_LMNA | -0.10497 | -0.259826125 | 0.055155046 | 1.98E-01 | 4.68E-01 | 1.00E+00 |
| ENSG00000213018.2_AL590762.1 | ENSG00000160789.18_LMNA | 0.11391  | -0.046131732 | 0.268241961 | 1.62E-01 | 4.17E-01 | 1.00E+00 |

|                             |                         |          |              |             |          |          |          |
|-----------------------------|-------------------------|----------|--------------|-------------|----------|----------|----------|
| ENSG00000273628.1_RP11-756A | ENSG00000160789.18_LMNA | -0.22324 | -0.36931074  | -0.06639392 | 5.70E-03 | 4.33E-02 | 1.00E+00 |
| ENSG00000258940.2_RP11-407N | ENSG00000160789.18_LMNA | -0.03847 | -0.1964701   | 0.121471949 | 6.38E-01 | 8.38E-01 | 1.00E+00 |
| ENSG00000235180.1_LINC00601 | ENSG00000160789.18_LMNA | 0.37169  | 0.225854258  | 0.501231543 | 2.42E-06 | 9.24E-05 | 1.24E-01 |
| ENSG00000225174.1_OSTM1-AS  | ENSG00000160789.18_LMNA | 0.08652  | -0.073694018 | 0.242383798 | 2.89E-01 | 5.75E-01 | 1.00E+00 |
| ENSG00000227486.1_RP13-188A | ENSG00000160789.18_LMNA | -0.0384  | -0.196403156 | 0.121540551 | 6.39E-01 | 8.38E-01 | 1.00E+00 |
| ENSG00000228150.1_RP11-84A1 | ENSG00000160789.18_LMNA | 0.07323  | -0.086987109 | 0.22974998  | 3.70E-01 | 6.50E-01 | 1.00E+00 |
| ENSG00000218350.1_LYPLA1P3  | ENSG00000160789.18_LMNA | -0.10284 | -0.257819285 | 0.057299175 | 2.07E-01 | 4.80E-01 | 1.00E+00 |
| ENSG00000034239.9_EFCAB1    | ENSG00000160789.18_LMNA | -0.07097 | -0.227597097 | 0.089241143 | 3.85E-01 | 6.64E-01 | 1.00E+00 |
| ENSG00000274253.3_RP11-566K | ENSG00000160789.18_LMNA | -0.32047 | -0.456386306 | -0.16993945 | 5.70E-05 | 1.19E-03 | 1.00E+00 |
| ENSG00000273821.1_RP5-963E2 | ENSG00000160789.18_LMNA | 0.08512  | -0.075096167 | 0.241056227 | 2.97E-01 | 5.83E-01 | 1.00E+00 |
| ENSG00000268355.1_AC006129. | ENSG00000160789.18_LMNA | -0.14112 | -0.293726244 | 0.018491416 | 8.29E-02 | 2.78E-01 | 1.00E+00 |
| ENSG00000261766.1_RP11-22P6 | ENSG00000160789.18_LMNA | 0.01415  | -0.145381919 | 0.172957382 | 8.63E-01 | 9.46E-01 | 1.00E+00 |
| ENSG00000273174.1_RP11-434H | ENSG00000160789.18_LMNA | 0.31404  | 0.162993137  | 0.450711661 | 8.15E-05 | 1.59E-03 | 1.00E+00 |
| ENSG00000266903.1_CTB-171A8 | ENSG00000160789.18_LMNA | 0.10911  | -0.050978628 | 0.26372733  | 1.81E-01 | 4.44E-01 | 1.00E+00 |
| ENSG00000272948.2_AP001412. | ENSG00000160789.18_LMNA | -0.00424 | -0.163334423 | 0.155061391 | 9.59E-01 | 9.83E-01 | 1.00E+00 |
| ENSG00000228063.1_LYPLAL1-A | ENSG00000160789.18_LMNA | -0.18819 | -0.337282265 | -0.02988085 | 2.02E-02 | 1.09E-01 | 1.00E+00 |
| ENSG00000182508.12_LHFPL1   | ENSG00000160789.18_LMNA | -0.20309 | -0.350947644 | -0.04535994 | 1.21E-02 | 7.52E-02 | 1.00E+00 |
| ENSG00000225964.4_NRIR      | ENSG00000160789.18_LMNA | -0.03825 | -0.19625561  | 0.121691743 | 6.40E-01 | 8.39E-01 | 1.00E+00 |
| ENSG00000272973.1_KB-1125A3 | ENSG00000160789.18_LMNA | -0.17887 | -0.328707774 | -0.02024302 | 2.75E-02 | 1.35E-01 | 1.00E+00 |
| ENSG00000244124.1_ATP1B3-AS | ENSG00000160789.18_LMNA | -0.01202 | -0.17089282  | 0.147463754 | 8.83E-01 | 9.55E-01 | 1.00E+00 |
| ENSG00000214108.4_TPT1P5    | ENSG00000160789.18_LMNA | 0.10169  | -0.058455487 | 0.256735882 | 2.13E-01 | 4.86E-01 | 1.00E+00 |
| ENSG00000110375.2_UPK2      | ENSG00000160789.18_LMNA | -0.11721 | -0.271349939 | 0.042786389 | 1.50E-01 | 3.99E-01 | 1.00E+00 |
| ENSG00000258245.1_RPL10P13  | ENSG00000160789.18_LMNA | 0.07259  | -0.087623429 | 0.229142529 | 3.74E-01 | 6.54E-01 | 1.00E+00 |
| ENSG00000232725.1_U52111.14 | ENSG00000160789.18_LMNA | 0.16066  | 0.001497637  | 0.311883629 | 4.80E-02 | 1.96E-01 | 1.00E+00 |
| ENSG00000266835.4_GAPLINC   | ENSG00000160789.18_LMNA | 0.03058  | -0.129248615 | 0.188862555 | 7.08E-01 | 8.76E-01 | 1.00E+00 |
| ENSG00000238099.2_LINC01625 | ENSG00000160789.18_LMNA | -0.32876 | -0.463693114 | -0.1789258  | 3.54E-05 | 8.19E-04 | 1.00E+00 |
| ENSG00000267868.1_RP11-120K | ENSG00000160789.18_LMNA | -0.17141 | -0.321828747 | -0.01255214 | 3.47E-02 | 1.58E-01 | 1.00E+00 |
| ENSG00000273369.1_RP11-700J | ENSG00000160789.18_LMNA | -0.15835 | -0.309745099 | 0.000869579 | 5.14E-02 | 2.05E-01 | 1.00E+00 |
| ENSG00000250794.2_ALG1L12P  | ENSG00000160789.18_LMNA | 0.11982  | -0.040149191 | 0.27379541  | 1.41E-01 | 3.84E-01 | 1.00E+00 |
| ENSG00000273416.1_RP4-597N1 | ENSG00000160789.18_LMNA | -0.18527 | -0.334600492 | -0.02686035 | 2.23E-02 | 1.17E-01 | 1.00E+00 |
| ENSG00000257596.1_RP11-968A | ENSG00000160789.18_LMNA | -0.04061 | -0.198526938 | 0.119362661 | 6.19E-01 | 8.28E-01 | 1.00E+00 |
| ENSG00000257681.1_RP11-341G | ENSG00000160789.18_LMNA | -0.14426 | -0.29664578  | 0.015294116 | 7.62E-02 | 2.64E-01 | 1.00E+00 |
| ENSG00000261620.1_HMGN2P41  | ENSG00000160789.18_LMNA | -0.14592 | -0.298197697 | 0.013591949 | 7.28E-02 | 2.56E-01 | 1.00E+00 |



|                              |                         |          |              |             |          |          |          |
|------------------------------|-------------------------|----------|--------------|-------------|----------|----------|----------|
| ENSG00000257261.4_RP11-96H1  | ENSG00000160789.18_LMNA | -0.14877 | -0.300843934 | 0.010685342 | 6.74E-02 | 2.43E-01 | 1.00E+00 |
| ENSG00000272221.1_XXbac-BPG  | ENSG00000160789.18_LMNA | 0.24063  | 0.084671258  | 0.385077434 | 2.82E-03 | 2.55E-02 | 1.00E+00 |
| ENSG00000235078.1_AC142528.  | ENSG00000160789.18_LMNA | 0.03192  | -0.127927628 | 0.190157511 | 6.96E-01 | 8.70E-01 | 1.00E+00 |
| ENSG00000224594.2_RPL29P19   | ENSG00000160789.18_LMNA | 0.12507  | -0.034826254 | 0.278719027 | 1.25E-01 | 3.56E-01 | 1.00E+00 |
| ENSG00000272144.1_CTD-2035E  | ENSG00000160789.18_LMNA | 0.05816  | -0.101980114 | 0.2153713   | 4.77E-01 | 7.35E-01 | 1.00E+00 |
| ENSG00000217416.4_ISCA1P1    | ENSG00000160789.18_LMNA | -0.02806 | -0.186427918 | 0.131729137 | 7.31E-01 | 8.87E-01 | 1.00E+00 |
| ENSG00000213253.5_RPL12P42   | ENSG00000160789.18_LMNA | -0.04494 | -0.202692816 | 0.115081743 | 5.82E-01 | 8.06E-01 | 1.00E+00 |
| ENSG00000271427.1_RP11-188D  | ENSG00000160789.18_LMNA | -0.00159 | -0.160747348 | 0.157653274 | 9.85E-01 | 9.94E-01 | 1.00E+00 |
| ENSG00000213673.3_SLC25A5P   | ENSG00000160789.18_LMNA | -0.05307 | -0.210488676 | 0.107038764 | 5.16E-01 | 7.63E-01 | 1.00E+00 |
| ENSG00000127083.7_OMD        | ENSG00000160789.18_LMNA | -0.10945 | -0.264048932 | 0.050633847 | 1.80E-01 | 4.42E-01 | 1.00E+00 |
| ENSG00000197614.9_MFAP5      | ENSG00000160789.18_LMNA | -0.00376 | -0.162861686 | 0.155535335 | 9.63E-01 | 9.85E-01 | 1.00E+00 |
| ENSG00000113749.6_HRH2       | ENSG00000160789.18_LMNA | 0.0736   | -0.086614195 | 0.23010586  | 3.68E-01 | 6.48E-01 | 1.00E+00 |
| ENSG00000183840.6_GPR39      | ENSG00000160789.18_LMNA | 0.32534  | 0.175209061  | 0.460675722 | 4.32E-05 | 9.53E-04 | 1.00E+00 |
| ENSG00000224906.3_RP1-102E2  | ENSG00000160789.18_LMNA | 0.04525  | -0.114781089 | 0.202984959 | 5.80E-01 | 8.04E-01 | 1.00E+00 |
| ENSG00000231429.2_RP11-343N  | ENSG00000160789.18_LMNA | -0.06762 | -0.22440152  | 0.092580891 | 4.08E-01 | 6.83E-01 | 1.00E+00 |
| ENSG00000271833.1_RP11-356B  | ENSG00000160789.18_LMNA | 0.02921  | -0.13060122  | 0.187535455 | 7.21E-01 | 8.82E-01 | 1.00E+00 |
| ENSG00000280780.1_JAKMIP2-A  | ENSG00000160789.18_LMNA | 0.13003  | -0.029791448 | 0.28336101  | 1.10E-01 | 3.31E-01 | 1.00E+00 |
| ENSG00000139194.6_RBP5       | ENSG00000160789.18_LMNA | 0.12454  | -0.035365781 | 0.278220724 | 1.26E-01 | 3.59E-01 | 1.00E+00 |
| ENSG00000235169.6_SMIM1      | ENSG00000160789.18_LMNA | 0.02511  | -0.134633311 | 0.183572492 | 7.59E-01 | 8.99E-01 | 1.00E+00 |
| ENSG00000254272.1_RP11-382J  | ENSG00000160789.18_LMNA | 0.07914  | -0.081079117 | 0.235378173 | 3.32E-01 | 6.18E-01 | 1.00E+00 |
| ENSG00000259081.1_RP11-488C  | ENSG00000160789.18_LMNA | -0.01416 | -0.172971695 | 0.145367477 | 8.63E-01 | 9.46E-01 | 1.00E+00 |
| ENSG00000176919.10_C8G       | ENSG00000160789.18_LMNA | 0.12317  | -0.036756186 | 0.276935778 | 1.31E-01 | 3.66E-01 | 1.00E+00 |
| ENSG00000158815.9_FGF17      | ENSG00000160789.18_LMNA | -0.33234 | -0.466842804 | -0.18281419 | 2.88E-05 | 6.88E-04 | 1.00E+00 |
| ENSG00000226453.1_RP11-379B  | ENSG00000160789.18_LMNA | 0.02056  | -0.139097235 | 0.179173002 | 8.02E-01 | 9.20E-01 | 1.00E+00 |
| ENSG00000257219.4_RP11-54A9  | ENSG00000160789.18_LMNA | 0.05457  | -0.105547645 | 0.211929557 | 5.04E-01 | 7.55E-01 | 1.00E+00 |
| ENSG00000261141.1_RP11-303E  | ENSG00000160789.18_LMNA | 0.04878  | -0.111287478 | 0.206375529 | 5.51E-01 | 7.87E-01 | 1.00E+00 |
| ENSG00000276251.1_CTB-32O4.  | ENSG00000160789.18_LMNA | -0.30704 | -0.444510811 | -0.15543518 | 1.19E-04 | 2.18E-03 | 1.00E+00 |
| ENSG00000244585.1_RPL12P33   | ENSG00000160789.18_LMNA | 0.05394  | -0.106171624 | 0.211326769 | 5.09E-01 | 7.59E-01 | 1.00E+00 |
| ENSG00000244752.2_CRYBB2     | ENSG00000160789.18_LMNA | -0.0972  | -0.252498156 | 0.062970287 | 2.34E-01 | 5.11E-01 | 1.00E+00 |
| ENSG00000163993.6_S100P      | ENSG00000160789.18_LMNA | -0.08324 | -0.239268881 | 0.076981946 | 3.08E-01 | 5.95E-01 | 1.00E+00 |
| ENSG00000254788.5_CKLF-CMTI  | ENSG00000160789.18_LMNA | -0.12474 | -0.278410866 | 0.03515993  | 1.26E-01 | 3.58E-01 | 1.00E+00 |
| ENSG00000270031.1_RP3-426I6. | ENSG00000160789.18_LMNA | 0.01675  | -0.142836062 | 0.175478321 | 8.38E-01 | 9.37E-01 | 1.00E+00 |
| ENSG00000241362.2_RPL36AP4   | ENSG00000160789.18_LMNA | -0.09644 | -0.251778003 | 0.063736246 | 2.37E-01 | 5.16E-01 | 1.00E+00 |

|                              |                         |          |              |             |          |          |          |
|------------------------------|-------------------------|----------|--------------|-------------|----------|----------|----------|
| ENSG00000227887.1_RPS26P13   | ENSG00000160789.18_LMNA | -0.10658 | -0.261350931 | 0.053523983 | 1.91E-01 | 4.59E-01 | 1.00E+00 |
| ENSG00000242527.1_RP11-159H  | ENSG00000160789.18_LMNA | -0.00096 | -0.160139435 | 0.158261681 | 9.91E-01 | 9.96E-01 | 1.00E+00 |
| ENSG00000105352.9_CEACAM4    | ENSG00000160789.18_LMNA | 0.01894  | -0.140682323 | 0.177607726 | 8.17E-01 | 9.28E-01 | 1.00E+00 |
| ENSG00000273341.1_RP5-899E9  | ENSG00000160789.18_LMNA | 0.08328  | -0.076941149 | 0.239307572 | 3.08E-01 | 5.94E-01 | 1.00E+00 |
| ENSG00000232527.6_RP11-14N7  | ENSG00000160789.18_LMNA | 0.10032  | -0.059833773 | 0.255443466 | 2.19E-01 | 4.94E-01 | 1.00E+00 |
| ENSG00000245975.2_RP11-30K9  | ENSG00000160789.18_LMNA | -0.04054 | -0.198464303 | 0.119426936 | 6.20E-01 | 8.28E-01 | 1.00E+00 |
| ENSG00000100197.19_CYP2D6    | ENSG00000160789.18_LMNA | -0.00291 | -0.162031956 | 0.156366827 | 9.72E-01 | 9.89E-01 | 1.00E+00 |
| ENSG00000243455.3_RPS18P13   | ENSG00000160789.18_LMNA | -0.01522 | -0.174002044 | 0.144327443 | 8.52E-01 | 9.42E-01 | 1.00E+00 |
| ENSG00000203279.3_RP11-498P  | ENSG00000160789.18_LMNA | -0.06806 | -0.224821777 | 0.09214208  | 4.05E-01 | 6.81E-01 | 1.00E+00 |
| ENSG00000241679.2_RP11-80H8  | ENSG00000160789.18_LMNA | 0.33747  | 0.188385318  | 0.471343029 | 2.12E-05 | 5.43E-04 | 1.00E+00 |
| ENSG00000244086.1_RPS20P35   | ENSG00000160789.18_LMNA | -0.04751 | -0.205157241 | 0.112543695 | 5.61E-01 | 7.93E-01 | 1.00E+00 |
| ENSG00000234152.1_TCEB2P1    | ENSG00000160789.18_LMNA | -0.19462 | -0.343188309 | -0.03655272 | 1.63E-02 | 9.31E-02 | 1.00E+00 |
| ENSG00000222019.6_URAHF      | ENSG00000160789.18_LMNA | 0.10344  | -0.056696541 | 0.258383607 | 2.05E-01 | 4.76E-01 | 1.00E+00 |
| ENSG00000234297.2_RP11-54D1  | ENSG00000160789.18_LMNA | -0.01519 | -0.173971311 | 0.144358475 | 8.53E-01 | 9.42E-01 | 1.00E+00 |
| ENSG00000231822.1_AC019097.  | ENSG00000160789.18_LMNA | 0.15496  | -0.004343997 | 0.306600628 | 5.66E-02 | 2.17E-01 | 1.00E+00 |
| ENSG00000224712.9_NPIPA3     | ENSG00000160789.18_LMNA | -0.02055 | -0.179162624 | 0.13910775  | 8.02E-01 | 9.20E-01 | 1.00E+00 |
| ENSG00000225793.2_RP1-234P1  | ENSG00000160789.18_LMNA | -0.10542 | -0.260256099 | 0.054695279 | 1.96E-01 | 4.65E-01 | 1.00E+00 |
| ENSG00000254245.2_PCDHGA3    | ENSG00000160789.18_LMNA | 0.01058  | -0.14887206  | 0.16949461  | 8.97E-01 | 9.60E-01 | 1.00E+00 |
| ENSG00000270426.1_RP11-326I1 | ENSG00000160789.18_LMNA | 0.1006   | -0.059558219 | 0.255701942 | 2.18E-01 | 4.92E-01 | 1.00E+00 |
| ENSG00000230992.3_FAM201B    | ENSG00000160789.18_LMNA | 0.12039  | -0.039569468 | 0.274332442 | 1.40E-01 | 3.81E-01 | 1.00E+00 |
| ENSG00000280231.1_LA16c-380F | ENSG00000160789.18_LMNA | 0.17905  | 0.020428251  | 0.328873047 | 2.73E-02 | 1.35E-01 | 1.00E+00 |
| ENSG00000254780.1_RP11-793I1 | ENSG00000160789.18_LMNA | 0.099    | -0.061165593 | 0.25419355  | 2.25E-01 | 5.01E-01 | 1.00E+00 |
| ENSG00000176402.5_GJC3       | ENSG00000160789.18_LMNA | -0.20816 | -0.355580528 | -0.05064124 | 1.01E-02 | 6.59E-02 | 1.00E+00 |
| ENSG00000240219.1_RP11-430C  | ENSG00000160789.18_LMNA | 0.03519  | -0.124711078 | 0.193306057 | 6.67E-01 | 8.53E-01 | 1.00E+00 |
| ENSG00000231993.1_EP300-AS1  | ENSG00000160789.18_LMNA | 0.0582   | -0.10194153  | 0.21540848  | 4.76E-01 | 7.35E-01 | 1.00E+00 |
| ENSG00000259630.2_CTD-2262B  | ENSG00000160789.18_LMNA | 0.05849  | -0.101661137 | 0.215678646 | 4.74E-01 | 7.34E-01 | 1.00E+00 |
| ENSG00000113088.5_GZMK       | ENSG00000160789.18_LMNA | 0.01053  | -0.148919163 | 0.169447823 | 8.98E-01 | 9.60E-01 | 1.00E+00 |
| ENSG00000275532.1_CTB-58E17  | ENSG00000160789.18_LMNA | -0.05566 | -0.212974519 | 0.104465356 | 4.96E-01 | 7.50E-01 | 1.00E+00 |
| ENSG00000244558.4_KCNK15-A5  | ENSG00000160789.18_LMNA | -0.3947  | -0.521155211 | -0.25129198 | 4.86E-07 | 2.56E-05 | 2.49E-02 |
| ENSG00000281849.1_RP13-465B  | ENSG00000160789.18_LMNA | 0.03878  | -0.121173302 | 0.19676149  | 6.35E-01 | 8.37E-01 | 1.00E+00 |
| ENSG00000231333.2_RPL34P6    | ENSG00000160789.18_LMNA | -0.09986 | -0.255006064 | 0.060299964 | 2.21E-01 | 4.96E-01 | 1.00E+00 |
| ENSG00000263293.2_THCAT158   | ENSG00000160789.18_LMNA | 0.17725  | 0.018574633  | 0.327218275 | 2.89E-02 | 1.40E-01 | 1.00E+00 |
| ENSG00000189292.14_FAM150B   | ENSG00000160789.18_LMNA | -0.05971 | -0.216850629 | 0.100444206 | 4.65E-01 | 7.27E-01 | 1.00E+00 |

|                              |                         |          |              |             |          |          |          |
|------------------------------|-------------------------|----------|--------------|-------------|----------|----------|----------|
| ENSG00000184293.6_CLECL1     | ENSG00000160789.18_LMNA | 0.05124  | -0.108850949 | 0.208735688 | 5.31E-01 | 7.74E-01 | 1.00E+00 |
| ENSG00000279675.1_RP11-454H  | ENSG00000160789.18_LMNA | -0.17347 | -0.323732064 | -0.01467643 | 3.26E-02 | 1.51E-01 | 1.00E+00 |
| ENSG00000227256.1_MIS18A-AS  | ENSG00000160789.18_LMNA | -0.16712 | -0.317866759 | -0.00813911 | 3.96E-02 | 1.72E-01 | 1.00E+00 |
| ENSG00000066230.9_SLC9A3     | ENSG00000160789.18_LMNA | 0.11235  | -0.047706455 | 0.266776701 | 1.68E-01 | 4.26E-01 | 1.00E+00 |
| ENSG00000214280.3_RP11-553K  | ENSG00000160789.18_LMNA | -0.08695 | -0.242787567 | 0.073267319 | 2.87E-01 | 5.72E-01 | 1.00E+00 |
| ENSG00000249092.1_CTD-2325A  | ENSG00000160789.18_LMNA | -0.01028 | -0.169198933 | 0.149169708 | 9.00E-01 | 9.61E-01 | 1.00E+00 |
| ENSG00000277369.1_RP11-486I1 | ENSG00000160789.18_LMNA | 0.02889  | -0.130914441 | 0.187227975 | 7.24E-01 | 8.83E-01 | 1.00E+00 |
| ENSG00000281501.1_SEPSECS-   | ENSG00000160789.18_LMNA | -0.05231 | -0.209763464 | 0.107788722 | 5.22E-01 | 7.68E-01 | 1.00E+00 |
| ENSG00000184925.10_LCN12     | ENSG00000160789.18_LMNA | -0.14137 | -0.293953616 | 0.018242641 | 8.23E-02 | 2.77E-01 | 1.00E+00 |
| ENSG00000261616.1_RP11-6O2.1 | ENSG00000160789.18_LMNA | 0.11385  | -0.046186329 | 0.268191183 | 1.63E-01 | 4.18E-01 | 1.00E+00 |
| ENSG00000159212.11_CLIC6     | ENSG00000160789.18_LMNA | -0.02498 | -0.183448977 | 0.134758812 | 7.60E-01 | 9.00E-01 | 1.00E+00 |
| ENSG00000223878.1_AC005517.1 | ENSG00000160789.18_LMNA | 0.13226  | -0.027515601 | 0.285454488 | 1.04E-01 | 3.20E-01 | 1.00E+00 |
| ENSG00000255277.3_ABCC6P2    | ENSG00000160789.18_LMNA | -0.01154 | -0.1704245   | 0.147935599 | 8.88E-01 | 9.56E-01 | 1.00E+00 |
| ENSG00000187013.4_C17orf82   | ENSG00000160789.18_LMNA | 0.31019  | 0.15883099   | 0.447300303 | 1.01E-04 | 1.89E-03 | 1.00E+00 |
| ENSG00000101197.11_BIRC7     | ENSG00000160789.18_LMNA | -0.21489 | -0.361718218 | -0.05766431 | 7.85E-03 | 5.48E-02 | 1.00E+00 |
| ENSG00000165816.11_VWA2      | ENSG00000160789.18_LMNA | -0.25712 | -0.399948182 | -0.10209725 | 1.39E-03 | 1.48E-02 | 1.00E+00 |
| ENSG00000229927.2_RHEBP1     | ENSG00000160789.18_LMNA | -0.09699 | -0.252290701 | 0.063190976 | 2.35E-01 | 5.12E-01 | 1.00E+00 |
| ENSG00000273154.2_RP4-583P1  | ENSG00000160789.18_LMNA | 0.05543  | -0.104695472 | 0.212752399 | 4.98E-01 | 7.51E-01 | 1.00E+00 |
| ENSG00000233393.1_AP000688.1 | ENSG00000160789.18_LMNA | -0.1755  | -0.325606614 | -0.01677134 | 3.06E-02 | 1.45E-01 | 1.00E+00 |
| ENSG00000262370.4_RP11-473M  | ENSG00000160789.18_LMNA | -0.01122 | -0.170120324 | 0.148241987 | 8.91E-01 | 9.57E-01 | 1.00E+00 |
| ENSG00000221887.5_HMSD       | ENSG00000160789.18_LMNA | -0.09451 | -0.249949984 | 0.065678864 | 2.47E-01 | 5.27E-01 | 1.00E+00 |
| ENSG00000237575.4_PYY2       | ENSG00000160789.18_LMNA | 0.01096  | -0.148500869 | 0.169863265 | 8.93E-01 | 9.58E-01 | 1.00E+00 |
| ENSG00000241218.1_RP11-446H  | ENSG00000160789.18_LMNA | 0.00075  | -0.15847289  | 0.159928341 | 9.93E-01 | 9.97E-01 | 1.00E+00 |
| ENSG00000280107.1_AL022393.5 | ENSG00000160789.18_LMNA | -0.18203 | -0.33161723  | -0.02350687 | 2.48E-02 | 1.26E-01 | 1.00E+00 |
| ENSG00000183850.12_ZNF730    | ENSG00000160789.18_LMNA | -0.06955 | -0.226241735 | 0.090658524 | 3.95E-01 | 6.72E-01 | 1.00E+00 |
| ENSG00000272733.1_KB-208E9.1 | ENSG00000160789.18_LMNA | -0.11851 | -0.272571372 | 0.041469742 | 1.46E-01 | 3.91E-01 | 1.00E+00 |
| ENSG00000213385.3_RP11-577H  | ENSG00000160789.18_LMNA | -0.00153 | -0.160693344 | 0.157707332 | 9.85E-01 | 9.94E-01 | 1.00E+00 |
| ENSG00000276533.1_RP11-139H  | ENSG00000160789.18_LMNA | -0.05507 | -0.212412079 | 0.10504798  | 5.00E-01 | 7.53E-01 | 1.00E+00 |
| ENSG00000223583.1_RP3-476K8  | ENSG00000160789.18_LMNA | 0.0995   | -0.060666404 | 0.254662163 | 2.23E-01 | 4.98E-01 | 1.00E+00 |
| ENSG00000251003.6_ZFPM2-AS   | ENSG00000160789.18_LMNA | 0.10715  | -0.052951727 | 0.261885535 | 1.89E-01 | 4.56E-01 | 1.00E+00 |
| ENSG00000225762.1_LINC01389  | ENSG00000160789.18_LMNA | -0.16322 | -0.314258164 | -0.00413018 | 4.45E-02 | 1.86E-01 | 1.00E+00 |
| ENSG00000268041.1_CTD-2575K  | ENSG00000160789.18_LMNA | -0.00016 | -0.159361332 | 0.159040064 | 9.98E-01 | 9.99E-01 | 1.00E+00 |
| ENSG00000228053.1_RP11-151F  | ENSG00000160789.18_LMNA | -0.15775 | -0.309184029 | 0.001490072 | 5.23E-02 | 2.07E-01 | 1.00E+00 |

|                              |                         |          |              |             |          |          |          |
|------------------------------|-------------------------|----------|--------------|-------------|----------|----------|----------|
| ENSG00000253771.4_TPTE2P1    | ENSG00000160789.18_LMNA | -0.45929 | -0.576351433 | -0.32376651 | 2.65E-09 | 3.50E-07 | 1.36E-04 |
| ENSG00000273091.1_AP000255.6 | ENSG00000160789.18_LMNA | -0.17491 | -0.32506281  | -0.01616333 | 3.11E-02 | 1.47E-01 | 1.00E+00 |
| ENSG00000215003.4_RPL15P20   | ENSG00000160789.18_LMNA | -0.12675 | -0.280299224 | 0.033114119 | 1.20E-01 | 3.48E-01 | 1.00E+00 |
| ENSG00000104901.5_DKKL1      | ENSG00000160789.18_LMNA | 0.14235  | -0.017240988 | 0.294868735 | 8.02E-02 | 2.73E-01 | 1.00E+00 |
| ENSG00000214914.3_RPL23AP3   | ENSG00000160789.18_LMNA | -0.14395 | -0.296354924 | 0.01561293  | 7.69E-02 | 2.65E-01 | 1.00E+00 |
| ENSG00000257524.4_RP11-203J  | ENSG00000160789.18_LMNA | 0.08435  | -0.075872592 | 0.240320589 | 3.02E-01 | 5.88E-01 | 1.00E+00 |
| ENSG00000228221.4_LINC00578  | ENSG00000160789.18_LMNA | -0.22357 | -0.369619556 | -0.06674997 | 5.63E-03 | 4.29E-02 | 1.00E+00 |
| ENSG00000235478.3_AC006946   | ENSG00000160789.18_LMNA | -0.23987 | -0.384395156 | -0.08387613 | 2.92E-03 | 2.62E-02 | 1.00E+00 |
| ENSG00000262519.1_TXNP4      | ENSG00000160789.18_LMNA | 0.1004   | -0.059756421 | 0.255516028 | 2.18E-01 | 4.93E-01 | 1.00E+00 |
| ENSG00000246523.6_RP11-736K  | ENSG00000160789.18_LMNA | -0.05942 | -0.216572496 | 0.100733092 | 4.67E-01 | 7.29E-01 | 1.00E+00 |
| ENSG00000279031.1_LA16c-360f | ENSG00000160789.18_LMNA | -0.099   | -0.254195173 | 0.061163864 | 2.25E-01 | 5.01E-01 | 1.00E+00 |
| ENSG00000205221.11_VIT       | ENSG00000160789.18_LMNA | -0.04839 | -0.206008057 | 0.111666498 | 5.54E-01 | 7.88E-01 | 1.00E+00 |
| ENSG00000214243.3_AC004980   | ENSG00000160789.18_LMNA | 0.09786  | -0.062311512 | 0.253117257 | 2.30E-01 | 5.08E-01 | 1.00E+00 |
| ENSG00000260360.1_RP11-533E  | ENSG00000160789.18_LMNA | -0.13551 | -0.288484186 | 0.02421622  | 9.60E-02 | 3.04E-01 | 1.00E+00 |
| ENSG00000236754.4_AC004019   | ENSG00000160789.18_LMNA | 0.00513  | -0.154193905 | 0.164199323 | 9.50E-01 | 9.80E-01 | 1.00E+00 |
| ENSG00000261520.4_DLGAP1-A   | ENSG00000160789.18_LMNA | -0.37413 | -0.50335377  | -0.22854608 | 2.05E-06 | 8.16E-05 | 1.05E-01 |
| ENSG00000243779.1_RP11-681N  | ENSG00000160789.18_LMNA | 0.04886  | -0.111206308 | 0.206454214 | 5.50E-01 | 7.86E-01 | 1.00E+00 |
| ENSG00000162643.11_WDR63     | ENSG00000160789.18_LMNA | 0.24292  | 0.087091288  | 0.387151975 | 2.57E-03 | 2.37E-02 | 1.00E+00 |
| ENSG00000227262.3_HCG4B      | ENSG00000160789.18_LMNA | 0.21372  | 0.056435089  | 0.360645862 | 8.20E-03 | 5.67E-02 | 1.00E+00 |
| ENSG00000173662.18_TAS1R1    | ENSG00000160789.18_LMNA | 0.18379  | 0.025326965  | 0.333237155 | 2.34E-02 | 1.21E-01 | 1.00E+00 |
| ENSG00000241278.1_ENPP7P4    | ENSG00000160789.18_LMNA | -0.28211 | -0.422346008 | -0.12869329 | 4.30E-04 | 6.00E-03 | 1.00E+00 |
| ENSG00000273162.1_RP11-108L  | ENSG00000160789.18_LMNA | -0.03606 | -0.194144248 | 0.123853655 | 6.59E-01 | 8.50E-01 | 1.00E+00 |
| ENSG00000224553.1_AC008065   | ENSG00000160789.18_LMNA | -0.24835 | -0.392053856 | -0.09282362 | 2.03E-03 | 1.98E-02 | 1.00E+00 |
| ENSG00000181240.12_SLC25A41  | ENSG00000160789.18_LMNA | -0.10825 | -0.262921837 | 0.051841848 | 1.84E-01 | 4.50E-01 | 1.00E+00 |
| ENSG00000233903.2_Z83851.4   | ENSG00000160789.18_LMNA | 0.03823  | -0.121713406 | 0.196234468 | 6.40E-01 | 8.39E-01 | 1.00E+00 |
| ENSG00000213128.3_RPL32P31   | ENSG00000160789.18_LMNA | -0.06784 | -0.224614162 | 0.092358877 | 4.06E-01 | 6.82E-01 | 1.00E+00 |
| ENSG00000215381.3_RP5-1057J  | ENSG00000160789.18_LMNA | -0.02526 | -0.183725069 | 0.134478267 | 7.57E-01 | 8.99E-01 | 1.00E+00 |
| ENSG00000130487.5_KLHDC7B    | ENSG00000160789.18_LMNA | 0.07924  | -0.080979862 | 0.235472547 | 3.32E-01 | 6.18E-01 | 1.00E+00 |
| ENSG00000213062.4_RP1-206D1  | ENSG00000160789.18_LMNA | -0.16231 | -0.313413634 | -0.00319339 | 4.57E-02 | 1.90E-01 | 1.00E+00 |
| ENSG00000213089.4_PDCL3P5    | ENSG00000160789.18_LMNA | 0.28413  | 0.130846475  | 0.42414375  | 3.89E-04 | 5.54E-03 | 1.00E+00 |
| ENSG00000243629.1_LINC00880  | ENSG00000160789.18_LMNA | -0.05979 | -0.216922415 | 0.100369635 | 4.64E-01 | 7.27E-01 | 1.00E+00 |
| ENSG00000220614.1_RP11-480N  | ENSG00000160789.18_LMNA | -0.10369 | -0.258619715 | 0.056444335 | 2.04E-01 | 4.75E-01 | 1.00E+00 |
| ENSG00000215548.2_FRG1JP     | ENSG00000160789.18_LMNA | -0.23419 | -0.379251651 | -0.07789416 | 3.68E-03 | 3.12E-02 | 1.00E+00 |

|                             |                         |          |              |             |          |          |          |
|-----------------------------|-------------------------|----------|--------------|-------------|----------|----------|----------|
| ENSG00000272189.1_RP3-325F2 | ENSG00000160789.18_LMNA | -0.2022  | -0.350132523 | -0.0444325  | 1.25E-02 | 7.69E-02 | 1.00E+00 |
| ENSG00000260727.1_SLC7A5P1  | ENSG00000160789.18_LMNA | -0.15694 | -0.308435621 | 0.002317371 | 5.35E-02 | 2.10E-01 | 1.00E+00 |
| ENSG00000102678.6_FGF9      | ENSG00000160789.18_LMNA | -0.38784 | -0.515227658 | -0.24368476 | 7.94E-07 | 3.78E-05 | 4.08E-02 |
| ENSG00000271964.1_RP11-415F | ENSG00000160789.18_LMNA | 0.15101  | -0.008392897 | 0.302927647 | 6.33E-02 | 2.34E-01 | 1.00E+00 |
| ENSG00000265478.2_CTD-2145A | ENSG00000160789.18_LMNA | -0.14082 | -0.29344067  | 0.018803817 | 8.36E-02 | 2.80E-01 | 1.00E+00 |
| ENSG00000272568.4_CTB-113D1 | ENSG00000160789.18_LMNA | -0.02284 | -0.181381926 | 0.136857575 | 7.80E-01 | 9.10E-01 | 1.00E+00 |
| ENSG00000273449.1_RP11-218F | ENSG00000160789.18_LMNA | -0.03798 | -0.195994314 | 0.121959459 | 6.42E-01 | 8.41E-01 | 1.00E+00 |
| ENSG00000272843.1_RP11-313P | ENSG00000160789.18_LMNA | -0.07416 | -0.230633737 | 0.086060889 | 3.64E-01 | 6.45E-01 | 1.00E+00 |
| ENSG00000275491.1_RP5-1009E | ENSG00000160789.18_LMNA | 0.18529  | 0.026877128  | 0.334615404 | 2.23E-02 | 1.17E-01 | 1.00E+00 |
| ENSG00000242553.1_AP001432  | ENSG00000160789.18_LMNA | -0.0453  | -0.203033697 | 0.114730926 | 5.79E-01 | 8.04E-01 | 1.00E+00 |
| ENSG00000229814.1_RPL35AP2  | ENSG00000160789.18_LMNA | -0.04795 | -0.205584423 | 0.112103329 | 5.57E-01 | 7.91E-01 | 1.00E+00 |
| ENSG00000219797.2_PPIAP9    | ENSG00000160789.18_LMNA | 0.10439  | -0.055734947 | 0.259283624 | 2.01E-01 | 4.71E-01 | 1.00E+00 |
| ENSG00000232037.3_RP11-26H1 | ENSG00000160789.18_LMNA | -0.14986 | -0.301858334 | 0.009569736 | 6.54E-02 | 2.38E-01 | 1.00E+00 |
| ENSG00000277597.1_RP11-961A | ENSG00000160789.18_LMNA | 0.11152  | -0.048537633 | 0.266002715 | 1.71E-01 | 4.31E-01 | 1.00E+00 |
| ENSG00000232387.2_SKA2P1    | ENSG00000160789.18_LMNA | -0.03848 | -0.196481328 | 0.121460442 | 6.38E-01 | 8.38E-01 | 1.00E+00 |
| ENSG00000260331.1_RP11-111J | ENSG00000160789.18_LMNA | -0.02651 | -0.184926765 | 0.133256599 | 7.46E-01 | 8.94E-01 | 1.00E+00 |
| ENSG00000227495.1_AC109333  | ENSG00000160789.18_LMNA | -0.07596 | -0.232351412 | 0.084259116 | 3.52E-01 | 6.36E-01 | 1.00E+00 |
| ENSG00000164128.5_NPY1R     | ENSG00000160789.18_LMNA | -0.25028 | -0.39379067  | -0.09485945 | 1.87E-03 | 1.86E-02 | 1.00E+00 |
| ENSG00000239622.1_CTA-242H1 | ENSG00000160789.18_LMNA | 0.11368  | -0.046364355 | 0.2680256   | 1.63E-01 | 4.19E-01 | 1.00E+00 |
| ENSG00000260229.1_RP11-391L | ENSG00000160789.18_LMNA | 0.04477  | -0.115256052 | 0.202523416 | 5.84E-01 | 8.07E-01 | 1.00E+00 |
| ENSG00000131142.12_CCL25    | ENSG00000160789.18_LMNA | -0.11083 | -0.26534848  | 0.04923987  | 1.74E-01 | 4.34E-01 | 1.00E+00 |
| ENSG00000227117.5_HORMAD2   | ENSG00000160789.18_LMNA | 0.27326  | 0.119249353  | 0.414433653 | 6.59E-04 | 8.36E-03 | 1.00E+00 |
| ENSG00000260910.1_LINC00565 | ENSG00000160789.18_LMNA | 0.21978  | 0.062778571  | 0.366171212 | 6.52E-03 | 4.78E-02 | 1.00E+00 |
| ENSG00000260306.1_RP11-645C | ENSG00000160789.18_LMNA | -0.15147 | -0.303356797 | 0.007920351 | 6.25E-02 | 2.32E-01 | 1.00E+00 |
| ENSG00000014257.14_ACPP     | ENSG00000160789.18_LMNA | 0.08997  | -0.070237502 | 0.24565142  | 2.70E-01 | 5.55E-01 | 1.00E+00 |
| ENSG00000281445.1           | ENSG00000160789.18_LMNA | -0.13938 | -0.292100059 | 0.020269551 | 8.68E-02 | 2.86E-01 | 1.00E+00 |
| ENSG00000243988.1_RPS24P17  | ENSG00000160789.18_LMNA | -0.04097 | -0.198875681 | 0.11900474  | 6.16E-01 | 8.26E-01 | 1.00E+00 |
| ENSG00000278978.1_RP11-164P | ENSG00000160789.18_LMNA | -0.11578 | -0.269999342 | 0.044241001 | 1.56E-01 | 4.07E-01 | 1.00E+00 |
| ENSG00000247193.2_RP11-431M | ENSG00000160789.18_LMNA | 0.07567  | -0.084544469 | 0.23207951  | 3.54E-01 | 6.38E-01 | 1.00E+00 |
| ENSG00000184292.6_TACSTD2   | ENSG00000160789.18_LMNA | 0.26066  | 0.105849532  | 0.403129866 | 1.18E-03 | 1.31E-02 | 1.00E+00 |
| ENSG00000241030.1_RPL29P24  | ENSG00000160789.18_LMNA | -0.07041 | -0.227064429 | 0.089798339 | 3.89E-01 | 6.67E-01 | 1.00E+00 |
| ENSG00000272800.1_RP11-438L | ENSG00000160789.18_LMNA | -0.22262 | -0.368747781 | -0.06574505 | 5.84E-03 | 4.41E-02 | 1.00E+00 |
| ENSG00000243711.1_RPL21P11  | ENSG00000160789.18_LMNA | -0.18469 | -0.334067253 | -0.02626043 | 2.27E-02 | 1.18E-01 | 1.00E+00 |

|                             |                         |          |              |             |          |          |          |
|-----------------------------|-------------------------|----------|--------------|-------------|----------|----------|----------|
| ENSG00000181544.12_FANCB    | ENSG00000160789.18_LMNA | 0.05757  | -0.102566736 | 0.214805902 | 4.81E-01 | 7.39E-01 | 1.00E+00 |
| ENSG00000260281.4_ITFG1-AS1 | ENSG00000160789.18_LMNA | -0.10873 | -0.263370125 | 0.051361491 | 1.82E-01 | 4.47E-01 | 1.00E+00 |
| ENSG00000171236.9_LRG1      | ENSG00000160789.18_LMNA | 0.01605  | -0.143519647 | 0.174801837 | 8.44E-01 | 9.39E-01 | 1.00E+00 |
| ENSG00000180015.12_RP11-756 | ENSG00000160789.18_LMNA | -0.05239 | -0.209840381 | 0.107709197 | 5.22E-01 | 7.67E-01 | 1.00E+00 |
| ENSG00000275329.1_RP11-83N9 | ENSG00000160789.18_LMNA | 0.12147  | -0.038470492 | 0.275349954 | 1.36E-01 | 3.75E-01 | 1.00E+00 |
| ENSG00000125804.12_FAM182A  | ENSG00000160789.18_LMNA | -0.12551 | -0.279133569 | 0.034377279 | 1.23E-01 | 3.54E-01 | 1.00E+00 |
| ENSG00000261416.1_RP11-455F | ENSG00000160789.18_LMNA | -0.12099 | -0.274896869 | 0.038959945 | 1.38E-01 | 3.78E-01 | 1.00E+00 |
| ENSG00000186431.17_FCAR     | ENSG00000160789.18_LMNA | 0.08417  | -0.076052359 | 0.240150214 | 3.03E-01 | 5.89E-01 | 1.00E+00 |
| ENSG00000145283.7_SLC10A6   | ENSG00000160789.18_LMNA | 0.09041  | -0.069796296 | 0.246067999 | 2.68E-01 | 5.52E-01 | 1.00E+00 |
| ENSG00000223540.1_RPS15AP5  | ENSG00000160789.18_LMNA | -0.08411 | -0.240093478 | 0.076112218 | 3.03E-01 | 5.89E-01 | 1.00E+00 |
| ENSG00000272416.1_CTD-2081C | ENSG00000160789.18_LMNA | -0.15343 | -0.305172707 | 0.005919274 | 5.91E-02 | 2.23E-01 | 1.00E+00 |
| ENSG00000270264.1_NDUFB8P2  | ENSG00000160789.18_LMNA | -0.17277 | -0.323083676 | -0.01395245 | 3.33E-02 | 1.53E-01 | 1.00E+00 |
| ENSG00000144837.7_PLA1A     | ENSG00000160789.18_LMNA | -0.05553 | -0.212845025 | 0.104599516 | 4.97E-01 | 7.51E-01 | 1.00E+00 |
| ENSG00000182885.15_ADGRG3   | ENSG00000160789.18_LMNA | 0.10093  | -0.059219592 | 0.256019521 | 2.16E-01 | 4.90E-01 | 1.00E+00 |
| ENSG00000241697.4_TMEFF1    | ENSG00000160789.18_LMNA | -0.28073 | -0.42110674  | -0.12721062 | 4.60E-04 | 6.32E-03 | 1.00E+00 |
| ENSG00000249158.5_PCDHA11   | ENSG00000160789.18_LMNA | 0.1402   | -0.019429596 | 0.292868461 | 8.49E-02 | 2.82E-01 | 1.00E+00 |
| ENSG00000205853.9_RFPL3S    | ENSG00000160789.18_LMNA | -0.16247 | -0.313561124 | -0.00335696 | 4.55E-02 | 1.89E-01 | 1.00E+00 |
| ENSG00000261329.4_CTD-2049C | ENSG00000160789.18_LMNA | -0.28173 | -0.42200558  | -0.12828587 | 4.38E-04 | 6.08E-03 | 1.00E+00 |
| ENSG00000233705.5_SLC26A4-A | ENSG00000160789.18_LMNA | -0.09481 | -0.250236074 | 0.065374997 | 2.45E-01 | 5.25E-01 | 1.00E+00 |
| ENSG00000174332.4_GLIS1     | ENSG00000160789.18_LMNA | -0.09929 | -0.254465074 | 0.060876372 | 2.24E-01 | 4.99E-01 | 1.00E+00 |
| ENSG00000274105.1_RP11-278C | ENSG00000160789.18_LMNA | -0.01679 | -0.175525693 | 0.142788182 | 8.37E-01 | 9.37E-01 | 1.00E+00 |
| ENSG00000149201.8_CCDC81    | ENSG00000160789.18_LMNA | 0.04748  | -0.112568892 | 0.205132794 | 5.61E-01 | 7.93E-01 | 1.00E+00 |
| ENSG00000272092.1_RP11-350N | ENSG00000160789.18_LMNA | 0.05731  | -0.10283068  | 0.214551439 | 4.83E-01 | 7.40E-01 | 1.00E+00 |
| ENSG00000213401.7_MAGEA12   | ENSG00000160789.18_LMNA | -0.06891 | -0.225634821 | 0.091292793 | 3.99E-01 | 6.76E-01 | 1.00E+00 |
| ENSG00000139445.16_FOXN4    | ENSG00000160789.18_LMNA | -0.16732 | -0.318050602 | -0.00834362 | 3.94E-02 | 1.72E-01 | 1.00E+00 |
| ENSG00000226953.6_AC010890. | ENSG00000160789.18_LMNA | -0.32644 | -0.461651002 | -0.17640949 | 4.05E-05 | 9.12E-04 | 1.00E+00 |
| ENSG00000279456.1_RP11-87H9 | ENSG00000160789.18_LMNA | -0.18254 | -0.332086053 | -0.02403341 | 2.44E-02 | 1.24E-01 | 1.00E+00 |
| ENSG00000164669.11_INTS4P1  | ENSG00000160789.18_LMNA | 0.04791  | -0.112141692 | 0.205547214 | 5.58E-01 | 7.91E-01 | 1.00E+00 |
| ENSG00000226310.1_RP3-323P2 | ENSG00000160789.18_LMNA | -0.07387 | -0.230362579 | 0.086345134 | 3.66E-01 | 6.47E-01 | 1.00E+00 |
| ENSG00000230325.1_RP11-385F | ENSG00000160789.18_LMNA | 0.07037  | -0.089841778 | 0.227022894 | 3.89E-01 | 6.67E-01 | 1.00E+00 |
| ENSG00000237276.7_ANO7L1    | ENSG00000160789.18_LMNA | 0.04574  | -0.114293175 | 0.203458941 | 5.76E-01 | 8.02E-01 | 1.00E+00 |
| ENSG00000266501.1_RP11-766H | ENSG00000160789.18_LMNA | -0.02832 | -0.186679147 | 0.131473357 | 7.29E-01 | 8.85E-01 | 1.00E+00 |
| ENSG00000231185.5_AC005592. | ENSG00000160789.18_LMNA | 0.40763  | 0.265671034  | 0.532288729 | 1.86E-07 | 1.20E-05 | 9.57E-03 |

|                              |                         |          |              |             |          |          |          |
|------------------------------|-------------------------|----------|--------------|-------------|----------|----------|----------|
| ENSG00000248546.3_ANP32C     | ENSG00000160789.18_LMNA | -0.03829 | -0.196292586 | 0.121653854 | 6.40E-01 | 8.39E-01 | 1.00E+00 |
| ENSG00000101188.4_NTSR1      | ENSG00000160789.18_LMNA | 0.03521  | -0.124687997 | 0.193328627 | 6.67E-01 | 8.53E-01 | 1.00E+00 |
| ENSG00000272146.4_ARF4-AS1   | ENSG00000160789.18_LMNA | -0.01496 | -0.173745938 | 0.144586022 | 8.55E-01 | 9.43E-01 | 1.00E+00 |
| ENSG00000260647.1_RP1-178F1  | ENSG00000160789.18_LMNA | -0.00122 | -0.16039093  | 0.158010011 | 9.88E-01 | 9.96E-01 | 1.00E+00 |
| ENSG00000272817.1_RP11-402D  | ENSG00000160789.18_LMNA | -0.05515 | -0.212485387 | 0.104972054 | 5.00E-01 | 7.53E-01 | 1.00E+00 |
| ENSG00000163792.6_TCF23      | ENSG00000160789.18_LMNA | -0.08926 | -0.244977505 | 0.070950996 | 2.74E-01 | 5.59E-01 | 1.00E+00 |
| ENSG00000280119.1_AC093642.  | ENSG00000160789.18_LMNA | -0.21859 | -0.365088992 | -0.06153417 | 6.82E-03 | 4.94E-02 | 1.00E+00 |
| ENSG00000276408.1_RP11-490B  | ENSG00000160789.18_LMNA | -0.05019 | -0.207726741 | 0.109893011 | 5.39E-01 | 7.79E-01 | 1.00E+00 |
| ENSG00000226098.4_SEC11B     | ENSG00000160789.18_LMNA | 0.07292  | -0.087294478 | 0.229456587 | 3.72E-01 | 6.52E-01 | 1.00E+00 |
| ENSG00000225746.7_SNHG23     | ENSG00000160789.18_LMNA | -0.07435 | -0.230818506 | 0.085867173 | 3.63E-01 | 6.44E-01 | 1.00E+00 |
| ENSG00000234450.1_AC005534.  | ENSG00000160789.18_LMNA | -0.06341 | -0.220382662 | 0.09677096  | 4.38E-01 | 7.06E-01 | 1.00E+00 |
| ENSG00000146151.11_HMGCLL1   | ENSG00000160789.18_LMNA | -0.24808 | -0.391809475 | -0.09253737 | 2.06E-03 | 2.00E-02 | 1.00E+00 |
| ENSG00000137757.9_CASP5      | ENSG00000160789.18_LMNA | 0.08667  | -0.073543361 | 0.242526371 | 2.88E-01 | 5.74E-01 | 1.00E+00 |
| ENSG00000258325.2_RP4-816N1  | ENSG00000160789.18_LMNA | -0.12402 | -0.277737054 | 0.03588929  | 1.28E-01 | 3.62E-01 | 1.00E+00 |
| ENSG00000229754.1_CXCR2P1    | ENSG00000160789.18_LMNA | -0.11957 | -0.273563822 | 0.040399123 | 1.42E-01 | 3.85E-01 | 1.00E+00 |
| ENSG00000232721.2_RP11-403I1 | ENSG00000160789.18_LMNA | -0.12283 | -0.276625764 | 0.037091463 | 1.32E-01 | 3.68E-01 | 1.00E+00 |
| ENSG00000232429.3_RPL21P131  | ENSG00000160789.18_LMNA | -0.0437  | -0.201495375 | 0.116313462 | 5.93E-01 | 8.12E-01 | 1.00E+00 |
| ENSG00000237784.1_AC097713.  | ENSG00000160789.18_LMNA | -0.06654 | -0.223370966 | 0.09365642  | 4.15E-01 | 6.88E-01 | 1.00E+00 |
| ENSG00000198774.4_RASSF9     | ENSG00000160789.18_LMNA | 0.22503  | 0.068274986  | 0.370941506 | 5.32E-03 | 4.11E-02 | 1.00E+00 |
| ENSG00000153820.11_SPHKAP    | ENSG00000160789.18_LMNA | -0.39985 | -0.525593345 | -0.25700963 | 3.33E-07 | 1.92E-05 | 1.71E-02 |
| ENSG00000226961.3_AC018463.  | ENSG00000160789.18_LMNA | -0.00469 | -0.163770129 | 0.154624444 | 9.54E-01 | 9.82E-01 | 1.00E+00 |
| ENSG00000239831.1_RNF7P1     | ENSG00000160789.18_LMNA | 0.08654  | -0.073677565 | 0.242399368 | 2.89E-01 | 5.74E-01 | 1.00E+00 |
| ENSG00000232876.1_CTA-212D2  | ENSG00000160789.18_LMNA | -0.20275 | -0.350631022 | -0.04499963 | 1.22E-02 | 7.58E-02 | 1.00E+00 |
| ENSG00000258895.1_CTD-2643K  | ENSG00000160789.18_LMNA | 0.06614  | -0.094049621 | 0.222994029 | 4.18E-01 | 6.90E-01 | 1.00E+00 |
| ENSG00000261330.1_RP11-281J. | ENSG00000160789.18_LMNA | 0.07383  | -0.086389244 | 0.230320496 | 3.66E-01 | 6.47E-01 | 1.00E+00 |
| ENSG00000158578.17_ALAS2     | ENSG00000160789.18_LMNA | -0.02541 | -0.183862107 | 0.134339001 | 7.56E-01 | 8.98E-01 | 1.00E+00 |
| ENSG00000279255.1_LA16c-380/ | ENSG00000160789.18_LMNA | -0.09431 | -0.249759366 | 0.065881295 | 2.48E-01 | 5.28E-01 | 1.00E+00 |
| ENSG00000271474.1_RP11-710C  | ENSG00000160789.18_LMNA | 0.00535  | -0.153985851 | 0.164406684 | 9.48E-01 | 9.79E-01 | 1.00E+00 |
| ENSG00000167807.14_CTD-2369  | ENSG00000160789.18_LMNA | -0.055   | -0.21234302  | 0.105119503 | 5.01E-01 | 7.53E-01 | 1.00E+00 |
| ENSG00000229111.1_MED4-AS1   | ENSG00000160789.18_LMNA | -0.05378 | -0.211171463 | 0.106332349 | 5.11E-01 | 7.59E-01 | 1.00E+00 |
| ENSG00000220343.5_RP11-440K  | ENSG00000160789.18_LMNA | 0.07911  | -0.081111585 | 0.235347301 | 3.33E-01 | 6.18E-01 | 1.00E+00 |
| ENSG00000270392.2_PFN1P2     | ENSG00000160789.18_LMNA | -0.04785 | -0.205482182 | 0.112208737 | 5.58E-01 | 7.91E-01 | 1.00E+00 |
| ENSG00000179542.14_SLITRK4   | ENSG00000160789.18_LMNA | -0.26807 | -0.409777997 | -0.11371736 | 8.41E-04 | 1.01E-02 | 1.00E+00 |

|                              |                         |          |              |             |          |          |          |
|------------------------------|-------------------------|----------|--------------|-------------|----------|----------|----------|
| ENSG00000213526.3_SETP8      | ENSG00000160789.18_LMNA | -0.01404 | -0.172858696 | 0.145481495 | 8.64E-01 | 9.47E-01 | 1.00E+00 |
| ENSG00000270765.4_GAS2L2     | ENSG00000160789.18_LMNA | -0.0382  | -0.196205592 | 0.121742993 | 6.40E-01 | 8.39E-01 | 1.00E+00 |
| ENSG00000204659.4_CBY3       | ENSG00000160789.18_LMNA | 0.11637  | -0.043639588 | 0.2705579   | 1.53E-01 | 4.03E-01 | 1.00E+00 |
| ENSG00000260872.1_           | ENSG00000160789.18_LMNA | 0.02176  | -0.137914003 | 0.180340396 | 7.90E-01 | 9.15E-01 | 1.00E+00 |
| ENSG00000219146.1_RPS4XP8    | ENSG00000160789.18_LMNA | -0.01025 | -0.169176721 | 0.149192065 | 9.00E-01 | 9.61E-01 | 1.00E+00 |
| ENSG00000272854.1_RP4-593H1  | ENSG00000160789.18_LMNA | -0.00439 | -0.163473384 | 0.154922048 | 9.57E-01 | 9.83E-01 | 1.00E+00 |
| ENSG00000278743.1_RP11-707G  | ENSG00000160789.18_LMNA | 0.03689  | -0.123037952 | 0.194941225 | 6.52E-01 | 8.46E-01 | 1.00E+00 |
| ENSG00000237584.1_RAC1P4     | ENSG00000160789.18_LMNA | 0.0324   | -0.127458092 | 0.190617528 | 6.92E-01 | 8.67E-01 | 1.00E+00 |
| ENSG00000053328.8_METTL24    | ENSG00000160789.18_LMNA | -0.17228 | -0.32262963  | -0.01344567 | 3.38E-02 | 1.55E-01 | 1.00E+00 |
| ENSG00000223461.1_AC004471.1 | ENSG00000160789.18_LMNA | -0.05809 | -0.215297501 | 0.102056695 | 4.77E-01 | 7.36E-01 | 1.00E+00 |
| ENSG00000249352.4_RP11-141O  | ENSG00000160789.18_LMNA | -0.13144 | -0.28468293  | 0.028354748 | 1.07E-01 | 3.24E-01 | 1.00E+00 |
| ENSG00000227014.4_AC007285.1 | ENSG00000160789.18_LMNA | 0.18603  | 0.027650719  | 0.335302711 | 2.18E-02 | 1.15E-01 | 1.00E+00 |
| ENSG00000271871.1_AC005740.1 | ENSG00000160789.18_LMNA | -0.0409  | -0.1988069   | 0.119075339 | 6.17E-01 | 8.26E-01 | 1.00E+00 |
| ENSG00000160838.12_LRRC71    | ENSG00000160789.18_LMNA | 0.05427  | -0.105842067 | 0.211645164 | 5.07E-01 | 7.57E-01 | 1.00E+00 |
| ENSG00000120907.16_ADRA1A    | ENSG00000160789.18_LMNA | -0.32571 | -0.461002623 | -0.17561134 | 4.23E-05 | 9.38E-04 | 1.00E+00 |
| ENSG00000243960.1_RP11-552M  | ENSG00000160789.18_LMNA | -0.12772 | -0.28119969  | 0.032137646 | 1.17E-01 | 3.42E-01 | 1.00E+00 |
| ENSG00000228649.7_AC005682.1 | ENSG00000160789.18_LMNA | 0.14275  | -0.016832821 | 0.295241477 | 7.94E-02 | 2.71E-01 | 1.00E+00 |
| ENSG00000261582.1_RP4-614O4  | ENSG00000160789.18_LMNA | 0.05338  | -0.106724648 | 0.210792324 | 5.14E-01 | 7.62E-01 | 1.00E+00 |
| ENSG00000236498.1_AC107081.1 | ENSG00000160789.18_LMNA | -0.03389 | -0.192056143 | 0.125988789 | 6.78E-01 | 8.60E-01 | 1.00E+00 |
| ENSG00000240240.7_RP11-146D  | ENSG00000160789.18_LMNA | -0.21318 | -0.360156835 | -0.05587483 | 8.37E-03 | 5.76E-02 | 1.00E+00 |
| ENSG00000272690.4_RP11-803B  | ENSG00000160789.18_LMNA | -0.16019 | -0.311446675 | -0.00101367 | 4.87E-02 | 1.98E-01 | 1.00E+00 |
| ENSG0000026751.15_SLAMF7     | ENSG00000160789.18_LMNA | -0.00716 | -0.166168821 | 0.152216684 | 9.30E-01 | 9.73E-01 | 1.00E+00 |
| ENSG00000230807.1_AC099535.1 | ENSG00000160789.18_LMNA | -0.00941 | -0.168355563 | 0.150018379 | 9.08E-01 | 9.65E-01 | 1.00E+00 |
| ENSG00000267741.1_UBE2L4     | ENSG00000160789.18_LMNA | -0.04375 | -0.20154619  | 0.116261212 | 5.93E-01 | 8.12E-01 | 1.00E+00 |
| ENSG00000184378.2_ACTRT3     | ENSG00000160789.18_LMNA | 0.02818  | -0.131607519 | 0.186547377 | 7.30E-01 | 8.86E-01 | 1.00E+00 |
| ENSG00000224557.6_HLA-DPB2   | ENSG00000160789.18_LMNA | -0.02362 | -0.182136371 | 0.136091887 | 7.73E-01 | 9.06E-01 | 1.00E+00 |
| ENSG00000139915.17_MDGA2     | ENSG00000160789.18_LMNA | -0.35963 | -0.49073651  | -0.21260396 | 5.35E-06 | 1.75E-04 | 2.75E-01 |
| ENSG00000060303.5_RPS17P5    | ENSG00000160789.18_LMNA | 0.06097  | -0.099192337 | 0.218055305 | 4.56E-01 | 7.20E-01 | 1.00E+00 |
| ENSG00000214073.2_RPL21P17   | ENSG00000160789.18_LMNA | -0.09574 | -0.251115909 | 0.064440122 | 2.41E-01 | 5.20E-01 | 1.00E+00 |
| ENSG00000145451.11_GLRA3     | ENSG00000160789.18_LMNA | -0.44207 | -0.561733503 | -0.3042797  | 1.19E-08 | 1.24E-06 | 6.09E-04 |
| ENSG00000257243.1_RP11-133N  | ENSG00000160789.18_LMNA | -0.07363 | -0.230137058 | 0.0865815   | 3.67E-01 | 6.48E-01 | 1.00E+00 |
| ENSG00000105501.10_SIGLEC5   | ENSG00000160789.18_LMNA | 0.10712  | -0.05297995  | 0.261859173 | 1.89E-01 | 4.56E-01 | 1.00E+00 |
| ENSG00000274322.1_RP11-314N  | ENSG00000160789.18_LMNA | 0.1145   | -0.045526041 | 0.268805162 | 1.60E-01 | 4.14E-01 | 1.00E+00 |



|                              |                         |          |              |             |          |          |          |
|------------------------------|-------------------------|----------|--------------|-------------|----------|----------|----------|
| ENSG00000205583.12_STAG3L1   | ENSG00000160789.18_LMNA | -0.03602 | -0.194104604 | 0.12389422  | 6.60E-01 | 8.50E-01 | 1.00E+00 |
| ENSG00000227906.6_SNAP25-AS1 | ENSG00000160789.18_LMNA | -0.07716 | -0.233488129 | 0.083065606 | 3.45E-01 | 6.29E-01 | 1.00E+00 |
| ENSG00000225302.2_RP11-539I5 | ENSG00000160789.18_LMNA | 0.10835  | -0.051744315 | 0.26301287  | 1.84E-01 | 4.49E-01 | 1.00E+00 |
| ENSG00000232260.2_BTF3L4P1   | ENSG00000160789.18_LMNA | -0.00758 | -0.166580715 | 0.151802853 | 9.26E-01 | 9.72E-01 | 1.00E+00 |
| ENSG00000213411.2_RBM22P2    | ENSG00000160789.18_LMNA | 0.06948  | -0.090725442 | 0.226177714 | 3.95E-01 | 6.72E-01 | 1.00E+00 |
| ENSG00000258847.1_CTD-2014B  | ENSG00000160789.18_LMNA | -0.17999 | -0.329744929 | -0.02140576 | 2.65E-02 | 1.32E-01 | 1.00E+00 |
| ENSG00000161944.15_ASGR2     | ENSG00000160789.18_LMNA | 0.14523  | -0.014296267 | 0.29755575  | 7.42E-02 | 2.60E-01 | 1.00E+00 |
| ENSG00000272498.1_RP11-415F  | ENSG00000160789.18_LMNA | -0.11349 | -0.267847347 | 0.04655598  | 1.64E-01 | 4.20E-01 | 1.00E+00 |
| ENSG00000250159.5_RP11-381K  | ENSG00000160789.18_LMNA | -0.16951 | -0.320071256 | -0.01059309 | 3.68E-02 | 1.64E-01 | 1.00E+00 |
| ENSG00000254572.2_GLULP3     | ENSG00000160789.18_LMNA | 0.17595  | 0.017228218  | 0.326015108 | 3.01E-02 | 1.44E-01 | 1.00E+00 |
| ENSG00000253133.1_RP11-360L  | ENSG00000160789.18_LMNA | -0.05448 | -0.211839076 | 0.105641323 | 5.05E-01 | 7.56E-01 | 1.00E+00 |
| ENSG00000275454.1_CTD-2026K  | ENSG00000160789.18_LMNA | 0.07217  | -0.088044168 | 0.228740744 | 3.77E-01 | 6.57E-01 | 1.00E+00 |
| ENSG00000168852.11_TPTE2P5   | ENSG00000160789.18_LMNA | -0.22244 | -0.36858416  | -0.06555651 | 5.88E-03 | 4.44E-02 | 1.00E+00 |
| ENSG00000178722.11_C5orf64   | ENSG00000160789.18_LMNA | -0.26688 | -0.408713719 | -0.11245532 | 8.89E-04 | 1.06E-02 | 1.00E+00 |
| ENSG00000267174.4_CTC-510F1  | ENSG00000160789.18_LMNA | 0.22675  | 0.070078514  | 0.3725033   | 4.97E-03 | 3.90E-02 | 1.00E+00 |
| ENSG00000237152.3_DLEU7-AS1  | ENSG00000160789.18_LMNA | -0.30972 | -0.44688457  | -0.15832446 | 1.03E-04 | 1.94E-03 | 1.00E+00 |
| ENSG00000261568.1_RP11-524C  | ENSG00000160789.18_LMNA | -0.12617 | -0.279751021 | 0.033708303 | 1.21E-01 | 3.51E-01 | 1.00E+00 |
| ENSG00000260743.1_RP11-255C  | ENSG00000160789.18_LMNA | -0.2394  | -0.383969491 | -0.08338025 | 2.97E-03 | 2.66E-02 | 1.00E+00 |
| ENSG00000275763.2_C18orf65   | ENSG00000160789.18_LMNA | 0.01898  | -0.140646943 | 0.177642681 | 8.16E-01 | 9.28E-01 | 1.00E+00 |
| ENSG00000271396.1_RP11-697E  | ENSG00000160789.18_LMNA | -0.03542 | -0.1935283   | 0.124483782 | 6.65E-01 | 8.52E-01 | 1.00E+00 |
| ENSG00000212124.2_TAS2R19    | ENSG00000160789.18_LMNA | -0.15381 | -0.30552935  | 0.005525971 | 5.85E-02 | 2.22E-01 | 1.00E+00 |
| ENSG00000279970.1_RP11-299G  | ENSG00000160789.18_LMNA | -0.16343 | -0.314446049 | -0.00433866 | 4.42E-02 | 1.86E-01 | 1.00E+00 |
| ENSG00000267416.1_CTD-2319I1 | ENSG00000160789.18_LMNA | -0.21695 | -0.363596672 | -0.05981977 | 7.26E-03 | 5.17E-02 | 1.00E+00 |
| ENSG00000261898.2_RP11-314A  | ENSG00000160789.18_LMNA | -0.2571  | -0.399929437 | -0.10207517 | 1.39E-03 | 1.48E-02 | 1.00E+00 |
| ENSG00000273254.1_RP11-100J1 | ENSG00000160789.18_LMNA | 0.07593  | -0.08428572  | 0.232326065 | 3.52E-01 | 6.36E-01 | 1.00E+00 |
| ENSG00000157168.17_NRG1      | ENSG00000160789.18_LMNA | -0.05535 | -0.212674442 | 0.104776228 | 4.98E-01 | 7.52E-01 | 1.00E+00 |
| ENSG00000095596.10_CYP26A1   | ENSG00000160789.18_LMNA | 0.10334  | -0.056799458 | 0.258287249 | 2.05E-01 | 4.77E-01 | 1.00E+00 |
| ENSG00000225422.4_RBMS1P1    | ENSG00000160789.18_LMNA | 0.19247  | 0.034325845  | 0.341219739 | 1.75E-02 | 9.81E-02 | 1.00E+00 |
| ENSG00000203650.6_LINC01285  | ENSG00000160789.18_LMNA | -0.12101 | -0.274917339 | 0.038937836 | 1.38E-01 | 3.78E-01 | 1.00E+00 |
| ENSG00000248734.2_CTD-2260A  | ENSG00000160789.18_LMNA | 0.23435  | 0.078062947  | 0.379397033 | 3.66E-03 | 3.10E-02 | 1.00E+00 |
| ENSG00000179111.7_HES7       | ENSG00000160789.18_LMNA | 0.04481  | -0.115215238 | 0.202563082 | 5.84E-01 | 8.06E-01 | 1.00E+00 |
| ENSG00000125780.11_TGM3      | ENSG00000160789.18_LMNA | -0.02862 | -0.18696781  | 0.131179413 | 7.26E-01 | 8.84E-01 | 1.00E+00 |
| ENSG00000105369.8_CD79A      | ENSG00000160789.18_LMNA | 0.15539  | -0.003904744 | 0.306998543 | 5.59E-02 | 2.16E-01 | 1.00E+00 |

|                              |                         |          |              |             |          |          |          |
|------------------------------|-------------------------|----------|--------------|-------------|----------|----------|----------|
| ENSG00000163009.7_C2orf48    | ENSG00000160789.18_LMNA | -0.12571 | -0.279323639 | 0.034171377 | 1.23E-01 | 3.53E-01 | 1.00E+00 |
| ENSG00000213304.3_CTC-398G3  | ENSG00000160789.18_LMNA | -0.02331 | -0.181837706 | 0.136395049 | 7.76E-01 | 9.08E-01 | 1.00E+00 |
| ENSG00000187682.1_ERAS       | ENSG00000160789.18_LMNA | -0.06663 | -0.22345933  | 0.093564228 | 4.15E-01 | 6.88E-01 | 1.00E+00 |
| ENSG00000088002.10_SULT2B1   | ENSG00000160789.18_LMNA | 0.13331  | -0.026453373 | 0.286430574 | 1.02E-01 | 3.15E-01 | 1.00E+00 |
| ENSG00000272140.2_RP11-574K  | ENSG00000160789.18_LMNA | -0.03878 | -0.196767022 | 0.121167633 | 6.35E-01 | 8.37E-01 | 1.00E+00 |
| ENSG00000010379.14_SLC6A13   | ENSG00000160789.18_LMNA | -0.17058 | -0.321060311 | -0.01169528 | 3.56E-02 | 1.61E-01 | 1.00E+00 |
| ENSG00000277420.1_CH17-408M  | ENSG00000160789.18_LMNA | 0.16004  | 0.000865096  | 0.311312502 | 4.89E-02 | 1.98E-01 | 1.00E+00 |
| ENSG00000111262.4_KCNA1      | ENSG00000160789.18_LMNA | -0.06926 | -0.22596745  | 0.090945204 | 3.97E-01 | 6.73E-01 | 1.00E+00 |
| ENSG00000164626.8_KCNK5      | ENSG00000160789.18_LMNA | 0.21616  | 0.058988476  | 0.362872505 | 7.48E-03 | 5.28E-02 | 1.00E+00 |
| ENSG00000235916.1_RP13-444K  | ENSG00000160789.18_LMNA | 0.00118  | -0.158051807 | 0.160349166 | 9.89E-01 | 9.96E-01 | 1.00E+00 |
| ENSG00000260174.1_CTD-2022H  | ENSG00000160789.18_LMNA | -0.11054 | -0.265075454 | 0.049532837 | 1.75E-01 | 4.36E-01 | 1.00E+00 |
| ENSG00000213307.4_RPL18P11   | ENSG00000160789.18_LMNA | -0.0611  | -0.218177874 | 0.09906491  | 4.55E-01 | 7.19E-01 | 1.00E+00 |
| ENSG00000249274.1_PDLIM1P4   | ENSG00000160789.18_LMNA | -0.1383  | -0.291096227 | 0.021366195 | 8.93E-02 | 2.91E-01 | 1.00E+00 |
| ENSG00000205502.3_C2CD4B     | ENSG00000160789.18_LMNA | 0.13984  | -0.019796928 | 0.29253247  | 8.57E-02 | 2.84E-01 | 1.00E+00 |
| ENSG00000248664.1_CTC-498J1  | ENSG00000160789.18_LMNA | -0.01218 | -0.171049233 | 0.14730613  | 8.82E-01 | 9.54E-01 | 1.00E+00 |
| ENSG00000232439.1_RPL18AP7   | ENSG00000160789.18_LMNA | 0.03249  | -0.127372357 | 0.19070151  | 6.91E-01 | 8.67E-01 | 1.00E+00 |
| ENSG00000273375.1_RP11-803P  | ENSG00000160789.18_LMNA | -0.01999 | -0.178621674 | 0.139655728 | 8.07E-01 | 9.23E-01 | 1.00E+00 |
| ENSG00000196860.6_TOMM20L    | ENSG00000160789.18_LMNA | -0.16974 | -0.320286495 | -0.01083288 | 3.66E-02 | 1.63E-01 | 1.00E+00 |
| ENSG00000257060.5_RP11-266O  | ENSG00000160789.18_LMNA | -0.00818 | -0.167160379 | 0.151220273 | 9.20E-01 | 9.70E-01 | 1.00E+00 |
| ENSG00000250138.4_RP11-848G  | ENSG00000160789.18_LMNA | 0.19044  | 0.032211364  | 0.339348029 | 1.88E-02 | 1.03E-01 | 1.00E+00 |
| ENSG00000279148.1_RP11-135F  | ENSG00000160789.18_LMNA | 0.13008  | -0.029735423 | 0.283412581 | 1.10E-01 | 3.31E-01 | 1.00E+00 |
| ENSG00000213183.3_RPS7P8     | ENSG00000160789.18_LMNA | -0.1071  | -0.261836715 | 0.053003994 | 1.89E-01 | 4.56E-01 | 1.00E+00 |
| ENSG00000241651.4_RP11-214O  | ENSG00000160789.18_LMNA | -0.14617 | -0.298428095 | 0.013339092 | 7.23E-02 | 2.55E-01 | 1.00E+00 |
| ENSG00000183317.15_EPHA10    | ENSG00000160789.18_LMNA | -0.26754 | -0.409303643 | -0.11315474 | 8.62E-04 | 1.03E-02 | 1.00E+00 |
| ENSG00000271538.4_RP11-326I1 | ENSG00000160789.18_LMNA | -0.05199 | -0.209459727 | 0.108102716 | 5.25E-01 | 7.70E-01 | 1.00E+00 |
| ENSG00000250240.4_CTD-2154I1 | ENSG00000160789.18_LMNA | -0.1083  | -0.262964673 | 0.051795954 | 1.84E-01 | 4.49E-01 | 1.00E+00 |
| ENSG00000261366.1_MANEA-AS   | ENSG00000160789.18_LMNA | -0.20239 | -0.350301668 | -0.04462491 | 1.24E-02 | 7.65E-02 | 1.00E+00 |
| ENSG00000223718.3_AC093107.  | ENSG00000160789.18_LMNA | -0.08571 | -0.241614026 | 0.074507185 | 2.94E-01 | 5.80E-01 | 1.00E+00 |
| ENSG00000277013.1_CTC-526N1  | ENSG00000160789.18_LMNA | 0.15221  | -0.007161168 | 0.304045996 | 6.12E-02 | 2.29E-01 | 1.00E+00 |
| ENSG00000257052.1_RP11-881M  | ENSG00000160789.18_LMNA | -0.24413 | -0.388241415 | -0.08836358 | 2.44E-03 | 2.28E-02 | 1.00E+00 |
| ENSG00000232759.1_AC002480.  | ENSG00000160789.18_LMNA | -0.09152 | -0.247116874 | 0.068684865 | 2.62E-01 | 5.45E-01 | 1.00E+00 |
| ENSG00000108684.13_ASIC2     | ENSG00000160789.18_LMNA | 0.02596  | -0.133793262 | 0.184398993 | 7.51E-01 | 8.96E-01 | 1.00E+00 |
| ENSG00000226543.3_MYL6P1     | ENSG00000160789.18_LMNA | 0.07189  | -0.08832038  | 0.228476915 | 3.79E-01 | 6.58E-01 | 1.00E+00 |

|                             |                         |          |              |             |          |          |          |
|-----------------------------|-------------------------|----------|--------------|-------------|----------|----------|----------|
| ENSG00000226496.2_LINC00323 | ENSG00000160789.18_LMNA | -0.16245 | -0.313543251 | -0.00333713 | 4.55E-02 | 1.89E-01 | 1.00E+00 |
| ENSG00000243537.1_CTC-458A3 | ENSG00000160789.18_LMNA | -0.06841 | -0.22516245  | 0.091786277 | 4.02E-01 | 6.78E-01 | 1.00E+00 |
| ENSG00000259772.5_RP11-16E1 | ENSG00000160789.18_LMNA | -0.01826 | -0.176951125 | 0.141346748 | 8.23E-01 | 9.31E-01 | 1.00E+00 |
| ENSG00000233067.2_PTCHD1-A  | ENSG00000160789.18_LMNA | 0.13081  | -0.028993604 | 0.28409526  | 1.08E-01 | 3.27E-01 | 1.00E+00 |
| ENSG00000232021.5_LEF1-AS1  | ENSG00000160789.18_LMNA | 0.108    | -0.052093695 | 0.262686749 | 1.85E-01 | 4.51E-01 | 1.00E+00 |
| ENSG00000254676.1_RP11-727A | ENSG00000160789.18_LMNA | -0.11401 | -0.268340444 | 0.046025836 | 1.62E-01 | 4.17E-01 | 1.00E+00 |
| ENSG00000175294.5_CATSPER1  | ENSG00000160789.18_LMNA | 0.2182   | 0.061126658  | 0.364734407 | 6.92E-03 | 5.00E-02 | 1.00E+00 |
| ENSG00000228510.2_RP11-339B | ENSG00000160789.18_LMNA | -0.02796 | -0.18633339  | 0.131825366 | 7.32E-01 | 8.87E-01 | 1.00E+00 |
| ENSG00000247317.3_RP11-273G | ENSG00000160789.18_LMNA | 0.12065  | -0.039308647 | 0.274573993 | 1.39E-01 | 3.80E-01 | 1.00E+00 |
| ENSG00000114854.6_TNNC1     | ENSG00000160789.18_LMNA | 0.02212  | -0.137567753 | 0.180681842 | 7.87E-01 | 9.13E-01 | 1.00E+00 |
| ENSG00000234377.6_RNF219-AS | ENSG00000160789.18_LMNA | -0.50613 | -0.615715973 | -0.37733003 | 2.90E-11 | 8.07E-09 | 1.49E-06 |
| ENSG00000177776.8_RPS2P2    | ENSG00000160789.18_LMNA | 0.05593  | -0.104203014 | 0.213227703 | 4.94E-01 | 7.49E-01 | 1.00E+00 |
| ENSG00000182257.6_PRR34     | ENSG00000160789.18_LMNA | 0.03324  | -0.126635036 | 0.191423562 | 6.84E-01 | 8.63E-01 | 1.00E+00 |
| ENSG00000248590.2_GLDPC1    | ENSG00000160789.18_LMNA | 0.12023  | -0.03973156  | 0.274182307 | 1.40E-01 | 3.82E-01 | 1.00E+00 |
| ENSG00000185972.5_CCIN      | ENSG00000160789.18_LMNA | 0.27801  | 0.124316002  | 0.418684165 | 5.24E-04 | 7.01E-03 | 1.00E+00 |
| ENSG00000196890.4_HIST3H2BE | ENSG00000160789.18_LMNA | -0.23936 | -0.383933682 | -0.08333854 | 2.98E-03 | 2.66E-02 | 1.00E+00 |
| ENSG00000231290.4_APCDD1L-  | ENSG00000160789.18_LMNA | 0.40311  | 0.260635727  | 0.528400421 | 2.62E-07 | 1.58E-05 | 1.34E-02 |
| ENSG00000260097.2_SPDYE6    | ENSG00000160789.18_LMNA | 0.215    | 0.057775588  | 0.361815257 | 7.81E-03 | 5.46E-02 | 1.00E+00 |
| ENSG00000272692.1_RP11-399K | ENSG00000160789.18_LMNA | -0.07564 | -0.232049334 | 0.084576134 | 3.54E-01 | 6.38E-01 | 1.00E+00 |
| ENSG00000250056.4_LINC01018 | ENSG00000160789.18_LMNA | -0.20484 | -0.352545895 | -0.04717995 | 1.14E-02 | 7.17E-02 | 1.00E+00 |
| ENSG00000196460.11_RFX8     | ENSG00000160789.18_LMNA | 0.28369  | 0.130372783  | 0.423748451 | 3.98E-04 | 5.64E-03 | 1.00E+00 |
| ENSG00000246465.1_RP11-57A1 | ENSG00000160789.18_LMNA | -0.1528  | -0.304588303 | 0.006563541 | 6.02E-02 | 2.26E-01 | 1.00E+00 |
| ENSG00000204791.7_SMPD5     | ENSG00000160789.18_LMNA | -0.05044 | -0.207972014 | 0.109639751 | 5.37E-01 | 7.78E-01 | 1.00E+00 |
| ENSG00000215088.3_RPS5P3    | ENSG00000160789.18_LMNA | 0.05032  | -0.109758881 | 0.207856646 | 5.38E-01 | 7.78E-01 | 1.00E+00 |
| ENSG00000170509.10_HSD17B1  | ENSG00000160789.18_LMNA | -0.06642 | -0.223255572 | 0.093776803 | 4.16E-01 | 6.89E-01 | 1.00E+00 |
| ENSG00000224728.1_IMPDI1P8  | ENSG00000160789.18_LMNA | -0.05942 | -0.216572328 | 0.100733266 | 4.67E-01 | 7.29E-01 | 1.00E+00 |
| ENSG00000279945.1_RP11-97O1 | ENSG00000160789.18_LMNA | 0.06111  | -0.099054914 | 0.218187488 | 4.55E-01 | 7.19E-01 | 1.00E+00 |
| ENSG00000154316.13_TDH      | ENSG00000160789.18_LMNA | -0.11863 | -0.272679464 | 0.041353171 | 1.45E-01 | 3.91E-01 | 1.00E+00 |
| ENSG00000262691.1_CTC-277H1 | ENSG00000160789.18_LMNA | 0.03533  | -0.124566513 | 0.193447412 | 6.66E-01 | 8.53E-01 | 1.00E+00 |
| ENSG00000226040.3_AC005740. | ENSG00000160789.18_LMNA | -0.21888 | -0.365350656 | -0.06183496 | 6.74E-03 | 4.90E-02 | 1.00E+00 |
| ENSG00000258461.4_RP11-164J | ENSG00000160789.18_LMNA | -0.05574 | -0.213053802 | 0.104383209 | 4.95E-01 | 7.50E-01 | 1.00E+00 |
| ENSG00000185078.3_AC093698. | ENSG00000160789.18_LMNA | -0.17378 | -0.324015613 | -0.01499314 | 3.23E-02 | 1.50E-01 | 1.00E+00 |
| ENSG00000198155.5_ZNF876P   | ENSG00000160789.18_LMNA | -0.00996 | -0.168892489 | 0.149478132 | 9.03E-01 | 9.63E-01 | 1.00E+00 |

|                             |                         |          |              |             |          |          |          |
|-----------------------------|-------------------------|----------|--------------|-------------|----------|----------|----------|
| ENSG00000119946.10_CNNM1    | ENSG00000160789.18_LMNA | -0.23616 | -0.381034138 | -0.07996477 | 3.40E-03 | 2.93E-02 | 1.00E+00 |
| ENSG00000237522.1_NONOP2    | ENSG00000160789.18_LMNA | 0.11429  | -0.045738068 | 0.268608033 | 1.61E-01 | 4.15E-01 | 1.00E+00 |
| ENSG00000100987.13_VSX1     | ENSG00000160789.18_LMNA | 0.05635  | -0.103783663 | 0.213632327 | 4.90E-01 | 7.46E-01 | 1.00E+00 |
| ENSG00000254387.1_MYL12AP1  | ENSG00000160789.18_LMNA | 0.05306  | -0.107046023 | 0.210481659 | 5.16E-01 | 7.63E-01 | 1.00E+00 |
| ENSG00000249129.1_SUDS3P1   | ENSG00000160789.18_LMNA | -0.04146 | -0.199346942 | 0.118520946 | 6.12E-01 | 8.23E-01 | 1.00E+00 |
| ENSG00000234911.1_TEX21P    | ENSG00000160789.18_LMNA | -0.07527 | -0.231698025 | 0.084944738 | 3.57E-01 | 6.40E-01 | 1.00E+00 |
| ENSG00000226167.1_AP4B1-AS1 | ENSG00000160789.18_LMNA | 0.06026  | -0.099897088 | 0.21737724  | 4.61E-01 | 7.24E-01 | 1.00E+00 |
| ENSG00000198156.9_NPIPB6    | ENSG00000160789.18_LMNA | -0.20522 | -0.352889421 | -0.04757141 | 1.12E-02 | 7.11E-02 | 1.00E+00 |
| ENSG00000255474.1_RP11-234B | ENSG00000160789.18_LMNA | -0.19341 | -0.342076363 | -0.0352945  | 1.70E-02 | 9.59E-02 | 1.00E+00 |
| ENSG00000223756.5_TSSC2     | ENSG00000160789.18_LMNA | 0.11009  | -0.049988528 | 0.264650679 | 1.77E-01 | 4.38E-01 | 1.00E+00 |
| ENSG00000228861.5_RPL23AP1  | ENSG00000160789.18_LMNA | 0.09172  | -0.068484992 | 0.24730542  | 2.61E-01 | 5.44E-01 | 1.00E+00 |
| ENSG00000168484.11_SFTPC    | ENSG00000160789.18_LMNA | -0.38102 | -0.509323755 | -0.23614097 | 1.28E-06 | 5.64E-05 | 6.57E-02 |
| ENSG00000240622.1_RPL7P15   | ENSG00000160789.18_LMNA | -0.06501 | -0.22191667  | 0.095172925 | 4.26E-01 | 6.97E-01 | 1.00E+00 |
| ENSG00000243709.1_LEFTY1    | ENSG00000160789.18_LMNA | -0.22318 | -0.369262036 | -0.06633777 | 5.71E-03 | 4.33E-02 | 1.00E+00 |
| ENSG00000172209.5_GPR22     | ENSG00000160789.18_LMNA | -0.19121 | -0.34006324  | -0.03301902 | 1.83E-02 | 1.01E-01 | 1.00E+00 |
| ENSG00000175518.6_UBQLNL    | ENSG00000160789.18_LMNA | 0.21449  | 0.057246628  | 0.361353929 | 7.96E-03 | 5.54E-02 | 1.00E+00 |
| ENSG00000279943.1_FLJ38576  | ENSG00000160789.18_LMNA | -0.03091 | -0.189182102 | 0.128922749 | 7.05E-01 | 8.75E-01 | 1.00E+00 |
| ENSG00000164695.4_CHMP4C    | ENSG00000160789.18_LMNA | -0.12857 | -0.281994599 | 0.031275142 | 1.14E-01 | 3.38E-01 | 1.00E+00 |
| ENSG00000244002.1_RPSAP39   | ENSG00000160789.18_LMNA | -0.09277 | -0.248302671 | 0.067427403 | 2.56E-01 | 5.38E-01 | 1.00E+00 |
| ENSG00000274021.1_RP11-823E | ENSG00000160789.18_LMNA | 0.13055  | -0.029260647 | 0.283849543 | 1.09E-01 | 3.28E-01 | 1.00E+00 |
| ENSG00000145757.14_SPATA9   | ENSG00000160789.18_LMNA | -0.12611 | -0.279692046 | 0.033772211 | 1.22E-01 | 3.51E-01 | 1.00E+00 |
| ENSG00000230212.5_AP000688  | ENSG00000160789.18_LMNA | 0.12124  | -0.038704333 | 0.275133505 | 1.37E-01 | 3.76E-01 | 1.00E+00 |
| ENSG00000240480.1_RPL29P2   | ENSG00000160789.18_LMNA | -0.05532 | -0.212644059 | 0.104807701 | 4.98E-01 | 7.52E-01 | 1.00E+00 |
| ENSG00000089558.7_KCNH4     | ENSG00000160789.18_LMNA | -0.10289 | -0.257866331 | 0.057248944 | 2.07E-01 | 4.79E-01 | 1.00E+00 |
| ENSG00000125508.3_SRMS      | ENSG00000160789.18_LMNA | 0.18661  | 0.028246414  | 0.335831741 | 2.13E-02 | 1.13E-01 | 1.00E+00 |
| ENSG00000271119.1_CTD-2012J | ENSG00000160789.18_LMNA | 0.19932  | 0.041430331  | 0.347490759 | 1.38E-02 | 8.27E-02 | 1.00E+00 |
| ENSG00000188316.12_ENO4     | ENSG00000160789.18_LMNA | 0.14005  | -0.019584779 | 0.292726528 | 8.53E-02 | 2.83E-01 | 1.00E+00 |
| ENSG00000180767.8_CHST13    | ENSG00000160789.18_LMNA | 0.13757  | -0.022112717 | 0.290412491 | 9.10E-02 | 2.94E-01 | 1.00E+00 |
| ENSG00000223675.1_RP11-86H7 | ENSG00000160789.18_LMNA | -0.05069 | -0.20821038  | 0.109393585 | 5.35E-01 | 7.76E-01 | 1.00E+00 |
| ENSG00000166035.9_LIPC      | ENSG00000160789.18_LMNA | -0.14081 | -0.293430283 | 0.018815179 | 8.36E-02 | 2.80E-01 | 1.00E+00 |
| ENSG00000224418.1_STK24-AS1 | ENSG00000160789.18_LMNA | 0.00217  | -0.157087539 | 0.161312408 | 9.79E-01 | 9.92E-01 | 1.00E+00 |
| ENSG00000266912.1_          | ENSG00000160789.18_LMNA | -0.19093 | -0.339799784 | -0.03272146 | 1.85E-02 | 1.02E-01 | 1.00E+00 |
| ENSG00000267452.1_RP11-1018 | ENSG00000160789.18_LMNA | 0.13487  | -0.024867115 | 0.287886989 | 9.76E-02 | 3.07E-01 | 1.00E+00 |

|                              |                         |          |              |             |          |          |          |
|------------------------------|-------------------------|----------|--------------|-------------|----------|----------|----------|
| ENSG00000213937.3_CLDN9      | ENSG00000160789.18_LMNA | 0.07413  | -0.086091072 | 0.230604946 | 3.64E-01 | 6.46E-01 | 1.00E+00 |
| ENSG00000268592.3_RAET1E-A5  | ENSG00000160789.18_LMNA | 0.06266  | -0.097510005 | 0.219672696 | 4.43E-01 | 7.10E-01 | 1.00E+00 |
| ENSG00000261659.2_LA16c-313I | ENSG00000160789.18_LMNA | 0.12453  | -0.035370331 | 0.278216521 | 1.26E-01 | 3.59E-01 | 1.00E+00 |
| ENSG00000166268.9_MYRFL      | ENSG00000160789.18_LMNA | -0.14576 | -0.298044422 | 0.013760145 | 7.32E-02 | 2.57E-01 | 1.00E+00 |
| ENSG00000160183.12_TMPRS3    | ENSG00000160789.18_LMNA | -0.08739 | -0.243202715 | 0.072828473 | 2.84E-01 | 5.70E-01 | 1.00E+00 |
| ENSG00000119411.10_BSPRY     | ENSG00000160789.18_LMNA | -0.10671 | -0.261468143 | 0.053398533 | 1.91E-01 | 4.58E-01 | 1.00E+00 |
| ENSG00000168621.13_GDNF      | ENSG00000160789.18_LMNA | -0.1583  | -0.309691852 | 0.000928475 | 5.14E-02 | 2.05E-01 | 1.00E+00 |
| ENSG00000174715.7_RP11-79L9  | ENSG00000160789.18_LMNA | -0.02178 | -0.180351663 | 0.137902579 | 7.90E-01 | 9.15E-01 | 1.00E+00 |
| ENSG00000271828.1_CTD-2310F  | ENSG00000160789.18_LMNA | -0.13962 | -0.292321705 | 0.020027311 | 8.62E-02 | 2.85E-01 | 1.00E+00 |
| ENSG00000257207.5_AC108938.I | ENSG00000160789.18_LMNA | 0.12079  | -0.039168082 | 0.274704155 | 1.38E-01 | 3.79E-01 | 1.00E+00 |
| ENSG00000232774.6_FLJ22447   | ENSG00000160789.18_LMNA | 0.04444  | -0.115575396 | 0.202213015 | 5.87E-01 | 8.08E-01 | 1.00E+00 |
| ENSG00000240418.1_CTD-2013N  | ENSG00000160789.18_LMNA | 0.09218  | -0.068023393 | 0.247740766 | 2.59E-01 | 5.42E-01 | 1.00E+00 |
| ENSG00000075886.10_TUBA3D    | ENSG00000160789.18_LMNA | 0.06804  | -0.092157831 | 0.224806694 | 4.05E-01 | 6.81E-01 | 1.00E+00 |
| ENSG00000274307.1_RP11-345J  | ENSG00000160789.18_LMNA | 0.07335  | -0.086862958 | 0.22986847  | 3.69E-01 | 6.50E-01 | 1.00E+00 |
| ENSG00000130762.13_ARHGEF1   | ENSG00000160789.18_LMNA | -0.08304 | -0.239078309 | 0.077182881 | 3.09E-01 | 5.96E-01 | 1.00E+00 |
| ENSG00000127364.3_TAS2R4     | ENSG00000160789.18_LMNA | -0.10291 | -0.257882978 | 0.057231169 | 2.07E-01 | 4.79E-01 | 1.00E+00 |
| ENSG00000204277.1_RP11-219G  | ENSG00000160789.18_LMNA | 0.21159  | 0.054212254  | 0.358704646 | 8.88E-03 | 6.02E-02 | 1.00E+00 |
| ENSG00000237938.4_RP11-288I2 | ENSG00000160789.18_LMNA | 0.08344  | -0.076783776 | 0.239456808 | 3.07E-01 | 5.93E-01 | 1.00E+00 |
| ENSG00000214896.4_RPSAP55    | ENSG00000160789.18_LMNA | -0.21127 | -0.358414928 | -0.05388076 | 8.98E-03 | 6.07E-02 | 1.00E+00 |
| ENSG00000271711.1_RP11-392O  | ENSG00000160789.18_LMNA | 0.03836  | -0.12157992  | 0.196364738 | 6.39E-01 | 8.39E-01 | 1.00E+00 |
| ENSG00000253525.1_CTD-2114J  | ENSG00000160789.18_LMNA | 0.11201  | -0.04804818  | 0.266458538 | 1.69E-01 | 4.28E-01 | 1.00E+00 |
| ENSG00000279853.1_RP5-844F9  | ENSG00000160789.18_LMNA | -0.01029 | -0.16921081  | 0.149157752 | 9.00E-01 | 9.61E-01 | 1.00E+00 |
| ENSG00000101977.18_MCF2      | ENSG00000160789.18_LMNA | -0.35004 | -0.482359681 | -0.20210086 | 9.84E-06 | 2.88E-04 | 5.05E-01 |
| ENSG00000218803.1_GSTM2P1    | ENSG00000160789.18_LMNA | -0.02003 | -0.178656244 | 0.139620714 | 8.07E-01 | 9.23E-01 | 1.00E+00 |
| ENSG00000120555.12_SEPT7P9   | ENSG00000160789.18_LMNA | -0.05668 | -0.21395301  | 0.103451228 | 4.88E-01 | 7.44E-01 | 1.00E+00 |
| ENSG00000249222.1_ATP5L2     | ENSG00000160789.18_LMNA | -0.05382 | -0.211207622 | 0.10629493  | 5.10E-01 | 7.59E-01 | 1.00E+00 |
| ENSG00000245468.3_RP11-367J  | ENSG00000160789.18_LMNA | 0.116    | -0.044011372 | 0.270212634 | 1.55E-01 | 4.06E-01 | 1.00E+00 |
| ENSG00000260871.1_CTD-2373J  | ENSG00000160789.18_LMNA | -0.00416 | -0.163251155 | 0.155144882 | 9.59E-01 | 9.84E-01 | 1.00E+00 |
| ENSG00000261465.5_RP11-626G  | ENSG00000160789.18_LMNA | -0.076   | -0.23239197  | 0.084216548 | 3.52E-01 | 6.36E-01 | 1.00E+00 |
| ENSG00000264548.1_RP13-516M  | ENSG00000160789.18_LMNA | -0.02664 | -0.185051937 | 0.133129291 | 7.45E-01 | 8.93E-01 | 1.00E+00 |
| ENSG00000272902.2_RP11-299H  | ENSG00000160789.18_LMNA | -0.05179 | -0.209268548 | 0.108300318 | 5.26E-01 | 7.71E-01 | 1.00E+00 |
| ENSG00000272209.1_RP3-500L1  | ENSG00000160789.18_LMNA | 0.12234  | -0.037587828 | 0.276166678 | 1.33E-01 | 3.70E-01 | 1.00E+00 |
| ENSG00000138772.11_ANXA3     | ENSG00000160789.18_LMNA | -0.1581  | -0.309514253 | 0.001124903 | 5.17E-02 | 2.06E-01 | 1.00E+00 |

|                              |                         |          |              |             |          |          |          |
|------------------------------|-------------------------|----------|--------------|-------------|----------|----------|----------|
| ENSG00000270503.1_YTHDF2P1   | ENSG00000160789.18_LMNA | 0.03492  | -0.124974336 | 0.193048611 | 6.69E-01 | 8.55E-01 | 1.00E+00 |
| ENSG00000174611.10_KY        | ENSG00000160789.18_LMNA | -0.31237 | -0.449231658 | -0.16118615 | 8.93E-05 | 1.72E-03 | 1.00E+00 |
| ENSG00000104760.15_FGL1      | ENSG00000160789.18_LMNA | -0.20593 | -0.353539293 | -0.04831221 | 1.09E-02 | 6.98E-02 | 1.00E+00 |
| ENSG00000225094.3_SETP20     | ENSG00000160789.18_LMNA | 0.09385  | -0.066342996 | 0.249324515 | 2.50E-01 | 5.31E-01 | 1.00E+00 |
| ENSG00000225531.1_RP11-196I1 | ENSG00000160789.18_LMNA | -0.17388 | -0.324105799 | -0.01509388 | 3.22E-02 | 1.50E-01 | 1.00E+00 |
| ENSG00000148488.14_ST8SIA6   | ENSG00000160789.18_LMNA | -0.23441 | -0.379449638 | -0.07812402 | 3.65E-03 | 3.10E-02 | 1.00E+00 |
| ENSG00000250790.4_RP11-46H1  | ENSG00000160789.18_LMNA | -0.10147 | -0.256522346 | 0.058683294 | 2.14E-01 | 4.88E-01 | 1.00E+00 |
| ENSG00000226421.1_SLC25A5P1  | ENSG00000160789.18_LMNA | -0.09295 | -0.248478388 | 0.06724098  | 2.55E-01 | 5.36E-01 | 1.00E+00 |
| ENSG00000146221.9_TCTE1      | ENSG00000160789.18_LMNA | -0.15757 | -0.309016736 | 0.001675037 | 5.25E-02 | 2.08E-01 | 1.00E+00 |
| ENSG00000237742.5_RP11-624M  | ENSG00000160789.18_LMNA | -0.27879 | -0.41937581  | -0.1251419  | 5.05E-04 | 6.80E-03 | 1.00E+00 |
| ENSG00000102837.6_OLFM4      | ENSG00000160789.18_LMNA | -0.13799 | -0.290800751 | 0.021688847 | 9.00E-02 | 2.92E-01 | 1.00E+00 |
| ENSG00000224184.4_MIR3681HC  | ENSG00000160789.18_LMNA | 0.33891  | 0.189957459  | 0.472610307 | 1.95E-05 | 5.05E-04 | 9.99E-01 |
| ENSG00000236768.1_RP11-1029  | ENSG00000160789.18_LMNA | -0.05598 | -0.213278953 | 0.104149905 | 4.93E-01 | 7.49E-01 | 1.00E+00 |
| ENSG00000249207.1_RP11-360F  | ENSG00000160789.18_LMNA | -0.07935 | -0.235575042 | 0.080872058 | 3.31E-01 | 6.17E-01 | 1.00E+00 |
| ENSG00000260774.1_CTD-2083E  | ENSG00000160789.18_LMNA | -0.11833 | -0.272395966 | 0.041658888 | 1.47E-01 | 3.92E-01 | 1.00E+00 |
| ENSG00000053108.15_FSTL4     | ENSG00000160789.18_LMNA | -0.21337 | -0.360333634 | -0.05607736 | 8.31E-03 | 5.73E-02 | 1.00E+00 |
| ENSG00000105143.11_SLC1A6    | ENSG00000160789.18_LMNA | -0.39545 | -0.521799672 | -0.25212107 | 4.60E-07 | 2.46E-05 | 2.36E-02 |
| ENSG00000234213.1_FHP1       | ENSG00000160789.18_LMNA | 0.01715  | -0.142438632 | 0.175871486 | 8.34E-01 | 9.35E-01 | 1.00E+00 |
| ENSG00000007001.11_UPP2      | ENSG00000160789.18_LMNA | -0.30091 | -0.439073244 | -0.14883528 | 1.65E-04 | 2.81E-03 | 1.00E+00 |
| ENSG00000254876.4_RP11-23J9  | ENSG00000160789.18_LMNA | -0.00506 | -0.164128983 | 0.154264474 | 9.51E-01 | 9.80E-01 | 1.00E+00 |
| ENSG00000139914.6_FITM1      | ENSG00000160789.18_LMNA | 0.05635  | -0.103785134 | 0.213630908 | 4.91E-01 | 7.46E-01 | 1.00E+00 |
| ENSG00000138161.11_CUZD1     | ENSG00000160789.18_LMNA | -0.20826 | -0.355668798 | -0.05074203 | 1.00E-02 | 6.58E-02 | 1.00E+00 |
| ENSG00000255408.3_PCDHA3     | ENSG00000160789.18_LMNA | -0.14687 | -0.299080857 | 0.012622479 | 7.10E-02 | 2.52E-01 | 1.00E+00 |
| ENSG00000273125.1_RP11-115H  | ENSG00000160789.18_LMNA | -0.13202 | -0.285225748 | 0.027764425 | 1.05E-01 | 3.21E-01 | 1.00E+00 |
| ENSG00000250654.6_RP11-834C  | ENSG00000160789.18_LMNA | -0.16996 | -0.320491828 | -0.01106168 | 3.63E-02 | 1.62E-01 | 1.00E+00 |
| ENSG00000198842.8_DUSP27     | ENSG00000160789.18_LMNA | 0.07683  | -0.083386148 | 0.233182925 | 3.47E-01 | 6.31E-01 | 1.00E+00 |
| ENSG00000231527.4_RP11-374M  | ENSG00000160789.18_LMNA | -0.24781 | -0.391564002 | -0.09224988 | 2.08E-03 | 2.02E-02 | 1.00E+00 |
| ENSG00000132854.17_KANK4     | ENSG00000160789.18_LMNA | -0.2477  | -0.391467917 | -0.09213737 | 2.09E-03 | 2.02E-02 | 1.00E+00 |
| ENSG00000279161.1_CTB-12A17  | ENSG00000160789.18_LMNA | -0.16345 | -0.314470073 | -0.00436532 | 4.42E-02 | 1.86E-01 | 1.00E+00 |
| ENSG00000269210.2_RP11-173C  | ENSG00000160789.18_LMNA | -0.27922 | -0.419761846 | -0.12560305 | 4.95E-04 | 6.68E-03 | 1.00E+00 |
| ENSG00000272822.1_RP11-302B  | ENSG00000160789.18_LMNA | 0.02215  | -0.137535594 | 0.180713551 | 7.86E-01 | 9.13E-01 | 1.00E+00 |
| ENSG00000125384.6_PTGER2     | ENSG00000160789.18_LMNA | 0.1371   | -0.022596198 | 0.289969503 | 9.21E-02 | 2.96E-01 | 1.00E+00 |
| ENSG00000267934.1_CTB-176F2  | ENSG00000160789.18_LMNA | 0.11159  | -0.048470699 | 0.266065058 | 1.71E-01 | 4.30E-01 | 1.00E+00 |

|                              |                         |          |              |             |          |          |          |
|------------------------------|-------------------------|----------|--------------|-------------|----------|----------|----------|
| ENSG00000249328.2_RP11-26J3. | ENSG00000160789.18_LMNA | 0.15234  | -0.007027661 | 0.304167163 | 6.10E-02 | 2.28E-01 | 1.00E+00 |
| ENSG00000266980.1_RP11-552F  | ENSG00000160789.18_LMNA | 0.05543  | -0.104695874 | 0.212752011 | 4.98E-01 | 7.51E-01 | 1.00E+00 |
| ENSG00000242337.4_TFP1       | ENSG00000160789.18_LMNA | -0.14135 | -0.293934444 | 0.018263619 | 8.24E-02 | 2.77E-01 | 1.00E+00 |
| ENSG00000258643.4_BCL2L2-PA  | ENSG00000160789.18_LMNA | 0.07941  | -0.080815872 | 0.235628458 | 3.31E-01 | 6.17E-01 | 1.00E+00 |
| ENSG00000213560.4_RP11-386I1 | ENSG00000160789.18_LMNA | 0.15931  | 0.00011586   | 0.310635721 | 4.99E-02 | 2.01E-01 | 1.00E+00 |
| ENSG00000213413.2_PVRIG      | ENSG00000160789.18_LMNA | -0.14505 | -0.297383576 | 0.014485116 | 7.46E-02 | 2.60E-01 | 1.00E+00 |
| ENSG00000235698.1_PA2G4P2    | ENSG00000160789.18_LMNA | -0.01732 | -0.176039312 | 0.142268952 | 8.32E-01 | 9.35E-01 | 1.00E+00 |
| ENSG00000249428.4_           | ENSG00000160789.18_LMNA | 0.05454  | -0.105578139 | 0.211900104 | 5.05E-01 | 7.55E-01 | 1.00E+00 |
| ENSG00000262185.1_RP11-462G  | ENSG00000160789.18_LMNA | -0.00868 | -0.16764721  | 0.150730823 | 9.15E-01 | 9.68E-01 | 1.00E+00 |
| ENSG00000260037.4_CTD-2524L  | ENSG00000160789.18_LMNA | 0.02622  | -0.133537085 | 0.184650949 | 7.48E-01 | 8.95E-01 | 1.00E+00 |
| ENSG00000235045.2_RPL7P8     | ENSG00000160789.18_LMNA | -0.0331  | -0.191292286 | 0.126769114 | 6.86E-01 | 8.64E-01 | 1.00E+00 |
| ENSG00000153404.12_PLEKHG4   | ENSG00000160789.18_LMNA | 0.05944  | -0.10071832  | 0.216586719 | 4.67E-01 | 7.29E-01 | 1.00E+00 |
| ENSG00000258458.4_CTD-2555K  | ENSG00000160789.18_LMNA | 0.01384  | -0.145685942 | 0.172656056 | 8.66E-01 | 9.47E-01 | 1.00E+00 |
| ENSG00000227890.1_PSMA2P3    | ENSG00000160789.18_LMNA | -0.02018 | -0.178806778 | 0.139468241 | 8.05E-01 | 9.22E-01 | 1.00E+00 |
| ENSG00000118137.8_APOA1      | ENSG00000160789.18_LMNA | 0.16031  | 0.001138062  | 0.311558993 | 4.85E-02 | 1.97E-01 | 1.00E+00 |
| ENSG00000276418.3_RP11-26J3. | ENSG00000160789.18_LMNA | 0.00184  | -0.157403923 | 0.160996426 | 9.82E-01 | 9.93E-01 | 1.00E+00 |
| ENSG00000265148.4_TSPOAP1-1  | ENSG00000160789.18_LMNA | -0.0587  | -0.215886989 | 0.101444873 | 4.73E-01 | 7.32E-01 | 1.00E+00 |
| ENSG00000259436.1_CTC-378H2  | ENSG00000160789.18_LMNA | 0.01091  | -0.14855242  | 0.169812072 | 8.94E-01 | 9.59E-01 | 1.00E+00 |
| ENSG00000234383.1_CTBP2P8    | ENSG00000160789.18_LMNA | 0.20225  | 0.044481661  | 0.350175743 | 1.25E-02 | 7.68E-02 | 1.00E+00 |
| ENSG00000236782.4_RP11-96L1. | ENSG00000160789.18_LMNA | 0.01522  | -0.144332701 | 0.173996837 | 8.52E-01 | 9.42E-01 | 1.00E+00 |
| ENSG00000266680.1_RP5-1148A  | ENSG00000160789.18_LMNA | 0.12883  | -0.031010454 | 0.282238457 | 1.14E-01 | 3.37E-01 | 1.00E+00 |
| ENSG00000270987.1_RP3-467N1  | ENSG00000160789.18_LMNA | 0.19176  | 0.033580699  | 0.340560423 | 1.80E-02 | 9.98E-02 | 1.00E+00 |
| ENSG00000112619.7_PRPH2      | ENSG00000160789.18_LMNA | -0.15278 | -0.304570663 | 0.006582984 | 6.02E-02 | 2.26E-01 | 1.00E+00 |
| ENSG00000279407.1_AC007191.  | ENSG00000160789.18_LMNA | 0.08575  | -0.074468477 | 0.241650677 | 2.94E-01 | 5.79E-01 | 1.00E+00 |
| ENSG00000238178.5_RP11-431J. | ENSG00000160789.18_LMNA | 0.18123  | 0.022683742  | 0.33088403  | 2.55E-02 | 1.28E-01 | 1.00E+00 |
| ENSG00000099960.11_SLC7A4    | ENSG00000160789.18_LMNA | -0.1347  | -0.287734987 | 0.025032742 | 9.80E-02 | 3.08E-01 | 1.00E+00 |
| ENSG00000248027.1_CTD-2383M  | ENSG00000160789.18_LMNA | -0.28397 | -0.424004479 | -0.13067957 | 3.92E-04 | 5.57E-03 | 1.00E+00 |
| ENSG00000159723.4_AGRP       | ENSG00000160789.18_LMNA | -0.07209 | -0.22867025  | 0.088117975 | 3.77E-01 | 6.57E-01 | 1.00E+00 |
| ENSG00000226979.7_LTA        | ENSG00000160789.18_LMNA | -0.02773 | -0.186107598 | 0.132055198 | 7.35E-01 | 8.88E-01 | 1.00E+00 |
| ENSG00000226800.5_CACTIN-AS  | ENSG00000160789.18_LMNA | 0.23387  | 0.077555972  | 0.378960305 | 3.73E-03 | 3.15E-02 | 1.00E+00 |
| ENSG00000204970.8_PCDHA1     | ENSG00000160789.18_LMNA | -0.25664 | -0.399520811 | -0.10159388 | 1.41E-03 | 1.50E-02 | 1.00E+00 |
| ENSG00000225731.1_AP001627.  | ENSG00000160789.18_LMNA | -0.08748 | -0.243292805 | 0.072733224 | 2.84E-01 | 5.69E-01 | 1.00E+00 |
| ENSG00000233467.2_U40455.1   | ENSG00000160789.18_LMNA | -0.00805 | -0.167037766 | 0.151343522 | 9.22E-01 | 9.70E-01 | 1.00E+00 |

|                              |                         |          |              |             |          |          |          |
|------------------------------|-------------------------|----------|--------------|-------------|----------|----------|----------|
| ENSG00000218416.4_PP14571    | ENSG00000160789.18_LMNA | 0.06142  | -0.098743163 | 0.21848731  | 4.52E-01 | 7.17E-01 | 1.00E+00 |
| ENSG00000232531.3_AC027612   | ENSG00000160789.18_LMNA | 0.33691  | 0.18778172   | 0.470856168 | 2.19E-05 | 5.56E-04 | 1.00E+00 |
| ENSG00000238230.1_LINC00391  | ENSG00000160789.18_LMNA | -0.12412 | -0.277829186 | 0.035789583 | 1.28E-01 | 3.62E-01 | 1.00E+00 |
| ENSG00000215347.3_SLC25A5P   | ENSG00000160789.18_LMNA | 0.00161  | -0.157634358 | 0.160766244 | 9.84E-01 | 9.94E-01 | 1.00E+00 |
| ENSG00000260633.1_RP11-375I2 | ENSG00000160789.18_LMNA | -0.19338 | -0.342053294 | -0.0352684  | 1.70E-02 | 9.60E-02 | 1.00E+00 |
| ENSG00000245598.5_DACT3-AS   | ENSG00000160789.18_LMNA | -0.12669 | -0.280241152 | 0.033177073 | 1.20E-01 | 3.48E-01 | 1.00E+00 |
| ENSG00000213239.3_NPM1P32    | ENSG00000160789.18_LMNA | -0.02849 | -0.186841059 | 0.13130849  | 7.28E-01 | 8.85E-01 | 1.00E+00 |
| ENSG00000227630.2_LINC01132  | ENSG00000160789.18_LMNA | 0.06658  | -0.093616913 | 0.223408833 | 4.15E-01 | 6.88E-01 | 1.00E+00 |
| ENSG00000146013.9_GFRA3      | ENSG00000160789.18_LMNA | -0.0444  | -0.202173245 | 0.115616307 | 5.87E-01 | 8.08E-01 | 1.00E+00 |
| ENSG00000224481.1_RP11-495P  | ENSG00000160789.18_LMNA | -0.00334 | -0.162451934 | 0.155946013 | 9.67E-01 | 9.87E-01 | 1.00E+00 |
| ENSG00000114547.8_RPN1B      | ENSG00000160789.18_LMNA | -0.27121 | -0.412600415 | -0.11706885 | 7.26E-04 | 9.01E-03 | 1.00E+00 |
| ENSG00000230280.2_HNRNPA1F   | ENSG00000160789.18_LMNA | 0.11314  | -0.046906093 | 0.26752161  | 1.65E-01 | 4.22E-01 | 1.00E+00 |
| ENSG00000266709.1_RP11-214O  | ENSG00000160789.18_LMNA | 0.32807  | 0.178177007  | 0.463085745 | 3.69E-05 | 8.45E-04 | 1.00E+00 |
| ENSG00000206557.5_TRIM71     | ENSG00000160789.18_LMNA | -0.05169 | -0.209167187 | 0.108405075 | 5.27E-01 | 7.72E-01 | 1.00E+00 |
| ENSG00000258867.4_LINC01146  | ENSG00000160789.18_LMNA | -0.03334 | -0.191521653 | 0.126534844 | 6.83E-01 | 8.63E-01 | 1.00E+00 |
| ENSG00000220685.3_RP11-530A  | ENSG00000160789.18_LMNA | -0.2191  | -0.365551925 | -0.06206637 | 6.69E-03 | 4.87E-02 | 1.00E+00 |
| ENSG00000279539.1_AC006486   | ENSG00000160789.18_LMNA | 0.19831  | 0.040386822  | 0.346571382 | 1.43E-02 | 8.50E-02 | 1.00E+00 |
| ENSG00000188710.2_QRFP       | ENSG00000160789.18_LMNA | 0.13617  | -0.023536244 | 0.289107805 | 9.44E-02 | 3.01E-01 | 1.00E+00 |
| ENSG00000279631.1_RP11-573G  | ENSG00000160789.18_LMNA | -0.03235 | -0.190570082 | 0.127506526 | 6.92E-01 | 8.68E-01 | 1.00E+00 |
| ENSG00000228484.1_RP11-106M  | ENSG00000160789.18_LMNA | -0.28321 | -0.423327136 | -0.12986806 | 4.07E-04 | 5.74E-03 | 1.00E+00 |
| ENSG00000147166.9_ITGB1BP2   | ENSG00000160789.18_LMNA | -0.08162 | -0.237729597 | 0.078604192 | 3.17E-01 | 6.04E-01 | 1.00E+00 |
| ENSG00000278918.1_CTD-2267D  | ENSG00000160789.18_LMNA | -0.01557 | -0.174333945 | 0.143992272 | 8.49E-01 | 9.41E-01 | 1.00E+00 |
| ENSG00000268658.4_LINC00664  | ENSG00000160789.18_LMNA | -0.1135  | -0.267863543 | 0.04653857  | 1.64E-01 | 4.19E-01 | 1.00E+00 |
| ENSG00000185105.4_MYADML2    | ENSG00000160789.18_LMNA | -0.06718 | -0.223987226 | 0.093013353 | 4.11E-01 | 6.85E-01 | 1.00E+00 |
| ENSG00000266993.3_RP4-657D1  | ENSG00000160789.18_LMNA | -0.03104 | -0.189301262 | 0.128801215 | 7.04E-01 | 8.74E-01 | 1.00E+00 |
| ENSG00000176761.7_ZNF285B    | ENSG00000160789.18_LMNA | -0.00168 | -0.160838781 | 0.157561746 | 9.84E-01 | 9.94E-01 | 1.00E+00 |
| ENSG00000174448.7_STARD6     | ENSG00000160789.18_LMNA | 0.07452  | -0.085692558 | 0.230985037 | 3.62E-01 | 6.43E-01 | 1.00E+00 |
| ENSG00000010310.7_GIPR       | ENSG00000160789.18_LMNA | -0.2145  | -0.361363345 | -0.05725742 | 7.96E-03 | 5.54E-02 | 1.00E+00 |
| ENSG00000166960.15_CCDC178   | ENSG00000160789.18_LMNA | -0.36632 | -0.496559532 | -0.21994309 | 3.46E-06 | 1.23E-04 | 1.78E-01 |
| ENSG00000163016.8_ALMS1P1    | ENSG00000160789.18_LMNA | -0.08293 | -0.238975874 | 0.077290875 | 3.10E-01 | 5.96E-01 | 1.00E+00 |
| ENSG00000174912.7_METTL15P   | ENSG00000160789.18_LMNA | 0.13613  | -0.023586721 | 0.289061521 | 9.45E-02 | 3.01E-01 | 1.00E+00 |
| ENSG00000241313.2_WWTR1-A    | ENSG00000160789.18_LMNA | 0.12211  | -0.037825504 | 0.275946803 | 1.34E-01 | 3.72E-01 | 1.00E+00 |
| ENSG00000213250.5_RBMS2P1    | ENSG00000160789.18_LMNA | 0.08529  | -0.074925778 | 0.241217617 | 2.96E-01 | 5.82E-01 | 1.00E+00 |



|                              |                         |          |              |             |          |          |          |
|------------------------------|-------------------------|----------|--------------|-------------|----------|----------|----------|
| ENSG00000276248.1_RP11-230F  | ENSG00000160789.18_LMNA | 0.06641  | -0.093783009 | 0.223249623 | 4.16E-01 | 6.89E-01 | 1.00E+00 |
| ENSG00000165078.10_CPA6      | ENSG00000160789.18_LMNA | -0.08276 | -0.238810127 | 0.077465601 | 3.11E-01 | 5.97E-01 | 1.00E+00 |
| ENSG00000232692.1_AP001596.1 | ENSG00000160789.18_LMNA | -0.01604 | -0.174795755 | 0.143525792 | 8.44E-01 | 9.39E-01 | 1.00E+00 |
| ENSG00000189419.6_SPATA41    | ENSG00000160789.18_LMNA | -0.12409 | -0.277805271 | 0.035815465 | 1.28E-01 | 3.62E-01 | 1.00E+00 |
| ENSG00000274184.1_RP11-158H  | ENSG00000160789.18_LMNA | -0.02291 | -0.181451951 | 0.136786523 | 7.79E-01 | 9.09E-01 | 1.00E+00 |
| ENSG00000243974.1_VTI1BP1    | ENSG00000160789.18_LMNA | -0.11263 | -0.267046961 | 0.047416123 | 1.67E-01 | 4.24E-01 | 1.00E+00 |
| ENSG00000204531.14_POU5F1    | ENSG00000160789.18_LMNA | 0.03973  | -0.120231722 | 0.197679826 | 6.27E-01 | 8.32E-01 | 1.00E+00 |
| ENSG00000226646.1_RPL7P37    | ENSG00000160789.18_LMNA | 0.07001  | -0.090199444 | 0.226680862 | 3.91E-01 | 6.69E-01 | 1.00E+00 |
| ENSG00000271789.1_RP5-1112D  | ENSG00000160789.18_LMNA | 0.05828  | -0.101870071 | 0.215477337 | 4.76E-01 | 7.34E-01 | 1.00E+00 |
| ENSG00000272702.1_RP11-44N2  | ENSG00000160789.18_LMNA | 0.06975  | -0.090456983 | 0.226434532 | 3.93E-01 | 6.71E-01 | 1.00E+00 |
| ENSG00000256464.1_YWHABP2    | ENSG00000160789.18_LMNA | 0.04823  | -0.111825999 | 0.205853388 | 5.55E-01 | 7.89E-01 | 1.00E+00 |
| ENSG00000262943.6_ALOX12P2   | ENSG00000160789.18_LMNA | 0.11626  | -0.043751402 | 0.27045407  | 1.54E-01 | 4.04E-01 | 1.00E+00 |
| ENSG00000243777.1_RP11-864G  | ENSG00000160789.18_LMNA | -0.07582 | -0.232214414 | 0.084402897 | 3.53E-01 | 6.37E-01 | 1.00E+00 |
| ENSG00000197445.2_C16orf47   | ENSG00000160789.18_LMNA | 0.12008  | -0.039878923 | 0.274045799 | 1.41E-01 | 3.82E-01 | 1.00E+00 |
| ENSG00000225151.9_GOLGA2P7   | ENSG00000160789.18_LMNA | -0.08194 | -0.238033204 | 0.078284354 | 3.16E-01 | 6.02E-01 | 1.00E+00 |
| ENSG00000180209.10_MYLPF     | ENSG00000160789.18_LMNA | -0.0578  | -0.215019764 | 0.102344872 | 4.79E-01 | 7.37E-01 | 1.00E+00 |
| ENSG00000141293.14_SKAP1     | ENSG00000160789.18_LMNA | 0.034    | -0.125877921 | 0.192164641 | 6.77E-01 | 8.59E-01 | 1.00E+00 |
| ENSG00000260325.1_HSPB9      | ENSG00000160789.18_LMNA | -0.05966 | -0.216803287 | 0.100493382 | 4.65E-01 | 7.27E-01 | 1.00E+00 |
| ENSG00000278917.1_RP11-15A1  | ENSG00000160789.18_LMNA | -0.05374 | -0.211133329 | 0.106371811 | 5.11E-01 | 7.60E-01 | 1.00E+00 |
| ENSG00000226055.2_PAICSP1    | ENSG00000160789.18_LMNA | 0.02424  | -0.135479442 | 0.182739552 | 7.67E-01 | 9.03E-01 | 1.00E+00 |
| ENSG00000255545.6_RP11-627G  | ENSG00000160789.18_LMNA | -0.07058 | -0.227222788 | 0.089632709 | 3.88E-01 | 6.66E-01 | 1.00E+00 |
| ENSG00000143473.10_KCNH1     | ENSG00000160789.18_LMNA | -0.11148 | -0.265963884 | 0.048579321 | 1.72E-01 | 4.31E-01 | 1.00E+00 |
| ENSG00000260401.1_RP11-800A  | ENSG00000160789.18_LMNA | 0.12784  | -0.032009768 | 0.281317573 | 1.17E-01 | 3.41E-01 | 1.00E+00 |
| ENSG00000235618.6_FAM21EP    | ENSG00000160789.18_LMNA | 0.08297  | -0.077249883 | 0.239014757 | 3.10E-01 | 5.96E-01 | 1.00E+00 |
| ENSG00000163898.8_LIPH       | ENSG00000160789.18_LMNA | -0.02745 | -0.185836565 | 0.132331034 | 7.37E-01 | 8.89E-01 | 1.00E+00 |
| ENSG00000213383.2_AC104297.1 | ENSG00000160789.18_LMNA | -0.20572 | -0.353344247 | -0.04808984 | 1.10E-02 | 7.01E-02 | 1.00E+00 |
| ENSG00000169933.11_FRMPD4    | ENSG00000160789.18_LMNA | -0.1082  | -0.262873975 | 0.051893126 | 1.85E-01 | 4.50E-01 | 1.00E+00 |
| ENSG00000260249.2_RP11-401P  | ENSG00000160789.18_LMNA | -0.34785 | -0.480441885 | -0.19970531 | 1.13E-05 | 3.22E-04 | 5.79E-01 |
| ENSG00000250365.5_CTD-2213F  | ENSG00000160789.18_LMNA | -0.11155 | -0.266023327 | 0.048515503 | 1.71E-01 | 4.30E-01 | 1.00E+00 |
| ENSG00000196684.11_HSH2D     | ENSG00000160789.18_LMNA | -0.03287 | -0.191072515 | 0.12699355  | 6.88E-01 | 8.65E-01 | 1.00E+00 |
| ENSG00000243175.1_RPSAP36    | ENSG00000160789.18_LMNA | -0.05302 | -0.21044746  | 0.107081397 | 5.16E-01 | 7.63E-01 | 1.00E+00 |
| ENSG00000155714.12_PDZD9     | ENSG00000160789.18_LMNA | -0.21613 | -0.362846283 | -0.05895838 | 7.49E-03 | 5.29E-02 | 1.00E+00 |
| ENSG00000242242.4_PVRL3-AS1  | ENSG00000160789.18_LMNA | -0.10609 | -0.260888939 | 0.054018347 | 1.93E-01 | 4.62E-01 | 1.00E+00 |

|                             |                         |          |              |             |          |          |          |
|-----------------------------|-------------------------|----------|--------------|-------------|----------|----------|----------|
| ENSG00000196366.3_C9orf163  | ENSG00000160789.18_LMNA | 0.06234  | -0.097831676 | 0.219363576 | 4.45E-01 | 7.12E-01 | 1.00E+00 |
| ENSG00000225674.1_IPO7P2    | ENSG00000160789.18_LMNA | 0.11434  | -0.045689258 | 0.268653416 | 1.61E-01 | 4.15E-01 | 1.00E+00 |
| ENSG00000232070.7_TM253     | ENSG00000160789.18_LMNA | 0.08348  | -0.076739889 | 0.239498424 | 3.07E-01 | 5.93E-01 | 1.00E+00 |
| ENSG00000257913.2_RP11-386G | ENSG00000160789.18_LMNA | 0.04158  | -0.118402522 | 0.199462276 | 6.11E-01 | 8.23E-01 | 1.00E+00 |
| ENSG00000263366.2_ABHD17AP  | ENSG00000160789.18_LMNA | 0.12518  | -0.034708878 | 0.278827412 | 1.24E-01 | 3.56E-01 | 1.00E+00 |
| ENSG00000235665.4_LINC00298 | ENSG00000160789.18_LMNA | -0.18914 | -0.338158062 | -0.03086848 | 1.96E-02 | 1.06E-01 | 1.00E+00 |
| ENSG00000278341.1_RP5-1142A | ENSG00000160789.18_LMNA | 0.01686  | -0.142721248 | 0.175591914 | 8.37E-01 | 9.37E-01 | 1.00E+00 |
| ENSG00000240738.1_RP1-273G1 | ENSG00000160789.18_LMNA | -0.06926 | -0.225965559 | 0.09094718  | 3.97E-01 | 6.73E-01 | 1.00E+00 |
| ENSG00000231799.2_RP13-93L1 | ENSG00000160789.18_LMNA | 0.14107  | -0.018550569 | 0.293672175 | 8.30E-02 | 2.78E-01 | 1.00E+00 |
| ENSG00000259093.1_RP11-1112 | ENSG00000160789.18_LMNA | 0.05132  | -0.108765928 | 0.208817978 | 5.30E-01 | 7.73E-01 | 1.00E+00 |
| ENSG00000126010.5_GRPR      | ENSG00000160789.18_LMNA | 0.32796  | 0.178050699  | 0.462983267 | 3.71E-05 | 8.48E-04 | 1.00E+00 |
| ENSG00000183918.13_SH2D1A   | ENSG00000160789.18_LMNA | 0.09475  | -0.0654364   | 0.250178268 | 2.46E-01 | 5.25E-01 | 1.00E+00 |
| ENSG00000135638.12_EMX1     | ENSG00000160789.18_LMNA | -0.11827 | -0.272346479 | 0.041712248 | 1.47E-01 | 3.92E-01 | 1.00E+00 |
| ENSG00000279423.1_RP11-671J | ENSG00000160789.18_LMNA | -0.00932 | -0.168266234 | 0.150108242 | 9.09E-01 | 9.65E-01 | 1.00E+00 |
| ENSG00000261253.2_AC137932  | ENSG00000160789.18_LMNA | 0.09597  | -0.064209358 | 0.251333007 | 2.40E-01 | 5.18E-01 | 1.00E+00 |
| ENSG00000120500.16_ARR3     | ENSG00000160789.18_LMNA | 0.09901  | -0.061152022 | 0.254206291 | 2.25E-01 | 5.01E-01 | 1.00E+00 |
| ENSG00000204969.6_PCDHA2    | ENSG00000160789.18_LMNA | -0.14314 | -0.295605296 | 0.016434324 | 7.85E-02 | 2.69E-01 | 1.00E+00 |
| ENSG00000150276.8_PPIAP26   | ENSG00000160789.18_LMNA | 0.00182  | -0.157422673 | 0.160977699 | 9.82E-01 | 9.93E-01 | 1.00E+00 |
| ENSG00000225361.3_PPP1R26-A | ENSG00000160789.18_LMNA | 0.18766  | 0.029338679  | 0.336801264 | 2.06E-02 | 1.10E-01 | 1.00E+00 |
| ENSG00000185739.12_SRL      | ENSG00000160789.18_LMNA | -0.24329 | -0.387486585 | -0.08748196 | 2.53E-03 | 2.34E-02 | 1.00E+00 |
| ENSG00000187726.7_DNAJB13   | ENSG00000160789.18_LMNA | -0.04382 | -0.201614846 | 0.116190615 | 5.92E-01 | 8.11E-01 | 1.00E+00 |
| ENSG00000278309.1_          | ENSG00000160789.18_LMNA | 0.25043  | 0.095012848  | 0.393921454 | 1.86E-03 | 1.85E-02 | 1.00E+00 |
| ENSG00000258944.1_RP4-647C1 | ENSG00000160789.18_LMNA | -0.00345 | -0.162557423 | 0.155840296 | 9.66E-01 | 9.87E-01 | 1.00E+00 |
| ENSG00000260361.1_CTD-2313J | ENSG00000160789.18_LMNA | -0.053   | -0.21042676  | 0.107102808 | 5.17E-01 | 7.63E-01 | 1.00E+00 |
| ENSG00000171872.4_KLF17     | ENSG00000160789.18_LMNA | 0.35832  | 0.211164738  | 0.489591679 | 5.83E-06 | 1.88E-04 | 2.99E-01 |
| ENSG00000227492.1_RP11-316M | ENSG00000160789.18_LMNA | -0.0669  | -0.223720606 | 0.093291603 | 4.13E-01 | 6.86E-01 | 1.00E+00 |
| ENSG00000163606.9_CD200R1   | ENSG00000160789.18_LMNA | 0.13173  | -0.028057647 | 0.284956147 | 1.06E-01 | 3.23E-01 | 1.00E+00 |
| ENSG00000214708.4_AC090616  | ENSG00000160789.18_LMNA | -0.06574 | -0.22261016  | 0.094449953 | 4.21E-01 | 6.93E-01 | 1.00E+00 |
| ENSG00000184908.16_CLCNKB   | ENSG00000160789.18_LMNA | 0.12602  | -0.033859957 | 0.27961107  | 1.22E-01 | 3.51E-01 | 1.00E+00 |
| ENSG00000228043.4_AC097721  | ENSG00000160789.18_LMNA | 0.06024  | -0.099922616 | 0.217352673 | 4.61E-01 | 7.24E-01 | 1.00E+00 |
| ENSG00000244926.5_ALKBH3-A5 | ENSG00000160789.18_LMNA | -0.03089 | -0.189163986 | 0.128941225 | 7.06E-01 | 8.75E-01 | 1.00E+00 |
| ENSG00000213296.4_RP5-1106E | ENSG00000160789.18_LMNA | 0.02643  | -0.133335085 | 0.184849591 | 7.47E-01 | 8.94E-01 | 1.00E+00 |
| ENSG00000259940.2_CTD-3203P | ENSG00000160789.18_LMNA | -0.09604 | -0.251397874 | 0.064140402 | 2.39E-01 | 5.18E-01 | 1.00E+00 |

|                             |                         |          |              |             |          |          |          |
|-----------------------------|-------------------------|----------|--------------|-------------|----------|----------|----------|
| ENSG00000279633.1_RP11-442G | ENSG00000160789.18_LMNA | 0.01589  | -0.143671612 | 0.174651409 | 8.46E-01 | 9.40E-01 | 1.00E+00 |
| ENSG00000226161.1	EIF4A1P5  | ENSG00000160789.18_LMNA | 0.06249  | -0.097681766 | 0.219507645 | 4.44E-01 | 7.11E-01 | 1.00E+00 |
| ENSG00000253439.1_CDC42P5   | ENSG00000160789.18_LMNA | -0.07195 | -0.228532916 | 0.088261755 | 3.78E-01 | 6.58E-01 | 1.00E+00 |
| ENSG00000188282.11_RUFY4    | ENSG00000160789.18_LMNA | 0.05305  | -0.107058441 | 0.210469653 | 5.16E-01 | 7.63E-01 | 1.00E+00 |
| ENSG00000262097.1_CTD-2135D | ENSG00000160789.18_LMNA | -0.15842 | -0.309805271 | 0.00080302  | 5.13E-02 | 2.05E-01 | 1.00E+00 |
| ENSG00000128383.11_APOBEC3  | ENSG00000160789.18_LMNA | 0.02278  | -0.13691993  | 0.181320471 | 7.81E-01 | 9.10E-01 | 1.00E+00 |
| ENSG00000162598.12_C1orf87  | ENSG00000160789.18_LMNA | -0.07661 | -0.232970282 | 0.083609438 | 3.48E-01 | 6.32E-01 | 1.00E+00 |
| ENSG00000241095.1_CYP51A1P  | ENSG00000160789.18_LMNA | 0.13499  | -0.024746796 | 0.2879974   | 9.73E-02 | 3.07E-01 | 1.00E+00 |
| ENSG00000260628.4_RP11-1166 | ENSG00000160789.18_LMNA | 0.09379  | -0.066405261 | 0.249265861 | 2.50E-01 | 5.31E-01 | 1.00E+00 |
| ENSG00000235897.1_TM4SF19-A | ENSG00000160789.18_LMNA | 0.14069  | -0.018934804 | 0.293320915 | 8.38E-02 | 2.80E-01 | 1.00E+00 |
| ENSG00000165197.4_VEGFD     | ENSG00000160789.18_LMNA | 0.06988  | -0.090325721 | 0.226560086 | 3.92E-01 | 6.70E-01 | 1.00E+00 |
| ENSG00000155761.12_SPAG17   | ENSG00000160789.18_LMNA | 0.0639   | -0.096281369 | 0.220852803 | 4.34E-01 | 7.03E-01 | 1.00E+00 |
| ENSG00000280054.1_RP1-197B1 | ENSG00000160789.18_LMNA | -0.05232 | -0.20977095  | 0.107780982 | 5.22E-01 | 7.68E-01 | 1.00E+00 |
| ENSG00000253522.3_MIR3142HC | ENSG00000160789.18_LMNA | -0.09382 | -0.249296597 | 0.066372633 | 2.50E-01 | 5.31E-01 | 1.00E+00 |
| ENSG00000186453.11_FAM228A  | ENSG00000160789.18_LMNA | -0.02499 | -0.183465387 | 0.134742138 | 7.60E-01 | 9.00E-01 | 1.00E+00 |
| ENSG00000225335.3_XXbac-B47 | ENSG00000160789.18_LMNA | -0.01636 | -0.175103086 | 0.143215274 | 8.41E-01 | 9.38E-01 | 1.00E+00 |
| ENSG00000280033.1_CTD-2095E | ENSG00000160789.18_LMNA | -0.00601 | -0.165053569 | 0.153336623 | 9.41E-01 | 9.77E-01 | 1.00E+00 |
| ENSG00000183479.11_TREX2    | ENSG00000160789.18_LMNA | 0.03545  | -0.124456355 | 0.193555116 | 6.65E-01 | 8.52E-01 | 1.00E+00 |
| ENSG00000198203.8_SULT1C2   | ENSG00000160789.18_LMNA | -0.23522 | -0.380183855 | -0.07897672 | 3.53E-03 | 3.02E-02 | 1.00E+00 |
| ENSG00000226469.1_ADAM1B    | ENSG00000160789.18_LMNA | -0.09526 | -0.250660753 | 0.064923821 | 2.43E-01 | 5.22E-01 | 1.00E+00 |
| ENSG00000231013.1_AC013275. | ENSG00000160789.18_LMNA | -0.04493 | -0.202681107 | 0.115093793 | 5.83E-01 | 8.06E-01 | 1.00E+00 |
| ENSG00000120055.7_C10orf95  | ENSG00000160789.18_LMNA | -0.1656  | -0.316460489 | -0.00657565 | 4.15E-02 | 1.78E-01 | 1.00E+00 |
| ENSG00000261335.1_RP11-318A | ENSG00000160789.18_LMNA | -0.24344 | -0.387620311 | -0.08763811 | 2.51E-03 | 2.33E-02 | 1.00E+00 |
| ENSG00000162676.10_GFI1     | ENSG00000160789.18_LMNA | 0.09169  | -0.068507029 | 0.247284632 | 2.61E-01 | 5.44E-01 | 1.00E+00 |
| ENSG00000213057.5_C1orf220  | ENSG00000160789.18_LMNA | -0.10536 | -0.260191697 | 0.054764152 | 1.96E-01 | 4.66E-01 | 1.00E+00 |
| ENSG00000213925.3_NPM1P33   | ENSG00000160789.18_LMNA | -0.06504 | -0.221938532 | 0.095150139 | 4.26E-01 | 6.97E-01 | 1.00E+00 |
| ENSG00000142513.5_ACPT      | ENSG00000160789.18_LMNA | 0.1416   | -0.01801018  | 0.294166045 | 8.18E-02 | 2.76E-01 | 1.00E+00 |
| ENSG00000230080.2_AC139143. | ENSG00000160789.18_LMNA | 0.21284  | 0.055520049  | 0.359847071 | 8.47E-03 | 5.81E-02 | 1.00E+00 |
| ENSG00000135248.14_FAM71F1  | ENSG00000160789.18_LMNA | -0.02379 | -0.182295874 | 0.135929958 | 7.71E-01 | 9.05E-01 | 1.00E+00 |
| ENSG00000259583.2_RP11-66B2 | ENSG00000160789.18_LMNA | -0.09281 | -0.248344492 | 0.067383035 | 2.55E-01 | 5.37E-01 | 1.00E+00 |
| ENSG00000275029.1_HMGB1P24  | ENSG00000160789.18_LMNA | -0.06416 | -0.221105691 | 0.096017956 | 4.32E-01 | 7.02E-01 | 1.00E+00 |
| ENSG00000105610.4_KLF1      | ENSG00000160789.18_LMNA | -0.03505 | -0.193174038 | 0.124846083 | 6.68E-01 | 8.54E-01 | 1.00E+00 |
| ENSG00000089012.13_SIRPG    | ENSG00000160789.18_LMNA | 0.13924  | -0.020408572 | 0.291972842 | 8.71E-02 | 2.87E-01 | 1.00E+00 |

|                              |                         |          |              |             |          |          |          |
|------------------------------|-------------------------|----------|--------------|-------------|----------|----------|----------|
| ENSG00000261242.1_CTD-2302E  | ENSG00000160789.18_LMNA | 0.15393  | -0.005405012 | 0.305639017 | 5.83E-02 | 2.21E-01 | 1.00E+00 |
| ENSG00000233723.6_LINC01122  | ENSG00000160789.18_LMNA | -0.2362  | -0.381070337 | -0.08000684 | 3.39E-03 | 2.93E-02 | 1.00E+00 |
| ENSG00000272381.1_RP11-192P  | ENSG00000160789.18_LMNA | -0.21283 | -0.3598398   | -0.05551172 | 8.48E-03 | 5.81E-02 | 1.00E+00 |
| ENSG00000158955.9_WNT9B      | ENSG00000160789.18_LMNA | -0.14643 | -0.298668718 | 0.013074969 | 7.18E-02 | 2.54E-01 | 1.00E+00 |
| ENSG00000253773.2_C8orf37-AS | ENSG00000160789.18_LMNA | 0.03307  | -0.126800269 | 0.191261781 | 6.86E-01 | 8.64E-01 | 1.00E+00 |
| ENSG00000230561.3_CCDC192    | ENSG00000160789.18_LMNA | 0.15529  | -0.004014252 | 0.306899351 | 5.61E-02 | 2.16E-01 | 1.00E+00 |
| ENSG00000189195.8_BTBD8      | ENSG00000160789.18_LMNA | -0.03496 | -0.193085725 | 0.124936387 | 6.69E-01 | 8.54E-01 | 1.00E+00 |
| ENSG00000258357.1_RP11-778J  | ENSG00000160789.18_LMNA | -0.20729 | -0.354782679 | -0.0497305  | 1.04E-02 | 6.73E-02 | 1.00E+00 |
| ENSG00000236686.1_BZW1P1     | ENSG00000160789.18_LMNA | 0.08421  | -0.076013637 | 0.240186915 | 3.02E-01 | 5.89E-01 | 1.00E+00 |
| ENSG00000219806.1_ATP5F1P6   | ENSG00000160789.18_LMNA | -0.07226 | -0.228832052 | 0.087948562 | 3.76E-01 | 6.56E-01 | 1.00E+00 |
| ENSG00000278558.3_TMEM191B   | ENSG00000160789.18_LMNA | 0.0055   | -0.153831494 | 0.164560508 | 9.46E-01 | 9.79E-01 | 1.00E+00 |
| ENSG00000177173.5_NAP1L4P1   | ENSG00000160789.18_LMNA | 0.11026  | -0.049811856 | 0.264815379 | 1.76E-01 | 4.38E-01 | 1.00E+00 |
| ENSG00000237425.1_RPSAP2     | ENSG00000160789.18_LMNA | -0.07095 | -0.227579527 | 0.089259526 | 3.85E-01 | 6.64E-01 | 1.00E+00 |
| ENSG00000280067.1_CTD-2600H  | ENSG00000160789.18_LMNA | 0.05663  | -0.103505948 | 0.213900229 | 4.88E-01 | 7.45E-01 | 1.00E+00 |
| ENSG00000275198.1_RP11-471B  | ENSG00000160789.18_LMNA | -0.22136 | -0.367610449 | -0.06443495 | 6.13E-03 | 4.57E-02 | 1.00E+00 |
| ENSG00000244945.1_RP11-1379  | ENSG00000160789.18_LMNA | -0.02278 | -0.181325333 | 0.136914996 | 7.81E-01 | 9.10E-01 | 1.00E+00 |
| ENSG00000269549.2_RP3-461P1  | ENSG00000160789.18_LMNA | 0.03215  | -0.127703528 | 0.190377085 | 6.94E-01 | 8.69E-01 | 1.00E+00 |
| ENSG00000279179.1_RP11-131M  | ENSG00000160789.18_LMNA | -0.03235 | -0.190567705 | 0.127508953 | 6.92E-01 | 8.68E-01 | 1.00E+00 |
| ENSG00000270882.2_HIST2H4A   | ENSG00000160789.18_LMNA | -0.05929 | -0.216445931 | 0.100864532 | 4.68E-01 | 7.29E-01 | 1.00E+00 |
| ENSG00000165091.14_TMC1      | ENSG00000160789.18_LMNA | 0.0611   | -0.099068129 | 0.218174778 | 4.55E-01 | 7.19E-01 | 1.00E+00 |
| ENSG00000235420.7_RPL29P30   | ENSG00000160789.18_LMNA | -0.05808 | -0.215287816 | 0.102066745 | 4.77E-01 | 7.36E-01 | 1.00E+00 |
| ENSG00000226125.1_AC098823.  | ENSG00000160789.18_LMNA | -0.01227 | -0.171133952 | 0.14722075  | 8.81E-01 | 9.54E-01 | 1.00E+00 |
| ENSG00000237285.1_HNRNPA1F   | ENSG00000160789.18_LMNA | -0.09336 | -0.248858395 | 0.066837747 | 2.53E-01 | 5.34E-01 | 1.00E+00 |
| ENSG00000160654.8_CD3G       | ENSG00000160789.18_LMNA | 0.06661  | -0.093580721 | 0.223443522 | 4.15E-01 | 6.88E-01 | 1.00E+00 |
| ENSG00000235036.4_RP5-1099D  | ENSG00000160789.18_LMNA | -0.04657 | -0.204255371 | 0.113472989 | 5.69E-01 | 7.98E-01 | 1.00E+00 |
| ENSG00000228065.9_LINC01515  | ENSG00000160789.18_LMNA | 0.0998   | -0.060356671 | 0.25495285  | 2.21E-01 | 4.97E-01 | 1.00E+00 |
| ENSG00000279302.1_MIR3622A   | ENSG00000160789.18_LMNA | -0.04713 | -0.204793376 | 0.112918691 | 5.64E-01 | 7.95E-01 | 1.00E+00 |
| ENSG00000253541.1_SEPT10P1   | ENSG00000160789.18_LMNA | -0.08971 | -0.245405542 | 0.070497857 | 2.72E-01 | 5.56E-01 | 1.00E+00 |
| ENSG00000226266.5_AC009961.  | ENSG00000160789.18_LMNA | -0.0269  | -0.185303836 | 0.132873062 | 7.42E-01 | 8.92E-01 | 1.00E+00 |
| ENSG00000246582.2_RP11-1149  | ENSG00000160789.18_LMNA | 0.18051  | 0.02194118   | 0.330222275 | 2.61E-02 | 1.30E-01 | 1.00E+00 |
| ENSG00000243406.5_MRPS31P5   | ENSG00000160789.18_LMNA | -0.18314 | -0.332638326 | -0.0246539  | 2.39E-02 | 1.23E-01 | 1.00E+00 |
| ENSG00000172460.13_PRSS30P   | ENSG00000160789.18_LMNA | -0.02093 | -0.179529829 | 0.138735663 | 7.98E-01 | 9.19E-01 | 1.00E+00 |
| ENSG00000226026.4_RP11-57H1  | ENSG00000160789.18_LMNA | 0.02187  | -0.137811217 | 0.180441764 | 7.89E-01 | 9.14E-01 | 1.00E+00 |

|                              |                         |          |              |             |          |          |          |
|------------------------------|-------------------------|----------|--------------|-------------|----------|----------|----------|
| ENSG00000224358.1_RP11-466F  | ENSG00000160789.18_LMNA | 0.00807  | -0.151323911 | 0.167057276 | 9.21E-01 | 9.70E-01 | 1.00E+00 |
| ENSG00000198633.9_ZNF534     | ENSG00000160789.18_LMNA | -0.24337 | -0.38755218  | -0.08755855 | 2.52E-03 | 2.33E-02 | 1.00E+00 |
| ENSG00000161180.9_CCDC116    | ENSG00000160789.18_LMNA | -0.09191 | -0.247486591 | 0.068292912 | 2.60E-01 | 5.43E-01 | 1.00E+00 |
| ENSG00000183423.10_LRIT3     | ENSG00000160789.18_LMNA | -0.14359 | -0.296023571 | 0.015976057 | 7.76E-02 | 2.67E-01 | 1.00E+00 |
| ENSG00000243708.7_PLA2G4B    | ENSG00000160789.18_LMNA | 0.00321  | -0.156071357 | 0.162326851 | 9.69E-01 | 9.88E-01 | 1.00E+00 |
| ENSG00000203872.6_C6orf163   | ENSG00000160789.18_LMNA | -0.10939 | -0.26399009  | 0.050696936 | 1.80E-01 | 4.43E-01 | 1.00E+00 |
| ENSG00000155974.10_GRIP1     | ENSG00000160789.18_LMNA | -0.17217 | -0.322530905 | -0.0133355  | 3.39E-02 | 1.55E-01 | 1.00E+00 |
| ENSG00000258659.5_TRIM34     | ENSG00000160789.18_LMNA | 0.04718  | -0.112867598 | 0.204842958 | 5.64E-01 | 7.95E-01 | 1.00E+00 |
| ENSG00000231731.6_AC010976.1 | ENSG00000160789.18_LMNA | -0.05207 | -0.209534454 | 0.108025471 | 5.24E-01 | 7.69E-01 | 1.00E+00 |
| ENSG00000256433.2_RP1-102E2  | ENSG00000160789.18_LMNA | -0.08339 | -0.239416631 | 0.076826145 | 3.07E-01 | 5.93E-01 | 1.00E+00 |
| ENSG00000258017.1_RP11-386G  | ENSG00000160789.18_LMNA | 0.00567  | -0.153672541 | 0.164718898 | 9.45E-01 | 9.78E-01 | 1.00E+00 |
| ENSG00000226849.1_RP4-635E1  | ENSG00000160789.18_LMNA | -0.15252 | -0.304331332 | 0.006846753 | 6.07E-02 | 2.27E-01 | 1.00E+00 |
| ENSG00000171815.5_PCDHB1     | ENSG00000160789.18_LMNA | -0.16809 | -0.318761997 | -0.00913521 | 3.85E-02 | 1.69E-01 | 1.00E+00 |
| ENSG00000132517.13_SLC52A1   | ENSG00000160789.18_LMNA | -0.00152 | -0.160678445 | 0.157722245 | 9.85E-01 | 9.94E-01 | 1.00E+00 |
| ENSG00000260139.5_CSPG4P13   | ENSG00000160789.18_LMNA | 0.08927  | -0.070936216 | 0.244991468 | 2.74E-01 | 5.59E-01 | 1.00E+00 |
| ENSG00000223877.4_RPS8P10    | ENSG00000160789.18_LMNA | 0.02507  | -0.134669506 | 0.183536871 | 7.59E-01 | 9.00E-01 | 1.00E+00 |
| ENSG00000258405.8_ZNF578     | ENSG00000160789.18_LMNA | -0.2184  | -0.36491378  | -0.06133279 | 6.87E-03 | 4.97E-02 | 1.00E+00 |
| ENSG00000274776.1_RP11-687F  | ENSG00000160789.18_LMNA | -0.20239 | -0.350306317 | -0.0446302  | 1.24E-02 | 7.65E-02 | 1.00E+00 |
| ENSG00000238132.2_CASC4P1    | ENSG00000160789.18_LMNA | 0.175    | 0.016251834  | 0.325141978 | 3.11E-02 | 1.47E-01 | 1.00E+00 |
| ENSG00000258012.1_RP11-603K  | ENSG00000160789.18_LMNA | -0.02158 | -0.180162795 | 0.138094072 | 7.92E-01 | 9.16E-01 | 1.00E+00 |
| ENSG00000108375.11_RNF43     | ENSG00000160789.18_LMNA | -0.07071 | -0.227355527 | 0.089493861 | 3.87E-01 | 6.65E-01 | 1.00E+00 |
| ENSG00000259635.1_AC100830.1 | ENSG00000160789.18_LMNA | -0.07067 | -0.227313647 | 0.08953767  | 3.87E-01 | 6.65E-01 | 1.00E+00 |
| ENSG00000254162.1_RP11-48B3  | ENSG00000160789.18_LMNA | 0.12831  | -0.031536267 | 0.281753984 | 1.15E-01 | 3.39E-01 | 1.00E+00 |
| ENSG00000275437.1_RP5-908M1  | ENSG00000160789.18_LMNA | 0.06312  | -0.097057786 | 0.220107161 | 4.40E-01 | 7.08E-01 | 1.00E+00 |
| ENSG00000158525.14_CPA5      | ENSG00000160789.18_LMNA | 0.12478  | -0.035116378 | 0.278451091 | 1.26E-01 | 3.58E-01 | 1.00E+00 |
| ENSG00000189045.12_ANKDD1B   | ENSG00000160789.18_LMNA | -0.08394 | -0.239936858 | 0.076277447 | 3.04E-01 | 5.90E-01 | 1.00E+00 |
| ENSG00000258168.4_RP11-588H  | ENSG00000160789.18_LMNA | -0.20879 | -0.356155489 | -0.05129786 | 9.84E-03 | 6.48E-02 | 1.00E+00 |
| ENSG00000213221.4_DNLZ       | ENSG00000160789.18_LMNA | -0.05513 | -0.212464398 | 0.104993793 | 5.00E-01 | 7.53E-01 | 1.00E+00 |
| ENSG00000259225.5_RP11-1008  | ENSG00000160789.18_LMNA | 0.23482  | 0.07856014   | 0.379825204 | 3.59E-03 | 3.06E-02 | 1.00E+00 |
| ENSG00000251634.2_RP11-1280  | ENSG00000160789.18_LMNA | -0.15671 | -0.30822483  | 0.002550306 | 5.38E-02 | 2.11E-01 | 1.00E+00 |
| ENSG00000171435.12_KSR2      | ENSG00000160789.18_LMNA | -0.18602 | -0.335288104 | -0.02763427 | 2.18E-02 | 1.15E-01 | 1.00E+00 |
| ENSG00000258376.2_RP4-647C1  | ENSG00000160789.18_LMNA | 0.02337  | -0.136336209 | 0.181895677 | 7.75E-01 | 9.07E-01 | 1.00E+00 |
| ENSG00000136872.16_ALDOB     | ENSG00000160789.18_LMNA | -0.17367 | -0.323917249 | -0.01488327 | 3.24E-02 | 1.51E-01 | 1.00E+00 |

|                              |                         |          |              |             |          |          |          |
|------------------------------|-------------------------|----------|--------------|-------------|----------|----------|----------|
| ENSG00000229991.1_AKR1B1P1   | ENSG00000160789.18_LMNA | 0.01555  | -0.144002616 | 0.174323703 | 8.49E-01 | 9.41E-01 | 1.00E+00 |
| ENSG00000261079.1_RP11-252A  | ENSG00000160789.18_LMNA | 0.1738   | 0.015015061  | 0.324035237 | 3.22E-02 | 1.50E-01 | 1.00E+00 |
| ENSG00000259158.2_ADAM20P1   | ENSG00000160789.18_LMNA | 0.05043  | -0.109647551 | 0.207964461 | 5.37E-01 | 7.78E-01 | 1.00E+00 |
| ENSG00000157335.18_CLEC18C   | ENSG00000160789.18_LMNA | 0.17791  | 0.019255429  | 0.327826259 | 2.83E-02 | 1.38E-01 | 1.00E+00 |
| ENSG00000117400.13_MPL       | ENSG00000160789.18_LMNA | 0.06105  | -0.099115764 | 0.21812896  | 4.55E-01 | 7.20E-01 | 1.00E+00 |
| ENSG00000005981.11_ASB4      | ENSG00000160789.18_LMNA | -0.3396  | -0.473219887 | -0.1907142  | 1.87E-05 | 4.87E-04 | 9.58E-01 |
| ENSG00000121594.10_CD80      | ENSG00000160789.18_LMNA | 0.07128  | -0.088929014 | 0.227895405 | 3.83E-01 | 6.61E-01 | 1.00E+00 |
| ENSG00000260996.1_RP13-122B  | ENSG00000160789.18_LMNA | 0.1243   | -0.035601509 | 0.278002955 | 1.27E-01 | 3.61E-01 | 1.00E+00 |
| ENSG00000236319.2_CTD-2033D  | ENSG00000160789.18_LMNA | -0.02525 | -0.183714972 | 0.134488529 | 7.57E-01 | 8.99E-01 | 1.00E+00 |
| ENSG00000206199.8_ANKUB1     | ENSG00000160789.18_LMNA | 0.02635  | -0.133409129 | 0.18477678  | 7.47E-01 | 8.94E-01 | 1.00E+00 |
| ENSG00000267439.1_AC002398.  | ENSG00000160789.18_LMNA | -0.03326 | -0.191444017 | 0.126614144 | 6.84E-01 | 8.63E-01 | 1.00E+00 |
| ENSG00000257242.5_LINC01619  | ENSG00000160789.18_LMNA | -0.17853 | -0.32839513  | -0.01989269 | 2.78E-02 | 1.36E-01 | 1.00E+00 |
| ENSG00000172058.14_SERF1A    | ENSG00000160789.18_LMNA | -0.14409 | -0.296485547 | 0.01546976  | 7.66E-02 | 2.65E-01 | 1.00E+00 |
| ENSG00000235997.2_AC109642.  | ENSG00000160789.18_LMNA | 0.07596  | -0.084258674 | 0.232351834 | 3.52E-01 | 6.36E-01 | 1.00E+00 |
| ENSG00000274340.1_RP11-435J  | ENSG00000160789.18_LMNA | 0.00119  | -0.158037997 | 0.160362966 | 9.88E-01 | 9.96E-01 | 1.00E+00 |
| ENSG00000073146.14_MOV10L1   | ENSG00000160789.18_LMNA | 0.21367  | 0.056385008  | 0.360602155 | 8.21E-03 | 5.68E-02 | 1.00E+00 |
| ENSG00000269959.1_SPACA6P-   | ENSG00000160789.18_LMNA | 0.00427  | -0.155034406 | 0.163361335 | 9.58E-01 | 9.83E-01 | 1.00E+00 |
| ENSG00000180113.14_TDRED6    | ENSG00000160789.18_LMNA | -0.16649 | -0.317285294 | -0.00749247 | 4.04E-02 | 1.74E-01 | 1.00E+00 |
| ENSG00000137766.15_UNC13C    | ENSG00000160789.18_LMNA | -0.27617 | -0.417038908 | -0.12235302 | 5.73E-04 | 7.49E-03 | 1.00E+00 |
| ENSG00000278811.3_LINC00624  | ENSG00000160789.18_LMNA | 0.01636  | -0.143209702 | 0.175108599 | 8.41E-01 | 9.38E-01 | 1.00E+00 |
| ENSG00000270574.1_RP11-171I2 | ENSG00000160789.18_LMNA | 0.05395  | -0.106163596 | 0.211334526 | 5.09E-01 | 7.59E-01 | 1.00E+00 |
| ENSG00000184492.6_FOXP4L1    | ENSG00000160789.18_LMNA | 0.03569  | -0.12421475  | 0.193791309 | 6.62E-01 | 8.51E-01 | 1.00E+00 |
| ENSG00000267731.1_RP11-147L  | ENSG00000160789.18_LMNA | -0.11612 | -0.270322508 | 0.043893068 | 1.54E-01 | 4.05E-01 | 1.00E+00 |
| ENSG00000245685.5_AF146191.  | ENSG00000160789.18_LMNA | -0.06467 | -0.221585966 | 0.09551757  | 4.29E-01 | 6.99E-01 | 1.00E+00 |
| ENSG00000280039.1_RN7SKP23   | ENSG00000160789.18_LMNA | -0.18057 | -0.330278971 | -0.02200479 | 2.60E-02 | 1.30E-01 | 1.00E+00 |
| ENSG00000276380.1_UBE2NL     | ENSG00000160789.18_LMNA | -0.21265 | -0.35967549  | -0.05532356 | 8.53E-03 | 5.84E-02 | 1.00E+00 |
| ENSG00000253309.5_SERPINE3   | ENSG00000160789.18_LMNA | -0.11484 | -0.269122914 | 0.045184214 | 1.59E-01 | 4.12E-01 | 1.00E+00 |
| ENSG00000150076.21_AL356053  | ENSG00000160789.18_LMNA | -0.126   | -0.279592125 | 0.033880485 | 1.22E-01 | 3.51E-01 | 1.00E+00 |
| ENSG00000177455.10_CD19      | ENSG00000160789.18_LMNA | -0.05089 | -0.208403987 | 0.109193614 | 5.34E-01 | 7.75E-01 | 1.00E+00 |
| ENSG00000260179.1_RP5-902P8  | ENSG00000160789.18_LMNA | 0.07332  | -0.086893954 | 0.229838888 | 3.69E-01 | 6.50E-01 | 1.00E+00 |
| ENSG00000278662.3_GOLGA6L1   | ENSG00000160789.18_LMNA | -0.04846 | -0.206070313 | 0.111602292 | 5.53E-01 | 7.88E-01 | 1.00E+00 |
| ENSG00000171596.6_NMUR1      | ENSG00000160789.18_LMNA | 0.15106  | -0.008343032 | 0.302972939 | 6.32E-02 | 2.34E-01 | 1.00E+00 |
| ENSG00000134709.9_HOOK1      | ENSG00000160789.18_LMNA | -0.04883 | -0.206427226 | 0.111234149 | 5.50E-01 | 7.87E-01 | 1.00E+00 |

|                              |                         |          |              |             |          |          |          |
|------------------------------|-------------------------|----------|--------------|-------------|----------|----------|----------|
| ENSG00000239345.2_HNRNPA1F   | ENSG00000160789.18_LMNA | -0.02573 | -0.184180889 | 0.134014985 | 7.53E-01 | 8.97E-01 | 1.00E+00 |
| ENSG00000203804.4_ADAMTSL4   | ENSG00000160789.18_LMNA | 0.14121  | -0.018401176 | 0.293808724 | 8.27E-02 | 2.78E-01 | 1.00E+00 |
| ENSG00000267629.3_AC138430.4 | ENSG00000160789.18_LMNA | 0.04958  | -0.110497367 | 0.20714128  | 5.44E-01 | 7.82E-01 | 1.00E+00 |
| ENSG00000254413.7_CHKBCPT    | ENSG00000160789.18_LMNA | -0.07896 | -0.235207957 | 0.081258122 | 3.34E-01 | 6.19E-01 | 1.00E+00 |
| ENSG00000182814.7_FUNDC2P2   | ENSG00000160789.18_LMNA | -0.1547  | -0.306359237 | 0.004610406 | 5.70E-02 | 2.18E-01 | 1.00E+00 |
| ENSG00000258957.1_RP11-363J  | ENSG00000160789.18_LMNA | -0.30845 | -0.445762044 | -0.15695753 | 1.11E-04 | 2.04E-03 | 1.00E+00 |
| ENSG00000183977.12_PP2D1     | ENSG00000160789.18_LMNA | -0.12126 | -0.275146024 | 0.03869081  | 1.37E-01 | 3.76E-01 | 1.00E+00 |
| ENSG00000272578.4_AP000347.2 | ENSG00000160789.18_LMNA | 0.03851  | -0.121434511 | 0.196506631 | 6.38E-01 | 8.38E-01 | 1.00E+00 |
| ENSG00000246877.1_DNM1P35    | ENSG00000160789.18_LMNA | 0.21887  | 0.061820031  | 0.365337667 | 6.75E-03 | 4.90E-02 | 1.00E+00 |
| ENSG00000261794.1_GOLGA8H    | ENSG00000160789.18_LMNA | 0.01184  | -0.147640126 | 0.170717782 | 8.85E-01 | 9.55E-01 | 1.00E+00 |
| ENSG00000259728.4_LINC00933  | ENSG00000160789.18_LMNA | 0.05731  | -0.102828554 | 0.214553489 | 4.83E-01 | 7.40E-01 | 1.00E+00 |
| ENSG00000279801.1_RP11-75C1  | ENSG00000160789.18_LMNA | -0.00641 | -0.165440564 | 0.152948094 | 9.38E-01 | 9.75E-01 | 1.00E+00 |
| ENSG00000235527.5_HIPK1-AS1  | ENSG00000160789.18_LMNA | -0.11152 | -0.265997145 | 0.048543612 | 1.71E-01 | 4.31E-01 | 1.00E+00 |
| ENSG00000279464.1_RP11-17P1  | ENSG00000160789.18_LMNA | -0.0041  | -0.163194307 | 0.155201879 | 9.60E-01 | 9.84E-01 | 1.00E+00 |
| ENSG00000198010.10_DLGA2P2   | ENSG00000160789.18_LMNA | -0.21784 | -0.36440489  | -0.06074804 | 7.02E-03 | 5.05E-02 | 1.00E+00 |
| ENSG00000188176.10_SMTNL2    | ENSG00000160789.18_LMNA | -0.1681  | -0.318769801 | -0.0091439  | 3.84E-02 | 1.69E-01 | 1.00E+00 |
| ENSG00000117281.14_CD160     | ENSG00000160789.18_LMNA | 0.01908  | -0.14055141  | 0.177737064 | 8.16E-01 | 9.28E-01 | 1.00E+00 |
| ENSG00000213704.3_EEF1A1P1   | ENSG00000160789.18_LMNA | -0.1021  | -0.257125626 | 0.058039612 | 2.11E-01 | 4.84E-01 | 1.00E+00 |
| ENSG00000246526.2_RP11-539L  | ENSG00000160789.18_LMNA | -0.01214 | -0.17101021  | 0.147345457 | 8.82E-01 | 9.54E-01 | 1.00E+00 |
| ENSG00000256616.3_RP11-815J  | ENSG00000160789.18_LMNA | -0.09805 | -0.253300622 | 0.062116345 | 2.29E-01 | 5.07E-01 | 1.00E+00 |
| ENSG00000262096.2_PCDHB19P   | ENSG00000160789.18_LMNA | 0.12126  | -0.03869083  | 0.275146005 | 1.37E-01 | 3.76E-01 | 1.00E+00 |
| ENSG00000269956.1_MKNK1-AS   | ENSG00000160789.18_LMNA | -0.04216 | -0.200017157 | 0.117832647 | 6.06E-01 | 8.20E-01 | 1.00E+00 |
| ENSG00000182329.9_KIAA2012   | ENSG00000160789.18_LMNA | 0.01226  | -0.147231314 | 0.17112347  | 8.81E-01 | 9.54E-01 | 1.00E+00 |
| ENSG00000279822.1_RP11-541M  | ENSG00000160789.18_LMNA | -0.11201 | -0.2664553   | 0.048051658 | 1.69E-01 | 4.28E-01 | 1.00E+00 |
| ENSG00000277043.1_EEF1A1P4   | ENSG00000160789.18_LMNA | -0.06235 | -0.219373792 | 0.097821047 | 4.45E-01 | 7.12E-01 | 1.00E+00 |
| ENSG00000172673.9_THEMIS     | ENSG00000160789.18_LMNA | -0.08068 | -0.236838072 | 0.079543001 | 3.23E-01 | 6.10E-01 | 1.00E+00 |
| ENSG00000228283.3_KATNBL1P   | ENSG00000160789.18_LMNA | -0.09962 | -0.254777947 | 0.060543041 | 2.22E-01 | 4.97E-01 | 1.00E+00 |
| ENSG00000245522.2_RP11-540A  | ENSG00000160789.18_LMNA | 0.20286  | 0.04511316   | 0.350730797 | 1.22E-02 | 7.56E-02 | 1.00E+00 |
| ENSG00000263818.4_CTD-2206N  | ENSG00000160789.18_LMNA | 0.07166  | -0.088551449 | 0.22825617  | 3.80E-01 | 6.59E-01 | 1.00E+00 |
| ENSG00000281106.1_RP11-327P  | ENSG00000160789.18_LMNA | -0.29431 | -0.433213582 | -0.1417519  | 2.33E-04 | 3.69E-03 | 1.00E+00 |
| ENSG00000233029.3_RP11-439A  | ENSG00000160789.18_LMNA | -0.04237 | -0.200222598 | 0.117621602 | 6.04E-01 | 8.18E-01 | 1.00E+00 |
| ENSG00000257949.5_TEN1       | ENSG00000160789.18_LMNA | -0.05848 | -0.215676335 | 0.101663536 | 4.74E-01 | 7.34E-01 | 1.00E+00 |
| ENSG00000253553.4_RP11-586K  | ENSG00000160789.18_LMNA | -0.1409  | -0.293515735 | 0.018721706 | 8.34E-02 | 2.79E-01 | 1.00E+00 |

|                              |                         |          |              |             |          |          |          |
|------------------------------|-------------------------|----------|--------------|-------------|----------|----------|----------|
| ENSG00000252690.3_SCARNA15   | ENSG00000160789.18_LMNA | -0.13768 | -0.290515979 | 0.021999748 | 9.07E-02 | 2.94E-01 | 1.00E+00 |
| ENSG00000258790.1_RP11-561B  | ENSG00000160789.18_LMNA | -0.14794 | -0.300076674 | 0.011528638 | 6.89E-02 | 2.47E-01 | 1.00E+00 |
| ENSG00000236283.2_AC013463.  | ENSG00000160789.18_LMNA | -0.17386 | -0.324093955 | -0.01508065 | 3.22E-02 | 1.50E-01 | 1.00E+00 |
| ENSG00000215571.5_GRK6P1     | ENSG00000160789.18_LMNA | -0.01175 | -0.170627438 | 0.147731151 | 8.86E-01 | 9.56E-01 | 1.00E+00 |
| ENSG00000248751.5_RP1-130H1  | ENSG00000160789.18_LMNA | -0.01101 | -0.169911593 | 0.148452202 | 8.93E-01 | 9.58E-01 | 1.00E+00 |
| ENSG00000136206.3_SPDYE1     | ENSG00000160789.18_LMNA | 0.20461  | 0.046940004  | 0.352335287 | 1.15E-02 | 7.22E-02 | 1.00E+00 |
| ENSG00000163749.16_CCDC158   | ENSG00000160789.18_LMNA | 0.05094  | -0.109146926 | 0.208449186 | 5.33E-01 | 7.75E-01 | 1.00E+00 |
| ENSG00000280367.1_RP11-121L  | ENSG00000160789.18_LMNA | -0.23641 | -0.381264453 | -0.0802325  | 3.36E-03 | 2.92E-02 | 1.00E+00 |
| ENSG00000185689.14_C6orf201  | ENSG00000160789.18_LMNA | 0.04339  | -0.116615992 | 0.201201118 | 5.96E-01 | 8.13E-01 | 1.00E+00 |
| ENSG00000251359.4_WWC2-AS2   | ENSG00000160789.18_LMNA | 0.12327  | -0.036653948 | 0.277030301 | 1.30E-01 | 3.66E-01 | 1.00E+00 |
| ENSG00000213514.2_RP11-428P  | ENSG00000160789.18_LMNA | 0.24389  | 0.088107419  | 0.388022136 | 2.46E-03 | 2.30E-02 | 1.00E+00 |
| ENSG00000257298.1_RP3-405J1  | ENSG00000160789.18_LMNA | -0.06387 | -0.220821166 | 0.09631432  | 4.34E-01 | 7.03E-01 | 1.00E+00 |
| ENSG00000242338.5_BMS1P4     | ENSG00000160789.18_LMNA | -0.09841 | -0.25363282  | 0.061762701 | 2.28E-01 | 5.04E-01 | 1.00E+00 |
| ENSG00000231831.1_MTHFD1P1   | ENSG00000160789.18_LMNA | 0.17807  | 0.019417118  | 0.327970617 | 2.82E-02 | 1.37E-01 | 1.00E+00 |
| ENSG00000256028.2_RP11-197N  | ENSG00000160789.18_LMNA | -0.00459 | -0.16367323  | 0.15472163  | 9.55E-01 | 9.82E-01 | 1.00E+00 |
| ENSG00000258819.1_RP11-7F17  | ENSG00000160789.18_LMNA | -0.01614 | -0.174886807 | 0.143433802 | 8.44E-01 | 9.39E-01 | 1.00E+00 |
| ENSG00000258938.1_RP11-317N  | ENSG00000160789.18_LMNA | 0.06669  | -0.09350073  | 0.223520189 | 4.14E-01 | 6.87E-01 | 1.00E+00 |
| ENSG00000148795.5_CYP17A1    | ENSG00000160789.18_LMNA | -0.30518 | -0.442859977 | -0.15342873 | 1.32E-04 | 2.36E-03 | 1.00E+00 |
| ENSG00000232633.4_CTD-2201C  | ENSG00000160789.18_LMNA | -0.01729 | -0.176010879 | 0.142297701 | 8.33E-01 | 9.35E-01 | 1.00E+00 |
| ENSG00000260103.2_RP11-100I  | ENSG00000160789.18_LMNA | -0.15868 | -0.310051072 | 0.000531099 | 5.09E-02 | 2.03E-01 | 1.00E+00 |
| ENSG00000275880.1_RP11-90L1  | ENSG00000160789.18_LMNA | 0.26849  | 0.114169968  | 0.41015949  | 8.24E-04 | 9.95E-03 | 1.00E+00 |
| ENSG00000179097.5_HTR1F      | ENSG00000160789.18_LMNA | 0.0757   | -0.08451515  | 0.232107449 | 3.54E-01 | 6.37E-01 | 1.00E+00 |
| ENSG00000141527.15_CARD14    | ENSG00000160789.18_LMNA | -0.01035 | -0.169272535 | 0.149095621 | 8.99E-01 | 9.61E-01 | 1.00E+00 |
| ENSG00000262953.1	EIF4A1P9   | ENSG00000160789.18_LMNA | -0.01041 | -0.169330159 | 0.149037615 | 8.99E-01 | 9.61E-01 | 1.00E+00 |
| ENSG00000231105.1_RP5-1071N  | ENSG00000160789.18_LMNA | 0.07328  | -0.086931416 | 0.229803135 | 3.70E-01 | 6.50E-01 | 1.00E+00 |
| ENSG00000142405.20_NLRP12    | ENSG00000160789.18_LMNA | 0.21294  | 0.055624359  | 0.359938152 | 8.44E-03 | 5.80E-02 | 1.00E+00 |
| ENSG00000213234.4_ST13P10    | ENSG00000160789.18_LMNA | -0.12658 | -0.280139801 | 0.033286937 | 1.20E-01 | 3.48E-01 | 1.00E+00 |
| ENSG00000137225.11_CAPN11    | ENSG00000160789.18_LMNA | 0.15897  | -0.000233903 | 0.310319674 | 5.04E-02 | 2.02E-01 | 1.00E+00 |
| ENSG00000258501.1	EIF3LP1    | ENSG00000160789.18_LMNA | -0.10491 | -0.259769192 | 0.055215914 | 1.98E-01 | 4.68E-01 | 1.00E+00 |
| ENSG00000255240.4_RP11-142C  | ENSG00000160789.18_LMNA | 0.00549  | -0.153847266 | 0.164544791 | 9.47E-01 | 9.79E-01 | 1.00E+00 |
| ENSG00000229816.1_DDX50P1    | ENSG00000160789.18_LMNA | -0.01566 | -0.174426253 | 0.143899042 | 8.48E-01 | 9.41E-01 | 1.00E+00 |
| ENSG00000188451.8_SRP72P2    | ENSG00000160789.18_LMNA | 0.00458  | -0.154730989 | 0.163663898 | 9.55E-01 | 9.82E-01 | 1.00E+00 |
| ENSG00000278206.1_RP1-20N2.1 | ENSG00000160789.18_LMNA | 0.08633  | -0.073884919 | 0.24220312  | 2.90E-01 | 5.76E-01 | 1.00E+00 |



|                              |                         |          |              |             |          |          |          |
|------------------------------|-------------------------|----------|--------------|-------------|----------|----------|----------|
| ENSG00000279880.1_RP11-855A  | ENSG00000160789.18_LMNA | -0.06234 | -0.219359311 | 0.097836115 | 4.46E-01 | 7.12E-01 | 1.00E+00 |
| ENSG00000272514.4_CFAP206    | ENSG00000160789.18_LMNA | 0.0241   | -0.135618878 | 0.182602246 | 7.68E-01 | 9.04E-01 | 1.00E+00 |
| ENSG00000267724.1_RP11-49K2  | ENSG00000160789.18_LMNA | -0.03167 | -0.189916515 | 0.128173554 | 6.98E-01 | 8.71E-01 | 1.00E+00 |
| ENSG00000203799.9_CCDC162P   | ENSG00000160789.18_LMNA | -0.07989 | -0.236087874 | 0.080332553 | 3.28E-01 | 6.14E-01 | 1.00E+00 |
| ENSG00000263884.1_RP11-705O  | ENSG00000160789.18_LMNA | 0.01347  | -0.146042424 | 0.17230266  | 8.69E-01 | 9.49E-01 | 1.00E+00 |
| ENSG00000260339.1_HEXAS1     | ENSG00000160789.18_LMNA | 0.01989  | -0.139755206 | 0.17852345  | 8.08E-01 | 9.23E-01 | 1.00E+00 |
| ENSG00000279141.2_LINC01451  | ENSG00000160789.18_LMNA | 0.19849  | 0.040572171  | 0.346734725 | 1.42E-02 | 8.47E-02 | 1.00E+00 |
| ENSG00000144063.3_MALL       | ENSG00000160789.18_LMNA | 0.28312  | 0.129772732  | 0.423247544 | 4.09E-04 | 5.76E-03 | 1.00E+00 |
| ENSG00000248697.1_TOX4P1     | ENSG00000160789.18_LMNA | 0.02197  | -0.137714233 | 0.180537404 | 7.88E-01 | 9.14E-01 | 1.00E+00 |
| ENSG00000268686.1_AC010524.1 | ENSG00000160789.18_LMNA | 0.07645  | -0.083772944 | 0.232814554 | 3.49E-01 | 6.33E-01 | 1.00E+00 |
| ENSG00000226252.1_RP1-18D14  | ENSG00000160789.18_LMNA | -0.15179 | -0.303654726 | 0.007592213 | 6.19E-02 | 2.30E-01 | 1.00E+00 |
| ENSG00000132681.15_ATP1A4    | ENSG00000160789.18_LMNA | -0.25171 | -0.39507976  | -0.09637209 | 1.76E-03 | 1.77E-02 | 1.00E+00 |
| ENSG00000233922.2_AL133493.2 | ENSG00000160789.18_LMNA | -0.1328  | -0.285956285 | 0.026969607 | 1.03E-01 | 3.17E-01 | 1.00E+00 |
| ENSG00000130377.12_ACSBG2    | ENSG00000160789.18_LMNA | 0.07214  | -0.088069714 | 0.228716345 | 3.77E-01 | 6.57E-01 | 1.00E+00 |
| ENSG00000223694.1_ADH5P3     | ENSG00000160789.18_LMNA | -0.01575 | -0.174510807 | 0.143813638 | 8.47E-01 | 9.40E-01 | 1.00E+00 |
| ENSG00000269890.1_RP5-1139B  | ENSG00000160789.18_LMNA | -0.05299 | -0.210411988 | 0.107118086 | 5.17E-01 | 7.64E-01 | 1.00E+00 |
| ENSG00000238222.3_MKRN4P     | ENSG00000160789.18_LMNA | 0.01491  | -0.144630575 | 0.173701807 | 8.55E-01 | 9.43E-01 | 1.00E+00 |
| ENSG00000204385.9_SLC44A4    | ENSG00000160789.18_LMNA | 0.05841  | -0.10173482  | 0.215607655 | 4.75E-01 | 7.34E-01 | 1.00E+00 |
| ENSG00000278330.1_RP11-4B16  | ENSG00000160789.18_LMNA | 0.06606  | -0.094133451 | 0.222913655 | 4.19E-01 | 6.91E-01 | 1.00E+00 |
| ENSG00000146530.10_VWDE      | ENSG00000160789.18_LMNA | -0.12429 | -0.277986123 | 0.035619728 | 1.27E-01 | 3.61E-01 | 1.00E+00 |
| ENSG00000249035.5_CTB-113P1  | ENSG00000160789.18_LMNA | 0.14217  | -0.017429875 | 0.294696211 | 8.06E-02 | 2.73E-01 | 1.00E+00 |
| ENSG00000258988.1_RP11-125H  | ENSG00000160789.18_LMNA | 0.11587  | -0.044143359 | 0.27009004  | 1.55E-01 | 4.06E-01 | 1.00E+00 |
| ENSG00000279953.1_RP11-338K  | ENSG00000160789.18_LMNA | -0.07781 | -0.234115314 | 0.082406695 | 3.41E-01 | 6.26E-01 | 1.00E+00 |
| ENSG00000224888.4_RP5-1142A  | ENSG00000160789.18_LMNA | 0.12159  | -0.038352908 | 0.27545878  | 1.36E-01 | 3.75E-01 | 1.00E+00 |
| ENSG00000235927.4_NEXN-AS1   | ENSG00000160789.18_LMNA | 0.12659  | -0.033280971 | 0.280145305 | 1.20E-01 | 3.48E-01 | 1.00E+00 |
| ENSG00000279879.1_RP11-1072  | ENSG00000160789.18_LMNA | -0.11116 | -0.265656185 | 0.048909626 | 1.73E-01 | 4.32E-01 | 1.00E+00 |
| ENSG00000261553.4_RP11-29G8  | ENSG00000160789.18_LMNA | -0.06087 | -0.217963006 | 0.099288287 | 4.56E-01 | 7.21E-01 | 1.00E+00 |
| ENSG00000269904.2_MAP2K4P1   | ENSG00000160789.18_LMNA | -0.03549 | -0.193593786 | 0.124416801 | 6.64E-01 | 8.52E-01 | 1.00E+00 |
| ENSG00000253919.1_THAP12P7   | ENSG00000160789.18_LMNA | -0.21969 | -0.36608334  | -0.0626775  | 6.54E-03 | 4.79E-02 | 1.00E+00 |
| ENSG00000215475.4_SIAH3      | ENSG00000160789.18_LMNA | -0.10988 | -0.26445181  | 0.050201826 | 1.78E-01 | 4.40E-01 | 1.00E+00 |
| ENSG00000211452.9_DIO1       | ENSG00000160789.18_LMNA | -0.0942  | -0.249658562 | 0.065988335 | 2.48E-01 | 5.29E-01 | 1.00E+00 |
| ENSG00000163689.17_C3orf67   | ENSG00000160789.18_LMNA | -0.09514 | -0.250544908 | 0.065046906 | 2.44E-01 | 5.23E-01 | 1.00E+00 |
| ENSG00000011590.12_ZBTB32    | ENSG00000160789.18_LMNA | 0.03737  | -0.122563736 | 0.195404361 | 6.48E-01 | 8.43E-01 | 1.00E+00 |

|                               |                         |          |              |             |          |          |          |
|-------------------------------|-------------------------|----------|--------------|-------------|----------|----------|----------|
| ENSG00000276545.1_PCDHGB9F    | ENSG00000160789.18_LMNA | 0.11129  | -0.048774104 | 0.265782441 | 1.72E-01 | 4.31E-01 | 1.00E+00 |
| ENSG00000232295.6_RP11-154D   | ENSG00000160789.18_LMNA | -0.00713 | -0.166141226 | 0.152244406 | 9.31E-01 | 9.73E-01 | 1.00E+00 |
| ENSG00000100351.15_GRAP2      | ENSG00000160789.18_LMNA | 0.0863   | -0.073916695 | 0.242173044 | 2.90E-01 | 5.76E-01 | 1.00E+00 |
| ENSG00000112706.10_IMPG1      | ENSG00000160789.18_LMNA | -0.11129 | -0.265782555 | 0.048773981 | 1.72E-01 | 4.31E-01 | 1.00E+00 |
| ENSG00000260977.1_RP11-3331   | ENSG00000160789.18_LMNA | -0.04327 | -0.20108755  | 0.116732737 | 5.97E-01 | 8.14E-01 | 1.00E+00 |
| ENSG00000186326.3_RGS9BP      | ENSG00000160789.18_LMNA | -0.01207 | -0.170940216 | 0.147415993 | 8.83E-01 | 9.55E-01 | 1.00E+00 |
| ENSG00000164520.10_RAET1E     | ENSG00000160789.18_LMNA | 0.03205  | -0.12780327  | 0.190279362 | 6.95E-01 | 8.69E-01 | 1.00E+00 |
| ENSG00000249476.1_CTD-2587M   | ENSG00000160789.18_LMNA | 0.21084  | 0.053431976  | 0.3580226   | 9.13E-03 | 6.13E-02 | 1.00E+00 |
| ENSG00000170959.13_DCDC1      | ENSG00000160789.18_LMNA | -0.12175 | -0.275613048 | 0.038186209 | 1.35E-01 | 3.74E-01 | 1.00E+00 |
| ENSG00000266998.1_RP11-9361E  | ENSG00000160789.18_LMNA | -0.01269 | -0.171546094 | 0.146805319 | 8.77E-01 | 9.52E-01 | 1.00E+00 |
| ENSG00000236449.1_AC018890.1  | ENSG00000160789.18_LMNA | -0.10625 | -0.261034887 | 0.053862188 | 1.93E-01 | 4.61E-01 | 1.00E+00 |
| ENSG00000251557.2_HNRNPKP3    | ENSG00000160789.18_LMNA | -0.13326 | -0.286388849 | 0.026498796 | 1.02E-01 | 3.15E-01 | 1.00E+00 |
| ENSG00000234252.1_            | ENSG00000160789.18_LMNA | 0.03027  | -0.129553185 | 0.188563828 | 7.11E-01 | 8.77E-01 | 1.00E+00 |
| ENSG00000267710.4_AC006116.1  | ENSG00000160789.18_LMNA | -0.06604 | -0.222892558 | 0.094155454 | 4.19E-01 | 6.91E-01 | 1.00E+00 |
| ENSG00000187045.15_TMPRS56    | ENSG00000160789.18_LMNA | 0.14364  | -0.015919874 | 0.296074843 | 7.75E-02 | 2.67E-01 | 1.00E+00 |
| ENSG00000185974.6_GRK1        | ENSG00000160789.18_LMNA | -0.1034  | -0.258349693 | 0.056732764 | 2.05E-01 | 4.76E-01 | 1.00E+00 |
| ENSG00000277287.1_RP4-79416.1 | ENSG00000160789.18_LMNA | 0.11614  | -0.043869532 | 0.270344366 | 1.54E-01 | 4.05E-01 | 1.00E+00 |
| ENSG00000244306.8_LINC01296   | ENSG00000160789.18_LMNA | -0.01435 | -0.173157559 | 0.145179918 | 8.61E-01 | 9.45E-01 | 1.00E+00 |
| ENSG00000136305.10_CIDEB      | ENSG00000160789.18_LMNA | 0.09895  | -0.061213759 | 0.254148326 | 2.25E-01 | 5.01E-01 | 1.00E+00 |
| ENSG00000197847.11_SLC22A2C   | ENSG00000160789.18_LMNA | 0.11403  | -0.046001443 | 0.268363128 | 1.62E-01 | 4.17E-01 | 1.00E+00 |
| ENSG00000234492.4_RPL34-AS1   | ENSG00000160789.18_LMNA | -0.09481 | -0.250237103 | 0.065373904 | 2.45E-01 | 5.25E-01 | 1.00E+00 |
| ENSG00000167105.6_TMEM92      | ENSG00000160789.18_LMNA | 0.12288  | -0.037043232 | 0.276670365 | 1.32E-01 | 3.68E-01 | 1.00E+00 |
| ENSG00000279344.1_RP11-44F1   | ENSG00000160789.18_LMNA | 0.11293  | -0.047113888 | 0.267328249 | 1.66E-01 | 4.23E-01 | 1.00E+00 |
| ENSG00000131379.8_C3orf20     | ENSG00000160789.18_LMNA | -0.10248 | -0.257479463 | 0.057661957 | 2.09E-01 | 4.82E-01 | 1.00E+00 |
| ENSG00000235979.7_AC004448.1  | ENSG00000160789.18_LMNA | -0.25467 | -0.397745209 | -0.09950415 | 1.54E-03 | 1.61E-02 | 1.00E+00 |
| ENSG00000236051.5_MYCBP2-A    | ENSG00000160789.18_LMNA | -0.18021 | -0.329941484 | -0.0216262  | 2.63E-02 | 1.31E-01 | 1.00E+00 |
| ENSG00000237484.5_AP000476.1  | ENSG00000160789.18_LMNA | 0.08159  | -0.078628473 | 0.237706545 | 3.18E-01 | 6.04E-01 | 1.00E+00 |
| ENSG00000235376.5_RPEL1       | ENSG00000160789.18_LMNA | -0.03627 | -0.194344316 | 0.123648927 | 6.57E-01 | 8.49E-01 | 1.00E+00 |
| ENSG00000198691.10_ABCA4      | ENSG00000160789.18_LMNA | 0.1158   | -0.044213869 | 0.270024545 | 1.55E-01 | 4.07E-01 | 1.00E+00 |
| ENSG00000230102.6_RP11-407B   | ENSG00000160789.18_LMNA | 0.00668  | -0.152683074 | 0.165704482 | 9.35E-01 | 9.74E-01 | 1.00E+00 |
| ENSG00000205740.2_RP11-363N   | ENSG00000160789.18_LMNA | -0.1291  | -0.282498926 | 0.030727688 | 1.13E-01 | 3.35E-01 | 1.00E+00 |
| ENSG00000136014.10_USP44      | ENSG00000160789.18_LMNA | -0.16664 | -0.317422292 | -0.0076448  | 4.02E-02 | 1.74E-01 | 1.00E+00 |
| ENSG00000204380.3_AC005042.1  | ENSG00000160789.18_LMNA | -0.34591 | -0.478746677 | -0.19759058 | 1.27E-05 | 3.55E-04 | 6.52E-01 |

|                              |                         |          |              |             |          |          |          |
|------------------------------|-------------------------|----------|--------------|-------------|----------|----------|----------|
| ENSG00000236423.4_LINC01134  | ENSG00000160789.18_LMNA | -0.03754 | -0.195568464 | 0.122395672 | 6.46E-01 | 8.43E-01 | 1.00E+00 |
| ENSG00000213471.7_TTLL13P    | ENSG00000160789.18_LMNA | -0.12671 | -0.280255267 | 0.033161771 | 1.20E-01 | 3.48E-01 | 1.00E+00 |
| ENSG00000232973.10_CYP1B1-A  | ENSG00000160789.18_LMNA | 0.04777  | -0.112285439 | 0.20540778  | 5.59E-01 | 7.92E-01 | 1.00E+00 |
| ENSG00000147647.11_DPYS      | ENSG00000160789.18_LMNA | -0.16958 | -0.32013594  | -0.01066515 | 3.67E-02 | 1.64E-01 | 1.00E+00 |
| ENSG00000180138.7_CSNK1A1L   | ENSG00000160789.18_LMNA | -0.12372 | -0.277453693 | 0.036195911 | 1.29E-01 | 3.64E-01 | 1.00E+00 |
| ENSG00000167094.14_TTC16     | ENSG00000160789.18_LMNA | -0.00741 | -0.166412022 | 0.151972354 | 9.28E-01 | 9.72E-01 | 1.00E+00 |
| ENSG00000241186.6_TDGF1      | ENSG00000160789.18_LMNA | -0.33112 | -0.465770705 | -0.18148965 | 3.09E-05 | 7.31E-04 | 1.00E+00 |
| ENSG00000215277.7_RNF212B    | ENSG00000160789.18_LMNA | 0.05768  | -0.102464036 | 0.214904902 | 4.80E-01 | 7.38E-01 | 1.00E+00 |
| ENSG00000176927.13_EFCAB5    | ENSG00000160789.18_LMNA | -0.26817 | -0.409869723 | -0.11382617 | 8.37E-04 | 1.01E-02 | 1.00E+00 |
| ENSG00000249244.1_RP11-548H  | ENSG00000160789.18_LMNA | 0.04638  | -0.113659673 | 0.204074131 | 5.70E-01 | 7.99E-01 | 1.00E+00 |
| ENSG00000174990.4_CA5A       | ENSG00000160789.18_LMNA | -0.18481 | -0.334177612 | -0.02638457 | 2.26E-02 | 1.18E-01 | 1.00E+00 |
| ENSG00000244161.1_FLNB-AS1   | ENSG00000160789.18_LMNA | -0.04142 | -0.199310196 | 0.118558675 | 6.12E-01 | 8.24E-01 | 1.00E+00 |
| ENSG00000159307.17_SCUBE1    | ENSG00000160789.18_LMNA | -0.20813 | -0.355547739 | -0.0506038  | 1.01E-02 | 6.60E-02 | 1.00E+00 |
| ENSG00000242412.1_DBIL5P2    | ENSG00000160789.18_LMNA | -0.13699 | -0.289867212 | 0.022707819 | 9.24E-02 | 2.97E-01 | 1.00E+00 |
| ENSG00000162438.10_CTRC      | ENSG00000160789.18_LMNA | 0.06097  | -0.099198067 | 0.218049793 | 4.56E-01 | 7.20E-01 | 1.00E+00 |
| ENSG00000213204.7_RP3-38211C | ENSG00000160789.18_LMNA | -0.1597  | -0.310992408 | -0.00051069 | 4.94E-02 | 2.00E-01 | 1.00E+00 |
| ENSG00000214558.4_RP11-74E2  | ENSG00000160789.18_LMNA | 0.01479  | -0.14475585  | 0.173577711 | 8.57E-01 | 9.43E-01 | 1.00E+00 |
| ENSG00000246548.3_RP11-7F17  | ENSG00000160789.18_LMNA | -0.01446 | -0.173264491 | 0.145072    | 8.60E-01 | 9.45E-01 | 1.00E+00 |
| ENSG00000148942.13_SLC5A12   | ENSG00000160789.18_LMNA | -0.37828 | -0.506954761 | -0.23312318 | 1.55E-06 | 6.58E-05 | 7.94E-02 |
| ENSG00000133863.5_TEX15      | ENSG00000160789.18_LMNA | -0.1465  | -0.298730802 | 0.013006815 | 7.17E-02 | 2.53E-01 | 1.00E+00 |
| ENSG00000237094.10_RP4-669L  | ENSG00000160789.18_LMNA | 0.034    | -0.125883523 | 0.192159158 | 6.78E-01 | 8.59E-01 | 1.00E+00 |
| ENSG00000230606.9_AC159540.  | ENSG00000160789.18_LMNA | 0.11242  | -0.047632527 | 0.266845524 | 1.68E-01 | 4.26E-01 | 1.00E+00 |
| ENSG00000256069.6_A2MP1      | ENSG00000160789.18_LMNA | -0.37854 | -0.507179222 | -0.23340889 | 1.52E-06 | 6.48E-05 | 7.80E-02 |
| ENSG00000204581.2_AC096670.  | ENSG00000160789.18_LMNA | -0.03649 | -0.194558052 | 0.123430182 | 6.55E-01 | 8.47E-01 | 1.00E+00 |
| ENSG00000166473.15_PKD1L2    | ENSG00000160789.18_LMNA | 0.03327  | -0.126606079 | 0.191451912 | 6.84E-01 | 8.63E-01 | 1.00E+00 |
| ENSG00000262481.4_TMEM256-F  | ENSG00000160789.18_LMNA | 0.01775  | -0.141854495 | 0.176449167 | 8.28E-01 | 9.33E-01 | 1.00E+00 |
| ENSG00000137843.10_PAK6      | ENSG00000160789.18_LMNA | -0.01797 | -0.176669419 | 0.141631724 | 8.26E-01 | 9.32E-01 | 1.00E+00 |
| ENSG00000223704.1_LINC01422  | ENSG00000160789.18_LMNA | -0.1891  | -0.33812033  | -0.03082592 | 1.96E-02 | 1.07E-01 | 1.00E+00 |
| ENSG00000273328.4_RP11-141M  | ENSG00000160789.18_LMNA | -0.20843 | -0.355824175 | -0.05091946 | 9.97E-03 | 6.55E-02 | 1.00E+00 |
| ENSG00000168676.9_KCTD19     | ENSG00000160789.18_LMNA | -0.01391 | -0.172728778 | 0.145612575 | 8.65E-01 | 9.47E-01 | 1.00E+00 |
| ENSG00000177398.17_UMODL1    | ENSG00000160789.18_LMNA | -0.0324  | -0.190615098 | 0.127460573 | 6.92E-01 | 8.67E-01 | 1.00E+00 |
| ENSG00000279145.1_RP11-547D  | ENSG00000160789.18_LMNA | 0.04804  | -0.112014599 | 0.205670482 | 5.57E-01 | 7.90E-01 | 1.00E+00 |
| ENSG00000112053.12_SLC26A8   | ENSG00000160789.18_LMNA | -0.23257 | -0.377780773 | -0.07618749 | 3.94E-03 | 3.28E-02 | 1.00E+00 |

|                              |                         |          |              |             |          |          |          |
|------------------------------|-------------------------|----------|--------------|-------------|----------|----------|----------|
| ENSG00000139351.13_SYCP3     | ENSG00000160789.18_LMNA | 0.00329  | -0.155988631 | 0.162409406 | 9.68E-01 | 9.87E-01 | 1.00E+00 |
| ENSG00000233862.4_AC016907.1 | ENSG00000160789.18_LMNA | -0.15915 | -0.310483002 | 5.32E-05    | 5.02E-02 | 2.02E-01 | 1.00E+00 |
| ENSG00000140675.11_SLC5A2    | ENSG00000160789.18_LMNA | -0.10472 | -0.259591754 | 0.055405601 | 1.99E-01 | 4.69E-01 | 1.00E+00 |
| ENSG00000174500.11_GCSAM     | ENSG00000160789.18_LMNA | -0.03838 | -0.19637643  | 0.121567939 | 6.39E-01 | 8.39E-01 | 1.00E+00 |
| ENSG00000267586.5_LINC00907  | ENSG00000160789.18_LMNA | -0.06694 | -0.223758405 | 0.093252159 | 4.13E-01 | 6.86E-01 | 1.00E+00 |
| ENSG00000212993.4_POU5F1B    | ENSG00000160789.18_LMNA | -0.12412 | -0.277826618 | 0.035792361 | 1.28E-01 | 3.62E-01 | 1.00E+00 |
| ENSG00000132874.12_SLC14A2   | ENSG00000160789.18_LMNA | -0.13202 | -0.285226022 | 0.027764127 | 1.05E-01 | 3.21E-01 | 1.00E+00 |
| ENSG00000255585.3_RP11-188C  | ENSG00000160789.18_LMNA | 0.06286  | -0.097310586 | 0.219864302 | 4.42E-01 | 7.09E-01 | 1.00E+00 |
| ENSG00000172927.6_MYEOV      | ENSG00000160789.18_LMNA | 0.19603  | 0.038010772  | 0.344475781 | 1.55E-02 | 8.99E-02 | 1.00E+00 |
| ENSG00000244479.5_OR2A1-AS1  | ENSG00000160789.18_LMNA | 0.04092  | -0.119056768 | 0.198824993 | 6.17E-01 | 8.26E-01 | 1.00E+00 |
| ENSG00000080293.8_SCTR       | ENSG00000160789.18_LMNA | -0.05827 | -0.215475008 | 0.101872489 | 4.76E-01 | 7.34E-01 | 1.00E+00 |
| ENSG00000205056.8_RP11-693J  | ENSG00000160789.18_LMNA | -0.19684 | -0.345226075 | -0.03886108 | 1.51E-02 | 8.82E-02 | 1.00E+00 |
| ENSG00000163293.10_NIPAL1    | ENSG00000160789.18_LMNA | -0.19001 | -0.338958666 | -0.03177184 | 1.90E-02 | 1.04E-01 | 1.00E+00 |
| ENSG00000248677.1_CTD-2044J  | ENSG00000160789.18_LMNA | 0.07041  | -0.089801165 | 0.227061726 | 3.89E-01 | 6.67E-01 | 1.00E+00 |
| ENSG00000185101.11_ANO9      | ENSG00000160789.18_LMNA | 0.21576  | 0.058575921  | 0.362512977 | 7.59E-03 | 5.34E-02 | 1.00E+00 |
| ENSG00000160870.11_CYP3A7    | ENSG00000160789.18_LMNA | -0.0528  | -0.210234434 | 0.107301723 | 5.18E-01 | 7.65E-01 | 1.00E+00 |
| ENSG00000275793.1_RIMBP3     | ENSG00000160789.18_LMNA | 0.27126  | 0.117114555  | 0.412638864 | 7.24E-04 | 9.00E-03 | 1.00E+00 |
| ENSG00000272078.1_RP4-734G2  | ENSG00000160789.18_LMNA | 0.35755  | 0.210325345  | 0.48892354  | 6.12E-06 | 1.96E-04 | 3.14E-01 |
| ENSG00000182366.8_FAM87A     | ENSG00000160789.18_LMNA | -0.22197 | -0.368159027 | -0.06506673 | 5.99E-03 | 4.50E-02 | 1.00E+00 |
| ENSG00000174473.14_GALNTL6   | ENSG00000160789.18_LMNA | -0.04616 | -0.203860029 | 0.113880177 | 5.72E-01 | 8.00E-01 | 1.00E+00 |
| ENSG00000128271.18_ADORA2A   | ENSG00000160789.18_LMNA | 0.04241  | -0.117587498 | 0.200255793 | 6.04E-01 | 8.18E-01 | 1.00E+00 |
| ENSG00000267426.4_RP11-552F  | ENSG00000160789.18_LMNA | 0.1872   | 0.02885832   | 0.336374966 | 2.09E-02 | 1.11E-01 | 1.00E+00 |
| ENSG00000249786.6_EAF1-AS1   | ENSG00000160789.18_LMNA | -0.04287 | -0.200698102 | 0.117133014 | 6.00E-01 | 8.16E-01 | 1.00E+00 |
| ENSG00000137860.10_SLC28A2   | ENSG00000160789.18_LMNA | -0.04983 | -0.207388923 | 0.110241761 | 5.42E-01 | 7.81E-01 | 1.00E+00 |
| ENSG00000113494.15_PRLR      | ENSG00000160789.18_LMNA | -0.0419  | -0.19976449  | 0.118092168 | 6.08E-01 | 8.21E-01 | 1.00E+00 |
| ENSG00000226937.8_CEP164P1   | ENSG00000160789.18_LMNA | -0.14345 | -0.295891502 | 0.016120767 | 7.79E-02 | 2.68E-01 | 1.00E+00 |
| ENSG00000230333.5_AC004538.1 | ENSG00000160789.18_LMNA | -0.22432 | -0.370300999 | -0.06753591 | 5.46E-03 | 4.19E-02 | 1.00E+00 |
| ENSG00000002079.11_MYH16     | ENSG00000160789.18_LMNA | -0.00282 | -0.161950082 | 0.156448851 | 9.72E-01 | 9.89E-01 | 1.00E+00 |
| ENSG00000122224.16_LY9       | ENSG00000160789.18_LMNA | 0.03241  | -0.127449614 | 0.190625834 | 6.92E-01 | 8.67E-01 | 1.00E+00 |
| ENSG00000237296.8_SMG1P1     | ENSG00000160789.18_LMNA | -0.17421 | -0.32441765  | -0.0154423  | 3.18E-02 | 1.49E-01 | 1.00E+00 |
| ENSG00000086570.11_FAT2      | ENSG00000160789.18_LMNA | 0.14419  | -0.01536375  | 0.296582258 | 7.63E-02 | 2.64E-01 | 1.00E+00 |
| ENSG00000120341.17_SEC16B    | ENSG00000160789.18_LMNA | -0.21832 | -0.364835877 | -0.06124326 | 6.89E-03 | 4.98E-02 | 1.00E+00 |
| ENSG00000258891.1_RP5-1021I2 | ENSG00000160789.18_LMNA | -0.04795 | -0.205582058 | 0.112105767 | 5.57E-01 | 7.91E-01 | 1.00E+00 |

|                              |                         |          |              |             |          |          |          |
|------------------------------|-------------------------|----------|--------------|-------------|----------|----------|----------|
| ENSG00000242352.2_FAM91A3P   | ENSG00000160789.18_LMNA | -0.04605 | -0.203754775 | 0.113988568 | 5.73E-01 | 8.01E-01 | 1.00E+00 |
| ENSG00000272916.4_RP11-574K  | ENSG00000160789.18_LMNA | -0.09093 | -0.246562512 | 0.069272387 | 2.65E-01 | 5.49E-01 | 1.00E+00 |
| ENSG00000170160.15_CCDC144   | ENSG00000160789.18_LMNA | -0.12158 | -0.275451965 | 0.038360271 | 1.36E-01 | 3.75E-01 | 1.00E+00 |
| ENSG00000255036.4_RP11-23J9  | ENSG00000160789.18_LMNA | 0.00309  | -0.156188287 | 0.162210155 | 9.70E-01 | 9.88E-01 | 1.00E+00 |
| ENSG00000253767.2_PCDHGA8    | ENSG00000160789.18_LMNA | 0.07097  | -0.089236158 | 0.227601862 | 3.85E-01 | 6.64E-01 | 1.00E+00 |
| ENSG00000140279.11_DUOX2     | ENSG00000160789.18_LMNA | -0.04413 | -0.201909305 | 0.115887793 | 5.89E-01 | 8.09E-01 | 1.00E+00 |
| ENSG00000162779.19_AXDND1    | ENSG00000160789.18_LMNA | -0.02427 | -0.182760974 | 0.135457687 | 7.67E-01 | 9.03E-01 | 1.00E+00 |
| ENSG00000147689.15_FAM83A    | ENSG00000160789.18_LMNA | -0.06997 | -0.226648481 | 0.090233301 | 3.92E-01 | 6.70E-01 | 1.00E+00 |
| ENSG00000042781.11_USH2A     | ENSG00000160789.18_LMNA | 0.04571  | -0.11432646  | 0.203426611 | 5.76E-01 | 8.02E-01 | 1.00E+00 |
| ENSG00000280383.1_CTA-941F9  | ENSG00000160789.18_LMNA | -0.01172 | -0.170598387 | 0.14776042  | 8.86E-01 | 9.56E-01 | 1.00E+00 |
| ENSG00000015568.11_RGPD5     | ENSG00000160789.18_LMNA | -0.14427 | -0.29665673  | 0.015282112 | 7.62E-02 | 2.64E-01 | 1.00E+00 |
| ENSG00000234707.2_RP11-745C  | ENSG00000160789.18_LMNA | 0.02638  | -0.133385237 | 0.184800274 | 7.47E-01 | 8.94E-01 | 1.00E+00 |
| ENSG00000275385.1_CCL18      | ENSG00000160789.18_LMNA | 0.01904  | -0.140583161 | 0.177705695 | 8.16E-01 | 9.28E-01 | 1.00E+00 |
| ENSG00000207425.1_Y_RNA      | ENSG00000160789.18_LMNA | 0.00429  | -0.155018842 | 0.163376857 | 9.58E-01 | 9.83E-01 | 1.00E+00 |
| ENSG00000276967.1_           | ENSG00000160789.18_LMNA | -0.00823 | -0.167207593 | 0.151172812 | 9.20E-01 | 9.69E-01 | 1.00E+00 |
| ENSG00000263597.1_MIR3936    | ENSG00000160789.18_LMNA | -0.23922 | -0.383805855 | -0.08318966 | 3.00E-03 | 2.67E-02 | 1.00E+00 |
| ENSG00000265917.1_MIR3685    | ENSG00000160789.18_LMNA | -0.13469 | -0.287716867 | 0.025052484 | 9.81E-02 | 3.08E-01 | 1.00E+00 |
| ENSG00000221539.1_SNORD99    | ENSG00000160789.18_LMNA | -0.0331  | -0.191297038 | 0.126764261 | 6.86E-01 | 8.64E-01 | 1.00E+00 |
| ENSG00000205809.8_KLRC2      | ENSG00000160789.18_LMNA | -0.408   | -0.532606964 | -0.26608379 | 1.81E-07 | 1.17E-05 | 9.30E-03 |
| ENSG00000272619.1_RP11-563K  | ENSG00000160789.18_LMNA | -0.17572 | -0.325802514 | -0.01699043 | 3.04E-02 | 1.44E-01 | 1.00E+00 |
| ENSG00000248126.1_CTD-2012J  | ENSG00000160789.18_LMNA | -0.08316 | -0.239189621 | 0.077065519 | 3.08E-01 | 5.95E-01 | 1.00E+00 |
| ENSG00000137142.4_IGFBPL1    | ENSG00000160789.18_LMNA | -0.32493 | -0.46032156  | -0.17477335 | 4.42E-05 | 9.71E-04 | 1.00E+00 |
| ENSG00000263660.1_           | ENSG00000160789.18_LMNA | 0.02496  | -0.134772973 | 0.183435039 | 7.60E-01 | 9.00E-01 | 1.00E+00 |
| ENSG00000211644.2_IGLV1-51   | ENSG00000160789.18_LMNA | 0.03574  | -0.124164943 | 0.193839996 | 6.62E-01 | 8.51E-01 | 1.00E+00 |
| ENSG00000264049.1_MIR4737    | ENSG00000160789.18_LMNA | -0.10336 | -0.258308102 | 0.056777185 | 2.05E-01 | 4.77E-01 | 1.00E+00 |
| ENSG00000226999.1_AC073325.1 | ENSG00000160789.18_LMNA | 0.12066  | -0.039296789 | 0.274584974 | 1.39E-01 | 3.80E-01 | 1.00E+00 |
| ENSG00000278771.1_Metazoa_SI | ENSG00000160789.18_LMNA | -0.00561 | -0.164660991 | 0.153730655 | 9.45E-01 | 9.78E-01 | 1.00E+00 |
| ENSG00000232887.1_AC006466.1 | ENSG00000160789.18_LMNA | -0.24116 | -0.385558104 | -0.08523166 | 2.76E-03 | 2.51E-02 | 1.00E+00 |
| ENSG00000212541.1_RNU6-510F  | ENSG00000160789.18_LMNA | 0.04813  | -0.111926538 | 0.205755887 | 5.56E-01 | 7.90E-01 | 1.00E+00 |
| ENSG00000225490.1_           | ENSG00000160789.18_LMNA | -0.11025 | -0.264798929 | 0.049829502 | 1.76E-01 | 4.38E-01 | 1.00E+00 |
| ENSG00000197576.12_HOXA4     | ENSG00000160789.18_LMNA | -0.12169 | -0.275550422 | 0.038253883 | 1.35E-01 | 3.74E-01 | 1.00E+00 |
| ENSG00000280992.1_           | ENSG00000160789.18_LMNA | -0.00409 | -0.163179913 | 0.155216311 | 9.60E-01 | 9.84E-01 | 1.00E+00 |
| ENSG00000207955.3_MIR219A2   | ENSG00000160789.18_LMNA | -0.37583 | -0.504823131 | -0.23041227 | 1.83E-06 | 7.49E-05 | 9.39E-02 |

|                              |                         |          |              |             |          |          |          |
|------------------------------|-------------------------|----------|--------------|-------------|----------|----------|----------|
| ENSG00000280550.1_AC131263.  | ENSG00000160789.18_LMNA | -0.00638 | -0.165417545 | 0.152971207 | 9.38E-01 | 9.75E-01 | 1.00E+00 |
| ENSG00000227094.1_RP11-565P  | ENSG00000160789.18_LMNA | 0.00912  | -0.150298839 | 0.168076753 | 9.11E-01 | 9.66E-01 | 1.00E+00 |
| ENSG00000273837.1_LLNL-470   | ENSG00000160789.18_LMNA | 0.0594   | -0.100754192 | 0.216552179 | 4.67E-01 | 7.29E-01 | 1.00E+00 |
| ENSG00000227053.1_RP11-395B  | ENSG00000160789.18_LMNA | 0.12827  | -0.03157233  | 0.281720751 | 1.15E-01 | 3.39E-01 | 1.00E+00 |
| ENSG00000202408.2_RNU1-122F  | ENSG00000160789.18_LMNA | -0.07252 | -0.229078256 | 0.087690742 | 3.75E-01 | 6.55E-01 | 1.00E+00 |
| ENSG00000230839.1_RP5-968J1. | ENSG00000160789.18_LMNA | -0.06053 | -0.217633249 | 0.099631041 | 4.59E-01 | 7.23E-01 | 1.00E+00 |
| ENSG00000199266.1_SNORA60    | ENSG00000160789.18_LMNA | 0.19148  | 0.033289183  | 0.340302404 | 1.81E-02 | 1.01E-01 | 1.00E+00 |
| ENSG00000279398.1_RP3-429G5  | ENSG00000160789.18_LMNA | 0.14471  | -0.014828829 | 0.29707016  | 7.53E-02 | 2.62E-01 | 1.00E+00 |
| ENSG00000273124.1_RP11-236B  | ENSG00000160789.18_LMNA | -0.10952 | -0.264120354 | 0.050557267 | 1.79E-01 | 4.42E-01 | 1.00E+00 |
| ENSG00000206828.1_U1         | ENSG00000160789.18_LMNA | -0.08392 | -0.239912428 | 0.076303219 | 3.04E-01 | 5.91E-01 | 1.00E+00 |
| ENSG00000207359.1_RNU6-925F  | ENSG00000160789.18_LMNA | -0.08725 | -0.243076842 | 0.072961544 | 2.85E-01 | 5.71E-01 | 1.00E+00 |
| ENSG00000199477.1_SNORA31    | ENSG00000160789.18_LMNA | -0.01503 | -0.173819314 | 0.144511942 | 8.54E-01 | 9.43E-01 | 1.00E+00 |
| ENSG00000232560.5_LINC01549  | ENSG00000160789.18_LMNA | -0.30596 | -0.443558655 | -0.15427762 | 1.26E-04 | 2.28E-03 | 1.00E+00 |
| ENSG00000250934.1_RP11-71E1  | ENSG00000160789.18_LMNA | -0.35174 | -0.483849049 | -0.20396357 | 8.85E-06 | 2.64E-04 | 4.54E-01 |
| ENSG00000206145.7_P2RX6P     | ENSG00000160789.18_LMNA | -0.25206 | -0.395393982 | -0.09674101 | 1.73E-03 | 1.75E-02 | 1.00E+00 |
| ENSG00000228630.4_HOTAIR     | ENSG00000160789.18_LMNA | -0.0223  | -0.180857365 | 0.13738973  | 7.85E-01 | 9.12E-01 | 1.00E+00 |
| ENSG00000132677.11_RHBG      | ENSG00000160789.18_LMNA | 0.02285  | -0.136848901 | 0.181390476 | 7.80E-01 | 9.10E-01 | 1.00E+00 |
| ENSG00000233864.6_TTTY15     | ENSG00000160789.18_LMNA | -0.08879 | -0.244536018 | 0.071418236 | 2.77E-01 | 5.61E-01 | 1.00E+00 |
| ENSG00000222000.6_AC092675.  | ENSG00000160789.18_LMNA | -0.01398 | -0.172795713 | 0.145545043 | 8.64E-01 | 9.47E-01 | 1.00E+00 |
| ENSG00000109321.9_AREG       | ENSG00000160789.18_LMNA | 0.09973  | -0.06042552  | 0.25488824  | 2.22E-01 | 4.97E-01 | 1.00E+00 |
| ENSG00000201207.1_Y_RNA      | ENSG00000160789.18_LMNA | 0.03695  | -0.122978189 | 0.194999599 | 6.51E-01 | 8.45E-01 | 1.00E+00 |
| ENSG00000238795.1_SCARNA12   | ENSG00000160789.18_LMNA | 0.04162  | -0.118369832 | 0.199494111 | 6.11E-01 | 8.22E-01 | 1.00E+00 |
| ENSG00000232412.1_RP1-315G1  | ENSG00000160789.18_LMNA | -0.09905 | -0.254238892 | 0.061117299 | 2.25E-01 | 5.01E-01 | 1.00E+00 |
| ENSG00000248996.1_RP11-1334. | ENSG00000160789.18_LMNA | 0.07049  | -0.089713408 | 0.227145634 | 3.88E-01 | 6.66E-01 | 1.00E+00 |
| ENSG00000273338.1_RP11-386I1 | ENSG00000160789.18_LMNA | -0.05246 | -0.209909047 | 0.1076382   | 5.21E-01 | 7.67E-01 | 1.00E+00 |
| ENSG00000207523.1_SNORA66    | ENSG00000160789.18_LMNA | -0.0014  | -0.160566909 | 0.157833885 | 9.86E-01 | 9.95E-01 | 1.00E+00 |
| ENSG00000258342.1_RP11-116N  | ENSG00000160789.18_LMNA | -0.39896 | -0.524823495 | -0.25601648 | 3.56E-07 | 2.02E-05 | 1.83E-02 |
| ENSG00000216901.1_ZNF603P    | ENSG00000160789.18_LMNA | -0.29233 | -0.431449122 | -0.13962478 | 2.58E-04 | 3.99E-03 | 1.00E+00 |
| ENSG00000274051.1_uc_338     | ENSG00000160789.18_LMNA | 0.04846  | -0.111598548 | 0.206073943 | 5.53E-01 | 7.88E-01 | 1.00E+00 |
| ENSG00000250237.1_CTC-498J1. | ENSG00000160789.18_LMNA | -0.13575 | -0.288713257 | 0.023966481 | 9.54E-02 | 3.03E-01 | 1.00E+00 |
| ENSG00000253230.5_LINC00599  | ENSG00000160789.18_LMNA | -0.3141  | -0.450756136 | -0.16304747 | 8.13E-05 | 1.59E-03 | 1.00E+00 |
| ENSG00000270871.1_AC015849.  | ENSG00000160789.18_LMNA | 0.03022  | -0.129602646 | 0.188515311 | 7.12E-01 | 8.77E-01 | 1.00E+00 |
| ENSG00000219992.2_RP11-420L  | ENSG00000160789.18_LMNA | 0.19462  | 0.036550657  | 0.343186488 | 1.63E-02 | 9.31E-02 | 1.00E+00 |

|                              |                         |          |              |             |          |          |          |
|------------------------------|-------------------------|----------|--------------|-------------|----------|----------|----------|
| ENSG00000230295.1_GTF2IP23   | ENSG00000160789.18_LMNA | -0.03569 | -0.193790407 | 0.124215673 | 6.62E-01 | 8.51E-01 | 1.00E+00 |
| ENSG00000180332.6_KCTD4      | ENSG00000160789.18_LMNA | -0.39733 | -0.523419413 | -0.2542066  | 4.01E-07 | 2.21E-05 | 2.06E-02 |
| ENSG00000229422.1_RP11-262H  | ENSG00000160789.18_LMNA | -0.09012 | -0.245798956 | 0.070081257 | 2.70E-01 | 5.54E-01 | 1.00E+00 |
| ENSG00000159184.7_HOXB13     | ENSG00000160789.18_LMNA | 0.03689  | -0.12302866  | 0.194950301 | 6.52E-01 | 8.46E-01 | 1.00E+00 |
| ENSG00000235681.1_AC008746.1 | ENSG00000160789.18_LMNA | -0.01399 | -0.172804126 | 0.145536555 | 8.64E-01 | 9.47E-01 | 1.00E+00 |
| ENSG00000226864.1_ATE1-AS1   | ENSG00000160789.18_LMNA | 0.01269  | -0.146804012 | 0.171547391 | 8.77E-01 | 9.52E-01 | 1.00E+00 |
| ENSG00000254428.1_RP11-110I1 | ENSG00000160789.18_LMNA | -0.08129 | -0.237414276 | 0.0789363   | 3.19E-01 | 6.06E-01 | 1.00E+00 |
| ENSG00000189366.8_ALG1L      | ENSG00000160789.18_LMNA | -0.21212 | -0.359192815 | -0.05477096 | 8.70E-03 | 5.93E-02 | 1.00E+00 |
| ENSG00000267640.4_CTD-2554C  | ENSG00000160789.18_LMNA | -0.12994 | -0.283285043 | 0.029873971 | 1.11E-01 | 3.32E-01 | 1.00E+00 |
| ENSG00000274248.1_AJ011932.1 | ENSG00000160789.18_LMNA | -0.02299 | -0.181528952 | 0.136708388 | 7.79E-01 | 9.09E-01 | 1.00E+00 |
| ENSG00000228812.6_LAMA5-AS   | ENSG00000160789.18_LMNA | -0.03689 | -0.194945103 | 0.123033982 | 6.52E-01 | 8.46E-01 | 1.00E+00 |
| ENSG00000223534.1_HLA-DQB1   | ENSG00000160789.18_LMNA | 0.05504  | -0.105080687 | 0.212380499 | 5.01E-01 | 7.53E-01 | 1.00E+00 |
| ENSG00000236654.2_AC079780.1 | ENSG00000160789.18_LMNA | -0.21679 | -0.363449425 | -0.0596507  | 7.30E-03 | 5.19E-02 | 1.00E+00 |
| ENSG00000230707.1_RP11-364B  | ENSG00000160789.18_LMNA | -0.23181 | -0.377093894 | -0.07539111 | 4.06E-03 | 3.35E-02 | 1.00E+00 |
| ENSG00000267191.1_RP11-15A1  | ENSG00000160789.18_LMNA | -0.16096 | -0.312165057 | -0.00180942 | 4.76E-02 | 1.95E-01 | 1.00E+00 |
| ENSG00000224164.1_RP3-369A1  | ENSG00000160789.18_LMNA | -0.0452  | -0.202940687 | 0.114826655 | 5.80E-01 | 8.04E-01 | 1.00E+00 |
| ENSG00000235204.1_RP11-121A  | ENSG00000160789.18_LMNA | 0.07342  | -0.086795107 | 0.229933223 | 3.69E-01 | 6.50E-01 | 1.00E+00 |
| ENSG00000270059.1_RP11-88H1  | ENSG00000160789.18_LMNA | -0.30267 | -0.440641386 | -0.15073598 | 1.51E-04 | 2.60E-03 | 1.00E+00 |
| ENSG00000268903.1_RP11-34P1  | ENSG00000160789.18_LMNA | 0.01811  | -0.141500511 | 0.176799133 | 8.25E-01 | 9.31E-01 | 1.00E+00 |
| ENSG00000231817.6_LINC01198  | ENSG00000160789.18_LMNA | -0.15805 | -0.309459561 | 0.001185388 | 5.18E-02 | 2.06E-01 | 1.00E+00 |
| ENSG00000221870.2_TMEM257    | ENSG00000160789.18_LMNA | -0.273   | -0.414196151 | -0.1189667  | 6.67E-04 | 8.44E-03 | 1.00E+00 |
| ENSG00000274341.1_RP11-227G  | ENSG00000160789.18_LMNA | -0.10977 | -0.264350851 | 0.050310099 | 1.78E-01 | 4.40E-01 | 1.00E+00 |
| ENSG00000279937.1_AC073657.1 | ENSG00000160789.18_LMNA | 0.08686  | -0.073358989 | 0.242700832 | 2.87E-01 | 5.73E-01 | 1.00E+00 |
| ENSG00000123388.4_HOXC11     | ENSG00000160789.18_LMNA | -0.0725  | -0.229058215 | 0.08771173  | 3.75E-01 | 6.55E-01 | 1.00E+00 |
| ENSG00000106006.6_HOXA6      | ENSG00000160789.18_LMNA | -0.05318 | -0.21059815  | 0.106925524 | 5.15E-01 | 7.63E-01 | 1.00E+00 |
| ENSG00000273650.1_CTD-3193K  | ENSG00000160789.18_LMNA | -0.32431 | -0.459770684 | -0.17409584 | 4.58E-05 | 1.00E-03 | 1.00E+00 |
| ENSG00000254760.1_CTD-2616J  | ENSG00000160789.18_LMNA | 0.04572  | -0.114315343 | 0.203437409 | 5.76E-01 | 8.02E-01 | 1.00E+00 |
| ENSG00000186297.10_GABRA5    | ENSG00000160789.18_LMNA | -0.17667 | -0.326684185 | -0.01797682 | 2.95E-02 | 1.42E-01 | 1.00E+00 |
| ENSG00000171551.10_ECEL1     | ENSG00000160789.18_LMNA | -0.15154 | -0.303423209 | 0.00784721  | 6.24E-02 | 2.31E-01 | 1.00E+00 |
| ENSG00000260583.1_AP000223.4 | ENSG00000160789.18_LMNA | -0.14198 | -0.294519992 | 0.017622782 | 8.10E-02 | 2.74E-01 | 1.00E+00 |
| ENSG00000250343.1 CTC-255N2  | ENSG00000160789.18_LMNA | -0.14697 | -0.299167699 | 0.012527118 | 7.08E-02 | 2.51E-01 | 1.00E+00 |
| ENSG00000006377.10_DLX6      | ENSG00000160789.18_LMNA | -0.38559 | -0.513283903 | -0.24119747 | 9.31E-07 | 4.33E-05 | 4.78E-02 |
| ENSG00000133135.12_RNF128    | ENSG00000160789.18_LMNA | 0.19163  | 0.033452543  | 0.340446999 | 1.80E-02 | 1.00E-01 | 1.00E+00 |

|                              |                         |          |              |             |          |          |          |
|------------------------------|-------------------------|----------|--------------|-------------|----------|----------|----------|
| ENSG00000260577.2_RP11-615I2 | ENSG00000160789.18_LMNA | -0.33477 | -0.468976861 | -0.18545381 | 2.49E-05 | 6.17E-04 | 1.00E+00 |
| ENSG00000179073.6_TAAR3      | ENSG00000160789.18_LMNA | -0.14372 | -0.296149034 | 0.015838574 | 7.73E-02 | 2.66E-01 | 1.00E+00 |
| ENSG00000179673.4_RPRML      | ENSG00000160789.18_LMNA | -0.1792  | -0.329018052 | -0.02059078 | 2.72E-02 | 1.34E-01 | 1.00E+00 |
| ENSG00000243230.1_RP11-286H  | ENSG00000160789.18_LMNA | 0.03821  | -0.12173095  | 0.196217346 | 6.40E-01 | 8.39E-01 | 1.00E+00 |
| ENSG00000257921.4_RP11-571M  | ENSG00000160789.18_LMNA | -0.21089 | -0.358068283 | -0.05348423 | 9.11E-03 | 6.13E-02 | 1.00E+00 |
| ENSG00000277587.1_CTD-3116E  | ENSG00000160789.18_LMNA | -0.06205 | -0.219089691 | 0.098116627 | 4.48E-01 | 7.14E-01 | 1.00E+00 |
| ENSG00000273216.1_AC002059.  | ENSG00000160789.18_LMNA | -0.07727 | -0.233600426 | 0.082947649 | 3.44E-01 | 6.29E-01 | 1.00E+00 |
| ENSG00000254802.1_AC022182.  | ENSG00000160789.18_LMNA | -0.22552 | -0.371389623 | -0.06879226 | 5.21E-03 | 4.05E-02 | 1.00E+00 |
| ENSG00000223374.1_AC005104.  | ENSG00000160789.18_LMNA | -0.03475 | -0.192887811 | 0.125138743 | 6.71E-01 | 8.56E-01 | 1.00E+00 |
| ENSG00000228906.1_RP13-216E  | ENSG00000160789.18_LMNA | 0.07917  | -0.081048    | 0.235407761 | 3.32E-01 | 6.18E-01 | 1.00E+00 |
| ENSG00000238279.1_BX470102.  | ENSG00000160789.18_LMNA | 0.32578  | 0.175693107  | 0.461069063 | 4.21E-05 | 9.36E-04 | 1.00E+00 |
| ENSG00000266578.1_RP11-838N  | ENSG00000160789.18_LMNA | -0.31436 | -0.450990606 | -0.16333393 | 8.01E-05 | 1.57E-03 | 1.00E+00 |
| ENSG00000231441.1_RP11-472M  | ENSG00000160789.18_LMNA | -0.06784 | -0.224616967 | 0.092355948 | 4.06E-01 | 6.82E-01 | 1.00E+00 |
| ENSG00000265936.1_RP11-563H  | ENSG00000160789.18_LMNA | -0.07888 | -0.235129868 | 0.081340236 | 3.34E-01 | 6.20E-01 | 1.00E+00 |
| ENSG00000239884.3_RN7SL608f  | ENSG00000160789.18_LMNA | 0.00885  | -0.1505665   | 0.167810618 | 9.14E-01 | 9.67E-01 | 1.00E+00 |
| ENSG00000261270.1_RP11-325K  | ENSG00000160789.18_LMNA | -0.03774 | -0.195760166 | 0.12219932  | 6.44E-01 | 8.42E-01 | 1.00E+00 |
| ENSG00000225475.1_RP11-377K  | ENSG00000160789.18_LMNA | 0.04902  | -0.111051764 | 0.206604017 | 5.49E-01 | 7.86E-01 | 1.00E+00 |
| ENSG00000256084.1_RP11-134N  | ENSG00000160789.18_LMNA | -0.06874 | -0.225474445 | 0.091460355 | 4.00E-01 | 6.77E-01 | 1.00E+00 |
| ENSG00000218672.1_AC008060.  | ENSG00000160789.18_LMNA | -0.051   | -0.208509684 | 0.109084431 | 5.33E-01 | 7.75E-01 | 1.00E+00 |
| ENSG00000006116.3_CACNG3     | ENSG00000160789.18_LMNA | -0.17692 | -0.326910978 | -0.01823064 | 2.92E-02 | 1.41E-01 | 1.00E+00 |
| ENSG00000273017.1_AP000240.  | ENSG00000160789.18_LMNA | 0.1704   | 0.011514868  | 0.320898461 | 3.58E-02 | 1.61E-01 | 1.00E+00 |
| ENSG00000268601.1_AC115522.  | ENSG00000160789.18_LMNA | -0.17873 | -0.328579072 | -0.02009879 | 2.76E-02 | 1.35E-01 | 1.00E+00 |
| ENSG00000274653.1_RP11-347C  | ENSG00000160789.18_LMNA | 0.07643  | -0.083793351 | 0.232795117 | 3.49E-01 | 6.33E-01 | 1.00E+00 |
| ENSG00000272715.1_RP4-753F5  | ENSG00000160789.18_LMNA | -0.03525 | -0.193369499 | 0.124646197 | 6.66E-01 | 8.53E-01 | 1.00E+00 |
| ENSG00000226427.1_HMG2P7     | ENSG00000160789.18_LMNA | -0.08087 | -0.237018896 | 0.079352631 | 3.22E-01 | 6.09E-01 | 1.00E+00 |
| ENSG00000185942.10_NKAIN3    | ENSG00000160789.18_LMNA | -0.26161 | -0.40398132  | -0.10685512 | 1.13E-03 | 1.27E-02 | 1.00E+00 |
| ENSG00000224805.2_LINC00853  | ENSG00000160789.18_LMNA | -0.06252 | -0.219534387 | 0.097653938 | 4.44E-01 | 7.11E-01 | 1.00E+00 |
| ENSG00000244128.4_LINC01322  | ENSG00000160789.18_LMNA | -0.22642 | -0.372200427 | -0.06972861 | 5.03E-03 | 3.94E-02 | 1.00E+00 |
| ENSG00000223476.1_VN1R42P    | ENSG00000160789.18_LMNA | -0.21895 | -0.365414816 | -0.06190873 | 6.73E-03 | 4.89E-02 | 1.00E+00 |
| ENSG00000272824.1_RP6-74O6.  | ENSG00000160789.18_LMNA | 0.17627  | 0.017565809  | 0.326316876 | 2.98E-02 | 1.43E-01 | 1.00E+00 |
| ENSG00000275560.1_RP11-180M  | ENSG00000160789.18_LMNA | -0.08808 | -0.243861546 | 0.072131784 | 2.81E-01 | 5.66E-01 | 1.00E+00 |
| ENSG00000256262.1_USP30-AS1  | ENSG00000160789.18_LMNA | 0.15209  | -0.007284015 | 0.303934495 | 6.14E-02 | 2.29E-01 | 1.00E+00 |
| ENSG00000272108.1_AC005754.  | ENSG00000160789.18_LMNA | -0.06134 | -0.218406515 | 0.098827179 | 4.53E-01 | 7.18E-01 | 1.00E+00 |



|                              |                         |          |              |             |          |          |          |
|------------------------------|-------------------------|----------|--------------|-------------|----------|----------|----------|
| ENSG00000147676.12_MAL2      | ENSG00000160789.18_LMNA | -0.171   | -0.321452926 | -0.01213302 | 3.52E-02 | 1.59E-01 | 1.00E+00 |
| ENSG00000267838.2_AC008746.  | ENSG00000160789.18_LMNA | -0.01739 | -0.176105683 | 0.142201844 | 8.32E-01 | 9.34E-01 | 1.00E+00 |
| ENSG00000229348.1_HYI-AS1    | ENSG00000160789.18_LMNA | 0.19745  | 0.039493539  | 0.345783893 | 1.48E-02 | 8.68E-02 | 1.00E+00 |
| ENSG00000230018.1_RP11-481H  | ENSG00000160789.18_LMNA | 0.02216  | -0.137529136 | 0.180719919 | 7.86E-01 | 9.13E-01 | 1.00E+00 |
| ENSG00000242640.1_RPS29P11   | ENSG00000160789.18_LMNA | 0.04098  | -0.118998465 | 0.198881794 | 6.16E-01 | 8.26E-01 | 1.00E+00 |
| ENSG00000267568.5_RP11-87G2  | ENSG00000160789.18_LMNA | 0.02029  | -0.139363707 | 0.178909973 | 8.04E-01 | 9.22E-01 | 1.00E+00 |
| ENSG00000272389.1_CTC-487M2  | ENSG00000160789.18_LMNA | 0.02407  | -0.13564699  | 0.182574562 | 7.68E-01 | 9.04E-01 | 1.00E+00 |
| ENSG00000244184.1_RP11-314A  | ENSG00000160789.18_LMNA | -0.08012 | -0.23630763  | 0.080101309 | 3.26E-01 | 6.13E-01 | 1.00E+00 |
| ENSG00000268734.1_CTB-61M7.  | ENSG00000160789.18_LMNA | 0.13867  | -0.020998646 | 0.291432746 | 8.84E-02 | 2.89E-01 | 1.00E+00 |
| ENSG00000224080.1_UBE2FP1    | ENSG00000160789.18_LMNA | 0.09228  | -0.067915221 | 0.247842766 | 2.58E-01 | 5.41E-01 | 1.00E+00 |
| ENSG00000227076.1_RP11-4C20  | ENSG00000160789.18_LMNA | 0.20906  | 0.051572577  | 0.356395974 | 9.74E-03 | 6.44E-02 | 1.00E+00 |
| ENSG00000265975.1_CTB-41I6.2 | ENSG00000160789.18_LMNA | -0.05649 | -0.21376409  | 0.10364708  | 4.89E-01 | 7.46E-01 | 1.00E+00 |
| ENSG00000236044.1_FABP5P2    | ENSG00000160789.18_LMNA | 0.08588  | -0.074338926 | 0.241773338 | 2.93E-01 | 5.79E-01 | 1.00E+00 |
| ENSG00000189068.8_VSTM1      | ENSG00000160789.18_LMNA | 0.07568  | -0.084537438 | 0.23208621  | 3.54E-01 | 6.38E-01 | 1.00E+00 |
| ENSG00000271265.1_RP11-230C  | ENSG00000160789.18_LMNA | -0.21707 | -0.363706444 | -0.05994582 | 7.22E-03 | 5.15E-02 | 1.00E+00 |
| ENSG00000248801.5_C8orf34-AS | ENSG00000160789.18_LMNA | -0.14316 | -0.295627025 | 0.01641052  | 7.85E-02 | 2.69E-01 | 1.00E+00 |
| ENSG00000242748.1_RPL23AP8   | ENSG00000160789.18_LMNA | -0.15446 | -0.306133741 | 0.004859235 | 5.74E-02 | 2.19E-01 | 1.00E+00 |
| ENSG00000248648.1_RP11-485M  | ENSG00000160789.18_LMNA | -0.04559 | -0.203311599 | 0.114444864 | 5.77E-01 | 8.03E-01 | 1.00E+00 |
| ENSG00000250948.1_RP11-1079I | ENSG00000160789.18_LMNA | -0.22217 | -0.36833895  | -0.065274   | 5.94E-03 | 4.47E-02 | 1.00E+00 |
| ENSG00000254281.1_KB-1507C5  | ENSG00000160789.18_LMNA | -0.22196 | -0.368148103 | -0.06505415 | 5.99E-03 | 4.50E-02 | 1.00E+00 |
| ENSG00000254851.1_RP11-109L  | ENSG00000160789.18_LMNA | 0.03423  | -0.125654455 | 0.192383303 | 6.75E-01 | 8.58E-01 | 1.00E+00 |
| ENSG00000273305.1_RP11-440D  | ENSG00000160789.18_LMNA | -0.03255 | -0.190760985 | 0.127311638 | 6.91E-01 | 8.67E-01 | 1.00E+00 |
| ENSG00000242797.3_GLYCTK-A:  | ENSG00000160789.18_LMNA | -0.25902 | -0.401658413 | -0.10411314 | 1.27E-03 | 1.39E-02 | 1.00E+00 |
| ENSG00000233799.1_AC139887.  | ENSG00000160789.18_LMNA | 0.06827  | -0.09192965  | 0.225025183 | 4.03E-01 | 6.79E-01 | 1.00E+00 |
| ENSG00000231920.1_NEBL-AS1   | ENSG00000160789.18_LMNA | -0.22054 | -0.366856443 | -0.06356698 | 6.33E-03 | 4.68E-02 | 1.00E+00 |
| ENSG00000258484.3_SPESP1     | ENSG00000160789.18_LMNA | -0.00231 | -0.161455131 | 0.156944611 | 9.77E-01 | 9.91E-01 | 1.00E+00 |
| ENSG00000198028.3_ZNF560     | ENSG00000160789.18_LMNA | -0.25041 | -0.393906356 | -0.09499514 | 1.86E-03 | 1.85E-02 | 1.00E+00 |
| ENSG00000184106.7_TREML3P    | ENSG00000160789.18_LMNA | 0.06758  | -0.092613911 | 0.224369891 | 4.08E-01 | 6.83E-01 | 1.00E+00 |
| ENSG00000278971.1_RP11-644A  | ENSG00000160789.18_LMNA | -0.20407 | -0.351839392 | -0.04637517 | 1.17E-02 | 7.32E-02 | 1.00E+00 |
| ENSG00000240929.2_HIST2H2BE  | ENSG00000160789.18_LMNA | 0.05508  | -0.105045048 | 0.21241491  | 5.00E-01 | 7.53E-01 | 1.00E+00 |
| ENSG00000242375.1_RP11-498P  | ENSG00000160789.18_LMNA | -0.19176 | -0.340566206 | -0.03358723 | 1.79E-02 | 9.98E-02 | 1.00E+00 |
| ENSG00000183662.9_FAM19A1    | ENSG00000160789.18_LMNA | -0.39593 | -0.522218508 | -0.25266011 | 4.44E-07 | 2.39E-05 | 2.28E-02 |
| ENSG00000225370.1_AC011515.  | ENSG00000160789.18_LMNA | -0.05977 | -0.216906896 | 0.100385757 | 4.64E-01 | 7.27E-01 | 1.00E+00 |

|                             |                         |          |              |             |          |          |          |
|-----------------------------|-------------------------|----------|--------------|-------------|----------|----------|----------|
| ENSG00000224834.1_BT3P9     | ENSG00000160789.18_LMNA | -0.12573 | -0.279338334 | 0.034155457 | 1.23E-01 | 3.53E-01 | 1.00E+00 |
| ENSG00000255966.1_RP5-940J5 | ENSG00000160789.18_LMNA | 5.69E-05 | -0.159145196 | 0.159256207 | 9.99E-01 | 1.00E+00 | 1.00E+00 |
| ENSG00000232917.5_HSPE1P6   | ENSG00000160789.18_LMNA | 0.14807  | -0.011399684 | 0.300194027 | 6.87E-02 | 2.46E-01 | 1.00E+00 |
| ENSG00000248632.1_RP11-366M | ENSG00000160789.18_LMNA | 0.15722  | -0.002027137 | 0.308698222 | 5.31E-02 | 2.09E-01 | 1.00E+00 |
| ENSG00000258955.1_LINC00519 | ENSG00000160789.18_LMNA | -0.11788 | -0.271973157 | 0.042114726 | 1.48E-01 | 3.94E-01 | 1.00E+00 |
| ENSG00000271849.1_CTC-332L2 | ENSG00000160789.18_LMNA | 0.11398  | -0.046056651 | 0.268311787 | 1.62E-01 | 4.17E-01 | 1.00E+00 |
| ENSG00000223393.1_RP5-858B6 | ENSG00000160789.18_LMNA | -0.09723 | -0.252522546 | 0.06294434  | 2.33E-01 | 5.11E-01 | 1.00E+00 |
| ENSG00000272444.1_RP11-1017 | ENSG00000160789.18_LMNA | -0.11025 | -0.264801438 | 0.049826811 | 1.76E-01 | 4.38E-01 | 1.00E+00 |
| ENSG00000269463.1_RP11-727F | ENSG00000160789.18_LMNA | -0.05681 | -0.214078327 | 0.1033213   | 4.87E-01 | 7.44E-01 | 1.00E+00 |
| ENSG00000232259.1_RP11-4C20 | ENSG00000160789.18_LMNA | 0.1403   | -0.019337541 | 0.29295265  | 8.47E-02 | 2.82E-01 | 1.00E+00 |
| ENSG00000140557.10_ST8SIA2  | ENSG00000160789.18_LMNA | -0.05703 | -0.214287925 | 0.103103965 | 4.85E-01 | 7.42E-01 | 1.00E+00 |
| ENSG00000152192.7_POU4F1    | ENSG00000160789.18_LMNA | -0.38217 | -0.510318668 | -0.23740993 | 1.18E-06 | 5.26E-05 | 6.07E-02 |
| ENSG00000179520.9_SLC17A8   | ENSG00000160789.18_LMNA | -0.48645 | -0.599242884 | -0.35471925 | 2.10E-10 | 4.18E-08 | 1.08E-05 |
| ENSG00000203930.9_LINC00632 | ENSG00000160789.18_LMNA | -0.29912 | -0.437491685 | -0.14692049 | 1.81E-04 | 3.02E-03 | 1.00E+00 |
| ENSG00000274447.1_LLNL-304  | ENSG00000160789.18_LMNA | 0.22173  | 0.064816881  | 0.367942107 | 6.04E-03 | 4.52E-02 | 1.00E+00 |
| ENSG00000232470.1_RP11-313D | ENSG00000160789.18_LMNA | -0.1744  | -0.324587676 | -0.01563229 | 3.16E-02 | 1.48E-01 | 1.00E+00 |
| ENSG00000257800.1_FBNP1P1   | ENSG00000160789.18_LMNA | -0.07801 | -0.234304125 | 0.08220828  | 3.39E-01 | 6.25E-01 | 1.00E+00 |
| ENSG00000234076.1_TPRG1-AS  | ENSG00000160789.18_LMNA | 0.0592   | -0.100955374 | 0.216358452 | 4.69E-01 | 7.30E-01 | 1.00E+00 |
| ENSG00000277450.1_CTB-96E2  | ENSG00000160789.18_LMNA | -0.11716 | -0.271299397 | 0.042840848 | 1.51E-01 | 3.99E-01 | 1.00E+00 |
| ENSG00000267056.2_AC005336  | ENSG00000160789.18_LMNA | 0.00106  | -0.158163162 | 0.16023789  | 9.90E-01 | 9.96E-01 | 1.00E+00 |
| ENSG00000271259.1_RP11-1109 | ENSG00000160789.18_LMNA | -0.01428 | -0.173088357 | 0.145249754 | 8.61E-01 | 9.46E-01 | 1.00E+00 |
| ENSG00000213613.2_RPL11P3   | ENSG00000160789.18_LMNA | 0.12467  | -0.035232802 | 0.278343558 | 1.26E-01 | 3.59E-01 | 1.00E+00 |
| ENSG00000183929.7_DUSP5P1   | ENSG00000160789.18_LMNA | 0.06441  | -0.095773066 | 0.221340758 | 4.30E-01 | 7.00E-01 | 1.00E+00 |
| ENSG00000277247.1_RP11-785D | ENSG00000160789.18_LMNA | -0.22989 | -0.375351711 | -0.0733729  | 4.38E-03 | 3.55E-02 | 1.00E+00 |
| ENSG00000279965.1_RP11-472K | ENSG00000160789.18_LMNA | 0.19554  | 0.037511972  | 0.344035467 | 1.58E-02 | 9.09E-02 | 1.00E+00 |
| ENSG00000275409.1_RP11-131L | ENSG00000160789.18_LMNA | -0.05013 | -0.207670756 | 0.109950812 | 5.40E-01 | 7.79E-01 | 1.00E+00 |
| ENSG00000236617.2_RP11-46H1 | ENSG00000160789.18_LMNA | 0.07487  | -0.085348604 | 0.231313012 | 3.59E-01 | 6.42E-01 | 1.00E+00 |
| ENSG00000231995.2_RP11-111F | ENSG00000160789.18_LMNA | 0.0395   | -0.120460228 | 0.197457013 | 6.29E-01 | 8.33E-01 | 1.00E+00 |
| ENSG00000260773.1_RP11-352G | ENSG00000160789.18_LMNA | 0.04413  | -0.115887802 | 0.201909296 | 5.89E-01 | 8.09E-01 | 1.00E+00 |
| ENSG00000163599.13_CTLA4    | ENSG00000160789.18_LMNA | 0.06632  | -0.093867955 | 0.223168193 | 4.17E-01 | 6.89E-01 | 1.00E+00 |
| ENSG00000225405.3_RPS15AP1  | ENSG00000160789.18_LMNA | -0.14503 | -0.297360515 | 0.014510408 | 7.46E-02 | 2.60E-01 | 1.00E+00 |
| ENSG00000250990.1_AC073635  | ENSG00000160789.18_LMNA | -0.02665 | -0.185061498 | 0.133119567 | 7.45E-01 | 8.93E-01 | 1.00E+00 |
| ENSG00000267283.1_AC005306  | ENSG00000160789.18_LMNA | -0.04198 | -0.199844006 | 0.118010499 | 6.08E-01 | 8.21E-01 | 1.00E+00 |

|                              |                         |          |              |             |          |          |          |
|------------------------------|-------------------------|----------|--------------|-------------|----------|----------|----------|
| ENSG00000227210.1_AC079145.4 | ENSG00000160789.18_LMNA | -0.06976 | -0.226443708 | 0.090447391 | 3.93E-01 | 6.71E-01 | 1.00E+00 |
| ENSG00000229914.1_RP11-404C  | ENSG00000160789.18_LMNA | -0.01859 | -0.177270438 | 0.141023666 | 8.20E-01 | 9.30E-01 | 1.00E+00 |
| ENSG00000154537.4_FAM27C     | ENSG00000160789.18_LMNA | -0.06478 | -0.221695773 | 0.095403142 | 4.28E-01 | 6.98E-01 | 1.00E+00 |
| ENSG00000271941.1_RP11-188P  | ENSG00000160789.18_LMNA | -0.16425 | -0.315206803 | -0.00518309 | 4.32E-02 | 1.83E-01 | 1.00E+00 |
| ENSG00000241418.1_MCRIP2P1   | ENSG00000160789.18_LMNA | -0.16562 | -0.316474936 | -0.0065917  | 4.14E-02 | 1.77E-01 | 1.00E+00 |
| ENSG00000228974.5_AC006483.1 | ENSG00000160789.18_LMNA | 0.19524  | 0.037192809  | 0.343753656 | 1.59E-02 | 9.16E-02 | 1.00E+00 |
| ENSG00000236307.2_EEF1E1P1   | ENSG00000160789.18_LMNA | -0.06523 | -0.222124951 | 0.094955825 | 4.25E-01 | 6.95E-01 | 1.00E+00 |
| ENSG00000268584.1_RP11-464F  | ENSG00000160789.18_LMNA | -0.00289 | -0.162011404 | 0.156387417 | 9.72E-01 | 9.89E-01 | 1.00E+00 |
| ENSG00000267274.1_CTD-2006C  | ENSG00000160789.18_LMNA | -0.04278 | -0.200615671 | 0.117217725 | 6.01E-01 | 8.16E-01 | 1.00E+00 |
| ENSG00000276384.1_RP11-186B  | ENSG00000160789.18_LMNA | 0.00609  | -0.153263963 | 0.16512595  | 9.41E-01 | 9.76E-01 | 1.00E+00 |
| ENSG00000165985.9_C1QL3      | ENSG00000160789.18_LMNA | -0.06236 | -0.219384796 | 0.097809597 | 4.45E-01 | 7.12E-01 | 1.00E+00 |
| ENSG00000266176.1_           | ENSG00000160789.18_LMNA | 0.08459  | -0.075629214 | 0.240551221 | 3.00E-01 | 5.87E-01 | 1.00E+00 |
| ENSG00000272155.1_RP11-707M  | ENSG00000160789.18_LMNA | -0.15083 | -0.302757802 | 0.008579879 | 6.36E-02 | 2.35E-01 | 1.00E+00 |
| ENSG00000273240.1_RP11-455J  | ENSG00000160789.18_LMNA | -0.22007 | -0.366435902 | -0.06308307 | 6.44E-03 | 4.75E-02 | 1.00E+00 |
| ENSG00000272562.1_RP11-396C  | ENSG00000160789.18_LMNA | -0.23523 | -0.380191926 | -0.0789861  | 3.53E-03 | 3.02E-02 | 1.00E+00 |
| ENSG00000270876.1_ZNF30-AS1  | ENSG00000160789.18_LMNA | -0.26901 | -0.410627803 | -0.11472575 | 8.05E-04 | 9.77E-03 | 1.00E+00 |
| ENSG00000274191.1_RP11-324E  | ENSG00000160789.18_LMNA | -0.09582 | -0.251192767 | 0.064358431 | 2.40E-01 | 5.19E-01 | 1.00E+00 |
| ENSG00000273013.1_CTD-2002J  | ENSG00000160789.18_LMNA | -0.07231 | -0.228878961 | 0.087899443 | 3.76E-01 | 6.56E-01 | 1.00E+00 |
| ENSG00000260057.4_LINC01571  | ENSG00000160789.18_LMNA | -0.16525 | -0.31613797  | -0.00621729 | 4.19E-02 | 1.79E-01 | 1.00E+00 |
| ENSG00000250155.1_CTD-2353F  | ENSG00000160789.18_LMNA | -0.08433 | -0.240303843 | 0.075890263 | 3.02E-01 | 5.88E-01 | 1.00E+00 |
| ENSG00000214787.7_MS4A4E     | ENSG00000160789.18_LMNA | 0.10058  | -0.059576631 | 0.255684673 | 2.18E-01 | 4.92E-01 | 1.00E+00 |
| ENSG00000277050.1_RP11-102G  | ENSG00000160789.18_LMNA | 0.02272  | -0.136974331 | 0.181266852 | 7.81E-01 | 9.10E-01 | 1.00E+00 |
| ENSG00000233278.1_RPS26P2    | ENSG00000160789.18_LMNA | -0.19512 | -0.343644458 | -0.03706915 | 1.60E-02 | 9.19E-02 | 1.00E+00 |
| ENSG00000239983.1_RP11-79E3  | ENSG00000160789.18_LMNA | 0.0024   | -0.156864851 | 0.161534772 | 9.77E-01 | 9.91E-01 | 1.00E+00 |
| ENSG00000281128.1_PTENP1-A5  | ENSG00000160789.18_LMNA | -0.28726 | -0.426932736 | -0.13419237 | 3.33E-04 | 4.87E-03 | 1.00E+00 |
| ENSG00000226002.1_GTF2IP14   | ENSG00000160789.18_LMNA | 0.00805  | -0.15134051  | 0.167040762 | 9.22E-01 | 9.70E-01 | 1.00E+00 |
| ENSG00000130037.4_KCNA5      | ENSG00000160789.18_LMNA | -0.33123 | -0.465863063 | -0.18160372 | 3.07E-05 | 7.27E-04 | 1.00E+00 |
| ENSG00000230912.1_RP3-508I15 | ENSG00000160789.18_LMNA | 0.06084  | -0.099321048 | 0.217931491 | 4.57E-01 | 7.21E-01 | 1.00E+00 |
| ENSG00000248468.1_RP11-517B  | ENSG00000160789.18_LMNA | -0.06081 | -0.217902487 | 0.099351197 | 4.57E-01 | 7.21E-01 | 1.00E+00 |
| ENSG00000240520.4_UOX        | ENSG00000160789.18_LMNA | -0.04992 | -0.207473308 | 0.110154652 | 5.41E-01 | 7.81E-01 | 1.00E+00 |
| ENSG00000229503.1_AC092155.1 | ENSG00000160789.18_LMNA | -0.1223  | -0.276128405 | 0.037629202 | 1.33E-01 | 3.71E-01 | 1.00E+00 |
| ENSG00000255328.1_RP11-326C  | ENSG00000160789.18_LMNA | 0.00446  | -0.154855502 | 0.163539743 | 9.57E-01 | 9.83E-01 | 1.00E+00 |
| ENSG00000272264.1_RP11-92K1  | ENSG00000160789.18_LMNA | 0.08238  | -0.077845301 | 0.238449876 | 3.13E-01 | 6.00E-01 | 1.00E+00 |

|                              |                         |          |              |             |          |          |          |
|------------------------------|-------------------------|----------|--------------|-------------|----------|----------|----------|
| ENSG00000248714.5_RP11-1079  | ENSG00000160789.18_LMNA | -0.34343 | -0.476574192 | -0.19488429 | 1.48E-05 | 4.03E-04 | 7.59E-01 |
| ENSG00000269894.1_RP11-1020  | ENSG00000160789.18_LMNA | -0.04867 | -0.206268528 | 0.111397851 | 5.52E-01 | 7.87E-01 | 1.00E+00 |
| ENSG00000133661.14_SFTPD     | ENSG00000160789.18_LMNA | -0.01527 | -0.174049663 | 0.144279359 | 8.52E-01 | 9.42E-01 | 1.00E+00 |
| ENSG00000269403.1_CTD-2616J  | ENSG00000160789.18_LMNA | 0.06126  | -0.098902348 | 0.218334224 | 4.53E-01 | 7.18E-01 | 1.00E+00 |
| ENSG00000244668.1_SNRPCP3    | ENSG00000160789.18_LMNA | -0.1403  | -0.292953833 | 0.019336247 | 8.47E-02 | 2.82E-01 | 1.00E+00 |
| ENSG00000258365.1_RP11-1105  | ENSG00000160789.18_LMNA | -0.11868 | -0.272731524 | 0.041297024 | 1.45E-01 | 3.90E-01 | 1.00E+00 |
| ENSG00000246575.2_AC093162.1 | ENSG00000160789.18_LMNA | 0.09583  | -0.064352592 | 0.25119826  | 2.40E-01 | 5.19E-01 | 1.00E+00 |
| ENSG00000270614.1_CTC-325H2  | ENSG00000160789.18_LMNA | -0.18691 | -0.336107222 | -0.0285567  | 2.11E-02 | 1.12E-01 | 1.00E+00 |
| ENSG00000249685.1_RP11-360F  | ENSG00000160789.18_LMNA | -0.0179  | -0.176601636 | 0.141700286 | 8.27E-01 | 9.32E-01 | 1.00E+00 |
| ENSG00000240571.1_RP11-775D  | ENSG00000160789.18_LMNA | 0.07284  | -0.087376747 | 0.229378049 | 3.73E-01 | 6.53E-01 | 1.00E+00 |
| ENSG00000259205.2_PRKXP1     | ENSG00000160789.18_LMNA | 0.07212  | -0.088093268 | 0.228693848 | 3.77E-01 | 6.57E-01 | 1.00E+00 |
| ENSG00000271524.1_BNIP3P17   | ENSG00000160789.18_LMNA | -0.17342 | -0.323684304 | -0.01462309 | 3.26E-02 | 1.51E-01 | 1.00E+00 |
| ENSG00000278733.1_RP11-425D  | ENSG00000160789.18_LMNA | -0.07366 | -0.230156977 | 0.086560625 | 3.67E-01 | 6.48E-01 | 1.00E+00 |
| ENSG00000238078.1_LINC01352  | ENSG00000160789.18_LMNA | -0.09935 | -0.25452757  | 0.060809794 | 2.23E-01 | 4.99E-01 | 1.00E+00 |
| ENSG00000281571.1_AC241585.1 | ENSG00000160789.18_LMNA | 0.13243  | -0.027343187 | 0.285612964 | 1.04E-01 | 3.19E-01 | 1.00E+00 |
| ENSG00000253392.2_AC006277.1 | ENSG00000160789.18_LMNA | -0.19092 | -0.339791892 | -0.03271255 | 1.85E-02 | 1.02E-01 | 1.00E+00 |
| ENSG00000272072.1_CTA-363E1  | ENSG00000160789.18_LMNA | 0.02962  | -0.130196479 | 0.187932686 | 7.17E-01 | 8.80E-01 | 1.00E+00 |
| ENSG00000258623.1_CTD-2325P  | ENSG00000160789.18_LMNA | -0.20991 | -0.357178346 | -0.05246665 | 9.44E-03 | 6.29E-02 | 1.00E+00 |
| ENSG00000213361.2_RP4-778K6  | ENSG00000160789.18_LMNA | 0.04309  | -0.116914791 | 0.200910434 | 5.98E-01 | 8.15E-01 | 1.00E+00 |
| ENSG00000272656.1_RP11-219D  | ENSG00000160789.18_LMNA | -0.05161 | -0.209090313 | 0.108484519 | 5.28E-01 | 7.72E-01 | 1.00E+00 |
| ENSG00000172061.8_LRRC15     | ENSG00000160789.18_LMNA | 0.3077   | 0.15615129   | 0.44509953  | 1.15E-04 | 2.11E-03 | 1.00E+00 |
| ENSG00000266473.1_RP11-401F  | ENSG00000160789.18_LMNA | 0.07496  | -0.085259164 | 0.231398286 | 3.59E-01 | 6.41E-01 | 1.00E+00 |
| ENSG00000269951.1_RP11-797A  | ENSG00000160789.18_LMNA | -0.095   | -0.250410622 | 0.065189574 | 2.44E-01 | 5.24E-01 | 1.00E+00 |
| ENSG00000273261.1_RP11-531F  | ENSG00000160789.18_LMNA | -0.10854 | -0.263196622 | 0.051547423 | 1.83E-01 | 4.48E-01 | 1.00E+00 |
| ENSG00000082929.7_LINC01587  | ENSG00000160789.18_LMNA | 0.1801   | 0.021521034  | 0.329847716 | 2.64E-02 | 1.31E-01 | 1.00E+00 |
| ENSG00000279331.1_RBM12B-A1  | ENSG00000160789.18_LMNA | -0.02766 | -0.186042109 | 0.132121851 | 7.35E-01 | 8.89E-01 | 1.00E+00 |
| ENSG00000233868.1_AC009302.1 | ENSG00000160789.18_LMNA | 0.04346  | -0.116543845 | 0.201271297 | 5.95E-01 | 8.13E-01 | 1.00E+00 |
| ENSG00000261570.1_RP11-744I2 | ENSG00000160789.18_LMNA | -0.05935 | -0.216502573 | 0.10080571  | 4.68E-01 | 7.29E-01 | 1.00E+00 |
| ENSG00000248121.7_SMURF2P1   | ENSG00000160789.18_LMNA | 0.05778  | -0.102365368 | 0.215000009 | 4.80E-01 | 7.38E-01 | 1.00E+00 |
| ENSG00000254501.1_AP003068.1 | ENSG00000160789.18_LMNA | 0.09671  | -0.063465722 | 0.252032389 | 2.36E-01 | 5.14E-01 | 1.00E+00 |
| ENSG00000254211.4_LINC01485  | ENSG00000160789.18_LMNA | -0.19202 | -0.340800239 | -0.03385169 | 1.78E-02 | 9.92E-02 | 1.00E+00 |
| ENSG00000249159.5_RP11-480D  | ENSG00000160789.18_LMNA | 0.03172  | -0.128131085 | 0.189958135 | 6.98E-01 | 8.71E-01 | 1.00E+00 |
| ENSG00000145526.10_CDH18     | ENSG00000160789.18_LMNA | -0.33266 | -0.467119461 | -0.18315616 | 2.82E-05 | 6.80E-04 | 1.00E+00 |

|                             |                         |          |              |             |          |          |          |
|-----------------------------|-------------------------|----------|--------------|-------------|----------|----------|----------|
| ENSG00000267268.1_AC007204. | ENSG00000160789.18_LMNA | -0.16217 | -0.313285052 | -0.00305081 | 4.59E-02 | 1.90E-01 | 1.00E+00 |
| ENSG00000242747.1_RP11-30K9 | ENSG00000160789.18_LMNA | -0.11128 | -0.265771378 | 0.048785979 | 1.72E-01 | 4.31E-01 | 1.00E+00 |
| ENSG00000228217.1_PNRC2P1   | ENSG00000160789.18_LMNA | -0.04199 | -0.199857459 | 0.117996681 | 6.07E-01 | 8.21E-01 | 1.00E+00 |
| ENSG00000276931.1_RP11-161M | ENSG00000160789.18_LMNA | -0.00572 | -0.16477417  | 0.153617068 | 9.44E-01 | 9.78E-01 | 1.00E+00 |
| ENSG00000213509.4_PPIAP16   | ENSG00000160789.18_LMNA | 0.07219  | -0.088022735 | 0.228761214 | 3.77E-01 | 6.57E-01 | 1.00E+00 |
| ENSG00000188365.3_AC092171. | ENSG00000160789.18_LMNA | -0.08222 | -0.238305458 | 0.07799749  | 3.14E-01 | 6.00E-01 | 1.00E+00 |
| ENSG00000173557.13_C2orf70  | ENSG00000160789.18_LMNA | 0.08431  | -0.075913619 | 0.240281708 | 3.02E-01 | 5.88E-01 | 1.00E+00 |
| ENSG00000273297.1_RP11-38M8 | ENSG00000160789.18_LMNA | -0.17742 | -0.327370027 | -0.01874453 | 2.88E-02 | 1.39E-01 | 1.00E+00 |
| ENSG00000271161.1_BOLA2P2   | ENSG00000160789.18_LMNA | -0.08937 | -0.245086319 | 0.070835813 | 2.74E-01 | 5.58E-01 | 1.00E+00 |
| ENSG00000124159.14_MATN4    | ENSG00000160789.18_LMNA | -0.11216 | -0.266596038 | 0.047900507 | 1.69E-01 | 4.27E-01 | 1.00E+00 |
| ENSG00000271367.1_RP3-483K1 | ENSG00000160789.18_LMNA | 0.06149  | -0.098672932 | 0.218554846 | 4.52E-01 | 7.17E-01 | 1.00E+00 |
| ENSG00000261395.3_HSPE1P5   | ENSG00000160789.18_LMNA | 0.03253  | -0.127334515 | 0.190738577 | 6.91E-01 | 8.67E-01 | 1.00E+00 |
| ENSG00000274929.1_RP11-165D | ENSG00000160789.18_LMNA | -0.16331 | -0.314342255 | -0.00422348 | 4.44E-02 | 1.86E-01 | 1.00E+00 |
| ENSG00000233084.2_RPL23AP2  | ENSG00000160789.18_LMNA | 0.06558  | -0.094607881 | 0.2224587   | 4.22E-01 | 6.93E-01 | 1.00E+00 |
| ENSG00000271868.1_RP11-1293 | ENSG00000160789.18_LMNA | -0.02529 | -0.183748483 | 0.134454474 | 7.57E-01 | 8.99E-01 | 1.00E+00 |
| ENSG00000244604.1_RP11-713H | ENSG00000160789.18_LMNA | -0.2012  | -0.349211283 | -0.04338495 | 1.29E-02 | 7.89E-02 | 1.00E+00 |
| ENSG00000156006.4_NAT2      | ENSG00000160789.18_LMNA | -0.37129 | -0.500883853 | -0.22541365 | 2.49E-06 | 9.43E-05 | 1.28E-01 |
| ENSG00000275720.1_CTB-75G16 | ENSG00000160789.18_LMNA | -0.02886 | -0.187200354 | 0.130942574 | 7.24E-01 | 8.83E-01 | 1.00E+00 |
| ENSG00000226578.1_RP11-258F | ENSG00000160789.18_LMNA | -0.21609 | -0.362811272 | -0.0589182  | 7.50E-03 | 5.29E-02 | 1.00E+00 |
| ENSG00000156150.6_ALX3      | ENSG00000160789.18_LMNA | -0.0337  | -0.191875954 | 0.126172898 | 6.80E-01 | 8.61E-01 | 1.00E+00 |
| ENSG00000118733.15_OLFM3    | ENSG00000160789.18_LMNA | -0.22132 | -0.36757028  | -0.0643887  | 6.14E-03 | 4.58E-02 | 1.00E+00 |
| ENSG00000243225.2_RP11-7F17 | ENSG00000160789.18_LMNA | 0.1527   | -0.006658081 | 0.304502528 | 6.04E-02 | 2.27E-01 | 1.00E+00 |
| ENSG00000226436.1_RP1-22N22 | ENSG00000160789.18_LMNA | -0.14624 | -0.298491072 | 0.013269968 | 7.22E-02 | 2.55E-01 | 1.00E+00 |
| ENSG00000172116.20_CD8B     | ENSG00000160789.18_LMNA | 0.08869  | -0.071519189 | 0.244440612 | 2.77E-01 | 5.62E-01 | 1.00E+00 |
| ENSG00000165309.12_ARMC3    | ENSG00000160789.18_LMNA | -0.0782  | -0.234485414 | 0.082017745 | 3.38E-01 | 6.24E-01 | 1.00E+00 |
| ENSG00000229178.1_AC069513. | ENSG00000160789.18_LMNA | -0.18648 | -0.335717371 | -0.02811761 | 2.14E-02 | 1.13E-01 | 1.00E+00 |
| ENSG00000205861.10_C1QTNF9  | ENSG00000160789.18_LMNA | 0.03391  | -0.125970423 | 0.192074117 | 6.78E-01 | 8.60E-01 | 1.00E+00 |
| ENSG00000106013.11_ANKRD7   | ENSG00000160789.18_LMNA | -0.09383 | -0.249307654 | 0.066360895 | 2.50E-01 | 5.31E-01 | 1.00E+00 |
| ENSG00000257283.1_RP11-1060 | ENSG00000160789.18_LMNA | -0.03761 | -0.195636392 | 0.122326099 | 6.46E-01 | 8.43E-01 | 1.00E+00 |
| ENSG00000163354.13_DCST2    | ENSG00000160789.18_LMNA | 0.05491  | -0.105211321 | 0.212254359 | 5.02E-01 | 7.53E-01 | 1.00E+00 |
| ENSG00000269139.2_CTD-3193C | ENSG00000160789.18_LMNA | -0.08045 | -0.236618382 | 0.079774256 | 3.25E-01 | 6.11E-01 | 1.00E+00 |
| ENSG00000223572.8_CKMT1A    | ENSG00000160789.18_LMNA | -0.4427  | -0.562269144 | -0.30498997 | 1.12E-08 | 1.19E-06 | 5.77E-04 |
| ENSG00000224427.1_AP000281. | ENSG00000160789.18_LMNA | 0.06068  | -0.099481095 | 0.217777518 | 4.58E-01 | 7.22E-01 | 1.00E+00 |

|                              |                         |          |              |             |          |          |          |
|------------------------------|-------------------------|----------|--------------|-------------|----------|----------|----------|
| ENSG00000186204.13_CYP4F12   | ENSG00000160789.18_LMNA | -0.23075 | -0.376129756 | -0.07427391 | 4.24E-03 | 3.46E-02 | 1.00E+00 |
| ENSG00000279396.1_AC130469.  | ENSG00000160789.18_LMNA | 0.11729  | -0.042710755 | 0.271420132 | 1.50E-01 | 3.98E-01 | 1.00E+00 |
| ENSG00000213956.4_RP11-269M  | ENSG00000160789.18_LMNA | 0.06857  | -0.091634196 | 0.225308041 | 4.01E-01 | 6.78E-01 | 1.00E+00 |
| ENSG00000240990.8_HOXA11-A:  | ENSG00000160789.18_LMNA | -0.32805 | -0.463070319 | -0.17815799 | 3.69E-05 | 8.45E-04 | 1.00E+00 |
| ENSG00000262119.1_RP11-483C  | ENSG00000160789.18_LMNA | -0.33783 | -0.471665687 | -0.18878546 | 2.08E-05 | 5.33E-04 | 1.00E+00 |
| ENSG00000267480.1_RP11-703I1 | ENSG00000160789.18_LMNA | 0.28116  | 0.127671605  | 0.421492165 | 4.50E-04 | 6.21E-03 | 1.00E+00 |
| ENSG00000169427.5_KCNK9      | ENSG00000160789.18_LMNA | -0.03374 | -0.191910948 | 0.126137144 | 6.80E-01 | 8.60E-01 | 1.00E+00 |
| ENSG00000262873.1_CTD-2561B  | ENSG00000160789.18_LMNA | -0.18043 | -0.330146416 | -0.02185608 | 2.61E-02 | 1.31E-01 | 1.00E+00 |
| ENSG00000277368.1_RP11-380N  | ENSG00000160789.18_LMNA | -0.06537 | -0.222260547 | 0.094814471 | 4.24E-01 | 6.95E-01 | 1.00E+00 |
| ENSG00000157502.11_MUM1L1    | ENSG00000160789.18_LMNA | -0.19156 | -0.340377078 | -0.03337355 | 1.81E-02 | 1.00E-01 | 1.00E+00 |
| ENSG00000227512.1_RP11-413M  | ENSG00000160789.18_LMNA | -0.05705 | -0.214299624 | 0.103091833 | 4.85E-01 | 7.42E-01 | 1.00E+00 |
| ENSG00000135973.2_GPR45      | ENSG00000160789.18_LMNA | -0.1563  | -0.307839193 | 0.002976366 | 5.45E-02 | 2.13E-01 | 1.00E+00 |
| ENSG00000258476.4_RP11-76E1  | ENSG00000160789.18_LMNA | 0.0974   | -0.062773887 | 0.252682756 | 2.33E-01 | 5.10E-01 | 1.00E+00 |
| ENSG00000234405.1_LLOXNC01-  | ENSG00000160789.18_LMNA | -0.01161 | -0.170492083 | 0.147867516 | 8.87E-01 | 9.56E-01 | 1.00E+00 |
| ENSG00000239300.4_RP11-400L  | ENSG00000160789.18_LMNA | -0.11288 | -0.267279158 | 0.047166638 | 1.66E-01 | 4.23E-01 | 1.00E+00 |
| ENSG00000224204.1_PHEX-AS1   | ENSG00000160789.18_LMNA | -0.01102 | -0.169923693 | 0.148440016 | 8.93E-01 | 9.58E-01 | 1.00E+00 |
| ENSG00000144891.16_AGTR1     | ENSG00000160789.18_LMNA | -0.03205 | -0.190275644 | 0.127807064 | 6.95E-01 | 8.69E-01 | 1.00E+00 |
| ENSG00000139874.5_SSTR1      | ENSG00000160789.18_LMNA | -0.41089 | -0.535086435 | -0.26930305 | 1.46E-07 | 9.80E-06 | 7.47E-03 |
| ENSG00000255449.1_RP11-91P2  | ENSG00000160789.18_LMNA | -0.14961 | -0.301624508 | 0.009826959 | 6.58E-02 | 2.40E-01 | 1.00E+00 |
| ENSG00000228327.2_RP11-206L  | ENSG00000160789.18_LMNA | -0.08115 | -0.237280527 | 0.079077149 | 3.20E-01 | 6.07E-01 | 1.00E+00 |
| ENSG00000248557.1_RP11-390G  | ENSG00000160789.18_LMNA | -0.059   | -0.216171205 | 0.101149803 | 4.70E-01 | 7.31E-01 | 1.00E+00 |
| ENSG00000240793.1_UBA52P8    | ENSG00000160789.18_LMNA | 0.05922  | -0.100934281 | 0.216378764 | 4.69E-01 | 7.30E-01 | 1.00E+00 |
| ENSG00000229873.1_OGFR-AS1   | ENSG00000160789.18_LMNA | 0.20142  | 0.043620595  | 0.349418566 | 1.28E-02 | 7.84E-02 | 1.00E+00 |
| ENSG00000280022.1_RP11-707O  | ENSG00000160789.18_LMNA | 0.04357  | -0.1164366   | 0.201375611 | 5.94E-01 | 8.13E-01 | 1.00E+00 |
| ENSG00000268945.1_CTD-2192J  | ENSG00000160789.18_LMNA | -0.02204 | -0.180611004 | 0.137639594 | 7.87E-01 | 9.13E-01 | 1.00E+00 |
| ENSG00000268533.1_AC004076.  | ENSG00000160789.18_LMNA | -0.07268 | -0.229232325 | 0.087529382 | 3.74E-01 | 6.54E-01 | 1.00E+00 |
| ENSG00000273901.1_CTD-2619J  | ENSG00000160789.18_LMNA | 0.0496   | -0.1104753   | 0.207162662 | 5.44E-01 | 7.82E-01 | 1.00E+00 |
| ENSG00000264808.1_RP11-802D  | ENSG00000160789.18_LMNA | -0.11455 | -0.268850734 | 0.04547702  | 1.60E-01 | 4.14E-01 | 1.00E+00 |
| ENSG00000250506.5_CDK3       | ENSG00000160789.18_LMNA | 0.01259  | -0.146907765 | 0.17144447  | 8.78E-01 | 9.53E-01 | 1.00E+00 |
| ENSG00000182888.5_RP11-558O  | ENSG00000160789.18_LMNA | -0.12237 | -0.276190171 | 0.037562431 | 1.33E-01 | 3.70E-01 | 1.00E+00 |
| ENSG00000242439.1_CTD-2349P  | ENSG00000160789.18_LMNA | 0.06516  | -0.095029425 | 0.222054344 | 4.25E-01 | 6.96E-01 | 1.00E+00 |
| ENSG00000247970.2_RP11-543C  | ENSG00000160789.18_LMNA | -0.25907 | -0.401703342 | -0.10416613 | 1.27E-03 | 1.39E-02 | 1.00E+00 |
| ENSG00000198759.10_EGFL6     | ENSG00000160789.18_LMNA | 0.17065  | 0.01176744   | 0.321125036 | 3.56E-02 | 1.60E-01 | 1.00E+00 |

|                              |                         |          |              |             |          |          |          |
|------------------------------|-------------------------|----------|--------------|-------------|----------|----------|----------|
| ENSG00000272115.1_GS1-393G1  | ENSG00000160789.18_LMNA | 0.1195   | -0.04047166  | 0.273496603 | 1.43E-01 | 3.86E-01 | 1.00E+00 |
| ENSG00000232648.3_RP11-367N  | ENSG00000160789.18_LMNA | -0.04555 | -0.203275136 | 0.114482401 | 5.77E-01 | 8.03E-01 | 1.00E+00 |
| ENSG00000172746.6_RPL12P13   | ENSG00000160789.18_LMNA | 0.08823  | -0.071978924 | 0.244006061 | 2.80E-01 | 5.65E-01 | 1.00E+00 |
| ENSG00000267282.1_CTB-129P6  | ENSG00000160789.18_LMNA | -0.02961 | -0.187924964 | 0.130204347 | 7.17E-01 | 8.80E-01 | 1.00E+00 |
| ENSG00000250705.1_CTC-470C1  | ENSG00000160789.18_LMNA | -0.25639 | -0.399289742 | -0.10132178 | 1.43E-03 | 1.52E-02 | 1.00E+00 |
| ENSG00000259856.1_RAB43P1    | ENSG00000160789.18_LMNA | 0.21707  | 0.059940615  | 0.363701915 | 7.23E-03 | 5.15E-02 | 1.00E+00 |
| ENSG00000268163.1_AC004076.1 | ENSG00000160789.18_LMNA | -0.15568 | -0.307263661 | 0.003612016 | 5.55E-02 | 2.15E-01 | 1.00E+00 |
| ENSG00000271754.1_RP3-337H4  | ENSG00000160789.18_LMNA | 0.18371  | 0.025249557  | 0.333168298 | 2.35E-02 | 1.21E-01 | 1.00E+00 |
| ENSG00000272247.1_RP11-379F  | ENSG00000160789.18_LMNA | -0.25753 | -0.400320495 | -0.10253589 | 1.36E-03 | 1.46E-02 | 1.00E+00 |
| ENSG00000232788.1_AC078883.1 | ENSG00000160789.18_LMNA | 0.12551  | -0.034379062 | 0.279131922 | 1.23E-01 | 3.54E-01 | 1.00E+00 |
| ENSG00000234753.4_FOXP4-AS   | ENSG00000160789.18_LMNA | -0.0112  | -0.170100197 | 0.148262259 | 8.91E-01 | 9.57E-01 | 1.00E+00 |
| ENSG00000233121.1_VN1R20P    | ENSG00000160789.18_LMNA | -0.23052 | -0.375925407 | -0.07403722 | 4.27E-03 | 3.49E-02 | 1.00E+00 |
| ENSG00000234678.1_RP11-465N  | ENSG00000160789.18_LMNA | -0.09624 | -0.251590654 | 0.063935449 | 2.38E-01 | 5.17E-01 | 1.00E+00 |
| ENSG00000277692.1_RP11-358N  | ENSG00000160789.18_LMNA | -0.19071 | -0.339602952 | -0.03249919 | 1.86E-02 | 1.02E-01 | 1.00E+00 |
| ENSG00000231652.2_RP11-553A  | ENSG00000160789.18_LMNA | 0.13696  | -0.022740858 | 0.289836933 | 9.25E-02 | 2.97E-01 | 1.00E+00 |
| ENSG00000229273.1_RP11-104G  | ENSG00000160789.18_LMNA | -0.27165 | -0.412989728 | -0.11753167 | 7.11E-04 | 8.88E-03 | 1.00E+00 |
| ENSG00000163421.7_PROK2      | ENSG00000160789.18_LMNA | 0.0418   | -0.118183979 | 0.199675093 | 6.09E-01 | 8.21E-01 | 1.00E+00 |
| ENSG00000272196.2_HIST2H2A   | ENSG00000160789.18_LMNA | 0.06373  | -0.096447759 | 0.22069304  | 4.35E-01 | 7.04E-01 | 1.00E+00 |
| ENSG00000198384.8_TPTE2P3    | ENSG00000160789.18_LMNA | -0.35627 | -0.487805433 | -0.20892157 | 6.64E-06 | 2.10E-04 | 3.41E-01 |
| ENSG00000261447.1_RP11-109D  | ENSG00000160789.18_LMNA | 0.01082  | -0.148640952 | 0.16972415  | 8.95E-01 | 9.59E-01 | 1.00E+00 |
| ENSG00000258210.1_RP11-478C  | ENSG00000160789.18_LMNA | -0.06237 | -0.219396441 | 0.097797481 | 4.45E-01 | 7.12E-01 | 1.00E+00 |
| ENSG00000214760.2_RPL21P1    | ENSG00000160789.18_LMNA | -0.15223 | -0.304064325 | 0.007140973 | 6.12E-02 | 2.29E-01 | 1.00E+00 |
| ENSG00000225643.1_RP11-70P1  | ENSG00000160789.18_LMNA | 0.1332   | -0.026561369 | 0.286331367 | 1.02E-01 | 3.15E-01 | 1.00E+00 |
| ENSG00000274227.1_RP1-267L1  | ENSG00000160789.18_LMNA | -0.07904 | -0.235283778 | 0.081178389 | 3.33E-01 | 6.19E-01 | 1.00E+00 |
| ENSG00000213157.3_RP11-259P  | ENSG00000160789.18_LMNA | -0.10448 | -0.259367958 | 0.055644812 | 2.00E-01 | 4.71E-01 | 1.00E+00 |
| ENSG00000273133.1_RP11-799M  | ENSG00000160789.18_LMNA | 0.07783  | -0.082387255 | 0.234133815 | 3.41E-01 | 6.26E-01 | 1.00E+00 |
| ENSG00000257285.4_RP11-298I3 | ENSG00000160789.18_LMNA | -0.05218 | -0.209634724 | 0.107921817 | 5.23E-01 | 7.69E-01 | 1.00E+00 |
| ENSG00000236862.1_RPS20P24   | ENSG00000160789.18_LMNA | 0.00518  | -0.154143751 | 0.164249312 | 9.49E-01 | 9.80E-01 | 1.00E+00 |
| ENSG00000229585.4_RPL21P44   | ENSG00000160789.18_LMNA | -0.12552 | -0.279144002 | 0.034365977 | 1.23E-01 | 3.54E-01 | 1.00E+00 |
| ENSG00000249502.1_AC006160.1 | ENSG00000160789.18_LMNA | -0.12419 | -0.27789274  | 0.035720799 | 1.27E-01 | 3.61E-01 | 1.00E+00 |
| ENSG00000267096.1_CTD-2537I5 | ENSG00000160789.18_LMNA | 0.19311  | 0.034980346  | 0.341798601 | 1.71E-02 | 9.66E-02 | 1.00E+00 |
| ENSG00000232454.2_RP11-3J10  | ENSG00000160789.18_LMNA | -0.04013 | -0.198067143 | 0.11983443  | 6.24E-01 | 8.30E-01 | 1.00E+00 |
| ENSG00000258769.1_RAP1AP     | ENSG00000160789.18_LMNA | 0.0559   | -0.104224416 | 0.21320705  | 4.94E-01 | 7.49E-01 | 1.00E+00 |

|                              |                         |          |              |             |          |          |          |
|------------------------------|-------------------------|----------|--------------|-------------|----------|----------|----------|
| ENSG00000213455.3_AC091654.  | ENSG00000160789.18_LMNA | 0.05418  | -0.105929999 | 0.211560217 | 5.07E-01 | 7.57E-01 | 1.00E+00 |
| ENSG00000184012.10_TMPRSS2   | ENSG00000160789.18_LMNA | 0.10004  | -0.060122725 | 0.255172374 | 2.20E-01 | 4.95E-01 | 1.00E+00 |
| ENSG00000272995.1_RP11-362J  | ENSG00000160789.18_LMNA | -0.19991 | -0.348030688 | -0.04204347 | 1.35E-02 | 8.14E-02 | 1.00E+00 |
| ENSG00000242163.1_RP11-299L  | ENSG00000160789.18_LMNA | -0.03007 | -0.188371116 | 0.129749637 | 7.13E-01 | 8.78E-01 | 1.00E+00 |
| ENSG00000235978.5_AC018816.  | ENSG00000160789.18_LMNA | 0.23931  | 0.083279309  | 0.383882826 | 2.98E-03 | 2.67E-02 | 1.00E+00 |
| ENSG00000251235.3_SNRPCP2    | ENSG00000160789.18_LMNA | -0.00195 | -0.161104674 | 0.157295545 | 9.81E-01 | 9.93E-01 | 1.00E+00 |
| ENSG00000237232.6_ZNF295-AS  | ENSG00000160789.18_LMNA | 0.16626  | 0.007246834  | 0.31706436  | 4.06E-02 | 1.75E-01 | 1.00E+00 |
| ENSG00000158428.3_CATIP      | ENSG00000160789.18_LMNA | 0.06006  | -0.100099919 | 0.217182033 | 4.62E-01 | 7.25E-01 | 1.00E+00 |
| ENSG00000263812.4_LINC00908  | ENSG00000160789.18_LMNA | 0.00406  | -0.155245796 | 0.163150505 | 9.60E-01 | 9.84E-01 | 1.00E+00 |
| ENSG00000214917.3_RP11-53I6. | ENSG00000160789.18_LMNA | -0.17852 | -0.328385502 | -0.0198819  | 2.78E-02 | 1.36E-01 | 1.00E+00 |
| ENSG00000213036.3_RP11-365D  | ENSG00000160789.18_LMNA | 0.04195  | -0.118042255 | 0.199813087 | 6.08E-01 | 8.21E-01 | 1.00E+00 |
| ENSG00000127743.5_IL17B      | ENSG00000160789.18_LMNA | -0.07229 | -0.228855974 | 0.087923513 | 3.76E-01 | 6.56E-01 | 1.00E+00 |
| ENSG00000179564.3_LSMEM2     | ENSG00000160789.18_LMNA | -0.2369  | -0.381705338 | -0.08074513 | 3.30E-03 | 2.87E-02 | 1.00E+00 |
| ENSG00000260815.3_RP11-24M1  | ENSG00000160789.18_LMNA | -0.08084 | -0.236988679 | 0.079384445 | 3.22E-01 | 6.09E-01 | 1.00E+00 |
| ENSG00000236259.1_AC017083.  | ENSG00000160789.18_LMNA | 0.07029  | -0.089920448 | 0.22694767  | 3.90E-01 | 6.68E-01 | 1.00E+00 |
| ENSG00000143107.7_FNDC7      | ENSG00000160789.18_LMNA | -0.29108 | -0.43033699  | -0.13828545 | 2.75E-04 | 4.19E-03 | 1.00E+00 |
| ENSG00000265158.1_LRRRC37A7  | ENSG00000160789.18_LMNA | -0.31595 | -0.452392189 | -0.1650473  | 7.34E-05 | 1.47E-03 | 1.00E+00 |
| ENSG00000130427.2_EPO        | ENSG00000160789.18_LMNA | 0.07941  | -0.080812162 | 0.235631985 | 3.31E-01 | 6.17E-01 | 1.00E+00 |
| ENSG00000273249.1_LL09NC01-  | ENSG00000160789.18_LMNA | 0.00714  | -0.15222899  | 0.166156571 | 9.30E-01 | 9.73E-01 | 1.00E+00 |
| ENSG00000272256.1_RP11-489E  | ENSG00000160789.18_LMNA | 0.07228  | -0.087933696 | 0.228846249 | 3.76E-01 | 6.56E-01 | 1.00E+00 |
| ENSG00000226981.2_ABHD17AP   | ENSG00000160789.18_LMNA | 0.11102  | -0.049048248 | 0.265527032 | 1.73E-01 | 4.33E-01 | 1.00E+00 |
| ENSG00000075035.8_WSCD2      | ENSG00000160789.18_LMNA | -0.23785 | -0.382561151 | -0.08174067 | 3.17E-03 | 2.78E-02 | 1.00E+00 |
| ENSG00000254170.1_CTD-2073C  | ENSG00000160789.18_LMNA | -0.07573 | -0.232134577 | 0.084486682 | 3.54E-01 | 6.37E-01 | 1.00E+00 |
| ENSG00000233438.1_AC109829.  | ENSG00000160789.18_LMNA | 0.09439  | -0.065798614 | 0.249837226 | 2.47E-01 | 5.28E-01 | 1.00E+00 |
| ENSG00000204767.3_FAM196B    | ENSG00000160789.18_LMNA | -0.06681 | -0.223630206 | 0.093385935 | 4.13E-01 | 6.87E-01 | 1.00E+00 |
| ENSG00000228741.2_SPATA13    | ENSG00000160789.18_LMNA | -0.07886 | -0.235113569 | 0.081357375 | 3.34E-01 | 6.20E-01 | 1.00E+00 |
| ENSG00000261238.1_AC009166.  | ENSG00000160789.18_LMNA | 0.04515  | -0.114877113 | 0.20289166  | 5.81E-01 | 8.05E-01 | 1.00E+00 |
| ENSG00000272906.1_RP11-533E  | ENSG00000160789.18_LMNA | -0.02479 | -0.183270337 | 0.134940305 | 7.62E-01 | 9.01E-01 | 1.00E+00 |
| ENSG00000236905.2_RP11-348H  | ENSG00000160789.18_LMNA | 0.03051  | -0.129319129 | 0.188793399 | 7.09E-01 | 8.76E-01 | 1.00E+00 |
| ENSG00000186810.7_CXCR3      | ENSG00000160789.18_LMNA | 0.17785  | 0.019189149  | 0.327767079 | 2.84E-02 | 1.38E-01 | 1.00E+00 |
| ENSG00000249797.1_CTD-3179P  | ENSG00000160789.18_LMNA | -0.20182 | -0.349785733 | -0.04403808 | 1.27E-02 | 7.76E-02 | 1.00E+00 |
| ENSG00000230406.2_AC079834.  | ENSG00000160789.18_LMNA | -0.05979 | -0.216926948 | 0.100364927 | 4.64E-01 | 7.27E-01 | 1.00E+00 |
| ENSG00000275371.1_RP11-455F  | ENSG00000160789.18_LMNA | 0.07902  | -0.08120593  | 0.235257589 | 3.33E-01 | 6.19E-01 | 1.00E+00 |



|                              |                         |          |              |             |          |          |          |
|------------------------------|-------------------------|----------|--------------|-------------|----------|----------|----------|
| ENSG00000233952.1_FTL15      | ENSG00000160789.18_LMNA | 0.07938  | -0.080839493 | 0.235606002 | 3.31E-01 | 6.17E-01 | 1.00E+00 |
| ENSG00000241157.1_RP11-3K24  | ENSG00000160789.18_LMNA | -0.00281 | -0.161942986 | 0.156455959 | 9.73E-01 | 9.89E-01 | 1.00E+00 |
| ENSG00000258399.5_MEG8       | ENSG00000160789.18_LMNA | -0.0112  | -0.17009912  | 0.148263343 | 8.91E-01 | 9.57E-01 | 1.00E+00 |
| ENSG00000227141.2_RP11-545A  | ENSG00000160789.18_LMNA | -0.15974 | -0.311027489 | -0.00054953 | 4.93E-02 | 2.00E-01 | 1.00E+00 |
| ENSG00000172399.5_MYOZ2      | ENSG00000160789.18_LMNA | -0.07094 | -0.227574594 | 0.089264688 | 3.85E-01 | 6.64E-01 | 1.00E+00 |
| ENSG00000122543.9_OCM        | ENSG00000160789.18_LMNA | -0.09816 | -0.253396985 | 0.062013769 | 2.29E-01 | 5.06E-01 | 1.00E+00 |
| ENSG00000227879.2_PSPC1P1    | ENSG00000160789.18_LMNA | -0.08433 | -0.240303419 | 0.07589071  | 3.02E-01 | 5.88E-01 | 1.00E+00 |
| ENSG00000272896.1_RP11-216L  | ENSG00000160789.18_LMNA | 0.07388  | -0.086334521 | 0.230372704 | 3.66E-01 | 6.47E-01 | 1.00E+00 |
| ENSG00000230970.3_HHATL-AS   | ENSG00000160789.18_LMNA | -0.16023 | -0.311482654 | -0.00105352 | 4.86E-02 | 1.98E-01 | 1.00E+00 |
| ENSG00000213579.3_RP4-595K1  | ENSG00000160789.18_LMNA | -0.09906 | -0.254247896 | 0.061107709 | 2.25E-01 | 5.01E-01 | 1.00E+00 |
| ENSG00000213331.4_RP11-713C  | ENSG00000160789.18_LMNA | 0.07724  | -0.082977386 | 0.233572116 | 3.44E-01 | 6.29E-01 | 1.00E+00 |
| ENSG00000260588.1_RP11-930P  | ENSG00000160789.18_LMNA | 0.18613  | 0.027753957  | 0.335394409 | 2.17E-02 | 1.14E-01 | 1.00E+00 |
| ENSG00000255014.1_ARL6IP1P3  | ENSG00000160789.18_LMNA | -0.03302 | -0.191214266 | 0.126848794 | 6.86E-01 | 8.64E-01 | 1.00E+00 |
| ENSG00000231989.3_PPP1R2P3   | ENSG00000160789.18_LMNA | -0.08581 | -0.241709581 | 0.074406266 | 2.93E-01 | 5.79E-01 | 1.00E+00 |
| ENSG00000219329.1_RP11-397G  | ENSG00000160789.18_LMNA | 0.13657  | -0.023136888 | 0.289473939 | 9.34E-02 | 2.99E-01 | 1.00E+00 |
| ENSG00000276116.2_FUT8-AS1   | ENSG00000160789.18_LMNA | 0.07226  | -0.08794913  | 0.22883151  | 3.76E-01 | 6.56E-01 | 1.00E+00 |
| ENSG00000255176.1_AP002954.1 | ENSG00000160789.18_LMNA | 0.0204   | -0.139249854 | 0.179022361 | 8.03E-01 | 9.21E-01 | 1.00E+00 |
| ENSG00000116031.8_CD207      | ENSG00000160789.18_LMNA | -0.09393 | -0.249403267 | 0.066259391 | 2.50E-01 | 5.30E-01 | 1.00E+00 |
| ENSG00000250404.1_           | ENSG00000160789.18_LMNA | 0.00804  | -0.15135235  | 0.167028983 | 9.22E-01 | 9.70E-01 | 1.00E+00 |
| ENSG00000270388.1_MTCO3P22   | ENSG00000160789.18_LMNA | -0.0691  | -0.225812017 | 0.091107637 | 3.98E-01 | 6.74E-01 | 1.00E+00 |
| ENSG00000276593.1_RP11-295H  | ENSG00000160789.18_LMNA | 0.01215  | -0.147337655 | 0.171017952 | 8.82E-01 | 9.54E-01 | 1.00E+00 |
| ENSG00000259592.1_PRELID1P4  | ENSG00000160789.18_LMNA | 0.18233  | 0.023824266  | 0.331899851 | 2.46E-02 | 1.25E-01 | 1.00E+00 |
| ENSG00000057294.12_PKP2      | ENSG00000160789.18_LMNA | -0.11157 | -0.266042801 | 0.048494596 | 1.71E-01 | 4.30E-01 | 1.00E+00 |
| ENSG00000225185.3_RP11-481K  | ENSG00000160789.18_LMNA | -0.01775 | -0.176447479 | 0.141856203 | 8.28E-01 | 9.33E-01 | 1.00E+00 |
| ENSG00000273983.1_HIST1H3G   | ENSG00000160789.18_LMNA | 0.16866  | 0.009722208  | 0.319289296 | 3.78E-02 | 1.67E-01 | 1.00E+00 |
| ENSG00000271888.1_RP11-560J  | ENSG00000160789.18_LMNA | -0.09255 | -0.248098336 | 0.067644158 | 2.57E-01 | 5.39E-01 | 1.00E+00 |
| ENSG00000272017.1_RP1-199J3  | ENSG00000160789.18_LMNA | 0.07043  | -0.089777776 | 0.22708409  | 3.89E-01 | 6.67E-01 | 1.00E+00 |
| ENSG00000237169.1_RPL12P27   | ENSG00000160789.18_LMNA | -0.11218 | -0.266619962 | 0.047874811 | 1.69E-01 | 4.27E-01 | 1.00E+00 |
| ENSG00000148702.13_HABP2     | ENSG00000160789.18_LMNA | 0.15253  | -0.006833855 | 0.304343036 | 6.07E-02 | 2.27E-01 | 1.00E+00 |
| ENSG00000251666.1_ZNF346-IT1 | ENSG00000160789.18_LMNA | -0.11965 | -0.273639228 | 0.040317748 | 1.42E-01 | 3.85E-01 | 1.00E+00 |
| ENSG00000036565.13_SLC18A1   | ENSG00000160789.18_LMNA | -0.27758 | -0.418292661 | -0.12384868 | 5.36E-04 | 7.12E-03 | 1.00E+00 |
| ENSG00000243099.1_AC020983.1 | ENSG00000160789.18_LMNA | 0.02853  | -0.131271718 | 0.18687717  | 7.27E-01 | 8.85E-01 | 1.00E+00 |
| ENSG00000259275.2_RP11-522B  | ENSG00000160789.18_LMNA | 0.13127  | -0.028522303 | 0.284528823 | 1.07E-01 | 3.25E-01 | 1.00E+00 |

|                              |                         |          |              |             |          |          |          |
|------------------------------|-------------------------|----------|--------------|-------------|----------|----------|----------|
| ENSG00000227934.1_RP11-423F  | ENSG00000160789.18_LMNA | 0.15715  | -0.002105653 | 0.308627186 | 5.32E-02 | 2.09E-01 | 1.00E+00 |
| ENSG00000145777.13_TSLP      | ENSG00000160789.18_LMNA | 0.23763  | 0.081511364  | 0.382364075 | 3.20E-03 | 2.80E-02 | 1.00E+00 |
| ENSG00000214184.3_GCC2-AS1   | ENSG00000160789.18_LMNA | 0.22567  | 0.068951259  | 0.371527336 | 5.18E-03 | 4.04E-02 | 1.00E+00 |
| ENSG00000272159.1_RP11-350N  | ENSG00000160789.18_LMNA | 0.11626  | -0.04375398  | 0.270451676 | 1.54E-01 | 4.04E-01 | 1.00E+00 |
| ENSG00000137473.16_TTC29     | ENSG00000160789.18_LMNA | -0.20148 | -0.349469417 | -0.04367841 | 1.28E-02 | 7.83E-02 | 1.00E+00 |
| ENSG00000279415.1_RP11-1102  | ENSG00000160789.18_LMNA | 0.04107  | -0.118903747 | 0.19897407  | 6.15E-01 | 8.26E-01 | 1.00E+00 |
| ENSG00000273454.1_RP11-797D  | ENSG00000160789.18_LMNA | -0.23874 | -0.383369258 | -0.08268127 | 3.06E-03 | 2.71E-02 | 1.00E+00 |
| ENSG00000260903.2_XKR7       | ENSG00000160789.18_LMNA | -0.21807 | -0.364616623 | -0.06099131 | 6.96E-03 | 5.02E-02 | 1.00E+00 |
| ENSG00000173239.12_LIPM      | ENSG00000160789.18_LMNA | -0.06101 | -0.218095798 | 0.09915024  | 4.55E-01 | 7.20E-01 | 1.00E+00 |
| ENSG00000229596.3_MYL8P      | ENSG00000160789.18_LMNA | 0.00745  | -0.151931979 | 0.166452206 | 9.27E-01 | 9.72E-01 | 1.00E+00 |
| ENSG00000261218.4_RP11-960L  | ENSG00000160789.18_LMNA | -0.1257  | -0.279314913 | 0.034180831 | 1.23E-01 | 3.53E-01 | 1.00E+00 |
| ENSG00000239272.1_RPL21P10   | ENSG00000160789.18_LMNA | -0.01884 | -0.177509241 | 0.140782    | 8.18E-01 | 9.29E-01 | 1.00E+00 |
| ENSG00000223945.2_RP11-458I7 | ENSG00000160789.18_LMNA | 0.03054  | -0.129287727 | 0.188824196 | 7.09E-01 | 8.76E-01 | 1.00E+00 |
| ENSG00000269228.1_RPS27AP1   | ENSG00000160789.18_LMNA | -0.06981 | -0.226496392 | 0.090392313 | 3.93E-01 | 6.70E-01 | 1.00E+00 |
| ENSG00000279488.1_AC004623.  | ENSG00000160789.18_LMNA | -0.11379 | -0.268131043 | 0.046250991 | 1.63E-01 | 4.18E-01 | 1.00E+00 |
| ENSG00000232794.1_HNRNPDP    | ENSG00000160789.18_LMNA | -0.01709 | -0.175817104 | 0.14249361  | 8.34E-01 | 9.36E-01 | 1.00E+00 |
| ENSG00000231381.2_RNF2P1     | ENSG00000160789.18_LMNA | 0.03496  | -0.124934225 | 0.193087839 | 6.69E-01 | 8.54E-01 | 1.00E+00 |
| ENSG00000275106.1_RP11-309L  | ENSG00000160789.18_LMNA | -0.05303 | -0.210456205 | 0.107072351 | 5.16E-01 | 7.63E-01 | 1.00E+00 |
| ENSG00000267898.1_CTD-2639E  | ENSG00000160789.18_LMNA | 0.17223  | 0.013399493  | 0.322588254 | 3.39E-02 | 1.55E-01 | 1.00E+00 |
| ENSG00000260997.1_RP4-647J2  | ENSG00000160789.18_LMNA | 0.28737  | 0.134318092  | 0.427037425 | 3.31E-04 | 4.85E-03 | 1.00E+00 |
| ENSG00000281406.1_BLACAT1    | ENSG00000160789.18_LMNA | -0.02474 | -0.18321449  | 0.13499704  | 7.62E-01 | 9.01E-01 | 1.00E+00 |
| ENSG00000243224.1_RP5-1157M  | ENSG00000160789.18_LMNA | 0.06326  | -0.096921214 | 0.220238347 | 4.39E-01 | 7.07E-01 | 1.00E+00 |
| ENSG00000170476.14_MZB1      | ENSG00000160789.18_LMNA | 0.10034  | -0.059813517 | 0.255462468 | 2.19E-01 | 4.94E-01 | 1.00E+00 |
| ENSG00000268884.1_CTD-2550C  | ENSG00000160789.18_LMNA | -0.03908 | -0.197051405 | 0.120876111 | 6.33E-01 | 8.35E-01 | 1.00E+00 |
| ENSG00000254288.1_RP11-6I2.3 | ENSG00000160789.18_LMNA | 0.20145  | 0.04364923   | 0.349443753 | 1.28E-02 | 7.84E-02 | 1.00E+00 |
| ENSG00000206129.3_CTD-2008L  | ENSG00000160789.18_LMNA | -0.33317 | -0.467569785 | -0.18371293 | 2.74E-05 | 6.64E-04 | 1.00E+00 |
| ENSG00000274461.1_RP11-323P  | ENSG00000160789.18_LMNA | -0.08164 | -0.237748447 | 0.078584336 | 3.17E-01 | 6.04E-01 | 1.00E+00 |
| ENSG00000264655.1_CTD-2267D  | ENSG00000160789.18_LMNA | 0.11313  | -0.046916421 | 0.267512    | 1.65E-01 | 4.22E-01 | 1.00E+00 |
| ENSG00000188269.7_OR7A5      | ENSG00000160789.18_LMNA | -0.28074 | -0.421115204 | -0.12722074 | 4.60E-04 | 6.32E-03 | 1.00E+00 |
| ENSG00000253981.4_ALG1L13P   | ENSG00000160789.18_LMNA | 0.35245  | 0.20473349   | 0.484464183 | 8.46E-06 | 2.55E-04 | 4.34E-01 |
| ENSG00000242767.1_ZBTB20-AS  | ENSG00000160789.18_LMNA | -0.33861 | -0.47234438  | -0.18962744 | 1.98E-05 | 5.13E-04 | 1.00E+00 |
| ENSG00000109158.9_GABRA4     | ENSG00000160789.18_LMNA | -0.1466  | -0.298828538 | 0.012899517 | 7.15E-02 | 2.53E-01 | 1.00E+00 |
| ENSG00000255423.1_EBLN2      | ENSG00000160789.18_LMNA | -0.07421 | -0.230682275 | 0.086010003 | 3.64E-01 | 6.45E-01 | 1.00E+00 |

|                              |                         |          |              |             |          |          |          |
|------------------------------|-------------------------|----------|--------------|-------------|----------|----------|----------|
| ENSG00000213041.4_RP11-383G  | ENSG00000160789.18_LMNA | -0.09788 | -0.253139691 | 0.062287636 | 2.30E-01 | 5.08E-01 | 1.00E+00 |
| ENSG00000132832.8_LINC01260  | ENSG00000160789.18_LMNA | -0.27868 | -0.419282722 | -0.12503072 | 5.08E-04 | 6.82E-03 | 1.00E+00 |
| ENSG00000123901.7_GPR83      | ENSG00000160789.18_LMNA | -0.26199 | -0.404324364 | -0.10726044 | 1.11E-03 | 1.26E-02 | 1.00E+00 |
| ENSG00000186715.9_MST1L      | ENSG00000160789.18_LMNA | -0.06863 | -0.225370629 | 0.091568812 | 4.01E-01 | 6.77E-01 | 1.00E+00 |
| ENSG00000280057.1_RP1-168L1  | ENSG00000160789.18_LMNA | -0.16078 | -0.311990776 | -0.00161633 | 4.78E-02 | 1.95E-01 | 1.00E+00 |
| ENSG00000205424.1_AL592528.1 | ENSG00000160789.18_LMNA | -0.12297 | -0.276751458 | 0.036955535 | 1.31E-01 | 3.67E-01 | 1.00E+00 |
| ENSG00000271698.1_GS1-393G1  | ENSG00000160789.18_LMNA | -0.06552 | -0.222401845 | 0.09466716  | 4.23E-01 | 6.94E-01 | 1.00E+00 |
| ENSG00000243844.1_RPL17P33   | ENSG00000160789.18_LMNA | -0.03164 | -0.189888656 | 0.128201981 | 6.99E-01 | 8.71E-01 | 1.00E+00 |
| ENSG00000230993.1_RPL12P15   | ENSG00000160789.18_LMNA | -0.00919 | -0.168147669 | 0.150227508 | 9.11E-01 | 9.66E-01 | 1.00E+00 |
| ENSG00000233578.1_EIF4EP1    | ENSG00000160789.18_LMNA | 0.02565  | -0.134095922 | 0.184101266 | 7.54E-01 | 8.98E-01 | 1.00E+00 |
| ENSG00000235264.1_RPL5P28    | ENSG00000160789.18_LMNA | 0.00859  | -0.150816278 | 0.167562223 | 9.16E-01 | 9.68E-01 | 1.00E+00 |
| ENSG00000248727.4_CTC-236F1  | ENSG00000160789.18_LMNA | -0.01732 | -0.176032036 | 0.14227631  | 8.32E-01 | 9.35E-01 | 1.00E+00 |
| ENSG00000278616.1_BEND3P3    | ENSG00000160789.18_LMNA | -0.03098 | -0.189243463 | 0.128860167 | 7.05E-01 | 8.74E-01 | 1.00E+00 |
| ENSG00000206113.6_CFAP99     | ENSG00000160789.18_LMNA | 0.12092  | -0.039034965 | 0.274827412 | 1.38E-01 | 3.78E-01 | 1.00E+00 |
| ENSG00000266913.1_CTC-548K1  | ENSG00000160789.18_LMNA | 0.11712  | -0.042877676 | 0.271265217 | 1.51E-01 | 3.99E-01 | 1.00E+00 |
| ENSG00000187642.8_PERM1      | ENSG00000160789.18_LMNA | 0.10392  | -0.056206951 | 0.258841914 | 2.03E-01 | 4.73E-01 | 1.00E+00 |
| ENSG00000157111.11_TMEM171   | ENSG00000160789.18_LMNA | 0.17066  | 0.011775928  | 0.32113265  | 3.55E-02 | 1.60E-01 | 1.00E+00 |
| ENSG00000276131.1_RP11-481J  | ENSG00000160789.18_LMNA | 0.02255  | -0.1371388   | 0.181104737 | 7.83E-01 | 9.11E-01 | 1.00E+00 |
| ENSG00000204583.8_LRCOL1     | ENSG00000160789.18_LMNA | 0.04792  | -0.112139963 | 0.205548891 | 5.58E-01 | 7.91E-01 | 1.00E+00 |
| ENSG00000160951.3_PTGER1     | ENSG00000160789.18_LMNA | 0.20201  | 0.0442294    | 0.349953959 | 1.26E-02 | 7.72E-02 | 1.00E+00 |
| ENSG00000259614.2_RP11-522B  | ENSG00000160789.18_LMNA | 0.05296  | -0.107141541 | 0.210389312 | 5.17E-01 | 7.64E-01 | 1.00E+00 |
| ENSG00000261587.2_TMEM249    | ENSG00000160789.18_LMNA | 0.00305  | -0.156227461 | 0.162171058 | 9.70E-01 | 9.88E-01 | 1.00E+00 |
| ENSG00000253869.1_PIGFP1     | ENSG00000160789.18_LMNA | -0.10581 | -0.260624069 | 0.054301706 | 1.94E-01 | 4.63E-01 | 1.00E+00 |
| ENSG00000219102.3_HNRNPA3F   | ENSG00000160789.18_LMNA | 0.13606  | -0.023654964 | 0.288998944 | 9.46E-02 | 3.01E-01 | 1.00E+00 |
| ENSG00000254369.5_HOXA-AS3   | ENSG00000160789.18_LMNA | -0.08561 | -0.241516524 | 0.074610154 | 2.94E-01 | 5.80E-01 | 1.00E+00 |
| ENSG00000255322.1_           | ENSG00000160789.18_LMNA | -0.02114 | -0.179735047 | 0.138527679 | 7.96E-01 | 9.18E-01 | 1.00E+00 |
| ENSG00000213714.1_FAM209B    | ENSG00000160789.18_LMNA | -0.05826 | -0.215464316 | 0.101883584 | 4.76E-01 | 7.34E-01 | 1.00E+00 |
| ENSG00000230736.2_RP1-149A1  | ENSG00000160789.18_LMNA | -0.09886 | -0.254065845 | 0.061301603 | 2.26E-01 | 5.02E-01 | 1.00E+00 |
| ENSG00000205307.9_SAP25      | ENSG00000160789.18_LMNA | 0.06538  | -0.094805421 | 0.222269228 | 4.24E-01 | 6.95E-01 | 1.00E+00 |
| ENSG00000080644.14_CHRNA3    | ENSG00000160789.18_LMNA | -0.06251 | -0.219522908 | 0.097665884 | 4.44E-01 | 7.11E-01 | 1.00E+00 |
| ENSG00000229000.1_SEPT7P8    | ENSG00000160789.18_LMNA | -0.21617 | -0.362885664 | -0.05900358 | 7.48E-03 | 5.28E-02 | 1.00E+00 |
| ENSG00000124249.6_KCNK15     | ENSG00000160789.18_LMNA | 0.17477  | 0.016012112  | 0.324927526 | 3.13E-02 | 1.47E-01 | 1.00E+00 |
| ENSG00000259438.1_CTD-2650P  | ENSG00000160789.18_LMNA | 0.09546  | -0.06472291  | 0.250849825 | 2.42E-01 | 5.21E-01 | 1.00E+00 |

|                              |                         |          |              |             |          |          |          |
|------------------------------|-------------------------|----------|--------------|-------------|----------|----------|----------|
| ENSG00000258959.1_RP11-1017  | ENSG00000160789.18_LMNA | 0.1977   | 0.03975504   | 0.346014469 | 1.46E-02 | 8.63E-02 | 1.00E+00 |
| ENSG00000224505.2_AC002117   | ENSG00000160789.18_LMNA | 0.00945  | -0.149976757 | 0.168396936 | 9.08E-01 | 9.65E-01 | 1.00E+00 |
| ENSG00000266588.1_RP1-56K13  | ENSG00000160789.18_LMNA | -0.09187 | -0.247456095 | 0.068325245 | 2.60E-01 | 5.43E-01 | 1.00E+00 |
| ENSG00000198723.9_C19orf45   | ENSG00000160789.18_LMNA | -0.15805 | -0.309467159 | 0.001176986 | 5.18E-02 | 2.06E-01 | 1.00E+00 |
| ENSG00000179157.4_RPS2P28    | ENSG00000160789.18_LMNA | 0.05791  | -0.102230402 | 0.215130093 | 4.79E-01 | 7.37E-01 | 1.00E+00 |
| ENSG00000259707.1_RP11-752G  | ENSG00000160789.18_LMNA | -0.03505 | -0.193174947 | 0.124845153 | 6.68E-01 | 8.54E-01 | 1.00E+00 |
| ENSG00000123454.9_DBH        | ENSG00000160789.18_LMNA | 0.02564  | -0.134107232 | 0.184090139 | 7.54E-01 | 8.98E-01 | 1.00E+00 |
| ENSG00000232848.1_CTA-215D1  | ENSG00000160789.18_LMNA | 0.00931  | -0.150117008 | 0.16825752  | 9.09E-01 | 9.65E-01 | 1.00E+00 |
| ENSG00000126733.19_DACH2     | ENSG00000160789.18_LMNA | -0.26113 | -0.403557787 | -0.10635484 | 1.16E-03 | 1.29E-02 | 1.00E+00 |
| ENSG00000250116.2_RP11-417F  | ENSG00000160789.18_LMNA | -0.0331  | -0.191296126 | 0.126765193 | 6.86E-01 | 8.64E-01 | 1.00E+00 |
| ENSG00000215199.3_YWHAZP6    | ENSG00000160789.18_LMNA | 0.12951  | -0.030312641 | 0.282881161 | 1.12E-01 | 3.33E-01 | 1.00E+00 |
| ENSG00000223873.1_SAP18P2    | ENSG00000160789.18_LMNA | 0.07528  | -0.084941092 | 0.2317015   | 3.57E-01 | 6.40E-01 | 1.00E+00 |
| ENSG00000164935.5_DCSTAMP    | ENSG00000160789.18_LMNA | 0.13046  | -0.029346597 | 0.283770448 | 1.09E-01 | 3.29E-01 | 1.00E+00 |
| ENSG00000272989.1_RP13-616I3 | ENSG00000160789.18_LMNA | 0.12954  | -0.030285296 | 0.282906341 | 1.12E-01 | 3.33E-01 | 1.00E+00 |
| ENSG00000233932.4_CTXN2      | ENSG00000160789.18_LMNA | -0.15716 | -0.308640942 | 0.00209045  | 5.32E-02 | 2.09E-01 | 1.00E+00 |
| ENSG00000279649.1_RP11-96D1  | ENSG00000160789.18_LMNA | -0.0215  | -0.180080796 | 0.138177204 | 7.93E-01 | 9.16E-01 | 1.00E+00 |
| ENSG00000179774.8_ATOH7      | ENSG00000160789.18_LMNA | -0.22095 | -0.3672331   | -0.06400051 | 6.23E-03 | 4.62E-02 | 1.00E+00 |
| ENSG00000162391.10_FAM151A   | ENSG00000160789.18_LMNA | 0.23875  | 0.082690995  | 0.383377616 | 3.05E-03 | 2.71E-02 | 1.00E+00 |
| ENSG00000274698.1_RP11-71L1  | ENSG00000160789.18_LMNA | -0.10642 | -0.261192081 | 0.053693981 | 1.92E-01 | 4.60E-01 | 1.00E+00 |
| ENSG00000276809.1_RP11-10E1  | ENSG00000160789.18_LMNA | -0.15889 | -0.310243894 | 0.000317755 | 5.06E-02 | 2.03E-01 | 1.00E+00 |
| ENSG00000234857.2_HNRNPUL2   | ENSG00000160789.18_LMNA | 0.18496  | 0.026540949  | 0.33431662  | 2.25E-02 | 1.18E-01 | 1.00E+00 |
| ENSG00000280327.1_LA16c-313F | ENSG00000160789.18_LMNA | 0.18042  | 0.021844214  | 0.330135838 | 2.61E-02 | 1.31E-01 | 1.00E+00 |
| ENSG00000264026.1_RP11-1124I | ENSG00000160789.18_LMNA | 0.18484  | 0.026419287  | 0.334208475 | 2.26E-02 | 1.18E-01 | 1.00E+00 |
| ENSG00000186765.10_FSCN2     | ENSG00000160789.18_LMNA | 0.43822  | 0.299947505  | 0.558461736 | 1.64E-08 | 1.63E-06 | 8.41E-04 |
| ENSG00000073861.2_TBX21      | ENSG00000160789.18_LMNA | -0.09766 | -0.252928729 | 0.062512151 | 2.31E-01 | 5.09E-01 | 1.00E+00 |
| ENSG00000254862.4_RP11-159H  | ENSG00000160789.18_LMNA | -0.08361 | -0.239622837 | 0.076608677 | 3.06E-01 | 5.92E-01 | 1.00E+00 |
| ENSG00000100191.5_SLC5A4     | ENSG00000160789.18_LMNA | -0.10887 | -0.263507996 | 0.051213728 | 1.82E-01 | 4.46E-01 | 1.00E+00 |
| ENSG00000225971.1_CTA-85E5.6 | ENSG00000160789.18_LMNA | -0.04723 | -0.204891872 | 0.112817191 | 5.63E-01 | 7.95E-01 | 1.00E+00 |
| ENSG00000257446.3_ZNF878     | ENSG00000160789.18_LMNA | 0.00601  | -0.153341674 | 0.165048537 | 9.41E-01 | 9.77E-01 | 1.00E+00 |
| ENSG00000236852.1_RP11-3D23  | ENSG00000160789.18_LMNA | 0.11445  | -0.045581258 | 0.268753827 | 1.60E-01 | 4.14E-01 | 1.00E+00 |
| ENSG00000227115.5_LINC01630  | ENSG00000160789.18_LMNA | -0.2561  | -0.399027408 | -0.10101292 | 1.45E-03 | 1.53E-02 | 1.00E+00 |
| ENSG00000216471.3_RPSAP43    | ENSG00000160789.18_LMNA | -0.16957 | -0.320127812 | -0.01065609 | 3.68E-02 | 1.64E-01 | 1.00E+00 |
| ENSG00000169306.8_IL1RAPL1   | ENSG00000160789.18_LMNA | -0.28733 | -0.427002691 | -0.13427638 | 3.32E-04 | 4.85E-03 | 1.00E+00 |

|                              |                         |          |              |             |          |          |          |
|------------------------------|-------------------------|----------|--------------|-------------|----------|----------|----------|
| ENSG00000241717.1_VWFP1      | ENSG00000160789.18_LMNA | 0.06492  | -0.095266785 | 0.221826614 | 4.27E-01 | 6.98E-01 | 1.00E+00 |
| ENSG00000205143.2_ARID3C     | ENSG00000160789.18_LMNA | 0.12651  | -0.033361644 | 0.280070879 | 1.20E-01 | 3.49E-01 | 1.00E+00 |
| ENSG00000196277.14_GRM7      | ENSG00000160789.18_LMNA | -0.24414 | -0.388247436 | -0.08837061 | 2.44E-03 | 2.28E-02 | 1.00E+00 |
| ENSG00000109047.7_RCVRN      | ENSG00000160789.18_LMNA | -0.05869 | -0.215876487 | 0.101455775 | 4.73E-01 | 7.32E-01 | 1.00E+00 |
| ENSG00000205238.8_SPDYE2     | ENSG00000160789.18_LMNA | 0.10858  | -0.051507298 | 0.263234067 | 1.83E-01 | 4.48E-01 | 1.00E+00 |
| ENSG00000226428.1_RPL15P13   | ENSG00000160789.18_LMNA | -0.12866 | -0.282084412 | 0.031177663 | 1.14E-01 | 3.37E-01 | 1.00E+00 |
| ENSG00000226232.7_NPIP14P    | ENSG00000160789.18_LMNA | -0.14463 | -0.296991487 | 0.014915095 | 7.54E-02 | 2.62E-01 | 1.00E+00 |
| ENSG00000226745.2_RP11-115D  | ENSG00000160789.18_LMNA | -0.0214  | -0.179990067 | 0.13826918  | 7.94E-01 | 9.17E-01 | 1.00E+00 |
| ENSG00000155966.12_AFF2      | ENSG00000160789.18_LMNA | -0.29519 | -0.433992288 | -0.14269151 | 2.23E-04 | 3.55E-03 | 1.00E+00 |
| ENSG00000144410.4_CPO        | ENSG00000160789.18_LMNA | -0.18748 | -0.336630686 | -0.02914645 | 2.07E-02 | 1.11E-01 | 1.00E+00 |
| ENSG00000225402.1_AC010878.  | ENSG00000160789.18_LMNA | -0.08424 | -0.24021731  | 0.075981567 | 3.02E-01 | 5.89E-01 | 1.00E+00 |
| ENSG00000258725.1_PRC1-AS1   | ENSG00000160789.18_LMNA | -0.04655 | -0.204240463 | 0.113488346 | 5.69E-01 | 7.98E-01 | 1.00E+00 |
| ENSG00000259699.2_HMGB1P8    | ENSG00000160789.18_LMNA | -0.11407 | -0.268395624 | 0.045966499 | 1.62E-01 | 4.16E-01 | 1.00E+00 |
| ENSG00000235072.2_AC012074.  | ENSG00000160789.18_LMNA | -0.03241 | -0.190631377 | 0.127443954 | 6.92E-01 | 8.67E-01 | 1.00E+00 |
| ENSG00000171595.12_DNAI2     | ENSG00000160789.18_LMNA | -0.26573 | -0.407683595 | -0.11123469 | 9.37E-04 | 1.10E-02 | 1.00E+00 |
| ENSG00000254409.1_RP11-613D  | ENSG00000160789.18_LMNA | 0.05507  | -0.105046991 | 0.212413034 | 5.00E-01 | 7.53E-01 | 1.00E+00 |
| ENSG00000165887.10_ANKRD2    | ENSG00000160789.18_LMNA | -0.02393 | -0.182430927 | 0.135792838 | 7.70E-01 | 9.05E-01 | 1.00E+00 |
| ENSG00000248810.1_RP11-362F  | ENSG00000160789.18_LMNA | 0.17135  | 0.012488709  | 0.321771872 | 3.48E-02 | 1.58E-01 | 1.00E+00 |
| ENSG00000280129.1_RP11-298I3 | ENSG00000160789.18_LMNA | -0.18454 | -0.333934653 | -0.02611128 | 2.28E-02 | 1.19E-01 | 1.00E+00 |
| ENSG00000274422.1_LL22NC03-  | ENSG00000160789.18_LMNA | -0.12508 | -0.278732463 | 0.034811704 | 1.25E-01 | 3.56E-01 | 1.00E+00 |
| ENSG00000249241.1_AC195454.  | ENSG00000160789.18_LMNA | -0.00702 | -0.166034229 | 0.152351885 | 9.32E-01 | 9.73E-01 | 1.00E+00 |
| ENSG00000266648.1_SETP3      | ENSG00000160789.18_LMNA | 0.15405  | -0.00528192  | 0.305750609 | 5.81E-02 | 2.21E-01 | 1.00E+00 |
| ENSG00000175344.15_CHRNA7    | ENSG00000160789.18_LMNA | -0.08254 | -0.238608896 | 0.077677708 | 3.12E-01 | 5.98E-01 | 1.00E+00 |
| ENSG00000138152.8_BTBD16     | ENSG00000160789.18_LMNA | 0.05085  | -0.109234564 | 0.208364342 | 5.34E-01 | 7.76E-01 | 1.00E+00 |
| ENSG00000133317.13_LGALS12   | ENSG00000160789.18_LMNA | 0.34329  | 0.194732513  | 0.476452249 | 1.49E-05 | 4.06E-04 | 7.66E-01 |
| ENSG00000146521.8_LINC01558  | ENSG00000160789.18_LMNA | -0.083   | -0.239040861 | 0.077222361 | 3.09E-01 | 5.96E-01 | 1.00E+00 |
| ENSG00000214988.4_RPL7AP26   | ENSG00000160789.18_LMNA | 0.08638  | -0.073835103 | 0.24225027  | 2.90E-01 | 5.75E-01 | 1.00E+00 |
| ENSG00000261572.1_RP11-384L  | ENSG00000160789.18_LMNA | -0.03367 | -0.191839765 | 0.126209872 | 6.81E-01 | 8.61E-01 | 1.00E+00 |
| ENSG00000102962.4_CCL22      | ENSG00000160789.18_LMNA | -0.04784 | -0.205477652 | 0.112213407 | 5.58E-01 | 7.91E-01 | 1.00E+00 |
| ENSG00000261390.4_MAFTRR     | ENSG00000160789.18_LMNA | -0.15463 | -0.306289931 | 0.004686888 | 5.72E-02 | 2.19E-01 | 1.00E+00 |
| ENSG00000271889.1_RP11-493E  | ENSG00000160789.18_LMNA | -0.05928 | -0.216442722 | 0.100867865 | 4.68E-01 | 7.29E-01 | 1.00E+00 |
| ENSG00000266968.2_RP11-116O  | ENSG00000160789.18_LMNA | -0.10283 | -0.257811735 | 0.057307236 | 2.07E-01 | 4.80E-01 | 1.00E+00 |
| ENSG00000279199.1_RP11-749I1 | ENSG00000160789.18_LMNA | -0.04998 | -0.207527158 | 0.110099062 | 5.41E-01 | 7.80E-01 | 1.00E+00 |

|                             |                         |          |              |             |          |          |          |
|-----------------------------|-------------------------|----------|--------------|-------------|----------|----------|----------|
| ENSG00000278959.1_RP11-455I | ENSG00000160789.18_LMNA | -0.01249 | -0.171350711 | 0.147002275 | 8.79E-01 | 9.53E-01 | 1.00E+00 |
| ENSG00000258925.2_NPM1P5    | ENSG00000160789.18_LMNA | 0.06588  | -0.094309204 | 0.222745132 | 4.20E-01 | 6.92E-01 | 1.00E+00 |
| ENSG00000261302.4_RP11-343H | ENSG00000160789.18_LMNA | -0.12965 | -0.283006699 | 0.030176303 | 1.11E-01 | 3.33E-01 | 1.00E+00 |
| ENSG00000248698.4_LINC01085 | ENSG00000160789.18_LMNA | -0.17191 | -0.32229018  | -0.01306689 | 3.42E-02 | 1.56E-01 | 1.00E+00 |
| ENSG00000222046.2_DCDC2B    | ENSG00000160789.18_LMNA | -0.01578 | -0.174539528 | 0.143784628 | 8.47E-01 | 9.40E-01 | 1.00E+00 |
| ENSG00000266783.1_RP11-715F | ENSG00000160789.18_LMNA | -0.13305 | -0.286188231 | 0.02671717  | 1.02E-01 | 3.16E-01 | 1.00E+00 |
| ENSG00000243444.6_PALM2     | ENSG00000160789.18_LMNA | 0.02058  | -0.139076688 | 0.179193282 | 8.01E-01 | 9.20E-01 | 1.00E+00 |
| ENSG00000229656.5_RP11-462L | ENSG00000160789.18_LMNA | -0.11124 | -0.265737351 | 0.048822505 | 1.72E-01 | 4.32E-01 | 1.00E+00 |
| ENSG00000147570.8_DNAJC5B   | ENSG00000160789.18_LMNA | -0.21963 | -0.366033736 | -0.06262044 | 6.55E-03 | 4.80E-02 | 1.00E+00 |
| ENSG00000213452.4_AKR1B1P2  | ENSG00000160789.18_LMNA | -0.04213 | -0.199991174 | 0.117859337 | 6.06E-01 | 8.20E-01 | 1.00E+00 |
| ENSG00000268785.1_RPL7P50   | ENSG00000160789.18_LMNA | 0.05382  | -0.106295146 | 0.211207414 | 5.10E-01 | 7.59E-01 | 1.00E+00 |
| ENSG00000214562.12_NUTM2D   | ENSG00000160789.18_LMNA | -0.16302 | -0.314068399 | -0.00391964 | 4.48E-02 | 1.87E-01 | 1.00E+00 |
| ENSG00000223864.1_NPM1P19   | ENSG00000160789.18_LMNA | -0.02616 | -0.18459322  | 0.133595785 | 7.49E-01 | 8.95E-01 | 1.00E+00 |
| ENSG00000235958.4_UBOX5-AS  | ENSG00000160789.18_LMNA | -0.0386  | -0.196588    | 0.121351119 | 6.37E-01 | 8.38E-01 | 1.00E+00 |
| ENSG00000213409.4_C1QBPP2   | ENSG00000160789.18_LMNA | 0.07819  | -0.08203398  | 0.234469968 | 3.38E-01 | 6.24E-01 | 1.00E+00 |
| ENSG00000274414.1_RP5-965G2 | ENSG00000160789.18_LMNA | 0.02862  | -0.131182499 | 0.18696478  | 7.26E-01 | 8.84E-01 | 1.00E+00 |
| ENSG00000213730.3_POLD2P1   | ENSG00000160789.18_LMNA | -0.08767 | -0.24346797  | 0.072548013 | 2.83E-01 | 5.68E-01 | 1.00E+00 |
| ENSG00000181378.12_CFAP65   | ENSG00000160789.18_LMNA | -0.24475 | -0.388802947 | -0.08901974 | 2.37E-03 | 2.23E-02 | 1.00E+00 |
| ENSG00000270898.4_GPR75-AS1 | ENSG00000160789.18_LMNA | -0.20619 | -0.353776065 | -0.04858219 | 1.08E-02 | 6.93E-02 | 1.00E+00 |
| ENSG00000204179.9_PTPN20    | ENSG00000160789.18_LMNA | -0.11606 | -0.27026422  | 0.043955829 | 1.54E-01 | 4.05E-01 | 1.00E+00 |
| ENSG00000184611.10_KCNH7    | ENSG00000160789.18_LMNA | -0.18945 | -0.33844548  | -0.03119273 | 1.94E-02 | 1.06E-01 | 1.00E+00 |
| ENSG00000237975.5_FLG-AS1   | ENSG00000160789.18_LMNA | -0.04253 | -0.200373344 | 0.117466724 | 6.03E-01 | 8.18E-01 | 1.00E+00 |
| ENSG00000111886.10_GABRR2   | ENSG00000160789.18_LMNA | -0.08368 | -0.239689511 | 0.076538355 | 3.05E-01 | 5.92E-01 | 1.00E+00 |
| ENSG00000254502.1_FNTAL1    | ENSG00000160789.18_LMNA | -0.13383 | -0.286915801 | 0.025925062 | 1.00E-01 | 3.12E-01 | 1.00E+00 |
| ENSG00000216802.1_RP11-390P | ENSG00000160789.18_LMNA | 0.00323  | -0.156046283 | 0.162351873 | 9.68E-01 | 9.88E-01 | 1.00E+00 |
| ENSG00000260689.2_HNRNPA3F  | ENSG00000160789.18_LMNA | 0.12815  | -0.031696015 | 0.281606764 | 1.16E-01 | 3.40E-01 | 1.00E+00 |
| ENSG00000163377.13_FAM19A4  | ENSG00000160789.18_LMNA | -0.22167 | -0.367884903 | -0.064751   | 6.06E-03 | 4.53E-02 | 1.00E+00 |
| ENSG00000204403.8_CASP12    | ENSG00000160789.18_LMNA | -0.27961 | -0.420107782 | -0.1260164  | 4.86E-04 | 6.58E-03 | 1.00E+00 |
| ENSG00000227191.5_TRGC2     | ENSG00000160789.18_LMNA | -0.05058 | -0.208107874 | 0.109499451 | 5.36E-01 | 7.77E-01 | 1.00E+00 |
| ENSG00000224003.1_YES1P1    | ENSG00000160789.18_LMNA | -0.0522  | -0.209662565 | 0.107893036 | 5.23E-01 | 7.69E-01 | 1.00E+00 |
| ENSG00000181036.12_FCRL6    | ENSG00000160789.18_LMNA | 0.10276  | -0.057375175 | 0.257748101 | 2.08E-01 | 4.80E-01 | 1.00E+00 |
| ENSG00000133640.17_LRRIQ1   | ENSG00000160789.18_LMNA | 0.09507  | -0.065112351 | 0.25048331  | 2.44E-01 | 5.24E-01 | 1.00E+00 |
| ENSG00000251017.1_RP11-629B | ENSG00000160789.18_LMNA | -0.11534 | -0.269587534 | 0.044684259 | 1.57E-01 | 4.09E-01 | 1.00E+00 |

|                              |                         |          |              |             |          |          |          |
|------------------------------|-------------------------|----------|--------------|-------------|----------|----------|----------|
| ENSG00000226443.3_GAPDHP32   | ENSG00000160789.18_LMNA | 0.26448  | 0.109907768  | 0.406562905 | 9.92E-04 | 1.15E-02 | 1.00E+00 |
| ENSG00000249987.1_RPS4XP20   | ENSG00000160789.18_LMNA | -0.04571 | -0.203427071 | 0.114325986 | 5.76E-01 | 8.02E-01 | 1.00E+00 |
| ENSG00000246214.1_RP11-260E  | ENSG00000160789.18_LMNA | -0.08724 | -0.243067653 | 0.072971259 | 2.85E-01 | 5.71E-01 | 1.00E+00 |
| ENSG00000188000.3_OR7D2      | ENSG00000160789.18_LMNA | 0.0445   | -0.115515997 | 0.202270755 | 5.86E-01 | 8.08E-01 | 1.00E+00 |
| ENSG00000226498.2_RPSAP21    | ENSG00000160789.18_LMNA | -0.06839 | -0.225143671 | 0.091805892 | 4.02E-01 | 6.78E-01 | 1.00E+00 |
| ENSG00000213946.3_DNAJB1P1   | ENSG00000160789.18_LMNA | 0.16795  | 0.008990039  | 0.318631557 | 3.86E-02 | 1.69E-01 | 1.00E+00 |
| ENSG00000280163.1_CTC-277H1  | ENSG00000160789.18_LMNA | -0.01995 | -0.178586383 | 0.13969147  | 8.07E-01 | 9.23E-01 | 1.00E+00 |
| ENSG00000233820.2_RP11-535M  | ENSG00000160789.18_LMNA | 0.0802   | -0.080024299 | 0.236380808 | 3.26E-01 | 6.13E-01 | 1.00E+00 |
| ENSG00000265091.4_RP11-835E  | ENSG00000160789.18_LMNA | -0.15644 | -0.307972454 | 0.002829149 | 5.43E-02 | 2.12E-01 | 1.00E+00 |
| ENSG00000215311.3_NPM1P12    | ENSG00000160789.18_LMNA | -0.00265 | -0.161779918 | 0.156619311 | 9.74E-01 | 9.90E-01 | 1.00E+00 |
| ENSG00000188933.13_USP32P1   | ENSG00000160789.18_LMNA | -0.08014 | -0.236330135 | 0.080077627 | 3.26E-01 | 6.13E-01 | 1.00E+00 |
| ENSG00000140254.11_DUOXA1    | ENSG00000160789.18_LMNA | -0.09288 | -0.248405267 | 0.067318559 | 2.55E-01 | 5.37E-01 | 1.00E+00 |
| ENSG00000236459.1_HNRNPA1F   | ENSG00000160789.18_LMNA | 0.1574   | -0.001849805 | 0.308858648 | 5.28E-02 | 2.08E-01 | 1.00E+00 |
| ENSG00000223442.1_TH2LCRR    | ENSG00000160789.18_LMNA | 0.04584  | -0.114193216 | 0.203556027 | 5.75E-01 | 8.02E-01 | 1.00E+00 |
| ENSG00000214102.6_WEE2       | ENSG00000160789.18_LMNA | -0.13402 | -0.287091063 | 0.025734195 | 9.98E-02 | 3.11E-01 | 1.00E+00 |
| ENSG00000242068.1_RP11-259P  | ENSG00000160789.18_LMNA | -0.08369 | -0.239696762 | 0.076530707 | 3.05E-01 | 5.92E-01 | 1.00E+00 |
| ENSG00000260729.1_RP11-106M  | ENSG00000160789.18_LMNA | 0.01103  | -0.148434134 | 0.169929534 | 8.93E-01 | 9.58E-01 | 1.00E+00 |
| ENSG00000197705.8_KLHL14     | ENSG00000160789.18_LMNA | -0.19192 | -0.340709375 | -0.03374901 | 1.79E-02 | 9.94E-02 | 1.00E+00 |
| ENSG00000229023.1_AC067945.1 | ENSG00000160789.18_LMNA | -0.01496 | -0.173746409 | 0.144585546 | 8.55E-01 | 9.43E-01 | 1.00E+00 |
| ENSG00000144407.8_PTH2R      | ENSG00000160789.18_LMNA | -0.25454 | -0.397631405 | -0.0993703  | 1.55E-03 | 1.61E-02 | 1.00E+00 |
| ENSG00000130045.14_NXNL2     | ENSG00000160789.18_LMNA | 0.02774  | -0.132043208 | 0.186119377 | 7.34E-01 | 8.88E-01 | 1.00E+00 |
| ENSG00000261192.1_RNF126P1   | ENSG00000160789.18_LMNA | 0.0508   | -0.109289349 | 0.208311302 | 5.34E-01 | 7.76E-01 | 1.00E+00 |
| ENSG00000188163.7_FAM166A    | ENSG00000160789.18_LMNA | 0.10131  | -0.058843451 | 0.256372203 | 2.14E-01 | 4.88E-01 | 1.00E+00 |
| ENSG00000256116.1_RP11-783K  | ENSG00000160789.18_LMNA | 0.11594  | -0.044077741 | 0.27015099  | 1.55E-01 | 4.06E-01 | 1.00E+00 |
| ENSG00000182397.13_DNM1P46   | ENSG00000160789.18_LMNA | 0.0593   | -0.100850492 | 0.216459451 | 4.68E-01 | 7.29E-01 | 1.00E+00 |
| ENSG00000256612.6_CYP2B7P    | ENSG00000160789.18_LMNA | -0.06978 | -0.226463319 | 0.090426889 | 3.93E-01 | 6.71E-01 | 1.00E+00 |
| ENSG00000153086.12_ACMSD     | ENSG00000160789.18_LMNA | -0.1643  | -0.315250875 | -0.00523203 | 4.31E-02 | 1.82E-01 | 1.00E+00 |
| ENSG00000163958.12_ZDHHC19   | ENSG00000160789.18_LMNA | 0.07263  | -0.087581267 | 0.229182786 | 3.74E-01 | 6.54E-01 | 1.00E+00 |
| ENSG00000228252.7_COL6A4P2   | ENSG00000160789.18_LMNA | -0.03059 | -0.18887114  | 0.129239861 | 7.08E-01 | 8.76E-01 | 1.00E+00 |
| ENSG00000266456.1_RP11-806L  | ENSG00000160789.18_LMNA | -0.08884 | -0.244579223 | 0.071372517 | 2.76E-01 | 5.61E-01 | 1.00E+00 |
| ENSG00000271826.4_PLS3-AS1   | ENSG00000160789.18_LMNA | -0.00477 | -0.163847184 | 0.154547156 | 9.53E-01 | 9.81E-01 | 1.00E+00 |
| ENSG00000249494.4_CTB-161M1  | ENSG00000160789.18_LMNA | -0.28528 | -0.425170344 | -0.13207728 | 3.67E-04 | 5.27E-03 | 1.00E+00 |
| ENSG00000134258.15_VTCN1     | ENSG00000160789.18_LMNA | -0.2202  | -0.366548761 | -0.06321292 | 6.41E-03 | 4.73E-02 | 1.00E+00 |

|                              |                         |          |              |             |          |          |          |
|------------------------------|-------------------------|----------|--------------|-------------|----------|----------|----------|
| ENSG00000232022.5_FAAHP1     | ENSG00000160789.18_LMNA | -0.09428 | -0.249731262 | 0.065911138 | 2.48E-01 | 5.28E-01 | 1.00E+00 |
| ENSG00000213658.9_LAT        | ENSG00000160789.18_LMNA | -0.02609 | -0.184523773 | 0.133666396 | 7.50E-01 | 8.95E-01 | 1.00E+00 |
| ENSG00000177688.6_SUMO4      | ENSG00000160789.18_LMNA | -0.12014 | -0.274095376 | 0.039825405 | 1.40E-01 | 3.82E-01 | 1.00E+00 |
| ENSG00000266184.1_RP11-552O  | ENSG00000160789.18_LMNA | -0.04685 | -0.204526882 | 0.11319328  | 5.67E-01 | 7.97E-01 | 1.00E+00 |
| ENSG00000280353.1_CTC-453G2  | ENSG00000160789.18_LMNA | -0.1735  | -0.323761329 | -0.01470912 | 3.25E-02 | 1.51E-01 | 1.00E+00 |
| ENSG00000092067.5_CEBPE      | ENSG00000160789.18_LMNA | -0.10311 | -0.258072987 | 0.057028277 | 2.06E-01 | 4.78E-01 | 1.00E+00 |
| ENSG00000228434.1_AC004951.F | ENSG00000160789.18_LMNA | 0.18743  | 0.029094764  | 0.336584816 | 2.08E-02 | 1.11E-01 | 1.00E+00 |
| ENSG00000229107.2_ABHD17AP   | ENSG00000160789.18_LMNA | 0.08301  | -0.077211926 | 0.239050759 | 3.09E-01 | 5.96E-01 | 1.00E+00 |
| ENSG00000229785.1_SLC25A38F  | ENSG00000160789.18_LMNA | 0.06892  | -0.091285123 | 0.225642162 | 3.99E-01 | 6.76E-01 | 1.00E+00 |
| ENSG00000086288.10_NME8      | ENSG00000160789.18_LMNA | 0.07492  | -0.085298404 | 0.231360874 | 3.59E-01 | 6.42E-01 | 1.00E+00 |
| ENSG00000237356.4_AL163953.3 | ENSG00000160789.18_LMNA | 0.03969  | -0.120268371 | 0.197644092 | 6.27E-01 | 8.32E-01 | 1.00E+00 |
| ENSG00000256737.1_RBBP4P5    | ENSG00000160789.18_LMNA | 0.07735  | -0.082872715 | 0.23367176  | 3.44E-01 | 6.28E-01 | 1.00E+00 |
| ENSG00000246640.1_RP11-1094I | ENSG00000160789.18_LMNA | 0.35238  | 0.204665146  | 0.48440959  | 8.50E-06 | 2.55E-04 | 4.36E-01 |
| ENSG00000197385.5_ZNF860     | ENSG00000160789.18_LMNA | 0.26503  | 0.110491625  | 0.407056127 | 9.68E-04 | 1.13E-02 | 1.00E+00 |
| ENSG00000171790.14_SLFNL1    | ENSG00000160789.18_LMNA | 0.10248  | -0.057660972 | 0.257480385 | 2.09E-01 | 4.82E-01 | 1.00E+00 |
| ENSG00000177669.3_MBOAT4     | ENSG00000160789.18_LMNA | -0.0268  | -0.185212585 | 0.132965886 | 7.43E-01 | 8.92E-01 | 1.00E+00 |
| ENSG00000175003.11_SLC22A1   | ENSG00000160789.18_LMNA | -0.12067 | -0.274590967 | 0.039290317 | 1.39E-01 | 3.80E-01 | 1.00E+00 |
| ENSG00000253327.2_RAD21-AS7  | ENSG00000160789.18_LMNA | -0.0432  | -0.201021084 | 0.116801059 | 5.97E-01 | 8.14E-01 | 1.00E+00 |
| ENSG00000273000.4_KB-1572G7  | ENSG00000160789.18_LMNA | -0.07004 | -0.226717407 | 0.090161232 | 3.91E-01 | 6.69E-01 | 1.00E+00 |
| ENSG00000227536.1_SOCS5P4    | ENSG00000160789.18_LMNA | 0.13637  | -0.023341349 | 0.289286498 | 9.39E-02 | 3.00E-01 | 1.00E+00 |
| ENSG00000165905.15_LARGE2    | ENSG00000160789.18_LMNA | 0.20064  | 0.042807772  | 0.348703445 | 1.32E-02 | 8.00E-02 | 1.00E+00 |
| ENSG00000277007.1_RP11-392O  | ENSG00000160789.18_LMNA | -0.13357 | -0.286672586 | 0.026189894 | 1.01E-01 | 3.13E-01 | 1.00E+00 |
| ENSG00000241838.3_LA16c-3G1  | ENSG00000160789.18_LMNA | 0.13388  | -0.025868433 | 0.286967803 | 1.00E-01 | 3.12E-01 | 1.00E+00 |
| ENSG00000280152.1_RP11-331F  | ENSG00000160789.18_LMNA | 0.03958  | -0.120376402 | 0.197538754 | 6.28E-01 | 8.33E-01 | 1.00E+00 |
| ENSG00000215319.2_EIF5P1     | ENSG00000160789.18_LMNA | 0.04942  | -0.110646342 | 0.206996928 | 5.45E-01 | 7.83E-01 | 1.00E+00 |
| ENSG00000152463.13_OLAH      | ENSG00000160789.18_LMNA | -0.05414 | -0.211521367 | 0.105970212 | 5.08E-01 | 7.58E-01 | 1.00E+00 |
| ENSG00000111305.17_GSG1      | ENSG00000160789.18_LMNA | 0.1142   | -0.045836377 | 0.268516623 | 1.61E-01 | 4.16E-01 | 1.00E+00 |
| ENSG00000224310.1_LINC01567  | ENSG00000160789.18_LMNA | 0.09604  | -0.064136918 | 0.251401151 | 2.39E-01 | 5.18E-01 | 1.00E+00 |
| ENSG00000122180.4_MYOG       | ENSG00000160789.18_LMNA | 0.06541  | -0.094773853 | 0.222299508 | 4.23E-01 | 6.94E-01 | 1.00E+00 |
| ENSG00000265692.1_RP13-516M  | ENSG00000160789.18_LMNA | 0.143    | -0.016573676 | 0.295478081 | 7.88E-02 | 2.70E-01 | 1.00E+00 |
| ENSG00000236114.1_RP11-517P  | ENSG00000160789.18_LMNA | -0.08465 | -0.240607983 | 0.07556931  | 3.00E-01 | 5.86E-01 | 1.00E+00 |
| ENSG00000163508.11_EOMES     | ENSG00000160789.18_LMNA | 0.13986  | -0.019784638 | 0.292543713 | 8.57E-02 | 2.84E-01 | 1.00E+00 |
| ENSG00000198547.7_C20orf203  | ENSG00000160789.18_LMNA | -0.26173 | -0.404092745 | -0.10698676 | 1.13E-03 | 1.27E-02 | 1.00E+00 |



|                              |                         |          |              |             |          |          |          |
|------------------------------|-------------------------|----------|--------------|-------------|----------|----------|----------|
| ENSG00000250071.1_CTD-2060C  | ENSG00000160789.18_LMNA | 0.03039  | -0.12943598  | 0.188678792 | 7.10E-01 | 8.77E-01 | 1.00E+00 |
| ENSG00000184530.8_C6orf58    | ENSG00000160789.18_LMNA | -0.11415 | -0.268471247 | 0.045885175 | 1.61E-01 | 4.16E-01 | 1.00E+00 |
| ENSG00000267009.5_RP11-120M  | ENSG00000160789.18_LMNA | -0.01054 | -0.169459519 | 0.148907388 | 8.97E-01 | 9.60E-01 | 1.00E+00 |
| ENSG00000214561.3_RBBP4P4    | ENSG00000160789.18_LMNA | -0.15201 | -0.303855065 | 0.007371522 | 6.16E-02 | 2.29E-01 | 1.00E+00 |
| ENSG00000197670.6_RP4-724E1  | ENSG00000160789.18_LMNA | 0.28517  | 0.13195572   | 0.425068983 | 3.69E-04 | 5.30E-03 | 1.00E+00 |
| ENSG00000232884.6_AF127936.3 | ENSG00000160789.18_LMNA | -0.09264 | -0.248180289 | 0.067557227 | 2.56E-01 | 5.39E-01 | 1.00E+00 |
| ENSG00000230832.3_RP11-325P  | ENSG00000160789.18_LMNA | -0.0132  | -0.172034857 | 0.146312511 | 8.72E-01 | 9.50E-01 | 1.00E+00 |
| ENSG00000250508.1_RP11-757G  | ENSG00000160789.18_LMNA | -0.21766 | -0.364238174 | -0.06055652 | 7.07E-03 | 5.08E-02 | 1.00E+00 |
| ENSG00000245534.5_RORA-AS1   | ENSG00000160789.18_LMNA | -0.04298 | -0.200804207 | 0.117023969 | 5.99E-01 | 8.16E-01 | 1.00E+00 |
| ENSG00000245888.5_FLJ21408   | ENSG00000160789.18_LMNA | -0.05132 | -0.208811936 | 0.10877217  | 5.30E-01 | 7.73E-01 | 1.00E+00 |
| ENSG00000266256.1_LINC00683  | ENSG00000160789.18_LMNA | 0.07866  | -0.081562449 | 0.234918528 | 3.35E-01 | 6.21E-01 | 1.00E+00 |
| ENSG00000218018.2_RP4-800J2  | ENSG00000160789.18_LMNA | 0.01104  | -0.148422036 | 0.169941548 | 8.93E-01 | 9.58E-01 | 1.00E+00 |
| ENSG00000149054.13_ZNF215    | ENSG00000160789.18_LMNA | 0.06243  | -0.097738359 | 0.219453258 | 4.45E-01 | 7.12E-01 | 1.00E+00 |
| ENSG00000117090.13_SLAMF1    | ENSG00000160789.18_LMNA | 0.01541  | -0.144149129 | 0.174178627 | 8.51E-01 | 9.41E-01 | 1.00E+00 |
| ENSG00000219642.2_BMPR1AP5   | ENSG00000160789.18_LMNA | -0.11137 | -0.265858489 | 0.048692468 | 1.72E-01 | 4.31E-01 | 1.00E+00 |
| ENSG00000254454.2_RCC2P6     | ENSG00000160789.18_LMNA | 0.0893   | -0.070908482 | 0.245017669 | 2.74E-01 | 5.59E-01 | 1.00E+00 |
| ENSG00000177627.8_C12orf54   | ENSG00000160789.18_LMNA | -0.2309  | -0.376271893 | -0.07443856 | 4.21E-03 | 3.45E-02 | 1.00E+00 |
| ENSG00000215102.2_TERF1P4    | ENSG00000160789.18_LMNA | 0.01891  | -0.140717403 | 0.177573066 | 8.17E-01 | 9.29E-01 | 1.00E+00 |
| ENSG00000236608.1	EIF4A1P6   | ENSG00000160789.18_LMNA | 0.00988  | -0.149560666 | 0.168810475 | 9.04E-01 | 9.63E-01 | 1.00E+00 |
| ENSG00000101280.7_ANGPT4     | ENSG00000160789.18_LMNA | -0.36114 | -0.492053981 | -0.21426171 | 4.86E-06 | 1.62E-04 | 2.49E-01 |
| ENSG00000213212.3_NCLP1      | ENSG00000160789.18_LMNA | 0.20159  | 0.043799823  | 0.349576202 | 1.28E-02 | 7.81E-02 | 1.00E+00 |
| ENSG00000247324.2_RP11-510M  | ENSG00000160789.18_LMNA | -0.15477 | -0.306420196 | 0.004543134 | 5.69E-02 | 2.18E-01 | 1.00E+00 |
| ENSG00000260735.1_RP11-72I8. | ENSG00000160789.18_LMNA | -0.01407 | -0.172884197 | 0.145455766 | 8.63E-01 | 9.47E-01 | 1.00E+00 |
| ENSG00000212961.4_HNRNPA1F   | ENSG00000160789.18_LMNA | 0.09426  | -0.065926625 | 0.249716677 | 2.48E-01 | 5.28E-01 | 1.00E+00 |
| ENSG00000112761.17_WISP3     | ENSG00000160789.18_LMNA | -0.20076 | -0.348816462 | -0.0429362  | 1.31E-02 | 7.97E-02 | 1.00E+00 |
| ENSG00000244226.1_ILF2P1     | ENSG00000160789.18_LMNA | -0.12846 | -0.281899153 | 0.031378729 | 1.15E-01 | 3.38E-01 | 1.00E+00 |
| ENSG00000250490.1_FLJ33360   | ENSG00000160789.18_LMNA | -0.18247 | -0.332022296 | -0.0239618  | 2.45E-02 | 1.25E-01 | 1.00E+00 |
| ENSG00000229207.1_SERPINH1I  | ENSG00000160789.18_LMNA | 0.25202  | 0.09669865   | 0.395357907 | 1.74E-03 | 1.76E-02 | 1.00E+00 |
| ENSG00000205334.2_LINC01460  | ENSG00000160789.18_LMNA | 0.00435  | -0.154958967 | 0.163436567 | 9.58E-01 | 9.83E-01 | 1.00E+00 |
| ENSG00000267198.1_RP11-798G  | ENSG00000160789.18_LMNA | -0.05907 | -0.216241601 | 0.101076709 | 4.70E-01 | 7.30E-01 | 1.00E+00 |
| ENSG00000173088.11_          | ENSG00000160789.18_LMNA | -0.07996 | -0.236157785 | 0.080258991 | 3.27E-01 | 6.14E-01 | 1.00E+00 |
| ENSG00000273674.3_CTD-2378E  | ENSG00000160789.18_LMNA | -0.17844 | -0.328318497 | -0.01980683 | 2.78E-02 | 1.36E-01 | 1.00E+00 |
| ENSG00000135517.6_MIP        | ENSG00000160789.18_LMNA | -0.07663 | -0.232987152 | 0.083591724 | 3.48E-01 | 6.32E-01 | 1.00E+00 |

|                              |                         |          |              |             |          |          |          |
|------------------------------|-------------------------|----------|--------------|-------------|----------|----------|----------|
| ENSG00000273018.4_CTD-2303H  | ENSG00000160789.18_LMNA | -0.16526 | -0.316143394 | -0.00622331 | 4.19E-02 | 1.79E-01 | 1.00E+00 |
| ENSG00000049283.16_EPN3      | ENSG00000160789.18_LMNA | 0.0674   | -0.092800642 | 0.224191015 | 4.09E-01 | 6.83E-01 | 1.00E+00 |
| ENSG00000005421.7_PON1       | ENSG00000160789.18_LMNA | -0.2796  | -0.420103348 | -0.12601111 | 4.86E-04 | 6.58E-03 | 1.00E+00 |
| ENSG00000154263.16_ABCA10    | ENSG00000160789.18_LMNA | -0.04791 | -0.20554571  | 0.112143242 | 5.58E-01 | 7.91E-01 | 1.00E+00 |
| ENSG00000258128.2_MKRN9P     | ENSG00000160789.18_LMNA | -0.01926 | -0.177910902 | 0.140375437 | 8.14E-01 | 9.27E-01 | 1.00E+00 |
| ENSG00000238145.2_RP11-346M  | ENSG00000160789.18_LMNA | -0.06542 | -0.222300882 | 0.09477242  | 4.23E-01 | 6.94E-01 | 1.00E+00 |
| ENSG00000198650.9_TAT        | ENSG00000160789.18_LMNA | 0.0996   | -0.060560142 | 0.254761897 | 2.22E-01 | 4.98E-01 | 1.00E+00 |
| ENSG00000239873.2_GAPDHP27   | ENSG00000160789.18_LMNA | 0.25945  | 0.104564329  | 0.402040909 | 1.25E-03 | 1.37E-02 | 1.00E+00 |
| ENSG00000197893.12_NRAP      | ENSG00000160789.18_LMNA | 0.14543  | -0.014092707 | 0.297741312 | 7.38E-02 | 2.58E-01 | 1.00E+00 |
| ENSG00000226891.5_LINC01359  | ENSG00000160789.18_LMNA | -0.27628 | -0.417137984 | -0.12247116 | 5.70E-04 | 7.46E-03 | 1.00E+00 |
| ENSG00000281731.1_RP11-384K  | ENSG00000160789.18_LMNA | -0.06833 | -0.22508424  | 0.091867968 | 4.03E-01 | 6.79E-01 | 1.00E+00 |
| ENSG00000205890.3_RP11-473M  | ENSG00000160789.18_LMNA | 0.09424  | -0.065948053 | 0.249696498 | 2.48E-01 | 5.28E-01 | 1.00E+00 |
| ENSG00000146285.12_SCML4     | ENSG00000160789.18_LMNA | -0.01019 | -0.169119645 | 0.149249514 | 9.01E-01 | 9.62E-01 | 1.00E+00 |
| ENSG00000270188.1_MTRNR2L1   | ENSG00000160789.18_LMNA | -0.06535 | -0.22223668  | 0.094839352 | 4.24E-01 | 6.95E-01 | 1.00E+00 |
| ENSG00000169314.13_C22orf15  | ENSG00000160789.18_LMNA | 0.00271  | -0.156558111 | 0.161841013 | 9.74E-01 | 9.90E-01 | 1.00E+00 |
| ENSG00000226971.1_AF196972.4 | ENSG00000160789.18_LMNA | -0.27288 | -0.414087212 | -0.11883707 | 6.71E-04 | 8.49E-03 | 1.00E+00 |
| ENSG00000173262.10_SLC2A14   | ENSG00000160789.18_LMNA | 0.17591  | 0.01719307   | 0.325983686 | 3.02E-02 | 1.44E-01 | 1.00E+00 |
| ENSG00000188611.13_ASAH2     | ENSG00000160789.18_LMNA | 0.04537  | -0.114659875 | 0.203102726 | 5.79E-01 | 8.04E-01 | 1.00E+00 |
| ENSG00000272869.4_CTC-487M2  | ENSG00000160789.18_LMNA | -0.04344 | -0.201247938 | 0.116567859 | 5.95E-01 | 8.13E-01 | 1.00E+00 |
| ENSG00000149488.12_TMC2      | ENSG00000160789.18_LMNA | -0.20783 | -0.355275293 | -0.05029275 | 1.02E-02 | 6.64E-02 | 1.00E+00 |
| ENSG00000101425.11_BPI       | ENSG00000160789.18_LMNA | -0.28365 | -0.423717758 | -0.13033601 | 3.98E-04 | 5.65E-03 | 1.00E+00 |
| ENSG00000169752.15_NRG4      | ENSG00000160789.18_LMNA | -0.01133 | -0.170221012 | 0.148140574 | 8.90E-01 | 9.57E-01 | 1.00E+00 |
| ENSG00000237301.1_RP4-680D5  | ENSG00000160789.18_LMNA | 0.20249  | 0.044730611  | 0.350394582 | 1.24E-02 | 7.64E-02 | 1.00E+00 |
| ENSG00000163645.13_ERICH6    | ENSG00000160789.18_LMNA | -0.03873 | -0.196718598 | 0.121217266 | 6.36E-01 | 8.37E-01 | 1.00E+00 |
| ENSG00000233360.4_Z83844.1   | ENSG00000160789.18_LMNA | -0.00621 | -0.165242996 | 0.153146457 | 9.40E-01 | 9.76E-01 | 1.00E+00 |
| ENSG00000278893.1_RP11-229C  | ENSG00000160789.18_LMNA | 0.09645  | -0.063730741 | 0.251783179 | 2.37E-01 | 5.16E-01 | 1.00E+00 |
| ENSG00000261229.4_RP11-38G5  | ENSG00000160789.18_LMNA | 0.19592  | 0.037899816  | 0.344377847 | 1.56E-02 | 9.01E-02 | 1.00E+00 |
| ENSG00000116783.13_TNNI3K    | ENSG00000160789.18_LMNA | -0.10957 | -0.264162374 | 0.050512211 | 1.79E-01 | 4.41E-01 | 1.00E+00 |
| ENSG00000184313.18_MROH7     | ENSG00000160789.18_LMNA | -0.03027 | -0.18856463  | 0.129552368 | 7.11E-01 | 8.77E-01 | 1.00E+00 |
| ENSG00000205955.4_HSP90AA5   | ENSG00000160789.18_LMNA | -0.1331  | -0.286231408 | 0.026670174 | 1.02E-01 | 3.16E-01 | 1.00E+00 |
| ENSG00000165182.9_CXorf58    | ENSG00000160789.18_LMNA | -0.06583 | -0.22269377  | 0.094362767 | 4.20E-01 | 6.92E-01 | 1.00E+00 |
| ENSG00000238116.2_RP3-347M6  | ENSG00000160789.18_LMNA | -0.12586 | -0.27945976  | 0.034023903 | 1.22E-01 | 3.52E-01 | 1.00E+00 |
| ENSG00000241158.4_ADAMTS9-   | ENSG00000160789.18_LMNA | 0.206    | 0.048385523  | 0.353603593 | 1.09E-02 | 6.96E-02 | 1.00E+00 |

|                              |                         |          |              |             |          |          |          |
|------------------------------|-------------------------|----------|--------------|-------------|----------|----------|----------|
| ENSG00000169894.16_MUC3A     | ENSG00000160789.18_LMNA | 0.3534   | 0.20577991   | 0.485299782 | 7.97E-06 | 2.43E-04 | 4.09E-01 |
| ENSG00000205879.4_FAM90A2P   | ENSG00000160789.18_LMNA | 0.00678  | -0.152587528 | 0.165799619 | 9.34E-01 | 9.74E-01 | 1.00E+00 |
| ENSG00000233024.6_RP11-1212  | ENSG00000160789.18_LMNA | 0.04587  | -0.11416657  | 0.203581906 | 5.75E-01 | 8.02E-01 | 1.00E+00 |
| ENSG00000251201.7_TMED7-TIC  | ENSG00000160789.18_LMNA | 0.08585  | -0.074364065 | 0.241749537 | 2.93E-01 | 5.79E-01 | 1.00E+00 |
| ENSG00000184984.9_CHRM5      | ENSG00000160789.18_LMNA | -0.05341 | -0.210815591 | 0.106700577 | 5.13E-01 | 7.62E-01 | 1.00E+00 |
| ENSG00000250938.4_RP11-679C  | ENSG00000160789.18_LMNA | -0.1531  | -0.304869989 | 0.006253033 | 5.97E-02 | 2.25E-01 | 1.00E+00 |
| ENSG00000172650.11_AGAP5     | ENSG00000160789.18_LMNA | -0.00545 | -0.164506299 | 0.153885893 | 9.47E-01 | 9.79E-01 | 1.00E+00 |
| ENSG00000246792.2_RP11-68L1  | ENSG00000160789.18_LMNA | 0.08509  | -0.075128656 | 0.241025451 | 2.97E-01 | 5.83E-01 | 1.00E+00 |
| ENSG00000185056.9_C5orf47    | ENSG00000160789.18_LMNA | -0.16338 | -0.314399486 | -0.00428699 | 4.43E-02 | 1.86E-01 | 1.00E+00 |
| ENSG00000267702.1_RP11-53B2  | ENSG00000160789.18_LMNA | 0.10861  | -0.051483497 | 0.263256277 | 1.83E-01 | 4.47E-01 | 1.00E+00 |
| ENSG00000248724.5_NPHP3-AS   | ENSG00000160789.18_LMNA | 0.05976  | -0.100398331 | 0.216894791 | 4.65E-01 | 7.27E-01 | 1.00E+00 |
| ENSG00000268744.1_CTD-3105H  | ENSG00000160789.18_LMNA | -0.10337 | -0.258321953 | 0.056762392 | 2.05E-01 | 4.76E-01 | 1.00E+00 |
| ENSG00000224280.1_AC005014   | ENSG00000160789.18_LMNA | 0.07961  | -0.080607714 | 0.235826339 | 3.30E-01 | 6.16E-01 | 1.00E+00 |
| ENSG00000262621.3_LA16c-306E | ENSG00000160789.18_LMNA | -0.11815 | -0.272230029 | 0.041837803 | 1.47E-01 | 3.93E-01 | 1.00E+00 |
| ENSG00000189166.6_TNRC18P3   | ENSG00000160789.18_LMNA | 0.20462  | 0.046952442  | 0.352346205 | 1.14E-02 | 7.21E-02 | 1.00E+00 |
| ENSG00000280162.1_RP11-314N  | ENSG00000160789.18_LMNA | -0.11192 | -0.266375014 | 0.048137878 | 1.70E-01 | 4.28E-01 | 1.00E+00 |
| ENSG00000250548.5_RP11-47I22 | ENSG00000160789.18_LMNA | 0.13383  | -0.025927168 | 0.286913867 | 1.00E-01 | 3.12E-01 | 1.00E+00 |
| ENSG00000171931.11_FBXW10    | ENSG00000160789.18_LMNA | -0.19438 | -0.342969273 | -0.03630479 | 1.64E-02 | 9.37E-02 | 1.00E+00 |
| ENSG00000275389.1_RP11-214K  | ENSG00000160789.18_LMNA | -0.0837  | -0.239705501 | 0.076521489 | 3.05E-01 | 5.92E-01 | 1.00E+00 |
| ENSG00000139540.10_SLC39A5   | ENSG00000160789.18_LMNA | 0.0407   | -0.119278361 | 0.198609084 | 6.19E-01 | 8.27E-01 | 1.00E+00 |
| ENSG00000181126.12_HLA-V     | ENSG00000160789.18_LMNA | 0.07127  | -0.08893647  | 0.22788828  | 3.83E-01 | 6.61E-01 | 1.00E+00 |
| ENSG00000233296.1_AC092159   | ENSG00000160789.18_LMNA | 0.04466  | -0.115361934 | 0.202420506 | 5.85E-01 | 8.07E-01 | 1.00E+00 |
| ENSG00000197046.10_SIGLEC15  | ENSG00000160789.18_LMNA | 0.11135  | -0.04871115  | 0.265841086 | 1.72E-01 | 4.31E-01 | 1.00E+00 |
| ENSG00000223518.5_CSNK1A1P   | ENSG00000160789.18_LMNA | -0.15845 | -0.309831594 | 0.000773902 | 5.12E-02 | 2.04E-01 | 1.00E+00 |
| ENSG00000244040.4_IL12A-AS1  | ENSG00000160789.18_LMNA | -0.06231 | -0.2193347   | 0.097861722 | 4.46E-01 | 7.12E-01 | 1.00E+00 |
| ENSG00000081985.9_IL12RB2    | ENSG00000160789.18_LMNA | 0.04834  | -0.111721673 | 0.205954555 | 5.54E-01 | 7.89E-01 | 1.00E+00 |
| ENSG00000259581.3_TYRO3P     | ENSG00000160789.18_LMNA | 0.12597  | -0.033905816 | 0.279568747 | 1.22E-01 | 3.52E-01 | 1.00E+00 |
| ENSG00000110777.10_POU2AF1   | ENSG00000160789.18_LMNA | -0.00211 | -0.16125531  | 0.157144714 | 9.79E-01 | 9.92E-01 | 1.00E+00 |
| ENSG00000232729.6_AC083884   | ENSG00000160789.18_LMNA | 0.02697  | -0.132803117 | 0.185372591 | 7.42E-01 | 8.92E-01 | 1.00E+00 |
| ENSG00000259895.1_RP11-715J  | ENSG00000160789.18_LMNA | -0.0181  | -0.176791369 | 0.141508365 | 8.25E-01 | 9.31E-01 | 1.00E+00 |
| ENSG00000185958.8_FAM186A    | ENSG00000160789.18_LMNA | -0.07542 | -0.231833355 | 0.084802756 | 3.56E-01 | 6.39E-01 | 1.00E+00 |
| ENSG00000243587.6            | ENSG00000160789.18_LMNA | -0.20919 | -0.356518519 | -0.05171259 | 9.70E-03 | 6.42E-02 | 1.00E+00 |
| ENSG00000124678.16_TCP11     | ENSG00000160789.18_LMNA | -0.11533 | -0.269576928 | 0.044695673 | 1.57E-01 | 4.09E-01 | 1.00E+00 |

|                              |                         |          |              |             |          |          |          |
|------------------------------|-------------------------|----------|--------------|-------------|----------|----------|----------|
| ENSG00000144852.15_NR1I2     | ENSG00000160789.18_LMNA | 0.21766  | 0.06055928   | 0.364240578 | 7.07E-03 | 5.08E-02 | 1.00E+00 |
| ENSG00000253123.3_RP11-527N  | ENSG00000160789.18_LMNA | 0.21076  | 0.053349915  | 0.35795085  | 9.15E-03 | 6.15E-02 | 1.00E+00 |
| ENSG00000225057.2_AC096574.4 | ENSG00000160789.18_LMNA | -0.23247 | -0.377695302 | -0.07608837 | 3.95E-03 | 3.29E-02 | 1.00E+00 |
| ENSG00000173809.14_TDRD12    | ENSG00000160789.18_LMNA | 0.01809  | -0.141518505 | 0.176781345 | 8.25E-01 | 9.31E-01 | 1.00E+00 |
| ENSG00000198555.7_RP11-598D  | ENSG00000160789.18_LMNA | -0.07815 | -0.234436725 | 0.08206892  | 3.39E-01 | 6.24E-01 | 1.00E+00 |
| ENSG00000189367.13_KIAA0408  | ENSG00000160789.18_LMNA | -0.08193 | -0.238026274 | 0.078291656 | 3.16E-01 | 6.02E-01 | 1.00E+00 |
| ENSG00000165521.14_EML5      | ENSG00000160789.18_LMNA | -0.13116 | -0.284421126 | 0.028639388 | 1.07E-01 | 3.26E-01 | 1.00E+00 |
| ENSG00000143365.15_RORC      | ENSG00000160789.18_LMNA | 0.03424  | -0.125649351 | 0.192388297 | 6.75E-01 | 8.58E-01 | 1.00E+00 |
| ENSG00000180525.11_PRR26     | ENSG00000160789.18_LMNA | -0.01424 | -0.17304692  | 0.145291568 | 8.62E-01 | 9.46E-01 | 1.00E+00 |
| ENSG00000278570.3_NR2E3      | ENSG00000160789.18_LMNA | -0.10276 | -0.257742949 | 0.057380676 | 2.08E-01 | 4.80E-01 | 1.00E+00 |
| ENSG00000246477.3_AF131216.6 | ENSG00000160789.18_LMNA | -0.01534 | -0.174117368 | 0.144210992 | 8.51E-01 | 9.42E-01 | 1.00E+00 |
| ENSG00000247287.2_RP11-902B  | ENSG00000160789.18_LMNA | -0.10801 | -0.262689141 | 0.052091132 | 1.85E-01 | 4.51E-01 | 1.00E+00 |
| ENSG00000121380.11_BCL2L14   | ENSG00000160789.18_LMNA | -0.14582 | -0.298103035 | 0.013695829 | 7.30E-02 | 2.57E-01 | 1.00E+00 |
| ENSG00000168356.10_SCN11A    | ENSG00000160789.18_LMNA | -0.23055 | -0.375949324 | -0.07406492 | 4.27E-03 | 3.48E-02 | 1.00E+00 |
| ENSG00000214900.7_LINC01588  | ENSG00000160789.18_LMNA | 0.08622  | -0.073994383 | 0.242099509 | 2.91E-01 | 5.76E-01 | 1.00E+00 |
| ENSG00000171916.15_LGALS9C   | ENSG00000160789.18_LMNA | -0.06166 | -0.218717691 | 0.098503574 | 4.50E-01 | 7.16E-01 | 1.00E+00 |
| ENSG00000142623.9_PADI1      | ENSG00000160789.18_LMNA | 0.01839  | -0.141221621 | 0.177074801 | 8.22E-01 | 9.30E-01 | 1.00E+00 |
| ENSG00000143552.8_NUP210L    | ENSG00000160789.18_LMNA | -0.09024 | -0.245908862 | 0.069964855 | 2.69E-01 | 5.53E-01 | 1.00E+00 |
| ENSG00000232043.1_RP4-530I15 | ENSG00000160789.18_LMNA | 0.08255  | -0.077671625 | 0.238614667 | 3.12E-01 | 5.98E-01 | 1.00E+00 |
| ENSG00000187908.14_DMBT1     | ENSG00000160789.18_LMNA | 0.07364  | -0.086571157 | 0.230146533 | 3.67E-01 | 6.48E-01 | 1.00E+00 |
| ENSG00000165646.10_SLC18A2   | ENSG00000160789.18_LMNA | 0.01767  | -0.141933372 | 0.176371175 | 8.29E-01 | 9.33E-01 | 1.00E+00 |
| ENSG00000136011.13_STAB2     | ENSG00000160789.18_LMNA | -0.13822 | -0.291020617 | 0.021448765 | 8.95E-02 | 2.91E-01 | 1.00E+00 |
| ENSG00000261654.1_RP11-96K1  | ENSG00000160789.18_LMNA | -0.00459 | -0.163675337 | 0.154719517 | 9.55E-01 | 9.82E-01 | 1.00E+00 |
| ENSG00000226440.6_RP11-506B  | ENSG00000160789.18_LMNA | 0.01232  | -0.147165585 | 0.171188686 | 8.80E-01 | 9.54E-01 | 1.00E+00 |
| ENSG00000137747.13_TMPRSS1   | ENSG00000160789.18_LMNA | 0.03619  | -0.123725561 | 0.194269429 | 6.58E-01 | 8.49E-01 | 1.00E+00 |
| ENSG00000277481.1_PKD1L3     | ENSG00000160789.18_LMNA | 0.14391  | -0.015652126 | 0.296319162 | 7.69E-02 | 2.66E-01 | 1.00E+00 |
| ENSG00000165874.11_FAM35BP   | ENSG00000160789.18_LMNA | -0.10683 | -0.261579926 | 0.053278885 | 1.90E-01 | 4.58E-01 | 1.00E+00 |
| ENSG00000270332.1_SMC2-AS1   | ENSG00000160789.18_LMNA | -0.09745 | -0.252728994 | 0.06272469  | 2.32E-01 | 5.10E-01 | 1.00E+00 |
| ENSG00000214248.2_CTD-3193C  | ENSG00000160789.18_LMNA | 0.05748  | -0.102656655 | 0.214719218 | 4.82E-01 | 7.40E-01 | 1.00E+00 |
| ENSG00000185304.13_RGPD2     | ENSG00000160789.18_LMNA | 0.02191  | -0.137775131 | 0.18047735  | 7.89E-01 | 9.14E-01 | 1.00E+00 |
| ENSG00000248858.6_FLJ46284   | ENSG00000160789.18_LMNA | -0.09039 | -0.246054315 | 0.06981079  | 2.68E-01 | 5.52E-01 | 1.00E+00 |
| ENSG00000240720.6_LRRD1      | ENSG00000160789.18_LMNA | -0.14846 | -0.300554205 | 0.011003836 | 6.80E-02 | 2.45E-01 | 1.00E+00 |
| ENSG00000236334.2_PPIAL4G    | ENSG00000160789.18_LMNA | 0.06582  | -0.094373304 | 0.222683665 | 4.20E-01 | 6.92E-01 | 1.00E+00 |

|                              |                         |          |              |             |          |          |          |
|------------------------------|-------------------------|----------|--------------|-------------|----------|----------|----------|
| ENSG00000259075.5_POC1B-GA   | ENSG00000160789.18_LMNA | 0.10692  | -0.05318734  | 0.261665447 | 1.90E-01 | 4.57E-01 | 1.00E+00 |
| ENSG00000280434.1_RP4-671O1  | ENSG00000160789.18_LMNA | 0.10059  | -0.059560027 | 0.255700247 | 2.18E-01 | 4.92E-01 | 1.00E+00 |
| ENSG00000274333.3_RP11-717F  | ENSG00000160789.18_LMNA | 0.09621  | -0.063970957 | 0.251557257 | 2.38E-01 | 5.17E-01 | 1.00E+00 |
| ENSG00000133477.15_FAM83F    | ENSG00000160789.18_LMNA | 0.09894  | -0.061225811 | 0.25413701  | 2.25E-01 | 5.01E-01 | 1.00E+00 |
| ENSG00000211677.2_IGLC2      | ENSG00000160789.18_LMNA | 0.02996  | -0.129857424 | 0.188265369 | 7.14E-01 | 8.78E-01 | 1.00E+00 |
| ENSG00000200879.1_SNORD14E   | ENSG00000160789.18_LMNA | 0.02426  | -0.135465163 | 0.182753613 | 7.67E-01 | 9.03E-01 | 1.00E+00 |
| ENSG00000156234.7_CXCL13     | ENSG00000160789.18_LMNA | -0.03437 | -0.19251643  | 0.125518388 | 6.74E-01 | 8.57E-01 | 1.00E+00 |
| ENSG00000271748.2_           | ENSG00000160789.18_LMNA | -0.03247 | -0.190684131 | 0.127390099 | 6.91E-01 | 8.67E-01 | 1.00E+00 |
| ENSG00000211890.3_IGHA2      | ENSG00000160789.18_LMNA | 0.05135  | -0.108736331 | 0.208846623 | 5.30E-01 | 7.73E-01 | 1.00E+00 |
| ENSG00000223812.4_RP11-197K  | ENSG00000160789.18_LMNA | -0.28892 | -0.428411206 | -0.13596877 | 3.06E-04 | 4.58E-03 | 1.00E+00 |
| ENSG00000205362.9_MT1A       | ENSG00000160789.18_LMNA | 0.15964  | 0.000446865  | 0.310934756 | 4.95E-02 | 2.00E-01 | 1.00E+00 |
| ENSG00000203877.6_RIPPLY2    | ENSG00000160789.18_LMNA | -0.39969 | -0.525459519 | -0.25683695 | 3.37E-07 | 1.93E-05 | 1.73E-02 |
| ENSG00000200090.1_Y_RNA      | ENSG00000160789.18_LMNA | -0.00509 | -0.164155203 | 0.154238169 | 9.50E-01 | 9.80E-01 | 1.00E+00 |
| ENSG00000269903.1_RP11-571M  | ENSG00000160789.18_LMNA | -0.17701 | -0.326995735 | -0.01832551 | 2.91E-02 | 1.41E-01 | 1.00E+00 |
| ENSG00000236591.1_RP11-162J1 | ENSG00000160789.18_LMNA | 0.09692  | -0.063258203 | 0.252227499 | 2.35E-01 | 5.13E-01 | 1.00E+00 |
| ENSG00000254909.1_RP11-110I1 | ENSG00000160789.18_LMNA | -0.10466 | -0.259539986 | 0.055460937 | 1.99E-01 | 4.70E-01 | 1.00E+00 |
| ENSG00000280605.1_           | ENSG00000160789.18_LMNA | 0.01128  | -0.148191516 | 0.170170436 | 8.90E-01 | 9.57E-01 | 1.00E+00 |
| ENSG00000207291.1_RNU6-30P   | ENSG00000160789.18_LMNA | -0.06034 | -0.217455312 | 0.09981596  | 4.60E-01 | 7.24E-01 | 1.00E+00 |
| ENSG00000225096.1_XXbac-BPG  | ENSG00000160789.18_LMNA | -0.21178 | -0.358877064 | -0.05440956 | 8.81E-03 | 5.98E-02 | 1.00E+00 |
| ENSG00000180806.4_HOXC9      | ENSG00000160789.18_LMNA | -0.00501 | -0.164082427 | 0.154311179 | 9.51E-01 | 9.80E-01 | 1.00E+00 |
| ENSG00000234614.1_AL450992.2 | ENSG00000160789.18_LMNA | 0.11416  | -0.045871265 | 0.268484182 | 1.61E-01 | 4.16E-01 | 1.00E+00 |
| ENSG00000123364.4_HOXC13     | ENSG00000160789.18_LMNA | -0.1192  | -0.273216106 | 0.040774309 | 1.44E-01 | 3.87E-01 | 1.00E+00 |
| ENSG00000163736.3_PPBP       | ENSG00000160789.18_LMNA | 0.14241  | -0.017179577 | 0.294924823 | 8.01E-02 | 2.72E-01 | 1.00E+00 |
| ENSG00000254348.1_RP11-1134I | ENSG00000160789.18_LMNA | -0.17702 | -0.327005449 | -0.01833639 | 2.91E-02 | 1.41E-01 | 1.00E+00 |
| ENSG00000224848.1_RP11-535M  | ENSG00000160789.18_LMNA | 0.12516  | -0.034729436 | 0.27880843  | 1.24E-01 | 3.56E-01 | 1.00E+00 |
| ENSG00000231533.1_RP1-232L2  | ENSG00000160789.18_LMNA | -0.37754 | -0.506306087 | -0.23229778 | 1.63E-06 | 6.83E-05 | 8.35E-02 |
| ENSG00000156076.8_WIF1       | ENSG00000160789.18_LMNA | -0.20189 | -0.349847571 | -0.04410841 | 1.26E-02 | 7.75E-02 | 1.00E+00 |
| ENSG00000213519.2_AC132008   | ENSG00000160789.18_LMNA | 0.00459  | -0.15472572  | 0.163669151 | 9.55E-01 | 9.82E-01 | 1.00E+00 |
| ENSG00000252150.1_           | ENSG00000160789.18_LMNA | 0.01671  | -0.142872404 | 0.175442365 | 8.38E-01 | 9.37E-01 | 1.00E+00 |
| ENSG00000259685.2_CTD-2315E  | ENSG00000160789.18_LMNA | -0.2769  | -0.417686681 | -0.12312561 | 5.54E-04 | 7.30E-03 | 1.00E+00 |
| ENSG00000237988.3_OR2I1P     | ENSG00000160789.18_LMNA | 0.04018  | -0.119791355 | 0.19810913  | 6.23E-01 | 8.30E-01 | 1.00E+00 |
| ENSG00000261431.1_RP4-616B8  | ENSG00000160789.18_LMNA | 0.05018  | -0.10989422  | 0.20772557  | 5.39E-01 | 7.79E-01 | 1.00E+00 |
| ENSG00000272668.1_RP11-190A  | ENSG00000160789.18_LMNA | 0.23404  | 0.077731442  | 0.379111477 | 3.71E-03 | 3.13E-02 | 1.00E+00 |

|                              |                         |          |              |             |          |          |          |
|------------------------------|-------------------------|----------|--------------|-------------|----------|----------|----------|
| ENSG00000272650.1_RP11-571I1 | ENSG00000160789.18_LMNA | -0.15015 | -0.302127178 | 0.009273938 | 6.48E-02 | 2.37E-01 | 1.00E+00 |
| ENSG00000226644.4_RP11-128M  | ENSG00000160789.18_LMNA | -0.08014 | -0.236322142 | 0.080086038 | 3.26E-01 | 6.13E-01 | 1.00E+00 |
| ENSG00000228651.1_RP11-556E  | ENSG00000160789.18_LMNA | 0.02949  | -0.130326855 | 0.18780474  | 7.18E-01 | 8.80E-01 | 1.00E+00 |
| ENSG00000264345.1_RP11-958F  | ENSG00000160789.18_LMNA | -0.06977 | -0.226457675 | 0.090432789 | 3.93E-01 | 6.71E-01 | 1.00E+00 |
| ENSG00000196611.4_MMP1       | ENSG00000160789.18_LMNA | 0.14485  | -0.014687673 | 0.297198882 | 7.50E-02 | 2.61E-01 | 1.00E+00 |
| ENSG00000257526.2_RP11-20E2  | ENSG00000160789.18_LMNA | -0.19401 | -0.342632328 | -0.03592348 | 1.66E-02 | 9.45E-02 | 1.00E+00 |
| ENSG00000164107.8_HAND2      | ENSG00000160789.18_LMNA | -0.16434 | -0.315295704 | -0.0052818  | 4.30E-02 | 1.82E-01 | 1.00E+00 |
| ENSG00000224014.1_RP11-488L  | ENSG00000160789.18_LMNA | -0.08137 | -0.237496487 | 0.07884972  | 3.19E-01 | 6.06E-01 | 1.00E+00 |
| ENSG00000214857.4_SHFM1P1    | ENSG00000160789.18_LMNA | 0.07008  | -0.090124292 | 0.226752735 | 3.91E-01 | 6.69E-01 | 1.00E+00 |
| ENSG00000235211.4_TMSB10P2   | ENSG00000160789.18_LMNA | 0.09002  | -0.070181781 | 0.245704036 | 2.70E-01 | 5.54E-01 | 1.00E+00 |
| ENSG00000224795.1_NTM-AS1    | ENSG00000160789.18_LMNA | -0.28235 | -0.422554591 | -0.12894298 | 4.25E-04 | 5.94E-03 | 1.00E+00 |
| ENSG00000268747.1_CTD-3030D  | ENSG00000160789.18_LMNA | -0.04121 | -0.199100538 | 0.118773922 | 6.14E-01 | 8.25E-01 | 1.00E+00 |
| ENSG00000280435.1_RP4-555D2  | ENSG00000160789.18_LMNA | -0.21016 | -0.357407068 | -0.05272811 | 9.36E-03 | 6.24E-02 | 1.00E+00 |
| ENSG00000263432.2_RN7SL689F  | ENSG00000160789.18_LMNA | 0.22729  | 0.070643216  | 0.372991961 | 4.86E-03 | 3.84E-02 | 1.00E+00 |
| ENSG00000273308.1_RP11-496H  | ENSG00000160789.18_LMNA | 0.03113  | -0.128710424 | 0.189390274 | 7.03E-01 | 8.73E-01 | 1.00E+00 |
| ENSG00000198768.9_APCDD1L    | ENSG00000160789.18_LMNA | 0.46413  | 0.329257323  | 0.580441355 | 1.72E-09 | 2.41E-07 | 8.81E-05 |
| ENSG00000258045.2_Metazoa_SI | ENSG00000160789.18_LMNA | -0.10139 | -0.25645354  | 0.058756691 | 2.14E-01 | 4.88E-01 | 1.00E+00 |
| ENSG00000267114.1_CTB-129P6  | ENSG00000160789.18_LMNA | -0.11686 | -0.271016452 | 0.043145684 | 1.52E-01 | 4.00E-01 | 1.00E+00 |
| ENSG00000232546.1_RP11-458F  | ENSG00000160789.18_LMNA | 0.09222  | -0.067974466 | 0.247786902 | 2.58E-01 | 5.41E-01 | 1.00E+00 |
| ENSG00000272836.1_RP3-402G1  | ENSG00000160789.18_LMNA | 0.1389   | -0.020756573 | 0.29165434  | 8.79E-02 | 2.88E-01 | 1.00E+00 |
| ENSG00000170454.5_KRT75      | ENSG00000160789.18_LMNA | 0.09162  | -0.068576081 | 0.247219496 | 2.62E-01 | 5.45E-01 | 1.00E+00 |
| ENSG00000257718.1_RP11-396F  | ENSG00000160789.18_LMNA | 0.22337  | 0.066536144  | 0.369434105 | 5.67E-03 | 4.31E-02 | 1.00E+00 |
| ENSG00000228078.1_HLA-U      | ENSG00000160789.18_LMNA | 0.05753  | -0.102610058 | 0.214764139 | 4.81E-01 | 7.39E-01 | 1.00E+00 |
| ENSG00000271659.1_RP11-435O  | ENSG00000160789.18_LMNA | -0.02673 | -0.185145378 | 0.133034248 | 7.44E-01 | 8.93E-01 | 1.00E+00 |
| ENSG00000108878.4_CACNG1     | ENSG00000160789.18_LMNA | -0.20021 | -0.348307792 | -0.04235824 | 1.34E-02 | 8.08E-02 | 1.00E+00 |
| ENSG00000235447.2_TRAPPC13   | ENSG00000160789.18_LMNA | -0.35744 | -0.488823361 | -0.21019952 | 6.16E-06 | 1.97E-04 | 3.16E-01 |
| ENSG00000260425.1_LA16c-316C | ENSG00000160789.18_LMNA | 0.01807  | -0.141536738 | 0.176763321 | 8.25E-01 | 9.31E-01 | 1.00E+00 |
| ENSG00000230838.1_LINC01614  | ENSG00000160789.18_LMNA | 0.05609  | -0.104042744 | 0.213382357 | 4.93E-01 | 7.48E-01 | 1.00E+00 |
| ENSG00000224969.1_RP11-54O7  | ENSG00000160789.18_LMNA | -0.114   | -0.268329141 | 0.04603799  | 1.62E-01 | 4.17E-01 | 1.00E+00 |
| ENSG00000244076.1_CTC-512J1  | ENSG00000160789.18_LMNA | -0.20271 | -0.350593726 | -0.04495719 | 1.23E-02 | 7.59E-02 | 1.00E+00 |
| ENSG00000237352.2_LINC01358  | ENSG00000160789.18_LMNA | 0.03416  | -0.125723921 | 0.192315334 | 6.76E-01 | 8.58E-01 | 1.00E+00 |
| ENSG00000250629.1_RP11-122C  | ENSG00000160789.18_LMNA | -0.16987 | -0.320406894 | -0.01096704 | 3.64E-02 | 1.63E-01 | 1.00E+00 |
| ENSG00000260070.1_RP11-182J  | ENSG00000160789.18_LMNA | -0.29817 | -0.436644063 | -0.14589518 | 1.91E-04 | 3.15E-03 | 1.00E+00 |

|                              |                         |          |              |             |          |          |          |
|------------------------------|-------------------------|----------|--------------|-------------|----------|----------|----------|
| ENSG00000258734.2_RP11-112J  | ENSG00000160789.18_LMNA | -0.13016 | -0.283485479 | 0.029656226 | 1.10E-01 | 3.30E-01 | 1.00E+00 |
| ENSG00000229400.1_RP11-3L21  | ENSG00000160789.18_LMNA | 0.01239  | -0.14710567  | 0.171248132 | 8.80E-01 | 9.53E-01 | 1.00E+00 |
| ENSG00000144119.3_C1QL2      | ENSG00000160789.18_LMNA | -0.15712 | -0.308600399 | 0.00213526  | 5.32E-02 | 2.09E-01 | 1.00E+00 |
| ENSG00000235351.1_AC114730   | ENSG00000160789.18_LMNA | 0.12679  | -0.033082788 | 0.280328125 | 1.20E-01 | 3.47E-01 | 1.00E+00 |
| ENSG00000116014.8_KISS1R     | ENSG00000160789.18_LMNA | 0.19383  | 0.035727856  | 0.34245944  | 1.67E-02 | 9.50E-02 | 1.00E+00 |
| ENSG00000255258.2_RP11-448P  | ENSG00000160789.18_LMNA | -0.23432 | -0.379366862 | -0.07802792 | 3.67E-03 | 3.11E-02 | 1.00E+00 |
| ENSG00000235408.4_SNORA71B   | ENSG00000160789.18_LMNA | -0.02585 | -0.18429249  | 0.133901536 | 7.52E-01 | 8.97E-01 | 1.00E+00 |
| ENSG00000219529.2_AP000580   | ENSG00000160789.18_LMNA | -0.07371 | -0.230209969 | 0.086505087 | 3.67E-01 | 6.48E-01 | 1.00E+00 |
| ENSG00000266601.1_RP11-6N17  | ENSG00000160789.18_LMNA | 0.02339  | -0.136322201 | 0.181909478 | 7.75E-01 | 9.07E-01 | 1.00E+00 |
| ENSG00000237781.3_RP11-54A4  | ENSG00000160789.18_LMNA | 0.14846  | -0.011004713 | 0.300553407 | 6.80E-02 | 2.45E-01 | 1.00E+00 |
| ENSG00000275413.1_CTC-529I1C | ENSG00000160789.18_LMNA | -0.06249 | -0.219511543 | 0.097677709 | 4.44E-01 | 7.11E-01 | 1.00E+00 |
| ENSG00000273615.1_           | ENSG00000160789.18_LMNA | -0.02103 | -0.179630781 | 0.138633354 | 7.97E-01 | 9.18E-01 | 1.00E+00 |
| ENSG00000224441.1_AC068831   | ENSG00000160789.18_LMNA | 0.01539  | -0.144159389 | 0.174168468 | 8.51E-01 | 9.41E-01 | 1.00E+00 |
| ENSG00000197238.4_HIST1H4J   | ENSG00000160789.18_LMNA | 0.00423  | -0.155073758 | 0.16332209  | 9.59E-01 | 9.84E-01 | 1.00E+00 |
| ENSG00000272372.1_RP11-441F  | ENSG00000160789.18_LMNA | -0.13634 | -0.289265575 | 0.023364171 | 9.40E-02 | 3.00E-01 | 1.00E+00 |
| ENSG00000260051.1_LA16c-390E | ENSG00000160789.18_LMNA | -0.03434 | -0.192489928 | 0.125545477 | 6.74E-01 | 8.57E-01 | 1.00E+00 |
| ENSG00000273030.1_RP11-285F  | ENSG00000160789.18_LMNA | -0.05148 | -0.208967726 | 0.108611197 | 5.29E-01 | 7.73E-01 | 1.00E+00 |
| ENSG00000226859.1_RP11-48F1  | ENSG00000160789.18_LMNA | -0.14665 | -0.298872443 | 0.012851314 | 7.14E-02 | 2.53E-01 | 1.00E+00 |
| ENSG00000228793.1_RP1-223B1  | ENSG00000160789.18_LMNA | -0.18022 | -0.329953686 | -0.02163989 | 2.63E-02 | 1.31E-01 | 1.00E+00 |
| ENSG00000224592.4_RP5-884C9  | ENSG00000160789.18_LMNA | 0.13069  | -0.029114111 | 0.283984382 | 1.09E-01 | 3.28E-01 | 1.00E+00 |
| ENSG00000232218.1_RP1-149A1  | ENSG00000160789.18_LMNA | -0.03395 | -0.192114962 | 0.125928686 | 6.78E-01 | 8.59E-01 | 1.00E+00 |
| ENSG00000272434.1_RP13-131K  | ENSG00000160789.18_LMNA | 0.2717   | 0.117584881  | 0.413034478 | 7.09E-04 | 8.87E-03 | 1.00E+00 |
| ENSG00000226363.3_HAGLROS    | ENSG00000160789.18_LMNA | -0.19634 | -0.344763609 | -0.03833691 | 1.53E-02 | 8.93E-02 | 1.00E+00 |
| ENSG00000280758.1_RP11-216B  | ENSG00000160789.18_LMNA | 0.08403  | -0.076187413 | 0.240022202 | 3.03E-01 | 5.90E-01 | 1.00E+00 |
| ENSG00000238287.1_RP11-656D  | ENSG00000160789.18_LMNA | -0.18305 | -0.332557785 | -0.0245634  | 2.40E-02 | 1.23E-01 | 1.00E+00 |
| ENSG00000106031.7_HOXA13     | ENSG00000160789.18_LMNA | -0.39622 | -0.522465702 | -0.25297833 | 4.35E-07 | 2.35E-05 | 2.23E-02 |
| ENSG00000278876.1_RP11-498C  | ENSG00000160789.18_LMNA | -0.00913 | -0.168084615 | 0.150290931 | 9.11E-01 | 9.66E-01 | 1.00E+00 |
| ENSG00000267707.2_RP11-95O2  | ENSG00000160789.18_LMNA | -0.04522 | -0.20295654  | 0.114810339 | 5.80E-01 | 8.04E-01 | 1.00E+00 |
| ENSG00000236279.5_CLEC2L     | ENSG00000160789.18_LMNA | -0.15438 | -0.306062664 | 0.004937658 | 5.76E-02 | 2.20E-01 | 1.00E+00 |
| ENSG00000279203.1_AC005785   | ENSG00000160789.18_LMNA | -0.05655 | -0.213827129 | 0.103581731 | 4.89E-01 | 7.45E-01 | 1.00E+00 |
| ENSG00000211753.3_TRBV28     | ENSG00000160789.18_LMNA | 0.09758  | -0.062593919 | 0.25285189  | 2.32E-01 | 5.09E-01 | 1.00E+00 |
| ENSG00000234175.1_RP11-730A  | ENSG00000160789.18_LMNA | -0.04592 | -0.203634094 | 0.114112834 | 5.74E-01 | 8.01E-01 | 1.00E+00 |
| ENSG00000173261.7_PLAC8L1    | ENSG00000160789.18_LMNA | -0.22434 | -0.370313106 | -0.06754988 | 5.46E-03 | 4.19E-02 | 1.00E+00 |

|                              |                         |          |              |             |          |          |          |
|------------------------------|-------------------------|----------|--------------|-------------|----------|----------|----------|
| ENSG00000231742.4_LINC01273  | ENSG00000160789.18_LMNA | 0.25304  | 0.097782661  | 0.39628081  | 1.66E-03 | 1.70E-02 | 1.00E+00 |
| ENSG00000280870.1_MIR325HG   | ENSG00000160789.18_LMNA | -0.30466 | -0.442407027 | -0.15287863 | 1.35E-04 | 2.40E-03 | 1.00E+00 |
| ENSG00000270083.1_RP1-257I2C | ENSG00000160789.18_LMNA | -0.11567 | -0.269899625 | 0.044348344 | 1.56E-01 | 4.07E-01 | 1.00E+00 |
| ENSG00000255521.1_RP4-607I7  | ENSG00000160789.18_LMNA | 0.18992  | 0.031679067  | 0.338876464 | 1.91E-02 | 1.04E-01 | 1.00E+00 |
| ENSG0000006606.7_CCL26       | ENSG00000160789.18_LMNA | 0.27726  | 0.123508999  | 0.418008017 | 5.44E-04 | 7.20E-03 | 1.00E+00 |
| ENSG00000260455.1_NBAT1      | ENSG00000160789.18_LMNA | -0.34498 | -0.477929362 | -0.19657194 | 1.35E-05 | 3.72E-04 | 6.91E-01 |
| ENSG00000279532.1_CTB-96E2   | ENSG00000160789.18_LMNA | -0.02259 | -0.18114144  | 0.137101565 | 7.82E-01 | 9.11E-01 | 1.00E+00 |
| ENSG00000234084.1_RP3-388E2  | ENSG00000160789.18_LMNA | -0.02646 | -0.184886269 | 0.133297784 | 7.46E-01 | 8.94E-01 | 1.00E+00 |
| ENSG00000263280.1_LA16c-325I | ENSG00000160789.18_LMNA | -0.09077 | -0.246407882 | 0.069436227 | 2.66E-01 | 5.50E-01 | 1.00E+00 |
| ENSG00000226352.2_RP11-523H  | ENSG00000160789.18_LMNA | -0.07675 | -0.233098291 | 0.083475024 | 3.47E-01 | 6.31E-01 | 1.00E+00 |
| ENSG00000272541.1_XXbac-BPG  | ENSG00000160789.18_LMNA | -0.16377 | -0.314761229 | -0.00468846 | 4.38E-02 | 1.84E-01 | 1.00E+00 |
| ENSG00000156206.12_CFAP161   | ENSG00000160789.18_LMNA | 0.09856  | -0.061609671 | 0.253776547 | 2.27E-01 | 5.04E-01 | 1.00E+00 |
| ENSG00000240877.3_RN7SL521F  | ENSG00000160789.18_LMNA | 0.05425  | -0.105867856 | 0.211620251 | 5.07E-01 | 7.57E-01 | 1.00E+00 |
| ENSG00000267886.1_CTD-2291D  | ENSG00000160789.18_LMNA | 0.02037  | -0.139284125 | 0.178988532 | 8.03E-01 | 9.21E-01 | 1.00E+00 |
| ENSG00000277639.1_RP11-467J  | ENSG00000160789.18_LMNA | 0.22362  | 0.066797646  | 0.369660902 | 5.62E-03 | 4.28E-02 | 1.00E+00 |
| ENSG00000261588.1_AC002310   | ENSG00000160789.18_LMNA | -0.11944 | -0.273437209 | 0.040535748 | 1.43E-01 | 3.86E-01 | 1.00E+00 |
| ENSG00000249911.1_           | ENSG00000160789.18_LMNA | 0.17962  | 0.021021565  | 0.329402314 | 2.68E-02 | 1.33E-01 | 1.00E+00 |
| ENSG00000277051.1_Metazoa_SI | ENSG00000160789.18_LMNA | 0.09411  | -0.066079953 | 0.249572277 | 2.49E-01 | 5.29E-01 | 1.00E+00 |
| ENSG00000254510.1_RP11-867G  | ENSG00000160789.18_LMNA | 0.09982  | -0.0603358   | 0.254972436 | 2.21E-01 | 4.96E-01 | 1.00E+00 |
| ENSG00000153266.11_FEZF2     | ENSG00000160789.18_LMNA | -0.36218 | -0.492955903 | -0.21539751 | 4.54E-06 | 1.54E-04 | 2.33E-01 |
| ENSG00000136457.8_CHAD       | ENSG00000160789.18_LMNA | -0.12284 | -0.276628759 | 0.037088224 | 1.32E-01 | 3.68E-01 | 1.00E+00 |
| ENSG00000279082.2_RP1-167O2  | ENSG00000160789.18_LMNA | -0.16626 | -0.317071917 | -0.00725524 | 4.06E-02 | 1.75E-01 | 1.00E+00 |
| ENSG00000275910.1_RP11-680G  | ENSG00000160789.18_LMNA | -0.02117 | -0.179760275 | 0.138502108 | 7.96E-01 | 9.18E-01 | 1.00E+00 |
| ENSG00000251000.1_AC008592   | ENSG00000160789.18_LMNA | 0.12794  | -0.03191184  | 0.281407841 | 1.16E-01 | 3.41E-01 | 1.00E+00 |
| ENSG00000275759.1_RP11-131L  | ENSG00000160789.18_LMNA | 0.03141  | -0.128430299 | 0.189664876 | 7.01E-01 | 8.72E-01 | 1.00E+00 |
| ENSG00000233055.1_RP11-490D  | ENSG00000160789.18_LMNA | -0.18072 | -0.330411378 | -0.02215334 | 2.59E-02 | 1.30E-01 | 1.00E+00 |
| ENSG00000266524.2_GDF10      | ENSG00000160789.18_LMNA | -0.25059 | -0.394070512 | -0.0951877  | 1.85E-03 | 1.84E-02 | 1.00E+00 |
| ENSG00000250731.1_TPM3P6     | ENSG00000160789.18_LMNA | 0.14934  | -0.010105889 | 0.301370908 | 6.63E-02 | 2.41E-01 | 1.00E+00 |
| ENSG00000260874.4_RP11-715J  | ENSG00000160789.18_LMNA | 0.21258  | 0.05524453   | 0.359606468 | 8.56E-03 | 5.85E-02 | 1.00E+00 |
| ENSG00000272449.1_RP3-395M2  | ENSG00000160789.18_LMNA | -0.01048 | -0.169400105 | 0.148967201 | 8.98E-01 | 9.60E-01 | 1.00E+00 |
| ENSG00000223834.2_RP11-472N  | ENSG00000160789.18_LMNA | 0.03999  | -0.119970042 | 0.197934947 | 6.25E-01 | 8.31E-01 | 1.00E+00 |
| ENSG00000267919.1_RP11-256I2 | ENSG00000160789.18_LMNA | 0.36312  | 0.216431298  | 0.493776304 | 4.27E-06 | 1.46E-04 | 2.19E-01 |
| ENSG00000277459.1_RP11-732A  | ENSG00000160789.18_LMNA | 0.16626  | 0.00725446   | 0.31707122  | 4.06E-02 | 1.75E-01 | 1.00E+00 |



|                              |                         |          |              |             |          |          |          |
|------------------------------|-------------------------|----------|--------------|-------------|----------|----------|----------|
| ENSG00000255080.1_           | ENSG00000160789.18_LMNA | 0.00837  | -0.151033201 | 0.167346468 | 9.18E-01 | 9.69E-01 | 1.00E+00 |
| ENSG00000233834.5_AC005083.  | ENSG00000160789.18_LMNA | 0.20166  | 0.043869834  | 0.349637775 | 1.27E-02 | 7.79E-02 | 1.00E+00 |
| ENSG00000272123.1_CTD-2366F  | ENSG00000160789.18_LMNA | -0.09057 | -0.246216389 | 0.069639103 | 2.67E-01 | 5.51E-01 | 1.00E+00 |
| ENSG00000260552.1_RP11-49I11 | ENSG00000160789.18_LMNA | 0.30858  | 0.157095186  | 0.445875127 | 1.10E-04 | 2.03E-03 | 1.00E+00 |
| ENSG00000278344.1_RP11-18C2  | ENSG00000160789.18_LMNA | -0.11748 | -0.271605358 | 0.04251115  | 1.49E-01 | 3.97E-01 | 1.00E+00 |
| ENSG00000267368.1_UPK3BL     | ENSG00000160789.18_LMNA | 0.04107  | -0.118908964 | 0.198968987 | 6.15E-01 | 8.26E-01 | 1.00E+00 |
| ENSG00000186838.12_SELENOV   | ENSG00000160789.18_LMNA | -0.13627 | -0.289198923 | 0.023436867 | 9.41E-02 | 3.00E-01 | 1.00E+00 |
| ENSG00000273464.1_RP11-313P  | ENSG00000160789.18_LMNA | 0.02133  | -0.138341409 | 0.179918815 | 7.94E-01 | 9.17E-01 | 1.00E+00 |
| ENSG00000217236.1_SP9        | ENSG00000160789.18_LMNA | -0.21748 | -0.364073278 | -0.06036711 | 7.12E-03 | 5.10E-02 | 1.00E+00 |
| ENSG00000280212.1_RP11-49K2  | ENSG00000160789.18_LMNA | -0.0387  | -0.196689417 | 0.121247176 | 6.36E-01 | 8.37E-01 | 1.00E+00 |
| ENSG00000260279.2_AC137932.  | ENSG00000160789.18_LMNA | 0.07349  | -0.086729139 | 0.229996175 | 3.68E-01 | 6.49E-01 | 1.00E+00 |
| ENSG00000110148.8_CCKBR      | ENSG00000160789.18_LMNA | -0.08789 | -0.243679762 | 0.072324045 | 2.82E-01 | 5.67E-01 | 1.00E+00 |
| ENSG00000251131.1_CTD-2035E  | ENSG00000160789.18_LMNA | 0.08071  | -0.079515895 | 0.23686382  | 3.23E-01 | 6.09E-01 | 1.00E+00 |
| ENSG00000272885.1_RP11-2H3.  | ENSG00000160789.18_LMNA | -0.16773 | -0.318424069 | -0.00875914 | 3.89E-02 | 1.70E-01 | 1.00E+00 |
| ENSG00000279372.1_RP11-1182  | ENSG00000160789.18_LMNA | -0.17659 | -0.326607852 | -0.01789139 | 2.95E-02 | 1.42E-01 | 1.00E+00 |
| ENSG00000236305.1_RP11-126L  | ENSG00000160789.18_LMNA | 0.11225  | -0.047805169 | 0.266684801 | 1.69E-01 | 4.27E-01 | 1.00E+00 |
| ENSG00000215900.4_SELENOV    | ENSG00000160789.18_LMNA | -0.09646 | -0.251795859 | 0.063717258 | 2.37E-01 | 5.16E-01 | 1.00E+00 |
| ENSG00000278389.1_RP11-626G  | ENSG00000160789.18_LMNA | 0.15191  | -0.007471374 | 0.303764425 | 6.17E-02 | 2.30E-01 | 1.00E+00 |
| ENSG00000228034.1_HMGN2P21   | ENSG00000160789.18_LMNA | -0.04088 | -0.198789644 | 0.119093049 | 6.17E-01 | 8.26E-01 | 1.00E+00 |
| ENSG00000273424.1_CTA-223H9  | ENSG00000160789.18_LMNA | -0.1116  | -0.266072193 | 0.048463038 | 1.71E-01 | 4.30E-01 | 1.00E+00 |
| ENSG00000227591.4_RP1-28O10  | ENSG00000160789.18_LMNA | -0.04112 | -0.199016653 | 0.118860035 | 6.15E-01 | 8.25E-01 | 1.00E+00 |
| ENSG00000240122.1_FABP5P11   | ENSG00000160789.18_LMNA | -0.10379 | -0.258718308 | 0.056339008 | 2.03E-01 | 4.74E-01 | 1.00E+00 |
| ENSG00000134259.3_NGF        | ENSG00000160789.18_LMNA | -0.0314  | -0.189650771 | 0.128444688 | 7.01E-01 | 8.72E-01 | 1.00E+00 |
| ENSG00000226102.3_SEPT7P3    | ENSG00000160789.18_LMNA | -0.01386 | -0.172681005 | 0.145660772 | 8.65E-01 | 9.47E-01 | 1.00E+00 |
| ENSG00000267289.1_CTD-2623N  | ENSG00000160789.18_LMNA | -0.06738 | -0.224177567 | 0.09281468  | 4.09E-01 | 6.84E-01 | 1.00E+00 |
| ENSG00000166828.2_SCNN1G     | ENSG00000160789.18_LMNA | 0.2203   | 0.063324126  | 0.366645409 | 6.39E-03 | 4.71E-02 | 1.00E+00 |
| ENSG00000272361.2_GS1-166A2  | ENSG00000160789.18_LMNA | -0.12018 | -0.274136763 | 0.039780727 | 1.40E-01 | 3.82E-01 | 1.00E+00 |
| ENSG00000278112.1_RP11-972P  | ENSG00000160789.18_LMNA | -0.09894 | -0.254136432 | 0.061226426 | 2.25E-01 | 5.01E-01 | 1.00E+00 |
| ENSG00000250969.1_RP11-364L  | ENSG00000160789.18_LMNA | -0.27796 | -0.418636319 | -0.12425888 | 5.26E-04 | 7.01E-03 | 1.00E+00 |
| ENSG00000272154.3_AC005754.  | ENSG00000160789.18_LMNA | -0.11198 | -0.266429494 | 0.048079373 | 1.70E-01 | 4.28E-01 | 1.00E+00 |
| ENSG00000273209.1_RP11-107N  | ENSG00000160789.18_LMNA | 0.26266  | 0.107975602  | 0.404929446 | 1.08E-03 | 1.23E-02 | 1.00E+00 |
| ENSG00000228107.1_AP000692.  | ENSG00000160789.18_LMNA | 0.02114  | -0.138525367 | 0.179737328 | 7.96E-01 | 9.18E-01 | 1.00E+00 |
| ENSG00000269102.1_CTD-2525K  | ENSG00000160789.18_LMNA | 0.07172  | -0.088492389 | 0.228312595 | 3.80E-01 | 6.59E-01 | 1.00E+00 |

|                               |                         |          |              |             |          |          |          |
|-------------------------------|-------------------------|----------|--------------|-------------|----------|----------|----------|
| ENSG00000186684.11_CYP27C1    | ENSG00000160789.18_LMNA | -0.19432 | -0.342916688 | -0.03624528 | 1.64E-02 | 9.38E-02 | 1.00E+00 |
| ENSG00000270917.1_RP11-271I.1 | ENSG00000160789.18_LMNA | 0.07688  | -0.083339773 | 0.233227085 | 3.46E-01 | 6.31E-01 | 1.00E+00 |
| ENSG00000106341.9_PPP1R17     | ENSG00000160789.18_LMNA | -0.30068 | -0.438875025 | -0.14859518 | 1.67E-04 | 2.84E-03 | 1.00E+00 |
| ENSG00000269815.1_CTD-2278I.1 | ENSG00000160789.18_LMNA | 0.08136  | -0.078866007 | 0.237481021 | 3.19E-01 | 6.06E-01 | 1.00E+00 |
| ENSG00000184160.7_ADRA2C      | ENSG00000160789.18_LMNA | -0.08349 | -0.239508836 | 0.076728909 | 3.06E-01 | 5.93E-01 | 1.00E+00 |
| ENSG00000281920.1_RP11-418H   | ENSG00000160789.18_LMNA | 0.1737   | 0.014908017  | 0.323939408 | 3.23E-02 | 1.51E-01 | 1.00E+00 |
| ENSG00000274943.1_RP11-351C   | ENSG00000160789.18_LMNA | -0.05876 | -0.215938764 | 0.101391125 | 4.72E-01 | 7.32E-01 | 1.00E+00 |
| ENSG00000274370.1_AC144831.1  | ENSG00000160789.18_LMNA | 0.24234  | 0.086477784  | 0.386626343 | 2.63E-03 | 2.41E-02 | 1.00E+00 |
| ENSG00000275703.1_U47924.32   | ENSG00000160789.18_LMNA | -0.13444 | -0.287490863 | 0.025298713 | 9.87E-02 | 3.09E-01 | 1.00E+00 |
| ENSG00000108511.9_HOXB6       | ENSG00000160789.18_LMNA | 0.37037  | 0.224400891  | 0.500084331 | 2.64E-06 | 9.89E-05 | 1.36E-01 |
| ENSG00000272721.4_RP11-778D   | ENSG00000160789.18_LMNA | -0.02162 | -0.180200956 | 0.138055383 | 7.91E-01 | 9.16E-01 | 1.00E+00 |
| ENSG00000258099.1_ATXN2-AS    | ENSG00000160789.18_LMNA | -0.00155 | -0.160710495 | 0.157690164 | 9.85E-01 | 9.94E-01 | 1.00E+00 |
| ENSG00000146469.11_VIP        | ENSG00000160789.18_LMNA | -0.21975 | -0.366138975 | -0.06274149 | 6.52E-03 | 4.79E-02 | 1.00E+00 |
| ENSG00000239801.1_DENND6A-    | ENSG00000160789.18_LMNA | -0.03835 | -0.19635614  | 0.12158873  | 6.39E-01 | 8.39E-01 | 1.00E+00 |
| ENSG00000255306.1_RP5-901A4   | ENSG00000160789.18_LMNA | 0.18488  | 0.02645437   | 0.334239661 | 2.26E-02 | 1.18E-01 | 1.00E+00 |
| ENSG00000250410.1_RP11-714G   | ENSG00000160789.18_LMNA | -0.07202 | -0.228602344 | 0.08818907  | 3.78E-01 | 6.57E-01 | 1.00E+00 |
| ENSG00000099725.13_PRKY       | ENSG00000160789.18_LMNA | -0.08802 | -0.243807389 | 0.072189065 | 2.81E-01 | 5.66E-01 | 1.00E+00 |
| ENSG00000276718.1_RP1-102E2   | ENSG00000160789.18_LMNA | 0.19231  | 0.034154356  | 0.34106803  | 1.76E-02 | 9.85E-02 | 1.00E+00 |
| ENSG00000255434.1_CTD-2530H   | ENSG00000160789.18_LMNA | 0.1627   | 0.003595743  | 0.31377642  | 4.52E-02 | 1.88E-01 | 1.00E+00 |
| ENSG00000259799.1_RP11-554A   | ENSG00000160789.18_LMNA | -0.02883 | -0.187168001 | 0.130975526 | 7.24E-01 | 8.83E-01 | 1.00E+00 |
| ENSG00000273973.1_RP11-973D   | ENSG00000160789.18_LMNA | -0.04273 | -0.200565741 | 0.117269033 | 6.01E-01 | 8.17E-01 | 1.00E+00 |
| ENSG00000219355.2_RPL31P52    | ENSG00000160789.18_LMNA | -0.1893  | -0.338304256 | -0.0310334  | 1.95E-02 | 1.06E-01 | 1.00E+00 |
| ENSG00000254667.2_            | ENSG00000160789.18_LMNA | -0.16035 | -0.311592099 | -0.00117473 | 4.85E-02 | 1.97E-01 | 1.00E+00 |
| ENSG00000272529.1_RP11-415F   | ENSG00000160789.18_LMNA | -0.04595 | -0.20365627  | 0.114090001 | 5.74E-01 | 8.01E-01 | 1.00E+00 |
| ENSG00000206168.1_Z69890.1    | ENSG00000160789.18_LMNA | 0.12468  | -0.035223943 | 0.278351741 | 1.26E-01 | 3.59E-01 | 1.00E+00 |
| ENSG00000236411.1_NDUFAF4P    | ENSG00000160789.18_LMNA | -0.17106 | -0.32150395  | -0.01218992 | 3.51E-02 | 1.59E-01 | 1.00E+00 |
| ENSG00000232628.4_RP11-365O   | ENSG00000160789.18_LMNA | -0.13966 | -0.292357356 | 0.019988343 | 8.62E-02 | 2.85E-01 | 1.00E+00 |
| ENSG00000235787.1_RP11-219I2  | ENSG00000160789.18_LMNA | -0.04432 | -0.202094523 | 0.115697285 | 5.88E-01 | 8.08E-01 | 1.00E+00 |
| ENSG00000145040.3_UCN2        | ENSG00000160789.18_LMNA | 0.20156  | 0.043767006  | 0.34954734  | 1.28E-02 | 7.82E-02 | 1.00E+00 |
| ENSG00000253721.1_SUMO2P2C    | ENSG00000160789.18_LMNA | -0.08392 | -0.239916152 | 0.07629929  | 3.04E-01 | 5.91E-01 | 1.00E+00 |
| ENSG00000276524.1_RP11-323F   | ENSG00000160789.18_LMNA | -0.23096 | -0.376325988 | -0.07450123 | 4.20E-03 | 3.44E-02 | 1.00E+00 |
| ENSG00000233747.1_RPL36AP1    | ENSG00000160789.18_LMNA | -0.10366 | -0.258595355 | 0.056470358 | 2.04E-01 | 4.75E-01 | 1.00E+00 |
| ENSG00000231966.1_RP11-12M5   | ENSG00000160789.18_LMNA | 0.14309  | -0.016481938 | 0.29556183  | 7.86E-02 | 2.69E-01 | 1.00E+00 |

|                              |                         |          |              |             |          |          |          |
|------------------------------|-------------------------|----------|--------------|-------------|----------|----------|----------|
| ENSG00000231686.1_RP1-203P1  | ENSG00000160789.18_LMNA | 0.16099  | 0.001834598  | 0.312187781 | 4.76E-02 | 1.95E-01 | 1.00E+00 |
| ENSG00000273402.1_RP5-855D2  | ENSG00000160789.18_LMNA | -0.07979 | -0.23599644  | 0.080428755 | 3.28E-01 | 6.15E-01 | 1.00E+00 |
| ENSG00000225279.1_RP11-536C  | ENSG00000160789.18_LMNA | -0.26384 | -0.40598707  | -0.10922637 | 1.02E-03 | 1.18E-02 | 1.00E+00 |
| ENSG00000141668.8_CBLN2      | ENSG00000160789.18_LMNA | -0.25151 | -0.394902616 | -0.09616414 | 1.77E-03 | 1.79E-02 | 1.00E+00 |
| ENSG00000233198.3_RNF224     | ENSG00000160789.18_LMNA | 0.18009  | 0.021500905  | 0.329829768 | 2.64E-02 | 1.32E-01 | 1.00E+00 |
| ENSG00000271730.1_RP11-787I2 | ENSG00000160789.18_LMNA | -0.021   | -0.179595862 | 0.138668743 | 7.97E-01 | 9.19E-01 | 1.00E+00 |
| ENSG00000214381.4_LINC00488  | ENSG00000160789.18_LMNA | 0.14694  | -0.012555621 | 0.299141743 | 7.08E-02 | 2.51E-01 | 1.00E+00 |
| ENSG00000234056.1_LINC00463  | ENSG00000160789.18_LMNA | -0.41007 | -0.534385106 | -0.26839186 | 1.55E-07 | 1.03E-05 | 7.95E-03 |
| ENSG00000256196.1_RP11-881M  | ENSG00000160789.18_LMNA | -0.06123 | -0.218299558 | 0.098938393 | 4.54E-01 | 7.19E-01 | 1.00E+00 |
| ENSG00000228970.6_UBTFL6     | ENSG00000160789.18_LMNA | -0.19512 | -0.343648883 | -0.03707417 | 1.60E-02 | 9.19E-02 | 1.00E+00 |
| ENSG00000268047.1_AC018766.I | ENSG00000160789.18_LMNA | -0.00992 | -0.168853033 | 0.149517839 | 9.03E-01 | 9.63E-01 | 1.00E+00 |
| ENSG00000263586.1_HID1-AS1   | ENSG00000160789.18_LMNA | -0.26547 | -0.40745368  | -0.11096238 | 9.48E-04 | 1.11E-02 | 1.00E+00 |
| ENSG00000223774.4_RP11-307B  | ENSG00000160789.18_LMNA | -0.03125 | -0.189512016 | 0.128586239 | 7.02E-01 | 8.73E-01 | 1.00E+00 |
| ENSG00000087510.6_TFAP2C     | ENSG00000160789.18_LMNA | 0.17636  | 0.017652927  | 0.32639474  | 2.97E-02 | 1.42E-01 | 1.00E+00 |
| ENSG00000225891.1_RP3-476K8  | ENSG00000160789.18_LMNA | 0.03815  | -0.121789398 | 0.196160302 | 6.41E-01 | 8.40E-01 | 1.00E+00 |
| ENSG00000276957.1_RP11-29B2  | ENSG00000160789.18_LMNA | -0.12555 | -0.279173238 | 0.034334307 | 1.23E-01 | 3.54E-01 | 1.00E+00 |
| ENSG00000231249.1_ITPR1-AS1  | ENSG00000160789.18_LMNA | 0.01819  | -0.141421484 | 0.176877252 | 8.24E-01 | 9.31E-01 | 1.00E+00 |
| ENSG00000278925.1_AC005753.  | ENSG00000160789.18_LMNA | 0.12124  | -0.038705043 | 0.275132848 | 1.37E-01 | 3.76E-01 | 1.00E+00 |
| ENSG00000257588.1_RP11-469H  | ENSG00000160789.18_LMNA | 0.03505  | -0.12484342  | 0.193176642 | 6.68E-01 | 8.54E-01 | 1.00E+00 |
| ENSG00000257999.1_RP11-61E1  | ENSG00000160789.18_LMNA | -0.20572 | -0.353352356 | -0.04809908 | 1.10E-02 | 7.01E-02 | 1.00E+00 |
| ENSG00000206532.2_RP11-553A  | ENSG00000160789.18_LMNA | 0.04075  | -0.119223628 | 0.198662416 | 6.18E-01 | 8.27E-01 | 1.00E+00 |
| ENSG00000270062.1_RP11-248J  | ENSG00000160789.18_LMNA | 0.18965  | 0.031394156  | 0.338623995 | 1.93E-02 | 1.05E-01 | 1.00E+00 |
| ENSG00000255968.1_RP11-513G  | ENSG00000160789.18_LMNA | 0.05853  | -0.101618214 | 0.215719999 | 4.74E-01 | 7.33E-01 | 1.00E+00 |
| ENSG00000279744.1_RP13-20L1  | ENSG00000160789.18_LMNA | 0.00536  | -0.153970528 | 0.164421955 | 9.48E-01 | 9.79E-01 | 1.00E+00 |
| ENSG00000234998.1_RP11-439A  | ENSG00000160789.18_LMNA | -0.06189 | -0.218930327 | 0.098282407 | 4.49E-01 | 7.15E-01 | 1.00E+00 |
| ENSG00000232916.1_HMGN2P27   | ENSG00000160789.18_LMNA | 0.0801   | -0.080127378 | 0.236282859 | 3.27E-01 | 6.13E-01 | 1.00E+00 |
| ENSG00000132026.12_RTBDN     | ENSG00000160789.18_LMNA | -0.01867 | -0.177344501 | 0.140948719 | 8.19E-01 | 9.30E-01 | 1.00E+00 |
| ENSG00000232228.1_RP11-77O7  | ENSG00000160789.18_LMNA | -0.09144 | -0.247043369 | 0.068762779 | 2.63E-01 | 5.46E-01 | 1.00E+00 |
| ENSG00000267581.1_CTC-559E9  | ENSG00000160789.18_LMNA | -0.03825 | -0.196252314 | 0.12169512  | 6.40E-01 | 8.39E-01 | 1.00E+00 |
| ENSG00000011083.7_SLC6A7     | ENSG00000160789.18_LMNA | -0.14443 | -0.296802967 | 0.015121793 | 7.59E-02 | 2.63E-01 | 1.00E+00 |
| ENSG00000272727.1_RP11-142A  | ENSG00000160789.18_LMNA | -0.26247 | -0.404762195 | -0.10777789 | 1.09E-03 | 1.24E-02 | 1.00E+00 |
| ENSG00000258011.2_HMGA1P3    | ENSG00000160789.18_LMNA | 0.14112  | -0.01849937  | 0.293718973 | 8.29E-02 | 2.78E-01 | 1.00E+00 |
| ENSG00000229739.2_RP11-295K  | ENSG00000160789.18_LMNA | -0.06543 | -0.222315498 | 0.094757183 | 4.23E-01 | 6.94E-01 | 1.00E+00 |

|                              |                         |          |              |             |          |          |          |
|------------------------------|-------------------------|----------|--------------|-------------|----------|----------|----------|
| ENSG00000143001.4_TM61       | ENSG00000160789.18_LMNA | 0.32077  | 0.170261273  | 0.456648653 | 5.60E-05 | 1.18E-03 | 1.00E+00 |
| ENSG00000273064.1_RP11-474G  | ENSG00000160789.18_LMNA | -0.19969 | -0.347832709 | -0.04181862 | 1.36E-02 | 8.19E-02 | 1.00E+00 |
| ENSG00000100290.2_BIK        | ENSG00000160789.18_LMNA | -0.00987 | -0.168809792 | 0.149561353 | 9.04E-01 | 9.63E-01 | 1.00E+00 |
| ENSG00000269974.1_RP11-932O  | ENSG00000160789.18_LMNA | 0.07027  | -0.089938914 | 0.226930012 | 3.90E-01 | 6.68E-01 | 1.00E+00 |
| ENSG00000263235.1_RP11-461A  | ENSG00000160789.18_LMNA | 0.10499  | -0.055131764 | 0.259847902 | 1.98E-01 | 4.68E-01 | 1.00E+00 |
| ENSG00000275445.1_CTD-2649C  | ENSG00000160789.18_LMNA | -0.12442 | -0.278115823 | 0.035479337 | 1.27E-01 | 3.60E-01 | 1.00E+00 |
| ENSG00000226567.1_LINC00606  | ENSG00000160789.18_LMNA | -0.1779  | -0.32781414  | -0.01924186 | 2.83E-02 | 1.38E-01 | 1.00E+00 |
| ENSG00000272969.1_RP11-528I4 | ENSG00000160789.18_LMNA | -0.14564 | -0.297930482 | 0.013885164 | 7.34E-02 | 2.58E-01 | 1.00E+00 |
| ENSG00000183780.11_SLC35F3   | ENSG00000160789.18_LMNA | -0.25451 | -0.397604972 | -0.09933922 | 1.55E-03 | 1.61E-02 | 1.00E+00 |
| ENSG00000266236.1_NARF-IT1   | ENSG00000160789.18_LMNA | -0.07573 | -0.232132645 | 0.08448871  | 3.54E-01 | 6.37E-01 | 1.00E+00 |
| ENSG00000230659.3_RP11-466F  | ENSG00000160789.18_LMNA | -0.03136 | -0.189613476 | 0.128482737 | 7.01E-01 | 8.72E-01 | 1.00E+00 |
| ENSG00000235175.1_RPL26P37   | ENSG00000160789.18_LMNA | -0.09718 | -0.252477876 | 0.062991863 | 2.34E-01 | 5.11E-01 | 1.00E+00 |
| ENSG00000237857.2_           | ENSG00000160789.18_LMNA | 0.18961  | 0.031355865  | 0.338590061 | 1.93E-02 | 1.05E-01 | 1.00E+00 |
| ENSG00000224292.1_AF196972.5 | ENSG00000160789.18_LMNA | 0.06528  | -0.094903558 | 0.22217509  | 4.24E-01 | 6.95E-01 | 1.00E+00 |
| ENSG00000234694.1_RP1-92O14  | ENSG00000160789.18_LMNA | 0.0665   | -0.093695462 | 0.223333543 | 4.16E-01 | 6.88E-01 | 1.00E+00 |
| ENSG00000263017.1_RP11-356I1 | ENSG00000160789.18_LMNA | 0.02881  | -0.130987799 | 0.187155952 | 7.25E-01 | 8.83E-01 | 1.00E+00 |
| ENSG00000229325.1_ACAP2-IT1  | ENSG00000160789.18_LMNA | -0.17582 | -0.325897573 | -0.01709675 | 3.03E-02 | 1.44E-01 | 1.00E+00 |
| ENSG00000225886.2_RP11-288L  | ENSG00000160789.18_LMNA | -0.00671 | -0.165732278 | 0.152655159 | 9.35E-01 | 9.74E-01 | 1.00E+00 |
| ENSG00000240498.5_CDKN2B-A   | ENSG00000160789.18_LMNA | -0.0553  | -0.212631608 | 0.104820599 | 4.99E-01 | 7.52E-01 | 1.00E+00 |
| ENSG00000269304.1_FKBP1AP1   | ENSG00000160789.18_LMNA | 0.12043  | -0.039525479 | 0.274373184 | 1.39E-01 | 3.81E-01 | 1.00E+00 |
| ENSG00000227582.2_ADGRF5P1   | ENSG00000160789.18_LMNA | -0.17634 | -0.32637392  | -0.01762963 | 2.98E-02 | 1.43E-01 | 1.00E+00 |
| ENSG00000261227.2_AC140912   | ENSG00000160789.18_LMNA | -0.18332 | -0.332809052 | -0.02484576 | 2.38E-02 | 1.22E-01 | 1.00E+00 |
| ENSG00000267258.1_CTC-448F2  | ENSG00000160789.18_LMNA | 0.00657  | -0.152793749 | 0.165594273 | 9.36E-01 | 9.75E-01 | 1.00E+00 |
| ENSG00000227437.1_RPS8P4     | ENSG00000160789.18_LMNA | 0.02159  | -0.138086912 | 0.180169857 | 7.92E-01 | 9.16E-01 | 1.00E+00 |
| ENSG00000279766.1_RP11-642A  | ENSG00000160789.18_LMNA | 0.07035  | -0.089855249 | 0.227010013 | 3.89E-01 | 6.67E-01 | 1.00E+00 |
| ENSG00000268654.1_MIMT1      | ENSG00000160789.18_LMNA | -0.23544 | -0.380383202 | -0.07920831 | 3.50E-03 | 3.00E-02 | 1.00E+00 |
| ENSG00000234699.1_RP11-225H  | ENSG00000160789.18_LMNA | 0.13278  | -0.02698678  | 0.285940505 | 1.03E-01 | 3.17E-01 | 1.00E+00 |
| ENSG00000177272.8_KCNA3      | ENSG00000160789.18_LMNA | -0.06866 | -0.225401249 | 0.091536824 | 4.01E-01 | 6.77E-01 | 1.00E+00 |
| ENSG00000261189.1_RP3-512B1  | ENSG00000160789.18_LMNA | 0.14561  | -0.013917259 | 0.29790123  | 7.35E-02 | 2.58E-01 | 1.00E+00 |
| ENSG00000280099.1_RP11-33E1  | ENSG00000160789.18_LMNA | 0.10821  | -0.051883639 | 0.26288283  | 1.85E-01 | 4.50E-01 | 1.00E+00 |
| ENSG00000259124.1_RP11-187O  | ENSG00000160789.18_LMNA | -0.17528 | -0.325397139 | -0.01653711 | 3.08E-02 | 1.46E-01 | 1.00E+00 |
| ENSG00000276188.1_RP11-173P  | ENSG00000160789.18_LMNA | -0.03801 | -0.19602002  | 0.121933123 | 6.42E-01 | 8.41E-01 | 1.00E+00 |
| ENSG00000230823.3_CBX1P1     | ENSG00000160789.18_LMNA | 0.0695   | -0.090699546 | 0.22620249  | 3.95E-01 | 6.72E-01 | 1.00E+00 |

|                              |                         |          |              |             |          |          |          |
|------------------------------|-------------------------|----------|--------------|-------------|----------|----------|----------|
| ENSG00000145850.7_TIMD4      | ENSG00000160789.18_LMNA | 0.16779  | 0.008828131  | 0.318486067 | 3.88E-02 | 1.70E-01 | 1.00E+00 |
| ENSG00000266933.2_AC005775.  | ENSG00000160789.18_LMNA | -0.08751 | -0.243320743 | 0.072703686 | 2.84E-01 | 5.69E-01 | 1.00E+00 |
| ENSG00000225920.2_RIMKLB2    | ENSG00000160789.18_LMNA | -0.0901  | -0.245776193 | 0.070105366 | 2.70E-01 | 5.54E-01 | 1.00E+00 |
| ENSG00000233565.1_RP11-42D2  | ENSG00000160789.18_LMNA | 0.02584  | -0.133908845 | 0.1842853   | 7.52E-01 | 8.97E-01 | 1.00E+00 |
| ENSG00000248554.1_RP11-159F  | ENSG00000160789.18_LMNA | 0.06789  | -0.092307064 | 0.224663783 | 4.06E-01 | 6.81E-01 | 1.00E+00 |
| ENSG00000272183.1_RP11-523H  | ENSG00000160789.18_LMNA | 0.1882   | 0.029891227  | 0.337291473 | 2.02E-02 | 1.09E-01 | 1.00E+00 |
| ENSG00000112232.8_KHDRBS2    | ENSG00000160789.18_LMNA | -0.29466 | -0.433526117 | -0.14212895 | 2.29E-04 | 3.63E-03 | 1.00E+00 |
| ENSG00000227060.5_LINC00629  | ENSG00000160789.18_LMNA | -0.0009  | -0.160082225 | 0.158318925 | 9.91E-01 | 9.97E-01 | 1.00E+00 |
| ENSG00000231579.3_RPL7P21    | ENSG00000160789.18_LMNA | 0.06987  | -0.090334776 | 0.226551425 | 3.92E-01 | 6.70E-01 | 1.00E+00 |
| ENSG00000213003.3_BT3P12     | ENSG00000160789.18_LMNA | 0.04871  | -0.111353139 | 0.206311875 | 5.51E-01 | 7.87E-01 | 1.00E+00 |
| ENSG00000248988.1_RP11-815N  | ENSG00000160789.18_LMNA | 0.12882  | -0.031012703 | 0.282236385 | 1.14E-01 | 3.37E-01 | 1.00E+00 |
| ENSG00000235529.1_AGAP1-IT1  | ENSG00000160789.18_LMNA | 0.06381  | -0.096370845 | 0.220766893 | 4.35E-01 | 7.03E-01 | 1.00E+00 |
| ENSG00000259868.2_RP11-1012  | ENSG00000160789.18_LMNA | -0.23496 | -0.379946952 | -0.07870154 | 3.57E-03 | 3.04E-02 | 1.00E+00 |
| ENSG00000263847.1_RP11-143J  | ENSG00000160789.18_LMNA | 0.1369   | -0.022795128 | 0.289787195 | 9.26E-02 | 2.97E-01 | 1.00E+00 |
| ENSG00000256898.1_RP11-707G  | ENSG00000160789.18_LMNA | -0.02442 | -0.182907497 | 0.135308875 | 7.65E-01 | 9.02E-01 | 1.00E+00 |
| ENSG00000225872.2_LINC01529  | ENSG00000160789.18_LMNA | 0.02705  | -0.132722896 | 0.185451444 | 7.41E-01 | 8.91E-01 | 1.00E+00 |
| ENSG00000231713.2_AF064860.7 | ENSG00000160789.18_LMNA | -0.13703 | -0.289910265 | 0.02266084  | 9.23E-02 | 2.97E-01 | 1.00E+00 |
| ENSG00000235602.5_POU5F1P3   | ENSG00000160789.18_LMNA | -0.01071 | -0.169622589 | 0.148743211 | 8.96E-01 | 9.59E-01 | 1.00E+00 |
| ENSG00000228839.4_PIK3IP1-AS | ENSG00000160789.18_LMNA | -0.21525 | -0.362044314 | -0.05803829 | 7.74E-03 | 5.42E-02 | 1.00E+00 |
| ENSG00000237931.1_CLIC4P3    | ENSG00000160789.18_LMNA | 0.04115  | -0.118829879 | 0.19904603  | 6.15E-01 | 8.25E-01 | 1.00E+00 |
| ENSG00000272745.1_RP5-1007H  | ENSG00000160789.18_LMNA | -0.02172 | -0.180301123 | 0.137953824 | 7.91E-01 | 9.15E-01 | 1.00E+00 |
| ENSG00000234838.3_RP11-5P22  | ENSG00000160789.18_LMNA | -0.07513 | -0.231558108 | 0.085091518 | 3.58E-01 | 6.41E-01 | 1.00E+00 |
| ENSG00000124882.3_EREG       | ENSG00000160789.18_LMNA | 0.15589  | -0.003397887 | 0.307457564 | 5.51E-02 | 2.14E-01 | 1.00E+00 |
| ENSG00000213744.3_RPS10P14   | ENSG00000160789.18_LMNA | -0.08627 | -0.242140426 | 0.073951155 | 2.91E-01 | 5.76E-01 | 1.00E+00 |
| ENSG00000271653.1_RP11-259K  | ENSG00000160789.18_LMNA | -0.04247 | -0.200315571 | 0.117526082 | 6.03E-01 | 8.18E-01 | 1.00E+00 |
| ENSG00000224635.1_RP4-564F2  | ENSG00000160789.18_LMNA | 0.04975  | -0.110329226 | 0.207304187 | 5.43E-01 | 7.82E-01 | 1.00E+00 |
| ENSG00000251118.1_CTC-505O3  | ENSG00000160789.18_LMNA | -0.03643 | -0.194502636 | 0.123486899 | 6.56E-01 | 8.48E-01 | 1.00E+00 |
| ENSG00000242267.5_SKINT1L    | ENSG00000160789.18_LMNA | 0.07134  | -0.088869044 | 0.227952712 | 3.82E-01 | 6.61E-01 | 1.00E+00 |
| ENSG00000214867.3_SRSF9P1    | ENSG00000160789.18_LMNA | 0.1909   | 0.032688766  | 0.339770832 | 1.85E-02 | 1.02E-01 | 1.00E+00 |
| ENSG00000230188.1_RP11-405L  | ENSG00000160789.18_LMNA | -0.19589 | -0.344351445 | -0.03786991 | 1.56E-02 | 9.02E-02 | 1.00E+00 |
| ENSG00000270557.1_RP11-546J  | ENSG00000160789.18_LMNA | -0.18231 | -0.331877481 | -0.02379914 | 2.46E-02 | 1.25E-01 | 1.00E+00 |
| ENSG00000272825.1_LL21NC02-  | ENSG00000160789.18_LMNA | 0.19498  | 0.036925904  | 0.343517945 | 1.61E-02 | 9.22E-02 | 1.00E+00 |
| ENSG00000237176.4_RP11-813P  | ENSG00000160789.18_LMNA | 0.14039  | -0.019240731 | 0.293041181 | 8.45E-02 | 2.82E-01 | 1.00E+00 |

|                              |                         |          |              |             |          |          |          |
|------------------------------|-------------------------|----------|--------------|-------------|----------|----------|----------|
| ENSG00000260940.1_RP4-575N6  | ENSG00000160789.18_LMNA | -0.26399 | -0.406126532 | -0.10939138 | 1.01E-03 | 1.17E-02 | 1.00E+00 |
| ENSG00000236296.6_GUSBP5     | ENSG00000160789.18_LMNA | -0.31077 | -0.447817297 | -0.15946111 | 9.75E-05 | 1.84E-03 | 1.00E+00 |
| ENSG00000164588.4_HCN1       | ENSG00000160789.18_LMNA | -0.21881 | -0.365283079 | -0.06175728 | 6.76E-03 | 4.91E-02 | 1.00E+00 |
| ENSG00000255035.2_SDHCP4     | ENSG00000160789.18_LMNA | 0.00589  | -0.153456193 | 0.164934451 | 9.43E-01 | 9.77E-01 | 1.00E+00 |
| ENSG00000183921.7_SDR42E2    | ENSG00000160789.18_LMNA | -0.10592 | -0.260727472 | 0.054191091 | 1.94E-01 | 4.63E-01 | 1.00E+00 |
| ENSG00000263786.1_RP11-649A  | ENSG00000160789.18_LMNA | -0.2118  | -0.358899089 | -0.05443477 | 8.81E-03 | 5.98E-02 | 1.00E+00 |
| ENSG00000257210.1_NACAP3     | ENSG00000160789.18_LMNA | -0.08659 | -0.24244568  | 0.073628629 | 2.89E-01 | 5.74E-01 | 1.00E+00 |
| ENSG00000224986.2_PPP1R8P1   | ENSG00000160789.18_LMNA | 0.16117  | 0.00201942   | 0.312354582 | 4.73E-02 | 1.94E-01 | 1.00E+00 |
| ENSG00000213343.5_RPL21P18   | ENSG00000160789.18_LMNA | -0.08575 | -0.241650711 | 0.074468442 | 2.94E-01 | 5.79E-01 | 1.00E+00 |
| ENSG00000255837.1_TAS2R20    | ENSG00000160789.18_LMNA | -0.09112 | -0.246738393 | 0.069086009 | 2.64E-01 | 5.48E-01 | 1.00E+00 |
| ENSG00000123500.8_COL10A1    | ENSG00000160789.18_LMNA | 0.17154  | 0.012682682  | 0.321945779 | 3.46E-02 | 1.57E-01 | 1.00E+00 |
| ENSG00000173988.11_LRRC63    | ENSG00000160789.18_LMNA | -0.14653 | -0.298757656 | 0.012977334 | 7.17E-02 | 2.53E-01 | 1.00E+00 |
| ENSG00000265590.8_AP000275.1 | ENSG00000160789.18_LMNA | -0.09578 | -0.251154481 | 0.064399125 | 2.40E-01 | 5.20E-01 | 1.00E+00 |
| ENSG00000154252.11_GAL3ST2   | ENSG00000160789.18_LMNA | -0.01371 | -0.172538342 | 0.145804694 | 8.67E-01 | 9.48E-01 | 1.00E+00 |
| ENSG00000240311.1_LA16c-306E | ENSG00000160789.18_LMNA | 0.05977  | -0.100381134 | 0.216911346 | 4.64E-01 | 7.27E-01 | 1.00E+00 |
| ENSG00000278200.1_RP13-766D  | ENSG00000160789.18_LMNA | -0.0404  | -0.198323868 | 0.119571037 | 6.21E-01 | 8.29E-01 | 1.00E+00 |
| ENSG00000178171.9_AMER3      | ENSG00000160789.18_LMNA | -0.24675 | -0.390609931 | -0.09113301 | 2.18E-03 | 2.09E-02 | 1.00E+00 |
| ENSG00000229083.1_PSMA6P2    | ENSG00000160789.18_LMNA | 0.07837  | -0.081852247 | 0.234642863 | 3.37E-01 | 6.23E-01 | 1.00E+00 |
| ENSG00000279837.1_RP11-504G  | ENSG00000160789.18_LMNA | 0.07817  | -0.082054667 | 0.234450286 | 3.38E-01 | 6.24E-01 | 1.00E+00 |
| ENSG00000277491.1_RP11-676J  | ENSG00000160789.18_LMNA | -0.07003 | -0.226700877 | 0.090178516 | 3.91E-01 | 6.69E-01 | 1.00E+00 |
| ENSG00000258282.2_BT3P2      | ENSG00000160789.18_LMNA | -0.1066  | -0.261365062 | 0.05350886  | 1.91E-01 | 4.59E-01 | 1.00E+00 |
| ENSG00000228331.2_RPL17P43   | ENSG00000160789.18_LMNA | -0.00817 | -0.167154214 | 0.151226471 | 9.20E-01 | 9.70E-01 | 1.00E+00 |
| ENSG00000270889.1_RP11-609L  | ENSG00000160789.18_LMNA | 0.11844  | -0.041548879 | 0.272497986 | 1.46E-01 | 3.92E-01 | 1.00E+00 |
| ENSG00000234324.1_RPL9P2     | ENSG00000160789.18_LMNA | -0.04588 | -0.203592965 | 0.114155184 | 5.75E-01 | 8.02E-01 | 1.00E+00 |
| ENSG00000214650.2_RP11-83B2  | ENSG00000160789.18_LMNA | 0.12692  | -0.032942571 | 0.280457459 | 1.19E-01 | 3.47E-01 | 1.00E+00 |
| ENSG00000257307.1_RP11-317N  | ENSG00000160789.18_LMNA | 0.07155  | -0.088657508 | 0.228154839 | 3.81E-01 | 6.60E-01 | 1.00E+00 |
| ENSG00000267011.4_CTB-50L17  | ENSG00000160789.18_LMNA | 0.03377  | -0.126109022 | 0.191938472 | 6.80E-01 | 8.60E-01 | 1.00E+00 |
| ENSG00000261996.1_CTC-281F2  | ENSG00000160789.18_LMNA | -0.09691 | -0.25222261  | 0.063263404 | 2.35E-01 | 5.13E-01 | 1.00E+00 |
| ENSG00000170965.8_PLAC1      | ENSG00000160789.18_LMNA | -0.16106 | -0.312257306 | -0.00191163 | 4.74E-02 | 1.94E-01 | 1.00E+00 |
| ENSG00000205482.8_SPDYE18    | ENSG00000160789.18_LMNA | -0.13136 | -0.284606601 | 0.02843774  | 1.07E-01 | 3.25E-01 | 1.00E+00 |
| ENSG00000226144.2_RPS27AP3   | ENSG00000160789.18_LMNA | -0.19451 | -0.343087091 | -0.03643814 | 1.63E-02 | 9.33E-02 | 1.00E+00 |
| ENSG00000230310.1_CTD-2192J  | ENSG00000160789.18_LMNA | -0.04287 | -0.200696712 | 0.117134444 | 6.00E-01 | 8.16E-01 | 1.00E+00 |
| ENSG00000229863.1_RP11-157F  | ENSG00000160789.18_LMNA | -0.14855 | -0.300636897 | 0.010912941 | 6.78E-02 | 2.44E-01 | 1.00E+00 |

|                              |                         |          |              |             |          |          |          |
|------------------------------|-------------------------|----------|--------------|-------------|----------|----------|----------|
| ENSG00000224962.4_PSAT1P4    | ENSG00000160789.18_LMNA | -0.11127 | -0.265762171 | 0.048795862 | 1.72E-01 | 4.31E-01 | 1.00E+00 |
| ENSG00000198569.8_SLC34A3    | ENSG00000160789.18_LMNA | 0.18944  | 0.031174962  | 0.338429731 | 1.94E-02 | 1.06E-01 | 1.00E+00 |
| ENSG00000258603.3_RP3-414A1  | ENSG00000160789.18_LMNA | 0.24933  | 0.0938524    | 0.3929318   | 1.95E-03 | 1.92E-02 | 1.00E+00 |
| ENSG00000236668.2_RP11-85O2  | ENSG00000160789.18_LMNA | -0.12387 | -0.27759859  | 0.036039127 | 1.28E-01 | 3.63E-01 | 1.00E+00 |
| ENSG00000248587.5_GDNF-AS1   | ENSG00000160789.18_LMNA | -0.24853 | -0.392208986 | -0.09300536 | 2.02E-03 | 1.97E-02 | 1.00E+00 |
| ENSG00000270689.1_BUD13P1    | ENSG00000160789.18_LMNA | 0.23042  | 0.073931822  | 0.375834406 | 4.29E-03 | 3.50E-02 | 1.00E+00 |
| ENSG00000238137.2_ARPC3P2    | ENSG00000160789.18_LMNA | -0.06987 | -0.226549125 | 0.090337181 | 3.92E-01 | 6.70E-01 | 1.00E+00 |
| ENSG00000226747.5_AC007966.  | ENSG00000160789.18_LMNA | -0.23522 | -0.380187231 | -0.07898064 | 3.53E-03 | 3.02E-02 | 1.00E+00 |
| ENSG00000124343.11_XG        | ENSG00000160789.18_LMNA | 0.02057  | -0.139085574 | 0.179184512 | 8.01E-01 | 9.20E-01 | 1.00E+00 |
| ENSG00000279182.1_XX-C00717  | ENSG00000160789.18_LMNA | 0.05776  | -0.102384396 | 0.214981668 | 4.80E-01 | 7.38E-01 | 1.00E+00 |
| ENSG00000102290.20_PCDH11X   | ENSG00000160789.18_LMNA | -0.38385 | -0.511780688 | -0.23927636 | 1.05E-06 | 4.78E-05 | 5.39E-02 |
| ENSG00000224208.1_AL590762.6 | ENSG00000160789.18_LMNA | -0.12272 | -0.276516963 | 0.037209112 | 1.32E-01 | 3.68E-01 | 1.00E+00 |
| ENSG00000220161.4_FLJ35934   | ENSG00000160789.18_LMNA | 0.08652  | -0.073698516 | 0.242379541 | 2.89E-01 | 5.75E-01 | 1.00E+00 |
| ENSG00000166492.9_FAM86GP    | ENSG00000160789.18_LMNA | 0.13048  | -0.029326934 | 0.283788544 | 1.09E-01 | 3.29E-01 | 1.00E+00 |
| ENSG00000253214.1_RP11-1149  | ENSG00000160789.18_LMNA | -0.12988 | -0.28322064  | 0.029943929 | 1.11E-01 | 3.32E-01 | 1.00E+00 |
| ENSG00000230756.1_RHOQP3     | ENSG00000160789.18_LMNA | 0.05111  | -0.108976652 | 0.208614015 | 5.32E-01 | 7.74E-01 | 1.00E+00 |
| ENSG00000279843.1_           | ENSG00000160789.18_LMNA | -0.08645 | -0.242314465 | 0.073767277 | 2.90E-01 | 5.75E-01 | 1.00E+00 |
| ENSG00000243836.4_WDR86-AS   | ENSG00000160789.18_LMNA | -0.03173 | -0.189967493 | 0.128121536 | 6.98E-01 | 8.71E-01 | 1.00E+00 |
| ENSG00000263531.1_RP13-753N  | ENSG00000160789.18_LMNA | -0.03058 | -0.188861554 | 0.129249635 | 7.08E-01 | 8.76E-01 | 1.00E+00 |
| ENSG00000242017.1_ALG1L15P   | ENSG00000160789.18_LMNA | 0.14383  | -0.015733265 | 0.296245127 | 7.71E-02 | 2.66E-01 | 1.00E+00 |
| ENSG00000215811.5_BTNL10     | ENSG00000160789.18_LMNA | 0.13534  | -0.024387469 | 0.288327088 | 9.64E-02 | 3.05E-01 | 1.00E+00 |
| ENSG00000267500.1_ZNF887P    | ENSG00000160789.18_LMNA | -0.11227 | -0.26670071  | 0.047788081 | 1.68E-01 | 4.27E-01 | 1.00E+00 |
| ENSG00000234869.1_RP3-439F8  | ENSG00000160789.18_LMNA | 0.28707  | 0.133989311  | 0.426763635 | 3.36E-04 | 4.90E-03 | 1.00E+00 |
| ENSG00000105467.7_SYNGR4     | ENSG00000160789.18_LMNA | 0.18236  | 0.0238506    | 0.331923296 | 2.45E-02 | 1.25E-01 | 1.00E+00 |
| ENSG00000227201.2_CNN2P1     | ENSG00000160789.18_LMNA | 0.0651   | -0.095089924 | 0.221996302 | 4.26E-01 | 6.96E-01 | 1.00E+00 |
| ENSG00000250156.3_CTC-498M1  | ENSG00000160789.18_LMNA | -0.2208  | -0.367095804 | -0.06384247 | 6.27E-03 | 4.64E-02 | 1.00E+00 |
| ENSG00000279469.1_RP11-215P  | ENSG00000160789.18_LMNA | -0.0378  | -0.195823761 | 0.122134177 | 6.44E-01 | 8.42E-01 | 1.00E+00 |
| ENSG00000217644.5_RP4-803A2  | ENSG00000160789.18_LMNA | 0.04614  | -0.11389815  | 0.203842578 | 5.72E-01 | 8.00E-01 | 1.00E+00 |
| ENSG00000178015.4_GPR150     | ENSG00000160789.18_LMNA | 0.03184  | -0.128006805 | 0.190079926 | 6.97E-01 | 8.70E-01 | 1.00E+00 |
| ENSG00000272202.1_RP11-157F  | ENSG00000160789.18_LMNA | 0.15495  | -0.004359236 | 0.306586821 | 5.66E-02 | 2.18E-01 | 1.00E+00 |
| ENSG00000204194.1_RPL12P1    | ENSG00000160789.18_LMNA | 0.03811  | -0.121833183 | 0.196117567 | 6.41E-01 | 8.40E-01 | 1.00E+00 |
| ENSG00000184845.3_DRD1       | ENSG00000160789.18_LMNA | -0.03373 | -0.191897484 | 0.126150901 | 6.80E-01 | 8.60E-01 | 1.00E+00 |
| ENSG00000265218.1_RP11-927P  | ENSG00000160789.18_LMNA | -0.16814 | -0.318811304 | -0.00919009 | 3.84E-02 | 1.69E-01 | 1.00E+00 |

|                              |                         |          |              |             |          |          |          |
|------------------------------|-------------------------|----------|--------------|-------------|----------|----------|----------|
| ENSG00000276744.1_CTD-2562G  | ENSG00000160789.18_LMNA | 0.02233  | -0.137355681 | 0.180890933 | 7.85E-01 | 9.12E-01 | 1.00E+00 |
| ENSG00000248476.1_BACH1-IT1  | ENSG00000160789.18_LMNA | 0.18409  | 0.025642317  | 0.333517642 | 2.32E-02 | 1.20E-01 | 1.00E+00 |
| ENSG00000268650.3_AC068499.  | ENSG00000160789.18_LMNA | -0.03409 | -0.192247553 | 0.125793191 | 6.77E-01 | 8.59E-01 | 1.00E+00 |
| ENSG00000260618.1_RP11-23N2  | ENSG00000160789.18_LMNA | -0.03173 | -0.189972155 | 0.128116779 | 6.98E-01 | 8.71E-01 | 1.00E+00 |
| ENSG00000272717.1_RP11-342I1 | ENSG00000160789.18_LMNA | -0.00235 | -0.161490245 | 0.156909445 | 9.77E-01 | 9.91E-01 | 1.00E+00 |
| ENSG00000187583.9_PLEKHN1    | ENSG00000160789.18_LMNA | 0.25698  | 0.101951351  | 0.399824326 | 1.39E-03 | 1.49E-02 | 1.00E+00 |
| ENSG00000279518.1_AC083843.  | ENSG00000160789.18_LMNA | 0.04341  | -0.116601242 | 0.201215466 | 5.95E-01 | 8.13E-01 | 1.00E+00 |
| ENSG00000237927.1_RP3-393E1  | ENSG00000160789.18_LMNA | 0.1885   | 0.030203296  | 0.33756826  | 2.00E-02 | 1.08E-01 | 1.00E+00 |
| ENSG00000255441.1_CTD-2616J  | ENSG00000160789.18_LMNA | 0.05672  | -0.103418697 | 0.213984388 | 4.88E-01 | 7.44E-01 | 1.00E+00 |
| ENSG00000235236.1_RP13-131K  | ENSG00000160789.18_LMNA | -0.14168 | -0.29424483  | 0.017923957 | 8.17E-02 | 2.76E-01 | 1.00E+00 |
| ENSG00000235290.1_HLA-W      | ENSG00000160789.18_LMNA | 0.22188  | 0.06496978   | 0.368074858 | 6.01E-03 | 4.51E-02 | 1.00E+00 |
| ENSG00000189334.7_S100A14    | ENSG00000160789.18_LMNA | 0.13268  | -0.027096353 | 0.285839814 | 1.03E-01 | 3.18E-01 | 1.00E+00 |
| ENSG00000234332.1_BCAS2P2    | ENSG00000160789.18_LMNA | 0.03342  | -0.126457158 | 0.191597705 | 6.83E-01 | 8.62E-01 | 1.00E+00 |
| ENSG00000223685.4_LINC00571  | ENSG00000160789.18_LMNA | 0.07461  | -0.08560561  | 0.231067952 | 3.61E-01 | 6.43E-01 | 1.00E+00 |
| ENSG00000272442.2_RP11-444E  | ENSG00000160789.18_LMNA | 0.03004  | -0.129778354 | 0.188342942 | 7.13E-01 | 8.78E-01 | 1.00E+00 |
| ENSG00000177452.7_RP4-597J3. | ENSG00000160789.18_LMNA | -0.04927 | -0.206850362 | 0.110797587 | 5.47E-01 | 7.84E-01 | 1.00E+00 |
| ENSG00000215146.4_RP11-313J. | ENSG00000160789.18_LMNA | -0.24242 | -0.386694529 | -0.08655736 | 2.62E-03 | 2.40E-02 | 1.00E+00 |
| ENSG00000182798.9_MAGEB17    | ENSG00000160789.18_LMNA | 0.123    | -0.036925272 | 0.27677944  | 1.31E-01 | 3.67E-01 | 1.00E+00 |
| ENSG00000265018.5_AGAP12P    | ENSG00000160789.18_LMNA | -0.16791 | -0.31859587  | -0.00895032 | 3.87E-02 | 1.69E-01 | 1.00E+00 |
| ENSG00000280012.1_RPL23AP6.  | ENSG00000160789.18_LMNA | -0.14436 | -0.296743156 | 0.015187365 | 7.60E-02 | 2.64E-01 | 1.00E+00 |
| ENSG00000005381.7_MPO        | ENSG00000160789.18_LMNA | -0.02781 | -0.18619076  | 0.131970552 | 7.34E-01 | 8.88E-01 | 1.00E+00 |
| ENSG00000214255.5_RPS2P6     | ENSG00000160789.18_LMNA | 0.0397   | -0.120258047 | 0.197654158 | 6.27E-01 | 8.32E-01 | 1.00E+00 |
| ENSG00000271664.1_RP4-800G7  | ENSG00000160789.18_LMNA | -0.03079 | -0.189062401 | 0.129044824 | 7.07E-01 | 8.75E-01 | 1.00E+00 |
| ENSG00000219135.1_RPL23AP4.  | ENSG00000160789.18_LMNA | 0.03108  | -0.128759821 | 0.189341845 | 7.04E-01 | 8.74E-01 | 1.00E+00 |
| ENSG00000224061.1_AC092106.  | ENSG00000160789.18_LMNA | 0.02902  | -0.130787956 | 0.187352149 | 7.23E-01 | 8.83E-01 | 1.00E+00 |
| ENSG00000279320.1_RP11-329N  | ENSG00000160789.18_LMNA | 0.20847  | 0.050958713  | 0.355858551 | 9.96E-03 | 6.54E-02 | 1.00E+00 |
| ENSG00000279254.1_RP11-536C  | ENSG00000160789.18_LMNA | -0.13078 | -0.284066828 | 0.029024507 | 1.08E-01 | 3.27E-01 | 1.00E+00 |
| ENSG00000279500.1_RP11-21K1  | ENSG00000160789.18_LMNA | -0.01464 | -0.173439401 | 0.144895462 | 8.58E-01 | 9.44E-01 | 1.00E+00 |
| ENSG00000237186.1_RP11-229A  | ENSG00000160789.18_LMNA | -0.11014 | -0.264698719 | 0.049936998 | 1.77E-01 | 4.38E-01 | 1.00E+00 |
| ENSG00000249532.3_MIR302B    | ENSG00000160789.18_LMNA | -0.04941 | -0.206981028 | 0.11066275  | 5.46E-01 | 7.83E-01 | 1.00E+00 |
| ENSG00000229525.1_AC053503.  | ENSG00000160789.18_LMNA | -0.05914 | -0.216299795 | 0.101016283 | 4.69E-01 | 7.30E-01 | 1.00E+00 |
| ENSG00000273155.1_RP11-38C1  | ENSG00000160789.18_LMNA | 0.07875  | -0.081476068 | 0.235000686 | 3.35E-01 | 6.21E-01 | 1.00E+00 |
| ENSG00000120051.13_CFAP58    | ENSG00000160789.18_LMNA | 0.17643  | 0.017729304  | 0.326463    | 2.97E-02 | 1.42E-01 | 1.00E+00 |



|                              |                         |          |              |             |          |          |          |
|------------------------------|-------------------------|----------|--------------|-------------|----------|----------|----------|
| ENSG00000198643.5_FAM3D      | ENSG00000160789.18_LMNA | 0.09032  | -0.069889263 | 0.245980231 | 2.68E-01 | 5.53E-01 | 1.00E+00 |
| ENSG00000236184.1_TCEA1P4    | ENSG00000160789.18_LMNA | 0.1551   | -0.004200743 | 0.306730412 | 5.64E-02 | 2.17E-01 | 1.00E+00 |
| ENSG00000280285.1_RP11-630A  | ENSG00000160789.18_LMNA | -0.00667 | -0.165695942 | 0.15269165  | 9.35E-01 | 9.74E-01 | 1.00E+00 |
| ENSG00000256538.1_RP11-847H  | ENSG00000160789.18_LMNA | -0.02066 | -0.179274924 | 0.138993967 | 8.01E-01 | 9.20E-01 | 1.00E+00 |
| ENSG00000109943.7_CRTAM      | ENSG00000160789.18_LMNA | 0.06947  | -0.090730204 | 0.226173159 | 3.95E-01 | 6.72E-01 | 1.00E+00 |
| ENSG00000230327.1_MTCO1P42   | ENSG00000160789.18_LMNA | -0.10921 | -0.263821344 | 0.050877846 | 1.80E-01 | 4.44E-01 | 1.00E+00 |
| ENSG00000216368.2_RP3-486D2  | ENSG00000160789.18_LMNA | 0.02029  | -0.13935882  | 0.178914798 | 8.04E-01 | 9.22E-01 | 1.00E+00 |
| ENSG00000155428.11_TRIM74    | ENSG00000160789.18_LMNA | 0.04027  | -0.119696229 | 0.198201851 | 6.22E-01 | 8.29E-01 | 1.00E+00 |
| ENSG00000259804.1_CTD-2012K  | ENSG00000160789.18_LMNA | -0.17711 | -0.327089601 | -0.01843059 | 2.90E-02 | 1.40E-01 | 1.00E+00 |
| ENSG00000099769.5_IGFALS     | ENSG00000160789.18_LMNA | -0.03234 | -0.190558972 | 0.127517868 | 6.92E-01 | 8.68E-01 | 1.00E+00 |
| ENSG00000236035.2_RP11-90O2  | ENSG00000160789.18_LMNA | 0.03994  | -0.120019992 | 0.197886253 | 6.25E-01 | 8.31E-01 | 1.00E+00 |
| ENSG00000254485.4_RP11-380C  | ENSG00000160789.18_LMNA | -0.04997 | -0.207519505 | 0.110106962 | 5.41E-01 | 7.81E-01 | 1.00E+00 |
| ENSG00000162526.6_TSSK3      | ENSG00000160789.18_LMNA | 0.07844  | -0.081783403 | 0.234708354 | 3.37E-01 | 6.22E-01 | 1.00E+00 |
| ENSG00000234619.1_RPL7P11    | ENSG00000160789.18_LMNA | -0.09565 | -0.251027902 | 0.06453366  | 2.41E-01 | 5.20E-01 | 1.00E+00 |
| ENSG00000231341.1_VDAC1P6    | ENSG00000160789.18_LMNA | 0.06213  | -0.09803739  | 0.219165856 | 4.47E-01 | 7.13E-01 | 1.00E+00 |
| ENSG00000251279.1_CTC-436P1  | ENSG00000160789.18_LMNA | 0.02773  | -0.132056556 | 0.186106263 | 7.35E-01 | 8.88E-01 | 1.00E+00 |
| ENSG00000273340.1_MICE       | ENSG00000160789.18_LMNA | 0.20824  | 0.050718032  | 0.355647786 | 1.00E-02 | 6.58E-02 | 1.00E+00 |
| ENSG00000213594.4_GAPDHP25   | ENSG00000160789.18_LMNA | 0.24467  | 0.088932048  | 0.388727913 | 2.38E-03 | 2.24E-02 | 1.00E+00 |
| ENSG00000241723.1_RP11-113A  | ENSG00000160789.18_LMNA | -0.13002 | -0.283356956 | 0.029795852 | 1.10E-01 | 3.31E-01 | 1.00E+00 |
| ENSG00000278919.1_AP006285.1 | ENSG00000160789.18_LMNA | -0.0573  | -0.214544277 | 0.102838108 | 4.83E-01 | 7.41E-01 | 1.00E+00 |
| ENSG00000235888.1_AF064858.1 | ENSG00000160789.18_LMNA | -0.21874 | -0.365223899 | -0.06168925 | 6.78E-03 | 4.92E-02 | 1.00E+00 |
| ENSG00000276417.1_RP11-266K  | ENSG00000160789.18_LMNA | -0.07119 | -0.227807209 | 0.089021302 | 3.83E-01 | 6.62E-01 | 1.00E+00 |
| ENSG00000255734.1_HNRNPAB1   | ENSG00000160789.18_LMNA | -0.04204 | -0.199901361 | 0.117951589 | 6.07E-01 | 8.20E-01 | 1.00E+00 |
| ENSG00000232233.1_RP11-573D  | ENSG00000160789.18_LMNA | -0.18906 | -0.338081226 | -0.03078181 | 1.97E-02 | 1.07E-01 | 1.00E+00 |
| ENSG00000279555.1_RP11-426D  | ENSG00000160789.18_LMNA | -0.03563 | -0.193729913 | 0.124277557 | 6.63E-01 | 8.51E-01 | 1.00E+00 |
| ENSG00000116032.5_GRIN3B     | ENSG00000160789.18_LMNA | 0.14856  | -0.010895978 | 0.300652328 | 6.78E-02 | 2.44E-01 | 1.00E+00 |
| ENSG00000226101.1_AC007461.1 | ENSG00000160789.18_LMNA | 0.06162  | -0.098546224 | 0.218676683 | 4.51E-01 | 7.16E-01 | 1.00E+00 |
| ENSG00000260470.1_RP11-834C  | ENSG00000160789.18_LMNA | -0.23752 | -0.382265319 | -0.08139647 | 3.21E-03 | 2.81E-02 | 1.00E+00 |
| ENSG00000255581.1_RP11-69M1  | ENSG00000160789.18_LMNA | 0.13846  | -0.021203186 | 0.291245484 | 8.89E-02 | 2.90E-01 | 1.00E+00 |
| ENSG00000240003.2_RPL7P24    | ENSG00000160789.18_LMNA | -0.11551 | -0.269750565 | 0.044508792 | 1.56E-01 | 4.08E-01 | 1.00E+00 |
| ENSG00000230530.1_LIMD1-AS1  | ENSG00000160789.18_LMNA | -0.05674 | -0.2140076   | 0.103394631 | 4.87E-01 | 7.44E-01 | 1.00E+00 |
| ENSG00000229222.1_KRT18P4    | ENSG00000160789.18_LMNA | 0.08944  | -0.070769487 | 0.245148974 | 2.73E-01 | 5.58E-01 | 1.00E+00 |
| ENSG00000235677.1_NPM1P26    | ENSG00000160789.18_LMNA | -0.04528 | -0.20301842  | 0.11474665  | 5.80E-01 | 8.04E-01 | 1.00E+00 |

|                              |                         |          |              |             |          |          |          |
|------------------------------|-------------------------|----------|--------------|-------------|----------|----------|----------|
| ENSG00000172497.7_ACOT12     | ENSG00000160789.18_LMNA | 0.30678  | 0.155154717  | 0.444280177 | 1.21E-04 | 2.20E-03 | 1.00E+00 |
| ENSG00000242899.1_RPL7P16    | ENSG00000160789.18_LMNA | 0.06313  | -0.097045546 | 0.220118919 | 4.40E-01 | 7.08E-01 | 1.00E+00 |
| ENSG00000237978.4_KCNMB2-A   | ENSG00000160789.18_LMNA | -0.0052  | -0.164261244 | 0.15413178  | 9.49E-01 | 9.80E-01 | 1.00E+00 |
| ENSG00000239291.1_RP5-867C2  | ENSG00000160789.18_LMNA | 0.01808  | -0.141532432 | 0.176767578 | 8.25E-01 | 9.31E-01 | 1.00E+00 |
| ENSG00000273507.3_RP11-50D1  | ENSG00000160789.18_LMNA | -0.31023 | -0.447339137 | -0.15887831 | 1.00E-04 | 1.89E-03 | 1.00E+00 |
| ENSG00000280401.1_RP11-104F  | ENSG00000160789.18_LMNA | 0.03002  | -0.12980297  | 0.188318793 | 7.14E-01 | 8.78E-01 | 1.00E+00 |
| ENSG00000183347.14_GBP6      | ENSG00000160789.18_LMNA | 0.03953  | -0.120427154 | 0.197489264 | 6.29E-01 | 8.33E-01 | 1.00E+00 |
| ENSG00000257376.1_RP11-328C  | ENSG00000160789.18_LMNA | 0.21675  | 0.059608877  | 0.363412992 | 7.31E-03 | 5.20E-02 | 1.00E+00 |
| ENSG00000171864.4_PRND       | ENSG00000160789.18_LMNA | 0.02908  | -0.130730646 | 0.187408408 | 7.22E-01 | 8.82E-01 | 1.00E+00 |
| ENSG00000205784.2_ARRDC5     | ENSG00000160789.18_LMNA | -0.01645 | -0.175195146 | 0.143122247 | 8.41E-01 | 9.38E-01 | 1.00E+00 |
| ENSG00000237390.1_RP11-139I1 | ENSG00000160789.18_LMNA | -0.09831 | -0.25354017  | 0.061861339 | 2.28E-01 | 5.05E-01 | 1.00E+00 |
| ENSG00000118156.11_ZNF541    | ENSG00000160789.18_LMNA | -0.14223 | -0.294757025 | 0.017363296 | 8.05E-02 | 2.73E-01 | 1.00E+00 |
| ENSG00000247728.2_RP11-932O  | ENSG00000160789.18_LMNA | -0.02793 | -0.186306382 | 0.131852859 | 7.33E-01 | 8.87E-01 | 1.00E+00 |
| ENSG00000228389.1_           | ENSG00000160789.18_LMNA | -0.08938 | -0.245097352 | 0.070824133 | 2.73E-01 | 5.58E-01 | 1.00E+00 |
| ENSG00000162913.9_C1orf145   | ENSG00000160789.18_LMNA | -0.15174 | -0.303607198 | 0.007644564 | 6.20E-02 | 2.30E-01 | 1.00E+00 |
| ENSG00000275778.1_PRH1-PRR   | ENSG00000160789.18_LMNA | -0.0421  | -0.199958584 | 0.117892812 | 6.07E-01 | 8.20E-01 | 1.00E+00 |
| ENSG00000229808.1_RP11-456P  | ENSG00000160789.18_LMNA | 0.1615   | 0.002355204  | 0.312657575 | 4.68E-02 | 1.93E-01 | 1.00E+00 |
| ENSG00000242058.2_RPS4XP19   | ENSG00000160789.18_LMNA | 0.13617  | -0.023540373 | 0.289104019 | 9.44E-02 | 3.01E-01 | 1.00E+00 |
| ENSG00000261468.1_RP11-1024I | ENSG00000160789.18_LMNA | 0.17947  | 0.020866605  | 0.3292641   | 2.69E-02 | 1.33E-01 | 1.00E+00 |
| ENSG00000261560.1_RP11-166B  | ENSG00000160789.18_LMNA | -0.07758 | -0.233891749 | 0.082641602 | 3.42E-01 | 6.27E-01 | 1.00E+00 |
| ENSG00000228599.1_RPL7P52    | ENSG00000160789.18_LMNA | -0.09311 | -0.248620792 | 0.067089884 | 2.54E-01 | 5.36E-01 | 1.00E+00 |
| ENSG00000165917.8_RAPSN      | ENSG00000160789.18_LMNA | -0.06028 | -0.217394232 | 0.099879432 | 4.61E-01 | 7.24E-01 | 1.00E+00 |
| ENSG00000237818.1_RPS3AP29   | ENSG00000160789.18_LMNA | -0.04379 | -0.201587347 | 0.116218892 | 5.92E-01 | 8.11E-01 | 1.00E+00 |
| ENSG00000276997.3_RP11-378J  | ENSG00000160789.18_LMNA | -0.01709 | -0.17581143  | 0.142499345 | 8.34E-01 | 9.36E-01 | 1.00E+00 |
| ENSG00000272549.1_RP11-351J  | ENSG00000160789.18_LMNA | 0.09267  | -0.067527083 | 0.248208705 | 2.56E-01 | 5.38E-01 | 1.00E+00 |
| ENSG00000126262.4_FFAR2      | ENSG00000160789.18_LMNA | 0.08548  | -0.074737303 | 0.241396116 | 2.95E-01 | 5.81E-01 | 1.00E+00 |
| ENSG00000230262.5_MIRLET7DI  | ENSG00000160789.18_LMNA | 0.16887  | 0.009933875  | 0.31947939  | 3.76E-02 | 1.66E-01 | 1.00E+00 |
| ENSG00000257038.1_RP11-800A  | ENSG00000160789.18_LMNA | 0.14719  | -0.012295648 | 0.29937847  | 7.04E-02 | 2.50E-01 | 1.00E+00 |
| ENSG00000237972.1_TUBG1P     | ENSG00000160789.18_LMNA | 0.17318  | 0.014373892  | 0.323461147 | 3.29E-02 | 1.52E-01 | 1.00E+00 |
| ENSG00000275882.1_IKBKGP1    | ENSG00000160789.18_LMNA | 0.20412  | 0.046424149  | 0.351882401 | 1.17E-02 | 7.31E-02 | 1.00E+00 |
| ENSG00000215032.2_GNL3LP1    | ENSG00000160789.18_LMNA | 0.02397  | -0.135752444 | 0.182470709 | 7.69E-01 | 9.05E-01 | 1.00E+00 |
| ENSG00000225568.1_RP11-384B  | ENSG00000160789.18_LMNA | -0.10233 | -0.257333934 | 0.057817293 | 2.10E-01 | 4.83E-01 | 1.00E+00 |
| ENSG00000230154.1_AC018463   | ENSG00000160789.18_LMNA | -0.02549 | -0.183945749 | 0.134253992 | 7.55E-01 | 8.98E-01 | 1.00E+00 |

|                             |                         |          |              |             |          |          |          |
|-----------------------------|-------------------------|----------|--------------|-------------|----------|----------|----------|
| ENSG00000254718.5_CTD-2184C | ENSG00000160789.18_LMNA | 0.11178  | -0.048278256 | 0.266244288 | 1.70E-01 | 4.29E-01 | 1.00E+00 |
| ENSG00000251102.1_CTBP2P4   | ENSG00000160789.18_LMNA | 0.11418  | -0.045851645 | 0.268502426 | 1.61E-01 | 4.16E-01 | 1.00E+00 |
| ENSG00000255046.1_RP11-297N | ENSG00000160789.18_LMNA | -0.09579 | -0.251164426 | 0.064388555 | 2.40E-01 | 5.19E-01 | 1.00E+00 |
| ENSG00000250539.1_KRT8P33   | ENSG00000160789.18_LMNA | 0.19836  | 0.040436781  | 0.346615412 | 1.43E-02 | 8.49E-02 | 1.00E+00 |
| ENSG00000233324.1_EEF1A1P3  | ENSG00000160789.18_LMNA | -0.02768 | -0.186063661 | 0.132099916 | 7.35E-01 | 8.89E-01 | 1.00E+00 |
| ENSG00000212766.8_EWSAT1    | ENSG00000160789.18_LMNA | -0.21629 | -0.362988469 | -0.05912157 | 7.44E-03 | 5.27E-02 | 1.00E+00 |
| ENSG00000081277.10_PKP1     | ENSG00000160789.18_LMNA | -0.05052 | -0.208043839 | 0.10956558  | 5.37E-01 | 7.77E-01 | 1.00E+00 |
| ENSG00000143217.8_NECTIN4   | ENSG00000160789.18_LMNA | 0.09159  | -0.068608774 | 0.247188656 | 2.62E-01 | 5.45E-01 | 1.00E+00 |
| ENSG00000183308.6_AC005037  | ENSG00000160789.18_LMNA | -0.07793 | -0.234223238 | 0.082293285 | 3.40E-01 | 6.25E-01 | 1.00E+00 |
| ENSG00000213071.9_LPAL2     | ENSG00000160789.18_LMNA | -0.25572 | -0.398693899 | -0.10062035 | 1.47E-03 | 1.55E-02 | 1.00E+00 |
| ENSG00000251354.3_RP11-697N | ENSG00000160789.18_LMNA | -0.09077 | -0.246408664 | 0.069435399 | 2.66E-01 | 5.50E-01 | 1.00E+00 |
| ENSG00000250125.1_RP11-707A | ENSG00000160789.18_LMNA | -0.24629 | -0.390188885 | -0.09064036 | 2.22E-03 | 2.12E-02 | 1.00E+00 |
| ENSG00000251587.1_LDHA1     | ENSG00000160789.18_LMNA | 0.20446  | 0.046782443  | 0.352196974 | 1.15E-02 | 7.24E-02 | 1.00E+00 |
| ENSG00000250325.1_IGBP1P4   | ENSG00000160789.18_LMNA | -0.01533 | -0.174105662 | 0.144222812 | 8.51E-01 | 9.42E-01 | 1.00E+00 |
| ENSG00000262728.4_RP11-1000 | ENSG00000160789.18_LMNA | -0.14252 | -0.295028732 | 0.017065799 | 7.98E-02 | 2.72E-01 | 1.00E+00 |
| ENSG00000164049.13_FBXW12   | ENSG00000160789.18_LMNA | -0.28181 | -0.422076317 | -0.12837052 | 4.36E-04 | 6.06E-03 | 1.00E+00 |
| ENSG00000280344.1_AC009166  | ENSG00000160789.18_LMNA | 0.00872  | -0.150694463 | 0.167683369 | 9.15E-01 | 9.68E-01 | 1.00E+00 |
| ENSG00000180458.2_CTD-3064H | ENSG00000160789.18_LMNA | -0.30405 | -0.441865702 | -0.15222143 | 1.40E-04 | 2.46E-03 | 1.00E+00 |
| ENSG00000203910.7_C1orf146  | ENSG00000160789.18_LMNA | -0.15743 | -0.308889477 | 0.001815724 | 5.27E-02 | 2.08E-01 | 1.00E+00 |
| ENSG00000224950.2_RP5-1086K | ENSG00000160789.18_LMNA | 0.24647  | 0.090833462  | 0.390353938 | 2.21E-03 | 2.11E-02 | 1.00E+00 |
| ENSG00000223697.3_AF230666  | ENSG00000160789.18_LMNA | 0.12259  | -0.037340299 | 0.276395635 | 1.32E-01 | 3.69E-01 | 1.00E+00 |
| ENSG00000268379.1_CTC-360J1 | ENSG00000160789.18_LMNA | -0.18862 | -0.337677695 | -0.0303267  | 2.00E-02 | 1.08E-01 | 1.00E+00 |
| ENSG00000225918.1_RPL7P59   | ENSG00000160789.18_LMNA | -0.00545 | -0.164506765 | 0.153885426 | 9.47E-01 | 9.79E-01 | 1.00E+00 |
| ENSG00000128254.12_C22orf24 | ENSG00000160789.18_LMNA | 0.05445  | -0.105665825 | 0.21181541  | 5.05E-01 | 7.56E-01 | 1.00E+00 |
| ENSG00000230701.2_FBXW4P1   | ENSG00000160789.18_LMNA | 0.18354  | 0.025069122  | 0.33300778  | 2.36E-02 | 1.21E-01 | 1.00E+00 |
| ENSG00000262488.1_RP11-876N | ENSG00000160789.18_LMNA | -0.00171 | -0.160868199 | 0.157532297 | 9.83E-01 | 9.94E-01 | 1.00E+00 |
| ENSG00000226808.1_LINC00840 | ENSG00000160789.18_LMNA | -0.06444 | -0.221373026 | 0.095739447 | 4.30E-01 | 7.00E-01 | 1.00E+00 |
| ENSG00000269420.4_PLA2G4C-7 | ENSG00000160789.18_LMNA | 0.13281  | -0.026961    | 0.285964194 | 1.03E-01 | 3.17E-01 | 1.00E+00 |
| ENSG00000215313.3_RPL6P30   | ENSG00000160789.18_LMNA | -0.08174 | -0.237849573 | 0.07847781  | 3.17E-01 | 6.04E-01 | 1.00E+00 |
| ENSG00000255875.2_CTD-2102P | ENSG00000160789.18_LMNA | 0.18736  | 0.029028345  | 0.33652587  | 2.08E-02 | 1.11E-01 | 1.00E+00 |
| ENSG00000231690.2_LINC00574 | ENSG00000160789.18_LMNA | -0.10376 | -0.258691496 | 0.056367653 | 2.03E-01 | 4.74E-01 | 1.00E+00 |
| ENSG00000255213.1_NPM1P35   | ENSG00000160789.18_LMNA | 0.12921  | -0.030616827 | 0.282601032 | 1.13E-01 | 3.35E-01 | 1.00E+00 |
| ENSG00000187959.8_CPSF4L    | ENSG00000160789.18_LMNA | -0.07383 | -0.230322677 | 0.086386958 | 3.66E-01 | 6.47E-01 | 1.00E+00 |

|                              |                         |          |              |             |          |          |          |
|------------------------------|-------------------------|----------|--------------|-------------|----------|----------|----------|
| ENSG00000197322.3_C17orf102  | ENSG00000160789.18_LMNA | -0.07897 | -0.235215749 | 0.081249928 | 3.33E-01 | 6.19E-01 | 1.00E+00 |
| ENSG00000162722.8_TRIM58     | ENSG00000160789.18_LMNA | 0.18614  | 0.027766336  | 0.335405404 | 2.17E-02 | 1.14E-01 | 1.00E+00 |
| ENSG00000073598.5_FNDC8      | ENSG00000160789.18_LMNA | 0.11871  | -0.041271928 | 0.272754794 | 1.45E-01 | 3.90E-01 | 1.00E+00 |
| ENSG00000259078.2_PTBP1P     | ENSG00000160789.18_LMNA | 0.06364  | -0.096535415 | 0.220608868 | 4.36E-01 | 7.04E-01 | 1.00E+00 |
| ENSG00000234571.1_RP5-998N2  | ENSG00000160789.18_LMNA | -0.07745 | -0.233771998 | 0.082767412 | 3.43E-01 | 6.28E-01 | 1.00E+00 |
| ENSG00000111863.11_ADTRP     | ENSG00000160789.18_LMNA | 0.04577  | -0.114265212 | 0.203486101 | 5.76E-01 | 8.02E-01 | 1.00E+00 |
| ENSG00000228022.4_HCG20      | ENSG00000160789.18_LMNA | 0.02579  | -0.133959514 | 0.184235458 | 7.52E-01 | 8.97E-01 | 1.00E+00 |
| ENSG00000248610.1_HSPA8P4    | ENSG00000160789.18_LMNA | -0.01043 | -0.169345142 | 0.149022531 | 8.99E-01 | 9.61E-01 | 1.00E+00 |
| ENSG00000097096.8_SYDE2      | ENSG00000160789.18_LMNA | 0.09549  | -0.064690524 | 0.250880301 | 2.42E-01 | 5.21E-01 | 1.00E+00 |
| ENSG00000125337.15_KIF25     | ENSG00000160789.18_LMNA | -0.10609 | -0.260885876 | 0.054021623 | 1.93E-01 | 4.62E-01 | 1.00E+00 |
| ENSG00000223500.1_AC083862.1 | ENSG00000160789.18_LMNA | 0.09251  | -0.0676926   | 0.248052666 | 2.57E-01 | 5.39E-01 | 1.00E+00 |
| ENSG00000143512.11_HHIPL2    | ENSG00000160789.18_LMNA | -0.03321 | -0.191400042 | 0.126659059 | 6.85E-01 | 8.63E-01 | 1.00E+00 |
| ENSG00000225154.2_RP11-184J  | ENSG00000160789.18_LMNA | -0.16745 | -0.318167265 | -0.00847341 | 3.92E-02 | 1.71E-01 | 1.00E+00 |
| ENSG00000106536.18_POU6F2    | ENSG00000160789.18_LMNA | -0.23498 | -0.37997006  | -0.07872838 | 3.57E-03 | 3.04E-02 | 1.00E+00 |
| ENSG00000236714.1_AC005592.1 | ENSG00000160789.18_LMNA | 0.02724  | -0.132536776 | 0.185634374 | 7.39E-01 | 8.90E-01 | 1.00E+00 |
| ENSG00000256282.1_RP11-504G  | ENSG00000160789.18_LMNA | 0.09934  | -0.060827002 | 0.254511417 | 2.23E-01 | 4.99E-01 | 1.00E+00 |
| ENSG00000228817.4_BACH1-IT2  | ENSG00000160789.18_LMNA | 0.03104  | -0.128799964 | 0.189302489 | 7.04E-01 | 8.74E-01 | 1.00E+00 |
| ENSG00000248383.4_PCDHAC1    | ENSG00000160789.18_LMNA | -0.06631 | -0.223155324 | 0.093881378 | 4.17E-01 | 6.89E-01 | 1.00E+00 |
| ENSG00000258561.1_RP11-72M1  | ENSG00000160789.18_LMNA | -0.00258 | -0.161713547 | 0.156685792 | 9.75E-01 | 9.90E-01 | 1.00E+00 |
| ENSG00000238005.2_RP11-443B  | ENSG00000160789.18_LMNA | -0.02942 | -0.187744851 | 0.130387878 | 7.19E-01 | 8.81E-01 | 1.00E+00 |
| ENSG00000176753.5_C15orf56   | ENSG00000160789.18_LMNA | 0.09857  | -0.061601021 | 0.253784671 | 2.27E-01 | 5.04E-01 | 1.00E+00 |
| ENSG00000272769.1_RP11-725P  | ENSG00000160789.18_LMNA | -0.12264 | -0.276439867 | 0.037292474 | 1.32E-01 | 3.69E-01 | 1.00E+00 |
| ENSG00000230612.2_AC004237.1 | ENSG00000160789.18_LMNA | -0.05361 | -0.211011746 | 0.106497622 | 5.12E-01 | 7.60E-01 | 1.00E+00 |
| ENSG00000239704.9_CDRT4      | ENSG00000160789.18_LMNA | 0.07123  | -0.088982148 | 0.227844628 | 3.83E-01 | 6.62E-01 | 1.00E+00 |
| ENSG00000270533.2_bP-21201H  | ENSG00000160789.18_LMNA | -0.26358 | -0.405755485 | -0.10895242 | 1.03E-03 | 1.19E-02 | 1.00E+00 |
| ENSG00000143167.10_GPA33     | ENSG00000160789.18_LMNA | 0.134    | -0.025747321 | 0.287079012 | 9.98E-02 | 3.11E-01 | 1.00E+00 |
| ENSG00000121570.11_DPPA4     | ENSG00000160789.18_LMNA | 0.04102  | -0.118958882 | 0.198920357 | 6.16E-01 | 8.26E-01 | 1.00E+00 |
| ENSG00000183813.6_CCR4       | ENSG00000160789.18_LMNA | 0.15222  | -0.007157673 | 0.304049168 | 6.12E-02 | 2.29E-01 | 1.00E+00 |
| ENSG00000233232.5_NPIPB7     | ENSG00000160789.18_LMNA | -0.08631 | -0.242185455 | 0.073903582 | 2.90E-01 | 5.76E-01 | 1.00E+00 |
| ENSG00000237654.4_AP003025.1 | ENSG00000160789.18_LMNA | -0.34259 | -0.475835318 | -0.19396484 | 1.56E-05 | 4.21E-04 | 7.99E-01 |
| ENSG00000280159.1_CTD-2591A  | ENSG00000160789.18_LMNA | -0.12396 | -0.277684774 | 0.035945865 | 1.28E-01 | 3.62E-01 | 1.00E+00 |
| ENSG00000251301.5_RP11-81H1  | ENSG00000160789.18_LMNA | -0.05752 | -0.214750219 | 0.102624498 | 4.82E-01 | 7.39E-01 | 1.00E+00 |
| ENSG00000279894.1_GHc-857Gc  | ENSG00000160789.18_LMNA | 0.00456  | -0.154748453 | 0.163646484 | 9.55E-01 | 9.82E-01 | 1.00E+00 |

|                              |                         |          |              |             |          |          |          |
|------------------------------|-------------------------|----------|--------------|-------------|----------|----------|----------|
| ENSG00000205794.4_RP11-333E  | ENSG00000160789.18_LMNA | 0.13723  | -0.022459362 | 0.290094892 | 9.18E-02 | 2.96E-01 | 1.00E+00 |
| ENSG00000183281.13_PLGLB1    | ENSG00000160789.18_LMNA | -0.28384 | -0.42388641  | -0.13053809 | 3.95E-04 | 5.60E-03 | 1.00E+00 |
| ENSG00000229001.1_ACTBP14    | ENSG00000160789.18_LMNA | 0.08323  | -0.07698901  | 0.239262182 | 3.08E-01 | 5.95E-01 | 1.00E+00 |
| ENSG00000227695.4_DNMBP-AS   | ENSG00000160789.18_LMNA | -0.25051 | -0.39400019  | -0.09510521 | 1.85E-03 | 1.85E-02 | 1.00E+00 |
| ENSG00000122188.11_LAX1      | ENSG00000160789.18_LMNA | 0.07839  | -0.081831357 | 0.234662736 | 3.37E-01 | 6.22E-01 | 1.00E+00 |
| ENSG00000225210.4_DUXAP9     | ENSG00000160789.18_LMNA | -0.03951 | -0.197471901 | 0.12044496  | 6.29E-01 | 8.33E-01 | 1.00E+00 |
| ENSG00000232850.3_PTGES2-A   | ENSG00000160789.18_LMNA | -0.03457 | -0.192711853 | 0.125318629 | 6.72E-01 | 8.56E-01 | 1.00E+00 |
| ENSG00000228466.1_TUBB4AP1   | ENSG00000160789.18_LMNA | -0.11804 | -0.272124007 | 0.041952107 | 1.48E-01 | 3.94E-01 | 1.00E+00 |
| ENSG00000268140.1_PCGF7P     | ENSG00000160789.18_LMNA | 0.00189  | -0.157357397 | 0.161042898 | 9.82E-01 | 9.93E-01 | 1.00E+00 |
| ENSG00000188626.6_GOLGA8M    | ENSG00000160789.18_LMNA | 0.07523  | -0.084989502 | 0.231655355 | 3.57E-01 | 6.40E-01 | 1.00E+00 |
| ENSG00000186583.10_SPATC1    | ENSG00000160789.18_LMNA | -0.05392 | -0.21130258  | 0.106196658 | 5.09E-01 | 7.59E-01 | 1.00E+00 |
| ENSG00000214204.4_HNRNPA1F   | ENSG00000160789.18_LMNA | 0.01855  | -0.141063636 | 0.177230938 | 8.21E-01 | 9.30E-01 | 1.00E+00 |
| ENSG00000222012.1_AC005481.1 | ENSG00000160789.18_LMNA | 0.0011   | -0.158129293 | 0.160271736 | 9.89E-01 | 9.96E-01 | 1.00E+00 |
| ENSG00000279594.1_RP11-950C  | ENSG00000160789.18_LMNA | 0.09388  | -0.066308222 | 0.249357271 | 2.50E-01 | 5.30E-01 | 1.00E+00 |
| ENSG00000038295.6_TLL1       | ENSG00000160789.18_LMNA | -0.14956 | -0.301576466 | 0.009879804 | 6.59E-02 | 2.40E-01 | 1.00E+00 |
| ENSG00000115221.9_ITGB6      | ENSG00000160789.18_LMNA | -0.02765 | -0.186034496 | 0.1321296   | 7.35E-01 | 8.89E-01 | 1.00E+00 |
| ENSG00000259867.4_RP11-525K  | ENSG00000160789.18_LMNA | -0.05379 | -0.211182966 | 0.106320445 | 5.10E-01 | 7.59E-01 | 1.00E+00 |
| ENSG00000117601.12_SERPINC   | ENSG00000160789.18_LMNA | -0.03598 | -0.194071686 | 0.123927901 | 6.60E-01 | 8.50E-01 | 1.00E+00 |
| ENSG00000279149.1_RP11-374F  | ENSG00000160789.18_LMNA | -0.03409 | -0.192243198 | 0.125797641 | 6.77E-01 | 8.59E-01 | 1.00E+00 |
| ENSG00000280186.1_RP11-483I1 | ENSG00000160789.18_LMNA | 0.10551  | -0.054603661 | 0.260341765 | 1.96E-01 | 4.65E-01 | 1.00E+00 |
| ENSG00000205790.1_DPP9-AS1   | ENSG00000160789.18_LMNA | 0.04858  | -0.111487102 | 0.206181998 | 5.52E-01 | 7.88E-01 | 1.00E+00 |
| ENSG00000184363.8_PKP3       | ENSG00000160789.18_LMNA | 0.13794  | -0.021737465 | 0.290756222 | 9.01E-02 | 2.92E-01 | 1.00E+00 |
| ENSG00000280184.1_AL023806.1 | ENSG00000160789.18_LMNA | 0.00979  | -0.149642077 | 0.168729572 | 9.05E-01 | 9.63E-01 | 1.00E+00 |
| ENSG00000215483.7_LINC00598  | ENSG00000160789.18_LMNA | -0.09587 | -0.25124036  | 0.064307841 | 2.40E-01 | 5.19E-01 | 1.00E+00 |
| ENSG00000122025.13_FLT3      | ENSG00000160789.18_LMNA | -0.03041 | -0.188697558 | 0.129416847 | 7.10E-01 | 8.77E-01 | 1.00E+00 |
| ENSG00000228495.1_LINC01013  | ENSG00000160789.18_LMNA | 0.00131  | -0.157928083 | 0.160472792 | 9.87E-01 | 9.95E-01 | 1.00E+00 |
| ENSG00000175773.11_RP11-121I | ENSG00000160789.18_LMNA | -0.02786 | -0.186230386 | 0.131930217 | 7.33E-01 | 8.88E-01 | 1.00E+00 |
| ENSG00000228463.7_AP006222.2 | ENSG00000160789.18_LMNA | -0.03034 | -0.18863402  | 0.129481626 | 7.11E-01 | 8.77E-01 | 1.00E+00 |
| ENSG00000182256.11_GABRG3    | ENSG00000160789.18_LMNA | -0.11423 | -0.268548003 | 0.045802629 | 1.61E-01 | 4.16E-01 | 1.00E+00 |
| ENSG00000125954.11_CHURC1-1  | ENSG00000160789.18_LMNA | -0.04429 | -0.202067335 | 0.11572525  | 5.88E-01 | 8.08E-01 | 1.00E+00 |
| ENSG00000140285.8_FGF7       | ENSG00000160789.18_LMNA | -0.08374 | -0.23974102  | 0.076484025 | 3.05E-01 | 5.92E-01 | 1.00E+00 |
| ENSG00000187686.4_KRT18P59   | ENSG00000160789.18_LMNA | -0.00231 | -0.161449113 | 0.156950638 | 9.77E-01 | 9.91E-01 | 1.00E+00 |
| ENSG00000108813.10_DLX4      | ENSG00000160789.18_LMNA | 0.02383  | -0.135890874 | 0.182334369 | 7.71E-01 | 9.05E-01 | 1.00E+00 |

|                              |                         |          |              |             |          |          |          |
|------------------------------|-------------------------|----------|--------------|-------------|----------|----------|----------|
| ENSG00000233926.1_RP11-154D  | ENSG00000160789.18_LMNA | -0.03192 | -0.190155419 | 0.127929764 | 6.96E-01 | 8.70E-01 | 1.00E+00 |
| ENSG00000251544.1_MTND5P12   | ENSG00000160789.18_LMNA | 0.05646  | -0.103677001 | 0.213735226 | 4.90E-01 | 7.46E-01 | 1.00E+00 |
| ENSG00000236756.4_DNAJC9-AS1 | ENSG00000160789.18_LMNA | 0.00595  | -0.15339919  | 0.164991239 | 9.42E-01 | 9.77E-01 | 1.00E+00 |
| ENSG00000271933.1_RP11-338I2 | ENSG00000160789.18_LMNA | -0.0721  | -0.228671734 | 0.088116421 | 3.77E-01 | 6.57E-01 | 1.00E+00 |
| ENSG00000218586.3_RP4-791C1  | ENSG00000160789.18_LMNA | 0.16065  | 0.001487138  | 0.311874151 | 4.80E-02 | 1.96E-01 | 1.00E+00 |
| ENSG00000182264.7_IZUMO1     | ENSG00000160789.18_LMNA | -0.09967 | -0.254823735 | 0.060494253 | 2.22E-01 | 4.97E-01 | 1.00E+00 |
| ENSG00000102010.13_BMX       | ENSG00000160789.18_LMNA | 0.22303  | 0.066174657  | 0.369120531 | 5.75E-03 | 4.36E-02 | 1.00E+00 |
| ENSG00000183785.13_TUBA8     | ENSG00000160789.18_LMNA | -0.04169 | -0.199567119 | 0.118294862 | 6.10E-01 | 8.22E-01 | 1.00E+00 |
| ENSG00000225411.2_RP11-764K  | ENSG00000160789.18_LMNA | -0.11075 | -0.26527663  | 0.049316973 | 1.74E-01 | 4.35E-01 | 1.00E+00 |
| ENSG00000279311.1_RP11-170K  | ENSG00000160789.18_LMNA | 0.01387  | -0.145648749 | 0.172692922 | 8.65E-01 | 9.47E-01 | 1.00E+00 |
| ENSG00000279742.1_RP11-700A  | ENSG00000160789.18_LMNA | 0.05973  | -0.100425945 | 0.216868208 | 4.65E-01 | 7.27E-01 | 1.00E+00 |
| ENSG00000260528.3_FAM157C    | ENSG00000160789.18_LMNA | 0.09649  | -0.063685625 | 0.251825607 | 2.37E-01 | 5.15E-01 | 1.00E+00 |
| ENSG00000238133.5_MLK7-AS1   | ENSG00000160789.18_LMNA | 0.00533  | -0.153999805 | 0.164392777 | 9.48E-01 | 9.79E-01 | 1.00E+00 |
| ENSG00000165837.10_ERICH6B   | ENSG00000160789.18_LMNA | -0.1784  | -0.328280538 | -0.0197643  | 2.79E-02 | 1.36E-01 | 1.00E+00 |
| ENSG00000115593.13_SMYD1     | ENSG00000160789.18_LMNA | -0.05814 | -0.215343024 | 0.102009456 | 4.77E-01 | 7.35E-01 | 1.00E+00 |
| ENSG00000261839.1_RP1-265C2  | ENSG00000160789.18_LMNA | -0.16595 | -0.316780552 | -0.00693135 | 4.10E-02 | 1.76E-01 | 1.00E+00 |
| ENSG00000175513.8_TSGA10IP   | ENSG00000160789.18_LMNA | 0.07662  | -0.08360532  | 0.232974204 | 3.48E-01 | 6.32E-01 | 1.00E+00 |
| ENSG00000236991.5_EDRF1-AS1  | ENSG00000160789.18_LMNA | -0.08071 | -0.236863791 | 0.079515925 | 3.23E-01 | 6.09E-01 | 1.00E+00 |
| ENSG00000130234.9_ACE2       | ENSG00000160789.18_LMNA | -0.03093 | -0.189201284 | 0.128903185 | 7.05E-01 | 8.75E-01 | 1.00E+00 |
| ENSG00000217733.2_CCT7P1     | ENSG00000160789.18_LMNA | 0.05597  | -0.104157598 | 0.213271529 | 4.93E-01 | 7.49E-01 | 1.00E+00 |
| ENSG00000260698.1_RP11-439E  | ENSG00000160789.18_LMNA | -0.05626 | -0.213550414 | 0.103868566 | 4.91E-01 | 7.47E-01 | 1.00E+00 |
| ENSG00000233780.3_HNRNPA1F   | ENSG00000160789.18_LMNA | 0.1072   | -0.052905982 | 0.261928262 | 1.89E-01 | 4.56E-01 | 1.00E+00 |
| ENSG00000235892.1_PKMP2      | ENSG00000160789.18_LMNA | 0.07763  | -0.082594166 | 0.233936896 | 3.42E-01 | 6.27E-01 | 1.00E+00 |
| ENSG00000248919.6_ATP5J2-PT  | ENSG00000160789.18_LMNA | -0.06725 | -0.224056163 | 0.092941401 | 4.10E-01 | 6.85E-01 | 1.00E+00 |
| ENSG00000124743.5_KLHL31     | ENSG00000160789.18_LMNA | -0.2013  | -0.349302055 | -0.04348814 | 1.29E-02 | 7.87E-02 | 1.00E+00 |
| ENSG00000161594.6_KLHL10     | ENSG00000160789.18_LMNA | 0.22107  | 0.064121094  | 0.36733785  | 6.20E-03 | 4.61E-02 | 1.00E+00 |
| ENSG00000111319.11_SCNN1A    | ENSG00000160789.18_LMNA | 0.19469  | 0.036624712  | 0.343251908 | 1.62E-02 | 9.29E-02 | 1.00E+00 |
| ENSG00000249245.2_RP11-557J  | ENSG00000160789.18_LMNA | -0.09783 | -0.253092973 | 0.062337359 | 2.30E-01 | 5.08E-01 | 1.00E+00 |
| ENSG00000170324.18_FRMPD2    | ENSG00000160789.18_LMNA | -0.13708 | -0.289956544 | 0.02261034  | 9.22E-02 | 2.96E-01 | 1.00E+00 |
| ENSG00000229989.3_MIR181A1F  | ENSG00000160789.18_LMNA | -0.01527 | -0.174048535 | 0.144280498 | 8.52E-01 | 9.42E-01 | 1.00E+00 |
| ENSG00000166866.11_MYO1A     | ENSG00000160789.18_LMNA | -0.07181 | -0.228395539 | 0.088405566 | 3.79E-01 | 6.58E-01 | 1.00E+00 |
| ENSG00000228340.4_MIR646HG   | ENSG00000160789.18_LMNA | -0.11776 | -0.271865063 | 0.042231242 | 1.48E-01 | 3.95E-01 | 1.00E+00 |
| ENSG00000155026.15_RSPH10B   | ENSG00000160789.18_LMNA | 0.09477  | -0.065413305 | 0.25020001  | 2.45E-01 | 5.25E-01 | 1.00E+00 |

|                              |                         |          |              |             |          |          |          |
|------------------------------|-------------------------|----------|--------------|-------------|----------|----------|----------|
| ENSG00000156463.16_SH3RF2    | ENSG00000160789.18_LMNA | 0.09048  | -0.069728463 | 0.246132034 | 2.68E-01 | 5.52E-01 | 1.00E+00 |
| ENSG00000239828.5_RP11-446H  | ENSG00000160789.18_LMNA | -0.15546 | -0.307061738 | 0.003834972 | 5.58E-02 | 2.16E-01 | 1.00E+00 |
| ENSG00000275383.1_RP11-615I2 | ENSG00000160789.18_LMNA | -0.11825 | -0.272327657 | 0.041732542 | 1.47E-01 | 3.93E-01 | 1.00E+00 |
| ENSG00000165125.16_TRPV6     | ENSG00000160789.18_LMNA | -0.16947 | -0.320032311 | -0.0105497  | 3.69E-02 | 1.64E-01 | 1.00E+00 |
| ENSG00000182472.7_CAPN12     | ENSG00000160789.18_LMNA | 0.28372  | 0.13041166   | 0.423780898 | 3.97E-04 | 5.63E-03 | 1.00E+00 |
| ENSG00000160886.12_LY6K      | ENSG00000160789.18_LMNA | 0.0883   | -0.071911632 | 0.244069675 | 2.79E-01 | 5.65E-01 | 1.00E+00 |
| ENSG00000228363.2_AC015971.1 | ENSG00000160789.18_LMNA | 0.01984  | -0.139803532 | 0.178475732 | 8.08E-01 | 9.24E-01 | 1.00E+00 |
| ENSG00000154874.13_CCDC144   | ENSG00000160789.18_LMNA | -0.30155 | -0.439642268 | -0.14952473 | 1.60E-04 | 2.74E-03 | 1.00E+00 |
| ENSG00000279811.1_RP11-862L  | ENSG00000160789.18_LMNA | -0.16644 | -0.31723469  | -0.0074362  | 4.04E-02 | 1.75E-01 | 1.00E+00 |
| ENSG00000186265.8_BTLA       | ENSG00000160789.18_LMNA | 0.08083  | -0.079393683 | 0.236979905 | 3.22E-01 | 6.09E-01 | 1.00E+00 |
| ENSG00000166126.9_AMN        | ENSG00000160789.18_LMNA | 0.07945  | -0.080767442 | 0.235674499 | 3.31E-01 | 6.17E-01 | 1.00E+00 |
| ENSG00000228784.6_LINC00954  | ENSG00000160789.18_LMNA | 0.20375  | 0.046041054  | 0.351545976 | 1.18E-02 | 7.39E-02 | 1.00E+00 |
| ENSG00000066405.11_CLDN18    | ENSG00000160789.18_LMNA | 0.09615  | -0.064034707 | 0.251497295 | 2.39E-01 | 5.17E-01 | 1.00E+00 |
| ENSG00000134571.9_MYBPC3     | ENSG00000160789.18_LMNA | 0.04344  | -0.116563005 | 0.20125266  | 5.95E-01 | 8.13E-01 | 1.00E+00 |
| ENSG00000229241.1_PNPT1P1    | ENSG00000160789.18_LMNA | -0.13419 | -0.287252182 | 0.02555871  | 9.93E-02 | 3.10E-01 | 1.00E+00 |
| ENSG00000160471.11_COX6B2    | ENSG00000160789.18_LMNA | 0.11274  | -0.047307286 | 0.267148261 | 1.67E-01 | 4.24E-01 | 1.00E+00 |
| ENSG00000258881.5_AC007040.1 | ENSG00000160789.18_LMNA | 0.00736  | -0.15201889  | 0.166365704 | 9.28E-01 | 9.72E-01 | 1.00E+00 |
| ENSG00000253302.1_STAU2-AS1  | ENSG00000160789.18_LMNA | -0.03163 | -0.189879265 | 0.128211562 | 6.99E-01 | 8.71E-01 | 1.00E+00 |
| ENSG00000232953.1_HSPA8P18   | ENSG00000160789.18_LMNA | -0.16117 | -0.31235632  | -0.00202135 | 4.73E-02 | 1.94E-01 | 1.00E+00 |
| ENSG00000214534.4_ZNF705E    | ENSG00000160789.18_LMNA | -0.02102 | -0.179623928 | 0.138640299 | 7.97E-01 | 9.18E-01 | 1.00E+00 |
| ENSG00000052344.14_PRSS8     | ENSG00000160789.18_LMNA | 0.18451  | 0.026077843  | 0.333904925 | 2.29E-02 | 1.19E-01 | 1.00E+00 |
| ENSG00000173826.13_KCNH6     | ENSG00000160789.18_LMNA | 0.1229   | -0.037026948 | 0.276685422 | 1.31E-01 | 3.68E-01 | 1.00E+00 |
| ENSG00000259498.1_RP11-244F  | ENSG00000160789.18_LMNA | 0.00643  | -0.152929977 | 0.165458608 | 9.37E-01 | 9.75E-01 | 1.00E+00 |
| ENSG00000229880.1_IMMTP1     | ENSG00000160789.18_LMNA | 0.03366  | -0.126221506 | 0.191828378 | 6.81E-01 | 8.61E-01 | 1.00E+00 |
| ENSG00000124493.12_GRM4      | ENSG00000160789.18_LMNA | -0.09123 | -0.246841822 | 0.068976397 | 2.64E-01 | 5.47E-01 | 1.00E+00 |
| ENSG00000262585.1_RP11-353N  | ENSG00000160789.18_LMNA | -0.01697 | -0.175699392 | 0.142612605 | 8.36E-01 | 9.36E-01 | 1.00E+00 |
| ENSG00000138075.10_ABCG5     | ENSG00000160789.18_LMNA | -0.01502 | -0.173807824 | 0.144523542 | 8.54E-01 | 9.43E-01 | 1.00E+00 |
| ENSG00000269845.1_RP11-420K  | ENSG00000160789.18_LMNA | -0.17292 | -0.323218659 | -0.01410315 | 3.31E-02 | 1.53E-01 | 1.00E+00 |
| ENSG00000213297.7_ZNF625-ZN  | ENSG00000160789.18_LMNA | -0.17871 | -0.32856271  | -0.02008046 | 2.76E-02 | 1.35E-01 | 1.00E+00 |
| ENSG00000272620.1_AFAP1-AS1  | ENSG00000160789.18_LMNA | -0.03605 | -0.194134678 | 0.123863447 | 6.59E-01 | 8.50E-01 | 1.00E+00 |
| ENSG00000259462.2_CPEB1-AS1  | ENSG00000160789.18_LMNA | -0.14675 | -0.298969842 | 0.012744375 | 7.12E-02 | 2.52E-01 | 1.00E+00 |
| ENSG00000273489.1_RP11-180C  | ENSG00000160789.18_LMNA | 0.16549  | 0.006455674  | 0.316352524 | 4.16E-02 | 1.78E-01 | 1.00E+00 |
| ENSG00000227339.1_THRAP3P1   | ENSG00000160789.18_LMNA | 0.12538  | -0.034508214 | 0.279012687 | 1.24E-01 | 3.55E-01 | 1.00E+00 |

|                              |                         |          |              |             |          |          |          |
|------------------------------|-------------------------|----------|--------------|-------------|----------|----------|----------|
| ENSG00000259159.4_           | ENSG00000160789.18_LMNA | -0.04909 | -0.206677537 | 0.110975911 | 5.48E-01 | 7.85E-01 | 1.00E+00 |
| ENSG00000138079.12_SLC3A1    | ENSG00000160789.18_LMNA | -0.0276  | -0.185985728 | 0.132179234 | 7.36E-01 | 8.89E-01 | 1.00E+00 |
| ENSG00000174527.8_MYO1H      | ENSG00000160789.18_LMNA | -0.06653 | -0.223365727 | 0.093661885 | 4.15E-01 | 6.88E-01 | 1.00E+00 |
| ENSG00000165972.11_CCDC38    | ENSG00000160789.18_LMNA | -0.01107 | -0.169966823 | 0.148396582 | 8.92E-01 | 9.58E-01 | 1.00E+00 |
| ENSG00000153165.17_RGPD3     | ENSG00000160789.18_LMNA | -0.05832 | -0.215518724 | 0.101827119 | 4.75E-01 | 7.34E-01 | 1.00E+00 |
| ENSG00000219565.2_ZNF259P1   | ENSG00000160789.18_LMNA | 0.12975  | -0.030071029 | 0.283103626 | 1.11E-01 | 3.32E-01 | 1.00E+00 |
| ENSG00000177238.12_TRIM72    | ENSG00000160789.18_LMNA | -0.0176  | -0.176310596 | 0.141994635 | 8.30E-01 | 9.33E-01 | 1.00E+00 |
| ENSG00000082175.13_PGR       | ENSG00000160789.18_LMNA | -0.11344 | -0.267801902 | 0.04660483  | 1.64E-01 | 4.20E-01 | 1.00E+00 |
| ENSG00000269086.2 CTC-523E2  | ENSG00000160789.18_LMNA | -0.06746 | -0.224255938 | 0.09273287  | 4.09E-01 | 6.83E-01 | 1.00E+00 |
| ENSG00000183054.10_RGPD6     | ENSG00000160789.18_LMNA | 0.04876  | -0.111307028 | 0.206356577 | 5.51E-01 | 7.87E-01 | 1.00E+00 |
| ENSG00000279184.1_RP3-323A1  | ENSG00000160789.18_LMNA | 0.10733  | -0.052772414 | 0.262053009 | 1.88E-01 | 4.55E-01 | 1.00E+00 |
| ENSG00000265982.1_RP11-927P  | ENSG00000160789.18_LMNA | 0.20091  | 0.043088546  | 0.34895051  | 1.31E-02 | 7.94E-02 | 1.00E+00 |
| ENSG00000281555.1_           | ENSG00000160789.18_LMNA | -0.11295 | -0.267341367 | 0.047099791 | 1.66E-01 | 4.23E-01 | 1.00E+00 |
| ENSG00000207721.1_MIR186     | ENSG00000160789.18_LMNA | 0.08473  | -0.07548473  | 0.240688122 | 2.99E-01 | 5.86E-01 | 1.00E+00 |
| ENSG00000212588.1_SNORA26    | ENSG00000160789.18_LMNA | -0.17171 | -0.322107444 | -0.01286302 | 3.44E-02 | 1.57E-01 | 1.00E+00 |
| ENSG00000253457.2_SMIM18     | ENSG00000160789.18_LMNA | -0.41008 | -0.534392256 | -0.26840115 | 1.55E-07 | 1.03E-05 | 7.95E-03 |
| ENSG00000280968.1_MIR3653    | ENSG00000160789.18_LMNA | 0.04842  | -0.1116405   | 0.206033266 | 5.54E-01 | 7.88E-01 | 1.00E+00 |
| ENSG00000250377.1 CTC-467M3  | ENSG00000160789.18_LMNA | -0.00817 | -0.167148681 | 0.151232033 | 9.20E-01 | 9.70E-01 | 1.00E+00 |
| ENSG00000199906.1_RNU5B-2P   | ENSG00000160789.18_LMNA | 0.18484  | 0.026413779  | 0.334203579 | 2.26E-02 | 1.18E-01 | 1.00E+00 |
| ENSG00000278820.1_           | ENSG00000160789.18_LMNA | -0.06885 | -0.225576714 | 0.091353506 | 3.99E-01 | 6.76E-01 | 1.00E+00 |
| ENSG00000202441.2_RNY4P10    | ENSG00000160789.18_LMNA | -0.09979 | -0.254940825 | 0.060369485 | 2.21E-01 | 4.97E-01 | 1.00E+00 |
| ENSG00000253047.1_SNORA40    | ENSG00000160789.18_LMNA | 0.08581  | -0.074408209 | 0.241707741 | 2.93E-01 | 5.79E-01 | 1.00E+00 |
| ENSG00000202079.1_Y_RNA      | ENSG00000160789.18_LMNA | -0.01911 | -0.177771403 | 0.14051665  | 8.15E-01 | 9.28E-01 | 1.00E+00 |
| ENSG00000186493.10_C5orf38   | ENSG00000160789.18_LMNA | -0.30198 | -0.44002743  | -0.14999157 | 1.56E-04 | 2.69E-03 | 1.00E+00 |
| ENSG00000228350.1_CELSR3-AS1 | ENSG00000160789.18_LMNA | 0.0331   | -0.126771765 | 0.191289691 | 6.86E-01 | 8.64E-01 | 1.00E+00 |
| ENSG00000257126.4_FOXG1-AS1  | ENSG00000160789.18_LMNA | -0.19901 | -0.347208582 | -0.04110998 | 1.40E-02 | 8.34E-02 | 1.00E+00 |
| ENSG00000188662.6_HILS1      | ENSG00000160789.18_LMNA | -0.14507 | -0.297398703 | 0.014468524 | 7.46E-02 | 2.60E-01 | 1.00E+00 |
| ENSG00000224525.2_RP11-561I1 | ENSG00000160789.18_LMNA | 0.0944   | -0.065790747 | 0.249844633 | 2.47E-01 | 5.27E-01 | 1.00E+00 |
| ENSG00000231702.2_RP11-54O7  | ENSG00000160789.18_LMNA | -0.02918 | -0.187510362 | 0.130626784 | 7.21E-01 | 8.82E-01 | 1.00E+00 |
| ENSG00000196866.2_HIST1H2AC  | ENSG00000160789.18_LMNA | -0.01838 | -0.177065806 | 0.141230722 | 8.22E-01 | 9.31E-01 | 1.00E+00 |
| ENSG00000163221.8_S100A12    | ENSG00000160789.18_LMNA | -0.07464 | -0.231091918 | 0.085580478 | 3.61E-01 | 6.43E-01 | 1.00E+00 |
| ENSG00000230641.1_USP12-AS2  | ENSG00000160789.18_LMNA | -0.01918 | -0.17783781  | 0.140449428 | 8.15E-01 | 9.27E-01 | 1.00E+00 |
| ENSG00000257139.1_RP11-320P  | ENSG00000160789.18_LMNA | 0.18335  | 0.024877766  | 0.332837527 | 2.38E-02 | 1.22E-01 | 1.00E+00 |



|                              |                         |          |              |             |          |          |          |
|------------------------------|-------------------------|----------|--------------|-------------|----------|----------|----------|
| ENSG00000237418.1_AC069257.1 | ENSG00000160789.18_LMNA | -0.11776 | -0.271860474 | 0.042236189 | 1.49E-01 | 3.95E-01 | 1.00E+00 |
| ENSG00000280727.1_           | ENSG00000160789.18_LMNA | 0.0249   | -0.134830867 | 0.183378057 | 7.61E-01 | 9.00E-01 | 1.00E+00 |
| ENSG00000236508.1_ATP13A5-A  | ENSG00000160789.18_LMNA | -0.38369 | -0.511635051 | -0.23909034 | 1.06E-06 | 4.82E-05 | 5.46E-02 |
| ENSG00000089225.18_TBX5      | ENSG00000160789.18_LMNA | -0.33101 | -0.465667288 | -0.18136194 | 3.11E-05 | 7.34E-04 | 1.00E+00 |
| ENSG00000176840.10_MIR7-3HG  | ENSG00000160789.18_LMNA | -0.16891 | -0.319518487 | -0.00997741 | 3.75E-02 | 1.66E-01 | 1.00E+00 |
| ENSG00000184357.4_HIST1H1B   | ENSG00000160789.18_LMNA | -0.12549 | -0.279117523 | 0.034394659 | 1.23E-01 | 3.54E-01 | 1.00E+00 |
| ENSG00000241622.1_RARRES2F   | ENSG00000160789.18_LMNA | -0.10367 | -0.25860007  | 0.056465321 | 2.04E-01 | 4.75E-01 | 1.00E+00 |
| ENSG00000251448.1_RP11-71E1  | ENSG00000160789.18_LMNA | -0.26501 | -0.407036082 | -0.11046789 | 9.69E-04 | 1.13E-02 | 1.00E+00 |
| ENSG00000078399.14_HOXA9     | ENSG00000160789.18_LMNA | -0.28156 | -0.421852774 | -0.12810303 | 4.41E-04 | 6.12E-03 | 1.00E+00 |
| ENSG00000183631.4_PRR32      | ENSG00000160789.18_LMNA | -0.11144 | -0.265918488 | 0.048628056 | 1.72E-01 | 4.31E-01 | 1.00E+00 |
| ENSG00000236154.1_RP11-343J  | ENSG00000160789.18_LMNA | -0.12227 | -0.276100182 | 0.037659711 | 1.33E-01 | 3.71E-01 | 1.00E+00 |
| ENSG00000267299.1_CTB-66B24  | ENSG00000160789.18_LMNA | -0.08557 | -0.241485369 | 0.074643054 | 2.95E-01 | 5.80E-01 | 1.00E+00 |
| ENSG00000168333.12_C8orf22   | ENSG00000160789.18_LMNA | 0.01904  | -0.140585989 | 0.177702901 | 8.16E-01 | 9.28E-01 | 1.00E+00 |
| ENSG00000235904.1_RBMS3-AS   | ENSG00000160789.18_LMNA | -0.3439  | -0.476988539 | -0.19540012 | 1.44E-05 | 3.95E-04 | 7.38E-01 |
| ENSG00000278254.3_RP4-668E1  | ENSG00000160789.18_LMNA | -0.23629 | -0.381150454 | -0.08009997 | 3.38E-03 | 2.92E-02 | 1.00E+00 |
| ENSG00000269483.1_LLNLF-191  | ENSG00000160789.18_LMNA | -0.11524 | -0.269493309 | 0.044785663 | 1.57E-01 | 4.10E-01 | 1.00E+00 |
| ENSG00000227888.4_FAM66A     | ENSG00000160789.18_LMNA | 0.01647  | -0.143101118 | 0.175216055 | 8.40E-01 | 9.38E-01 | 1.00E+00 |
| ENSG00000274427.1_RP11-972P  | ENSG00000160789.18_LMNA | -0.07289 | -0.229424023 | 0.087328589 | 3.72E-01 | 6.52E-01 | 1.00E+00 |
| ENSG00000204338.7_CYP21A1P   | ENSG00000160789.18_LMNA | 0.00991  | -0.149522305 | 0.168848594 | 9.04E-01 | 9.63E-01 | 1.00E+00 |
| ENSG00000254981.1_RP11-350N  | ENSG00000160789.18_LMNA | 0.2205   | 0.0635262    | 0.366821011 | 6.34E-03 | 4.69E-02 | 1.00E+00 |
| ENSG00000259658.3_RP11-89K1  | ENSG00000160789.18_LMNA | -0.05521 | -0.212537838 | 0.104917727 | 4.99E-01 | 7.52E-01 | 1.00E+00 |
| ENSG00000256427.1_RP11-118B  | ENSG00000160789.18_LMNA | -0.25891 | -0.401556794 | -0.10399329 | 1.28E-03 | 1.39E-02 | 1.00E+00 |
| ENSG00000225905.1_RP4-758J1  | ENSG00000160789.18_LMNA | 0.20912  | 0.051638296  | 0.356453497 | 9.72E-03 | 6.43E-02 | 1.00E+00 |
| ENSG00000244425.3_RN7SL268F  | ENSG00000160789.18_LMNA | -0.1044  | -0.259291287 | 0.055726757 | 2.01E-01 | 4.71E-01 | 1.00E+00 |
| ENSG00000237605.1_RP11-343H  | ENSG00000160789.18_LMNA | -0.02181 | -0.180386311 | 0.137867447 | 7.90E-01 | 9.15E-01 | 1.00E+00 |
| ENSG00000230149.2_RP3-508I15 | ENSG00000160789.18_LMNA | 0.06258  | -0.09759186  | 0.219594041 | 4.44E-01 | 7.11E-01 | 1.00E+00 |
| ENSG00000271904.1_CTC-498M1  | ENSG00000160789.18_LMNA | -0.1508  | -0.302730286 | 0.008610168 | 6.37E-02 | 2.35E-01 | 1.00E+00 |
| ENSG00000251414.1_RP11-843P  | ENSG00000160789.18_LMNA | -0.05444 | -0.211807801 | 0.105673702 | 5.05E-01 | 7.56E-01 | 1.00E+00 |
| ENSG00000274290.1_HIST1H2BE  | ENSG00000160789.18_LMNA | 0.02354  | -0.136171772 | 0.182057676 | 7.73E-01 | 9.07E-01 | 1.00E+00 |
| ENSG00000249001.4_RP11-742B  | ENSG00000160789.18_LMNA | 0.28127  | 0.127788683  | 0.421590036 | 4.48E-04 | 6.19E-03 | 1.00E+00 |
| ENSG00000258352.1_RP11-23J1  | ENSG00000160789.18_LMNA | 0.16056  | 0.001398102  | 0.311793772 | 4.81E-02 | 1.96E-01 | 1.00E+00 |
| ENSG00000183019.6_MCEMP1     | ENSG00000160789.18_LMNA | 0.16609  | 0.007079765  | 0.316914071 | 4.08E-02 | 1.76E-01 | 1.00E+00 |
| ENSG00000271993.1_RP11-285J  | ENSG00000160789.18_LMNA | -0.07882 | -0.235071024 | 0.08140211  | 3.34E-01 | 6.20E-01 | 1.00E+00 |

|                             |                         |          |              |             |          |          |          |
|-----------------------------|-------------------------|----------|--------------|-------------|----------|----------|----------|
| ENSG00000226207.1_RP1-104O1 | ENSG00000160789.18_LMNA | 0.01204  | -0.147440247 | 0.170916147 | 8.83E-01 | 9.55E-01 | 1.00E+00 |
| ENSG00000273958.1_RP11-219B | ENSG00000160789.18_LMNA | -0.08379 | -0.239791576 | 0.076430699 | 3.05E-01 | 5.92E-01 | 1.00E+00 |
| ENSG00000223356.1_RP11-66D1 | ENSG00000160789.18_LMNA | 0.05066  | -0.109425871 | 0.208179119 | 5.35E-01 | 7.77E-01 | 1.00E+00 |
| ENSG00000272482.1_RP11-474O | ENSG00000160789.18_LMNA | 0.06318  | -0.096993194 | 0.220169207 | 4.39E-01 | 7.07E-01 | 1.00E+00 |
| ENSG00000241634.1_RP11-381E | ENSG00000160789.18_LMNA | -0.04736 | -0.205011622 | 0.112693779 | 5.62E-01 | 7.94E-01 | 1.00E+00 |
| ENSG00000226426.1_RP11-174J | ENSG00000160789.18_LMNA | -0.06766 | -0.2244413   | 0.092539359 | 4.08E-01 | 6.83E-01 | 1.00E+00 |
| ENSG00000266944.1_AC005262  | ENSG00000160789.18_LMNA | -0.01378 | -0.172599372 | 0.145743126 | 8.66E-01 | 9.48E-01 | 1.00E+00 |
| ENSG00000213994.3_RP11-414H | ENSG00000160789.18_LMNA | 0.02979  | -0.130029527 | 0.18809651  | 7.16E-01 | 8.79E-01 | 1.00E+00 |
| ENSG00000228040.1_RP3-522D1 | ENSG00000160789.18_LMNA | -0.06925 | -0.225959483 | 0.09095353  | 3.97E-01 | 6.73E-01 | 1.00E+00 |
| ENSG00000272950.1_RP11-307C | ENSG00000160789.18_LMNA | 0.09596  | -0.064216907 | 0.251325907 | 2.40E-01 | 5.18E-01 | 1.00E+00 |
| ENSG00000271239.1_RP11-238F | ENSG00000160789.18_LMNA | -0.20692 | -0.35444814  | -0.04934878 | 1.05E-02 | 6.80E-02 | 1.00E+00 |
| ENSG00000261204.1_AC004449  | ENSG00000160789.18_LMNA | 0.09606  | -0.064119454 | 0.251417579 | 2.39E-01 | 5.18E-01 | 1.00E+00 |
| ENSG00000226465.1_RP13-401N | ENSG00000160789.18_LMNA | -0.15489 | -0.306528521 | 0.004423582 | 5.67E-02 | 2.18E-01 | 1.00E+00 |
| ENSG00000231863.1_RP3-428L1 | ENSG00000160789.18_LMNA | -0.20462 | -0.352346001 | -0.04695221 | 1.14E-02 | 7.21E-02 | 1.00E+00 |
| ENSG00000258520.1_RP11-363J | ENSG00000160789.18_LMNA | -0.0835  | -0.239515648 | 0.076721724 | 3.06E-01 | 5.93E-01 | 1.00E+00 |
| ENSG00000102924.10_CBLN1    | ENSG00000160789.18_LMNA | -0.25496 | -0.398001414 | -0.09980552 | 1.52E-03 | 1.59E-02 | 1.00E+00 |
| ENSG00000237289.8_CKMT1B    | ENSG00000160789.18_LMNA | -0.33379 | -0.468115722 | -0.18438817 | 2.64E-05 | 6.46E-04 | 1.00E+00 |
| ENSG00000231081.1_RP4-760C5 | ENSG00000160789.18_LMNA | -0.03067 | -0.188949762 | 0.12915969  | 7.08E-01 | 8.76E-01 | 1.00E+00 |
| ENSG00000225026.1_AC091492  | ENSG00000160789.18_LMNA | -0.15781 | -0.309241679 | 0.001426328 | 5.22E-02 | 2.07E-01 | 1.00E+00 |
| ENSG00000267986.1_AC130469  | ENSG00000160789.18_LMNA | -0.03274 | -0.190944917 | 0.127123842 | 6.89E-01 | 8.66E-01 | 1.00E+00 |
| ENSG00000249740.1_OSMR-AS1  | ENSG00000160789.18_LMNA | 0.13332  | -0.026443215 | 0.286439906 | 1.02E-01 | 3.14E-01 | 1.00E+00 |
| ENSG00000231964.1_RP11-67C2 | ENSG00000160789.18_LMNA | 0.17339  | 0.01458798   | 0.323652863 | 3.27E-02 | 1.51E-01 | 1.00E+00 |
| ENSG00000237980.1_RP11-338C | ENSG00000160789.18_LMNA | 0.31267  | 0.161507676  | 0.449495119 | 8.79E-05 | 1.70E-03 | 1.00E+00 |
| ENSG00000277310.1_RP11-699C | ENSG00000160789.18_LMNA | -0.17332 | -0.323591486 | -0.01451944 | 3.27E-02 | 1.51E-01 | 1.00E+00 |
| ENSG00000273542.1_HIST1H4K  | ENSG00000160789.18_LMNA | -0.03604 | -0.194127805 | 0.12387048  | 6.59E-01 | 8.50E-01 | 1.00E+00 |
| ENSG00000254377.4_MIR124-2H | ENSG00000160789.18_LMNA | -0.36518 | -0.495571226 | -0.21869526 | 3.73E-06 | 1.31E-04 | 1.91E-01 |
| ENSG00000273212.1_AC000068  | ENSG00000160789.18_LMNA | -0.01195 | -0.170825325 | 0.147531765 | 8.84E-01 | 9.55E-01 | 1.00E+00 |
| ENSG00000234776.3_C11orf94  | ENSG00000160789.18_LMNA | 0.22383  | 0.067019269  | 0.369853085 | 5.57E-03 | 4.25E-02 | 1.00E+00 |
| ENSG00000229367.1_HMG2P1    | ENSG00000160789.18_LMNA | -0.04855 | -0.20615715  | 0.111512731 | 5.53E-01 | 7.88E-01 | 1.00E+00 |
| ENSG00000276261.1_RP11-1060 | ENSG00000160789.18_LMNA | 0.01513  | -0.144422392 | 0.173908008 | 8.53E-01 | 9.42E-01 | 1.00E+00 |
| ENSG00000168992.4_OR7E102P  | ENSG00000160789.18_LMNA | 0.06941  | -0.090794261 | 0.226111873 | 3.95E-01 | 6.73E-01 | 1.00E+00 |
| ENSG00000267583.4_RP11-322E | ENSG00000160789.18_LMNA | -0.13186 | -0.285077067 | 0.02792614  | 1.05E-01 | 3.22E-01 | 1.00E+00 |
| ENSG00000253671.1_RP11-806C | ENSG00000160789.18_LMNA | -0.00491 | -0.163985553 | 0.15440836  | 9.52E-01 | 9.81E-01 | 1.00E+00 |

|                              |                         |          |              |             |          |          |          |
|------------------------------|-------------------------|----------|--------------|-------------|----------|----------|----------|
| ENSG00000240785.1_RPL36AP2   | ENSG00000160789.18_LMNA | 0.01474  | -0.144800812 | 0.17353317  | 8.57E-01 | 9.44E-01 | 1.00E+00 |
| ENSG00000278952.1_RP11-399J  | ENSG00000160789.18_LMNA | -0.01275 | -0.171601666 | 0.146749295 | 8.76E-01 | 9.52E-01 | 1.00E+00 |
| ENSG00000256481.1_RP11-21A7  | ENSG00000160789.18_LMNA | -0.32969 | -0.464512579 | -0.1799366  | 3.36E-05 | 7.84E-04 | 1.00E+00 |
| ENSG00000261889.1_RP11-473M  | ENSG00000160789.18_LMNA | 0.22113  | 0.06419247   | 0.367399849 | 6.19E-03 | 4.60E-02 | 1.00E+00 |
| ENSG00000261886.1_RP11-63A1  | ENSG00000160789.18_LMNA | -0.06333 | -0.220306257 | 0.09685051  | 4.38E-01 | 7.06E-01 | 1.00E+00 |
| ENSG00000261101.2_RP4-545K1  | ENSG00000160789.18_LMNA | 0.10116  | -0.058988132 | 0.256236555 | 2.15E-01 | 4.89E-01 | 1.00E+00 |
| ENSG00000258744.1_RP11-80A1  | ENSG00000160789.18_LMNA | 0.01729  | -0.142299308 | 0.17600929  | 8.33E-01 | 9.35E-01 | 1.00E+00 |
| ENSG00000279274.1_AC012005   | ENSG00000160789.18_LMNA | -0.15595 | -0.307514734 | 0.003334747 | 5.50E-02 | 2.14E-01 | 1.00E+00 |
| ENSG00000169627.7_BOLA2B     | ENSG00000160789.18_LMNA | -0.03335 | -0.191537203 | 0.12651896  | 6.83E-01 | 8.62E-01 | 1.00E+00 |
| ENSG00000234215.2_RP5-942I16 | ENSG00000160789.18_LMNA | 0.0367   | -0.123221958 | 0.19476148  | 6.54E-01 | 8.47E-01 | 1.00E+00 |
| ENSG00000273100.1_RP11-302L  | ENSG00000160789.18_LMNA | -0.01501 | -0.173792421 | 0.144539094 | 8.54E-01 | 9.43E-01 | 1.00E+00 |
| ENSG00000226684.2            | ENSG00000160789.18_LMNA | -0.21674 | -0.363399945 | -0.0595939  | 7.32E-03 | 5.20E-02 | 1.00E+00 |
| ENSG00000235013.1_COX20P2    | ENSG00000160789.18_LMNA | -0.00536 | -0.164416276 | 0.153976227 | 9.48E-01 | 9.79E-01 | 1.00E+00 |
| ENSG00000248774.1_RP11-798M  | ENSG00000160789.18_LMNA | -0.13841 | -0.291196952 | 0.02125619  | 8.90E-02 | 2.90E-01 | 1.00E+00 |
| ENSG00000249106.1_RP11-806K  | ENSG00000160789.18_LMNA | -0.1836  | -0.33306138  | -0.02512937 | 2.36E-02 | 1.21E-01 | 1.00E+00 |
| ENSG00000280300.1_RP11-338K  | ENSG00000160789.18_LMNA | -0.09955 | -0.254717787 | 0.06060714  | 2.22E-01 | 4.98E-01 | 1.00E+00 |
| ENSG00000272597.1_RP11-446H  | ENSG00000160789.18_LMNA | -0.00965 | -0.168592228 | 0.149780274 | 9.06E-01 | 9.64E-01 | 1.00E+00 |
| ENSG00000272555.1_RP11-459I1 | ENSG00000160789.18_LMNA | 0.17202  | 0.013184098  | 0.322395226 | 3.41E-02 | 1.56E-01 | 1.00E+00 |
| ENSG00000245667.2_RP5-940J5  | ENSG00000160789.18_LMNA | -0.07587 | -0.232266028 | 0.084348729 | 3.53E-01 | 6.37E-01 | 1.00E+00 |
| ENSG00000257056.2_RP11-966I7 | ENSG00000160789.18_LMNA | -0.04249 | -0.2003385   | 0.117502524 | 6.03E-01 | 8.18E-01 | 1.00E+00 |
| ENSG00000164488.10_DACT2     | ENSG00000160789.18_LMNA | -0.2185  | -0.365000548 | -0.06143252 | 6.84E-03 | 4.96E-02 | 1.00E+00 |
| ENSG00000278703.1_RP11-706P  | ENSG00000160789.18_LMNA | -0.07422 | -0.230692558 | 0.085999223 | 3.63E-01 | 6.45E-01 | 1.00E+00 |
| ENSG00000271550.1_BNIP3P11   | ENSG00000160789.18_LMNA | 0.11808  | -0.041908292 | 0.272164648 | 1.47E-01 | 3.93E-01 | 1.00E+00 |
| ENSG00000224800.1_RPS27AP6   | ENSG00000160789.18_LMNA | 0.0753   | -0.084922934 | 0.231718808 | 3.57E-01 | 6.40E-01 | 1.00E+00 |
| ENSG00000180828.2_BHLHE22    | ENSG00000160789.18_LMNA | -0.14035 | -0.293003314 | 0.019282139 | 8.46E-02 | 2.82E-01 | 1.00E+00 |
| ENSG00000224040.1_HMGN1P4    | ENSG00000160789.18_LMNA | 0.12711  | -0.032758156 | 0.280627544 | 1.19E-01 | 3.46E-01 | 1.00E+00 |
| ENSG00000223849.1_RP11-80I15 | ENSG00000160789.18_LMNA | 0.02889  | -0.130910082 | 0.187232254 | 7.24E-01 | 8.83E-01 | 1.00E+00 |
| ENSG00000205611.3_LINC01597  | ENSG00000160789.18_LMNA | -0.2374  | -0.382157274 | -0.08127078 | 3.23E-03 | 2.82E-02 | 1.00E+00 |
| ENSG00000267092.2_CTB-25B13  | ENSG00000160789.18_LMNA | 0.05158  | -0.108509074 | 0.209066552 | 5.28E-01 | 7.72E-01 | 1.00E+00 |
| ENSG00000169884.12_WNT10B    | ENSG00000160789.18_LMNA | -0.09373 | -0.249209142 | 0.06646547  | 2.51E-01 | 5.31E-01 | 1.00E+00 |
| ENSG00000267852.1_CTB-133G6  | ENSG00000160789.18_LMNA | -0.07479 | -0.231235247 | 0.085430165 | 3.60E-01 | 6.42E-01 | 1.00E+00 |
| ENSG00000255445.1_RP11-573M  | ENSG00000160789.18_LMNA | -0.1533  | -0.30505621  | 0.006047725 | 5.94E-02 | 2.24E-01 | 1.00E+00 |
| ENSG00000270945.1_HSPE1P7    | ENSG00000160789.18_LMNA | -0.06078 | -0.217876912 | 0.099377782 | 4.57E-01 | 7.21E-01 | 1.00E+00 |

|                             |                         |          |              |             |          |          |          |
|-----------------------------|-------------------------|----------|--------------|-------------|----------|----------|----------|
| ENSG00000166006.11_KCNC2    | ENSG00000160789.18_LMNA | -0.24541 | -0.389393644 | -0.08971027 | 2.31E-03 | 2.18E-02 | 1.00E+00 |
| ENSG00000251521.2_IMPA1P1   | ENSG00000160789.18_LMNA | 0.04056  | -0.119407769 | 0.198482981 | 6.20E-01 | 8.28E-01 | 1.00E+00 |
| ENSG00000250412.1_KLHL2P1   | ENSG00000160789.18_LMNA | -0.05058 | -0.208109531 | 0.109497739 | 5.36E-01 | 7.77E-01 | 1.00E+00 |
| ENSG00000272426.1_RP11-108M | ENSG00000160789.18_LMNA | -0.08314 | -0.23917596  | 0.077079923 | 3.09E-01 | 5.95E-01 | 1.00E+00 |
| ENSG00000251188.1_RP11-478C | ENSG00000160789.18_LMNA | -0.12078 | -0.274701032 | 0.039171456 | 1.38E-01 | 3.79E-01 | 1.00E+00 |
| ENSG00000240143.1_RP4-753P9 | ENSG00000160789.18_LMNA | -0.14368 | -0.296112175 | 0.015878965 | 7.74E-02 | 2.67E-01 | 1.00E+00 |
| ENSG00000241656.1_UBA52P7   | ENSG00000160789.18_LMNA | 0.05401  | -0.106102494 | 0.211393563 | 5.09E-01 | 7.58E-01 | 1.00E+00 |
| ENSG00000169126.14_ARMC4    | ENSG00000160789.18_LMNA | -0.04058 | -0.19849802  | 0.119392336 | 6.20E-01 | 8.28E-01 | 1.00E+00 |
| ENSG00000232591.1_RP5-1031D | ENSG00000160789.18_LMNA | -0.14441 | -0.2967879   | 0.015138312 | 7.59E-02 | 2.63E-01 | 1.00E+00 |
| ENSG00000250863.1_RP11-663P | ENSG00000160789.18_LMNA | -0.03173 | -0.189971916 | 0.128117023 | 6.98E-01 | 8.71E-01 | 1.00E+00 |
| ENSG00000184608.7_FAM167A-7 | ENSG00000160789.18_LMNA | -0.13079 | -0.284071318 | 0.029019627 | 1.08E-01 | 3.27E-01 | 1.00E+00 |
| ENSG00000267658.1_RP11-358B | ENSG00000160789.18_LMNA | 0.11688  | -0.043126121 | 0.271034612 | 1.52E-01 | 4.00E-01 | 1.00E+00 |
| ENSG00000261195.1_CTD-2380F | ENSG00000160789.18_LMNA | -0.34186 | -0.47519825  | -0.19317248 | 1.63E-05 | 4.35E-04 | 8.36E-01 |
| ENSG00000244535.1_RP1-181J2 | ENSG00000160789.18_LMNA | -0.04611 | -0.203811749 | 0.113929897 | 5.73E-01 | 8.00E-01 | 1.00E+00 |
| ENSG00000270184.1_RP11-568J | ENSG00000160789.18_LMNA | 0.02743  | -0.132346138 | 0.185821723 | 7.37E-01 | 8.90E-01 | 1.00E+00 |
| ENSG00000275223.1_RP1-63M2  | ENSG00000160789.18_LMNA | 0.18362  | 0.025150807  | 0.33308045  | 2.36E-02 | 1.21E-01 | 1.00E+00 |
| ENSG00000229635.1_RP4-713B5 | ENSG00000160789.18_LMNA | 0.15679  | -0.002471721 | 0.308295948 | 5.37E-02 | 2.11E-01 | 1.00E+00 |
| ENSG00000240366.1_RPL36AP4  | ENSG00000160789.18_LMNA | 0.07492  | -0.085298136 | 0.231361129 | 3.59E-01 | 6.42E-01 | 1.00E+00 |
| ENSG00000125787.10_GNRH2    | ENSG00000160789.18_LMNA | 0.10346  | -0.056676257 | 0.258402598 | 2.05E-01 | 4.76E-01 | 1.00E+00 |
| ENSG00000251179.1_TMEN92-A  | ENSG00000160789.18_LMNA | 0.15015  | -0.009267882 | 0.302132683 | 6.48E-02 | 2.37E-01 | 1.00E+00 |
| ENSG00000277423.1_RP11-173P | ENSG00000160789.18_LMNA | 0.18244  | 0.023933229  | 0.331996862 | 2.45E-02 | 1.25E-01 | 1.00E+00 |
| ENSG00000236710.1_AC108448  | ENSG00000160789.18_LMNA | 0.26558  | 0.111074361  | 0.407548229 | 9.44E-04 | 1.11E-02 | 1.00E+00 |
| ENSG00000224746.1_AC015987  | ENSG00000160789.18_LMNA | -0.01139 | -0.170283027 | 0.148078109 | 8.89E-01 | 9.57E-01 | 1.00E+00 |
| ENSG00000237899.1_RP4-739H1 | ENSG00000160789.18_LMNA | -0.06591 | -0.222777903 | 0.094275029 | 4.20E-01 | 6.91E-01 | 1.00E+00 |
| ENSG00000272100.1_RP11-155O | ENSG00000160789.18_LMNA | -0.04886 | -0.206450409 | 0.111210234 | 5.50E-01 | 7.86E-01 | 1.00E+00 |
| ENSG00000243321.3_RP11-167H | ENSG00000160789.18_LMNA | -0.29101 | -0.4302787   | -0.13821528 | 2.76E-04 | 4.20E-03 | 1.00E+00 |
| ENSG00000249256.2_ATP5LP3   | ENSG00000160789.18_LMNA | -0.07946 | -0.235675999 | 0.080765864 | 3.31E-01 | 6.17E-01 | 1.00E+00 |
| ENSG00000267388.1_AF038458  | ENSG00000160789.18_LMNA | -0.02913 | -0.187465887 | 0.130672092 | 7.22E-01 | 8.82E-01 | 1.00E+00 |
| ENSG00000258708.1_SLC25A21  | ENSG00000160789.18_LMNA | -0.35711 | -0.488537211 | -0.20984018 | 6.29E-06 | 2.01E-04 | 3.23E-01 |
| ENSG00000178342.4_KCNG2     | ENSG00000160789.18_LMNA | 0.06041  | -0.099751092 | 0.217517733 | 4.60E-01 | 7.23E-01 | 1.00E+00 |
| ENSG00000231680.1_AP003774  | ENSG00000160789.18_LMNA | -0.15042 | -0.302380203 | 0.008995498 | 6.44E-02 | 2.36E-01 | 1.00E+00 |
| ENSG00000278861.1_RP11-338K | ENSG00000160789.18_LMNA | -0.05142 | -0.208911186 | 0.108669619 | 5.29E-01 | 7.73E-01 | 1.00E+00 |
| ENSG00000213849.3_AC104306  | ENSG00000160789.18_LMNA | 0.0234   | -0.136307659 | 0.181923805 | 7.75E-01 | 9.07E-01 | 1.00E+00 |

|                              |                         |          |              |             |          |          |          |
|------------------------------|-------------------------|----------|--------------|-------------|----------|----------|----------|
| ENSG00000254480.1_RP11-23F2  | ENSG00000160789.18_LMNA | 0.01041  | -0.149040087 | 0.169327702 | 8.99E-01 | 9.61E-01 | 1.00E+00 |
| ENSG00000231196.3_RP11-495P  | ENSG00000160789.18_LMNA | -0.09876 | -0.253971905 | 0.061401643 | 2.26E-01 | 5.02E-01 | 1.00E+00 |
| ENSG00000231851.4_UTAT33     | ENSG00000160789.18_LMNA | -0.07179 | -0.228382011 | 0.088419727 | 3.79E-01 | 6.58E-01 | 1.00E+00 |
| ENSG00000243094.1_RP11-1084  | ENSG00000160789.18_LMNA | -0.00629 | -0.165326921 | 0.153062198 | 9.39E-01 | 9.76E-01 | 1.00E+00 |
| ENSG00000228674.4_CTB-147C2  | ENSG00000160789.18_LMNA | 0.02881  | -0.130991999 | 0.187151828 | 7.25E-01 | 8.83E-01 | 1.00E+00 |
| ENSG00000183644.12_C11orf88  | ENSG00000160789.18_LMNA | -0.04598 | -0.20368963  | 0.11405565  | 5.74E-01 | 8.01E-01 | 1.00E+00 |
| ENSG00000258960.1_CTD-2014B  | ENSG00000160789.18_LMNA | 0.0828   | -0.077418258 | 0.238855039 | 3.10E-01 | 5.97E-01 | 1.00E+00 |
| ENSG00000188729.5_OSTN       | ENSG00000160789.18_LMNA | -0.13373 | -0.286819985 | 0.0260294   | 1.00E-01 | 3.12E-01 | 1.00E+00 |
| ENSG00000263307.1_RP11-166B  | ENSG00000160789.18_LMNA | -0.00999 | -0.168922924 | 0.149447503 | 9.03E-01 | 9.62E-01 | 1.00E+00 |
| ENSG00000197406.7_DIO3       | ENSG00000160789.18_LMNA | 0.0667   | -0.093497079 | 0.223523688 | 4.14E-01 | 6.87E-01 | 1.00E+00 |
| ENSG00000249741.2_RP11-673E  | ENSG00000160789.18_LMNA | -0.00141 | -0.160577876 | 0.157822909 | 9.86E-01 | 9.95E-01 | 1.00E+00 |
| ENSG00000213448.3_RPS23P2    | ENSG00000160789.18_LMNA | -0.01092 | -0.169829907 | 0.148534459 | 8.94E-01 | 9.58E-01 | 1.00E+00 |
| ENSG00000243491.1_RP11-521D  | ENSG00000160789.18_LMNA | -0.18348 | -0.332950911 | -0.0250052  | 2.37E-02 | 1.22E-01 | 1.00E+00 |
| ENSG00000260602.2_HMGN2P4C   | ENSG00000160789.18_LMNA | 0.06378  | -0.096398801 | 0.22074005  | 4.35E-01 | 7.03E-01 | 1.00E+00 |
| ENSG00000248375.1_RP11-177B  | ENSG00000160789.18_LMNA | -0.18093 | -0.330607627 | -0.02237355 | 2.57E-02 | 1.29E-01 | 1.00E+00 |
| ENSG00000168748.12_CA7       | ENSG00000160789.18_LMNA | -0.09665 | -0.251969953 | 0.063532123 | 2.36E-01 | 5.14E-01 | 1.00E+00 |
| ENSG00000278416.1_PMS2P2     | ENSG00000160789.18_LMNA | -0.06695 | -0.223765635 | 0.093244614 | 4.12E-01 | 6.86E-01 | 1.00E+00 |
| ENSG00000183439.6_TRIM61     | ENSG00000160789.18_LMNA | 0.06327  | -0.096905319 | 0.220253614 | 4.39E-01 | 7.07E-01 | 1.00E+00 |
| ENSG00000258999.1_RP11-114N  | ENSG00000160789.18_LMNA | -0.08684 | -0.242686458 | 0.07337418  | 2.87E-01 | 5.73E-01 | 1.00E+00 |
| ENSG00000267466.1_RP11-13K1  | ENSG00000160789.18_LMNA | -0.26366 | -0.405822578 | -0.10903178 | 1.03E-03 | 1.18E-02 | 1.00E+00 |
| ENSG00000267048.1_RP11-566K  | ENSG00000160789.18_LMNA | 0.054    | -0.106110948 | 0.211385395 | 5.09E-01 | 7.58E-01 | 1.00E+00 |
| ENSG00000217702.2_RP11-287D  | ENSG00000160789.18_LMNA | 0.00494  | -0.154386485 | 0.16400736  | 9.52E-01 | 9.81E-01 | 1.00E+00 |
| ENSG00000261813.2_RP11-151H  | ENSG00000160789.18_LMNA | -0.06053 | -0.217635799 | 0.099628391 | 4.59E-01 | 7.23E-01 | 1.00E+00 |
| ENSG00000270074.1_RP11-351I2 | ENSG00000160789.18_LMNA | -0.07377 | -0.230265454 | 0.086446935 | 3.66E-01 | 6.47E-01 | 1.00E+00 |
| ENSG00000230176.2_LINC01433  | ENSG00000160789.18_LMNA | 0.06712  | -0.093072772 | 0.223930295 | 4.11E-01 | 6.85E-01 | 1.00E+00 |
| ENSG00000228124.1_RP11-122O8 | ENSG00000160789.18_LMNA | -0.17928 | -0.329091509 | -0.02067312 | 2.71E-02 | 1.34E-01 | 1.00E+00 |
| ENSG00000279611.1_CTD-2619J  | ENSG00000160789.18_LMNA | -0.04477 | -0.202527769 | 0.115251573 | 5.84E-01 | 8.07E-01 | 1.00E+00 |
| ENSG00000243592.1_RPL17P22   | ENSG00000160789.18_LMNA | 0.00744  | -0.151940436 | 0.166443789 | 9.28E-01 | 9.72E-01 | 1.00E+00 |
| ENSG00000230613.1_HM13-AS1   | ENSG00000160789.18_LMNA | -0.09628 | -0.251620158 | 0.06390408  | 2.38E-01 | 5.17E-01 | 1.00E+00 |
| ENSG00000238266.1_LINC00707  | ENSG00000160789.18_LMNA | 0.11659  | -0.043417708 | 0.270763916 | 1.53E-01 | 4.02E-01 | 1.00E+00 |
| ENSG00000256436.1_TAS2R31    | ENSG00000160789.18_LMNA | -0.075   | -0.231433903 | 0.085221805 | 3.58E-01 | 6.41E-01 | 1.00E+00 |
| ENSG00000271937.1_RP11-424N  | ENSG00000160789.18_LMNA | -0.18522 | -0.334559182 | -0.02681386 | 2.23E-02 | 1.17E-01 | 1.00E+00 |
| ENSG00000260830.1_RP11-524C  | ENSG00000160789.18_LMNA | 0.02294  | -0.136760785 | 0.181477316 | 7.79E-01 | 9.09E-01 | 1.00E+00 |

|                             |                         |          |              |             |          |          |          |
|-----------------------------|-------------------------|----------|--------------|-------------|----------|----------|----------|
| ENSG00000271781.1_CTD-2589H | ENSG00000160789.18_LMNA | 0.16793  | 0.008971899  | 0.318615257 | 3.86E-02 | 1.69E-01 | 1.00E+00 |
| ENSG00000215063.3_RPL21P2   | ENSG00000160789.18_LMNA | -0.06494 | -0.221848283 | 0.095244201 | 4.27E-01 | 6.97E-01 | 1.00E+00 |
| ENSG00000242990.2_RPL13AP2  | ENSG00000160789.18_LMNA | -0.11848 | -0.272544696 | 0.041498509 | 1.46E-01 | 3.91E-01 | 1.00E+00 |
| ENSG00000233818.1_AP000695  | ENSG00000160789.18_LMNA | 0.19199  | 0.033827914  | 0.340779196 | 1.78E-02 | 9.93E-02 | 1.00E+00 |
| ENSG00000225693.1_LAGE3P1   | ENSG00000160789.18_LMNA | 0.01933  | -0.140307342 | 0.177978165 | 8.13E-01 | 9.27E-01 | 1.00E+00 |
| ENSG00000214659.4_KRT8P26   | ENSG00000160789.18_LMNA | 0.20545  | 0.047812082  | 0.353100587 | 1.11E-02 | 7.06E-02 | 1.00E+00 |
| ENSG00000235319.1_AC012360  | ENSG00000160789.18_LMNA | -0.02505 | -0.183522644 | 0.134683962 | 7.59E-01 | 9.00E-01 | 1.00E+00 |
| ENSG00000264968.1_RP11-387H | ENSG00000160789.18_LMNA | -0.13256 | -0.285729658 | 0.027216217 | 1.04E-01 | 3.19E-01 | 1.00E+00 |
| ENSG00000122420.8_PTGFR     | ENSG00000160789.18_LMNA | -0.03468 | -0.192818733 | 0.125209365 | 6.71E-01 | 8.56E-01 | 1.00E+00 |
| ENSG00000225978.3_HAR1A     | ENSG00000160789.18_LMNA | -0.06509 | -0.221994184 | 0.095092132 | 4.26E-01 | 6.96E-01 | 1.00E+00 |
| ENSG00000258613.1_RPL21P7   | ENSG00000160789.18_LMNA | -0.09922 | -0.254399776 | 0.06094593  | 2.24E-01 | 5.00E-01 | 1.00E+00 |
| ENSG00000259169.1_GNRHR2P1  | ENSG00000160789.18_LMNA | 0.14818  | -0.011289341 | 0.300294436 | 6.85E-02 | 2.46E-01 | 1.00E+00 |
| ENSG00000244050.2_RP11-266K | ENSG00000160789.18_LMNA | 0.00166  | -0.157582879 | 0.16081767  | 9.84E-01 | 9.94E-01 | 1.00E+00 |
| ENSG00000177447.6_CBX3P1    | ENSG00000160789.18_LMNA | 0.03886  | -0.121094018 | 0.196838839 | 6.35E-01 | 8.36E-01 | 1.00E+00 |
| ENSG00000242314.1_RPL12P32  | ENSG00000160789.18_LMNA | 0.11447  | -0.045561835 | 0.268771885 | 1.60E-01 | 4.14E-01 | 1.00E+00 |
| ENSG00000269755.1_CTD-3105H | ENSG00000160789.18_LMNA | -0.09812 | -0.253358928 | 0.06205428  | 2.29E-01 | 5.06E-01 | 1.00E+00 |
| ENSG00000172971.7_UNC93B3   | ENSG00000160789.18_LMNA | 0.01139  | -0.148083813 | 0.170277364 | 8.89E-01 | 9.57E-01 | 1.00E+00 |
| ENSG00000256925.2_ADGRA1-A  | ENSG00000160789.18_LMNA | -0.24639 | -0.390284482 | -0.0907522  | 2.21E-03 | 2.11E-02 | 1.00E+00 |
| ENSG00000249013.1_FTH1P21   | ENSG00000160789.18_LMNA | -0.0887  | -0.244448552 | 0.071510787 | 2.77E-01 | 5.62E-01 | 1.00E+00 |
| ENSG00000265943.1_RP11-739L | ENSG00000160789.18_LMNA | -0.01989 | -0.178526025 | 0.139752598 | 8.08E-01 | 9.23E-01 | 1.00E+00 |
| ENSG00000279214.1_RP5-1024N | ENSG00000160789.18_LMNA | 0.14348  | -0.016088831 | 0.29592065  | 7.78E-02 | 2.67E-01 | 1.00E+00 |
| ENSG00000232539.1_LINC00945 | ENSG00000160789.18_LMNA | -0.17667 | -0.326681137 | -0.0179734  | 2.95E-02 | 1.42E-01 | 1.00E+00 |
| ENSG00000259086.3_RP11-134E | ENSG00000160789.18_LMNA | -0.02359 | -0.182104039 | 0.136124708 | 7.73E-01 | 9.06E-01 | 1.00E+00 |
| ENSG00000255114.1_RP11-1101 | ENSG00000160789.18_LMNA | 0.10491  | -0.055212622 | 0.259772271 | 1.98E-01 | 4.68E-01 | 1.00E+00 |
| ENSG00000272282.1_RP11-222K | ENSG00000160789.18_LMNA | 0.22174  | 0.064822744  | 0.367947198 | 6.04E-03 | 4.52E-02 | 1.00E+00 |
| ENSG00000237773.4_AC003075  | ENSG00000160789.18_LMNA | 0.05276  | -0.107340922 | 0.210196531 | 5.19E-01 | 7.65E-01 | 1.00E+00 |
| ENSG00000279587.1_RP1-278D1 | ENSG00000160789.18_LMNA | -0.03487 | -0.192999871 | 0.125024171 | 6.70E-01 | 8.55E-01 | 1.00E+00 |
| ENSG00000255026.1_RP11-326C | ENSG00000160789.18_LMNA | 0.33959  | 0.190694197  | 0.473203778 | 1.87E-05 | 4.87E-04 | 9.59E-01 |
| ENSG00000235808.1_MYL6P2    | ENSG00000160789.18_LMNA | 0.08141  | -0.078811399 | 0.237532872 | 3.19E-01 | 6.05E-01 | 1.00E+00 |
| ENSG00000244952.2_RP11-1000 | ENSG00000160789.18_LMNA | -0.05443 | -0.211796533 | 0.105685367 | 5.05E-01 | 7.56E-01 | 1.00E+00 |
| ENSG00000227118.3_BTF3P13   | ENSG00000160789.18_LMNA | -0.00241 | -0.161550316 | 0.156849283 | 9.76E-01 | 9.91E-01 | 1.00E+00 |
| ENSG00000233483.2_CTD-2020K | ENSG00000160789.18_LMNA | -0.00841 | -0.167386485 | 0.150992971 | 9.18E-01 | 9.69E-01 | 1.00E+00 |
| ENSG00000277559.1_RP11-434E | ENSG00000160789.18_LMNA | 0.21442  | 0.057170105  | 0.361287178 | 7.99E-03 | 5.55E-02 | 1.00E+00 |

|                              |                         |          |              |             |          |          |          |
|------------------------------|-------------------------|----------|--------------|-------------|----------|----------|----------|
| ENSG00000272205.1_RP11-277B  | ENSG00000160789.18_LMNA | -0.13023 | -0.283550948 | 0.029585097 | 1.10E-01 | 3.30E-01 | 1.00E+00 |
| ENSG00000234965.2_SHISA8     | ENSG00000160789.18_LMNA | -0.09809 | -0.253336757 | 0.06207788  | 2.29E-01 | 5.06E-01 | 1.00E+00 |
| ENSG00000266969.1_RP11-773H  | ENSG00000160789.18_LMNA | -0.04028 | -0.198211805 | 0.119686016 | 6.22E-01 | 8.29E-01 | 1.00E+00 |
| ENSG00000246331.2_RP11-77I22 | ENSG00000160789.18_LMNA | 0.01641  | -0.143164499 | 0.175153333 | 8.41E-01 | 9.38E-01 | 1.00E+00 |
| ENSG00000168843.12_FSTL5     | ENSG00000160789.18_LMNA | -0.18967 | -0.338640901 | -0.03141323 | 1.93E-02 | 1.05E-01 | 1.00E+00 |
| ENSG00000228089.1_PNKDP1     | ENSG00000160789.18_LMNA | 0.02391  | -0.135810417 | 0.182413613 | 7.70E-01 | 9.05E-01 | 1.00E+00 |
| ENSG00000244515.1_KRT18P34   | ENSG00000160789.18_LMNA | 0.07949  | -0.080730551 | 0.235709569 | 3.30E-01 | 6.16E-01 | 1.00E+00 |
| ENSG00000244381.1_RP11-3K16  | ENSG00000160789.18_LMNA | -0.02357 | -0.182089194 | 0.136139778 | 7.73E-01 | 9.06E-01 | 1.00E+00 |
| ENSG00000274949.1_RP5-1009E  | ENSG00000160789.18_LMNA | -0.01366 | -0.172489103 | 0.145854363 | 8.67E-01 | 9.48E-01 | 1.00E+00 |
| ENSG00000225742.4_RP11-513G  | ENSG00000160789.18_LMNA | 0.10909  | -0.050996438 | 0.263710716 | 1.81E-01 | 4.44E-01 | 1.00E+00 |
| ENSG00000259744.1_RP11-138H  | ENSG00000160789.18_LMNA | -0.03124 | -0.189501894 | 0.128596565 | 7.02E-01 | 8.73E-01 | 1.00E+00 |
| ENSG00000214178.3_PPIAP23    | ENSG00000160789.18_LMNA | 0.14034  | -0.01928715  | 0.292998732 | 8.46E-02 | 2.82E-01 | 1.00E+00 |
| ENSG00000229700.1_RP1-130G2  | ENSG00000160789.18_LMNA | -0.08297 | -0.239015372 | 0.077249234 | 3.10E-01 | 5.96E-01 | 1.00E+00 |
| ENSG00000258445.3_RP11-307P  | ENSG00000160789.18_LMNA | -0.05339 | -0.210800923 | 0.106715752 | 5.14E-01 | 7.62E-01 | 1.00E+00 |
| ENSG00000250892.1_RP11-1365I | ENSG00000160789.18_LMNA | 0.03042  | -0.129402802 | 0.188711333 | 7.10E-01 | 8.77E-01 | 1.00E+00 |
| ENSG00000241002.1_RP11-119H  | ENSG00000160789.18_LMNA | -0.01562 | -0.174391254 | 0.143934391 | 8.48E-01 | 9.41E-01 | 1.00E+00 |
| ENSG00000178440.5_LINC00843  | ENSG00000160789.18_LMNA | 0.0422   | -0.117787859 | 0.200060758 | 6.06E-01 | 8.20E-01 | 1.00E+00 |
| ENSG00000261386.2_CTD-2012K  | ENSG00000160789.18_LMNA | -0.10467 | -0.259549107 | 0.055451188 | 1.99E-01 | 4.70E-01 | 1.00E+00 |
| ENSG00000239959.1_ENPP7P2    | ENSG00000160789.18_LMNA | -0.17565 | -0.325737931 | -0.0169182  | 3.04E-02 | 1.45E-01 | 1.00E+00 |
| ENSG00000260949.1_KB-1836B5  | ENSG00000160789.18_LMNA | 0.02423  | -0.135489325 | 0.182729821 | 7.67E-01 | 9.03E-01 | 1.00E+00 |
| ENSG00000223467.2_CALM1P1    | ENSG00000160789.18_LMNA | -0.13829 | -0.291078206 | 0.021385875 | 8.93E-02 | 2.91E-01 | 1.00E+00 |
| ENSG00000260509.2_RP11-271M  | ENSG00000160789.18_LMNA | -0.21665 | -0.363315632 | -0.0594971  | 7.34E-03 | 5.22E-02 | 1.00E+00 |
| ENSG00000267648.1_RP11-686D  | ENSG00000160789.18_LMNA | 0.22414  | 0.067345878  | 0.370136261 | 5.50E-03 | 4.21E-02 | 1.00E+00 |
| ENSG00000230911.1_PPIHP1     | ENSG00000160789.18_LMNA | 0.05335  | -0.106758636 | 0.210759471 | 5.14E-01 | 7.62E-01 | 1.00E+00 |
| ENSG00000218996.1_ARL4AP5    | ENSG00000160789.18_LMNA | 0.11894  | -0.041039224 | 0.272970537 | 1.44E-01 | 3.89E-01 | 1.00E+00 |
| ENSG00000254165.1_RP11-503E  | ENSG00000160789.18_LMNA | 0.0894   | -0.070810157 | 0.245110556 | 2.73E-01 | 5.58E-01 | 1.00E+00 |
| ENSG00000150045.10_KLRF1     | ENSG00000160789.18_LMNA | -0.16379 | -0.314778854 | -0.00470802 | 4.38E-02 | 1.84E-01 | 1.00E+00 |
| ENSG00000236409.1_NRADDP     | ENSG00000160789.18_LMNA | 0.00318  | -0.156103005 | 0.162295267 | 9.69E-01 | 9.88E-01 | 1.00E+00 |
| ENSG00000234232.5_RP11-353N  | ENSG00000160789.18_LMNA | -0.09429 | -0.249738573 | 0.065903375 | 2.48E-01 | 5.28E-01 | 1.00E+00 |
| ENSG00000268849.4_SIGLEC22F  | ENSG00000160789.18_LMNA | 0.11062  | -0.049447835 | 0.265154676 | 1.75E-01 | 4.35E-01 | 1.00E+00 |
| ENSG00000173810.9_PPIAP7     | ENSG00000160789.18_LMNA | 0.09434  | -0.065845198 | 0.249793358 | 2.48E-01 | 5.28E-01 | 1.00E+00 |
| ENSG00000152936.9_LMNTD1     | ENSG00000160789.18_LMNA | 0.03688  | -0.123046367 | 0.194933005 | 6.52E-01 | 8.46E-01 | 1.00E+00 |
| ENSG00000259755.1_RP11-505E  | ENSG00000160789.18_LMNA | 0.16794  | 0.008975276  | 0.318618292 | 3.86E-02 | 1.69E-01 | 1.00E+00 |

|                              |                         |          |              |             |          |          |          |
|------------------------------|-------------------------|----------|--------------|-------------|----------|----------|----------|
| ENSG00000234292.3_RP11-213H  | ENSG00000160789.18_LMNA | 0.15574  | -0.003545764 | 0.307323658 | 5.54E-02 | 2.15E-01 | 1.00E+00 |
| ENSG00000270923.1_TAS2R6P    | ENSG00000160789.18_LMNA | -0.15139 | -0.30328538  | 0.007998999 | 6.26E-02 | 2.32E-01 | 1.00E+00 |
| ENSG00000242052.1_RPL10P7    | ENSG00000160789.18_LMNA | 0.19227  | 0.034117927  | 0.3410358   | 1.76E-02 | 9.86E-02 | 1.00E+00 |
| ENSG00000254340.1_RP11-10A1  | ENSG00000160789.18_LMNA | 0.10729  | -0.052814266 | 0.262013922 | 1.88E-01 | 4.55E-01 | 1.00E+00 |
| ENSG00000236352.1_AC005220.1 | ENSG00000160789.18_LMNA | -0.10837 | -0.26303421  | 0.05172145  | 1.84E-01 | 4.49E-01 | 1.00E+00 |
| ENSG00000206448.3_PPIAP30    | ENSG00000160789.18_LMNA | -0.01653 | -0.175265983 | 0.143050662 | 8.40E-01 | 9.38E-01 | 1.00E+00 |
| ENSG00000261357.1_RP11-626G  | ENSG00000160789.18_LMNA | -0.01777 | -0.176471212 | 0.1418322   | 8.28E-01 | 9.33E-01 | 1.00E+00 |
| ENSG00000257199.2_RP11-669B  | ENSG00000160789.18_LMNA | -0.01911 | -0.177768039 | 0.140520055 | 8.15E-01 | 9.28E-01 | 1.00E+00 |
| ENSG00000246596.5_RP11-1277  | ENSG00000160789.18_LMNA | 0.02779  | -0.131998177 | 0.186163619 | 7.34E-01 | 8.88E-01 | 1.00E+00 |
| ENSG00000279135.1_RP11-261P  | ENSG00000160789.18_LMNA | -0.25768 | -0.400455063 | -0.10269447 | 1.35E-03 | 1.45E-02 | 1.00E+00 |
| ENSG00000257711.1_RP11-482D  | ENSG00000160789.18_LMNA | -0.13894 | -0.291689691 | 0.020717951 | 8.78E-02 | 2.88E-01 | 1.00E+00 |
| ENSG00000241520.1_AC098820.1 | ENSG00000160789.18_LMNA | 0.00725  | -0.15212154  | 0.16626353  | 9.29E-01 | 9.73E-01 | 1.00E+00 |
| ENSG00000259216.2_RP11-227D  | ENSG00000160789.18_LMNA | 0.07057  | -0.089637401 | 0.227218302 | 3.88E-01 | 6.66E-01 | 1.00E+00 |
| ENSG00000259209.3_RP5-991G2  | ENSG00000160789.18_LMNA | -0.17409 | -0.324301872 | -0.01531294 | 3.20E-02 | 1.49E-01 | 1.00E+00 |
| ENSG00000280214.1_CTD-2012K  | ENSG00000160789.18_LMNA | -0.06136 | -0.218426077 | 0.098806838 | 4.53E-01 | 7.18E-01 | 1.00E+00 |
| ENSG00000160396.8_HIPK4      | ENSG00000160789.18_LMNA | 0.07478  | -0.085436773 | 0.231228946 | 3.60E-01 | 6.42E-01 | 1.00E+00 |
| ENSG00000235172.6_LINC01366  | ENSG00000160789.18_LMNA | 0.04567  | -0.114357328 | 0.203396628 | 5.76E-01 | 8.03E-01 | 1.00E+00 |
| ENSG00000147614.3_ATP6V0D2   | ENSG00000160789.18_LMNA | 0.12026  | -0.039698799 | 0.274212652 | 1.40E-01 | 3.82E-01 | 1.00E+00 |
| ENSG00000187862.10_TTC24     | ENSG00000160789.18_LMNA | -0.06412 | -0.221065055 | 0.096060287 | 4.33E-01 | 7.02E-01 | 1.00E+00 |
| ENSG00000269153.1_LYPLA2P2   | ENSG00000160789.18_LMNA | 0.12166  | -0.038278949 | 0.275527226 | 1.35E-01 | 3.74E-01 | 1.00E+00 |
| ENSG00000147434.7_CHRNA6     | ENSG00000160789.18_LMNA | 0.15859  | -0.000628717 | 0.309962836 | 5.10E-02 | 2.04E-01 | 1.00E+00 |
| ENSG00000225556.1_C2CD4D     | ENSG00000160789.18_LMNA | 0.02761  | -0.132175617 | 0.185989282 | 7.36E-01 | 8.89E-01 | 1.00E+00 |
| ENSG00000213070.3_HMGB3P6    | ENSG00000160789.18_LMNA | -0.08644 | -0.242303275 | 0.0737791   | 2.90E-01 | 5.75E-01 | 1.00E+00 |
| ENSG00000233785.1_RP13-314C  | ENSG00000160789.18_LMNA | -0.05839 | -0.215588077 | 0.10175514  | 4.75E-01 | 7.34E-01 | 1.00E+00 |
| ENSG00000231468.2_PRDX3P2    | ENSG00000160789.18_LMNA | -0.03113 | -0.189388366 | 0.12871237  | 7.03E-01 | 8.73E-01 | 1.00E+00 |
| ENSG00000258572.1_RP11-1070I | ENSG00000160789.18_LMNA | 0.03604  | -0.12387338  | 0.194124971 | 6.59E-01 | 8.50E-01 | 1.00E+00 |
| ENSG00000170442.10_KRT86     | ENSG00000160789.18_LMNA | 0.16603  | 0.007019401  | 0.316859766 | 4.09E-02 | 1.76E-01 | 1.00E+00 |
| ENSG00000254777.4_AC022182.1 | ENSG00000160789.18_LMNA | -0.18139 | -0.331033291 | -0.02285128 | 2.53E-02 | 1.27E-01 | 1.00E+00 |
| ENSG00000258317.1_RP11-603J  | ENSG00000160789.18_LMNA | 0.16872  | 0.009784356  | 0.319345112 | 3.77E-02 | 1.67E-01 | 1.00E+00 |
| ENSG00000237672.1_KRR1P1     | ENSG00000160789.18_LMNA | -0.04307 | -0.200890649 | 0.116935126 | 5.98E-01 | 8.15E-01 | 1.00E+00 |
| ENSG00000273366.1_CTA-989H1  | ENSG00000160789.18_LMNA | 0.02208  | -0.137609147 | 0.180641027 | 7.87E-01 | 9.13E-01 | 1.00E+00 |
| ENSG00000235089.1_RP3-445O1  | ENSG00000160789.18_LMNA | -0.22601 | -0.37182961  | -0.06930031 | 5.11E-03 | 3.99E-02 | 1.00E+00 |
| ENSG00000244712.1_RP11-874G  | ENSG00000160789.18_LMNA | -0.11022 | -0.264777787 | 0.049852183 | 1.76E-01 | 4.38E-01 | 1.00E+00 |



|                             |                         |          |              |             |          |          |          |
|-----------------------------|-------------------------|----------|--------------|-------------|----------|----------|----------|
| ENSG00000227066.1_RP3-340N1 | ENSG00000160789.18_LMNA | 0.05198  | -0.108112037 | 0.20945071  | 5.25E-01 | 7.70E-01 | 1.00E+00 |
| ENSG00000226493.1_RPL26P27  | ENSG00000160789.18_LMNA | -0.00337 | -0.162479648 | 0.15591824  | 9.67E-01 | 9.87E-01 | 1.00E+00 |
| ENSG00000151952.13_TM132    | ENSG00000160789.18_LMNA | -0.24364 | -0.387797614 | -0.08784517 | 2.49E-03 | 2.31E-02 | 1.00E+00 |
| ENSG00000237595.3_RP11-112L | ENSG00000160789.18_LMNA | 0.04301  | -0.116990786 | 0.200836495 | 5.99E-01 | 8.15E-01 | 1.00E+00 |
| ENSG00000260808.1_CTD-2007L | ENSG00000160789.18_LMNA | 0.00677  | -0.152596031 | 0.165791153 | 9.34E-01 | 9.74E-01 | 1.00E+00 |
| ENSG00000240050.4_RP1-93H18 | ENSG00000160789.18_LMNA | -0.02423 | -0.182723039 | 0.135496213 | 7.67E-01 | 9.03E-01 | 1.00E+00 |
| ENSG00000174946.6_GPR171    | ENSG00000160789.18_LMNA | 0.19296  | 0.034833054  | 0.341668352 | 1.72E-02 | 9.70E-02 | 1.00E+00 |
| ENSG00000267429.1_AC006116. | ENSG00000160789.18_LMNA | -0.1113  | -0.26578651  | 0.048769735 | 1.72E-01 | 4.31E-01 | 1.00E+00 |
| ENSG00000144045.12_DQX1     | ENSG00000160789.18_LMNA | -0.12262 | -0.276419883 | 0.037314081 | 1.32E-01 | 3.69E-01 | 1.00E+00 |
| ENSG00000197272.2_IL27      | ENSG00000160789.18_LMNA | 0.22129  | 0.064361204  | 0.367546403 | 6.15E-03 | 4.58E-02 | 1.00E+00 |
| ENSG00000245293.2_RP11-286E | ENSG00000160789.18_LMNA | -0.1881  | -0.337203011 | -0.0297915  | 2.03E-02 | 1.09E-01 | 1.00E+00 |
| ENSG00000266899.1_AKR1B1P7  | ENSG00000160789.18_LMNA | -0.09202 | -0.247593803 | 0.068179232 | 2.60E-01 | 5.43E-01 | 1.00E+00 |
| ENSG00000141096.4_DPEP3     | ENSG00000160789.18_LMNA | -0.19608 | -0.344527146 | -0.03806897 | 1.55E-02 | 8.98E-02 | 1.00E+00 |
| ENSG00000223947.1_AC016738. | ENSG00000160789.18_LMNA | 0.10218  | -0.057964019 | 0.257196459 | 2.10E-01 | 4.83E-01 | 1.00E+00 |
| ENSG00000213434.2_VTI1BP2   | ENSG00000160789.18_LMNA | 0.01373  | -0.145785506 | 0.172557362 | 8.67E-01 | 9.48E-01 | 1.00E+00 |
| ENSG00000246430.5_LINC00968 | ENSG00000160789.18_LMNA | -0.01528 | -0.174055354 | 0.144273613 | 8.52E-01 | 9.42E-01 | 1.00E+00 |
| ENSG00000255864.4_RP11-444D | ENSG00000160789.18_LMNA | -0.0408  | -0.198712958 | 0.119171756 | 6.18E-01 | 8.27E-01 | 1.00E+00 |
| ENSG00000267150.1_RP11-411B | ENSG00000160789.18_LMNA | -0.03798 | -0.196000423 | 0.1219532   | 6.42E-01 | 8.41E-01 | 1.00E+00 |
| ENSG00000156486.7_KCNS2     | ENSG00000160789.18_LMNA | -0.13263 | -0.285795409 | 0.027144673 | 1.03E-01 | 3.18E-01 | 1.00E+00 |
| ENSG00000232938.2_RPL23AP8  | ENSG00000160789.18_LMNA | -0.03258 | -0.190794447 | 0.127277475 | 6.90E-01 | 8.67E-01 | 1.00E+00 |
| ENSG00000223813.2_AC007255. | ENSG00000160789.18_LMNA | -0.12129 | -0.275173933 | 0.03866066  | 1.37E-01 | 3.76E-01 | 1.00E+00 |
| ENSG00000278931.1_bP-2189O9 | ENSG00000160789.18_LMNA | -0.11536 | -0.269612329 | 0.044657574 | 1.57E-01 | 4.09E-01 | 1.00E+00 |
| ENSG00000237836.4_PHKA2-AS  | ENSG00000160789.18_LMNA | 0.08858  | -0.071634724 | 0.244331418 | 2.78E-01 | 5.63E-01 | 1.00E+00 |
| ENSG00000250569.1_NTAN1P2   | ENSG00000160789.18_LMNA | 0.18163  | 0.023097993  | 0.33125307  | 2.51E-02 | 1.27E-01 | 1.00E+00 |
| ENSG00000275591.3_XKR5      | ENSG00000160789.18_LMNA | -0.09033 | -0.245990896 | 0.069877966 | 2.68E-01 | 5.52E-01 | 1.00E+00 |
| ENSG00000281087.1_RP11-983G | ENSG00000160789.18_LMNA | -0.00023 | -0.159420391 | 0.158980997 | 9.98E-01 | 9.99E-01 | 1.00E+00 |
| ENSG00000214077.4_GNAQP1    | ENSG00000160789.18_LMNA | -0.00785 | -0.166838121 | 0.15154418  | 9.24E-01 | 9.71E-01 | 1.00E+00 |
| ENSG00000243979.2_RP11-347C | ENSG00000160789.18_LMNA | -0.0093  | -0.168251874 | 0.150122687 | 9.09E-01 | 9.65E-01 | 1.00E+00 |
| ENSG00000216938.3_RPL7P58   | ENSG00000160789.18_LMNA | -0.10259 | -0.257581399 | 0.057553142 | 2.09E-01 | 4.81E-01 | 1.00E+00 |
| ENSG00000272456.1_CTD-2342N | ENSG00000160789.18_LMNA | -0.03086 | -0.189127166 | 0.128978776 | 7.06E-01 | 8.75E-01 | 1.00E+00 |
| ENSG00000262188.1_RP11-353N | ENSG00000160789.18_LMNA | -0.14308 | -0.295545835 | 0.016499459 | 7.87E-02 | 2.69E-01 | 1.00E+00 |
| ENSG00000280334.1_RP11-361L | ENSG00000160789.18_LMNA | -0.05809 | -0.215297819 | 0.102056366 | 4.77E-01 | 7.36E-01 | 1.00E+00 |
| ENSG00000267336.1	EIF4A2P1  | ENSG00000160789.18_LMNA | 0.01     | -0.149435025 | 0.168935323 | 9.03E-01 | 9.62E-01 | 1.00E+00 |

|                              |                         |          |              |             |          |          |          |
|------------------------------|-------------------------|----------|--------------|-------------|----------|----------|----------|
| ENSG00000267690.1_LDLRAD4-   | ENSG00000160789.18_LMNA | -0.36327 | -0.493909489 | -0.21659918 | 4.23E-06 | 1.45E-04 | 2.17E-01 |
| ENSG00000231942.3_HNRNPA1F   | ENSG00000160789.18_LMNA | 0.0243   | -0.135427509 | 0.182790689 | 7.66E-01 | 9.03E-01 | 1.00E+00 |
| ENSG00000234253.1_RPL7P13    | ENSG00000160789.18_LMNA | 0.07533  | -0.084884024 | 0.231755895 | 3.56E-01 | 6.40E-01 | 1.00E+00 |
| ENSG00000260493.1_RP11-219B  | ENSG00000160789.18_LMNA | 0.05846  | -0.101687397 | 0.215653346 | 4.74E-01 | 7.34E-01 | 1.00E+00 |
| ENSG00000260750.4_RP11-482M  | ENSG00000160789.18_LMNA | -0.09047 | -0.246129134 | 0.069731535 | 2.68E-01 | 5.52E-01 | 1.00E+00 |
| ENSG00000281100.1_RP11-640L  | ENSG00000160789.18_LMNA | 0.23187  | 0.075457536  | 0.377151201 | 4.05E-03 | 3.34E-02 | 1.00E+00 |
| ENSG00000263464.2_PPIAL4C    | ENSG00000160789.18_LMNA | 0.02672  | -0.13304242  | 0.185137344 | 7.44E-01 | 8.93E-01 | 1.00E+00 |
| ENSG00000277156.1_RP11-496I2 | ENSG00000160789.18_LMNA | -0.05528 | -0.212608524 | 0.10484451  | 4.99E-01 | 7.52E-01 | 1.00E+00 |
| ENSG00000188095.4_MESP2      | ENSG00000160789.18_LMNA | 0.03268  | -0.127178023 | 0.190891853 | 6.89E-01 | 8.66E-01 | 1.00E+00 |
| ENSG00000230779.1_RP1-140J1  | ENSG00000160789.18_LMNA | -0.03176 | -0.189995967 | 0.128092481 | 6.98E-01 | 8.71E-01 | 1.00E+00 |
| ENSG00000228992.2_RPL5P32    | ENSG00000160789.18_LMNA | 0.00684  | -0.152530865 | 0.165856038 | 9.33E-01 | 9.74E-01 | 1.00E+00 |
| ENSG00000260277.1_RP11-101E  | ENSG00000160789.18_LMNA | -0.13388 | -0.286961213 | 0.025875609 | 1.00E-01 | 3.12E-01 | 1.00E+00 |
| ENSG00000258702.1_RP11-433J1 | ENSG00000160789.18_LMNA | -0.10025 | -0.255375675 | 0.059906035 | 2.19E-01 | 4.94E-01 | 1.00E+00 |
| ENSG00000244675.2_AC108676   | ENSG00000160789.18_LMNA | 0.18234  | 0.023833585  | 0.331908148 | 2.46E-02 | 1.25E-01 | 1.00E+00 |
| ENSG00000230092.6_RP11-206L  | ENSG00000160789.18_LMNA | -0.12671 | -0.28025744  | 0.033159416 | 1.20E-01 | 3.48E-01 | 1.00E+00 |
| ENSG00000232460.4_BMPR1AP5   | ENSG00000160789.18_LMNA | -0.00961 | -0.168550122 | 0.149822638 | 9.06E-01 | 9.64E-01 | 1.00E+00 |
| ENSG00000124664.9_SPDEF      | ENSG00000160789.18_LMNA | -0.04399 | -0.20177621  | 0.116024675 | 5.91E-01 | 8.10E-01 | 1.00E+00 |
| ENSG00000248896.2_CTD-2135J  | ENSG00000160789.18_LMNA | -0.12012 | -0.27407553  | 0.039846829 | 1.40E-01 | 3.82E-01 | 1.00E+00 |
| ENSG00000272682.1_AC004471   | ENSG00000160789.18_LMNA | 0.10929  | -0.050793298 | 0.26390021  | 1.80E-01 | 4.43E-01 | 1.00E+00 |
| ENSG00000165496.4_RPL10L     | ENSG00000160789.18_LMNA | -0.08765 | -0.243456859 | 0.072559763 | 2.83E-01 | 5.68E-01 | 1.00E+00 |
| ENSG00000213512.1_GBP7       | ENSG00000160789.18_LMNA | -0.17481 | -0.324966142 | -0.01605528 | 3.12E-02 | 1.47E-01 | 1.00E+00 |
| ENSG00000176635.16_HORMAD2   | ENSG00000160789.18_LMNA | 0.19118  | 0.032981561  | 0.340030079 | 1.83E-02 | 1.01E-01 | 1.00E+00 |
| ENSG00000248265.1_FLJ12825   | ENSG00000160789.18_LMNA | -0.07257 | -0.229120631 | 0.087646363 | 3.74E-01 | 6.54E-01 | 1.00E+00 |
| ENSG00000228820.2_RPSAP1     | ENSG00000160789.18_LMNA | -0.05269 | -0.21013016  | 0.107409559 | 5.19E-01 | 7.65E-01 | 1.00E+00 |
| ENSG00000279917.1_RP11-360N  | ENSG00000160789.18_LMNA | -0.10858 | -0.263227888 | 0.051513918 | 1.83E-01 | 4.48E-01 | 1.00E+00 |
| ENSG00000249271.2_HNRNPA1F   | ENSG00000160789.18_LMNA | -0.07108 | -0.227699355 | 0.089134155 | 3.84E-01 | 6.63E-01 | 1.00E+00 |
| ENSG00000213480.3_RP11-364P  | ENSG00000160789.18_LMNA | 0.02368  | -0.136034179 | 0.182193216 | 7.72E-01 | 9.06E-01 | 1.00E+00 |
| ENSG00000236155.5_RP11-231P  | ENSG00000160789.18_LMNA | 0.02846  | -0.131339307 | 0.186810796 | 7.28E-01 | 8.85E-01 | 1.00E+00 |
| ENSG00000251340.1_MTCYBP35   | ENSG00000160789.18_LMNA | 0.05706  | -0.103074746 | 0.214316101 | 4.85E-01 | 7.42E-01 | 1.00E+00 |
| ENSG00000213798.3_AC004129   | ENSG00000160789.18_LMNA | -0.06429 | -0.221225663 | 0.095892976 | 4.31E-01 | 7.01E-01 | 1.00E+00 |
| ENSG00000070388.10_FGF22     | ENSG00000160789.18_LMNA | 0.08446  | -0.075763702 | 0.24042378  | 3.01E-01 | 5.87E-01 | 1.00E+00 |
| ENSG00000230373.7_GOLGA6L5   | ENSG00000160789.18_LMNA | 0.08002  | -0.080203657 | 0.236210371 | 3.27E-01 | 6.14E-01 | 1.00E+00 |
| ENSG00000224956.5            | ENSG00000160789.18_LMNA | 0.0747   | -0.085514018 | 0.231155291 | 3.60E-01 | 6.43E-01 | 1.00E+00 |

|                              |                         |          |              |             |          |          |          |
|------------------------------|-------------------------|----------|--------------|-------------|----------|----------|----------|
| ENSG00000234491.1_HNRNPA1F   | ENSG00000160789.18_LMNA | -0.09259 | -0.248130144 | 0.067610418 | 2.57E-01 | 5.39E-01 | 1.00E+00 |
| ENSG00000259404.4_EFTUD1P1   | ENSG00000160789.18_LMNA | -0.09617 | -0.25151525  | 0.064015617 | 2.39E-01 | 5.17E-01 | 1.00E+00 |
| ENSG00000280061.1_CTD-2001J  | ENSG00000160789.18_LMNA | -0.28455 | -0.42452098  | -0.13129864 | 3.81E-04 | 5.45E-03 | 1.00E+00 |
| ENSG00000226544.4_RPL7P22    | ENSG00000160789.18_LMNA | -0.09113 | -0.246749677 | 0.069074052 | 2.64E-01 | 5.48E-01 | 1.00E+00 |
| ENSG00000229887.3_HNRNPA1F   | ENSG00000160789.18_LMNA | 0.01805  | -0.141553724 | 0.176746529 | 8.25E-01 | 9.31E-01 | 1.00E+00 |
| ENSG00000243312.3_RP11-397E  | ENSG00000160789.18_LMNA | -0.00557 | -0.164628762 | 0.153762999 | 9.46E-01 | 9.78E-01 | 1.00E+00 |
| ENSG00000146453.11_PNLDC1    | ENSG00000160789.18_LMNA | -0.0383  | -0.196301729 | 0.121644486 | 6.39E-01 | 8.39E-01 | 1.00E+00 |
| ENSG00000214244.4_SETP21     | ENSG00000160789.18_LMNA | 0.1443   | -0.015252703 | 0.296683557 | 7.61E-02 | 2.64E-01 | 1.00E+00 |
| ENSG00000245148.2_ARAP1-AS2  | ENSG00000160789.18_LMNA | 0.02236  | -0.137332534 | 0.180913753 | 7.85E-01 | 9.12E-01 | 1.00E+00 |
| ENSG00000230528.6_NOS2P3     | ENSG00000160789.18_LMNA | -0.01304 | -0.171883553 | 0.146465084 | 8.73E-01 | 9.51E-01 | 1.00E+00 |
| ENSG00000270020.1_RP11-463O  | ENSG00000160789.18_LMNA | -0.07724 | -0.233563988 | 0.082985925 | 3.44E-01 | 6.29E-01 | 1.00E+00 |
| ENSG00000167945.1_PRR25      | ENSG00000160789.18_LMNA | -0.09832 | -0.253556163 | 0.061844314 | 2.28E-01 | 5.05E-01 | 1.00E+00 |
| ENSG00000174792.9_C4orf26    | ENSG00000160789.18_LMNA | -0.07621 | -0.232586831 | 0.084012009 | 3.51E-01 | 6.34E-01 | 1.00E+00 |
| ENSG00000163357.9_DCST1      | ENSG00000160789.18_LMNA | 0.05768  | -0.102464758 | 0.214904206 | 4.80E-01 | 7.38E-01 | 1.00E+00 |
| ENSG00000258130.6_RP11-347C  | ENSG00000160789.18_LMNA | -0.08037 | -0.236544742 | 0.079851765 | 3.25E-01 | 6.12E-01 | 1.00E+00 |
| ENSG00000236582.1_PRPF38AP   | ENSG00000160789.18_LMNA | -0.08407 | -0.240059011 | 0.076148581 | 3.03E-01 | 5.90E-01 | 1.00E+00 |
| ENSG00000278983.1_RP11-426J  | ENSG00000160789.18_LMNA | -0.00152 | -0.160677559 | 0.157723132 | 9.85E-01 | 9.94E-01 | 1.00E+00 |
| ENSG00000261762.1_RP11-650L  | ENSG00000160789.18_LMNA | 0.09423  | -0.065958622 | 0.249686545 | 2.48E-01 | 5.28E-01 | 1.00E+00 |
| ENSG00000218574.1_HNRNPA1F   | ENSG00000160789.18_LMNA | -0.05499 | -0.21232744  | 0.105135638 | 5.01E-01 | 7.53E-01 | 1.00E+00 |
| ENSG00000233122.2_CTAGE7P    | ENSG00000160789.18_LMNA | 0.07278  | -0.087437253 | 0.229320284 | 3.73E-01 | 6.53E-01 | 1.00E+00 |
| ENSG00000224936.1_SUCLA2P1   | ENSG00000160789.18_LMNA | -0.18462 | -0.333999312 | -0.02618401 | 2.28E-02 | 1.18E-01 | 1.00E+00 |
| ENSG00000279081.1_AL356585.1 | ENSG00000160789.18_LMNA | 0.0987   | -0.061466947 | 0.253910582 | 2.26E-01 | 5.03E-01 | 1.00E+00 |
| ENSG00000213184.3_RP11-335F  | ENSG00000160789.18_LMNA | 0.12062  | -0.039331613 | 0.274552725 | 1.39E-01 | 3.80E-01 | 1.00E+00 |
| ENSG00000140986.7_RPL3L      | ENSG00000160789.18_LMNA | 0.09272  | -0.067473509 | 0.248259209 | 2.56E-01 | 5.38E-01 | 1.00E+00 |
| ENSG00000237357.2_RP11-475I2 | ENSG00000160789.18_LMNA | -0.02385 | -0.182358232 | 0.135866647 | 7.71E-01 | 9.05E-01 | 1.00E+00 |
| ENSG00000162753.11_SLC9C2    | ENSG00000160789.18_LMNA | 0.0554   | -0.104719612 | 0.212729096 | 4.98E-01 | 7.51E-01 | 1.00E+00 |
| ENSG00000243566.5_UPK3B      | ENSG00000160789.18_LMNA | 0.07602  | -0.08419961  | 0.232408107 | 3.52E-01 | 6.36E-01 | 1.00E+00 |
| ENSG00000267666.1_AC004156.1 | ENSG00000160789.18_LMNA | 0.09762  | -0.062552908 | 0.252890429 | 2.32E-01 | 5.09E-01 | 1.00E+00 |
| ENSG00000182489.8_XKRX       | ENSG00000160789.18_LMNA | 0.19114  | 0.03294429   | 0.33999708  | 1.83E-02 | 1.01E-01 | 1.00E+00 |
| ENSG00000279909.1_AC110615.1 | ENSG00000160789.18_LMNA | 0.06143  | -0.098740396 | 0.218489971 | 4.52E-01 | 7.17E-01 | 1.00E+00 |
| ENSG00000258875.4_CTD-2547L  | ENSG00000160789.18_LMNA | -0.08803 | -0.243812215 | 0.072183961 | 2.81E-01 | 5.66E-01 | 1.00E+00 |
| ENSG00000232224.4_           | ENSG00000160789.18_LMNA | -0.06666 | -0.223491596 | 0.093530563 | 4.15E-01 | 6.88E-01 | 1.00E+00 |
| ENSG00000077327.14_SPAG6     | ENSG00000160789.18_LMNA | -0.21853 | -0.365031408 | -0.06146799 | 6.84E-03 | 4.95E-02 | 1.00E+00 |

|                             |                         |          |              |             |          |          |          |
|-----------------------------|-------------------------|----------|--------------|-------------|----------|----------|----------|
| ENSG00000253667.2_RP11-30L1 | ENSG00000160789.18_LMNA | 0.05381  | -0.106303008 | 0.211199816 | 5.10E-01 | 7.59E-01 | 1.00E+00 |
| ENSG00000225778.4_PROSER2   | ENSG00000160789.18_LMNA | -0.17574 | -0.325823107 | -0.01701346 | 3.03E-02 | 1.44E-01 | 1.00E+00 |
| ENSG00000232934.6_RP11-324O | ENSG00000160789.18_LMNA | -0.078   | -0.234292243 | 0.082220767 | 3.39E-01 | 6.25E-01 | 1.00E+00 |
| ENSG00000148483.8_TMEN236   | ENSG00000160789.18_LMNA | 0.12332  | -0.036603889 | 0.277076579 | 1.30E-01 | 3.66E-01 | 1.00E+00 |
| ENSG00000267506.4_RP11-13K1 | ENSG00000160789.18_LMNA | -0.15627 | -0.307813235 | 0.003005041 | 5.45E-02 | 2.13E-01 | 1.00E+00 |
| ENSG00000112812.14_PRSS16   | ENSG00000160789.18_LMNA | -0.04548 | -0.203205331 | 0.114554258 | 5.78E-01 | 8.03E-01 | 1.00E+00 |
| ENSG00000250295.5_RDH10-AS  | ENSG00000160789.18_LMNA | 0.08475  | -0.075466173 | 0.240705703 | 2.99E-01 | 5.86E-01 | 1.00E+00 |
| ENSG00000230869.1_AGAP10P   | ENSG00000160789.18_LMNA | 0.00379  | -0.155502224 | 0.162894717 | 9.63E-01 | 9.85E-01 | 1.00E+00 |
| ENSG00000231665.1_OGFOD1P1  | ENSG00000160789.18_LMNA | -0.03307 | -0.191267057 | 0.12679488  | 6.86E-01 | 8.64E-01 | 1.00E+00 |
| ENSG00000259378.1_DCAF13P3  | ENSG00000160789.18_LMNA | 0.15755  | -0.001694997 | 0.308998681 | 5.26E-02 | 2.08E-01 | 1.00E+00 |
| ENSG00000254561.3_RP11-196E | ENSG00000160789.18_LMNA | -0.11476 | -0.269046474 | 0.045266452 | 1.59E-01 | 4.12E-01 | 1.00E+00 |
| ENSG00000136881.10_BAAT     | ENSG00000160789.18_LMNA | -0.18827 | -0.337357574 | -0.02996575 | 2.02E-02 | 1.09E-01 | 1.00E+00 |
| ENSG00000226147.1_TUBBP10   | ENSG00000160789.18_LMNA | 0.09895  | -0.061213195 | 0.254148855 | 2.25E-01 | 5.01E-01 | 1.00E+00 |
| ENSG00000100565.14_LRRC74A  | ENSG00000160789.18_LMNA | -0.0494  | -0.206973299 | 0.110670726 | 5.46E-01 | 7.83E-01 | 1.00E+00 |
| ENSG00000225170.2_RP5-828K2 | ENSG00000160789.18_LMNA | -0.15936 | -0.310677238 | -0.00016181 | 4.99E-02 | 2.01E-01 | 1.00E+00 |
| ENSG00000276651.1_AC007950. | ENSG00000160789.18_LMNA | -0.01493 | -0.17372185  | 0.14461034  | 8.55E-01 | 9.43E-01 | 1.00E+00 |
| ENSG00000242600.5_MBL1P     | ENSG00000160789.18_LMNA | -0.24702 | -0.39084869  | -0.09141244 | 2.16E-03 | 2.07E-02 | 1.00E+00 |
| ENSG00000212643.2_ZRSR1     | ENSG00000160789.18_LMNA | -0.2034  | -0.351223688 | -0.04567414 | 1.20E-02 | 7.46E-02 | 1.00E+00 |
| ENSG00000260388.2_LINC00562 | ENSG00000160789.18_LMNA | -0.0732  | -0.229723812 | 0.087014526 | 3.70E-01 | 6.51E-01 | 1.00E+00 |
| ENSG00000163817.14_SLC6A20  | ENSG00000160789.18_LMNA | -0.10348 | -0.258424791 | 0.056652552 | 2.05E-01 | 4.76E-01 | 1.00E+00 |
| ENSG00000218676.1_BRD7P4    | ENSG00000160789.18_LMNA | 0.02541  | -0.134335072 | 0.183865972 | 7.56E-01 | 8.98E-01 | 1.00E+00 |
| ENSG00000109163.6_GNRHR     | ENSG00000160789.18_LMNA | -0.19922 | -0.347398973 | -0.04132612 | 1.39E-02 | 8.29E-02 | 1.00E+00 |
| ENSG00000162896.5_PIGR      | ENSG00000160789.18_LMNA | -0.11933 | -0.273338514 | 0.040642241 | 1.43E-01 | 3.87E-01 | 1.00E+00 |
| ENSG00000204740.8_MALRD1    | ENSG00000160789.18_LMNA | -0.03415 | -0.192306799 | 0.125732643 | 6.76E-01 | 8.58E-01 | 1.00E+00 |
| ENSG00000077935.15_SMC1B    | ENSG00000160789.18_LMNA | 0.00167  | -0.157569528 | 0.160831007 | 9.84E-01 | 9.94E-01 | 1.00E+00 |
| ENSG00000159650.7_UROC1     | ENSG00000160789.18_LMNA | -0.02629 | -0.184720484 | 0.133466377 | 7.48E-01 | 8.95E-01 | 1.00E+00 |
| ENSG00000263606.1_RP11-737O | ENSG00000160789.18_LMNA | 0.17862  | 0.019986645  | 0.328478986 | 2.77E-02 | 1.36E-01 | 1.00E+00 |
| ENSG00000232196.3_MTRNR2L4  | ENSG00000160789.18_LMNA | -0.13185 | -0.285070972 | 0.027932768 | 1.05E-01 | 3.22E-01 | 1.00E+00 |
| ENSG00000186399.10_GOLGA8F  | ENSG00000160789.18_LMNA | 0.17385  | 0.015070637  | 0.324084989 | 3.22E-02 | 1.50E-01 | 1.00E+00 |
| ENSG00000057468.6_MSH4      | ENSG00000160789.18_LMNA | -0.05557 | -0.212889219 | 0.10455373  | 4.96E-01 | 7.51E-01 | 1.00E+00 |
| ENSG00000214188.8_ST7-OT4   | ENSG00000160789.18_LMNA | 0.05627  | -0.103864769 | 0.213554078 | 4.91E-01 | 7.47E-01 | 1.00E+00 |
| ENSG00000250075.4_RP11-584P | ENSG00000160789.18_LMNA | -0.02018 | -0.178809912 | 0.139465067 | 8.05E-01 | 9.22E-01 | 1.00E+00 |
| ENSG00000246627.5_CACNA1C-  | ENSG00000160789.18_LMNA | 0.02789  | -0.131898732 | 0.186261317 | 7.33E-01 | 8.88E-01 | 1.00E+00 |

|                              |                         |          |              |             |          |          |          |
|------------------------------|-------------------------|----------|--------------|-------------|----------|----------|----------|
| ENSG00000280248.1_CTD-2047H  | ENSG00000160789.18_LMNA | -0.0289  | -0.187234628 | 0.130907664 | 7.24E-01 | 8.83E-01 | 1.00E+00 |
| ENSG00000162078.10_ZG16B     | ENSG00000160789.18_LMNA | 0.02435  | -0.135380281 | 0.182837191 | 7.66E-01 | 9.03E-01 | 1.00E+00 |
| ENSG00000095464.9_PDE6C      | ENSG00000160789.18_LMNA | -0.10364 | -0.258571067 | 0.056496304 | 2.04E-01 | 4.75E-01 | 1.00E+00 |
| ENSG00000152592.12_DMP1      | ENSG00000160789.18_LMNA | 0.16135  | 0.00220216   | 0.312519484 | 4.71E-02 | 1.93E-01 | 1.00E+00 |
| ENSG00000220418.1_TUBB3P1    | ENSG00000160789.18_LMNA | 0.10684  | -0.053270086 | 0.261588147 | 1.90E-01 | 4.58E-01 | 1.00E+00 |
| ENSG00000267293.1_RP11-8H2.  | ENSG00000160789.18_LMNA | -0.13661 | -0.289514848 | 0.02309226  | 9.33E-02 | 2.99E-01 | 1.00E+00 |
| ENSG00000271086.4_NAMA       | ENSG00000160789.18_LMNA | -0.10491 | -0.259774493 | 0.055210247 | 1.98E-01 | 4.68E-01 | 1.00E+00 |
| ENSG00000213901.9_SLC23A3    | ENSG00000160789.18_LMNA | 0.07191  | -0.088298934 | 0.228497401 | 3.79E-01 | 6.58E-01 | 1.00E+00 |
| ENSG00000280399.1_RP11-80P2  | ENSG00000160789.18_LMNA | -0.09923 | -0.254410885 | 0.060934097 | 2.24E-01 | 5.00E-01 | 1.00E+00 |
| ENSG00000084110.9_HAL        | ENSG00000160789.18_LMNA | -0.04626 | -0.2039634   | 0.113773719 | 5.71E-01 | 8.00E-01 | 1.00E+00 |
| ENSG00000229839.5_AC018462.  | ENSG00000160789.18_LMNA | -0.05573 | -0.213037509 | 0.104400091 | 4.95E-01 | 7.50E-01 | 1.00E+00 |
| ENSG00000261812.4_TUBB8P7    | ENSG00000160789.18_LMNA | 0.15032  | -0.009100613 | 0.302284688 | 6.45E-02 | 2.37E-01 | 1.00E+00 |
| ENSG00000238121.4_LINC00426  | ENSG00000160789.18_LMNA | 0.0308   | -0.129037845 | 0.189069246 | 7.06E-01 | 8.75E-01 | 1.00E+00 |
| ENSG00000183784.6_C9orf66    | ENSG00000160789.18_LMNA | 0.08619  | -0.074025774 | 0.242069794 | 2.91E-01 | 5.77E-01 | 1.00E+00 |
| ENSG00000234511.7_C5orf58    | ENSG00000160789.18_LMNA | -0.0475  | -0.205147375 | 0.112553864 | 5.61E-01 | 7.93E-01 | 1.00E+00 |
| ENSG00000153002.10_CPB1      | ENSG00000160789.18_LMNA | -0.27568 | -0.416597455 | -0.1218267  | 5.87E-04 | 7.65E-03 | 1.00E+00 |
| ENSG00000106328.9_FSCN3      | ENSG00000160789.18_LMNA | -0.01796 | -0.17665961  | 0.141641646 | 8.26E-01 | 9.32E-01 | 1.00E+00 |
| ENSG00000251204.1_CTC-278L1  | ENSG00000160789.18_LMNA | -0.08312 | -0.239154302 | 0.077102759 | 3.09E-01 | 5.95E-01 | 1.00E+00 |
| ENSG00000261997.1_RP11-212I2 | ENSG00000160789.18_LMNA | -0.25081 | -0.394266567 | -0.09541771 | 1.83E-03 | 1.83E-02 | 1.00E+00 |
| ENSG00000249816.5_LINC00964  | ENSG00000160789.18_LMNA | -0.23766 | -0.382394299 | -0.08154653 | 3.20E-03 | 2.80E-02 | 1.00E+00 |
| ENSG00000235989.3_MORC2-AS   | ENSG00000160789.18_LMNA | -0.05025 | -0.20778886  | 0.109828873 | 5.39E-01 | 7.79E-01 | 1.00E+00 |
| ENSG00000232712.5_KIZ-AS1    | ENSG00000160789.18_LMNA | -0.11043 | -0.264967668 | 0.04964848  | 1.76E-01 | 4.37E-01 | 1.00E+00 |
| ENSG00000280053.1_RP11-61K1  | ENSG00000160789.18_LMNA | -0.01706 | -0.175780377 | 0.142530738 | 8.35E-01 | 9.36E-01 | 1.00E+00 |
| ENSG00000069812.10_HES2      | ENSG00000160789.18_LMNA | 0.37792  | 0.23272614   | 0.506642768 | 1.59E-06 | 6.69E-05 | 8.13E-02 |
| ENSG00000172955.16_ADH6      | ENSG00000160789.18_LMNA | 0.06113  | -0.099038584 | 0.218203195 | 4.54E-01 | 7.19E-01 | 1.00E+00 |
| ENSG00000178803.9_ADORA2A-   | ENSG00000160789.18_LMNA | 0.08985  | -0.070360676 | 0.2455351   | 2.71E-01 | 5.55E-01 | 1.00E+00 |
| ENSG00000004948.12_CALCR     | ENSG00000160789.18_LMNA | -0.0953  | -0.250693293 | 0.064889245 | 2.43E-01 | 5.22E-01 | 1.00E+00 |
| ENSG00000180509.10_KCNE1     | ENSG00000160789.18_LMNA | 0.15677  | -0.002492125 | 0.308277483 | 5.38E-02 | 2.11E-01 | 1.00E+00 |
| ENSG00000065618.15_COL17A1   | ENSG00000160789.18_LMNA | 0.06084  | -0.099323737 | 0.217928903 | 4.57E-01 | 7.21E-01 | 1.00E+00 |
| ENSG00000224743.5_TEX26-AS1  | ENSG00000160789.18_LMNA | 0.2298   | 0.073278636  | 0.375270288 | 4.40E-03 | 3.56E-02 | 1.00E+00 |
| ENSG00000222035.3_AC079354.  | ENSG00000160789.18_LMNA | 0.30149  | 0.149465108  | 0.439593068 | 1.60E-04 | 2.74E-03 | 1.00E+00 |
| ENSG00000226674.7_TEX41      | ENSG00000160789.18_LMNA | -0.0082  | -0.167182367 | 0.151198171 | 9.20E-01 | 9.70E-01 | 1.00E+00 |
| ENSG00000170298.14_LGALS9B   | ENSG00000160789.18_LMNA | 0.01131  | -0.148153639 | 0.170208041 | 8.90E-01 | 9.57E-01 | 1.00E+00 |

|                             |                         |          |              |             |          |          |          |
|-----------------------------|-------------------------|----------|--------------|-------------|----------|----------|----------|
| ENSG00000050628.19_PTGER3   | ENSG00000160789.18_LMNA | -0.28779 | -0.427405387 | -0.13476006 | 3.24E-04 | 4.78E-03 | 1.00E+00 |
| ENSG00000179270.6_C2orf71   | ENSG00000160789.18_LMNA | -0.26376 | -0.405911732 | -0.10913725 | 1.03E-03 | 1.18E-02 | 1.00E+00 |
| ENSG00000226312.6_CFLAR-AS  | ENSG00000160789.18_LMNA | 0.16965  | 0.010736302  | 0.320199808 | 3.67E-02 | 1.63E-01 | 1.00E+00 |
| ENSG00000243414.5_TICAM2    | ENSG00000160789.18_LMNA | 0.34558  | 0.197228563  | 0.478456264 | 1.30E-05 | 3.61E-04 | 6.66E-01 |
| ENSG00000203995.8_ZYG11A    | ENSG00000160789.18_LMNA | 0.01796  | -0.141649161 | 0.176652181 | 8.26E-01 | 9.32E-01 | 1.00E+00 |
| ENSG00000231794.4_AC009542. | ENSG00000160789.18_LMNA | -0.16972 | -0.320265862 | -0.0108099  | 3.66E-02 | 1.63E-01 | 1.00E+00 |
| ENSG00000114124.2_GRK7      | ENSG00000160789.18_LMNA | -0.08615 | -0.242028539 | 0.074069356 | 2.91E-01 | 5.77E-01 | 1.00E+00 |
| ENSG00000196689.9_TRPV1     | ENSG00000160789.18_LMNA | 0.01506  | -0.144483325 | 0.173847657 | 8.54E-01 | 9.43E-01 | 1.00E+00 |
| ENSG00000229153.4_EPHA1-AS  | ENSG00000160789.18_LMNA | 0.06436  | -0.095820065 | 0.221295647 | 4.31E-01 | 7.00E-01 | 1.00E+00 |
| ENSG00000113073.13_SLC4A9   | ENSG00000160789.18_LMNA | -0.19152 | -0.34034253  | -0.03333451 | 1.81E-02 | 1.00E-01 | 1.00E+00 |
| ENSG00000273523.1_RP11-248G | ENSG00000160789.18_LMNA | -0.11353 | -0.267892442 | 0.046507504 | 1.64E-01 | 4.19E-01 | 1.00E+00 |
| ENSG00000227155.6_RP11-165F | ENSG00000160789.18_LMNA | 0.16812  | 0.009166386  | 0.318790004 | 3.84E-02 | 1.69E-01 | 1.00E+00 |
| ENSG00000267065.2_CTD-2246P | ENSG00000160789.18_LMNA | -0.0082  | -0.167181524 | 0.151199018 | 9.20E-01 | 9.70E-01 | 1.00E+00 |
| ENSG00000279035.1_RP11-649A | ENSG00000160789.18_LMNA | -0.03495 | -0.193073855 | 0.124948524 | 6.69E-01 | 8.54E-01 | 1.00E+00 |
| ENSG00000079112.8_CDH17     | ENSG00000160789.18_LMNA | 0.00163  | -0.15760958  | 0.160790998 | 9.84E-01 | 9.94E-01 | 1.00E+00 |
| ENSG00000257594.3_GALNT4    | ENSG00000160789.18_LMNA | 0.34776  | 0.199612566  | 0.480367588 | 1.13E-05 | 3.23E-04 | 5.82E-01 |
| ENSG00000159450.11_TCHH     | ENSG00000160789.18_LMNA | 0.17157  | 0.012721316  | 0.321980413 | 3.46E-02 | 1.57E-01 | 1.00E+00 |
| ENSG00000213090.2_AC007256. | ENSG00000160789.18_LMNA | 0.0738   | -0.086413225 | 0.230297616 | 3.66E-01 | 6.47E-01 | 1.00E+00 |
| ENSG00000275496.3_CH507-24F | ENSG00000160789.18_LMNA | -0.08001 | -0.236199293 | 0.080215313 | 3.27E-01 | 6.14E-01 | 1.00E+00 |
| ENSG00000280222.1_RP11-174G | ENSG00000160789.18_LMNA | -0.06616 | -0.223013986 | 0.094028806 | 4.18E-01 | 6.90E-01 | 1.00E+00 |
| ENSG00000259362.2_RP11-307C | ENSG00000160789.18_LMNA | -0.02488 | -0.183356479 | 0.13485279  | 7.61E-01 | 9.00E-01 | 1.00E+00 |
| ENSG00000248360.6_LINC00504 | ENSG00000160789.18_LMNA | 0.10125  | -0.058903083 | 0.256316295 | 2.15E-01 | 4.89E-01 | 1.00E+00 |
| ENSG00000236548.1_RNF217-AS | ENSG00000160789.18_LMNA | -0.03331 | -0.191494589 | 0.126562488 | 6.84E-01 | 8.63E-01 | 1.00E+00 |
| ENSG00000167419.9_LPO       | ENSG00000160789.18_LMNA | 0.09624  | -0.063935458 | 0.251590646 | 2.38E-01 | 5.17E-01 | 1.00E+00 |
| ENSG00000124203.5_ZNF831    | ENSG00000160789.18_LMNA | -0.00745 | -0.166449284 | 0.151934914 | 9.27E-01 | 9.72E-01 | 1.00E+00 |
| ENSG00000118976.5_OTUD4P1   | ENSG00000160789.18_LMNA | 0.17792  | 0.019265052  | 0.327834851 | 2.83E-02 | 1.38E-01 | 1.00E+00 |
| ENSG00000188112.7_C6orf132  | ENSG00000160789.18_LMNA | 0.15363  | -0.005711528 | 0.3053611   | 5.88E-02 | 2.23E-01 | 1.00E+00 |
| ENSG00000255185.4_PDXDC2P   | ENSG00000160789.18_LMNA | 0.02533  | -0.134413837 | 0.18378847  | 7.57E-01 | 8.99E-01 | 1.00E+00 |
| ENSG00000095627.8_TDRD1     | ENSG00000160789.18_LMNA | -0.07858 | -0.234846935 | 0.081637718 | 3.36E-01 | 6.22E-01 | 1.00E+00 |
| ENSG00000224976.2_PARP4P2   | ENSG00000160789.18_LMNA | -0.00804 | -0.16702314  | 0.151358223 | 9.22E-01 | 9.70E-01 | 1.00E+00 |
| ENSG00000163116.8_STPG2     | ENSG00000160789.18_LMNA | -0.0745  | -0.230963949 | 0.085714671 | 3.62E-01 | 6.44E-01 | 1.00E+00 |
| ENSG00000122728.6_TAF1L     | ENSG00000160789.18_LMNA | 0.07819  | -0.082031505 | 0.234472322 | 3.38E-01 | 6.24E-01 | 1.00E+00 |
| ENSG00000279072.1_RP13-580B | ENSG00000160789.18_LMNA | 0.07263  | -0.087580086 | 0.229183914 | 3.74E-01 | 6.54E-01 | 1.00E+00 |

|                              |                         |          |              |             |          |          |          |
|------------------------------|-------------------------|----------|--------------|-------------|----------|----------|----------|
| ENSG00000205622.8_AF064858.6 | ENSG00000160789.18_LMNA | -0.07686 | -0.233211683 | 0.083355947 | 3.47E-01 | 6.31E-01 | 1.00E+00 |
| ENSG00000163092.18_XIRP2     | ENSG00000160789.18_LMNA | -0.18713 | -0.336308025 | -0.0287829  | 2.10E-02 | 1.12E-01 | 1.00E+00 |
| ENSG00000124092.11_CTCFL     | ENSG00000160789.18_LMNA | 0.05198  | -0.108110731 | 0.209451973 | 5.25E-01 | 7.70E-01 | 1.00E+00 |
| ENSG00000206384.9_COL6A6     | ENSG00000160789.18_LMNA | -0.07746 | -0.233776336 | 0.082762855 | 3.43E-01 | 6.28E-01 | 1.00E+00 |
| ENSG00000231427.4_LINC01445  | ENSG00000160789.18_LMNA | -0.01648 | -0.175223567 | 0.143093526 | 8.40E-01 | 9.38E-01 | 1.00E+00 |
| ENSG00000280890.1_ELDR       | ENSG00000160789.18_LMNA | 0.1241   | -0.035804113 | 0.27781576  | 1.28E-01 | 3.62E-01 | 1.00E+00 |
| ENSG00000239951.1_IGKV3-20   | ENSG00000160789.18_LMNA | 0.03557  | -0.124333373 | 0.193675347 | 6.64E-01 | 8.52E-01 | 1.00E+00 |
| ENSG00000264219.1_           | ENSG00000160789.18_LMNA | 0.11606  | -0.043954332 | 0.270265611 | 1.54E-01 | 4.05E-01 | 1.00E+00 |
| ENSG00000222937.1_SNORD63    | ENSG00000160789.18_LMNA | 0.12203  | -0.037907605 | 0.275870843 | 1.34E-01 | 3.72E-01 | 1.00E+00 |
| ENSG00000224243.1_LINC00403  | ENSG00000160789.18_LMNA | -0.2922  | -0.431334139 | -0.13948626 | 2.59E-04 | 4.01E-03 | 1.00E+00 |
| ENSG00000231587.1_SNORD62E   | ENSG00000160789.18_LMNA | 0.07359  | -0.08662761  | 0.23009306  | 3.68E-01 | 6.48E-01 | 1.00E+00 |
| ENSG00000263820.1_           | ENSG00000160789.18_LMNA | 0.07937  | -0.080847344 | 0.235598538 | 3.31E-01 | 6.17E-01 | 1.00E+00 |
| ENSG00000241351.2_IGKV3-11   | ENSG00000160789.18_LMNA | -0.06741 | -0.224200892 | 0.092790332 | 4.09E-01 | 6.83E-01 | 1.00E+00 |
| ENSG00000225986.1_UBXN10-A5  | ENSG00000160789.18_LMNA | 0.04992  | -0.110159374 | 0.207468733 | 5.41E-01 | 7.81E-01 | 1.00E+00 |
| ENSG00000260878.1_RP11-320H  | ENSG00000160789.18_LMNA | -0.0981  | -0.253348662 | 0.062065208 | 2.29E-01 | 5.06E-01 | 1.00E+00 |
| ENSG00000260850.1_RP11-437L  | ENSG00000160789.18_LMNA | 0.0997   | -0.060456897 | 0.254858794 | 2.22E-01 | 4.97E-01 | 1.00E+00 |
| ENSG00000255122.1_RP11-303G  | ENSG00000160789.18_LMNA | -0.08999 | -0.245673398 | 0.070214228 | 2.70E-01 | 5.55E-01 | 1.00E+00 |
| ENSG00000199476.1_Y_RNA      | ENSG00000160789.18_LMNA | -0.09153 | -0.247126037 | 0.068675152 | 2.62E-01 | 5.45E-01 | 1.00E+00 |
| ENSG00000200913.1_SNORD46    | ENSG00000160789.18_LMNA | -0.02496 | -0.18343318  | 0.134774862 | 7.60E-01 | 9.00E-01 | 1.00E+00 |
| ENSG00000278888.1_AC090154.  | ENSG00000160789.18_LMNA | -0.08996 | -0.24564707  | 0.070242108 | 2.70E-01 | 5.55E-01 | 1.00E+00 |
| ENSG00000239437.3_RN7SL752f  | ENSG00000160789.18_LMNA | 0.04203  | -0.117961586 | 0.199891628 | 6.07E-01 | 8.20E-01 | 1.00E+00 |
| ENSG00000224237.1_MINOS1P3   | ENSG00000160789.18_LMNA | 0.00466  | -0.154657645 | 0.163737027 | 9.55E-01 | 9.82E-01 | 1.00E+00 |
| ENSG00000265321.1_MIR4263    | ENSG00000160789.18_LMNA | -0.06878 | -0.225515661 | 0.091417294 | 4.00E-01 | 6.76E-01 | 1.00E+00 |
| ENSG00000197061.4_HIST1H4C   | ENSG00000160789.18_LMNA | -0.28683 | -0.426556218 | -0.13374028 | 3.40E-04 | 4.95E-03 | 1.00E+00 |
| ENSG00000260011.2_RP13-20L1. | ENSG00000160789.18_LMNA | -0.00992 | -0.168849282 | 0.149521613 | 9.04E-01 | 9.63E-01 | 1.00E+00 |
| ENSG00000231362.1_RP11-715l4 | ENSG00000160789.18_LMNA | 0.0765   | -0.08372192  | 0.232863153 | 3.49E-01 | 6.33E-01 | 1.00E+00 |
| ENSG00000219222.1_RPL12P47   | ENSG00000160789.18_LMNA | 0.01422  | -0.145311616 | 0.173027054 | 8.62E-01 | 9.46E-01 | 1.00E+00 |
| ENSG00000212607.1_SNORA3B    | ENSG00000160789.18_LMNA | 0.0322   | -0.127651896 | 0.190427671 | 6.94E-01 | 8.68E-01 | 1.00E+00 |
| ENSG00000163273.3_NPPC       | ENSG00000160789.18_LMNA | -0.02766 | -0.186041118 | 0.13212286  | 7.35E-01 | 8.89E-01 | 1.00E+00 |
| ENSG00000267014.4_LINC01532  | ENSG00000160789.18_LMNA | -0.39408 | -0.520616293 | -0.25059897 | 5.08E-07 | 2.65E-05 | 2.61E-02 |
| ENSG00000260978.1_MKRN3-AS   | ENSG00000160789.18_LMNA | -0.28355 | -0.423628234 | -0.13022875 | 4.00E-04 | 5.66E-03 | 1.00E+00 |
| ENSG00000276538.1_RP11-545G  | ENSG00000160789.18_LMNA | 0.05542  | -0.104707153 | 0.212741124 | 4.98E-01 | 7.51E-01 | 1.00E+00 |
| ENSG00000229512.1_AC068580.1 | ENSG00000160789.18_LMNA | 0.10464  | -0.055482501 | 0.259519813 | 1.99E-01 | 4.70E-01 | 1.00E+00 |

|                              |                         |          |              |             |          |          |          |
|------------------------------|-------------------------|----------|--------------|-------------|----------|----------|----------|
| ENSG00000143196.4_DPT        | ENSG00000160789.18_LMNA | 0.02156  | -0.138110719 | 0.180146376 | 7.92E-01 | 9.16E-01 | 1.00E+00 |
| ENSG00000274168.1_RN7SL585F  | ENSG00000160789.18_LMNA | -0.16303 | -0.314078405 | -0.00393074 | 4.48E-02 | 1.87E-01 | 1.00E+00 |
| ENSG00000261123.1_RP11-304L  | ENSG00000160789.18_LMNA | -0.00531 | -0.164373653 | 0.154018994 | 9.48E-01 | 9.79E-01 | 1.00E+00 |
| ENSG00000108342.11_CSF3      | ENSG00000160789.18_LMNA | 0.21609  | 0.05891204   | 0.362805899 | 7.50E-03 | 5.29E-02 | 1.00E+00 |
| ENSG00000251062.1_CTD-2218C  | ENSG00000160789.18_LMNA | -0.14328 | -0.295739452 | 0.016287355 | 7.82E-02 | 2.68E-01 | 1.00E+00 |
| ENSG00000272121.1_RP4-555D2  | ENSG00000160789.18_LMNA | -0.17103 | -0.321474397 | -0.01215696 | 3.51E-02 | 1.59E-01 | 1.00E+00 |
| ENSG00000267340.1_RP11-242D  | ENSG00000160789.18_LMNA | 0.14504  | -0.014492857 | 0.297376518 | 7.46E-02 | 2.60E-01 | 1.00E+00 |
| ENSG00000261675.1_RP5-1119A  | ENSG00000160789.18_LMNA | -0.29741 | -0.435969932 | -0.14508017 | 1.98E-04 | 3.24E-03 | 1.00E+00 |
| ENSG00000227183.3_HDGFP1     | ENSG00000160789.18_LMNA | 0.06647  | -0.093724587 | 0.223305625 | 4.16E-01 | 6.88E-01 | 1.00E+00 |
| ENSG00000261857.5_MIA        | ENSG00000160789.18_LMNA | -0.05131 | -0.208806334 | 0.108777958 | 5.30E-01 | 7.73E-01 | 1.00E+00 |
| ENSG00000224016.2_RP11-728K  | ENSG00000160789.18_LMNA | 0.04791  | -0.112148381 | 0.205540726 | 5.58E-01 | 7.91E-01 | 1.00E+00 |
| ENSG00000233411.1_RP11-104L  | ENSG00000160789.18_LMNA | -0.06982 | -0.226499272 | 0.090389302 | 3.93E-01 | 6.70E-01 | 1.00E+00 |
| ENSG00000229278.1_RP11-483F  | ENSG00000160789.18_LMNA | -0.17354 | -0.323795152 | -0.01474689 | 3.25E-02 | 1.51E-01 | 1.00E+00 |
| ENSG00000173253.13_DMRT2     | ENSG00000160789.18_LMNA | -0.06563 | -0.222504392 | 0.09456024  | 4.22E-01 | 6.93E-01 | 1.00E+00 |
| ENSG00000273812.1_WI2-87327I | ENSG00000160789.18_LMNA | 0.45935  | 0.323829502  | 0.576398426 | 2.64E-09 | 3.49E-07 | 1.35E-04 |
| ENSG00000229151.1_RP11-348F  | ENSG00000160789.18_LMNA | -0.29871 | -0.437120365 | -0.14647125 | 1.85E-04 | 3.07E-03 | 1.00E+00 |
| ENSG00000253807.4_LINC01170  | ENSG00000160789.18_LMNA | -0.28422 | -0.424224036 | -0.1309427  | 3.87E-04 | 5.52E-03 | 1.00E+00 |
| ENSG00000261963.2_CCDC92B    | ENSG00000160789.18_LMNA | -0.23639 | -0.381239662 | -0.08020368 | 3.37E-03 | 2.92E-02 | 1.00E+00 |
| ENSG00000225056.1_RP11-218C  | ENSG00000160789.18_LMNA | -0.07137 | -0.227983775 | 0.088836537 | 3.82E-01 | 6.61E-01 | 1.00E+00 |
| ENSG00000258884.1_CTD-3035D  | ENSG00000160789.18_LMNA | 0.15038  | -0.009041297 | 0.302338587 | 6.44E-02 | 2.36E-01 | 1.00E+00 |
| ENSG00000227212.3_PFN1P6     | ENSG00000160789.18_LMNA | 0.0365   | -0.123415643 | 0.194572257 | 6.55E-01 | 8.47E-01 | 1.00E+00 |
| ENSG00000101180.14_HRH3      | ENSG00000160789.18_LMNA | -0.23821 | -0.38289031  | -0.08212373 | 3.12E-03 | 2.75E-02 | 1.00E+00 |
| ENSG00000254224.1_KB-1043D8  | ENSG00000160789.18_LMNA | -0.20096 | -0.348995879 | -0.04314011 | 1.30E-02 | 7.93E-02 | 1.00E+00 |
| ENSG00000257703.4_RP11-328Ji | ENSG00000160789.18_LMNA | -0.37403 | -0.503264241 | -0.22843243 | 2.07E-06 | 8.20E-05 | 1.06E-01 |
| ENSG00000265800.1_RP11-649A  | ENSG00000160789.18_LMNA | -0.14686 | -0.299066945 | 0.012637755 | 7.10E-02 | 2.52E-01 | 1.00E+00 |
| ENSG00000226386.1_PARD3-AS   | ENSG00000160789.18_LMNA | -0.1011  | -0.256173921 | 0.059054933 | 2.15E-01 | 4.89E-01 | 1.00E+00 |
| ENSG00000271973.1_RP11-572O  | ENSG00000160789.18_LMNA | -0.08118 | -0.237311633 | 0.079044393 | 3.20E-01 | 6.07E-01 | 1.00E+00 |
| ENSG00000235802.1_HCFC1-AS   | ENSG00000160789.18_LMNA | -0.15093 | -0.302857595 | 0.00847002  | 6.34E-02 | 2.34E-01 | 1.00E+00 |
| ENSG00000268942.2_CKS1BP3    | ENSG00000160789.18_LMNA | -0.04407 | -0.201856266 | 0.115942343 | 5.90E-01 | 8.10E-01 | 1.00E+00 |
| ENSG00000276488.1_CTD-2537I  | ENSG00000160789.18_LMNA | 0.14977  | -0.009658217 | 0.301777906 | 6.55E-02 | 2.39E-01 | 1.00E+00 |
| ENSG00000264017.2_RN7SL336F  | ENSG00000160789.18_LMNA | -0.21977 | -0.36615721  | -0.06276246 | 6.52E-03 | 4.79E-02 | 1.00E+00 |
| ENSG00000231563.1_RP11-245P  | ENSG00000160789.18_LMNA | -0.06536 | -0.22224815  | 0.094827395 | 4.24E-01 | 6.95E-01 | 1.00E+00 |
| ENSG00000273293.1_RP11-445N  | ENSG00000160789.18_LMNA | 0.10185  | -0.058299809 | 0.25688179  | 2.12E-01 | 4.86E-01 | 1.00E+00 |



|                              |                         |          |              |             |          |          |          |
|------------------------------|-------------------------|----------|--------------|-------------|----------|----------|----------|
| ENSG00000124575.6_HIST1H1D   | ENSG00000160789.18_LMNA | 0.06366  | -0.096522914 | 0.220620872 | 4.36E-01 | 7.04E-01 | 1.00E+00 |
| ENSG00000259416.2_RP11-158M  | ENSG00000160789.18_LMNA | -0.15011 | -0.302088775 | 0.009316195 | 6.49E-02 | 2.37E-01 | 1.00E+00 |
| ENSG00000227370.1_RP4-669P1  | ENSG00000160789.18_LMNA | -0.03045 | -0.188738228 | 0.129375381 | 7.10E-01 | 8.77E-01 | 1.00E+00 |
| ENSG00000269161.1_CTD-3131K  | ENSG00000160789.18_LMNA | -0.0601  | -0.217221201 | 0.100059223 | 4.62E-01 | 7.25E-01 | 1.00E+00 |
| ENSG00000196747.4_HIST1H2AI  | ENSG00000160789.18_LMNA | -0.06065 | -0.217750136 | 0.099509556 | 4.58E-01 | 7.22E-01 | 1.00E+00 |
| ENSG00000229109.1_RP11-439K  | ENSG00000160789.18_LMNA | 0.17914  | 0.020523775  | 0.328958272 | 2.72E-02 | 1.34E-01 | 1.00E+00 |
| ENSG00000226334.1_RP11-217B  | ENSG00000160789.18_LMNA | 0.0382   | -0.121743588 | 0.196205012 | 6.40E-01 | 8.39E-01 | 1.00E+00 |
| ENSG00000266389.1_CTB-41I6.1 | ENSG00000160789.18_LMNA | 0.03295  | -0.12691395  | 0.191150465 | 6.87E-01 | 8.64E-01 | 1.00E+00 |
| ENSG00000234506.4_LINC01506  | ENSG00000160789.18_LMNA | -0.08589 | -0.241787096 | 0.074324395 | 2.93E-01 | 5.79E-01 | 1.00E+00 |
| ENSG00000263627.1_PPP4R1-A5  | ENSG00000160789.18_LMNA | -0.02253 | -0.181085743 | 0.137158069 | 7.83E-01 | 9.11E-01 | 1.00E+00 |
| ENSG00000237154.2_MCFD2P1    | ENSG00000160789.18_LMNA | -0.09313 | -0.248648296 | 0.067060699 | 2.54E-01 | 5.35E-01 | 1.00E+00 |
| ENSG00000275070.1_Metazoa_SI | ENSG00000160789.18_LMNA | 0.18283  | 0.024342719  | 0.33236138  | 2.42E-02 | 1.24E-01 | 1.00E+00 |
| ENSG00000268896.1_RP11-256I2 | ENSG00000160789.18_LMNA | 0.04248  | -0.11751151  | 0.200329754 | 6.03E-01 | 8.18E-01 | 1.00E+00 |
| ENSG00000244063.1_AC024704.1 | ENSG00000160789.18_LMNA | 0.03026  | -0.129566628 | 0.188550642 | 7.11E-01 | 8.77E-01 | 1.00E+00 |
| ENSG00000231530.1_RP11-187A  | ENSG00000160789.18_LMNA | -0.00423 | -0.163319561 | 0.155076293 | 9.59E-01 | 9.84E-01 | 1.00E+00 |
| ENSG00000272823.1_RP11-295M  | ENSG00000160789.18_LMNA | -0.00924 | -0.168189492 | 0.150185438 | 9.10E-01 | 9.66E-01 | 1.00E+00 |
| ENSG00000197561.5_ELANE      | ENSG00000160789.18_LMNA | 0.20013  | 0.042280149  | 0.348239052 | 1.34E-02 | 8.09E-02 | 1.00E+00 |
| ENSG00000230735.1_RP11-413E  | ENSG00000160789.18_LMNA | -0.18856 | -0.337625028 | -0.03026731 | 2.00E-02 | 1.08E-01 | 1.00E+00 |
| ENSG00000259888.1_           | ENSG00000160789.18_LMNA | -0.05824 | -0.21543918  | 0.101909671 | 4.76E-01 | 7.35E-01 | 1.00E+00 |
| ENSG00000254333.1_CTC-367J1  | ENSG00000160789.18_LMNA | 0.0674   | -0.09279239  | 0.22419892  | 4.09E-01 | 6.83E-01 | 1.00E+00 |
| ENSG00000240710.1_RP11-430C  | ENSG00000160789.18_LMNA | -0.06161 | -0.218661824 | 0.098561677 | 4.51E-01 | 7.16E-01 | 1.00E+00 |
| ENSG00000272360.1_RP11-359I1 | ENSG00000160789.18_LMNA | -0.00595 | -0.164994663 | 0.153395753 | 9.42E-01 | 9.77E-01 | 1.00E+00 |
| ENSG00000258092.1_RP4-816N1  | ENSG00000160789.18_LMNA | 0.11995  | -0.040010319 | 0.273924073 | 1.41E-01 | 3.83E-01 | 1.00E+00 |
| ENSG00000228415.2_PTMAP1     | ENSG00000160789.18_LMNA | -0.12194 | -0.275782502 | 0.038003082 | 1.35E-01 | 3.73E-01 | 1.00E+00 |
| ENSG00000268536.1_AC005523.1 | ENSG00000160789.18_LMNA | -0.17877 | -0.328618257 | -0.02014271 | 2.76E-02 | 1.35E-01 | 1.00E+00 |
| ENSG00000229368.1_AC090587.1 | ENSG00000160789.18_LMNA | 0.13287  | -0.026900458 | 0.286019825 | 1.03E-01 | 3.17E-01 | 1.00E+00 |
| ENSG00000156564.8_LRFN2      | ENSG00000160789.18_LMNA | -0.26792 | -0.409649105 | -0.11356446 | 8.47E-04 | 1.02E-02 | 1.00E+00 |
| ENSG00000232287.2_SLC6A1-A5  | ENSG00000160789.18_LMNA | -0.2424  | -0.386681563 | -0.08654222 | 2.62E-03 | 2.40E-02 | 1.00E+00 |
| ENSG00000262039.1_RP11-81K2  | ENSG00000160789.18_LMNA | -0.19531 | -0.343819583 | -0.03726747 | 1.59E-02 | 9.15E-02 | 1.00E+00 |
| ENSG00000219391.1_AC019129.1 | ENSG00000160789.18_LMNA | 0.01404  | -0.145484688 | 0.172855532 | 8.64E-01 | 9.47E-01 | 1.00E+00 |
| ENSG00000272689.1_RP4-539M6  | ENSG00000160789.18_LMNA | 0.04749  | -0.112557346 | 0.205143996 | 5.61E-01 | 7.93E-01 | 1.00E+00 |
| ENSG00000269949.1_RP11-738E  | ENSG00000160789.18_LMNA | -0.0631  | -0.220087856 | 0.097077882 | 4.40E-01 | 7.08E-01 | 1.00E+00 |
| ENSG00000274918.1_RP11-54G1  | ENSG00000160789.18_LMNA | -0.05663 | -0.213904693 | 0.10350132  | 4.88E-01 | 7.45E-01 | 1.00E+00 |

|                             |                         |          |              |             |          |          |          |
|-----------------------------|-------------------------|----------|--------------|-------------|----------|----------|----------|
| ENSG00000278737.1_RP11-325L | ENSG00000160789.18_LMNA | -0.13637 | -0.289294464 | 0.02333266  | 9.39E-02 | 3.00E-01 | 1.00E+00 |
| ENSG00000271983.1_RP11-28H5 | ENSG00000160789.18_LMNA | 0.07388  | -0.086337855 | 0.230369524 | 3.66E-01 | 6.47E-01 | 1.00E+00 |
| ENSG00000275484.1_CTC-1337H | ENSG00000160789.18_LMNA | 0.1132   | -0.046843511 | 0.26757984  | 1.65E-01 | 4.21E-01 | 1.00E+00 |
| ENSG00000232946.1_RP11-390F | ENSG00000160789.18_LMNA | -0.07022 | -0.226887909 | 0.089982943 | 3.90E-01 | 6.68E-01 | 1.00E+00 |
| ENSG00000198535.5_C2CD4A    | ENSG00000160789.18_LMNA | 0.31402  | 0.16296662   | 0.450689954 | 8.16E-05 | 1.59E-03 | 1.00E+00 |
| ENSG00000249776.4_RP11-133F | ENSG00000160789.18_LMNA | -0.36836 | -0.498334269 | -0.22218615 | 3.02E-06 | 1.11E-04 | 1.55E-01 |
| ENSG00000141028.6_CDRT15P1  | ENSG00000160789.18_LMNA | 0.0624   | -0.097770463 | 0.219422406 | 4.45E-01 | 7.12E-01 | 1.00E+00 |
| ENSG00000224157.1_HCG14     | ENSG00000160789.18_LMNA | -0.18337 | -0.33285416  | -0.02489646 | 2.37E-02 | 1.22E-01 | 1.00E+00 |
| ENSG00000204711.7_C9orf135  | ENSG00000160789.18_LMNA | 0.12113  | -0.038816925 | 0.275029276 | 1.37E-01 | 3.77E-01 | 1.00E+00 |
| ENSG00000105989.7_WNT2      | ENSG00000160789.18_LMNA | 0.04734  | -0.112711401 | 0.204994524 | 5.62E-01 | 7.94E-01 | 1.00E+00 |
| ENSG00000203812.2_HIST2H2A  | ENSG00000160789.18_LMNA | 0.03089  | -0.128948774 | 0.189156584 | 7.06E-01 | 8.75E-01 | 1.00E+00 |
| ENSG00000259349.1_RP11-15E1 | ENSG00000160789.18_LMNA | -0.17655 | -0.326571986 | -0.01785126 | 2.96E-02 | 1.42E-01 | 1.00E+00 |
| ENSG00000270076.1_AF131215  | ENSG00000160789.18_LMNA | -0.06599 | -0.222848017 | 0.094201907 | 4.19E-01 | 6.91E-01 | 1.00E+00 |
| ENSG00000237422.1_RP11-305L | ENSG00000160789.18_LMNA | -0.11905 | -0.273072043 | 0.040929726 | 1.44E-01 | 3.88E-01 | 1.00E+00 |
| ENSG00000267543.1_RP11-666A | ENSG00000160789.18_LMNA | -0.01656 | -0.175302822 | 0.143013433 | 8.39E-01 | 9.38E-01 | 1.00E+00 |
| ENSG00000272574.1_RP11-359K | ENSG00000160789.18_LMNA | 0.11266  | -0.047390914 | 0.267070425 | 1.67E-01 | 4.24E-01 | 1.00E+00 |
| ENSG00000279022.1_RP11-250B | ENSG00000160789.18_LMNA | -0.11371 | -0.268062698 | 0.046324471 | 1.63E-01 | 4.18E-01 | 1.00E+00 |
| ENSG00000259287.2_RP11-3D4  | ENSG00000160789.18_LMNA | -0.01777 | -0.176474661 | 0.141828712 | 8.28E-01 | 9.33E-01 | 1.00E+00 |
| ENSG00000263916.1_RP11-110H | ENSG00000160789.18_LMNA | 0.06607  | -0.094117935 | 0.222928532 | 4.19E-01 | 6.91E-01 | 1.00E+00 |
| ENSG00000262874.1_C19orf84  | ENSG00000160789.18_LMNA | 0.02289  | -0.136812986 | 0.181425871 | 7.80E-01 | 9.09E-01 | 1.00E+00 |
| ENSG00000257222.1_RP11-554E | ENSG00000160789.18_LMNA | -0.03582 | -0.193910528 | 0.124092786 | 6.61E-01 | 8.50E-01 | 1.00E+00 |
| ENSG00000278668.1_RP11-227G | ENSG00000160789.18_LMNA | -0.23496 | -0.379946919 | -0.0787015  | 3.57E-03 | 3.04E-02 | 1.00E+00 |
| ENSG00000228487.2_RP13-225O | ENSG00000160789.18_LMNA | -0.14552 | -0.297824152 | 0.014001825 | 7.36E-02 | 2.58E-01 | 1.00E+00 |
| ENSG00000253171.1_CTB-118P1 | ENSG00000160789.18_LMNA | -0.13915 | -0.291885238 | 0.020504297 | 8.73E-02 | 2.87E-01 | 1.00E+00 |
| ENSG00000205898.3_RP11-3B12 | ENSG00000160789.18_LMNA | -0.11651 | -0.270690265 | 0.043497034 | 1.53E-01 | 4.03E-01 | 1.00E+00 |
| ENSG00000251257.2_CTD-2263F | ENSG00000160789.18_LMNA | 0.27922  | 0.125599405  | 0.419758794 | 4.95E-04 | 6.68E-03 | 1.00E+00 |
| ENSG00000271857.1_RP1-244F2 | ENSG00000160789.18_LMNA | 0.03658  | -0.123339077 | 0.194647062 | 6.55E-01 | 8.47E-01 | 1.00E+00 |
| ENSG00000225764.1_P3H2-AS1  | ENSG00000160789.18_LMNA | -0.04281 | -0.200642711 | 0.117189938 | 6.01E-01 | 8.16E-01 | 1.00E+00 |
| ENSG00000233921.2_RPS15AP4  | ENSG00000160789.18_LMNA | 0.03281  | -0.127056267 | 0.191011096 | 6.88E-01 | 8.65E-01 | 1.00E+00 |
| ENSG00000243429.1_OR7E29P   | ENSG00000160789.18_LMNA | -0.11148 | -0.265956727 | 0.048587005 | 1.72E-01 | 4.31E-01 | 1.00E+00 |
| ENSG00000019186.8_CYP24A1   | ENSG00000160789.18_LMNA | -0.09253 | -0.248080233 | 0.06766336  | 2.57E-01 | 5.39E-01 | 1.00E+00 |
| ENSG00000224509.1_AC010884  | ENSG00000160789.18_LMNA | -0.31935 | -0.455395404 | -0.16872443 | 6.07E-05 | 1.25E-03 | 1.00E+00 |
| ENSG00000217897.2_HSPE1P8   | ENSG00000160789.18_LMNA | 0.01171  | -0.147765804 | 0.170593043 | 8.86E-01 | 9.56E-01 | 1.00E+00 |

|                              |                         |          |              |             |          |          |          |
|------------------------------|-------------------------|----------|--------------|-------------|----------|----------|----------|
| ENSG00000218472.2_RP1-140K8  | ENSG00000160789.18_LMNA | -0.00691 | -0.165932815 | 0.152453751 | 9.33E-01 | 9.74E-01 | 1.00E+00 |
| ENSG00000232383.1_AC010677.1 | ENSG00000160789.18_LMNA | -0.1542  | -0.305895605 | 0.005121968 | 5.79E-02 | 2.20E-01 | 1.00E+00 |
| ENSG00000272576.1_RP11-365H  | ENSG00000160789.18_LMNA | -0.1755  | -0.325604105 | -0.01676854 | 3.06E-02 | 1.45E-01 | 1.00E+00 |
| ENSG00000227632.2_AC018804.1 | ENSG00000160789.18_LMNA | 0.10113  | -0.059024852 | 0.256202126 | 2.15E-01 | 4.89E-01 | 1.00E+00 |
| ENSG00000277020.3_RP11-476H  | ENSG00000160789.18_LMNA | -0.08094 | -0.237084649 | 0.079283402 | 3.22E-01 | 6.08E-01 | 1.00E+00 |
| ENSG00000248240.1_RP11-159F  | ENSG00000160789.18_LMNA | -0.04076 | -0.198675244 | 0.119210463 | 6.18E-01 | 8.27E-01 | 1.00E+00 |
| ENSG00000272102.1_RP3-355L5  | ENSG00000160789.18_LMNA | 0.0215   | -0.138170251 | 0.180087655 | 7.93E-01 | 9.16E-01 | 1.00E+00 |
| ENSG00000225486.1_RP11-301G  | ENSG00000160789.18_LMNA | -0.11634 | -0.270525433 | 0.043674552 | 1.53E-01 | 4.04E-01 | 1.00E+00 |
| ENSG00000105509.9_HAS1       | ENSG00000160789.18_LMNA | 0.22955  | 0.073019448  | 0.375046382 | 4.44E-03 | 3.59E-02 | 1.00E+00 |
| ENSG00000229237.2_HMG1P37    | ENSG00000160789.18_LMNA | 0.12055  | -0.039405094 | 0.274484676 | 1.39E-01 | 3.80E-01 | 1.00E+00 |
| ENSG00000197587.9_DMBX1      | ENSG00000160789.18_LMNA | 0.18024  | 0.021659634  | 0.329971288 | 2.63E-02 | 1.31E-01 | 1.00E+00 |
| ENSG00000270956.1_RP11-65L3  | ENSG00000160789.18_LMNA | 0.1103   | -0.049773416 | 0.264851212 | 1.76E-01 | 4.37E-01 | 1.00E+00 |
| ENSG00000234219.1_CDCA4P4    | ENSG00000160789.18_LMNA | 0.09268  | -0.067514534 | 0.248220535 | 2.56E-01 | 5.38E-01 | 1.00E+00 |
| ENSG00000268095.1_ZNF649-AS  | ENSG00000160789.18_LMNA | -0.04649 | -0.204181866 | 0.113548705 | 5.70E-01 | 7.99E-01 | 1.00E+00 |
| ENSG00000124657.1_OR2B6      | ENSG00000160789.18_LMNA | -0.12409 | -0.277806728 | 0.035813888 | 1.28E-01 | 3.62E-01 | 1.00E+00 |
| ENSG00000251189.1_CTD-2196P  | ENSG00000160789.18_LMNA | -0.19383 | -0.342461981 | -0.03573073 | 1.67E-02 | 9.50E-02 | 1.00E+00 |
| ENSG00000172987.11_HPSE2     | ENSG00000160789.18_LMNA | -0.32629 | -0.461520125 | -0.17624835 | 4.09E-05 | 9.17E-04 | 1.00E+00 |
| ENSG00000269646.1_CTD-2331H  | ENSG00000160789.18_LMNA | 0.13199  | -0.027793909 | 0.285198641 | 1.05E-01 | 3.22E-01 | 1.00E+00 |
| ENSG00000272622.1_RP11-395N  | ENSG00000160789.18_LMNA | -0.0056  | -0.164649847 | 0.153741839 | 9.45E-01 | 9.78E-01 | 1.00E+00 |
| ENSG00000164362.17_TERT      | ENSG00000160789.18_LMNA | 0.16601  | 0.006994238  | 0.316837128 | 4.10E-02 | 1.76E-01 | 1.00E+00 |
| ENSG00000182782.7_HCAR2      | ENSG00000160789.18_LMNA | 0.16859  | 0.009648525  | 0.319223117 | 3.79E-02 | 1.67E-01 | 1.00E+00 |
| ENSG00000272940.1_CTA-384D8  | ENSG00000160789.18_LMNA | -0.03767 | -0.195695007 | 0.122266063 | 6.45E-01 | 8.42E-01 | 1.00E+00 |
| ENSG00000185272.12_RBM11     | ENSG00000160789.18_LMNA | -0.21691 | -0.363558041 | -0.05977541 | 7.27E-03 | 5.17E-02 | 1.00E+00 |
| ENSG00000264769.1_RP11-498C  | ENSG00000160789.18_LMNA | 0.16988  | 0.010971233  | 0.32041066  | 3.64E-02 | 1.63E-01 | 1.00E+00 |
| ENSG00000273747.1_RP11-90B9  | ENSG00000160789.18_LMNA | -0.08231 | -0.2383859   | 0.077912722 | 3.13E-01 | 6.00E-01 | 1.00E+00 |
| ENSG00000148677.6_ANKRD1     | ENSG00000160789.18_LMNA | 0.12735  | -0.032514413 | 0.280852316 | 1.18E-01 | 3.44E-01 | 1.00E+00 |
| ENSG00000267505.1_CTC-296K1  | ENSG00000160789.18_LMNA | 0.14035  | -0.019284694 | 0.293000978 | 8.46E-02 | 2.82E-01 | 1.00E+00 |
| ENSG00000232344.2_AC087163.1 | ENSG00000160789.18_LMNA | 0.10462  | -0.055505301 | 0.259498483 | 2.00E-01 | 4.70E-01 | 1.00E+00 |
| ENSG00000180279.5_MGC45922   | ENSG00000160789.18_LMNA | 0.07669  | -0.08352868  | 0.233047193 | 3.48E-01 | 6.32E-01 | 1.00E+00 |
| ENSG00000214925.3_RP3-507115 | ENSG00000160789.18_LMNA | -0.04632 | -0.20401444  | 0.113721152 | 5.71E-01 | 7.99E-01 | 1.00E+00 |
| ENSG00000254887.1_CTC-378H2  | ENSG00000160789.18_LMNA | -0.0843  | -0.240279647 | 0.075915793 | 3.02E-01 | 5.88E-01 | 1.00E+00 |
| ENSG00000227885.1_RP11-79N2  | ENSG00000160789.18_LMNA | -0.1269  | -0.280435834 | 0.032966016 | 1.19E-01 | 3.47E-01 | 1.00E+00 |
| ENSG00000273203.1_AC006946.1 | ENSG00000160789.18_LMNA | -0.12172 | -0.275579392 | 0.038222578 | 1.35E-01 | 3.74E-01 | 1.00E+00 |

|                             |                         |          |              |             |          |          |          |
|-----------------------------|-------------------------|----------|--------------|-------------|----------|----------|----------|
| ENSG00000177822.6_AC108142. | ENSG00000160789.18_LMNA | 0.0273   | -0.132475062 | 0.185695026 | 7.38E-01 | 8.90E-01 | 1.00E+00 |
| ENSG00000254997.3_KRTAP5-9  | ENSG00000160789.18_LMNA | 0.17468  | 0.015920842  | 0.324845869 | 3.14E-02 | 1.48E-01 | 1.00E+00 |
| ENSG00000272735.1_RP11-467P | ENSG00000160789.18_LMNA | -0.10811 | -0.26278532  | 0.051988102 | 1.85E-01 | 4.51E-01 | 1.00E+00 |
| ENSG00000268756.1_AC104534. | ENSG00000160789.18_LMNA | 0.01182  | -0.14765413  | 0.170703883 | 8.85E-01 | 9.55E-01 | 1.00E+00 |
| ENSG00000249947.2_XBP1P1    | ENSG00000160789.18_LMNA | -0.0571  | -0.214348275 | 0.103041381 | 4.85E-01 | 7.42E-01 | 1.00E+00 |
| ENSG00000217030.1_RP11-428J | ENSG00000160789.18_LMNA | -0.04184 | -0.19971406  | 0.11814396  | 6.09E-01 | 8.21E-01 | 1.00E+00 |
| ENSG00000230537.1_RP11-305L | ENSG00000160789.18_LMNA | -0.11406 | -0.268390356 | 0.045972164 | 1.62E-01 | 4.17E-01 | 1.00E+00 |
| ENSG00000185523.6_SPATA45   | ENSG00000160789.18_LMNA | -0.02303 | -0.181567959 | 0.136668805 | 7.78E-01 | 9.09E-01 | 1.00E+00 |
| ENSG00000270171.1_RP11-338N | ENSG00000160789.18_LMNA | -0.06652 | -0.223359413 | 0.093668472 | 4.15E-01 | 6.88E-01 | 1.00E+00 |
| ENSG00000236266.1_RP3-467L1 | ENSG00000160789.18_LMNA | -0.10555 | -0.260373569 | 0.054569646 | 1.96E-01 | 4.65E-01 | 1.00E+00 |
| ENSG00000275601.1_AC011330. | ENSG00000160789.18_LMNA | -0.03447 | -0.19261473  | 0.12541791  | 6.73E-01 | 8.57E-01 | 1.00E+00 |
| ENSG00000279700.1_RP13-554M | ENSG00000160789.18_LMNA | 0.18178  | 0.023252558  | 0.331390742 | 2.50E-02 | 1.26E-01 | 1.00E+00 |
| ENSG00000242628.4_AC009228. | ENSG00000160789.18_LMNA | -0.07138 | -0.227991577 | 0.088828372 | 3.82E-01 | 6.61E-01 | 1.00E+00 |
| ENSG00000268352.1_AC007228. | ENSG00000160789.18_LMNA | -0.10568 | -0.260500868 | 0.05443349  | 1.95E-01 | 4.64E-01 | 1.00E+00 |
| ENSG00000267752.1_RPS10P27  | ENSG00000160789.18_LMNA | -0.09725 | -0.252542095 | 0.062923543 | 2.33E-01 | 5.11E-01 | 1.00E+00 |
| ENSG00000254414.1_          | ENSG00000160789.18_LMNA | -0.08869 | -0.244444072 | 0.071515528 | 2.77E-01 | 5.62E-01 | 1.00E+00 |
| ENSG00000267723.1_CTD-2189E | ENSG00000160789.18_LMNA | -0.0126  | -0.17146043  | 0.146891676 | 8.78E-01 | 9.52E-01 | 1.00E+00 |
| ENSG00000205041.1_CTC-425O2 | ENSG00000160789.18_LMNA | 0.06224  | -0.097930262 | 0.219268825 | 4.46E-01 | 7.13E-01 | 1.00E+00 |
| ENSG00000273213.1_RP5-998N2 | ENSG00000160789.18_LMNA | -0.00561 | -0.164664713 | 0.153726921 | 9.45E-01 | 9.78E-01 | 1.00E+00 |
| ENSG00000155052.14_CNTNAP5  | ENSG00000160789.18_LMNA | -0.39119 | -0.518125319 | -0.24739935 | 6.25E-07 | 3.14E-05 | 3.21E-02 |
| ENSG00000224903.1_AC005534. | ENSG00000160789.18_LMNA | -0.04917 | -0.206751258 | 0.110899847 | 5.47E-01 | 7.85E-01 | 1.00E+00 |
| ENSG00000224810.1_RP11-538D | ENSG00000160789.18_LMNA | 0.16874  | 0.009800912  | 0.319359981 | 3.77E-02 | 1.66E-01 | 1.00E+00 |
| ENSG00000272866.1_RP11-12D2 | ENSG00000160789.18_LMNA | -0.0826  | -0.238659801 | 0.077624054 | 3.12E-01 | 5.98E-01 | 1.00E+00 |
| ENSG00000258611.2_RP11-368J | ENSG00000160789.18_LMNA | 0.09315  | -0.067042251 | 0.248665682 | 2.54E-01 | 5.35E-01 | 1.00E+00 |
| ENSG00000267033.1_CTD-2562J | ENSG00000160789.18_LMNA | 0.06856  | -0.091643642 | 0.225298998 | 4.01E-01 | 6.78E-01 | 1.00E+00 |
| ENSG00000213785.3_AKR1B1P3  | ENSG00000160789.18_LMNA | -0.11739 | -0.271511807 | 0.042611966 | 1.50E-01 | 3.98E-01 | 1.00E+00 |
| ENSG00000264365.1_RP11-621L | ENSG00000160789.18_LMNA | 0.17753  | 0.018866133  | 0.32747863  | 2.87E-02 | 1.39E-01 | 1.00E+00 |
| ENSG00000265485.4_RP11-449D | ENSG00000160789.18_LMNA | 0.14712  | -0.012365924 | 0.299314481 | 7.05E-02 | 2.51E-01 | 1.00E+00 |
| ENSG00000230358.3_SPDYE21P  | ENSG00000160789.18_LMNA | 0.11052  | -0.049554539 | 0.265055227 | 1.75E-01 | 4.36E-01 | 1.00E+00 |
| ENSG00000178821.11_TMEN52   | ENSG00000160789.18_LMNA | 0.06743  | -0.092769374 | 0.224220969 | 4.09E-01 | 6.83E-01 | 1.00E+00 |
| ENSG00000218069.2_RSL24D1P  | ENSG00000160789.18_LMNA | -0.0505  | -0.20802894  | 0.109580966 | 5.37E-01 | 7.77E-01 | 1.00E+00 |
| ENSG00000270903.1_HNRNPA3F  | ENSG00000160789.18_LMNA | 0.0009   | -0.158324442 | 0.160076711 | 9.91E-01 | 9.97E-01 | 1.00E+00 |
| ENSG00000176399.3_DMRTA1    | ENSG00000160789.18_LMNA | -0.02977 | -0.188082856 | 0.130043442 | 7.16E-01 | 8.79E-01 | 1.00E+00 |

|                              |                         |          |              |             |          |          |          |
|------------------------------|-------------------------|----------|--------------|-------------|----------|----------|----------|
| ENSG00000250927.1_MESTP3     | ENSG00000160789.18_LMNA | -0.00494 | -0.164011717 | 0.154382114 | 9.52E-01 | 9.81E-01 | 1.00E+00 |
| ENSG00000240975.1_RP11-313M  | ENSG00000160789.18_LMNA | 0.08922  | -0.070993476 | 0.244937371 | 2.74E-01 | 5.59E-01 | 1.00E+00 |
| ENSG00000254065.1_RP11-697N  | ENSG00000160789.18_LMNA | -0.12143 | -0.2753111   | 0.03851247  | 1.36E-01 | 3.76E-01 | 1.00E+00 |
| ENSG00000214955.5_AP000318.2 | ENSG00000160789.18_LMNA | -0.0116  | -0.170490368 | 0.147869244 | 8.87E-01 | 9.56E-01 | 1.00E+00 |
| ENSG00000227620.4_ALG1L8P    | ENSG00000160789.18_LMNA | 0.09644  | -0.063737968 | 0.251776382 | 2.37E-01 | 5.16E-01 | 1.00E+00 |
| ENSG00000257556.1_RP11-44N2  | ENSG00000160789.18_LMNA | 0.01595  | -0.143612621 | 0.174709806 | 8.45E-01 | 9.40E-01 | 1.00E+00 |
| ENSG00000259584.1_RP11-521C  | ENSG00000160789.18_LMNA | -0.06146 | -0.218521496 | 0.098707613 | 4.52E-01 | 7.17E-01 | 1.00E+00 |
| ENSG00000275465.3_RP11-569G  | ENSG00000160789.18_LMNA | -0.1336  | -0.286702016 | 0.026157852 | 1.01E-01 | 3.13E-01 | 1.00E+00 |
| ENSG00000129048.6_ACKR4      | ENSG00000160789.18_LMNA | -0.02171 | -0.180283971 | 0.137971215 | 7.91E-01 | 9.15E-01 | 1.00E+00 |
| ENSG00000214076.3_CPSF1P1    | ENSG00000160789.18_LMNA | -0.16951 | -0.320076583 | -0.01059902 | 3.68E-02 | 1.64E-01 | 1.00E+00 |
| ENSG00000162877.11_PM20D1    | ENSG00000160789.18_LMNA | -0.02563 | -0.18407752  | 0.134120059 | 7.54E-01 | 8.98E-01 | 1.00E+00 |
| ENSG00000277795.1_AC005752.1 | ENSG00000160789.18_LMNA | 0.08803  | -0.072186359 | 0.243809947 | 2.81E-01 | 5.66E-01 | 1.00E+00 |
| ENSG00000240270.1_RPL12P37   | ENSG00000160789.18_LMNA | -0.05542 | -0.212740172 | 0.104708139 | 4.98E-01 | 7.51E-01 | 1.00E+00 |
| ENSG00000245832.5_MIR4300HC  | ENSG00000160789.18_LMNA | -0.39604 | -0.52231     | -0.25277788 | 4.41E-07 | 2.38E-05 | 2.26E-02 |
| ENSG00000214433.4_GOLGA2P8   | ENSG00000160789.18_LMNA | -0.06533 | -0.222221883 | 0.094854778 | 4.24E-01 | 6.95E-01 | 1.00E+00 |
| ENSG00000216917.2_RP5-988G1  | ENSG00000160789.18_LMNA | -0.09449 | -0.249930327 | 0.065699741 | 2.47E-01 | 5.27E-01 | 1.00E+00 |
| ENSG00000218027.2_RP11-157J  | ENSG00000160789.18_LMNA | 0.13867  | -0.020996621 | 0.291434599 | 8.84E-02 | 2.89E-01 | 1.00E+00 |
| ENSG00000180221.6_TPT1P10    | ENSG00000160789.18_LMNA | -0.12867 | -0.282089895 | 0.031171711 | 1.14E-01 | 3.37E-01 | 1.00E+00 |
| ENSG00000236813.1_BTF3P8     | ENSG00000160789.18_LMNA | 0.03822  | -0.121722263 | 0.196225824 | 6.40E-01 | 8.39E-01 | 1.00E+00 |
| ENSG00000267345.1_CTD-2293H  | ENSG00000160789.18_LMNA | 0.01593  | -0.143630124 | 0.174692479 | 8.46E-01 | 9.40E-01 | 1.00E+00 |
| ENSG00000081842.16_PCDHA6    | ENSG00000160789.18_LMNA | -0.12276 | -0.276557926 | 0.037164819 | 1.32E-01 | 3.68E-01 | 1.00E+00 |
| ENSG00000277435.1_RP11-1180I | ENSG00000160789.18_LMNA | 0.20287  | 0.045127339  | 0.350743257 | 1.22E-02 | 7.56E-02 | 1.00E+00 |
| ENSG00000227590.2_ATP5G1P5   | ENSG00000160789.18_LMNA | -0.07979 | -0.235988468 | 0.080437144 | 3.29E-01 | 6.15E-01 | 1.00E+00 |
| ENSG00000129991.11_TNNI3     | ENSG00000160789.18_LMNA | 0.12086  | -0.039094919 | 0.2747719   | 1.38E-01 | 3.79E-01 | 1.00E+00 |
| ENSG00000232882.1_PHKA1P1    | ENSG00000160789.18_LMNA | 0.04667  | -0.113377463 | 0.204348103 | 5.68E-01 | 7.98E-01 | 1.00E+00 |
| ENSG00000278875.1_CTC-439O9  | ENSG00000160789.18_LMNA | 0.00635  | -0.153005785 | 0.165383107 | 9.38E-01 | 9.76E-01 | 1.00E+00 |
| ENSG00000104804.6_TULP2      | ENSG00000160789.18_LMNA | 0.30502  | 0.153260603  | 0.442721558 | 1.33E-04 | 2.37E-03 | 1.00E+00 |
| ENSG00000134545.12_KLRC1     | ENSG00000160789.18_LMNA | -0.10072 | -0.255820189 | 0.059432144 | 2.17E-01 | 4.92E-01 | 1.00E+00 |
| ENSG00000186051.6_TAL2       | ENSG00000160789.18_LMNA | -0.08982 | -0.245507053 | 0.070390375 | 2.71E-01 | 5.55E-01 | 1.00E+00 |
| ENSG00000267736.2_HMGB2P1    | ENSG00000160789.18_LMNA | 0.13876  | -0.020898205 | 0.291524693 | 8.82E-02 | 2.89E-01 | 1.00E+00 |
| ENSG00000205177.6_C11orf91   | ENSG00000160789.18_LMNA | 0.06969  | -0.09051749  | 0.226376653 | 3.94E-01 | 6.71E-01 | 1.00E+00 |
| ENSG00000232406.5_RP11-234K  | ENSG00000160789.18_LMNA | -0.26525 | -0.407255327 | -0.11072749 | 9.58E-04 | 1.12E-02 | 1.00E+00 |
| ENSG00000269533.4_AC003002.1 | ENSG00000160789.18_LMNA | 0.08544  | -0.074782637 | 0.241353184 | 2.95E-01 | 5.81E-01 | 1.00E+00 |

|                              |                         |          |              |             |          |          |          |
|------------------------------|-------------------------|----------|--------------|-------------|----------|----------|----------|
| ENSG00000275322.1_RP11-262A  | ENSG00000160789.18_LMNA | 0.15797  | -0.001257647 | 0.309394221 | 5.19E-02 | 2.06E-01 | 1.00E+00 |
| ENSG00000227583.1_RPS3AP37   | ENSG00000160789.18_LMNA | 0.05835  | -0.10179255  | 0.215552032 | 4.75E-01 | 7.34E-01 | 1.00E+00 |
| ENSG00000255108.1_AP006621.1 | ENSG00000160789.18_LMNA | 0.24847  | 0.092942883  | 0.392155661 | 2.02E-03 | 1.97E-02 | 1.00E+00 |
| ENSG00000128652.10_HOXD3     | ENSG00000160789.18_LMNA | -0.19667 | -0.345062928 | -0.03867615 | 1.52E-02 | 8.85E-02 | 1.00E+00 |
| ENSG00000225206.5_MIR137HG   | ENSG00000160789.18_LMNA | 0.02481  | -0.134924627 | 0.18328577  | 7.62E-01 | 9.01E-01 | 1.00E+00 |
| ENSG00000229848.1_RP13-766D  | ENSG00000160789.18_LMNA | 0.09306  | -0.067133546 | 0.248579643 | 2.54E-01 | 5.36E-01 | 1.00E+00 |
| ENSG00000237897.2_RP11-90H3  | ENSG00000160789.18_LMNA | -0.0764  | -0.2327656   | 0.083824339 | 3.50E-01 | 6.33E-01 | 1.00E+00 |
| ENSG00000215302.7_CTD-3092A  | ENSG00000160789.18_LMNA | 0.09817  | -0.061999517 | 0.253410373 | 2.29E-01 | 5.06E-01 | 1.00E+00 |
| ENSG00000258466.4_RP11-1012  | ENSG00000160789.18_LMNA | 0.00802  | -0.151375541 | 0.16700591  | 9.22E-01 | 9.70E-01 | 1.00E+00 |
| ENSG00000259433.2_CTD-2651B  | ENSG00000160789.18_LMNA | -0.19288 | -0.341593786 | -0.03474874 | 1.73E-02 | 9.72E-02 | 1.00E+00 |
| ENSG00000278601.1_RP11-348N  | ENSG00000160789.18_LMNA | -0.12394 | -0.277665408 | 0.035966823 | 1.28E-01 | 3.62E-01 | 1.00E+00 |
| ENSG00000233892.1_PAIP1P1    | ENSG00000160789.18_LMNA | 0.0358   | -0.124104091 | 0.193899477 | 6.61E-01 | 8.51E-01 | 1.00E+00 |
| ENSG00000231628.1_RP3-355L5  | ENSG00000160789.18_LMNA | -0.09492 | -0.250334464 | 0.065270479 | 2.45E-01 | 5.25E-01 | 1.00E+00 |
| ENSG00000235121.1_RP11-90L2  | ENSG00000160789.18_LMNA | 0.00538  | -0.15395211  | 0.16444031  | 9.48E-01 | 9.79E-01 | 1.00E+00 |
| ENSG00000240271.1_RP11-200A  | ENSG00000160789.18_LMNA | -0.06266 | -0.219673111 | 0.097509572 | 4.43E-01 | 7.10E-01 | 1.00E+00 |
| ENSG00000203499.9_FAM83H-A   | ENSG00000160789.18_LMNA | 0.21283  | 0.055506387  | 0.359835142 | 8.48E-03 | 5.81E-02 | 1.00E+00 |
| ENSG00000271959.1_CTD-3064M  | ENSG00000160789.18_LMNA | 0.13286  | -0.026913264 | 0.286008058 | 1.03E-01 | 3.17E-01 | 1.00E+00 |
| ENSG00000247131.4_RP11-588G  | ENSG00000160789.18_LMNA | -0.20563 | -0.353261485 | -0.04799549 | 1.10E-02 | 7.03E-02 | 1.00E+00 |
| ENSG00000259343.4_TMC3-AS1   | ENSG00000160789.18_LMNA | -0.04726 | -0.204920094 | 0.112788107 | 5.63E-01 | 7.94E-01 | 1.00E+00 |
| ENSG00000260439.1_LMF1-AS1   | ENSG00000160789.18_LMNA | -0.19798 | -0.346268672 | -0.04004339 | 1.45E-02 | 8.57E-02 | 1.00E+00 |
| ENSG00000261655.1_CTD-3064M  | ENSG00000160789.18_LMNA | 0.16118  | 0.002030527  | 0.312364605 | 4.73E-02 | 1.94E-01 | 1.00E+00 |
| ENSG00000273301.1_RP11-314B  | ENSG00000160789.18_LMNA | -0.28    | -0.420456569 | -0.12643327 | 4.76E-04 | 6.49E-03 | 1.00E+00 |
| ENSG00000119915.4_ELOVL3     | ENSG00000160789.18_LMNA | 0.10353  | -0.056608514 | 0.25846602  | 2.04E-01 | 4.76E-01 | 1.00E+00 |
| ENSG00000213540.3_RP11-486G  | ENSG00000160789.18_LMNA | 0.02586  | -0.133890723 | 0.184303127 | 7.52E-01 | 8.97E-01 | 1.00E+00 |
| ENSG00000175749.11_EIF3KP1   | ENSG00000160789.18_LMNA | -0.01    | -0.168936473 | 0.149433868 | 9.03E-01 | 9.62E-01 | 1.00E+00 |
| ENSG00000226080.1_RP11-345J  | ENSG00000160789.18_LMNA | 0.06784  | -0.092361221 | 0.224611917 | 4.06E-01 | 6.82E-01 | 1.00E+00 |
| ENSG00000240210.3_RP11-204K  | ENSG00000160789.18_LMNA | -0.00477 | -0.163850489 | 0.154543841 | 9.53E-01 | 9.81E-01 | 1.00E+00 |
| ENSG00000165935.8_SMCO2      | ENSG00000160789.18_LMNA | 0.21622  | 0.059051119  | 0.362927088 | 7.46E-03 | 5.28E-02 | 1.00E+00 |
| ENSG00000213078.3_RP5-933K2  | ENSG00000160789.18_LMNA | 0.13643  | -0.023278016 | 0.289344562 | 9.37E-02 | 3.00E-01 | 1.00E+00 |
| ENSG00000227770.1_RPL7P12    | ENSG00000160789.18_LMNA | 0.02771  | -0.132075049 | 0.186088094 | 7.35E-01 | 8.89E-01 | 1.00E+00 |
| ENSG00000278002.1_RP11-596C  | ENSG00000160789.18_LMNA | -0.10028 | -0.255406296 | 0.059873395 | 2.19E-01 | 4.94E-01 | 1.00E+00 |
| ENSG00000278991.1_RP11-797A  | ENSG00000160789.18_LMNA | -0.07526 | -0.231688673 | 0.084954548 | 3.57E-01 | 6.40E-01 | 1.00E+00 |
| ENSG00000159186.4_AC007383.1 | ENSG00000160789.18_LMNA | -0.0724  | -0.228959737 | 0.087814858 | 3.75E-01 | 6.55E-01 | 1.00E+00 |

|                              |                         |          |              |             |          |          |          |
|------------------------------|-------------------------|----------|--------------|-------------|----------|----------|----------|
| ENSG00000279930.1_LA16c-312E | ENSG00000160789.18_LMNA | -0.03373 | -0.191902791 | 0.126145478 | 6.80E-01 | 8.60E-01 | 1.00E+00 |
| ENSG00000188477.11_AC003003  | ENSG00000160789.18_LMNA | -0.21892 | -0.365386581 | -0.06187626 | 6.73E-03 | 4.89E-02 | 1.00E+00 |
| ENSG00000279685.2_MAPT-IT1   | ENSG00000160789.18_LMNA | -0.13905 | -0.291793507 | 0.020604526 | 8.75E-02 | 2.88E-01 | 1.00E+00 |
| ENSG00000176083.16_ZNF683    | ENSG00000160789.18_LMNA | 0.09107  | -0.069129904 | 0.246696972 | 2.64E-01 | 5.48E-01 | 1.00E+00 |
| ENSG00000130173.12_ANGPTL8   | ENSG00000160789.18_LMNA | 0.0929   | -0.067296339 | 0.248426211 | 2.55E-01 | 5.37E-01 | 1.00E+00 |
| ENSG00000259105.1_RPS3AP4    | ENSG00000160789.18_LMNA | 0.00349  | -0.155793158 | 0.162604456 | 9.66E-01 | 9.87E-01 | 1.00E+00 |
| ENSG00000227578.1_RPS3AP53   | ENSG00000160789.18_LMNA | -0.10366 | -0.258597507 | 0.056468059 | 2.04E-01 | 4.75E-01 | 1.00E+00 |
| ENSG00000268790.4_CTC-429P9  | ENSG00000160789.18_LMNA | -0.077   | -0.233343945 | 0.083217044 | 3.46E-01 | 6.30E-01 | 1.00E+00 |
| ENSG00000179031.8_LLOXNC01-  | ENSG00000160789.18_LMNA | 0.00797  | -0.151419611 | 0.166962064 | 9.22E-01 | 9.70E-01 | 1.00E+00 |
| ENSG00000235482.1_RPL21P135  | ENSG00000160789.18_LMNA | -0.2107  | -0.357897012 | -0.05328834 | 9.17E-03 | 6.16E-02 | 1.00E+00 |
| ENSG00000269929.1_RP11-2B6.2 | ENSG00000160789.18_LMNA | 0.13724  | -0.022451868 | 0.290101759 | 9.18E-02 | 2.96E-01 | 1.00E+00 |
| ENSG00000279347.1_RP11-85I17 | ENSG00000160789.18_LMNA | -0.1366  | -0.289507286 | 0.023100511 | 9.33E-02 | 2.99E-01 | 1.00E+00 |
| ENSG00000261121.1_RP11-496D  | ENSG00000160789.18_LMNA | -0.13388 | -0.286965029 | 0.025871453 | 1.00E-01 | 3.12E-01 | 1.00E+00 |
| ENSG00000231473.2_LINC00441  | ENSG00000160789.18_LMNA | 0.00785  | -0.151542904 | 0.166839391 | 9.24E-01 | 9.71E-01 | 1.00E+00 |
| ENSG00000249779.1_RP11-447H  | ENSG00000160789.18_LMNA | -0.13746 | -0.29030836  | 0.02222638  | 9.13E-02 | 2.95E-01 | 1.00E+00 |
| ENSG00000227176.1_AC092641.1 | ENSG00000160789.18_LMNA | 0.11911  | -0.040865572 | 0.273131512 | 1.44E-01 | 3.88E-01 | 1.00E+00 |
| ENSG00000261787.1_TCF24      | ENSG00000160789.18_LMNA | -0.01188 | -0.170758294 | 0.147599307 | 8.84E-01 | 9.55E-01 | 1.00E+00 |
| ENSG00000248540.2_RP11-247C  | ENSG00000160789.18_LMNA | -0.01333 | -0.172161393 | 0.146184902 | 8.71E-01 | 9.50E-01 | 1.00E+00 |
| ENSG00000125245.11_GPR18     | ENSG00000160789.18_LMNA | 0.06561  | -0.094575925 | 0.222489348 | 4.22E-01 | 6.93E-01 | 1.00E+00 |
| ENSG00000213130.3_EEF1DP5    | ENSG00000160789.18_LMNA | 0.08482  | -0.075402595 | 0.24076594  | 2.99E-01 | 5.85E-01 | 1.00E+00 |
| ENSG00000233229.1_CNOT7P1    | ENSG00000160789.18_LMNA | -0.05555 | -0.212872903 | 0.104570634 | 4.97E-01 | 7.51E-01 | 1.00E+00 |
| ENSG00000249286.1_AMD1P3     | ENSG00000160789.18_LMNA | -0.13429 | -0.287349943 | 0.025452224 | 9.90E-02 | 3.10E-01 | 1.00E+00 |
| ENSG00000269699.4_ZIM2       | ENSG00000160789.18_LMNA | 0.01982  | -0.139821928 | 0.178457567 | 8.08E-01 | 9.24E-01 | 1.00E+00 |
| ENSG00000279636.2_LINC00216  | ENSG00000160789.18_LMNA | 0.04454  | -0.115480833 | 0.202304936 | 5.86E-01 | 8.08E-01 | 1.00E+00 |
| ENSG00000140284.9_SLC27A2    | ENSG00000160789.18_LMNA | 0.06609  | -0.094102482 | 0.222943348 | 4.19E-01 | 6.91E-01 | 1.00E+00 |
| ENSG00000231162.4_COX11P1    | ENSG00000160789.18_LMNA | -0.08666 | -0.242513118 | 0.073557366 | 2.88E-01 | 5.74E-01 | 1.00E+00 |
| ENSG00000213711.3_PHPB7      | ENSG00000160789.18_LMNA | -0.10133 | -0.256392688 | 0.058821601 | 2.14E-01 | 4.88E-01 | 1.00E+00 |
| ENSG00000182255.6_KCNA4      | ENSG00000160789.18_LMNA | -0.25998 | -0.402522006 | -0.105132   | 1.22E-03 | 1.34E-02 | 1.00E+00 |
| ENSG00000279748.1_CTD-3222D  | ENSG00000160789.18_LMNA | 0.04577  | -0.114259783 | 0.203491374 | 5.76E-01 | 8.02E-01 | 1.00E+00 |
| ENSG00000227471.7_AKR1B15    | ENSG00000160789.18_LMNA | -0.2692  | -0.410791496 | -0.11492007 | 7.98E-04 | 9.70E-03 | 1.00E+00 |
| ENSG00000204475.8_NCR3       | ENSG00000160789.18_LMNA | -0.02823 | -0.186593058 | 0.131561011 | 7.30E-01 | 8.86E-01 | 1.00E+00 |
| ENSG00000253431.1_SRPK2P     | ENSG00000160789.18_LMNA | -0.10236 | -0.257364137 | 0.057785056 | 2.10E-01 | 4.82E-01 | 1.00E+00 |
| ENSG00000184617.10_ZNF840P   | ENSG00000160789.18_LMNA | -0.09216 | -0.247727658 | 0.068037292 | 2.59E-01 | 5.42E-01 | 1.00E+00 |

|                              |                         |          |              |             |          |          |          |
|------------------------------|-------------------------|----------|--------------|-------------|----------|----------|----------|
| ENSG00000279330.1_AJ003147.1 | ENSG00000160789.18_LMNA | -0.04058 | -0.198501627 | 0.119388635 | 6.20E-01 | 8.28E-01 | 1.00E+00 |
| ENSG00000261635.2_RP11-618N  | ENSG00000160789.18_LMNA | 0.08278  | -0.077440424 | 0.238834011 | 3.11E-01 | 5.97E-01 | 1.00E+00 |
| ENSG00000263264.1_CTB-133G6  | ENSG00000160789.18_LMNA | -0.0948  | -0.250223007 | 0.065388878 | 2.45E-01 | 5.25E-01 | 1.00E+00 |
| ENSG00000267623.3_AC022153.  | ENSG00000160789.18_LMNA | -0.12906 | -0.282453016 | 0.030777531 | 1.13E-01 | 3.36E-01 | 1.00E+00 |
| ENSG00000267432.4_DNAH17-A3  | ENSG00000160789.18_LMNA | -0.09686 | -0.252172584 | 0.063316614 | 2.35E-01 | 5.13E-01 | 1.00E+00 |
| ENSG00000204860.4_FAM201A    | ENSG00000160789.18_LMNA | -0.34243 | -0.475696656 | -0.19379235 | 1.57E-05 | 4.23E-04 | 8.07E-01 |
| ENSG00000274386.3_RP5-994D1  | ENSG00000160789.18_LMNA | -0.06472 | -0.221640741 | 0.095460491 | 4.28E-01 | 6.99E-01 | 1.00E+00 |
| ENSG00000055732.11_MCOLN3    | ENSG00000160789.18_LMNA | -0.01484 | -0.173626417 | 0.144706682 | 8.56E-01 | 9.43E-01 | 1.00E+00 |
| ENSG00000260382.1_RP11-540B  | ENSG00000160789.18_LMNA | -0.13787 | -0.290691771 | 0.021807833 | 9.03E-02 | 2.93E-01 | 1.00E+00 |
| ENSG00000272892.1_RP11-57G1  | ENSG00000160789.18_LMNA | -0.08728 | -0.243103194 | 0.072933686 | 2.85E-01 | 5.70E-01 | 1.00E+00 |
| ENSG00000237737.4_DCTN1-AS   | ENSG00000160789.18_LMNA | -0.20118 | -0.349196414 | -0.04336805 | 1.29E-02 | 7.89E-02 | 1.00E+00 |
| ENSG00000216863.8_LY86-AS1   | ENSG00000160789.18_LMNA | -0.18212 | -0.331701851 | -0.0236019  | 2.47E-02 | 1.25E-01 | 1.00E+00 |
| ENSG00000229256.1_ST13P13    | ENSG00000160789.18_LMNA | -0.07433 | -0.230803302 | 0.085883115 | 3.63E-01 | 6.44E-01 | 1.00E+00 |
| ENSG00000224315.2_RPL7P7     | ENSG00000160789.18_LMNA | -0.07361 | -0.230113357 | 0.086606339 | 3.67E-01 | 6.48E-01 | 1.00E+00 |
| ENSG00000278897.1_AC020951.  | ENSG00000160789.18_LMNA | -0.07584 | -0.232233686 | 0.084382672 | 3.53E-01 | 6.37E-01 | 1.00E+00 |
| ENSG00000231760.4_RP11-350J  | ENSG00000160789.18_LMNA | -0.04841 | -0.206022052 | 0.111652064 | 5.54E-01 | 7.88E-01 | 1.00E+00 |
| ENSG00000254406.1_RP11-215D  | ENSG00000160789.18_LMNA | -0.04803 | -0.205662079 | 0.112023264 | 5.57E-01 | 7.90E-01 | 1.00E+00 |
| ENSG00000230439.2_RP11-488P  | ENSG00000160789.18_LMNA | -0.06956 | -0.226259582 | 0.090639869 | 3.94E-01 | 6.72E-01 | 1.00E+00 |
| ENSG00000243160.1_RP11-342F  | ENSG00000160789.18_LMNA | 0.02555  | -0.134195045 | 0.184003746 | 7.55E-01 | 8.98E-01 | 1.00E+00 |
| ENSG00000236285.1_NPM1P8     | ENSG00000160789.18_LMNA | 0.0042   | -0.155103298 | 0.163292629 | 9.59E-01 | 9.84E-01 | 1.00E+00 |
| ENSG00000280325.1_AC074183.  | ENSG00000160789.18_LMNA | 0.04789  | -0.11216426  | 0.205525323 | 5.58E-01 | 7.91E-01 | 1.00E+00 |
| ENSG00000090512.10_FETUB     | ENSG00000160789.18_LMNA | 0.08796  | -0.072257025 | 0.243743133 | 2.81E-01 | 5.67E-01 | 1.00E+00 |
| ENSG00000008323.14_PLEKHG6   | ENSG00000160789.18_LMNA | 0.12628  | -0.033599297 | 0.279851607 | 1.21E-01 | 3.50E-01 | 1.00E+00 |
| ENSG00000215035.2_FDPSP5     | ENSG00000160789.18_LMNA | 0.20441  | 0.046727516  | 0.352148754 | 1.15E-02 | 7.25E-02 | 1.00E+00 |
| ENSG00000238035.7_AC138035.  | ENSG00000160789.18_LMNA | 0.06307  | -0.097106026 | 0.220060821 | 4.40E-01 | 7.08E-01 | 1.00E+00 |
| ENSG00000230069.3_LRR37A1    | ENSG00000160789.18_LMNA | 0.10317  | -0.056962971 | 0.258134141 | 2.06E-01 | 4.78E-01 | 1.00E+00 |
| ENSG00000224614.1_TNK2-AS1   | ENSG00000160789.18_LMNA | -0.05495 | -0.212296013 | 0.105168184 | 5.01E-01 | 7.53E-01 | 1.00E+00 |
| ENSG00000185433.7_LINC00158  | ENSG00000160789.18_LMNA | -0.19634 | -0.34476036  | -0.03833323 | 1.53E-02 | 8.93E-02 | 1.00E+00 |
| ENSG00000228414.5_LINC01185  | ENSG00000160789.18_LMNA | -0.24255 | -0.386817069 | -0.08670037 | 2.61E-03 | 2.39E-02 | 1.00E+00 |
| ENSG00000233167.1_EEF1A1P2   | ENSG00000160789.18_LMNA | -0.06648 | -0.223313031 | 0.09371686  | 4.16E-01 | 6.88E-01 | 1.00E+00 |
| ENSG00000182759.3_MAF        | ENSG00000160789.18_LMNA | 0.07693  | -0.08328808  | 0.233276306 | 3.46E-01 | 6.30E-01 | 1.00E+00 |
| ENSG00000260711.2_RP11-747H  | ENSG00000160789.18_LMNA | 0.03859  | -0.1213556   | 0.196583628 | 6.37E-01 | 8.38E-01 | 1.00E+00 |
| ENSG00000274751.1_LA16c-358E | ENSG00000160789.18_LMNA | -0.03351 | -0.191690681 | 0.126362179 | 6.82E-01 | 8.62E-01 | 1.00E+00 |



|                             |                         |          |              |             |          |          |          |
|-----------------------------|-------------------------|----------|--------------|-------------|----------|----------|----------|
| ENSG00000270019.1_RP11-141B | ENSG00000160789.18_LMNA | -0.13351 | -0.28661816  | 0.026249152 | 1.01E-01 | 3.13E-01 | 1.00E+00 |
| ENSG00000213333.3_NPM1P50   | ENSG00000160789.18_LMNA | 0.12275  | -0.037178008 | 0.276545729 | 1.32E-01 | 3.68E-01 | 1.00E+00 |
| ENSG00000118094.10_TREH     | ENSG00000160789.18_LMNA | 0.10219  | -0.057948826 | 0.257210695 | 2.10E-01 | 4.83E-01 | 1.00E+00 |
| ENSG00000225347.1_SLC25A5P1 | ENSG00000160789.18_LMNA | 0.01719  | -0.142402211 | 0.175907511 | 8.34E-01 | 9.35E-01 | 1.00E+00 |
| ENSG00000065325.11_GLP2R    | ENSG00000160789.18_LMNA | -0.22251 | -0.368648819 | -0.06563102 | 5.87E-03 | 4.43E-02 | 1.00E+00 |
| ENSG00000229465.1_ACTG1P11  | ENSG00000160789.18_LMNA | 0.16983  | 0.010920387  | 0.320365028 | 3.65E-02 | 1.63E-01 | 1.00E+00 |
| ENSG00000255384.1_RP11-770J | ENSG00000160789.18_LMNA | -0.15633 | -0.307872953 | 0.002939071 | 5.44E-02 | 2.12E-01 | 1.00E+00 |
| ENSG00000186510.10_CLCNKA   | ENSG00000160789.18_LMNA | 0.09151  | -0.068689232 | 0.247112754 | 2.62E-01 | 5.45E-01 | 1.00E+00 |
| ENSG00000130545.14_CRB3     | ENSG00000160789.18_LMNA | -0.07852 | -0.234786478 | 0.081701275 | 3.36E-01 | 6.22E-01 | 1.00E+00 |
| ENSG00000279644.1_AC008074  | ENSG00000160789.18_LMNA | -0.014   | -0.172820342 | 0.145520193 | 8.64E-01 | 9.47E-01 | 1.00E+00 |
| ENSG00000219682.4_RP3-425P1 | ENSG00000160789.18_LMNA | 0.19217  | 0.03400947   | 0.340939843 | 1.77E-02 | 9.89E-02 | 1.00E+00 |
| ENSG00000225282.1_AP000350  | ENSG00000160789.18_LMNA | 0.04328  | -0.116728695 | 0.201091483 | 5.97E-01 | 8.14E-01 | 1.00E+00 |
| ENSG00000237788.1_RP5-1041C | ENSG00000160789.18_LMNA | 0.05963  | -0.100520708 | 0.216776979 | 4.66E-01 | 7.27E-01 | 1.00E+00 |
| ENSG00000261617.1_RP11-243A | ENSG00000160789.18_LMNA | -0.2332  | -0.378357145 | -0.07685605 | 3.84E-03 | 3.21E-02 | 1.00E+00 |
| ENSG00000251664.3_PCDHA12   | ENSG00000160789.18_LMNA | -0.0456  | -0.203328122 | 0.114427855 | 5.77E-01 | 8.03E-01 | 1.00E+00 |
| ENSG00000230061.2_TRPM2-AS  | ENSG00000160789.18_LMNA | 0.03927  | -0.120688435 | 0.197234457 | 6.31E-01 | 8.34E-01 | 1.00E+00 |
| ENSG00000157703.14_SVOPL    | ENSG00000160789.18_LMNA | -0.03648 | -0.194554089 | 0.123434237 | 6.55E-01 | 8.47E-01 | 1.00E+00 |
| ENSG00000100312.9_ACR       | ENSG00000160789.18_LMNA | -0.03996 | -0.197897698 | 0.120008251 | 6.25E-01 | 8.31E-01 | 1.00E+00 |
| ENSG00000205086.6_C2orf91   | ENSG00000160789.18_LMNA | -0.09604 | -0.251400982 | 0.064137098 | 2.39E-01 | 5.18E-01 | 1.00E+00 |
| ENSG00000244503.1_RP11-278L | ENSG00000160789.18_LMNA | -0.08768 | -0.243478534 | 0.072536843 | 2.83E-01 | 5.68E-01 | 1.00E+00 |
| ENSG00000187905.9_LRRC74B   | ENSG00000160789.18_LMNA | 0.08165  | -0.078570924 | 0.237761179 | 3.17E-01 | 6.04E-01 | 1.00E+00 |
| ENSG00000105523.3_FAM83E    | ENSG00000160789.18_LMNA | 0.17152  | 0.01266879   | 0.321933324 | 3.46E-02 | 1.57E-01 | 1.00E+00 |
| ENSG00000227344.2_HAUS6P1   | ENSG00000160789.18_LMNA | 0.03781  | -0.122121627 | 0.195836012 | 6.44E-01 | 8.42E-01 | 1.00E+00 |
| ENSG00000213590.2_RP11-229P | ENSG00000160789.18_LMNA | 0.14188  | -0.017723512 | 0.294427968 | 8.12E-02 | 2.75E-01 | 1.00E+00 |
| ENSG00000279277.1_RP11-861A | ENSG00000160789.18_LMNA | -0.04152 | -0.199403986 | 0.118462374 | 6.12E-01 | 8.23E-01 | 1.00E+00 |
| ENSG00000248235.5_AC037459  | ENSG00000160789.18_LMNA | 0.10597  | -0.054148673 | 0.260767122 | 1.94E-01 | 4.63E-01 | 1.00E+00 |
| ENSG00000114487.8_MORC1     | ENSG00000160789.18_LMNA | -0.28979 | -0.429188776 | -0.13690379 | 2.93E-04 | 4.42E-03 | 1.00E+00 |
| ENSG00000189409.11_MMP23B   | ENSG00000160789.18_LMNA | 0.04168  | -0.118310577 | 0.199551816 | 6.10E-01 | 8.22E-01 | 1.00E+00 |
| ENSG00000215156.5_RP11-1023 | ENSG00000160789.18_LMNA | 0.04951  | -0.110564629 | 0.207076107 | 5.45E-01 | 7.83E-01 | 1.00E+00 |
| ENSG00000272808.2_RP11-66B2 | ENSG00000160789.18_LMNA | -0.26431 | -0.406413382 | -0.10973081 | 1.00E-03 | 1.16E-02 | 1.00E+00 |
| ENSG00000260988.1_RP11-285A | ENSG00000160789.18_LMNA | -0.11901 | -0.273033402 | 0.04097141  | 1.44E-01 | 3.89E-01 | 1.00E+00 |
| ENSG00000278338.3_VWA8-AS1  | ENSG00000160789.18_LMNA | -0.13192 | -0.285136896 | 0.027861068 | 1.05E-01 | 3.22E-01 | 1.00E+00 |
| ENSG00000236107.6_AC010127  | ENSG00000160789.18_LMNA | -0.20203 | -0.349976693 | -0.04425526 | 1.26E-02 | 7.71E-02 | 1.00E+00 |

|                              |                         |          |              |             |          |          |          |
|------------------------------|-------------------------|----------|--------------|-------------|----------|----------|----------|
| ENSG00000279393.1_RP11-95G6  | ENSG00000160789.18_LMNA | 0.03625  | -0.12365987  | 0.194333622 | 6.57E-01 | 8.49E-01 | 1.00E+00 |
| ENSG00000203697.10_CAPN8     | ENSG00000160789.18_LMNA | 0.07092  | -0.089287631 | 0.227552663 | 3.85E-01 | 6.64E-01 | 1.00E+00 |
| ENSG00000175868.12_CALCB     | ENSG00000160789.18_LMNA | -0.27133 | -0.412700325 | -0.11718761 | 7.22E-04 | 8.97E-03 | 1.00E+00 |
| ENSG00000237021.2_RP3-486I3  | ENSG00000160789.18_LMNA | -0.11185 | -0.266311591 | 0.048205986 | 1.70E-01 | 4.29E-01 | 1.00E+00 |
| ENSG00000088053.10_GP6       | ENSG00000160789.18_LMNA | 0.20391  | 0.046211742  | 0.35169588  | 1.17E-02 | 7.36E-02 | 1.00E+00 |
| ENSG00000180712.3_RP11-290F  | ENSG00000160789.18_LMNA | -0.0666  | -0.223434545 | 0.093590087 | 4.15E-01 | 6.88E-01 | 1.00E+00 |
| ENSG00000270276.2_HIST2H4B   | ENSG00000160789.18_LMNA | -0.20384 | -0.351633167 | -0.04614033 | 1.18E-02 | 7.37E-02 | 1.00E+00 |
| ENSG00000229766.5_RP5-971N1  | ENSG00000160789.18_LMNA | -0.07211 | -0.228689664 | 0.088097649 | 3.77E-01 | 6.57E-01 | 1.00E+00 |
| ENSG00000224609.5_HSD52      | ENSG00000160789.18_LMNA | 0.12557  | -0.034319977 | 0.279186467 | 1.23E-01 | 3.54E-01 | 1.00E+00 |
| ENSG00000259915.2_RP11-410E  | ENSG00000160789.18_LMNA | 0.00391  | -0.155387107 | 0.163009552 | 9.62E-01 | 9.85E-01 | 1.00E+00 |
| ENSG00000261924.1_CTD-2561B  | ENSG00000160789.18_LMNA | -0.03553 | -0.193639604 | 0.124369935 | 6.64E-01 | 8.52E-01 | 1.00E+00 |
| ENSG00000188037.9_CLCN1      | ENSG00000160789.18_LMNA | 0.05978  | -0.100380932 | 0.21691154  | 4.64E-01 | 7.27E-01 | 1.00E+00 |
| ENSG00000232676.1_ADH5P2     | ENSG00000160789.18_LMNA | -0.03896 | -0.196942865 | 0.120987382 | 6.34E-01 | 8.36E-01 | 1.00E+00 |
| ENSG00000074966.9_TXK        | ENSG00000160789.18_LMNA | -0.07749 | -0.233810202 | 0.082727276 | 3.43E-01 | 6.27E-01 | 1.00E+00 |
| ENSG00000262420.3_RP11-490O  | ENSG00000160789.18_LMNA | 0.06679  | -0.093406265 | 0.223610723 | 4.14E-01 | 6.87E-01 | 1.00E+00 |
| ENSG00000275552.1_CH17-302M  | ENSG00000160789.18_LMNA | 0.01955  | -0.140085537 | 0.178197242 | 8.11E-01 | 9.26E-01 | 1.00E+00 |
| ENSG00000259326.1_RP11-102L  | ENSG00000160789.18_LMNA | 0.03049  | -0.129336339 | 0.188776519 | 7.09E-01 | 8.76E-01 | 1.00E+00 |
| ENSG00000112077.14_RHAG      | ENSG00000160789.18_LMNA | 0.03295  | -0.126917346 | 0.19114714  | 6.87E-01 | 8.64E-01 | 1.00E+00 |
| ENSG00000160973.7_FOXH1      | ENSG00000160789.18_LMNA | 0.02647  | -0.133289471 | 0.184894443 | 7.46E-01 | 8.94E-01 | 1.00E+00 |
| ENSG00000213414.3_CTB-47B8.1 | ENSG00000160789.18_LMNA | 0.10275  | -0.057390628 | 0.257733628 | 2.08E-01 | 4.80E-01 | 1.00E+00 |
| ENSG00000266171.1_RP11-769O  | ENSG00000160789.18_LMNA | 0.01061  | -0.148840261 | 0.169526196 | 8.97E-01 | 9.60E-01 | 1.00E+00 |
| ENSG00000267882.2_RP4-569M2  | ENSG00000160789.18_LMNA | 0.24881  | 0.093304282  | 0.392464113 | 2.00E-03 | 1.95E-02 | 1.00E+00 |
| ENSG00000144671.9_SLC22A14   | ENSG00000160789.18_LMNA | -0.10707 | -0.261803317 | 0.053039749 | 1.89E-01 | 4.56E-01 | 1.00E+00 |
| ENSG00000246130.1_RP11-875O  | ENSG00000160789.18_LMNA | 0.22499  | 0.068231934  | 0.370904203 | 5.32E-03 | 4.11E-02 | 1.00E+00 |
| ENSG00000243789.9_JMJD7      | ENSG00000160789.18_LMNA | 0.06014  | -0.100016762 | 0.217262068 | 4.62E-01 | 7.25E-01 | 1.00E+00 |
| ENSG00000228140.1_RP3-467K1  | ENSG00000160789.18_LMNA | -0.04218 | -0.200038487 | 0.117810736 | 6.06E-01 | 8.20E-01 | 1.00E+00 |
| ENSG00000259040.4_BLOC1S5-1  | ENSG00000160789.18_LMNA | -0.18879 | -0.33783349  | -0.03050239 | 1.98E-02 | 1.07E-01 | 1.00E+00 |
| ENSG00000170667.13_RASA4B    | ENSG00000160789.18_LMNA | -0.04933 | -0.206901676 | 0.110744637 | 5.46E-01 | 7.84E-01 | 1.00E+00 |
| ENSG00000237682.2_RP3-514P1  | ENSG00000160789.18_LMNA | 0.04778  | -0.112270697 | 0.20542208  | 5.59E-01 | 7.92E-01 | 1.00E+00 |
| ENSG00000274944.3_RP5-864K1  | ENSG00000160789.18_LMNA | -0.03384 | -0.192002128 | 0.126043982 | 6.79E-01 | 8.60E-01 | 1.00E+00 |
| ENSG00000243004.4_AC005062.1 | ENSG00000160789.18_LMNA | -0.19544 | -0.343939103 | -0.03740283 | 1.58E-02 | 9.12E-02 | 1.00E+00 |
| ENSG00000113303.10_BTNL8     | ENSG00000160789.18_LMNA | -0.06462 | -0.221537239 | 0.095568344 | 4.29E-01 | 6.99E-01 | 1.00E+00 |
| ENSG00000279948.1_CTD-2233K  | ENSG00000160789.18_LMNA | 0.09433  | -0.065863776 | 0.249775864 | 2.48E-01 | 5.28E-01 | 1.00E+00 |

|                              |                         |          |              |             |          |          |          |
|------------------------------|-------------------------|----------|--------------|-------------|----------|----------|----------|
| ENSG00000224072.1_RP11-75A9  | ENSG00000160789.18_LMNA | -0.14843 | -0.300528063 | 0.011032569 | 6.80E-02 | 2.45E-01 | 1.00E+00 |
| ENSG00000258539.1_RP11-12J1  | ENSG00000160789.18_LMNA | -0.07151 | -0.228113198 | 0.08870109  | 3.81E-01 | 6.60E-01 | 1.00E+00 |
| ENSG00000250608.1_RP11-933H  | ENSG00000160789.18_LMNA | -0.04568 | -0.203400503 | 0.114353339 | 5.76E-01 | 8.02E-01 | 1.00E+00 |
| ENSG00000277957.1_SENP3-EIF  | ENSG00000160789.18_LMNA | 0.09178  | -0.068423388 | 0.247363527 | 2.61E-01 | 5.44E-01 | 1.00E+00 |
| ENSG0000002726.18_AOC1       | ENSG00000160789.18_LMNA | -0.06096 | -0.218044793 | 0.099203265 | 4.56E-01 | 7.20E-01 | 1.00E+00 |
| ENSG00000039600.9_SOX30      | ENSG00000160789.18_LMNA | 0.07868  | -0.081545338 | 0.234934802 | 3.35E-01 | 6.21E-01 | 1.00E+00 |
| ENSG00000148734.7_NPFFR1     | ENSG00000160789.18_LMNA | -0.17531 | -0.325431997 | -0.01657608 | 3.07E-02 | 1.46E-01 | 1.00E+00 |
| ENSG00000273319.1_RP11-138A  | ENSG00000160789.18_LMNA | 0.04166  | -0.118325386 | 0.199537395 | 6.10E-01 | 8.22E-01 | 1.00E+00 |
| ENSG00000178404.8_CEP295NL   | ENSG00000160789.18_LMNA | 0.07673  | -0.083491053 | 0.233083026 | 3.47E-01 | 6.32E-01 | 1.00E+00 |
| ENSG00000248746.4_ACTN3      | ENSG00000160789.18_LMNA | -0.05081 | -0.208322131 | 0.109278164 | 5.34E-01 | 7.76E-01 | 1.00E+00 |
| ENSG00000230750.1_SDAD1P2    | ENSG00000160789.18_LMNA | 0.04082  | -0.119158407 | 0.198725964 | 6.18E-01 | 8.27E-01 | 1.00E+00 |
| ENSG00000235370.6_DNM1P51    | ENSG00000160789.18_LMNA | -0.07912 | -0.235352274 | 0.081106355 | 3.33E-01 | 6.18E-01 | 1.00E+00 |
| ENSG00000230221.2_RP11-173G  | ENSG00000160789.18_LMNA | -0.01445 | -0.17325424  | 0.145082346 | 8.60E-01 | 9.45E-01 | 1.00E+00 |
| ENSG00000151704.14_KCNJ1     | ENSG00000160789.18_LMNA | -0.01408 | -0.172889481 | 0.145450433 | 8.63E-01 | 9.47E-01 | 1.00E+00 |
| ENSG00000133454.14_MYO18B    | ENSG00000160789.18_LMNA | -0.0734  | -0.229917936 | 0.086811125 | 3.69E-01 | 6.50E-01 | 1.00E+00 |
| ENSG00000257884.2_RP11-597A  | ENSG00000160789.18_LMNA | 0.00691  | -0.152456807 | 0.165929772 | 9.33E-01 | 9.74E-01 | 1.00E+00 |
| ENSG00000103067.10_ESRP2     | ENSG00000160789.18_LMNA | 0.05517  | -0.104948455 | 0.212508171 | 5.00E-01 | 7.52E-01 | 1.00E+00 |
| ENSG00000226650.5_KIF4B      | ENSG00000160789.18_LMNA | 0.10863  | -0.051457059 | 0.263280948 | 1.83E-01 | 4.47E-01 | 1.00E+00 |
| ENSG00000261668.1_RP11-50D9  | ENSG00000160789.18_LMNA | 0.04488  | -0.115141717 | 0.202634534 | 5.83E-01 | 8.06E-01 | 1.00E+00 |
| ENSG00000261670.1_RP11-1C8.1 | ENSG00000160789.18_LMNA | -0.1116  | -0.266071462 | 0.048463823 | 1.71E-01 | 4.30E-01 | 1.00E+00 |
| ENSG00000153093.17_ACOXL     | ENSG00000160789.18_LMNA | 0.23036  | 0.073867874  | 0.375779188 | 4.30E-03 | 3.50E-02 | 1.00E+00 |
| ENSG00000183638.5_RP1L1      | ENSG00000160789.18_LMNA | 0.04722  | -0.112826744 | 0.204882602 | 5.63E-01 | 7.95E-01 | 1.00E+00 |
| ENSG00000103426.11_CORO7-P   | ENSG00000160789.18_LMNA | -0.15389 | -0.305603757 | 0.005443904 | 5.84E-02 | 2.21E-01 | 1.00E+00 |
| ENSG00000241860.5_RP11-34P1  | ENSG00000160789.18_LMNA | -0.12948 | -0.282848334 | 0.03034829  | 1.12E-01 | 3.34E-01 | 1.00E+00 |
| ENSG00000100024.13_UPB1      | ENSG00000160789.18_LMNA | -0.21725 | -0.363868213 | -0.06013159 | 7.18E-03 | 5.13E-02 | 1.00E+00 |
| ENSG00000166947.10_EPB42     | ENSG00000160789.18_LMNA | -0.12959 | -0.282950591 | 0.03023724  | 1.12E-01 | 3.33E-01 | 1.00E+00 |
| ENSG00000141052.16_MYOCD     | ENSG00000160789.18_LMNA | 0.09826  | -0.061912047 | 0.253492539 | 2.28E-01 | 5.05E-01 | 1.00E+00 |
| ENSG00000184305.13_CC SER1   | ENSG00000160789.18_LMNA | -0.04455 | -0.202314304 | 0.115471196 | 5.86E-01 | 8.08E-01 | 1.00E+00 |
| ENSG00000272980.3_RP11-517H  | ENSG00000160789.18_LMNA | 0.015    | -0.144549619 | 0.173781996 | 8.55E-01 | 9.43E-01 | 1.00E+00 |
| ENSG00000280011.1_RP4-671O1  | ENSG00000160789.18_LMNA | 0.03982  | -0.120141783 | 0.197767515 | 6.26E-01 | 8.31E-01 | 1.00E+00 |
| ENSG00000200795.1_RNU4-1     | ENSG00000160789.18_LMNA | -0.025   | -0.183467932 | 0.134739553 | 7.60E-01 | 9.00E-01 | 1.00E+00 |
| ENSG00000252743.1_RNU6-850F  | ENSG00000160789.18_LMNA | 0.02188  | -0.137800314 | 0.180452516 | 7.89E-01 | 9.14E-01 | 1.00E+00 |
| ENSG00000120057.4_SFRP5      | ENSG00000160789.18_LMNA | -0.14007 | -0.292744658 | 0.019564957 | 8.52E-02 | 2.83E-01 | 1.00E+00 |

|                              |                         |          |              |             |          |          |          |
|------------------------------|-------------------------|----------|--------------|-------------|----------|----------|----------|
| ENSG00000280730.1_           | ENSG00000160789.18_LMNA | -0.03387 | -0.19203351  | 0.126011915 | 6.79E-01 | 8.60E-01 | 1.00E+00 |
| ENSG00000207757.1_MIR93      | ENSG00000160789.18_LMNA | 0.18044  | 0.021870458  | 0.330159233 | 2.61E-02 | 1.30E-01 | 1.00E+00 |
| ENSG00000230432.1_AC114803.1 | ENSG00000160789.18_LMNA | 0.22772  | 0.071097137  | 0.373384638 | 4.78E-03 | 3.79E-02 | 1.00E+00 |
| ENSG00000249577.1_CTD-2195M  | ENSG00000160789.18_LMNA | 0.02454  | -0.13518983  | 0.183024701 | 7.64E-01 | 9.02E-01 | 1.00E+00 |
| ENSG00000223318.1_RNA5SP11   | ENSG00000160789.18_LMNA | 0.08445  | -0.075773038 | 0.240414934 | 3.01E-01 | 5.88E-01 | 1.00E+00 |
| ENSG00000267594.5_CYP4F24P   | ENSG00000160789.18_LMNA | -0.10328 | -0.258234347 | 0.056855956 | 2.05E-01 | 4.77E-01 | 1.00E+00 |
| ENSG00000207297.1_SNORD7     | ENSG00000160789.18_LMNA | -0.05922 | -0.216379518 | 0.100933499 | 4.69E-01 | 7.30E-01 | 1.00E+00 |
| ENSG00000124935.3_SCGB1D2    | ENSG00000160789.18_LMNA | -0.28411 | -0.424130459 | -0.13083055 | 3.89E-04 | 5.54E-03 | 1.00E+00 |
| ENSG00000260981.1_RP11-315A  | ENSG00000160789.18_LMNA | 0.11574  | -0.044274716 | 0.269968023 | 1.56E-01 | 4.07E-01 | 1.00E+00 |
| ENSG00000121742.14_GJB6      | ENSG00000160789.18_LMNA | -0.22535 | -0.371230776 | -0.06860888 | 5.25E-03 | 4.07E-02 | 1.00E+00 |
| ENSG00000227432.1_AC053503.1 | ENSG00000160789.18_LMNA | -0.21629 | -0.362988086 | -0.05912113 | 7.44E-03 | 5.27E-02 | 1.00E+00 |
| ENSG00000207181.1_SNORA14B   | ENSG00000160789.18_LMNA | -0.11542 | -0.269662168 | 0.044603934 | 1.57E-01 | 4.09E-01 | 1.00E+00 |
| ENSG00000244642.3_RN7SL396F  | ENSG00000160789.18_LMNA | 0.015    | -0.144547711 | 0.173783886 | 8.54E-01 | 9.43E-01 | 1.00E+00 |
| ENSG00000258910.2_RP11-19E1  | ENSG00000160789.18_LMNA | -0.02425 | -0.182744849 | 0.135474064 | 7.67E-01 | 9.03E-01 | 1.00E+00 |
| ENSG00000273179.1_RP11-20I2C | ENSG00000160789.18_LMNA | 0.21984  | 0.062838125  | 0.366222984 | 6.50E-03 | 4.78E-02 | 1.00E+00 |
| ENSG00000253404.1_AC034243.1 | ENSG00000160789.18_LMNA | 0.05065  | -0.109433414 | 0.208171816 | 5.35E-01 | 7.77E-01 | 1.00E+00 |
| ENSG00000280502.1_Metazoa_SI | ENSG00000160789.18_LMNA | 0.06735  | -0.092847819 | 0.22414582  | 4.10E-01 | 6.84E-01 | 1.00E+00 |
| ENSG00000225140.1_RP11-809C  | ENSG00000160789.18_LMNA | -0.14896 | -0.301023736 | 0.010487658 | 6.70E-02 | 2.42E-01 | 1.00E+00 |
| ENSG00000278642.1_RP11-159D  | ENSG00000160789.18_LMNA | 0.12035  | -0.039606313 | 0.274298316 | 1.40E-01 | 3.81E-01 | 1.00E+00 |
| ENSG00000271347.1_RP11-701H  | ENSG00000160789.18_LMNA | 0.00946  | -0.149967396 | 0.16840624  | 9.08E-01 | 9.65E-01 | 1.00E+00 |
| ENSG00000264937.1_AC100830.1 | ENSG00000160789.18_LMNA | -0.02034 | -0.17896288  | 0.139310112 | 8.04E-01 | 9.21E-01 | 1.00E+00 |
| ENSG00000248693.1_CTD-2023M  | ENSG00000160789.18_LMNA | -0.22799 | -0.373632073 | -0.07138323 | 4.73E-03 | 3.76E-02 | 1.00E+00 |
| ENSG00000225704.2_RP4-798A1  | ENSG00000160789.18_LMNA | 0.06113  | -0.099033857 | 0.218207741 | 4.54E-01 | 7.19E-01 | 1.00E+00 |
| ENSG00000100362.11_PVALB     | ENSG00000160789.18_LMNA | -0.06365 | -0.220615761 | 0.096528237 | 4.36E-01 | 7.04E-01 | 1.00E+00 |
| ENSG00000235576.1_AC092580.1 | ENSG00000160789.18_LMNA | -0.0794  | -0.235626735 | 0.080817685 | 3.31E-01 | 6.17E-01 | 1.00E+00 |
| ENSG00000260187.1_RP11-439I1 | ENSG00000160789.18_LMNA | -0.14814 | -0.300258729 | 0.011328581 | 6.86E-02 | 2.46E-01 | 1.00E+00 |
| ENSG00000235026.4_DPP10-AS1  | ENSG00000160789.18_LMNA | -0.24529 | -0.38929008  | -0.08958918 | 2.32E-03 | 2.19E-02 | 1.00E+00 |
| ENSG00000233535.1_RP1-122K4  | ENSG00000160789.18_LMNA | 0.1725   | 0.013677348  | 0.322837218 | 3.36E-02 | 1.54E-01 | 1.00E+00 |
| ENSG00000250673.1_RP11-6L6.2 | ENSG00000160789.18_LMNA | -0.04643 | -0.204125877 | 0.113606375 | 5.70E-01 | 7.99E-01 | 1.00E+00 |
| ENSG00000153347.8_FAM81B     | ENSG00000160789.18_LMNA | -0.05168 | -0.2091605   | 0.108411985 | 5.27E-01 | 7.72E-01 | 1.00E+00 |
| ENSG00000176268.5_CYCSP34    | ENSG00000160789.18_LMNA | -0.02389 | -0.182398168 | 0.135826099 | 7.70E-01 | 9.05E-01 | 1.00E+00 |
| ENSG00000180730.4_SHISA2     | ENSG00000160789.18_LMNA | -0.22195 | -0.36814232  | -0.06504749 | 5.99E-03 | 4.50E-02 | 1.00E+00 |
| ENSG00000275585.1_CH17-118C  | ENSG00000160789.18_LMNA | -0.19049 | -0.339394872 | -0.03226425 | 1.87E-02 | 1.03E-01 | 1.00E+00 |

|                              |                         |          |              |             |          |          |          |
|------------------------------|-------------------------|----------|--------------|-------------|----------|----------|----------|
| ENSG00000267344.1_CTB-39G8.  | ENSG00000160789.18_LMNA | 0.08998  | -0.070222708 | 0.24566539  | 2.70E-01 | 5.55E-01 | 1.00E+00 |
| ENSG00000231769.2_RP1-8B1.4  | ENSG00000160789.18_LMNA | -0.17766 | -0.327598759 | -0.01900065 | 2.85E-02 | 1.38E-01 | 1.00E+00 |
| ENSG00000186471.11_AKAP14    | ENSG00000160789.18_LMNA | -0.14224 | -0.294768904 | 0.01735029  | 8.04E-02 | 2.73E-01 | 1.00E+00 |
| ENSG00000242268.2_RP11-368I2 | ENSG00000160789.18_LMNA | -0.31163 | -0.448578752 | -0.16038961 | 9.30E-05 | 1.78E-03 | 1.00E+00 |
| ENSG00000170561.11_IRX2      | ENSG00000160789.18_LMNA | -0.28719 | -0.426872805 | -0.1341204  | 3.34E-04 | 4.88E-03 | 1.00E+00 |
| ENSG00000272049.1_RP11-480D  | ENSG00000160789.18_LMNA | 0.04534  | -0.114690084 | 0.203073377 | 5.79E-01 | 8.04E-01 | 1.00E+00 |
| ENSG00000275542.1_RP11-455O  | ENSG00000160789.18_LMNA | 0.0725   | -0.087712122 | 0.22905784  | 3.75E-01 | 6.55E-01 | 1.00E+00 |
| ENSG00000250081.1_CTD-2116N  | ENSG00000160789.18_LMNA | 0.04187  | -0.11812165  | 0.199735783 | 6.09E-01 | 8.21E-01 | 1.00E+00 |
| ENSG00000262372.1_RP11-669E  | ENSG00000160789.18_LMNA | -0.14119 | -0.293784949 | 0.018427188 | 8.27E-02 | 2.78E-01 | 1.00E+00 |
| ENSG00000259262.1_NDUFA3P4   | ENSG00000160789.18_LMNA | -0.23895 | -0.383562095 | -0.0829058  | 3.03E-03 | 2.70E-02 | 1.00E+00 |
| ENSG00000236431.1_AC009237.  | ENSG00000160789.18_LMNA | -0.03284 | -0.191042176 | 0.127024531 | 6.88E-01 | 8.65E-01 | 1.00E+00 |
| ENSG00000139209.14_SLC38A4   | ENSG00000160789.18_LMNA | 0.10037  | -0.059789562 | 0.25548494  | 2.19E-01 | 4.93E-01 | 1.00E+00 |
| ENSG00000226862.1_RP11-569A  | ENSG00000160789.18_LMNA | -0.0526  | -0.210039976 | 0.107502818 | 5.20E-01 | 7.66E-01 | 1.00E+00 |
| ENSG00000263878.1_DLGAP1-A   | ENSG00000160789.18_LMNA | -0.18758 | -0.336727856 | -0.02925595 | 2.07E-02 | 1.10E-01 | 1.00E+00 |
| ENSG00000229468.1_RPL39P18   | ENSG00000160789.18_LMNA | 0.11931  | -0.040659823 | 0.273322218 | 1.43E-01 | 3.87E-01 | 1.00E+00 |
| ENSG00000233529.1_HCG21      | ENSG00000160789.18_LMNA | 0.06363  | -0.096552378 | 0.220592579 | 4.36E-01 | 7.04E-01 | 1.00E+00 |
| ENSG00000270933.1_CTD-2227E  | ENSG00000160789.18_LMNA | 0.11412  | -0.045914456 | 0.268444019 | 1.62E-01 | 4.16E-01 | 1.00E+00 |
| ENSG00000232901.1_CYCSP10    | ENSG00000160789.18_LMNA | -0.07066 | -0.227302915 | 0.089548896 | 3.87E-01 | 6.65E-01 | 1.00E+00 |
| ENSG00000214195.4_HMG2P31    | ENSG00000160789.18_LMNA | -0.11252 | -0.266935671 | 0.047535686 | 1.68E-01 | 4.25E-01 | 1.00E+00 |
| ENSG00000265393.1_CTD-2517M  | ENSG00000160789.18_LMNA | -0.01008 | -0.169009716 | 0.149360154 | 9.02E-01 | 9.62E-01 | 1.00E+00 |
| ENSG00000136574.16_GATA4     | ENSG00000160789.18_LMNA | 0.06923  | -0.090970121 | 0.225943607 | 3.97E-01 | 6.74E-01 | 1.00E+00 |
| ENSG00000228208.5_C1orf143   | ENSG00000160789.18_LMNA | 0.00236  | -0.156895426 | 0.161504243 | 9.77E-01 | 9.91E-01 | 1.00E+00 |
| ENSG00000240211.1_RP11-758P  | ENSG00000160789.18_LMNA | 0.04712  | -0.112932685 | 0.204779796 | 5.64E-01 | 7.95E-01 | 1.00E+00 |
| ENSG00000258483.2_AC144835.  | ENSG00000160789.18_LMNA | -0.1847  | -0.33407766  | -0.02627213 | 2.27E-02 | 1.18E-01 | 1.00E+00 |
| ENSG00000281333.1_RP11-900F  | ENSG00000160789.18_LMNA | 0.02045  | -0.139206996 | 0.179064665 | 8.03E-01 | 9.21E-01 | 1.00E+00 |
| ENSG00000168079.15_SCARA5    | ENSG00000160789.18_LMNA | -0.03745 | -0.1954831   | 0.122483098 | 6.47E-01 | 8.43E-01 | 1.00E+00 |
| ENSG00000273687.1_RP5-837J1. | ENSG00000160789.18_LMNA | 0.16151  | 0.00237233   | 0.312673027 | 4.68E-02 | 1.93E-01 | 1.00E+00 |
| ENSG00000268938.2_AC005387.  | ENSG00000160789.18_LMNA | 0.0516   | -0.108493183 | 0.209081929 | 5.28E-01 | 7.72E-01 | 1.00E+00 |
| ENSG00000265752.2_RP11-403A  | ENSG00000160789.18_LMNA | 0.05933  | -0.100825787 | 0.21648324  | 4.68E-01 | 7.29E-01 | 1.00E+00 |
| ENSG00000274560.1_RP11-285E  | ENSG00000160789.18_LMNA | -0.00649 | -0.165517019 | 0.152871325 | 9.37E-01 | 9.75E-01 | 1.00E+00 |
| ENSG00000273724.1_RP11-347C  | ENSG00000160789.18_LMNA | 0.05156  | -0.108530031 | 0.209046271 | 5.28E-01 | 7.72E-01 | 1.00E+00 |
| ENSG00000235946.1_LL0XNC01-  | ENSG00000160789.18_LMNA | -0.04136 | -0.199250817 | 0.11861964  | 6.13E-01 | 8.24E-01 | 1.00E+00 |
| ENSG00000272755.1_RP11-326G  | ENSG00000160789.18_LMNA | -0.00583 | -0.164873317 | 0.153517556 | 9.43E-01 | 9.77E-01 | 1.00E+00 |

|                              |                         |          |              |             |          |          |          |
|------------------------------|-------------------------|----------|--------------|-------------|----------|----------|----------|
| ENSG00000230679.1_ENO1-AS1   | ENSG00000160789.18_LMNA | -0.12371 | -0.277445305 | 0.036204986 | 1.29E-01 | 3.64E-01 | 1.00E+00 |
| ENSG00000267131.1_RP11-332H  | ENSG00000160789.18_LMNA | -0.03695 | -0.195007314 | 0.12297029  | 6.51E-01 | 8.45E-01 | 1.00E+00 |
| ENSG00000273019.1_           | ENSG00000160789.18_LMNA | -0.04284 | -0.20067204  | 0.117159798 | 6.00E-01 | 8.16E-01 | 1.00E+00 |
| ENSG00000267834.1_RP11-167N  | ENSG00000160789.18_LMNA | -0.10576 | -0.260576552 | 0.054352535 | 1.95E-01 | 4.63E-01 | 1.00E+00 |
| ENSG00000267984.1_CTD-2616J  | ENSG00000160789.18_LMNA | 0.05868  | -0.10147272  | 0.215860164 | 4.73E-01 | 7.33E-01 | 1.00E+00 |
| ENSG00000163464.7_CXCR1      | ENSG00000160789.18_LMNA | 0.07811  | -0.082111739 | 0.234395984 | 3.39E-01 | 6.24E-01 | 1.00E+00 |
| ENSG00000269191.1_AC005387.1 | ENSG00000160789.18_LMNA | -0.1526  | -0.3044092   | 0.006760938 | 6.05E-02 | 2.27E-01 | 1.00E+00 |
| ENSG00000127588.4_GNG13      | ENSG00000160789.18_LMNA | -0.22114 | -0.367409064 | -0.06420308 | 6.18E-03 | 4.60E-02 | 1.00E+00 |
| ENSG00000270578.1_RP11-712B  | ENSG00000160789.18_LMNA | 0.12892  | -0.03091978  | 0.282321986 | 1.13E-01 | 3.36E-01 | 1.00E+00 |
| ENSG00000266573.4_RP11-449D  | ENSG00000160789.18_LMNA | -0.02316 | -0.181694319 | 0.136540573 | 7.77E-01 | 9.08E-01 | 1.00E+00 |
| ENSG00000224468.3_RP11-181K  | ENSG00000160789.18_LMNA | 0.2532   | 0.097951993  | 0.39642492  | 1.65E-03 | 1.69E-02 | 1.00E+00 |
| ENSG00000217769.4_RP11-76H1  | ENSG00000160789.18_LMNA | -0.04651 | -0.204200323 | 0.113529693 | 5.69E-01 | 7.99E-01 | 1.00E+00 |
| ENSG00000279904.1_CTD-2015C  | ENSG00000160789.18_LMNA | -0.06402 | -0.220964957 | 0.096164553 | 4.33E-01 | 7.03E-01 | 1.00E+00 |
| ENSG00000234353.2_AP000347.1 | ENSG00000160789.18_LMNA | 0.03854  | -0.121402378 | 0.196537985 | 6.37E-01 | 8.38E-01 | 1.00E+00 |
| ENSG00000187472.3_RP11-67P1  | ENSG00000160789.18_LMNA | 0.0365   | -0.123417915 | 0.194570037 | 6.55E-01 | 8.47E-01 | 1.00E+00 |
| ENSG00000237594.2_AP000251.1 | ENSG00000160789.18_LMNA | -0.04757 | -0.205219835 | 0.112479177 | 5.61E-01 | 7.93E-01 | 1.00E+00 |
| ENSG00000271815.1_CTD-2235C  | ENSG00000160789.18_LMNA | -0.03859 | -0.196587159 | 0.121351981 | 6.37E-01 | 8.38E-01 | 1.00E+00 |
| ENSG00000249609.1_RP11-635L  | ENSG00000160789.18_LMNA | -0.08381 | -0.239814903 | 0.076406094 | 3.05E-01 | 5.91E-01 | 1.00E+00 |
| ENSG00000260031.1_RPL10P14   | ENSG00000160789.18_LMNA | 0.01108  | -0.148382737 | 0.169980571 | 8.92E-01 | 9.58E-01 | 1.00E+00 |
| ENSG00000245711.2_NADK2-AS   | ENSG00000160789.18_LMNA | 0.15111  | -0.008290621 | 0.303020541 | 6.31E-02 | 2.33E-01 | 1.00E+00 |
| ENSG00000180440.3_SERTM1     | ENSG00000160789.18_LMNA | 0.01437  | -0.14516373  | 0.173173599 | 8.61E-01 | 9.45E-01 | 1.00E+00 |
| ENSG00000250167.1_CTC-321K1  | ENSG00000160789.18_LMNA | 0.196    | 0.037988781  | 0.344456371 | 1.55E-02 | 8.99E-02 | 1.00E+00 |
| ENSG00000260167.1_RP11-146F  | ENSG00000160789.18_LMNA | -0.07586 | -0.232256656 | 0.084358565 | 3.53E-01 | 6.37E-01 | 1.00E+00 |
| ENSG00000274403.1_CTD-2036P  | ENSG00000160789.18_LMNA | 0.02262  | -0.137076991 | 0.181165664 | 7.82E-01 | 9.11E-01 | 1.00E+00 |
| ENSG00000224452.1_RSL24D1P1  | ENSG00000160789.18_LMNA | 0.06904  | -0.0911635   | 0.225758558 | 3.98E-01 | 6.75E-01 | 1.00E+00 |
| ENSG00000223908.5_AC068657.1 | ENSG00000160789.18_LMNA | -0.10679 | -0.261542869 | 0.05331855  | 1.90E-01 | 4.58E-01 | 1.00E+00 |
| ENSG00000269985.1_RP1-232P2  | ENSG00000160789.18_LMNA | -0.08577 | -0.241670031 | 0.074448037 | 2.93E-01 | 5.79E-01 | 1.00E+00 |
| ENSG00000102970.9_CCL17      | ENSG00000160789.18_LMNA | -0.0111  | -0.170003521 | 0.148359624 | 8.92E-01 | 9.58E-01 | 1.00E+00 |
| ENSG00000227791.3_AC007365.1 | ENSG00000160789.18_LMNA | -0.09088 | -0.246517725 | 0.069319844 | 2.65E-01 | 5.49E-01 | 1.00E+00 |
| ENSG00000279130.1_RP11-278J1 | ENSG00000160789.18_LMNA | -0.07956 | -0.235776437 | 0.08066021  | 3.30E-01 | 6.16E-01 | 1.00E+00 |
| ENSG00000274849.1_RP11-49I11 | ENSG00000160789.18_LMNA | 0.29212  | 0.139406983  | 0.43126833  | 2.60E-04 | 4.02E-03 | 1.00E+00 |
| ENSG00000272666.1_CTA-384D8  | ENSG00000160789.18_LMNA | 0.01215  | -0.147331878 | 0.171023685 | 8.82E-01 | 9.54E-01 | 1.00E+00 |
| ENSG00000218631.1_RP3-395C1  | ENSG00000160789.18_LMNA | 0.086    | -0.07421503  | 0.241890636 | 2.92E-01 | 5.78E-01 | 1.00E+00 |

|                              |                         |          |              |             |          |          |          |
|------------------------------|-------------------------|----------|--------------|-------------|----------|----------|----------|
| ENSG00000241932.1_RP11-14K2  | ENSG00000160789.18_LMNA | 0.07242  | -0.087791403 | 0.228982135 | 3.75E-01 | 6.55E-01 | 1.00E+00 |
| ENSG00000225544.1_KB-1027C1  | ENSG00000160789.18_LMNA | 0.04054  | -0.119432326 | 0.19845905  | 6.20E-01 | 8.28E-01 | 1.00E+00 |
| ENSG00000267327.1_CTD-2008L  | ENSG00000160789.18_LMNA | -0.44225 | -0.561888625 | -0.30448537 | 1.17E-08 | 1.23E-06 | 5.99E-04 |
| ENSG00000263648.1_RP11-471L  | ENSG00000160789.18_LMNA | -0.00842 | -0.167396578 | 0.150982823 | 9.18E-01 | 9.69E-01 | 1.00E+00 |
| ENSG00000267328.1_AC002398.  | ENSG00000160789.18_LMNA | 0.2765   | 0.122699305  | 0.417329286 | 5.64E-04 | 7.40E-03 | 1.00E+00 |
| ENSG00000250687.5_RP11-497H  | ENSG00000160789.18_LMNA | -0.05736 | -0.214602998 | 0.102777203 | 4.83E-01 | 7.40E-01 | 1.00E+00 |
| ENSG00000234141.1_AC009473.  | ENSG00000160789.18_LMNA | -0.20315 | -0.350996341 | -0.04541536 | 1.21E-02 | 7.51E-02 | 1.00E+00 |
| ENSG00000223505.2_RP11-397P  | ENSG00000160789.18_LMNA | 0.01837  | -0.141241354 | 0.177055298 | 8.22E-01 | 9.31E-01 | 1.00E+00 |
| ENSG00000276842.1_RP11-713N  | ENSG00000160789.18_LMNA | -0.06279 | -0.219791812 | 0.097386034 | 4.42E-01 | 7.10E-01 | 1.00E+00 |
| ENSG00000182035.10_ADIG      | ENSG00000160789.18_LMNA | -0.11933 | -0.273340169 | 0.040640455 | 1.43E-01 | 3.87E-01 | 1.00E+00 |
| ENSG00000256973.1_RP11-359J  | ENSG00000160789.18_LMNA | 0.0447   | -0.115316644 | 0.202464526 | 5.84E-01 | 8.07E-01 | 1.00E+00 |
| ENSG00000227220.1_RP11-69I8. | ENSG00000160789.18_LMNA | -0.04245 | -0.200292814 | 0.117549463 | 6.04E-01 | 8.18E-01 | 1.00E+00 |
| ENSG00000276030.1_CTD-2027I1 | ENSG00000160789.18_LMNA | -0.0877  | -0.243502815 | 0.072511167 | 2.83E-01 | 5.68E-01 | 1.00E+00 |
| ENSG00000225787.1_LSM3P3     | ENSG00000160789.18_LMNA | -0.04247 | -0.200320051 | 0.117521479 | 6.03E-01 | 8.18E-01 | 1.00E+00 |
| ENSG00000230943.1_RP11-367G  | ENSG00000160789.18_LMNA | -0.01501 | -0.173793363 | 0.144538142 | 8.54E-01 | 9.43E-01 | 1.00E+00 |
| ENSG00000273123.1_RP11-9N20  | ENSG00000160789.18_LMNA | -0.09456 | -0.249998922 | 0.06562689  | 2.47E-01 | 5.27E-01 | 1.00E+00 |
| ENSG00000203588.3_IGBP1-AS1  | ENSG00000160789.18_LMNA | -0.03387 | -0.192040033 | 0.126005251 | 6.79E-01 | 8.60E-01 | 1.00E+00 |
| ENSG00000147697.7_GSDMC      | ENSG00000160789.18_LMNA | -0.11861 | -0.272657817 | 0.041376517 | 1.46E-01 | 3.91E-01 | 1.00E+00 |
| ENSG00000244723.3_ASLP1      | ENSG00000160789.18_LMNA | -0.1043  | -0.259195237 | 0.055829407 | 2.01E-01 | 4.71E-01 | 1.00E+00 |
| ENSG00000253180.1_RP11-410L  | ENSG00000160789.18_LMNA | 0.01855  | -0.141069856 | 0.177224791 | 8.21E-01 | 9.30E-01 | 1.00E+00 |
| ENSG00000226774.1_RP11-654E  | ENSG00000160789.18_LMNA | -0.05257 | -0.210010609 | 0.107533185 | 5.20E-01 | 7.66E-01 | 1.00E+00 |
| ENSG00000198088.9_NUP62CL    | ENSG00000160789.18_LMNA | -0.00774 | -0.166737181 | 0.151645622 | 9.25E-01 | 9.71E-01 | 1.00E+00 |
| ENSG00000234020.1_CHIAP3     | ENSG00000160789.18_LMNA | -0.17466 | -0.32483109  | -0.01590432 | 3.14E-02 | 1.48E-01 | 1.00E+00 |
| ENSG00000280221.1_AC008686.  | ENSG00000160789.18_LMNA | 0.06795  | -0.092253544 | 0.224715037 | 4.06E-01 | 6.81E-01 | 1.00E+00 |
| ENSG00000278740.1_RP11-147L  | ENSG00000160789.18_LMNA | -0.02764 | -0.18602268  | 0.132141625 | 7.35E-01 | 8.89E-01 | 1.00E+00 |
| ENSG00000225331.1_AP001055.  | ENSG00000160789.18_LMNA | -0.018   | -0.176697722 | 0.141603095 | 8.26E-01 | 9.32E-01 | 1.00E+00 |
| ENSG00000255775.1_RP3-454B2  | ENSG00000160789.18_LMNA | -0.15583 | -0.307401806 | 0.003459464 | 5.52E-02 | 2.14E-01 | 1.00E+00 |
| ENSG00000224992.1_RP11-295G  | ENSG00000160789.18_LMNA | 0.12424  | -0.035665227 | 0.277944086 | 1.27E-01 | 3.61E-01 | 1.00E+00 |
| ENSG00000237077.1_AC105399.  | ENSG00000160789.18_LMNA | -0.05526 | -0.212592422 | 0.104861189 | 4.99E-01 | 7.52E-01 | 1.00E+00 |
| ENSG00000237721.1_AF064858.  | ENSG00000160789.18_LMNA | -0.09732 | -0.252610066 | 0.062851227 | 2.33E-01 | 5.11E-01 | 1.00E+00 |
| ENSG00000271821.1_XXbac-BPG  | ENSG00000160789.18_LMNA | 0.04064  | -0.119332193 | 0.198556628 | 6.19E-01 | 8.28E-01 | 1.00E+00 |
| ENSG00000239210.2_RPS26P55   | ENSG00000160789.18_LMNA | -0.10322 | -0.25818081  | 0.056913132 | 2.06E-01 | 4.77E-01 | 1.00E+00 |
| ENSG00000244527.1_RP11-254G  | ENSG00000160789.18_LMNA | -0.06224 | -0.219267043 | 0.097932116 | 4.46E-01 | 7.13E-01 | 1.00E+00 |

|                              |                         |          |              |             |          |          |          |
|------------------------------|-------------------------|----------|--------------|-------------|----------|----------|----------|
| ENSG00000229647.1_AC007879.  | ENSG00000160789.18_LMNA | 0.13686  | -0.02283995  | 0.289746115 | 9.27E-02 | 2.98E-01 | 1.00E+00 |
| ENSG00000255291.1_HMGB1P4C   | ENSG00000160789.18_LMNA | -0.07648 | -0.232847136 | 0.083738737 | 3.49E-01 | 6.33E-01 | 1.00E+00 |
| ENSG00000216867.2_AC114776.  | ENSG00000160789.18_LMNA | -0.06166 | -0.218713751 | 0.098507672 | 4.50E-01 | 7.16E-01 | 1.00E+00 |
| ENSG00000240919.1_RP11-400K  | ENSG00000160789.18_LMNA | -0.05064 | -0.208164486 | 0.109440985 | 5.36E-01 | 7.77E-01 | 1.00E+00 |
| ENSG00000236514.1_RP11-162G  | ENSG00000160789.18_LMNA | 0.06708  | -0.093118233 | 0.223886736 | 4.12E-01 | 6.86E-01 | 1.00E+00 |
| ENSG00000261625.1_RP11-554A  | ENSG00000160789.18_LMNA | 0.0618   | -0.098370978 | 0.218845175 | 4.49E-01 | 7.15E-01 | 1.00E+00 |
| ENSG00000266368.1_RP11-1096  | ENSG00000160789.18_LMNA | 0.06013  | -0.100027716 | 0.217251525 | 4.62E-01 | 7.25E-01 | 1.00E+00 |
| ENSG00000274372.3_RP11-94I2. | ENSG00000160789.18_LMNA | -0.16001 | -0.311281028 | -0.00083024 | 4.89E-02 | 1.99E-01 | 1.00E+00 |
| ENSG00000237512.5_UNC5B-AS   | ENSG00000160789.18_LMNA | 0.02913  | -0.130676567 | 0.187461494 | 7.22E-01 | 8.82E-01 | 1.00E+00 |
| ENSG00000236809.2_SNX25P1    | ENSG00000160789.18_LMNA | 0.14198  | -0.017615992 | 0.294526195 | 8.10E-02 | 2.74E-01 | 1.00E+00 |
| ENSG00000274624.1_RP11-49G2  | ENSG00000160789.18_LMNA | -0.12674 | -0.280281128 | 0.033133737 | 1.20E-01 | 3.48E-01 | 1.00E+00 |
| ENSG00000226450.2_CYP2D8P    | ENSG00000160789.18_LMNA | -0.05991 | -0.217041221 | 0.100246214 | 4.63E-01 | 7.26E-01 | 1.00E+00 |
| ENSG00000226149.4_RP1-69D17  | ENSG00000160789.18_LMNA | 0.16331  | 0.004216837  | 0.314336264 | 4.44E-02 | 1.86E-01 | 1.00E+00 |
| ENSG00000232912.4_RP5-1115A  | ENSG00000160789.18_LMNA | -0.00331 | -0.162428481 | 0.155969516 | 9.68E-01 | 9.87E-01 | 1.00E+00 |
| ENSG00000256030.1_CBX3P4     | ENSG00000160789.18_LMNA | -0.16828 | -0.318939226 | -0.00933248 | 3.82E-02 | 1.68E-01 | 1.00E+00 |
| ENSG00000273302.1_RP11-493E  | ENSG00000160789.18_LMNA | 0.03733  | -0.122603381 | 0.195365647 | 6.48E-01 | 8.44E-01 | 1.00E+00 |
| ENSG00000213005.3_PTTG3P     | ENSG00000160789.18_LMNA | -0.01138 | -0.170274876 | 0.148086319 | 8.89E-01 | 9.57E-01 | 1.00E+00 |
| ENSG00000271268.1_AC015849.  | ENSG00000160789.18_LMNA | 0.0125   | -0.146990753 | 0.171362142 | 8.78E-01 | 9.53E-01 | 1.00E+00 |
| ENSG00000273035.1_RP11-449G  | ENSG00000160789.18_LMNA | -0.13109 | -0.284359175 | 0.028706734 | 1.07E-01 | 3.26E-01 | 1.00E+00 |
| ENSG00000279342.1_AP000866.  | ENSG00000160789.18_LMNA | -0.09201 | -0.247587473 | 0.068185944 | 2.60E-01 | 5.43E-01 | 1.00E+00 |
| ENSG00000249896.1_RP11-586D  | ENSG00000160789.18_LMNA | -0.22585 | -0.371682625 | -0.06913057 | 5.15E-03 | 4.01E-02 | 1.00E+00 |
| ENSG00000234107.1_TPT1P1     | ENSG00000160789.18_LMNA | 0.01573  | -0.143828345 | 0.174496247 | 8.47E-01 | 9.40E-01 | 1.00E+00 |
| ENSG00000227399.1_RP11-118F  | ENSG00000160789.18_LMNA | -0.01009 | -0.169018414 | 0.149351401 | 9.02E-01 | 9.62E-01 | 1.00E+00 |
| ENSG00000260634.1_RP11-521O  | ENSG00000160789.18_LMNA | -0.23408 | -0.379153349 | -0.07778005 | 3.70E-03 | 3.13E-02 | 1.00E+00 |
| ENSG00000226889.3_RP11-474I1 | ENSG00000160789.18_LMNA | -0.18627 | -0.335524058 | -0.02789993 | 2.16E-02 | 1.14E-01 | 1.00E+00 |
| ENSG00000274269.1_RP4-545L1  | ENSG00000160789.18_LMNA | -0.07443 | -0.230890944 | 0.085791221 | 3.62E-01 | 6.44E-01 | 1.00E+00 |
| ENSG00000169495.4_HTRA4      | ENSG00000160789.18_LMNA | 0.01414  | -0.145384181 | 0.172955141 | 8.63E-01 | 9.46E-01 | 1.00E+00 |
| ENSG00000256385.1_UBE2NP1    | ENSG00000160789.18_LMNA | -0.13507 | -0.288078516 | 0.024658395 | 9.71E-02 | 3.06E-01 | 1.00E+00 |
| ENSG00000263353.3_PPIAL4A    | ENSG00000160789.18_LMNA | 0.07285  | -0.087360033 | 0.229394005 | 3.72E-01 | 6.53E-01 | 1.00E+00 |
| ENSG00000213875.3_AC005019.  | ENSG00000160789.18_LMNA | -0.14423 | -0.29662189  | 0.015320305 | 7.63E-02 | 2.64E-01 | 1.00E+00 |
| ENSG00000235875.3_ARHGEF7.   | ENSG00000160789.18_LMNA | -0.29461 | -0.433476402 | -0.14206897 | 2.29E-04 | 3.64E-03 | 1.00E+00 |
| ENSG00000232489.1_MFAP1P1    | ENSG00000160789.18_LMNA | 0.1127   | -0.047352863 | 0.267105841 | 1.67E-01 | 4.24E-01 | 1.00E+00 |
| ENSG00000268583.1_CTC-453G2  | ENSG00000160789.18_LMNA | -0.03624 | -0.194321273 | 0.123672508 | 6.58E-01 | 8.49E-01 | 1.00E+00 |



|                             |                         |          |              |             |          |          |          |
|-----------------------------|-------------------------|----------|--------------|-------------|----------|----------|----------|
| ENSG00000178654.11_PPIAP33  | ENSG00000160789.18_LMNA | -0.05908 | -0.216249048 | 0.101068977 | 4.70E-01 | 7.30E-01 | 1.00E+00 |
| ENSG00000261040.5_WFDC21P   | ENSG00000160789.18_LMNA | 0.09725  | -0.062929686 | 0.25253632  | 2.33E-01 | 5.11E-01 | 1.00E+00 |
| ENSG00000269656.1_GLTSCR2-/ | ENSG00000160789.18_LMNA | 0.0319   | -0.12795011  | 0.190135481 | 6.96E-01 | 8.70E-01 | 1.00E+00 |
| ENSG00000259659.1_RP11-151N | ENSG00000160789.18_LMNA | 0.09974  | -0.060423768 | 0.254889884 | 2.22E-01 | 4.97E-01 | 1.00E+00 |
| ENSG00000234515.1_PPP1R2P1  | ENSG00000160789.18_LMNA | -0.07435 | -0.230822632 | 0.085862847 | 3.63E-01 | 6.44E-01 | 1.00E+00 |
| ENSG00000203280.4_CTA-221G  | ENSG00000160789.18_LMNA | -0.0799  | -0.236101003 | 0.080318738 | 3.28E-01 | 6.14E-01 | 1.00E+00 |
| ENSG00000280040.1_RP11-296E | ENSG00000160789.18_LMNA | -0.14493 | -0.297271544 | 0.014607986 | 7.48E-02 | 2.61E-01 | 1.00E+00 |
| ENSG00000219559.1_RP11-346C | ENSG00000160789.18_LMNA | -0.049   | -0.206584687 | 0.111071707 | 5.49E-01 | 7.86E-01 | 1.00E+00 |
| ENSG00000261308.1_FIGNL2    | ENSG00000160789.18_LMNA | 0.04867  | -0.11139415  | 0.206272117 | 5.52E-01 | 7.87E-01 | 1.00E+00 |
| ENSG00000272004.1_RP11-345P | ENSG00000160789.18_LMNA | -0.0222  | -0.180762635 | 0.137485812 | 7.86E-01 | 9.13E-01 | 1.00E+00 |
| ENSG00000236189.2_RPL18AP1  | ENSG00000160789.18_LMNA | 0.04794  | -0.112121282 | 0.20556701  | 5.58E-01 | 7.91E-01 | 1.00E+00 |
| ENSG00000233836.6_RP11-255H | ENSG00000160789.18_LMNA | -0.0694  | -0.226101624 | 0.090804974 | 3.96E-01 | 6.73E-01 | 1.00E+00 |
| ENSG00000267737.1_AC061992. | ENSG00000160789.18_LMNA | 0.29304  | 0.140392569  | 0.432086266 | 2.48E-04 | 3.87E-03 | 1.00E+00 |
| ENSG00000231704.4_AC004895. | ENSG00000160789.18_LMNA | 0.1335   | -0.026263608 | 0.286604883 | 1.01E-01 | 3.13E-01 | 1.00E+00 |
| ENSG00000259954.1_IL21R-AS1 | ENSG00000160789.18_LMNA | -0.04655 | -0.204234835 | 0.113494143 | 5.69E-01 | 7.98E-01 | 1.00E+00 |
| ENSG00000213055.3_EEF1B2P7  | ENSG00000160789.18_LMNA | -0.02728 | -0.18567429  | 0.132496162 | 7.39E-01 | 8.90E-01 | 1.00E+00 |
| ENSG00000204978.2_ERICH4    | ENSG00000160789.18_LMNA | 0.13415  | -0.025595142 | 0.287218734 | 9.94E-02 | 3.10E-01 | 1.00E+00 |
| ENSG00000256139.2_RP11-968O | ENSG00000160789.18_LMNA | 0.22918  | 0.072632753  | 0.374712258 | 4.51E-03 | 3.63E-02 | 1.00E+00 |
| ENSG00000275540.1_CTC-559E9 | ENSG00000160789.18_LMNA | 0.07644  | -0.083778098 | 0.232809645 | 3.49E-01 | 6.33E-01 | 1.00E+00 |
| ENSG00000235795.1_RP11-421L | ENSG00000160789.18_LMNA | 0.03808  | -0.121857271 | 0.196094056 | 6.41E-01 | 8.40E-01 | 1.00E+00 |
| ENSG00000280710.1_RP11-214F | ENSG00000160789.18_LMNA | -0.09885 | -0.254055729 | 0.061312376 | 2.26E-01 | 5.02E-01 | 1.00E+00 |
| ENSG00000164100.8_NDST3     | ENSG00000160789.18_LMNA | -0.06374 | -0.220704348 | 0.096435983 | 4.35E-01 | 7.04E-01 | 1.00E+00 |
| ENSG00000233930.3_KRTAP5-A  | ENSG00000160789.18_LMNA | -0.13284 | -0.285992783 | 0.026929887 | 1.03E-01 | 3.17E-01 | 1.00E+00 |
| ENSG00000233707.3_RPL22P11  | ENSG00000160789.18_LMNA | -0.04159 | -0.199467474 | 0.118397185 | 6.11E-01 | 8.23E-01 | 1.00E+00 |
| ENSG00000237409.2_RP11-226L | ENSG00000160789.18_LMNA | -0.10122 | -0.25629144  | 0.058929594 | 2.15E-01 | 4.89E-01 | 1.00E+00 |
| ENSG00000274015.1_CTD-2302E | ENSG00000160789.18_LMNA | 0.0029   | -0.156369762 | 0.162029027 | 9.72E-01 | 9.89E-01 | 1.00E+00 |
| ENSG00000219547.1_RPL17P25  | ENSG00000160789.18_LMNA | -0.08391 | -0.239910381 | 0.076305378 | 3.04E-01 | 5.91E-01 | 1.00E+00 |
| ENSG00000229020.4_AKR7A2P1  | ENSG00000160789.18_LMNA | -0.11404 | -0.268372171 | 0.045991719 | 1.62E-01 | 4.17E-01 | 1.00E+00 |
| ENSG00000131152.4_RP11-178L | ENSG00000160789.18_LMNA | 0.03831  | -0.121628824 | 0.196317014 | 6.39E-01 | 8.39E-01 | 1.00E+00 |
| ENSG00000258759.1_RP11-1012 | ENSG00000160789.18_LMNA | 0.0624   | -0.097770543 | 0.219422329 | 4.45E-01 | 7.12E-01 | 1.00E+00 |
| ENSG00000274677.1_RP11-505K | ENSG00000160789.18_LMNA | 0.25818  | 0.103225883  | 0.400905944 | 1.32E-03 | 1.43E-02 | 1.00E+00 |
| ENSG00000180189.10_HMGB1P1  | ENSG00000160789.18_LMNA | -0.16104 | -0.312232507 | -0.00188415 | 4.75E-02 | 1.94E-01 | 1.00E+00 |
| ENSG00000232053.5_AC009784. | ENSG00000160789.18_LMNA | -0.09484 | -0.250266332 | 0.065342856 | 2.45E-01 | 5.25E-01 | 1.00E+00 |

|                              |                         |          |              |             |          |          |          |
|------------------------------|-------------------------|----------|--------------|-------------|----------|----------|----------|
| ENSG00000255977.1_RP11-444J: | ENSG00000160789.18_LMNA | 0.03926  | -0.120695185 | 0.197227874 | 6.31E-01 | 8.34E-01 | 1.00E+00 |
| ENSG00000203327.2_AC012358:  | ENSG00000160789.18_LMNA | -0.17777 | -0.327699981 | -0.019114   | 2.84E-02 | 1.38E-01 | 1.00E+00 |
| ENSG00000198883.10_PNMA5     | ENSG00000160789.18_LMNA | -0.10545 | -0.260282208 | 0.054667357 | 1.96E-01 | 4.65E-01 | 1.00E+00 |
| ENSG00000267927.1_CTD-2525K: | ENSG00000160789.18_LMNA | -0.04599 | -0.203698762 | 0.114046246 | 5.74E-01 | 8.01E-01 | 1.00E+00 |
| ENSG00000250752.2_RPL23AP9:  | ENSG00000160789.18_LMNA | 0.00438  | -0.154933503 | 0.163461961 | 9.57E-01 | 9.83E-01 | 1.00E+00 |
| ENSG00000213412.3_HNRNPA1F   | ENSG00000160789.18_LMNA | -0.04517 | -0.20291491  | 0.114853184 | 5.81E-01 | 8.04E-01 | 1.00E+00 |
| ENSG00000226828.1_RP11-278H  | ENSG00000160789.18_LMNA | -0.27232 | -0.413586617 | -0.11824151 | 6.89E-04 | 8.66E-03 | 1.00E+00 |
| ENSG00000233381.3_AK4P3      | ENSG00000160789.18_LMNA | 0.03991  | -0.120052406 | 0.197854652 | 6.25E-01 | 8.31E-01 | 1.00E+00 |
| ENSG00000214549.2_SDHCP2     | ENSG00000160789.18_LMNA | -0.08494 | -0.240885896 | 0.075275976 | 2.98E-01 | 5.84E-01 | 1.00E+00 |
| ENSG00000225739.1_NPM1P18    | ENSG00000160789.18_LMNA | -0.00724 | -0.166250212 | 0.15213492  | 9.29E-01 | 9.73E-01 | 1.00E+00 |
| ENSG00000228852.5_RP11-57H1  | ENSG00000160789.18_LMNA | 0.0691   | -0.091105199 | 0.22581435  | 3.98E-01 | 6.74E-01 | 1.00E+00 |
| ENSG00000260368.1_RP11-521I2 | ENSG00000160789.18_LMNA | 0.03831  | -0.121630426 | 0.19631545  | 6.39E-01 | 8.39E-01 | 1.00E+00 |
| ENSG00000267676.1_THA1P      | ENSG00000160789.18_LMNA | 0.06922  | -0.090981521 | 0.225932699 | 3.97E-01 | 6.74E-01 | 1.00E+00 |
| ENSG00000254477.1_AP000640:  | ENSG00000160789.18_LMNA | 0.11695  | -0.043053805 | 0.271101739 | 1.51E-01 | 4.00E-01 | 1.00E+00 |
| ENSG00000279041.1_CTD-2373N  | ENSG00000160789.18_LMNA | 0.21891  | 0.061863708  | 0.365375659 | 6.74E-03 | 4.89E-02 | 1.00E+00 |
| ENSG00000257246.1_PHBP19     | ENSG00000160789.18_LMNA | 0.05513  | -0.104996878 | 0.212461419 | 5.00E-01 | 7.53E-01 | 1.00E+00 |
| ENSG00000243977.1_RP11-473P  | ENSG00000160789.18_LMNA | -0.05586 | -0.213160924 | 0.104272212 | 4.94E-01 | 7.49E-01 | 1.00E+00 |
| ENSG00000140287.9_HDC        | ENSG00000160789.18_LMNA | 0.10308  | -0.057053192 | 0.258049656 | 2.06E-01 | 4.78E-01 | 1.00E+00 |
| ENSG00000249773.3_RP11-15K1  | ENSG00000160789.18_LMNA | 0.01845  | -0.141167165 | 0.177128622 | 8.22E-01 | 9.30E-01 | 1.00E+00 |
| ENSG00000143184.4_XCL1       | ENSG00000160789.18_LMNA | 0.01464  | -0.144899308 | 0.173435591 | 8.58E-01 | 9.44E-01 | 1.00E+00 |
| ENSG00000233806.6_LINC01237  | ENSG00000160789.18_LMNA | -0.09553 | -0.250919133 | 0.064649256 | 2.42E-01 | 5.21E-01 | 1.00E+00 |
| ENSG00000270112.3_RP11-742D  | ENSG00000160789.18_LMNA | 0.02328  | -0.13643093  | 0.181802352 | 7.76E-01 | 9.08E-01 | 1.00E+00 |
| ENSG00000249920.2_HNRNPA1F   | ENSG00000160789.18_LMNA | -0.02522 | -0.183680507 | 0.134523552 | 7.58E-01 | 8.99E-01 | 1.00E+00 |
| ENSG00000274895.1_RP11-478J: | ENSG00000160789.18_LMNA | 0.18507  | 0.026651665  | 0.334415027 | 2.25E-02 | 1.17E-01 | 1.00E+00 |
| ENSG00000250254.1_PTTG2      | ENSG00000160789.18_LMNA | -0.09847 | -0.253691003 | 0.061700754 | 2.27E-01 | 5.04E-01 | 1.00E+00 |
| ENSG00000232237.3_ASCL5      | ENSG00000160789.18_LMNA | -0.07497 | -0.231404742 | 0.085252392 | 3.59E-01 | 6.41E-01 | 1.00E+00 |
| ENSG00000250986.1_AC141928:  | ENSG00000160789.18_LMNA | -0.09932 | -0.254492947 | 0.060846679 | 2.23E-01 | 4.99E-01 | 1.00E+00 |
| ENSG00000260928.2_SPCS2P1    | ENSG00000160789.18_LMNA | 0.04733  | -0.112724078 | 0.204982224 | 5.63E-01 | 7.94E-01 | 1.00E+00 |
| ENSG00000151365.2_THRSP      | ENSG00000160789.18_LMNA | -0.17946 | -0.329252374 | -0.02085346 | 2.70E-02 | 1.33E-01 | 1.00E+00 |
| ENSG00000173867.8_RP11-97O1  | ENSG00000160789.18_LMNA | -0.18282 | -0.332351705 | -0.02433185 | 2.42E-02 | 1.24E-01 | 1.00E+00 |
| ENSG00000244390.2_RPS6P22    | ENSG00000160789.18_LMNA | -0.03001 | -0.188313147 | 0.129808725 | 7.14E-01 | 8.78E-01 | 1.00E+00 |
| ENSG00000267323.1_SLC25A1P:  | ENSG00000160789.18_LMNA | 0.05165  | -0.108438615 | 0.209134733 | 5.27E-01 | 7.72E-01 | 1.00E+00 |
| ENSG00000223427.1_AC016716:  | ENSG00000160789.18_LMNA | -0.05762 | -0.214845954 | 0.102525188 | 4.81E-01 | 7.39E-01 | 1.00E+00 |

|                             |                         |          |              |             |          |          |          |
|-----------------------------|-------------------------|----------|--------------|-------------|----------|----------|----------|
| ENSG00000240891.5_PLCXD2    | ENSG00000160789.18_LMNA | -0.37922 | -0.507762885 | -0.23415204 | 1.45E-06 | 6.26E-05 | 7.44E-02 |
| ENSG00000254252.1_RPL7P20   | ENSG00000160789.18_LMNA | -0.1229  | -0.276685962 | 0.037026364 | 1.31E-01 | 3.68E-01 | 1.00E+00 |
| ENSG00000256799.1_RP11-500M | ENSG00000160789.18_LMNA | 0.02568  | -0.134065854 | 0.184130846 | 7.53E-01 | 8.97E-01 | 1.00E+00 |
| ENSG00000172232.8_AZU1      | ENSG00000160789.18_LMNA | -0.07395 | -0.230440804 | 0.086263139 | 3.65E-01 | 6.47E-01 | 1.00E+00 |
| ENSG00000171759.7_PAH       | ENSG00000160789.18_LMNA | -0.31583 | -0.452288535 | -0.16492052 | 7.38E-05 | 1.48E-03 | 1.00E+00 |
| ENSG00000179342.4_GS1-124K5 | ENSG00000160789.18_LMNA | -0.00925 | -0.168201431 | 0.15017343  | 9.10E-01 | 9.66E-01 | 1.00E+00 |
| ENSG00000279803.1_RP11-407G | ENSG00000160789.18_LMNA | 0.14924  | -0.010204442 | 0.301281294 | 6.65E-02 | 2.41E-01 | 1.00E+00 |
| ENSG00000214646.7_RP11-114H | ENSG00000160789.18_LMNA | 0.00911  | -0.150305273 | 0.168070355 | 9.11E-01 | 9.66E-01 | 1.00E+00 |
| ENSG00000237234.5_RP1-142L7 | ENSG00000160789.18_LMNA | 0.06087  | -0.099293025 | 0.217958448 | 4.56E-01 | 7.21E-01 | 1.00E+00 |
| ENSG00000203688.4_RP11-351J | ENSG00000160789.18_LMNA | 0.07144  | -0.088774754 | 0.228042812 | 3.82E-01 | 6.60E-01 | 1.00E+00 |
| ENSG00000237718.2_AC009095  | ENSG00000160789.18_LMNA | -0.11892 | -0.272952313 | 0.041058881 | 1.45E-01 | 3.89E-01 | 1.00E+00 |
| ENSG00000160185.12_UBASH3A  | ENSG00000160789.18_LMNA | 0.19959  | 0.041710984  | 0.347737927 | 1.37E-02 | 8.21E-02 | 1.00E+00 |
| ENSG00000229676.2_ZNF492    | ENSG00000160789.18_LMNA | -0.29234 | -0.431455879 | -0.13963292 | 2.58E-04 | 3.99E-03 | 1.00E+00 |
| ENSG00000188223.9_AC002398  | ENSG00000160789.18_LMNA | -0.05991 | -0.21704148  | 0.100245945 | 4.63E-01 | 7.26E-01 | 1.00E+00 |
| ENSG00000168959.13_GRM5     | ENSG00000160789.18_LMNA | -0.2357  | -0.38062168  | -0.07948541 | 3.46E-03 | 2.98E-02 | 1.00E+00 |
| ENSG00000214465.3_SMARCE1F  | ENSG00000160789.18_LMNA | 0.17835  | 0.019713222  | 0.328234947 | 2.79E-02 | 1.36E-01 | 1.00E+00 |
| ENSG00000273287.2_CTA-268H5 | ENSG00000160789.18_LMNA | -0.18927 | -0.338276089 | -0.03100162 | 1.95E-02 | 1.06E-01 | 1.00E+00 |
| ENSG00000182586.6_LINC00334 | ENSG00000160789.18_LMNA | 0.03272  | -0.127145542 | 0.190923665 | 6.89E-01 | 8.66E-01 | 1.00E+00 |
| ENSG00000275956.1_RP5-966M1 | ENSG00000160789.18_LMNA | -0.16619 | -0.31700561  | -0.00718152 | 4.07E-02 | 1.76E-01 | 1.00E+00 |
| ENSG00000230116.1_RP11-163G | ENSG00000160789.18_LMNA | -0.07203 | -0.228612087 | 0.088178869 | 3.78E-01 | 6.57E-01 | 1.00E+00 |
| ENSG00000242229.1_RPS3AP14  | ENSG00000160789.18_LMNA | -0.00072 | -0.15990137  | 0.158499874 | 9.93E-01 | 9.97E-01 | 1.00E+00 |
| ENSG00000264943.1_SH3GL1P2  | ENSG00000160789.18_LMNA | -0.03396 | -0.192118252 | 0.125925324 | 6.78E-01 | 8.59E-01 | 1.00E+00 |
| ENSG00000225611.1_RP11-70C1 | ENSG00000160789.18_LMNA | -0.09363 | -0.249113521 | 0.066566969 | 2.51E-01 | 5.32E-01 | 1.00E+00 |
| ENSG00000266932.1_AC006116  | ENSG00000160789.18_LMNA | -0.04023 | -0.198158201 | 0.119741012 | 6.23E-01 | 8.30E-01 | 1.00E+00 |
| ENSG00000218180.2_SLC25A5P  | ENSG00000160789.18_LMNA | 0.00911  | -0.150304922 | 0.168070705 | 9.11E-01 | 9.66E-01 | 1.00E+00 |
| ENSG00000165794.8_SLC39A2   | ENSG00000160789.18_LMNA | -0.12553 | -0.279156418 | 0.034352528 | 1.23E-01 | 3.54E-01 | 1.00E+00 |
| ENSG00000231625.4_CTD-2104P | ENSG00000160789.18_LMNA | -0.13894 | -0.291684554 | 0.020723564 | 8.78E-02 | 2.88E-01 | 1.00E+00 |
| ENSG00000231298.5_LINC00704 | ENSG00000160789.18_LMNA | 0.17315  | 0.014347461  | 0.323437477 | 3.29E-02 | 1.52E-01 | 1.00E+00 |
| ENSG00000007908.14_SELE     | ENSG00000160789.18_LMNA | 0.21745  | 0.060338067  | 0.364047994 | 7.12E-03 | 5.10E-02 | 1.00E+00 |
| ENSG00000260776.4_RP11-114H | ENSG00000160789.18_LMNA | 0.15146  | -0.00793285  | 0.303345447 | 6.25E-02 | 2.32E-01 | 1.00E+00 |
| ENSG00000236779.1_RP11-430C | ENSG00000160789.18_LMNA | 0.03085  | -0.128985459 | 0.189120613 | 7.06E-01 | 8.75E-01 | 1.00E+00 |
| ENSG00000007314.10_SCN4A    | ENSG00000160789.18_LMNA | 0.01467  | -0.14486829  | 0.17346632  | 8.58E-01 | 9.44E-01 | 1.00E+00 |
| ENSG00000279711.1_AP004782  | ENSG00000160789.18_LMNA | -0.06853 | -0.225273117 | 0.091670678 | 4.02E-01 | 6.78E-01 | 1.00E+00 |

|                              |                         |          |              |             |          |          |          |
|------------------------------|-------------------------|----------|--------------|-------------|----------|----------|----------|
| ENSG00000230490.2_RP11-141M  | ENSG00000160789.18_LMNA | -0.08983 | -0.245522392 | 0.070374133 | 2.71E-01 | 5.55E-01 | 1.00E+00 |
| ENSG00000233642.1_GPR158-A5  | ENSG00000160789.18_LMNA | -0.19758 | -0.345902255 | -0.03962777 | 1.47E-02 | 8.65E-02 | 1.00E+00 |
| ENSG00000189089.5_RIMKLBP1   | ENSG00000160789.18_LMNA | 0.00673  | -0.152633991 | 0.165753356 | 9.34E-01 | 9.74E-01 | 1.00E+00 |
| ENSG00000280279.1_RP11-1228  | ENSG00000160789.18_LMNA | 0.05841  | -0.101740774 | 0.215601919 | 4.75E-01 | 7.34E-01 | 1.00E+00 |
| ENSG00000230393.1_AC092667.1 | ENSG00000160789.18_LMNA | -0.24666 | -0.390523359 | -0.0910317  | 2.19E-03 | 2.10E-02 | 1.00E+00 |
| ENSG00000257859.1_CASC18     | ENSG00000160789.18_LMNA | -0.11504 | -0.269305433 | 0.044987833 | 1.58E-01 | 4.11E-01 | 1.00E+00 |
| ENSG00000224678.3_GAPDHP46   | ENSG00000160789.18_LMNA | 0.11047  | -0.049599168 | 0.26501363  | 1.75E-01 | 4.36E-01 | 1.00E+00 |
| ENSG00000237211.2_SETP4      | ENSG00000160789.18_LMNA | 0.08234  | -0.077882722 | 0.238414367 | 3.13E-01 | 6.00E-01 | 1.00E+00 |
| ENSG00000213842.2_SUGT1P2    | ENSG00000160789.18_LMNA | -0.06421 | -0.221151367 | 0.095970375 | 4.32E-01 | 7.01E-01 | 1.00E+00 |
| ENSG00000080007.7_DDX43      | ENSG00000160789.18_LMNA | -0.14142 | -0.293998876 | 0.018193115 | 8.22E-02 | 2.77E-01 | 1.00E+00 |
| ENSG00000249149.2_RP11-79P5  | ENSG00000160789.18_LMNA | 0.03611  | -0.12380454  | 0.194192247 | 6.59E-01 | 8.49E-01 | 1.00E+00 |
| ENSG00000147206.15_NXF3      | ENSG00000160789.18_LMNA | 0.22449  | 0.0677072    | 0.370449468 | 5.43E-03 | 4.17E-02 | 1.00E+00 |
| ENSG00000223922.1_ASS1P2     | ENSG00000160789.18_LMNA | 0.08597  | -0.07424935  | 0.241858144 | 2.92E-01 | 5.78E-01 | 1.00E+00 |
| ENSG00000254512.1_PHBP2      | ENSG00000160789.18_LMNA | 0.04095  | -0.119024838 | 0.198856101 | 6.16E-01 | 8.26E-01 | 1.00E+00 |
| ENSG00000226342.1_NMD3P1     | ENSG00000160789.18_LMNA | -0.16684 | -0.317605113 | -0.00784811 | 3.99E-02 | 1.73E-01 | 1.00E+00 |
| ENSG00000115598.8_IL1RL2     | ENSG00000160789.18_LMNA | 0.10031  | -0.059844105 | 0.255433773 | 2.19E-01 | 4.94E-01 | 1.00E+00 |
| ENSG00000234115.2_RP11-288G  | ENSG00000160789.18_LMNA | -0.03865 | -0.196638323 | 0.121299544 | 6.36E-01 | 8.37E-01 | 1.00E+00 |
| ENSG00000260394.2_LA16c-313L | ENSG00000160789.18_LMNA | 0.0128   | -0.14669592  | 0.171654609 | 8.76E-01 | 9.52E-01 | 1.00E+00 |
| ENSG00000186777.10_ZNF732    | ENSG00000160789.18_LMNA | -0.05388 | -0.21126757  | 0.106232891 | 5.10E-01 | 7.59E-01 | 1.00E+00 |
| ENSG00000266992.1_DHX40P1    | ENSG00000160789.18_LMNA | 0.04732  | -0.112728931 | 0.204977515 | 5.63E-01 | 7.94E-01 | 1.00E+00 |
| ENSG00000248213.3_CICP16     | ENSG00000160789.18_LMNA | 0.0586   | -0.101549495 | 0.215786203 | 4.73E-01 | 7.33E-01 | 1.00E+00 |
| ENSG00000235720.1_GABPAP     | ENSG00000160789.18_LMNA | -0.0109  | -0.169801298 | 0.148563269 | 8.94E-01 | 9.59E-01 | 1.00E+00 |
| ENSG00000281195.1_ZNF638-IT1 | ENSG00000160789.18_LMNA | -0.1089  | -0.26353152  | 0.051188515 | 1.82E-01 | 4.46E-01 | 1.00E+00 |
| ENSG00000154162.12_CDH12     | ENSG00000160789.18_LMNA | -0.15718 | -0.308658965 | 0.002070529 | 5.31E-02 | 2.09E-01 | 1.00E+00 |
| ENSG00000227706.3_RP11-301G  | ENSG00000160789.18_LMNA | -0.08568 | -0.241589973 | 0.074532588 | 2.94E-01 | 5.80E-01 | 1.00E+00 |
| ENSG00000100593.16_ISM2      | ENSG00000160789.18_LMNA | 0.01167  | -0.147806422 | 0.170552726 | 8.87E-01 | 9.56E-01 | 1.00E+00 |
| ENSG00000255350.1_MTCO1P15   | ENSG00000160789.18_LMNA | 0.00873  | -0.150680746 | 0.16769701  | 9.15E-01 | 9.68E-01 | 1.00E+00 |
| ENSG00000145192.11_AHSG      | ENSG00000160789.18_LMNA | -0.17871 | -0.328564642 | -0.02008263 | 2.76E-02 | 1.35E-01 | 1.00E+00 |
| ENSG00000231340.1_ACTG1P10   | ENSG00000160789.18_LMNA | 0.06724  | -0.092953385 | 0.224044682 | 4.10E-01 | 6.85E-01 | 1.00E+00 |
| ENSG00000159712.10_ANKRD18   | ENSG00000160789.18_LMNA | -0.06839 | -0.225144087 | 0.091805458 | 4.02E-01 | 6.78E-01 | 1.00E+00 |
| ENSG00000241570.7_PAQR9-AS   | ENSG00000160789.18_LMNA | -0.08362 | -0.239635187 | 0.076595651 | 3.06E-01 | 5.92E-01 | 1.00E+00 |
| ENSG00000196096.3_AC079610.1 | ENSG00000160789.18_LMNA | -0.05674 | -0.214003795 | 0.103398576 | 4.88E-01 | 7.44E-01 | 1.00E+00 |
| ENSG00000249790.2_RP11-20D1  | ENSG00000160789.18_LMNA | -0.0321  | -0.190332815 | 0.127748714 | 6.95E-01 | 8.69E-01 | 1.00E+00 |

|                             |                         |          |              |             |          |          |          |
|-----------------------------|-------------------------|----------|--------------|-------------|----------|----------|----------|
| ENSG00000225077.2_LINC00337 | ENSG00000160789.18_LMNA | 0.17568  | 0.016958095  | 0.325773604 | 3.04E-02 | 1.45E-01 | 1.00E+00 |
| ENSG00000171101.12_SIGLEC17 | ENSG00000160789.18_LMNA | 0.07358  | -0.086639832 | 0.230081397 | 3.68E-01 | 6.48E-01 | 1.00E+00 |
| ENSG00000239351.1_NPM1P29   | ENSG00000160789.18_LMNA | -0.09736 | -0.252644561 | 0.062814526 | 2.33E-01 | 5.11E-01 | 1.00E+00 |
| ENSG00000169856.8_ONECUT1   | ENSG00000160789.18_LMNA | 0.03034  | -0.129489457 | 0.188626339 | 7.11E-01 | 8.77E-01 | 1.00E+00 |
| ENSG00000163687.12_DNASE1L  | ENSG00000160789.18_LMNA | -0.1267  | -0.280250584 | 0.033166848 | 1.20E-01 | 3.48E-01 | 1.00E+00 |
| ENSG00000106113.17_CRHR2    | ENSG00000160789.18_LMNA | -0.1173  | -0.271431593 | 0.042698405 | 1.50E-01 | 3.98E-01 | 1.00E+00 |
| ENSG00000261693.1_RP13-467H | ENSG00000160789.18_LMNA | 0.0358   | -0.12410605  | 0.193897562 | 6.61E-01 | 8.51E-01 | 1.00E+00 |
| ENSG00000043039.6_BARX2     | ENSG00000160789.18_LMNA | -0.14563 | -0.297925668 | 0.013890446 | 7.34E-02 | 2.58E-01 | 1.00E+00 |
| ENSG00000280018.2_CH507-154 | ENSG00000160789.18_LMNA | -0.12037 | -0.274310734 | 0.039592906 | 1.40E-01 | 3.81E-01 | 1.00E+00 |
| ENSG00000223599.1_RP11-216N | ENSG00000160789.18_LMNA | 0.07525  | -0.084967153 | 0.231676659 | 3.57E-01 | 6.40E-01 | 1.00E+00 |
| ENSG00000279805.1_CTA-212A2 | ENSG00000160789.18_LMNA | 0.15742  | -0.001824391 | 0.308881637 | 5.28E-02 | 2.08E-01 | 1.00E+00 |
| ENSG00000266718.1_RP11-466A | ENSG00000160789.18_LMNA | -0.04928 | -0.206855374 | 0.110792415 | 5.47E-01 | 7.84E-01 | 1.00E+00 |
| ENSG00000163519.12_TRAT1    | ENSG00000160789.18_LMNA | 0.07726  | -0.082956885 | 0.233591633 | 3.44E-01 | 6.29E-01 | 1.00E+00 |
| ENSG00000234125.5_EEF1GP8   | ENSG00000160789.18_LMNA | 0.01809  | -0.141523101 | 0.176776802 | 8.25E-01 | 9.31E-01 | 1.00E+00 |
| ENSG00000158816.14_VWA5B1   | ENSG00000160789.18_LMNA | 0.02861  | -0.131188866 | 0.186958528 | 7.26E-01 | 8.84E-01 | 1.00E+00 |
| ENSG00000240103.2_RP11-846F | ENSG00000160789.18_LMNA | -0.05445 | -0.211814558 | 0.105666706 | 5.05E-01 | 7.56E-01 | 1.00E+00 |
| ENSG00000217060.1_RP11-30P6 | ENSG00000160789.18_LMNA | 0.04671  | -0.113330196 | 0.204393986 | 5.68E-01 | 7.98E-01 | 1.00E+00 |
| ENSG00000237569.1_TUBAP     | ENSG00000160789.18_LMNA | -0.03736 | -0.195398483 | 0.122569755 | 6.48E-01 | 8.43E-01 | 1.00E+00 |
| ENSG00000174885.11_NLRP6    | ENSG00000160789.18_LMNA | 0.16217  | 0.003044057  | 0.31327896  | 4.59E-02 | 1.90E-01 | 1.00E+00 |
| ENSG00000259459.4_RP11-321G | ENSG00000160789.18_LMNA | 0.04588  | -0.114157119 | 0.203591085 | 5.75E-01 | 8.02E-01 | 1.00E+00 |
| ENSG00000184923.11_NUTM2A   | ENSG00000160789.18_LMNA | 0.00543  | -0.15390747  | 0.164484796 | 9.47E-01 | 9.79E-01 | 1.00E+00 |
| ENSG00000232267.1_ACTR3P2   | ENSG00000160789.18_LMNA | 0.01976  | -0.139883372 | 0.178396893 | 8.09E-01 | 9.24E-01 | 1.00E+00 |
| ENSG00000228612.2_HK2P1     | ENSG00000160789.18_LMNA | 0.09977  | -0.060385889 | 0.254925432 | 2.21E-01 | 4.97E-01 | 1.00E+00 |
| ENSG00000159860.6_TCAF2P1   | ENSG00000160789.18_LMNA | 0.33242  | 0.182896094  | 0.466909071 | 2.86E-05 | 6.87E-04 | 1.00E+00 |
| ENSG00000175262.13_C1orf127 | ENSG00000160789.18_LMNA | 0.1116   | -0.048457885 | 0.266076993 | 1.71E-01 | 4.30E-01 | 1.00E+00 |
| ENSG00000256075.1_RP11-81H1 | ENSG00000160789.18_LMNA | 0.0747   | -0.085522525 | 0.23114718  | 3.60E-01 | 6.43E-01 | 1.00E+00 |
| ENSG00000233459.1_AC125238. | ENSG00000160789.18_LMNA | -0.01298 | -0.171829715 | 0.14651937  | 8.74E-01 | 9.51E-01 | 1.00E+00 |
| ENSG00000082293.11_COL19A1  | ENSG00000160789.18_LMNA | 0.1197   | -0.040267539 | 0.273685753 | 1.42E-01 | 3.85E-01 | 1.00E+00 |
| ENSG00000198574.5_SH2D1B    | ENSG00000160789.18_LMNA | -0.09161 | -0.247207585 | 0.068588708 | 2.62E-01 | 5.45E-01 | 1.00E+00 |
| ENSG00000260517.2_RP11-426C | ENSG00000160789.18_LMNA | 0.04373  | -0.116277646 | 0.201530207 | 5.93E-01 | 8.12E-01 | 1.00E+00 |
| ENSG00000248449.2_PCDHGB8F  | ENSG00000160789.18_LMNA | -0.0944  | -0.249841451 | 0.065794126 | 2.47E-01 | 5.27E-01 | 1.00E+00 |
| ENSG00000229558.2_SACS-AS1  | ENSG00000160789.18_LMNA | -0.01828 | -0.17696646  | 0.141331234 | 8.23E-01 | 9.31E-01 | 1.00E+00 |
| ENSG00000072657.7_TRHDE     | ENSG00000160789.18_LMNA | -0.15786 | -0.309285407 | 0.001377975 | 5.21E-02 | 2.07E-01 | 1.00E+00 |

|                              |                         |          |              |             |          |          |          |
|------------------------------|-------------------------|----------|--------------|-------------|----------|----------|----------|
| ENSG00000179165.10_PXT1      | ENSG00000160789.18_LMNA | -0.03349 | -0.191669175 | 0.126384149 | 6.82E-01 | 8.62E-01 | 1.00E+00 |
| ENSG00000133808.4_MICALCL    | ENSG00000160789.18_LMNA | 0.08556  | -0.074660776 | 0.241468587 | 2.95E-01 | 5.80E-01 | 1.00E+00 |
| ENSG00000164142.14_FAM160A   | ENSG00000160789.18_LMNA | 0.06995  | -0.090255355 | 0.226627388 | 3.92E-01 | 6.70E-01 | 1.00E+00 |
| ENSG00000279246.1_RP11-286N  | ENSG00000160789.18_LMNA | 0.0652   | -0.094982746 | 0.222099125 | 4.25E-01 | 6.96E-01 | 1.00E+00 |
| ENSG00000238755.3_RP11-23D2  | ENSG00000160789.18_LMNA | -0.10178 | -0.256821015 | 0.058364656 | 2.12E-01 | 4.86E-01 | 1.00E+00 |
| ENSG00000266677.1_RP11-258F  | ENSG00000160789.18_LMNA | 0.1539   | -0.005437719 | 0.305609365 | 5.84E-02 | 2.21E-01 | 1.00E+00 |
| ENSG00000253606.1_AFG3L2P1   | ENSG00000160789.18_LMNA | 0.15708  | -0.002174415 | 0.308564973 | 5.33E-02 | 2.09E-01 | 1.00E+00 |
| ENSG00000204965.7_PCDHA5     | ENSG00000160789.18_LMNA | -0.16475 | -0.315674909 | -0.00570291 | 4.25E-02 | 1.81E-01 | 1.00E+00 |
| ENSG00000257069.4_KCNK4-TE   | ENSG00000160789.18_LMNA | -0.15693 | -0.308427335 | 0.002326528 | 5.35E-02 | 2.10E-01 | 1.00E+00 |
| ENSG00000151360.8_ALLC       | ENSG00000160789.18_LMNA | -0.07784 | -0.234142917 | 0.08237769  | 3.40E-01 | 6.26E-01 | 1.00E+00 |
| ENSG00000132518.6_GUCY2D     | ENSG00000160789.18_LMNA | -0.03573 | -0.193830303 | 0.124174859 | 6.62E-01 | 8.51E-01 | 1.00E+00 |
| ENSG00000260316.2_LA16c-306A | ENSG00000160789.18_LMNA | -0.1414  | -0.293979573 | 0.018214238 | 8.23E-02 | 2.77E-01 | 1.00E+00 |
| ENSG00000164053.16_ATRIP     | ENSG00000160789.18_LMNA | -0.02649 | -0.184913103 | 0.133270493 | 7.46E-01 | 8.94E-01 | 1.00E+00 |
| ENSG00000235485.1_RP1-101G1  | ENSG00000160789.18_LMNA | 0.06103  | -0.09913574  | 0.218109745 | 4.55E-01 | 7.20E-01 | 1.00E+00 |
| ENSG00000267287.1_RP11-567M  | ENSG00000160789.18_LMNA | -0.23914 | -0.383730874 | -0.08310234 | 3.01E-03 | 2.68E-02 | 1.00E+00 |
| ENSG00000260809.1_VPS35P1    | ENSG00000160789.18_LMNA | -0.05527 | -0.212599148 | 0.104854221 | 4.99E-01 | 7.52E-01 | 1.00E+00 |
| ENSG00000274376.3_ADAMTS7F   | ENSG00000160789.18_LMNA | 0.0686   | -0.091597256 | 0.225343402 | 4.01E-01 | 6.77E-01 | 1.00E+00 |
| ENSG00000188649.10_CC2D2B    | ENSG00000160789.18_LMNA | -0.14359 | -0.296026319 | 0.015973046 | 7.76E-02 | 2.67E-01 | 1.00E+00 |
| ENSG00000273381.1_RP11-305L  | ENSG00000160789.18_LMNA | -0.07535 | -0.23177411  | 0.084864914 | 3.56E-01 | 6.39E-01 | 1.00E+00 |
| ENSG00000268949.1_MRPS17P1   | ENSG00000160789.18_LMNA | -0.09681 | -0.252129223 | 0.063362732 | 2.35E-01 | 5.13E-01 | 1.00E+00 |
| ENSG00000274588.1_DGKK       | ENSG00000160789.18_LMNA | -0.09179 | -0.247372263 | 0.068414126 | 2.61E-01 | 5.44E-01 | 1.00E+00 |
| ENSG00000164483.15_SAMD3     | ENSG00000160789.18_LMNA | -0.00664 | -0.165666172 | 0.152721547 | 9.35E-01 | 9.75E-01 | 1.00E+00 |
| ENSG00000178795.8_GDPD4      | ENSG00000160789.18_LMNA | 0.04175  | -0.11823895  | 0.199621565 | 6.10E-01 | 8.22E-01 | 1.00E+00 |
| ENSG00000185306.11_C12orf56  | ENSG00000160789.18_LMNA | -0.10806 | -0.26274438  | 0.052031959 | 1.85E-01 | 4.51E-01 | 1.00E+00 |
| ENSG00000259144.2_RANBP20P   | ENSG00000160789.18_LMNA | 0.10512  | -0.055004515 | 0.259966915 | 1.97E-01 | 4.67E-01 | 1.00E+00 |
| ENSG00000229920.2_RPS4XP5    | ENSG00000160789.18_LMNA | 0.07461  | -0.085611805 | 0.231062045 | 3.61E-01 | 6.43E-01 | 1.00E+00 |
| ENSG00000258984.4_UBE2F-SCI  | ENSG00000160789.18_LMNA | -0.05478 | -0.212132779 | 0.105337222 | 5.03E-01 | 7.54E-01 | 1.00E+00 |
| ENSG00000241978.8_AKAP2      | ENSG00000160789.18_LMNA | 0.10122  | -0.058928589 | 0.256292383 | 2.15E-01 | 4.89E-01 | 1.00E+00 |
| ENSG00000269243.1_CTD-2231E  | ENSG00000160789.18_LMNA | 0.07329  | -0.086926333 | 0.229807985 | 3.70E-01 | 6.50E-01 | 1.00E+00 |
| ENSG00000134962.6_KLB        | ENSG00000160789.18_LMNA | -0.26289 | -0.405131596 | -0.1082146  | 1.07E-03 | 1.22E-02 | 1.00E+00 |
| ENSG00000134489.6_HRH4       | ENSG00000160789.18_LMNA | 0.121    | -0.038946234 | 0.274909564 | 1.38E-01 | 3.78E-01 | 1.00E+00 |
| ENSG00000161270.18_NPHS1     | ENSG00000160789.18_LMNA | -0.02863 | -0.186976596 | 0.131170465 | 7.26E-01 | 8.84E-01 | 1.00E+00 |
| ENSG00000197099.7_RP11-573D  | ENSG00000160789.18_LMNA | 0.05529  | -0.104831604 | 0.212620983 | 4.99E-01 | 7.52E-01 | 1.00E+00 |

|                              |                         |          |              |             |          |          |          |
|------------------------------|-------------------------|----------|--------------|-------------|----------|----------|----------|
| ENSG00000265657.1_MIR3151    | ENSG00000160789.18_LMNA | -0.13323 | -0.286353997 | 0.026536734 | 1.02E-01 | 3.15E-01 | 1.00E+00 |
| ENSG00000265806.1_MIR4292    | ENSG00000160789.18_LMNA | 0.09934  | -0.060826494 | 0.254511895 | 2.23E-01 | 4.99E-01 | 1.00E+00 |
| ENSG00000211553.1_           | ENSG00000160789.18_LMNA | -0.09342 | -0.248919299 | 0.06677311  | 2.52E-01 | 5.33E-01 | 1.00E+00 |
| ENSG00000278267.1_MIR6859-1  | ENSG00000160789.18_LMNA | 0.06611  | -0.094078334 | 0.2229665   | 4.18E-01 | 6.90E-01 | 1.00E+00 |
| ENSG00000136315.4_RP11-84C1  | ENSG00000160789.18_LMNA | 0.15318  | -0.006175174 | 0.304940612 | 5.96E-02 | 2.24E-01 | 1.00E+00 |
| ENSG00000267595.1_RP11-242D  | ENSG00000160789.18_LMNA | -0.06787 | -0.224645282 | 0.092326382 | 4.06E-01 | 6.81E-01 | 1.00E+00 |
| ENSG00000281628.1_           | ENSG00000160789.18_LMNA | 0.22357  | 0.066741389  | 0.369612114 | 5.63E-03 | 4.29E-02 | 1.00E+00 |
| ENSG00000199804.1_RNA5SP38   | ENSG00000160789.18_LMNA | -0.04564 | -0.203362123 | 0.114392851 | 5.77E-01 | 8.03E-01 | 1.00E+00 |
| ENSG00000221184.1_MIR1254-1  | ENSG00000160789.18_LMNA | -0.15992 | -0.311198272 | -0.00073861 | 4.91E-02 | 1.99E-01 | 1.00E+00 |
| ENSG00000226580.1_RPL39P40   | ENSG00000160789.18_LMNA | -0.11145 | -0.265936477 | 0.048608745 | 1.72E-01 | 4.31E-01 | 1.00E+00 |
| ENSG00000259446.4_RP11-489D  | ENSG00000160789.18_LMNA | 0.12779  | -0.032061876 | 0.281269539 | 1.17E-01 | 3.42E-01 | 1.00E+00 |
| ENSG00000243620.1_RP11-649A  | ENSG00000160789.18_LMNA | -0.05263 | -0.210070775 | 0.107470969 | 5.20E-01 | 7.66E-01 | 1.00E+00 |
| ENSG00000273811.1_           | ENSG00000160789.18_LMNA | 0.04444  | -0.115575382 | 0.202213029 | 5.87E-01 | 8.08E-01 | 1.00E+00 |
| ENSG00000206674.1_RNU6-945F  | ENSG00000160789.18_LMNA | 0.05806  | -0.102081191 | 0.215273895 | 4.77E-01 | 7.36E-01 | 1.00E+00 |
| ENSG00000269978.1_RP11-338N  | ENSG00000160789.18_LMNA | -0.14234 | -0.294856164 | 0.017254753 | 8.02E-02 | 2.73E-01 | 1.00E+00 |
| ENSG00000163263.6_C1orf189   | ENSG00000160789.18_LMNA | 0.07608  | -0.08413792  | 0.232466881 | 3.52E-01 | 6.35E-01 | 1.00E+00 |
| ENSG00000270071.1_AP001172.2 | ENSG00000160789.18_LMNA | -0.24401 | -0.388130319 | -0.08823379 | 2.45E-03 | 2.29E-02 | 1.00E+00 |
| ENSG00000225554.1_RP11-527D  | ENSG00000160789.18_LMNA | -0.21032 | -0.357549816 | -0.05289132 | 9.30E-03 | 6.22E-02 | 1.00E+00 |
| ENSG00000254866.2_DEFB109P   | ENSG00000160789.18_LMNA | -0.08028 | -0.23646     | 0.079940955 | 3.26E-01 | 6.12E-01 | 1.00E+00 |
| ENSG00000250358.4_RP11-159K  | ENSG00000160789.18_LMNA | -0.27101 | -0.412415393 | -0.11684894 | 7.33E-04 | 9.07E-03 | 1.00E+00 |
| ENSG00000129988.5_LBP        | ENSG00000160789.18_LMNA | -0.01529 | -0.174063499 | 0.144265388 | 8.52E-01 | 9.42E-01 | 1.00E+00 |
| ENSG00000189431.7_RASSF10    | ENSG00000160789.18_LMNA | -0.00149 | -0.160650848 | 0.157749868 | 9.85E-01 | 9.94E-01 | 1.00E+00 |
| ENSG00000270179.1_RP11-159N  | ENSG00000160789.18_LMNA | 0.2626   | 0.107908514  | 0.404872695 | 1.08E-03 | 1.23E-02 | 1.00E+00 |
| ENSG00000100373.8_UPK3A      | ENSG00000160789.18_LMNA | -0.0313  | -0.189558593 | 0.128538725 | 7.02E-01 | 8.73E-01 | 1.00E+00 |
| ENSG00000165553.4_NGB        | ENSG00000160789.18_LMNA | -0.14714 | -0.299332084 | 0.012346593 | 7.05E-02 | 2.51E-01 | 1.00E+00 |
| ENSG00000205810.7_KLRC3      | ENSG00000160789.18_LMNA | -0.36523 | -0.495616217 | -0.21875204 | 3.72E-06 | 1.31E-04 | 1.91E-01 |
| ENSG00000160180.15_TFF3      | ENSG00000160789.18_LMNA | -0.09672 | -0.252041095 | 0.063456463 | 2.36E-01 | 5.14E-01 | 1.00E+00 |
| ENSG00000224731.1_AC016716.2 | ENSG00000160789.18_LMNA | -0.11758 | -0.27169074  | 0.042419132 | 1.49E-01 | 3.96E-01 | 1.00E+00 |
| ENSG00000274762.1_RP11-966I7 | ENSG00000160789.18_LMNA | 0.11428  | -0.045749435 | 0.268597464 | 1.61E-01 | 4.15E-01 | 1.00E+00 |
| ENSG00000273493.1_RP11-80H1  | ENSG00000160789.18_LMNA | -0.05483 | -0.212178852 | 0.105289513 | 5.02E-01 | 7.54E-01 | 1.00E+00 |
| ENSG00000255422.1_AP002954.4 | ENSG00000160789.18_LMNA | -0.02729 | -0.185682879 | 0.132487422 | 7.39E-01 | 8.90E-01 | 1.00E+00 |
| ENSG00000238363.1_SNORA13    | ENSG00000160789.18_LMNA | 0.03814  | -0.121802353 | 0.196147658 | 6.41E-01 | 8.40E-01 | 1.00E+00 |
| ENSG00000281881.1_SPRY4-IT1  | ENSG00000160789.18_LMNA | 0.40257  | 0.260029894  | 0.527931833 | 2.73E-07 | 1.64E-05 | 1.40E-02 |

|                              |                         |          |              |             |          |          |          |
|------------------------------|-------------------------|----------|--------------|-------------|----------|----------|----------|
| ENSG00000232238.1_RPS29P8    | ENSG00000160789.18_LMNA | 0.08756  | -0.07264928  | 0.243372199 | 2.83E-01 | 5.69E-01 | 1.00E+00 |
| ENSG00000253642.4_RP11-317N  | ENSG00000160789.18_LMNA | -0.29078 | -0.430074386 | -0.13796936 | 2.79E-04 | 4.25E-03 | 1.00E+00 |
| ENSG00000259015.1_RP11-109N  | ENSG00000160789.18_LMNA | 0.06907  | -0.091133718 | 0.225787058 | 3.98E-01 | 6.75E-01 | 1.00E+00 |
| ENSG00000226530.1_RP11-348F  | ENSG00000160789.18_LMNA | -0.17154 | -0.321950778 | -0.01268826 | 3.46E-02 | 1.57E-01 | 1.00E+00 |
| ENSG00000260788.4_RP11-298D  | ENSG00000160789.18_LMNA | -0.22806 | -0.373697328 | -0.07145869 | 4.71E-03 | 3.75E-02 | 1.00E+00 |
| ENSG00000261797.1_RP11-744I2 | ENSG00000160789.18_LMNA | 0.04128  | -0.118704138 | 0.199168514 | 6.14E-01 | 8.24E-01 | 1.00E+00 |
| ENSG00000272971.1_RP11-284F  | ENSG00000160789.18_LMNA | -0.25385 | -0.397009369 | -0.0986389  | 1.60E-03 | 1.65E-02 | 1.00E+00 |
| ENSG00000091664.7_SLC17A6    | ENSG00000160789.18_LMNA | -0.25834 | -0.401042255 | -0.10338658 | 1.31E-03 | 1.42E-02 | 1.00E+00 |
| ENSG00000243384.1_RP11-475O  | ENSG00000160789.18_LMNA | -0.15574 | -0.307323995 | 0.003545392 | 5.54E-02 | 2.15E-01 | 1.00E+00 |
| ENSG00000269980.1_RP11-282O  | ENSG00000160789.18_LMNA | -0.06007 | -0.21719668  | 0.100084701 | 4.62E-01 | 7.25E-01 | 1.00E+00 |
| ENSG00000265545.1_RP11-183C  | ENSG00000160789.18_LMNA | -0.04198 | -0.19984109  | 0.118013495 | 6.08E-01 | 8.21E-01 | 1.00E+00 |
| ENSG00000235821.1_IFITM4P    | ENSG00000160789.18_LMNA | 0.18667  | 0.028311164  | 0.335889232 | 2.13E-02 | 1.13E-01 | 1.00E+00 |
| ENSG00000254419.1_RP11-261P  | ENSG00000160789.18_LMNA | 0.16597  | 0.006952628  | 0.316799693 | 4.10E-02 | 1.76E-01 | 1.00E+00 |
| ENSG00000152595.15_MEPE      | ENSG00000160789.18_LMNA | 0.05263  | -0.107475538 | 0.210066356 | 5.20E-01 | 7.66E-01 | 1.00E+00 |
| ENSG00000250133.2_HOXC-AS2   | ENSG00000160789.18_LMNA | 0.20739  | 0.049831673  | 0.354871331 | 1.04E-02 | 6.72E-02 | 1.00E+00 |
| ENSG00000275155.1_CTD-2595P  | ENSG00000160789.18_LMNA | -0.11664 | -0.270815305 | 0.043362357 | 1.52E-01 | 4.02E-01 | 1.00E+00 |
| ENSG00000249617.1_RP11-366M  | ENSG00000160789.18_LMNA | -0.15114 | -0.303045644 | 0.008262982 | 6.31E-02 | 2.33E-01 | 1.00E+00 |
| ENSG00000182625.3_RP11-123C  | ENSG00000160789.18_LMNA | -0.07866 | -0.234917975 | 0.08156303  | 3.35E-01 | 6.21E-01 | 1.00E+00 |
| ENSG00000233532.4_LINC00460  | ENSG00000160789.18_LMNA | 0.34117  | 0.192424209  | 0.474596363 | 1.70E-05 | 4.51E-04 | 8.71E-01 |
| ENSG00000228398.3_HMG2P25    | ENSG00000160789.18_LMNA | -0.05156 | -0.209049167 | 0.108527039 | 5.28E-01 | 7.72E-01 | 1.00E+00 |
| ENSG00000257114.2_RP11-251I5 | ENSG00000160789.18_LMNA | -0.06342 | -0.220398424 | 0.096754548 | 4.38E-01 | 7.06E-01 | 1.00E+00 |
| ENSG00000250366.2_TUNAR      | ENSG00000160789.18_LMNA | -0.22543 | -0.37130916  | -0.06869937 | 5.23E-03 | 4.06E-02 | 1.00E+00 |
| ENSG00000271938.1_RP11-589C  | ENSG00000160789.18_LMNA | -0.03804 | -0.196050446 | 0.121901952 | 6.42E-01 | 8.40E-01 | 1.00E+00 |
| ENSG00000253194.1_RP11-351A  | ENSG00000160789.18_LMNA | 0.05343  | -0.106675858 | 0.210839483 | 5.13E-01 | 7.61E-01 | 1.00E+00 |
| ENSG00000268266.1_AC003005.1 | ENSG00000160789.18_LMNA | 0.03274  | -0.127121007 | 0.190947694 | 6.89E-01 | 8.66E-01 | 1.00E+00 |
| ENSG00000272255.1_CTD-3224K  | ENSG00000160789.18_LMNA | 0.00347  | -0.155812993 | 0.162584666 | 9.66E-01 | 9.87E-01 | 1.00E+00 |
| ENSG00000228373.2_RP11-497K  | ENSG00000160789.18_LMNA | -0.12747 | -0.280973586 | 0.032382892 | 1.18E-01 | 3.44E-01 | 1.00E+00 |
| ENSG00000166159.9_LRTM2      | ENSG00000160789.18_LMNA | -0.32043 | -0.456351591 | -0.16989687 | 5.71E-05 | 1.19E-03 | 1.00E+00 |
| ENSG00000224769.1_MUC20P1    | ENSG00000160789.18_LMNA | -0.00908 | -0.168036208 | 0.15033962  | 9.12E-01 | 9.66E-01 | 1.00E+00 |
| ENSG00000235994.4_RP3-470B2  | ENSG00000160789.18_LMNA | -0.02563 | -0.184078998 | 0.134118557 | 7.54E-01 | 8.98E-01 | 1.00E+00 |
| ENSG00000249456.1_RP11-298J  | ENSG00000160789.18_LMNA | 0.01449  | -0.145042493 | 0.173293728 | 8.59E-01 | 9.45E-01 | 1.00E+00 |
| ENSG00000133665.11_DYDC2     | ENSG00000160789.18_LMNA | -0.13928 | -0.292005963 | 0.020372378 | 8.70E-02 | 2.87E-01 | 1.00E+00 |
| ENSG00000249379.1_RP1-27K12  | ENSG00000160789.18_LMNA | -0.1676  | -0.318304526 | -0.00862613 | 3.90E-02 | 1.71E-01 | 1.00E+00 |



|                              |                         |          |              |             |          |          |          |
|------------------------------|-------------------------|----------|--------------|-------------|----------|----------|----------|
| ENSG00000175315.2_CST6       | ENSG00000160789.18_LMNA | 0.18567  | 0.027273168  | 0.334967312 | 2.20E-02 | 1.16E-01 | 1.00E+00 |
| ENSG00000274515.1_CTD-2026K  | ENSG00000160789.18_LMNA | 0.11037  | -0.049701333 | 0.264918403 | 1.76E-01 | 4.37E-01 | 1.00E+00 |
| ENSG00000235499.1_AC073046.  | ENSG00000160789.18_LMNA | 0.0645   | -0.095685552 | 0.221424752 | 4.30E-01 | 7.00E-01 | 1.00E+00 |
| ENSG00000235385.1_GS1-600G8  | ENSG00000160789.18_LMNA | 0.17833  | 0.019684339  | 0.328209165 | 2.79E-02 | 1.36E-01 | 1.00E+00 |
| ENSG00000229072.1_HMGN2P24   | ENSG00000160789.18_LMNA | -0.11675 | -0.270910838 | 0.043259454 | 1.52E-01 | 4.01E-01 | 1.00E+00 |
| ENSG00000231544.3_RSL24D1P   | ENSG00000160789.18_LMNA | -0.1383  | -0.291094155 | 0.021368458 | 8.93E-02 | 2.91E-01 | 1.00E+00 |
| ENSG00000278075.1_RP11-248M  | ENSG00000160789.18_LMNA | 0.20233  | 0.044568266  | 0.350251877 | 1.24E-02 | 7.66E-02 | 1.00E+00 |
| ENSG00000270755.1_RP11-138E  | ENSG00000160789.18_LMNA | -0.17309 | -0.323377522 | -0.01428052 | 3.30E-02 | 1.52E-01 | 1.00E+00 |
| ENSG00000203819.6_HIST2H2BC  | ENSG00000160789.18_LMNA | -0.03373 | -0.191897999 | 0.126150375 | 6.80E-01 | 8.60E-01 | 1.00E+00 |
| ENSG00000279794.1_CTD-2621I1 | ENSG00000160789.18_LMNA | 0.01142  | -0.148049622 | 0.170311308 | 8.89E-01 | 9.57E-01 | 1.00E+00 |
| ENSG00000229780.1_UBE2Q1-A   | ENSG00000160789.18_LMNA | 0.15176  | -0.00761991  | 0.303629581 | 6.20E-02 | 2.30E-01 | 1.00E+00 |
| ENSG00000263326.1_RP11-266L  | ENSG00000160789.18_LMNA | -0.01286 | -0.171711304 | 0.146638759 | 8.75E-01 | 9.51E-01 | 1.00E+00 |
| ENSG00000225450.1_RP3-508I15 | ENSG00000160789.18_LMNA | -0.06886 | -0.225587124 | 0.091342629 | 3.99E-01 | 6.76E-01 | 1.00E+00 |
| ENSG00000272354.1_RP11-307L  | ENSG00000160789.18_LMNA | 0.06469  | -0.095493751 | 0.221608824 | 4.28E-01 | 6.99E-01 | 1.00E+00 |
| ENSG00000217258.2_AC007249.  | ENSG00000160789.18_LMNA | 0.08079  | -0.079428887 | 0.236946466 | 3.22E-01 | 6.09E-01 | 1.00E+00 |
| ENSG00000242206.2_RPS26P35   | ENSG00000160789.18_LMNA | -0.07777 | -0.234071607 | 0.082452622 | 3.41E-01 | 6.26E-01 | 1.00E+00 |
| ENSG00000246528.3_RP11-159H  | ENSG00000160789.18_LMNA | -0.27806 | -0.418725141 | -0.12436492 | 5.23E-04 | 6.99E-03 | 1.00E+00 |
| ENSG00000229666.1_MAST4-AS   | ENSG00000160789.18_LMNA | -0.0321  | -0.190324348 | 0.127757355 | 6.95E-01 | 8.69E-01 | 1.00E+00 |
| ENSG00000216548.2_RP11-471B  | ENSG00000160789.18_LMNA | -0.00931 | -0.168263297 | 0.150111197 | 9.09E-01 | 9.65E-01 | 1.00E+00 |
| ENSG00000220323.3_HIST2H2BC  | ENSG00000160789.18_LMNA | -0.09451 | -0.249948543 | 0.065680395 | 2.47E-01 | 5.27E-01 | 1.00E+00 |
| ENSG00000273175.1_RP11-11N7  | ENSG00000160789.18_LMNA | -0.02797 | -0.186343692 | 0.131814879 | 7.32E-01 | 8.87E-01 | 1.00E+00 |
| ENSG00000267192.1_AC006116.  | ENSG00000160789.18_LMNA | -0.01651 | -0.175250669 | 0.143066138 | 8.40E-01 | 9.38E-01 | 1.00E+00 |
| ENSG00000260022.1_LA16c-306/ | ENSG00000160789.18_LMNA | 0.04905  | -0.111022442 | 0.206632437 | 5.48E-01 | 7.85E-01 | 1.00E+00 |
| ENSG00000243055.1_GK-AS1     | ENSG00000160789.18_LMNA | 0.17949  | 0.020886381  | 0.32928174  | 2.69E-02 | 1.33E-01 | 1.00E+00 |
| ENSG00000249085.1_CTD-2631K  | ENSG00000160789.18_LMNA | -0.04761 | -0.205257659 | 0.112440189 | 5.60E-01 | 7.93E-01 | 1.00E+00 |
| ENSG00000227440.1_ATP5G1P4   | ENSG00000160789.18_LMNA | 0.1369   | -0.022800551 | 0.289782225 | 9.26E-02 | 2.97E-01 | 1.00E+00 |
| ENSG00000234624.2_AC016894.  | ENSG00000160789.18_LMNA | -0.15782 | -0.309248415 | 0.001418879 | 5.22E-02 | 2.07E-01 | 1.00E+00 |
| ENSG00000272862.1_RP11-814H  | ENSG00000160789.18_LMNA | -0.14114 | -0.293741832 | 0.018474362 | 8.28E-02 | 2.78E-01 | 1.00E+00 |
| ENSG00000254812.1_RP11-661A  | ENSG00000160789.18_LMNA | -0.06981 | -0.226496562 | 0.090392134 | 3.93E-01 | 6.70E-01 | 1.00E+00 |
| ENSG00000227462.1_PSME2P6    | ENSG00000160789.18_LMNA | 0.13961  | -0.020036469 | 0.292313325 | 8.63E-02 | 2.85E-01 | 1.00E+00 |
| ENSG00000232075.1_MRPL35P2   | ENSG00000160789.18_LMNA | -0.10771 | -0.262407378 | 0.052392931 | 1.87E-01 | 4.53E-01 | 1.00E+00 |
| ENSG00000273176.1_RP3-510H1  | ENSG00000160789.18_LMNA | 0.04064  | -0.119333931 | 0.198554934 | 6.19E-01 | 8.28E-01 | 1.00E+00 |
| ENSG00000258745.1_RP11-218E  | ENSG00000160789.18_LMNA | 0.22659  | 0.06991291   | 0.372359964 | 5.00E-03 | 3.92E-02 | 1.00E+00 |

|                              |                         |          |              |             |          |          |          |
|------------------------------|-------------------------|----------|--------------|-------------|----------|----------|----------|
| ENSG00000198237.8_RP11-98J2  | ENSG00000160789.18_LMNA | 0.03905  | -0.120904811 | 0.19702341  | 6.33E-01 | 8.35E-01 | 1.00E+00 |
| ENSG00000228639.5_AC005152   | ENSG00000160789.18_LMNA | 0.11389  | -0.046145612 | 0.268229052 | 1.62E-01 | 4.17E-01 | 1.00E+00 |
| ENSG00000272647.1_GS1-259H1  | ENSG00000160789.18_LMNA | 0.06383  | -0.09634694  | 0.220789845 | 4.35E-01 | 7.03E-01 | 1.00E+00 |
| ENSG00000279328.1_RP11-203H  | ENSG00000160789.18_LMNA | 0.05565  | -0.104476991 | 0.212963289 | 4.96E-01 | 7.50E-01 | 1.00E+00 |
| ENSG00000260571.1_BNIP3P5    | ENSG00000160789.18_LMNA | -0.06683 | -0.223649603 | 0.093365695 | 4.13E-01 | 6.87E-01 | 1.00E+00 |
| ENSG00000240238.1_RP11-112N  | ENSG00000160789.18_LMNA | 0.06378  | -0.09639503  | 0.220743671 | 4.35E-01 | 7.03E-01 | 1.00E+00 |
| ENSG00000232083.3_RPL31P7    | ENSG00000160789.18_LMNA | 0.04762  | -0.112431288 | 0.205266294 | 5.60E-01 | 7.93E-01 | 1.00E+00 |
| ENSG00000274902.1_RP1-197B1  | ENSG00000160789.18_LMNA | 0.00155  | -0.157693479 | 0.160707183 | 9.85E-01 | 9.94E-01 | 1.00E+00 |
| ENSG00000229007.1_EXOSC3P1   | ENSG00000160789.18_LMNA | -0.01814 | -0.17683303  | 0.141466221 | 8.24E-01 | 9.31E-01 | 1.00E+00 |
| ENSG00000271874.1_CTD-2024P  | ENSG00000160789.18_LMNA | -0.04981 | -0.207364382 | 0.110267092 | 5.42E-01 | 7.81E-01 | 1.00E+00 |
| ENSG00000231170.4_AC002451   | ENSG00000160789.18_LMNA | -0.2599  | -0.402448798 | -0.10504561 | 1.22E-03 | 1.35E-02 | 1.00E+00 |
| ENSG00000152672.6_CLEC4F     | ENSG00000160789.18_LMNA | -0.26968 | -0.411228962 | -0.11543947 | 7.80E-04 | 9.53E-03 | 1.00E+00 |
| ENSG00000279384.1_RP11-635L  | ENSG00000160789.18_LMNA | 0.03487  | -0.125020254 | 0.193003702 | 6.70E-01 | 8.55E-01 | 1.00E+00 |
| ENSG00000238286.1_SLC35E1P   | ENSG00000160789.18_LMNA | -0.05107 | -0.208578431 | 0.109013413 | 5.32E-01 | 7.75E-01 | 1.00E+00 |
| ENSG00000239480.1_RP11-514P  | ENSG00000160789.18_LMNA | 0.04768  | -0.112369694 | 0.205326047 | 5.60E-01 | 7.92E-01 | 1.00E+00 |
| ENSG00000235481.2_UBE2R2-A   | ENSG00000160789.18_LMNA | 0.07093  | -0.089279702 | 0.227560242 | 3.85E-01 | 6.64E-01 | 1.00E+00 |
| ENSG00000261671.1_RP11-573G  | ENSG00000160789.18_LMNA | -0.17216 | -0.32252233  | -0.01332593 | 3.39E-02 | 1.55E-01 | 1.00E+00 |
| ENSG00000253893.2_FAM85B     | ENSG00000160789.18_LMNA | -0.01188 | -0.17075994  | 0.147597648 | 8.84E-01 | 9.55E-01 | 1.00E+00 |
| ENSG00000240441.1_RP11-864J  | ENSG00000160789.18_LMNA | -0.13576 | -0.28872473  | 0.023953972 | 9.54E-02 | 3.03E-01 | 1.00E+00 |
| ENSG00000236276.1_NDP-AS1    | ENSG00000160789.18_LMNA | 0.09434  | -0.065846013 | 0.249792591 | 2.48E-01 | 5.28E-01 | 1.00E+00 |
| ENSG00000146374.12_RSPO3     | ENSG00000160789.18_LMNA | -0.10842 | -0.263082678 | 0.051669518 | 1.84E-01 | 4.49E-01 | 1.00E+00 |
| ENSG00000138115.12_CYP2C8    | ENSG00000160789.18_LMNA | -0.07027 | -0.226929692 | 0.089939248 | 3.90E-01 | 6.68E-01 | 1.00E+00 |
| ENSG00000234661.2_CHL1-AS1   | ENSG00000160789.18_LMNA | 0.10184  | -0.058310726 | 0.256871559 | 2.12E-01 | 4.86E-01 | 1.00E+00 |
| ENSG00000263033.2_RP11-396B  | ENSG00000160789.18_LMNA | -0.16736 | -0.318081111 | -0.00837756 | 3.93E-02 | 1.71E-01 | 1.00E+00 |
| ENSG00000278831.1_RP11-12J1  | ENSG00000160789.18_LMNA | -0.0803  | -0.236474119 | 0.079926096 | 3.25E-01 | 6.12E-01 | 1.00E+00 |
| ENSG00000268231.1_CTD-2560K  | ENSG00000160789.18_LMNA | -0.06755 | -0.224333592 | 0.092651805 | 4.08E-01 | 6.83E-01 | 1.00E+00 |
| ENSG00000254459.1_RP11-91P2  | ENSG00000160789.18_LMNA | -0.15073 | -0.30266409  | 0.008683036 | 6.38E-02 | 2.35E-01 | 1.00E+00 |
| ENSG00000227073.1_SDHDP2     | ENSG00000160789.18_LMNA | -0.022   | -0.180565552 | 0.137685688 | 7.88E-01 | 9.14E-01 | 1.00E+00 |
| ENSG00000261773.1_WI2-89031  | ENSG00000160789.18_LMNA | -0.0096  | -0.168540493 | 0.149832327 | 9.07E-01 | 9.64E-01 | 1.00E+00 |
| ENSG00000236325.1_AC005300   | ENSG00000160789.18_LMNA | 0.11689  | -0.043111369 | 0.271048305 | 1.52E-01 | 4.00E-01 | 1.00E+00 |
| ENSG00000275092.1_LA16c-329F | ENSG00000160789.18_LMNA | -0.04014 | -0.198074721 | 0.119826656 | 6.23E-01 | 8.30E-01 | 1.00E+00 |
| ENSG00000253930.1_RP11-1149  | ENSG00000160789.18_LMNA | 0.13217  | -0.027612728 | 0.285365204 | 1.05E-01 | 3.21E-01 | 1.00E+00 |
| ENSG00000226367.4_ST7-AS2    | ENSG00000160789.18_LMNA | -0.27974 | -0.420223567 | -0.12615478 | 4.82E-04 | 6.56E-03 | 1.00E+00 |

|                              |                         |          |              |             |          |          |          |
|------------------------------|-------------------------|----------|--------------|-------------|----------|----------|----------|
| ENSG00000213063.3_RPL29P7    | ENSG00000160789.18_LMNA | -0.04858 | -0.206185774 | 0.111483208 | 5.52E-01 | 7.88E-01 | 1.00E+00 |
| ENSG00000257613.1_LINC01481  | ENSG00000160789.18_LMNA | 0.08354  | -0.076682008 | 0.239553307 | 3.06E-01 | 5.93E-01 | 1.00E+00 |
| ENSG00000234393.1_RP11-211N  | ENSG00000160789.18_LMNA | 0.02372  | -0.135997312 | 0.182229531 | 7.72E-01 | 9.06E-01 | 1.00E+00 |
| ENSG00000234006.1_DDX39B-A5  | ENSG00000160789.18_LMNA | 0.01795  | -0.141656805 | 0.176644624 | 8.26E-01 | 9.32E-01 | 1.00E+00 |
| ENSG00000228444.2_RP11-173B  | ENSG00000160789.18_LMNA | -0.02897 | -0.187306178 | 0.130834784 | 7.23E-01 | 8.83E-01 | 1.00E+00 |
| ENSG00000242791.2_RP11-651P  | ENSG00000160789.18_LMNA | -0.07962 | -0.235833321 | 0.080600485 | 3.30E-01 | 6.15E-01 | 1.00E+00 |
| ENSG00000271180.1_RP11-665C  | ENSG00000160789.18_LMNA | 0.06586  | -0.094328131 | 0.222726983 | 4.20E-01 | 6.92E-01 | 1.00E+00 |
| ENSG00000260646.1_LA16c-385E | ENSG00000160789.18_LMNA | 0.03395  | -0.125933373 | 0.192110375 | 6.78E-01 | 8.59E-01 | 1.00E+00 |
| ENSG00000180662.8_RPL21P8    | ENSG00000160789.18_LMNA | -0.13416 | -0.28722677  | 0.02558639  | 9.94E-02 | 3.10E-01 | 1.00E+00 |
| ENSG00000188582.7_PAQR9      | ENSG00000160789.18_LMNA | -0.13619 | -0.289118953 | 0.023524087 | 9.43E-02 | 3.01E-01 | 1.00E+00 |
| ENSG00000254847.1_RP11-51B2  | ENSG00000160789.18_LMNA | 0.05417  | -0.105947917 | 0.211542907 | 5.07E-01 | 7.57E-01 | 1.00E+00 |
| ENSG00000236935.1_AP003774   | ENSG00000160789.18_LMNA | 0.00033  | -0.15887759  | 0.15952378  | 9.97E-01 | 9.99E-01 | 1.00E+00 |
| ENSG00000279281.1_RP11-226M  | ENSG00000160789.18_LMNA | -0.16262 | -0.313694727 | -0.00350513 | 4.53E-02 | 1.89E-01 | 1.00E+00 |
| ENSG00000170209.4_ANKK1      | ENSG00000160789.18_LMNA | 0.20627  | 0.048668785  | 0.353851997 | 1.08E-02 | 6.92E-02 | 1.00E+00 |
| ENSG00000259502.1_RP11-643G  | ENSG00000160789.18_LMNA | -0.1918  | -0.340601916 | -0.03362758 | 1.79E-02 | 9.97E-02 | 1.00E+00 |
| ENSG00000240083.2_RPS3AP22   | ENSG00000160789.18_LMNA | 0.01873  | -0.140890085 | 0.17740244  | 8.19E-01 | 9.30E-01 | 1.00E+00 |
| ENSG00000263680.2_RP11-57A1  | ENSG00000160789.18_LMNA | 0.03682  | -0.123104035 | 0.194876674 | 6.52E-01 | 8.46E-01 | 1.00E+00 |
| ENSG00000271151.1_RP11-394I1 | ENSG00000160789.18_LMNA | -0.01139 | -0.170282869 | 0.148078268 | 8.89E-01 | 9.57E-01 | 1.00E+00 |
| ENSG00000223703.1_AC027612   | ENSG00000160789.18_LMNA | 0.14198  | -0.017620664 | 0.294521927 | 8.10E-02 | 2.74E-01 | 1.00E+00 |
| ENSG00000223734.2_RP11-644K  | ENSG00000160789.18_LMNA | -0.07689 | -0.233232937 | 0.083333627 | 3.46E-01 | 6.31E-01 | 1.00E+00 |
| ENSG00000262180.1_OCLM       | ENSG00000160789.18_LMNA | 0.1429   | -0.016684786 | 0.29537664  | 7.91E-02 | 2.70E-01 | 1.00E+00 |
| ENSG00000228352.2_RP11-537H  | ENSG00000160789.18_LMNA | -0.07207 | -0.228648728 | 0.088140508 | 3.78E-01 | 6.57E-01 | 1.00E+00 |
| ENSG00000268660.1_LETM1P2    | ENSG00000160789.18_LMNA | 0.0363   | -0.123617557 | 0.19437497  | 6.57E-01 | 8.48E-01 | 1.00E+00 |
| ENSG00000259399.1_TGIF2-C20  | ENSG00000160789.18_LMNA | -0.11117 | -0.265668894 | 0.048895985 | 1.73E-01 | 4.32E-01 | 1.00E+00 |
| ENSG00000187010.17_RHD       | ENSG00000160789.18_LMNA | -0.10672 | -0.261474208 | 0.053392042 | 1.91E-01 | 4.58E-01 | 1.00E+00 |
| ENSG00000229595.1_RP5-1097F  | ENSG00000160789.18_LMNA | 0.01418  | -0.145345845 | 0.172993133 | 8.62E-01 | 9.46E-01 | 1.00E+00 |
| ENSG00000260668.1_RP11-744D  | ENSG00000160789.18_LMNA | -0.0576  | -0.214826144 | 0.102545738 | 4.81E-01 | 7.39E-01 | 1.00E+00 |
| ENSG00000213435.3_ATP6V0CP   | ENSG00000160789.18_LMNA | -0.04826 | -0.205874622 | 0.111804103 | 5.55E-01 | 7.89E-01 | 1.00E+00 |
| ENSG00000278434.1_RP11-709D  | ENSG00000160789.18_LMNA | -0.09372 | -0.249201041 | 0.06647407  | 2.51E-01 | 5.31E-01 | 1.00E+00 |
| ENSG00000204657.3_OR2H2      | ENSG00000160789.18_LMNA | -0.14369 | -0.296114025 | 0.015876937 | 7.74E-02 | 2.67E-01 | 1.00E+00 |
| ENSG00000180264.9_ADGRD2     | ENSG00000160789.18_LMNA | 0.03028  | -0.129547699 | 0.188569209 | 7.11E-01 | 8.77E-01 | 1.00E+00 |
| ENSG00000233025.1_CRYZP1     | ENSG00000160789.18_LMNA | 0.0061   | -0.153252084 | 0.165137782 | 9.41E-01 | 9.76E-01 | 1.00E+00 |
| ENSG00000270022.3_RNU12      | ENSG00000160789.18_LMNA | -0.03977 | -0.19772265  | 0.1201878   | 6.27E-01 | 8.32E-01 | 1.00E+00 |

|                              |                         |          |              |             |          |          |          |
|------------------------------|-------------------------|----------|--------------|-------------|----------|----------|----------|
| ENSG00000264057.1_RP11-583F  | ENSG00000160789.18_LMNA | 0.11047  | -0.049601479 | 0.265011477 | 1.75E-01 | 4.36E-01 | 1.00E+00 |
| ENSG00000234629.1_WDR82P1    | ENSG00000160789.18_LMNA | -0.06648 | -0.223320338 | 0.093709237 | 4.16E-01 | 6.88E-01 | 1.00E+00 |
| ENSG00000279699.1_RP1-102K2  | ENSG00000160789.18_LMNA | 0.08602  | -0.074192439 | 0.241912022 | 2.92E-01 | 5.78E-01 | 1.00E+00 |
| ENSG00000244183.1_RP11-641C  | ENSG00000160789.18_LMNA | 0.14223  | -0.017364749 | 0.294755698 | 8.05E-02 | 2.73E-01 | 1.00E+00 |
| ENSG00000229498.1_AC105053.1 | ENSG00000160789.18_LMNA | -0.31468 | -0.451277518 | -0.16368452 | 7.87E-05 | 1.55E-03 | 1.00E+00 |
| ENSG00000242278.1_RP11-382N  | ENSG00000160789.18_LMNA | 0.09275  | -0.067446491 | 0.248284678 | 2.56E-01 | 5.38E-01 | 1.00E+00 |
| ENSG00000281692.1_PACRG-AS   | ENSG00000160789.18_LMNA | -0.35501 | -0.486705771 | -0.20754207 | 7.20E-06 | 2.25E-04 | 3.69E-01 |
| ENSG00000184682.5_           | ENSG00000160789.18_LMNA | 0.20744  | 0.049886513  | 0.354919384 | 1.03E-02 | 6.71E-02 | 1.00E+00 |
| ENSG00000272053.1_RP11-367G  | ENSG00000160789.18_LMNA | 0.04487  | -0.115156883 | 0.202619795 | 5.83E-01 | 8.06E-01 | 1.00E+00 |
| ENSG00000213809.7_KLRK1      | ENSG00000160789.18_LMNA | -0.22479 | -0.370723832 | -0.06802378 | 5.37E-03 | 4.13E-02 | 1.00E+00 |
| ENSG00000271522.1_RP11-36B6  | ENSG00000160789.18_LMNA | 0.096    | -0.064185307 | 0.251355632 | 2.39E-01 | 5.18E-01 | 1.00E+00 |
| ENSG00000214259.3_RP11-568J  | ENSG00000160789.18_LMNA | -0.00299 | -0.162113435 | 0.156285195 | 9.71E-01 | 9.89E-01 | 1.00E+00 |
| ENSG00000248927.1_CTD-2334D  | ENSG00000160789.18_LMNA | 0.08287  | -0.077355081 | 0.238914969 | 3.10E-01 | 5.97E-01 | 1.00E+00 |
| ENSG00000099937.9_SERPIND1   | ENSG00000160789.18_LMNA | 0.19126  | 0.03306993   | 0.340108313 | 1.83E-02 | 1.01E-01 | 1.00E+00 |
| ENSG00000179873.13_NLRP11    | ENSG00000160789.18_LMNA | -0.15897 | -0.310320909 | 0.000232537 | 5.04E-02 | 2.02E-01 | 1.00E+00 |
| ENSG00000272858.1_CTA-292E1  | ENSG00000160789.18_LMNA | 0.03016  | -0.129665231 | 0.188453918 | 7.12E-01 | 8.78E-01 | 1.00E+00 |
| ENSG00000213149.3_CNN2P9     | ENSG00000160789.18_LMNA | 0.06382  | -0.096356892 | 0.22078029  | 4.35E-01 | 7.03E-01 | 1.00E+00 |
| ENSG00000244490.1_RWDD4P1    | ENSG00000160789.18_LMNA | -0.0463  | -0.203994127 | 0.113742074 | 5.71E-01 | 8.00E-01 | 1.00E+00 |
| ENSG00000250933.1_GAPDHP6    | ENSG00000160789.18_LMNA | -0.04641 | -0.204101038 | 0.113631959 | 5.70E-01 | 7.99E-01 | 1.00E+00 |
| ENSG00000253379.4_RP11-1102  | ENSG00000160789.18_LMNA | -0.33997 | -0.473539652 | -0.19111129 | 1.83E-05 | 4.78E-04 | 9.37E-01 |
| ENSG00000183287.12_CCBE1     | ENSG00000160789.18_LMNA | -0.00264 | -0.161774379 | 0.156624859 | 9.74E-01 | 9.90E-01 | 1.00E+00 |
| ENSG00000128253.12_RFPL2     | ENSG00000160789.18_LMNA | -0.14618 | -0.298439341 | 0.013326748 | 7.23E-02 | 2.55E-01 | 1.00E+00 |
| ENSG00000231453.1_LINC01305  | ENSG00000160789.18_LMNA | -0.01614 | -0.174888194 | 0.1434324   | 8.44E-01 | 9.39E-01 | 1.00E+00 |
| ENSG00000227449.7_FGF7P6     | ENSG00000160789.18_LMNA | -0.17176 | -0.322151708 | -0.0129124  | 3.44E-02 | 1.57E-01 | 1.00E+00 |
| ENSG00000248477.5_RP11-848G  | ENSG00000160789.18_LMNA | 0.10063  | -0.059522201 | 0.255735725 | 2.17E-01 | 4.92E-01 | 1.00E+00 |
| ENSG00000220773.1_RPSAP44    | ENSG00000160789.18_LMNA | 0.02693  | -0.132837843 | 0.185338456 | 7.42E-01 | 8.92E-01 | 1.00E+00 |
| ENSG00000255210.1_RP11-344L  | ENSG00000160789.18_LMNA | 0.06781  | -0.092390016 | 0.224584339 | 4.07E-01 | 6.82E-01 | 1.00E+00 |
| ENSG00000227040.4_RP11-533F  | ENSG00000160789.18_LMNA | -0.00613 | -0.165174339 | 0.153215385 | 9.40E-01 | 9.76E-01 | 1.00E+00 |
| ENSG00000248113.2_RP11-791G  | ENSG00000160789.18_LMNA | 0.03983  | -0.120130744 | 0.197778278 | 6.26E-01 | 8.31E-01 | 1.00E+00 |
| ENSG00000251667.1_BRCC3P1    | ENSG00000160789.18_LMNA | -0.08323 | -0.239257793 | 0.076993638 | 3.08E-01 | 5.95E-01 | 1.00E+00 |
| ENSG00000255008.2_AP000442.4 | ENSG00000160789.18_LMNA | 0.06827  | -0.091933243 | 0.225021743 | 4.03E-01 | 6.79E-01 | 1.00E+00 |
| ENSG00000255450.1_CTD-2063L  | ENSG00000160789.18_LMNA | 0.04577  | -0.114265141 | 0.20348617  | 5.76E-01 | 8.02E-01 | 1.00E+00 |
| ENSG00000055957.9_ITIH1      | ENSG00000160789.18_LMNA | -0.1108  | -0.26532144  | 0.049268888 | 1.74E-01 | 4.34E-01 | 1.00E+00 |

|                             |                         |          |              |             |          |          |          |
|-----------------------------|-------------------------|----------|--------------|-------------|----------|----------|----------|
| ENSG00000267546.2_RP11-666A | ENSG00000160789.18_LMNA | -0.0507  | -0.20821801  | 0.109385705 | 5.35E-01 | 7.76E-01 | 1.00E+00 |
| ENSG00000197465.12_GYPE     | ENSG00000160789.18_LMNA | -0.09041 | -0.246072095 | 0.069791956 | 2.68E-01 | 5.52E-01 | 1.00E+00 |
| ENSG00000103023.10_PRSS54   | ENSG00000160789.18_LMNA | -0.18773 | -0.336861889 | -0.029407   | 2.06E-02 | 1.10E-01 | 1.00E+00 |
| ENSG00000229534.1_HNRNPA1F  | ENSG00000160789.18_LMNA | 0.10038  | -0.05978044  | 0.255493497 | 2.19E-01 | 4.93E-01 | 1.00E+00 |
| ENSG00000278195.1_SSTR3     | ENSG00000160789.18_LMNA | -0.08495 | -0.240892233 | 0.075269286 | 2.98E-01 | 5.84E-01 | 1.00E+00 |
| ENSG00000145063.13_AC062028 | ENSG00000160789.18_LMNA | -0.07007 | -0.226738015 | 0.090139684 | 3.91E-01 | 6.69E-01 | 1.00E+00 |
| ENSG00000036473.6_OTC       | ENSG00000160789.18_LMNA | -0.06962 | -0.226314588 | 0.09058237  | 3.94E-01 | 6.72E-01 | 1.00E+00 |
| ENSG00000186212.3_SOWAHB    | ENSG00000160789.18_LMNA | 0.07399  | -0.086221953 | 0.230480095 | 3.65E-01 | 6.46E-01 | 1.00E+00 |
| ENSG00000188833.8_ENTPD8    | ENSG00000160789.18_LMNA | -0.04524 | -0.20298128  | 0.114784876 | 5.80E-01 | 8.04E-01 | 1.00E+00 |
| ENSG00000244953.1_RP11-613D | ENSG00000160789.18_LMNA | 0.00103  | -0.15819971  | 0.160201367 | 9.90E-01 | 9.96E-01 | 1.00E+00 |
| ENSG00000205037.2_RP11-863P | ENSG00000160789.18_LMNA | 0.00827  | -0.151126553 | 0.16725361  | 9.19E-01 | 9.69E-01 | 1.00E+00 |
| ENSG00000112041.11_TULP1    | ENSG00000160789.18_LMNA | 0.30503  | 0.153273043  | 0.442731801 | 1.33E-04 | 2.37E-03 | 1.00E+00 |
| ENSG00000223522.1_AC093690. | ENSG00000160789.18_LMNA | -0.03422 | -0.192375217 | 0.125662719 | 6.76E-01 | 8.58E-01 | 1.00E+00 |
| ENSG00000241286.2_RPL29P25  | ENSG00000160789.18_LMNA | 0.02056  | -0.139093617 | 0.179176574 | 8.01E-01 | 9.20E-01 | 1.00E+00 |
| ENSG00000249240.2_AC069368. | ENSG00000160789.18_LMNA | 0.0319   | -0.127948322 | 0.190137234 | 6.96E-01 | 8.70E-01 | 1.00E+00 |
| ENSG00000255836.1_RP11-157G | ENSG00000160789.18_LMNA | 0.05859  | -0.101554949 | 0.215780949 | 4.73E-01 | 7.33E-01 | 1.00E+00 |
| ENSG00000233009.1_NALCN-AS  | ENSG00000160789.18_LMNA | -0.10708 | -0.261818271 | 0.053023739 | 1.89E-01 | 4.56E-01 | 1.00E+00 |
| ENSG00000242575.1_AC012501. | ENSG00000160789.18_LMNA | -0.16956 | -0.320120673 | -0.01064814 | 3.68E-02 | 1.64E-01 | 1.00E+00 |
| ENSG00000275945.1	EIF3FP1   | ENSG00000160789.18_LMNA | 0.03496  | -0.124939756 | 0.19308243  | 6.69E-01 | 8.54E-01 | 1.00E+00 |
| ENSG00000159339.12_PADI4    | ENSG00000160789.18_LMNA | 0.0238   | -0.135920178 | 0.182305507 | 7.71E-01 | 9.05E-01 | 1.00E+00 |
| ENSG00000248640.1_HNRNPA1F  | ENSG00000160789.18_LMNA | 0.12884  | -0.030999373 | 0.282248666 | 1.14E-01 | 3.37E-01 | 1.00E+00 |
| ENSG00000237064.1	EIF3IP1   | ENSG00000160789.18_LMNA | 0.01652  | -0.143059115 | 0.175257618 | 8.40E-01 | 9.38E-01 | 1.00E+00 |
| ENSG00000225357.3_RPF2P1    | ENSG00000160789.18_LMNA | 0.13183  | -0.027959117 | 0.285046746 | 1.05E-01 | 3.22E-01 | 1.00E+00 |
| ENSG00000255964.1_HSPD1P12  | ENSG00000160789.18_LMNA | -0.00697 | -0.165989143 | 0.152397173 | 9.32E-01 | 9.73E-01 | 1.00E+00 |
| ENSG00000279866.1_          | ENSG00000160789.18_LMNA | 0.0427   | -0.117295549 | 0.200539936 | 6.01E-01 | 8.17E-01 | 1.00E+00 |
| ENSG00000255725.2_TDGP1     | ENSG00000160789.18_LMNA | -0.07218 | -0.228751596 | 0.088032805 | 3.77E-01 | 6.57E-01 | 1.00E+00 |
| ENSG00000184956.14_MUC6     | ENSG00000160789.18_LMNA | 0.1118   | -0.048263419 | 0.266258105 | 1.70E-01 | 4.29E-01 | 1.00E+00 |
| ENSG00000173250.2_GPR151    | ENSG00000160789.18_LMNA | -0.23282 | -0.378005918 | -0.07644862 | 3.90E-03 | 3.25E-02 | 1.00E+00 |
| ENSG00000204962.5_PCDHA8    | ENSG00000160789.18_LMNA | -0.00964 | -0.168585717 | 0.149786825 | 9.06E-01 | 9.64E-01 | 1.00E+00 |
| ENSG00000141738.12_GRB7     | ENSG00000160789.18_LMNA | 0.14901  | -0.010438703 | 0.30106826  | 6.69E-02 | 2.42E-01 | 1.00E+00 |
| ENSG00000279557.1_CTD-2210P | ENSG00000160789.18_LMNA | -0.08171 | -0.237817558 | 0.078511535 | 3.17E-01 | 6.04E-01 | 1.00E+00 |
| ENSG00000244556.1_ODCP      | ENSG00000160789.18_LMNA | 0.08357  | -0.076645728 | 0.239587707 | 3.06E-01 | 5.93E-01 | 1.00E+00 |
| ENSG00000227373.4_RP11-160H | ENSG00000160789.18_LMNA | -0.18609 | -0.335351474 | -0.02770562 | 2.17E-02 | 1.14E-01 | 1.00E+00 |

|                              |                         |          |              |             |          |          |          |
|------------------------------|-------------------------|----------|--------------|-------------|----------|----------|----------|
| ENSG00000261096.1_RP11-690I2 | ENSG00000160789.18_LMNA | 0.00079  | -0.158433415 | 0.159967796 | 9.92E-01 | 9.97E-01 | 1.00E+00 |
| ENSG00000243910.6_TUBA4B     | ENSG00000160789.18_LMNA | 0.05572  | -0.104405161 | 0.213032616 | 4.95E-01 | 7.50E-01 | 1.00E+00 |
| ENSG00000254231.1_CTD-2284J  | ENSG00000160789.18_LMNA | 0.10218  | -0.057961475 | 0.257198842 | 2.10E-01 | 4.83E-01 | 1.00E+00 |
| ENSG00000109991.7_P2RX3      | ENSG00000160789.18_LMNA | -0.15731 | -0.308780317 | 0.001936393 | 5.29E-02 | 2.09E-01 | 1.00E+00 |
| ENSG00000280122.1_RP11-87G2  | ENSG00000160789.18_LMNA | -0.10188 | -0.256909376 | 0.058270375 | 2.12E-01 | 4.85E-01 | 1.00E+00 |
| ENSG00000228141.5_AC105339.  | ENSG00000160789.18_LMNA | -0.10714 | -0.261874314 | 0.05296374  | 1.89E-01 | 4.56E-01 | 1.00E+00 |
| ENSG00000205111.7_CDKL4      | ENSG00000160789.18_LMNA | -0.18615 | -0.335414205 | -0.02777624 | 2.17E-02 | 1.14E-01 | 1.00E+00 |
| ENSG00000267013.4_CTD-2171N  | ENSG00000160789.18_LMNA | 0.13409  | -0.025658913 | 0.287160184 | 9.96E-02 | 3.11E-01 | 1.00E+00 |
| ENSG00000182687.3_GALR2      | ENSG00000160789.18_LMNA | 0.24995  | 0.09451212   | 0.393494508 | 1.90E-03 | 1.88E-02 | 1.00E+00 |
| ENSG00000236229.1_VEZF1P1    | ENSG00000160789.18_LMNA | -0.08659 | -0.242446773 | 0.073627474 | 2.89E-01 | 5.74E-01 | 1.00E+00 |
| ENSG00000230183.4_CNOT6LP1   | ENSG00000160789.18_LMNA | 0.03585  | -0.124058079 | 0.193944452 | 6.61E-01 | 8.50E-01 | 1.00E+00 |
| ENSG00000251405.2_CTB-109A1  | ENSG00000160789.18_LMNA | 0.10393  | -0.056200227 | 0.258848207 | 2.03E-01 | 4.73E-01 | 1.00E+00 |
| ENSG00000269514.1_RP11-370I1 | ENSG00000160789.18_LMNA | 0.17351  | 0.014719673  | 0.323770781 | 3.25E-02 | 1.51E-01 | 1.00E+00 |
| ENSG00000279345.1_RP3-522J7. | ENSG00000160789.18_LMNA | -0.01226 | -0.171124444 | 0.147230333 | 8.81E-01 | 9.54E-01 | 1.00E+00 |
| ENSG00000163564.13_PYHIN1    | ENSG00000160789.18_LMNA | 0.02696  | -0.132814158 | 0.185361738 | 7.42E-01 | 8.92E-01 | 1.00E+00 |
| ENSG00000261286.1_RP11-517C  | ENSG00000160789.18_LMNA | 0.04552  | -0.114508116 | 0.203250156 | 5.78E-01 | 8.03E-01 | 1.00E+00 |
| ENSG00000261202.1_RP3-496C2  | ENSG00000160789.18_LMNA | -0.16122 | -0.312400712 | -0.00207054 | 4.72E-02 | 1.94E-01 | 1.00E+00 |
| ENSG00000184374.2_COLEC10    | ENSG00000160789.18_LMNA | 0.16167  | 0.002530407  | 0.312815643 | 4.66E-02 | 1.92E-01 | 1.00E+00 |
| ENSG00000260112.1_CTC-543D1  | ENSG00000160789.18_LMNA | 0.00331  | -0.155974449 | 0.162423558 | 9.68E-01 | 9.87E-01 | 1.00E+00 |
| ENSG00000273679.1_RP11-566K  | ENSG00000160789.18_LMNA | -0.04199 | -0.199859344 | 0.117994745 | 6.07E-01 | 8.21E-01 | 1.00E+00 |
| ENSG00000235071.1_RP11-759L  | ENSG00000160789.18_LMNA | 0.13387  | -0.025882539 | 0.28695485  | 1.00E-01 | 3.12E-01 | 1.00E+00 |
| ENSG00000233077.1_LINC01271  | ENSG00000160789.18_LMNA | 0.25269  | 0.097406752  | 0.395960837 | 1.69E-03 | 1.72E-02 | 1.00E+00 |
| ENSG00000279936.1_CTD-2086C  | ENSG00000160789.18_LMNA | -0.04427 | -0.202048041 | 0.115745097 | 5.88E-01 | 8.09E-01 | 1.00E+00 |
| ENSG00000260288.3_RP11-24M1  | ENSG00000160789.18_LMNA | -0.01295 | -0.171793526 | 0.146555859 | 8.74E-01 | 9.51E-01 | 1.00E+00 |
| ENSG00000278932.2_bP-21264C  | ENSG00000160789.18_LMNA | -0.13144 | -0.284682279 | 0.028355456 | 1.07E-01 | 3.24E-01 | 1.00E+00 |
| ENSG00000234509.1_AP000253.  | ENSG00000160789.18_LMNA | -0.14177 | -0.294331372 | 0.01782924  | 8.15E-02 | 2.75E-01 | 1.00E+00 |
| ENSG00000240138.1_EEF1GP4    | ENSG00000160789.18_LMNA | 0.02769  | -0.132088823 | 0.186074561 | 7.35E-01 | 8.89E-01 | 1.00E+00 |
| ENSG00000237442.3_HNRNPA1F   | ENSG00000160789.18_LMNA | -0.03825 | -0.196257498 | 0.121689808 | 6.40E-01 | 8.39E-01 | 1.00E+00 |
| ENSG00000254842.5_RP11-890B  | ENSG00000160789.18_LMNA | -0.12247 | -0.276283844 | 0.037461163 | 1.33E-01 | 3.70E-01 | 1.00E+00 |
| ENSG00000235546.2_AC087499.  | ENSG00000160789.18_LMNA | -0.03261 | -0.190820567 | 0.127250807 | 6.90E-01 | 8.66E-01 | 1.00E+00 |
| ENSG00000250878.3_METTL21E1  | ENSG00000160789.18_LMNA | -0.25753 | -0.400318731 | -0.10253381 | 1.36E-03 | 1.46E-02 | 1.00E+00 |
| ENSG00000224785.1_AC006026.  | ENSG00000160789.18_LMNA | 0.16817  | 0.009214152  | 0.318832918 | 3.84E-02 | 1.69E-01 | 1.00E+00 |
| ENSG00000249593.5_CTB-46B19  | ENSG00000160789.18_LMNA | -0.26529 | -0.407285714 | -0.11076347 | 9.56E-04 | 1.12E-02 | 1.00E+00 |

|                              |                         |          |              |             |          |          |          |
|------------------------------|-------------------------|----------|--------------|-------------|----------|----------|----------|
| ENSG00000166800.8_LDHAL6A    | ENSG00000160789.18_LMNA | -0.15834 | -0.309736646 | 0.000878929 | 5.14E-02 | 2.05E-01 | 1.00E+00 |
| ENSG00000215070.4_XRCC6P5    | ENSG00000160789.18_LMNA | 0.00559  | -0.153746784 | 0.16464492  | 9.45E-01 | 9.78E-01 | 1.00E+00 |
| ENSG00000234814.6_SVILP1     | ENSG00000160789.18_LMNA | 0.12258  | -0.037350688 | 0.276386026 | 1.32E-01 | 3.69E-01 | 1.00E+00 |
| ENSG00000188199.9_NUTM2B     | ENSG00000160789.18_LMNA | -0.02205 | -0.180614711 | 0.137635835 | 7.87E-01 | 9.13E-01 | 1.00E+00 |
| ENSG00000135373.11_EHF       | ENSG00000160789.18_LMNA | -0.00288 | -0.162009273 | 0.156389551 | 9.72E-01 | 9.89E-01 | 1.00E+00 |
| ENSG00000279349.1_RP11-147G  | ENSG00000160789.18_LMNA | -0.22864 | -0.374221662 | -0.07206513 | 4.61E-03 | 3.68E-02 | 1.00E+00 |
| ENSG00000236530.2_AC097711.  | ENSG00000160789.18_LMNA | 0.09528  | -0.064907098 | 0.250676491 | 2.43E-01 | 5.22E-01 | 1.00E+00 |
| ENSG00000215005.2_HSPD1P7    | ENSG00000160789.18_LMNA | -0.07305 | -0.229577854 | 0.087167441 | 3.71E-01 | 6.51E-01 | 1.00E+00 |
| ENSG00000137204.13_SLC22A7   | ENSG00000160789.18_LMNA | -0.18482 | -0.334191995 | -0.02640075 | 2.26E-02 | 1.18E-01 | 1.00E+00 |
| ENSG00000225914.1_XXbac-BPG  | ENSG00000160789.18_LMNA | -0.15724 | -0.308717272 | 0.002006081 | 5.30E-02 | 2.09E-01 | 1.00E+00 |
| ENSG00000223839.6_FAM95B1    | ENSG00000160789.18_LMNA | 0.01757  | -0.142024432 | 0.176281131 | 8.30E-01 | 9.34E-01 | 1.00E+00 |
| ENSG00000179082.3_C9orf106   | ENSG00000160789.18_LMNA | -0.04589 | -0.203605722 | 0.114142048 | 5.75E-01 | 8.01E-01 | 1.00E+00 |
| ENSG00000279852.1_RP11-91J1  | ENSG00000160789.18_LMNA | -0.1667  | -0.317477753 | -0.00770647 | 4.01E-02 | 1.74E-01 | 1.00E+00 |
| ENSG00000279432.1_RP11-135N  | ENSG00000160789.18_LMNA | 0.00743  | -0.151954873 | 0.16642942  | 9.28E-01 | 9.72E-01 | 1.00E+00 |
| ENSG00000039987.5_BEST2      | ENSG00000160789.18_LMNA | -0.03486 | -0.192990511 | 0.125033741 | 6.70E-01 | 8.55E-01 | 1.00E+00 |
| ENSG00000211689.5_TRGC1      | ENSG00000160789.18_LMNA | -0.12943 | -0.282805541 | 0.030394761 | 1.12E-01 | 3.34E-01 | 1.00E+00 |
| ENSG00000256407.1_RP11-446E  | ENSG00000160789.18_LMNA | -0.08792 | -0.243707641 | 0.072294561 | 2.81E-01 | 5.67E-01 | 1.00E+00 |
| ENSG00000271741.1_RP11-244H  | ENSG00000160789.18_LMNA | -0.03706 | -0.195113714 | 0.122861353 | 6.50E-01 | 8.45E-01 | 1.00E+00 |
| ENSG00000179256.2_SMCO3      | ENSG00000160789.18_LMNA | -0.13695 | -0.28983226  | 0.022745957 | 9.25E-02 | 2.97E-01 | 1.00E+00 |
| ENSG00000170615.13_SLC26A5   | ENSG00000160789.18_LMNA | 0.05594  | -0.104188473 | 0.213241735 | 4.94E-01 | 7.49E-01 | 1.00E+00 |
| ENSG00000141086.16_CTRL      | ENSG00000160789.18_LMNA | 0.11568  | -0.04433304  | 0.269913843 | 1.56E-01 | 4.07E-01 | 1.00E+00 |
| ENSG00000165188.12_RNF183    | ENSG00000160789.18_LMNA | 0.16199  | 0.002867441  | 0.313119667 | 4.62E-02 | 1.91E-01 | 1.00E+00 |
| ENSG00000249096.5_RP11-290F  | ENSG00000160789.18_LMNA | -0.0026  | -0.161734186 | 0.15666512  | 9.75E-01 | 9.90E-01 | 1.00E+00 |
| ENSG00000245164.5_LINC00861  | ENSG00000160789.18_LMNA | 0.00757  | -0.151814185 | 0.166569438 | 9.26E-01 | 9.72E-01 | 1.00E+00 |
| ENSG00000078795.15_PKD2L2    | ENSG00000160789.18_LMNA | -0.10364 | -0.258576118 | 0.056490908 | 2.04E-01 | 4.75E-01 | 1.00E+00 |
| ENSG00000279412.1_RP11-394B  | ENSG00000160789.18_LMNA | 0.02636  | -0.133400365 | 0.184785399 | 7.47E-01 | 8.94E-01 | 1.00E+00 |
| ENSG00000259354.4_RP11-519G  | ENSG00000160789.18_LMNA | 0.25492  | 0.099763149  | 0.397965395 | 1.53E-03 | 1.59E-02 | 1.00E+00 |
| ENSG00000214338.9_SOGA3      | ENSG00000160789.18_LMNA | -0.02691 | -0.185319181 | 0.132857451 | 7.42E-01 | 8.92E-01 | 1.00E+00 |
| ENSG00000270024.4_C8orf44-SC | ENSG00000160789.18_LMNA | -0.11508 | -0.269348057 | 0.044941968 | 1.58E-01 | 4.11E-01 | 1.00E+00 |
| ENSG00000178217.12_SH2D4B    | ENSG00000160789.18_LMNA | -0.15622 | -0.307762212 | 0.003061402 | 5.46E-02 | 2.13E-01 | 1.00E+00 |
| ENSG00000277701.3_RP11-734K  | ENSG00000160789.18_LMNA | 0.01602  | -0.143550393 | 0.174771403 | 8.45E-01 | 9.39E-01 | 1.00E+00 |
| ENSG00000104970.9_KIR3DX1    | ENSG00000160789.18_LMNA | -0.14918 | -0.301225662 | 0.010265621 | 6.66E-02 | 2.41E-01 | 1.00E+00 |
| ENSG00000137878.15_GCOM1     | ENSG00000160789.18_LMNA | -0.16619 | -0.317004357 | -0.00718013 | 4.07E-02 | 1.76E-01 | 1.00E+00 |

|                              |                         |          |              |             |          |          |          |
|------------------------------|-------------------------|----------|--------------|-------------|----------|----------|----------|
| ENSG00000224356.4_RP11-151A  | ENSG00000160789.18_LMNA | 0.02016  | -0.13949298  | 0.178782354 | 8.05E-01 | 9.22E-01 | 1.00E+00 |
| ENSG00000246145.1_RRS1-AS1   | ENSG00000160789.18_LMNA | -0.09957 | -0.254734959 | 0.060588845 | 2.22E-01 | 4.98E-01 | 1.00E+00 |
| ENSG00000163810.10_TGM4      | ENSG00000160789.18_LMNA | 0.0477   | -0.112357527 | 0.20533785  | 5.60E-01 | 7.92E-01 | 1.00E+00 |
| ENSG00000255346.8_NOX5       | ENSG00000160789.18_LMNA | 0.0209   | -0.138761313 | 0.179504519 | 7.98E-01 | 9.19E-01 | 1.00E+00 |
| ENSG00000236467.6_KCNMA1-A   | ENSG00000160789.18_LMNA | 0.06936  | -0.090848102 | 0.226060359 | 3.96E-01 | 6.73E-01 | 1.00E+00 |
| ENSG00000280156.1_AC006548.  | ENSG00000160789.18_LMNA | -0.12414 | -0.277846536 | 0.035770806 | 1.28E-01 | 3.62E-01 | 1.00E+00 |
| ENSG00000199133.2_MIRLET7D   | ENSG00000160789.18_LMNA | 0.1559   | -0.003383979 | 0.307470158 | 5.51E-02 | 2.14E-01 | 1.00E+00 |
| ENSG00000277702.1_CH17-13I2  | ENSG00000160789.18_LMNA | 0.02175  | -0.13792913  | 0.180325477 | 7.90E-01 | 9.15E-01 | 1.00E+00 |
| ENSG00000274267.1_HIST1H3B   | ENSG00000160789.18_LMNA | -0.01804 | -0.176733739 | 0.141566663 | 8.25E-01 | 9.32E-01 | 1.00E+00 |
| ENSG00000222345.1_SNORD19    | ENSG00000160789.18_LMNA | -0.09897 | -0.254165147 | 0.061195844 | 2.25E-01 | 5.01E-01 | 1.00E+00 |
| ENSG00000269981.1_RP11-34P1  | ENSG00000160789.18_LMNA | 0.09769  | -0.062479288 | 0.25295961  | 2.31E-01 | 5.09E-01 | 1.00E+00 |
| ENSG00000222808.1_RNU4-47P   | ENSG00000160789.18_LMNA | 0.06264  | -0.097531478 | 0.219652063 | 4.43E-01 | 7.11E-01 | 1.00E+00 |
| ENSG00000202314.1_SNORD6     | ENSG00000160789.18_LMNA | 0.00503  | -0.154293321 | 0.164100228 | 9.51E-01 | 9.80E-01 | 1.00E+00 |
| ENSG00000208036.1_MIR106B    | ENSG00000160789.18_LMNA | 0.19081  | 0.032603243  | 0.339695098 | 1.85E-02 | 1.02E-01 | 1.00E+00 |
| ENSG00000273238.1_RP11-1263  | ENSG00000160789.18_LMNA | -0.1005  | -0.255613826 | 0.059652163 | 2.18E-01 | 4.93E-01 | 1.00E+00 |
| ENSG00000079689.12_SCGN      | ENSG00000160789.18_LMNA | -0.19591 | -0.344367986 | -0.03788864 | 1.56E-02 | 9.01E-02 | 1.00E+00 |
| ENSG00000131668.12_BARX1     | ENSG00000160789.18_LMNA | 0.06457  | -0.095616189 | 0.221491323 | 4.29E-01 | 6.99E-01 | 1.00E+00 |
| ENSG00000169297.7_NR0B1      | ENSG00000160789.18_LMNA | -0.29601 | -0.434728484 | -0.14358031 | 2.13E-04 | 3.43E-03 | 1.00E+00 |
| ENSG00000267108.1_RP11-861E  | ENSG00000160789.18_LMNA | -0.07777 | -0.234074737 | 0.082449334 | 3.41E-01 | 6.26E-01 | 1.00E+00 |
| ENSG00000273096.1_RP3-508I15 | ENSG00000160789.18_LMNA | 0.0363   | -0.12361154  | 0.194380849 | 6.57E-01 | 8.48E-01 | 1.00E+00 |
| ENSG00000237560.4_LINC01497  | ENSG00000160789.18_LMNA | -0.08846 | -0.24421755  | 0.071755195 | 2.79E-01 | 5.64E-01 | 1.00E+00 |
| ENSG00000257585.1_LINC00609  | ENSG00000160789.18_LMNA | -0.36857 | -0.498520093 | -0.22242118 | 2.98E-06 | 1.09E-04 | 1.53E-01 |
| ENSG00000239381.4_RP11-4B14  | ENSG00000160789.18_LMNA | -0.14474 | -0.29709688  | 0.014799529 | 7.52E-02 | 2.62E-01 | 1.00E+00 |
| ENSG00000279798.1_RP11-528M  | ENSG00000160789.18_LMNA | -0.09558 | -0.250957275 | 0.064608721 | 2.41E-01 | 5.21E-01 | 1.00E+00 |
| ENSG00000275858.1_           | ENSG00000160789.18_LMNA | 0.06562  | -0.094563848 | 0.222500931 | 4.22E-01 | 6.93E-01 | 1.00E+00 |
| ENSG00000279656.1_RP11-298I3 | ENSG00000160789.18_LMNA | 0.03666  | -0.123262292 | 0.194722077 | 6.54E-01 | 8.47E-01 | 1.00E+00 |
| ENSG00000273682.1_RP11-427P  | ENSG00000160789.18_LMNA | -0.14195 | -0.294500009 | 0.017644657 | 8.11E-02 | 2.74E-01 | 1.00E+00 |
| ENSG00000248479.1_RP11-807H  | ENSG00000160789.18_LMNA | -0.02382 | -0.182331407 | 0.135893882 | 7.71E-01 | 9.05E-01 | 1.00E+00 |
| ENSG00000268545.1_VN1R107P   | ENSG00000160789.18_LMNA | -0.03769 | -0.195715011 | 0.122245573 | 6.45E-01 | 8.42E-01 | 1.00E+00 |
| ENSG00000232930.1_AC083864.  | ENSG00000160789.18_LMNA | -0.29544 | -0.434220395 | -0.14296685 | 2.20E-04 | 3.51E-03 | 1.00E+00 |
| ENSG00000280331.1_RP11-545D  | ENSG00000160789.18_LMNA | 0.18954  | 0.031280649  | 0.338523401 | 1.93E-02 | 1.05E-01 | 1.00E+00 |
| ENSG00000128610.10_FEZF1     | ENSG00000160789.18_LMNA | 0.18228  | 0.023773879  | 0.331854988 | 2.46E-02 | 1.25E-01 | 1.00E+00 |
| ENSG00000251331.5_           | ENSG00000160789.18_LMNA | -0.0972  | -0.252492926 | 0.062975852 | 2.34E-01 | 5.11E-01 | 1.00E+00 |



|                              |                         |          |              |             |          |          |          |
|------------------------------|-------------------------|----------|--------------|-------------|----------|----------|----------|
| ENSG00000257185.1_RP11-626P  | ENSG00000160789.18_LMNA | -0.2939  | -0.432850747 | -0.14131427 | 2.38E-04 | 3.75E-03 | 1.00E+00 |
| ENSG00000163497.2_FEV        | ENSG00000160789.18_LMNA | -0.03369 | -0.191859707 | 0.126189498 | 6.80E-01 | 8.61E-01 | 1.00E+00 |
| ENSG00000272691.1_RP11-290M  | ENSG00000160789.18_LMNA | 0.15579  | -0.003498665 | 0.307366308 | 5.53E-02 | 2.14E-01 | 1.00E+00 |
| ENSG00000273160.1_RP11-104L  | ENSG00000160789.18_LMNA | -0.00377 | -0.162877797 | 0.155519184 | 9.63E-01 | 9.85E-01 | 1.00E+00 |
| ENSG00000273870.1_RP11-174N  | ENSG00000160789.18_LMNA | -0.18182 | -0.331430199 | -0.02329686 | 2.50E-02 | 1.26E-01 | 1.00E+00 |
| ENSG00000242085.1_RPS20P33   | ENSG00000160789.18_LMNA | -0.00652 | -0.165549248 | 0.152838962 | 9.36E-01 | 9.75E-01 | 1.00E+00 |
| ENSG00000183598.3_HIST2H3D   | ENSG00000160789.18_LMNA | -0.0331  | -0.191293529 | 0.126767845 | 6.86E-01 | 8.64E-01 | 1.00E+00 |
| ENSG00000263968.2_RN7SL381f  | ENSG00000160789.18_LMNA | -0.08077 | -0.236922673 | 0.079453936 | 3.23E-01 | 6.09E-01 | 1.00E+00 |
| ENSG00000254352.1_RP11-578O  | ENSG00000160789.18_LMNA | 0.08618  | -0.074036677 | 0.242059474 | 2.91E-01 | 5.77E-01 | 1.00E+00 |
| ENSG00000258521.1_RP11-638I2 | ENSG00000160789.18_LMNA | 0.03023  | -0.129592839 | 0.188524931 | 7.12E-01 | 8.77E-01 | 1.00E+00 |
| ENSG00000249978.1_TRGV7      | ENSG00000160789.18_LMNA | -0.07359 | -0.230094969 | 0.086625609 | 3.68E-01 | 6.48E-01 | 1.00E+00 |
| ENSG00000272848.1_RP1-137D1  | ENSG00000160789.18_LMNA | 0.06166  | -0.098510949 | 0.2187106   | 4.50E-01 | 7.16E-01 | 1.00E+00 |
| ENSG00000250432.4_LINC01598  | ENSG00000160789.18_LMNA | -0.27691 | -0.417694512 | -0.12313495 | 5.53E-04 | 7.30E-03 | 1.00E+00 |
| ENSG00000236337.1_FMR1-IT1   | ENSG00000160789.18_LMNA | 0.02201  | -0.137671785 | 0.180579262 | 7.88E-01 | 9.14E-01 | 1.00E+00 |
| ENSG00000253921.1_CTB-113P1  | ENSG00000160789.18_LMNA | -0.03848 | -0.196475289 | 0.121466631 | 6.38E-01 | 8.38E-01 | 1.00E+00 |
| ENSG00000270972.1_RP11-326C  | ENSG00000160789.18_LMNA | 0.16632  | 0.007315524  | 0.317126146 | 4.06E-02 | 1.75E-01 | 1.00E+00 |
| ENSG00000234789.1_RP11-483H  | ENSG00000160789.18_LMNA | 0.06172  | -0.098446517 | 0.21877255  | 4.50E-01 | 7.16E-01 | 1.00E+00 |
| ENSG00000196301.3_HLA-DRB9   | ENSG00000160789.18_LMNA | 0.00747  | -0.151914299 | 0.166469802 | 9.27E-01 | 9.72E-01 | 1.00E+00 |
| ENSG00000242198.1_CTD-2235C  | ENSG00000160789.18_LMNA | -0.04897 | -0.206559526 | 0.111097665 | 5.49E-01 | 7.86E-01 | 1.00E+00 |
| ENSG00000226107.1_AC004383.  | ENSG00000160789.18_LMNA | 0.06442  | -0.095760543 | 0.221352778 | 4.30E-01 | 7.00E-01 | 1.00E+00 |
| ENSG00000272128.1_KB-1836B5  | ENSG00000160789.18_LMNA | -0.15253 | -0.304345028 | 0.006831659 | 6.06E-02 | 2.27E-01 | 1.00E+00 |
| ENSG00000267783.1_CTB-55O6.  | ENSG00000160789.18_LMNA | -0.1011  | -0.25618105  | 0.05904733  | 2.15E-01 | 4.89E-01 | 1.00E+00 |
| ENSG00000253395.1_KB-1460A1  | ENSG00000160789.18_LMNA | 0.01273  | -0.146769381 | 0.171581742 | 8.76E-01 | 9.52E-01 | 1.00E+00 |
| ENSG00000227755.1_AP000344.  | ENSG00000160789.18_LMNA | -0.029   | -0.187332687 | 0.13080778  | 7.23E-01 | 8.83E-01 | 1.00E+00 |
| ENSG00000269720.1_CTD-2521M  | ENSG00000160789.18_LMNA | 0.14807  | -0.011395248 | 0.300198064 | 6.87E-02 | 2.46E-01 | 1.00E+00 |
| ENSG00000280369.1_CTD-2256P  | ENSG00000160789.18_LMNA | -0.17086 | -0.32132312  | -0.01198828 | 3.53E-02 | 1.60E-01 | 1.00E+00 |
| ENSG00000279044.1_AC007787.  | ENSG00000160789.18_LMNA | -0.11198 | -0.266429762 | 0.048079084 | 1.70E-01 | 4.28E-01 | 1.00E+00 |
| ENSG00000255670.1_RP11-253I1 | ENSG00000160789.18_LMNA | 0.01661  | -0.142973601 | 0.175342235 | 8.39E-01 | 9.37E-01 | 1.00E+00 |
| ENSG00000280439.1_RP4-568B1  | ENSG00000160789.18_LMNA | -0.04496 | -0.202711365 | 0.115062656 | 5.82E-01 | 8.06E-01 | 1.00E+00 |
| ENSG00000271709.1_RP11-297J. | ENSG00000160789.18_LMNA | 0.05955  | -0.100604552 | 0.216696258 | 4.66E-01 | 7.28E-01 | 1.00E+00 |
| ENSG00000263508.4_RP11-963H  | ENSG00000160789.18_LMNA | -0.09981 | -0.254961643 | 0.060347302 | 2.21E-01 | 4.96E-01 | 1.00E+00 |
| ENSG00000271943.1_RP11-222K  | ENSG00000160789.18_LMNA | -0.08375 | -0.239754199 | 0.076470125 | 3.05E-01 | 5.92E-01 | 1.00E+00 |
| ENSG00000241782.1_RP11-91P2  | ENSG00000160789.18_LMNA | -0.02814 | -0.186505104 | 0.131650557 | 7.31E-01 | 8.86E-01 | 1.00E+00 |

|                              |                         |          |              |             |          |          |          |
|------------------------------|-------------------------|----------|--------------|-------------|----------|----------|----------|
| ENSG00000232545.1_KB-318B8.7 | ENSG00000160789.18_LMNA | 0.02017  | -0.139480739 | 0.17879444  | 8.05E-01 | 9.22E-01 | 1.00E+00 |
| ENSG00000267449.1_RP11-264B  | ENSG00000160789.18_LMNA | 0.01253  | -0.146960773 | 0.171391884 | 8.78E-01 | 9.53E-01 | 1.00E+00 |
| ENSG00000258274.1_RP11-887P  | ENSG00000160789.18_LMNA | 0.01688  | -0.142699936 | 0.175612998 | 8.36E-01 | 9.37E-01 | 1.00E+00 |
| ENSG00000227361.1_RPS24P7    | ENSG00000160789.18_LMNA | -0.05174 | -0.209218389 | 0.108352158 | 5.27E-01 | 7.71E-01 | 1.00E+00 |
| ENSG00000273076.1_RP3-508I15 | ENSG00000160789.18_LMNA | -0.07248 | -0.229037797 | 0.087733113 | 3.75E-01 | 6.55E-01 | 1.00E+00 |
| ENSG00000254756.1_RP11-867G  | ENSG00000160789.18_LMNA | 0.25354  | 0.098312544  | 0.39673172  | 1.62E-03 | 1.67E-02 | 1.00E+00 |
| ENSG00000105664.9_COMP       | ENSG00000160789.18_LMNA | 0.09011  | -0.070094886 | 0.245786088 | 2.70E-01 | 5.54E-01 | 1.00E+00 |
| ENSG00000254319.4_RP11-134O  | ENSG00000160789.18_LMNA | -0.02938 | -0.187700592 | 0.130432974 | 7.19E-01 | 8.81E-01 | 1.00E+00 |
| ENSG00000273139.1_XXbac-B44  | ENSG00000160789.18_LMNA | -0.07854 | -0.234805368 | 0.081681417 | 3.36E-01 | 6.22E-01 | 1.00E+00 |
| ENSG00000219863.5_RPL31P28   | ENSG00000160789.18_LMNA | 0.03433  | -0.125556796 | 0.192478854 | 6.75E-01 | 8.57E-01 | 1.00E+00 |
| ENSG00000277504.1_RP11-278A  | ENSG00000160789.18_LMNA | -0.09747 | -0.252752742 | 0.06269942  | 2.32E-01 | 5.10E-01 | 1.00E+00 |
| ENSG00000224331.2_AC019181.1 | ENSG00000160789.18_LMNA | 0.11876  | -0.041221562 | 0.272801491 | 1.45E-01 | 3.90E-01 | 1.00E+00 |
| ENSG00000259120.2_SMIM6      | ENSG00000160789.18_LMNA | -0.17605 | -0.326110926 | -0.0173354  | 3.00E-02 | 1.43E-01 | 1.00E+00 |
| ENSG00000213244.3_HIST2H3DF  | ENSG00000160789.18_LMNA | 0.09211  | -0.068091631 | 0.247676417 | 2.59E-01 | 5.42E-01 | 1.00E+00 |
| ENSG00000225969.1_ABHD11-A1  | ENSG00000160789.18_LMNA | 0.14976  | -0.00967244  | 0.301764977 | 6.55E-02 | 2.39E-01 | 1.00E+00 |
| ENSG00000048545.12_GUCA1A    | ENSG00000160789.18_LMNA | 0.14783  | -0.011642591 | 0.299972964 | 6.91E-02 | 2.48E-01 | 1.00E+00 |
| ENSG00000016602.9_CLCA4      | ENSG00000160789.18_LMNA | -0.27062 | -0.412067683 | -0.11643574 | 7.46E-04 | 9.21E-03 | 1.00E+00 |
| ENSG00000243234.1_CTD-2583A  | ENSG00000160789.18_LMNA | -0.03255 | -0.190757948 | 0.127314738 | 6.91E-01 | 8.67E-01 | 1.00E+00 |
| ENSG00000198074.8_AKR1B10    | ENSG00000160789.18_LMNA | 0.13405  | -0.025702882 | 0.287119814 | 9.97E-02 | 3.11E-01 | 1.00E+00 |
| ENSG00000227757.3_AP000282.1 | ENSG00000160789.18_LMNA | -0.00545 | -0.164506218 | 0.153885975 | 9.47E-01 | 9.79E-01 | 1.00E+00 |
| ENSG00000229694.5_LINC00484  | ENSG00000160789.18_LMNA | 0.0685   | -0.091704805 | 0.225240447 | 4.02E-01 | 6.78E-01 | 1.00E+00 |
| ENSG00000236086.4_HMGN2P28   | ENSG00000160789.18_LMNA | 0.02877  | -0.131033355 | 0.187111223 | 7.25E-01 | 8.83E-01 | 1.00E+00 |
| ENSG00000197253.12_TPSB2     | ENSG00000160789.18_LMNA | 0.12617  | -0.033708742 | 0.279750616 | 1.21E-01 | 3.51E-01 | 1.00E+00 |
| ENSG00000272588.1_RP11-440L  | ENSG00000160789.18_LMNA | 0.17546  | 0.016730465  | 0.325570059 | 3.06E-02 | 1.45E-01 | 1.00E+00 |
| ENSG00000267024.1_CTD-2588C  | ENSG00000160789.18_LMNA | 0.05091  | -0.109177497 | 0.20841959  | 5.33E-01 | 7.75E-01 | 1.00E+00 |
| ENSG00000073754.5_CD5L       | ENSG00000160789.18_LMNA | -0.27335 | -0.414515576 | -0.11934686 | 6.56E-04 | 8.33E-03 | 1.00E+00 |
| ENSG00000273009.1_RP11-352G  | ENSG00000160789.18_LMNA | -0.10348 | -0.258421223 | 0.056656363 | 2.05E-01 | 4.76E-01 | 1.00E+00 |
| ENSG00000258378.1_RP11-517O  | ENSG00000160789.18_LMNA | 0.09908  | -0.061080038 | 0.254273875 | 2.25E-01 | 5.01E-01 | 1.00E+00 |
| ENSG00000271757.1_RP11-111M  | ENSG00000160789.18_LMNA | -0.25332 | -0.396533443 | -0.09807952 | 1.64E-03 | 1.68E-02 | 1.00E+00 |
| ENSG00000267765.1_CTD-3193K  | ENSG00000160789.18_LMNA | -0.0523  | -0.209755984 | 0.107796455 | 5.22E-01 | 7.68E-01 | 1.00E+00 |
| ENSG00000254305.1_MRPL9P1    | ENSG00000160789.18_LMNA | -0.02848 | -0.186832696 | 0.131317006 | 7.28E-01 | 8.85E-01 | 1.00E+00 |
| ENSG00000269976.1_RP11-130L  | ENSG00000160789.18_LMNA | 0.03551  | -0.124393813 | 0.19361626  | 6.64E-01 | 8.52E-01 | 1.00E+00 |
| ENSG00000179023.8_KLHDC7A    | ENSG00000160789.18_LMNA | 0.23282  | 0.076454303  | 0.378010822 | 3.90E-03 | 3.25E-02 | 1.00E+00 |

|                              |                         |          |              |             |          |          |          |
|------------------------------|-------------------------|----------|--------------|-------------|----------|----------|----------|
| ENSG00000130675.13_MNX1      | ENSG00000160789.18_LMNA | -0.31608 | -0.45250803  | -0.16518898 | 7.28E-05 | 1.46E-03 | 1.00E+00 |
| ENSG00000243404.2_RPL35AP3   | ENSG00000160789.18_LMNA | 0.10369  | -0.056442118 | 0.258621791 | 2.04E-01 | 4.75E-01 | 1.00E+00 |
| ENSG00000166862.6_CACNG2     | ENSG00000160789.18_LMNA | -0.30062 | -0.438823021 | -0.14853219 | 1.68E-04 | 2.84E-03 | 1.00E+00 |
| ENSG00000254109.4_RBPMS-AS   | ENSG00000160789.18_LMNA | 0.07394  | -0.086276866 | 0.230427709 | 3.65E-01 | 6.47E-01 | 1.00E+00 |
| ENSG00000253167.1_KIAA0196-1 | ENSG00000160789.18_LMNA | 0.00146  | -0.157773147 | 0.160627592 | 9.86E-01 | 9.94E-01 | 1.00E+00 |
| ENSG00000232311.1_RP1-249I4  | ENSG00000160789.18_LMNA | -0.13289 | -0.28604099  | 0.026877423 | 1.03E-01 | 3.17E-01 | 1.00E+00 |
| ENSG00000175189.3_INHBC      | ENSG00000160789.18_LMNA | -0.05017 | -0.207709654 | 0.109910653 | 5.39E-01 | 7.79E-01 | 1.00E+00 |
| ENSG00000279758.1_RP11-752G  | ENSG00000160789.18_LMNA | 0.08003  | -0.080189101 | 0.236224203 | 3.27E-01 | 6.14E-01 | 1.00E+00 |
| ENSG00000256633.1_RP11-169D  | ENSG00000160789.18_LMNA | 0.11466  | -0.045364235 | 0.268955581 | 1.60E-01 | 4.13E-01 | 1.00E+00 |
| ENSG00000274400.1_RP11-294N  | ENSG00000160789.18_LMNA | -0.12416 | -0.277866984 | 0.035748675 | 1.28E-01 | 3.62E-01 | 1.00E+00 |
| ENSG00000279386.1_AC021106   | ENSG00000160789.18_LMNA | 0.08587  | -0.074344316 | 0.241768236 | 2.93E-01 | 5.79E-01 | 1.00E+00 |
| ENSG00000264743.2_DPRXP4     | ENSG00000160789.18_LMNA | 0.00317  | -0.156114155 | 0.16228414  | 9.69E-01 | 9.88E-01 | 1.00E+00 |
| ENSG00000250331.1_LINC01340  | ENSG00000160789.18_LMNA | 0.16573  | 0.006710331  | 0.316581686 | 4.13E-02 | 1.77E-01 | 1.00E+00 |
| ENSG00000271778.1_RP11-379F  | ENSG00000160789.18_LMNA | -0.09386 | -0.249339484 | 0.066327105 | 2.50E-01 | 5.31E-01 | 1.00E+00 |
| ENSG00000226025.8_LGALS17A   | ENSG00000160789.18_LMNA | -0.06878 | -0.225507008 | 0.091426334 | 4.00E-01 | 6.76E-01 | 1.00E+00 |
| ENSG00000271734.1_RP1-111B2  | ENSG00000160789.18_LMNA | 0.00691  | -0.152459779 | 0.165926813 | 9.33E-01 | 9.74E-01 | 1.00E+00 |
| ENSG00000254521.5_SIGLEC12   | ENSG00000160789.18_LMNA | 0.09203  | -0.068168878 | 0.247603569 | 2.59E-01 | 5.43E-01 | 1.00E+00 |
| ENSG00000274578.1_RP11-430E  | ENSG00000160789.18_LMNA | -0.02472 | -0.183197747 | 0.135014048 | 7.62E-01 | 9.01E-01 | 1.00E+00 |
| ENSG00000248787.1_RP11-666A  | ENSG00000160789.18_LMNA | 0.03282  | -0.127045843 | 0.191021305 | 6.88E-01 | 8.65E-01 | 1.00E+00 |
| ENSG00000214041.4_PGAM1P4    | ENSG00000160789.18_LMNA | 0.03921  | -0.12074071  | 0.197183473 | 6.31E-01 | 8.35E-01 | 1.00E+00 |
| ENSG00000273771.1_RP11-236L  | ENSG00000160789.18_LMNA | 0.01575  | -0.143811503 | 0.17451292  | 8.47E-01 | 9.40E-01 | 1.00E+00 |
| ENSG00000213783.4_RPL35P4    | ENSG00000160789.18_LMNA | 0.03364  | -0.126240041 | 0.191810236 | 6.81E-01 | 8.61E-01 | 1.00E+00 |
| ENSG00000240459.2_RP11-477G  | ENSG00000160789.18_LMNA | 0.0254   | -0.134341232 | 0.183859911 | 7.56E-01 | 8.98E-01 | 1.00E+00 |
| ENSG00000125385.9_RP11-297B  | ENSG00000160789.18_LMNA | -0.0521  | -0.209563735 | 0.107995203 | 5.24E-01 | 7.69E-01 | 1.00E+00 |
| ENSG00000214322.3_CBX1P2     | ENSG00000160789.18_LMNA | -0.04228 | -0.200134935 | 0.117711659 | 6.05E-01 | 8.19E-01 | 1.00E+00 |
| ENSG00000236643.1_RP11-175D  | ENSG00000160789.18_LMNA | -0.07526 | -0.231682181 | 0.08496136  | 3.57E-01 | 6.40E-01 | 1.00E+00 |
| ENSG00000226155.1_AC124944   | ENSG00000160789.18_LMNA | -0.06861 | -0.225349159 | 0.091591241 | 4.01E-01 | 6.77E-01 | 1.00E+00 |
| ENSG00000233264.2_AC006042   | ENSG00000160789.18_LMNA | -0.3251  | -0.460468833 | -0.17495452 | 4.38E-05 | 9.64E-04 | 1.00E+00 |
| ENSG00000119913.4_TECTB      | ENSG00000160789.18_LMNA | -0.10545 | -0.26027741  | 0.054672488 | 1.96E-01 | 4.65E-01 | 1.00E+00 |
| ENSG00000157219.3_HTR5A      | ENSG00000160789.18_LMNA | -0.11959 | -0.273582668 | 0.040378786 | 1.42E-01 | 3.85E-01 | 1.00E+00 |
| ENSG00000271266.1_LAPTM4BP   | ENSG00000160789.18_LMNA | -0.07567 | -0.232078177 | 0.084545867 | 3.54E-01 | 6.38E-01 | 1.00E+00 |
| ENSG00000280008.1            | ENSG00000160789.18_LMNA | 0.09053  | -0.069674574 | 0.246182905 | 2.67E-01 | 5.51E-01 | 1.00E+00 |
| ENSG00000231918.1_AC007682   | ENSG00000160789.18_LMNA | -0.29351 | -0.432502298 | -0.1408941  | 2.43E-04 | 3.81E-03 | 1.00E+00 |

|                              |                         |          |              |             |          |          |          |
|------------------------------|-------------------------|----------|--------------|-------------|----------|----------|----------|
| ENSG00000213642.3_RP11-561N  | ENSG00000160789.18_LMNA | -0.04201 | -0.199876163 | 0.117977471 | 6.07E-01 | 8.21E-01 | 1.00E+00 |
| ENSG00000242880.1_RP11-190P  | ENSG00000160789.18_LMNA | -0.12061 | -0.27453852  | 0.039346953 | 1.39E-01 | 3.80E-01 | 1.00E+00 |
| ENSG00000275549.1_STPG3-AS   | ENSG00000160789.18_LMNA | 0.07993  | -0.080297332 | 0.236121347 | 3.28E-01 | 6.14E-01 | 1.00E+00 |
| ENSG00000197768.9_STPG3      | ENSG00000160789.18_LMNA | 0.04016  | -0.119809865 | 0.198091088 | 6.23E-01 | 8.30E-01 | 1.00E+00 |
| ENSG00000269148.1_AC092301.1 | ENSG00000160789.18_LMNA | 0.12547  | -0.034419722 | 0.279094385 | 1.24E-01 | 3.54E-01 | 1.00E+00 |
| ENSG00000035720.6_STAP1      | ENSG00000160789.18_LMNA | 0.00425  | -0.155058407 | 0.163337399 | 9.59E-01 | 9.83E-01 | 1.00E+00 |
| ENSG00000124721.16_DNAH8     | ENSG00000160789.18_LMNA | -0.08087 | -0.237022726 | 0.079348599 | 3.22E-01 | 6.09E-01 | 1.00E+00 |
| ENSG00000110203.7_FOLR3      | ENSG00000160789.18_LMNA | 0.09258  | -0.067613154 | 0.248127565 | 2.57E-01 | 5.39E-01 | 1.00E+00 |
| ENSG00000250853.1_RNF138P1   | ENSG00000160789.18_LMNA | -0.01699 | -0.175719963 | 0.142591811 | 8.35E-01 | 9.36E-01 | 1.00E+00 |
| ENSG00000204625.9_HCG9       | ENSG00000160789.18_LMNA | 0.05285  | -0.107253859 | 0.210280714 | 5.18E-01 | 7.64E-01 | 1.00E+00 |
| ENSG00000273828.1_RP11-394O  | ENSG00000160789.18_LMNA | -0.09062 | -0.246267788 | 0.069584651 | 2.67E-01 | 5.51E-01 | 1.00E+00 |
| ENSG00000240052.1_RP11-289K  | ENSG00000160789.18_LMNA | -0.05083 | -0.208342244 | 0.10925739  | 5.34E-01 | 7.76E-01 | 1.00E+00 |
| ENSG00000204091.6_TDRG1      | ENSG00000160789.18_LMNA | -0.06395 | -0.220898268 | 0.096234015 | 4.34E-01 | 7.03E-01 | 1.00E+00 |
| ENSG00000271131.1_RP11-33A1  | ENSG00000160789.18_LMNA | 0.03593  | -0.123975105 | 0.194025551 | 6.60E-01 | 8.50E-01 | 1.00E+00 |
| ENSG00000259332.2_ST20-MTHF  | ENSG00000160789.18_LMNA | 0.16546  | 0.006423612  | 0.316323668 | 4.16E-02 | 1.78E-01 | 1.00E+00 |
| ENSG00000228037.1_RP3-395M2  | ENSG00000160789.18_LMNA | 0.17999  | 0.021399927  | 0.329739731 | 2.65E-02 | 1.32E-01 | 1.00E+00 |
| ENSG00000231466.2_CTA-246H3  | ENSG00000160789.18_LMNA | 0.05203  | -0.108064547 | 0.209496652 | 5.24E-01 | 7.70E-01 | 1.00E+00 |
| ENSG00000258981.1_COX5AP2    | ENSG00000160789.18_LMNA | -0.04204 | -0.199903035 | 0.11794987  | 6.07E-01 | 8.20E-01 | 1.00E+00 |
| ENSG00000274659.1_RP11-986G  | ENSG00000160789.18_LMNA | -0.09111 | -0.246735643 | 0.069088923 | 2.64E-01 | 5.48E-01 | 1.00E+00 |
| ENSG00000204290.9_BTNL2      | ENSG00000160789.18_LMNA | -0.20575 | -0.353378709 | -0.04812912 | 1.10E-02 | 7.01E-02 | 1.00E+00 |
| ENSG00000266289.1_RP11-1C8.1 | ENSG00000160789.18_LMNA | 0.0089   | -0.150515258 | 0.167861572 | 9.13E-01 | 9.67E-01 | 1.00E+00 |
| ENSG00000184423.5_RPL23AP3   | ENSG00000160789.18_LMNA | -0.12435 | -0.278050993 | 0.035549512 | 1.27E-01 | 3.60E-01 | 1.00E+00 |
| ENSG00000259595.1_RP11-516C  | ENSG00000160789.18_LMNA | 0.04258  | -0.117412208 | 0.200426402 | 6.02E-01 | 8.18E-01 | 1.00E+00 |
| ENSG00000265496.3_MIR1539    | ENSG00000160789.18_LMNA | -0.04075 | -0.198657995 | 0.119228165 | 6.18E-01 | 8.27E-01 | 1.00E+00 |
| ENSG00000248187.1_RP11-184M  | ENSG00000160789.18_LMNA | -0.01033 | -0.169254655 | 0.149113618 | 8.99E-01 | 9.61E-01 | 1.00E+00 |
| ENSG00000220305.1_HNRNPH1F   | ENSG00000160789.18_LMNA | 0.14169  | -0.017914273 | 0.294253679 | 8.16E-02 | 2.76E-01 | 1.00E+00 |
| ENSG00000232951.1_IPO7P1     | ENSG00000160789.18_LMNA | 0.05258  | -0.107519723 | 0.210023627 | 5.20E-01 | 7.66E-01 | 1.00E+00 |
| ENSG00000267474.1_CTC-548K1  | ENSG00000160789.18_LMNA | 0.0466   | -0.113444863 | 0.204282675 | 5.69E-01 | 7.98E-01 | 1.00E+00 |
| ENSG00000215457.5_RPS8P3     | ENSG00000160789.18_LMNA | 0.02526  | -0.134480657 | 0.183722717 | 7.57E-01 | 8.99E-01 | 1.00E+00 |
| ENSG00000259182.4_RP11-424I1 | ENSG00000160789.18_LMNA | 0.03399  | -0.125894979 | 0.192147947 | 6.78E-01 | 8.59E-01 | 1.00E+00 |
| ENSG00000228293.1_RP4-686C3  | ENSG00000160789.18_LMNA | 0.09125  | -0.068956243 | 0.246860838 | 2.64E-01 | 5.47E-01 | 1.00E+00 |
| ENSG00000225670.4_CADM3-AS   | ENSG00000160789.18_LMNA | -0.19022 | -0.339150838 | -0.03198876 | 1.89E-02 | 1.04E-01 | 1.00E+00 |
| ENSG00000225683.4_PACRG-AS   | ENSG00000160789.18_LMNA | -0.32159 | -0.457373348 | -0.17115059 | 5.35E-05 | 1.14E-03 | 1.00E+00 |

|                              |                         |          |              |             |          |          |          |
|------------------------------|-------------------------|----------|--------------|-------------|----------|----------|----------|
| ENSG00000229303.1_PPIAP25    | ENSG00000160789.18_LMNA | 0.11894  | -0.041042598 | 0.272967409 | 1.44E-01 | 3.89E-01 | 1.00E+00 |
| ENSG00000229140.7_CCDC26     | ENSG00000160789.18_LMNA | -0.21977 | -0.366162073 | -0.06276806 | 6.52E-03 | 4.79E-02 | 1.00E+00 |
| ENSG00000171345.12_KRT19     | ENSG00000160789.18_LMNA | -0.06448 | -0.221406407 | 0.095704667 | 4.30E-01 | 7.00E-01 | 1.00E+00 |
| ENSG00000256566.1_RP4-734P1  | ENSG00000160789.18_LMNA | 0.06618  | -0.0940146   | 0.223027606 | 4.18E-01 | 6.90E-01 | 1.00E+00 |
| ENSG00000267123.4_CTD-2357A  | ENSG00000160789.18_LMNA | 0.1005   | -0.059658274 | 0.255608094 | 2.18E-01 | 4.93E-01 | 1.00E+00 |
| ENSG00000168348.3_INSM2      | ENSG00000160789.18_LMNA | -0.2409  | -0.385324494 | -0.08495928 | 2.79E-03 | 2.53E-02 | 1.00E+00 |
| ENSG00000060140.7_STYK1      | ENSG00000160789.18_LMNA | -0.03988 | -0.197824477 | 0.120083358 | 6.26E-01 | 8.31E-01 | 1.00E+00 |
| ENSG00000241877.1_RP11-84H6  | ENSG00000160789.18_LMNA | 0.04027  | -0.119699836 | 0.198198335 | 6.22E-01 | 8.29E-01 | 1.00E+00 |
| ENSG00000150556.15_LYPD6B    | ENSG00000160789.18_LMNA | -0.07505 | -0.231483542 | 0.085169736 | 3.58E-01 | 6.41E-01 | 1.00E+00 |
| ENSG00000213028.3_RP11-108F  | ENSG00000160789.18_LMNA | -0.04579 | -0.203507854 | 0.114242816 | 5.75E-01 | 8.02E-01 | 1.00E+00 |
| ENSG00000235213.1_OR6E1P     | ENSG00000160789.18_LMNA | -0.14854 | -0.300631084 | 0.01091933  | 6.78E-02 | 2.44E-01 | 1.00E+00 |
| ENSG00000261754.2_CTC-523E2  | ENSG00000160789.18_LMNA | -0.09066 | -0.24630667  | 0.069543459 | 2.67E-01 | 5.51E-01 | 1.00E+00 |
| ENSG00000219930.4_GAPDHP67   | ENSG00000160789.18_LMNA | 0.058    | -0.102140765 | 0.215216482 | 4.78E-01 | 7.36E-01 | 1.00E+00 |
| ENSG00000280020.1_CTD-2095E  | ENSG00000160789.18_LMNA | 0.0125   | -0.146988481 | 0.171364396 | 8.78E-01 | 9.53E-01 | 1.00E+00 |
| ENSG00000259932.1_CTD-2651B  | ENSG00000160789.18_LMNA | -0.29725 | -0.435822325 | -0.14490176 | 2.00E-04 | 3.27E-03 | 1.00E+00 |
| ENSG00000214727.2_RPL5P35    | ENSG00000160789.18_LMNA | -0.07474 | -0.231193394 | 0.085474059 | 3.60E-01 | 6.42E-01 | 1.00E+00 |
| ENSG00000267156.1_TPMP1      | ENSG00000160789.18_LMNA | 0.01228  | -0.147210869 | 0.171143756 | 8.81E-01 | 9.54E-01 | 1.00E+00 |
| ENSG00000236304.1_AP001189.4 | ENSG00000160789.18_LMNA | 0.21107  | 0.053673795  | 0.35823401  | 9.05E-03 | 6.10E-02 | 1.00E+00 |
| ENSG00000156466.9_GDF6       | ENSG00000160789.18_LMNA | -0.14818 | -0.300297159 | 0.011286348 | 6.85E-02 | 2.46E-01 | 1.00E+00 |
| ENSG00000240471.1_PHBP8      | ENSG00000160789.18_LMNA | -0.0497  | -0.207261188 | 0.110373608 | 5.43E-01 | 7.82E-01 | 1.00E+00 |
| ENSG00000276853.1_RP11-305O  | ENSG00000160789.18_LMNA | 0.0399   | -0.120067107 | 0.19784032  | 6.26E-01 | 8.31E-01 | 1.00E+00 |
| ENSG00000211697.3_TRGV5      | ENSG00000160789.18_LMNA | 0.12786  | -0.031996969 | 0.281329372 | 1.16E-01 | 3.41E-01 | 1.00E+00 |
| ENSG00000225251.1_RPL5P25    | ENSG00000160789.18_LMNA | -0.08911 | -0.244834292 | 0.071102578 | 2.75E-01 | 5.59E-01 | 1.00E+00 |
| ENSG00000243107.1_AC000120.1 | ENSG00000160789.18_LMNA | -0.00421 | -0.163299008 | 0.155096902 | 9.59E-01 | 9.84E-01 | 1.00E+00 |
| ENSG00000171509.14_RXFP1     | ENSG00000160789.18_LMNA | -0.101   | -0.256078506 | 0.059156691 | 2.16E-01 | 4.90E-01 | 1.00E+00 |
| ENSG00000233542.1_RP11-547D  | ENSG00000160789.18_LMNA | 0.10766  | -0.05243537  | 0.262367752 | 1.87E-01 | 4.53E-01 | 1.00E+00 |
| ENSG00000132958.16_TPTE2     | ENSG00000160789.18_LMNA | -0.19791 | -0.346201545 | -0.03996724 | 1.45E-02 | 8.59E-02 | 1.00E+00 |
| ENSG00000165702.11_GFI1B     | ENSG00000160789.18_LMNA | -0.07253 | -0.229083095 | 0.087685674 | 3.75E-01 | 6.55E-01 | 1.00E+00 |
| ENSG00000258907.2_RP11-644F  | ENSG00000160789.18_LMNA | -0.03727 | -0.195314823 | 0.122655427 | 6.48E-01 | 8.44E-01 | 1.00E+00 |
| ENSG00000256982.1_CTD-2555A  | ENSG00000160789.18_LMNA | -0.19066 | -0.339557125 | -0.03244744 | 1.86E-02 | 1.02E-01 | 1.00E+00 |
| ENSG00000180610.10_ZBTB12Bf  | ENSG00000160789.18_LMNA | 0.10361  | -0.056524898 | 0.258544299 | 2.04E-01 | 4.75E-01 | 1.00E+00 |
| ENSG00000270149.4_RP11-544M  | ENSG00000160789.18_LMNA | 0.1963   | 0.038294291  | 0.344725996 | 1.54E-02 | 8.93E-02 | 1.00E+00 |
| ENSG00000271072.1_PHBP20     | ENSG00000160789.18_LMNA | -0.05104 | -0.208547191 | 0.109045686 | 5.32E-01 | 7.75E-01 | 1.00E+00 |

|                              |                         |          |              |             |          |          |          |
|------------------------------|-------------------------|----------|--------------|-------------|----------|----------|----------|
| ENSG00000185674.8_LYG2       | ENSG00000160789.18_LMNA | -0.0387  | -0.196687273 | 0.121249373 | 6.36E-01 | 8.37E-01 | 1.00E+00 |
| ENSG00000226261.1_AC064836.1 | ENSG00000160789.18_LMNA | -0.07204 | -0.228618239 | 0.088172428 | 3.78E-01 | 6.57E-01 | 1.00E+00 |
| ENSG00000268105.1_RP11-369G  | ENSG00000160789.18_LMNA | -0.10031 | -0.255430175 | 0.059847941 | 2.19E-01 | 4.94E-01 | 1.00E+00 |
| ENSG00000219163.2_HMGB1P2C   | ENSG00000160789.18_LMNA | 0.03043  | -0.129394127 | 0.188719842 | 7.10E-01 | 8.77E-01 | 1.00E+00 |
| ENSG00000269883.1_RP11-463C  | ENSG00000160789.18_LMNA | -0.29278 | -0.431851355 | -0.14010945 | 2.52E-04 | 3.92E-03 | 1.00E+00 |
| ENSG00000174279.4_EVX2       | ENSG00000160789.18_LMNA | -0.17879 | -0.328633271 | -0.02015953 | 2.75E-02 | 1.35E-01 | 1.00E+00 |
| ENSG00000213365.3_AP000593.1 | ENSG00000160789.18_LMNA | 0.08828  | -0.07192994  | 0.244052367 | 2.79E-01 | 5.65E-01 | 1.00E+00 |
| ENSG00000261183.4_RP11-532F  | ENSG00000160789.18_LMNA | 0.04195  | -0.118034886 | 0.199820263 | 6.08E-01 | 8.21E-01 | 1.00E+00 |
| ENSG00000213194.3_CDK7P1     | ENSG00000160789.18_LMNA | 0.06692  | -0.09327186  | 0.223739526 | 4.13E-01 | 6.86E-01 | 1.00E+00 |
| ENSG00000233056.2_ERVH48-1   | ENSG00000160789.18_LMNA | 0.00863  | -0.150778068 | 0.167600224 | 9.16E-01 | 9.68E-01 | 1.00E+00 |
| ENSG00000280486.1_LLNL-307   | ENSG00000160789.18_LMNA | -0.0629  | -0.21989794  | 0.097275573 | 4.41E-01 | 7.09E-01 | 1.00E+00 |
| ENSG00000257545.3_RP11-144F  | ENSG00000160789.18_LMNA | -0.15826 | -0.30965433  | 0.000969978 | 5.15E-02 | 2.05E-01 | 1.00E+00 |
| ENSG00000165215.6_CLDN3      | ENSG00000160789.18_LMNA | 0.0866   | -0.073615665 | 0.242457948 | 2.89E-01 | 5.74E-01 | 1.00E+00 |
| ENSG00000181260.8_MTHFD2P7   | ENSG00000160789.18_LMNA | -0.19297 | -0.341671829 | -0.03483699 | 1.72E-02 | 9.70E-02 | 1.00E+00 |
| ENSG00000232642.1_AC008073.1 | ENSG00000160789.18_LMNA | 0.17989  | 0.021299258  | 0.329649963 | 2.66E-02 | 1.32E-01 | 1.00E+00 |
| ENSG00000231971.4_RP11-557H  | ENSG00000160789.18_LMNA | -0.07986 | -0.236063102 | 0.080358617 | 3.28E-01 | 6.14E-01 | 1.00E+00 |
| ENSG00000224172.1_RP11-416N  | ENSG00000160789.18_LMNA | 0.05288  | -0.107225753 | 0.21030789  | 5.18E-01 | 7.64E-01 | 1.00E+00 |
| ENSG00000262823.1_RP13-580F  | ENSG00000160789.18_LMNA | 0.02522  | -0.134516667 | 0.183687282 | 7.58E-01 | 8.99E-01 | 1.00E+00 |
| ENSG00000215704.8_CELA2B     | ENSG00000160789.18_LMNA | -0.09211 | -0.247681566 | 0.06808617  | 2.59E-01 | 5.42E-01 | 1.00E+00 |
| ENSG00000275672.1_GATM-AS1   | ENSG00000160789.18_LMNA | -0.15517 | -0.306787357 | 0.004137884 | 5.63E-02 | 2.17E-01 | 1.00E+00 |
| ENSG00000250076.1_RP11-141P  | ENSG00000160789.18_LMNA | 0.05795  | -0.102191421 | 0.215167662 | 4.78E-01 | 7.36E-01 | 1.00E+00 |
| ENSG00000112195.8_TREML2     | ENSG00000160789.18_LMNA | 0.12315  | -0.036768645 | 0.276924259 | 1.31E-01 | 3.66E-01 | 1.00E+00 |
| ENSG00000135902.8_CHRND      | ENSG00000160789.18_LMNA | -0.11498 | -0.269251279 | 0.045046102 | 1.58E-01 | 4.11E-01 | 1.00E+00 |
| ENSG00000142677.3_IL22RA1    | ENSG00000160789.18_LMNA | 0.19992  | 0.042054153  | 0.348040093 | 1.35E-02 | 8.14E-02 | 1.00E+00 |
| ENSG00000145107.14_TM4SF19   | ENSG00000160789.18_LMNA | 0.05418  | -0.105933935 | 0.211556414 | 5.07E-01 | 7.57E-01 | 1.00E+00 |
| ENSG00000267699.2_RP11-729L  | ENSG00000160789.18_LMNA | 0.03694  | -0.122979636 | 0.194998186 | 6.51E-01 | 8.45E-01 | 1.00E+00 |
| ENSG00000259666.2_LINGO1-AS  | ENSG00000160789.18_LMNA | -0.19934 | -0.347507899 | -0.04144979 | 1.38E-02 | 8.27E-02 | 1.00E+00 |
| ENSG00000131096.9_PYY        | ENSG00000160789.18_LMNA | 0.17464  | 0.015878678  | 0.324808144 | 3.14E-02 | 1.48E-01 | 1.00E+00 |
| ENSG00000231345.3_BEND3P1    | ENSG00000160789.18_LMNA | -0.05992 | -0.217045529 | 0.100241739 | 4.63E-01 | 7.26E-01 | 1.00E+00 |
| ENSG00000228986.1_RP13-228J  | ENSG00000160789.18_LMNA | 0.12657  | -0.033299473 | 0.280128235 | 1.20E-01 | 3.48E-01 | 1.00E+00 |
| ENSG00000244705.1_RP11-133K  | ENSG00000160789.18_LMNA | 0.0322   | -0.127659488 | 0.190420232 | 6.94E-01 | 8.68E-01 | 1.00E+00 |
| ENSG00000231907.2_GAPDHP37   | ENSG00000160789.18_LMNA | 0.05476  | -0.105363056 | 0.212107831 | 5.03E-01 | 7.54E-01 | 1.00E+00 |
| ENSG00000215450.2_RP5-890O1  | ENSG00000160789.18_LMNA | 0.06573  | -0.094458337 | 0.22260212  | 4.21E-01 | 6.93E-01 | 1.00E+00 |

|                              |                         |          |              |             |          |          |          |
|------------------------------|-------------------------|----------|--------------|-------------|----------|----------|----------|
| ENSG00000254433.1_RP11-6771  | ENSG00000160789.18_LMNA | 0.04034  | -0.119627399 | 0.198268937 | 6.22E-01 | 8.29E-01 | 1.00E+00 |
| ENSG00000243284.1_VSIG8      | ENSG00000160789.18_LMNA | 0.27508  | 0.121181581  | 0.416056158 | 6.04E-04 | 7.83E-03 | 1.00E+00 |
| ENSG00000226007.2_RP11-211N  | ENSG00000160789.18_LMNA | -0.036   | -0.194090311 | 0.123908844 | 6.60E-01 | 8.50E-01 | 1.00E+00 |
| ENSG00000236364.3_RP11-525G  | ENSG00000160789.18_LMNA | 0.05657  | -0.103561938 | 0.213846222 | 4.89E-01 | 7.45E-01 | 1.00E+00 |
| ENSG00000255507.4_RP11-535A  | ENSG00000160789.18_LMNA | 0.03745  | -0.122485378 | 0.195480874 | 6.47E-01 | 8.43E-01 | 1.00E+00 |
| ENSG00000181101.7_SDCCAG3F   | ENSG00000160789.18_LMNA | 0.00723  | -0.152142857 | 0.166242311 | 9.30E-01 | 9.73E-01 | 1.00E+00 |
| ENSG00000182057.4_OGFRP1     | ENSG00000160789.18_LMNA | -0.01362 | -0.172448718 | 0.145895101 | 8.68E-01 | 9.48E-01 | 1.00E+00 |
| ENSG00000226845.1_EEF1GP3    | ENSG00000160789.18_LMNA | -0.02991 | -0.188217489 | 0.129906226 | 7.14E-01 | 8.79E-01 | 1.00E+00 |
| ENSG00000254589.1_EIF4A2P3   | ENSG00000160789.18_LMNA | -0.2074  | -0.354887649 | -0.0498503  | 1.04E-02 | 6.72E-02 | 1.00E+00 |
| ENSG00000121075.8_TBX4       | ENSG00000160789.18_LMNA | 0.22561  | 0.068885597  | 0.371470466 | 5.19E-03 | 4.04E-02 | 1.00E+00 |
| ENSG00000251349.3_MSANTD3-   | ENSG00000160789.18_LMNA | -0.03919 | -0.19715678  | 0.120768078 | 6.32E-01 | 8.35E-01 | 1.00E+00 |
| ENSG00000124091.8_GCNT7      | ENSG00000160789.18_LMNA | 0.08842  | -0.07179533  | 0.244179613 | 2.79E-01 | 5.64E-01 | 1.00E+00 |
| ENSG00000260298.2_ACTG1P16   | ENSG00000160789.18_LMNA | 0.03949  | -0.120468173 | 0.197449265 | 6.29E-01 | 8.33E-01 | 1.00E+00 |
| ENSG00000254656.1_RTL1       | ENSG00000160789.18_LMNA | 0.09053  | -0.06967153  | 0.246185779 | 2.67E-01 | 5.51E-01 | 1.00E+00 |
| ENSG00000242562.1_DCAF13P1   | ENSG00000160789.18_LMNA | -0.01192 | -0.170795419 | 0.147561899 | 8.84E-01 | 9.55E-01 | 1.00E+00 |
| ENSG00000250039.3_RP11-17E2  | ENSG00000160789.18_LMNA | -0.19885 | -0.347062695 | -0.04094439 | 1.41E-02 | 8.38E-02 | 1.00E+00 |
| ENSG00000226239.1_RP1-310O1  | ENSG00000160789.18_LMNA | -0.07188 | -0.228470807 | 0.088326774 | 3.79E-01 | 6.58E-01 | 1.00E+00 |
| ENSG00000278214.1_RP11-442O  | ENSG00000160789.18_LMNA | -0.21198 | -0.359065983 | -0.05462578 | 8.75E-03 | 5.95E-02 | 1.00E+00 |
| ENSG00000268894.5_PLCE1-AS1  | ENSG00000160789.18_LMNA | -0.00736 | -0.166366253 | 0.152018338 | 9.28E-01 | 9.72E-01 | 1.00E+00 |
| ENSG00000081138.12_CDH7      | ENSG00000160789.18_LMNA | -0.35666 | -0.488144212 | -0.20934678 | 6.48E-06 | 2.06E-04 | 3.32E-01 |
| ENSG00000268549.1_           | ENSG00000160789.18_LMNA | 0.01899  | -0.140638824 | 0.177650703 | 8.16E-01 | 9.28E-01 | 1.00E+00 |
| ENSG00000237372.2_UNQ6494    | ENSG00000160789.18_LMNA | -0.23893 | -0.383545952 | -0.082887   | 3.03E-03 | 2.70E-02 | 1.00E+00 |
| ENSG00000196092.11_PAX5      | ENSG00000160789.18_LMNA | -0.10967 | -0.26425381  | 0.050414164 | 1.79E-01 | 4.41E-01 | 1.00E+00 |
| ENSG00000196616.11_ADH1B     | ENSG00000160789.18_LMNA | -0.19135 | -0.340183657 | -0.03315504 | 1.82E-02 | 1.01E-01 | 1.00E+00 |
| ENSG00000184274.3_LINC00315  | ENSG00000160789.18_LMNA | -0.05686 | -0.214117938 | 0.103280229 | 4.87E-01 | 7.43E-01 | 1.00E+00 |
| ENSG00000267920.1_SNX6P1     | ENSG00000160789.18_LMNA | 0.02033  | -0.139322807 | 0.178950348 | 8.04E-01 | 9.21E-01 | 1.00E+00 |
| ENSG00000230849.2_GOT2P2     | ENSG00000160789.18_LMNA | -0.04085 | -0.198756583 | 0.119126982 | 6.17E-01 | 8.27E-01 | 1.00E+00 |
| ENSG00000267312.1_RP11-1094I | ENSG00000160789.18_LMNA | 0.0896   | -0.070603586 | 0.245305682 | 2.72E-01 | 5.57E-01 | 1.00E+00 |
| ENSG00000269072.1_CTD-3187F  | ENSG00000160789.18_LMNA | 0.08759  | -0.07262369  | 0.243396401 | 2.83E-01 | 5.69E-01 | 1.00E+00 |
| ENSG00000132437.16_DDC       | ENSG00000160789.18_LMNA | -0.11453 | -0.268827496 | 0.045502017 | 1.60E-01 | 4.14E-01 | 1.00E+00 |
| ENSG00000232063.1_RP11-307E  | ENSG00000160789.18_LMNA | -0.01529 | -0.174067568 | 0.14426128  | 8.52E-01 | 9.42E-01 | 1.00E+00 |
| ENSG00000256596.1_RP11-522N  | ENSG00000160789.18_LMNA | 0.00244  | -0.156817025 | 0.161582525 | 9.76E-01 | 9.91E-01 | 1.00E+00 |
| ENSG00000160321.13_ZNF208    | ENSG00000160789.18_LMNA | -0.40975 | -0.534110365 | -0.26803504 | 1.59E-07 | 1.05E-05 | 8.15E-03 |

|                             |                         |          |              |             |          |          |          |
|-----------------------------|-------------------------|----------|--------------|-------------|----------|----------|----------|
| ENSG00000269404.5_SPIB      | ENSG00000160789.18_LMNA | 0.11976  | -0.040210243 | 0.273738842 | 1.42E-01 | 3.84E-01 | 1.00E+00 |
| ENSG00000120215.8_MLANA     | ENSG00000160789.18_LMNA | 0.08459  | -0.075633105 | 0.240547534 | 3.00E-01 | 5.87E-01 | 1.00E+00 |
| ENSG00000260186.4_RP11-481J | ENSG00000160789.18_LMNA | 0.07038  | -0.089823678 | 0.227040201 | 3.89E-01 | 6.67E-01 | 1.00E+00 |
| ENSG00000179636.13_TPPP2    | ENSG00000160789.18_LMNA | -0.18654 | -0.335768619 | -0.02817533 | 2.14E-02 | 1.13E-01 | 1.00E+00 |
| ENSG00000226435.9_ANKRD18D  | ENSG00000160789.18_LMNA | -0.05506 | -0.212395449 | 0.105065204 | 5.01E-01 | 7.53E-01 | 1.00E+00 |
| ENSG00000270562.1_RP11-154H | ENSG00000160789.18_LMNA | -0.04125 | -0.199140154 | 0.118733252 | 6.14E-01 | 8.25E-01 | 1.00E+00 |
| ENSG00000267551.3_AC005264. | ENSG00000160789.18_LMNA | 0.21741  | 0.06029818   | 0.364013267 | 7.13E-03 | 5.11E-02 | 1.00E+00 |
| ENSG00000115616.2_SLC9A2    | ENSG00000160789.18_LMNA | -0.07083 | -0.227468886 | 0.089375277 | 3.86E-01 | 6.64E-01 | 1.00E+00 |
| ENSG00000179460.5_EEF1A1P2  | ENSG00000160789.18_LMNA | 0.0869   | -0.073312521 | 0.242744799 | 2.87E-01 | 5.73E-01 | 1.00E+00 |
| ENSG00000253608.1_RP11-770E | ENSG00000160789.18_LMNA | 0.13369  | -0.026066889 | 0.286785557 | 1.01E-01 | 3.12E-01 | 1.00E+00 |
| ENSG00000243083.4_LINC00870 | ENSG00000160789.18_LMNA | -0.06311 | -0.220098979 | 0.097066304 | 4.40E-01 | 7.08E-01 | 1.00E+00 |
| ENSG00000258811.1_CTD-3051D | ENSG00000160789.18_LMNA | 0.22539  | 0.06864756   | 0.371264283 | 5.24E-03 | 4.07E-02 | 1.00E+00 |
| ENSG00000254226.4_CTB-12O2  | ENSG00000160789.18_LMNA | -0.16792 | -0.31859953  | -0.0089544  | 3.87E-02 | 1.69E-01 | 1.00E+00 |
| ENSG00000219410.5_RP4-761J1 | ENSG00000160789.18_LMNA | 0.10062  | -0.059535238 | 0.255723497 | 2.17E-01 | 4.92E-01 | 1.00E+00 |
| ENSG00000215246.5_RP11-43F1 | ENSG00000160789.18_LMNA | 0.0365   | -0.123421665 | 0.194566373 | 6.55E-01 | 8.47E-01 | 1.00E+00 |
| ENSG00000268460.1_AC006262  | ENSG00000160789.18_LMNA | -0.11268 | -0.267085529 | 0.047374686 | 1.67E-01 | 4.24E-01 | 1.00E+00 |
| ENSG00000267179.1_CTD-2006C | ENSG00000160789.18_LMNA | 0.08166  | -0.078559852 | 0.23777169  | 3.17E-01 | 6.04E-01 | 1.00E+00 |
| ENSG00000253438.2_PCAT1     | ENSG00000160789.18_LMNA | 0.043    | -0.117000074 | 0.200827457 | 5.99E-01 | 8.16E-01 | 1.00E+00 |
| ENSG00000197506.7_SLC28A3   | ENSG00000160789.18_LMNA | 0.01743  | -0.142167671 | 0.176139479 | 8.31E-01 | 9.34E-01 | 1.00E+00 |
| ENSG00000230006.6_ANKRD36B  | ENSG00000160789.18_LMNA | -0.17626 | -0.326306422 | -0.01755411 | 2.98E-02 | 1.43E-01 | 1.00E+00 |
| ENSG00000004939.12_SLC4A1   | ENSG00000160789.18_LMNA | 0.04596  | -0.114072518 | 0.203673248 | 5.74E-01 | 8.01E-01 | 1.00E+00 |
| ENSG00000126467.9_TSKS      | ENSG00000160789.18_LMNA | 0.03697  | -0.122954037 | 0.195023189 | 6.51E-01 | 8.45E-01 | 1.00E+00 |
| ENSG00000111713.2_GYS2      | ENSG00000160789.18_LMNA | -0.23117 | -0.376517993 | -0.07472369 | 4.16E-03 | 3.42E-02 | 1.00E+00 |
| ENSG00000249506.3_ZEB2P1    | ENSG00000160789.18_LMNA | -0.05518 | -0.212517307 | 0.104938992 | 5.00E-01 | 7.52E-01 | 1.00E+00 |
| ENSG00000174145.7_NWD2      | ENSG00000160789.18_LMNA | -0.12228 | -0.276108218 | 0.037651024 | 1.33E-01 | 3.71E-01 | 1.00E+00 |
| ENSG00000277022.1_RP3-453C1 | ENSG00000160789.18_LMNA | -0.01827 | -0.176954105 | 0.141343734 | 8.23E-01 | 9.31E-01 | 1.00E+00 |
| ENSG00000081248.9_CACNA1S   | ENSG00000160789.18_LMNA | -0.07611 | -0.232492458 | 0.084111072 | 3.51E-01 | 6.35E-01 | 1.00E+00 |
| ENSG00000280623.1_PCAT14    | ENSG00000160789.18_LMNA | 0.13572  | -0.023995101 | 0.288687008 | 9.55E-02 | 3.03E-01 | 1.00E+00 |
| ENSG00000203356.2_LINC01562 | ENSG00000160789.18_LMNA | 0.00843  | -0.150977076 | 0.167402294 | 9.18E-01 | 9.69E-01 | 1.00E+00 |
| ENSG00000159247.11_TUBBP5   | ENSG00000160789.18_LMNA | 0.00447  | -0.154837882 | 0.163557313 | 9.56E-01 | 9.83E-01 | 1.00E+00 |
| ENSG00000213599.8_SLX1A-SUL | ENSG00000160789.18_LMNA | -0.00729 | -0.166293775 | 0.152091155 | 9.29E-01 | 9.73E-01 | 1.00E+00 |
| ENSG00000197213.8_ZSCAN5B   | ENSG00000160789.18_LMNA | -0.14547 | -0.297774126 | 0.014056708 | 7.37E-02 | 2.58E-01 | 1.00E+00 |
| ENSG00000204961.6_PCDHA9    | ENSG00000160789.18_LMNA | -0.09908 | -0.254271899 | 0.061082143 | 2.25E-01 | 5.01E-01 | 1.00E+00 |



|                             |                         |          |              |             |          |          |          |
|-----------------------------|-------------------------|----------|--------------|-------------|----------|----------|----------|
| ENSG00000167131.15_CCDC103  | ENSG00000160789.18_LMNA | 0.06632  | -0.093873576 | 0.223162804 | 4.17E-01 | 6.89E-01 | 1.00E+00 |
| ENSG00000230665.3_THAP12P1  | ENSG00000160789.18_LMNA | 0.0367   | -0.123217024 | 0.194766299 | 6.53E-01 | 8.47E-01 | 1.00E+00 |
| ENSG00000248966.1_BCLAF1P1  | ENSG00000160789.18_LMNA | 0.0738   | -0.086418252 | 0.230292819 | 3.66E-01 | 6.47E-01 | 1.00E+00 |
| ENSG00000205045.7_SLFN12L   | ENSG00000160789.18_LMNA | 0.11879  | -0.041189652 | 0.272831076 | 1.45E-01 | 3.90E-01 | 1.00E+00 |
| ENSG00000241322.7_CDRT1     | ENSG00000160789.18_LMNA | -0.06346 | -0.220434365 | 0.096717125 | 4.37E-01 | 7.05E-01 | 1.00E+00 |
| ENSG00000244153.1_WWP1P1    | ENSG00000160789.18_LMNA | 0.07949  | -0.080732466 | 0.23570775  | 3.30E-01 | 6.16E-01 | 1.00E+00 |
| ENSG00000187553.7_CYP26C1   | ENSG00000160789.18_LMNA | -0.01618 | -0.174925509 | 0.1433947   | 8.43E-01 | 9.39E-01 | 1.00E+00 |
| ENSG00000187950.7_OVCH1     | ENSG00000160789.18_LMNA | -0.13338 | -0.286497372 | 0.026380655 | 1.01E-01 | 3.14E-01 | 1.00E+00 |
| ENSG00000228016.1_RAPGEF4-  | ENSG00000160789.18_LMNA | -0.13092 | -0.284194506 | 0.028885732 | 1.08E-01 | 3.27E-01 | 1.00E+00 |
| ENSG00000169402.14_RSHP10B  | ENSG00000160789.18_LMNA | -0.0158  | -0.174566393 | 0.143757491 | 8.47E-01 | 9.40E-01 | 1.00E+00 |
| ENSG00000172818.8_OVOL1     | ENSG00000160789.18_LMNA | 0.08767  | -0.072546834 | 0.243469085 | 2.83E-01 | 5.68E-01 | 1.00E+00 |
| ENSG00000279191.1_RP11-803D | ENSG00000160789.18_LMNA | 0.34638  | 0.198098378  | 0.479153929 | 1.24E-05 | 3.47E-04 | 6.34E-01 |
| ENSG00000214892.4_USP8P1    | ENSG00000160789.18_LMNA | 0.13401  | -0.025741735 | 0.28708414  | 9.98E-02 | 3.11E-01 | 1.00E+00 |
| ENSG00000262966.2_RP11-85B7 | ENSG00000160789.18_LMNA | 0.05135  | -0.108740191 | 0.208842886 | 5.30E-01 | 7.73E-01 | 1.00E+00 |
| ENSG00000228212.1_OFD1P17   | ENSG00000160789.18_LMNA | 0.127    | -0.032861226 | 0.280532485 | 1.19E-01 | 3.46E-01 | 1.00E+00 |
| ENSG00000084674.12_APOB     | ENSG00000160789.18_LMNA | -0.05953 | -0.216678532 | 0.100622962 | 4.66E-01 | 7.28E-01 | 1.00E+00 |
| ENSG00000183579.14_ZNRF3    | ENSG00000160789.18_LMNA | 0.07431  | -0.085902363 | 0.230784943 | 3.63E-01 | 6.45E-01 | 1.00E+00 |
| ENSG00000165805.8_C12orf50  | ENSG00000160789.18_LMNA | 0.03514  | -0.124761779 | 0.193256479 | 6.67E-01 | 8.53E-01 | 1.00E+00 |
| ENSG00000279933.1_RP4-671O1 | ENSG00000160789.18_LMNA | 0.02849  | -0.131302793 | 0.186846654 | 7.27E-01 | 8.85E-01 | 1.00E+00 |
| ENSG00000198106.8_RP11-231C | ENSG00000160789.18_LMNA | 0.18374  | 0.02528248   | 0.333197585 | 2.35E-02 | 1.21E-01 | 1.00E+00 |
| ENSG00000259370.2_RP11-1069 | ENSG00000160789.18_LMNA | 0.13744  | -0.022243283 | 0.290292873 | 9.13E-02 | 2.95E-01 | 1.00E+00 |
| ENSG00000279467.1_KB-1125A3 | ENSG00000160789.18_LMNA | 0.03194  | -0.127914822 | 0.190170059 | 6.96E-01 | 8.70E-01 | 1.00E+00 |
| ENSG00000279217.1_CTA-212A2 | ENSG00000160789.18_LMNA | -0.07996 | -0.236155466 | 0.080261431 | 3.27E-01 | 6.14E-01 | 1.00E+00 |
| ENSG00000278920.1_RP3-412A9 | ENSG00000160789.18_LMNA | -0.073   | -0.229533556 | 0.087213849 | 3.71E-01 | 6.52E-01 | 1.00E+00 |
| ENSG00000280370.1_          | ENSG00000160789.18_LMNA | -0.08388 | -0.239876702 | 0.076340905 | 3.04E-01 | 5.91E-01 | 1.00E+00 |
| ENSG00000204542.2_C6orf15   | ENSG00000160789.18_LMNA | 0.21183  | 0.054465265  | 0.358925736 | 8.80E-03 | 5.97E-02 | 1.00E+00 |
| ENSG00000211648.2_IGLV1-47  | ENSG00000160789.18_LMNA | 0.00747  | -0.151915019 | 0.166469086 | 9.27E-01 | 9.72E-01 | 1.00E+00 |
| ENSG00000221500.1_SNORD100  | ENSG00000160789.18_LMNA | -0.0398  | -0.197752333 | 0.120157356 | 6.26E-01 | 8.32E-01 | 1.00E+00 |
| ENSG00000229588.1_RP11-479J | ENSG00000160789.18_LMNA | 0.15809  | -0.001140891 | 0.309499797 | 5.18E-02 | 2.06E-01 | 1.00E+00 |
| ENSG00000239002.3_SCARNA10  | ENSG00000160789.18_LMNA | -0.23935 | -0.383917647 | -0.08331987 | 2.98E-03 | 2.66E-02 | 1.00E+00 |
| ENSG00000206630.1_SNORD60   | ENSG00000160789.18_LMNA | -0.00557 | -0.164628622 | 0.15376314  | 9.46E-01 | 9.78E-01 | 1.00E+00 |
| ENSG00000214748.2_RP11-332E | ENSG00000160789.18_LMNA | 0.03489  | -0.125001682 | 0.193021866 | 6.70E-01 | 8.55E-01 | 1.00E+00 |
| ENSG00000120068.6_HOXB8     | ENSG00000160789.18_LMNA | 0.10268  | -0.057462842 | 0.257665986 | 2.08E-01 | 4.81E-01 | 1.00E+00 |

|                              |                         |          |              |             |          |          |          |
|------------------------------|-------------------------|----------|--------------|-------------|----------|----------|----------|
| ENSG00000226197.2_RP11-536O  | ENSG00000160789.18_LMNA | -0.2402  | -0.384692454 | -0.08422255 | 2.88E-03 | 2.59E-02 | 1.00E+00 |
| ENSG00000124875.8_CXCL6      | ENSG00000160789.18_LMNA | 0.1714   | 0.012545476  | 0.321822769 | 3.47E-02 | 1.58E-01 | 1.00E+00 |
| ENSG00000278272.1_HIST1H3C   | ENSG00000160789.18_LMNA | 0.04025  | -0.119719263 | 0.1981794   | 6.22E-01 | 8.29E-01 | 1.00E+00 |
| ENSG00000258717.1_RP11-566J  | ENSG00000160789.18_LMNA | 0.30264  | 0.15069904   | 0.440610927 | 1.51E-04 | 2.61E-03 | 1.00E+00 |
| ENSG00000239149.1_SNORA59A   | ENSG00000160789.18_LMNA | 0.00375  | -0.155542855 | 0.162854183 | 9.63E-01 | 9.85E-01 | 1.00E+00 |
| ENSG00000269970.1_RP11-498E  | ENSG00000160789.18_LMNA | 0.1042   | -0.055930321 | 0.259100805 | 2.01E-01 | 4.72E-01 | 1.00E+00 |
| ENSG00000176728.6_TTTY14     | ENSG00000160789.18_LMNA | -0.11262 | -0.267031392 | 0.047432849 | 1.67E-01 | 4.25E-01 | 1.00E+00 |
| ENSG00000112175.7_BMP5       | ENSG00000160789.18_LMNA | 0.12815  | -0.031699102 | 0.281603919 | 1.16E-01 | 3.40E-01 | 1.00E+00 |
| ENSG00000259318.1_RP11-454L  | ENSG00000160789.18_LMNA | -0.01241 | -0.171270553 | 0.147083071 | 8.79E-01 | 9.53E-01 | 1.00E+00 |
| ENSG00000227470.1_AC073415.  | ENSG00000160789.18_LMNA | -0.08417 | -0.240154681 | 0.076047646 | 3.03E-01 | 5.89E-01 | 1.00E+00 |
| ENSG00000271267.1_RP11-29H2  | ENSG00000160789.18_LMNA | -0.02014 | -0.178765675 | 0.139509874 | 8.05E-01 | 9.22E-01 | 1.00E+00 |
| ENSG00000272537.1_GS1-166A2  | ENSG00000160789.18_LMNA | -0.01058 | -0.169492666 | 0.148874018 | 8.97E-01 | 9.60E-01 | 1.00E+00 |
| ENSG00000250166.2_RP11-268P  | ENSG00000160789.18_LMNA | -0.14323 | -0.295689099 | 0.016342519 | 7.83E-02 | 2.69E-01 | 1.00E+00 |
| ENSG00000281350.1_           | ENSG00000160789.18_LMNA | 0.01788  | -0.141720644 | 0.176581509 | 8.27E-01 | 9.32E-01 | 1.00E+00 |
| ENSG00000229067.1_RP11-91I11 | ENSG00000160789.18_LMNA | 0.07068  | -0.089525096 | 0.227325668 | 3.87E-01 | 6.65E-01 | 1.00E+00 |
| ENSG00000213761.4_MT1P1      | ENSG00000160789.18_LMNA | -0.01151 | -0.17040048  | 0.147959796 | 8.88E-01 | 9.57E-01 | 1.00E+00 |
| ENSG00000222112.1_RN7SKP16   | ENSG00000160789.18_LMNA | 0.23334  | 0.077000495  | 0.378481641 | 3.81E-03 | 3.20E-02 | 1.00E+00 |
| ENSG00000225398.2_PGM5P4     | ENSG00000160789.18_LMNA | 0.0936   | -0.066588988 | 0.249092776 | 2.51E-01 | 5.32E-01 | 1.00E+00 |
| ENSG00000272797.1_RP11-368I2 | ENSG00000160789.18_LMNA | -0.30735 | -0.444787406 | -0.15577159 | 1.17E-04 | 2.15E-03 | 1.00E+00 |
| ENSG00000211815.3_TRAV36DV   | ENSG00000160789.18_LMNA | -0.05194 | -0.209413225 | 0.108150782 | 5.25E-01 | 7.70E-01 | 1.00E+00 |
| ENSG00000223624.1_RP1-125I3. | ENSG00000160789.18_LMNA | 0.00336  | -0.155925229 | 0.162472673 | 9.67E-01 | 9.87E-01 | 1.00E+00 |
| ENSG00000262147.1_RP13-638C  | ENSG00000160789.18_LMNA | 0.13276  | -0.027014612 | 0.28591493  | 1.03E-01 | 3.18E-01 | 1.00E+00 |
| ENSG00000224577.1_LINC01117  | ENSG00000160789.18_LMNA | -0.19838 | -0.346636362 | -0.04046055 | 1.43E-02 | 8.49E-02 | 1.00E+00 |
| ENSG00000265626.1_AC139085.  | ENSG00000160789.18_LMNA | -0.10354 | -0.258476497 | 0.056597323 | 2.04E-01 | 4.76E-01 | 1.00E+00 |
| ENSG00000275966.1_RP11-1055I | ENSG00000160789.18_LMNA | -0.02064 | -0.179256066 | 0.139013075 | 8.01E-01 | 9.20E-01 | 1.00E+00 |
| ENSG00000078898.6_BPIFB2     | ENSG00000160789.18_LMNA | -0.09372 | -0.249201817 | 0.066473245 | 2.51E-01 | 5.31E-01 | 1.00E+00 |
| ENSG00000186081.10_KRT5      | ENSG00000160789.18_LMNA | -0.20143 | -0.349421951 | -0.04362444 | 1.28E-02 | 7.84E-02 | 1.00E+00 |
| ENSG00000229196.3_RP11-775D  | ENSG00000160789.18_LMNA | 0.29669  | 0.144310331  | 0.435332868 | 2.06E-04 | 3.34E-03 | 1.00E+00 |
| ENSG00000267746.1_RP11-379L  | ENSG00000160789.18_LMNA | -0.1901  | -0.339035972 | -0.0318591  | 1.90E-02 | 1.04E-01 | 1.00E+00 |
| ENSG00000251008.1_ORAOV1P1   | ENSG00000160789.18_LMNA | -0.05051 | -0.20804259  | 0.109566871 | 5.37E-01 | 7.77E-01 | 1.00E+00 |
| ENSG00000234705.1_HMGA1P4    | ENSG00000160789.18_LMNA | 0.0304   | -0.129426629 | 0.188687963 | 7.10E-01 | 8.77E-01 | 1.00E+00 |
| ENSG00000237641.1_RP11-690I2 | ENSG00000160789.18_LMNA | -0.04565 | -0.203373687 | 0.114380946 | 5.77E-01 | 8.03E-01 | 1.00E+00 |
| ENSG00000196415.8_PRTN3      | ENSG00000160789.18_LMNA | 0.24164  | 0.085734418  | 0.385989189 | 2.71E-03 | 2.47E-02 | 1.00E+00 |

|                              |                         |          |              |             |          |          |          |
|------------------------------|-------------------------|----------|--------------|-------------|----------|----------|----------|
| ENSG00000269688.1_AC008982.1 | ENSG00000160789.18_LMNA | 0.00477  | -0.154545746 | 0.163848589 | 9.53E-01 | 9.81E-01 | 1.00E+00 |
| ENSG00000273164.1_DGCR10     | ENSG00000160789.18_LMNA | -0.03308 | -0.191272779 | 0.126789037 | 6.86E-01 | 8.64E-01 | 1.00E+00 |
| ENSG00000226251.4_RP11-15I11 | ENSG00000160789.18_LMNA | -0.03906 | -0.197031126 | 0.120896901 | 6.33E-01 | 8.35E-01 | 1.00E+00 |
| ENSG00000230289.1_RP11-334J1 | ENSG00000160789.18_LMNA | 0.185    | 0.026584328  | 0.334355177 | 2.25E-02 | 1.17E-01 | 1.00E+00 |
| ENSG00000231246.1_RP5-965F6  | ENSG00000160789.18_LMNA | -0.07985 | -0.236050021 | 0.080372381 | 3.28E-01 | 6.14E-01 | 1.00E+00 |
| ENSG00000267769.1_CTB-50L17  | ENSG00000160789.18_LMNA | 0.11904  | -0.040941562 | 0.273061072 | 1.44E-01 | 3.88E-01 | 1.00E+00 |
| ENSG00000265342.1_RP11-16C1  | ENSG00000160789.18_LMNA | -0.15257 | -0.304373453 | 0.006800334 | 6.06E-02 | 2.27E-01 | 1.00E+00 |
| ENSG00000230614.3_DYNLL1P7   | ENSG00000160789.18_LMNA | 0.03072  | -0.129107557 | 0.189000885 | 7.07E-01 | 8.75E-01 | 1.00E+00 |
| ENSG00000268649.3_MIR296     | ENSG00000160789.18_LMNA | 0.02479  | -0.134941562 | 0.183269099 | 7.62E-01 | 9.01E-01 | 1.00E+00 |
| ENSG00000258604.1_AL161668.5 | ENSG00000160789.18_LMNA | -0.27019 | -0.411684246 | -0.1159802  | 7.61E-04 | 9.34E-03 | 1.00E+00 |
| ENSG00000110887.6_DAO        | ENSG00000160789.18_LMNA | -0.28123 | -0.421552733 | -0.12774406 | 4.49E-04 | 6.20E-03 | 1.00E+00 |
| ENSG00000244422.3_RPL38P3    | ENSG00000160789.18_LMNA | -0.01024 | -0.16916409  | 0.149204778 | 9.00E-01 | 9.61E-01 | 1.00E+00 |
| ENSG00000243738.3_RN7SL181F  | ENSG00000160789.18_LMNA | -0.02604 | -0.184476942 | 0.133714012 | 7.50E-01 | 8.96E-01 | 1.00E+00 |
| ENSG00000123977.8_DAW1       | ENSG00000160789.18_LMNA | -0.1232  | -0.276967479 | 0.036721899 | 1.31E-01 | 3.66E-01 | 1.00E+00 |
| ENSG00000268707.1_RP11-247A  | ENSG00000160789.18_LMNA | -0.02705 | -0.185455548 | 0.132718721 | 7.41E-01 | 8.91E-01 | 1.00E+00 |
| ENSG00000228971.2_RP11-286B  | ENSG00000160789.18_LMNA | -0.15326 | -0.305015002 | 0.006093159 | 5.94E-02 | 2.24E-01 | 1.00E+00 |
| ENSG00000264964.1_RP11-888D  | ENSG00000160789.18_LMNA | 0.05434  | -0.105777137 | 0.211707887 | 5.06E-01 | 7.57E-01 | 1.00E+00 |
| ENSG00000254533.1_AF186192.1 | ENSG00000160789.18_LMNA | -0.17544 | -0.32555165  | -0.01670988 | 3.06E-02 | 1.45E-01 | 1.00E+00 |
| ENSG00000260891.1_RP11-96D1  | ENSG00000160789.18_LMNA | -0.06275 | -0.219759988 | 0.097419156 | 4.42E-01 | 7.10E-01 | 1.00E+00 |
| ENSG00000276603.1_RP11-425M  | ENSG00000160789.18_LMNA | -0.03846 | -0.19645957  | 0.12148274  | 6.38E-01 | 8.38E-01 | 1.00E+00 |
| ENSG00000230730.1_AC074011.1 | ENSG00000160789.18_LMNA | 0.18504  | 0.026623163  | 0.334389694 | 2.25E-02 | 1.17E-01 | 1.00E+00 |
| ENSG00000225578.1_NCBP2-AS   | ENSG00000160789.18_LMNA | 0.01199  | -0.147495045 | 0.170861767 | 8.83E-01 | 9.55E-01 | 1.00E+00 |
| ENSG00000267201.1_AC005624.1 | ENSG00000160789.18_LMNA | 0.29188  | 0.139146732  | 0.431052268 | 2.64E-04 | 4.06E-03 | 1.00E+00 |
| ENSG00000236124.1_HMGN2P23   | ENSG00000160789.18_LMNA | 0.00982  | -0.149611812 | 0.168759649 | 9.04E-01 | 9.63E-01 | 1.00E+00 |
| ENSG00000228061.4_Z83001.1   | ENSG00000160789.18_LMNA | -0.28621 | -0.426002758 | -0.13307595 | 3.51E-04 | 5.07E-03 | 1.00E+00 |
| ENSG00000224324.1_THAP5P1    | ENSG00000160789.18_LMNA | 0.0219   | -0.137782433 | 0.18047015  | 7.89E-01 | 9.14E-01 | 1.00E+00 |
| ENSG00000273394.1_RP11-255E  | ENSG00000160789.18_LMNA | -0.02226 | -0.180822463 | 0.137425131 | 7.85E-01 | 9.12E-01 | 1.00E+00 |
| ENSG00000229921.5_KIF25-AS1  | ENSG00000160789.18_LMNA | -0.22869 | -0.374268003 | -0.07211874 | 4.60E-03 | 3.68E-02 | 1.00E+00 |
| ENSG00000243433.1_RP11-148K  | ENSG00000160789.18_LMNA | 0.06687  | -0.093324069 | 0.223689494 | 4.13E-01 | 6.86E-01 | 1.00E+00 |
| ENSG00000228137.1_AP001469.1 | ENSG00000160789.18_LMNA | -0.06232 | -0.219348949 | 0.097846896 | 4.46E-01 | 7.12E-01 | 1.00E+00 |
| ENSG00000234043.3_NUDT9P1    | ENSG00000160789.18_LMNA | -0.00082 | -0.160000489 | 0.158400706 | 9.92E-01 | 9.97E-01 | 1.00E+00 |
| ENSG00000225951.1_ODF2-AS1   | ENSG00000160789.18_LMNA | -0.06255 | -0.219561105 | 0.097626134 | 4.44E-01 | 7.11E-01 | 1.00E+00 |
| ENSG00000224011.1_AC111155.1 | ENSG00000160789.18_LMNA | 0.05191  | -0.108181798 | 0.209383219 | 5.25E-01 | 7.70E-01 | 1.00E+00 |

|                              |                         |          |              |             |          |          |          |
|------------------------------|-------------------------|----------|--------------|-------------|----------|----------|----------|
| ENSG00000175077.5_RTP1       | ENSG00000160789.18_LMNA | -0.2044  | -0.352146333 | -0.04672476 | 1.15E-02 | 7.25E-02 | 1.00E+00 |
| ENSG00000231344.1_RP3-426I6. | ENSG00000160789.18_LMNA | 0.02056  | -0.139100821 | 0.179169463 | 8.02E-01 | 9.20E-01 | 1.00E+00 |
| ENSG00000233547.1_RP11-57H1  | ENSG00000160789.18_LMNA | -0.0192  | -0.177861033 | 0.14042592  | 8.14E-01 | 9.27E-01 | 1.00E+00 |
| ENSG00000253476.1_RP11-395I1 | ENSG00000160789.18_LMNA | -0.05847 | -0.215660441 | 0.101680033 | 4.74E-01 | 7.34E-01 | 1.00E+00 |
| ENSG00000008196.11_TFAP2B    | ENSG00000160789.18_LMNA | -0.03742 | -0.195452652 | 0.122514281 | 6.47E-01 | 8.43E-01 | 1.00E+00 |
| ENSG00000262482.1_LA16c-321I | ENSG00000160789.18_LMNA | 0.12906  | -0.030776675 | 0.282453805 | 1.13E-01 | 3.36E-01 | 1.00E+00 |
| ENSG00000259116.1_RP11-973N  | ENSG00000160789.18_LMNA | 0.03927  | -0.120690112 | 0.197232822 | 6.31E-01 | 8.34E-01 | 1.00E+00 |
| ENSG00000234193.1_AC097461.  | ENSG00000160789.18_LMNA | -0.03696 | -0.195012698 | 0.122964778 | 6.51E-01 | 8.45E-01 | 1.00E+00 |
| ENSG00000248290.1_TNXA       | ENSG00000160789.18_LMNA | 0.00932  | -0.150099923 | 0.168274504 | 9.09E-01 | 9.65E-01 | 1.00E+00 |
| ENSG00000235052.1_RP1-150O5  | ENSG00000160789.18_LMNA | 0.02933  | -0.13047655  | 0.187657822 | 7.20E-01 | 8.81E-01 | 1.00E+00 |
| ENSG00000228401.4_HSPC324    | ENSG00000160789.18_LMNA | 0.03228  | -0.127581072 | 0.190497055 | 6.93E-01 | 8.68E-01 | 1.00E+00 |
| ENSG00000267264.1_CTC-459F4  | ENSG00000160789.18_LMNA | -0.10592 | -0.260726249 | 0.0541924   | 1.94E-01 | 4.63E-01 | 1.00E+00 |
| ENSG00000259338.1_CTD-2651B  | ENSG00000160789.18_LMNA | -0.15796 | -0.309383642 | 0.001269345 | 5.19E-02 | 2.06E-01 | 1.00E+00 |
| ENSG00000218305.3_CDC14C     | ENSG00000160789.18_LMNA | -0.27473 | -0.415746537 | -0.12081268 | 6.14E-04 | 7.94E-03 | 1.00E+00 |
| ENSG00000229587.2_RP11-197P  | ENSG00000160789.18_LMNA | -0.11013 | -0.264687094 | 0.049949467 | 1.77E-01 | 4.38E-01 | 1.00E+00 |
| ENSG00000231449.1_AC097359.  | ENSG00000160789.18_LMNA | 0.07904  | -0.081182735 | 0.235279645 | 3.33E-01 | 6.19E-01 | 1.00E+00 |
| ENSG00000271970.1_RP3-337H4  | ENSG00000160789.18_LMNA | -0.17359 | -0.323839298 | -0.0147962  | 3.25E-02 | 1.51E-01 | 1.00E+00 |
| ENSG00000255650.4_FAM222A-7  | ENSG00000160789.18_LMNA | -0.33254 | -0.46701975  | -0.1830329  | 2.84E-05 | 6.82E-04 | 1.00E+00 |
| ENSG00000267170.1_CALM2P1    | ENSG00000160789.18_LMNA | -0.01367 | -0.172497429 | 0.145845965 | 8.67E-01 | 9.48E-01 | 1.00E+00 |
| ENSG00000251532.1_CTD-2245E  | ENSG00000160789.18_LMNA | -0.07073 | -0.227373284 | 0.089475287 | 3.87E-01 | 6.65E-01 | 1.00E+00 |
| ENSG00000258857.1_RP11-247L  | ENSG00000160789.18_LMNA | 0.02057  | -0.139082616 | 0.179187432 | 8.01E-01 | 9.20E-01 | 1.00E+00 |
| ENSG00000271662.1_RP11-141C  | ENSG00000160789.18_LMNA | -0.00905 | -0.168010992 | 0.150364981 | 9.12E-01 | 9.66E-01 | 1.00E+00 |
| ENSG00000233560.2_KRT8P39    | ENSG00000160789.18_LMNA | 0.00737  | -0.152013638 | 0.166370931 | 9.28E-01 | 9.72E-01 | 1.00E+00 |
| ENSG00000256577.2_RP11-283I3 | ENSG00000160789.18_LMNA | -0.11769 | -0.271798424 | 0.04230307  | 1.49E-01 | 3.95E-01 | 1.00E+00 |
| ENSG00000180535.3_BHLHA15    | ENSG00000160789.18_LMNA | 0.23858  | 0.082509125  | 0.3832214   | 3.08E-03 | 2.72E-02 | 1.00E+00 |
| ENSG00000105929.14_ATP6V0A   | ENSG00000160789.18_LMNA | -0.37377 | -0.503037927 | -0.2281452  | 2.10E-06 | 8.28E-05 | 1.08E-01 |
| ENSG00000248936.1_RP11-36B1  | ENSG00000160789.18_LMNA | 0.00538  | -0.153951798 | 0.164440621 | 9.48E-01 | 9.79E-01 | 1.00E+00 |
| ENSG00000229536.1_AC079776.  | ENSG00000160789.18_LMNA | -0.02704 | -0.185445916 | 0.132728521 | 7.41E-01 | 8.91E-01 | 1.00E+00 |
| ENSG00000186439.11_TRDN      | ENSG00000160789.18_LMNA | -0.41875 | -0.54182762  | -0.2780857  | 7.92E-08 | 5.95E-06 | 4.07E-03 |
| ENSG00000272002.1_RP11-557L  | ENSG00000160789.18_LMNA | 0.15944  | 0.0002502    | 0.310757093 | 4.97E-02 | 2.01E-01 | 1.00E+00 |
| ENSG00000158481.11_CD1C      | ENSG00000160789.18_LMNA | -0.01298 | -0.171830258 | 0.146518823 | 8.74E-01 | 9.51E-01 | 1.00E+00 |
| ENSG00000223571.4_DHRX-IT1   | ENSG00000160789.18_LMNA | 0.1428   | -0.016784017 | 0.295286039 | 7.93E-02 | 2.71E-01 | 1.00E+00 |
| ENSG00000200674.1_RN7SKP16   | ENSG00000160789.18_LMNA | -0.18889 | -0.337927733 | -0.03060868 | 1.98E-02 | 1.07E-01 | 1.00E+00 |

|                              |                         |          |              |             |          |          |          |
|------------------------------|-------------------------|----------|--------------|-------------|----------|----------|----------|
| ENSG00000235910.1_APOA1-AS   | ENSG00000160789.18_LMNA | 0.07649  | -0.08372638  | 0.232858905 | 3.49E-01 | 6.33E-01 | 1.00E+00 |
| ENSG00000125492.8_BARHL1     | ENSG00000160789.18_LMNA | -0.09666 | -0.251986372 | 0.063514662 | 2.36E-01 | 5.14E-01 | 1.00E+00 |
| ENSG00000233158.1_RPS24P6    | ENSG00000160789.18_LMNA | -0.05856 | -0.215744629 | 0.101592648 | 4.74E-01 | 7.33E-01 | 1.00E+00 |
| ENSG00000253390.1_CTC-756D1  | ENSG00000160789.18_LMNA | 0.06592  | -0.094269007 | 0.222783677 | 4.20E-01 | 6.91E-01 | 1.00E+00 |
| ENSG00000189269.11_DRICH1    | ENSG00000160789.18_LMNA | -0.07222 | -0.228789412 | 0.08799321  | 3.77E-01 | 6.56E-01 | 1.00E+00 |
| ENSG00000277425.1_RP5-1116H  | ENSG00000160789.18_LMNA | -0.15296 | -0.304739672 | 0.006396691 | 5.99E-02 | 2.25E-01 | 1.00E+00 |
| ENSG00000223695.1_RP4-633O1  | ENSG00000160789.18_LMNA | -0.14041 | -0.293061983 | 0.019217984 | 8.45E-02 | 2.81E-01 | 1.00E+00 |
| ENSG00000242405.2_RP11-267J  | ENSG00000160789.18_LMNA | 0.00232  | -0.156936156 | 0.161463574 | 9.77E-01 | 9.91E-01 | 1.00E+00 |
| ENSG00000241886.1_RP11-242C  | ENSG00000160789.18_LMNA | -0.1077  | -0.262400081 | 0.052400746 | 1.87E-01 | 4.53E-01 | 1.00E+00 |
| ENSG00000214846.4_RP11-115L  | ENSG00000160789.18_LMNA | -0.06087 | -0.217954523 | 0.099297105 | 4.56E-01 | 7.21E-01 | 1.00E+00 |
| ENSG00000236792.1_RP11-142L  | ENSG00000160789.18_LMNA | 0.09325  | -0.066943193 | 0.248759032 | 2.53E-01 | 5.35E-01 | 1.00E+00 |
| ENSG00000224965.1_KCNC4-AS   | ENSG00000160789.18_LMNA | -0.10386 | -0.258785232 | 0.05626751  | 2.03E-01 | 4.74E-01 | 1.00E+00 |
| ENSG00000240627.1_CTD-2312P  | ENSG00000160789.18_LMNA | -0.02543 | -0.183886156 | 0.13431456  | 7.56E-01 | 8.98E-01 | 1.00E+00 |
| ENSG00000277566.1_RP11-545P  | ENSG00000160789.18_LMNA | -0.04061 | -0.198522961 | 0.119366743 | 6.19E-01 | 8.28E-01 | 1.00E+00 |
| ENSG00000170608.2_FOXA3      | ENSG00000160789.18_LMNA | 0.29476  | 0.142229087  | 0.433609108 | 2.28E-04 | 3.62E-03 | 1.00E+00 |
| ENSG00000182000.9_RP11-651P  | ENSG00000160789.18_LMNA | -0.09232 | -0.247875382 | 0.067880631 | 2.58E-01 | 5.41E-01 | 1.00E+00 |
| ENSG00000273129.1_PACERR     | ENSG00000160789.18_LMNA | -0.14074 | -0.29336646  | 0.018884988 | 8.37E-02 | 2.80E-01 | 1.00E+00 |
| ENSG00000236913.1_AC025750.1 | ENSG00000160789.18_LMNA | -0.01034 | -0.169264636 | 0.149103571 | 8.99E-01 | 9.61E-01 | 1.00E+00 |
| ENSG00000255566.1_RP11-114F  | ENSG00000160789.18_LMNA | -0.08585 | -0.241744029 | 0.074369883 | 2.93E-01 | 5.79E-01 | 1.00E+00 |
| ENSG00000267369.1_RP11-1094I | ENSG00000160789.18_LMNA | 0.10134  | -0.058808097 | 0.256405348 | 2.14E-01 | 4.88E-01 | 1.00E+00 |
| ENSG00000263429.3_LINC00675  | ENSG00000160789.18_LMNA | -0.1171  | -0.271243652 | 0.04290091  | 1.51E-01 | 3.99E-01 | 1.00E+00 |
| ENSG00000270207.1_RP11-157E  | ENSG00000160789.18_LMNA | -0.18459 | -0.333976406 | -0.02615824 | 2.28E-02 | 1.19E-01 | 1.00E+00 |
| ENSG00000172410.4_INSL5      | ENSG00000160789.18_LMNA | -0.01947 | -0.178114428 | 0.140169386 | 8.12E-01 | 9.26E-01 | 1.00E+00 |
| ENSG00000249148.2_AC006445.1 | ENSG00000160789.18_LMNA | -0.07828 | -0.234556501 | 0.081943026 | 3.38E-01 | 6.23E-01 | 1.00E+00 |
| ENSG00000256980.4_KHDC1L     | ENSG00000160789.18_LMNA | 0.10804  | -0.052053975 | 0.262723828 | 1.85E-01 | 4.51E-01 | 1.00E+00 |
| ENSG00000253181.1_RP11-863K  | ENSG00000160789.18_LMNA | -0.30117 | -0.439306678 | -0.14911809 | 1.63E-04 | 2.78E-03 | 1.00E+00 |
| ENSG00000240591.1_RP11-247I1 | ENSG00000160789.18_LMNA | -0.16248 | -0.313566457 | -0.00336287 | 4.55E-02 | 1.89E-01 | 1.00E+00 |
| ENSG00000228549.3_RP11-108M  | ENSG00000160789.18_LMNA | -0.00251 | -0.161648976 | 0.156750468 | 9.75E-01 | 9.91E-01 | 1.00E+00 |
| ENSG00000269244.1_RPL23AP7I  | ENSG00000160789.18_LMNA | -0.13227 | -0.285459001 | 0.027510691 | 1.04E-01 | 3.20E-01 | 1.00E+00 |
| ENSG00000271109.1_CTC-523E2  | ENSG00000160789.18_LMNA | -0.1283  | -0.281747454 | 0.031543353 | 1.15E-01 | 3.39E-01 | 1.00E+00 |
| ENSG00000230312.2_LLOXNC01-  | ENSG00000160789.18_LMNA | -0.26569 | -0.407645029 | -0.11118901 | 9.39E-04 | 1.10E-02 | 1.00E+00 |
| ENSG00000270617.1_URGCP-MF   | ENSG00000160789.18_LMNA | -0.08764 | -0.243446057 | 0.072571184 | 2.83E-01 | 5.68E-01 | 1.00E+00 |
| ENSG00000227230.1_RP11-261C  | ENSG00000160789.18_LMNA | 0.00317  | -0.15611402  | 0.162284275 | 9.69E-01 | 9.88E-01 | 1.00E+00 |

|                              |                         |          |              |             |          |          |          |
|------------------------------|-------------------------|----------|--------------|-------------|----------|----------|----------|
| ENSG00000178248.11_AP000345  | ENSG00000160789.18_LMNA | -0.09995 | -0.255091231 | 0.060209202 | 2.21E-01 | 4.96E-01 | 1.00E+00 |
| ENSG00000213179.4_RPL17P41   | ENSG00000160789.18_LMNA | 0.09853  | -0.061637037 | 0.253750845 | 2.27E-01 | 5.04E-01 | 1.00E+00 |
| ENSG00000189001.9_SBSN       | ENSG00000160789.18_LMNA | 0.17008  | 0.011177517  | 0.320595777 | 3.62E-02 | 1.62E-01 | 1.00E+00 |
| ENSG00000231646.4_FSIP2-AS1  | ENSG00000160789.18_LMNA | -0.17143 | -0.321851088 | -0.01257706 | 3.47E-02 | 1.58E-01 | 1.00E+00 |
| ENSG00000231367.4_AC016995.1 | ENSG00000160789.18_LMNA | -0.19606 | -0.344503799 | -0.03804252 | 1.55E-02 | 8.98E-02 | 1.00E+00 |
| ENSG00000227514.3_RP11-709P  | ENSG00000160789.18_LMNA | -0.00658 | -0.165606803 | 0.152781166 | 9.36E-01 | 9.75E-01 | 1.00E+00 |
| ENSG00000244491.1_RP3-508I15 | ENSG00000160789.18_LMNA | 0.03277  | -0.127092808 | 0.190975311 | 6.89E-01 | 8.66E-01 | 1.00E+00 |
| ENSG00000245857.2_GS1-24F4.2 | ENSG00000160789.18_LMNA | -0.20182 | -0.349784239 | -0.04403638 | 1.27E-02 | 7.76E-02 | 1.00E+00 |
| ENSG00000231355.1_AP000302.1 | ENSG00000160789.18_LMNA | -0.19817 | -0.346440514 | -0.04023834 | 1.44E-02 | 8.53E-02 | 1.00E+00 |
| ENSG00000233231.1_HNRNPA1F   | ENSG00000160789.18_LMNA | 0.13294  | -0.026831311 | 0.28608336  | 1.03E-01 | 3.17E-01 | 1.00E+00 |
| ENSG00000248254.1_AC092597.1 | ENSG00000160789.18_LMNA | 0.00164  | -0.157598373 | 0.160802193 | 9.84E-01 | 9.94E-01 | 1.00E+00 |
| ENSG00000226413.2_OR8T1P     | ENSG00000160789.18_LMNA | -0.18256 | -0.332108093 | -0.02405817 | 2.44E-02 | 1.24E-01 | 1.00E+00 |
| ENSG00000254560.4_BBOX1-AS   | ENSG00000160789.18_LMNA | 0.16781  | 0.008845076  | 0.318501295 | 3.88E-02 | 1.70E-01 | 1.00E+00 |
| ENSG00000131355.13_ADGRE3    | ENSG00000160789.18_LMNA | -0.04972 | -0.207280812 | 0.110353353 | 5.43E-01 | 7.82E-01 | 1.00E+00 |
| ENSG00000267701.2            | ENSG00000160789.18_LMNA | 0.0969   | -0.06327418  | 0.252212478 | 2.35E-01 | 5.13E-01 | 1.00E+00 |
| ENSG00000273951.1_RP4-620E1  | ENSG00000160789.18_LMNA | 0.10582  | -0.05429888  | 0.260626711 | 1.94E-01 | 4.63E-01 | 1.00E+00 |
| ENSG00000107014.8_RLN2       | ENSG00000160789.18_LMNA | -0.09724 | -0.252527561 | 0.062939004 | 2.33E-01 | 5.11E-01 | 1.00E+00 |
| ENSG00000223935.1_AC008074.1 | ENSG00000160789.18_LMNA | 0.01801  | -0.14159527  | 0.176705458 | 8.26E-01 | 9.32E-01 | 1.00E+00 |
| ENSG00000180230.6_NACAP2     | ENSG00000160789.18_LMNA | -0.0235  | -0.182024555 | 0.136205393 | 7.74E-01 | 9.07E-01 | 1.00E+00 |
| ENSG00000267273.1_CTC-543D1  | ENSG00000160789.18_LMNA | -0.13498 | -0.287995644 | 0.02474871  | 9.73E-02 | 3.07E-01 | 1.00E+00 |
| ENSG00000257221.1_MIR4496    | ENSG00000160789.18_LMNA | -0.13913 | -0.29186541  | 0.020525963 | 8.74E-02 | 2.87E-01 | 1.00E+00 |
| ENSG00000259066.4_RP11-371E  | ENSG00000160789.18_LMNA | 0.00853  | -0.150872652 | 0.167506156 | 9.17E-01 | 9.68E-01 | 1.00E+00 |
| ENSG00000205837.6_LINC00487  | ENSG00000160789.18_LMNA | -0.35007 | -0.482389017 | -0.20213753 | 9.82E-06 | 2.87E-04 | 5.04E-01 |
| ENSG00000224448.1_GS1-259H1  | ENSG00000160789.18_LMNA | 0.20351  | 0.045793139  | 0.351328222 | 1.19E-02 | 7.44E-02 | 1.00E+00 |
| ENSG00000277130.1_RP11-530C  | ENSG00000160789.18_LMNA | -0.01293 | -0.171775051 | 0.146574487 | 8.74E-01 | 9.51E-01 | 1.00E+00 |
| ENSG00000254990.4_RP11-108C  | ENSG00000160789.18_LMNA | -0.04532 | -0.203058349 | 0.114705552 | 5.79E-01 | 8.04E-01 | 1.00E+00 |
| ENSG00000254200.1_RPL7AP33   | ENSG00000160789.18_LMNA | -0.06866 | -0.225400436 | 0.091537674 | 4.01E-01 | 6.77E-01 | 1.00E+00 |
| ENSG00000188910.7_GJB3       | ENSG00000160789.18_LMNA | 0.26602  | 0.111543983  | 0.407944685 | 9.25E-04 | 1.09E-02 | 1.00E+00 |
| ENSG00000235100.3_RP11-80H5  | ENSG00000160789.18_LMNA | -0.20662 | -0.354175155 | -0.04903736 | 1.06E-02 | 6.85E-02 | 1.00E+00 |
| ENSG00000107018.7_RLN1       | ENSG00000160789.18_LMNA | -0.05993 | -0.21706216  | 0.100224461 | 4.63E-01 | 7.26E-01 | 1.00E+00 |
| ENSG00000151812.13_SLC35F4   | ENSG00000160789.18_LMNA | -0.1071  | -0.261840851 | 0.052999566 | 1.89E-01 | 4.56E-01 | 1.00E+00 |
| ENSG00000218358.2_RAET1K     | ENSG00000160789.18_LMNA | 0.03373  | -0.126146986 | 0.191901315 | 6.80E-01 | 8.60E-01 | 1.00E+00 |
| ENSG00000215236.3_RPL7P33    | ENSG00000160789.18_LMNA | 0.05523  | -0.104890746 | 0.212563887 | 4.99E-01 | 7.52E-01 | 1.00E+00 |

|                             |                         |          |              |             |          |          |          |
|-----------------------------|-------------------------|----------|--------------|-------------|----------|----------|----------|
| ENSG0000007038.9_PRSS21     | ENSG00000160789.18_LMNA | -0.08097 | -0.237114213 | 0.079252274 | 3.21E-01 | 6.08E-01 | 1.00E+00 |
| ENSG00000275719.1_CTB-147N1 | ENSG00000160789.18_LMNA | 0.23747  | 0.081341273  | 0.382217873 | 3.22E-03 | 2.82E-02 | 1.00E+00 |
| ENSG00000280247.1_AC005578. | ENSG00000160789.18_LMNA | -0.01033 | -0.169254638 | 0.149113635 | 8.99E-01 | 9.61E-01 | 1.00E+00 |
| ENSG00000227253.3_RP11-166N | ENSG00000160789.18_LMNA | -0.16386 | -0.31484507  | -0.00478152 | 4.37E-02 | 1.84E-01 | 1.00E+00 |
| ENSG00000182545.6_RNASE10   | ENSG00000160789.18_LMNA | 0.09848  | -0.061688414 | 0.253702592 | 2.27E-01 | 5.04E-01 | 1.00E+00 |
| ENSG00000204572.7_KRTAP5-1C | ENSG00000160789.18_LMNA | 0.12025  | -0.039707449 | 0.27420464  | 1.40E-01 | 3.82E-01 | 1.00E+00 |
| ENSG00000179930.5_ZNF648    | ENSG00000160789.18_LMNA | 0.04213  | -0.117858901 | 0.199991598 | 6.06E-01 | 8.20E-01 | 1.00E+00 |
| ENSG00000258545.4_RHOXF1-A  | ENSG00000160789.18_LMNA | -0.10422 | -0.259126071 | 0.055903321 | 2.01E-01 | 4.72E-01 | 1.00E+00 |
| ENSG00000160505.14_NLRP4    | ENSG00000160789.18_LMNA | -0.13379 | -0.286878621 | 0.02596555  | 1.00E-01 | 3.12E-01 | 1.00E+00 |
| ENSG00000236523.2_NPM1P40   | ENSG00000160789.18_LMNA | 0.1397   | -0.019940299 | 0.292401311 | 8.61E-02 | 2.85E-01 | 1.00E+00 |
| ENSG00000213270.5_RPL6P25   | ENSG00000160789.18_LMNA | -0.04681 | -0.204486154 | 0.113235241 | 5.67E-01 | 7.97E-01 | 1.00E+00 |
| ENSG00000230162.1_CT45A11P  | ENSG00000160789.18_LMNA | 0.01236  | -0.14712899  | 0.171224995 | 8.80E-01 | 9.53E-01 | 1.00E+00 |
| ENSG00000234702.1_VDAC1P3   | ENSG00000160789.18_LMNA | 0.02639  | -0.133369815 | 0.184815439 | 7.47E-01 | 8.94E-01 | 1.00E+00 |
| ENSG00000224295.2_OLFM5P    | ENSG00000160789.18_LMNA | 0.08259  | -0.077627225 | 0.238656793 | 3.12E-01 | 5.98E-01 | 1.00E+00 |
| ENSG00000168418.7_KCNG4     | ENSG00000160789.18_LMNA | -0.10418 | -0.259083411 | 0.055948909 | 2.01E-01 | 4.72E-01 | 1.00E+00 |
| ENSG00000137975.7_CLCA2     | ENSG00000160789.18_LMNA | 0.00376  | -0.155534863 | 0.162862156 | 9.63E-01 | 9.85E-01 | 1.00E+00 |
| ENSG00000231793.4_DOC2GP    | ENSG00000160789.18_LMNA | 0.04712  | -0.112924879 | 0.204787371 | 5.64E-01 | 7.95E-01 | 1.00E+00 |
| ENSG00000231206.2_HNRNPA1F  | ENSG00000160789.18_LMNA | 0.02637  | -0.133386744 | 0.184798793 | 7.47E-01 | 8.94E-01 | 1.00E+00 |
| ENSG00000196796.5_NPIPB10P  | ENSG00000160789.18_LMNA | -0.01558 | -0.174347368 | 0.143978716 | 8.49E-01 | 9.41E-01 | 1.00E+00 |
| ENSG00000214146.2_RP11-699L | ENSG00000160789.18_LMNA | 0.04443  | -0.115589317 | 0.202199482 | 5.87E-01 | 8.08E-01 | 1.00E+00 |
| ENSG00000248971.2_KRT8P46   | ENSG00000160789.18_LMNA | 0.01012  | -0.149322681 | 0.16904695  | 9.02E-01 | 9.62E-01 | 1.00E+00 |
| ENSG00000270792.4_RP11-103J | ENSG00000160789.18_LMNA | 0.07478  | -0.085436314 | 0.231229384 | 3.60E-01 | 6.42E-01 | 1.00E+00 |
| ENSG00000279513.1_RP4-675C2 | ENSG00000160789.18_LMNA | -0.04447 | -0.20224365  | 0.115543881 | 5.86E-01 | 8.08E-01 | 1.00E+00 |
| ENSG00000249884.7_RNF103-C  | ENSG00000160789.18_LMNA | -0.10814 | -0.262816028 | 0.051955205 | 1.85E-01 | 4.50E-01 | 1.00E+00 |
| ENSG00000226068.1_HNRNPA3F  | ENSG00000160789.18_LMNA | 0.18412  | 0.025670565  | 0.333542764 | 2.32E-02 | 1.20E-01 | 1.00E+00 |
| ENSG00000174236.3_REP15     | ENSG00000160789.18_LMNA | -0.17047 | -0.320963967 | -0.01158789 | 3.57E-02 | 1.61E-01 | 1.00E+00 |
| ENSG00000213091.2_PHBP1     | ENSG00000160789.18_LMNA | 0.03207  | -0.127778821 | 0.190303317 | 6.95E-01 | 8.69E-01 | 1.00E+00 |
| ENSG00000233497.4_HNRNPA1F  | ENSG00000160789.18_LMNA | 0.00804  | -0.151350551 | 0.167030772 | 9.22E-01 | 9.70E-01 | 1.00E+00 |
| ENSG00000257885.1_PHBP18    | ENSG00000160789.18_LMNA | 0.01536  | -0.144197508 | 0.17413072  | 8.51E-01 | 9.42E-01 | 1.00E+00 |
| ENSG00000270433.1_RP11-124D | ENSG00000160789.18_LMNA | -0.031   | -0.189271116 | 0.128831918 | 7.05E-01 | 8.74E-01 | 1.00E+00 |
| ENSG00000186842.4_LINC00846 | ENSG00000160789.18_LMNA | -0.12691 | -0.280441733 | 0.032959621 | 1.19E-01 | 3.47E-01 | 1.00E+00 |
| ENSG00000272235.1_RP11-22L1 | ENSG00000160789.18_LMNA | 0.33308  | 0.183611454  | 0.467487718 | 2.75E-05 | 6.67E-04 | 1.00E+00 |
| ENSG00000154227.12_CERS3    | ENSG00000160789.18_LMNA | 0.07373  | -0.086486034 | 0.230228148 | 3.67E-01 | 6.48E-01 | 1.00E+00 |

|                              |                         |          |              |             |          |          |          |
|------------------------------|-------------------------|----------|--------------|-------------|----------|----------|----------|
| ENSG00000260876.4_LINC01229  | ENSG00000160789.18_LMNA | -0.15851 | -0.30988638  | 0.000713297 | 5.11E-02 | 2.04E-01 | 1.00E+00 |
| ENSG00000171124.11_FUT3      | ENSG00000160789.18_LMNA | 0.06577  | -0.094421747 | 0.222637209 | 4.21E-01 | 6.92E-01 | 1.00E+00 |
| ENSG00000279296.1_RP11-609D  | ENSG00000160789.18_LMNA | 0.07726  | -0.082962831 | 0.233585973 | 3.44E-01 | 6.29E-01 | 1.00E+00 |
| ENSG00000113722.15_CDX1      | ENSG00000160789.18_LMNA | 0.12114  | -0.038812735 | 0.275033156 | 1.37E-01 | 3.77E-01 | 1.00E+00 |
| ENSG00000196993.7_NPIPB9     | ENSG00000160789.18_LMNA | -0.15611 | -0.307660746 | 0.003173479 | 5.48E-02 | 2.13E-01 | 1.00E+00 |
| ENSG00000117971.10_CHRNB4    | ENSG00000160789.18_LMNA | 0.2748   | 0.120884884  | 0.415807142 | 6.12E-04 | 7.92E-03 | 1.00E+00 |
| ENSG00000253183.1_RP4-701O1  | ENSG00000160789.18_LMNA | 0.03567  | -0.124234088 | 0.193772405 | 6.63E-01 | 8.51E-01 | 1.00E+00 |
| ENSG00000246228.5_CASC8      | ENSG00000160789.18_LMNA | 0.03359  | -0.126286191 | 0.191765063 | 6.81E-01 | 8.61E-01 | 1.00E+00 |
| ENSG00000179840.5_PIK3CD-AS  | ENSG00000160789.18_LMNA | -0.03888 | -0.196865528 | 0.12106666  | 6.34E-01 | 8.36E-01 | 1.00E+00 |
| ENSG00000221971.3_TTC4P1     | ENSG00000160789.18_LMNA | 0.08697  | -0.073244336 | 0.242809311 | 2.87E-01 | 5.72E-01 | 1.00E+00 |
| ENSG00000184647.9_PRSS55     | ENSG00000160789.18_LMNA | -0.24985 | -0.393402979 | -0.09440479 | 1.91E-03 | 1.89E-02 | 1.00E+00 |
| ENSG00000120440.12_TTLL2     | ENSG00000160789.18_LMNA | -0.21776 | -0.364327646 | -0.0606593  | 7.04E-03 | 5.07E-02 | 1.00E+00 |
| ENSG00000279288.1_RP11-736E  | ENSG00000160789.18_LMNA | -0.27261 | -0.413852099 | -0.11855733 | 6.79E-04 | 8.57E-03 | 1.00E+00 |
| ENSG00000179148.8_ALOXE3     | ENSG00000160789.18_LMNA | 0.04576  | -0.114275572 | 0.203476038 | 5.76E-01 | 8.02E-01 | 1.00E+00 |
| ENSG00000213205.3_STRADBP1   | ENSG00000160789.18_LMNA | -0.09621 | -0.251560869 | 0.063967117 | 2.38E-01 | 5.17E-01 | 1.00E+00 |
| ENSG00000261832.3_RP11-435I1 | ENSG00000160789.18_LMNA | -0.07519 | -0.231616444 | 0.085030322 | 3.57E-01 | 6.40E-01 | 1.00E+00 |
| ENSG00000267665.1_RP11-13K1  | ENSG00000160789.18_LMNA | -0.27954 | -0.420047067 | -0.12594385 | 4.87E-04 | 6.60E-03 | 1.00E+00 |
| ENSG00000279778.1_RP11-60A1  | ENSG00000160789.18_LMNA | -0.03375 | -0.191923037 | 0.126124793 | 6.80E-01 | 8.60E-01 | 1.00E+00 |
| ENSG00000204188.6_GGNBP1     | ENSG00000160789.18_LMNA | 0.08755  | -0.072667085 | 0.24335536  | 2.83E-01 | 5.69E-01 | 1.00E+00 |
| ENSG00000218890.1_NUFIP1P    | ENSG00000160789.18_LMNA | -0.05143 | -0.208924082 | 0.108656294 | 5.29E-01 | 7.73E-01 | 1.00E+00 |
| ENSG00000254979.4_RP11-872D  | ENSG00000160789.18_LMNA | 0.04956  | -0.110516922 | 0.207122333 | 5.44E-01 | 7.82E-01 | 1.00E+00 |
| ENSG00000185915.5_KLHL34     | ENSG00000160789.18_LMNA | 0.10217  | -0.057970059 | 0.257190799 | 2.10E-01 | 4.83E-01 | 1.00E+00 |
| ENSG00000196979.1_RP11-88G1  | ENSG00000160789.18_LMNA | 0.12941  | -0.030421666 | 0.282780765 | 1.12E-01 | 3.34E-01 | 1.00E+00 |
| ENSG00000239265.4_CLRN1-AS   | ENSG00000160789.18_LMNA | 0.10007  | -0.060083177 | 0.25520948  | 2.20E-01 | 4.95E-01 | 1.00E+00 |
| ENSG00000239455.1_RP11-561O  | ENSG00000160789.18_LMNA | 0.11509  | -0.044938926 | 0.269350884 | 1.58E-01 | 4.11E-01 | 1.00E+00 |
| ENSG00000279549.1_AP000437.1 | ENSG00000160789.18_LMNA | 0.0919   | -0.068295255 | 0.24748438  | 2.60E-01 | 5.43E-01 | 1.00E+00 |
| ENSG00000238290.1_RP11-431K  | ENSG00000160789.18_LMNA | 0.15091  | -0.008490373 | 0.302839107 | 6.35E-02 | 2.34E-01 | 1.00E+00 |
| ENSG00000164270.16_HTR4      | ENSG00000160789.18_LMNA | 0.01064  | -0.148817553 | 0.169548751 | 8.97E-01 | 9.60E-01 | 1.00E+00 |
| ENSG00000168427.8_KLHL30     | ENSG00000160789.18_LMNA | 0.13369  | -0.026061727 | 0.286790297 | 1.01E-01 | 3.12E-01 | 1.00E+00 |
| ENSG00000189149.10_CRYM-AS   | ENSG00000160789.18_LMNA | 0.24263  | 0.086782686  | 0.386887599 | 2.60E-03 | 2.39E-02 | 1.00E+00 |
| ENSG00000197934.7_CYYR1-AS   | ENSG00000160789.18_LMNA | -0.06662 | -0.223453407 | 0.093570408 | 4.15E-01 | 6.88E-01 | 1.00E+00 |
| ENSG00000145103.11_ILDR1     | ENSG00000160789.18_LMNA | 0.05304  | -0.107064928 | 0.210463382 | 5.16E-01 | 7.63E-01 | 1.00E+00 |
| ENSG00000230806.1_SRGP2-A    | ENSG00000160789.18_LMNA | -0.15811 | -0.309516001 | 0.001122969 | 5.17E-02 | 2.06E-01 | 1.00E+00 |



|                              |                         |          |              |             |          |          |          |
|------------------------------|-------------------------|----------|--------------|-------------|----------|----------|----------|
| ENSG00000100012.10_SEC14L3   | ENSG00000160789.18_LMNA | -0.00593 | -0.164978343 | 0.153412135 | 9.42E-01 | 9.77E-01 | 1.00E+00 |
| ENSG00000272414.4_FAM47E-S1  | ENSG00000160789.18_LMNA | -0.07576 | -0.232158138 | 0.084461957 | 3.54E-01 | 6.37E-01 | 1.00E+00 |
| ENSG00000229562.1_ZFYVE9P1   | ENSG00000160789.18_LMNA | 0.06843  | -0.091772126 | 0.225175998 | 4.02E-01 | 6.78E-01 | 1.00E+00 |
| ENSG00000105641.3_SLC5A5     | ENSG00000160789.18_LMNA | 0.05559  | -0.104539156 | 0.212903286 | 4.96E-01 | 7.51E-01 | 1.00E+00 |
| ENSG00000070886.9_EPHA8      | ENSG00000160789.18_LMNA | -0.0999  | -0.255040541 | 0.060263223 | 2.21E-01 | 4.96E-01 | 1.00E+00 |
| ENSG00000181333.11_HEPHL1    | ENSG00000160789.18_LMNA | 0.07623  | -0.083994084 | 0.232603908 | 3.51E-01 | 6.34E-01 | 1.00E+00 |
| ENSG00000213973.7_ZNF99      | ENSG00000160789.18_LMNA | -0.279   | -0.419564066 | -0.12536677 | 5.00E-04 | 6.74E-03 | 1.00E+00 |
| ENSG00000266733.4_TBC1D29    | ENSG00000160789.18_LMNA | -0.10417 | -0.259076414 | 0.055956385 | 2.02E-01 | 4.72E-01 | 1.00E+00 |
| ENSG00000254634.4_SMG1P6     | ENSG00000160789.18_LMNA | 0.00092  | -0.158300813 | 0.160100327 | 9.91E-01 | 9.97E-01 | 1.00E+00 |
| ENSG00000176029.12_C11orf16  | ENSG00000160789.18_LMNA | -0.14757 | -0.29973342  | 0.011905764 | 6.96E-02 | 2.49E-01 | 1.00E+00 |
| ENSG00000223566.1_TNRC18P2   | ENSG00000160789.18_LMNA | 0.09346  | -0.066736628 | 0.248953674 | 2.52E-01 | 5.33E-01 | 1.00E+00 |
| ENSG00000278965.1_RP11-39H3  | ENSG00000160789.18_LMNA | -0.09405 | -0.249513912 | 0.066141922 | 2.49E-01 | 5.30E-01 | 1.00E+00 |
| ENSG00000279339.1_CTD-2373H  | ENSG00000160789.18_LMNA | 0.01559  | -0.143964396 | 0.174361546 | 8.49E-01 | 9.41E-01 | 1.00E+00 |
| ENSG00000225725.4_FAM66E     | ENSG00000160789.18_LMNA | -0.16402 | -0.314997472 | -0.00495069 | 4.35E-02 | 1.83E-01 | 1.00E+00 |
| ENSG00000275481.1_RP11-474P  | ENSG00000160789.18_LMNA | 0.02357  | -0.136145692 | 0.182083368 | 7.73E-01 | 9.07E-01 | 1.00E+00 |
| ENSG00000261143.1_ADAMTS7F   | ENSG00000160789.18_LMNA | 0.11164  | -0.048416365 | 0.266115664 | 1.71E-01 | 4.30E-01 | 1.00E+00 |
| ENSG00000172367.14_PDZD3     | ENSG00000160789.18_LMNA | 0.01935  | -0.140278524 | 0.178006631 | 8.13E-01 | 9.26E-01 | 1.00E+00 |
| ENSG00000257150.2_PGAM1P5    | ENSG00000160789.18_LMNA | -0.12681 | -0.28034958  | 0.033059529 | 1.20E-01 | 3.47E-01 | 1.00E+00 |
| ENSG00000269964.2_MEI4       | ENSG00000160789.18_LMNA | -0.28235 | -0.422558849 | -0.12894807 | 4.25E-04 | 5.94E-03 | 1.00E+00 |
| ENSG00000229715.4_EEF1DP3    | ENSG00000160789.18_LMNA | 0.0418   | -0.11818382  | 0.199675248 | 6.09E-01 | 8.21E-01 | 1.00E+00 |
| ENSG00000214617.8_SLC6A10P   | ENSG00000160789.18_LMNA | -0.0808  | -0.236948886 | 0.07942634  | 3.22E-01 | 6.09E-01 | 1.00E+00 |
| ENSG00000268635.2_RP11-739B  | ENSG00000160789.18_LMNA | -0.0513  | -0.208798583 | 0.108785967 | 5.30E-01 | 7.73E-01 | 1.00E+00 |
| ENSG00000142661.17_MYOM3     | ENSG00000160789.18_LMNA | 0.0936   | -0.066590382 | 0.249091463 | 2.51E-01 | 5.32E-01 | 1.00E+00 |
| ENSG00000109684.13_CLNK      | ENSG00000160789.18_LMNA | 0.04415  | -0.115864084 | 0.201932357 | 5.89E-01 | 8.09E-01 | 1.00E+00 |
| ENSG00000228021.6_RP11-383C  | ENSG00000160789.18_LMNA | -0.00936 | -0.168313639 | 0.150060554 | 9.09E-01 | 9.65E-01 | 1.00E+00 |
| ENSG00000262304.1_RP11-235E  | ENSG00000160789.18_LMNA | -0.01252 | -0.171378384 | 0.146974381 | 8.78E-01 | 9.53E-01 | 1.00E+00 |
| ENSG00000262732.1_CTD-2135D  | ENSG00000160789.18_LMNA | 0.08085  | -0.079370987 | 0.237001462 | 3.22E-01 | 6.09E-01 | 1.00E+00 |
| ENSG00000232855.5_AF131217.1 | ENSG00000160789.18_LMNA | -0.04854 | -0.206150338 | 0.111519757 | 5.53E-01 | 7.88E-01 | 1.00E+00 |
| ENSG00000159173.17_TNNI1     | ENSG00000160789.18_LMNA | -0.06427 | -0.221205718 | 0.095913754 | 4.32E-01 | 7.01E-01 | 1.00E+00 |
| ENSG00000163554.10_SPTA1     | ENSG00000160789.18_LMNA | 0.04601  | -0.11402893  | 0.203715578 | 5.74E-01 | 8.01E-01 | 1.00E+00 |
| ENSG00000270641.1_TSIX       | ENSG00000160789.18_LMNA | 0.06183  | -0.098336904 | 0.218877935 | 4.49E-01 | 7.15E-01 | 1.00E+00 |
| ENSG00000276924.1_           | ENSG00000160789.18_LMNA | 0.01556  | -0.143997695 | 0.174328576 | 8.49E-01 | 9.41E-01 | 1.00E+00 |
| ENSG00000266392.1_MIR4740    | ENSG00000160789.18_LMNA | -0.02082 | -0.179424174 | 0.138842733 | 7.99E-01 | 9.19E-01 | 1.00E+00 |

|                              |                         |          |              |             |          |          |          |
|------------------------------|-------------------------|----------|--------------|-------------|----------|----------|----------|
| ENSG00000251720.1_RNU7-123F  | ENSG00000160789.18_LMNA | -0.12474 | -0.278411499 | 0.035159245 | 1.26E-01 | 3.58E-01 | 1.00E+00 |
| ENSG00000251819.1_RNU6-322F  | ENSG00000160789.18_LMNA | -0.03676 | -0.194818871 | 0.123163209 | 6.53E-01 | 8.46E-01 | 1.00E+00 |
| ENSG00000278350.1_           | ENSG00000160789.18_LMNA | 0.00752  | -0.151863438 | 0.166520421 | 9.27E-01 | 9.72E-01 | 1.00E+00 |
| ENSG00000212452.1_SNORD69    | ENSG00000160789.18_LMNA | 0.03879  | -0.121155972 | 0.196778398 | 6.35E-01 | 8.37E-01 | 1.00E+00 |
| ENSG00000240497.2_RP11-185E  | ENSG00000160789.18_LMNA | -0.07018 | -0.226848555 | 0.090024096 | 3.90E-01 | 6.68E-01 | 1.00E+00 |
| ENSG00000228162.1_AC097713.  | ENSG00000160789.18_LMNA | 0.02135  | -0.138323243 | 0.179936735 | 7.94E-01 | 9.17E-01 | 1.00E+00 |
| ENSG00000206634.1_SNORA22    | ENSG00000160789.18_LMNA | -0.00706 | -0.166072056 | 0.152313889 | 9.31E-01 | 9.73E-01 | 1.00E+00 |
| ENSG00000238741.1_SCARNA7    | ENSG00000160789.18_LMNA | -0.10513 | -0.259979048 | 0.054991542 | 1.97E-01 | 4.67E-01 | 1.00E+00 |
| ENSG00000221164.1_SNORA11    | ENSG00000160789.18_LMNA | 0.04624  | -0.113794156 | 0.203943556 | 5.72E-01 | 8.00E-01 | 1.00E+00 |
| ENSG00000277916.1_uc_338     | ENSG00000160789.18_LMNA | 0.06     | -0.100153335 | 0.21713062  | 4.63E-01 | 7.26E-01 | 1.00E+00 |
| ENSG00000205116.3_TMEN88B    | ENSG00000160789.18_LMNA | -0.0873  | -0.243125674 | 0.072909922 | 2.85E-01 | 5.70E-01 | 1.00E+00 |
| ENSG00000200237.1_SNORA70    | ENSG00000160789.18_LMNA | 0.07872  | -0.081504283 | 0.234973851 | 3.35E-01 | 6.21E-01 | 1.00E+00 |
| ENSG00000184523.3_PTGER4P2   | ENSG00000160789.18_LMNA | -0.15186 | -0.303715144 | 0.007525661 | 6.18E-02 | 2.30E-01 | 1.00E+00 |
| ENSG00000206612.1_SNORA2A    | ENSG00000160789.18_LMNA | -0.0152  | -0.173979333 | 0.144350375 | 8.53E-01 | 9.42E-01 | 1.00E+00 |
| ENSG00000241529.3_RN7SL767F  | ENSG00000160789.18_LMNA | -0.088   | -0.243781754 | 0.072216178 | 2.81E-01 | 5.67E-01 | 1.00E+00 |
| ENSG00000260450.1_RP11-523L  | ENSG00000160789.18_LMNA | -0.1549  | -0.3065387   | 0.004412347 | 5.67E-02 | 2.18E-01 | 1.00E+00 |
| ENSG00000234183.1_AC004854.  | ENSG00000160789.18_LMNA | -0.02289 | -0.181429052 | 0.136809758 | 7.80E-01 | 9.09E-01 | 1.00E+00 |
| ENSG00000275630.1_RP6-65G23  | ENSG00000160789.18_LMNA | 0.18163  | 0.023092388  | 0.331248077 | 2.51E-02 | 1.27E-01 | 1.00E+00 |
| ENSG00000227392.1_HPNA-AS1   | ENSG00000160789.18_LMNA | -0.15156 | -0.303438529 | 0.007830338 | 6.23E-02 | 2.31E-01 | 1.00E+00 |
| ENSG00000170166.5_HOXD4      | ENSG00000160789.18_LMNA | -0.23447 | -0.379503577 | -0.07818665 | 3.64E-03 | 3.09E-02 | 1.00E+00 |
| ENSG00000234418.1_RP11-560I1 | ENSG00000160789.18_LMNA | -0.14769 | -0.29984034  | 0.011788303 | 6.94E-02 | 2.48E-01 | 1.00E+00 |
| ENSG00000225007.1_AC000067.  | ENSG00000160789.18_LMNA | 0.20806  | 0.050532192  | 0.355485025 | 1.01E-02 | 6.61E-02 | 1.00E+00 |
| ENSG00000276505.1_CMB9-94B1  | ENSG00000160789.18_LMNA | -0.05281 | -0.210246526 | 0.107289217 | 5.18E-01 | 7.65E-01 | 1.00E+00 |
| ENSG00000238186.1_RP11-656D  | ENSG00000160789.18_LMNA | 0.0264   | -0.133360973 | 0.184824134 | 7.47E-01 | 8.94E-01 | 1.00E+00 |
| ENSG00000233975.1_RP11-288L  | ENSG00000160789.18_LMNA | -0.05608 | -0.21337954  | 0.104045664 | 4.93E-01 | 7.48E-01 | 1.00E+00 |
| ENSG00000236078.1_LINC01447  | ENSG00000160789.18_LMNA | -0.428   | -0.549744987 | -0.28845733 | 3.79E-08 | 3.29E-06 | 1.95E-03 |
| ENSG00000235686.1_PPIAP20    | ENSG00000160789.18_LMNA | 0.05291  | -0.107195936 | 0.210336719 | 5.17E-01 | 7.64E-01 | 1.00E+00 |
| ENSG00000259519.1_RP11-519G  | ENSG00000160789.18_LMNA | -0.27331 | -0.414473515 | -0.1192968  | 6.57E-04 | 8.35E-03 | 1.00E+00 |
| ENSG00000228039.3_KB-1125A3  | ENSG00000160789.18_LMNA | 0.0009   | -0.158324793 | 0.16007636  | 9.91E-01 | 9.97E-01 | 1.00E+00 |
| ENSG00000107807.11_TLX1      | ENSG00000160789.18_LMNA | -0.26333 | -0.405532618 | -0.10868881 | 1.05E-03 | 1.20E-02 | 1.00E+00 |
| ENSG00000259884.1_RP11-1100I | ENSG00000160789.18_LMNA | -0.06776 | -0.22453775  | 0.092438659 | 4.07E-01 | 6.82E-01 | 1.00E+00 |
| ENSG00000274356.1_RP11-216L  | ENSG00000160789.18_LMNA | 0.1055   | -0.054620699 | 0.260325835 | 1.96E-01 | 4.65E-01 | 1.00E+00 |
| ENSG00000253992.1_RP11-737F  | ENSG00000160789.18_LMNA | -0.10909 | -0.263711885 | 0.050995185 | 1.81E-01 | 4.44E-01 | 1.00E+00 |

|                              |                         |          |              |             |          |          |          |
|------------------------------|-------------------------|----------|--------------|-------------|----------|----------|----------|
| ENSG00000247311.2_CTC-441N1  | ENSG00000160789.18_LMNA | 0.13627  | -0.023435962 | 0.289199753 | 9.41E-02 | 3.00E-01 | 1.00E+00 |
| ENSG00000229385.1_AC010975.  | ENSG00000160789.18_LMNA | -0.21429 | -0.36116874  | -0.05703434 | 8.03E-03 | 5.57E-02 | 1.00E+00 |
| ENSG00000256001.1_RP11-575F  | ENSG00000160789.18_LMNA | -0.04318 | -0.201001726 | 0.116820957 | 5.97E-01 | 8.14E-01 | 1.00E+00 |
| ENSG00000279360.1_RP11-946P  | ENSG00000160789.18_LMNA | -0.04688 | -0.204557208 | 0.113162036 | 5.66E-01 | 7.97E-01 | 1.00E+00 |
| ENSG00000250909.1_RP11-843P  | ENSG00000160789.18_LMNA | -0.08372 | -0.239728747 | 0.07649697  | 3.05E-01 | 5.92E-01 | 1.00E+00 |
| ENSG00000268186.1_CTC-241F2  | ENSG00000160789.18_LMNA | 0.01491  | -0.144629826 | 0.173702548 | 8.55E-01 | 9.43E-01 | 1.00E+00 |
| ENSG00000236848.2_RPL23AP9.  | ENSG00000160789.18_LMNA | 0.10952  | -0.050565797 | 0.264112399 | 1.79E-01 | 4.42E-01 | 1.00E+00 |
| ENSG00000267197.1_CTC-429L1  | ENSG00000160789.18_LMNA | 0.07443  | -0.085786196 | 0.230895736 | 3.62E-01 | 6.44E-01 | 1.00E+00 |
| ENSG00000086506.2_HBQ1       | ENSG00000160789.18_LMNA | -0.11397 | -0.268305544 | 0.046063363 | 1.62E-01 | 4.17E-01 | 1.00E+00 |
| ENSG00000249599.1_BMPR1B-A   | ENSG00000160789.18_LMNA | -0.05865 | -0.215837923 | 0.101495807 | 4.73E-01 | 7.33E-01 | 1.00E+00 |
| ENSG00000253695.1_RP11-177H  | ENSG00000160789.18_LMNA | -0.15824 | -0.309642362 | 0.000983215 | 5.15E-02 | 2.05E-01 | 1.00E+00 |
| ENSG00000153789.11_FAM92B    | ENSG00000160789.18_LMNA | 0.20661  | 0.049018345  | 0.354158482 | 1.07E-02 | 6.85E-02 | 1.00E+00 |
| ENSG00000263321.1_RP11-388C  | ENSG00000160789.18_LMNA | -0.06737 | -0.224166431 | 0.092826304 | 4.10E-01 | 6.84E-01 | 1.00E+00 |
| ENSG00000280916.1_FOXCUT     | ENSG00000160789.18_LMNA | 0.36602  | 0.219617035  | 0.496301359 | 3.53E-06 | 1.25E-04 | 1.81E-01 |
| ENSG00000231017.1_AC013404.  | ENSG00000160789.18_LMNA | 0.1272   | -0.032664482 | 0.280713931 | 1.18E-01 | 3.45E-01 | 1.00E+00 |
| ENSG00000233984.1_RPSAP14    | ENSG00000160789.18_LMNA | -0.12264 | -0.276447726 | 0.037283976 | 1.32E-01 | 3.69E-01 | 1.00E+00 |
| ENSG00000234535.1_RP11-37L2  | ENSG00000160789.18_LMNA | 0.03202  | -0.127830197 | 0.190252979 | 6.95E-01 | 8.69E-01 | 1.00E+00 |
| ENSG00000214657.4_RP11-120J. | ENSG00000160789.18_LMNA | 0.0183   | -0.141307812 | 0.176989611 | 8.23E-01 | 9.31E-01 | 1.00E+00 |
| ENSG00000204644.8_ZFP57      | ENSG00000160789.18_LMNA | -0.30262 | -0.440590425 | -0.15067418 | 1.51E-04 | 2.61E-03 | 1.00E+00 |
| ENSG00000224825.2_RORB-AS1   | ENSG00000160789.18_LMNA | 0.07857  | -0.081650068 | 0.234835187 | 3.36E-01 | 6.22E-01 | 1.00E+00 |
| ENSG00000241770.1_RP11-555M  | ENSG00000160789.18_LMNA | 0.08915  | -0.07106327  | 0.244871431 | 2.75E-01 | 5.59E-01 | 1.00E+00 |
| ENSG00000239494.2_RN7SL333F  | ENSG00000160789.18_LMNA | 0.05278  | -0.107318587 | 0.210218127 | 5.18E-01 | 7.65E-01 | 1.00E+00 |
| ENSG00000227172.2_AC011290.  | ENSG00000160789.18_LMNA | 0.06906  | -0.091140457 | 0.22578061  | 3.98E-01 | 6.75E-01 | 1.00E+00 |
| ENSG00000244247.1_RP11-139K  | ENSG00000160789.18_LMNA | 0.08556  | -0.07465868  | 0.241470571 | 2.95E-01 | 5.80E-01 | 1.00E+00 |
| ENSG00000270760.1_AD001527.  | ENSG00000160789.18_LMNA | 0.08104  | -0.079183628 | 0.237179408 | 3.21E-01 | 6.07E-01 | 1.00E+00 |
| ENSG00000243339.3_RN7SL738F  | ENSG00000160789.18_LMNA | -0.11454 | -0.26883948  | 0.045489126 | 1.60E-01 | 4.14E-01 | 1.00E+00 |
| ENSG00000224514.2_LINC00620  | ENSG00000160789.18_LMNA | -0.16782 | -0.318511648 | -0.0088566  | 3.88E-02 | 1.70E-01 | 1.00E+00 |
| ENSG00000254880.1_PKNOX2-A.  | ENSG00000160789.18_LMNA | -0.13488 | -0.287897697 | 0.024855446 | 9.76E-02 | 3.07E-01 | 1.00E+00 |
| ENSG00000276174.1_RP11-687E  | ENSG00000160789.18_LMNA | -0.03525 | -0.193361118 | 0.124654768 | 6.66E-01 | 8.53E-01 | 1.00E+00 |
| ENSG00000215023.2_AC114730.  | ENSG00000160789.18_LMNA | -0.15408 | -0.305776955 | 0.005252858 | 5.81E-02 | 2.21E-01 | 1.00E+00 |
| ENSG00000258451.1_RP11-903H  | ENSG00000160789.18_LMNA | 0.28214  | 0.128721101  | 0.422369238 | 4.29E-04 | 5.99E-03 | 1.00E+00 |
| ENSG00000267042.1_CTD-3193K  | ENSG00000160789.18_LMNA | 0.01564  | -0.143920778 | 0.174404732 | 8.48E-01 | 9.41E-01 | 1.00E+00 |
| ENSG00000225807.1_RP11-44M.  | ENSG00000160789.18_LMNA | 0.00544  | -0.153893224 | 0.164498993 | 9.47E-01 | 9.79E-01 | 1.00E+00 |

|                              |                         |          |              |             |          |          |          |
|------------------------------|-------------------------|----------|--------------|-------------|----------|----------|----------|
| ENSG00000260492.2_CISTR      | ENSG00000160789.18_LMNA | -0.29431 | -0.433211161 | -0.14174898 | 2.33E-04 | 3.69E-03 | 1.00E+00 |
| ENSG00000188396.3_TCTEX1D4   | ENSG00000160789.18_LMNA | 0.0632   | -0.096975625 | 0.220186083 | 4.39E-01 | 7.07E-01 | 1.00E+00 |
| ENSG00000271002.1_RP11-599B  | ENSG00000160789.18_LMNA | -0.15423 | -0.305920217 | 0.005094816 | 5.78E-02 | 2.20E-01 | 1.00E+00 |
| ENSG00000270030.1_RP11-326C  | ENSG00000160789.18_LMNA | -0.01216 | -0.171027922 | 0.147327608 | 8.82E-01 | 9.54E-01 | 1.00E+00 |
| ENSG00000254550.1_OMP        | ENSG00000160789.18_LMNA | 0.06671  | -0.093479678 | 0.223540365 | 4.14E-01 | 6.87E-01 | 1.00E+00 |
| ENSG00000259616.2_RP11-507B  | ENSG00000160789.18_LMNA | -0.13894 | -0.291688702 | 0.020719032 | 8.78E-02 | 2.88E-01 | 1.00E+00 |
| ENSG00000232751.1_RP11-296O  | ENSG00000160789.18_LMNA | -0.13973 | -0.292427975 | 0.019911153 | 8.60E-02 | 2.85E-01 | 1.00E+00 |
| ENSG00000224885.1_TSSC1-IT1  | ENSG00000160789.18_LMNA | -0.06447 | -0.221394669 | 0.095716897 | 4.30E-01 | 7.00E-01 | 1.00E+00 |
| ENSG00000238168.5_RP11-686G  | ENSG00000160789.18_LMNA | 0.26017  | 0.10533537   | 0.402694315 | 1.21E-03 | 1.34E-02 | 1.00E+00 |
| ENSG00000225487.2_RP11-403P  | ENSG00000160789.18_LMNA | -0.10611 | -0.260901675 | 0.054004721 | 1.93E-01 | 4.62E-01 | 1.00E+00 |
| ENSG00000225916.1_AC007879.4 | ENSG00000160789.18_LMNA | 0.06226  | -0.097909675 | 0.219288611 | 4.46E-01 | 7.13E-01 | 1.00E+00 |
| ENSG00000234478.1_RP11-2751I | ENSG00000160789.18_LMNA | 0.19136  | 0.033166969  | 0.340194219 | 1.82E-02 | 1.01E-01 | 1.00E+00 |
| ENSG00000261173.1_RP11-169E  | ENSG00000160789.18_LMNA | 0.04669  | -0.113348802 | 0.204375925 | 5.68E-01 | 7.98E-01 | 1.00E+00 |
| ENSG00000259308.3_RP11-382A  | ENSG00000160789.18_LMNA | 0.04375  | -0.116256329 | 0.201550938 | 5.92E-01 | 8.12E-01 | 1.00E+00 |
| ENSG00000232926.1_AC000078.1 | ENSG00000160789.18_LMNA | 0.13847  | -0.021202237 | 0.291246353 | 8.89E-02 | 2.90E-01 | 1.00E+00 |
| ENSG00000265962.1_GACAT2     | ENSG00000160789.18_LMNA | -0.00467 | -0.163751585 | 0.154643043 | 9.54E-01 | 9.82E-01 | 1.00E+00 |
| ENSG00000274512.3_TBC1D3L    | ENSG00000160789.18_LMNA | 0.06653  | -0.093666251 | 0.223361542 | 4.15E-01 | 6.88E-01 | 1.00E+00 |
| ENSG00000234108.1_RP11-115A  | ENSG00000160789.18_LMNA | -0.18516 | -0.334499112 | -0.02674627 | 2.24E-02 | 1.17E-01 | 1.00E+00 |
| ENSG00000255236.2_CTD-2655K  | ENSG00000160789.18_LMNA | 0.03331  | -0.126563146 | 0.191493945 | 6.84E-01 | 8.63E-01 | 1.00E+00 |
| ENSG00000271334.4_CTD-2078B  | ENSG00000160789.18_LMNA | -0.10652 | -0.261292148 | 0.053586893 | 1.91E-01 | 4.59E-01 | 1.00E+00 |
| ENSG00000257258.1_RP11-946L  | ENSG00000160789.18_LMNA | -0.19587 | -0.344333563 | -0.03784965 | 1.56E-02 | 9.02E-02 | 1.00E+00 |
| ENSG00000138669.8_PRKG2      | ENSG00000160789.18_LMNA | -0.28966 | -0.429077617 | -0.13677009 | 2.95E-04 | 4.44E-03 | 1.00E+00 |
| ENSG00000250286.1_RP11-94C2  | ENSG00000160789.18_LMNA | 0.02745  | -0.132331165 | 0.185836436 | 7.37E-01 | 8.89E-01 | 1.00E+00 |
| ENSG00000228702.1_RP11-671E  | ENSG00000160789.18_LMNA | -0.01824 | -0.176922791 | 0.141375414 | 8.24E-01 | 9.31E-01 | 1.00E+00 |
| ENSG00000240032.1_RP11-274H  | ENSG00000160789.18_LMNA | 0.17061  | 0.011731636  | 0.321092919 | 3.56E-02 | 1.60E-01 | 1.00E+00 |
| ENSG00000280198.1_RP11-384M  | ENSG00000160789.18_LMNA | -0.08671 | -0.242562964 | 0.073504691 | 2.88E-01 | 5.74E-01 | 1.00E+00 |
| ENSG00000276302.1_RP5-874C2  | ENSG00000160789.18_LMNA | -0.10032 | -0.255439776 | 0.059837706 | 2.19E-01 | 4.94E-01 | 1.00E+00 |
| ENSG00000249834.3_PGBD4P3    | ENSG00000160789.18_LMNA | -0.20976 | -0.357041047 | -0.05230971 | 9.49E-03 | 6.32E-02 | 1.00E+00 |
| ENSG00000261060.1_RP11-545A  | ENSG00000160789.18_LMNA | -0.16109 | -0.312278683 | -0.00193532 | 4.74E-02 | 1.94E-01 | 1.00E+00 |
| ENSG00000248206.1_RP11-739P  | ENSG00000160789.18_LMNA | -0.10523 | -0.260073855 | 0.054890167 | 1.97E-01 | 4.66E-01 | 1.00E+00 |
| ENSG00000233990.1_RP11-401E  | ENSG00000160789.18_LMNA | 0.06718  | -0.093010751 | 0.22398972  | 4.11E-01 | 6.85E-01 | 1.00E+00 |
| ENSG00000242551.2_POU5F1P6   | ENSG00000160789.18_LMNA | -0.04485 | -0.202604494 | 0.115172628 | 5.83E-01 | 8.06E-01 | 1.00E+00 |
| ENSG00000276462.1_BX255923.1 | ENSG00000160789.18_LMNA | -0.26453 | -0.406604554 | -0.10995706 | 9.90E-04 | 1.15E-02 | 1.00E+00 |

|                              |                         |          |              |             |          |          |          |
|------------------------------|-------------------------|----------|--------------|-------------|----------|----------|----------|
| ENSG00000273428.3_RP4-539M6  | ENSG00000160789.18_LMNA | 0.15697  | -0.002287709 | 0.308462461 | 5.34E-02 | 2.10E-01 | 1.00E+00 |
| ENSG00000224829.3_TOMM20P1   | ENSG00000160789.18_LMNA | -0.02306 | -0.181596144 | 0.136640203 | 7.78E-01 | 9.09E-01 | 1.00E+00 |
| ENSG00000273011.1_RP11-728K  | ENSG00000160789.18_LMNA | -0.17699 | -0.32697579  | -0.01830319 | 2.92E-02 | 1.41E-01 | 1.00E+00 |
| ENSG00000213612.3_FAM220CP   | ENSG00000160789.18_LMNA | -0.04357 | -0.201377011 | 0.116435161 | 5.94E-01 | 8.13E-01 | 1.00E+00 |
| ENSG00000250320.4_CTD-2269F  | ENSG00000160789.18_LMNA | -0.01801 | -0.176702846 | 0.141597912 | 8.26E-01 | 9.32E-01 | 1.00E+00 |
| ENSG00000273333.2_XXbac-BPC  | ENSG00000160789.18_LMNA | -0.02916 | -0.187486962 | 0.130650622 | 7.21E-01 | 8.82E-01 | 1.00E+00 |
| ENSG00000240673.1_AC006539.  | ENSG00000160789.18_LMNA | -0.04696 | -0.204634751 | 0.113082141 | 5.66E-01 | 7.96E-01 | 1.00E+00 |
| ENSG00000262777.1_RP11-818O  | ENSG00000160789.18_LMNA | 0.03988  | -0.120084455 | 0.197823407 | 6.26E-01 | 8.31E-01 | 1.00E+00 |
| ENSG00000161055.3_SCGB3A1    | ENSG00000160789.18_LMNA | -0.06671 | -0.223540184 | 0.093479867 | 4.14E-01 | 6.87E-01 | 1.00E+00 |
| ENSG00000242142.1_SERBP1P3   | ENSG00000160789.18_LMNA | 0.11495  | -0.045073749 | 0.269225584 | 1.58E-01 | 4.12E-01 | 1.00E+00 |
| ENSG00000272248.1_RP3-406P2  | ENSG00000160789.18_LMNA | 0.01389  | -0.145629998 | 0.172711508 | 8.65E-01 | 9.47E-01 | 1.00E+00 |
| ENSG00000241941.2_RPL32P26   | ENSG00000160789.18_LMNA | -0.02333 | -0.181855325 | 0.136377166 | 7.75E-01 | 9.08E-01 | 1.00E+00 |
| ENSG00000148704.11_VAX1      | ENSG00000160789.18_LMNA | -0.20798 | -0.355417135 | -0.05045468 | 1.01E-02 | 6.62E-02 | 1.00E+00 |
| ENSG00000272945.1_CTD-3216D  | ENSG00000160789.18_LMNA | 0.10374  | -0.056395483 | 0.258665445 | 2.03E-01 | 4.74E-01 | 1.00E+00 |
| ENSG00000227815.2_RP11-195C  | ENSG00000160789.18_LMNA | -0.00473 | -0.163806511 | 0.154587953 | 9.54E-01 | 9.81E-01 | 1.00E+00 |
| ENSG00000236772.1_RP5-1184F  | ENSG00000160789.18_LMNA | 0.13081  | -0.028998201 | 0.284091031 | 1.08E-01 | 3.27E-01 | 1.00E+00 |
| ENSG00000240729.1_CTD-2301A  | ENSG00000160789.18_LMNA | -0.10208 | -0.257098202 | 0.058068879 | 2.11E-01 | 4.84E-01 | 1.00E+00 |
| ENSG00000174495.12_AC005017  | ENSG00000160789.18_LMNA | -0.03352 | -0.191701297 | 0.126351334 | 6.82E-01 | 8.62E-01 | 1.00E+00 |
| ENSG00000255237.1_RP13-317D  | ENSG00000160789.18_LMNA | 0.08653  | -0.073690694 | 0.242386943 | 2.89E-01 | 5.75E-01 | 1.00E+00 |
| ENSG00000262528.2_LA16c-349E | ENSG00000160789.18_LMNA | 0.18018  | 0.021601281  | 0.329919263 | 2.63E-02 | 1.31E-01 | 1.00E+00 |
| ENSG00000256128.4_LINC00944  | ENSG00000160789.18_LMNA | 0.0362   | -0.123709854 | 0.194284779 | 6.58E-01 | 8.49E-01 | 1.00E+00 |
| ENSG00000263393.1_RP11-53I6. | ENSG00000160789.18_LMNA | -0.07048 | -0.227136618 | 0.089722838 | 3.88E-01 | 6.66E-01 | 1.00E+00 |
| ENSG00000082556.9_OPRK1      | ENSG00000160789.18_LMNA | -0.1192  | -0.273213716 | 0.040776886 | 1.44E-01 | 3.87E-01 | 1.00E+00 |
| ENSG00000251548.1_RP11-215G  | ENSG00000160789.18_LMNA | 0.12957  | -0.030259711 | 0.2829299   | 1.12E-01 | 3.33E-01 | 1.00E+00 |
| ENSG00000214812.3_RP5-1053E  | ENSG00000160789.18_LMNA | -0.05168 | -0.209158203 | 0.108414359 | 5.27E-01 | 7.72E-01 | 1.00E+00 |
| ENSG00000131951.9_LRRC9      | ENSG00000160789.18_LMNA | -0.01441 | -0.173214249 | 0.145122706 | 8.60E-01 | 9.45E-01 | 1.00E+00 |
| ENSG00000240350.2_AC017002.  | ENSG00000160789.18_LMNA | 0.07676  | -0.083464773 | 0.233108053 | 3.47E-01 | 6.31E-01 | 1.00E+00 |
| ENSG00000280441.1_CH507-528  | ENSG00000160789.18_LMNA | -0.08001 | -0.236206257 | 0.080207986 | 3.27E-01 | 6.14E-01 | 1.00E+00 |
| ENSG00000244342.4_LINC00698  | ENSG00000160789.18_LMNA | -0.21196 | -0.359040793 | -0.05459695 | 8.76E-03 | 5.95E-02 | 1.00E+00 |
| ENSG00000260369.2_CTD-2526A  | ENSG00000160789.18_LMNA | 0.06708  | -0.0931157   | 0.223889163 | 4.12E-01 | 6.86E-01 | 1.00E+00 |
| ENSG00000230370.1_RPL23AP5   | ENSG00000160789.18_LMNA | 0.07775  | -0.082475025 | 0.234050287 | 3.41E-01 | 6.26E-01 | 1.00E+00 |
| ENSG00000187492.7_CDHR4      | ENSG00000160789.18_LMNA | 0.08318  | -0.077038311 | 0.239215426 | 3.08E-01 | 5.95E-01 | 1.00E+00 |
| ENSG00000121318.2_TAS2R10    | ENSG00000160789.18_LMNA | -0.12339 | -0.277149603 | 0.036524896 | 1.30E-01 | 3.65E-01 | 1.00E+00 |

|                              |                         |          |              |             |          |          |          |
|------------------------------|-------------------------|----------|--------------|-------------|----------|----------|----------|
| ENSG00000224598.1_RPS5P2     | ENSG00000160789.18_LMNA | 0.07806  | -0.082157967 | 0.234351999 | 3.39E-01 | 6.24E-01 | 1.00E+00 |
| ENSG00000279508.1_AL589743.1 | ENSG00000160789.18_LMNA | 0.10599  | -0.054123135 | 0.260790994 | 1.94E-01 | 4.62E-01 | 1.00E+00 |
| ENSG00000244674.1_RPS3AP15   | ENSG00000160789.18_LMNA | 0.00613  | -0.153215733 | 0.165173992 | 9.40E-01 | 9.76E-01 | 1.00E+00 |
| ENSG00000260496.3_RP11-161M  | ENSG00000160789.18_LMNA | -0.09634 | -0.251681693 | 0.063838653 | 2.38E-01 | 5.16E-01 | 1.00E+00 |
| ENSG00000279306.1_RP5-915N1  | ENSG00000160789.18_LMNA | 0.00306  | -0.156216923 | 0.162181575 | 9.70E-01 | 9.88E-01 | 1.00E+00 |
| ENSG00000069018.16_TRPC7     | ENSG00000160789.18_LMNA | 0.05045  | -0.109635467 | 0.207976164 | 5.37E-01 | 7.78E-01 | 1.00E+00 |
| ENSG00000254593.1_OR7E126P   | ENSG00000160789.18_LMNA | -0.02784 | -0.186219945 | 0.131940845 | 7.33E-01 | 8.88E-01 | 1.00E+00 |
| ENSG00000228766.3_RPL7L1P8   | ENSG00000160789.18_LMNA | 0.05921  | -0.100945865 | 0.21636761  | 4.69E-01 | 7.30E-01 | 1.00E+00 |
| ENSG00000273184.1_RP11-212P  | ENSG00000160789.18_LMNA | -0.16824 | -0.318896913 | -0.00928538 | 3.83E-02 | 1.68E-01 | 1.00E+00 |
| ENSG00000174576.7_NPAS4      | ENSG00000160789.18_LMNA | 0.03921  | -0.120747645 | 0.197176709 | 6.32E-01 | 8.35E-01 | 1.00E+00 |
| ENSG00000260144.1_RP11-361M  | ENSG00000160789.18_LMNA | 0.02438  | -0.135344926 | 0.182872002 | 7.66E-01 | 9.03E-01 | 1.00E+00 |
| ENSG00000257489.5_RP11-175P  | ENSG00000160789.18_LMNA | 0.12765  | -0.032202826 | 0.281139601 | 1.17E-01 | 3.43E-01 | 1.00E+00 |
| ENSG00000225399.4_RP11-3B7.1 | ENSG00000160789.18_LMNA | -0.13485 | -0.287868678 | 0.024887068 | 9.76E-02 | 3.07E-01 | 1.00E+00 |
| ENSG00000172554.10_SNTG2     | ENSG00000160789.18_LMNA | -0.02195 | -0.18052344  | 0.137728393 | 7.88E-01 | 9.14E-01 | 1.00E+00 |
| ENSG00000135577.4_NMBR       | ENSG00000160789.18_LMNA | -0.01143 | -0.170319225 | 0.148041647 | 8.89E-01 | 9.57E-01 | 1.00E+00 |
| ENSG00000135312.5_HTR1B      | ENSG00000160789.18_LMNA | 0.04342  | -0.11658638  | 0.201229923 | 5.95E-01 | 8.13E-01 | 1.00E+00 |
| ENSG00000230547.1_HMGB1P11   | ENSG00000160789.18_LMNA | 0.04278  | -0.117221781 | 0.200611724 | 6.01E-01 | 8.16E-01 | 1.00E+00 |
| ENSG00000281691.1_RBM5-AS1   | ENSG00000160789.18_LMNA | -0.03572 | -0.193821579 | 0.124183784 | 6.62E-01 | 8.51E-01 | 1.00E+00 |
| ENSG00000170262.11_MRAP      | ENSG00000160789.18_LMNA | -0.13949 | -0.292204364 | 0.020155559 | 8.65E-02 | 2.86E-01 | 1.00E+00 |
| ENSG00000235081.1_AC010492.1 | ENSG00000160789.18_LMNA | 0.06812  | -0.092074542 | 0.22488645  | 4.04E-01 | 6.80E-01 | 1.00E+00 |
| ENSG00000214142.2_RPL7P60    | ENSG00000160789.18_LMNA | -0.01257 | -0.171425245 | 0.146927144 | 8.78E-01 | 9.53E-01 | 1.00E+00 |
| ENSG00000234754.1_C1orf140   | ENSG00000160789.18_LMNA | -0.08216 | -0.238247404 | 0.078058664 | 3.14E-01 | 6.01E-01 | 1.00E+00 |
| ENSG00000240654.5_C1QTNF9    | ENSG00000160789.18_LMNA | 0.18359  | 0.02512304   | 0.333055748 | 2.36E-02 | 1.21E-01 | 1.00E+00 |
| ENSG00000161649.11_CD300LG   | ENSG00000160789.18_LMNA | -0.37566 | -0.504676888 | -0.23022644 | 1.85E-06 | 7.57E-05 | 9.50E-02 |
| ENSG00000130711.3_PRDM12     | ENSG00000160789.18_LMNA | -0.0263  | -0.184731805 | 0.133454865 | 7.48E-01 | 8.95E-01 | 1.00E+00 |
| ENSG00000269476.1_CTD-2583A  | ENSG00000160789.18_LMNA | 0.05793  | -0.102209041 | 0.21515068  | 4.78E-01 | 7.37E-01 | 1.00E+00 |
| ENSG00000235413.3_KRT18P63   | ENSG00000160789.18_LMNA | -0.00598 | -0.165024172 | 0.153366132 | 9.42E-01 | 9.77E-01 | 1.00E+00 |
| ENSG00000279619.1_CTD-2527L2 | ENSG00000160789.18_LMNA | 0.06001  | -0.100144573 | 0.217139054 | 4.63E-01 | 7.26E-01 | 1.00E+00 |
| ENSG00000223901.2_AP001469.1 | ENSG00000160789.18_LMNA | 0.08917  | -0.071037204 | 0.244896058 | 2.75E-01 | 5.59E-01 | 1.00E+00 |
| ENSG00000117560.7_FASLG      | ENSG00000160789.18_LMNA | 0.15024  | -0.009182765 | 0.302210034 | 6.47E-02 | 2.37E-01 | 1.00E+00 |
| ENSG00000245059.2_RP11-303E  | ENSG00000160789.18_LMNA | 0.04182  | -0.11817061  | 0.19968811  | 6.09E-01 | 8.21E-01 | 1.00E+00 |
| ENSG00000270277.1_RP11-65L3  | ENSG00000160789.18_LMNA | 0.14949  | -0.009950166 | 0.301512495 | 6.60E-02 | 2.40E-01 | 1.00E+00 |
| ENSG00000135374.8_ELF5       | ENSG00000160789.18_LMNA | -0.0079  | -0.166894034 | 0.151487985 | 9.23E-01 | 9.71E-01 | 1.00E+00 |

|                              |                         |          |              |             |          |          |          |
|------------------------------|-------------------------|----------|--------------|-------------|----------|----------|----------|
| ENSG00000279489.1_RP11-392A  | ENSG00000160789.18_LMNA | 0.0988   | -0.061370442 | 0.254001205 | 2.26E-01 | 5.02E-01 | 1.00E+00 |
| ENSG00000203721.4_LINC00862  | ENSG00000160789.18_LMNA | -0.14879 | -0.300868616 | 0.010658207 | 6.73E-02 | 2.43E-01 | 1.00E+00 |
| ENSG00000230872.1_MFSD13B    | ENSG00000160789.18_LMNA | -0.08548 | -0.241395315 | 0.074738148 | 2.95E-01 | 5.81E-01 | 1.00E+00 |
| ENSG00000179141.8_MTUS2-AS   | ENSG00000160789.18_LMNA | -0.03659 | -0.194653965 | 0.123332011 | 6.55E-01 | 8.47E-01 | 1.00E+00 |
| ENSG00000258479.4_LINC00640  | ENSG00000160789.18_LMNA | -0.01088 | -0.169790812 | 0.148573828 | 8.94E-01 | 9.59E-01 | 1.00E+00 |
| ENSG00000279875.1_RP11-474C  | ENSG00000160789.18_LMNA | 0.16032  | 0.001143688  | 0.311564073 | 4.85E-02 | 1.97E-01 | 1.00E+00 |
| ENSG00000124253.10_PCK1      | ENSG00000160789.18_LMNA | -0.0448  | -0.20255762  | 0.115220858 | 5.84E-01 | 8.06E-01 | 1.00E+00 |
| ENSG00000137875.4_BCL2L10    | ENSG00000160789.18_LMNA | -0.00673 | -0.165749086 | 0.152638279 | 9.34E-01 | 9.74E-01 | 1.00E+00 |
| ENSG00000216906.2_RP11-350J  | ENSG00000160789.18_LMNA | 0.19482  | 0.036758603  | 0.343370177 | 1.62E-02 | 9.26E-02 | 1.00E+00 |
| ENSG00000184788.11_SATL1     | ENSG00000160789.18_LMNA | -0.18407 | -0.33349511  | -0.02561698 | 2.32E-02 | 1.20E-01 | 1.00E+00 |
| ENSG00000109625.17_CPZ       | ENSG00000160789.18_LMNA | 0.30285  | 0.150930419  | 0.440801706 | 1.49E-04 | 2.58E-03 | 1.00E+00 |
| ENSG00000250848.1_CTD-2083E  | ENSG00000160789.18_LMNA | 0.16131  | 0.002165769  | 0.312486647 | 4.71E-02 | 1.93E-01 | 1.00E+00 |
| ENSG00000188848.14_BEND4     | ENSG00000160789.18_LMNA | -0.33581 | -0.469887956 | -0.18658199 | 2.34E-05 | 5.86E-04 | 1.00E+00 |
| ENSG00000232046.5_AC007392.1 | ENSG00000160789.18_LMNA | -0.02774 | -0.186120388 | 0.132042179 | 7.34E-01 | 8.88E-01 | 1.00E+00 |
| ENSG00000166558.9_SLC38A8    | ENSG00000160789.18_LMNA | -0.13791 | -0.290725729 | 0.021770758 | 9.02E-02 | 2.93E-01 | 1.00E+00 |
| ENSG00000235165.2_CDK5P1     | ENSG00000160789.18_LMNA | -0.0622  | -0.219226073 | 0.097974742 | 4.47E-01 | 7.13E-01 | 1.00E+00 |
| ENSG00000279039.1_CTC-260E6  | ENSG00000160789.18_LMNA | -0.07367 | -0.23017213  | 0.086544744 | 3.67E-01 | 6.48E-01 | 1.00E+00 |
| ENSG00000258256.1_RP11-219B  | ENSG00000160789.18_LMNA | 0.10642  | -0.053692707 | 0.261193272 | 1.92E-01 | 4.60E-01 | 1.00E+00 |
| ENSG00000280135.1_RP1-47M23  | ENSG00000160789.18_LMNA | -0.09342 | -0.24891918  | 0.066773236 | 2.52E-01 | 5.33E-01 | 1.00E+00 |
| ENSG00000229018.5_PMS2P7     | ENSG00000160789.18_LMNA | 0.20575  | 0.048127461  | 0.35337725  | 1.10E-02 | 7.01E-02 | 1.00E+00 |
| ENSG00000175946.8_KLHL38     | ENSG00000160789.18_LMNA | -0.06868 | -0.225413685 | 0.091523832 | 4.01E-01 | 6.77E-01 | 1.00E+00 |
| ENSG00000248565.2_TECRP2     | ENSG00000160789.18_LMNA | 0.09278  | -0.06741268  | 0.248316549 | 2.56E-01 | 5.38E-01 | 1.00E+00 |
| ENSG00000205863.8_C1QTNF9B   | ENSG00000160789.18_LMNA | 0.00362  | -0.15567112  | 0.162726219 | 9.65E-01 | 9.86E-01 | 1.00E+00 |
| ENSG00000153060.6_TEKT5      | ENSG00000160789.18_LMNA | 0.07167  | -0.088541093 | 0.228266065 | 3.80E-01 | 6.59E-01 | 1.00E+00 |
| ENSG00000227107.1_AC096574.1 | ENSG00000160789.18_LMNA | 0.11484  | -0.045184288 | 0.269122846 | 1.59E-01 | 4.12E-01 | 1.00E+00 |
| ENSG00000181800.5_CELF2-AS1  | ENSG00000160789.18_LMNA | -0.00515 | -0.164218949 | 0.154174215 | 9.50E-01 | 9.80E-01 | 1.00E+00 |
| ENSG00000249239.2_RP11-428L  | ENSG00000160789.18_LMNA | -0.05529 | -0.212614797 | 0.104838012 | 4.99E-01 | 7.52E-01 | 1.00E+00 |
| ENSG00000188175.8_HEPACAM2   | ENSG00000160789.18_LMNA | -0.07337 | -0.22988681  | 0.08684374  | 3.69E-01 | 6.50E-01 | 1.00E+00 |
| ENSG00000215004.3_MESTP4     | ENSG00000160789.18_LMNA | -0.01081 | -0.169714148 | 0.148651022 | 8.95E-01 | 9.59E-01 | 1.00E+00 |
| ENSG00000205412.5_HNRNPA1F   | ENSG00000160789.18_LMNA | -0.04145 | -0.199332946 | 0.118535317 | 6.12E-01 | 8.24E-01 | 1.00E+00 |
| ENSG00000227467.3_LINC01537  | ENSG00000160789.18_LMNA | -0.05453 | -0.211895457 | 0.105582951 | 5.05E-01 | 7.55E-01 | 1.00E+00 |
| ENSG00000229129.1_ACTG1P2    | ENSG00000160789.18_LMNA | 0.15385  | -0.005487501 | 0.30556423  | 5.84E-02 | 2.22E-01 | 1.00E+00 |
| ENSG00000229017.5_LINC01277  | ENSG00000160789.18_LMNA | -0.13097 | -0.284243797 | 0.028832154 | 1.08E-01 | 3.27E-01 | 1.00E+00 |

|                              |                         |          |              |             |          |          |          |
|------------------------------|-------------------------|----------|--------------|-------------|----------|----------|----------|
| ENSG00000279827.1_RP11-886P  | ENSG00000160789.18_LMNA | 0.09485  | -0.065339144 | 0.250269826 | 2.45E-01 | 5.25E-01 | 1.00E+00 |
| ENSG00000279437.1_RP3-326L1  | ENSG00000160789.18_LMNA | -0.15911 | -0.310448813 | 9.10E-05    | 5.02E-02 | 2.02E-01 | 1.00E+00 |
| ENSG00000269891.2_ARHGAP19   | ENSG00000160789.18_LMNA | -0.26211 | -0.404433715 | -0.10738966 | 1.11E-03 | 1.25E-02 | 1.00E+00 |
| ENSG00000232027.2_RP11-275F  | ENSG00000160789.18_LMNA | -0.0821  | -0.238189302 | 0.078119886 | 3.15E-01 | 6.01E-01 | 1.00E+00 |
| ENSG00000257675.1_BTBD10P1   | ENSG00000160789.18_LMNA | -0.15381 | -0.305532179 | 0.005522851 | 5.85E-02 | 2.22E-01 | 1.00E+00 |
| ENSG00000243095.1_RPL3P10    | ENSG00000160789.18_LMNA | -0.03496 | -0.193089123 | 0.124932912 | 6.69E-01 | 8.54E-01 | 1.00E+00 |
| ENSG00000102145.12_GATA1     | ENSG00000160789.18_LMNA | -0.05891 | -0.216087533 | 0.101236676 | 4.71E-01 | 7.31E-01 | 1.00E+00 |
| ENSG00000158077.4_NLRP14     | ENSG00000160789.18_LMNA | 0.00431  | -0.154999114 | 0.163396531 | 9.58E-01 | 9.83E-01 | 1.00E+00 |
| ENSG00000140015.18_KCNH5     | ENSG00000160789.18_LMNA | -0.315   | -0.451553638 | -0.164022   | 7.73E-05 | 1.53E-03 | 1.00E+00 |
| ENSG00000225423.1_TNPO1P1    | ENSG00000160789.18_LMNA | -0.06761 | -0.224394495 | 0.092588224 | 4.08E-01 | 6.83E-01 | 1.00E+00 |
| ENSG00000119457.7_SLC46A2    | ENSG00000160789.18_LMNA | -0.02334 | -0.181863419 | 0.13636895  | 7.75E-01 | 9.08E-01 | 1.00E+00 |
| ENSG00000214145.5_LINC00887  | ENSG00000160789.18_LMNA | 0.19826  | 0.04033687   | 0.346527357 | 1.43E-02 | 8.51E-02 | 1.00E+00 |
| ENSG00000164175.13_SLC45A2   | ENSG00000160789.18_LMNA | -0.15378 | -0.30549846  | 0.00556004  | 5.86E-02 | 2.22E-01 | 1.00E+00 |
| ENSG00000267163.1_           | ENSG00000160789.18_LMNA | 0.04648  | -0.113561202 | 0.204169733 | 5.70E-01 | 7.99E-01 | 1.00E+00 |
| ENSG00000182230.10_FAM153B   | ENSG00000160789.18_LMNA | -0.11759 | -0.271702174 | 0.042406809 | 1.49E-01 | 3.96E-01 | 1.00E+00 |
| ENSG00000255063.1_RP11-718B  | ENSG00000160789.18_LMNA | 0.00995  | -0.149486699 | 0.168883976 | 9.03E-01 | 9.63E-01 | 1.00E+00 |
| ENSG00000152086.8_TUBA3E     | ENSG00000160789.18_LMNA | 0.09964  | -0.060519132 | 0.254800386 | 2.22E-01 | 4.97E-01 | 1.00E+00 |
| ENSG00000162888.4_C1orf147   | ENSG00000160789.18_LMNA | -0.04991 | -0.207461326 | 0.110167021 | 5.41E-01 | 7.81E-01 | 1.00E+00 |
| ENSG00000265369.3_PCAT18     | ENSG00000160789.18_LMNA | -0.3672  | -0.49732408  | -0.22090903 | 3.27E-06 | 1.18E-04 | 1.68E-01 |
| ENSG00000229106.1_BTBD6P1    | ENSG00000160789.18_LMNA | 0.14979  | -0.009642457 | 0.301792231 | 6.55E-02 | 2.39E-01 | 1.00E+00 |
| ENSG00000080618.12_CPB2      | ENSG00000160789.18_LMNA | -0.35936 | -0.490500411 | -0.21230705 | 5.45E-06 | 1.78E-04 | 2.80E-01 |
| ENSG00000259648.1_RP11-643G  | ENSG00000160789.18_LMNA | -0.03944 | -0.197400643 | 0.120518032 | 6.30E-01 | 8.33E-01 | 1.00E+00 |
| ENSG00000127377.7_CRYGN      | ENSG00000160789.18_LMNA | 0.09576  | -0.064420985 | 0.251133915 | 2.41E-01 | 5.20E-01 | 1.00E+00 |
| ENSG00000260272.1_RP11-20I23 | ENSG00000160789.18_LMNA | -0.0826  | -0.238658626 | 0.077625292 | 3.12E-01 | 5.98E-01 | 1.00E+00 |
| ENSG00000223912.1_EEF1A1P3f  | ENSG00000160789.18_LMNA | -0.07903 | -0.235268799 | 0.081194142 | 3.33E-01 | 6.19E-01 | 1.00E+00 |
| ENSG00000165164.11_CFAP47    | ENSG00000160789.18_LMNA | -0.11187 | -0.266324096 | 0.048192557 | 1.70E-01 | 4.29E-01 | 1.00E+00 |
| ENSG00000254929.5_RP11-144G  | ENSG00000160789.18_LMNA | -0.03814 | -0.196153739 | 0.121796122 | 6.41E-01 | 8.40E-01 | 1.00E+00 |
| ENSG00000188306.6_LRRIQ4     | ENSG00000160789.18_LMNA | 0.10258  | -0.057563546 | 0.257571654 | 2.09E-01 | 4.81E-01 | 1.00E+00 |
| ENSG00000255220.1_DDX18P5    | ENSG00000160789.18_LMNA | -0.15095 | -0.302874708 | 0.00845118  | 6.34E-02 | 2.34E-01 | 1.00E+00 |
| ENSG00000279762.2_RP11-227G  | ENSG00000160789.18_LMNA | -0.02813 | -0.186493777 | 0.131662089 | 7.31E-01 | 8.87E-01 | 1.00E+00 |
| ENSG00000276337.1_RP11-106D  | ENSG00000160789.18_LMNA | -0.06856 | -0.225305795 | 0.091636541 | 4.01E-01 | 6.78E-01 | 1.00E+00 |
| ENSG00000180422.3_LINC00304  | ENSG00000160789.18_LMNA | 0.02997  | -0.129846373 | 0.188276211 | 7.14E-01 | 8.78E-01 | 1.00E+00 |
| ENSG00000270977.1_AC015849   | ENSG00000160789.18_LMNA | -0.00116 | -0.160330069 | 0.158070918 | 9.89E-01 | 9.96E-01 | 1.00E+00 |



|                             |                         |          |              |             |          |          |          |
|-----------------------------|-------------------------|----------|--------------|-------------|----------|----------|----------|
| ENSG00000260337.3_RP11-386M | ENSG00000160789.18_LMNA | -0.05986 | -0.21699442  | 0.100294835 | 4.64E-01 | 7.26E-01 | 1.00E+00 |
| ENSG00000170074.18_FAM153A  | ENSG00000160789.18_LMNA | -0.03493 | -0.193056062 | 0.124966718 | 6.69E-01 | 8.55E-01 | 1.00E+00 |
| ENSG00000133962.6_CATSPERE  | ENSG00000160789.18_LMNA | 0.16319  | 0.004094495  | 0.314226004 | 4.46E-02 | 1.86E-01 | 1.00E+00 |
| ENSG00000279232.1_AC008522. | ENSG00000160789.18_LMNA | -0.03178 | -0.190021315 | 0.128066615 | 6.97E-01 | 8.70E-01 | 1.00E+00 |
| ENSG00000279319.1_RP11-693M | ENSG00000160789.18_LMNA | -0.04441 | -0.202182255 | 0.115607039 | 5.87E-01 | 8.08E-01 | 1.00E+00 |
| ENSG00000255234.4_RP11-727A | ENSG00000160789.18_LMNA | -0.04373 | -0.201524644 | 0.116283366 | 5.93E-01 | 8.12E-01 | 1.00E+00 |
| ENSG00000235641.4_LINC00484 | ENSG00000160789.18_LMNA | -0.03222 | -0.190446105 | 0.12763308  | 6.94E-01 | 8.68E-01 | 1.00E+00 |
| ENSG00000279573.1_RP11-855A | ENSG00000160789.18_LMNA | -0.04759 | -0.205236069 | 0.112462444 | 5.60E-01 | 7.93E-01 | 1.00E+00 |
| ENSG00000099834.17_CDHR5    | ENSG00000160789.18_LMNA | 0.09201  | -0.068193221 | 0.247580611 | 2.60E-01 | 5.43E-01 | 1.00E+00 |
| ENSG00000274492.1_RP11-976B | ENSG00000160789.18_LMNA | -0.04293 | -0.200760359 | 0.117069034 | 5.99E-01 | 8.16E-01 | 1.00E+00 |
| ENSG00000235522.5_AC009505. | ENSG00000160789.18_LMNA | 0.13718  | -0.022509755 | 0.290048716 | 9.19E-02 | 2.96E-01 | 1.00E+00 |
| ENSG00000166763.7_STRCP1    | ENSG00000160789.18_LMNA | -0.10885 | -0.263486043 | 0.051237257 | 1.82E-01 | 4.46E-01 | 1.00E+00 |
| ENSG00000240563.1_L1TD1     | ENSG00000160789.18_LMNA | 0.00136  | -0.157873562 | 0.160527267 | 9.87E-01 | 9.95E-01 | 1.00E+00 |
| ENSG00000228051.1_RP11-325E | ENSG00000160789.18_LMNA | -0.05597 | -0.213271647 | 0.104157476 | 4.93E-01 | 7.49E-01 | 1.00E+00 |
| ENSG00000229268.1_PES1P2    | ENSG00000160789.18_LMNA | 0.03173  | -0.128121334 | 0.189967691 | 6.98E-01 | 8.71E-01 | 1.00E+00 |
| ENSG00000135747.10_ZNF670-Z | ENSG00000160789.18_LMNA | -0.12139 | -0.275268211 | 0.038558806 | 1.36E-01 | 3.76E-01 | 1.00E+00 |
| ENSG00000157654.16_PALM2-A  | ENSG00000160789.18_LMNA | 0.22891  | 0.072342567  | 0.374461472 | 4.56E-03 | 3.66E-02 | 1.00E+00 |
| ENSG00000134007.3_ADAM20    | ENSG00000160789.18_LMNA | 0.10397  | -0.05615977  | 0.258886072 | 2.02E-01 | 4.73E-01 | 1.00E+00 |
| ENSG00000258929.5_          | ENSG00000160789.18_LMNA | 0.07491  | -0.085312702 | 0.231347243 | 3.59E-01 | 6.42E-01 | 1.00E+00 |
| ENSG00000127074.13_RGS13    | ENSG00000160789.18_LMNA | -0.20203 | -0.349978739 | -0.04425758 | 1.26E-02 | 7.71E-02 | 1.00E+00 |
| ENSG00000250492.1_INTS6P1   | ENSG00000160789.18_LMNA | 0.07442  | -0.085792375 | 0.230889844 | 3.62E-01 | 6.44E-01 | 1.00E+00 |
| ENSG00000246863.2_RP11-325N | ENSG00000160789.18_LMNA | -0.11031 | -0.264862914 | 0.049760862 | 1.76E-01 | 4.37E-01 | 1.00E+00 |
| ENSG00000248115.1_RP11-752D | ENSG00000160789.18_LMNA | -0.20044 | -0.348523599 | -0.04260342 | 1.33E-02 | 8.03E-02 | 1.00E+00 |
| ENSG00000259921.1_AC022819. | ENSG00000160789.18_LMNA | 0.01386  | -0.145659273 | 0.172682491 | 8.65E-01 | 9.47E-01 | 1.00E+00 |
| ENSG00000226982.4_CENPCP1   | ENSG00000160789.18_LMNA | -0.0452  | -0.202943504 | 0.114823756 | 5.80E-01 | 8.04E-01 | 1.00E+00 |
| ENSG00000167880.6_EVPL      | ENSG00000160789.18_LMNA | -0.09293 | -0.248450983 | 0.067270056 | 2.55E-01 | 5.37E-01 | 1.00E+00 |
| ENSG00000144130.10_NT5DC4   | ENSG00000160789.18_LMNA | 0.15888  | -0.00032941  | 0.310233361 | 5.06E-02 | 2.03E-01 | 1.00E+00 |
| ENSG00000196946.8_ZNF705A   | ENSG00000160789.18_LMNA | -0.09926 | -0.254439528 | 0.060903585 | 2.24E-01 | 5.00E-01 | 1.00E+00 |
| ENSG00000168631.10_DPCR1    | ENSG00000160789.18_LMNA | 0.27391  | 0.119937442  | 0.415011661 | 6.39E-04 | 8.18E-03 | 1.00E+00 |
| ENSG00000275410.3_HNF1B     | ENSG00000160789.18_LMNA | -0.20886 | -0.356213243 | -0.05136383 | 9.82E-03 | 6.47E-02 | 1.00E+00 |
| ENSG00000158486.12_DNAH3    | ENSG00000160789.18_LMNA | 0.16552  | 0.006491005  | 0.316384319 | 4.16E-02 | 1.78E-01 | 1.00E+00 |
| ENSG00000279110.1_CTA-243E7 | ENSG00000160789.18_LMNA | 0.01544  | -0.144118122 | 0.174209332 | 8.50E-01 | 9.41E-01 | 1.00E+00 |
| ENSG00000251705.1_RNA5-8SP  | ENSG00000160789.18_LMNA | -0.05352 | -0.210923821 | 0.106588598 | 5.13E-01 | 7.61E-01 | 1.00E+00 |

|                             |                         |          |              |             |          |          |          |
|-----------------------------|-------------------------|----------|--------------|-------------|----------|----------|----------|
| ENSG00000204894.4_RP11-208G | ENSG00000160789.18_LMNA | -0.06123 | -0.218303757 | 0.098934027 | 4.54E-01 | 7.19E-01 | 1.00E+00 |
| ENSG00000211598.2_IGKV4-1   | ENSG00000160789.18_LMNA | -0.01569 | -0.174454106 | 0.14387091  | 8.48E-01 | 9.41E-01 | 1.00E+00 |
| ENSG00000243466.1_IGKV1-5   | ENSG00000160789.18_LMNA | -0.05514 | -0.212479273 | 0.104978386 | 5.00E-01 | 7.53E-01 | 1.00E+00 |
| ENSG00000201098.1_RNY1      | ENSG00000160789.18_LMNA | -0.14723 | -0.299414779 | 0.01225577  | 7.03E-02 | 2.50E-01 | 1.00E+00 |
| ENSG00000281126.1_AC091180. | ENSG00000160789.18_LMNA | -0.03866 | -0.196647472 | 0.121290166 | 6.36E-01 | 8.37E-01 | 1.00E+00 |
| ENSG00000234104.1_RP5-1177M | ENSG00000160789.18_LMNA | -0.27785 | -0.418538889 | -0.12414258 | 5.29E-04 | 7.04E-03 | 1.00E+00 |
| ENSG00000207741.1_MIR590    | ENSG00000160789.18_LMNA | 0.11367  | -0.046369099 | 0.268021187 | 1.63E-01 | 4.19E-01 | 1.00E+00 |
| ENSG00000250451.4_HOXC-AS1  | ENSG00000160789.18_LMNA | -0.02686 | -0.185269823 | 0.132907662 | 7.43E-01 | 8.92E-01 | 1.00E+00 |
| ENSG00000234286.1_AC006026. | ENSG00000160789.18_LMNA | 0.11983  | -0.040140487 | 0.273803474 | 1.41E-01 | 3.84E-01 | 1.00E+00 |
| ENSG00000207697.1_MIR573    | ENSG00000160789.18_LMNA | -0.04527 | -0.203009034 | 0.11475631  | 5.80E-01 | 8.04E-01 | 1.00E+00 |
| ENSG00000206754.1_SNORD101  | ENSG00000160789.18_LMNA | 0.04522  | -0.114811774 | 0.202955146 | 5.80E-01 | 8.04E-01 | 1.00E+00 |
| ENSG00000199036.1_MIR219A1  | ENSG00000160789.18_LMNA | 0.1081   | -0.051991488 | 0.262782159 | 1.85E-01 | 4.51E-01 | 1.00E+00 |
| ENSG00000199325.1_RNU4-39P  | ENSG00000160789.18_LMNA | 0.02858  | -0.131213181 | 0.186934652 | 7.27E-01 | 8.84E-01 | 1.00E+00 |
| ENSG00000207973.1_MIR589    | ENSG00000160789.18_LMNA | 0.10554  | -0.054580735 | 0.260363201 | 1.96E-01 | 4.65E-01 | 1.00E+00 |
| ENSG00000184302.6_SIX6      | ENSG00000160789.18_LMNA | -0.23108 | -0.376433869 | -0.07462622 | 4.18E-03 | 3.43E-02 | 1.00E+00 |
| ENSG00000200488.1_RN7SKP20  | ENSG00000160789.18_LMNA | -0.13054 | -0.283845164 | 0.029265406 | 1.09E-01 | 3.28E-01 | 1.00E+00 |
| ENSG00000206913.1_SNORA7    | ENSG00000160789.18_LMNA | -0.03412 | -0.192279777 | 0.125760259 | 6.76E-01 | 8.59E-01 | 1.00E+00 |
| ENSG00000277157.1_HIST1H4D  | ENSG00000160789.18_LMNA | 0.02836  | -0.131433655 | 0.186718139 | 7.29E-01 | 8.85E-01 | 1.00E+00 |
| ENSG00000206921.1_RNU6-481F | ENSG00000160789.18_LMNA | -0.04543 | -0.203164908 | 0.114595869 | 5.78E-01 | 8.03E-01 | 1.00E+00 |
| ENSG00000267692.1_TAF9P3    | ENSG00000160789.18_LMNA | 0.04181  | -0.118173186 | 0.199685603 | 6.09E-01 | 8.21E-01 | 1.00E+00 |
| ENSG00000278677.1_HIST1H2AA | ENSG00000160789.18_LMNA | 0.01297  | -0.146532203 | 0.171816988 | 8.74E-01 | 9.51E-01 | 1.00E+00 |
| ENSG00000272438.1_RP11-54O7 | ENSG00000160789.18_LMNA | -0.0694  | -0.22609791  | 0.090808854 | 3.96E-01 | 6.73E-01 | 1.00E+00 |
| ENSG00000281433.1_          | ENSG00000160789.18_LMNA | -0.01342 | -0.1722496   | 0.14609594  | 8.70E-01 | 9.49E-01 | 1.00E+00 |
| ENSG00000216921.6_AC131097. | ENSG00000160789.18_LMNA | -0.06172 | -0.218773068 | 0.098445978 | 4.50E-01 | 7.16E-01 | 1.00E+00 |
| ENSG00000120075.5_HOXB5     | ENSG00000160789.18_LMNA | 0.19538  | 0.037339761  | 0.343883416 | 1.59E-02 | 9.13E-02 | 1.00E+00 |
| ENSG00000255399.3_TBX5-AS1  | ENSG00000160789.18_LMNA | -0.30023 | -0.438470429 | -0.1481052  | 1.71E-04 | 2.89E-03 | 1.00E+00 |
| ENSG00000250378.1_RP11-119J | ENSG00000160789.18_LMNA | 0.22534  | 0.068599712  | 0.371222834 | 5.25E-03 | 4.07E-02 | 1.00E+00 |
| ENSG00000207110.1_RNU1-106F | ENSG00000160789.18_LMNA | -0.05165 | -0.20912825  | 0.108445314 | 5.27E-01 | 7.72E-01 | 1.00E+00 |
| ENSG00000144227.4_NXPH2     | ENSG00000160789.18_LMNA | -0.31416 | -0.450817592 | -0.16312255 | 8.09E-05 | 1.59E-03 | 1.00E+00 |
| ENSG00000229886.1_RP5-1132H | ENSG00000160789.18_LMNA | 0.20465  | 0.046978756  | 0.352369302 | 1.14E-02 | 7.21E-02 | 1.00E+00 |
| ENSG00000252464.1_RN7SKP70  | ENSG00000160789.18_LMNA | 0.01006  | -0.149378155 | 0.16899183  | 9.02E-01 | 9.62E-01 | 1.00E+00 |
| ENSG00000134443.8_GRP       | ENSG00000160789.18_LMNA | 0.05064  | -0.109444951 | 0.208160645 | 5.36E-01 | 7.77E-01 | 1.00E+00 |
| ENSG00000232519.2_RP11-29H2 | ENSG00000160789.18_LMNA | -0.0425  | -0.200347004 | 0.117493787 | 6.03E-01 | 8.18E-01 | 1.00E+00 |

|                             |                         |          |              |             |          |          |          |
|-----------------------------|-------------------------|----------|--------------|-------------|----------|----------|----------|
| ENSG00000225559.1_AC083867. | ENSG00000160789.18_LMNA | -0.19246 | -0.341210665 | -0.03431559 | 1.75E-02 | 9.81E-02 | 1.00E+00 |
| ENSG00000163737.3_PF4       | ENSG00000160789.18_LMNA | -0.02439 | -0.182879725 | 0.135337082 | 7.66E-01 | 9.03E-01 | 1.00E+00 |
| ENSG00000250796.1_RP11-723O | ENSG00000160789.18_LMNA | 0.10187  | -0.058280305 | 0.256900069 | 2.12E-01 | 4.85E-01 | 1.00E+00 |
| ENSG00000232949.1_AC002480. | ENSG00000160789.18_LMNA | -0.12076 | -0.274677143 | 0.039197254 | 1.38E-01 | 3.79E-01 | 1.00E+00 |
| ENSG00000183090.5_FREM3     | ENSG00000160789.18_LMNA | -0.45342 | -0.571374736 | -0.31710805 | 4.46E-09 | 5.45E-07 | 2.29E-04 |
| ENSG00000183586.8_HMGN3P1   | ENSG00000160789.18_LMNA | -0.02928 | -0.187604207 | 0.130531175 | 7.20E-01 | 8.81E-01 | 1.00E+00 |
| ENSG00000234921.1_RP11-85O2 | ENSG00000160789.18_LMNA | 0.10823  | -0.051864966 | 0.262900259 | 1.84E-01 | 4.50E-01 | 1.00E+00 |
| ENSG00000164266.9_SPINK1    | ENSG00000160789.18_LMNA | -0.07248 | -0.229035747 | 0.08773526  | 3.75E-01 | 6.55E-01 | 1.00E+00 |
| ENSG00000237529.1_RP11-439K | ENSG00000160789.18_LMNA | -0.02034 | -0.178961125 | 0.139311889 | 8.04E-01 | 9.21E-01 | 1.00E+00 |
| ENSG00000275426.1_CH17-262A | ENSG00000160789.18_LMNA | -0.09112 | -0.246740904 | 0.069083349 | 2.64E-01 | 5.48E-01 | 1.00E+00 |
| ENSG00000226756.1_AC007365. | ENSG00000160789.18_LMNA | -0.04424 | -0.202019847 | 0.115774096 | 5.88E-01 | 8.09E-01 | 1.00E+00 |
| ENSG00000258249.1_RP11-497G | ENSG00000160789.18_LMNA | -0.18834 | -0.337425364 | -0.03004218 | 2.01E-02 | 1.09E-01 | 1.00E+00 |
| ENSG00000221571.3_RNU6ATAC  | ENSG00000160789.18_LMNA | -0.24084 | -0.38526888  | -0.08489444 | 2.80E-03 | 2.53E-02 | 1.00E+00 |
| ENSG00000251194.2_RP1-68D18 | ENSG00000160789.18_LMNA | 0.25105  | 0.095675019  | 0.394485857 | 1.81E-03 | 1.82E-02 | 1.00E+00 |
| ENSG00000268564.1_AC003956. | ENSG00000160789.18_LMNA | -0.13596 | -0.28890466  | 0.02375778  | 9.49E-02 | 3.02E-01 | 1.00E+00 |
| ENSG00000105694.3_TCEB1P28  | ENSG00000160789.18_LMNA | 0.14363  | -0.015934827 | 0.296061198 | 7.75E-02 | 2.67E-01 | 1.00E+00 |
| ENSG00000225365.1_AC078942. | ENSG00000160789.18_LMNA | -0.12502 | -0.278670011 | 0.034879333 | 1.25E-01 | 3.57E-01 | 1.00E+00 |
| ENSG00000176998.4_HCG4      | ENSG00000160789.18_LMNA | -0.03052 | -0.188801067 | 0.12931131  | 7.09E-01 | 8.76E-01 | 1.00E+00 |
| ENSG00000236592.5_S100A11P2 | ENSG00000160789.18_LMNA | 0.01541  | -0.144146314 | 0.174181415 | 8.51E-01 | 9.41E-01 | 1.00E+00 |
| ENSG00000228683.1_RP11-31E1 | ENSG00000160789.18_LMNA | -0.0693  | -0.226004085 | 0.090906917 | 3.96E-01 | 6.73E-01 | 1.00E+00 |
| ENSG00000254462.1_TMX2-CTNI | ENSG00000160789.18_LMNA | -0.12984 | -0.28318589  | 0.029981676 | 1.11E-01 | 3.32E-01 | 1.00E+00 |
| ENSG00000265939.1_UBE2CP2   | ENSG00000160789.18_LMNA | 0.06932  | -0.090885706 | 0.226024379 | 3.96E-01 | 6.73E-01 | 1.00E+00 |
| ENSG00000223609.6_HBD       | ENSG00000160789.18_LMNA | -0.15328 | -0.30503773  | 0.006068099 | 5.94E-02 | 2.24E-01 | 1.00E+00 |
| ENSG00000223676.1_RPL34P26  | ENSG00000160789.18_LMNA | -0.06902 | -0.225739804 | 0.091183096 | 3.98E-01 | 6.75E-01 | 1.00E+00 |
| ENSG00000269584.1_TDGF1P7   | ENSG00000160789.18_LMNA | -0.12456 | -0.278239835 | 0.035345092 | 1.26E-01 | 3.59E-01 | 1.00E+00 |
| ENSG00000224163.4_RP11-309L | ENSG00000160789.18_LMNA | 0.21263  | 0.055298607  | 0.359653695 | 8.54E-03 | 5.85E-02 | 1.00E+00 |
| ENSG00000254855.1_RP11-867G | ENSG00000160789.18_LMNA | 0.09761  | -0.062567783 | 0.252876451 | 2.32E-01 | 5.09E-01 | 1.00E+00 |
| ENSG00000218459.1_RPS27P15  | ENSG00000160789.18_LMNA | -0.03001 | -0.188306879 | 0.129815114 | 7.14E-01 | 8.78E-01 | 1.00E+00 |
| ENSG00000236953.1_ZDHHC20-I | ENSG00000160789.18_LMNA | 0.06482  | -0.095365322 | 0.221732065 | 4.28E-01 | 6.98E-01 | 1.00E+00 |
| ENSG00000235695.1_RP11-395P | ENSG00000160789.18_LMNA | 0.01942  | -0.140217333 | 0.178067071 | 8.12E-01 | 9.26E-01 | 1.00E+00 |
| ENSG00000267366.1_RP11-53B2 | ENSG00000160789.18_LMNA | 0.09545  | -0.064732344 | 0.250840948 | 2.42E-01 | 5.21E-01 | 1.00E+00 |
| ENSG00000237049.1_RPL34P1   | ENSG00000160789.18_LMNA | -0.15733 | -0.308800558 | 0.001914018 | 5.29E-02 | 2.09E-01 | 1.00E+00 |
| ENSG00000241907.1_RPS20P4   | ENSG00000160789.18_LMNA | 0.16656  | 0.007555413  | 0.317341906 | 4.03E-02 | 1.74E-01 | 1.00E+00 |

|                              |                         |          |              |             |          |          |          |
|------------------------------|-------------------------|----------|--------------|-------------|----------|----------|----------|
| ENSG00000203897.3_SPATA42    | ENSG00000160789.18_LMNA | -0.0814  | -0.23752543  | 0.078819237 | 3.19E-01 | 6.05E-01 | 1.00E+00 |
| ENSG00000271046.1_RP11-138I1 | ENSG00000160789.18_LMNA | -0.26641 | -0.4082903   | -0.11195349 | 9.08E-04 | 1.08E-02 | 1.00E+00 |
| ENSG00000214546.3_AC087491.  | ENSG00000160789.18_LMNA | -0.24961 | -0.393187957 | -0.09415269 | 1.93E-03 | 1.90E-02 | 1.00E+00 |
| ENSG00000228323.2_AC008753.I | ENSG00000160789.18_LMNA | 0.15803  | -0.00120289  | 0.309443735 | 5.18E-02 | 2.06E-01 | 1.00E+00 |
| ENSG00000267781.1_SLC25A36F  | ENSG00000160789.18_LMNA | 0.07346  | -0.086754406 | 0.229972064 | 3.68E-01 | 6.49E-01 | 1.00E+00 |
| ENSG00000273143.1_RP11-525A  | ENSG00000160789.18_LMNA | 0.16727  | 0.008287816  | 0.31800044  | 3.94E-02 | 1.72E-01 | 1.00E+00 |
| ENSG00000228512.2_RP11-281A  | ENSG00000160789.18_LMNA | -0.11148 | -0.265960875 | 0.048582551 | 1.72E-01 | 4.31E-01 | 1.00E+00 |
| ENSG00000232612.1_RPL31P35   | ENSG00000160789.18_LMNA | 0.07443  | -0.085782508 | 0.230899253 | 3.62E-01 | 6.44E-01 | 1.00E+00 |
| ENSG00000213461.3_RP13-235E  | ENSG00000160789.18_LMNA | -0.05756 | -0.214788443 | 0.102584848 | 4.81E-01 | 7.39E-01 | 1.00E+00 |
| ENSG00000271848.1_RP11-464F  | ENSG00000160789.18_LMNA | 0.0774   | -0.082820899 | 0.233721085 | 3.43E-01 | 6.28E-01 | 1.00E+00 |
| ENSG00000163499.10_CRYBA2    | ENSG00000160789.18_LMNA | -0.02248 | -0.181028675 | 0.13721596  | 7.83E-01 | 9.11E-01 | 1.00E+00 |
| ENSG00000275345.1_RP11-697E  | ENSG00000160789.18_LMNA | -0.03816 | -0.196172448 | 0.121776953 | 6.41E-01 | 8.40E-01 | 1.00E+00 |
| ENSG00000270800.1_RPS10-NUI  | ENSG00000160789.18_LMNA | -0.14436 | -0.296738963 | 0.015191963 | 7.60E-02 | 2.64E-01 | 1.00E+00 |
| ENSG00000259732.1_RP11-59H7  | ENSG00000160789.18_LMNA | 0.16696  | 0.007974055  | 0.31771836  | 3.98E-02 | 1.73E-01 | 1.00E+00 |
| ENSG00000236360.2_RP11-334A  | ENSG00000160789.18_LMNA | -0.06923 | -0.225941867 | 0.09097194  | 3.97E-01 | 6.74E-01 | 1.00E+00 |
| ENSG00000234263.1_RP3-325F2  | ENSG00000160789.18_LMNA | 0.00055  | -0.158661007 | 0.159740302 | 9.95E-01 | 9.98E-01 | 1.00E+00 |
| ENSG00000243902.5_ELFN2      | ENSG00000160789.18_LMNA | -0.24997 | -0.393512499 | -0.09453322 | 1.90E-03 | 1.88E-02 | 1.00E+00 |
| ENSG00000184389.9_A3GALT2    | ENSG00000160789.18_LMNA | 0.10324  | -0.056894035 | 0.258198692 | 2.06E-01 | 4.77E-01 | 1.00E+00 |
| ENSG00000203811.1_HIST2H3C   | ENSG00000160789.18_LMNA | -0.03785 | -0.1958713   | 0.122085478 | 6.43E-01 | 8.41E-01 | 1.00E+00 |
| ENSG00000234709.2_UPF3AP3    | ENSG00000160789.18_LMNA | 0.07526  | -0.084961248 | 0.231682287 | 3.57E-01 | 6.40E-01 | 1.00E+00 |
| ENSG00000253986.1_CTC-756D1  | ENSG00000160789.18_LMNA | 0.06185  | -0.098320287 | 0.21889391  | 4.49E-01 | 7.15E-01 | 1.00E+00 |
| ENSG00000267394.1_CTB-175E5  | ENSG00000160789.18_LMNA | 0.09801  | -0.062161954 | 0.253257773 | 2.30E-01 | 5.07E-01 | 1.00E+00 |
| ENSG00000226604.2_PAPPA-AS:  | ENSG00000160789.18_LMNA | -0.10628 | -0.261060682 | 0.053834587 | 1.93E-01 | 4.61E-01 | 1.00E+00 |
| ENSG00000272021.1_AC008592.I | ENSG00000160789.18_LMNA | 0.07911  | -0.081113011 | 0.235345945 | 3.33E-01 | 6.18E-01 | 1.00E+00 |
| ENSG00000267662.1_AC007796.  | ENSG00000160789.18_LMNA | -0.10153 | -0.256580671 | 0.058621075 | 2.13E-01 | 4.87E-01 | 1.00E+00 |
| ENSG00000197901.10_SLC22A6   | ENSG00000160789.18_LMNA | -0.38397 | -0.51187772  | -0.2394003  | 1.04E-06 | 4.75E-05 | 5.35E-02 |
| ENSG00000196420.6_S100A5     | ENSG00000160789.18_LMNA | 0.3113   | 0.160035585  | 0.448288471 | 9.47E-05 | 1.81E-03 | 1.00E+00 |
| ENSG00000132911.4_NMUR2      | ENSG00000160789.18_LMNA | -0.11751 | -0.271627672 | 0.042487102 | 1.49E-01 | 3.97E-01 | 1.00E+00 |
| ENSG00000230618.3_H3F3AP3    | ENSG00000160789.18_LMNA | 0.05054  | -0.109544353 | 0.208064394 | 5.36E-01 | 7.77E-01 | 1.00E+00 |
| ENSG00000273181.1_RP11-778D  | ENSG00000160789.18_LMNA | -0.02317 | -0.181703628 | 0.136531125 | 7.77E-01 | 9.08E-01 | 1.00E+00 |
| ENSG00000237868.1_AC097533.  | ENSG00000160789.18_LMNA | -0.01335 | -0.172181755 | 0.146164367 | 8.70E-01 | 9.50E-01 | 1.00E+00 |
| ENSG00000279807.1_CTC-510F1  | ENSG00000160789.18_LMNA | 0.01574  | -0.143823416 | 0.174501127 | 8.47E-01 | 9.40E-01 | 1.00E+00 |
| ENSG00000264666.1_RP11-524F  | ENSG00000160789.18_LMNA | 0.02171  | -0.137971105 | 0.180284079 | 7.91E-01 | 9.15E-01 | 1.00E+00 |

|                              |                         |          |              |             |          |          |          |
|------------------------------|-------------------------|----------|--------------|-------------|----------|----------|----------|
| ENSG00000278514.1_AC068831.  | ENSG00000160789.18_LMNA | -0.12362 | -0.277361462 | 0.0362957   | 1.29E-01 | 3.64E-01 | 1.00E+00 |
| ENSG00000270813.2_NANOGNBI   | ENSG00000160789.18_LMNA | -0.02187 | -0.18044037  | 0.13781263  | 7.89E-01 | 9.14E-01 | 1.00E+00 |
| ENSG00000188383.8_GPAT2P2    | ENSG00000160789.18_LMNA | -0.02983 | -0.188134727 | 0.129990577 | 7.15E-01 | 8.79E-01 | 1.00E+00 |
| ENSG00000253965.1_CTC-329D1  | ENSG00000160789.18_LMNA | -0.06329 | -0.220271369 | 0.096886833 | 4.39E-01 | 7.07E-01 | 1.00E+00 |
| ENSG00000259792.1_RP11-114H  | ENSG00000160789.18_LMNA | -0.02899 | -0.187326963 | 0.130813611 | 7.23E-01 | 8.83E-01 | 1.00E+00 |
| ENSG00000141448.7_GATA6      | ENSG00000160789.18_LMNA | 0.07709  | -0.083129244 | 0.233427541 | 3.45E-01 | 6.29E-01 | 1.00E+00 |
| ENSG00000253326.2_RP11-261C  | ENSG00000160789.18_LMNA | 0.14653  | -0.012973433 | 0.29876121  | 7.16E-02 | 2.53E-01 | 1.00E+00 |
| ENSG00000115297.10_TLX2      | ENSG00000160789.18_LMNA | -0.0698  | -0.226488224 | 0.090400851 | 3.93E-01 | 6.70E-01 | 1.00E+00 |
| ENSG00000225869.4_CTB-70D19  | ENSG00000160789.18_LMNA | 0.11762  | -0.042377642 | 0.271729236 | 1.49E-01 | 3.96E-01 | 1.00E+00 |
| ENSG00000224727.1_FCF1P7     | ENSG00000160789.18_LMNA | 0.04445  | -0.115563788 | 0.202224299 | 5.87E-01 | 8.08E-01 | 1.00E+00 |
| ENSG00000104826.10_LHB       | ENSG00000160789.18_LMNA | 0.01148  | -0.147989561 | 0.170370932 | 8.88E-01 | 9.57E-01 | 1.00E+00 |
| ENSG00000228397.1_RP1-224A6  | ENSG00000160789.18_LMNA | -0.00413 | -0.163219226 | 0.155176896 | 9.60E-01 | 9.84E-01 | 1.00E+00 |
| ENSG00000275569.1_RP11-930C  | ENSG00000160789.18_LMNA | -0.11948 | -0.273478501 | 0.040491193 | 1.43E-01 | 3.86E-01 | 1.00E+00 |
| ENSG00000248243.1_RP11-93K2  | ENSG00000160789.18_LMNA | -0.01167 | -0.170557061 | 0.147802055 | 8.86E-01 | 9.56E-01 | 1.00E+00 |
| ENSG00000273363.1_RP11-285G  | ENSG00000160789.18_LMNA | -0.11517 | -0.269429532 | 0.044854295 | 1.58E-01 | 4.10E-01 | 1.00E+00 |
| ENSG00000259442.1_RP11-752G  | ENSG00000160789.18_LMNA | 0.00085  | -0.158372889 | 0.160028291 | 9.92E-01 | 9.97E-01 | 1.00E+00 |
| ENSG00000225864.1_HCG4P11    | ENSG00000160789.18_LMNA | 0.10268  | -0.057457829 | 0.257670682 | 2.08E-01 | 4.81E-01 | 1.00E+00 |
| ENSG00000105261.6_OVOL3      | ENSG00000160789.18_LMNA | 0.00107  | -0.158153984 | 0.160247063 | 9.90E-01 | 9.96E-01 | 1.00E+00 |
| ENSG00000225873.1_LINC00694  | ENSG00000160789.18_LMNA | -0.05578 | -0.213089153 | 0.10434658  | 4.95E-01 | 7.50E-01 | 1.00E+00 |
| ENSG00000260685.1_RP11-326L  | ENSG00000160789.18_LMNA | -0.09149 | -0.247090463 | 0.068712861 | 2.62E-01 | 5.45E-01 | 1.00E+00 |
| ENSG00000214510.8_SPINK13    | ENSG00000160789.18_LMNA | 0.02995  | -0.129867779 | 0.18825521  | 7.14E-01 | 8.79E-01 | 1.00E+00 |
| ENSG00000263603.1_CTD-2349P  | ENSG00000160789.18_LMNA | 0.03031  | -0.129512258 | 0.188603973 | 7.11E-01 | 8.77E-01 | 1.00E+00 |
| ENSG00000249319.2_AC068533.  | ENSG00000160789.18_LMNA | 0.18839  | 0.030091253  | 0.337468891 | 2.01E-02 | 1.08E-01 | 1.00E+00 |
| ENSG00000244753.2_RPL15P21   | ENSG00000160789.18_LMNA | 0.1157   | -0.044317369 | 0.269928401 | 1.56E-01 | 4.07E-01 | 1.00E+00 |
| ENSG00000278969.1_RP11-662I1 | ENSG00000160789.18_LMNA | 0.31904  | 0.168396576  | 0.455127899 | 6.17E-05 | 1.27E-03 | 1.00E+00 |
| ENSG00000174482.9_LINGO2     | ENSG00000160789.18_LMNA | -0.01871 | -0.177381556 | 0.140911221 | 8.19E-01 | 9.30E-01 | 1.00E+00 |
| ENSG00000251271.3_ALG1L7P    | ENSG00000160789.18_LMNA | -0.01487 | -0.173656495 | 0.144676319 | 8.56E-01 | 9.43E-01 | 1.00E+00 |
| ENSG00000262888.1_RP11-462G  | ENSG00000160789.18_LMNA | -0.12138 | -0.275259654 | 0.038568052 | 1.36E-01 | 3.76E-01 | 1.00E+00 |
| ENSG00000253426.4_RP11-10A1  | ENSG00000160789.18_LMNA | -0.14396 | -0.296370055 | 0.015596346 | 7.68E-02 | 2.65E-01 | 1.00E+00 |
| ENSG00000256377.4_RP11-1060. | ENSG00000160789.18_LMNA | 0.04805  | -0.112005966 | 0.205678855 | 5.57E-01 | 7.90E-01 | 1.00E+00 |
| ENSG00000173702.6_MUC13      | ENSG00000160789.18_LMNA | 0.14986  | -0.009568062 | 0.301859855 | 6.54E-02 | 2.38E-01 | 1.00E+00 |
| ENSG00000198857.3_HSD3BP5    | ENSG00000160789.18_LMNA | 0.09694  | -0.063234072 | 0.252250186 | 2.35E-01 | 5.13E-01 | 1.00E+00 |
| ENSG00000233791.4_LINC01136  | ENSG00000160789.18_LMNA | -0.00051 | -0.159697159 | 0.158704164 | 9.95E-01 | 9.98E-01 | 1.00E+00 |

|                              |                         |          |              |             |          |          |          |
|------------------------------|-------------------------|----------|--------------|-------------|----------|----------|----------|
| ENSG00000219553.2_RP1-281H8  | ENSG00000160789.18_LMNA | 0.10048  | -0.059670352 | 0.255596765 | 2.18E-01 | 4.93E-01 | 1.00E+00 |
| ENSG00000230732.4_AC127904.  | ENSG00000160789.18_LMNA | 0.11563  | -0.044390113 | 0.269860823 | 1.56E-01 | 4.08E-01 | 1.00E+00 |
| ENSG00000235454.1_HAUS6P3    | ENSG00000160789.18_LMNA | 0.00482  | -0.154496476 | 0.16389771  | 9.53E-01 | 9.81E-01 | 1.00E+00 |
| ENSG00000251381.5_LINC00958  | ENSG00000160789.18_LMNA | 0.02065  | -0.139008021 | 0.179261054 | 8.01E-01 | 9.20E-01 | 1.00E+00 |
| ENSG00000244259.1_AP000797.  | ENSG00000160789.18_LMNA | -0.12051 | -0.274449953 | 0.039442587 | 1.39E-01 | 3.80E-01 | 1.00E+00 |
| ENSG00000262152.5_LA16c-380f | ENSG00000160789.18_LMNA | -0.06078 | -0.217870159 | 0.099384801 | 4.57E-01 | 7.21E-01 | 1.00E+00 |
| ENSG00000251313.1_RP11-747H  | ENSG00000160789.18_LMNA | -0.02884 | -0.187179326 | 0.130963992 | 7.24E-01 | 8.83E-01 | 1.00E+00 |
| ENSG00000234902.5_AC007879.  | ENSG00000160789.18_LMNA | 0.02311  | -0.136592173 | 0.181643474 | 7.77E-01 | 9.09E-01 | 1.00E+00 |
| ENSG00000114113.5_RBP2       | ENSG00000160789.18_LMNA | 0.05152  | -0.108566701 | 0.209010786 | 5.28E-01 | 7.72E-01 | 1.00E+00 |
| ENSG00000232615.4_CTD-2012J  | ENSG00000160789.18_LMNA | 0.08529  | -0.074927306 | 0.241216169 | 2.96E-01 | 5.82E-01 | 1.00E+00 |
| ENSG00000239389.6_PCDHA13    | ENSG00000160789.18_LMNA | 0.02164  | -0.138035233 | 0.18022083  | 7.91E-01 | 9.15E-01 | 1.00E+00 |
| ENSG00000281880.1_PAUPAR     | ENSG00000160789.18_LMNA | 0.35299  | 0.20532931   | 0.484940026 | 8.18E-06 | 2.47E-04 | 4.20E-01 |
| ENSG00000254213.2_RP11-434I1 | ENSG00000160789.18_LMNA | -0.07971 | -0.235918949 | 0.080510284 | 3.29E-01 | 6.15E-01 | 1.00E+00 |
| ENSG00000258956.2_COX4I1P1   | ENSG00000160789.18_LMNA | -0.00204 | -0.161187742 | 0.157212371 | 9.80E-01 | 9.93E-01 | 1.00E+00 |
| ENSG00000274259.2_XXbac-BPG  | ENSG00000160789.18_LMNA | 0.1188   | -0.041181351 | 0.272838772 | 1.45E-01 | 3.90E-01 | 1.00E+00 |
| ENSG00000274877.1_           | ENSG00000160789.18_LMNA | 0.10767  | -0.052425415 | 0.262377047 | 1.87E-01 | 4.53E-01 | 1.00E+00 |
| ENSG00000228824.5_MIR4500HC  | ENSG00000160789.18_LMNA | -0.08801 | -0.243792475 | 0.072204839 | 2.81E-01 | 5.67E-01 | 1.00E+00 |
| ENSG00000161133.15_USP41     | ENSG00000160789.18_LMNA | -0.25276 | -0.39602392  | -0.09748086 | 1.68E-03 | 1.71E-02 | 1.00E+00 |
| ENSG00000156886.11_ITGAD     | ENSG00000160789.18_LMNA | -0.03571 | -0.193810956 | 0.124194651 | 6.62E-01 | 8.51E-01 | 1.00E+00 |
| ENSG00000171496.3_OR1L8      | ENSG00000160789.18_LMNA | -0.10027 | -0.255397409 | 0.059882868 | 2.19E-01 | 4.94E-01 | 1.00E+00 |
| ENSG00000256713.6_PGA5       | ENSG00000160789.18_LMNA | -0.32614 | -0.461385182 | -0.17608222 | 4.12E-05 | 9.21E-04 | 1.00E+00 |
| ENSG00000216360.1_RP1-182O1  | ENSG00000160789.18_LMNA | -0.02376 | -0.182274953 | 0.135951198 | 7.71E-01 | 9.05E-01 | 1.00E+00 |
| ENSG00000270339.2_AC243756.  | ENSG00000160789.18_LMNA | 0.0705   | -0.089711092 | 0.227147848 | 3.88E-01 | 6.66E-01 | 1.00E+00 |
| ENSG00000180878.2_C11orf42   | ENSG00000160789.18_LMNA | 0.09916  | -0.061004095 | 0.254345172 | 2.24E-01 | 5.00E-01 | 1.00E+00 |
| ENSG00000186867.9_QRFPR      | ENSG00000160789.18_LMNA | -0.05757 | -0.214800332 | 0.102572514 | 4.81E-01 | 7.39E-01 | 1.00E+00 |
| ENSG00000237637.1_FRY-AS1    | ENSG00000160789.18_LMNA | -0.19533 | -0.343841143 | -0.03729189 | 1.59E-02 | 9.14E-02 | 1.00E+00 |
| ENSG00000262228.2_RP11-676J  | ENSG00000160789.18_LMNA | 0.05005  | -0.110031538 | 0.207592565 | 5.40E-01 | 7.80E-01 | 1.00E+00 |
| ENSG00000249212.1_ATP1B1P1   | ENSG00000160789.18_LMNA | -0.01917 | -0.177827648 | 0.140459715 | 8.15E-01 | 9.27E-01 | 1.00E+00 |
| ENSG00000231164.1_RPL7P56    | ENSG00000160789.18_LMNA | -0.19286 | -0.341572035 | -0.03472414 | 1.73E-02 | 9.72E-02 | 1.00E+00 |
| ENSG00000226466.2_RPA2P2     | ENSG00000160789.18_LMNA | -0.03022 | -0.188509709 | 0.129608357 | 7.12E-01 | 8.77E-01 | 1.00E+00 |
| ENSG00000230956.2_RP3-452M1  | ENSG00000160789.18_LMNA | -0.09033 | -0.24599083  | 0.069878035 | 2.68E-01 | 5.52E-01 | 1.00E+00 |
| ENSG00000100739.9_BDKRB1     | ENSG00000160789.18_LMNA | 0.42875  | 0.289300465  | 0.55038655  | 3.57E-08 | 3.13E-06 | 1.83E-03 |
| ENSG00000227747.2_RP11-16L9  | ENSG00000160789.18_LMNA | -0.00376 | -0.162864115 | 0.155532899 | 9.63E-01 | 9.85E-01 | 1.00E+00 |

|                              |                         |          |              |             |          |          |          |
|------------------------------|-------------------------|----------|--------------|-------------|----------|----------|----------|
| ENSG00000118194.17_TNNT2     | ENSG00000160789.18_LMNA | -0.06847 | -0.225210977 | 0.091735589 | 4.02E-01 | 6.78E-01 | 1.00E+00 |
| ENSG00000163600.11_ICOS      | ENSG00000160789.18_LMNA | 0.05108  | -0.109009279 | 0.208582433 | 5.32E-01 | 7.75E-01 | 1.00E+00 |
| ENSG00000257467.4_RP11-121G  | ENSG00000160789.18_LMNA | 0.05457  | -0.105550951 | 0.211926364 | 5.04E-01 | 7.55E-01 | 1.00E+00 |
| ENSG00000197301.6_RP11-366L  | ENSG00000160789.18_LMNA | 0.10677  | -0.053339833 | 0.261522985 | 1.90E-01 | 4.58E-01 | 1.00E+00 |
| ENSG00000264187.1_RP11-45M2  | ENSG00000160789.18_LMNA | -0.02348 | -0.182004143 | 0.136226113 | 7.74E-01 | 9.07E-01 | 1.00E+00 |
| ENSG00000267091.1_CTBP2P7    | ENSG00000160789.18_LMNA | 0.04043  | -0.119542736 | 0.19835145  | 6.21E-01 | 8.28E-01 | 1.00E+00 |
| ENSG00000125997.5_BPIFB9P    | ENSG00000160789.18_LMNA | -0.11276 | -0.267163549 | 0.04729086  | 1.67E-01 | 4.24E-01 | 1.00E+00 |
| ENSG00000237548.1_TTLL11-IT1 | ENSG00000160789.18_LMNA | -0.07707 | -0.233407901 | 0.083149872 | 3.45E-01 | 6.30E-01 | 1.00E+00 |
| ENSG00000280073.1_CTD-2525P  | ENSG00000160789.18_LMNA | 0.02041  | -0.139243069 | 0.179029059 | 8.03E-01 | 9.21E-01 | 1.00E+00 |
| ENSG00000213777.5_CTD-2224J  | ENSG00000160789.18_LMNA | -0.11795 | -0.272039093 | 0.042043648 | 1.48E-01 | 3.94E-01 | 1.00E+00 |
| ENSG00000227087.4_RBMX2P5    | ENSG00000160789.18_LMNA | 0.09116  | -0.069040886 | 0.246780972 | 2.64E-01 | 5.48E-01 | 1.00E+00 |
| ENSG00000091010.4_POU4F3     | ENSG00000160789.18_LMNA | -0.00185 | -0.161000729 | 0.157399616 | 9.82E-01 | 9.93E-01 | 1.00E+00 |
| ENSG00000120903.9_CHRNA2     | ENSG00000160789.18_LMNA | -0.16307 | -0.314112593 | -0.00396867 | 4.47E-02 | 1.87E-01 | 1.00E+00 |
| ENSG00000230882.1_AC005077.  | ENSG00000160789.18_LMNA | 0.16937  | 0.010454061  | 0.319946453 | 3.70E-02 | 1.64E-01 | 1.00E+00 |
| ENSG00000253119.1_HNRNPA3F   | ENSG00000160789.18_LMNA | 0.08495  | -0.075267312 | 0.240894104 | 2.98E-01 | 5.84E-01 | 1.00E+00 |
| ENSG00000228367.3_RP11-524L  | ENSG00000160789.18_LMNA | 0.02142  | -0.13825594  | 0.180003128 | 7.93E-01 | 9.16E-01 | 1.00E+00 |
| ENSG00000213559.4_HNRNPA1F   | ENSG00000160789.18_LMNA | 0.02172  | -0.137955063 | 0.180299901 | 7.91E-01 | 9.15E-01 | 1.00E+00 |
| ENSG00000240567.1_RP11-3P17  | ENSG00000160789.18_LMNA | -0.00794 | -0.166931872 | 0.151449956 | 9.23E-01 | 9.70E-01 | 1.00E+00 |
| ENSG00000231546.1_RPL3P5     | ENSG00000160789.18_LMNA | -0.03634 | -0.194414059 | 0.123577552 | 6.57E-01 | 8.48E-01 | 1.00E+00 |
| ENSG00000213513.3_IMPDP1P5   | ENSG00000160789.18_LMNA | 0.22716  | 0.070508546  | 0.372875441 | 4.89E-03 | 3.85E-02 | 1.00E+00 |
| ENSG00000235595.1_GAPDHP23   | ENSG00000160789.18_LMNA | 0.23364  | 0.077312221  | 0.37875028  | 3.77E-03 | 3.17E-02 | 1.00E+00 |
| ENSG00000243319.6_FGF14-IT1  | ENSG00000160789.18_LMNA | -0.1103  | -0.264854321 | 0.049770081 | 1.76E-01 | 4.37E-01 | 1.00E+00 |
| ENSG00000259171.1_RP11-903H  | ENSG00000160789.18_LMNA | 0.10571  | -0.054405084 | 0.260527425 | 1.95E-01 | 4.64E-01 | 1.00E+00 |
| ENSG00000187288.9_CIDEC      | ENSG00000160789.18_LMNA | 0.07095  | -0.089262673 | 0.227576519 | 3.85E-01 | 6.64E-01 | 1.00E+00 |
| ENSG00000241666.2_RP3-455J7. | ENSG00000160789.18_LMNA | -0.00821 | -0.167189116 | 0.151191387 | 9.20E-01 | 9.70E-01 | 1.00E+00 |
| ENSG00000279356.1_RP11-429P  | ENSG00000160789.18_LMNA | -0.01988 | -0.178518705 | 0.139760012 | 8.08E-01 | 9.24E-01 | 1.00E+00 |
| ENSG00000233665.7_RP11-523O  | ENSG00000160789.18_LMNA | 0.04417  | -0.115846985 | 0.201948982 | 5.89E-01 | 8.09E-01 | 1.00E+00 |
| ENSG00000235613.2_NSRP1P1    | ENSG00000160789.18_LMNA | 0.02723  | -0.132547526 | 0.18562381  | 7.39E-01 | 8.90E-01 | 1.00E+00 |
| ENSG00000181072.10_CHRM2     | ENSG00000160789.18_LMNA | -0.32593 | -0.461203284 | -0.17585831 | 4.17E-05 | 9.29E-04 | 1.00E+00 |
| ENSG00000143631.10_FLG       | ENSG00000160789.18_LMNA | 0.02479  | -0.134943222 | 0.183267466 | 7.62E-01 | 9.01E-01 | 1.00E+00 |
| ENSG00000162782.14_TDRD5     | ENSG00000160789.18_LMNA | -0.16675 | -0.31752467  | -0.00775864 | 4.00E-02 | 1.74E-01 | 1.00E+00 |
| ENSG00000254266.4_PKIA-AS1   | ENSG00000160789.18_LMNA | -0.3676  | -0.49767584  | -0.22135363 | 3.18E-06 | 1.15E-04 | 1.63E-01 |
| ENSG00000265533.1_RP11-638L  | ENSG00000160789.18_LMNA | -0.06589 | -0.222753774 | 0.094300193 | 4.20E-01 | 6.92E-01 | 1.00E+00 |

|                              |                         |          |              |             |          |          |          |
|------------------------------|-------------------------|----------|--------------|-------------|----------|----------|----------|
| ENSG00000216835.3_RBMXP1     | ENSG00000160789.18_LMNA | -0.06014 | -0.217256509 | 0.100022538 | 4.62E-01 | 7.25E-01 | 1.00E+00 |
| ENSG00000214851.4_LINC00612  | ENSG00000160789.18_LMNA | -0.00444 | -0.163525949 | 0.154869335 | 9.57E-01 | 9.83E-01 | 1.00E+00 |
| ENSG00000215838.4_RP11-466F  | ENSG00000160789.18_LMNA | 0.06543  | -0.094761247 | 0.222311599 | 4.23E-01 | 6.94E-01 | 1.00E+00 |
| ENSG00000261052.4_SULT1A3    | ENSG00000160789.18_LMNA | -0.00802 | -0.167007554 | 0.151373889 | 9.22E-01 | 9.70E-01 | 1.00E+00 |
| ENSG00000185168.5_LINC00482  | ENSG00000160789.18_LMNA | 0.15792  | -0.001314822 | 0.309342518 | 5.20E-02 | 2.06E-01 | 1.00E+00 |
| ENSG00000279980.1_GABARAPL   | ENSG00000160789.18_LMNA | -0.1256  | -0.279220553 | 0.034283052 | 1.23E-01 | 3.53E-01 | 1.00E+00 |
| ENSG00000198515.12_CNGA1     | ENSG00000160789.18_LMNA | -0.23894 | -0.383547706 | -0.08288904 | 3.03E-03 | 2.70E-02 | 1.00E+00 |
| ENSG00000231827.2_RP11-216N  | ENSG00000160789.18_LMNA | -0.01611 | -0.174863552 | 0.143457296 | 8.44E-01 | 9.39E-01 | 1.00E+00 |
| ENSG00000021461.15_CYP3A43   | ENSG00000160789.18_LMNA | -0.07918 | -0.235409392 | 0.081046284 | 3.32E-01 | 6.18E-01 | 1.00E+00 |
| ENSG00000265912.1_RP11-583F  | ENSG00000160789.18_LMNA | -0.20517 | -0.352848573 | -0.04752485 | 1.12E-02 | 7.11E-02 | 1.00E+00 |
| ENSG00000255154.6_RP11-80H1  | ENSG00000160789.18_LMNA | 0.1014   | -0.058749197 | 0.256460566 | 2.14E-01 | 4.88E-01 | 1.00E+00 |
| ENSG00000228753.1_EIF4BP2    | ENSG00000160789.18_LMNA | 0.00575  | -0.153591498 | 0.164799647 | 9.44E-01 | 9.78E-01 | 1.00E+00 |
| ENSG00000180316.10_PNPLA1    | ENSG00000160789.18_LMNA | 0.00511  | -0.154217606 | 0.164175699 | 9.50E-01 | 9.80E-01 | 1.00E+00 |
| ENSG00000129451.10_KLK10     | ENSG00000160789.18_LMNA | -0.04556 | -0.203283667 | 0.114473619 | 5.77E-01 | 8.03E-01 | 1.00E+00 |
| ENSG00000162069.13_BICDL2    | ENSG00000160789.18_LMNA | 0.18238  | 0.0238749    | 0.331944932 | 2.45E-02 | 1.25E-01 | 1.00E+00 |
| ENSG00000261003.1_RP1-140C1  | ENSG00000160789.18_LMNA | -0.10127 | -0.256337701 | 0.058880252 | 2.14E-01 | 4.89E-01 | 1.00E+00 |
| ENSG00000167355.6_AC104389.1 | ENSG00000160789.18_LMNA | 0.00738  | -0.151997965 | 0.166386531 | 9.28E-01 | 9.72E-01 | 1.00E+00 |
| ENSG00000226783.1_TLK1P1     | ENSG00000160789.18_LMNA | 0.03533  | -0.124571451 | 0.193442584 | 6.66E-01 | 8.53E-01 | 1.00E+00 |
| ENSG00000168878.15_SFTPB     | ENSG00000160789.18_LMNA | 0.06331  | -0.096863348 | 0.220293927 | 4.38E-01 | 7.06E-01 | 1.00E+00 |
| ENSG00000242950.5_ERVW-1     | ENSG00000160789.18_LMNA | 0.07417  | -0.086048539 | 0.230645518 | 3.64E-01 | 6.45E-01 | 1.00E+00 |
| ENSG00000164855.14_TMEM184   | ENSG00000160789.18_LMNA | 0.13087  | -0.028937554 | 0.284146829 | 1.08E-01 | 3.27E-01 | 1.00E+00 |
| ENSG00000236581.7_STARD13-1  | ENSG00000160789.18_LMNA | -0.08313 | -0.239162555 | 0.077094057 | 3.09E-01 | 5.95E-01 | 1.00E+00 |
| ENSG00000215529.11_EFCAB8    | ENSG00000160789.18_LMNA | 0.02231  | -0.137381093 | 0.18086588  | 7.85E-01 | 9.12E-01 | 1.00E+00 |
| ENSG00000279038.1_           | ENSG00000160789.18_LMNA | -0.06961 | -0.226301333 | 0.090596226 | 3.94E-01 | 6.72E-01 | 1.00E+00 |
| ENSG00000214553.8_LRRC37A1   | ENSG00000160789.18_LMNA | 0.09452  | -0.065667832 | 0.249960372 | 2.47E-01 | 5.27E-01 | 1.00E+00 |
| ENSG00000237596.5_RP13-143G  | ENSG00000160789.18_LMNA | -0.03755 | -0.195581062 | 0.122382769 | 6.46E-01 | 8.43E-01 | 1.00E+00 |
| ENSG00000140297.11_GCNT3     | ENSG00000160789.18_LMNA | 0.10146  | -0.058689033 | 0.256516966 | 2.14E-01 | 4.88E-01 | 1.00E+00 |
| ENSG00000277152.1_RP11-622C  | ENSG00000160789.18_LMNA | 0.28496  | 0.13173424   | 0.424884293 | 3.73E-04 | 5.35E-03 | 1.00E+00 |
| ENSG00000205922.4_ONECUT3    | ENSG00000160789.18_LMNA | -0.11009 | -0.264654733 | 0.049984179 | 1.77E-01 | 4.38E-01 | 1.00E+00 |
| ENSG00000277991.3_CH507-338  | ENSG00000160789.18_LMNA | 0.02584  | -0.133912538 | 0.184281668 | 7.52E-01 | 8.97E-01 | 1.00E+00 |
| ENSG00000274735.1_           | ENSG00000160789.18_LMNA | 0.12792  | -0.031927212 | 0.281393671 | 1.16E-01 | 3.41E-01 | 1.00E+00 |
| ENSG00000263958.1_RP11-676J  | ENSG00000160789.18_LMNA | -0.25256 | -0.395841922 | -0.09726707 | 1.69E-03 | 1.72E-02 | 1.00E+00 |
| ENSG00000229520.1_LINC00404  | ENSG00000160789.18_LMNA | -0.15376 | -0.305482753 | 0.005577364 | 5.86E-02 | 2.22E-01 | 1.00E+00 |



|                              |                         |          |              |             |          |          |          |
|------------------------------|-------------------------|----------|--------------|-------------|----------|----------|----------|
| ENSG00000200769.1_Y_RNA      | ENSG00000160789.18_LMNA | -0.02705 | -0.185449378 | 0.132724998 | 7.41E-01 | 8.91E-01 | 1.00E+00 |
| ENSG00000200847.1_Y_RNA      | ENSG00000160789.18_LMNA | 0.08778  | -0.072430184 | 0.243579397 | 2.82E-01 | 5.67E-01 | 1.00E+00 |
| ENSG00000185275.6_CD24P4     | ENSG00000160789.18_LMNA | -0.15733 | -0.308800634 | 0.001913934 | 5.29E-02 | 2.09E-01 | 1.00E+00 |
| ENSG00000266931.1_RP11-1252  | ENSG00000160789.18_LMNA | -0.12374 | -0.277474399 | 0.036173507 | 1.29E-01 | 3.64E-01 | 1.00E+00 |
| ENSG00000221299.1_           | ENSG00000160789.18_LMNA | 0.00013  | -0.159073874 | 0.159327525 | 9.99E-01 | 9.99E-01 | 1.00E+00 |
| ENSG00000211482.1_           | ENSG00000160789.18_LMNA | -0.0369  | -0.194959783 | 0.123018953 | 6.52E-01 | 8.46E-01 | 1.00E+00 |
| ENSG00000239335.4_LLPH-AS1   | ENSG00000160789.18_LMNA | 0.02946  | -0.130355286 | 0.187776838 | 7.19E-01 | 8.80E-01 | 1.00E+00 |
| ENSG00000277224.1_HIST1H2BF  | ENSG00000160789.18_LMNA | 0.03354  | -0.126338746 | 0.191713619 | 6.82E-01 | 8.61E-01 | 1.00E+00 |
| ENSG00000276742.1_RP11-500G  | ENSG00000160789.18_LMNA | -0.08264 | -0.238696117 | 0.077585776 | 3.11E-01 | 5.98E-01 | 1.00E+00 |
| ENSG00000278009.1_RP11-649E  | ENSG00000160789.18_LMNA | -0.00071 | -0.159887966 | 0.158513283 | 9.93E-01 | 9.97E-01 | 1.00E+00 |
| ENSG00000270124.1_RP11-118F  | ENSG00000160789.18_LMNA | -0.14485 | -0.297198568 | 0.014688017 | 7.50E-02 | 2.61E-01 | 1.00E+00 |
| ENSG00000231967.1_RP11-12D2  | ENSG00000160789.18_LMNA | -0.06818 | -0.224941105 | 0.092017462 | 4.04E-01 | 6.80E-01 | 1.00E+00 |
| ENSG00000254709.5_IGLL5      | ENSG00000160789.18_LMNA | -0.00531 | -0.164366961 | 0.154025708 | 9.48E-01 | 9.79E-01 | 1.00E+00 |
| ENSG00000244681.1_MTHFD2P1   | ENSG00000160789.18_LMNA | 0.01418  | -0.145346068 | 0.172992912 | 8.62E-01 | 9.46E-01 | 1.00E+00 |
| ENSG00000170162.12_VGLL2     | ENSG00000160789.18_LMNA | -0.05129 | -0.208786877 | 0.108798061 | 5.30E-01 | 7.73E-01 | 1.00E+00 |
| ENSG00000274444.1_RP11-128A  | ENSG00000160789.18_LMNA | -0.13114 | -0.284402789 | 0.028659321 | 1.07E-01 | 3.26E-01 | 1.00E+00 |
| ENSG00000231445.1_TIMM8AP1   | ENSG00000160789.18_LMNA | 0.10762  | -0.052482062 | 0.262324153 | 1.87E-01 | 4.53E-01 | 1.00E+00 |
| ENSG00000259704.1_CTD-3094K  | ENSG00000160789.18_LMNA | 0.0642   | -0.095986261 | 0.221136117 | 4.32E-01 | 7.01E-01 | 1.00E+00 |
| ENSG00000271018.1_RP11-60E8  | ENSG00000160789.18_LMNA | -0.02311 | -0.181644684 | 0.136590945 | 7.77E-01 | 9.09E-01 | 1.00E+00 |
| ENSG00000255542.1_RP4-683L5  | ENSG00000160789.18_LMNA | -0.01109 | -0.169993128 | 0.148370091 | 8.92E-01 | 9.58E-01 | 1.00E+00 |
| ENSG00000266959.1_AC005786.1 | ENSG00000160789.18_LMNA | -0.12584 | -0.279446056 | 0.034038751 | 1.22E-01 | 3.52E-01 | 1.00E+00 |
| ENSG00000228930.1_MTCO1P3    | ENSG00000160789.18_LMNA | -0.002   | -0.161148434 | 0.15725173  | 9.81E-01 | 9.93E-01 | 1.00E+00 |
| ENSG00000239504.3_RN7SL583F  | ENSG00000160789.18_LMNA | -0.08745 | -0.243263253 | 0.07276447  | 2.84E-01 | 5.70E-01 | 1.00E+00 |
| ENSG00000237133.1_AC020594.1 | ENSG00000160789.18_LMNA | 0.03076  | -0.129072335 | 0.189035425 | 7.07E-01 | 8.75E-01 | 1.00E+00 |
| ENSG00000172236.15_TPSAB1    | ENSG00000160789.18_LMNA | 0.14871  | -0.010748125 | 0.300786826 | 6.75E-02 | 2.44E-01 | 1.00E+00 |
| ENSG00000253983.2_RP1-16A9.1 | ENSG00000160789.18_LMNA | 0.26017  | 0.10532696   | 0.40268719  | 1.21E-03 | 1.34E-02 | 1.00E+00 |
| ENSG00000261105.4_LMO7-AS1   | ENSG00000160789.18_LMNA | -0.00454 | -0.163625747 | 0.15476925  | 9.56E-01 | 9.82E-01 | 1.00E+00 |
| ENSG00000235192.1_AC009495.1 | ENSG00000160789.18_LMNA | 0.00216  | -0.157092687 | 0.161307267 | 9.79E-01 | 9.92E-01 | 1.00E+00 |
| ENSG00000185130.5_HIST1H2BL  | ENSG00000160789.18_LMNA | -0.04863 | -0.206232189 | 0.111435334 | 5.52E-01 | 7.88E-01 | 1.00E+00 |
| ENSG00000268307.1_CTD-2619J  | ENSG00000160789.18_LMNA | 0.06794  | -0.092253831 | 0.224714762 | 4.06E-01 | 6.81E-01 | 1.00E+00 |
| ENSG00000224666.3_RP1-50J22  | ENSG00000160789.18_LMNA | 0.12947  | -0.030361175 | 0.282836469 | 1.12E-01 | 3.34E-01 | 1.00E+00 |
| ENSG00000235189.1_RP4-537K2  | ENSG00000160789.18_LMNA | -0.19349 | -0.34215344  | -0.03538168 | 1.69E-02 | 9.57E-02 | 1.00E+00 |
| ENSG00000279690.1_AP000280.1 | ENSG00000160789.18_LMNA | 0.09583  | -0.064352766 | 0.251198096 | 2.40E-01 | 5.19E-01 | 1.00E+00 |

|                              |                         |          |              |             |          |          |          |
|------------------------------|-------------------------|----------|--------------|-------------|----------|----------|----------|
| ENSG00000259887.1_RP11-923I1 | ENSG00000160789.18_LMNA | 0.01614  | -0.143431917 | 0.174888672 | 8.44E-01 | 9.39E-01 | 1.00E+00 |
| ENSG00000101883.4_RHOXF1     | ENSG00000160789.18_LMNA | 0.02457  | -0.135158789 | 0.18305526  | 7.64E-01 | 9.02E-01 | 1.00E+00 |
| ENSG00000226609.1_RP11-276E  | ENSG00000160789.18_LMNA | -0.13228 | -0.285468818 | 0.027500011 | 1.04E-01 | 3.20E-01 | 1.00E+00 |
| ENSG00000271825.1_RP11-337N  | ENSG00000160789.18_LMNA | -0.05312 | -0.210542896 | 0.10698268  | 5.16E-01 | 7.63E-01 | 1.00E+00 |
| ENSG00000254336.1_AC008694.  | ENSG00000160789.18_LMNA | -0.02158 | -0.180158499 | 0.138098428 | 7.92E-01 | 9.16E-01 | 1.00E+00 |
| ENSG00000233072.1_RPS15AP6   | ENSG00000160789.18_LMNA | -0.04828 | -0.205894416 | 0.111783691 | 5.55E-01 | 7.89E-01 | 1.00E+00 |
| ENSG00000278966.1_RP5-1174N  | ENSG00000160789.18_LMNA | 0.00459  | -0.154728619 | 0.163666261 | 9.55E-01 | 9.82E-01 | 1.00E+00 |
| ENSG00000268670.1_CTD-2622I1 | ENSG00000160789.18_LMNA | 0.10934  | -0.050739698 | 0.263950205 | 1.80E-01 | 4.43E-01 | 1.00E+00 |
| ENSG00000265205.1_AC010761.  | ENSG00000160789.18_LMNA | 0.06722  | -0.092972455 | 0.224026411 | 4.11E-01 | 6.85E-01 | 1.00E+00 |
| ENSG00000260366.1_CTD-2639E  | ENSG00000160789.18_LMNA | -0.02096 | -0.179560402 | 0.13870468  | 7.98E-01 | 9.19E-01 | 1.00E+00 |
| ENSG00000270457.1_RP11-467C  | ENSG00000160789.18_LMNA | 0.2021   | 0.044327089  | 0.35003985  | 1.25E-02 | 7.70E-02 | 1.00E+00 |
| ENSG00000272915.1_RP11-62J1. | ENSG00000160789.18_LMNA | -0.11352 | -0.267883552 | 0.046517061 | 1.64E-01 | 4.19E-01 | 1.00E+00 |
| ENSG00000138083.4_SIX3       | ENSG00000160789.18_LMNA | -0.13626 | -0.289190469 | 0.023446088 | 9.41E-02 | 3.00E-01 | 1.00E+00 |
| ENSG00000273243.1_CTA-217C2  | ENSG00000160789.18_LMNA | -0.03347 | -0.191650153 | 0.126403581 | 6.82E-01 | 8.62E-01 | 1.00E+00 |
| ENSG00000234192.1_RPS26P38   | ENSG00000160789.18_LMNA | -0.09855 | -0.253766923 | 0.061619918 | 2.27E-01 | 5.04E-01 | 1.00E+00 |
| ENSG00000253483.1 CTC-756D1  | ENSG00000160789.18_LMNA | 0.17541  | 0.016674127  | 0.325519678 | 3.07E-02 | 1.45E-01 | 1.00E+00 |
| ENSG00000218902.3_PTMAP3     | ENSG00000160789.18_LMNA | -0.00171 | -0.16087021  | 0.157530283 | 9.83E-01 | 9.94E-01 | 1.00E+00 |
| ENSG00000270951.1_RP1-309F2  | ENSG00000160789.18_LMNA | 0.02035  | -0.139299197 | 0.178973654 | 8.03E-01 | 9.21E-01 | 1.00E+00 |
| ENSG00000214652.5_ZNF727     | ENSG00000160789.18_LMNA | -0.27054 | -0.411996791 | -0.11635151 | 7.49E-04 | 9.23E-03 | 1.00E+00 |
| ENSG00000233081.1_RP11-440G  | ENSG00000160789.18_LMNA | 0.02891  | -0.130897764 | 0.187244347 | 7.24E-01 | 8.83E-01 | 1.00E+00 |
| ENSG00000269227.1_           | ENSG00000160789.18_LMNA | 0.16569  | 0.00666191   | 0.316538115 | 4.14E-02 | 1.77E-01 | 1.00E+00 |
| ENSG00000258181.1_RP11-493L  | ENSG00000160789.18_LMNA | -0.07188 | -0.228467027 | 0.088330731 | 3.79E-01 | 6.58E-01 | 1.00E+00 |
| ENSG00000261207.1_LA16c-361/ | ENSG00000160789.18_LMNA | 0.04565  | -0.114381751 | 0.203372906 | 5.77E-01 | 8.03E-01 | 1.00E+00 |
| ENSG00000254040.1_RP11-421P  | ENSG00000160789.18_LMNA | -0.22726 | -0.372964379 | -0.07061134 | 4.87E-03 | 3.84E-02 | 1.00E+00 |
| ENSG00000253618.1_GRPEL2-A:  | ENSG00000160789.18_LMNA | -0.04647 | -0.204159271 | 0.113571979 | 5.70E-01 | 7.99E-01 | 1.00E+00 |
| ENSG00000225655.4_PGM5-AS1   | ENSG00000160789.18_LMNA | -0.14107 | -0.293675253 | 0.018547201 | 8.30E-02 | 2.78E-01 | 1.00E+00 |
| ENSG00000215630.6_GUSBP9     | ENSG00000160789.18_LMNA | 0.03052  | -0.12930458  | 0.188807668 | 7.09E-01 | 8.76E-01 | 1.00E+00 |
| ENSG00000223452.3_HMG2P18    | ENSG00000160789.18_LMNA | 0.12061  | -0.039346624 | 0.274538824 | 1.39E-01 | 3.80E-01 | 1.00E+00 |
| ENSG00000244361.1_RPL30P7    | ENSG00000160789.18_LMNA | 0.05231  | -0.107788135 | 0.209764032 | 5.22E-01 | 7.68E-01 | 1.00E+00 |
| ENSG00000269765.2_CTB-187L3  | ENSG00000160789.18_LMNA | 0.07396  | -0.086260803 | 0.230443033 | 3.65E-01 | 6.47E-01 | 1.00E+00 |
| ENSG00000257956.1_NOP56P3    | ENSG00000160789.18_LMNA | -0.02351 | -0.182027668 | 0.136202233 | 7.74E-01 | 9.07E-01 | 1.00E+00 |
| ENSG00000233741.1_AC016691.  | ENSG00000160789.18_LMNA | -0.03688 | -0.194937866 | 0.123041391 | 6.52E-01 | 8.46E-01 | 1.00E+00 |
| ENSG00000273342.1_KB-1440D3  | ENSG00000160789.18_LMNA | -0.18266 | -0.332203509 | -0.02416536 | 2.43E-02 | 1.24E-01 | 1.00E+00 |

|                              |                         |          |              |             |          |          |          |
|------------------------------|-------------------------|----------|--------------|-------------|----------|----------|----------|
| ENSG00000103355.11_PRSS33    | ENSG00000160789.18_LMNA | -0.22761 | -0.373283989 | -0.07098078 | 4.80E-03 | 3.80E-02 | 1.00E+00 |
| ENSG00000269091.4_CTD-2126E  | ENSG00000160789.18_LMNA | 0.15543  | -0.003864322 | 0.307035155 | 5.59E-02 | 2.16E-01 | 1.00E+00 |
| ENSG00000277548.1_RP11-139H  | ENSG00000160789.18_LMNA | 0.19978  | 0.041910636  | 0.347913731 | 1.36E-02 | 8.17E-02 | 1.00E+00 |
| ENSG00000237941.2_KCNQ1DN    | ENSG00000160789.18_LMNA | -0.2207  | -0.367003331 | -0.06373603 | 6.29E-03 | 4.66E-02 | 1.00E+00 |
| ENSG00000233797.1_UFL1-AS1   | ENSG00000160789.18_LMNA | -0.31219 | -0.449074904 | -0.16099487 | 9.02E-05 | 1.74E-03 | 1.00E+00 |
| ENSG00000278869.1_CITF22-49E | ENSG00000160789.18_LMNA | 0.27651  | 0.122708697  | 0.41733716  | 5.64E-04 | 7.40E-03 | 1.00E+00 |
| ENSG00000279047.2_CTC-270D5  | ENSG00000160789.18_LMNA | -0.11221 | -0.26664996  | 0.047842592 | 1.69E-01 | 4.27E-01 | 1.00E+00 |
| ENSG00000248916.1_NUP210P3   | ENSG00000160789.18_LMNA | 0.02144  | -0.138230912 | 0.180027817 | 7.93E-01 | 9.16E-01 | 1.00E+00 |
| ENSG00000262434.1_RP11-676J  | ENSG00000160789.18_LMNA | 0.03288  | -0.126987766 | 0.19107818  | 6.88E-01 | 8.65E-01 | 1.00E+00 |
| ENSG00000270980.1_RP11-626A  | ENSG00000160789.18_LMNA | 0.01025  | -0.149198157 | 0.169170669 | 9.00E-01 | 9.61E-01 | 1.00E+00 |
| ENSG00000255042.1_RP11-347H  | ENSG00000160789.18_LMNA | -0.03436 | -0.192502872 | 0.125532246 | 6.74E-01 | 8.57E-01 | 1.00E+00 |
| ENSG00000276945.1_CTC-436P1  | ENSG00000160789.18_LMNA | 0.23023  | 0.073733223  | 0.375662912 | 4.32E-03 | 3.52E-02 | 1.00E+00 |
| ENSG00000166329.2_CCDC182    | ENSG00000160789.18_LMNA | -0.15573 | -0.307311586 | 0.003559095 | 5.54E-02 | 2.15E-01 | 1.00E+00 |
| ENSG00000253829.1_RP11-723D  | ENSG00000160789.18_LMNA | -0.00184 | -0.160996447 | 0.157403903 | 9.82E-01 | 9.93E-01 | 1.00E+00 |
| ENSG00000174403.14_C20orf166 | ENSG00000160789.18_LMNA | 0.20621  | 0.04860418   | 0.353795347 | 1.08E-02 | 6.93E-02 | 1.00E+00 |
| ENSG00000269560.1_CTD-2192J  | ENSG00000160789.18_LMNA | -0.00757 | -0.166567637 | 0.151815994 | 9.26E-01 | 9.72E-01 | 1.00E+00 |
| ENSG00000260500.1_CTD-3193C  | ENSG00000160789.18_LMNA | -0.0018  | -0.160953695 | 0.157446704 | 9.82E-01 | 9.94E-01 | 1.00E+00 |
| ENSG00000276092.1_RP11-734B  | ENSG00000160789.18_LMNA | 0.06675  | -0.093444603 | 0.223573981 | 4.14E-01 | 6.87E-01 | 1.00E+00 |
| ENSG00000267224.1_AC005498.  | ENSG00000160789.18_LMNA | -0.03924 | -0.197213211 | 0.12071022  | 6.31E-01 | 8.34E-01 | 1.00E+00 |
| ENSG00000227868.5_C1orf234   | ENSG00000160789.18_LMNA | -0.24262 | -0.386875119 | -0.08676812 | 2.60E-03 | 2.39E-02 | 1.00E+00 |
| ENSG00000135625.7_EGR4       | ENSG00000160789.18_LMNA | -0.02901 | -0.187343578 | 0.130796687 | 7.23E-01 | 8.83E-01 | 1.00E+00 |
| ENSG00000213786.3_NHP2P2     | ENSG00000160789.18_LMNA | -0.01833 | -0.177017963 | 0.141279128 | 8.23E-01 | 9.31E-01 | 1.00E+00 |
| ENSG00000241129.3_RPL22P19   | ENSG00000160789.18_LMNA | 0.08345  | -0.076772566 | 0.239467438 | 3.07E-01 | 5.93E-01 | 1.00E+00 |
| ENSG00000256824.1_RP11-21A7  | ENSG00000160789.18_LMNA | -0.15893 | -0.310282766 | 0.000274743 | 5.05E-02 | 2.03E-01 | 1.00E+00 |
| ENSG00000279205.1_RP11-632P  | ENSG00000160789.18_LMNA | -0.26968 | -0.411223318 | -0.11543277 | 7.80E-04 | 9.53E-03 | 1.00E+00 |
| ENSG00000254507.2_RP11-481A  | ENSG00000160789.18_LMNA | -0.05289 | -0.21031767  | 0.107215638 | 5.18E-01 | 7.64E-01 | 1.00E+00 |
| ENSG00000224316.1_GTF2IP5    | ENSG00000160789.18_LMNA | -0.07044 | -0.227090795 | 0.089770764 | 3.89E-01 | 6.67E-01 | 1.00E+00 |
| ENSG00000268401.1_CTC-344H1  | ENSG00000160789.18_LMNA | -0.07865 | -0.234907972 | 0.081573547 | 3.35E-01 | 6.21E-01 | 1.00E+00 |
| ENSG00000220924.4_OSTCP4     | ENSG00000160789.18_LMNA | -0.0103  | -0.169227037 | 0.149141419 | 9.00E-01 | 9.61E-01 | 1.00E+00 |
| ENSG00000270240.2_AC015849.  | ENSG00000160789.18_LMNA | -0.09622 | -0.251570517 | 0.063956859 | 2.38E-01 | 5.17E-01 | 1.00E+00 |
| ENSG00000267314.1_AC104532.  | ENSG00000160789.18_LMNA | -0.01561 | -0.174378034 | 0.143947743 | 8.49E-01 | 9.41E-01 | 1.00E+00 |
| ENSG00000257252.4_RP11-486A  | ENSG00000160789.18_LMNA | -0.03427 | -0.192416342 | 0.125620688 | 6.75E-01 | 8.58E-01 | 1.00E+00 |
| ENSG00000251015.1_SLC25A30-  | ENSG00000160789.18_LMNA | 0.00656  | -0.152799016 | 0.165589028 | 9.36E-01 | 9.75E-01 | 1.00E+00 |

|                             |                         |          |              |             |          |          |          |
|-----------------------------|-------------------------|----------|--------------|-------------|----------|----------|----------|
| ENSG00000228663.1_PSM10P1   | ENSG00000160789.18_LMNA | 0.12591  | -0.033969244 | 0.279510208 | 1.22E-01 | 3.52E-01 | 1.00E+00 |
| ENSG00000251307.1_RP11-506H | ENSG00000160789.18_LMNA | 0.0159   | -0.143667198 | 0.174655779 | 8.46E-01 | 9.40E-01 | 1.00E+00 |
| ENSG00000275709.1_RP11-96O2 | ENSG00000160789.18_LMNA | -0.07778 | -0.234081352 | 0.082442383 | 3.41E-01 | 6.26E-01 | 1.00E+00 |
| ENSG00000267301.1_RPL23AP7  | ENSG00000160789.18_LMNA | 0.11616  | -0.043854987 | 0.270357874 | 1.54E-01 | 4.05E-01 | 1.00E+00 |
| ENSG00000243730.2_RPL29P3   | ENSG00000160789.18_LMNA | -0.05684 | -0.214101261 | 0.103297521 | 4.87E-01 | 7.43E-01 | 1.00E+00 |
| ENSG00000241739.1_CTD-2290C | ENSG00000160789.18_LMNA | -0.09961 | -0.254768543 | 0.060553061 | 2.22E-01 | 4.98E-01 | 1.00E+00 |
| ENSG00000261341.4_CTD-2568A | ENSG00000160789.18_LMNA | -0.01687 | -0.175600727 | 0.142712339 | 8.37E-01 | 9.37E-01 | 1.00E+00 |
| ENSG00000234135.2_RPL23AP8  | ENSG00000160789.18_LMNA | -0.04599 | -0.203696692 | 0.114048378 | 5.74E-01 | 8.01E-01 | 1.00E+00 |
| ENSG00000239524.2_RPL32P34  | ENSG00000160789.18_LMNA | -0.05954 | -0.216688489 | 0.10061262  | 4.66E-01 | 7.28E-01 | 1.00E+00 |
| ENSG00000237166.1_AC007163. | ENSG00000160789.18_LMNA | -0.17011 | -0.320623912 | -0.01120887 | 3.62E-02 | 1.62E-01 | 1.00E+00 |
| ENSG00000267589.1_CTC-232P5 | ENSG00000160789.18_LMNA | -0.04675 | -0.204424623 | 0.113298633 | 5.67E-01 | 7.97E-01 | 1.00E+00 |
| ENSG00000243396.1_RP11-454H | ENSG00000160789.18_LMNA | -0.02198 | -0.180553654 | 0.137697754 | 7.88E-01 | 9.14E-01 | 1.00E+00 |
| ENSG00000231086.1_TSSK1A    | ENSG00000160789.18_LMNA | 0.03847  | -0.121473768 | 0.196468324 | 6.38E-01 | 8.38E-01 | 1.00E+00 |
| ENSG00000234844.1_CDC42P2   | ENSG00000160789.18_LMNA | -0.05273 | -0.21017019  | 0.107368163 | 5.19E-01 | 7.65E-01 | 1.00E+00 |
| ENSG00000230175.1_RP11-466F | ENSG00000160789.18_LMNA | -0.10181 | -0.256845771 | 0.058338242 | 2.12E-01 | 4.86E-01 | 1.00E+00 |
| ENSG00000259062.2_ACTN1-AS  | ENSG00000160789.18_LMNA | 0.20535  | 0.047713222  | 0.353013852 | 1.11E-02 | 7.08E-02 | 1.00E+00 |
| ENSG00000173699.14_SPATA3   | ENSG00000160789.18_LMNA | -0.29208 | -0.431229936 | -0.13936073 | 2.61E-04 | 4.03E-03 | 1.00E+00 |
| ENSG00000203325.3_RP11-277A | ENSG00000160789.18_LMNA | 0.04534  | -0.114684073 | 0.203079217 | 5.79E-01 | 8.04E-01 | 1.00E+00 |
| ENSG00000273365.1_RP11-466F | ENSG00000160789.18_LMNA | -0.01189 | -0.170762703 | 0.147594865 | 8.84E-01 | 9.55E-01 | 1.00E+00 |
| ENSG00000273786.1_RP11-133K | ENSG00000160789.18_LMNA | -0.02695 | -0.185353113 | 0.132822932 | 7.42E-01 | 8.92E-01 | 1.00E+00 |
| ENSG00000255647.3_CTD-2373J | ENSG00000160789.18_LMNA | -0.1166  | -0.270770694 | 0.043410408 | 1.53E-01 | 4.02E-01 | 1.00E+00 |
| ENSG00000249176.1_RP11-304F | ENSG00000160789.18_LMNA | 0.02193  | -0.137751026 | 0.180501121 | 7.89E-01 | 9.14E-01 | 1.00E+00 |
| ENSG00000215264.4_RPL10AP3  | ENSG00000160789.18_LMNA | -0.13007 | -0.283404717 | 0.029743966 | 1.10E-01 | 3.31E-01 | 1.00E+00 |
| ENSG00000275325.3_PDCD6IPP  | ENSG00000160789.18_LMNA | 0.03472  | -0.125174571 | 0.192852767 | 6.71E-01 | 8.56E-01 | 1.00E+00 |
| ENSG00000230753.4_ZNF341-AS | ENSG00000160789.18_LMNA | 0.15257  | -0.006794277 | 0.30437895  | 6.06E-02 | 2.27E-01 | 1.00E+00 |
| ENSG00000234199.2_LINC01191 | ENSG00000160789.18_LMNA | 0.08267  | -0.07755532  | 0.238725011 | 3.11E-01 | 5.98E-01 | 1.00E+00 |
| ENSG00000270806.1_C17orf50  | ENSG00000160789.18_LMNA | -0.17986 | -0.329617811 | -0.0212632  | 2.66E-02 | 1.32E-01 | 1.00E+00 |
| ENSG00000223711.1_AC091633. | ENSG00000160789.18_LMNA | 0.11788  | -0.042114818 | 0.271973071 | 1.48E-01 | 3.94E-01 | 1.00E+00 |
| ENSG00000266373.1_RP11-710M | ENSG00000160789.18_LMNA | 0.14174  | -0.017859422 | 0.294303796 | 8.15E-02 | 2.75E-01 | 1.00E+00 |
| ENSG00000259286.3_RP11-696L | ENSG00000160789.18_LMNA | 0.01359  | -0.145931047 | 0.172413082 | 8.68E-01 | 9.48E-01 | 1.00E+00 |
| ENSG00000102245.6_CD40LG    | ENSG00000160789.18_LMNA | 0.00241  | -0.156851718 | 0.161547885 | 9.77E-01 | 9.91E-01 | 1.00E+00 |
| ENSG00000234476.1_RP11-496N | ENSG00000160789.18_LMNA | 0.07071  | -0.08950168  | 0.227348052 | 3.87E-01 | 6.65E-01 | 1.00E+00 |
| ENSG00000244004.1_RP11-1396 | ENSG00000160789.18_LMNA | -0.08877 | -0.244514342 | 0.071441173 | 2.77E-01 | 5.62E-01 | 1.00E+00 |

|                              |                         |          |              |             |          |          |          |
|------------------------------|-------------------------|----------|--------------|-------------|----------|----------|----------|
| ENSG00000214366.4	EIF4EP5    | ENSG00000160789.18_LMNA | -0.00775 | -0.166744524 | 0.151638243 | 9.25E-01 | 9.71E-01 | 1.00E+00 |
| ENSG00000224055.1_GAPDHP55   | ENSG00000160789.18_LMNA | 0.21423  | 0.05696722   | 0.361110186 | 8.04E-03 | 5.58E-02 | 1.00E+00 |
| ENSG00000250900.5_CTC-338M1  | ENSG00000160789.18_LMNA | -0.00411 | -0.163205664 | 0.155190493 | 9.60E-01 | 9.84E-01 | 1.00E+00 |
| ENSG00000261424.1_ATP5F1P7   | ENSG00000160789.18_LMNA | 0.02785  | -0.13193349  | 0.18622717  | 7.33E-01 | 8.88E-01 | 1.00E+00 |
| ENSG00000251633.3_GYG1P1     | ENSG00000160789.18_LMNA | 0.01492  | -0.144627924 | 0.173704432 | 8.55E-01 | 9.43E-01 | 1.00E+00 |
| ENSG00000237008.2_LAPTM4BP   | ENSG00000160789.18_LMNA | 0.00642  | -0.152934579 | 0.165454024 | 9.37E-01 | 9.75E-01 | 1.00E+00 |
| ENSG00000240423.1_LINC00636  | ENSG00000160789.18_LMNA | 0.06605  | -0.094140226 | 0.222907159 | 4.19E-01 | 6.91E-01 | 1.00E+00 |
| ENSG00000255526.5_NEDD8-MD   | ENSG00000160789.18_LMNA | 0.05147  | -0.108618469 | 0.208960688 | 5.29E-01 | 7.73E-01 | 1.00E+00 |
| ENSG00000213641.4_RPL7AP4    | ENSG00000160789.18_LMNA | 0.11025  | -0.04982816  | 0.264800181 | 1.76E-01 | 4.38E-01 | 1.00E+00 |
| ENSG00000176754.11_LINC0030  | ENSG00000160789.18_LMNA | -0.09686 | -0.252169551 | 0.06331984  | 2.35E-01 | 5.13E-01 | 1.00E+00 |
| ENSG00000213386.3_RP11-779C  | ENSG00000160789.18_LMNA | -0.04014 | -0.198077981 | 0.119823311 | 6.23E-01 | 8.30E-01 | 1.00E+00 |
| ENSG00000187166.1_H1FNT      | ENSG00000160789.18_LMNA | 0.08506  | -0.075154235 | 0.241001222 | 2.97E-01 | 5.83E-01 | 1.00E+00 |
| ENSG00000188487.10_INSC      | ENSG00000160789.18_LMNA | -0.12327 | -0.27703827  | 0.036645327 | 1.30E-01 | 3.66E-01 | 1.00E+00 |
| ENSG00000124701.5_APOBEC2    | ENSG00000160789.18_LMNA | -0.03976 | -0.197707514 | 0.120203324 | 6.27E-01 | 8.32E-01 | 1.00E+00 |
| ENSG00000243806.1_RPL7P18    | ENSG00000160789.18_LMNA | 0.04502  | -0.115006739 | 0.202765702 | 5.82E-01 | 8.05E-01 | 1.00E+00 |
| ENSG00000273618.1_RP11-66N2  | ENSG00000160789.18_LMNA | -0.02478 | -0.183261151 | 0.134949638 | 7.62E-01 | 9.01E-01 | 1.00E+00 |
| ENSG00000230799.1_AC007279   | ENSG00000160789.18_LMNA | 0.18186  | 0.023336086  | 0.331465135 | 2.49E-02 | 1.26E-01 | 1.00E+00 |
| ENSG00000205562.2_RP11-497E  | ENSG00000160789.18_LMNA | -0.0577  | -0.214928408 | 0.10243965  | 4.80E-01 | 7.38E-01 | 1.00E+00 |
| ENSG00000177710.5_SLC35G5    | ENSG00000160789.18_LMNA | 0.13582  | -0.023900175 | 0.28877407  | 9.52E-02 | 3.02E-01 | 1.00E+00 |
| ENSG00000241318.3_WDR82P2    | ENSG00000160789.18_LMNA | -0.09145 | -0.247053402 | 0.068752145 | 2.62E-01 | 5.46E-01 | 1.00E+00 |
| ENSG00000279727.1_RP11-640L  | ENSG00000160789.18_LMNA | 0.08148  | -0.078744505 | 0.237596384 | 3.18E-01 | 6.05E-01 | 1.00E+00 |
| ENSG00000273189.1_CTD-3148I  | ENSG00000160789.18_LMNA | 0.03696  | -0.122964627 | 0.195012846 | 6.51E-01 | 8.45E-01 | 1.00E+00 |
| ENSG00000184697.6_CLDN6      | ENSG00000160789.18_LMNA | 0.06224  | -0.097930736 | 0.219268369 | 4.46E-01 | 7.13E-01 | 1.00E+00 |
| ENSG00000225715.1_RP11-325E  | ENSG00000160789.18_LMNA | -0.12324 | -0.277008166 | 0.03667789  | 1.30E-01 | 3.66E-01 | 1.00E+00 |
| ENSG00000227018.1_IL6STP1    | ENSG00000160789.18_LMNA | 0.02404  | -0.135681684 | 0.182540396 | 7.69E-01 | 9.04E-01 | 1.00E+00 |
| ENSG00000223414.2_LINC00473  | ENSG00000160789.18_LMNA | 0.19204  | 0.03387602   | 0.340821764 | 1.78E-02 | 9.92E-02 | 1.00E+00 |
| ENSG00000241544.1_RP11-6F2.5 | ENSG00000160789.18_LMNA | 0.03827  | -0.121671681 | 0.196275189 | 6.40E-01 | 8.39E-01 | 1.00E+00 |
| ENSG00000224341.1_RP4-562J1  | ENSG00000160789.18_LMNA | 0.04326  | -0.116746579 | 0.201074084 | 5.97E-01 | 8.14E-01 | 1.00E+00 |
| ENSG00000105668.6_UPK1A      | ENSG00000160789.18_LMNA | 0.02089  | -0.138768086 | 0.179497836 | 7.98E-01 | 9.19E-01 | 1.00E+00 |
| ENSG00000281706.1_LINC01012  | ENSG00000160789.18_LMNA | -0.16272 | -0.31379129  | -0.00361224 | 4.52E-02 | 1.88E-01 | 1.00E+00 |
| ENSG00000236833.1_AC024560   | ENSG00000160789.18_LMNA | 0.00509  | -0.154232576 | 0.164160778 | 9.50E-01 | 9.80E-01 | 1.00E+00 |
| ENSG00000236806.1_RPL7AP15   | ENSG00000160789.18_LMNA | 0.01429  | -0.145241526 | 0.173096511 | 8.61E-01 | 9.46E-01 | 1.00E+00 |
| ENSG00000227145.1_IL21-AS1   | ENSG00000160789.18_LMNA | 0.14542  | -0.01411122  | 0.297724437 | 7.39E-02 | 2.59E-01 | 1.00E+00 |

|                             |                         |          |              |             |          |          |          |
|-----------------------------|-------------------------|----------|--------------|-------------|----------|----------|----------|
| ENSG00000230469.1_RPL5P26   | ENSG00000160789.18_LMNA | -0.00103 | -0.160201694 | 0.158199383 | 9.90E-01 | 9.96E-01 | 1.00E+00 |
| ENSG00000229212.6_RP11-561C | ENSG00000160789.18_LMNA | 0.01521  | -0.144338726 | 0.17399087  | 8.52E-01 | 9.42E-01 | 1.00E+00 |
| ENSG00000231095.1_GYG1P3    | ENSG00000160789.18_LMNA | -0.05738 | -0.214618225 | 0.10276141  | 4.83E-01 | 7.40E-01 | 1.00E+00 |
| ENSG00000274769.1_RP11-493E | ENSG00000160789.18_LMNA | -0.08912 | -0.244842931 | 0.071093435 | 2.75E-01 | 5.59E-01 | 1.00E+00 |
| ENSG00000249364.4_RP11-434D | ENSG00000160789.18_LMNA | -0.05728 | -0.214524215 | 0.102858915 | 4.83E-01 | 7.41E-01 | 1.00E+00 |
| ENSG00000238217.4_AC093590. | ENSG00000160789.18_LMNA | -0.26909 | -0.410698152 | -0.11480926 | 8.02E-04 | 9.74E-03 | 1.00E+00 |
| ENSG00000257513.6_NPIPBP1   | ENSG00000160789.18_LMNA | -0.04016 | -0.198092261 | 0.119808661 | 6.23E-01 | 8.30E-01 | 1.00E+00 |
| ENSG00000234323.4_LINC01505 | ENSG00000160789.18_LMNA | -0.10184 | -0.256871667 | 0.05831061  | 2.12E-01 | 4.86E-01 | 1.00E+00 |
| ENSG00000227709.4_RP11-118D | ENSG00000160789.18_LMNA | 0.03413  | -0.125750309 | 0.192289513 | 6.76E-01 | 8.59E-01 | 1.00E+00 |
| ENSG00000176153.11_GPX2     | ENSG00000160789.18_LMNA | 0.12008  | -0.039884263 | 0.274040852 | 1.41E-01 | 3.83E-01 | 1.00E+00 |
| ENSG00000220586.1_TUBBP9    | ENSG00000160789.18_LMNA | -0.06458 | -0.221500459 | 0.09560667  | 4.29E-01 | 6.99E-01 | 1.00E+00 |
| ENSG00000236695.1_HNRNPA1F  | ENSG00000160789.18_LMNA | 0.171    | 0.012131505  | 0.321451567 | 3.52E-02 | 1.59E-01 | 1.00E+00 |
| ENSG00000164744.11_SUN3     | ENSG00000160789.18_LMNA | 0.14834  | -0.011119207 | 0.300449239 | 6.82E-02 | 2.45E-01 | 1.00E+00 |
| ENSG00000187753.11_C9orf153 | ENSG00000160789.18_LMNA | -0.03275 | -0.190953754 | 0.127114819 | 6.89E-01 | 8.66E-01 | 1.00E+00 |
| ENSG00000165828.12_PRAP1    | ENSG00000160789.18_LMNA | -0.02416 | -0.182660435 | 0.135559788 | 7.68E-01 | 9.04E-01 | 1.00E+00 |
| ENSG00000238107.1_RP11-495P | ENSG00000160789.18_LMNA | -0.02959 | -0.187908745 | 0.130220875 | 7.17E-01 | 8.80E-01 | 1.00E+00 |
| ENSG00000277324.1_RP11-850A | ENSG00000160789.18_LMNA | 0.10576  | -0.054351741 | 0.260577294 | 1.95E-01 | 4.63E-01 | 1.00E+00 |
| ENSG00000121764.10_HCRTR1   | ENSG00000160789.18_LMNA | 0.13869  | -0.020969302 | 0.291459609 | 8.84E-02 | 2.89E-01 | 1.00E+00 |
| ENSG00000251323.2_RP11-452H | ENSG00000160789.18_LMNA | -0.187   | -0.33619568  | -0.02865634 | 2.11E-02 | 1.12E-01 | 1.00E+00 |
| ENSG00000215009.5_ACSM4     | ENSG00000160789.18_LMNA | 0.08132  | -0.078904594 | 0.237444382 | 3.19E-01 | 6.06E-01 | 1.00E+00 |
| ENSG00000248544.2_CTB-47B11 | ENSG00000160789.18_LMNA | 0.23483  | 0.078564768  | 0.379829189 | 3.59E-03 | 3.06E-02 | 1.00E+00 |
| ENSG00000234155.1_RP11-30P6 | ENSG00000160789.18_LMNA | -0.02527 | -0.18373234  | 0.134470878 | 7.57E-01 | 8.99E-01 | 1.00E+00 |
| ENSG00000130167.12_TSPAN16  | ENSG00000160789.18_LMNA | 0.13846  | -0.021212676 | 0.291236795 | 8.89E-02 | 2.90E-01 | 1.00E+00 |
| ENSG00000259585.2_RBM17P4   | ENSG00000160789.18_LMNA | -0.09848 | -0.253704692 | 0.061686178 | 2.27E-01 | 5.04E-01 | 1.00E+00 |
| ENSG00000236841.6_AC007750. | ENSG00000160789.18_LMNA | 0.07321  | -0.087008623 | 0.229729446 | 3.70E-01 | 6.50E-01 | 1.00E+00 |
| ENSG00000154485.4_MMP21     | ENSG00000160789.18_LMNA | -0.03273 | -0.190934572 | 0.127134405 | 6.89E-01 | 8.66E-01 | 1.00E+00 |
| ENSG00000279086.1_RP11-667F | ENSG00000160789.18_LMNA | 0.14723  | -0.01225562  | 0.299414916 | 7.03E-02 | 2.50E-01 | 1.00E+00 |
| ENSG00000233208.4_LINC00642 | ENSG00000160789.18_LMNA | -0.1618  | -0.31294253  | -0.00267106 | 4.64E-02 | 1.92E-01 | 1.00E+00 |
| ENSG00000137709.8_POU2F3    | ENSG00000160789.18_LMNA | 0.25846  | 0.103518609  | 0.401154245 | 1.30E-03 | 1.42E-02 | 1.00E+00 |
| ENSG00000140798.14_ABCC12   | ENSG00000160789.18_LMNA | -0.25478 | -0.397845073 | -0.09962161 | 1.54E-03 | 1.60E-02 | 1.00E+00 |
| ENSG00000213252.3_RP11-819M | ENSG00000160789.18_LMNA | -0.04431 | -0.202083816 | 0.115708298 | 5.88E-01 | 8.08E-01 | 1.00E+00 |
| ENSG00000226235.1_LEMD1-AS  | ENSG00000160789.18_LMNA | 0.10995  | -0.050131156 | 0.264517702 | 1.78E-01 | 4.39E-01 | 1.00E+00 |
| ENSG00000261211.1_RP1-80N2. | ENSG00000160789.18_LMNA | -0.01691 | -0.175638969 | 0.142673683 | 8.36E-01 | 9.37E-01 | 1.00E+00 |

|                              |                         |          |              |             |          |          |          |
|------------------------------|-------------------------|----------|--------------|-------------|----------|----------|----------|
| ENSG00000224116.5_INHBA-AS1  | ENSG00000160789.18_LMNA | -0.27253 | -0.413776929 | -0.1184679  | 6.82E-04 | 8.60E-03 | 1.00E+00 |
| ENSG00000266296.1_ARIH2P1    | ENSG00000160789.18_LMNA | -0.05653 | -0.213806207 | 0.10360342  | 4.89E-01 | 7.45E-01 | 1.00E+00 |
| ENSG00000233543.1_CHTF8P1    | ENSG00000160789.18_LMNA | -0.12064 | -0.274567945 | 0.039315178 | 1.39E-01 | 3.80E-01 | 1.00E+00 |
| ENSG00000259299.1_RP11-37J1  | ENSG00000160789.18_LMNA | -0.0793  | -0.23553156  | 0.080917793 | 3.31E-01 | 6.17E-01 | 1.00E+00 |
| ENSG00000169194.8_IL13       | ENSG00000160789.18_LMNA | -0.12113 | -0.275025207 | 0.038821321 | 1.37E-01 | 3.77E-01 | 1.00E+00 |
| ENSG00000227972.1_THAP12P3   | ENSG00000160789.18_LMNA | -0.11662 | -0.270795672 | 0.043383504 | 1.52E-01 | 4.02E-01 | 1.00E+00 |
| ENSG00000257539.2_HSPA8P14   | ENSG00000160789.18_LMNA | 0.13096  | -0.028843868 | 0.28423302  | 1.08E-01 | 3.27E-01 | 1.00E+00 |
| ENSG00000253336.1_RP11-468O  | ENSG00000160789.18_LMNA | -0.09054 | -0.246195775 | 0.06966094  | 2.67E-01 | 5.51E-01 | 1.00E+00 |
| ENSG00000136155.15_SCEL      | ENSG00000160789.18_LMNA | -0.23787 | -0.382581799 | -0.0817647  | 3.17E-03 | 2.78E-02 | 1.00E+00 |
| ENSG00000251513.2_CTD-2215E  | ENSG00000160789.18_LMNA | 2.05E-05 | -0.159180693 | 0.159220711 | 1.00E+00 | 1.00E+00 | 1.00E+00 |
| ENSG00000279266.1_RP11-371I2 | ENSG00000160789.18_LMNA | -0.01462 | -0.173419055 | 0.144915998 | 8.58E-01 | 9.44E-01 | 1.00E+00 |
| ENSG00000224431.1_AC063976   | ENSG00000160789.18_LMNA | 0.1373   | -0.022393365 | 0.290155365 | 9.17E-02 | 2.95E-01 | 1.00E+00 |
| ENSG00000268869.4_ESPNP      | ENSG00000160789.18_LMNA | -0.12941 | -0.282784025 | 0.030418125 | 1.12E-01 | 3.34E-01 | 1.00E+00 |
| ENSG00000275897.1_RP11-94C2  | ENSG00000160789.18_LMNA | 0.09405  | -0.066145821 | 0.249510239 | 2.49E-01 | 5.30E-01 | 1.00E+00 |
| ENSG00000270571.2_RP11-355F  | ENSG00000160789.18_LMNA | -0.07315 | -0.229673059 | 0.087067699 | 3.70E-01 | 6.51E-01 | 1.00E+00 |
| ENSG00000004809.12_SLC22A1f  | ENSG00000160789.18_LMNA | 0.11926  | -0.040711287 | 0.273274519 | 1.43E-01 | 3.87E-01 | 1.00E+00 |
| ENSG00000168955.3_TM4SF20    | ENSG00000160789.18_LMNA | -0.12071 | -0.274636171 | 0.039241501 | 1.39E-01 | 3.79E-01 | 1.00E+00 |
| ENSG00000270299.1_RP5-850E9  | ENSG00000160789.18_LMNA | -0.08346 | -0.239474924 | 0.076764672 | 3.07E-01 | 5.93E-01 | 1.00E+00 |
| ENSG00000133710.14_SPINK5    | ENSG00000160789.18_LMNA | -0.23828 | -0.382954263 | -0.08219816 | 3.11E-03 | 2.75E-02 | 1.00E+00 |
| ENSG00000267122.1_AC004490   | ENSG00000160789.18_LMNA | 0.15665  | -0.002613271 | 0.308167845 | 5.39E-02 | 2.11E-01 | 1.00E+00 |
| ENSG00000247624.5_CPEB2-AS   | ENSG00000160789.18_LMNA | -0.04026 | -0.19819139  | 0.119706962 | 6.22E-01 | 8.29E-01 | 1.00E+00 |
| ENSG00000264668.1_RP13-582O  | ENSG00000160789.18_LMNA | -0.01684 | -0.175569339 | 0.142744066 | 8.37E-01 | 9.37E-01 | 1.00E+00 |
| ENSG00000279608.1_RP11-182N  | ENSG00000160789.18_LMNA | 0.00173  | -0.15751167  | 0.160888803 | 9.83E-01 | 9.94E-01 | 1.00E+00 |
| ENSG00000168065.14_SLC22A11  | ENSG00000160789.18_LMNA | 0.15066  | -0.008751126 | 0.302602231 | 6.39E-02 | 2.35E-01 | 1.00E+00 |
| ENSG00000267136.1_RP11-53B2  | ENSG00000160789.18_LMNA | -0.08055 | -0.236717912 | 0.079669491 | 3.24E-01 | 6.11E-01 | 1.00E+00 |
| ENSG00000257279.1_RP11-231I1 | ENSG00000160789.18_LMNA | 0.01402  | -0.145508449 | 0.172831982 | 8.64E-01 | 9.47E-01 | 1.00E+00 |
| ENSG00000226789.1_AC110926   | ENSG00000160789.18_LMNA | 0.04408  | -0.115931333 | 0.201866971 | 5.90E-01 | 8.10E-01 | 1.00E+00 |
| ENSG00000257771.4_RP11-70F1  | ENSG00000160789.18_LMNA | 0.00897  | -0.150444624 | 0.167931805 | 9.13E-01 | 9.67E-01 | 1.00E+00 |
| ENSG00000100170.8_SLC5A1     | ENSG00000160789.18_LMNA | -0.15818 | -0.309580668 | 0.00105145  | 5.16E-02 | 2.06E-01 | 1.00E+00 |
| ENSG00000242866.8_STRC       | ENSG00000160789.18_LMNA | -0.15024 | -0.30220984  | 0.009182979 | 6.47E-02 | 2.37E-01 | 1.00E+00 |
| ENSG00000273590.3_SMIM11B    | ENSG00000160789.18_LMNA | -0.08275 | -0.238804524 | 0.077471507 | 3.11E-01 | 5.97E-01 | 1.00E+00 |
| ENSG00000083307.9_GRHL2      | ENSG00000160789.18_LMNA | 0.01071  | -0.148744409 | 0.169621399 | 8.96E-01 | 9.59E-01 | 1.00E+00 |
| ENSG00000280381.1_RP11-197N  | ENSG00000160789.18_LMNA | 0.01469  | -0.144848579 | 0.173485848 | 8.57E-01 | 9.44E-01 | 1.00E+00 |

|                              |                         |          |              |             |          |          |          |
|------------------------------|-------------------------|----------|--------------|-------------|----------|----------|----------|
| ENSG00000211949.3_IGHV3-23   | ENSG00000160789.18_LMNA | 0.06446  | -0.095721764 | 0.221389998 | 4.30E-01 | 7.00E-01 | 1.00E+00 |
| ENSG00000275834.1_RP11-440E  | ENSG00000160789.18_LMNA | -0.05879 | -0.215966695 | 0.101362128 | 4.72E-01 | 7.32E-01 | 1.00E+00 |
| ENSG00000205361.7_MT1DP      | ENSG00000160789.18_LMNA | 0.10294  | -0.057197766 | 0.257914262 | 2.07E-01 | 4.79E-01 | 1.00E+00 |
| ENSG00000265638.1_           | ENSG00000160789.18_LMNA | 0.14448  | -0.015064969 | 0.296854796 | 7.57E-02 | 2.63E-01 | 1.00E+00 |
| ENSG00000200170.1_Y_RNA      | ENSG00000160789.18_LMNA | -0.10752 | -0.262234085 | 0.052578516 | 1.87E-01 | 4.54E-01 | 1.00E+00 |
| ENSG00000266631.1_           | ENSG00000160789.18_LMNA | -0.05483 | -0.212174761 | 0.105293749 | 5.02E-01 | 7.54E-01 | 1.00E+00 |
| ENSG00000169271.2_HSPB3      | ENSG00000160789.18_LMNA | -0.18206 | -0.331648641 | -0.02354214 | 2.48E-02 | 1.26E-01 | 1.00E+00 |
| ENSG00000221676.1_RNU6ATAC   | ENSG00000160789.18_LMNA | -0.02212 | -0.180685675 | 0.137563865 | 7.87E-01 | 9.13E-01 | 1.00E+00 |
| ENSG00000237815.1_           | ENSG00000160789.18_LMNA | 0.09883  | -0.0613311   | 0.254038147 | 2.26E-01 | 5.02E-01 | 1.00E+00 |
| ENSG00000275178.1_RP11-4B16  | ENSG00000160789.18_LMNA | -0.04365 | -0.201451243 | 0.116358838 | 5.93E-01 | 8.12E-01 | 1.00E+00 |
| ENSG00000238390.1_SNORA81    | ENSG00000160789.18_LMNA | 0.08081  | -0.079416149 | 0.236958565 | 3.22E-01 | 6.09E-01 | 1.00E+00 |
| ENSG00000261172.1_RP11-356C  | ENSG00000160789.18_LMNA | 0.06261  | -0.097560875 | 0.219623815 | 4.43E-01 | 7.11E-01 | 1.00E+00 |
| ENSG00000249610.1_CTC-441N1  | ENSG00000160789.18_LMNA | 0.13038  | -0.02942999  | 0.283693703 | 1.09E-01 | 3.29E-01 | 1.00E+00 |
| ENSG00000172724.10_CCL19     | ENSG00000160789.18_LMNA | -0.12991 | -0.283253555 | 0.029908176 | 1.11E-01 | 3.32E-01 | 1.00E+00 |
| ENSG00000256006.1_AC084117.1 | ENSG00000160789.18_LMNA | 0.12945  | -0.030372433 | 0.282826102 | 1.12E-01 | 3.34E-01 | 1.00E+00 |
| ENSG00000232893.1_IQCA1-AS1  | ENSG00000160789.18_LMNA | -0.10115 | -0.256227582 | 0.058997703 | 2.15E-01 | 4.89E-01 | 1.00E+00 |
| ENSG00000268743.1_CTD-2538C  | ENSG00000160789.18_LMNA | -0.08353 | -0.239546654 | 0.076689024 | 3.06E-01 | 5.93E-01 | 1.00E+00 |
| ENSG00000149968.10_MMP3      | ENSG00000160789.18_LMNA | -0.02695 | -0.185353946 | 0.132822085 | 7.42E-01 | 8.92E-01 | 1.00E+00 |
| ENSG00000278816.1_RP5-1116H  | ENSG00000160789.18_LMNA | -0.19454 | -0.343113193 | -0.03646769 | 1.63E-02 | 9.33E-02 | 1.00E+00 |
| ENSG00000273712.1_RP5-874C2  | ENSG00000160789.18_LMNA | -0.09546 | -0.250849769 | 0.064722297 | 2.42E-01 | 5.21E-01 | 1.00E+00 |
| ENSG00000228421.2_AC005013.1 | ENSG00000160789.18_LMNA | -0.00914 | -0.168096688 | 0.150278788 | 9.11E-01 | 9.66E-01 | 1.00E+00 |
| ENSG00000272043.1_RP11-44N1  | ENSG00000160789.18_LMNA | -0.2516  | -0.394979971 | -0.09625494 | 1.77E-03 | 1.78E-02 | 1.00E+00 |
| ENSG00000270246.3_RP11-701H  | ENSG00000160789.18_LMNA | 0.01604  | -0.143527466 | 0.174794097 | 8.45E-01 | 9.39E-01 | 1.00E+00 |
| ENSG00000204092.2_LINC00951  | ENSG00000160789.18_LMNA | -0.06698 | -0.223793354 | 0.093215687 | 4.12E-01 | 6.86E-01 | 1.00E+00 |
| ENSG00000228222.1_AC074363.1 | ENSG00000160789.18_LMNA | 0.00598  | -0.153367648 | 0.165022662 | 9.42E-01 | 9.77E-01 | 1.00E+00 |
| ENSG00000224174.2_RP4-798A1  | ENSG00000160789.18_LMNA | -0.16711 | -0.317851224 | -0.00812183 | 3.96E-02 | 1.72E-01 | 1.00E+00 |
| ENSG00000258667.1_HIF1A-AS2  | ENSG00000160789.18_LMNA | 0.20132  | 0.043508964  | 0.349320374 | 1.29E-02 | 7.86E-02 | 1.00E+00 |
| ENSG00000280336.1_CH17-140K  | ENSG00000160789.18_LMNA | 0.15961  | 0.000420655  | 0.310911079 | 4.95E-02 | 2.00E-01 | 1.00E+00 |
| ENSG00000265474.1_AC010761.1 | ENSG00000160789.18_LMNA | 0.04596  | -0.114075182 | 0.203670661 | 5.74E-01 | 8.01E-01 | 1.00E+00 |
| ENSG00000156885.5_COX6A2     | ENSG00000160789.18_LMNA | -0.06839 | -0.225139492 | 0.091810257 | 4.02E-01 | 6.78E-01 | 1.00E+00 |
| ENSG00000257119.1_EEF1B2P4   | ENSG00000160789.18_LMNA | -0.05509 | -0.212427887 | 0.105031608 | 5.00E-01 | 7.53E-01 | 1.00E+00 |
| ENSG00000259244.1_RP11-182J  | ENSG00000160789.18_LMNA | -0.02897 | -0.187302406 | 0.130838626 | 7.23E-01 | 8.83E-01 | 1.00E+00 |
| ENSG00000271218.1_RP3-523E1  | ENSG00000160789.18_LMNA | -0.11689 | -0.271044265 | 0.043115721 | 1.52E-01 | 4.00E-01 | 1.00E+00 |



|                              |                         |          |              |             |          |          |          |
|------------------------------|-------------------------|----------|--------------|-------------|----------|----------|----------|
| ENSG00000278464.1_RP11-96A1  | ENSG00000160789.18_LMNA | 0.16238  | 0.003260963  | 0.313474567 | 4.56E-02 | 1.89E-01 | 1.00E+00 |
| ENSG00000244757.1_RP11-45A1  | ENSG00000160789.18_LMNA | -0.07437 | -0.230834722 | 0.085850171 | 3.63E-01 | 6.44E-01 | 1.00E+00 |
| ENSG00000214100.7_AC079776.1 | ENSG00000160789.18_LMNA | -0.00625 | -0.165289861 | 0.153099406 | 9.39E-01 | 9.76E-01 | 1.00E+00 |
| ENSG00000235934.1_AC007405.1 | ENSG00000160789.18_LMNA | -0.21794 | -0.364495827 | -0.06085252 | 6.99E-03 | 5.04E-02 | 1.00E+00 |
| ENSG00000256826.1_ATP5J2P4   | ENSG00000160789.18_LMNA | 0.00859  | -0.150814441 | 0.167564051 | 9.16E-01 | 9.68E-01 | 1.00E+00 |
| ENSG00000270666.1_XXbac-BPC  | ENSG00000160789.18_LMNA | -0.08286 | -0.238910656 | 0.077359628 | 3.10E-01 | 5.97E-01 | 1.00E+00 |
| ENSG00000271181.1_CTA-221G9  | ENSG00000160789.18_LMNA | 0.13871  | -0.020950263 | 0.291477039 | 8.83E-02 | 2.89E-01 | 1.00E+00 |
| ENSG00000260252.1_RP11-384M  | ENSG00000160789.18_LMNA | -0.08485 | -0.240801674 | 0.075364877 | 2.99E-01 | 5.85E-01 | 1.00E+00 |
| ENSG00000281186.1_LINC00706  | ENSG00000160789.18_LMNA | 0.00433  | -0.154974723 | 0.163420855 | 9.58E-01 | 9.83E-01 | 1.00E+00 |
| ENSG00000276096.1_Metazoa_SI | ENSG00000160789.18_LMNA | -0.04164 | -0.199519443 | 0.11834382  | 6.10E-01 | 8.22E-01 | 1.00E+00 |
| ENSG00000232874.1_RP11-135A  | ENSG00000160789.18_LMNA | -0.02738 | -0.185773341 | 0.132395372 | 7.38E-01 | 8.90E-01 | 1.00E+00 |
| ENSG00000272662.1_RP11-190C  | ENSG00000160789.18_LMNA | -0.0226  | -0.181145531 | 0.137097416 | 7.82E-01 | 9.11E-01 | 1.00E+00 |
| ENSG00000261744.1_RP11-21B2  | ENSG00000160789.18_LMNA | 0.16615  | 0.007133387  | 0.316962309 | 4.08E-02 | 1.76E-01 | 1.00E+00 |
| ENSG00000272839.1_RP11-452C  | ENSG00000160789.18_LMNA | 0.16038  | 0.001208051  | 0.311622187 | 4.84E-02 | 1.97E-01 | 1.00E+00 |
| ENSG00000267521.1_RP11-87G2  | ENSG00000160789.18_LMNA | 0.15723  | -0.002023985 | 0.308701074 | 5.31E-02 | 2.09E-01 | 1.00E+00 |
| ENSG00000234565.1_COX6B1P1   | ENSG00000160789.18_LMNA | 0.05792  | -0.102228093 | 0.215132318 | 4.78E-01 | 7.37E-01 | 1.00E+00 |
| ENSG00000228236.2_TXNP5      | ENSG00000160789.18_LMNA | 0.17921  | 0.020592324  | 0.329019428 | 2.72E-02 | 1.34E-01 | 1.00E+00 |
| ENSG00000261775.1_RP11-10O1  | ENSG00000160789.18_LMNA | -0.05765 | -0.214874689 | 0.102495378 | 4.81E-01 | 7.38E-01 | 1.00E+00 |
| ENSG00000267874.1_CTD-2527I2 | ENSG00000160789.18_LMNA | -0.03625 | -0.194328749 | 0.123664857 | 6.57E-01 | 8.49E-01 | 1.00E+00 |
| ENSG00000261131.1_RP11-93O1  | ENSG00000160789.18_LMNA | -0.10516 | -0.26001067  | 0.05495773  | 1.97E-01 | 4.67E-01 | 1.00E+00 |
| ENSG00000225867.1_RP5-1177I5 | ENSG00000160789.18_LMNA | -0.2521  | -0.395430171 | -0.0967835  | 1.73E-03 | 1.75E-02 | 1.00E+00 |
| ENSG00000230712.2_GGTLC4P    | ENSG00000160789.18_LMNA | 0.26918  | 0.114900853  | 0.410775311 | 7.98E-04 | 9.71E-03 | 1.00E+00 |
| ENSG00000213061.2_PFN1P11    | ENSG00000160789.18_LMNA | 0.04563  | -0.114397097 | 0.203357999 | 5.77E-01 | 8.03E-01 | 1.00E+00 |
| ENSG00000259618.1_RP11-562A  | ENSG00000160789.18_LMNA | 0.05142  | -0.108668492 | 0.208912277 | 5.29E-01 | 7.73E-01 | 1.00E+00 |
| ENSG00000276968.1_RP11-90M2  | ENSG00000160789.18_LMNA | -0.07537 | -0.231791895 | 0.084846255 | 3.56E-01 | 6.39E-01 | 1.00E+00 |
| ENSG00000212663.2_RP1-122K4  | ENSG00000160789.18_LMNA | -0.06234 | -0.219368309 | 0.097826752 | 4.45E-01 | 7.12E-01 | 1.00E+00 |
| ENSG00000262179.2_RP1-302G2  | ENSG00000160789.18_LMNA | -0.02353 | -0.18204763  | 0.13618197  | 7.74E-01 | 9.07E-01 | 1.00E+00 |
| ENSG00000227598.1_RP1-167A1  | ENSG00000160789.18_LMNA | -0.03154 | -0.1897857   | 0.128307028 | 7.00E-01 | 8.71E-01 | 1.00E+00 |
| ENSG00000267612.1_CTD-3116E  | ENSG00000160789.18_LMNA | -0.15388 | -0.305598378 | 0.005449837 | 5.84E-02 | 2.21E-01 | 1.00E+00 |
| ENSG00000271752.1_RP11-269M  | ENSG00000160789.18_LMNA | -0.04197 | -0.199835405 | 0.118019333 | 6.08E-01 | 8.21E-01 | 1.00E+00 |
| ENSG00000237194.1_SNAI1P1    | ENSG00000160789.18_LMNA | -0.30688 | -0.444367996 | -0.1552615  | 1.20E-04 | 2.20E-03 | 1.00E+00 |
| ENSG00000237745.1_AC009963.1 | ENSG00000160789.18_LMNA | -0.05971 | -0.216849664 | 0.100445208 | 4.65E-01 | 7.27E-01 | 1.00E+00 |
| ENSG00000254810.1_RP11-672A  | ENSG00000160789.18_LMNA | 0.20403  | 0.04632957   | 0.351799351 | 1.17E-02 | 7.33E-02 | 1.00E+00 |

|                              |                         |          |              |             |          |          |          |
|------------------------------|-------------------------|----------|--------------|-------------|----------|----------|----------|
| ENSG00000133328.3_HRASLS2    | ENSG00000160789.18_LMNA | 0.06676  | -0.093436237 | 0.223581999 | 4.14E-01 | 6.87E-01 | 1.00E+00 |
| ENSG00000258509.1_RP11-857B  | ENSG00000160789.18_LMNA | -0.036   | -0.194085008 | 0.12391427  | 6.60E-01 | 8.50E-01 | 1.00E+00 |
| ENSG00000230480.1_AC093142.  | ENSG00000160789.18_LMNA | -0.10654 | -0.261306232 | 0.05357182  | 1.91E-01 | 4.59E-01 | 1.00E+00 |
| ENSG00000227207.2_RPL31P12   | ENSG00000160789.18_LMNA | -0.04345 | -0.201261817 | 0.116553591 | 5.95E-01 | 8.13E-01 | 1.00E+00 |
| ENSG00000219274.1_RPS20P2    | ENSG00000160789.18_LMNA | -0.01376 | -0.172582662 | 0.145759984 | 8.66E-01 | 9.48E-01 | 1.00E+00 |
| ENSG00000261217.2_BCAP31P1   | ENSG00000160789.18_LMNA | 0.12076  | -0.03919404  | 0.27468012  | 1.38E-01 | 3.79E-01 | 1.00E+00 |
| ENSG00000231073.1_RP11-316M  | ENSG00000160789.18_LMNA | -0.02057 | -0.179187199 | 0.139082852 | 8.01E-01 | 9.20E-01 | 1.00E+00 |
| ENSG00000240874.1_CTD-2515H  | ENSG00000160789.18_LMNA | 0.0676   | -0.09260097  | 0.224382287 | 4.08E-01 | 6.83E-01 | 1.00E+00 |
| ENSG00000281039.1_RP4-777O2  | ENSG00000160789.18_LMNA | -0.03135 | -0.189599941 | 0.128496544 | 7.01E-01 | 8.72E-01 | 1.00E+00 |
| ENSG00000233469.1_ST6GALNA   | ENSG00000160789.18_LMNA | -0.03385 | -0.192019603 | 0.126026125 | 6.79E-01 | 8.60E-01 | 1.00E+00 |
| ENSG00000172799.5_ZBTB8OSP   | ENSG00000160789.18_LMNA | 0.02636  | -0.133403158 | 0.184782652 | 7.47E-01 | 8.94E-01 | 1.00E+00 |
| ENSG00000254974.1_RP11-702H  | ENSG00000160789.18_LMNA | 0.102    | -0.058147785 | 0.25702426  | 2.11E-01 | 4.85E-01 | 1.00E+00 |
| ENSG00000234740.1_RP11-272P  | ENSG00000160789.18_LMNA | 0.01742  | -0.142176296 | 0.17613095  | 8.31E-01 | 9.34E-01 | 1.00E+00 |
| ENSG00000225447.1_RPS15AP1   | ENSG00000160789.18_LMNA | 0.04086  | -0.119118671 | 0.19876468  | 6.17E-01 | 8.27E-01 | 1.00E+00 |
| ENSG00000259511.1_UBE2Q2L    | ENSG00000160789.18_LMNA | -0.10119 | -0.256264162 | 0.058958688 | 2.15E-01 | 4.89E-01 | 1.00E+00 |
| ENSG00000251675.1 CTC-458I2. | ENSG00000160789.18_LMNA | -0.0695  | -0.226198361 | 0.090703862 | 3.95E-01 | 6.72E-01 | 1.00E+00 |
| ENSG00000253621.1_RPSAP74    | ENSG00000160789.18_LMNA | -0.12028 | -0.274227566 | 0.039682698 | 1.40E-01 | 3.82E-01 | 1.00E+00 |
| ENSG00000229591.1_RP5-981O7  | ENSG00000160789.18_LMNA | 0.06002  | -0.100141299 | 0.217142205 | 4.63E-01 | 7.26E-01 | 1.00E+00 |
| ENSG00000261707.1_RP11-264M  | ENSG00000160789.18_LMNA | -0.05375 | -0.211148565 | 0.106356044 | 5.11E-01 | 7.59E-01 | 1.00E+00 |
| ENSG00000276317.1_RP11-93B1  | ENSG00000160789.18_LMNA | 0.11353  | -0.046513573 | 0.267886796 | 1.64E-01 | 4.19E-01 | 1.00E+00 |
| ENSG00000236269.1_ENO1-IT1   | ENSG00000160789.18_LMNA | 0.02921  | -0.130602536 | 0.187534163 | 7.21E-01 | 8.82E-01 | 1.00E+00 |
| ENSG00000235051.3_RP11-637O  | ENSG00000160789.18_LMNA | -0.02752 | -0.185904057 | 0.132262351 | 7.36E-01 | 8.89E-01 | 1.00E+00 |
| ENSG00000227128.4_LBX1-AS1   | ENSG00000160789.18_LMNA | -0.14731 | -0.2994889   | 0.012174359 | 7.01E-02 | 2.50E-01 | 1.00E+00 |
| ENSG00000224928.2_KRT8P30    | ENSG00000160789.18_LMNA | -0.2085  | -0.355891717 | -0.05099659 | 9.94E-03 | 6.54E-02 | 1.00E+00 |
| ENSG00000274765.1_RP11-139H  | ENSG00000160789.18_LMNA | 0.06532  | -0.094866299 | 0.222210832 | 4.24E-01 | 6.95E-01 | 1.00E+00 |
| ENSG00000261117.1_RP11-333O  | ENSG00000160789.18_LMNA | 0.14968  | -0.009757415 | 0.30168773  | 6.57E-02 | 2.39E-01 | 1.00E+00 |
| ENSG00000273565.1_CTD-3075F  | ENSG00000160789.18_LMNA | 0.03964  | -0.120316103 | 0.197597551 | 6.28E-01 | 8.32E-01 | 1.00E+00 |
| ENSG00000260796.1_RP11-1348  | ENSG00000160789.18_LMNA | 0.08248  | -0.077740177 | 0.238549624 | 3.12E-01 | 5.99E-01 | 1.00E+00 |
| ENSG00000274678.1_RP11-2C24  | ENSG00000160789.18_LMNA | 0.09763  | -0.062540675 | 0.252901925 | 2.31E-01 | 5.09E-01 | 1.00E+00 |
| ENSG00000213729.3_AC098828.  | ENSG00000160789.18_LMNA | 0.01553  | -0.144030164 | 0.174296427 | 8.49E-01 | 9.41E-01 | 1.00E+00 |
| ENSG00000232149.1_FERP1      | ENSG00000160789.18_LMNA | -0.07297 | -0.229501935 | 0.087246973 | 3.72E-01 | 6.52E-01 | 1.00E+00 |
| ENSG00000235183.3_RP11-613C  | ENSG00000160789.18_LMNA | 0.08119  | -0.079027279 | 0.237327885 | 3.20E-01 | 6.06E-01 | 1.00E+00 |
| ENSG00000238243.3_OR2W3      | ENSG00000160789.18_LMNA | -0.01406 | -0.172877346 | 0.145462678 | 8.63E-01 | 9.47E-01 | 1.00E+00 |

|                              |                         |          |              |             |          |          |          |
|------------------------------|-------------------------|----------|--------------|-------------|----------|----------|----------|
| ENSG00000259125.1_LRP1-AS    | ENSG00000160789.18_LMNA | -0.05792 | -0.215138365 | 0.102221819 | 4.78E-01 | 7.37E-01 | 1.00E+00 |
| ENSG00000242272.1_AK2P2      | ENSG00000160789.18_LMNA | -0.10709 | -0.261822752 | 0.053018943 | 1.89E-01 | 4.56E-01 | 1.00E+00 |
| ENSG00000274898.1_AC001226.1 | ENSG00000160789.18_LMNA | -0.22124 | -0.367494774 | -0.06430176 | 6.16E-03 | 4.59E-02 | 1.00E+00 |
| ENSG00000272274.1_LINC00551  | ENSG00000160789.18_LMNA | 0.00585  | -0.153488874 | 0.164901892 | 9.43E-01 | 9.77E-01 | 1.00E+00 |
| ENSG00000225083.1_GRTP1-AS   | ENSG00000160789.18_LMNA | -0.1131  | -0.267485779 | 0.0469446   | 1.65E-01 | 4.22E-01 | 1.00E+00 |
| ENSG00000244196.1_PPIAP15    | ENSG00000160789.18_LMNA | 0.11609  | -0.043921009 | 0.270296559 | 1.54E-01 | 4.05E-01 | 1.00E+00 |
| ENSG00000259712.1_CTD-2184D  | ENSG00000160789.18_LMNA | 0.07662  | -0.083603941 | 0.232975518 | 3.48E-01 | 6.32E-01 | 1.00E+00 |
| ENSG00000180745.4_CLRN3      | ENSG00000160789.18_LMNA | 0.14528  | -0.014251497 | 0.297596563 | 7.41E-02 | 2.59E-01 | 1.00E+00 |
| ENSG00000183145.7_RIPPLY3    | ENSG00000160789.18_LMNA | 0.11427  | -0.045759176 | 0.268588407 | 1.61E-01 | 4.15E-01 | 1.00E+00 |
| ENSG00000179428.2_AC073072.1 | ENSG00000160789.18_LMNA | 0.01461  | -0.144925657 | 0.173409486 | 8.58E-01 | 9.44E-01 | 1.00E+00 |
| ENSG00000261679.2_ATP5HP1    | ENSG00000160789.18_LMNA | -0.07812 | -0.234407267 | 0.08209988  | 3.39E-01 | 6.24E-01 | 1.00E+00 |
| ENSG00000259767.1_RP11-90B9  | ENSG00000160789.18_LMNA | 0.00033  | -0.158881321 | 0.15952005  | 9.97E-01 | 9.99E-01 | 1.00E+00 |
| ENSG00000259314.1_CTD-3065B  | ENSG00000160789.18_LMNA | -0.0888  | -0.244546888 | 0.071406733 | 2.77E-01 | 5.61E-01 | 1.00E+00 |
| ENSG00000233255.1_AC019181.1 | ENSG00000160789.18_LMNA | -0.1552  | -0.306817412 | 0.004104706 | 5.62E-02 | 2.17E-01 | 1.00E+00 |
| ENSG00000267742.1_FAM60CP    | ENSG00000160789.18_LMNA | -0.18461 | -0.333990427 | -0.02617401 | 2.28E-02 | 1.18E-01 | 1.00E+00 |
| ENSG00000106631.7_MYL7       | ENSG00000160789.18_LMNA | 0.1422   | -0.017396538 | 0.294726661 | 8.05E-02 | 2.73E-01 | 1.00E+00 |
| ENSG00000225294.1_OSTCP2     | ENSG00000160789.18_LMNA | 0.01565  | -0.143907873 | 0.17441751  | 8.48E-01 | 9.41E-01 | 1.00E+00 |
| ENSG00000081051.6_AFP        | ENSG00000160789.18_LMNA | 0.08406  | -0.076164187 | 0.240044219 | 3.03E-01 | 5.90E-01 | 1.00E+00 |
| ENSG00000272657.1_AP000320.1 | ENSG00000160789.18_LMNA | -0.0461  | -0.203808327 | 0.113933421 | 5.73E-01 | 8.00E-01 | 1.00E+00 |
| ENSG00000268278.1_RP11-420K  | ENSG00000160789.18_LMNA | -0.17757 | -0.32751283  | -0.01890443 | 2.86E-02 | 1.39E-01 | 1.00E+00 |
| ENSG00000253971.1_CDC42P3    | ENSG00000160789.18_LMNA | 0.08985  | -0.070355984 | 0.245539532 | 2.71E-01 | 5.55E-01 | 1.00E+00 |
| ENSG00000232780.1_GAPDHP74   | ENSG00000160789.18_LMNA | 0.04659  | -0.113453947 | 0.204273856 | 5.69E-01 | 7.98E-01 | 1.00E+00 |
| ENSG00000280913.1_CTSLP2     | ENSG00000160789.18_LMNA | -0.20835 | -0.355753181 | -0.05083838 | 1.00E-02 | 6.56E-02 | 1.00E+00 |
| ENSG00000241668.2_RPL19P11   | ENSG00000160789.18_LMNA | -0.035   | -0.193120596 | 0.12490073  | 6.69E-01 | 8.54E-01 | 1.00E+00 |
| ENSG00000235907.2_RP4-580O1  | ENSG00000160789.18_LMNA | -0.02556 | -0.184014444 | 0.134184171 | 7.55E-01 | 8.98E-01 | 1.00E+00 |
| ENSG00000272465.1_RP1-136B1  | ENSG00000160789.18_LMNA | 0.16678  | 0.007783962  | 0.317547436 | 4.00E-02 | 1.73E-01 | 1.00E+00 |
| ENSG00000272844.1_RP11-484K  | ENSG00000160789.18_LMNA | 0.04735  | -0.112703206 | 0.205002476 | 5.62E-01 | 7.94E-01 | 1.00E+00 |
| ENSG00000167653.4_PSCA       | ENSG00000160789.18_LMNA | 0.16739  | 0.008412815  | 0.318112802 | 3.93E-02 | 1.71E-01 | 1.00E+00 |
| ENSG00000249252.4_RP11-665G  | ENSG00000160789.18_LMNA | -0.25639 | -0.399296052 | -0.10132921 | 1.43E-03 | 1.52E-02 | 1.00E+00 |
| ENSG00000183760.9_ACP7       | ENSG00000160789.18_LMNA | 0.1569   | -0.002364084 | 0.308393351 | 5.36E-02 | 2.10E-01 | 1.00E+00 |
| ENSG00000279066.1_HEXDC-IT1  | ENSG00000160789.18_LMNA | 0.03445  | -0.125438412 | 0.192594673 | 6.73E-01 | 8.57E-01 | 1.00E+00 |
| ENSG00000229771.2_RP4-644L1  | ENSG00000160789.18_LMNA | -0.00907 | -0.16802847  | 0.150347402 | 9.12E-01 | 9.66E-01 | 1.00E+00 |
| ENSG00000251151.2_HOXC-AS3   | ENSG00000160789.18_LMNA | -0.10377 | -0.258701278 | 0.056357203 | 2.03E-01 | 4.74E-01 | 1.00E+00 |

|                              |                         |          |              |             |          |          |          |
|------------------------------|-------------------------|----------|--------------|-------------|----------|----------|----------|
| ENSG00000213880.3_RPL7AP7    | ENSG00000160789.18_LMNA | -0.0183  | -0.176987547 | 0.1413099   | 8.23E-01 | 9.31E-01 | 1.00E+00 |
| ENSG00000254706.2_RP11-565P  | ENSG00000160789.18_LMNA | 0.0425   | -0.117495102 | 0.200345725 | 6.03E-01 | 8.18E-01 | 1.00E+00 |
| ENSG00000253564.1_RP11-956J  | ENSG00000160789.18_LMNA | -0.04209 | -0.199952337 | 0.117899229 | 6.07E-01 | 8.20E-01 | 1.00E+00 |
| ENSG00000254648.1_RP11-713P  | ENSG00000160789.18_LMNA | 0.01448  | -0.145052005 | 0.173284303 | 8.59E-01 | 9.45E-01 | 1.00E+00 |
| ENSG00000273295.1_AP000350.1 | ENSG00000160789.18_LMNA | -0.06905 | -0.225765913 | 0.091155814 | 3.98E-01 | 6.75E-01 | 1.00E+00 |
| ENSG00000257831.1_RP11-596D  | ENSG00000160789.18_LMNA | 0.06871  | -0.091492427 | 0.225443746 | 4.00E-01 | 6.77E-01 | 1.00E+00 |
| ENSG00000236056.1_GAPDHP14   | ENSG00000160789.18_LMNA | 0.04253  | -0.117470269 | 0.200369894 | 6.03E-01 | 8.18E-01 | 1.00E+00 |
| ENSG00000235049.1_LINC00940  | ENSG00000160789.18_LMNA | -0.2501  | -0.3936305   | -0.0946716  | 1.89E-03 | 1.87E-02 | 1.00E+00 |
| ENSG00000213332.4_SLC25A5P1  | ENSG00000160789.18_LMNA | 0.05245  | -0.107649153 | 0.209898455 | 5.21E-01 | 7.67E-01 | 1.00E+00 |
| ENSG00000251453.1_HAUS1P1    | ENSG00000160789.18_LMNA | -0.1328  | -0.285957384 | 0.026968412 | 1.03E-01 | 3.17E-01 | 1.00E+00 |
| ENSG00000240554.1_RPL7AP58   | ENSG00000160789.18_LMNA | 0.05528  | -0.104847803 | 0.212605345 | 4.99E-01 | 7.52E-01 | 1.00E+00 |
| ENSG00000249693.2_THEGL      | ENSG00000160789.18_LMNA | 0.07939  | -0.08082885  | 0.23561612  | 3.31E-01 | 6.17E-01 | 1.00E+00 |
| ENSG00000236182.1_RP11-297K  | ENSG00000160789.18_LMNA | 0.00297  | -0.156308936 | 0.162089739 | 9.71E-01 | 9.89E-01 | 1.00E+00 |
| ENSG00000226869.5_LHFPL3-AS  | ENSG00000160789.18_LMNA | -0.18158 | -0.331204825 | -0.02304383 | 2.52E-02 | 1.27E-01 | 1.00E+00 |
| ENSG00000186008.7_RPS4XP21   | ENSG00000160789.18_LMNA | 0.10236  | -0.05777865  | 0.257370139 | 2.10E-01 | 4.82E-01 | 1.00E+00 |
| ENSG00000124557.11_BTN1A1    | ENSG00000160789.18_LMNA | -0.24389 | -0.388020494 | -0.0881055  | 2.46E-03 | 2.30E-02 | 1.00E+00 |
| ENSG00000228196.1_PTPN2P1    | ENSG00000160789.18_LMNA | -0.03114 | -0.189403927 | 0.128696498 | 7.03E-01 | 8.73E-01 | 1.00E+00 |
| ENSG00000249574.1_AC226118.1 | ENSG00000160789.18_LMNA | 0.09762  | -0.062552944 | 0.252890395 | 2.32E-01 | 5.09E-01 | 1.00E+00 |
| ENSG00000231550.1_PTCHD3P2   | ENSG00000160789.18_LMNA | -0.09039 | -0.246046052 | 0.069819543 | 2.68E-01 | 5.52E-01 | 1.00E+00 |
| ENSG00000254708.1_RP1-145M2  | ENSG00000160789.18_LMNA | -0.11608 | -0.270289253 | 0.043928875 | 1.54E-01 | 4.05E-01 | 1.00E+00 |
| ENSG00000224439.2_RPSAP10    | ENSG00000160789.18_LMNA | -0.10075 | -0.25584926  | 0.059401147 | 2.17E-01 | 4.91E-01 | 1.00E+00 |
| ENSG00000139223.2_ANP32D     | ENSG00000160789.18_LMNA | 0.04609  | -0.113942105 | 0.203799894 | 5.73E-01 | 8.01E-01 | 1.00E+00 |
| ENSG00000236683.3_HMGA1P1    | ENSG00000160789.18_LMNA | 0.14362  | -0.01594727  | 0.296049842 | 7.75E-02 | 2.67E-01 | 1.00E+00 |
| ENSG00000225595.2_LINC01623  | ENSG00000160789.18_LMNA | -0.03745 | -0.195480995 | 0.122485255 | 6.47E-01 | 8.43E-01 | 1.00E+00 |
| ENSG00000266522.1_RP11-805F  | ENSG00000160789.18_LMNA | 0.18578  | 0.027394013  | 0.335074674 | 2.19E-02 | 1.15E-01 | 1.00E+00 |
| ENSG00000272921.1_RP11-500M  | ENSG00000160789.18_LMNA | -0.00047 | -0.159655404 | 0.158745932 | 9.95E-01 | 9.98E-01 | 1.00E+00 |
| ENSG00000274629.1_RP11-92F2  | ENSG00000160789.18_LMNA | 0.14196  | -0.017635518 | 0.294508358 | 8.10E-02 | 2.74E-01 | 1.00E+00 |
| ENSG00000225005.1_RP11-483G  | ENSG00000160789.18_LMNA | 0.08202  | -0.078206655 | 0.23810695  | 3.15E-01 | 6.01E-01 | 1.00E+00 |
| ENSG00000177459.9_ERICH5     | ENSG00000160789.18_LMNA | -0.06515 | -0.222046909 | 0.095037174 | 4.25E-01 | 6.96E-01 | 1.00E+00 |
| ENSG00000134612.10_FOLH1B    | ENSG00000160789.18_LMNA | -0.21296 | -0.359958436 | -0.05564759 | 8.43E-03 | 5.79E-02 | 1.00E+00 |
| ENSG00000227969.1_NPM1P22    | ENSG00000160789.18_LMNA | 0.09927  | -0.060896827 | 0.254445872 | 2.24E-01 | 4.99E-01 | 1.00E+00 |
| ENSG00000251013.1_GAPDHP62   | ENSG00000160789.18_LMNA | -0.08411 | -0.240098396 | 0.076107029 | 3.03E-01 | 5.89E-01 | 1.00E+00 |
| ENSG00000188032.8_C19orf67   | ENSG00000160789.18_LMNA | 0.03642  | -0.123495825 | 0.194493915 | 6.56E-01 | 8.48E-01 | 1.00E+00 |

|                              |                         |          |              |             |          |          |          |
|------------------------------|-------------------------|----------|--------------|-------------|----------|----------|----------|
| ENSG00000264044.1_RP11-192H  | ENSG00000160789.18_LMNA | -0.07955 | -0.235761499 | 0.080675924 | 3.30E-01 | 6.16E-01 | 1.00E+00 |
| ENSG00000250651.1_PABPC1P7   | ENSG00000160789.18_LMNA | -0.02577 | -0.184217912 | 0.13397735  | 7.53E-01 | 8.97E-01 | 1.00E+00 |
| ENSG00000185271.6_KLHL33     | ENSG00000160789.18_LMNA | 0.04752  | -0.112533869 | 0.205166775 | 5.61E-01 | 7.93E-01 | 1.00E+00 |
| ENSG00000217289.3_AC018865.1 | ENSG00000160789.18_LMNA | -0.02799 | -0.186356876 | 0.131801457 | 7.32E-01 | 8.87E-01 | 1.00E+00 |
| ENSG00000166840.12_GLYATL1   | ENSG00000160789.18_LMNA | -0.05946 | -0.216605912 | 0.100698387 | 4.67E-01 | 7.28E-01 | 1.00E+00 |
| ENSG00000235079.1_ZRANB2-A   | ENSG00000160789.18_LMNA | -0.01727 | -0.175985248 | 0.142323615 | 8.33E-01 | 9.35E-01 | 1.00E+00 |
| ENSG00000116703.13_PDC       | ENSG00000160789.18_LMNA | -0.10331 | -0.258262009 | 0.056826414 | 2.05E-01 | 4.77E-01 | 1.00E+00 |
| ENSG00000123201.13_GUCY1B2   | ENSG00000160789.18_LMNA | -0.23291 | -0.378090174 | -0.07654635 | 3.88E-03 | 3.24E-02 | 1.00E+00 |
| ENSG00000274615.1_CH17-258A  | ENSG00000160789.18_LMNA | -0.04976 | -0.20731602  | 0.110317013 | 5.43E-01 | 7.82E-01 | 1.00E+00 |
| ENSG00000279187.1_RP11-455O  | ENSG00000160789.18_LMNA | 0.05415  | -0.105967665 | 0.211523828 | 5.08E-01 | 7.58E-01 | 1.00E+00 |
| ENSG00000189127.6_ANKRD34B   | ENSG00000160789.18_LMNA | -0.03882 | -0.196799864 | 0.121133969 | 6.35E-01 | 8.36E-01 | 1.00E+00 |
| ENSG00000229970.3_AC007128.1 | ENSG00000160789.18_LMNA | -0.33718 | -0.471094458 | -0.18807712 | 2.16E-05 | 5.50E-04 | 1.00E+00 |
| ENSG00000227619.1_RP11-492E  | ENSG00000160789.18_LMNA | 0.12342  | -0.036494621 | 0.27717759  | 1.30E-01 | 3.65E-01 | 1.00E+00 |
| ENSG00000237693.4_IRGM       | ENSG00000160789.18_LMNA | 0.21451  | 0.057268494  | 0.361373002 | 7.96E-03 | 5.54E-02 | 1.00E+00 |
| ENSG00000234810.1_RP11-90C4  | ENSG00000160789.18_LMNA | -0.1284  | -0.281841635 | 0.031441149 | 1.15E-01 | 3.39E-01 | 1.00E+00 |
| ENSG00000170374.5_SP7        | ENSG00000160789.18_LMNA | 0.04627  | -0.113768424 | 0.203968542 | 5.71E-01 | 8.00E-01 | 1.00E+00 |
| ENSG00000259102.2_SMARCE1F   | ENSG00000160789.18_LMNA | -0.1941  | -0.342713058 | -0.03601483 | 1.66E-02 | 9.43E-02 | 1.00E+00 |
| ENSG00000185933.6_CALHM1     | ENSG00000160789.18_LMNA | 0.03049  | -0.12933414  | 0.188778676 | 7.09E-01 | 8.76E-01 | 1.00E+00 |
| ENSG00000280182.1_RP11-626G  | ENSG00000160789.18_LMNA | -0.16179 | -0.31293182  | -0.00265919 | 4.64E-02 | 1.92E-01 | 1.00E+00 |
| ENSG00000196433.10_ASMT      | ENSG00000160789.18_LMNA | 0.02216  | -0.137527681 | 0.180721353 | 7.86E-01 | 9.13E-01 | 1.00E+00 |
| ENSG00000279954.1_WI2-85898I | ENSG00000160789.18_LMNA | -0.17925 | -0.329062363 | -0.02064045 | 2.71E-02 | 1.34E-01 | 1.00E+00 |
| ENSG00000225329.2_LHFPL3-AS  | ENSG00000160789.18_LMNA | 0.09517  | -0.065011231 | 0.250578486 | 2.43E-01 | 5.23E-01 | 1.00E+00 |
| ENSG00000216990.2_HSPD1P10   | ENSG00000160789.18_LMNA | -0.02027 | -0.178890173 | 0.139383765 | 8.04E-01 | 9.22E-01 | 1.00E+00 |
| ENSG00000172404.4_DNAJB7     | ENSG00000160789.18_LMNA | -0.11556 | -0.269798557 | 0.044457136 | 1.56E-01 | 4.08E-01 | 1.00E+00 |
| ENSG00000257225.1_RP11-328C  | ENSG00000160789.18_LMNA | -0.13345 | -0.286566307 | 0.026305607 | 1.01E-01 | 3.14E-01 | 1.00E+00 |
| ENSG00000189152.9_GRAPL      | ENSG00000160789.18_LMNA | -0.15092 | -0.302839784 | 0.008489628 | 6.35E-02 | 2.34E-01 | 1.00E+00 |
| ENSG00000197721.15_CR1L      | ENSG00000160789.18_LMNA | -0.07375 | -0.230244089 | 0.086469326 | 3.67E-01 | 6.47E-01 | 1.00E+00 |
| ENSG00000257743.7_MGAM2      | ENSG00000160789.18_LMNA | -0.03736 | -0.195396117 | 0.122572178 | 6.48E-01 | 8.43E-01 | 1.00E+00 |
| ENSG00000267253.1_RP11-209M  | ENSG00000160789.18_LMNA | 0.27475  | 0.120839275  | 0.415768858 | 6.13E-04 | 7.93E-03 | 1.00E+00 |
| ENSG00000197880.7_MDS2       | ENSG00000160789.18_LMNA | -0.14046 | -0.293105814 | 0.019170052 | 8.44E-02 | 2.81E-01 | 1.00E+00 |
| ENSG00000269920.1_           | ENSG00000160789.18_LMNA | -0.15042 | -0.302376137 | 0.008999972 | 6.44E-02 | 2.36E-01 | 1.00E+00 |
| ENSG00000271382.1_RP11-1060I | ENSG00000160789.18_LMNA | -0.10359 | -0.258524424 | 0.056546128 | 2.04E-01 | 4.75E-01 | 1.00E+00 |
| ENSG00000262312.2_LA16c-390I | ENSG00000160789.18_LMNA | -0.03029 | -0.188579633 | 0.129537073 | 7.11E-01 | 8.77E-01 | 1.00E+00 |

|                              |                         |          |              |             |          |          |          |
|------------------------------|-------------------------|----------|--------------|-------------|----------|----------|----------|
| ENSG00000280424.1_CITF22-92A | ENSG00000160789.18_LMNA | 0.02611  | -0.133645248 | 0.184544573 | 7.49E-01 | 8.95E-01 | 1.00E+00 |
| ENSG00000145700.8_ANKRD31    | ENSG00000160789.18_LMNA | -0.13156 | -0.284800376 | 0.028227042 | 1.06E-01 | 3.23E-01 | 1.00E+00 |
| ENSG00000260163.1_RP11-521O  | ENSG00000160789.18_LMNA | -0.28927 | -0.428728666 | -0.13635045 | 3.01E-04 | 4.51E-03 | 1.00E+00 |
| ENSG00000257175.2_RP11-536C  | ENSG00000160789.18_LMNA | 0.13247  | -0.027310418 | 0.285643082 | 1.04E-01 | 3.19E-01 | 1.00E+00 |
| ENSG00000250072.4_CTC-529P8  | ENSG00000160789.18_LMNA | -0.22445 | -0.370419082 | -0.06767214 | 5.44E-03 | 4.17E-02 | 1.00E+00 |
| ENSG00000234722.3_LINC01287  | ENSG00000160789.18_LMNA | -0.08795 | -0.243738188 | 0.072262254 | 2.81E-01 | 5.67E-01 | 1.00E+00 |
| ENSG00000281852.1_LINC00891  | ENSG00000160789.18_LMNA | -0.01823 | -0.176920343 | 0.14137789  | 8.24E-01 | 9.31E-01 | 1.00E+00 |
| ENSG00000213588.5_ZBTB9      | ENSG00000160789.18_LMNA | -0.00059 | -0.159779016 | 0.158622279 | 9.94E-01 | 9.98E-01 | 1.00E+00 |
| ENSG00000164304.14_CAGE1     | ENSG00000160789.18_LMNA | -0.00324 | -0.162357275 | 0.15604087  | 9.68E-01 | 9.88E-01 | 1.00E+00 |
| ENSG00000260034.1_LCMT1-AS2  | ENSG00000160789.18_LMNA | 0.08521  | -0.075010581 | 0.241137295 | 2.97E-01 | 5.82E-01 | 1.00E+00 |
| ENSG00000274600.1_RIMBP3B    | ENSG00000160789.18_LMNA | 0.06758  | -0.092619292 | 0.224364736 | 4.08E-01 | 6.83E-01 | 1.00E+00 |
| ENSG00000211666.2_IGLV2-14   | ENSG00000160789.18_LMNA | -0.02082 | -0.17942831  | 0.138838542 | 7.99E-01 | 9.19E-01 | 1.00E+00 |
| ENSG00000237875.1_RP5-1174J  | ENSG00000160789.18_LMNA | -0.05519 | -0.212522533 | 0.104933579 | 4.99E-01 | 7.52E-01 | 1.00E+00 |
| ENSG00000225765.1_AC068535.1 | ENSG00000160789.18_LMNA | -0.0143  | -0.173104685 | 0.145233276 | 8.61E-01 | 9.46E-01 | 1.00E+00 |
| ENSG00000266239.2_           | ENSG00000160789.18_LMNA | 0.07495  | -0.085266434 | 0.231391354 | 3.59E-01 | 6.42E-01 | 1.00E+00 |
| ENSG00000237987.1_RP11-503C  | ENSG00000160789.18_LMNA | -0.20162 | -0.349595609 | -0.04382189 | 1.27E-02 | 7.81E-02 | 1.00E+00 |
| ENSG00000206885.1_SNORA75    | ENSG00000160789.18_LMNA | 0.04287  | -0.117125445 | 0.200705468 | 6.00E-01 | 8.16E-01 | 1.00E+00 |
| ENSG00000257905.1_RP3-432I18 | ENSG00000160789.18_LMNA | 0.14023  | -0.019401038 | 0.292894579 | 8.49E-02 | 2.82E-01 | 1.00E+00 |
| ENSG00000207524.1_RNU6-33P   | ENSG00000160789.18_LMNA | -0.12147 | -0.275344985 | 0.03847586  | 1.36E-01 | 3.75E-01 | 1.00E+00 |
| ENSG00000104918.6_RETN       | ENSG00000160789.18_LMNA | 0.06289  | -0.097289145 | 0.219884901 | 4.41E-01 | 7.09E-01 | 1.00E+00 |
| ENSG00000230355.1_AC009474.1 | ENSG00000160789.18_LMNA | -0.05159 | -0.209073397 | 0.108502    | 5.28E-01 | 7.72E-01 | 1.00E+00 |
| ENSG00000248227.1_RP11-83C7  | ENSG00000160789.18_LMNA | -0.03506 | -0.193179734 | 0.124840259 | 6.68E-01 | 8.54E-01 | 1.00E+00 |
| ENSG00000252755.1_RNU6-703F  | ENSG00000160789.18_LMNA | -0.11842 | -0.272481376 | 0.04156679  | 1.46E-01 | 3.92E-01 | 1.00E+00 |
| ENSG00000276851.1_RP5-875H1  | ENSG00000160789.18_LMNA | 0.3666   | 0.22025018   | 0.49680264  | 3.40E-06 | 1.21E-04 | 1.74E-01 |
| ENSG00000267079.1_RP11-820I1 | ENSG00000160789.18_LMNA | 0.09977  | -0.060387863 | 0.254923579 | 2.21E-01 | 4.97E-01 | 1.00E+00 |
| ENSG00000280403.1_AL137860.1 | ENSG00000160789.18_LMNA | -0.09124 | -0.246857338 | 0.068959953 | 2.64E-01 | 5.47E-01 | 1.00E+00 |
| ENSG00000279427.1_RP11-132F  | ENSG00000160789.18_LMNA | -0.17535 | -0.325466449 | -0.01661461 | 3.07E-02 | 1.46E-01 | 1.00E+00 |
| ENSG00000261959.1_RP11-893F  | ENSG00000160789.18_LMNA | -0.17365 | -0.3239009   | -0.014865   | 3.24E-02 | 1.51E-01 | 1.00E+00 |
| ENSG00000204792.2_LINC01291  | ENSG00000160789.18_LMNA | -0.0948  | -0.250226077 | 0.065385617 | 2.45E-01 | 5.25E-01 | 1.00E+00 |
| ENSG00000181541.5_MAB21L2    | ENSG00000160789.18_LMNA | 0.07211  | -0.08809842  | 0.228688927 | 3.77E-01 | 6.57E-01 | 1.00E+00 |
| ENSG00000269373.1_CTD-2542C  | ENSG00000160789.18_LMNA | -0.14337 | -0.295815537 | 0.016203998 | 7.81E-02 | 2.68E-01 | 1.00E+00 |
| ENSG00000231165.3_TRBV26OR   | ENSG00000160789.18_LMNA | -0.26202 | -0.404356074 | -0.10729791 | 1.11E-03 | 1.26E-02 | 1.00E+00 |
| ENSG00000277235.1_RP4-550H1  | ENSG00000160789.18_LMNA | 0.01198  | -0.147503443 | 0.170853432 | 8.84E-01 | 9.55E-01 | 1.00E+00 |

|                              |                         |          |              |             |          |          |          |
|------------------------------|-------------------------|----------|--------------|-------------|----------|----------|----------|
| ENSG00000250562.1_RPL38P4    | ENSG00000160789.18_LMNA | -0.10183 | -0.256864066 | 0.058318721 | 2.12E-01 | 4.86E-01 | 1.00E+00 |
| ENSG00000244357.3_RN7SL145F  | ENSG00000160789.18_LMNA | -0.08867 | -0.244423476 | 0.071537321 | 2.77E-01 | 5.62E-01 | 1.00E+00 |
| ENSG00000250218.1_ALDH1L1-A  | ENSG00000160789.18_LMNA | -0.05108 | -0.208582137 | 0.109009585 | 5.32E-01 | 7.75E-01 | 1.00E+00 |
| ENSG00000238024.1_DDX39BP2   | ENSG00000160789.18_LMNA | 0.08278  | -0.077444767 | 0.238829891 | 3.11E-01 | 5.97E-01 | 1.00E+00 |
| ENSG00000203286.5_Metazoa_SI | ENSG00000160789.18_LMNA | -0.03098 | -0.189249095 | 0.128854422 | 7.05E-01 | 8.74E-01 | 1.00E+00 |
| ENSG00000250831.1_CTD-2232E  | ENSG00000160789.18_LMNA | -0.07841 | -0.234680847 | 0.081812319 | 3.37E-01 | 6.22E-01 | 1.00E+00 |
| ENSG00000164093.14_PITX2     | ENSG00000160789.18_LMNA | 0.07515  | -0.0850664   | 0.231582052 | 3.57E-01 | 6.41E-01 | 1.00E+00 |
| ENSG00000184502.3_GAST       | ENSG00000160789.18_LMNA | 0.06153  | -0.098632868 | 0.218593371 | 4.51E-01 | 7.17E-01 | 1.00E+00 |
| ENSG00000235586.1_AC011247.1 | ENSG00000160789.18_LMNA | -0.05326 | -0.210674837 | 0.106846194 | 5.15E-01 | 7.62E-01 | 1.00E+00 |
| ENSG00000273153.1_RP11-406H  | ENSG00000160789.18_LMNA | -0.02818 | -0.186545199 | 0.131609736 | 7.30E-01 | 8.86E-01 | 1.00E+00 |
| ENSG00000249216.1_RP11-227F  | ENSG00000160789.18_LMNA | -0.20257 | -0.350469921 | -0.04481632 | 1.23E-02 | 7.62E-02 | 1.00E+00 |
| ENSG00000225940.4_C5orf67    | ENSG00000160789.18_LMNA | 0.06934  | -0.090868484 | 0.226040858 | 3.96E-01 | 6.73E-01 | 1.00E+00 |
| ENSG00000262663.1_RP11-497H  | ENSG00000160789.18_LMNA | 0.05188  | -0.108214198 | 0.209351872 | 5.26E-01 | 7.70E-01 | 1.00E+00 |
| ENSG00000257595.2_RP3-473L9  | ENSG00000160789.18_LMNA | -0.05372 | -0.211111742 | 0.106394149 | 5.11E-01 | 7.60E-01 | 1.00E+00 |
| ENSG00000279068.1_CH17-140K  | ENSG00000160789.18_LMNA | 0.07935  | -0.08087632  | 0.23557099  | 3.31E-01 | 6.17E-01 | 1.00E+00 |
| ENSG00000236116.1_AC064853.1 | ENSG00000160789.18_LMNA | -0.13714 | -0.290013228 | 0.022548483 | 9.20E-02 | 2.96E-01 | 1.00E+00 |
| ENSG00000222448.1_RN7SKP15   | ENSG00000160789.18_LMNA | 0.03379  | -0.126084264 | 0.191962703 | 6.79E-01 | 8.60E-01 | 1.00E+00 |
| ENSG00000236646.1_LAMTOR5F   | ENSG00000160789.18_LMNA | 0.11183  | -0.048224636 | 0.266294223 | 1.70E-01 | 4.29E-01 | 1.00E+00 |
| ENSG00000236173.1_RP1-182D1  | ENSG00000160789.18_LMNA | -0.01539 | -0.174160272 | 0.144167665 | 8.51E-01 | 9.41E-01 | 1.00E+00 |
| ENSG00000250906.1_RP11-632F  | ENSG00000160789.18_LMNA | -0.07192 | -0.228503448 | 0.088292604 | 3.79E-01 | 6.58E-01 | 1.00E+00 |
| ENSG00000280560.1_LINC01374  | ENSG00000160789.18_LMNA | -0.10487 | -0.259730297 | 0.055257496 | 1.99E-01 | 4.69E-01 | 1.00E+00 |
| ENSG00000268812.3_RP1-102K2  | ENSG00000160789.18_LMNA | 0.33697  | 0.187848215  | 0.470909811 | 2.19E-05 | 5.55E-04 | 1.00E+00 |
| ENSG00000188624.2_IGFL3      | ENSG00000160789.18_LMNA | -0.00482 | -0.163896804 | 0.154497385 | 9.53E-01 | 9.81E-01 | 1.00E+00 |
| ENSG00000267105.1_CTD-2369P  | ENSG00000160789.18_LMNA | -0.01647 | -0.175210511 | 0.143106719 | 8.40E-01 | 9.38E-01 | 1.00E+00 |
| ENSG00000278035.1_RP11-234K  | ENSG00000160789.18_LMNA | 0.16199  | 0.002860205  | 0.313111314 | 4.62E-02 | 1.91E-01 | 1.00E+00 |
| ENSG00000213201.3_FABP5P10   | ENSG00000160789.18_LMNA | 0.04109  | -0.118892543 | 0.198984985 | 6.15E-01 | 8.26E-01 | 1.00E+00 |
| ENSG00000275142.1_RP5-999L4  | ENSG00000160789.18_LMNA | 0.13545  | -0.024278248 | 0.288427285 | 9.62E-02 | 3.04E-01 | 1.00E+00 |
| ENSG00000274825.1_RP4-616B8  | ENSG00000160789.18_LMNA | 0.08882  | -0.071386317 | 0.244566182 | 2.77E-01 | 5.61E-01 | 1.00E+00 |
| ENSG00000271420.1_RP5-1057J  | ENSG00000160789.18_LMNA | 0.09331  | -0.066883208 | 0.248815557 | 2.53E-01 | 5.34E-01 | 1.00E+00 |
| ENSG00000270988.1_RP11-439C  | ENSG00000160789.18_LMNA | -0.13891 | -0.291660615 | 0.020749717 | 8.79E-02 | 2.88E-01 | 1.00E+00 |
| ENSG00000257826.1_RP11-116N  | ENSG00000160789.18_LMNA | -0.37431 | -0.503503158 | -0.22873572 | 2.03E-06 | 8.09E-05 | 1.04E-01 |
| ENSG00000213035.4_RPL23AP8   | ENSG00000160789.18_LMNA | 0.03205  | -0.127800705 | 0.190281875 | 6.95E-01 | 8.69E-01 | 1.00E+00 |
| ENSG00000236711.2_SMAD9-IT1  | ENSG00000160789.18_LMNA | -0.18853 | -0.33759364  | -0.03023191 | 2.00E-02 | 1.08E-01 | 1.00E+00 |

|                              |                         |          |              |             |          |          |          |
|------------------------------|-------------------------|----------|--------------|-------------|----------|----------|----------|
| ENSG00000270540.1_RP11-785G  | ENSG00000160789.18_LMNA | -0.15779 | -0.309227397 | 0.001442119 | 5.22E-02 | 2.07E-01 | 1.00E+00 |
| ENSG00000228614.1_RP13-476E  | ENSG00000160789.18_LMNA | -0.031   | -0.189270959 | 0.128832123 | 7.05E-01 | 8.74E-01 | 1.00E+00 |
| ENSG00000272834.1_RP5-1042K  | ENSG00000160789.18_LMNA | 0.0402   | -0.119763277 | 0.198136499 | 6.23E-01 | 8.30E-01 | 1.00E+00 |
| ENSG00000139610.1_CELA1      | ENSG00000160789.18_LMNA | -0.06664 | -0.223473415 | 0.093549532 | 4.15E-01 | 6.88E-01 | 1.00E+00 |
| ENSG00000273765.1_RP11-370I1 | ENSG00000160789.18_LMNA | -0.16403 | -0.315008076 | -0.00496247 | 4.35E-02 | 1.83E-01 | 1.00E+00 |
| ENSG00000273890.1_RP11-603J  | ENSG00000160789.18_LMNA | -0.04196 | -0.199825214 | 0.118029801 | 6.08E-01 | 8.21E-01 | 1.00E+00 |
| ENSG00000230107.1_CTA-126B4  | ENSG00000160789.18_LMNA | 0.01085  | -0.14861006  | 0.169754829 | 8.94E-01 | 9.59E-01 | 1.00E+00 |
| ENSG00000264304.1_RP11-20B2  | ENSG00000160789.18_LMNA | 0.01206  | -0.147427242 | 0.170929053 | 8.83E-01 | 9.55E-01 | 1.00E+00 |
| ENSG00000241281.1_RP11-364M  | ENSG00000160789.18_LMNA | 0.06572  | -0.094467785 | 0.22259306  | 4.21E-01 | 6.93E-01 | 1.00E+00 |
| ENSG00000184937.11_WT1       | ENSG00000160789.18_LMNA | 0.0542   | -0.105917109 | 0.21157267  | 5.07E-01 | 7.57E-01 | 1.00E+00 |
| ENSG00000272799.1_RP11-474N  | ENSG00000160789.18_LMNA | 0.1508   | -0.008612009 | 0.302728614 | 6.37E-02 | 2.35E-01 | 1.00E+00 |
| ENSG00000233765.1_RP11-154P  | ENSG00000160789.18_LMNA | 0.03347  | -0.126405675 | 0.191648103 | 6.82E-01 | 8.62E-01 | 1.00E+00 |
| ENSG00000268157.1_AC010524.  | ENSG00000160789.18_LMNA | -0.06314 | -0.220124938 | 0.09703928  | 4.40E-01 | 7.08E-01 | 1.00E+00 |
| ENSG00000260441.4_RP11-96D1  | ENSG00000160789.18_LMNA | -0.05321 | -0.210624576 | 0.106898187 | 5.15E-01 | 7.63E-01 | 1.00E+00 |
| ENSG00000260047.1_BCAP31P2   | ENSG00000160789.18_LMNA | -0.03584 | -0.193936378 | 0.124066339 | 6.61E-01 | 8.50E-01 | 1.00E+00 |
| ENSG00000237643.1_RP11-462G  | ENSG00000160789.18_LMNA | 0.04561  | -0.114425604 | 0.203330308 | 5.77E-01 | 8.03E-01 | 1.00E+00 |
| ENSG00000227192.1_RP1-45I4.3 | ENSG00000160789.18_LMNA | -0.00527 | -0.16433651  | 0.154056262 | 9.49E-01 | 9.79E-01 | 1.00E+00 |
| ENSG00000280767.1_RP13-465B  | ENSG00000160789.18_LMNA | 0.04864  | -0.111418912 | 0.20624811  | 5.52E-01 | 7.87E-01 | 1.00E+00 |
| ENSG00000261798.1_RP1-118J2  | ENSG00000160789.18_LMNA | -0.12036 | -0.274306321 | 0.039597671 | 1.40E-01 | 3.81E-01 | 1.00E+00 |
| ENSG00000227193.2_RP11-439A  | ENSG00000160789.18_LMNA | -0.12567 | -0.279281073 | 0.034217491 | 1.23E-01 | 3.53E-01 | 1.00E+00 |
| ENSG00000257453.1_RP11-290L  | ENSG00000160789.18_LMNA | 0.03516  | -0.124736351 | 0.193281344 | 6.67E-01 | 8.53E-01 | 1.00E+00 |
| ENSG00000225455.3_TPI1P4     | ENSG00000160789.18_LMNA | 0.12243  | -0.037498752 | 0.276249075 | 1.33E-01 | 3.70E-01 | 1.00E+00 |
| ENSG00000240991.3_RPL23AP6   | ENSG00000160789.18_LMNA | 0.0478   | -0.112252034 | 0.205440184 | 5.59E-01 | 7.92E-01 | 1.00E+00 |
| ENSG00000213657.3_RPL31P44   | ENSG00000160789.18_LMNA | 0.10999  | -0.050090395 | 0.264555706 | 1.77E-01 | 4.39E-01 | 1.00E+00 |
| ENSG00000264164.1_RP11-640N  | ENSG00000160789.18_LMNA | -0.10087 | -0.255962414 | 0.05928049  | 2.16E-01 | 4.91E-01 | 1.00E+00 |
| ENSG00000231519.1_AC007285.  | ENSG00000160789.18_LMNA | -0.03943 | -0.197386814 | 0.120532212 | 6.30E-01 | 8.33E-01 | 1.00E+00 |
| ENSG00000240068.1_RPL21P42   | ENSG00000160789.18_LMNA | -0.01055 | -0.169467376 | 0.148899478 | 8.97E-01 | 9.60E-01 | 1.00E+00 |
| ENSG00000204904.6_LINC01545  | ENSG00000160789.18_LMNA | -0.34599 | -0.478814698 | -0.19767539 | 1.27E-05 | 3.54E-04 | 6.49E-01 |
| ENSG00000250635.1_CTD-3224K  | ENSG00000160789.18_LMNA | -0.01205 | -0.170922769 | 0.147433574 | 8.83E-01 | 9.55E-01 | 1.00E+00 |
| ENSG00000238180.1_AC017079.  | ENSG00000160789.18_LMNA | -0.01175 | -0.170633919 | 0.147724622 | 8.86E-01 | 9.56E-01 | 1.00E+00 |
| ENSG00000214559.3_RP11-323J  | ENSG00000160789.18_LMNA | -0.06957 | -0.226265805 | 0.090633363 | 3.94E-01 | 6.72E-01 | 1.00E+00 |
| ENSG00000170890.12_PLA2G1B   | ENSG00000160789.18_LMNA | -0.09449 | -0.249935369 | 0.065694386 | 2.47E-01 | 5.27E-01 | 1.00E+00 |
| ENSG00000260052.1_CTC-527H2  | ENSG00000160789.18_LMNA | 0.11357  | -0.046473935 | 0.267923669 | 1.64E-01 | 4.19E-01 | 1.00E+00 |



|                              |                         |          |              |             |          |          |          |
|------------------------------|-------------------------|----------|--------------|-------------|----------|----------|----------|
| ENSG00000224437.2_PIGUP1     | ENSG00000160789.18_LMNA | -0.02662 | -0.185037505 | 0.13314397  | 7.45E-01 | 8.93E-01 | 1.00E+00 |
| ENSG00000229750.1_AC096649.1 | ENSG00000160789.18_LMNA | 0.15468  | -0.004632351 | 0.306339352 | 5.71E-02 | 2.18E-01 | 1.00E+00 |
| ENSG00000229037.2_RP11-272G  | ENSG00000160789.18_LMNA | -0.04568 | -0.203399513 | 0.114354359 | 5.76E-01 | 8.02E-01 | 1.00E+00 |
| ENSG00000232493.2_RPL12P11   | ENSG00000160789.18_LMNA | 0.00879  | -0.150618648 | 0.167758763 | 9.14E-01 | 9.67E-01 | 1.00E+00 |
| ENSG00000243761.1_RP11-216N  | ENSG00000160789.18_LMNA | -0.09243 | -0.247984493 | 0.067764909 | 2.57E-01 | 5.40E-01 | 1.00E+00 |
| ENSG00000174788.8_PCP2       | ENSG00000160789.18_LMNA | -0.01289 | -0.17173485  | 0.14661502  | 8.75E-01 | 9.51E-01 | 1.00E+00 |
| ENSG00000215002.2_RPL23AP5   | ENSG00000160789.18_LMNA | 0.00397  | -0.155331134 | 0.163065384 | 9.61E-01 | 9.85E-01 | 1.00E+00 |
| ENSG00000235837.1_AC073333.1 | ENSG00000160789.18_LMNA | 0.08309  | -0.077127319 | 0.239131007 | 3.09E-01 | 5.95E-01 | 1.00E+00 |
| ENSG00000232283.1_RP11-240L  | ENSG00000160789.18_LMNA | -0.13502 | -0.288026588 | 0.024714987 | 9.72E-02 | 3.06E-01 | 1.00E+00 |
| ENSG00000237159.4_CNTFR-AS   | ENSG00000160789.18_LMNA | -0.10245 | -0.257455127 | 0.057687934 | 2.09E-01 | 4.82E-01 | 1.00E+00 |
| ENSG00000232407.3_RP11-641C  | ENSG00000160789.18_LMNA | 0.16399  | 0.004914219  | 0.314964615 | 4.35E-02 | 1.84E-01 | 1.00E+00 |
| ENSG00000225062.1_CATIP-AS1  | ENSG00000160789.18_LMNA | 0.02787  | -0.131916216 | 0.18624414  | 7.33E-01 | 8.88E-01 | 1.00E+00 |
| ENSG00000259828.1_RP11-63E9  | ENSG00000160789.18_LMNA | -0.00889 | -0.167849024 | 0.150527878 | 9.13E-01 | 9.67E-01 | 1.00E+00 |
| ENSG00000213176.4_RPL13P6    | ENSG00000160789.18_LMNA | 0.08129  | -0.078934943 | 0.237415565 | 3.19E-01 | 6.06E-01 | 1.00E+00 |
| ENSG00000237513.1_RP11-325F  | ENSG00000160789.18_LMNA | 0.09029  | -0.069916304 | 0.2459547   | 2.69E-01 | 5.53E-01 | 1.00E+00 |
| ENSG00000250484.2_RP11-728C  | ENSG00000160789.18_LMNA | 0.17139  | 0.012530024  | 0.321808915 | 3.48E-02 | 1.58E-01 | 1.00E+00 |
| ENSG00000243250.1_RPS6P16    | ENSG00000160789.18_LMNA | 0.00562  | -0.153721681 | 0.164669934 | 9.45E-01 | 9.78E-01 | 1.00E+00 |
| ENSG00000258082.1_RP11-443B  | ENSG00000160789.18_LMNA | 0.02201  | -0.137675483 | 0.180575615 | 7.88E-01 | 9.14E-01 | 1.00E+00 |
| ENSG00000279591.1_AC002044.1 | ENSG00000160789.18_LMNA | 0.13373  | -0.0260273   | 0.286821913 | 1.00E-01 | 3.12E-01 | 1.00E+00 |
| ENSG00000237125.7_HAND2-AS   | ENSG00000160789.18_LMNA | -0.20664 | -0.354185696 | -0.04904939 | 1.06E-02 | 6.85E-02 | 1.00E+00 |
| ENSG00000185860.12_CCDC190   | ENSG00000160789.18_LMNA | -0.14258 | -0.295080676 | 0.017008917 | 7.97E-02 | 2.72E-01 | 1.00E+00 |
| ENSG00000145808.7_ADAMTS19   | ENSG00000160789.18_LMNA | -0.30446 | -0.442222873 | -0.15265502 | 1.37E-04 | 2.42E-03 | 1.00E+00 |
| ENSG00000231184.3_FAM58DP    | ENSG00000160789.18_LMNA | -0.01107 | -0.169971405 | 0.148391968 | 8.92E-01 | 9.58E-01 | 1.00E+00 |
| ENSG00000241135.4_LINC00881  | ENSG00000160789.18_LMNA | -0.0283  | -0.18665513  | 0.131497811 | 7.29E-01 | 8.86E-01 | 1.00E+00 |
| ENSG00000236105.1_PRELID3B   | ENSG00000160789.18_LMNA | 0.04031  | -0.119663492 | 0.198233759 | 6.22E-01 | 8.29E-01 | 1.00E+00 |
| ENSG00000232118.2_BACH1-AS   | ENSG00000160789.18_LMNA | 0.10996  | -0.050122127 | 0.264526121 | 1.77E-01 | 4.39E-01 | 1.00E+00 |
| ENSG00000271590.1_RP11-181E  | ENSG00000160789.18_LMNA | 0.37534  | 0.229874366  | 0.504399771 | 1.89E-06 | 7.68E-05 | 9.71E-02 |
| ENSG00000225449.3_RAB6C-AS   | ENSG00000160789.18_LMNA | -0.25934 | -0.401945287 | -0.10445152 | 1.25E-03 | 1.37E-02 | 1.00E+00 |
| ENSG00000233028.1_RP4-725G1  | ENSG00000160789.18_LMNA | 0.07331  | -0.086901181 | 0.22983199  | 3.69E-01 | 6.50E-01 | 1.00E+00 |
| ENSG00000146276.10_GABRR1    | ENSG00000160789.18_LMNA | 0.20017  | 0.042314513  | 0.348269302 | 1.34E-02 | 8.09E-02 | 1.00E+00 |
| ENSG00000259883.1_EHD4-AS1   | ENSG00000160789.18_LMNA | -0.24037 | -0.384844922 | -0.08440025 | 2.86E-03 | 2.58E-02 | 1.00E+00 |
| ENSG00000238110.1_RP11-350E  | ENSG00000160789.18_LMNA | 0.09314  | -0.067057114 | 0.248651675 | 2.54E-01 | 5.35E-01 | 1.00E+00 |
| ENSG00000269924.1_RP11-697N  | ENSG00000160789.18_LMNA | 0.12386  | -0.036049459 | 0.277589042 | 1.28E-01 | 3.63E-01 | 1.00E+00 |

|                             |                         |          |              |             |          |          |          |
|-----------------------------|-------------------------|----------|--------------|-------------|----------|----------|----------|
| ENSG00000203441.2_LINC00449 | ENSG00000160789.18_LMNA | 0.01696  | -0.142622885 | 0.175689223 | 8.36E-01 | 9.36E-01 | 1.00E+00 |
| ENSG00000234109.1_RPL7P36   | ENSG00000160789.18_LMNA | 0.04693  | -0.113119591 | 0.204598404 | 5.66E-01 | 7.96E-01 | 1.00E+00 |
| ENSG00000186118.8_TEX38     | ENSG00000160789.18_LMNA | 0.19795  | 0.040012544  | 0.346241484 | 1.45E-02 | 8.58E-02 | 1.00E+00 |
| ENSG00000274718.1_RP11-346C | ENSG00000160789.18_LMNA | -0.159   | -0.310343163 | 0.000207911 | 5.04E-02 | 2.02E-01 | 1.00E+00 |
| ENSG00000250995.1_RP13-128C | ENSG00000160789.18_LMNA | 0.26712  | 0.112712682  | 0.408930819 | 8.79E-04 | 1.05E-02 | 1.00E+00 |
| ENSG00000225850.3_RP11-452K | ENSG00000160789.18_LMNA | -0.00682 | -0.165840741 | 0.152546228 | 9.34E-01 | 9.74E-01 | 1.00E+00 |
| ENSG00000251450.1_RASGRF2-  | ENSG00000160789.18_LMNA | -0.18869 | -0.337744296 | -0.0304018  | 1.99E-02 | 1.08E-01 | 1.00E+00 |
| ENSG00000187889.11_C1orf168 | ENSG00000160789.18_LMNA | -0.19628 | -0.344705492 | -0.03827106 | 1.54E-02 | 8.94E-02 | 1.00E+00 |
| ENSG00000239322.1_ATP6V1B1- | ENSG00000160789.18_LMNA | 0.09066  | -0.069544772 | 0.24630543  | 2.67E-01 | 5.51E-01 | 1.00E+00 |
| ENSG00000075891.20_PAX2     | ENSG00000160789.18_LMNA | -0.08518 | -0.241114926 | 0.075034196 | 2.97E-01 | 5.83E-01 | 1.00E+00 |
| ENSG00000167332.7_OR51E2    | ENSG00000160789.18_LMNA | 0.12861  | -0.031225293 | 0.282040528 | 1.14E-01 | 3.38E-01 | 1.00E+00 |
| ENSG00000249906.1_RP5-1029K | ENSG00000160789.18_LMNA | 0.15258  | -0.006785797 | 0.304386643 | 6.06E-02 | 2.27E-01 | 1.00E+00 |
| ENSG00000214003.2_ATP5F1P3  | ENSG00000160789.18_LMNA | 0.03916  | -0.120791318 | 0.197134112 | 6.32E-01 | 8.35E-01 | 1.00E+00 |
| ENSG00000171658.7_NMRAL2P   | ENSG00000160789.18_LMNA | 0.1408   | -0.018818983 | 0.293426805 | 8.36E-02 | 2.80E-01 | 1.00E+00 |
| ENSG00000254748.1_HNRNPCP   | ENSG00000160789.18_LMNA | 0.08884  | -0.071375074 | 0.244576807 | 2.76E-01 | 5.61E-01 | 1.00E+00 |
| ENSG00000279283.1_RP11-417L | ENSG00000160789.18_LMNA | 0.08117  | -0.079050393 | 0.237305935 | 3.20E-01 | 6.07E-01 | 1.00E+00 |
| ENSG00000205426.9_KRT81     | ENSG00000160789.18_LMNA | -0.02402 | -0.182519245 | 0.135703161 | 7.69E-01 | 9.04E-01 | 1.00E+00 |
| ENSG00000259845.1_HERC2P10  | ENSG00000160789.18_LMNA | -0.07991 | -0.236106261 | 0.080313205 | 3.28E-01 | 6.14E-01 | 1.00E+00 |
| ENSG00000213917.2_RPL5P8    | ENSG00000160789.18_LMNA | 0.17768  | 0.019020975  | 0.327616909 | 2.85E-02 | 1.38E-01 | 1.00E+00 |
| ENSG00000244019.1_RPS2P24   | ENSG00000160789.18_LMNA | 0.01305  | -0.146456142 | 0.171892421 | 8.73E-01 | 9.51E-01 | 1.00E+00 |
| ENSG00000268434.4_AC011530. | ENSG00000160789.18_LMNA | 0.17726  | 0.018585253  | 0.327227762 | 2.89E-02 | 1.40E-01 | 1.00E+00 |
| ENSG00000259807.1_RP11-426C | ENSG00000160789.18_LMNA | 0.14831  | -0.011157748 | 0.300414172 | 6.82E-02 | 2.45E-01 | 1.00E+00 |
| ENSG00000012504.12_NR1H4    | ENSG00000160789.18_LMNA | -0.28668 | -0.426416374 | -0.13357239 | 3.43E-04 | 4.99E-03 | 1.00E+00 |
| ENSG00000136931.8_NR5A1     | ENSG00000160789.18_LMNA | -0.05555 | -0.212869704 | 0.104573949 | 4.97E-01 | 7.51E-01 | 1.00E+00 |
| ENSG00000248050.1_RP11-422N | ENSG00000160789.18_LMNA | 0.1186   | -0.041385416 | 0.272649565 | 1.46E-01 | 3.91E-01 | 1.00E+00 |
| ENSG00000253810.1_PSAT1P1   | ENSG00000160789.18_LMNA | -0.28362 | -0.423694303 | -0.13030791 | 3.99E-04 | 5.65E-03 | 1.00E+00 |
| ENSG00000231956.1_HNRNPA1F  | ENSG00000160789.18_LMNA | -0.03187 | -0.190103463 | 0.127982785 | 6.97E-01 | 8.70E-01 | 1.00E+00 |
| ENSG00000124143.9_ARHGAP4C  | ENSG00000160789.18_LMNA | -0.02451 | -0.182998641 | 0.1352163   | 7.64E-01 | 9.02E-01 | 1.00E+00 |
| ENSG00000232054.1_NPM1P34   | ENSG00000160789.18_LMNA | -0.01533 | -0.174107825 | 0.144220627 | 8.51E-01 | 9.42E-01 | 1.00E+00 |
| ENSG00000254142.2_          | ENSG00000160789.18_LMNA | -0.0824  | -0.238468842 | 0.077825314 | 3.13E-01 | 5.99E-01 | 1.00E+00 |
| ENSG00000168158.3_OR2C1     | ENSG00000160789.18_LMNA | -0.22614 | -0.371946371 | -0.06943516 | 5.09E-03 | 3.98E-02 | 1.00E+00 |
| ENSG00000249958.1_CCT7P2    | ENSG00000160789.18_LMNA | -0.28149 | -0.421784878 | -0.12802179 | 4.43E-04 | 6.14E-03 | 1.00E+00 |
| ENSG00000204866.7_IGFL2     | ENSG00000160789.18_LMNA | 0.11819  | -0.041798655 | 0.27226634  | 1.47E-01 | 3.93E-01 | 1.00E+00 |

|                              |                         |          |              |             |          |          |          |
|------------------------------|-------------------------|----------|--------------|-------------|----------|----------|----------|
| ENSG00000179133.10_C10orf67  | ENSG00000160789.18_LMNA | 0.09272  | -0.067474771 | 0.248258019 | 2.56E-01 | 5.38E-01 | 1.00E+00 |
| ENSG00000259493.2_RP11-621H  | ENSG00000160789.18_LMNA | 0.01505  | -0.144496094 | 0.173835011 | 8.54E-01 | 9.43E-01 | 1.00E+00 |
| ENSG00000117215.13_PLA2G2D   | ENSG00000160789.18_LMNA | 0.06839  | -0.091807962 | 0.225141689 | 4.02E-01 | 6.78E-01 | 1.00E+00 |
| ENSG00000226942.2_IL9RP3     | ENSG00000160789.18_LMNA | 0.05803  | -0.102110859 | 0.215245303 | 4.78E-01 | 7.36E-01 | 1.00E+00 |
| ENSG00000250031.1_RP11-114M  | ENSG00000160789.18_LMNA | 0.00955  | -0.149874473 | 0.168498603 | 9.07E-01 | 9.64E-01 | 1.00E+00 |
| ENSG00000213171.2_LINGO4     | ENSG00000160789.18_LMNA | -0.03897 | -0.196950731 | 0.120979319 | 6.34E-01 | 8.36E-01 | 1.00E+00 |
| ENSG00000151962.6_RBM46      | ENSG00000160789.18_LMNA | 0.1261   | -0.033774738 | 0.279689714 | 1.22E-01 | 3.51E-01 | 1.00E+00 |
| ENSG00000235138.1_RP11-374P  | ENSG00000160789.18_LMNA | 0.12538  | -0.034512067 | 0.27900913  | 1.24E-01 | 3.55E-01 | 1.00E+00 |
| ENSG00000279771.1_AP000997.5 | ENSG00000160789.18_LMNA | 0.17435  | 0.015586118  | 0.324546359 | 3.17E-02 | 1.49E-01 | 1.00E+00 |
| ENSG00000226361.5_TERF1P5    | ENSG00000160789.18_LMNA | 0.06461  | -0.095574833 | 0.221531012 | 4.29E-01 | 6.99E-01 | 1.00E+00 |
| ENSG00000249628.2_LINC00942  | ENSG00000160789.18_LMNA | -0.04043 | -0.198357879 | 0.119536139 | 6.21E-01 | 8.28E-01 | 1.00E+00 |
| ENSG00000215097.3_DUSP8P3    | ENSG00000160789.18_LMNA | 0.03448  | -0.125404289 | 0.192628055 | 6.73E-01 | 8.57E-01 | 1.00E+00 |
| ENSG00000240135.1_PSM12P     | ENSG00000160789.18_LMNA | 0.12873  | -0.031104673 | 0.282151657 | 1.14E-01 | 3.37E-01 | 1.00E+00 |
| ENSG00000278987.1_LA16c-431H | ENSG00000160789.18_LMNA | 0.02607  | -0.133681892 | 0.184508533 | 7.50E-01 | 8.95E-01 | 1.00E+00 |
| ENSG00000225215.1_SMARCE1F   | ENSG00000160789.18_LMNA | 0.04125  | -0.118733775 | 0.199139645 | 6.14E-01 | 8.25E-01 | 1.00E+00 |
| ENSG00000259770.2_RP11-81A1  | ENSG00000160789.18_LMNA | 0.23355  | 0.07722337   | 0.378673716 | 3.78E-03 | 3.18E-02 | 1.00E+00 |
| ENSG00000230079.1_STK24P1    | ENSG00000160789.18_LMNA | -0.10181 | -0.25684643  | 0.058337539 | 2.12E-01 | 4.86E-01 | 1.00E+00 |
| ENSG0000018607.6_ZNF806      | ENSG00000160789.18_LMNA | -0.03089 | -0.189163792 | 0.128941423 | 7.06E-01 | 8.75E-01 | 1.00E+00 |
| ENSG00000267120.3_AD000671.6 | ENSG00000160789.18_LMNA | 0.01825  | -0.141357425 | 0.176940572 | 8.23E-01 | 9.31E-01 | 1.00E+00 |
| ENSG00000260240.3_APOOP5     | ENSG00000160789.18_LMNA | -0.03651 | -0.194584359 | 0.123403256 | 6.55E-01 | 8.47E-01 | 1.00E+00 |
| ENSG00000267412.1_CTC-265F1  | ENSG00000160789.18_LMNA | 0.11215  | -0.047901458 | 0.266595153 | 1.69E-01 | 4.27E-01 | 1.00E+00 |
| ENSG00000184361.11_SPATA32   | ENSG00000160789.18_LMNA | 0.12853  | -0.031311052 | 0.281961512 | 1.15E-01 | 3.38E-01 | 1.00E+00 |
| ENSG00000260619.1_RP11-775C  | ENSG00000160789.18_LMNA | 0.15217  | -0.007203491 | 0.304007583 | 6.13E-02 | 2.29E-01 | 1.00E+00 |
| ENSG00000279841.1_RP11-274A  | ENSG00000160789.18_LMNA | 0.08542  | -0.074801994 | 0.241334851 | 2.95E-01 | 5.81E-01 | 1.00E+00 |
| ENSG00000216809.1_RP11-57K1  | ENSG00000160789.18_LMNA | 0.06975  | -0.09045203  | 0.22643927  | 3.93E-01 | 6.71E-01 | 1.00E+00 |
| ENSG00000182912.6_TSPEAR-A   | ENSG00000160789.18_LMNA | -0.02172 | -0.180293841 | 0.137961208 | 7.91E-01 | 9.15E-01 | 1.00E+00 |
| ENSG00000249215.1_AC138517.4 | ENSG00000160789.18_LMNA | -0.12875 | -0.282167029 | 0.031087988 | 1.14E-01 | 3.37E-01 | 1.00E+00 |
| ENSG00000125872.7_LRRN4      | ENSG00000160789.18_LMNA | -0.06207 | -0.21910319  | 0.098102585 | 4.47E-01 | 7.14E-01 | 1.00E+00 |
| ENSG00000235095.1_RP11-1217  | ENSG00000160789.18_LMNA | 0.01051  | -0.148935414 | 0.169431681 | 8.98E-01 | 9.60E-01 | 1.00E+00 |
| ENSG00000255621.1_RP11-377D  | ENSG00000160789.18_LMNA | -0.02424 | -0.182738891 | 0.135480114 | 7.67E-01 | 9.03E-01 | 1.00E+00 |
| ENSG00000261054.1_RP11-602.4 | ENSG00000160789.18_LMNA | 0.07693  | -0.083292348 | 0.233272243 | 3.46E-01 | 6.30E-01 | 1.00E+00 |
| ENSG00000173157.15_ADAMTS2   | ENSG00000160789.18_LMNA | -0.37721 | -0.506019391 | -0.2319331  | 1.67E-06 | 6.95E-05 | 8.54E-02 |
| ENSG00000233012.2_HDAC1P2    | ENSG00000160789.18_LMNA | 0.01947  | -0.140167953 | 0.178115843 | 8.12E-01 | 9.26E-01 | 1.00E+00 |

|                             |                         |          |              |             |          |          |          |
|-----------------------------|-------------------------|----------|--------------|-------------|----------|----------|----------|
| ENSG00000261456.4_TUBB8     | ENSG00000160789.18_LMNA | 0.05417  | -0.105943446 | 0.211547226 | 5.07E-01 | 7.57E-01 | 1.00E+00 |
| ENSG00000261336.1_EIF4BP5   | ENSG00000160789.18_LMNA | 0.04128  | -0.118699346 | 0.199173181 | 6.14E-01 | 8.24E-01 | 1.00E+00 |
| ENSG00000246851.1_RP11-544A | ENSG00000160789.18_LMNA | -0.03268 | -0.190883422 | 0.127186632 | 6.89E-01 | 8.66E-01 | 1.00E+00 |
| ENSG00000280639.1_RP11-96C2 | ENSG00000160789.18_LMNA | 0.08128  | -0.078942982 | 0.237407931 | 3.20E-01 | 6.06E-01 | 1.00E+00 |
| ENSG00000240048.1_DDX50P2   | ENSG00000160789.18_LMNA | -0.04369 | -0.201491186 | 0.116317768 | 5.93E-01 | 8.12E-01 | 1.00E+00 |
| ENSG00000246250.2_RP11-613D | ENSG00000160789.18_LMNA | 0.03366  | -0.126218799 | 0.191831028 | 6.81E-01 | 8.61E-01 | 1.00E+00 |
| ENSG00000258838.4_          | ENSG00000160789.18_LMNA | -0.13803 | -0.290842886 | 0.021642841 | 8.99E-02 | 2.92E-01 | 1.00E+00 |
| ENSG00000244578.1_LINC01391 | ENSG00000160789.18_LMNA | 0.04847  | -0.111591536 | 0.206080742 | 5.53E-01 | 7.88E-01 | 1.00E+00 |
| ENSG00000176092.12_AIM1L    | ENSG00000160789.18_LMNA | -0.03455 | -0.192692822 | 0.125338083 | 6.73E-01 | 8.56E-01 | 1.00E+00 |
| ENSG00000162843.16_WDR64    | ENSG00000160789.18_LMNA | 0.03043  | -0.129393617 | 0.188720342 | 7.10E-01 | 8.77E-01 | 1.00E+00 |
| ENSG00000187510.6_PLEKHG7   | ENSG00000160789.18_LMNA | -0.04962 | -0.20718041  | 0.110456982 | 5.44E-01 | 7.82E-01 | 1.00E+00 |
| ENSG00000250033.4_SLC7A11-A | ENSG00000160789.18_LMNA | 0.0436   | -0.11640933  | 0.201402134 | 5.94E-01 | 8.12E-01 | 1.00E+00 |
| ENSG00000232732.8_AC073043. | ENSG00000160789.18_LMNA | -0.05005 | -0.2076      | 0.110023862 | 5.40E-01 | 7.80E-01 | 1.00E+00 |
| ENSG00000169668.10_BCRP2    | ENSG00000160789.18_LMNA | -0.02286 | -0.181399699 | 0.136839542 | 7.80E-01 | 9.10E-01 | 1.00E+00 |
| ENSG00000236008.1_AC011747. | ENSG00000160789.18_LMNA | 0.08035  | -0.079874338 | 0.236523296 | 3.25E-01 | 6.12E-01 | 1.00E+00 |
| ENSG00000117983.16_MUC5B    | ENSG00000160789.18_LMNA | 0.12742  | -0.032440361 | 0.280920597 | 1.18E-01 | 3.44E-01 | 1.00E+00 |
| ENSG00000275530.1_          | ENSG00000160789.18_LMNA | -0.0664  | -0.223242225 | 0.093790727 | 4.16E-01 | 6.89E-01 | 1.00E+00 |
| ENSG00000221643.1_SNORA77   | ENSG00000160789.18_LMNA | -0.10931 | -0.263917891 | 0.050774341 | 1.80E-01 | 4.43E-01 | 1.00E+00 |
| ENSG00000275529.1_SNORD116  | ENSG00000160789.18_LMNA | -0.01034 | -0.169264211 | 0.149103999 | 8.99E-01 | 9.61E-01 | 1.00E+00 |
| ENSG00000248399.1_RP11-503N | ENSG00000160789.18_LMNA | 0.04193  | -0.118059402 | 0.199796392 | 6.08E-01 | 8.21E-01 | 1.00E+00 |
| ENSG00000281584.1_AC024060. | ENSG00000160789.18_LMNA | 0.01702  | -0.142571715 | 0.175739843 | 8.35E-01 | 9.36E-01 | 1.00E+00 |
| ENSG00000252542.1_SNORD36C  | ENSG00000160789.18_LMNA | 0.0355   | -0.124403552 | 0.193606739 | 6.64E-01 | 8.52E-01 | 1.00E+00 |
| ENSG00000199023.2_MIR339    | ENSG00000160789.18_LMNA | 0.09856  | -0.061609517 | 0.253776692 | 2.27E-01 | 5.04E-01 | 1.00E+00 |
| ENSG00000277201.1_          | ENSG00000160789.18_LMNA | 0.07742  | -0.082805855 | 0.233735405 | 3.43E-01 | 6.28E-01 | 1.00E+00 |
| ENSG00000212283.1_SNORD89   | ENSG00000160789.18_LMNA | 0.02582  | -0.133932783 | 0.184261754 | 7.52E-01 | 8.97E-01 | 1.00E+00 |
| ENSG00000274483.1_          | ENSG00000160789.18_LMNA | 0.09097  | -0.069235894 | 0.246596952 | 2.65E-01 | 5.49E-01 | 1.00E+00 |
| ENSG00000234604.2_RP1-206D1 | ENSG00000160789.18_LMNA | -0.0701  | -0.226772664 | 0.090103454 | 3.91E-01 | 6.69E-01 | 1.00E+00 |
| ENSG00000229654.1_RP1-60O19 | ENSG00000160789.18_LMNA | -0.16531 | -0.316190723 | -0.0062759  | 4.18E-02 | 1.79E-01 | 1.00E+00 |
| ENSG00000253092.1_SNORA81   | ENSG00000160789.18_LMNA | -0.28159 | -0.421878277 | -0.12813354 | 4.41E-04 | 6.12E-03 | 1.00E+00 |
| ENSG00000075429.7_CACNG5    | ENSG00000160789.18_LMNA | 0.02914  | -0.130665717 | 0.187472145 | 7.22E-01 | 8.82E-01 | 1.00E+00 |
| ENSG00000275955.1_          | ENSG00000160789.18_LMNA | 0.07635  | -0.083873145 | 0.232719112 | 3.50E-01 | 6.33E-01 | 1.00E+00 |
| ENSG00000274682.1_RP11-385G | ENSG00000160789.18_LMNA | -0.27816 | -0.418810629 | -0.12446698 | 5.21E-04 | 6.97E-03 | 1.00E+00 |
| ENSG00000258788.3_CKS1BP1   | ENSG00000160789.18_LMNA | 0.11517  | -0.044849247 | 0.269434223 | 1.58E-01 | 4.10E-01 | 1.00E+00 |

|                              |                         |          |              |             |          |          |          |
|------------------------------|-------------------------|----------|--------------|-------------|----------|----------|----------|
| ENSG00000276032.1_RP11-12A2  | ENSG00000160789.18_LMNA | -0.01813 | -0.176819344 | 0.141480066 | 8.25E-01 | 9.31E-01 | 1.00E+00 |
| ENSG00000268438.1_BNIP3P27   | ENSG00000160789.18_LMNA | 0.00844  | -0.150962557 | 0.167416736 | 9.18E-01 | 9.69E-01 | 1.00E+00 |
| ENSG00000277952.1_RP11-90D4  | ENSG00000160789.18_LMNA | -0.11111 | -0.265609572 | 0.048959659 | 1.73E-01 | 4.32E-01 | 1.00E+00 |
| ENSG00000144820.6_ADGRG7     | ENSG00000160789.18_LMNA | 0.33699  | 0.187862876  | 0.470921638 | 2.18E-05 | 5.55E-04 | 1.00E+00 |
| ENSG00000270598.1_RP11-396C  | ENSG00000160789.18_LMNA | 0.03769  | -0.122248535 | 0.195712119 | 6.45E-01 | 8.42E-01 | 1.00E+00 |
| ENSG00000234318.1_RP4-771M4  | ENSG00000160789.18_LMNA | -0.24161 | -0.385963532 | -0.08570449 | 2.71E-03 | 2.47E-02 | 1.00E+00 |
| ENSG00000244256.3_RN7SL130F  | ENSG00000160789.18_LMNA | 0.06114  | -0.099029303 | 0.218212122 | 4.54E-01 | 7.19E-01 | 1.00E+00 |
| ENSG00000279900.1_RP11-113K  | ENSG00000160789.18_LMNA | -0.1137  | -0.268051777 | 0.046336213 | 1.63E-01 | 4.18E-01 | 1.00E+00 |
| ENSG00000239413.1_RPS27P23   | ENSG00000160789.18_LMNA | 0.1536   | -0.005742719 | 0.305332816 | 5.89E-02 | 2.23E-01 | 1.00E+00 |
| ENSG00000138136.6_LBX1       | ENSG00000160789.18_LMNA | -0.06156 | -0.218616523 | 0.09860879  | 4.51E-01 | 7.17E-01 | 1.00E+00 |
| ENSG00000258919.1_RP11-1029  | ENSG00000160789.18_LMNA | 0.13899  | -0.02067067  | 0.291732968 | 8.77E-02 | 2.88E-01 | 1.00E+00 |
| ENSG00000221819.5_GAS8-AS1   | ENSG00000160789.18_LMNA | 0.14176  | -0.017847959 | 0.294314269 | 8.15E-02 | 2.75E-01 | 1.00E+00 |
| ENSG00000251459.1_RP11-319E  | ENSG00000160789.18_LMNA | -0.14511 | -0.29744373  | 0.014419138 | 7.45E-02 | 2.60E-01 | 1.00E+00 |
| ENSG00000237632.3_S100A11P1  | ENSG00000160789.18_LMNA | 0.18047  | 0.021895119  | 0.330181217 | 2.61E-02 | 1.30E-01 | 1.00E+00 |
| ENSG00000143185.3_XCL2       | ENSG00000160789.18_LMNA | 0.07339  | -0.08682374  | 0.229905897 | 3.69E-01 | 6.50E-01 | 1.00E+00 |
| ENSG00000267800.1_RP11-49K2  | ENSG00000160789.18_LMNA | 0.026    | -0.133754878 | 0.184436747 | 7.51E-01 | 8.96E-01 | 1.00E+00 |
| ENSG00000234685.1_NUS1P2     | ENSG00000160789.18_LMNA | -0.26214 | -0.404462961 | -0.10742422 | 1.10E-03 | 1.25E-02 | 1.00E+00 |
| ENSG00000239701.1_RP3-461F1  | ENSG00000160789.18_LMNA | -0.0806  | -0.23676117  | 0.079623955 | 3.24E-01 | 6.10E-01 | 1.00E+00 |
| ENSG00000241859.5_ANOS2P     | ENSG00000160789.18_LMNA | -0.02561 | -0.184056536 | 0.134141388 | 7.54E-01 | 8.98E-01 | 1.00E+00 |
| ENSG00000255382.1_RP11-718B  | ENSG00000160789.18_LMNA | -0.09552 | -0.250909078 | 0.064659942 | 2.42E-01 | 5.21E-01 | 1.00E+00 |
| ENSG00000231261.1_HMGN2P1C   | ENSG00000160789.18_LMNA | -0.00381 | -0.162915577 | 0.155481313 | 9.63E-01 | 9.85E-01 | 1.00E+00 |
| ENSG00000273102.1_AP000569.5 | ENSG00000160789.18_LMNA | 0.0021   | -0.157152635 | 0.161247399 | 9.80E-01 | 9.92E-01 | 1.00E+00 |
| ENSG00000232963.1_HMGN2P2C   | ENSG00000160789.18_LMNA | 0.09978  | -0.060378049 | 0.254932788 | 2.21E-01 | 4.97E-01 | 1.00E+00 |
| ENSG00000267645.4_RP11-577H  | ENSG00000160789.18_LMNA | -0.12971 | -0.283067108 | 0.030110693 | 1.11E-01 | 3.33E-01 | 1.00E+00 |
| ENSG00000276691.1_RP5-1057I2 | ENSG00000160789.18_LMNA | 0.01176  | -0.14771788  | 0.170640611 | 8.86E-01 | 9.56E-01 | 1.00E+00 |
| ENSG00000231107.1_LINC01508  | ENSG00000160789.18_LMNA | 0.12352  | -0.036392532 | 0.277271958 | 1.29E-01 | 3.65E-01 | 1.00E+00 |
| ENSG00000225330.1_AF064860.5 | ENSG00000160789.18_LMNA | -0.1084  | -0.26306313  | 0.051690463 | 1.84E-01 | 4.49E-01 | 1.00E+00 |
| ENSG00000255819.5_KLRC4-KLF  | ENSG00000160789.18_LMNA | -0.35014 | -0.482444411 | -0.20220677 | 9.78E-06 | 2.86E-04 | 5.02E-01 |
| ENSG00000224961.1_RP1-278O2  | ENSG00000160789.18_LMNA | 0.16969  | 0.010778068  | 0.320237295 | 3.66E-02 | 1.63E-01 | 1.00E+00 |
| ENSG00000277218.1_RP11-500G  | ENSG00000160789.18_LMNA | 0.0122   | -0.147285563 | 0.171069642 | 8.81E-01 | 9.54E-01 | 1.00E+00 |
| ENSG00000239774.1_RP11-496B  | ENSG00000160789.18_LMNA | -0.03991 | -0.197854312 | 0.120052755 | 6.25E-01 | 8.31E-01 | 1.00E+00 |
| ENSG00000237629.1_UQCRHP2    | ENSG00000160789.18_LMNA | -0.08911 | -0.244832901 | 0.07110405  | 2.75E-01 | 5.59E-01 | 1.00E+00 |
| ENSG00000272163.1_GS1-72M22  | ENSG00000160789.18_LMNA | -0.2207  | -0.367005638 | -0.06373869 | 6.29E-03 | 4.66E-02 | 1.00E+00 |

|                              |                         |          |              |             |          |          |          |
|------------------------------|-------------------------|----------|--------------|-------------|----------|----------|----------|
| ENSG00000226679.1_RP13-43E1  | ENSG00000160789.18_LMNA | 0.05368  | -0.106432039 | 0.211075126 | 5.11E-01 | 7.60E-01 | 1.00E+00 |
| ENSG00000145642.10_FAM159B   | ENSG00000160789.18_LMNA | -0.23336 | -0.378496578 | -0.07701783 | 3.81E-03 | 3.20E-02 | 1.00E+00 |
| ENSG00000268366.1_CTC-492K1  | ENSG00000160789.18_LMNA | 0.11518  | -0.044846981 | 0.269436329 | 1.58E-01 | 4.10E-01 | 1.00E+00 |
| ENSG00000177770.11_CDKN2AIF  | ENSG00000160789.18_LMNA | -0.14254 | -0.29504474  | 0.017048269 | 7.98E-02 | 2.72E-01 | 1.00E+00 |
| ENSG00000232821.1_AC003986.1 | ENSG00000160789.18_LMNA | -0.04965 | -0.207214198 | 0.110422109 | 5.44E-01 | 7.82E-01 | 1.00E+00 |
| ENSG00000204876.4_AC021218.1 | ENSG00000160789.18_LMNA | 0.33339  | 0.183950203  | 0.467761644 | 2.70E-05 | 6.57E-04 | 1.00E+00 |
| ENSG00000261613.2_RP11-20I23 | ENSG00000160789.18_LMNA | -0.02639 | -0.184818658 | 0.133366543 | 7.47E-01 | 8.94E-01 | 1.00E+00 |
| ENSG00000271105.1_SCML2P2    | ENSG00000160789.18_LMNA | -0.15593 | -0.307500297 | 0.003350692 | 5.51E-02 | 2.14E-01 | 1.00E+00 |
| ENSG00000255443.1_RP1-68D18  | ENSG00000160789.18_LMNA | 0.13968  | -0.019961879 | 0.292381568 | 8.61E-02 | 2.85E-01 | 1.00E+00 |
| ENSG00000223979.2_SMCR2      | ENSG00000160789.18_LMNA | -0.11276 | -0.267165223 | 0.047289061 | 1.67E-01 | 4.24E-01 | 1.00E+00 |
| ENSG00000253596.1_CTD-2320C  | ENSG00000160789.18_LMNA | -0.24042 | -0.38488547  | -0.0844475  | 2.85E-03 | 2.57E-02 | 1.00E+00 |
| ENSG00000262678.1_RP5-1050D  | ENSG00000160789.18_LMNA | 0.05791  | -0.102230748 | 0.21512976  | 4.79E-01 | 7.37E-01 | 1.00E+00 |
| ENSG00000236166.1_RP3-523C2  | ENSG00000160789.18_LMNA | -0.11361 | -0.267965863 | 0.046428576 | 1.63E-01 | 4.19E-01 | 1.00E+00 |
| ENSG00000279571.1_MIR3911    | ENSG00000160789.18_LMNA | -0.04005 | -0.197985447 | 0.119918239 | 6.24E-01 | 8.31E-01 | 1.00E+00 |
| ENSG00000236098.1_RP11-148B  | ENSG00000160789.18_LMNA | 0.16727  | 0.008294359  | 0.318006322 | 3.94E-02 | 1.72E-01 | 1.00E+00 |
| ENSG00000234362.4_AC104654.1 | ENSG00000160789.18_LMNA | -0.01125 | -0.170144203 | 0.148217938 | 8.91E-01 | 9.57E-01 | 1.00E+00 |
| ENSG00000254671.2_STT3A-AS1  | ENSG00000160789.18_LMNA | -0.06811 | -0.224871975 | 0.092089658 | 4.04E-01 | 6.80E-01 | 1.00E+00 |
| ENSG00000184258.6_CDR1       | ENSG00000160789.18_LMNA | -0.25435 | -0.397459279 | -0.09916788 | 1.57E-03 | 1.62E-02 | 1.00E+00 |
| ENSG00000278177.1_RP11-632L  | ENSG00000160789.18_LMNA | -0.00619 | -0.165228269 | 0.153161242 | 9.40E-01 | 9.76E-01 | 1.00E+00 |
| ENSG00000277453.1_CTC-492K1  | ENSG00000160789.18_LMNA | -0.09795 | -0.253197978 | 0.062225598 | 2.30E-01 | 5.07E-01 | 1.00E+00 |
| ENSG00000253816.3_RP11-1415  | ENSG00000160789.18_LMNA | 0.01819  | -0.14142394  | 0.176874824 | 8.24E-01 | 9.31E-01 | 1.00E+00 |
| ENSG00000258454.1_RP11-361H  | ENSG00000160789.18_LMNA | 0.10653  | -0.053577373 | 0.261301044 | 1.91E-01 | 4.59E-01 | 1.00E+00 |
| ENSG00000233968.5_RP11-354E  | ENSG00000160789.18_LMNA | -0.01336 | -0.172191093 | 0.146154949 | 8.70E-01 | 9.50E-01 | 1.00E+00 |
| ENSG00000228204.2_RP4-724E1  | ENSG00000160789.18_LMNA | 0.18958  | 0.031323276  | 0.33856118  | 1.93E-02 | 1.05E-01 | 1.00E+00 |
| ENSG00000260135.5_RP11-212I2 | ENSG00000160789.18_LMNA | 0.06395  | -0.096231851 | 0.220900346 | 4.34E-01 | 7.03E-01 | 1.00E+00 |
| ENSG00000214526.3_AP000343.1 | ENSG00000160789.18_LMNA | -0.09    | -0.245684803 | 0.07020215  | 2.70E-01 | 5.55E-01 | 1.00E+00 |
| ENSG00000272789.1_RP11-286H  | ENSG00000160789.18_LMNA | -0.02954 | -0.187855407 | 0.130275227 | 7.18E-01 | 8.80E-01 | 1.00E+00 |
| ENSG00000270975.1_MAGOH3P    | ENSG00000160789.18_LMNA | 0.05828  | -0.101866173 | 0.215481093 | 4.76E-01 | 7.34E-01 | 1.00E+00 |
| ENSG00000240531.1_RPL21P123  | ENSG00000160789.18_LMNA | -0.08985 | -0.245542245 | 0.07035311  | 2.71E-01 | 5.55E-01 | 1.00E+00 |
| ENSG00000258631.2_RP11-739G  | ENSG00000160789.18_LMNA | -0.09029 | -0.245953036 | 0.069918067 | 2.69E-01 | 5.53E-01 | 1.00E+00 |
| ENSG00000233196.2_GS1-304P7  | ENSG00000160789.18_LMNA | -0.07361 | -0.230109809 | 0.086610057 | 3.67E-01 | 6.48E-01 | 1.00E+00 |
| ENSG00000235488.1_JARID2-AS  | ENSG00000160789.18_LMNA | -0.04389 | -0.201678584 | 0.116125072 | 5.91E-01 | 8.11E-01 | 1.00E+00 |
| ENSG00000204421.2_LY6G6C     | ENSG00000160789.18_LMNA | 0.08284  | -0.077382702 | 0.238888768 | 3.10E-01 | 5.97E-01 | 1.00E+00 |

|                              |                         |          |              |             |          |          |          |
|------------------------------|-------------------------|----------|--------------|-------------|----------|----------|----------|
| ENSG00000260929.1_           | ENSG00000160789.18_LMNA | 0.07945  | -0.080773268 | 0.235668961 | 3.31E-01 | 6.17E-01 | 1.00E+00 |
| ENSG00000143340.6_FAM163A    | ENSG00000160789.18_LMNA | -0.08412 | -0.240104998 | 0.076100064 | 3.03E-01 | 5.89E-01 | 1.00E+00 |
| ENSG00000267405.1_CTC-296K1  | ENSG00000160789.18_LMNA | 0.05222  | -0.107872681 | 0.209682254 | 5.23E-01 | 7.68E-01 | 1.00E+00 |
| ENSG00000260190.1_RP11-229P  | ENSG00000160789.18_LMNA | 0.21928  | 0.062247475  | 0.365709432 | 6.64E-03 | 4.85E-02 | 1.00E+00 |
| ENSG00000196431.3_CRYBA4     | ENSG00000160789.18_LMNA | 0.07288  | -0.087335218 | 0.229417695 | 3.72E-01 | 6.52E-01 | 1.00E+00 |
| ENSG00000274874.1_RP11-214K  | ENSG00000160789.18_LMNA | -0.01018 | -0.169109868 | 0.149259355 | 9.01E-01 | 9.62E-01 | 1.00E+00 |
| ENSG00000229197.1_RPS15AP2   | ENSG00000160789.18_LMNA | -0.04133 | -0.199218197 | 0.11865313  | 6.13E-01 | 8.24E-01 | 1.00E+00 |
| ENSG00000230749.4_MEIS1-AS2  | ENSG00000160789.18_LMNA | 0.13172  | -0.028072746 | 0.284942264 | 1.06E-01 | 3.23E-01 | 1.00E+00 |
| ENSG00000271824.1_AC009014.  | ENSG00000160789.18_LMNA | -0.10303 | -0.257999962 | 0.057106257 | 2.07E-01 | 4.78E-01 | 1.00E+00 |
| ENSG00000271991.1_RP11-79O8  | ENSG00000160789.18_LMNA | -0.13803 | -0.290843048 | 0.021642663 | 8.99E-02 | 2.92E-01 | 1.00E+00 |
| ENSG00000259083.1_RP11-407N  | ENSG00000160789.18_LMNA | 0.02436  | -0.135363649 | 0.182853568 | 7.66E-01 | 9.03E-01 | 1.00E+00 |
| ENSG00000128645.12_HOXD1     | ENSG00000160789.18_LMNA | -0.28965 | -0.429069165 | -0.13675992 | 2.95E-04 | 4.44E-03 | 1.00E+00 |
| ENSG00000228060.1_RP11-69E1  | ENSG00000160789.18_LMNA | 0.02785  | -0.131932946 | 0.186227705 | 7.33E-01 | 8.88E-01 | 1.00E+00 |
| ENSG00000256897.1_RP11-17G1  | ENSG00000160789.18_LMNA | 0.14373  | -0.015837894 | 0.296149653 | 7.73E-02 | 2.66E-01 | 1.00E+00 |
| ENSG00000260955.2_RP11-30L1  | ENSG00000160789.18_LMNA | 0.0118   | -0.147674372 | 0.170683794 | 8.85E-01 | 9.55E-01 | 1.00E+00 |
| ENSG00000251330.3_CTD-2283N  | ENSG00000160789.18_LMNA | -0.00524 | -0.164306384 | 0.154086489 | 9.49E-01 | 9.79E-01 | 1.00E+00 |
| ENSG00000189316.3_RP11-797H  | ENSG00000160789.18_LMNA | -0.07842 | -0.234692006 | 0.081800589 | 3.37E-01 | 6.22E-01 | 1.00E+00 |
| ENSG00000227006.1_RP5-956O1  | ENSG00000160789.18_LMNA | 0.19789  | 0.039952308  | 0.346188383 | 1.45E-02 | 8.59E-02 | 1.00E+00 |
| ENSG00000171722.10_C1orf111  | ENSG00000160789.18_LMNA | -0.02719 | -0.185589447 | 0.13258249  | 7.39E-01 | 8.91E-01 | 1.00E+00 |
| ENSG00000203593.3_RP5-1096D  | ENSG00000160789.18_LMNA | -0.04847 | -0.206077254 | 0.111595133 | 5.53E-01 | 7.88E-01 | 1.00E+00 |
| ENSG00000262202.4_RP11-160E  | ENSG00000160789.18_LMNA | -0.09461 | -0.250044598 | 0.065578377 | 2.46E-01 | 5.26E-01 | 1.00E+00 |
| ENSG00000158022.6_TRIM63     | ENSG00000160789.18_LMNA | 0.05547  | -0.104654053 | 0.212792382 | 4.97E-01 | 7.51E-01 | 1.00E+00 |
| ENSG00000228718.1_RP11-145H  | ENSG00000160789.18_LMNA | 0.07616  | -0.084059061 | 0.232542008 | 3.51E-01 | 6.35E-01 | 1.00E+00 |
| ENSG00000260844.2_RP11-578F  | ENSG00000160789.18_LMNA | 0.0786   | -0.081626751 | 0.234857366 | 3.36E-01 | 6.22E-01 | 1.00E+00 |
| ENSG00000228686.2_RP11-492I2 | ENSG00000160789.18_LMNA | 0.11788  | -0.042108493 | 0.271978939 | 1.48E-01 | 3.94E-01 | 1.00E+00 |
| ENSG00000264269.1_RP11-15F1  | ENSG00000160789.18_LMNA | 0.02728  | -0.132500423 | 0.185670102 | 7.39E-01 | 8.90E-01 | 1.00E+00 |
| ENSG00000255158.1_RP11-754B  | ENSG00000160789.18_LMNA | 0.01876  | -0.140856667 | 0.177435462 | 8.19E-01 | 9.29E-01 | 1.00E+00 |
| ENSG00000221972.3_C3orf36    | ENSG00000160789.18_LMNA | 0.24866  | 0.093146779  | 0.392329693 | 2.01E-03 | 1.96E-02 | 1.00E+00 |
| ENSG00000228754.1_RPL13AP1   | ENSG00000160789.18_LMNA | -0.07393 | -0.230415877 | 0.086289267 | 3.65E-01 | 6.47E-01 | 1.00E+00 |
| ENSG00000204118.1_NAP1L6     | ENSG00000160789.18_LMNA | -0.27071 | -0.412147787 | -0.11653092 | 7.43E-04 | 9.18E-03 | 1.00E+00 |
| ENSG00000277186.1_RP13-554M  | ENSG00000160789.18_LMNA | -0.08641 | -0.242275209 | 0.073808753 | 2.90E-01 | 5.75E-01 | 1.00E+00 |
| ENSG00000232303.2_DFFBP1     | ENSG00000160789.18_LMNA | 0.08815  | -0.072058359 | 0.243930964 | 2.80E-01 | 5.66E-01 | 1.00E+00 |
| ENSG00000232194.1_RP1-313L4  | ENSG00000160789.18_LMNA | 0.00283  | -0.156444509 | 0.161954416 | 9.72E-01 | 9.89E-01 | 1.00E+00 |

|                              |                         |          |              |             |          |          |          |
|------------------------------|-------------------------|----------|--------------|-------------|----------|----------|----------|
| ENSG00000254317.1_RP11-473O  | ENSG00000160789.18_LMNA | -0.13684 | -0.289732889 | 0.022854381 | 9.27E-02 | 2.98E-01 | 1.00E+00 |
| ENSG00000141371.11_C17orf64  | ENSG00000160789.18_LMNA | -0.00746 | -0.166464515 | 0.151919611 | 9.27E-01 | 9.72E-01 | 1.00E+00 |
| ENSG00000113100.8_CDH9       | ENSG00000160789.18_LMNA | -0.19334 | -0.342017672 | -0.03522811 | 1.70E-02 | 9.61E-02 | 1.00E+00 |
| ENSG00000228915.3_OR7E128P   | ENSG00000160789.18_LMNA | 0.10137  | -0.058775834 | 0.256435594 | 2.14E-01 | 4.88E-01 | 1.00E+00 |
| ENSG00000260422.1_RP1-155D2  | ENSG00000160789.18_LMNA | -0.01318 | -0.172020089 | 0.146327403 | 8.72E-01 | 9.50E-01 | 1.00E+00 |
| ENSG00000245729.2_RP11-480D  | ENSG00000160789.18_LMNA | -0.14356 | -0.295991853 | 0.016010813 | 7.77E-02 | 2.67E-01 | 1.00E+00 |
| ENSG00000243144.5_RP11-115N  | ENSG00000160789.18_LMNA | 0.23563  | 0.079405373  | 0.380552803 | 3.47E-03 | 2.99E-02 | 1.00E+00 |
| ENSG00000233093.4_LINC00892  | ENSG00000160789.18_LMNA | -0.01708 | -0.175802255 | 0.142508621 | 8.35E-01 | 9.36E-01 | 1.00E+00 |
| ENSG00000233589.1_RP4-694A7  | ENSG00000160789.18_LMNA | 0.04968  | -0.110396446 | 0.207239062 | 5.43E-01 | 7.82E-01 | 1.00E+00 |
| ENSG00000184560.6_C17orf74   | ENSG00000160789.18_LMNA | -0.02248 | -0.18103218  | 0.137212405 | 7.83E-01 | 9.11E-01 | 1.00E+00 |
| ENSG00000237226.1_RPS3AP39   | ENSG00000160789.18_LMNA | -0.03533 | -0.193444346 | 0.124569649 | 6.66E-01 | 8.53E-01 | 1.00E+00 |
| ENSG00000268015.1_CTD-2525K  | ENSG00000160789.18_LMNA | -0.02395 | -0.182451269 | 0.135772183 | 7.70E-01 | 9.05E-01 | 1.00E+00 |
| ENSG00000057593.12_F7        | ENSG00000160789.18_LMNA | -0.13079 | -0.284076646 | 0.029013835 | 1.08E-01 | 3.27E-01 | 1.00E+00 |
| ENSG00000244137.1_RP11-99J11 | ENSG00000160789.18_LMNA | -0.17084 | -0.321305867 | -0.01196905 | 3.53E-02 | 1.60E-01 | 1.00E+00 |
| ENSG00000124103.8_FAM209A    | ENSG00000160789.18_LMNA | 0.1075   | -0.052601416 | 0.262212701 | 1.87E-01 | 4.54E-01 | 1.00E+00 |
| ENSG00000280234.1_RP11-145P  | ENSG00000160789.18_LMNA | 0.02242  | -0.137269149 | 0.180976241 | 7.84E-01 | 9.12E-01 | 1.00E+00 |
| ENSG00000267892.1_CTD-2540F  | ENSG00000160789.18_LMNA | 0.19633  | 0.038325293  | 0.344753354 | 1.53E-02 | 8.93E-02 | 1.00E+00 |
| ENSG00000220069.1_RPL7P27    | ENSG00000160789.18_LMNA | 0.08141  | -0.078814996 | 0.237529457 | 3.19E-01 | 6.05E-01 | 1.00E+00 |
| ENSG00000233539.4_AC011294.1 | ENSG00000160789.18_LMNA | 0.21227  | 0.05492746   | 0.359329528 | 8.65E-03 | 5.90E-02 | 1.00E+00 |
| ENSG00000112818.8_MEP1A      | ENSG00000160789.18_LMNA | -0.25198 | -0.395325943 | -0.09666112 | 1.74E-03 | 1.76E-02 | 1.00E+00 |
| ENSG00000205002.3_AARD       | ENSG00000160789.18_LMNA | -0.06496 | -0.22186899  | 0.09522262  | 4.27E-01 | 6.97E-01 | 1.00E+00 |
| ENSG00000254286.4_RP11-89K1  | ENSG00000160789.18_LMNA | -0.12481 | -0.278478179 | 0.03508705  | 1.26E-01 | 3.58E-01 | 1.00E+00 |
| ENSG00000268423.3_AC011551.1 | ENSG00000160789.18_LMNA | -0.01213 | -0.171000257 | 0.147355487 | 8.82E-01 | 9.54E-01 | 1.00E+00 |
| ENSG00000204165.5_CXorf65    | ENSG00000160789.18_LMNA | -0.03777 | -0.195789045 | 0.122169738 | 6.44E-01 | 8.42E-01 | 1.00E+00 |
| ENSG00000205054.5_LINC01121  | ENSG00000160789.18_LMNA | -0.28168 | -0.421960178 | -0.12823154 | 4.39E-04 | 6.10E-03 | 1.00E+00 |
| ENSG00000253557.4_RP11-1080  | ENSG00000160789.18_LMNA | 0.1124   | -0.047658192 | 0.266821632 | 1.68E-01 | 4.26E-01 | 1.00E+00 |
| ENSG00000232457.4_SLC16A6P   | ENSG00000160789.18_LMNA | 0.00593  | -0.153412469 | 0.164978011 | 9.42E-01 | 9.77E-01 | 1.00E+00 |
| ENSG00000272968.4_RBAK-RBA   | ENSG00000160789.18_LMNA | 0.1568   | -0.00246267  | 0.308304139 | 5.37E-02 | 2.11E-01 | 1.00E+00 |
| ENSG00000236740.5_RP11-411K  | ENSG00000160789.18_LMNA | -0.14487 | -0.297217092 | 0.014667702 | 7.50E-02 | 2.61E-01 | 1.00E+00 |
| ENSG00000132698.12_RAB25     | ENSG00000160789.18_LMNA | -0.14511 | -0.29744067  | 0.014422494 | 7.45E-02 | 2.60E-01 | 1.00E+00 |
| ENSG00000277893.1_SRD5A2     | ENSG00000160789.18_LMNA | -0.28192 | -0.422168367 | -0.12848068 | 4.34E-04 | 6.04E-03 | 1.00E+00 |
| ENSG00000270665.1_HNRNPA1F   | ENSG00000160789.18_LMNA | -0.00199 | -0.161142665 | 0.157257506 | 9.81E-01 | 9.93E-01 | 1.00E+00 |
| ENSG00000187999.4_HNRNPA1F   | ENSG00000160789.18_LMNA | 0.01776  | -0.141844524 | 0.176459026 | 8.28E-01 | 9.33E-01 | 1.00E+00 |



|                              |                         |          |              |             |          |          |          |
|------------------------------|-------------------------|----------|--------------|-------------|----------|----------|----------|
| ENSG00000181215.11_C4orf50   | ENSG00000160789.18_LMNA | -0.21588 | -0.362617534 | -0.05869589 | 7.56E-03 | 5.32E-02 | 1.00E+00 |
| ENSG00000163012.3_ZSWIM2     | ENSG00000160789.18_LMNA | -0.16559 | -0.316452704 | -0.00656699 | 4.15E-02 | 1.78E-01 | 1.00E+00 |
| ENSG00000238109.1_AC004893.  | ENSG00000160789.18_LMNA | 0.12928  | -0.03055374  | 0.282659135 | 1.12E-01 | 3.35E-01 | 1.00E+00 |
| ENSG00000179477.8_ALOX12B    | ENSG00000160789.18_LMNA | -0.13113 | -0.284392218 | 0.028670813 | 1.07E-01 | 3.26E-01 | 1.00E+00 |
| ENSG00000142973.11_CYP4B1    | ENSG00000160789.18_LMNA | -0.12354 | -0.277285728 | 0.036377635 | 1.29E-01 | 3.65E-01 | 1.00E+00 |
| ENSG00000257322.4_RP11-511B  | ENSG00000160789.18_LMNA | -0.07096 | -0.227586597 | 0.089252129 | 3.85E-01 | 6.64E-01 | 1.00E+00 |
| ENSG00000278572.1_RP11-231P  | ENSG00000160789.18_LMNA | -0.12054 | -0.274469773 | 0.039421187 | 1.39E-01 | 3.80E-01 | 1.00E+00 |
| ENSG00000233220.3_LINC00167  | ENSG00000160789.18_LMNA | -0.17759 | -0.32752898  | -0.01892251 | 2.86E-02 | 1.39E-01 | 1.00E+00 |
| ENSG00000205632.2_LINC01310  | ENSG00000160789.18_LMNA | -0.26436 | -0.406455594 | -0.10978076 | 9.98E-04 | 1.16E-02 | 1.00E+00 |
| ENSG00000268234.1_FKBP4P6    | ENSG00000160789.18_LMNA | -0.15413 | -0.305825753 | 0.005199028 | 5.80E-02 | 2.21E-01 | 1.00E+00 |
| ENSG00000279314.1_RP1-257C2  | ENSG00000160789.18_LMNA | -0.07582 | -0.232221635 | 0.08439532  | 3.53E-01 | 6.37E-01 | 1.00E+00 |
| ENSG00000254872.3_RP13-870H  | ENSG00000160789.18_LMNA | 0.11564  | -0.044380279 | 0.269869959 | 1.56E-01 | 4.08E-01 | 1.00E+00 |
| ENSG00000236526.1_RP4-742J2. | ENSG00000160789.18_LMNA | 0.12324  | -0.036682521 | 0.277003884 | 1.30E-01 | 3.66E-01 | 1.00E+00 |
| ENSG00000281796.1_           | ENSG00000160789.18_LMNA | -0.01085 | -0.169754473 | 0.148610419 | 8.94E-01 | 9.59E-01 | 1.00E+00 |
| ENSG00000241293.1_PPATP1     | ENSG00000160789.18_LMNA | 0.07476  | -0.085461625 | 0.231205249 | 3.60E-01 | 6.42E-01 | 1.00E+00 |
| ENSG00000093134.12_VNN3      | ENSG00000160789.18_LMNA | 0.03818  | -0.121759296 | 0.196189681 | 6.40E-01 | 8.39E-01 | 1.00E+00 |
| ENSG00000251079.5_BMS1P2     | ENSG00000160789.18_LMNA | -0.18802 | -0.337133194 | -0.0297128  | 2.04E-02 | 1.09E-01 | 1.00E+00 |
| ENSG00000279137.1_RP11-205K  | ENSG00000160789.18_LMNA | -0.09295 | -0.248477075 | 0.067242373 | 2.55E-01 | 5.36E-01 | 1.00E+00 |
| ENSG00000231244.1_PSMC1P3    | ENSG00000160789.18_LMNA | 0.107    | -0.053106176 | 0.261741267 | 1.90E-01 | 4.57E-01 | 1.00E+00 |
| ENSG00000070729.12_CNGB1     | ENSG00000160789.18_LMNA | -0.05101 | -0.208519396 | 0.109074399 | 5.33E-01 | 7.75E-01 | 1.00E+00 |
| ENSG00000255387.1_RP11-23F2  | ENSG00000160789.18_LMNA | 0.00487  | -0.154448696 | 0.163945342 | 9.52E-01 | 9.81E-01 | 1.00E+00 |
| ENSG00000256574.5_OR13A1     | ENSG00000160789.18_LMNA | -0.09524 | -0.25064186  | 0.064943896 | 2.43E-01 | 5.23E-01 | 1.00E+00 |
| ENSG00000232928.2_DDX3P1     | ENSG00000160789.18_LMNA | -0.06457 | -0.221496097 | 0.095611214 | 4.29E-01 | 6.99E-01 | 1.00E+00 |
| ENSG00000258679.1_RP11-74M1  | ENSG00000160789.18_LMNA | 0.06783  | -0.092367301 | 0.224606094 | 4.06E-01 | 6.82E-01 | 1.00E+00 |
| ENSG00000236348.1_PSMC1P10   | ENSG00000160789.18_LMNA | 0.07487  | -0.085348666 | 0.231312953 | 3.59E-01 | 6.42E-01 | 1.00E+00 |
| ENSG00000267719.1_HP09025    | ENSG00000160789.18_LMNA | 0.03511  | -0.124789192 | 0.193229672 | 6.68E-01 | 8.54E-01 | 1.00E+00 |
| ENSG00000261222.2_CTD-2006K  | ENSG00000160789.18_LMNA | 0.14262  | -0.016961714 | 0.295123781 | 7.96E-02 | 2.71E-01 | 1.00E+00 |
| ENSG00000188959.9_C9orf152   | ENSG00000160789.18_LMNA | 0.03669  | -0.123234779 | 0.194748954 | 6.54E-01 | 8.47E-01 | 1.00E+00 |
| ENSG00000261546.1_CTD-2555A  | ENSG00000160789.18_LMNA | 0.11787  | -0.042120613 | 0.271967696 | 1.48E-01 | 3.95E-01 | 1.00E+00 |
| ENSG00000162949.15_CAPN13    | ENSG00000160789.18_LMNA | -0.27141 | -0.412778099 | -0.11728007 | 7.19E-04 | 8.95E-03 | 1.00E+00 |
| ENSG00000277561.3_GOLGA8IP   | ENSG00000160789.18_LMNA | 0.17808  | 0.019428762  | 0.327981013 | 2.82E-02 | 1.37E-01 | 1.00E+00 |
| ENSG00000260278.1_RP11-109G  | ENSG00000160789.18_LMNA | -0.05049 | -0.208016479 | 0.109593835 | 5.37E-01 | 7.78E-01 | 1.00E+00 |
| ENSG00000160868.13_CYP3A4    | ENSG00000160789.18_LMNA | -0.12129 | -0.275176778 | 0.038657586 | 1.37E-01 | 3.76E-01 | 1.00E+00 |

|                              |                         |          |              |             |          |          |          |
|------------------------------|-------------------------|----------|--------------|-------------|----------|----------|----------|
| ENSG00000215179.5_MAPK6PS4   | ENSG00000160789.18_LMNA | -0.00654 | -0.165570075 | 0.152818048 | 9.36E-01 | 9.75E-01 | 1.00E+00 |
| ENSG00000237307.2_SRRM1P3    | ENSG00000160789.18_LMNA | 0.14929  | -0.010156142 | 0.301325214 | 6.64E-02 | 2.41E-01 | 1.00E+00 |
| ENSG00000255872.3_RP11-613M  | ENSG00000160789.18_LMNA | -0.10142 | -0.256480147 | 0.058728309 | 2.14E-01 | 4.88E-01 | 1.00E+00 |
| ENSG00000261739.2_GOLGA8S    | ENSG00000160789.18_LMNA | 0.04099  | -0.118990301 | 0.198889748 | 6.16E-01 | 8.26E-01 | 1.00E+00 |
| ENSG00000269948.4_           | ENSG00000160789.18_LMNA | -0.05952 | -0.216671084 | 0.100630698 | 4.66E-01 | 7.28E-01 | 1.00E+00 |
| ENSG00000183625.13_CCR3      | ENSG00000160789.18_LMNA | 0.12486  | -0.035034143 | 0.278527042 | 1.25E-01 | 3.58E-01 | 1.00E+00 |
| ENSG00000255833.1_TIFAB      | ENSG00000160789.18_LMNA | -0.11911 | -0.273134541 | 0.040862304 | 1.44E-01 | 3.88E-01 | 1.00E+00 |
| ENSG00000224775.2_BRAFP1     | ENSG00000160789.18_LMNA | 0.19603  | 0.03801751   | 0.344481728 | 1.55E-02 | 8.99E-02 | 1.00E+00 |
| ENSG00000227508.5_LINC01624  | ENSG00000160789.18_LMNA | 0.04695  | -0.113092863 | 0.204624345 | 5.66E-01 | 7.96E-01 | 1.00E+00 |
| ENSG00000235724.7_AC009299.  | ENSG00000160789.18_LMNA | 0.03357  | -0.126300965 | 0.191750602 | 6.81E-01 | 8.61E-01 | 1.00E+00 |
| ENSG00000230662.1_TNPO1P2    | ENSG00000160789.18_LMNA | 0.05498  | -0.105145357 | 0.212318055 | 5.01E-01 | 7.53E-01 | 1.00E+00 |
| ENSG00000233725.6_LINC00284  | ENSG00000160789.18_LMNA | -0.11526 | -0.269518681 | 0.044758358 | 1.57E-01 | 4.10E-01 | 1.00E+00 |
| ENSG00000006555.9_TTC22      | ENSG00000160789.18_LMNA | 0.03842  | -0.121521731 | 0.196421522 | 6.38E-01 | 8.38E-01 | 1.00E+00 |
| ENSG00000266976.1_AC079466.  | ENSG00000160789.18_LMNA | 0.09219  | -0.068010864 | 0.247752579 | 2.59E-01 | 5.42E-01 | 1.00E+00 |
| ENSG00000070915.8_SLC12A3    | ENSG00000160789.18_LMNA | -0.07997 | -0.236165227 | 0.08025116  | 3.27E-01 | 6.14E-01 | 1.00E+00 |
| ENSG00000261732.1_LA16c-431f | ENSG00000160789.18_LMNA | 0.03596  | -0.123954715 | 0.19404548  | 6.60E-01 | 8.50E-01 | 1.00E+00 |
| ENSG00000183246.6_RIMBP3C    | ENSG00000160789.18_LMNA | 0.19996  | 0.042098931  | 0.348079516 | 1.35E-02 | 8.13E-02 | 1.00E+00 |
| ENSG00000184860.8_SDR42E1    | ENSG00000160789.18_LMNA | -0.00904 | -0.168001462 | 0.150374566 | 9.12E-01 | 9.66E-01 | 1.00E+00 |
| ENSG00000181143.14_MUC16     | ENSG00000160789.18_LMNA | 0.06494  | -0.095245556 | 0.221846983 | 4.27E-01 | 6.97E-01 | 1.00E+00 |
| ENSG00000211574.1_MIR770     | ENSG00000160789.18_LMNA | 0.02329  | -0.136420801 | 0.181812332 | 7.76E-01 | 9.08E-01 | 1.00E+00 |
| ENSG00000137745.10_MMP13     | ENSG00000160789.18_LMNA | 0.10104  | -0.05911006  | 0.256122231 | 2.15E-01 | 4.90E-01 | 1.00E+00 |
| ENSG00000263675.1_MIR5581    | ENSG00000160789.18_LMNA | -0.25319 | -0.396415747 | -0.09794121 | 1.65E-03 | 1.69E-02 | 1.00E+00 |
| ENSG00000231394.1_RP11-310H  | ENSG00000160789.18_LMNA | 0.03072  | -0.129108473 | 0.188999987 | 7.07E-01 | 8.75E-01 | 1.00E+00 |
| ENSG00000208028.1_MIR616     | ENSG00000160789.18_LMNA | 0.02745  | -0.132330817 | 0.185836779 | 7.37E-01 | 8.89E-01 | 1.00E+00 |
| ENSG00000265106.1_           | ENSG00000160789.18_LMNA | -0.12145 | -0.275326508 | 0.038495823 | 1.36E-01 | 3.75E-01 | 1.00E+00 |
| ENSG00000250535.1_STK19B     | ENSG00000160789.18_LMNA | -0.01711 | -0.175834774 | 0.142475746 | 8.34E-01 | 9.36E-01 | 1.00E+00 |
| ENSG00000276381.1_           | ENSG00000160789.18_LMNA | -0.0136  | -0.172429056 | 0.145914934 | 8.68E-01 | 9.48E-01 | 1.00E+00 |
| ENSG00000266701.1_           | ENSG00000160789.18_LMNA | 0.09275  | -0.067442058 | 0.248288856 | 2.56E-01 | 5.38E-01 | 1.00E+00 |
| ENSG00000262406.2_MMP12      | ENSG00000160789.18_LMNA | -0.09654 | -0.251868284 | 0.063640242 | 2.37E-01 | 5.15E-01 | 1.00E+00 |
| ENSG00000271819.1_RNU6-94P   | ENSG00000160789.18_LMNA | -0.1625  | -0.313583903 | -0.00338222 | 4.55E-02 | 1.89E-01 | 1.00E+00 |
| ENSG00000270896.1_XXbac-BPG  | ENSG00000160789.18_LMNA | 0.15439  | -0.004935636 | 0.306064496 | 5.76E-02 | 2.20E-01 | 1.00E+00 |
| ENSG00000207399.1_RNU6-1011  | ENSG00000160789.18_LMNA | 0.00082  | -0.158404796 | 0.159996401 | 9.92E-01 | 9.97E-01 | 1.00E+00 |
| ENSG00000263842.1_           | ENSG00000160789.18_LMNA | -0.07202 | -0.228598618 | 0.08819297  | 3.78E-01 | 6.57E-01 | 1.00E+00 |

|                              |                         |          |              |             |          |          |          |
|------------------------------|-------------------------|----------|--------------|-------------|----------|----------|----------|
| ENSG00000212242.1_RNA5SP21   | ENSG00000160789.18_LMNA | 0.12133  | -0.038612755 | 0.275218275 | 1.36E-01 | 3.76E-01 | 1.00E+00 |
| ENSG00000278635.1_CTD-2318C  | ENSG00000160789.18_LMNA | -0.02901 | -0.187341133 | 0.130799177 | 7.23E-01 | 8.83E-01 | 1.00E+00 |
| ENSG00000274978.1_RNU11      | ENSG00000160789.18_LMNA | -0.06838 | -0.225126674 | 0.091823646 | 4.03E-01 | 6.78E-01 | 1.00E+00 |
| ENSG00000268081.1_RP11-678G  | ENSG00000160789.18_LMNA | -0.13101 | -0.284277767 | 0.028795228 | 1.08E-01 | 3.26E-01 | 1.00E+00 |
| ENSG00000231324.1_AP000696.1 | ENSG00000160789.18_LMNA | -0.28015 | -0.4205958   | -0.1265997  | 4.73E-04 | 6.45E-03 | 1.00E+00 |
| ENSG00000275833.1_RP11-479C  | ENSG00000160789.18_LMNA | -0.03161 | -0.189853974 | 0.128237367 | 6.99E-01 | 8.71E-01 | 1.00E+00 |
| ENSG00000264458.1_RP11-220C  | ENSG00000160789.18_LMNA | -0.25653 | -0.399419981 | -0.10147514 | 1.42E-03 | 1.51E-02 | 1.00E+00 |
| ENSG00000235450.1_RP11-142A  | ENSG00000160789.18_LMNA | -0.10559 | -0.260416031 | 0.054524232 | 1.95E-01 | 4.64E-01 | 1.00E+00 |
| ENSG00000265630.2_GLUD1P8    | ENSG00000160789.18_LMNA | -0.15452 | -0.306193014 | 0.004793832 | 5.73E-02 | 2.19E-01 | 1.00E+00 |
| ENSG00000227113.2_RP11-460N  | ENSG00000160789.18_LMNA | -0.08754 | -0.243352133 | 0.072670496 | 2.84E-01 | 5.69E-01 | 1.00E+00 |
| ENSG00000243018.1_RP5-1070G  | ENSG00000160789.18_LMNA | -0.09035 | -0.246012099 | 0.069855508 | 2.68E-01 | 5.52E-01 | 1.00E+00 |
| ENSG00000269124.1_AC007193.1 | ENSG00000160789.18_LMNA | -0.07318 | -0.229705494 | 0.087033718 | 3.70E-01 | 6.51E-01 | 1.00E+00 |
| ENSG00000239793.1_RP11-109G  | ENSG00000160789.18_LMNA | -0.2428  | -0.387035653 | -0.0869555  | 2.58E-03 | 2.38E-02 | 1.00E+00 |
| ENSG00000275714.1_HIST1H3A   | ENSG00000160789.18_LMNA | -0.14177 | -0.294324349 | 0.017836927 | 8.15E-02 | 2.75E-01 | 1.00E+00 |
| ENSG00000116981.3_NT5C1A     | ENSG00000160789.18_LMNA | -0.26742 | -0.409201008 | -0.11303303 | 8.66E-04 | 1.04E-02 | 1.00E+00 |
| ENSG00000277602.1_AC005363.1 | ENSG00000160789.18_LMNA | -0.04282 | -0.200649587 | 0.117182871 | 6.00E-01 | 8.16E-01 | 1.00E+00 |
| ENSG00000275278.1_RP11-946L  | ENSG00000160789.18_LMNA | -0.1828  | -0.332332126 | -0.02430985 | 2.42E-02 | 1.24E-01 | 1.00E+00 |
| ENSG00000239419.3_RN7SL535F  | ENSG00000160789.18_LMNA | 0.02948  | -0.130331602 | 0.187800082 | 7.18E-01 | 8.80E-01 | 1.00E+00 |
| ENSG00000224106.1_CYP4F25P   | ENSG00000160789.18_LMNA | 0.06062  | -0.099540568 | 0.217720298 | 4.58E-01 | 7.22E-01 | 1.00E+00 |
| ENSG00000266928.1_CTB-70G1C  | ENSG00000160789.18_LMNA | 0.23193  | 0.07551428   | 0.377200152 | 4.04E-03 | 3.34E-02 | 1.00E+00 |
| ENSG00000254859.1_RP11-661A  | ENSG00000160789.18_LMNA | 0.07168  | -0.088530963 | 0.228275743 | 3.80E-01 | 6.59E-01 | 1.00E+00 |
| ENSG00000274124.1_RP11-474C  | ENSG00000160789.18_LMNA | -0.15665 | -0.30816679  | 0.002614437 | 5.39E-02 | 2.11E-01 | 1.00E+00 |
| ENSG00000265010.1_RP11-661C  | ENSG00000160789.18_LMNA | -0.18246 | -0.332014593 | -0.02395315 | 2.45E-02 | 1.25E-01 | 1.00E+00 |
| ENSG00000249335.1_CTC-340D7  | ENSG00000160789.18_LMNA | -0.19004 | -0.33898316  | -0.03179949 | 1.90E-02 | 1.04E-01 | 1.00E+00 |
| ENSG00000258118.1_RP11-77I22 | ENSG00000160789.18_LMNA | 0.17805  | 0.01939483   | 0.32795072  | 2.82E-02 | 1.37E-01 | 1.00E+00 |
| ENSG00000225981.1_AC102953.1 | ENSG00000160789.18_LMNA | 0.07451  | -0.085712011 | 0.230966486 | 3.62E-01 | 6.43E-01 | 1.00E+00 |
| ENSG00000225173.1_XXbac-BPG  | ENSG00000160789.18_LMNA | 0.16534  | 0.006307301  | 0.316218987 | 4.18E-02 | 1.79E-01 | 1.00E+00 |
| ENSG00000270966.1_RP11-62H7  | ENSG00000160789.18_LMNA | -0.0601  | -0.217223825 | 0.100056497 | 4.62E-01 | 7.25E-01 | 1.00E+00 |
| ENSG00000235902.1_RP11-626E  | ENSG00000160789.18_LMNA | -0.00717 | -0.166176908 | 0.152208561 | 9.30E-01 | 9.73E-01 | 1.00E+00 |
| ENSG00000279578.1_RP4-815D2  | ENSG00000160789.18_LMNA | -0.4382  | -0.558443615 | -0.29992354 | 1.64E-08 | 1.63E-06 | 8.42E-04 |
| ENSG00000272856.1_RP11-710E  | ENSG00000160789.18_LMNA | -0.06266 | -0.219669231 | 0.09751361  | 4.43E-01 | 7.10E-01 | 1.00E+00 |
| ENSG00000123838.9_C4BPA      | ENSG00000160789.18_LMNA | -0.05739 | -0.214625352 | 0.102754018 | 4.83E-01 | 7.40E-01 | 1.00E+00 |
| ENSG00000261550.1_           | ENSG00000160789.18_LMNA | 0.1388   | -0.020860821 | 0.291558915 | 8.81E-02 | 2.89E-01 | 1.00E+00 |

|                              |                         |          |              |             |          |          |          |
|------------------------------|-------------------------|----------|--------------|-------------|----------|----------|----------|
| ENSG00000279499.1_RP11-490N  | ENSG00000160789.18_LMNA | 0.07569  | -0.084529117 | 0.232094139 | 3.54E-01 | 6.38E-01 | 1.00E+00 |
| ENSG00000223537.2_RP5-919F1  | ENSG00000160789.18_LMNA | -0.11267 | -0.26707853  | 0.047382206 | 1.67E-01 | 4.24E-01 | 1.00E+00 |
| ENSG00000241954.1_RP1-149A1  | ENSG00000160789.18_LMNA | -0.00872 | -0.167684656 | 0.150693169 | 9.15E-01 | 9.68E-01 | 1.00E+00 |
| ENSG00000224573.1_AC083863.1 | ENSG00000160789.18_LMNA | 0.08455  | -0.075672875 | 0.240509849 | 3.00E-01 | 5.87E-01 | 1.00E+00 |
| ENSG00000235308.1_RP11-82K1  | ENSG00000160789.18_LMNA | 0.14854  | -0.010914414 | 0.300635557 | 6.78E-02 | 2.44E-01 | 1.00E+00 |
| ENSG00000230980.1_RPL36AP3.1 | ENSG00000160789.18_LMNA | -0.04925 | -0.20682937  | 0.110819248 | 5.47E-01 | 7.84E-01 | 1.00E+00 |
| ENSG00000260352.1_CTD-2288F  | ENSG00000160789.18_LMNA | 0.24659  | 0.090961398  | 0.390463278 | 2.19E-03 | 2.10E-02 | 1.00E+00 |
| ENSG00000225018.1_RP11-419M  | ENSG00000160789.18_LMNA | 0.17811  | 0.01945676   | 0.328006008 | 2.81E-02 | 1.37E-01 | 1.00E+00 |
| ENSG00000279584.1_AC005593.1 | ENSG00000160789.18_LMNA | -0.01421 | -0.173015017 | 0.145323762 | 8.62E-01 | 9.46E-01 | 1.00E+00 |
| ENSG00000253865.1_RP11-394O  | ENSG00000160789.18_LMNA | -0.03211 | -0.190339592 | 0.127741796 | 6.95E-01 | 8.69E-01 | 1.00E+00 |
| ENSG00000260536.1_RP5-1085F  | ENSG00000160789.18_LMNA | 0.06594  | -0.094245692 | 0.222806034 | 4.20E-01 | 6.91E-01 | 1.00E+00 |
| ENSG00000235267.1_AC074117.1 | ENSG00000160789.18_LMNA | 0.01528  | -0.144270347 | 0.174058588 | 8.52E-01 | 9.42E-01 | 1.00E+00 |
| ENSG00000261407.1_RP11-326A  | ENSG00000160789.18_LMNA | 0.00438  | -0.154928857 | 0.163466594 | 9.57E-01 | 9.83E-01 | 1.00E+00 |
| ENSG00000273069.1_RP5-1186P  | ENSG00000160789.18_LMNA | 0.13071  | -0.029098889 | 0.283998389 | 1.08E-01 | 3.28E-01 | 1.00E+00 |
| ENSG00000233108.1_AC006042.1 | ENSG00000160789.18_LMNA | -0.11437 | -0.268683026 | 0.04565741  | 1.61E-01 | 4.15E-01 | 1.00E+00 |
| ENSG00000165383.9_LRRC18     | ENSG00000160789.18_LMNA | 0.03421  | -0.125678724 | 0.192359558 | 6.76E-01 | 8.58E-01 | 1.00E+00 |
| ENSG00000224067.2_RP11-430K  | ENSG00000160789.18_LMNA | 0.0601   | -0.100056785 | 0.217223548 | 4.62E-01 | 7.25E-01 | 1.00E+00 |
| ENSG00000272942.1_CTA-246H3  | ENSG00000160789.18_LMNA | -0.15677 | -0.308275441 | 0.002494381 | 5.38E-02 | 2.11E-01 | 1.00E+00 |
| ENSG00000279115.1_AC006386.1 | ENSG00000160789.18_LMNA | -0.07272 | -0.229269341 | 0.087490612 | 3.73E-01 | 6.53E-01 | 1.00E+00 |
| ENSG00000251230.4_MIR3945HC  | ENSG00000160789.18_LMNA | 0.02692  | -0.132852414 | 0.185324132 | 7.42E-01 | 8.92E-01 | 1.00E+00 |
| ENSG00000213440.2_H2AFZP1    | ENSG00000160789.18_LMNA | -0.09281 | -0.248338431 | 0.067389465 | 2.55E-01 | 5.37E-01 | 1.00E+00 |
| ENSG00000213717.3_AC004692.1 | ENSG00000160789.18_LMNA | 0.00125  | -0.157980585 | 0.160420332 | 9.88E-01 | 9.95E-01 | 1.00E+00 |
| ENSG00000213997.3_PGAM1P7    | ENSG00000160789.18_LMNA | 0.26417  | 0.109578478  | 0.406284657 | 1.01E-03 | 1.16E-02 | 1.00E+00 |
| ENSG00000214111.3_RP1-258N2  | ENSG00000160789.18_LMNA | 0.17429  | 0.01551634   | 0.324483915 | 3.18E-02 | 1.49E-01 | 1.00E+00 |
| ENSG00000236095.1_RP11-49O1  | ENSG00000160789.18_LMNA | -0.0335  | -0.19167941  | 0.126373693 | 6.82E-01 | 8.62E-01 | 1.00E+00 |
| ENSG00000239443.1_PABPC1P1   | ENSG00000160789.18_LMNA | -0.00427 | -0.163356001 | 0.155039755 | 9.58E-01 | 9.83E-01 | 1.00E+00 |
| ENSG00000281021.1_RP1-12G14  | ENSG00000160789.18_LMNA | 0.01706  | -0.142532686 | 0.17577845  | 8.35E-01 | 9.36E-01 | 1.00E+00 |
| ENSG00000270402.1_CTC-412M1  | ENSG00000160789.18_LMNA | 0.10264  | -0.057499641 | 0.257631516 | 2.08E-01 | 4.81E-01 | 1.00E+00 |
| ENSG00000272810.1_U91328.22  | ENSG00000160789.18_LMNA | -0.06058 | -0.21768119  | 0.099581215 | 4.58E-01 | 7.22E-01 | 1.00E+00 |
| ENSG00000234617.1_SNRK-AS1   | ENSG00000160789.18_LMNA | 0.05882  | -0.10133234  | 0.215995389 | 4.72E-01 | 7.32E-01 | 1.00E+00 |
| ENSG00000227158.1_AC073621.1 | ENSG00000160789.18_LMNA | -0.02307 | -0.181604501 | 0.136631723 | 7.78E-01 | 9.09E-01 | 1.00E+00 |
| ENSG00000272772.1_CTD-2410N  | ENSG00000160789.18_LMNA | 0.08544  | -0.074778094 | 0.241357485 | 2.95E-01 | 5.81E-01 | 1.00E+00 |
| ENSG00000273455.1_RP11-305O  | ENSG00000160789.18_LMNA | -0.04097 | -0.198874631 | 0.119005818 | 6.16E-01 | 8.26E-01 | 1.00E+00 |

|                              |                         |          |              |             |          |          |          |
|------------------------------|-------------------------|----------|--------------|-------------|----------|----------|----------|
| ENSG00000224875.2_AC083949.  | ENSG00000160789.18_LMNA | -0.24319 | -0.387394668 | -0.08737463 | 2.54E-03 | 2.35E-02 | 1.00E+00 |
| ENSG00000229677.1_RP11-383F  | ENSG00000160789.18_LMNA | 0.14784  | -0.0116346   | 0.299980237 | 6.91E-02 | 2.48E-01 | 1.00E+00 |
| ENSG00000274251.1_CTC-1337H  | ENSG00000160789.18_LMNA | 0.01419  | -0.145339709 | 0.172999214 | 8.62E-01 | 9.46E-01 | 1.00E+00 |
| ENSG00000279377.1_AC003973.  | ENSG00000160789.18_LMNA | -0.22637 | -0.372155731 | -0.06967698 | 5.04E-03 | 3.95E-02 | 1.00E+00 |
| ENSG00000183911.7_RPL21P13   | ENSG00000160789.18_LMNA | 0.11049  | -0.049582235 | 0.265029413 | 1.75E-01 | 4.36E-01 | 1.00E+00 |
| ENSG00000250400.3_LINC00977  | ENSG00000160789.18_LMNA | -0.01334 | -0.172170658 | 0.146175558 | 8.70E-01 | 9.50E-01 | 1.00E+00 |
| ENSG00000159248.4_GJD2       | ENSG00000160789.18_LMNA | -0.24281 | -0.387044603 | -0.08696595 | 2.58E-03 | 2.38E-02 | 1.00E+00 |
| ENSG00000258435.1_RP11-711D  | ENSG00000160789.18_LMNA | -0.08165 | -0.23776261  | 0.078569417 | 3.17E-01 | 6.04E-01 | 1.00E+00 |
| ENSG00000271580.1_RP11-536L  | ENSG00000160789.18_LMNA | -0.03537 | -0.193477737 | 0.124535497 | 6.65E-01 | 8.53E-01 | 1.00E+00 |
| ENSG00000269930.1_RP11-932O  | ENSG00000160789.18_LMNA | 0.04847  | -0.111596506 | 0.206075923 | 5.53E-01 | 7.88E-01 | 1.00E+00 |
| ENSG00000242431.2_RP11-731J  | ENSG00000160789.18_LMNA | -0.11852 | -0.272576094 | 0.04146465  | 1.46E-01 | 3.91E-01 | 1.00E+00 |
| ENSG00000254631.4_RP11-702H  | ENSG00000160789.18_LMNA | -0.05851 | -0.215697947 | 0.101641103 | 4.74E-01 | 7.34E-01 | 1.00E+00 |
| ENSG00000204872.3_NAT8B      | ENSG00000160789.18_LMNA | 0.08445  | -0.075772565 | 0.240415382 | 3.01E-01 | 5.88E-01 | 1.00E+00 |
| ENSG00000268069.2_RP5-1057I2 | ENSG00000160789.18_LMNA | -0.02596 | -0.184400817 | 0.133791408 | 7.51E-01 | 8.96E-01 | 1.00E+00 |
| ENSG00000228446.2_AC073052.  | ENSG00000160789.18_LMNA | 0.06696  | -0.09323354  | 0.223776247 | 4.12E-01 | 6.86E-01 | 1.00E+00 |
| ENSG00000182223.7_ZAR1       | ENSG00000160789.18_LMNA | 0.15826  | -0.000967025 | 0.309657    | 5.15E-02 | 2.05E-01 | 1.00E+00 |
| ENSG00000249965.2_CDC42P4    | ENSG00000160789.18_LMNA | 0.03584  | -0.124067185 | 0.193935551 | 6.61E-01 | 8.50E-01 | 1.00E+00 |
| ENSG00000219491.6_TPT1P8     | ENSG00000160789.18_LMNA | -0.11138 | -0.265869295 | 0.048680867 | 1.72E-01 | 4.31E-01 | 1.00E+00 |
| ENSG00000267157.1_CTB-54O9.  | ENSG00000160789.18_LMNA | 0.06847  | -0.091733172 | 0.22521329  | 4.02E-01 | 6.78E-01 | 1.00E+00 |
| ENSG00000229917.2_RPL7P46    | ENSG00000160789.18_LMNA | -0.07008 | -0.226747717 | 0.09012954  | 3.91E-01 | 6.69E-01 | 1.00E+00 |
| ENSG00000244036.3_RP11-306G  | ENSG00000160789.18_LMNA | 0.04607  | -0.113971231 | 0.203771611 | 5.73E-01 | 8.01E-01 | 1.00E+00 |
| ENSG00000183055.5_FAM133CP   | ENSG00000160789.18_LMNA | -0.12517 | -0.278816117 | 0.03472111  | 1.24E-01 | 3.56E-01 | 1.00E+00 |
| ENSG00000159904.10_ZNF890P   | ENSG00000160789.18_LMNA | -0.07183 | -0.228423297 | 0.088376509 | 3.79E-01 | 6.58E-01 | 1.00E+00 |
| ENSG00000241008.1_RP11-494M  | ENSG00000160789.18_LMNA | 0.00096  | -0.158263914 | 0.160137203 | 9.91E-01 | 9.96E-01 | 1.00E+00 |
| ENSG00000260581.1_CTB-113P1  | ENSG00000160789.18_LMNA | -0.09644 | -0.251779418 | 0.063734741 | 2.37E-01 | 5.16E-01 | 1.00E+00 |
| ENSG00000103375.9_AQP8       | ENSG00000160789.18_LMNA | -0.08866 | -0.244413101 | 0.071548298 | 2.77E-01 | 5.62E-01 | 1.00E+00 |
| ENSG00000258077.2_RP11-114H  | ENSG00000160789.18_LMNA | 0.05138  | -0.108709269 | 0.208872814 | 5.30E-01 | 7.73E-01 | 1.00E+00 |
| ENSG00000176769.9_TCERG1L    | ENSG00000160789.18_LMNA | -0.14957 | -0.301588272 | 0.009866818 | 6.59E-02 | 2.40E-01 | 1.00E+00 |
| ENSG00000213943.3_KRT18P17   | ENSG00000160789.18_LMNA | 0.09727  | -0.06290385  | 0.252560604 | 2.33E-01 | 5.11E-01 | 1.00E+00 |
| ENSG00000176566.4_DCAF4L2    | ENSG00000160789.18_LMNA | -0.19206 | -0.340836705 | -0.03389291 | 1.78E-02 | 9.92E-02 | 1.00E+00 |
| ENSG00000215196.4_AC091878.  | ENSG00000160789.18_LMNA | -0.25925 | -0.401868276 | -0.10436068 | 1.26E-03 | 1.38E-02 | 1.00E+00 |
| ENSG00000235649.2_MXRA5Y     | ENSG00000160789.18_LMNA | 0.13857  | -0.021094816 | 0.291344702 | 8.87E-02 | 2.90E-01 | 1.00E+00 |
| ENSG00000257529.4_RPL36A-H   | ENSG00000160789.18_LMNA | 0.02006  | -0.139582604 | 0.178693871 | 8.06E-01 | 9.23E-01 | 1.00E+00 |

|                              |                         |          |              |             |          |          |          |
|------------------------------|-------------------------|----------|--------------|-------------|----------|----------|----------|
| ENSG00000234832.1_RP3-322G1  | ENSG00000160789.18_LMNA | 0.02285  | -0.136847775 | 0.181391585 | 7.80E-01 | 9.10E-01 | 1.00E+00 |
| ENSG00000227959.1_RP11-276H  | ENSG00000160789.18_LMNA | 0.38736  | 0.243149906  | 0.514809916 | 8.22E-07 | 3.88E-05 | 4.22E-02 |
| ENSG00000198754.5_OXCT2      | ENSG00000160789.18_LMNA | 0.1023   | -0.057845014 | 0.257307961 | 2.10E-01 | 4.83E-01 | 1.00E+00 |
| ENSG00000223715.1_LINC01208  | ENSG00000160789.18_LMNA | -0.00935 | -0.168297808 | 0.15007648  | 9.09E-01 | 9.65E-01 | 1.00E+00 |
| ENSG00000235060.1_VDAC1P4    | ENSG00000160789.18_LMNA | 0.08943  | -0.070780579 | 0.245138496 | 2.73E-01 | 5.58E-01 | 1.00E+00 |
| ENSG00000178750.2_STX19      | ENSG00000160789.18_LMNA | -0.03783 | -0.195854243 | 0.122102952 | 6.44E-01 | 8.41E-01 | 1.00E+00 |
| ENSG00000268750.5_CTD-2583A  | ENSG00000160789.18_LMNA | 0.04676  | -0.113282198 | 0.204440576 | 5.67E-01 | 7.97E-01 | 1.00E+00 |
| ENSG00000233110.1_RP11-301L  | ENSG00000160789.18_LMNA | -0.07584 | -0.232237377 | 0.084378799 | 3.53E-01 | 6.37E-01 | 1.00E+00 |
| ENSG00000250770.2_RP5-1063M  | ENSG00000160789.18_LMNA | 0.33318  | 0.183729721  | 0.46758336  | 2.74E-05 | 6.64E-04 | 1.00E+00 |
| ENSG00000261618.1_RP11-79H2  | ENSG00000160789.18_LMNA | 0.22742  | 0.07078424   | 0.37311397  | 4.84E-03 | 3.82E-02 | 1.00E+00 |
| ENSG00000235145.2_RPSAP16    | ENSG00000160789.18_LMNA | 0.08307  | -0.07715426  | 0.239105455 | 3.09E-01 | 5.95E-01 | 1.00E+00 |
| ENSG00000261002.4_RP11-546B  | ENSG00000160789.18_LMNA | 0.02221  | -0.13747306  | 0.180775207 | 7.86E-01 | 9.13E-01 | 1.00E+00 |
| ENSG00000266401.1_RP11-874J  | ENSG00000160789.18_LMNA | 0.02503  | -0.134710304 | 0.183496718 | 7.60E-01 | 9.00E-01 | 1.00E+00 |
| ENSG00000180176.13_TH        | ENSG00000160789.18_LMNA | -0.15248 | -0.30429274  | 0.006889281 | 6.07E-02 | 2.27E-01 | 1.00E+00 |
| ENSG00000249487.5_LINC01586  | ENSG00000160789.18_LMNA | -0.33354 | -0.467894707 | -0.18411478 | 2.68E-05 | 6.54E-04 | 1.00E+00 |
| ENSG00000237624.1_OXCT2P1    | ENSG00000160789.18_LMNA | 0.07106  | -0.089148402 | 0.227685738 | 3.84E-01 | 6.63E-01 | 1.00E+00 |
| ENSG00000142615.7_CELA2A     | ENSG00000160789.18_LMNA | -0.07187 | -0.228453005 | 0.08834541  | 3.79E-01 | 6.58E-01 | 1.00E+00 |
| ENSG00000213049.3_HNRNPA1F   | ENSG00000160789.18_LMNA | -0.05082 | -0.208331132 | 0.109268866 | 5.34E-01 | 7.76E-01 | 1.00E+00 |
| ENSG00000183032.9_SLC25A21   | ENSG00000160789.18_LMNA | -0.27419 | -0.415260643 | -0.12023393 | 6.30E-04 | 8.09E-03 | 1.00E+00 |
| ENSG00000126952.15_NXF5      | ENSG00000160789.18_LMNA | -0.14711 | -0.299300752 | 0.012381003 | 7.05E-02 | 2.51E-01 | 1.00E+00 |
| ENSG00000235076.2_GAPDHP52   | ENSG00000160789.18_LMNA | 0.02319  | -0.136519566 | 0.181715018 | 7.77E-01 | 9.08E-01 | 1.00E+00 |
| ENSG00000181433.8_SAGE1      | ENSG00000160789.18_LMNA | -0.0754  | -0.231822711 | 0.084813923 | 3.56E-01 | 6.39E-01 | 1.00E+00 |
| ENSG00000279373.1_RP11-650L  | ENSG00000160789.18_LMNA | 0.06639  | -0.093805976 | 0.223227607 | 4.16E-01 | 6.89E-01 | 1.00E+00 |
| ENSG00000256304.1_CCDC150P   | ENSG00000160789.18_LMNA | 0.08253  | -0.077688034 | 0.238599098 | 3.12E-01 | 5.99E-01 | 1.00E+00 |
| ENSG00000240244.3_GAPDHP33   | ENSG00000160789.18_LMNA | -0.01246 | -0.171325596 | 0.147027591 | 8.79E-01 | 9.53E-01 | 1.00E+00 |
| ENSG00000165621.7_OXGR1      | ENSG00000160789.18_LMNA | -0.09099 | -0.24661922  | 0.069212297 | 2.65E-01 | 5.49E-01 | 1.00E+00 |
| ENSG00000243775.2_OSTCP1     | ENSG00000160789.18_LMNA | -0.0454  | -0.203135054 | 0.114626599 | 5.79E-01 | 8.04E-01 | 1.00E+00 |
| ENSG00000280069.1_CTD-2349P  | ENSG00000160789.18_LMNA | 0.02738  | -0.132393656 | 0.185775028 | 7.38E-01 | 8.90E-01 | 1.00E+00 |
| ENSG00000205018.2_RP11-830F  | ENSG00000160789.18_LMNA | -0.01217 | -0.171043155 | 0.147312256 | 8.82E-01 | 9.54E-01 | 1.00E+00 |
| ENSG00000220412.1_RP11-95M1  | ENSG00000160789.18_LMNA | 0.05032  | -0.109757991 | 0.207857508 | 5.38E-01 | 7.78E-01 | 1.00E+00 |
| ENSG00000251455.1_RP11-164P  | ENSG00000160789.18_LMNA | -0.00148 | -0.160640352 | 0.157760375 | 9.86E-01 | 9.94E-01 | 1.00E+00 |
| ENSG00000267607.1_CTD-2369P  | ENSG00000160789.18_LMNA | 0.24314  | 0.087315305  | 0.387343858 | 2.54E-03 | 2.35E-02 | 1.00E+00 |
| ENSG00000237070.1_AC005550.1 | ENSG00000160789.18_LMNA | 0.17444  | 0.015677881  | 0.324628474 | 3.16E-02 | 1.48E-01 | 1.00E+00 |

|                              |                         |          |              |             |          |          |          |
|------------------------------|-------------------------|----------|--------------|-------------|----------|----------|----------|
| ENSG00000168229.3_PTGDR      | ENSG00000160789.18_LMNA | -0.02697 | -0.185374368 | 0.132801309 | 7.42E-01 | 8.92E-01 | 1.00E+00 |
| ENSG00000163914.4_RHO        | ENSG00000160789.18_LMNA | -0.08159 | -0.23770139  | 0.078633903 | 3.18E-01 | 6.04E-01 | 1.00E+00 |
| ENSG00000250274.1_CTB-114C7  | ENSG00000160789.18_LMNA | 0.10167  | -0.058472235 | 0.256720185 | 2.13E-01 | 4.86E-01 | 1.00E+00 |
| ENSG00000224533.4_TMLHE-AS   | ENSG00000160789.18_LMNA | -0.00325 | -0.162366706 | 0.15603142  | 9.68E-01 | 9.88E-01 | 1.00E+00 |
| ENSG00000261519.3_RP11-403P  | ENSG00000160789.18_LMNA | 0.06103  | -0.099129647 | 0.218115607 | 4.55E-01 | 7.20E-01 | 1.00E+00 |
| ENSG00000277304.1_RP11-989E  | ENSG00000160789.18_LMNA | 0.14955  | -0.009881835 | 0.301574619 | 6.59E-02 | 2.40E-01 | 1.00E+00 |
| ENSG00000255438.2_CTD-2653D  | ENSG00000160789.18_LMNA | -0.05448 | -0.211842818 | 0.105637449 | 5.05E-01 | 7.56E-01 | 1.00E+00 |
| ENSG00000234210.1_AC006372.  | ENSG00000160789.18_LMNA | -0.10178 | -0.256818016 | 0.058367856 | 2.12E-01 | 4.86E-01 | 1.00E+00 |
| ENSG00000213962.2_API5P2     | ENSG00000160789.18_LMNA | 0.17047  | 0.011583825  | 0.320960324 | 3.58E-02 | 1.61E-01 | 1.00E+00 |
| ENSG00000228146.5_CASP16P    | ENSG00000160789.18_LMNA | 0.07177  | -0.088441834 | 0.228360891 | 3.80E-01 | 6.58E-01 | 1.00E+00 |
| ENSG00000228928.1_AC002069.  | ENSG00000160789.18_LMNA | 0.04097  | -0.11900262  | 0.198877747 | 6.16E-01 | 8.26E-01 | 1.00E+00 |
| ENSG00000260781.1_ARHGAP23   | ENSG00000160789.18_LMNA | 0.01828  | -0.141332739 | 0.176964972 | 8.23E-01 | 9.31E-01 | 1.00E+00 |
| ENSG00000243918.1	EIF4BP8    | ENSG00000160789.18_LMNA | 0.03809  | -0.121851676 | 0.196099517 | 6.41E-01 | 8.40E-01 | 1.00E+00 |
| ENSG00000230097.2_ME2P1      | ENSG00000160789.18_LMNA | -0.03665 | -0.194713516 | 0.123271055 | 6.54E-01 | 8.47E-01 | 1.00E+00 |
| ENSG00000072315.3_TRPC5      | ENSG00000160789.18_LMNA | -0.19774 | -0.346045397 | -0.03979012 | 1.46E-02 | 8.62E-02 | 1.00E+00 |
| ENSG00000239880.1_RP11-420J  | ENSG00000160789.18_LMNA | 0.06001  | -0.100147811 | 0.217135937 | 4.63E-01 | 7.26E-01 | 1.00E+00 |
| ENSG00000204959.4_ARHGEF34   | ENSG00000160789.18_LMNA | 0.06608  | -0.094109046 | 0.222937054 | 4.19E-01 | 6.91E-01 | 1.00E+00 |
| ENSG00000257331.1_RP11-478B  | ENSG00000160789.18_LMNA | 0.10281  | -0.057333302 | 0.257787322 | 2.08E-01 | 4.80E-01 | 1.00E+00 |
| ENSG00000259165.1_DDX18P1    | ENSG00000160789.18_LMNA | 0.20177  | 0.043979741  | 0.349734429 | 1.27E-02 | 7.77E-02 | 1.00E+00 |
| ENSG00000132207.16_SLX1A     | ENSG00000160789.18_LMNA | 0.06452  | -0.095660753 | 0.221448554 | 4.30E-01 | 7.00E-01 | 1.00E+00 |
| ENSG00000229951.4_FLJ31356   | ENSG00000160789.18_LMNA | 0.19549  | 0.037450751  | 0.343981415 | 1.58E-02 | 9.11E-02 | 1.00E+00 |
| ENSG00000229688.6_ISPD-AS1   | ENSG00000160789.18_LMNA | 0.0722   | -0.088016765 | 0.228766915 | 3.77E-01 | 6.57E-01 | 1.00E+00 |
| ENSG00000249635.1_RP11-710F  | ENSG00000160789.18_LMNA | -0.03617 | -0.194254404 | 0.123740937 | 6.58E-01 | 8.49E-01 | 1.00E+00 |
| ENSG00000229052.2_RP11-386I2 | ENSG00000160789.18_LMNA | -0.07545 | -0.231862525 | 0.08477215  | 3.56E-01 | 6.39E-01 | 1.00E+00 |
| ENSG00000214814.5_FER1L6     | ENSG00000160789.18_LMNA | 0.20227  | 0.044501769  | 0.35019342  | 1.25E-02 | 7.68E-02 | 1.00E+00 |
| ENSG00000227242.3_NBPF13P    | ENSG00000160789.18_LMNA | -0.08915 | -0.244875478 | 0.071058986 | 2.75E-01 | 5.59E-01 | 1.00E+00 |
| ENSG00000264324.1_RP11-287D  | ENSG00000160789.18_LMNA | 0.0357   | -0.124207416 | 0.193798478 | 6.62E-01 | 8.51E-01 | 1.00E+00 |
| ENSG00000187627.13_RGPD1     | ENSG00000160789.18_LMNA | 0.02331  | -0.136398431 | 0.181834373 | 7.76E-01 | 9.08E-01 | 1.00E+00 |
| ENSG00000175820.3_CCDC168    | ENSG00000160789.18_LMNA | 0.15773  | -0.001510731 | 0.309165344 | 5.23E-02 | 2.07E-01 | 1.00E+00 |
| ENSG00000210049.1_MT-TF      | ENSG00000160789.18_LMNA | -0.24095 | -0.385366711 | -0.0850085  | 2.79E-03 | 2.53E-02 | 1.00E+00 |
| ENSG00000251791.1_SCARNA6    | ENSG00000160789.18_LMNA | -0.05404 | -0.21142548  | 0.10606946  | 5.08E-01 | 7.58E-01 | 1.00E+00 |
| ENSG00000252516.1_RNA5SP82   | ENSG00000160789.18_LMNA | -0.0373  | -0.195338707 | 0.12263097  | 6.48E-01 | 8.44E-01 | 1.00E+00 |
| ENSG00000206932.1_RNU6-4P    | ENSG00000160789.18_LMNA | -0.08825 | -0.244024421 | 0.071959502 | 2.80E-01 | 5.65E-01 | 1.00E+00 |

|                              |                         |          |              |             |          |          |          |
|------------------------------|-------------------------|----------|--------------|-------------|----------|----------|----------|
| ENSG00000207340.1_RNVU1-1    | ENSG00000160789.18_LMNA | 0.058    | -0.102141746 | 0.215215537 | 4.78E-01 | 7.36E-01 | 1.00E+00 |
| ENSG00000231916.1_AC006033.1 | ENSG00000160789.18_LMNA | -0.00814 | -0.167128706 | 0.151252112 | 9.21E-01 | 9.70E-01 | 1.00E+00 |
| ENSG00000221044.2_U3         | ENSG00000160789.18_LMNA | 0.08055  | -0.079672649 | 0.236714912 | 3.24E-01 | 6.11E-01 | 1.00E+00 |
| ENSG00000271150.1_CTD-2571L  | ENSG00000160789.18_LMNA | -0.11037 | -0.264917461 | 0.049702345 | 1.76E-01 | 4.37E-01 | 1.00E+00 |
| ENSG00000232456.1_RP11-5P18  | ENSG00000160789.18_LMNA | -0.29968 | -0.437985586 | -0.14751823 | 1.76E-04 | 2.96E-03 | 1.00E+00 |
| ENSG00000272872.1_LL22NC03-  | ENSG00000160789.18_LMNA | 0.06917  | -0.091031735 | 0.22588465  | 3.97E-01 | 6.74E-01 | 1.00E+00 |
| ENSG00000262141.1_CTC-479C5  | ENSG00000160789.18_LMNA | -0.13014 | -0.283468338 | 0.029674849 | 1.10E-01 | 3.30E-01 | 1.00E+00 |
| ENSG00000230847.4_RP11-195E  | ENSG00000160789.18_LMNA | 0.06368  | -0.096498399 | 0.220644413 | 4.36E-01 | 7.04E-01 | 1.00E+00 |
| ENSG00000239804.1_RP11-379B  | ENSG00000160789.18_LMNA | 0.05242  | -0.107681027 | 0.209867627 | 5.21E-01 | 7.67E-01 | 1.00E+00 |
| ENSG00000270035.1_RP11-338N  | ENSG00000160789.18_LMNA | -0.00369 | -0.162798596 | 0.155598574 | 9.64E-01 | 9.86E-01 | 1.00E+00 |
| ENSG00000257319.1_RP11-478B  | ENSG00000160789.18_LMNA | 0.07877  | -0.081450017 | 0.235025462 | 3.35E-01 | 6.20E-01 | 1.00E+00 |
| ENSG00000279507.1_RP11-723O  | ENSG00000160789.18_LMNA | 0.03702  | -0.122902061 | 0.195073955 | 6.51E-01 | 8.45E-01 | 1.00E+00 |
| ENSG00000265566.2_RN7SL605F  | ENSG00000160789.18_LMNA | 0.06125  | -0.098920011 | 0.218317236 | 4.54E-01 | 7.19E-01 | 1.00E+00 |
| ENSG00000277427.1_XXbac-BPG  | ENSG00000160789.18_LMNA | -0.04859 | -0.206192033 | 0.111476752 | 5.52E-01 | 7.88E-01 | 1.00E+00 |
| ENSG00000274736.3_CCL23      | ENSG00000160789.18_LMNA | 0.01044  | -0.149008998 | 0.169358586 | 8.98E-01 | 9.61E-01 | 1.00E+00 |
| ENSG00000279845.1_RP11-6L6.4 | ENSG00000160789.18_LMNA | 0.03079  | -0.129044092 | 0.189063119 | 7.07E-01 | 8.75E-01 | 1.00E+00 |
| ENSG00000278590.1_RN7SL113F  | ENSG00000160789.18_LMNA | 0.03715  | -0.122773958 | 0.195199068 | 6.50E-01 | 8.44E-01 | 1.00E+00 |
| ENSG00000266479.1_CTD-2515C  | ENSG00000160789.18_LMNA | -0.15769 | -0.309131258 | 0.001548419 | 5.23E-02 | 2.07E-01 | 1.00E+00 |
| ENSG00000196274.5_Metazoa_SI | ENSG00000160789.18_LMNA | -0.07971 | -0.235919054 | 0.080510174 | 3.29E-01 | 6.15E-01 | 1.00E+00 |
| ENSG00000259129.4_LINC00648  | ENSG00000160789.18_LMNA | -0.19765 | -0.345964908 | -0.03969883 | 1.47E-02 | 8.64E-02 | 1.00E+00 |
| ENSG00000238246.1_RP11-575A  | ENSG00000160789.18_LMNA | 0.07314  | -0.087072575 | 0.229668406 | 3.71E-01 | 6.51E-01 | 1.00E+00 |
| ENSG00000242353.1_RPL12P30   | ENSG00000160789.18_LMNA | -0.22763 | -0.373303981 | -0.07100389 | 4.80E-03 | 3.80E-02 | 1.00E+00 |
| ENSG00000230702.1_RP11-681L  | ENSG00000160789.18_LMNA | 0.02944  | -0.130375806 | 0.187756699 | 7.19E-01 | 8.81E-01 | 1.00E+00 |
| ENSG00000271417.2_           | ENSG00000160789.18_LMNA | -0.08109 | -0.237228689 | 0.079131736 | 3.21E-01 | 6.07E-01 | 1.00E+00 |
| ENSG00000235282.3_DYNLL1P3   | ENSG00000160789.18_LMNA | 0.01682  | -0.142763234 | 0.175550376 | 8.37E-01 | 9.37E-01 | 1.00E+00 |
| ENSG00000264520.1_RP4-777O2  | ENSG00000160789.18_LMNA | 0.20253  | 0.04477299   | 0.350431833 | 1.23E-02 | 7.63E-02 | 1.00E+00 |
| ENSG00000226393.1_IFNA20P    | ENSG00000160789.18_LMNA | -0.15788 | -0.309309408 | 0.001351434 | 5.21E-02 | 2.07E-01 | 1.00E+00 |
| ENSG00000225473.1_ATP13A4-A  | ENSG00000160789.18_LMNA | -0.2802  | -0.420635857 | -0.12664759 | 4.72E-04 | 6.44E-03 | 1.00E+00 |
| ENSG00000245864.2_CTC-467M3  | ENSG00000160789.18_LMNA | -0.14383 | -0.296251177 | 0.015726635 | 7.71E-02 | 2.66E-01 | 1.00E+00 |
| ENSG00000255749.1_GNAI2P1    | ENSG00000160789.18_LMNA | 0.11587  | -0.044140927 | 0.270092299 | 1.55E-01 | 4.06E-01 | 1.00E+00 |
| ENSG00000234185.2_RP5-1132H  | ENSG00000160789.18_LMNA | 0.00663  | -0.152731524 | 0.165656237 | 9.35E-01 | 9.75E-01 | 1.00E+00 |
| ENSG00000213558.3_HMG2P32    | ENSG00000160789.18_LMNA | 0.06601  | -0.094177516 | 0.222871405 | 4.19E-01 | 6.91E-01 | 1.00E+00 |
| ENSG00000213393.5_RP11-546B  | ENSG00000160789.18_LMNA | 0.014    | -0.145520968 | 0.172819575 | 8.64E-01 | 9.47E-01 | 1.00E+00 |



|                              |                         |          |              |             |          |          |          |
|------------------------------|-------------------------|----------|--------------|-------------|----------|----------|----------|
| ENSG00000277651.1_CTD-2014B  | ENSG00000160789.18_LMNA | 0.021    | -0.138666749 | 0.17959783  | 7.97E-01 | 9.19E-01 | 1.00E+00 |
| ENSG00000233690.1_EBAG9P1    | ENSG00000160789.18_LMNA | 0.07028  | -0.089926897 | 0.226941502 | 3.90E-01 | 6.68E-01 | 1.00E+00 |
| ENSG00000268883.2_PNMA6B     | ENSG00000160789.18_LMNA | -0.12282 | -0.276614389 | 0.037103764 | 1.32E-01 | 3.68E-01 | 1.00E+00 |
| ENSG00000229519.2_RP11-58A1  | ENSG00000160789.18_LMNA | 0.07907  | -0.08115625  | 0.23530483  | 3.33E-01 | 6.19E-01 | 1.00E+00 |
| ENSG00000260657.2_RP11-315D  | ENSG00000160789.18_LMNA | 0.16459  | 0.005529951  | 0.315519172 | 4.27E-02 | 1.81E-01 | 1.00E+00 |
| ENSG00000255250.1_CTD-2005H  | ENSG00000160789.18_LMNA | 0.03344  | -0.126431296 | 0.191623022 | 6.83E-01 | 8.62E-01 | 1.00E+00 |
| ENSG00000008438.4_PGLYRP1    | ENSG00000160789.18_LMNA | 0.04065  | -0.119326012 | 0.198562651 | 6.19E-01 | 8.28E-01 | 1.00E+00 |
| ENSG00000274584.1_RP11-819M  | ENSG00000160789.18_LMNA | 0.02115  | -0.138516334 | 0.17974624  | 7.96E-01 | 9.18E-01 | 1.00E+00 |
| ENSG00000272457.1_RP11-1070  | ENSG00000160789.18_LMNA | 0.31269  | 0.161524981  | 0.449509297 | 8.78E-05 | 1.70E-03 | 1.00E+00 |
| ENSG00000225075.1_RP11-426L  | ENSG00000160789.18_LMNA | 0.23686  | 0.080705749  | 0.381671473 | 3.30E-03 | 2.87E-02 | 1.00E+00 |
| ENSG00000248884.1 CTC-537E7  | ENSG00000160789.18_LMNA | -0.03672 | -0.194783605 | 0.12319931  | 6.53E-01 | 8.47E-01 | 1.00E+00 |
| ENSG00000167194.6_C16orf92   | ENSG00000160789.18_LMNA | -0.21386 | -0.360776818 | -0.05658515 | 8.16E-03 | 5.65E-02 | 1.00E+00 |
| ENSG00000260304.1_RP11-388M  | ENSG00000160789.18_LMNA | 0.26313  | 0.108473217  | 0.405350312 | 1.06E-03 | 1.21E-02 | 1.00E+00 |
| ENSG00000214853.4_RP11-509M  | ENSG00000160789.18_LMNA | 0.12284  | -0.037085122 | 0.276631628 | 1.32E-01 | 3.68E-01 | 1.00E+00 |
| ENSG00000241112.1_RPL29P14   | ENSG00000160789.18_LMNA | 0.14677  | -0.012731643 | 0.298981439 | 7.12E-02 | 2.52E-01 | 1.00E+00 |
| ENSG00000258534.1_CTD-2134A  | ENSG00000160789.18_LMNA | -0.01657 | -0.175311644 | 0.143004517 | 8.39E-01 | 9.38E-01 | 1.00E+00 |
| ENSG00000261669.1_CTD-2515A  | ENSG00000160789.18_LMNA | -0.01135 | -0.170239924 | 0.148121525 | 8.90E-01 | 9.57E-01 | 1.00E+00 |
| ENSG00000260979.1_RP11-77H9  | ENSG00000160789.18_LMNA | 0.111    | -0.049067565 | 0.265509033 | 1.73E-01 | 4.33E-01 | 1.00E+00 |
| ENSG00000224796.1_RPL32P1    | ENSG00000160789.18_LMNA | -0.00327 | -0.162382242 | 0.156015851 | 9.68E-01 | 9.87E-01 | 1.00E+00 |
| ENSG00000242295.1_RP11-522B  | ENSG00000160789.18_LMNA | 0.04523  | -0.114794207 | 0.202972214 | 5.80E-01 | 8.04E-01 | 1.00E+00 |
| ENSG00000267512.1 CTC-250I14 | ENSG00000160789.18_LMNA | 0.16398  | 0.004909677  | 0.314960523 | 4.35E-02 | 1.84E-01 | 1.00E+00 |
| ENSG00000229758.2_DYNLT3P2   | ENSG00000160789.18_LMNA | 0.02266  | -0.13703952  | 0.181202599 | 7.82E-01 | 9.10E-01 | 1.00E+00 |
| ENSG00000220920.1_RP3-525L6  | ENSG00000160789.18_LMNA | -0.0022  | -0.161340269 | 0.157059639 | 9.79E-01 | 9.92E-01 | 1.00E+00 |
| ENSG00000235908.1_RHOA-IT1   | ENSG00000160789.18_LMNA | 0.02342  | -0.136289829 | 0.181941371 | 7.75E-01 | 9.07E-01 | 1.00E+00 |
| ENSG00000267457.1_RP5-837J1  | ENSG00000160789.18_LMNA | -0.02925 | -0.187576962 | 0.130558933 | 7.21E-01 | 8.81E-01 | 1.00E+00 |
| ENSG00000273056.1_RP11-77E1  | ENSG00000160789.18_LMNA | -0.02315 | -0.181684605 | 0.136550431 | 7.77E-01 | 9.08E-01 | 1.00E+00 |
| ENSG00000224600.5_RP4-612B1  | ENSG00000160789.18_LMNA | -0.10337 | -0.258315634 | 0.056769141 | 2.05E-01 | 4.76E-01 | 1.00E+00 |
| ENSG00000214359.3_RPL18P10   | ENSG00000160789.18_LMNA | 0.04118  | -0.11880016  | 0.19907498  | 6.14E-01 | 8.25E-01 | 1.00E+00 |
| ENSG00000272646.1_RP11-188P  | ENSG00000160789.18_LMNA | 0.25867  | 0.103745414  | 0.4013466   | 1.29E-03 | 1.41E-02 | 1.00E+00 |
| ENSG00000224460.1_RP11-439L  | ENSG00000160789.18_LMNA | 0.06721  | -0.092985786 | 0.224013639 | 4.11E-01 | 6.85E-01 | 1.00E+00 |
| ENSG00000257696.1_RP11-175P  | ENSG00000160789.18_LMNA | -0.04449 | -0.202256191 | 0.11553098  | 5.86E-01 | 8.08E-01 | 1.00E+00 |
| ENSG00000237379.1_CBX1P3     | ENSG00000160789.18_LMNA | -0.14546 | -0.297762617 | 0.014069334 | 7.38E-02 | 2.58E-01 | 1.00E+00 |
| ENSG00000226632.1_UBE2V1P1   | ENSG00000160789.18_LMNA | 0.16417  | 0.005099739  | 0.315131725 | 4.33E-02 | 1.83E-01 | 1.00E+00 |

|                              |                         |          |              |             |          |          |          |
|------------------------------|-------------------------|----------|--------------|-------------|----------|----------|----------|
| ENSG00000203711.10_C6orf99   | ENSG00000160789.18_LMNA | 0.00269  | -0.156577568 | 0.16182159  | 9.74E-01 | 9.90E-01 | 1.00E+00 |
| ENSG00000164794.7_KCNV1      | ENSG00000160789.18_LMNA | -0.1474  | -0.299571151 | 0.012084015 | 7.00E-02 | 2.49E-01 | 1.00E+00 |
| ENSG00000218596.2_RP11-2J18  | ENSG00000160789.18_LMNA | -0.09546 | -0.250849039 | 0.064723745 | 2.42E-01 | 5.21E-01 | 1.00E+00 |
| ENSG00000230113.1_AC091177   | ENSG00000160789.18_LMNA | -0.02185 | -0.180418411 | 0.137834897 | 7.89E-01 | 9.14E-01 | 1.00E+00 |
| ENSG00000216718.7_RP3-522P1  | ENSG00000160789.18_LMNA | -0.14674 | -0.298956419 | 0.012759114 | 7.12E-02 | 2.52E-01 | 1.00E+00 |
| ENSG00000181778.4_TMEN252    | ENSG00000160789.18_LMNA | -0.09744 | -0.252723062 | 0.062731001 | 2.32E-01 | 5.10E-01 | 1.00E+00 |
| ENSG00000244229.1_RPL26P35   | ENSG00000160789.18_LMNA | -0.00434 | -0.163427    | 0.154968561 | 9.58E-01 | 9.83E-01 | 1.00E+00 |
| ENSG00000223656.1_HMGB3P10   | ENSG00000160789.18_LMNA | -0.14183 | -0.294386981 | 0.017768375 | 8.13E-02 | 2.75E-01 | 1.00E+00 |
| ENSG00000269680.1_CTD-3128C  | ENSG00000160789.18_LMNA | 0.10705  | -0.053055039 | 0.261789034 | 1.89E-01 | 4.57E-01 | 1.00E+00 |
| ENSG00000197734.7_C14orf178  | ENSG00000160789.18_LMNA | -0.00851 | -0.167480849 | 0.150898096 | 9.17E-01 | 9.69E-01 | 1.00E+00 |
| ENSG00000267088.1_RP11-115N  | ENSG00000160789.18_LMNA | 0.0038   | -0.155490294 | 0.162906618 | 9.63E-01 | 9.85E-01 | 1.00E+00 |
| ENSG00000205312.7_KRT17P4    | ENSG00000160789.18_LMNA | -0.25542 | -0.398423815 | -0.1003025  | 1.49E-03 | 1.56E-02 | 1.00E+00 |
| ENSG00000264204.2_AGAP7P     | ENSG00000160789.18_LMNA | -0.07936 | -0.235580607 | 0.080866204 | 3.31E-01 | 6.17E-01 | 1.00E+00 |
| ENSG00000164129.10_NPY5R     | ENSG00000160789.18_LMNA | -0.10462 | -0.259496212 | 0.055507729 | 2.00E-01 | 4.70E-01 | 1.00E+00 |
| ENSG00000254554.1_RP11-351I2 | ENSG00000160789.18_LMNA | 0.19948  | 0.041603035  | 0.347642862 | 1.37E-02 | 8.24E-02 | 1.00E+00 |
| ENSG00000270343.1_UNGP3      | ENSG00000160789.18_LMNA | 0.06136  | -0.098806317 | 0.218426578 | 4.53E-01 | 7.18E-01 | 1.00E+00 |
| ENSG00000242154.1_RP4-778K6  | ENSG00000160789.18_LMNA | -0.00853 | -0.167499784 | 0.150879058 | 9.17E-01 | 9.68E-01 | 1.00E+00 |
| ENSG00000226659.1_RP11-137H  | ENSG00000160789.18_LMNA | -0.10038 | -0.255502298 | 0.059771058 | 2.19E-01 | 4.93E-01 | 1.00E+00 |
| ENSG00000224675.1_AC009227   | ENSG00000160789.18_LMNA | -0.25068 | -0.394152273 | -0.09528362 | 1.84E-03 | 1.84E-02 | 1.00E+00 |
| ENSG00000235448.1_LURAP1L-A  | ENSG00000160789.18_LMNA | -0.01071 | -0.169616961 | 0.148748877 | 8.96E-01 | 9.59E-01 | 1.00E+00 |
| ENSG00000232332.1_RP3-481A1  | ENSG00000160789.18_LMNA | 0.0389   | -0.121049318 | 0.196882446 | 6.34E-01 | 8.36E-01 | 1.00E+00 |
| ENSG00000251613.3_CTC-347C2  | ENSG00000160789.18_LMNA | 0.03945  | -0.120511993 | 0.197406533 | 6.29E-01 | 8.33E-01 | 1.00E+00 |
| ENSG00000239670.1_RP4-803A2  | ENSG00000160789.18_LMNA | 0.16298  | 0.003883537  | 0.31403586  | 4.48E-02 | 1.87E-01 | 1.00E+00 |
| ENSG00000167618.8_LAIR2      | ENSG00000160789.18_LMNA | 0.00901  | -0.150402407 | 0.167973781 | 9.12E-01 | 9.67E-01 | 1.00E+00 |
| ENSG00000276282.1_RP11-210K  | ENSG00000160789.18_LMNA | -0.16191 | -0.313040896 | -0.00278011 | 4.63E-02 | 1.91E-01 | 1.00E+00 |
| ENSG00000226318.1_RPS3AP38   | ENSG00000160789.18_LMNA | -0.08511 | -0.241047734 | 0.075105133 | 2.97E-01 | 5.83E-01 | 1.00E+00 |
| ENSG00000257894.2_RP1-78O14  | ENSG00000160789.18_LMNA | 0.07776  | -0.082464475 | 0.234060327 | 3.41E-01 | 6.26E-01 | 1.00E+00 |
| ENSG00000213587.3_RP11-646D  | ENSG00000160789.18_LMNA | -0.02139 | -0.179974736 | 0.138284722 | 7.94E-01 | 9.17E-01 | 1.00E+00 |
| ENSG00000108255.6_CRYBA1     | ENSG00000160789.18_LMNA | 0.02594  | -0.13381403  | 0.184378565 | 7.51E-01 | 8.96E-01 | 1.00E+00 |
| ENSG00000244998.1_CTD-3064M  | ENSG00000160789.18_LMNA | 0.08909  | -0.071122509 | 0.24481546  | 2.75E-01 | 5.59E-01 | 1.00E+00 |
| ENSG00000203397.2_RP13-36G1  | ENSG00000160789.18_LMNA | 0.13183  | -0.027959975 | 0.285045956 | 1.05E-01 | 3.22E-01 | 1.00E+00 |
| ENSG00000236138.4_DUX4L26    | ENSG00000160789.18_LMNA | -0.07084 | -0.227473584 | 0.089370362 | 3.86E-01 | 6.64E-01 | 1.00E+00 |
| ENSG00000232829.3_GSTO3P     | ENSG00000160789.18_LMNA | -0.09247 | -0.248022575 | 0.067724517 | 2.57E-01 | 5.40E-01 | 1.00E+00 |

|                              |                         |          |              |             |          |          |          |
|------------------------------|-------------------------|----------|--------------|-------------|----------|----------|----------|
| ENSG00000235271.4_LINC01422  | ENSG00000160789.18_LMNA | -0.02775 | -0.186130916 | 0.132031464 | 7.34E-01 | 8.88E-01 | 1.00E+00 |
| ENSG00000236031.1_RP11-269F  | ENSG00000160789.18_LMNA | -0.18084 | -0.330521919 | -0.02227737 | 2.58E-02 | 1.29E-01 | 1.00E+00 |
| ENSG00000271840.1_RP1-224A6  | ENSG00000160789.18_LMNA | 0.09392  | -0.066268626 | 0.249394568 | 2.50E-01 | 5.30E-01 | 1.00E+00 |
| ENSG00000279786.1_CTD-2014D  | ENSG00000160789.18_LMNA | 0.07114  | -0.089067645 | 0.22776292  | 3.84E-01 | 6.62E-01 | 1.00E+00 |
| ENSG00000176177.9_ENTHD1     | ENSG00000160789.18_LMNA | 0.08093  | -0.079287711 | 0.237080556 | 3.22E-01 | 6.08E-01 | 1.00E+00 |
| ENSG00000217327.3_RPS7P5     | ENSG00000160789.18_LMNA | 0.18633  | 0.02795869   | 0.335576241 | 2.15E-02 | 1.14E-01 | 1.00E+00 |
| ENSG00000232202.1_AC098824.f | ENSG00000160789.18_LMNA | 0.09659  | -0.063591465 | 0.251914152 | 2.37E-01 | 5.15E-01 | 1.00E+00 |
| ENSG00000236018.2_RP4-814D1  | ENSG00000160789.18_LMNA | 0.08607  | -0.074141915 | 0.241959852 | 2.92E-01 | 5.77E-01 | 1.00E+00 |
| ENSG00000131885.15_KRT17P1   | ENSG00000160789.18_LMNA | -0.05771 | -0.214933018 | 0.102434868 | 4.80E-01 | 7.38E-01 | 1.00E+00 |
| ENSG00000259224.2_SLC35G6    | ENSG00000160789.18_LMNA | 0.04465  | -0.115370151 | 0.20241252  | 5.85E-01 | 8.07E-01 | 1.00E+00 |
| ENSG00000237766.2_GGTA2P     | ENSG00000160789.18_LMNA | 0.051    | -0.109084455 | 0.208509661 | 5.33E-01 | 7.75E-01 | 1.00E+00 |
| ENSG00000228187.1_RP11-363H  | ENSG00000160789.18_LMNA | -0.01469 | -0.173486513 | 0.144847908 | 8.57E-01 | 9.44E-01 | 1.00E+00 |
| ENSG00000243672.1_RPS3AP40   | ENSG00000160789.18_LMNA | -0.04578 | -0.203496758 | 0.11425424  | 5.75E-01 | 8.02E-01 | 1.00E+00 |
| ENSG00000279058.1_AGAP14     | ENSG00000160789.18_LMNA | -0.08286 | -0.238913632 | 0.077356491 | 3.10E-01 | 5.97E-01 | 1.00E+00 |
| ENSG00000144785.7_RP11-977G  | ENSG00000160789.18_LMNA | -0.01879 | -0.177459351 | 0.140832491 | 8.18E-01 | 9.29E-01 | 1.00E+00 |
| ENSG00000244380.1_RP11-24C3  | ENSG00000160789.18_LMNA | -0.02852 | -0.186876656 | 0.131272241 | 7.27E-01 | 8.85E-01 | 1.00E+00 |
| ENSG00000260802.1_LINC00890  | ENSG00000160789.18_LMNA | -0.2182  | -0.364732579 | -0.06112456 | 6.92E-03 | 5.00E-02 | 1.00E+00 |
| ENSG00000232828.1_AF196970.3 | ENSG00000160789.18_LMNA | 0.08707  | -0.073145558 | 0.242902764 | 2.86E-01 | 5.72E-01 | 1.00E+00 |
| ENSG00000269846.1_RP4-621N1  | ENSG00000160789.18_LMNA | -0.00216 | -0.161305697 | 0.157094259 | 9.79E-01 | 9.92E-01 | 1.00E+00 |
| ENSG00000108244.15_KRT23     | ENSG00000160789.18_LMNA | -0.08511 | -0.241045847 | 0.075107125 | 2.97E-01 | 5.83E-01 | 1.00E+00 |
| ENSG00000213316.8_LTC4S      | ENSG00000160789.18_LMNA | 0.04531  | -0.114722909 | 0.203041486 | 5.79E-01 | 8.04E-01 | 1.00E+00 |
| ENSG00000119973.4_PRLHR      | ENSG00000160789.18_LMNA | -0.31742 | -0.453695857 | -0.16664253 | 6.76E-05 | 1.37E-03 | 1.00E+00 |
| ENSG00000169224.11_GCSAML    | ENSG00000160789.18_LMNA | -0.02316 | -0.18169048  | 0.136544469 | 7.77E-01 | 9.08E-01 | 1.00E+00 |
| ENSG00000279785.1_GS1-124K5  | ENSG00000160789.18_LMNA | -0.05209 | -0.209551188 | 0.108008173 | 5.24E-01 | 7.69E-01 | 1.00E+00 |
| ENSG00000227453.1_HNRNPA1F   | ENSG00000160789.18_LMNA | -0.02247 | -0.181025934 | 0.13721874  | 7.83E-01 | 9.11E-01 | 1.00E+00 |
| ENSG00000271567.1_PP1AL4E    | ENSG00000160789.18_LMNA | -0.01147 | -0.170355709 | 0.148004896 | 8.89E-01 | 9.57E-01 | 1.00E+00 |
| ENSG00000261868.1_MFSD1P1    | ENSG00000160789.18_LMNA | -0.30539 | -0.44305109  | -0.15366089 | 1.30E-04 | 2.33E-03 | 1.00E+00 |
| ENSG00000102104.8_RS1        | ENSG00000160789.18_LMNA | -0.10708 | -0.261820877 | 0.05302095  | 1.89E-01 | 4.56E-01 | 1.00E+00 |
| ENSG00000150783.8_TEX12      | ENSG00000160789.18_LMNA | -0.11512 | -0.269387904 | 0.044899091 | 1.58E-01 | 4.11E-01 | 1.00E+00 |
| ENSG00000271167.1_LINC01109  | ENSG00000160789.18_LMNA | -0.159   | -0.310340842 | 0.000210479 | 5.04E-02 | 2.02E-01 | 1.00E+00 |
| ENSG00000226652.2_PSM1D10P2  | ENSG00000160789.18_LMNA | -0.01506 | -0.173840102 | 0.144490954 | 8.54E-01 | 9.43E-01 | 1.00E+00 |
| ENSG00000234781.2_LINC01103  | ENSG00000160789.18_LMNA | -0.13641 | -0.289329782 | 0.023294137 | 9.38E-02 | 3.00E-01 | 1.00E+00 |
| ENSG00000170956.15_CEACAM3   | ENSG00000160789.18_LMNA | 0.02346  | -0.136250012 | 0.181980598 | 7.74E-01 | 9.07E-01 | 1.00E+00 |

|                              |                         |          |              |             |          |          |          |
|------------------------------|-------------------------|----------|--------------|-------------|----------|----------|----------|
| ENSG00000213671.3_OLA1P2     | ENSG00000160789.18_LMNA | 0.05543  | -0.104697661 | 0.212750287 | 4.98E-01 | 7.51E-01 | 1.00E+00 |
| ENSG00000260868.1_RP11-394I1 | ENSG00000160789.18_LMNA | 0.12295  | -0.036979103 | 0.276729665 | 1.31E-01 | 3.67E-01 | 1.00E+00 |
| ENSG00000172014.12_ANKRD20   | ENSG00000160789.18_LMNA | -0.02877 | -0.187118406 | 0.13102604  | 7.25E-01 | 8.83E-01 | 1.00E+00 |
| ENSG00000277895.1_RP11-114F  | ENSG00000160789.18_LMNA | 0.07587  | -0.084353383 | 0.232261594 | 3.53E-01 | 6.37E-01 | 1.00E+00 |
| ENSG00000223730.1_RP1-127B2  | ENSG00000160789.18_LMNA | 0.13882  | -0.020846    | 0.291572482 | 8.81E-02 | 2.89E-01 | 1.00E+00 |
| ENSG00000231638.1_AC011738.4 | ENSG00000160789.18_LMNA | -0.09589 | -0.251253085 | 0.064294316 | 2.40E-01 | 5.19E-01 | 1.00E+00 |
| ENSG00000099812.7_MISP       | ENSG00000160789.18_LMNA | -0.04232 | -0.200169821 | 0.117675821 | 6.05E-01 | 8.19E-01 | 1.00E+00 |
| ENSG00000280423.1_RP11-299J1 | ENSG00000160789.18_LMNA | 0.0407   | -0.119268911 | 0.198618292 | 6.19E-01 | 8.27E-01 | 1.00E+00 |
| ENSG00000146755.9_TRIM50     | ENSG00000160789.18_LMNA | -0.02762 | -0.186003753 | 0.132160889 | 7.36E-01 | 8.89E-01 | 1.00E+00 |
| ENSG00000030304.11_MUSK      | ENSG00000160789.18_LMNA | 0.04959  | -0.110486982 | 0.207151343 | 5.44E-01 | 7.82E-01 | 1.00E+00 |
| ENSG00000137270.10_GCM1      | ENSG00000160789.18_LMNA | 0.09075  | -0.069456508 | 0.24638874  | 2.66E-01 | 5.50E-01 | 1.00E+00 |
| ENSG00000232564.2_RP4-591N1  | ENSG00000160789.18_LMNA | 0.04838  | -0.111677414 | 0.205997472 | 5.54E-01 | 7.88E-01 | 1.00E+00 |
| ENSG00000169594.11_BNC1      | ENSG00000160789.18_LMNA | -0.06363 | -0.220598749 | 0.096545953 | 4.36E-01 | 7.04E-01 | 1.00E+00 |
| ENSG00000108825.16_PTGES3L   | ENSG00000160789.18_LMNA | -0.0222  | -0.180762042 | 0.137486413 | 7.86E-01 | 9.13E-01 | 1.00E+00 |
| ENSG00000235768.1_BRD7P5     | ENSG00000160789.18_LMNA | -0.01229 | -0.171160252 | 0.147194243 | 8.81E-01 | 9.54E-01 | 1.00E+00 |
| ENSG00000280003.1_RP11-330H  | ENSG00000160789.18_LMNA | 0.00276  | -0.156509687 | 0.161889353 | 9.73E-01 | 9.90E-01 | 1.00E+00 |
| ENSG00000280304.1_CTD-2536I1 | ENSG00000160789.18_LMNA | 0.04382  | -0.116195236 | 0.201610352 | 5.92E-01 | 8.11E-01 | 1.00E+00 |
| ENSG00000166743.8_ACSM1      | ENSG00000160789.18_LMNA | -0.16694 | -0.317693137 | -0.007946   | 3.98E-02 | 1.73E-01 | 1.00E+00 |
| ENSG00000248817.1_PMPCAP1    | ENSG00000160789.18_LMNA | 0.08848  | -0.071730545 | 0.244240849 | 2.78E-01 | 5.64E-01 | 1.00E+00 |
| ENSG00000229373.7_LINC00452  | ENSG00000160789.18_LMNA | 0.22232  | 0.065431663  | 0.368475802 | 5.91E-03 | 4.45E-02 | 1.00E+00 |
| ENSG00000261915.5_RP11-542C  | ENSG00000160789.18_LMNA | -0.11465 | -0.268937987 | 0.045383161 | 1.60E-01 | 4.13E-01 | 1.00E+00 |
| ENSG00000271856.1_LINC01215  | ENSG00000160789.18_LMNA | 0.06097  | -0.09919171  | 0.218055908 | 4.56E-01 | 7.20E-01 | 1.00E+00 |
| ENSG00000232706.3_NUTM2HP    | ENSG00000160789.18_LMNA | -0.14297 | -0.295444231 | 0.016610753 | 7.89E-02 | 2.70E-01 | 1.00E+00 |
| ENSG00000158014.13_SLC30A2   | ENSG00000160789.18_LMNA | -0.04343 | -0.201235776 | 0.116580363 | 5.95E-01 | 8.13E-01 | 1.00E+00 |
| ENSG00000233086.6_RP11-375O  | ENSG00000160789.18_LMNA | -0.01891 | -0.177576323 | 0.140714107 | 8.17E-01 | 9.29E-01 | 1.00E+00 |
| ENSG00000105675.7_ATP4A      | ENSG00000160789.18_LMNA | -0.00843 | -0.167402929 | 0.150976438 | 9.18E-01 | 9.69E-01 | 1.00E+00 |
| ENSG00000260078.3_RP11-44F1  | ENSG00000160789.18_LMNA | -0.07338 | -0.229899462 | 0.086830484 | 3.69E-01 | 6.50E-01 | 1.00E+00 |
| ENSG00000271723.4_MROH7-TT   | ENSG00000160789.18_LMNA | -0.14344 | -0.295881099 | 0.016132166 | 7.79E-02 | 2.68E-01 | 1.00E+00 |
| ENSG00000261611.5_AC010547.1 | ENSG00000160789.18_LMNA | -0.11715 | -0.271293429 | 0.042847278 | 1.51E-01 | 3.99E-01 | 1.00E+00 |
| ENSG00000176160.8_HSF5       | ENSG00000160789.18_LMNA | -0.034   | -0.19216168  | 0.125880945 | 6.78E-01 | 8.59E-01 | 1.00E+00 |
| ENSG00000141161.10_UNC45B    | ENSG00000160789.18_LMNA | 0.04032  | -0.119648914 | 0.198247967 | 6.22E-01 | 8.29E-01 | 1.00E+00 |
| ENSG00000244257.5_PKD1P1     | ENSG00000160789.18_LMNA | 0.09613  | -0.064049274 | 0.251483593 | 2.39E-01 | 5.17E-01 | 1.00E+00 |
| ENSG00000138347.14_MYPN      | ENSG00000160789.18_LMNA | -0.04686 | -0.204534518 | 0.113185414 | 5.66E-01 | 7.97E-01 | 1.00E+00 |

|                              |                         |          |              |             |          |          |          |
|------------------------------|-------------------------|----------|--------------|-------------|----------|----------|----------|
| ENSG00000252010.1_SCARNA5    | ENSG00000160789.18_LMNA | -0.18026 | -0.329986732 | -0.02167696 | 2.63E-02 | 1.31E-01 | 1.00E+00 |
| ENSG00000252412.1_Y_RNA      | ENSG00000160789.18_LMNA | 0.08027  | -0.079947758 | 0.236453536 | 3.26E-01 | 6.12E-01 | 1.00E+00 |
| ENSG00000281420.1_AP001052.  | ENSG00000160789.18_LMNA | 0.07096  | -0.089246254 | 0.227592213 | 3.85E-01 | 6.64E-01 | 1.00E+00 |
| ENSG00000252147.1_RNY3P16    | ENSG00000160789.18_LMNA | 0.32807  | 0.178175621  | 0.463084621 | 3.69E-05 | 8.45E-04 | 1.00E+00 |
| ENSG00000255618.1_RP11-357K  | ENSG00000160789.18_LMNA | -0.25017 | -0.393689439 | -0.09474072 | 1.88E-03 | 1.87E-02 | 1.00E+00 |
| ENSG00000272551.1_RP11-324L  | ENSG00000160789.18_LMNA | -0.12475 | -0.278422542 | 0.035147289 | 1.26E-01 | 3.58E-01 | 1.00E+00 |
| ENSG00000199172.2_MIR331     | ENSG00000160789.18_LMNA | -0.0392  | -0.197170846 | 0.120753656 | 6.32E-01 | 8.35E-01 | 1.00E+00 |
| ENSG00000201457.1_SNORA55    | ENSG00000160789.18_LMNA | -0.12214 | -0.275977713 | 0.037792093 | 1.34E-01 | 3.71E-01 | 1.00E+00 |
| ENSG00000216331.1_HIST1H1P5  | ENSG00000160789.18_LMNA | 0.05447  | -0.105649036 | 0.211831626 | 5.05E-01 | 7.56E-01 | 1.00E+00 |
| ENSG00000229409.1_RP11-494O  | ENSG00000160789.18_LMNA | 0.0225   | -0.137190762 | 0.181053515 | 7.83E-01 | 9.11E-01 | 1.00E+00 |
| ENSG00000248174.4_RP11-148L  | ENSG00000160789.18_LMNA | -0.27042 | -0.411888531 | -0.11622289 | 7.53E-04 | 9.28E-03 | 1.00E+00 |
| ENSG00000260420.2_LA16c-444C | ENSG00000160789.18_LMNA | -0.17984 | -0.329607338 | -0.02125146 | 2.66E-02 | 1.32E-01 | 1.00E+00 |
| ENSG00000186466.5_AQP7P1     | ENSG00000160789.18_LMNA | -0.02236 | -0.180912123 | 0.137334188 | 7.85E-01 | 9.12E-01 | 1.00E+00 |
| ENSG00000262539.1_RP11-259G  | ENSG00000160789.18_LMNA | -0.07476 | -0.231208569 | 0.085458144 | 3.60E-01 | 6.42E-01 | 1.00E+00 |
| ENSG00000240322.3_RN7SL481F  | ENSG00000160789.18_LMNA | -0.04081 | -0.19871968  | 0.119164857 | 6.18E-01 | 8.27E-01 | 1.00E+00 |
| ENSG00000225386.1_AC099754.  | ENSG00000160789.18_LMNA | -0.11422 | -0.268533999 | 0.045817691 | 1.61E-01 | 4.16E-01 | 1.00E+00 |
| ENSG00000230286.1_AC013472.  | ENSG00000160789.18_LMNA | 0.01125  | -0.148218109 | 0.170144032 | 8.91E-01 | 9.57E-01 | 1.00E+00 |
| ENSG00000254331.1_CKS1BP7    | ENSG00000160789.18_LMNA | -0.09302 | -0.248544412 | 0.067170929 | 2.54E-01 | 5.36E-01 | 1.00E+00 |
| ENSG00000235038.1_RP11-393I2 | ENSG00000160789.18_LMNA | -0.14676 | -0.298971379 | 0.012742687 | 7.12E-02 | 2.52E-01 | 1.00E+00 |
| ENSG00000271064.1_RP11-792A  | ENSG00000160789.18_LMNA | -0.04379 | -0.201589302 | 0.116216881 | 5.92E-01 | 8.11E-01 | 1.00E+00 |
| ENSG00000228314.1_CYP4F29P   | ENSG00000160789.18_LMNA | -0.14193 | -0.294475222 | 0.017671789 | 8.11E-02 | 2.75E-01 | 1.00E+00 |
| ENSG00000274833.1_RP11-1055I | ENSG00000160789.18_LMNA | -0.08673 | -0.242581628 | 0.073484968 | 2.88E-01 | 5.74E-01 | 1.00E+00 |
| ENSG00000227259.2_HMGN2P22   | ENSG00000160789.18_LMNA | -0.10035 | -0.255470761 | 0.059804677 | 2.19E-01 | 4.94E-01 | 1.00E+00 |
| ENSG00000253746.1_RP11-527N  | ENSG00000160789.18_LMNA | 0.19209  | 0.033926575  | 0.340866497 | 1.77E-02 | 9.91E-02 | 1.00E+00 |
| ENSG00000233850.1_AC103563.I | ENSG00000160789.18_LMNA | -0.04714 | -0.204805659 | 0.112906034 | 5.64E-01 | 7.95E-01 | 1.00E+00 |
| ENSG00000273082.1_LL22NC03-  | ENSG00000160789.18_LMNA | -0.09718 | -0.252474466 | 0.062995491 | 2.34E-01 | 5.11E-01 | 1.00E+00 |
| ENSG00000099869.7_IGF2-AS    | ENSG00000160789.18_LMNA | -0.09751 | -0.25278361  | 0.062666575 | 2.32E-01 | 5.10E-01 | 1.00E+00 |
| ENSG00000254509.1_RP11-677M  | ENSG00000160789.18_LMNA | -0.14081 | -0.293432122 | 0.018813166 | 8.36E-02 | 2.80E-01 | 1.00E+00 |
| ENSG00000186832.7_KRT16      | ENSG00000160789.18_LMNA | 0.15282  | -0.006540044 | 0.30460962  | 6.02E-02 | 2.26E-01 | 1.00E+00 |
| ENSG00000228551.1_SNRPGP9    | ENSG00000160789.18_LMNA | -0.1364  | -0.28931948  | 0.023305374 | 9.38E-02 | 3.00E-01 | 1.00E+00 |
| ENSG00000266891.1_RP11-692N  | ENSG00000160789.18_LMNA | -0.01384 | -0.172664404 | 0.145677521 | 8.66E-01 | 9.47E-01 | 1.00E+00 |
| ENSG00000272792.1_           | ENSG00000160789.18_LMNA | -0.02201 | -0.180573393 | 0.137677737 | 7.88E-01 | 9.14E-01 | 1.00E+00 |
| ENSG00000256422.4_RP11-886D  | ENSG00000160789.18_LMNA | -0.20019 | -0.348289729 | -0.04233772 | 1.34E-02 | 8.08E-02 | 1.00E+00 |

|                               |                         |          |              |             |          |          |          |
|-------------------------------|-------------------------|----------|--------------|-------------|----------|----------|----------|
| ENSG00000257551.1_HLX-AS1     | ENSG00000160789.18_LMNA | -0.00055 | -0.15973971  | 0.158661599 | 9.95E-01 | 9.98E-01 | 1.00E+00 |
| ENSG00000259710.1_NUTF2P6     | ENSG00000160789.18_LMNA | 0.00865  | -0.150758629 | 0.167619557 | 9.16E-01 | 9.68E-01 | 1.00E+00 |
| ENSG00000263316.1_RP11-530N   | ENSG00000160789.18_LMNA | 0.11086  | -0.049208092 | 0.265378093 | 1.74E-01 | 4.34E-01 | 1.00E+00 |
| ENSG00000254164.1_CTB-33O18   | ENSG00000160789.18_LMNA | -0.03384 | -0.192006738 | 0.126039271 | 6.79E-01 | 8.60E-01 | 1.00E+00 |
| ENSG00000229759.1_MRPS18AF    | ENSG00000160789.18_LMNA | -0.07224 | -0.228811293 | 0.087970299 | 3.76E-01 | 6.56E-01 | 1.00E+00 |
| ENSG00000253677.1_UBE2HP1     | ENSG00000160789.18_LMNA | -0.05226 | -0.209719196 | 0.107834489 | 5.23E-01 | 7.68E-01 | 1.00E+00 |
| ENSG00000232082.1_RPS6KA2-I   | ENSG00000160789.18_LMNA | 0.23512  | 0.0788697    | 0.380091724 | 3.55E-03 | 3.03E-02 | 1.00E+00 |
| ENSG00000225868.5_AC016582.I  | ENSG00000160789.18_LMNA | -0.10531 | -0.260146452 | 0.054812536 | 1.97E-01 | 4.66E-01 | 1.00E+00 |
| ENSG00000223511.4_RP13-297E   | ENSG00000160789.18_LMNA | 0.04213  | -0.117864973 | 0.199985687 | 6.06E-01 | 8.20E-01 | 1.00E+00 |
| ENSG00000275438.1_LA16c-360/I | ENSG00000160789.18_LMNA | -0.10608 | -0.260874884 | 0.054033384 | 1.93E-01 | 4.62E-01 | 1.00E+00 |
| ENSG00000269288.1_CTD-2245F   | ENSG00000160789.18_LMNA | -0.1741  | -0.324311739 | -0.01532396 | 3.19E-02 | 1.49E-01 | 1.00E+00 |
| ENSG00000227359.1_AC017074.I  | ENSG00000160789.18_LMNA | -0.00843 | -0.167406071 | 0.150973279 | 9.18E-01 | 9.69E-01 | 1.00E+00 |
| ENSG00000258949.1_RP11-857B   | ENSG00000160789.18_LMNA | -0.04097 | -0.198875245 | 0.119005188 | 6.16E-01 | 8.26E-01 | 1.00E+00 |
| ENSG00000260176.1_CTD-3126B   | ENSG00000160789.18_LMNA | 0.05056  | -0.109519119 | 0.208088829 | 5.36E-01 | 7.77E-01 | 1.00E+00 |
| ENSG00000253796.1_RP11-1084I  | ENSG00000160789.18_LMNA | 0.00058  | -0.158630988 | 0.15977031  | 9.94E-01 | 9.98E-01 | 1.00E+00 |
| ENSG00000272103.1_CTD-2653M   | ENSG00000160789.18_LMNA | -0.00312 | -0.162235644 | 0.156162748 | 9.70E-01 | 9.88E-01 | 1.00E+00 |
| ENSG00000232823.2_TXNP1       | ENSG00000160789.18_LMNA | 0.04938  | -0.110693815 | 0.206950925 | 5.46E-01 | 7.84E-01 | 1.00E+00 |
| ENSG00000228312.1_GAPDHP45    | ENSG00000160789.18_LMNA | 0.21589  | 0.0587094    | 0.36262931  | 7.56E-03 | 5.32E-02 | 1.00E+00 |
| ENSG00000272431.1_RP11-281O   | ENSG00000160789.18_LMNA | 0.02799  | -0.131796357 | 0.186361887 | 7.32E-01 | 8.87E-01 | 1.00E+00 |
| ENSG00000269376.1_RP11-120K   | ENSG00000160789.18_LMNA | -0.06015 | -0.217272383 | 0.100006043 | 4.62E-01 | 7.25E-01 | 1.00E+00 |
| ENSG00000258586.1_RP5-1021I2  | ENSG00000160789.18_LMNA | 0.35087  | 0.203005013  | 0.48308282  | 9.35E-06 | 2.76E-04 | 4.79E-01 |
| ENSG00000266261.1_RP11-640I1  | ENSG00000160789.18_LMNA | -0.13861 | -0.291377979 | 0.021058469 | 8.86E-02 | 2.90E-01 | 1.00E+00 |
| ENSG00000237640.1_RP4-604G5   | ENSG00000160789.18_LMNA | -0.11503 | -0.26930244  | 0.044991053 | 1.58E-01 | 4.11E-01 | 1.00E+00 |
| ENSG00000259005.1_RP3-449M8   | ENSG00000160789.18_LMNA | -0.02499 | -0.183457874 | 0.134749772 | 7.60E-01 | 9.00E-01 | 1.00E+00 |
| ENSG00000249483.1_CTD-2249K   | ENSG00000160789.18_LMNA | -0.04029 | -0.198214885 | 0.119682856 | 6.22E-01 | 8.29E-01 | 1.00E+00 |
| ENSG00000265008.1_RP11-53I6.I | ENSG00000160789.18_LMNA | -0.07644 | -0.232811417 | 0.083776237 | 3.49E-01 | 6.33E-01 | 1.00E+00 |
| ENSG00000275401.1_RP4-564F2   | ENSG00000160789.18_LMNA | 0.14301  | -0.016567127 | 0.295484059 | 7.88E-02 | 2.69E-01 | 1.00E+00 |
| ENSG00000242209.1_AC006445.I  | ENSG00000160789.18_LMNA | 0.06783  | -0.092369553 | 0.224603936 | 4.06E-01 | 6.82E-01 | 1.00E+00 |
| ENSG00000256817.1_TPT1P12     | ENSG00000160789.18_LMNA | -0.18196 | -0.331557286 | -0.02343956 | 2.49E-02 | 1.26E-01 | 1.00E+00 |
| ENSG00000244048.1_RPS18P6     | ENSG00000160789.18_LMNA | -0.0264  | -0.184819613 | 0.133365571 | 7.47E-01 | 8.94E-01 | 1.00E+00 |
| ENSG00000267650.1_CTD-2553C   | ENSG00000160789.18_LMNA | 0.1784   | 0.019764478  | 0.328280698 | 2.79E-02 | 1.36E-01 | 1.00E+00 |
| ENSG00000213424.7_KRT222      | ENSG00000160789.18_LMNA | -0.21589 | -0.362625047 | -0.05870451 | 7.56E-03 | 5.32E-02 | 1.00E+00 |
| ENSG00000227692.1_MED28P3     | ENSG00000160789.18_LMNA | 0.06629  | -0.093903533 | 0.223134086 | 4.17E-01 | 6.89E-01 | 1.00E+00 |

|                              |                         |          |              |             |          |          |          |
|------------------------------|-------------------------|----------|--------------|-------------|----------|----------|----------|
| ENSG00000241720.2_RP4-735C1  | ENSG00000160789.18_LMNA | -0.27559 | -0.4165181   | -0.12173211 | 5.89E-04 | 7.67E-03 | 1.00E+00 |
| ENSG00000239593.1_RP11-477J  | ENSG00000160789.18_LMNA | -0.10626 | -0.261040217 | 0.053856486 | 1.93E-01 | 4.61E-01 | 1.00E+00 |
| ENSG00000215351.3_PPIAP1     | ENSG00000160789.18_LMNA | 0.09585  | -0.064333545 | 0.251216179 | 2.40E-01 | 5.19E-01 | 1.00E+00 |
| ENSG00000179799.8_OR7E22P    | ENSG00000160789.18_LMNA | -0.0747  | -0.231151266 | 0.08551824  | 3.60E-01 | 6.43E-01 | 1.00E+00 |
| ENSG00000229544.8_NKX1-2     | ENSG00000160789.18_LMNA | 0.00942  | -0.150001538 | 0.168372304 | 9.08E-01 | 9.65E-01 | 1.00E+00 |
| ENSG00000255050.1_RP11-661A  | ENSG00000160789.18_LMNA | 0.15489  | -0.004420596 | 0.306531226 | 5.67E-02 | 2.18E-01 | 1.00E+00 |
| ENSG00000272625.1_RP11-737C  | ENSG00000160789.18_LMNA | 0.07188  | -0.08832749  | 0.228470123 | 3.79E-01 | 6.58E-01 | 1.00E+00 |
| ENSG00000223486.1_AC092198   | ENSG00000160789.18_LMNA | -0.03589 | -0.193985961 | 0.124015611 | 6.61E-01 | 8.50E-01 | 1.00E+00 |
| ENSG00000179066.7_CTD-2527I2 | ENSG00000160789.18_LMNA | -0.03108 | -0.189348013 | 0.12875353  | 7.04E-01 | 8.74E-01 | 1.00E+00 |
| ENSG00000260381.2_RP11-429P  | ENSG00000160789.18_LMNA | -0.07411 | -0.230587874 | 0.086108969 | 3.64E-01 | 6.46E-01 | 1.00E+00 |
| ENSG00000249098.1_RP11-39E3  | ENSG00000160789.18_LMNA | 0.14826  | -0.011208343 | 0.300368137 | 6.83E-02 | 2.46E-01 | 1.00E+00 |
| ENSG00000242636.1_RPL21P125  | ENSG00000160789.18_LMNA | -0.02446 | -0.182949849 | 0.135265859 | 7.65E-01 | 9.02E-01 | 1.00E+00 |
| ENSG00000275374.1_RP11-346J  | ENSG00000160789.18_LMNA | -0.06909 | -0.225803654 | 0.091116376 | 3.98E-01 | 6.75E-01 | 1.00E+00 |
| ENSG00000235325.1_AC009963   | ENSG00000160789.18_LMNA | -0.06827 | -0.225020295 | 0.091934755 | 4.03E-01 | 6.79E-01 | 1.00E+00 |
| ENSG00000280229.1_RP11-470C  | ENSG00000160789.18_LMNA | 0.00099  | -0.158237702 | 0.160163399 | 9.90E-01 | 9.96E-01 | 1.00E+00 |
| ENSG00000243101.1_RPS3P7     | ENSG00000160789.18_LMNA | -0.05319 | -0.210607313 | 0.106916045 | 5.15E-01 | 7.63E-01 | 1.00E+00 |
| ENSG00000213735.2_ANAPC10P   | ENSG00000160789.18_LMNA | -0.05074 | -0.208257299 | 0.109345126 | 5.35E-01 | 7.76E-01 | 1.00E+00 |
| ENSG00000279624.2            | ENSG00000160789.18_LMNA | -0.08145 | -0.237567721 | 0.078774695 | 3.19E-01 | 6.05E-01 | 1.00E+00 |
| ENSG00000275468.1_LLNLR-304  | ENSG00000160789.18_LMNA | 0.15343  | -0.005913023 | 0.305178376 | 5.91E-02 | 2.23E-01 | 1.00E+00 |
| ENSG00000271318.1_AP000654   | ENSG00000160789.18_LMNA | 0.25463  | 0.099457915  | 0.397705897 | 1.55E-03 | 1.61E-02 | 1.00E+00 |
| ENSG00000262497.1_FAM187B2I  | ENSG00000160789.18_LMNA | -0.04908 | -0.206665692 | 0.110988132 | 5.48E-01 | 7.85E-01 | 1.00E+00 |
| ENSG00000251402.3_FAM90A25I  | ENSG00000160789.18_LMNA | 0.13673  | -0.022972374 | 0.28962474  | 9.30E-02 | 2.98E-01 | 1.00E+00 |
| ENSG00000257564.1_RP11-123M  | ENSG00000160789.18_LMNA | -0.06207 | -0.219107835 | 0.098097752 | 4.47E-01 | 7.14E-01 | 1.00E+00 |
| ENSG00000260886.1_TAT-AS1    | ENSG00000160789.18_LMNA | -0.0299  | -0.188208369 | 0.129915521 | 7.15E-01 | 8.79E-01 | 1.00E+00 |
| ENSG00000224159.1_HMGB1P9    | ENSG00000160789.18_LMNA | -0.00774 | -0.166736899 | 0.151645906 | 9.25E-01 | 9.71E-01 | 1.00E+00 |
| ENSG00000224287.2_MSL3P1     | ENSG00000160789.18_LMNA | 0.14111  | -0.018502411 | 0.293716194 | 8.29E-02 | 2.78E-01 | 1.00E+00 |
| ENSG00000261656.4_BEAN1-AS   | ENSG00000160789.18_LMNA | 0.00069  | -0.158532653 | 0.159868605 | 9.93E-01 | 9.97E-01 | 1.00E+00 |
| ENSG00000166143.8_PPP1R14D   | ENSG00000160789.18_LMNA | 0.05865  | -0.101493465 | 0.215840179 | 4.73E-01 | 7.33E-01 | 1.00E+00 |
| ENSG00000267795.4_SMIM22     | ENSG00000160789.18_LMNA | -0.09515 | -0.250559689 | 0.065031203 | 2.44E-01 | 5.23E-01 | 1.00E+00 |
| ENSG00000234995.1_AC013429   | ENSG00000160789.18_LMNA | -0.04954 | -0.207108136 | 0.110531574 | 5.44E-01 | 7.83E-01 | 1.00E+00 |
| ENSG00000214807.2_NPM1P31    | ENSG00000160789.18_LMNA | 0.11174  | -0.048315721 | 0.266209397 | 1.70E-01 | 4.29E-01 | 1.00E+00 |
| ENSG00000174175.15_SELP      | ENSG00000160789.18_LMNA | 0.18955  | 0.031293616  | 0.338534894 | 1.93E-02 | 1.05E-01 | 1.00E+00 |
| ENSG00000272180.1_RP11-481J  | ENSG00000160789.18_LMNA | -0.10316 | -0.258121328 | 0.056976655 | 2.06E-01 | 4.78E-01 | 1.00E+00 |

|                              |                         |          |              |             |          |          |          |
|------------------------------|-------------------------|----------|--------------|-------------|----------|----------|----------|
| ENSG00000259924.1_RP11-16E2  | ENSG00000160789.18_LMNA | -0.03044 | -0.188730012 | 0.129383758 | 7.10E-01 | 8.77E-01 | 1.00E+00 |
| ENSG00000183562.3_CTC-343N3  | ENSG00000160789.18_LMNA | 0.21901  | 0.061969532  | 0.365467705 | 6.71E-03 | 4.88E-02 | 1.00E+00 |
| ENSG00000174899.9_PQLC2L     | ENSG00000160789.18_LMNA | 0.21995  | 0.06295798   | 0.366327172 | 6.47E-03 | 4.76E-02 | 1.00E+00 |
| ENSG00000225541.1_AC002480.1 | ENSG00000160789.18_LMNA | -0.05887 | -0.216042108 | 0.101283837 | 4.71E-01 | 7.31E-01 | 1.00E+00 |
| ENSG00000257599.1_OVCH1-AS   | ENSG00000160789.18_LMNA | 0.02377  | -0.135940623 | 0.182285369 | 7.71E-01 | 9.05E-01 | 1.00E+00 |
| ENSG00000227056.2_RPL6P2     | ENSG00000160789.18_LMNA | -0.06599 | -0.222845334 | 0.094204706 | 4.19E-01 | 6.91E-01 | 1.00E+00 |
| ENSG00000255974.5_CYP2A6     | ENSG00000160789.18_LMNA | -0.11776 | -0.271866492 | 0.042229703 | 1.48E-01 | 3.95E-01 | 1.00E+00 |
| ENSG00000258893.1_SETP2      | ENSG00000160789.18_LMNA | 0.04701  | -0.113031829 | 0.20468358  | 5.65E-01 | 7.96E-01 | 1.00E+00 |
| ENSG00000273597.1_RP11-392A  | ENSG00000160789.18_LMNA | 0.02867  | -0.131132801 | 0.18701358  | 7.26E-01 | 8.84E-01 | 1.00E+00 |
| ENSG00000267353.1_CTD-2162K  | ENSG00000160789.18_LMNA | -0.10749 | -0.262203361 | 0.052611417 | 1.87E-01 | 4.54E-01 | 1.00E+00 |
| ENSG00000122548.5_KIAA0087   | ENSG00000160789.18_LMNA | -0.23332 | -0.378460573 | -0.07697605 | 3.82E-03 | 3.20E-02 | 1.00E+00 |
| ENSG00000231735.1_RP11-1O7.1 | ENSG00000160789.18_LMNA | 0.05719  | -0.102952616 | 0.214433868 | 4.84E-01 | 7.41E-01 | 1.00E+00 |
| ENSG00000219257.2_NPM1P38    | ENSG00000160789.18_LMNA | 0.02761  | -0.132174313 | 0.185990563 | 7.36E-01 | 8.89E-01 | 1.00E+00 |
| ENSG00000224763.1_FDPSP8     | ENSG00000160789.18_LMNA | 0.12989  | -0.029929182 | 0.283234217 | 1.11E-01 | 3.32E-01 | 1.00E+00 |
| ENSG00000237415.2_NRBF2P3    | ENSG00000160789.18_LMNA | -0.01797 | -0.17666672  | 0.141634454 | 8.26E-01 | 9.32E-01 | 1.00E+00 |
| ENSG00000222033.1_LINC01124  | ENSG00000160789.18_LMNA | 0.34725  | 0.199053872  | 0.479919906 | 1.17E-05 | 3.31E-04 | 6.00E-01 |
| ENSG00000256443.1_RP11-794G  | ENSG00000160789.18_LMNA | 0.03022  | -0.129605395 | 0.188512615 | 7.12E-01 | 8.77E-01 | 1.00E+00 |
| ENSG00000232760.1_AC103564.1 | ENSG00000160789.18_LMNA | -0.16561 | -0.316468929 | -0.00658502 | 4.14E-02 | 1.78E-01 | 1.00E+00 |
| ENSG00000276772.1_CTD-2515H  | ENSG00000160789.18_LMNA | 0.12564  | -0.034247328 | 0.27925353  | 1.23E-01 | 3.53E-01 | 1.00E+00 |
| ENSG00000275774.2_HNRNPCL2   | ENSG00000160789.18_LMNA | 0.03229  | -0.12756725  | 0.190510596 | 6.93E-01 | 8.68E-01 | 1.00E+00 |
| ENSG00000185303.14_SFPA2     | ENSG00000160789.18_LMNA | -0.08562 | -0.241530839 | 0.074595037 | 2.94E-01 | 5.80E-01 | 1.00E+00 |
| ENSG00000231741.2_RP11-213G  | ENSG00000160789.18_LMNA | -0.05569 | -0.213001161 | 0.104437752 | 4.96E-01 | 7.50E-01 | 1.00E+00 |
| ENSG00000253408.4_RP11-231D  | ENSG00000160789.18_LMNA | 0.06384  | -0.096344166 | 0.220792509 | 4.35E-01 | 7.03E-01 | 1.00E+00 |
| ENSG00000114349.8_GNAT1      | ENSG00000160789.18_LMNA | -0.14517 | -0.297499659 | 0.014357792 | 7.43E-02 | 2.60E-01 | 1.00E+00 |
| ENSG00000236700.4_LINC01010  | ENSG00000160789.18_LMNA | 0.07047  | -0.089741311 | 0.227118955 | 3.88E-01 | 6.66E-01 | 1.00E+00 |
| ENSG00000265413.1_RP11-789C  | ENSG00000160789.18_LMNA | -0.07033 | -0.226992327 | 0.089873745 | 3.89E-01 | 6.67E-01 | 1.00E+00 |
| ENSG00000269653.1_CTB-102L5  | ENSG00000160789.18_LMNA | -0.04106 | -0.198962469 | 0.118915655 | 6.15E-01 | 8.26E-01 | 1.00E+00 |
| ENSG00000224725.3_CEP57L1P   | ENSG00000160789.18_LMNA | -0.0186  | -0.177278655 | 0.141015351 | 8.20E-01 | 9.30E-01 | 1.00E+00 |
| ENSG00000224430.2_MKRN5P     | ENSG00000160789.18_LMNA | 0.0264   | -0.133359397 | 0.184825685 | 7.47E-01 | 8.94E-01 | 1.00E+00 |
| ENSG00000232479.2_AC010900.1 | ENSG00000160789.18_LMNA | 0.22967  | 0.073143524  | 0.375153572 | 4.42E-03 | 3.57E-02 | 1.00E+00 |
| ENSG00000178055.11_PRSS42    | ENSG00000160789.18_LMNA | -0.1065  | -0.261266658 | 0.053614172 | 1.92E-01 | 4.59E-01 | 1.00E+00 |
| ENSG00000229727.5_AC013460.1 | ENSG00000160789.18_LMNA | -0.19472 | -0.343277947 | -0.03665419 | 1.62E-02 | 9.29E-02 | 1.00E+00 |
| ENSG00000164621.5_SMAD5-AS   | ENSG00000160789.18_LMNA | 0.0791   | -0.081124145 | 0.235335358 | 3.33E-01 | 6.18E-01 | 1.00E+00 |



|                              |                         |          |              |             |          |          |          |
|------------------------------|-------------------------|----------|--------------|-------------|----------|----------|----------|
| ENSG00000277058.2_HNRNPCL3   | ENSG00000160789.18_LMNA | 0.00488  | -0.154438011 | 0.163955994 | 9.52E-01 | 9.81E-01 | 1.00E+00 |
| ENSG00000073067.12_CYP2W1    | ENSG00000160789.18_LMNA | 0.06342  | -0.096754013 | 0.220398938 | 4.38E-01 | 7.06E-01 | 1.00E+00 |
| ENSG00000213046.4_EEF1A1P3   | ENSG00000160789.18_LMNA | -0.09569 | -0.251070585 | 0.064488296 | 2.41E-01 | 5.20E-01 | 1.00E+00 |
| ENSG00000188883.4_KLRG2      | ENSG00000160789.18_LMNA | 0.01735  | -0.142239301 | 0.176068638 | 8.32E-01 | 9.35E-01 | 1.00E+00 |
| ENSG00000259024.5_TVP23C-CI  | ENSG00000160789.18_LMNA | -0.07822 | -0.234504658 | 0.081997518 | 3.38E-01 | 6.24E-01 | 1.00E+00 |
| ENSG00000277726.3_RP4-635E1  | ENSG00000160789.18_LMNA | -0.03363 | -0.19180015  | 0.126250345 | 6.81E-01 | 8.61E-01 | 1.00E+00 |
| ENSG00000159398.14_CES5A     | ENSG00000160789.18_LMNA | -0.34268 | -0.475918275 | -0.19406805 | 1.55E-05 | 4.20E-04 | 7.95E-01 |
| ENSG00000237263.1_MAPK6PS3   | ENSG00000160789.18_LMNA | 0.02057  | -0.139082863 | 0.179187188 | 8.01E-01 | 9.20E-01 | 1.00E+00 |
| ENSG00000230318.2_XRCC6P3    | ENSG00000160789.18_LMNA | -0.00876 | -0.16773125  | 0.150646315 | 9.15E-01 | 9.67E-01 | 1.00E+00 |
| ENSG00000236908.2_RP5-1063M  | ENSG00000160789.18_LMNA | 0.26371  | 0.109088246  | 0.40587031  | 1.03E-03 | 1.18E-02 | 1.00E+00 |
| ENSG00000184224.3_C11orf72   | ENSG00000160789.18_LMNA | -0.07259 | -0.229142207 | 0.087623767 | 3.74E-01 | 6.54E-01 | 1.00E+00 |
| ENSG00000274554.1_RP11-240G  | ENSG00000160789.18_LMNA | -0.04166 | -0.199539222 | 0.118323509 | 6.10E-01 | 8.22E-01 | 1.00E+00 |
| ENSG00000215174.2_NLRP2B     | ENSG00000160789.18_LMNA | 0.01643  | -0.143140365 | 0.175177217 | 8.41E-01 | 9.38E-01 | 1.00E+00 |
| ENSG00000162571.12_TTLL10    | ENSG00000160789.18_LMNA | 0.00636  | -0.152998139 | 0.165390722 | 9.38E-01 | 9.75E-01 | 1.00E+00 |
| ENSG00000261402.1_RP11-378I6 | ENSG00000160789.18_LMNA | -0.12861 | -0.282036507 | 0.031229658 | 1.14E-01 | 3.38E-01 | 1.00E+00 |
| ENSG00000189233.10_NUGGC     | ENSG00000160789.18_LMNA | 0.12951  | -0.030310851 | 0.282882809 | 1.12E-01 | 3.33E-01 | 1.00E+00 |
| ENSG00000141579.6_ZNF750     | ENSG00000160789.18_LMNA | -0.05079 | -0.208302294 | 0.109298653 | 5.34E-01 | 7.76E-01 | 1.00E+00 |
| ENSG00000246820.2_RP11-379P  | ENSG00000160789.18_LMNA | -0.20888 | -0.356238529 | -0.05139271 | 9.81E-03 | 6.47E-02 | 1.00E+00 |
| ENSG00000159261.9_CLDN14     | ENSG00000160789.18_LMNA | 0.14485  | -0.014687102 | 0.297199402 | 7.50E-02 | 2.61E-01 | 1.00E+00 |
| ENSG00000171017.9_LRRRC8E    | ENSG00000160789.18_LMNA | 0.33626  | 0.187077174  | 0.470287663 | 2.28E-05 | 5.75E-04 | 1.00E+00 |
| ENSG00000256660.4_CLEC12B    | ENSG00000160789.18_LMNA | -0.15013 | -0.302105431 | 0.009297869 | 6.49E-02 | 2.37E-01 | 1.00E+00 |
| ENSG00000204930.8_FAM221B    | ENSG00000160789.18_LMNA | -0.16423 | -0.315191518 | -0.00516612 | 4.32E-02 | 1.83E-01 | 1.00E+00 |
| ENSG00000280145.2_CH507-154  | ENSG00000160789.18_LMNA | 0.08296  | -0.077259775 | 0.239005374 | 3.10E-01 | 5.96E-01 | 1.00E+00 |
| ENSG00000253284.2_RP11-282K  | ENSG00000160789.18_LMNA | -0.07321 | -0.229737682 | 0.086999994 | 3.70E-01 | 6.50E-01 | 1.00E+00 |
| ENSG00000104892.15_KLC3      | ENSG00000160789.18_LMNA | 0.11218  | -0.047878877 | 0.266616177 | 1.69E-01 | 4.27E-01 | 1.00E+00 |
| ENSG00000241933.1_RP11-755B  | ENSG00000160789.18_LMNA | -0.11544 | -0.269684715 | 0.044579668 | 1.57E-01 | 4.09E-01 | 1.00E+00 |
| ENSG00000239732.3_TLR9       | ENSG00000160789.18_LMNA | 0.09433  | -0.065855084 | 0.249784049 | 2.48E-01 | 5.28E-01 | 1.00E+00 |
| ENSG00000135100.16_HNF1A     | ENSG00000160789.18_LMNA | 0.00117  | -0.158064666 | 0.160336316 | 9.89E-01 | 9.96E-01 | 1.00E+00 |
| ENSG00000185013.15_NT5C1B    | ENSG00000160789.18_LMNA | 0.16598  | 0.006963458  | 0.316809436 | 4.10E-02 | 1.76E-01 | 1.00E+00 |
| ENSG00000180432.5_CYP8B1     | ENSG00000160789.18_LMNA | 0.12096  | -0.038993857 | 0.274865472 | 1.38E-01 | 3.78E-01 | 1.00E+00 |
| ENSG00000250493.2_RP11-640N  | ENSG00000160789.18_LMNA | 0.02999  | -0.129832321 | 0.188289997 | 7.14E-01 | 8.78E-01 | 1.00E+00 |
| ENSG00000185710.8_SMG1P4     | ENSG00000160789.18_LMNA | -0.1566  | -0.308121641 | 0.002664322 | 5.40E-02 | 2.11E-01 | 1.00E+00 |
| ENSG00000249375.6_CASC11     | ENSG00000160789.18_LMNA | -0.07222 | -0.228786802 | 0.087995942 | 3.77E-01 | 6.56E-01 | 1.00E+00 |

|                              |                         |          |              |             |          |          |          |
|------------------------------|-------------------------|----------|--------------|-------------|----------|----------|----------|
| ENSG00000274810.2_NPHP3-AC   | ENSG00000160789.18_LMNA | -0.12788 | -0.281356464 | 0.031967577 | 1.16E-01 | 3.41E-01 | 1.00E+00 |
| ENSG00000205592.12_MUC19     | ENSG00000160789.18_LMNA | -0.16214 | -0.313252106 | -0.00301428 | 4.60E-02 | 1.90E-01 | 1.00E+00 |
| ENSG00000211653.2_IGLV1-40   | ENSG00000160789.18_LMNA | 0.0294   | -0.130406912 | 0.18772617  | 7.19E-01 | 8.81E-01 | 1.00E+00 |
| ENSG00000264370.1_MIR3125    | ENSG00000160789.18_LMNA | 0.14392  | -0.015642491 | 0.296327953 | 7.69E-02 | 2.66E-01 | 1.00E+00 |
| ENSG00000206878.1_SNORA51    | ENSG00000160789.18_LMNA | 0.03241  | -0.127447433 | 0.19062797  | 6.92E-01 | 8.67E-01 | 1.00E+00 |
| ENSG00000273662.1_           | ENSG00000160789.18_LMNA | -0.03576 | -0.19385534  | 0.124149246 | 6.62E-01 | 8.51E-01 | 1.00E+00 |
| ENSG00000265996.1_MIR3671    | ENSG00000160789.18_LMNA | -0.10479 | -0.259656496 | 0.055336392 | 1.99E-01 | 4.69E-01 | 1.00E+00 |
| ENSG00000201820.1_Y_RNA      | ENSG00000160789.18_LMNA | 0.08777  | -0.072442739 | 0.243567525 | 2.82E-01 | 5.68E-01 | 1.00E+00 |
| ENSG00000202533.1_Y_RNA      | ENSG00000160789.18_LMNA | 0.06594  | -0.0942522   | 0.222799793 | 4.20E-01 | 6.91E-01 | 1.00E+00 |
| ENSG00000207507.1_RNU6-9     | ENSG00000160789.18_LMNA | -0.18961 | -0.338586027 | -0.03135131 | 1.93E-02 | 1.05E-01 | 1.00E+00 |
| ENSG00000234779.1_RP11-62F2  | ENSG00000160789.18_LMNA | 0.14839  | -0.011071916 | 0.300492266 | 6.81E-02 | 2.45E-01 | 1.00E+00 |
| ENSG00000223254.1_Y_RNA      | ENSG00000160789.18_LMNA | 0.10286  | -0.057281086 | 0.257836227 | 2.07E-01 | 4.80E-01 | 1.00E+00 |
| ENSG00000234165.1_AC114877.1 | ENSG00000160789.18_LMNA | -0.18614 | -0.335404349 | -0.02776515 | 2.17E-02 | 1.14E-01 | 1.00E+00 |
| ENSG00000161610.1_HCRT       | ENSG00000160789.18_LMNA | -0.09162 | -0.247215964 | 0.068579825 | 2.62E-01 | 5.45E-01 | 1.00E+00 |
| ENSG00000272519.1_RP11-105N  | ENSG00000160789.18_LMNA | -0.10467 | -0.259543234 | 0.055457466 | 1.99E-01 | 4.70E-01 | 1.00E+00 |
| ENSG00000237398.1_HLA-DPA3   | ENSG00000160789.18_LMNA | -0.07108 | -0.227707825 | 0.089125292 | 3.84E-01 | 6.63E-01 | 1.00E+00 |
| ENSG00000236860.1_RPL39P29   | ENSG00000160789.18_LMNA | 0.07377  | -0.086441633 | 0.230270512 | 3.66E-01 | 6.47E-01 | 1.00E+00 |
| ENSG00000238173.1_RPL39P6    | ENSG00000160789.18_LMNA | -0.07829 | -0.234565403 | 0.08193367  | 3.38E-01 | 6.23E-01 | 1.00E+00 |
| ENSG00000197153.4_HIST1H3J   | ENSG00000160789.18_LMNA | 0.06839  | -0.091810575 | 0.225139188 | 4.02E-01 | 6.78E-01 | 1.00E+00 |
| ENSG00000226944.1_RP1-120G2  | ENSG00000160789.18_LMNA | -0.07328 | -0.229795882 | 0.086939015 | 3.70E-01 | 6.50E-01 | 1.00E+00 |
| ENSG00000250015.1_CTC-339F2  | ENSG00000160789.18_LMNA | -0.05195 | -0.209423125 | 0.10814055  | 5.25E-01 | 7.70E-01 | 1.00E+00 |
| ENSG00000240618.1_           | ENSG00000160789.18_LMNA | -0.05141 | -0.208900246 | 0.108680924 | 5.29E-01 | 7.73E-01 | 1.00E+00 |
| ENSG00000236577.1_SNRPGP14   | ENSG00000160789.18_LMNA | -0.10915 | -0.263767182 | 0.050935909 | 1.81E-01 | 4.44E-01 | 1.00E+00 |
| ENSG00000234819.1_RP11-336N  | ENSG00000160789.18_LMNA | -0.05208 | -0.209543982 | 0.108015622 | 5.24E-01 | 7.69E-01 | 1.00E+00 |
| ENSG00000233521.4_RP5-1172A  | ENSG00000160789.18_LMNA | 0.07608  | -0.08414182  | 0.232463165 | 3.52E-01 | 6.35E-01 | 1.00E+00 |
| ENSG00000244218.3_RN7SL81P   | ENSG00000160789.18_LMNA | 0.12454  | -0.035360601 | 0.278225509 | 1.26E-01 | 3.59E-01 | 1.00E+00 |
| ENSG00000273063.1_RP11-334G  | ENSG00000160789.18_LMNA | -0.11338 | -0.267745245 | 0.04666573  | 1.64E-01 | 4.20E-01 | 1.00E+00 |
| ENSG00000276292.1_RP11-33N1  | ENSG00000160789.18_LMNA | 0.02709  | -0.132679606 | 0.185493994 | 7.40E-01 | 8.91E-01 | 1.00E+00 |
| ENSG00000236536.1_AC003986.1 | ENSG00000160789.18_LMNA | -0.03631 | -0.194389998 | 0.123602177 | 6.57E-01 | 8.48E-01 | 1.00E+00 |
| ENSG00000219693.3_FGF7P8     | ENSG00000160789.18_LMNA | -0.12449 | -0.278180283 | 0.03540956  | 1.26E-01 | 3.60E-01 | 1.00E+00 |
| ENSG00000136352.16_NKX2-1    | ENSG00000160789.18_LMNA | -0.18842 | -0.337499175 | -0.0301254  | 2.01E-02 | 1.08E-01 | 1.00E+00 |
| ENSG00000226330.1_RP11-739N  | ENSG00000160789.18_LMNA | -0.01816 | -0.176846826 | 0.141452264 | 8.24E-01 | 9.31E-01 | 1.00E+00 |
| ENSG00000272832.1_RP11-91K8  | ENSG00000160789.18_LMNA | 0.0708   | -0.089405182 | 0.227440299 | 3.86E-01 | 6.64E-01 | 1.00E+00 |

|                              |                         |          |              |             |          |          |          |
|------------------------------|-------------------------|----------|--------------|-------------|----------|----------|----------|
| ENSG00000233916.1_ZDHHC20P   | ENSG00000160789.18_LMNA | 0.02545  | -0.134296961 | 0.183903471 | 7.56E-01 | 8.98E-01 | 1.00E+00 |
| ENSG00000176136.5_MC5R       | ENSG00000160789.18_LMNA | 0.00351  | -0.155779618 | 0.162617966 | 9.66E-01 | 9.87E-01 | 1.00E+00 |
| ENSG00000280264.1_AC004158.  | ENSG00000160789.18_LMNA | -0.06089 | -0.217980097 | 0.099270521 | 4.56E-01 | 7.21E-01 | 1.00E+00 |
| ENSG00000233508.2_RP1-269M1  | ENSG00000160789.18_LMNA | -0.26746 | -0.409232308 | -0.11307015 | 8.65E-04 | 1.03E-02 | 1.00E+00 |
| ENSG00000224958.4_PGM5-AS1   | ENSG00000160789.18_LMNA | -0.1759  | -0.325974325 | -0.0171826  | 3.02E-02 | 1.44E-01 | 1.00E+00 |
| ENSG00000262601.1_           | ENSG00000160789.18_LMNA | 0.21344  | 0.056142197  | 0.360390229 | 8.29E-03 | 5.72E-02 | 1.00E+00 |
| ENSG00000176040.12_TMPRSS7   | ENSG00000160789.18_LMNA | -0.17399 | -0.324210745 | -0.01521113 | 3.21E-02 | 1.50E-01 | 1.00E+00 |
| ENSG00000242696.3_RN7SL40P   | ENSG00000160789.18_LMNA | -0.12388 | -0.277602949 | 0.03603441  | 1.28E-01 | 3.63E-01 | 1.00E+00 |
| ENSG00000251387.1_CTB-35F21  | ENSG00000160789.18_LMNA | 0.06613  | -0.094065435 | 0.222978867 | 4.18E-01 | 6.90E-01 | 1.00E+00 |
| ENSG00000170178.6_HOXD12     | ENSG00000160789.18_LMNA | -0.03757 | -0.195600312 | 0.122363053 | 6.46E-01 | 8.43E-01 | 1.00E+00 |
| ENSG00000253944.1_RP11-156K  | ENSG00000160789.18_LMNA | 0.17479  | 0.016035147  | 0.324948134 | 3.13E-02 | 1.47E-01 | 1.00E+00 |
| ENSG00000211699.2_TRGV3      | ENSG00000160789.18_LMNA | 0.1718   | 0.012949933  | 0.322185348 | 3.43E-02 | 1.57E-01 | 1.00E+00 |
| ENSG00000233626.2_RP11-565J  | ENSG00000160789.18_LMNA | -0.12703 | -0.2805614   | 0.032829875 | 1.19E-01 | 3.46E-01 | 1.00E+00 |
| ENSG00000227401.1_RPL37P1    | ENSG00000160789.18_LMNA | 0.06595  | -0.094235338 | 0.222815962 | 4.19E-01 | 6.91E-01 | 1.00E+00 |
| ENSG00000225146.1_AC073957.  | ENSG00000160789.18_LMNA | 0.02949  | -0.130322095 | 0.187809412 | 7.18E-01 | 8.80E-01 | 1.00E+00 |
| ENSG00000253875.1_RP11-16P2  | ENSG00000160789.18_LMNA | -0.10234 | -0.257346454 | 0.05780393  | 2.10E-01 | 4.82E-01 | 1.00E+00 |
| ENSG00000258851.1_RP11-894P  | ENSG00000160789.18_LMNA | -0.01262 | -0.171471525 | 0.146880492 | 8.77E-01 | 9.52E-01 | 1.00E+00 |
| ENSG00000251226.1_RP11-469N  | ENSG00000160789.18_LMNA | -0.21083 | -0.358012262 | -0.05342015 | 9.13E-03 | 6.14E-02 | 1.00E+00 |
| ENSG00000235028.3_HMGN1P3C   | ENSG00000160789.18_LMNA | 0.14716  | -0.012333466 | 0.299344036 | 7.04E-02 | 2.51E-01 | 1.00E+00 |
| ENSG00000250202.2_RP11-397E  | ENSG00000160789.18_LMNA | -0.00609 | -0.165131492 | 0.153258399 | 9.41E-01 | 9.76E-01 | 1.00E+00 |
| ENSG00000166670.8_MMP10      | ENSG00000160789.18_LMNA | 0.13045  | -0.02936042  | 0.283757728 | 1.09E-01 | 3.29E-01 | 1.00E+00 |
| ENSG00000202415.1_RN7SKP26   | ENSG00000160789.18_LMNA | 0.10402  | -0.056109478 | 0.258933141 | 2.02E-01 | 4.73E-01 | 1.00E+00 |
| ENSG00000230251.1_PHBP4      | ENSG00000160789.18_LMNA | -0.22619 | -0.371997716 | -0.06949446 | 5.08E-03 | 3.97E-02 | 1.00E+00 |
| ENSG00000258081.3_RP11-384J. | ENSG00000160789.18_LMNA | -0.08703 | -0.242865281 | 0.073185178 | 2.86E-01 | 5.72E-01 | 1.00E+00 |
| ENSG00000270480.1_RP11-57B2  | ENSG00000160789.18_LMNA | 0.09841  | -0.06176314  | 0.253632407 | 2.28E-01 | 5.04E-01 | 1.00E+00 |
| ENSG00000219758.6_RP1-249H1  | ENSG00000160789.18_LMNA | -0.03034 | -0.188624904 | 0.12949092  | 7.11E-01 | 8.77E-01 | 1.00E+00 |
| ENSG00000259322.1_RP11-762H  | ENSG00000160789.18_LMNA | -0.08791 | -0.243703114 | 0.072299348 | 2.81E-01 | 5.67E-01 | 1.00E+00 |
| ENSG00000223652.2_AC106786.  | ENSG00000160789.18_LMNA | -0.01794 | -0.17663548  | 0.141666054 | 8.26E-01 | 9.32E-01 | 1.00E+00 |
| ENSG00000249996.1_RP11-359P  | ENSG00000160789.18_LMNA | 0.13747  | -0.022214248 | 0.290319474 | 9.12E-02 | 2.95E-01 | 1.00E+00 |
| ENSG00000231901.1_RP11-281A  | ENSG00000160789.18_LMNA | -0.14557 | -0.297870393 | 0.013951092 | 7.35E-02 | 2.58E-01 | 1.00E+00 |
| ENSG00000275485.1_RP11-261P  | ENSG00000160789.18_LMNA | -0.06531 | -0.222205097 | 0.094872277 | 4.24E-01 | 6.95E-01 | 1.00E+00 |
| ENSG00000223485.1_LINC01615  | ENSG00000160789.18_LMNA | 0.18715  | 0.028809242  | 0.336331403 | 2.10E-02 | 1.11E-01 | 1.00E+00 |
| ENSG00000225392.1_AC016700.  | ENSG00000160789.18_LMNA | 0.00525  | -0.154084359 | 0.164308508 | 9.49E-01 | 9.79E-01 | 1.00E+00 |

|                               |                         |          |              |             |          |          |          |
|-------------------------------|-------------------------|----------|--------------|-------------|----------|----------|----------|
| ENSG00000227869.1_RP11-807H   | ENSG00000160789.18_LMNA | -0.21242 | -0.359466086 | -0.0550838  | 8.61E-03 | 5.87E-02 | 1.00E+00 |
| ENSG00000270553.1_RP11-15E1   | ENSG00000160789.18_LMNA | -0.0006  | -0.159784367 | 0.158616925 | 9.94E-01 | 9.98E-01 | 1.00E+00 |
| ENSG00000236238.2_AC093106.4  | ENSG00000160789.18_LMNA | -0.08643 | -0.242298761 | 0.073783869 | 2.90E-01 | 5.75E-01 | 1.00E+00 |
| ENSG00000205444.2_RP4-529N6   | ENSG00000160789.18_LMNA | 0.20049  | 0.042655619  | 0.348569541 | 1.33E-02 | 8.02E-02 | 1.00E+00 |
| ENSG00000237212.1_RP11-569G   | ENSG00000160789.18_LMNA | -0.20876 | -0.356125376 | -0.05126346 | 9.85E-03 | 6.49E-02 | 1.00E+00 |
| ENSG00000267735.1_CTD-2265C   | ENSG00000160789.18_LMNA | -0.08498 | -0.24092235  | 0.075237495 | 2.98E-01 | 5.84E-01 | 1.00E+00 |
| ENSG00000239256.1_RPL35AP3.4  | ENSG00000160789.18_LMNA | -0.01501 | -0.17379979  | 0.144531653 | 8.54E-01 | 9.43E-01 | 1.00E+00 |
| ENSG00000231636.1_AGBL5-AS.7  | ENSG00000160789.18_LMNA | -0.03096 | -0.189229384 | 0.128874527 | 7.05E-01 | 8.74E-01 | 1.00E+00 |
| ENSG00000257809.1_RP11-603J.1 | ENSG00000160789.18_LMNA | -0.13953 | -0.292235625 | 0.020121393 | 8.65E-02 | 2.86E-01 | 1.00E+00 |
| ENSG00000234735.1_AL022237.3  | ENSG00000160789.18_LMNA | -0.01297 | -0.171819721 | 0.146529447 | 8.74E-01 | 9.51E-01 | 1.00E+00 |
| ENSG00000232324.1_AC008440.1  | ENSG00000160789.18_LMNA | 0.0691   | -0.091106785 | 0.225812833 | 3.98E-01 | 6.74E-01 | 1.00E+00 |
| ENSG00000224717.1_RP11-576D   | ENSG00000160789.18_LMNA | -0.08713 | -0.242965242 | 0.073079517 | 2.86E-01 | 5.71E-01 | 1.00E+00 |
| ENSG00000269487.1_CTB-174O2   | ENSG00000160789.18_LMNA | 0.07507  | -0.085149943 | 0.231502411 | 3.58E-01 | 6.41E-01 | 1.00E+00 |
| ENSG00000273797.1_RP11-1046I  | ENSG00000160789.18_LMNA | -0.11222 | -0.266656392 | 0.047835683 | 1.69E-01 | 4.27E-01 | 1.00E+00 |
| ENSG00000274443.3_C8orf89     | ENSG00000160789.18_LMNA | -0.06479 | -0.221705806 | 0.095392686 | 4.28E-01 | 6.98E-01 | 1.00E+00 |
| ENSG00000257475.2_RP11-983P   | ENSG00000160789.18_LMNA | -0.07535 | -0.231766272 | 0.084873138 | 3.56E-01 | 6.40E-01 | 1.00E+00 |
| ENSG00000112164.5_GLP1R       | ENSG00000160789.18_LMNA | -0.24803 | -0.391764431 | -0.09248461 | 2.06E-03 | 2.00E-02 | 1.00E+00 |
| ENSG00000266644.1_RP11-927P   | ENSG00000160789.18_LMNA | 0.15905  | -0.000159074 | 0.310387295 | 5.03E-02 | 2.02E-01 | 1.00E+00 |
| ENSG00000271631.1_RP11-408O   | ENSG00000160789.18_LMNA | -0.16688 | -0.317644712 | -0.00789214 | 3.99E-02 | 1.73E-01 | 1.00E+00 |
| ENSG00000255624.2_RP11-564D   | ENSG00000160789.18_LMNA | -0.05711 | -0.214364787 | 0.103024258 | 4.85E-01 | 7.42E-01 | 1.00E+00 |
| ENSG00000173728.9_C1orf100    | ENSG00000160789.18_LMNA | 0.09404  | -0.06614871  | 0.249507518 | 2.49E-01 | 5.30E-01 | 1.00E+00 |
| ENSG00000236345.1_RP11-59D5   | ENSG00000160789.18_LMNA | -0.0443  | -0.202077015 | 0.115715294 | 5.88E-01 | 8.08E-01 | 1.00E+00 |
| ENSG00000256243.2_RPL7AP3     | ENSG00000160789.18_LMNA | -0.03038 | -0.188670715 | 0.129444214 | 7.10E-01 | 8.77E-01 | 1.00E+00 |
| ENSG00000254180.1_AB015752.1  | ENSG00000160789.18_LMNA | 0.06427  | -0.095907498 | 0.221211723 | 4.31E-01 | 7.01E-01 | 1.00E+00 |
| ENSG00000224566.2_FAM96AP2    | ENSG00000160789.18_LMNA | -0.04039 | -0.198316952 | 0.119578133 | 6.21E-01 | 8.29E-01 | 1.00E+00 |
| ENSG00000278607.1_RP11-405M   | ENSG00000160789.18_LMNA | 0.0492   | -0.110867057 | 0.206783037 | 5.47E-01 | 7.85E-01 | 1.00E+00 |
| ENSG00000255222.1_SETP17      | ENSG00000160789.18_LMNA | 0.07484  | -0.085379942 | 0.231283133 | 3.59E-01 | 6.42E-01 | 1.00E+00 |
| ENSG00000270469.1_RP11-411B   | ENSG00000160789.18_LMNA | -0.06544 | -0.2223199   | 0.094752594 | 4.23E-01 | 6.94E-01 | 1.00E+00 |
| ENSG00000273036.2_FAM95C      | ENSG00000160789.18_LMNA | -0.1635  | -0.314517874 | -0.00441837 | 4.41E-02 | 1.85E-01 | 1.00E+00 |
| ENSG00000234933.1_CDC42P1     | ENSG00000160789.18_LMNA | -0.02759 | -0.185973375 | 0.132191805 | 7.36E-01 | 8.89E-01 | 1.00E+00 |
| ENSG00000162494.5_LRRRC38     | ENSG00000160789.18_LMNA | -0.07362 | -0.230128053 | 0.086590937 | 3.67E-01 | 6.48E-01 | 1.00E+00 |
| ENSG00000269534.4_CTC-453G2   | ENSG00000160789.18_LMNA | 0.08573  | -0.074485277 | 0.24163477  | 2.94E-01 | 5.79E-01 | 1.00E+00 |
| ENSG00000233144.1_RP11-537A   | ENSG00000160789.18_LMNA | -0.00841 | -0.167383094 | 0.150996379 | 9.18E-01 | 9.69E-01 | 1.00E+00 |

|                             |                         |          |              |             |          |          |          |
|-----------------------------|-------------------------|----------|--------------|-------------|----------|----------|----------|
| ENSG00000241532.1_AGGF1P3   | ENSG00000160789.18_LMNA | -0.12084 | -0.274758934 | 0.039108923 | 1.38E-01 | 3.79E-01 | 1.00E+00 |
| ENSG00000265282.1_RP11-269G | ENSG00000160789.18_LMNA | 0.13528  | -0.024446962 | 0.288272508 | 9.66E-02 | 3.05E-01 | 1.00E+00 |
| ENSG00000224153.2_RP11-433C | ENSG00000160789.18_LMNA | -0.17836 | -0.32823675  | -0.01971524 | 2.79E-02 | 1.36E-01 | 1.00E+00 |
| ENSG00000270361.1_RP11-307C | ENSG00000160789.18_LMNA | -0.03747 | -0.195500699 | 0.122465075 | 6.47E-01 | 8.43E-01 | 1.00E+00 |
| ENSG00000227542.1_AC092614. | ENSG00000160789.18_LMNA | 0.06266  | -0.097516548 | 0.219666409 | 4.43E-01 | 7.10E-01 | 1.00E+00 |
| ENSG00000213014.3_VN2R17P   | ENSG00000160789.18_LMNA | -0.06935 | -0.226053154 | 0.090855633 | 3.96E-01 | 6.73E-01 | 1.00E+00 |
| ENSG00000266728.4_AC015688. | ENSG00000160789.18_LMNA | 0.05222  | -0.107874054 | 0.209680925 | 5.23E-01 | 7.68E-01 | 1.00E+00 |
| ENSG00000106038.11_EVX1     | ENSG00000160789.18_LMNA | -0.21949 | -0.365900687 | -0.06246742 | 6.59E-03 | 4.82E-02 | 1.00E+00 |
| ENSG00000254912.2_RP11-632K | ENSG00000160789.18_LMNA | 0.098    | -0.062173837 | 0.253246609 | 2.30E-01 | 5.07E-01 | 1.00E+00 |
| ENSG00000188996.4_HUS1B     | ENSG00000160789.18_LMNA | 0.045    | -0.115027014 | 0.202746    | 5.82E-01 | 8.05E-01 | 1.00E+00 |
| ENSG00000259644.1_RP11-680F | ENSG00000160789.18_LMNA | 0.02652  | -0.133241943 | 0.184941176 | 7.46E-01 | 8.94E-01 | 1.00E+00 |
| ENSG00000231057.3_RP11-122M | ENSG00000160789.18_LMNA | -0.01922 | -0.177871642 | 0.140415181 | 8.14E-01 | 9.27E-01 | 1.00E+00 |
| ENSG00000259381.2_RP11-192M | ENSG00000160789.18_LMNA | 0.03099  | -0.128849061 | 0.189254352 | 7.05E-01 | 8.74E-01 | 1.00E+00 |
| ENSG00000229165.1_GDI2P1    | ENSG00000160789.18_LMNA | -0.19783 | -0.34612879  | -0.03988471 | 1.46E-02 | 8.61E-02 | 1.00E+00 |
| ENSG00000224155.2_RP11-700P | ENSG00000160789.18_LMNA | 0.13319  | -0.026577559 | 0.286316493 | 1.02E-01 | 3.15E-01 | 1.00E+00 |
| ENSG00000272589.1_ZSWIM8-A: | ENSG00000160789.18_LMNA | -0.07053 | -0.227181391 | 0.089676008 | 3.88E-01 | 6.66E-01 | 1.00E+00 |
| ENSG00000260211.2_RP13-395E | ENSG00000160789.18_LMNA | -0.04247 | -0.200317628 | 0.117523968 | 6.03E-01 | 8.18E-01 | 1.00E+00 |
| ENSG00000243914.1_RPL5P14   | ENSG00000160789.18_LMNA | -0.02923 | -0.187559857 | 0.13057636  | 7.21E-01 | 8.82E-01 | 1.00E+00 |
| ENSG00000213778.2_HNRNPA1F  | ENSG00000160789.18_LMNA | 0.07977  | -0.080452829 | 0.235973559 | 3.29E-01 | 6.15E-01 | 1.00E+00 |
| ENSG00000280432.1_AP000962. | ENSG00000160789.18_LMNA | -0.0997  | -0.25485467  | 0.06046129  | 2.22E-01 | 4.97E-01 | 1.00E+00 |
| ENSG00000213787.3_RPL7AP38  | ENSG00000160789.18_LMNA | -0.12806 | -0.281518404 | 0.031791886 | 1.16E-01 | 3.40E-01 | 1.00E+00 |
| ENSG00000187151.6_ANGPTL5   | ENSG00000160789.18_LMNA | -0.08845 | -0.244209656 | 0.071763546 | 2.79E-01 | 5.64E-01 | 1.00E+00 |
| ENSG00000220517.2_ASS1P1    | ENSG00000160789.18_LMNA | 0.18739  | 0.029055536  | 0.336550002 | 2.08E-02 | 1.11E-01 | 1.00E+00 |
| ENSG00000147246.8_HTR2C     | ENSG00000160789.18_LMNA | -0.27432 | -0.415377833 | -0.1203735  | 6.26E-04 | 8.06E-03 | 1.00E+00 |
| ENSG00000225156.2_AC012354. | ENSG00000160789.18_LMNA | -0.03188 | -0.190115414 | 0.12797059  | 6.97E-01 | 8.70E-01 | 1.00E+00 |
| ENSG00000240602.6_AADACP1   | ENSG00000160789.18_LMNA | 0.00013  | -0.159072454 | 0.159328945 | 9.99E-01 | 9.99E-01 | 1.00E+00 |
| ENSG00000188505.4_NCCRP1    | ENSG00000160789.18_LMNA | 0.13675  | -0.022954365 | 0.289641247 | 9.30E-02 | 2.98E-01 | 1.00E+00 |
| ENSG00000232757.1_ETF1P1    | ENSG00000160789.18_LMNA | -0.0296  | -0.187911163 | 0.130218411 | 7.17E-01 | 8.80E-01 | 1.00E+00 |
| ENSG00000225639.1_PGAM1P2   | ENSG00000160789.18_LMNA | -0.03406 | -0.192218874 | 0.125822499 | 6.77E-01 | 8.59E-01 | 1.00E+00 |
| ENSG00000229359.2_PIN1P1    | ENSG00000160789.18_LMNA | 0.03682  | -0.123104769 | 0.194875957 | 6.52E-01 | 8.46E-01 | 1.00E+00 |
| ENSG00000260913.1_LINC01254 | ENSG00000160789.18_LMNA | -0.27618 | -0.417042419 | -0.1223572  | 5.73E-04 | 7.49E-03 | 1.00E+00 |
| ENSG00000276290.1_RBBP4P3   | ENSG00000160789.18_LMNA | 0.06545  | -0.094738028 | 0.222333871 | 4.23E-01 | 6.94E-01 | 1.00E+00 |
| ENSG00000234424.2_RP11-213G | ENSG00000160789.18_LMNA | -0.11567 | -0.269901544 | 0.044346279 | 1.56E-01 | 4.07E-01 | 1.00E+00 |

|                              |                         |          |              |             |          |          |          |
|------------------------------|-------------------------|----------|--------------|-------------|----------|----------|----------|
| ENSG00000254294.1_IMP        | ENSG00000160789.18_LMNA | 0.10575  | -0.054368886 | 0.260561266 | 1.95E-01 | 4.64E-01 | 1.00E+00 |
| ENSG00000165863.15_C10orf82  | ENSG00000160789.18_LMNA | -0.12998 | -0.283321024 | 0.029834885 | 1.10E-01 | 3.31E-01 | 1.00E+00 |
| ENSG00000271810.4_RP11-426L  | ENSG00000160789.18_LMNA | 0.13282  | -0.02694807  | 0.285976076 | 1.03E-01 | 3.17E-01 | 1.00E+00 |
| ENSG00000215572.2_ESRRAP1    | ENSG00000160789.18_LMNA | 0.1312   | -0.028596205 | 0.284460847 | 1.07E-01 | 3.25E-01 | 1.00E+00 |
| ENSG00000218857.1_RP1-209B5  | ENSG00000160789.18_LMNA | 0.11666  | -0.043346341 | 0.270830174 | 1.52E-01 | 4.02E-01 | 1.00E+00 |
| ENSG00000227942.1_FRMD8P1    | ENSG00000160789.18_LMNA | 0.26342  | 0.108785558  | 0.405614416 | 1.04E-03 | 1.19E-02 | 1.00E+00 |
| ENSG00000279166.1_RP11-107E  | ENSG00000160789.18_LMNA | -0.05574 | -0.213050521 | 0.104386609 | 4.95E-01 | 7.50E-01 | 1.00E+00 |
| ENSG00000280278.1_FLJ30679   | ENSG00000160789.18_LMNA | -0.06831 | -0.225067655 | 0.09188529  | 4.03E-01 | 6.79E-01 | 1.00E+00 |
| ENSG00000181625.16_SLX1B     | ENSG00000160789.18_LMNA | -0.10114 | -0.256211293 | 0.059015076 | 2.15E-01 | 4.89E-01 | 1.00E+00 |
| ENSG00000182376.2_RP5-1142A  | ENSG00000160789.18_LMNA | 0.0823   | -0.077923531 | 0.238375642 | 3.13E-01 | 6.00E-01 | 1.00E+00 |
| ENSG00000161973.9_CCDC42     | ENSG00000160789.18_LMNA | 0.18123  | 0.022685726  | 0.330885797 | 2.55E-02 | 1.28E-01 | 1.00E+00 |
| ENSG00000226673.1_LINC01108  | ENSG00000160789.18_LMNA | -0.09715 | -0.25244305  | 0.063028912 | 2.34E-01 | 5.12E-01 | 1.00E+00 |
| ENSG00000133742.12_CA1       | ENSG00000160789.18_LMNA | -0.04089 | -0.198796219 | 0.119086301 | 6.17E-01 | 8.26E-01 | 1.00E+00 |
| ENSG00000217385.1_PSMC1P11   | ENSG00000160789.18_LMNA | 0.18357  | 0.025104053  | 0.333038857 | 2.36E-02 | 1.21E-01 | 1.00E+00 |
| ENSG00000279901.1_CTD-2270P  | ENSG00000160789.18_LMNA | 0.00561  | -0.153731524 | 0.164660126 | 9.45E-01 | 9.78E-01 | 1.00E+00 |
| ENSG00000233817.1_RP11-168K  | ENSG00000160789.18_LMNA | 0.23572  | 0.079502398  | 0.380636301 | 3.46E-03 | 2.98E-02 | 1.00E+00 |
| ENSG00000265182.1_SRP72P1    | ENSG00000160789.18_LMNA | 0.03641  | -0.123507177 | 0.194482823 | 6.56E-01 | 8.48E-01 | 1.00E+00 |
| ENSG00000163501.6_IHH        | ENSG00000160789.18_LMNA | 0.00899  | -0.150430801 | 0.167945549 | 9.13E-01 | 9.67E-01 | 1.00E+00 |
| ENSG00000257379.1_RP11-793H  | ENSG00000160789.18_LMNA | -0.08265 | -0.238705796 | 0.077575574 | 3.11E-01 | 5.98E-01 | 1.00E+00 |
| ENSG00000138315.11_OIT3      | ENSG00000160789.18_LMNA | -0.00614 | -0.165183058 | 0.153206631 | 9.40E-01 | 9.76E-01 | 1.00E+00 |
| ENSG00000188828.10_GLRA4     | ENSG00000160789.18_LMNA | -0.07298 | -0.229515991 | 0.087232249 | 3.72E-01 | 6.52E-01 | 1.00E+00 |
| ENSG00000239254.1_RP11-365F  | ENSG00000160789.18_LMNA | 0.11009  | -0.049990308 | 0.26464902  | 1.77E-01 | 4.38E-01 | 1.00E+00 |
| ENSG00000224216.1_RP13-228J  | ENSG00000160789.18_LMNA | 0.04562  | -0.114412276 | 0.203343255 | 5.77E-01 | 8.03E-01 | 1.00E+00 |
| ENSG00000256913.1_RP1-102E2  | ENSG00000160789.18_LMNA | 0.04445  | -0.11556398  | 0.202224112 | 5.87E-01 | 8.08E-01 | 1.00E+00 |
| ENSG00000279365.1_KB-176G8.  | ENSG00000160789.18_LMNA | 0.06862  | -0.091580807 | 0.225359147 | 4.01E-01 | 6.77E-01 | 1.00E+00 |
| ENSG00000229582.3_RP11-423C  | ENSG00000160789.18_LMNA | 0.04628  | -0.113761276 | 0.203975482 | 5.71E-01 | 8.00E-01 | 1.00E+00 |
| ENSG00000156738.16_MS4A1     | ENSG00000160789.18_LMNA | 0.07153  | -0.088684633 | 0.228128922 | 3.81E-01 | 6.60E-01 | 1.00E+00 |
| ENSG00000248827.1_RP11-252I1 | ENSG00000160789.18_LMNA | 0.11297  | -0.047079934 | 0.267359845 | 1.66E-01 | 4.23E-01 | 1.00E+00 |
| ENSG00000279289.1_RP3-331H2  | ENSG00000160789.18_LMNA | -0.1128  | -0.267197932 | 0.047253917 | 1.66E-01 | 4.24E-01 | 1.00E+00 |
| ENSG00000254506.1_RP11-748H  | ENSG00000160789.18_LMNA | 0.06187  | -0.098295921 | 0.218917334 | 4.49E-01 | 7.15E-01 | 1.00E+00 |
| ENSG00000280302.1_RP11-64C1  | ENSG00000160789.18_LMNA | -0.01062 | -0.169532918 | 0.148833493 | 8.97E-01 | 9.60E-01 | 1.00E+00 |
| ENSG00000258653.3_RP5-1021I2 | ENSG00000160789.18_LMNA | -0.08992 | -0.245606008 | 0.070285591 | 2.71E-01 | 5.55E-01 | 1.00E+00 |
| ENSG00000249961.8_TERB1      | ENSG00000160789.18_LMNA | 0.0259   | -0.133850825 | 0.184342372 | 7.51E-01 | 8.96E-01 | 1.00E+00 |

|                              |                         |          |              |             |          |          |          |
|------------------------------|-------------------------|----------|--------------|-------------|----------|----------|----------|
| ENSG00000268173.1_AC007192.4 | ENSG00000160789.18_LMNA | 0.00214  | -0.157111663 | 0.161288317 | 9.79E-01 | 9.92E-01 | 1.00E+00 |
| ENSG00000235373.1_           | ENSG00000160789.18_LMNA | -0.04796 | -0.205587419 | 0.112100241 | 5.57E-01 | 7.91E-01 | 1.00E+00 |
| ENSG00000004846.15_ABCB5     | ENSG00000160789.18_LMNA | 0.01218  | -0.147305511 | 0.171049848 | 8.82E-01 | 9.54E-01 | 1.00E+00 |
| ENSG00000187144.10_SPATA21   | ENSG00000160789.18_LMNA | -0.11341 | -0.267776818 | 0.046631794 | 1.64E-01 | 4.20E-01 | 1.00E+00 |
| ENSG00000211663.2_IGLV3-19   | ENSG00000160789.18_LMNA | 0.11365  | -0.046394446 | 0.26799761  | 1.63E-01 | 4.19E-01 | 1.00E+00 |
| ENSG00000207445.1_SNORD15E   | ENSG00000160789.18_LMNA | -0.00907 | -0.168031715 | 0.150344138 | 9.12E-01 | 9.66E-01 | 1.00E+00 |
| ENSG00000254964.1_RP11-831H  | ENSG00000160789.18_LMNA | -0.07339 | -0.229903891 | 0.086825842 | 3.69E-01 | 6.50E-01 | 1.00E+00 |
| ENSG00000280836.1_AL355480.1 | ENSG00000160789.18_LMNA | -0.01083 | -0.169735775 | 0.148629246 | 8.95E-01 | 9.59E-01 | 1.00E+00 |
| ENSG00000201555.1_Y_RNA      | ENSG00000160789.18_LMNA | -0.05226 | -0.209713539 | 0.107840337 | 5.23E-01 | 7.68E-01 | 1.00E+00 |
| ENSG00000251739.1_RNU6-1053  | ENSG00000160789.18_LMNA | -0.08954 | -0.245245062 | 0.070667763 | 2.73E-01 | 5.57E-01 | 1.00E+00 |
| ENSG00000206762.1_RNU6-418F  | ENSG00000160789.18_LMNA | -0.05064 | -0.208166508 | 0.109438896 | 5.36E-01 | 7.77E-01 | 1.00E+00 |
| ENSG00000199562.1_RNU6-37P   | ENSG00000160789.18_LMNA | -0.19644 | -0.344856965 | -0.03844271 | 1.53E-02 | 8.90E-02 | 1.00E+00 |
| ENSG00000202461.1_Y_RNA      | ENSG00000160789.18_LMNA | -0.05467 | -0.212027986 | 0.105445732 | 5.04E-01 | 7.55E-01 | 1.00E+00 |
| ENSG00000230299.1_AC093162.1 | ENSG00000160789.18_LMNA | -0.04831 | -0.205927809 | 0.111749255 | 5.54E-01 | 7.89E-01 | 1.00E+00 |
| ENSG00000225091.3_SNORA71A   | ENSG00000160789.18_LMNA | 0.01761  | -0.141990902 | 0.176314288 | 8.30E-01 | 9.33E-01 | 1.00E+00 |
| ENSG00000251775.1_ACA59      | ENSG00000160789.18_LMNA | 0.08349  | -0.076733306 | 0.239504666 | 3.07E-01 | 5.93E-01 | 1.00E+00 |
| ENSG00000252311.1_RNU1-103F  | ENSG00000160789.18_LMNA | 0.04481  | -0.115212716 | 0.202565533 | 5.84E-01 | 8.06E-01 | 1.00E+00 |
| ENSG00000265611.1_           | ENSG00000160789.18_LMNA | 0.06648  | -0.093712079 | 0.223317615 | 4.16E-01 | 6.88E-01 | 1.00E+00 |
| ENSG00000233265.1_MICF       | ENSG00000160789.18_LMNA | 0.04213  | -0.117857188 | 0.199993265 | 6.06E-01 | 8.20E-01 | 1.00E+00 |
| ENSG00000252641.2_RNU6-678F  | ENSG00000160789.18_LMNA | -0.06908 | -0.225793691 | 0.091126787 | 3.98E-01 | 6.75E-01 | 1.00E+00 |
| ENSG00000207217.1_SNORA42    | ENSG00000160789.18_LMNA | -0.06844 | -0.225185437 | 0.091762267 | 4.02E-01 | 6.78E-01 | 1.00E+00 |
| ENSG00000221491.2_SNORA2C    | ENSG00000160789.18_LMNA | 0.01274  | -0.146755296 | 0.171595713 | 8.76E-01 | 9.52E-01 | 1.00E+00 |
| ENSG00000206625.1_RNU6-1     | ENSG00000160789.18_LMNA | 0.03054  | -0.129291836 | 0.188820167 | 7.09E-01 | 8.76E-01 | 1.00E+00 |
| ENSG00000206897.1_SNORA9     | ENSG00000160789.18_LMNA | -0.14037 | -0.293023829 | 0.019259706 | 8.45E-02 | 2.82E-01 | 1.00E+00 |
| ENSG00000241131.1_RP11-639B  | ENSG00000160789.18_LMNA | 0.01668  | -0.142896853 | 0.175418174 | 8.38E-01 | 9.37E-01 | 1.00E+00 |
| ENSG00000211820.1_TRAV41     | ENSG00000160789.18_LMNA | -0.01627 | -0.175021255 | 0.143297959 | 8.42E-01 | 9.39E-01 | 1.00E+00 |
| ENSG00000234233.1_KCNH1-IT1  | ENSG00000160789.18_LMNA | -0.06477 | -0.221683774 | 0.095415647 | 4.28E-01 | 6.98E-01 | 1.00E+00 |
| ENSG00000227045.1_RP11-98D1  | ENSG00000160789.18_LMNA | -0.18715 | -0.336333562 | -0.02881167 | 2.10E-02 | 1.11E-01 | 1.00E+00 |
| ENSG00000226117.1_AC079199.1 | ENSG00000160789.18_LMNA | -0.09196 | -0.247541028 | 0.068235192 | 2.60E-01 | 5.43E-01 | 1.00E+00 |
| ENSG00000223436.1_AC011625.1 | ENSG00000160789.18_LMNA | -0.12605 | -0.279643271 | 0.033825065 | 1.22E-01 | 3.51E-01 | 1.00E+00 |
| ENSG00000231808.2_LINC01388  | ENSG00000160789.18_LMNA | -0.16909 | -0.319689612 | -0.01016799 | 3.73E-02 | 1.65E-01 | 1.00E+00 |
| ENSG00000185290.3_NUPR2      | ENSG00000160789.18_LMNA | -0.11588 | -0.270096709 | 0.04413618  | 1.55E-01 | 4.06E-01 | 1.00E+00 |
| ENSG00000250068.1_RP11-576C  | ENSG00000160789.18_LMNA | -0.12672 | -0.280263061 | 0.033153323 | 1.20E-01 | 3.48E-01 | 1.00E+00 |

|                               |                         |          |              |             |          |          |          |
|-------------------------------|-------------------------|----------|--------------|-------------|----------|----------|----------|
| ENSG00000240823.3_RN7SL23P    | ENSG00000160789.18_LMNA | -0.09237 | -0.247920637 | 0.067832635 | 2.58E-01 | 5.40E-01 | 1.00E+00 |
| ENSG00000125813.12_PAX1       | ENSG00000160789.18_LMNA | -0.36403 | -0.494570754 | -0.21743298 | 4.02E-06 | 1.39E-04 | 2.06E-01 |
| ENSG00000271555.1_CTD-3214K   | ENSG00000160789.18_LMNA | -0.08545 | -0.241371836 | 0.074762941 | 2.95E-01 | 5.81E-01 | 1.00E+00 |
| ENSG00000225642.1_SNRPEP5     | ENSG00000160789.18_LMNA | -0.06081 | -0.217900672 | 0.099353084 | 4.57E-01 | 7.21E-01 | 1.00E+00 |
| ENSG00000266824.1_RP11-599B   | ENSG00000160789.18_LMNA | 0.10643  | -0.053683929 | 0.261201475 | 1.92E-01 | 4.60E-01 | 1.00E+00 |
| ENSG00000196071.3_OR2L13      | ENSG00000160789.18_LMNA | -0.09383 | -0.249306407 | 0.066362219 | 2.50E-01 | 5.31E-01 | 1.00E+00 |
| ENSG00000227078.1_AC004448.1  | ENSG00000160789.18_LMNA | -0.19656 | -0.344966111 | -0.03856641 | 1.52E-02 | 8.88E-02 | 1.00E+00 |
| ENSG00000230105.1_RP11-431N   | ENSG00000160789.18_LMNA | -0.11616 | -0.270357583 | 0.043855301 | 1.54E-01 | 4.05E-01 | 1.00E+00 |
| ENSG00000170409.7_CTA-313A1   | ENSG00000160789.18_LMNA | 0.0001   | -0.15910167  | 0.159299731 | 9.99E-01 | 1.00E+00 | 1.00E+00 |
| ENSG00000148346.10_LCN2       | ENSG00000160789.18_LMNA | 0.03268  | -0.127178765 | 0.190891127 | 6.89E-01 | 8.66E-01 | 1.00E+00 |
| ENSG00000250310.1_RP5-1029K   | ENSG00000160789.18_LMNA | -0.04551 | -0.203235589 | 0.114523111 | 5.78E-01 | 8.03E-01 | 1.00E+00 |
| ENSG00000231830.1_XX-FW831.1  | ENSG00000160789.18_LMNA | 0.00342  | -0.155866098 | 0.162531678 | 9.67E-01 | 9.87E-01 | 1.00E+00 |
| ENSG00000104044.14_OCA2       | ENSG00000160789.18_LMNA | -0.1134  | -0.26776197  | 0.046647754 | 1.64E-01 | 4.20E-01 | 1.00E+00 |
| ENSG00000276916.1_RP11-230F   | ENSG00000160789.18_LMNA | 0.13773  | -0.021947876 | 0.290563496 | 9.06E-02 | 2.93E-01 | 1.00E+00 |
| ENSG00000226835.1_RP11-148B   | ENSG00000160789.18_LMNA | 0.11607  | -0.043938066 | 0.270280717 | 1.54E-01 | 4.05E-01 | 1.00E+00 |
| ENSG00000267334.1_CTD-2534I.1 | ENSG00000160789.18_LMNA | -0.22746 | -0.373152345 | -0.0708286  | 4.83E-03 | 3.82E-02 | 1.00E+00 |
| ENSG00000262693.1_RP11-46I8.1 | ENSG00000160789.18_LMNA | -0.13349 | -0.286595654 | 0.026273656 | 1.01E-01 | 3.13E-01 | 1.00E+00 |
| ENSG00000223968.1_AC098614.1  | ENSG00000160789.18_LMNA | 0.02504  | -0.134702227 | 0.183504668 | 7.59E-01 | 9.00E-01 | 1.00E+00 |
| ENSG00000259665.1_RP11-323I1  | ENSG00000160789.18_LMNA | -0.05831 | -0.215509535 | 0.101836656 | 4.75E-01 | 7.34E-01 | 1.00E+00 |
| ENSG00000243423.1_RP5-837J1.1 | ENSG00000160789.18_LMNA | -0.00611 | -0.165147313 | 0.153242516 | 9.40E-01 | 9.76E-01 | 1.00E+00 |
| ENSG00000267990.1_CTD-3187F   | ENSG00000160789.18_LMNA | 0.13666  | -0.023043378 | 0.289559656 | 9.32E-02 | 2.99E-01 | 1.00E+00 |
| ENSG00000254731.1_CTD-2005H   | ENSG00000160789.18_LMNA | -0.08075 | -0.236902701 | 0.079474963 | 3.23E-01 | 6.09E-01 | 1.00E+00 |
| ENSG00000176289.4_IDSP1       | ENSG00000160789.18_LMNA | 0.14632  | -0.013184159 | 0.298569248 | 7.21E-02 | 2.54E-01 | 1.00E+00 |
| ENSG00000270462.1_RP11-342K   | ENSG00000160789.18_LMNA | -0.01934 | -0.177992582 | 0.140292747 | 8.13E-01 | 9.26E-01 | 1.00E+00 |
| ENSG00000258512.1_LINC00239   | ENSG00000160789.18_LMNA | 0.32174  | 0.171318243  | 0.457509921 | 5.30E-05 | 1.13E-03 | 1.00E+00 |
| ENSG00000272181.1_RP11-245J1  | ENSG00000160789.18_LMNA | -0.09477 | -0.250198929 | 0.065414453 | 2.45E-01 | 5.25E-01 | 1.00E+00 |
| ENSG00000251107.1_PDCD5P2     | ENSG00000160789.18_LMNA | 0.00299  | -0.15628068  | 0.162117941 | 9.71E-01 | 9.89E-01 | 1.00E+00 |
| ENSG00000238039.1_AF011889.2  | ENSG00000160789.18_LMNA | 0.08984  | -0.070366593 | 0.245529512 | 2.71E-01 | 5.55E-01 | 1.00E+00 |
| ENSG00000267786.1_AF038458.3  | ENSG00000160789.18_LMNA | 0.10948  | -0.050600285 | 0.264080234 | 1.79E-01 | 4.42E-01 | 1.00E+00 |
| ENSG00000231439.4_WASIR2      | ENSG00000160789.18_LMNA | -0.02716 | -0.185562226 | 0.132610186 | 7.40E-01 | 8.91E-01 | 1.00E+00 |
| ENSG00000211898.6_IGHD        | ENSG00000160789.18_LMNA | -0.09292 | -0.248448724 | 0.067272453 | 2.55E-01 | 5.37E-01 | 1.00E+00 |
| ENSG00000235480.1_RP11-363D   | ENSG00000160789.18_LMNA | -0.0654  | -0.222287909 | 0.094785945 | 4.23E-01 | 6.94E-01 | 1.00E+00 |
| ENSG00000276702.1_RP11-3D4.4  | ENSG00000160789.18_LMNA | 0.02173  | -0.137949452 | 0.180305435 | 7.90E-01 | 9.15E-01 | 1.00E+00 |



|                              |                         |          |              |             |          |          |          |
|------------------------------|-------------------------|----------|--------------|-------------|----------|----------|----------|
| ENSG00000273706.3_LHX1       | ENSG00000160789.18_LMNA | -0.29642 | -0.435086131 | -0.14401227 | 2.09E-04 | 3.37E-03 | 1.00E+00 |
| ENSG00000224100.1_AP001630.1 | ENSG00000160789.18_LMNA | 0.02422  | -0.135501407 | 0.182717924 | 7.67E-01 | 9.03E-01 | 1.00E+00 |
| ENSG00000182566.11_CLEC4G    | ENSG00000160789.18_LMNA | -0.11231 | -0.266742616 | 0.047743069 | 1.68E-01 | 4.26E-01 | 1.00E+00 |
| ENSG00000253203.5_GUSBP3     | ENSG00000160789.18_LMNA | 0.14293  | -0.016654604 | 0.295404196 | 7.90E-02 | 2.70E-01 | 1.00E+00 |
| ENSG00000277144.1_RP11-59H7  | ENSG00000160789.18_LMNA | 0.22297  | 0.06611725   | 0.369070727 | 5.76E-03 | 4.36E-02 | 1.00E+00 |
| ENSG00000237402.1_CAMTA1-IT  | ENSG00000160789.18_LMNA | -0.04075 | -0.198664272 | 0.119221723 | 6.18E-01 | 8.27E-01 | 1.00E+00 |
| ENSG00000273481.1_RP11-126K  | ENSG00000160789.18_LMNA | -0.07122 | -0.227833326 | 0.088993975 | 3.83E-01 | 6.62E-01 | 1.00E+00 |
| ENSG00000273233.1_RP11-713D  | ENSG00000160789.18_LMNA | 0.03996  | -0.119999676 | 0.197906058 | 6.25E-01 | 8.31E-01 | 1.00E+00 |
| ENSG00000229765.2_RP11-339A  | ENSG00000160789.18_LMNA | -0.13248 | -0.285654689 | 0.027297789 | 1.04E-01 | 3.19E-01 | 1.00E+00 |
| ENSG00000275343.1_RP11-323F  | ENSG00000160789.18_LMNA | 0.05617  | -0.10396149  | 0.213460759 | 4.92E-01 | 7.47E-01 | 1.00E+00 |
| ENSG00000227017.1_AC007036.1 | ENSG00000160789.18_LMNA | -0.12152 | -0.275389564 | 0.038427695 | 1.36E-01 | 3.75E-01 | 1.00E+00 |
| ENSG00000255843.1_AP000593.1 | ENSG00000160789.18_LMNA | 0.07258  | -0.087629143 | 0.229137073 | 3.74E-01 | 6.54E-01 | 1.00E+00 |
| ENSG00000253736.1_RP11-779O  | ENSG00000160789.18_LMNA | 0.06343  | -0.096751441 | 0.220401408 | 4.38E-01 | 7.06E-01 | 1.00E+00 |
| ENSG00000233143.1_DIRC3-AS1  | ENSG00000160789.18_LMNA | -0.09979 | -0.254942422 | 0.060367783 | 2.21E-01 | 4.97E-01 | 1.00E+00 |
| ENSG00000267089.1_CTC-499B1  | ENSG00000160789.18_LMNA | 0.03723  | -0.122698511 | 0.195272749 | 6.49E-01 | 8.44E-01 | 1.00E+00 |
| ENSG00000264515.4_CTC-525D6  | ENSG00000160789.18_LMNA | -0.30888 | -0.4461387   | -0.15741607 | 1.08E-04 | 2.01E-03 | 1.00E+00 |
| ENSG00000197632.7_SERPINB2   | ENSG00000160789.18_LMNA | -0.08086 | -0.237005603 | 0.079366627 | 3.22E-01 | 6.09E-01 | 1.00E+00 |
| ENSG00000257941.1_RP11-290L  | ENSG00000160789.18_LMNA | -0.08532 | -0.241240336 | 0.07490179  | 2.96E-01 | 5.82E-01 | 1.00E+00 |
| ENSG00000225213.2_RP11-197M  | ENSG00000160789.18_LMNA | -0.05842 | -0.215615272 | 0.101726914 | 4.75E-01 | 7.34E-01 | 1.00E+00 |
| ENSG00000229870.1_RPL21P89   | ENSG00000160789.18_LMNA | 0.03071  | -0.129125184 | 0.1889836   | 7.07E-01 | 8.76E-01 | 1.00E+00 |
| ENSG00000234584.1_AC019186.1 | ENSG00000160789.18_LMNA | 0.02702  | -0.132746909 | 0.185427841 | 7.41E-01 | 8.91E-01 | 1.00E+00 |
| ENSG00000277595.1_RP11-946P  | ENSG00000160789.18_LMNA | -0.06874 | -0.225470487 | 0.09146449  | 4.00E-01 | 6.77E-01 | 1.00E+00 |
| ENSG00000225408.1_RP11-207C  | ENSG00000160789.18_LMNA | -0.11632 | -0.270509621 | 0.043691581 | 1.54E-01 | 4.04E-01 | 1.00E+00 |
| ENSG00000155070.8_UNC93B2    | ENSG00000160789.18_LMNA | 0.06482  | -0.095365173 | 0.221732208 | 4.28E-01 | 6.98E-01 | 1.00E+00 |
| ENSG00000278202.1_RP11-152F  | ENSG00000160789.18_LMNA | 0.02381  | -0.135905051 | 0.182320406 | 7.71E-01 | 9.05E-01 | 1.00E+00 |
| ENSG00000277386.1_RP11-141M  | ENSG00000160789.18_LMNA | 0.09733  | -0.06284319  | 0.25261762  | 2.33E-01 | 5.11E-01 | 1.00E+00 |
| ENSG00000253507.4_CTD-2501M  | ENSG00000160789.18_LMNA | -0.14094 | -0.293558031 | 0.018675439 | 8.33E-02 | 2.79E-01 | 1.00E+00 |
| ENSG00000213779.4_RP11-452G  | ENSG00000160789.18_LMNA | 0.03999  | -0.119972522 | 0.197932529 | 6.25E-01 | 8.31E-01 | 1.00E+00 |
| ENSG00000243720.1_RPL21P127  | ENSG00000160789.18_LMNA | 0.0805   | -0.079719742 | 0.236670172 | 3.24E-01 | 6.11E-01 | 1.00E+00 |
| ENSG00000279123.1_RP11-424M  | ENSG00000160789.18_LMNA | -0.04471 | -0.202472778 | 0.115308153 | 5.84E-01 | 8.07E-01 | 1.00E+00 |
| ENSG00000235397.1_EPN2-AS1   | ENSG00000160789.18_LMNA | -0.22801 | -0.373651756 | -0.07140599 | 4.72E-03 | 3.76E-02 | 1.00E+00 |
| ENSG00000215274.5_GAGE10     | ENSG00000160789.18_LMNA | -0.03897 | -0.196952706 | 0.120977293 | 6.34E-01 | 8.36E-01 | 1.00E+00 |
| ENSG00000267222.1_RP11-194N  | ENSG00000160789.18_LMNA | -0.07209 | -0.228669137 | 0.08811914  | 3.77E-01 | 6.57E-01 | 1.00E+00 |

|                             |                         |          |              |             |          |          |          |
|-----------------------------|-------------------------|----------|--------------|-------------|----------|----------|----------|
| ENSG00000270165.1_RP11-167P | ENSG00000160789.18_LMNA | 0.01439  | -0.145146181 | 0.173190989 | 8.60E-01 | 9.45E-01 | 1.00E+00 |
| ENSG00000225579.1_EDNRB-AS  | ENSG00000160789.18_LMNA | -0.17498 | -0.325123221 | -0.01623087 | 3.11E-02 | 1.47E-01 | 1.00E+00 |
| ENSG00000267346.1	EIF5AP3   | ENSG00000160789.18_LMNA | 0.21609  | 0.05891192   | 0.362805795 | 7.50E-03 | 5.29E-02 | 1.00E+00 |
| ENSG00000255669.1_RP11-885B | ENSG00000160789.18_LMNA | -0.01637 | -0.175112019 | 0.143206247 | 8.41E-01 | 9.38E-01 | 1.00E+00 |
| ENSG00000179008.7_C14orf39  | ENSG00000160789.18_LMNA | -0.16784 | -0.318529135 | -0.00887606 | 3.87E-02 | 1.70E-01 | 1.00E+00 |
| ENSG00000268204.1_CTD-3214H | ENSG00000160789.18_LMNA | 0.04611  | -0.11392637  | 0.203815174 | 5.73E-01 | 8.00E-01 | 1.00E+00 |
| ENSG00000228154.3_RP11-302F | ENSG00000160789.18_LMNA | -0.19243 | -0.341183229 | -0.03428457 | 1.75E-02 | 9.82E-02 | 1.00E+00 |
| ENSG00000232398.1_TMPRSS11  | ENSG00000160789.18_LMNA | -0.06429 | -0.221229123 | 0.095889371 | 4.31E-01 | 7.01E-01 | 1.00E+00 |
| ENSG00000253688.1_RP11-567J | ENSG00000160789.18_LMNA | 0.18839  | 0.030094273  | 0.337471569 | 2.01E-02 | 1.08E-01 | 1.00E+00 |
| ENSG00000264179.1_RP11-672L | ENSG00000160789.18_LMNA | 0.09303  | -0.067161211 | 0.24855357  | 2.54E-01 | 5.36E-01 | 1.00E+00 |
| ENSG00000078589.11_P2RY10   | ENSG00000160789.18_LMNA | 0.02816  | -0.131627655 | 0.186527599 | 7.31E-01 | 8.86E-01 | 1.00E+00 |
| ENSG00000256056.1_RP11-709A | ENSG00000160789.18_LMNA | -0.03668 | -0.194740722 | 0.123243206 | 6.54E-01 | 8.47E-01 | 1.00E+00 |
| ENSG00000228238.1_GS1-304P7 | ENSG00000160789.18_LMNA | -0.02235 | -0.180910483 | 0.137335852 | 7.85E-01 | 9.12E-01 | 1.00E+00 |
| ENSG00000167311.12_ART5     | ENSG00000160789.18_LMNA | -0.00145 | -0.160611545 | 0.157789209 | 9.86E-01 | 9.95E-01 | 1.00E+00 |
| ENSG00000223510.5_CDRT15    | ENSG00000160789.18_LMNA | -0.0702  | -0.226863423 | 0.090008548 | 3.90E-01 | 6.68E-01 | 1.00E+00 |
| ENSG00000205669.2_ACOT6     | ENSG00000160789.18_LMNA | 0.08336  | -0.076864335 | 0.239380416 | 3.07E-01 | 5.94E-01 | 1.00E+00 |
| ENSG00000278500.1_AC009336  | ENSG00000160789.18_LMNA | -0.28844 | -0.427988886 | -0.13546116 | 3.14E-04 | 4.66E-03 | 1.00E+00 |
| ENSG00000144035.3_NAT8      | ENSG00000160789.18_LMNA | 0.0308   | -0.129028671 | 0.189078241 | 7.06E-01 | 8.75E-01 | 1.00E+00 |
| ENSG00000262140.1_RP11-417N | ENSG00000160789.18_LMNA | -0.02117 | -0.179760727 | 0.13850165  | 7.96E-01 | 9.18E-01 | 1.00E+00 |
| ENSG00000214125.2_RP3-412A9 | ENSG00000160789.18_LMNA | -0.06999 | -0.226665072 | 0.090215954 | 3.92E-01 | 6.70E-01 | 1.00E+00 |
| ENSG00000253844.1_RP11-546K | ENSG00000160789.18_LMNA | -0.15191 | -0.303766845 | 0.007468708 | 6.17E-02 | 2.30E-01 | 1.00E+00 |
| ENSG00000260899.1_RP11-2C24 | ENSG00000160789.18_LMNA | 0.01949  | -0.140146246 | 0.178137283 | 8.12E-01 | 9.26E-01 | 1.00E+00 |
| ENSG00000267651.1_RP11-95O2 | ENSG00000160789.18_LMNA | -0.21936 | -0.365786793 | -0.06233644 | 6.62E-03 | 4.83E-02 | 1.00E+00 |
| ENSG00000230865.1_TSEN15P1  | ENSG00000160789.18_LMNA | -0.10972 | -0.26430344  | 0.050360942 | 1.78E-01 | 4.41E-01 | 1.00E+00 |
| ENSG00000273521.1_RP11-45A1 | ENSG00000160789.18_LMNA | 0.02878  | -0.131021059 | 0.187123296 | 7.25E-01 | 8.83E-01 | 1.00E+00 |
| ENSG00000231840.1_AC073342  | ENSG00000160789.18_LMNA | -0.033   | -0.191197738 | 0.126865673 | 6.86E-01 | 8.64E-01 | 1.00E+00 |
| ENSG00000248625.1_RP11-205M | ENSG00000160789.18_LMNA | -0.0162  | -0.174950152 | 0.143369801 | 8.43E-01 | 9.39E-01 | 1.00E+00 |
| ENSG00000128310.2_GALR3     | ENSG00000160789.18_LMNA | -0.07746 | -0.233779638 | 0.082759386 | 3.43E-01 | 6.28E-01 | 1.00E+00 |
| ENSG00000064195.7_DLX3      | ENSG00000160789.18_LMNA | 0.0487   | -0.111361731 | 0.206303546 | 5.51E-01 | 7.87E-01 | 1.00E+00 |
| ENSG00000244738.1_RP11-373E | ENSG00000160789.18_LMNA | -0.2931  | -0.432137631 | -0.14045448 | 2.48E-04 | 3.87E-03 | 1.00E+00 |
| ENSG00000251165.4_F11-AS1   | ENSG00000160789.18_LMNA | -0.05834 | -0.215539968 | 0.101805071 | 4.75E-01 | 7.34E-01 | 1.00E+00 |
| ENSG00000255547.1_RPA2P3    | ENSG00000160789.18_LMNA | -0.12057 | -0.274497122 | 0.039391655 | 1.39E-01 | 3.80E-01 | 1.00E+00 |
| ENSG00000134827.6_TCN1      | ENSG00000160789.18_LMNA | 0.04401  | -0.116003043 | 0.201797245 | 5.90E-01 | 8.10E-01 | 1.00E+00 |

|                             |                         |          |              |             |          |          |          |
|-----------------------------|-------------------------|----------|--------------|-------------|----------|----------|----------|
| ENSG00000214761.3_HNRNPA1F  | ENSG00000160789.18_LMNA | 0.13309  | -0.02667879  | 0.286223492 | 1.02E-01 | 3.16E-01 | 1.00E+00 |
| ENSG00000255398.2_HCAR3     | ENSG00000160789.18_LMNA | 0.01817  | -0.141441779 | 0.17685719  | 8.24E-01 | 9.31E-01 | 1.00E+00 |
| ENSG00000255465.3_RP11-264E | ENSG00000160789.18_LMNA | -0.08382 | -0.239821115 | 0.076399541 | 3.05E-01 | 5.91E-01 | 1.00E+00 |
| ENSG00000168828.5_OR13J1    | ENSG00000160789.18_LMNA | 0.05937  | -0.100779579 | 0.216527734 | 4.67E-01 | 7.29E-01 | 1.00E+00 |
| ENSG00000178503.6_NECAP1P1  | ENSG00000160789.18_LMNA | -0.09092 | -0.24654796  | 0.069287806 | 2.65E-01 | 5.49E-01 | 1.00E+00 |
| ENSG00000270858.1_VDAC1P5   | ENSG00000160789.18_LMNA | 0.06418  | -0.096001101 | 0.221121872 | 4.32E-01 | 7.01E-01 | 1.00E+00 |
| ENSG00000237027.1_RP11-16C1 | ENSG00000160789.18_LMNA | -0.2064  | -0.353967454 | -0.04880046 | 1.07E-02 | 6.89E-02 | 1.00E+00 |
| ENSG00000171517.5_LPAR3     | ENSG00000160789.18_LMNA | -0.0355  | -0.193611185 | 0.124399004 | 6.64E-01 | 8.52E-01 | 1.00E+00 |
| ENSG00000126231.12_PROZ     | ENSG00000160789.18_LMNA | -0.01347 | -0.172303254 | 0.146041826 | 8.69E-01 | 9.49E-01 | 1.00E+00 |
| ENSG00000236998.2_RP11-203L | ENSG00000160789.18_LMNA | -0.14047 | -0.29311512  | 0.019159874 | 8.43E-02 | 2.81E-01 | 1.00E+00 |
| ENSG00000213450.4_VDAC1P7   | ENSG00000160789.18_LMNA | 0.09197  | -0.068234168 | 0.247541993 | 2.60E-01 | 5.43E-01 | 1.00E+00 |
| ENSG00000186790.5_FOXE3     | ENSG00000160789.18_LMNA | 0.17184  | 0.012998155  | 0.322228571 | 3.43E-02 | 1.56E-01 | 1.00E+00 |
| ENSG00000267908.1_ZSCAN5DF  | ENSG00000160789.18_LMNA | 0.08809  | -0.072126206 | 0.24386682  | 2.81E-01 | 5.66E-01 | 1.00E+00 |
| ENSG00000270292.1_RP11-453E | ENSG00000160789.18_LMNA | -0.08071 | -0.236862696 | 0.079517079 | 3.23E-01 | 6.09E-01 | 1.00E+00 |
| ENSG00000243609.1_RPS2P44   | ENSG00000160789.18_LMNA | 0.03748  | -0.122451901 | 0.195513562 | 6.47E-01 | 8.43E-01 | 1.00E+00 |
| ENSG00000261056.2_RP11-454F | ENSG00000160789.18_LMNA | -0.02903 | -0.187360981 | 0.130778959 | 7.23E-01 | 8.83E-01 | 1.00E+00 |
| ENSG00000275236.1_AC009120  | ENSG00000160789.18_LMNA | 0.08966  | -0.070549686 | 0.245356591 | 2.72E-01 | 5.56E-01 | 1.00E+00 |
| ENSG00000161905.11_ALOX15   | ENSG00000160789.18_LMNA | -0.1627  | -0.313771576 | -0.00359037 | 4.52E-02 | 1.88E-01 | 1.00E+00 |
| ENSG00000224333.1_GAPDHP2C  | ENSG00000160789.18_LMNA | -0.03392 | -0.192087935 | 0.125956304 | 6.78E-01 | 8.60E-01 | 1.00E+00 |
| ENSG00000133488.13_SEC14L4  | ENSG00000160789.18_LMNA | 0.18453  | 0.026093428  | 0.333918782 | 2.29E-02 | 1.19E-01 | 1.00E+00 |
| ENSG00000227382.1	EIF4A2P2  | ENSG00000160789.18_LMNA | 0.09186  | -0.068343867 | 0.247438531 | 2.60E-01 | 5.43E-01 | 1.00E+00 |
| ENSG00000079393.19_DUSP13   | ENSG00000160789.18_LMNA | -0.05388 | -0.211270523 | 0.106229835 | 5.10E-01 | 7.59E-01 | 1.00E+00 |
| ENSG00000279951.1_RP11-264J | ENSG00000160789.18_LMNA | -0.09087 | -0.246500797 | 0.06933778  | 2.66E-01 | 5.49E-01 | 1.00E+00 |
| ENSG00000231459.1_          | ENSG00000160789.18_LMNA | -0.29669 | -0.435328344 | -0.14430487 | 2.06E-04 | 3.34E-03 | 1.00E+00 |
| ENSG00000261758.1_RP11-102M | ENSG00000160789.18_LMNA | -0.13186 | -0.285071789 | 0.027931879 | 1.05E-01 | 3.22E-01 | 1.00E+00 |
| ENSG00000250826.2_HNRNPA3F  | ENSG00000160789.18_LMNA | 0.00954  | -0.149888565 | 0.168484596 | 9.07E-01 | 9.64E-01 | 1.00E+00 |
| ENSG00000255693.1_RP11-766N | ENSG00000160789.18_LMNA | -0.16678 | -0.317553725 | -0.00779096 | 4.00E-02 | 1.73E-01 | 1.00E+00 |
| ENSG00000173213.8_TUBB8P12  | ENSG00000160789.18_LMNA | 0.09161  | -0.068591148 | 0.247205283 | 2.62E-01 | 5.45E-01 | 1.00E+00 |
| ENSG00000260691.4_ANKRD20A  | ENSG00000160789.18_LMNA | -0.13749 | -0.290339106 | 0.022192821 | 9.12E-02 | 2.94E-01 | 1.00E+00 |
| ENSG00000258526.4_RP11-111A | ENSG00000160789.18_LMNA | -0.03138 | -0.189635159 | 0.128460616 | 7.01E-01 | 8.72E-01 | 1.00E+00 |
| ENSG00000104413.14_ESRP1    | ENSG00000160789.18_LMNA | -0.20589 | -0.353507714 | -0.0482762  | 1.09E-02 | 6.98E-02 | 1.00E+00 |
| ENSG00000232709.1_MARK2P9   | ENSG00000160789.18_LMNA | -0.00427 | -0.163364303 | 0.15503143  | 9.58E-01 | 9.83E-01 | 1.00E+00 |
| ENSG00000260613.1_RP3-522J7 | ENSG00000160789.18_LMNA | -0.11292 | -0.267314716 | 0.04712843  | 1.66E-01 | 4.23E-01 | 1.00E+00 |

|                              |                         |          |              |             |          |          |          |
|------------------------------|-------------------------|----------|--------------|-------------|----------|----------|----------|
| ENSG00000251463.2_FKBP4P1    | ENSG00000160789.18_LMNA | -0.099   | -0.254193499 | 0.061165647 | 2.25E-01 | 5.01E-01 | 1.00E+00 |
| ENSG00000279162.1_CTD-3126B  | ENSG00000160789.18_LMNA | 0.04815  | -0.111907403 | 0.205774444 | 5.56E-01 | 7.90E-01 | 1.00E+00 |
| ENSG00000255339.5_RP11-411B  | ENSG00000160789.18_LMNA | -0.19962 | -0.34776804  | -0.04174518 | 1.37E-02 | 8.21E-02 | 1.00E+00 |
| ENSG00000272754.1_AL133245.2 | ENSG00000160789.18_LMNA | -0.1058  | -0.260611655 | 0.054314985 | 1.95E-01 | 4.63E-01 | 1.00E+00 |
| ENSG00000173578.7_XCR1       | ENSG00000160789.18_LMNA | 0.09915  | -0.061011063 | 0.25433863  | 2.24E-01 | 5.00E-01 | 1.00E+00 |
| ENSG00000166959.6_MS4A8      | ENSG00000160789.18_LMNA | -0.07281 | -0.229347761 | 0.087408472 | 3.73E-01 | 6.53E-01 | 1.00E+00 |
| ENSG00000239392.2_RP11-537H  | ENSG00000160789.18_LMNA | 0.16674  | 0.007743866  | 0.31751138  | 4.01E-02 | 1.74E-01 | 1.00E+00 |
| ENSG00000136573.11_BLK       | ENSG00000160789.18_LMNA | -0.04411 | -0.201888199 | 0.115909501 | 5.90E-01 | 8.09E-01 | 1.00E+00 |
| ENSG00000254471.1_RP11-885L  | ENSG00000160789.18_LMNA | -0.05063 | -0.208151691 | 0.109454199 | 5.36E-01 | 7.77E-01 | 1.00E+00 |
| ENSG00000065371.16_ROPN1     | ENSG00000160789.18_LMNA | 0.0211   | -0.138563303 | 0.179699899 | 7.96E-01 | 9.18E-01 | 1.00E+00 |
| ENSG00000259100.1_RP11-1074  | ENSG00000160789.18_LMNA | 0.09415  | -0.066040631 | 0.249609311 | 2.49E-01 | 5.29E-01 | 1.00E+00 |
| ENSG00000226194.4_RP1-137D1  | ENSG00000160789.18_LMNA | -0.01589 | -0.174648853 | 0.143674194 | 8.46E-01 | 9.40E-01 | 1.00E+00 |
| ENSG00000140465.12_CYP1A1    | ENSG00000160789.18_LMNA | 0.09613  | -0.064052905 | 0.251480177 | 2.39E-01 | 5.17E-01 | 1.00E+00 |
| ENSG00000143627.16_PKLR      | ENSG00000160789.18_LMNA | 0.08642  | -0.073798588 | 0.242284831 | 2.90E-01 | 5.75E-01 | 1.00E+00 |
| ENSG00000101251.10_SEL1L2    | ENSG00000160789.18_LMNA | -0.01166 | -0.170543139 | 0.147816081 | 8.87E-01 | 9.56E-01 | 1.00E+00 |
| ENSG00000184434.7_LRRC19     | ENSG00000160789.18_LMNA | -0.07873 | -0.234989237 | 0.081488106 | 3.35E-01 | 6.21E-01 | 1.00E+00 |
| ENSG00000232872.2_CTAGE3P    | ENSG00000160789.18_LMNA | -0.10502 | -0.259874786 | 0.05510302  | 1.98E-01 | 4.68E-01 | 1.00E+00 |
| ENSG00000227954.5_TARID      | ENSG00000160789.18_LMNA | 0.1551   | -0.004208009 | 0.30672383  | 5.64E-02 | 2.17E-01 | 1.00E+00 |
| ENSG00000197085.10_NPSR1-A5  | ENSG00000160789.18_LMNA | -0.2771  | -0.41786392  | -0.12333707 | 5.48E-04 | 7.25E-03 | 1.00E+00 |
| ENSG00000214039.7_RP11-474D  | ENSG00000160789.18_LMNA | -0.07391 | -0.230396434 | 0.086309648 | 3.66E-01 | 6.47E-01 | 1.00E+00 |
| ENSG00000228862.3_RP11-91I2C | ENSG00000160789.18_LMNA | -0.05568 | -0.212996822 | 0.104442247 | 4.96E-01 | 7.50E-01 | 1.00E+00 |
| ENSG00000279908.1_RP11-325I2 | ENSG00000160789.18_LMNA | 0.15668  | -0.002586713 | 0.30819188  | 5.39E-02 | 2.11E-01 | 1.00E+00 |
| ENSG00000279982.1_RP11-45A1  | ENSG00000160789.18_LMNA | 0.01614  | -0.143431343 | 0.174889241 | 8.44E-01 | 9.39E-01 | 1.00E+00 |
| ENSG00000266302.4_RP11-219A  | ENSG00000160789.18_LMNA | -0.11463 | -0.268919301 | 0.045403262 | 1.60E-01 | 4.13E-01 | 1.00E+00 |
| ENSG00000070985.12_TRPM5     | ENSG00000160789.18_LMNA | 0.05998  | -0.100181015 | 0.217103978 | 4.63E-01 | 7.26E-01 | 1.00E+00 |
| ENSG00000264714.1_RP11-21G1  | ENSG00000160789.18_LMNA | -0.15425 | -0.305937465 | 0.005075787 | 5.78E-02 | 2.20E-01 | 1.00E+00 |
| ENSG00000229719.3_MIR194-2H  | ENSG00000160789.18_LMNA | 0.00888  | -0.150531859 | 0.167845065 | 9.14E-01 | 9.67E-01 | 1.00E+00 |
| ENSG00000196862.9_RGPD4      | ENSG00000160789.18_LMNA | -0.15364 | -0.305367537 | 0.005704429 | 5.88E-02 | 2.23E-01 | 1.00E+00 |
| ENSG00000279652.1_RP1-78B3.1 | ENSG00000160789.18_LMNA | 0.14459  | -0.014959241 | 0.296951227 | 7.55E-02 | 2.63E-01 | 1.00E+00 |
| ENSG00000259000.1_DOCK11P1   | ENSG00000160789.18_LMNA | -0.04925 | -0.206826091 | 0.110822632 | 5.47E-01 | 7.84E-01 | 1.00E+00 |
| ENSG00000273823.1_           | ENSG00000160789.18_LMNA | 0.10329  | -0.056848009 | 0.258241789 | 2.05E-01 | 4.77E-01 | 1.00E+00 |
| ENSG00000212237.1_RNA5SP18   | ENSG00000160789.18_LMNA | 0.06193  | -0.098241139 | 0.218969999 | 4.48E-01 | 7.15E-01 | 1.00E+00 |
| ENSG00000266235.1_MIR3176    | ENSG00000160789.18_LMNA | 0.17886  | 0.020235535  | 0.328701093 | 2.75E-02 | 1.35E-01 | 1.00E+00 |

|                              |                         |          |              |             |          |          |          |
|------------------------------|-------------------------|----------|--------------|-------------|----------|----------|----------|
| ENSG00000252202.1_Y_RNA      | ENSG00000160789.18_LMNA | 0.05072  | -0.109365323 | 0.208237745 | 5.35E-01 | 7.76E-01 | 1.00E+00 |
| ENSG00000230876.5_LINC00486  | ENSG00000160789.18_LMNA | -0.23853 | -0.383182473 | -0.08246381 | 3.08E-03 | 2.73E-02 | 1.00E+00 |
| ENSG00000274620.1_MIR378J    | ENSG00000160789.18_LMNA | -0.09508 | -0.250489131 | 0.065106166 | 2.44E-01 | 5.23E-01 | 1.00E+00 |
| ENSG00000277678.1_U1         | ENSG00000160789.18_LMNA | 0.01252  | -0.146977958 | 0.171374835 | 8.78E-01 | 9.53E-01 | 1.00E+00 |
| ENSG00000197273.3_GUCA2A     | ENSG00000160789.18_LMNA | -0.13803 | -0.290843897 | 0.021641737 | 8.99E-02 | 2.92E-01 | 1.00E+00 |
| ENSG00000249192.1_MTND3P25   | ENSG00000160789.18_LMNA | -0.06807 | -0.224830566 | 0.092132902 | 4.05E-01 | 6.80E-01 | 1.00E+00 |
| ENSG00000244699.1_RP11-803B  | ENSG00000160789.18_LMNA | -0.0429  | -0.200732065 | 0.117098111 | 6.00E-01 | 8.16E-01 | 1.00E+00 |
| ENSG00000254338.1_MAFAS1     | ENSG00000160789.18_LMNA | 0.14046  | -0.019171488 | 0.293104501 | 8.44E-02 | 2.81E-01 | 1.00E+00 |
| ENSG00000254577.1_RP11-484D  | ENSG00000160789.18_LMNA | 0.14096  | -0.018659552 | 0.293572553 | 8.32E-02 | 2.79E-01 | 1.00E+00 |
| ENSG00000270822.1_RP11-730B  | ENSG00000160789.18_LMNA | 0.10477  | -0.055349646 | 0.259644097 | 1.99E-01 | 4.69E-01 | 1.00E+00 |
| ENSG00000273768.1_U1         | ENSG00000160789.18_LMNA | 0.00232  | -0.156938306 | 0.161461427 | 9.77E-01 | 9.91E-01 | 1.00E+00 |
| ENSG00000239367.2_RN7SL477F  | ENSG00000160789.18_LMNA | -0.09071 | -0.246354383 | 0.069492909 | 2.66E-01 | 5.50E-01 | 1.00E+00 |
| ENSG00000211747.3_TRBV20-1   | ENSG00000160789.18_LMNA | 0.00071  | -0.158512486 | 0.159888764 | 9.93E-01 | 9.97E-01 | 1.00E+00 |
| ENSG00000244717.1_RPS27P14   | ENSG00000160789.18_LMNA | -0.07381 | -0.230303036 | 0.086407544 | 3.66E-01 | 6.47E-01 | 1.00E+00 |
| ENSG00000270802.2_AC005776.  | ENSG00000160789.18_LMNA | 0.00632  | -0.153030347 | 0.165358644 | 9.38E-01 | 9.76E-01 | 1.00E+00 |
| ENSG00000251604.1_LINC01385  | ENSG00000160789.18_LMNA | 0.03764  | -0.122294282 | 0.195667455 | 6.45E-01 | 8.42E-01 | 1.00E+00 |
| ENSG00000204709.4_LINC01556  | ENSG00000160789.18_LMNA | 0.00132  | -0.157917794 | 0.160483073 | 9.87E-01 | 9.95E-01 | 1.00E+00 |
| ENSG00000273557.1_CTD-2024I7 | ENSG00000160789.18_LMNA | 0.11694  | -0.04306489  | 0.271091449 | 1.51E-01 | 4.00E-01 | 1.00E+00 |
| ENSG00000225183.1_RP4-758J2. | ENSG00000160789.18_LMNA | 0.05211  | -0.107986693 | 0.209571967 | 5.24E-01 | 7.69E-01 | 1.00E+00 |
| ENSG00000225822.4_UBXN7-AS   | ENSG00000160789.18_LMNA | -0.03583 | -0.193920229 | 0.124082861 | 6.61E-01 | 8.50E-01 | 1.00E+00 |
| ENSG00000123307.3_NEUROD4    | ENSG00000160789.18_LMNA | -0.26073 | -0.40319854  | -0.10593062 | 1.18E-03 | 1.31E-02 | 1.00E+00 |
| ENSG00000225976.5_CKS1BP2    | ENSG00000160789.18_LMNA | 0.0605   | -0.099656876 | 0.217608391 | 4.59E-01 | 7.23E-01 | 1.00E+00 |
| ENSG00000213876.4_RPL7AP64   | ENSG00000160789.18_LMNA | 0.0317   | -0.128151484 | 0.189938144 | 6.98E-01 | 8.71E-01 | 1.00E+00 |
| ENSG00000254099.1_AC005740.  | ENSG00000160789.18_LMNA | -0.08458 | -0.240543679 | 0.075637174 | 3.00E-01 | 5.87E-01 | 1.00E+00 |
| ENSG00000223528.6_RP11-223P  | ENSG00000160789.18_LMNA | 0.01125  | -0.148219136 | 0.170143012 | 8.91E-01 | 9.57E-01 | 1.00E+00 |
| ENSG00000229029.2_CDCA4P1    | ENSG00000160789.18_LMNA | 0.06353  | -0.096651715 | 0.220497183 | 4.37E-01 | 7.05E-01 | 1.00E+00 |
| ENSG00000259557.2_HMGNI1P26  | ENSG00000160789.18_LMNA | 0.0649   | -0.095280286 | 0.22181366  | 4.27E-01 | 6.98E-01 | 1.00E+00 |
| ENSG00000249889.1_ALG1L11P   | ENSG00000160789.18_LMNA | -0.02047 | -0.179088146 | 0.139183207 | 8.02E-01 | 9.21E-01 | 1.00E+00 |
| ENSG00000279858.1_RP11-618M  | ENSG00000160789.18_LMNA | -0.12045 | -0.274389893 | 0.039507437 | 1.39E-01 | 3.81E-01 | 1.00E+00 |
| ENSG00000251361.1_CTD-2091N  | ENSG00000160789.18_LMNA | -0.08419 | -0.240170871 | 0.076030564 | 3.02E-01 | 5.89E-01 | 1.00E+00 |
| ENSG00000261232.2_RP11-331H  | ENSG00000160789.18_LMNA | 0.09062  | -0.069587119 | 0.246265459 | 2.67E-01 | 5.51E-01 | 1.00E+00 |
| ENSG00000205869.2_KRTAP5-1   | ENSG00000160789.18_LMNA | 0.00105  | -0.158174488 | 0.160226572 | 9.90E-01 | 9.96E-01 | 1.00E+00 |
| ENSG00000235214.1_FAM83C-A   | ENSG00000160789.18_LMNA | 0.13209  | -0.027696148 | 0.285288517 | 1.05E-01 | 3.21E-01 | 1.00E+00 |

|                              |                         |          |              |             |          |          |          |
|------------------------------|-------------------------|----------|--------------|-------------|----------|----------|----------|
| ENSG00000242659.1_RP11-271C  | ENSG00000160789.18_LMNA | -0.03614 | -0.194225433 | 0.123770582 | 6.58E-01 | 8.49E-01 | 1.00E+00 |
| ENSG00000236872.1_RP11-291L  | ENSG00000160789.18_LMNA | 0.03897  | -0.120983413 | 0.196946737 | 6.34E-01 | 8.36E-01 | 1.00E+00 |
| ENSG00000277170.1_RP11-295D  | ENSG00000160789.18_LMNA | -0.0908  | -0.246440046 | 0.069402149 | 2.66E-01 | 5.50E-01 | 1.00E+00 |
| ENSG00000260907.1_AC008088.  | ENSG00000160789.18_LMNA | -0.08612 | -0.242006266 | 0.074092886 | 2.91E-01 | 5.77E-01 | 1.00E+00 |
| ENSG00000276107.1_CTD-2033D  | ENSG00000160789.18_LMNA | 0.15576  | -0.003525654 | 0.307341868 | 5.53E-02 | 2.15E-01 | 1.00E+00 |
| ENSG00000253175.1_RP11-267M  | ENSG00000160789.18_LMNA | 0.0569   | -0.103234715 | 0.214161833 | 4.86E-01 | 7.43E-01 | 1.00E+00 |
| ENSG00000186191.7_BPIFB4     | ENSG00000160789.18_LMNA | 0.05037  | -0.109714638 | 0.207899494 | 5.38E-01 | 7.78E-01 | 1.00E+00 |
| ENSG00000259236.1_GOLGA8VF   | ENSG00000160789.18_LMNA | 0.1097   | -0.050379583 | 0.264286057 | 1.79E-01 | 4.41E-01 | 1.00E+00 |
| ENSG00000274859.1_RP11-136L  | ENSG00000160789.18_LMNA | 0.14685  | -0.012651388 | 0.299054529 | 7.10E-02 | 2.52E-01 | 1.00E+00 |
| ENSG00000267178.3_PHF5CP     | ENSG00000160789.18_LMNA | -0.09146 | -0.247064443 | 0.068740442 | 2.62E-01 | 5.46E-01 | 1.00E+00 |
| ENSG00000255986.5_MT1JP      | ENSG00000160789.18_LMNA | 0.0094   | -0.150029804 | 0.168344206 | 9.09E-01 | 9.65E-01 | 1.00E+00 |
| ENSG00000236471.1_AF127577.1 | ENSG00000160789.18_LMNA | -0.07636 | -0.232729222 | 0.08386253  | 3.50E-01 | 6.33E-01 | 1.00E+00 |
| ENSG00000226912.1_ISCA2P1    | ENSG00000160789.18_LMNA | 0.08924  | -0.070971496 | 0.244958137 | 2.74E-01 | 5.59E-01 | 1.00E+00 |
| ENSG00000214511.3_HIGD1C     | ENSG00000160789.18_LMNA | -0.18516 | -0.334500294 | -0.0267476  | 2.24E-02 | 1.17E-01 | 1.00E+00 |
| ENSG00000140481.12_CCDC33    | ENSG00000160789.18_LMNA | 0.10122  | -0.05893301  | 0.256288237 | 2.15E-01 | 4.89E-01 | 1.00E+00 |
| ENSG00000233416.1_AC012065.1 | ENSG00000160789.18_LMNA | -0.06029 | -0.217408044 | 0.099865079 | 4.61E-01 | 7.24E-01 | 1.00E+00 |
| ENSG00000272334.1_RP11-129K  | ENSG00000160789.18_LMNA | -0.14305 | -0.295522044 | 0.01652552  | 7.87E-02 | 2.69E-01 | 1.00E+00 |
| ENSG00000259823.4_LYPD8      | ENSG00000160789.18_LMNA | -0.0989  | -0.254098128 | 0.061267221 | 2.25E-01 | 5.01E-01 | 1.00E+00 |
| ENSG00000258204.1_RP11-90E9  | ENSG00000160789.18_LMNA | -0.1718  | -0.322186483 | -0.0129512  | 3.43E-02 | 1.57E-01 | 1.00E+00 |
| ENSG00000214641.3_RP11-793K  | ENSG00000160789.18_LMNA | 0.03845  | -0.121490658 | 0.196451843 | 6.38E-01 | 8.38E-01 | 1.00E+00 |
| ENSG00000171119.2_NRTN       | ENSG00000160789.18_LMNA | -0.02887 | -0.187207854 | 0.130934935 | 7.24E-01 | 8.83E-01 | 1.00E+00 |
| ENSG00000251520.1_RP11-46A1  | ENSG00000160789.18_LMNA | 0.05537  | -0.104755738 | 0.212694222 | 4.98E-01 | 7.51E-01 | 1.00E+00 |
| ENSG00000241582.1_RPL23AP8   | ENSG00000160789.18_LMNA | -0.08001 | -0.236197403 | 0.080217303 | 3.27E-01 | 6.14E-01 | 1.00E+00 |
| ENSG00000278467.1_RP11-504P  | ENSG00000160789.18_LMNA | -0.04679 | -0.204464346 | 0.113257709 | 5.67E-01 | 7.97E-01 | 1.00E+00 |
| ENSG00000225155.4_TOMM22P5   | ENSG00000160789.18_LMNA | 0.05113  | -0.108962383 | 0.208627827 | 5.32E-01 | 7.74E-01 | 1.00E+00 |
| ENSG00000267708.1_RP11-147L  | ENSG00000160789.18_LMNA | 0.00293  | -0.156343149 | 0.16205559  | 9.71E-01 | 9.89E-01 | 1.00E+00 |
| ENSG00000235929.1_TPT1P14    | ENSG00000160789.18_LMNA | 0.04846  | -0.11160385  | 0.206068802 | 5.53E-01 | 7.88E-01 | 1.00E+00 |
| ENSG00000270427.1_NRBF2P5    | ENSG00000160789.18_LMNA | 0.06234  | -0.097833786 | 0.219361549 | 4.45E-01 | 7.12E-01 | 1.00E+00 |
| ENSG00000273972.1_CTD-2306A  | ENSG00000160789.18_LMNA | -0.12205 | -0.275893176 | 0.037883466 | 1.34E-01 | 3.72E-01 | 1.00E+00 |
| ENSG00000254636.1_ARMS2      | ENSG00000160789.18_LMNA | -0.06133 | -0.218395679 | 0.098838447 | 4.53E-01 | 7.18E-01 | 1.00E+00 |
| ENSG00000127530.2_OR7C1      | ENSG00000160789.18_LMNA | -0.18332 | -0.332808231 | -0.02484484 | 2.38E-02 | 1.22E-01 | 1.00E+00 |
| ENSG00000215159.3_RP11-629N  | ENSG00000160789.18_LMNA | -0.09799 | -0.253237779 | 0.062183236 | 2.30E-01 | 5.07E-01 | 1.00E+00 |
| ENSG00000223819.2_RP3-347M6  | ENSG00000160789.18_LMNA | 0.07291  | -0.087308622 | 0.229443084 | 3.72E-01 | 6.52E-01 | 1.00E+00 |

|                              |                         |          |              |             |          |          |          |
|------------------------------|-------------------------|----------|--------------|-------------|----------|----------|----------|
| ENSG00000266707.1_PSM7P1     | ENSG00000160789.18_LMNA | -0.01168 | -0.170565102 | 0.147793954 | 8.86E-01 | 9.56E-01 | 1.00E+00 |
| ENSG00000219395.2_HSPA8P15   | ENSG00000160789.18_LMNA | 0.04675  | -0.113289186 | 0.204433793 | 5.67E-01 | 7.97E-01 | 1.00E+00 |
| ENSG00000259783.4_RP11-1006  | ENSG00000160789.18_LMNA | -0.09672 | -0.252040407 | 0.063457194 | 2.36E-01 | 5.14E-01 | 1.00E+00 |
| ENSG00000182533.6_CAV3       | ENSG00000160789.18_LMNA | -0.05937 | -0.216523619 | 0.100783853 | 4.67E-01 | 7.29E-01 | 1.00E+00 |
| ENSG00000224799.1_RP11-445O  | ENSG00000160789.18_LMNA | -0.16668 | -0.317460137 | -0.00768688 | 4.01E-02 | 1.74E-01 | 1.00E+00 |
| ENSG00000224215.1_RP11-371A  | ENSG00000160789.18_LMNA | -0.10585 | -0.260653618 | 0.054270097 | 1.94E-01 | 4.63E-01 | 1.00E+00 |
| ENSG00000180347.12_CCDC129   | ENSG00000160789.18_LMNA | 0.19894  | 0.041043401  | 0.347149925 | 1.40E-02 | 8.36E-02 | 1.00E+00 |
| ENSG00000256050.2_RP11-982M  | ENSG00000160789.18_LMNA | -0.03219 | -0.190411876 | 0.127668018 | 6.94E-01 | 8.68E-01 | 1.00E+00 |
| ENSG00000233775.1_RP4-811H2  | ENSG00000160789.18_LMNA | 0.07619  | -0.084033634 | 0.232566231 | 3.51E-01 | 6.35E-01 | 1.00E+00 |
| ENSG00000230257.1_NFE4       | ENSG00000160789.18_LMNA | 0.11636  | -0.043652776 | 0.270545654 | 1.53E-01 | 4.04E-01 | 1.00E+00 |
| ENSG00000275234.1_CTD-2396E  | ENSG00000160789.18_LMNA | -0.01352 | -0.172348157 | 0.145996535 | 8.69E-01 | 9.49E-01 | 1.00E+00 |
| ENSG00000274423.1_RP11-544O  | ENSG00000160789.18_LMNA | -0.04438 | -0.20214953  | 0.115640702 | 5.87E-01 | 8.08E-01 | 1.00E+00 |
| ENSG00000181741.7_FDX1P1     | ENSG00000160789.18_LMNA | 0.08964  | -0.070570182 | 0.245337232 | 2.72E-01 | 5.57E-01 | 1.00E+00 |
| ENSG00000274330.1_RP11-486O  | ENSG00000160789.18_LMNA | -0.23149 | -0.376805533 | -0.07505689 | 4.11E-03 | 3.38E-02 | 1.00E+00 |
| ENSG00000230449.1_RPL7P4     | ENSG00000160789.18_LMNA | -0.05842 | -0.215614432 | 0.101727787 | 4.75E-01 | 7.34E-01 | 1.00E+00 |
| ENSG00000248538.5_RP11-10A1  | ENSG00000160789.18_LMNA | -0.02372 | -0.182229125 | 0.135997724 | 7.72E-01 | 9.06E-01 | 1.00E+00 |
| ENSG00000257818.1_C1GALT1P   | ENSG00000160789.18_LMNA | -0.10152 | -0.256576625 | 0.058625391 | 2.13E-01 | 4.87E-01 | 1.00E+00 |
| ENSG00000226416.1_MRPL23-A5  | ENSG00000160789.18_LMNA | 0.08068  | -0.079543602 | 0.236837501 | 3.23E-01 | 6.10E-01 | 1.00E+00 |
| ENSG00000233955.1_AHCYP3     | ENSG00000160789.18_LMNA | -0.16414 | -0.315110923 | -0.00507664 | 4.33E-02 | 1.83E-01 | 1.00E+00 |
| ENSG00000256637.5_RP11-76I14 | ENSG00000160789.18_LMNA | 0.15725  | -0.002001536 | 0.308721384 | 5.30E-02 | 2.09E-01 | 1.00E+00 |
| ENSG00000259230.1_CTD-2555C  | ENSG00000160789.18_LMNA | 0.10492  | -0.055206757 | 0.259777757 | 1.98E-01 | 4.68E-01 | 1.00E+00 |
| ENSG00000259780.3_RP11-304L  | ENSG00000160789.18_LMNA | -0.03212 | -0.190351369 | 0.127729776 | 6.94E-01 | 8.69E-01 | 1.00E+00 |
| ENSG00000227764.1_RP11-354K  | ENSG00000160789.18_LMNA | 0.01351  | -0.146002314 | 0.172342427 | 8.69E-01 | 9.49E-01 | 1.00E+00 |
| ENSG00000198491.3_RP11-208N  | ENSG00000160789.18_LMNA | -0.15225 | -0.304079679 | 0.007124056 | 6.11E-02 | 2.29E-01 | 1.00E+00 |
| ENSG00000234259.3_CTC-507E1  | ENSG00000160789.18_LMNA | -0.12815 | -0.28160667  | 0.031696117 | 1.16E-01 | 3.40E-01 | 1.00E+00 |
| ENSG00000213754.2_RP11-284B  | ENSG00000160789.18_LMNA | 0.06546  | -0.094730133 | 0.222341443 | 4.23E-01 | 6.94E-01 | 1.00E+00 |
| ENSG00000276509.1_CH17-353B  | ENSG00000160789.18_LMNA | 0.01688  | -0.14270211  | 0.175610847 | 8.36E-01 | 9.37E-01 | 1.00E+00 |
| ENSG00000220515.2_PGAM1P10   | ENSG00000160789.18_LMNA | 0.07489  | -0.085326026 | 0.231334539 | 3.59E-01 | 6.42E-01 | 1.00E+00 |
| ENSG00000255189.1_GLYATL1P   | ENSG00000160789.18_LMNA | 0.06793  | -0.092272871 | 0.224696529 | 4.06E-01 | 6.81E-01 | 1.00E+00 |
| ENSG00000259163.1_RP11-1078I | ENSG00000160789.18_LMNA | -0.07258 | -0.229128518 | 0.087638103 | 3.74E-01 | 6.54E-01 | 1.00E+00 |
| ENSG00000243916.1_RP11-6K23  | ENSG00000160789.18_LMNA | 0.03233  | -0.127528706 | 0.190548355 | 6.93E-01 | 8.68E-01 | 1.00E+00 |
| ENSG00000174898.14_CATSPER   | ENSG00000160789.18_LMNA | -0.03186 | -0.190094978 | 0.127991444 | 6.97E-01 | 8.70E-01 | 1.00E+00 |
| ENSG00000267633.1_CTB-5E10.1 | ENSG00000160789.18_LMNA | 0.03401  | -0.125871407 | 0.192171014 | 6.77E-01 | 8.59E-01 | 1.00E+00 |

|                              |                         |          |              |             |          |          |          |
|------------------------------|-------------------------|----------|--------------|-------------|----------|----------|----------|
| ENSG00000224209.5_LINC00466  | ENSG00000160789.18_LMNA | -0.16271 | -0.313780685 | -0.00360047 | 4.52E-02 | 1.88E-01 | 1.00E+00 |
| ENSG00000214803.3_RP11-37N2  | ENSG00000160789.18_LMNA | -0.05785 | -0.215069175 | 0.102293607 | 4.79E-01 | 7.37E-01 | 1.00E+00 |
| ENSG00000267218.2_AC005336.1 | ENSG00000160789.18_LMNA | 0.15203  | -0.007344437 | 0.303879651 | 6.15E-02 | 2.29E-01 | 1.00E+00 |
| ENSG00000235244.3_DANT2      | ENSG00000160789.18_LMNA | -0.02582 | -0.184267257 | 0.133927188 | 7.52E-01 | 8.97E-01 | 1.00E+00 |
| ENSG00000264635.1_RP11-769O  | ENSG00000160789.18_LMNA | 0.15095  | -0.008453822 | 0.302872308 | 6.34E-02 | 2.34E-01 | 1.00E+00 |
| ENSG00000267522.1_CTD-2621I1 | ENSG00000160789.18_LMNA | -0.15592 | -0.307487744 | 0.003364556 | 5.51E-02 | 2.14E-01 | 1.00E+00 |
| ENSG00000265118.4_CTD-2370N  | ENSG00000160789.18_LMNA | -0.22227 | -0.368436055 | -0.06538587 | 5.92E-03 | 4.46E-02 | 1.00E+00 |
| ENSG00000120436.3_GPR31      | ENSG00000160789.18_LMNA | -0.03115 | -0.189414626 | 0.128685584 | 7.03E-01 | 8.73E-01 | 1.00E+00 |
| ENSG00000245954.5_RP11-18H2  | ENSG00000160789.18_LMNA | -0.00731 | -0.166321427 | 0.152063374 | 9.29E-01 | 9.73E-01 | 1.00E+00 |
| ENSG00000257976.1_RP11-388G  | ENSG00000160789.18_LMNA | 0.08617  | -0.07405056  | 0.242046332 | 2.91E-01 | 5.77E-01 | 1.00E+00 |
| ENSG00000187980.6_PLA2G2C    | ENSG00000160789.18_LMNA | 0.00649  | -0.152863977 | 0.165524336 | 9.37E-01 | 9.75E-01 | 1.00E+00 |
| ENSG00000047936.9_ROS1       | ENSG00000160789.18_LMNA | -0.07131 | -0.227923945 | 0.088899148 | 3.83E-01 | 6.61E-01 | 1.00E+00 |
| ENSG00000235008.1_RP3-497J2  | ENSG00000160789.18_LMNA | -0.02725 | -0.185646054 | 0.132524892 | 7.39E-01 | 8.90E-01 | 1.00E+00 |
| ENSG00000277172.1_GAPDHP41   | ENSG00000160789.18_LMNA | 0.11158  | -0.048477088 | 0.266059107 | 1.71E-01 | 4.30E-01 | 1.00E+00 |
| ENSG00000226309.1_SMARCE1F   | ENSG00000160789.18_LMNA | -0.05295 | -0.210375852 | 0.107155462 | 5.17E-01 | 7.64E-01 | 1.00E+00 |
| ENSG00000261037.1_CTC-471C1  | ENSG00000160789.18_LMNA | -0.28621 | -0.425998448 | -0.13307078 | 3.51E-04 | 5.07E-03 | 1.00E+00 |
| ENSG00000253886.1_CTB-158E9  | ENSG00000160789.18_LMNA | 0.05475  | -0.105369539 | 0.21210157  | 5.03E-01 | 7.54E-01 | 1.00E+00 |
| ENSG00000242593.4_RP5-921G1  | ENSG00000160789.18_LMNA | 0.07287  | -0.087343534 | 0.229409756 | 3.72E-01 | 6.52E-01 | 1.00E+00 |
| ENSG00000189002.10_PROS2P    | ENSG00000160789.18_LMNA | 0.26863  | 0.114322451  | 0.41028799  | 8.19E-04 | 9.89E-03 | 1.00E+00 |
| ENSG00000203387.2_AC074019.1 | ENSG00000160789.18_LMNA | 0.10654  | -0.053570879 | 0.261307112 | 1.91E-01 | 4.59E-01 | 1.00E+00 |
| ENSG00000230638.4_RP11-486B  | ENSG00000160789.18_LMNA | 0.3083   | 0.156794233  | 0.445627882 | 1.11E-04 | 2.06E-03 | 1.00E+00 |
| ENSG00000204362.5_RP11-380J  | ENSG00000160789.18_LMNA | 0.32178  | 0.171352963  | 0.457538203 | 5.29E-05 | 1.13E-03 | 1.00E+00 |
| ENSG00000126895.12_AVPR2     | ENSG00000160789.18_LMNA | 0.14432  | -0.015235663 | 0.296699101 | 7.61E-02 | 2.64E-01 | 1.00E+00 |
| ENSG00000280414.1_RP11-572N  | ENSG00000160789.18_LMNA | -0.03274 | -0.190944707 | 0.127124057 | 6.89E-01 | 8.66E-01 | 1.00E+00 |
| ENSG00000145692.13_BHMT      | ENSG00000160789.18_LMNA | -0.02716 | -0.185559314 | 0.132613148 | 7.40E-01 | 8.91E-01 | 1.00E+00 |
| ENSG00000230267.6_HERC2P4    | ENSG00000160789.18_LMNA | -0.15598 | -0.307543546 | 0.003302927 | 5.50E-02 | 2.14E-01 | 1.00E+00 |
| ENSG00000276087.1_RP11-507M  | ENSG00000160789.18_LMNA | -0.0279  | -0.186269386 | 0.131890519 | 7.33E-01 | 8.88E-01 | 1.00E+00 |
| ENSG00000229894.3_GK3P       | ENSG00000160789.18_LMNA | 0.06648  | -0.093709564 | 0.223320025 | 4.16E-01 | 6.88E-01 | 1.00E+00 |
| ENSG00000231635.1_ATP5BP1    | ENSG00000160789.18_LMNA | -0.04123 | -0.199123191 | 0.118750666 | 6.14E-01 | 8.25E-01 | 1.00E+00 |
| ENSG00000219294.6_PIP5K1P1   | ENSG00000160789.18_LMNA | -0.01116 | -0.170063341 | 0.148299378 | 8.91E-01 | 9.57E-01 | 1.00E+00 |
| ENSG00000149516.12_MS4A3     | ENSG00000160789.18_LMNA | 0.0062   | -0.153156185 | 0.165233307 | 9.40E-01 | 9.76E-01 | 1.00E+00 |
| ENSG00000224093.4_RP5-1033H  | ENSG00000160789.18_LMNA | 0.04131  | -0.118674888 | 0.199197004 | 6.13E-01 | 8.24E-01 | 1.00E+00 |
| ENSG00000077800.10_FKBP6     | ENSG00000160789.18_LMNA | -0.11085 | -0.265367453 | 0.049219509 | 1.74E-01 | 4.34E-01 | 1.00E+00 |



|                              |                         |          |              |             |          |          |          |
|------------------------------|-------------------------|----------|--------------|-------------|----------|----------|----------|
| ENSG00000228941.1_UBE3AP2    | ENSG00000160789.18_LMNA | 0.06487  | -0.095310733 | 0.221784445 | 4.27E-01 | 6.98E-01 | 1.00E+00 |
| ENSG00000171570.9_RAB4B-EG   | ENSG00000160789.18_LMNA | -0.10821 | -0.262879176 | 0.051887553 | 1.85E-01 | 4.50E-01 | 1.00E+00 |
| ENSG00000225930.3_DKFZP434I  | ENSG00000160789.18_LMNA | -0.05246 | -0.209908891 | 0.107638362 | 5.21E-01 | 7.67E-01 | 1.00E+00 |
| ENSG00000266527.1_RP11-138P  | ENSG00000160789.18_LMNA | -0.17368 | -0.323920342 | -0.01488672 | 3.24E-02 | 1.51E-01 | 1.00E+00 |
| ENSG00000224511.1_LINC00365  | ENSG00000160789.18_LMNA | -0.03688 | -0.194939002 | 0.123040227 | 6.52E-01 | 8.46E-01 | 1.00E+00 |
| ENSG00000255587.6_RAB44      | ENSG00000160789.18_LMNA | 0.16105  | 0.001901318  | 0.312247998 | 4.75E-02 | 1.94E-01 | 1.00E+00 |
| ENSG00000280537.1_RP11-33O4  | ENSG00000160789.18_LMNA | 0.14983  | -0.009597141 | 0.301833423 | 6.54E-02 | 2.39E-01 | 1.00E+00 |
| ENSG00000260714.1_RP11-266L  | ENSG00000160789.18_LMNA | 0.04257  | -0.117422932 | 0.200415966 | 6.03E-01 | 8.18E-01 | 1.00E+00 |
| ENSG00000137948.17_BRDT      | ENSG00000160789.18_LMNA | -0.05488 | -0.212223696 | 0.105243075 | 5.02E-01 | 7.54E-01 | 1.00E+00 |
| ENSG00000220248.1_ZNF402P    | ENSG00000160789.18_LMNA | 0.02143  | -0.138240461 | 0.180018398 | 7.93E-01 | 9.16E-01 | 1.00E+00 |
| ENSG00000201151.1_SNORD56    | ENSG00000160789.18_LMNA | -0.0631  | -0.220089101 | 0.097076587 | 4.40E-01 | 7.08E-01 | 1.00E+00 |
| ENSG00000164047.4_CAMP       | ENSG00000160789.18_LMNA | 0.04062  | -0.119352318 | 0.198537017 | 6.19E-01 | 8.28E-01 | 1.00E+00 |
| ENSG00000252915.1_Y_RNA      | ENSG00000160789.18_LMNA | 0.01834  | -0.141273601 | 0.177023426 | 8.23E-01 | 9.31E-01 | 1.00E+00 |
| ENSG00000276103.1_U4         | ENSG00000160789.18_LMNA | 0.07778  | -0.082446324 | 0.234077602 | 3.41E-01 | 6.26E-01 | 1.00E+00 |
| ENSG00000212464.1_SNORA12    | ENSG00000160789.18_LMNA | -0.16614 | -0.316957423 | -0.00712796 | 4.08E-02 | 1.76E-01 | 1.00E+00 |
| ENSG00000261600.1_RP11-575H  | ENSG00000160789.18_LMNA | -0.10597 | -0.260767091 | 0.054148707 | 1.94E-01 | 4.63E-01 | 1.00E+00 |
| ENSG00000206785.1_SNORA15    | ENSG00000160789.18_LMNA | 0.04319  | -0.116815386 | 0.201007146 | 5.97E-01 | 8.14E-01 | 1.00E+00 |
| ENSG00000183542.5_KLRC4      | ENSG00000160789.18_LMNA | -0.32883 | -0.463753819 | -0.17900066 | 3.53E-05 | 8.17E-04 | 1.00E+00 |
| ENSG00000275358.1_RP5-1025A  | ENSG00000160789.18_LMNA | 0.16593  | 0.006913006  | 0.316764044 | 4.10E-02 | 1.76E-01 | 1.00E+00 |
| ENSG00000173467.7_AGR3       | ENSG00000160789.18_LMNA | 0.03548  | -0.124421687 | 0.193589009 | 6.64E-01 | 8.52E-01 | 1.00E+00 |
| ENSG00000234630.1_LL22NC03-  | ENSG00000160789.18_LMNA | -0.0889  | -0.244635014 | 0.071313478 | 2.76E-01 | 5.61E-01 | 1.00E+00 |
| ENSG00000234536.1_           | ENSG00000160789.18_LMNA | 0.06953  | -0.090676552 | 0.226224488 | 3.95E-01 | 6.72E-01 | 1.00E+00 |
| ENSG00000128040.9_SPINK2     | ENSG00000160789.18_LMNA | 0.16612  | 0.00710517   | 0.316936925 | 4.08E-02 | 1.76E-01 | 1.00E+00 |
| ENSG00000262198.1_RP11-124N  | ENSG00000160789.18_LMNA | -0.22898 | -0.374526632 | -0.07241796 | 4.55E-03 | 3.65E-02 | 1.00E+00 |
| ENSG00000223628.2_AC023449.  | ENSG00000160789.18_LMNA | -0.13966 | -0.292364405 | 0.019980639 | 8.61E-02 | 2.85E-01 | 1.00E+00 |
| ENSG00000235579.1_AC007283.  | ENSG00000160789.18_LMNA | -0.07267 | -0.229223492 | 0.087538633 | 3.74E-01 | 6.54E-01 | 1.00E+00 |
| ENSG00000234134.1_RP11-383C  | ENSG00000160789.18_LMNA | 0.00496  | -0.154364593 | 0.164029182 | 9.52E-01 | 9.81E-01 | 1.00E+00 |
| ENSG00000279422.1_RP11-641Ji | ENSG00000160789.18_LMNA | 0.19248  | 0.034334639  | 0.341227518 | 1.75E-02 | 9.81E-02 | 1.00E+00 |
| ENSG00000230397.1_SPTLC1P1   | ENSG00000160789.18_LMNA | 0.10391  | -0.056217754 | 0.258831802 | 2.03E-01 | 4.73E-01 | 1.00E+00 |
| ENSG00000070031.3_SCT        | ENSG00000160789.18_LMNA | 0.10928  | -0.050800844 | 0.263893171 | 1.80E-01 | 4.43E-01 | 1.00E+00 |
| ENSG00000223513.1_ATP6V0E1I  | ENSG00000160789.18_LMNA | -0.06438 | -0.221314853 | 0.095800056 | 4.31E-01 | 7.00E-01 | 1.00E+00 |
| ENSG00000279322.1_RP4-738P1  | ENSG00000160789.18_LMNA | 0.03774  | -0.122196168 | 0.195763243 | 6.44E-01 | 8.42E-01 | 1.00E+00 |
| ENSG00000266975.1_FARSA-AS   | ENSG00000160789.18_LMNA | 0.0304   | -0.129430651 | 0.188684018 | 7.10E-01 | 8.77E-01 | 1.00E+00 |

|                              |                         |          |              |             |          |          |          |
|------------------------------|-------------------------|----------|--------------|-------------|----------|----------|----------|
| ENSG00000275024.1_CTB-1144G  | ENSG00000160789.18_LMNA | -0.15975 | -0.31103575  | -0.00055867 | 4.93E-02 | 2.00E-01 | 1.00E+00 |
| ENSG00000272023.1_CTC-350I8. | ENSG00000160789.18_LMNA | 0.03944  | -0.120522102 | 0.197396674 | 6.30E-01 | 8.33E-01 | 1.00E+00 |
| ENSG00000280286.1_FRG1KP     | ENSG00000160789.18_LMNA | -0.08266 | -0.238716726 | 0.077564053 | 3.11E-01 | 5.98E-01 | 1.00E+00 |
| ENSG00000227666.1_CYCSP24    | ENSG00000160789.18_LMNA | 0.14999  | -0.009431249 | 0.301984208 | 6.51E-02 | 2.38E-01 | 1.00E+00 |
| ENSG00000243494.1_CTC-550B1  | ENSG00000160789.18_LMNA | 0.04025  | -0.119713493 | 0.198185024 | 6.22E-01 | 8.29E-01 | 1.00E+00 |
| ENSG00000256268.1_RP11-221N  | ENSG00000160789.18_LMNA | 0.34638  | 0.198098443  | 0.479153981 | 1.24E-05 | 3.47E-04 | 6.34E-01 |
| ENSG00000163394.5_CCKAR      | ENSG00000160789.18_LMNA | -0.03735 | -0.195387416 | 0.122581088 | 6.48E-01 | 8.43E-01 | 1.00E+00 |
| ENSG00000269994.1_RP11-276H  | ENSG00000160789.18_LMNA | -0.15396 | -0.305667795 | 0.005373269 | 5.83E-02 | 2.21E-01 | 1.00E+00 |
| ENSG00000244020.2_MT1HL1     | ENSG00000160789.18_LMNA | 0.16513  | 0.00608461   | 0.316018543 | 4.21E-02 | 1.79E-01 | 1.00E+00 |
| ENSG00000231585.1_AC034228.  | ENSG00000160789.18_LMNA | -0.30811 | -0.445461166 | -0.15659133 | 1.13E-04 | 2.08E-03 | 1.00E+00 |
| ENSG00000254689.1_RP11-354A  | ENSG00000160789.18_LMNA | -0.14129 | -0.29388385  | 0.018318978 | 8.25E-02 | 2.77E-01 | 1.00E+00 |
| ENSG00000261409.1_RP6-24A23  | ENSG00000160789.18_LMNA | -0.25531 | -0.398317236 | -0.10017709 | 1.50E-03 | 1.57E-02 | 1.00E+00 |
| ENSG00000279352.1_RP11-411B  | ENSG00000160789.18_LMNA | 0.07312  | -0.087091841 | 0.229650017 | 3.71E-01 | 6.51E-01 | 1.00E+00 |
| ENSG00000255557.1_RP11-770G  | ENSG00000160789.18_LMNA | 0.14658  | -0.012926017 | 0.2988044   | 7.16E-02 | 2.53E-01 | 1.00E+00 |
| ENSG00000281348.1_CTD-2574D  | ENSG00000160789.18_LMNA | 0.21262  | 0.055293193  | 0.359648967 | 8.54E-03 | 5.85E-02 | 1.00E+00 |
| ENSG00000255893.1_RP11-685N  | ENSG00000160789.18_LMNA | -0.06957 | -0.226263943 | 0.09063531  | 3.94E-01 | 6.72E-01 | 1.00E+00 |
| ENSG00000259246.3_HMGN2P47   | ENSG00000160789.18_LMNA | -0.04795 | -0.205586047 | 0.112101655 | 5.57E-01 | 7.91E-01 | 1.00E+00 |
| ENSG00000236012.2_HIGD1AP1   | ENSG00000160789.18_LMNA | 0.01678  | -0.142805502 | 0.175508557 | 8.37E-01 | 9.37E-01 | 1.00E+00 |
| ENSG00000204637.4_AC068538.  | ENSG00000160789.18_LMNA | -0.10178 | -0.25681566  | 0.05837037  | 2.12E-01 | 4.86E-01 | 1.00E+00 |
| ENSG00000234197.1_ETV5-AS1   | ENSG00000160789.18_LMNA | 0.02186  | -0.137824691 | 0.180428476 | 7.89E-01 | 9.14E-01 | 1.00E+00 |
| ENSG00000174418.7_RPL35P9    | ENSG00000160789.18_LMNA | 0.02798  | -0.131811266 | 0.186347242 | 7.32E-01 | 8.87E-01 | 1.00E+00 |
| ENSG00000258100.1_RP11-121E  | ENSG00000160789.18_LMNA | -0.14893 | -0.300992119 | 0.010522421 | 6.71E-02 | 2.43E-01 | 1.00E+00 |
| ENSG00000171819.4_ANGPTL7    | ENSG00000160789.18_LMNA | -0.01875 | -0.177425896 | 0.140866349 | 8.19E-01 | 9.29E-01 | 1.00E+00 |
| ENSG00000234230.1_ZFX-AS1    | ENSG00000160789.18_LMNA | 0.04644  | -0.113599442 | 0.204132608 | 5.70E-01 | 7.99E-01 | 1.00E+00 |
| ENSG00000279846.1_RP11-20G1  | ENSG00000160789.18_LMNA | -0.15892 | -0.310274847 | 0.000283505 | 5.05E-02 | 2.03E-01 | 1.00E+00 |
| ENSG00000104921.13_FCER2     | ENSG00000160789.18_LMNA | 0.04494  | -0.115081724 | 0.202692835 | 5.82E-01 | 8.06E-01 | 1.00E+00 |
| ENSG00000253720.1_RP11-473O  | ENSG00000160789.18_LMNA | -0.21018 | -0.357416996 | -0.05273946 | 9.35E-03 | 6.24E-02 | 1.00E+00 |
| ENSG00000254208.1_RP11-219B  | ENSG00000160789.18_LMNA | -0.13443 | -0.287479814 | 0.025310749 | 9.87E-02 | 3.09E-01 | 1.00E+00 |
| ENSG00000268499.1_CTB-102L5  | ENSG00000160789.18_LMNA | -0.05602 | -0.213321207 | 0.104106116 | 4.93E-01 | 7.48E-01 | 1.00E+00 |
| ENSG00000227698.1_AP001619.  | ENSG00000160789.18_LMNA | 0.22314  | 0.066289943  | 0.369220544 | 5.72E-03 | 4.34E-02 | 1.00E+00 |
| ENSG00000281491.1_DNAJB5-A5  | ENSG00000160789.18_LMNA | 0.00351  | -0.155779313 | 0.162618271 | 9.66E-01 | 9.87E-01 | 1.00E+00 |
| ENSG00000253347.1_CTD-2026D  | ENSG00000160789.18_LMNA | -0.0076  | -0.16660214  | 0.151781324 | 9.26E-01 | 9.72E-01 | 1.00E+00 |
| ENSG00000259347.4_RP11-798K  | ENSG00000160789.18_LMNA | -0.07951 | -0.235722159 | 0.080717308 | 3.30E-01 | 6.16E-01 | 1.00E+00 |

|                              |                         |          |              |             |          |          |          |
|------------------------------|-------------------------|----------|--------------|-------------|----------|----------|----------|
| ENSG00000187772.6_LIN28B     | ENSG00000160789.18_LMNA | -0.22328 | -0.369351719 | -0.06644116 | 5.69E-03 | 4.32E-02 | 1.00E+00 |
| ENSG00000215533.7_LINC00189  | ENSG00000160789.18_LMNA | -0.03893 | -0.196909644 | 0.121021438 | 6.34E-01 | 8.36E-01 | 1.00E+00 |
| ENSG00000270750.1_RP11-461L  | ENSG00000160789.18_LMNA | -0.04656 | -0.204250791 | 0.113477707 | 5.69E-01 | 7.98E-01 | 1.00E+00 |
| ENSG00000268288.1_RP11-98D1  | ENSG00000160789.18_LMNA | -0.03825 | -0.196254535 | 0.121692845 | 6.40E-01 | 8.39E-01 | 1.00E+00 |
| ENSG00000228038.1_VN1R51P    | ENSG00000160789.18_LMNA | 0.09633  | -0.06384974  | 0.251671265 | 2.38E-01 | 5.16E-01 | 1.00E+00 |
| ENSG00000265136.1_RP13-638C  | ENSG00000160789.18_LMNA | -0.04367 | -0.20147427  | 0.116335161 | 5.93E-01 | 8.12E-01 | 1.00E+00 |
| ENSG00000237879.1_LINC00398  | ENSG00000160789.18_LMNA | 0.08532  | -0.07489922  | 0.24124277  | 2.96E-01 | 5.82E-01 | 1.00E+00 |
| ENSG00000217379.2_RP11-254A  | ENSG00000160789.18_LMNA | -0.10439 | -0.25928599  | 0.055732418 | 2.01E-01 | 4.71E-01 | 1.00E+00 |
| ENSG00000230444.1_TFAMP1     | ENSG00000160789.18_LMNA | 0.05891  | -0.101236245 | 0.216087948 | 4.71E-01 | 7.31E-01 | 1.00E+00 |
| ENSG00000243122.1_RP11-25H1  | ENSG00000160789.18_LMNA | 0.06031  | -0.099850433 | 0.217422138 | 4.60E-01 | 7.24E-01 | 1.00E+00 |
| ENSG00000259211.1_RP11-64K1  | ENSG00000160789.18_LMNA | -0.01147 | -0.170359689 | 0.148000887 | 8.88E-01 | 9.57E-01 | 1.00E+00 |
| ENSG00000260459.2_FTLF14     | ENSG00000160789.18_LMNA | -0.06064 | -0.217742737 | 0.099517247 | 4.58E-01 | 7.22E-01 | 1.00E+00 |
| ENSG00000258401.1_RP11-326E  | ENSG00000160789.18_LMNA | -0.03666 | -0.194723234 | 0.123261107 | 6.54E-01 | 8.47E-01 | 1.00E+00 |
| ENSG00000254251.1_RP11-662G  | ENSG00000160789.18_LMNA | -0.02972 | -0.188027987 | 0.13009936  | 7.16E-01 | 8.79E-01 | 1.00E+00 |
| ENSG00000228901.3_HMGN2P36   | ENSG00000160789.18_LMNA | 0.16939  | 0.010474066  | 0.319964411 | 3.70E-02 | 1.64E-01 | 1.00E+00 |
| ENSG00000241899.1_TPT1P3     | ENSG00000160789.18_LMNA | -0.0212  | -0.179791773 | 0.138470182 | 7.95E-01 | 9.18E-01 | 1.00E+00 |
| ENSG00000237586.3_RP11-383J  | ENSG00000160789.18_LMNA | -0.00631 | -0.165347727 | 0.153041308 | 9.38E-01 | 9.76E-01 | 1.00E+00 |
| ENSG00000271156.1_RP11-642C  | ENSG00000160789.18_LMNA | 0.00179  | -0.157450999 | 0.160949406 | 9.82E-01 | 9.94E-01 | 1.00E+00 |
| ENSG00000273384.1_RP5-1098D  | ENSG00000160789.18_LMNA | -0.10403 | -0.25894507  | 0.056096733 | 2.02E-01 | 4.73E-01 | 1.00E+00 |
| ENSG00000262136.1_CTD-2033A  | ENSG00000160789.18_LMNA | 0.07084  | -0.089368185 | 0.227475665 | 3.86E-01 | 6.64E-01 | 1.00E+00 |
| ENSG00000197360.8_ZNF98      | ENSG00000160789.18_LMNA | -0.36408 | -0.494612484 | -0.21748561 | 4.01E-06 | 1.39E-04 | 2.06E-01 |
| ENSG00000253653.1_CTC-248O1  | ENSG00000160789.18_LMNA | -0.10133 | -0.256391368 | 0.058823009 | 2.14E-01 | 4.88E-01 | 1.00E+00 |
| ENSG00000236708.1_AC073316   | ENSG00000160789.18_LMNA | -0.05049 | -0.208018153 | 0.109592106 | 5.37E-01 | 7.78E-01 | 1.00E+00 |
| ENSG00000257735.1_RP11-370I1 | ENSG00000160789.18_LMNA | -0.02476 | -0.183236344 | 0.134974838 | 7.62E-01 | 9.01E-01 | 1.00E+00 |
| ENSG00000279897.1_BIRC6-AS2  | ENSG00000160789.18_LMNA | -0.03234 | -0.190557331 | 0.127519544 | 6.92E-01 | 8.68E-01 | 1.00E+00 |
| ENSG00000257534.1_RP11-834C  | ENSG00000160789.18_LMNA | -0.12701 | -0.280535467 | 0.032857993 | 1.19E-01 | 3.46E-01 | 1.00E+00 |
| ENSG00000203321.2_C9orf41-AS | ENSG00000160789.18_LMNA | -0.05412 | -0.211495381 | 0.105997109 | 5.08E-01 | 7.58E-01 | 1.00E+00 |
| ENSG00000258177.1_RP11-394J  | ENSG00000160789.18_LMNA | 0.19281  | 0.034668589  | 0.341522902 | 1.73E-02 | 9.73E-02 | 1.00E+00 |
| ENSG00000236047.1_AC073410   | ENSG00000160789.18_LMNA | -0.02404 | -0.182543743 | 0.135678285 | 7.69E-01 | 9.04E-01 | 1.00E+00 |
| ENSG00000225984.1_HMGB1P26   | ENSG00000160789.18_LMNA | 0.0682   | -0.091999118 | 0.22495867  | 4.04E-01 | 6.80E-01 | 1.00E+00 |
| ENSG00000107187.14_LHX3      | ENSG00000160789.18_LMNA | -0.21152 | -0.358639141 | -0.0541373  | 8.90E-03 | 6.03E-02 | 1.00E+00 |
| ENSG00000214009.2_PCNPAP3    | ENSG00000160789.18_LMNA | 0.07195  | -0.088256777 | 0.228537671 | 3.78E-01 | 6.58E-01 | 1.00E+00 |
| ENSG00000229057.1_RPS3AP54   | ENSG00000160789.18_LMNA | -0.0591  | -0.216267138 | 0.101050193 | 4.70E-01 | 7.30E-01 | 1.00E+00 |

|                              |                         |          |              |             |          |          |          |
|------------------------------|-------------------------|----------|--------------|-------------|----------|----------|----------|
| ENSG00000116176.6_TPSG1      | ENSG00000160789.18_LMNA | 0.091    | -0.069204674 | 0.246626414 | 2.65E-01 | 5.49E-01 | 1.00E+00 |
| ENSG00000240167.1_RPS7P7     | ENSG00000160789.18_LMNA | -0.13265 | -0.28581786  | 0.027120243 | 1.03E-01 | 3.18E-01 | 1.00E+00 |
| ENSG00000264448.3_MIR378D2   | ENSG00000160789.18_LMNA | -0.05157 | -0.209051356 | 0.108524777 | 5.28E-01 | 7.72E-01 | 1.00E+00 |
| ENSG00000224426.1_SLC31A1P   | ENSG00000160789.18_LMNA | 0.15709  | -0.002168949 | 0.308569918 | 5.33E-02 | 2.09E-01 | 1.00E+00 |
| ENSG00000231725.1_VN1R110P   | ENSG00000160789.18_LMNA | -0.21748 | -0.364078249 | -0.06037282 | 7.11E-03 | 5.10E-02 | 1.00E+00 |
| ENSG00000230805.5_AL132709.1 | ENSG00000160789.18_LMNA | 0.07073  | -0.089482326 | 0.227366554 | 3.87E-01 | 6.65E-01 | 1.00E+00 |
| ENSG00000150175.13_FRMPD2E   | ENSG00000160789.18_LMNA | -0.02902 | -0.187351864 | 0.130788246 | 7.23E-01 | 8.83E-01 | 1.00E+00 |
| ENSG00000122859.4_NEUROG3    | ENSG00000160789.18_LMNA | -0.08359 | -0.239598782 | 0.076634048 | 3.06E-01 | 5.93E-01 | 1.00E+00 |
| ENSG00000091181.18_IL5RA     | ENSG00000160789.18_LMNA | 0.00586  | -0.15348425  | 0.164906499 | 9.43E-01 | 9.77E-01 | 1.00E+00 |
| ENSG00000213368.3_ST13P11    | ENSG00000160789.18_LMNA | -0.05514 | -0.212476842 | 0.104980904 | 5.00E-01 | 7.53E-01 | 1.00E+00 |
| ENSG00000254551.1_RP11-727A  | ENSG00000160789.18_LMNA | 0.04313  | -0.116870296 | 0.200953724 | 5.98E-01 | 8.15E-01 | 1.00E+00 |
| ENSG00000255002.1_CTD-2509C  | ENSG00000160789.18_LMNA | 0.01016  | -0.149282826 | 0.169086547 | 9.01E-01 | 9.62E-01 | 1.00E+00 |
| ENSG00000245112.2_SMARCA5-   | ENSG00000160789.18_LMNA | 0.01602  | -0.14354773  | 0.174774039 | 8.45E-01 | 9.39E-01 | 1.00E+00 |
| ENSG00000107165.11_TYRP1     | ENSG00000160789.18_LMNA | -0.14987 | -0.301866736 | 0.009560492 | 6.53E-02 | 2.38E-01 | 1.00E+00 |
| ENSG00000244244.2_RPS3AP42   | ENSG00000160789.18_LMNA | 0.10898  | -0.051107908 | 0.263606724 | 1.81E-01 | 4.45E-01 | 1.00E+00 |
| ENSG00000269794.1_AC010642.  | ENSG00000160789.18_LMNA | 0.16645  | 0.007446993  | 0.317244395 | 4.04E-02 | 1.75E-01 | 1.00E+00 |
| ENSG00000265194.1_RP11-70L8  | ENSG00000160789.18_LMNA | -0.13162 | -0.284855599 | 0.028166992 | 1.06E-01 | 3.23E-01 | 1.00E+00 |
| ENSG00000188162.9_OTOG       | ENSG00000160789.18_LMNA | -0.30567 | -0.443298445 | -0.15396142 | 1.28E-04 | 2.31E-03 | 1.00E+00 |
| ENSG00000259750.1_RP11-356M  | ENSG00000160789.18_LMNA | -0.00788 | -0.166867215 | 0.15151494  | 9.23E-01 | 9.71E-01 | 1.00E+00 |
| ENSG00000239481.1_RPS3AP41   | ENSG00000160789.18_LMNA | -0.09091 | -0.246542719 | 0.06929336  | 2.65E-01 | 5.49E-01 | 1.00E+00 |
| ENSG00000075673.10_ATP12A    | ENSG00000160789.18_LMNA | 0.05411  | -0.106005097 | 0.211487665 | 5.08E-01 | 7.58E-01 | 1.00E+00 |
| ENSG00000140835.9_CHST4      | ENSG00000160789.18_LMNA | 0.22688  | 0.070216518  | 0.372622737 | 4.94E-03 | 3.89E-02 | 1.00E+00 |
| ENSG00000232665.2_PHBP10     | ENSG00000160789.18_LMNA | 0.04397  | -0.116045244 | 0.201756209 | 5.91E-01 | 8.10E-01 | 1.00E+00 |
| ENSG00000203589.2_           | ENSG00000160789.18_LMNA | 0.03089  | -0.128948377 | 0.189156973 | 7.06E-01 | 8.75E-01 | 1.00E+00 |
| ENSG00000232613.5_AC007386.  | ENSG00000160789.18_LMNA | -0.2146  | -0.361454085 | -0.05736145 | 7.93E-03 | 5.53E-02 | 1.00E+00 |
| ENSG00000228744.1_RPS3AP30   | ENSG00000160789.18_LMNA | -0.14861 | -0.300695941 | 0.010848036 | 6.77E-02 | 2.44E-01 | 1.00E+00 |
| ENSG00000166415.13_WDR72     | ENSG00000160789.18_LMNA | -0.13428 | -0.287333682 | 0.025469937 | 9.91E-02 | 3.10E-01 | 1.00E+00 |
| ENSG00000233760.1_AC004947.  | ENSG00000160789.18_LMNA | -0.29791 | -0.436414494 | -0.14561759 | 1.93E-04 | 3.18E-03 | 1.00E+00 |
| ENSG00000129170.7_CSRP3      | ENSG00000160789.18_LMNA | -0.22136 | -0.367606215 | -0.06443007 | 6.13E-03 | 4.57E-02 | 1.00E+00 |
| ENSG00000253384.1_CTD-2547L  | ENSG00000160789.18_LMNA | -0.06772 | -0.224501156 | 0.092476866 | 4.07E-01 | 6.82E-01 | 1.00E+00 |
| ENSG00000274308.1_RP11-19G2  | ENSG00000160789.18_LMNA | -0.05757 | -0.214804796 | 0.102567884 | 4.81E-01 | 7.39E-01 | 1.00E+00 |
| ENSG00000163612.10_FAM86KP   | ENSG00000160789.18_LMNA | -0.0178  | -0.176502935 | 0.141800115 | 8.28E-01 | 9.33E-01 | 1.00E+00 |
| ENSG00000204033.8_LRIT2      | ENSG00000160789.18_LMNA | -0.26269 | -0.404954191 | -0.10800486 | 1.08E-03 | 1.23E-02 | 1.00E+00 |

|                              |                         |          |              |             |          |          |          |
|------------------------------|-------------------------|----------|--------------|-------------|----------|----------|----------|
| ENSG00000238181.2_AHCYP2     | ENSG00000160789.18_LMNA | 0.13061  | -0.02919385  | 0.283911009 | 1.09E-01 | 3.28E-01 | 1.00E+00 |
| ENSG00000206127.9_GOLGA8O    | ENSG00000160789.18_LMNA | 0.02074  | -0.138920429 | 0.179347499 | 8.00E-01 | 9.20E-01 | 1.00E+00 |
| ENSG00000233719.3_GOT2P3     | ENSG00000160789.18_LMNA | -0.0997  | -0.25485779  | 0.060457966 | 2.22E-01 | 4.97E-01 | 1.00E+00 |
| ENSG00000225008.1_RP13-228J  | ENSG00000160789.18_LMNA | 0.0395   | -0.120459703 | 0.197457524 | 6.29E-01 | 8.33E-01 | 1.00E+00 |
| ENSG00000120498.12_TEX11     | ENSG00000160789.18_LMNA | -0.12191 | -0.275754939 | 0.038032871 | 1.35E-01 | 3.73E-01 | 1.00E+00 |
| ENSG00000228677.1_TTC3-AS1   | ENSG00000160789.18_LMNA | 0.04061  | -0.119358422 | 0.198531069 | 6.19E-01 | 8.28E-01 | 1.00E+00 |
| ENSG00000257542.4_OR7E47P    | ENSG00000160789.18_LMNA | 0.05827  | -0.101877866 | 0.215469826 | 4.76E-01 | 7.34E-01 | 1.00E+00 |
| ENSG00000231574.4_KCCAT211   | ENSG00000160789.18_LMNA | 0.29077  | 0.137954473  | 0.43006202  | 2.79E-04 | 4.25E-03 | 1.00E+00 |
| ENSG00000167769.4_ACER1      | ENSG00000160789.18_LMNA | -0.01862 | -0.17729427  | 0.14099955  | 8.20E-01 | 9.30E-01 | 1.00E+00 |
| ENSG00000138483.2_CCDC54     | ENSG00000160789.18_LMNA | -0.11146 | -0.265937358 | 0.048607799 | 1.72E-01 | 4.31E-01 | 1.00E+00 |
| ENSG00000102128.7_RAB40AL    | ENSG00000160789.18_LMNA | 0.09572  | -0.06446025  | 0.251096972 | 2.41E-01 | 5.20E-01 | 1.00E+00 |
| ENSG00000230356.1_NCAPD2P1   | ENSG00000160789.18_LMNA | -0.05818 | -0.215381921 | 0.101969092 | 4.77E-01 | 7.35E-01 | 1.00E+00 |
| ENSG00000116882.13_HAO2      | ENSG00000160789.18_LMNA | 0.01913  | -0.140499104 | 0.177788737 | 8.15E-01 | 9.28E-01 | 1.00E+00 |
| ENSG00000248400.2_ST13P12    | ENSG00000160789.18_LMNA | -0.09288 | -0.248410694 | 0.067312801 | 2.55E-01 | 5.37E-01 | 1.00E+00 |
| ENSG00000279092.1_RP11-1H8.1 | ENSG00000160789.18_LMNA | 0.02341  | -0.136298979 | 0.181932356 | 7.75E-01 | 9.07E-01 | 1.00E+00 |
| ENSG00000185156.5_MFSD6L     | ENSG00000160789.18_LMNA | 0.01221  | -0.147278499 | 0.171076651 | 8.81E-01 | 9.54E-01 | 1.00E+00 |
| ENSG00000224939.1_LINC00184  | ENSG00000160789.18_LMNA | -0.15409 | -0.305793387 | 0.005234732 | 5.80E-02 | 2.21E-01 | 1.00E+00 |
| ENSG00000223949.5_ROR1-AS1   | ENSG00000160789.18_LMNA | 0.08815  | -0.072064601 | 0.243925063 | 2.80E-01 | 5.66E-01 | 1.00E+00 |
| ENSG00000261649.4_GOLGA6L7   | ENSG00000160789.18_LMNA | 0.03675  | -0.123168481 | 0.194813721 | 6.53E-01 | 8.46E-01 | 1.00E+00 |
| ENSG00000279078.1_SND1-IT1   | ENSG00000160789.18_LMNA | -0.03492 | -0.193051375 | 0.12497151  | 6.69E-01 | 8.55E-01 | 1.00E+00 |
| ENSG00000165376.9_CLDN2      | ENSG00000160789.18_LMNA | 0.12287  | -0.037053943 | 0.27666046  | 1.32E-01 | 3.68E-01 | 1.00E+00 |
| ENSG00000178732.5_GP5        | ENSG00000160789.18_LMNA | 0.09726  | -0.062919292 | 0.252546089 | 2.33E-01 | 5.11E-01 | 1.00E+00 |
| ENSG00000274808.3_TBC1D3B    | ENSG00000160789.18_LMNA | 0.04051  | -0.119457956 | 0.198434073 | 6.20E-01 | 8.28E-01 | 1.00E+00 |
| ENSG00000269937.1_RP11-20I23 | ENSG00000160789.18_LMNA | 0.06857  | -0.091628132 | 0.225313846 | 4.01E-01 | 6.78E-01 | 1.00E+00 |
| ENSG00000179088.13_C12orf42  | ENSG00000160789.18_LMNA | -0.19617 | -0.344607497 | -0.03816001 | 1.54E-02 | 8.96E-02 | 1.00E+00 |
| ENSG00000261842.1_RP11-143I2 | ENSG00000160789.18_LMNA | -0.02988 | -0.188188034 | 0.129936247 | 7.15E-01 | 8.79E-01 | 1.00E+00 |
| ENSG00000130368.5_MAS1       | ENSG00000160789.18_LMNA | -0.05005 | -0.207595005 | 0.110029019 | 5.40E-01 | 7.80E-01 | 1.00E+00 |
| ENSG00000258465.5_RP11-574F  | ENSG00000160789.18_LMNA | -0.02544 | -0.183895337 | 0.134305228 | 7.56E-01 | 8.98E-01 | 1.00E+00 |
| ENSG00000127412.5_TRPV5      | ENSG00000160789.18_LMNA | -0.14909 | -0.301138813 | 0.010361123 | 6.68E-02 | 2.42E-01 | 1.00E+00 |
| ENSG00000230360.1_DDX10P2    | ENSG00000160789.18_LMNA | -0.06699 | -0.22380847  | 0.093199912 | 4.12E-01 | 6.86E-01 | 1.00E+00 |
| ENSG00000236393.1_RP11-320G  | ENSG00000160789.18_LMNA | 0.17458  | 0.015817724  | 0.324753606 | 3.15E-02 | 1.48E-01 | 1.00E+00 |
| ENSG00000232354.6_VIPR1-AS1  | ENSG00000160789.18_LMNA | -0.03719 | -0.195235862 | 0.122736283 | 6.49E-01 | 8.44E-01 | 1.00E+00 |
| ENSG00000259091.1_LINC00517  | ENSG00000160789.18_LMNA | -0.06187 | -0.218918404 | 0.098294808 | 4.49E-01 | 7.15E-01 | 1.00E+00 |

|                              |                         |          |              |             |          |          |          |
|------------------------------|-------------------------|----------|--------------|-------------|----------|----------|----------|
| ENSG00000248522.1_SBF1P1     | ENSG00000160789.18_LMNA | 0.04928  | -0.110791163 | 0.206856588 | 5.47E-01 | 7.84E-01 | 1.00E+00 |
| ENSG00000258535.1_RP11-280K  | ENSG00000160789.18_LMNA | -0.03109 | -0.189352093 | 0.128749368 | 7.04E-01 | 8.74E-01 | 1.00E+00 |
| ENSG00000115850.8_LCT        | ENSG00000160789.18_LMNA | 0.16207  | 0.002945669  | 0.313190225 | 4.61E-02 | 1.91E-01 | 1.00E+00 |
| ENSG00000211660.3_IGLV2-23   | ENSG00000160789.18_LMNA | 0.10619  | -0.053924607 | 0.260976552 | 1.93E-01 | 4.61E-01 | 1.00E+00 |
| ENSG00000266852.2_MIR4482    | ENSG00000160789.18_LMNA | 0.05854  | -0.101607313 | 0.215730502 | 4.74E-01 | 7.33E-01 | 1.00E+00 |
| ENSG00000265280.1_           | ENSG00000160789.18_LMNA | -0.10888 | -0.263512672 | 0.051208716 | 1.82E-01 | 4.46E-01 | 1.00E+00 |
| ENSG00000233977.1_RP11-310H  | ENSG00000160789.18_LMNA | 0.15599  | -0.003290744 | 0.307554576 | 5.50E-02 | 2.14E-01 | 1.00E+00 |
| ENSG00000212327.1_RNU6-882F  | ENSG00000160789.18_LMNA | 0.00332  | -0.155963491 | 0.162434493 | 9.68E-01 | 9.87E-01 | 1.00E+00 |
| ENSG00000249641.2_HOXC13-A   | ENSG00000160789.18_LMNA | -0.15514 | -0.306763178 | 0.004164575 | 5.63E-02 | 2.17E-01 | 1.00E+00 |
| ENSG00000265082.2_           | ENSG00000160789.18_LMNA | -0.12593 | -0.279526496 | 0.033951596 | 1.22E-01 | 3.52E-01 | 1.00E+00 |
| ENSG00000120937.8_NPPB       | ENSG00000160789.18_LMNA | 0.15288  | -0.006476853 | 0.30466695  | 6.01E-02 | 2.26E-01 | 1.00E+00 |
| ENSG00000280753.1_           | ENSG00000160789.18_LMNA | 0.13953  | -0.02011849  | 0.292238281 | 8.65E-02 | 2.86E-01 | 1.00E+00 |
| ENSG00000262890.1_RP11-424M  | ENSG00000160789.18_LMNA | 0.01842  | -0.141192749 | 0.177103337 | 8.22E-01 | 9.30E-01 | 1.00E+00 |
| ENSG00000164326.4_CARTPT     | ENSG00000160789.18_LMNA | -0.17487 | -0.325024957 | -0.01612102 | 3.12E-02 | 1.47E-01 | 1.00E+00 |
| ENSG00000274210.1_U1         | ENSG00000160789.18_LMNA | -0.00843 | -0.16740485  | 0.150974507 | 9.18E-01 | 9.69E-01 | 1.00E+00 |
| ENSG00000265665.1_           | ENSG00000160789.18_LMNA | -0.07608 | -0.232469721 | 0.084134938 | 3.52E-01 | 6.35E-01 | 1.00E+00 |
| ENSG00000280859.1_           | ENSG00000160789.18_LMNA | 0.06521  | -0.094975267 | 0.222106299 | 4.25E-01 | 6.96E-01 | 1.00E+00 |
| ENSG00000239122.1_RNU2-11P   | ENSG00000160789.18_LMNA | 0.07448  | -0.085737265 | 0.230942402 | 3.62E-01 | 6.44E-01 | 1.00E+00 |
| ENSG00000230635.2_CYP4F60P   | ENSG00000160789.18_LMNA | -0.18147 | -0.331107938 | -0.02293507 | 2.53E-02 | 1.27E-01 | 1.00E+00 |
| ENSG00000276354.1_           | ENSG00000160789.18_LMNA | -0.08718 | -0.243011182 | 0.073030955 | 2.86E-01 | 5.71E-01 | 1.00E+00 |
| ENSG00000239542.3_RN7SL399F  | ENSG00000160789.18_LMNA | 0.10065  | -0.0595013   | 0.255755328 | 2.17E-01 | 4.92E-01 | 1.00E+00 |
| ENSG00000222222.1_RNU2-17P   | ENSG00000160789.18_LMNA | -0.0678  | -0.224577524 | 0.092397131 | 4.07E-01 | 6.82E-01 | 1.00E+00 |
| ENSG00000241846.1_RP11-318G  | ENSG00000160789.18_LMNA | -0.10836 | -0.263019834 | 0.051736853 | 1.84E-01 | 4.49E-01 | 1.00E+00 |
| ENSG00000234676.1_IFT74-AS1  | ENSG00000160789.18_LMNA | -0.17699 | -0.326975976 | -0.0183034  | 2.92E-02 | 1.41E-01 | 1.00E+00 |
| ENSG00000253853.1_GS1-57L11  | ENSG00000160789.18_LMNA | -0.08615 | -0.242028455 | 0.074069445 | 2.91E-01 | 5.77E-01 | 1.00E+00 |
| ENSG00000249955.1_RP11-6E9.4 | ENSG00000160789.18_LMNA | -0.23209 | -0.377349906 | -0.07568789 | 4.01E-03 | 3.32E-02 | 1.00E+00 |
| ENSG00000265033.2_RN7SL262F  | ENSG00000160789.18_LMNA | -0.09169 | -0.247278068 | 0.068513988 | 2.61E-01 | 5.44E-01 | 1.00E+00 |
| ENSG00000258035.1_RP11-74K1  | ENSG00000160789.18_LMNA | -0.29781 | -0.436321521 | -0.14550518 | 1.94E-04 | 3.19E-03 | 1.00E+00 |
| ENSG00000239377.1_RP4-584D1  | ENSG00000160789.18_LMNA | -0.0794  | -0.235624986 | 0.080819525 | 3.31E-01 | 6.17E-01 | 1.00E+00 |
| ENSG00000243289.1_AGAP13P    | ENSG00000160789.18_LMNA | -0.10767 | -0.262374735 | 0.052427891 | 1.87E-01 | 4.53E-01 | 1.00E+00 |
| ENSG00000250692.1_CTB-35F21  | ENSG00000160789.18_LMNA | -0.06016 | -0.217278878 | 0.099999295 | 4.62E-01 | 7.25E-01 | 1.00E+00 |
| ENSG00000228944.1_AC004485.3 | ENSG00000160789.18_LMNA | -0.1247  | -0.278373869 | 0.035199987 | 1.26E-01 | 3.58E-01 | 1.00E+00 |
| ENSG00000231931.1_AC024082.4 | ENSG00000160789.18_LMNA | -0.09251 | -0.248061723 | 0.067682994 | 2.57E-01 | 5.39E-01 | 1.00E+00 |

|                              |                         |          |              |             |          |          |          |
|------------------------------|-------------------------|----------|--------------|-------------|----------|----------|----------|
| ENSG00000276216.1_CH17-373J  | ENSG00000160789.18_LMNA | 0.12744  | -0.032421835 | 0.280937679 | 1.18E-01 | 3.44E-01 | 1.00E+00 |
| ENSG00000229795.2_RPS21P1    | ENSG00000160789.18_LMNA | 0.08655  | -0.073665185 | 0.242411085 | 2.89E-01 | 5.74E-01 | 1.00E+00 |
| ENSG00000257531.2_RP3-405J1  | ENSG00000160789.18_LMNA | -0.1413  | -0.293893173 | 0.018308778 | 8.25E-02 | 2.77E-01 | 1.00E+00 |
| ENSG00000230402.2_LINC01349  | ENSG00000160789.18_LMNA | -0.1101  | -0.264661969 | 0.049976418 | 1.77E-01 | 4.38E-01 | 1.00E+00 |
| ENSG00000235772.1_AP001625   | ENSG00000160789.18_LMNA | -0.0456  | -0.203322738 | 0.114433398 | 5.77E-01 | 8.03E-01 | 1.00E+00 |
| ENSG00000266075.2_RN7SL574   | ENSG00000160789.18_LMNA | -0.07911 | -0.235344724 | 0.081114295 | 3.33E-01 | 6.18E-01 | 1.00E+00 |
| ENSG00000273971.1_RP11-77K1  | ENSG00000160789.18_LMNA | -0.13411 | -0.287174702 | 0.025643101 | 9.95E-02 | 3.11E-01 | 1.00E+00 |
| ENSG00000240808.1_CTD-3236F  | ENSG00000160789.18_LMNA | -0.13803 | -0.290838302 | 0.021647846 | 8.99E-02 | 2.92E-01 | 1.00E+00 |
| ENSG00000232097.1_AC079781   | ENSG00000160789.18_LMNA | 0.16369  | 0.004610063  | 0.3146906   | 4.39E-02 | 1.85E-01 | 1.00E+00 |
| ENSG00000147869.4_CER1       | ENSG00000160789.18_LMNA | -0.04942 | -0.206996221 | 0.110647072 | 5.45E-01 | 7.83E-01 | 1.00E+00 |
| ENSG00000254694.1_RP11-50B3  | ENSG00000160789.18_LMNA | -0.0385  | -0.196493768 | 0.121447694 | 6.38E-01 | 8.38E-01 | 1.00E+00 |
| ENSG00000263220.1_RP11-420A  | ENSG00000160789.18_LMNA | -0.15905 | -0.310387626 | 0.000158708 | 5.03E-02 | 2.02E-01 | 1.00E+00 |
| ENSG00000234772.1_LINC00412  | ENSG00000160789.18_LMNA | -0.07381 | -0.230299815 | 0.086410919 | 3.66E-01 | 6.47E-01 | 1.00E+00 |
| ENSG00000262248.1_RP11-235E  | ENSG00000160789.18_LMNA | 0.12822  | -0.031625406 | 0.281671838 | 1.15E-01 | 3.40E-01 | 1.00E+00 |
| ENSG00000242087.2_RPL36AP4   | ENSG00000160789.18_LMNA | 0.00996  | -0.149478362 | 0.168892261 | 9.03E-01 | 9.63E-01 | 1.00E+00 |
| ENSG00000275636.1_RP11-521C  | ENSG00000160789.18_LMNA | -0.17127 | -0.321701884 | -0.01241065 | 3.49E-02 | 1.58E-01 | 1.00E+00 |
| ENSG00000278472.1_RP11-74D7  | ENSG00000160789.18_LMNA | 0.04276  | -0.117239726 | 0.200594261 | 6.01E-01 | 8.17E-01 | 1.00E+00 |
| ENSG00000276692.1_RP11-104G  | ENSG00000160789.18_LMNA | -0.03912 | -0.197094155 | 0.120832284 | 6.32E-01 | 8.35E-01 | 1.00E+00 |
| ENSG00000272137.1_RP11-177G  | ENSG00000160789.18_LMNA | -0.1325  | -0.285669993 | 0.027281138 | 1.04E-01 | 3.19E-01 | 1.00E+00 |
| ENSG00000231613.1_RP5-943J3  | ENSG00000160789.18_LMNA | -0.06718 | -0.22398077  | 0.093020092 | 4.11E-01 | 6.85E-01 | 1.00E+00 |
| ENSG00000280850.1_RP4-655C5  | ENSG00000160789.18_LMNA | 0.06663  | -0.093560774 | 0.22346264  | 4.15E-01 | 6.88E-01 | 1.00E+00 |
| ENSG00000267507.1_CTD-2587H  | ENSG00000160789.18_LMNA | 0.23374  | 0.077416238  | 0.378839909 | 3.75E-03 | 3.16E-02 | 1.00E+00 |
| ENSG00000166796.10_LDHC      | ENSG00000160789.18_LMNA | -0.00741 | -0.166416185 | 0.151968171 | 9.28E-01 | 9.72E-01 | 1.00E+00 |
| ENSG00000258922.1_CTD-2313J  | ENSG00000160789.18_LMNA | -0.06174 | -0.218794472 | 0.098423716 | 4.50E-01 | 7.16E-01 | 1.00E+00 |
| ENSG00000276832.1_RP11-187C  | ENSG00000160789.18_LMNA | 0.02021  | -0.139435212 | 0.178839385 | 8.05E-01 | 9.22E-01 | 1.00E+00 |
| ENSG00000130595.15_TNNT3     | ENSG00000160789.18_LMNA | 0.04649  | -0.113555362 | 0.204175403 | 5.70E-01 | 7.99E-01 | 1.00E+00 |
| ENSG00000279155.1_LL0XNC01   | ENSG00000160789.18_LMNA | -0.00674 | -0.165765604 | 0.152621691 | 9.34E-01 | 9.74E-01 | 1.00E+00 |
| ENSG00000251556.1_RP11-118M  | ENSG00000160789.18_LMNA | -0.20531 | -0.352969052 | -0.04766216 | 1.12E-02 | 7.09E-02 | 1.00E+00 |
| ENSG00000127129.8_EDN2       | ENSG00000160789.18_LMNA | 0.31606  | 0.165174881  | 0.452496501 | 7.29E-05 | 1.46E-03 | 1.00E+00 |
| ENSG00000226669.2_RP11-509J  | ENSG00000160789.18_LMNA | 0.13826  | -0.021407487 | 0.291058416 | 8.94E-02 | 2.91E-01 | 1.00E+00 |
| ENSG00000267076.1_CCDC58P3   | ENSG00000160789.18_LMNA | 0.10997  | -0.050104706 | 0.264542363 | 1.77E-01 | 4.39E-01 | 1.00E+00 |
| ENSG00000262362.1_LA16c-380F | ENSG00000160789.18_LMNA | 0.05703  | -0.103104837 | 0.214287084 | 4.85E-01 | 7.42E-01 | 1.00E+00 |
| ENSG00000259843.2_RP11-429P  | ENSG00000160789.18_LMNA | 0.06296  | -0.097214303 | 0.219956803 | 4.41E-01 | 7.09E-01 | 1.00E+00 |

|                              |                         |          |              |             |          |          |          |
|------------------------------|-------------------------|----------|--------------|-------------|----------|----------|----------|
| ENSG00000246115.3_SUPT4H1P   | ENSG00000160789.18_LMNA | -0.13161 | -0.284843359 | 0.028180302 | 1.06E-01 | 3.23E-01 | 1.00E+00 |
| ENSG00000226088.1_RP11-180C  | ENSG00000160789.18_LMNA | -0.04098 | -0.198883685 | 0.118996525 | 6.16E-01 | 8.26E-01 | 1.00E+00 |
| ENSG00000232618.1_RP11-439L  | ENSG00000160789.18_LMNA | 0.03239  | -0.127470956 | 0.190604927 | 6.92E-01 | 8.67E-01 | 1.00E+00 |
| ENSG00000271414.1_RP11-751K  | ENSG00000160789.18_LMNA | -0.09061 | -0.246260652 | 0.069592211 | 2.67E-01 | 5.51E-01 | 1.00E+00 |
| ENSG00000261916.1_RP11-235E  | ENSG00000160789.18_LMNA | -0.03804 | -0.196055686 | 0.121896582 | 6.42E-01 | 8.40E-01 | 1.00E+00 |
| ENSG00000269997.1_RP11-214K  | ENSG00000160789.18_LMNA | 0.00669  | -0.152672514 | 0.165714998 | 9.35E-01 | 9.74E-01 | 1.00E+00 |
| ENSG00000267747.1_RP11-392C  | ENSG00000160789.18_LMNA | 0.02662  | -0.133140927 | 0.185040497 | 7.45E-01 | 8.93E-01 | 1.00E+00 |
| ENSG00000273805.1_RP11-620J  | ENSG00000160789.18_LMNA | -0.17534 | -0.325459672 | -0.01660703 | 3.07E-02 | 1.46E-01 | 1.00E+00 |
| ENSG00000236888.1_RPS20P5    | ENSG00000160789.18_LMNA | -0.06903 | -0.225749876 | 0.091172572 | 3.98E-01 | 6.75E-01 | 1.00E+00 |
| ENSG00000225555.1_AP000320   | ENSG00000160789.18_LMNA | -0.1627  | -0.31377443  | -0.00359353 | 4.52E-02 | 1.88E-01 | 1.00E+00 |
| ENSG00000260082.1_RP11-2C24  | ENSG00000160789.18_LMNA | -0.04805 | -0.205679751 | 0.112005042 | 5.57E-01 | 7.90E-01 | 1.00E+00 |
| ENSG00000234206.4_RP1-67A8.5 | ENSG00000160789.18_LMNA | -0.10811 | -0.262783952 | 0.051989568 | 1.85E-01 | 4.51E-01 | 1.00E+00 |
| ENSG00000221882.2_OR3A2      | ENSG00000160789.18_LMNA | -0.13826 | -0.291057016 | 0.021409016 | 8.94E-02 | 2.91E-01 | 1.00E+00 |
| ENSG00000213739.3_AC007679   | ENSG00000160789.18_LMNA | 0.16982  | 0.010916002  | 0.320361092 | 3.65E-02 | 1.63E-01 | 1.00E+00 |
| ENSG00000260740.2_AC026471   | ENSG00000160789.18_LMNA | 0.10225  | -0.057892011 | 0.257263928 | 2.10E-01 | 4.83E-01 | 1.00E+00 |
| ENSG00000213295.3_AC092106   | ENSG00000160789.18_LMNA | -0.03678 | -0.194840816 | 0.123140743 | 6.53E-01 | 8.46E-01 | 1.00E+00 |
| ENSG00000232734.1_ATP5G1P7   | ENSG00000160789.18_LMNA | -0.10155 | -0.256603893 | 0.0585963   | 2.13E-01 | 4.87E-01 | 1.00E+00 |
| ENSG00000243265.1_RPL23AP5   | ENSG00000160789.18_LMNA | -0.10524 | -0.26007976  | 0.054883852 | 1.97E-01 | 4.66E-01 | 1.00E+00 |
| ENSG00000254896.1_OPCML-IT1  | ENSG00000160789.18_LMNA | -0.26159 | -0.403964501 | -0.10683525 | 1.13E-03 | 1.27E-02 | 1.00E+00 |
| ENSG00000236045.1_RP3-467K1  | ENSG00000160789.18_LMNA | 0.22428  | 0.067490682  | 0.370261791 | 5.47E-03 | 4.19E-02 | 1.00E+00 |
| ENSG00000253389.2_RP11-930P  | ENSG00000160789.18_LMNA | -0.32741 | -0.462503119 | -0.17745903 | 3.83E-05 | 8.69E-04 | 1.00E+00 |
| ENSG00000186288.5_PABPC1L2   | ENSG00000160789.18_LMNA | -0.14965 | -0.301668186 | 0.009778914 | 6.57E-02 | 2.39E-01 | 1.00E+00 |
| ENSG00000242578.1_RP11-469J  | ENSG00000160789.18_LMNA | 0.03627  | -0.123647208 | 0.194345995 | 6.57E-01 | 8.49E-01 | 1.00E+00 |
| ENSG00000258640.3_RPL21P5    | ENSG00000160789.18_LMNA | -0.14908 | -0.301132531 | 0.010368031 | 6.68E-02 | 2.42E-01 | 1.00E+00 |
| ENSG00000249664.1_CTD-2227C  | ENSG00000160789.18_LMNA | -0.02449 | -0.182978078 | 0.135237187 | 7.65E-01 | 9.02E-01 | 1.00E+00 |
| ENSG00000234577.1_SYNE1-AS   | ENSG00000160789.18_LMNA | -0.15012 | -0.30209731  | 0.009306804 | 6.49E-02 | 2.37E-01 | 1.00E+00 |
| ENSG00000281756.1_C2-AS1     | ENSG00000160789.18_LMNA | 0.04247  | -0.117527252 | 0.200314432 | 6.03E-01 | 8.18E-01 | 1.00E+00 |
| ENSG00000259277.1_RP13-126C  | ENSG00000160789.18_LMNA | 0.11555  | -0.044468593 | 0.269787913 | 1.56E-01 | 4.08E-01 | 1.00E+00 |
| ENSG00000230536.1_RP11-379C  | ENSG00000160789.18_LMNA | 0.15554  | -0.003752966 | 0.307136011 | 5.57E-02 | 2.15E-01 | 1.00E+00 |
| ENSG00000273509.1_CNTNAP3F   | ENSG00000160789.18_LMNA | -0.15754 | -0.308990146 | 0.001704434 | 5.26E-02 | 2.08E-01 | 1.00E+00 |
| ENSG00000258983.2_RP11-507K  | ENSG00000160789.18_LMNA | -0.11979 | -0.273768695 | 0.040178024 | 1.42E-01 | 3.84E-01 | 1.00E+00 |
| ENSG00000280571.1_RP4-613B2  | ENSG00000160789.18_LMNA | 0.01355  | -0.145968339 | 0.17237611  | 8.68E-01 | 9.49E-01 | 1.00E+00 |
| ENSG00000272635.1_LLNLF-65H  | ENSG00000160789.18_LMNA | -0.05465 | -0.212010136 | 0.105464214 | 5.04E-01 | 7.55E-01 | 1.00E+00 |



|                              |                         |          |              |             |          |          |          |
|------------------------------|-------------------------|----------|--------------|-------------|----------|----------|----------|
| ENSG00000253372.4_RP11-44N1  | ENSG00000160789.18_LMNA | -0.21429 | -0.361166119 | -0.05703133 | 8.03E-03 | 5.57E-02 | 1.00E+00 |
| ENSG00000250027.1_RP11-563E  | ENSG00000160789.18_LMNA | -0.0092  | -0.168159173 | 0.150215936 | 9.10E-01 | 9.66E-01 | 1.00E+00 |
| ENSG00000273113.1_RP11-367H  | ENSG00000160789.18_LMNA | -0.05676 | -0.214024483 | 0.103377127 | 4.87E-01 | 7.44E-01 | 1.00E+00 |
| ENSG00000255553.1_RP11-810P  | ENSG00000160789.18_LMNA | 0.02877  | -0.131032176 | 0.187112382 | 7.25E-01 | 8.83E-01 | 1.00E+00 |
| ENSG00000227343.1_RPL15P1    | ENSG00000160789.18_LMNA | -0.03531 | -0.193419609 | 0.124594949 | 6.66E-01 | 8.53E-01 | 1.00E+00 |
| ENSG00000069764.8_PLA2G10    | ENSG00000160789.18_LMNA | -0.01374 | -0.172565538 | 0.145777258 | 8.67E-01 | 9.48E-01 | 1.00E+00 |
| ENSG00000107831.11_FGF8      | ENSG00000160789.18_LMNA | -0.18465 | -0.334027296 | -0.02621548 | 2.28E-02 | 1.18E-01 | 1.00E+00 |
| ENSG00000260494.1_AC002310.  | ENSG00000160789.18_LMNA | -0.01076 | -0.169669754 | 0.148695723 | 8.95E-01 | 9.59E-01 | 1.00E+00 |
| ENSG00000279659.1_RP11-177G  | ENSG00000160789.18_LMNA | -0.12476 | -0.278430804 | 0.035138344 | 1.26E-01 | 3.58E-01 | 1.00E+00 |
| ENSG00000158748.3_HTR6       | ENSG00000160789.18_LMNA | -0.02249 | -0.181041214 | 0.137203241 | 7.83E-01 | 9.11E-01 | 1.00E+00 |
| ENSG00000251175.4_RP11-45L9  | ENSG00000160789.18_LMNA | -0.14915 | -0.301198371 | 0.010295632 | 6.67E-02 | 2.42E-01 | 1.00E+00 |
| ENSG00000270160.1_RP11-264E  | ENSG00000160789.18_LMNA | 0.01021  | -0.149234721 | 0.169134342 | 9.01E-01 | 9.62E-01 | 1.00E+00 |
| ENSG00000228983.7_SLC47A1P   | ENSG00000160789.18_LMNA | -0.10718 | -0.261913006 | 0.052922315 | 1.89E-01 | 4.56E-01 | 1.00E+00 |
| ENSG00000173966.7_RP11-18M1  | ENSG00000160789.18_LMNA | 0.0533   | -0.106802703 | 0.210716876 | 5.14E-01 | 7.62E-01 | 1.00E+00 |
| ENSG00000230873.7_STMND1     | ENSG00000160789.18_LMNA | -0.03725 | -0.195291579 | 0.122679229 | 6.49E-01 | 8.44E-01 | 1.00E+00 |
| ENSG00000229414.2_KCNQ1-AS   | ENSG00000160789.18_LMNA | -0.00088 | -0.160054328 | 0.158346838 | 9.91E-01 | 9.97E-01 | 1.00E+00 |
| ENSG00000248288.1_CTD-2194F  | ENSG00000160789.18_LMNA | 0.11811  | -0.041873639 | 0.272196791 | 1.47E-01 | 3.93E-01 | 1.00E+00 |
| ENSG00000230131.4_RP11-282I1 | ENSG00000160789.18_LMNA | 0.08737  | -0.072842592 | 0.243189361 | 2.84E-01 | 5.70E-01 | 1.00E+00 |
| ENSG00000260100.1_RP11-220I1 | ENSG00000160789.18_LMNA | -0.02624 | -0.184665195 | 0.133522599 | 7.48E-01 | 8.95E-01 | 1.00E+00 |
| ENSG00000230303.4_RP11-213G  | ENSG00000160789.18_LMNA | -0.09297 | -0.248492528 | 0.067225978 | 2.55E-01 | 5.36E-01 | 1.00E+00 |
| ENSG00000213272.5_RP11-613M  | ENSG00000160789.18_LMNA | -0.03432 | -0.19246662  | 0.1255693   | 6.75E-01 | 8.57E-01 | 1.00E+00 |
| ENSG00000213701.4_SETP22     | ENSG00000160789.18_LMNA | 0.22757  | 0.070935705  | 0.373244999 | 4.81E-03 | 3.81E-02 | 1.00E+00 |
| ENSG00000251203.1_RP11-14I17 | ENSG00000160789.18_LMNA | 0.08057  | -0.079652569 | 0.236733988 | 3.24E-01 | 6.10E-01 | 1.00E+00 |
| ENSG00000258010.3_RP11-210M  | ENSG00000160789.18_LMNA | 0.15328  | -0.00606787  | 0.305037938 | 5.94E-02 | 2.24E-01 | 1.00E+00 |
| ENSG00000235852.1_AC005540.  | ENSG00000160789.18_LMNA | 0.19353  | 0.035422391  | 0.342189429 | 1.69E-02 | 9.56E-02 | 1.00E+00 |
| ENSG00000218347.2_HNRNPA1F   | ENSG00000160789.18_LMNA | 0.00075  | -0.158472288 | 0.159928943 | 9.93E-01 | 9.97E-01 | 1.00E+00 |
| ENSG00000234537.1_RP11-100G  | ENSG00000160789.18_LMNA | 0.03803  | -0.121908197 | 0.196044349 | 6.42E-01 | 8.40E-01 | 1.00E+00 |
| ENSG00000120160.9_EQTN       | ENSG00000160789.18_LMNA | -0.22145 | -0.367691432 | -0.0645282  | 6.11E-03 | 4.56E-02 | 1.00E+00 |
| ENSG00000235118.6_AC010731.  | ENSG00000160789.18_LMNA | -0.12286 | -0.276653115 | 0.037061886 | 1.32E-01 | 3.68E-01 | 1.00E+00 |
| ENSG00000188992.10_LIP1      | ENSG00000160789.18_LMNA | -0.08679 | -0.242639454 | 0.073423856 | 2.88E-01 | 5.73E-01 | 1.00E+00 |
| ENSG00000230026.2_RP11-382D  | ENSG00000160789.18_LMNA | -0.01194 | -0.170814243 | 0.147542932 | 8.84E-01 | 9.55E-01 | 1.00E+00 |
| ENSG00000259512.3_HNRNPA1F   | ENSG00000160789.18_LMNA | -0.07313 | -0.229654341 | 0.08708731  | 3.71E-01 | 6.51E-01 | 1.00E+00 |
| ENSG00000267606.1_AC006116.  | ENSG00000160789.18_LMNA | 0.06318  | -0.096992579 | 0.220169798 | 4.39E-01 | 7.07E-01 | 1.00E+00 |

|                              |                         |          |              |             |          |          |          |
|------------------------------|-------------------------|----------|--------------|-------------|----------|----------|----------|
| ENSG00000239207.2_GAPDHP3E   | ENSG00000160789.18_LMNA | 0.17507  | 0.01632719   | 0.325209383 | 3.10E-02 | 1.46E-01 | 1.00E+00 |
| ENSG00000269570.2_CMB9-55A1  | ENSG00000160789.18_LMNA | 0.1124   | -0.047651088 | 0.266828244 | 1.68E-01 | 4.26E-01 | 1.00E+00 |
| ENSG00000255562.2_UNC93B6    | ENSG00000160789.18_LMNA | 0.12431  | -0.035597518 | 0.278006642 | 1.27E-01 | 3.61E-01 | 1.00E+00 |
| ENSG00000259118.4_RP11-840I1 | ENSG00000160789.18_LMNA | 0.08014  | -0.080086478 | 0.236321724 | 3.26E-01 | 6.13E-01 | 1.00E+00 |
| ENSG00000170950.4_PGK2       | ENSG00000160789.18_LMNA | 0.1276   | -0.032254544 | 0.28109192  | 1.17E-01 | 3.43E-01 | 1.00E+00 |
| ENSG00000182676.4_PPP1R27    | ENSG00000160789.18_LMNA | 0.08776  | -0.072448274 | 0.24356229  | 2.82E-01 | 5.68E-01 | 1.00E+00 |
| ENSG00000249448.1_MTCO1P24   | ENSG00000160789.18_LMNA | -0.0375  | -0.195530066 | 0.122434999 | 6.46E-01 | 8.43E-01 | 1.00E+00 |
| ENSG00000226840.1_PAICSP3    | ENSG00000160789.18_LMNA | 0.0117   | -0.147778858 | 0.170580086 | 8.86E-01 | 9.56E-01 | 1.00E+00 |
| ENSG00000267672.1_CTD-2293H  | ENSG00000160789.18_LMNA | -0.15666 | -0.308175946 | 0.00260432  | 5.39E-02 | 2.11E-01 | 1.00E+00 |
| ENSG00000188629.10_ZNF177    | ENSG00000160789.18_LMNA | -0.11022 | -0.264773419 | 0.049856868 | 1.76E-01 | 4.38E-01 | 1.00E+00 |
| ENSG00000177699.4_RP11-16K1  | ENSG00000160789.18_LMNA | -0.14998 | -0.301970508 | 0.009446322 | 6.51E-02 | 2.38E-01 | 1.00E+00 |
| ENSG00000168263.8_KCNV2      | ENSG00000160789.18_LMNA | 0.13676  | -0.02293905  | 0.289655285 | 9.29E-02 | 2.98E-01 | 1.00E+00 |
| ENSG00000167748.9_KLK1       | ENSG00000160789.18_LMNA | 0.0162   | -0.143366392 | 0.174953526 | 8.43E-01 | 9.39E-01 | 1.00E+00 |
| ENSG00000164123.6_C4orf45    | ENSG00000160789.18_LMNA | -0.15622 | -0.307763067 | 0.003060458 | 5.46E-02 | 2.13E-01 | 1.00E+00 |
| ENSG00000260412.1_RP11-438B  | ENSG00000160789.18_LMNA | -0.06988 | -0.22655739  | 0.090328541 | 3.92E-01 | 6.70E-01 | 1.00E+00 |
| ENSG00000247877.5_CTD-2001C  | ENSG00000160789.18_LMNA | -0.1023  | -0.257306077 | 0.057847026 | 2.10E-01 | 4.83E-01 | 1.00E+00 |
| ENSG00000240236.1_HNRNPA1F   | ENSG00000160789.18_LMNA | 0.08832  | -0.071895989 | 0.244084463 | 2.79E-01 | 5.65E-01 | 1.00E+00 |
| ENSG00000280402.1_RP11-20I23 | ENSG00000160789.18_LMNA | -0.02053 | -0.179144349 | 0.139126265 | 8.02E-01 | 9.20E-01 | 1.00E+00 |
| ENSG00000250332.1_CTD-2272C  | ENSG00000160789.18_LMNA | -0.1003  | -0.25542622  | 0.059852157 | 2.19E-01 | 4.94E-01 | 1.00E+00 |
| ENSG00000136929.11_HEMGN     | ENSG00000160789.18_LMNA | -0.2881  | -0.427683965 | -0.13509474 | 3.19E-04 | 4.72E-03 | 1.00E+00 |
| ENSG00000238273.3_AC012360.1 | ENSG00000160789.18_LMNA | 0.11579  | -0.044222095 | 0.270016904 | 1.55E-01 | 4.07E-01 | 1.00E+00 |
| ENSG00000276409.3_CCL14      | ENSG00000160789.18_LMNA | -0.0397  | -0.197652208 | 0.120260047 | 6.27E-01 | 8.32E-01 | 1.00E+00 |
| ENSG00000217539.2_IQCB2P     | ENSG00000160789.18_LMNA | 0.00765  | -0.151738768 | 0.166644491 | 9.26E-01 | 9.71E-01 | 1.00E+00 |
| ENSG00000261026.1_CTD-3247F  | ENSG00000160789.18_LMNA | 0.239    | 0.082952957  | 0.383602596 | 3.02E-03 | 2.69E-02 | 1.00E+00 |
| ENSG00000236256.8_DIAPH2-AS  | ENSG00000160789.18_LMNA | -0.09828 | -0.253511444 | 0.061891922 | 2.28E-01 | 5.05E-01 | 1.00E+00 |
| ENSG00000279050.1_PWAR1      | ENSG00000160789.18_LMNA | -0.06933 | -0.226038441 | 0.090871009 | 3.96E-01 | 6.73E-01 | 1.00E+00 |
| ENSG00000249258.2_RP11-468H  | ENSG00000160789.18_LMNA | -0.00532 | -0.164379001 | 0.154013628 | 9.48E-01 | 9.79E-01 | 1.00E+00 |
| ENSG00000175894.13_TSPEAR    | ENSG00000160789.18_LMNA | 0.05537  | -0.104752928 | 0.212696935 | 4.98E-01 | 7.51E-01 | 1.00E+00 |
| ENSG00000279663.1_RP11-542H  | ENSG00000160789.18_LMNA | -0.00423 | -0.163318276 | 0.155077582 | 9.59E-01 | 9.84E-01 | 1.00E+00 |
| ENSG00000224904.1_RP5-934G1  | ENSG00000160789.18_LMNA | -0.01335 | -0.172189172 | 0.146156885 | 8.70E-01 | 9.50E-01 | 1.00E+00 |
| ENSG00000249604.1_RP11-286E  | ENSG00000160789.18_LMNA | -0.14947 | -0.301492809 | 0.009971818 | 6.61E-02 | 2.40E-01 | 1.00E+00 |
| ENSG00000280587.1_LINC01348  | ENSG00000160789.18_LMNA | 0.13782  | -0.021864139 | 0.290640198 | 9.04E-02 | 2.93E-01 | 1.00E+00 |
| ENSG00000204802.3_RP11-111F  | ENSG00000160789.18_LMNA | -0.07702 | -0.233362415 | 0.083197646 | 3.46E-01 | 6.30E-01 | 1.00E+00 |

|                              |                         |          |              |             |          |          |          |
|------------------------------|-------------------------|----------|--------------|-------------|----------|----------|----------|
| ENSG00000240707.2_LINC01168  | ENSG00000160789.18_LMNA | 0.1843   | 0.025859837  | 0.33371108  | 2.30E-02 | 1.19E-01 | 1.00E+00 |
| ENSG00000185332.5_TMEM105    | ENSG00000160789.18_LMNA | 0.09765  | -0.06252116  | 0.252920263 | 2.31E-01 | 5.09E-01 | 1.00E+00 |
| ENSG00000091138.11_SLC26A3   | ENSG00000160789.18_LMNA | 0.08935  | -0.070859432 | 0.245064007 | 2.74E-01 | 5.58E-01 | 1.00E+00 |
| ENSG00000280604.1_PCBP3-OT   | ENSG00000160789.18_LMNA | -0.07236 | -0.228921329 | 0.087855078 | 3.76E-01 | 6.56E-01 | 1.00E+00 |
| ENSG00000280660.1_RP11-437J  | ENSG00000160789.18_LMNA | -0.05938 | -0.216535682 | 0.100771325 | 4.67E-01 | 7.29E-01 | 1.00E+00 |
| ENSG00000239605.7_C2orf61    | ENSG00000160789.18_LMNA | 0.15698  | -0.002276692 | 0.308472431 | 5.34E-02 | 2.10E-01 | 1.00E+00 |
| ENSG00000227769.6_AC072062.1 | ENSG00000160789.18_LMNA | 0.02085  | -0.138813025 | 0.17945349  | 7.99E-01 | 9.19E-01 | 1.00E+00 |
| ENSG00000163833.7_FBXO40     | ENSG00000160789.18_LMNA | -0.03332 | -0.191502929 | 0.12655397  | 6.84E-01 | 8.63E-01 | 1.00E+00 |
| ENSG00000232517.2_AC112198.1 | ENSG00000160789.18_LMNA | 0.06995  | -0.090260368 | 0.226622594 | 3.92E-01 | 6.70E-01 | 1.00E+00 |
| ENSG00000259660.2_DNM1P47    | ENSG00000160789.18_LMNA | 0.18152  | 0.022984586  | 0.33115205  | 2.52E-02 | 1.27E-01 | 1.00E+00 |
| ENSG00000235688.1_AC116614.1 | ENSG00000160789.18_LMNA | 0.01905  | -0.140581464 | 0.177707372 | 8.16E-01 | 9.28E-01 | 1.00E+00 |
| ENSG00000276712.1_MIR7111    | ENSG00000160789.18_LMNA | 0.00552  | -0.15381312  | 0.164578818 | 9.46E-01 | 9.78E-01 | 1.00E+00 |
| ENSG00000264091.1_           | ENSG00000160789.18_LMNA | 0.12796  | -0.031890486 | 0.281427524 | 1.16E-01 | 3.41E-01 | 1.00E+00 |
| ENSG00000207031.1_SNORD59A   | ENSG00000160789.18_LMNA | -0.03645 | -0.194518295 | 0.123470872 | 6.56E-01 | 8.48E-01 | 1.00E+00 |
| ENSG00000265600.1_           | ENSG00000160789.18_LMNA | -0.03453 | -0.192668261 | 0.12536319  | 6.73E-01 | 8.56E-01 | 1.00E+00 |
| ENSG00000238961.1_SNORA47    | ENSG00000160789.18_LMNA | -0.1648  | -0.31571496  | -0.00574739 | 4.25E-02 | 1.80E-01 | 1.00E+00 |
| ENSG00000276406.1_RP11-78O7  | ENSG00000160789.18_LMNA | -0.07989 | -0.236089738 | 0.080330591 | 3.28E-01 | 6.14E-01 | 1.00E+00 |
| ENSG00000201428.1_RN7SKP71   | ENSG00000160789.18_LMNA | -0.04543 | -0.203163389 | 0.114597433 | 5.78E-01 | 8.03E-01 | 1.00E+00 |
| ENSG00000253945.1_RP11-328L  | ENSG00000160789.18_LMNA | -0.04266 | -0.200500705 | 0.117335861 | 6.02E-01 | 8.17E-01 | 1.00E+00 |
| ENSG00000212371.1_SNORA46    | ENSG00000160789.18_LMNA | 0.07211  | -0.08809813  | 0.228689204 | 3.77E-01 | 6.57E-01 | 1.00E+00 |
| ENSG00000212135.1_SNORD67    | ENSG00000160789.18_LMNA | 0.12513  | -0.034762325 | 0.27877806  | 1.25E-01 | 3.56E-01 | 1.00E+00 |
| ENSG00000276903.1_HIST1H2AL  | ENSG00000160789.18_LMNA | 0.12349  | -0.036430962 | 0.277236435 | 1.30E-01 | 3.65E-01 | 1.00E+00 |
| ENSG00000271924.1_RNA5SP10   | ENSG00000160789.18_LMNA | 0.10594  | -0.054176054 | 0.260741528 | 1.94E-01 | 4.63E-01 | 1.00E+00 |
| ENSG00000238194.1_RP4-719C8  | ENSG00000160789.18_LMNA | -0.36293 | -0.493614664 | -0.21622757 | 4.32E-06 | 1.47E-04 | 2.22E-01 |
| ENSG00000279691.1_RP11-485M  | ENSG00000160789.18_LMNA | 0.04609  | -0.113948908 | 0.203793288 | 5.73E-01 | 8.01E-01 | 1.00E+00 |
| ENSG00000231005.1_RPL39P39   | ENSG00000160789.18_LMNA | -0.0066  | -0.165622656 | 0.152765247 | 9.36E-01 | 9.75E-01 | 1.00E+00 |
| ENSG00000230648.1_RP3-406P2  | ENSG00000160789.18_LMNA | -0.08225 | -0.238327267 | 0.077974508 | 3.14E-01 | 6.00E-01 | 1.00E+00 |
| ENSG00000274525.1_CTC-338M1  | ENSG00000160789.18_LMNA | 0.06608  | -0.094106405 | 0.222939586 | 4.19E-01 | 6.91E-01 | 1.00E+00 |
| ENSG00000224739.2_AC016735.1 | ENSG00000160789.18_LMNA | -0.1197  | -0.273686797 | 0.040266412 | 1.42E-01 | 3.85E-01 | 1.00E+00 |
| ENSG00000231424.2_RP1-45C12  | ENSG00000160789.18_LMNA | -0.05418 | -0.211560036 | 0.105930186 | 5.07E-01 | 7.57E-01 | 1.00E+00 |
| ENSG00000270326.1_RP5-874C2  | ENSG00000160789.18_LMNA | 0.02529  | -0.134449838 | 0.183753044 | 7.57E-01 | 8.99E-01 | 1.00E+00 |
| ENSG00000274997.1_HIST1H2A   | ENSG00000160789.18_LMNA | 0.05563  | -0.10449468  | 0.212946215 | 4.96E-01 | 7.50E-01 | 1.00E+00 |
| ENSG00000239517.1_CTD-2503C  | ENSG00000160789.18_LMNA | 0.05394  | -0.10616864  | 0.211329652 | 5.09E-01 | 7.59E-01 | 1.00E+00 |

|                              |                         |          |              |              |          |          |          |
|------------------------------|-------------------------|----------|--------------|--------------|----------|----------|----------|
| ENSG00000164509.12_IL31RA    | ENSG00000160789.18_LMNA | 0.16015  | 0.00097261   | 0.311409593  | 4.87E-02 | 1.98E-01 | 1.00E+00 |
| ENSG00000225218.1_AP001628.1 | ENSG00000160789.18_LMNA | 0.10225  | -0.057888645 | 0.257267082  | 2.10E-01 | 4.83E-01 | 1.00E+00 |
| ENSG00000248528.1_CTC-458G   | ENSG00000160789.18_LMNA | -0.37283 | -0.502223307 | -0.227111168 | 2.24E-06 | 8.73E-05 | 1.15E-01 |
| ENSG00000184270.4_HIST2H2AE  | ENSG00000160789.18_LMNA | -0.01467 | -0.173468946 | 0.14486564   | 8.58E-01 | 9.44E-01 | 1.00E+00 |
| ENSG00000228526.2_MIR34A     | ENSG00000160789.18_LMNA | 0.34247  | 0.193839555  | 0.475734605  | 1.57E-05 | 4.22E-04 | 8.05E-01 |
| ENSG00000231295.1_RP4-797C5  | ENSG00000160789.18_LMNA | -0.17679 | -0.326796113 | -0.01810208  | 2.93E-02 | 1.41E-01 | 1.00E+00 |
| ENSG00000273138.1_GS1-293C5  | ENSG00000160789.18_LMNA | -0.05288 | -0.210313393 | 0.107220062  | 5.18E-01 | 7.64E-01 | 1.00E+00 |
| ENSG00000234283.1_RP11-495P  | ENSG00000160789.18_LMNA | 0.06792  | -0.092277598 | 0.224692002  | 4.06E-01 | 6.81E-01 | 1.00E+00 |
| ENSG00000270296.1_STX8P1     | ENSG00000160789.18_LMNA | -0.00299 | -0.162117186 | 0.156281436  | 9.71E-01 | 9.89E-01 | 1.00E+00 |
| ENSG00000274501.1_RP4-583P1  | ENSG00000160789.18_LMNA | 0.11025  | -0.049830267 | 0.264798217  | 1.76E-01 | 4.38E-01 | 1.00E+00 |
| ENSG00000228431.1_ARL5AP3    | ENSG00000160789.18_LMNA | 0.07295  | -0.087264824 | 0.229484895  | 3.72E-01 | 6.52E-01 | 1.00E+00 |
| ENSG00000253502.1_ATP6V1G1   | ENSG00000160789.18_LMNA | -0.09226 | -0.247823946 | 0.06793518   | 2.58E-01 | 5.41E-01 | 1.00E+00 |
| ENSG00000267682.1_CTD-3220F  | ENSG00000160789.18_LMNA | 0.02523  | -0.134514837 | 0.183689082  | 7.58E-01 | 8.99E-01 | 1.00E+00 |
| ENSG00000220130.1_RP1-72A23  | ENSG00000160789.18_LMNA | -0.11196 | -0.26640818  | 0.048102262  | 1.70E-01 | 4.28E-01 | 1.00E+00 |
| ENSG00000254869.1_RP11-91I2C | ENSG00000160789.18_LMNA | -0.07489 | -0.231334957 | 0.085325587  | 3.59E-01 | 6.42E-01 | 1.00E+00 |
| ENSG00000276984.1_LA16c-359F | ENSG00000160789.18_LMNA | 0.04386  | -0.116152673 | 0.201651743  | 5.92E-01 | 8.11E-01 | 1.00E+00 |
| ENSG00000227071.1_FOCAD-AS   | ENSG00000160789.18_LMNA | -0.11379 | -0.268129237 | 0.046252932  | 1.63E-01 | 4.18E-01 | 1.00E+00 |
| ENSG00000255362.1_RP11-619A  | ENSG00000160789.18_LMNA | -0.10722 | -0.261950535 | 0.052882134  | 1.89E-01 | 4.56E-01 | 1.00E+00 |
| ENSG00000262801.4_U91319.1   | ENSG00000160789.18_LMNA | -0.17173 | -0.322121771 | -0.01287901  | 3.44E-02 | 1.57E-01 | 1.00E+00 |
| ENSG00000230013.1_RP11-217B  | ENSG00000160789.18_LMNA | 0.17681  | 0.018121122  | 0.326813126  | 2.93E-02 | 1.41E-01 | 1.00E+00 |
| ENSG00000258450.1_RP11-649E  | ENSG00000160789.18_LMNA | -0.14495 | -0.297286725 | 0.014591337  | 7.48E-02 | 2.61E-01 | 1.00E+00 |
| ENSG00000235555.1_SUMO1P4    | ENSG00000160789.18_LMNA | -0.02351 | -0.182033741 | 0.136196068  | 7.74E-01 | 9.07E-01 | 1.00E+00 |
| ENSG00000256448.4_RP11-809N  | ENSG00000160789.18_LMNA | 0.01826  | -0.14134984  | 0.176948069  | 8.23E-01 | 9.31E-01 | 1.00E+00 |
| ENSG00000260954.1_LA16c-425C | ENSG00000160789.18_LMNA | 0.07583  | -0.084386167 | 0.232230356  | 3.53E-01 | 6.37E-01 | 1.00E+00 |
| ENSG00000256955.2_RP11-417L  | ENSG00000160789.18_LMNA | -0.09692 | -0.252226999 | 0.063258735  | 2.35E-01 | 5.13E-01 | 1.00E+00 |
| ENSG00000239353.1_           | ENSG00000160789.18_LMNA | 0.06331  | -0.096865823 | 0.22029155   | 4.38E-01 | 7.06E-01 | 1.00E+00 |
| ENSG00000263982.1_RP11-504I1 | ENSG00000160789.18_LMNA | 0.12415  | -0.035761763 | 0.277854891  | 1.28E-01 | 3.62E-01 | 1.00E+00 |
| ENSG00000228763.1_LIMS1-AS1  | ENSG00000160789.18_LMNA | -0.00789 | -0.166885833 | 0.151496228  | 9.23E-01 | 9.71E-01 | 1.00E+00 |
| ENSG00000231133.5_HAR1B      | ENSG00000160789.18_LMNA | 0.0082   | -0.151196957 | 0.167183574  | 9.20E-01 | 9.70E-01 | 1.00E+00 |
| ENSG00000266846.1_RP11-793A  | ENSG00000160789.18_LMNA | -0.1401  | -0.292774636 | 0.019532182  | 8.51E-02 | 2.83E-01 | 1.00E+00 |
| ENSG00000249183.1_SUMO2P4    | ENSG00000160789.18_LMNA | -0.0498  | -0.207358513 | 0.11027315   | 5.42E-01 | 7.81E-01 | 1.00E+00 |
| ENSG00000228278.3_ORM2       | ENSG00000160789.18_LMNA | 0.02899  | -0.130818307 | 0.187322353  | 7.23E-01 | 8.83E-01 | 1.00E+00 |
| ENSG00000273903.1_RP11-686G  | ENSG00000160789.18_LMNA | -0.04562 | -0.203346014 | 0.114409435  | 5.77E-01 | 8.03E-01 | 1.00E+00 |

|                             |                         |          |              |             |          |          |          |
|-----------------------------|-------------------------|----------|--------------|-------------|----------|----------|----------|
| ENSG00000233190.1_RPS24P13  | ENSG00000160789.18_LMNA | -0.02395 | -0.182458415 | 0.135764927 | 7.70E-01 | 9.05E-01 | 1.00E+00 |
| ENSG00000237604.1_AP001056. | ENSG00000160789.18_LMNA | -0.00721 | -0.166224606 | 0.152160644 | 9.30E-01 | 9.73E-01 | 1.00E+00 |
| ENSG00000261124.1_AC135050. | ENSG00000160789.18_LMNA | 0.04509  | -0.114938516 | 0.202831996 | 5.81E-01 | 8.05E-01 | 1.00E+00 |
| ENSG00000244740.1_RP11-463H | ENSG00000160789.18_LMNA | 0.00778  | -0.151605624 | 0.166776982 | 9.24E-01 | 9.71E-01 | 1.00E+00 |
| ENSG00000254429.1_CTD-2562J | ENSG00000160789.18_LMNA | -0.06308 | -0.220070662 | 0.097095781 | 4.40E-01 | 7.08E-01 | 1.00E+00 |
| ENSG00000178403.3_NEUROG2   | ENSG00000160789.18_LMNA | -0.18544 | -0.334759859 | -0.02703969 | 2.22E-02 | 1.16E-01 | 1.00E+00 |
| ENSG00000229484.1_RP5-888M1 | ENSG00000160789.18_LMNA | -0.06859 | -0.225333345 | 0.091607762 | 4.01E-01 | 6.77E-01 | 1.00E+00 |
| ENSG00000227133.1_AC011742. | ENSG00000160789.18_LMNA | -0.07274 | -0.229281487 | 0.08747789  | 3.73E-01 | 6.53E-01 | 1.00E+00 |
| ENSG00000275936.1_RP1-278C1 | ENSG00000160789.18_LMNA | -0.02924 | -0.187571574 | 0.130564422 | 7.21E-01 | 8.81E-01 | 1.00E+00 |
| ENSG00000232650.4_RP5-834N1 | ENSG00000160789.18_LMNA | -0.20014 | -0.348242191 | -0.04228371 | 1.34E-02 | 8.09E-02 | 1.00E+00 |
| ENSG00000271384.1_RP11-435O | ENSG00000160789.18_LMNA | 0.07012  | -0.090082575 | 0.226792631 | 3.91E-01 | 6.69E-01 | 1.00E+00 |
| ENSG00000229324.1_NUTF2P7   | ENSG00000160789.18_LMNA | -0.01936 | -0.178011274 | 0.140273823 | 8.13E-01 | 9.26E-01 | 1.00E+00 |
| ENSG00000239872.1_RPL35AP1  | ENSG00000160789.18_LMNA | 0.00807  | -0.151329344 | 0.167051871 | 9.21E-01 | 9.70E-01 | 1.00E+00 |
| ENSG00000274156.1_RP11-407N | ENSG00000160789.18_LMNA | -0.07689 | -0.23323537  | 0.083331071 | 3.46E-01 | 6.31E-01 | 1.00E+00 |
| ENSG00000279579.2_bP-2189O9 | ENSG00000160789.18_LMNA | -0.10921 | -0.263820904 | 0.050878318 | 1.80E-01 | 4.44E-01 | 1.00E+00 |
| ENSG00000273361.1_RP11-378A | ENSG00000160789.18_LMNA | 0.19998  | 0.04212004   | 0.3480981   | 1.35E-02 | 8.13E-02 | 1.00E+00 |
| ENSG00000260379.1_RP11-483K | ENSG00000160789.18_LMNA | -0.03388 | -0.192046516 | 0.125998626 | 6.79E-01 | 8.60E-01 | 1.00E+00 |
| ENSG00000227484.1_XX-C283C7 | ENSG00000160789.18_LMNA | 0.05648  | -0.103649998 | 0.213761275 | 4.89E-01 | 7.46E-01 | 1.00E+00 |
| ENSG00000227653.1_ISCA1P6   | ENSG00000160789.18_LMNA | -0.03411 | -0.192265768 | 0.125774576 | 6.77E-01 | 8.59E-01 | 1.00E+00 |
| ENSG00000237892.1_KLF7-IT1  | ENSG00000160789.18_LMNA | 0.05795  | -0.102192404 | 0.215166715 | 4.78E-01 | 7.36E-01 | 1.00E+00 |
| ENSG00000170786.11_SDR16C5  | ENSG00000160789.18_LMNA | -0.12343 | -0.277188059 | 0.036483296 | 1.30E-01 | 3.65E-01 | 1.00E+00 |
| ENSG00000267567.1_CTD-2538C | ENSG00000160789.18_LMNA | 0.2579   | 0.102928908  | 0.400653994 | 1.34E-03 | 1.44E-02 | 1.00E+00 |
| ENSG00000260926.2_RP11-380D | ENSG00000160789.18_LMNA | -0.05545 | -0.212768416 | 0.10467888  | 4.97E-01 | 7.51E-01 | 1.00E+00 |
| ENSG00000167644.10_C19orf33 | ENSG00000160789.18_LMNA | -0.03974 | -0.197687514 | 0.120223837 | 6.27E-01 | 8.32E-01 | 1.00E+00 |
| ENSG00000255750.4_RP11-283G | ENSG00000160789.18_LMNA | 0.11185  | -0.048204483 | 0.26631299  | 1.70E-01 | 4.29E-01 | 1.00E+00 |
| ENSG00000237273.1_RSL24D1P  | ENSG00000160789.18_LMNA | -0.07915 | -0.235386685 | 0.081070166 | 3.32E-01 | 6.18E-01 | 1.00E+00 |
| ENSG00000250726.1_RP11-616K | ENSG00000160789.18_LMNA | -0.29714 | -0.435724655 | -0.14478373 | 2.01E-04 | 3.28E-03 | 1.00E+00 |
| ENSG00000234928.1_AP000344. | ENSG00000160789.18_LMNA | 0.24295  | 0.087119291  | 0.387175963 | 2.56E-03 | 2.37E-02 | 1.00E+00 |
| ENSG00000236354.1_LINC00437 | ENSG00000160789.18_LMNA | -0.03704 | -0.195088984 | 0.122886673 | 6.51E-01 | 8.45E-01 | 1.00E+00 |
| ENSG00000187848.11_P2RX2    | ENSG00000160789.18_LMNA | -0.09814 | -0.253384282 | 0.062027291 | 2.29E-01 | 5.06E-01 | 1.00E+00 |
| ENSG00000228804.4_RP11-211G | ENSG00000160789.18_LMNA | 0.09275  | -0.067446307 | 0.248284851 | 2.56E-01 | 5.38E-01 | 1.00E+00 |
| ENSG00000230482.1_ATP5G2P3  | ENSG00000160789.18_LMNA | -0.11902 | -0.273046811 | 0.040956945 | 1.44E-01 | 3.88E-01 | 1.00E+00 |
| ENSG00000258599.2_RP11-84C1 | ENSG00000160789.18_LMNA | 0.08466  | -0.075554137 | 0.240622359 | 3.00E-01 | 5.86E-01 | 1.00E+00 |

|                              |                         |          |              |             |          |          |          |
|------------------------------|-------------------------|----------|--------------|-------------|----------|----------|----------|
| ENSG00000239705.1_RP11-65N1  | ENSG00000160789.18_LMNA | 0.18292  | 0.024435257  | 0.332443742 | 2.41E-02 | 1.23E-01 | 1.00E+00 |
| ENSG00000223823.1_LINC01342  | ENSG00000160789.18_LMNA | 0.22085  | 0.063892222  | 0.36713903  | 6.25E-03 | 4.64E-02 | 1.00E+00 |
| ENSG00000231816.1_           | ENSG00000160789.18_LMNA | -0.10755 | -0.26225829  | 0.052552596 | 1.87E-01 | 4.54E-01 | 1.00E+00 |
| ENSG00000273443.1_RP11-54O7  | ENSG00000160789.18_LMNA | 0.14315  | -0.01642947  | 0.295609726 | 7.85E-02 | 2.69E-01 | 1.00E+00 |
| ENSG00000130656.4_HBZ        | ENSG00000160789.18_LMNA | -0.25161 | -0.394986499 | -0.09626261 | 1.77E-03 | 1.78E-02 | 1.00E+00 |
| ENSG00000219435.4_TEX40      | ENSG00000160789.18_LMNA | 0.08309  | -0.077134252 | 0.239124432 | 3.09E-01 | 5.95E-01 | 1.00E+00 |
| ENSG00000259563.1_CTD-2329K  | ENSG00000160789.18_LMNA | -0.08679 | -0.242641522 | 0.073421671 | 2.88E-01 | 5.73E-01 | 1.00E+00 |
| ENSG00000213690.3_RP11-513D  | ENSG00000160789.18_LMNA | 0.07616  | -0.084056959 | 0.23254401  | 3.51E-01 | 6.35E-01 | 1.00E+00 |
| ENSG00000253208.1_RP11-1G11  | ENSG00000160789.18_LMNA | -0.02913 | -0.187462991 | 0.130675042 | 7.22E-01 | 8.82E-01 | 1.00E+00 |
| ENSG00000256374.2_PP1AL4D    | ENSG00000160789.18_LMNA | 0.09739  | -0.062782108 | 0.25267503  | 2.33E-01 | 5.10E-01 | 1.00E+00 |
| ENSG00000273998.1_RP4-777L9  | ENSG00000160789.18_LMNA | 0.25434  | 0.099151373  | 0.397445239 | 1.57E-03 | 1.62E-02 | 1.00E+00 |
| ENSG00000241345.1_RP4-630C2  | ENSG00000160789.18_LMNA | -0.16469 | -0.315614931 | -0.0056363  | 4.26E-02 | 1.81E-01 | 1.00E+00 |
| ENSG00000250709.1_CCDC169-5  | ENSG00000160789.18_LMNA | -0.05684 | -0.21410728  | 0.10329128  | 4.87E-01 | 7.43E-01 | 1.00E+00 |
| ENSG00000039537.12_C6        | ENSG00000160789.18_LMNA | 0.05865  | -0.101500441 | 0.215833459 | 4.73E-01 | 7.33E-01 | 1.00E+00 |
| ENSG00000248530.1_BCL2L12P1  | ENSG00000160789.18_LMNA | -0.02153 | -0.180113711 | 0.138143835 | 7.92E-01 | 9.16E-01 | 1.00E+00 |
| ENSG00000263923.1_RP11-571L  | ENSG00000160789.18_LMNA | 0.00456  | -0.154754296 | 0.163640659 | 9.56E-01 | 9.82E-01 | 1.00E+00 |
| ENSG00000239626.1_RPSAP41    | ENSG00000160789.18_LMNA | -0.08866 | -0.244411962 | 0.071549504 | 2.77E-01 | 5.62E-01 | 1.00E+00 |
| ENSG00000260621.1_RP11-413H  | ENSG00000160789.18_LMNA | -0.02531 | -0.183767207 | 0.134435446 | 7.57E-01 | 8.99E-01 | 1.00E+00 |
| ENSG00000250889.2_LINC01336  | ENSG00000160789.18_LMNA | 0.04338  | -0.116628406 | 0.201189043 | 5.96E-01 | 8.13E-01 | 1.00E+00 |
| ENSG00000263612.1_AF186192.6 | ENSG00000160789.18_LMNA | 0.04689  | -0.113153089 | 0.204565891 | 5.66E-01 | 7.97E-01 | 1.00E+00 |
| ENSG00000134551.11_PRH2      | ENSG00000160789.18_LMNA | 0.08946  | -0.070745248 | 0.245171871 | 2.73E-01 | 5.58E-01 | 1.00E+00 |
| ENSG00000249378.4_LINC01060  | ENSG00000160789.18_LMNA | 0.08506  | -0.075156776 | 0.240998815 | 2.97E-01 | 5.83E-01 | 1.00E+00 |
| ENSG00000251468.2_RP11-369K  | ENSG00000160789.18_LMNA | 0.16822  | 0.00926842   | 0.318881674 | 3.83E-02 | 1.68E-01 | 1.00E+00 |
| ENSG00000270775.1_AP000436.4 | ENSG00000160789.18_LMNA | 0.0604   | -0.099764675 | 0.217504663 | 4.60E-01 | 7.23E-01 | 1.00E+00 |
| ENSG00000244383.1_FAM3D-AS   | ENSG00000160789.18_LMNA | -0.06315 | -0.220133887 | 0.097029963 | 4.40E-01 | 7.08E-01 | 1.00E+00 |
| ENSG00000216915.2_GPR89P     | ENSG00000160789.18_LMNA | 0.07045  | -0.089754928 | 0.227105935 | 3.88E-01 | 6.67E-01 | 1.00E+00 |
| ENSG00000124780.12_KCNK17    | ENSG00000160789.18_LMNA | -0.14534 | -0.297651544 | 0.014191185 | 7.40E-02 | 2.59E-01 | 1.00E+00 |
| ENSG00000255355.1_AP000640.2 | ENSG00000160789.18_LMNA | -0.12327 | -0.27703069  | 0.036653526 | 1.30E-01 | 3.66E-01 | 1.00E+00 |
| ENSG00000204882.3_GPR20      | ENSG00000160789.18_LMNA | 0.06817  | -0.092030375 | 0.224928741 | 4.04E-01 | 6.80E-01 | 1.00E+00 |
| ENSG00000179580.8_RNF151     | ENSG00000160789.18_LMNA | 0.02262  | -0.137070092 | 0.181172464 | 7.82E-01 | 9.11E-01 | 1.00E+00 |
| ENSG00000177984.6_LCN15      | ENSG00000160789.18_LMNA | -0.1113  | -0.265791199 | 0.048764702 | 1.72E-01 | 4.31E-01 | 1.00E+00 |
| ENSG00000187690.3_CXorf67    | ENSG00000160789.18_LMNA | -0.13947 | -0.292185409 | 0.020176275 | 8.66E-02 | 2.86E-01 | 1.00E+00 |
| ENSG00000231738.9_TSPAN19    | ENSG00000160789.18_LMNA | -0.06379 | -0.220750679 | 0.096387731 | 4.35E-01 | 7.03E-01 | 1.00E+00 |

|                              |                         |          |              |             |          |          |          |
|------------------------------|-------------------------|----------|--------------|-------------|----------|----------|----------|
| ENSG00000234602.6_MCIDAS     | ENSG00000160789.18_LMNA | 0.04969  | -0.110386932 | 0.20724828  | 5.43E-01 | 7.82E-01 | 1.00E+00 |
| ENSG00000165509.12_MAGEC3    | ENSG00000160789.18_LMNA | -0.14439 | -0.296770591 | 0.015157288 | 7.59E-02 | 2.63E-01 | 1.00E+00 |
| ENSG00000203489.3_HMGB1P3    | ENSG00000160789.18_LMNA | -0.05351 | -0.210916542 | 0.106596129 | 5.13E-01 | 7.61E-01 | 1.00E+00 |
| ENSG00000246323.2_RP11-325L  | ENSG00000160789.18_LMNA | -0.07932 | -0.235547107 | 0.080901441 | 3.31E-01 | 6.17E-01 | 1.00E+00 |
| ENSG00000235701.1_PCBP2P1    | ENSG00000160789.18_LMNA | 0.04458  | -0.11544291  | 0.202341799 | 5.86E-01 | 8.08E-01 | 1.00E+00 |
| ENSG00000261742.4_LINC00922  | ENSG00000160789.18_LMNA | 0.05085  | -0.109236656 | 0.208362316 | 5.34E-01 | 7.76E-01 | 1.00E+00 |
| ENSG00000184811.3_TUSC5      | ENSG00000160789.18_LMNA | 0.02037  | -0.139283233 | 0.178989413 | 8.03E-01 | 9.21E-01 | 1.00E+00 |
| ENSG00000267577.1_CTD-2587H  | ENSG00000160789.18_LMNA | 0.07213  | -0.088080674 | 0.228705876 | 3.77E-01 | 6.57E-01 | 1.00E+00 |
| ENSG00000262700.1_RP11-266L  | ENSG00000160789.18_LMNA | 0.01558  | -0.143979032 | 0.174347055 | 8.49E-01 | 9.41E-01 | 1.00E+00 |
| ENSG00000213568.4_HNRNPA1F   | ENSG00000160789.18_LMNA | -0.04579 | -0.203503545 | 0.114247252 | 5.75E-01 | 8.02E-01 | 1.00E+00 |
| ENSG00000279568.1_RP11-20I23 | ENSG00000160789.18_LMNA | 0.16777  | 0.008807826  | 0.318467821 | 3.88E-02 | 1.70E-01 | 1.00E+00 |
| ENSG00000101892.10_ATP1B4    | ENSG00000160789.18_LMNA | -0.15974 | -0.311029947 | -0.00055225 | 4.93E-02 | 2.00E-01 | 1.00E+00 |
| ENSG00000278879.1_AP000560.1 | ENSG00000160789.18_LMNA | -0.02862 | -0.186964584 | 0.131182699 | 7.26E-01 | 8.84E-01 | 1.00E+00 |
| ENSG00000162592.7_CCDC27     | ENSG00000160789.18_LMNA | 0.17703  | 0.018349612  | 0.327017265 | 2.91E-02 | 1.40E-01 | 1.00E+00 |
| ENSG00000204818.4_ADGRF5P2   | ENSG00000160789.18_LMNA | 0.05975  | -0.10040292  | 0.216890374 | 4.65E-01 | 7.27E-01 | 1.00E+00 |
| ENSG00000258778.2_RP11-804M  | ENSG00000160789.18_LMNA | 0.09743  | -0.062747044 | 0.252707984 | 2.32E-01 | 5.10E-01 | 1.00E+00 |
| ENSG00000264705.1_RP11-674P  | ENSG00000160789.18_LMNA | 0.19622  | 0.038209165  | 0.344650874 | 1.54E-02 | 8.95E-02 | 1.00E+00 |
| ENSG00000182450.11_KCNK4     | ENSG00000160789.18_LMNA | -0.03196 | -0.190188755 | 0.127895742 | 6.96E-01 | 8.70E-01 | 1.00E+00 |
| ENSG00000278909.1_RP11-401P  | ENSG00000160789.18_LMNA | -0.19804 | -0.3463215   | -0.04010332 | 1.45E-02 | 8.56E-02 | 1.00E+00 |
| ENSG00000280134.1_RP11-113E  | ENSG00000160789.18_LMNA | -0.11344 | -0.267801069 | 0.046605725 | 1.64E-01 | 4.20E-01 | 1.00E+00 |
| ENSG00000279174.1_RP11-1099I | ENSG00000160789.18_LMNA | 0.01263  | -0.14686334  | 0.17148854  | 8.77E-01 | 9.52E-01 | 1.00E+00 |
| ENSG00000241560.4_ZBTB20-AS  | ENSG00000160789.18_LMNA | 0.04827  | -0.111792493 | 0.20588588  | 5.55E-01 | 7.89E-01 | 1.00E+00 |
| ENSG00000119614.2_VSX2       | ENSG00000160789.18_LMNA | -0.21385 | -0.360766176 | -0.05657296 | 8.16E-03 | 5.65E-02 | 1.00E+00 |
| ENSG00000140107.10_SLC25A47  | ENSG00000160789.18_LMNA | 0.2399   | 0.083898918  | 0.384414715 | 2.91E-03 | 2.62E-02 | 1.00E+00 |
| ENSG00000248781.1_PSMC1P4    | ENSG00000160789.18_LMNA | 0.00123  | -0.158005563 | 0.160395374 | 9.88E-01 | 9.96E-01 | 1.00E+00 |
| ENSG00000275088.1_RP11-442O  | ENSG00000160789.18_LMNA | -0.05406 | -0.211440146 | 0.106054281 | 5.08E-01 | 7.58E-01 | 1.00E+00 |
| ENSG00000206028.1_CTA-373H7  | ENSG00000160789.18_LMNA | 0.03017  | -0.129655787 | 0.188463182 | 7.12E-01 | 8.78E-01 | 1.00E+00 |
| ENSG00000226746.2_SMCR5      | ENSG00000160789.18_LMNA | -0.15075 | -0.302689715 | 0.008654829 | 6.38E-02 | 2.35E-01 | 1.00E+00 |
| ENSG00000196337.9_CGB7       | ENSG00000160789.18_LMNA | 0.17214  | 0.01330323   | 0.32250199  | 3.40E-02 | 1.55E-01 | 1.00E+00 |
| ENSG00000236333.3_TRHDE-AS   | ENSG00000160789.18_LMNA | -0.13113 | -0.284392796 | 0.028670185 | 1.07E-01 | 3.26E-01 | 1.00E+00 |
| ENSG00000274049.3_INO80B-WF  | ENSG00000160789.18_LMNA | -0.01679 | -0.175521685 | 0.142792233 | 8.37E-01 | 9.37E-01 | 1.00E+00 |
| ENSG00000229670.2_PKP4P1     | ENSG00000160789.18_LMNA | -0.24383 | -0.387970551 | -0.08804716 | 2.47E-03 | 2.30E-02 | 1.00E+00 |
| ENSG00000183979.7_NPB        | ENSG00000160789.18_LMNA | -0.05107 | -0.208575434 | 0.109016509 | 5.32E-01 | 7.75E-01 | 1.00E+00 |

|                               |                         |          |              |             |          |          |          |
|-------------------------------|-------------------------|----------|--------------|-------------|----------|----------|----------|
| ENSG00000260777.1_CTD-2008P   | ENSG00000160789.18_LMNA | -0.12245 | -0.276260928 | 0.037485937 | 1.33E-01 | 3.70E-01 | 1.00E+00 |
| ENSG00000134398.11_ERN2       | ENSG00000160789.18_LMNA | 0.12582  | -0.034063244 | 0.279423449 | 1.22E-01 | 3.52E-01 | 1.00E+00 |
| ENSG00000114455.12_HHLA2      | ENSG00000160789.18_LMNA | -0.13647 | -0.289383681 | 0.023235345 | 9.36E-02 | 2.99E-01 | 1.00E+00 |
| ENSG00000259818.1_RP5-1024G   | ENSG00000160789.18_LMNA | 0.21924  | 0.062206451  | 0.365673756 | 6.65E-03 | 4.85E-02 | 1.00E+00 |
| ENSG00000231616.7_RP11-575L   | ENSG00000160789.18_LMNA | -0.08109 | -0.237230392 | 0.079129942 | 3.21E-01 | 6.07E-01 | 1.00E+00 |
| ENSG00000231256.6_C17orf105   | ENSG00000160789.18_LMNA | -0.0689  | -0.225622551 | 0.091305613 | 3.99E-01 | 6.76E-01 | 1.00E+00 |
| ENSG00000236986.5_RP11-544A   | ENSG00000160789.18_LMNA | -0.05175 | -0.209228511 | 0.108341698 | 5.27E-01 | 7.71E-01 | 1.00E+00 |
| ENSG00000241484.8_ARHGAP8     | ENSG00000160789.18_LMNA | -0.05046 | -0.207989487 | 0.109621709 | 5.37E-01 | 7.78E-01 | 1.00E+00 |
| ENSG00000273167.1_RP11-307N   | ENSG00000160789.18_LMNA | 0.04642  | -0.113619262 | 0.204113366 | 5.70E-01 | 7.99E-01 | 1.00E+00 |
| ENSG00000197915.5_HRNR        | ENSG00000160789.18_LMNA | 0.13437  | -0.025376267 | 0.287419671 | 9.89E-02 | 3.09E-01 | 1.00E+00 |
| ENSG00000211662.2_IGLV3-21    | ENSG00000160789.18_LMNA | -0.00989 | -0.168828663 | 0.149542362 | 9.04E-01 | 9.63E-01 | 1.00E+00 |
| ENSG00000266643.1_MIR3677     | ENSG00000160789.18_LMNA | 0.23331  | 0.076972923  | 0.378457878 | 3.82E-03 | 3.20E-02 | 1.00E+00 |
| ENSG00000249362.1_CTD-2316B   | ENSG00000160789.18_LMNA | -0.32502 | -0.460400876 | -0.17487092 | 4.40E-05 | 9.67E-04 | 1.00E+00 |
| ENSG00000209482.1_SNORD83A    | ENSG00000160789.18_LMNA | 0.11438  | -0.045647745 | 0.268692013 | 1.61E-01 | 4.15E-01 | 1.00E+00 |
| ENSG00000221055.1_MIR1302-3   | ENSG00000160789.18_LMNA | -0.13472 | -0.287751904 | 0.025014309 | 9.80E-02 | 3.08E-01 | 1.00E+00 |
| ENSG00000272583.1_RP11-344P   | ENSG00000160789.18_LMNA | -0.13913 | -0.291868836 | 0.020522219 | 8.74E-02 | 2.87E-01 | 1.00E+00 |
| ENSG00000277555.1_            | ENSG00000160789.18_LMNA | -0.09692 | -0.252228962 | 0.063256647 | 2.35E-01 | 5.13E-01 | 1.00E+00 |
| ENSG00000272055.1_RNU6-6P     | ENSG00000160789.18_LMNA | -0.16877 | -0.319389036 | -0.00983326 | 3.77E-02 | 1.66E-01 | 1.00E+00 |
| ENSG00000259001.3_RPPH1       | ENSG00000160789.18_LMNA | -0.09572 | -0.251091065 | 0.064466529 | 2.41E-01 | 5.20E-01 | 1.00E+00 |
| ENSG00000224463.1_AC079354.1  | ENSG00000160789.18_LMNA | -0.06639 | -0.223235886 | 0.093797339 | 4.16E-01 | 6.89E-01 | 1.00E+00 |
| ENSG00000272783.1_RP13-1016I  | ENSG00000160789.18_LMNA | 0.24502  | 0.089303891  | 0.389046047 | 2.35E-03 | 2.21E-02 | 1.00E+00 |
| ENSG00000259203.1_RP11-209K   | ENSG00000160789.18_LMNA | 0.06379  | -0.096392734 | 0.220745875 | 4.35E-01 | 7.03E-01 | 1.00E+00 |
| ENSG00000266441.1_RP11-91I8.1 | ENSG00000160789.18_LMNA | -0.24066 | -0.385101972 | -0.08469986 | 2.82E-03 | 2.55E-02 | 1.00E+00 |
| ENSG00000227987.1_AC092675.4  | ENSG00000160789.18_LMNA | 0.10182  | -0.058323179 | 0.256859888 | 2.12E-01 | 4.86E-01 | 1.00E+00 |
| ENSG00000266356.1_RP11-578C   | ENSG00000160789.18_LMNA | -0.08796 | -0.243751577 | 0.072248094 | 2.81E-01 | 5.67E-01 | 1.00E+00 |
| ENSG00000166603.4_MC4R        | ENSG00000160789.18_LMNA | -0.15497 | -0.306609269 | 0.004334459 | 5.66E-02 | 2.17E-01 | 1.00E+00 |
| ENSG00000260132.1_LA16c-312E  | ENSG00000160789.18_LMNA | 0.08196  | -0.078260969 | 0.2380554   | 3.15E-01 | 6.02E-01 | 1.00E+00 |
| ENSG00000147571.4_CRH         | ENSG00000160789.18_LMNA | 0.00652  | -0.152838375 | 0.165549832 | 9.36E-01 | 9.75E-01 | 1.00E+00 |
| ENSG00000269935.1_RP11-482M   | ENSG00000160789.18_LMNA | -0.25368 | -0.396853195 | -0.09845532 | 1.61E-03 | 1.66E-02 | 1.00E+00 |
| ENSG00000250273.1_PSMC1P5     | ENSG00000160789.18_LMNA | 0.03042  | -0.129404289 | 0.188709874 | 7.10E-01 | 8.77E-01 | 1.00E+00 |
| ENSG00000228950.1_AC023137.1  | ENSG00000160789.18_LMNA | -0.15559 | -0.307180347 | 0.003704012 | 5.56E-02 | 2.15E-01 | 1.00E+00 |
| ENSG00000248859.2_LINC01574   | ENSG00000160789.18_LMNA | -0.10797 | -0.262658971 | 0.052123451 | 1.85E-01 | 4.51E-01 | 1.00E+00 |
| ENSG00000268067.1_OR5AH1P     | ENSG00000160789.18_LMNA | -0.11364 | -0.267995809 | 0.046396382 | 1.63E-01 | 4.19E-01 | 1.00E+00 |



|                              |                         |          |              |             |          |          |          |
|------------------------------|-------------------------|----------|--------------|-------------|----------|----------|----------|
| ENSG00000226032.1_RP1-111C2  | ENSG00000160789.18_LMNA | -0.07793 | -0.234223174 | 0.082293352 | 3.40E-01 | 6.25E-01 | 1.00E+00 |
| ENSG00000258048.1_RP11-530C  | ENSG00000160789.18_LMNA | 0.15539  | -0.003908368 | 0.30699526  | 5.59E-02 | 2.16E-01 | 1.00E+00 |
| ENSG00000165643.9_SOHLH1     | ENSG00000160789.18_LMNA | -0.02667 | -0.185085932 | 0.133094714 | 7.44E-01 | 8.93E-01 | 1.00E+00 |
| ENSG00000164600.5_NEUROD6    | ENSG00000160789.18_LMNA | -0.22069 | -0.3669961   | -0.06372771 | 6.29E-03 | 4.66E-02 | 1.00E+00 |
| ENSG00000269983.1_RP11-497H  | ENSG00000160789.18_LMNA | 0.05821  | -0.101931475 | 0.215418169 | 4.76E-01 | 7.35E-01 | 1.00E+00 |
| ENSG00000226186.1_TCEB1P21   | ENSG00000160789.18_LMNA | 0.02459  | -0.135141931 | 0.183071856 | 7.64E-01 | 9.02E-01 | 1.00E+00 |
| ENSG00000268458.1_CTC-471J1  | ENSG00000160789.18_LMNA | -0.17761 | -0.327551202 | -0.0189474  | 2.86E-02 | 1.39E-01 | 1.00E+00 |
| ENSG00000250762.1_RP1-313L4  | ENSG00000160789.18_LMNA | 0.00208  | -0.157171969 | 0.161228092 | 9.80E-01 | 9.92E-01 | 1.00E+00 |
| ENSG00000256280.1_RP11-466C  | ENSG00000160789.18_LMNA | -0.02286 | -0.181396638 | 0.136842647 | 7.80E-01 | 9.10E-01 | 1.00E+00 |
| ENSG00000260990.1_RP3-518E1  | ENSG00000160789.18_LMNA | -0.3054  | -0.443062549 | -0.15367481 | 1.30E-04 | 2.33E-03 | 1.00E+00 |
| ENSG00000237701.1_ATP5JP1    | ENSG00000160789.18_LMNA | 0.00457  | -0.154746183 | 0.163648748 | 9.55E-01 | 9.82E-01 | 1.00E+00 |
| ENSG00000273177.1_RP11-368I2 | ENSG00000160789.18_LMNA | -0.12311 | -0.276886975 | 0.036808971 | 1.31E-01 | 3.67E-01 | 1.00E+00 |
| ENSG00000242396.1_RP11-67L3  | ENSG00000160789.18_LMNA | 0.20564  | 0.048006702  | 0.353271322 | 1.10E-02 | 7.03E-02 | 1.00E+00 |
| ENSG0000009709.10_PAX7       | ENSG00000160789.18_LMNA | -0.24271 | -0.386958206 | -0.0868651  | 2.59E-03 | 2.38E-02 | 1.00E+00 |
| ENSG00000275356.2_C7orf77    | ENSG00000160789.18_LMNA | -0.21795 | -0.364504501 | -0.06086249 | 6.99E-03 | 5.04E-02 | 1.00E+00 |
| ENSG00000273389.1_RP13-514E  | ENSG00000160789.18_LMNA | -0.08354 | -0.239554124 | 0.076681147 | 3.06E-01 | 5.93E-01 | 1.00E+00 |
| ENSG00000267711.1_RP11-686D  | ENSG00000160789.18_LMNA | -0.05571 | -0.213023086 | 0.104415035 | 4.95E-01 | 7.50E-01 | 1.00E+00 |
| ENSG00000260608.1_RP11-382A  | ENSG00000160789.18_LMNA | 0.07012  | -0.090086388 | 0.226788985 | 3.91E-01 | 6.69E-01 | 1.00E+00 |
| ENSG00000272321.1_KB-1517D1  | ENSG00000160789.18_LMNA | -0.11115 | -0.265645704 | 0.048920877 | 1.73E-01 | 4.32E-01 | 1.00E+00 |
| ENSG00000234356.1_AC009945.4 | ENSG00000160789.18_LMNA | 0.10166  | -0.05849077  | 0.256702811 | 2.13E-01 | 4.86E-01 | 1.00E+00 |
| ENSG00000171956.6_FOXB1      | ENSG00000160789.18_LMNA | -0.13924 | -0.291971065 | 0.020410513 | 8.71E-02 | 2.87E-01 | 1.00E+00 |
| ENSG00000270133.1_CTC-303L1  | ENSG00000160789.18_LMNA | -0.05304 | -0.210465824 | 0.107062402 | 5.16E-01 | 7.63E-01 | 1.00E+00 |
| ENSG00000234289.5_H2BFS      | ENSG00000160789.18_LMNA | 0.09399  | -0.066203016 | 0.249456368 | 2.49E-01 | 5.30E-01 | 1.00E+00 |
| ENSG00000230090.4_AC108025.1 | ENSG00000160789.18_LMNA | -0.16178 | -0.31292536  | -0.00265203 | 4.64E-02 | 1.92E-01 | 1.00E+00 |
| ENSG00000224063.4_AC007319.1 | ENSG00000160789.18_LMNA | -0.27268 | -0.413909248 | -0.11862532 | 6.77E-04 | 8.55E-03 | 1.00E+00 |
| ENSG00000223663.2_NDUFB4P8   | ENSG00000160789.18_LMNA | 0.06102  | -0.099138981 | 0.218106628 | 4.55E-01 | 7.20E-01 | 1.00E+00 |
| ENSG00000264083.1_RP11-227G  | ENSG00000160789.18_LMNA | -0.081   | -0.237139583 | 0.079225561 | 3.21E-01 | 6.08E-01 | 1.00E+00 |
| ENSG00000118271.8_TTR        | ENSG00000160789.18_LMNA | -0.12217 | -0.276006371 | 0.037761117 | 1.34E-01 | 3.71E-01 | 1.00E+00 |
| ENSG00000275191.1_RP11-36I17 | ENSG00000160789.18_LMNA | -0.01749 | -0.176195408 | 0.142111117 | 8.31E-01 | 9.34E-01 | 1.00E+00 |
| ENSG00000276058.1_STMN1P1    | ENSG00000160789.18_LMNA | -0.16782 | -0.318510504 | -0.00885532 | 3.88E-02 | 1.70E-01 | 1.00E+00 |
| ENSG00000204538.3_PSORS1C2   | ENSG00000160789.18_LMNA | 0.29034  | 0.137491314  | 0.429677148 | 2.85E-04 | 4.32E-03 | 1.00E+00 |
| ENSG00000232018.4_           | ENSG00000160789.18_LMNA | -0.03431 | -0.192461496 | 0.125574537 | 6.75E-01 | 8.57E-01 | 1.00E+00 |
| ENSG00000261367.1_RP11-455F  | ENSG00000160789.18_LMNA | -0.0896  | -0.245305072 | 0.070604231 | 2.72E-01 | 5.57E-01 | 1.00E+00 |

|                             |                         |          |              |             |          |          |          |
|-----------------------------|-------------------------|----------|--------------|-------------|----------|----------|----------|
| ENSG00000213209.2_AC005229. | ENSG00000160789.18_LMNA | 0.13774  | -0.021939266 | 0.290571382 | 9.06E-02 | 2.93E-01 | 1.00E+00 |
| ENSG00000265179.5_RP11-672L | ENSG00000160789.18_LMNA | -0.1785  | -0.328365124 | -0.01985907 | 2.78E-02 | 1.36E-01 | 1.00E+00 |
| ENSG00000275197.1_RP11-295I | ENSG00000160789.18_LMNA | -0.00088 | -0.160057454 | 0.15834371  | 9.91E-01 | 9.97E-01 | 1.00E+00 |
| ENSG00000231948.2_HS1BP3-IT | ENSG00000160789.18_LMNA | 0.17894  | 0.020316631  | 0.328773455 | 2.74E-02 | 1.35E-01 | 1.00E+00 |
| ENSG00000260084.1_RP11-615I | ENSG00000160789.18_LMNA | -0.08654 | -0.242404326 | 0.073672327 | 2.89E-01 | 5.74E-01 | 1.00E+00 |
| ENSG00000260156.1_RP11-394B | ENSG00000160789.18_LMNA | -0.06003 | -0.217158681 | 0.100124182 | 4.63E-01 | 7.25E-01 | 1.00E+00 |
| ENSG00000254691.1_RP11-91P2 | ENSG00000160789.18_LMNA | -0.02297 | -0.181511212 | 0.13672639  | 7.79E-01 | 9.09E-01 | 1.00E+00 |
| ENSG00000245870.2_LINC00682 | ENSG00000160789.18_LMNA | -0.17802 | -0.327930649 | -0.01937235 | 2.82E-02 | 1.37E-01 | 1.00E+00 |
| ENSG00000203446.2_AC004988. | ENSG00000160789.18_LMNA | -0.02934 | -0.187661332 | 0.130472975 | 7.20E-01 | 8.81E-01 | 1.00E+00 |
| ENSG00000235670.1_RPL21P40  | ENSG00000160789.18_LMNA | -0.03139 | -0.189639985 | 0.128455692 | 7.01E-01 | 8.72E-01 | 1.00E+00 |
| ENSG00000239527.1_RPS23P7   | ENSG00000160789.18_LMNA | -0.06909 | -0.225803626 | 0.091116406 | 3.98E-01 | 6.75E-01 | 1.00E+00 |
| ENSG00000231328.1_TPT1P7    | ENSG00000160789.18_LMNA | -0.09493 | -0.250349378 | 0.065254636 | 2.45E-01 | 5.25E-01 | 1.00E+00 |
| ENSG00000261723.1_CTD-2196E | ENSG00000160789.18_LMNA | 0.00378  | -0.155509571 | 0.162887387 | 9.63E-01 | 9.85E-01 | 1.00E+00 |
| ENSG00000237481.1_RP4-803J1 | ENSG00000160789.18_LMNA | -0.03884 | -0.196820927 | 0.121112379 | 6.35E-01 | 8.36E-01 | 1.00E+00 |
| ENSG00000235330.2_RPL12P25  | ENSG00000160789.18_LMNA | -0.01599 | -0.174742258 | 0.143579837 | 8.45E-01 | 9.40E-01 | 1.00E+00 |
| ENSG00000232625.1_RPL23AP3  | ENSG00000160789.18_LMNA | 0.02542  | -0.13432334  | 0.183877517 | 7.56E-01 | 8.98E-01 | 1.00E+00 |
| ENSG00000203307.2_RP11-375H | ENSG00000160789.18_LMNA | 0.03348  | -0.126394567 | 0.191658976 | 6.82E-01 | 8.62E-01 | 1.00E+00 |
| ENSG00000184385.2_UMODL1-A  | ENSG00000160789.18_LMNA | 0.02842  | -0.131376563 | 0.186774208 | 7.28E-01 | 8.85E-01 | 1.00E+00 |
| ENSG00000232710.1_RP4-669P1 | ENSG00000160789.18_LMNA | -0.15961 | -0.310910445 | -0.00041995 | 4.95E-02 | 2.00E-01 | 1.00E+00 |
| ENSG00000240253.4_FAR2P3    | ENSG00000160789.18_LMNA | -0.01615 | -0.174904808 | 0.143415614 | 8.43E-01 | 9.39E-01 | 1.00E+00 |
| ENSG00000234946.1_SDHCP3    | ENSG00000160789.18_LMNA | 0.01862  | -0.140999915 | 0.177293909 | 8.20E-01 | 9.30E-01 | 1.00E+00 |
| ENSG00000236290.1_EEF1GP7   | ENSG00000160789.18_LMNA | -0.15942 | -0.310731898 | -0.00022231 | 4.98E-02 | 2.01E-01 | 1.00E+00 |
| ENSG00000275898.1_RP11-497G | ENSG00000160789.18_LMNA | -0.16142 | -0.312592389 | -0.00228296 | 4.69E-02 | 1.93E-01 | 1.00E+00 |
| ENSG00000235672.1_AC090286. | ENSG00000160789.18_LMNA | -0.07015 | -0.226817367 | 0.090056709 | 3.90E-01 | 6.69E-01 | 1.00E+00 |
| ENSG00000224959.1_AC017002. | ENSG00000160789.18_LMNA | 0.34511  | 0.196711946  | 0.478041725 | 1.34E-05 | 3.70E-04 | 6.85E-01 |
| ENSG00000267385.1_CTB-50L17 | ENSG00000160789.18_LMNA | -0.20286 | -0.3507357   | -0.04511874 | 1.22E-02 | 7.56E-02 | 1.00E+00 |
| ENSG00000261603.1_PRSS46    | ENSG00000160789.18_LMNA | 0.01759  | -0.142009814 | 0.176295586 | 8.30E-01 | 9.34E-01 | 1.00E+00 |
| ENSG00000265203.1_RBP3      | ENSG00000160789.18_LMNA | -0.32439 | -0.459840816 | -0.17418208 | 4.56E-05 | 9.98E-04 | 1.00E+00 |
| ENSG00000189013.13_KIR2DL4  | ENSG00000160789.18_LMNA | 0.05512  | -0.105000596 | 0.212457829 | 5.00E-01 | 7.53E-01 | 1.00E+00 |
| ENSG00000166527.6_CLEC4D    | ENSG00000160789.18_LMNA | -0.01573 | -0.174497831 | 0.143826745 | 8.47E-01 | 9.40E-01 | 1.00E+00 |
| ENSG00000255710.2_RP11-667M | ENSG00000160789.18_LMNA | 0.02361  | -0.136098436 | 0.182129919 | 7.73E-01 | 9.06E-01 | 1.00E+00 |
| ENSG00000224224.1_HAUS1P2   | ENSG00000160789.18_LMNA | -0.05287 | -0.210305063 | 0.107228676 | 5.18E-01 | 7.64E-01 | 1.00E+00 |
| ENSG00000270757.1_HSPE1-MO  | ENSG00000160789.18_LMNA | 0.04152  | -0.118468396 | 0.199398122 | 6.12E-01 | 8.23E-01 | 1.00E+00 |

|                              |                         |          |              |             |          |          |          |
|------------------------------|-------------------------|----------|--------------|-------------|----------|----------|----------|
| ENSG00000266378.1_RP11-214O  | ENSG00000160789.18_LMNA | 0.20789  | 0.050353084  | 0.355328141 | 1.02E-02 | 6.64E-02 | 1.00E+00 |
| ENSG00000224647.2_AC026954.1 | ENSG00000160789.18_LMNA | 0.22723  | 0.070578304  | 0.372935799 | 4.87E-03 | 3.84E-02 | 1.00E+00 |
| ENSG00000262003.1_RP11-676J  | ENSG00000160789.18_LMNA | 0.01119  | -0.148278034 | 0.170084534 | 8.91E-01 | 9.57E-01 | 1.00E+00 |
| ENSG00000174384.9_PMS2P6     | ENSG00000160789.18_LMNA | -0.14642 | -0.298658402 | 0.013086293 | 7.19E-02 | 2.54E-01 | 1.00E+00 |
| ENSG00000263938.1_RP11-579O  | ENSG00000160789.18_LMNA | -0.13262 | -0.285786609 | 0.027154249 | 1.03E-01 | 3.18E-01 | 1.00E+00 |
| ENSG00000224957.4_LINC01266  | ENSG00000160789.18_LMNA | -0.17306 | -0.323351679 | -0.01425166 | 3.30E-02 | 1.52E-01 | 1.00E+00 |
| ENSG00000236499.2_LINC00896  | ENSG00000160789.18_LMNA | 0.11861  | -0.041372187 | 0.272661832 | 1.46E-01 | 3.91E-01 | 1.00E+00 |
| ENSG00000230990.1_RP4-734C1  | ENSG00000160789.18_LMNA | -0.16549 | -0.316356267 | -0.00645983 | 4.16E-02 | 1.78E-01 | 1.00E+00 |
| ENSG00000258303.1_RP11-887P  | ENSG00000160789.18_LMNA | -0.06498 | -0.221887451 | 0.095203379 | 4.26E-01 | 6.97E-01 | 1.00E+00 |
| ENSG00000267206.4_LCN6       | ENSG00000160789.18_LMNA | 0.05561  | -0.104511204 | 0.212930266 | 4.96E-01 | 7.50E-01 | 1.00E+00 |
| ENSG00000261488.1_RP11-757F  | ENSG00000160789.18_LMNA | -0.00467 | -0.163744123 | 0.154650527 | 9.55E-01 | 9.82E-01 | 1.00E+00 |
| ENSG00000260410.2_RP11-505K  | ENSG00000160789.18_LMNA | -0.15763 | -0.309077701 | 0.001607634 | 5.24E-02 | 2.07E-01 | 1.00E+00 |
| ENSG00000226220.1_CICP22     | ENSG00000160789.18_LMNA | -0.01418 | -0.172987027 | 0.145352006 | 8.62E-01 | 9.46E-01 | 1.00E+00 |
| ENSG00000172782.10_FADS6     | ENSG00000160789.18_LMNA | -0.12083 | -0.274750128 | 0.039118433 | 1.38E-01 | 3.79E-01 | 1.00E+00 |
| ENSG00000223725.5_AC007879.1 | ENSG00000160789.18_LMNA | 0.17586  | 0.017138601  | 0.32593499  | 3.02E-02 | 1.44E-01 | 1.00E+00 |
| ENSG00000280387.1_RP5-1153D  | ENSG00000160789.18_LMNA | 0.09773  | -0.062441996 | 0.252994652 | 2.31E-01 | 5.09E-01 | 1.00E+00 |
| ENSG00000175967.3_RP11-544L  | ENSG00000160789.18_LMNA | -0.28124 | -0.421565436 | -0.12775925 | 4.48E-04 | 6.19E-03 | 1.00E+00 |
| ENSG00000259010.1_RP11-973N  | ENSG00000160789.18_LMNA | 0.118    | -0.041986739 | 0.272091882 | 1.48E-01 | 3.94E-01 | 1.00E+00 |
| ENSG00000236670.1_KRT18P5    | ENSG00000160789.18_LMNA | 0.10791  | -0.052188519 | 0.262598226 | 1.86E-01 | 4.52E-01 | 1.00E+00 |
| ENSG00000250232.1_           | ENSG00000160789.18_LMNA | 0.0485   | -0.111566193 | 0.206105314 | 5.53E-01 | 7.88E-01 | 1.00E+00 |
| ENSG00000279613.1_RP13-638C  | ENSG00000160789.18_LMNA | 0.09849  | -0.061677516 | 0.253712828 | 2.27E-01 | 5.04E-01 | 1.00E+00 |
| ENSG00000280274.1_RP11-556H  | ENSG00000160789.18_LMNA | 0.1123   | -0.047751432 | 0.26673483  | 1.68E-01 | 4.27E-01 | 1.00E+00 |
| ENSG00000260785.1_CASC17     | ENSG00000160789.18_LMNA | -0.2674  | -0.40918593  | -0.11301516 | 8.67E-04 | 1.04E-02 | 1.00E+00 |
| ENSG00000277215.1_SPANXA2-1  | ENSG00000160789.18_LMNA | -0.16396 | -0.314940249 | -0.00488717 | 4.35E-02 | 1.84E-01 | 1.00E+00 |
| ENSG00000143032.7_BARHL2     | ENSG00000160789.18_LMNA | -0.15308 | -0.304851456 | 0.006273464 | 5.97E-02 | 2.25E-01 | 1.00E+00 |
| ENSG00000256625.1_RP11-582E  | ENSG00000160789.18_LMNA | -0.00919 | -0.168143245 | 0.150231958 | 9.11E-01 | 9.66E-01 | 1.00E+00 |
| ENSG00000235868.3_GAPDHP31   | ENSG00000160789.18_LMNA | 0.05049  | -0.109592333 | 0.208017933 | 5.37E-01 | 7.78E-01 | 1.00E+00 |
| ENSG00000204677.9_FAM153C    | ENSG00000160789.18_LMNA | -0.09098 | -0.246609008 | 0.069223119 | 2.65E-01 | 5.49E-01 | 1.00E+00 |
| ENSG00000147223.5_RIPPLY1    | ENSG00000160789.18_LMNA | -0.05564 | -0.212957743 | 0.104482737 | 4.96E-01 | 7.50E-01 | 1.00E+00 |
| ENSG00000231881.1_RP5-1120P  | ENSG00000160789.18_LMNA | 0.01318  | -0.146328831 | 0.172018674 | 8.72E-01 | 9.50E-01 | 1.00E+00 |
| ENSG00000242258.1_LINC00996  | ENSG00000160789.18_LMNA | 0.10632  | -0.053796128 | 0.261096624 | 1.92E-01 | 4.61E-01 | 1.00E+00 |
| ENSG00000186115.11_CYP4F2    | ENSG00000160789.18_LMNA | -0.05012 | -0.207660431 | 0.109961473 | 5.40E-01 | 7.80E-01 | 1.00E+00 |
| ENSG00000244411.3_KRTAP5-7   | ENSG00000160789.18_LMNA | -0.20291 | -0.350780032 | -0.04516919 | 1.22E-02 | 7.56E-02 | 1.00E+00 |

|                              |                         |          |              |             |          |          |          |
|------------------------------|-------------------------|----------|--------------|-------------|----------|----------|----------|
| ENSG00000169618.6_PROKR1     | ENSG00000160789.18_LMNA | 0.10538  | -0.054737361 | 0.260216749 | 1.96E-01 | 4.66E-01 | 1.00E+00 |
| ENSG00000184601.9_C14orf180  | ENSG00000160789.18_LMNA | -0.08957 | -0.245277758 | 0.070633149 | 2.72E-01 | 5.57E-01 | 1.00E+00 |
| ENSG00000224406.4_RP11-48F1  | ENSG00000160789.18_LMNA | -0.07183 | -0.228416651 | 0.088383466 | 3.79E-01 | 6.58E-01 | 1.00E+00 |
| ENSG00000080224.16_EPHA6     | ENSG00000160789.18_LMNA | -0.22787 | -0.373520169 | -0.07125384 | 4.75E-03 | 3.78E-02 | 1.00E+00 |
| ENSG00000162621.6_LRRC53     | ENSG00000160789.18_LMNA | 0.17688  | 0.018190699  | 0.326875291 | 2.93E-02 | 1.41E-01 | 1.00E+00 |
| ENSG00000213484.2_EIF4A1P8   | ENSG00000160789.18_LMNA | 0.04377  | -0.116241095 | 0.201565754 | 5.92E-01 | 8.11E-01 | 1.00E+00 |
| ENSG00000240338.4_RP11-331F  | ENSG00000160789.18_LMNA | 0.17824  | 0.019596465  | 0.328130724 | 2.80E-02 | 1.37E-01 | 1.00E+00 |
| ENSG00000229593.1_SUCLA2P3   | ENSG00000160789.18_LMNA | -0.03783 | -0.195853208 | 0.122104012 | 6.44E-01 | 8.41E-01 | 1.00E+00 |
| ENSG00000254402.5_LRRC24     | ENSG00000160789.18_LMNA | 0.05131  | -0.108779939 | 0.208804417 | 5.30E-01 | 7.73E-01 | 1.00E+00 |
| ENSG00000275297.1_RP11-292F  | ENSG00000160789.18_LMNA | -0.1204  | -0.274343923 | 0.039557072 | 1.40E-01 | 3.81E-01 | 1.00E+00 |
| ENSG00000228392.1_RP11-343J  | ENSG00000160789.18_LMNA | -0.17476 | -0.324923608 | -0.01600773 | 3.13E-02 | 1.47E-01 | 1.00E+00 |
| ENSG00000215472.8_RPL17-C18  | ENSG00000160789.18_LMNA | -0.20781 | -0.355257274 | -0.05027218 | 1.02E-02 | 6.65E-02 | 1.00E+00 |
| ENSG00000246225.5_RP11-17A1  | ENSG00000160789.18_LMNA | 0.04058  | -0.119391099 | 0.198499226 | 6.20E-01 | 8.28E-01 | 1.00E+00 |
| ENSG00000254401.1_RP11-179A  | ENSG00000160789.18_LMNA | -0.13815 | -0.290948507 | 0.021527509 | 8.96E-02 | 2.92E-01 | 1.00E+00 |
| ENSG00000213373.6_LINC00671  | ENSG00000160789.18_LMNA | 0.00111  | -0.158122088 | 0.160278936 | 9.89E-01 | 9.96E-01 | 1.00E+00 |
| ENSG00000151838.10_CCDC175   | ENSG00000160789.18_LMNA | 0.19435  | 0.036270007  | 0.34293854  | 1.64E-02 | 9.37E-02 | 1.00E+00 |
| ENSG00000237090.1_RP11-342M  | ENSG00000160789.18_LMNA | -0.03042 | -0.188711303 | 0.129402832 | 7.10E-01 | 8.77E-01 | 1.00E+00 |
| ENSG00000245330.4_KB-1471A8  | ENSG00000160789.18_LMNA | -0.11779 | -0.271895286 | 0.042198666 | 1.48E-01 | 3.95E-01 | 1.00E+00 |
| ENSG00000244234.1_GMCL1P1    | ENSG00000160789.18_LMNA | 0.10132  | -0.058833193 | 0.25638182  | 2.14E-01 | 4.88E-01 | 1.00E+00 |
| ENSG00000113249.11_HAVCR1    | ENSG00000160789.18_LMNA | -0.08397 | -0.23996017  | 0.076252855 | 3.04E-01 | 5.90E-01 | 1.00E+00 |
| ENSG00000228960.5_OR2A9P     | ENSG00000160789.18_LMNA | -0.03778 | -0.195803029 | 0.122155413 | 6.44E-01 | 8.42E-01 | 1.00E+00 |
| ENSG00000267230.1_           | ENSG00000160789.18_LMNA | -0.03664 | -0.194705988 | 0.123278761 | 6.54E-01 | 8.47E-01 | 1.00E+00 |
| ENSG00000213279.2_RP1-29C18  | ENSG00000160789.18_LMNA | -0.0549  | -0.212250315 | 0.105215509 | 5.02E-01 | 7.53E-01 | 1.00E+00 |
| ENSG00000223843.4_EFCAB6-A5  | ENSG00000160789.18_LMNA | 0.07789  | -0.082329897 | 0.234188398 | 3.40E-01 | 6.25E-01 | 1.00E+00 |
| ENSG00000068781.19_STON1-G   | ENSG00000160789.18_LMNA | -0.10991 | -0.26448609  | 0.050165061 | 1.78E-01 | 4.39E-01 | 1.00E+00 |
| ENSG00000232578.4_CTC-303L1  | ENSG00000160789.18_LMNA | 0.02487  | -0.134864504 | 0.183344949 | 7.61E-01 | 9.00E-01 | 1.00E+00 |
| ENSG00000088726.14_TMEM40    | ENSG00000160789.18_LMNA | -0.05896 | -0.216129712 | 0.101192884 | 4.71E-01 | 7.31E-01 | 1.00E+00 |
| ENSG00000274628.3_FAM95B1    | ENSG00000160789.18_LMNA | -0.07263 | -0.229176979 | 0.087587349 | 3.74E-01 | 6.54E-01 | 1.00E+00 |
| ENSG00000264570.1_SNX19P3    | ENSG00000160789.18_LMNA | 0.06922  | -0.090980264 | 0.225933902 | 3.97E-01 | 6.74E-01 | 1.00E+00 |
| ENSG00000198670.10_LPA       | ENSG00000160789.18_LMNA | -0.16869 | -0.319317331 | -0.00975342 | 3.78E-02 | 1.67E-01 | 1.00E+00 |
| ENSG00000093100.13_XXbac-B4i | ENSG00000160789.18_LMNA | 0.05982  | -0.100332336 | 0.216958321 | 4.64E-01 | 7.26E-01 | 1.00E+00 |
| ENSG00000257501.5_RP11-1016i | ENSG00000160789.18_LMNA | -0.08663 | -0.242485658 | 0.073586384 | 2.89E-01 | 5.74E-01 | 1.00E+00 |
| ENSG00000170289.11_CNGB3     | ENSG00000160789.18_LMNA | 0.101    | -0.059149362 | 0.256085378 | 2.16E-01 | 4.90E-01 | 1.00E+00 |

|                             |                         |          |              |             |          |          |          |
|-----------------------------|-------------------------|----------|--------------|-------------|----------|----------|----------|
| ENSG00000245748.1_RP11-367J | ENSG00000160789.18_LMNA | -0.05187 | -0.209338551 | 0.108227966 | 5.26E-01 | 7.71E-01 | 1.00E+00 |
| ENSG00000250910.6_AC097467. | ENSG00000160789.18_LMNA | -0.00252 | -0.161658469 | 0.15674096  | 9.75E-01 | 9.91E-01 | 1.00E+00 |
| ENSG00000167210.15_LOXHD1   | ENSG00000160789.18_LMNA | -0.0236  | -0.182113693 | 0.136114909 | 7.73E-01 | 9.06E-01 | 1.00E+00 |
| ENSG00000205038.10_PKHD1L1  | ENSG00000160789.18_LMNA | -0.00251 | -0.161643493 | 0.15675596  | 9.76E-01 | 9.91E-01 | 1.00E+00 |
| ENSG00000281181.1_CH507-513 | ENSG00000160789.18_LMNA | 0.06742  | -0.092773835 | 0.224216696 | 4.09E-01 | 6.83E-01 | 1.00E+00 |
| ENSG00000207864.2_MIR27B    | ENSG00000160789.18_LMNA | 0.06648  | -0.093708722 | 0.223320832 | 4.16E-01 | 6.88E-01 | 1.00E+00 |
| ENSG00000222317.1_RNA5SP11  | ENSG00000160789.18_LMNA | -0.08311 | -0.239143127 | 0.077114541 | 3.09E-01 | 5.95E-01 | 1.00E+00 |
| ENSG00000223475.1_RP11-310H | ENSG00000160789.18_LMNA | -0.00441 | -0.163491172 | 0.15490421  | 9.57E-01 | 9.83E-01 | 1.00E+00 |
| ENSG00000222057.1_RNU4-62P  | ENSG00000160789.18_LMNA | 0.0288   | -0.130997368 | 0.187146557 | 7.25E-01 | 8.83E-01 | 1.00E+00 |
| ENSG00000271047.1_RP11-760D | ENSG00000160789.18_LMNA | 0.10659  | -0.053518937 | 0.261355646 | 1.91E-01 | 4.59E-01 | 1.00E+00 |
| ENSG00000207186.1_RNA5SP12  | ENSG00000160789.18_LMNA | 0.04355  | -0.116454109 | 0.201358581 | 5.94E-01 | 8.13E-01 | 1.00E+00 |
| ENSG00000201512.1_SNORA71C  | ENSG00000160789.18_LMNA | 0.146    | -0.01351647  | 0.298266476 | 7.27E-02 | 2.56E-01 | 1.00E+00 |
| ENSG00000005102.11_ME0X1    | ENSG00000160789.18_LMNA | 0.07148  | -0.088725693 | 0.22808969  | 3.81E-01 | 6.60E-01 | 1.00E+00 |
| ENSG00000266640.1_MIR4754   | ENSG00000160789.18_LMNA | -0.05417 | -0.211545306 | 0.105945433 | 5.07E-01 | 7.57E-01 | 1.00E+00 |
| ENSG00000187714.6_SLC18A3   | ENSG00000160789.18_LMNA | -0.07723 | -0.233559695 | 0.082990434 | 3.44E-01 | 6.29E-01 | 1.00E+00 |
| ENSG00000236969.2_GGT8P     | ENSG00000160789.18_LMNA | 0.08969  | -0.070520786 | 0.245383887 | 2.72E-01 | 5.56E-01 | 1.00E+00 |
| ENSG00000212460.1_RNU6-460F | ENSG00000160789.18_LMNA | 0.00012  | -0.159084106 | 0.159317293 | 9.99E-01 | 1.00E+00 | 1.00E+00 |
| ENSG00000213355.3_CNN2P8    | ENSG00000160789.18_LMNA | -0.10698 | -0.261723293 | 0.053125417 | 1.90E-01 | 4.57E-01 | 1.00E+00 |
| ENSG00000257443.1_RP11-150C | ENSG00000160789.18_LMNA | -0.07618 | -0.232555713 | 0.084044675 | 3.51E-01 | 6.35E-01 | 1.00E+00 |
| ENSG00000227579.4_RP1-35C21 | ENSG00000160789.18_LMNA | -0.36018 | -0.491211128 | -0.21320098 | 5.17E-06 | 1.70E-04 | 2.65E-01 |
| ENSG00000275084.2_SNORD91E  | ENSG00000160789.18_LMNA | -0.00488 | -0.163950624 | 0.154443398 | 9.52E-01 | 9.81E-01 | 1.00E+00 |
| ENSG00000237911.2_SRP68P3   | ENSG00000160789.18_LMNA | 0.05438  | -0.105739498 | 0.211744246 | 5.06E-01 | 7.56E-01 | 1.00E+00 |
| ENSG00000236153.1_AC104076. | ENSG00000160789.18_LMNA | -0.09033 | -0.245996096 | 0.069872458 | 2.68E-01 | 5.52E-01 | 1.00E+00 |
| ENSG00000235830.1_SRGA3-A   | ENSG00000160789.18_LMNA | -0.08433 | -0.240303466 | 0.07589066  | 3.02E-01 | 5.88E-01 | 1.00E+00 |
| ENSG00000201684.1_RN7SKP23  | ENSG00000160789.18_LMNA | 0.11109  | -0.048972668 | 0.265597451 | 1.73E-01 | 4.33E-01 | 1.00E+00 |
| ENSG00000271392.1_RP1-161P9 | ENSG00000160789.18_LMNA | -0.08416 | -0.240143174 | 0.076059787 | 3.03E-01 | 5.89E-01 | 1.00E+00 |
| ENSG00000118990.5_GLRXP3    | ENSG00000160789.18_LMNA | 0.03389  | -0.125995333 | 0.192049738 | 6.79E-01 | 8.60E-01 | 1.00E+00 |
| ENSG00000237751.2_LINC01143 | ENSG00000160789.18_LMNA | -0.12911 | -0.282508166 | 0.030717656 | 1.13E-01 | 3.35E-01 | 1.00E+00 |
| ENSG00000273474.1_RP11-295P | ENSG00000160789.18_LMNA | -0.04956 | -0.207122288 | 0.110516968 | 5.44E-01 | 7.82E-01 | 1.00E+00 |
| ENSG00000237903.1_RP3-404F1 | ENSG00000160789.18_LMNA | 0.06653  | -0.093664112 | 0.223363593 | 4.15E-01 | 6.88E-01 | 1.00E+00 |
| ENSG00000213630.3_BOLA3P3   | ENSG00000160789.18_LMNA | -0.14409 | -0.296488693 | 0.015466311 | 7.66E-02 | 2.65E-01 | 1.00E+00 |
| ENSG00000244692.3_RN7SL724f | ENSG00000160789.18_LMNA | -0.10851 | -0.26316432  | 0.051582037 | 1.83E-01 | 4.48E-01 | 1.00E+00 |
| ENSG00000262098.1_CTD-2561B | ENSG00000160789.18_LMNA | -0.03211 | -0.190341174 | 0.127740182 | 6.94E-01 | 8.69E-01 | 1.00E+00 |

|                              |                         |          |              |             |          |          |          |
|------------------------------|-------------------------|----------|--------------|-------------|----------|----------|----------|
| ENSG00000231977.1_RP5-963E2  | ENSG00000160789.18_LMNA | -0.15449 | -0.30616454  | 0.004825251 | 5.74E-02 | 2.19E-01 | 1.00E+00 |
| ENSG00000226874.1_AC005154.1 | ENSG00000160789.18_LMNA | 0.11037  | -0.049703891 | 0.264916019 | 1.76E-01 | 4.37E-01 | 1.00E+00 |
| ENSG00000250942.1_ENPP7P11   | ENSG00000160789.18_LMNA | -0.11877 | -0.27281371  | 0.041208383 | 1.45E-01 | 3.90E-01 | 1.00E+00 |
| ENSG00000272632.1_RP11-362F  | ENSG00000160789.18_LMNA | 0.0375   | -0.122434132 | 0.195530911 | 6.46E-01 | 8.43E-01 | 1.00E+00 |
| ENSG00000269729.1_AC006262.4 | ENSG00000160789.18_LMNA | 0.08653  | -0.073680808 | 0.242396299 | 2.89E-01 | 5.74E-01 | 1.00E+00 |
| ENSG00000228546.2_CTA-313A1  | ENSG00000160789.18_LMNA | 0.06707  | -0.093122439 | 0.223882706 | 4.12E-01 | 6.86E-01 | 1.00E+00 |
| ENSG00000257231.1_DYNLL1P4   | ENSG00000160789.18_LMNA | -0.06436 | -0.221290862 | 0.09582505  | 4.31E-01 | 7.00E-01 | 1.00E+00 |
| ENSG00000224977.1_RP11-160H  | ENSG00000160789.18_LMNA | 0.00574  | -0.153605523 | 0.164785673 | 9.44E-01 | 9.78E-01 | 1.00E+00 |
| ENSG00000147138.1_GPR174     | ENSG00000160789.18_LMNA | -0.05659 | -0.213859434 | 0.103548241 | 4.89E-01 | 7.45E-01 | 1.00E+00 |
| ENSG00000223828.1_BANF1P4    | ENSG00000160789.18_LMNA | -0.05774 | -0.214968648 | 0.102397903 | 4.80E-01 | 7.38E-01 | 1.00E+00 |
| ENSG00000270052.1_WI2-80269  | ENSG00000160789.18_LMNA | 0.02337  | -0.136334691 | 0.181897173 | 7.75E-01 | 9.07E-01 | 1.00E+00 |
| ENSG00000178734.5_LMO7DN     | ENSG00000160789.18_LMNA | -0.12596 | -0.279557231 | 0.033918294 | 1.22E-01 | 3.52E-01 | 1.00E+00 |
| ENSG00000274367.1_LA16c-380F | ENSG00000160789.18_LMNA | 0.02562  | -0.134132623 | 0.184065159 | 7.54E-01 | 8.98E-01 | 1.00E+00 |
| ENSG00000254607.2_RP11-115C  | ENSG00000160789.18_LMNA | 0.01682  | -0.142759257 | 0.17555431  | 8.37E-01 | 9.37E-01 | 1.00E+00 |
| ENSG00000269356.1_RP11-120K  | ENSG00000160789.18_LMNA | -0.17942 | -0.329215812 | -0.02081247 | 2.70E-02 | 1.33E-01 | 1.00E+00 |
| ENSG00000271670.1_RP11-9511E | ENSG00000160789.18_LMNA | -0.13226 | -0.285448828 | 0.027521758 | 1.04E-01 | 3.20E-01 | 1.00E+00 |
| ENSG00000253858.1_CTB-147C1  | ENSG00000160789.18_LMNA | -0.12937 | -0.282743514 | 0.030462116 | 1.12E-01 | 3.34E-01 | 1.00E+00 |
| ENSG00000272417.1_CTD-2199C  | ENSG00000160789.18_LMNA | -0.07681 | -0.233161989 | 0.083408134 | 3.47E-01 | 6.31E-01 | 1.00E+00 |
| ENSG00000258626.2_COX7A2P1   | ENSG00000160789.18_LMNA | 0.01853  | -0.141084748 | 0.177210074 | 8.21E-01 | 9.30E-01 | 1.00E+00 |
| ENSG00000231643.4_GHc-210E9  | ENSG00000160789.18_LMNA | -0.05202 | -0.209484805 | 0.108076793 | 5.24E-01 | 7.70E-01 | 1.00E+00 |
| ENSG00000250519.5_RP11-680H  | ENSG00000160789.18_LMNA | -0.17252 | -0.322852403 | -0.0136943  | 3.36E-02 | 1.54E-01 | 1.00E+00 |
| ENSG00000258658.1_RP11-517O  | ENSG00000160789.18_LMNA | 0.09156  | -0.068638808 | 0.247160323 | 2.62E-01 | 5.45E-01 | 1.00E+00 |
| ENSG00000271215.1_RPL21P13E  | ENSG00000160789.18_LMNA | -0.05001 | -0.207555914 | 0.110069376 | 5.41E-01 | 7.80E-01 | 1.00E+00 |
| ENSG00000267117.1_AC010525.4 | ENSG00000160789.18_LMNA | 0.08328  | -0.076939538 | 0.239309099 | 3.08E-01 | 5.94E-01 | 1.00E+00 |
| ENSG00000222044.1_RP5-1039K  | ENSG00000160789.18_LMNA | -0.23344 | -0.378572968 | -0.07710646 | 3.80E-03 | 3.19E-02 | 1.00E+00 |
| ENSG00000273399.2_RP11-408A  | ENSG00000160789.18_LMNA | 0.07964  | -0.080577975 | 0.235854607 | 3.29E-01 | 6.15E-01 | 1.00E+00 |
| ENSG00000265728.1_RP11-883A  | ENSG00000160789.18_LMNA | -0.15716 | -0.308635477 | 0.00209649  | 5.32E-02 | 2.09E-01 | 1.00E+00 |
| ENSG00000215692.2_AC114730.1 | ENSG00000160789.18_LMNA | -0.088   | -0.243789624 | 0.072207854 | 2.81E-01 | 5.67E-01 | 1.00E+00 |
| ENSG00000257259.1_RP11-767I2 | ENSG00000160789.18_LMNA | -0.29644 | -0.435107084 | -0.14403758 | 2.09E-04 | 3.37E-03 | 1.00E+00 |
| ENSG00000108849.6_PPY        | ENSG00000160789.18_LMNA | 0.29156  | 0.138806771  | 0.43076998  | 2.68E-04 | 4.11E-03 | 1.00E+00 |
| ENSG00000234003.1_MTATP6P2   | ENSG00000160789.18_LMNA | -0.09801 | -0.25325689  | 0.062162893 | 2.30E-01 | 5.07E-01 | 1.00E+00 |
| ENSG00000253582.1_RP11-649G  | ENSG00000160789.18_LMNA | 0.06062  | -0.099543273 | 0.217717696 | 4.58E-01 | 7.22E-01 | 1.00E+00 |
| ENSG00000229820.2_RP1-308E4  | ENSG00000160789.18_LMNA | 0.0289   | -0.130906995 | 0.187235284 | 7.24E-01 | 8.83E-01 | 1.00E+00 |

|                             |                         |          |              |             |          |          |          |
|-----------------------------|-------------------------|----------|--------------|-------------|----------|----------|----------|
| ENSG00000277214.1_RP11-70D2 | ENSG00000160789.18_LMNA | -0.0072  | -0.166206375 | 0.152178959 | 9.30E-01 | 9.73E-01 | 1.00E+00 |
| ENSG00000229116.2_RP11-20J1 | ENSG00000160789.18_LMNA | 0.13971  | -0.019934331 | 0.292406771 | 8.60E-02 | 2.85E-01 | 1.00E+00 |
| ENSG00000254758.1_AP000889. | ENSG00000160789.18_LMNA | 0.03302  | -0.126847898 | 0.191215144 | 6.86E-01 | 8.64E-01 | 1.00E+00 |
| ENSG00000251298.1_RP11-425A | ENSG00000160789.18_LMNA | -0.14786 | -0.300000766 | 0.011612044 | 6.91E-02 | 2.47E-01 | 1.00E+00 |
| ENSG00000226053.1_RP5-1070A | ENSG00000160789.18_LMNA | 0.02326  | -0.136443448 | 0.181790018 | 7.76E-01 | 9.08E-01 | 1.00E+00 |
| ENSG00000225506.2_CYP4A22-A | ENSG00000160789.18_LMNA | 0.05181  | -0.108279499 | 0.209288692 | 5.26E-01 | 7.71E-01 | 1.00E+00 |
| ENSG00000234042.1_RP11-452D | ENSG00000160789.18_LMNA | -0.02716 | -0.18555703  | 0.132615472 | 7.40E-01 | 8.91E-01 | 1.00E+00 |
| ENSG00000273584.1_RP11-861L | ENSG00000160789.18_LMNA | 0.05724  | -0.102894579 | 0.214489828 | 4.84E-01 | 7.41E-01 | 1.00E+00 |
| ENSG00000259609.1_RP11-342A | ENSG00000160789.18_LMNA | -0.14824 | -0.300350452 | 0.011227779 | 6.84E-02 | 2.46E-01 | 1.00E+00 |
| ENSG00000228737.2_AC008781. | ENSG00000160789.18_LMNA | 0.10932  | -0.050759389 | 0.263931838 | 1.80E-01 | 4.43E-01 | 1.00E+00 |
| ENSG00000279817.1_RP11-386I | ENSG00000160789.18_LMNA | 0.01161  | -0.147860925 | 0.170498626 | 8.87E-01 | 9.56E-01 | 1.00E+00 |
| ENSG00000277299.1_RP11-837J | ENSG00000160789.18_LMNA | -0.06166 | -0.218711475 | 0.098510039 | 4.50E-01 | 7.16E-01 | 1.00E+00 |
| ENSG00000272699.1_RP11-145M | ENSG00000160789.18_LMNA | 0.01572  | -0.143837804 | 0.174486882 | 8.48E-01 | 9.40E-01 | 1.00E+00 |
| ENSG00000267115.1_CTD-3064H | ENSG00000160789.18_LMNA | -0.0734  | -0.229910138 | 0.086819297 | 3.69E-01 | 6.50E-01 | 1.00E+00 |
| ENSG00000231700.3_RP11-367J | ENSG00000160789.18_LMNA | 0.07486  | -0.085354105 | 0.231307767 | 3.59E-01 | 6.42E-01 | 1.00E+00 |
| ENSG00000243415.2_RP11-274H | ENSG00000160789.18_LMNA | 0.123    | -0.036921923 | 0.276782537 | 1.31E-01 | 3.67E-01 | 1.00E+00 |
| ENSG00000262402.1_RP11-667K | ENSG00000160789.18_LMNA | 0.02391  | -0.1358069   | 0.182417077 | 7.70E-01 | 9.05E-01 | 1.00E+00 |
| ENSG00000234264.1_DEPDC1-A  | ENSG00000160789.18_LMNA | 0.229    | 0.072437693  | 0.374543688 | 4.54E-03 | 3.65E-02 | 1.00E+00 |
| ENSG00000226526.1_RP1-37C10 | ENSG00000160789.18_LMNA | 0.12809  | -0.031754502 | 0.28155286  | 1.16E-01 | 3.40E-01 | 1.00E+00 |
| ENSG00000113520.9_IL4       | ENSG00000160789.18_LMNA | 0.18743  | 0.029098325  | 0.336587976 | 2.08E-02 | 1.11E-01 | 1.00E+00 |
| ENSG00000167774.2_CTD-2550C | ENSG00000160789.18_LMNA | 0.05303  | -0.107070148 | 0.210458335 | 5.16E-01 | 7.63E-01 | 1.00E+00 |
| ENSG00000257954.1_RP11-161H | ENSG00000160789.18_LMNA | -0.01232 | -0.171185962 | 0.147168331 | 8.80E-01 | 9.54E-01 | 1.00E+00 |
| ENSG00000263080.1_RP11-485G | ENSG00000160789.18_LMNA | 0.0845   | -0.07572386  | 0.240461536 | 3.01E-01 | 5.87E-01 | 1.00E+00 |
| ENSG00000227627.1_RP1-101K1 | ENSG00000160789.18_LMNA | -0.14177 | -0.294325825 | 0.017835311 | 8.15E-02 | 2.75E-01 | 1.00E+00 |
| ENSG00000225165.3_CTD-2538A | ENSG00000160789.18_LMNA | -0.03552 | -0.193625884 | 0.124383969 | 6.64E-01 | 8.52E-01 | 1.00E+00 |
| ENSG00000279708.1_CTD-2335A | ENSG00000160789.18_LMNA | -0.20961 | -0.356900173 | -0.0521487  | 9.55E-03 | 6.34E-02 | 1.00E+00 |
| ENSG00000259656.1_RP11-325E | ENSG00000160789.18_LMNA | -0.01976 | -0.178398382 | 0.139881864 | 8.09E-01 | 9.24E-01 | 1.00E+00 |
| ENSG00000261089.1_CDC37P2   | ENSG00000160789.18_LMNA | 0.1018   | -0.058351268 | 0.256833563 | 2.12E-01 | 4.86E-01 | 1.00E+00 |
| ENSG00000137090.10_DMRT1    | ENSG00000160789.18_LMNA | 0.02389  | -0.135826714 | 0.182397563 | 7.70E-01 | 9.05E-01 | 1.00E+00 |
| ENSG00000279782.1_PP1AL4F   | ENSG00000160789.18_LMNA | 0.08712  | -0.073090966 | 0.242954411 | 2.86E-01 | 5.71E-01 | 1.00E+00 |
| ENSG00000240579.1_RP11-20L2 | ENSG00000160789.18_LMNA | 0.21877  | 0.061714034  | 0.365245462 | 6.77E-03 | 4.91E-02 | 1.00E+00 |
| ENSG00000228195.2_RPL5P27   | ENSG00000160789.18_LMNA | -0.0151  | -0.173882403 | 0.144448245 | 8.54E-01 | 9.43E-01 | 1.00E+00 |
| ENSG00000230913.1_NPM1P51   | ENSG00000160789.18_LMNA | 0.04994  | -0.110131892 | 0.207495356 | 5.41E-01 | 7.81E-01 | 1.00E+00 |

|                              |                         |          |              |             |          |          |          |
|------------------------------|-------------------------|----------|--------------|-------------|----------|----------|----------|
| ENSG00000236013.4_RP3-332B2  | ENSG00000160789.18_LMNA | -0.09194 | -0.247515344 | 0.068262424 | 2.60E-01 | 5.43E-01 | 1.00E+00 |
| ENSG00000213188.3_YBX1P4     | ENSG00000160789.18_LMNA | 0.03079  | -0.129041191 | 0.189065964 | 7.06E-01 | 8.75E-01 | 1.00E+00 |
| ENSG00000270866.1_RP11-706J  | ENSG00000160789.18_LMNA | 0.05187  | -0.108225321 | 0.20934111  | 5.26E-01 | 7.71E-01 | 1.00E+00 |
| ENSG00000250427.1_HNCAT21    | ENSG00000160789.18_LMNA | -0.09411 | -0.249570433 | 0.066081911 | 2.49E-01 | 5.29E-01 | 1.00E+00 |
| ENSG00000272473.1_AC006273.4 | ENSG00000160789.18_LMNA | -0.05568 | -0.212996089 | 0.104443007 | 4.96E-01 | 7.50E-01 | 1.00E+00 |
| ENSG00000269934.1_RP5-1139B  | ENSG00000160789.18_LMNA | 0.01433  | -0.14520118  | 0.17313649  | 8.61E-01 | 9.46E-01 | 1.00E+00 |
| ENSG00000237979.1_AC007389.  | ENSG00000160789.18_LMNA | 0.08131  | -0.078913416 | 0.237436006 | 3.19E-01 | 6.06E-01 | 1.00E+00 |
| ENSG00000267767.2_CTC-523E2  | ENSG00000160789.18_LMNA | -0.16576 | -0.316606709 | -0.00673814 | 4.13E-02 | 1.77E-01 | 1.00E+00 |
| ENSG00000214940.7_NPIPA8     | ENSG00000160789.18_LMNA | 0.00828  | -0.151123837 | 0.167256311 | 9.19E-01 | 9.69E-01 | 1.00E+00 |
| ENSG00000259696.2_RP11-126F  | ENSG00000160789.18_LMNA | 0.21092  | 0.053516824  | 0.358096781 | 9.10E-03 | 6.12E-02 | 1.00E+00 |
| ENSG00000225053.1_PRPF38AP   | ENSG00000160789.18_LMNA | -0.05079 | -0.208310636 | 0.109290037 | 5.34E-01 | 7.76E-01 | 1.00E+00 |
| ENSG00000279468.1_           | ENSG00000160789.18_LMNA | 0.08171  | -0.078514395 | 0.237814843 | 3.17E-01 | 6.04E-01 | 1.00E+00 |
| ENSG00000260818.2_UNGP1      | ENSG00000160789.18_LMNA | -0.14597 | -0.298236451 | 0.013549421 | 7.28E-02 | 2.56E-01 | 1.00E+00 |
| ENSG00000236194.3_AC003104.  | ENSG00000160789.18_LMNA | -0.05161 | -0.209097392 | 0.108477204 | 5.28E-01 | 7.72E-01 | 1.00E+00 |
| ENSG00000254185.1_RP11-419L  | ENSG00000160789.18_LMNA | 0.08847  | -0.071736966 | 0.244234781 | 2.78E-01 | 5.64E-01 | 1.00E+00 |
| ENSG00000249934.2_RP11-466G  | ENSG00000160789.18_LMNA | -0.09512 | -0.250524531 | 0.065068556 | 2.44E-01 | 5.23E-01 | 1.00E+00 |
| ENSG00000226636.1_RP5-1049N  | ENSG00000160789.18_LMNA | 0.09647  | -0.063713754 | 0.251799154 | 2.37E-01 | 5.16E-01 | 1.00E+00 |
| ENSG00000188425.3_NANOS2     | ENSG00000160789.18_LMNA | -0.12923 | -0.28261306  | 0.030603768 | 1.13E-01 | 3.35E-01 | 1.00E+00 |
| ENSG00000196131.6_VN1R2      | ENSG00000160789.18_LMNA | -0.0205  | -0.179116465 | 0.139154517 | 8.02E-01 | 9.21E-01 | 1.00E+00 |
| ENSG00000237764.2_RP11-3B12  | ENSG00000160789.18_LMNA | -0.23827 | -0.382943926 | -0.08218613 | 3.12E-03 | 2.75E-02 | 1.00E+00 |
| ENSG00000249541.1_RP11-692C  | ENSG00000160789.18_LMNA | 0.1473   | -0.012185468 | 0.299478787 | 7.01E-02 | 2.50E-01 | 1.00E+00 |
| ENSG00000279200.1_RP11-524F  | ENSG00000160789.18_LMNA | 0.05462  | -0.105498012 | 0.211977494 | 5.04E-01 | 7.55E-01 | 1.00E+00 |
| ENSG00000253591.1_CTC-265N9  | ENSG00000160789.18_LMNA | -0.00449 | -0.163573553 | 0.154821595 | 9.56E-01 | 9.82E-01 | 1.00E+00 |
| ENSG00000188801.9_ZNF322P1   | ENSG00000160789.18_LMNA | 0.02179  | -0.137887274 | 0.180366757 | 7.90E-01 | 9.15E-01 | 1.00E+00 |
| ENSG00000223973.2_AC068491.  | ENSG00000160789.18_LMNA | -0.01944 | -0.178090007 | 0.140194111 | 8.12E-01 | 9.26E-01 | 1.00E+00 |
| ENSG00000240280.5_TCAM1P     | ENSG00000160789.18_LMNA | -0.06511 | -0.222007207 | 0.095078558 | 4.25E-01 | 6.96E-01 | 1.00E+00 |
| ENSG00000126337.12_KRT36     | ENSG00000160789.18_LMNA | -0.03848 | -0.196480417 | 0.121461376 | 6.38E-01 | 8.38E-01 | 1.00E+00 |
| ENSG00000254702.1_CTD-2651C  | ENSG00000160789.18_LMNA | 0.04871  | -0.111355592 | 0.206309497 | 5.51E-01 | 7.87E-01 | 1.00E+00 |
| ENSG00000204361.8_NXPE2      | ENSG00000160789.18_LMNA | 0.04837  | -0.111694736 | 0.205980675 | 5.54E-01 | 7.88E-01 | 1.00E+00 |
| ENSG00000250334.4_LINC00989  | ENSG00000160789.18_LMNA | 0.08503  | -0.075188731 | 0.240968545 | 2.98E-01 | 5.84E-01 | 1.00E+00 |
| ENSG00000198033.10_TUBA3C    | ENSG00000160789.18_LMNA | -0.12258 | -0.276390147 | 0.037346232 | 1.32E-01 | 3.69E-01 | 1.00E+00 |
| ENSG00000173626.8_TRAPPC3L   | ENSG00000160789.18_LMNA | 0.00174  | -0.157501738 | 0.160898723 | 9.83E-01 | 9.94E-01 | 1.00E+00 |
| ENSG00000147059.8_SPIN2A     | ENSG00000160789.18_LMNA | -0.00374 | -0.162846447 | 0.15555061  | 9.63E-01 | 9.85E-01 | 1.00E+00 |



|                             |                         |          |              |             |          |          |          |
|-----------------------------|-------------------------|----------|--------------|-------------|----------|----------|----------|
| ENSG00000212710.4_CTAGE1    | ENSG00000160789.18_LMNA | 0.01746  | -0.14213667  | 0.176170138 | 8.31E-01 | 9.34E-01 | 1.00E+00 |
| ENSG00000174255.6_ZNF80     | ENSG00000160789.18_LMNA | 0.06324  | -0.096939663 | 0.220220625 | 4.39E-01 | 7.07E-01 | 1.00E+00 |
| ENSG00000259993.1_RP11-261B | ENSG00000160789.18_LMNA | -0.0229  | -0.181437654 | 0.13680103  | 7.79E-01 | 9.09E-01 | 1.00E+00 |
| ENSG00000279212.1_RP13-16H1 | ENSG00000160789.18_LMNA | -0.17346 | -0.323719355 | -0.01466224 | 3.26E-02 | 1.51E-01 | 1.00E+00 |
| ENSG00000247473.2_CARS-AS1  | ENSG00000160789.18_LMNA | 0.15596  | -0.003318742 | 0.307529226 | 5.50E-02 | 2.14E-01 | 1.00E+00 |
| ENSG00000234123.1_RHBDF1P1  | ENSG00000160789.18_LMNA | 0.0794   | -0.08081821  | 0.235626235 | 3.31E-01 | 6.17E-01 | 1.00E+00 |
| ENSG00000263961.5_C1orf186  | ENSG00000160789.18_LMNA | 0.17827  | 0.019629939  | 0.328160606 | 2.80E-02 | 1.37E-01 | 1.00E+00 |
| ENSG00000188869.11_TMC3     | ENSG00000160789.18_LMNA | -0.08375 | -0.239752318 | 0.076472109 | 3.05E-01 | 5.92E-01 | 1.00E+00 |
| ENSG00000165682.13_CLEC1B   | ENSG00000160789.18_LMNA | 0.02703  | -0.13274279  | 0.18543189  | 7.41E-01 | 8.91E-01 | 1.00E+00 |
| ENSG00000230552.4_AC092162. | ENSG00000160789.18_LMNA | -0.31334 | -0.45008508  | -0.16222789 | 8.47E-05 | 1.65E-03 | 1.00E+00 |
| ENSG00000245768.5_RP11-410D | ENSG00000160789.18_LMNA | 0.08497  | -0.075251104 | 0.240909458 | 2.98E-01 | 5.84E-01 | 1.00E+00 |
| ENSG00000197616.10_MYH6     | ENSG00000160789.18_LMNA | -0.15062 | -0.302567689 | 0.008789147 | 6.40E-02 | 2.35E-01 | 1.00E+00 |
| ENSG00000259316.6_CTD-2116N | ENSG00000160789.18_LMNA | 0.22362  | 0.06679671   | 0.369660091 | 5.62E-03 | 4.28E-02 | 1.00E+00 |
| ENSG00000160856.19_FCRL3    | ENSG00000160789.18_LMNA | 0.02572  | -0.13402809  | 0.184167997 | 7.53E-01 | 8.97E-01 | 1.00E+00 |
| ENSG00000165269.11_AQP7     | ENSG00000160789.18_LMNA | -0.26691 | -0.408738733 | -0.11248497 | 8.87E-04 | 1.06E-02 | 1.00E+00 |
| ENSG00000178997.10_EXD1     | ENSG00000160789.18_LMNA | 0.00938  | -0.150047679 | 0.168326438 | 9.09E-01 | 9.65E-01 | 1.00E+00 |
| ENSG00000273294.1_C1QTNF3-7 | ENSG00000160789.18_LMNA | -0.0881  | -0.243880745 | 0.072111477 | 2.80E-01 | 5.66E-01 | 1.00E+00 |
| ENSG00000234352.8_AC009264. | ENSG00000160789.18_LMNA | 0.15946  | 0.00026423   | 0.310769768 | 4.97E-02 | 2.01E-01 | 1.00E+00 |
| ENSG00000241111.1_PRICKLE2- | ENSG00000160789.18_LMNA | 0.04297  | -0.117026504 | 0.200801741 | 5.99E-01 | 8.16E-01 | 1.00E+00 |
| ENSG00000264357.1_MIR4648   | ENSG00000160789.18_LMNA | -0.01792 | -0.176618155 | 0.141683577 | 8.27E-01 | 9.32E-01 | 1.00E+00 |
| ENSG00000221211.1_          | ENSG00000160789.18_LMNA | -0.15215 | -0.303990891 | 0.007221881 | 6.13E-02 | 2.29E-01 | 1.00E+00 |
| ENSG00000212493.1_SNORD19   | ENSG00000160789.18_LMNA | 0.09656  | -0.063623133 | 0.251884373 | 2.37E-01 | 5.15E-01 | 1.00E+00 |
| ENSG00000221598.2_MIR1249   | ENSG00000160789.18_LMNA | -0.01891 | -0.177571686 | 0.1407188   | 8.17E-01 | 9.29E-01 | 1.00E+00 |
| ENSG00000199347.1_RNU5E-1   | ENSG00000160789.18_LMNA | -0.2503  | -0.393807683 | -0.0948794  | 1.87E-03 | 1.86E-02 | 1.00E+00 |
| ENSG00000211513.4_MIR320E   | ENSG00000160789.18_LMNA | 0.13886  | -0.020799807 | 0.291614766 | 8.80E-02 | 2.89E-01 | 1.00E+00 |
| ENSG00000118231.4_CRYGD     | ENSG00000160789.18_LMNA | -0.01553 | -0.174299227 | 0.144027336 | 8.49E-01 | 9.41E-01 | 1.00E+00 |
| ENSG00000200953.1_Y_RNA     | ENSG00000160789.18_LMNA | 0.04145  | -0.118536545 | 0.19933175  | 6.12E-01 | 8.24E-01 | 1.00E+00 |
| ENSG00000252916.1_RNU6-762F | ENSG00000160789.18_LMNA | -0.06743 | -0.224227787 | 0.092762257 | 4.09E-01 | 6.83E-01 | 1.00E+00 |
| ENSG00000277610.1_RNVU1-4   | ENSG00000160789.18_LMNA | 0.02545  | -0.134299198 | 0.18390127  | 7.56E-01 | 8.98E-01 | 1.00E+00 |
| ENSG00000222267.1_RNU6-892F | ENSG00000160789.18_LMNA | 0.05571  | -0.104414493 | 0.213023609 | 4.95E-01 | 7.50E-01 | 1.00E+00 |
| ENSG00000251374.1_RPS23P5   | ENSG00000160789.18_LMNA | -0.1286  | -0.282029177 | 0.031237613 | 1.14E-01 | 3.38E-01 | 1.00E+00 |
| ENSG00000241493.1_RP11-274B | ENSG00000160789.18_LMNA | -0.00615 | -0.16518812  | 0.15320155  | 9.40E-01 | 9.76E-01 | 1.00E+00 |
| ENSG00000279542.1_RP11-963H | ENSG00000160789.18_LMNA | -0.06078 | -0.217871286 | 0.09938363  | 4.57E-01 | 7.21E-01 | 1.00E+00 |

|                              |                         |          |              |             |          |          |          |
|------------------------------|-------------------------|----------|--------------|-------------|----------|----------|----------|
| ENSG00000253484.1_RP11-109P  | ENSG00000160789.18_LMNA | -0.04267 | -0.200504268 | 0.117332201 | 6.02E-01 | 8.17E-01 | 1.00E+00 |
| ENSG00000238189.2_ENOX1-AS   | ENSG00000160789.18_LMNA | -0.14078 | -0.293401633 | 0.018846516 | 8.36E-02 | 2.80E-01 | 1.00E+00 |
| ENSG00000272911.1_RP11-74E2  | ENSG00000160789.18_LMNA | -0.04935 | -0.206927524 | 0.110717964 | 5.46E-01 | 7.84E-01 | 1.00E+00 |
| ENSG00000091583.9_APOH       | ENSG00000160789.18_LMNA | -0.16654 | -0.317331893 | -0.00754428 | 4.03E-02 | 1.74E-01 | 1.00E+00 |
| ENSG00000233613.4_DCUN1D2-   | ENSG00000160789.18_LMNA | 0.08187  | -0.078347383 | 0.237973379 | 3.16E-01 | 6.03E-01 | 1.00E+00 |
| ENSG00000237906.1_MUPP       | ENSG00000160789.18_LMNA | -0.11451 | -0.268810716 | 0.045520066 | 1.60E-01 | 4.14E-01 | 1.00E+00 |
| ENSG00000275613.1_CTD-3194C  | ENSG00000160789.18_LMNA | -0.00601 | -0.165053265 | 0.153336928 | 9.41E-01 | 9.77E-01 | 1.00E+00 |
| ENSG00000270000.1_RP3-449M8  | ENSG00000160789.18_LMNA | 0.18319  | 0.02471254   | 0.332690507 | 2.39E-02 | 1.23E-01 | 1.00E+00 |
| ENSG00000260545.1_CTB-134F1  | ENSG00000160789.18_LMNA | -0.07754 | -0.23385777  | 0.0826773   | 3.42E-01 | 6.27E-01 | 1.00E+00 |
| ENSG00000255839.1_RP11-338K  | ENSG00000160789.18_LMNA | 0.15482  | -0.004494    | 0.306464717 | 5.69E-02 | 2.18E-01 | 1.00E+00 |
| ENSG00000229195.1_AC009495.  | ENSG00000160789.18_LMNA | 0.0405   | -0.119469635 | 0.198422691 | 6.20E-01 | 8.28E-01 | 1.00E+00 |
| ENSG00000278924.1_RP11-227L  | ENSG00000160789.18_LMNA | -0.19658 | -0.344986547 | -0.03858957 | 1.52E-02 | 8.87E-02 | 1.00E+00 |
| ENSG00000270087.4_RP11-399K  | ENSG00000160789.18_LMNA | -0.03631 | -0.194382501 | 0.12360985  | 6.57E-01 | 8.48E-01 | 1.00E+00 |
| ENSG00000237952.1_RPL7AP73   | ENSG00000160789.18_LMNA | 0.0151   | -0.144451688 | 0.173878993 | 8.54E-01 | 9.43E-01 | 1.00E+00 |
| ENSG00000254455.1_HIGD1AP1   | ENSG00000160789.18_LMNA | -0.03876 | -0.196744701 | 0.121190511 | 6.35E-01 | 8.37E-01 | 1.00E+00 |
| ENSG00000272265.1_CTD-2287C  | ENSG00000160789.18_LMNA | -0.05696 | -0.21421708  | 0.103177428 | 4.86E-01 | 7.43E-01 | 1.00E+00 |
| ENSG00000258111.1_RP11-43D4  | ENSG00000160789.18_LMNA | -0.0727  | -0.22924953  | 0.087511362 | 3.73E-01 | 6.53E-01 | 1.00E+00 |
| ENSG00000225163.3_LINC00618  | ENSG00000160789.18_LMNA | 0.11836  | -0.041620682 | 0.272431398 | 1.46E-01 | 3.92E-01 | 1.00E+00 |
| ENSG00000229316.1_HMGB1P45   | ENSG00000160789.18_LMNA | 0.26166  | 0.106912801  | 0.404030141 | 1.13E-03 | 1.27E-02 | 1.00E+00 |
| ENSG00000237863.2_RP6-24A23  | ENSG00000160789.18_LMNA | -0.28357 | -0.423645101 | -0.13024896 | 4.00E-04 | 5.66E-03 | 1.00E+00 |
| ENSG00000265262.1_TRMT112P   | ENSG00000160789.18_LMNA | 0.11167  | -0.04839483  | 0.26613572  | 1.71E-01 | 4.30E-01 | 1.00E+00 |
| ENSG00000213291.3_RP11-420H  | ENSG00000160789.18_LMNA | -0.0159  | -0.174657931 | 0.143665024 | 8.46E-01 | 9.40E-01 | 1.00E+00 |
| ENSG00000256008.2_RP11-728G  | ENSG00000160789.18_LMNA | -0.18537 | -0.334696593 | -0.02696849 | 2.22E-02 | 1.16E-01 | 1.00E+00 |
| ENSG00000274294.1_RP11-20G1  | ENSG00000160789.18_LMNA | 0.07705  | -0.08317047  | 0.23338829  | 3.45E-01 | 6.30E-01 | 1.00E+00 |
| ENSG00000241985.1_WWTR1-IT   | ENSG00000160789.18_LMNA | 0.21122  | 0.053828952  | 0.35836964  | 9.00E-03 | 6.07E-02 | 1.00E+00 |
| ENSG00000187870.7_RNFT1P3    | ENSG00000160789.18_LMNA | 0.13883  | -0.020831923 | 0.291585368 | 8.81E-02 | 2.89E-01 | 1.00E+00 |
| ENSG00000264693.1_RP11-63N3  | ENSG00000160789.18_LMNA | 0.00773  | -0.15165463  | 0.166728218 | 9.25E-01 | 9.71E-01 | 1.00E+00 |
| ENSG00000270919.1_RP11-379K  | ENSG00000160789.18_LMNA | 0.13866  | -0.02100463  | 0.291427267 | 8.84E-02 | 2.89E-01 | 1.00E+00 |
| ENSG00000267077.1_RP11-127I2 | ENSG00000160789.18_LMNA | -0.08017 | -0.236357721 | 0.080048596 | 3.26E-01 | 6.13E-01 | 1.00E+00 |
| ENSG00000231970.1_RP11-452K  | ENSG00000160789.18_LMNA | 0.11143  | -0.04862913  | 0.265917488 | 1.72E-01 | 4.31E-01 | 1.00E+00 |
| ENSG00000234557.2_RP1-164F3  | ENSG00000160789.18_LMNA | 0.14257  | -0.017018157 | 0.295072238 | 7.97E-02 | 2.72E-01 | 1.00E+00 |
| ENSG00000273476.1_RP11-108L  | ENSG00000160789.18_LMNA | -0.08796 | -0.243744778 | 0.072255285 | 2.81E-01 | 5.67E-01 | 1.00E+00 |
| ENSG00000219186.2_FTH1P19    | ENSG00000160789.18_LMNA | 0.14284  | -0.016745786 | 0.295320946 | 7.92E-02 | 2.70E-01 | 1.00E+00 |

|                              |                         |          |              |             |          |          |          |
|------------------------------|-------------------------|----------|--------------|-------------|----------|----------|----------|
| ENSG00000275678.1_RP4-547N1  | ENSG00000160789.18_LMNA | -0.06786 | -0.224638574 | 0.092333386 | 4.06E-01 | 6.82E-01 | 1.00E+00 |
| ENSG00000262052.1_RP11-763E  | ENSG00000160789.18_LMNA | -0.15423 | -0.305917425 | 0.005097897 | 5.78E-02 | 2.20E-01 | 1.00E+00 |
| ENSG00000235296.1_AC137723.1 | ENSG00000160789.18_LMNA | -0.06109 | -0.218164143 | 0.099079186 | 4.55E-01 | 7.19E-01 | 1.00E+00 |
| ENSG00000258809.1_CTD-2555C  | ENSG00000160789.18_LMNA | -0.04789 | -0.205521151 | 0.112168562 | 5.58E-01 | 7.91E-01 | 1.00E+00 |
| ENSG00000228566.1_RP11-170M  | ENSG00000160789.18_LMNA | -0.04247 | -0.200312566 | 0.117529169 | 6.03E-01 | 8.18E-01 | 1.00E+00 |
| ENSG00000226539.1_AC012512.1 | ENSG00000160789.18_LMNA | -0.02451 | -0.182994433 | 0.135220574 | 7.64E-01 | 9.02E-01 | 1.00E+00 |
| ENSG00000257346.1_RP11-386G  | ENSG00000160789.18_LMNA | 0.10552  | -0.054602    | 0.260343319 | 1.96E-01 | 4.65E-01 | 1.00E+00 |
| ENSG00000235010.1_RP11-140A  | ENSG00000160789.18_LMNA | -0.25199 | -0.395332008 | -0.09666824 | 1.74E-03 | 1.76E-02 | 1.00E+00 |
| ENSG00000225079.2_FTH1P22    | ENSG00000160789.18_LMNA | 0.0595   | -0.100649846 | 0.216652648 | 4.66E-01 | 7.28E-01 | 1.00E+00 |
| ENSG00000224232.1_AC110299.1 | ENSG00000160789.18_LMNA | -0.06819 | -0.224950198 | 0.092007965 | 4.04E-01 | 6.80E-01 | 1.00E+00 |
| ENSG00000241105.1_RP11-333A  | ENSG00000160789.18_LMNA | -0.05736 | -0.214604875 | 0.102775257 | 4.83E-01 | 7.40E-01 | 1.00E+00 |
| ENSG00000233334.3_FAM53B-A5  | ENSG00000160789.18_LMNA | -0.16436 | -0.315313998 | -0.00530212 | 4.30E-02 | 1.82E-01 | 1.00E+00 |
| ENSG00000237416.5_           | ENSG00000160789.18_LMNA | 0.11325  | -0.046797326 | 0.267622812 | 1.65E-01 | 4.21E-01 | 1.00E+00 |
| ENSG00000204913.5_LRRC3C     | ENSG00000160789.18_LMNA | 0.10952  | -0.050566592 | 0.264111658 | 1.79E-01 | 4.42E-01 | 1.00E+00 |
| ENSG00000262703.1_RP11-485G  | ENSG00000160789.18_LMNA | 0.06164  | -0.098528664 | 0.218693567 | 4.51E-01 | 7.16E-01 | 1.00E+00 |
| ENSG00000231426.4_RP5-899B1  | ENSG00000160789.18_LMNA | -0.12367 | -0.277404964 | 0.036248634 | 1.29E-01 | 3.64E-01 | 1.00E+00 |
| ENSG00000268223.2_ARL14EPL   | ENSG00000160789.18_LMNA | 0.00384  | -0.155455758 | 0.16294107  | 9.63E-01 | 9.85E-01 | 1.00E+00 |
| ENSG00000273172.1_AC108004.1 | ENSG00000160789.18_LMNA | -0.0608  | -0.217892068 | 0.099362028 | 4.57E-01 | 7.21E-01 | 1.00E+00 |
| ENSG00000274654.1_CTD-3247H  | ENSG00000160789.18_LMNA | 0.15447  | -0.00485349  | 0.306138947 | 5.74E-02 | 2.19E-01 | 1.00E+00 |
| ENSG00000266934.1_RP11-332H  | ENSG00000160789.18_LMNA | 0.10652  | -0.053591108 | 0.26128821  | 1.92E-01 | 4.59E-01 | 1.00E+00 |
| ENSG00000205693.3_MANSC4     | ENSG00000160789.18_LMNA | 0.11256  | -0.04748701  | 0.26698098  | 1.67E-01 | 4.25E-01 | 1.00E+00 |
| ENSG00000158488.14_CD1E      | ENSG00000160789.18_LMNA | -0.06757 | -0.224356194 | 0.092628209 | 4.08E-01 | 6.83E-01 | 1.00E+00 |
| ENSG00000234477.1_AC004231.1 | ENSG00000160789.18_LMNA | -0.0769  | -0.233246945 | 0.083318916 | 3.46E-01 | 6.31E-01 | 1.00E+00 |
| ENSG00000267627.4_RP11-905K  | ENSG00000160789.18_LMNA | 0.14095  | -0.018671031 | 0.293562059 | 8.33E-02 | 2.79E-01 | 1.00E+00 |
| ENSG00000233392.4_AC104809.1 | ENSG00000160789.18_LMNA | -0.13449 | -0.287534276 | 0.025251418 | 9.85E-02 | 3.09E-01 | 1.00E+00 |
| ENSG00000273485.1_RP11-225H  | ENSG00000160789.18_LMNA | -0.02519 | -0.183653845 | 0.134550645 | 7.58E-01 | 8.99E-01 | 1.00E+00 |
| ENSG00000233974.3_RP11-823P  | ENSG00000160789.18_LMNA | -0.1157  | -0.269928783 | 0.044316958 | 1.56E-01 | 4.07E-01 | 1.00E+00 |
| ENSG00000215520.3_RPS4XP4    | ENSG00000160789.18_LMNA | 0.01752  | -0.142081089 | 0.176225103 | 8.30E-01 | 9.34E-01 | 1.00E+00 |
| ENSG00000279693.1_RP11-71L1  | ENSG00000160789.18_LMNA | -0.25596 | -0.398904856 | -0.10086865 | 1.46E-03 | 1.54E-02 | 1.00E+00 |
| ENSG00000257657.2_RP11-352M  | ENSG00000160789.18_LMNA | -0.12027 | -0.274216824 | 0.039694294 | 1.40E-01 | 3.82E-01 | 1.00E+00 |
| ENSG00000267530.2_AC006273.1 | ENSG00000160789.18_LMNA | -0.02781 | -0.18618445  | 0.131976974 | 7.34E-01 | 8.88E-01 | 1.00E+00 |
| ENSG00000235947.1_EGOT       | ENSG00000160789.18_LMNA | 0.09446  | -0.065727139 | 0.249904529 | 2.47E-01 | 5.27E-01 | 1.00E+00 |
| ENSG00000175772.10_LINC01101 | ENSG00000160789.18_LMNA | -0.04984 | -0.207391664 | 0.110238931 | 5.42E-01 | 7.81E-01 | 1.00E+00 |

|                              |                         |          |              |             |          |          |          |
|------------------------------|-------------------------|----------|--------------|-------------|----------|----------|----------|
| ENSG00000279653.1_LLNLR-304  | ENSG00000160789.18_LMNA | -0.00501 | -0.164076167 | 0.154317459 | 9.51E-01 | 9.80E-01 | 1.00E+00 |
| ENSG00000256278.1_RP11-182J  | ENSG00000160789.18_LMNA | -0.08668 | -0.242534256 | 0.073535028 | 2.88E-01 | 5.74E-01 | 1.00E+00 |
| ENSG00000154478.3_GPR26      | ENSG00000160789.18_LMNA | -0.09103 | -0.246656778 | 0.069172498 | 2.65E-01 | 5.48E-01 | 1.00E+00 |
| ENSG00000213335.4_CLNS1AP1   | ENSG00000160789.18_LMNA | -0.03098 | -0.189247233 | 0.128856321 | 7.05E-01 | 8.74E-01 | 1.00E+00 |
| ENSG00000228643.1_AC079779.4 | ENSG00000160789.18_LMNA | -0.07301 | -0.229547207 | 0.087199547 | 3.71E-01 | 6.52E-01 | 1.00E+00 |
| ENSG00000225230.1_AC008937.1 | ENSG00000160789.18_LMNA | -0.15417 | -0.305868019 | 0.005152401 | 5.79E-02 | 2.20E-01 | 1.00E+00 |
| ENSG00000203942.4_C10orf62   | ENSG00000160789.18_LMNA | -0.01485 | -0.173639479 | 0.144693496 | 8.56E-01 | 9.43E-01 | 1.00E+00 |
| ENSG00000251692.6_PTX4       | ENSG00000160789.18_LMNA | 0.11684  | -0.043167348 | 0.270996341 | 1.52E-01 | 4.01E-01 | 1.00E+00 |
| ENSG00000261757.1_AC005592.1 | ENSG00000160789.18_LMNA | 0.12888  | -0.030960649 | 0.282284338 | 1.14E-01 | 3.37E-01 | 1.00E+00 |
| ENSG00000122375.10_OPN4      | ENSG00000160789.18_LMNA | 0.0538   | -0.106310385 | 0.211192688 | 5.10E-01 | 7.59E-01 | 1.00E+00 |
| ENSG00000236973.2_GAPDHP51   | ENSG00000160789.18_LMNA | 0.07452  | -0.085694855 | 0.230982846 | 3.62E-01 | 6.43E-01 | 1.00E+00 |
| ENSG00000240751.1_RP11-553D  | ENSG00000160789.18_LMNA | 0.04552  | -0.114511691 | 0.203246683 | 5.78E-01 | 8.03E-01 | 1.00E+00 |
| ENSG00000213214.4_ARHGEF35   | ENSG00000160789.18_LMNA | 0.21104  | 0.053640743  | 0.358205116 | 9.06E-03 | 6.10E-02 | 1.00E+00 |
| ENSG00000246394.6_RP11-386I8 | ENSG00000160789.18_LMNA | 0.05184  | -0.108257702 | 0.209309781 | 5.26E-01 | 7.71E-01 | 1.00E+00 |
| ENSG00000099715.13_PCDH11Y   | ENSG00000160789.18_LMNA | -0.37906 | -0.507622882 | -0.23397375 | 1.47E-06 | 6.31E-05 | 7.53E-02 |
| ENSG00000253125.1_RP11-459E  | ENSG00000160789.18_LMNA | 0.0844   | -0.075821012 | 0.24036947  | 3.01E-01 | 5.88E-01 | 1.00E+00 |
| ENSG00000254285.3_KRT8P3     | ENSG00000160789.18_LMNA | 0.10458  | -0.055543145 | 0.259463078 | 2.00E-01 | 4.70E-01 | 1.00E+00 |
| ENSG00000109424.3_UCP1       | ENSG00000160789.18_LMNA | 0.01069  | -0.148760285 | 0.169605631 | 8.96E-01 | 9.59E-01 | 1.00E+00 |
| ENSG00000264546.1_RP11-464D  | ENSG00000160789.18_LMNA | -0.11218 | -0.266615611 | 0.047879485 | 1.69E-01 | 4.27E-01 | 1.00E+00 |
| ENSG00000188086.11_PRSS45    | ENSG00000160789.18_LMNA | 0.00068  | -0.158536434 | 0.159864826 | 9.93E-01 | 9.97E-01 | 1.00E+00 |
| ENSG00000163705.11_FANCD2C   | ENSG00000160789.18_LMNA | -0.25704 | -0.399879388 | -0.10201621 | 1.39E-03 | 1.48E-02 | 1.00E+00 |
| ENSG00000165192.12_ASB11     | ENSG00000160789.18_LMNA | -0.2035  | -0.351322189 | -0.04578627 | 1.19E-02 | 7.44E-02 | 1.00E+00 |
| ENSG00000254088.1_SLC2A3P4   | ENSG00000160789.18_LMNA | 0.13007  | -0.029751098 | 0.283398153 | 1.10E-01 | 3.31E-01 | 1.00E+00 |
| ENSG00000248599.1_FLJ42969   | ENSG00000160789.18_LMNA | -0.08104 | -0.237176088 | 0.079187123 | 3.21E-01 | 6.07E-01 | 1.00E+00 |
| ENSG00000280169.1_RP11-151A  | ENSG00000160789.18_LMNA | 0.01208  | -0.147408548 | 0.170947604 | 8.83E-01 | 9.55E-01 | 1.00E+00 |
| ENSG00000204532.5_ZSCAN5C    | ENSG00000160789.18_LMNA | 0.01029  | -0.149158565 | 0.169210002 | 9.00E-01 | 9.61E-01 | 1.00E+00 |
| ENSG00000237294.1	EIF4BP9    | ENSG00000160789.18_LMNA | 0.02616  | -0.133599341 | 0.184589722 | 7.49E-01 | 8.95E-01 | 1.00E+00 |
| ENSG00000050730.14_TNIP3     | ENSG00000160789.18_LMNA | 0.01931  | -0.14032293  | 0.177962768 | 8.13E-01 | 9.27E-01 | 1.00E+00 |
| ENSG00000088386.14_SLC15A1   | ENSG00000160789.18_LMNA | 0.11506  | -0.044961658 | 0.269329759 | 1.58E-01 | 4.11E-01 | 1.00E+00 |
| ENSG00000155875.12_SAXO1     | ENSG00000160789.18_LMNA | 0.02403  | -0.135693544 | 0.182528716 | 7.69E-01 | 9.04E-01 | 1.00E+00 |
| ENSG00000235848.3_RMDN2-AS   | ENSG00000160789.18_LMNA | -0.08131 | -0.237437634 | 0.078911701 | 3.19E-01 | 6.06E-01 | 1.00E+00 |
| ENSG00000184206.10_GOLGA6L   | ENSG00000160789.18_LMNA | 0.03132  | -0.128524662 | 0.189572379 | 7.02E-01 | 8.72E-01 | 1.00E+00 |
| ENSG00000134160.12_TRPM1     | ENSG00000160789.18_LMNA | 0.03361  | -0.12626643  | 0.191784406 | 6.81E-01 | 8.61E-01 | 1.00E+00 |

|                              |                         |          |              |              |          |          |          |
|------------------------------|-------------------------|----------|--------------|--------------|----------|----------|----------|
| ENSG00000263711.4_RP11-169F  | ENSG00000160789.18_LMNA | -0.10818 | -0.262856678 | 0.051911656  | 1.85E-01 | 4.50E-01 | 1.00E+00 |
| ENSG00000259726.1_CSPG4P11   | ENSG00000160789.18_LMNA | 0.01315  | -0.146357821 | 0.171989925  | 8.72E-01 | 9.50E-01 | 1.00E+00 |
| ENSG00000211651.3_IGLV1-44   | ENSG00000160789.18_LMNA | -0.00307 | -0.162189139 | 0.156209345  | 9.70E-01 | 9.88E-01 | 1.00E+00 |
| ENSG00000281079.1_AC055866.  | ENSG00000160789.18_LMNA | 0.01245  | -0.147041641 | 0.171311656  | 8.79E-01 | 9.53E-01 | 1.00E+00 |
| ENSG00000229637.3_PRAC2      | ENSG00000160789.18_LMNA | 0.22722  | 0.07056728   | 0.372926261  | 4.88E-03 | 3.85E-02 | 1.00E+00 |
| ENSG00000265874.1_MIR4489    | ENSG00000160789.18_LMNA | 0.13111  | -0.028686125 | 0.284378133  | 1.07E-01 | 3.26E-01 | 1.00E+00 |
| ENSG00000152611.10_CAPSL     | ENSG00000160789.18_LMNA | -0.19259 | -0.341329225 | -0.034444962 | 1.74E-02 | 9.78E-02 | 1.00E+00 |
| ENSG00000231271.1_AP000350.f | ENSG00000160789.18_LMNA | -0.04723 | -0.204885599 | 0.112823656  | 5.63E-01 | 7.95E-01 | 1.00E+00 |
| ENSG00000238406.1_RNU7-171F  | ENSG00000160789.18_LMNA | -0.03673 | -0.194791283 | 0.12319145   | 6.53E-01 | 8.47E-01 | 1.00E+00 |
| ENSG00000212293.1_SNORA16    | ENSG00000160789.18_LMNA | -0.01337 | -0.172204751 | 0.146141174  | 8.70E-01 | 9.50E-01 | 1.00E+00 |
| ENSG00000264425.1_MIR4653    | ENSG00000160789.18_LMNA | 0.24589  | 0.090219489  | 0.389829093  | 2.26E-03 | 2.15E-02 | 1.00E+00 |
| ENSG00000223249.1_           | ENSG00000160789.18_LMNA | -0.10037 | -0.25548756  | 0.05978677   | 2.19E-01 | 4.93E-01 | 1.00E+00 |
| ENSG00000278637.1_HIST1H4A   | ENSG00000160789.18_LMNA | -0.02169 | -0.180268502 | 0.137986899  | 7.91E-01 | 9.15E-01 | 1.00E+00 |
| ENSG00000278463.1_HIST1H2AE  | ENSG00000160789.18_LMNA | 0.00269  | -0.156574879 | 0.161824275  | 9.74E-01 | 9.90E-01 | 1.00E+00 |
| ENSG00000271817.2_U3         | ENSG00000160789.18_LMNA | -0.00029 | -0.159479556 | 0.158921823  | 9.97E-01 | 9.99E-01 | 1.00E+00 |
| ENSG00000231501.1_MTND4LP1   | ENSG00000160789.18_LMNA | -0.02836 | -0.186715748 | 0.13143609   | 7.29E-01 | 8.85E-01 | 1.00E+00 |
| ENSG00000236453.4_AC003092.  | ENSG00000160789.18_LMNA | 0.22564  | 0.068916325  | 0.37149708   | 5.19E-03 | 4.04E-02 | 1.00E+00 |
| ENSG00000242292.2_CTD-2282P  | ENSG00000160789.18_LMNA | -0.09403 | -0.24949401  | 0.066163052  | 2.49E-01 | 5.30E-01 | 1.00E+00 |
| ENSG00000231027.1_AC079325.f | ENSG00000160789.18_LMNA | 0.19752  | 0.03956547   | 0.345847321  | 1.47E-02 | 8.67E-02 | 1.00E+00 |
| ENSG00000112238.11_PRDM13    | ENSG00000160789.18_LMNA | -0.14932 | -0.301353945 | 0.010124545  | 6.64E-02 | 2.41E-01 | 1.00E+00 |
| ENSG00000229403.1_RP4-718N1  | ENSG00000160789.18_LMNA | -0.11129 | -0.265779212 | 0.048777569  | 1.72E-01 | 4.31E-01 | 1.00E+00 |
| ENSG00000251350.1_LVCAT1     | ENSG00000160789.18_LMNA | -0.08094 | -0.237087681 | 0.079280209  | 3.22E-01 | 6.08E-01 | 1.00E+00 |
| ENSG00000261543.1_RP11-665J  | ENSG00000160789.18_LMNA | 0.17449  | 0.015721131  | 0.324667175  | 3.16E-02 | 1.48E-01 | 1.00E+00 |
| ENSG00000269349.1_CTD-3099C  | ENSG00000160789.18_LMNA | -0.13473 | -0.287756814 | 0.025008959  | 9.79E-02 | 3.08E-01 | 1.00E+00 |
| ENSG00000227116.1_           | ENSG00000160789.18_LMNA | -0.03277 | -0.190971006 | 0.127097204  | 6.89E-01 | 8.66E-01 | 1.00E+00 |
| ENSG00000275611.1_RP11-291I  | ENSG00000160789.18_LMNA | 0.16851  | 0.009562081  | 0.319145472  | 3.80E-02 | 1.67E-01 | 1.00E+00 |
| ENSG00000231397.1_AC004941.f | ENSG00000160789.18_LMNA | 0.03941  | -0.120547511 | 0.197371895  | 6.30E-01 | 8.33E-01 | 1.00E+00 |
| ENSG00000242244.1_ATP5G1P3   | ENSG00000160789.18_LMNA | -0.00248 | -0.161617306 | 0.156782188  | 9.76E-01 | 9.91E-01 | 1.00E+00 |
| ENSG00000259590.1_RP11-20G1  | ENSG00000160789.18_LMNA | 0.02988  | -0.129940839 | 0.188183529  | 7.15E-01 | 8.79E-01 | 1.00E+00 |
| ENSG00000275132.1_RN7SL663f  | ENSG00000160789.18_LMNA | 0.11356  | -0.046477125 | 0.267920701  | 1.64E-01 | 4.19E-01 | 1.00E+00 |
| ENSG00000272567.1_RP11-73K9  | ENSG00000160789.18_LMNA | 0.06227  | -0.097897118 | 0.219300681  | 4.46E-01 | 7.13E-01 | 1.00E+00 |
| ENSG00000163751.3_CPA3       | ENSG00000160789.18_LMNA | -0.01066 | -0.169568685 | 0.148797483  | 8.96E-01 | 9.60E-01 | 1.00E+00 |
| ENSG00000230024.1_RP11-95P1  | ENSG00000160789.18_LMNA | 0.1265   | -0.033377396 | 0.280056346  | 1.20E-01 | 3.49E-01 | 1.00E+00 |

|                              |                         |          |              |             |          |          |          |
|------------------------------|-------------------------|----------|--------------|-------------|----------|----------|----------|
| ENSG00000228522.2_RP11-236F  | ENSG00000160789.18_LMNA | -0.02073 | -0.179337165 | 0.1389309   | 8.00E-01 | 9.20E-01 | 1.00E+00 |
| ENSG00000273289.1_RP6-109B7  | ENSG00000160789.18_LMNA | -0.05605 | -0.21334756  | 0.104078807 | 4.93E-01 | 7.48E-01 | 1.00E+00 |
| ENSG00000255931.1_RP11-286N  | ENSG00000160789.18_LMNA | -0.26201 | -0.404344881 | -0.10728468 | 1.11E-03 | 1.26E-02 | 1.00E+00 |
| ENSG00000278153.1_RP4-585I14 | ENSG00000160789.18_LMNA | 0.17871  | 0.020075787  | 0.328558539 | 2.76E-02 | 1.35E-01 | 1.00E+00 |
| ENSG00000212769.5_HMGN2P8    | ENSG00000160789.18_LMNA | -0.02384 | -0.182349775 | 0.135875233 | 7.71E-01 | 9.05E-01 | 1.00E+00 |
| ENSG00000089116.3_LHX5       | ENSG00000160789.18_LMNA | -0.33239 | -0.46688257  | -0.18286334 | 2.87E-05 | 6.88E-04 | 1.00E+00 |
| ENSG00000276631.1_CTB-32O4.  | ENSG00000160789.18_LMNA | -0.20113 | -0.349148505 | -0.04331359 | 1.30E-02 | 7.90E-02 | 1.00E+00 |
| ENSG00000232875.1_HMGN2P35   | ENSG00000160789.18_LMNA | -0.12871 | -0.282134038 | 0.031123798 | 1.14E-01 | 3.37E-01 | 1.00E+00 |
| ENSG00000224349.2_RP11-462G  | ENSG00000160789.18_LMNA | -0.05083 | -0.208349398 | 0.10925     | 5.34E-01 | 7.76E-01 | 1.00E+00 |
| ENSG00000231428.2_LINC00396  | ENSG00000160789.18_LMNA | 0.21826  | 0.061188075  | 0.364787853 | 6.91E-03 | 4.99E-02 | 1.00E+00 |
| ENSG00000234683.1_RP5-837I24 | ENSG00000160789.18_LMNA | 0.09349  | -0.066702479 | 0.24898585  | 2.52E-01 | 5.33E-01 | 1.00E+00 |
| ENSG00000228527.1_RP11-179B  | ENSG00000160789.18_LMNA | -0.15287 | -0.304655495 | 0.00648948  | 6.01E-02 | 2.26E-01 | 1.00E+00 |
| ENSG00000229323.1_DLEU1-AS'  | ENSG00000160789.18_LMNA | -0.0577  | -0.214925561 | 0.102442604 | 4.80E-01 | 7.38E-01 | 1.00E+00 |
| ENSG00000224161.3_RPS26P54   | ENSG00000160789.18_LMNA | -0.01456 | -0.173354507 | 0.144981149 | 8.59E-01 | 9.44E-01 | 1.00E+00 |
| ENSG00000254370.1_RP11-181B  | ENSG00000160789.18_LMNA | -0.10534 | -0.26017724  | 0.054779613 | 1.96E-01 | 4.66E-01 | 1.00E+00 |
| ENSG00000229611.1_RP11-390F  | ENSG00000160789.18_LMNA | -0.09068 | -0.246324904 | 0.069524141 | 2.67E-01 | 5.51E-01 | 1.00E+00 |
| ENSG00000270068.1_RP4-761J1. | ENSG00000160789.18_LMNA | -0.07557 | -0.231975892 | 0.084653199 | 3.55E-01 | 6.38E-01 | 1.00E+00 |
| ENSG00000249948.5_GBA3       | ENSG00000160789.18_LMNA | -0.10788 | -0.262571101 | 0.052217573 | 1.86E-01 | 4.52E-01 | 1.00E+00 |
| ENSG00000260351.1_RP11-382A  | ENSG00000160789.18_LMNA | 0.07542  | -0.084797814 | 0.231838065 | 3.56E-01 | 6.39E-01 | 1.00E+00 |
| ENSG00000232623.1_AP000266.  | ENSG00000160789.18_LMNA | -0.09412 | -0.249584408 | 0.066067072 | 2.49E-01 | 5.29E-01 | 1.00E+00 |
| ENSG00000260328.1_RP11-416I2 | ENSG00000160789.18_LMNA | -0.06402 | -0.220971079 | 0.096158176 | 4.33E-01 | 7.03E-01 | 1.00E+00 |
| ENSG00000205300.3_RP11-352D  | ENSG00000160789.18_LMNA | 0.15591  | -0.003373224 | 0.307479895 | 5.51E-02 | 2.14E-01 | 1.00E+00 |
| ENSG00000263931.1_           | ENSG00000160789.18_LMNA | 0.05793  | -0.102216964 | 0.215143044 | 4.78E-01 | 7.37E-01 | 1.00E+00 |
| ENSG00000228616.1_RP11-66N1  | ENSG00000160789.18_LMNA | -0.07592 | -0.23231209  | 0.084300387 | 3.53E-01 | 6.36E-01 | 1.00E+00 |
| ENSG00000261292.2_RP11-389G  | ENSG00000160789.18_LMNA | -0.14256 | -0.295068159 | 0.017022624 | 7.98E-02 | 2.72E-01 | 1.00E+00 |
| ENSG00000231227.1_RP11-85O2  | ENSG00000160789.18_LMNA | 0.0628   | -0.09737005  | 0.21980717  | 4.42E-01 | 7.10E-01 | 1.00E+00 |
| ENSG00000188770.8_OPTC       | ENSG00000160789.18_LMNA | -0.31043 | -0.447518071 | -0.15909638 | 9.93E-05 | 1.87E-03 | 1.00E+00 |
| ENSG00000228629.2_AC092295.  | ENSG00000160789.18_LMNA | -0.15923 | -0.310553783 | -2.52E-05   | 5.01E-02 | 2.01E-01 | 1.00E+00 |
| ENSG00000261044.1_AP006547.  | ENSG00000160789.18_LMNA | 0.17214  | 0.01330737   | 0.3225057   | 3.40E-02 | 1.55E-01 | 1.00E+00 |
| ENSG00000225376.4_TMEM246-/  | ENSG00000160789.18_LMNA | -0.28707 | -0.426771106 | -0.13399828 | 3.36E-04 | 4.90E-03 | 1.00E+00 |
| ENSG00000184388.5_PABPC1L2   | ENSG00000160789.18_LMNA | -0.10335 | -0.258297115 | 0.05678892  | 2.05E-01 | 4.77E-01 | 1.00E+00 |
| ENSG00000230138.1_RP11-117D  | ENSG00000160789.18_LMNA | -0.07267 | -0.229221786 | 0.08754042  | 3.74E-01 | 6.54E-01 | 1.00E+00 |
| ENSG00000219776.2_RPL21P67   | ENSG00000160789.18_LMNA | -0.13448 | -0.287528594 | 0.025257608 | 9.86E-02 | 3.09E-01 | 1.00E+00 |

|                              |                         |          |              |             |          |          |          |
|------------------------------|-------------------------|----------|--------------|-------------|----------|----------|----------|
| ENSG00000235933.1_RP5-1185H  | ENSG00000160789.18_LMNA | -0.18543 | -0.334748756 | -0.02702719 | 2.22E-02 | 1.16E-01 | 1.00E+00 |
| ENSG00000272324.4_CTD-2154B  | ENSG00000160789.18_LMNA | -0.01776 | -0.176460615 | 0.141842917 | 8.28E-01 | 9.33E-01 | 1.00E+00 |
| ENSG00000257398.5_RP11-554D  | ENSG00000160789.18_LMNA | -0.15969 | -0.310987146 | -0.00050486 | 4.94E-02 | 2.00E-01 | 1.00E+00 |
| ENSG00000270385.1_GS1-21A4.2 | ENSG00000160789.18_LMNA | 0.01806  | -0.141548344 | 0.176751848 | 8.25E-01 | 9.31E-01 | 1.00E+00 |
| ENSG00000189145.7_RP11-77G2  | ENSG00000160789.18_LMNA | -0.02429 | -0.18278668  | 0.135431581 | 7.66E-01 | 9.03E-01 | 1.00E+00 |
| ENSG00000275839.1_CTC-421K2  | ENSG00000160789.18_LMNA | 0.08437  | -0.075849299 | 0.240342664 | 3.01E-01 | 5.88E-01 | 1.00E+00 |
| ENSG00000228111.1_TPT1P2     | ENSG00000160789.18_LMNA | -0.0688  | -0.22553097  | 0.091401299 | 4.00E-01 | 6.76E-01 | 1.00E+00 |
| ENSG00000273245.1_RP11-434P  | ENSG00000160789.18_LMNA | -0.0894  | -0.24511352  | 0.070807019 | 2.73E-01 | 5.58E-01 | 1.00E+00 |
| ENSG00000172789.3_HOXC5      | ENSG00000160789.18_LMNA | -0.07816 | -0.234443822 | 0.082061461 | 3.38E-01 | 6.24E-01 | 1.00E+00 |
| ENSG00000234315.1_OSTCP5     | ENSG00000160789.18_LMNA | 0.08345  | -0.076767168 | 0.239472557 | 3.07E-01 | 5.93E-01 | 1.00E+00 |
| ENSG00000258162.2_RP11-315E  | ENSG00000160789.18_LMNA | -0.3338  | -0.468120123 | -0.18439362 | 2.64E-05 | 6.46E-04 | 1.00E+00 |
| ENSG00000260693.1_AC026150.1 | ENSG00000160789.18_LMNA | 0.20588  | 0.048266325  | 0.353499051 | 1.09E-02 | 6.98E-02 | 1.00E+00 |
| ENSG00000237485.4_           | ENSG00000160789.18_LMNA | -0.02047 | -0.179091257 | 0.139180055 | 8.02E-01 | 9.21E-01 | 1.00E+00 |
| ENSG00000274114.1_CTC-281F2  | ENSG00000160789.18_LMNA | -0.02271 | -0.181252173 | 0.136989224 | 7.81E-01 | 9.10E-01 | 1.00E+00 |
| ENSG00000261823.1_RP11-48G1  | ENSG00000160789.18_LMNA | 0.08319  | -0.077032642 | 0.239220802 | 3.08E-01 | 5.95E-01 | 1.00E+00 |
| ENSG00000243771.1_CTD-3131K  | ENSG00000160789.18_LMNA | -0.12712 | -0.280639493 | 0.032745199 | 1.19E-01 | 3.46E-01 | 1.00E+00 |
| ENSG00000225415.2_CCRL1P1    | ENSG00000160789.18_LMNA | -0.04566 | -0.203384912 | 0.11436939  | 5.76E-01 | 8.03E-01 | 1.00E+00 |
| ENSG00000198881.9_AS12       | ENSG00000160789.18_LMNA | -0.17323 | -0.32351339  | -0.01443223 | 3.28E-02 | 1.52E-01 | 1.00E+00 |
| ENSG00000228330.1_RP11-730A  | ENSG00000160789.18_LMNA | -0.1067  | -0.261461976 | 0.053405134 | 1.91E-01 | 4.58E-01 | 1.00E+00 |
| ENSG00000281016.1_RP11-2H3.7 | ENSG00000160789.18_LMNA | 0.08671  | -0.073509917 | 0.242558019 | 2.88E-01 | 5.74E-01 | 1.00E+00 |
| ENSG00000228600.1_POLR2CP1   | ENSG00000160789.18_LMNA | -0.00299 | -0.162112493 | 0.156286138 | 9.71E-01 | 9.89E-01 | 1.00E+00 |
| ENSG00000262470.2_TVP23CP2   | ENSG00000160789.18_LMNA | 0.06702  | -0.093176476 | 0.223830927 | 4.12E-01 | 6.86E-01 | 1.00E+00 |
| ENSG00000241250.1_RPL17P20   | ENSG00000160789.18_LMNA | -0.01546 | -0.174232958 | 0.144094262 | 8.50E-01 | 9.41E-01 | 1.00E+00 |
| ENSG00000259604.4_RP11-66B2  | ENSG00000160789.18_LMNA | -0.22235 | -0.368505633 | -0.06546603 | 5.90E-03 | 4.45E-02 | 1.00E+00 |
| ENSG00000274695.1_RP11-21K1  | ENSG00000160789.18_LMNA | -0.12869 | -0.282108139 | 0.031151909 | 1.14E-01 | 3.37E-01 | 1.00E+00 |
| ENSG00000256705.3_CTD-2017C  | ENSG00000160789.18_LMNA | -0.01225 | -0.171121497 | 0.147233303 | 8.81E-01 | 9.54E-01 | 1.00E+00 |
| ENSG00000205215.7_KRT17P7    | ENSG00000160789.18_LMNA | -0.16736 | -0.318082883 | -0.00837953 | 3.93E-02 | 1.71E-01 | 1.00E+00 |
| ENSG00000269480.1_CTD-3032J  | ENSG00000160789.18_LMNA | 0.11288  | -0.047165851 | 0.26727989  | 1.66E-01 | 4.23E-01 | 1.00E+00 |
| ENSG00000271121.2_NUDT4P2    | ENSG00000160789.18_LMNA | 0.02614  | -0.133617633 | 0.184571732 | 7.49E-01 | 8.95E-01 | 1.00E+00 |
| ENSG00000238140.1_RP11-253A  | ENSG00000160789.18_LMNA | -0.05202 | -0.209481928 | 0.108079767 | 5.24E-01 | 7.70E-01 | 1.00E+00 |
| ENSG00000272573.4_MUSTN1     | ENSG00000160789.18_LMNA | 0.01641  | -0.143166086 | 0.175151763 | 8.41E-01 | 9.38E-01 | 1.00E+00 |
| ENSG00000229828.2_PDE4DIP1   | ENSG00000160789.18_LMNA | 0.04923  | -0.11084302  | 0.206806332 | 5.47E-01 | 7.84E-01 | 1.00E+00 |
| ENSG00000172186.7_HMGN1P35   | ENSG00000160789.18_LMNA | 0.11516  | -0.044867247 | 0.269417495 | 1.58E-01 | 4.10E-01 | 1.00E+00 |

|                              |                         |          |              |             |          |          |          |
|------------------------------|-------------------------|----------|--------------|-------------|----------|----------|----------|
| ENSG00000256597.2_FLJ37505   | ENSG00000160789.18_LMNA | -0.09254 | -0.248081864 | 0.06766163  | 2.57E-01 | 5.39E-01 | 1.00E+00 |
| ENSG00000256862.1_RP11-664D  | ENSG00000160789.18_LMNA | -0.21607 | -0.362788867 | -0.05889249 | 7.51E-03 | 5.30E-02 | 1.00E+00 |
| ENSG00000256555.1_RP11-256L  | ENSG00000160789.18_LMNA | 0.00788  | -0.151506829 | 0.166875285 | 9.23E-01 | 9.71E-01 | 1.00E+00 |
| ENSG00000230563.2_RP5-828H9  | ENSG00000160789.18_LMNA | -0.07701 | -0.233352307 | 0.083208261 | 3.46E-01 | 6.30E-01 | 1.00E+00 |
| ENSG00000231821.1_NPM1P48    | ENSG00000160789.18_LMNA | 0.16497  | 0.005929937  | 0.315879305 | 4.22E-02 | 1.80E-01 | 1.00E+00 |
| ENSG00000234937.1_RP11-101O  | ENSG00000160789.18_LMNA | 0.08529  | -0.074932519 | 0.241211232 | 2.96E-01 | 5.82E-01 | 1.00E+00 |
| ENSG00000254793.1_FDPSP4     | ENSG00000160789.18_LMNA | 0.04616  | -0.113877354 | 0.203862771 | 5.72E-01 | 8.00E-01 | 1.00E+00 |
| ENSG00000106927.10_AMBP      | ENSG00000160789.18_LMNA | 0.12578  | -0.034100377 | 0.279389175 | 1.23E-01 | 3.53E-01 | 1.00E+00 |
| ENSG00000266642.2_RP11-20B2  | ENSG00000160789.18_LMNA | 0.17788  | 0.019224074  | 0.327798263 | 2.83E-02 | 1.38E-01 | 1.00E+00 |
| ENSG00000225988.1_LAMP5-AS   | ENSG00000160789.18_LMNA | -0.14626 | -0.298507239 | 0.013252223 | 7.22E-02 | 2.55E-01 | 1.00E+00 |
| ENSG00000237783.2_RP11-306I1 | ENSG00000160789.18_LMNA | 0.13885  | -0.020808956 | 0.291606391 | 8.80E-02 | 2.89E-01 | 1.00E+00 |
| ENSG00000255353.1_RP11-382M  | ENSG00000160789.18_LMNA | -0.06659 | -0.223423465 | 0.093601647 | 4.15E-01 | 6.88E-01 | 1.00E+00 |
| ENSG00000250061.4_RP11-541P  | ENSG00000160789.18_LMNA | 0.03727  | -0.122656207 | 0.195314061 | 6.48E-01 | 8.44E-01 | 1.00E+00 |
| ENSG00000278480.1_RP5-903E1  | ENSG00000160789.18_LMNA | 0.02686  | -0.132907912 | 0.185269577 | 7.43E-01 | 8.92E-01 | 1.00E+00 |
| ENSG00000277501.1_RP11-697E  | ENSG00000160789.18_LMNA | -0.16733 | -0.318055373 | -0.00834893 | 3.94E-02 | 1.72E-01 | 1.00E+00 |
| ENSG00000186009.4_ATP4B      | ENSG00000160789.18_LMNA | -0.14364 | -0.296071687 | 0.015923332 | 7.75E-02 | 2.67E-01 | 1.00E+00 |
| ENSG00000260239.1_RP11-274H  | ENSG00000160789.18_LMNA | 0.06805  | -0.092147374 | 0.224816707 | 4.05E-01 | 6.81E-01 | 1.00E+00 |
| ENSG00000279881.1_RP11-513O  | ENSG00000160789.18_LMNA | 0.1165   | -0.043508076 | 0.270680013 | 1.53E-01 | 4.03E-01 | 1.00E+00 |
| ENSG00000257674.1_RP11-76E1  | ENSG00000160789.18_LMNA | 0.29799  | 0.145706126  | 0.43648772  | 1.92E-04 | 3.17E-03 | 1.00E+00 |
| ENSG00000156269.4_NAA11      | ENSG00000160789.18_LMNA | -0.25098 | -0.394422341 | -0.09560049 | 1.82E-03 | 1.82E-02 | 1.00E+00 |
| ENSG00000251297.1_TUBB7P     | ENSG00000160789.18_LMNA | 0.07105  | -0.089159464 | 0.227675166 | 3.84E-01 | 6.63E-01 | 1.00E+00 |
| ENSG00000258909.1_RP11-164C  | ENSG00000160789.18_LMNA | 0.23087  | 0.074408324  | 0.37624579  | 4.21E-03 | 3.45E-02 | 1.00E+00 |
| ENSG00000234949.2_AC104667.1 | ENSG00000160789.18_LMNA | 0.01026  | -0.149184225 | 0.16918451  | 9.00E-01 | 9.61E-01 | 1.00E+00 |
| ENSG00000281450.1_PANDAR     | ENSG00000160789.18_LMNA | 0.08062  | -0.079607202 | 0.236777085 | 3.23E-01 | 6.10E-01 | 1.00E+00 |
| ENSG00000177340.5_FLJ13224   | ENSG00000160789.18_LMNA | -0.10924 | -0.263852869 | 0.05084405  | 1.80E-01 | 4.44E-01 | 1.00E+00 |
| ENSG00000130612.13_CYP2G1P   | ENSG00000160789.18_LMNA | -0.08356 | -0.239571325 | 0.076663005 | 3.06E-01 | 5.93E-01 | 1.00E+00 |
| ENSG00000230922.1_RP4-753M9  | ENSG00000160789.18_LMNA | 0.01418  | -0.145344305 | 0.172994659 | 8.62E-01 | 9.46E-01 | 1.00E+00 |
| ENSG00000251314.2_CTD-2337A  | ENSG00000160789.18_LMNA | -0.08726 | -0.243087035 | 0.072950769 | 2.85E-01 | 5.71E-01 | 1.00E+00 |
| ENSG00000253313.4_C1orf210   | ENSG00000160789.18_LMNA | 0.00084  | -0.15838243  | 0.160018755 | 9.92E-01 | 9.97E-01 | 1.00E+00 |
| ENSG00000167183.2_PRR15L     | ENSG00000160789.18_LMNA | 0.043    | -0.117003642 | 0.200823986 | 5.99E-01 | 8.16E-01 | 1.00E+00 |
| ENSG00000258590.4_NBEAP1     | ENSG00000160789.18_LMNA | -0.06177 | -0.218817374 | 0.098399895 | 4.50E-01 | 7.15E-01 | 1.00E+00 |
| ENSG00000234572.1_AC007880.1 | ENSG00000160789.18_LMNA | -0.0406  | -0.198513811 | 0.119376132 | 6.19E-01 | 8.28E-01 | 1.00E+00 |
| ENSG00000272211.1_RP11-347P  | ENSG00000160789.18_LMNA | 0.02517  | -0.134572599 | 0.18363224  | 7.58E-01 | 8.99E-01 | 1.00E+00 |



|                              |                         |          |              |             |          |          |          |
|------------------------------|-------------------------|----------|--------------|-------------|----------|----------|----------|
| ENSG00000174697.4_LEP        | ENSG00000160789.18_LMNA | 0.08031  | -0.079908737 | 0.236490612 | 3.25E-01 | 6.12E-01 | 1.00E+00 |
| ENSG00000180251.4_SLC9A4     | ENSG00000160789.18_LMNA | 0.10188  | -0.058266215 | 0.256913274 | 2.12E-01 | 4.85E-01 | 1.00E+00 |
| ENSG00000159648.10_TEPP      | ENSG00000160789.18_LMNA | 0.02147  | -0.138204824 | 0.180053551 | 7.93E-01 | 9.16E-01 | 1.00E+00 |
| ENSG00000205212.3_CCDC144N   | ENSG00000160789.18_LMNA | -0.09362 | -0.249110423 | 0.066570258 | 2.51E-01 | 5.32E-01 | 1.00E+00 |
| ENSG00000224236.3_MRRFP1     | ENSG00000160789.18_LMNA | -0.02086 | -0.17946594  | 0.138800408 | 7.99E-01 | 9.19E-01 | 1.00E+00 |
| ENSG00000233478.1_RP1-187B2  | ENSG00000160789.18_LMNA | 0.13989  | -0.01974772  | 0.292577485 | 8.56E-02 | 2.84E-01 | 1.00E+00 |
| ENSG00000170236.13_USP50     | ENSG00000160789.18_LMNA | -0.08593 | -0.241819446 | 0.074290225 | 2.93E-01 | 5.78E-01 | 1.00E+00 |
| ENSG00000134765.8_DSC1       | ENSG00000160789.18_LMNA | -0.11429 | -0.268599573 | 0.045747167 | 1.61E-01 | 4.15E-01 | 1.00E+00 |
| ENSG00000169836.4_TACR3      | ENSG00000160789.18_LMNA | -0.2523  | -0.395609453 | -0.09699404 | 1.71E-03 | 1.74E-02 | 1.00E+00 |
| ENSG00000231093.1_RP13-150K  | ENSG00000160789.18_LMNA | 0.14754  | -0.011936732 | 0.299705231 | 6.97E-02 | 2.49E-01 | 1.00E+00 |
| ENSG00000140488.13_CELF6     | ENSG00000160789.18_LMNA | -0.0369  | -0.194952545 | 0.123026362 | 6.52E-01 | 8.46E-01 | 1.00E+00 |
| ENSG00000229586.2_TNPO1P3    | ENSG00000160789.18_LMNA | 0.05592  | -0.104204303 | 0.213226459 | 4.94E-01 | 7.49E-01 | 1.00E+00 |
| ENSG00000233355.5_CHRM3-AS   | ENSG00000160789.18_LMNA | 0.00737  | -0.152010568 | 0.166373987 | 9.28E-01 | 9.72E-01 | 1.00E+00 |
| ENSG00000260093.1_RP11-1E4.1 | ENSG00000160789.18_LMNA | -0.10473 | -0.259603838 | 0.055392683 | 1.99E-01 | 4.69E-01 | 1.00E+00 |
| ENSG00000254873.1_RP11-770J  | ENSG00000160789.18_LMNA | 0.0427   | -0.117295895 | 0.2005396   | 6.01E-01 | 8.17E-01 | 1.00E+00 |
| ENSG00000174038.11_C9orf131  | ENSG00000160789.18_LMNA | 0.06238  | -0.097790205 | 0.219403433 | 4.45E-01 | 7.12E-01 | 1.00E+00 |
| ENSG00000233327.9_USP32P2    | ENSG00000160789.18_LMNA | -0.09016 | -0.245832551 | 0.070045678 | 2.69E-01 | 5.54E-01 | 1.00E+00 |
| ENSG00000173585.14_CCR9      | ENSG00000160789.18_LMNA | -0.04957 | -0.207134072 | 0.110504807 | 5.44E-01 | 7.82E-01 | 1.00E+00 |
| ENSG00000256966.5_RP11-613M  | ENSG00000160789.18_LMNA | 0.01327  | -0.146241832 | 0.172104942 | 8.71E-01 | 9.50E-01 | 1.00E+00 |
| ENSG00000113946.3_CLDN16     | ENSG00000160789.18_LMNA | -0.01708 | -0.175804746 | 0.142506103 | 8.35E-01 | 9.36E-01 | 1.00E+00 |
| ENSG00000230650.1_AC112229   | ENSG00000160789.18_LMNA | 0.04584  | -0.114195693 | 0.203553622 | 5.75E-01 | 8.02E-01 | 1.00E+00 |
| ENSG00000115592.10_PRKAG3    | ENSG00000160789.18_LMNA | 0.00055  | -0.158661721 | 0.159739588 | 9.95E-01 | 9.98E-01 | 1.00E+00 |
| ENSG00000274775.1_RP1-274L7  | ENSG00000160789.18_LMNA | -0.10166 | -0.256703392 | 0.058490151 | 2.13E-01 | 4.86E-01 | 1.00E+00 |
| ENSG00000280065.1_           | ENSG00000160789.18_LMNA | -0.14246 | -0.294967885 | 0.017132425 | 8.00E-02 | 2.72E-01 | 1.00E+00 |
| ENSG00000211943.2_IGHV3-15   | ENSG00000160789.18_LMNA | 0.03783  | -0.122107477 | 0.195849826 | 6.44E-01 | 8.41E-01 | 1.00E+00 |
| ENSG00000201998.1_SNORA23    | ENSG00000160789.18_LMNA | -0.07415 | -0.230631626 | 0.086063103 | 3.64E-01 | 6.45E-01 | 1.00E+00 |
| ENSG00000281523.1_AC104581   | ENSG00000160789.18_LMNA | 0.11614  | -0.043870889 | 0.270343106 | 1.54E-01 | 4.05E-01 | 1.00E+00 |
| ENSG00000221520.1_MIR1285-1  | ENSG00000160789.18_LMNA | -0.03774 | -0.195759822 | 0.122199673 | 6.44E-01 | 8.42E-01 | 1.00E+00 |
| ENSG00000207631.1_MIR641     | ENSG00000160789.18_LMNA | 0.02975  | -0.130068212 | 0.188058551 | 7.16E-01 | 8.79E-01 | 1.00E+00 |
| ENSG00000277573.1_           | ENSG00000160789.18_LMNA | -0.02099 | -0.179589348 | 0.138675345 | 7.97E-01 | 9.19E-01 | 1.00E+00 |
| ENSG00000199053.2_MIR324     | ENSG00000160789.18_LMNA | 0.03057  | -0.129263    | 0.188848447 | 7.09E-01 | 8.76E-01 | 1.00E+00 |
| ENSG00000207696.1_MIR659     | ENSG00000160789.18_LMNA | -0.12984 | -0.283186191 | 0.029981349 | 1.11E-01 | 3.32E-01 | 1.00E+00 |
| ENSG00000199933.1_RNY1P16    | ENSG00000160789.18_LMNA | 0.07699  | -0.083229645 | 0.233331947 | 3.46E-01 | 6.30E-01 | 1.00E+00 |

|                             |                         |          |              |             |          |          |          |
|-----------------------------|-------------------------|----------|--------------|-------------|----------|----------|----------|
| ENSG00000256155.1_RP11-277P | ENSG00000160789.18_LMNA | -0.40781 | -0.532442416 | -0.26587036 | 1.84E-07 | 1.19E-05 | 9.44E-03 |
| ENSG00000272330.1_AC002044. | ENSG00000160789.18_LMNA | -0.03752 | -0.195556389 | 0.122408039 | 6.46E-01 | 8.43E-01 | 1.00E+00 |
| ENSG00000222383.1_RNA5SP20  | ENSG00000160789.18_LMNA | 0.00028  | -0.15892979  | 0.15947159  | 9.97E-01 | 9.99E-01 | 1.00E+00 |
| ENSG00000212175.1_SNORA12   | ENSG00000160789.18_LMNA | -0.1249  | -0.278559477 | 0.034999024 | 1.25E-01 | 3.58E-01 | 1.00E+00 |
| ENSG00000270640.1_RP11-373D | ENSG00000160789.18_LMNA | 0.04626  | -0.113782772 | 0.203954611 | 5.71E-01 | 8.00E-01 | 1.00E+00 |
| ENSG00000223198.1_RNU2-22P  | ENSG00000160789.18_LMNA | 0.09964  | -0.060525464 | 0.254794444 | 2.22E-01 | 4.97E-01 | 1.00E+00 |
| ENSG00000225760.1_LINC00431 | ENSG00000160789.18_LMNA | -0.09212 | -0.247687702 | 0.068079663 | 2.59E-01 | 5.42E-01 | 1.00E+00 |
| ENSG00000267653.1_RP1-193H1 | ENSG00000160789.18_LMNA | -0.31141 | -0.44838307  | -0.16015095 | 9.41E-05 | 1.80E-03 | 1.00E+00 |
| ENSG00000271717.1_CTD-3020H | ENSG00000160789.18_LMNA | -0.04147 | -0.1993588   | 0.118508771 | 6.12E-01 | 8.23E-01 | 1.00E+00 |
| ENSG00000227499.1_RP11-419M | ENSG00000160789.18_LMNA | -0.07472 | -0.231170547 | 0.085498019 | 3.60E-01 | 6.42E-01 | 1.00E+00 |
| ENSG00000239805.1_RP11-252O | ENSG00000160789.18_LMNA | -0.20751 | -0.35498457  | -0.04996091 | 1.03E-02 | 6.70E-02 | 1.00E+00 |
| ENSG00000231521.1_RP11-244N | ENSG00000160789.18_LMNA | 0.06003  | -0.100127335 | 0.217155645 | 4.63E-01 | 7.25E-01 | 1.00E+00 |
| ENSG00000271404.1_MZT1P2    | ENSG00000160789.18_LMNA | -0.06266 | -0.219669143 | 0.097513703 | 4.43E-01 | 7.10E-01 | 1.00E+00 |
| ENSG00000169035.10_KLK7     | ENSG00000160789.18_LMNA | -0.21776 | -0.364328714 | -0.06066053 | 7.04E-03 | 5.07E-02 | 1.00E+00 |
| ENSG00000255406.1_RP11-713P | ENSG00000160789.18_LMNA | -0.13845 | -0.291232482 | 0.021217386 | 8.89E-02 | 2.90E-01 | 1.00E+00 |
| ENSG00000273272.1_CTA-384D8 | ENSG00000160789.18_LMNA | -0.07007 | -0.226742674 | 0.090134813 | 3.91E-01 | 6.69E-01 | 1.00E+00 |
| ENSG00000250815.1_RP11-89B1 | ENSG00000160789.18_LMNA | -0.03507 | -0.193188675 | 0.124831116 | 6.68E-01 | 8.54E-01 | 1.00E+00 |
| ENSG00000242902.1_RP11-309L | ENSG00000160789.18_LMNA | 0.1005   | -0.05965782  | 0.25560852  | 2.18E-01 | 4.93E-01 | 1.00E+00 |
| ENSG00000167494.8_NOS2P2    | ENSG00000160789.18_LMNA | -0.00399 | -0.163083208 | 0.155313265 | 9.61E-01 | 9.84E-01 | 1.00E+00 |
| ENSG00000274963.1_RN7SL600F | ENSG00000160789.18_LMNA | -0.11856 | -0.272619796 | 0.04141752  | 1.46E-01 | 3.91E-01 | 1.00E+00 |
| ENSG00000258871.1_RP3-514A2 | ENSG00000160789.18_LMNA | 0.1147   | -0.045323576 | 0.268993375 | 1.59E-01 | 4.13E-01 | 1.00E+00 |
| ENSG00000243260.3_RN7SL558F | ENSG00000160789.18_LMNA | -0.03169 | -0.189927931 | 0.128161906 | 6.98E-01 | 8.71E-01 | 1.00E+00 |
| ENSG00000259509.2_RP11-627D | ENSG00000160789.18_LMNA | -0.19133 | -0.340172314 | -0.03314222 | 1.82E-02 | 1.01E-01 | 1.00E+00 |
| ENSG00000279208.1_bP-21264C | ENSG00000160789.18_LMNA | -0.06224 | -0.219267725 | 0.097931406 | 4.46E-01 | 7.13E-01 | 1.00E+00 |
| ENSG00000224963.2_U82695.9  | ENSG00000160789.18_LMNA | -0.16705 | -0.317796304 | -0.00806075 | 3.97E-02 | 1.73E-01 | 1.00E+00 |
| ENSG00000258452.1_RP11-757H | ENSG00000160789.18_LMNA | -0.00916 | -0.168114229 | 0.150261144 | 9.11E-01 | 9.66E-01 | 1.00E+00 |
| ENSG00000278910.2_BANCR     | ENSG00000160789.18_LMNA | 0.04188  | -0.118110079 | 0.19974705  | 6.08E-01 | 8.21E-01 | 1.00E+00 |
| ENSG00000170426.1_SDR9C7    | ENSG00000160789.18_LMNA | -0.01827 | -0.17695688  | 0.141340926 | 8.23E-01 | 9.31E-01 | 1.00E+00 |
| ENSG00000225082.2_DAP3P1    | ENSG00000160789.18_LMNA | 0.22482  | 0.068050907  | 0.370747341 | 5.36E-03 | 4.13E-02 | 1.00E+00 |
| ENSG00000241641.1_RPS23P6   | ENSG00000160789.18_LMNA | -0.00218 | -0.161329021 | 0.157070902 | 9.79E-01 | 9.92E-01 | 1.00E+00 |
| ENSG00000232814.2_COL4A2-A5 | ENSG00000160789.18_LMNA | 0.10374  | -0.056396404 | 0.258664583 | 2.03E-01 | 4.74E-01 | 1.00E+00 |
| ENSG00000276768.1_RP5-1116H | ENSG00000160789.18_LMNA | -0.05413 | -0.211510308 | 0.105981659 | 5.08E-01 | 7.58E-01 | 1.00E+00 |
| ENSG00000224944.1_CASC6     | ENSG00000160789.18_LMNA | -0.23101 | -0.376368588 | -0.07455059 | 4.19E-03 | 3.44E-02 | 1.00E+00 |

|                              |                         |          |              |             |          |          |          |
|------------------------------|-------------------------|----------|--------------|-------------|----------|----------|----------|
| ENSG00000217557.1_RP11-157L  | ENSG00000160789.18_LMNA | 0.00378  | -0.155513755 | 0.162883213 | 9.63E-01 | 9.85E-01 | 1.00E+00 |
| ENSG00000211683.3_KB-1572G7  | ENSG00000160789.18_LMNA | 0.0264   | -0.133363954 | 0.184821204 | 7.47E-01 | 8.94E-01 | 1.00E+00 |
| ENSG00000249753.2_RP11-415I1 | ENSG00000160789.18_LMNA | 0.06285  | -0.097324571 | 0.219850865 | 4.42E-01 | 7.09E-01 | 1.00E+00 |
| ENSG00000224312.1_MCCD1P2    | ENSG00000160789.18_LMNA | -0.00415 | -0.163238411 | 0.155157659 | 9.60E-01 | 9.84E-01 | 1.00E+00 |
| ENSG00000213391.3_RP11-66N1  | ENSG00000160789.18_LMNA | -0.09033 | -0.245996359 | 0.069872179 | 2.68E-01 | 5.52E-01 | 1.00E+00 |
| ENSG00000237472.1_AP000361.1 | ENSG00000160789.18_LMNA | -0.0266  | -0.185020171 | 0.1331616   | 7.45E-01 | 8.93E-01 | 1.00E+00 |
| ENSG00000238231.2_RP11-460I1 | ENSG00000160789.18_LMNA | 0.01238  | -0.147111226 | 0.171242619 | 8.80E-01 | 9.53E-01 | 1.00E+00 |
| ENSG00000242602.1_CTD-2339M  | ENSG00000160789.18_LMNA | 0.00698  | -0.15239241  | 0.165993885 | 9.32E-01 | 9.73E-01 | 1.00E+00 |
| ENSG00000242291.1_RPL36AP5   | ENSG00000160789.18_LMNA | -0.07694 | -0.233279022 | 0.083285228 | 3.46E-01 | 6.30E-01 | 1.00E+00 |
| ENSG00000246095.2_LINC01096  | ENSG00000160789.18_LMNA | -0.02666 | -0.185072963 | 0.133107905 | 7.44E-01 | 8.93E-01 | 1.00E+00 |
| ENSG00000256226.1_RP11-582E  | ENSG00000160789.18_LMNA | -0.19407 | -0.342687467 | -0.03598587 | 1.66E-02 | 9.44E-02 | 1.00E+00 |
| ENSG00000225235.1_INTS6L-AS  | ENSG00000160789.18_LMNA | 0.05012  | -0.109959933 | 0.207661922 | 5.40E-01 | 7.80E-01 | 1.00E+00 |
| ENSG00000253154.1_CTA-392E5  | ENSG00000160789.18_LMNA | -0.08659 | -0.24244763  | 0.073626568 | 2.89E-01 | 5.74E-01 | 1.00E+00 |
| ENSG00000259561.1_RP11-300G  | ENSG00000160789.18_LMNA | 0.14175  | -0.017850381 | 0.294312056 | 8.15E-02 | 2.75E-01 | 1.00E+00 |
| ENSG00000231024.1_AC092431.1 | ENSG00000160789.18_LMNA | -0.0301  | -0.18839719  | 0.129723058 | 7.13E-01 | 8.78E-01 | 1.00E+00 |
| ENSG00000273059.1_XXyac-YX1  | ENSG00000160789.18_LMNA | -0.09172 | -0.247310882 | 0.068479201 | 2.61E-01 | 5.44E-01 | 1.00E+00 |
| ENSG00000277246.1_RP11-153I2 | ENSG00000160789.18_LMNA | 0.01718  | -0.14240848  | 0.17590131  | 8.34E-01 | 9.35E-01 | 1.00E+00 |
| ENSG00000233419.3_RP4-781L3  | ENSG00000160789.18_LMNA | 0.14459  | -0.014956026 | 0.296954159 | 7.55E-02 | 2.63E-01 | 1.00E+00 |
| ENSG00000253196.1_RP11-706C  | ENSG00000160789.18_LMNA | 0.11816  | -0.041824508 | 0.272242361 | 1.47E-01 | 3.93E-01 | 1.00E+00 |
| ENSG00000248993.1_XXbac-BPG  | ENSG00000160789.18_LMNA | -0.04636 | -0.204055045 | 0.113679331 | 5.71E-01 | 7.99E-01 | 1.00E+00 |
| ENSG00000214772.2_RP11-174G  | ENSG00000160789.18_LMNA | 0.11462  | -0.045406566 | 0.26891623  | 1.60E-01 | 4.13E-01 | 1.00E+00 |
| ENSG00000276790.1_RP11-290H  | ENSG00000160789.18_LMNA | -0.05092 | -0.208432876 | 0.109163773 | 5.33E-01 | 7.75E-01 | 1.00E+00 |
| ENSG00000228318.3_AP001610.1 | ENSG00000160789.18_LMNA | 0.12831  | -0.031536629 | 0.28175365  | 1.15E-01 | 3.39E-01 | 1.00E+00 |
| ENSG00000213318.4_RP11-331F  | ENSG00000160789.18_LMNA | -0.02708 | -0.185484314 | 0.132689454 | 7.40E-01 | 8.91E-01 | 1.00E+00 |
| ENSG00000225142.2_RP11-490K  | ENSG00000160789.18_LMNA | -0.00415 | -0.163240464 | 0.155155602 | 9.60E-01 | 9.84E-01 | 1.00E+00 |
| ENSG00000256037.1_MRPL40P1   | ENSG00000160789.18_LMNA | 0.03393  | -0.125955958 | 0.192088273 | 6.78E-01 | 8.60E-01 | 1.00E+00 |
| ENSG00000244146.1_RP11-366M  | ENSG00000160789.18_LMNA | -0.10295 | -0.257926742 | 0.05718444  | 2.07E-01 | 4.79E-01 | 1.00E+00 |
| ENSG00000274215.1_CTD-2313J  | ENSG00000160789.18_LMNA | -0.10406 | -0.25897419  | 0.056065617 | 2.02E-01 | 4.73E-01 | 1.00E+00 |
| ENSG00000236483.1_MTND2P40   | ENSG00000160789.18_LMNA | -0.11924 | -0.273252252 | 0.040735311 | 1.43E-01 | 3.87E-01 | 1.00E+00 |
| ENSG00000248371.4_CTC-347C2  | ENSG00000160789.18_LMNA | 0.05515  | -0.104971088 | 0.21248632  | 5.00E-01 | 7.53E-01 | 1.00E+00 |
| ENSG00000220660.2_RP3-406A7  | ENSG00000160789.18_LMNA | -0.05164 | -0.209123897 | 0.108449813 | 5.27E-01 | 7.72E-01 | 1.00E+00 |
| ENSG00000261592.1_RP11-178L  | ENSG00000160789.18_LMNA | 0.09513  | -0.065051421 | 0.250540659 | 2.44E-01 | 5.23E-01 | 1.00E+00 |
| ENSG00000258086.1_RP11-753H  | ENSG00000160789.18_LMNA | -0.04534 | -0.203075597 | 0.114687799 | 5.79E-01 | 8.04E-01 | 1.00E+00 |

|                              |                         |          |              |             |          |          |          |
|------------------------------|-------------------------|----------|--------------|-------------|----------|----------|----------|
| ENSG00000213108.3_BTFL4P3    | ENSG00000160789.18_LMNA | -0.05486 | -0.212209563 | 0.105257711 | 5.02E-01 | 7.54E-01 | 1.00E+00 |
| ENSG00000231121.3_           | ENSG00000160789.18_LMNA | -0.12978 | -0.283131515 | 0.030040737 | 1.11E-01 | 3.32E-01 | 1.00E+00 |
| ENSG00000258888.1_RP11-326A  | ENSG00000160789.18_LMNA | -0.07608 | -0.232468454 | 0.084136269 | 3.52E-01 | 6.35E-01 | 1.00E+00 |
| ENSG00000249203.1_RP11-473L  | ENSG00000160789.18_LMNA | -0.06106 | -0.218136684 | 0.099107734 | 4.55E-01 | 7.20E-01 | 1.00E+00 |
| ENSG00000225098.1_BCRP1      | ENSG00000160789.18_LMNA | 0.13355  | -0.026205145 | 0.28665858  | 1.01E-01 | 3.13E-01 | 1.00E+00 |
| ENSG00000268931.1_RP11-886P  | ENSG00000160789.18_LMNA | 0.06986  | -0.09034764  | 0.226539122 | 3.92E-01 | 6.70E-01 | 1.00E+00 |
| ENSG00000235315.2_RPL23AP6   | ENSG00000160789.18_LMNA | -0.02416 | -0.182660375 | 0.135559849 | 7.68E-01 | 9.04E-01 | 1.00E+00 |
| ENSG00000254732.1_RP11-691N  | ENSG00000160789.18_LMNA | 0.12289  | -0.037031069 | 0.276681612 | 1.31E-01 | 3.68E-01 | 1.00E+00 |
| ENSG00000253848.1_RP11-10N2  | ENSG00000160789.18_LMNA | 0.07163  | -0.08857989  | 0.228228998 | 3.81E-01 | 6.59E-01 | 1.00E+00 |
| ENSG00000228554.1_AC004837.1 | ENSG00000160789.18_LMNA | 0.08545  | -0.074769211 | 0.241365898 | 2.95E-01 | 5.81E-01 | 1.00E+00 |
| ENSG00000262623.1_RP5-1107A  | ENSG00000160789.18_LMNA | -0.07643 | -0.232795461 | 0.083792989 | 3.49E-01 | 6.33E-01 | 1.00E+00 |
| ENSG00000278594.1_RP11-146E  | ENSG00000160789.18_LMNA | 0.10173  | -0.058416895 | 0.256772053 | 2.12E-01 | 4.86E-01 | 1.00E+00 |
| ENSG00000273989.1_RP11-425D  | ENSG00000160789.18_LMNA | -0.1007  | -0.25579527  | 0.059458714 | 2.17E-01 | 4.92E-01 | 1.00E+00 |
| ENSG00000242137.1_RPL11P5    | ENSG00000160789.18_LMNA | 0.15795  | -0.001279993 | 0.309374013 | 5.20E-02 | 2.06E-01 | 1.00E+00 |
| ENSG00000124568.9_SLC17A1    | ENSG00000160789.18_LMNA | -0.02845 | -0.186808536 | 0.131341608 | 7.28E-01 | 8.85E-01 | 1.00E+00 |
| ENSG00000182632.13_CCNYL2    | ENSG00000160789.18_LMNA | -0.10264 | -0.257631869 | 0.057499264 | 2.08E-01 | 4.81E-01 | 1.00E+00 |
| ENSG00000259425.4_RP11-566K  | ENSG00000160789.18_LMNA | -0.13578 | -0.288736128 | 0.023941545 | 9.53E-02 | 3.02E-01 | 1.00E+00 |
| ENSG00000274869.1_RP11-195B  | ENSG00000160789.18_LMNA | -0.05882 | -0.216000368 | 0.101327171 | 4.72E-01 | 7.32E-01 | 1.00E+00 |
| ENSG00000228143.2_RP11-308N  | ENSG00000160789.18_LMNA | 0.08206  | -0.078157495 | 0.238153608 | 3.15E-01 | 6.01E-01 | 1.00E+00 |
| ENSG00000281593.1_GS1-114I9. | ENSG00000160789.18_LMNA | 0.05815  | -0.101999084 | 0.215353019 | 4.77E-01 | 7.35E-01 | 1.00E+00 |
| ENSG00000229162.1_RP11-84D1  | ENSG00000160789.18_LMNA | 0.15588  | -0.003402403 | 0.307453474 | 5.51E-02 | 2.14E-01 | 1.00E+00 |
| ENSG00000232864.1_NUCKS1P1   | ENSG00000160789.18_LMNA | 0.05342  | -0.106692562 | 0.210823337 | 5.13E-01 | 7.61E-01 | 1.00E+00 |
| ENSG00000244113.1_RP11-468H  | ENSG00000160789.18_LMNA | -0.22322 | -0.369301516 | -0.06638329 | 5.70E-03 | 4.33E-02 | 1.00E+00 |
| ENSG00000241984.2_RPL7AP2    | ENSG00000160789.18_LMNA | -0.0628  | -0.219799405 | 0.097378132 | 4.42E-01 | 7.10E-01 | 1.00E+00 |
| ENSG00000100053.8_CRYBB3     | ENSG00000160789.18_LMNA | 0.02769  | -0.132093594 | 0.186069873 | 7.35E-01 | 8.89E-01 | 1.00E+00 |
| ENSG00000264316.1_MTCO3P13   | ENSG00000160789.18_LMNA | 0.11397  | -0.046070246 | 0.268299144 | 1.62E-01 | 4.17E-01 | 1.00E+00 |
| ENSG00000260803.1_Z84812.4   | ENSG00000160789.18_LMNA | -0.14966 | -0.301671209 | 0.009775589 | 6.57E-02 | 2.39E-01 | 1.00E+00 |
| ENSG00000213871.3_TAF9BP1    | ENSG00000160789.18_LMNA | 0.08363  | -0.076592649 | 0.239638034 | 3.06E-01 | 5.92E-01 | 1.00E+00 |
| ENSG00000229081.1_LINC01165  | ENSG00000160789.18_LMNA | 0.01264  | -0.146852727 | 0.171499067 | 8.77E-01 | 9.52E-01 | 1.00E+00 |
| ENSG00000232347.1_RP11-488L  | ENSG00000160789.18_LMNA | -0.09428 | -0.249730824 | 0.065911604 | 2.48E-01 | 5.28E-01 | 1.00E+00 |
| ENSG00000240477.1_RP11-63E1  | ENSG00000160789.18_LMNA | 0.06611  | -0.094078311 | 0.222966523 | 4.18E-01 | 6.90E-01 | 1.00E+00 |
| ENSG00000111291.7_GPRC5D     | ENSG00000160789.18_LMNA | 0.15087  | -0.008535989 | 0.302797671 | 6.35E-02 | 2.34E-01 | 1.00E+00 |
| ENSG00000260473.1_RP11-923I1 | ENSG00000160789.18_LMNA | 0.08843  | -0.07178227  | 0.244191958 | 2.79E-01 | 5.64E-01 | 1.00E+00 |

|                              |                         |          |              |             |          |          |          |
|------------------------------|-------------------------|----------|--------------|-------------|----------|----------|----------|
| ENSG00000261007.2_RP11-382N  | ENSG00000160789.18_LMNA | 0.19825  | 0.040320361  | 0.346512807 | 1.44E-02 | 8.51E-02 | 1.00E+00 |
| ENSG00000162897.13_FCAMR     | ENSG00000160789.18_LMNA | -0.12308 | -0.276851756 | 0.036847063 | 1.31E-01 | 3.67E-01 | 1.00E+00 |
| ENSG00000125084.10_WNT1      | ENSG00000160789.18_LMNA | 0.04411  | -0.115903803 | 0.201893739 | 5.89E-01 | 8.09E-01 | 1.00E+00 |
| ENSG00000165462.5_PHOX2A     | ENSG00000160789.18_LMNA | -0.00672 | -0.165739585 | 0.152647821 | 9.35E-01 | 9.74E-01 | 1.00E+00 |
| ENSG00000261359.2_PYCARD-A   | ENSG00000160789.18_LMNA | 0.01521  | -0.144339547 | 0.173990057 | 8.52E-01 | 9.42E-01 | 1.00E+00 |
| ENSG00000249840.2_GAPDHP76   | ENSG00000160789.18_LMNA | 0.18142  | 0.022883671  | 0.331062151 | 2.53E-02 | 1.27E-01 | 1.00E+00 |
| ENSG00000135960.8_EDAR       | ENSG00000160789.18_LMNA | -0.20368 | -0.351482891 | -0.04596923 | 1.18E-02 | 7.40E-02 | 1.00E+00 |
| ENSG00000189108.11_IL1RAPL2  | ENSG00000160789.18_LMNA | -0.15493 | -0.306571268 | 0.004376403 | 5.67E-02 | 2.18E-01 | 1.00E+00 |
| ENSG00000278719.1_MCM8-AS1   | ENSG00000160789.18_LMNA | -0.03739 | -0.195422823 | 0.122544829 | 6.47E-01 | 8.43E-01 | 1.00E+00 |
| ENSG00000275056.1_RP11-127I2 | ENSG00000160789.18_LMNA | 0.05994  | -0.100214089 | 0.217072143 | 4.63E-01 | 7.26E-01 | 1.00E+00 |
| ENSG00000228020.2_HNRNPA1F   | ENSG00000160789.18_LMNA | -0.05313 | -0.210551065 | 0.10697423  | 5.16E-01 | 7.63E-01 | 1.00E+00 |
| ENSG00000171126.7_KCNG3      | ENSG00000160789.18_LMNA | -0.05119 | -0.208689863 | 0.108898293 | 5.31E-01 | 7.74E-01 | 1.00E+00 |
| ENSG00000231861.2_OR5K2      | ENSG00000160789.18_LMNA | -0.03066 | -0.188937009 | 0.129172694 | 7.08E-01 | 8.76E-01 | 1.00E+00 |
| ENSG00000144460.11_NYAP2     | ENSG00000160789.18_LMNA | -0.21804 | -0.364587412 | -0.06095775 | 6.96E-03 | 5.02E-02 | 1.00E+00 |
| ENSG00000241185.2_RPL21P122  | ENSG00000160789.18_LMNA | -0.01668 | -0.175410455 | 0.142904655 | 8.38E-01 | 9.37E-01 | 1.00E+00 |
| ENSG00000229704.1	EIF2S2P2   | ENSG00000160789.18_LMNA | 0.08275  | -0.077475575 | 0.238800664 | 3.11E-01 | 5.97E-01 | 1.00E+00 |
| ENSG00000149635.2_OCSTAMP    | ENSG00000160789.18_LMNA | 0.17212  | 0.013282913  | 0.322483783 | 3.40E-02 | 1.56E-01 | 1.00E+00 |
| ENSG00000185031.6_SLC2A3P2   | ENSG00000160789.18_LMNA | 0.19662  | 0.038623623  | 0.345016588 | 1.52E-02 | 8.87E-02 | 1.00E+00 |
| ENSG00000248871.1_TNFSF12-T  | ENSG00000160789.18_LMNA | 0.03226  | -0.127593457 | 0.190484922 | 6.93E-01 | 8.68E-01 | 1.00E+00 |
| ENSG00000235616.1_ST13P2     | ENSG00000160789.18_LMNA | 0.08845  | -0.071760961 | 0.2442121   | 2.79E-01 | 5.64E-01 | 1.00E+00 |
| ENSG00000274010.1_RP5-935K1  | ENSG00000160789.18_LMNA | 0.063    | -0.097176507 | 0.219993113 | 4.41E-01 | 7.08E-01 | 1.00E+00 |
| ENSG00000248498.3_ASNSP1     | ENSG00000160789.18_LMNA | -0.09289 | -0.248419305 | 0.067303665 | 2.55E-01 | 5.37E-01 | 1.00E+00 |
| ENSG00000198099.7_ADH4       | ENSG00000160789.18_LMNA | 0.11886  | -0.041114517 | 0.272900734 | 1.45E-01 | 3.89E-01 | 1.00E+00 |
| ENSG00000113525.8_IL5        | ENSG00000160789.18_LMNA | -0.08567 | -0.241571601 | 0.07455199  | 2.94E-01 | 5.80E-01 | 1.00E+00 |
| ENSG00000232006.7_AC005537.1 | ENSG00000160789.18_LMNA | -0.17681 | -0.326813601 | -0.01812165 | 2.93E-02 | 1.41E-01 | 1.00E+00 |
| ENSG00000260914.3_RP11-343C  | ENSG00000160789.18_LMNA | 0.18103  | 0.022474328  | 0.330697435 | 2.56E-02 | 1.29E-01 | 1.00E+00 |
| ENSG00000227403.1_AC009299.1 | ENSG00000160789.18_LMNA | -0.01493 | -0.173714058 | 0.144618207 | 8.55E-01 | 9.43E-01 | 1.00E+00 |
| ENSG00000232199.1_RPL3P8     | ENSG00000160789.18_LMNA | -0.20736 | -0.354851098 | -0.04980858 | 1.04E-02 | 6.72E-02 | 1.00E+00 |
| ENSG00000233708.1_RP11-342M  | ENSG00000160789.18_LMNA | -0.18456 | -0.333944284 | -0.02612211 | 2.28E-02 | 1.19E-01 | 1.00E+00 |
| ENSG00000224520.2_KRT8P45    | ENSG00000160789.18_LMNA | -0.04519 | -0.202931941 | 0.114835656 | 5.80E-01 | 8.04E-01 | 1.00E+00 |
| ENSG00000259219.1_CTD-3076C  | ENSG00000160789.18_LMNA | -0.16214 | -0.313253374 | -0.00301569 | 4.60E-02 | 1.90E-01 | 1.00E+00 |
| ENSG00000188991.3_SLC15A5    | ENSG00000160789.18_LMNA | -0.31136 | -0.448340677 | -0.16009925 | 9.44E-05 | 1.80E-03 | 1.00E+00 |
| ENSG00000259810.2_AC002519.1 | ENSG00000160789.18_LMNA | 0.0961   | -0.064083487 | 0.251451411 | 2.39E-01 | 5.18E-01 | 1.00E+00 |

|                               |                         |          |              |             |          |          |          |
|-------------------------------|-------------------------|----------|--------------|-------------|----------|----------|----------|
| ENSG00000234913.1_XXbac-B47   | ENSG00000160789.18_LMNA | -0.07501 | -0.231451189 | 0.085203673 | 3.58E-01 | 6.41E-01 | 1.00E+00 |
| ENSG00000267620.1_RP11-795H   | ENSG00000160789.18_LMNA | -0.01684 | -0.175570535 | 0.142742857 | 8.37E-01 | 9.37E-01 | 1.00E+00 |
| ENSG00000258628.1_RP11-492D   | ENSG00000160789.18_LMNA | 0.13315  | -0.026616617 | 0.286280611 | 1.02E-01 | 3.15E-01 | 1.00E+00 |
| ENSG00000236780.4_AC078941.   | ENSG00000160789.18_LMNA | 0.02748  | -0.132297528 | 0.18586949  | 7.37E-01 | 8.89E-01 | 1.00E+00 |
| ENSG00000223650.1_UHRF2P1     | ENSG00000160789.18_LMNA | 0.19926  | 0.041368532  | 0.347436328 | 1.39E-02 | 8.28E-02 | 1.00E+00 |
| ENSG00000227038.2_GTF2IP7     | ENSG00000160789.18_LMNA | -0.0799  | -0.236102095 | 0.080317589 | 3.28E-01 | 6.14E-01 | 1.00E+00 |
| ENSG00000279910.1_RP11-113E   | ENSG00000160789.18_LMNA | -0.10357 | -0.25850369  | 0.056568276 | 2.04E-01 | 4.75E-01 | 1.00E+00 |
| ENSG00000251152.1_RP11-281P   | ENSG00000160789.18_LMNA | -0.18878 | -0.337825953 | -0.03049389 | 1.98E-02 | 1.07E-01 | 1.00E+00 |
| ENSG00000175746.6_C15orf54    | ENSG00000160789.18_LMNA | 0.17285  | 0.014038359  | 0.323160627 | 3.32E-02 | 1.53E-01 | 1.00E+00 |
| ENSG00000279036.1_RP11-81K2   | ENSG00000160789.18_LMNA | 0.02862  | -0.131179055 | 0.186968162 | 7.26E-01 | 8.84E-01 | 1.00E+00 |
| ENSG00000141434.10_MEP1B      | ENSG00000160789.18_LMNA | -0.02877 | -0.187113199 | 0.131031343 | 7.25E-01 | 8.83E-01 | 1.00E+00 |
| ENSG00000249695.5_RP11-598F   | ENSG00000160789.18_LMNA | -0.10082 | -0.255914744 | 0.059331322 | 2.16E-01 | 4.91E-01 | 1.00E+00 |
| ENSG00000231079.6_AC105402.   | ENSG00000160789.18_LMNA | -0.14    | -0.292678778 | 0.019636983 | 8.54E-02 | 2.83E-01 | 1.00E+00 |
| ENSG00000235500.2_SNX19P2     | ENSG00000160789.18_LMNA | 0.01678  | -0.14280166  | 0.175512358 | 8.37E-01 | 9.37E-01 | 1.00E+00 |
| ENSG00000159337.6_PLA2G4D     | ENSG00000160789.18_LMNA | 0.01215  | -0.147332801 | 0.171022768 | 8.82E-01 | 9.54E-01 | 1.00E+00 |
| ENSG00000278903.2_CH507-145   | ENSG00000160789.18_LMNA | 0.01541  | -0.144141444 | 0.174186238 | 8.51E-01 | 9.41E-01 | 1.00E+00 |
| ENSG00000173930.8_SLCO4C1     | ENSG00000160789.18_LMNA | 0.05107  | -0.109012774 | 0.20857905  | 5.32E-01 | 7.75E-01 | 1.00E+00 |
| ENSG00000275740.1_RP11-449H   | ENSG00000160789.18_LMNA | 0.11644  | -0.043565197 | 0.270626976 | 1.53E-01 | 4.03E-01 | 1.00E+00 |
| ENSG00000242288.9_RP11-464F   | ENSG00000160789.18_LMNA | 0.05626  | -0.103869512 | 0.213549502 | 4.91E-01 | 7.47E-01 | 1.00E+00 |
| ENSG00000272884.1_RP11-104H   | ENSG00000160789.18_LMNA | 0.12966  | -0.030167793 | 0.283014534 | 1.11E-01 | 3.33E-01 | 1.00E+00 |
| ENSG00000251095.5_RP11-115D   | ENSG00000160789.18_LMNA | -0.04725 | -0.204906878 | 0.112801727 | 5.63E-01 | 7.94E-01 | 1.00E+00 |
| ENSG00000127831.9_VIL1        | ENSG00000160789.18_LMNA | 0.04756  | -0.112495795 | 0.205203713 | 5.61E-01 | 7.93E-01 | 1.00E+00 |
| ENSG00000215910.6_C1orf167    | ENSG00000160789.18_LMNA | 0.14595  | -0.013562666 | 0.298224382 | 7.28E-02 | 2.56E-01 | 1.00E+00 |
| ENSG00000137648.15_TMPRSS4    | ENSG00000160789.18_LMNA | -0.00952 | -0.168466138 | 0.149907136 | 9.07E-01 | 9.64E-01 | 1.00E+00 |
| ENSG00000170498.8_KISS1       | ENSG00000160789.18_LMNA | -0.18233 | -0.331896058 | -0.02382001 | 2.46E-02 | 1.25E-01 | 1.00E+00 |
| ENSG00000244437.1_IGKV3-15    | ENSG00000160789.18_LMNA | 0.02464  | -0.135087586 | 0.183125356 | 7.63E-01 | 9.01E-01 | 1.00E+00 |
| ENSG00000211649.3_IGLV7-46    | ENSG00000160789.18_LMNA | 0.01462  | -0.144922496 | 0.173412618 | 8.58E-01 | 9.44E-01 | 1.00E+00 |
| ENSG00000207688.2_hsa-mir-548 | ENSG00000160789.18_LMNA | 0.00796  | -0.15143543  | 0.166946325 | 9.22E-01 | 9.70E-01 | 1.00E+00 |
| ENSG00000202078.1_Y_RNA       | ENSG00000160789.18_LMNA | 0.00813  | -0.151262799 | 0.167118073 | 9.21E-01 | 9.70E-01 | 1.00E+00 |
| ENSG00000265078.2_RN7SL664f   | ENSG00000160789.18_LMNA | 0.03738  | -0.122547502 | 0.195420213 | 6.48E-01 | 8.43E-01 | 1.00E+00 |
| ENSG00000255091.1_RP11-495O   | ENSG00000160789.18_LMNA | 0.21178  | 0.054411281  | 0.358878565 | 8.81E-03 | 5.98E-02 | 1.00E+00 |
| ENSG00000258696.1_CTD-2058B   | ENSG00000160789.18_LMNA | -0.13247 | -0.285649968 | 0.027302926 | 1.04E-01 | 3.19E-01 | 1.00E+00 |
| ENSG00000226690.5_AC005281.   | ENSG00000160789.18_LMNA | -0.0836  | -0.239611374 | 0.076620767 | 3.06E-01 | 5.93E-01 | 1.00E+00 |

|                             |                         |          |              |             |          |          |          |
|-----------------------------|-------------------------|----------|--------------|-------------|----------|----------|----------|
| ENSG00000229770.1_CTA-796E4 | ENSG00000160789.18_LMNA | -0.23356 | -0.378681242 | -0.0772321  | 3.78E-03 | 3.18E-02 | 1.00E+00 |
| ENSG00000273444.1_RP5-1147A | ENSG00000160789.18_LMNA | 0.06965  | -0.09055547  | 0.226340321 | 3.94E-01 | 6.71E-01 | 1.00E+00 |
| ENSG00000228536.1_RP11-392O | ENSG00000160789.18_LMNA | 0.19228  | 0.034126917  | 0.341043754 | 1.76E-02 | 9.86E-02 | 1.00E+00 |
| ENSG00000255124.1_          | ENSG00000160789.18_LMNA | -0.29109 | -0.43034451  | -0.1382945  | 2.75E-04 | 4.19E-03 | 1.00E+00 |
| ENSG00000272239.1_CTB-108O  | ENSG00000160789.18_LMNA | -0.08767 | -0.243476636 | 0.072538849 | 2.83E-01 | 5.68E-01 | 1.00E+00 |
| ENSG00000232606.1_LINC01412 | ENSG00000160789.18_LMNA | -0.278   | -0.41867011  | -0.12429922 | 5.25E-04 | 7.01E-03 | 1.00E+00 |
| ENSG00000270178.1_RP11-494H | ENSG00000160789.18_LMNA | -0.1306  | -0.283897928 | 0.029208067 | 1.09E-01 | 3.28E-01 | 1.00E+00 |
| ENSG00000266217.2_CTSLP2    | ENSG00000160789.18_LMNA | -0.03227 | -0.190494935 | 0.127583236 | 6.93E-01 | 8.68E-01 | 1.00E+00 |
| ENSG00000149656.7_LINC00266 | ENSG00000160789.18_LMNA | -0.00769 | -0.166683118 | 0.151699952 | 9.25E-01 | 9.71E-01 | 1.00E+00 |
| ENSG00000226497.1_RP11-406O | ENSG00000160789.18_LMNA | 0.01655  | -0.143025184 | 0.175291194 | 8.40E-01 | 9.38E-01 | 1.00E+00 |
| ENSG00000273367.1_RP5-827C2 | ENSG00000160789.18_LMNA | -0.08217 | -0.238253344 | 0.078052404 | 3.14E-01 | 6.01E-01 | 1.00E+00 |
| ENSG00000259255.1_RP11-627D | ENSG00000160789.18_LMNA | -0.13954 | -0.292252153 | 0.020103329 | 8.64E-02 | 2.86E-01 | 1.00E+00 |
| ENSG00000240373.1_SEC62-AS1 | ENSG00000160789.18_LMNA | -0.03652 | -0.194594088 | 0.123393298 | 6.55E-01 | 8.47E-01 | 1.00E+00 |
| ENSG00000225334.1_RP11-449J | ENSG00000160789.18_LMNA | 0.24764  | 0.092064153  | 0.391405389 | 2.10E-03 | 2.03E-02 | 1.00E+00 |
| ENSG00000281517.1_          | ENSG00000160789.18_LMNA | -0.0525  | -0.209945403 | 0.107600609 | 5.21E-01 | 7.67E-01 | 1.00E+00 |
| ENSG00000267667.1_RP11-136H | ENSG00000160789.18_LMNA | -0.17866 | -0.328515268 | -0.0200273  | 2.77E-02 | 1.36E-01 | 1.00E+00 |
| ENSG00000242190.1_RP11-142L | ENSG00000160789.18_LMNA | -0.01077 | -0.169680027 | 0.148685378 | 8.95E-01 | 9.59E-01 | 1.00E+00 |
| ENSG00000255010.1_RP11-113K | ENSG00000160789.18_LMNA | -0.09966 | -0.254820307 | 0.060497906 | 2.22E-01 | 4.97E-01 | 1.00E+00 |
| ENSG00000225671.2_FCF1P6    | ENSG00000160789.18_LMNA | 0.19082  | 0.032614897  | 0.339705419 | 1.85E-02 | 1.02E-01 | 1.00E+00 |
| ENSG00000236641.1_CTA-221G  | ENSG00000160789.18_LMNA | -0.06157 | -0.218625085 | 0.098599886 | 4.51E-01 | 7.17E-01 | 1.00E+00 |
| ENSG00000224207.3_RP11-10L1 | ENSG00000160789.18_LMNA | 0.10536  | -0.054759418 | 0.260196123 | 1.96E-01 | 4.66E-01 | 1.00E+00 |
| ENSG00000271930.1_RP11-44N1 | ENSG00000160789.18_LMNA | -0.02193 | -0.180504822 | 0.137747273 | 7.89E-01 | 9.14E-01 | 1.00E+00 |
| ENSG00000259478.2_RP11-753A | ENSG00000160789.18_LMNA | -0.06184 | -0.218890159 | 0.098324188 | 4.49E-01 | 7.15E-01 | 1.00E+00 |
| ENSG00000232258.5_TMEN114   | ENSG00000160789.18_LMNA | -0.12185 | -0.275701604 | 0.038090511 | 1.35E-01 | 3.73E-01 | 1.00E+00 |
| ENSG00000268746.1_CTD-2571L | ENSG00000160789.18_LMNA | 0.09958  | -0.060578986 | 0.254744211 | 2.22E-01 | 4.98E-01 | 1.00E+00 |
| ENSG00000203740.3_METTL11B  | ENSG00000160789.18_LMNA | -0.16318 | -0.314216282 | -0.00408371 | 4.46E-02 | 1.87E-01 | 1.00E+00 |
| ENSG00000220575.6_HTR5A-AS  | ENSG00000160789.18_LMNA | -0.12654 | -0.280094729 | 0.033335792 | 1.20E-01 | 3.49E-01 | 1.00E+00 |
| ENSG00000270061.1_RP11-214K | ENSG00000160789.18_LMNA | -0.05936 | -0.216515467 | 0.100792319 | 4.68E-01 | 7.29E-01 | 1.00E+00 |
| ENSG00000225913.2_RP11-57C1 | ENSG00000160789.18_LMNA | -0.2065  | -0.354064262 | -0.04891088 | 1.07E-02 | 6.87E-02 | 1.00E+00 |
| ENSG00000263724.1_DLGAP1-A  | ENSG00000160789.18_LMNA | -0.24953 | -0.393115241 | -0.09406744 | 1.93E-03 | 1.90E-02 | 1.00E+00 |
| ENSG00000096395.9_MLN       | ENSG00000160789.18_LMNA | -0.01789 | -0.176584408 | 0.141717711 | 8.27E-01 | 9.32E-01 | 1.00E+00 |
| ENSG00000271732.1_RP5-1182A | ENSG00000160789.18_LMNA | -0.03241 | -0.19063032  | 0.127445034 | 6.92E-01 | 8.67E-01 | 1.00E+00 |
| ENSG00000199691.1_RN7SKP17  | ENSG00000160789.18_LMNA | 0.03728  | -0.122653479 | 0.195316725 | 6.48E-01 | 8.44E-01 | 1.00E+00 |

|                             |                         |          |              |             |          |          |          |
|-----------------------------|-------------------------|----------|--------------|-------------|----------|----------|----------|
| ENSG00000235254.3_TM185A    | ENSG00000160789.18_LMNA | 0.02033  | -0.139317734 | 0.178955355 | 8.04E-01 | 9.21E-01 | 1.00E+00 |
| ENSG00000254438.1_RP11-231N | ENSG00000160789.18_LMNA | -0.28097 | -0.421327866 | -0.12747508 | 4.54E-04 | 6.26E-03 | 1.00E+00 |
| ENSG00000250030.2_RP11-584P | ENSG00000160789.18_LMNA | 0.02906  | -0.130748351 | 0.187391028 | 7.22E-01 | 8.82E-01 | 1.00E+00 |
| ENSG00000226247.1_SUPT4H1P  | ENSG00000160789.18_LMNA | 0.04525  | -0.114778262 | 0.202987706 | 5.80E-01 | 8.04E-01 | 1.00E+00 |
| ENSG00000270040.1_RP11-416A | ENSG00000160789.18_LMNA | 0.03943  | -0.120523577 | 0.197395236 | 6.30E-01 | 8.33E-01 | 1.00E+00 |
| ENSG00000233246.1_RP11-415J | ENSG00000160789.18_LMNA | -0.01848 | -0.1771613   | 0.1411341   | 8.21E-01 | 9.30E-01 | 1.00E+00 |
| ENSG00000242325.1_RPS12P31  | ENSG00000160789.18_LMNA | -0.15537 | -0.306978166 | 0.003927241 | 5.60E-02 | 2.16E-01 | 1.00E+00 |
| ENSG00000230841.2_RPL23AP1  | ENSG00000160789.18_LMNA | 0.01628  | -0.143287327 | 0.175031778 | 8.42E-01 | 9.39E-01 | 1.00E+00 |
| ENSG00000211643.2_IGLV5-52  | ENSG00000160789.18_LMNA | -0.01348 | -0.172310707 | 0.146034308 | 8.69E-01 | 9.49E-01 | 1.00E+00 |
| ENSG00000240093.1_AC093627  | ENSG00000160789.18_LMNA | 0.41495  | 0.273838435  | 0.538571837 | 1.07E-07 | 7.61E-06 | 5.47E-03 |
| ENSG00000224613.5_RP11-153F | ENSG00000160789.18_LMNA | -0.15921 | -0.310542359 | -1.25E-05   | 5.01E-02 | 2.02E-01 | 1.00E+00 |
| ENSG00000236394.2_RP11-229P | ENSG00000160789.18_LMNA | -0.01416 | -0.172966067 | 0.145373156 | 8.63E-01 | 9.46E-01 | 1.00E+00 |
| ENSG00000231130.1_HLA-T     | ENSG00000160789.18_LMNA | 0.2061   | 0.048485826  | 0.353691558 | 1.09E-02 | 6.94E-02 | 1.00E+00 |
| ENSG00000280420.1_AC005355  | ENSG00000160789.18_LMNA | 0.08121  | -0.079015673 | 0.237338906 | 3.20E-01 | 6.06E-01 | 1.00E+00 |
| ENSG00000272516.1_RP11-573G | ENSG00000160789.18_LMNA | -0.27747 | -0.418200704 | -0.12373894 | 5.38E-04 | 7.14E-03 | 1.00E+00 |
| ENSG00000248099.3_INSL3     | ENSG00000160789.18_LMNA | 0.10005  | -0.060106207 | 0.255187871 | 2.20E-01 | 4.95E-01 | 1.00E+00 |
| ENSG00000280350.1_RP5-1065O | ENSG00000160789.18_LMNA | -0.0046  | -0.163676315 | 0.154718535 | 9.55E-01 | 9.82E-01 | 1.00E+00 |
| ENSG00000249655.1_CTC-325J2 | ENSG00000160789.18_LMNA | -0.04279 | -0.200620937 | 0.117212313 | 6.01E-01 | 8.16E-01 | 1.00E+00 |
| ENSG00000226622.4_AC092155  | ENSG00000160789.18_LMNA | -0.0356  | -0.19369887  | 0.124309311 | 6.63E-01 | 8.51E-01 | 1.00E+00 |
| ENSG00000226617.1_RPL21P11  | ENSG00000160789.18_LMNA | -0.15052 | -0.30247304  | 0.008893323 | 6.42E-02 | 2.36E-01 | 1.00E+00 |
| ENSG00000231464.1_AC024937  | ENSG00000160789.18_LMNA | 0.03255  | -0.127308267 | 0.190764287 | 6.91E-01 | 8.67E-01 | 1.00E+00 |
| ENSG00000255741.1_RP11-757G | ENSG00000160789.18_LMNA | 0.07114  | -0.089064788 | 0.227765651 | 3.84E-01 | 6.62E-01 | 1.00E+00 |
| ENSG00000277855.1_RP11-154H | ENSG00000160789.18_LMNA | -0.07425 | -0.230721014 | 0.085969389 | 3.63E-01 | 6.45E-01 | 1.00E+00 |
| ENSG00000251680.4_CTC-575N7 | ENSG00000160789.18_LMNA | -0.11143 | -0.265912211 | 0.048634796 | 1.72E-01 | 4.31E-01 | 1.00E+00 |
| ENSG00000204936.8_CD177     | ENSG00000160789.18_LMNA | 0.04428  | -0.115736296 | 0.202056597 | 5.88E-01 | 8.09E-01 | 1.00E+00 |
| ENSG00000261318.1_RP11-653J | ENSG00000160789.18_LMNA | -0.08977 | -0.245465239 | 0.070434649 | 2.71E-01 | 5.56E-01 | 1.00E+00 |
| ENSG00000229352.1_AC007563  | ENSG00000160789.18_LMNA | -0.06918 | -0.225893348 | 0.091022645 | 3.97E-01 | 6.74E-01 | 1.00E+00 |
| ENSG00000259048.1_CTD-2058B | ENSG00000160789.18_LMNA | -0.06976 | -0.226449895 | 0.090440922 | 3.93E-01 | 6.71E-01 | 1.00E+00 |
| ENSG00000238021.5_ARMC4P1   | ENSG00000160789.18_LMNA | -0.04985 | -0.207402374 | 0.110227875 | 5.42E-01 | 7.81E-01 | 1.00E+00 |
| ENSG00000262769.1_RP11-1113 | ENSG00000160789.18_LMNA | 0.02062  | -0.139035831 | 0.179233607 | 8.01E-01 | 9.20E-01 | 1.00E+00 |
| ENSG00000271554.1_RP4-665N4 | ENSG00000160789.18_LMNA | -0.04382 | -0.201617334 | 0.116188057 | 5.92E-01 | 8.11E-01 | 1.00E+00 |
| ENSG00000182674.5_KCNB2     | ENSG00000160789.18_LMNA | -0.30417 | -0.441967629 | -0.15234515 | 1.39E-04 | 2.45E-03 | 1.00E+00 |
| ENSG00000237233.2_TM26-A    | ENSG00000160789.18_LMNA | 0.00973  | -0.149701502 | 0.168670515 | 9.05E-01 | 9.64E-01 | 1.00E+00 |



|                              |                         |          |              |             |          |          |          |
|------------------------------|-------------------------|----------|--------------|-------------|----------|----------|----------|
| ENSG00000238221.1_RP11-69L1  | ENSG00000160789.18_LMNA | 0.09177  | -0.068427958 | 0.247359216 | 2.61E-01 | 5.44E-01 | 1.00E+00 |
| ENSG00000225857.4_RP11-46A1  | ENSG00000160789.18_LMNA | 0.19024  | 0.032006206  | 0.339166296 | 1.89E-02 | 1.04E-01 | 1.00E+00 |
| ENSG00000259869.1_AL022344.7 | ENSG00000160789.18_LMNA | -0.15632 | -0.307857452 | 0.002956196 | 5.45E-02 | 2.12E-01 | 1.00E+00 |
| ENSG00000262619.1_LINC00621  | ENSG00000160789.18_LMNA | -0.33918 | -0.47284685  | -0.19025107 | 1.92E-05 | 4.98E-04 | 9.83E-01 |
| ENSG00000262115.1_RP11-455O  | ENSG00000160789.18_LMNA | 0.00046  | -0.158748816 | 0.159652521 | 9.95E-01 | 9.98E-01 | 1.00E+00 |
| ENSG00000255760.1_RP11-428G  | ENSG00000160789.18_LMNA | -0.04228 | -0.200132044 | 0.117714629 | 6.05E-01 | 8.19E-01 | 1.00E+00 |
| ENSG00000181074.3_OR52N4     | ENSG00000160789.18_LMNA | -0.0955  | -0.25088358  | 0.064687039 | 2.42E-01 | 5.21E-01 | 1.00E+00 |
| ENSG00000224865.6_AC009518.4 | ENSG00000160789.18_LMNA | 0.163    | 0.00389862   | 0.314049455 | 4.48E-02 | 1.87E-01 | 1.00E+00 |
| ENSG00000225549.3_RP11-210H  | ENSG00000160789.18_LMNA | -0.19199 | -0.340770984 | -0.03381863 | 1.78E-02 | 9.93E-02 | 1.00E+00 |
| ENSG00000198807.11_PAX9      | ENSG00000160789.18_LMNA | -0.18133 | -0.330974295 | -0.02278506 | 2.54E-02 | 1.28E-01 | 1.00E+00 |
| ENSG00000250403.1_RP11-15B1  | ENSG00000160789.18_LMNA | 0.16272  | 0.003610843  | 0.313790034 | 4.52E-02 | 1.88E-01 | 1.00E+00 |
| ENSG00000231131.5_LINC01468  | ENSG00000160789.18_LMNA | -0.00963 | -0.168576635 | 0.149795963 | 9.06E-01 | 9.64E-01 | 1.00E+00 |
| ENSG00000224469.1_AC009517.4 | ENSG00000160789.18_LMNA | 0.02442  | -0.135306525 | 0.182909811 | 7.65E-01 | 9.02E-01 | 1.00E+00 |
| ENSG00000259553.3_MIR1302-1  | ENSG00000160789.18_LMNA | -0.08973 | -0.245422652 | 0.070479741 | 2.72E-01 | 5.56E-01 | 1.00E+00 |
| ENSG00000224079.1_AC091729.4 | ENSG00000160789.18_LMNA | 0.08652  | -0.073691864 | 0.242385836 | 2.89E-01 | 5.75E-01 | 1.00E+00 |
| ENSG00000228376.3_GAS2L1P2   | ENSG00000160789.18_LMNA | -0.00044 | -0.159629368 | 0.158771976 | 9.96E-01 | 9.98E-01 | 1.00E+00 |
| ENSG00000251609.2_SETP12     | ENSG00000160789.18_LMNA | 0.06755  | -0.092645604 | 0.224339533 | 4.08E-01 | 6.83E-01 | 1.00E+00 |
| ENSG00000238258.1_RP11-342D  | ENSG00000160789.18_LMNA | 0.2059   | 0.048282096  | 0.353512883 | 1.09E-02 | 6.98E-02 | 1.00E+00 |
| ENSG00000217404.2_RPS4XP9    | ENSG00000160789.18_LMNA | -0.02835 | -0.186711591 | 0.131440323 | 7.29E-01 | 8.85E-01 | 1.00E+00 |
| ENSG00000203435.2_E2F3P2     | ENSG00000160789.18_LMNA | 0.1077   | -0.05239544  | 0.262405034 | 1.87E-01 | 4.53E-01 | 1.00E+00 |
| ENSG00000235806.1_RP4-646N3  | ENSG00000160789.18_LMNA | 0.00463  | -0.154682382 | 0.163712363 | 9.55E-01 | 9.82E-01 | 1.00E+00 |
| ENSG00000262118.1_MTCO1P28   | ENSG00000160789.18_LMNA | -0.09297 | -0.248488608 | 0.067230137 | 2.55E-01 | 5.36E-01 | 1.00E+00 |
| ENSG00000235920.1_AC073109.4 | ENSG00000160789.18_LMNA | 0.07794  | -0.08228278  | 0.234233234 | 3.40E-01 | 6.25E-01 | 1.00E+00 |
| ENSG00000213077.5_FAM106A    | ENSG00000160789.18_LMNA | -0.0878  | -0.243592255 | 0.072416587 | 2.82E-01 | 5.67E-01 | 1.00E+00 |
| ENSG00000224464.2_PGAM1P6    | ENSG00000160789.18_LMNA | -0.00483 | -0.16390684  | 0.154487318 | 9.53E-01 | 9.81E-01 | 1.00E+00 |
| ENSG00000235890.2_TSPEAR-A   | ENSG00000160789.18_LMNA | 0.09776  | -0.062408749 | 0.253025893 | 2.31E-01 | 5.09E-01 | 1.00E+00 |
| ENSG00000227474.1_RPL6P24    | ENSG00000160789.18_LMNA | 0.04736  | -0.112690531 | 0.205014774 | 5.62E-01 | 7.94E-01 | 1.00E+00 |
| ENSG00000267059.2_AC005943.4 | ENSG00000160789.18_LMNA | 0.01517  | -0.144376076 | 0.17395388  | 8.53E-01 | 9.42E-01 | 1.00E+00 |
| ENSG00000214484.3_RPSAP28    | ENSG00000160789.18_LMNA | -0.04378 | -0.201579622 | 0.116226835 | 5.92E-01 | 8.11E-01 | 1.00E+00 |
| ENSG00000213726.5_RPS2P52    | ENSG00000160789.18_LMNA | 0.05959  | -0.100566849 | 0.216732557 | 4.66E-01 | 7.28E-01 | 1.00E+00 |
| ENSG00000241593.4_RP11-520D  | ENSG00000160789.18_LMNA | 0.09173  | -0.068474452 | 0.247315361 | 2.61E-01 | 5.44E-01 | 1.00E+00 |
| ENSG00000175766.10	EIF4E1B   | ENSG00000160789.18_LMNA | -0.11191 | -0.26636528  | 0.048148331 | 1.70E-01 | 4.29E-01 | 1.00E+00 |
| ENSG00000257896.1_RP11-210N  | ENSG00000160789.18_LMNA | -0.06838 | -0.225125288 | 0.091825093 | 4.03E-01 | 6.78E-01 | 1.00E+00 |

|                               |                         |          |              |             |          |          |          |
|-------------------------------|-------------------------|----------|--------------|-------------|----------|----------|----------|
| ENSG00000249345.5_RP11-575F   | ENSG00000160789.18_LMNA | -0.02671 | -0.185123782 | 0.133056215 | 7.44E-01 | 8.93E-01 | 1.00E+00 |
| ENSG00000233684.2_AC079779.1  | ENSG00000160789.18_LMNA | 0.0655   | -0.094689903 | 0.222380031 | 4.23E-01 | 6.94E-01 | 1.00E+00 |
| ENSG00000238213.1_TARDBPP2    | ENSG00000160789.18_LMNA | 0.00147  | -0.157769635 | 0.1606311   | 9.86E-01 | 9.94E-01 | 1.00E+00 |
| ENSG00000228868.3_MYLKP1      | ENSG00000160789.18_LMNA | -0.16547 | -0.316336705 | -0.0064381  | 4.16E-02 | 1.78E-01 | 1.00E+00 |
| ENSG00000265417.1_RP11-288C   | ENSG00000160789.18_LMNA | -0.02089 | -0.179496877 | 0.138769057 | 7.98E-01 | 9.19E-01 | 1.00E+00 |
| ENSG00000204086.4_RPA4        | ENSG00000160789.18_LMNA | 0.0498   | -0.110270207 | 0.207361365 | 5.42E-01 | 7.81E-01 | 1.00E+00 |
| ENSG00000188133.5_TMEN215     | ENSG00000160789.18_LMNA | -0.02506 | -0.183532299 | 0.134674151 | 7.59E-01 | 9.00E-01 | 1.00E+00 |
| ENSG00000236430.1_KRT8P29     | ENSG00000160789.18_LMNA | -0.02148 | -0.1800671   | 0.138191089 | 7.93E-01 | 9.16E-01 | 1.00E+00 |
| ENSG00000237917.1_PARP4P1     | ENSG00000160789.18_LMNA | 0.02771  | -0.132074797 | 0.186088341 | 7.35E-01 | 8.89E-01 | 1.00E+00 |
| ENSG00000253868.3_FER1L6-AS   | ENSG00000160789.18_LMNA | -0.19915 | -0.347340839 | -0.04126012 | 1.39E-02 | 8.31E-02 | 1.00E+00 |
| ENSG00000125900.11_SIRPD      | ENSG00000160789.18_LMNA | -0.07605 | -0.232433614 | 0.084172838 | 3.52E-01 | 6.35E-01 | 1.00E+00 |
| ENSG00000183421.10_RIPK4      | ENSG00000160789.18_LMNA | -0.00105 | -0.160221408 | 0.158179655 | 9.90E-01 | 9.96E-01 | 1.00E+00 |
| ENSG00000257097.1_CLIP1-AS1   | ENSG00000160789.18_LMNA | -0.00579 | -0.164835846 | 0.153555165 | 9.44E-01 | 9.78E-01 | 1.00E+00 |
| ENSG00000232662.2_LDHBP1      | ENSG00000160789.18_LMNA | 0.02409  | -0.135631669 | 0.18258965  | 7.68E-01 | 9.04E-01 | 1.00E+00 |
| ENSG00000229893.2_AC004549.1  | ENSG00000160789.18_LMNA | 0.04007  | -0.119897539 | 0.198005625 | 6.24E-01 | 8.31E-01 | 1.00E+00 |
| ENSG00000233370.1_AC092664.1  | ENSG00000160789.18_LMNA | -0.12563 | -0.279244446 | 0.03425717  | 1.23E-01 | 3.53E-01 | 1.00E+00 |
| ENSG00000272347.1_RP11-43F1   | ENSG00000160789.18_LMNA | 0.04878  | -0.111280186 | 0.206382598 | 5.51E-01 | 7.87E-01 | 1.00E+00 |
| ENSG00000128313.2_APOL5       | ENSG00000160789.18_LMNA | 0.09543  | -0.064756972 | 0.250817772 | 2.42E-01 | 5.21E-01 | 1.00E+00 |
| ENSG00000259803.5_SLC22A31    | ENSG00000160789.18_LMNA | 0.09907  | -0.061097075 | 0.25425788  | 2.25E-01 | 5.01E-01 | 1.00E+00 |
| ENSG00000167780.10_SOAT2      | ENSG00000160789.18_LMNA | 0.06165  | -0.098520849 | 0.218701082 | 4.51E-01 | 7.16E-01 | 1.00E+00 |
| ENSG00000269955.2_C7orf55-LU  | ENSG00000160789.18_LMNA | 0.06949  | -0.090711706 | 0.226190856 | 3.95E-01 | 6.72E-01 | 1.00E+00 |
| ENSG00000258525.1_RP11-829H   | ENSG00000160789.18_LMNA | 0.08695  | -0.073265105 | 0.242789661 | 2.87E-01 | 5.72E-01 | 1.00E+00 |
| ENSG00000261610.1_AP000265.1  | ENSG00000160789.18_LMNA | 0.09798  | -0.062188857 | 0.253232498 | 2.30E-01 | 5.07E-01 | 1.00E+00 |
| ENSG00000163746.10_PLSCR2     | ENSG00000160789.18_LMNA | 0.03517  | -0.124731857 | 0.193285739 | 6.67E-01 | 8.53E-01 | 1.00E+00 |
| ENSG00000267360.5_CTC-454I2.1 | ENSG00000160789.18_LMNA | -0.17901 | -0.328841694 | -0.02039311 | 2.73E-02 | 1.35E-01 | 1.00E+00 |
| ENSG00000214894.5_LINC00243   | ENSG00000160789.18_LMNA | 0.00627  | -0.153086592 | 0.165302624 | 9.39E-01 | 9.76E-01 | 1.00E+00 |
| ENSG00000214424.5_FAM149B1I   | ENSG00000160789.18_LMNA | 0.03183  | -0.128020285 | 0.190066716 | 6.97E-01 | 8.70E-01 | 1.00E+00 |
| ENSG00000254543.1_HSPD1P2     | ENSG00000160789.18_LMNA | 0.01637  | -0.143206269 | 0.175111997 | 8.41E-01 | 9.38E-01 | 1.00E+00 |
| ENSG00000234229.6_LINC01505   | ENSG00000160789.18_LMNA | -0.15641 | -0.307947311 | 0.002856926 | 5.43E-02 | 2.12E-01 | 1.00E+00 |
| ENSG00000147573.15_TRIM55     | ENSG00000160789.18_LMNA | -0.10651 | -0.261279007 | 0.053600957 | 1.92E-01 | 4.59E-01 | 1.00E+00 |
| ENSG00000124915.9_DKFZP434I   | ENSG00000160789.18_LMNA | -0.21757 | -0.364155985 | -0.06046211 | 7.09E-03 | 5.09E-02 | 1.00E+00 |
| ENSG00000222005.7_LINC01118   | ENSG00000160789.18_LMNA | -0.05723 | -0.214481181 | 0.102903548 | 4.84E-01 | 7.41E-01 | 1.00E+00 |
| ENSG00000266821.1_RP11-6N17   | ENSG00000160789.18_LMNA | 0.03805  | -0.121892437 | 0.196059733 | 6.42E-01 | 8.40E-01 | 1.00E+00 |

|                             |                         |          |              |             |          |          |          |
|-----------------------------|-------------------------|----------|--------------|-------------|----------|----------|----------|
| ENSG00000187783.10_TMEN72   | ENSG00000160789.18_LMNA | -0.12969 | -0.283043084 | 0.030136785 | 1.11E-01 | 3.33E-01 | 1.00E+00 |
| ENSG00000260672.1_RP11-1006 | ENSG00000160789.18_LMNA | 0.14424  | -0.015308127 | 0.296632999 | 7.62E-02 | 2.64E-01 | 1.00E+00 |
| ENSG00000170807.11_LMOD2    | ENSG00000160789.18_LMNA | -0.01326 | -0.172094645 | 0.146252217 | 8.71E-01 | 9.50E-01 | 1.00E+00 |
| ENSG00000264230.6_ANXA8L1   | ENSG00000160789.18_LMNA | -0.0123  | -0.171169844 | 0.147184576 | 8.80E-01 | 9.54E-01 | 1.00E+00 |
| ENSG00000250264.1_XXbac-BPG | ENSG00000160789.18_LMNA | 0.04637  | -0.113667071 | 0.204066949 | 5.71E-01 | 7.99E-01 | 1.00E+00 |
| ENSG00000182021.8_RP11-381O | ENSG00000160789.18_LMNA | 0.08297  | -0.077253546 | 0.239011282 | 3.10E-01 | 5.96E-01 | 1.00E+00 |
| ENSG00000115705.19_TPO      | ENSG00000160789.18_LMNA | -0.10856 | -0.263215229 | 0.051527484 | 1.83E-01 | 4.48E-01 | 1.00E+00 |
| ENSG00000231329.6_RP1-225E1 | ENSG00000160789.18_LMNA | 0.07589  | -0.084330053 | 0.232283823 | 3.53E-01 | 6.36E-01 | 1.00E+00 |
| ENSG00000248713.1_RP11-766F | ENSG00000160789.18_LMNA | 0.21634  | 0.059182447  | 0.363041512 | 7.43E-03 | 5.26E-02 | 1.00E+00 |
| ENSG00000227617.7_CERS6-AS  | ENSG00000160789.18_LMNA | 0.12461  | -0.035290967 | 0.278289832 | 1.26E-01 | 3.59E-01 | 1.00E+00 |
| ENSG00000259522.2_RP11-468E | ENSG00000160789.18_LMNA | 0.1378   | -0.021882879 | 0.290623033 | 9.05E-02 | 2.93E-01 | 1.00E+00 |
| ENSG00000143297.17_FCRL5    | ENSG00000160789.18_LMNA | 0.05883  | -0.101316881 | 0.216010279 | 4.72E-01 | 7.31E-01 | 1.00E+00 |
| ENSG00000250423.2_KIAA1210  | ENSG00000160789.18_LMNA | -0.06372 | -0.2206843   | 0.09645686  | 4.35E-01 | 7.04E-01 | 1.00E+00 |
| ENSG00000279175.1_CTA-414D7 | ENSG00000160789.18_LMNA | -0.03605 | -0.194136752 | 0.123861326 | 6.59E-01 | 8.50E-01 | 1.00E+00 |
| ENSG00000206989.1_SNORD63   | ENSG00000160789.18_LMNA | 0.17175  | 0.01289866   | 0.322139389 | 3.44E-02 | 1.57E-01 | 1.00E+00 |
| ENSG00000221051.1_          | ENSG00000160789.18_LMNA | 0.00846  | -0.150943041 | 0.167436147 | 9.18E-01 | 9.69E-01 | 1.00E+00 |
| ENSG00000239040.1_Y_RNA     | ENSG00000160789.18_LMNA | -0.09438 | -0.249829749 | 0.065806553 | 2.47E-01 | 5.28E-01 | 1.00E+00 |
| ENSG00000207279.1_SNORD116  | ENSG00000160789.18_LMNA | -0.0408  | -0.198712743 | 0.119171977 | 6.18E-01 | 8.27E-01 | 1.00E+00 |
| ENSG00000265403.1_          | ENSG00000160789.18_LMNA | -0.10314 | -0.258105789 | 0.056993249 | 2.06E-01 | 4.78E-01 | 1.00E+00 |
| ENSG00000277699.1_          | ENSG00000160789.18_LMNA | -0.05355 | -0.210948457 | 0.106563108 | 5.12E-01 | 7.61E-01 | 1.00E+00 |
| ENSG00000200737.1_Y_RNA     | ENSG00000160789.18_LMNA | -0.08354 | -0.239551724 | 0.076683677 | 3.06E-01 | 5.93E-01 | 1.00E+00 |
| ENSG00000184139.8_RPL7AP28  | ENSG00000160789.18_LMNA | 0.0162   | -0.143367923 | 0.174952011 | 8.43E-01 | 9.39E-01 | 1.00E+00 |
| ENSG00000252821.1_RNU6-388F | ENSG00000160789.18_LMNA | 0.00189  | -0.157357812 | 0.161042484 | 9.82E-01 | 9.93E-01 | 1.00E+00 |
| ENSG00000221487.1_          | ENSG00000160789.18_LMNA | -0.06296 | -0.219959377 | 0.097211624 | 4.41E-01 | 7.09E-01 | 1.00E+00 |
| ENSG00000281035.1_          | ENSG00000160789.18_LMNA | 0.14489  | -0.014653655 | 0.297229902 | 7.49E-02 | 2.61E-01 | 1.00E+00 |
| ENSG00000267406.1_CTD-2189E | ENSG00000160789.18_LMNA | 0.03884  | -0.121105367 | 0.196827767 | 6.35E-01 | 8.36E-01 | 1.00E+00 |
| ENSG00000207062.1_SNORA15   | ENSG00000160789.18_LMNA | 0.11165  | -0.048408424 | 0.26612306  | 1.71E-01 | 4.30E-01 | 1.00E+00 |
| ENSG00000267714.1_CTD-2540B | ENSG00000160789.18_LMNA | 0.06885  | -0.091356474 | 0.225573873 | 3.99E-01 | 6.76E-01 | 1.00E+00 |
| ENSG00000133115.10_STOML3   | ENSG00000160789.18_LMNA | 0.01126  | -0.148204169 | 0.170157873 | 8.90E-01 | 9.57E-01 | 1.00E+00 |
| ENSG00000259223.2_RP11-82L7 | ENSG00000160789.18_LMNA | -0.10059 | -0.255696563 | 0.059563954 | 2.18E-01 | 4.92E-01 | 1.00E+00 |
| ENSG00000264169.2_RN7SL665F | ENSG00000160789.18_LMNA | 0.05879  | -0.101361072 | 0.215967713 | 4.72E-01 | 7.32E-01 | 1.00E+00 |
| ENSG00000249436.1_CTD-2023N | ENSG00000160789.18_LMNA | -0.13797 | -0.29078619  | 0.021704745 | 9.01E-02 | 2.92E-01 | 1.00E+00 |
| ENSG00000256843.1_RP11-467L | ENSG00000160789.18_LMNA | -0.12908 | -0.282474991 | 0.030753673 | 1.13E-01 | 3.36E-01 | 1.00E+00 |

|                              |                         |          |              |             |          |          |          |
|------------------------------|-------------------------|----------|--------------|-------------|----------|----------|----------|
| ENSG00000260593.1_RP11-432I5 | ENSG00000160789.18_LMNA | 0.02388  | -0.135836735 | 0.182387693 | 7.70E-01 | 9.05E-01 | 1.00E+00 |
| ENSG00000280620.1_SCAANT1    | ENSG00000160789.18_LMNA | 0.07861  | -0.081607518 | 0.23487566  | 3.36E-01 | 6.21E-01 | 1.00E+00 |
| ENSG00000249752.1_RP11-563M  | ENSG00000160789.18_LMNA | 0.10563  | -0.054487041 | 0.260450803 | 1.95E-01 | 4.64E-01 | 1.00E+00 |
| ENSG00000260197.1_RP11-424G  | ENSG00000160789.18_LMNA | -0.08793 | -0.243721221 | 0.072280199 | 2.81E-01 | 5.67E-01 | 1.00E+00 |
| ENSG00000166926.7_MS4A6E     | ENSG00000160789.18_LMNA | -0.06243 | -0.219450781 | 0.097740938 | 4.45E-01 | 7.12E-01 | 1.00E+00 |
| ENSG00000232599.1_RP1-161N1  | ENSG00000160789.18_LMNA | 0.02224  | -0.137447198 | 0.180800707 | 7.86E-01 | 9.13E-01 | 1.00E+00 |
| ENSG00000230622.1_UQCRHP1    | ENSG00000160789.18_LMNA | -0.04799 | -0.205616594 | 0.112070161 | 5.57E-01 | 7.91E-01 | 1.00E+00 |
| ENSG00000249451.1_RP11-94C2  | ENSG00000160789.18_LMNA | -0.08295 | -0.238997684 | 0.077267881 | 3.10E-01 | 5.96E-01 | 1.00E+00 |
| ENSG00000274441.1_CTD-2282P  | ENSG00000160789.18_LMNA | 0.12115  | -0.038794948 | 0.275049622 | 1.37E-01 | 3.77E-01 | 1.00E+00 |
| ENSG00000235335.2_AC016723.4 | ENSG00000160789.18_LMNA | 0.00953  | -0.149900631 | 0.168472603 | 9.07E-01 | 9.64E-01 | 1.00E+00 |
| ENSG00000230305.2_AC004980.5 | ENSG00000160789.18_LMNA | 0.10477  | -0.05535282  | 0.259641128 | 1.99E-01 | 4.69E-01 | 1.00E+00 |
| ENSG00000231300.1_EZH2P1     | ENSG00000160789.18_LMNA | 0.03414  | -0.125746733 | 0.192293012 | 6.76E-01 | 8.59E-01 | 1.00E+00 |
| ENSG00000221879.3_MRPS21P3   | ENSG00000160789.18_LMNA | -0.08739 | -0.243206729 | 0.07282423  | 2.84E-01 | 5.70E-01 | 1.00E+00 |
| ENSG00000228848.3_AC105402.1 | ENSG00000160789.18_LMNA | 0.05085  | -0.109235323 | 0.208363607 | 5.34E-01 | 7.76E-01 | 1.00E+00 |
| ENSG00000259258.1_RP11-325L  | ENSG00000160789.18_LMNA | 0.02949  | -0.130325681 | 0.187805892 | 7.18E-01 | 8.80E-01 | 1.00E+00 |
| ENSG00000258933.1_RP11-991C  | ENSG00000160789.18_LMNA | 0.12899  | -0.030844278 | 0.282391535 | 1.13E-01 | 3.36E-01 | 1.00E+00 |
| ENSG00000230160.1_AC004854.1 | ENSG00000160789.18_LMNA | 0.08402  | -0.076197698 | 0.240012454 | 3.03E-01 | 5.90E-01 | 1.00E+00 |
| ENSG00000251221.1_LINC01337  | ENSG00000160789.18_LMNA | -0.11757 | -0.271681502 | 0.042429088 | 1.49E-01 | 3.96E-01 | 1.00E+00 |
| ENSG00000219993.1_RP11-288G  | ENSG00000160789.18_LMNA | -0.04548 | -0.203209313 | 0.11455016  | 5.78E-01 | 8.03E-01 | 1.00E+00 |
| ENSG00000248773.1_RP11-231L  | ENSG00000160789.18_LMNA | -0.05888 | -0.216052801 | 0.101272736 | 4.71E-01 | 7.31E-01 | 1.00E+00 |
| ENSG00000264188.1_RP11-13N1  | ENSG00000160789.18_LMNA | 0.12657  | -0.033302481 | 0.28012546  | 1.20E-01 | 3.48E-01 | 1.00E+00 |
| ENSG00000255692.1_RP1-127H1  | ENSG00000160789.18_LMNA | -0.05933 | -0.216481888 | 0.100827191 | 4.68E-01 | 7.29E-01 | 1.00E+00 |
| ENSG00000256654.2_RP11-429A  | ENSG00000160789.18_LMNA | -0.15455 | -0.306218793 | 0.004765387 | 5.73E-02 | 2.19E-01 | 1.00E+00 |
| ENSG00000228413.1_AC024937.1 | ENSG00000160789.18_LMNA | 0.08046  | -0.079762405 | 0.236629641 | 3.24E-01 | 6.11E-01 | 1.00E+00 |
| ENSG00000231228.4_CTD-2593A  | ENSG00000160789.18_LMNA | -0.15523 | -0.306849334 | 0.004069468 | 5.62E-02 | 2.17E-01 | 1.00E+00 |
| ENSG00000269621.1_RP11-98D1  | ENSG00000160789.18_LMNA | -0.16885 | -0.319462195 | -0.00991473 | 3.76E-02 | 1.66E-01 | 1.00E+00 |
| ENSG00000162456.8_KNCN       | ENSG00000160789.18_LMNA | -0.09093 | -0.246563754 | 0.069271071 | 2.65E-01 | 5.49E-01 | 1.00E+00 |
| ENSG00000278621.1_CTD-2033D  | ENSG00000160789.18_LMNA | 0.13731  | -0.02238391  | 0.290164028 | 9.16E-02 | 2.95E-01 | 1.00E+00 |
| ENSG00000232690.1_HSPE1P9    | ENSG00000160789.18_LMNA | -0.00118 | -0.160347986 | 0.158052988 | 9.89E-01 | 9.96E-01 | 1.00E+00 |
| ENSG00000259238.1_RP11-361D  | ENSG00000160789.18_LMNA | 0.14031  | -0.019323975 | 0.292965056 | 8.47E-02 | 2.82E-01 | 1.00E+00 |
| ENSG00000253824.1_KB-173C10  | ENSG00000160789.18_LMNA | -0.26163 | -0.404005341 | -0.1068835  | 1.13E-03 | 1.27E-02 | 1.00E+00 |
| ENSG00000260014.1_LSM3P5     | ENSG00000160789.18_LMNA | -0.10628 | -0.261059718 | 0.053835619 | 1.93E-01 | 4.61E-01 | 1.00E+00 |
| ENSG00000260592.1_CTA-363E6  | ENSG00000160789.18_LMNA | -0.07421 | -0.230684584 | 0.086007583 | 3.64E-01 | 6.45E-01 | 1.00E+00 |

|                              |                         |          |              |             |          |          |          |
|------------------------------|-------------------------|----------|--------------|-------------|----------|----------|----------|
| ENSG00000230646.1_KLF2P2     | ENSG00000160789.18_LMNA | -0.05446 | -0.211824851 | 0.10565605  | 5.05E-01 | 7.56E-01 | 1.00E+00 |
| ENSG00000187581.2_COX8C      | ENSG00000160789.18_LMNA | -0.02    | -0.1786303   | 0.139646991 | 8.07E-01 | 9.23E-01 | 1.00E+00 |
| ENSG00000255703.1_RP11-46H1  | ENSG00000160789.18_LMNA | -0.04044 | -0.198366476 | 0.119527318 | 6.21E-01 | 8.28E-01 | 1.00E+00 |
| ENSG00000254458.1_RP11-867G  | ENSG00000160789.18_LMNA | 0.25758  | 0.102587885  | 0.400364617 | 1.36E-03 | 1.46E-02 | 1.00E+00 |
| ENSG00000213068.3_RP11-277B  | ENSG00000160789.18_LMNA | 0.04751  | -0.112541663 | 0.205159212 | 5.61E-01 | 7.93E-01 | 1.00E+00 |
| ENSG00000236501.4_AC079305   | ENSG00000160789.18_LMNA | -0.32124 | -0.457064554 | -0.1707716  | 5.45E-05 | 1.15E-03 | 1.00E+00 |
| ENSG00000279480.1_RP13-977J  | ENSG00000160789.18_LMNA | -0.12692 | -0.280454991 | 0.032945247 | 1.19E-01 | 3.47E-01 | 1.00E+00 |
| ENSG00000258904.1_RP11-638I2 | ENSG00000160789.18_LMNA | 0.04131  | -0.118670632 | 0.199201149 | 6.13E-01 | 8.24E-01 | 1.00E+00 |
| ENSG00000277463.1_CTD-3035K  | ENSG00000160789.18_LMNA | 0.04441  | -0.1156084   | 0.202180932 | 5.87E-01 | 8.08E-01 | 1.00E+00 |
| ENSG00000255118.1_RP11-703H  | ENSG00000160789.18_LMNA | -0.08973 | -0.245420207 | 0.07048233  | 2.72E-01 | 5.56E-01 | 1.00E+00 |
| ENSG00000264924.1_RP11-799B  | ENSG00000160789.18_LMNA | 0.09826  | -0.061908379 | 0.253495985 | 2.28E-01 | 5.05E-01 | 1.00E+00 |
| ENSG00000267339.4_LINC00906  | ENSG00000160789.18_LMNA | -0.31785 | -0.454075731 | -0.16710764 | 6.60E-05 | 1.34E-03 | 1.00E+00 |
| ENSG00000259654.1_RP11-245C  | ENSG00000160789.18_LMNA | -0.19975 | -0.347886721 | -0.04187996 | 1.36E-02 | 8.18E-02 | 1.00E+00 |
| ENSG00000270510.1_RP11-777F  | ENSG00000160789.18_LMNA | 0.03748  | -0.122455897 | 0.19550966  | 6.47E-01 | 8.43E-01 | 1.00E+00 |
| ENSG00000261327.4_RP11-863P  | ENSG00000160789.18_LMNA | 0.08569  | -0.074527552 | 0.241594741 | 2.94E-01 | 5.80E-01 | 1.00E+00 |
| ENSG00000270130.1_RP11-214K  | ENSG00000160789.18_LMNA | 0.11097  | -0.049096491 | 0.265482082 | 1.73E-01 | 4.33E-01 | 1.00E+00 |
| ENSG00000266495.1_RP11-17J1  | ENSG00000160789.18_LMNA | -0.06328 | -0.220263715 | 0.096894803 | 4.39E-01 | 7.07E-01 | 1.00E+00 |
| ENSG00000275328.1_SPDYE19P   | ENSG00000160789.18_LMNA | 0.02494  | -0.134795906 | 0.183412467 | 7.60E-01 | 9.00E-01 | 1.00E+00 |
| ENSG00000275147.1_           | ENSG00000160789.18_LMNA | -0.0582  | -0.215405286 | 0.101944845 | 4.76E-01 | 7.35E-01 | 1.00E+00 |
| ENSG00000273232.1_RP11-370A  | ENSG00000160789.18_LMNA | 0.04172  | -0.118261325 | 0.199599777 | 6.10E-01 | 8.22E-01 | 1.00E+00 |
| ENSG00000269421.1_ZNF92P3    | ENSG00000160789.18_LMNA | -0.07704 | -0.233381251 | 0.083177862 | 3.45E-01 | 6.30E-01 | 1.00E+00 |
| ENSG00000279551.1_RP11-588G  | ENSG00000160789.18_LMNA | -0.24772 | -0.391479412 | -0.09215083 | 2.09E-03 | 2.02E-02 | 1.00E+00 |
| ENSG00000228366.1_RP11-18B3  | ENSG00000160789.18_LMNA | 0.14413  | -0.015425429 | 0.296525989 | 7.65E-02 | 2.65E-01 | 1.00E+00 |
| ENSG00000274395.1_RP11-554D  | ENSG00000160789.18_LMNA | -0.09542 | -0.250808589 | 0.06476673  | 2.42E-01 | 5.21E-01 | 1.00E+00 |
| ENSG00000228779.1_Z69666.2   | ENSG00000160789.18_LMNA | 0.03051  | -0.129314965 | 0.188797483 | 7.09E-01 | 8.76E-01 | 1.00E+00 |
| ENSG00000274002.1_RP11-66N2  | ENSG00000160789.18_LMNA | -0.21805 | -0.364598485 | -0.06097047 | 6.96E-03 | 5.02E-02 | 1.00E+00 |
| ENSG00000177144.6_NUDT4P1    | ENSG00000160789.18_LMNA | -0.00568 | -0.164733572 | 0.153657813 | 9.45E-01 | 9.78E-01 | 1.00E+00 |
| ENSG00000258413.1_RP11-665C  | ENSG00000160789.18_LMNA | 0.13916  | -0.020491751 | 0.29189672  | 8.73E-02 | 2.87E-01 | 1.00E+00 |
| ENSG00000267413.1_RP11-636O  | ENSG00000160789.18_LMNA | -0.07923 | -0.235457625 | 0.080995556 | 3.32E-01 | 6.18E-01 | 1.00E+00 |
| ENSG00000279640.1_RP13-977J  | ENSG00000160789.18_LMNA | 0.10468  | -0.055446766 | 0.259553244 | 1.99E-01 | 4.70E-01 | 1.00E+00 |
| ENSG00000243961.2_RP5-839B4  | ENSG00000160789.18_LMNA | -0.03907 | -0.197049458 | 0.120878107 | 6.33E-01 | 8.35E-01 | 1.00E+00 |
| ENSG00000172482.4_AGXT       | ENSG00000160789.18_LMNA | 0.20455  | 0.04687828   | 0.352281104 | 1.15E-02 | 7.23E-02 | 1.00E+00 |
| ENSG00000233261.2_LINC00264  | ENSG00000160789.18_LMNA | -0.02348 | -0.181998535 | 0.136231805 | 7.74E-01 | 9.07E-01 | 1.00E+00 |

|                              |                         |          |              |             |          |          |          |
|------------------------------|-------------------------|----------|--------------|-------------|----------|----------|----------|
| ENSG00000244062.1_RP11-404G  | ENSG00000160789.18_LMNA | -0.22892 | -0.374471102 | -0.07235371 | 4.56E-03 | 3.66E-02 | 1.00E+00 |
| ENSG00000259677.1_RP11-493E  | ENSG00000160789.18_LMNA | 0.13743  | -0.0222532   | 0.290283788 | 9.13E-02 | 2.95E-01 | 1.00E+00 |
| ENSG00000254183.1_RP11-953B  | ENSG00000160789.18_LMNA | 0.10321  | -0.056925585 | 0.25816915  | 2.06E-01 | 4.77E-01 | 1.00E+00 |
| ENSG00000235444.2_PSMB3P2    | ENSG00000160789.18_LMNA | -0.06789 | -0.224665867 | 0.092304887 | 4.06E-01 | 6.81E-01 | 1.00E+00 |
| ENSG00000254453.1_NAV2-AS2   | ENSG00000160789.18_LMNA | -0.05813 | -0.215340837 | 0.102011726 | 4.77E-01 | 7.35E-01 | 1.00E+00 |
| ENSG00000233430.3_RP11-403I1 | ENSG00000160789.18_LMNA | -0.03556 | -0.193661056 | 0.124347992 | 6.64E-01 | 8.52E-01 | 1.00E+00 |
| ENSG00000239440.4_RP11-260C  | ENSG00000160789.18_LMNA | -0.09399 | -0.249454881 | 0.066204594 | 2.49E-01 | 5.30E-01 | 1.00E+00 |
| ENSG00000211751.6_TRBC1      | ENSG00000160789.18_LMNA | 0.06368  | -0.096494267 | 0.220648381 | 4.36E-01 | 7.04E-01 | 1.00E+00 |
| ENSG00000213940.4_RP11-94D2  | ENSG00000160789.18_LMNA | 0.04364  | -0.116369957 | 0.201440429 | 5.93E-01 | 8.12E-01 | 1.00E+00 |
| ENSG00000129354.10_AP1M2     | ENSG00000160789.18_LMNA | 0.00177  | -0.157471074 | 0.160929353 | 9.83E-01 | 9.94E-01 | 1.00E+00 |
| ENSG00000136944.16_LMX1B     | ENSG00000160789.18_LMNA | -0.04689 | -0.204563363 | 0.113155694 | 5.66E-01 | 7.97E-01 | 1.00E+00 |
| ENSG00000257802.1_RP11-2H8.4 | ENSG00000160789.18_LMNA | -0.1076  | -0.262310633 | 0.052496541 | 1.87E-01 | 4.53E-01 | 1.00E+00 |
| ENSG00000226205.1_AC007790.4 | ENSG00000160789.18_LMNA | 0.07218  | -0.088027418 | 0.22875674  | 3.77E-01 | 6.57E-01 | 1.00E+00 |
| ENSG00000260880.2_HCCAT5     | ENSG00000160789.18_LMNA | -0.1707  | -0.321176292 | -0.01182458 | 3.55E-02 | 1.60E-01 | 1.00E+00 |
| ENSG00000255991.2_RP11-242C  | ENSG00000160789.18_LMNA | -0.09273 | -0.248265648 | 0.067466678 | 2.56E-01 | 5.38E-01 | 1.00E+00 |
| ENSG00000254479.1_SLC25A1P   | ENSG00000160789.18_LMNA | 0.08961  | -0.070596497 | 0.245312377 | 2.72E-01 | 5.57E-01 | 1.00E+00 |
| ENSG00000205644.5_CTD-2375C  | ENSG00000160789.18_LMNA | 0.0613   | -0.098866658 | 0.218368548 | 4.53E-01 | 7.18E-01 | 1.00E+00 |
| ENSG00000260851.5_RP11-403P  | ENSG00000160789.18_LMNA | -0.02625 | -0.1846783   | 0.133509273 | 7.48E-01 | 8.95E-01 | 1.00E+00 |
| ENSG00000120329.6_SLC25A2    | ENSG00000160789.18_LMNA | 0.24896  | 0.093466582  | 0.392602613 | 1.98E-03 | 1.94E-02 | 1.00E+00 |
| ENSG00000260518.1_BMS1P8     | ENSG00000160789.18_LMNA | -0.15107 | -0.302983099 | 0.008331845 | 6.32E-02 | 2.34E-01 | 1.00E+00 |
| ENSG00000215873.2_FEN1P1     | ENSG00000160789.18_LMNA | -0.09038 | -0.246043958 | 0.069821761 | 2.68E-01 | 5.52E-01 | 1.00E+00 |
| ENSG00000260128.5_ULK4P2     | ENSG00000160789.18_LMNA | -0.00615 | -0.165192615 | 0.153197037 | 9.40E-01 | 9.76E-01 | 1.00E+00 |
| ENSG00000261439.1_DKFZP434I  | ENSG00000160789.18_LMNA | -0.19723 | -0.345580348 | -0.03926273 | 1.49E-02 | 8.73E-02 | 1.00E+00 |
| ENSG00000237801.4_AMD1P2     | ENSG00000160789.18_LMNA | 0.10879  | -0.051299244 | 0.263428207 | 1.82E-01 | 4.46E-01 | 1.00E+00 |
| ENSG00000275064.1_CH17-262C  | ENSG00000160789.18_LMNA | -0.06268 | -0.219689182 | 0.097492848 | 4.43E-01 | 7.10E-01 | 1.00E+00 |
| ENSG00000263120.1_RP5-1107A  | ENSG00000160789.18_LMNA | -0.03635 | -0.194422233 | 0.123569187 | 6.57E-01 | 8.48E-01 | 1.00E+00 |
| ENSG00000232300.1_FAM215B    | ENSG00000160789.18_LMNA | -0.11055 | -0.265080787 | 0.049527115 | 1.75E-01 | 4.36E-01 | 1.00E+00 |
| ENSG00000149043.15_SYT8      | ENSG00000160789.18_LMNA | 0.13317  | -0.026598847 | 0.286296936 | 1.02E-01 | 3.15E-01 | 1.00E+00 |
| ENSG00000279070.2_RP11-287D  | ENSG00000160789.18_LMNA | -0.1962  | -0.344634137 | -0.0381902  | 1.54E-02 | 8.96E-02 | 1.00E+00 |
| ENSG00000236065.2_RP1-117O3  | ENSG00000160789.18_LMNA | 0.01264  | -0.146851546 | 0.171500239 | 8.77E-01 | 9.52E-01 | 1.00E+00 |
| ENSG00000182459.4_TEX19      | ENSG00000160789.18_LMNA | -0.04345 | -0.201256874 | 0.116558673 | 5.95E-01 | 8.13E-01 | 1.00E+00 |
| ENSG00000186912.6_P2RY4      | ENSG00000160789.18_LMNA | 0.23315  | 0.076796077  | 0.37830545  | 3.84E-03 | 3.22E-02 | 1.00E+00 |
| ENSG00000217139.2_RP11-129H  | ENSG00000160789.18_LMNA | 0.04615  | -0.113884232 | 0.203856092 | 5.72E-01 | 8.00E-01 | 1.00E+00 |

|                              |                         |          |              |             |          |          |          |
|------------------------------|-------------------------|----------|--------------|-------------|----------|----------|----------|
| ENSG00000280165.1_PCDH20     | ENSG00000160789.18_LMNA | -0.06628 | -0.223127606 | 0.093910292 | 4.17E-01 | 6.90E-01 | 1.00E+00 |
| ENSG00000260460.1_RP11-284F  | ENSG00000160789.18_LMNA | -0.06506 | -0.221965209 | 0.095122334 | 4.26E-01 | 6.97E-01 | 1.00E+00 |
| ENSG00000251497.2_RP11-197N  | ENSG00000160789.18_LMNA | 0.07906  | -0.081161987 | 0.235299374 | 3.33E-01 | 6.19E-01 | 1.00E+00 |
| ENSG00000230453.8_ANKRD18B   | ENSG00000160789.18_LMNA | -0.05118 | -0.208679118 | 0.108909394 | 5.31E-01 | 7.74E-01 | 1.00E+00 |
| ENSG00000234861.2_ATP5A1P5   | ENSG00000160789.18_LMNA | 0.10027  | -0.059889983 | 0.255390734 | 2.19E-01 | 4.94E-01 | 1.00E+00 |
| ENSG00000264954.1_PRR29-AS   | ENSG00000160789.18_LMNA | -0.02555 | -0.184005493 | 0.134193269 | 7.55E-01 | 8.98E-01 | 1.00E+00 |
| ENSG00000125551.17_PLGLB2    | ENSG00000160789.18_LMNA | 0.11431  | -0.045719098 | 0.268625671 | 1.61E-01 | 4.15E-01 | 1.00E+00 |
| ENSG00000182040.7_USH1G      | ENSG00000160789.18_LMNA | 0.05263  | -0.10747283  | 0.210068975 | 5.20E-01 | 7.66E-01 | 1.00E+00 |
| ENSG00000228717.1_AF013593.1 | ENSG00000160789.18_LMNA | 0.03883  | -0.12112379  | 0.196809795 | 6.35E-01 | 8.36E-01 | 1.00E+00 |
| ENSG00000262094.1_AC139099.1 | ENSG00000160789.18_LMNA | 0.08523  | -0.074992568 | 0.241154356 | 2.97E-01 | 5.82E-01 | 1.00E+00 |
| ENSG00000240499.6_RP5-1101C  | ENSG00000160789.18_LMNA | 0.14606  | -0.013451707 | 0.298325487 | 7.26E-02 | 2.56E-01 | 1.00E+00 |
| ENSG00000180438.13_TPRXL     | ENSG00000160789.18_LMNA | -0.15207 | -0.303908561 | 0.007312587 | 6.15E-02 | 2.29E-01 | 1.00E+00 |
| ENSG00000231865.1_           | ENSG00000160789.18_LMNA | 0.05828  | -0.10186775  | 0.215479574 | 4.76E-01 | 7.34E-01 | 1.00E+00 |
| ENSG00000131233.9_GJA9       | ENSG00000160789.18_LMNA | -0.09884 | -0.254042346 | 0.061326628 | 2.26E-01 | 5.02E-01 | 1.00E+00 |
| ENSG00000229376.3_CICP3      | ENSG00000160789.18_LMNA | -0.02566 | -0.184106746 | 0.134090352 | 7.54E-01 | 8.98E-01 | 1.00E+00 |
| ENSG00000188778.4_ADRB3      | ENSG00000160789.18_LMNA | 0.06781  | -0.092387275 | 0.224586964 | 4.06E-01 | 6.82E-01 | 1.00E+00 |
| ENSG00000204661.8_C5orf60    | ENSG00000160789.18_LMNA | 0.09799  | -0.062185571 | 0.253235584 | 2.30E-01 | 5.07E-01 | 1.00E+00 |
| ENSG00000167910.3_CYP7A1     | ENSG00000160789.18_LMNA | -0.06401 | -0.220963078 | 0.09616651  | 4.33E-01 | 7.03E-01 | 1.00E+00 |
| ENSG00000227678.6_RP11-73O6  | ENSG00000160789.18_LMNA | 0.06122  | -0.098940823 | 0.218297221 | 4.54E-01 | 7.19E-01 | 1.00E+00 |
| ENSG00000172139.13_SLC9C1    | ENSG00000160789.18_LMNA | -0.10011 | -0.255246958 | 0.060043232 | 2.20E-01 | 4.95E-01 | 1.00E+00 |
| ENSG00000189051.5_RNF222     | ENSG00000160789.18_LMNA | 0.08137  | -0.07885245  | 0.237493894 | 3.19E-01 | 6.06E-01 | 1.00E+00 |
| ENSG00000203801.7_LINC00222  | ENSG00000160789.18_LMNA | -0.03131 | -0.189568175 | 0.128528951 | 7.02E-01 | 8.72E-01 | 1.00E+00 |
| ENSG00000229227.7_RP11-38L1  | ENSG00000160789.18_LMNA | -0.04773 | -0.205366662 | 0.112327826 | 5.59E-01 | 7.92E-01 | 1.00E+00 |
| ENSG00000166183.14_ASPG      | ENSG00000160789.18_LMNA | -0.07195 | -0.228531437 | 0.088263303 | 3.78E-01 | 6.58E-01 | 1.00E+00 |
| ENSG00000166856.2_GPR182     | ENSG00000160789.18_LMNA | 0.05804  | -0.102106716 | 0.215249296 | 4.78E-01 | 7.36E-01 | 1.00E+00 |
| ENSG00000188822.7_CNR2       | ENSG00000160789.18_LMNA | 0.06868  | -0.09151882  | 0.225418483 | 4.00E-01 | 6.77E-01 | 1.00E+00 |
| ENSG00000253490.4_AC145110.1 | ENSG00000160789.18_LMNA | 0.09123  | -0.068971765 | 0.246846192 | 2.64E-01 | 5.47E-01 | 1.00E+00 |
| ENSG00000111339.9_ART4       | ENSG00000160789.18_LMNA | -0.19163 | -0.340442582 | -0.03344755 | 1.80E-02 | 1.00E-01 | 1.00E+00 |
| ENSG00000279802.1_           | ENSG00000160789.18_LMNA | -0.10245 | -0.257448774 | 0.057694716 | 2.09E-01 | 4.82E-01 | 1.00E+00 |
| ENSG00000211668.2_IGLV2-11   | ENSG00000160789.18_LMNA | -0.03971 | -0.197659888 | 0.12025217  | 6.27E-01 | 8.32E-01 | 1.00E+00 |
| ENSG00000278603.1_RP13-608F  | ENSG00000160789.18_LMNA | 0.06571  | -0.094481867 | 0.222579555 | 4.21E-01 | 6.93E-01 | 1.00E+00 |
| ENSG00000221595.1_           | ENSG00000160789.18_LMNA | -0.0541  | -0.211477519 | 0.106015598 | 5.08E-01 | 7.58E-01 | 1.00E+00 |
| ENSG00000206585.1_RNVU1-7    | ENSG00000160789.18_LMNA | 0.03824  | -0.12170003  | 0.196247522 | 6.40E-01 | 8.39E-01 | 1.00E+00 |

|                              |                         |          |              |             |          |          |          |
|------------------------------|-------------------------|----------|--------------|-------------|----------|----------|----------|
| ENSG00000280667.1_           | ENSG00000160789.18_LMNA | 0.02374  | -0.135972625 | 0.182253847 | 7.72E-01 | 9.06E-01 | 1.00E+00 |
| ENSG00000207865.1_           | ENSG00000160789.18_LMNA | 0.20788  | 0.050344713  | 0.355320808 | 1.02E-02 | 6.64E-02 | 1.00E+00 |
| ENSG00000206991.1_RNU6-610F  | ENSG00000160789.18_LMNA | -0.10846 | -0.263121633 | 0.051627777 | 1.83E-01 | 4.48E-01 | 1.00E+00 |
| ENSG00000280483.1_           | ENSG00000160789.18_LMNA | 0.03719  | -0.122732498 | 0.195239558 | 6.49E-01 | 8.44E-01 | 1.00E+00 |
| ENSG00000277049.1_5S_rRNA    | ENSG00000160789.18_LMNA | 0.0076   | -0.151783551 | 0.166599924 | 9.26E-01 | 9.72E-01 | 1.00E+00 |
| ENSG00000275538.1_RNVU1-19   | ENSG00000160789.18_LMNA | -0.04132 | -0.199210701 | 0.118660826 | 6.13E-01 | 8.24E-01 | 1.00E+00 |
| ENSG00000254675.1_RP11-7I15. | ENSG00000160789.18_LMNA | 0.11324  | -0.046808848 | 0.267612091 | 1.65E-01 | 4.21E-01 | 1.00E+00 |
| ENSG00000200312.1_RN7SKP25   | ENSG00000160789.18_LMNA | -0.08292 | -0.238963101 | 0.077304341 | 3.10E-01 | 5.96E-01 | 1.00E+00 |
| ENSG00000238151.1_MLLT10P1   | ENSG00000160789.18_LMNA | -0.07932 | -0.235548357 | 0.080900126 | 3.31E-01 | 6.17E-01 | 1.00E+00 |
| ENSG00000227609.2_TMEM183A   | ENSG00000160789.18_LMNA | 0.02358  | -0.136135494 | 0.182093414 | 7.73E-01 | 9.06E-01 | 1.00E+00 |
| ENSG00000201448.1_SNORA63    | ENSG00000160789.18_LMNA | 0.02746  | -0.132319412 | 0.185847986 | 7.37E-01 | 8.89E-01 | 1.00E+00 |
| ENSG00000046774.9_MAGEC2     | ENSG00000160789.18_LMNA | -0.26186 | -0.404211746 | -0.10712737 | 1.12E-03 | 1.26E-02 | 1.00E+00 |
| ENSG00000222726.1_RNU2-7P    | ENSG00000160789.18_LMNA | 0.10392  | -0.056208815 | 0.258840169 | 2.03E-01 | 4.73E-01 | 1.00E+00 |
| ENSG00000243642.3_RN7SL526F  | ENSG00000160789.18_LMNA | -0.09242 | -0.247969141 | 0.067781191 | 2.57E-01 | 5.40E-01 | 1.00E+00 |
| ENSG00000241983.3_RN7SL566F  | ENSG00000160789.18_LMNA | -0.07995 | -0.236141021 | 0.080276631 | 3.28E-01 | 6.14E-01 | 1.00E+00 |
| ENSG00000258802.1_RP11-589M  | ENSG00000160789.18_LMNA | 0.00074  | -0.158479428 | 0.159921805 | 9.93E-01 | 9.97E-01 | 1.00E+00 |
| ENSG00000276573.1_RP11-128N  | ENSG00000160789.18_LMNA | -0.19204 | -0.340819826 | -0.03387383 | 1.78E-02 | 9.92E-02 | 1.00E+00 |
| ENSG00000263105.1_RP11-95P2  | ENSG00000160789.18_LMNA | 0.19563  | 0.037605373  | 0.344117926 | 1.57E-02 | 9.07E-02 | 1.00E+00 |
| ENSG00000243650.3_RN7SL834F  | ENSG00000160789.18_LMNA | 0.02967  | -0.130142092 | 0.187986056 | 7.17E-01 | 8.80E-01 | 1.00E+00 |
| ENSG00000276988.1_Metazoa_SI | ENSG00000160789.18_LMNA | -0.16659 | -0.317369095 | -0.00758565 | 4.02E-02 | 1.74E-01 | 1.00E+00 |
| ENSG00000070193.4_FGF10      | ENSG00000160789.18_LMNA | 0.01654  | -0.143037484 | 0.175279022 | 8.40E-01 | 9.38E-01 | 1.00E+00 |
| ENSG00000258425.1_CTD-2207P  | ENSG00000160789.18_LMNA | 0.04772  | -0.112339042 | 0.205355782 | 5.59E-01 | 7.92E-01 | 1.00E+00 |
| ENSG00000237916.1_RP11-537E  | ENSG00000160789.18_LMNA | 0.05436  | -0.105753625 | 0.211730599 | 5.06E-01 | 7.57E-01 | 1.00E+00 |
| ENSG00000257449.1_RP11-603J  | ENSG00000160789.18_LMNA | -0.15238 | -0.304197001 | 0.006994782 | 6.09E-02 | 2.28E-01 | 1.00E+00 |
| ENSG00000243560.3_RN7SL364F  | ENSG00000160789.18_LMNA | -0.10721 | -0.261941902 | 0.052891377 | 1.89E-01 | 4.56E-01 | 1.00E+00 |
| ENSG00000253328.2_SUMO2P19   | ENSG00000160789.18_LMNA | 0.03328  | -0.126587329 | 0.191470269 | 6.84E-01 | 8.63E-01 | 1.00E+00 |
| ENSG00000168582.4_CRYGA      | ENSG00000160789.18_LMNA | -0.20537 | -0.353030259 | -0.04773192 | 1.11E-02 | 7.07E-02 | 1.00E+00 |
| ENSG00000261170.1_RP11-252A  | ENSG00000160789.18_LMNA | -0.15644 | -0.307970614 | 0.002831182 | 5.43E-02 | 2.12E-01 | 1.00E+00 |
| ENSG00000251372.4_LINC00499  | ENSG00000160789.18_LMNA | -0.21098 | -0.358153019 | -0.05358115 | 9.08E-03 | 6.11E-02 | 1.00E+00 |
| ENSG00000175877.3_WBSCR28    | ENSG00000160789.18_LMNA | 0.40062  | 0.257861324  | 0.526253193 | 3.15E-07 | 1.83E-05 | 1.62E-02 |
| ENSG00000259424.1_RP11-35O1  | ENSG00000160789.18_LMNA | 0.06314  | -0.097035152 | 0.220128904 | 4.40E-01 | 7.08E-01 | 1.00E+00 |
| ENSG00000275091.1_CTB-55O6.  | ENSG00000160789.18_LMNA | -0.09227 | -0.247830749 | 0.067927966 | 2.58E-01 | 5.41E-01 | 1.00E+00 |
| ENSG00000106178.5_CCL24      | ENSG00000160789.18_LMNA | 0.18733  | 0.02898992   | 0.336491768 | 2.08E-02 | 1.11E-01 | 1.00E+00 |



|                              |                         |          |              |             |          |          |          |
|------------------------------|-------------------------|----------|--------------|-------------|----------|----------|----------|
| ENSG00000265888.1_DSCAS      | ENSG00000160789.18_LMNA | -0.05826 | -0.215464678 | 0.101883209 | 4.76E-01 | 7.34E-01 | 1.00E+00 |
| ENSG00000254924.2_RP11-684B  | ENSG00000160789.18_LMNA | 0.11798  | -0.042010954 | 0.27206942  | 1.48E-01 | 3.94E-01 | 1.00E+00 |
| ENSG00000236662.1_RP11-108L  | ENSG00000160789.18_LMNA | -0.03468 | -0.192817485 | 0.125210641 | 6.71E-01 | 8.56E-01 | 1.00E+00 |
| ENSG00000253755.1_IGHGP      | ENSG00000160789.18_LMNA | 0.00532  | -0.154014124 | 0.164378507 | 9.48E-01 | 9.79E-01 | 1.00E+00 |
| ENSG00000271727.1_RP11-532F  | ENSG00000160789.18_LMNA | -0.06578 | -0.222651333 | 0.09440702  | 4.21E-01 | 6.92E-01 | 1.00E+00 |
| ENSG00000262074.5_SNORD3B-   | ENSG00000160789.18_LMNA | -0.12326 | -0.277025534 | 0.036659104 | 1.30E-01 | 3.66E-01 | 1.00E+00 |
| ENSG00000250668.1_CTD-2296D  | ENSG00000160789.18_LMNA | -0.19238 | -0.341129624 | -0.03422398 | 1.76E-02 | 9.84E-02 | 1.00E+00 |
| ENSG00000248840.2_RP11-357G  | ENSG00000160789.18_LMNA | 0.09364  | -0.066556417 | 0.249123463 | 2.51E-01 | 5.32E-01 | 1.00E+00 |
| ENSG00000277135.1_RP11-327J  | ENSG00000160789.18_LMNA | 0.07332  | -0.086899784 | 0.229833324 | 3.69E-01 | 6.50E-01 | 1.00E+00 |
| ENSG00000271579.1_RP11-116D  | ENSG00000160789.18_LMNA | -0.01283 | -0.171682632 | 0.146667667 | 8.75E-01 | 9.52E-01 | 1.00E+00 |
| ENSG00000096088.15_PGC       | ENSG00000160789.18_LMNA | -0.04744 | -0.205091508 | 0.112611445 | 5.62E-01 | 7.93E-01 | 1.00E+00 |
| ENSG00000261216.1_RP11-166B  | ENSG00000160789.18_LMNA | -0.12062 | -0.274547927 | 0.039336795 | 1.39E-01 | 3.80E-01 | 1.00E+00 |
| ENSG00000225675.2_RP4-784A1  | ENSG00000160789.18_LMNA | -0.06262 | -0.219627693 | 0.097556839 | 4.43E-01 | 7.11E-01 | 1.00E+00 |
| ENSG00000223640.1_RPL30P3    | ENSG00000160789.18_LMNA | 0.00931  | -0.150109448 | 0.168265035 | 9.09E-01 | 9.65E-01 | 1.00E+00 |
| ENSG00000250115.2_AK3P2      | ENSG00000160789.18_LMNA | -0.02346 | -0.181984833 | 0.136245714 | 7.74E-01 | 9.07E-01 | 1.00E+00 |
| ENSG00000226276.1_AC093382   | ENSG00000160789.18_LMNA | 0.08434  | -0.075875112 | 0.240318201 | 3.02E-01 | 5.88E-01 | 1.00E+00 |
| ENSG00000255329.1_H2AFZP4    | ENSG00000160789.18_LMNA | -0.03223 | -0.190452166 | 0.127626893 | 6.93E-01 | 8.68E-01 | 1.00E+00 |
| ENSG00000211698.2_TRGV4      | ENSG00000160789.18_LMNA | 0.04702  | -0.113029406 | 0.204685931 | 5.65E-01 | 7.96E-01 | 1.00E+00 |
| ENSG00000270424.1_RP11-1348  | ENSG00000160789.18_LMNA | -0.15174 | -0.303606406 | 0.007645437 | 6.20E-02 | 2.30E-01 | 1.00E+00 |
| ENSG00000236527.1_ARF4P2     | ENSG00000160789.18_LMNA | 0.14377  | -0.015793684 | 0.296189996 | 7.72E-02 | 2.66E-01 | 1.00E+00 |
| ENSG00000253616.4_RP11-875O  | ENSG00000160789.18_LMNA | 0.15252  | -0.006845905 | 0.304332102 | 6.07E-02 | 2.27E-01 | 1.00E+00 |
| ENSG00000256034.1_RP11-707G  | ENSG00000160789.18_LMNA | 0.03574  | -0.12416241  | 0.193842472 | 6.62E-01 | 8.51E-01 | 1.00E+00 |
| ENSG00000214369.2_AC009967   | ENSG00000160789.18_LMNA | -0.13008 | -0.283413158 | 0.029734797 | 1.10E-01 | 3.31E-01 | 1.00E+00 |
| ENSG00000274737.1_RP5-1057I2 | ENSG00000160789.18_LMNA | 0.151    | -0.008397643 | 0.302923336 | 6.33E-02 | 2.34E-01 | 1.00E+00 |
| ENSG00000226900.1_RP11-432J  | ENSG00000160789.18_LMNA | -0.04073 | -0.198640675 | 0.11924594  | 6.18E-01 | 8.27E-01 | 1.00E+00 |
| ENSG00000240669.1_RP11-555K  | ENSG00000160789.18_LMNA | -0.06181 | -0.21885401  | 0.098361789 | 4.49E-01 | 7.15E-01 | 1.00E+00 |
| ENSG00000269938.1_RP11-214K  | ENSG00000160789.18_LMNA | -0.0421  | -0.199964515 | 0.11788672  | 6.07E-01 | 8.20E-01 | 1.00E+00 |
| ENSG00000260651.1_AF213884   | ENSG00000160789.18_LMNA | 0.04518  | -0.114850509 | 0.202917509 | 5.81E-01 | 8.04E-01 | 1.00E+00 |
| ENSG00000228348.1_EFCAB14P   | ENSG00000160789.18_LMNA | -0.03764 | -0.195671774 | 0.122289859 | 6.45E-01 | 8.42E-01 | 1.00E+00 |
| ENSG00000259113.1_RP11-406H  | ENSG00000160789.18_LMNA | 0.11197  | -0.048090424 | 0.266419203 | 1.70E-01 | 4.28E-01 | 1.00E+00 |
| ENSG00000242706.2_RPS27AP9   | ENSG00000160789.18_LMNA | -0.00616 | -0.165195951 | 0.153193688 | 9.40E-01 | 9.76E-01 | 1.00E+00 |
| ENSG00000233569.1_RP11-500B  | ENSG00000160789.18_LMNA | -0.24548 | -0.389458554 | -0.08978616 | 2.30E-03 | 2.18E-02 | 1.00E+00 |
| ENSG00000250929.2_LINC01181  | ENSG00000160789.18_LMNA | -0.00779 | -0.16677974  | 0.151602852 | 9.24E-01 | 9.71E-01 | 1.00E+00 |

|                              |                         |          |              |             |          |          |          |
|------------------------------|-------------------------|----------|--------------|-------------|----------|----------|----------|
| ENSG00000230550.1_RP11-74C1  | ENSG00000160789.18_LMNA | 0.09588  | -0.064297763 | 0.251249842 | 2.40E-01 | 5.19E-01 | 1.00E+00 |
| ENSG00000257042.1_RP11-993B  | ENSG00000160789.18_LMNA | 0.02085  | -0.138806562 | 0.179459868 | 7.99E-01 | 9.19E-01 | 1.00E+00 |
| ENSG00000269927.1_RP6-91H8.1 | ENSG00000160789.18_LMNA | 0.13893  | -0.020724725 | 0.291683491 | 8.78E-02 | 2.88E-01 | 1.00E+00 |
| ENSG00000276054.1_RP11-378E  | ENSG00000160789.18_LMNA | -0.05853 | -0.215723735 | 0.101614336 | 4.74E-01 | 7.33E-01 | 1.00E+00 |
| ENSG00000249140.1_PRDX2P3    | ENSG00000160789.18_LMNA | 0.08108  | -0.079143291 | 0.237217715 | 3.21E-01 | 6.07E-01 | 1.00E+00 |
| ENSG00000258072.1_RP11-554D  | ENSG00000160789.18_LMNA | -0.09651 | -0.251843801 | 0.063666277 | 2.37E-01 | 5.15E-01 | 1.00E+00 |
| ENSG00000249279.4_CTC-436P1  | ENSG00000160789.18_LMNA | 0.00245  | -0.156807886 | 0.161591649 | 9.76E-01 | 9.91E-01 | 1.00E+00 |
| ENSG00000091704.8_CPA1       | ENSG00000160789.18_LMNA | 0.00769  | -0.15169855  | 0.166684512 | 9.25E-01 | 9.71E-01 | 1.00E+00 |
| ENSG00000230054.1_RP11-402G  | ENSG00000160789.18_LMNA | -0.07327 | -0.229792506 | 0.086942552 | 3.70E-01 | 6.50E-01 | 1.00E+00 |
| ENSG00000230778.1_ANKRD63    | ENSG00000160789.18_LMNA | 0.12142  | -0.038523157 | 0.275301208 | 1.36E-01 | 3.76E-01 | 1.00E+00 |
| ENSG00000232736.1_AC007551.1 | ENSG00000160789.18_LMNA | 0.14649  | -0.013010952 | 0.298727033 | 7.17E-02 | 2.53E-01 | 1.00E+00 |
| ENSG00000230156.2_LINC00443  | ENSG00000160789.18_LMNA | -0.19686 | -0.34523891  | -0.03887563 | 1.51E-02 | 8.81E-02 | 1.00E+00 |
| ENSG00000257002.1_AP000438.1 | ENSG00000160789.18_LMNA | -0.069   | -0.225718091 | 0.091205785 | 3.98E-01 | 6.75E-01 | 1.00E+00 |
| ENSG00000224401.2_RPL7P57    | ENSG00000160789.18_LMNA | 0.07642  | -0.083796569 | 0.232792052 | 3.49E-01 | 6.33E-01 | 1.00E+00 |
| ENSG00000048462.9_TNFRSF17   | ENSG00000160789.18_LMNA | -0.07415 | -0.230623717 | 0.086071394 | 3.64E-01 | 6.45E-01 | 1.00E+00 |
| ENSG00000229372.1_SZT2-AS1   | ENSG00000160789.18_LMNA | 0.02838  | -0.131415804 | 0.18673567  | 7.29E-01 | 8.85E-01 | 1.00E+00 |
| ENSG00000227331.1_AC005042.1 | ENSG00000160789.18_LMNA | 0.04536  | -0.114669598 | 0.20309328  | 5.79E-01 | 8.04E-01 | 1.00E+00 |
| ENSG00000276727.1_RP11-123K  | ENSG00000160789.18_LMNA | -0.00137 | -0.160533907 | 0.157866916 | 9.87E-01 | 9.95E-01 | 1.00E+00 |
| ENSG00000240305.1_RP11-1072  | ENSG00000160789.18_LMNA | -0.04547 | -0.203195625 | 0.11456425  | 5.78E-01 | 8.03E-01 | 1.00E+00 |
| ENSG00000258647.4_LINC00930  | ENSG00000160789.18_LMNA | -0.1502  | -0.302172827 | 0.009223708 | 6.48E-02 | 2.37E-01 | 1.00E+00 |
| ENSG00000224475.1_AC073900.1 | ENSG00000160789.18_LMNA | -0.09784 | -0.25309438  | 0.06233586  | 2.30E-01 | 5.08E-01 | 1.00E+00 |
| ENSG00000151224.11_MAT1A     | ENSG00000160789.18_LMNA | 0.02825  | -0.131539812 | 0.186613878 | 7.30E-01 | 8.86E-01 | 1.00E+00 |
| ENSG00000230585.2_PHBP12     | ENSG00000160789.18_LMNA | 0.04438  | -0.115638385 | 0.202151783 | 5.87E-01 | 8.08E-01 | 1.00E+00 |
| ENSG00000235631.1_RNF148     | ENSG00000160789.18_LMNA | 0.20571  | 0.048089011  | 0.353343523 | 1.10E-02 | 7.01E-02 | 1.00E+00 |
| ENSG00000182574.8_RP3-341D1  | ENSG00000160789.18_LMNA | 0.09633  | -0.063852266 | 0.25166889  | 2.38E-01 | 5.16E-01 | 1.00E+00 |
| ENSG00000250656.2_ST3GAL1P   | ENSG00000160789.18_LMNA | -0.03546 | -0.193567678 | 0.124443505 | 6.65E-01 | 8.52E-01 | 1.00E+00 |
| ENSG00000213033.4_AURKAPS1   | ENSG00000160789.18_LMNA | 0.1793   | 0.020690956  | 0.329107418 | 2.71E-02 | 1.34E-01 | 1.00E+00 |
| ENSG00000233040.2_FAM204BP   | ENSG00000160789.18_LMNA | -0.11112 | -0.265617733 | 0.0489509   | 1.73E-01 | 4.32E-01 | 1.00E+00 |
| ENSG00000281831.1_HCP5B      | ENSG00000160789.18_LMNA | 0.0303   | -0.129524043 | 0.188592414 | 7.11E-01 | 8.77E-01 | 1.00E+00 |
| ENSG00000264315.1_HNRNPA1F   | ENSG00000160789.18_LMNA | 0.0324   | -0.127462575 | 0.190613137 | 6.92E-01 | 8.67E-01 | 1.00E+00 |
| ENSG00000213608.5_SLC25A14F  | ENSG00000160789.18_LMNA | -0.04045 | -0.19837588  | 0.119517669 | 6.21E-01 | 8.28E-01 | 1.00E+00 |
| ENSG00000164287.11_CDC20B    | ENSG00000160789.18_LMNA | 0.10431  | -0.055813036 | 0.259210556 | 2.01E-01 | 4.71E-01 | 1.00E+00 |
| ENSG00000126752.7_SXX1       | ENSG00000160789.18_LMNA | 0.04696  | -0.113084165 | 0.204632786 | 5.66E-01 | 7.96E-01 | 1.00E+00 |

|                              |                         |          |              |             |          |          |          |
|------------------------------|-------------------------|----------|--------------|-------------|----------|----------|----------|
| ENSG00000259709.1_CTD-2184D  | ENSG00000160789.18_LMNA | -0.08173 | -0.237834865 | 0.078493303 | 3.17E-01 | 6.04E-01 | 1.00E+00 |
| ENSG00000244649.3_CTD-2377D  | ENSG00000160789.18_LMNA | 0.16271  | 0.00360574   | 0.313785433 | 4.52E-02 | 1.88E-01 | 1.00E+00 |
| ENSG00000237324.3_RP11-439H  | ENSG00000160789.18_LMNA | 0.00411  | -0.15519375  | 0.163202416 | 9.60E-01 | 9.84E-01 | 1.00E+00 |
| ENSG00000234711.1_TUBB8P11   | ENSG00000160789.18_LMNA | 0.00981  | -0.149621389 | 0.168750131 | 9.04E-01 | 9.63E-01 | 1.00E+00 |
| ENSG00000253555.1_RP11-16E1  | ENSG00000160789.18_LMNA | 0.0331   | -0.126767161 | 0.191294198 | 6.86E-01 | 8.64E-01 | 1.00E+00 |
| ENSG00000226083.4_SLC39A12-  | ENSG00000160789.18_LMNA | -0.03677 | -0.194834144 | 0.123147574 | 6.53E-01 | 8.46E-01 | 1.00E+00 |
| ENSG00000128276.9_RFPL3      | ENSG00000160789.18_LMNA | -0.07652 | -0.232885983 | 0.08369795  | 3.49E-01 | 6.33E-01 | 1.00E+00 |
| ENSG00000233154.4_RP4-655J1: | ENSG00000160789.18_LMNA | 0.1235   | -0.036413515 | 0.277252563 | 1.30E-01 | 3.65E-01 | 1.00E+00 |
| ENSG00000278772.1_           | ENSG00000160789.18_LMNA | -0.15135 | -0.303239887 | 0.008049097 | 6.27E-02 | 2.32E-01 | 1.00E+00 |
| ENSG00000075290.7_WNT8B      | ENSG00000160789.18_LMNA | -0.03485 | -0.192983374 | 0.125041038 | 6.70E-01 | 8.55E-01 | 1.00E+00 |
| ENSG00000271204.1_RP11-138A  | ENSG00000160789.18_LMNA | 0.01121  | -0.148252344 | 0.170110041 | 8.91E-01 | 9.57E-01 | 1.00E+00 |
| ENSG00000124334.15_IL9R      | ENSG00000160789.18_LMNA | 0.08994  | -0.070266003 | 0.245624505 | 2.70E-01 | 5.55E-01 | 1.00E+00 |
| ENSG00000276289.3_KCNE1B     | ENSG00000160789.18_LMNA | -0.02845 | -0.186804373 | 0.131345847 | 7.28E-01 | 8.85E-01 | 1.00E+00 |
| ENSG00000279662.1_RP11-609N  | ENSG00000160789.18_LMNA | 0.05231  | -0.107786027 | 0.20976607  | 5.22E-01 | 7.68E-01 | 1.00E+00 |
| ENSG00000249267.5_LINC00939  | ENSG00000160789.18_LMNA | -0.0047  | -0.16377882  | 0.154615727 | 9.54E-01 | 9.82E-01 | 1.00E+00 |
| ENSG00000235111.1_RP1-29C18  | ENSG00000160789.18_LMNA | 0.13907  | -0.02058293  | 0.291813272 | 8.75E-02 | 2.88E-01 | 1.00E+00 |
| ENSG00000278999.1_AC008985.  | ENSG00000160789.18_LMNA | 0.06759  | -0.092602812 | 0.224380522 | 4.08E-01 | 6.83E-01 | 1.00E+00 |
| ENSG00000205500.7_AC013472.: | ENSG00000160789.18_LMNA | 0.05537  | -0.104759044 | 0.212691031 | 4.98E-01 | 7.51E-01 | 1.00E+00 |
| ENSG00000255439.5_RP11-196G  | ENSG00000160789.18_LMNA | 0.16562  | 0.006591393  | 0.31647466  | 4.14E-02 | 1.77E-01 | 1.00E+00 |
| ENSG00000245466.1_CTD-2540L  | ENSG00000160789.18_LMNA | -0.07488 | -0.231325136 | 0.085335888 | 3.59E-01 | 6.42E-01 | 1.00E+00 |
| ENSG00000254349.4_MIR2052HC  | ENSG00000160789.18_LMNA | -0.15317 | -0.30493603  | 0.006180226 | 5.96E-02 | 2.24E-01 | 1.00E+00 |
| ENSG00000183273.5_CCDC60     | ENSG00000160789.18_LMNA | -0.01424 | -0.173050119 | 0.145288341 | 8.62E-01 | 9.46E-01 | 1.00E+00 |
| ENSG00000259831.1_LINC00567  | ENSG00000160789.18_LMNA | -0.05291 | -0.210340317 | 0.107192216 | 5.17E-01 | 7.64E-01 | 1.00E+00 |
| ENSG00000101890.4_GUCY2F     | ENSG00000160789.18_LMNA | -0.11423 | -0.268550023 | 0.045800457 | 1.61E-01 | 4.16E-01 | 1.00E+00 |
| ENSG00000269296.1_AC005614.: | ENSG00000160789.18_LMNA | -0.11967 | -0.273659528 | 0.04029584  | 1.42E-01 | 3.85E-01 | 1.00E+00 |
| ENSG00000238086.5_PPP1R26P   | ENSG00000160789.18_LMNA | 0.01646  | -0.143116648 | 0.175200686 | 8.40E-01 | 9.38E-01 | 1.00E+00 |
| ENSG00000275846.1_RP11-457M  | ENSG00000160789.18_LMNA | 0.15221  | -0.007163186 | 0.304044164 | 6.12E-02 | 2.29E-01 | 1.00E+00 |
| ENSG00000259198.1_RP11-133K  | ENSG00000160789.18_LMNA | 0.04557  | -0.114462743 | 0.203294232 | 5.77E-01 | 8.03E-01 | 1.00E+00 |
| ENSG00000277105.1_           | ENSG00000160789.18_LMNA | -0.01868 | -0.177350084 | 0.140943069 | 8.19E-01 | 9.30E-01 | 1.00E+00 |
| ENSG00000211959.2_IGHV4-39   | ENSG00000160789.18_LMNA | -0.012   | -0.170871922 | 0.147484812 | 8.83E-01 | 9.55E-01 | 1.00E+00 |
| ENSG00000256678.1_RP11-611O  | ENSG00000160789.18_LMNA | -0.03228 | -0.190498681 | 0.127579412 | 6.93E-01 | 8.68E-01 | 1.00E+00 |
| ENSG00000108688.10_CCL7      | ENSG00000160789.18_LMNA | 0.21473  | 0.057495973  | 0.361571412 | 7.89E-03 | 5.50E-02 | 1.00E+00 |
| ENSG00000207870.1_MIR221     | ENSG00000160789.18_LMNA | 0.27669  | 0.122907193  | 0.417503581 | 5.59E-04 | 7.35E-03 | 1.00E+00 |

|                              |                         |          |              |             |          |          |          |
|------------------------------|-------------------------|----------|--------------|-------------|----------|----------|----------|
| ENSG00000199094.2_MIR30C2    | ENSG00000160789.18_LMNA | -0.06783 | -0.224601414 | 0.092372186 | 4.06E-01 | 6.82E-01 | 1.00E+00 |
| ENSG00000207003.1_RNU6-611F  | ENSG00000160789.18_LMNA | -0.11706 | -0.271207803 | 0.042939535 | 1.51E-01 | 3.99E-01 | 1.00E+00 |
| ENSG00000207926.1_MIR135A1   | ENSG00000160789.18_LMNA | 0.04181  | -0.118176685 | 0.199682196 | 6.09E-01 | 8.21E-01 | 1.00E+00 |
| ENSG00000206936.1_RNU4-52P   | ENSG00000160789.18_LMNA | 0.07685  | -0.08337532  | 0.233193236 | 3.47E-01 | 6.31E-01 | 1.00E+00 |
| ENSG00000201496.1_RN7SKP27   | ENSG00000160789.18_LMNA | 0.17091  | 0.012031852  | 0.321362195 | 3.53E-02 | 1.59E-01 | 1.00E+00 |
| ENSG00000274008.1_Metazoa_SI | ENSG00000160789.18_LMNA | -0.01505 | -0.173836854 | 0.144494233 | 8.54E-01 | 9.43E-01 | 1.00E+00 |
| ENSG00000261514.1_RP11-527L  | ENSG00000160789.18_LMNA | -0.101   | -0.256081402 | 0.059153602 | 2.16E-01 | 4.90E-01 | 1.00E+00 |
| ENSG00000259369.1_RP11-291H  | ENSG00000160789.18_LMNA | 0.04545  | -0.114577238 | 0.203183008 | 5.78E-01 | 8.03E-01 | 1.00E+00 |
| ENSG00000253931.1_RP11-909N  | ENSG00000160789.18_LMNA | 0.39166  | 0.247916619  | 0.518528335 | 6.05E-07 | 3.05E-05 | 3.10E-02 |
| ENSG00000259042.2_AE000661.1 | ENSG00000160789.18_LMNA | 0.05304  | -0.107068422 | 0.210460003 | 5.16E-01 | 7.63E-01 | 1.00E+00 |
| ENSG00000271560.1_KB-1410C5  | ENSG00000160789.18_LMNA | -0.15778 | -0.309217331 | 0.001453249 | 5.22E-02 | 2.07E-01 | 1.00E+00 |
| ENSG00000275710.1_RP11-257O  | ENSG00000160789.18_LMNA | 0.18894  | 0.0306585    | 0.337971904 | 1.97E-02 | 1.07E-01 | 1.00E+00 |
| ENSG00000228139.1_LINC01402  | ENSG00000160789.18_LMNA | -0.0604  | -0.217510331 | 0.099758784 | 4.60E-01 | 7.23E-01 | 1.00E+00 |
| ENSG00000261349.1_RP3-465N2  | ENSG00000160789.18_LMNA | -0.08616 | -0.242045425 | 0.074051518 | 2.91E-01 | 5.77E-01 | 1.00E+00 |
| ENSG00000261193.1_RP11-863P  | ENSG00000160789.18_LMNA | -0.00893 | -0.167891559 | 0.1504851   | 9.13E-01 | 9.67E-01 | 1.00E+00 |
| ENSG00000263167.1_RP11-149I  | ENSG00000160789.18_LMNA | 0.08088  | -0.07933864  | 0.237032186 | 3.22E-01 | 6.08E-01 | 1.00E+00 |
| ENSG00000236094.1_LINC00545  | ENSG00000160789.18_LMNA | 0.01237  | -0.147124031 | 0.171229915 | 8.80E-01 | 9.53E-01 | 1.00E+00 |
| ENSG00000235029.1_MNX1-AS2   | ENSG00000160789.18_LMNA | -0.08529 | -0.241211578 | 0.074932153 | 2.96E-01 | 5.82E-01 | 1.00E+00 |
| ENSG00000253361.1_RP11-675F  | ENSG00000160789.18_LMNA | -0.02206 | -0.180622758 | 0.137627674 | 7.87E-01 | 9.13E-01 | 1.00E+00 |
| ENSG00000279090.1_RP11-684N  | ENSG00000160789.18_LMNA | -0.25709 | -0.399924881 | -0.1020698  | 1.39E-03 | 1.48E-02 | 1.00E+00 |
| ENSG00000226339.1_RPS26P56   | ENSG00000160789.18_LMNA | -0.07498 | -0.231418708 | 0.085237743 | 3.59E-01 | 6.41E-01 | 1.00E+00 |
| ENSG00000261103.1_RP11-298D  | ENSG00000160789.18_LMNA | 0.01781  | -0.141796757 | 0.176506255 | 8.28E-01 | 9.33E-01 | 1.00E+00 |
| ENSG00000248409.1_KB-1269D1  | ENSG00000160789.18_LMNA | 0.06359  | -0.096590451 | 0.220556017 | 4.36E-01 | 7.04E-01 | 1.00E+00 |
| ENSG00000265802.2_RN7SL49P   | ENSG00000160789.18_LMNA | 0.03983  | -0.120127684 | 0.197781262 | 6.26E-01 | 8.31E-01 | 1.00E+00 |
| ENSG00000228067.1_RP11-61J1  | ENSG00000160789.18_LMNA | -0.05579 | -0.213094613 | 0.104340923 | 4.95E-01 | 7.50E-01 | 1.00E+00 |
| ENSG00000272139.1_CTD-2544H  | ENSG00000160789.18_LMNA | -0.24212 | -0.386423942 | -0.08624161 | 2.65E-03 | 2.43E-02 | 1.00E+00 |
| ENSG00000265272.2_RN7SL693F  | ENSG00000160789.18_LMNA | -0.02034 | -0.178961472 | 0.139311538 | 8.04E-01 | 9.21E-01 | 1.00E+00 |
| ENSG00000274505.1_Metazoa_SI | ENSG00000160789.18_LMNA | 0.02461  | -0.135119736 | 0.183093707 | 7.63E-01 | 9.02E-01 | 1.00E+00 |
| ENSG00000243900.3_RN7SL320F  | ENSG00000160789.18_LMNA | -0.08519 | -0.241119665 | 0.075029193 | 2.97E-01 | 5.83E-01 | 1.00E+00 |
| ENSG00000224541.1_AP001439.1 | ENSG00000160789.18_LMNA | -0.01817 | -0.176858441 | 0.141440515 | 8.24E-01 | 9.31E-01 | 1.00E+00 |
| ENSG00000260350.1_RP11-152P  | ENSG00000160789.18_LMNA | 0.09411  | -0.066078994 | 0.24957318  | 2.49E-01 | 5.29E-01 | 1.00E+00 |
| ENSG00000227245.1_RP11-136C  | ENSG00000160789.18_LMNA | -0.09441 | -0.24985105  | 0.065783933 | 2.47E-01 | 5.27E-01 | 1.00E+00 |
| ENSG00000260035.1_CTD-2651B  | ENSG00000160789.18_LMNA | 0.07562  | -0.084602147 | 0.232024544 | 3.54E-01 | 6.38E-01 | 1.00E+00 |

|                             |                         |          |              |             |          |          |          |
|-----------------------------|-------------------------|----------|--------------|-------------|----------|----------|----------|
| ENSG00000266145.1_RHOT1P1   | ENSG00000160789.18_LMNA | -0.12883 | -0.282238883 | 0.031009992 | 1.14E-01 | 3.37E-01 | 1.00E+00 |
| ENSG00000224223.1_VSTM2A-O  | ENSG00000160789.18_LMNA | -0.20561 | -0.353251193 | -0.04798376 | 1.10E-02 | 7.03E-02 | 1.00E+00 |
| ENSG00000163046.14_ANKRD30  | ENSG00000160789.18_LMNA | -0.10364 | -0.258578664 | 0.056488188 | 2.04E-01 | 4.75E-01 | 1.00E+00 |
| ENSG00000261268.1_RP11-308D | ENSG00000160789.18_LMNA | -0.22801 | -0.373648813 | -0.07140259 | 4.72E-03 | 3.76E-02 | 1.00E+00 |
| ENSG00000270497.1_RP1-290F1 | ENSG00000160789.18_LMNA | 0.07879  | -0.081430925 | 0.23504362  | 3.35E-01 | 6.20E-01 | 1.00E+00 |
| ENSG00000228019.1_RP11-166O | ENSG00000160789.18_LMNA | 0.0456   | -0.114432877 | 0.203323243 | 5.77E-01 | 8.03E-01 | 1.00E+00 |
| ENSG00000228417.1_RP11-549L | ENSG00000160789.18_LMNA | -0.1761  | -0.326159896 | -0.01739018 | 3.00E-02 | 1.43E-01 | 1.00E+00 |
| ENSG00000278212.1_MAFIP     | ENSG00000160789.18_LMNA | -0.00595 | -0.164998979 | 0.153391421 | 9.42E-01 | 9.77E-01 | 1.00E+00 |
| ENSG00000257239.1_RP11-630C | ENSG00000160789.18_LMNA | -0.25104 | -0.394478979 | -0.09566695 | 1.81E-03 | 1.82E-02 | 1.00E+00 |
| ENSG00000187258.12_NPSR1    | ENSG00000160789.18_LMNA | -0.23865 | -0.38328517  | -0.08258336 | 3.07E-03 | 2.72E-02 | 1.00E+00 |
| ENSG00000266954.1_RP11-701H | ENSG00000160789.18_LMNA | -0.08392 | -0.239917466 | 0.076297904 | 3.04E-01 | 5.91E-01 | 1.00E+00 |
| ENSG00000259031.1_CTD-2062F | ENSG00000160789.18_LMNA | 0.14865  | -0.010807303 | 0.300732995 | 6.76E-02 | 2.44E-01 | 1.00E+00 |
| ENSG00000233351.1_RP1-69D17 | ENSG00000160789.18_LMNA | 0.20165  | 0.043855536  | 0.349625201 | 1.27E-02 | 7.80E-02 | 1.00E+00 |
| ENSG00000176812.7_RP11-629O | ENSG00000160789.18_LMNA | -0.10787 | -0.262559688 | 0.052229798 | 1.86E-01 | 4.52E-01 | 1.00E+00 |
| ENSG00000260678.1_RP11-146F | ENSG00000160789.18_LMNA | 0.07608  | -0.084135758 | 0.23246894  | 3.52E-01 | 6.35E-01 | 1.00E+00 |
| ENSG00000227300.11_KRT16P2  | ENSG00000160789.18_LMNA | -0.1502  | -0.302175214 | 0.009221082 | 6.47E-02 | 2.37E-01 | 1.00E+00 |
| ENSG00000280233.1_RP11-159D | ENSG00000160789.18_LMNA | 0.0405   | -0.119471083 | 0.198421281 | 6.20E-01 | 8.28E-01 | 1.00E+00 |
| ENSG00000233752.1_AC009414. | ENSG00000160789.18_LMNA | -0.12045 | -0.27438944  | 0.039507927 | 1.39E-01 | 3.81E-01 | 1.00E+00 |
| ENSG00000248876.1_RP11-231G | ENSG00000160789.18_LMNA | -0.01074 | -0.169654741 | 0.148710839 | 8.95E-01 | 9.59E-01 | 1.00E+00 |
| ENSG00000240996.1_RP11-80H5 | ENSG00000160789.18_LMNA | -0.06153 | -0.218589664 | 0.098636723 | 4.51E-01 | 7.17E-01 | 1.00E+00 |
| ENSG00000254398.1_RP11-578F | ENSG00000160789.18_LMNA | 0.17398  | 0.0151989    | 0.324199802 | 3.21E-02 | 1.50E-01 | 1.00E+00 |
| ENSG00000281469.1_RP11-567F | ENSG00000160789.18_LMNA | -0.11225 | -0.266682792 | 0.047807327 | 1.69E-01 | 4.27E-01 | 1.00E+00 |
| ENSG00000267761.3_CTD-2130C | ENSG00000160789.18_LMNA | -0.06822 | -0.224976401 | 0.091980599 | 4.04E-01 | 6.79E-01 | 1.00E+00 |
| ENSG00000236472.1_AC002401. | ENSG00000160789.18_LMNA | -0.07223 | -0.228802617 | 0.087979383 | 3.77E-01 | 6.56E-01 | 1.00E+00 |
| ENSG00000280969.1_RPS4Y2    | ENSG00000160789.18_LMNA | -0.13813 | -0.290932216 | 0.021545299 | 8.97E-02 | 2.92E-01 | 1.00E+00 |
| ENSG00000259460.1_RP11-128A | ENSG00000160789.18_LMNA | -0.16336 | -0.31438609  | -0.00427213 | 4.43E-02 | 1.86E-01 | 1.00E+00 |
| ENSG00000233203.5_RP11-67L3 | ENSG00000160789.18_LMNA | 0.32953  | 0.179756482  | 0.464366592 | 3.39E-05 | 7.90E-04 | 1.00E+00 |
| ENSG00000213663.4_CTD-2158P | ENSG00000160789.18_LMNA | -0.15413 | -0.305823336 | 0.005201694 | 5.80E-02 | 2.21E-01 | 1.00E+00 |
| ENSG00000236234.1_AC091132. | ENSG00000160789.18_LMNA | 0.11536  | -0.044663653 | 0.26960668  | 1.57E-01 | 4.09E-01 | 1.00E+00 |
| ENSG00000237934.1_RP11-467D | ENSG00000160789.18_LMNA | 0.18444  | 0.025998303  | 0.333834203 | 2.29E-02 | 1.19E-01 | 1.00E+00 |
| ENSG00000276576.1_MRPL30P1  | ENSG00000160789.18_LMNA | -0.0546  | -0.211962848 | 0.105513177 | 5.04E-01 | 7.55E-01 | 1.00E+00 |
| ENSG00000257272.1_RP11-317N | ENSG00000160789.18_LMNA | 0.00973  | -0.149705439 | 0.168666603 | 9.05E-01 | 9.64E-01 | 1.00E+00 |
| ENSG00000267316.4_RP11-879F | ENSG00000160789.18_LMNA | -0.01502 | -0.173801527 | 0.1445299   | 8.54E-01 | 9.43E-01 | 1.00E+00 |

|                              |                         |          |              |             |          |          |          |
|------------------------------|-------------------------|----------|--------------|-------------|----------|----------|----------|
| ENSG00000258230.2_RP11-511H  | ENSG00000160789.18_LMNA | 0.17854  | 0.01990836   | 0.328409119 | 2.78E-02 | 1.36E-01 | 1.00E+00 |
| ENSG00000213495.3_RP11-416L  | ENSG00000160789.18_LMNA | -0.0611  | -0.218181047 | 0.099061611 | 4.55E-01 | 7.19E-01 | 1.00E+00 |
| ENSG00000226527.1_AP000289   | ENSG00000160789.18_LMNA | -0.28942 | -0.428859528 | -0.13650781 | 2.99E-04 | 4.49E-03 | 1.00E+00 |
| ENSG00000270104.1_RP11-245P  | ENSG00000160789.18_LMNA | -0.15143 | -0.303318038 | 0.007963035 | 6.26E-02 | 2.32E-01 | 1.00E+00 |
| ENSG00000138675.15_FGF5      | ENSG00000160789.18_LMNA | 0.0485   | -0.111560017 | 0.206111303 | 5.53E-01 | 7.88E-01 | 1.00E+00 |
| ENSG00000263657.1_RP11-82O1  | ENSG00000160789.18_LMNA | -0.12192 | -0.275764206 | 0.038022856 | 1.35E-01 | 3.73E-01 | 1.00E+00 |
| ENSG00000261241.4_RP11-883G  | ENSG00000160789.18_LMNA | -0.14583 | -0.298106705 | 0.013691801 | 7.30E-02 | 2.57E-01 | 1.00E+00 |
| ENSG00000225662.2_RP11-1036I | ENSG00000160789.18_LMNA | -0.01007 | -0.169001577 | 0.149368346 | 9.02E-01 | 9.62E-01 | 1.00E+00 |
| ENSG00000228127.1_RP11-12L8  | ENSG00000160789.18_LMNA | -0.18858 | -0.337644313 | -0.03028905 | 2.00E-02 | 1.08E-01 | 1.00E+00 |
| ENSG00000236440.1_AC117947   | ENSG00000160789.18_LMNA | 0.02913  | -0.13067743  | 0.187460647 | 7.22E-01 | 8.82E-01 | 1.00E+00 |
| ENSG00000214700.5_C12orf71   | ENSG00000160789.18_LMNA | -0.07596 | -0.232355401 | 0.084254929 | 3.52E-01 | 6.36E-01 | 1.00E+00 |
| ENSG00000215720.4_RP1-21O18  | ENSG00000160789.18_LMNA | 0.07143  | -0.08878269  | 0.228035228 | 3.82E-01 | 6.61E-01 | 1.00E+00 |
| ENSG00000267149.2_CTC-550B1  | ENSG00000160789.18_LMNA | 0.16002  | 0.000838642  | 0.311288612 | 4.89E-02 | 1.99E-01 | 1.00E+00 |
| ENSG00000234848.1_CTD-3105H  | ENSG00000160789.18_LMNA | -0.17093 | -0.321388451 | -0.01206113 | 3.52E-02 | 1.59E-01 | 1.00E+00 |
| ENSG00000259782.2_CTD-2270L  | ENSG00000160789.18_LMNA | 0.03817  | -0.121769069 | 0.196180143 | 6.41E-01 | 8.39E-01 | 1.00E+00 |
| ENSG00000262959.2_RPL23AP8   | ENSG00000160789.18_LMNA | 0.03549  | -0.124415181 | 0.19359537  | 6.64E-01 | 8.52E-01 | 1.00E+00 |
| ENSG00000188056.10_TREML4    | ENSG00000160789.18_LMNA | -0.08021 | -0.23639603  | 0.080008279 | 3.26E-01 | 6.13E-01 | 1.00E+00 |
| ENSG00000100253.11_MIOX      | ENSG00000160789.18_LMNA | 0.05237  | -0.107731607 | 0.209818707 | 5.22E-01 | 7.67E-01 | 1.00E+00 |
| ENSG00000266717.1_RP11-855A  | ENSG00000160789.18_LMNA | -0.08128 | -0.237410506 | 0.07894027  | 3.19E-01 | 6.06E-01 | 1.00E+00 |
| ENSG00000219867.1_RP11-40G1  | ENSG00000160789.18_LMNA | -0.11545 | -0.269694569 | 0.044569062 | 1.57E-01 | 4.09E-01 | 1.00E+00 |
| ENSG00000257345.2_RP11-511B  | ENSG00000160789.18_LMNA | -0.03876 | -0.196746572 | 0.121188593 | 6.35E-01 | 8.37E-01 | 1.00E+00 |
| ENSG00000265625.1_RP11-68I3  | ENSG00000160789.18_LMNA | -0.0324  | -0.190621662 | 0.127453872 | 6.92E-01 | 8.67E-01 | 1.00E+00 |
| ENSG00000270409.1_RP11-44D5  | ENSG00000160789.18_LMNA | -0.18015 | -0.329888093 | -0.02156632 | 2.64E-02 | 1.31E-01 | 1.00E+00 |
| ENSG00000230266.1_XXYL1-AS   | ENSG00000160789.18_LMNA | -0.04312 | -0.200940101 | 0.116884299 | 5.98E-01 | 8.15E-01 | 1.00E+00 |
| ENSG00000281641.1_SAMD12-A   | ENSG00000160789.18_LMNA | -0.01531 | -0.174085927 | 0.144242741 | 8.52E-01 | 9.42E-01 | 1.00E+00 |
| ENSG00000243864.1_RPS3AP50   | ENSG00000160789.18_LMNA | -0.02694 | -0.185345043 | 0.132831142 | 7.42E-01 | 8.92E-01 | 1.00E+00 |
| ENSG00000238029.1_AC012493   | ENSG00000160789.18_LMNA | 0.03018  | -0.129642639 | 0.18847608  | 7.12E-01 | 8.78E-01 | 1.00E+00 |
| ENSG00000273691.1_RP11-617F  | ENSG00000160789.18_LMNA | 0.03106  | -0.128775485 | 0.189326488 | 7.04E-01 | 8.74E-01 | 1.00E+00 |
| ENSG00000228008.1_CTD-2330K  | ENSG00000160789.18_LMNA | 0.12361  | -0.036307698 | 0.277350372 | 1.29E-01 | 3.64E-01 | 1.00E+00 |
| ENSG00000177291.3_GJD4       | ENSG00000160789.18_LMNA | -0.06978 | -0.226460355 | 0.090429987 | 3.93E-01 | 6.71E-01 | 1.00E+00 |
| ENSG00000255367.1_RP13-726E  | ENSG00000160789.18_LMNA | -0.16079 | -0.312000092 | -0.00162665 | 4.78E-02 | 1.95E-01 | 1.00E+00 |
| ENSG00000223899.1_SEC13P1    | ENSG00000160789.18_LMNA | 0.05337  | -0.106734875 | 0.210782439 | 5.14E-01 | 7.62E-01 | 1.00E+00 |
| ENSG00000234841.4_RP11-119H  | ENSG00000160789.18_LMNA | 0.05461  | -0.105504317 | 0.211971405 | 5.04E-01 | 7.55E-01 | 1.00E+00 |

|                              |                         |          |              |             |          |          |          |
|------------------------------|-------------------------|----------|--------------|-------------|----------|----------|----------|
| ENSG00000171794.3_UTF1       | ENSG00000160789.18_LMNA | 0.16525  | 0.006216773  | 0.316137506 | 4.19E-02 | 1.79E-01 | 1.00E+00 |
| ENSG00000178412.4_RP11-567M  | ENSG00000160789.18_LMNA | -0.11393 | -0.268261932 | 0.046110258 | 1.62E-01 | 4.17E-01 | 1.00E+00 |
| ENSG00000178462.10_TUBAL3    | ENSG00000160789.18_LMNA | -0.10158 | -0.256634634 | 0.058563506 | 2.13E-01 | 4.87E-01 | 1.00E+00 |
| ENSG00000224117.1_PTPN2P2    | ENSG00000160789.18_LMNA | -0.11689 | -0.271042227 | 0.043117916 | 1.52E-01 | 4.00E-01 | 1.00E+00 |
| ENSG00000270788.1_PDLIM1P1   | ENSG00000160789.18_LMNA | 0.20995  | 0.052507082  | 0.357213722 | 9.43E-03 | 6.28E-02 | 1.00E+00 |
| ENSG00000259411.1_HNRNPA1F   | ENSG00000160789.18_LMNA | 0.06996  | -0.090243725 | 0.226638511 | 3.92E-01 | 6.70E-01 | 1.00E+00 |
| ENSG00000237351.1_CTD-2522E  | ENSG00000160789.18_LMNA | 0.09314  | -0.06705487  | 0.24865379  | 2.54E-01 | 5.35E-01 | 1.00E+00 |
| ENSG00000241233.2_KRTAP5-8   | ENSG00000160789.18_LMNA | 0.0668   | -0.09339187  | 0.223624518 | 4.14E-01 | 6.87E-01 | 1.00E+00 |
| ENSG00000278685.3_IQCA1L     | ENSG00000160789.18_LMNA | 0.04617  | -0.113868336 | 0.203871528 | 5.72E-01 | 8.00E-01 | 1.00E+00 |
| ENSG00000229492.1_AC004019.  | ENSG00000160789.18_LMNA | 0.00904  | -0.150379449 | 0.167996607 | 9.12E-01 | 9.67E-01 | 1.00E+00 |
| ENSG00000229937.5_PRPS1L1    | ENSG00000160789.18_LMNA | -0.05469 | -0.212045708 | 0.105427383 | 5.03E-01 | 7.55E-01 | 1.00E+00 |
| ENSG00000123843.11_C4BPB     | ENSG00000160789.18_LMNA | 0.08039  | -0.079833398 | 0.236562193 | 3.25E-01 | 6.12E-01 | 1.00E+00 |
| ENSG00000279424.1_           | ENSG00000160789.18_LMNA | -0.097   | -0.25230659  | 0.063174075 | 2.34E-01 | 5.12E-01 | 1.00E+00 |
| ENSG00000251348.1_HSPD1P11   | ENSG00000160789.18_LMNA | -0.03342 | -0.191602299 | 0.126452466 | 6.83E-01 | 8.62E-01 | 1.00E+00 |
| ENSG00000118017.3_A4GNT      | ENSG00000160789.18_LMNA | 0.04788  | -0.112177691 | 0.205512296 | 5.58E-01 | 7.91E-01 | 1.00E+00 |
| ENSG00000246350.1_RP5-1186N  | ENSG00000160789.18_LMNA | 0.02219  | -0.137500468 | 0.180748185 | 7.86E-01 | 9.13E-01 | 1.00E+00 |
| ENSG00000259090.1_SEPT7P1    | ENSG00000160789.18_LMNA | -0.04492 | -0.202670657 | 0.115104546 | 5.83E-01 | 8.06E-01 | 1.00E+00 |
| ENSG00000261404.4_AC009120.  | ENSG00000160789.18_LMNA | -0.12479 | -0.278460201 | 0.035106515 | 1.26E-01 | 3.58E-01 | 1.00E+00 |
| ENSG00000267691.1_SHC1P2     | ENSG00000160789.18_LMNA | 0.241    | 0.085065052  | 0.385415215 | 2.78E-03 | 2.52E-02 | 1.00E+00 |
| ENSG00000124564.16_SLC17A3   | ENSG00000160789.18_LMNA | -0.04963 | -0.207193176 | 0.110443806 | 5.44E-01 | 7.82E-01 | 1.00E+00 |
| ENSG00000189196.4_LINC00994  | ENSG00000160789.18_LMNA | -0.11244 | -0.26685918  | 0.047617857 | 1.68E-01 | 4.26E-01 | 1.00E+00 |
| ENSG00000224655.4_AC018737.  | ENSG00000160789.18_LMNA | -0.0211  | -0.179700412 | 0.138562783 | 7.96E-01 | 9.18E-01 | 1.00E+00 |
| ENSG00000279024.1_RP11-1193  | ENSG00000160789.18_LMNA | 0.09709  | -0.063090732 | 0.252384938 | 2.34E-01 | 5.12E-01 | 1.00E+00 |
| ENSG00000232825.1_RP5-896L1  | ENSG00000160789.18_LMNA | 0.07591  | -0.084314286 | 0.232298846 | 3.53E-01 | 6.36E-01 | 1.00E+00 |
| ENSG00000171772.14_SYCE1     | ENSG00000160789.18_LMNA | -0.15208 | -0.303925508 | 0.007293916 | 6.14E-02 | 2.29E-01 | 1.00E+00 |
| ENSG00000267784.1_RP11-17112 | ENSG00000160789.18_LMNA | -0.18143 | -0.331066594 | -0.02288866 | 2.53E-02 | 1.27E-01 | 1.00E+00 |
| ENSG00000258791.6_LINC00520  | ENSG00000160789.18_LMNA | 0.15877  | -0.000438015 | 0.310135206 | 5.07E-02 | 2.03E-01 | 1.00E+00 |
| ENSG00000189430.11_NCR1      | ENSG00000160789.18_LMNA | -0.02398 | -0.182481494 | 0.135741494 | 7.69E-01 | 9.05E-01 | 1.00E+00 |
| ENSG00000235812.4_ADAM21P1   | ENSG00000160789.18_LMNA | -0.05164 | -0.209118994 | 0.10845488  | 5.28E-01 | 7.72E-01 | 1.00E+00 |
| ENSG00000129965.12_INS-IGF2  | ENSG00000160789.18_LMNA | 0.0059   | -0.153448007 | 0.164942606 | 9.43E-01 | 9.77E-01 | 1.00E+00 |
| ENSG00000205436.6_EXOC3L4    | ENSG00000160789.18_LMNA | 0.04321  | -0.116791495 | 0.201030388 | 5.97E-01 | 8.14E-01 | 1.00E+00 |
| ENSG00000088926.12_F11       | ENSG00000160789.18_LMNA | -0.02983 | -0.188140223 | 0.129984976 | 7.15E-01 | 8.79E-01 | 1.00E+00 |
| ENSG00000235711.4_ANKRD34C   | ENSG00000160789.18_LMNA | -0.1179  | -0.271995913 | 0.042090195 | 1.48E-01 | 3.94E-01 | 1.00E+00 |

|                              |                         |          |              |             |          |          |          |
|------------------------------|-------------------------|----------|--------------|-------------|----------|----------|----------|
| ENSG00000228828.1_TLK2P2     | ENSG00000160789.18_LMNA | -0.09956 | -0.25472652  | 0.060597835 | 2.22E-01 | 4.98E-01 | 1.00E+00 |
| ENSG00000249839.1_AC011330.1 | ENSG00000160789.18_LMNA | 0.01748  | -0.142118986 | 0.176187626 | 8.31E-01 | 9.34E-01 | 1.00E+00 |
| ENSG00000182156.8_ENPP7      | ENSG00000160789.18_LMNA | -0.21395 | -0.360854975 | -0.05667472 | 8.13E-03 | 5.63E-02 | 1.00E+00 |
| ENSG00000267659.4_LINC01482  | ENSG00000160789.18_LMNA | -0.04136 | -0.199245651 | 0.118624944 | 6.13E-01 | 8.24E-01 | 1.00E+00 |
| ENSG00000266805.1_RP11-61L1  | ENSG00000160789.18_LMNA | -0.0508  | -0.20831507  | 0.109285457 | 5.34E-01 | 7.76E-01 | 1.00E+00 |
| ENSG00000198488.9_B3GNT6     | ENSG00000160789.18_LMNA | 0.00512  | -0.154204668 | 0.164188595 | 9.50E-01 | 9.80E-01 | 1.00E+00 |
| ENSG00000241388.4_HNF1A-AS1  | ENSG00000160789.18_LMNA | 0.01022  | -0.149224175 | 0.169144819 | 9.01E-01 | 9.61E-01 | 1.00E+00 |
| ENSG00000187621.13_TCL6      | ENSG00000160789.18_LMNA | -0.18075 | -0.330440658 | -0.02218619 | 2.59E-02 | 1.29E-01 | 1.00E+00 |
| ENSG00000130561.15_SAG       | ENSG00000160789.18_LMNA | -0.05191 | -0.209381914 | 0.108183146 | 5.25E-01 | 7.70E-01 | 1.00E+00 |
| ENSG00000252973.1_RNU6-1028  | ENSG00000160789.18_LMNA | -0.03243 | -0.190643902 | 0.127431169 | 6.92E-01 | 8.67E-01 | 1.00E+00 |
| ENSG00000264266.1_MIR4322    | ENSG00000160789.18_LMNA | 0.11048  | -0.049595518 | 0.265017032 | 1.75E-01 | 4.36E-01 | 1.00E+00 |
| ENSG00000225851.1_HLA-S      | ENSG00000160789.18_LMNA | 0.22106  | 0.064111457  | 0.36732948  | 6.20E-03 | 4.61E-02 | 1.00E+00 |
| ENSG00000258752.1_RP11-356K  | ENSG00000160789.18_LMNA | -0.02578 | -0.184227911 | 0.133967186 | 7.53E-01 | 8.97E-01 | 1.00E+00 |
| ENSG00000221340.1_RNU6ATAC   | ENSG00000160789.18_LMNA | 0.05928  | -0.100873083 | 0.216437697 | 4.68E-01 | 7.29E-01 | 1.00E+00 |
| ENSG00000281133.1_AL355480.3 | ENSG00000160789.18_LMNA | 0.00283  | -0.156437246 | 0.161961665 | 9.72E-01 | 9.89E-01 | 1.00E+00 |
| ENSG00000207200.1_RNU6-45P   | ENSG00000160789.18_LMNA | 0.02175  | -0.13792921  | 0.180325399 | 7.90E-01 | 9.15E-01 | 1.00E+00 |
| ENSG00000231106.2_LINC01436  | ENSG00000160789.18_LMNA | -0.12257 | -0.276375578 | 0.037361984 | 1.32E-01 | 3.69E-01 | 1.00E+00 |
| ENSG00000211581.1_MIR765     | ENSG00000160789.18_LMNA | 0.14119  | -0.018424831 | 0.293787103 | 8.27E-02 | 2.78E-01 | 1.00E+00 |
| ENSG00000281267.1_AC110602.1 | ENSG00000160789.18_LMNA | -0.19266 | -0.341394271 | -0.03452315 | 1.74E-02 | 9.76E-02 | 1.00E+00 |
| ENSG00000222915.1_RNU6-564F  | ENSG00000160789.18_LMNA | 0.20366  | 0.04594513   | 0.351461726 | 1.19E-02 | 7.41E-02 | 1.00E+00 |
| ENSG00000199550.1_Y_RNA      | ENSG00000160789.18_LMNA | 0.18581  | 0.027416739  | 0.335094863 | 2.19E-02 | 1.15E-01 | 1.00E+00 |
| ENSG00000243479.3_MNX1-AS1   | ENSG00000160789.18_LMNA | -0.30903 | -0.446279224 | -0.15758718 | 1.07E-04 | 1.99E-03 | 1.00E+00 |
| ENSG00000225107.1_AC092484.1 | ENSG00000160789.18_LMNA | 0.21731  | 0.060194069  | 0.363922619 | 7.16E-03 | 5.12E-02 | 1.00E+00 |
| ENSG00000243058.1_RPL39P33   | ENSG00000160789.18_LMNA | -0.08634 | -0.242207105 | 0.073880709 | 2.90E-01 | 5.76E-01 | 1.00E+00 |
| ENSG00000171889.3_MIR31HG    | ENSG00000160789.18_LMNA | -0.05755 | -0.214782441 | 0.102591073 | 4.81E-01 | 7.39E-01 | 1.00E+00 |
| ENSG00000280176.1_RP11-84A1  | ENSG00000160789.18_LMNA | -0.10609 | -0.260880767 | 0.05402709  | 1.93E-01 | 4.62E-01 | 1.00E+00 |
| ENSG00000254204.1_RP11-400K  | ENSG00000160789.18_LMNA | 0.15138  | -0.008009824 | 0.30327555  | 6.26E-02 | 2.32E-01 | 1.00E+00 |
| ENSG00000259570.1_RP11-671M  | ENSG00000160789.18_LMNA | -0.08344 | -0.239462469 | 0.076777807 | 3.07E-01 | 5.93E-01 | 1.00E+00 |
| ENSG00000264491.1_RP11-349A  | ENSG00000160789.18_LMNA | -0.12626 | -0.279833387 | 0.033619042 | 1.21E-01 | 3.50E-01 | 1.00E+00 |
| ENSG00000242020.3_RN7SL68P   | ENSG00000160789.18_LMNA | 0.04881  | -0.111251717 | 0.206410196 | 5.50E-01 | 7.87E-01 | 1.00E+00 |
| ENSG00000233383.1_RP11-324F  | ENSG00000160789.18_LMNA | 0.1314   | -0.028399621 | 0.28464166  | 1.07E-01 | 3.24E-01 | 1.00E+00 |
| ENSG00000234055.1_RP11-247A  | ENSG00000160789.18_LMNA | -0.01993 | -0.178559431 | 0.139718766 | 8.08E-01 | 9.23E-01 | 1.00E+00 |
| ENSG00000244043.1_RPS27P27   | ENSG00000160789.18_LMNA | -0.02929 | -0.187611041 | 0.130524213 | 7.20E-01 | 8.81E-01 | 1.00E+00 |



|                              |                         |          |              |             |          |          |          |
|------------------------------|-------------------------|----------|--------------|-------------|----------|----------|----------|
| ENSG00000231564.1_EIF4A1P11  | ENSG00000160789.18_LMNA | 0.13819  | -0.021485308 | 0.290987154 | 8.95E-02 | 2.91E-01 | 1.00E+00 |
| ENSG00000230564.1_CALM1P2    | ENSG00000160789.18_LMNA | 0.03426  | -0.125623283 | 0.192413803 | 6.75E-01 | 8.58E-01 | 1.00E+00 |
| ENSG00000169877.8_AHSP       | ENSG00000160789.18_LMNA | -0.03821 | -0.196213255 | 0.121735141 | 6.40E-01 | 8.39E-01 | 1.00E+00 |
| ENSG00000278276.1_RP3-324O1  | ENSG00000160789.18_LMNA | 0.07324  | -0.08697508  | 0.229761461 | 3.70E-01 | 6.50E-01 | 1.00E+00 |
| ENSG00000183242.10_WT1-AS    | ENSG00000160789.18_LMNA | 0.04101  | -0.118971855 | 0.198907719 | 6.16E-01 | 8.26E-01 | 1.00E+00 |
| ENSG00000278700.1_Metazoa_SI | ENSG00000160789.18_LMNA | 0.18399  | 0.025537691  | 0.33342459  | 2.33E-02 | 1.20E-01 | 1.00E+00 |
| ENSG00000236216.5_PPP1R11P   | ENSG00000160789.18_LMNA | -0.00157 | -0.160728285 | 0.157672356 | 9.85E-01 | 9.94E-01 | 1.00E+00 |
| ENSG00000265445.1_RP11-849N  | ENSG00000160789.18_LMNA | 0.04259  | -0.117403385 | 0.200434989 | 6.02E-01 | 8.18E-01 | 1.00E+00 |
| ENSG00000261120.1_RP11-62H2  | ENSG00000160789.18_LMNA | -0.12887 | -0.282283472 | 0.030961589 | 1.14E-01 | 3.37E-01 | 1.00E+00 |
| ENSG00000253516.1_HMGB1P41   | ENSG00000160789.18_LMNA | -0.1684  | -0.319047661 | -0.00945319 | 3.81E-02 | 1.68E-01 | 1.00E+00 |
| ENSG00000213060.4_RP4-612B1  | ENSG00000160789.18_LMNA | 0.07966  | -0.080557901 | 0.235873689 | 3.29E-01 | 6.15E-01 | 1.00E+00 |
| ENSG00000225080.1_PFN1P4     | ENSG00000160789.18_LMNA | 0.05092  | -0.1091631   | 0.208433528 | 5.33E-01 | 7.75E-01 | 1.00E+00 |
| ENSG00000257964.1_RP11-133N  | ENSG00000160789.18_LMNA | -0.05146 | -0.208945115 | 0.108634561 | 5.29E-01 | 7.73E-01 | 1.00E+00 |
| ENSG00000237013.1_AC010987.1 | ENSG00000160789.18_LMNA | 0.28686  | 0.133768054  | 0.426579355 | 3.40E-04 | 4.94E-03 | 1.00E+00 |
| ENSG00000239462.1_CTD-2021J  | ENSG00000160789.18_LMNA | 0.02464  | -0.135094643 | 0.183118409 | 7.63E-01 | 9.01E-01 | 1.00E+00 |
| ENSG00000232555.1_AC104088.1 | ENSG00000160789.18_LMNA | -0.2787  | -0.419292444 | -0.12504233 | 5.08E-04 | 6.82E-03 | 1.00E+00 |
| ENSG00000242041.1_RP11-70F1  | ENSG00000160789.18_LMNA | 0.00198  | -0.157266589 | 0.161133593 | 9.81E-01 | 9.93E-01 | 1.00E+00 |
| ENSG00000248514.1_CTC-338M1  | ENSG00000160789.18_LMNA | 0.03661  | -0.1233054   | 0.194679963 | 6.54E-01 | 8.47E-01 | 1.00E+00 |
| ENSG00000275040.1_RP11-70D2  | ENSG00000160789.18_LMNA | 0.05661  | -0.103525062 | 0.213881792 | 4.88E-01 | 7.45E-01 | 1.00E+00 |
| ENSG00000260989.1_LA16c-395F | ENSG00000160789.18_LMNA | -0.01648 | -0.175223861 | 0.143093229 | 8.40E-01 | 9.38E-01 | 1.00E+00 |
| ENSG00000231882.1_F10-AS1    | ENSG00000160789.18_LMNA | -0.0487  | -0.206301582 | 0.111363756 | 5.51E-01 | 7.87E-01 | 1.00E+00 |
| ENSG00000263338.1_RP11-235E  | ENSG00000160789.18_LMNA | 0.03507  | -0.124829357 | 0.193190395 | 6.68E-01 | 8.54E-01 | 1.00E+00 |
| ENSG00000118113.10_MMP8      | ENSG00000160789.18_LMNA | 0.05343  | -0.106679481 | 0.210835981 | 5.13E-01 | 7.61E-01 | 1.00E+00 |
| ENSG00000276867.1_CTD-2358C  | ENSG00000160789.18_LMNA | -0.02769 | -0.186068801 | 0.132094685 | 7.35E-01 | 8.89E-01 | 1.00E+00 |
| ENSG00000236936.1_RP3-329E2  | ENSG00000160789.18_LMNA | 0.03051  | -0.129315645 | 0.188796815 | 7.09E-01 | 8.76E-01 | 1.00E+00 |
| ENSG00000279623.1_RP11-399C  | ENSG00000160789.18_LMNA | 0.04799  | -0.112065345 | 0.205621264 | 5.57E-01 | 7.91E-01 | 1.00E+00 |
| ENSG00000239482.5_RP11-90K6  | ENSG00000160789.18_LMNA | -0.27349 | -0.41463731  | -0.11949176 | 6.52E-04 | 8.30E-03 | 1.00E+00 |
| ENSG00000254420.1_RP11-452H  | ENSG00000160789.18_LMNA | 0.04205  | -0.117939985 | 0.199912659 | 6.07E-01 | 8.20E-01 | 1.00E+00 |
| ENSG00000266541.1_RP11-881L  | ENSG00000160789.18_LMNA | -0.0293  | -0.187621426 | 0.130513632 | 7.20E-01 | 8.81E-01 | 1.00E+00 |
| ENSG00000250641.1_XXbac-BPG  | ENSG00000160789.18_LMNA | -0.37212 | -0.501600864 | -0.2263224  | 2.35E-06 | 9.02E-05 | 1.21E-01 |
| ENSG00000242634.1_RPS24P16   | ENSG00000160789.18_LMNA | -0.11276 | -0.267166717 | 0.047287456 | 1.67E-01 | 4.24E-01 | 1.00E+00 |
| ENSG00000239405.1_TMED10P2   | ENSG00000160789.18_LMNA | 0.00899  | -0.150427189 | 0.167949141 | 9.12E-01 | 9.67E-01 | 1.00E+00 |
| ENSG00000231217.1_RP11-1M18  | ENSG00000160789.18_LMNA | 0.12985  | -0.029970432 | 0.283196241 | 1.11E-01 | 3.32E-01 | 1.00E+00 |

|                              |                         |          |              |             |          |          |          |
|------------------------------|-------------------------|----------|--------------|-------------|----------|----------|----------|
| ENSG00000173080.5_RXFP4      | ENSG00000160789.18_LMNA | 0.04136  | -0.118624269 | 0.199246308 | 6.13E-01 | 8.24E-01 | 1.00E+00 |
| ENSG00000143556.7_S100A7     | ENSG00000160789.18_LMNA | 0.14435  | -0.015202747 | 0.296729126 | 7.60E-02 | 2.64E-01 | 1.00E+00 |
| ENSG00000231029.2_RP3-455J7  | ENSG00000160789.18_LMNA | -0.05662 | -0.213893306 | 0.103513125 | 4.88E-01 | 7.45E-01 | 1.00E+00 |
| ENSG00000250699.1_AP000892.4 | ENSG00000160789.18_LMNA | -0.12411 | -0.27781929  | 0.035800293 | 1.28E-01 | 3.62E-01 | 1.00E+00 |
| ENSG00000269026.2_AC003006.1 | ENSG00000160789.18_LMNA | -0.03881 | -0.196793287 | 0.12114071  | 6.35E-01 | 8.36E-01 | 1.00E+00 |
| ENSG00000277984.1_RP11-735A  | ENSG00000160789.18_LMNA | -0.0368  | -0.194859465 | 0.123121652 | 6.53E-01 | 8.46E-01 | 1.00E+00 |
| ENSG00000259540.1_RP11-526I2 | ENSG00000160789.18_LMNA | 0.09845  | -0.061717437 | 0.253675333 | 2.28E-01 | 5.04E-01 | 1.00E+00 |
| ENSG00000251600.4_RP11-673E  | ENSG00000160789.18_LMNA | -0.39208 | -0.518888389 | -0.24837888 | 5.87E-07 | 2.99E-05 | 3.01E-02 |
| ENSG00000281530.1_DGCR12     | ENSG00000160789.18_LMNA | -0.04386 | -0.201652076 | 0.116152331 | 5.92E-01 | 8.11E-01 | 1.00E+00 |
| ENSG00000239924.1_RPL29P22   | ENSG00000160789.18_LMNA | 0.08343  | -0.076790408 | 0.23945052  | 3.07E-01 | 5.93E-01 | 1.00E+00 |
| ENSG00000217181.1_RP11-360O  | ENSG00000160789.18_LMNA | -0.00385 | -0.162950992 | 0.155445812 | 9.62E-01 | 9.85E-01 | 1.00E+00 |
| ENSG00000254300.1_LINC01111  | ENSG00000160789.18_LMNA | 0.1333   | -0.026463105 | 0.286421635 | 1.02E-01 | 3.15E-01 | 1.00E+00 |
| ENSG00000241088.2_RPL17P44   | ENSG00000160789.18_LMNA | 0.03019  | -0.129635736 | 0.188482851 | 7.12E-01 | 8.78E-01 | 1.00E+00 |
| ENSG00000264812.1_RP13-20L1  | ENSG00000160789.18_LMNA | -0.07294 | -0.229476593 | 0.087273521 | 3.72E-01 | 6.52E-01 | 1.00E+00 |
| ENSG00000254152.1_CTD-3107M  | ENSG00000160789.18_LMNA | 0.11824  | -0.041750082 | 0.272311389 | 1.47E-01 | 3.93E-01 | 1.00E+00 |
| ENSG00000243766.6_HOTTIP     | ENSG00000160789.18_LMNA | -0.33525 | -0.469401048 | -0.18597898 | 2.42E-05 | 6.03E-04 | 1.00E+00 |
| ENSG00000254985.1_RSFI-IT2   | ENSG00000160789.18_LMNA | -0.0006  | -0.159788701 | 0.15861259  | 9.94E-01 | 9.98E-01 | 1.00E+00 |
| ENSG00000224438.3_RPL23AP1   | ENSG00000160789.18_LMNA | 0.07552  | -0.084698579 | 0.231932643 | 3.55E-01 | 6.39E-01 | 1.00E+00 |
| ENSG00000106648.12_GALNTL5   | ENSG00000160789.18_LMNA | -0.16672 | -0.317490678 | -0.00772084 | 4.01E-02 | 1.74E-01 | 1.00E+00 |
| ENSG00000267074.1_RP11-1094I | ENSG00000160789.18_LMNA | 0.11079  | -0.049276168 | 0.265314655 | 1.74E-01 | 4.34E-01 | 1.00E+00 |
| ENSG00000227688.2_HNRNPA3F   | ENSG00000160789.18_LMNA | -0.09407 | -0.249536605 | 0.066117828 | 2.49E-01 | 5.29E-01 | 1.00E+00 |
| ENSG00000244573.3_RPL30P11   | ENSG00000160789.18_LMNA | -0.0171  | -0.175825313 | 0.142485311 | 8.34E-01 | 9.36E-01 | 1.00E+00 |
| ENSG00000228322.1_RP11-358M  | ENSG00000160789.18_LMNA | -0.19746 | -0.345792695 | -0.03950352 | 1.48E-02 | 8.68E-02 | 1.00E+00 |
| ENSG00000251356.1_RAB5CP2    | ENSG00000160789.18_LMNA | -0.05039 | -0.207922074 | 0.109691321 | 5.38E-01 | 7.78E-01 | 1.00E+00 |
| ENSG00000260498.4_RP4-536B2  | ENSG00000160789.18_LMNA | 0.00062  | -0.158599856 | 0.15980143  | 9.94E-01 | 9.98E-01 | 1.00E+00 |
| ENSG00000233524.1_RANP8      | ENSG00000160789.18_LMNA | -0.01112 | -0.170023076 | 0.14833993  | 8.92E-01 | 9.58E-01 | 1.00E+00 |
| ENSG00000248692.4_ADGRL3-A   | ENSG00000160789.18_LMNA | 0.03132  | -0.128522429 | 0.189574567 | 7.02E-01 | 8.72E-01 | 1.00E+00 |
| ENSG00000254936.4_AF131215.3 | ENSG00000160789.18_LMNA | 0.01335  | -0.146159354 | 0.172186725 | 8.70E-01 | 9.50E-01 | 1.00E+00 |
| ENSG00000232380.1_ZDHHC20P   | ENSG00000160789.18_LMNA | -0.01223 | -0.171094135 | 0.147260879 | 8.81E-01 | 9.54E-01 | 1.00E+00 |
| ENSG00000243025.1_MTAPP1     | ENSG00000160789.18_LMNA | 0.01539  | -0.144160189 | 0.174167675 | 8.51E-01 | 9.41E-01 | 1.00E+00 |
| ENSG00000269600.1_AC016629.3 | ENSG00000160789.18_LMNA | -0.18226 | -0.33183582  | -0.02375235 | 2.46E-02 | 1.25E-01 | 1.00E+00 |
| ENSG00000203900.2_RP11-261N  | ENSG00000160789.18_LMNA | -0.17712 | -0.327097216 | -0.01843911 | 2.90E-02 | 1.40E-01 | 1.00E+00 |
| ENSG00000228523.1_RP11-131O  | ENSG00000160789.18_LMNA | 0.01819  | -0.141421525 | 0.176877211 | 8.24E-01 | 9.31E-01 | 1.00E+00 |

|                              |                         |          |              |             |          |          |          |
|------------------------------|-------------------------|----------|--------------|-------------|----------|----------|----------|
| ENSG00000243521.2_RPL5P33    | ENSG00000160789.18_LMNA | -0.14693 | -0.299133782 | 0.012564362 | 7.09E-02 | 2.51E-01 | 1.00E+00 |
| ENSG00000255929.4_RP11-867G  | ENSG00000160789.18_LMNA | -0.12563 | -0.279248615 | 0.034252653 | 1.23E-01 | 3.53E-01 | 1.00E+00 |
| ENSG00000279592.1_RP11-417N  | ENSG00000160789.18_LMNA | -0.17032 | -0.320821062 | -0.0114286  | 3.59E-02 | 1.61E-01 | 1.00E+00 |
| ENSG00000204710.2_SPDYC      | ENSG00000160789.18_LMNA | 0.01448  | -0.145055701 | 0.173280641 | 8.59E-01 | 9.45E-01 | 1.00E+00 |
| ENSG00000258952.2_SALRNA1    | ENSG00000160789.18_LMNA | -0.09122 | -0.246832627 | 0.068986142 | 2.64E-01 | 5.47E-01 | 1.00E+00 |
| ENSG00000164900.4_GBX1       | ENSG00000160789.18_LMNA | 0.00303  | -0.15624842  | 0.162150139 | 9.70E-01 | 9.89E-01 | 1.00E+00 |
| ENSG00000233924.1_RPSAP13    | ENSG00000160789.18_LMNA | -0.05048 | -0.208007703 | 0.109602898 | 5.37E-01 | 7.78E-01 | 1.00E+00 |
| ENSG00000255106.1_RP11-58K2  | ENSG00000160789.18_LMNA | 0.00561  | -0.153724453 | 0.164667171 | 9.45E-01 | 9.78E-01 | 1.00E+00 |
| ENSG00000276272.1_RP11-121C  | ENSG00000160789.18_LMNA | 0.02419  | -0.135531657 | 0.182688136 | 7.67E-01 | 9.04E-01 | 1.00E+00 |
| ENSG00000184459.7_BPIFC      | ENSG00000160789.18_LMNA | -0.09457 | -0.250008479 | 0.065616739 | 2.46E-01 | 5.27E-01 | 1.00E+00 |
| ENSG00000197753.8_LHFPL5     | ENSG00000160789.18_LMNA | -0.13339 | -0.286506783 | 0.026370409 | 1.01E-01 | 3.14E-01 | 1.00E+00 |
| ENSG00000225931.3_RP3-395M2  | ENSG00000160789.18_LMNA | 0.06978  | -0.090421954 | 0.226468039 | 3.93E-01 | 6.71E-01 | 1.00E+00 |
| ENSG00000243838.1_PSMC1P7    | ENSG00000160789.18_LMNA | 0.05496  | -0.10515987  | 0.212304041 | 5.01E-01 | 7.53E-01 | 1.00E+00 |
| ENSG00000274893.1_RP11-15E1  | ENSG00000160789.18_LMNA | -0.08556 | -0.241468531 | 0.074660835 | 2.95E-01 | 5.80E-01 | 1.00E+00 |
| ENSG00000140623.12_SEPT12    | ENSG00000160789.18_LMNA | -0.04966 | -0.207225309 | 0.110410641 | 5.43E-01 | 7.82E-01 | 1.00E+00 |
| ENSG00000228509.4_AC006460.  | ENSG00000160789.18_LMNA | 0.06877  | -0.091428117 | 0.225505301 | 4.00E-01 | 6.76E-01 | 1.00E+00 |
| ENSG00000240668.1_KRT8P36    | ENSG00000160789.18_LMNA | 0.30384  | 0.151996279  | 0.441680204 | 1.42E-04 | 2.48E-03 | 1.00E+00 |
| ENSG00000261442.1_RP11-709D  | ENSG00000160789.18_LMNA | 0.15012  | -0.009299922 | 0.302103564 | 6.49E-02 | 2.37E-01 | 1.00E+00 |
| ENSG00000214584.3_PGGT1BP2   | ENSG00000160789.18_LMNA | 0.0188   | -0.140823021 | 0.177468708 | 8.18E-01 | 9.29E-01 | 1.00E+00 |
| ENSG00000189167.10_ZAR1L     | ENSG00000160789.18_LMNA | 0.08302  | -0.077203381 | 0.239058864 | 3.09E-01 | 5.96E-01 | 1.00E+00 |
| ENSG00000188388.10_GOLGA6L   | ENSG00000160789.18_LMNA | -0.0185  | -0.17718216  | 0.141112993 | 8.21E-01 | 9.30E-01 | 1.00E+00 |
| ENSG00000243480.6_AMY2A      | ENSG00000160789.18_LMNA | -0.13171 | -0.284937657 | 0.028077755 | 1.06E-01 | 3.23E-01 | 1.00E+00 |
| ENSG00000228819.1_RP1-305B1  | ENSG00000160789.18_LMNA | 0.08505  | -0.075165727 | 0.240990336 | 2.97E-01 | 5.83E-01 | 1.00E+00 |
| ENSG00000186652.8_PRG2       | ENSG00000160789.18_LMNA | 0.02891  | -0.130896973 | 0.187245124 | 7.24E-01 | 8.83E-01 | 1.00E+00 |
| ENSG00000243440.5_AF165138.7 | ENSG00000160789.18_LMNA | 0.00968  | -0.149753914 | 0.168618426 | 9.06E-01 | 9.64E-01 | 1.00E+00 |
| ENSG00000204010.3_IFIT1B     | ENSG00000160789.18_LMNA | -0.09618 | -0.251528301 | 0.064001743 | 2.39E-01 | 5.17E-01 | 1.00E+00 |
| ENSG00000168928.11_CTRB2     | ENSG00000160789.18_LMNA | 0.00694  | -0.152430828 | 0.165955637 | 9.32E-01 | 9.74E-01 | 1.00E+00 |
| ENSG00000278505.3_C17orf78   | ENSG00000160789.18_LMNA | -0.06966 | -0.226350339 | 0.090544998 | 3.94E-01 | 6.71E-01 | 1.00E+00 |
| ENSG00000278963.1_RP11-294J  | ENSG00000160789.18_LMNA | -0.01631 | -0.175055556 | 0.143263301 | 8.42E-01 | 9.38E-01 | 1.00E+00 |
| ENSG00000280384.1_RP4-695O2  | ENSG00000160789.18_LMNA | -0.00781 | -0.166800522 | 0.151581967 | 9.24E-01 | 9.71E-01 | 1.00E+00 |
| ENSG00000218713.1_RP1-34L19  | ENSG00000160789.18_LMNA | 0.11467  | -0.045354514 | 0.268964616 | 1.59E-01 | 4.13E-01 | 1.00E+00 |
| ENSG00000188467.9_SLC24A5    | ENSG00000160789.18_LMNA | 0.05005  | -0.110025282 | 0.207598625 | 5.40E-01 | 7.80E-01 | 1.00E+00 |
| ENSG00000215559.7_ANKRD20A   | ENSG00000160789.18_LMNA | -0.07534 | -0.231761985 | 0.084877635 | 3.56E-01 | 6.40E-01 | 1.00E+00 |

|                              |                         |          |              |             |          |          |          |
|------------------------------|-------------------------|----------|--------------|-------------|----------|----------|----------|
| ENSG00000144644.13_GADL1     | ENSG00000160789.18_LMNA | -0.05964 | -0.216785996 | 0.100511342 | 4.65E-01 | 7.27E-01 | 1.00E+00 |
| ENSG00000230666.4_CEACAM22   | ENSG00000160789.18_LMNA | 0.03366  | -0.126216219 | 0.191833553 | 6.81E-01 | 8.61E-01 | 1.00E+00 |
| ENSG00000189433.5_GJB4       | ENSG00000160789.18_LMNA | 0.14765  | -0.011827904 | 0.299804294 | 6.95E-02 | 2.48E-01 | 1.00E+00 |
| ENSG00000188937.5_NYX        | ENSG00000160789.18_LMNA | -0.17868 | -0.328533979 | -0.02004827 | 2.76E-02 | 1.36E-01 | 1.00E+00 |
| ENSG00000204022.8_LIPJ       | ENSG00000160789.18_LMNA | -0.04591 | -0.203625411 | 0.114121775 | 5.74E-01 | 8.01E-01 | 1.00E+00 |
| ENSG00000259096.1_FAM35CP    | ENSG00000160789.18_LMNA | -0.16656 | -0.317342754 | -0.00755636 | 4.03E-02 | 1.74E-01 | 1.00E+00 |
| ENSG00000233008.4_RP11-475O  | ENSG00000160789.18_LMNA | -0.13084 | -0.284118682 | 0.028968147 | 1.08E-01 | 3.27E-01 | 1.00E+00 |
| ENSG00000158125.8_XDH        | ENSG00000160789.18_LMNA | 0.1337   | -0.026052079 | 0.286799157 | 1.01E-01 | 3.12E-01 | 1.00E+00 |
| ENSG00000280258.1_           | ENSG00000160789.18_LMNA | 0.00976  | -0.149670101 | 0.168701721 | 9.05E-01 | 9.63E-01 | 1.00E+00 |
| ENSG00000219448.1_           | ENSG00000160789.18_LMNA | -0.04977 | -0.207327631 | 0.110305027 | 5.43E-01 | 7.81E-01 | 1.00E+00 |
| ENSG00000228863.7_RP11-404F  | ENSG00000160789.18_LMNA | -0.01864 | -0.177309979 | 0.140983653 | 8.20E-01 | 9.30E-01 | 1.00E+00 |
| ENSG00000258555.4_SPECC1L-/  | ENSG00000160789.18_LMNA | 0.00562  | -0.15372012  | 0.164671489 | 9.45E-01 | 9.78E-01 | 1.00E+00 |
| ENSG00000211966.2_IGHV5-51   | ENSG00000160789.18_LMNA | 0.06789  | -0.092307042 | 0.224663804 | 4.06E-01 | 6.81E-01 | 1.00E+00 |
| ENSG00000252206.1_RNU7-40P   | ENSG00000160789.18_LMNA | -0.02768 | -0.186056777 | 0.132106923 | 7.35E-01 | 8.89E-01 | 1.00E+00 |
| ENSG00000221069.1_           | ENSG00000160789.18_LMNA | 0.00477  | -0.154546147 | 0.16384819  | 9.53E-01 | 9.81E-01 | 1.00E+00 |
| ENSG00000199161.1_MIR126     | ENSG00000160789.18_LMNA | 0.16928  | 0.010361227  | 0.31986311  | 3.71E-02 | 1.65E-01 | 1.00E+00 |
| ENSG00000281882.1_           | ENSG00000160789.18_LMNA | -0.10222 | -0.257236479 | 0.057921307 | 2.10E-01 | 4.83E-01 | 1.00E+00 |
| ENSG00000209082.1_MT-TL1     | ENSG00000160789.18_LMNA | -0.14192 | -0.294470326 | 0.017677148 | 8.11E-02 | 2.75E-01 | 1.00E+00 |
| ENSG00000200579.1_Y_RNA      | ENSG00000160789.18_LMNA | 0.03728  | -0.122646126 | 0.195323905 | 6.48E-01 | 8.44E-01 | 1.00E+00 |
| ENSG00000258231.4_RP11-362K  | ENSG00000160789.18_LMNA | -0.10024 | -0.255368647 | 0.059913527 | 2.19E-01 | 4.94E-01 | 1.00E+00 |
| ENSG00000276322.1_           | ENSG00000160789.18_LMNA | 0.1216   | -0.038343673 | 0.275467327 | 1.36E-01 | 3.75E-01 | 1.00E+00 |
| ENSG00000207088.1_SNORA7B    | ENSG00000160789.18_LMNA | -0.05325 | -0.210662204 | 0.106859261 | 5.15E-01 | 7.62E-01 | 1.00E+00 |
| ENSG00000221338.2_           | ENSG00000160789.18_LMNA | 0.04359  | -0.116418777 | 0.201392946 | 5.94E-01 | 8.13E-01 | 1.00E+00 |
| ENSG00000212385.1_RNU6-817F  | ENSG00000160789.18_LMNA | -0.03499 | -0.19311722  | 0.124904183 | 6.69E-01 | 8.54E-01 | 1.00E+00 |
| ENSG00000178776.4_C5orf46    | ENSG00000160789.18_LMNA | 0.09692  | -0.063251962 | 0.252233367 | 2.35E-01 | 5.13E-01 | 1.00E+00 |
| ENSG00000206965.1_RNU6-5P    | ENSG00000160789.18_LMNA | -0.03888 | -0.196860617 | 0.121071694 | 6.34E-01 | 8.36E-01 | 1.00E+00 |
| ENSG00000207175.1_RNU1-67P   | ENSG00000160789.18_LMNA | -0.03641 | -0.194485684 | 0.123504249 | 6.56E-01 | 8.48E-01 | 1.00E+00 |
| ENSG00000240922.1_LSAMP-AS   | ENSG00000160789.18_LMNA | 0.07852  | -0.081697789 | 0.234789795 | 3.36E-01 | 6.22E-01 | 1.00E+00 |
| ENSG00000251155.2_SEPT14P4   | ENSG00000160789.18_LMNA | -0.08291 | -0.238952224 | 0.077315807 | 3.10E-01 | 5.96E-01 | 1.00E+00 |
| ENSG00000232663.2_RP3-477M7  | ENSG00000160789.18_LMNA | -0.06269 | -0.219700883 | 0.09748067  | 4.43E-01 | 7.10E-01 | 1.00E+00 |
| ENSG00000238271.2_IFNWP19    | ENSG00000160789.18_LMNA | -0.02436 | -0.182850429 | 0.135366836 | 7.66E-01 | 9.03E-01 | 1.00E+00 |
| ENSG00000225647.1_AC005487.: | ENSG00000160789.18_LMNA | -0.0773  | -0.233622959 | 0.082923979 | 3.44E-01 | 6.29E-01 | 1.00E+00 |
| ENSG00000223117.1_RN7SKP29   | ENSG00000160789.18_LMNA | 0.20922  | 0.051742669  | 0.356544849 | 9.69E-03 | 6.41E-02 | 1.00E+00 |

|                              |                         |          |              |             |          |          |          |
|------------------------------|-------------------------|----------|--------------|-------------|----------|----------|----------|
| ENSG00000249430.1_           | ENSG00000160789.18_LMNA | 0.05505  | -0.105069308 | 0.212391486 | 5.01E-01 | 7.53E-01 | 1.00E+00 |
| ENSG00000257845.1_RP11-626P  | ENSG00000160789.18_LMNA | -0.18287 | -0.332396484 | -0.02438216 | 2.41E-02 | 1.23E-01 | 1.00E+00 |
| ENSG00000227857.2_RP4-533D7  | ENSG00000160789.18_LMNA | -0.01863 | -0.1773085   | 0.140985151 | 8.20E-01 | 9.30E-01 | 1.00E+00 |
| ENSG00000265753.2_RN7SL444f  | ENSG00000160789.18_LMNA | 0.04208  | -0.1179093   | 0.199942532 | 6.07E-01 | 8.20E-01 | 1.00E+00 |
| ENSG00000189099.10_PRSS48    | ENSG00000160789.18_LMNA | -0.34913 | -0.481562275 | -0.2011044  | 1.04E-05 | 3.01E-04 | 5.34E-01 |
| ENSG00000241810.1_HMGN2P13   | ENSG00000160789.18_LMNA | 0.03108  | -0.128756164 | 0.189345431 | 7.04E-01 | 8.74E-01 | 1.00E+00 |
| ENSG00000269873.1_CTD-2587H  | ENSG00000160789.18_LMNA | -0.03173 | -0.189967582 | 0.128121445 | 6.98E-01 | 8.71E-01 | 1.00E+00 |
| ENSG00000267138.1_AC005954.1 | ENSG00000160789.18_LMNA | -0.11772 | -0.271823913 | 0.042275597 | 1.49E-01 | 3.95E-01 | 1.00E+00 |
| ENSG00000274295.1_RP11-1081f | ENSG00000160789.18_LMNA | 0.03884  | -0.121109599 | 0.196823639 | 6.35E-01 | 8.36E-01 | 1.00E+00 |
| ENSG00000261240.1_RP11-304L  | ENSG00000160789.18_LMNA | 0.18725  | 0.028916155  | 0.336426298 | 2.09E-02 | 1.11E-01 | 1.00E+00 |
| ENSG00000225039.1_LINC01058  | ENSG00000160789.18_LMNA | 0.11894  | -0.041039693 | 0.272970102 | 1.44E-01 | 3.89E-01 | 1.00E+00 |
| ENSG00000225110.1_LLOXNC01   | ENSG00000160789.18_LMNA | -0.05785 | -0.215072302 | 0.102290363 | 4.79E-01 | 7.37E-01 | 1.00E+00 |
| ENSG00000269392.1_CTB-191K2  | ENSG00000160789.18_LMNA | 0.04112  | -0.118859589 | 0.199017088 | 6.15E-01 | 8.25E-01 | 1.00E+00 |
| ENSG00000255572.1_RP11-273B  | ENSG00000160789.18_LMNA | -0.21781 | -0.364372765 | -0.06071114 | 7.03E-03 | 5.06E-02 | 1.00E+00 |
| ENSG00000228074.1_UBBP5      | ENSG00000160789.18_LMNA | 0.01109  | -0.148368109 | 0.169995095 | 8.92E-01 | 9.58E-01 | 1.00E+00 |
| ENSG00000275393.1_RP11-568J  | ENSG00000160789.18_LMNA | 0.05995  | -0.100210667 | 0.217075437 | 4.63E-01 | 7.26E-01 | 1.00E+00 |
| ENSG00000270236.1_RP11-265B  | ENSG00000160789.18_LMNA | -0.02271 | -0.181254336 | 0.13698703  | 7.81E-01 | 9.10E-01 | 1.00E+00 |
| ENSG00000264513.1_RP11-556C  | ENSG00000160789.18_LMNA | -0.08074 | -0.236896902 | 0.079481068 | 3.23E-01 | 6.09E-01 | 1.00E+00 |
| ENSG00000275248.1_RP11-40E6  | ENSG00000160789.18_LMNA | 0.16391  | 0.004836499  | 0.314894601 | 4.36E-02 | 1.84E-01 | 1.00E+00 |
| ENSG00000228976.1_SUMO2P8    | ENSG00000160789.18_LMNA | 0.06574  | -0.094444913 | 0.222614993 | 4.21E-01 | 6.93E-01 | 1.00E+00 |
| ENSG00000233664.1_NDUFS5P3   | ENSG00000160789.18_LMNA | 0.10732  | -0.05278253  | 0.262043562 | 1.88E-01 | 4.55E-01 | 1.00E+00 |
| ENSG00000232217.1_FTLF8      | ENSG00000160789.18_LMNA | -0.02598 | -0.184415458 | 0.133776522 | 7.51E-01 | 8.96E-01 | 1.00E+00 |
| ENSG00000234997.1_AC016745.1 | ENSG00000160789.18_LMNA | 0.20915  | 0.051668486  | 0.356479921 | 9.71E-03 | 6.43E-02 | 1.00E+00 |
| ENSG00000225527.1_RP11-383B  | ENSG00000160789.18_LMNA | -0.11905 | -0.273076451 | 0.040924971 | 1.44E-01 | 3.88E-01 | 1.00E+00 |
| ENSG00000231903.1_AC079354.1 | ENSG00000160789.18_LMNA | 0.03473  | -0.125166639 | 0.192860525 | 6.71E-01 | 8.56E-01 | 1.00E+00 |
| ENSG00000253515.1_RP11-417F  | ENSG00000160789.18_LMNA | -0.12494 | -0.278599692 | 0.034955479 | 1.25E-01 | 3.57E-01 | 1.00E+00 |
| ENSG00000213529.3_RP11-432F  | ENSG00000160789.18_LMNA | -0.06778 | -0.224555483 | 0.092420145 | 4.07E-01 | 6.82E-01 | 1.00E+00 |
| ENSG00000271141.1_RP11-171I2 | ENSG00000160789.18_LMNA | 0.02573  | -0.134019852 | 0.184176102 | 7.53E-01 | 8.97E-01 | 1.00E+00 |
| ENSG00000229869.1_RP11-363N  | ENSG00000160789.18_LMNA | 0.00789  | -0.15149907  | 0.166883005 | 9.23E-01 | 9.71E-01 | 1.00E+00 |
| ENSG00000224745.1_RP11-380G  | ENSG00000160789.18_LMNA | -0.03453 | -0.192667198 | 0.125364276 | 6.73E-01 | 8.56E-01 | 1.00E+00 |
| ENSG00000240298.3_RPL36AP4f  | ENSG00000160789.18_LMNA | -0.0059  | -0.164941915 | 0.1534487   | 9.43E-01 | 9.77E-01 | 1.00E+00 |
| ENSG00000241103.1_RP11-398J  | ENSG00000160789.18_LMNA | 0.06121  | -0.09895994  | 0.218278835 | 4.54E-01 | 7.19E-01 | 1.00E+00 |
| ENSG00000234005.3_GAPDHP22   | ENSG00000160789.18_LMNA | 0.00733  | -0.152051393 | 0.166333352 | 9.29E-01 | 9.73E-01 | 1.00E+00 |

|                             |                         |          |              |             |          |          |          |
|-----------------------------|-------------------------|----------|--------------|-------------|----------|----------|----------|
| ENSG00000224883.1_CTA-250D1 | ENSG00000160789.18_LMNA | -0.25635 | -0.399254389 | -0.10128015 | 1.43E-03 | 1.52E-02 | 1.00E+00 |
| ENSG00000268520.1_CTD-2616J | ENSG00000160789.18_LMNA | 0.09658  | -0.063597129 | 0.251908826 | 2.37E-01 | 5.15E-01 | 1.00E+00 |
| ENSG00000241334.2_RPL35AP3  | ENSG00000160789.18_LMNA | 0.09801  | -0.062165415 | 0.253254522 | 2.30E-01 | 5.07E-01 | 1.00E+00 |
| ENSG00000254057.1_RP3-388N1 | ENSG00000160789.18_LMNA | 0.0727   | -0.087508891 | 0.229251889 | 3.73E-01 | 6.53E-01 | 1.00E+00 |
| ENSG00000230526.1_RP11-472G | ENSG00000160789.18_LMNA | 0.01045  | -0.148993942 | 0.169373542 | 8.98E-01 | 9.60E-01 | 1.00E+00 |
| ENSG00000278493.1_CTD-2382E | ENSG00000160789.18_LMNA | 0.12708  | -0.032780187 | 0.280607226 | 1.19E-01 | 3.46E-01 | 1.00E+00 |
| ENSG00000213873.4_RP11-678D | ENSG00000160789.18_LMNA | 0.0307   | -0.129134595 | 0.188974372 | 7.07E-01 | 8.76E-01 | 1.00E+00 |
| ENSG00000275674.1_RP11-697E | ENSG00000160789.18_LMNA | -0.02865 | -0.186995397 | 0.131151319 | 7.26E-01 | 8.84E-01 | 1.00E+00 |
| ENSG00000259647.1_RP11-143J | ENSG00000160789.18_LMNA | -0.02105 | -0.17964404  | 0.138619916 | 7.97E-01 | 9.18E-01 | 1.00E+00 |
| ENSG00000231494.1_AC104634  | ENSG00000160789.18_LMNA | -0.13042 | -0.283726321 | 0.029394547 | 1.09E-01 | 3.29E-01 | 1.00E+00 |
| ENSG00000237347.2_AC004461  | ENSG00000160789.18_LMNA | 0.15253  | -0.006840134 | 0.304337339 | 6.07E-02 | 2.27E-01 | 1.00E+00 |
| ENSG00000279206.1_RP5-991G2 | ENSG00000160789.18_LMNA | 0.15011  | -0.009315903 | 0.302089041 | 6.49E-02 | 2.37E-01 | 1.00E+00 |
| ENSG00000242683.1_RPL12P21  | ENSG00000160789.18_LMNA | -0.02434 | -0.182828366 | 0.135389244 | 7.66E-01 | 9.03E-01 | 1.00E+00 |
| ENSG00000274093.1_RP11-140H | ENSG00000160789.18_LMNA | -0.20624 | -0.353823452 | -0.04863623 | 1.08E-02 | 6.92E-02 | 1.00E+00 |
| ENSG00000241527.1_CA15P1    | ENSG00000160789.18_LMNA | -0.26062 | -0.403095894 | -0.10580942 | 1.18E-03 | 1.32E-02 | 1.00E+00 |
| ENSG00000233189.1_RPL12P29  | ENSG00000160789.18_LMNA | -0.03446 | -0.192600133 | 0.125432831 | 6.73E-01 | 8.57E-01 | 1.00E+00 |
| ENSG00000230988.3_RPL23AP1  | ENSG00000160789.18_LMNA | 0.09923  | -0.060933471 | 0.254411472 | 2.24E-01 | 5.00E-01 | 1.00E+00 |
| ENSG00000205596.4_RP5-1132H | ENSG00000160789.18_LMNA | -0.01808 | -0.176772514 | 0.141527439 | 8.25E-01 | 9.31E-01 | 1.00E+00 |
| ENSG00000276127.1_RP11-154D | ENSG00000160789.18_LMNA | -0.03626 | -0.194340936 | 0.123652385 | 6.57E-01 | 8.49E-01 | 1.00E+00 |
| ENSG00000274358.1           | ENSG00000160789.18_LMNA | -0.12605 | -0.279634501 | 0.033834568 | 1.22E-01 | 3.51E-01 | 1.00E+00 |
| ENSG00000259059.1_PEBP1P1   | ENSG00000160789.18_LMNA | -0.10067 | -0.255772718 | 0.059482759 | 2.17E-01 | 4.92E-01 | 1.00E+00 |
| ENSG00000254037.2_RP11-775B | ENSG00000160789.18_LMNA | 0.08441  | -0.075813353 | 0.240376729 | 3.01E-01 | 5.88E-01 | 1.00E+00 |
| ENSG00000225794.1_AC073321  | ENSG00000160789.18_LMNA | -0.02185 | -0.180420709 | 0.137832567 | 7.89E-01 | 9.14E-01 | 1.00E+00 |
| ENSG00000243635.1_RP11-281P | ENSG00000160789.18_LMNA | 0.01683  | -0.142757552 | 0.175555997 | 8.37E-01 | 9.37E-01 | 1.00E+00 |
| ENSG00000254397.1_CTD-2371C | ENSG00000160789.18_LMNA | 0.08014  | -0.08008125  | 0.236326692 | 3.26E-01 | 6.13E-01 | 1.00E+00 |
| ENSG00000269097.1_TPRG1LP1  | ENSG00000160789.18_LMNA | -0.0561  | -0.213393072 | 0.10403164  | 4.92E-01 | 7.48E-01 | 1.00E+00 |
| ENSG00000275140.1_CH17-478G | ENSG00000160789.18_LMNA | 0.00702  | -0.152352355 | 0.166033762 | 9.32E-01 | 9.73E-01 | 1.00E+00 |
| ENSG00000139144.8_PIK3C2G   | ENSG00000160789.18_LMNA | -0.1928  | -0.341521537 | -0.03466705 | 1.73E-02 | 9.73E-02 | 1.00E+00 |
| ENSG00000248968.1_CTD-2256P | ENSG00000160789.18_LMNA | 0.02589  | -0.133863335 | 0.184330067 | 7.52E-01 | 8.96E-01 | 1.00E+00 |
| ENSG00000249094.2_RP1-7G5.6 | ENSG00000160789.18_LMNA | -0.26885 | -0.410482536 | -0.11455333 | 8.11E-04 | 9.83E-03 | 1.00E+00 |
| ENSG00000257194.2_RP11-567C | ENSG00000160789.18_LMNA | 0.11927  | -0.040708507 | 0.273277096 | 1.43E-01 | 3.87E-01 | 1.00E+00 |
| ENSG00000275562.1_RP11-3K24 | ENSG00000160789.18_LMNA | -0.07203 | -0.228606985 | 0.088184211 | 3.78E-01 | 6.57E-01 | 1.00E+00 |
| ENSG00000185467.7_KPNA7     | ENSG00000160789.18_LMNA | 0.15851  | -0.000707734 | 0.309891409 | 5.11E-02 | 2.04E-01 | 1.00E+00 |

|                              |                         |          |              |             |          |          |          |
|------------------------------|-------------------------|----------|--------------|-------------|----------|----------|----------|
| ENSG00000146666.5_LINC00525  | ENSG00000160789.18_LMNA | 0.16719  | 0.008211007  | 0.317931392 | 3.95E-02 | 1.72E-01 | 1.00E+00 |
| ENSG00000237088.1_RP11-73E6  | ENSG00000160789.18_LMNA | -0.03272 | -0.190929368 | 0.127139719 | 6.89E-01 | 8.66E-01 | 1.00E+00 |
| ENSG00000266445.1_RP13-991F  | ENSG00000160789.18_LMNA | 0.11178  | -0.04827641  | 0.266246007 | 1.70E-01 | 4.29E-01 | 1.00E+00 |
| ENSG00000265845.2_RP11-20B2  | ENSG00000160789.18_LMNA | 0.178    | 0.019345598  | 0.327906765 | 2.82E-02 | 1.37E-01 | 1.00E+00 |
| ENSG00000136688.9_IL36G      | ENSG00000160789.18_LMNA | -0.00989 | -0.168825683 | 0.149545362 | 9.04E-01 | 9.63E-01 | 1.00E+00 |
| ENSG00000253647.1_CTD-2270F  | ENSG00000160789.18_LMNA | -0.05143 | -0.208920492 | 0.108660004 | 5.29E-01 | 7.73E-01 | 1.00E+00 |
| ENSG00000181819.14_KCTD9P2   | ENSG00000160789.18_LMNA | 0.01126  | -0.148207212 | 0.170154851 | 8.91E-01 | 9.57E-01 | 1.00E+00 |
| ENSG00000250215.1_CIR1P2     | ENSG00000160789.18_LMNA | -0.27696 | -0.417741757 | -0.12319132 | 5.52E-04 | 7.29E-03 | 1.00E+00 |
| ENSG00000249069.6_LINC01033  | ENSG00000160789.18_LMNA | -0.11497 | -0.269243396 | 0.045054584 | 1.58E-01 | 4.12E-01 | 1.00E+00 |
| ENSG00000277288.2_C10orf142  | ENSG00000160789.18_LMNA | 0.01466  | -0.144879201 | 0.173455511 | 8.58E-01 | 9.44E-01 | 1.00E+00 |
| ENSG00000204603.5_LINC01257  | ENSG00000160789.18_LMNA | -0.2534  | -0.396603409 | -0.09816174 | 1.63E-03 | 1.68E-02 | 1.00E+00 |
| ENSG00000214354.3_AC133644.1 | ENSG00000160789.18_LMNA | -0.00497 | -0.164044956 | 0.15434877  | 9.52E-01 | 9.81E-01 | 1.00E+00 |
| ENSG00000233963.1_ATP8A2P3   | ENSG00000160789.18_LMNA | 0.03712  | -0.122807555 | 0.195166256 | 6.50E-01 | 8.45E-01 | 1.00E+00 |
| ENSG00000180071.17_ANKRD18   | ENSG00000160789.18_LMNA | -0.10667 | -0.261427924 | 0.05344158  | 1.91E-01 | 4.59E-01 | 1.00E+00 |
| ENSG00000248885.1_RP11-950K  | ENSG00000160789.18_LMNA | -0.03004 | -0.188338899 | 0.129782476 | 7.13E-01 | 8.78E-01 | 1.00E+00 |
| ENSG00000273062.1_RP11-428K  | ENSG00000160789.18_LMNA | -0.21494 | -0.361757641 | -0.05770952 | 7.83E-03 | 5.47E-02 | 1.00E+00 |
| ENSG00000261083.1_RP11-93I21 | ENSG00000160789.18_LMNA | 0.04127  | -0.118711023 | 0.199161807 | 6.14E-01 | 8.24E-01 | 1.00E+00 |
| ENSG00000115474.6_KCNJ13     | ENSG00000160789.18_LMNA | -0.2885  | -0.428043085 | -0.13552629 | 3.13E-04 | 4.65E-03 | 1.00E+00 |
| ENSG00000103832.10_GOLGA8L   | ENSG00000160789.18_LMNA | -0.00177 | -0.160929541 | 0.157470886 | 9.83E-01 | 9.94E-01 | 1.00E+00 |
| ENSG00000226321.5_CROCC2     | ENSG00000160789.18_LMNA | 0.05398  | -0.106133089 | 0.211364003 | 5.09E-01 | 7.58E-01 | 1.00E+00 |
| ENSG00000232992.2_AHCYP4     | ENSG00000160789.18_LMNA | -0.0417  | -0.199578784 | 0.118282883 | 6.10E-01 | 8.22E-01 | 1.00E+00 |
| ENSG00000280321.1_RP11-1110  | ENSG00000160789.18_LMNA | 0.01147  | -0.147999191 | 0.170361372 | 8.88E-01 | 9.57E-01 | 1.00E+00 |
| ENSG00000251478.1_CTD-2122P  | ENSG00000160789.18_LMNA | 0.07025  | -0.089960963 | 0.226908927 | 3.90E-01 | 6.68E-01 | 1.00E+00 |
| ENSG00000214097.4_SMC01      | ENSG00000160789.18_LMNA | 0.04366  | -0.116349509 | 0.201460316 | 5.93E-01 | 8.12E-01 | 1.00E+00 |
| ENSG00000261411.1_RP11-268G  | ENSG00000160789.18_LMNA | -0.20953 | -0.356823947 | -0.05206159 | 9.58E-03 | 6.36E-02 | 1.00E+00 |
| ENSG00000267749.1_CTC-265F1  | ENSG00000160789.18_LMNA | 0.15573  | -0.003557313 | 0.307313199 | 5.54E-02 | 2.15E-01 | 1.00E+00 |
| ENSG00000243915.1_THAP12P2   | ENSG00000160789.18_LMNA | -0.08545 | -0.241365923 | 0.074769185 | 2.95E-01 | 5.81E-01 | 1.00E+00 |
| ENSG00000166961.13_MS4A15    | ENSG00000160789.18_LMNA | 0.07525  | -0.084965075 | 0.23167864  | 3.57E-01 | 6.40E-01 | 1.00E+00 |
| ENSG00000259422.1_RP11-593F  | ENSG00000160789.18_LMNA | 0.01181  | -0.147667887 | 0.17069023  | 8.85E-01 | 9.55E-01 | 1.00E+00 |
| ENSG00000143452.14_HORMAD    | ENSG00000160789.18_LMNA | -0.00494 | -0.164008591 | 0.15438525  | 9.52E-01 | 9.81E-01 | 1.00E+00 |
| ENSG00000254870.4_ATP6V1G2   | ENSG00000160789.18_LMNA | -0.09198 | -0.247558894 | 0.068216248 | 2.60E-01 | 5.43E-01 | 1.00E+00 |
| ENSG00000279544.1_AL133243.4 | ENSG00000160789.18_LMNA | -0.03564 | -0.193737996 | 0.124269288 | 6.63E-01 | 8.51E-01 | 1.00E+00 |
| ENSG00000176020.8_AMIGO3     | ENSG00000160789.18_LMNA | 0.07124  | -0.088970558 | 0.227855703 | 3.83E-01 | 6.62E-01 | 1.00E+00 |

|                              |                         |          |              |             |          |          |          |
|------------------------------|-------------------------|----------|--------------|-------------|----------|----------|----------|
| ENSG00000234512.1_TLR12P     | ENSG00000160789.18_LMNA | -0.06896 | -0.225682768 | 0.091242694 | 3.99E-01 | 6.75E-01 | 1.00E+00 |
| ENSG00000255293.1_WIZP1      | ENSG00000160789.18_LMNA | -0.03617 | -0.194249319 | 0.12374614  | 6.58E-01 | 8.49E-01 | 1.00E+00 |
| ENSG00000196811.10_CHRNG     | ENSG00000160789.18_LMNA | 0.01564  | -0.143919481 | 0.174406016 | 8.48E-01 | 9.41E-01 | 1.00E+00 |
| ENSG00000271013.1_LRRC37A9   | ENSG00000160789.18_LMNA | 0.04597  | -0.114063328 | 0.203682173 | 5.74E-01 | 8.01E-01 | 1.00E+00 |
| ENSG00000214946.12_TBC1D26   | ENSG00000160789.18_LMNA | -0.0713  | -0.227915381 | 0.088908109 | 3.83E-01 | 6.61E-01 | 1.00E+00 |
| ENSG00000157211.10_CDGP2     | ENSG00000160789.18_LMNA | -0.0817  | -0.237807459 | 0.078522174 | 3.17E-01 | 6.04E-01 | 1.00E+00 |
| ENSG00000274317.1_RP11-93G5  | ENSG00000160789.18_LMNA | -0.00015 | -0.159349203 | 0.159052194 | 9.99E-01 | 9.99E-01 | 1.00E+00 |
| ENSG00000104848.1_KCNA7      | ENSG00000160789.18_LMNA | 0.16687  | 0.007879803  | 0.317633615 | 3.99E-02 | 1.73E-01 | 1.00E+00 |
| ENSG00000111704.9_NANOG      | ENSG00000160789.18_LMNA | -0.04482 | -0.202579033 | 0.115198826 | 5.83E-01 | 8.06E-01 | 1.00E+00 |
| ENSG00000280575.1_AC024361.  | ENSG00000160789.18_LMNA | 0.14056  | -0.019066245 | 0.293200734 | 8.41E-02 | 2.81E-01 | 1.00E+00 |
| ENSG00000277775.1_HIST1H3F   | ENSG00000160789.18_LMNA | 0.21299  | 0.055677373  | 0.359984441 | 8.43E-03 | 5.79E-02 | 1.00E+00 |
| ENSG00000248475.4_RP11-479C  | ENSG00000160789.18_LMNA | -0.11427 | -0.26858738  | 0.04576028  | 1.61E-01 | 4.15E-01 | 1.00E+00 |
| ENSG00000264534.2_MIR378B    | ENSG00000160789.18_LMNA | -0.07916 | -0.235394847 | 0.081061582 | 3.32E-01 | 6.18E-01 | 1.00E+00 |
| ENSG00000181374.6_CCL13      | ENSG00000160789.18_LMNA | 0.15918  | -2.29E-05    | 0.310510377 | 5.01E-02 | 2.02E-01 | 1.00E+00 |
| ENSG00000271584.1_RP11-89C3  | ENSG00000160789.18_LMNA | -0.13935 | -0.292075778 | 0.020296086 | 8.68E-02 | 2.86E-01 | 1.00E+00 |
| ENSG00000281780.1_snoZ196    | ENSG00000160789.18_LMNA | 0.0539   | -0.106210694 | 0.211289018 | 5.10E-01 | 7.59E-01 | 1.00E+00 |
| ENSG00000252643.1_RNU6-1136  | ENSG00000160789.18_LMNA | 0.01496  | -0.144585302 | 0.173746652 | 8.55E-01 | 9.43E-01 | 1.00E+00 |
| ENSG00000200376.1_RNU5E-10F  | ENSG00000160789.18_LMNA | 0.08587  | -0.07434396  | 0.241768573 | 2.93E-01 | 5.79E-01 | 1.00E+00 |
| ENSG00000235349.1_RP11-561N  | ENSG00000160789.18_LMNA | 0.05129  | -0.108801684 | 0.208783371 | 5.30E-01 | 7.73E-01 | 1.00E+00 |
| ENSG00000227241.1_AC011998.  | ENSG00000160789.18_LMNA | 0.06578  | -0.094414235 | 0.222644413 | 4.21E-01 | 6.92E-01 | 1.00E+00 |
| ENSG00000276845.1_RP11-374M  | ENSG00000160789.18_LMNA | 0.02279  | -0.136910277 | 0.181329984 | 7.81E-01 | 9.10E-01 | 1.00E+00 |
| ENSG00000233682.3_RP11-13P5  | ENSG00000160789.18_LMNA | 0.01904  | -0.140588241 | 0.177700677 | 8.16E-01 | 9.28E-01 | 1.00E+00 |
| ENSG00000242308.2_RP11-572C  | ENSG00000160789.18_LMNA | -0.11848 | -0.272541395 | 0.041502069 | 1.46E-01 | 3.91E-01 | 1.00E+00 |
| ENSG00000270704.3_RP11-701H  | ENSG00000160789.18_LMNA | -0.10306 | -0.258024581 | 0.057079968 | 2.06E-01 | 4.78E-01 | 1.00E+00 |
| ENSG00000257384.1_RP11-644F  | ENSG00000160789.18_LMNA | -0.05721 | -0.214455482 | 0.102930201 | 4.84E-01 | 7.41E-01 | 1.00E+00 |
| ENSG00000262636.1_CTD-3088C  | ENSG00000160789.18_LMNA | 0.32949  | 0.179714501  | 0.464332563 | 3.40E-05 | 7.91E-04 | 1.00E+00 |
| ENSG00000256193.4_LINC00507  | ENSG00000160789.18_LMNA | -0.02023 | -0.178856601 | 0.139417773 | 8.05E-01 | 9.22E-01 | 1.00E+00 |
| ENSG00000276757.1_RN7SL192f  | ENSG00000160789.18_LMNA | 0.03389  | -0.125986789 | 0.192058101 | 6.78E-01 | 8.60E-01 | 1.00E+00 |
| ENSG00000243544.3_RN7SL172f  | ENSG00000160789.18_LMNA | 0.16325  | 0.004158713  | 0.314283881 | 4.45E-02 | 1.86E-01 | 1.00E+00 |
| ENSG00000265554.1_RP11-419J  | ENSG00000160789.18_LMNA | -0.17064 | -0.321120482 | -0.01176236 | 3.56E-02 | 1.60E-01 | 1.00E+00 |
| ENSG00000233293.1_RP11-410N  | ENSG00000160789.18_LMNA | 0.01904  | -0.140591346 | 0.177697609 | 8.16E-01 | 9.28E-01 | 1.00E+00 |
| ENSG00000224846.2_RP1-90J20. | ENSG00000160789.18_LMNA | 0.10119  | -0.058955943 | 0.256266736 | 2.15E-01 | 4.89E-01 | 1.00E+00 |
| ENSG00000253369.1_RP11-1081l | ENSG00000160789.18_LMNA | 0.06217  | -0.097996453 | 0.219205204 | 4.47E-01 | 7.13E-01 | 1.00E+00 |



|                              |                         |          |              |             |          |          |          |
|------------------------------|-------------------------|----------|--------------|-------------|----------|----------|----------|
| ENSG00000241462.1_RP11-5790  | ENSG00000160789.18_LMNA | -0.08734 | -0.243160674 | 0.07287292  | 2.85E-01 | 5.70E-01 | 1.00E+00 |
| ENSG00000226291.1_AC091729   | ENSG00000160789.18_LMNA | 0.0407   | -0.119273362 | 0.198613955 | 6.19E-01 | 8.27E-01 | 1.00E+00 |
| ENSG00000232403.1_RP11-5111  | ENSG00000160789.18_LMNA | -0.01017 | -0.169100958 | 0.149268323 | 9.01E-01 | 9.62E-01 | 1.00E+00 |
| ENSG00000232375.1_RP11-136C  | ENSG00000160789.18_LMNA | 0.07677  | -0.08344941  | 0.233122682 | 3.47E-01 | 6.31E-01 | 1.00E+00 |
| ENSG00000228577.1_AC010731   | ENSG00000160789.18_LMNA | -0.06646 | -0.223296175 | 0.093734446 | 4.16E-01 | 6.89E-01 | 1.00E+00 |
| ENSG00000255753.1_RP11-22B2  | ENSG00000160789.18_LMNA | 0.04849  | -0.111574065 | 0.206097682 | 5.53E-01 | 7.88E-01 | 1.00E+00 |
| ENSG00000227875.2_RPL23AP8   | ENSG00000160789.18_LMNA | -0.12643 | -0.27999704  | 0.033441676 | 1.21E-01 | 3.49E-01 | 1.00E+00 |
| ENSG00000242670.1_RP11-6011  | ENSG00000160789.18_LMNA | 0.03333  | -0.126539427 | 0.191517166 | 6.84E-01 | 8.63E-01 | 1.00E+00 |
| ENSG00000260209.1_RP11-680F  | ENSG00000160789.18_LMNA | -0.37687 | -0.505727681 | -0.23156212 | 1.70E-06 | 7.06E-05 | 8.74E-02 |
| ENSG00000204971.3_RP11-807H  | ENSG00000160789.18_LMNA | -0.09851 | -0.253732062 | 0.061657037 | 2.27E-01 | 5.04E-01 | 1.00E+00 |
| ENSG00000271185.1_RP5-855F1  | ENSG00000160789.18_LMNA | -0.138   | -0.290814427 | 0.021673914 | 9.00E-02 | 2.92E-01 | 1.00E+00 |
| ENSG00000250066.1_RP11-141O  | ENSG00000160789.18_LMNA | -0.1178  | -0.271898045 | 0.042195692 | 1.48E-01 | 3.95E-01 | 1.00E+00 |
| ENSG00000211746.3_TRBV19     | ENSG00000160789.18_LMNA | 0.00428  | -0.155029057 | 0.163366669 | 9.58E-01 | 9.83E-01 | 1.00E+00 |
| ENSG00000219361.1_RPSAP72    | ENSG00000160789.18_LMNA | 0.00633  | -0.15302502  | 0.165363949 | 9.38E-01 | 9.76E-01 | 1.00E+00 |
| ENSG00000271163.1_RP4-607J2  | ENSG00000160789.18_LMNA | -0.10862 | -0.263267247 | 0.051471741 | 1.83E-01 | 4.47E-01 | 1.00E+00 |
| ENSG00000225705.2_AC004899   | ENSG00000160789.18_LMNA | -0.36798 | -0.49800894  | -0.22177476 | 3.10E-06 | 1.13E-04 | 1.59E-01 |
| ENSG00000270115.1_RP11-415J  | ENSG00000160789.18_LMNA | 0.05062  | -0.109466644 | 0.208139641 | 5.36E-01 | 7.77E-01 | 1.00E+00 |
| ENSG00000250613.1_RP11-136I1 | ENSG00000160789.18_LMNA | 0.00846  | -0.150939507 | 0.167439662 | 9.18E-01 | 9.69E-01 | 1.00E+00 |
| ENSG00000276223.1_RP4-781B1  | ENSG00000160789.18_LMNA | 0.13158  | -0.028208424 | 0.284817498 | 1.06E-01 | 3.23E-01 | 1.00E+00 |
| ENSG00000257920.1_RP11-541G  | ENSG00000160789.18_LMNA | 0.0524   | -0.107703808 | 0.209845594 | 5.21E-01 | 7.67E-01 | 1.00E+00 |
| ENSG00000224555.3_RP11-438N  | ENSG00000160789.18_LMNA | 0.05355  | -0.106555028 | 0.210956266 | 5.12E-01 | 7.61E-01 | 1.00E+00 |
| ENSG00000226822.1_RP11-356N  | ENSG00000160789.18_LMNA | 0.23531  | 0.079070145  | 0.380264274 | 3.52E-03 | 3.01E-02 | 1.00E+00 |
| ENSG00000249984.1_CTC-529L1  | ENSG00000160789.18_LMNA | -0.32048 | -0.456397384 | -0.16995303 | 5.69E-05 | 1.19E-03 | 1.00E+00 |
| ENSG00000237540.1_RPL36AP3   | ENSG00000160789.18_LMNA | -0.01401 | -0.172827528 | 0.145512943 | 8.64E-01 | 9.47E-01 | 1.00E+00 |
| ENSG00000270140.1_RP5-1021I2 | ENSG00000160789.18_LMNA | 0.07027  | -0.089940795 | 0.226928213 | 3.90E-01 | 6.68E-01 | 1.00E+00 |
| ENSG00000233776.4_LINC01251  | ENSG00000160789.18_LMNA | -0.01408 | -0.172893577 | 0.145446301 | 8.63E-01 | 9.47E-01 | 1.00E+00 |
| ENSG00000254238.1_RP11-300E  | ENSG00000160789.18_LMNA | 0.01737  | -0.142227386 | 0.176080422 | 8.32E-01 | 9.35E-01 | 1.00E+00 |
| ENSG00000230323.4_LINC00159  | ENSG00000160789.18_LMNA | -0.06567 | -0.222548135 | 0.094514629 | 4.21E-01 | 6.93E-01 | 1.00E+00 |
| ENSG00000254639.1_CTD-2589M  | ENSG00000160789.18_LMNA | 0.17359  | 0.014794494  | 0.323837772 | 3.25E-02 | 1.51E-01 | 1.00E+00 |
| ENSG00000253968.1_CTB-32H22  | ENSG00000160789.18_LMNA | -0.18376 | -0.333211031 | -0.0252976  | 2.34E-02 | 1.21E-01 | 1.00E+00 |
| ENSG00000279357.1_RP11-475D  | ENSG00000160789.18_LMNA | -0.06895 | -0.225669551 | 0.091256505 | 3.99E-01 | 6.75E-01 | 1.00E+00 |
| ENSG00000264078.1_RP11-73M7  | ENSG00000160789.18_LMNA | -0.00025 | -0.15944188  | 0.158959505 | 9.98E-01 | 9.99E-01 | 1.00E+00 |
| ENSG00000235937.1_AC008280   | ENSG00000160789.18_LMNA | -0.11885 | -0.272883491 | 0.041133117 | 1.45E-01 | 3.90E-01 | 1.00E+00 |

|                              |                         |          |              |             |          |          |          |
|------------------------------|-------------------------|----------|--------------|-------------|----------|----------|----------|
| ENSG00000270016.1_RP11-932O  | ENSG00000160789.18_LMNA | -0.05388 | -0.211263978 | 0.106236608 | 5.10E-01 | 7.59E-01 | 1.00E+00 |
| ENSG00000271424.1_RP11-647O  | ENSG00000160789.18_LMNA | 0.11571  | -0.044309961 | 0.269935282 | 1.56E-01 | 4.07E-01 | 1.00E+00 |
| ENSG00000228781.1_RP11-336N  | ENSG00000160789.18_LMNA | -0.03573 | -0.193830061 | 0.124175107 | 6.62E-01 | 8.51E-01 | 1.00E+00 |
| ENSG00000275228.1_RP11-370I  | ENSG00000160789.18_LMNA | -0.05589 | -0.213195198 | 0.104236697 | 4.94E-01 | 7.49E-01 | 1.00E+00 |
| ENSG00000271761.1_XXbac-BPG  | ENSG00000160789.18_LMNA | -0.09381 | -0.249287914 | 0.066381851 | 2.50E-01 | 5.31E-01 | 1.00E+00 |
| ENSG00000255410.1_RP11-732A  | ENSG00000160789.18_LMNA | 0.06226  | -0.097913048 | 0.21928537  | 4.46E-01 | 7.13E-01 | 1.00E+00 |
| ENSG00000255136.2_CTD-2562J  | ENSG00000160789.18_LMNA | 0.05268  | -0.107418362 | 0.210121647 | 5.19E-01 | 7.65E-01 | 1.00E+00 |
| ENSG00000239412.1_RPL21P71   | ENSG00000160789.18_LMNA | -0.17627 | -0.326314883 | -0.01756358 | 2.98E-02 | 1.43E-01 | 1.00E+00 |
| ENSG00000260838.3_RP11-531A  | ENSG00000160789.18_LMNA | -0.27898 | -0.419550071 | -0.12535006 | 5.00E-04 | 6.74E-03 | 1.00E+00 |
| ENSG00000203908.3_KHDC3L     | ENSG00000160789.18_LMNA | -0.10045 | -0.255562822 | 0.059706538 | 2.18E-01 | 4.93E-01 | 1.00E+00 |
| ENSG00000184471.7_C1QTNF8    | ENSG00000160789.18_LMNA | -0.23298 | -0.378157002 | -0.07662387 | 3.87E-03 | 3.23E-02 | 1.00E+00 |
| ENSG00000253793.1_RP11-293D  | ENSG00000160789.18_LMNA | 0.00396  | -0.155341277 | 0.163055267 | 9.61E-01 | 9.85E-01 | 1.00E+00 |
| ENSG00000261393.1_RP11-21B2  | ENSG00000160789.18_LMNA | -0.01633 | -0.175072053 | 0.143246631 | 8.42E-01 | 9.38E-01 | 1.00E+00 |
| ENSG00000255847.4_RP11-167N  | ENSG00000160789.18_LMNA | 0.09609  | -0.064095182 | 0.25144041  | 2.39E-01 | 5.18E-01 | 1.00E+00 |
| ENSG00000260206.1_CTD-2026K  | ENSG00000160789.18_LMNA | -0.12919 | -0.282577805 | 0.030642046 | 1.13E-01 | 3.35E-01 | 1.00E+00 |
| ENSG00000254028.1_AC083843.  | ENSG00000160789.18_LMNA | -0.13255 | -0.285722731 | 0.027223755 | 1.04E-01 | 3.19E-01 | 1.00E+00 |
| ENSG00000236857.3_RAP1BP1    | ENSG00000160789.18_LMNA | -0.09628 | -0.251627499 | 0.063896275 | 2.38E-01 | 5.17E-01 | 1.00E+00 |
| ENSG00000189030.9_VHLL       | ENSG00000160789.18_LMNA | 0.03903  | -0.120918474 | 0.197010083 | 6.33E-01 | 8.35E-01 | 1.00E+00 |
| ENSG00000219433.2_BTBD10P2   | ENSG00000160789.18_LMNA | -0.02645 | -0.18486993  | 0.1333144   | 7.46E-01 | 8.94E-01 | 1.00E+00 |
| ENSG00000248909.1_HMGB1P21   | ENSG00000160789.18_LMNA | 0.07567  | -0.084549615 | 0.232074605 | 3.54E-01 | 6.38E-01 | 1.00E+00 |
| ENSG00000206013.2_IFITM5     | ENSG00000160789.18_LMNA | 0.17588  | 0.017156719  | 0.325951188 | 3.02E-02 | 1.44E-01 | 1.00E+00 |
| ENSG00000249624.7_AP000295.  | ENSG00000160789.18_LMNA | 0.07513  | -0.085089602 | 0.231559935 | 3.58E-01 | 6.41E-01 | 1.00E+00 |
| ENSG00000254081.1_LINC01299  | ENSG00000160789.18_LMNA | -0.26896 | -0.410584037 | -0.11467381 | 8.06E-04 | 9.79E-03 | 1.00E+00 |
| ENSG00000279447.1_RP4-737E2  | ENSG00000160789.18_LMNA | 0.26021  | 0.105374042  | 0.40272708  | 1.21E-03 | 1.33E-02 | 1.00E+00 |
| ENSG00000197588.8_KLKP1      | ENSG00000160789.18_LMNA | 0.14876  | -0.010697532 | 0.300832847 | 6.74E-02 | 2.43E-01 | 1.00E+00 |
| ENSG00000235816.3_PRELID1P3  | ENSG00000160789.18_LMNA | -0.01382 | -0.172637056 | 0.14570511  | 8.66E-01 | 9.48E-01 | 1.00E+00 |
| ENSG00000261513.1_RP11-432I5 | ENSG00000160789.18_LMNA | 0.09996  | -0.060198396 | 0.255101371 | 2.20E-01 | 4.96E-01 | 1.00E+00 |
| ENSG00000225877.1_AC004603.  | ENSG00000160789.18_LMNA | -0.20907 | -0.356412219 | -0.05159114 | 9.74E-03 | 6.44E-02 | 1.00E+00 |
| ENSG00000165131.6_C7orf34    | ENSG00000160789.18_LMNA | -0.09979 | -0.254942422 | 0.060367784 | 2.21E-01 | 4.97E-01 | 1.00E+00 |
| ENSG00000267016.1_RP11-75C1  | ENSG00000160789.18_LMNA | 0.03001  | -0.12981314  | 0.188308816 | 7.14E-01 | 8.78E-01 | 1.00E+00 |
| ENSG00000267246.1_RP11-798G  | ENSG00000160789.18_LMNA | 0.00711  | -0.152267558 | 0.166118178 | 9.31E-01 | 9.73E-01 | 1.00E+00 |
| ENSG00000214313.7_AZGP1P1    | ENSG00000160789.18_LMNA | -0.09446 | -0.249902008 | 0.065729816 | 2.47E-01 | 5.27E-01 | 1.00E+00 |
| ENSG00000231035.1_RPL7L1P9   | ENSG00000160789.18_LMNA | 0.09434  | -0.065848489 | 0.24979026  | 2.48E-01 | 5.28E-01 | 1.00E+00 |

|                              |                         |          |              |             |          |          |          |
|------------------------------|-------------------------|----------|--------------|-------------|----------|----------|----------|
| ENSG00000243469.1_RPL7P51    | ENSG00000160789.18_LMNA | 0.01124  | -0.148228196 | 0.170134018 | 8.91E-01 | 9.57E-01 | 1.00E+00 |
| ENSG00000227179.5_PGCP1      | ENSG00000160789.18_LMNA | -0.0033  | -0.162418781 | 0.155979237 | 9.68E-01 | 9.87E-01 | 1.00E+00 |
| ENSG00000259871.1_CTA-363E6  | ENSG00000160789.18_LMNA | -0.08684 | -0.242685582 | 0.073375107 | 2.87E-01 | 5.73E-01 | 1.00E+00 |
| ENSG00000251321.1_PCAT4      | ENSG00000160789.18_LMNA | -0.15523 | -0.306850783 | 0.004067868 | 5.62E-02 | 2.17E-01 | 1.00E+00 |
| ENSG00000215478.7_CES5AP1    | ENSG00000160789.18_LMNA | -0.03384 | -0.192007952 | 0.126038031 | 6.79E-01 | 8.60E-01 | 1.00E+00 |
| ENSG00000236554.1_ASNSP3     | ENSG00000160789.18_LMNA | 0.15429  | -0.005033203 | 0.305976065 | 5.77E-02 | 2.20E-01 | 1.00E+00 |
| ENSG00000259439.2_RP11-89K2  | ENSG00000160789.18_LMNA | -0.12428 | -0.2779795   | 0.035626896 | 1.27E-01 | 3.61E-01 | 1.00E+00 |
| ENSG00000188050.2_RNF133     | ENSG00000160789.18_LMNA | 0.19712  | 0.039148591  | 0.345479683 | 1.49E-02 | 8.76E-02 | 1.00E+00 |
| ENSG00000235377.1_RP11-388B  | ENSG00000160789.18_LMNA | 0.08833  | -0.071882489 | 0.244097224 | 2.79E-01 | 5.65E-01 | 1.00E+00 |
| ENSG00000269037.1 CTC-523E2  | ENSG00000160789.18_LMNA | 0.0087   | -0.150707298 | 0.167670605 | 9.15E-01 | 9.68E-01 | 1.00E+00 |
| ENSG00000259259.1_NPM1P42    | ENSG00000160789.18_LMNA | -0.0014  | -0.160564613 | 0.157836183 | 9.86E-01 | 9.95E-01 | 1.00E+00 |
| ENSG00000204832.8_ST8SIA6-A  | ENSG00000160789.18_LMNA | -0.10521 | -0.26005296  | 0.054912511 | 1.97E-01 | 4.67E-01 | 1.00E+00 |
| ENSG00000102539.5_MLNR       | ENSG00000160789.18_LMNA | 0.03247  | -0.127386566 | 0.190687593 | 6.91E-01 | 8.67E-01 | 1.00E+00 |
| ENSG00000213338.3_ATF4P1     | ENSG00000160789.18_LMNA | 0.08094  | -0.079279536 | 0.237088321 | 3.22E-01 | 6.08E-01 | 1.00E+00 |
| ENSG00000105679.7_GAPDHS     | ENSG00000160789.18_LMNA | 0.0905   | -0.069707306 | 0.246152007 | 2.68E-01 | 5.52E-01 | 1.00E+00 |
| ENSG00000223776.5_LGALS8-A   | ENSG00000160789.18_LMNA | 0.06253  | -0.097646143 | 0.219541878 | 4.44E-01 | 7.11E-01 | 1.00E+00 |
| ENSG00000266213.1_RP11-100K  | ENSG00000160789.18_LMNA | -0.13474 | -0.287770513 | 0.024994032 | 9.79E-02 | 3.08E-01 | 1.00E+00 |
| ENSG00000233401.1_PRKAR1A    | ENSG00000160789.18_LMNA | 0.07308  | -0.087129727 | 0.229613854 | 3.71E-01 | 6.51E-01 | 1.00E+00 |
| ENSG00000184911.13_DMRTC1E   | ENSG00000160789.18_LMNA | -0.16267 | -0.313741508 | -0.00355702 | 4.53E-02 | 1.88E-01 | 1.00E+00 |
| ENSG00000184774.8_MGAT4EP    | ENSG00000160789.18_LMNA | -0.01139 | -0.170277311 | 0.148083866 | 8.89E-01 | 9.57E-01 | 1.00E+00 |
| ENSG00000259345.4_RP11-624L  | ENSG00000160789.18_LMNA | -0.17548 | -0.325587039 | -0.01674945 | 3.06E-02 | 1.45E-01 | 1.00E+00 |
| ENSG00000259099.2_RP11-348M  | ENSG00000160789.18_LMNA | 0.05668  | -0.103458685 | 0.213945817 | 4.88E-01 | 7.44E-01 | 1.00E+00 |
| ENSG00000244198.4_RP4-545C2  | ENSG00000160789.18_LMNA | 0.1682   | 0.00925162   | 0.318866581 | 3.83E-02 | 1.68E-01 | 1.00E+00 |
| ENSG00000261226.1_RP11-830F  | ENSG00000160789.18_LMNA | -0.05312 | -0.210541892 | 0.106983719 | 5.16E-01 | 7.63E-01 | 1.00E+00 |
| ENSG00000261068.2_RP11-7K24  | ENSG00000160789.18_LMNA | -0.01316 | -0.172001379 | 0.146346271 | 8.72E-01 | 9.50E-01 | 1.00E+00 |
| ENSG00000267561.2_RP5-1052I5 | ENSG00000160789.18_LMNA | 0.15107  | -0.00832716  | 0.302987354 | 6.32E-02 | 2.34E-01 | 1.00E+00 |
| ENSG00000233874.2_RP1-136J1  | ENSG00000160789.18_LMNA | 0.06363  | -0.096552752 | 0.220592219 | 4.36E-01 | 7.04E-01 | 1.00E+00 |
| ENSG00000253686.1_LINC01484  | ENSG00000160789.18_LMNA | -0.06583 | -0.222693692 | 0.094362848 | 4.20E-01 | 6.92E-01 | 1.00E+00 |
| ENSG00000130182.6_ZSCAN10    | ENSG00000160789.18_LMNA | 0.00332  | -0.155966883 | 0.162431108 | 9.68E-01 | 9.87E-01 | 1.00E+00 |
| ENSG00000232554.7_RSU1P2     | ENSG00000160789.18_LMNA | 0.08775  | -0.072464131 | 0.243547295 | 2.82E-01 | 5.68E-01 | 1.00E+00 |
| ENSG00000261175.4_CTD-2015G  | ENSG00000160789.18_LMNA | -0.10084 | -0.255934221 | 0.059310553 | 2.16E-01 | 4.91E-01 | 1.00E+00 |
| ENSG00000141748.11_ARL5C     | ENSG00000160789.18_LMNA | -0.13473 | -0.287762741 | 0.025002501 | 9.79E-02 | 3.08E-01 | 1.00E+00 |
| ENSG00000232724.1_TRIM80P    | ENSG00000160789.18_LMNA | 0.03957  | -0.120392522 | 0.197523035 | 6.28E-01 | 8.33E-01 | 1.00E+00 |

|                             |                         |          |              |             |          |          |          |
|-----------------------------|-------------------------|----------|--------------|-------------|----------|----------|----------|
| ENSG00000152670.17_DDX4     | ENSG00000160789.18_LMNA | -0.15176 | -0.303622553 | 0.007627652 | 6.20E-02 | 2.30E-01 | 1.00E+00 |
| ENSG00000233750.3_CICP27    | ENSG00000160789.18_LMNA | 0.08333  | -0.076886208 | 0.239359674 | 3.07E-01 | 5.94E-01 | 1.00E+00 |
| ENSG00000251537.4_RP11-385D | ENSG00000160789.18_LMNA | 0.0597   | -0.100458204 | 0.216837153 | 4.65E-01 | 7.27E-01 | 1.00E+00 |
| ENSG00000261239.5_ANKRD26P  | ENSG00000160789.18_LMNA | -0.09606 | -0.251419954 | 0.064116929 | 2.39E-01 | 5.18E-01 | 1.00E+00 |
| ENSG00000280418.1_AC007326. | ENSG00000160789.18_LMNA | 0.02306  | -0.136645457 | 0.181590967 | 7.78E-01 | 9.09E-01 | 1.00E+00 |
| ENSG00000100101.14_RP1-37E1 | ENSG00000160789.18_LMNA | -0.16235 | -0.313444898 | -0.00322806 | 4.57E-02 | 1.90E-01 | 1.00E+00 |
| ENSG00000278847.1_RP11-414C | ENSG00000160789.18_LMNA | -0.07379 | -0.230283094 | 0.086428445 | 3.66E-01 | 6.47E-01 | 1.00E+00 |
| ENSG00000211956.2_IGHV4-34  | ENSG00000160789.18_LMNA | -0.01892 | -0.177589775 | 0.140700491 | 8.17E-01 | 9.28E-01 | 1.00E+00 |
| ENSG00000235689.1_AP000351. | ENSG00000160789.18_LMNA | -0.10958 | -0.264176368 | 0.050497206 | 1.79E-01 | 4.41E-01 | 1.00E+00 |
| ENSG00000252498.1_RNU6-1016 | ENSG00000160789.18_LMNA | 0.11266  | -0.047387722 | 0.267073396 | 1.67E-01 | 4.24E-01 | 1.00E+00 |
| ENSG00000223259.1_RNA5SP50  | ENSG00000160789.18_LMNA | -0.34387 | -0.476956191 | -0.19535984 | 1.44E-05 | 3.95E-04 | 7.39E-01 |
| ENSG00000238364.1_RNU7-140F | ENSG00000160789.18_LMNA | -0.07338 | -0.229897187 | 0.086832867 | 3.69E-01 | 6.50E-01 | 1.00E+00 |
| ENSG00000251991.1_RNU7-49P  | ENSG00000160789.18_LMNA | 0.02385  | -0.13586204  | 0.18236277  | 7.71E-01 | 9.05E-01 | 1.00E+00 |
| ENSG00000272710.1_CTD-2026C | ENSG00000160789.18_LMNA | -0.01233 | -0.171191324 | 0.147162926 | 8.80E-01 | 9.54E-01 | 1.00E+00 |
| ENSG00000230695.1_AC012462. | ENSG00000160789.18_LMNA | 0.02283  | -0.136871955 | 0.181367754 | 7.80E-01 | 9.10E-01 | 1.00E+00 |
| ENSG00000199331.1_Y_RNA     | ENSG00000160789.18_LMNA | -0.00302 | -0.162144831 | 0.156253738 | 9.71E-01 | 9.89E-01 | 1.00E+00 |
| ENSG00000222872.1_RNU4-78P  | ENSG00000160789.18_LMNA | -0.00542 | -0.164476382 | 0.153915914 | 9.47E-01 | 9.79E-01 | 1.00E+00 |
| ENSG00000267528.1_AC011524. | ENSG00000160789.18_LMNA | -0.27184 | -0.413161176 | -0.11773553 | 7.04E-04 | 8.82E-03 | 1.00E+00 |
| ENSG00000200378.1_RNU5B-4P  | ENSG00000160789.18_LMNA | 0.02108  | -0.138586549 | 0.179676963 | 7.97E-01 | 9.18E-01 | 1.00E+00 |
| ENSG00000244056.3_RN7SL417F | ENSG00000160789.18_LMNA | -0.0882  | -0.243978763 | 0.0720078   | 2.80E-01 | 5.65E-01 | 1.00E+00 |
| ENSG00000224629.1_RP5-1142J | ENSG00000160789.18_LMNA | -0.04089 | -0.198796587 | 0.119085923 | 6.17E-01 | 8.26E-01 | 1.00E+00 |
| ENSG00000206892.1_RNU6-42P  | ENSG00000160789.18_LMNA | -0.05665 | -0.213921913 | 0.103483469 | 4.88E-01 | 7.44E-01 | 1.00E+00 |
| ENSG00000278947.1_          | ENSG00000160789.18_LMNA | -0.00281 | -0.16194085  | 0.156458099 | 9.73E-01 | 9.89E-01 | 1.00E+00 |
| ENSG00000151963.4_ZNF37CP   | ENSG00000160789.18_LMNA | 0.04322  | -0.116783555 | 0.201038113 | 5.97E-01 | 8.14E-01 | 1.00E+00 |
| ENSG00000223458.2_LMO7DN-IT | ENSG00000160789.18_LMNA | -0.29713 | -0.435715975 | -0.14477324 | 2.01E-04 | 3.28E-03 | 1.00E+00 |
| ENSG00000224065.2_SRIP2     | ENSG00000160789.18_LMNA | -0.07071 | -0.227350341 | 0.089499286 | 3.87E-01 | 6.65E-01 | 1.00E+00 |
| ENSG00000260487.1_RP11-297C | ENSG00000160789.18_LMNA | -0.22666 | -0.372421824 | -0.06998438 | 4.98E-03 | 3.91E-02 | 1.00E+00 |
| ENSG00000259760.1_RP11-20G1 | ENSG00000160789.18_LMNA | -0.02296 | -0.18149635  | 0.13674147  | 7.79E-01 | 9.09E-01 | 1.00E+00 |
| ENSG00000224137.1_AC079767. | ENSG00000160789.18_LMNA | -0.0642  | -0.221138573 | 0.095983702 | 4.32E-01 | 7.01E-01 | 1.00E+00 |
| ENSG00000236544.1_AC008060. | ENSG00000160789.18_LMNA | -0.01412 | -0.172936776 | 0.145402712 | 8.63E-01 | 9.46E-01 | 1.00E+00 |
| ENSG00000258932.4_CTD-3006C | ENSG00000160789.18_LMNA | 0.01209  | -0.147398606 | 0.17095747  | 8.83E-01 | 9.55E-01 | 1.00E+00 |
| ENSG00000267461.1_RP11-120M | ENSG00000160789.18_LMNA | 0.13988  | -0.019765241 | 0.292561456 | 8.57E-02 | 2.84E-01 | 1.00E+00 |
| ENSG00000213721.3_HMG2P3C   | ENSG00000160789.18_LMNA | -0.05973 | -0.21687126  | 0.100422775 | 4.65E-01 | 7.27E-01 | 1.00E+00 |

|                              |                         |          |              |             |          |          |          |
|------------------------------|-------------------------|----------|--------------|-------------|----------|----------|----------|
| ENSG00000281892.1_           | ENSG00000160789.18_LMNA | 0.07902  | -0.081198516 | 0.235264639 | 3.33E-01 | 6.19E-01 | 1.00E+00 |
| ENSG00000224291.1_AC012671.  | ENSG00000160789.18_LMNA | 0.09178  | -0.06841568  | 0.247370797 | 2.61E-01 | 5.44E-01 | 1.00E+00 |
| ENSG00000277250.1_Metazoa_SI | ENSG00000160789.18_LMNA | -0.03892 | -0.196901382 | 0.121029906 | 6.34E-01 | 8.36E-01 | 1.00E+00 |
| ENSG00000278011.1_RP11-900F  | ENSG00000160789.18_LMNA | -0.0915  | -0.247104343 | 0.068698148 | 2.62E-01 | 5.45E-01 | 1.00E+00 |
| ENSG00000251599.1_RP11-232L  | ENSG00000160789.18_LMNA | -0.1939  | -0.342526575 | -0.03580382 | 1.67E-02 | 9.48E-02 | 1.00E+00 |
| ENSG00000267113.1_AF038458.4 | ENSG00000160789.18_LMNA | 0.01176  | -0.147720252 | 0.170638256 | 8.86E-01 | 9.56E-01 | 1.00E+00 |
| ENSG00000235077.1_AC073842.  | ENSG00000160789.18_LMNA | -0.08704 | -0.242877964 | 0.073171772 | 2.86E-01 | 5.72E-01 | 1.00E+00 |
| ENSG00000253877.4_LINC01608  | ENSG00000160789.18_LMNA | -0.26779 | -0.409534157 | -0.11342812 | 8.52E-04 | 1.02E-02 | 1.00E+00 |
| ENSG00000266304.1_RP11-484N  | ENSG00000160789.18_LMNA | -0.03307 | -0.191263283 | 0.126798735 | 6.86E-01 | 8.64E-01 | 1.00E+00 |
| ENSG00000234022.1_AC008278.  | ENSG00000160789.18_LMNA | -0.00747 | -0.166472669 | 0.151911419 | 9.27E-01 | 9.72E-01 | 1.00E+00 |
| ENSG00000228181.1_RP11-455B  | ENSG00000160789.18_LMNA | 0.02551  | -0.134232849 | 0.183966552 | 7.55E-01 | 8.98E-01 | 1.00E+00 |
| ENSG00000231758.2_AC092652.  | ENSG00000160789.18_LMNA | -0.16902 | -0.319622279 | -0.010093   | 3.74E-02 | 1.65E-01 | 1.00E+00 |
| ENSG00000239253.1_RPS4XP23   | ENSG00000160789.18_LMNA | 0.07889  | -0.081336502 | 0.235133419 | 3.34E-01 | 6.20E-01 | 1.00E+00 |
| ENSG00000257847.1_LSM3P2     | ENSG00000160789.18_LMNA | -0.15845 | -0.309835157 | 0.00076996  | 5.12E-02 | 2.04E-01 | 1.00E+00 |
| ENSG00000270166.1_RP11-158D  | ENSG00000160789.18_LMNA | -0.06255 | -0.219568018 | 0.09761894  | 4.44E-01 | 7.11E-01 | 1.00E+00 |
| ENSG00000262006.1_RP11-700H  | ENSG00000160789.18_LMNA | -0.17475 | -0.324915617 | -0.0159988  | 3.13E-02 | 1.47E-01 | 1.00E+00 |
| ENSG00000259798.1_RP11-23E1  | ENSG00000160789.18_LMNA | 0.23718  | 0.081040344  | 0.381959172 | 3.26E-03 | 2.84E-02 | 1.00E+00 |
| ENSG00000278052.1_RP11-379L  | ENSG00000160789.18_LMNA | -0.19579 | -0.34425558  | -0.0377613  | 1.56E-02 | 9.03E-02 | 1.00E+00 |
| ENSG00000225024.1_AC015977.  | ENSG00000160789.18_LMNA | -0.00122 | -0.160386437 | 0.158014507 | 9.88E-01 | 9.96E-01 | 1.00E+00 |
| ENSG00000272379.1_RP1-257A7  | ENSG00000160789.18_LMNA | -0.08602 | -0.241905931 | 0.074198873 | 2.92E-01 | 5.78E-01 | 1.00E+00 |
| ENSG00000229032.1_RP11-91A1  | ENSG00000160789.18_LMNA | 0.02953  | -0.130281868 | 0.18784889  | 7.18E-01 | 8.80E-01 | 1.00E+00 |
| ENSG00000256250.1_RP11-989F  | ENSG00000160789.18_LMNA | -0.15867 | -0.31004292  | 0.000540118 | 5.09E-02 | 2.03E-01 | 1.00E+00 |
| ENSG00000223701.3_RAET1E-A   | ENSG00000160789.18_LMNA | 0.06183  | -0.098335625 | 0.218879164 | 4.49E-01 | 7.15E-01 | 1.00E+00 |
| ENSG00000277999.1_RP11-426C  | ENSG00000160789.18_LMNA | 0.14263  | -0.016960281 | 0.295125089 | 7.96E-02 | 2.71E-01 | 1.00E+00 |
| ENSG00000266897.1_AC005546.  | ENSG00000160789.18_LMNA | 0.01662  | -0.142954833 | 0.175360806 | 8.39E-01 | 9.37E-01 | 1.00E+00 |
| ENSG00000258524.1_NT5CP1     | ENSG00000160789.18_LMNA | 0.16313  | 0.004036089  | 0.314173363 | 4.46E-02 | 1.87E-01 | 1.00E+00 |
| ENSG00000248144.4_ADH1C      | ENSG00000160789.18_LMNA | -0.07856 | -0.234821411 | 0.081664551 | 3.36E-01 | 6.22E-01 | 1.00E+00 |
| ENSG00000255027.2_RP11-680F  | ENSG00000160789.18_LMNA | -0.09115 | -0.24676713  | 0.069055555 | 2.64E-01 | 5.48E-01 | 1.00E+00 |
| ENSG00000239200.1_RP11-536C  | ENSG00000160789.18_LMNA | 0.10506  | -0.055060808 | 0.259914267 | 1.98E-01 | 4.67E-01 | 1.00E+00 |
| ENSG00000258876.1_RP11-270M  | ENSG00000160789.18_LMNA | 0.06933  | -0.09086972  | 0.226039675 | 3.96E-01 | 6.73E-01 | 1.00E+00 |
| ENSG00000260075.1_NSFP1      | ENSG00000160789.18_LMNA | -0.03441 | -0.192556755 | 0.125477171 | 6.74E-01 | 8.57E-01 | 1.00E+00 |
| ENSG00000259367.1_RP11-815J  | ENSG00000160789.18_LMNA | 0.14026  | -0.019377447 | 0.292916154 | 8.48E-02 | 2.82E-01 | 1.00E+00 |
| ENSG00000268655.1_CTB-60B18  | ENSG00000160789.18_LMNA | -0.07728 | -0.233605638 | 0.082942174 | 3.44E-01 | 6.29E-01 | 1.00E+00 |

|                              |                         |          |              |             |          |          |          |
|------------------------------|-------------------------|----------|--------------|-------------|----------|----------|----------|
| ENSG00000163352.5_LENEP      | ENSG00000160789.18_LMNA | 0.02253  | -0.137165671 | 0.181078249 | 7.83E-01 | 9.11E-01 | 1.00E+00 |
| ENSG00000239510.2_RPL9P5     | ENSG00000160789.18_LMNA | 0.0734   | -0.08681954  | 0.229909905 | 3.69E-01 | 6.50E-01 | 1.00E+00 |
| ENSG00000232028.1_AC007391.  | ENSG00000160789.18_LMNA | -0.10219 | -0.25720793  | 0.057951776 | 2.10E-01 | 4.83E-01 | 1.00E+00 |
| ENSG00000232298.2_RP11-10N1  | ENSG00000160789.18_LMNA | -0.15529 | -0.306906641 | 0.004006204 | 5.61E-02 | 2.16E-01 | 1.00E+00 |
| ENSG00000259130.1_RP11-219E  | ENSG00000160789.18_LMNA | 0.07195  | -0.088264315 | 0.228530471 | 3.78E-01 | 6.58E-01 | 1.00E+00 |
| ENSG00000261433.1_CTC-297N7  | ENSG00000160789.18_LMNA | -0.07269 | -0.229236136 | 0.087525391 | 3.73E-01 | 6.53E-01 | 1.00E+00 |
| ENSG00000234840.1_LINC01239  | ENSG00000160789.18_LMNA | 0.01191  | -0.147569592 | 0.170787785 | 8.84E-01 | 9.55E-01 | 1.00E+00 |
| ENSG00000272506.1_RP4-535B2  | ENSG00000160789.18_LMNA | 0.05258  | -0.107520847 | 0.210022541 | 5.20E-01 | 7.66E-01 | 1.00E+00 |
| ENSG00000250415.1_CTC-461F2  | ENSG00000160789.18_LMNA | -0.00462 | -0.163700117 | 0.154694664 | 9.55E-01 | 9.82E-01 | 1.00E+00 |
| ENSG00000263698.1_RP11-408H  | ENSG00000160789.18_LMNA | -0.17885 | -0.328691696 | -0.020225   | 2.75E-02 | 1.35E-01 | 1.00E+00 |
| ENSG00000240687.1_RP11-521D  | ENSG00000160789.18_LMNA | -0.03456 | -0.192704082 | 0.125326572 | 6.72E-01 | 8.56E-01 | 1.00E+00 |
| ENSG00000255996.1_RP11-429A  | ENSG00000160789.18_LMNA | 0.07741  | -0.082812559 | 0.233729024 | 3.43E-01 | 6.28E-01 | 1.00E+00 |
| ENSG00000238199.1_UBE2V2P3   | ENSG00000160789.18_LMNA | 0.05896  | -0.101190379 | 0.216132124 | 4.71E-01 | 7.31E-01 | 1.00E+00 |
| ENSG00000274204.1_RP11-272L  | ENSG00000160789.18_LMNA | 0.09666  | -0.063517826 | 0.251983396 | 2.36E-01 | 5.14E-01 | 1.00E+00 |
| ENSG00000222017.1_AC011997.  | ENSG00000160789.18_LMNA | -0.14017 | -0.292837659 | 0.019463275 | 8.50E-02 | 2.83E-01 | 1.00E+00 |
| ENSG00000177202.2_SPACA4     | ENSG00000160789.18_LMNA | 0.07266  | -0.087556362 | 0.229206565 | 3.74E-01 | 6.54E-01 | 1.00E+00 |
| ENSG00000241307.1_RP11-674E  | ENSG00000160789.18_LMNA | -0.05424 | -0.211613619 | 0.105874721 | 5.07E-01 | 7.57E-01 | 1.00E+00 |
| ENSG00000251072.2_RP11-434D  | ENSG00000160789.18_LMNA | 0.07492  | -0.085300954 | 0.231358443 | 3.59E-01 | 6.42E-01 | 1.00E+00 |
| ENSG00000229056.2_AC020571.  | ENSG00000160789.18_LMNA | 0.01872  | -0.140899418 | 0.177393218 | 8.19E-01 | 9.30E-01 | 1.00E+00 |
| ENSG00000277589.1_RP11-333J  | ENSG00000160789.18_LMNA | -0.06263 | -0.219639005 | 0.097545067 | 4.43E-01 | 7.11E-01 | 1.00E+00 |
| ENSG00000233421.4_RP5-875O1  | ENSG00000160789.18_LMNA | -0.03017 | -0.188464201 | 0.129654749 | 7.12E-01 | 8.78E-01 | 1.00E+00 |
| ENSG00000203585.3_RP11-542B  | ENSG00000160789.18_LMNA | 0.02207  | -0.13761742  | 0.180632869 | 7.87E-01 | 9.13E-01 | 1.00E+00 |
| ENSG00000124003.12_MOGAT1    | ENSG00000160789.18_LMNA | 0.09713  | -0.063049689 | 0.252423519 | 2.34E-01 | 5.12E-01 | 1.00E+00 |
| ENSG00000214869.5_TPM3P4     | ENSG00000160789.18_LMNA | 0.19806  | 0.04012035   | 0.346336514 | 1.44E-02 | 8.56E-02 | 1.00E+00 |
| ENSG00000259192.1_AC109631.  | ENSG00000160789.18_LMNA | -0.08776 | -0.243557872 | 0.072452947 | 2.82E-01 | 5.68E-01 | 1.00E+00 |
| ENSG00000224286.4_LINC01142  | ENSG00000160789.18_LMNA | -0.12585 | -0.279455378 | 0.034028651 | 1.22E-01 | 3.52E-01 | 1.00E+00 |
| ENSG00000244289.1_RPS3AP35   | ENSG00000160789.18_LMNA | -0.12532 | -0.27895588  | 0.034569742 | 1.24E-01 | 3.55E-01 | 1.00E+00 |
| ENSG00000250483.1_PPM1AP1    | ENSG00000160789.18_LMNA | -0.03849 | -0.196483787 | 0.121457922 | 6.38E-01 | 8.38E-01 | 1.00E+00 |
| ENSG00000250130.1_RP11-616K  | ENSG00000160789.18_LMNA | 0.24394  | 0.088158134  | 0.388065552 | 2.46E-03 | 2.29E-02 | 1.00E+00 |
| ENSG00000173862.3_RP11-89N1  | ENSG00000160789.18_LMNA | -0.09924 | -0.254422698 | 0.060921513 | 2.24E-01 | 5.00E-01 | 1.00E+00 |
| ENSG00000275026.1_GXYLT1P4   | ENSG00000160789.18_LMNA | -0.03378 | -0.191947043 | 0.126100265 | 6.80E-01 | 8.60E-01 | 1.00E+00 |
| ENSG00000262412.1_RP11-85G1  | ENSG00000160789.18_LMNA | -0.07726 | -0.233584108 | 0.082964789 | 3.44E-01 | 6.29E-01 | 1.00E+00 |
| ENSG00000263082.1_CTD-2034Iz | ENSG00000160789.18_LMNA | -0.09975 | -0.254903656 | 0.060409093 | 2.21E-01 | 4.97E-01 | 1.00E+00 |

|                              |                         |          |              |             |          |          |          |
|------------------------------|-------------------------|----------|--------------|-------------|----------|----------|----------|
| ENSG00000259686.1_HNRNPA1F   | ENSG00000160789.18_LMNA | -0.03615 | -0.194235989 | 0.12375978  | 6.58E-01 | 8.49E-01 | 1.00E+00 |
| ENSG00000279353.1_RP11-864N  | ENSG00000160789.18_LMNA | 0.03036  | -0.129467143 | 0.188648225 | 7.10E-01 | 8.77E-01 | 1.00E+00 |
| ENSG00000276476.2_LINC00540  | ENSG00000160789.18_LMNA | -0.0948  | -0.250221469 | 0.065390511 | 2.45E-01 | 5.25E-01 | 1.00E+00 |
| ENSG00000225216.5_AC007362.  | ENSG00000160789.18_LMNA | 0.26312  | 0.108458174  | 0.405337592 | 1.06E-03 | 1.21E-02 | 1.00E+00 |
| ENSG00000224887.1_RP11-276H  | ENSG00000160789.18_LMNA | 0.10274  | -0.057396151 | 0.257728454 | 2.08E-01 | 4.80E-01 | 1.00E+00 |
| ENSG00000214264.4_KCTD9P4    | ENSG00000160789.18_LMNA | 0.04988  | -0.110198161 | 0.20743116  | 5.42E-01 | 7.81E-01 | 1.00E+00 |
| ENSG00000276128.1_RP11-459O  | ENSG00000160789.18_LMNA | -0.12114 | -0.275033562 | 0.038812296 | 1.37E-01 | 3.77E-01 | 1.00E+00 |
| ENSG00000187589.8_TERF1P2    | ENSG00000160789.18_LMNA | -0.02375 | -0.182260603 | 0.135965766 | 7.71E-01 | 9.06E-01 | 1.00E+00 |
| ENSG00000241571.2_ATP5A1P7   | ENSG00000160789.18_LMNA | -0.01251 | -0.171369791 | 0.146983042 | 8.78E-01 | 9.53E-01 | 1.00E+00 |
| ENSG00000211695.2_TRGV9      | ENSG00000160789.18_LMNA | -0.05609 | -0.213383588 | 0.104041469 | 4.93E-01 | 7.48E-01 | 1.00E+00 |
| ENSG00000235020.3_RP11-109I1 | ENSG00000160789.18_LMNA | -0.15493 | -0.306569087 | 0.004378809 | 5.67E-02 | 2.18E-01 | 1.00E+00 |
| ENSG00000153294.10_ADGRF4    | ENSG00000160789.18_LMNA | 0.03531  | -0.124586436 | 0.193427932 | 6.66E-01 | 8.53E-01 | 1.00E+00 |
| ENSG00000264727.1_RP11-680C  | ENSG00000160789.18_LMNA | 0.02477  | -0.134965253 | 0.18324578  | 7.62E-01 | 9.01E-01 | 1.00E+00 |
| ENSG00000187559.5_FOXD4L3    | ENSG00000160789.18_LMNA | -0.06531 | -0.222196556 | 0.094881181 | 4.24E-01 | 6.95E-01 | 1.00E+00 |
| ENSG00000157119.11_KLHL40    | ENSG00000160789.18_LMNA | 0.0053   | -0.154031787 | 0.164360904 | 9.48E-01 | 9.79E-01 | 1.00E+00 |
| ENSG00000172969.6_FRG2C      | ENSG00000160789.18_LMNA | 0.05104  | -0.109045284 | 0.20854758  | 5.32E-01 | 7.75E-01 | 1.00E+00 |
| ENSG00000171989.5_LDHAL6B    | ENSG00000160789.18_LMNA | 0.00715  | -0.152219833 | 0.166165687 | 9.30E-01 | 9.73E-01 | 1.00E+00 |
| ENSG00000259881.1_RP11-830F  | ENSG00000160789.18_LMNA | 0.07531  | -0.084904329 | 0.231736542 | 3.56E-01 | 6.40E-01 | 1.00E+00 |
| ENSG00000235288.2_RP11-70C1  | ENSG00000160789.18_LMNA | -0.21372 | -0.360650572 | -0.05644049 | 8.20E-03 | 5.67E-02 | 1.00E+00 |
| ENSG00000239791.1_AC002310.  | ENSG00000160789.18_LMNA | -0.01459 | -0.173389518 | 0.144945811 | 8.58E-01 | 9.44E-01 | 1.00E+00 |
| ENSG00000217414.2_DDX18P3    | ENSG00000160789.18_LMNA | 0.02908  | -0.130726927 | 0.187412059 | 7.22E-01 | 8.82E-01 | 1.00E+00 |
| ENSG00000229924.3_FAM90A26   | ENSG00000160789.18_LMNA | -0.02886 | -0.187197074 | 0.130945915 | 7.24E-01 | 8.83E-01 | 1.00E+00 |
| ENSG00000250748.5_RP11-230G  | ENSG00000160789.18_LMNA | 0.21005  | 0.052605418  | 0.357299744 | 9.40E-03 | 6.27E-02 | 1.00E+00 |
| ENSG00000214514.6_KRT42P     | ENSG00000160789.18_LMNA | -0.13209 | -0.285293884 | 0.02769031  | 1.05E-01 | 3.21E-01 | 1.00E+00 |
| ENSG00000233013.7_FAM157B    | ENSG00000160789.18_LMNA | -0.11979 | -0.27376804  | 0.040178731 | 1.42E-01 | 3.84E-01 | 1.00E+00 |
| ENSG00000237115.2_RP11-131F1 | ENSG00000160789.18_LMNA | -0.19845 | -0.346699584 | -0.04053229 | 1.42E-02 | 8.47E-02 | 1.00E+00 |
| ENSG00000104321.9_TRPA1      | ENSG00000160789.18_LMNA | 0.03323  | -0.126637354 | 0.191421293 | 6.84E-01 | 8.63E-01 | 1.00E+00 |
| ENSG00000183148.6_ANKRD20A   | ENSG00000160789.18_LMNA | -0.08108 | -0.237218483 | 0.079142482 | 3.21E-01 | 6.07E-01 | 1.00E+00 |
| ENSG00000094755.15_GABRP     | ENSG00000160789.18_LMNA | -0.15039 | -0.302349836 | 0.009028917 | 6.44E-02 | 2.36E-01 | 1.00E+00 |
| ENSG00000232400.1_RAD17P1    | ENSG00000160789.18_LMNA | 0.04291  | -0.117090246 | 0.200739719 | 6.00E-01 | 8.16E-01 | 1.00E+00 |
| ENSG00000280062.1_LA16c-380F | ENSG00000160789.18_LMNA | 0.01579  | -0.143769297 | 0.174554705 | 8.47E-01 | 9.40E-01 | 1.00E+00 |
| ENSG00000183185.8_GABRR3     | ENSG00000160789.18_LMNA | -0.11023 | -0.264780858 | 0.049848888 | 1.76E-01 | 4.38E-01 | 1.00E+00 |
| ENSG00000248710.1_RP11-432B  | ENSG00000160789.18_LMNA | 0.07018  | -0.09002749  | 0.22684531  | 3.90E-01 | 6.69E-01 | 1.00E+00 |

|                              |                         |          |              |             |          |          |          |
|------------------------------|-------------------------|----------|--------------|-------------|----------|----------|----------|
| ENSG00000146166.15_LGSN      | ENSG00000160789.18_LMNA | -0.05863 | -0.215817575 | 0.10151693  | 4.73E-01 | 7.33E-01 | 1.00E+00 |
| ENSG00000171346.12_KRT15     | ENSG00000160789.18_LMNA | 0.15351  | -0.005834116 | 0.305249934 | 5.90E-02 | 2.23E-01 | 1.00E+00 |
| ENSG00000155269.10_GPR78     | ENSG00000160789.18_LMNA | 0.03498  | -0.124911856 | 0.193109715 | 6.69E-01 | 8.54E-01 | 1.00E+00 |
| ENSG00000261796.1_ISY1-RAB4  | ENSG00000160789.18_LMNA | 0.02713  | -0.132646333 | 0.185526698 | 7.40E-01 | 8.91E-01 | 1.00E+00 |
| ENSG00000201700.3_SNORD113   | ENSG00000160789.18_LMNA | -0.00288 | -0.162005211 | 0.156393621 | 9.72E-01 | 9.89E-01 | 1.00E+00 |
| ENSG00000200356.1_RNU6-833F  | ENSG00000160789.18_LMNA | 0.11943  | -0.040541956 | 0.273431456 | 1.43E-01 | 3.86E-01 | 1.00E+00 |
| ENSG00000264991.1_           | ENSG00000160789.18_LMNA | 0.08724  | -0.072973624 | 0.243065416 | 2.85E-01 | 5.71E-01 | 1.00E+00 |
| ENSG00000263361.1_MIR378H    | ENSG00000160789.18_LMNA | -0.03886 | -0.196842022 | 0.121090755 | 6.35E-01 | 8.36E-01 | 1.00E+00 |
| ENSG00000207041.1_RNU6-3P    | ENSG00000160789.18_LMNA | -0.06366 | -0.22062317  | 0.096520521 | 4.36E-01 | 7.04E-01 | 1.00E+00 |
| ENSG00000259405.1_ISCA1P4    | ENSG00000160789.18_LMNA | 0.15627  | -0.003004632 | 0.307813605 | 5.45E-02 | 2.13E-01 | 1.00E+00 |
| ENSG00000202399.1_Y_RNA      | ENSG00000160789.18_LMNA | -0.07965 | -0.235862531 | 0.080569639 | 3.29E-01 | 6.15E-01 | 1.00E+00 |
| ENSG00000279229.1_AC019206.  | ENSG00000160789.18_LMNA | -0.08435 | -0.240325138 | 0.075867792 | 3.02E-01 | 5.88E-01 | 1.00E+00 |
| ENSG00000223263.1_RNU6-387F  | ENSG00000160789.18_LMNA | -0.00668 | -0.165701557 | 0.152686012 | 9.35E-01 | 9.74E-01 | 1.00E+00 |
| ENSG00000258636.1_CTD-2298J  | ENSG00000160789.18_LMNA | 0.0145   | -0.145039471 | 0.173296722 | 8.59E-01 | 9.45E-01 | 1.00E+00 |
| ENSG00000267184.1_RP1-200G1  | ENSG00000160789.18_LMNA | -0.04517 | -0.202908623 | 0.114859654 | 5.81E-01 | 8.05E-01 | 1.00E+00 |
| ENSG00000229314.5_ORM1       | ENSG00000160789.18_LMNA | 0.04008  | -0.11988756  | 0.198015353 | 6.24E-01 | 8.30E-01 | 1.00E+00 |
| ENSG00000259859.1_RP11-439I1 | ENSG00000160789.18_LMNA | -0.20243 | -0.350336817 | -0.04466489 | 1.24E-02 | 7.65E-02 | 1.00E+00 |
| ENSG00000271234.1_RP5-894D1  | ENSG00000160789.18_LMNA | -0.10361 | -0.258542246 | 0.056527091 | 2.04E-01 | 4.75E-01 | 1.00E+00 |
| ENSG00000257507.1_RP11-956E  | ENSG00000160789.18_LMNA | -0.05514 | -0.212475353 | 0.104982446 | 5.00E-01 | 7.53E-01 | 1.00E+00 |
| ENSG00000276135.1_FAM27E2    | ENSG00000160789.18_LMNA | 0.05727  | -0.102864258 | 0.214519063 | 4.83E-01 | 7.41E-01 | 1.00E+00 |
| ENSG00000215474.5_SKOR2      | ENSG00000160789.18_LMNA | -0.32144 | -0.457245511 | -0.17099368 | 5.39E-05 | 1.14E-03 | 1.00E+00 |
| ENSG00000253678.1_RP11-981G  | ENSG00000160789.18_LMNA | 0.02527  | -0.134467205 | 0.183735955 | 7.57E-01 | 8.99E-01 | 1.00E+00 |
| ENSG00000253477.4_RP11-1C8.  | ENSG00000160789.18_LMNA | -0.16502 | -0.315916756 | -0.00597154 | 4.22E-02 | 1.80E-01 | 1.00E+00 |
| ENSG00000254126.5_CD8BP      | ENSG00000160789.18_LMNA | -0.16272 | -0.313788042 | -0.00360863 | 4.52E-02 | 1.88E-01 | 1.00E+00 |
| ENSG00000279975.1_           | ENSG00000160789.18_LMNA | -0.00166 | -0.16081861  | 0.157581939 | 9.84E-01 | 9.94E-01 | 1.00E+00 |
| ENSG00000258531.2_BANF1P1    | ENSG00000160789.18_LMNA | 0.01375  | -0.145774251 | 0.172568519 | 8.67E-01 | 9.48E-01 | 1.00E+00 |
| ENSG00000271401.1_RP11-171I2 | ENSG00000160789.18_LMNA | -0.09023 | -0.245895778 | 0.069978712 | 2.69E-01 | 5.53E-01 | 1.00E+00 |
| ENSG00000281669.1_           | ENSG00000160789.18_LMNA | 0.05444  | -0.105673552 | 0.211807945 | 5.05E-01 | 7.56E-01 | 1.00E+00 |
| ENSG00000235299.2_MRPL53P1   | ENSG00000160789.18_LMNA | -0.02475 | -0.183224376 | 0.134986997 | 7.62E-01 | 9.01E-01 | 1.00E+00 |
| ENSG00000239317.1_RP11-449H  | ENSG00000160789.18_LMNA | 0.02     | -0.139644035 | 0.178633218 | 8.07E-01 | 9.23E-01 | 1.00E+00 |
| ENSG00000266279.1_RP11-849F  | ENSG00000160789.18_LMNA | -0.06968 | -0.22637358  | 0.090520703 | 3.94E-01 | 6.71E-01 | 1.00E+00 |
| ENSG00000223837.2_BRD2-IT1   | ENSG00000160789.18_LMNA | 0.02058  | -0.139075046 | 0.179194902 | 8.01E-01 | 9.20E-01 | 1.00E+00 |
| ENSG00000229652.1_RP11-435P  | ENSG00000160789.18_LMNA | 0.11109  | -0.048971957 | 0.265598113 | 1.73E-01 | 4.33E-01 | 1.00E+00 |



|                              |                         |          |              |             |          |          |          |
|------------------------------|-------------------------|----------|--------------|-------------|----------|----------|----------|
| ENSG00000205279.7_CTXN3      | ENSG00000160789.18_LMNA | -0.08126 | -0.237393213 | 0.078958483 | 3.20E-01 | 6.06E-01 | 1.00E+00 |
| ENSG00000272386.1_RP11-666A  | ENSG00000160789.18_LMNA | 0.00759  | -0.151798885 | 0.166584664 | 9.26E-01 | 9.72E-01 | 1.00E+00 |
| ENSG00000240625.3_RN7SL403F  | ENSG00000160789.18_LMNA | -0.01302 | -0.171866355 | 0.146482425 | 8.73E-01 | 9.51E-01 | 1.00E+00 |
| ENSG00000259212.1_CTD-3065B  | ENSG00000160789.18_LMNA | 0.014    | -0.145522286 | 0.172818268 | 8.64E-01 | 9.47E-01 | 1.00E+00 |
| ENSG00000250441.1_RP11-47F1  | ENSG00000160789.18_LMNA | -0.03097 | -0.189237167 | 0.128866588 | 7.05E-01 | 8.74E-01 | 1.00E+00 |
| ENSG00000229537.4_RP11-5P4.1 | ENSG00000160789.18_LMNA | -0.21557 | -0.362337375 | -0.05837446 | 7.65E-03 | 5.37E-02 | 1.00E+00 |
| ENSG00000271593.1_           | ENSG00000160789.18_LMNA | -0.25966 | -0.402230867 | -0.10478845 | 1.24E-03 | 1.36E-02 | 1.00E+00 |
| ENSG00000261574.1_RP1-168P1  | ENSG00000160789.18_LMNA | 0.07869  | -0.081534115 | 0.234945476 | 3.35E-01 | 6.21E-01 | 1.00E+00 |
| ENSG00000227309.1_AC140076.  | ENSG00000160789.18_LMNA | -0.04248 | -0.200328858 | 0.117512431 | 6.03E-01 | 8.18E-01 | 1.00E+00 |
| ENSG00000229716.2_RPL23AP1   | ENSG00000160789.18_LMNA | -0.00357 | -0.162674987 | 0.155722469 | 9.65E-01 | 9.86E-01 | 1.00E+00 |
| ENSG00000281809.1_LINC01394  | ENSG00000160789.18_LMNA | -0.04386 | -0.201653846 | 0.11615051  | 5.92E-01 | 8.11E-01 | 1.00E+00 |
| ENSG00000249867.4_RP11-115J  | ENSG00000160789.18_LMNA | 0.08669  | -0.07352683  | 0.242542014 | 2.88E-01 | 5.74E-01 | 1.00E+00 |
| ENSG00000270702.1_RP11-107F  | ENSG00000160789.18_LMNA | -0.04187 | -0.199738065 | 0.118119307 | 6.09E-01 | 8.21E-01 | 1.00E+00 |
| ENSG00000242756.2_RHOT1P3    | ENSG00000160789.18_LMNA | -0.02663 | -0.185046995 | 0.133134317 | 7.45E-01 | 8.93E-01 | 1.00E+00 |
| ENSG00000280140.1_RP11-597D  | ENSG00000160789.18_LMNA | -0.10595 | -0.26074888  | 0.054168189 | 1.94E-01 | 4.63E-01 | 1.00E+00 |
| ENSG00000249791.1_CTC-428G2  | ENSG00000160789.18_LMNA | 0.00519  | -0.154133767 | 0.164259263 | 9.49E-01 | 9.80E-01 | 1.00E+00 |
| ENSG00000231302.1_RPL36P2    | ENSG00000160789.18_LMNA | 0.14066  | -0.018967463 | 0.293291054 | 8.39E-02 | 2.80E-01 | 1.00E+00 |
| ENSG00000240476.1_LINC00973  | ENSG00000160789.18_LMNA | 0.06662  | -0.093575012 | 0.223448994 | 4.15E-01 | 6.88E-01 | 1.00E+00 |
| ENSG00000230729.1_RP11-296L  | ENSG00000160789.18_LMNA | -0.29378 | -0.432741267 | -0.14118224 | 2.39E-04 | 3.76E-03 | 1.00E+00 |
| ENSG00000242737.1_RP11-562A  | ENSG00000160789.18_LMNA | -0.07839 | -0.234665304 | 0.081828658 | 3.37E-01 | 6.22E-01 | 1.00E+00 |
| ENSG00000258300.2_NUTF2P2    | ENSG00000160789.18_LMNA | 0.00311  | -0.156163593 | 0.162234801 | 9.70E-01 | 9.88E-01 | 1.00E+00 |
| ENSG00000260690.1_CYCSP39    | ENSG00000160789.18_LMNA | -0.06852 | -0.22525934  | 0.091685069 | 4.02E-01 | 6.78E-01 | 1.00E+00 |
| ENSG00000272798.1_CTA-390C1  | ENSG00000160789.18_LMNA | -0.12689 | -0.280428357 | 0.032974123 | 1.19E-01 | 3.47E-01 | 1.00E+00 |
| ENSG00000276934.1_RP11-231E  | ENSG00000160789.18_LMNA | 0.1004   | -0.059760801 | 0.25551192  | 2.18E-01 | 4.93E-01 | 1.00E+00 |
| ENSG00000163060.7_TEKT4      | ENSG00000160789.18_LMNA | -0.00124 | -0.160410347 | 0.157990579 | 9.88E-01 | 9.95E-01 | 1.00E+00 |
| ENSG00000254396.1_RP11-56F1  | ENSG00000160789.18_LMNA | -0.03416 | -0.192318532 | 0.125720652 | 6.76E-01 | 8.58E-01 | 1.00E+00 |
| ENSG00000236846.1_RP11-239E  | ENSG00000160789.18_LMNA | -0.11909 | -0.273109812 | 0.040888982 | 1.44E-01 | 3.88E-01 | 1.00E+00 |
| ENSG00000272226.1_RP11-63G1  | ENSG00000160789.18_LMNA | 0.11709  | -0.042911059 | 0.271234233 | 1.51E-01 | 3.99E-01 | 1.00E+00 |
| ENSG00000277581.1_RP4-616B8  | ENSG00000160789.18_LMNA | 0.08249  | -0.077731433 | 0.23855792  | 3.12E-01 | 5.99E-01 | 1.00E+00 |
| ENSG00000271153.1_RPL23AP8   | ENSG00000160789.18_LMNA | -0.02737 | -0.185760139 | 0.132408806 | 7.38E-01 | 8.90E-01 | 1.00E+00 |
| ENSG00000237260.1_AC073069.  | ENSG00000160789.18_LMNA | -0.08624 | -0.242120398 | 0.073972314 | 2.91E-01 | 5.76E-01 | 1.00E+00 |
| ENSG00000262652.1_RP13-638C  | ENSG00000160789.18_LMNA | 0.10035  | -0.059809028 | 0.255466679 | 2.19E-01 | 4.94E-01 | 1.00E+00 |
| ENSG00000224669.1_RP11-561N  | ENSG00000160789.18_LMNA | -0.04628 | -0.203981597 | 0.113754978 | 5.71E-01 | 8.00E-01 | 1.00E+00 |

|                              |                         |          |              |             |          |          |          |
|------------------------------|-------------------------|----------|--------------|-------------|----------|----------|----------|
| ENSG00000223635.1_RP4-613A2  | ENSG00000160789.18_LMNA | 0.05979  | -0.100367353 | 0.216924612 | 4.64E-01 | 7.27E-01 | 1.00E+00 |
| ENSG00000242837.1_RPL21P13   | ENSG00000160789.18_LMNA | -0.13764 | -0.290471384 | 0.02204843  | 9.08E-02 | 2.94E-01 | 1.00E+00 |
| ENSG00000267408.1_CTB-50L17  | ENSG00000160789.18_LMNA | -0.07163 | -0.228232712 | 0.088576003 | 3.80E-01 | 6.59E-01 | 1.00E+00 |
| ENSG00000267515.1_RP11-861E  | ENSG00000160789.18_LMNA | -0.08688 | -0.242719115 | 0.073339666 | 2.87E-01 | 5.73E-01 | 1.00E+00 |
| ENSG00000227805.1_RPL21P90   | ENSG00000160789.18_LMNA | -0.16453 | -0.315467114 | -0.00547214 | 4.28E-02 | 1.82E-01 | 1.00E+00 |
| ENSG00000170523.3_KRT83      | ENSG00000160789.18_LMNA | -0.17382 | -0.324050534 | -0.01503215 | 3.22E-02 | 1.50E-01 | 1.00E+00 |
| ENSG00000259177.1_RP11-154B  | ENSG00000160789.18_LMNA | 0.05557  | -0.104552277 | 0.212890622 | 4.96E-01 | 7.51E-01 | 1.00E+00 |
| ENSG00000277840.1_RP11-103B  | ENSG00000160789.18_LMNA | 0.19667  | 0.038682476  | 0.345068513 | 1.52E-02 | 8.85E-02 | 1.00E+00 |
| ENSG00000258439.1_RP11-173A  | ENSG00000160789.18_LMNA | 0.06405  | -0.096129066 | 0.220999026 | 4.33E-01 | 7.02E-01 | 1.00E+00 |
| ENSG00000224085.3_RPL23AP4   | ENSG00000160789.18_LMNA | 0.02173  | -0.137947037 | 0.180307817 | 7.90E-01 | 9.15E-01 | 1.00E+00 |
| ENSG00000179219.5_LINC00311  | ENSG00000160789.18_LMNA | -0.17625 | -0.326290924 | -0.01753677 | 2.99E-02 | 1.43E-01 | 1.00E+00 |
| ENSG00000228079.2_AC012368   | ENSG00000160789.18_LMNA | -0.18247 | -0.33202467  | -0.02396446 | 2.45E-02 | 1.25E-01 | 1.00E+00 |
| ENSG00000259565.2_KRT8P23    | ENSG00000160789.18_LMNA | -0.00478 | -0.163852361 | 0.154541963 | 9.53E-01 | 9.81E-01 | 1.00E+00 |
| ENSG00000213076.3_yR211F11.2 | ENSG00000160789.18_LMNA | 0.00696  | -0.152412864 | 0.165973522 | 9.32E-01 | 9.74E-01 | 1.00E+00 |
| ENSG00000274767.1_AC131056   | ENSG00000160789.18_LMNA | -0.05754 | -0.214769089 | 0.102604923 | 4.81E-01 | 7.39E-01 | 1.00E+00 |
| ENSG00000265437.1_RP11-757O  | ENSG00000160789.18_LMNA | 0.08951  | -0.070703054 | 0.245211727 | 2.73E-01 | 5.57E-01 | 1.00E+00 |
| ENSG00000277327.1_SPDYE20P   | ENSG00000160789.18_LMNA | -0.04396 | -0.201753242 | 0.116048296 | 5.91E-01 | 8.10E-01 | 1.00E+00 |
| ENSG00000232166.1_RP4-799P1  | ENSG00000160789.18_LMNA | 0.01123  | -0.148232331 | 0.170129912 | 8.91E-01 | 9.57E-01 | 1.00E+00 |
| ENSG00000219582.2_HNRNPA1F   | ENSG00000160789.18_LMNA | -0.0084  | -0.167374351 | 0.15100517  | 9.18E-01 | 9.69E-01 | 1.00E+00 |
| ENSG00000214563.2_GAPDHP15   | ENSG00000160789.18_LMNA | -0.17145 | -0.32186841  | -0.01259638 | 3.47E-02 | 1.58E-01 | 1.00E+00 |
| ENSG00000239315.4_RPL19P13   | ENSG00000160789.18_LMNA | -0.06016 | -0.21728374  | 0.099994243 | 4.62E-01 | 7.25E-01 | 1.00E+00 |
| ENSG00000251229.1_RP11-503N  | ENSG00000160789.18_LMNA | 0.13039  | -0.029423827 | 0.283699375 | 1.09E-01 | 3.29E-01 | 1.00E+00 |
| ENSG00000267827.4_CTC-471J1  | ENSG00000160789.18_LMNA | 0.01077  | -0.148687085 | 0.169678332 | 8.95E-01 | 9.59E-01 | 1.00E+00 |
| ENSG00000253500.4_AF121898   | ENSG00000160789.18_LMNA | -0.22756 | -0.373240584 | -0.0709306  | 4.81E-03 | 3.81E-02 | 1.00E+00 |
| ENSG00000236062.1_GSTM5P1    | ENSG00000160789.18_LMNA | 0.04962  | -0.11045312  | 0.207184151 | 5.44E-01 | 7.82E-01 | 1.00E+00 |
| ENSG00000231943.6_PGM5P4-A   | ENSG00000160789.18_LMNA | -0.04427 | -0.202043198 | 0.115750079 | 5.88E-01 | 8.09E-01 | 1.00E+00 |
| ENSG00000233295.3_FAM90A20I  | ENSG00000160789.18_LMNA | 0.1786   | 0.019967528  | 0.328461925 | 2.77E-02 | 1.36E-01 | 1.00E+00 |
| ENSG00000268866.1_AC020915   | ENSG00000160789.18_LMNA | -0.09011 | -0.245780778 | 0.07010051  | 2.70E-01 | 5.54E-01 | 1.00E+00 |
| ENSG00000216636.1_RPL7P25    | ENSG00000160789.18_LMNA | 0.03663  | -0.123285623 | 0.194699284 | 6.54E-01 | 8.47E-01 | 1.00E+00 |
| ENSG00000213050.5_TPM3P1     | ENSG00000160789.18_LMNA | 0.06066  | -0.099499125 | 0.217760171 | 4.58E-01 | 7.22E-01 | 1.00E+00 |
| ENSG00000236977.1_ANKRD44-I  | ENSG00000160789.18_LMNA | -0.12506 | -0.278708212 | 0.034837965 | 1.25E-01 | 3.57E-01 | 1.00E+00 |
| ENSG00000257023.1_RP11-268P  | ENSG00000160789.18_LMNA | 0.13929  | -0.020365894 | 0.292011897 | 8.70E-02 | 2.87E-01 | 1.00E+00 |
| ENSG00000217791.4_ASS1P9     | ENSG00000160789.18_LMNA | 0.06934  | -0.090861209 | 0.226047818 | 3.96E-01 | 6.73E-01 | 1.00E+00 |

|                              |                         |          |              |             |          |          |          |
|------------------------------|-------------------------|----------|--------------|-------------|----------|----------|----------|
| ENSG00000274421.1_RP11-386J  | ENSG00000160789.18_LMNA | -0.01377 | -0.17259639  | 0.145746135 | 8.66E-01 | 9.48E-01 | 1.00E+00 |
| ENSG00000258684.2_BMS1P16    | ENSG00000160789.18_LMNA | 0.03192  | -0.127931208 | 0.190154003 | 6.96E-01 | 8.70E-01 | 1.00E+00 |
| ENSG00000232586.1_KIAA1614-7 | ENSG00000160789.18_LMNA | 0.04319  | -0.116809397 | 0.201012972 | 5.97E-01 | 8.14E-01 | 1.00E+00 |
| ENSG00000233242.2_RP11-220I1 | ENSG00000160789.18_LMNA | -0.08374 | -0.239743448 | 0.076481464 | 3.05E-01 | 5.92E-01 | 1.00E+00 |
| ENSG00000166736.10_HTR3A     | ENSG00000160789.18_LMNA | 0.03332  | -0.126554142 | 0.19150276  | 6.84E-01 | 8.63E-01 | 1.00E+00 |
| ENSG00000182747.4_SLC35D3    | ENSG00000160789.18_LMNA | -0.1927  | -0.341429842 | -0.03456337 | 1.74E-02 | 9.75E-02 | 1.00E+00 |
| ENSG00000126266.3_FFAR1      | ENSG00000160789.18_LMNA | -0.213   | -0.359989185 | -0.05568281 | 8.42E-03 | 5.79E-02 | 1.00E+00 |
| ENSG00000107859.8_PITX3      | ENSG00000160789.18_LMNA | 0.1348   | -0.024933069 | 0.287826462 | 9.78E-02 | 3.07E-01 | 1.00E+00 |
| ENSG00000244414.5_CFHR1      | ENSG00000160789.18_LMNA | -0.16273 | -0.313797662 | -0.0036193  | 4.52E-02 | 1.88E-01 | 1.00E+00 |
| ENSG00000271676.1_RP11-1E1.2 | ENSG00000160789.18_LMNA | 0.1264   | -0.033478332 | 0.27996322  | 1.21E-01 | 3.49E-01 | 1.00E+00 |
| ENSG00000164556.7_FAM183BP   | ENSG00000160789.18_LMNA | -0.04841 | -0.206019711 | 0.111654479 | 5.54E-01 | 7.88E-01 | 1.00E+00 |
| ENSG00000266850.1_RP11-370A  | ENSG00000160789.18_LMNA | 0.21458  | 0.057333728  | 0.361429903 | 7.94E-03 | 5.53E-02 | 1.00E+00 |
| ENSG00000196970.7_NXF4       | ENSG00000160789.18_LMNA | -0.16239 | -0.313489948 | -0.00327802 | 4.56E-02 | 1.89E-01 | 1.00E+00 |
| ENSG00000214999.3_AC129492.1 | ENSG00000160789.18_LMNA | -0.0759  | -0.232298503 | 0.084314647 | 3.53E-01 | 6.36E-01 | 1.00E+00 |
| ENSG00000185221.6_GAPDHP24   | ENSG00000160789.18_LMNA | 0.1065   | -0.053605206 | 0.261275036 | 1.92E-01 | 4.59E-01 | 1.00E+00 |
| ENSG00000232878.2_DPYD-AS1   | ENSG00000160789.18_LMNA | 0.15341  | -0.005939351 | 0.305154499 | 5.92E-02 | 2.24E-01 | 1.00E+00 |
| ENSG00000220494.4_YAP1P1     | ENSG00000160789.18_LMNA | -0.00211 | -0.161254574 | 0.157145451 | 9.79E-01 | 9.92E-01 | 1.00E+00 |
| ENSG00000266918.1_RP11-798G  | ENSG00000160789.18_LMNA | -0.03435 | -0.192502272 | 0.12553286  | 6.74E-01 | 8.57E-01 | 1.00E+00 |
| ENSG00000280295.1_RP11-358B  | ENSG00000160789.18_LMNA | 0.06352  | -0.096660419 | 0.220488824 | 4.37E-01 | 7.05E-01 | 1.00E+00 |
| ENSG00000203414.2_BTBD7P1    | ENSG00000160789.18_LMNA | -0.06166 | -0.218714095 | 0.098507314 | 4.50E-01 | 7.16E-01 | 1.00E+00 |
| ENSG00000277914.1_DDX6P2     | ENSG00000160789.18_LMNA | -0.02374 | -0.182251542 | 0.135974966 | 7.72E-01 | 9.06E-01 | 1.00E+00 |
| ENSG00000275512.1_RP11-322E  | ENSG00000160789.18_LMNA | -0.06935 | -0.226053484 | 0.090855288 | 3.96E-01 | 6.73E-01 | 1.00E+00 |
| ENSG00000279147.1_RP11-271K  | ENSG00000160789.18_LMNA | -0.21968 | -0.366079016 | -0.06267252 | 6.54E-03 | 4.79E-02 | 1.00E+00 |
| ENSG00000214128.9_TMEN213    | ENSG00000160789.18_LMNA | -0.26038 | -0.402877537 | -0.10555164 | 1.20E-03 | 1.33E-02 | 1.00E+00 |
| ENSG00000261247.1_GOLGA8T    | ENSG00000160789.18_LMNA | 0.09041  | -0.069792036 | 0.24607202  | 2.68E-01 | 5.52E-01 | 1.00E+00 |
| ENSG00000139304.11_PTPRQ     | ENSG00000160789.18_LMNA | 0.05069  | -0.109396272 | 0.208207778 | 5.35E-01 | 7.76E-01 | 1.00E+00 |
| ENSG00000233783.6_AP001442.2 | ENSG00000160789.18_LMNA | 0.0719   | -0.088309524 | 0.228487285 | 3.79E-01 | 6.58E-01 | 1.00E+00 |
| ENSG00000235838.1_HSP90AB7   | ENSG00000160789.18_LMNA | 0.08152  | -0.078704699 | 0.237634177 | 3.18E-01 | 6.05E-01 | 1.00E+00 |
| ENSG00000230773.5_AC079807.4 | ENSG00000160789.18_LMNA | -0.0221  | -0.180669709 | 0.137580059 | 7.87E-01 | 9.13E-01 | 1.00E+00 |
| ENSG00000255104.6_TBC1D26    | ENSG00000160789.18_LMNA | -0.18182 | -0.331427737 | -0.0232941  | 2.50E-02 | 1.26E-01 | 1.00E+00 |
| ENSG00000270136.4_MINOS1-NE  | ENSG00000160789.18_LMNA | -0.08815 | -0.243930105 | 0.072059268 | 2.80E-01 | 5.66E-01 | 1.00E+00 |
| ENSG00000261634.3_RP11-352D  | ENSG00000160789.18_LMNA | -0.27203 | -0.413328388 | -0.11793438 | 6.98E-04 | 8.77E-03 | 1.00E+00 |
| ENSG00000156194.16_PPEF2     | ENSG00000160789.18_LMNA | 0.0397   | -0.120255972 | 0.197656181 | 6.27E-01 | 8.32E-01 | 1.00E+00 |

|                              |                         |          |              |             |          |          |          |
|------------------------------|-------------------------|----------|--------------|-------------|----------|----------|----------|
| ENSG00000279905.1_RP11-117L  | ENSG00000160789.18_LMNA | -0.16182 | -0.312962737 | -0.00269346 | 4.64E-02 | 1.92E-01 | 1.00E+00 |
| ENSG00000225769.1_CROCCP1    | ENSG00000160789.18_LMNA | 0.04382  | -0.116193033 | 0.201612494 | 5.92E-01 | 8.11E-01 | 1.00E+00 |
| ENSG00000224650.2_IGHV3-74   | ENSG00000160789.18_LMNA | -0.02772 | -0.186103531 | 0.132059337 | 7.35E-01 | 8.88E-01 | 1.00E+00 |
| ENSG00000281370.1_AC079907   | ENSG00000160789.18_LMNA | -0.06978 | -0.226460472 | 0.090429865 | 3.93E-01 | 6.71E-01 | 1.00E+00 |
| ENSG00000273196.1_RP11-717A  | ENSG00000160789.18_LMNA | 0.11816  | -0.041831643 | 0.272235743 | 1.47E-01 | 3.93E-01 | 1.00E+00 |
| ENSG00000258240.4_RP1-46F2.3 | ENSG00000160789.18_LMNA | -0.13806 | -0.290870124 | 0.021613099 | 8.98E-02 | 2.92E-01 | 1.00E+00 |
| ENSG00000207129.1_RNA5SP18   | ENSG00000160789.18_LMNA | 0.0234   | -0.136312253 | 0.181919279 | 7.75E-01 | 9.07E-01 | 1.00E+00 |
| ENSG00000275258.1_           | ENSG00000160789.18_LMNA | 0.07521  | -0.085004693 | 0.231640874 | 3.57E-01 | 6.40E-01 | 1.00E+00 |
| ENSG00000207276.1_RNU6-1160  | ENSG00000160789.18_LMNA | 0.09188  | -0.068323729 | 0.247457525 | 2.60E-01 | 5.43E-01 | 1.00E+00 |
| ENSG00000199488.1_RNU1-70P   | ENSG00000160789.18_LMNA | -0.12889 | -0.28229483  | 0.030949259 | 1.14E-01 | 3.37E-01 | 1.00E+00 |
| ENSG00000249784.1_SCARNA22   | ENSG00000160789.18_LMNA | -0.11475 | -0.269035079 | 0.045278711 | 1.59E-01 | 4.12E-01 | 1.00E+00 |
| ENSG00000226744.1_AC079781.1 | ENSG00000160789.18_LMNA | -0.01368 | -0.172509793 | 0.145833492 | 8.67E-01 | 9.48E-01 | 1.00E+00 |
| ENSG00000236663.1_FRGCA      | ENSG00000160789.18_LMNA | -0.12289 | -0.27667524  | 0.037037959 | 1.31E-01 | 3.68E-01 | 1.00E+00 |
| ENSG00000198354.5_DCAF12L2   | ENSG00000160789.18_LMNA | -0.15184 | -0.303698762 | 0.007543706 | 6.18E-02 | 2.30E-01 | 1.00E+00 |
| ENSG00000212195.2_U3         | ENSG00000160789.18_LMNA | -0.08359 | -0.239598404 | 0.076634446 | 3.06E-01 | 5.93E-01 | 1.00E+00 |
| ENSG00000234238.1_RP11-430L  | ENSG00000160789.18_LMNA | -0.23695 | -0.381753291 | -0.0808009  | 3.29E-03 | 2.87E-02 | 1.00E+00 |
| ENSG00000242971.3_RN7SL233f  | ENSG00000160789.18_LMNA | -0.03393 | -0.192093916 | 0.125950191 | 6.78E-01 | 8.60E-01 | 1.00E+00 |
| ENSG00000271214.1_RP11-9M16  | ENSG00000160789.18_LMNA | 0.08996  | -0.070244751 | 0.245644575 | 2.70E-01 | 5.55E-01 | 1.00E+00 |
| ENSG00000256093.1_RP11-158L  | ENSG00000160789.18_LMNA | -0.03055 | -0.188830331 | 0.129281472 | 7.09E-01 | 8.76E-01 | 1.00E+00 |
| ENSG00000266936.1_CTC-215O4  | ENSG00000160789.18_LMNA | -0.00845 | -0.167423866 | 0.150955388 | 9.18E-01 | 9.69E-01 | 1.00E+00 |
| ENSG00000241217.3_RN7SL809f  | ENSG00000160789.18_LMNA | 0.12076  | -0.039195055 | 0.27467918  | 1.38E-01 | 3.79E-01 | 1.00E+00 |
| ENSG00000242611.1_AC093627.1 | ENSG00000160789.18_LMNA | 0.15065  | -0.008765367 | 0.302589294 | 6.39E-02 | 2.35E-01 | 1.00E+00 |
| ENSG00000230627.1_RP1-155D2  | ENSG00000160789.18_LMNA | -0.04646 | -0.204154954 | 0.113576425 | 5.70E-01 | 7.99E-01 | 1.00E+00 |
| ENSG00000136696.9_IL36B      | ENSG00000160789.18_LMNA | 0.13266  | -0.027109915 | 0.285827351 | 1.03E-01 | 3.18E-01 | 1.00E+00 |
| ENSG00000271199.1_RP13-216E  | ENSG00000160789.18_LMNA | -0.15724 | -0.308710448 | 0.002013624 | 5.30E-02 | 2.09E-01 | 1.00E+00 |
| ENSG00000273407.1_RP11-757A  | ENSG00000160789.18_LMNA | -0.05526 | -0.212594743 | 0.104858785 | 4.99E-01 | 7.52E-01 | 1.00E+00 |
| ENSG00000235659.1_RP11-374M  | ENSG00000160789.18_LMNA | 0.15182  | -0.007563657 | 0.30368065  | 6.19E-02 | 2.30E-01 | 1.00E+00 |
| ENSG00000272840.1_RP11-379B  | ENSG00000160789.18_LMNA | -0.08885 | -0.244595426 | 0.07135537  | 2.76E-01 | 5.61E-01 | 1.00E+00 |
| ENSG00000249019.2_RP11-539G  | ENSG00000160789.18_LMNA | -0.09847 | -0.253693553 | 0.061698039 | 2.27E-01 | 5.04E-01 | 1.00E+00 |
| ENSG00000236469.1_AC007040.1 | ENSG00000160789.18_LMNA | 0.04566  | -0.11437683  | 0.203377685 | 5.76E-01 | 8.03E-01 | 1.00E+00 |
| ENSG00000270954.1_RPSAP75    | ENSG00000160789.18_LMNA | -0.08314 | -0.239177172 | 0.077078645 | 3.09E-01 | 5.95E-01 | 1.00E+00 |
| ENSG00000277268.1_RP11-445F  | ENSG00000160789.18_LMNA | -0.23139 | -0.376714587 | -0.07495149 | 4.13E-03 | 3.40E-02 | 1.00E+00 |
| ENSG00000237080.2_EHMT2-AS   | ENSG00000160789.18_LMNA | 0.0008   | -0.158423081 | 0.159978125 | 9.92E-01 | 9.97E-01 | 1.00E+00 |

|                              |                         |          |              |             |          |          |          |
|------------------------------|-------------------------|----------|--------------|-------------|----------|----------|----------|
| ENSG00000237458.1_TUBB4BP3   | ENSG00000160789.18_LMNA | 0.10994  | -0.050142732 | 0.264506909 | 1.78E-01 | 4.39E-01 | 1.00E+00 |
| ENSG00000254605.1_RP11-626H  | ENSG00000160789.18_LMNA | 0.27712  | 0.123365487  | 0.417887741 | 5.48E-04 | 7.25E-03 | 1.00E+00 |
| ENSG00000213548.3_AC005522.I | ENSG00000160789.18_LMNA | 0.15261  | -0.006759657 | 0.304410363 | 6.05E-02 | 2.27E-01 | 1.00E+00 |
| ENSG00000264540.2_RN7SL405F  | ENSG00000160789.18_LMNA | -0.0462  | -0.203904135 | 0.113834755 | 5.72E-01 | 8.00E-01 | 1.00E+00 |
| ENSG00000205035.7_RP11-707M  | ENSG00000160789.18_LMNA | -0.37461 | -0.503768913 | -0.22907313 | 1.99E-06 | 7.94E-05 | 1.02E-01 |
| ENSG00000233308.1_OSTN-AS1   | ENSG00000160789.18_LMNA | -0.02668 | -0.185092684 | 0.133087846 | 7.44E-01 | 8.93E-01 | 1.00E+00 |
| ENSG00000228939.1_AKT3-IT1   | ENSG00000160789.18_LMNA | -0.18533 | -0.334658703 | -0.02692585 | 2.23E-02 | 1.17E-01 | 1.00E+00 |
| ENSG00000236797.1_SPA17P1    | ENSG00000160789.18_LMNA | 0.06915  | -0.091048284 | 0.225868814 | 3.97E-01 | 6.74E-01 | 1.00E+00 |
| ENSG00000279144.1_RP11-894J  | ENSG00000160789.18_LMNA | 0.08849  | -0.071717389 | 0.244253285 | 2.78E-01 | 5.64E-01 | 1.00E+00 |
| ENSG00000267641.1_BNIP3P16   | ENSG00000160789.18_LMNA | -0.13194 | -0.28515487  | 0.027841518 | 1.05E-01 | 3.22E-01 | 1.00E+00 |
| ENSG00000271931.1_RP11-63L7  | ENSG00000160789.18_LMNA | 0.08596  | -0.074253945 | 0.241853794 | 2.92E-01 | 5.78E-01 | 1.00E+00 |
| ENSG00000253768.1_CTB-33O18  | ENSG00000160789.18_LMNA | -0.16967 | -0.320223578 | -0.01076279 | 3.66E-02 | 1.63E-01 | 1.00E+00 |
| ENSG00000236542.1_MED28P7    | ENSG00000160789.18_LMNA | -0.00956 | -0.168508727 | 0.149864287 | 9.07E-01 | 9.64E-01 | 1.00E+00 |
| ENSG00000267472.1_LOC440461  | ENSG00000160789.18_LMNA | 0.21811  | 0.061026477  | 0.364647225 | 6.95E-03 | 5.02E-02 | 1.00E+00 |
| ENSG00000226281.2_RP1-80N2.2 | ENSG00000160789.18_LMNA | -0.06246 | -0.219477067 | 0.097713585 | 4.45E-01 | 7.12E-01 | 1.00E+00 |
| ENSG00000119440.8_LCN1P1     | ENSG00000160789.18_LMNA | -0.01783 | -0.17653358  | 0.14176912  | 8.27E-01 | 9.32E-01 | 1.00E+00 |
| ENSG00000237109.1_RPL21P111  | ENSG00000160789.18_LMNA | -0.09429 | -0.249737422 | 0.065904597 | 2.48E-01 | 5.28E-01 | 1.00E+00 |
| ENSG00000248112.1_RP11-78C3  | ENSG00000160789.18_LMNA | -0.14546 | -0.297760746 | 0.014071387 | 7.38E-02 | 2.58E-01 | 1.00E+00 |
| ENSG00000167941.2_SOST       | ENSG00000160789.18_LMNA | 0.16173  | 0.002599087  | 0.312877601 | 4.65E-02 | 1.92E-01 | 1.00E+00 |
| ENSG00000262503.1_RP11-530N  | ENSG00000160789.18_LMNA | 0.03204  | -0.127813795 | 0.19026905  | 6.95E-01 | 8.69E-01 | 1.00E+00 |
| ENSG00000227933.1_RP11-331F  | ENSG00000160789.18_LMNA | 0.03451  | -0.125377912 | 0.192653859 | 6.73E-01 | 8.56E-01 | 1.00E+00 |
| ENSG00000226798.1_RP11-289F  | ENSG00000160789.18_LMNA | 0.31336  | 0.162251343  | 0.45010429  | 8.46E-05 | 1.65E-03 | 1.00E+00 |
| ENSG00000254905.1_RP11-712L  | ENSG00000160789.18_LMNA | 0.08125  | -0.078971531 | 0.237380823 | 3.20E-01 | 6.06E-01 | 1.00E+00 |
| ENSG00000272483.1_RP11-169K  | ENSG00000160789.18_LMNA | -0.12803 | -0.281493963 | 0.031818404 | 1.16E-01 | 3.41E-01 | 1.00E+00 |
| ENSG00000217889.3_KRT18P48   | ENSG00000160789.18_LMNA | -0.15544 | -0.30704217  | 0.003856577 | 5.58E-02 | 2.16E-01 | 1.00E+00 |
| ENSG00000274723.1_RP11-618L  | ENSG00000160789.18_LMNA | -0.13822 | -0.29101754  | 0.021452125 | 8.95E-02 | 2.91E-01 | 1.00E+00 |
| ENSG00000256756.1_TIMM17BP   | ENSG00000160789.18_LMNA | 0.09059  | -0.069611458 | 0.246242485 | 2.67E-01 | 5.51E-01 | 1.00E+00 |
| ENSG00000239465.1_RP11-330L  | ENSG00000160789.18_LMNA | 0.06523  | -0.094958008 | 0.222122856 | 4.25E-01 | 6.95E-01 | 1.00E+00 |
| ENSG00000253666.1_KB-1615E4  | ENSG00000160789.18_LMNA | -0.20975 | -0.357027156 | -0.05229383 | 9.50E-03 | 6.32E-02 | 1.00E+00 |
| ENSG00000225751.2_AC087501.  | ENSG00000160789.18_LMNA | -0.12507 | -0.278721699 | 0.034823361 | 1.25E-01 | 3.56E-01 | 1.00E+00 |
| ENSG00000269967.1_RP11-84A1  | ENSG00000160789.18_LMNA | 0.03243  | -0.12742847  | 0.190646545 | 6.92E-01 | 8.67E-01 | 1.00E+00 |
| ENSG00000213137.3_ARF1P2     | ENSG00000160789.18_LMNA | -0.15294 | -0.304725538 | 0.006412271 | 6.00E-02 | 2.26E-01 | 1.00E+00 |
| ENSG00000229473.2_RGS17P1    | ENSG00000160789.18_LMNA | 0.15895  | -0.000256622 | 0.310299143 | 5.05E-02 | 2.02E-01 | 1.00E+00 |

|                              |                         |          |              |             |          |          |          |
|------------------------------|-------------------------|----------|--------------|-------------|----------|----------|----------|
| ENSG00000240174.1_RP11-851M  | ENSG00000160789.18_LMNA | -0.08941 | -0.245120451 | 0.070799681 | 2.73E-01 | 5.58E-01 | 1.00E+00 |
| ENSG00000259916.1_RP11-407P  | ENSG00000160789.18_LMNA | 0.05188  | -0.108219105 | 0.209347124 | 5.26E-01 | 7.71E-01 | 1.00E+00 |
| ENSG00000253376.1_RP11-44D1  | ENSG00000160789.18_LMNA | -0.32018 | -0.456134489 | -0.16963059 | 5.79E-05 | 1.21E-03 | 1.00E+00 |
| ENSG00000227835.7_CARM1P1    | ENSG00000160789.18_LMNA | 0.08129  | -0.078935933 | 0.237414625 | 3.19E-01 | 6.06E-01 | 1.00E+00 |
| ENSG00000169676.5_DRD5       | ENSG00000160789.18_LMNA | -0.11148 | -0.265956534 | 0.048587212 | 1.72E-01 | 4.31E-01 | 1.00E+00 |
| ENSG00000231744.1_RP11-164H  | ENSG00000160789.18_LMNA | -0.02564 | -0.184089714 | 0.134107664 | 7.54E-01 | 8.98E-01 | 1.00E+00 |
| ENSG00000234345.2_LLOXNC01-  | ENSG00000160789.18_LMNA | -0.10086 | -0.255951897 | 0.059291704 | 2.16E-01 | 4.91E-01 | 1.00E+00 |
| ENSG00000258443.1_RP3-414A1  | ENSG00000160789.18_LMNA | 0.07636  | -0.083857433 | 0.232734078 | 3.50E-01 | 6.33E-01 | 1.00E+00 |
| ENSG00000220695.1_RP1-121G1  | ENSG00000160789.18_LMNA | -0.06073 | -0.217826132 | 0.099430565 | 4.57E-01 | 7.22E-01 | 1.00E+00 |
| ENSG00000235872.2_RP11-335O  | ENSG00000160789.18_LMNA | 0.18192  | 0.023392632  | 0.331515495 | 2.49E-02 | 1.26E-01 | 1.00E+00 |
| ENSG00000251254.1_GTF2F2P1   | ENSG00000160789.18_LMNA | 0.12593  | -0.033956282 | 0.279522171 | 1.22E-01 | 3.52E-01 | 1.00E+00 |
| ENSG00000260962.1_LINC00557  | ENSG00000160789.18_LMNA | -0.05921 | -0.216370242 | 0.100943131 | 4.69E-01 | 7.30E-01 | 1.00E+00 |
| ENSG00000250825.1_PGAM1P12   | ENSG00000160789.18_LMNA | 0.0162   | -0.143368258 | 0.17495168  | 8.43E-01 | 9.39E-01 | 1.00E+00 |
| ENSG00000280181.1_RP11-629N  | ENSG00000160789.18_LMNA | 0.05645  | -0.103686445 | 0.213726116 | 4.90E-01 | 7.46E-01 | 1.00E+00 |
| ENSG00000255318.1_RP11-655M  | ENSG00000160789.18_LMNA | 0.03792  | -0.122013711 | 0.195941357 | 6.43E-01 | 8.41E-01 | 1.00E+00 |
| ENSG00000232463.1_RP11-195C  | ENSG00000160789.18_LMNA | 0.05206  | -0.10803304  | 0.209527132 | 5.24E-01 | 7.69E-01 | 1.00E+00 |
| ENSG00000225308.2_ASS1P11    | ENSG00000160789.18_LMNA | 0.0716   | -0.088608844 | 0.228201334 | 3.81E-01 | 6.59E-01 | 1.00E+00 |
| ENSG00000280311.1_RP13-554M  | ENSG00000160789.18_LMNA | 0.11599  | -0.044023847 | 0.270201047 | 1.55E-01 | 4.06E-01 | 1.00E+00 |
| ENSG00000100341.10_PNPLA5    | ENSG00000160789.18_LMNA | 0.013    | -0.146506984 | 0.171841999 | 8.74E-01 | 9.51E-01 | 1.00E+00 |
| ENSG00000146049.1_KAAG1      | ENSG00000160789.18_LMNA | 0.21537  | 0.058168688  | 0.362157999 | 7.70E-03 | 5.40E-02 | 1.00E+00 |
| ENSG00000268144.1_NIFKP6     | ENSG00000160789.18_LMNA | 0.04253  | -0.11746681  | 0.200373261 | 6.03E-01 | 8.18E-01 | 1.00E+00 |
| ENSG00000250803.4_CTC-441N1  | ENSG00000160789.18_LMNA | 0.119    | -0.040976569 | 0.27302862  | 1.44E-01 | 3.89E-01 | 1.00E+00 |
| ENSG00000120659.13_TNFSF11   | ENSG00000160789.18_LMNA | 0.22442  | 0.067636338  | 0.370388047 | 5.44E-03 | 4.18E-02 | 1.00E+00 |
| ENSG00000180999.9_C1orf105   | ENSG00000160789.18_LMNA | -0.24425 | -0.388349739 | -0.08849014 | 2.43E-03 | 2.27E-02 | 1.00E+00 |
| ENSG00000215043.2_GLULP6     | ENSG00000160789.18_LMNA | 0.0368   | -0.12312049  | 0.1948606   | 6.53E-01 | 8.46E-01 | 1.00E+00 |
| ENSG00000269945.1_RP6-91H8.5 | ENSG00000160789.18_LMNA | -0.04332 | -0.201130858 | 0.116688219 | 5.96E-01 | 8.14E-01 | 1.00E+00 |
| ENSG00000203963.10_C1orf141  | ENSG00000160789.18_LMNA | -0.07051 | -0.22716221  | 0.08969607  | 3.88E-01 | 6.66E-01 | 1.00E+00 |
| ENSG00000242324.1_RP4-576H2  | ENSG00000160789.18_LMNA | 0.00545  | -0.153879471 | 0.164512699 | 9.47E-01 | 9.79E-01 | 1.00E+00 |
| ENSG00000273792.1_RP11-554D  | ENSG00000160789.18_LMNA | -0.0425  | -0.200341643 | 0.117499296 | 6.03E-01 | 8.18E-01 | 1.00E+00 |
| ENSG00000233217.1_MROH3P     | ENSG00000160789.18_LMNA | -0.08001 | -0.236202451 | 0.080211991 | 3.27E-01 | 6.14E-01 | 1.00E+00 |
| ENSG00000213109.4_RP11-55K2  | ENSG00000160789.18_LMNA | -0.02608 | -0.184513556 | 0.133676784 | 7.50E-01 | 8.95E-01 | 1.00E+00 |
| ENSG00000251288.2_RP11-10L1  | ENSG00000160789.18_LMNA | -0.03131 | -0.189564458 | 0.128532742 | 7.02E-01 | 8.73E-01 | 1.00E+00 |
| ENSG00000269779.1_CTD-2542C  | ENSG00000160789.18_LMNA | -0.2331  | -0.378260412 | -0.07674383 | 3.85E-03 | 3.22E-02 | 1.00E+00 |

|                              |                         |          |              |             |          |          |          |
|------------------------------|-------------------------|----------|--------------|-------------|----------|----------|----------|
| ENSG00000279964.1_RP11-69J7  | ENSG00000160789.18_LMNA | 0.05787  | -0.102269148 | 0.21509275  | 4.79E-01 | 7.37E-01 | 1.00E+00 |
| ENSG00000227288.3_RP5-837I24 | ENSG00000160789.18_LMNA | 0.16105  | 0.001900719  | 0.312247458 | 4.75E-02 | 1.94E-01 | 1.00E+00 |
| ENSG00000196344.10_ADH7      | ENSG00000160789.18_LMNA | -0.07235 | -0.228910686 | 0.087866222 | 3.76E-01 | 6.56E-01 | 1.00E+00 |
| ENSG00000165970.10_SLC6A5    | ENSG00000160789.18_LMNA | -0.27116 | -0.412554762 | -0.11701459 | 7.27E-04 | 9.03E-03 | 1.00E+00 |
| ENSG00000255128.1_HSPD1P3    | ENSG00000160789.18_LMNA | 0.01031  | -0.149139005 | 0.169229435 | 9.00E-01 | 9.61E-01 | 1.00E+00 |
| ENSG00000204001.8_LCN8       | ENSG00000160789.18_LMNA | -0.10443 | -0.259322524 | 0.055693372 | 2.00E-01 | 4.71E-01 | 1.00E+00 |
| ENSG00000204993.3_AC139712.1 | ENSG00000160789.18_LMNA | 0.05823  | -0.101915732 | 0.215433339 | 4.76E-01 | 7.35E-01 | 1.00E+00 |
| ENSG00000100652.4_SLC10A1    | ENSG00000160789.18_LMNA | -0.06122 | -0.218288682 | 0.098949701 | 4.54E-01 | 7.19E-01 | 1.00E+00 |
| ENSG00000215198.3_RP11-182N  | ENSG00000160789.18_LMNA | -0.14109 | -0.293695857 | 0.01852466  | 8.29E-02 | 2.78E-01 | 1.00E+00 |
| ENSG00000260762.1_ACSM5P1    | ENSG00000160789.18_LMNA | -0.24705 | -0.390878154 | -0.09144693 | 2.15E-03 | 2.07E-02 | 1.00E+00 |
| ENSG00000178021.10_TSPYL6    | ENSG00000160789.18_LMNA | -0.10214 | -0.25715827  | 0.058004775 | 2.11E-01 | 4.84E-01 | 1.00E+00 |
| ENSG00000235137.2_HSP90AB6   | ENSG00000160789.18_LMNA | 0.23821  | 0.082127679  | 0.382893704 | 3.12E-03 | 2.75E-02 | 1.00E+00 |
| ENSG00000259388.1_CTD-2647E  | ENSG00000160789.18_LMNA | -0.04096 | -0.198864557 | 0.119016158 | 6.16E-01 | 8.26E-01 | 1.00E+00 |
| ENSG00000196166.3_C8orf86    | ENSG00000160789.18_LMNA | 0.05945  | -0.100704072 | 0.216600438 | 4.67E-01 | 7.28E-01 | 1.00E+00 |
| ENSG00000198526.7_PABPC1P2   | ENSG00000160789.18_LMNA | 0.08514  | -0.07507417  | 0.241077063 | 2.97E-01 | 5.83E-01 | 1.00E+00 |
| ENSG00000280172.1_CH507-210  | ENSG00000160789.18_LMNA | 0.0527   | -0.107406528 | 0.210133091 | 5.19E-01 | 7.65E-01 | 1.00E+00 |
| ENSG00000204616.9_TRIM31     | ENSG00000160789.18_LMNA | -0.11482 | -0.269102417 | 0.045206266 | 1.59E-01 | 4.12E-01 | 1.00E+00 |
| ENSG00000186481.14_ANKRD20   | ENSG00000160789.18_LMNA | -0.16451 | -0.315452939 | -0.0054564  | 4.28E-02 | 1.82E-01 | 1.00E+00 |
| ENSG00000249931.4_GOLGA8K    | ENSG00000160789.18_LMNA | 0.0807   | -0.079526287 | 0.236853948 | 3.23E-01 | 6.10E-01 | 1.00E+00 |
| ENSG00000180861.8_LINC01559  | ENSG00000160789.18_LMNA | 0.15349  | -0.005852899 | 0.305232901 | 5.90E-02 | 2.23E-01 | 1.00E+00 |
| ENSG00000105392.14_CRX       | ENSG00000160789.18_LMNA | -0.08572 | -0.241618675 | 0.074502275 | 2.94E-01 | 5.80E-01 | 1.00E+00 |
| ENSG00000280109.1_PLAC4      | ENSG00000160789.18_LMNA | 0.07884  | -0.081382495 | 0.235089679 | 3.34E-01 | 6.20E-01 | 1.00E+00 |
| ENSG00000241755.1_IGKV1-9    | ENSG00000160789.18_LMNA | -0.04658 | -0.204268018 | 0.113459961 | 5.69E-01 | 7.98E-01 | 1.00E+00 |
| ENSG00000270168.1_LA16c-380f | ENSG00000160789.18_LMNA | -0.09836 | -0.253592154 | 0.061805996 | 2.28E-01 | 5.05E-01 | 1.00E+00 |
| ENSG00000276404.1_MIR6835    | ENSG00000160789.18_LMNA | 0.17866  | 0.020026806  | 0.328514827 | 2.77E-02 | 1.36E-01 | 1.00E+00 |
| ENSG00000277249.1_MIR6784    | ENSG00000160789.18_LMNA | 0.00867  | -0.150741748 | 0.167636345 | 9.16E-01 | 9.68E-01 | 1.00E+00 |
| ENSG00000257336.1_PRELID2P1  | ENSG00000160789.18_LMNA | 0.04783  | -0.112228474 | 0.205463038 | 5.58E-01 | 7.91E-01 | 1.00E+00 |
| ENSG00000266712.2_MIR3149    | ENSG00000160789.18_LMNA | -0.01197 | -0.170840405 | 0.147516571 | 8.84E-01 | 9.55E-01 | 1.00E+00 |
| ENSG00000199121.3_MIR26B     | ENSG00000160789.18_LMNA | 0.12417  | -0.03574109  | 0.277873992 | 1.27E-01 | 3.62E-01 | 1.00E+00 |
| ENSG00000205293.3_LINC01602  | ENSG00000160789.18_LMNA | -0.07711 | -0.233448033 | 0.08310772  | 3.45E-01 | 6.29E-01 | 1.00E+00 |
| ENSG00000252473.1_SNORA67    | ENSG00000160789.18_LMNA | -0.12246 | -0.27627465  | 0.037471103 | 1.33E-01 | 3.70E-01 | 1.00E+00 |
| ENSG00000253620.2_AC144568.1 | ENSG00000160789.18_LMNA | 0.03784  | -0.122100573 | 0.195856565 | 6.44E-01 | 8.41E-01 | 1.00E+00 |
| ENSG00000253821.1_RP11-246K  | ENSG00000160789.18_LMNA | 0.06846  | -0.091739436 | 0.225207293 | 4.02E-01 | 6.78E-01 | 1.00E+00 |

|                              |                         |          |              |             |          |          |          |
|------------------------------|-------------------------|----------|--------------|-------------|----------|----------|----------|
| ENSG00000236595.1_MED15P5    | ENSG00000160789.18_LMNA | 0.01373  | -0.145794016 | 0.172548926 | 8.67E-01 | 9.48E-01 | 1.00E+00 |
| ENSG00000268673.3_LLNLR-249  | ENSG00000160789.18_LMNA | -0.13675 | -0.289641899 | 0.022953655 | 9.30E-02 | 2.98E-01 | 1.00E+00 |
| ENSG00000269387.1_RP11-298J  | ENSG00000160789.18_LMNA | -0.03892 | -0.196902845 | 0.121028407 | 6.34E-01 | 8.36E-01 | 1.00E+00 |
| ENSG00000237371.1_RP13-152O  | ENSG00000160789.18_LMNA | 0.17368  | 0.014893919  | 0.323926787 | 3.24E-02 | 1.51E-01 | 1.00E+00 |
| ENSG00000280408.1_RP11-818O  | ENSG00000160789.18_LMNA | 0.004    | -0.155295631 | 0.163100797 | 9.61E-01 | 9.84E-01 | 1.00E+00 |
| ENSG00000215914.4_MMP23A     | ENSG00000160789.18_LMNA | 0.02354  | -0.136166127 | 0.182063237 | 7.73E-01 | 9.07E-01 | 1.00E+00 |
| ENSG00000239948.2_RN7SL368F  | ENSG00000160789.18_LMNA | 0.12131  | -0.038636787 | 0.27519603  | 1.37E-01 | 3.76E-01 | 1.00E+00 |
| ENSG00000261399.1_LA16c-329F | ENSG00000160789.18_LMNA | -0.0993  | -0.254473414 | 0.060867487 | 2.24E-01 | 4.99E-01 | 1.00E+00 |
| ENSG00000122136.12_OBP2A     | ENSG00000160789.18_LMNA | 0.00581  | -0.153535431 | 0.164855508 | 9.43E-01 | 9.77E-01 | 1.00E+00 |
| ENSG00000235581.1_GS1-111G1  | ENSG00000160789.18_LMNA | 0.00293  | -0.156347164 | 0.162051583 | 9.71E-01 | 9.89E-01 | 1.00E+00 |
| ENSG00000267028.1_TCF4-AS1   | ENSG00000160789.18_LMNA | -0.09015 | -0.245826191 | 0.070052414 | 2.69E-01 | 5.54E-01 | 1.00E+00 |
| ENSG00000261245.2_RP11-120K  | ENSG00000160789.18_LMNA | -0.06683 | -0.223654362 | 0.093360729 | 4.13E-01 | 6.87E-01 | 1.00E+00 |
| ENSG00000196109.6_ZNF676     | ENSG00000160789.18_LMNA | -0.34348 | -0.476617997 | -0.19493882 | 1.48E-05 | 4.03E-04 | 7.57E-01 |
| ENSG00000277794.1_Metazoa_SI | ENSG00000160789.18_LMNA | -0.08731 | -0.243134704 | 0.072900375 | 2.85E-01 | 5.70E-01 | 1.00E+00 |
| ENSG00000164265.7_SCGB3A2    | ENSG00000160789.18_LMNA | -0.12357 | -0.277313297 | 0.036347809 | 1.29E-01 | 3.64E-01 | 1.00E+00 |
| ENSG00000169900.6_PYDC1      | ENSG00000160789.18_LMNA | -0.11196 | -0.266410991 | 0.048099243 | 1.70E-01 | 4.28E-01 | 1.00E+00 |
| ENSG00000248676.1_RP11-766F  | ENSG00000160789.18_LMNA | 0.05045  | -0.109630275 | 0.207981191 | 5.37E-01 | 7.78E-01 | 1.00E+00 |
| ENSG00000279405.1_AC098795.  | ENSG00000160789.18_LMNA | 0.00816  | -0.151234645 | 0.167146082 | 9.20E-01 | 9.70E-01 | 1.00E+00 |
| ENSG00000231485.1_RP4-535B2  | ENSG00000160789.18_LMNA | -0.04202 | -0.199885948 | 0.11796742  | 6.07E-01 | 8.20E-01 | 1.00E+00 |
| ENSG00000271275.1_AC007326.  | ENSG00000160789.18_LMNA | -0.07823 | -0.234511937 | 0.081989868 | 3.38E-01 | 6.24E-01 | 1.00E+00 |
| ENSG00000254744.3_CTD-3076C  | ENSG00000160789.18_LMNA | -0.13065 | -0.283945864 | 0.029155972 | 1.09E-01 | 3.28E-01 | 1.00E+00 |
| ENSG00000236529.1_RP13-254B  | ENSG00000160789.18_LMNA | 0.00995  | -0.149490979 | 0.168879723 | 9.03E-01 | 9.63E-01 | 1.00E+00 |
| ENSG00000228541.1_AC093159.  | ENSG00000160789.18_LMNA | -0.02682 | -0.185229847 | 0.132948327 | 7.43E-01 | 8.92E-01 | 1.00E+00 |
| ENSG00000272057.1_CTB-40H15  | ENSG00000160789.18_LMNA | 0.13679  | -0.022914184 | 0.289678076 | 9.29E-02 | 2.98E-01 | 1.00E+00 |
| ENSG00000224948.1_ATP5G1P8   | ENSG00000160789.18_LMNA | -0.125   | -0.278652382 | 0.034898424 | 1.25E-01 | 3.57E-01 | 1.00E+00 |
| ENSG00000235663.1_SAPCD1-A.  | ENSG00000160789.18_LMNA | -0.15741 | -0.308866965 | 0.001840611 | 5.28E-02 | 2.08E-01 | 1.00E+00 |
| ENSG00000275175.1_CTD-2313J  | ENSG00000160789.18_LMNA | -0.09448 | -0.249919908 | 0.065710806 | 2.47E-01 | 5.27E-01 | 1.00E+00 |
| ENSG00000279448.1_AC006026.  | ENSG00000160789.18_LMNA | -0.05878 | -0.215958429 | 0.10137071  | 4.72E-01 | 7.32E-01 | 1.00E+00 |
| ENSG00000265443.1_CTD-2349P  | ENSG00000160789.18_LMNA | 0.16666  | 0.007667227  | 0.317442461 | 4.02E-02 | 1.74E-01 | 1.00E+00 |
| ENSG00000185053.11_SGCZ      | ENSG00000160789.18_LMNA | -0.17318 | -0.323463851 | -0.01437691 | 3.29E-02 | 1.52E-01 | 1.00E+00 |
| ENSG00000231395.1_ARL4AP4    | ENSG00000160789.18_LMNA | 0.15616  | -0.003122729 | 0.307706693 | 5.47E-02 | 2.13E-01 | 1.00E+00 |
| ENSG00000235024.1_AC097468.  | ENSG00000160789.18_LMNA | -0.08701 | -0.242847267 | 0.073204218 | 2.86E-01 | 5.72E-01 | 1.00E+00 |
| ENSG00000279168.1_AC105052.  | ENSG00000160789.18_LMNA | -0.01582 | -0.174579439 | 0.143744313 | 8.47E-01 | 9.40E-01 | 1.00E+00 |



|                              |                         |          |              |             |          |          |          |
|------------------------------|-------------------------|----------|--------------|-------------|----------|----------|----------|
| ENSG00000249412.1_CTC-563A5  | ENSG00000160789.18_LMNA | -0.12977 | -0.283125445 | 0.030047331 | 1.11E-01 | 3.32E-01 | 1.00E+00 |
| ENSG00000203416.2_FAM32BP    | ENSG00000160789.18_LMNA | -0.16903 | -0.319625565 | -0.01009666 | 3.74E-02 | 1.65E-01 | 1.00E+00 |
| ENSG00000266126.1_RP11-209D  | ENSG00000160789.18_LMNA | -0.03858 | -0.196572836 | 0.121366661 | 6.37E-01 | 8.38E-01 | 1.00E+00 |
| ENSG00000227836.1_AC008850.1 | ENSG00000160789.18_LMNA | -0.06218 | -0.219207998 | 0.097993546 | 4.47E-01 | 7.13E-01 | 1.00E+00 |
| ENSG00000215785.2_CFL1P6     | ENSG00000160789.18_LMNA | 0.15369  | -0.005644778 | 0.305421626 | 5.87E-02 | 2.22E-01 | 1.00E+00 |
| ENSG00000258172.1_RP11-1105  | ENSG00000160789.18_LMNA | -0.06792 | -0.224690618 | 0.092279043 | 4.06E-01 | 6.81E-01 | 1.00E+00 |
| ENSG00000266117.1_FBXO36P1   | ENSG00000160789.18_LMNA | 0.03897  | -0.120984979 | 0.196945209 | 6.34E-01 | 8.36E-01 | 1.00E+00 |
| ENSG00000228384.4_AC007040.1 | ENSG00000160789.18_LMNA | 0.04225  | -0.1177419   | 0.200105497 | 6.05E-01 | 8.19E-01 | 1.00E+00 |
| ENSG00000258034.1_RP11-493P  | ENSG00000160789.18_LMNA | 0.0908   | -0.069407096 | 0.246435377 | 2.66E-01 | 5.50E-01 | 1.00E+00 |
| ENSG00000261481.1_RP11-77H9  | ENSG00000160789.18_LMNA | 0.03232  | -0.127532462 | 0.190544676 | 6.93E-01 | 8.68E-01 | 1.00E+00 |
| ENSG00000261140.1_RP11-20I23 | ENSG00000160789.18_LMNA | 0.06582  | -0.094365717 | 0.222690941 | 4.20E-01 | 6.92E-01 | 1.00E+00 |
| ENSG00000269608.1_CTB-167G5  | ENSG00000160789.18_LMNA | 0.00097  | -0.158258689 | 0.160142425 | 9.91E-01 | 9.96E-01 | 1.00E+00 |
| ENSG00000272729.1_RP11-387A  | ENSG00000160789.18_LMNA | -0.16976 | -0.320301641 | -0.01084976 | 3.65E-02 | 1.63E-01 | 1.00E+00 |
| ENSG00000233153.4_UBE2E2-A5  | ENSG00000160789.18_LMNA | -0.24237 | -0.386650919 | -0.08650646 | 2.63E-03 | 2.41E-02 | 1.00E+00 |
| ENSG00000261396.1_CTD-2012K  | ENSG00000160789.18_LMNA | -0.01431 | -0.173112115 | 0.145225778 | 8.61E-01 | 9.46E-01 | 1.00E+00 |
| ENSG00000259514.1_RP11-685G  | ENSG00000160789.18_LMNA | -0.02519 | -0.18365863  | 0.134545782 | 7.58E-01 | 8.99E-01 | 1.00E+00 |
| ENSG00000280241.2_RP11-290O  | ENSG00000160789.18_LMNA | -0.13677 | -0.28966434  | 0.022929171 | 9.29E-02 | 2.98E-01 | 1.00E+00 |
| ENSG00000225513.1_RP11-165N  | ENSG00000160789.18_LMNA | -0.01472 | -0.173509701 | 0.144824501 | 8.57E-01 | 9.44E-01 | 1.00E+00 |
| ENSG00000271725.1_RP11-761I4 | ENSG00000160789.18_LMNA | -0.08226 | -0.238341127 | 0.077959904 | 3.14E-01 | 6.00E-01 | 1.00E+00 |
| ENSG00000226230.1_AC007237.1 | ENSG00000160789.18_LMNA | -0.02641 | -0.184833814 | 0.133351129 | 7.47E-01 | 8.94E-01 | 1.00E+00 |
| ENSG00000277440.1_RP11-295D  | ENSG00000160789.18_LMNA | 0.0073   | -0.152080202 | 0.166304677 | 9.29E-01 | 9.73E-01 | 1.00E+00 |
| ENSG00000279524.1_AC108925.1 | ENSG00000160789.18_LMNA | 0.22849  | 0.071907032  | 0.374084989 | 4.64E-03 | 3.70E-02 | 1.00E+00 |
| ENSG00000270154.1_RP11-419I1 | ENSG00000160789.18_LMNA | 0.01376  | -0.14575571  | 0.172586899 | 8.66E-01 | 9.48E-01 | 1.00E+00 |
| ENSG00000273819.1_ENPP7P7    | ENSG00000160789.18_LMNA | -0.08424 | -0.240220905 | 0.075977773 | 3.02E-01 | 5.89E-01 | 1.00E+00 |
| ENSG00000223829.4_AC004870.1 | ENSG00000160789.18_LMNA | 0.08589  | -0.074324841 | 0.241786673 | 2.93E-01 | 5.79E-01 | 1.00E+00 |
| ENSG00000266312.1_RP11-111H  | ENSG00000160789.18_LMNA | -0.25656 | -0.399445161 | -0.10150479 | 1.42E-03 | 1.51E-02 | 1.00E+00 |
| ENSG00000266498.1_RP11-45M2  | ENSG00000160789.18_LMNA | 0.0084   | -0.151001388 | 0.167378112 | 9.18E-01 | 9.69E-01 | 1.00E+00 |
| ENSG00000267484.1_CTC-518P1  | ENSG00000160789.18_LMNA | 0.06747  | -0.092729774 | 0.224258904 | 4.09E-01 | 6.83E-01 | 1.00E+00 |
| ENSG00000264151.4_RP11-739N  | ENSG00000160789.18_LMNA | -0.21902 | -0.365480607 | -0.06198437 | 6.71E-03 | 4.88E-02 | 1.00E+00 |
| ENSG00000171954.11_CYP4F22   | ENSG00000160789.18_LMNA | 0.15926  | 6.08E-05     | 0.310585981 | 5.00E-02 | 2.01E-01 | 1.00E+00 |
| ENSG00000232739.1_RP11-25G1  | ENSG00000160789.18_LMNA | -0.16778 | -0.318477963 | -0.00881911 | 3.88E-02 | 1.70E-01 | 1.00E+00 |
| ENSG00000272515.1_RP11-29P2  | ENSG00000160789.18_LMNA | -0.07768 | -0.233991378 | 0.082536923 | 3.41E-01 | 6.26E-01 | 1.00E+00 |
| ENSG00000280389.1_RP11-512M  | ENSG00000160789.18_LMNA | -0.09372 | -0.249200808 | 0.066474317 | 2.51E-01 | 5.31E-01 | 1.00E+00 |

|                             |                         |          |              |             |          |          |          |
|-----------------------------|-------------------------|----------|--------------|-------------|----------|----------|----------|
| ENSG00000112212.10_TSPO2    | ENSG00000160789.18_LMNA | -0.04373 | -0.201524265 | 0.116283756 | 5.93E-01 | 8.12E-01 | 1.00E+00 |
| ENSG00000250980.1_RP11-529H | ENSG00000160789.18_LMNA | 0.06999  | -0.090214636 | 0.226666333 | 3.92E-01 | 6.70E-01 | 1.00E+00 |
| ENSG00000254786.1_RP11-142C | ENSG00000160789.18_LMNA | -0.01445 | -0.173250409 | 0.145086213 | 8.60E-01 | 9.45E-01 | 1.00E+00 |
| ENSG00000187536.4_TPM3P7    | ENSG00000160789.18_LMNA | 0.04019  | -0.119777615 | 0.198122523 | 6.23E-01 | 8.30E-01 | 1.00E+00 |
| ENSG00000248394.1_FOSL1P1   | ENSG00000160789.18_LMNA | 0.21082  | 0.053408392  | 0.358001979 | 9.13E-03 | 6.14E-02 | 1.00E+00 |
| ENSG00000248458.2_RP4-598P1 | ENSG00000160789.18_LMNA | 0.06695  | -0.09324168  | 0.223768446 | 4.12E-01 | 6.86E-01 | 1.00E+00 |
| ENSG00000260409.1_RP11-403B | ENSG00000160789.18_LMNA | 0.00454  | -0.15477124  | 0.163623764 | 9.56E-01 | 9.82E-01 | 1.00E+00 |
| ENSG00000239780.1_RPLP0P11  | ENSG00000160789.18_LMNA | -0.05935 | -0.216505202 | 0.100802979 | 4.68E-01 | 7.29E-01 | 1.00E+00 |
| ENSG00000215477.2_RCN1P1    | ENSG00000160789.18_LMNA | 0.07005  | -0.090160518 | 0.226718091 | 3.91E-01 | 6.69E-01 | 1.00E+00 |
| ENSG00000215871.2_RP5-837M1 | ENSG00000160789.18_LMNA | 0.08062  | -0.079602454 | 0.236781595 | 3.23E-01 | 6.10E-01 | 1.00E+00 |
| ENSG00000218016.2_ZNF192P2  | ENSG00000160789.18_LMNA | -0.07226 | -0.228828299 | 0.087952492 | 3.76E-01 | 6.56E-01 | 1.00E+00 |
| ENSG00000245479.2_LINC01585 | ENSG00000160789.18_LMNA | 0.1076   | -0.052502444 | 0.262305121 | 1.87E-01 | 4.53E-01 | 1.00E+00 |
| ENSG00000237510.6_GPAT2P1   | ENSG00000160789.18_LMNA | 0.01216  | -0.147326573 | 0.171028948 | 8.82E-01 | 9.54E-01 | 1.00E+00 |
| ENSG00000274717.1_RP1-47A17 | ENSG00000160789.18_LMNA | 0.00826  | -0.15113986  | 0.167240373 | 9.20E-01 | 9.69E-01 | 1.00E+00 |
| ENSG00000249231.6_CASC16    | ENSG00000160789.18_LMNA | 0.03147  | -0.128378102 | 0.189716038 | 7.00E-01 | 8.72E-01 | 1.00E+00 |
| ENSG00000256508.2_MRGPRF-A  | ENSG00000160789.18_LMNA | 0.07738  | -0.082846209 | 0.233696992 | 3.43E-01 | 6.28E-01 | 1.00E+00 |
| ENSG00000185897.6_FFAR3     | ENSG00000160789.18_LMNA | 0.14476  | -0.01478071  | 0.297114042 | 7.52E-02 | 2.62E-01 | 1.00E+00 |
| ENSG00000225261.1_          | ENSG00000160789.18_LMNA | 0.10316  | -0.056977852 | 0.258120207 | 2.06E-01 | 4.78E-01 | 1.00E+00 |
| ENSG00000141437.8_SLC25A52  | ENSG00000160789.18_LMNA | -0.01788 | -0.176573657 | 0.141728586 | 8.27E-01 | 9.32E-01 | 1.00E+00 |
| ENSG00000165076.12_PRSS37   | ENSG00000160789.18_LMNA | -0.08414 | -0.240122722 | 0.076081364 | 3.03E-01 | 5.89E-01 | 1.00E+00 |
| ENSG00000171116.7_HSFX1     | ENSG00000160789.18_LMNA | 0.04841  | -0.111653592 | 0.206020571 | 5.54E-01 | 7.88E-01 | 1.00E+00 |
| ENSG00000277301.1_RP5-1184F | ENSG00000160789.18_LMNA | -0.06385 | -0.220808925 | 0.096327069 | 4.34E-01 | 7.03E-01 | 1.00E+00 |
| ENSG00000220548.3_VIM2P     | ENSG00000160789.18_LMNA | 0.20094  | 0.043121572  | 0.348979568 | 1.31E-02 | 7.94E-02 | 1.00E+00 |
| ENSG00000220378.3_KRT8P42   | ENSG00000160789.18_LMNA | -0.01835 | -0.177037675 | 0.141259184 | 8.22E-01 | 9.31E-01 | 1.00E+00 |
| ENSG00000269289.4_CTB-92J24 | ENSG00000160789.18_LMNA | -0.13786 | -0.290683857 | 0.021816474 | 9.03E-02 | 2.93E-01 | 1.00E+00 |
| ENSG00000260782.1_RP11-480G | ENSG00000160789.18_LMNA | -0.11227 | -0.266702992 | 0.04778563  | 1.68E-01 | 4.27E-01 | 1.00E+00 |
| ENSG00000280551.1_RP11-358D | ENSG00000160789.18_LMNA | -0.11945 | -0.273449404 | 0.04052259  | 1.43E-01 | 3.86E-01 | 1.00E+00 |
| ENSG00000232903.2_LINC01166 | ENSG00000160789.18_LMNA | -0.12218 | -0.276013204 | 0.037753731 | 1.34E-01 | 3.71E-01 | 1.00E+00 |
| ENSG00000234568.3_BIN2P1    | ENSG00000160789.18_LMNA | 0.05519  | -0.104933665 | 0.212522451 | 4.99E-01 | 7.52E-01 | 1.00E+00 |
| ENSG00000214045.3_RP6-186E3 | ENSG00000160789.18_LMNA | 0.06758  | -0.09261476  | 0.224369077 | 4.08E-01 | 6.83E-01 | 1.00E+00 |
| ENSG00000226792.5_LINC00371 | ENSG00000160789.18_LMNA | -0.16878 | -0.319402103 | -0.00984781 | 3.76E-02 | 1.66E-01 | 1.00E+00 |
| ENSG00000181013.3_C17orf47  | ENSG00000160789.18_LMNA | -0.01254 | -0.171398863 | 0.146953738 | 8.78E-01 | 9.53E-01 | 1.00E+00 |
| ENSG00000276255.2_RP5-881P1 | ENSG00000160789.18_LMNA | 0.10286  | -0.057275266 | 0.257841678 | 2.07E-01 | 4.80E-01 | 1.00E+00 |

|                              |                         |          |              |             |          |          |          |
|------------------------------|-------------------------|----------|--------------|-------------|----------|----------|----------|
| ENSG00000270379.4_HEATR9     | ENSG00000160789.18_LMNA | 0.00244  | -0.156818113 | 0.161581438 | 9.76E-01 | 9.91E-01 | 1.00E+00 |
| ENSG00000256646.6_RP11-111K  | ENSG00000160789.18_LMNA | 0.02265  | -0.137048748 | 0.181193502 | 7.82E-01 | 9.10E-01 | 1.00E+00 |
| ENSG00000168070.10_MAJIN     | ENSG00000160789.18_LMNA | -0.12249 | -0.276305048 | 0.037438238 | 1.33E-01 | 3.70E-01 | 1.00E+00 |
| ENSG00000223553.4_SMPD4P1    | ENSG00000160789.18_LMNA | 0.00527  | -0.154061494 | 0.164331297 | 9.49E-01 | 9.79E-01 | 1.00E+00 |
| ENSG00000224490.4_TTC21B-AS  | ENSG00000160789.18_LMNA | 0.03323  | -0.126636496 | 0.191422133 | 6.84E-01 | 8.63E-01 | 1.00E+00 |
| ENSG00000198211.8_RP11-566K  | ENSG00000160789.18_LMNA | 0.2934   | 0.140777241  | 0.432405373 | 2.44E-04 | 3.83E-03 | 1.00E+00 |
| ENSG00000234394.7_RP11-561O  | ENSG00000160789.18_LMNA | -0.11721 | -0.271345463 | 0.042791213 | 1.50E-01 | 3.99E-01 | 1.00E+00 |
| ENSG00000179571.10_NBPF17P   | ENSG00000160789.18_LMNA | -0.06893 | -0.225650776 | 0.091276123 | 3.99E-01 | 6.76E-01 | 1.00E+00 |
| ENSG00000174171.5_RP11-23P1  | ENSG00000160789.18_LMNA | 0.08497  | -0.07524501  | 0.240915231 | 2.98E-01 | 5.84E-01 | 1.00E+00 |
| ENSG00000122787.13_AKR1D1    | ENSG00000160789.18_LMNA | 0.14263  | -0.016959612 | 0.2951257   | 7.96E-02 | 2.71E-01 | 1.00E+00 |
| ENSG00000234255.7_AC012370.1 | ENSG00000160789.18_LMNA | 0.19095  | 0.032743707  | 0.339819481 | 1.84E-02 | 1.02E-01 | 1.00E+00 |
| ENSG00000253288.1_RP11-238K  | ENSG00000160789.18_LMNA | -0.2395  | -0.384054149 | -0.08347886 | 2.96E-03 | 2.65E-02 | 1.00E+00 |
| ENSG00000271806.1_RP5-892K4  | ENSG00000160789.18_LMNA | -0.0301  | -0.188398277 | 0.12972195  | 7.13E-01 | 8.78E-01 | 1.00E+00 |
| ENSG00000272281.5_TPTE2P2    | ENSG00000160789.18_LMNA | -0.08597 | -0.241860604 | 0.074246753 | 2.92E-01 | 5.78E-01 | 1.00E+00 |
| ENSG00000226807.5_MROH5      | ENSG00000160789.18_LMNA | 0.10012  | -0.060035017 | 0.255254665 | 2.20E-01 | 4.95E-01 | 1.00E+00 |
| ENSG00000229817.1_RP11-78H1  | ENSG00000160789.18_LMNA | 0.15494  | -0.004365193 | 0.306581424 | 5.66E-02 | 2.18E-01 | 1.00E+00 |
| ENSG00000227391.1_SALL1P1    | ENSG00000160789.18_LMNA | 0.01336  | -0.146154772 | 0.172191268 | 8.70E-01 | 9.50E-01 | 1.00E+00 |
| ENSG00000248518.1_RP11-231C  | ENSG00000160789.18_LMNA | -0.37107 | -0.500693816 | -0.22517288 | 2.52E-06 | 9.51E-05 | 1.29E-01 |
| ENSG00000233730.1_RP4-666F2  | ENSG00000160789.18_LMNA | -0.11278 | -0.267179757 | 0.047273445 | 1.67E-01 | 4.24E-01 | 1.00E+00 |
| ENSG00000264757.1_MIR3198-1  | ENSG00000160789.18_LMNA | -0.05497 | -0.212308583 | 0.105155167 | 5.01E-01 | 7.53E-01 | 1.00E+00 |
| ENSG00000207342.1_Y_RNA      | ENSG00000160789.18_LMNA | -0.02025 | -0.178874132 | 0.139400014 | 8.04E-01 | 9.22E-01 | 1.00E+00 |
| ENSG00000272428.1_RP11-704J  | ENSG00000160789.18_LMNA | 0.01624  | -0.143328171 | 0.174991354 | 8.43E-01 | 9.39E-01 | 1.00E+00 |
| ENSG00000199226.1_RNU6-50P   | ENSG00000160789.18_LMNA | 0.00624  | -0.153111988 | 0.165277329 | 9.39E-01 | 9.76E-01 | 1.00E+00 |
| ENSG00000223274.4_RNA5SP49   | ENSG00000160789.18_LMNA | -0.10839 | -0.263054123 | 0.051700114 | 1.84E-01 | 4.49E-01 | 1.00E+00 |
| ENSG00000200361.1_Y_RNA      | ENSG00000160789.18_LMNA | -0.08131 | -0.237433231 | 0.078916338 | 3.19E-01 | 6.06E-01 | 1.00E+00 |
| ENSG00000212536.1_RNA5SP47   | ENSG00000160789.18_LMNA | -0.01838 | -0.17705967  | 0.14123693  | 8.22E-01 | 9.31E-01 | 1.00E+00 |
| ENSG00000277353.1_           | ENSG00000160789.18_LMNA | -0.11565 | -0.269880311 | 0.044369135 | 1.56E-01 | 4.07E-01 | 1.00E+00 |
| ENSG00000252503.1_RNU6-531F  | ENSG00000160789.18_LMNA | 0.05829  | -0.101858882 | 0.215488119 | 4.76E-01 | 7.34E-01 | 1.00E+00 |
| ENSG00000254092.1_RP11-369E  | ENSG00000160789.18_LMNA | -0.1826  | -0.332149031 | -0.02410416 | 2.43E-02 | 1.24E-01 | 1.00E+00 |
| ENSG00000254670.1_CTC-497E2  | ENSG00000160789.18_LMNA | 0.11552  | -0.044494413 | 0.269763924 | 1.56E-01 | 4.08E-01 | 1.00E+00 |
| ENSG00000268433.1_MTDHP3     | ENSG00000160789.18_LMNA | -0.12136 | -0.275246163 | 0.038582627 | 1.36E-01 | 3.76E-01 | 1.00E+00 |
| ENSG00000278504.1_           | ENSG00000160789.18_LMNA | -0.013   | -0.171844517 | 0.146504445 | 8.74E-01 | 9.51E-01 | 1.00E+00 |
| ENSG00000243705.1_RP11-178L  | ENSG00000160789.18_LMNA | -0.07722 | -0.23354846  | 0.083002235 | 3.44E-01 | 6.29E-01 | 1.00E+00 |

|                             |                         |          |              |             |          |          |          |
|-----------------------------|-------------------------|----------|--------------|-------------|----------|----------|----------|
| ENSG00000263317.1_RP11-429O | ENSG00000160789.18_LMNA | 0.12324  | -0.03668306  | 0.277003386 | 1.30E-01 | 3.66E-01 | 1.00E+00 |
| ENSG00000259711.1_CTD-3032H | ENSG00000160789.18_LMNA | -0.04655 | -0.204233006 | 0.113496027 | 5.69E-01 | 7.98E-01 | 1.00E+00 |
| ENSG00000236054.1_LL22NC03- | ENSG00000160789.18_LMNA | -0.25514 | -0.398164488 | -0.09999737 | 1.51E-03 | 1.58E-02 | 1.00E+00 |
| ENSG00000275090.1_RN7SL296F | ENSG00000160789.18_LMNA | -0.03939 | -0.197357737 | 0.120562029 | 6.30E-01 | 8.34E-01 | 1.00E+00 |
| ENSG00000278487.1_RP11-447H | ENSG00000160789.18_LMNA | 0.03483  | -0.125069099 | 0.192955929 | 6.70E-01 | 8.55E-01 | 1.00E+00 |
| ENSG00000235209.1_CTA-150C2 | ENSG00000160789.18_LMNA | -0.19805 | -0.346334166 | -0.04011769 | 1.44E-02 | 8.56E-02 | 1.00E+00 |
| ENSG00000269908.1_          | ENSG00000160789.18_LMNA | -0.21984 | -0.366221149 | -0.06283601 | 6.50E-03 | 4.78E-02 | 1.00E+00 |
| ENSG00000277382.1_RP11-318A | ENSG00000160789.18_LMNA | 0.16924  | 0.010314352  | 0.319821026 | 3.71E-02 | 1.65E-01 | 1.00E+00 |
| ENSG00000253839.1_RP11-431D | ENSG00000160789.18_LMNA | -0.03714 | -0.195188002 | 0.122785288 | 6.50E-01 | 8.44E-01 | 1.00E+00 |
| ENSG00000279750.2_RP11-33H1 | ENSG00000160789.18_LMNA | -0.18519 | -0.334527099 | -0.02677776 | 2.24E-02 | 1.17E-01 | 1.00E+00 |
| ENSG00000236502.1_SIX3-AS1  | ENSG00000160789.18_LMNA | -0.13253 | -0.285707178 | 0.027240678 | 1.04E-01 | 3.19E-01 | 1.00E+00 |
| ENSG00000236317.1_RP11-348H | ENSG00000160789.18_LMNA | 0.05992  | -0.100240534 | 0.217046689 | 4.63E-01 | 7.26E-01 | 1.00E+00 |
| ENSG00000237585.1_LINC00407 | ENSG00000160789.18_LMNA | -0.19673 | -0.345118226 | -0.03873883 | 1.51E-02 | 8.84E-02 | 1.00E+00 |
| ENSG00000234496.2_MRPS21P1  | ENSG00000160789.18_LMNA | 0.01866  | -0.140958867 | 0.177334473 | 8.20E-01 | 9.30E-01 | 1.00E+00 |
| ENSG00000255421.1_CTD-2011F | ENSG00000160789.18_LMNA | 0.01623  | -0.143341621 | 0.174978043 | 8.43E-01 | 9.39E-01 | 1.00E+00 |
| ENSG00000244641.2_RPS26P43  | ENSG00000160789.18_LMNA | -0.10228 | -0.257289874 | 0.057864319 | 2.10E-01 | 4.83E-01 | 1.00E+00 |
| ENSG00000225667.1_          | ENSG00000160789.18_LMNA | 0.0476   | -0.112449057 | 0.205249056 | 5.60E-01 | 7.93E-01 | 1.00E+00 |
| ENSG00000249131.1_CTB-35F21 | ENSG00000160789.18_LMNA | -0.07634 | -0.232709421 | 0.083883318 | 3.50E-01 | 6.34E-01 | 1.00E+00 |
| ENSG00000250413.1_RP11-448G | ENSG00000160789.18_LMNA | -0.04881 | -0.206405762 | 0.111256291 | 5.50E-01 | 7.87E-01 | 1.00E+00 |
| ENSG00000263941.2_RN7SL32P  | ENSG00000160789.18_LMNA | -0.1024  | -0.25740356  | 0.057742977 | 2.09E-01 | 4.82E-01 | 1.00E+00 |
| ENSG00000255462.1_RP11-483L | ENSG00000160789.18_LMNA | 0.04328  | -0.116728914 | 0.20109127  | 5.97E-01 | 8.14E-01 | 1.00E+00 |
| ENSG00000259410.4_RP11-34F1 | ENSG00000160789.18_LMNA | -0.07937 | -0.23559137  | 0.080854884 | 3.31E-01 | 6.17E-01 | 1.00E+00 |
| ENSG00000262358.1_CTD-3195I | ENSG00000160789.18_LMNA | 0.01392  | -0.14559969  | 0.17274155  | 8.65E-01 | 9.47E-01 | 1.00E+00 |
| ENSG00000163081.2_CCDC140   | ENSG00000160789.18_LMNA | -0.09637 | -0.251711129 | 0.063807353 | 2.38E-01 | 5.16E-01 | 1.00E+00 |
| ENSG00000267095.1_CTD-2319I | ENSG00000160789.18_LMNA | -0.03236 | -0.190578043 | 0.1274984   | 6.92E-01 | 8.68E-01 | 1.00E+00 |
| ENSG00000231193.1_RP11-462B | ENSG00000160789.18_LMNA | -0.1044  | -0.259286982 | 0.055731357 | 2.01E-01 | 4.71E-01 | 1.00E+00 |
| ENSG00000248576.1_RP11-834C | ENSG00000160789.18_LMNA | 0.07332  | -0.086895644 | 0.229837275 | 3.69E-01 | 6.50E-01 | 1.00E+00 |
| ENSG00000219902.1_RPL35P3   | ENSG00000160789.18_LMNA | 0.01008  | -0.14935853  | 0.16901133  | 9.02E-01 | 9.62E-01 | 1.00E+00 |
| ENSG00000227676.3_LINC01068 | ENSG00000160789.18_LMNA | -0.11285 | -0.267251837 | 0.047195995 | 1.66E-01 | 4.23E-01 | 1.00E+00 |
| ENSG00000277087.1_RP5-1116H | ENSG00000160789.18_LMNA | -0.19197 | -0.340757403 | -0.03380329 | 1.78E-02 | 9.93E-02 | 1.00E+00 |
| ENSG00000275025.1_RP5-875H1 | ENSG00000160789.18_LMNA | 0.05107  | -0.10901728  | 0.208574688 | 5.32E-01 | 7.75E-01 | 1.00E+00 |
| ENSG00000241204.1_RP11-333A | ENSG00000160789.18_LMNA | -0.04438 | -0.20214878  | 0.115641474 | 5.87E-01 | 8.08E-01 | 1.00E+00 |
| ENSG00000250584.2_LINC01511 | ENSG00000160789.18_LMNA | -0.0378  | -0.195817961 | 0.122140118 | 6.44E-01 | 8.42E-01 | 1.00E+00 |

|                              |                         |          |              |             |          |          |          |
|------------------------------|-------------------------|----------|--------------|-------------|----------|----------|----------|
| ENSG00000269275.1_CTD-2105E  | ENSG00000160789.18_LMNA | 0.04881  | -0.111252563 | 0.206409376 | 5.50E-01 | 7.87E-01 | 1.00E+00 |
| ENSG00000218792.2_HSPD1P16   | ENSG00000160789.18_LMNA | -0.01338 | -0.172211382 | 0.146134486 | 8.70E-01 | 9.50E-01 | 1.00E+00 |
| ENSG00000232701.1_RPL21P10   | ENSG00000160789.18_LMNA | -0.24885 | -0.392497237 | -0.0933431  | 1.99E-03 | 1.95E-02 | 1.00E+00 |
| ENSG00000238141.2_BRWD1-AS   | ENSG00000160789.18_LMNA | 0.05658  | -0.103550872 | 0.213856896 | 4.89E-01 | 7.45E-01 | 1.00E+00 |
| ENSG00000244088.1_RPL23AP4   | ENSG00000160789.18_LMNA | 0.00822  | -0.151178834 | 0.167201603 | 9.20E-01 | 9.69E-01 | 1.00E+00 |
| ENSG00000279300.1_CTD-3149D  | ENSG00000160789.18_LMNA | -0.17557 | -0.325669032 | -0.01684115 | 3.05E-02 | 1.45E-01 | 1.00E+00 |
| ENSG00000237951.1_PPIL1P1    | ENSG00000160789.18_LMNA | -0.0229  | -0.181441506 | 0.136797121 | 7.79E-01 | 9.09E-01 | 1.00E+00 |
| ENSG00000237719.1_RP1-179N1  | ENSG00000160789.18_LMNA | 0.20067  | 0.042841067  | 0.348732745 | 1.32E-02 | 7.99E-02 | 1.00E+00 |
| ENSG00000274068.1_RP11-475E  | ENSG00000160789.18_LMNA | 0.0396   | -0.120363727 | 0.197551113 | 6.28E-01 | 8.33E-01 | 1.00E+00 |
| ENSG00000241251.2_RP11-73B8  | ENSG00000160789.18_LMNA | -0.04527 | -0.203008017 | 0.114757357 | 5.80E-01 | 8.04E-01 | 1.00E+00 |
| ENSG00000259039.1_RP11-409I1 | ENSG00000160789.18_LMNA | -0.02482 | -0.183295654 | 0.134914585 | 7.61E-01 | 9.01E-01 | 1.00E+00 |
| ENSG00000223754.1_AC008073   | ENSG00000160789.18_LMNA | -0.1129  | -0.267298592 | 0.047145755 | 1.66E-01 | 4.23E-01 | 1.00E+00 |
| ENSG00000267501.1_RP11-108P  | ENSG00000160789.18_LMNA | -0.04329 | -0.201107459 | 0.116712272 | 5.96E-01 | 8.14E-01 | 1.00E+00 |
| ENSG00000227135.1_GCSAML-A   | ENSG00000160789.18_LMNA | 0.0279   | -0.131890205 | 0.186269694 | 7.33E-01 | 8.88E-01 | 1.00E+00 |
| ENSG00000227742.1_CALR4P     | ENSG00000160789.18_LMNA | -0.03059 | -0.188873066 | 0.129237897 | 7.08E-01 | 8.76E-01 | 1.00E+00 |
| ENSG00000214380.4_RP11-457K  | ENSG00000160789.18_LMNA | 0.03718  | -0.122744243 | 0.195228088 | 6.49E-01 | 8.44E-01 | 1.00E+00 |
| ENSG00000237412.5_PRSS56     | ENSG00000160789.18_LMNA | -0.05963 | -0.21677204  | 0.100525839 | 4.66E-01 | 7.27E-01 | 1.00E+00 |
| ENSG00000269136.1_BRI3BPP1   | ENSG00000160789.18_LMNA | -0.09548 | -0.250871931 | 0.064699419 | 2.42E-01 | 5.21E-01 | 1.00E+00 |
| ENSG00000255409.1_RSFI-IT1   | ENSG00000160789.18_LMNA | -0.0365  | -0.194570732 | 0.123417204 | 6.55E-01 | 8.47E-01 | 1.00E+00 |
| ENSG00000226765.1_RPSAP33    | ENSG00000160789.18_LMNA | -0.23071 | -0.37610121  | -0.07424084 | 4.24E-03 | 3.47E-02 | 1.00E+00 |
| ENSG00000263745.4_RP11-161I  | ENSG00000160789.18_LMNA | 0.12702  | -0.03284674  | 0.280545846 | 1.19E-01 | 3.46E-01 | 1.00E+00 |
| ENSG00000139656.6_SMIM2      | ENSG00000160789.18_LMNA | -0.21058 | -0.35778284  | -0.05315777 | 9.21E-03 | 6.18E-02 | 1.00E+00 |
| ENSG00000236796.1_RP11-462B  | ENSG00000160789.18_LMNA | -0.03718 | -0.195229096 | 0.122743211 | 6.49E-01 | 8.44E-01 | 1.00E+00 |
| ENSG00000234428.2_RP11-666F  | ENSG00000160789.18_LMNA | 0.11501  | -0.04501112  | 0.26928379  | 1.58E-01 | 4.11E-01 | 1.00E+00 |
| ENSG00000233894.1_RP4-650F1  | ENSG00000160789.18_LMNA | 0.06379  | -0.096391037 | 0.220747505 | 4.35E-01 | 7.03E-01 | 1.00E+00 |
| ENSG00000204429.4_RP11-1E11  | ENSG00000160789.18_LMNA | -0.15262 | -0.304428404 | 0.006739774 | 6.05E-02 | 2.27E-01 | 1.00E+00 |
| ENSG00000227482.1_RP11-18B1  | ENSG00000160789.18_LMNA | 0.21444  | 0.057194565  | 0.361308515 | 7.98E-03 | 5.55E-02 | 1.00E+00 |
| ENSG00000237922.1_RP11-478H  | ENSG00000160789.18_LMNA | 0.07211  | -0.088099173 | 0.228688208 | 3.77E-01 | 6.57E-01 | 1.00E+00 |
| ENSG00000261113.1_RP11-141O  | ENSG00000160789.18_LMNA | 0.05603  | -0.104103821 | 0.213323422 | 4.93E-01 | 7.48E-01 | 1.00E+00 |
| ENSG00000104371.4_DKK4       | ENSG00000160789.18_LMNA | -0.01225 | -0.17111603  | 0.147238812 | 8.81E-01 | 9.54E-01 | 1.00E+00 |
| ENSG00000256274.1_TAS2R64P   | ENSG00000160789.18_LMNA | 0.07664  | -0.083584706 | 0.232993837 | 3.48E-01 | 6.32E-01 | 1.00E+00 |
| ENSG00000239519.1_CADM2-AS   | ENSG00000160789.18_LMNA | -0.28416 | -0.424172847 | -0.13088135 | 3.88E-04 | 5.53E-03 | 1.00E+00 |
| ENSG00000234067.1_RPL5P10    | ENSG00000160789.18_LMNA | -0.13929 | -0.292015113 | 0.02036238  | 8.70E-02 | 2.87E-01 | 1.00E+00 |

|                              |                         |          |              |             |          |          |          |
|------------------------------|-------------------------|----------|--------------|-------------|----------|----------|----------|
| ENSG00000244176.1_RP11-810P  | ENSG00000160789.18_LMNA | 0.12027  | -0.03968686  | 0.274223711 | 1.40E-01 | 3.82E-01 | 1.00E+00 |
| ENSG00000237523.1_LINC00857  | ENSG00000160789.18_LMNA | 0.04085  | -0.119123043 | 0.198760421 | 6.17E-01 | 8.27E-01 | 1.00E+00 |
| ENSG00000254968.5_RP11-65M1  | ENSG00000160789.18_LMNA | -0.36846 | -0.498421357 | -0.2222963  | 3.00E-06 | 1.10E-04 | 1.54E-01 |
| ENSG00000258951.1_KRT18P7    | ENSG00000160789.18_LMNA | 0.02994  | -0.129883204 | 0.188240076 | 7.14E-01 | 8.79E-01 | 1.00E+00 |
| ENSG00000224413.1_AP001476.1 | ENSG00000160789.18_LMNA | 0.31893  | 0.168276947  | 0.455030279 | 6.21E-05 | 1.28E-03 | 1.00E+00 |
| ENSG00000253141.1_CTB-164N1  | ENSG00000160789.18_LMNA | -0.16654 | -0.317328437 | -0.00754044 | 4.03E-02 | 1.74E-01 | 1.00E+00 |
| ENSG00000258948.2_KRT8P1     | ENSG00000160789.18_LMNA | -0.1322  | -0.285395489 | 0.027579783 | 1.04E-01 | 3.21E-01 | 1.00E+00 |
| ENSG00000257846.2_RP11-597A  | ENSG00000160789.18_LMNA | -0.04266 | -0.200501522 | 0.117335022 | 6.02E-01 | 8.17E-01 | 1.00E+00 |
| ENSG00000238283.3_TBC1D3P1   | ENSG00000160789.18_LMNA | 0.22997  | 0.073456557  | 0.37542397  | 4.37E-03 | 3.54E-02 | 1.00E+00 |
| ENSG00000273106.1_RP11-559M  | ENSG00000160789.18_LMNA | -0.13296 | -0.286107527 | 0.026805009 | 1.02E-01 | 3.17E-01 | 1.00E+00 |
| ENSG00000223549.1_MTND5P28   | ENSG00000160789.18_LMNA | 0.04217  | -0.117820657 | 0.200028829 | 6.06E-01 | 8.20E-01 | 1.00E+00 |
| ENSG00000251504.1_LINC01099  | ENSG00000160789.18_LMNA | -0.12309 | -0.276869899 | 0.03682744  | 1.31E-01 | 3.67E-01 | 1.00E+00 |
| ENSG00000251011.4_TMEM108-1  | ENSG00000160789.18_LMNA | 0.0697   | -0.090507502 | 0.226386208 | 3.94E-01 | 6.71E-01 | 1.00E+00 |
| ENSG00000175336.9_APOF       | ENSG00000160789.18_LMNA | -0.07668 | -0.233039335 | 0.083536931 | 3.48E-01 | 6.32E-01 | 1.00E+00 |
| ENSG00000233363.1_AC006019.1 | ENSG00000160789.18_LMNA | 0.01519  | -0.144356277 | 0.173973488 | 8.53E-01 | 9.42E-01 | 1.00E+00 |
| ENSG00000225885.5_AC023590.1 | ENSG00000160789.18_LMNA | 0.04573  | -0.114307434 | 0.203445091 | 5.76E-01 | 8.02E-01 | 1.00E+00 |
| ENSG00000154646.7_TMPRSS15   | ENSG00000160789.18_LMNA | 0.00203  | -0.157220505 | 0.161179619 | 9.80E-01 | 9.93E-01 | 1.00E+00 |
| ENSG00000261522.4_RP11-407P  | ENSG00000160789.18_LMNA | -0.14625 | -0.298504752 | 0.013254953 | 7.22E-02 | 2.55E-01 | 1.00E+00 |
| ENSG00000277631.3_PGM5P3-A1  | ENSG00000160789.18_LMNA | 0.02622  | -0.133538961 | 0.184649103 | 7.48E-01 | 8.95E-01 | 1.00E+00 |
| ENSG00000257431.1_RP11-263K  | ENSG00000160789.18_LMNA | -0.00843 | -0.167406076 | 0.150973274 | 9.18E-01 | 9.69E-01 | 1.00E+00 |
| ENSG00000257350.1_RP11-616L  | ENSG00000160789.18_LMNA | 0.01533  | -0.144223014 | 0.174105462 | 8.51E-01 | 9.42E-01 | 1.00E+00 |
| ENSG00000250007.5_RP11-814P  | ENSG00000160789.18_LMNA | -0.25047 | -0.393958926 | -0.0950568  | 1.86E-03 | 1.85E-02 | 1.00E+00 |
| ENSG00000226241.2_LL0XNC01-1 | ENSG00000160789.18_LMNA | -0.03121 | -0.189468919 | 0.128630203 | 7.03E-01 | 8.73E-01 | 1.00E+00 |
| ENSG00000178115.11_GOLGA8C   | ENSG00000160789.18_LMNA | 0.10345  | -0.056682284 | 0.258396955 | 2.05E-01 | 4.76E-01 | 1.00E+00 |
| ENSG00000124827.6_GCM2       | ENSG00000160789.18_LMNA | 0.101    | -0.059154834 | 0.256080246 | 2.16E-01 | 4.90E-01 | 1.00E+00 |
| ENSG00000243193.3_CTA-360L1  | ENSG00000160789.18_LMNA | -0.07787 | -0.234164001 | 0.082355535 | 3.40E-01 | 6.25E-01 | 1.00E+00 |
| ENSG00000253558.1_CTD-2179L  | ENSG00000160789.18_LMNA | 0.04689  | -0.113155566 | 0.204563487 | 5.66E-01 | 7.97E-01 | 1.00E+00 |
| ENSG00000250420.7_AACSP1     | ENSG00000160789.18_LMNA | -0.10398 | -0.258895945 | 0.056149222 | 2.02E-01 | 4.73E-01 | 1.00E+00 |
| ENSG00000259175.1_RP11-379K  | ENSG00000160789.18_LMNA | 0.06021  | -0.099951237 | 0.217325129 | 4.61E-01 | 7.25E-01 | 1.00E+00 |
| ENSG00000225937.1_PCA3       | ENSG00000160789.18_LMNA | 0.18762  | 0.02928975   | 0.336757848 | 2.06E-02 | 1.10E-01 | 1.00E+00 |
| ENSG00000129221.13_AIPL1     | ENSG00000160789.18_LMNA | 0.04615  | -0.113883751 | 0.203856559 | 5.72E-01 | 8.00E-01 | 1.00E+00 |
| ENSG00000226017.2_PRICKLE2-1 | ENSG00000160789.18_LMNA | 0.13889  | -0.020765645 | 0.291646036 | 8.79E-02 | 2.88E-01 | 1.00E+00 |
| ENSG00000185792.8_NLRP9      | ENSG00000160789.18_LMNA | 0.17231  | 0.013481177  | 0.322661449 | 3.38E-02 | 1.55E-01 | 1.00E+00 |

|                               |                         |          |              |             |          |          |          |
|-------------------------------|-------------------------|----------|--------------|-------------|----------|----------|----------|
| ENSG00000170180.18_GYP        | ENSG00000160789.18_LMNA | -0.09346 | -0.248955828 | 0.066734341 | 2.52E-01 | 5.33E-01 | 1.00E+00 |
| ENSG00000275340.1_FGD5P1      | ENSG00000160789.18_LMNA | -0.05297 | -0.21039936  | 0.107131148 | 5.17E-01 | 7.64E-01 | 1.00E+00 |
| ENSG00000036828.12_CASR       | ENSG00000160789.18_LMNA | 0.03185  | -0.128003709 | 0.190082959 | 6.97E-01 | 8.70E-01 | 1.00E+00 |
| ENSG00000126856.12_PRDM7      | ENSG00000160789.18_LMNA | 0.09736  | -0.062813226 | 0.252645782 | 2.33E-01 | 5.11E-01 | 1.00E+00 |
| ENSG00000211945.2_IGHV1-18    | ENSG00000160789.18_LMNA | -0.03857 | -0.196561134 | 0.121378654 | 6.37E-01 | 8.38E-01 | 1.00E+00 |
| ENSG00000255071.2_SAA2-SAA4   | ENSG00000160789.18_LMNA | 0.07686  | -0.083362082 | 0.233205841 | 3.47E-01 | 6.31E-01 | 1.00E+00 |
| ENSG00000211659.2_IGLV3-25    | ENSG00000160789.18_LMNA | 0.0579   | -0.102247758 | 0.215113366 | 4.79E-01 | 7.37E-01 | 1.00E+00 |
| ENSG00000222788.1_RNU2-38P    | ENSG00000160789.18_LMNA | -0.0394  | -0.1973611   | 0.120558581 | 6.30E-01 | 8.34E-01 | 1.00E+00 |
| ENSG00000277681.1_MIR6739     | ENSG00000160789.18_LMNA | 0.19676  | 0.038770648  | 0.3451463   | 1.51E-02 | 8.84E-02 | 1.00E+00 |
| ENSG00000207808.1_MIR27A      | ENSG00000160789.18_LMNA | 0.38061  | 0.235686305  | 0.508967102 | 1.32E-06 | 5.78E-05 | 6.76E-02 |
| ENSG00000273754.1_            | ENSG00000160789.18_LMNA | 0.06471  | -0.095475253 | 0.221626575 | 4.28E-01 | 6.99E-01 | 1.00E+00 |
| ENSG00000206685.1_RNU6-1189   | ENSG00000160789.18_LMNA | -0.02583 | -0.184274905 | 0.133919413 | 7.52E-01 | 8.97E-01 | 1.00E+00 |
| ENSG00000239839.4_DEFA3       | ENSG00000160789.18_LMNA | -0.00562 | -0.16467101  | 0.1537206   | 9.45E-01 | 9.78E-01 | 1.00E+00 |
| ENSG00000176294.4_OR4N2       | ENSG00000160789.18_LMNA | -0.2966  | -0.435249848 | -0.14421004 | 2.07E-04 | 3.35E-03 | 1.00E+00 |
| ENSG00000201579.1_RNU6-343F   | ENSG00000160789.18_LMNA | 0.07276  | -0.087452281 | 0.229305937 | 3.73E-01 | 6.53E-01 | 1.00E+00 |
| ENSG00000278705.1_HIST1H4B    | ENSG00000160789.18_LMNA | 0.05566  | -0.104464765 | 0.212975089 | 4.96E-01 | 7.50E-01 | 1.00E+00 |
| ENSG00000200344.1_Y_RNA       | ENSG00000160789.18_LMNA | 0.1499   | -0.009531221 | 0.301893342 | 6.53E-02 | 2.38E-01 | 1.00E+00 |
| ENSG00000252334.1_RNU6-1337   | ENSG00000160789.18_LMNA | -0.17203 | -0.322398309 | -0.01318754 | 3.41E-02 | 1.56E-01 | 1.00E+00 |
| ENSG00000277764.1_Vax2os1_3   | ENSG00000160789.18_LMNA | -0.17088 | -0.32133467  | -0.01200116 | 3.53E-02 | 1.60E-01 | 1.00E+00 |
| ENSG00000260443.1_CTD-3057C   | ENSG00000160789.18_LMNA | 0.05865  | -0.101500931 | 0.215832987 | 4.73E-01 | 7.33E-01 | 1.00E+00 |
| ENSG00000276368.1_HIST1H2AJ   | ENSG00000160789.18_LMNA | 0.0494   | -0.110675552 | 0.206968623 | 5.46E-01 | 7.84E-01 | 1.00E+00 |
| ENSG00000276840.1_PMS2P10     | ENSG00000160789.18_LMNA | -0.16828 | -0.318932203 | -0.00932467 | 3.82E-02 | 1.68E-01 | 1.00E+00 |
| ENSG00000256984.1_RP11-551L   | ENSG00000160789.18_LMNA | -0.03654 | -0.194607828 | 0.123379235 | 6.55E-01 | 8.47E-01 | 1.00E+00 |
| ENSG00000257464.1_RP11-161H   | ENSG00000160789.18_LMNA | -0.07496 | -0.231403583 | 0.085253607 | 3.59E-01 | 6.41E-01 | 1.00E+00 |
| ENSG00000224050.1_RP1-90G24   | ENSG00000160789.18_LMNA | -0.18223 | -0.331805367 | -0.02371815 | 2.46E-02 | 1.25E-01 | 1.00E+00 |
| ENSG00000273703.1_HIST1H2BA   | ENSG00000160789.18_LMNA | 0.05991  | -0.100245899 | 0.217041524 | 4.63E-01 | 7.26E-01 | 1.00E+00 |
| ENSG00000225974.1_AC005550.1  | ENSG00000160789.18_LMNA | 0.12537  | -0.034515803 | 0.27900568  | 1.24E-01 | 3.55E-01 | 1.00E+00 |
| ENSG00000238250.1_ST6GAL2-1   | ENSG00000160789.18_LMNA | -0.1496  | -0.301613369 | 0.009839212 | 6.58E-02 | 2.40E-01 | 1.00E+00 |
| ENSG00000273267.1_RP11-338K   | ENSG00000160789.18_LMNA | -0.20952 | -0.356814242 | -0.0520505  | 9.58E-03 | 6.36E-02 | 1.00E+00 |
| ENSG00000232391.1_RANP2       | ENSG00000160789.18_LMNA | -0.02806 | -0.186426168 | 0.131730919 | 7.31E-01 | 8.87E-01 | 1.00E+00 |
| ENSG00000239587.1_AC018730.1  | ENSG00000160789.18_LMNA | 0.11294  | -0.047103394 | 0.267338014 | 1.66E-01 | 4.23E-01 | 1.00E+00 |
| ENSG00000259054.1_AE000662.1  | ENSG00000160789.18_LMNA | 0.01991  | -0.139732398 | 0.178545972 | 8.08E-01 | 9.23E-01 | 1.00E+00 |
| ENSG00000263370.1_RP11-6813.1 | ENSG00000160789.18_LMNA | 0.00931  | -0.15011592  | 0.168258602 | 9.09E-01 | 9.65E-01 | 1.00E+00 |

|                              |                         |          |              |             |          |          |          |
|------------------------------|-------------------------|----------|--------------|-------------|----------|----------|----------|
| ENSG00000205835.7_GMNC       | ENSG00000160789.18_LMNA | -0.04989 | -0.207442847 | 0.110186097 | 5.42E-01 | 7.81E-01 | 1.00E+00 |
| ENSG00000258001.1_RP11-756H  | ENSG00000160789.18_LMNA | -0.13635 | -0.289274253 | 0.023354706 | 9.39E-02 | 3.00E-01 | 1.00E+00 |
| ENSG00000270350.1_MTND4LP5   | ENSG00000160789.18_LMNA | -0.04627 | -0.203967533 | 0.113769463 | 5.71E-01 | 8.00E-01 | 1.00E+00 |
| ENSG00000258404.1_RP11-1029  | ENSG00000160789.18_LMNA | 0.1504   | -0.009020903 | 0.302357118 | 6.44E-02 | 2.36E-01 | 1.00E+00 |
| ENSG00000178556.8_CKS1BP6    | ENSG00000160789.18_LMNA | -0.11374 | -0.268090786 | 0.046294273 | 1.63E-01 | 4.18E-01 | 1.00E+00 |
| ENSG00000275576.1_RP5-836N1  | ENSG00000160789.18_LMNA | 0.06573  | -0.094458245 | 0.222602209 | 4.21E-01 | 6.93E-01 | 1.00E+00 |
| ENSG00000224302.1_RP11-302K  | ENSG00000160789.18_LMNA | -0.03322 | -0.191413217 | 0.126645603 | 6.84E-01 | 8.63E-01 | 1.00E+00 |
| ENSG00000250761.2_RP11-711G  | ENSG00000160789.18_LMNA | -0.13437 | -0.287425611 | 0.025369797 | 9.88E-02 | 3.09E-01 | 1.00E+00 |
| ENSG00000280783.1_           | ENSG00000160789.18_LMNA | 0.13468  | -0.02506289  | 0.287707318 | 9.81E-02 | 3.08E-01 | 1.00E+00 |
| ENSG00000259215.1_RP11-253M  | ENSG00000160789.18_LMNA | -0.05015 | -0.20768941  | 0.109931553 | 5.40E-01 | 7.79E-01 | 1.00E+00 |
| ENSG00000238358.2_RP5-1121E  | ENSG00000160789.18_LMNA | -0.04421 | -0.201985721 | 0.115809197 | 5.89E-01 | 8.09E-01 | 1.00E+00 |
| ENSG00000255850.1_TMEM5-AS   | ENSG00000160789.18_LMNA | 0.02991  | -0.129913304 | 0.188210545 | 7.15E-01 | 8.79E-01 | 1.00E+00 |
| ENSG00000270849.1_CHCHD2P3   | ENSG00000160789.18_LMNA | 0.04433  | -0.115683774 | 0.202107658 | 5.88E-01 | 8.08E-01 | 1.00E+00 |
| ENSG00000254965.1_C1DP5      | ENSG00000160789.18_LMNA | -0.25455 | -0.397640349 | -0.09938082 | 1.55E-03 | 1.61E-02 | 1.00E+00 |
| ENSG00000275381.1_RP11-401N  | ENSG00000160789.18_LMNA | 0.02453  | -0.135199014 | 0.18301566  | 7.64E-01 | 9.02E-01 | 1.00E+00 |
| ENSG00000183654.8_MARCH11    | ENSG00000160789.18_LMNA | -0.23089 | -0.376263933 | -0.07442934 | 4.21E-03 | 3.45E-02 | 1.00E+00 |
| ENSG00000225446.1_RP4-665J2  | ENSG00000160789.18_LMNA | -0.07722 | -0.233554136 | 0.082996273 | 3.44E-01 | 6.29E-01 | 1.00E+00 |
| ENSG00000269998.1_RP11-272L  | ENSG00000160789.18_LMNA | -0.12101 | -0.27491269  | 0.038942857 | 1.38E-01 | 3.78E-01 | 1.00E+00 |
| ENSG00000248531.3_NDUFA5P1   | ENSG00000160789.18_LMNA | 0.00789  | -0.151501243 | 0.166880843 | 9.23E-01 | 9.71E-01 | 1.00E+00 |
| ENSG00000269300.1_CTD-2529P  | ENSG00000160789.18_LMNA | -0.0084  | -0.16738096  | 0.150998525 | 9.18E-01 | 9.69E-01 | 1.00E+00 |
| ENSG00000275695.1_UBE2Q2P6   | ENSG00000160789.18_LMNA | 0.00361  | -0.155684187 | 0.162713182 | 9.65E-01 | 9.86E-01 | 1.00E+00 |
| ENSG00000250011.1_HMGB1P3    | ENSG00000160789.18_LMNA | 0.19065  | 0.032430277  | 0.339541921 | 1.86E-02 | 1.02E-01 | 1.00E+00 |
| ENSG00000270116.1_AP001429   | ENSG00000160789.18_LMNA | 0.08167  | -0.078547029 | 0.237783863 | 3.17E-01 | 6.04E-01 | 1.00E+00 |
| ENSG00000213653.4_RPL22P22   | ENSG00000160789.18_LMNA | -0.01912 | -0.177780179 | 0.140507766 | 8.15E-01 | 9.28E-01 | 1.00E+00 |
| ENSG00000258689.1_LINC01269  | ENSG00000160789.18_LMNA | -0.12831 | -0.281754259 | 0.031535969 | 1.15E-01 | 3.39E-01 | 1.00E+00 |
| ENSG00000273450.1_RP11-76P2  | ENSG00000160789.18_LMNA | -0.17027 | -0.320777535 | -0.01138008 | 3.60E-02 | 1.61E-01 | 1.00E+00 |
| ENSG00000211694.2_TRGV10     | ENSG00000160789.18_LMNA | 0.04161  | -0.118376726 | 0.199487397 | 6.11E-01 | 8.22E-01 | 1.00E+00 |
| ENSG00000266994.1_RP11-127I2 | ENSG00000160789.18_LMNA | 0.1127   | -0.047351802 | 0.267106829 | 1.67E-01 | 4.24E-01 | 1.00E+00 |
| ENSG00000254884.1_PRR13P2    | ENSG00000160789.18_LMNA | 0.05595  | -0.104177781 | 0.213252053 | 4.94E-01 | 7.49E-01 | 1.00E+00 |
| ENSG00000227163.2_RP5-1198O  | ENSG00000160789.18_LMNA | 0.36525  | 0.218773888  | 0.495633525 | 3.71E-06 | 1.31E-04 | 1.90E-01 |
| ENSG00000206177.5_HBM        | ENSG00000160789.18_LMNA | -0.18235 | -0.331919437 | -0.02384627 | 2.45E-02 | 1.25E-01 | 1.00E+00 |
| ENSG00000261864.1_RP11-67A1  | ENSG00000160789.18_LMNA | 0.08068  | -0.079539292 | 0.236841595 | 3.23E-01 | 6.10E-01 | 1.00E+00 |
| ENSG00000188850.9_RP11-159F  | ENSG00000160789.18_LMNA | -0.09241 | -0.247963125 | 0.067787572 | 2.57E-01 | 5.40E-01 | 1.00E+00 |



|                              |                         |          |              |             |          |          |          |
|------------------------------|-------------------------|----------|--------------|-------------|----------|----------|----------|
| ENSG00000220506.2_RP3-415N1  | ENSG00000160789.18_LMNA | 0.01354  | -0.145974131 | 0.172370369 | 8.68E-01 | 9.49E-01 | 1.00E+00 |
| ENSG00000261687.1_RP11-473C  | ENSG00000160789.18_LMNA | 0.1107   | -0.049374509 | 0.265223011 | 1.75E-01 | 4.35E-01 | 1.00E+00 |
| ENSG00000232455.2_LARS2-AS1  | ENSG00000160789.18_LMNA | -0.06552 | -0.222397309 | 0.094671888 | 4.23E-01 | 6.94E-01 | 1.00E+00 |
| ENSG00000249180.1_CTC-506B8  | ENSG00000160789.18_LMNA | 0.02034  | -0.139316646 | 0.17895643  | 8.04E-01 | 9.21E-01 | 1.00E+00 |
| ENSG00000204020.5_LIPN       | ENSG00000160789.18_LMNA | 0.15318  | -0.006167313 | 0.304947743 | 5.95E-02 | 2.24E-01 | 1.00E+00 |
| ENSG00000236268.4_LINC01361  | ENSG00000160789.18_LMNA | -0.16745 | -0.31816918  | -0.00847554 | 3.92E-02 | 1.71E-01 | 1.00E+00 |
| ENSG00000229738.1_AC010240.1 | ENSG00000160789.18_LMNA | 0.10281  | -0.057331372 | 0.257789129 | 2.08E-01 | 4.80E-01 | 1.00E+00 |
| ENSG00000228897.1_CTD-2021A  | ENSG00000160789.18_LMNA | 0.13942  | -0.020227588 | 0.292138457 | 8.67E-02 | 2.86E-01 | 1.00E+00 |
| ENSG00000229455.2_RPS10P18   | ENSG00000160789.18_LMNA | 0.03328  | -0.126588759 | 0.19146887  | 6.84E-01 | 8.63E-01 | 1.00E+00 |
| ENSG00000253831.1_ETV3L      | ENSG00000160789.18_LMNA | 0.18124  | 0.02269788   | 0.330896626 | 2.54E-02 | 1.28E-01 | 1.00E+00 |
| ENSG00000266411.1_RP11-180P  | ENSG00000160789.18_LMNA | -0.16602 | -0.316849939 | -0.00700848 | 4.09E-02 | 1.76E-01 | 1.00E+00 |
| ENSG00000266340.1_RP11-848P  | ENSG00000160789.18_LMNA | 0.05416  | -0.105957478 | 0.21153367  | 5.08E-01 | 7.58E-01 | 1.00E+00 |
| ENSG00000214268.2_RPS3AP33   | ENSG00000160789.18_LMNA | -0.0087  | -0.167667178 | 0.150710744 | 9.15E-01 | 9.68E-01 | 1.00E+00 |
| ENSG00000102239.4_BRS3       | ENSG00000160789.18_LMNA | -0.09358 | -0.249067526 | 0.06661579  | 2.52E-01 | 5.32E-01 | 1.00E+00 |
| ENSG00000213421.4_RP11-84O1  | ENSG00000160789.18_LMNA | 0.01698  | -0.142602265 | 0.175709621 | 8.35E-01 | 9.36E-01 | 1.00E+00 |
| ENSG00000279388.1_RP11-897M  | ENSG00000160789.18_LMNA | 0.20065  | 0.042821828  | 0.348715814 | 1.32E-02 | 7.99E-02 | 1.00E+00 |
| ENSG00000267097.1_SLC14A2-A  | ENSG00000160789.18_LMNA | -0.08074 | -0.23689301  | 0.079485166 | 3.23E-01 | 6.09E-01 | 1.00E+00 |
| ENSG00000227290.1_LINC01364  | ENSG00000160789.18_LMNA | -0.04081 | -0.19871951  | 0.119165031 | 6.18E-01 | 8.27E-01 | 1.00E+00 |
| ENSG00000229871.1_RPSAP20    | ENSG00000160789.18_LMNA | 0.0434   | -0.116606013 | 0.201210825 | 5.95E-01 | 8.13E-01 | 1.00E+00 |
| ENSG00000172967.7_XKR3       | ENSG00000160789.18_LMNA | -0.1245  | -0.278182509 | 0.03540715  | 1.26E-01 | 3.60E-01 | 1.00E+00 |
| ENSG00000258137.4_RP11-753H  | ENSG00000160789.18_LMNA | -0.07852 | -0.234784733 | 0.08170311  | 3.36E-01 | 6.22E-01 | 1.00E+00 |
| ENSG00000235414.3_RPSAP24    | ENSG00000160789.18_LMNA | -0.04138 | -0.199263368 | 0.118606754 | 6.13E-01 | 8.24E-01 | 1.00E+00 |
| ENSG00000214668.4_SLC29A4P   | ENSG00000160789.18_LMNA | 0.13638  | -0.023325544 | 0.289300989 | 9.39E-02 | 3.00E-01 | 1.00E+00 |
| ENSG00000255815.3_KRT8P11    | ENSG00000160789.18_LMNA | 0.09994  | -0.060220217 | 0.255080896 | 2.21E-01 | 4.96E-01 | 1.00E+00 |
| ENSG00000233947.1_RP11-336N  | ENSG00000160789.18_LMNA | -0.01147 | -0.170362938 | 0.147997613 | 8.88E-01 | 9.57E-01 | 1.00E+00 |
| ENSG00000251370.1_CTD-2201E  | ENSG00000160789.18_LMNA | -0.05663 | -0.213900945 | 0.103505206 | 4.88E-01 | 7.45E-01 | 1.00E+00 |
| ENSG00000213117.4_RP3-352A2  | ENSG00000160789.18_LMNA | 0.00992  | -0.149513396 | 0.168857448 | 9.03E-01 | 9.63E-01 | 1.00E+00 |
| ENSG00000178395.6_CCDC185    | ENSG00000160789.18_LMNA | 0.0643   | -0.095883159 | 0.221235086 | 4.31E-01 | 7.01E-01 | 1.00E+00 |
| ENSG00000245008.3_RP11-744N  | ENSG00000160789.18_LMNA | -0.28004 | -0.420490025 | -0.12647326 | 4.76E-04 | 6.48E-03 | 1.00E+00 |
| ENSG00000206150.3_RNASE13    | ENSG00000160789.18_LMNA | 0.20724  | 0.049682209  | 0.354740359 | 1.04E-02 | 6.74E-02 | 1.00E+00 |
| ENSG00000226557.1_TRAF6P1    | ENSG00000160789.18_LMNA | 0.00131  | -0.157921081 | 0.160479788 | 9.87E-01 | 9.95E-01 | 1.00E+00 |
| ENSG00000229800.1_ATP8A2P2   | ENSG00000160789.18_LMNA | -0.19899 | -0.347195181 | -0.04109477 | 1.40E-02 | 8.34E-02 | 1.00E+00 |
| ENSG00000169548.3_ZNF280A    | ENSG00000160789.18_LMNA | 0.11378  | -0.046254273 | 0.26812799  | 1.63E-01 | 4.18E-01 | 1.00E+00 |

|                              |                         |          |              |             |          |          |          |
|------------------------------|-------------------------|----------|--------------|-------------|----------|----------|----------|
| ENSG00000259151.2_CAP2P1     | ENSG00000160789.18_LMNA | -0.00747 | -0.166470304 | 0.151913794 | 9.27E-01 | 9.72E-01 | 1.00E+00 |
| ENSG00000131914.9_LIN28A     | ENSG00000160789.18_LMNA | -0.0047  | -0.163779044 | 0.154615502 | 9.54E-01 | 9.82E-01 | 1.00E+00 |
| ENSG00000269545.1_           | ENSG00000160789.18_LMNA | 0.06767  | -0.092527687 | 0.22445248  | 4.07E-01 | 6.83E-01 | 1.00E+00 |
| ENSG00000278090.1_RP11-6O2.1 | ENSG00000160789.18_LMNA | -0.03348 | -0.191657717 | 0.126395854 | 6.82E-01 | 8.62E-01 | 1.00E+00 |
| ENSG00000231258.2_ZSWIM5P2   | ENSG00000160789.18_LMNA | -0.1451  | -0.297425593 | 0.014439031 | 7.45E-02 | 2.60E-01 | 1.00E+00 |
| ENSG00000233614.6_DDX11L10   | ENSG00000160789.18_LMNA | -0.03672 | -0.194783935 | 0.123198972 | 6.53E-01 | 8.47E-01 | 1.00E+00 |
| ENSG00000162039.13_MEIOB     | ENSG00000160789.18_LMNA | 0.04118  | -0.118797175 | 0.199077888 | 6.14E-01 | 8.25E-01 | 1.00E+00 |
| ENSG00000268066.4_FMR1-AS1   | ENSG00000160789.18_LMNA | -0.0925  | -0.248047544 | 0.067698033 | 2.57E-01 | 5.39E-01 | 1.00E+00 |
| ENSG00000203645.2_LINC00501  | ENSG00000160789.18_LMNA | -0.09525 | -0.250653824 | 0.064931183 | 2.43E-01 | 5.23E-01 | 1.00E+00 |
| ENSG00000259641.4_PCAT29     | ENSG00000160789.18_LMNA | -0.12883 | -0.282239073 | 0.031009786 | 1.14E-01 | 3.37E-01 | 1.00E+00 |
| ENSG00000169218.12_RSPO1     | ENSG00000160789.18_LMNA | -0.00524 | -0.164304314 | 0.154088567 | 9.49E-01 | 9.79E-01 | 1.00E+00 |
| ENSG00000213265.7_TSGA13     | ENSG00000160789.18_LMNA | -0.05467 | -0.212024558 | 0.105449281 | 5.04E-01 | 7.55E-01 | 1.00E+00 |
| ENSG00000261231.5_RP11-523L  | ENSG00000160789.18_LMNA | -0.01854 | -0.177217935 | 0.141076794 | 8.21E-01 | 9.30E-01 | 1.00E+00 |
| ENSG00000173093.11_CCDC63    | ENSG00000160789.18_LMNA | -0.01384 | -0.172657802 | 0.145684181 | 8.66E-01 | 9.47E-01 | 1.00E+00 |
| ENSG00000251441.2_RTEL1P1    | ENSG00000160789.18_LMNA | 0.16891  | 0.009981073  | 0.319521774 | 3.75E-02 | 1.66E-01 | 1.00E+00 |
| ENSG00000280425.1_RP11-446E  | ENSG00000160789.18_LMNA | 0.14273  | -0.016851523 | 0.2952244   | 7.94E-02 | 2.71E-01 | 1.00E+00 |
| ENSG00000170927.13_PKHD1     | ENSG00000160789.18_LMNA | -0.08402 | -0.240014751 | 0.076195275 | 3.03E-01 | 5.90E-01 | 1.00E+00 |
| ENSG00000199899.2_Y_RNA      | ENSG00000160789.18_LMNA | 0.09763  | -0.062545662 | 0.252897239 | 2.31E-01 | 5.09E-01 | 1.00E+00 |
| ENSG00000273720.1_RP11-613E  | ENSG00000160789.18_LMNA | 0.00793  | -0.151466092 | 0.166915818 | 9.23E-01 | 9.70E-01 | 1.00E+00 |
| ENSG00000199038.1_MIR210     | ENSG00000160789.18_LMNA | 0.33667  | 0.187523008  | 0.470647438 | 2.23E-05 | 5.63E-04 | 1.00E+00 |
| ENSG00000200924.1_RNU6-1048  | ENSG00000160789.18_LMNA | 0.04405  | -0.115965931 | 0.20183333  | 5.90E-01 | 8.10E-01 | 1.00E+00 |
| ENSG00000238793.1_SNORD124   | ENSG00000160789.18_LMNA | -0.07196 | -0.228543377 | 0.088250803 | 3.78E-01 | 6.58E-01 | 1.00E+00 |
| ENSG00000252933.1_RNU6-1223  | ENSG00000160789.18_LMNA | -0.00911 | -0.168064492 | 0.150311171 | 9.11E-01 | 9.66E-01 | 1.00E+00 |
| ENSG00000239739.1_RP11-373E  | ENSG00000160789.18_LMNA | -0.16187 | -0.313006578 | -0.00274207 | 4.63E-02 | 1.91E-01 | 1.00E+00 |
| ENSG00000199179.2_MIRLET7I   | ENSG00000160789.18_LMNA | -0.02433 | -0.182825008 | 0.135392655 | 7.66E-01 | 9.03E-01 | 1.00E+00 |
| ENSG00000256609.1_RP11-64B1  | ENSG00000160789.18_LMNA | -0.3826  | -0.510695469 | -0.23789077 | 1.15E-06 | 5.16E-05 | 5.89E-02 |
| ENSG00000223391.2_GS1-309P1  | ENSG00000160789.18_LMNA | -0.02615 | -0.184577709 | 0.133611556 | 7.49E-01 | 8.95E-01 | 1.00E+00 |
| ENSG00000226702.1_MIR217HG   | ENSG00000160789.18_LMNA | -0.36979 | -0.499581328 | -0.22376404 | 2.75E-06 | 1.02E-04 | 1.41E-01 |
| ENSG00000281115.1_           | ENSG00000160789.18_LMNA | 0.05245  | -0.107652825 | 0.209894903 | 5.21E-01 | 7.67E-01 | 1.00E+00 |
| ENSG00000199851.2_U3         | ENSG00000160789.18_LMNA | -0.17041 | -0.320908011 | -0.01152551 | 3.58E-02 | 1.61E-01 | 1.00E+00 |
| ENSG00000281419.1_           | ENSG00000160789.18_LMNA | -0.03926 | -0.19722403  | 0.120699126 | 6.31E-01 | 8.34E-01 | 1.00E+00 |
| ENSG00000249908.2_BRD9P2     | ENSG00000160789.18_LMNA | -0.17087 | -0.321330614 | -0.01199664 | 3.53E-02 | 1.60E-01 | 1.00E+00 |
| ENSG00000261078.1_RP11-481J  | ENSG00000160789.18_LMNA | -0.2035  | -0.351319993 | -0.04578377 | 1.19E-02 | 7.44E-02 | 1.00E+00 |

|                              |                         |          |              |             |          |          |          |
|------------------------------|-------------------------|----------|--------------|-------------|----------|----------|----------|
| ENSG00000231754.1_RP11-204E  | ENSG00000160789.18_LMNA | -0.24184 | -0.386171358 | -0.08594692 | 2.69E-03 | 2.45E-02 | 1.00E+00 |
| ENSG00000260671.2_RP11-278A  | ENSG00000160789.18_LMNA | -0.09725 | -0.252538543 | 0.062927321 | 2.33E-01 | 5.11E-01 | 1.00E+00 |
| ENSG00000253819.1_LINC01151  | ENSG00000160789.18_LMNA | -0.06385 | -0.220810814 | 0.096325102 | 4.34E-01 | 7.03E-01 | 1.00E+00 |
| ENSG00000253668.1_RP11-463C  | ENSG00000160789.18_LMNA | -0.06099 | -0.218071385 | 0.09917562  | 4.55E-01 | 7.20E-01 | 1.00E+00 |
| ENSG00000281918.1_           | ENSG00000160789.18_LMNA | -0.05554 | -0.212857263 | 0.104586837 | 4.97E-01 | 7.51E-01 | 1.00E+00 |
| ENSG00000225417.1_RP5-1178H  | ENSG00000160789.18_LMNA | -0.01318 | -0.1720234   | 0.146324065 | 8.72E-01 | 9.50E-01 | 1.00E+00 |
| ENSG00000271947.1_RP11-439M  | ENSG00000160789.18_LMNA | 0.06287  | -0.097300188 | 0.219874291 | 4.42E-01 | 7.09E-01 | 1.00E+00 |
| ENSG00000278840.1_RP11-345N  | ENSG00000160789.18_LMNA | -0.19706 | -0.345422828 | -0.03908413 | 1.50E-02 | 8.77E-02 | 1.00E+00 |
| ENSG00000257906.1_RP1-90J4.1 | ENSG00000160789.18_LMNA | -0.12083 | -0.274749194 | 0.039119441 | 1.38E-01 | 3.79E-01 | 1.00E+00 |
| ENSG00000243532.3_RN7SL19P   | ENSG00000160789.18_LMNA | 0.03172  | -0.128126868 | 0.189962268 | 6.98E-01 | 8.71E-01 | 1.00E+00 |
| ENSG00000249304.1_RP11-26P1  | ENSG00000160789.18_LMNA | 0.44517  | 0.307777224  | 0.56436904  | 9.12E-09 | 9.93E-07 | 4.68E-04 |
| ENSG00000273816.1_RP11-85B7  | ENSG00000160789.18_LMNA | -0.07324 | -0.229760881 | 0.086975688 | 3.70E-01 | 6.50E-01 | 1.00E+00 |
| ENSG00000253929.1_CASC21     | ENSG00000160789.18_LMNA | 0.03503  | -0.12486552  | 0.19315503  | 6.68E-01 | 8.54E-01 | 1.00E+00 |
| ENSG00000233147.1_           | ENSG00000160789.18_LMNA | -0.08883 | -0.24457285  | 0.07137926  | 2.76E-01 | 5.61E-01 | 1.00E+00 |
| ENSG00000254041.1_RP11-574O  | ENSG00000160789.18_LMNA | -0.26129 | -0.403695718 | -0.10651775 | 1.15E-03 | 1.29E-02 | 1.00E+00 |
| ENSG00000279370.1_RP1-247F3  | ENSG00000160789.18_LMNA | 0.03953  | -0.120428376 | 0.197488073 | 6.29E-01 | 8.33E-01 | 1.00E+00 |
| ENSG00000268055.1_AC067969.  | ENSG00000160789.18_LMNA | -0.14794 | -0.300070302 | 0.01153564  | 6.89E-02 | 2.47E-01 | 1.00E+00 |
| ENSG00000254112.1_KB-1205A7  | ENSG00000160789.18_LMNA | 0.03057  | -0.129257639 | 0.188853704 | 7.08E-01 | 8.76E-01 | 1.00E+00 |
| ENSG00000256442.1_RP11-705C  | ENSG00000160789.18_LMNA | -0.09474 | -0.250166824 | 0.065448555 | 2.46E-01 | 5.25E-01 | 1.00E+00 |
| ENSG00000243328.1_RP11-520P  | ENSG00000160789.18_LMNA | -0.03229 | -0.190513899 | 0.127563878 | 6.93E-01 | 8.68E-01 | 1.00E+00 |
| ENSG00000250678.1_CTB-161M1  | ENSG00000160789.18_LMNA | -0.10021 | -0.255337848 | 0.059946355 | 2.19E-01 | 4.94E-01 | 1.00E+00 |
| ENSG00000277039.1_Metazoa_SI | ENSG00000160789.18_LMNA | 0.06069  | -0.099472111 | 0.217786161 | 4.58E-01 | 7.22E-01 | 1.00E+00 |
| ENSG00000230243.1_FKBP1AP3   | ENSG00000160789.18_LMNA | 0.15101  | -0.00838801  | 0.302932086 | 6.33E-02 | 2.34E-01 | 1.00E+00 |
| ENSG00000256209.1_RP11-897M  | ENSG00000160789.18_LMNA | 0.07981  | -0.080408151 | 0.236016024 | 3.28E-01 | 6.14E-01 | 1.00E+00 |
| ENSG00000064218.4_DMRT3      | ENSG00000160789.18_LMNA | 0.00599  | -0.153359661 | 0.165030618 | 9.42E-01 | 9.77E-01 | 1.00E+00 |
| ENSG00000226087.1_AC106869.  | ENSG00000160789.18_LMNA | -0.08545 | -0.241371919 | 0.074762853 | 2.95E-01 | 5.81E-01 | 1.00E+00 |
| ENSG00000232411.1_AC009495.  | ENSG00000160789.18_LMNA | -0.15607 | -0.307624916 | 0.003213054 | 5.49E-02 | 2.13E-01 | 1.00E+00 |
| ENSG00000267560.1_RP11-173A  | ENSG00000160789.18_LMNA | 0.00808  | -0.15131485  | 0.167066291 | 9.21E-01 | 9.70E-01 | 1.00E+00 |
| ENSG00000233942.1_AC004012.  | ENSG00000160789.18_LMNA | -0.01948 | -0.178129029 | 0.140154603 | 8.12E-01 | 9.26E-01 | 1.00E+00 |
| ENSG00000270105.1_RP11-326C  | ENSG00000160789.18_LMNA | -0.02677 | -0.185179444 | 0.132999597 | 7.43E-01 | 8.92E-01 | 1.00E+00 |
| ENSG00000231294.1_AC006994.  | ENSG00000160789.18_LMNA | -0.15587 | -0.307439244 | 0.00341812  | 5.52E-02 | 2.14E-01 | 1.00E+00 |
| ENSG00000231858.4_AC067945.  | ENSG00000160789.18_LMNA | -0.0123  | -0.171165053 | 0.147189404 | 8.80E-01 | 9.54E-01 | 1.00E+00 |
| ENSG00000249234.1_RP11-452J  | ENSG00000160789.18_LMNA | -0.04731 | -0.204962518 | 0.112744386 | 5.63E-01 | 7.94E-01 | 1.00E+00 |

|                              |                         |          |              |             |          |          |          |
|------------------------------|-------------------------|----------|--------------|-------------|----------|----------|----------|
| ENSG00000254242.1_RP11-1080  | ENSG00000160789.18_LMNA | 0.11383  | -0.046204869 | 0.26817394  | 1.63E-01 | 4.18E-01 | 1.00E+00 |
| ENSG00000232396.2_RP1-76B20  | ENSG00000160789.18_LMNA | -0.15566 | -0.307244019 | 0.003633705 | 5.55E-02 | 2.15E-01 | 1.00E+00 |
| ENSG00000268889.1_CTD-2616J  | ENSG00000160789.18_LMNA | 0.08785  | -0.072359854 | 0.243645901 | 2.82E-01 | 5.67E-01 | 1.00E+00 |
| ENSG00000238043.1_RP11-699L  | ENSG00000160789.18_LMNA | -0.10595 | -0.260754569 | 0.054162103 | 1.94E-01 | 4.63E-01 | 1.00E+00 |
| ENSG00000230058.1_           | ENSG00000160789.18_LMNA | -0.02984 | -0.188151341 | 0.129973645 | 7.15E-01 | 8.79E-01 | 1.00E+00 |
| ENSG00000259155.2_RP11-831F  | ENSG00000160789.18_LMNA | 0.03733  | -0.122597898 | 0.195371002 | 6.48E-01 | 8.44E-01 | 1.00E+00 |
| ENSG00000236180.2_RP11-163G  | ENSG00000160789.18_LMNA | -0.07472 | -0.2311692   | 0.085499432 | 3.60E-01 | 6.42E-01 | 1.00E+00 |
| ENSG00000257327.1_RP11-650K  | ENSG00000160789.18_LMNA | 0.03646  | -0.123460321 | 0.194528604 | 6.56E-01 | 8.48E-01 | 1.00E+00 |
| ENSG00000139053.2_PDE6H      | ENSG00000160789.18_LMNA | -0.12061 | -0.274538445 | 0.039347033 | 1.39E-01 | 3.80E-01 | 1.00E+00 |
| ENSG00000264971.1_PRR13P4    | ENSG00000160789.18_LMNA | -0.08882 | -0.244561192 | 0.071391597 | 2.77E-01 | 5.61E-01 | 1.00E+00 |
| ENSG00000234806.1_RPL26P29   | ENSG00000160789.18_LMNA | -0.04355 | -0.201351862 | 0.116461017 | 5.94E-01 | 8.13E-01 | 1.00E+00 |
| ENSG00000242061.1_CTD-2555K  | ENSG00000160789.18_LMNA | 0.11515  | -0.044872967 | 0.269412181 | 1.58E-01 | 4.10E-01 | 1.00E+00 |
| ENSG00000213934.5_HBG1       | ENSG00000160789.18_LMNA | -0.0816  | -0.237712644 | 0.078622049 | 3.18E-01 | 6.04E-01 | 1.00E+00 |
| ENSG00000227205.4_PFN1P9     | ENSG00000160789.18_LMNA | 0.06458  | -0.095604179 | 0.221502849 | 4.29E-01 | 6.99E-01 | 1.00E+00 |
| ENSG00000254362.1_RP11-14I17 | ENSG00000160789.18_LMNA | -0.04674 | -0.204417568 | 0.113305901 | 5.67E-01 | 7.97E-01 | 1.00E+00 |
| ENSG00000249650.1_RP11-310P  | ENSG00000160789.18_LMNA | 0.11578  | -0.044234818 | 0.270005085 | 1.55E-01 | 4.07E-01 | 1.00E+00 |
| ENSG00000250950.1_RP11-33B1  | ENSG00000160789.18_LMNA | -0.02681 | -0.185222153 | 0.132956153 | 7.43E-01 | 8.92E-01 | 1.00E+00 |
| ENSG00000183395.4_PMCH       | ENSG00000160789.18_LMNA | -0.00086 | -0.160035823 | 0.158365353 | 9.92E-01 | 9.97E-01 | 1.00E+00 |
| ENSG00000237450.5_RPL23AP7   | ENSG00000160789.18_LMNA | 0.04827  | -0.111788028 | 0.20589021  | 5.55E-01 | 7.89E-01 | 1.00E+00 |
| ENSG00000177418.2_RP4-756H1  | ENSG00000160789.18_LMNA | 0.18317  | 0.024689811  | 0.332670281 | 2.39E-02 | 1.23E-01 | 1.00E+00 |
| ENSG00000255202.1_RP4-541C2  | ENSG00000160789.18_LMNA | 0.03943  | -0.120525016 | 0.197393832 | 6.30E-01 | 8.33E-01 | 1.00E+00 |
| ENSG00000226633.2_PPIAP28    | ENSG00000160789.18_LMNA | 0.0325   | -0.127360564 | 0.190713061 | 6.91E-01 | 8.67E-01 | 1.00E+00 |
| ENSG00000223503.1_RP11-29H2  | ENSG00000160789.18_LMNA | 0.15733  | -0.001917506 | 0.308797403 | 5.29E-02 | 2.09E-01 | 1.00E+00 |
| ENSG00000267255.1_CTB-50L17  | ENSG00000160789.18_LMNA | 0.09785  | -0.062317178 | 0.253111934 | 2.30E-01 | 5.08E-01 | 1.00E+00 |
| ENSG00000232431.3_RP11-578F  | ENSG00000160789.18_LMNA | 0.05139  | -0.108704723 | 0.208877213 | 5.30E-01 | 7.73E-01 | 1.00E+00 |
| ENSG00000243300.2_LINC00359  | ENSG00000160789.18_LMNA | -0.04089 | -0.198791931 | 0.119090702 | 6.17E-01 | 8.26E-01 | 1.00E+00 |
| ENSG00000278638.1_CTC-268N1  | ENSG00000160789.18_LMNA | 0.05847  | -0.101680821 | 0.215659681 | 4.74E-01 | 7.34E-01 | 1.00E+00 |
| ENSG00000258831.1_RP11-76E1  | ENSG00000160789.18_LMNA | 0.04322  | -0.11678784  | 0.201033944 | 5.97E-01 | 8.14E-01 | 1.00E+00 |
| ENSG00000225406.1_AC080125   | ENSG00000160789.18_LMNA | -0.01829 | -0.176976663 | 0.141320912 | 8.23E-01 | 9.31E-01 | 1.00E+00 |
| ENSG00000254907.1_RP11-484D  | ENSG00000160789.18_LMNA | -0.08985 | -0.245537588 | 0.070358042 | 2.71E-01 | 5.55E-01 | 1.00E+00 |
| ENSG00000235574.1_AC073150   | ENSG00000160789.18_LMNA | -0.13681 | -0.289705143 | 0.022884653 | 9.28E-02 | 2.98E-01 | 1.00E+00 |
| ENSG00000238171.1_AC068196   | ENSG00000160789.18_LMNA | -0.17581 | -0.325892928 | -0.01709155 | 3.03E-02 | 1.44E-01 | 1.00E+00 |
| ENSG00000257763.1_OR5BK1P    | ENSG00000160789.18_LMNA | -0.01923 | -0.177883908 | 0.140402763 | 8.14E-01 | 9.27E-01 | 1.00E+00 |

|                             |                         |          |              |             |          |          |          |
|-----------------------------|-------------------------|----------|--------------|-------------|----------|----------|----------|
| ENSG00000258806.1_OR11H7    | ENSG00000160789.18_LMNA | 0.05626  | -0.103872775 | 0.213546354 | 4.91E-01 | 7.47E-01 | 1.00E+00 |
| ENSG00000204588.5_LINC01123 | ENSG00000160789.18_LMNA | 0.03739  | -0.122543548 | 0.195424073 | 6.47E-01 | 8.43E-01 | 1.00E+00 |
| ENSG00000188886.3_ASTL      | ENSG00000160789.18_LMNA | 0.19675  | 0.038762851  | 0.345139421 | 1.51E-02 | 8.84E-02 | 1.00E+00 |
| ENSG00000236484.2_RRM2P2    | ENSG00000160789.18_LMNA | 0.0743   | -0.085918939 | 0.230769134 | 3.63E-01 | 6.45E-01 | 1.00E+00 |
| ENSG00000244427.1_RP11-52B1 | ENSG00000160789.18_LMNA | -0.03325 | -0.191441241 | 0.126616979 | 6.84E-01 | 8.63E-01 | 1.00E+00 |
| ENSG00000233457.1_RP11-336N | ENSG00000160789.18_LMNA | 0.08219  | -0.078033234 | 0.238271538 | 3.14E-01 | 6.00E-01 | 1.00E+00 |
| ENSG00000273451.1_RP4-569M2 | ENSG00000160789.18_LMNA | -0.07218 | -0.228756515 | 0.088027655 | 3.77E-01 | 6.57E-01 | 1.00E+00 |
| ENSG00000176194.16_CIDEA    | ENSG00000160789.18_LMNA | -0.04331 | -0.201126799 | 0.116692392 | 5.96E-01 | 8.14E-01 | 1.00E+00 |
| ENSG00000236289.2_GACAT3    | ENSG00000160789.18_LMNA | -0.19527 | -0.343784126 | -0.03722731 | 1.59E-02 | 9.16E-02 | 1.00E+00 |
| ENSG00000150361.10_KLHL1    | ENSG00000160789.18_LMNA | -0.26745 | -0.409223296 | -0.11305946 | 8.65E-04 | 1.04E-02 | 1.00E+00 |
| ENSG00000176302.11_FOXR1    | ENSG00000160789.18_LMNA | -0.04604 | -0.203751424 | 0.113992018 | 5.73E-01 | 8.01E-01 | 1.00E+00 |
| ENSG00000233786.1_CDC27P1   | ENSG00000160789.18_LMNA | 0.02713  | -0.132641878 | 0.185531077 | 7.40E-01 | 8.91E-01 | 1.00E+00 |
| ENSG00000224425.2_AC073869. | ENSG00000160789.18_LMNA | -0.08767 | -0.243469095 | 0.072546823 | 2.83E-01 | 5.68E-01 | 1.00E+00 |
| ENSG00000204365.4_C10orf126 | ENSG00000160789.18_LMNA | -0.05554 | -0.212860685 | 0.104583292 | 4.97E-01 | 7.51E-01 | 1.00E+00 |
| ENSG00000239699.1_HNRNPA3F  | ENSG00000160789.18_LMNA | 0.12328  | -0.036643418 | 0.277040035 | 1.30E-01 | 3.66E-01 | 1.00E+00 |
| ENSG00000266826.1_CTD-2200P | ENSG00000160789.18_LMNA | -0.17357 | -0.323818747 | -0.01477324 | 3.25E-02 | 1.51E-01 | 1.00E+00 |
| ENSG00000249169.1_CTC-529L1 | ENSG00000160789.18_LMNA | -0.26727 | -0.409068147 | -0.1128755  | 8.72E-04 | 1.04E-02 | 1.00E+00 |
| ENSG00000229541.2_GAPDHP26  | ENSG00000160789.18_LMNA | 0.12858  | -0.031261731 | 0.282006956 | 1.14E-01 | 3.38E-01 | 1.00E+00 |
| ENSG00000235827.2_TUBB8P9   | ENSG00000160789.18_LMNA | 0.09409  | -0.066101504 | 0.249551979 | 2.49E-01 | 5.29E-01 | 1.00E+00 |
| ENSG00000231552.1_IGBP1P3   | ENSG00000160789.18_LMNA | 0.02296  | -0.136739835 | 0.181497962 | 7.79E-01 | 9.09E-01 | 1.00E+00 |
| ENSG00000213667.3_PGGT1BP1  | ENSG00000160789.18_LMNA | -0.0348  | -0.192934888 | 0.125090612 | 6.70E-01 | 8.55E-01 | 1.00E+00 |
| ENSG00000239642.4_MEIKIN    | ENSG00000160789.18_LMNA | 0.06575  | -0.094441262 | 0.222618495 | 4.21E-01 | 6.93E-01 | 1.00E+00 |
| ENSG00000217227.1_RP1-319M7 | ENSG00000160789.18_LMNA | 0.18495  | 0.026531872  | 0.334308551 | 2.25E-02 | 1.18E-01 | 1.00E+00 |
| ENSG00000152254.9_G6PC2     | ENSG00000160789.18_LMNA | -0.27461 | -0.415643024 | -0.12068937 | 6.18E-04 | 7.97E-03 | 1.00E+00 |
| ENSG00000103546.17_SLC6A2   | ENSG00000160789.18_LMNA | -0.06667 | -0.223498043 | 0.093523836 | 4.14E-01 | 6.87E-01 | 1.00E+00 |
| ENSG00000225191.1_RP11-97C1 | ENSG00000160789.18_LMNA | 0.06566  | -0.094524161 | 0.222538993 | 4.22E-01 | 6.93E-01 | 1.00E+00 |
| ENSG00000205414.1_RP11-401P | ENSG00000160789.18_LMNA | -0.2386  | -0.383244442 | -0.08253595 | 3.07E-03 | 2.72E-02 | 1.00E+00 |
| ENSG00000166104.13_RP11-299 | ENSG00000160789.18_LMNA | -0.02891 | -0.187247028 | 0.130895033 | 7.24E-01 | 8.83E-01 | 1.00E+00 |
| ENSG00000225530.1_SP3P      | ENSG00000160789.18_LMNA | 0.08781  | -0.072404237 | 0.243603933 | 2.82E-01 | 5.67E-01 | 1.00E+00 |
| ENSG00000225420.1_AC104134. | ENSG00000160789.18_LMNA | 0.24737  | 0.091784171  | 0.391166252 | 2.12E-03 | 2.05E-02 | 1.00E+00 |
| ENSG00000271034.1_RP11-963H | ENSG00000160789.18_LMNA | -0.00398 | -0.163079664 | 0.155316818 | 9.61E-01 | 9.84E-01 | 1.00E+00 |
| ENSG00000261471.1_RP11-61F1 | ENSG00000160789.18_LMNA | 0.02962  | -0.130190744 | 0.187938314 | 7.17E-01 | 8.80E-01 | 1.00E+00 |
| ENSG00000249196.5_RP11-669N | ENSG00000160789.18_LMNA | -0.08657 | -0.242425887 | 0.073649544 | 2.89E-01 | 5.74E-01 | 1.00E+00 |

|                              |                         |          |              |             |          |          |          |
|------------------------------|-------------------------|----------|--------------|-------------|----------|----------|----------|
| ENSG00000272610.1_MAGI1-IT1  | ENSG00000160789.18_LMNA | 0.04794  | -0.112113179 | 0.205574869 | 5.58E-01 | 7.91E-01 | 1.00E+00 |
| ENSG00000274080.1_CTA-315H1  | ENSG00000160789.18_LMNA | -0.07498 | -0.231420272 | 0.085236102 | 3.59E-01 | 6.41E-01 | 1.00E+00 |
| ENSG00000187664.8_HAPLN4     | ENSG00000160789.18_LMNA | 0.08275  | -0.077474889 | 0.238801316 | 3.11E-01 | 5.97E-01 | 1.00E+00 |
| ENSG00000251032.1_CUL1P1     | ENSG00000160789.18_LMNA | 0.06655  | -0.093640673 | 0.223386059 | 4.15E-01 | 6.88E-01 | 1.00E+00 |
| ENSG00000250069.1_CTB-131B5  | ENSG00000160789.18_LMNA | 0.16102  | 0.001870823  | 0.312220476 | 4.75E-02 | 1.94E-01 | 1.00E+00 |
| ENSG00000188263.9_IL17REL    | ENSG00000160789.18_LMNA | 0.1257   | -0.034186997 | 0.279309222 | 1.23E-01 | 3.53E-01 | 1.00E+00 |
| ENSG00000151303.11_RP11-96C  | ENSG00000160789.18_LMNA | -0.03892 | -0.196896266 | 0.121035151 | 6.34E-01 | 8.36E-01 | 1.00E+00 |
| ENSG00000255275.3_RP13-279N  | ENSG00000160789.18_LMNA | 0.05987  | -0.100286808 | 0.217002146 | 4.64E-01 | 7.26E-01 | 1.00E+00 |
| ENSG00000171804.8_WDR87      | ENSG00000160789.18_LMNA | -0.18701 | -0.336200701 | -0.028662   | 2.11E-02 | 1.12E-01 | 1.00E+00 |
| ENSG00000248483.5_POU5F2     | ENSG00000160789.18_LMNA | 0.04413  | -0.11588561  | 0.201911427 | 5.89E-01 | 8.09E-01 | 1.00E+00 |
| ENSG00000270550.1_IGHV3-30   | ENSG00000160789.18_LMNA | 0.02664  | -0.133120561 | 0.185060521 | 7.45E-01 | 8.93E-01 | 1.00E+00 |
| ENSG00000201185.1_RNA5SP20   | ENSG00000160789.18_LMNA | -0.06101 | -0.218091791 | 0.099154406 | 4.55E-01 | 7.20E-01 | 1.00E+00 |
| ENSG00000266124.1_MIR5587    | ENSG00000160789.18_LMNA | 0.22937  | 0.072829906  | 0.374882618 | 4.48E-03 | 3.61E-02 | 1.00E+00 |
| ENSG00000211962.2_IGHV1-46   | ENSG00000160789.18_LMNA | 0.17444  | 0.015677996  | 0.324628578 | 3.16E-02 | 1.48E-01 | 1.00E+00 |
| ENSG00000207563.1_MIR23B     | ENSG00000160789.18_LMNA | 0.23003  | 0.073522539  | 0.375480959 | 4.36E-03 | 3.54E-02 | 1.00E+00 |
| ENSG00000207789.1_MIR26A2    | ENSG00000160789.18_LMNA | -0.10699 | -0.261731856 | 0.053116251 | 1.90E-01 | 4.57E-01 | 1.00E+00 |
| ENSG00000281599.1_           | ENSG00000160789.18_LMNA | 0.13663  | -0.023069781 | 0.289535455 | 9.33E-02 | 2.99E-01 | 1.00E+00 |
| ENSG00000201920.1_RNA5SP44   | ENSG00000160789.18_LMNA | 0.13325  | -0.026516557 | 0.286372533 | 1.02E-01 | 3.15E-01 | 1.00E+00 |
| ENSG00000281827.1_           | ENSG00000160789.18_LMNA | 0.0273   | -0.132476435 | 0.185693677 | 7.38E-01 | 8.90E-01 | 1.00E+00 |
| ENSG00000211997.1_MIR708     | ENSG00000160789.18_LMNA | 0.05796  | -0.102187492 | 0.215171449 | 4.78E-01 | 7.36E-01 | 1.00E+00 |
| ENSG00000224513.2_AC109309.4 | ENSG00000160789.18_LMNA | -0.02641 | -0.184838041 | 0.133346831 | 7.47E-01 | 8.94E-01 | 1.00E+00 |
| ENSG00000275379.1_HIST1H3I   | ENSG00000160789.18_LMNA | -0.10276 | -0.257742361 | 0.057381303 | 2.08E-01 | 4.80E-01 | 1.00E+00 |
| ENSG00000201440.1_RNA5SP51   | ENSG00000160789.18_LMNA | -0.20368 | -0.351485122 | -0.04597177 | 1.18E-02 | 7.40E-02 | 1.00E+00 |
| ENSG00000252361.1_RNU6-118F  | ENSG00000160789.18_LMNA | 0.09452  | -0.06567281  | 0.249955685 | 2.47E-01 | 5.27E-01 | 1.00E+00 |
| ENSG00000248285.1_RP11-158J  | ENSG00000160789.18_LMNA | -0.02165 | -0.180233836 | 0.138022047 | 7.91E-01 | 9.15E-01 | 1.00E+00 |
| ENSG00000233090.1_AC015922.1 | ENSG00000160789.18_LMNA | -0.11871 | -0.272759715 | 0.04126662  | 1.45E-01 | 3.90E-01 | 1.00E+00 |
| ENSG00000252577.1_SCARNA20   | ENSG00000160789.18_LMNA | -0.01023 | -0.169157179 | 0.149211735 | 9.00E-01 | 9.61E-01 | 1.00E+00 |
| ENSG00000243352.3_RN7SL8P    | ENSG00000160789.18_LMNA | 0.1192   | -0.040770809 | 0.27321935  | 1.44E-01 | 3.87E-01 | 1.00E+00 |
| ENSG00000250266.1_LINC01612  | ENSG00000160789.18_LMNA | -0.10911 | -0.263731403 | 0.050974262 | 1.81E-01 | 4.44E-01 | 1.00E+00 |
| ENSG00000229487.1_ALG13-AS1  | ENSG00000160789.18_LMNA | 0.03777  | -0.122168397 | 0.195790354 | 6.44E-01 | 8.42E-01 | 1.00E+00 |
| ENSG00000253187.2_HOXA10-AS  | ENSG00000160789.18_LMNA | -0.16154 | -0.312697448 | -0.0023994  | 4.68E-02 | 1.93E-01 | 1.00E+00 |
| ENSG00000222640.1_RNU2-51P   | ENSG00000160789.18_LMNA | -0.08099 | -0.23713496  | 0.079230429 | 3.21E-01 | 6.08E-01 | 1.00E+00 |
| ENSG00000270322.1_RP11-697E  | ENSG00000160789.18_LMNA | -0.06775 | -0.224528103 | 0.092448732 | 4.07E-01 | 6.82E-01 | 1.00E+00 |

|                              |                         |          |              |             |          |          |          |
|------------------------------|-------------------------|----------|--------------|-------------|----------|----------|----------|
| ENSG00000277452.1_RN7SL473f  | ENSG00000160789.18_LMNA | 0.09519  | -0.064998591 | 0.250590382 | 2.43E-01 | 5.23E-01 | 1.00E+00 |
| ENSG00000212163.4_SNORD91A   | ENSG00000160789.18_LMNA | 0.15618  | -0.003093805 | 0.307732878 | 5.47E-02 | 2.13E-01 | 1.00E+00 |
| ENSG00000260335.1_RP11-345J  | ENSG00000160789.18_LMNA | 0.0927   | -0.067498832 | 0.248235337 | 2.56E-01 | 5.38E-01 | 1.00E+00 |
| ENSG00000278683.1_RP11-132A  | ENSG00000160789.18_LMNA | -0.0669  | -0.223716766 | 0.093295611 | 4.13E-01 | 6.86E-01 | 1.00E+00 |
| ENSG00000125798.13_FOXA2     | ENSG00000160789.18_LMNA | -0.088   | -0.243787431 | 0.072210174 | 2.81E-01 | 5.67E-01 | 1.00E+00 |
| ENSG00000254952.1_AP001257   | ENSG00000160789.18_LMNA | -0.10642 | -0.261195064 | 0.053690788 | 1.92E-01 | 4.60E-01 | 1.00E+00 |
| ENSG00000237445.2_CTA-520D8  | ENSG00000160789.18_LMNA | 0.16009  | 0.000913475  | 0.311356192 | 4.88E-02 | 1.98E-01 | 1.00E+00 |
| ENSG00000235763.1_SNRPGP5    | ENSG00000160789.18_LMNA | -0.04667 | -0.204352199 | 0.113373243 | 5.68E-01 | 7.98E-01 | 1.00E+00 |
| ENSG00000160349.8_LCN1       | ENSG00000160789.18_LMNA | 0.1756   | 0.016872517  | 0.325697084 | 3.05E-02 | 1.45E-01 | 1.00E+00 |
| ENSG00000271803.1_RP1-63M2   | ENSG00000160789.18_LMNA | 0.03006  | -0.129762336 | 0.188358657 | 7.13E-01 | 8.78E-01 | 1.00E+00 |
| ENSG00000236691.3_NDUFA4P2   | ENSG00000160789.18_LMNA | -0.06838 | -0.22513308  | 0.091816955 | 4.03E-01 | 6.78E-01 | 1.00E+00 |
| ENSG00000229664.1_RP11-536K  | ENSG00000160789.18_LMNA | -0.00182 | -0.160976344 | 0.157424029 | 9.82E-01 | 9.93E-01 | 1.00E+00 |
| ENSG00000241035.2_RP11-689J  | ENSG00000160789.18_LMNA | 0.13608  | -0.023637167 | 0.289015264 | 9.46E-02 | 3.01E-01 | 1.00E+00 |
| ENSG00000219532.2_RP3-323K2  | ENSG00000160789.18_LMNA | -0.10735 | -0.26207347  | 0.052750506 | 1.88E-01 | 4.55E-01 | 1.00E+00 |
| ENSG00000222898.1_RN7SKP97   | ENSG00000160789.18_LMNA | 0.00951  | -0.149921192 | 0.168452167 | 9.07E-01 | 9.65E-01 | 1.00E+00 |
| ENSG00000211734.3_TRBV5-1    | ENSG00000160789.18_LMNA | -0.01196 | -0.170834245 | 0.147522778 | 8.84E-01 | 9.55E-01 | 1.00E+00 |
| ENSG00000227188.1_MGAT3-AS   | ENSG00000160789.18_LMNA | -0.09014 | -0.24581341  | 0.07006595  | 2.69E-01 | 5.54E-01 | 1.00E+00 |
| ENSG00000237292.1_RP11-540K  | ENSG00000160789.18_LMNA | -0.02824 | -0.18660429  | 0.131549574 | 7.30E-01 | 8.86E-01 | 1.00E+00 |
| ENSG00000271377.1_RP11-331I1 | ENSG00000160789.18_LMNA | -0.18333 | -0.33281716  | -0.02485488 | 2.38E-02 | 1.22E-01 | 1.00E+00 |
| ENSG00000213302.3_RP11-560I1 | ENSG00000160789.18_LMNA | 0.00283  | -0.156440541 | 0.161958376 | 9.72E-01 | 9.89E-01 | 1.00E+00 |
| ENSG00000253307.1_RP11-10J2  | ENSG00000160789.18_LMNA | 0.1755   | 0.016768464  | 0.325604039 | 3.06E-02 | 1.45E-01 | 1.00E+00 |
| ENSG00000253263.1_KB-1507C5  | ENSG00000160789.18_LMNA | -0.10293 | -0.257908092 | 0.057204355 | 2.07E-01 | 4.79E-01 | 1.00E+00 |
| ENSG00000181408.3_UTS2R      | ENSG00000160789.18_LMNA | 0.08254  | -0.077680066 | 0.238606658 | 3.12E-01 | 5.98E-01 | 1.00E+00 |
| ENSG00000228961.1_AP000282   | ENSG00000160789.18_LMNA | -0.12616 | -0.279743232 | 0.033716743 | 1.21E-01 | 3.51E-01 | 1.00E+00 |
| ENSG00000258553.4_RP11-16B1  | ENSG00000160789.18_LMNA | 0.01606  | -0.14351124  | 0.174810158 | 8.44E-01 | 9.39E-01 | 1.00E+00 |
| ENSG00000168124.2_OR1F1      | ENSG00000160789.18_LMNA | -0.14979 | -0.301792542 | 0.009642115 | 6.55E-02 | 2.39E-01 | 1.00E+00 |
| ENSG00000266385.1_RP11-227G  | ENSG00000160789.18_LMNA | -0.13756 | -0.290397829 | 0.022128722 | 9.10E-02 | 2.94E-01 | 1.00E+00 |
| ENSG00000253295.1_RP11-779O  | ENSG00000160789.18_LMNA | 0.16585  | 0.00683337   | 0.316692394 | 4.11E-02 | 1.77E-01 | 1.00E+00 |
| ENSG00000266963.1_AC005625   | ENSG00000160789.18_LMNA | 0.11372  | -0.046316334 | 0.268070267 | 1.63E-01 | 4.18E-01 | 1.00E+00 |
| ENSG00000077009.12_NMRK2     | ENSG00000160789.18_LMNA | -0.07496 | -0.23140232  | 0.085254932 | 3.59E-01 | 6.41E-01 | 1.00E+00 |
| ENSG00000260603.1_GS1-21A4   | ENSG00000160789.18_LMNA | 0.10449  | -0.055640647 | 0.259371855 | 2.00E-01 | 4.71E-01 | 1.00E+00 |
| ENSG00000196900.4_TEX43      | ENSG00000160789.18_LMNA | 0.01525  | -0.144297883 | 0.174031318 | 8.52E-01 | 9.42E-01 | 1.00E+00 |
| ENSG00000233602.1_ERI3-IT1   | ENSG00000160789.18_LMNA | 0.04198  | -0.118010865 | 0.19984365  | 6.08E-01 | 8.21E-01 | 1.00E+00 |

|                                         |                         |          |              |             |          |          |          |
|-----------------------------------------|-------------------------|----------|--------------|-------------|----------|----------|----------|
| ENSG00000232378.1_RPL29P28              | ENSG00000160789.18_LMNA | -0.00718 | -0.166188604 | 0.152196811 | 9.30E-01 | 9.73E-01 | 1.00E+00 |
| ENSG00000203886.4_CYP17A1- <del>A</del> | ENSG00000160789.18_LMNA | -0.23799 | -0.382692004 | -0.08189294 | 3.15E-03 | 2.77E-02 | 1.00E+00 |
| ENSG00000258344.1_RP11-968A             | ENSG00000160789.18_LMNA | -0.07444 | -0.230901913 | 0.085779719 | 3.62E-01 | 6.44E-01 | 1.00E+00 |
| ENSG00000278797.1_LLNL-276              | ENSG00000160789.18_LMNA | 0.02242  | -0.137273428 | 0.180972023 | 7.84E-01 | 9.12E-01 | 1.00E+00 |
| ENSG00000258260.1_RP11-977G             | ENSG00000160789.18_LMNA | -0.14359 | -0.296022463 | 0.015977271 | 7.76E-02 | 2.67E-01 | 1.00E+00 |
| ENSG00000227227.1_AC017101.             | ENSG00000160789.18_LMNA | -0.11578 | -0.270004618 | 0.044235321 | 1.55E-01 | 4.07E-01 | 1.00E+00 |
| ENSG00000233611.3_AC079135.             | ENSG00000160789.18_LMNA | -0.14847 | -0.300565417 | 0.010991512 | 6.79E-02 | 2.45E-01 | 1.00E+00 |
| ENSG00000259535.1_RPL21P12              | ENSG00000160789.18_LMNA | -0.08638 | -0.242248689 | 0.073836774 | 2.90E-01 | 5.75E-01 | 1.00E+00 |
| ENSG00000267142.1_CTD-3162L             | ENSG00000160789.18_LMNA | -0.09076 | -0.246401491 | 0.069442999 | 2.66E-01 | 5.50E-01 | 1.00E+00 |
| ENSG00000214347.6_CTB-180A7             | ENSG00000160789.18_LMNA | 0.0434   | -0.116608391 | 0.201208512 | 5.96E-01 | 8.13E-01 | 1.00E+00 |
| ENSG00000279647.1_CH507-254             | ENSG00000160789.18_LMNA | 0.04076  | -0.119216602 | 0.198669262 | 6.18E-01 | 8.27E-01 | 1.00E+00 |
| ENSG00000274245.1_RP11-357P             | ENSG00000160789.18_LMNA | -0.03352 | -0.191698181 | 0.126354518 | 6.82E-01 | 8.62E-01 | 1.00E+00 |
| ENSG00000253607.1_RP11-557C             | ENSG00000160789.18_LMNA | 0.03281  | -0.127058474 | 0.191008935 | 6.88E-01 | 8.65E-01 | 1.00E+00 |
| ENSG00000141977.8_CIB3                  | ENSG00000160789.18_LMNA | -0.12712 | -0.280640939 | 0.032743631 | 1.19E-01 | 3.46E-01 | 1.00E+00 |
| ENSG00000233420.1_AC002127.             | ENSG00000160789.18_LMNA | -0.17982 | -0.329588038 | -0.02122982 | 2.66E-02 | 1.32E-01 | 1.00E+00 |
| ENSG00000257277.1_RP11-434H             | ENSG00000160789.18_LMNA | -0.1249  | -0.278559102 | 0.03499943  | 1.25E-01 | 3.58E-01 | 1.00E+00 |
| ENSG00000280208.1_GGT4P                 | ENSG00000160789.18_LMNA | 0.00586  | -0.15348203  | 0.164908711 | 9.43E-01 | 9.77E-01 | 1.00E+00 |
| ENSG00000235007.2_RP11-344B             | ENSG00000160789.18_LMNA | -0.0469  | -0.204568912 | 0.113149977 | 5.66E-01 | 7.97E-01 | 1.00E+00 |
| ENSG00000280266.1_RP11-331D             | ENSG00000160789.18_LMNA | -0.12368 | -0.277415013 | 0.036237761 | 1.29E-01 | 3.64E-01 | 1.00E+00 |
| ENSG00000125571.8_IL37                  | ENSG00000160789.18_LMNA | 0.08538  | -0.074842459 | 0.241296528 | 2.96E-01 | 5.82E-01 | 1.00E+00 |
| ENSG00000267215.1_RP11-685A             | ENSG00000160789.18_LMNA | -0.07314 | -0.229662151 | 0.087079128 | 3.71E-01 | 6.51E-01 | 1.00E+00 |
| ENSG00000263624.1_RP11-45M2             | ENSG00000160789.18_LMNA | 0.13882  | -0.020845691 | 0.291572765 | 8.81E-02 | 2.89E-01 | 1.00E+00 |
| ENSG00000231458.2_RNASEH1F              | ENSG00000160789.18_LMNA | -0.0101  | -0.169031121 | 0.149338612 | 9.02E-01 | 9.62E-01 | 1.00E+00 |
| ENSG00000228429.1_RP5-859M6             | ENSG00000160789.18_LMNA | -0.05936 | -0.216514811 | 0.100793    | 4.68E-01 | 7.29E-01 | 1.00E+00 |
| ENSG00000244623.1_OR2AE1                | ENSG00000160789.18_LMNA | 0.05052  | -0.109560739 | 0.208048527 | 5.36E-01 | 7.77E-01 | 1.00E+00 |
| ENSG00000273312.1_RP11-425A             | ENSG00000160789.18_LMNA | -0.10559 | -0.260412973 | 0.054527502 | 1.95E-01 | 4.64E-01 | 1.00E+00 |
| ENSG00000240063.1_RP11-225N             | ENSG00000160789.18_LMNA | -0.01739 | -0.176098877 | 0.142208726 | 8.32E-01 | 9.34E-01 | 1.00E+00 |
| ENSG00000215054.3_HNRNPCP               | ENSG00000160789.18_LMNA | 0.02872  | -0.131077415 | 0.187067963 | 7.25E-01 | 8.84E-01 | 1.00E+00 |
| ENSG00000233427.1_RP1-212P9             | ENSG00000160789.18_LMNA | 0.00075  | -0.158473037 | 0.159928194 | 9.93E-01 | 9.97E-01 | 1.00E+00 |
| ENSG00000180846.7_CSNK1G2-              | ENSG00000160789.18_LMNA | 0.07854  | -0.081684787 | 0.234802163 | 3.36E-01 | 6.22E-01 | 1.00E+00 |
| ENSG00000273041.1_ATF4P2                | ENSG00000160789.18_LMNA | -0.00199 | -0.161138111 | 0.157262066 | 9.81E-01 | 9.93E-01 | 1.00E+00 |
| ENSG00000259882.1_RP11-293B             | ENSG00000160789.18_LMNA | -0.01046 | -0.169382568 | 0.148984856 | 8.98E-01 | 9.60E-01 | 1.00E+00 |
| ENSG00000196758.3_AC079612.             | ENSG00000160789.18_LMNA | 0.05544  | -0.104685715 | 0.212761818 | 4.98E-01 | 7.51E-01 | 1.00E+00 |



|                              |                         |          |              |             |          |          |          |
|------------------------------|-------------------------|----------|--------------|-------------|----------|----------|----------|
| ENSG00000215875.4_ST13P20    | ENSG00000160789.18_LMNA | 0.00132  | -0.157910388 | 0.160490472 | 9.87E-01 | 9.95E-01 | 1.00E+00 |
| ENSG00000280268.1_RP11-147K  | ENSG00000160789.18_LMNA | -0.15618 | -0.307730711 | 0.003096199 | 5.47E-02 | 2.13E-01 | 1.00E+00 |
| ENSG00000258735.1_LINC00637  | ENSG00000160789.18_LMNA | 0.01621  | -0.143356344 | 0.174963471 | 8.43E-01 | 9.39E-01 | 1.00E+00 |
| ENSG00000241098.1_FLJ46066   | ENSG00000160789.18_LMNA | 0.12517  | -0.034726463 | 0.278811175 | 1.24E-01 | 3.56E-01 | 1.00E+00 |
| ENSG00000279030.1_RP11-212I2 | ENSG00000160789.18_LMNA | 0.12501  | -0.034889077 | 0.278661013 | 1.25E-01 | 3.57E-01 | 1.00E+00 |
| ENSG00000214147.2_RP11-332P  | ENSG00000160789.18_LMNA | -0.05554 | -0.212856343 | 0.10458779  | 4.97E-01 | 7.51E-01 | 1.00E+00 |
| ENSG00000266844.1_RP11-862L  | ENSG00000160789.18_LMNA | -0.2195  | -0.365912755 | -0.0624813  | 6.59E-03 | 4.82E-02 | 1.00E+00 |
| ENSG00000249850.1_KRT18P31   | ENSG00000160789.18_LMNA | 0.00888  | -0.150530248 | 0.167846666 | 9.14E-01 | 9.67E-01 | 1.00E+00 |
| ENSG00000249534.1_LINC01258  | ENSG00000160789.18_LMNA | -0.17947 | -0.329259513 | -0.02086146 | 2.69E-02 | 1.33E-01 | 1.00E+00 |
| ENSG00000227375.4_DLG1-AS1   | ENSG00000160789.18_LMNA | -0.00632 | -0.165351661 | 0.153037358 | 9.38E-01 | 9.76E-01 | 1.00E+00 |
| ENSG00000279530.1_AC092881   | ENSG00000160789.18_LMNA | -0.08018 | -0.236367987 | 0.080037792 | 3.26E-01 | 6.13E-01 | 1.00E+00 |
| ENSG00000064835.9_POU1F1     | ENSG00000160789.18_LMNA | -0.09722 | -0.252508216 | 0.062959586 | 2.33E-01 | 5.11E-01 | 1.00E+00 |
| ENSG00000166869.2_CHP2       | ENSG00000160789.18_LMNA | -0.24648 | -0.39035868  | -0.09083901 | 2.21E-03 | 2.11E-02 | 1.00E+00 |
| ENSG00000279770.1_LINC00552  | ENSG00000160789.18_LMNA | 0.09526  | -0.064928844 | 0.250656025 | 2.43E-01 | 5.23E-01 | 1.00E+00 |
| ENSG00000170044.7_ZPLD1      | ENSG00000160789.18_LMNA | -0.03622 | -0.194303902 | 0.123690285 | 6.58E-01 | 8.49E-01 | 1.00E+00 |
| ENSG00000042304.9_C2orf83    | ENSG00000160789.18_LMNA | -0.19368 | -0.342326433 | -0.03557738 | 1.68E-02 | 9.53E-02 | 1.00E+00 |
| ENSG00000168509.16_HFE2      | ENSG00000160789.18_LMNA | -0.1764  | -0.32643109  | -0.0176936  | 2.97E-02 | 1.42E-01 | 1.00E+00 |
| ENSG00000225572.1_DOCK4-AS   | ENSG00000160789.18_LMNA | -0.01624 | -0.174986085 | 0.143333495 | 8.43E-01 | 9.39E-01 | 1.00E+00 |
| ENSG00000256162.2_SMLR1      | ENSG00000160789.18_LMNA | -0.162   | -0.313129558 | -0.00287841 | 4.61E-02 | 1.91E-01 | 1.00E+00 |
| ENSG00000215268.3_LA16c-60G  | ENSG00000160789.18_LMNA | -0.05149 | -0.20898025  | 0.108598255 | 5.29E-01 | 7.73E-01 | 1.00E+00 |
| ENSG00000187791.10_FAM205C   | ENSG00000160789.18_LMNA | -0.06629 | -0.223139905 | 0.093897463 | 4.17E-01 | 6.89E-01 | 1.00E+00 |
| ENSG00000161103.10_AC008132  | ENSG00000160789.18_LMNA | -0.18633 | -0.335579412 | -0.02796226 | 2.15E-02 | 1.14E-01 | 1.00E+00 |
| ENSG00000266189.1_MIR3186    | ENSG00000160789.18_LMNA | 0.00881  | -0.150606182 | 0.167771159 | 9.14E-01 | 9.67E-01 | 1.00E+00 |
| ENSG00000275635.1_U7         | ENSG00000160789.18_LMNA | -0.13111 | -0.284377809 | 0.028686478 | 1.07E-01 | 3.26E-01 | 1.00E+00 |
| ENSG00000278588.1_HIST1H2BI  | ENSG00000160789.18_LMNA | 0.04952  | -0.110552348 | 0.207088007 | 5.45E-01 | 7.83E-01 | 1.00E+00 |
| ENSG00000264453.1_           | ENSG00000160789.18_LMNA | 0.12399  | -0.035922068 | 0.277706765 | 1.28E-01 | 3.62E-01 | 1.00E+00 |
| ENSG00000207525.1_Y_RNA      | ENSG00000160789.18_LMNA | 0.15995  | 0.00076853   | 0.311225293 | 4.90E-02 | 1.99E-01 | 1.00E+00 |
| ENSG00000206647.1_SNORA2     | ENSG00000160789.18_LMNA | 0.04874  | -0.11132544  | 0.206338728 | 5.51E-01 | 7.87E-01 | 1.00E+00 |
| ENSG00000272006.1_RP11-583F  | ENSG00000160789.18_LMNA | 0.01437  | -0.145159708 | 0.173177585 | 8.60E-01 | 9.45E-01 | 1.00E+00 |
| ENSG00000201988.2_Y_RNA      | ENSG00000160789.18_LMNA | 0.12042  | -0.039542967 | 0.274356987 | 1.39E-01 | 3.81E-01 | 1.00E+00 |
| ENSG00000238460.1_           | ENSG00000160789.18_LMNA | -0.00074 | -0.159925287 | 0.158475945 | 9.93E-01 | 9.97E-01 | 1.00E+00 |
| ENSG00000252768.1_RNU6-856F  | ENSG00000160789.18_LMNA | -0.00067 | -0.159856351 | 0.158544913 | 9.93E-01 | 9.97E-01 | 1.00E+00 |
| ENSG00000266621.1_           | ENSG00000160789.18_LMNA | 0.12317  | -0.036755696 | 0.276936231 | 1.31E-01 | 3.66E-01 | 1.00E+00 |

|                             |                         |          |              |             |          |          |          |
|-----------------------------|-------------------------|----------|--------------|-------------|----------|----------|----------|
| ENSG00000206633.1_SNORA80E  | ENSG00000160789.18_LMNA | -0.08734 | -0.243155341 | 0.072878558 | 2.85E-01 | 5.70E-01 | 1.00E+00 |
| ENSG00000268088.1_AC093063. | ENSG00000160789.18_LMNA | -0.00242 | -0.161561388 | 0.156838194 | 9.76E-01 | 9.91E-01 | 1.00E+00 |
| ENSG00000234457.1_AC006960. | ENSG00000160789.18_LMNA | -0.15052 | -0.302468834 | 0.008897952 | 6.42E-02 | 2.36E-01 | 1.00E+00 |
| ENSG00000269836.1_CTD-3032J | ENSG00000160789.18_LMNA | 0.06268  | -0.097492177 | 0.219689826 | 4.43E-01 | 7.10E-01 | 1.00E+00 |
| ENSG00000199846.1_RNU1-72P  | ENSG00000160789.18_LMNA | -0.01685 | -0.175576217 | 0.142737114 | 8.37E-01 | 9.37E-01 | 1.00E+00 |
| ENSG00000234688.1_RP1-293L6 | ENSG00000160789.18_LMNA | -0.14852 | -0.300608617 | 0.010944026 | 6.78E-02 | 2.44E-01 | 1.00E+00 |
| ENSG00000200428.1_Y_RNA     | ENSG00000160789.18_LMNA | -0.04321 | -0.201030039 | 0.116791854 | 5.97E-01 | 8.14E-01 | 1.00E+00 |
| ENSG00000278030.1_TRBV7-9   | ENSG00000160789.18_LMNA | 0.14214  | -0.01745836  | 0.294670192 | 8.07E-02 | 2.74E-01 | 1.00E+00 |
| ENSG00000267683.1_AC008991. | ENSG00000160789.18_LMNA | -0.27221 | -0.413491466 | -0.11812834 | 6.92E-04 | 8.70E-03 | 1.00E+00 |
| ENSG00000271916.1_RP11-884K | ENSG00000160789.18_LMNA | -0.11673 | -0.270896378 | 0.04327503  | 1.52E-01 | 4.01E-01 | 1.00E+00 |
| ENSG00000231927.1_AC102953. | ENSG00000160789.18_LMNA | 0.01338  | -0.146130664 | 0.172215172 | 8.70E-01 | 9.50E-01 | 1.00E+00 |
| ENSG00000258284.1_POLR2KP1  | ENSG00000160789.18_LMNA | 0.0589   | -0.101249253 | 0.216075419 | 4.71E-01 | 7.31E-01 | 1.00E+00 |
| ENSG00000239224.3_RN7SL546f | ENSG00000160789.18_LMNA | 0.18342  | 0.024944584  | 0.332896979 | 2.37E-02 | 1.22E-01 | 1.00E+00 |
| ENSG00000232869.2_TRBV29-1  | ENSG00000160789.18_LMNA | 0.06229  | -0.097880166 | 0.219316973 | 4.46E-01 | 7.12E-01 | 1.00E+00 |
| ENSG00000255364.1_RP11-94A2 | ENSG00000160789.18_LMNA | 0.02634  | -0.13342347  | 0.184762678 | 7.47E-01 | 8.94E-01 | 1.00E+00 |
| ENSG00000250983.1_RP11-91K8 | ENSG00000160789.18_LMNA | 0.15145  | -0.007943189 | 0.303336059 | 6.25E-02 | 2.32E-01 | 1.00E+00 |
| ENSG00000269652.1_CTD-2195B | ENSG00000160789.18_LMNA | 0.20738  | 0.049829163  | 0.354869132 | 1.04E-02 | 6.72E-02 | 1.00E+00 |
| ENSG00000230506.1_RP11-416N | ENSG00000160789.18_LMNA | 0.05716  | -0.102976413 | 0.214410922 | 4.84E-01 | 7.41E-01 | 1.00E+00 |
| ENSG00000214560.4_RPL21P41  | ENSG00000160789.18_LMNA | -0.09035 | -0.24601101  | 0.06985666  | 2.68E-01 | 5.52E-01 | 1.00E+00 |
| ENSG00000270612.1_RP11-34P1 | ENSG00000160789.18_LMNA | -0.01205 | -0.170927596 | 0.14742871  | 8.83E-01 | 9.55E-01 | 1.00E+00 |
| ENSG00000230498.1_RP4-564M1 | ENSG00000160789.18_LMNA | 0.10578  | -0.054340048 | 0.260588226 | 1.95E-01 | 4.63E-01 | 1.00E+00 |
| ENSG00000219608.3_HIGD1AP1f | ENSG00000160789.18_LMNA | -0.14323 | -0.295692596 | 0.016338688 | 7.83E-02 | 2.69E-01 | 1.00E+00 |
| ENSG00000244307.3_RN7SL395f | ENSG00000160789.18_LMNA | 0.01954  | -0.140094671 | 0.178188221 | 8.11E-01 | 9.26E-01 | 1.00E+00 |
| ENSG00000226965.1_AC003088. | ENSG00000160789.18_LMNA | -0.0231  | -0.181629052 | 0.136606808 | 7.78E-01 | 9.09E-01 | 1.00E+00 |
| ENSG00000218029.3_RP1-232L2 | ENSG00000160789.18_LMNA | -0.01784 | -0.176539056 | 0.141763582 | 8.27E-01 | 9.32E-01 | 1.00E+00 |
| ENSG00000277672.1_RP11-386G | ENSG00000160789.18_LMNA | -0.01127 | -0.170166147 | 0.148195835 | 8.90E-01 | 9.57E-01 | 1.00E+00 |
| ENSG00000248469.1_RP11-826N | ENSG00000160789.18_LMNA | -0.15442 | -0.306099873 | 0.004896603 | 5.75E-02 | 2.19E-01 | 1.00E+00 |
| ENSG00000275516.1_RP11-353N | ENSG00000160789.18_LMNA | -0.02817 | -0.186531114 | 0.131624077 | 7.30E-01 | 8.86E-01 | 1.00E+00 |
| ENSG00000170373.7_CST1      | ENSG00000160789.18_LMNA | -0.04132 | -0.199213698 | 0.118657749 | 6.13E-01 | 8.24E-01 | 1.00E+00 |
| ENSG00000178172.5_SPINK6    | ENSG00000160789.18_LMNA | 0.07141  | -0.088797935 | 0.228020661 | 3.82E-01 | 6.61E-01 | 1.00E+00 |
| ENSG00000267582.1_CTD-3252C | ENSG00000160789.18_LMNA | 0.02924  | -0.13056491  | 0.187571095 | 7.21E-01 | 8.81E-01 | 1.00E+00 |
| ENSG00000235748.1_SEPT14P1  | ENSG00000160789.18_LMNA | -0.04771 | -0.205347114 | 0.112347977 | 5.59E-01 | 7.92E-01 | 1.00E+00 |
| ENSG00000250057.1_RP11-576N | ENSG00000160789.18_LMNA | -0.05767 | -0.214901369 | 0.102467701 | 4.80E-01 | 7.38E-01 | 1.00E+00 |

|                              |                         |          |              |             |          |          |          |
|------------------------------|-------------------------|----------|--------------|-------------|----------|----------|----------|
| ENSG00000253995.1_RPL10P18   | ENSG00000160789.18_LMNA | -0.01915 | -0.177806807 | 0.140480812 | 8.15E-01 | 9.27E-01 | 1.00E+00 |
| ENSG00000228877.2_RP11-473E  | ENSG00000160789.18_LMNA | 0.17194  | 0.013097547  | 0.322317655 | 3.42E-02 | 1.56E-01 | 1.00E+00 |
| ENSG00000271412.1_PRR13P3    | ENSG00000160789.18_LMNA | -0.09406 | -0.249519903 | 0.06613556  | 2.49E-01 | 5.30E-01 | 1.00E+00 |
| ENSG00000272763.1_RP11-357H  | ENSG00000160789.18_LMNA | 0.2166   | 0.05945147   | 0.36327588  | 7.36E-03 | 5.22E-02 | 1.00E+00 |
| ENSG00000271134.1_RP11-416L  | ENSG00000160789.18_LMNA | 0.18121  | 0.022659713  | 0.330862621 | 2.55E-02 | 1.28E-01 | 1.00E+00 |
| ENSG00000234944.1_RP11-124O  | ENSG00000160789.18_LMNA | -0.072   | -0.228583242 | 0.088209068 | 3.78E-01 | 6.57E-01 | 1.00E+00 |
| ENSG00000229832.1_RP11-384C  | ENSG00000160789.18_LMNA | -0.11026 | -0.264814277 | 0.049813038 | 1.76E-01 | 4.38E-01 | 1.00E+00 |
| ENSG00000261710.1_RP11-953B  | ENSG00000160789.18_LMNA | -0.23526 | -0.380217252 | -0.07901552 | 3.53E-03 | 3.02E-02 | 1.00E+00 |
| ENSG00000233033.1_CASK-AS1   | ENSG00000160789.18_LMNA | -0.00529 | -0.164354603 | 0.154038109 | 9.48E-01 | 9.79E-01 | 1.00E+00 |
| ENSG00000269482.1_Z69720.2   | ENSG00000160789.18_LMNA | -0.12063 | -0.274558956 | 0.039324884 | 1.39E-01 | 3.80E-01 | 1.00E+00 |
| ENSG00000272161.1_RP4-713A8  | ENSG00000160789.18_LMNA | -0.02891 | -0.187244543 | 0.130897565 | 7.24E-01 | 8.83E-01 | 1.00E+00 |
| ENSG00000256944.1_RP11-881M  | ENSG00000160789.18_LMNA | -0.0002  | -0.159395831 | 0.15900556  | 9.98E-01 | 9.99E-01 | 1.00E+00 |
| ENSG00000269889.1_RP11-816J  | ENSG00000160789.18_LMNA | -0.05827 | -0.215471206 | 0.101876434 | 4.76E-01 | 7.34E-01 | 1.00E+00 |
| ENSG00000265126.1_CTB-187M2  | ENSG00000160789.18_LMNA | -0.17011 | -0.320630058 | -0.01121572 | 3.61E-02 | 1.62E-01 | 1.00E+00 |
| ENSG00000242162.1_RP11-128A  | ENSG00000160789.18_LMNA | 0.13266  | -0.02711151  | 0.285825886 | 1.03E-01 | 3.18E-01 | 1.00E+00 |
| ENSG00000258422.4_RP11-486O  | ENSG00000160789.18_LMNA | -0.21442 | -0.361283419 | -0.0571658  | 7.99E-03 | 5.55E-02 | 1.00E+00 |
| ENSG00000257444.1_SETP7      | ENSG00000160789.18_LMNA | 0.0497   | -0.110371673 | 0.207263063 | 5.43E-01 | 7.82E-01 | 1.00E+00 |
| ENSG00000269303.1_CTD-2527I2 | ENSG00000160789.18_LMNA | -0.06082 | -0.217911839 | 0.099341476 | 4.57E-01 | 7.21E-01 | 1.00E+00 |
| ENSG00000219790.3_OSTCP6     | ENSG00000160789.18_LMNA | 0.05082  | -0.109260539 | 0.208339195 | 5.34E-01 | 7.76E-01 | 1.00E+00 |
| ENSG00000272627.1_RP11-354E  | ENSG00000160789.18_LMNA | -0.10283 | -0.257809097 | 0.057310052 | 2.07E-01 | 4.80E-01 | 1.00E+00 |
| ENSG00000256632.3_RP13-672B  | ENSG00000160789.18_LMNA | 0.02004  | -0.139601655 | 0.178675061 | 8.06E-01 | 9.23E-01 | 1.00E+00 |
| ENSG00000215160.2_OR7E122P   | ENSG00000160789.18_LMNA | -0.05498 | -0.212325404 | 0.105137746 | 5.01E-01 | 7.53E-01 | 1.00E+00 |
| ENSG00000229896.2_RP11-456H  | ENSG00000160789.18_LMNA | -0.10602 | -0.260819431 | 0.054092711 | 1.94E-01 | 4.62E-01 | 1.00E+00 |
| ENSG00000227417.3_RP11-397P  | ENSG00000160789.18_LMNA | 0.02797  | -0.131822341 | 0.186336361 | 7.32E-01 | 8.87E-01 | 1.00E+00 |
| ENSG00000260145.1_RP11-322D  | ENSG00000160789.18_LMNA | -0.03372 | -0.191893036 | 0.126155446 | 6.80E-01 | 8.60E-01 | 1.00E+00 |
| ENSG00000251169.2_AC005355.1 | ENSG00000160789.18_LMNA | 0.15278  | -0.006582334 | 0.304571253 | 6.02E-02 | 2.26E-01 | 1.00E+00 |
| ENSG00000267734.1_RP4-604K5  | ENSG00000160789.18_LMNA | -0.04211 | -0.199965632 | 0.117885573 | 6.07E-01 | 8.20E-01 | 1.00E+00 |
| ENSG00000224391.1_LINC01280  | ENSG00000160789.18_LMNA | -0.00247 | -0.161603485 | 0.156796031 | 9.76E-01 | 9.91E-01 | 1.00E+00 |
| ENSG00000189275.3_LINC01164  | ENSG00000160789.18_LMNA | -0.04284 | -0.200673655 | 0.117158138 | 6.00E-01 | 8.16E-01 | 1.00E+00 |
| ENSG00000260036.1_RP11-178D  | ENSG00000160789.18_LMNA | 0.13081  | -0.028990924 | 0.284097726 | 1.08E-01 | 3.27E-01 | 1.00E+00 |
| ENSG00000240704.1_KLF7P1     | ENSG00000160789.18_LMNA | -0.12134 | -0.275224392 | 0.038606147 | 1.36E-01 | 3.76E-01 | 1.00E+00 |
| ENSG00000213328.3_RP11-281O  | ENSG00000160789.18_LMNA | -0.12896 | -0.282362684 | 0.030875599 | 1.13E-01 | 3.36E-01 | 1.00E+00 |
| ENSG00000260159.1_RP11-483E  | ENSG00000160789.18_LMNA | -0.10255 | -0.257547616 | 0.057589206 | 2.09E-01 | 4.81E-01 | 1.00E+00 |

|                              |                         |          |              |             |          |          |          |
|------------------------------|-------------------------|----------|--------------|-------------|----------|----------|----------|
| ENSG00000184566.3_RP13-786C  | ENSG00000160789.18_LMNA | 0.04326  | -0.116740461 | 0.201080037 | 5.97E-01 | 8.14E-01 | 1.00E+00 |
| ENSG00000218793.1_RP3-3821C  | ENSG00000160789.18_LMNA | -0.05486 | -0.212206508 | 0.105260874 | 5.02E-01 | 7.54E-01 | 1.00E+00 |
| ENSG00000272912.1_RP11-724N  | ENSG00000160789.18_LMNA | -0.00189 | -0.161044286 | 0.157356007 | 9.82E-01 | 9.93E-01 | 1.00E+00 |
| ENSG00000136883.11_KIF12     | ENSG00000160789.18_LMNA | 0.02328  | -0.136426209 | 0.181807005 | 7.76E-01 | 9.08E-01 | 1.00E+00 |
| ENSG00000225950.6_NTF4       | ENSG00000160789.18_LMNA | 0.09294  | -0.067253738 | 0.248466363 | 2.55E-01 | 5.36E-01 | 1.00E+00 |
| ENSG00000151005.4_TKTL2      | ENSG00000160789.18_LMNA | -0.25203 | -0.395364492 | -0.09670638 | 1.73E-03 | 1.75E-02 | 1.00E+00 |
| ENSG00000260484.1_RP11-1081I | ENSG00000160789.18_LMNA | 0.12953  | -0.030295565 | 0.282896884 | 1.12E-01 | 3.33E-01 | 1.00E+00 |
| ENSG00000233579.1_KRT8P15    | ENSG00000160789.18_LMNA | 0.08447  | -0.075747557 | 0.24043908  | 3.01E-01 | 5.87E-01 | 1.00E+00 |
| ENSG00000277741.3_GOLGA6L1   | ENSG00000160789.18_LMNA | -0.02573 | -0.184178752 | 0.134017158 | 7.53E-01 | 8.97E-01 | 1.00E+00 |
| ENSG00000259228.1_HNRNPA1F   | ENSG00000160789.18_LMNA | 0.07562  | -0.084596297 | 0.232030119 | 3.54E-01 | 6.38E-01 | 1.00E+00 |
| ENSG00000224177.5_LINC00570  | ENSG00000160789.18_LMNA | 0.0334   | -0.126473427 | 0.191581778 | 6.83E-01 | 8.62E-01 | 1.00E+00 |
| ENSG00000277112.2_ANKRD20A   | ENSG00000160789.18_LMNA | -0.24094 | -0.385357706 | -0.084998   | 2.79E-03 | 2.53E-02 | 1.00E+00 |
| ENSG00000235615.2_AJ239322.1 | ENSG00000160789.18_LMNA | -0.11294 | -0.267336874 | 0.047104619 | 1.66E-01 | 4.23E-01 | 1.00E+00 |
| ENSG00000259374.2_NDUFB4P1   | ENSG00000160789.18_LMNA | -0.12152 | -0.275397314 | 0.038419321 | 1.36E-01 | 3.75E-01 | 1.00E+00 |
| ENSG00000267430.1_RP11-635N  | ENSG00000160789.18_LMNA | -0.10142 | -0.256478311 | 0.058730267 | 2.14E-01 | 4.88E-01 | 1.00E+00 |
| ENSG00000239835.1_RP11-767L  | ENSG00000160789.18_LMNA | -0.03287 | -0.191066772 | 0.126999415 | 6.88E-01 | 8.65E-01 | 1.00E+00 |
| ENSG00000185294.6_SPPL2C     | ENSG00000160789.18_LMNA | -0.07704 | -0.233373772 | 0.083185718 | 3.46E-01 | 6.30E-01 | 1.00E+00 |
| ENSG00000234423.1_LINC01250  | ENSG00000160789.18_LMNA | -0.06963 | -0.226318121 | 0.090578677 | 3.94E-01 | 6.72E-01 | 1.00E+00 |
| ENSG00000269535.1_CTD-2525I3 | ENSG00000160789.18_LMNA | 0.09974  | -0.060419091 | 0.254894273 | 2.21E-01 | 4.97E-01 | 1.00E+00 |
| ENSG00000248210.1_RP11-24I21 | ENSG00000160789.18_LMNA | -0.09668 | -0.251999321 | 0.06350089  | 2.36E-01 | 5.14E-01 | 1.00E+00 |
| ENSG00000249963.1_EEF1A1P2I  | ENSG00000160789.18_LMNA | -0.01066 | -0.169573039 | 0.148793099 | 8.96E-01 | 9.59E-01 | 1.00E+00 |
| ENSG00000179046.7_TRIML2     | ENSG00000160789.18_LMNA | 0.09483  | -0.065357246 | 0.250252785 | 2.45E-01 | 5.25E-01 | 1.00E+00 |
| ENSG00000205266.8_KRT17P5    | ENSG00000160789.18_LMNA | 0.00262  | -0.15664896  | 0.161750319 | 9.74E-01 | 9.90E-01 | 1.00E+00 |
| ENSG00000275210.1_AC008984.1 | ENSG00000160789.18_LMNA | 0.06068  | -0.099478896 | 0.217779634 | 4.58E-01 | 7.22E-01 | 1.00E+00 |
| ENSG00000262962.1_KARSP3     | ENSG00000160789.18_LMNA | -0.15066 | -0.302607332 | 0.008745512 | 6.39E-02 | 2.35E-01 | 1.00E+00 |
| ENSG00000224751.2_SHMT1P1    | ENSG00000160789.18_LMNA | 0.10326  | -0.056876059 | 0.258215524 | 2.06E-01 | 4.77E-01 | 1.00E+00 |
| ENSG00000253519.1_AC106801.1 | ENSG00000160789.18_LMNA | 0.21321  | 0.055906635  | 0.360184599 | 8.36E-03 | 5.75E-02 | 1.00E+00 |
| ENSG00000142319.17_SLC6A3    | ENSG00000160789.18_LMNA | 0.1201   | -0.039867596 | 0.274056292 | 1.41E-01 | 3.82E-01 | 1.00E+00 |
| ENSG00000250634.4_LINC01182  | ENSG00000160789.18_LMNA | -0.17603 | -0.326090586 | -0.01731265 | 3.01E-02 | 1.43E-01 | 1.00E+00 |
| ENSG00000263887.5_RP11-51L5  | ENSG00000160789.18_LMNA | 0.00131  | -0.157927275 | 0.1604736   | 9.87E-01 | 9.95E-01 | 1.00E+00 |
| ENSG00000261713.5_SSTR5-AS1  | ENSG00000160789.18_LMNA | -0.14097 | -0.293580306 | 0.018651071 | 8.32E-02 | 2.79E-01 | 1.00E+00 |
| ENSG00000233673.5_ANAPC1P1   | ENSG00000160789.18_LMNA | 0.05054  | -0.109537986 | 0.208070559 | 5.36E-01 | 7.77E-01 | 1.00E+00 |
| ENSG00000172940.10_SLC22A13  | ENSG00000160789.18_LMNA | 0.06622  | -0.093969987 | 0.223070377 | 4.18E-01 | 6.90E-01 | 1.00E+00 |

|                              |                         |          |              |             |          |          |          |
|------------------------------|-------------------------|----------|--------------|-------------|----------|----------|----------|
| ENSG00000167580.6_AQP2       | ENSG00000160789.18_LMNA | 0.19357  | 0.035458302  | 0.342221175 | 1.69E-02 | 9.56E-02 | 1.00E+00 |
| ENSG00000255970.1_RP11-43N5  | ENSG00000160789.18_LMNA | 0.08499  | -0.0752298   | 0.24092964  | 2.98E-01 | 5.84E-01 | 1.00E+00 |
| ENSG00000267243.4_AC005307.4 | ENSG00000160789.18_LMNA | -0.07439 | -0.230853322 | 0.085830668 | 3.62E-01 | 6.44E-01 | 1.00E+00 |
| ENSG00000240890.2_RP11-65E2  | ENSG00000160789.18_LMNA | 0.20272  | 0.044969042  | 0.350604144 | 1.23E-02 | 7.59E-02 | 1.00E+00 |
| ENSG00000176349.10_AC110781  | ENSG00000160789.18_LMNA | 0.04436  | -0.115654897 | 0.202135731 | 5.87E-01 | 8.08E-01 | 1.00E+00 |
| ENSG00000180777.12_ANKRD30   | ENSG00000160789.18_LMNA | -0.01077 | -0.169680087 | 0.148685318 | 8.95E-01 | 9.59E-01 | 1.00E+00 |
| ENSG00000240216.6_CPHL1P     | ENSG00000160789.18_LMNA | -0.04566 | -0.203386389 | 0.11436787  | 5.76E-01 | 8.03E-01 | 1.00E+00 |
| ENSG00000279114.1_RP3-425C1  | ENSG00000160789.18_LMNA | -0.00824 | -0.167219795 | 0.151160546 | 9.20E-01 | 9.69E-01 | 1.00E+00 |
| ENSG00000200156.1_RNU5B-1    | ENSG00000160789.18_LMNA | -0.13046 | -0.283764067 | 0.029353532 | 1.09E-01 | 3.29E-01 | 1.00E+00 |
| ENSG00000266750.1_MIR4645    | ENSG00000160789.18_LMNA | 0.02033  | -0.139325275 | 0.178947912 | 8.04E-01 | 9.21E-01 | 1.00E+00 |
| ENSG00000238621.1_           | ENSG00000160789.18_LMNA | -0.07626 | -0.232632797 | 0.083963758 | 3.50E-01 | 6.34E-01 | 1.00E+00 |
| ENSG00000273555.1_MIR6812    | ENSG00000160789.18_LMNA | 0.02325  | -0.136460076 | 0.181773635 | 7.76E-01 | 9.08E-01 | 1.00E+00 |
| ENSG00000264279.1_MIR4786    | ENSG00000160789.18_LMNA | 0.11106  | -0.049006138 | 0.265566267 | 1.73E-01 | 4.33E-01 | 1.00E+00 |
| ENSG00000252874.2_Y_RNA      | ENSG00000160789.18_LMNA | -0.05696 | -0.214217463 | 0.103177031 | 4.86E-01 | 7.43E-01 | 1.00E+00 |
| ENSG00000201492.1_RNA5SP78   | ENSG00000160789.18_LMNA | 0.06314  | -0.097034434 | 0.220129593 | 4.40E-01 | 7.08E-01 | 1.00E+00 |
| ENSG00000200815.1_RNU6-1091  | ENSG00000160789.18_LMNA | -0.07764 | -0.233947031 | 0.082583518 | 3.42E-01 | 6.27E-01 | 1.00E+00 |
| ENSG00000199497.1_RNU1-94P   | ENSG00000160789.18_LMNA | 0.03576  | -0.124142774 | 0.193861666 | 6.62E-01 | 8.51E-01 | 1.00E+00 |
| ENSG00000133636.9_NTS        | ENSG00000160789.18_LMNA | -0.07203 | -0.22860856  | 0.088182562 | 3.78E-01 | 6.57E-01 | 1.00E+00 |
| ENSG00000180318.3_ALX1       | ENSG00000160789.18_LMNA | 0.03683  | -0.123093484 | 0.194886981 | 6.52E-01 | 8.46E-01 | 1.00E+00 |
| ENSG00000231156.1_AC093702.1 | ENSG00000160789.18_LMNA | -0.05876 | -0.215943396 | 0.101386317 | 4.72E-01 | 7.32E-01 | 1.00E+00 |
| ENSG00000225126.1_RP4-549F1  | ENSG00000160789.18_LMNA | -0.04472 | -0.202475962 | 0.115304878 | 5.84E-01 | 8.07E-01 | 1.00E+00 |
| ENSG00000239552.2_HOXB-AS2   | ENSG00000160789.18_LMNA | 0.1838   | 0.025336542  | 0.333245674 | 2.34E-02 | 1.21E-01 | 1.00E+00 |
| ENSG00000271283.1_CTC-412M1  | ENSG00000160789.18_LMNA | -0.01572 | -0.174488096 | 0.143836578 | 8.48E-01 | 9.40E-01 | 1.00E+00 |
| ENSG00000269365.2_RP11-380M  | ENSG00000160789.18_LMNA | -0.01253 | -0.171384334 | 0.146968383 | 8.78E-01 | 9.53E-01 | 1.00E+00 |
| ENSG00000261332.1_RP11-297C  | ENSG00000160789.18_LMNA | -0.1343  | -0.287356754 | 0.025444804 | 9.90E-02 | 3.10E-01 | 1.00E+00 |
| ENSG00000232679.1_RP11-400N  | ENSG00000160789.18_LMNA | 0.07555  | -0.084670871 | 0.23195905  | 3.55E-01 | 6.38E-01 | 1.00E+00 |
| ENSG00000233893.1_EZR-AS1    | ENSG00000160789.18_LMNA | -0.09481 | -0.250232157 | 0.065379158 | 2.45E-01 | 5.25E-01 | 1.00E+00 |
| ENSG00000276667.1_RP11-471J  | ENSG00000160789.18_LMNA | 0.10238  | -0.057764566 | 0.257383333 | 2.09E-01 | 4.82E-01 | 1.00E+00 |
| ENSG00000271742.1_RP4-680D5  | ENSG00000160789.18_LMNA | 0.00142  | -0.157819678 | 0.160581104 | 9.86E-01 | 9.95E-01 | 1.00E+00 |
| ENSG00000249047.2_COX6B1P5   | ENSG00000160789.18_LMNA | 0.0079   | -0.151493944 | 0.166888105 | 9.23E-01 | 9.71E-01 | 1.00E+00 |
| ENSG00000253690.1_RP11-380I1 | ENSG00000160789.18_LMNA | 0.15809  | -0.001135523 | 0.30950465  | 5.17E-02 | 2.06E-01 | 1.00E+00 |
| ENSG00000273980.1_RP13-49I15 | ENSG00000160789.18_LMNA | 0.19909  | 0.041191146  | 0.347280079 | 1.39E-02 | 8.32E-02 | 1.00E+00 |
| ENSG00000255921.1_RP11-662I1 | ENSG00000160789.18_LMNA | 0.12749  | -0.032365671 | 0.280989464 | 1.18E-01 | 3.43E-01 | 1.00E+00 |

|                              |                         |          |              |             |          |          |          |
|------------------------------|-------------------------|----------|--------------|-------------|----------|----------|----------|
| ENSG00000270723.1_RPL23AP9   | ENSG00000160789.18_LMNA | -0.14991 | -0.301900911 | 0.009522894 | 6.53E-02 | 2.38E-01 | 1.00E+00 |
| ENSG00000231726.2_HMGN2P3    | ENSG00000160789.18_LMNA | 0.08553  | -0.074689098 | 0.241441766 | 2.95E-01 | 5.81E-01 | 1.00E+00 |
| ENSG00000213180.4_RPL36AP4   | ENSG00000160789.18_LMNA | -0.00172 | -0.160874167 | 0.157526322 | 9.83E-01 | 9.94E-01 | 1.00E+00 |
| ENSG00000272175.1_RP4-657D1  | ENSG00000160789.18_LMNA | 0.00373  | -0.155561593 | 0.16283549  | 9.64E-01 | 9.86E-01 | 1.00E+00 |
| ENSG00000274514.1_Metazoa_SI | ENSG00000160789.18_LMNA | -0.03946 | -0.197420091 | 0.12049809  | 6.29E-01 | 8.33E-01 | 1.00E+00 |
| ENSG00000237210.1_RP11-339F  | ENSG00000160789.18_LMNA | 0.0473   | -0.112745644 | 0.204961297 | 5.63E-01 | 7.94E-01 | 1.00E+00 |
| ENSG00000215644.8_GCGR       | ENSG00000160789.18_LMNA | -0.02748 | -0.185864479 | 0.132302628 | 7.37E-01 | 8.89E-01 | 1.00E+00 |
| ENSG00000253474.1_RP11-10H3  | ENSG00000160789.18_LMNA | -0.17049 | -0.320975889 | -0.01160118 | 3.57E-02 | 1.61E-01 | 1.00E+00 |
| ENSG00000267212.1_CTD-2659N  | ENSG00000160789.18_LMNA | 0.02443  | -0.135292855 | 0.18292327  | 7.65E-01 | 9.02E-01 | 1.00E+00 |
| ENSG00000234156.1_RP11-64P1  | ENSG00000160789.18_LMNA | -0.09252 | -0.248064429 | 0.067680124 | 2.57E-01 | 5.39E-01 | 1.00E+00 |
| ENSG00000254187.1_CTB-78F1.1 | ENSG00000160789.18_LMNA | -0.07717 | -0.233504663 | 0.083048239 | 3.45E-01 | 6.29E-01 | 1.00E+00 |
| ENSG00000253632.1_RP11-486M  | ENSG00000160789.18_LMNA | 0.17059  | 0.011706332  | 0.321070221 | 3.56E-02 | 1.60E-01 | 1.00E+00 |
| ENSG00000276740.1_RP11-381O  | ENSG00000160789.18_LMNA | -0.1379  | -0.290714194 | 0.021783352 | 9.02E-02 | 2.93E-01 | 1.00E+00 |
| ENSG00000230936.1_RP11-775L  | ENSG00000160789.18_LMNA | 0.14606  | -0.013451499 | 0.298325677 | 7.26E-02 | 2.56E-01 | 1.00E+00 |
| ENSG00000256568.1_RP11-800A  | ENSG00000160789.18_LMNA | -0.1828  | -0.332333162 | -0.02431102 | 2.42E-02 | 1.24E-01 | 1.00E+00 |
| ENSG00000234203.1_RP5-1050D  | ENSG00000160789.18_LMNA | 0.0964   | -0.063777298 | 0.251739395 | 2.37E-01 | 5.16E-01 | 1.00E+00 |
| ENSG00000218261.1_RP11-96J1  | ENSG00000160789.18_LMNA | -0.02127 | -0.17985969  | 0.138401341 | 7.95E-01 | 9.17E-01 | 1.00E+00 |
| ENSG00000224217.1_RP11-232D  | ENSG00000160789.18_LMNA | -0.02134 | -0.179932291 | 0.138327748 | 7.94E-01 | 9.17E-01 | 1.00E+00 |
| ENSG00000237827.1_RPS15AP2   | ENSG00000160789.18_LMNA | -0.1171  | -0.271245952 | 0.042898432 | 1.51E-01 | 3.99E-01 | 1.00E+00 |
| ENSG00000229657.2_RP11-494K  | ENSG00000160789.18_LMNA | 0.06523  | -0.094956248 | 0.222124545 | 4.25E-01 | 6.95E-01 | 1.00E+00 |
| ENSG00000267275.1_CTD-2562J  | ENSG00000160789.18_LMNA | -0.03657 | -0.194636349 | 0.123350042 | 6.55E-01 | 8.47E-01 | 1.00E+00 |
| ENSG00000229751.1_RP11-142M  | ENSG00000160789.18_LMNA | -0.03751 | -0.195544147 | 0.122420577 | 6.46E-01 | 8.43E-01 | 1.00E+00 |
| ENSG00000260810.1_CTD-2547L  | ENSG00000160789.18_LMNA | 0.125    | -0.034895827 | 0.278654779 | 1.25E-01 | 3.57E-01 | 1.00E+00 |
| ENSG00000278819.1_RP5-1099C  | ENSG00000160789.18_LMNA | 0.12893  | -0.030909762 | 0.282331214 | 1.13E-01 | 3.36E-01 | 1.00E+00 |
| ENSG00000242941.1_RPL12P7    | ENSG00000160789.18_LMNA | -0.00419 | -0.163278108 | 0.155117858 | 9.59E-01 | 9.84E-01 | 1.00E+00 |
| ENSG00000213133.4_PPP1R14B   | ENSG00000160789.18_LMNA | 0.05631  | -0.103820427 | 0.213596859 | 4.91E-01 | 7.47E-01 | 1.00E+00 |
| ENSG00000275894.1_RP3-453C1  | ENSG00000160789.18_LMNA | 0.12302  | -0.036900335 | 0.276802499 | 1.31E-01 | 3.67E-01 | 1.00E+00 |
| ENSG00000215034.4_DSTNP4     | ENSG00000160789.18_LMNA | -0.04167 | -0.199548521 | 0.11831396  | 6.10E-01 | 8.22E-01 | 1.00E+00 |
| ENSG00000279949.1_RP11-10A1  | ENSG00000160789.18_LMNA | -0.17002 | -0.320545076 | -0.01112102 | 3.62E-02 | 1.62E-01 | 1.00E+00 |
| ENSG00000259628.1_RP11-467H  | ENSG00000160789.18_LMNA | 0.01076  | -0.14869258  | 0.169672875 | 8.95E-01 | 9.59E-01 | 1.00E+00 |
| ENSG00000233586.1_RP11-763B  | ENSG00000160789.18_LMNA | -0.04466 | -0.202421977 | 0.115360421 | 5.85E-01 | 8.07E-01 | 1.00E+00 |
| ENSG00000261158.1_CTD-2583P  | ENSG00000160789.18_LMNA | -0.08377 | -0.239770841 | 0.076452571 | 3.05E-01 | 5.92E-01 | 1.00E+00 |
| ENSG00000237514.3_PTP4A1P7   | ENSG00000160789.18_LMNA | -0.00253 | -0.161668962 | 0.15673045  | 9.75E-01 | 9.91E-01 | 1.00E+00 |

|                              |                         |          |              |             |          |          |          |
|------------------------------|-------------------------|----------|--------------|-------------|----------|----------|----------|
| ENSG00000118903.6_BT3P11     | ENSG00000160789.18_LMNA | -0.04753 | -0.20517576  | 0.112524607 | 5.61E-01 | 7.93E-01 | 1.00E+00 |
| ENSG00000226240.1_LINC00381  | ENSG00000160789.18_LMNA | -0.18212 | -0.331706275 | -0.02360687 | 2.47E-02 | 1.25E-01 | 1.00E+00 |
| ENSG00000228317.1_RP11-235C  | ENSG00000160789.18_LMNA | -0.1058  | -0.260610598 | 0.054316117 | 1.95E-01 | 4.63E-01 | 1.00E+00 |
| ENSG00000237009.2_GLIS3-AS1  | ENSG00000160789.18_LMNA | 0.10897  | -0.051114602 | 0.263600479 | 1.81E-01 | 4.45E-01 | 1.00E+00 |
| ENSG00000183396.3_TM89       | ENSG00000160789.18_LMNA | 0.06116  | -0.098999757 | 0.21824054  | 4.54E-01 | 7.19E-01 | 1.00E+00 |
| ENSG00000236039.1_AC017060.  | ENSG00000160789.18_LMNA | 0.09817  | -0.062000176 | 0.253409753 | 2.29E-01 | 5.06E-01 | 1.00E+00 |
| ENSG00000263829.1_FAM60BP    | ENSG00000160789.18_LMNA | -0.16245 | -0.313538705 | -0.00333209 | 4.55E-02 | 1.89E-01 | 1.00E+00 |
| ENSG00000266086.1_RP11-159D  | ENSG00000160789.18_LMNA | -0.09353 | -0.249023345 | 0.066662682 | 2.52E-01 | 5.33E-01 | 1.00E+00 |
| ENSG00000205456.10_TP53TG3I  | ENSG00000160789.18_LMNA | -0.15769 | -0.309128496 | 0.001551473 | 5.24E-02 | 2.07E-01 | 1.00E+00 |
| ENSG00000227581.2_RP13-140E  | ENSG00000160789.18_LMNA | -0.13016 | -0.283483892 | 0.02965795  | 1.10E-01 | 3.30E-01 | 1.00E+00 |
| ENSG00000261340.1_LINC01616  | ENSG00000160789.18_LMNA | -0.14117 | -0.293770595 | 0.018442893 | 8.28E-02 | 2.78E-01 | 1.00E+00 |
| ENSG00000159387.7_IRX6       | ENSG00000160789.18_LMNA | -0.01078 | -0.169691466 | 0.148673861 | 8.95E-01 | 9.59E-01 | 1.00E+00 |
| ENSG00000248898.1_CTD-2288C  | ENSG00000160789.18_LMNA | 0.07405  | -0.086171348 | 0.23052837  | 3.65E-01 | 6.46E-01 | 1.00E+00 |
| ENSG00000261535.1_CTA-305I2. | ENSG00000160789.18_LMNA | 0.02441  | -0.135319942 | 0.182896601 | 7.65E-01 | 9.03E-01 | 1.00E+00 |
| ENSG00000228655.5_AC096558.  | ENSG00000160789.18_LMNA | 0.05267  | -0.107432154 | 0.210108311 | 5.19E-01 | 7.65E-01 | 1.00E+00 |
| ENSG00000228307.1_OR2S1P     | ENSG00000160789.18_LMNA | -0.07515 | -0.231581773 | 0.085066694 | 3.57E-01 | 6.41E-01 | 1.00E+00 |
| ENSG00000229648.1_RPSAP22    | ENSG00000160789.18_LMNA | -0.14649 | -0.298727875 | 0.013010028 | 7.17E-02 | 2.53E-01 | 1.00E+00 |
| ENSG00000242104.3_RP11-340E  | ENSG00000160789.18_LMNA | -0.03486 | -0.192987051 | 0.125037279 | 6.70E-01 | 8.55E-01 | 1.00E+00 |
| ENSG00000203837.4_PNLIPRP3   | ENSG00000160789.18_LMNA | 0.01472  | -0.144824316 | 0.173509885 | 8.57E-01 | 9.44E-01 | 1.00E+00 |
| ENSG00000230408.3_AC007163.I | ENSG00000160789.18_LMNA | 0.17573  | 0.017008677  | 0.32581883  | 3.03E-02 | 1.44E-01 | 1.00E+00 |
| ENSG00000203413.3_ACTBP6     | ENSG00000160789.18_LMNA | 0.02761  | -0.132167753 | 0.185997009 | 7.36E-01 | 8.89E-01 | 1.00E+00 |
| ENSG00000230427.1_RP11-313A  | ENSG00000160789.18_LMNA | -0.008   | -0.166989568 | 0.151391967 | 9.22E-01 | 9.70E-01 | 1.00E+00 |
| ENSG00000110680.11_CALCA     | ENSG00000160789.18_LMNA | -0.08472 | -0.240672846 | 0.075500853 | 2.99E-01 | 5.86E-01 | 1.00E+00 |
| ENSG00000248863.2_RP11-83A2  | ENSG00000160789.18_LMNA | 0.18959  | 0.031338128  | 0.338574342 | 1.93E-02 | 1.05E-01 | 1.00E+00 |
| ENSG00000228695.8_CES1P1     | ENSG00000160789.18_LMNA | 0.21715  | 0.060024409  | 0.363774885 | 7.20E-03 | 5.14E-02 | 1.00E+00 |
| ENSG00000223575.2_RBMX2P3    | ENSG00000160789.18_LMNA | 0.00466  | -0.154653561 | 0.163741098 | 9.55E-01 | 9.82E-01 | 1.00E+00 |
| ENSG00000260271.1_RP1-45N11  | ENSG00000160789.18_LMNA | -0.07646 | -0.232826755 | 0.083760134 | 3.49E-01 | 6.33E-01 | 1.00E+00 |
| ENSG00000232682.2_RP11-388P  | ENSG00000160789.18_LMNA | -0.28332 | -0.423418998 | -0.1299781  | 4.05E-04 | 5.71E-03 | 1.00E+00 |
| ENSG00000257803.2_RP11-575G  | ENSG00000160789.18_LMNA | 0.04162  | -0.118363808 | 0.199499978 | 6.11E-01 | 8.22E-01 | 1.00E+00 |
| ENSG00000243033.2_GAPDHP47   | ENSG00000160789.18_LMNA | 0.21603  | 0.058856118  | 0.362757169 | 7.52E-03 | 5.30E-02 | 1.00E+00 |
| ENSG00000100078.3_PLA2G3     | ENSG00000160789.18_LMNA | 0.12503  | -0.034868468 | 0.278680045 | 1.25E-01 | 3.57E-01 | 1.00E+00 |
| ENSG00000257720.1_ILF2P2     | ENSG00000160789.18_LMNA | -0.22755 | -0.373230824 | -0.07091932 | 4.81E-03 | 3.81E-02 | 1.00E+00 |
| ENSG00000197172.9_MAGEA6     | ENSG00000160789.18_LMNA | -0.1606  | -0.311829018 | -0.00143714 | 4.81E-02 | 1.96E-01 | 1.00E+00 |

|                              |                         |          |              |             |          |          |          |
|------------------------------|-------------------------|----------|--------------|-------------|----------|----------|----------|
| ENSG00000243501.5_RP11-257K  | ENSG00000160789.18_LMNA | -0.09678 | -0.252094203 | 0.06339998  | 2.36E-01 | 5.14E-01 | 1.00E+00 |
| ENSG00000279862.1_RP11-423E  | ENSG00000160789.18_LMNA | 0.13255  | -0.027223734 | 0.28572275  | 1.04E-01 | 3.19E-01 | 1.00E+00 |
| ENSG00000169551.11_CT55      | ENSG00000160789.18_LMNA | -0.12561 | -0.279222473 | 0.034280972 | 1.23E-01 | 3.53E-01 | 1.00E+00 |
| ENSG00000248738.5_RP11-87E2  | ENSG00000160789.18_LMNA | -0.13292 | -0.286068025 | 0.026848001 | 1.03E-01 | 3.17E-01 | 1.00E+00 |
| ENSG00000213500.3_LAP3P2     | ENSG00000160789.18_LMNA | 0.0398   | -0.120159847 | 0.197749903 | 6.26E-01 | 8.32E-01 | 1.00E+00 |
| ENSG00000234718.6_AC007161.1 | ENSG00000160789.18_LMNA | 0.03176  | -0.128084096 | 0.190004185 | 6.98E-01 | 8.70E-01 | 1.00E+00 |
| ENSG00000169075.7_RP3-509L4  | ENSG00000160789.18_LMNA | 0.10545  | -0.054667027 | 0.260282516 | 1.96E-01 | 4.65E-01 | 1.00E+00 |
| ENSG00000234504.2_RP11-285G  | ENSG00000160789.18_LMNA | -0.10006 | -0.255192439 | 0.060101339 | 2.20E-01 | 4.95E-01 | 1.00E+00 |
| ENSG00000100557.8_C14orf105  | ENSG00000160789.18_LMNA | -0.20242 | -0.350329211 | -0.04465624 | 1.24E-02 | 7.65E-02 | 1.00E+00 |
| ENSG00000279791.1_RP11-499E  | ENSG00000160789.18_LMNA | 0.04405  | -0.115966073 | 0.201833193 | 5.90E-01 | 8.10E-01 | 1.00E+00 |
| ENSG00000178636.7_RP11-455G  | ENSG00000160789.18_LMNA | 0.12722  | -0.032639409 | 0.280737052 | 1.18E-01 | 3.45E-01 | 1.00E+00 |
| ENSG00000233896.1_RP4-684O2  | ENSG00000160789.18_LMNA | -0.10079 | -0.255887826 | 0.059360025 | 2.17E-01 | 4.91E-01 | 1.00E+00 |
| ENSG00000237135.1_DDX10P1    | ENSG00000160789.18_LMNA | -0.06442 | -0.221352231 | 0.095761113 | 4.30E-01 | 7.00E-01 | 1.00E+00 |
| ENSG00000061492.10_WNT8A     | ENSG00000160789.18_LMNA | -0.02823 | -0.186590774 | 0.131563336 | 7.30E-01 | 8.86E-01 | 1.00E+00 |
| ENSG00000114248.8_LRRC31     | ENSG00000160789.18_LMNA | -0.04295 | -0.200781237 | 0.117047577 | 5.99E-01 | 8.16E-01 | 1.00E+00 |
| ENSG00000272563.1_RP11-480C  | ENSG00000160789.18_LMNA | 0.13834  | -0.021332732 | 0.291126868 | 8.92E-02 | 2.91E-01 | 1.00E+00 |
| ENSG00000125631.7_HTR5BP     | ENSG00000160789.18_LMNA | 0.05676  | -0.103374655 | 0.214026867 | 4.87E-01 | 7.44E-01 | 1.00E+00 |
| ENSG00000230731.2_RP11-478K  | ENSG00000160789.18_LMNA | -0.07092 | -0.227547186 | 0.089293361 | 3.85E-01 | 6.64E-01 | 1.00E+00 |
| ENSG00000237588.2_RP11-66D1  | ENSG00000160789.18_LMNA | -0.06975 | -0.22643906  | 0.09045225  | 3.93E-01 | 6.71E-01 | 1.00E+00 |
| ENSG00000185960.11_SHOX      | ENSG00000160789.18_LMNA | 0.07252  | -0.087689947 | 0.229079015 | 3.75E-01 | 6.55E-01 | 1.00E+00 |
| ENSG00000227517.5_LINC01483  | ENSG00000160789.18_LMNA | 0.08031  | -0.079915564 | 0.236484126 | 3.25E-01 | 6.12E-01 | 1.00E+00 |
| ENSG00000139287.11_TPH2      | ENSG00000160789.18_LMNA | -0.0391  | -0.197078035 | 0.12084881  | 6.32E-01 | 8.35E-01 | 1.00E+00 |
| ENSG00000161609.8_CCDC155    | ENSG00000160789.18_LMNA | -0.01615 | -0.174905403 | 0.143415014 | 8.43E-01 | 9.39E-01 | 1.00E+00 |
| ENSG00000277572.1_pRNA       | ENSG00000160789.18_LMNA | -0.00746 | -0.166463476 | 0.151920656 | 9.27E-01 | 9.72E-01 | 1.00E+00 |
| ENSG00000273996.1_           | ENSG00000160789.18_LMNA | -0.18825 | -0.337342699 | -0.02994898 | 2.02E-02 | 1.09E-01 | 1.00E+00 |
| ENSG00000276678.1_GHRLOS     | ENSG00000160789.18_LMNA | 0.06455  | -0.095634115 | 0.221474119 | 4.29E-01 | 6.99E-01 | 1.00E+00 |
| ENSG00000232969.1_AP001062.1 | ENSG00000160789.18_LMNA | 0.09388  | -0.06631023  | 0.249355379 | 2.50E-01 | 5.30E-01 | 1.00E+00 |
| ENSG00000200651.1_Y_RNA      | ENSG00000160789.18_LMNA | 0.21139  | 0.054010426  | 0.358528258 | 8.94E-03 | 6.05E-02 | 1.00E+00 |
| ENSG00000202382.1_Y_RNA      | ENSG00000160789.18_LMNA | 0.0235   | -0.136214708 | 0.182015379 | 7.74E-01 | 9.07E-01 | 1.00E+00 |
| ENSG00000263475.2_           | ENSG00000160789.18_LMNA | -0.04421 | -0.2019886   | 0.115806236 | 5.89E-01 | 8.09E-01 | 1.00E+00 |
| ENSG00000207392.1_SNORA20    | ENSG00000160789.18_LMNA | -0.01864 | -0.177318724 | 0.140974804 | 8.20E-01 | 9.30E-01 | 1.00E+00 |
| ENSG00000251733.1_SCARNA8    | ENSG00000160789.18_LMNA | -0.13857 | -0.291344366 | 0.021095184 | 8.87E-02 | 2.90E-01 | 1.00E+00 |
| ENSG00000278077.1_RP11-157L  | ENSG00000160789.18_LMNA | 0.01137  | -0.148102873 | 0.170258441 | 8.89E-01 | 9.57E-01 | 1.00E+00 |



|                              |                         |          |              |             |          |          |          |
|------------------------------|-------------------------|----------|--------------|-------------|----------|----------|----------|
| ENSG0000025528.1_RP11-25I9.  | ENSG00000160789.18_LMNA | 0.09911  | -0.061057883 | 0.254294674 | 2.24E-01 | 5.00E-01 | 1.00E+00 |
| ENSG00000232101.1_AC108059.  | ENSG00000160789.18_LMNA | -0.17557 | -0.325666473 | -0.01683828 | 3.05E-02 | 1.45E-01 | 1.00E+00 |
| ENSG00000265487.1_RP11-793A  | ENSG00000160789.18_LMNA | 0.00489  | -0.154432209 | 0.163961778 | 9.52E-01 | 9.81E-01 | 1.00E+00 |
| ENSG00000254432.1_RP11-33I11 | ENSG00000160789.18_LMNA | -0.14409 | -0.29648775  | 0.015467345 | 7.66E-02 | 2.65E-01 | 1.00E+00 |
| ENSG00000235742.1_RP11-5G18  | ENSG00000160789.18_LMNA | 0.10231  | -0.057837482 | 0.257315019 | 2.10E-01 | 4.83E-01 | 1.00E+00 |
| ENSG00000227624.2_SNRPEP3    | ENSG00000160789.18_LMNA | -0.05798 | -0.215196275 | 0.102161732 | 4.78E-01 | 7.36E-01 | 1.00E+00 |
| ENSG00000270403.1_RP11-35P1  | ENSG00000160789.18_LMNA | -0.48951 | -0.601810939 | -0.35822542 | 1.56E-10 | 3.26E-08 | 7.98E-06 |
| ENSG00000252797.1_RN7SKP27   | ENSG00000160789.18_LMNA | -0.26203 | -0.404363912 | -0.10730717 | 1.11E-03 | 1.26E-02 | 1.00E+00 |
| ENSG00000241631.3_RN7SL316f  | ENSG00000160789.18_LMNA | -0.07248 | -0.229036852 | 0.087734102 | 3.75E-01 | 6.55E-01 | 1.00E+00 |
| ENSG00000235369.1_RPL36AP1f  | ENSG00000160789.18_LMNA | -0.07758 | -0.2338927   | 0.082640602 | 3.42E-01 | 6.27E-01 | 1.00E+00 |
| ENSG00000267193.4_RP11-116O  | ENSG00000160789.18_LMNA | -0.29211 | -0.431256597 | -0.13939285 | 2.61E-04 | 4.02E-03 | 1.00E+00 |
| ENSG00000253817.1_RP11-1134f | ENSG00000160789.18_LMNA | -0.17757 | -0.327511654 | -0.01890311 | 2.86E-02 | 1.39E-01 | 1.00E+00 |
| ENSG00000278095.1_RP11-283G  | ENSG00000160789.18_LMNA | 0.06655  | -0.093638604 | 0.223388042 | 4.15E-01 | 6.88E-01 | 1.00E+00 |
| ENSG00000244756.1_RP11-1042f | ENSG00000160789.18_LMNA | 0.02329  | -0.136417177 | 0.181815903 | 7.76E-01 | 9.08E-01 | 1.00E+00 |
| ENSG00000271547.1_RP11-579D  | ENSG00000160789.18_LMNA | 0.03005  | -0.129772975 | 0.18834822  | 7.13E-01 | 8.78E-01 | 1.00E+00 |
| ENSG00000260922.1_RP11-538f  | ENSG00000160789.18_LMNA | 0.06216  | -0.098007162 | 0.219194911 | 4.47E-01 | 7.13E-01 | 1.00E+00 |
| ENSG00000253593.2_RP11-157E  | ENSG00000160789.18_LMNA | -0.13762 | -0.29045389  | 0.022067526 | 9.09E-02 | 2.94E-01 | 1.00E+00 |
| ENSG00000270762.1_FXYD6P1    | ENSG00000160789.18_LMNA | -0.20324 | -0.351081285 | -0.04551205 | 1.20E-02 | 7.49E-02 | 1.00E+00 |
| ENSG00000232192.1_RP11-62f   | ENSG00000160789.18_LMNA | -0.09448 | -0.249923189 | 0.065707321 | 2.47E-01 | 5.27E-01 | 1.00E+00 |
| ENSG00000277373.1_RP11-462D  | ENSG00000160789.18_LMNA | 0.14018  | -0.019451635 | 0.292848305 | 8.50E-02 | 2.83E-01 | 1.00E+00 |
| ENSG00000233739.1_RP5-1039K  | ENSG00000160789.18_LMNA | -0.01516 | -0.173937706 | 0.144392407 | 8.53E-01 | 9.42E-01 | 1.00E+00 |
| ENSG00000270050.1_RP4-769N1  | ENSG00000160789.18_LMNA | 0.1056   | -0.054513425 | 0.260426135 | 1.95E-01 | 4.64E-01 | 1.00E+00 |
| ENSG00000225385.3_RP11-350E  | ENSG00000160789.18_LMNA | -0.07881 | -0.235063022 | 0.081410524 | 3.34E-01 | 6.20E-01 | 1.00E+00 |
| ENSG00000226340.1_AC105402.  | ENSG00000160789.18_LMNA | 0.00226  | -0.156993593 | 0.161406221 | 9.78E-01 | 9.92E-01 | 1.00E+00 |
| ENSG00000230062.5_ANKRD66    | ENSG00000160789.18_LMNA | -0.22937 | -0.37488565  | -0.07283342 | 4.48E-03 | 3.61E-02 | 1.00E+00 |
| ENSG00000270733.1_RP11-231P  | ENSG00000160789.18_LMNA | 0.07536  | -0.084857552 | 0.231781127 | 3.56E-01 | 6.39E-01 | 1.00E+00 |
| ENSG00000227602.1_RP3-445N2  | ENSG00000160789.18_LMNA | 0.03953  | -0.120431781 | 0.197484752 | 6.29E-01 | 8.33E-01 | 1.00E+00 |
| ENSG00000226766.1_FABP7P1    | ENSG00000160789.18_LMNA | 0.1077   | -0.052404043 | 0.262397002 | 1.87E-01 | 4.53E-01 | 1.00E+00 |
| ENSG00000255496.1_RP11-587D  | ENSG00000160789.18_LMNA | -0.15166 | -0.30352858  | 0.007731157 | 6.22E-02 | 2.31E-01 | 1.00E+00 |
| ENSG00000225924.1_RP1-111D6  | ENSG00000160789.18_LMNA | -0.17899 | -0.328824779 | -0.02037415 | 2.74E-02 | 1.35E-01 | 1.00E+00 |
| ENSG00000237921.2_AC004543.  | ENSG00000160789.18_LMNA | -0.00677 | -0.165790283 | 0.152596905 | 9.34E-01 | 9.74E-01 | 1.00E+00 |
| ENSG00000049247.12_UTS2      | ENSG00000160789.18_LMNA | -0.01166 | -0.170540704 | 0.147818534 | 8.87E-01 | 9.56E-01 | 1.00E+00 |
| ENSG00000251365.1_RP11-332J  | ENSG00000160789.18_LMNA | -0.05819 | -0.215399259 | 0.101951099 | 4.76E-01 | 7.35E-01 | 1.00E+00 |

|                              |                         |          |              |             |          |          |          |
|------------------------------|-------------------------|----------|--------------|-------------|----------|----------|----------|
| ENSG00000226405.1_RP5-984P4  | ENSG00000160789.18_LMNA | -0.16575 | -0.316599836 | -0.0067305  | 4.13E-02 | 1.77E-01 | 1.00E+00 |
| ENSG00000279877.1_RP11-420N  | ENSG00000160789.18_LMNA | -0.07094 | -0.227571013 | 0.089268434 | 3.85E-01 | 6.64E-01 | 1.00E+00 |
| ENSG00000270270.1_BNIP3P10   | ENSG00000160789.18_LMNA | -0.32311 | -0.458717722 | -0.1728016  | 4.90E-05 | 1.06E-03 | 1.00E+00 |
| ENSG00000247925.2_RP3-510L9  | ENSG00000160789.18_LMNA | 0.22813  | 0.071529994  | 0.373758991 | 4.70E-03 | 3.74E-02 | 1.00E+00 |
| ENSG00000254267.1_KB-1458E1  | ENSG00000160789.18_LMNA | -0.06156 | -0.21861811  | 0.09860714  | 4.51E-01 | 7.17E-01 | 1.00E+00 |
| ENSG00000218754.4_RPL18AP8   | ENSG00000160789.18_LMNA | 0.02716  | -0.132614977 | 0.185557516 | 7.40E-01 | 8.91E-01 | 1.00E+00 |
| ENSG00000260253.1_RP4-676L2  | ENSG00000160789.18_LMNA | 0.24145  | 0.085533436  | 0.385816874 | 2.73E-03 | 2.48E-02 | 1.00E+00 |
| ENSG00000230690.1_AC013402.1 | ENSG00000160789.18_LMNA | 0.03259  | -0.127274388 | 0.19079747  | 6.90E-01 | 8.67E-01 | 1.00E+00 |
| ENSG00000254527.1_ENPP7P12   | ENSG00000160789.18_LMNA | 0.06322  | -0.096951993 | 0.220208783 | 4.39E-01 | 7.07E-01 | 1.00E+00 |
| ENSG00000235461.1_RP5-928E2  | ENSG00000160789.18_LMNA | -0.21202 | -0.359097199 | -0.05466151 | 8.74E-03 | 5.94E-02 | 1.00E+00 |
| ENSG00000230519.2_RP11-1060  | ENSG00000160789.18_LMNA | 0.0277   | -0.132081098 | 0.18608215  | 7.35E-01 | 8.89E-01 | 1.00E+00 |
| ENSG00000225333.6_RP1-144F1  | ENSG00000160789.18_LMNA | 0.09954  | -0.060621862 | 0.25470397  | 2.22E-01 | 4.98E-01 | 1.00E+00 |
| ENSG00000249395.2_CASC9      | ENSG00000160789.18_LMNA | -0.08901 | -0.244747028 | 0.071194934 | 2.75E-01 | 5.60E-01 | 1.00E+00 |
| ENSG00000229326.3_AC069154.1 | ENSG00000160789.18_LMNA | 0.07806  | -0.082157431 | 0.234352509 | 3.39E-01 | 6.24E-01 | 1.00E+00 |
| ENSG00000213277.3_MARCKSL1   | ENSG00000160789.18_LMNA | -0.13452 | -0.287560626 | 0.025222711 | 9.85E-02 | 3.09E-01 | 1.00E+00 |
| ENSG00000258537.4_FRMD6-AS   | ENSG00000160789.18_LMNA | -0.12585 | -0.27945051  | 0.034033925 | 1.22E-01 | 3.52E-01 | 1.00E+00 |
| ENSG00000226661.1_RP5-1139I1 | ENSG00000160789.18_LMNA | 0.06171  | -0.0984589   | 0.218760645 | 4.50E-01 | 7.16E-01 | 1.00E+00 |
| ENSG00000074771.3_NOX3       | ENSG00000160789.18_LMNA | -0.22537 | -0.371250558 | -0.06863172 | 5.24E-03 | 4.07E-02 | 1.00E+00 |
| ENSG00000271989.1_RP4-736L2  | ENSG00000160789.18_LMNA | 0.05193  | -0.10816448  | 0.209399973 | 5.25E-01 | 7.70E-01 | 1.00E+00 |
| ENSG00000225187.1_AC073283.1 | ENSG00000160789.18_LMNA | 0.12066  | -0.039298466 | 0.274583421 | 1.39E-01 | 3.80E-01 | 1.00E+00 |
| ENSG00000270098.1_LDHAL6EP   | ENSG00000160789.18_LMNA | 0.12942  | -0.030410985 | 0.282790601 | 1.12E-01 | 3.34E-01 | 1.00E+00 |
| ENSG00000277737.2_FP325317.1 | ENSG00000160789.18_LMNA | -0.18162 | -0.331247511 | -0.02309175 | 2.51E-02 | 1.27E-01 | 1.00E+00 |
| ENSG00000234449.2_RP11-706O  | ENSG00000160789.18_LMNA | -0.02418 | -0.18268098  | 0.135538925 | 7.67E-01 | 9.04E-01 | 1.00E+00 |
| ENSG00000261664.4_TTC39A-AS  | ENSG00000160789.18_LMNA | 0.02439  | -0.135332959 | 0.182883785 | 7.65E-01 | 9.03E-01 | 1.00E+00 |
| ENSG00000214062.5_RPL7P17    | ENSG00000160789.18_LMNA | 0.02482  | -0.134916414 | 0.183293853 | 7.62E-01 | 9.01E-01 | 1.00E+00 |
| ENSG00000250041.2_CTD-2003C  | ENSG00000160789.18_LMNA | 0.06028  | -0.099878403 | 0.217395222 | 4.61E-01 | 7.24E-01 | 1.00E+00 |
| ENSG00000259235.1_RP11-605F  | ENSG00000160789.18_LMNA | 0.07576  | -0.084457606 | 0.232162284 | 3.54E-01 | 6.37E-01 | 1.00E+00 |
| ENSG00000257668.1_RP11-58A1  | ENSG00000160789.18_LMNA | -0.05214 | -0.209597051 | 0.107960762 | 5.24E-01 | 7.69E-01 | 1.00E+00 |
| ENSG00000265787.1_CYP4F35P   | ENSG00000160789.18_LMNA | -0.15273 | -0.304525764 | 0.00663247  | 6.03E-02 | 2.26E-01 | 1.00E+00 |
| ENSG00000189229.10_AC069277  | ENSG00000160789.18_LMNA | -0.09771 | -0.252973214 | 0.062464811 | 2.31E-01 | 5.09E-01 | 1.00E+00 |
| ENSG00000230757.1_NFU1P1     | ENSG00000160789.18_LMNA | -0.06316 | -0.220146706 | 0.097016618 | 4.40E-01 | 7.08E-01 | 1.00E+00 |
| ENSG00000241416.1_KRT8P13    | ENSG00000160789.18_LMNA | -0.12538 | -0.279012258 | 0.034508679 | 1.24E-01 | 3.55E-01 | 1.00E+00 |
| ENSG00000253973.2_RP11-467K  | ENSG00000160789.18_LMNA | -0.14606 | -0.298325945 | 0.013451204 | 7.26E-02 | 2.56E-01 | 1.00E+00 |

|                              |                         |          |              |             |          |          |          |
|------------------------------|-------------------------|----------|--------------|-------------|----------|----------|----------|
| ENSG00000250362.1_AC008592.1 | ENSG00000160789.18_LMNA | -0.07564 | -0.232047111 | 0.084578467 | 3.54E-01 | 6.38E-01 | 1.00E+00 |
| ENSG00000227914.3_RP11-130C  | ENSG00000160789.18_LMNA | -0.04411 | -0.201893358 | 0.115904194 | 5.89E-01 | 8.09E-01 | 1.00E+00 |
| ENSG00000226389.3_MAPK6PS6   | ENSG00000160789.18_LMNA | -0.07782 | -0.234124298 | 0.082397255 | 3.41E-01 | 6.26E-01 | 1.00E+00 |
| ENSG00000255292.5_AP002884.1 | ENSG00000160789.18_LMNA | -0.01525 | -0.174031274 | 0.144297928 | 8.52E-01 | 9.42E-01 | 1.00E+00 |
| ENSG00000165606.7_DRGX       | ENSG00000160789.18_LMNA | -0.20756 | -0.355033645 | -0.05001692 | 1.03E-02 | 6.69E-02 | 1.00E+00 |
| ENSG00000185028.3_LRRC14B    | ENSG00000160789.18_LMNA | 0.04731  | -0.112738966 | 0.204967777 | 5.63E-01 | 7.94E-01 | 1.00E+00 |
| ENSG00000213226.4_RP11-337C  | ENSG00000160789.18_LMNA | 0.06803  | -0.092165195 | 0.224799643 | 4.05E-01 | 6.81E-01 | 1.00E+00 |
| ENSG00000234065.2_MTND4P26   | ENSG00000160789.18_LMNA | 0.13355  | -0.026205643 | 0.286658122 | 1.01E-01 | 3.13E-01 | 1.00E+00 |
| ENSG00000251435.1_C1GALT1P   | ENSG00000160789.18_LMNA | -0.07895 | -0.235191608 | 0.081275314 | 3.34E-01 | 6.19E-01 | 1.00E+00 |
| ENSG00000232716.2_AC016831.1 | ENSG00000160789.18_LMNA | 0.15232  | -0.007048067 | 0.304148643 | 6.10E-02 | 2.28E-01 | 1.00E+00 |
| ENSG0000020219.9_CCT8L1P     | ENSG00000160789.18_LMNA | 0.06486  | -0.095324938 | 0.221770816 | 4.27E-01 | 6.98E-01 | 1.00E+00 |
| ENSG00000279164.1_RP4-737E2  | ENSG00000160789.18_LMNA | 0.08785  | -0.07235803  | 0.243647627 | 2.82E-01 | 5.67E-01 | 1.00E+00 |
| ENSG00000225535.5_LINC01393  | ENSG00000160789.18_LMNA | 0.23765  | 0.081537001  | 0.38238611  | 3.20E-03 | 2.80E-02 | 1.00E+00 |
| ENSG00000095777.13_MYO3A     | ENSG00000160789.18_LMNA | -0.02766 | -0.186041897 | 0.132122068 | 7.35E-01 | 8.89E-01 | 1.00E+00 |
| ENSG00000279721.1_RP11-416H  | ENSG00000160789.18_LMNA | -0.10603 | -0.260826277 | 0.054085387 | 1.94E-01 | 4.62E-01 | 1.00E+00 |
| ENSG00000264207.1_RP11-196G  | ENSG00000160789.18_LMNA | -0.09297 | -0.248496818 | 0.067221426 | 2.55E-01 | 5.36E-01 | 1.00E+00 |
| ENSG00000253146.1_CIR1P1     | ENSG00000160789.18_LMNA | -0.01608 | -0.174831662 | 0.143489515 | 8.44E-01 | 9.39E-01 | 1.00E+00 |
| ENSG00000228919.5_AC097381.1 | ENSG00000160789.18_LMNA | -0.02554 | -0.183990416 | 0.134208594 | 7.55E-01 | 8.98E-01 | 1.00E+00 |
| ENSG00000261615.5_CTD-2291D  | ENSG00000160789.18_LMNA | 0.05521  | -0.104915608 | 0.212539883 | 4.99E-01 | 7.52E-01 | 1.00E+00 |
| ENSG00000213538.5_KRT8P41    | ENSG00000160789.18_LMNA | -0.02322 | -0.18175175  | 0.136482287 | 7.76E-01 | 9.08E-01 | 1.00E+00 |
| ENSG00000215262.6_KCNU1      | ENSG00000160789.18_LMNA | 0.16642  | 0.007420386  | 0.317220464 | 4.04E-02 | 1.75E-01 | 1.00E+00 |
| ENSG00000261459.1_AC002310.1 | ENSG00000160789.18_LMNA | -0.1392  | -0.291928762 | 0.020456739 | 8.72E-02 | 2.87E-01 | 1.00E+00 |
| ENSG00000118492.15_ADGB      | ENSG00000160789.18_LMNA | -0.03573 | -0.193826601 | 0.124178646 | 6.62E-01 | 8.51E-01 | 1.00E+00 |
| ENSG00000226306.6_NPY6R      | ENSG00000160789.18_LMNA | -0.23351 | -0.378636353 | -0.07718001 | 3.79E-03 | 3.18E-02 | 1.00E+00 |
| ENSG00000259793.1_RP11-400N  | ENSG00000160789.18_LMNA | 0.14856  | -0.010899725 | 0.30064892  | 6.78E-02 | 2.44E-01 | 1.00E+00 |
| ENSG00000225028.1_RP11-330M  | ENSG00000160789.18_LMNA | 0.06006  | -0.100099752 | 0.217182194 | 4.62E-01 | 7.25E-01 | 1.00E+00 |
| ENSG00000255835.1_RP4-559A3  | ENSG00000160789.18_LMNA | -0.13137 | -0.284622666 | 0.028420273 | 1.07E-01 | 3.25E-01 | 1.00E+00 |
| ENSG00000233485.1_RP3-467K1  | ENSG00000160789.18_LMNA | 0.01049  | -0.148955864 | 0.169411367 | 8.98E-01 | 9.60E-01 | 1.00E+00 |
| ENSG00000254486.1_RP13-631K  | ENSG00000160789.18_LMNA | -0.05995 | -0.217081336 | 0.100204539 | 4.63E-01 | 7.26E-01 | 1.00E+00 |
| ENSG00000261760.5_RP11-1223  | ENSG00000160789.18_LMNA | 0.20458  | 0.046904484  | 0.352304107 | 1.15E-02 | 7.22E-02 | 1.00E+00 |
| ENSG00000260908.1_CTB-134H2  | ENSG00000160789.18_LMNA | 0.12333  | -0.036593596 | 0.277086094 | 1.30E-01 | 3.66E-01 | 1.00E+00 |
| ENSG00000167612.11_ANKRD33   | ENSG00000160789.18_LMNA | 0.19107  | 0.032864114  | 0.339926094 | 1.84E-02 | 1.02E-01 | 1.00E+00 |
| ENSG00000280042.1_RP11-71H1  | ENSG00000160789.18_LMNA | 0.17134  | 0.012481158  | 0.321765102 | 3.48E-02 | 1.58E-01 | 1.00E+00 |

|                              |                         |          |              |             |          |          |          |
|------------------------------|-------------------------|----------|--------------|-------------|----------|----------|----------|
| ENSG00000174876.15_AMY1B     | ENSG00000160789.18_LMNA | 0.09131  | -0.068887866 | 0.246925354 | 2.63E-01 | 5.47E-01 | 1.00E+00 |
| ENSG00000239435.2_KCNMB3P1   | ENSG00000160789.18_LMNA | -0.18821 | -0.337305509 | -0.02990705 | 2.02E-02 | 1.09E-01 | 1.00E+00 |
| ENSG00000138039.13_LHCGR     | ENSG00000160789.18_LMNA | -0.13224 | -0.285428205 | 0.027544193 | 1.04E-01 | 3.20E-01 | 1.00E+00 |
| ENSG00000265142.5_MIR133A1f  | ENSG00000160789.18_LMNA | -0.17639 | -0.326428178 | -0.01769034 | 2.97E-02 | 1.42E-01 | 1.00E+00 |
| ENSG00000132204.12_LINC0047f | ENSG00000160789.18_LMNA | -0.14895 | -0.301013506 | 0.010498907 | 6.70E-02 | 2.42E-01 | 1.00E+00 |
| ENSG00000254553.1_RP1-27O5.1 | ENSG00000160789.18_LMNA | -0.13142 | -0.284664122 | 0.028375198 | 1.07E-01 | 3.24E-01 | 1.00E+00 |
| ENSG00000263089.1_RP11-166P  | ENSG00000160789.18_LMNA | 0.03942  | -0.120539621 | 0.197379589 | 6.30E-01 | 8.33E-01 | 1.00E+00 |
| ENSG00000211955.2_IGHV3-33   | ENSG00000160789.18_LMNA | -0.01839 | -0.177073989 | 0.141222442 | 8.22E-01 | 9.30E-01 | 1.00E+00 |
| ENSG00000211640.3_IGLV6-57   | ENSG00000160789.18_LMNA | 0.01537  | -0.144186251 | 0.174141868 | 8.51E-01 | 9.41E-01 | 1.00E+00 |
| ENSG00000222881.1_Y_RNA      | ENSG00000160789.18_LMNA | 0.02973  | -0.130088277 | 0.188038863 | 7.16E-01 | 8.79E-01 | 1.00E+00 |
| ENSG00000224219.1_AC074290.1 | ENSG00000160789.18_LMNA | 0.08762  | -0.07259736  | 0.243421302 | 2.83E-01 | 5.69E-01 | 1.00E+00 |
| ENSG00000216109.1_           | ENSG00000160789.18_LMNA | -0.01424 | -0.173051041 | 0.14528741  | 8.62E-01 | 9.46E-01 | 1.00E+00 |
| ENSG00000200164.1_Y_RNA      | ENSG00000160789.18_LMNA | -0.04169 | -0.199562992 | 0.118299099 | 6.10E-01 | 8.22E-01 | 1.00E+00 |
| ENSG00000222365.1_SNORD12E   | ENSG00000160789.18_LMNA | 0.06327  | -0.096909962 | 0.220249155 | 4.39E-01 | 7.07E-01 | 1.00E+00 |
| ENSG00000236464.1_CTA-796E4  | ENSG00000160789.18_LMNA | -0.20986 | -0.357133535 | -0.05241542 | 9.46E-03 | 6.30E-02 | 1.00E+00 |
| ENSG00000276410.2_HIST1H2BE  | ENSG00000160789.18_LMNA | -0.04866 | -0.206266249 | 0.111400202 | 5.52E-01 | 7.87E-01 | 1.00E+00 |
| ENSG00000200403.1_RNU6-1099  | ENSG00000160789.18_LMNA | 0.07251  | -0.087698889 | 0.229070476 | 3.75E-01 | 6.55E-01 | 1.00E+00 |
| ENSG00000268117.1_VN1R84P    | ENSG00000160789.18_LMNA | -0.07059 | -0.22723334  | 0.089621672 | 3.88E-01 | 6.66E-01 | 1.00E+00 |
| ENSG00000252950.1_RNA5SP49   | ENSG00000160789.18_LMNA | -0.00816 | -0.167144438 | 0.151236298 | 9.21E-01 | 9.70E-01 | 1.00E+00 |
| ENSG00000277568.1_uc_338     | ENSG00000160789.18_LMNA | -0.13773 | -0.290559379 | 0.02195237  | 9.06E-02 | 2.93E-01 | 1.00E+00 |
| ENSG00000253232.1_RP11-359B  | ENSG00000160789.18_LMNA | 0.05805  | -0.102098064 | 0.215257634 | 4.77E-01 | 7.36E-01 | 1.00E+00 |
| ENSG00000273325.1_RP1-90G24  | ENSG00000160789.18_LMNA | -0.1283  | -0.281745577 | 0.031545389 | 1.15E-01 | 3.39E-01 | 1.00E+00 |
| ENSG00000271314.1_RP11-435O  | ENSG00000160789.18_LMNA | -0.35781 | -0.489144885 | -0.21060338 | 6.02E-06 | 1.94E-04 | 3.09E-01 |
| ENSG00000244355.6_LY6G6D     | ENSG00000160789.18_LMNA | -0.2351  | -0.380073155 | -0.07884813 | 3.55E-03 | 3.03E-02 | 1.00E+00 |
| ENSG00000240173.3_RN7SL771f  | ENSG00000160789.18_LMNA | 0.23065  | 0.074176877  | 0.376045987 | 4.25E-03 | 3.47E-02 | 1.00E+00 |
| ENSG00000251628.1_RP11-371M  | ENSG00000160789.18_LMNA | -0.25549 | -0.398483337 | -0.10037254 | 1.49E-03 | 1.56E-02 | 1.00E+00 |
| ENSG00000250126.1_RP13-884E  | ENSG00000160789.18_LMNA | 0.02688  | -0.132890861 | 0.185286339 | 7.42E-01 | 8.92E-01 | 1.00E+00 |
| ENSG00000178934.4_LGALS7B    | ENSG00000160789.18_LMNA | 0.33965  | 0.190762669  | 0.473258922 | 1.86E-05 | 4.86E-04 | 9.55E-01 |
| ENSG00000239908.3_RN7SL75P   | ENSG00000160789.18_LMNA | 0.04004  | -0.119923669 | 0.197980153 | 6.24E-01 | 8.31E-01 | 1.00E+00 |
| ENSG00000184350.9_MRGPRES    | ENSG00000160789.18_LMNA | -0.02121 | -0.179807181 | 0.138454565 | 7.95E-01 | 9.18E-01 | 1.00E+00 |
| ENSG00000238276.4_RP11-245Jf | ENSG00000160789.18_LMNA | -0.24404 | -0.388156462 | -0.08826433 | 2.45E-03 | 2.29E-02 | 1.00E+00 |
| ENSG00000227962.1_RP11-382D  | ENSG00000160789.18_LMNA | -0.03489 | -0.193017022 | 0.125006635 | 6.70E-01 | 8.55E-01 | 1.00E+00 |
| ENSG00000259296.1_RP11-313P  | ENSG00000160789.18_LMNA | -0.15476 | -0.306413353 | 0.004550686 | 5.69E-02 | 2.18E-01 | 1.00E+00 |

|                             |                         |          |              |             |          |          |          |
|-----------------------------|-------------------------|----------|--------------|-------------|----------|----------|----------|
| ENSG00000256312.1_RP13-977J | ENSG00000160789.18_LMNA | 0.07086  | -0.089348188 | 0.227494779 | 3.86E-01 | 6.64E-01 | 1.00E+00 |
| ENSG00000237404.1_          | ENSG00000160789.18_LMNA | -0.09262 | -0.248164244 | 0.067574247 | 2.56E-01 | 5.39E-01 | 1.00E+00 |
| ENSG00000243280.2_RP11-477G | ENSG00000160789.18_LMNA | -0.01638 | -0.175126529 | 0.143191585 | 8.41E-01 | 9.38E-01 | 1.00E+00 |
| ENSG00000224988.1_RP11-409K | ENSG00000160789.18_LMNA | 0.14919  | -0.010257307 | 0.301233222 | 6.66E-02 | 2.41E-01 | 1.00E+00 |
| ENSG00000259104.2_PTCSC3    | ENSG00000160789.18_LMNA | -0.27585 | -0.41674679  | -0.12200473 | 5.82E-04 | 7.59E-03 | 1.00E+00 |
| ENSG00000260635.1_RP11-21M2 | ENSG00000160789.18_LMNA | 0.12088  | -0.0390677   | 0.274797103 | 1.38E-01 | 3.78E-01 | 1.00E+00 |
| ENSG00000249838.1_SUMO2P7   | ENSG00000160789.18_LMNA | -0.07936 | -0.235585434 | 0.080861128 | 3.31E-01 | 6.17E-01 | 1.00E+00 |
| ENSG00000214823.3_NXT1P1    | ENSG00000160789.18_LMNA | 0.17968  | 0.021087376  | 0.329461009 | 2.68E-02 | 1.33E-01 | 1.00E+00 |
| ENSG00000267130.1_CTD-2540B | ENSG00000160789.18_LMNA | -0.0567  | -0.213972538 | 0.103430983 | 4.88E-01 | 7.44E-01 | 1.00E+00 |
| ENSG00000180284.5_RP5-1055C | ENSG00000160789.18_LMNA | -0.0468  | -0.20447747  | 0.113244188 | 5.67E-01 | 7.97E-01 | 1.00E+00 |
| ENSG00000219375.1_RP11-69L1 | ENSG00000160789.18_LMNA | 0.08168  | -0.078537026 | 0.237793359 | 3.17E-01 | 6.04E-01 | 1.00E+00 |
| ENSG00000270773.1_RP13-685P | ENSG00000160789.18_LMNA | -0.03697 | -0.195020861 | 0.122956421 | 6.51E-01 | 8.45E-01 | 1.00E+00 |
| ENSG00000280103.1_AC007792. | ENSG00000160789.18_LMNA | -0.03975 | -0.197697065 | 0.120214041 | 6.27E-01 | 8.32E-01 | 1.00E+00 |
| ENSG00000259162.1_RP11-203M | ENSG00000160789.18_LMNA | 0.23886  | 0.08281163   | 0.383481225 | 3.04E-03 | 2.70E-02 | 1.00E+00 |
| ENSG00000263466.1_RP1-56K13 | ENSG00000160789.18_LMNA | -0.03358 | -0.191758432 | 0.126292965 | 6.81E-01 | 8.61E-01 | 1.00E+00 |
| ENSG00000234553.1_AC022431. | ENSG00000160789.18_LMNA | -0.08036 | -0.236532953 | 0.079864173 | 3.25E-01 | 6.12E-01 | 1.00E+00 |
| ENSG00000220522.2_RP1-177A1 | ENSG00000160789.18_LMNA | -0.03474 | -0.19287136  | 0.125155562 | 6.71E-01 | 8.56E-01 | 1.00E+00 |
| ENSG00000226987.1_RP11-544A | ENSG00000160789.18_LMNA | -0.03241 | -0.190626403 | 0.127449033 | 6.92E-01 | 8.67E-01 | 1.00E+00 |
| ENSG00000233538.1_AC017104. | ENSG00000160789.18_LMNA | 0.03404  | -0.125842863 | 0.192198946 | 6.77E-01 | 8.59E-01 | 1.00E+00 |
| ENSG00000230147.2_RP11-305L | ENSG00000160789.18_LMNA | 0.10186  | -0.058284551 | 0.25689609  | 2.12E-01 | 4.85E-01 | 1.00E+00 |
| ENSG00000236878.1_MTATP6P2  | ENSG00000160789.18_LMNA | 0.04852  | -0.111544552 | 0.206126297 | 5.53E-01 | 7.88E-01 | 1.00E+00 |
| ENSG00000267141.1_CTB-31O2C | ENSG00000160789.18_LMNA | 0.19827  | 0.040339112  | 0.346529334 | 1.43E-02 | 8.51E-02 | 1.00E+00 |
| ENSG00000244265.1_SIAH2-AS1 | ENSG00000160789.18_LMNA | 0.14828  | -0.011186161 | 0.30038832  | 6.83E-02 | 2.45E-01 | 1.00E+00 |
| ENSG00000255120.4_OVOL1-AS  | ENSG00000160789.18_LMNA | 0.03745  | -0.122483356 | 0.195482848 | 6.47E-01 | 8.43E-01 | 1.00E+00 |
| ENSG00000231301.1_RPL13AP   | ENSG00000160789.18_LMNA | 0.03775  | -0.122183641 | 0.195775473 | 6.44E-01 | 8.42E-01 | 1.00E+00 |
| ENSG00000268322.1_BNIP3P25  | ENSG00000160789.18_LMNA | -0.14977 | -0.301779725 | 0.009656215 | 6.55E-02 | 2.39E-01 | 1.00E+00 |
| ENSG00000213488.4_CTB-85P21 | ENSG00000160789.18_LMNA | -0.14362 | -0.296055787 | 0.015940756 | 7.75E-02 | 2.67E-01 | 1.00E+00 |
| ENSG00000219039.2_AC005102. | ENSG00000160789.18_LMNA | 0.09223  | -0.067969928 | 0.247791182 | 2.58E-01 | 5.41E-01 | 1.00E+00 |
| ENSG00000254034.1_RP11-662B | ENSG00000160789.18_LMNA | -0.16706 | -0.317808323 | -0.00807412 | 3.97E-02 | 1.73E-01 | 1.00E+00 |
| ENSG00000249767.1_ENPP7P10  | ENSG00000160789.18_LMNA | -0.05245 | -0.2098964   | 0.107651277 | 5.21E-01 | 7.67E-01 | 1.00E+00 |
| ENSG00000280217.1_RP11-638F | ENSG00000160789.18_LMNA | -0.37324 | -0.502580718 | -0.22756506 | 2.18E-06 | 8.51E-05 | 1.12E-01 |
| ENSG00000228728.1_RP11-316K | ENSG00000160789.18_LMNA | 0.04156  | -0.118426138 | 0.199439277 | 6.11E-01 | 8.23E-01 | 1.00E+00 |
| ENSG00000228709.1_AP001065. | ENSG00000160789.18_LMNA | -0.07313 | -0.229660298 | 0.08708107  | 3.71E-01 | 6.51E-01 | 1.00E+00 |

|                              |                         |          |              |             |          |          |          |
|------------------------------|-------------------------|----------|--------------|-------------|----------|----------|----------|
| ENSG00000109182.10_CWH43     | ENSG00000160789.18_LMNA | 0.05846  | -0.101682468 | 0.215658095 | 4.74E-01 | 7.34E-01 | 1.00E+00 |
| ENSG00000232568.2_RPL23AP3   | ENSG00000160789.18_LMNA | -0.04706 | -0.204728705 | 0.112985331 | 5.65E-01 | 7.95E-01 | 1.00E+00 |
| ENSG00000235525.1_FTL1P1     | ENSG00000160789.18_LMNA | 0.02448  | -0.135244314 | 0.182971061 | 7.65E-01 | 9.02E-01 | 1.00E+00 |
| ENSG00000267503.1_RP11-53B2  | ENSG00000160789.18_LMNA | -0.03017 | -0.188460935 | 0.129658078 | 7.12E-01 | 8.78E-01 | 1.00E+00 |
| ENSG00000266088.4_RP5-1028K  | ENSG00000160789.18_LMNA | 0.14527  | -0.014262758 | 0.297586298 | 7.42E-02 | 2.59E-01 | 1.00E+00 |
| ENSG00000274310.1_RP11-53M1  | ENSG00000160789.18_LMNA | -0.05324 | -0.210652093 | 0.106869721 | 5.15E-01 | 7.62E-01 | 1.00E+00 |
| ENSG00000277825.1_CTD-2013N  | ENSG00000160789.18_LMNA | -0.21653 | -0.363207563 | -0.05937305 | 7.38E-03 | 5.23E-02 | 1.00E+00 |
| ENSG00000233063.2_SAR1AP4    | ENSG00000160789.18_LMNA | 0.02217  | -0.13751664  | 0.180732239 | 7.86E-01 | 9.13E-01 | 1.00E+00 |
| ENSG00000228125.2_AKIRIN1P2  | ENSG00000160789.18_LMNA | 0.02255  | -0.137145423 | 0.181098208 | 7.83E-01 | 9.11E-01 | 1.00E+00 |
| ENSG00000260653.4_RP11-114G  | ENSG00000160789.18_LMNA | -0.1076  | -0.262303547 | 0.05250413  | 1.87E-01 | 4.53E-01 | 1.00E+00 |
| ENSG00000280232.1_RP11-321N  | ENSG00000160789.18_LMNA | 0.00436  | -0.154953121 | 0.163442397 | 9.58E-01 | 9.83E-01 | 1.00E+00 |
| ENSG00000248930.1_CTC-250P2  | ENSG00000160789.18_LMNA | 0.02425  | -0.135472063 | 0.182746818 | 7.67E-01 | 9.03E-01 | 1.00E+00 |
| ENSG00000275489.1_C17orf98   | ENSG00000160789.18_LMNA | -0.13273 | -0.285885321 | 0.027046833 | 1.03E-01 | 3.18E-01 | 1.00E+00 |
| ENSG00000254031.4_RP11-326E  | ENSG00000160789.18_LMNA | -0.17444 | -0.324622814 | -0.01567156 | 3.16E-02 | 1.48E-01 | 1.00E+00 |
| ENSG00000223390.1_RP11-91A1  | ENSG00000160789.18_LMNA | 0.07203  | -0.088178413 | 0.228612523 | 3.78E-01 | 6.57E-01 | 1.00E+00 |
| ENSG00000244199.1	EIF4EP3    | ENSG00000160789.18_LMNA | 0.06712  | -0.093073204 | 0.223929881 | 4.11E-01 | 6.85E-01 | 1.00E+00 |
| ENSG00000259461.1_ANP32BP3   | ENSG00000160789.18_LMNA | -0.12675 | -0.280298548 | 0.033114852 | 1.20E-01 | 3.48E-01 | 1.00E+00 |
| ENSG00000256189.1_RP11-167N  | ENSG00000160789.18_LMNA | -0.05734 | -0.214586013 | 0.10279482  | 4.83E-01 | 7.40E-01 | 1.00E+00 |
| ENSG00000235310.1_GXYLT1P6   | ENSG00000160789.18_LMNA | -0.13057 | -0.283873928 | 0.029234147 | 1.09E-01 | 3.28E-01 | 1.00E+00 |
| ENSG00000117148.7_ACTL8      | ENSG00000160789.18_LMNA | -0.15319 | -0.304954592 | 0.006159761 | 5.95E-02 | 2.24E-01 | 1.00E+00 |
| ENSG00000034971.13_MYOC      | ENSG00000160789.18_LMNA | -0.01659 | -0.175332089 | 0.142983855 | 8.39E-01 | 9.38E-01 | 1.00E+00 |
| ENSG00000124391.4_IL17C      | ENSG00000160789.18_LMNA | 0.04386  | -0.116156041 | 0.201648468 | 5.92E-01 | 8.11E-01 | 1.00E+00 |
| ENSG00000269540.1_CTD-2126E  | ENSG00000160789.18_LMNA | 0.05333  | -0.106775686 | 0.210742991 | 5.14E-01 | 7.62E-01 | 1.00E+00 |
| ENSG00000260597.1_AC012531.1 | ENSG00000160789.18_LMNA | 0.16242  | 0.003301213  | 0.313510861 | 4.56E-02 | 1.89E-01 | 1.00E+00 |
| ENSG00000178596.10_GAPDHP2   | ENSG00000160789.18_LMNA | 0.12923  | -0.030597564 | 0.282618774 | 1.13E-01 | 3.35E-01 | 1.00E+00 |
| ENSG00000235358.1_RP11-399E  | ENSG00000160789.18_LMNA | 0.09575  | -0.064434509 | 0.25112119  | 2.41E-01 | 5.20E-01 | 1.00E+00 |
| ENSG00000249064.1_KRT18P25   | ENSG00000160789.18_LMNA | 0.05452  | -0.105600379 | 0.211878623 | 5.05E-01 | 7.56E-01 | 1.00E+00 |
| ENSG00000144771.7_LRTM1      | ENSG00000160789.18_LMNA | -0.07701 | -0.23335035  | 0.083210317 | 3.46E-01 | 6.30E-01 | 1.00E+00 |
| ENSG00000175202.3_HIGD2B     | ENSG00000160789.18_LMNA | 0.16775  | 0.008780873  | 0.318443599 | 3.89E-02 | 1.70E-01 | 1.00E+00 |
| ENSG00000267808.1_AC018755.1 | ENSG00000160789.18_LMNA | 0.01199  | -0.147491117 | 0.170865665 | 8.83E-01 | 9.55E-01 | 1.00E+00 |
| ENSG00000215325.4_ASS1P10    | ENSG00000160789.18_LMNA | -0.00341 | -0.162523297 | 0.155874497 | 9.67E-01 | 9.87E-01 | 1.00E+00 |
| ENSG00000256812.1_CAPNS2     | ENSG00000160789.18_LMNA | 0.07075  | -0.08946117  | 0.227386778 | 3.86E-01 | 6.65E-01 | 1.00E+00 |
| ENSG00000229221.1_HNRNPA1F   | ENSG00000160789.18_LMNA | 0.01492  | -0.144625367 | 0.173706966 | 8.55E-01 | 9.43E-01 | 1.00E+00 |

|                             |                         |          |              |             |          |          |          |
|-----------------------------|-------------------------|----------|--------------|-------------|----------|----------|----------|
| ENSG00000231431.6_FAR2P4    | ENSG00000160789.18_LMNA | 0.0255   | -0.13424483  | 0.183954763 | 7.55E-01 | 8.98E-01 | 1.00E+00 |
| ENSG00000255639.2_RP11-234B | ENSG00000160789.18_LMNA | -0.19378 | -0.342415293 | -0.03567791 | 1.68E-02 | 9.51E-02 | 1.00E+00 |
| ENSG00000113600.9_C9        | ENSG00000160789.18_LMNA | -0.07238 | -0.228938287 | 0.08783732  | 3.76E-01 | 6.56E-01 | 1.00E+00 |
| ENSG00000232451.1_AC016768. | ENSG00000160789.18_LMNA | -0.00948 | -0.168427134 | 0.149946376 | 9.08E-01 | 9.65E-01 | 1.00E+00 |
| ENSG00000248444.1_HNRNPA1F  | ENSG00000160789.18_LMNA | -0.00616 | -0.165202322 | 0.153187292 | 9.40E-01 | 9.76E-01 | 1.00E+00 |
| ENSG00000255532.1_CTD-2026C | ENSG00000160789.18_LMNA | -0.06658 | -0.223416709 | 0.093608696 | 4.15E-01 | 6.88E-01 | 1.00E+00 |
| ENSG00000260930.1_LINC01416 | ENSG00000160789.18_LMNA | -0.10816 | -0.262830364 | 0.051939846 | 1.85E-01 | 4.50E-01 | 1.00E+00 |
| ENSG00000267529.3_RP11-53B2 | ENSG00000160789.18_LMNA | -0.07815 | -0.234436072 | 0.082069606 | 3.39E-01 | 6.24E-01 | 1.00E+00 |
| ENSG00000265843.2_LINC01029 | ENSG00000160789.18_LMNA | -0.07304 | -0.229573085 | 0.087172438 | 3.71E-01 | 6.51E-01 | 1.00E+00 |
| ENSG00000159166.12_LAD1     | ENSG00000160789.18_LMNA | 0.15203  | -0.007352331 | 0.303872485 | 6.15E-02 | 2.29E-01 | 1.00E+00 |
| ENSG00000149124.9_GLYAT     | ENSG00000160789.18_LMNA | 0.03376  | -0.126115037 | 0.191932585 | 6.80E-01 | 8.60E-01 | 1.00E+00 |
| ENSG00000279057.1_CTD-3126B | ENSG00000160789.18_LMNA | 0.09843  | -0.061741432 | 0.253652797 | 2.28E-01 | 5.04E-01 | 1.00E+00 |
| ENSG00000262319.1 CTC-457L1 | ENSG00000160789.18_LMNA | 0.07648  | -0.083740025 | 0.232845909 | 3.49E-01 | 6.33E-01 | 1.00E+00 |
| ENSG00000223930.4_RP11-33A1 | ENSG00000160789.18_LMNA | -0.14873 | -0.300804019 | 0.010729224 | 6.75E-02 | 2.43E-01 | 1.00E+00 |
| ENSG00000223963.2_THAP12P8  | ENSG00000160789.18_LMNA | -0.02997 | -0.188274262 | 0.12984836  | 7.14E-01 | 8.78E-01 | 1.00E+00 |
| ENSG00000227195.7_MIR663AH  | ENSG00000160789.18_LMNA | -0.06619 | -0.223041353 | 0.094000261 | 4.18E-01 | 6.90E-01 | 1.00E+00 |
| ENSG00000281732.1_CTA-299D3 | ENSG00000160789.18_LMNA | -0.18237 | -0.331937784 | -0.02386687 | 2.45E-02 | 1.25E-01 | 1.00E+00 |
| ENSG00000265296.1_FEM1AP2   | ENSG00000160789.18_LMNA | 0.03463  | -0.125265996 | 0.192763338 | 6.72E-01 | 8.56E-01 | 1.00E+00 |
| ENSG00000164007.9_CLDN19    | ENSG00000160789.18_LMNA | 0.19812  | 0.040182508  | 0.346391303 | 1.44E-02 | 8.54E-02 | 1.00E+00 |
| ENSG00000279601.1_CTA-38K21 | ENSG00000160789.18_LMNA | 0.01601  | -0.143557592 | 0.174764277 | 8.45E-01 | 9.39E-01 | 1.00E+00 |
| ENSG00000132855.4_ANGPTL3   | ENSG00000160789.18_LMNA | -0.09586 | -0.251230694 | 0.064318116 | 2.40E-01 | 5.19E-01 | 1.00E+00 |
| ENSG00000259724.1_LINC01581 | ENSG00000160789.18_LMNA | -0.04719 | -0.204852326 | 0.112857944 | 5.64E-01 | 7.95E-01 | 1.00E+00 |
| ENSG00000227877.5_MRLN      | ENSG00000160789.18_LMNA | -0.09605 | -0.251408351 | 0.064129264 | 2.39E-01 | 5.18E-01 | 1.00E+00 |
| ENSG00000267646.1 CTC-499B1 | ENSG00000160789.18_LMNA | 0.02266  | -0.137037603 | 0.181204488 | 7.82E-01 | 9.10E-01 | 1.00E+00 |
| ENSG00000227308.2_AC009502. | ENSG00000160789.18_LMNA | 0.27904  | 0.125405143  | 0.419596186 | 4.99E-04 | 6.73E-03 | 1.00E+00 |
| ENSG00000245080.5_MIR3150B  | ENSG00000160789.18_LMNA | -0.10407 | -0.258981147 | 0.056058184 | 2.02E-01 | 4.73E-01 | 1.00E+00 |
| ENSG00000244476.2_ERVFRD-1  | ENSG00000160789.18_LMNA | -0.00155 | -0.160709944 | 0.157690715 | 9.85E-01 | 9.94E-01 | 1.00E+00 |
| ENSG00000230711.2_CTAGE13P  | ENSG00000160789.18_LMNA | 0.05633  | -0.103804523 | 0.213612202 | 4.91E-01 | 7.46E-01 | 1.00E+00 |
| ENSG00000124429.16_POF1B    | ENSG00000160789.18_LMNA | -0.03496 | -0.193082687 | 0.124939493 | 6.69E-01 | 8.54E-01 | 1.00E+00 |
| ENSG00000211947.2_IGHV3-21  | ENSG00000160789.18_LMNA | -0.02693 | -0.185334749 | 0.132841614 | 7.42E-01 | 8.92E-01 | 1.00E+00 |
| ENSG00000278196.1_IGLV2-8   | ENSG00000160789.18_LMNA | -0.09671 | -0.252027717 | 0.063470691 | 2.36E-01 | 5.14E-01 | 1.00E+00 |
| ENSG00000270123.3_VTRNA2-1  | ENSG00000160789.18_LMNA | 0.19109  | 0.032892614  | 0.339951328 | 1.84E-02 | 1.01E-01 | 1.00E+00 |
| ENSG00000265660.1_MIR4664   | ENSG00000160789.18_LMNA | 0.00569  | -0.153654644 | 0.16473673  | 9.45E-01 | 9.78E-01 | 1.00E+00 |

|                              |                         |          |              |             |          |          |          |
|------------------------------|-------------------------|----------|--------------|-------------|----------|----------|----------|
| ENSG00000281359.1_AC104650.  | ENSG00000160789.18_LMNA | 0.08881  | -0.071400085 | 0.244553171 | 2.77E-01 | 5.61E-01 | 1.00E+00 |
| ENSG00000278939.1_AC242988.  | ENSG00000160789.18_LMNA | 0.00926  | -0.150164808 | 0.168210002 | 9.10E-01 | 9.66E-01 | 1.00E+00 |
| ENSG00000206603.1_SNORA22    | ENSG00000160789.18_LMNA | 0.20503  | 0.047372201  | 0.352714616 | 1.13E-02 | 7.14E-02 | 1.00E+00 |
| ENSG00000199990.1_VTRNA1-1   | ENSG00000160789.18_LMNA | -0.07464 | -0.231096967 | 0.085575183 | 3.61E-01 | 6.43E-01 | 1.00E+00 |
| ENSG00000272507.1_RNU6-88P   | ENSG00000160789.18_LMNA | -0.072   | -0.228579143 | 0.088213359 | 3.78E-01 | 6.57E-01 | 1.00E+00 |
| ENSG00000206992.1_RNU6-574F  | ENSG00000160789.18_LMNA | 0.05288  | -0.10722593  | 0.210307718 | 5.18E-01 | 7.64E-01 | 1.00E+00 |
| ENSG00000206899.1_RNU6-36P   | ENSG00000160789.18_LMNA | -0.00776 | -0.166751458 | 0.151631274 | 9.24E-01 | 9.71E-01 | 1.00E+00 |
| ENSG00000227365.1_AC008060.  | ENSG00000160789.18_LMNA | -0.07075 | -0.227386295 | 0.089461676 | 3.86E-01 | 6.65E-01 | 1.00E+00 |
| ENSG00000274973.1_BSNDP2     | ENSG00000160789.18_LMNA | 0.03514  | -0.124755229 | 0.193262884 | 6.67E-01 | 8.53E-01 | 1.00E+00 |
| ENSG00000211714.3_TRBV7-3    | ENSG00000160789.18_LMNA | 0.21022  | 0.052790707  | 0.357461818 | 9.33E-03 | 6.24E-02 | 1.00E+00 |
| ENSG00000228085.1_AC004920.  | ENSG00000160789.18_LMNA | 0.00164  | -0.157600801 | 0.160799767 | 9.84E-01 | 9.94E-01 | 1.00E+00 |
| ENSG00000147378.10_FATE1     | ENSG00000160789.18_LMNA | 0.04011  | -0.119854866 | 0.198047222 | 6.24E-01 | 8.30E-01 | 1.00E+00 |
| ENSG00000269916.1_RP11-193M  | ENSG00000160789.18_LMNA | -0.01439 | -0.173196784 | 0.145140333 | 8.60E-01 | 9.45E-01 | 1.00E+00 |
| ENSG00000265386.2_RN7SL219F  | ENSG00000160789.18_LMNA | 0.09633  | -0.063849254 | 0.251671723 | 2.38E-01 | 5.16E-01 | 1.00E+00 |
| ENSG00000231255.1_AC005009.  | ENSG00000160789.18_LMNA | -0.2856  | -0.425456622 | -0.13242067 | 3.62E-04 | 5.20E-03 | 1.00E+00 |
| ENSG00000169393.7_ELSPBP1    | ENSG00000160789.18_LMNA | -0.02257 | -0.181120713 | 0.137122593 | 7.83E-01 | 9.11E-01 | 1.00E+00 |
| ENSG00000259675.1_RP11-507B  | ENSG00000160789.18_LMNA | -0.06926 | -0.225970288 | 0.090942237 | 3.97E-01 | 6.73E-01 | 1.00E+00 |
| ENSG00000265185.4_SNORD3B-   | ENSG00000160789.18_LMNA | -0.17511 | -0.325243905 | -0.01636578 | 3.09E-02 | 1.46E-01 | 1.00E+00 |
| ENSG00000281439.1_           | ENSG00000160789.18_LMNA | -0.00545 | -0.16450347  | 0.153888732 | 9.47E-01 | 9.79E-01 | 1.00E+00 |
| ENSG00000267203.1_SNRPGP4    | ENSG00000160789.18_LMNA | 0.03125  | -0.128586971 | 0.189511299 | 7.02E-01 | 8.73E-01 | 1.00E+00 |
| ENSG00000280485.1_RP11-437J  | ENSG00000160789.18_LMNA | 0.07096  | -0.089245683 | 0.227592758 | 3.85E-01 | 6.64E-01 | 1.00E+00 |
| ENSG00000271138.1_IGLVIVOR2  | ENSG00000160789.18_LMNA | -0.06736 | -0.224156883 | 0.09283627  | 4.10E-01 | 6.84E-01 | 1.00E+00 |
| ENSG00000249639.1_CTB-138E5  | ENSG00000160789.18_LMNA | 0.04807  | -0.11198439  | 0.20569978  | 5.56E-01 | 7.90E-01 | 1.00E+00 |
| ENSG00000276704.1_RP11-128N  | ENSG00000160789.18_LMNA | -0.15846 | -0.309839648 | 0.000764993 | 5.12E-02 | 2.04E-01 | 1.00E+00 |
| ENSG00000256757.1_RP11-159N  | ENSG00000160789.18_LMNA | 0.11722  | -0.042776452 | 0.271359161 | 1.50E-01 | 3.99E-01 | 1.00E+00 |
| ENSG00000091482.5_SMPX       | ENSG00000160789.18_LMNA | -0.16442 | -0.315361333 | -0.00535468 | 4.30E-02 | 1.82E-01 | 1.00E+00 |
| ENSG00000255343.1_RP11-299M  | ENSG00000160789.18_LMNA | 0.11574  | -0.044276573 | 0.269966298 | 1.56E-01 | 4.07E-01 | 1.00E+00 |
| ENSG00000228115.1_RP11-165F  | ENSG00000160789.18_LMNA | 0.04358  | -0.116425428 | 0.201386477 | 5.94E-01 | 8.13E-01 | 1.00E+00 |
| ENSG00000148386.8_LCN9       | ENSG00000160789.18_LMNA | -0.08979 | -0.245480299 | 0.070418703 | 2.71E-01 | 5.56E-01 | 1.00E+00 |
| ENSG00000279219.1_AL008723.1 | ENSG00000160789.18_LMNA | 0.01854  | -0.141076211 | 0.177218511 | 8.21E-01 | 9.30E-01 | 1.00E+00 |
| ENSG00000267315.1_RP11-686D  | ENSG00000160789.18_LMNA | 0.12993  | -0.029889087 | 0.283271128 | 1.11E-01 | 3.32E-01 | 1.00E+00 |
| ENSG00000267207.1_RP11-264B  | ENSG00000160789.18_LMNA | -0.09873 | -0.253943731 | 0.061431647 | 2.26E-01 | 5.02E-01 | 1.00E+00 |
| ENSG00000213600.3_XXcos-LUC  | ENSG00000160789.18_LMNA | 0.10266  | -0.057477307 | 0.257652437 | 2.08E-01 | 4.81E-01 | 1.00E+00 |



|                              |                         |          |              |             |          |          |          |
|------------------------------|-------------------------|----------|--------------|-------------|----------|----------|----------|
| ENSG00000226390.1_RP11-358D  | ENSG00000160789.18_LMNA | -0.06126 | -0.218331822 | 0.098904845 | 4.53E-01 | 7.18E-01 | 1.00E+00 |
| ENSG00000158477.6_CD1A       | ENSG00000160789.18_LMNA | 0.1156   | -0.04441588  | 0.269836885 | 1.56E-01 | 4.08E-01 | 1.00E+00 |
| ENSG00000257986.1_RP11-314P  | ENSG00000160789.18_LMNA | 0.01093  | -0.148526407 | 0.169837904 | 8.94E-01 | 9.58E-01 | 1.00E+00 |
| ENSG00000244268.1_RP11-529G  | ENSG00000160789.18_LMNA | 0.13643  | -0.023279337 | 0.28934335  | 9.37E-02 | 3.00E-01 | 1.00E+00 |
| ENSG00000232208.2_RP3-477M7  | ENSG00000160789.18_LMNA | 0.02305  | -0.136654201 | 0.18158235  | 7.78E-01 | 9.09E-01 | 1.00E+00 |
| ENSG00000257405.1_RP11-609L  | ENSG00000160789.18_LMNA | #####    | -0.159297101 | 0.159104299 | 9.99E-01 | 1.00E+00 | 1.00E+00 |
| ENSG00000270777.1_RP11-103J  | ENSG00000160789.18_LMNA | -0.08251 | -0.238577989 | 0.077710282 | 3.12E-01 | 5.99E-01 | 1.00E+00 |
| ENSG00000254495.1_AP000487.4 | ENSG00000160789.18_LMNA | 0.07605  | -0.08417055  | 0.232435793 | 3.52E-01 | 6.35E-01 | 1.00E+00 |
| ENSG00000275017.1_RP11-317B  | ENSG00000160789.18_LMNA | -0.05189 | -0.209362996 | 0.1082027   | 5.25E-01 | 7.70E-01 | 1.00E+00 |
| ENSG00000234790.1_NUTF2P4    | ENSG00000160789.18_LMNA | -0.0099  | -0.168831955 | 0.14953905  | 9.04E-01 | 9.63E-01 | 1.00E+00 |
| ENSG00000250147.1_MORF4L2P   | ENSG00000160789.18_LMNA | -0.00306 | -0.162182285 | 0.156216212 | 9.70E-01 | 9.88E-01 | 1.00E+00 |
| ENSG00000248103.1_CTC-338M1  | ENSG00000160789.18_LMNA | -0.06326 | -0.22024577  | 0.096913485 | 4.39E-01 | 7.07E-01 | 1.00E+00 |
| ENSG00000277738.1_RP11-693J  | ENSG00000160789.18_LMNA | -0.08949 | -0.245194714 | 0.070721065 | 2.73E-01 | 5.57E-01 | 1.00E+00 |
| ENSG00000101405.3_OXT        | ENSG00000160789.18_LMNA | -0.04718 | -0.204839737 | 0.112870918 | 5.64E-01 | 7.95E-01 | 1.00E+00 |
| ENSG00000213706.2_AL590762.7 | ENSG00000160789.18_LMNA | 0.16595  | 0.006935709  | 0.316784471 | 4.10E-02 | 1.76E-01 | 1.00E+00 |
| ENSG00000253283.1_RP11-146E  | ENSG00000160789.18_LMNA | 0.03308  | -0.126789246 | 0.191272574 | 6.86E-01 | 8.64E-01 | 1.00E+00 |
| ENSG00000131686.13_CA6       | ENSG00000160789.18_LMNA | -0.00871 | -0.167680982 | 0.150696863 | 9.15E-01 | 9.68E-01 | 1.00E+00 |
| ENSG00000236511.1_LINC01231  | ENSG00000160789.18_LMNA | 0.05163  | -0.108466024 | 0.20910821  | 5.28E-01 | 7.72E-01 | 1.00E+00 |
| ENSG00000223838.1_AC007091.  | ENSG00000160789.18_LMNA | -0.04832 | -0.205941092 | 0.111735557 | 5.54E-01 | 7.89E-01 | 1.00E+00 |
| ENSG00000257752.1_RP11-474L  | ENSG00000160789.18_LMNA | 0.02447  | -0.135255066 | 0.182960475 | 7.65E-01 | 9.02E-01 | 1.00E+00 |
| ENSG00000257666.1_CBX3P5     | ENSG00000160789.18_LMNA | 0.09343  | -0.066760304 | 0.248931366 | 2.52E-01 | 5.33E-01 | 1.00E+00 |
| ENSG00000227788.1_MTCO3P43   | ENSG00000160789.18_LMNA | 0.12866  | -0.031182132 | 0.282080294 | 1.14E-01 | 3.37E-01 | 1.00E+00 |
| ENSG00000223884.4_AC019048.  | ENSG00000160789.18_LMNA | -0.12126 | -0.275149789 | 0.038686742 | 1.37E-01 | 3.76E-01 | 1.00E+00 |
| ENSG00000280375.1_RP13-204A  | ENSG00000160789.18_LMNA | 0.12589  | -0.033990654 | 0.279490448 | 1.22E-01 | 3.52E-01 | 1.00E+00 |
| ENSG00000138653.8_NDST4      | ENSG00000160789.18_LMNA | -0.2389  | -0.38351875  | -0.08285532 | 3.04E-03 | 2.70E-02 | 1.00E+00 |
| ENSG00000262810.1_RP11-667K  | ENSG00000160789.18_LMNA | 0.05216  | -0.107941316 | 0.209615863 | 5.23E-01 | 7.69E-01 | 1.00E+00 |
| ENSG00000251393.3_RP1-240K6  | ENSG00000160789.18_LMNA | -0.2286  | -0.374186896 | -0.07202491 | 4.61E-03 | 3.69E-02 | 1.00E+00 |
| ENSG00000198812.4_LRRC10     | ENSG00000160789.18_LMNA | -0.0191  | -0.177763052 | 0.140525104 | 8.15E-01 | 9.28E-01 | 1.00E+00 |
| ENSG00000256039.1_RP11-291B  | ENSG00000160789.18_LMNA | 0.0892   | -0.071009616 | 0.244922123 | 2.74E-01 | 5.59E-01 | 1.00E+00 |
| ENSG00000272672.1_RP11-302M  | ENSG00000160789.18_LMNA | -0.12825 | -0.281694711 | 0.031600586 | 1.15E-01 | 3.39E-01 | 1.00E+00 |
| ENSG00000232461.1_RP11-644C  | ENSG00000160789.18_LMNA | -0.0338  | -0.191971437 | 0.126075341 | 6.79E-01 | 8.60E-01 | 1.00E+00 |
| ENSG00000224478.1_RP11-13P5  | ENSG00000160789.18_LMNA | -0.10244 | -0.25744091  | 0.057703109 | 2.09E-01 | 4.82E-01 | 1.00E+00 |
| ENSG00000229321.1_AC008269.  | ENSG00000160789.18_LMNA | -0.08864 | -0.244387918 | 0.071574944 | 2.78E-01 | 5.62E-01 | 1.00E+00 |

|                              |                         |          |              |             |          |          |          |
|------------------------------|-------------------------|----------|--------------|-------------|----------|----------|----------|
| ENSG00000256283.1_METTL8P1   | ENSG00000160789.18_LMNA | -0.00635 | -0.165386383 | 0.153002496 | 9.38E-01 | 9.76E-01 | 1.00E+00 |
| ENSG00000260012.1_RP11-329J  | ENSG00000160789.18_LMNA | -0.03941 | -0.197373319 | 0.120546051 | 6.30E-01 | 8.33E-01 | 1.00E+00 |
| ENSG00000234358.1_AC003080.4 | ENSG00000160789.18_LMNA | -0.04504 | -0.202783951 | 0.11498796  | 5.82E-01 | 8.05E-01 | 1.00E+00 |
| ENSG00000155918.6_RAET1L     | ENSG00000160789.18_LMNA | 0.2085   | 0.050987404  | 0.355883674 | 9.95E-03 | 6.54E-02 | 1.00E+00 |
| ENSG00000230809.1_RPS6P15    | ENSG00000160789.18_LMNA | -0.01057 | -0.169484528 | 0.148882211 | 8.97E-01 | 9.60E-01 | 1.00E+00 |
| ENSG00000205642.8_VCX3B      | ENSG00000160789.18_LMNA | 0.13848  | -0.021188854 | 0.291258606 | 8.89E-02 | 2.90E-01 | 1.00E+00 |
| ENSG00000123171.6_CCDC70     | ENSG00000160789.18_LMNA | 0.18007  | 0.021483603  | 0.329814342 | 2.64E-02 | 1.32E-01 | 1.00E+00 |
| ENSG00000228570.6_NUTM2E     | ENSG00000160789.18_LMNA | -0.13266 | -0.285822917 | 0.02711474  | 1.03E-01 | 3.18E-01 | 1.00E+00 |
| ENSG00000186234.7_FAM86MP    | ENSG00000160789.18_LMNA | 0.06194  | -0.098232264 | 0.218978531 | 4.48E-01 | 7.15E-01 | 1.00E+00 |
| ENSG00000215162.1_LINC00269  | ENSG00000160789.18_LMNA | -0.12787 | -0.281344856 | 0.03198017  | 1.16E-01 | 3.41E-01 | 1.00E+00 |
| ENSG00000268400.4_CTD-3214H  | ENSG00000160789.18_LMNA | 0.12962  | -0.030200368 | 0.282984541 | 1.11E-01 | 3.33E-01 | 1.00E+00 |
| ENSG00000205856.3_C22orf42   | ENSG00000160789.18_LMNA | -0.19999 | -0.348109337 | -0.0421328  | 1.35E-02 | 8.13E-02 | 1.00E+00 |
| ENSG00000170819.4_BFSP2      | ENSG00000160789.18_LMNA | -0.10076 | -0.255855637 | 0.059394347 | 2.17E-01 | 4.91E-01 | 1.00E+00 |
| ENSG00000220666.2_RCC2P7     | ENSG00000160789.18_LMNA | 0.07942  | -0.08080543  | 0.235638386 | 3.31E-01 | 6.17E-01 | 1.00E+00 |
| ENSG00000229442.2_THEMIS3P   | ENSG00000160789.18_LMNA | -0.24294 | -0.387165857 | -0.08710749 | 2.56E-03 | 2.37E-02 | 1.00E+00 |
| ENSG00000253943.1_KRT18P37   | ENSG00000160789.18_LMNA | 0.04909  | -0.110976073 | 0.20667738  | 5.48E-01 | 7.85E-01 | 1.00E+00 |
| ENSG00000214842.5_RAD51AP2   | ENSG00000160789.18_LMNA | 0.03589  | -0.124023275 | 0.19397847  | 6.61E-01 | 8.50E-01 | 1.00E+00 |
| ENSG00000184659.5_FOXD4L4    | ENSG00000160789.18_LMNA | 0.0964   | -0.063780738 | 0.25173616  | 2.37E-01 | 5.16E-01 | 1.00E+00 |
| ENSG00000235286.1_AP000925.1 | ENSG00000160789.18_LMNA | 0.14865  | -0.010803075 | 0.300736841 | 6.76E-02 | 2.44E-01 | 1.00E+00 |
| ENSG00000218976.2_RP11-528A  | ENSG00000160789.18_LMNA | 0.07668  | -0.083544435 | 0.233032189 | 3.48E-01 | 6.32E-01 | 1.00E+00 |
| ENSG00000279512.1_RP11-575M  | ENSG00000160789.18_LMNA | -0.04751 | -0.205156189 | 0.11254478  | 5.61E-01 | 7.93E-01 | 1.00E+00 |
| ENSG00000237810.3_CTD-2571E  | ENSG00000160789.18_LMNA | -0.03632 | -0.194392855 | 0.123599253 | 6.57E-01 | 8.48E-01 | 1.00E+00 |
| ENSG00000175707.8_KDF1       | ENSG00000160789.18_LMNA | 0.09916  | -0.061007607 | 0.254341875 | 2.24E-01 | 5.00E-01 | 1.00E+00 |
| ENSG00000260555.1_RP11-728K  | ENSG00000160789.18_LMNA | 0.04463  | -0.115391543 | 0.202391727 | 5.85E-01 | 8.07E-01 | 1.00E+00 |
| ENSG00000226126.2_PSMC1P12   | ENSG00000160789.18_LMNA | -0.01205 | -0.170923899 | 0.147432435 | 8.83E-01 | 9.55E-01 | 1.00E+00 |
| ENSG00000175604.2_RP11-276H  | ENSG00000160789.18_LMNA | 0.01144  | -0.148034461 | 0.170326359 | 8.89E-01 | 9.57E-01 | 1.00E+00 |
| ENSG00000147160.8_AWAT2      | ENSG00000160789.18_LMNA | 0.07947  | -0.080757015 | 0.235684412 | 3.30E-01 | 6.16E-01 | 1.00E+00 |
| ENSG00000226994.6_AC012593.1 | ENSG00000160789.18_LMNA | -0.23095 | -0.376315604 | -0.0744892  | 4.20E-03 | 3.44E-02 | 1.00E+00 |
| ENSG00000237161.4_RP11-32B5  | ENSG00000160789.18_LMNA | 0.0116   | -0.147873099 | 0.170486542 | 8.87E-01 | 9.56E-01 | 1.00E+00 |
| ENSG00000259380.4_RP11-346D  | ENSG00000160789.18_LMNA | -0.16117 | -0.3123596   | -0.00202498 | 4.73E-02 | 1.94E-01 | 1.00E+00 |
| ENSG00000279494.1_RP11-494O  | ENSG00000160789.18_LMNA | 0.08979  | -0.070417863 | 0.245481092 | 2.71E-01 | 5.56E-01 | 1.00E+00 |
| ENSG00000124818.13_OPN5      | ENSG00000160789.18_LMNA | 0.04122  | -0.118755736 | 0.199118254 | 6.14E-01 | 8.25E-01 | 1.00E+00 |
| ENSG00000258320.1_RP11-274M  | ENSG00000160789.18_LMNA | -0.00074 | -0.159920574 | 0.15848066  | 9.93E-01 | 9.97E-01 | 1.00E+00 |

|                              |                         |          |              |             |          |          |          |
|------------------------------|-------------------------|----------|--------------|-------------|----------|----------|----------|
| ENSG00000267559.4_RP11-383M  | ENSG00000160789.18_LMNA | 0.11733  | -0.042668803 | 0.271459063 | 1.50E-01 | 3.98E-01 | 1.00E+00 |
| ENSG00000260287.4_TBC1D3G    | ENSG00000160789.18_LMNA | -0.03037 | -0.188657927 | 0.129457252 | 7.10E-01 | 8.77E-01 | 1.00E+00 |
| ENSG00000259632.2_RP11-56B1  | ENSG00000160789.18_LMNA | 0.08619  | -0.074031418 | 0.242064452 | 2.91E-01 | 5.77E-01 | 1.00E+00 |
| ENSG00000249923.1_XXbac-B44  | ENSG00000160789.18_LMNA | -0.24955 | -0.393135509 | -0.0940912  | 1.93E-03 | 1.90E-02 | 1.00E+00 |
| ENSG00000174429.3_ABRA       | ENSG00000160789.18_LMNA | 0.1529   | -0.00645873  | 0.304683391 | 6.00E-02 | 2.26E-01 | 1.00E+00 |
| ENSG00000250891.1_CTD-2281M  | ENSG00000160789.18_LMNA | -0.06638 | -0.223224876 | 0.093808825 | 4.16E-01 | 6.89E-01 | 1.00E+00 |
| ENSG00000187922.12_LCN10     | ENSG00000160789.18_LMNA | -0.06495 | -0.221861351 | 0.095230581 | 4.27E-01 | 6.97E-01 | 1.00E+00 |
| ENSG00000261606.4_RP11-414J  | ENSG00000160789.18_LMNA | 0.01256  | -0.146934203 | 0.171418242 | 8.78E-01 | 9.53E-01 | 1.00E+00 |
| ENSG00000249661.1_TNRC18P1   | ENSG00000160789.18_LMNA | 0.03402  | -0.125863962 | 0.1921783   | 6.77E-01 | 8.59E-01 | 1.00E+00 |
| ENSG00000272058.2_FAM231D    | ENSG00000160789.18_LMNA | -0.0005  | -0.159685457 | 0.15871587  | 9.95E-01 | 9.98E-01 | 1.00E+00 |
| ENSG00000187268.10_FAM9C     | ENSG00000160789.18_LMNA | -0.06724 | -0.224037771 | 0.092960599 | 4.10E-01 | 6.85E-01 | 1.00E+00 |
| ENSG00000252835.1_SCARNA21   | ENSG00000160789.18_LMNA | -0.1762  | -0.326248767 | -0.01748961 | 2.99E-02 | 1.43E-01 | 1.00E+00 |
| ENSG00000207933.2_MIR9-1     | ENSG00000160789.18_LMNA | -0.06726 | -0.224059933 | 0.092937467 | 4.10E-01 | 6.85E-01 | 1.00E+00 |
| ENSG00000272359.1_RNU4-89P   | ENSG00000160789.18_LMNA | -0.00485 | -0.163922407 | 0.154471702 | 9.53E-01 | 9.81E-01 | 1.00E+00 |
| ENSG00000279075.1_RP11-480D  | ENSG00000160789.18_LMNA | 0.00375  | -0.155545178 | 0.162851866 | 9.63E-01 | 9.85E-01 | 1.00E+00 |
| ENSG00000200783.1_RN7SKP18   | ENSG00000160789.18_LMNA | -0.10048 | -0.255596322 | 0.059670823 | 2.18E-01 | 4.93E-01 | 1.00E+00 |
| ENSG00000266957.1_RP11-49K2  | ENSG00000160789.18_LMNA | 0.07407  | -0.086147968 | 0.230550673 | 3.64E-01 | 6.46E-01 | 1.00E+00 |
| ENSG00000229786.1_SNRFPF2    | ENSG00000160789.18_LMNA | -0.11409 | -0.268417508 | 0.045942966 | 1.62E-01 | 4.16E-01 | 1.00E+00 |
| ENSG00000229930.1_RP11-504P  | ENSG00000160789.18_LMNA | -0.00036 | -0.159556273 | 0.15884509  | 9.96E-01 | 9.99E-01 | 1.00E+00 |
| ENSG00000242101.3_RN7SL416f  | ENSG00000160789.18_LMNA | 0.02261  | -0.137081186 | 0.181161528 | 7.82E-01 | 9.11E-01 | 1.00E+00 |
| ENSG00000250662.1_HNRNPKP6   | ENSG00000160789.18_LMNA | 0.06856  | -0.091644039 | 0.225298618 | 4.01E-01 | 6.78E-01 | 1.00E+00 |
| ENSG00000217824.1_SNRPEP6    | ENSG00000160789.18_LMNA | -0.13438 | -0.287429345 | 0.025365728 | 9.88E-02 | 3.09E-01 | 1.00E+00 |
| ENSG00000180269.7_GPR139     | ENSG00000160789.18_LMNA | -0.00048 | -0.159664201 | 0.158737133 | 9.95E-01 | 9.98E-01 | 1.00E+00 |
| ENSG00000229337.1_AC079305.1 | ENSG00000160789.18_LMNA | -0.10205 | -0.257070465 | 0.058098478 | 2.11E-01 | 4.84E-01 | 1.00E+00 |
| ENSG00000259121.2_RP11-545M  | ENSG00000160789.18_LMNA | 0.00656  | -0.152797854 | 0.165590185 | 9.36E-01 | 9.75E-01 | 1.00E+00 |
| ENSG00000254418.1_RP11-21L1  | ENSG00000160789.18_LMNA | -0.01124 | -0.170138785 | 0.148223394 | 8.91E-01 | 9.57E-01 | 1.00E+00 |
| ENSG00000257808.1_RP11-1136  | ENSG00000160789.18_LMNA | -0.14367 | -0.296093729 | 0.015899178 | 7.74E-02 | 2.67E-01 | 1.00E+00 |
| ENSG00000211716.2_TRBV9      | ENSG00000160789.18_LMNA | 0.04338  | -0.116629513 | 0.201187966 | 5.96E-01 | 8.13E-01 | 1.00E+00 |
| ENSG00000236437.1_AP001891.1 | ENSG00000160789.18_LMNA | -0.20614 | -0.353728567 | -0.04852803 | 1.08E-02 | 6.94E-02 | 1.00E+00 |
| ENSG00000221857.6_CTD-2527I2 | ENSG00000160789.18_LMNA | -0.11971 | -0.273693651 | 0.040259015 | 1.42E-01 | 3.85E-01 | 1.00E+00 |
| ENSG00000254610.1_RP5-903G2  | ENSG00000160789.18_LMNA | 0.01067  | -0.14878411  | 0.169581968 | 8.96E-01 | 9.59E-01 | 1.00E+00 |
| ENSG00000254695.1_RP11-396O  | ENSG00000160789.18_LMNA | -0.35764 | -0.488999425 | -0.21042066 | 6.08E-06 | 1.95E-04 | 3.12E-01 |
| ENSG00000150201.13_FXYD4     | ENSG00000160789.18_LMNA | -0.23764 | -0.382371771 | -0.08152032 | 3.20E-03 | 2.80E-02 | 1.00E+00 |

|                              |                         |          |              |             |          |          |          |
|------------------------------|-------------------------|----------|--------------|-------------|----------|----------|----------|
| ENSG00000271607.1_RP3-418A9  | ENSG00000160789.18_LMNA | -0.22999 | -0.375442795 | -0.07347835 | 4.37E-03 | 3.54E-02 | 1.00E+00 |
| ENSG00000242995.1_RP11-1085I | ENSG00000160789.18_LMNA | -0.01582 | -0.174578567 | 0.143745193 | 8.47E-01 | 9.40E-01 | 1.00E+00 |
| ENSG00000248234.1_CTD-2108C  | ENSG00000160789.18_LMNA | -0.0608  | -0.217896188 | 0.099357745 | 4.57E-01 | 7.21E-01 | 1.00E+00 |
| ENSG00000255444.1_CYCSP27    | ENSG00000160789.18_LMNA | -0.06823 | -0.224989432 | 0.091966989 | 4.04E-01 | 6.79E-01 | 1.00E+00 |
| ENSG00000258695.2_RP3-414A1  | ENSG00000160789.18_LMNA | 0.01347  | -0.14604563  | 0.172299481 | 8.69E-01 | 9.49E-01 | 1.00E+00 |
| ENSG00000260017.1_RP11-1035I | ENSG00000160789.18_LMNA | 0.09841  | -0.0617587   | 0.253636578 | 2.28E-01 | 5.04E-01 | 1.00E+00 |
| ENSG00000263154.1_RP11-1055I | ENSG00000160789.18_LMNA | -0.09666 | -0.251979412 | 0.063522063 | 2.36E-01 | 5.14E-01 | 1.00E+00 |
| ENSG00000234775.1_RP11-335O  | ENSG00000160789.18_LMNA | 0.19706  | 0.039084176  | 0.345422867 | 1.50E-02 | 8.77E-02 | 1.00E+00 |
| ENSG00000236491.1_RP13-565O  | ENSG00000160789.18_LMNA | -0.07657 | -0.23293008  | 0.08365165  | 3.48E-01 | 6.32E-01 | 1.00E+00 |
| ENSG00000227683.1_RP11-445N  | ENSG00000160789.18_LMNA | 0.03792  | -0.122013331 | 0.195941728 | 6.43E-01 | 8.41E-01 | 1.00E+00 |
| ENSG00000226928.1_RPS14P4    | ENSG00000160789.18_LMNA | 0.05229  | -0.107808908 | 0.209743939 | 5.22E-01 | 7.68E-01 | 1.00E+00 |
| ENSG00000233933.2_RP11-63P1  | ENSG00000160789.18_LMNA | -0.05337 | -0.210783416 | 0.106733864 | 5.14E-01 | 7.62E-01 | 1.00E+00 |
| ENSG00000271557.1_YPEL5P2    | ENSG00000160789.18_LMNA | 0.06586  | -0.094324967 | 0.222730017 | 4.20E-01 | 6.92E-01 | 1.00E+00 |
| ENSG00000228470.1_RP11-176D  | ENSG00000160789.18_LMNA | 0.0284   | -0.131392133 | 0.186758917 | 7.28E-01 | 8.85E-01 | 1.00E+00 |
| ENSG00000263311.1_RP11-498D  | ENSG00000160789.18_LMNA | -0.06487 | -0.221776222 | 0.095319303 | 4.27E-01 | 6.98E-01 | 1.00E+00 |
| ENSG00000230697.1_SAP18P3    | ENSG00000160789.18_LMNA | -0.01385 | -0.172671367 | 0.145670496 | 8.66E-01 | 9.47E-01 | 1.00E+00 |
| ENSG00000226957.1_RP4-533D7  | ENSG00000160789.18_LMNA | 0.09206  | -0.068134596 | 0.247635899 | 2.59E-01 | 5.42E-01 | 1.00E+00 |
| ENSG00000255644.1_RP11-59N2  | ENSG00000160789.18_LMNA | 0.06823  | -0.091970033 | 0.224986518 | 4.04E-01 | 6.79E-01 | 1.00E+00 |
| ENSG00000274038.1_RP11-66H6  | ENSG00000160789.18_LMNA | 0.06625  | -0.093946147 | 0.223093232 | 4.17E-01 | 6.90E-01 | 1.00E+00 |
| ENSG00000276097.1_AC006538.I | ENSG00000160789.18_LMNA | 0.0927   | -0.067495509 | 0.24823847  | 2.56E-01 | 5.38E-01 | 1.00E+00 |
| ENSG00000253603.1_CTA-397H3  | ENSG00000160789.18_LMNA | -0.07913 | -0.235362748 | 0.081095339 | 3.33E-01 | 6.18E-01 | 1.00E+00 |
| ENSG00000214835.3_RPL23AP6   | ENSG00000160789.18_LMNA | -0.09179 | -0.247375881 | 0.06841029  | 2.61E-01 | 5.44E-01 | 1.00E+00 |
| ENSG00000273198.1_GS1-304P7  | ENSG00000160789.18_LMNA | -0.11913 | -0.273150459 | 0.040845132 | 1.44E-01 | 3.88E-01 | 1.00E+00 |
| ENSG00000212932.3_RPL23AP4   | ENSG00000160789.18_LMNA | -0.04121 | -0.199100096 | 0.118774376 | 6.14E-01 | 8.25E-01 | 1.00E+00 |
| ENSG00000233319.1_PPIAP32    | ENSG00000160789.18_LMNA | 0.13252  | -0.027257358 | 0.285691848 | 1.04E-01 | 3.19E-01 | 1.00E+00 |
| ENSG00000259847.1_RP11-95H3  | ENSG00000160789.18_LMNA | 0.08728  | -0.072931903 | 0.243104881 | 2.85E-01 | 5.70E-01 | 1.00E+00 |
| ENSG00000226003.2_RP11-312J  | ENSG00000160789.18_LMNA | -0.04485 | -0.202608271 | 0.115168741 | 5.83E-01 | 8.06E-01 | 1.00E+00 |
| ENSG00000263177.1_MTND1P8    | ENSG00000160789.18_LMNA | -0.1041  | -0.259003804 | 0.056033974 | 2.02E-01 | 4.73E-01 | 1.00E+00 |
| ENSG00000233610.1_LINC00462  | ENSG00000160789.18_LMNA | -0.04874 | -0.206339767 | 0.111324368 | 5.51E-01 | 7.87E-01 | 1.00E+00 |
| ENSG00000244371.2_PFN1P8     | ENSG00000160789.18_LMNA | 0.05095  | -0.10914051  | 0.208455397 | 5.33E-01 | 7.75E-01 | 1.00E+00 |
| ENSG00000213122.4_RPL23AP4I  | ENSG00000160789.18_LMNA | -0.04441 | -0.202177237 | 0.115612201 | 5.87E-01 | 8.08E-01 | 1.00E+00 |
| ENSG00000228133.2_AC099684.  | ENSG00000160789.18_LMNA | -0.13478 | -0.287806498 | 0.024954823 | 9.78E-02 | 3.08E-01 | 1.00E+00 |
| ENSG00000235760.3_HCG20400I  | ENSG00000160789.18_LMNA | -0.14931 | -0.301343375 | 0.010136169 | 6.64E-02 | 2.41E-01 | 1.00E+00 |

|                              |                         |          |              |             |          |          |          |
|------------------------------|-------------------------|----------|--------------|-------------|----------|----------|----------|
| ENSG00000224907.1_RPL21P91   | ENSG00000160789.18_LMNA | 0.06287  | -0.097308428 | 0.219866374 | 4.42E-01 | 7.09E-01 | 1.00E+00 |
| ENSG00000268873.1_RP11-138H  | ENSG00000160789.18_LMNA | 0.07146  | -0.088751227 | 0.228065292 | 3.82E-01 | 6.60E-01 | 1.00E+00 |
| ENSG00000274092.1_CTD-3203P  | ENSG00000160789.18_LMNA | 0.1399   | -0.019741014 | 0.292583619 | 8.56E-02 | 2.84E-01 | 1.00E+00 |
| ENSG00000272076.1_RP11-11C2  | ENSG00000160789.18_LMNA | 0.04203  | -0.117962983 | 0.199890268 | 6.07E-01 | 8.20E-01 | 1.00E+00 |
| ENSG00000231386.1_AC007395.4 | ENSG00000160789.18_LMNA | 0.04781  | -0.112241625 | 0.205450281 | 5.59E-01 | 7.92E-01 | 1.00E+00 |
| ENSG00000271142.1_YWHAQP7    | ENSG00000160789.18_LMNA | -0.08377 | -0.239772888 | 0.076450411 | 3.05E-01 | 5.92E-01 | 1.00E+00 |
| ENSG00000237939.1_AC097523.1 | ENSG00000160789.18_LMNA | -0.20456 | -0.352287962 | -0.04688609 | 1.15E-02 | 7.23E-02 | 1.00E+00 |
| ENSG00000236816.2_ANKRD20A   | ENSG00000160789.18_LMNA | -0.15313 | -0.30489925  | 0.006220774 | 5.96E-02 | 2.25E-01 | 1.00E+00 |
| ENSG00000214141.4_ACTN4P2    | ENSG00000160789.18_LMNA | 0.05604  | -0.104093662 | 0.213333225 | 4.93E-01 | 7.48E-01 | 1.00E+00 |
| ENSG00000229142.1_HCG4P8     | ENSG00000160789.18_LMNA | 0.18427  | 0.025823667  | 0.333678916 | 2.31E-02 | 1.19E-01 | 1.00E+00 |
| ENSG00000168671.8_UGT3A2     | ENSG00000160789.18_LMNA | 0.05448  | -0.105634113 | 0.21184604  | 5.05E-01 | 7.56E-01 | 1.00E+00 |
| ENSG00000227080.2_CTD-2021A  | ENSG00000160789.18_LMNA | 0.0253   | -0.134439867 | 0.183762856 | 7.57E-01 | 8.99E-01 | 1.00E+00 |
| ENSG00000228364.1_SAR1P1     | ENSG00000160789.18_LMNA | 0.13001  | -0.029808103 | 0.283345678 | 1.10E-01 | 3.31E-01 | 1.00E+00 |
| ENSG00000267656.1_RP11-807E  | ENSG00000160789.18_LMNA | 0.06569  | -0.094499075 | 0.222563051 | 4.21E-01 | 6.93E-01 | 1.00E+00 |
| ENSG00000203386.5_LINC01317  | ENSG00000160789.18_LMNA | 0.05391  | -0.106203986 | 0.2112955   | 5.09E-01 | 7.59E-01 | 1.00E+00 |
| ENSG00000166090.8_IL25       | ENSG00000160789.18_LMNA | 0.08669  | -0.073529844 | 0.242539162 | 2.88E-01 | 5.74E-01 | 1.00E+00 |
| ENSG00000229425.1_AJ006998.2 | ENSG00000160789.18_LMNA | -0.04464 | -0.202404501 | 0.1153784   | 5.85E-01 | 8.07E-01 | 1.00E+00 |
| ENSG00000225661.5_RPL14P5    | ENSG00000160789.18_LMNA | 0.00683  | -0.152534823 | 0.165852097 | 9.33E-01 | 9.74E-01 | 1.00E+00 |
| ENSG00000228144.2_RP11-745O  | ENSG00000160789.18_LMNA | 0.12041  | -0.03955311  | 0.274347592 | 1.40E-01 | 3.81E-01 | 1.00E+00 |
| ENSG00000250337.4_LINC01021  | ENSG00000160789.18_LMNA | 0.09095  | -0.069254382 | 0.246579504 | 2.65E-01 | 5.49E-01 | 1.00E+00 |
| ENSG00000231435.1_AC011747.1 | ENSG00000160789.18_LMNA | 0.01565  | -0.143908644 | 0.174416746 | 8.48E-01 | 9.41E-01 | 1.00E+00 |
| ENSG00000248791.1_CTD-2165H  | ENSG00000160789.18_LMNA | 0.00602  | -0.15332365  | 0.165066492 | 9.41E-01 | 9.77E-01 | 1.00E+00 |
| ENSG00000224569.3_RP11-341G  | ENSG00000160789.18_LMNA | -0.15988 | -0.311164028 | -0.0007007  | 4.91E-02 | 1.99E-01 | 1.00E+00 |
| ENSG00000279891.1_FLJ42393   | ENSG00000160789.18_LMNA | 0.00208  | -0.157168148 | 0.161231907 | 9.80E-01 | 9.92E-01 | 1.00E+00 |
| ENSG00000151577.11_DRD3      | ENSG00000160789.18_LMNA | 0.07319  | -0.087020873 | 0.229717754 | 3.70E-01 | 6.51E-01 | 1.00E+00 |
| ENSG00000258792.3_RP11-944C  | ENSG00000160789.18_LMNA | -0.04013 | -0.198066871 | 0.119834709 | 6.24E-01 | 8.30E-01 | 1.00E+00 |
| ENSG00000218565.2_RP11-12A2  | ENSG00000160789.18_LMNA | 0.09154  | -0.068663378 | 0.247137144 | 2.62E-01 | 5.45E-01 | 1.00E+00 |
| ENSG00000261584.1_RP11-457M  | ENSG00000160789.18_LMNA | -0.05396 | -0.211344225 | 0.106153557 | 5.09E-01 | 7.59E-01 | 1.00E+00 |
| ENSG00000280009.1_CTD-2123J  | ENSG00000160789.18_LMNA | -0.02684 | -0.185244462 | 0.13293346  | 7.43E-01 | 8.92E-01 | 1.00E+00 |
| ENSG00000271499.1_CTC-559E9  | ENSG00000160789.18_LMNA | 0.0307   | -0.129132668 | 0.18897626  | 7.07E-01 | 8.76E-01 | 1.00E+00 |
| ENSG00000214773.1_RP11-717D  | ENSG00000160789.18_LMNA | -0.08654 | -0.242401639 | 0.073675167 | 2.89E-01 | 5.74E-01 | 1.00E+00 |
| ENSG00000266946.1_MRPL37P1   | ENSG00000160789.18_LMNA | 0.0305   | -0.129325061 | 0.188787581 | 7.09E-01 | 8.76E-01 | 1.00E+00 |
| ENSG00000258354.1_MIR3180-1  | ENSG00000160789.18_LMNA | 0.01831  | -0.141304504 | 0.17699288  | 8.23E-01 | 9.31E-01 | 1.00E+00 |

|                              |                         |          |              |             |          |          |          |
|------------------------------|-------------------------|----------|--------------|-------------|----------|----------|----------|
| ENSG00000137707.12_BTG4      | ENSG00000160789.18_LMNA | 0.07832  | -0.081906017 | 0.23459171  | 3.38E-01 | 6.23E-01 | 1.00E+00 |
| ENSG00000225192.1_ZNF33BP1   | ENSG00000160789.18_LMNA | 0.03053  | -0.129296408 | 0.188815682 | 7.09E-01 | 8.76E-01 | 1.00E+00 |
| ENSG00000213724.3_PRDX2P2    | ENSG00000160789.18_LMNA | 0.17568  | 0.016957391  | 0.325772974 | 3.04E-02 | 1.45E-01 | 1.00E+00 |
| ENSG00000270499.1_MKI67P1    | ENSG00000160789.18_LMNA | 0.11181  | -0.048248237 | 0.266272244 | 1.70E-01 | 4.29E-01 | 1.00E+00 |
| ENSG00000281904.1_CH17-132F  | ENSG00000160789.18_LMNA | -0.05133 | -0.208826939 | 0.108756669 | 5.30E-01 | 7.73E-01 | 1.00E+00 |
| ENSG00000235621.7_LINC00494  | ENSG00000160789.18_LMNA | -0.23911 | -0.383703582 | -0.08307056 | 3.01E-03 | 2.68E-02 | 1.00E+00 |
| ENSG00000229491.4_RP11-342D  | ENSG00000160789.18_LMNA | -0.09531 | -0.250711059 | 0.064870368 | 2.43E-01 | 5.22E-01 | 1.00E+00 |
| ENSG00000280200.1_RP11-243M  | ENSG00000160789.18_LMNA | 0.05735  | -0.102786449 | 0.214594084 | 4.83E-01 | 7.40E-01 | 1.00E+00 |
| ENSG00000232684.1_ATP11A-AS  | ENSG00000160789.18_LMNA | -0.05962 | -0.216766996 | 0.100531077 | 4.66E-01 | 7.28E-01 | 1.00E+00 |
| ENSG00000231235.1_RP11-75A9  | ENSG00000160789.18_LMNA | 0.12172  | -0.038222815 | 0.275579173 | 1.35E-01 | 3.74E-01 | 1.00E+00 |
| ENSG00000180532.9_ZSCAN4     | ENSG00000160789.18_LMNA | 0.0098   | -0.149631732 | 0.168739852 | 9.05E-01 | 9.63E-01 | 1.00E+00 |
| ENSG00000243349.2_RP11-445N  | ENSG00000160789.18_LMNA | 0.02878  | -0.131016417 | 0.187127854 | 7.25E-01 | 8.83E-01 | 1.00E+00 |
| ENSG00000244378.1_RPS2P45    | ENSG00000160789.18_LMNA | 0.02986  | -0.129955642 | 0.188169004 | 7.15E-01 | 8.79E-01 | 1.00E+00 |
| ENSG00000280281.1_RP11-340L  | ENSG00000160789.18_LMNA | -0.18529 | -0.334616034 | -0.02687784 | 2.23E-02 | 1.17E-01 | 1.00E+00 |
| ENSG00000270002.1_RP11-93H1  | ENSG00000160789.18_LMNA | -0.10438 | -0.259270198 | 0.055749296 | 2.01E-01 | 4.71E-01 | 1.00E+00 |
| ENSG00000279565.1_RP4-570O1  | ENSG00000160789.18_LMNA | 0.05024  | -0.109841035 | 0.207777081 | 5.39E-01 | 7.79E-01 | 1.00E+00 |
| ENSG00000243207.5_PPAN-P2R   | ENSG00000160789.18_LMNA | 0.11085  | -0.049219574 | 0.265367393 | 1.74E-01 | 4.34E-01 | 1.00E+00 |
| ENSG00000113889.10_KNG1      | ENSG00000160789.18_LMNA | -0.08114 | -0.237271653 | 0.079086494 | 3.20E-01 | 6.07E-01 | 1.00E+00 |
| ENSG00000163534.13_FCRL1     | ENSG00000160789.18_LMNA | -0.03736 | -0.195396284 | 0.122572007 | 6.48E-01 | 8.43E-01 | 1.00E+00 |
| ENSG00000180178.9_FAR2P1     | ENSG00000160789.18_LMNA | -0.04971 | -0.207272159 | 0.110362285 | 5.43E-01 | 7.82E-01 | 1.00E+00 |
| ENSG00000245384.1_AC004053   | ENSG00000160789.18_LMNA | -0.18788 | -0.337001869 | -0.02956477 | 2.05E-02 | 1.10E-01 | 1.00E+00 |
| ENSG00000229021.2_AL591893.1 | ENSG00000160789.18_LMNA | 0.29586  | 0.143412481  | 0.434589498 | 2.15E-04 | 3.45E-03 | 1.00E+00 |
| ENSG00000260105.5_AOC4P      | ENSG00000160789.18_LMNA | 0.06757  | -0.09262974  | 0.224354729 | 4.08E-01 | 6.83E-01 | 1.00E+00 |
| ENSG00000170827.8_CELP       | ENSG00000160789.18_LMNA | 0.10016  | -0.059997742 | 0.255289638 | 2.20E-01 | 4.95E-01 | 1.00E+00 |
| ENSG00000259848.7_AC097374   | ENSG00000160789.18_LMNA | -0.07665 | -0.233008782 | 0.083569013 | 3.48E-01 | 6.32E-01 | 1.00E+00 |
| ENSG00000224373.3_IGHV4-59   | ENSG00000160789.18_LMNA | -0.04199 | -0.199855569 | 0.117998622 | 6.07E-01 | 8.21E-01 | 1.00E+00 |
| ENSG00000202515.1_VTRNA1-3   | ENSG00000160789.18_LMNA | 0.00659  | -0.152766999 | 0.165620911 | 9.36E-01 | 9.75E-01 | 1.00E+00 |
| ENSG00000278108.1_MIR6757    | ENSG00000160789.18_LMNA | -0.1606  | -0.311830086 | -0.00143833 | 4.81E-02 | 1.96E-01 | 1.00E+00 |
| ENSG00000199377.1_RNU5F-1    | ENSG00000160789.18_LMNA | -0.0241  | -0.182599337 | 0.135621832 | 7.68E-01 | 9.04E-01 | 1.00E+00 |
| ENSG00000206712.1_RNU6-26P   | ENSG00000160789.18_LMNA | 0.13503  | -0.024704816 | 0.288035921 | 9.72E-02 | 3.06E-01 | 1.00E+00 |
| ENSG00000201451.1_Y_RNA      | ENSG00000160789.18_LMNA | 0.06013  | -0.100025522 | 0.217253637 | 4.62E-01 | 7.25E-01 | 1.00E+00 |
| ENSG00000202318.1_Y_RNA      | ENSG00000160789.18_LMNA | -0.07905 | -0.235288873 | 0.08117303  | 3.33E-01 | 6.19E-01 | 1.00E+00 |
| ENSG00000264599.2            | ENSG00000160789.18_LMNA | 0.05153  | -0.108562374 | 0.209014973 | 5.28E-01 | 7.72E-01 | 1.00E+00 |

|                              |                         |          |              |             |          |          |          |
|------------------------------|-------------------------|----------|--------------|-------------|----------|----------|----------|
| ENSG00000202150.1_RNU6-407F  | ENSG00000160789.18_LMNA | 0.04247  | -0.117527636 | 0.200314059 | 6.03E-01 | 8.18E-01 | 1.00E+00 |
| ENSG00000201558.1_RNVU1-6    | ENSG00000160789.18_LMNA | -0.17489 | -0.325044958 | -0.01614338 | 3.12E-02 | 1.47E-01 | 1.00E+00 |
| ENSG00000229246.1_LINC00377  | ENSG00000160789.18_LMNA | 0.01738  | -0.142216448 | 0.17609124  | 8.32E-01 | 9.35E-01 | 1.00E+00 |
| ENSG00000278026.1_SOX2OT_e   | ENSG00000160789.18_LMNA | -0.17011 | -0.320631755 | -0.01121761 | 3.61E-02 | 1.62E-01 | 1.00E+00 |
| ENSG00000252274.1_SCARNA24   | ENSG00000160789.18_LMNA | -0.04462 | -0.202383868 | 0.115399629 | 5.85E-01 | 8.07E-01 | 1.00E+00 |
| ENSG00000256452.1_RP11-667M  | ENSG00000160789.18_LMNA | -0.0096  | -0.16854472  | 0.149828074 | 9.07E-01 | 9.64E-01 | 1.00E+00 |
| ENSG00000278012.1_RP1-310O1  | ENSG00000160789.18_LMNA | -0.23538 | -0.380329798 | -0.07914627 | 3.51E-03 | 3.01E-02 | 1.00E+00 |
| ENSG00000256884.1_RP11-64B1  | ENSG00000160789.18_LMNA | -0.24245 | -0.386722233 | -0.08658969 | 2.62E-03 | 2.40E-02 | 1.00E+00 |
| ENSG00000269971.1_RP3-426I6. | ENSG00000160789.18_LMNA | 0.17263  | 0.013813507  | 0.322959203 | 3.34E-02 | 1.54E-01 | 1.00E+00 |
| ENSG00000228787.1_NLGN4Y-A   | ENSG00000160789.18_LMNA | -0.08293 | -0.238978753 | 0.07728784  | 3.10E-01 | 5.96E-01 | 1.00E+00 |
| ENSG00000268297.1_CLEC4GP1   | ENSG00000160789.18_LMNA | 0.07375  | -0.086466859 | 0.230246444 | 3.67E-01 | 6.47E-01 | 1.00E+00 |
| ENSG00000225805.4_CTD-2313N  | ENSG00000160789.18_LMNA | 0.0926   | -0.067596736 | 0.248143043 | 2.57E-01 | 5.39E-01 | 1.00E+00 |
| ENSG00000160472.4_TMEN190    | ENSG00000160789.18_LMNA | 0.21025  | 0.052814145  | 0.357482318 | 9.33E-03 | 6.23E-02 | 1.00E+00 |
| ENSG00000233101.9_HOXB-AS3   | ENSG00000160789.18_LMNA | 0.20629  | 0.048687061  | 0.353868023 | 1.08E-02 | 6.91E-02 | 1.00E+00 |
| ENSG00000269553.1_U62631.5   | ENSG00000160789.18_LMNA | -0.29538 | -0.434168017 | -0.14290362 | 2.20E-04 | 3.52E-03 | 1.00E+00 |
| ENSG00000272130.1_RP11-360I2 | ENSG00000160789.18_LMNA | -0.18468 | -0.334055251 | -0.02624693 | 2.27E-02 | 1.18E-01 | 1.00E+00 |
| ENSG00000258748.1_CTD-2223C  | ENSG00000160789.18_LMNA | -0.21976 | -0.366148615 | -0.06275258 | 6.52E-03 | 4.79E-02 | 1.00E+00 |
| ENSG00000255487.1_RP11-513D  | ENSG00000160789.18_LMNA | -0.0696  | -0.226291759 | 0.090606233 | 3.94E-01 | 6.72E-01 | 1.00E+00 |
| ENSG00000255045.1_RP11-677M  | ENSG00000160789.18_LMNA | 0.01396  | -0.145567665 | 0.172773291 | 8.64E-01 | 9.47E-01 | 1.00E+00 |
| ENSG00000242307.1_RPS26P52   | ENSG00000160789.18_LMNA | -0.06614 | -0.222988659 | 0.094055223 | 4.18E-01 | 6.90E-01 | 1.00E+00 |
| ENSG00000268598.1_VN1R80P    | ENSG00000160789.18_LMNA | -0.01946 | -0.178104078 | 0.140179865 | 8.12E-01 | 9.26E-01 | 1.00E+00 |
| ENSG00000272510.1_RP4-680D5  | ENSG00000160789.18_LMNA | 0.0463   | -0.113742009 | 0.203994189 | 5.71E-01 | 8.00E-01 | 1.00E+00 |
| ENSG00000256706.1_RP5-1096D  | ENSG00000160789.18_LMNA | -0.09774 | -0.253000495 | 0.062435778 | 2.31E-01 | 5.09E-01 | 1.00E+00 |
| ENSG00000237471.1_AC073115.I | ENSG00000160789.18_LMNA | 0.124    | -0.035911461 | 0.277716567 | 1.28E-01 | 3.62E-01 | 1.00E+00 |
| ENSG00000269752.1_CTD-3149D  | ENSG00000160789.18_LMNA | -0.11142 | -0.265900633 | 0.048647225 | 1.72E-01 | 4.31E-01 | 1.00E+00 |
| ENSG00000241829.1_RPL21P54   | ENSG00000160789.18_LMNA | -0.04876 | -0.20636247  | 0.111300949 | 5.51E-01 | 7.87E-01 | 1.00E+00 |
| ENSG00000278595.1_RP5-1068H  | ENSG00000160789.18_LMNA | 0.01724  | -0.142347294 | 0.175961828 | 8.33E-01 | 9.35E-01 | 1.00E+00 |
| ENSG00000256720.1_BTG1P1     | ENSG00000160789.18_LMNA | -0.10863 | -0.263279747 | 0.051458347 | 1.83E-01 | 4.47E-01 | 1.00E+00 |
| ENSG00000278546.1_RP1-41C23  | ENSG00000160789.18_LMNA | 0.12481  | -0.035086446 | 0.278478737 | 1.26E-01 | 3.58E-01 | 1.00E+00 |
| ENSG00000173237.4_C11orf86   | ENSG00000160789.18_LMNA | -0.25556 | -0.39854784  | -0.10044845 | 1.48E-03 | 1.56E-02 | 1.00E+00 |
| ENSG00000235191.1_NUCB1-AS   | ENSG00000160789.18_LMNA | 0.14456  | -0.014987931 | 0.29692506  | 7.56E-02 | 2.63E-01 | 1.00E+00 |
| ENSG00000236140.1_RP11-89F3  | ENSG00000160789.18_LMNA | 0.03844  | -0.121503747 | 0.196439071 | 6.38E-01 | 8.38E-01 | 1.00E+00 |
| ENSG00000214298.3_MRPS21P6   | ENSG00000160789.18_LMNA | -0.11474 | -0.26902979  | 0.045284401 | 1.59E-01 | 4.12E-01 | 1.00E+00 |

|                              |                         |          |              |             |          |          |          |
|------------------------------|-------------------------|----------|--------------|-------------|----------|----------|----------|
| ENSG00000237930.1_AC007563.4 | ENSG00000160789.18_LMNA | -0.0582  | -0.215400684 | 0.10194962  | 4.76E-01 | 7.35E-01 | 1.00E+00 |
| ENSG00000240846.2_RPS15P9    | ENSG00000160789.18_LMNA | 0.04431  | -0.1157035   | 0.202088481 | 5.88E-01 | 8.08E-01 | 1.00E+00 |
| ENSG00000261305.1_RP4-584D1  | ENSG00000160789.18_LMNA | 0.05922  | -0.10093678  | 0.216376358 | 4.69E-01 | 7.30E-01 | 1.00E+00 |
| ENSG00000258088.1_RP11-114H  | ENSG00000160789.18_LMNA | -0.13058 | -0.283878967 | 0.029228672 | 1.09E-01 | 3.28E-01 | 1.00E+00 |
| ENSG00000237359.1_RP11-509J  | ENSG00000160789.18_LMNA | -0.02257 | -0.181124046 | 0.137119211 | 7.83E-01 | 9.11E-01 | 1.00E+00 |
| ENSG00000182698.10_RESP18    | ENSG00000160789.18_LMNA | -0.13412 | -0.287192694 | 0.025623504 | 9.95E-02 | 3.11E-01 | 1.00E+00 |
| ENSG00000229543.1_RP11-90J7  | ENSG00000160789.18_LMNA | -0.23113 | -0.37647617  | -0.07467523 | 4.17E-03 | 3.43E-02 | 1.00E+00 |
| ENSG00000223576.2_RP11-61K9  | ENSG00000160789.18_LMNA | 0.00222  | -0.157031654 | 0.161368214 | 9.78E-01 | 9.92E-01 | 1.00E+00 |
| ENSG00000266941.1_AC104532.1 | ENSG00000160789.18_LMNA | 0.05336  | -0.106748174 | 0.210769584 | 5.14E-01 | 7.62E-01 | 1.00E+00 |
| ENSG00000243514.2_RPL32P33   | ENSG00000160789.18_LMNA | -0.0533  | -0.210712577 | 0.106807151 | 5.14E-01 | 7.62E-01 | 1.00E+00 |
| ENSG00000220694.2_RP3-403A1  | ENSG00000160789.18_LMNA | -0.1075  | -0.262213391 | 0.052600678 | 1.87E-01 | 4.54E-01 | 1.00E+00 |
| ENSG00000244502.2_HDAC11-A1  | ENSG00000160789.18_LMNA | 0.03152  | -0.128322229 | 0.189770801 | 7.00E-01 | 8.72E-01 | 1.00E+00 |
| ENSG00000272966.1_RP11-686O  | ENSG00000160789.18_LMNA | 0.06919  | -0.091017354 | 0.225898411 | 3.97E-01 | 6.74E-01 | 1.00E+00 |
| ENSG00000230489.1_VAV3-AS1   | ENSG00000160789.18_LMNA | 0.26887  | 0.114577569  | 0.410502955 | 8.10E-04 | 9.82E-03 | 1.00E+00 |
| ENSG00000255933.1_RP11-495K  | ENSG00000160789.18_LMNA | -0.03669 | -0.194750384 | 0.123233316 | 6.54E-01 | 8.47E-01 | 1.00E+00 |
| ENSG00000255987.1_TOMM20P2   | ENSG00000160789.18_LMNA | 0.01267  | -0.146823625 | 0.171527936 | 8.77E-01 | 9.52E-01 | 1.00E+00 |
| ENSG00000272109.1_CTD-2260A  | ENSG00000160789.18_LMNA | 0.06032  | -0.099836492 | 0.217435554 | 4.60E-01 | 7.24E-01 | 1.00E+00 |
| ENSG00000258346.1_RP11-148B  | ENSG00000160789.18_LMNA | -0.08805 | -0.24382851  | 0.072166726 | 2.81E-01 | 5.66E-01 | 1.00E+00 |
| ENSG00000236064.1_RP6-191P2  | ENSG00000160789.18_LMNA | -0.09966 | -0.254818548 | 0.060499781 | 2.22E-01 | 4.97E-01 | 1.00E+00 |
| ENSG00000272784.1_RP11-335L  | ENSG00000160789.18_LMNA | 0.17252  | 0.013700126  | 0.322857625 | 3.36E-02 | 1.54E-01 | 1.00E+00 |
| ENSG00000262905.1_RP5-1029F  | ENSG00000160789.18_LMNA | -0.02349 | -0.182013881 | 0.136216228 | 7.74E-01 | 9.07E-01 | 1.00E+00 |
| ENSG00000242978.1_RP4-545C2  | ENSG00000160789.18_LMNA | 0.12835  | -0.031490295 | 0.281796348 | 1.15E-01 | 3.39E-01 | 1.00E+00 |
| ENSG00000228261.1_RP11-127L  | ENSG00000160789.18_LMNA | -0.03451 | -0.192655182 | 0.12537656  | 6.73E-01 | 8.56E-01 | 1.00E+00 |
| ENSG00000258794.3_DUX4L27    | ENSG00000160789.18_LMNA | -0.10541 | -0.260242455 | 0.054709871 | 1.96E-01 | 4.65E-01 | 1.00E+00 |
| ENSG00000280037.1_RP11-434P  | ENSG00000160789.18_LMNA | -0.04722 | -0.204881769 | 0.112827603 | 5.63E-01 | 7.95E-01 | 1.00E+00 |
| ENSG00000257715.1_RP11-256L  | ENSG00000160789.18_LMNA | -0.14615 | -0.298403601 | 0.013365975 | 7.24E-02 | 2.55E-01 | 1.00E+00 |
| ENSG00000238245.2_MYO5BP2    | ENSG00000160789.18_LMNA | -0.11686 | -0.27102311  | 0.043138511 | 1.52E-01 | 4.00E-01 | 1.00E+00 |
| ENSG00000249109.1_RP11-1026  | ENSG00000160789.18_LMNA | -0.0002  | -0.159397716 | 0.159003675 | 9.98E-01 | 9.99E-01 | 1.00E+00 |
| ENSG00000258633.1_RP11-857B  | ENSG00000160789.18_LMNA | -0.07416 | -0.230635129 | 0.08605943  | 3.64E-01 | 6.45E-01 | 1.00E+00 |
| ENSG00000250893.1_RP11-588L  | ENSG00000160789.18_LMNA | 0.10383  | -0.05630247  | 0.258752509 | 2.03E-01 | 4.74E-01 | 1.00E+00 |
| ENSG00000236607.3_EEF1DP8    | ENSG00000160789.18_LMNA | -0.0384  | -0.196397325 | 0.121546527 | 6.39E-01 | 8.38E-01 | 1.00E+00 |
| ENSG00000229613.1_LINC01501  | ENSG00000160789.18_LMNA | -0.00651 | -0.1655357   | 0.152852566 | 9.37E-01 | 9.75E-01 | 1.00E+00 |
| ENSG00000238081.1_RP4-620F2  | ENSG00000160789.18_LMNA | -0.14447 | -0.296840494 | 0.01508065  | 7.58E-02 | 2.63E-01 | 1.00E+00 |



|                              |                         |          |              |             |          |          |          |
|------------------------------|-------------------------|----------|--------------|-------------|----------|----------|----------|
| ENSG00000261462.1_CTA-254O6  | ENSG00000160789.18_LMNA | -0.32978 | -0.464590978 | -0.18003334 | 3.34E-05 | 7.81E-04 | 1.00E+00 |
| ENSG00000168126.3_OR2W6P     | ENSG00000160789.18_LMNA | -0.05007 | -0.207616211 | 0.110007126 | 5.40E-01 | 7.80E-01 | 1.00E+00 |
| ENSG00000236475.1_TRIM26BP   | ENSG00000160789.18_LMNA | -0.07674 | -0.233094883 | 0.083478602 | 3.47E-01 | 6.31E-01 | 1.00E+00 |
| ENSG00000228339.1_AMD1P1     | ENSG00000160789.18_LMNA | 0.07466  | -0.085558222 | 0.231113141 | 3.61E-01 | 6.43E-01 | 1.00E+00 |
| ENSG00000270120.1_RP11-327F  | ENSG00000160789.18_LMNA | 0.00685  | -0.152521837 | 0.165865027 | 9.33E-01 | 9.74E-01 | 1.00E+00 |
| ENSG00000234693.1_RP4-530I15 | ENSG00000160789.18_LMNA | 0.06912  | -0.091079936 | 0.225838525 | 3.97E-01 | 6.74E-01 | 1.00E+00 |
| ENSG00000182583.11_VCX       | ENSG00000160789.18_LMNA | -0.03169 | -0.189930472 | 0.128159313 | 6.98E-01 | 8.71E-01 | 1.00E+00 |
| ENSG00000163586.8_FABP1      | ENSG00000160789.18_LMNA | 0.0318   | -0.128045539 | 0.190041969 | 6.97E-01 | 8.70E-01 | 1.00E+00 |
| ENSG00000227160.2_THEM7P     | ENSG00000160789.18_LMNA | -0.22678 | -0.372530863 | -0.07011036 | 4.96E-03 | 3.90E-02 | 1.00E+00 |
| ENSG00000230387.2_RP4-737E2  | ENSG00000160789.18_LMNA | 0.02311  | -0.136593257 | 0.181642405 | 7.77E-01 | 9.09E-01 | 1.00E+00 |
| ENSG00000260704.1_LINC00543  | ENSG00000160789.18_LMNA | -0.10737 | -0.262086861 | 0.052736168 | 1.88E-01 | 4.55E-01 | 1.00E+00 |
| ENSG00000233878.1_AC073133   | ENSG00000160789.18_LMNA | -0.14751 | -0.299674304 | 0.011970705 | 6.97E-02 | 2.49E-01 | 1.00E+00 |
| ENSG00000128322.6_IGLL1      | ENSG00000160789.18_LMNA | -0.00257 | -0.161702684 | 0.156696673 | 9.75E-01 | 9.90E-01 | 1.00E+00 |
| ENSG00000251138.5_RP11-81H3  | ENSG00000160789.18_LMNA | -0.25306 | -0.396292347 | -0.09779622 | 1.66E-03 | 1.70E-02 | 1.00E+00 |
| ENSG00000163793.11_DNAJC5G   | ENSG00000160789.18_LMNA | 0.00223  | -0.157030776 | 0.161369091 | 9.78E-01 | 9.92E-01 | 1.00E+00 |
| ENSG00000146955.9_RAB19      | ENSG00000160789.18_LMNA | 0.07112  | -0.089089987 | 0.227741568 | 3.84E-01 | 6.62E-01 | 1.00E+00 |
| ENSG00000279317.1_AC006994   | ENSG00000160789.18_LMNA | -0.20845 | -0.355840157 | -0.05093771 | 9.96E-03 | 6.54E-02 | 1.00E+00 |
| ENSG00000249360.1_CTD-2233C  | ENSG00000160789.18_LMNA | 0.09335  | -0.066849031 | 0.248847762 | 2.53E-01 | 5.34E-01 | 1.00E+00 |
| ENSG00000255107.1_RP11-159H  | ENSG00000160789.18_LMNA | -0.13476 | -0.287783708 | 0.024979656 | 9.79E-02 | 3.08E-01 | 1.00E+00 |
| ENSG00000231087.2_FDPSP7     | ENSG00000160789.18_LMNA | -0.01747 | -0.176181277 | 0.142125406 | 8.31E-01 | 9.34E-01 | 1.00E+00 |
| ENSG00000279378.1_RP11-70D2  | ENSG00000160789.18_LMNA | -0.00707 | -0.166088589 | 0.152297282 | 9.31E-01 | 9.73E-01 | 1.00E+00 |
| ENSG00000218233.1_NEPNP      | ENSG00000160789.18_LMNA | -0.17826 | -0.328150865 | -0.01961903 | 2.80E-02 | 1.37E-01 | 1.00E+00 |
| ENSG00000213113.3_TUBB8P8    | ENSG00000160789.18_LMNA | 0.07442  | -0.085793623 | 0.230888653 | 3.62E-01 | 6.44E-01 | 1.00E+00 |
| ENSG00000155495.8_MAGEC1     | ENSG00000160789.18_LMNA | -0.02931 | -0.187631903 | 0.130502958 | 7.20E-01 | 8.81E-01 | 1.00E+00 |
| ENSG00000124449.6_IRGC       | ENSG00000160789.18_LMNA | -0.00592 | -0.164964958 | 0.153425571 | 9.42E-01 | 9.77E-01 | 1.00E+00 |
| ENSG00000237859.1_EEF1A1P3   | ENSG00000160789.18_LMNA | 0.04385  | -0.116166384 | 0.20163841  | 5.92E-01 | 8.11E-01 | 1.00E+00 |
| ENSG00000256723.1_RP11-167N  | ENSG00000160789.18_LMNA | 0.1613   | 0.002150779  | 0.312473121 | 4.71E-02 | 1.93E-01 | 1.00E+00 |
| ENSG00000215869.3_RP11-364B  | ENSG00000160789.18_LMNA | -0.06936 | -0.226062915 | 0.09084543  | 3.96E-01 | 6.73E-01 | 1.00E+00 |
| ENSG00000100721.9_TCL1A      | ENSG00000160789.18_LMNA | 0.06429  | -0.095893666 | 0.221225    | 4.31E-01 | 7.01E-01 | 1.00E+00 |
| ENSG00000237290.1_LINC01343  | ENSG00000160789.18_LMNA | 0.10776  | -0.052336425 | 0.262460137 | 1.86E-01 | 4.52E-01 | 1.00E+00 |
| ENSG00000280171.1_CTD-2542C  | ENSG00000160789.18_LMNA | -0.23371 | -0.378815466 | -0.07738787 | 3.76E-03 | 3.17E-02 | 1.00E+00 |
| ENSG00000257813.2_RP11-73B8  | ENSG00000160789.18_LMNA | -0.16363 | -0.314630072 | -0.00454289 | 4.40E-02 | 1.85E-01 | 1.00E+00 |
| ENSG00000247011.2_RP11-700H  | ENSG00000160789.18_LMNA | 0.04753  | -0.112524585 | 0.205175781 | 5.61E-01 | 7.93E-01 | 1.00E+00 |

|                              |                         |          |              |             |          |          |          |
|------------------------------|-------------------------|----------|--------------|-------------|----------|----------|----------|
| ENSG00000243797.5_CTB-111H1  | ENSG00000160789.18_LMNA | 0.05214  | -0.107960277 | 0.209597521 | 5.24E-01 | 7.69E-01 | 1.00E+00 |
| ENSG00000109511.9_ANXA10     | ENSG00000160789.18_LMNA | 0.03601  | -0.123903238 | 0.19409579  | 6.60E-01 | 8.50E-01 | 1.00E+00 |
| ENSG00000280048.1_RP11-327J  | ENSG00000160789.18_LMNA | -0.02272 | -0.181261234 | 0.136980031 | 7.81E-01 | 9.10E-01 | 1.00E+00 |
| ENSG00000276715.3_YWHAEP7    | ENSG00000160789.18_LMNA | 0.02703  | -0.132743767 | 0.18543093  | 7.41E-01 | 8.91E-01 | 1.00E+00 |
| ENSG00000257611.1_RP11-185N  | ENSG00000160789.18_LMNA | 0.25359  | 0.098363615  | 0.396775172 | 1.62E-03 | 1.66E-02 | 1.00E+00 |
| ENSG00000112499.11_SLC22A2   | ENSG00000160789.18_LMNA | -0.16787 | -0.318557065 | -0.00890714 | 3.87E-02 | 1.70E-01 | 1.00E+00 |
| ENSG00000184571.12_PIWIL3    | ENSG00000160789.18_LMNA | -0.05809 | -0.215298799 | 0.102055348 | 4.77E-01 | 7.36E-01 | 1.00E+00 |
| ENSG00000139865.15_TTC6      | ENSG00000160789.18_LMNA | -0.10724 | -0.261972397 | 0.052858727 | 1.88E-01 | 4.55E-01 | 1.00E+00 |
| ENSG00000251209.6_LINC00923  | ENSG00000160789.18_LMNA | -0.09095 | -0.24657575  | 0.06925836  | 2.65E-01 | 5.49E-01 | 1.00E+00 |
| ENSG00000267943.1_CTD-2620L  | ENSG00000160789.18_LMNA | 0.00518  | -0.154144891 | 0.164248176 | 9.49E-01 | 9.80E-01 | 1.00E+00 |
| ENSG00000237031.6_AC008067   | ENSG00000160789.18_LMNA | -0.26135 | -0.403749757 | -0.10658158 | 1.15E-03 | 1.28E-02 | 1.00E+00 |
| ENSG00000227518.3_MIR1302-9  | ENSG00000160789.18_LMNA | 0.08623  | -0.073989714 | 0.242103928 | 2.91E-01 | 5.76E-01 | 1.00E+00 |
| ENSG00000124208.16_TMEM189   | ENSG00000160789.18_LMNA | -0.06942 | -0.226119481 | 0.090786309 | 3.95E-01 | 6.73E-01 | 1.00E+00 |
| ENSG00000280025.1_CTA-992D9  | ENSG00000160789.18_LMNA | 0.04669  | -0.113354847 | 0.204370057 | 5.68E-01 | 7.98E-01 | 1.00E+00 |
| ENSG00000267026.4_RP11-92C4  | ENSG00000160789.18_LMNA | 0.10386  | -0.056273083 | 0.258780016 | 2.03E-01 | 4.74E-01 | 1.00E+00 |
| ENSG00000252271.1_RNU6-1110  | ENSG00000160789.18_LMNA | -0.12695 | -0.280483439 | 0.032914403 | 1.19E-01 | 3.47E-01 | 1.00E+00 |
| ENSG00000261711.5_FRG2DP     | ENSG00000160789.18_LMNA | -0.44904 | -0.567664135 | -0.31215979 | 6.53E-09 | 7.51E-07 | 3.35E-04 |
| ENSG00000226886.1_AC093787   | ENSG00000160789.18_LMNA | -0.10507 | -0.259919428 | 0.055055289 | 1.98E-01 | 4.67E-01 | 1.00E+00 |
| ENSG00000238317.2_SNORD11    | ENSG00000160789.18_LMNA | 0.09397  | -0.066222992 | 0.249437553 | 2.50E-01 | 5.30E-01 | 1.00E+00 |
| ENSG00000279414.1_bP-2171C2  | ENSG00000160789.18_LMNA | -0.05924 | -0.216403268 | 0.100908836 | 4.68E-01 | 7.29E-01 | 1.00E+00 |
| ENSG00000216184.1_           | ENSG00000160789.18_LMNA | 0.0972   | -0.06297609  | 0.252492702 | 2.34E-01 | 5.11E-01 | 1.00E+00 |
| ENSG00000277812.1_           | ENSG00000160789.18_LMNA | 0.04563  | -0.114404574 | 0.203350736 | 5.77E-01 | 8.03E-01 | 1.00E+00 |
| ENSG00000271830.1_RP11-1C8   | ENSG00000160789.18_LMNA | -0.19152 | -0.340347696 | -0.03334035 | 1.81E-02 | 1.00E-01 | 1.00E+00 |
| ENSG00000255916.1_RP13-895J  | ENSG00000160789.18_LMNA | -0.21448 | -0.36134057  | -0.05723131 | 7.97E-03 | 5.54E-02 | 1.00E+00 |
| ENSG00000281114.1_           | ENSG00000160789.18_LMNA | 0.13046  | -0.029348211 | 0.283768963 | 1.09E-01 | 3.29E-01 | 1.00E+00 |
| ENSG00000202000.1_RNU1-36P   | ENSG00000160789.18_LMNA | 0.06959  | -0.090614035 | 0.226284297 | 3.94E-01 | 6.72E-01 | 1.00E+00 |
| ENSG00000233906.1_RP11-3151I | ENSG00000160789.18_LMNA | -0.326   | -0.461263076 | -0.17593191 | 4.16E-05 | 9.26E-04 | 1.00E+00 |
| ENSG00000270993.1_RP11-1112I | ENSG00000160789.18_LMNA | 0.12657  | -0.033306726 | 0.280121545 | 1.20E-01 | 3.48E-01 | 1.00E+00 |
| ENSG00000207475.1_SNORA80E   | ENSG00000160789.18_LMNA | -0.03251 | -0.190719176 | 0.127354322 | 6.91E-01 | 8.67E-01 | 1.00E+00 |
| ENSG00000224269.1_AP000697   | ENSG00000160789.18_LMNA | -0.04431 | -0.202085514 | 0.115706552 | 5.88E-01 | 8.08E-01 | 1.00E+00 |
| ENSG00000259195.1_RP11-158M  | ENSG00000160789.18_LMNA | -0.01485 | -0.17364203  | 0.144690921 | 8.56E-01 | 9.43E-01 | 1.00E+00 |
| ENSG00000179813.5_FAM216B    | ENSG00000160789.18_LMNA | -0.11687 | -0.271028531 | 0.043132671 | 1.52E-01 | 4.00E-01 | 1.00E+00 |
| ENSG00000205696.4_ADARB2-A   | ENSG00000160789.18_LMNA | -0.2966  | -0.435249832 | -0.14421002 | 2.07E-04 | 3.35E-03 | 1.00E+00 |

|                              |                         |          |              |             |          |          |          |
|------------------------------|-------------------------|----------|--------------|-------------|----------|----------|----------|
| ENSG00000270111.1_RP11-271F  | ENSG00000160789.18_LMNA | -0.20482 | -0.352529899 | -0.04716173 | 1.14E-02 | 7.18E-02 | 1.00E+00 |
| ENSG00000204528.3_PSORS1C3   | ENSG00000160789.18_LMNA | -0.03618 | -0.194258813 | 0.123736425 | 6.58E-01 | 8.49E-01 | 1.00E+00 |
| ENSG00000253528.2_RP11-347C  | ENSG00000160789.18_LMNA | -0.01503 | -0.173811976 | 0.144519351 | 8.54E-01 | 9.43E-01 | 1.00E+00 |
| ENSG00000240086.4_RP11-657O  | ENSG00000160789.18_LMNA | -0.1652  | -0.316083835 | -0.00615714 | 4.20E-02 | 1.79E-01 | 1.00E+00 |
| ENSG00000242329.1_RP11-59H1  | ENSG00000160789.18_LMNA | 0.06937  | -0.090836535 | 0.226071427 | 3.96E-01 | 6.73E-01 | 1.00E+00 |
| ENSG00000268535.1_MTDHP4     | ENSG00000160789.18_LMNA | -0.01549 | -0.174259541 | 0.144067416 | 8.50E-01 | 9.41E-01 | 1.00E+00 |
| ENSG00000223962.1_UBBP3      | ENSG00000160789.18_LMNA | -0.11952 | -0.273519627 | 0.040446814 | 1.42E-01 | 3.85E-01 | 1.00E+00 |
| ENSG00000216721.3_AC093850.  | ENSG00000160789.18_LMNA | -0.03522 | -0.19333887  | 0.124677521 | 6.67E-01 | 8.53E-01 | 1.00E+00 |
| ENSG00000267696.5_ERVK-28    | ENSG00000160789.18_LMNA | -0.01932 | -0.177968681 | 0.140316944 | 8.13E-01 | 9.27E-01 | 1.00E+00 |
| ENSG00000248719.1_RP11-377G  | ENSG00000160789.18_LMNA | -0.12156 | -0.27543108  | 0.038382838 | 1.36E-01 | 3.75E-01 | 1.00E+00 |
| ENSG00000241357.1_RP11-758P  | ENSG00000160789.18_LMNA | 0.06566  | -0.094532876 | 0.222530635 | 4.22E-01 | 6.93E-01 | 1.00E+00 |
| ENSG00000239799.1_ITIH4-AS1  | ENSG00000160789.18_LMNA | 0.00825  | -0.15115173  | 0.167228565 | 9.20E-01 | 9.69E-01 | 1.00E+00 |
| ENSG00000267440.1_CTC-501O1  | ENSG00000160789.18_LMNA | -0.03596 | -0.194049212 | 0.123950896 | 6.60E-01 | 8.50E-01 | 1.00E+00 |
| ENSG00000223669.1_RP11-93B1  | ENSG00000160789.18_LMNA | 0.08454  | -0.0756783   | 0.240504709 | 3.00E-01 | 5.87E-01 | 1.00E+00 |
| ENSG00000269807.1_AC007292.  | ENSG00000160789.18_LMNA | 0.11041  | -0.049662487 | 0.264954612 | 1.76E-01 | 4.37E-01 | 1.00E+00 |
| ENSG00000259982.1_CDC37P1    | ENSG00000160789.18_LMNA | 0.1211   | -0.038851592 | 0.274997183 | 1.37E-01 | 3.77E-01 | 1.00E+00 |
| ENSG00000248455.4_RP11-321E  | ENSG00000160789.18_LMNA | -0.29796 | -0.436454178 | -0.14566557 | 1.93E-04 | 3.17E-03 | 1.00E+00 |
| ENSG00000254532.1_RP11-624D  | ENSG00000160789.18_LMNA | -0.14594 | -0.298216164 | 0.013571684 | 7.28E-02 | 2.56E-01 | 1.00E+00 |
| ENSG00000273982.1_RP11-332H  | ENSG00000160789.18_LMNA | 0.14805  | -0.011423179 | 0.300172646 | 6.87E-02 | 2.47E-01 | 1.00E+00 |
| ENSG00000234367.1_PFN1P3     | ENSG00000160789.18_LMNA | 0.12778  | -0.032078034 | 0.281254644 | 1.17E-01 | 3.42E-01 | 1.00E+00 |
| ENSG00000262492.1_RP11-1099I | ENSG00000160789.18_LMNA | -0.04554 | -0.203268457 | 0.114489277 | 5.77E-01 | 8.03E-01 | 1.00E+00 |
| ENSG00000228842.3_PCDH9-AS.  | ENSG00000160789.18_LMNA | 0.02294  | -0.136760424 | 0.181477672 | 7.79E-01 | 9.09E-01 | 1.00E+00 |
| ENSG00000250162.1_CSNK1A1P   | ENSG00000160789.18_LMNA | 0.17038  | 0.0114905    | 0.320876599 | 3.59E-02 | 1.61E-01 | 1.00E+00 |
| ENSG00000228914.1_OR1H1P     | ENSG00000160789.18_LMNA | -0.12338 | -0.277133868 | 0.036541918 | 1.30E-01 | 3.65E-01 | 1.00E+00 |
| ENSG00000280097.1_RP11-83B2  | ENSG00000160789.18_LMNA | 0.0939   | -0.066288037 | 0.249376285 | 2.50E-01 | 5.30E-01 | 1.00E+00 |
| ENSG00000274159.1_AL133243.3 | ENSG00000160789.18_LMNA | 0.01962  | -0.140017504 | 0.178264431 | 8.10E-01 | 9.25E-01 | 1.00E+00 |
| ENSG00000226871.1_AC135178.  | ENSG00000160789.18_LMNA | -0.10181 | -0.256843171 | 0.058341016 | 2.12E-01 | 4.86E-01 | 1.00E+00 |
| ENSG00000240787.1_RP11-615J. | ENSG00000160789.18_LMNA | 0.06835  | -0.091847103 | 0.225104216 | 4.03E-01 | 6.79E-01 | 1.00E+00 |
| ENSG00000269444.1_CTB-180A7  | ENSG00000160789.18_LMNA | 0.02629  | -0.133464468 | 0.184722361 | 7.48E-01 | 8.95E-01 | 1.00E+00 |
| ENSG00000226158.1_CLCP2      | ENSG00000160789.18_LMNA | -0.13607 | -0.289008601 | 0.023644432 | 9.46E-02 | 3.01E-01 | 1.00E+00 |
| ENSG00000238269.7_PAGE2B     | ENSG00000160789.18_LMNA | 0.09755  | -0.062620817 | 0.252826612 | 2.32E-01 | 5.10E-01 | 1.00E+00 |
| ENSG00000236732.1_AC094019.  | ENSG00000160789.18_LMNA | 0.05729  | -0.102846991 | 0.214535713 | 4.83E-01 | 7.41E-01 | 1.00E+00 |
| ENSG00000255680.1_RP11-732A  | ENSG00000160789.18_LMNA | 0.04606  | -0.113971774 | 0.203771083 | 5.73E-01 | 8.01E-01 | 1.00E+00 |

|                              |                         |          |              |             |          |          |          |
|------------------------------|-------------------------|----------|--------------|-------------|----------|----------|----------|
| ENSG00000240915.2_RP11-659E  | ENSG00000160789.18_LMNA | -0.09391 | -0.249386233 | 0.066277476 | 2.50E-01 | 5.30E-01 | 1.00E+00 |
| ENSG00000230317.1_LINC01284  | ENSG00000160789.18_LMNA | -0.0712  | -0.227817606 | 0.089010423 | 3.83E-01 | 6.62E-01 | 1.00E+00 |
| ENSG00000261838.4_RP11-303E  | ENSG00000160789.18_LMNA | 0.07347  | -0.086744512 | 0.229981506 | 3.68E-01 | 6.49E-01 | 1.00E+00 |
| ENSG00000257649.1_METTL7AP   | ENSG00000160789.18_LMNA | -0.14509 | -0.297417842 | 0.014447533 | 7.45E-02 | 2.60E-01 | 1.00E+00 |
| ENSG00000269919.1_RP1-134E1  | ENSG00000160789.18_LMNA | 0.16155  | 0.002409096  | 0.312706198 | 4.68E-02 | 1.93E-01 | 1.00E+00 |
| ENSG00000255038.1_RP11-1167. | ENSG00000160789.18_LMNA | 0.04092  | -0.119059875 | 0.198821965 | 6.17E-01 | 8.26E-01 | 1.00E+00 |
| ENSG00000243141.2_RPL23AP6   | ENSG00000160789.18_LMNA | -0.03982 | -0.197769751 | 0.12013949  | 6.26E-01 | 8.31E-01 | 1.00E+00 |
| ENSG00000070748.16_CHAT      | ENSG00000160789.18_LMNA | 0.07684  | -0.083381786 | 0.233187078 | 3.47E-01 | 6.31E-01 | 1.00E+00 |
| ENSG00000239201.1_RPL21P10   | ENSG00000160789.18_LMNA | -0.09907 | -0.2542578   | 0.06109716  | 2.25E-01 | 5.01E-01 | 1.00E+00 |
| ENSG00000233068.2_RP1-140K8  | ENSG00000160789.18_LMNA | 0.14288  | -0.016695749 | 0.29536663  | 7.91E-02 | 2.70E-01 | 1.00E+00 |
| ENSG00000234818.1_AC092687.  | ENSG00000160789.18_LMNA | 0.02277  | -0.136922302 | 0.181318133 | 7.81E-01 | 9.10E-01 | 1.00E+00 |
| ENSG00000232041.1_PSM10P3    | ENSG00000160789.18_LMNA | 0.01733  | -0.142261882 | 0.176046306 | 8.32E-01 | 9.35E-01 | 1.00E+00 |
| ENSG00000231838.1_RP11-449H  | ENSG00000160789.18_LMNA | -0.09135 | -0.246955864 | 0.068855528 | 2.63E-01 | 5.46E-01 | 1.00E+00 |
| ENSG00000261476.1_RP11-77K1  | ENSG00000160789.18_LMNA | 0.18285  | 0.024353608  | 0.332371072 | 2.42E-02 | 1.24E-01 | 1.00E+00 |
| ENSG00000260467.1_RP11-405F  | ENSG00000160789.18_LMNA | 0.07155  | -0.088659124 | 0.228153295 | 3.81E-01 | 6.60E-01 | 1.00E+00 |
| ENSG00000269736.1_CTD-2521M  | ENSG00000160789.18_LMNA | -0.04842 | -0.206035601 | 0.111638092 | 5.54E-01 | 7.88E-01 | 1.00E+00 |
| ENSG00000232680.2_AC002511.  | ENSG00000160789.18_LMNA | -0.3671  | -0.497242295 | -0.22080568 | 3.29E-06 | 1.18E-04 | 1.69E-01 |
| ENSG00000278367.1_RP11-42O4  | ENSG00000160789.18_LMNA | 0.0685   | -0.091704272 | 0.225240957 | 4.02E-01 | 6.78E-01 | 1.00E+00 |
| ENSG00000228050.1_TOP3BP1    | ENSG00000160789.18_LMNA | -0.16772 | -0.318414654 | -0.00874866 | 3.89E-02 | 1.70E-01 | 1.00E+00 |
| ENSG00000267262.1_CTC-232P5  | ENSG00000160789.18_LMNA | 0.02023  | -0.139414962 | 0.178859376 | 8.05E-01 | 9.22E-01 | 1.00E+00 |
| ENSG00000280114.1_RP5-875O1  | ENSG00000160789.18_LMNA | -0.12475 | -0.278423215 | 0.035146561 | 1.26E-01 | 3.58E-01 | 1.00E+00 |
| ENSG00000259545.2_RP11-325E  | ENSG00000160789.18_LMNA | -0.08661 | -0.242471339 | 0.073601515 | 2.89E-01 | 5.74E-01 | 1.00E+00 |
| ENSG00000233073.1_AC005009.  | ENSG00000160789.18_LMNA | -0.24124 | -0.385626574 | -0.08531151 | 2.75E-03 | 2.50E-02 | 1.00E+00 |
| ENSG00000231875.1_RP11-346E  | ENSG00000160789.18_LMNA | -0.10708 | -0.261813811 | 0.053028514 | 1.89E-01 | 4.56E-01 | 1.00E+00 |
| ENSG00000259372.2_CTD-2240J  | ENSG00000160789.18_LMNA | -0.16219 | -0.313300607 | -0.00306806 | 4.59E-02 | 1.90E-01 | 1.00E+00 |
| ENSG00000226758.1_DISC1-IT1  | ENSG00000160789.18_LMNA | -0.0826  | -0.238664215 | 0.077619401 | 3.12E-01 | 5.98E-01 | 1.00E+00 |
| ENSG00000242428.4_C3orf67-AS | ENSG00000160789.18_LMNA | -0.33214 | -0.466663627 | -0.18259275 | 2.91E-05 | 6.95E-04 | 1.00E+00 |
| ENSG00000228054.2_RANP5      | ENSG00000160789.18_LMNA | 0.03845  | -0.121495658 | 0.196446964 | 6.38E-01 | 8.38E-01 | 1.00E+00 |
| ENSG00000197416.4_FABP12     | ENSG00000160789.18_LMNA | 0.04036  | -0.119608803 | 0.198287061 | 6.22E-01 | 8.29E-01 | 1.00E+00 |
| ENSG00000269066.1_CTD-2528A  | ENSG00000160789.18_LMNA | -0.11711 | -0.271252588 | 0.042891282 | 1.51E-01 | 3.99E-01 | 1.00E+00 |
| ENSG00000267634.1_RPL7L1P5   | ENSG00000160789.18_LMNA | 0.02825  | -0.131543876 | 0.186609887 | 7.30E-01 | 8.86E-01 | 1.00E+00 |
| ENSG00000259674.1_RP11-356M  | ENSG00000160789.18_LMNA | 0.08103  | -0.079193584 | 0.237169952 | 3.21E-01 | 6.07E-01 | 1.00E+00 |
| ENSG00000261448.1_CTD-2576D  | ENSG00000160789.18_LMNA | -0.08617 | -0.242052223 | 0.074044337 | 2.91E-01 | 5.77E-01 | 1.00E+00 |

|                              |                         |          |              |             |          |          |          |
|------------------------------|-------------------------|----------|--------------|-------------|----------|----------|----------|
| ENSG00000254740.2_RP11-334E  | ENSG00000160789.18_LMNA | -0.10703 | -0.261769768 | 0.053075665 | 1.89E-01 | 4.57E-01 | 1.00E+00 |
| ENSG00000259356.1_RP11-90E5  | ENSG00000160789.18_LMNA | -0.1627  | -0.313775005 | -0.00359417 | 4.52E-02 | 1.88E-01 | 1.00E+00 |
| ENSG00000249004.1_PRMT5P1    | ENSG00000160789.18_LMNA | 0.04407  | -0.11594293  | 0.201855695 | 5.90E-01 | 8.10E-01 | 1.00E+00 |
| ENSG00000237623.1_RP11-571E  | ENSG00000160789.18_LMNA | -0.08846 | -0.244225361 | 0.071746932 | 2.78E-01 | 5.64E-01 | 1.00E+00 |
| ENSG00000227711.2_FAM166AP   | ENSG00000160789.18_LMNA | 0.12959  | -0.030233245 | 0.282954269 | 1.12E-01 | 3.33E-01 | 1.00E+00 |
| ENSG00000259518.1_LINC01583  | ENSG00000160789.18_LMNA | 0.01641  | -0.143160017 | 0.175157769 | 8.41E-01 | 9.38E-01 | 1.00E+00 |
| ENSG00000232549.1_SRD5A1P1   | ENSG00000160789.18_LMNA | -0.01311 | -0.171955101 | 0.146392938 | 8.73E-01 | 9.51E-01 | 1.00E+00 |
| ENSG00000125888.13_BANF2     | ENSG00000160789.18_LMNA | -0.02525 | -0.183707683 | 0.134495935 | 7.58E-01 | 8.99E-01 | 1.00E+00 |
| ENSG00000152785.6_BMP3       | ENSG00000160789.18_LMNA | -0.09029 | -0.245952397 | 0.069918744 | 2.69E-01 | 5.53E-01 | 1.00E+00 |
| ENSG00000101323.4_HAO1       | ENSG00000160789.18_LMNA | 0.07715  | -0.083075396 | 0.233478808 | 3.45E-01 | 6.29E-01 | 1.00E+00 |
| ENSG00000253228.1_NRBF2P4    | ENSG00000160789.18_LMNA | -0.05277 | -0.210201566 | 0.107335714 | 5.19E-01 | 7.65E-01 | 1.00E+00 |
| ENSG00000168925.9_CTRB1      | ENSG00000160789.18_LMNA | -0.01667 | -0.175400707 | 0.142914507 | 8.39E-01 | 9.37E-01 | 1.00E+00 |
| ENSG00000226943.3_ALG1L5P    | ENSG00000160789.18_LMNA | 0.03586  | -0.124050846 | 0.193951522 | 6.61E-01 | 8.50E-01 | 1.00E+00 |
| ENSG00000186825.5_C2orf27B   | ENSG00000160789.18_LMNA | -0.14404 | -0.296447413 | 0.015511558 | 7.66E-02 | 2.65E-01 | 1.00E+00 |
| ENSG00000250516.1_RP11-380I1 | ENSG00000160789.18_LMNA | 0.0823   | -0.077926194 | 0.238373115 | 3.13E-01 | 6.00E-01 | 1.00E+00 |
| ENSG00000259558.1_MESTP2     | ENSG00000160789.18_LMNA | 0.07977  | -0.080450496 | 0.235975777 | 3.29E-01 | 6.15E-01 | 1.00E+00 |
| ENSG00000255556.2_RP11-351I2 | ENSG00000160789.18_LMNA | 0.00491  | -0.154414255 | 0.163979676 | 9.52E-01 | 9.81E-01 | 1.00E+00 |
| ENSG00000146857.3_STRA8      | ENSG00000160789.18_LMNA | 0.01489  | -0.14465211  | 0.173680475 | 8.56E-01 | 9.43E-01 | 1.00E+00 |
| ENSG00000228271.1_RP11-513G  | ENSG00000160789.18_LMNA | 0.16146  | 0.002319342  | 0.312625218 | 4.69E-02 | 1.93E-01 | 1.00E+00 |
| ENSG00000279893.1_           | ENSG00000160789.18_LMNA | -0.09118 | -0.246800374 | 0.069020324 | 2.64E-01 | 5.47E-01 | 1.00E+00 |
| ENSG00000214035.3_AC073310.4 | ENSG00000160789.18_LMNA | 0.13528  | -0.024444926 | 0.288274376 | 9.66E-02 | 3.05E-01 | 1.00E+00 |
| ENSG00000224540.1_RP11-385M  | ENSG00000160789.18_LMNA | 0.01377  | -0.145748632 | 0.172593915 | 8.66E-01 | 9.48E-01 | 1.00E+00 |
| ENSG00000165799.4_RNASE7     | ENSG00000160789.18_LMNA | 0.2259   | 0.069191954  | 0.371735783 | 5.14E-03 | 4.01E-02 | 1.00E+00 |
| ENSG00000214998.2_CCNB2P1    | ENSG00000160789.18_LMNA | 0.0007   | -0.158518744 | 0.159882508 | 9.93E-01 | 9.97E-01 | 1.00E+00 |
| ENSG00000281041.1_           | ENSG00000160789.18_LMNA | 0.07114  | -0.089068065 | 0.227762519 | 3.84E-01 | 6.62E-01 | 1.00E+00 |
| ENSG00000257332.1_HNRNPA1F   | ENSG00000160789.18_LMNA | 0.10103  | -0.059124855 | 0.256108358 | 2.16E-01 | 4.90E-01 | 1.00E+00 |
| ENSG00000225014.1_KCTD9P1    | ENSG00000160789.18_LMNA | 0.1303   | -0.029509715 | 0.283620328 | 1.10E-01 | 3.30E-01 | 1.00E+00 |
| ENSG00000138271.5_GPR87      | ENSG00000160789.18_LMNA | 0.19296  | 0.0348287    | 0.341664501 | 1.72E-02 | 9.70E-02 | 1.00E+00 |
| ENSG00000179447.2_RP5-1027G  | ENSG00000160789.18_LMNA | -0.11578 | -0.270008377 | 0.044231275 | 1.55E-01 | 4.07E-01 | 1.00E+00 |
| ENSG00000124232.9_RBPJL      | ENSG00000160789.18_LMNA | -0.04632 | -0.20401618  | 0.11371936  | 5.71E-01 | 7.99E-01 | 1.00E+00 |
| ENSG00000272446.4_RP1-225E1  | ENSG00000160789.18_LMNA | 0.1089   | -0.051187243 | 0.263532707 | 1.82E-01 | 4.46E-01 | 1.00E+00 |
| ENSG00000234942.2_GRID1-AS1  | ENSG00000160789.18_LMNA | 0.01338  | -0.146133911 | 0.172211952 | 8.70E-01 | 9.50E-01 | 1.00E+00 |
| ENSG00000267924.1_RP11-255H  | ENSG00000160789.18_LMNA | -0.26956 | -0.411120589 | -0.11531078 | 7.84E-04 | 9.57E-03 | 1.00E+00 |

|                              |                         |          |              |             |          |          |          |
|------------------------------|-------------------------|----------|--------------|-------------|----------|----------|----------|
| ENSG00000214049.6_UCA1       | ENSG00000160789.18_LMNA | -0.07977 | -0.235977634 | 0.080448542 | 3.29E-01 | 6.15E-01 | 1.00E+00 |
| ENSG00000251258.1_RFPL4B     | ENSG00000160789.18_LMNA | 0.084    | -0.076220214 | 0.239991111 | 3.04E-01 | 5.90E-01 | 1.00E+00 |
| ENSG00000225860.2_RP11-1018  | ENSG00000160789.18_LMNA | -0.02364 | -0.182151996 | 0.136076025 | 7.73E-01 | 9.06E-01 | 1.00E+00 |
| ENSG00000224083.1_MTCO1P11   | ENSG00000160789.18_LMNA | -0.18093 | -0.330603708 | -0.02236915 | 2.57E-02 | 1.29E-01 | 1.00E+00 |
| ENSG00000187242.4_KRT12      | ENSG00000160789.18_LMNA | -0.00796 | -0.166951819 | 0.151429908 | 9.22E-01 | 9.70E-01 | 1.00E+00 |
| ENSG00000260347.1_MOCS1P1    | ENSG00000160789.18_LMNA | 0.0296   | -0.130209705 | 0.187919707 | 7.17E-01 | 8.80E-01 | 1.00E+00 |
| ENSG00000272219.1_CTB-181H1  | ENSG00000160789.18_LMNA | -0.06306 | -0.22005484  | 0.097112252 | 4.40E-01 | 7.08E-01 | 1.00E+00 |
| ENSG00000114638.6_UPK1B      | ENSG00000160789.18_LMNA | 0.0025   | -0.156760361 | 0.161639099 | 9.76E-01 | 9.91E-01 | 1.00E+00 |
| ENSG00000257391.1_MIR3180-4  | ENSG00000160789.18_LMNA | -0.02997 | -0.188273299 | 0.129849341 | 7.14E-01 | 8.78E-01 | 1.00E+00 |
| ENSG00000257966.1_OLA1P3     | ENSG00000160789.18_LMNA | -0.04164 | -0.199515675 | 0.118347689 | 6.11E-01 | 8.22E-01 | 1.00E+00 |
| ENSG00000214992.6_AKAP17BP   | ENSG00000160789.18_LMNA | 0.00279  | -0.156484231 | 0.161914764 | 9.73E-01 | 9.89E-01 | 1.00E+00 |
| ENSG00000228151.1_AC004941.5 | ENSG00000160789.18_LMNA | 0.01215  | -0.147336163 | 0.171019432 | 8.82E-01 | 9.54E-01 | 1.00E+00 |
| ENSG00000243064.7_ABCC13     | ENSG00000160789.18_LMNA | -0.07849 | -0.234761112 | 0.081727942 | 3.36E-01 | 6.22E-01 | 1.00E+00 |
| ENSG00000279927.1_CTA-212A2  | ENSG00000160789.18_LMNA | 0.12296  | -0.036960337 | 0.276747018 | 1.31E-01 | 3.67E-01 | 1.00E+00 |
| ENSG00000277067.3_CH507-254  | ENSG00000160789.18_LMNA | 0.08925  | -0.070954804 | 0.244973907 | 2.74E-01 | 5.59E-01 | 1.00E+00 |
| ENSG00000235743.1_RP11-439H  | ENSG00000160789.18_LMNA | -0.19645 | -0.344865552 | -0.03845244 | 1.53E-02 | 8.90E-02 | 1.00E+00 |
| ENSG00000207146.1_Y_RNA      | ENSG00000160789.18_LMNA | -0.0186  | -0.177277831 | 0.141016185 | 8.20E-01 | 9.30E-01 | 1.00E+00 |
| ENSG00000222489.1_SNORA79    | ENSG00000160789.18_LMNA | -0.05604 | -0.213338888 | 0.104087794 | 4.93E-01 | 7.48E-01 | 1.00E+00 |
| ENSG00000201264.1_SNORD73E   | ENSG00000160789.18_LMNA | -0.16739 | -0.318108876 | -0.00840845 | 3.93E-02 | 1.71E-01 | 1.00E+00 |
| ENSG00000264349.1_MIR4258    | ENSG00000160789.18_LMNA | 0.07008  | -0.090124091 | 0.226752927 | 3.91E-01 | 6.69E-01 | 1.00E+00 |
| ENSG00000201354.1_Y_RNA      | ENSG00000160789.18_LMNA | 0.12907  | -0.030762237 | 0.282467104 | 1.13E-01 | 3.36E-01 | 1.00E+00 |
| ENSG00000251957.1_RNU6-1095  | ENSG00000160789.18_LMNA | 0.00752  | -0.151865109 | 0.166518758 | 9.27E-01 | 9.72E-01 | 1.00E+00 |
| ENSG00000207277.1_RNA5SP28   | ENSG00000160789.18_LMNA | -0.04315 | -0.200972127 | 0.11685138  | 5.98E-01 | 8.14E-01 | 1.00E+00 |
| ENSG00000200152.1_RNU6-216F  | ENSG00000160789.18_LMNA | 0.0123   | -0.147185726 | 0.171168703 | 8.80E-01 | 9.54E-01 | 1.00E+00 |
| ENSG00000249621.1_CTD-2544H  | ENSG00000160789.18_LMNA | 0.00161  | -0.157634857 | 0.160765746 | 9.84E-01 | 9.94E-01 | 1.00E+00 |
| ENSG00000281001.1_           | ENSG00000160789.18_LMNA | -0.00038 | -0.159570406 | 0.158830954 | 9.96E-01 | 9.99E-01 | 1.00E+00 |
| ENSG00000199436.1_SNORD9     | ENSG00000160789.18_LMNA | -0.01622 | -0.174966327 | 0.143353458 | 8.43E-01 | 9.39E-01 | 1.00E+00 |
| ENSG00000226939.1_AC062021.5 | ENSG00000160789.18_LMNA | -0.37232 | -0.50177728  | -0.22654607 | 2.32E-06 | 8.92E-05 | 1.19E-01 |
| ENSG00000264618.2_RN7SL732F  | ENSG00000160789.18_LMNA | 0.01287  | -0.146632094 | 0.171717915 | 8.75E-01 | 9.51E-01 | 1.00E+00 |
| ENSG00000256948.1_RP11-598F  | ENSG00000160789.18_LMNA | -0.01182 | -0.170695765 | 0.14766231  | 8.85E-01 | 9.55E-01 | 1.00E+00 |
| ENSG00000266248.1 CTC-525D6  | ENSG00000160789.18_LMNA | -0.31169 | -0.448626043 | -0.16044729 | 9.27E-05 | 1.78E-03 | 1.00E+00 |
| ENSG00000258650.1_HSBP1P1    | ENSG00000160789.18_LMNA | -0.08235 | -0.23842791  | 0.07786845  | 3.13E-01 | 6.00E-01 | 1.00E+00 |
| ENSG00000234459.1_AC002064.5 | ENSG00000160789.18_LMNA | 0.13523  | -0.02449395  | 0.288229398 | 9.67E-02 | 3.05E-01 | 1.00E+00 |

|                              |                         |          |              |             |          |          |          |
|------------------------------|-------------------------|----------|--------------|-------------|----------|----------|----------|
| ENSG00000233070.1_ZFY-AS1    | ENSG00000160789.18_LMNA | -0.14351 | -0.295952898 | 0.016053496 | 7.77E-02 | 2.67E-01 | 1.00E+00 |
| ENSG00000229901.1_RP11-399E  | ENSG00000160789.18_LMNA | -0.03981 | -0.197754353 | 0.120155283 | 6.26E-01 | 8.32E-01 | 1.00E+00 |
| ENSG00000109272.3_PF4V1      | ENSG00000160789.18_LMNA | 0.11172  | -0.04833559  | 0.266190893 | 1.71E-01 | 4.29E-01 | 1.00E+00 |
| ENSG00000205057.4_CLLU1OS    | ENSG00000160789.18_LMNA | -0.1134  | -0.267761921 | 0.046647806 | 1.64E-01 | 4.20E-01 | 1.00E+00 |
| ENSG00000270716.1_BNIP3P15   | ENSG00000160789.18_LMNA | -0.14475 | -0.297103195 | 0.014792604 | 7.52E-02 | 2.62E-01 | 1.00E+00 |
| ENSG00000270808.1_RP11-574K  | ENSG00000160789.18_LMNA | -0.11169 | -0.266154118 | 0.048375077 | 1.71E-01 | 4.30E-01 | 1.00E+00 |
| ENSG00000234274.1_COX7BP2    | ENSG00000160789.18_LMNA | 0.01491  | -0.144634123 | 0.173698292 | 8.55E-01 | 9.43E-01 | 1.00E+00 |
| ENSG00000272479.1_RP11-301G  | ENSG00000160789.18_LMNA | 0.11069  | -0.049377938 | 0.265219816 | 1.75E-01 | 4.35E-01 | 1.00E+00 |
| ENSG00000235829.1_TBCAP2     | ENSG00000160789.18_LMNA | -0.05565 | -0.21296073  | 0.104479641 | 4.96E-01 | 7.50E-01 | 1.00E+00 |
| ENSG00000261458.1_RP11-787D  | ENSG00000160789.18_LMNA | 0.00056  | -0.158651718 | 0.159749588 | 9.95E-01 | 9.98E-01 | 1.00E+00 |
| ENSG00000267922.1_AC007193.I | ENSG00000160789.18_LMNA | 0.06468  | -0.095503872 | 0.221599111 | 4.29E-01 | 6.99E-01 | 1.00E+00 |
| ENSG00000276918.1_Metazoa_SI | ENSG00000160789.18_LMNA | -0.08935 | -0.245068501 | 0.070854675 | 2.74E-01 | 5.58E-01 | 1.00E+00 |
| ENSG00000235990.2_RPL23AP2(I | ENSG00000160789.18_LMNA | 0.04482  | -0.115199502 | 0.202578376 | 5.83E-01 | 8.06E-01 | 1.00E+00 |
| ENSG00000273442.1_AC006946.  | ENSG00000160789.18_LMNA | -0.14635 | -0.298591288 | 0.013159965 | 7.20E-02 | 2.54E-01 | 1.00E+00 |
| ENSG00000279928.1_FO538757.: | ENSG00000160789.18_LMNA | -0.12136 | -0.275242376 | 0.038586718 | 1.36E-01 | 3.76E-01 | 1.00E+00 |
| ENSG00000211789.2_TRAV12-2   | ENSG00000160789.18_LMNA | 0.00501  | -0.154312115 | 0.164081494 | 9.51E-01 | 9.80E-01 | 1.00E+00 |
| ENSG00000267677.1_RP11-27G2  | ENSG00000160789.18_LMNA | 0.08118  | -0.079046961 | 0.237309195 | 3.20E-01 | 6.07E-01 | 1.00E+00 |
| ENSG00000250643.1_RP11-93K2  | ENSG00000160789.18_LMNA | -0.17327 | -0.323548027 | -0.01447091 | 3.28E-02 | 1.52E-01 | 1.00E+00 |
| ENSG00000239602.1_RP11-449H  | ENSG00000160789.18_LMNA | -0.04579 | -0.203510901 | 0.114239679 | 5.75E-01 | 8.02E-01 | 1.00E+00 |
| ENSG00000227200.1_RP11-121A  | ENSG00000160789.18_LMNA | 0.21295  | 0.055632531  | 0.359945288 | 8.44E-03 | 5.80E-02 | 1.00E+00 |
| ENSG00000244743.1_RP11-8P13  | ENSG00000160789.18_LMNA | -0.12046 | -0.274393916 | 0.039503094 | 1.39E-01 | 3.81E-01 | 1.00E+00 |
| ENSG00000240435.2_RPS12P27   | ENSG00000160789.18_LMNA | 0.00556  | -0.153779557 | 0.164612263 | 9.46E-01 | 9.78E-01 | 1.00E+00 |
| ENSG00000275232.1_RP11-897M  | ENSG00000160789.18_LMNA | -0.02693 | -0.185340814 | 0.132835444 | 7.42E-01 | 8.92E-01 | 1.00E+00 |
| ENSG00000217776.1_RP11-156F  | ENSG00000160789.18_LMNA | -0.05632 | -0.2136034   | 0.103813646 | 4.91E-01 | 7.47E-01 | 1.00E+00 |
| ENSG00000259503.1_RP11-543G  | ENSG00000160789.18_LMNA | -0.05226 | -0.209717416 | 0.107836329 | 5.23E-01 | 7.68E-01 | 1.00E+00 |
| ENSG00000228216.1_RP11-367F  | ENSG00000160789.18_LMNA | -0.03844 | -0.196437135 | 0.12150573  | 6.38E-01 | 8.38E-01 | 1.00E+00 |
| ENSG00000228719.1_RP5-1119A  | ENSG00000160789.18_LMNA | 0.10565  | -0.054461783 | 0.260474416 | 1.95E-01 | 4.64E-01 | 1.00E+00 |
| ENSG00000223665.1_CTB-111F1  | ENSG00000160789.18_LMNA | -0.03844 | -0.196437439 | 0.12150542  | 6.38E-01 | 8.38E-01 | 1.00E+00 |
| ENSG00000219404.2_RP11-524C  | ENSG00000160789.18_LMNA | 0.12232  | -0.037612688 | 0.276143682 | 1.33E-01 | 3.70E-01 | 1.00E+00 |
| ENSG00000233064.2_RP3-380B8  | ENSG00000160789.18_LMNA | -0.04882 | -0.206415212 | 0.111246543 | 5.50E-01 | 7.87E-01 | 1.00E+00 |
| ENSG00000229048.5_DUTP1      | ENSG00000160789.18_LMNA | -0.05562 | -0.212936955 | 0.104504274 | 4.96E-01 | 7.50E-01 | 1.00E+00 |
| ENSG00000279694.1_RP11-5Q23  | ENSG00000160789.18_LMNA | -0.23246 | -0.377683698 | -0.07607492 | 3.95E-03 | 3.29E-02 | 1.00E+00 |
| ENSG00000248839.1_RP11-227H  | ENSG00000160789.18_LMNA | -0.0846  | -0.240563805 | 0.075615934 | 3.00E-01 | 5.86E-01 | 1.00E+00 |

|                             |                         |          |              |             |          |          |          |
|-----------------------------|-------------------------|----------|--------------|-------------|----------|----------|----------|
| ENSG00000224985.1_RP11-297K | ENSG00000160789.18_LMNA | 0.09939  | -0.060770181 | 0.254564755 | 2.23E-01 | 4.99E-01 | 1.00E+00 |
| ENSG00000158764.6_ITLN2     | ENSG00000160789.18_LMNA | 0.04008  | -0.119881976 | 0.198020796 | 6.24E-01 | 8.30E-01 | 1.00E+00 |
| ENSG00000270894.1_AC015849. | ENSG00000160789.18_LMNA | -0.0174  | -0.176114571 | 0.142192857 | 8.31E-01 | 9.34E-01 | 1.00E+00 |
| ENSG00000227269.1_RP11-96L7 | ENSG00000160789.18_LMNA | 0.1267   | -0.033173093 | 0.280244823 | 1.20E-01 | 3.48E-01 | 1.00E+00 |
| ENSG00000168830.7_HTR1E     | ENSG00000160789.18_LMNA | -0.12819 | -0.28164021  | 0.031659725 | 1.16E-01 | 3.40E-01 | 1.00E+00 |
| ENSG00000095917.12_TPSD1    | ENSG00000160789.18_LMNA | 0.03769  | -0.122245672 | 0.195714914 | 6.45E-01 | 8.42E-01 | 1.00E+00 |
| ENSG00000263065.1_AF001548. | ENSG00000160789.18_LMNA | -0.01061 | -0.169526832 | 0.14883962  | 8.97E-01 | 9.60E-01 | 1.00E+00 |
| ENSG00000232034.1_AC092168. | ENSG00000160789.18_LMNA | 0.14636  | -0.013145217 | 0.298604724 | 7.20E-02 | 2.54E-01 | 1.00E+00 |
| ENSG00000213752.3_CTA-268H5 | ENSG00000160789.18_LMNA | -0.0632  | -0.220186849 | 0.096974828 | 4.39E-01 | 7.07E-01 | 1.00E+00 |
| ENSG00000256588.1_RP11-613F | ENSG00000160789.18_LMNA | 0.0007   | -0.158523067 | 0.159878187 | 9.93E-01 | 9.97E-01 | 1.00E+00 |
| ENSG00000269950.1_AP000962. | ENSG00000160789.18_LMNA | -0.01066 | -0.169575972 | 0.148790146 | 8.96E-01 | 9.59E-01 | 1.00E+00 |
| ENSG00000237772.1_AC092620. | ENSG00000160789.18_LMNA | 0.06941  | -0.090795477 | 0.22611071  | 3.95E-01 | 6.73E-01 | 1.00E+00 |
| ENSG00000277684.1_RP11-305D | ENSG00000160789.18_LMNA | 0.059    | -0.101152237 | 0.216168861 | 4.70E-01 | 7.31E-01 | 1.00E+00 |
| ENSG00000197585.8_AC107218. | ENSG00000160789.18_LMNA | 0.10114  | -0.059010407 | 0.25621567  | 2.15E-01 | 4.89E-01 | 1.00E+00 |
| ENSG00000237385.1_RP11-165J | ENSG00000160789.18_LMNA | -0.11878 | -0.272820776 | 0.041200761 | 1.45E-01 | 3.90E-01 | 1.00E+00 |
| ENSG00000213301.2_HMGB3P11  | ENSG00000160789.18_LMNA | 0.04843  | -0.111630803 | 0.206042668 | 5.54E-01 | 7.88E-01 | 1.00E+00 |
| ENSG00000254129.1_CTD-2647L | ENSG00000160789.18_LMNA | 0.05673  | -0.103405499 | 0.213997117 | 4.88E-01 | 7.44E-01 | 1.00E+00 |
| ENSG00000213959.2_RP5-1100H | ENSG00000160789.18_LMNA | -0.0089  | -0.167865584 | 0.150511223 | 9.13E-01 | 9.67E-01 | 1.00E+00 |
| ENSG00000275572.1_GRIFIN    | ENSG00000160789.18_LMNA | 0.1101   | -0.049980073 | 0.264658561 | 1.77E-01 | 4.38E-01 | 1.00E+00 |
| ENSG00000237432.2_RPS7P12   | ENSG00000160789.18_LMNA | 0.0815   | -0.078718728 | 0.237620858 | 3.18E-01 | 6.05E-01 | 1.00E+00 |
| ENSG00000265334.1_CTD-2349P | ENSG00000160789.18_LMNA | -0.06532 | -0.222208228 | 0.094869013 | 4.24E-01 | 6.95E-01 | 1.00E+00 |
| ENSG00000232433.2_GXYLT1P3  | ENSG00000160789.18_LMNA | -0.15465 | -0.306309146 | 0.004665684 | 5.71E-02 | 2.19E-01 | 1.00E+00 |
| ENSG00000236671.6_PRKG1-AS  | ENSG00000160789.18_LMNA | -0.04984 | -0.207397558 | 0.110232847 | 5.42E-01 | 7.81E-01 | 1.00E+00 |
| ENSG00000221867.7_MAGEA3    | ENSG00000160789.18_LMNA | -0.1262  | -0.279777173 | 0.033679962 | 1.21E-01 | 3.51E-01 | 1.00E+00 |
| ENSG00000204909.6_SPINK9    | ENSG00000160789.18_LMNA | -0.14922 | -0.301259362 | 0.010228561 | 6.65E-02 | 2.41E-01 | 1.00E+00 |
| ENSG00000236546.1_RP1-118J2 | ENSG00000160789.18_LMNA | -0.06877 | -0.225504756 | 0.091428687 | 4.00E-01 | 6.76E-01 | 1.00E+00 |
| ENSG00000259964.5_THSD4-AS  | ENSG00000160789.18_LMNA | -0.14976 | -0.30176351  | 0.009674053 | 6.55E-02 | 2.39E-01 | 1.00E+00 |
| ENSG00000271776.1_RP11-52L5 | ENSG00000160789.18_LMNA | -0.36986 | -0.499637688 | -0.22383538 | 2.74E-06 | 1.02E-04 | 1.40E-01 |
| ENSG00000244217.1_RPS4XP10  | ENSG00000160789.18_LMNA | -0.06725 | -0.224053885 | 0.092943779 | 4.10E-01 | 6.85E-01 | 1.00E+00 |
| ENSG00000271625.1_PSMA6P4   | ENSG00000160789.18_LMNA | -0.15097 | -0.302893805 | 0.008430155 | 6.34E-02 | 2.34E-01 | 1.00E+00 |
| ENSG00000254101.4_RP11-30J2 | ENSG00000160789.18_LMNA | -0.13909 | -0.291830381 | 0.020564237 | 8.75E-02 | 2.88E-01 | 1.00E+00 |
| ENSG00000158639.10_PAGE5    | ENSG00000160789.18_LMNA | -0.17619 | -0.326240793 | -0.01748069 | 2.99E-02 | 1.43E-01 | 1.00E+00 |
| ENSG00000196844.7_PATE2     | ENSG00000160789.18_LMNA | -0.21552 | -0.362292487 | -0.05832296 | 7.66E-03 | 5.38E-02 | 1.00E+00 |



|                              |                         |          |              |             |          |          |          |
|------------------------------|-------------------------|----------|--------------|-------------|----------|----------|----------|
| ENSG00000277173.1_CTD-2024F  | ENSG00000160789.18_LMNA | 0.08333  | -0.076890751 | 0.239355366 | 3.07E-01 | 5.94E-01 | 1.00E+00 |
| ENSG00000232905.2_RP11-534I8 | ENSG00000160789.18_LMNA | 0.09117  | -0.06902917  | 0.246792027 | 2.64E-01 | 5.47E-01 | 1.00E+00 |
| ENSG00000266953.5_RP11-618P  | ENSG00000160789.18_LMNA | 0.03789  | -0.122045056 | 0.19591076  | 6.43E-01 | 8.41E-01 | 1.00E+00 |
| ENSG00000273170.4_           | ENSG00000160789.18_LMNA | -0.21053 | -0.357742214 | -0.05311132 | 9.23E-03 | 6.19E-02 | 1.00E+00 |
| ENSG00000073734.8_ABCB11     | ENSG00000160789.18_LMNA | 0.15471  | -0.004602636 | 0.306366279 | 5.70E-02 | 2.18E-01 | 1.00E+00 |
| ENSG00000125850.9_OVOL2      | ENSG00000160789.18_LMNA | -0.0904  | -0.246062524 | 0.069802095 | 2.68E-01 | 5.52E-01 | 1.00E+00 |
| ENSG00000270300.1_PHACTR2F   | ENSG00000160789.18_LMNA | 0.06644  | -0.093754332 | 0.223277112 | 4.16E-01 | 6.89E-01 | 1.00E+00 |
| ENSG00000265799.1_RP11-387H  | ENSG00000160789.18_LMNA | 0.09595  | -0.064227667 | 0.251315784 | 2.40E-01 | 5.18E-01 | 1.00E+00 |
| ENSG00000230039.1_RP11-314A  | ENSG00000160789.18_LMNA | -0.0091  | -0.168059425 | 0.150316267 | 9.11E-01 | 9.66E-01 | 1.00E+00 |
| ENSG00000236438.5_FAM157A    | ENSG00000160789.18_LMNA | -0.05603 | -0.213328961 | 0.104098081 | 4.93E-01 | 7.48E-01 | 1.00E+00 |
| ENSG00000273514.1_FOXD4L6    | ENSG00000160789.18_LMNA | -0.12881 | -0.282226912 | 0.031022986 | 1.14E-01 | 3.37E-01 | 1.00E+00 |
| ENSG00000124469.9_CEACAM8    | ENSG00000160789.18_LMNA | 0.05365  | -0.106455373 | 0.211052576 | 5.11E-01 | 7.60E-01 | 1.00E+00 |
| ENSG00000262117.4_BCAR4      | ENSG00000160789.18_LMNA | -0.13081 | -0.284094887 | 0.028994009 | 1.08E-01 | 3.27E-01 | 1.00E+00 |
| ENSG00000185186.7_LINC00313  | ENSG00000160789.18_LMNA | 0.29034  | 0.13749483   | 0.42968007  | 2.85E-04 | 4.32E-03 | 1.00E+00 |
| ENSG00000245719.1_RP11-34F1  | ENSG00000160789.18_LMNA | -0.16677 | -0.317541092 | -0.00777691 | 4.00E-02 | 1.73E-01 | 1.00E+00 |
| ENSG00000249006.1_RP11-317B  | ENSG00000160789.18_LMNA | -0.12168 | -0.275541361 | 0.038263675 | 1.35E-01 | 3.74E-01 | 1.00E+00 |
| ENSG00000279124.1_RP11-341D  | ENSG00000160789.18_LMNA | -0.07587 | -0.232269829 | 0.08434474  | 3.53E-01 | 6.36E-01 | 1.00E+00 |
| ENSG00000231560.1_AC091814.1 | ENSG00000160789.18_LMNA | 0.1608   | 0.001641133  | 0.312013161 | 4.78E-02 | 1.95E-01 | 1.00E+00 |
| ENSG00000220256.3_AC093802.1 | ENSG00000160789.18_LMNA | -0.34922 | -0.481644636 | -0.20120729 | 1.04E-05 | 3.00E-04 | 5.31E-01 |
| ENSG00000182348.6_ZNF804B    | ENSG00000160789.18_LMNA | -0.10738 | -0.262096488 | 0.052725859 | 1.88E-01 | 4.55E-01 | 1.00E+00 |
| ENSG00000229696.1_KARSP1     | ENSG00000160789.18_LMNA | -0.03967 | -0.197618485 | 0.120294634 | 6.28E-01 | 8.32E-01 | 1.00E+00 |
| ENSG00000279606.1_RP11-502F  | ENSG00000160789.18_LMNA | -0.04796 | -0.205591548 | 0.112095983 | 5.57E-01 | 7.91E-01 | 1.00E+00 |
| ENSG00000249484.7_LINC01470  | ENSG00000160789.18_LMNA | -0.1202  | -0.274156997 | 0.039758883 | 1.40E-01 | 3.82E-01 | 1.00E+00 |
| ENSG00000243251.5_PGBD3      | ENSG00000160789.18_LMNA | -0.11218 | -0.26661581  | 0.047879271 | 1.69E-01 | 4.27E-01 | 1.00E+00 |
| ENSG00000278891.1_RP11-246E  | ENSG00000160789.18_LMNA | -0.00661 | -0.165634005 | 0.15275385  | 9.36E-01 | 9.75E-01 | 1.00E+00 |
| ENSG00000152591.11_DSPP      | ENSG00000160789.18_LMNA | 0.06831  | -0.091893918 | 0.225059395 | 4.03E-01 | 6.79E-01 | 1.00E+00 |
| ENSG00000226777.6_FAM30A     | ENSG00000160789.18_LMNA | -0.05152 | -0.20900423  | 0.108573475 | 5.28E-01 | 7.72E-01 | 1.00E+00 |
| ENSG00000146839.17_ZAN       | ENSG00000160789.18_LMNA | 0.04451  | -0.115504469 | 0.202281961 | 5.86E-01 | 8.08E-01 | 1.00E+00 |
| ENSG00000248327.1_NOL8P1     | ENSG00000160789.18_LMNA | 0.0195   | -0.14013702  | 0.178146395 | 8.12E-01 | 9.26E-01 | 1.00E+00 |
| ENSG00000230524.7_COL6A4P1   | ENSG00000160789.18_LMNA | -0.11893 | -0.272960672 | 0.041049865 | 1.44E-01 | 3.89E-01 | 1.00E+00 |
| ENSG00000153292.14_ADGRF1    | ENSG00000160789.18_LMNA | 0.15627  | -0.003002601 | 0.307815443 | 5.45E-02 | 2.13E-01 | 1.00E+00 |
| ENSG00000266019.1_MIR3609    | ENSG00000160789.18_LMNA | -0.11621 | -0.270410715 | 0.043798088 | 1.54E-01 | 4.04E-01 | 1.00E+00 |
| ENSG00000239855.1_IGKV1-6    | ENSG00000160789.18_LMNA | -0.01043 | -0.169351277 | 0.149016355 | 8.99E-01 | 9.61E-01 | 1.00E+00 |

|                              |                         |          |              |             |          |          |          |
|------------------------------|-------------------------|----------|--------------|-------------|----------|----------|----------|
| ENSG00000277918.1_U1         | ENSG00000160789.18_LMNA | -0.04779 | -0.205425633 | 0.112267035 | 5.59E-01 | 7.92E-01 | 1.00E+00 |
| ENSG00000221246.1_           | ENSG00000160789.18_LMNA | 0.01611  | -0.143455062 | 0.174865764 | 8.44E-01 | 9.39E-01 | 1.00E+00 |
| ENSG00000274066.1_MIR6514    | ENSG00000160789.18_LMNA | -0.0263  | -0.184725522 | 0.133461255 | 7.48E-01 | 8.95E-01 | 1.00E+00 |
| ENSG00000280697.1_           | ENSG00000160789.18_LMNA | 0.02828  | -0.131512592 | 0.186640613 | 7.29E-01 | 8.86E-01 | 1.00E+00 |
| ENSG00000249706.1_RP11-89B1  | ENSG00000160789.18_LMNA | 0.03777  | -0.122160778 | 0.195797792 | 6.44E-01 | 8.42E-01 | 1.00E+00 |
| ENSG00000252034.1_RNY4P37    | ENSG00000160789.18_LMNA | -0.14966 | -0.301670754 | 0.009776088 | 6.57E-02 | 2.39E-01 | 1.00E+00 |
| ENSG00000207249.1_SNORA72    | ENSG00000160789.18_LMNA | 0.12543  | -0.034459984 | 0.279057215 | 1.24E-01 | 3.55E-01 | 1.00E+00 |
| ENSG00000207205.1_RNVU1-15   | ENSG00000160789.18_LMNA | 0.06544  | -0.094742821 | 0.222329274 | 4.23E-01 | 6.94E-01 | 1.00E+00 |
| ENSG00000259340.2_CTD-2027C  | ENSG00000160789.18_LMNA | -0.05223 | -0.209690199 | 0.107864467 | 5.23E-01 | 7.68E-01 | 1.00E+00 |
| ENSG00000231535.4_LINC00278  | ENSG00000160789.18_LMNA | -0.11153 | -0.266011086 | 0.048528646 | 1.71E-01 | 4.30E-01 | 1.00E+00 |
| ENSG00000264222.1_           | ENSG00000160789.18_LMNA | 0.00902  | -0.150398815 | 0.167977353 | 9.12E-01 | 9.67E-01 | 1.00E+00 |
| ENSG00000250592.1_RP11-39E3  | ENSG00000160789.18_LMNA | -0.17731 | -0.327274158 | -0.0186372  | 2.89E-02 | 1.40E-01 | 1.00E+00 |
| ENSG00000164825.3_DEFB1      | ENSG00000160789.18_LMNA | -0.24267 | -0.386919208 | -0.08681958 | 2.59E-03 | 2.39E-02 | 1.00E+00 |
| ENSG00000280116.1_AC231657.  | ENSG00000160789.18_LMNA | 0.0208   | -0.138861495 | 0.179405658 | 7.99E-01 | 9.19E-01 | 1.00E+00 |
| ENSG00000148965.7_SAA4       | ENSG00000160789.18_LMNA | 0.03355  | -0.126323119 | 0.191728916 | 6.82E-01 | 8.61E-01 | 1.00E+00 |
| ENSG00000257004.1_RP11-180M  | ENSG00000160789.18_LMNA | -0.1251  | -0.278745215 | 0.034797894 | 1.25E-01 | 3.56E-01 | 1.00E+00 |
| ENSG00000272524.1_RP11-254F  | ENSG00000160789.18_LMNA | 0.08763  | -0.072579982 | 0.243437737 | 2.83E-01 | 5.68E-01 | 1.00E+00 |
| ENSG00000275874.1_PICSAR     | ENSG00000160789.18_LMNA | -0.12324 | -0.27700951  | 0.036676436 | 1.30E-01 | 3.66E-01 | 1.00E+00 |
| ENSG00000237528.1_RP11-234P  | ENSG00000160789.18_LMNA | -0.18542 | -0.334739758 | -0.02701707 | 2.22E-02 | 1.16E-01 | 1.00E+00 |
| ENSG00000115386.5_REG1A      | ENSG00000160789.18_LMNA | 0.06465  | -0.095537904 | 0.221566453 | 4.29E-01 | 6.99E-01 | 1.00E+00 |
| ENSG00000180019.5_AC079741.  | ENSG00000160789.18_LMNA | -0.01845 | -0.177134241 | 0.141161479 | 8.21E-01 | 9.30E-01 | 1.00E+00 |
| ENSG00000255133.1_RP11-646J. | ENSG00000160789.18_LMNA | 0.11936  | -0.040617398 | 0.273361538 | 1.43E-01 | 3.86E-01 | 1.00E+00 |
| ENSG00000271398.1_RP5-1092A  | ENSG00000160789.18_LMNA | -0.18783 | -0.336950616 | -0.029507   | 2.05E-02 | 1.10E-01 | 1.00E+00 |
| ENSG00000139780.7_METTL21C   | ENSG00000160789.18_LMNA | -0.2006  | -0.348667895 | -0.04276738 | 1.32E-02 | 8.00E-02 | 1.00E+00 |
| ENSG00000279487.1_AC234582.  | ENSG00000160789.18_LMNA | 0.2379   | 0.081795155  | 0.382607975 | 3.16E-03 | 2.78E-02 | 1.00E+00 |
| ENSG00000231518.1_           | ENSG00000160789.18_LMNA | -0.07599 | -0.23237741  | 0.08423183  | 3.52E-01 | 6.36E-01 | 1.00E+00 |
| ENSG00000239930.2_AP001625.  | ENSG00000160789.18_LMNA | 0.11161  | -0.048452872 | 0.266081662 | 1.71E-01 | 4.30E-01 | 1.00E+00 |
| ENSG00000236559.1_RP11-243J. | ENSG00000160789.18_LMNA | 0.09158  | -0.068620784 | 0.247177326 | 2.62E-01 | 5.45E-01 | 1.00E+00 |
| ENSG00000240106.2_RN7SL146F  | ENSG00000160789.18_LMNA | 0.15386  | -0.005470251 | 0.305579869 | 5.84E-02 | 2.22E-01 | 1.00E+00 |
| ENSG00000232023.2_AC009410.  | ENSG00000160789.18_LMNA | -0.26    | -0.402539676 | -0.10515286 | 1.22E-03 | 1.34E-02 | 1.00E+00 |
| ENSG00000251126.2_RP11-119H  | ENSG00000160789.18_LMNA | -0.20044 | -0.348516982 | -0.0425959  | 1.33E-02 | 8.03E-02 | 1.00E+00 |
| ENSG00000279654.1_AL135745.1 | ENSG00000160789.18_LMNA | 0.02343  | -0.136283498 | 0.181947609 | 7.75E-01 | 9.07E-01 | 1.00E+00 |
| ENSG00000228404.1_AP001468.  | ENSG00000160789.18_LMNA | -0.06466 | -0.221578117 | 0.095525749 | 4.29E-01 | 6.99E-01 | 1.00E+00 |

|                              |                         |          |              |             |          |          |          |
|------------------------------|-------------------------|----------|--------------|-------------|----------|----------|----------|
| ENSG00000181511.5_RP4-655L2  | ENSG00000160789.18_LMNA | -0.05028 | -0.207813193 | 0.109803748 | 5.38E-01 | 7.79E-01 | 1.00E+00 |
| ENSG00000267247.1_RP11-64C1  | ENSG00000160789.18_LMNA | -0.20245 | -0.350362491 | -0.0446941  | 1.24E-02 | 7.64E-02 | 1.00E+00 |
| ENSG00000269901.1_RP11-178L  | ENSG00000160789.18_LMNA | 0.18706  | 0.028717509  | 0.336249977 | 2.10E-02 | 1.12E-01 | 1.00E+00 |
| ENSG00000256341.1_RP11-21A7  | ENSG00000160789.18_LMNA | -0.16399 | -0.314964011 | -0.00491355 | 4.35E-02 | 1.84E-01 | 1.00E+00 |
| ENSG00000178394.4_HTR1A      | ENSG00000160789.18_LMNA | -0.22263 | -0.368756681 | -0.06575531 | 5.84E-03 | 4.41E-02 | 1.00E+00 |
| ENSG00000259771.1_RP11-429D  | ENSG00000160789.18_LMNA | 0.12379  | -0.036121732 | 0.27752225  | 1.29E-01 | 3.63E-01 | 1.00E+00 |
| ENSG00000152034.9_MCHR2      | ENSG00000160789.18_LMNA | -0.21612 | -0.36283849  | -0.05894944 | 7.49E-03 | 5.29E-02 | 1.00E+00 |
| ENSG00000251139.2_RP11-701P  | ENSG00000160789.18_LMNA | -0.06592 | -0.222781874 | 0.094270888 | 4.20E-01 | 6.91E-01 | 1.00E+00 |
| ENSG00000269067.1_ZNF728     | ENSG00000160789.18_LMNA | -0.26105 | -0.403482799 | -0.10626628 | 1.16E-03 | 1.29E-02 | 1.00E+00 |
| ENSG00000275162.1_LLNLR-260  | ENSG00000160789.18_LMNA | -0.06397 | -0.220918819 | 0.096212611 | 4.34E-01 | 7.03E-01 | 1.00E+00 |
| ENSG00000272984.1_RP11-85E1  | ENSG00000160789.18_LMNA | -0.22501 | -0.370920399 | -0.06825063 | 5.32E-03 | 4.11E-02 | 1.00E+00 |
| ENSG00000254094.1_AC078852   | ENSG00000160789.18_LMNA | -0.02289 | -0.181431658 | 0.136807114 | 7.80E-01 | 9.09E-01 | 1.00E+00 |
| ENSG00000254100.1_RP11-675F  | ENSG00000160789.18_LMNA | -0.04912 | -0.206708973 | 0.110943476 | 5.48E-01 | 7.85E-01 | 1.00E+00 |
| ENSG00000232325.3_AC093627   | ENSG00000160789.18_LMNA | 0.19652  | 0.038526506  | 0.344930902 | 1.52E-02 | 8.88E-02 | 1.00E+00 |
| ENSG00000216813.1_RP11-812I2 | ENSG00000160789.18_LMNA | -0.00894 | -0.167898833 | 0.150477784 | 9.13E-01 | 9.67E-01 | 1.00E+00 |
| ENSG00000262979.1_CTD-2047H  | ENSG00000160789.18_LMNA | 0.13804  | -0.0216322   | 0.290852631 | 8.99E-02 | 2.92E-01 | 1.00E+00 |
| ENSG00000254844.4_RP11-728F  | ENSG00000160789.18_LMNA | -0.24682 | -0.390666346 | -0.09119903 | 2.17E-03 | 2.08E-02 | 1.00E+00 |
| ENSG00000268056.4_CTD-3032J  | ENSG00000160789.18_LMNA | 0.01923  | -0.140399932 | 0.177886705 | 8.14E-01 | 9.27E-01 | 1.00E+00 |
| ENSG00000236171.1_RPL12P26   | ENSG00000160789.18_LMNA | -0.00172 | -0.160878337 | 0.157522147 | 9.83E-01 | 9.94E-01 | 1.00E+00 |
| ENSG00000231393.1_RP11-331F  | ENSG00000160789.18_LMNA | 0.06296  | -0.097219906 | 0.21995142  | 4.41E-01 | 7.09E-01 | 1.00E+00 |
| ENSG00000257087.1_RP11-136I1 | ENSG00000160789.18_LMNA | 0.07941  | -0.080813422 | 0.235630788 | 3.31E-01 | 6.17E-01 | 1.00E+00 |
| ENSG00000228802.1_AC073641   | ENSG00000160789.18_LMNA | -0.08398 | -0.239970267 | 0.076242203 | 3.04E-01 | 5.90E-01 | 1.00E+00 |
| ENSG00000224621.1_RP11-276H  | ENSG00000160789.18_LMNA | 0.15567  | -0.003617285 | 0.30725889  | 5.55E-02 | 2.15E-01 | 1.00E+00 |
| ENSG00000224273.1_AC005077   | ENSG00000160789.18_LMNA | 0.09159  | -0.068612619 | 0.247185028 | 2.62E-01 | 5.45E-01 | 1.00E+00 |
| ENSG00000270870.1_GS1-531I17 | ENSG00000160789.18_LMNA | 0.07121  | -0.088995509 | 0.227831859 | 3.83E-01 | 6.62E-01 | 1.00E+00 |
| ENSG00000260447.1_RP11-304L  | ENSG00000160789.18_LMNA | 0.09517  | -0.065019323 | 0.250570869 | 2.44E-01 | 5.23E-01 | 1.00E+00 |
| ENSG00000267069.1_RP11-64C1  | ENSG00000160789.18_LMNA | 0.24063  | 0.084673227  | 0.385079123 | 2.82E-03 | 2.55E-02 | 1.00E+00 |
| ENSG00000230186.3_RP5-998N2  | ENSG00000160789.18_LMNA | 7.39E-05 | -0.159128626 | 0.159272777 | 9.99E-01 | 1.00E+00 | 1.00E+00 |
| ENSG00000255270.1_NAV2-IT1   | ENSG00000160789.18_LMNA | -0.04265 | -0.200487916 | 0.117349003 | 6.02E-01 | 8.17E-01 | 1.00E+00 |
| ENSG00000254877.1_RP11-142C  | ENSG00000160789.18_LMNA | -0.02216 | -0.180720037 | 0.137529016 | 7.86E-01 | 9.13E-01 | 1.00E+00 |
| ENSG00000169704.4_GP9        | ENSG00000160789.18_LMNA | 0.10128  | -0.058874799 | 0.256342814 | 2.14E-01 | 4.89E-01 | 1.00E+00 |
| ENSG00000250551.1_RP11-254I2 | ENSG00000160789.18_LMNA | 0.14847  | -0.010992025 | 0.30056495  | 6.79E-02 | 2.45E-01 | 1.00E+00 |
| ENSG00000214360.4_EFCAB9     | ENSG00000160789.18_LMNA | -0.1088  | -0.263434208 | 0.051292812 | 1.82E-01 | 4.46E-01 | 1.00E+00 |

|                             |                         |          |              |             |          |          |          |
|-----------------------------|-------------------------|----------|--------------|-------------|----------|----------|----------|
| ENSG00000236040.1_CHIAP1    | ENSG00000160789.18_LMNA | -0.25513 | -0.398154337 | -0.09998543 | 1.51E-03 | 1.58E-02 | 1.00E+00 |
| ENSG00000271329.1_RP5-891H2 | ENSG00000160789.18_LMNA | -0.00749 | -0.166489537 | 0.15189447  | 9.27E-01 | 9.72E-01 | 1.00E+00 |
| ENSG00000267717.1_SRSF10P1  | ENSG00000160789.18_LMNA | 0.11804  | -0.041949048 | 0.272126845 | 1.48E-01 | 3.94E-01 | 1.00E+00 |
| ENSG00000229163.2_NAP1L1P2  | ENSG00000160789.18_LMNA | -0.11939 | -0.273394634 | 0.040581688 | 1.43E-01 | 3.86E-01 | 1.00E+00 |
| ENSG00000258343.1_RP11-536G | ENSG00000160789.18_LMNA | 0.01158  | -0.14789524  | 0.170464563 | 8.87E-01 | 9.56E-01 | 1.00E+00 |
| ENSG00000216613.2_RP3-406A7 | ENSG00000160789.18_LMNA | 0.04707  | -0.112974833 | 0.204738894 | 5.65E-01 | 7.95E-01 | 1.00E+00 |
| ENSG00000161992.5_PRR35     | ENSG00000160789.18_LMNA | 0.11987  | -0.040092742 | 0.27384771  | 1.41E-01 | 3.84E-01 | 1.00E+00 |
| ENSG00000259264.4_          | ENSG00000160789.18_LMNA | 0.12283  | -0.037098688 | 0.276619083 | 1.32E-01 | 3.68E-01 | 1.00E+00 |
| ENSG00000250050.1_MTND4P9   | ENSG00000160789.18_LMNA | 0.07502  | -0.085202869 | 0.231451955 | 3.58E-01 | 6.41E-01 | 1.00E+00 |
| ENSG00000231645.2_KRT17P6   | ENSG00000160789.18_LMNA | -0.01948 | -0.178127302 | 0.140156351 | 8.12E-01 | 9.26E-01 | 1.00E+00 |
| ENSG00000182965.6_NPM1P14   | ENSG00000160789.18_LMNA | 0.02218  | -0.137507745 | 0.18074101  | 7.86E-01 | 9.13E-01 | 1.00E+00 |
| ENSG00000256533.1_RP11-212D | ENSG00000160789.18_LMNA | -0.02906 | -0.187392645 | 0.130746703 | 7.22E-01 | 8.82E-01 | 1.00E+00 |
| ENSG00000254608.1_          | ENSG00000160789.18_LMNA | -0.07987 | -0.236070534 | 0.080350798 | 3.28E-01 | 6.14E-01 | 1.00E+00 |
| ENSG00000226705.1_SDCBPP1   | ENSG00000160789.18_LMNA | 0.01607  | -0.143501774 | 0.174819529 | 8.44E-01 | 9.39E-01 | 1.00E+00 |
| ENSG00000278599.3_TBC1D3E   | ENSG00000160789.18_LMNA | 0.07956  | -0.080667101 | 0.235769886 | 3.30E-01 | 6.16E-01 | 1.00E+00 |
| ENSG00000260943.1_RP11-476D | ENSG00000160789.18_LMNA | -0.07776 | -0.234060952 | 0.082463819 | 3.41E-01 | 6.26E-01 | 1.00E+00 |
| ENSG00000248568.1_KRT8P48   | ENSG00000160789.18_LMNA | -0.03298 | -0.191176562 | 0.126887299 | 6.87E-01 | 8.64E-01 | 1.00E+00 |
| ENSG00000265287.2_RP11-192H | ENSG00000160789.18_LMNA | -0.03815 | -0.196157682 | 0.121792083 | 6.41E-01 | 8.40E-01 | 1.00E+00 |
| ENSG00000230676.1_RP11-65J3 | ENSG00000160789.18_LMNA | -0.1056  | -0.26042254  | 0.05451727  | 1.95E-01 | 4.64E-01 | 1.00E+00 |
| ENSG00000256035.1_AP000619  | ENSG00000160789.18_LMNA | 0.00468  | -0.154636151 | 0.163758457 | 9.54E-01 | 9.82E-01 | 1.00E+00 |
| ENSG00000254290.1_RP11-150C | ENSG00000160789.18_LMNA | 0.02882  | -0.130977364 | 0.187166197 | 7.24E-01 | 8.83E-01 | 1.00E+00 |
| ENSG00000254973.1_RP11-429J | ENSG00000160789.18_LMNA | -0.10329 | -0.258239691 | 0.056850249 | 2.05E-01 | 4.77E-01 | 1.00E+00 |
| ENSG00000253480.1_RP11-39H3 | ENSG00000160789.18_LMNA | -0.23261 | -0.377823577 | -0.07623713 | 3.93E-03 | 3.27E-02 | 1.00E+00 |
| ENSG00000258780.1_BMS1P15   | ENSG00000160789.18_LMNA | 0.05234  | -0.107754643 | 0.209796426 | 5.22E-01 | 7.68E-01 | 1.00E+00 |
| ENSG00000251575.2_CTD-2170C | ENSG00000160789.18_LMNA | -0.15606 | -0.30762121  | 0.003217148 | 5.49E-02 | 2.13E-01 | 1.00E+00 |
| ENSG00000275805.1_RP11-349H | ENSG00000160789.18_LMNA | -0.14325 | -0.295707955 | 0.016321862 | 7.83E-02 | 2.69E-01 | 1.00E+00 |
| ENSG00000226553.1_AC018735  | ENSG00000160789.18_LMNA | 0.10463  | -0.05549827  | 0.259505061 | 2.00E-01 | 4.70E-01 | 1.00E+00 |
| ENSG00000231114.1_AC078842  | ENSG00000160789.18_LMNA | 0.00526  | -0.154067343 | 0.164325467 | 9.49E-01 | 9.79E-01 | 1.00E+00 |
| ENSG00000246774.1_AC004051  | ENSG00000160789.18_LMNA | -0.07131 | -0.22791895  | 0.088904375 | 3.83E-01 | 6.61E-01 | 1.00E+00 |
| ENSG00000176984.5_AP000679  | ENSG00000160789.18_LMNA | 0.07167  | -0.0885369   | 0.22827007  | 3.80E-01 | 6.59E-01 | 1.00E+00 |
| ENSG00000267712.4_LINC01539 | ENSG00000160789.18_LMNA | -0.14178 | -0.294334686 | 0.017825614 | 8.15E-02 | 2.75E-01 | 1.00E+00 |
| ENSG00000143921.6_ABCG8     | ENSG00000160789.18_LMNA | -0.08909 | -0.244816563 | 0.071121342 | 2.75E-01 | 5.59E-01 | 1.00E+00 |
| ENSG00000233771.2_CICP5     | ENSG00000160789.18_LMNA | -0.07244 | -0.228999735 | 0.087772972 | 3.75E-01 | 6.55E-01 | 1.00E+00 |

|                              |                         |          |              |             |          |          |          |
|------------------------------|-------------------------|----------|--------------|-------------|----------|----------|----------|
| ENSG00000237330.2_RNF223     | ENSG00000160789.18_LMNA | 0.03072  | -0.129110624 | 0.188997878 | 7.07E-01 | 8.75E-01 | 1.00E+00 |
| ENSG00000261315.2_LARP4P     | ENSG00000160789.18_LMNA | 0.01948  | -0.140156892 | 0.178126768 | 8.12E-01 | 9.26E-01 | 1.00E+00 |
| ENSG00000206144.5_RP11-400K  | ENSG00000160789.18_LMNA | -0.05995 | -0.217082788 | 0.10020303  | 4.63E-01 | 7.26E-01 | 1.00E+00 |
| ENSG00000131746.11_TNS4      | ENSG00000160789.18_LMNA | 0.15563  | -0.003665399 | 0.307215317 | 5.56E-02 | 2.15E-01 | 1.00E+00 |
| ENSG00000280179.1_CH507-42P  | ENSG00000160789.18_LMNA | -0.00943 | -0.16838015  | 0.149993644 | 9.08E-01 | 9.65E-01 | 1.00E+00 |
| ENSG00000218823.1_PAPOLB     | ENSG00000160789.18_LMNA | -0.03309 | -0.191287308 | 0.126774198 | 6.86E-01 | 8.64E-01 | 1.00E+00 |
| ENSG00000266104.1_MIR4326    | ENSG00000160789.18_LMNA | -0.02397 | -0.182469725 | 0.135753444 | 7.69E-01 | 9.05E-01 | 1.00E+00 |
| ENSG00000207863.1_MIR125B2   | ENSG00000160789.18_LMNA | -0.13069 | -0.283978527 | 0.029120474 | 1.09E-01 | 3.28E-01 | 1.00E+00 |
| ENSG00000266174.1_MIR4666A   | ENSG00000160789.18_LMNA | -0.18785 | -0.336972156 | -0.02953128 | 2.05E-02 | 1.10E-01 | 1.00E+00 |
| ENSG00000279238.1_AL138706.1 | ENSG00000160789.18_LMNA | 0.00186  | -0.157387581 | 0.161012749 | 9.82E-01 | 9.93E-01 | 1.00E+00 |
| ENSG00000252448.1_SNORA63    | ENSG00000160789.18_LMNA | 0.02191  | -0.137768995 | 0.180483402 | 7.89E-01 | 9.14E-01 | 1.00E+00 |
| ENSG00000266589.1_MIR4512    | ENSG00000160789.18_LMNA | 0.04317  | -0.11683688  | 0.200986235 | 5.97E-01 | 8.14E-01 | 1.00E+00 |
| ENSG00000209042.1_SNORD12C   | ENSG00000160789.18_LMNA | 0.04523  | -0.114798241 | 0.202968294 | 5.80E-01 | 8.04E-01 | 1.00E+00 |
| ENSG00000272533.1_SNORA28    | ENSG00000160789.18_LMNA | 0.01253  | -0.146965753 | 0.171386944 | 8.78E-01 | 9.53E-01 | 1.00E+00 |
| ENSG00000223284.1_RNU6-195F  | ENSG00000160789.18_LMNA | -0.02559 | -0.184040739 | 0.134157445 | 7.54E-01 | 8.98E-01 | 1.00E+00 |
| ENSG00000200059.1_Y_RNA      | ENSG00000160789.18_LMNA | -0.0552  | -0.21252979  | 0.104926063 | 4.99E-01 | 7.52E-01 | 1.00E+00 |
| ENSG00000238934.1_ACA64      | ENSG00000160789.18_LMNA | 0.01375  | -0.145767678 | 0.172575035 | 8.66E-01 | 9.48E-01 | 1.00E+00 |
| ENSG00000237531.4_RP11-309M  | ENSG00000160789.18_LMNA | -0.23336 | -0.378497863 | -0.07701932 | 3.81E-03 | 3.20E-02 | 1.00E+00 |
| ENSG00000201388.1_SNORA68    | ENSG00000160789.18_LMNA | -0.00244 | -0.161578377 | 0.156821179 | 9.76E-01 | 9.91E-01 | 1.00E+00 |
| ENSG00000242559.3_RN7SL144f  | ENSG00000160789.18_LMNA | 0.06754  | -0.092661145 | 0.224324645 | 4.08E-01 | 6.83E-01 | 1.00E+00 |
| ENSG00000237838.1_AC133680.  | ENSG00000160789.18_LMNA | -0.37528 | -0.5043451   | -0.22980492 | 1.90E-06 | 7.70E-05 | 9.75E-02 |
| ENSG00000131126.17_TEX101    | ENSG00000160789.18_LMNA | 0.01059  | -0.148856954 | 0.169509615 | 8.97E-01 | 9.60E-01 | 1.00E+00 |
| ENSG00000249937.4_RP11-454P  | ENSG00000160789.18_LMNA | -0.2301  | -0.375539318 | -0.07359011 | 4.35E-03 | 3.53E-02 | 1.00E+00 |
| ENSG00000218809.1_RP1-229K2  | ENSG00000160789.18_LMNA | 0.14486  | -0.01468347  | 0.297202714 | 7.50E-02 | 2.61E-01 | 1.00E+00 |
| ENSG00000256150.1_RP11-885B  | ENSG00000160789.18_LMNA | -0.03835 | -0.196349999 | 0.121595023 | 6.39E-01 | 8.39E-01 | 1.00E+00 |
| ENSG00000241912.1_RP11-292E  | ENSG00000160789.18_LMNA | -0.14116 | -0.293758367 | 0.018456271 | 8.28E-02 | 2.78E-01 | 1.00E+00 |
| ENSG00000273077.1_RP11-130C  | ENSG00000160789.18_LMNA | -0.01149 | -0.170377063 | 0.147983385 | 8.88E-01 | 9.57E-01 | 1.00E+00 |
| ENSG00000224222.1_RP11-262I2 | ENSG00000160789.18_LMNA | -0.04374 | -0.201537369 | 0.116270282 | 5.93E-01 | 8.12E-01 | 1.00E+00 |
| ENSG00000260247.1_SUB1P4     | ENSG00000160789.18_LMNA | -0.06504 | -0.221944889 | 0.095143513 | 4.26E-01 | 6.97E-01 | 1.00E+00 |
| ENSG00000242876.3_RN7SL812f  | ENSG00000160789.18_LMNA | 0.09039  | -0.069818495 | 0.246047041 | 2.68E-01 | 5.52E-01 | 1.00E+00 |
| ENSG00000232163.2_RPLP1P13   | ENSG00000160789.18_LMNA | -0.02418 | -0.182675923 | 0.135544061 | 7.67E-01 | 9.04E-01 | 1.00E+00 |
| ENSG00000237955.1_AC008746.  | ENSG00000160789.18_LMNA | 0.12048  | -0.039480129 | 0.274415185 | 1.39E-01 | 3.81E-01 | 1.00E+00 |
| ENSG00000196748.8_CLPSL2     | ENSG00000160789.18_LMNA | 0.14403  | -0.015526271 | 0.29643399  | 7.67E-02 | 2.65E-01 | 1.00E+00 |

|                              |                         |          |              |             |          |          |          |
|------------------------------|-------------------------|----------|--------------|-------------|----------|----------|----------|
| ENSG00000261039.2_RP11-417E  | ENSG00000160789.18_LMNA | 0.12683  | -0.033033245 | 0.280373824 | 1.19E-01 | 3.47E-01 | 1.00E+00 |
| ENSG00000226045.1_AC009274.1 | ENSG00000160789.18_LMNA | 0.03881  | -0.121143957 | 0.19679012  | 6.35E-01 | 8.36E-01 | 1.00E+00 |
| ENSG00000224128.1_LINC01248  | ENSG00000160789.18_LMNA | -0.12119 | -0.275080005 | 0.038762127 | 1.37E-01 | 3.77E-01 | 1.00E+00 |
| ENSG00000225588.2_AC096669.1 | ENSG00000160789.18_LMNA | -0.43099 | -0.552293626 | -0.29180911 | 2.98E-08 | 2.68E-06 | 1.53E-03 |
| ENSG00000240286.1_MEAF6P1    | ENSG00000160789.18_LMNA | 0.05856  | -0.101586685 | 0.215750374 | 4.74E-01 | 7.33E-01 | 1.00E+00 |
| ENSG00000267418.1_TCEB1P29   | ENSG00000160789.18_LMNA | -0.035   | -0.19312588  | 0.124895327 | 6.69E-01 | 8.54E-01 | 1.00E+00 |
| ENSG00000258183.4_RP11-753N  | ENSG00000160789.18_LMNA | 0.18166  | 0.023123695  | 0.331275964 | 2.51E-02 | 1.27E-01 | 1.00E+00 |
| ENSG00000255325.2_RP11-96B2  | ENSG00000160789.18_LMNA | 0.16678  | 0.007788786  | 0.317551773 | 4.00E-02 | 1.73E-01 | 1.00E+00 |
| ENSG00000267005.1_AC002984.1 | ENSG00000160789.18_LMNA | -0.08229 | -0.238368144 | 0.077931432 | 3.14E-01 | 6.00E-01 | 1.00E+00 |
| ENSG00000271148.1_RP11-401N  | ENSG00000160789.18_LMNA | -0.2657  | -0.407656685 | -0.11120282 | 9.38E-04 | 1.10E-02 | 1.00E+00 |
| ENSG00000213527.5_RP11-591L  | ENSG00000160789.18_LMNA | 0.04613  | -0.113903958 | 0.203836937 | 5.72E-01 | 8.00E-01 | 1.00E+00 |
| ENSG00000218198.3_RPS20P32   | ENSG00000160789.18_LMNA | 0.08385  | -0.07636834  | 0.239850694 | 3.04E-01 | 5.91E-01 | 1.00E+00 |
| ENSG00000229915.1_AC016999.1 | ENSG00000160789.18_LMNA | 0.13183  | -0.027954347 | 0.285051131 | 1.05E-01 | 3.22E-01 | 1.00E+00 |
| ENSG00000273313.1_RBAKDN     | ENSG00000160789.18_LMNA | 0.12452  | -0.035378651 | 0.278208836 | 1.26E-01 | 3.59E-01 | 1.00E+00 |
| ENSG00000257067.4_AP000797.4 | ENSG00000160789.18_LMNA | 0.0693   | -0.090907292 | 0.226003725 | 3.96E-01 | 6.73E-01 | 1.00E+00 |
| ENSG00000253842.1_KB-173C10  | ENSG00000160789.18_LMNA | -0.0074  | -0.166408099 | 0.151976294 | 9.28E-01 | 9.72E-01 | 1.00E+00 |
| ENSG00000261665.2_TUBAP4     | ENSG00000160789.18_LMNA | -0.07134 | -0.227951965 | 0.088869826 | 3.82E-01 | 6.61E-01 | 1.00E+00 |
| ENSG00000233292.1_RP11-341B  | ENSG00000160789.18_LMNA | -0.08671 | -0.242565686 | 0.073501814 | 2.88E-01 | 5.74E-01 | 1.00E+00 |
| ENSG00000218187.2_RP11-325O  | ENSG00000160789.18_LMNA | -0.10006 | -0.255198086 | 0.060095321 | 2.20E-01 | 4.95E-01 | 1.00E+00 |
| ENSG00000276436.1_RP11-195L  | ENSG00000160789.18_LMNA | -0.0133  | -0.172133204 | 0.146213331 | 8.71E-01 | 9.50E-01 | 1.00E+00 |
| ENSG00000262298.1_RP5-1107A  | ENSG00000160789.18_LMNA | 0.07251  | -0.087699553 | 0.229069842 | 3.75E-01 | 6.55E-01 | 1.00E+00 |
| ENSG00000243495.1_GMFBP1     | ENSG00000160789.18_LMNA | 0.01698  | -0.14260845  | 0.175703502 | 8.36E-01 | 9.36E-01 | 1.00E+00 |
| ENSG00000254833.1_RP11-50B3  | ENSG00000160789.18_LMNA | -0.09629 | -0.251637782 | 0.063885341 | 2.38E-01 | 5.17E-01 | 1.00E+00 |
| ENSG00000253737.1_KB-1460A1  | ENSG00000160789.18_LMNA | -0.06354 | -0.220505711 | 0.096642835 | 4.37E-01 | 7.05E-01 | 1.00E+00 |
| ENSG00000142273.9_CBLC       | ENSG00000160789.18_LMNA | 0.27095  | 0.11678646   | 0.412362821 | 7.35E-04 | 9.09E-03 | 1.00E+00 |
| ENSG00000228237.4_EFCAB14.4  | ENSG00000160789.18_LMNA | 0.05661  | -0.103528072 | 0.213878889 | 4.89E-01 | 7.45E-01 | 1.00E+00 |
| ENSG00000229384.2_HMGB1P16   | ENSG00000160789.18_LMNA | 0.02005  | -0.139592639 | 0.178683964 | 8.06E-01 | 9.23E-01 | 1.00E+00 |
| ENSG00000235237.1_RP1-151B1  | ENSG00000160789.18_LMNA | 0.11585  | -0.044166333 | 0.270068701 | 1.55E-01 | 4.06E-01 | 1.00E+00 |
| ENSG00000236741.4_RP4-560B9  | ENSG00000160789.18_LMNA | 0.0156   | -0.143962807 | 0.174363119 | 8.49E-01 | 9.41E-01 | 1.00E+00 |
| ENSG00000257496.1_RP11-474P  | ENSG00000160789.18_LMNA | -0.07432 | -0.230793972 | 0.085892896 | 3.63E-01 | 6.44E-01 | 1.00E+00 |
| ENSG00000229044.1_RP11-266K  | ENSG00000160789.18_LMNA | -0.08923 | -0.244950549 | 0.070979528 | 2.74E-01 | 5.59E-01 | 1.00E+00 |
| ENSG00000280060.1_RP11-5G9.1 | ENSG00000160789.18_LMNA | 0.00656  | -0.152802465 | 0.165585593 | 9.36E-01 | 9.75E-01 | 1.00E+00 |
| ENSG00000249835.2_VCAN-AS1   | ENSG00000160789.18_LMNA | -0.11145 | -0.265929443 | 0.048616296 | 1.72E-01 | 4.31E-01 | 1.00E+00 |

|                              |                         |          |              |             |          |          |          |
|------------------------------|-------------------------|----------|--------------|-------------|----------|----------|----------|
| ENSG00000280299.1_RP11-583F  | ENSG00000160789.18_LMNA | 0.00596  | -0.153387853 | 0.165002533 | 9.42E-01 | 9.77E-01 | 1.00E+00 |
| ENSG00000249309.1_RP11-153M  | ENSG00000160789.18_LMNA | -0.02364 | -0.182157246 | 0.136070695 | 7.72E-01 | 9.06E-01 | 1.00E+00 |
| ENSG00000258823.1_CTD-2555K  | ENSG00000160789.18_LMNA | -0.06051 | -0.217616962 | 0.099647968 | 4.59E-01 | 7.23E-01 | 1.00E+00 |
| ENSG00000220925.2_IGBP1-AS2  | ENSG00000160789.18_LMNA | 0.01521  | -0.144339315 | 0.173990286 | 8.52E-01 | 9.42E-01 | 1.00E+00 |
| ENSG00000228742.8_RP5-884M   | ENSG00000160789.18_LMNA | 0.23516  | 0.078912987  | 0.380128989 | 3.54E-03 | 3.03E-02 | 1.00E+00 |
| ENSG00000244346.1_RP11-531F  | ENSG00000160789.18_LMNA | -0.02354 | -0.182056388 | 0.13617308  | 7.73E-01 | 9.07E-01 | 1.00E+00 |
| ENSG00000226355.1_RP11-65J3  | ENSG00000160789.18_LMNA | -0.101   | -0.256078557 | 0.059156636 | 2.16E-01 | 4.90E-01 | 1.00E+00 |
| ENSG00000237631.2_RP11-72B4  | ENSG00000160789.18_LMNA | 0.01532  | -0.144233227 | 0.174095349 | 8.51E-01 | 9.42E-01 | 1.00E+00 |
| ENSG00000280081.2_MGC39584   | ENSG00000160789.18_LMNA | -0.03266 | -0.190869553 | 0.127200792 | 6.90E-01 | 8.66E-01 | 1.00E+00 |
| ENSG00000253967.1_RP11-333A  | ENSG00000160789.18_LMNA | -0.00968 | -0.168623006 | 0.149749306 | 9.06E-01 | 9.64E-01 | 1.00E+00 |
| ENSG00000244327.1_RP11-383G  | ENSG00000160789.18_LMNA | -0.01298 | -0.171822959 | 0.146526182 | 8.74E-01 | 9.51E-01 | 1.00E+00 |
| ENSG00000272141.1_RP11-465B  | ENSG00000160789.18_LMNA | 0.1868   | 0.028444093  | 0.336007254 | 2.12E-02 | 1.12E-01 | 1.00E+00 |
| ENSG00000266801.1_RP11-521L  | ENSG00000160789.18_LMNA | -0.10644 | -0.261213608 | 0.053670944 | 1.92E-01 | 4.60E-01 | 1.00E+00 |
| ENSG00000270294.1_XIAPP1     | ENSG00000160789.18_LMNA | 0.2193   | 0.062268485  | 0.365727702 | 6.64E-03 | 4.84E-02 | 1.00E+00 |
| ENSG00000242968.1_RP11-731C  | ENSG00000160789.18_LMNA | -0.1761  | -0.32615963  | -0.01738989 | 3.00E-02 | 1.43E-01 | 1.00E+00 |
| ENSG00000280269.1_AP000577.2 | ENSG00000160789.18_LMNA | -0.04416 | -0.201939553 | 0.115856683 | 5.89E-01 | 8.09E-01 | 1.00E+00 |
| ENSG00000270479.1_BNIP3P37   | ENSG00000160789.18_LMNA | -0.07779 | -0.234087412 | 0.082436015 | 3.41E-01 | 6.26E-01 | 1.00E+00 |
| ENSG00000238061.2_RP4-635A2  | ENSG00000160789.18_LMNA | 0.09765  | -0.062522109 | 0.252919371 | 2.31E-01 | 5.09E-01 | 1.00E+00 |
| ENSG00000258171.1_RP11-511B  | ENSG00000160789.18_LMNA | -0.07392 | -0.230411837 | 0.086293503 | 3.65E-01 | 6.47E-01 | 1.00E+00 |
| ENSG00000259521.1_RP11-540C  | ENSG00000160789.18_LMNA | 0.08868  | -0.071534201 | 0.244426425 | 2.77E-01 | 5.62E-01 | 1.00E+00 |
| ENSG00000257572.1_RP11-478B  | ENSG00000160789.18_LMNA | 0.08306  | -0.077163202 | 0.239096974 | 3.09E-01 | 5.95E-01 | 1.00E+00 |
| ENSG00000237714.1_P4HA2-AS1  | ENSG00000160789.18_LMNA | 0.1068   | -0.053309123 | 0.261551676 | 1.90E-01 | 4.58E-01 | 1.00E+00 |
| ENSG00000178081.11_ULK4P3    | ENSG00000160789.18_LMNA | 0.00186  | -0.157383709 | 0.161016617 | 9.82E-01 | 9.93E-01 | 1.00E+00 |
| ENSG00000231063.1_AC006994.1 | ENSG00000160789.18_LMNA | -0.05338 | -0.21079035  | 0.106726691 | 5.14E-01 | 7.62E-01 | 1.00E+00 |
| ENSG00000267709.1_AC024592.1 | ENSG00000160789.18_LMNA | 0.00407  | -0.155232907 | 0.16316336  | 9.60E-01 | 9.84E-01 | 1.00E+00 |
| ENSG00000219881.1_GAPDHP42   | ENSG00000160789.18_LMNA | -0.07971 | -0.235912829 | 0.080516723 | 3.29E-01 | 6.15E-01 | 1.00E+00 |
| ENSG00000277526.3_RP11-378A  | ENSG00000160789.18_LMNA | -0.22613 | -0.371939887 | -0.06942767 | 5.09E-03 | 3.98E-02 | 1.00E+00 |
| ENSG00000224891.1_AC007899.1 | ENSG00000160789.18_LMNA | 0.04309  | -0.116913889 | 0.200911312 | 5.98E-01 | 8.15E-01 | 1.00E+00 |
| ENSG00000256589.1_ENPP7P5    | ENSG00000160789.18_LMNA | -0.16906 | -0.319661849 | -0.01013707 | 3.73E-02 | 1.65E-01 | 1.00E+00 |
| ENSG00000251087.3_ALG1L3P    | ENSG00000160789.18_LMNA | -0.1242  | -0.277908913 | 0.035703295 | 1.27E-01 | 3.61E-01 | 1.00E+00 |
| ENSG00000183571.9_PGPEP1L    | ENSG00000160789.18_LMNA | 0.0163   | -0.143273785 | 0.17504518  | 8.42E-01 | 9.39E-01 | 1.00E+00 |
| ENSG00000271350.1_CTD-2384B  | ENSG00000160789.18_LMNA | -0.08992 | -0.245603003 | 0.070288773 | 2.71E-01 | 5.55E-01 | 1.00E+00 |
| ENSG00000146722.10_AC006014  | ENSG00000160789.18_LMNA | 0.09486  | -0.065325005 | 0.250283136 | 2.45E-01 | 5.25E-01 | 1.00E+00 |

|                             |                         |          |              |             |          |          |          |
|-----------------------------|-------------------------|----------|--------------|-------------|----------|----------|----------|
| ENSG00000246084.2_CTD-2506J | ENSG00000160789.18_LMNA | 0.02132  | -0.138346094 | 0.179914193 | 7.94E-01 | 9.17E-01 | 1.00E+00 |
| ENSG00000267610.2_AC007787. | ENSG00000160789.18_LMNA | 0.01755  | -0.14205007  | 0.176255778 | 8.30E-01 | 9.34E-01 | 1.00E+00 |
| ENSG00000204460.3_AC079586. | ENSG00000160789.18_LMNA | -0.22953 | -0.375028434 | -0.07299867 | 4.45E-03 | 3.59E-02 | 1.00E+00 |
| ENSG00000225603.3_RP11-325P | ENSG00000160789.18_LMNA | 0.08405  | -0.07617284  | 0.240036016 | 3.03E-01 | 5.90E-01 | 1.00E+00 |
| ENSG00000257671.1_RP3-416H2 | ENSG00000160789.18_LMNA | 0.12879  | -0.031049021 | 0.282202928 | 1.14E-01 | 3.37E-01 | 1.00E+00 |
| ENSG00000276535.1_RP11-345K | ENSG00000160789.18_LMNA | -0.0041  | -0.163189818 | 0.15520638  | 9.60E-01 | 9.84E-01 | 1.00E+00 |
| ENSG00000272780.4_RP11-822E | ENSG00000160789.18_LMNA | -0.10407 | -0.258982469 | 0.056056771 | 2.02E-01 | 4.73E-01 | 1.00E+00 |
| ENSG00000258731.1_RP11-547D | ENSG00000160789.18_LMNA | -0.15098 | -0.302903026 | 0.008420003 | 6.33E-02 | 2.34E-01 | 1.00E+00 |
| ENSG00000198054.10_DSCR8    | ENSG00000160789.18_LMNA | 0.12558  | -0.034311304 | 0.279194474 | 1.23E-01 | 3.54E-01 | 1.00E+00 |
| ENSG00000270394.2_MTRNR2L1  | ENSG00000160789.18_LMNA | -0.10258 | -0.25757782  | 0.057556963 | 2.09E-01 | 4.81E-01 | 1.00E+00 |
| ENSG00000260120.1_RP11-177B | ENSG00000160789.18_LMNA | -0.13955 | -0.292257889 | 0.02009706  | 8.64E-02 | 2.85E-01 | 1.00E+00 |
| ENSG00000233432.2_RP11-344P | ENSG00000160789.18_LMNA | 0.01009  | -0.14935364  | 0.169016189 | 9.02E-01 | 9.62E-01 | 1.00E+00 |
| ENSG00000274209.3_ANTXRL    | ENSG00000160789.18_LMNA | -0.34698 | -0.479682385 | -0.19875753 | 1.19E-05 | 3.36E-04 | 6.11E-01 |
| ENSG00000278979.1_RP11-165M | ENSG00000160789.18_LMNA | 0.04521  | -0.114812285 | 0.202954649 | 5.80E-01 | 8.04E-01 | 1.00E+00 |
| ENSG00000228157.4_AC007952. | ENSG00000160789.18_LMNA | 0.08196  | -0.07825987  | 0.238056443 | 3.15E-01 | 6.02E-01 | 1.00E+00 |
| ENSG00000267239.1_RP11-794M | ENSG00000160789.18_LMNA | -0.01662 | -0.175358879 | 0.142956781 | 8.39E-01 | 9.37E-01 | 1.00E+00 |
| ENSG00000203506.4_RBMS3-AS  | ENSG00000160789.18_LMNA | -0.12986 | -0.283203634 | 0.029962402 | 1.11E-01 | 3.32E-01 | 1.00E+00 |
| ENSG00000231023.5_LINC00326 | ENSG00000160789.18_LMNA | 0.06576  | -0.094433524 | 0.222625916 | 4.21E-01 | 6.93E-01 | 1.00E+00 |
| ENSG00000177800.2_TMEM78    | ENSG00000160789.18_LMNA | 0.01234  | -0.147151718 | 0.171202445 | 8.80E-01 | 9.54E-01 | 1.00E+00 |
| ENSG00000269897.4_COMMD3-E  | ENSG00000160789.18_LMNA | -0.15664 | -0.30815649  | 0.002625818 | 5.40E-02 | 2.11E-01 | 1.00E+00 |
| ENSG00000279481.1_RP11-181K | ENSG00000160789.18_LMNA | 0.02091  | -0.138752045 | 0.179513664 | 7.98E-01 | 9.19E-01 | 1.00E+00 |
| ENSG00000236567.2_TCF3P1    | ENSG00000160789.18_LMNA | 0.02052  | -0.139131483 | 0.1791392   | 8.02E-01 | 9.20E-01 | 1.00E+00 |
| ENSG00000256975.1_RP11-525E | ENSG00000160789.18_LMNA | 0.01067  | -0.148783393 | 0.16958268  | 8.96E-01 | 9.59E-01 | 1.00E+00 |
| ENSG00000133475.15_GGT2     | ENSG00000160789.18_LMNA | -0.02546 | -0.183915873 | 0.134284357 | 7.56E-01 | 8.98E-01 | 1.00E+00 |
| ENSG00000264853.1_RP11-16C1 | ENSG00000160789.18_LMNA | 0.01778  | -0.141824639 | 0.176478688 | 8.28E-01 | 9.33E-01 | 1.00E+00 |
| ENSG00000164756.11_SLC30A8  | ENSG00000160789.18_LMNA | -0.01503 | -0.17381527  | 0.144516025 | 8.54E-01 | 9.43E-01 | 1.00E+00 |
| ENSG00000163581.12_SLC2A2   | ENSG00000160789.18_LMNA | 0.02245  | -0.137238832 | 0.181006129 | 7.84E-01 | 9.11E-01 | 1.00E+00 |
| ENSG00000244301.4_AOX3P     | ENSG00000160789.18_LMNA | -0.24829 | -0.391996302 | -0.0927562  | 2.04E-03 | 1.98E-02 | 1.00E+00 |
| ENSG00000234419.1_CICP13    | ENSG00000160789.18_LMNA | 0.09564  | -0.064548094 | 0.251014321 | 2.41E-01 | 5.20E-01 | 1.00E+00 |
| ENSG00000166748.11_AGBL1    | ENSG00000160789.18_LMNA | -0.21179 | -0.358893124 | -0.05442794 | 8.81E-03 | 5.98E-02 | 1.00E+00 |
| ENSG00000135409.9_AMHR2     | ENSG00000160789.18_LMNA | 0.0021   | -0.157156701 | 0.161243339 | 9.80E-01 | 9.92E-01 | 1.00E+00 |
| ENSG00000172900.10_FLJ42102 | ENSG00000160789.18_LMNA | 0.20041  | 0.042567298  | 0.348491808 | 1.33E-02 | 8.04E-02 | 1.00E+00 |
| ENSG00000180116.14_C12orf40 | ENSG00000160789.18_LMNA | -0.16653 | -0.317315278 | -0.00752581 | 4.03E-02 | 1.74E-01 | 1.00E+00 |



|                              |                         |          |              |             |          |          |          |
|------------------------------|-------------------------|----------|--------------|-------------|----------|----------|----------|
| ENSG00000254235.4_RP11-115J  | ENSG00000160789.18_LMNA | -0.14138 | -0.293964343 | 0.018230903 | 8.23E-02 | 2.77E-01 | 1.00E+00 |
| ENSG00000248319.1_RP11-205M  | ENSG00000160789.18_LMNA | -0.09866 | -0.25387238  | 0.061507627 | 2.27E-01 | 5.03E-01 | 1.00E+00 |
| ENSG00000156413.12_FUT6      | ENSG00000160789.18_LMNA | -0.02279 | -0.181329378 | 0.136910892 | 7.81E-01 | 9.10E-01 | 1.00E+00 |
| ENSG00000276104.1_           | ENSG00000160789.18_LMNA | 0.00476  | -0.154561308 | 0.163833076 | 9.54E-01 | 9.81E-01 | 1.00E+00 |
| ENSG00000207980.1_MIR23A     | ENSG00000160789.18_LMNA | 0.23943  | 0.083404463  | 0.383990277 | 2.97E-03 | 2.66E-02 | 1.00E+00 |
| ENSG00000207736.1_MIR657     | ENSG00000160789.18_LMNA | 0.12302  | -0.036905907 | 0.276797347 | 1.31E-01 | 3.67E-01 | 1.00E+00 |
| ENSG00000236082.2_RP11-217L  | ENSG00000160789.18_LMNA | -0.3234  | -0.458971543 | -0.17311349 | 4.82E-05 | 1.05E-03 | 1.00E+00 |
| ENSG00000280922.1_           | ENSG00000160789.18_LMNA | -0.0093  | -0.168249727 | 0.150124847 | 9.09E-01 | 9.65E-01 | 1.00E+00 |
| ENSG00000206924.1_RNU6-689F  | ENSG00000160789.18_LMNA | 0.1954   | 0.037358476  | 0.343899942 | 1.58E-02 | 9.13E-02 | 1.00E+00 |
| ENSG00000201793.1_RN7SKP9    | ENSG00000160789.18_LMNA | -0.04343 | -0.201241241 | 0.116574744 | 5.95E-01 | 8.13E-01 | 1.00E+00 |
| ENSG00000222421.1_Y_RNA      | ENSG00000160789.18_LMNA | 0.08963  | -0.070576071 | 0.24533167  | 2.72E-01 | 5.57E-01 | 1.00E+00 |
| ENSG00000252393.1_RNU6-1004  | ENSG00000160789.18_LMNA | 0.10186  | -0.058284845 | 0.256895815 | 2.12E-01 | 4.85E-01 | 1.00E+00 |
| ENSG00000206820.1_RNU1-138F  | ENSG00000160789.18_LMNA | 0.2086   | 0.051099969  | 0.355982235 | 9.91E-03 | 6.52E-02 | 1.00E+00 |
| ENSG00000231606.1_RP11-344F  | ENSG00000160789.18_LMNA | 0.03064  | -0.129191572 | 0.188918496 | 7.08E-01 | 8.76E-01 | 1.00E+00 |
| ENSG00000234692.1_RP11-445L  | ENSG00000160789.18_LMNA | 0.12313  | -0.036794319 | 0.276900522 | 1.31E-01 | 3.67E-01 | 1.00E+00 |
| ENSG00000248749.1_RP11-42A4  | ENSG00000160789.18_LMNA | -0.08128 | -0.237408319 | 0.078942574 | 3.20E-01 | 6.06E-01 | 1.00E+00 |
| ENSG00000272236.1_XXbac-BPC  | ENSG00000160789.18_LMNA | 0.19005  | 0.031815229  | 0.338997105 | 1.90E-02 | 1.04E-01 | 1.00E+00 |
| ENSG00000268154.2_Metazoa_SI | ENSG00000160789.18_LMNA | 0.02495  | -0.134790206 | 0.183418078 | 7.60E-01 | 9.00E-01 | 1.00E+00 |
| ENSG00000241159.3_RN7SL160F  | ENSG00000160789.18_LMNA | -0.12102 | -0.274919773 | 0.038935206 | 1.38E-01 | 3.78E-01 | 1.00E+00 |
| ENSG00000271543.1_RP11-692M  | ENSG00000160789.18_LMNA | 0.14644  | -0.013069062 | 0.298674099 | 7.18E-02 | 2.54E-01 | 1.00E+00 |
| ENSG00000275005.1_RP11-234G  | ENSG00000160789.18_LMNA | -0.19278 | -0.341498456 | -0.03464095 | 1.73E-02 | 9.74E-02 | 1.00E+00 |
| ENSG00000223923.1_AC010136.  | ENSG00000160789.18_LMNA | -0.02427 | -0.182764986 | 0.135453612 | 7.67E-01 | 9.03E-01 | 1.00E+00 |
| ENSG00000240163.1_RP11-745A  | ENSG00000160789.18_LMNA | 0.16583  | 0.006804542  | 0.316666456 | 4.12E-02 | 1.77E-01 | 1.00E+00 |
| ENSG00000217078.1_RP1-13D10  | ENSG00000160789.18_LMNA | -0.10439 | -0.259281636 | 0.055737071 | 2.01E-01 | 4.71E-01 | 1.00E+00 |
| ENSG00000257241.1_RP11-611E  | ENSG00000160789.18_LMNA | -0.0961  | -0.251457655 | 0.064076849 | 2.39E-01 | 5.18E-01 | 1.00E+00 |
| ENSG00000229618.1_AC011288.  | ENSG00000160789.18_LMNA | -0.06137 | -0.218436    | 0.09879652  | 4.53E-01 | 7.18E-01 | 1.00E+00 |
| ENSG00000250777.1_RP13-884E  | ENSG00000160789.18_LMNA | 0.09678  | -0.063401051 | 0.252093195 | 2.36E-01 | 5.14E-01 | 1.00E+00 |
| ENSG00000226142.2_RPL35P8    | ENSG00000160789.18_LMNA | 0.01163  | -0.14784605  | 0.170513391 | 8.87E-01 | 9.56E-01 | 1.00E+00 |
| ENSG00000273965.1_RP11-378E  | ENSG00000160789.18_LMNA | 0.03926  | -0.12069018  | 0.197232755 | 6.31E-01 | 8.34E-01 | 1.00E+00 |
| ENSG00000223502.1_RP11-96B5  | ENSG00000160789.18_LMNA | -0.17515 | -0.325284906 | -0.01641162 | 3.09E-02 | 1.46E-01 | 1.00E+00 |
| ENSG00000260123.1_RP11-326A  | ENSG00000160789.18_LMNA | 0.07889  | -0.081332647 | 0.235137086 | 3.34E-01 | 6.20E-01 | 1.00E+00 |
| ENSG00000255641.1_RP11-277P  | ENSG00000160789.18_LMNA | -0.33475 | -0.468954541 | -0.18542618 | 2.50E-05 | 6.17E-04 | 1.00E+00 |
| ENSG00000261765.1_RP11-498D  | ENSG00000160789.18_LMNA | -0.02711 | -0.185507153 | 0.132666218 | 7.40E-01 | 8.91E-01 | 1.00E+00 |

|                              |                         |          |              |             |          |          |          |
|------------------------------|-------------------------|----------|--------------|-------------|----------|----------|----------|
| ENSG00000267443.2_AC010641.  | ENSG00000160789.18_LMNA | 0.18982  | 0.031572276  | 0.338781838 | 1.92E-02 | 1.05E-01 | 1.00E+00 |
| ENSG00000270232.1_MTCYBP22   | ENSG00000160789.18_LMNA | -0.02602 | -0.184454896 | 0.133736426 | 7.50E-01 | 8.96E-01 | 1.00E+00 |
| ENSG00000227355.1_RP11-162D  | ENSG00000160789.18_LMNA | -0.15171 | -0.303576609 | 0.007678258 | 6.21E-02 | 2.31E-01 | 1.00E+00 |
| ENSG00000230637.2_CTA-246H3  | ENSG00000160789.18_LMNA | -0.1074  | -0.26212052  | 0.052700126 | 1.88E-01 | 4.54E-01 | 1.00E+00 |
| ENSG00000255608.1_RP3-377H1  | ENSG00000160789.18_LMNA | -0.10761 | -0.262314231 | 0.052492688 | 1.87E-01 | 4.53E-01 | 1.00E+00 |
| ENSG00000254739.1_RP13-46H2  | ENSG00000160789.18_LMNA | 0.19498  | 0.036928495  | 0.343520233 | 1.61E-02 | 9.22E-02 | 1.00E+00 |
| ENSG00000250194.1_RP11-257I8 | ENSG00000160789.18_LMNA | -0.00693 | -0.165945512 | 0.152440997 | 9.32E-01 | 9.74E-01 | 1.00E+00 |
| ENSG00000226409.1_RP11-735G  | ENSG00000160789.18_LMNA | -0.18497 | -0.334323636 | -0.02654884 | 2.25E-02 | 1.18E-01 | 1.00E+00 |
| ENSG00000235129.1_FABP7P2    | ENSG00000160789.18_LMNA | 0.02791  | -0.131879092 | 0.186280612 | 7.33E-01 | 8.88E-01 | 1.00E+00 |
| ENSG00000255084.1_RP11-843A  | ENSG00000160789.18_LMNA | -0.01614 | -0.174888937 | 0.14343165  | 8.44E-01 | 9.39E-01 | 1.00E+00 |
| ENSG00000267214.1_CTC-265F1  | ENSG00000160789.18_LMNA | -0.01406 | -0.172869342 | 0.145470754 | 8.64E-01 | 9.47E-01 | 1.00E+00 |
| ENSG00000233005.1_AC067959.  | ENSG00000160789.18_LMNA | -0.18471 | -0.334086749 | -0.02628236 | 2.27E-02 | 1.18E-01 | 1.00E+00 |
| ENSG00000219027.2_RPS3AP2    | ENSG00000160789.18_LMNA | 0.13784  | -0.021835816 | 0.29066614  | 9.04E-02 | 2.93E-01 | 1.00E+00 |
| ENSG00000278370.1_RP11-387D  | ENSG00000160789.18_LMNA | 0.08125  | -0.078974553 | 0.237377953 | 3.20E-01 | 6.06E-01 | 1.00E+00 |
| ENSG00000227070.1_RP11-191G  | ENSG00000160789.18_LMNA | 0.08254  | -0.077685162 | 0.238601823 | 3.12E-01 | 5.98E-01 | 1.00E+00 |
| ENSG00000227289.1_HSFY3P     | ENSG00000160789.18_LMNA | -0.04813 | -0.205749403 | 0.111933224 | 5.56E-01 | 7.90E-01 | 1.00E+00 |
| ENSG00000253163.1_RP11-443C  | ENSG00000160789.18_LMNA | 0.05561  | -0.104519534 | 0.212922226 | 4.96E-01 | 7.50E-01 | 1.00E+00 |
| ENSG00000237705.1_AC008937.  | ENSG00000160789.18_LMNA | 0.15485  | -0.00446248  | 0.306493277 | 5.68E-02 | 2.18E-01 | 1.00E+00 |
| ENSG00000236653.1_AC005235.  | ENSG00000160789.18_LMNA | -0.18627 | -0.335524025 | -0.02789989 | 2.16E-02 | 1.14E-01 | 1.00E+00 |
| ENSG00000213110.2_AC019178.  | ENSG00000160789.18_LMNA | -0.09803 | -0.253282467 | 0.062135669 | 2.30E-01 | 5.07E-01 | 1.00E+00 |
| ENSG00000253651.1_SOD1P3     | ENSG00000160789.18_LMNA | 0.04439  | -0.115625465 | 0.202164343 | 5.87E-01 | 8.08E-01 | 1.00E+00 |
| ENSG00000227431.4_CSE1L-AS1  | ENSG00000160789.18_LMNA | -0.09065 | -0.246294893 | 0.069555935 | 2.67E-01 | 5.51E-01 | 1.00E+00 |
| ENSG00000232906.1_RP11-746P  | ENSG00000160789.18_LMNA | -0.1102  | -0.264756842 | 0.04987465  | 1.77E-01 | 4.38E-01 | 1.00E+00 |
| ENSG00000241596.1_RP11-326J  | ENSG00000160789.18_LMNA | 0.01622  | -0.143353233 | 0.17496655  | 8.43E-01 | 9.39E-01 | 1.00E+00 |
| ENSG00000162009.8_SSTR5      | ENSG00000160789.18_LMNA | -0.20872 | -0.3560927   | -0.05122614 | 9.86E-03 | 6.49E-02 | 1.00E+00 |
| ENSG00000256943.1_RP13-895J  | ENSG00000160789.18_LMNA | -0.04421 | -0.201989702 | 0.115805103 | 5.89E-01 | 8.09E-01 | 1.00E+00 |
| ENSG00000275741.1_RP11-40E6  | ENSG00000160789.18_LMNA | 0.00883  | -0.150586988 | 0.167790245 | 9.14E-01 | 9.67E-01 | 1.00E+00 |
| ENSG00000264242.2_RP11-271K  | ENSG00000160789.18_LMNA | -0.00318 | -0.162298455 | 0.156099811 | 9.69E-01 | 9.88E-01 | 1.00E+00 |
| ENSG00000226473.2_AC079807.  | ENSG00000160789.18_LMNA | 0.15783  | -0.001406845 | 0.309259298 | 5.21E-02 | 2.07E-01 | 1.00E+00 |
| ENSG00000257359.1_RP11-780K  | ENSG00000160789.18_LMNA | -0.15869 | -0.310057954 | 0.000523485 | 5.09E-02 | 2.03E-01 | 1.00E+00 |
| ENSG00000234698.1_RP11-112L  | ENSG00000160789.18_LMNA | 0.19749  | 0.039536584  | 0.34582185  | 1.47E-02 | 8.67E-02 | 1.00E+00 |
| ENSG00000272203.1_AC004775.  | ENSG00000160789.18_LMNA | 0.08731  | -0.072904977 | 0.243130351 | 2.85E-01 | 5.70E-01 | 1.00E+00 |
| ENSG00000258787.1_RP11-164C  | ENSG00000160789.18_LMNA | 0.04575  | -0.114278858 | 0.203472847 | 5.76E-01 | 8.02E-01 | 1.00E+00 |

|                              |                         |          |              |             |          |          |          |
|------------------------------|-------------------------|----------|--------------|-------------|----------|----------|----------|
| ENSG00000259649.3_RP11-351M  | ENSG00000160789.18_LMNA | 0.15718  | -0.00207346  | 0.308656313 | 5.31E-02 | 2.09E-01 | 1.00E+00 |
| ENSG00000151615.3_POU4F2     | ENSG00000160789.18_LMNA | -0.21081 | -0.357998575 | -0.0534045  | 9.13E-03 | 6.14E-02 | 1.00E+00 |
| ENSG00000229427.1_ANKRD26P   | ENSG00000160789.18_LMNA | 0.09417  | -0.066024216 | 0.24962477  | 2.49E-01 | 5.29E-01 | 1.00E+00 |
| ENSG00000274598.1_RP11-423G  | ENSG00000160789.18_LMNA | -0.07141 | -0.228019774 | 0.088798863 | 3.82E-01 | 6.61E-01 | 1.00E+00 |
| ENSG00000256091.1_MTRF1LP1   | ENSG00000160789.18_LMNA | -0.06505 | -0.221954874 | 0.095133106 | 4.26E-01 | 6.97E-01 | 1.00E+00 |
| ENSG00000229068.1_TMPOP1     | ENSG00000160789.18_LMNA | -0.14847 | -0.300565673 | 0.01099123  | 6.79E-02 | 2.45E-01 | 1.00E+00 |
| ENSG00000237136.5_C4orf51    | ENSG00000160789.18_LMNA | 0.10565  | -0.054464901 | 0.260471502 | 1.95E-01 | 4.64E-01 | 1.00E+00 |
| ENSG00000166509.9_CLEC3A     | ENSG00000160789.18_LMNA | -0.20773 | -0.35518174  | -0.05018596 | 1.02E-02 | 6.66E-02 | 1.00E+00 |
| ENSG00000229862.4_RP11-505P  | ENSG00000160789.18_LMNA | -0.06044 | -0.217549539 | 0.099718039 | 4.59E-01 | 7.23E-01 | 1.00E+00 |
| ENSG00000251379.1_RP11-484O  | ENSG00000160789.18_LMNA | 0.13103  | -0.028769362 | 0.284301563 | 1.08E-01 | 3.26E-01 | 1.00E+00 |
| ENSG00000251332.1_RP11-177C  | ENSG00000160789.18_LMNA | 0.04483  | -0.115195262 | 0.202582496 | 5.83E-01 | 8.06E-01 | 1.00E+00 |
| ENSG00000258565.1_BLZF2P     | ENSG00000160789.18_LMNA | 0.23867  | 0.082603558  | 0.383302514 | 3.07E-03 | 2.72E-02 | 1.00E+00 |
| ENSG00000236886.2_AC007563.I | ENSG00000160789.18_LMNA | -0.00151 | -0.160673269 | 0.157727427 | 9.85E-01 | 9.94E-01 | 1.00E+00 |
| ENSG00000241562.2_RPL7P5     | ENSG00000160789.18_LMNA | -0.07371 | -0.230210988 | 0.086504019 | 3.67E-01 | 6.48E-01 | 1.00E+00 |
| ENSG00000233304.4_LINC01346  | ENSG00000160789.18_LMNA | -0.22976 | -0.375237423 | -0.07324059 | 4.41E-03 | 3.56E-02 | 1.00E+00 |
| ENSG00000258499.1_RP11-862G  | ENSG00000160789.18_LMNA | -0.13411 | -0.287181007 | 0.025636234 | 9.95E-02 | 3.11E-01 | 1.00E+00 |
| ENSG00000237679.2_VDAC1P11   | ENSG00000160789.18_LMNA | 0.04447  | -0.115545699 | 0.202241884 | 5.86E-01 | 8.08E-01 | 1.00E+00 |
| ENSG00000259050.2_CHORDC2I   | ENSG00000160789.18_LMNA | -0.06614 | -0.222994957 | 0.094048653 | 4.18E-01 | 6.90E-01 | 1.00E+00 |
| ENSG00000224682.1_SOCS5P2    | ENSG00000160789.18_LMNA | 0.00699  | -0.152383451 | 0.166002805 | 9.32E-01 | 9.73E-01 | 1.00E+00 |
| ENSG00000135477.10_KRT87P    | ENSG00000160789.18_LMNA | 0.22204  | 0.065142302  | 0.368224631 | 5.97E-03 | 4.49E-02 | 1.00E+00 |
| ENSG00000134640.2_MTNR1B     | ENSG00000160789.18_LMNA | 0.13853  | -0.021134313 | 0.291308542 | 8.87E-02 | 2.90E-01 | 1.00E+00 |
| ENSG00000230023.2_RP11-10N1  | ENSG00000160789.18_LMNA | 0.03251  | -0.127353145 | 0.190720328 | 6.91E-01 | 8.67E-01 | 1.00E+00 |
| ENSG00000225724.1_LL22NC03-  | ENSG00000160789.18_LMNA | 0.2072   | 0.049636258  | 0.35470009  | 1.04E-02 | 6.75E-02 | 1.00E+00 |
| ENSG00000279071.1_RP11-83B2  | ENSG00000160789.18_LMNA | 0.17972  | 0.021127953  | 0.329497197 | 2.67E-02 | 1.33E-01 | 1.00E+00 |
| ENSG00000256542.2_RP13-895J: | ENSG00000160789.18_LMNA | -0.02615 | -0.184581312 | 0.133607893 | 7.49E-01 | 8.95E-01 | 1.00E+00 |
| ENSG00000260951.1_RP5-978I12 | ENSG00000160789.18_LMNA | -0.03237 | -0.190593083 | 0.127483047 | 6.92E-01 | 8.67E-01 | 1.00E+00 |
| ENSG00000232610.1_CCT6P4     | ENSG00000160789.18_LMNA | 0.20613  | 0.048519626  | 0.353721199 | 1.08E-02 | 6.94E-02 | 1.00E+00 |
| ENSG00000279726.1_AC005609:  | ENSG00000160789.18_LMNA | -0.08615 | -0.242033414 | 0.074064206 | 2.91E-01 | 5.77E-01 | 1.00E+00 |
| ENSG00000261334.1_RP11-65J3. | ENSG00000160789.18_LMNA | 0.0753   | -0.084917254 | 0.231724222 | 3.57E-01 | 6.40E-01 | 1.00E+00 |
| ENSG00000264985.1_RP11-449L: | ENSG00000160789.18_LMNA | -0.21773 | -0.364303311 | -0.06063135 | 7.05E-03 | 5.07E-02 | 1.00E+00 |
| ENSG00000167768.4_KRT1       | ENSG00000160789.18_LMNA | 0.04573  | -0.114300774 | 0.20345156  | 5.76E-01 | 8.02E-01 | 1.00E+00 |
| ENSG00000250329.1_KDEL1P1    | ENSG00000160789.18_LMNA | 0.06864  | -0.09156226  | 0.225376901 | 4.01E-01 | 6.77E-01 | 1.00E+00 |
| ENSG00000281883.1_RP11-65B7  | ENSG00000160789.18_LMNA | -0.05783 | -0.215052835 | 0.10231056  | 4.79E-01 | 7.37E-01 | 1.00E+00 |

|                             |                         |          |              |             |          |          |          |
|-----------------------------|-------------------------|----------|--------------|-------------|----------|----------|----------|
| ENSG00000279077.1_RP11-800A | ENSG00000160789.18_LMNA | 0.01699  | -0.1425937   | 0.175718094 | 8.35E-01 | 9.36E-01 | 1.00E+00 |
| ENSG00000145888.9_GLRA1     | ENSG00000160789.18_LMNA | -0.10328 | -0.258234176 | 0.05685614  | 2.05E-01 | 4.77E-01 | 1.00E+00 |
| ENSG00000250328.4_MGC32805  | ENSG00000160789.18_LMNA | -0.18835 | -0.337436255 | -0.03005446 | 2.01E-02 | 1.09E-01 | 1.00E+00 |
| ENSG00000224794.1_RP3-333H2 | ENSG00000160789.18_LMNA | 0.14327  | -0.016306171 | 0.295722278 | 7.83E-02 | 2.68E-01 | 1.00E+00 |
| ENSG00000130383.7_FUT5      | ENSG00000160789.18_LMNA | 0.14851  | -0.010953942 | 0.300599596 | 6.79E-02 | 2.44E-01 | 1.00E+00 |
| ENSG00000182585.8_EPGN      | ENSG00000160789.18_LMNA | -0.14199 | -0.294531154 | 0.017610564 | 8.10E-02 | 2.74E-01 | 1.00E+00 |
| ENSG00000105549.9_THEG      | ENSG00000160789.18_LMNA | -0.02046 | -0.179075732 | 0.139195784 | 8.02E-01 | 9.21E-01 | 1.00E+00 |
| ENSG00000271911.1_RP11-532F | ENSG00000160789.18_LMNA | 0.04247  | -0.117522993 | 0.200318578 | 6.03E-01 | 8.18E-01 | 1.00E+00 |
| ENSG00000279490.1_CTD-2576D | ENSG00000160789.18_LMNA | 0.06177  | -0.098396293 | 0.218820838 | 4.50E-01 | 7.15E-01 | 1.00E+00 |
| ENSG00000230400.1_RP11-359G | ENSG00000160789.18_LMNA | 0.15924  | 4.17E-05     | 0.310568692 | 5.00E-02 | 2.01E-01 | 1.00E+00 |
| ENSG00000214043.6_RP5-944M2 | ENSG00000160789.18_LMNA | 0.10615  | -0.053960719 | 0.260942801 | 1.93E-01 | 4.61E-01 | 1.00E+00 |
| ENSG00000145975.12_FAM217A  | ENSG00000160789.18_LMNA | -0.00551 | -0.164566089 | 0.153825894 | 9.46E-01 | 9.79E-01 | 1.00E+00 |
| ENSG00000279484.1_KLHL30-AS | ENSG00000160789.18_LMNA | -0.06132 | -0.218391311 | 0.098842989 | 4.53E-01 | 7.18E-01 | 1.00E+00 |
| ENSG00000223731.2_SUPT20HL  | ENSG00000160789.18_LMNA | -0.02951 | -0.187824932 | 0.13030628  | 7.18E-01 | 8.80E-01 | 1.00E+00 |
| ENSG00000189375.9_TBC1D28   | ENSG00000160789.18_LMNA | -0.1182  | -0.272280536 | 0.041783349 | 1.47E-01 | 3.93E-01 | 1.00E+00 |
| ENSG00000261821.2_CTD-2311M | ENSG00000160789.18_LMNA | 0.06664  | -0.093551344 | 0.223471678 | 4.15E-01 | 6.88E-01 | 1.00E+00 |
| ENSG00000255082.1_GRM5-AS1  | ENSG00000160789.18_LMNA | -0.24134 | -0.385725057 | -0.08542635 | 2.74E-03 | 2.49E-02 | 1.00E+00 |
| ENSG00000246790.2_RP11-730K | ENSG00000160789.18_LMNA | -0.11834 | -0.272405256 | 0.041648871 | 1.46E-01 | 3.92E-01 | 1.00E+00 |
| ENSG00000269842.3_MIR519A2  | ENSG00000160789.18_LMNA | -0.02416 | -0.182656856 | 0.135563423 | 7.68E-01 | 9.04E-01 | 1.00E+00 |
| ENSG00000259361.4_LINC00927 | ENSG00000160789.18_LMNA | -0.06241 | -0.219432923 | 0.09775952  | 4.45E-01 | 7.12E-01 | 1.00E+00 |
| ENSG00000167741.9_GGT6      | ENSG00000160789.18_LMNA | 0.02572  | -0.134031873 | 0.184164276 | 7.53E-01 | 8.97E-01 | 1.00E+00 |
| ENSG00000131482.8_G6PC      | ENSG00000160789.18_LMNA | 0.04124  | -0.118743218 | 0.199130447 | 6.14E-01 | 8.25E-01 | 1.00E+00 |
| ENSG00000165325.12_DEUP1    | ENSG00000160789.18_LMNA | -0.12195 | -0.275797748 | 0.037986605 | 1.34E-01 | 3.73E-01 | 1.00E+00 |
| ENSG00000270106.4_TSNAX-DIS | ENSG00000160789.18_LMNA | 0.05927  | -0.100884046 | 0.21642714  | 4.68E-01 | 7.29E-01 | 1.00E+00 |
| ENSG00000280078.1_RP11-361H | ENSG00000160789.18_LMNA | -0.01644 | -0.175182995 | 0.143134526 | 8.41E-01 | 9.38E-01 | 1.00E+00 |
| ENSG00000009765.13_IYD      | ENSG00000160789.18_LMNA | -0.05411 | -0.211491023 | 0.106001621 | 5.08E-01 | 7.58E-01 | 1.00E+00 |
| ENSG00000276325.1_          | ENSG00000160789.18_LMNA | -0.10992 | -0.264496899 | 0.050153467 | 1.78E-01 | 4.39E-01 | 1.00E+00 |
| ENSG00000266721.1_MIR5695   | ENSG00000160789.18_LMNA | 0.01452  | -0.145011674 | 0.173324264 | 8.59E-01 | 9.45E-01 | 1.00E+00 |
| ENSG00000275875.1_RP11-613E | ENSG00000160789.18_LMNA | 0.04431  | -0.115705507 | 0.20208653  | 5.88E-01 | 8.08E-01 | 1.00E+00 |
| ENSG00000264468.1_MIR4520-1 | ENSG00000160789.18_LMNA | -0.17246 | -0.322798359 | -0.01363398 | 3.36E-02 | 1.54E-01 | 1.00E+00 |
| ENSG00000270722.1_U1        | ENSG00000160789.18_LMNA | 0.02727  | -0.132509    | 0.185661673 | 7.39E-01 | 8.90E-01 | 1.00E+00 |
| ENSG00000257057.1_C11orf97  | ENSG00000160789.18_LMNA | -0.14312 | -0.295587331 | 0.016454003 | 7.86E-02 | 2.69E-01 | 1.00E+00 |
| ENSG00000230451.2_RPS29P6   | ENSG00000160789.18_LMNA | -0.17229 | -0.322640437 | -0.01345773 | 3.38E-02 | 1.55E-01 | 1.00E+00 |

|                              |                         |          |              |             |          |          |          |
|------------------------------|-------------------------|----------|--------------|-------------|----------|----------|----------|
| ENSG00000281443.1_           | ENSG00000160789.18_LMNA | -0.00303 | -0.162156912 | 0.156241634 | 9.70E-01 | 9.89E-01 | 1.00E+00 |
| ENSG00000200788.1_Y_RNA      | ENSG00000160789.18_LMNA | 0.06448  | -0.095704615 | 0.221406457 | 4.30E-01 | 7.00E-01 | 1.00E+00 |
| ENSG00000206815.1_RNU6-483F  | ENSG00000160789.18_LMNA | -0.04907 | -0.206652725 | 0.111100151 | 5.48E-01 | 7.85E-01 | 1.00E+00 |
| ENSG00000212206.1_SNORA69    | ENSG00000160789.18_LMNA | -0.12161 | -0.275480178 | 0.038329786 | 1.36E-01 | 3.74E-01 | 1.00E+00 |
| ENSG00000274759.1_5S_rRNA    | ENSG00000160789.18_LMNA | -0.05948 | -0.216627639 | 0.100675821 | 4.67E-01 | 7.28E-01 | 1.00E+00 |
| ENSG00000266751.1_MIR3661    | ENSG00000160789.18_LMNA | 0.01957  | -0.140062377 | 0.178220115 | 8.11E-01 | 9.25E-01 | 1.00E+00 |
| ENSG00000222990.1_RNU4-22P   | ENSG00000160789.18_LMNA | -0.03418 | -0.192338599 | 0.125700144 | 6.76E-01 | 8.58E-01 | 1.00E+00 |
| ENSG00000236318.1_KCCAT333   | ENSG00000160789.18_LMNA | 0.12113  | -0.038816797 | 0.275029395 | 1.37E-01 | 3.77E-01 | 1.00E+00 |
| ENSG00000253166.2_RP11-585F  | ENSG00000160789.18_LMNA | -0.00522 | -0.164288025 | 0.154104911 | 9.49E-01 | 9.79E-01 | 1.00E+00 |
| ENSG00000271511.1_RP11-712C  | ENSG00000160789.18_LMNA | 0.09291  | -0.067282454 | 0.248439298 | 2.55E-01 | 5.37E-01 | 1.00E+00 |
| ENSG00000272566.1_RP11-462G  | ENSG00000160789.18_LMNA | -0.14694 | -0.299143497 | 0.012553694 | 7.08E-02 | 2.51E-01 | 1.00E+00 |
| ENSG00000226031.4_FGF13-AS1  | ENSG00000160789.18_LMNA | -0.21146 | -0.35858542  | -0.05407583 | 8.92E-03 | 6.04E-02 | 1.00E+00 |
| ENSG00000267793.1_RP11-576C  | ENSG00000160789.18_LMNA | -0.0832  | -0.239228255 | 0.077024784 | 3.08E-01 | 5.95E-01 | 1.00E+00 |
| ENSG00000233200.1_RP11-324I2 | ENSG00000160789.18_LMNA | -0.02732 | -0.185716825 | 0.132452881 | 7.38E-01 | 8.90E-01 | 1.00E+00 |
| ENSG00000250672.1_CTD-2017D  | ENSG00000160789.18_LMNA | -0.01203 | -0.170905341 | 0.147451136 | 8.83E-01 | 9.55E-01 | 1.00E+00 |
| ENSG00000229393.1_RP3-395M2  | ENSG00000160789.18_LMNA | -0.15898 | -0.310325242 | 0.000227742 | 5.04E-02 | 2.02E-01 | 1.00E+00 |
| ENSG00000129514.5_FOXA1      | ENSG00000160789.18_LMNA | -0.09713 | -0.252430296 | 0.06304248  | 2.34E-01 | 5.12E-01 | 1.00E+00 |
| ENSG00000231366.1_RPS26P40   | ENSG00000160789.18_LMNA | -0.14893 | -0.300991894 | 0.010522669 | 6.71E-02 | 2.43E-01 | 1.00E+00 |
| ENSG00000240160.3_RN7SL263F  | ENSG00000160789.18_LMNA | -0.00741 | -0.166415237 | 0.151969123 | 9.28E-01 | 9.72E-01 | 1.00E+00 |
| ENSG00000271766.1_CTD-2195M  | ENSG00000160789.18_LMNA | 0.00136  | -0.157878327 | 0.160522506 | 9.87E-01 | 9.95E-01 | 1.00E+00 |
| ENSG00000162763.3_LRRC52     | ENSG00000160789.18_LMNA | -0.27744 | -0.418167707 | -0.12369956 | 5.39E-04 | 7.15E-03 | 1.00E+00 |
| ENSG00000241400.1_RP11-764I5 | ENSG00000160789.18_LMNA | 0.15526  | -0.004039054 | 0.306876884 | 5.61E-02 | 2.16E-01 | 1.00E+00 |
| ENSG00000232750.2_RP11-177A  | ENSG00000160789.18_LMNA | -0.11291 | -0.267305262 | 0.047138588 | 1.66E-01 | 4.23E-01 | 1.00E+00 |
| ENSG00000229331.1_GK-IT1     | ENSG00000160789.18_LMNA | 0.00499  | -0.154332424 | 0.164061249 | 9.51E-01 | 9.81E-01 | 1.00E+00 |
| ENSG00000258131.1_RP11-541G  | ENSG00000160789.18_LMNA | 0.14263  | -0.016952185 | 0.295132483 | 7.96E-02 | 2.71E-01 | 1.00E+00 |
| ENSG00000256790.1_RP11-429A  | ENSG00000160789.18_LMNA | 0.00749  | -0.151895798 | 0.166488215 | 9.27E-01 | 9.72E-01 | 1.00E+00 |
| ENSG00000232334.1_RP11-47G1  | ENSG00000160789.18_LMNA | -0.00344 | -0.162553297 | 0.155844432 | 9.66E-01 | 9.87E-01 | 1.00E+00 |
| ENSG00000254131.1_RP11-1007. | ENSG00000160789.18_LMNA | 0.0988   | -0.061367838 | 0.25400365  | 2.26E-01 | 5.02E-01 | 1.00E+00 |
| ENSG00000243164.1_RP11-166B  | ENSG00000160789.18_LMNA | -0.04574 | -0.203460568 | 0.1142915   | 5.76E-01 | 8.02E-01 | 1.00E+00 |
| ENSG00000262154.1_EIF1P4     | ENSG00000160789.18_LMNA | -0.04687 | -0.204540336 | 0.113179419 | 5.66E-01 | 7.97E-01 | 1.00E+00 |
| ENSG00000274225.1_KB-68A7.1  | ENSG00000160789.18_LMNA | -0.07322 | -0.229738578 | 0.086999055 | 3.70E-01 | 6.50E-01 | 1.00E+00 |
| ENSG00000229357.1_CYCSP51    | ENSG00000160789.18_LMNA | 0.0371   | -0.122827224 | 0.195147046 | 6.50E-01 | 8.45E-01 | 1.00E+00 |
| ENSG00000239393.1_CTD-2301A  | ENSG00000160789.18_LMNA | -0.08915 | -0.244874271 | 0.071060264 | 2.75E-01 | 5.59E-01 | 1.00E+00 |

|                               |                         |          |              |             |          |          |          |
|-------------------------------|-------------------------|----------|--------------|-------------|----------|----------|----------|
| ENSG00000230751.1_AC007036.4  | ENSG00000160789.18_LMNA | -0.08538 | -0.241304168 | 0.074834392 | 2.96E-01 | 5.82E-01 | 1.00E+00 |
| ENSG00000231824.3_AKAIN1      | ENSG00000160789.18_LMNA | -0.14406 | -0.296460355 | 0.015497372 | 7.66E-02 | 2.65E-01 | 1.00E+00 |
| ENSG00000257910.1_RP11-461F   | ENSG00000160789.18_LMNA | 0.05356  | -0.106545598 | 0.21096538  | 5.12E-01 | 7.61E-01 | 1.00E+00 |
| ENSG00000249772.1_CTD-2193P   | ENSG00000160789.18_LMNA | -0.10982 | -0.264394541 | 0.050263244 | 1.78E-01 | 4.40E-01 | 1.00E+00 |
| ENSG00000229890.1_ACTP1       | ENSG00000160789.18_LMNA | 0.15884  | -0.000374358 | 0.310192739 | 5.06E-02 | 2.03E-01 | 1.00E+00 |
| ENSG00000255652.2_RP11-313F   | ENSG00000160789.18_LMNA | -0.2653  | -0.407295529 | -0.11077509 | 9.56E-04 | 1.12E-02 | 1.00E+00 |
| ENSG00000243669.2_RPL34P23    | ENSG00000160789.18_LMNA | 0.09675  | -0.063423151 | 0.252072416 | 2.36E-01 | 5.14E-01 | 1.00E+00 |
| ENSG00000261267.1_RP11-441I1C | ENSG00000160789.18_LMNA | 0.01174  | -0.147731968 | 0.170626627 | 8.86E-01 | 9.56E-01 | 1.00E+00 |
| ENSG00000236434.2_RP11-296A   | ENSG00000160789.18_LMNA | 0.0645   | -0.095680798 | 0.221429316 | 4.30E-01 | 7.00E-01 | 1.00E+00 |
| ENSG00000253859.2_RP11-157I4  | ENSG00000160789.18_LMNA | -0.06313 | -0.220114305 | 0.097050349 | 4.40E-01 | 7.08E-01 | 1.00E+00 |
| ENSG00000224185.1_SNX18P9     | ENSG00000160789.18_LMNA | -0.01446 | -0.1732608   | 0.145075726 | 8.60E-01 | 9.45E-01 | 1.00E+00 |
| ENSG00000133124.11_IRS4       | ENSG00000160789.18_LMNA | -0.15825 | -0.309653208 | 0.000971218 | 5.15E-02 | 2.05E-01 | 1.00E+00 |
| ENSG00000214318.3_ATP5G1P6    | ENSG00000160789.18_LMNA | 0.01258  | -0.14691086  | 0.171441399 | 8.78E-01 | 9.53E-01 | 1.00E+00 |
| ENSG00000254463.1_RP11-484D   | ENSG00000160789.18_LMNA | 0.03284  | -0.127024883 | 0.191041831 | 6.88E-01 | 8.65E-01 | 1.00E+00 |
| ENSG00000265916.1_RP11-434D   | ENSG00000160789.18_LMNA | 0.01752  | -0.142077852 | 0.176228305 | 8.30E-01 | 9.34E-01 | 1.00E+00 |
| ENSG00000213954.3_ATP5HP3     | ENSG00000160789.18_LMNA | -0.01333 | -0.172167311 | 0.146178934 | 8.71E-01 | 9.50E-01 | 1.00E+00 |
| ENSG00000254103.1_RP11-114M   | ENSG00000160789.18_LMNA | 0.02916  | -0.130648446 | 0.187489098 | 7.21E-01 | 8.82E-01 | 1.00E+00 |
| ENSG00000256381.1_RP11-500M   | ENSG00000160789.18_LMNA | -0.0919  | -0.247480898 | 0.068298947 | 2.60E-01 | 5.43E-01 | 1.00E+00 |
| ENSG00000259268.1_AC007950.1  | ENSG00000160789.18_LMNA | -0.10621 | -0.260995935 | 0.053903867 | 1.93E-01 | 4.61E-01 | 1.00E+00 |
| ENSG00000280431.1_RP11-218I2  | ENSG00000160789.18_LMNA | -0.24021 | -0.384698828 | -0.08422998 | 2.87E-03 | 2.59E-02 | 1.00E+00 |
| ENSG00000184544.10_DHRS7C     | ENSG00000160789.18_LMNA | -0.2886  | -0.428129554 | -0.13563022 | 3.11E-04 | 4.64E-03 | 1.00E+00 |
| ENSG00000253153.1_KB-1562D1   | ENSG00000160789.18_LMNA | 0.02088  | -0.138786151 | 0.179480009 | 7.99E-01 | 9.19E-01 | 1.00E+00 |
| ENSG00000173389.14_IQCF1      | ENSG00000160789.18_LMNA | 0.01797  | -0.141640336 | 0.176660905 | 8.26E-01 | 9.32E-01 | 1.00E+00 |
| ENSG00000230914.2_AC004840.1  | ENSG00000160789.18_LMNA | 0.02139  | -0.138281855 | 0.179977564 | 7.94E-01 | 9.17E-01 | 1.00E+00 |
| ENSG00000236230.1_RP11-400N   | ENSG00000160789.18_LMNA | 0.09906  | -0.06110375  | 0.254251612 | 2.25E-01 | 5.01E-01 | 1.00E+00 |
| ENSG00000213703.2_RP5-849H1   | ENSG00000160789.18_LMNA | 0.03969  | -0.120268098 | 0.197644359 | 6.27E-01 | 8.32E-01 | 1.00E+00 |
| ENSG00000257904.1_RP11-269C   | ENSG00000160789.18_LMNA | 0.12247  | -0.037458445 | 0.276286358 | 1.33E-01 | 3.70E-01 | 1.00E+00 |
| ENSG00000255959.1_RP11-804A   | ENSG00000160789.18_LMNA | 0.13985  | -0.019791037 | 0.292537859 | 8.57E-02 | 2.84E-01 | 1.00E+00 |
| ENSG00000255363.1_RP11-672A   | ENSG00000160789.18_LMNA | 0.16614  | 0.007124863  | 0.316954641 | 4.08E-02 | 1.76E-01 | 1.00E+00 |
| ENSG00000238280.1_RP11-436D   | ENSG00000160789.18_LMNA | 0.10782  | -0.052278577 | 0.262514146 | 1.86E-01 | 4.52E-01 | 1.00E+00 |
| ENSG00000250046.3_RP11-148B   | ENSG00000160789.18_LMNA | 0.0633   | -0.096879148 | 0.220278751 | 4.39E-01 | 7.07E-01 | 1.00E+00 |
| ENSG00000259284.1_RP11-162I7  | ENSG00000160789.18_LMNA | -0.32142 | -0.457220908 | -0.17096349 | 5.40E-05 | 1.15E-03 | 1.00E+00 |
| ENSG00000176510.4_OR10AC1     | ENSG00000160789.18_LMNA | 0.03571  | -0.124200688 | 0.193805055 | 6.62E-01 | 8.51E-01 | 1.00E+00 |

|                             |                         |          |              |             |          |          |          |
|-----------------------------|-------------------------|----------|--------------|-------------|----------|----------|----------|
| ENSG00000254441.1_RP11-718B | ENSG00000160789.18_LMNA | -0.10264 | -0.257626325 | 0.057505183 | 2.08E-01 | 4.81E-01 | 1.00E+00 |
| ENSG00000272788.1_RP11-674N | ENSG00000160789.18_LMNA | 0.20385  | 0.046143752  | 0.351636171 | 1.18E-02 | 7.37E-02 | 1.00E+00 |
| ENSG00000225823.1_RPL7P45   | ENSG00000160789.18_LMNA | -0.01822 | -0.176905521 | 0.141392886 | 8.24E-01 | 9.31E-01 | 1.00E+00 |
| ENSG00000268199.2_CTD-3137H | ENSG00000160789.18_LMNA | 0.02468  | -0.135055689 | 0.183156756 | 7.63E-01 | 9.01E-01 | 1.00E+00 |
| ENSG00000248356.1_RP11-557J | ENSG00000160789.18_LMNA | 0.01474  | -0.144799751 | 0.17353422  | 8.57E-01 | 9.44E-01 | 1.00E+00 |
| ENSG00000214967.5_NPIPA7    | ENSG00000160789.18_LMNA | 0.00132  | -0.157912701 | 0.160488161 | 9.87E-01 | 9.95E-01 | 1.00E+00 |
| ENSG00000271049.1_CTD-2553L | ENSG00000160789.18_LMNA | 0.1475   | -0.011984386 | 0.29966185  | 6.98E-02 | 2.49E-01 | 1.00E+00 |
| ENSG00000254622.1_NAV2-AS4  | ENSG00000160789.18_LMNA | -0.19782 | -0.346120756 | -0.0398756  | 1.46E-02 | 8.61E-02 | 1.00E+00 |
| ENSG00000225901.1_MTND2P9   | ENSG00000160789.18_LMNA | -0.04457 | -0.202336554 | 0.115448305 | 5.86E-01 | 8.08E-01 | 1.00E+00 |
| ENSG00000215878.3_MARCKSL1  | ENSG00000160789.18_LMNA | 0.00274  | -0.156526403 | 0.161872667 | 9.73E-01 | 9.90E-01 | 1.00E+00 |
| ENSG00000251187.4_CTC-459M  | ENSG00000160789.18_LMNA | -0.11414 | -0.268458134 | 0.045899277 | 1.61E-01 | 4.16E-01 | 1.00E+00 |
| ENSG00000213698.2_RP1-172N1 | ENSG00000160789.18_LMNA | 0.07728  | -0.082940311 | 0.233607412 | 3.44E-01 | 6.29E-01 | 1.00E+00 |
| ENSG00000225883.2_BMS1P11   | ENSG00000160789.18_LMNA | -0.06707 | -0.223881337 | 0.093123867 | 4.12E-01 | 6.86E-01 | 1.00E+00 |
| ENSG00000268614.1_CTD-2207C | ENSG00000160789.18_LMNA | 0.09207  | -0.068128309 | 0.247641827 | 2.59E-01 | 5.42E-01 | 1.00E+00 |
| ENSG00000109851.6_DBX1      | ENSG00000160789.18_LMNA | -0.06211 | -0.219145155 | 0.098058927 | 4.47E-01 | 7.13E-01 | 1.00E+00 |
| ENSG00000225636.1_HNRNPA3F  | ENSG00000160789.18_LMNA | 0.11207  | -0.047982298 | 0.266519884 | 1.69E-01 | 4.28E-01 | 1.00E+00 |
| ENSG00000131721.4_RHOXF2    | ENSG00000160789.18_LMNA | -0.09548 | -0.250867089 | 0.064704564 | 2.42E-01 | 5.21E-01 | 1.00E+00 |
| ENSG00000227968.1_BUB3P1    | ENSG00000160789.18_LMNA | -0.10435 | -0.259239929 | 0.055781644 | 2.01E-01 | 4.71E-01 | 1.00E+00 |
| ENSG00000229456.1_RLIMP1    | ENSG00000160789.18_LMNA | 0.00299  | -0.156285172 | 0.162113458 | 9.71E-01 | 9.89E-01 | 1.00E+00 |
| ENSG00000215796.3_RP11-551G | ENSG00000160789.18_LMNA | -0.07985 | -0.236047253 | 0.080375293 | 3.28E-01 | 6.14E-01 | 1.00E+00 |
| ENSG00000272033.1_RP11-52A2 | ENSG00000160789.18_LMNA | -0.01589 | -0.17465185  | 0.143671167 | 8.46E-01 | 9.40E-01 | 1.00E+00 |
| ENSG00000228286.3_AP000593  | ENSG00000160789.18_LMNA | -0.06917 | -0.225886083 | 0.091030238 | 3.97E-01 | 6.74E-01 | 1.00E+00 |
| ENSG00000261595.1_RP11-426L | ENSG00000160789.18_LMNA | 0.00383  | -0.15546872  | 0.162928139 | 9.63E-01 | 9.85E-01 | 1.00E+00 |
| ENSG00000206552.4_KRBOX1-A  | ENSG00000160789.18_LMNA | -0.14375 | -0.29617255  | 0.015812803 | 7.73E-02 | 2.66E-01 | 1.00E+00 |
| ENSG00000245869.2_RP11-158I | ENSG00000160789.18_LMNA | 0.15772  | -0.0015239   | 0.309153435 | 5.23E-02 | 2.07E-01 | 1.00E+00 |
| ENSG00000237469.2_TUBB8P10  | ENSG00000160789.18_LMNA | -0.03876 | -0.196749852 | 0.121185231 | 6.35E-01 | 8.37E-01 | 1.00E+00 |
| ENSG00000170356.8_OR2A20P   | ENSG00000160789.18_LMNA | 0.11283  | -0.047219096 | 0.267230338 | 1.66E-01 | 4.23E-01 | 1.00E+00 |
| ENSG00000277448.1_RP11-538C | ENSG00000160789.18_LMNA | -0.0183  | -0.176983796 | 0.141313695 | 8.23E-01 | 9.31E-01 | 1.00E+00 |
| ENSG00000279129.1_RP11-264L | ENSG00000160789.18_LMNA | 0.07362  | -0.086590883 | 0.230128105 | 3.67E-01 | 6.48E-01 | 1.00E+00 |
| ENSG00000279825.1_CTC-457L1 | ENSG00000160789.18_LMNA | -0.03167 | -0.189912308 | 0.128177847 | 6.99E-01 | 8.71E-01 | 1.00E+00 |
| ENSG00000280693.1_SH3PXD2A  | ENSG00000160789.18_LMNA | 0.17277  | 0.013949989  | 0.323081468 | 3.33E-02 | 1.53E-01 | 1.00E+00 |
| ENSG00000248167.5_TRIM39-RP | ENSG00000160789.18_LMNA | -0.05122 | -0.208721549 | 0.108865557 | 5.31E-01 | 7.74E-01 | 1.00E+00 |
| ENSG00000277498.1_RP11-681L | ENSG00000160789.18_LMNA | -0.09555 | -0.250933844 | 0.064633622 | 2.42E-01 | 5.21E-01 | 1.00E+00 |

|                             |                         |          |              |             |          |          |          |
|-----------------------------|-------------------------|----------|--------------|-------------|----------|----------|----------|
| ENSG00000230368.2_FAM41C    | ENSG00000160789.18_LMNA | -0.01011 | -0.169043242 | 0.149326412 | 9.02E-01 | 9.62E-01 | 1.00E+00 |
| ENSG00000153923.9_CLCA3P    | ENSG00000160789.18_LMNA | 0.0964   | -0.063774871 | 0.251741678 | 2.37E-01 | 5.16E-01 | 1.00E+00 |
| ENSG00000250869.1_RP11-453N | ENSG00000160789.18_LMNA | -0.10209 | -0.257107448 | 0.058059011 | 2.11E-01 | 4.84E-01 | 1.00E+00 |
| ENSG00000236320.3_SLFN14    | ENSG00000160789.18_LMNA | 0.03028  | -0.129541302 | 0.188575485 | 7.11E-01 | 8.77E-01 | 1.00E+00 |
| ENSG00000232265.6_XXyac-YX1 | ENSG00000160789.18_LMNA | -0.04279 | -0.200621364 | 0.117211875 | 6.01E-01 | 8.16E-01 | 1.00E+00 |
| ENSG00000266613.1_RFWD2P1   | ENSG00000160789.18_LMNA | -0.03561 | -0.193711688 | 0.124296199 | 6.63E-01 | 8.51E-01 | 1.00E+00 |
| ENSG00000250405.2_RP11-114H | ENSG00000160789.18_LMNA | -0.08799 | -0.243773027 | 0.072225408 | 2.81E-01 | 5.67E-01 | 1.00E+00 |
| ENSG00000197376.2_OR8S1     | ENSG00000160789.18_LMNA | -0.00278 | -0.16191334  | 0.156485658 | 9.73E-01 | 9.89E-01 | 1.00E+00 |
| ENSG00000177369.7_FLJ40194  | ENSG00000160789.18_LMNA | 0.03382  | -0.12606152  | 0.191984964 | 6.79E-01 | 8.60E-01 | 1.00E+00 |
| ENSG00000182177.12_ASB18    | ENSG00000160789.18_LMNA | -0.09735 | -0.252635907 | 0.062823733 | 2.33E-01 | 5.11E-01 | 1.00E+00 |
| ENSG00000237775.1_DDR1-AS1  | ENSG00000160789.18_LMNA | 0.01957  | -0.140066802 | 0.178215745 | 8.11E-01 | 9.25E-01 | 1.00E+00 |
| ENSG00000128438.9_TBC1D27   | ENSG00000160789.18_LMNA | 0.06984  | -0.090365066 | 0.226522453 | 3.93E-01 | 6.70E-01 | 1.00E+00 |
| ENSG00000211637.2_IGLV4-69  | ENSG00000160789.18_LMNA | -0.04522 | -0.202964296 | 0.114802357 | 5.80E-01 | 8.04E-01 | 1.00E+00 |
| ENSG00000211941.3_IGHV3-11  | ENSG00000160789.18_LMNA | 0.08071  | -0.07950898  | 0.236870389 | 3.23E-01 | 6.09E-01 | 1.00E+00 |
| ENSG00000207744.1_MIR10B    | ENSG00000160789.18_LMNA | -0.11075 | -0.265276171 | 0.049317465 | 1.74E-01 | 4.35E-01 | 1.00E+00 |
| ENSG00000201672.1_SNORD113  | ENSG00000160789.18_LMNA | -0.01395 | -0.17276322  | 0.145577826 | 8.65E-01 | 9.47E-01 | 1.00E+00 |
| ENSG00000276822.1_RP11-252A | ENSG00000160789.18_LMNA | 0.13379  | -0.0259619   | 0.286881973 | 1.00E-01 | 3.12E-01 | 1.00E+00 |
| ENSG00000242078.1_RP11-738B | ENSG00000160789.18_LMNA | -0.17288 | -0.323189019 | -0.01407006 | 3.32E-02 | 1.53E-01 | 1.00E+00 |
| ENSG00000212093.1_          | ENSG00000160789.18_LMNA | -0.1008  | -0.255890745 | 0.059356913 | 2.17E-01 | 4.91E-01 | 1.00E+00 |
| ENSG00000280615.1_          | ENSG00000160789.18_LMNA | 0.0017   | -0.157544332 | 0.160856176 | 9.83E-01 | 9.94E-01 | 1.00E+00 |
| ENSG00000238423.1_SNORD42E  | ENSG00000160789.18_LMNA | -0.01143 | -0.170318714 | 0.148042162 | 8.89E-01 | 9.57E-01 | 1.00E+00 |
| ENSG00000276926.1_MIR6797   | ENSG00000160789.18_LMNA | 0.02966  | -0.130154588 | 0.187973793 | 7.17E-01 | 8.80E-01 | 1.00E+00 |
| ENSG00000222364.1_          | ENSG00000160789.18_LMNA | -0.07788 | -0.234176905 | 0.082341975 | 3.40E-01 | 6.25E-01 | 1.00E+00 |
| ENSG00000207336.1_RNU6-658F | ENSG00000160789.18_LMNA | -0.13471 | -0.287741789 | 0.02502533  | 9.80E-02 | 3.08E-01 | 1.00E+00 |
| ENSG00000230040.1_LINC00364 | ENSG00000160789.18_LMNA | -0.10781 | -0.262500919 | 0.052292745 | 1.86E-01 | 4.52E-01 | 1.00E+00 |
| ENSG00000122133.15_PAEP     | ENSG00000160789.18_LMNA | 0.25347  | 0.098229227  | 0.39666083  | 1.63E-03 | 1.67E-02 | 1.00E+00 |
| ENSG00000276288.1_          | ENSG00000160789.18_LMNA | 0.01908  | -0.140543545 | 0.177744834 | 8.15E-01 | 9.28E-01 | 1.00E+00 |
| ENSG00000207206.1_RNU6-1035 | ENSG00000160789.18_LMNA | 0.04695  | -0.113096028 | 0.204621272 | 5.66E-01 | 7.96E-01 | 1.00E+00 |
| ENSG00000279113.1_RP13-895J | ENSG00000160789.18_LMNA | -0.17408 | -0.324296569 | -0.01530701 | 3.20E-02 | 1.49E-01 | 1.00E+00 |
| ENSG00000226345.1_AC083822. | ENSG00000160789.18_LMNA | -0.01247 | -0.17132653  | 0.147026649 | 8.79E-01 | 9.53E-01 | 1.00E+00 |
| ENSG00000270257.1_RP11-17P1 | ENSG00000160789.18_LMNA | 0.09047  | -0.069731192 | 0.246129459 | 2.68E-01 | 5.52E-01 | 1.00E+00 |
| ENSG00000254239.1_GS1-39E22 | ENSG00000160789.18_LMNA | -0.2478  | -0.391557193 | -0.09224191 | 2.08E-03 | 2.02E-02 | 1.00E+00 |
| ENSG00000258107.1_RP11-260G | ENSG00000160789.18_LMNA | -0.15795 | -0.309372031 | 0.001282185 | 5.20E-02 | 2.06E-01 | 1.00E+00 |



|                             |                         |          |              |             |          |          |          |
|-----------------------------|-------------------------|----------|--------------|-------------|----------|----------|----------|
| ENSG00000229156.1_RP11-250H | ENSG00000160789.18_LMNA | 0.02666  | -0.133107957 | 0.185072912 | 7.44E-01 | 8.93E-01 | 1.00E+00 |
| ENSG00000263674.1_RP11-443G | ENSG00000160789.18_LMNA | -0.0606  | -0.217698595 | 0.099563126 | 4.58E-01 | 7.22E-01 | 1.00E+00 |
| ENSG00000270058.1_RP11-514D | ENSG00000160789.18_LMNA | -0.09603 | -0.251385656 | 0.06415339  | 2.39E-01 | 5.18E-01 | 1.00E+00 |
| ENSG00000254949.1_GNG5P3    | ENSG00000160789.18_LMNA | 0.09913  | -0.061031462 | 0.25431948  | 2.24E-01 | 5.00E-01 | 1.00E+00 |
| ENSG00000158497.2_HMHB1     | ENSG00000160789.18_LMNA | -0.06271 | -0.21971335  | 0.097467695 | 4.43E-01 | 7.10E-01 | 1.00E+00 |
| ENSG00000226762.1_RP11-298E | ENSG00000160789.18_LMNA | -0.08727 | -0.243094681 | 0.072942686 | 2.85E-01 | 5.71E-01 | 1.00E+00 |
| ENSG00000271986.2_RN7SL827F | ENSG00000160789.18_LMNA | 0.04856  | -0.111504529 | 0.206165102 | 5.52E-01 | 7.88E-01 | 1.00E+00 |
| ENSG00000211721.2_TRBV6-5   | ENSG00000160789.18_LMNA | -0.05031 | -0.207843155 | 0.109772812 | 5.38E-01 | 7.78E-01 | 1.00E+00 |
| ENSG00000264384.2_RN7SL431F | ENSG00000160789.18_LMNA | 0.01581  | -0.14375235  | 0.174571482 | 8.47E-01 | 9.40E-01 | 1.00E+00 |
| ENSG00000243847.3_RN7SL610F | ENSG00000160789.18_LMNA | 0.02719  | -0.132586438 | 0.185585566 | 7.40E-01 | 8.91E-01 | 1.00E+00 |
| ENSG00000239919.1_SNRPGP3   | ENSG00000160789.18_LMNA | -0.11978 | -0.273760734 | 0.040186616 | 1.42E-01 | 3.84E-01 | 1.00E+00 |
| ENSG00000248486.1_RP1-137K2 | ENSG00000160789.18_LMNA | -0.10771 | -0.262408367 | 0.052391871 | 1.87E-01 | 4.53E-01 | 1.00E+00 |
| ENSG00000237720.1_AC011995. | ENSG00000160789.18_LMNA | -0.15847 | -0.309851057 | 0.000752372 | 5.12E-02 | 2.04E-01 | 1.00E+00 |
| ENSG00000238015.2_RP4-641G1 | ENSG00000160789.18_LMNA | -0.03031 | -0.188603452 | 0.12951279  | 7.11E-01 | 8.77E-01 | 1.00E+00 |
| ENSG00000255334.1_RP11-708L | ENSG00000160789.18_LMNA | -0.00237 | -0.161507531 | 0.156892134 | 9.77E-01 | 9.91E-01 | 1.00E+00 |
| ENSG00000229782.1_AC118754. | ENSG00000160789.18_LMNA | -0.25542 | -0.398423904 | -0.10030261 | 1.49E-03 | 1.56E-02 | 1.00E+00 |
| ENSG00000244018.1_RPL35P6   | ENSG00000160789.18_LMNA | 0.01605  | -0.143521877 | 0.174799629 | 8.44E-01 | 9.39E-01 | 1.00E+00 |
| ENSG00000273248.1_RP11-399K | ENSG00000160789.18_LMNA | 0.06811  | -0.092094175 | 0.224867649 | 4.04E-01 | 6.80E-01 | 1.00E+00 |
| ENSG00000249509.1_RP11-402J | ENSG00000160789.18_LMNA | -0.21631 | -0.363012772 | -0.05914946 | 7.44E-03 | 5.26E-02 | 1.00E+00 |
| ENSG00000258122.1_RP11-61A1 | ENSG00000160789.18_LMNA | -0.06605 | -0.222907734 | 0.094139626 | 4.19E-01 | 6.91E-01 | 1.00E+00 |
| ENSG00000259797.1_RP11-96D1 | ENSG00000160789.18_LMNA | -0.02884 | -0.187178772 | 0.130964556 | 7.24E-01 | 8.83E-01 | 1.00E+00 |
| ENSG00000189398.5_OR7E12P   | ENSG00000160789.18_LMNA | 0.0186   | -0.141018618 | 0.177275427 | 8.20E-01 | 9.30E-01 | 1.00E+00 |
| ENSG00000224545.1_AC008264. | ENSG00000160789.18_LMNA | -0.0165  | -0.175243137 | 0.143073749 | 8.40E-01 | 9.38E-01 | 1.00E+00 |
| ENSG00000251075.1_HTTP-AS   | ENSG00000160789.18_LMNA | 0.08773  | -0.072485179 | 0.243527391 | 2.82E-01 | 5.68E-01 | 1.00E+00 |
| ENSG00000281160.1_RP11-333B | ENSG00000160789.18_LMNA | -0.17053 | -0.32101884  | -0.01164905 | 3.57E-02 | 1.61E-01 | 1.00E+00 |
| ENSG00000233435.1_AGGF1P2   | ENSG00000160789.18_LMNA | 0.06283  | -0.097348572 | 0.219827806 | 4.42E-01 | 7.09E-01 | 1.00E+00 |
| ENSG00000257193.1_RP11-818F | ENSG00000160789.18_LMNA | 0.0476   | -0.112457149 | 0.205241206 | 5.60E-01 | 7.93E-01 | 1.00E+00 |
| ENSG00000146360.8_GPR6      | ENSG00000160789.18_LMNA | -0.21951 | -0.365927599 | -0.06249837 | 6.58E-03 | 4.82E-02 | 1.00E+00 |
| ENSG00000260454.1_RP11-367F | ENSG00000160789.18_LMNA | 0.01162  | -0.147851894 | 0.17050759  | 8.87E-01 | 9.56E-01 | 1.00E+00 |
| ENSG00000235110.5_RP11-8J23 | ENSG00000160789.18_LMNA | 0.06794  | -0.092262278 | 0.224706673 | 4.06E-01 | 6.81E-01 | 1.00E+00 |
| ENSG00000213900.2_RPS17P1   | ENSG00000160789.18_LMNA | 0.01071  | -0.148746496 | 0.169619326 | 8.96E-01 | 9.59E-01 | 1.00E+00 |
| ENSG00000213344.2_PCNPP3    | ENSG00000160789.18_LMNA | 0.11722  | -0.042782484 | 0.271353564 | 1.50E-01 | 3.99E-01 | 1.00E+00 |
| ENSG00000227363.1_AC019172. | ENSG00000160789.18_LMNA | 0.2319   | 0.075481659  | 0.377172011 | 4.04E-03 | 3.34E-02 | 1.00E+00 |

|                              |                         |          |              |             |          |          |          |
|------------------------------|-------------------------|----------|--------------|-------------|----------|----------|----------|
| ENSG00000204175.5_GPRIN2     | ENSG00000160789.18_LMNA | -0.15739 | -0.308853906 | 0.001855046 | 5.28E-02 | 2.08E-01 | 1.00E+00 |
| ENSG00000149021.5_SCGB1A1    | ENSG00000160789.18_LMNA | -0.14311 | -0.295580136 | 0.016461885 | 7.86E-02 | 2.69E-01 | 1.00E+00 |
| ENSG00000224806.2_ARL5AP4    | ENSG00000160789.18_LMNA | -0.09351 | -0.249008288 | 0.066678663 | 2.52E-01 | 5.33E-01 | 1.00E+00 |
| ENSG00000257156.1_RP11-13A1  | ENSG00000160789.18_LMNA | 0.05521  | -0.104913494 | 0.212541925 | 4.99E-01 | 7.52E-01 | 1.00E+00 |
| ENSG00000261325.1_AC140542.1 | ENSG00000160789.18_LMNA | -0.13148 | -0.284719645 | 0.028314827 | 1.06E-01 | 3.24E-01 | 1.00E+00 |
| ENSG00000260932.1_RP11-483P  | ENSG00000160789.18_LMNA | 0.00113  | -0.158100076 | 0.160300932 | 9.89E-01 | 9.96E-01 | 1.00E+00 |
| ENSG00000256717.1_AP000797.1 | ENSG00000160789.18_LMNA | -0.04033 | -0.198255321 | 0.119641369 | 6.22E-01 | 8.29E-01 | 1.00E+00 |
| ENSG00000264272.1_CTD-2514K  | ENSG00000160789.18_LMNA | -0.00958 | -0.168522447 | 0.149850483 | 9.07E-01 | 9.64E-01 | 1.00E+00 |
| ENSG00000233842.1_AC062031.1 | ENSG00000160789.18_LMNA | -0.08959 | -0.245289772 | 0.070620429 | 2.72E-01 | 5.57E-01 | 1.00E+00 |
| ENSG00000227589.1_RP5-1092A  | ENSG00000160789.18_LMNA | 0.15119  | -0.008208082 | 0.303095504 | 6.30E-02 | 2.33E-01 | 1.00E+00 |
| ENSG00000274297.1_RP11-138H  | ENSG00000160789.18_LMNA | -0.08391 | -0.239908528 | 0.076307333 | 3.04E-01 | 5.91E-01 | 1.00E+00 |
| ENSG00000260071.1_RP11-418I2 | ENSG00000160789.18_LMNA | -0.25994 | -0.402489296 | -0.1050934  | 1.22E-03 | 1.34E-02 | 1.00E+00 |
| ENSG00000271075.1_RP11-589M  | ENSG00000160789.18_LMNA | 0.1095   | -0.050587498 | 0.264092159 | 1.79E-01 | 4.42E-01 | 1.00E+00 |
| ENSG00000231158.1_PTP4A1P1   | ENSG00000160789.18_LMNA | -0.04038 | -0.198305845 | 0.119589529 | 6.21E-01 | 8.29E-01 | 1.00E+00 |
| ENSG00000179826.6_MRGPX3     | ENSG00000160789.18_LMNA | 0.07197  | -0.088242225 | 0.22855157  | 3.78E-01 | 6.57E-01 | 1.00E+00 |
| ENSG00000270606.1_RP11-713H  | ENSG00000160789.18_LMNA | 0.11861  | -0.041371051 | 0.272662885 | 1.46E-01 | 3.91E-01 | 1.00E+00 |
| ENSG00000236651.1_DLX2-AS1   | ENSG00000160789.18_LMNA | 0.0766   | -0.08361808  | 0.232962052 | 3.48E-01 | 6.32E-01 | 1.00E+00 |
| ENSG00000227436.1_FCF1P1     | ENSG00000160789.18_LMNA | -0.02282 | -0.181357538 | 0.13688232  | 7.80E-01 | 9.10E-01 | 1.00E+00 |
| ENSG00000226375.1_RP3-395P1  | ENSG00000160789.18_LMNA | -0.12686 | -0.280399682 | 0.033005211 | 1.19E-01 | 3.47E-01 | 1.00E+00 |
| ENSG00000237926.1_RP13-346H  | ENSG00000160789.18_LMNA | -0.08345 | -0.239472297 | 0.076767442 | 3.07E-01 | 5.93E-01 | 1.00E+00 |
| ENSG00000250238.1_Z95704.3   | ENSG00000160789.18_LMNA | -0.13212 | -0.28532095  | 0.027660868 | 1.05E-01 | 3.21E-01 | 1.00E+00 |
| ENSG00000164616.13_FBXL21    | ENSG00000160789.18_LMNA | -0.08091 | -0.237054687 | 0.079314948 | 3.22E-01 | 6.08E-01 | 1.00E+00 |
| ENSG00000225893.1_RP11-6J24  | ENSG00000160789.18_LMNA | -0.13933 | -0.292052859 | 0.020321132 | 8.69E-02 | 2.86E-01 | 1.00E+00 |
| ENSG00000228135.1_LINC01494  | ENSG00000160789.18_LMNA | -0.04322 | -0.201032944 | 0.116788868 | 5.97E-01 | 8.14E-01 | 1.00E+00 |
| ENSG00000261219.1_RP11-344A  | ENSG00000160789.18_LMNA | -0.03398 | -0.19213919  | 0.125903928 | 6.78E-01 | 8.59E-01 | 1.00E+00 |
| ENSG00000239490.1_RPS4XP18   | ENSG00000160789.18_LMNA | 0.08128  | -0.078940977 | 0.237409836 | 3.20E-01 | 6.06E-01 | 1.00E+00 |
| ENSG00000236564.1_YWHAQP5    | ENSG00000160789.18_LMNA | -0.03246 | -0.190675972 | 0.127398429 | 6.91E-01 | 8.67E-01 | 1.00E+00 |
| ENSG00000225431.1_AP001626.1 | ENSG00000160789.18_LMNA | -0.01029 | -0.169217606 | 0.149150912 | 9.00E-01 | 9.61E-01 | 1.00E+00 |
| ENSG00000171773.2_NXNL1      | ENSG00000160789.18_LMNA | -0.05464 | -0.211996674 | 0.105478153 | 5.04E-01 | 7.55E-01 | 1.00E+00 |
| ENSG00000280188.1_AC005477.1 | ENSG00000160789.18_LMNA | 0.19557  | 0.037537548  | 0.344058048 | 1.58E-02 | 9.09E-02 | 1.00E+00 |
| ENSG00000248608.2_RP11-206P  | ENSG00000160789.18_LMNA | 0.01638  | -0.143198729 | 0.175119459 | 8.41E-01 | 9.38E-01 | 1.00E+00 |
| ENSG00000155087.3_ODF1       | ENSG00000160789.18_LMNA | -0.02523 | -0.183693899 | 0.134509942 | 7.58E-01 | 8.99E-01 | 1.00E+00 |
| ENSG00000236946.2_HNRNPA1F   | ENSG00000160789.18_LMNA | 0.02406  | -0.135658204 | 0.182563519 | 7.69E-01 | 9.04E-01 | 1.00E+00 |

|                             |                         |          |              |             |          |          |          |
|-----------------------------|-------------------------|----------|--------------|-------------|----------|----------|----------|
| ENSG00000225345.3_SNX18P3   | ENSG00000160789.18_LMNA | -0.18767 | -0.336812193 | -0.029351   | 2.06E-02 | 1.10E-01 | 1.00E+00 |
| ENSG00000233300.1_EIF4A1P1  | ENSG00000160789.18_LMNA | 0.05566  | -0.104461903 | 0.212977851 | 4.96E-01 | 7.50E-01 | 1.00E+00 |
| ENSG00000257480.1_MRPL2P1   | ENSG00000160789.18_LMNA | -0.00141 | -0.160572038 | 0.157828752 | 9.86E-01 | 9.95E-01 | 1.00E+00 |
| ENSG00000258583.4_LINC01500 | ENSG00000160789.18_LMNA | -0.00278 | -0.161905625 | 0.156493387 | 9.73E-01 | 9.89E-01 | 1.00E+00 |
| ENSG00000248461.1_CTD-2207A | ENSG00000160789.18_LMNA | -0.16808 | -0.318751842 | -0.00912391 | 3.85E-02 | 1.69E-01 | 1.00E+00 |
| ENSG00000196593.8_ANKRD20A  | ENSG00000160789.18_LMNA | -0.16489 | -0.315800255 | -0.00584213 | 4.24E-02 | 1.80E-01 | 1.00E+00 |
| ENSG00000281028.1_RP11-717K | ENSG00000160789.18_LMNA | 0.07189  | -0.088322568 | 0.228474825 | 3.79E-01 | 6.58E-01 | 1.00E+00 |
| ENSG00000215065.3_DUSP8P4   | ENSG00000160789.18_LMNA | -0.01565 | -0.174417222 | 0.143908163 | 8.48E-01 | 9.41E-01 | 1.00E+00 |
| ENSG00000280277.1_RP1-72A23 | ENSG00000160789.18_LMNA | -0.01693 | -0.175653906 | 0.142658585 | 8.36E-01 | 9.36E-01 | 1.00E+00 |
| ENSG00000165694.8_FRMD7     | ENSG00000160789.18_LMNA | -0.12797 | -0.281438717 | 0.031878343 | 1.16E-01 | 3.41E-01 | 1.00E+00 |
| ENSG00000233388.2_RP4-569D1 | ENSG00000160789.18_LMNA | 0.03279  | -0.127076849 | 0.19099094  | 6.88E-01 | 8.66E-01 | 1.00E+00 |
| ENSG00000215515.2_IFIT1P1   | ENSG00000160789.18_LMNA | -0.04473 | -0.202489993 | 0.115290441 | 5.84E-01 | 8.07E-01 | 1.00E+00 |
| ENSG00000260092.1_RP11-77K1 | ENSG00000160789.18_LMNA | 0.05334  | -0.106763463 | 0.210754806 | 5.14E-01 | 7.62E-01 | 1.00E+00 |
| ENSG00000260719.1_AC009133  | ENSG00000160789.18_LMNA | -0.02049 | -0.179110139 | 0.139160925 | 8.02E-01 | 9.21E-01 | 1.00E+00 |
| ENSG00000278954.1_RP13-415G | ENSG00000160789.18_LMNA | 0.10458  | -0.055549752 | 0.259456896 | 2.00E-01 | 4.70E-01 | 1.00E+00 |
| ENSG00000236990.1_RP11-433J | ENSG00000160789.18_LMNA | -0.16131 | -0.312483412 | -0.00216218 | 4.71E-02 | 1.93E-01 | 1.00E+00 |
| ENSG00000241832.1_CECR3     | ENSG00000160789.18_LMNA | -0.06922 | -0.225930766 | 0.090983541 | 3.97E-01 | 6.74E-01 | 1.00E+00 |
| ENSG00000234880.1_LINC00163 | ENSG00000160789.18_LMNA | 0.05581  | -0.104317791 | 0.213116938 | 4.95E-01 | 7.50E-01 | 1.00E+00 |
| ENSG00000080511.3_RDH8      | ENSG00000160789.18_LMNA | 0.11777  | -0.042227215 | 0.2718688   | 1.48E-01 | 3.95E-01 | 1.00E+00 |
| ENSG00000244227.4_LINC01330 | ENSG00000160789.18_LMNA | -0.07301 | -0.229545958 | 0.087200856 | 3.71E-01 | 6.52E-01 | 1.00E+00 |
| ENSG00000259358.1_RP11-456J | ENSG00000160789.18_LMNA | -0.06039 | -0.217500503 | 0.099768998 | 4.60E-01 | 7.23E-01 | 1.00E+00 |
| ENSG00000237647.7_          | ENSG00000160789.18_LMNA | -0.23104 | -0.376392356 | -0.07457812 | 4.19E-03 | 3.44E-02 | 1.00E+00 |
| ENSG00000215580.9_BCORP1    | ENSG00000160789.18_LMNA | -0.14222 | -0.294742848 | 0.017378816 | 8.05E-02 | 2.73E-01 | 1.00E+00 |
| ENSG00000205231.1_TTLL10-AS | ENSG00000160789.18_LMNA | 0.04697  | -0.113079791 | 0.204637032 | 5.66E-01 | 7.96E-01 | 1.00E+00 |
| ENSG00000244588.4_RAD21L1   | ENSG00000160789.18_LMNA | -0.03955 | -0.197504561 | 0.120411468 | 6.29E-01 | 8.33E-01 | 1.00E+00 |
| ENSG00000280777.1_          | ENSG00000160789.18_LMNA | -0.07645 | -0.232813204 | 0.083774361 | 3.49E-01 | 6.33E-01 | 1.00E+00 |
| ENSG00000237452.2_BHMG1     | ENSG00000160789.18_LMNA | 0.09837  | -0.061794834 | 0.253602638 | 2.28E-01 | 5.05E-01 | 1.00E+00 |
| ENSG00000233821.1_ENOX1-AS  | ENSG00000160789.18_LMNA | -0.27465 | -0.415679122 | -0.12073237 | 6.16E-04 | 7.96E-03 | 1.00E+00 |
| ENSG00000267166.4_RP11-527L | ENSG00000160789.18_LMNA | -0.0128  | -0.171651618 | 0.146698936 | 8.76E-01 | 9.52E-01 | 1.00E+00 |
| ENSG00000204283.3_FLJ45079  | ENSG00000160789.18_LMNA | -0.07161 | -0.228208474 | 0.088601371 | 3.81E-01 | 6.59E-01 | 1.00E+00 |
| ENSG00000279085.1_CTA-243E7 | ENSG00000160789.18_LMNA | 0.05629  | -0.103838553 | 0.213579371 | 4.91E-01 | 7.47E-01 | 1.00E+00 |
| ENSG00000244575.3_IGKV1-27  | ENSG00000160789.18_LMNA | 0.04711  | -0.112938845 | 0.204773818 | 5.64E-01 | 7.95E-01 | 1.00E+00 |
| ENSG00000247345.2_RP11-266N | ENSG00000160789.18_LMNA | -0.09555 | -0.250930481 | 0.064637196 | 2.42E-01 | 5.21E-01 | 1.00E+00 |

|                              |                         |          |              |             |          |          |          |
|------------------------------|-------------------------|----------|--------------|-------------|----------|----------|----------|
| ENSG00000240382.3_IGKV1-17   | ENSG00000160789.18_LMNA | 0.10801  | -0.052087518 | 0.262692516 | 1.85E-01 | 4.51E-01 | 1.00E+00 |
| ENSG00000266347.2_           | ENSG00000160789.18_LMNA | 0.107    | -0.053106547 | 0.26174092  | 1.90E-01 | 4.57E-01 | 1.00E+00 |
| ENSG00000256325.1_RP11-611O  | ENSG00000160789.18_LMNA | 0.0614   | -0.098765634 | 0.218465701 | 4.52E-01 | 7.18E-01 | 1.00E+00 |
| ENSG00000280834.1_           | ENSG00000160789.18_LMNA | -0.09721 | -0.252502966 | 0.062965171 | 2.33E-01 | 5.11E-01 | 1.00E+00 |
| ENSG00000253739.1_RNU6-323F  | ENSG00000160789.18_LMNA | -0.03919 | -0.197158667 | 0.120766143 | 6.32E-01 | 8.35E-01 | 1.00E+00 |
| ENSG00000250677.1_RP11-576N  | ENSG00000160789.18_LMNA | 0.00513  | -0.154200294 | 0.164192955 | 9.50E-01 | 9.80E-01 | 1.00E+00 |
| ENSG00000206926.1_RNU6-1024  | ENSG00000160789.18_LMNA | 0.06425  | -0.095928111 | 0.221191937 | 4.32E-01 | 7.01E-01 | 1.00E+00 |
| ENSG00000206601.1_RNU6-431F  | ENSG00000160789.18_LMNA | 0.07896  | -0.081258192 | 0.23520789  | 3.34E-01 | 6.19E-01 | 1.00E+00 |
| ENSG00000232498.1_RP5-1011O  | ENSG00000160789.18_LMNA | -0.11077 | -0.265291106 | 0.049301439 | 1.74E-01 | 4.35E-01 | 1.00E+00 |
| ENSG00000201806.1_RNU4-8P    | ENSG00000160789.18_LMNA | 0.04637  | -0.113665798 | 0.204068185 | 5.70E-01 | 7.99E-01 | 1.00E+00 |
| ENSG00000233648.1_AC010095.I | ENSG00000160789.18_LMNA | 0.002    | -0.15725032  | 0.161149842 | 9.80E-01 | 9.93E-01 | 1.00E+00 |
| ENSG00000213067.2_RP11-760D  | ENSG00000160789.18_LMNA | 0.09966  | -0.060500575 | 0.254817802 | 2.22E-01 | 4.97E-01 | 1.00E+00 |
| ENSG00000204790.9_BX255923.I | ENSG00000160789.18_LMNA | -0.15289 | -0.304674066 | 0.006469009 | 6.00E-02 | 2.26E-01 | 1.00E+00 |
| ENSG00000197084.5_LCE1C      | ENSG00000160789.18_LMNA | -0.12898 | -0.282383411 | 0.030853098 | 1.13E-01 | 3.36E-01 | 1.00E+00 |
| ENSG00000265813.2_RN7SL300F  | ENSG00000160789.18_LMNA | 0.05321  | -0.106896092 | 0.210626602 | 5.15E-01 | 7.63E-01 | 1.00E+00 |
| ENSG00000256288.1_RP11-277P  | ENSG00000160789.18_LMNA | -0.36027 | -0.491294032 | -0.21330529 | 5.14E-06 | 1.69E-04 | 2.64E-01 |
| ENSG00000228886.1_RP11-290D  | ENSG00000160789.18_LMNA | -0.04822 | -0.20584054  | 0.111839248 | 5.55E-01 | 7.89E-01 | 1.00E+00 |
| ENSG00000240233.3_RN7SL587F  | ENSG00000160789.18_LMNA | 0.03022  | -0.129606948 | 0.188511091 | 7.12E-01 | 8.77E-01 | 1.00E+00 |
| ENSG00000232971.2_RP11-293A  | ENSG00000160789.18_LMNA | -0.18043 | -0.330144253 | -0.02185365 | 2.61E-02 | 1.31E-01 | 1.00E+00 |
| ENSG00000224205.1_AP000351.I | ENSG00000160789.18_LMNA | -0.00706 | -0.166073464 | 0.152312475 | 9.31E-01 | 9.73E-01 | 1.00E+00 |
| ENSG00000211799.3_TRAV19     | ENSG00000160789.18_LMNA | -0.03081 | -0.189080302 | 0.129026569 | 7.06E-01 | 8.75E-01 | 1.00E+00 |
| ENSG00000236489.1_RP11-537I1 | ENSG00000160789.18_LMNA | 0.10656  | -0.053544414 | 0.261331841 | 1.91E-01 | 4.59E-01 | 1.00E+00 |
| ENSG00000274475.1_RN7SL650F  | ENSG00000160789.18_LMNA | 0.07593  | -0.08429391  | 0.232318261 | 3.53E-01 | 6.36E-01 | 1.00E+00 |
| ENSG00000270577.1_RP5-1147A  | ENSG00000160789.18_LMNA | -0.08826 | -0.244034433 | 0.071948912 | 2.80E-01 | 5.65E-01 | 1.00E+00 |
| ENSG00000237738.1_RNF216-IT  | ENSG00000160789.18_LMNA | -0.09365 | -0.249135127 | 0.066544036 | 2.51E-01 | 5.32E-01 | 1.00E+00 |
| ENSG00000248994.1_RP11-259O  | ENSG00000160789.18_LMNA | -0.13754 | -0.290382789 | 0.022145139 | 9.11E-02 | 2.94E-01 | 1.00E+00 |
| ENSG00000226660.2_TRBV2      | ENSG00000160789.18_LMNA | -0.01687 | -0.175602428 | 0.14271062  | 8.37E-01 | 9.37E-01 | 1.00E+00 |
| ENSG00000227505.1_RP11-434J  | ENSG00000160789.18_LMNA | 0.05446  | -0.10565209  | 0.211828676 | 5.05E-01 | 7.56E-01 | 1.00E+00 |
| ENSG00000242082.1_RP1-90G24  | ENSG00000160789.18_LMNA | -0.18893 | -0.337968356 | -0.0306545  | 1.97E-02 | 1.07E-01 | 1.00E+00 |
| ENSG00000250740.1_RP11-710F  | ENSG00000160789.18_LMNA | 0.2061   | 0.048493936  | 0.35369867  | 1.09E-02 | 6.94E-02 | 1.00E+00 |
| ENSG00000257141.1_RP11-554D  | ENSG00000160789.18_LMNA | -0.15873 | -0.310097294 | 0.000479961 | 5.08E-02 | 2.03E-01 | 1.00E+00 |
| ENSG00000273353.1_CTA-268H5  | ENSG00000160789.18_LMNA | -0.00785 | -0.166845263 | 0.151537002 | 9.24E-01 | 9.71E-01 | 1.00E+00 |
| ENSG00000231296.1_RP1-39G22  | ENSG00000160789.18_LMNA | 0.06428  | -0.095903908 | 0.221215169 | 4.31E-01 | 7.01E-01 | 1.00E+00 |

|                              |                         |          |              |             |          |          |          |
|------------------------------|-------------------------|----------|--------------|-------------|----------|----------|----------|
| ENSG00000268764.1_CTC-450M5  | ENSG00000160789.18_LMNA | -0.00578 | -0.164833613 | 0.153557406 | 9.44E-01 | 9.78E-01 | 1.00E+00 |
| ENSG00000222460.1_RN7SKP27   | ENSG00000160789.18_LMNA | 0.152    | -0.007383912 | 0.303843819 | 6.16E-02 | 2.29E-01 | 1.00E+00 |
| ENSG00000230978.1_LINC00160  | ENSG00000160789.18_LMNA | 0.14736  | -0.01212784  | 0.299531253 | 7.00E-02 | 2.50E-01 | 1.00E+00 |
| ENSG00000225196.2_RPL10P17   | ENSG00000160789.18_LMNA | 0.07382  | -0.086400056 | 0.23031018  | 3.66E-01 | 6.47E-01 | 1.00E+00 |
| ENSG00000230321.1_MTCO2P27   | ENSG00000160789.18_LMNA | -0.15979 | -0.311078118 | -0.00060558 | 4.92E-02 | 1.99E-01 | 1.00E+00 |
| ENSG00000233517.1_AC005162.1 | ENSG00000160789.18_LMNA | -0.12057 | -0.274500234 | 0.039388294 | 1.39E-01 | 3.80E-01 | 1.00E+00 |
| ENSG00000242829.1_RPS26P21   | ENSG00000160789.18_LMNA | 0.04337  | -0.116634688 | 0.201182932 | 5.96E-01 | 8.13E-01 | 1.00E+00 |
| ENSG00000239483.1_RPS15AP1   | ENSG00000160789.18_LMNA | -0.01286 | -0.171711169 | 0.14663837  | 8.75E-01 | 9.51E-01 | 1.00E+00 |
| ENSG00000213964.3_CHCHD4P4   | ENSG00000160789.18_LMNA | 0.03473  | -0.125163796 | 0.192863306 | 6.71E-01 | 8.56E-01 | 1.00E+00 |
| ENSG00000270492.1_RP13-685P  | ENSG00000160789.18_LMNA | 0.01586  | -0.143706021 | 0.174617347 | 8.46E-01 | 9.40E-01 | 1.00E+00 |
| ENSG00000254571.1_RP11-60I3. | ENSG00000160789.18_LMNA | 0.00333  | -0.155951223 | 0.162446735 | 9.68E-01 | 9.87E-01 | 1.00E+00 |
| ENSG00000248708.1_CTD-2316B  | ENSG00000160789.18_LMNA | -0.08735 | -0.243164715 | 0.072868648 | 2.85E-01 | 5.70E-01 | 1.00E+00 |
| ENSG00000229282.1_RP1-40E16  | ENSG00000160789.18_LMNA | 0.07068  | -0.089528707 | 0.227322216 | 3.87E-01 | 6.65E-01 | 1.00E+00 |
| ENSG00000266111.2_RP11-296K  | ENSG00000160789.18_LMNA | -0.10092 | -0.256007876 | 0.05923201  | 2.16E-01 | 4.90E-01 | 1.00E+00 |
| ENSG00000244541.4_LINC01213  | ENSG00000160789.18_LMNA | -0.03356 | -0.191735728 | 0.12631616  | 6.81E-01 | 8.61E-01 | 1.00E+00 |
| ENSG00000223692.1_DIP2A-IT1  | ENSG00000160789.18_LMNA | -0.00357 | -0.162680817 | 0.155716625 | 9.65E-01 | 9.86E-01 | 1.00E+00 |
| ENSG00000234091.1_RP11-353M  | ENSG00000160789.18_LMNA | 0.01951  | -0.140128759 | 0.178154554 | 8.11E-01 | 9.26E-01 | 1.00E+00 |
| ENSG00000275097.1_RP11-627K  | ENSG00000160789.18_LMNA | -0.15952 | -0.31082385  | -0.0003241  | 4.96E-02 | 2.00E-01 | 1.00E+00 |
| ENSG00000279878.1_RP11-286N  | ENSG00000160789.18_LMNA | -0.0655  | -0.222383787 | 0.094685987 | 4.23E-01 | 6.94E-01 | 1.00E+00 |
| ENSG00000269471.1_RP11-15H2  | ENSG00000160789.18_LMNA | -0.10444 | -0.259324431 | 0.055691334 | 2.00E-01 | 4.71E-01 | 1.00E+00 |
| ENSG00000229336.1_AP000568.1 | ENSG00000160789.18_LMNA | -0.13918 | -0.291910191 | 0.020477031 | 8.73E-02 | 2.87E-01 | 1.00E+00 |
| ENSG00000224459.1_RP11-169K  | ENSG00000160789.18_LMNA | 0.02511  | -0.134626564 | 0.183579132 | 7.59E-01 | 8.99E-01 | 1.00E+00 |
| ENSG00000254701.3_RP11-1415  | ENSG00000160789.18_LMNA | 0.10743  | -0.052666616 | 0.262151814 | 1.88E-01 | 4.54E-01 | 1.00E+00 |
| ENSG00000213770.3_FAM210CP   | ENSG00000160789.18_LMNA | 0.12614  | -0.033739449 | 0.279722279 | 1.22E-01 | 3.51E-01 | 1.00E+00 |
| ENSG00000236838.2_AC090617.  | ENSG00000160789.18_LMNA | 0.24072  | 0.084763862  | 0.385156873 | 2.81E-03 | 2.55E-02 | 1.00E+00 |
| ENSG00000236776.1_RPL21P23   | ENSG00000160789.18_LMNA | 0.06242  | -0.097748314 | 0.219443692 | 4.45E-01 | 7.12E-01 | 1.00E+00 |
| ENSG00000268316.1_AC006272.1 | ENSG00000160789.18_LMNA | 0.06772  | -0.092481396 | 0.224496818 | 4.07E-01 | 6.82E-01 | 1.00E+00 |
| ENSG00000259342.1_RP11-519G  | ENSG00000160789.18_LMNA | 0.12299  | -0.036930285 | 0.276774806 | 1.31E-01 | 3.67E-01 | 1.00E+00 |
| ENSG00000263934.3_SNORD3A    | ENSG00000160789.18_LMNA | -0.03927 | -0.197233569 | 0.120689346 | 6.31E-01 | 8.34E-01 | 1.00E+00 |
| ENSG00000229236.1_TTTY10     | ENSG00000160789.18_LMNA | -0.1071  | -0.261833162 | 0.053007798 | 1.89E-01 | 4.56E-01 | 1.00E+00 |
| ENSG00000227123.1_RPL12P44   | ENSG00000160789.18_LMNA | -0.06889 | -0.225620869 | 0.091307371 | 3.99E-01 | 6.76E-01 | 1.00E+00 |
| ENSG00000244061.1_RP11-389C  | ENSG00000160789.18_LMNA | 0.01798  | -0.141629476 | 0.176671641 | 8.26E-01 | 9.32E-01 | 1.00E+00 |
| ENSG00000233243.1_RP11-12D5  | ENSG00000160789.18_LMNA | 0.03277  | -0.12709451  | 0.190973644 | 6.89E-01 | 8.66E-01 | 1.00E+00 |

|                              |                         |          |              |             |          |          |          |
|------------------------------|-------------------------|----------|--------------|-------------|----------|----------|----------|
| ENSG00000238272.1_RP3-436N2  | ENSG00000160789.18_LMNA | 0.09487  | -0.065317731 | 0.250289983 | 2.45E-01 | 5.25E-01 | 1.00E+00 |
| ENSG00000250045.2_CBX3P3     | ENSG00000160789.18_LMNA | 0.10974  | -0.050340489 | 0.264322513 | 1.78E-01 | 4.40E-01 | 1.00E+00 |
| ENSG00000236667.1_AC104076.1 | ENSG00000160789.18_LMNA | -0.09316 | -0.248675009 | 0.067032354 | 2.54E-01 | 5.35E-01 | 1.00E+00 |
| ENSG00000227394.1_AC007386.1 | ENSG00000160789.18_LMNA | -0.00174 | -0.160898401 | 0.15750206  | 9.83E-01 | 9.94E-01 | 1.00E+00 |
| ENSG00000230104.1_AC018712.1 | ENSG00000160789.18_LMNA | 0.07388  | -0.086340582 | 0.230366922 | 3.66E-01 | 6.47E-01 | 1.00E+00 |
| ENSG00000267263.1_RP11-75C1  | ENSG00000160789.18_LMNA | 0.19221  | 0.034049449  | 0.340975215 | 1.77E-02 | 9.88E-02 | 1.00E+00 |
| ENSG00000180697.7_C3orf22    | ENSG00000160789.18_LMNA | -0.10456 | -0.25944349  | 0.055564082 | 2.00E-01 | 4.70E-01 | 1.00E+00 |
| ENSG00000254316.1_CTD-2345M  | ENSG00000160789.18_LMNA | 0.28347  | 0.130145164  | 0.423558462 | 4.02E-04 | 5.68E-03 | 1.00E+00 |
| ENSG00000204187.5_LINC00619  | ENSG00000160789.18_LMNA | 0.06532  | -0.094862868 | 0.222214123 | 4.24E-01 | 6.95E-01 | 1.00E+00 |
| ENSG00000264449.4_RP11-945C  | ENSG00000160789.18_LMNA | -0.08227 | -0.238345617 | 0.077955171 | 3.14E-01 | 6.00E-01 | 1.00E+00 |
| ENSG00000279387.1 CTC-525D6  | ENSG00000160789.18_LMNA | -0.37404 | -0.503270205 | -0.22844    | 2.07E-06 | 8.20E-05 | 1.06E-01 |
| ENSG00000243008.2_RP11-556N  | ENSG00000160789.18_LMNA | -0.1246  | -0.278280851 | 0.03530069  | 1.26E-01 | 3.59E-01 | 1.00E+00 |
| ENSG00000258390.1_RP11-1070I | ENSG00000160789.18_LMNA | -0.01714 | -0.175859202 | 0.14245105  | 8.34E-01 | 9.35E-01 | 1.00E+00 |
| ENSG00000269546.1_CLIC4P2    | ENSG00000160789.18_LMNA | -0.02967 | -0.187985422 | 0.130142738 | 7.17E-01 | 8.80E-01 | 1.00E+00 |
| ENSG00000251234.1_PSMA2P2    | ENSG00000160789.18_LMNA | -0.10976 | -0.264345715 | 0.050315607 | 1.78E-01 | 4.40E-01 | 1.00E+00 |
| ENSG00000223783.1_AC124944.1 | ENSG00000160789.18_LMNA | -0.11185 | -0.266311041 | 0.048206576 | 1.70E-01 | 4.29E-01 | 1.00E+00 |
| ENSG00000267764.1_RP11-484L  | ENSG00000160789.18_LMNA | 0.15522  | -0.004085629 | 0.306834694 | 5.62E-02 | 2.17E-01 | 1.00E+00 |
| ENSG00000215456.5_BCRP4      | ENSG00000160789.18_LMNA | 0.08464  | -0.075576255 | 0.240601402 | 3.00E-01 | 5.86E-01 | 1.00E+00 |
| ENSG00000267535.1_LINC00868  | ENSG00000160789.18_LMNA | 0.1267   | -0.033168713 | 0.280248863 | 1.20E-01 | 3.48E-01 | 1.00E+00 |
| ENSG00000255299.4_RP11-655C  | ENSG00000160789.18_LMNA | -0.10958 | -0.26417441  | 0.050499305 | 1.79E-01 | 4.41E-01 | 1.00E+00 |
| ENSG00000236478.2_AC012513.1 | ENSG00000160789.18_LMNA | 0.0374   | -0.122529709 | 0.195437587 | 6.47E-01 | 8.43E-01 | 1.00E+00 |
| ENSG00000260008.1_RP11-732A  | ENSG00000160789.18_LMNA | 0.00704  | -0.152329993 | 0.166056024 | 9.31E-01 | 9.73E-01 | 1.00E+00 |
| ENSG00000274351.1_RP11-203I1 | ENSG00000160789.18_LMNA | -0.02926 | -0.187587725 | 0.130547967 | 7.20E-01 | 8.81E-01 | 1.00E+00 |
| ENSG00000233833.1 ETF1P3     | ENSG00000160789.18_LMNA | -0.12735 | -0.28085496  | 0.032511545 | 1.18E-01 | 3.44E-01 | 1.00E+00 |
| ENSG00000213781.3_PSMC1P2    | ENSG00000160789.18_LMNA | 0.0862   | -0.074017381 | 0.242077739 | 2.91E-01 | 5.76E-01 | 1.00E+00 |
| ENSG00000122043.9_LINC00544  | ENSG00000160789.18_LMNA | 0.06282  | -0.097357449 | 0.219819277 | 4.42E-01 | 7.09E-01 | 1.00E+00 |
| ENSG00000171557.15_FGG       | ENSG00000160789.18_LMNA | 0.08161  | -0.078610613 | 0.2377235   | 3.18E-01 | 6.04E-01 | 1.00E+00 |
| ENSG00000255146.1_RP11-659P  | ENSG00000160789.18_LMNA | -0.15733 | -0.308799286 | 0.001915424 | 5.29E-02 | 2.09E-01 | 1.00E+00 |
| ENSG00000183128.7_CALHM3     | ENSG00000160789.18_LMNA | -0.02021 | -0.178834094 | 0.139440572 | 8.05E-01 | 9.22E-01 | 1.00E+00 |
| ENSG00000236172.5_MIR7515HC  | ENSG00000160789.18_LMNA | -0.14876 | -0.300840564 | 0.010689047 | 6.74E-02 | 2.43E-01 | 1.00E+00 |
| ENSG00000255345.1_CTD-2337I7 | ENSG00000160789.18_LMNA | 0.1543   | -0.005024781 | 0.305983698 | 5.77E-02 | 2.20E-01 | 1.00E+00 |
| ENSG00000260198.1_RP11-441F  | ENSG00000160789.18_LMNA | -0.11374 | -0.268082015 | 0.046303703 | 1.63E-01 | 4.18E-01 | 1.00E+00 |
| ENSG00000230725.4_RP4-738P1  | ENSG00000160789.18_LMNA | -0.19028 | -0.339209644 | -0.03205514 | 1.89E-02 | 1.04E-01 | 1.00E+00 |

|                        |          |                         |          |              |             |          |          |          |
|------------------------|----------|-------------------------|----------|--------------|-------------|----------|----------|----------|
| ENSG00000237970.1_TM   | MEM161B  | ENSG00000160789.18_LMNA | 0.10785  | -0.052250078 | 0.262540754 | 1.86E-01 | 4.52E-01 | 1.00E+00 |
| ENSG00000260046.1_RP   | 11-454K  | ENSG00000160789.18_LMNA | 0.18697  | 0.028625621  | 0.336168409 | 2.11E-02 | 1.12E-01 | 1.00E+00 |
| ENSG00000248150.1_RP   | 1-167G2  | ENSG00000160789.18_LMNA | -0.11531 | -0.269561205 | 0.044712595 | 1.57E-01 | 4.09E-01 | 1.00E+00 |
| ENSG00000266371.1_RP   | 11-142O  | ENSG00000160789.18_LMNA | 0.07116  | -0.089053914 | 0.227776043 | 3.84E-01 | 6.62E-01 | 1.00E+00 |
| ENSG00000104941.6_RSP  | H6A      | ENSG00000160789.18_LMNA | -0.02362 | -0.182133102 | 0.136095205 | 7.73E-01 | 9.06E-01 | 1.00E+00 |
| ENSG00000281664.1_LIN  | C00538   | ENSG00000160789.18_LMNA | -0.04031 | -0.198235326 | 0.119661884 | 6.22E-01 | 8.29E-01 | 1.00E+00 |
| ENSG00000117501.13_M   | ROH9     | ENSG00000160789.18_LMNA | 0.0822   | -0.078025676 | 0.23827871  | 3.14E-01 | 6.00E-01 | 1.00E+00 |
| ENSG00000273637.1_RP   | 5-864K1  | ENSG00000160789.18_LMNA | 0.08877  | -0.071442355 | 0.244513225 | 2.77E-01 | 5.62E-01 | 1.00E+00 |
| ENSG00000220585.4_DDX  | 18P6     | ENSG00000160789.18_LMNA | -0.03223 | -0.190458004 | 0.127620934 | 6.93E-01 | 8.68E-01 | 1.00E+00 |
| ENSG00000159289.6_GOL  | GA6A     | ENSG00000160789.18_LMNA | 0.23818  | 0.08209175   | 0.382862834 | 3.13E-03 | 2.76E-02 | 1.00E+00 |
| ENSG00000164411.9_GJB  | 7        | ENSG00000160789.18_LMNA | 0.00808  | -0.151316841 | 0.16706431  | 9.21E-01 | 9.70E-01 | 1.00E+00 |
| ENSG00000261467.2_RP   | 11-731K  | ENSG00000160789.18_LMNA | 0.00999  | -0.149447328 | 0.168923098 | 9.03E-01 | 9.62E-01 | 1.00E+00 |
| ENSG00000116785.12_CF  | HHR3     | ENSG00000160789.18_LMNA | -0.05502 | -0.21236078  | 0.105101109 | 5.01E-01 | 7.53E-01 | 1.00E+00 |
| ENSG00000235955.1_CIC  | P20      | ENSG00000160789.18_LMNA | -0.02517 | -0.183636556 | 0.134568214 | 7.58E-01 | 8.99E-01 | 1.00E+00 |
| ENSG00000187048.11_CYP | 4A11     | ENSG00000160789.18_LMNA | -0.11719 | -0.271328723 | 0.042809249 | 1.50E-01 | 3.99E-01 | 1.00E+00 |
| ENSG00000104938.15_CLE | C4M      | ENSG00000160789.18_LMNA | -0.06642 | -0.223264001 | 0.09376801  | 4.16E-01 | 6.89E-01 | 1.00E+00 |
| ENSG00000280413.1_     |          | ENSG00000160789.18_LMNA | 0.10245  | -0.057694076 | 0.257449373 | 2.09E-01 | 4.82E-01 | 1.00E+00 |
| ENSG00000200372.1_RNU  | 5E-8P    | ENSG00000160789.18_LMNA | -0.10098 | -0.256062825 | 0.059173413 | 2.16E-01 | 4.90E-01 | 1.00E+00 |
| ENSG00000265112.1_MIR  | 3153     | ENSG00000160789.18_LMNA | 0.21792  | 0.060824805  | 0.364471705 | 7.00E-03 | 5.04E-02 | 1.00E+00 |
| ENSG00000207235.1_Y_   | RNA      | ENSG00000160789.18_LMNA | -0.14262 | -0.295117323 | 0.016968786 | 7.96E-02 | 2.71E-01 | 1.00E+00 |
| ENSG00000200591.1_Y_   | RNA      | ENSG00000160789.18_LMNA | 0.03745  | -0.122485085 | 0.19548116  | 6.47E-01 | 8.43E-01 | 1.00E+00 |
| ENSG00000206816.1_Y_   | RNA      | ENSG00000160789.18_LMNA | 0.00761  | -0.151777839 | 0.166605608 | 9.26E-01 | 9.72E-01 | 1.00E+00 |
| ENSG00000276580.1_MIR  | 8055     | ENSG00000160789.18_LMNA | 0.1656   | 0.006574458  | 0.31645942  | 4.15E-02 | 1.78E-01 | 1.00E+00 |
| ENSG00000199709.1_RNU  | 4-23P    | ENSG00000160789.18_LMNA | 0.17025  | 0.011357638  | 0.320757396 | 3.60E-02 | 1.62E-01 | 1.00E+00 |
| ENSG00000199313.1_RNU  | 4-82P    | ENSG00000160789.18_LMNA | 0.01508  | -0.144470211 | 0.173860647 | 8.54E-01 | 9.43E-01 | 1.00E+00 |
| ENSG00000242296.2_DEFB | 109P     | ENSG00000160789.18_LMNA | 0.05202  | -0.108077455 | 0.209484165 | 5.24E-01 | 7.70E-01 | 1.00E+00 |
| ENSG00000246448.2_RP   | 13-578N  | ENSG00000160789.18_LMNA | -0.29714 | -0.435730592 | -0.1447909  | 2.01E-04 | 3.28E-03 | 1.00E+00 |
| ENSG00000244230.3_RN7  | SL151f   | ENSG00000160789.18_LMNA | 0.00344  | -0.155848271 | 0.162549466 | 9.66E-01 | 9.87E-01 | 1.00E+00 |
| ENSG00000266875.2_RN7  | SL408f   | ENSG00000160789.18_LMNA | -0.04305 | -0.200872098 | 0.116954193 | 5.98E-01 | 8.15E-01 | 1.00E+00 |
| ENSG00000139330.5_KERA |          | ENSG00000160789.18_LMNA | -0.00823 | -0.167207153 | 0.151173255 | 9.20E-01 | 9.69E-01 | 1.00E+00 |
| ENSG00000252620.1_RNU  | 6ATAC    | ENSG00000160789.18_LMNA | 0.05886  | -0.10129188  | 0.216034361 | 4.71E-01 | 7.31E-01 | 1.00E+00 |
| ENSG00000253508.1_RP   | 1-170O1  | ENSG00000160789.18_LMNA | -0.31773 | -0.453966214 | -0.16697354 | 6.64E-05 | 1.35E-03 | 1.00E+00 |
| ENSG00000226581.1_RP   | 11-340I6 | ENSG00000160789.18_LMNA | -0.27488 | -0.415877022 | -0.12096814 | 6.10E-04 | 7.90E-03 | 1.00E+00 |

|                              |                         |          |              |             |          |          |          |
|------------------------------|-------------------------|----------|--------------|-------------|----------|----------|----------|
| ENSG00000225907.1_RPS27P16   | ENSG00000160789.18_LMNA | -0.03908 | -0.197054884 | 0.120872544 | 6.33E-01 | 8.35E-01 | 1.00E+00 |
| ENSG00000227743.1_RP4-745K6  | ENSG00000160789.18_LMNA | -0.11673 | -0.270896954 | 0.043274409 | 1.52E-01 | 4.01E-01 | 1.00E+00 |
| ENSG00000259017.1_RP11-561B  | ENSG00000160789.18_LMNA | -0.31109 | -0.448101057 | -0.15980706 | 9.58E-05 | 1.82E-03 | 1.00E+00 |
| ENSG00000198923.4_RP11-290L  | ENSG00000160789.18_LMNA | 0.12271  | -0.037221657 | 0.276505362 | 1.32E-01 | 3.69E-01 | 1.00E+00 |
| ENSG00000263727.1_RP11-806L  | ENSG00000160789.18_LMNA | 0.02928  | -0.130528741 | 0.187606597 | 7.20E-01 | 8.81E-01 | 1.00E+00 |
| ENSG00000232965.1_RPS12P18   | ENSG00000160789.18_LMNA | -0.07088 | -0.227512227 | 0.089329935 | 3.86E-01 | 6.64E-01 | 1.00E+00 |
| ENSG00000255533.1_RP11-326C  | ENSG00000160789.18_LMNA | 0.16421  | 0.005144334  | 0.315171892 | 4.32E-02 | 1.83E-01 | 1.00E+00 |
| ENSG00000256379.1_TRAV8-5    | ENSG00000160789.18_LMNA | -0.19682 | -0.345202061 | -0.03883386 | 1.51E-02 | 8.82E-02 | 1.00E+00 |
| ENSG00000229628.1_AC073115   | ENSG00000160789.18_LMNA | 0.08374  | -0.076480204 | 0.239744643 | 3.05E-01 | 5.92E-01 | 1.00E+00 |
| ENSG00000276754.1_RP11-461A  | ENSG00000160789.18_LMNA | -0.10349 | -0.258434346 | 0.056642347 | 2.05E-01 | 4.76E-01 | 1.00E+00 |
| ENSG00000254144.3_RP11-661A  | ENSG00000160789.18_LMNA | 0.00491  | -0.154411158 | 0.163982763 | 9.52E-01 | 9.81E-01 | 1.00E+00 |
| ENSG00000254946.1_RP11-531H  | ENSG00000160789.18_LMNA | -0.11522 | -0.269480503 | 0.044799444 | 1.57E-01 | 4.10E-01 | 1.00E+00 |
| ENSG00000164853.8_UNCX       | ENSG00000160789.18_LMNA | -0.11951 | -0.273503331 | 0.040464399 | 1.43E-01 | 3.85E-01 | 1.00E+00 |
| ENSG00000268392.1_AC003682   | ENSG00000160789.18_LMNA | 0.03141  | -0.128434329 | 0.189660925 | 7.01E-01 | 8.72E-01 | 1.00E+00 |
| ENSG00000231655.1_AC011742   | ENSG00000160789.18_LMNA | 0.07194  | -0.088271876 | 0.228523247 | 3.78E-01 | 6.58E-01 | 1.00E+00 |
| ENSG00000248459.1_RP11-93K2  | ENSG00000160789.18_LMNA | -0.09722 | -0.252511218 | 0.062956391 | 2.33E-01 | 5.11E-01 | 1.00E+00 |
| ENSG00000237003.1_RP4-612C1  | ENSG00000160789.18_LMNA | -0.07628 | -0.232656242 | 0.083939145 | 3.50E-01 | 6.34E-01 | 1.00E+00 |
| ENSG00000179997.8_AC010894   | ENSG00000160789.18_LMNA | -0.06929 | -0.225998467 | 0.090912788 | 3.96E-01 | 6.73E-01 | 1.00E+00 |
| ENSG00000257530.1_RP11-843B  | ENSG00000160789.18_LMNA | 0.21363  | 0.05634197   | 0.360564594 | 8.23E-03 | 5.68E-02 | 1.00E+00 |
| ENSG00000237341.1_SYP-AS1    | ENSG00000160789.18_LMNA | -0.05559 | -0.212907818 | 0.104534462 | 4.96E-01 | 7.51E-01 | 1.00E+00 |
| ENSG00000226645.1_AP006216   | ENSG00000160789.18_LMNA | -0.01306 | -0.171906085 | 0.146442364 | 8.73E-01 | 9.51E-01 | 1.00E+00 |
| ENSG00000249421.1_ADAMTS19   | ENSG00000160789.18_LMNA | -0.14095 | -0.293565335 | 0.018667448 | 8.33E-02 | 2.79E-01 | 1.00E+00 |
| ENSG00000239920.1_AC015691   | ENSG00000160789.18_LMNA | 0.04878  | -0.111281143 | 0.20638167  | 5.51E-01 | 7.87E-01 | 1.00E+00 |
| ENSG00000197888.2_UGT2B17    | ENSG00000160789.18_LMNA | -0.10377 | -0.258695792 | 0.056363063 | 2.03E-01 | 4.74E-01 | 1.00E+00 |
| ENSG00000228634.1_RP4-534N1  | ENSG00000160789.18_LMNA | 0.09787  | -0.062300802 | 0.25312732  | 2.30E-01 | 5.08E-01 | 1.00E+00 |
| ENSG00000246316.6_RP11-492A  | ENSG00000160789.18_LMNA | -0.06236 | -0.219379919 | 0.097814671 | 4.45E-01 | 7.12E-01 | 1.00E+00 |
| ENSG00000241220.1_RP11-292E  | ENSG00000160789.18_LMNA | -0.13416 | -0.287227798 | 0.02558527  | 9.94E-02 | 3.10E-01 | 1.00E+00 |
| ENSG00000231842.1_RP11-527F  | ENSG00000160789.18_LMNA | -0.07793 | -0.234224951 | 0.082291485 | 3.40E-01 | 6.25E-01 | 1.00E+00 |
| ENSG00000182931.8_WFDC10B    | ENSG00000160789.18_LMNA | 0.23252  | 0.076140119  | 0.377739922 | 3.94E-03 | 3.28E-02 | 1.00E+00 |
| ENSG00000259821.1_RP11-169E  | ENSG00000160789.18_LMNA | -0.28543 | -0.425306833 | -0.13224099 | 3.65E-04 | 5.24E-03 | 1.00E+00 |
| ENSG00000256746.4_RP11-17G1  | ENSG00000160789.18_LMNA | 0.03552  | -0.124386396 | 0.193623511 | 6.64E-01 | 8.52E-01 | 1.00E+00 |
| ENSG00000273920.1_RP11-761I4 | ENSG00000160789.18_LMNA | -0.00058 | -0.15976785  | 0.158633449 | 9.94E-01 | 9.98E-01 | 1.00E+00 |
| ENSG00000231804.1_RP11-317B  | ENSG00000160789.18_LMNA | -0.08509 | -0.241022415 | 0.075131862 | 2.97E-01 | 5.83E-01 | 1.00E+00 |



|                              |                         |          |              |             |          |          |          |
|------------------------------|-------------------------|----------|--------------|-------------|----------|----------|----------|
| ENSG00000258558.1_RP11-159L  | ENSG00000160789.18_LMNA | 0.04545  | -0.114577339 | 0.203182909 | 5.78E-01 | 8.03E-01 | 1.00E+00 |
| ENSG00000230728.1_RP11-240D  | ENSG00000160789.18_LMNA | 0.16182  | 0.002689411  | 0.312959082 | 4.64E-02 | 1.92E-01 | 1.00E+00 |
| ENSG00000250347.1_AC005740.4 | ENSG00000160789.18_LMNA | -0.03971 | -0.197664549 | 0.120247391 | 6.27E-01 | 8.32E-01 | 1.00E+00 |
| ENSG00000251533.2_LINC00605  | ENSG00000160789.18_LMNA | 0.023    | -0.136705367 | 0.181531929 | 7.79E-01 | 9.09E-01 | 1.00E+00 |
| ENSG00000273368.1_RP11-376P  | ENSG00000160789.18_LMNA | 0.08492  | -0.075300164 | 0.240862981 | 2.98E-01 | 5.84E-01 | 1.00E+00 |
| ENSG00000253550.1_RP11-115C  | ENSG00000160789.18_LMNA | 0.08531  | -0.074912741 | 0.241229964 | 2.96E-01 | 5.82E-01 | 1.00E+00 |
| ENSG00000214321.3_CBX1P4     | ENSG00000160789.18_LMNA | 0.00642  | -0.152939519 | 0.165449105 | 9.37E-01 | 9.75E-01 | 1.00E+00 |
| ENSG00000225922.1_RPL21P92   | ENSG00000160789.18_LMNA | -0.15324 | -0.305000764 | 0.006108857 | 5.95E-02 | 2.24E-01 | 1.00E+00 |
| ENSG00000269944.1_RP11-770J  | ENSG00000160789.18_LMNA | -0.03087 | -0.189144721 | 0.128960873 | 7.06E-01 | 8.75E-01 | 1.00E+00 |
| ENSG00000183153.6_GJD3       | ENSG00000160789.18_LMNA | 0.10783  | -0.052268201 | 0.262523834 | 1.86E-01 | 4.52E-01 | 1.00E+00 |
| ENSG00000259201.1_RP11-56B1  | ENSG00000160789.18_LMNA | -0.00139 | -0.160554258 | 0.157846547 | 9.86E-01 | 9.95E-01 | 1.00E+00 |
| ENSG00000253356.1_RP11-90P5  | ENSG00000160789.18_LMNA | -0.09856 | -0.253777522 | 0.061608633 | 2.27E-01 | 5.04E-01 | 1.00E+00 |
| ENSG00000248138.4_RP11-446J  | ENSG00000160789.18_LMNA | -0.0415  | -0.199386997 | 0.118479819 | 6.12E-01 | 8.23E-01 | 1.00E+00 |
| ENSG00000256603.1_RP11-667M  | ENSG00000160789.18_LMNA | -0.04758 | -0.205224306 | 0.112474569 | 5.61E-01 | 7.93E-01 | 1.00E+00 |
| ENSG00000250195.1_RP11-371F  | ENSG00000160789.18_LMNA | -0.10629 | -0.261074992 | 0.053819276 | 1.92E-01 | 4.61E-01 | 1.00E+00 |
| ENSG00000233544.1	EIF3KP2    | ENSG00000160789.18_LMNA | -0.05927 | -0.216432388 | 0.100878597 | 4.68E-01 | 7.29E-01 | 1.00E+00 |
| ENSG00000227917.2_RP11-143M  | ENSG00000160789.18_LMNA | -0.02568 | -0.184123237 | 0.134073589 | 7.54E-01 | 8.98E-01 | 1.00E+00 |
| ENSG00000239926.1_PRDX3P4    | ENSG00000160789.18_LMNA | -0.03637 | -0.194447002 | 0.123543838 | 6.56E-01 | 8.48E-01 | 1.00E+00 |
| ENSG00000258024.1_OR5BT1P    | ENSG00000160789.18_LMNA | -0.10703 | -0.261769411 | 0.053076047 | 1.89E-01 | 4.57E-01 | 1.00E+00 |
| ENSG00000229757.2_RP4-738P1  | ENSG00000160789.18_LMNA | -0.07881 | -0.235057963 | 0.081415844 | 3.35E-01 | 6.20E-01 | 1.00E+00 |
| ENSG00000167749.10_KLK4      | ENSG00000160789.18_LMNA | -0.10446 | -0.259346618 | 0.055667621 | 2.00E-01 | 4.71E-01 | 1.00E+00 |
| ENSG00000258736.1_RP11-982M  | ENSG00000160789.18_LMNA | 0.05213  | -0.107968604 | 0.209589465 | 5.24E-01 | 7.69E-01 | 1.00E+00 |
| ENSG00000244640.1_RP11-436J  | ENSG00000160789.18_LMNA | 0.02713  | -0.132647373 | 0.185525675 | 7.40E-01 | 8.91E-01 | 1.00E+00 |
| ENSG00000265293.2_ARGFXP2    | ENSG00000160789.18_LMNA | 0.02266  | -0.13703768  | 0.181204412 | 7.82E-01 | 9.10E-01 | 1.00E+00 |
| ENSG00000256651.1_RP11-144O  | ENSG00000160789.18_LMNA | -0.13087 | -0.284154936 | 0.028928743 | 1.08E-01 | 3.27E-01 | 1.00E+00 |
| ENSG00000216687.2_RP11-278J  | ENSG00000160789.18_LMNA | -0.31697 | -0.453294462 | -0.1661512  | 6.93E-05 | 1.40E-03 | 1.00E+00 |
| ENSG00000136698.7_CFC1       | ENSG00000160789.18_LMNA | -0.28293 | -0.423074482 | -0.12956546 | 4.13E-04 | 5.81E-03 | 1.00E+00 |
| ENSG00000260784.1_AC026150.1 | ENSG00000160789.18_LMNA | 0.08298  | -0.077245847 | 0.239018584 | 3.09E-01 | 5.96E-01 | 1.00E+00 |
| ENSG00000205318.5_GCNT6      | ENSG00000160789.18_LMNA | -0.06373 | -0.220689987 | 0.096450938 | 4.35E-01 | 7.04E-01 | 1.00E+00 |
| ENSG00000258805.1_ADIPOR1P   | ENSG00000160789.18_LMNA | 0.14384  | -0.015721576 | 0.296255793 | 7.71E-02 | 2.66E-01 | 1.00E+00 |
| ENSG00000187185.4_CTD-2600C  | ENSG00000160789.18_LMNA | -0.03121 | -0.189473588 | 0.128625439 | 7.03E-01 | 8.73E-01 | 1.00E+00 |
| ENSG00000234787.6_LINC00458  | ENSG00000160789.18_LMNA | 0.1149   | -0.045126605 | 0.269176459 | 1.59E-01 | 4.12E-01 | 1.00E+00 |
| ENSG00000218475.2_ACTG1P18   | ENSG00000160789.18_LMNA | -0.06186 | -0.218909588 | 0.098303978 | 4.49E-01 | 7.15E-01 | 1.00E+00 |

|                             |                         |          |              |             |          |          |          |
|-----------------------------|-------------------------|----------|--------------|-------------|----------|----------|----------|
| ENSG00000277011.1_RP13-895J | ENSG00000160789.18_LMNA | 0.07175  | -0.088457278 | 0.228346138 | 3.80E-01 | 6.59E-01 | 1.00E+00 |
| ENSG00000196350.8_ZNF729    | ENSG00000160789.18_LMNA | -0.20944 | -0.356748439 | -0.0519753  | 9.61E-03 | 6.37E-02 | 1.00E+00 |
| ENSG00000196553.12_LINC0023 | ENSG00000160789.18_LMNA | -0.22342 | -0.369474654 | -0.0665829  | 5.66E-03 | 4.31E-02 | 1.00E+00 |
| ENSG00000249188.1_ENPP7P1   | ENSG00000160789.18_LMNA | -0.10217 | -0.257187879 | 0.057973175 | 2.10E-01 | 4.83E-01 | 1.00E+00 |
| ENSG00000265460.5_RP11-690G | ENSG00000160789.18_LMNA | -0.07578 | -0.232180162 | 0.084438844 | 3.53E-01 | 6.37E-01 | 1.00E+00 |
| ENSG00000259339.2_TGIF1P1   | ENSG00000160789.18_LMNA | 0.04585  | -0.114188555 | 0.203560554 | 5.75E-01 | 8.02E-01 | 1.00E+00 |
| ENSG00000273331.1_TM4SF19-T | ENSG00000160789.18_LMNA | 0.0415   | -0.11848429  | 0.199382643 | 6.12E-01 | 8.23E-01 | 1.00E+00 |
| ENSG00000268621.4_AC006262  | ENSG00000160789.18_LMNA | 0.08474  | -0.075482122 | 0.240690593 | 2.99E-01 | 5.86E-01 | 1.00E+00 |
| ENSG00000270304.1_RP11-597G | ENSG00000160789.18_LMNA | -0.03707 | -0.19511616  | 0.122858849 | 6.50E-01 | 8.45E-01 | 1.00E+00 |
| ENSG00000241146.1_RPL7P41   | ENSG00000160789.18_LMNA | 0.0604   | -0.099758317 | 0.217510781 | 4.60E-01 | 7.23E-01 | 1.00E+00 |
| ENSG00000218868.1_CNN3P1    | ENSG00000160789.18_LMNA | 0.06996  | -0.090249077 | 0.226633392 | 3.92E-01 | 6.70E-01 | 1.00E+00 |
| ENSG00000165120.3_SSMEM1    | ENSG00000160789.18_LMNA | 0.03178  | -0.128070535 | 0.190017474 | 6.98E-01 | 8.70E-01 | 1.00E+00 |
| ENSG00000255484.2_RP11-65M1 | ENSG00000160789.18_LMNA | -0.25487 | -0.39792113  | -0.09971108 | 1.53E-03 | 1.60E-02 | 1.00E+00 |
| ENSG00000230596.2_GPAA1P2   | ENSG00000160789.18_LMNA | 0.27922  | 0.125605748  | 0.419764103 | 4.95E-04 | 6.68E-03 | 1.00E+00 |
| ENSG00000203852.3_HIST2H3A  | ENSG00000160789.18_LMNA | -0.1349  | -0.287913275 | 0.024838471 | 9.75E-02 | 3.07E-01 | 1.00E+00 |
| ENSG00000225180.5_AATK-AS1  | ENSG00000160789.18_LMNA | -0.05511 | -0.212442404 | 0.105016572 | 5.00E-01 | 7.53E-01 | 1.00E+00 |
| ENSG00000261312.1_AC002550  | ENSG00000160789.18_LMNA | 0.02753  | -0.132255062 | 0.185911219 | 7.36E-01 | 8.89E-01 | 1.00E+00 |
| ENSG00000278543.1_CTD-3018C | ENSG00000160789.18_LMNA | -0.13186 | -0.285079715 | 0.027923259 | 1.05E-01 | 3.22E-01 | 1.00E+00 |
| ENSG00000230971.1_AC005703  | ENSG00000160789.18_LMNA | 0.21772  | 0.060618148  | 0.364291822 | 7.05E-03 | 5.07E-02 | 1.00E+00 |
| ENSG00000260790.1_RP11-21M2 | ENSG00000160789.18_LMNA | 0.09171  | -0.0684921   | 0.247298714 | 2.61E-01 | 5.44E-01 | 1.00E+00 |
| ENSG00000277550.1_RP5-1057B | ENSG00000160789.18_LMNA | -0.05531 | -0.212634083 | 0.104818034 | 4.99E-01 | 7.52E-01 | 1.00E+00 |
| ENSG00000254233.1_RP11-242J | ENSG00000160789.18_LMNA | 0.02797  | -0.131814357 | 0.186344205 | 7.32E-01 | 8.87E-01 | 1.00E+00 |
| ENSG00000250433.1_CLSTN2-AS | ENSG00000160789.18_LMNA | -0.27435 | -0.415408156 | -0.12040961 | 6.25E-04 | 8.05E-03 | 1.00E+00 |
| ENSG00000214888.2_XXyac-YM2 | ENSG00000160789.18_LMNA | 0.04655  | -0.113494039 | 0.204234936 | 5.69E-01 | 7.98E-01 | 1.00E+00 |
| ENSG00000226521.6_AC126365  | ENSG00000160789.18_LMNA | 0.01715  | -0.142442366 | 0.175867792 | 8.34E-01 | 9.35E-01 | 1.00E+00 |
| ENSG00000198077.9_CYP2A7    | ENSG00000160789.18_LMNA | -0.03366 | -0.191833901 | 0.126215863 | 6.81E-01 | 8.61E-01 | 1.00E+00 |
| ENSG00000266278.1_RP11-41O4 | ENSG00000160789.18_LMNA | 0.19842  | 0.040502755  | 0.346673553 | 1.43E-02 | 8.48E-02 | 1.00E+00 |
| ENSG00000233061.1_TTLL7-IT1 | ENSG00000160789.18_LMNA | 0.02069  | -0.138968821 | 0.179299741 | 8.00E-01 | 9.20E-01 | 1.00E+00 |
| ENSG00000273003.1_ARL2-SNX1 | ENSG00000160789.18_LMNA | 0.04578  | -0.114250285 | 0.203500599 | 5.75E-01 | 8.02E-01 | 1.00E+00 |
| ENSG00000226995.6_LINC00658 | ENSG00000160789.18_LMNA | -0.11799 | -0.272084071 | 0.041995161 | 1.48E-01 | 3.94E-01 | 1.00E+00 |
| ENSG00000247213.5_LINC01498 | ENSG00000160789.18_LMNA | -0.09592 | -0.251282684 | 0.064262852 | 2.40E-01 | 5.19E-01 | 1.00E+00 |
| ENSG00000186148.10_AC013271 | ENSG00000160789.18_LMNA | 0.17396  | 0.015176237  | 0.324179516 | 3.21E-02 | 1.50E-01 | 1.00E+00 |
| ENSG00000242705.1_ICE2P2    | ENSG00000160789.18_LMNA | 0.10338  | -0.056755399 | 0.258328501 | 2.05E-01 | 4.76E-01 | 1.00E+00 |

|                              |                         |          |              |             |          |          |          |
|------------------------------|-------------------------|----------|--------------|-------------|----------|----------|----------|
| ENSG00000232117.1_LINC00384  | ENSG00000160789.18_LMNA | -0.00947 | -0.168417841 | 0.149955726 | 9.08E-01 | 9.65E-01 | 1.00E+00 |
| ENSG00000280614.1_CH507-513  | ENSG00000160789.18_LMNA | -0.05324 | -0.210652672 | 0.106869123 | 5.15E-01 | 7.62E-01 | 1.00E+00 |
| ENSG00000211669.2_IGLV3-10   | ENSG00000160789.18_LMNA | 0.01051  | -0.148942554 | 0.169424589 | 8.98E-01 | 9.60E-01 | 1.00E+00 |
| ENSG00000211965.3_IGHV3-49   | ENSG00000160789.18_LMNA | 0.0882   | -0.072016107 | 0.243970909 | 2.80E-01 | 5.65E-01 | 1.00E+00 |
| ENSG00000275027.1_           | ENSG00000160789.18_LMNA | -0.0767  | -0.233056858 | 0.083518532 | 3.48E-01 | 6.32E-01 | 1.00E+00 |
| ENSG00000263980.4_           | ENSG00000160789.18_LMNA | 0.02976  | -0.130055944 | 0.188070589 | 7.16E-01 | 8.79E-01 | 1.00E+00 |
| ENSG00000277892.1_MIR6746    | ENSG00000160789.18_LMNA | -0.08719 | -0.243013005 | 0.073029027 | 2.85E-01 | 5.71E-01 | 1.00E+00 |
| ENSG00000252081.1_RNU6-277F  | ENSG00000160789.18_LMNA | -0.25499 | -0.398033978 | -0.09984383 | 1.52E-03 | 1.59E-02 | 1.00E+00 |
| ENSG00000207585.1_MIR181D    | ENSG00000160789.18_LMNA | 0.01565  | -0.143913339 | 0.174412097 | 8.48E-01 | 9.41E-01 | 1.00E+00 |
| ENSG00000231317.1_RP11-310H  | ENSG00000160789.18_LMNA | 0.10437  | -0.055755224 | 0.25926465  | 2.01E-01 | 4.71E-01 | 1.00E+00 |
| ENSG00000251129.1_RP11-734I1 | ENSG00000160789.18_LMNA | -0.16997 | -0.320501627 | -0.0110726  | 3.63E-02 | 1.62E-01 | 1.00E+00 |
| ENSG00000221083.1_SNORA77    | ENSG00000160789.18_LMNA | -0.01845 | -0.177135025 | 0.141160686 | 8.21E-01 | 9.30E-01 | 1.00E+00 |
| ENSG00000280950.1_           | ENSG00000160789.18_LMNA | -0.0128  | -0.171655517 | 0.146695005 | 8.76E-01 | 9.52E-01 | 1.00E+00 |
| ENSG00000206937.1_SNORA70E   | ENSG00000160789.18_LMNA | 0.15331  | -0.006036669 | 0.305066237 | 5.93E-02 | 2.24E-01 | 1.00E+00 |
| ENSG00000249061.1_RP11-72L2  | ENSG00000160789.18_LMNA | 0.10561  | -0.054505582 | 0.260433467 | 1.95E-01 | 4.64E-01 | 1.00E+00 |
| ENSG00000206964.1_Y_RNA      | ENSG00000160789.18_LMNA | -0.0568  | -0.21406795  | 0.103332059 | 4.87E-01 | 7.44E-01 | 1.00E+00 |
| ENSG00000227271.1_RPL39P25   | ENSG00000160789.18_LMNA | -0.0165  | -0.175239412 | 0.143077514 | 8.40E-01 | 9.38E-01 | 1.00E+00 |
| ENSG00000237806.1_FAUP2      | ENSG00000160789.18_LMNA | -0.04261 | -0.200448582 | 0.117389419 | 6.02E-01 | 8.17E-01 | 1.00E+00 |
| ENSG00000231699.1_AC020550   | ENSG00000160789.18_LMNA | -0.15263 | -0.304435531 | 0.00673192  | 6.05E-02 | 2.27E-01 | 1.00E+00 |
| ENSG00000272411.1_RP11-44B1  | ENSG00000160789.18_LMNA | -0.04518 | -0.202921089 | 0.114846825 | 5.80E-01 | 8.04E-01 | 1.00E+00 |
| ENSG00000224387.1_RP3-395M2  | ENSG00000160789.18_LMNA | -0.16944 | -0.320005795 | -0.01052016 | 3.69E-02 | 1.64E-01 | 1.00E+00 |
| ENSG00000278995.1_Z69720.3   | ENSG00000160789.18_LMNA | -0.09675 | -0.252063878 | 0.063432232 | 2.36E-01 | 5.14E-01 | 1.00E+00 |
| ENSG00000227922.1_SPTLC1P5   | ENSG00000160789.18_LMNA | 0.08638  | -0.073832735 | 0.242252512 | 2.90E-01 | 5.75E-01 | 1.00E+00 |
| ENSG00000254499.1_AC002056   | ENSG00000160789.18_LMNA | -0.04463 | -0.202390284 | 0.115393028 | 5.85E-01 | 8.07E-01 | 1.00E+00 |
| ENSG00000234248.1_RP11-799O  | ENSG00000160789.18_LMNA | -0.00247 | -0.161608086 | 0.156791423 | 9.76E-01 | 9.91E-01 | 1.00E+00 |
| ENSG00000235899.1_LINC01564  | ENSG00000160789.18_LMNA | -0.18259 | -0.332139958 | -0.02409397 | 2.44E-02 | 1.24E-01 | 1.00E+00 |
| ENSG00000136327.6_NKX2-8     | ENSG00000160789.18_LMNA | -0.14014 | -0.292807935 | 0.019495774 | 8.51E-02 | 2.83E-01 | 1.00E+00 |
| ENSG00000227413.1_RP5-1042K  | ENSG00000160789.18_LMNA | -0.05715 | -0.214401521 | 0.102986163 | 4.84E-01 | 7.41E-01 | 1.00E+00 |
| ENSG00000237702.2_TRBV3-1    | ENSG00000160789.18_LMNA | 0.04935  | -0.110717144 | 0.206928319 | 5.46E-01 | 7.84E-01 | 1.00E+00 |
| ENSG00000233354.1_LINC00028  | ENSG00000160789.18_LMNA | -0.10944 | -0.264042973 | 0.050640236 | 1.80E-01 | 4.42E-01 | 1.00E+00 |
| ENSG00000230918.1_AC008063   | ENSG00000160789.18_LMNA | 0.03438  | -0.125509507 | 0.192525119 | 6.74E-01 | 8.57E-01 | 1.00E+00 |
| ENSG00000273876.1_RP11-221H  | ENSG00000160789.18_LMNA | 0.10189  | -0.05825604  | 0.25692281  | 2.12E-01 | 4.85E-01 | 1.00E+00 |
| ENSG00000225176.2_ATP5LP4    | ENSG00000160789.18_LMNA | -0.05725 | -0.214496325 | 0.102887841 | 4.84E-01 | 7.41E-01 | 1.00E+00 |

|                              |                         |          |              |             |          |          |          |
|------------------------------|-------------------------|----------|--------------|-------------|----------|----------|----------|
| ENSG00000280006.1_AC009060.  | ENSG00000160789.18_LMNA | 0.16674  | 0.007743672  | 0.317511206 | 4.01E-02 | 1.74E-01 | 1.00E+00 |
| ENSG00000256351.1_RP1-7G5.5  | ENSG00000160789.18_LMNA | -0.02365 | -0.182166729 | 0.136061068 | 7.72E-01 | 9.06E-01 | 1.00E+00 |
| ENSG00000258670.1_RP11-1042  | ENSG00000160789.18_LMNA | -0.08827 | -0.244036978 | 0.071946219 | 2.80E-01 | 5.65E-01 | 1.00E+00 |
| ENSG00000274719.1_RP11-86K2  | ENSG00000160789.18_LMNA | -0.05549 | -0.212809333 | 0.104636492 | 4.97E-01 | 7.51E-01 | 1.00E+00 |
| ENSG00000216977.1_RPL21P65   | ENSG00000160789.18_LMNA | 0.00621  | -0.153143922 | 0.165245522 | 9.39E-01 | 9.76E-01 | 1.00E+00 |
| ENSG00000257779.1_RP11-848D  | ENSG00000160789.18_LMNA | 0.11771  | -0.042286194 | 0.271814081 | 1.49E-01 | 3.95E-01 | 1.00E+00 |
| ENSG00000258474.1_RP11-187E  | ENSG00000160789.18_LMNA | -0.12752 | -0.281017776 | 0.032334963 | 1.17E-01 | 3.43E-01 | 1.00E+00 |
| ENSG00000255727.1_LINC01489  | ENSG00000160789.18_LMNA | -0.11204 | -0.26648606  | 0.048018623 | 1.69E-01 | 4.28E-01 | 1.00E+00 |
| ENSG00000225779.1_RP4-603I14 | ENSG00000160789.18_LMNA | -0.11888 | -0.272915755 | 0.041098315 | 1.45E-01 | 3.89E-01 | 1.00E+00 |
| ENSG00000249388.1_RP11-834C  | ENSG00000160789.18_LMNA | -0.23738 | -0.382135097 | -0.08124498 | 3.23E-03 | 2.82E-02 | 1.00E+00 |
| ENSG00000237158.1_RP11-472F  | ENSG00000160789.18_LMNA | 0.04486  | -0.115162798 | 0.202614046 | 5.83E-01 | 8.06E-01 | 1.00E+00 |
| ENSG00000235993.1_AC007559.  | ENSG00000160789.18_LMNA | 0.02394  | -0.135775319 | 0.182448181 | 7.70E-01 | 9.05E-01 | 1.00E+00 |
| ENSG00000231651.1_DLG3-AS1   | ENSG00000160789.18_LMNA | 0.18223  | 0.023719511  | 0.331806579 | 2.46E-02 | 1.25E-01 | 1.00E+00 |
| ENSG00000271715.1_CTD-2256P  | ENSG00000160789.18_LMNA | 0.08307  | -0.077151518 | 0.239108056 | 3.09E-01 | 5.95E-01 | 1.00E+00 |
| ENSG00000235751.3_           | ENSG00000160789.18_LMNA | -0.07081 | -0.227445219 | 0.089400036 | 3.86E-01 | 6.64E-01 | 1.00E+00 |
| ENSG00000271172.1_RP11-660M  | ENSG00000160789.18_LMNA | -0.08693 | -0.242770143 | 0.073285734 | 2.87E-01 | 5.72E-01 | 1.00E+00 |
| ENSG00000224568.1_AC096669.  | ENSG00000160789.18_LMNA | -0.34625 | -0.479045429 | -0.19796308 | 1.24E-05 | 3.49E-04 | 6.39E-01 |
| ENSG00000259977.1_AL121578.2 | ENSG00000160789.18_LMNA | 0.29767  | 0.1453613    | 0.436202507 | 1.96E-04 | 3.21E-03 | 1.00E+00 |
| ENSG00000272071.1_RP11-332J  | ENSG00000160789.18_LMNA | 0.09386  | -0.066326982 | 0.2493396   | 2.50E-01 | 5.31E-01 | 1.00E+00 |
| ENSG00000266922.1_CTC-499B1  | ENSG00000160789.18_LMNA | 0.0217   | -0.137973435 | 0.180281781 | 7.91E-01 | 9.15E-01 | 1.00E+00 |
| ENSG00000275265.1_RP11-15J2  | ENSG00000160789.18_LMNA | -0.02517 | -0.183631944 | 0.1345729   | 7.58E-01 | 8.99E-01 | 1.00E+00 |
| ENSG00000232894.1_MRPS31P2   | ENSG00000160789.18_LMNA | -0.15616 | -0.307713765 | 0.003114917 | 5.47E-02 | 2.13E-01 | 1.00E+00 |
| ENSG00000229444.1_RP11-184I1 | ENSG00000160789.18_LMNA | 0.00736  | -0.15201445  | 0.166370123 | 9.28E-01 | 9.72E-01 | 1.00E+00 |
| ENSG00000253140.1_RP11-567J  | ENSG00000160789.18_LMNA | -0.02986 | -0.188169532 | 0.129955104 | 7.15E-01 | 8.79E-01 | 1.00E+00 |
| ENSG00000239722.1_IMP3P2     | ENSG00000160789.18_LMNA | -0.05567 | -0.2129874   | 0.10445201  | 4.96E-01 | 7.50E-01 | 1.00E+00 |
| ENSG00000268070.1_AC006539.  | ENSG00000160789.18_LMNA | -0.06028 | -0.217395541 | 0.099878071 | 4.61E-01 | 7.24E-01 | 1.00E+00 |
| ENSG00000260953.1_RP11-426C  | ENSG00000160789.18_LMNA | -0.00693 | -0.165948967 | 0.152437527 | 9.32E-01 | 9.74E-01 | 1.00E+00 |
| ENSG00000259245.1_RP11-684B  | ENSG00000160789.18_LMNA | 0.12576  | -0.034123821 | 0.279367536 | 1.23E-01 | 3.53E-01 | 1.00E+00 |
| ENSG00000184709.7_LRRC26     | ENSG00000160789.18_LMNA | -0.12481 | -0.278474793 | 0.035090717 | 1.26E-01 | 3.58E-01 | 1.00E+00 |
| ENSG00000254693.1_RP11-58K2  | ENSG00000160789.18_LMNA | 0.04785  | -0.112209527 | 0.205481416 | 5.58E-01 | 7.91E-01 | 1.00E+00 |
| ENSG00000224764.1_RP11-54O1  | ENSG00000160789.18_LMNA | 0.10123  | -0.058917589 | 0.256302696 | 2.15E-01 | 4.89E-01 | 1.00E+00 |
| ENSG00000236030.1_LINC01036  | ENSG00000160789.18_LMNA | -0.21952 | -0.365928413 | -0.0624993  | 6.58E-03 | 4.82E-02 | 1.00E+00 |
| ENSG00000225407.3_CTD-2384B  | ENSG00000160789.18_LMNA | 0.08407  | -0.076150006 | 0.24005766  | 3.03E-01 | 5.90E-01 | 1.00E+00 |

|                              |                         |          |              |             |          |          |          |
|------------------------------|-------------------------|----------|--------------|-------------|----------|----------|----------|
| ENSG00000241678.1_RP11-732A  | ENSG00000160789.18_LMNA | 0.06853  | -0.091667877 | 0.225275798 | 4.02E-01 | 6.78E-01 | 1.00E+00 |
| ENSG00000278829.1_RP11-358B  | ENSG00000160789.18_LMNA | -0.03467 | -0.192808419 | 0.125219909 | 6.72E-01 | 8.56E-01 | 1.00E+00 |
| ENSG00000234139.2_RP4-550H1  | ENSG00000160789.18_LMNA | 0.05036  | -0.109719531 | 0.207894755 | 5.38E-01 | 7.78E-01 | 1.00E+00 |
| ENSG00000232717.1_TRIM51JP   | ENSG00000160789.18_LMNA | 0.03117  | -0.128669225 | 0.189430664 | 7.03E-01 | 8.73E-01 | 1.00E+00 |
| ENSG00000255327.1_RP11-555G  | ENSG00000160789.18_LMNA | -0.00076 | -0.159937275 | 0.158463951 | 9.93E-01 | 9.97E-01 | 1.00E+00 |
| ENSG00000170165.5_CR848007.  | ENSG00000160789.18_LMNA | -0.04857 | -0.206178743 | 0.111490459 | 5.52E-01 | 7.88E-01 | 1.00E+00 |
| ENSG00000258942.1_RP11-255G  | ENSG00000160789.18_LMNA | -0.04303 | -0.200851973 | 0.116974878 | 5.99E-01 | 8.15E-01 | 1.00E+00 |
| ENSG00000234835.1_PHPB13     | ENSG00000160789.18_LMNA | -0.0366  | -0.194664443 | 0.123321286 | 6.54E-01 | 8.47E-01 | 1.00E+00 |
| ENSG00000266803.1_RP1-77H15  | ENSG00000160789.18_LMNA | -0.08955 | -0.245252186 | 0.070660221 | 2.73E-01 | 5.57E-01 | 1.00E+00 |
| ENSG00000259179.1_UBE2CP4    | ENSG00000160789.18_LMNA | 0.17145  | 0.012593333  | 0.321865675 | 3.47E-02 | 1.58E-01 | 1.00E+00 |
| ENSG00000223601.2_EBLN1      | ENSG00000160789.18_LMNA | -0.29836 | -0.436812351 | -0.14609869 | 1.89E-04 | 3.12E-03 | 1.00E+00 |
| ENSG00000111780.8_AL021546.6 | ENSG00000160789.18_LMNA | -0.04856 | -0.206171572 | 0.111497856 | 5.52E-01 | 7.88E-01 | 1.00E+00 |
| ENSG00000229999.5_RP5-1042K  | ENSG00000160789.18_LMNA | -0.0034  | -0.162511228 | 0.155886591 | 9.67E-01 | 9.87E-01 | 1.00E+00 |
| ENSG00000180090.4_OR3A1      | ENSG00000160789.18_LMNA | -0.20785 | -0.355298451 | -0.05031919 | 1.02E-02 | 6.64E-02 | 1.00E+00 |
| ENSG00000248122.1_APOOP4     | ENSG00000160789.18_LMNA | -0.03042 | -0.188706467 | 0.129407763 | 7.10E-01 | 8.77E-01 | 1.00E+00 |
| ENSG00000186831.10_KRT17P2   | ENSG00000160789.18_LMNA | 0.00521  | -0.154120265 | 0.164272721 | 9.49E-01 | 9.80E-01 | 1.00E+00 |
| ENSG00000234469.4_CLDN34     | ENSG00000160789.18_LMNA | 0.02501  | -0.134726255 | 0.183481019 | 7.60E-01 | 9.00E-01 | 1.00E+00 |
| ENSG00000172640.3_OR10AD1    | ENSG00000160789.18_LMNA | 0.00099  | -0.158230916 | 0.160170181 | 9.90E-01 | 9.96E-01 | 1.00E+00 |
| ENSG00000251483.2_LYPLA1P2   | ENSG00000160789.18_LMNA | -0.05554 | -0.212863289 | 0.104580594 | 4.97E-01 | 7.51E-01 | 1.00E+00 |
| ENSG00000267491.1_CTD-2373H  | ENSG00000160789.18_LMNA | 0.12487  | -0.035029851 | 0.278531006 | 1.25E-01 | 3.58E-01 | 1.00E+00 |
| ENSG00000235781.1_XXbac-BPG  | ENSG00000160789.18_LMNA | 0.17161  | 0.012758021  | 0.322013318 | 3.45E-02 | 1.57E-01 | 1.00E+00 |
| ENSG00000168903.8_BTNL3      | ENSG00000160789.18_LMNA | -0.12008 | -0.274039178 | 0.039886071 | 1.41E-01 | 3.83E-01 | 1.00E+00 |
| ENSG00000259774.1_RP11-182J  | ENSG00000160789.18_LMNA | -0.03208 | -0.190305972 | 0.127776111 | 6.95E-01 | 8.69E-01 | 1.00E+00 |
| ENSG00000261025.1_RP11-84D1  | ENSG00000160789.18_LMNA | 0.19592  | 0.037905292  | 0.34438268  | 1.56E-02 | 9.01E-02 | 1.00E+00 |
| ENSG00000168594.14_ADAM29    | ENSG00000160789.18_LMNA | -0.39387 | -0.52043316  | -0.25036354 | 5.16E-07 | 2.69E-05 | 2.65E-02 |
| ENSG00000240412.1_RPL5P15    | ENSG00000160789.18_LMNA | -0.064   | -0.220945943 | 0.096184358 | 4.33E-01 | 7.03E-01 | 1.00E+00 |
| ENSG00000234993.1_CUBNP2     | ENSG00000160789.18_LMNA | 0.00792  | -0.151468595 | 0.166913327 | 9.23E-01 | 9.70E-01 | 1.00E+00 |
| ENSG00000216588.7_IGSF23     | ENSG00000160789.18_LMNA | -0.05768 | -0.21490754  | 0.1024613   | 4.80E-01 | 7.38E-01 | 1.00E+00 |
| ENSG00000278399.1_RP11-74M1  | ENSG00000160789.18_LMNA | 0.04865  | -0.111415162 | 0.206251745 | 5.52E-01 | 7.87E-01 | 1.00E+00 |
| ENSG00000261728.1_RP11-307O  | ENSG00000160789.18_LMNA | -0.22041 | -0.366738667 | -0.06343144 | 6.36E-03 | 4.70E-02 | 1.00E+00 |
| ENSG00000005001.8_PRSS22     | ENSG00000160789.18_LMNA | 0.0612   | -0.098963468 | 0.218275442 | 4.54E-01 | 7.19E-01 | 1.00E+00 |
| ENSG00000221844.2_DPP3P2     | ENSG00000160789.18_LMNA | -0.07811 | -0.234398733 | 0.08210885  | 3.39E-01 | 6.24E-01 | 1.00E+00 |
| ENSG00000165953.8_SERPINA1   | ENSG00000160789.18_LMNA | -0.1008  | -0.255890304 | 0.059357382 | 2.17E-01 | 4.91E-01 | 1.00E+00 |

|                              |                         |          |              |             |          |          |          |
|------------------------------|-------------------------|----------|--------------|-------------|----------|----------|----------|
| ENSG00000203907.8_OOEP       | ENSG00000160789.18_LMNA | -0.02498 | -0.183446501 | 0.134761328 | 7.60E-01 | 9.00E-01 | 1.00E+00 |
| ENSG00000187997.10_C17orf99  | ENSG00000160789.18_LMNA | -0.0502  | -0.207744392 | 0.109874787 | 5.39E-01 | 7.79E-01 | 1.00E+00 |
| ENSG00000203620.2_RP11-84A1  | ENSG00000160789.18_LMNA | -0.02425 | -0.182743138 | 0.135475801 | 7.67E-01 | 9.03E-01 | 1.00E+00 |
| ENSG00000267497.1_NFE2L3P1   | ENSG00000160789.18_LMNA | 0.13103  | -0.028770851 | 0.284300193 | 1.08E-01 | 3.26E-01 | 1.00E+00 |
| ENSG00000257550.1_RP11-793H  | ENSG00000160789.18_LMNA | 0.02469  | -0.135040489 | 0.18317172  | 7.63E-01 | 9.01E-01 | 1.00E+00 |
| ENSG00000266900.1_RP11-173A  | ENSG00000160789.18_LMNA | -0.00225 | -0.161395798 | 0.157004031 | 9.78E-01 | 9.92E-01 | 1.00E+00 |
| ENSG00000230010.1_RP4-568F9  | ENSG00000160789.18_LMNA | -0.21645 | -0.363133242 | -0.05928774 | 7.40E-03 | 5.24E-02 | 1.00E+00 |
| ENSG00000165059.6_PRKACG     | ENSG00000160789.18_LMNA | 0.04643  | -0.113612127 | 0.204120292 | 5.70E-01 | 7.99E-01 | 1.00E+00 |
| ENSG00000274099.1_ABCB10P1   | ENSG00000160789.18_LMNA | -0.10787 | -0.262560064 | 0.052229395 | 1.86E-01 | 4.52E-01 | 1.00E+00 |
| ENSG00000250685.6_RP11-486L  | ENSG00000160789.18_LMNA | -0.17863 | -0.328493072 | -0.02000243 | 2.77E-02 | 1.36E-01 | 1.00E+00 |
| ENSG00000188676.12_IDO2      | ENSG00000160789.18_LMNA | 0.09047  | -0.069730577 | 0.246130039 | 2.68E-01 | 5.52E-01 | 1.00E+00 |
| ENSG00000248405.8_PRR5-ARH   | ENSG00000160789.18_LMNA | -0.17797 | -0.327885281 | -0.01932153 | 2.83E-02 | 1.38E-01 | 1.00E+00 |
| ENSG00000211638.2_IGLV8-61   | ENSG00000160789.18_LMNA | 0.01211  | -0.14737662  | 0.170979287 | 8.82E-01 | 9.54E-01 | 1.00E+00 |
| ENSG00000274494.1_MIR6832    | ENSG00000160789.18_LMNA | 0.03452  | -0.125367831 | 0.192663721 | 6.73E-01 | 8.56E-01 | 1.00E+00 |
| ENSG00000241767.2_LINC01324  | ENSG00000160789.18_LMNA | -0.27072 | -0.412153411 | -0.11653761 | 7.43E-04 | 9.18E-03 | 1.00E+00 |
| ENSG00000264961.1_MIR4730    | ENSG00000160789.18_LMNA | 0.09808  | -0.062094393 | 0.253321244 | 2.29E-01 | 5.06E-01 | 1.00E+00 |
| ENSG00000242953.1_RP11-803B  | ENSG00000160789.18_LMNA | -0.07401 | -0.230491006 | 0.086210516 | 3.65E-01 | 6.46E-01 | 1.00E+00 |
| ENSG00000238829.1_RNU7-45P   | ENSG00000160789.18_LMNA | -0.01318 | -0.172019654 | 0.146327842 | 8.72E-01 | 9.50E-01 | 1.00E+00 |
| ENSG00000264553.1_MIR4257    | ENSG00000160789.18_LMNA | 0.13403  | -0.025718477 | 0.287105495 | 9.97E-02 | 3.11E-01 | 1.00E+00 |
| ENSG00000227019.2_OR7E101P   | ENSG00000160789.18_LMNA | -0.05829 | -0.215490471 | 0.10185644  | 4.76E-01 | 7.34E-01 | 1.00E+00 |
| ENSG00000223023.1_Y_RNA      | ENSG00000160789.18_LMNA | -0.08128 | -0.237409365 | 0.078941472 | 3.20E-01 | 6.06E-01 | 1.00E+00 |
| ENSG00000252192.1_SNORA9     | ENSG00000160789.18_LMNA | 0.07595  | -0.084266487 | 0.232344389 | 3.52E-01 | 6.36E-01 | 1.00E+00 |
| ENSG00000251752.1_RNU4-29P   | ENSG00000160789.18_LMNA | 0.16125  | 0.002103364  | 0.312430334 | 4.72E-02 | 1.94E-01 | 1.00E+00 |
| ENSG00000225965.1_RP11-508N  | ENSG00000160789.18_LMNA | -0.03931 | -0.197272676 | 0.120649248 | 6.31E-01 | 8.34E-01 | 1.00E+00 |
| ENSG00000253585.1_KB-1184D1  | ENSG00000160789.18_LMNA | -0.03281 | -0.191014316 | 0.127052979 | 6.88E-01 | 8.65E-01 | 1.00E+00 |
| ENSG00000256299.1_RP11-989F  | ENSG00000160789.18_LMNA | -0.10898 | -0.263611036 | 0.051103286 | 1.81E-01 | 4.45E-01 | 1.00E+00 |
| ENSG00000234061.1_AC007969.4 | ENSG00000160789.18_LMNA | -0.16671 | -0.317482378 | -0.00771161 | 4.01E-02 | 1.74E-01 | 1.00E+00 |
| ENSG00000274135.1_Metazoa_Sl | ENSG00000160789.18_LMNA | -0.09406 | -0.249527972 | 0.066126993 | 2.49E-01 | 5.29E-01 | 1.00E+00 |
| ENSG00000220557.1_HMGB1P13   | ENSG00000160789.18_LMNA | -0.13325 | -0.28637629  | 0.026512467 | 1.02E-01 | 3.15E-01 | 1.00E+00 |
| ENSG00000254805.1_SNRPCP14   | ENSG00000160789.18_LMNA | -0.04474 | -0.20249829  | 0.115281904 | 5.84E-01 | 8.07E-01 | 1.00E+00 |
| ENSG00000223831.1_RP1-56J10  | ENSG00000160789.18_LMNA | -0.11989 | -0.273867168 | 0.04007174  | 1.41E-01 | 3.84E-01 | 1.00E+00 |
| ENSG00000235660.1_LINC00345  | ENSG00000160789.18_LMNA | 0.06115  | -0.099015315 | 0.218225576 | 4.54E-01 | 7.19E-01 | 1.00E+00 |
| ENSG00000271596.1_RP11-407N  | ENSG00000160789.18_LMNA | -0.16033 | -0.311577701 | -0.00115878 | 4.85E-02 | 1.97E-01 | 1.00E+00 |

|                              |                         |          |              |             |          |          |          |
|------------------------------|-------------------------|----------|--------------|-------------|----------|----------|----------|
| ENSG00000273950.1_Metazoa_Sl | ENSG00000160789.18_LMNA | 0.072    | -0.088214792 | 0.228577774 | 3.78E-01 | 6.57E-01 | 1.00E+00 |
| ENSG00000231811.2_RP3-527G5  | ENSG00000160789.18_LMNA | 0.10577  | -0.054346899 | 0.260581821 | 1.95E-01 | 4.63E-01 | 1.00E+00 |
| ENSG00000264573.2_RN7SL15P   | ENSG00000160789.18_LMNA | 0.05719  | -0.102948881 | 0.21443747  | 4.84E-01 | 7.41E-01 | 1.00E+00 |
| ENSG00000276093.1_RP5-1017F  | ENSG00000160789.18_LMNA | 0.06491  | -0.095270427 | 0.22182312  | 4.27E-01 | 6.98E-01 | 1.00E+00 |
| ENSG00000205549.7_C9orf92    | ENSG00000160789.18_LMNA | -0.01842 | -0.177105151 | 0.141190913 | 8.22E-01 | 9.30E-01 | 1.00E+00 |
| ENSG00000237924.1_RPL21P112  | ENSG00000160789.18_LMNA | -0.1259  | -0.27950139  | 0.033978798 | 1.22E-01 | 3.52E-01 | 1.00E+00 |
| ENSG00000271065.1_RP11-607P  | ENSG00000160789.18_LMNA | 0.00682  | -0.152543319 | 0.165843638 | 9.34E-01 | 9.74E-01 | 1.00E+00 |
| ENSG00000218073.1_RP1-13D10  | ENSG00000160789.18_LMNA | -0.04511 | -0.202850182 | 0.1149198   | 5.81E-01 | 8.05E-01 | 1.00E+00 |
| ENSG00000270523.1_RP11-145P  | ENSG00000160789.18_LMNA | -0.14651 | -0.298742271 | 0.012994224 | 7.17E-02 | 2.53E-01 | 1.00E+00 |
| ENSG00000248155.1_WI2-89927I | ENSG00000160789.18_LMNA | -0.05416 | -0.211536613 | 0.105954431 | 5.08E-01 | 7.58E-01 | 1.00E+00 |
| ENSG00000234112.2_RP11-145A  | ENSG00000160789.18_LMNA | 0.09189  | -0.068311838 | 0.24746874  | 2.60E-01 | 5.43E-01 | 1.00E+00 |
| ENSG00000256762.1_STH        | ENSG00000160789.18_LMNA | -0.07731 | -0.233636734 | 0.082909509 | 3.44E-01 | 6.28E-01 | 1.00E+00 |
| ENSG00000224476.3_RPL36P16   | ENSG00000160789.18_LMNA | 0.09743  | -0.062741996 | 0.252712728 | 2.32E-01 | 5.10E-01 | 1.00E+00 |
| ENSG00000266190.1_RP11-218F  | ENSG00000160789.18_LMNA | 0.01449  | -0.14504261  | 0.173293612 | 8.59E-01 | 9.45E-01 | 1.00E+00 |
| ENSG00000262670.4_RP11-64J4  | ENSG00000160789.18_LMNA | -0.14518 | -0.297507062 | 0.014349672 | 7.43E-02 | 2.60E-01 | 1.00E+00 |
| ENSG00000231612.1_RP11-522M  | ENSG00000160789.18_LMNA | 0.08123  | -0.078990672 | 0.237362646 | 3.20E-01 | 6.06E-01 | 1.00E+00 |
| ENSG00000261000.1_RP11-534L  | ENSG00000160789.18_LMNA | 0.223    | 0.066151482  | 0.369100426 | 5.75E-03 | 4.36E-02 | 1.00E+00 |
| ENSG00000262313.1_CTD-2561B  | ENSG00000160789.18_LMNA | 0.00895  | -0.150467125 | 0.167909432 | 9.13E-01 | 9.67E-01 | 1.00E+00 |
| ENSG00000217447.1_RP3-366N2  | ENSG00000160789.18_LMNA | -0.20147 | -0.349464068 | -0.04367233 | 1.28E-02 | 7.83E-02 | 1.00E+00 |
| ENSG00000253433.1_NCRNA002   | ENSG00000160789.18_LMNA | -0.01968 | -0.178326221 | 0.139954937 | 8.10E-01 | 9.25E-01 | 1.00E+00 |
| ENSG00000226545.1_RP4-633I8  | ENSG00000160789.18_LMNA | -0.07641 | -0.232781416 | 0.083807735 | 3.49E-01 | 6.33E-01 | 1.00E+00 |
| ENSG00000230099.2_TRBV5-4    | ENSG00000160789.18_LMNA | -0.01144 | -0.170331519 | 0.148029263 | 8.89E-01 | 9.57E-01 | 1.00E+00 |
| ENSG00000236713.1_RP11-363I2 | ENSG00000160789.18_LMNA | -0.00674 | -0.165763374 | 0.15262393  | 9.34E-01 | 9.74E-01 | 1.00E+00 |
| ENSG00000250669.1_RP11-83M1  | ENSG00000160789.18_LMNA | 0.0801   | -0.080123356 | 0.23628668  | 3.27E-01 | 6.13E-01 | 1.00E+00 |
| ENSG00000236191.3_RPS15AP2   | ENSG00000160789.18_LMNA | -0.04655 | -0.204238906 | 0.11348995  | 5.69E-01 | 7.98E-01 | 1.00E+00 |
| ENSG00000267291.1_CTB-186G2  | ENSG00000160789.18_LMNA | 0.0483   | -0.111761751 | 0.205915691 | 5.55E-01 | 7.89E-01 | 1.00E+00 |
| ENSG00000244676.4_AL109761.5 | ENSG00000160789.18_LMNA | -0.03575 | -0.193845989 | 0.124158813 | 6.62E-01 | 8.51E-01 | 1.00E+00 |
| ENSG00000217684.2_RPS3AP24   | ENSG00000160789.18_LMNA | -0.09587 | -0.251234611 | 0.064313953 | 2.40E-01 | 5.19E-01 | 1.00E+00 |
| ENSG00000225947.1_RP11-313E  | ENSG00000160789.18_LMNA | 0.00302  | -0.156258915 | 0.162139665 | 9.71E-01 | 9.89E-01 | 1.00E+00 |
| ENSG00000259935.1_RP11-519C  | ENSG00000160789.18_LMNA | -0.07359 | -0.230091402 | 0.086629347 | 3.68E-01 | 6.48E-01 | 1.00E+00 |
| ENSG00000230595.1_RSL24D1P   | ENSG00000160789.18_LMNA | -0.03986 | -0.197803843 | 0.120104522 | 6.26E-01 | 8.31E-01 | 1.00E+00 |
| ENSG00000254938.1_RP11-688I5 | ENSG00000160789.18_LMNA | -0.0883  | -0.244072478 | 0.071908667 | 2.79E-01 | 5.65E-01 | 1.00E+00 |
| ENSG00000242675.1_RPS16P9    | ENSG00000160789.18_LMNA | -0.13485 | -0.28786992  | 0.024885714 | 9.76E-02 | 3.07E-01 | 1.00E+00 |

|                             |                         |          |              |             |          |          |          |
|-----------------------------|-------------------------|----------|--------------|-------------|----------|----------|----------|
| ENSG00000261949.4_GFY       | ENSG00000160789.18_LMNA | -0.22609 | -0.371905362 | -0.06938779 | 5.10E-03 | 3.98E-02 | 1.00E+00 |
| ENSG00000261266.2_CTD-2196E | ENSG00000160789.18_LMNA | 0.03715  | -0.12277238  | 0.195200609 | 6.50E-01 | 8.44E-01 | 1.00E+00 |
| ENSG00000232173.2_OR2H5P    | ENSG00000160789.18_LMNA | -0.0209  | -0.179500864 | 0.138765017 | 7.98E-01 | 9.19E-01 | 1.00E+00 |
| ENSG00000266973.1_CTD-3162L | ENSG00000160789.18_LMNA | -0.05847 | -0.215662696 | 0.101677692 | 4.74E-01 | 7.34E-01 | 1.00E+00 |
| ENSG00000279104.1_RP11-138B | ENSG00000160789.18_LMNA | -0.15908 | -0.310419197 | 0.000123772 | 5.03E-02 | 2.02E-01 | 1.00E+00 |
| ENSG00000270857.1_RP11-757G | ENSG00000160789.18_LMNA | 0.06181  | -0.098363302 | 0.218852556 | 4.49E-01 | 7.15E-01 | 1.00E+00 |
| ENSG00000241661.1_PPP1R2P6  | ENSG00000160789.18_LMNA | -0.16909 | -0.319686109 | -0.01016409 | 3.73E-02 | 1.65E-01 | 1.00E+00 |
| ENSG00000174450.10_GOLGA6L  | ENSG00000160789.18_LMNA | -0.12609 | -0.279676727 | 0.033788811 | 1.22E-01 | 3.51E-01 | 1.00E+00 |
| ENSG00000238076.1_MRPL48P1  | ENSG00000160789.18_LMNA | -0.14736 | -0.299537892 | 0.012120547 | 7.00E-02 | 2.50E-01 | 1.00E+00 |
| ENSG00000260660.1_RP11-69H7 | ENSG00000160789.18_LMNA | 0.24761  | 0.092040035  | 0.391384791 | 2.10E-03 | 2.03E-02 | 1.00E+00 |
| ENSG00000267570.1_STK25P1   | ENSG00000160789.18_LMNA | -0.02989 | -0.188198996 | 0.129925075 | 7.15E-01 | 8.79E-01 | 1.00E+00 |
| ENSG00000218357.3_LL22NC03- | ENSG00000160789.18_LMNA | -0.1013  | -0.256369786 | 0.058846029 | 2.14E-01 | 4.88E-01 | 1.00E+00 |
| ENSG00000230294.4_RP13-507P | ENSG00000160789.18_LMNA | -0.28424 | -0.42424515  | -0.13096801 | 3.87E-04 | 5.51E-03 | 1.00E+00 |
| ENSG00000280953.1_LINC01163 | ENSG00000160789.18_LMNA | -0.3263  | -0.46152562  | -0.17625512 | 4.09E-05 | 9.17E-04 | 1.00E+00 |
| ENSG00000241213.1_RP11-768G | ENSG00000160789.18_LMNA | -0.04174 | -0.199614296 | 0.118246415 | 6.10E-01 | 8.22E-01 | 1.00E+00 |
| ENSG00000255549.2_ENPP7P6   | ENSG00000160789.18_LMNA | -0.16406 | -0.31503429  | -0.00499157 | 4.34E-02 | 1.83E-01 | 1.00E+00 |
| ENSG00000242390.1_RPL6P9    | ENSG00000160789.18_LMNA | -0.00047 | -0.159660722 | 0.158740613 | 9.95E-01 | 9.98E-01 | 1.00E+00 |
| ENSG00000272542.1_RP11-255P | ENSG00000160789.18_LMNA | -0.20098 | -0.349017417 | -0.04316459 | 1.30E-02 | 7.93E-02 | 1.00E+00 |
| ENSG00000228382.1_ITPKB-IT1 | ENSG00000160789.18_LMNA | -0.08119 | -0.237319709 | 0.079035889 | 3.20E-01 | 6.07E-01 | 1.00E+00 |
| ENSG00000232377.1_AC016910. | ENSG00000160789.18_LMNA | -0.05897 | -0.216141962 | 0.101180165 | 4.71E-01 | 7.31E-01 | 1.00E+00 |
| ENSG00000179994.9_SPDYE7P   | ENSG00000160789.18_LMNA | 0.07562  | -0.084601266 | 0.232025384 | 3.54E-01 | 6.38E-01 | 1.00E+00 |
| ENSG00000184650.8_ODF4      | ENSG00000160789.18_LMNA | -0.04536 | -0.203098647 | 0.114664073 | 5.79E-01 | 8.04E-01 | 1.00E+00 |
| ENSG00000258308.4_RP11-554E | ENSG00000160789.18_LMNA | -0.03586 | -0.193952429 | 0.124049917 | 6.61E-01 | 8.50E-01 | 1.00E+00 |
| ENSG00000230534.5_RP11-297A | ENSG00000160789.18_LMNA | 0.01575  | -0.143812677 | 0.174511758 | 8.47E-01 | 9.40E-01 | 1.00E+00 |
| ENSG00000259335.1_HNRNPMP   | ENSG00000160789.18_LMNA | -0.09216 | -0.247730628 | 0.068034143 | 2.59E-01 | 5.42E-01 | 1.00E+00 |
| ENSG00000197826.10_C4orf22  | ENSG00000160789.18_LMNA | 0.04354  | -0.116467637 | 0.201345423 | 5.94E-01 | 8.13E-01 | 1.00E+00 |
| ENSG00000255319.4_ENPP7P8   | ENSG00000160789.18_LMNA | -0.13421 | -0.287272057 | 0.025537062 | 9.93E-02 | 3.10E-01 | 1.00E+00 |
| ENSG00000184210.5_DGAT2L6   | ENSG00000160789.18_LMNA | 0.14361  | -0.015959796 | 0.296038411 | 7.76E-02 | 2.67E-01 | 1.00E+00 |
| ENSG00000249311.4_TERF1P3   | ENSG00000160789.18_LMNA | -0.06269 | -0.219701479 | 0.09748005  | 4.43E-01 | 7.10E-01 | 1.00E+00 |
| ENSG00000162947.4_AC007364. | ENSG00000160789.18_LMNA | -0.05521 | -0.212540347 | 0.104915128 | 4.99E-01 | 7.52E-01 | 1.00E+00 |
| ENSG00000255043.1_NAV2-AS5  | ENSG00000160789.18_LMNA | -0.07994 | -0.23613996  | 0.080277747 | 3.28E-01 | 6.14E-01 | 1.00E+00 |
| ENSG00000251553.1_DDX18P4   | ENSG00000160789.18_LMNA | 0.03387  | -0.126006288 | 0.192039017 | 6.79E-01 | 8.60E-01 | 1.00E+00 |
| ENSG00000203859.8_HSD3B2    | ENSG00000160789.18_LMNA | -0.10442 | -0.259310609 | 0.055706106 | 2.00E-01 | 4.71E-01 | 1.00E+00 |



|                             |                         |          |              |             |          |          |          |
|-----------------------------|-------------------------|----------|--------------|-------------|----------|----------|----------|
| ENSG00000249917.2_LINC00536 | ENSG00000160789.18_LMNA | -0.00733 | -0.166334272 | 0.152050469 | 9.29E-01 | 9.73E-01 | 1.00E+00 |
| ENSG00000280392.1_RP11-357N | ENSG00000160789.18_LMNA | 0.00852  | -0.150887831 | 0.167491059 | 9.17E-01 | 9.68E-01 | 1.00E+00 |
| ENSG00000267303.1_CTD-2369P | ENSG00000160789.18_LMNA | -0.03206 | -0.190294153 | 0.127788174 | 6.95E-01 | 8.69E-01 | 1.00E+00 |
| ENSG00000151475.5_SLC25A31  | ENSG00000160789.18_LMNA | 0.13003  | -0.029785182 | 0.283366778 | 1.10E-01 | 3.31E-01 | 1.00E+00 |
| ENSG00000217612.2_RP1-28C20 | ENSG00000160789.18_LMNA | -0.06895 | -0.225669441 | 0.09125662  | 3.99E-01 | 6.75E-01 | 1.00E+00 |
| ENSG00000231104.7_RP11-354M | ENSG00000160789.18_LMNA | -0.05137 | -0.208860965 | 0.108721512 | 5.30E-01 | 7.73E-01 | 1.00E+00 |
| ENSG00000270442.1_CTB-95D12 | ENSG00000160789.18_LMNA | -0.00642 | -0.165453853 | 0.152934751 | 9.37E-01 | 9.75E-01 | 1.00E+00 |
| ENSG00000237803.4_LINC00211 | ENSG00000160789.18_LMNA | -0.0602  | -0.217317918 | 0.09995873  | 4.61E-01 | 7.25E-01 | 1.00E+00 |
| ENSG00000196600.11_SLC22A2  | ENSG00000160789.18_LMNA | -0.05387 | -0.21125458  | 0.106246334 | 5.10E-01 | 7.59E-01 | 1.00E+00 |
| ENSG00000241956.8_CTC-340A1 | ENSG00000160789.18_LMNA | -0.11774 | -0.271841166 | 0.042257001 | 1.49E-01 | 3.95E-01 | 1.00E+00 |
| ENSG00000180210.13_F2       | ENSG00000160789.18_LMNA | 0.00763  | -0.151753205 | 0.166630123 | 9.26E-01 | 9.71E-01 | 1.00E+00 |
| ENSG00000272949.1_RP11-514P | ENSG00000160789.18_LMNA | -0.1447  | -0.297055404 | 0.01484501  | 7.53E-02 | 2.62E-01 | 1.00E+00 |
| ENSG00000260792.1_RP11-982M | ENSG00000160789.18_LMNA | 0.05483  | -0.105286063 | 0.212182183 | 5.02E-01 | 7.54E-01 | 1.00E+00 |
| ENSG00000177910.7_SPATA31C  | ENSG00000160789.18_LMNA | -0.08651 | -0.242368985 | 0.07370967  | 2.89E-01 | 5.75E-01 | 1.00E+00 |
| ENSG00000203825.4_RP11-744H | ENSG00000160789.18_LMNA | 0.02808  | -0.131707414 | 0.186449256 | 7.31E-01 | 8.87E-01 | 1.00E+00 |
| ENSG00000166984.10_TCP10L2  | ENSG00000160789.18_LMNA | -0.04106 | -0.19895599  | 0.118922306 | 6.16E-01 | 8.26E-01 | 1.00E+00 |
| ENSG00000086696.9_HSD17B2   | ENSG00000160789.18_LMNA | 0.18778  | 0.029457978  | 0.336907118 | 2.05E-02 | 1.10E-01 | 1.00E+00 |
| ENSG00000235066.5_AC009303  | ENSG00000160789.18_LMNA | 0.04844  | -0.111621296 | 0.206051886 | 5.53E-01 | 7.88E-01 | 1.00E+00 |
| ENSG00000205786.7_LINC01531 | ENSG00000160789.18_LMNA | 0.07071  | -0.089501904 | 0.227347839 | 3.87E-01 | 6.65E-01 | 1.00E+00 |
| ENSG00000152430.16_BOLL     | ENSG00000160789.18_LMNA | -0.02664 | -0.185055694 | 0.13312547  | 7.45E-01 | 8.93E-01 | 1.00E+00 |
| ENSG00000104237.6_RP1       | ENSG00000160789.18_LMNA | 0.03768  | -0.122252162 | 0.195708578 | 6.45E-01 | 8.42E-01 | 1.00E+00 |
| ENSG00000211673.2_IGLV3-1   | ENSG00000160789.18_LMNA | 0.00587  | -0.153477808 | 0.164912917 | 9.43E-01 | 9.77E-01 | 1.00E+00 |
| ENSG00000241294.1_IGKV2-24  | ENSG00000160789.18_LMNA | 0.0235   | -0.136215187 | 0.182014907 | 7.74E-01 | 9.07E-01 | 1.00E+00 |
| ENSG00000211652.2_IGLV7-43  | ENSG00000160789.18_LMNA | 0.02904  | -0.130767658 | 0.187372075 | 7.23E-01 | 8.83E-01 | 1.00E+00 |
| ENSG00000281674.1_AC087651  | ENSG00000160789.18_LMNA | -0.04832 | -0.205940575 | 0.11173609  | 5.54E-01 | 7.89E-01 | 1.00E+00 |
| ENSG00000212402.1_SNORA74B  | ENSG00000160789.18_LMNA | -0.16227 | -0.313374486 | -0.00314998 | 4.58E-02 | 1.90E-01 | 1.00E+00 |
| ENSG00000275076.1           | ENSG00000160789.18_LMNA | 0.03862  | -0.121323999 | 0.196614462 | 6.37E-01 | 8.37E-01 | 1.00E+00 |
| ENSG00000184895.7_SRY       | ENSG00000160789.18_LMNA | -0.0838  | -0.239802661 | 0.076419007 | 3.05E-01 | 5.91E-01 | 1.00E+00 |
| ENSG00000221413.1           | ENSG00000160789.18_LMNA | -0.26656 | -0.408429332 | -0.11211825 | 9.02E-04 | 1.07E-02 | 1.00E+00 |
| ENSG00000206651.1_Y_RNA     | ENSG00000160789.18_LMNA | 0.03748  | -0.122451072 | 0.195514372 | 6.47E-01 | 8.43E-01 | 1.00E+00 |
| ENSG00000253024.1_RNU6-1238 | ENSG00000160789.18_LMNA | -0.01575 | -0.174517212 | 0.143807168 | 8.47E-01 | 9.40E-01 | 1.00E+00 |
| ENSG00000252026.1_RNU6-1262 | ENSG00000160789.18_LMNA | 0.09867  | -0.061494099 | 0.253885084 | 2.26E-01 | 5.03E-01 | 1.00E+00 |
| ENSG00000255156.1_RNY1P9    | ENSG00000160789.18_LMNA | 0.05712  | -0.103016687 | 0.214372087 | 4.85E-01 | 7.42E-01 | 1.00E+00 |

|                             |                         |          |              |             |          |          |          |
|-----------------------------|-------------------------|----------|--------------|-------------|----------|----------|----------|
| ENSG00000211575.2_MIR760    | ENSG00000160789.18_LMNA | 0.0318   | -0.128045911 | 0.190041604 | 6.97E-01 | 8.70E-01 | 1.00E+00 |
| ENSG00000258627.1_RP11-76E1 | ENSG00000160789.18_LMNA | 0.03247  | -0.127388646 | 0.190685555 | 6.91E-01 | 8.67E-01 | 1.00E+00 |
| ENSG00000111537.4_IFNG      | ENSG00000160789.18_LMNA | 0.10651  | -0.053596184 | 0.261283467 | 1.92E-01 | 4.59E-01 | 1.00E+00 |
| ENSG00000206739.1_Y_RNA     | ENSG00000160789.18_LMNA | -0.0545  | -0.2118636   | 0.105615933 | 5.05E-01 | 7.56E-01 | 1.00E+00 |
| ENSG00000211707.3_TRBV7-1   | ENSG00000160789.18_LMNA | 0.06725  | -0.092948084 | 0.224049761 | 4.10E-01 | 6.85E-01 | 1.00E+00 |
| ENSG00000278244.1_          | ENSG00000160789.18_LMNA | 0.00708  | -0.152292099 | 0.166093747 | 9.31E-01 | 9.73E-01 | 1.00E+00 |
| ENSG00000278746.1_RN7SL660F | ENSG00000160789.18_LMNA | 0.1418   | -0.017797947 | 0.294359963 | 8.14E-02 | 2.75E-01 | 1.00E+00 |
| ENSG00000222612.1_RNU2-52P  | ENSG00000160789.18_LMNA | 0.01648  | -0.143097909 | 0.17521923  | 8.40E-01 | 9.38E-01 | 1.00E+00 |
| ENSG00000207119.2_U3        | ENSG00000160789.18_LMNA | -0.06995 | -0.226629471 | 0.090253177 | 3.92E-01 | 6.70E-01 | 1.00E+00 |
| ENSG00000275227.1_uc_338    | ENSG00000160789.18_LMNA | -0.03807 | -0.196077746 | 0.121873981 | 6.42E-01 | 8.40E-01 | 1.00E+00 |
| ENSG00000236209.1_AC104135. | ENSG00000160789.18_LMNA | -0.0455  | -0.203228043 | 0.11453088  | 5.78E-01 | 8.03E-01 | 1.00E+00 |
| ENSG00000217862.2_HIST1H4P5 | ENSG00000160789.18_LMNA | -0.09747 | -0.252744573 | 0.062708112 | 2.32E-01 | 5.10E-01 | 1.00E+00 |
| ENSG00000267592.1_CTC-507E2 | ENSG00000160789.18_LMNA | 0.00667  | -0.152694753 | 0.165692853 | 9.35E-01 | 9.74E-01 | 1.00E+00 |
| ENSG00000263970.1_RP11-789C | ENSG00000160789.18_LMNA | -0.07383 | -0.230324529 | 0.086385016 | 3.66E-01 | 6.47E-01 | 1.00E+00 |
| ENSG00000241765.2_RPS26P45  | ENSG00000160789.18_LMNA | -0.0555  | -0.212824635 | 0.10462064  | 4.97E-01 | 7.51E-01 | 1.00E+00 |
| ENSG00000231715.1_COX6CP2   | ENSG00000160789.18_LMNA | 0.0452   | -0.114823208 | 0.202944036 | 5.80E-01 | 8.04E-01 | 1.00E+00 |
| ENSG00000268916.4_CSAG3     | ENSG00000160789.18_LMNA | 0.02276  | -0.136936883 | 0.181303761 | 7.81E-01 | 9.10E-01 | 1.00E+00 |
| ENSG00000220771.2_BOLA2P3   | ENSG00000160789.18_LMNA | -0.17529 | -0.325408741 | -0.01655008 | 3.08E-02 | 1.46E-01 | 1.00E+00 |
| ENSG00000211818.1_TRAV39    | ENSG00000160789.18_LMNA | 0.04614  | -0.113893818 | 0.203846784 | 5.72E-01 | 8.00E-01 | 1.00E+00 |
| ENSG00000255216.1_RP11-831A | ENSG00000160789.18_LMNA | -0.27507 | -0.416052611 | -0.12117735 | 6.04E-04 | 7.83E-03 | 1.00E+00 |
| ENSG00000231599.1_LINC01037 | ENSG00000160789.18_LMNA | -0.11752 | -0.271634095 | 0.04248018  | 1.49E-01 | 3.97E-01 | 1.00E+00 |
| ENSG00000271236.1_SUMO2P15  | ENSG00000160789.18_LMNA | 0.02368  | -0.136030336 | 0.182197002 | 7.72E-01 | 9.06E-01 | 1.00E+00 |
| ENSG00000227910.1_RP11-73B2 | ENSG00000160789.18_LMNA | -0.07462 | -0.23107758  | 0.085595514 | 3.61E-01 | 6.43E-01 | 1.00E+00 |
| ENSG00000244399.3_RN7SL251F | ENSG00000160789.18_LMNA | 0.03997  | -0.119993884 | 0.197911705 | 6.25E-01 | 8.31E-01 | 1.00E+00 |
| ENSG00000239821.3_RN7SL513F | ENSG00000160789.18_LMNA | 0.03588  | -0.124032025 | 0.193969917 | 6.61E-01 | 8.50E-01 | 1.00E+00 |
| ENSG00000206066.3_IGLL3P    | ENSG00000160789.18_LMNA | -0.04254 | -0.200388025 | 0.117451641 | 6.03E-01 | 8.18E-01 | 1.00E+00 |
| ENSG00000268038.1_AC011516. | ENSG00000160789.18_LMNA | -0.16629 | -0.317096384 | -0.00728244 | 4.06E-02 | 1.75E-01 | 1.00E+00 |
| ENSG00000277867.1_AC138649. | ENSG00000160789.18_LMNA | -0.06331 | -0.220287449 | 0.096870092 | 4.38E-01 | 7.07E-01 | 1.00E+00 |
| ENSG00000257005.1_RP11-972L | ENSG00000160789.18_LMNA | 0.16029  | 0.001119071  | 0.311541846 | 4.85E-02 | 1.97E-01 | 1.00E+00 |
| ENSG00000273214.1_RP5-1039K | ENSG00000160789.18_LMNA | -0.1702  | -0.320706975 | -0.01130144 | 3.61E-02 | 1.62E-01 | 1.00E+00 |
| ENSG00000269635.1_AC004257. | ENSG00000160789.18_LMNA | 0.13647  | -0.023232178 | 0.289386585 | 9.36E-02 | 2.99E-01 | 1.00E+00 |
| ENSG00000235424.1_SUMO2P1C  | ENSG00000160789.18_LMNA | -0.13061 | -0.283910017 | 0.029194929 | 1.09E-01 | 3.28E-01 | 1.00E+00 |
| ENSG00000258355.1_RP11-651L | ENSG00000160789.18_LMNA | 0.09332  | -0.066871433 | 0.248826652 | 2.53E-01 | 5.34E-01 | 1.00E+00 |

|                              |                         |          |              |             |          |          |          |
|------------------------------|-------------------------|----------|--------------|-------------|----------|----------|----------|
| ENSG00000254104.2_RP11-63E5  | ENSG00000160789.18_LMNA | -0.07945 | -0.235666489 | 0.080775868 | 3.31E-01 | 6.17E-01 | 1.00E+00 |
| ENSG00000237073.1_RP11-168K  | ENSG00000160789.18_LMNA | 0.09947  | -0.060687942 | 0.254641947 | 2.23E-01 | 4.98E-01 | 1.00E+00 |
| ENSG00000268731.1_CTD-2561J  | ENSG00000160789.18_LMNA | 0.01566  | -0.143904037 | 0.174421307 | 8.48E-01 | 9.41E-01 | 1.00E+00 |
| ENSG00000225498.1_AC002064.  | ENSG00000160789.18_LMNA | 0.01251  | -0.146981984 | 0.171370841 | 8.78E-01 | 9.53E-01 | 1.00E+00 |
| ENSG00000232605.2_HMGN2P11   | ENSG00000160789.18_LMNA | 0.13491  | -0.024819612 | 0.287930581 | 9.75E-02 | 3.07E-01 | 1.00E+00 |
| ENSG00000228280.1_RP11-367B  | ENSG00000160789.18_LMNA | -0.04861 | -0.206210123 | 0.111458093 | 5.52E-01 | 7.88E-01 | 1.00E+00 |
| ENSG00000229919.3_TCEB1P3    | ENSG00000160789.18_LMNA | 0.04652  | -0.113526333 | 0.204203585 | 5.69E-01 | 7.99E-01 | 1.00E+00 |
| ENSG00000249973.2_CHCHD2P7   | ENSG00000160789.18_LMNA | 0.07874  | -0.08148118  | 0.234995824 | 3.35E-01 | 6.21E-01 | 1.00E+00 |
| ENSG00000231688.1_RPL21P43   | ENSG00000160789.18_LMNA | -0.07784 | -0.234136474 | 0.082384461 | 3.41E-01 | 6.26E-01 | 1.00E+00 |
| ENSG00000265656.1_RP11-13N1  | ENSG00000160789.18_LMNA | 0.04525  | -0.114781988 | 0.202984086 | 5.80E-01 | 8.04E-01 | 1.00E+00 |
| ENSG00000259622.1_RP11-597K  | ENSG00000160789.18_LMNA | 0.01515  | -0.144402663 | 0.173927548 | 8.53E-01 | 9.42E-01 | 1.00E+00 |
| ENSG00000237178.2_AC019080.  | ENSG00000160789.18_LMNA | 0.02889  | -0.130915485 | 0.187226949 | 7.24E-01 | 8.83E-01 | 1.00E+00 |
| ENSG00000274797.1_RP11-407N  | ENSG00000160789.18_LMNA | 0.03318  | -0.126693163 | 0.191366651 | 6.85E-01 | 8.63E-01 | 1.00E+00 |
| ENSG00000257890.1_RP11-114F  | ENSG00000160789.18_LMNA | -0.05736 | -0.214598538 | 0.10278183  | 4.83E-01 | 7.40E-01 | 1.00E+00 |
| ENSG00000225726.1_AC007000.  | ENSG00000160789.18_LMNA | 0.02026  | -0.139388657 | 0.178885344 | 8.04E-01 | 9.22E-01 | 1.00E+00 |
| ENSG00000280924.1_LINC00628  | ENSG00000160789.18_LMNA | 0.03276  | -0.127103309 | 0.190965027 | 6.89E-01 | 8.66E-01 | 1.00E+00 |
| ENSG00000226819.1_MEIS1-AS3  | ENSG00000160789.18_LMNA | -0.02742 | -0.185813698 | 0.132354304 | 7.37E-01 | 8.90E-01 | 1.00E+00 |
| ENSG00000259544.1_RP11-158M  | ENSG00000160789.18_LMNA | -0.10666 | -0.261423909 | 0.053445877 | 1.91E-01 | 4.59E-01 | 1.00E+00 |
| ENSG00000229840.2_ISCA1P2    | ENSG00000160789.18_LMNA | -0.06194 | -0.218983653 | 0.098226936 | 4.48E-01 | 7.15E-01 | 1.00E+00 |
| ENSG00000261278.1_RP11-430C  | ENSG00000160789.18_LMNA | 0.08313  | -0.077095514 | 0.239161173 | 3.09E-01 | 5.95E-01 | 1.00E+00 |
| ENSG00000253708.1_RP11-51J9. | ENSG00000160789.18_LMNA | -0.09128 | -0.246891497 | 0.06892375  | 2.63E-01 | 5.47E-01 | 1.00E+00 |
| ENSG00000265096.1_C1QTNF1-/- | ENSG00000160789.18_LMNA | 0.02653  | -0.133232082 | 0.184950871 | 7.46E-01 | 8.94E-01 | 1.00E+00 |
| ENSG00000254141.1_RP11-642D  | ENSG00000160789.18_LMNA | -0.20777 | -0.355220999 | -0.05023077 | 1.02E-02 | 6.65E-02 | 1.00E+00 |
| ENSG00000267144.1_AC067968.  | ENSG00000160789.18_LMNA | -0.10529 | -0.26012598  | 0.054834428 | 1.97E-01 | 4.66E-01 | 1.00E+00 |
| ENSG00000229423.2_RPL27AP8   | ENSG00000160789.18_LMNA | 0.13199  | -0.027798907 | 0.285194046 | 1.05E-01 | 3.22E-01 | 1.00E+00 |
| ENSG00000240074.1_RPL9P30    | ENSG00000160789.18_LMNA | -0.0063  | -0.165331223 | 0.153057878 | 9.39E-01 | 9.76E-01 | 1.00E+00 |
| ENSG00000259591.1_RP11-554D  | ENSG00000160789.18_LMNA | 0.09117  | -0.069031127 | 0.24679018  | 2.64E-01 | 5.47E-01 | 1.00E+00 |
| ENSG00000244157.1_EIF4E2P2   | ENSG00000160789.18_LMNA | -0.03029 | -0.188577406 | 0.129539344 | 7.11E-01 | 8.77E-01 | 1.00E+00 |
| ENSG00000250751.1_RP11-613C  | ENSG00000160789.18_LMNA | -0.01843 | -0.177114963 | 0.141180985 | 8.22E-01 | 9.30E-01 | 1.00E+00 |
| ENSG00000249768.2_HSPE1P10   | ENSG00000160789.18_LMNA | -0.03561 | -0.193709955 | 0.124297972 | 6.63E-01 | 8.51E-01 | 1.00E+00 |
| ENSG00000224855.4_OPA1-AS1   | ENSG00000160789.18_LMNA | 0.0765   | -0.083723949 | 0.23286122  | 3.49E-01 | 6.33E-01 | 1.00E+00 |
| ENSG00000250564.1_RP11-215P  | ENSG00000160789.18_LMNA | 0.05597  | -0.104162357 | 0.213266936 | 4.93E-01 | 7.49E-01 | 1.00E+00 |
| ENSG00000270521.1_RP11-24C1  | ENSG00000160789.18_LMNA | -0.03569 | -0.193789222 | 0.124216885 | 6.62E-01 | 8.51E-01 | 1.00E+00 |

|                              |                         |          |              |             |          |          |          |
|------------------------------|-------------------------|----------|--------------|-------------|----------|----------|----------|
| ENSG00000261537.1_RP11-319G  | ENSG00000160789.18_LMNA | 0.04756  | -0.112489806 | 0.205209523 | 5.61E-01 | 7.93E-01 | 1.00E+00 |
| ENSG00000235090.1_RPL7L1P3   | ENSG00000160789.18_LMNA | -0.04053 | -0.1984531   | 0.119438432 | 6.20E-01 | 8.28E-01 | 1.00E+00 |
| ENSG00000266786.1_LGALS9DP   | ENSG00000160789.18_LMNA | 0.05869  | -0.10146356  | 0.215868988 | 4.73E-01 | 7.32E-01 | 1.00E+00 |
| ENSG00000231782.5_LINC00575  | ENSG00000160789.18_LMNA | -0.19387 | -0.342499618 | -0.03577331 | 1.67E-02 | 9.49E-02 | 1.00E+00 |
| ENSG00000225928.2_CACYBPP1   | ENSG00000160789.18_LMNA | -0.04256 | -0.200406869 | 0.117432279 | 6.03E-01 | 8.18E-01 | 1.00E+00 |
| ENSG00000267496.3_FAM215A    | ENSG00000160789.18_LMNA | -0.05539 | -0.21271711  | 0.104732029 | 4.98E-01 | 7.51E-01 | 1.00E+00 |
| ENSG00000149305.5_HTR3B      | ENSG00000160789.18_LMNA | -0.09266 | -0.248201756 | 0.067534455 | 2.56E-01 | 5.38E-01 | 1.00E+00 |
| ENSG00000251624.1_UNC93B7    | ENSG00000160789.18_LMNA | 0.13242  | -0.027358755 | 0.285598654 | 1.04E-01 | 3.19E-01 | 1.00E+00 |
| ENSG00000248505.1_RP11-319E  | ENSG00000160789.18_LMNA | 0.07755  | -0.082673566 | 0.233861325 | 3.42E-01 | 6.27E-01 | 1.00E+00 |
| ENSG00000213530.3_MTHFD2P5   | ENSG00000160789.18_LMNA | -0.07412 | -0.230596281 | 0.086100156 | 3.64E-01 | 6.46E-01 | 1.00E+00 |
| ENSG00000259006.1_RP11-566K  | ENSG00000160789.18_LMNA | 0.1917   | 0.033525756  | 0.340511797 | 1.80E-02 | 1.00E-01 | 1.00E+00 |
| ENSG00000231709.1_           | ENSG00000160789.18_LMNA | -0.01261 | -0.17146725  | 0.146884801 | 8.77E-01 | 9.52E-01 | 1.00E+00 |
| ENSG00000251688.1_RP11-752L  | ENSG00000160789.18_LMNA | 0.00162  | -0.157617579 | 0.160783006 | 9.84E-01 | 9.94E-01 | 1.00E+00 |
| ENSG00000233858.4_AC026904.  | ENSG00000160789.18_LMNA | 0.23238  | 0.07598596   | 0.377606983 | 3.97E-03 | 3.30E-02 | 1.00E+00 |
| ENSG00000203782.5_LOR        | ENSG00000160789.18_LMNA | -0.04508 | -0.202826496 | 0.114944177 | 5.81E-01 | 8.05E-01 | 1.00E+00 |
| ENSG00000280136.1_RP11-1228  | ENSG00000160789.18_LMNA | -0.07491 | -0.231354526 | 0.085305062 | 3.59E-01 | 6.42E-01 | 1.00E+00 |
| ENSG00000174950.9_CD164L2    | ENSG00000160789.18_LMNA | 0.03863  | -0.121314961 | 0.19662328  | 6.37E-01 | 8.37E-01 | 1.00E+00 |
| ENSG00000261375.1_RP11-632K  | ENSG00000160789.18_LMNA | 0.10159  | -0.058556681 | 0.256641031 | 2.13E-01 | 4.87E-01 | 1.00E+00 |
| ENSG00000257512.1_RP11-486A  | ENSG00000160789.18_LMNA | 0.0325   | -0.127360207 | 0.190713411 | 6.91E-01 | 8.67E-01 | 1.00E+00 |
| ENSG00000255303.1_OR5BA1P    | ENSG00000160789.18_LMNA | 0.02623  | -0.133524412 | 0.184663412 | 7.48E-01 | 8.95E-01 | 1.00E+00 |
| ENSG00000212126.3_TAS2R50    | ENSG00000160789.18_LMNA | -0.0961  | -0.251450324 | 0.064084643 | 2.39E-01 | 5.18E-01 | 1.00E+00 |
| ENSG00000230946.3_HNRNPA1F   | ENSG00000160789.18_LMNA | -0.03189 | -0.190124172 | 0.127961652 | 6.97E-01 | 8.70E-01 | 1.00E+00 |
| ENSG00000279361.1_RP11-360N  | ENSG00000160789.18_LMNA | 0.11285  | -0.047200454 | 0.267247688 | 1.66E-01 | 4.23E-01 | 1.00E+00 |
| ENSG00000254556.1_AF131215.4 | ENSG00000160789.18_LMNA | -0.07984 | -0.236040613 | 0.080382279 | 3.28E-01 | 6.14E-01 | 1.00E+00 |
| ENSG00000111046.3_MYF6       | ENSG00000160789.18_LMNA | 0.04473  | -0.115296392 | 0.202484209 | 5.84E-01 | 8.07E-01 | 1.00E+00 |
| ENSG00000268333.1_RP4-806M2  | ENSG00000160789.18_LMNA | -0.00163 | -0.160787551 | 0.15761303  | 9.84E-01 | 9.94E-01 | 1.00E+00 |
| ENSG00000233996.1_AC013439.4 | ENSG00000160789.18_LMNA | -0.139   | -0.29174207  | 0.020660725 | 8.77E-02 | 2.88E-01 | 1.00E+00 |
| ENSG00000205755.9_CRLF2      | ENSG00000160789.18_LMNA | 0.14161  | -0.017997575 | 0.294177563 | 8.18E-02 | 2.76E-01 | 1.00E+00 |
| ENSG00000164325.7_TMEN174    | ENSG00000160789.18_LMNA | 0.03784  | -0.122094572 | 0.195862423 | 6.43E-01 | 8.41E-01 | 1.00E+00 |
| ENSG00000214890.3_CTD-2299I2 | ENSG00000160789.18_LMNA | -0.00878 | -0.167741622 | 0.150635884 | 9.15E-01 | 9.67E-01 | 1.00E+00 |
| ENSG00000279013.1_RP11-254A  | ENSG00000160789.18_LMNA | 0.01341  | -0.146107208 | 0.172238428 | 8.70E-01 | 9.49E-01 | 1.00E+00 |
| ENSG00000167800.9_TBX10      | ENSG00000160789.18_LMNA | 0.01847  | -0.141148007 | 0.177147556 | 8.21E-01 | 9.30E-01 | 1.00E+00 |
| ENSG00000254677.1_OSBPL9P2   | ENSG00000160789.18_LMNA | -0.01273 | -0.171582491 | 0.146768627 | 8.76E-01 | 9.52E-01 | 1.00E+00 |

|                              |                         |          |              |             |          |          |          |
|------------------------------|-------------------------|----------|--------------|-------------|----------|----------|----------|
| ENSG00000224494.1_HNRNPA3F   | ENSG00000160789.18_LMNA | 0.0082   | -0.151196011 | 0.167184515 | 9.20E-01 | 9.70E-01 | 1.00E+00 |
| ENSG00000259905.4_PWRN1      | ENSG00000160789.18_LMNA | -0.16588 | -0.316720014 | -0.00686407 | 4.11E-02 | 1.77E-01 | 1.00E+00 |
| ENSG00000280118.1_RP11-385H  | ENSG00000160789.18_LMNA | -0.14697 | -0.299172989 | 0.012521309 | 7.08E-02 | 2.51E-01 | 1.00E+00 |
| ENSG00000261097.1_LINC00563  | ENSG00000160789.18_LMNA | 0.09368  | -0.066513079 | 0.249164291 | 2.51E-01 | 5.32E-01 | 1.00E+00 |
| ENSG00000198049.6_AVPR1B     | ENSG00000160789.18_LMNA | -0.09485 | -0.250269979 | 0.065338981 | 2.45E-01 | 5.25E-01 | 1.00E+00 |
| ENSG00000235256.1_FKBP4P7    | ENSG00000160789.18_LMNA | 0.07212  | -0.088096943 | 0.228690338 | 3.77E-01 | 6.57E-01 | 1.00E+00 |
| ENSG00000250387.2_RP11-136K  | ENSG00000160789.18_LMNA | 0.09996  | -0.060194344 | 0.255105173 | 2.20E-01 | 4.96E-01 | 1.00E+00 |
| ENSG00000269502.4_DMRTC1     | ENSG00000160789.18_LMNA | -0.2606  | -0.403078393 | -0.10578876 | 1.18E-03 | 1.32E-02 | 1.00E+00 |
| ENSG00000241738.1_ZNF90P1    | ENSG00000160789.18_LMNA | -0.00281 | -0.161938959 | 0.156459993 | 9.73E-01 | 9.89E-01 | 1.00E+00 |
| ENSG00000246740.2_PLA2G4E-A  | ENSG00000160789.18_LMNA | 0.05353  | -0.106581604 | 0.21093058  | 5.12E-01 | 7.61E-01 | 1.00E+00 |
| ENSG00000235726.4_AC010148.  | ENSG00000160789.18_LMNA | -0.0785  | -0.234767843 | 0.081720866 | 3.36E-01 | 6.22E-01 | 1.00E+00 |
| ENSG00000206181.5_TCEB3B     | ENSG00000160789.18_LMNA | 0.13736  | -0.022333633 | 0.290210094 | 9.15E-02 | 2.95E-01 | 1.00E+00 |
| ENSG00000198758.9_EPS8L3     | ENSG00000160789.18_LMNA | -0.01858 | -0.177253517 | 0.141040789 | 8.20E-01 | 9.30E-01 | 1.00E+00 |
| ENSG00000227744.4_FLJ43879   | ENSG00000160789.18_LMNA | -0.04008 | -0.198020666 | 0.119882109 | 6.24E-01 | 8.30E-01 | 1.00E+00 |
| ENSG00000254275.5_LINC00824  | ENSG00000160789.18_LMNA | -0.014   | -0.172814759 | 0.145525826 | 8.64E-01 | 9.47E-01 | 1.00E+00 |
| ENSG00000228430.7_RP11-15B2  | ENSG00000160789.18_LMNA | -0.05346 | -0.210862902 | 0.106651627 | 5.13E-01 | 7.61E-01 | 1.00E+00 |
| ENSG00000101076.15_HNF4A     | ENSG00000160789.18_LMNA | 0.02482  | -0.134913639 | 0.183296586 | 7.61E-01 | 9.01E-01 | 1.00E+00 |
| ENSG00000175311.6_ANKS4B     | ENSG00000160789.18_LMNA | 0.01791  | -0.141697619 | 0.176604272 | 8.27E-01 | 9.32E-01 | 1.00E+00 |
| ENSG00000240864.3_IGKV1-16   | ENSG00000160789.18_LMNA | 0.05228  | -0.107817453 | 0.209735674 | 5.22E-01 | 7.68E-01 | 1.00E+00 |
| ENSG00000211934.3_IGHV1-2    | ENSG00000160789.18_LMNA | 0.12573  | -0.034149357 | 0.279343965 | 1.23E-01 | 3.53E-01 | 1.00E+00 |
| ENSG00000280411.1_IGHV1-69-2 | ENSG00000160789.18_LMNA | 0.11069  | -0.04938513  | 0.265213113 | 1.75E-01 | 4.35E-01 | 1.00E+00 |
| ENSG00000165588.15_OTX2      | ENSG00000160789.18_LMNA | -0.05099 | -0.208493755 | 0.109100886 | 5.33E-01 | 7.75E-01 | 1.00E+00 |
| ENSG00000279230.1_AL158839.1 | ENSG00000160789.18_LMNA | 0.00703  | -0.152345165 | 0.166040919 | 9.32E-01 | 9.73E-01 | 1.00E+00 |
| ENSG00000264773.1_MIR4420    | ENSG00000160789.18_LMNA | -0.05766 | -0.214885869 | 0.102483781 | 4.80E-01 | 7.38E-01 | 1.00E+00 |
| ENSG00000200257.1_RNU6-97P   | ENSG00000160789.18_LMNA | 0.01139  | -0.148076288 | 0.170284835 | 8.89E-01 | 9.57E-01 | 1.00E+00 |
| ENSG00000230290.1_ARMC2-AS   | ENSG00000160789.18_LMNA | 0.10378  | -0.056351133 | 0.258706959 | 2.03E-01 | 4.74E-01 | 1.00E+00 |
| ENSG00000222108.1_RNA5SP31   | ENSG00000160789.18_LMNA | 0.05345  | -0.106656419 | 0.210858271 | 5.13E-01 | 7.61E-01 | 1.00E+00 |
| ENSG00000258273.1_RP11-370I1 | ENSG00000160789.18_LMNA | 0.0533   | -0.106808689 | 0.21071109  | 5.14E-01 | 7.62E-01 | 1.00E+00 |
| ENSG00000276868.1_RP11-318K  | ENSG00000160789.18_LMNA | 0.0199   | -0.139742654 | 0.178535845 | 8.08E-01 | 9.23E-01 | 1.00E+00 |
| ENSG00000216753.3_HMGA1P7    | ENSG00000160789.18_LMNA | -0.45564 | -0.573253906 | -0.3196193  | 3.67E-09 | 4.62E-07 | 1.88E-04 |
| ENSG00000231622.1_RPS29P7    | ENSG00000160789.18_LMNA | 0.07786  | -0.082358524 | 0.234161156 | 3.40E-01 | 6.25E-01 | 1.00E+00 |
| ENSG00000266439.2_RN7SL493f  | ENSG00000160789.18_LMNA | -0.04984 | -0.20739636  | 0.110234084 | 5.42E-01 | 7.81E-01 | 1.00E+00 |
| ENSG00000267729.1_AC010761.  | ENSG00000160789.18_LMNA | 0.08892  | -0.071293935 | 0.244653481 | 2.76E-01 | 5.61E-01 | 1.00E+00 |

|                              |                         |          |              |             |          |          |          |
|------------------------------|-------------------------|----------|--------------|-------------|----------|----------|----------|
| ENSG00000228171.1_AC121251.  | ENSG00000160789.18_LMNA | -0.15106 | -0.302972257 | 0.008343782 | 6.32E-02 | 2.34E-01 | 1.00E+00 |
| ENSG00000271892.1_CTD-2228A  | ENSG00000160789.18_LMNA | -0.24059 | -0.385041326 | -0.08462917 | 2.83E-03 | 2.56E-02 | 1.00E+00 |
| ENSG00000224677.1_PDIA3P2    | ENSG00000160789.18_LMNA | 0.14714  | -0.01234612  | 0.299332514 | 7.05E-02 | 2.51E-01 | 1.00E+00 |
| ENSG00000223633.2_RP11-143A  | ENSG00000160789.18_LMNA | -0.36922 | -0.499082935 | -0.22313325 | 2.86E-06 | 1.06E-04 | 1.47E-01 |
| ENSG00000232015.2_HSPE1P25   | ENSG00000160789.18_LMNA | -0.11114 | -0.265642428 | 0.048924393 | 1.73E-01 | 4.32E-01 | 1.00E+00 |
| ENSG00000109193.9_SULT1E1    | ENSG00000160789.18_LMNA | 0.00532  | -0.154006404 | 0.164386201 | 9.48E-01 | 9.79E-01 | 1.00E+00 |
| ENSG00000080572.11_PIH1D3    | ENSG00000160789.18_LMNA | 0.05101  | -0.109076905 | 0.20851697  | 5.33E-01 | 7.75E-01 | 1.00E+00 |
| ENSG00000227479.1_AC124861.  | ENSG00000160789.18_LMNA | -0.06135 | -0.21841605  | 0.098817264 | 4.53E-01 | 7.18E-01 | 1.00E+00 |
| ENSG00000265971.1_RP11-269G  | ENSG00000160789.18_LMNA | 0.02298  | -0.136718758 | 0.181518733 | 7.79E-01 | 9.09E-01 | 1.00E+00 |
| ENSG00000242199.1_RP11-71H1  | ENSG00000160789.18_LMNA | -0.02933 | -0.187654838 | 0.130479591 | 7.20E-01 | 8.81E-01 | 1.00E+00 |
| ENSG00000211645.2_IGLV1-50   | ENSG00000160789.18_LMNA | -0.15195 | -0.303801722 | 0.007430288 | 6.17E-02 | 2.30E-01 | 1.00E+00 |
| ENSG00000258896.1_SCOP1      | ENSG00000160789.18_LMNA | -0.0232  | -0.181731803 | 0.136502531 | 7.77E-01 | 9.08E-01 | 1.00E+00 |
| ENSG00000259575.1_RP11-39M2  | ENSG00000160789.18_LMNA | 0.07971  | -0.080509822 | 0.235919388 | 3.29E-01 | 6.15E-01 | 1.00E+00 |
| ENSG00000256276.1_RP5-916L7  | ENSG00000160789.18_LMNA | 0.00587  | -0.153475983 | 0.164914735 | 9.43E-01 | 9.77E-01 | 1.00E+00 |
| ENSG00000254768.4_CTD-2140C  | ENSG00000160789.18_LMNA | -0.25696 | -0.399808931 | -0.10193322 | 1.39E-03 | 1.49E-02 | 1.00E+00 |
| ENSG00000201600.1_RN7SKP12   | ENSG00000160789.18_LMNA | -0.12013 | -0.274092853 | 0.039828129 | 1.40E-01 | 3.82E-01 | 1.00E+00 |
| ENSG00000257829.1_RP11-845M  | ENSG00000160789.18_LMNA | 0.02004  | -0.139604417 | 0.178672335 | 8.06E-01 | 9.23E-01 | 1.00E+00 |
| ENSG00000225790.1_RP11-2L8.1 | ENSG00000160789.18_LMNA | 0.06098  | -0.099185234 | 0.218062137 | 4.55E-01 | 7.20E-01 | 1.00E+00 |
| ENSG00000234777.1_RP11-125D  | ENSG00000160789.18_LMNA | 0.02677  | -0.132999744 | 0.1851793   | 7.43E-01 | 8.92E-01 | 1.00E+00 |
| ENSG00000267638.1_RP11-546M  | ENSG00000160789.18_LMNA | 0.16083  | 0.001668963  | 0.312038282 | 4.78E-02 | 1.95E-01 | 1.00E+00 |
| ENSG00000235021.1_RP11-439E  | ENSG00000160789.18_LMNA | -0.12725 | -0.280760305 | 0.032614194 | 1.18E-01 | 3.45E-01 | 1.00E+00 |
| ENSG00000236395.1_AC093106.  | ENSG00000160789.18_LMNA | -0.07885 | -0.235097311 | 0.081374471 | 3.34E-01 | 6.20E-01 | 1.00E+00 |
| ENSG00000226984.1_RP4-591B8  | ENSG00000160789.18_LMNA | -0.06255 | -0.219560366 | 0.097626904 | 4.44E-01 | 7.11E-01 | 1.00E+00 |
| ENSG00000227237.1_AL672294.1 | ENSG00000160789.18_LMNA | 0.04075  | -0.119228507 | 0.198657661 | 6.18E-01 | 8.27E-01 | 1.00E+00 |
| ENSG00000218682.1_AC010150.  | ENSG00000160789.18_LMNA | 0.07323  | -0.086980353 | 0.229756428 | 3.70E-01 | 6.50E-01 | 1.00E+00 |
| ENSG00000278071.1_RP11-736N  | ENSG00000160789.18_LMNA | 0.05586  | -0.104267847 | 0.213165137 | 4.94E-01 | 7.49E-01 | 1.00E+00 |
| ENSG00000264273.1_CTD-2145A  | ENSG00000160789.18_LMNA | -0.05493 | -0.212277851 | 0.105186993 | 5.01E-01 | 7.53E-01 | 1.00E+00 |
| ENSG00000227154.3_MKRNP2     | ENSG00000160789.18_LMNA | 0.08011  | -0.080111587 | 0.236297864 | 3.27E-01 | 6.13E-01 | 1.00E+00 |
| ENSG00000225720.5_RP4-742C1  | ENSG00000160789.18_LMNA | -0.02426 | -0.182756192 | 0.135462544 | 7.67E-01 | 9.03E-01 | 1.00E+00 |
| ENSG00000219703.1_RAP1BP3    | ENSG00000160789.18_LMNA | -0.05767 | -0.214893156 | 0.102476221 | 4.80E-01 | 7.38E-01 | 1.00E+00 |
| ENSG00000254867.1_RP11-1167. | ENSG00000160789.18_LMNA | -0.05492 | -0.212265249 | 0.105200043 | 5.02E-01 | 7.53E-01 | 1.00E+00 |
| ENSG00000228884.2_RPL23AP2f  | ENSG00000160789.18_LMNA | 0.12995  | -0.029872222 | 0.283286654 | 1.11E-01 | 3.32E-01 | 1.00E+00 |
| ENSG00000203663.3_OR2L2      | ENSG00000160789.18_LMNA | -0.19673 | -0.345123679 | -0.03874501 | 1.51E-02 | 8.84E-02 | 1.00E+00 |

|                              |                         |          |              |             |          |          |          |
|------------------------------|-------------------------|----------|--------------|-------------|----------|----------|----------|
| ENSG00000227009.1_FUNDC2P4   | ENSG00000160789.18_LMNA | -0.05334 | -0.210751609 | 0.10676677  | 5.14E-01 | 7.62E-01 | 1.00E+00 |
| ENSG00000253852.1_CTB-140J7  | ENSG00000160789.18_LMNA | -0.02208 | -0.180650198 | 0.137599846 | 7.87E-01 | 9.13E-01 | 1.00E+00 |
| ENSG00000250174.4_MYLK-AS2   | ENSG00000160789.18_LMNA | -0.25835 | -0.401053635 | -0.10339999 | 1.31E-03 | 1.42E-02 | 1.00E+00 |
| ENSG00000270036.1_RP11-685G  | ENSG00000160789.18_LMNA | -0.12676 | -0.280303492 | 0.033109492 | 1.20E-01 | 3.48E-01 | 1.00E+00 |
| ENSG00000259678.1_RP11-707P  | ENSG00000160789.18_LMNA | -0.07056 | -0.227205063 | 0.089651249 | 3.88E-01 | 6.66E-01 | 1.00E+00 |
| ENSG00000181562.3_EDDM3A     | ENSG00000160789.18_LMNA | -0.19446 | -0.343041634 | -0.03638669 | 1.64E-02 | 9.34E-02 | 1.00E+00 |
| ENSG00000254645.1_RP11-396O  | ENSG00000160789.18_LMNA | -0.07006 | -0.226731934 | 0.090146042 | 3.91E-01 | 6.69E-01 | 1.00E+00 |
| ENSG00000206159.9_GYG2P1     | ENSG00000160789.18_LMNA | -0.02856 | -0.186913862 | 0.131234352 | 7.27E-01 | 8.84E-01 | 1.00E+00 |
| ENSG00000249272.1_UNC93B8    | ENSG00000160789.18_LMNA | 0.06499  | -0.095197572 | 0.221893023 | 4.26E-01 | 6.97E-01 | 1.00E+00 |
| ENSG00000226556.2_NPM1P49    | ENSG00000160789.18_LMNA | -0.01565 | -0.17441404  | 0.143911377 | 8.48E-01 | 9.41E-01 | 1.00E+00 |
| ENSG00000228380.1_MYL6BP1    | ENSG00000160789.18_LMNA | -0.03037 | -0.188654529 | 0.129460716 | 7.10E-01 | 8.77E-01 | 1.00E+00 |
| ENSG00000273540.1_AGBL1      | ENSG00000160789.18_LMNA | -0.15942 | -0.310734776 | -0.0002255  | 4.98E-02 | 2.01E-01 | 1.00E+00 |
| ENSG00000238160.1_AC116366.1 | ENSG00000160789.18_LMNA | 0.00943  | -0.149991876 | 0.168381907 | 9.08E-01 | 9.65E-01 | 1.00E+00 |
| ENSG00000215812.5_ZNF847P    | ENSG00000160789.18_LMNA | 0.00943  | -0.149994743 | 0.168379057 | 9.08E-01 | 9.65E-01 | 1.00E+00 |
| ENSG00000257302.1_FAHD2P1    | ENSG00000160789.18_LMNA | -0.10332 | -0.258272331 | 0.05681539  | 2.05E-01 | 4.77E-01 | 1.00E+00 |
| ENSG00000221957.7_KIR2DS4    | ENSG00000160789.18_LMNA | 0.14225  | -0.017346066 | 0.294772762 | 8.04E-02 | 2.73E-01 | 1.00E+00 |
| ENSG00000279368.1_RP1-80N2.4 | ENSG00000160789.18_LMNA | -0.04408 | -0.201865828 | 0.115932509 | 5.90E-01 | 8.10E-01 | 1.00E+00 |
| ENSG00000241537.1_RP11-624D  | ENSG00000160789.18_LMNA | -0.01104 | -0.169943546 | 0.148420024 | 8.93E-01 | 9.58E-01 | 1.00E+00 |
| ENSG00000175800.5_OR52B3P    | ENSG00000160789.18_LMNA | 0.10382  | -0.056307774 | 0.258747545 | 2.03E-01 | 4.74E-01 | 1.00E+00 |
| ENSG00000270090.4_RP11-529E  | ENSG00000160789.18_LMNA | -0.07807 | -0.234362154 | 0.082147294 | 3.39E-01 | 6.24E-01 | 1.00E+00 |
| ENSG00000266127.1_ZNF415P1   | ENSG00000160789.18_LMNA | -0.06194 | -0.218984902 | 0.098225636 | 4.48E-01 | 7.15E-01 | 1.00E+00 |
| ENSG00000231274.5_SBK3       | ENSG00000160789.18_LMNA | 0.08443  | -0.075791309 | 0.240397619 | 3.01E-01 | 5.88E-01 | 1.00E+00 |
| ENSG00000280029.2_CH17-140K  | ENSG00000160789.18_LMNA | 0.09899  | -0.061171362 | 0.254188133 | 2.25E-01 | 5.01E-01 | 1.00E+00 |
| ENSG00000248964.5_RP11-94H1  | ENSG00000160789.18_LMNA | 0.16398  | 0.00490671   | 0.31495785  | 4.35E-02 | 1.84E-01 | 1.00E+00 |
| ENSG00000270863.1_DDX55P1    | ENSG00000160789.18_LMNA | -0.09132 | -0.246931813 | 0.06888102  | 2.63E-01 | 5.47E-01 | 1.00E+00 |
| ENSG00000279286.2_RP11-248B  | ENSG00000160789.18_LMNA | 0.12098  | -0.038969882 | 0.274887669 | 1.38E-01 | 3.78E-01 | 1.00E+00 |
| ENSG00000256674.1_RP11-172C  | ENSG00000160789.18_LMNA | 0.09854  | -0.061627717 | 0.253759599 | 2.27E-01 | 5.04E-01 | 1.00E+00 |
| ENSG00000229231.1_FEM1AP1    | ENSG00000160789.18_LMNA | -0.00407 | -0.163160864 | 0.15523541  | 9.60E-01 | 9.84E-01 | 1.00E+00 |
| ENSG00000230889.2_SHC1P1     | ENSG00000160789.18_LMNA | 0.23477  | 0.07850411   | 0.379776959 | 3.60E-03 | 3.06E-02 | 1.00E+00 |
| ENSG00000251249.1_RP11-73G1  | ENSG00000160789.18_LMNA | -0.05171 | -0.209190177 | 0.108381315 | 5.27E-01 | 7.72E-01 | 1.00E+00 |
| ENSG00000204539.3_CDSN       | ENSG00000160789.18_LMNA | 0.29218  | 0.139465545  | 0.431316944 | 2.60E-04 | 4.01E-03 | 1.00E+00 |
| ENSG00000167633.15_KIR3DL1   | ENSG00000160789.18_LMNA | 0.15052  | -0.008896756 | 0.30246992  | 6.42E-02 | 2.36E-01 | 1.00E+00 |
| ENSG00000279476.1_RP11-391L  | ENSG00000160789.18_LMNA | -0.00367 | -0.162777685 | 0.155619534 | 9.64E-01 | 9.86E-01 | 1.00E+00 |

|                              |                         |          |              |             |          |          |          |
|------------------------------|-------------------------|----------|--------------|-------------|----------|----------|----------|
| ENSG00000232675.6_RP4-718D2  | ENSG00000160789.18_LMNA | -0.12713 | -0.280652199 | 0.032731422 | 1.19E-01 | 3.46E-01 | 1.00E+00 |
| ENSG00000166391.13_MOGAT2    | ENSG00000160789.18_LMNA | 0.07582  | -0.084403606 | 0.232213739 | 3.53E-01 | 6.37E-01 | 1.00E+00 |
| ENSG00000224721.1_AC007182.1 | ENSG00000160789.18_LMNA | -0.13935 | -0.292069941 | 0.020302464 | 8.69E-02 | 2.86E-01 | 1.00E+00 |
| ENSG00000280032.1_RP11-832A  | ENSG00000160789.18_LMNA | 0.27176  | 0.11765289   | 0.413091675 | 7.07E-04 | 8.85E-03 | 1.00E+00 |
| ENSG00000273372.1_SFTPD-AS   | ENSG00000160789.18_LMNA | -0.13489 | -0.287908759 | 0.024843392 | 9.75E-02 | 3.07E-01 | 1.00E+00 |
| ENSG00000278597.1_           | ENSG00000160789.18_LMNA | 0.05056  | -0.109522815 | 0.20808525  | 5.36E-01 | 7.77E-01 | 1.00E+00 |
| ENSG00000280675.1_AC092384.1 | ENSG00000160789.18_LMNA | 0.17491  | 0.016156269  | 0.32505649  | 3.11E-02 | 1.47E-01 | 1.00E+00 |
| ENSG00000278739.1_MIR6859-4  | ENSG00000160789.18_LMNA | 0.03473  | -0.125167493 | 0.19285969  | 6.71E-01 | 8.56E-01 | 1.00E+00 |
| ENSG00000264952.1_           | ENSG00000160789.18_LMNA | 0.06744  | -0.092755959 | 0.22423382  | 4.09E-01 | 6.83E-01 | 1.00E+00 |
| ENSG00000221795.1_           | ENSG00000160789.18_LMNA | -0.09244 | -0.247995715 | 0.067753006 | 2.57E-01 | 5.40E-01 | 1.00E+00 |
| ENSG00000265539.1_MIR3164    | ENSG00000160789.18_LMNA | -0.02578 | -0.18422748  | 0.133967624 | 7.53E-01 | 8.97E-01 | 1.00E+00 |
| ENSG00000252367.1_Y_RNA      | ENSG00000160789.18_LMNA | -0.01606 | -0.174813691 | 0.143507671 | 8.44E-01 | 9.39E-01 | 1.00E+00 |
| ENSG00000199400.1_RNY4P19    | ENSG00000160789.18_LMNA | -0.15177 | -0.303634422 | 0.007614578 | 6.20E-02 | 2.30E-01 | 1.00E+00 |
| ENSG00000207185.1_RNU6-1157  | ENSG00000160789.18_LMNA | -0.01494 | -0.173724532 | 0.144607633 | 8.55E-01 | 9.43E-01 | 1.00E+00 |
| ENSG00000271394.1_7SK        | ENSG00000160789.18_LMNA | 0.01708  | -0.142503503 | 0.175807317 | 8.35E-01 | 9.36E-01 | 1.00E+00 |
| ENSG00000207572.2_           | ENSG00000160789.18_LMNA | -0.26878 | -0.410414636 | -0.11447275 | 8.14E-04 | 9.85E-03 | 1.00E+00 |
| ENSG00000206914.1_Y_RNA      | ENSG00000160789.18_LMNA | 0.26971  | 0.115471814  | 0.411256198 | 7.79E-04 | 9.52E-03 | 1.00E+00 |
| ENSG00000238825.1_RNU1-13P   | ENSG00000160789.18_LMNA | 0.04269  | -0.117311023 | 0.200524878 | 6.02E-01 | 8.17E-01 | 1.00E+00 |
| ENSG00000222790.1_RNU4-14P   | ENSG00000160789.18_LMNA | -0.02231 | -0.180864838 | 0.13738215  | 7.85E-01 | 9.12E-01 | 1.00E+00 |
| ENSG00000180383.3_DEFB124    | ENSG00000160789.18_LMNA | -0.1943  | -0.342890629 | -0.03621578 | 1.65E-02 | 9.39E-02 | 1.00E+00 |
| ENSG00000251730.1_SNORA4     | ENSG00000160789.18_LMNA | -0.19402 | -0.342636063 | -0.0359277  | 1.66E-02 | 9.45E-02 | 1.00E+00 |
| ENSG00000265174.1_CTD-2124B  | ENSG00000160789.18_LMNA | -0.3183  | -0.4544695   | -0.1675899  | 6.43E-05 | 1.31E-03 | 1.00E+00 |
| ENSG00000269125.1_RP11-98F1  | ENSG00000160789.18_LMNA | -0.00491 | -0.163980447 | 0.154413481 | 9.52E-01 | 9.81E-01 | 1.00E+00 |
| ENSG00000201659.1_RNU12-2P   | ENSG00000160789.18_LMNA | -0.09832 | -0.253549525 | 0.061851381 | 2.28E-01 | 5.05E-01 | 1.00E+00 |
| ENSG00000275803.1_RN7SL736f  | ENSG00000160789.18_LMNA | -0.07099 | -0.227616601 | 0.089220738 | 3.85E-01 | 6.63E-01 | 1.00E+00 |
| ENSG00000246016.2_LINC01513  | ENSG00000160789.18_LMNA | -0.02326 | -0.181787023 | 0.136446488 | 7.76E-01 | 9.08E-01 | 1.00E+00 |
| ENSG00000266179.2_RP11-1113l | ENSG00000160789.18_LMNA | -0.15509 | -0.306717225 | 0.004215299 | 5.64E-02 | 2.17E-01 | 1.00E+00 |
| ENSG00000243955.4_GSTA1      | ENSG00000160789.18_LMNA | -0.03829 | -0.196298243 | 0.121648058 | 6.40E-01 | 8.39E-01 | 1.00E+00 |
| ENSG00000276925.1_RP11-708J  | ENSG00000160789.18_LMNA | 0.09578  | -0.064406769 | 0.25114729  | 2.40E-01 | 5.20E-01 | 1.00E+00 |
| ENSG00000199719.1_RN7SKP74   | ENSG00000160789.18_LMNA | -0.10247 | -0.257469768 | 0.057672306 | 2.09E-01 | 4.82E-01 | 1.00E+00 |
| ENSG00000235215.2_RP11-145M  | ENSG00000160789.18_LMNA | 0.0769   | -0.083321912 | 0.233244092 | 3.46E-01 | 6.31E-01 | 1.00E+00 |
| ENSG00000257624.1_RP1-128M1  | ENSG00000160789.18_LMNA | 0.13999  | -0.019646525 | 0.29267005  | 8.54E-02 | 2.84E-01 | 1.00E+00 |
| ENSG00000255239.1_TREHP1     | ENSG00000160789.18_LMNA | 0.07225  | -0.087965419 | 0.228815953 | 3.76E-01 | 6.56E-01 | 1.00E+00 |



|                              |                         |          |              |             |          |          |          |
|------------------------------|-------------------------|----------|--------------|-------------|----------|----------|----------|
| ENSG00000253308.2_RP1-170O1  | ENSG00000160789.18_LMNA | -0.20325 | -0.351092706 | -0.04552504 | 1.20E-02 | 7.49E-02 | 1.00E+00 |
| ENSG00000235736.1_RP1-10C16  | ENSG00000160789.18_LMNA | -0.26631 | -0.408206942 | -0.11185471 | 9.12E-04 | 1.08E-02 | 1.00E+00 |
| ENSG00000266869.1_RP6-114E2  | ENSG00000160789.18_LMNA | 0.10067  | -0.059483511 | 0.255772013 | 2.17E-01 | 4.92E-01 | 1.00E+00 |
| ENSG00000239472.3_RN7SL221F  | ENSG00000160789.18_LMNA | -0.04293 | -0.200757565 | 0.117071905 | 5.99E-01 | 8.16E-01 | 1.00E+00 |
| ENSG00000231207.1_RP1-144C9  | ENSG00000160789.18_LMNA | -0.10276 | -0.257739765 | 0.057384075 | 2.08E-01 | 4.80E-01 | 1.00E+00 |
| ENSG00000270941.1_RP5-966M1  | ENSG00000160789.18_LMNA | -0.07085 | -0.227486086 | 0.089357282 | 3.86E-01 | 6.64E-01 | 1.00E+00 |
| ENSG00000237786.1_GFOD1-AS   | ENSG00000160789.18_LMNA | 0.00561  | -0.153724421 | 0.164667203 | 9.45E-01 | 9.78E-01 | 1.00E+00 |
| ENSG00000255520.1_RP11-390K  | ENSG00000160789.18_LMNA | 0.04153  | -0.118453496 | 0.199412633 | 6.11E-01 | 8.23E-01 | 1.00E+00 |
| ENSG00000231194.1_FARP1-AS   | ENSG00000160789.18_LMNA | -0.12924 | -0.28262758  | 0.030588002 | 1.13E-01 | 3.35E-01 | 1.00E+00 |
| ENSG00000118702.8_GHRH       | ENSG00000160789.18_LMNA | -0.25629 | -0.39920606  | -0.10122325 | 1.44E-03 | 1.52E-02 | 1.00E+00 |
| ENSG00000242993.1_RP11-697H  | ENSG00000160789.18_LMNA | 0.08162  | -0.078599631 | 0.237733927 | 3.17E-01 | 6.04E-01 | 1.00E+00 |
| ENSG00000264595.1_RP11-94B1  | ENSG00000160789.18_LMNA | -0.2341  | -0.379168254 | -0.07779735 | 3.70E-03 | 3.13E-02 | 1.00E+00 |
| ENSG00000275506.1_CTD-2062A  | ENSG00000160789.18_LMNA | -0.04218 | -0.200036317 | 0.117812965 | 6.06E-01 | 8.20E-01 | 1.00E+00 |
| ENSG00000267554.1_RP11-686D  | ENSG00000160789.18_LMNA | 0.01465  | -0.144884129 | 0.173450628 | 8.58E-01 | 9.44E-01 | 1.00E+00 |
| ENSG00000229298.1_TUBB8P1    | ENSG00000160789.18_LMNA | 0.08273  | -0.077488078 | 0.238788804 | 3.11E-01 | 5.97E-01 | 1.00E+00 |
| ENSG00000266909.1_SLC25A6P   | ENSG00000160789.18_LMNA | -0.10536 | -0.260199747 | 0.054755543 | 1.96E-01 | 4.66E-01 | 1.00E+00 |
| ENSG00000250579.1_CTD-2297D  | ENSG00000160789.18_LMNA | -0.08843 | -0.24419472  | 0.071779348 | 2.79E-01 | 5.64E-01 | 1.00E+00 |
| ENSG00000275332.1_CTD-2017F  | ENSG00000160789.18_LMNA | 0.09589  | -0.064290902 | 0.251256296 | 2.40E-01 | 5.19E-01 | 1.00E+00 |
| ENSG00000218454.2_HNRNPA1F   | ENSG00000160789.18_LMNA | 0.00021  | -0.159000566 | 0.159400825 | 9.98E-01 | 9.99E-01 | 1.00E+00 |
| ENSG00000235421.1_RP11-667F  | ENSG00000160789.18_LMNA | -0.08659 | -0.24245206  | 0.073621888 | 2.89E-01 | 5.74E-01 | 1.00E+00 |
| ENSG00000225280.5_RP11-227D  | ENSG00000160789.18_LMNA | 0.01787  | -0.141733975 | 0.176568329 | 8.27E-01 | 9.32E-01 | 1.00E+00 |
| ENSG00000229977.2_AC073264   | ENSG00000160789.18_LMNA | 0.02574  | -0.134007949 | 0.184187811 | 7.53E-01 | 8.97E-01 | 1.00E+00 |
| ENSG00000270269.1_IMMP1LP1   | ENSG00000160789.18_LMNA | 0.02515  | -0.13458534  | 0.183619701 | 7.58E-01 | 8.99E-01 | 1.00E+00 |
| ENSG00000229983.1_RP11-15I11 | ENSG00000160789.18_LMNA | 0.02595  | -0.133803837 | 0.184388591 | 7.51E-01 | 8.96E-01 | 1.00E+00 |
| ENSG00000249848.1_RP11-212F  | ENSG00000160789.18_LMNA | -0.0058  | -0.164851945 | 0.153539006 | 9.43E-01 | 9.77E-01 | 1.00E+00 |
| ENSG00000273580.1_RP11-609L  | ENSG00000160789.18_LMNA | 0.0026   | -0.156666211 | 0.161733097 | 9.75E-01 | 9.90E-01 | 1.00E+00 |
| ENSG00000260965.1_RPL23AP9   | ENSG00000160789.18_LMNA | 0.00429  | -0.155011849 | 0.163383831 | 9.58E-01 | 9.83E-01 | 1.00E+00 |
| ENSG00000254921.1_RP11-236J  | ENSG00000160789.18_LMNA | -0.21248 | -0.359515263 | -0.0551401  | 8.59E-03 | 5.87E-02 | 1.00E+00 |
| ENSG00000213498.3_TPT1P13    | ENSG00000160789.18_LMNA | 0.08258  | -0.077639579 | 0.238645071 | 3.12E-01 | 5.98E-01 | 1.00E+00 |
| ENSG00000269058.4_CALR3      | ENSG00000160789.18_LMNA | 0.15596  | -0.003324892 | 0.307523657 | 5.50E-02 | 2.14E-01 | 1.00E+00 |
| ENSG00000250384.1_UBE2CP3    | ENSG00000160789.18_LMNA | 0.21685  | 0.059708126  | 0.363499438 | 7.29E-03 | 5.18E-02 | 1.00E+00 |
| ENSG00000258552.1_RP11-463C  | ENSG00000160789.18_LMNA | -0.0655  | -0.22238575  | 0.09468394  | 4.23E-01 | 6.94E-01 | 1.00E+00 |
| ENSG00000268581.1_SIGLEC18F  | ENSG00000160789.18_LMNA | 0.16168  | 0.002542857  | 0.312826875 | 4.66E-02 | 1.92E-01 | 1.00E+00 |

|                              |                         |          |              |             |          |          |          |
|------------------------------|-------------------------|----------|--------------|-------------|----------|----------|----------|
| ENSG00000241597.2_CTD-2007H  | ENSG00000160789.18_LMNA | 0.13029  | -0.029527316 | 0.283604129 | 1.10E-01 | 3.30E-01 | 1.00E+00 |
| ENSG00000248967.1_RP11-241J  | ENSG00000160789.18_LMNA | -0.07805 | -0.23433837  | 0.08217229  | 3.39E-01 | 6.24E-01 | 1.00E+00 |
| ENSG00000237025.1_RP1-315G1  | ENSG00000160789.18_LMNA | 0.13886  | -0.020795658 | 0.291618564 | 8.80E-02 | 2.89E-01 | 1.00E+00 |
| ENSG00000233010.1_RPEP4      | ENSG00000160789.18_LMNA | -0.08478 | -0.240734102 | 0.075436199 | 2.99E-01 | 5.85E-01 | 1.00E+00 |
| ENSG00000267205.1_AC005954.4 | ENSG00000160789.18_LMNA | 0.13922  | -0.02043038  | 0.291952884 | 8.71E-02 | 2.87E-01 | 1.00E+00 |
| ENSG00000243243.4_AC073130.3 | ENSG00000160789.18_LMNA | 0.06206  | -0.098105211 | 0.219100665 | 4.47E-01 | 7.14E-01 | 1.00E+00 |
| ENSG00000279275.1_RP11-756J  | ENSG00000160789.18_LMNA | 0.0293   | -0.130512895 | 0.18762215  | 7.20E-01 | 8.81E-01 | 1.00E+00 |
| ENSG00000256232.1_RP11-771K  | ENSG00000160789.18_LMNA | 0.01856  | -0.14105824  | 0.17723627  | 8.20E-01 | 9.30E-01 | 1.00E+00 |
| ENSG00000250260.1_RP11-325L  | ENSG00000160789.18_LMNA | 0.01242  | -0.147070672 | 0.171282855 | 8.79E-01 | 9.53E-01 | 1.00E+00 |
| ENSG00000215409.4_RP11-748L  | ENSG00000160789.18_LMNA | -0.09932 | -0.254492842 | 0.060846791 | 2.23E-01 | 4.99E-01 | 1.00E+00 |
| ENSG00000231561.2_CEACAMP2   | ENSG00000160789.18_LMNA | -0.05471 | -0.212058943 | 0.105413678 | 5.03E-01 | 7.54E-01 | 1.00E+00 |
| ENSG00000262316.1_RP11-433P  | ENSG00000160789.18_LMNA | -0.05741 | -0.214652445 | 0.102725917 | 4.82E-01 | 7.40E-01 | 1.00E+00 |
| ENSG00000259453.1_RP11-815J  | ENSG00000160789.18_LMNA | 0.05512  | -0.105005403 | 0.212453188 | 5.00E-01 | 7.53E-01 | 1.00E+00 |
| ENSG00000264125.1_RP11-354P  | ENSG00000160789.18_LMNA | -0.00865 | -0.167621856 | 0.150756318 | 9.16E-01 | 9.68E-01 | 1.00E+00 |
| ENSG00000186082.9_KRT18P14   | ENSG00000160789.18_LMNA | 0.08242  | -0.07780051  | 0.238492378 | 3.13E-01 | 5.99E-01 | 1.00E+00 |
| ENSG00000230501.1_ANKRD30B   | ENSG00000160789.18_LMNA | -0.025   | -0.183466086 | 0.134741429 | 7.60E-01 | 9.00E-01 | 1.00E+00 |
| ENSG00000254158.1_RP11-281O  | ENSG00000160789.18_LMNA | 0.16042  | 0.001255676  | 0.311665186 | 4.83E-02 | 1.97E-01 | 1.00E+00 |
| ENSG00000215304.3_RP13-395E  | ENSG00000160789.18_LMNA | -0.00972 | -0.168658216 | 0.149713878 | 9.05E-01 | 9.64E-01 | 1.00E+00 |
| ENSG00000230384.1_RPSAP25    | ENSG00000160789.18_LMNA | -0.11064 | -0.265166732 | 0.049434898 | 1.75E-01 | 4.35E-01 | 1.00E+00 |
| ENSG00000234311.1_RP11-432J  | ENSG00000160789.18_LMNA | -0.08249 | -0.238554786 | 0.077734736 | 3.12E-01 | 5.99E-01 | 1.00E+00 |
| ENSG00000228014.1_ZNF680P1   | ENSG00000160789.18_LMNA | -0.09873 | -0.253935707 | 0.061440192 | 2.26E-01 | 5.02E-01 | 1.00E+00 |
| ENSG00000271410.1_RP11-506H  | ENSG00000160789.18_LMNA | 0.05021  | -0.109870696 | 0.207748354 | 5.39E-01 | 7.79E-01 | 1.00E+00 |
| ENSG00000226455.1_RP3-512E2  | ENSG00000160789.18_LMNA | 0.12346  | -0.036452694 | 0.277216347 | 1.30E-01 | 3.65E-01 | 1.00E+00 |
| ENSG00000258551.4_CRAT37     | ENSG00000160789.18_LMNA | -0.02712 | -0.185518088 | 0.132655093 | 7.40E-01 | 8.91E-01 | 1.00E+00 |
| ENSG00000205682.2_RP11-798L  | ENSG00000160789.18_LMNA | -0.0393  | -0.19726692  | 0.12065515  | 6.31E-01 | 8.34E-01 | 1.00E+00 |
| ENSG00000171431.3_KRT20      | ENSG00000160789.18_LMNA | 0.01464  | -0.144897102 | 0.173437776 | 8.58E-01 | 9.44E-01 | 1.00E+00 |
| ENSG00000226072.1_AC016772.4 | ENSG00000160789.18_LMNA | 0.06573  | -0.094459897 | 0.222600624 | 4.21E-01 | 6.93E-01 | 1.00E+00 |
| ENSG00000239877.2_IGSF11-AS  | ENSG00000160789.18_LMNA | -0.09117 | -0.246791947 | 0.069029254 | 2.64E-01 | 5.47E-01 | 1.00E+00 |
| ENSG00000231615.2_RP11-296O  | ENSG00000160789.18_LMNA | 0.03049  | -0.129342402 | 0.188770573 | 7.09E-01 | 8.76E-01 | 1.00E+00 |
| ENSG00000214856.10_KRT16P1   | ENSG00000160789.18_LMNA | 0.00452  | -0.15478836  | 0.163606693 | 9.56E-01 | 9.82E-01 | 1.00E+00 |
| ENSG00000279996.1_CTB-139P1  | ENSG00000160789.18_LMNA | 0.02555  | -0.134200132 | 0.183998741 | 7.55E-01 | 8.98E-01 | 1.00E+00 |
| ENSG00000172867.3_KRT2       | ENSG00000160789.18_LMNA | 0.02954  | -0.130273125 | 0.18785747  | 7.18E-01 | 8.80E-01 | 1.00E+00 |
| ENSG00000106541.10_AGR2      | ENSG00000160789.18_LMNA | -0.1873  | -0.336469467 | -0.02896479 | 2.09E-02 | 1.11E-01 | 1.00E+00 |

|                              |                         |          |              |             |          |          |          |
|------------------------------|-------------------------|----------|--------------|-------------|----------|----------|----------|
| ENSG00000265190.5_ANXA8      | ENSG00000160789.18_LMNA | 0.07101  | -0.089200368 | 0.22763607  | 3.85E-01 | 6.63E-01 | 1.00E+00 |
| ENSG00000162399.6_BSND       | ENSG00000160789.18_LMNA | 0.30275  | 0.150815541  | 0.440706989 | 1.50E-04 | 2.60E-03 | 1.00E+00 |
| ENSG00000232756.1_RP5-1185I7 | ENSG00000160789.18_LMNA | -0.22577 | -0.371611708 | -0.06904868 | 5.16E-03 | 4.02E-02 | 1.00E+00 |
| ENSG00000172752.13_COL6A5    | ENSG00000160789.18_LMNA | 0.07564  | -0.084578399 | 0.232047176 | 3.54E-01 | 6.38E-01 | 1.00E+00 |
| ENSG00000134216.17_CHIA      | ENSG00000160789.18_LMNA | -0.07078 | -0.227416363 | 0.089430222 | 3.86E-01 | 6.65E-01 | 1.00E+00 |
| ENSG00000231322.4_RPL13AP1   | ENSG00000160789.18_LMNA | -0.13195 | -0.285163711 | 0.027831901 | 1.05E-01 | 3.22E-01 | 1.00E+00 |
| ENSG00000197251.3_LINC00336  | ENSG00000160789.18_LMNA | 0.11997  | -0.03999652  | 0.273936857 | 1.41E-01 | 3.83E-01 | 1.00E+00 |
| ENSG00000231703.2_RP4-669H2  | ENSG00000160789.18_LMNA | 0.14435  | -0.015197619 | 0.296733804 | 7.60E-02 | 2.64E-01 | 1.00E+00 |
| ENSG00000279622.1_RP11-254F  | ENSG00000160789.18_LMNA | 0.02851  | -0.131288009 | 0.186861171 | 7.27E-01 | 8.85E-01 | 1.00E+00 |
| ENSG00000224025.2_RP11-274B  | ENSG00000160789.18_LMNA | -0.01847 | -0.177151033 | 0.141144489 | 8.21E-01 | 9.30E-01 | 1.00E+00 |
| ENSG00000189325.6_C6orf222   | ENSG00000160789.18_LMNA | 0.09254  | -0.067655361 | 0.248087775 | 2.57E-01 | 5.39E-01 | 1.00E+00 |
| ENSG00000162594.13_IL23R     | ENSG00000160789.18_LMNA | 0.07203  | -0.088182303 | 0.228608807 | 3.78E-01 | 6.57E-01 | 1.00E+00 |
| ENSG00000185038.13_MROH2A    | ENSG00000160789.18_LMNA | -0.03265 | -0.190858008 | 0.12721258  | 6.90E-01 | 8.66E-01 | 1.00E+00 |
| ENSG00000202111.1_VTRNA1-2   | ENSG00000160789.18_LMNA | 0.16082  | 0.001660868  | 0.312030975 | 4.78E-02 | 1.95E-01 | 1.00E+00 |
| ENSG00000211642.2_IGLV10-54  | ENSG00000160789.18_LMNA | 0.02183  | -0.137853884 | 0.180399686 | 7.90E-01 | 9.14E-01 | 1.00E+00 |
| ENSG00000270097.1_           | ENSG00000160789.18_LMNA | -0.17377 | -0.324003767 | -0.01497991 | 3.23E-02 | 1.50E-01 | 1.00E+00 |
| ENSG00000214285.2_NPS        | ENSG00000160789.18_LMNA | 0.02845  | -0.131345331 | 0.18680488  | 7.28E-01 | 8.85E-01 | 1.00E+00 |
| ENSG00000277792.1_           | ENSG00000160789.18_LMNA | 0.10224  | -0.057900059 | 0.257256387 | 2.10E-01 | 4.83E-01 | 1.00E+00 |
| ENSG00000211650.2_IGLV5-45   | ENSG00000160789.18_LMNA | -0.06044 | -0.217547754 | 0.099719893 | 4.59E-01 | 7.23E-01 | 1.00E+00 |
| ENSG00000201136.1_RNU6-353F  | ENSG00000160789.18_LMNA | -0.18192 | -0.331519102 | -0.02339668 | 2.49E-02 | 1.26E-01 | 1.00E+00 |
| ENSG00000278136.1_           | ENSG00000160789.18_LMNA | 0.06389  | -0.096288637 | 0.220845825 | 4.34E-01 | 7.03E-01 | 1.00E+00 |
| ENSG00000278418.1_MIR6512    | ENSG00000160789.18_LMNA | -0.01227 | -0.171139461 | 0.147215197 | 8.81E-01 | 9.54E-01 | 1.00E+00 |
| ENSG00000266743.1_RP11-94B1  | ENSG00000160789.18_LMNA | -0.1979  | -0.346195659 | -0.03996056 | 1.45E-02 | 8.59E-02 | 1.00E+00 |
| ENSG00000252759.1_Y_RNA      | ENSG00000160789.18_LMNA | 0.00461  | -0.154709017 | 0.163685805 | 9.55E-01 | 9.82E-01 | 1.00E+00 |
| ENSG00000201208.1_Y_RNA      | ENSG00000160789.18_LMNA | 0.03526  | -0.124639881 | 0.193375675 | 6.66E-01 | 8.53E-01 | 1.00E+00 |
| ENSG00000252461.1_SNORA43    | ENSG00000160789.18_LMNA | 0.07646  | -0.083756337 | 0.232830372 | 3.49E-01 | 6.33E-01 | 1.00E+00 |
| ENSG00000279471.1_AC008759.  | ENSG00000160789.18_LMNA | 0.0262   | -0.133553332 | 0.184634971 | 7.49E-01 | 8.95E-01 | 1.00E+00 |
| ENSG00000226738.1_CTA-384D8  | ENSG00000160789.18_LMNA | 0.12091  | -0.039041258 | 0.274821585 | 1.38E-01 | 3.78E-01 | 1.00E+00 |
| ENSG00000201544.1_SNORA16E   | ENSG00000160789.18_LMNA | -0.07015 | -0.226818086 | 0.090055958 | 3.90E-01 | 6.69E-01 | 1.00E+00 |
| ENSG00000240606.3_RN7SL564f  | ENSG00000160789.18_LMNA | 0.01236  | -0.147133188 | 0.17122083  | 8.80E-01 | 9.53E-01 | 1.00E+00 |
| ENSG00000200013.1_RNU6-623F  | ENSG00000160789.18_LMNA | -0.08587 | -0.241767704 | 0.074344877 | 2.93E-01 | 5.79E-01 | 1.00E+00 |
| ENSG00000200550.1_RNU6-137F  | ENSG00000160789.18_LMNA | 0.06881  | -0.091395259 | 0.225536751 | 4.00E-01 | 6.76E-01 | 1.00E+00 |
| ENSG00000278374.1_U4         | ENSG00000160789.18_LMNA | -0.13767 | -0.290500654 | 0.022016477 | 9.08E-02 | 2.94E-01 | 1.00E+00 |

|                              |                         |          |              |             |          |          |          |
|------------------------------|-------------------------|----------|--------------|-------------|----------|----------|----------|
| ENSG00000275022.1_MIR6753    | ENSG00000160789.18_LMNA | 0.18396  | 0.02550803   | 0.333398208 | 2.33E-02 | 1.20E-01 | 1.00E+00 |
| ENSG00000248345.1_           | ENSG00000160789.18_LMNA | 0.02807  | -0.1317231   | 0.186433848 | 7.31E-01 | 8.87E-01 | 1.00E+00 |
| ENSG00000271749.1_RP11-269G  | ENSG00000160789.18_LMNA | 0.06992  | -0.090285996 | 0.226598082 | 3.92E-01 | 6.70E-01 | 1.00E+00 |
| ENSG00000240490.3_RN7SL277f  | ENSG00000160789.18_LMNA | 0.06586  | -0.094330417 | 0.222724791 | 4.20E-01 | 6.92E-01 | 1.00E+00 |
| ENSG00000271063.1_SNRPGP17   | ENSG00000160789.18_LMNA | -0.03857 | -0.196564266 | 0.121375444 | 6.37E-01 | 8.38E-01 | 1.00E+00 |
| ENSG00000266420.2_RN7SL118f  | ENSG00000160789.18_LMNA | 0.07656  | -0.083657916 | 0.232924112 | 3.48E-01 | 6.33E-01 | 1.00E+00 |
| ENSG00000233214.1_AC002511.f | ENSG00000160789.18_LMNA | -0.24295 | -0.387176295 | -0.08711968 | 2.56E-03 | 2.37E-02 | 1.00E+00 |
| ENSG00000275339.1_RP3-425C1  | ENSG00000160789.18_LMNA | 0.07368  | -0.086532469 | 0.230183842 | 3.67E-01 | 6.48E-01 | 1.00E+00 |
| ENSG00000250090.1_RP13-401N  | ENSG00000160789.18_LMNA | -0.02976 | -0.188065223 | 0.130061412 | 7.16E-01 | 8.79E-01 | 1.00E+00 |
| ENSG00000237026.1_RP11-328P  | ENSG00000160789.18_LMNA | 0.09329  | -0.066899356 | 0.248800341 | 2.53E-01 | 5.34E-01 | 1.00E+00 |
| ENSG00000229308.1_AC010084.f | ENSG00000160789.18_LMNA | 0.00415  | -0.155155907 | 0.163240159 | 9.60E-01 | 9.84E-01 | 1.00E+00 |
| ENSG00000281003.1_           | ENSG00000160789.18_LMNA | 0.05903  | -0.101120292 | 0.216199627 | 4.70E-01 | 7.30E-01 | 1.00E+00 |
| ENSG00000250392.2_RP11-700N  | ENSG00000160789.18_LMNA | -0.13625 | -0.289174871 | 0.023463101 | 9.42E-02 | 3.00E-01 | 1.00E+00 |
| ENSG00000231806.2_PCAT7      | ENSG00000160789.18_LMNA | -0.07418 | -0.230652663 | 0.086041048 | 3.64E-01 | 6.45E-01 | 1.00E+00 |
| ENSG00000270048.1_RP11-214K  | ENSG00000160789.18_LMNA | -0.00448 | -0.163568261 | 0.154826902 | 9.56E-01 | 9.82E-01 | 1.00E+00 |
| ENSG00000234396.3_RP11-181G  | ENSG00000160789.18_LMNA | -0.10433 | -0.259227051 | 0.055795407 | 2.01E-01 | 4.71E-01 | 1.00E+00 |
| ENSG00000242889.3_RN7SL449f  | ENSG00000160789.18_LMNA | -0.00166 | -0.160815027 | 0.157585525 | 9.84E-01 | 9.94E-01 | 1.00E+00 |
| ENSG00000273866.1_Metazoa_Si | ENSG00000160789.18_LMNA | 0.07558  | -0.084642976 | 0.231985634 | 3.55E-01 | 6.38E-01 | 1.00E+00 |
| ENSG00000237622.1_TCEB1P18   | ENSG00000160789.18_LMNA | 0.07281  | -0.087400197 | 0.229355662 | 3.73E-01 | 6.53E-01 | 1.00E+00 |
| ENSG00000236081.1_ELFN1-AS1  | ENSG00000160789.18_LMNA | 0.12527  | -0.03462505  | 0.278904814 | 1.24E-01 | 3.55E-01 | 1.00E+00 |
| ENSG00000231873.1_RP11-761N  | ENSG00000160789.18_LMNA | 0.01855  | -0.141064584 | 0.177230002 | 8.21E-01 | 9.30E-01 | 1.00E+00 |
| ENSG00000230830.1_ARPP21-AS1 | ENSG00000160789.18_LMNA | -0.10374 | -0.258673326 | 0.056387064 | 2.03E-01 | 4.74E-01 | 1.00E+00 |
| ENSG00000211794.3_TRAV12-3   | ENSG00000160789.18_LMNA | 0.02298  | -0.136723459 | 0.1815141   | 7.79E-01 | 9.09E-01 | 1.00E+00 |
| ENSG00000277385.1_Metazoa_Si | ENSG00000160789.18_LMNA | -0.1988  | -0.34702075  | -0.04089678 | 1.41E-02 | 8.39E-02 | 1.00E+00 |
| ENSG00000237470.3_DCLRE1CF   | ENSG00000160789.18_LMNA | -0.06785 | -0.22462778  | 0.092344656 | 4.06E-01 | 6.82E-01 | 1.00E+00 |
| ENSG00000240427.1_RPS26P34   | ENSG00000160789.18_LMNA | 0.01832  | -0.141295019 | 0.177002255 | 8.23E-01 | 9.31E-01 | 1.00E+00 |
| ENSG00000241054.1_RP5-1002M  | ENSG00000160789.18_LMNA | -0.04627 | -0.203964846 | 0.11377223  | 5.71E-01 | 8.00E-01 | 1.00E+00 |
| ENSG00000227663.1_RPL7P2     | ENSG00000160789.18_LMNA | -0.06164 | -0.218698478 | 0.098523556 | 4.51E-01 | 7.16E-01 | 1.00E+00 |
| ENSG00000268560.1_CTD-2332E  | ENSG00000160789.18_LMNA | 0.06517  | -0.095013765 | 0.222069367 | 4.25E-01 | 6.96E-01 | 1.00E+00 |
| ENSG00000224535.1_RP11-61J1f | ENSG00000160789.18_LMNA | -0.07094 | -0.227572695 | 0.089266673 | 3.85E-01 | 6.64E-01 | 1.00E+00 |
| ENSG00000230459.3_RP11-741G  | ENSG00000160789.18_LMNA | -0.13066 | -0.283956399 | 0.029144523 | 1.09E-01 | 3.28E-01 | 1.00E+00 |
| ENSG00000239577.3_RN7SL388f  | ENSG00000160789.18_LMNA | -0.08666 | -0.242510223 | 0.073560426 | 2.88E-01 | 5.74E-01 | 1.00E+00 |
| ENSG00000228028.2_AC069257.f | ENSG00000160789.18_LMNA | 0.03989  | -0.120076055 | 0.197831597 | 6.26E-01 | 8.31E-01 | 1.00E+00 |

|                              |                         |          |              |             |          |          |          |
|------------------------------|-------------------------|----------|--------------|-------------|----------|----------|----------|
| ENSG00000229827.1_AC093899.  | ENSG00000160789.18_LMNA | -0.06877 | -0.2254977   | 0.091436059 | 4.00E-01 | 6.77E-01 | 1.00E+00 |
| ENSG00000237153.1_RP11-132E  | ENSG00000160789.18_LMNA | 0.01455  | -0.144982309 | 0.173353358 | 8.59E-01 | 9.44E-01 | 1.00E+00 |
| ENSG00000238149.1_AC104978.  | ENSG00000160789.18_LMNA | -0.08912 | -0.244846996 | 0.071089132 | 2.75E-01 | 5.59E-01 | 1.00E+00 |
| ENSG00000272371.1_RP11-250I  | ENSG00000160789.18_LMNA | -0.05591 | -0.213210489 | 0.104220851 | 4.94E-01 | 7.49E-01 | 1.00E+00 |
| ENSG00000223570.2_RP11-275I1 | ENSG00000160789.18_LMNA | 0.0274   | -0.132381679 | 0.185786797 | 7.38E-01 | 8.90E-01 | 1.00E+00 |
| ENSG00000226919.1_RP11-80B9  | ENSG00000160789.18_LMNA | -0.12592 | -0.279516182 | 0.033962771 | 1.22E-01 | 3.52E-01 | 1.00E+00 |
| ENSG00000271897.1_RP11-679B  | ENSG00000160789.18_LMNA | -0.10596 | -0.260766283 | 0.054149571 | 1.94E-01 | 4.63E-01 | 1.00E+00 |
| ENSG00000187550.7_SBK2       | ENSG00000160789.18_LMNA | 0.1266   | -0.033268761 | 0.280156568 | 1.20E-01 | 3.48E-01 | 1.00E+00 |
| ENSG00000266397.1_RP11-737C  | ENSG00000160789.18_LMNA | 0.07577  | -0.084453718 | 0.232165989 | 3.54E-01 | 6.37E-01 | 1.00E+00 |
| ENSG00000250268.3_ALG1L14P   | ENSG00000160789.18_LMNA | 0.0244   | -0.135327838 | 0.182888826 | 7.65E-01 | 9.03E-01 | 1.00E+00 |
| ENSG00000256171.1_GCSHP4     | ENSG00000160789.18_LMNA | -0.0527  | -0.210141896 | 0.107397422 | 5.19E-01 | 7.65E-01 | 1.00E+00 |
| ENSG00000184564.8_SLITRK6    | ENSG00000160789.18_LMNA | -0.1812  | -0.330859611 | -0.02265634 | 2.55E-02 | 1.28E-01 | 1.00E+00 |
| ENSG00000256563.2_NANOGNBI   | ENSG00000160789.18_LMNA | 0.0824   | -0.077821294 | 0.238472656 | 3.13E-01 | 5.99E-01 | 1.00E+00 |
| ENSG00000259974.2_LINC00261  | ENSG00000160789.18_LMNA | -0.07171 | -0.228303067 | 0.088502362 | 3.80E-01 | 6.59E-01 | 1.00E+00 |
| ENSG00000230274.1_PGAM1P3    | ENSG00000160789.18_LMNA | -0.11098 | -0.265489318 | 0.049088725 | 1.73E-01 | 4.33E-01 | 1.00E+00 |
| ENSG00000227496.1_RP11-145A  | ENSG00000160789.18_LMNA | 0.2375   | 0.081376563  | 0.382248208 | 3.22E-03 | 2.81E-02 | 1.00E+00 |
| ENSG00000264311.1_CCDC58P1   | ENSG00000160789.18_LMNA | -0.04888 | -0.206470331 | 0.111189682 | 5.50E-01 | 7.86E-01 | 1.00E+00 |
| ENSG00000225831.1_RPS18P1    | ENSG00000160789.18_LMNA | -0.13114 | -0.284404223 | 0.028657762 | 1.07E-01 | 3.26E-01 | 1.00E+00 |
| ENSG00000254664.1_CTD-2560E  | ENSG00000160789.18_LMNA | -0.05003 | -0.207578425 | 0.110046136 | 5.40E-01 | 7.80E-01 | 1.00E+00 |
| ENSG00000225521.1_AC005237.  | ENSG00000160789.18_LMNA | 0.23945  | 0.083426086  | 0.384008841 | 2.97E-03 | 2.66E-02 | 1.00E+00 |
| ENSG00000236545.1_AP001619.  | ENSG00000160789.18_LMNA | -0.00574 | -0.16479221  | 0.153598962 | 9.44E-01 | 9.78E-01 | 1.00E+00 |
| ENSG00000235390.4_CTD-2651B  | ENSG00000160789.18_LMNA | -0.00629 | -0.165320449 | 0.153068696 | 9.39E-01 | 9.76E-01 | 1.00E+00 |
| ENSG00000250734.2_RP11-404E  | ENSG00000160789.18_LMNA | -0.05267 | -0.210108379 | 0.107432083 | 5.19E-01 | 7.65E-01 | 1.00E+00 |
| ENSG00000234425.1_RP11-528G  | ENSG00000160789.18_LMNA | -0.04147 | -0.199355808 | 0.118511843 | 6.12E-01 | 8.23E-01 | 1.00E+00 |
| ENSG00000267545.1_AC005779.  | ENSG00000160789.18_LMNA | 0.17117  | 0.01230234   | 0.321604764 | 3.50E-02 | 1.59E-01 | 1.00E+00 |
| ENSG00000258527.1_AS9P1      | ENSG00000160789.18_LMNA | 0.07967  | -0.080554365 | 0.23587705  | 3.29E-01 | 6.15E-01 | 1.00E+00 |
| ENSG00000241818.1_RP11-1000I | ENSG00000160789.18_LMNA | 0.05789  | -0.102248993 | 0.215112175 | 4.79E-01 | 7.37E-01 | 1.00E+00 |
| ENSG00000259530.1_RP11-259A  | ENSG00000160789.18_LMNA | -0.18676 | -0.335967603 | -0.02839943 | 2.12E-02 | 1.13E-01 | 1.00E+00 |
| ENSG00000227712.1_RP11-418J  | ENSG00000160789.18_LMNA | -0.02192 | -0.180495443 | 0.137756784 | 7.89E-01 | 9.14E-01 | 1.00E+00 |
| ENSG00000255491.1_RP11-1082I | ENSG00000160789.18_LMNA | -0.01309 | -0.171935571 | 0.146412632 | 8.73E-01 | 9.51E-01 | 1.00E+00 |
| ENSG00000141316.11_SPACA3    | ENSG00000160789.18_LMNA | 0.0373   | -0.122631567 | 0.195338123 | 6.48E-01 | 8.44E-01 | 1.00E+00 |
| ENSG00000248466.1_RP11-640B  | ENSG00000160789.18_LMNA | 0.0039   | -0.155396408 | 0.163000274 | 9.62E-01 | 9.85E-01 | 1.00E+00 |
| ENSG00000225744.1_AC017002.  | ENSG00000160789.18_LMNA | 0.18249  | 0.023982651  | 0.332040861 | 2.44E-02 | 1.24E-01 | 1.00E+00 |

|                              |                         |          |              |             |          |          |          |
|------------------------------|-------------------------|----------|--------------|-------------|----------|----------|----------|
| ENSG00000230928.1_RP11-34A1  | ENSG00000160789.18_LMNA | 0.18033  | 0.021757354  | 0.330058406 | 2.62E-02 | 1.31E-01 | 1.00E+00 |
| ENSG00000253766.1_RP11-804N  | ENSG00000160789.18_LMNA | -0.08236 | -0.238437652 | 0.077858183 | 3.13E-01 | 6.00E-01 | 1.00E+00 |
| ENSG00000254539.1_RP4-791M1  | ENSG00000160789.18_LMNA | 0.02391  | -0.135811214 | 0.182412828 | 7.70E-01 | 9.05E-01 | 1.00E+00 |
| ENSG00000236528.1_RP1-125I3. | ENSG00000160789.18_LMNA | 0.1195   | -0.04047569  | 0.273492867 | 1.43E-01 | 3.86E-01 | 1.00E+00 |
| ENSG00000224776.3_RPSAP50    | ENSG00000160789.18_LMNA | 0.06107  | -0.099096883 | 0.218147121 | 4.55E-01 | 7.20E-01 | 1.00E+00 |
| ENSG00000235142.6_RP1-60O19  | ENSG00000160789.18_LMNA | -0.05654 | -0.213811809 | 0.103597613 | 4.89E-01 | 7.45E-01 | 1.00E+00 |
| ENSG00000223842.1_RP11-135J. | ENSG00000160789.18_LMNA | -0.05817 | -0.215379409 | 0.101971698 | 4.77E-01 | 7.35E-01 | 1.00E+00 |
| ENSG00000169059.11_VCX3A     | ENSG00000160789.18_LMNA | 0.01143  | -0.148040467 | 0.170320396 | 8.89E-01 | 9.57E-01 | 1.00E+00 |
| ENSG00000259721.1_RP11-758N  | ENSG00000160789.18_LMNA | -0.24576 | -0.389712251 | -0.09008284 | 2.27E-03 | 2.16E-02 | 1.00E+00 |
| ENSG00000256682.2_TAS2R12    | ENSG00000160789.18_LMNA | -0.21952 | -0.36593382  | -0.06250552 | 6.58E-03 | 4.82E-02 | 1.00E+00 |
| ENSG00000267175.4_RP11-879F  | ENSG00000160789.18_LMNA | -0.21491 | -0.361733825 | -0.05768221 | 7.84E-03 | 5.47E-02 | 1.00E+00 |
| ENSG00000255467.1_RP11-144G  | ENSG00000160789.18_LMNA | 0.11211  | -0.047947637 | 0.266552156 | 1.69E-01 | 4.28E-01 | 1.00E+00 |
| ENSG00000161652.11_IZUMO2    | ENSG00000160789.18_LMNA | -0.03473 | -0.192867312 | 0.1251597   | 6.71E-01 | 8.56E-01 | 1.00E+00 |
| ENSG00000226757.2_PP12613    | ENSG00000160789.18_LMNA | -0.08153 | -0.237641468 | 0.07869702  | 3.18E-01 | 6.05E-01 | 1.00E+00 |
| ENSG00000249738.5_AC008697.  | ENSG00000160789.18_LMNA | -0.21392 | -0.360834807 | -0.0566516  | 8.14E-03 | 5.63E-02 | 1.00E+00 |
| ENSG00000248100.2_RP11-709A  | ENSG00000160789.18_LMNA | -0.24507 | -0.389092465 | -0.08935815 | 2.34E-03 | 2.21E-02 | 1.00E+00 |
| ENSG00000162006.8_MSLNL      | ENSG00000160789.18_LMNA | 0.05592  | -0.104205675 | 0.213225135 | 4.94E-01 | 7.49E-01 | 1.00E+00 |
| ENSG00000142619.4_PADI3      | ENSG00000160789.18_LMNA | 0.23175  | 0.07533293   | 0.377043703 | 4.07E-03 | 3.36E-02 | 1.00E+00 |
| ENSG00000173212.4_MAB21L3    | ENSG00000160789.18_LMNA | 0.04504  | -0.114987286 | 0.202784605 | 5.82E-01 | 8.05E-01 | 1.00E+00 |
| ENSG00000279834.1_RP11-775C  | ENSG00000160789.18_LMNA | 0.06753  | -0.092671839 | 0.224314402 | 4.08E-01 | 6.83E-01 | 1.00E+00 |
| ENSG00000222028.3_PSMB11     | ENSG00000160789.18_LMNA | 0.11368  | -0.046363692 | 0.268026216 | 1.63E-01 | 4.19E-01 | 1.00E+00 |
| ENSG00000279956.1_RP11-310N  | ENSG00000160789.18_LMNA | 0.16948  | 0.010562407  | 0.320043715 | 3.69E-02 | 1.64E-01 | 1.00E+00 |
| ENSG00000234663.4_AC104820.  | ENSG00000160789.18_LMNA | 0.00208  | -0.157171739 | 0.161228321 | 9.80E-01 | 9.92E-01 | 1.00E+00 |
| ENSG00000147596.3_PRDM14     | ENSG00000160789.18_LMNA | -0.12358 | -0.277327554 | 0.036332385 | 1.29E-01 | 3.64E-01 | 1.00E+00 |
| ENSG00000188755.8_TBC1D3P2   | ENSG00000160789.18_LMNA | -0.02203 | -0.180596157 | 0.137654651 | 7.88E-01 | 9.14E-01 | 1.00E+00 |
| ENSG00000229556.2_           | ENSG00000160789.18_LMNA | 0.04133  | -0.118654413 | 0.199216948 | 6.13E-01 | 8.24E-01 | 1.00E+00 |
| ENSG00000172689.1_MS4A10     | ENSG00000160789.18_LMNA | 0.01601  | -0.143555092 | 0.174766752 | 8.45E-01 | 9.39E-01 | 1.00E+00 |
| ENSG00000280177.1_RP5-906A2  | ENSG00000160789.18_LMNA | -0.05878 | -0.215955889 | 0.101373347 | 4.72E-01 | 7.32E-01 | 1.00E+00 |
| ENSG00000280246.1_           | ENSG00000160789.18_LMNA | -0.08827 | -0.24404013  | 0.071942885 | 2.80E-01 | 5.65E-01 | 1.00E+00 |
| ENSG00000256995.5_RP11-114G  | ENSG00000160789.18_LMNA | -0.1243  | -0.278003955 | 0.035600426 | 1.27E-01 | 3.61E-01 | 1.00E+00 |
| ENSG00000132464.10_ENAM      | ENSG00000160789.18_LMNA | 0.0492   | -0.110865981 | 0.206784079 | 5.47E-01 | 7.85E-01 | 1.00E+00 |
| ENSG00000198788.8_MUC2       | ENSG00000160789.18_LMNA | 0.14846  | -0.011002061 | 0.30055582  | 6.79E-02 | 2.45E-01 | 1.00E+00 |
| ENSG00000199568.1_RNU5A-1    | ENSG00000160789.18_LMNA | -0.00623 | -0.165268886 | 0.153120464 | 9.39E-01 | 9.76E-01 | 1.00E+00 |

|                              |                         |          |              |             |          |          |          |
|------------------------------|-------------------------|----------|--------------|-------------|----------|----------|----------|
| ENSG00000201741.1_Y_RNA      | ENSG00000160789.18_LMNA | -0.23336 | -0.378499872 | -0.07702165 | 3.81E-03 | 3.20E-02 | 1.00E+00 |
| ENSG00000279109.1_AC008641.1 | ENSG00000160789.18_LMNA | 0.123    | -0.036924923 | 0.276779764 | 1.31E-01 | 3.67E-01 | 1.00E+00 |
| ENSG00000275344.1_MIR6503    | ENSG00000160789.18_LMNA | 0.20734  | 0.049782422  | 0.354828175 | 1.04E-02 | 6.73E-02 | 1.00E+00 |
| ENSG00000264720.2_MIR3117    | ENSG00000160789.18_LMNA | -0.09396 | -0.249430469 | 0.066230513 | 2.50E-01 | 5.30E-01 | 1.00E+00 |
| ENSG00000223060.1_Y_RNA      | ENSG00000160789.18_LMNA | 0.13072  | -0.029087536 | 0.284008835 | 1.08E-01 | 3.28E-01 | 1.00E+00 |
| ENSG00000264864.1_MIR3613    | ENSG00000160789.18_LMNA | 0.00446  | -0.154849263 | 0.163545964 | 9.56E-01 | 9.83E-01 | 1.00E+00 |
| ENSG00000201041.1_RNA5SP24   | ENSG00000160789.18_LMNA | -0.0929  | -0.24842739  | 0.067295087 | 2.55E-01 | 5.37E-01 | 1.00E+00 |
| ENSG00000221429.1_           | ENSG00000160789.18_LMNA | 0.03306  | -0.126808621 | 0.191253603 | 6.86E-01 | 8.64E-01 | 1.00E+00 |
| ENSG00000227329.2_RP11-258C  | ENSG00000160789.18_LMNA | -0.0224  | -0.18095647  | 0.137289205 | 7.84E-01 | 9.12E-01 | 1.00E+00 |
| ENSG00000199509.1_RNA5SP47   | ENSG00000160789.18_LMNA | -0.14305 | -0.29551609  | 0.016532042 | 7.87E-02 | 2.69E-01 | 1.00E+00 |
| ENSG00000207457.1_RNU6-476F  | ENSG00000160789.18_LMNA | 0.12325  | -0.036668529 | 0.27701682  | 1.30E-01 | 3.66E-01 | 1.00E+00 |
| ENSG00000242034.1_RP11-1396  | ENSG00000160789.18_LMNA | -0.15112 | -0.303029846 | 0.008280376 | 6.31E-02 | 2.33E-01 | 1.00E+00 |
| ENSG00000206888.1_RNU6-48P   | ENSG00000160789.18_LMNA | 0.08574  | -0.074481204 | 0.241638627 | 2.94E-01 | 5.79E-01 | 1.00E+00 |
| ENSG00000221639.1_SNORA3     | ENSG00000160789.18_LMNA | 0.0732   | -0.087011477 | 0.229726722 | 3.70E-01 | 6.50E-01 | 1.00E+00 |
| ENSG00000272827.1_RP11-445P  | ENSG00000160789.18_LMNA | 0.0279   | -0.131889316 | 0.186270568 | 7.33E-01 | 8.88E-01 | 1.00E+00 |
| ENSG00000254055.1_RP11-17A4  | ENSG00000160789.18_LMNA | 0.06402  | -0.096165355 | 0.220964187 | 4.33E-01 | 7.03E-01 | 1.00E+00 |
| ENSG00000198738.4_SMIM11P1   | ENSG00000160789.18_LMNA | -0.0165  | -0.17523555  | 0.143081416 | 8.40E-01 | 9.38E-01 | 1.00E+00 |
| ENSG00000163646.9_CLRN1      | ENSG00000160789.18_LMNA | 0.06967  | -0.090537554 | 0.22635746  | 3.94E-01 | 6.71E-01 | 1.00E+00 |
| ENSG00000263684.1_RP11-628C  | ENSG00000160789.18_LMNA | 0.07041  | -0.089798134 | 0.227064625 | 3.89E-01 | 6.67E-01 | 1.00E+00 |
| ENSG00000279211.1_RP11-570J  | ENSG00000160789.18_LMNA | -0.16691 | -0.317666563 | -0.00791645 | 3.99E-02 | 1.73E-01 | 1.00E+00 |
| ENSG00000274198.1_RP11-579A  | ENSG00000160789.18_LMNA | -0.03177 | -0.190005752 | 0.128082496 | 6.98E-01 | 8.70E-01 | 1.00E+00 |
| ENSG00000230404.1_RP5-855F1  | ENSG00000160789.18_LMNA | -0.00447 | -0.163554578 | 0.154840624 | 9.56E-01 | 9.83E-01 | 1.00E+00 |
| ENSG00000231589.1_AC009110   | ENSG00000160789.18_LMNA | -0.13144 | -0.284684174 | 0.028353396 | 1.06E-01 | 3.24E-01 | 1.00E+00 |
| ENSG00000237716.1_RP3-400B1  | ENSG00000160789.18_LMNA | -0.03565 | -0.193754982 | 0.124251912 | 6.63E-01 | 8.51E-01 | 1.00E+00 |
| ENSG00000280567.1_           | ENSG00000160789.18_LMNA | 0.02167  | -0.138010291 | 0.180245431 | 7.91E-01 | 9.15E-01 | 1.00E+00 |
| ENSG00000281075.1_           | ENSG00000160789.18_LMNA | 0.11683  | -0.043171361 | 0.270992616 | 1.52E-01 | 4.01E-01 | 1.00E+00 |
| ENSG00000229979.1_U82670.9   | ENSG00000160789.18_LMNA | -0.01428 | -0.173090658 | 0.145247432 | 8.61E-01 | 9.46E-01 | 1.00E+00 |
| ENSG00000271609.1_CTB-31N19  | ENSG00000160789.18_LMNA | -0.05036 | -0.20788972  | 0.10972473  | 5.38E-01 | 7.78E-01 | 1.00E+00 |
| ENSG00000276831.1_CTD-2105E  | ENSG00000160789.18_LMNA | 0.00914  | -0.150279815 | 0.168095666 | 9.11E-01 | 9.66E-01 | 1.00E+00 |
| ENSG00000250686.2_RP1-240B8  | ENSG00000160789.18_LMNA | -0.18281 | -0.332336899 | -0.02431521 | 2.42E-02 | 1.24E-01 | 1.00E+00 |
| ENSG00000214237.8_FAM188B2   | ENSG00000160789.18_LMNA | -0.0273  | -0.185696745 | 0.132473313 | 7.38E-01 | 8.90E-01 | 1.00E+00 |
| ENSG00000271332.1_RP11-797J  | ENSG00000160789.18_LMNA | -0.00523 | -0.164295141 | 0.15409777  | 9.49E-01 | 9.79E-01 | 1.00E+00 |
| ENSG00000239247.3_RN7SL589f  | ENSG00000160789.18_LMNA | 0.16369  | 0.00461455   | 0.314694642 | 4.39E-02 | 1.85E-01 | 1.00E+00 |

|                              |                         |          |              |             |          |          |          |
|------------------------------|-------------------------|----------|--------------|-------------|----------|----------|----------|
| ENSG00000257886.1_           | ENSG00000160789.18_LMNA | -0.07847 | -0.234740572 | 0.081749535 | 3.37E-01 | 6.22E-01 | 1.00E+00 |
| ENSG00000236311.5_TLX1NB     | ENSG00000160789.18_LMNA | -0.24333 | -0.387523346 | -0.08752488 | 2.52E-03 | 2.34E-02 | 1.00E+00 |
| ENSG00000230171.1_RPL22P18   | ENSG00000160789.18_LMNA | 0.0163   | -0.143268966 | 0.175049949 | 8.42E-01 | 9.38E-01 | 1.00E+00 |
| ENSG00000241657.1_TRBV11-2   | ENSG00000160789.18_LMNA | 0.07091  | -0.089296553 | 0.227544136 | 3.85E-01 | 6.64E-01 | 1.00E+00 |
| ENSG00000253787.1_RP11-404L  | ENSG00000160789.18_LMNA | -0.08753 | -0.243341024 | 0.072682243 | 2.84E-01 | 5.69E-01 | 1.00E+00 |
| ENSG00000275286.1_RP11-499A  | ENSG00000160789.18_LMNA | -0.18123 | -0.330882161 | -0.02268164 | 2.55E-02 | 1.28E-01 | 1.00E+00 |
| ENSG00000257569.1_GSTP1P1    | ENSG00000160789.18_LMNA | 0.09543  | -0.064751023 | 0.250823371 | 2.42E-01 | 5.21E-01 | 1.00E+00 |
| ENSG00000272104.1_XXcos-LUC  | ENSG00000160789.18_LMNA | -0.07589 | -0.232288458 | 0.084325189 | 3.53E-01 | 6.36E-01 | 1.00E+00 |
| ENSG00000235002.1_RP11-157D  | ENSG00000160789.18_LMNA | -0.02916 | -0.187492924 | 0.130644548 | 7.21E-01 | 8.82E-01 | 1.00E+00 |
| ENSG00000251093.1_RP11-414H  | ENSG00000160789.18_LMNA | 0.11412  | -0.045914569 | 0.268443915 | 1.62E-01 | 4.16E-01 | 1.00E+00 |
| ENSG00000249959.4_RP11-252I1 | ENSG00000160789.18_LMNA | -0.19473 | -0.343284025 | -0.03666107 | 1.62E-02 | 9.29E-02 | 1.00E+00 |
| ENSG00000278938.1_AC104981.  | ENSG00000160789.18_LMNA | 0.00982  | -0.149614443 | 0.168757034 | 9.04E-01 | 9.63E-01 | 1.00E+00 |
| ENSG00000226253.1_MRPL35P3   | ENSG00000160789.18_LMNA | -0.03472 | -0.192857009 | 0.125170234 | 6.71E-01 | 8.56E-01 | 1.00E+00 |
| ENSG00000197308.7_GATA3-AS   | ENSG00000160789.18_LMNA | 0.17276  | 0.013946519  | 0.32307836  | 3.33E-02 | 1.53E-01 | 1.00E+00 |
| ENSG00000234282.1_RP4-673D2  | ENSG00000160789.18_LMNA | 0.00439  | -0.154917351 | 0.163478068 | 9.57E-01 | 9.83E-01 | 1.00E+00 |
| ENSG00000215771.2_LRRC37A1   | ENSG00000160789.18_LMNA | 0.13296  | -0.026812047 | 0.28610106  | 1.02E-01 | 3.17E-01 | 1.00E+00 |
| ENSG00000273791.1_CTC-559E9  | ENSG00000160789.18_LMNA | -0.08677 | -0.242623377 | 0.073440847 | 2.88E-01 | 5.73E-01 | 1.00E+00 |
| ENSG00000225722.1_RP11-706O  | ENSG00000160789.18_LMNA | 0.01675  | -0.142832841 | 0.175481508 | 8.38E-01 | 9.37E-01 | 1.00E+00 |
| ENSG00000261633.1_RP11-405F  | ENSG00000160789.18_LMNA | 0.03886  | -0.121093661 | 0.196839187 | 6.35E-01 | 8.36E-01 | 1.00E+00 |
| ENSG00000203258.3_RP11-47J1  | ENSG00000160789.18_LMNA | -0.03703 | -0.195081057 | 0.12289479  | 6.51E-01 | 8.45E-01 | 1.00E+00 |
| ENSG00000257548.1_RP11-797M  | ENSG00000160789.18_LMNA | 0.02041  | -0.139247612 | 0.179024574 | 8.03E-01 | 9.21E-01 | 1.00E+00 |
| ENSG00000269040.1_BNIP3P24   | ENSG00000160789.18_LMNA | -0.13545 | -0.288432092 | 0.024273008 | 9.61E-02 | 3.04E-01 | 1.00E+00 |
| ENSG00000259483.1_RP11-930O  | ENSG00000160789.18_LMNA | -0.1082  | -0.262871602 | 0.051895668 | 1.85E-01 | 4.50E-01 | 1.00E+00 |
| ENSG00000244292.1_OR9N1P     | ENSG00000160789.18_LMNA | -0.06152 | -0.218576685 | 0.09865022  | 4.52E-01 | 7.17E-01 | 1.00E+00 |
| ENSG00000224523.1_RP13-52K8  | ENSG00000160789.18_LMNA | -0.17311 | -0.323401339 | -0.01430711 | 3.29E-02 | 1.52E-01 | 1.00E+00 |
| ENSG00000172551.9_MUCL1      | ENSG00000160789.18_LMNA | 0.0306   | -0.129229046 | 0.188881745 | 7.08E-01 | 8.76E-01 | 1.00E+00 |
| ENSG00000204464.6_C1orf195   | ENSG00000160789.18_LMNA | 0.03751  | -0.12241783  | 0.195546829 | 6.46E-01 | 8.43E-01 | 1.00E+00 |
| ENSG00000231654.1_RPS6KA2-7  | ENSG00000160789.18_LMNA | -0.08649 | -0.24235457  | 0.073724902 | 2.89E-01 | 5.75E-01 | 1.00E+00 |
| ENSG00000251273.1_RP11-549K  | ENSG00000160789.18_LMNA | -0.00517 | -0.16423672  | 0.154156386 | 9.50E-01 | 9.80E-01 | 1.00E+00 |
| ENSG00000276993.1_RP11-321M  | ENSG00000160789.18_LMNA | -0.07463 | -0.231089441 | 0.085583076 | 3.61E-01 | 6.43E-01 | 1.00E+00 |
| ENSG00000262380.1_CTB-193M1  | ENSG00000160789.18_LMNA | -0.02546 | -0.183917456 | 0.134282748 | 7.56E-01 | 8.98E-01 | 1.00E+00 |
| ENSG00000280474.1_RP11-216B  | ENSG00000160789.18_LMNA | -0.04973 | -0.207289403 | 0.110344486 | 5.43E-01 | 7.82E-01 | 1.00E+00 |
| ENSG00000213486.3_AC108039.  | ENSG00000160789.18_LMNA | 0.04711  | -0.112934564 | 0.204777972 | 5.64E-01 | 7.95E-01 | 1.00E+00 |



|                             |                         |          |              |             |          |          |          |
|-----------------------------|-------------------------|----------|--------------|-------------|----------|----------|----------|
| ENSG00000262429.1_RP5-1050D | ENSG00000160789.18_LMNA | 0.06277  | -0.097402107 | 0.219776369 | 4.42E-01 | 7.10E-01 | 1.00E+00 |
| ENSG00000250447.4_CTD-2081C | ENSG00000160789.18_LMNA | -0.16441 | -0.315356203 | -0.00534898 | 4.30E-02 | 1.82E-01 | 1.00E+00 |
| ENSG00000214676.4_RPL9P16   | ENSG00000160789.18_LMNA | 0.01222  | -0.147263912 | 0.171091125 | 8.81E-01 | 9.54E-01 | 1.00E+00 |
| ENSG00000233998.1_SETP5     | ENSG00000160789.18_LMNA | 0.04503  | -0.114993208 | 0.202778851 | 5.82E-01 | 8.05E-01 | 1.00E+00 |
| ENSG00000256101.4_RP11-90D4 | ENSG00000160789.18_LMNA | -0.09211 | -0.24767568  | 0.068092412 | 2.59E-01 | 5.42E-01 | 1.00E+00 |
| ENSG00000228539.1_RP11-526K | ENSG00000160789.18_LMNA | -0.1233  | -0.277065022 | 0.03661639  | 1.30E-01 | 3.66E-01 | 1.00E+00 |
| ENSG00000267790.1_RP11-316M | ENSG00000160789.18_LMNA | -0.2966  | -0.435251696 | -0.14421227 | 2.07E-04 | 3.35E-03 | 1.00E+00 |
| ENSG00000278973.1_RP11-83B2 | ENSG00000160789.18_LMNA | 0.12191  | -0.038030528 | 0.275757107 | 1.35E-01 | 3.73E-01 | 1.00E+00 |
| ENSG00000171102.13_OBP2B    | ENSG00000160789.18_LMNA | -0.06521 | -0.222106238 | 0.094975332 | 4.25E-01 | 6.96E-01 | 1.00E+00 |
| ENSG00000259946.1_RP11-490G | ENSG00000160789.18_LMNA | -0.19523 | -0.343747428 | -0.03718576 | 1.59E-02 | 9.16E-02 | 1.00E+00 |
| ENSG00000261717.4_RP11-77K1 | ENSG00000160789.18_LMNA | 0.04511  | -0.114918943 | 0.202851015 | 5.81E-01 | 8.05E-01 | 1.00E+00 |
| ENSG00000223750.1_SIRPB3P   | ENSG00000160789.18_LMNA | -0.02198 | -0.180544583 | 0.137706953 | 7.88E-01 | 9.14E-01 | 1.00E+00 |
| ENSG00000112246.8_SIM1      | ENSG00000160789.18_LMNA | 0.02052  | -0.13913281  | 0.17913789  | 8.02E-01 | 9.20E-01 | 1.00E+00 |
| ENSG00000214733.7_          | ENSG00000160789.18_LMNA | -0.07073 | -0.22736894  | 0.089479831 | 3.87E-01 | 6.65E-01 | 1.00E+00 |
| ENSG00000232491.1_SAPCD2P3  | ENSG00000160789.18_LMNA | 0.05698  | -0.103153154 | 0.21424049  | 4.86E-01 | 7.42E-01 | 1.00E+00 |
| ENSG00000248196.1_RP11-476C | ENSG00000160789.18_LMNA | -0.07247 | -0.229025991 | 0.087745477 | 3.75E-01 | 6.55E-01 | 1.00E+00 |
| ENSG00000253923.2_KB-1980E6 | ENSG00000160789.18_LMNA | -0.01929 | -0.177947167 | 0.140338724 | 8.13E-01 | 9.27E-01 | 1.00E+00 |
| ENSG00000260722.1_VN1R67P   | ENSG00000160789.18_LMNA | 0.10952  | -0.050558552 | 0.264119156 | 1.79E-01 | 4.42E-01 | 1.00E+00 |
| ENSG00000131910.4_NR0B2     | ENSG00000160789.18_LMNA | -0.05123 | -0.208728921 | 0.10885794  | 5.31E-01 | 7.74E-01 | 1.00E+00 |
| ENSG00000182921.9_CCDC75P1  | ENSG00000160789.18_LMNA | 0.12066  | -0.039296265 | 0.274585459 | 1.39E-01 | 3.80E-01 | 1.00E+00 |
| ENSG00000205240.4_OR7E36P   | ENSG00000160789.18_LMNA | -0.06784 | -0.224618931 | 0.092353897 | 4.06E-01 | 6.82E-01 | 1.00E+00 |
| ENSG00000232139.4_LINC00867 | ENSG00000160789.18_LMNA | -0.01976 | -0.178398323 | 0.139881923 | 8.09E-01 | 9.24E-01 | 1.00E+00 |
| ENSG00000232775.5_BMS1P22   | ENSG00000160789.18_LMNA | 0.0466   | -0.113440728 | 0.204286689 | 5.69E-01 | 7.98E-01 | 1.00E+00 |
| ENSG00000218048.2_RP3-407E4 | ENSG00000160789.18_LMNA | 0.01879  | -0.140828492 | 0.177463303 | 8.18E-01 | 9.29E-01 | 1.00E+00 |
| ENSG00000250062.4_RP11-778J | ENSG00000160789.18_LMNA | -0.06018 | -0.217299532 | 0.099977834 | 4.61E-01 | 7.25E-01 | 1.00E+00 |
| ENSG00000236474.1_GCNT1P1   | ENSG00000160789.18_LMNA | -0.0826  | -0.238658782 | 0.077625128 | 3.12E-01 | 5.98E-01 | 1.00E+00 |
| ENSG00000279589.1_RP11-454F | ENSG00000160789.18_LMNA | -0.07108 | -0.227706102 | 0.089127096 | 3.84E-01 | 6.63E-01 | 1.00E+00 |
| ENSG00000279479.1_RP11-91I8 | ENSG00000160789.18_LMNA | -0.23656 | -0.381397618 | -0.08038732 | 3.34E-03 | 2.90E-02 | 1.00E+00 |
| ENSG00000226810.3_RP11-45H2 | ENSG00000160789.18_LMNA | 0.00682  | -0.152547355 | 0.165839619 | 9.34E-01 | 9.74E-01 | 1.00E+00 |
| ENSG00000198092.5_TMPRSS11  | ENSG00000160789.18_LMNA | -0.13561 | -0.288584437 | 0.024106929 | 9.57E-02 | 3.03E-01 | 1.00E+00 |
| ENSG00000230371.1_KARSP2    | ENSG00000160789.18_LMNA | 0.00433  | -0.154980303 | 0.16341529  | 9.58E-01 | 9.83E-01 | 1.00E+00 |
| ENSG00000250424.4_RP5-877J2 | ENSG00000160789.18_LMNA | 0.05041  | -0.10966632  | 0.207946286 | 5.37E-01 | 7.78E-01 | 1.00E+00 |
| ENSG00000213771.3_KRT8P37   | ENSG00000160789.18_LMNA | -0.03315 | -0.191338258 | 0.126722162 | 6.85E-01 | 8.63E-01 | 1.00E+00 |

|                              |                         |          |              |             |          |          |          |
|------------------------------|-------------------------|----------|--------------|-------------|----------|----------|----------|
| ENSG00000214132.4_RP11-420C  | ENSG00000160789.18_LMNA | 0.13136  | -0.028436292 | 0.284607933 | 1.07E-01 | 3.25E-01 | 1.00E+00 |
| ENSG00000170748.6_RBMXL2     | ENSG00000160789.18_LMNA | -0.01248 | -0.17133725  | 0.147015844 | 8.79E-01 | 9.53E-01 | 1.00E+00 |
| ENSG00000257178.3_MIR10A     | ENSG00000160789.18_LMNA | 0.10202  | -0.058127124 | 0.257043621 | 2.11E-01 | 4.84E-01 | 1.00E+00 |
| ENSG00000214282.3_KRT8P14    | ENSG00000160789.18_LMNA | -0.12328 | -0.277047064 | 0.036635815 | 1.30E-01 | 3.66E-01 | 1.00E+00 |
| ENSG00000248118.1_LINC01019  | ENSG00000160789.18_LMNA | -0.14509 | -0.297417425 | 0.01444799  | 7.45E-02 | 2.60E-01 | 1.00E+00 |
| ENSG00000255524.6_NPIPB8     | ENSG00000160789.18_LMNA | 0.09734  | -0.062834953 | 0.252625362 | 2.33E-01 | 5.11E-01 | 1.00E+00 |
| ENSG00000225362.7_CT62       | ENSG00000160789.18_LMNA | -0.1381  | -0.290905643 | 0.021574315 | 8.98E-02 | 2.92E-01 | 1.00E+00 |
| ENSG00000255414.1_           | ENSG00000160789.18_LMNA | -0.19071 | -0.339604162 | -0.03250056 | 1.86E-02 | 1.02E-01 | 1.00E+00 |
| ENSG00000143595.11_AQP10     | ENSG00000160789.18_LMNA | 0.15703  | -0.002229377 | 0.308515242 | 5.34E-02 | 2.10E-01 | 1.00E+00 |
| ENSG00000260305.1_NTRK3-AS   | ENSG00000160789.18_LMNA | 9.80E-05 | -0.1591052   | 0.159296201 | 9.99E-01 | 1.00E+00 | 1.00E+00 |
| ENSG00000271880.1_AGAP11     | ENSG00000160789.18_LMNA | -0.13439 | -0.287437599 | 0.025356737 | 9.88E-02 | 3.09E-01 | 1.00E+00 |
| ENSG00000255073.7_ZFP91-CNT  | ENSG00000160789.18_LMNA | -0.02032 | -0.178942444 | 0.139330814 | 8.04E-01 | 9.21E-01 | 1.00E+00 |
| ENSG00000230392.1_RP5-1139I1 | ENSG00000160789.18_LMNA | 0.11036  | -0.04971915  | 0.264901796 | 1.76E-01 | 4.37E-01 | 1.00E+00 |
| ENSG00000095110.6_NXPE1      | ENSG00000160789.18_LMNA | 2.50E-05 | -0.159176309 | 0.159225095 | 1.00E+00 | 1.00E+00 | 1.00E+00 |
| ENSG00000265933.4_LINC00668  | ENSG00000160789.18_LMNA | -0.09168 | -0.24727505  | 0.068517187 | 2.61E-01 | 5.44E-01 | 1.00E+00 |
| ENSG00000235885.6_AC023115.  | ENSG00000160789.18_LMNA | 0.04824  | -0.11182336  | 0.205855947 | 5.55E-01 | 7.89E-01 | 1.00E+00 |
| ENSG00000281255.1_           | ENSG00000160789.18_LMNA | -0.04753 | -0.205179056 | 0.11252121  | 5.61E-01 | 7.93E-01 | 1.00E+00 |
| ENSG00000201229.1_SNORA63    | ENSG00000160789.18_LMNA | -0.15036 | -0.302322884 | 0.009058578 | 6.45E-02 | 2.36E-01 | 1.00E+00 |
| ENSG00000199961.1_SNORD1B    | ENSG00000160789.18_LMNA | 0.0069   | -0.152468252 | 0.165918377 | 9.33E-01 | 9.74E-01 | 1.00E+00 |
| ENSG00000202081.1_RNU6-1280  | ENSG00000160789.18_LMNA | -0.15335 | -0.305097549 | 0.006002145 | 5.93E-02 | 2.24E-01 | 1.00E+00 |
| ENSG00000201724.1_Y_RNA      | ENSG00000160789.18_LMNA | -0.04116 | -0.199059029 | 0.118816534 | 6.15E-01 | 8.25E-01 | 1.00E+00 |
| ENSG00000200502.1_Y_RNA      | ENSG00000160789.18_LMNA | 0.17608  | 0.017362965  | 0.326135564 | 3.00E-02 | 1.43E-01 | 1.00E+00 |
| ENSG00000266995.1_RP11-703I1 | ENSG00000160789.18_LMNA | 0.07128  | -0.088927136 | 0.227897199 | 3.83E-01 | 6.61E-01 | 1.00E+00 |
| ENSG00000266143.1_           | ENSG00000160789.18_LMNA | -0.07927 | -0.235499784 | 0.080951215 | 3.32E-01 | 6.17E-01 | 1.00E+00 |
| ENSG00000268615.1_RP11-65J3. | ENSG00000160789.18_LMNA | -0.01353 | -0.172364041 | 0.145980513 | 8.69E-01 | 9.49E-01 | 1.00E+00 |
| ENSG00000260246.1_AC000032.  | ENSG00000160789.18_LMNA | 0.08707  | -0.073145593 | 0.242902731 | 2.86E-01 | 5.72E-01 | 1.00E+00 |
| ENSG00000125879.4_OTOR       | ENSG00000160789.18_LMNA | -0.34561 | -0.478481104 | -0.19725953 | 1.30E-05 | 3.61E-04 | 6.65E-01 |
| ENSG00000226699.1_RP11-122K  | ENSG00000160789.18_LMNA | 0.20308  | 0.045347944  | 0.350937104 | 1.21E-02 | 7.52E-02 | 1.00E+00 |
| ENSG00000234907.1_RP11-415H  | ENSG00000160789.18_LMNA | -0.08414 | -0.240123228 | 0.076080831 | 3.03E-01 | 5.89E-01 | 1.00E+00 |
| ENSG00000235949.1_AC061961.  | ENSG00000160789.18_LMNA | -0.21731 | -0.363923295 | -0.06019485 | 7.16E-03 | 5.12E-02 | 1.00E+00 |
| ENSG00000253357.1_CTB-78F1.  | ENSG00000160789.18_LMNA | -0.03363 | -0.191805196 | 0.12624519  | 6.81E-01 | 8.61E-01 | 1.00E+00 |
| ENSG00000184344.3_GDF3       | ENSG00000160789.18_LMNA | -0.01261 | -0.171464238 | 0.146887837 | 8.77E-01 | 9.52E-01 | 1.00E+00 |
| ENSG00000221767.1_           | ENSG00000160789.18_LMNA | 0.00523  | -0.154095419 | 0.164297484 | 9.49E-01 | 9.79E-01 | 1.00E+00 |

|                              |                         |          |              |             |          |          |          |
|------------------------------|-------------------------|----------|--------------|-------------|----------|----------|----------|
| ENSG00000276413.1_RP3-393E1  | ENSG00000160789.18_LMNA | 0.06142  | -0.098750211 | 0.218480533 | 4.52E-01 | 7.18E-01 | 1.00E+00 |
| ENSG00000231566.1_RP5-1158E  | ENSG00000160789.18_LMNA | 0.29671  | 0.144330518  | 0.435349576 | 2.06E-04 | 3.34E-03 | 1.00E+00 |
| ENSG00000277199.1_CH17-125A  | ENSG00000160789.18_LMNA | -0.1442  | -0.296594535 | 0.015350292 | 7.63E-02 | 2.64E-01 | 1.00E+00 |
| ENSG00000254039.1_RP11-304F  | ENSG00000160789.18_LMNA | -0.05597 | -0.213269247 | 0.104159963 | 4.93E-01 | 7.49E-01 | 1.00E+00 |
| ENSG00000224683.1_RPL36AP2   | ENSG00000160789.18_LMNA | 0.1582   | -0.001030953 | 0.3095992   | 5.16E-02 | 2.05E-01 | 1.00E+00 |
| ENSG00000260944.1_FOXC2-AS   | ENSG00000160789.18_LMNA | 0.07352  | -0.086693148 | 0.230030521 | 3.68E-01 | 6.49E-01 | 1.00E+00 |
| ENSG00000180150.5_HMGN2P9    | ENSG00000160789.18_LMNA | 0.17775  | 0.019088063  | 0.327676817 | 2.85E-02 | 1.38E-01 | 1.00E+00 |
| ENSG00000267661.1_RP11-820I1 | ENSG00000160789.18_LMNA | 0.09459  | -0.065602036 | 0.250022323 | 2.46E-01 | 5.27E-01 | 1.00E+00 |
| ENSG00000265139.1_RP11-227G  | ENSG00000160789.18_LMNA | -0.10726 | -0.261990323 | 0.052839534 | 1.88E-01 | 4.55E-01 | 1.00E+00 |
| ENSG00000211724.3_TRBV6-6    | ENSG00000160789.18_LMNA | -0.01656 | -0.175301819 | 0.143014447 | 8.39E-01 | 9.38E-01 | 1.00E+00 |
| ENSG00000225292.2_RP11-57H1  | ENSG00000160789.18_LMNA | 0.12624  | -0.033639514 | 0.279814497 | 1.21E-01 | 3.50E-01 | 1.00E+00 |
| ENSG00000236391.3_AC092573   | ENSG00000160789.18_LMNA | -0.12426 | -0.277966614 | 0.035640843 | 1.27E-01 | 3.61E-01 | 1.00E+00 |
| ENSG00000241499.1_RP11-85G2  | ENSG00000160789.18_LMNA | 0.07153  | -0.088681622 | 0.228131799 | 3.81E-01 | 6.60E-01 | 1.00E+00 |
| ENSG00000273585.1_RP11-14C1  | ENSG00000160789.18_LMNA | -0.22543 | -0.371309241 | -0.06869946 | 5.23E-03 | 4.06E-02 | 1.00E+00 |
| ENSG00000249055.1_TBCAP3     | ENSG00000160789.18_LMNA | -0.00038 | -0.159567524 | 0.158833836 | 9.96E-01 | 9.99E-01 | 1.00E+00 |
| ENSG00000223739.1_AC007389   | ENSG00000160789.18_LMNA | -0.00148 | -0.160641659 | 0.157759066 | 9.86E-01 | 9.94E-01 | 1.00E+00 |
| ENSG00000223558.1_TRIM60P17  | ENSG00000160789.18_LMNA | -0.11116 | -0.265656101 | 0.048909717 | 1.73E-01 | 4.32E-01 | 1.00E+00 |
| ENSG00000254484.1_CTA-797E1  | ENSG00000160789.18_LMNA | 0.13652  | -0.023184628 | 0.289430175 | 9.35E-02 | 2.99E-01 | 1.00E+00 |
| ENSG00000278013.1_RP11-379H  | ENSG00000160789.18_LMNA | 0.04446  | -0.115554435 | 0.202233391 | 5.86E-01 | 8.08E-01 | 1.00E+00 |
| ENSG00000244545.1_RP11-788A  | ENSG00000160789.18_LMNA | -0.13046 | -0.283766828 | 0.029350531 | 1.09E-01 | 3.29E-01 | 1.00E+00 |
| ENSG00000230284.1_RP11-402G  | ENSG00000160789.18_LMNA | -0.13427 | -0.287328446 | 0.02547564  | 9.91E-02 | 3.10E-01 | 1.00E+00 |
| ENSG00000185652.10_NTF3      | ENSG00000160789.18_LMNA | -0.09867 | -0.253887093 | 0.061491959 | 2.26E-01 | 5.03E-01 | 1.00E+00 |
| ENSG00000236463.1_LINC00427  | ENSG00000160789.18_LMNA | -0.02664 | -0.185054692 | 0.133126488 | 7.45E-01 | 8.93E-01 | 1.00E+00 |
| ENSG00000267052.1_CTB-30L5.1 | ENSG00000160789.18_LMNA | 0.01725  | -0.14234479  | 0.175964305 | 8.33E-01 | 9.35E-01 | 1.00E+00 |
| ENSG00000279931.1_RP11-13J1  | ENSG00000160789.18_LMNA | 0.02073  | -0.138933905 | 0.179334199 | 8.00E-01 | 9.20E-01 | 1.00E+00 |
| ENSG00000270544.1_CTC-523E2  | ENSG00000160789.18_LMNA | -0.0734  | -0.229914191 | 0.08681505  | 3.69E-01 | 6.50E-01 | 1.00E+00 |
| ENSG00000277901.1_RP5-851M4  | ENSG00000160789.18_LMNA | 0.20717  | 0.049604614  | 0.354672359 | 1.04E-02 | 6.75E-02 | 1.00E+00 |
| ENSG00000214702.6_RP11-247C  | ENSG00000160789.18_LMNA | 0.0073   | -0.152076258 | 0.166308603 | 9.29E-01 | 9.73E-01 | 1.00E+00 |
| ENSG00000231357.1_AC006028   | ENSG00000160789.18_LMNA | 0.05327  | -0.106837499 | 0.210683241 | 5.15E-01 | 7.62E-01 | 1.00E+00 |
| ENSG00000226331.1_RPL23AP2   | ENSG00000160789.18_LMNA | -0.27514 | -0.416116054 | -0.12125295 | 6.02E-04 | 7.81E-03 | 1.00E+00 |
| ENSG00000240328.1_RP11-841C  | ENSG00000160789.18_LMNA | -0.06043 | -0.217538799 | 0.0997292   | 4.60E-01 | 7.23E-01 | 1.00E+00 |
| ENSG00000271563.1_HIRAP1     | ENSG00000160789.18_LMNA | -0.18436 | -0.333768727 | -0.02592467 | 2.30E-02 | 1.19E-01 | 1.00E+00 |
| ENSG00000280989.1_LINC00581  | ENSG00000160789.18_LMNA | -0.14868 | -0.300758058 | 0.010779751 | 6.75E-02 | 2.44E-01 | 1.00E+00 |

|                              |                         |          |              |             |          |          |          |
|------------------------------|-------------------------|----------|--------------|-------------|----------|----------|----------|
| ENSG00000248583.1_RP11-241F  | ENSG00000160789.18_LMNA | -0.06176 | -0.218813293 | 0.09840414  | 4.50E-01 | 7.15E-01 | 1.00E+00 |
| ENSG00000280023.1_LLNL-276   | ENSG00000160789.18_LMNA | 0.17006  | 0.011164593  | 0.32058418  | 3.62E-02 | 1.62E-01 | 1.00E+00 |
| ENSG00000238169.1_LINC01053  | ENSG00000160789.18_LMNA | -0.27434 | -0.415397998 | -0.12039751 | 6.26E-04 | 8.05E-03 | 1.00E+00 |
| ENSG00000244060.2_RPS2P41    | ENSG00000160789.18_LMNA | -0.08827 | -0.244042385 | 0.0719405   | 2.80E-01 | 5.65E-01 | 1.00E+00 |
| ENSG00000180016.2_OR1E1      | ENSG00000160789.18_LMNA | -0.12583 | -0.279429509 | 0.034056678 | 1.22E-01 | 3.52E-01 | 1.00E+00 |
| ENSG00000232536.1_RP11-74C1  | ENSG00000160789.18_LMNA | 0.01034  | -0.149102064 | 0.169266134 | 8.99E-01 | 9.61E-01 | 1.00E+00 |
| ENSG00000276724.1_RP11-1000I | ENSG00000160789.18_LMNA | 0.00557  | -0.153766955 | 0.164624821 | 9.46E-01 | 9.78E-01 | 1.00E+00 |
| ENSG00000247228.2_RP11-296I1 | ENSG00000160789.18_LMNA | -0.08997 | -0.245654421 | 0.070234324 | 2.70E-01 | 5.55E-01 | 1.00E+00 |
| ENSG00000255418.4_RP11-266A  | ENSG00000160789.18_LMNA | 0.07747  | -0.082749075 | 0.233789452 | 3.43E-01 | 6.27E-01 | 1.00E+00 |
| ENSG00000264186.1_SNRPCP4    | ENSG00000160789.18_LMNA | -0.04545 | -0.203176761 | 0.114583668 | 5.78E-01 | 8.03E-01 | 1.00E+00 |
| ENSG00000259735.1_RP11-356M  | ENSG00000160789.18_LMNA | -0.05546 | -0.21277779  | 0.104669169 | 4.97E-01 | 7.51E-01 | 1.00E+00 |
| ENSG00000238285.1_MRPL50P2   | ENSG00000160789.18_LMNA | 0.03679  | -0.123128708 | 0.194852573 | 6.53E-01 | 8.46E-01 | 1.00E+00 |
| ENSG00000271996.1_RP11-337N  | ENSG00000160789.18_LMNA | -0.08853 | -0.244285752 | 0.071683039 | 2.78E-01 | 5.63E-01 | 1.00E+00 |
| ENSG00000231666.4_RP11-404C  | ENSG00000160789.18_LMNA | 0.13166  | -0.028130722 | 0.284888952 | 1.06E-01 | 3.23E-01 | 1.00E+00 |
| ENSG00000266958.1_AC006126.1 | ENSG00000160789.18_LMNA | 0.05284  | -0.107262943 | 0.210271931 | 5.18E-01 | 7.64E-01 | 1.00E+00 |
| ENSG00000263883.1_EEF1DP7    | ENSG00000160789.18_LMNA | -0.00643 | -0.165462128 | 0.152926442 | 9.37E-01 | 9.75E-01 | 1.00E+00 |
| ENSG00000267424.1_CTD-2265C  | ENSG00000160789.18_LMNA | -0.00817 | -0.167157265 | 0.151223404 | 9.20E-01 | 9.70E-01 | 1.00E+00 |
| ENSG00000249899.4_CTD-2175A  | ENSG00000160789.18_LMNA | -0.05093 | -0.208437212 | 0.109159294 | 5.33E-01 | 7.75E-01 | 1.00E+00 |
| ENSG00000271623.1_RP11-435I1 | ENSG00000160789.18_LMNA | -0.14408 | -0.296477795 | 0.015478256 | 7.66E-02 | 2.65E-01 | 1.00E+00 |
| ENSG00000238242.1_RP11-575B  | ENSG00000160789.18_LMNA | -0.17374 | -0.323978727 | -0.01495194 | 3.23E-02 | 1.50E-01 | 1.00E+00 |
| ENSG00000259873.1_RP11-481E  | ENSG00000160789.18_LMNA | 0.00618  | -0.153169822 | 0.165219724 | 9.40E-01 | 9.76E-01 | 1.00E+00 |
| ENSG00000175509.8_RP11-395L  | ENSG00000160789.18_LMNA | 0.01983  | -0.139811255 | 0.178468106 | 8.08E-01 | 9.24E-01 | 1.00E+00 |
| ENSG00000215278.4_RPS7P6     | ENSG00000160789.18_LMNA | 0.10554  | -0.054582223 | 0.26036181  | 1.96E-01 | 4.65E-01 | 1.00E+00 |
| ENSG00000235042.1_AC098820.1 | ENSG00000160789.18_LMNA | 0.01309  | -0.146419786 | 0.171928476 | 8.73E-01 | 9.51E-01 | 1.00E+00 |
| ENSG00000259414.1_HERC2P7    | ENSG00000160789.18_LMNA | 0.13705  | -0.022645916 | 0.289923942 | 9.22E-02 | 2.97E-01 | 1.00E+00 |
| ENSG00000272988.1_RP11-150D  | ENSG00000160789.18_LMNA | 0.05478  | -0.105336261 | 0.212133708 | 5.03E-01 | 7.54E-01 | 1.00E+00 |
| ENSG00000230068.2_CDC42-IT1  | ENSG00000160789.18_LMNA | 0.11266  | -0.047387376 | 0.267073718 | 1.67E-01 | 4.24E-01 | 1.00E+00 |
| ENSG00000276591.1_GXYLT1P5   | ENSG00000160789.18_LMNA | -0.12977 | -0.283123991 | 0.03004891  | 1.11E-01 | 3.32E-01 | 1.00E+00 |
| ENSG00000267992.1_CTB-189B5  | ENSG00000160789.18_LMNA | -0.08042 | -0.236588131 | 0.079806097 | 3.25E-01 | 6.11E-01 | 1.00E+00 |
| ENSG00000268529.1_CYP2T3P    | ENSG00000160789.18_LMNA | 0.03261  | -0.127248342 | 0.190822981 | 6.90E-01 | 8.66E-01 | 1.00E+00 |
| ENSG00000250381.1_UNC93B4    | ENSG00000160789.18_LMNA | 0.01682  | -0.142760441 | 0.175553139 | 8.37E-01 | 9.37E-01 | 1.00E+00 |
| ENSG00000176007.10_FAM220BI  | ENSG00000160789.18_LMNA | 0.02055  | -0.13910603  | 0.179164321 | 8.02E-01 | 9.20E-01 | 1.00E+00 |
| ENSG00000243568.2_RP11-2I17  | ENSG00000160789.18_LMNA | -0.16578 | -0.31662146  | -0.00675453 | 4.12E-02 | 1.77E-01 | 1.00E+00 |

|                              |                         |          |              |             |          |          |          |
|------------------------------|-------------------------|----------|--------------|-------------|----------|----------|----------|
| ENSG00000230282.1_RPL7P61    | ENSG00000160789.18_LMNA | -0.01054 | -0.169460091 | 0.148906813 | 8.97E-01 | 9.60E-01 | 1.00E+00 |
| ENSG00000229211.3_KCTD9P6    | ENSG00000160789.18_LMNA | 0.09436  | -0.065833843 | 0.249804051 | 2.48E-01 | 5.28E-01 | 1.00E+00 |
| ENSG00000258807.4_RP11-1152  | ENSG00000160789.18_LMNA | -0.00994 | -0.168868715 | 0.149502057 | 9.03E-01 | 9.63E-01 | 1.00E+00 |
| ENSG00000170128.3_GPR25      | ENSG00000160789.18_LMNA | -0.05619 | -0.213485176 | 0.103936183 | 4.92E-01 | 7.47E-01 | 1.00E+00 |
| ENSG00000179412.10_HNRNPCL   | ENSG00000160789.18_LMNA | -0.08535 | -0.241273065 | 0.074867233 | 2.96E-01 | 5.82E-01 | 1.00E+00 |
| ENSG00000250599.1_AC064853.  | ENSG00000160789.18_LMNA | -0.12095 | -0.274856233 | 0.039003835 | 1.38E-01 | 3.78E-01 | 1.00E+00 |
| ENSG00000157884.9_CIB4       | ENSG00000160789.18_LMNA | 0.01609  | -0.143481794 | 0.174839304 | 8.44E-01 | 9.39E-01 | 1.00E+00 |
| ENSG00000232719.1_RP11-13J8  | ENSG00000160789.18_LMNA | 0.09083  | -0.069373848 | 0.246466757 | 2.66E-01 | 5.50E-01 | 1.00E+00 |
| ENSG00000125816.4_NKX2-4     | ENSG00000160789.18_LMNA | 0.06647  | -0.093722839 | 0.2233073   | 4.16E-01 | 6.88E-01 | 1.00E+00 |
| ENSG00000254017.1_IGHEP2     | ENSG00000160789.18_LMNA | 0.03069  | -0.129142038 | 0.188967072 | 7.07E-01 | 8.76E-01 | 1.00E+00 |
| ENSG00000279971.1_CTD-2553L  | ENSG00000160789.18_LMNA | 0.00812  | -0.151279517 | 0.167101442 | 9.21E-01 | 9.70E-01 | 1.00E+00 |
| ENSG00000232837.1_AF064858.7 | ENSG00000160789.18_LMNA | -0.0477  | -0.205339092 | 0.112356247 | 5.60E-01 | 7.92E-01 | 1.00E+00 |
| ENSG00000234724.1_HDAC1P1    | ENSG00000160789.18_LMNA | 0.12401  | -0.035897395 | 0.277729565 | 1.28E-01 | 3.62E-01 | 1.00E+00 |
| ENSG00000138068.9_SULT6B1    | ENSG00000160789.18_LMNA | 0.00579  | -0.153548627 | 0.16484236  | 9.44E-01 | 9.78E-01 | 1.00E+00 |
| ENSG00000204889.9_KRT40      | ENSG00000160789.18_LMNA | -0.1061  | -0.260895482 | 0.054011346 | 1.93E-01 | 4.62E-01 | 1.00E+00 |
| ENSG00000205126.2_ACCSL      | ENSG00000160789.18_LMNA | -0.16318 | -0.314214706 | -0.00408196 | 4.46E-02 | 1.87E-01 | 1.00E+00 |
| ENSG00000060566.12_CREB3L3   | ENSG00000160789.18_LMNA | -0.02556 | -0.184011334 | 0.134187332 | 7.55E-01 | 8.98E-01 | 1.00E+00 |
| ENSG00000156009.8_MAGEA8     | ENSG00000160789.18_LMNA | 0.02694  | -0.132827409 | 0.185348713 | 7.42E-01 | 8.92E-01 | 1.00E+00 |
| ENSG00000230021.6_RP5-857K2  | ENSG00000160789.18_LMNA | 0.03872  | -0.12122329  | 0.196712721 | 6.36E-01 | 8.37E-01 | 1.00E+00 |
| ENSG00000251571.1_DDX3P3     | ENSG00000160789.18_LMNA | 0.02978  | -0.130041013 | 0.188085239 | 7.16E-01 | 8.79E-01 | 1.00E+00 |
| ENSG00000235876.2_FEM1AP4    | ENSG00000160789.18_LMNA | -0.02454 | -0.183022016 | 0.135192557 | 7.64E-01 | 9.02E-01 | 1.00E+00 |
| ENSG00000187893.9_CXXC1P1    | ENSG00000160789.18_LMNA | 0.13868  | -0.020984029 | 0.291446127 | 8.84E-02 | 2.89E-01 | 1.00E+00 |
| ENSG00000234277.2_CTD-2090I1 | ENSG00000160789.18_LMNA | 0.17353  | 0.014733608  | 0.323783258 | 3.25E-02 | 1.51E-01 | 1.00E+00 |
| ENSG00000134193.13_REG4      | ENSG00000160789.18_LMNA | -0.23863 | -0.383274467 | -0.0825709  | 3.07E-03 | 2.72E-02 | 1.00E+00 |
| ENSG00000187033.8_SAMD7      | ENSG00000160789.18_LMNA | -0.01679 | -0.17552277  | 0.142791136 | 8.37E-01 | 9.37E-01 | 1.00E+00 |
| ENSG00000279907.1_RP11-568J  | ENSG00000160789.18_LMNA | 0.14703  | -0.012466841 | 0.299222589 | 7.07E-02 | 2.51E-01 | 1.00E+00 |
| ENSG00000248529.4_RP11-2O17  | ENSG00000160789.18_LMNA | -0.04019 | -0.198119389 | 0.11978083  | 6.23E-01 | 8.30E-01 | 1.00E+00 |
| ENSG00000235721.1_AC013268.  | ENSG00000160789.18_LMNA | 0.02263  | -0.137060323 | 0.181182093 | 7.82E-01 | 9.11E-01 | 1.00E+00 |
| ENSG00000197446.7_CYP2F1     | ENSG00000160789.18_LMNA | -0.01861 | -0.177285953 | 0.141007966 | 8.20E-01 | 9.30E-01 | 1.00E+00 |
| ENSG00000117322.15_CR2       | ENSG00000160789.18_LMNA | 0.05302  | -0.107086549 | 0.210442479 | 5.17E-01 | 7.63E-01 | 1.00E+00 |
| ENSG00000276203.3_ANKRD20A   | ENSG00000160789.18_LMNA | -0.00786 | -0.166851209 | 0.151531027 | 9.23E-01 | 9.71E-01 | 1.00E+00 |
| ENSG00000215182.8_MUC5AC     | ENSG00000160789.18_LMNA | 0.02766  | -0.132124678 | 0.186039332 | 7.35E-01 | 8.89E-01 | 1.00E+00 |
| ENSG00000201839.1_SNORD114   | ENSG00000160789.18_LMNA | 0.06064  | -0.099523145 | 0.217737061 | 4.58E-01 | 7.22E-01 | 1.00E+00 |

|                              |                         |          |              |             |          |          |          |
|------------------------------|-------------------------|----------|--------------|-------------|----------|----------|----------|
| ENSG00000201785.1_SNORD117   | ENSG00000160789.18_LMNA | 0.02486  | -0.134878187 | 0.183331481 | 7.61E-01 | 9.00E-01 | 1.00E+00 |
| ENSG00000278832.1_           | ENSG00000160789.18_LMNA | 0.03334  | -0.126529997 | 0.191526398 | 6.83E-01 | 8.62E-01 | 1.00E+00 |
| ENSG00000240665.1_LSP1P2     | ENSG00000160789.18_LMNA | 0.02218  | -0.137505489 | 0.180743234 | 7.86E-01 | 9.13E-01 | 1.00E+00 |
| ENSG00000207063.1_SNORD116   | ENSG00000160789.18_LMNA | 0.02924  | -0.130566431 | 0.187569603 | 7.21E-01 | 8.81E-01 | 1.00E+00 |
| ENSG00000200742.1_Y_RNA      | ENSG00000160789.18_LMNA | 0.09975  | -0.060406031 | 0.25490653  | 2.21E-01 | 4.97E-01 | 1.00E+00 |
| ENSG00000199217.1_RNU6-1123  | ENSG00000160789.18_LMNA | -0.0669  | -0.223714378 | 0.093298103 | 4.13E-01 | 6.86E-01 | 1.00E+00 |
| ENSG00000242001.1_GS1-388B5  | ENSG00000160789.18_LMNA | -0.16565 | -0.316508047 | -0.00662849 | 4.14E-02 | 1.77E-01 | 1.00E+00 |
| ENSG00000265102.1_MIR3942    | ENSG00000160789.18_LMNA | -0.03197 | -0.190203587 | 0.127880605 | 6.96E-01 | 8.70E-01 | 1.00E+00 |
| ENSG00000271250.1_RP11-101P  | ENSG00000160789.18_LMNA | -0.04422 | -0.201995767 | 0.115798864 | 5.89E-01 | 8.09E-01 | 1.00E+00 |
| ENSG00000281634.1_           | ENSG00000160789.18_LMNA | 0.05104  | -0.109050708 | 0.208542329 | 5.32E-01 | 7.75E-01 | 1.00E+00 |
| ENSG00000206622.1_SNORA69    | ENSG00000160789.18_LMNA | 0.04544  | -0.114586385 | 0.203174122 | 5.78E-01 | 8.03E-01 | 1.00E+00 |
| ENSG00000273694.1_U2         | ENSG00000160789.18_LMNA | -0.17836 | -0.328243297 | -0.01972258 | 2.79E-02 | 1.36E-01 | 1.00E+00 |
| ENSG00000265727.2_RN7SL648f  | ENSG00000160789.18_LMNA | 0.06488  | -0.095308479 | 0.221786608 | 4.27E-01 | 6.98E-01 | 1.00E+00 |
| ENSG00000254953.1_RP11-100N  | ENSG00000160789.18_LMNA | 0.00697  | -0.152399089 | 0.165987235 | 9.32E-01 | 9.73E-01 | 1.00E+00 |
| ENSG00000274011.1_Metazoa_SI | ENSG00000160789.18_LMNA | 0.08218  | -0.078042115 | 0.238263109 | 3.14E-01 | 6.00E-01 | 1.00E+00 |
| ENSG00000278520.1_MIR7851    | ENSG00000160789.18_LMNA | -0.13583 | -0.288787984 | 0.023885004 | 9.52E-02 | 3.02E-01 | 1.00E+00 |
| ENSG00000277749.1_RP11-60L3  | ENSG00000160789.18_LMNA | 0.27068  | 0.116500062  | 0.412121816 | 7.44E-04 | 9.19E-03 | 1.00E+00 |
| ENSG00000228573.1_RP11-279N  | ENSG00000160789.18_LMNA | 0.07686  | -0.083356425 | 0.233211228 | 3.47E-01 | 6.31E-01 | 1.00E+00 |
| ENSG00000273258.1_RP11-394I1 | ENSG00000160789.18_LMNA | 0.03611  | -0.12380499  | 0.194191808 | 6.59E-01 | 8.49E-01 | 1.00E+00 |
| ENSG00000276923.1_RP11-321P  | ENSG00000160789.18_LMNA | -0.0587  | -0.215881162 | 0.101450922 | 4.73E-01 | 7.32E-01 | 1.00E+00 |
| ENSG00000267652.1_RP11-188I2 | ENSG00000160789.18_LMNA | -0.13158 | -0.284815003 | 0.028211138 | 1.06E-01 | 3.23E-01 | 1.00E+00 |
| ENSG00000223305.1_RN7SKP30   | ENSG00000160789.18_LMNA | -0.14711 | -0.299296436 | 0.012385742 | 7.05E-02 | 2.51E-01 | 1.00E+00 |
| ENSG00000237200.1_ZBTB40-IT1 | ENSG00000160789.18_LMNA | -0.05411 | -0.211484761 | 0.106008102 | 5.08E-01 | 7.58E-01 | 1.00E+00 |
| ENSG00000254787.1_CTD-2537C  | ENSG00000160789.18_LMNA | -0.16544 | -0.316311236 | -0.0064098  | 4.17E-02 | 1.78E-01 | 1.00E+00 |
| ENSG00000186847.5_KRT14      | ENSG00000160789.18_LMNA | 0.03561  | -0.124299496 | 0.193708466 | 6.63E-01 | 8.51E-01 | 1.00E+00 |
| ENSG00000228955.2_RP11-452J1 | ENSG00000160789.18_LMNA | 0.1028   | -0.05733636  | 0.257784457 | 2.08E-01 | 4.80E-01 | 1.00E+00 |
| ENSG00000225701.1	EIF4A1P13  | ENSG00000160789.18_LMNA | -0.0653  | -0.222187027 | 0.094891115 | 4.24E-01 | 6.95E-01 | 1.00E+00 |
| ENSG00000226977.1_HMG1N1P24  | ENSG00000160789.18_LMNA | 0.04745  | -0.112597369 | 0.205105166 | 5.62E-01 | 7.93E-01 | 1.00E+00 |
| ENSG00000224918.1_AY269186.1 | ENSG00000160789.18_LMNA | -0.06346 | -0.220431778 | 0.096719818 | 4.37E-01 | 7.05E-01 | 1.00E+00 |
| ENSG00000219870.2_RP11-430A  | ENSG00000160789.18_LMNA | 0.03995  | -0.120015198 | 0.197890926 | 6.25E-01 | 8.31E-01 | 1.00E+00 |
| ENSG00000258602.1_LINC01629  | ENSG00000160789.18_LMNA | 0.10216  | -0.057983401 | 0.257178298 | 2.10E-01 | 4.84E-01 | 1.00E+00 |
| ENSG00000251518.1_CTD-2130F  | ENSG00000160789.18_LMNA | -0.26739 | -0.409168663 | -0.11299468 | 8.68E-04 | 1.04E-02 | 1.00E+00 |
| ENSG00000267636.1_AC008992.1 | ENSG00000160789.18_LMNA | 0.01001  | -0.149427465 | 0.168942835 | 9.03E-01 | 9.62E-01 | 1.00E+00 |

|                              |                         |          |              |             |          |          |          |
|------------------------------|-------------------------|----------|--------------|-------------|----------|----------|----------|
| ENSG00000236146.2_RP11-65J3  | ENSG00000160789.18_LMNA | 0.12187  | -0.038068053 | 0.275722384 | 1.35E-01 | 3.73E-01 | 1.00E+00 |
| ENSG00000259398.1_RP11-430B  | ENSG00000160789.18_LMNA | -0.01893 | -0.177594493 | 0.140695716 | 8.17E-01 | 9.28E-01 | 1.00E+00 |
| ENSG00000213045.3_RP11-532L  | ENSG00000160789.18_LMNA | -0.06694 | -0.223759507 | 0.093251008 | 4.13E-01 | 6.86E-01 | 1.00E+00 |
| ENSG00000225768.1_RP11-127O  | ENSG00000160789.18_LMNA | -0.29249 | -0.431590908 | -0.13979561 | 2.56E-04 | 3.97E-03 | 1.00E+00 |
| ENSG00000267895.1_SIGLEC19F  | ENSG00000160789.18_LMNA | -0.03834 | -0.196345391 | 0.121599745 | 6.39E-01 | 8.39E-01 | 1.00E+00 |
| ENSG00000229276.1_REV3L-IT1  | ENSG00000160789.18_LMNA | 0.01274  | -0.14676018  | 0.171590869 | 8.76E-01 | 9.52E-01 | 1.00E+00 |
| ENSG00000237798.1_AC010894.1 | ENSG00000160789.18_LMNA | -0.12608 | -0.279666198 | 0.03380022  | 1.22E-01 | 3.51E-01 | 1.00E+00 |
| ENSG00000260403.1_RP11-616M  | ENSG00000160789.18_LMNA | -0.06646 | -0.223298001 | 0.09373254  | 4.16E-01 | 6.89E-01 | 1.00E+00 |
| ENSG00000253813.1_COX6B1P4   | ENSG00000160789.18_LMNA | -0.27044 | -0.411907296 | -0.11624518 | 7.52E-04 | 9.27E-03 | 1.00E+00 |
| ENSG00000264860.1_RP11-143K  | ENSG00000160789.18_LMNA | -0.28575 | -0.425586257 | -0.13257619 | 3.59E-04 | 5.17E-03 | 1.00E+00 |
| ENSG00000267626.1_AC002115.1 | ENSG00000160789.18_LMNA | 0.04265  | -0.11734631  | 0.200490537 | 6.02E-01 | 8.17E-01 | 1.00E+00 |
| ENSG00000275390.1_RP11-318K  | ENSG00000160789.18_LMNA | 0.0072   | -0.152176608 | 0.166208715 | 9.30E-01 | 9.73E-01 | 1.00E+00 |
| ENSG00000255260.1_CTD-3224K  | ENSG00000160789.18_LMNA | -0.09061 | -0.246256986 | 0.069596095 | 2.67E-01 | 5.51E-01 | 1.00E+00 |
| ENSG00000203616.2_RHOT1P2    | ENSG00000160789.18_LMNA | 0.03686  | -0.123060772 | 0.194918934 | 6.52E-01 | 8.46E-01 | 1.00E+00 |
| ENSG00000277010.1_RP11-616M  | ENSG00000160789.18_LMNA | 0.13271  | -0.027059416 | 0.285873758 | 1.03E-01 | 3.18E-01 | 1.00E+00 |
| ENSG00000211795.3_TRAV8-6    | ENSG00000160789.18_LMNA | 0.01613  | -0.143434746 | 0.174885873 | 8.44E-01 | 9.39E-01 | 1.00E+00 |
| ENSG00000228369.2_TXNDC12-1  | ENSG00000160789.18_LMNA | 0.03784  | -0.122099214 | 0.195857892 | 6.44E-01 | 8.41E-01 | 1.00E+00 |
| ENSG00000241211.1_IQCJ-SCHII | ENSG00000160789.18_LMNA | -0.19573 | -0.344206376 | -0.03770556 | 1.57E-02 | 9.05E-02 | 1.00E+00 |
| ENSG00000255539.1_CTA-797E1  | ENSG00000160789.18_LMNA | 0.07781  | -0.082408039 | 0.234114036 | 3.41E-01 | 6.26E-01 | 1.00E+00 |
| ENSG00000167754.11_KLK5      | ENSG00000160789.18_LMNA | -0.15313 | -0.304893994 | 0.006226569 | 5.96E-02 | 2.25E-01 | 1.00E+00 |
| ENSG00000218536.1_AP002530.1 | ENSG00000160789.18_LMNA | -0.13778 | -0.29060262  | 0.021905164 | 9.05E-02 | 2.93E-01 | 1.00E+00 |
| ENSG00000227920.2_RP1-153P1  | ENSG00000160789.18_LMNA | -0.29022 | -0.429575722 | -0.13736928 | 2.87E-04 | 4.34E-03 | 1.00E+00 |
| ENSG00000223462.2_RP11-285G  | ENSG00000160789.18_LMNA | 0.11243  | -0.047625614 | 0.266851959 | 1.68E-01 | 4.26E-01 | 1.00E+00 |
| ENSG00000224690.2_UBE2D3P3   | ENSG00000160789.18_LMNA | -0.05391 | -0.211297443 | 0.106201974 | 5.09E-01 | 7.59E-01 | 1.00E+00 |
| ENSG00000229753.1_RPS27AP1   | ENSG00000160789.18_LMNA | -0.09515 | -0.250557046 | 0.065034011 | 2.44E-01 | 5.23E-01 | 1.00E+00 |
| ENSG00000244144.1_RP11-757F  | ENSG00000160789.18_LMNA | -0.13142 | -0.284664215 | 0.028375097 | 1.07E-01 | 3.24E-01 | 1.00E+00 |
| ENSG00000274892.1_CTB-167G5  | ENSG00000160789.18_LMNA | -0.01134 | -0.170237937 | 0.148123526 | 8.90E-01 | 9.57E-01 | 1.00E+00 |
| ENSG00000248637.1_RP11-485C  | ENSG00000160789.18_LMNA | 0.02206  | -0.137624016 | 0.180626365 | 7.87E-01 | 9.13E-01 | 1.00E+00 |
| ENSG00000216723.1_NUDT19P3   | ENSG00000160789.18_LMNA | -0.15337 | -0.305118618 | 0.005978914 | 5.92E-02 | 2.24E-01 | 1.00E+00 |
| ENSG00000184961.5_AL772307.1 | ENSG00000160789.18_LMNA | -0.01482 | -0.173608669 | 0.144724598 | 8.56E-01 | 9.43E-01 | 1.00E+00 |
| ENSG00000236159.1_RP3-343K2  | ENSG00000160789.18_LMNA | 0.09074  | -0.069462327 | 0.246383249 | 2.66E-01 | 5.50E-01 | 1.00E+00 |
| ENSG00000271304.1_DPRXP2     | ENSG00000160789.18_LMNA | -0.15406 | -0.305761179 | 0.005270261 | 5.81E-02 | 2.21E-01 | 1.00E+00 |
| ENSG00000229390.1_MICD       | ENSG00000160789.18_LMNA | 0.04466  | -0.115361973 | 0.202420468 | 5.85E-01 | 8.07E-01 | 1.00E+00 |

|                              |                         |          |              |             |          |          |          |
|------------------------------|-------------------------|----------|--------------|-------------|----------|----------|----------|
| ENSG00000249081.1_OR5M14P    | ENSG00000160789.18_LMNA | -0.25938 | -0.40198586  | -0.10449939 | 1.25E-03 | 1.37E-02 | 1.00E+00 |
| ENSG00000258244.1_OSTF1P1    | ENSG00000160789.18_LMNA | 0.08125  | -0.078970158 | 0.237382126 | 3.20E-01 | 6.06E-01 | 1.00E+00 |
| ENSG00000272748.1_RP11-222G  | ENSG00000160789.18_LMNA | -0.03116 | -0.189418685 | 0.128681444 | 7.03E-01 | 8.73E-01 | 1.00E+00 |
| ENSG00000270679.1_CTC-512J1  | ENSG00000160789.18_LMNA | 0.05823  | -0.101911859 | 0.215437071 | 4.76E-01 | 7.35E-01 | 1.00E+00 |
| ENSG00000227368.1_CDK8P2     | ENSG00000160789.18_LMNA | 0.00688  | -0.15248617  | 0.165900537 | 9.33E-01 | 9.74E-01 | 1.00E+00 |
| ENSG00000227531.1_RP11-202G  | ENSG00000160789.18_LMNA | -0.21173 | -0.358831904 | -0.05435788 | 8.83E-03 | 5.99E-02 | 1.00E+00 |
| ENSG00000241961.1_RP11-7F18  | ENSG00000160789.18_LMNA | 0.07495  | -0.08527245  | 0.231385619 | 3.59E-01 | 6.42E-01 | 1.00E+00 |
| ENSG00000259364.1_RP11-64K1  | ENSG00000160789.18_LMNA | -0.02372 | -0.182231505 | 0.135995308 | 7.72E-01 | 9.06E-01 | 1.00E+00 |
| ENSG00000260733.1_RP11-264L  | ENSG00000160789.18_LMNA | 0.01498  | -0.144562459 | 0.173769278 | 8.55E-01 | 9.43E-01 | 1.00E+00 |
| ENSG00000184995.7_IFNE       | ENSG00000160789.18_LMNA | -0.031   | -0.189264412 | 0.1288388   | 7.05E-01 | 8.74E-01 | 1.00E+00 |
| ENSG00000233691.2_RP11-312J  | ENSG00000160789.18_LMNA | 0.01558  | -0.143977328 | 0.174348742 | 8.49E-01 | 9.41E-01 | 1.00E+00 |
| ENSG00000266943.1_RPSAP66    | ENSG00000160789.18_LMNA | -0.06892 | -0.225647257 | 0.091279799 | 3.99E-01 | 6.76E-01 | 1.00E+00 |
| ENSG00000226188.2_HNRNPA1F   | ENSG00000160789.18_LMNA | -0.0253  | -0.183759597 | 0.134443179 | 7.57E-01 | 8.99E-01 | 1.00E+00 |
| ENSG00000279590.1_AC005786.1 | ENSG00000160789.18_LMNA | -0.0473  | -0.204952778 | 0.112754424 | 5.63E-01 | 7.94E-01 | 1.00E+00 |
| ENSG00000279235.1_RP11-16K1  | ENSG00000160789.18_LMNA | -0.09383 | -0.249302359 | 0.066366516 | 2.50E-01 | 5.31E-01 | 1.00E+00 |
| ENSG00000122872.8_ARL4AP1    | ENSG00000160789.18_LMNA | -0.00508 | -0.164147908 | 0.154245487 | 9.50E-01 | 9.80E-01 | 1.00E+00 |
| ENSG00000232467.2_TMA16P2    | ENSG00000160789.18_LMNA | 0.02856  | -0.131240604 | 0.186907723 | 7.27E-01 | 8.84E-01 | 1.00E+00 |
| ENSG00000258216.4_RP11-654D  | ENSG00000160789.18_LMNA | 0.12837  | -0.031471929 | 0.281813272 | 1.15E-01 | 3.39E-01 | 1.00E+00 |
| ENSG00000279632.1_RP11-286N  | ENSG00000160789.18_LMNA | -0.00174 | -0.160898766 | 0.157501695 | 9.83E-01 | 9.94E-01 | 1.00E+00 |
| ENSG00000241449.4_RP11-545G  | ENSG00000160789.18_LMNA | -0.08365 | -0.239659502 | 0.076570006 | 3.06E-01 | 5.92E-01 | 1.00E+00 |
| ENSG00000229962.1_AP000221.1 | ENSG00000160789.18_LMNA | -0.1631  | -0.314145466 | -0.00400514 | 4.47E-02 | 1.87E-01 | 1.00E+00 |
| ENSG00000173678.13_SPDYE2B   | ENSG00000160789.18_LMNA | 0.07991  | -0.080307764 | 0.236111433 | 3.28E-01 | 6.14E-01 | 1.00E+00 |
| ENSG00000257522.4_RP11-562L  | ENSG00000160789.18_LMNA | -0.11763 | -0.271740204 | 0.04236582  | 1.49E-01 | 3.96E-01 | 1.00E+00 |
| ENSG00000226516.6_FAM138B    | ENSG00000160789.18_LMNA | 0.17665  | 0.017950289  | 0.326660481 | 2.95E-02 | 1.42E-01 | 1.00E+00 |
| ENSG00000171133.2_OR2K2      | ENSG00000160789.18_LMNA | -0.09572 | -0.251096639 | 0.064460604 | 2.41E-01 | 5.20E-01 | 1.00E+00 |
| ENSG00000267552.5_CTD-2528L  | ENSG00000160789.18_LMNA | -0.02396 | -0.182463529 | 0.135759735 | 7.70E-01 | 9.05E-01 | 1.00E+00 |
| ENSG00000255374.2_TAS2R43    | ENSG00000160789.18_LMNA | 0.01657  | -0.143009237 | 0.175306973 | 8.39E-01 | 9.38E-01 | 1.00E+00 |
| ENSG00000177535.7_OR2B11     | ENSG00000160789.18_LMNA | -0.04538 | -0.203116084 | 0.114646125 | 5.79E-01 | 8.04E-01 | 1.00E+00 |
| ENSG00000250379.1_RP11-23P1  | ENSG00000160789.18_LMNA | -0.00821 | -0.16719536  | 0.15118511  | 9.20E-01 | 9.70E-01 | 1.00E+00 |
| ENSG00000258502.4_RP11-783L  | ENSG00000160789.18_LMNA | -0.06823 | -0.224982219 | 0.091974522 | 4.04E-01 | 6.79E-01 | 1.00E+00 |
| ENSG00000188800.5_TMCO2      | ENSG00000160789.18_LMNA | 0.13283  | -0.026938974 | 0.285984434 | 1.03E-01 | 3.17E-01 | 1.00E+00 |
| ENSG00000254584.1_RP1-17K7.2 | ENSG00000160789.18_LMNA | -0.08691 | -0.242749071 | 0.073308006 | 2.87E-01 | 5.72E-01 | 1.00E+00 |
| ENSG00000255500.2_RP11-347H  | ENSG00000160789.18_LMNA | -0.03353 | -0.191707241 | 0.126345262 | 6.82E-01 | 8.61E-01 | 1.00E+00 |



|                              |                         |          |              |             |          |          |          |
|------------------------------|-------------------------|----------|--------------|-------------|----------|----------|----------|
| ENSG00000257957.1_QRSL1P3    | ENSG00000160789.18_LMNA | -0.00681 | -0.16583453  | 0.152552466 | 9.34E-01 | 9.74E-01 | 1.00E+00 |
| ENSG00000257893.2_RP11-587P  | ENSG00000160789.18_LMNA | -0.11154 | -0.266019799 | 0.048519291 | 1.71E-01 | 4.30E-01 | 1.00E+00 |
| ENSG00000255057.1_RP11-567M  | ENSG00000160789.18_LMNA | -0.03903 | -0.197002988 | 0.120925748 | 6.33E-01 | 8.35E-01 | 1.00E+00 |
| ENSG00000226081.2_USP12PX    | ENSG00000160789.18_LMNA | 0.0435   | -0.116508479 | 0.201305697 | 5.95E-01 | 8.13E-01 | 1.00E+00 |
| ENSG00000265494.1_RP11-131K  | ENSG00000160789.18_LMNA | -0.13084 | -0.284120647 | 0.028966012 | 1.08E-01 | 3.27E-01 | 1.00E+00 |
| ENSG00000257316.1_RP11-267D  | ENSG00000160789.18_LMNA | 0.05931  | -0.100841035 | 0.216468557 | 4.68E-01 | 7.29E-01 | 1.00E+00 |
| ENSG00000256704.3_SDCCAG3F   | ENSG00000160789.18_LMNA | 0.01637  | -0.143206258 | 0.175112008 | 8.41E-01 | 9.38E-01 | 1.00E+00 |
| ENSG00000174015.8_SPERT      | ENSG00000160789.18_LMNA | 0.08173  | -0.078496069 | 0.23783224  | 3.17E-01 | 6.04E-01 | 1.00E+00 |
| ENSG00000278881.1_FP325331.1 | ENSG00000160789.18_LMNA | 0.10618  | -0.053932009 | 0.260969633 | 1.93E-01 | 4.61E-01 | 1.00E+00 |
| ENSG00000243468.5_INGX       | ENSG00000160789.18_LMNA | 0.10253  | -0.057611033 | 0.257527169 | 2.09E-01 | 4.81E-01 | 1.00E+00 |
| ENSG00000261205.2_NIFKP4     | ENSG00000160789.18_LMNA | -0.01168 | -0.170563838 | 0.147795227 | 8.86E-01 | 9.56E-01 | 1.00E+00 |
| ENSG00000214980.4_RP11-274J  | ENSG00000160789.18_LMNA | 0.05833  | -0.101819419 | 0.215526143 | 4.75E-01 | 7.34E-01 | 1.00E+00 |
| ENSG00000149300.8_C11orf52   | ENSG00000160789.18_LMNA | -0.19143 | -0.340261849 | -0.03324337 | 1.82E-02 | 1.01E-01 | 1.00E+00 |
| ENSG00000236674.1_RP4-792G4  | ENSG00000160789.18_LMNA | 0.13804  | -0.021637016 | 0.29084822  | 8.99E-02 | 2.92E-01 | 1.00E+00 |
| ENSG00000215120.2_AL590763.5 | ENSG00000160789.18_LMNA | 0.04993  | -0.110150498 | 0.207477333 | 5.41E-01 | 7.81E-01 | 1.00E+00 |
| ENSG00000228882.1_CICP9      | ENSG00000160789.18_LMNA | 0.12224  | -0.037697124 | 0.276065571 | 1.34E-01 | 3.71E-01 | 1.00E+00 |
| ENSG00000235690.2_CUBNP3     | ENSG00000160789.18_LMNA | 0.113    | -0.04704474  | 0.267392596 | 1.66E-01 | 4.22E-01 | 1.00E+00 |
| ENSG00000215441.3_CTAGE12P   | ENSG00000160789.18_LMNA | 0.06012  | -0.100034351 | 0.217245139 | 4.62E-01 | 7.25E-01 | 1.00E+00 |
| ENSG00000183729.3_NPBWR1     | ENSG00000160789.18_LMNA | -0.12912 | -0.282508736 | 0.030717037 | 1.13E-01 | 3.35E-01 | 1.00E+00 |
| ENSG00000153802.10_TMPRS1    | ENSG00000160789.18_LMNA | 0.06023  | -0.099928136 | 0.217347361 | 4.61E-01 | 7.24E-01 | 1.00E+00 |
| ENSG00000276077.3_CH507-254  | ENSG00000160789.18_LMNA | -0.07971 | -0.235917429 | 0.080511883 | 3.29E-01 | 6.15E-01 | 1.00E+00 |
| ENSG00000125999.9_BPIFB1     | ENSG00000160789.18_LMNA | 0.05231  | -0.107791531 | 0.209760747 | 5.22E-01 | 7.68E-01 | 1.00E+00 |
| ENSG00000256195.2_RP11-64D2  | ENSG00000160789.18_LMNA | 0.12028  | -0.039677854 | 0.274232052 | 1.40E-01 | 3.82E-01 | 1.00E+00 |
| ENSG00000280180.1_RP11-244B  | ENSG00000160789.18_LMNA | -0.17147 | -0.321881168 | -0.01261061 | 3.47E-02 | 1.57E-01 | 1.00E+00 |
| ENSG00000260644.5_HERC2P5    | ENSG00000160789.18_LMNA | -0.03622 | -0.194304358 | 0.123689818 | 6.58E-01 | 8.49E-01 | 1.00E+00 |
| ENSG00000140093.8_SERPINA1   | ENSG00000160789.18_LMNA | -0.06972 | -0.226410642 | 0.090481958 | 3.93E-01 | 6.71E-01 | 1.00E+00 |
| ENSG00000172179.10_PRL       | ENSG00000160789.18_LMNA | -0.10691 | -0.261659409 | 0.053193804 | 1.90E-01 | 4.57E-01 | 1.00E+00 |
| ENSG00000238906.1_snoU13     | ENSG00000160789.18_LMNA | -0.04827 | -0.205887036 | 0.111791301 | 5.55E-01 | 7.89E-01 | 1.00E+00 |
| ENSG00000208892.1_SNORA49    | ENSG00000160789.18_LMNA | -0.06027 | -0.217384423 | 0.099889624 | 4.61E-01 | 7.24E-01 | 1.00E+00 |
| ENSG00000199332.1_Y_RNA      | ENSG00000160789.18_LMNA | 0.12304  | -0.036882072 | 0.276819386 | 1.31E-01 | 3.67E-01 | 1.00E+00 |
| ENSG00000237137.1_RP11-408A  | ENSG00000160789.18_LMNA | 0.09059  | -0.069615376 | 0.246238786 | 2.67E-01 | 5.51E-01 | 1.00E+00 |
| ENSG00000274991.1_           | ENSG00000160789.18_LMNA | 0.04607  | -0.11397093  | 0.203771902 | 5.73E-01 | 8.01E-01 | 1.00E+00 |
| ENSG00000105205.6_CLC        | ENSG00000160789.18_LMNA | -0.16566 | -0.316514525 | -0.00663569 | 4.14E-02 | 1.77E-01 | 1.00E+00 |

|                              |                         |          |              |             |          |          |          |
|------------------------------|-------------------------|----------|--------------|-------------|----------|----------|----------|
| ENSG00000227161.1_AC092755.4 | ENSG00000160789.18_LMNA | 0.04302  | -0.11698465  | 0.200842465 | 5.99E-01 | 8.15E-01 | 1.00E+00 |
| ENSG00000139515.5_PDX1       | ENSG00000160789.18_LMNA | -0.071   | -0.227631924 | 0.089204706 | 3.85E-01 | 6.63E-01 | 1.00E+00 |
| ENSG00000211788.2_TRAV13-1   | ENSG00000160789.18_LMNA | 0.00996  | -0.149480755 | 0.168889882 | 9.03E-01 | 9.63E-01 | 1.00E+00 |
| ENSG00000276412.1_RP11-157L  | ENSG00000160789.18_LMNA | 0.00367  | -0.155622734 | 0.162774493 | 9.64E-01 | 9.86E-01 | 1.00E+00 |
| ENSG00000274594.1_RP11-43P8  | ENSG00000160789.18_LMNA | -0.02043 | -0.17905044  | 0.139221407 | 8.03E-01 | 9.21E-01 | 1.00E+00 |
| ENSG00000259353.1_RP11-30K9  | ENSG00000160789.18_LMNA | -0.00902 | -0.167982499 | 0.150393638 | 9.12E-01 | 9.67E-01 | 1.00E+00 |
| ENSG00000279724.1_AC005086.1 | ENSG00000160789.18_LMNA | -0.12834 | -0.281781321 | 0.031506602 | 1.15E-01 | 3.39E-01 | 1.00E+00 |
| ENSG00000249746.1_RP11-254I2 | ENSG00000160789.18_LMNA | 0.16072  | 0.001554604  | 0.311935054 | 4.79E-02 | 1.96E-01 | 1.00E+00 |
| ENSG00000211801.3_TRAV21     | ENSG00000160789.18_LMNA | 0.05371  | -0.106403361 | 0.21110284  | 5.11E-01 | 7.60E-01 | 1.00E+00 |
| ENSG00000265559.2_RN7SL652f  | ENSG00000160789.18_LMNA | 0.08372  | -0.076496226 | 0.239729453 | 3.05E-01 | 5.92E-01 | 1.00E+00 |
| ENSG00000233191.1_AC006372.1 | ENSG00000160789.18_LMNA | -0.08156 | -0.237678876 | 0.078657618 | 3.18E-01 | 6.04E-01 | 1.00E+00 |
| ENSG00000181201.3_HIST3H2BA  | ENSG00000160789.18_LMNA | -0.12597 | -0.27956774  | 0.033906907 | 1.22E-01 | 3.52E-01 | 1.00E+00 |
| ENSG00000229559.2_RP1-153P1  | ENSG00000160789.18_LMNA | -0.26158 | -0.4039583   | -0.10682793 | 1.13E-03 | 1.27E-02 | 1.00E+00 |
| ENSG00000275812.1_RP4-697K1  | ENSG00000160789.18_LMNA | 0.1201   | -0.03986077  | 0.274062616 | 1.41E-01 | 3.82E-01 | 1.00E+00 |
| ENSG00000254717.2_GLYATL1P   | ENSG00000160789.18_LMNA | -0.10753 | -0.262239043 | 0.052573207 | 1.87E-01 | 4.54E-01 | 1.00E+00 |
| ENSG00000278886.1_RP11-108A  | ENSG00000160789.18_LMNA | -0.04279 | -0.200627596 | 0.117205471 | 6.01E-01 | 8.16E-01 | 1.00E+00 |
| ENSG00000211745.3_TRBV4-2    | ENSG00000160789.18_LMNA | 0.04394  | -0.116071718 | 0.201730466 | 5.91E-01 | 8.10E-01 | 1.00E+00 |
| ENSG00000223538.2_RP11-216P  | ENSG00000160789.18_LMNA | -0.08153 | -0.237642581 | 0.078695847 | 3.18E-01 | 6.05E-01 | 1.00E+00 |
| ENSG00000275212.1_RP3-446N1  | ENSG00000160789.18_LMNA | -0.05455 | -0.211913311 | 0.105564466 | 5.04E-01 | 7.55E-01 | 1.00E+00 |
| ENSG00000231139.1_AC104843.4 | ENSG00000160789.18_LMNA | -0.09645 | -0.251788775 | 0.06372479  | 2.37E-01 | 5.16E-01 | 1.00E+00 |
| ENSG00000270711.1_RP11-46A1  | ENSG00000160789.18_LMNA | 0.03665  | -0.123269072 | 0.194715453 | 6.54E-01 | 8.47E-01 | 1.00E+00 |
| ENSG00000241722.2_RP11-255I1 | ENSG00000160789.18_LMNA | 0.05891  | -0.101240687 | 0.21608367  | 4.71E-01 | 7.31E-01 | 1.00E+00 |
| ENSG00000160339.14_FCN2      | ENSG00000160789.18_LMNA | 0.14029  | -0.019341635 | 0.292948906 | 8.47E-02 | 2.82E-01 | 1.00E+00 |
| ENSG00000236896.1_RP11-535C  | ENSG00000160789.18_LMNA | -0.01934 | -0.177995483 | 0.14028981  | 8.13E-01 | 9.26E-01 | 1.00E+00 |
| ENSG00000259984.1_RP11-335G  | ENSG00000160789.18_LMNA | 0.09172  | -0.068478333 | 0.2473117   | 2.61E-01 | 5.44E-01 | 1.00E+00 |
| ENSG00000272719.1_CTB-161C1  | ENSG00000160789.18_LMNA | 0.15738  | -0.001866404 | 0.308843631 | 5.28E-02 | 2.08E-01 | 1.00E+00 |
| ENSG00000270182.1_RP1-170O1  | ENSG00000160789.18_LMNA | 0.00192  | -0.157331488 | 0.161068776 | 9.81E-01 | 9.93E-01 | 1.00E+00 |
| ENSG00000236854.1_AL121656.5 | ENSG00000160789.18_LMNA | -0.0503  | -0.207839306 | 0.109776786 | 5.38E-01 | 7.79E-01 | 1.00E+00 |
| ENSG00000265844.1_RP11-751H  | ENSG00000160789.18_LMNA | 0.0831   | -0.077118954 | 0.239138941 | 3.09E-01 | 5.95E-01 | 1.00E+00 |
| ENSG00000233825.1_RP11-135A  | ENSG00000160789.18_LMNA | 0.01798  | -0.141621218 | 0.176679806 | 8.26E-01 | 9.32E-01 | 1.00E+00 |
| ENSG00000216642.1_RP1-95L4.3 | ENSG00000160789.18_LMNA | 0.10997  | -0.050111753 | 0.264535793 | 1.77E-01 | 4.39E-01 | 1.00E+00 |
| ENSG00000256902.1_IQSEC3P1   | ENSG00000160789.18_LMNA | -0.04965 | -0.207211178 | 0.110425226 | 5.44E-01 | 7.82E-01 | 1.00E+00 |
| ENSG00000233163.1_RPS12P17   | ENSG00000160789.18_LMNA | -0.0006  | -0.159784424 | 0.158616869 | 9.94E-01 | 9.98E-01 | 1.00E+00 |

|                             |                         |          |              |             |          |          |          |
|-----------------------------|-------------------------|----------|--------------|-------------|----------|----------|----------|
| ENSG00000273406.1_RP11-114O | ENSG00000160789.18_LMNA | -0.19122 | -0.340069736 | -0.03302635 | 1.83E-02 | 1.01E-01 | 1.00E+00 |
| ENSG00000243925.1_RPS24P18  | ENSG00000160789.18_LMNA | 0.01412  | -0.145405216 | 0.172934294 | 8.63E-01 | 9.46E-01 | 1.00E+00 |
| ENSG00000244564.1_RP11-14D2 | ENSG00000160789.18_LMNA | 0.11614  | -0.043871387 | 0.270342644 | 1.54E-01 | 4.05E-01 | 1.00E+00 |
| ENSG00000236549.1_RPS27AP7  | ENSG00000160789.18_LMNA | 0.08234  | -0.077880228 | 0.238416734 | 3.13E-01 | 6.00E-01 | 1.00E+00 |
| ENSG00000258096.1_RP11-474P | ENSG00000160789.18_LMNA | 0.03171  | -0.128139502 | 0.189949887 | 6.98E-01 | 8.71E-01 | 1.00E+00 |
| ENSG00000232936.4_RP11-80H5 | ENSG00000160789.18_LMNA | 0.07358  | -0.086640065 | 0.230081175 | 3.68E-01 | 6.48E-01 | 1.00E+00 |
| ENSG00000259542.4_RP11-522B | ENSG00000160789.18_LMNA | 0.05907  | -0.101084996 | 0.216233621 | 4.70E-01 | 7.30E-01 | 1.00E+00 |
| ENSG00000273112.1_RP11-25K2 | ENSG00000160789.18_LMNA | 0.00286  | -0.156415127 | 0.161983744 | 9.72E-01 | 9.89E-01 | 1.00E+00 |
| ENSG00000236636.2_RP11-211A | ENSG00000160789.18_LMNA | -0.15119 | -0.303091611 | 0.008212369 | 6.30E-02 | 2.33E-01 | 1.00E+00 |
| ENSG00000251535.1_RP11-478C | ENSG00000160789.18_LMNA | -0.1266  | -0.280155674 | 0.033269731 | 1.20E-01 | 3.48E-01 | 1.00E+00 |
| ENSG00000259475.1_RP11-654A | ENSG00000160789.18_LMNA | -0.14427 | -0.296656768 | 0.015282071 | 7.62E-02 | 2.64E-01 | 1.00E+00 |
| ENSG00000227409.1_ZMYM4-AS  | ENSG00000160789.18_LMNA | 0.07309  | -0.087122703 | 0.229620558 | 3.71E-01 | 6.51E-01 | 1.00E+00 |
| ENSG00000239870.1_RP11-83M1 | ENSG00000160789.18_LMNA | -0.10431 | -0.259209212 | 0.055814472 | 2.01E-01 | 4.71E-01 | 1.00E+00 |
| ENSG00000277863.1_RP11-282A | ENSG00000160789.18_LMNA | -0.06374 | -0.220702414 | 0.096437996 | 4.35E-01 | 7.04E-01 | 1.00E+00 |
| ENSG00000157093.7_LYZL4     | ENSG00000160789.18_LMNA | -0.21918 | -0.365620127 | -0.06214479 | 6.67E-03 | 4.86E-02 | 1.00E+00 |
| ENSG00000198312.4_BMS1P9    | ENSG00000160789.18_LMNA | 0.039    | -0.120955632 | 0.196973836 | 6.33E-01 | 8.36E-01 | 1.00E+00 |
| ENSG00000235601.1_BARX1-AS  | ENSG00000160789.18_LMNA | -0.00823 | -0.167214495 | 0.151165874 | 9.20E-01 | 9.69E-01 | 1.00E+00 |
| ENSG00000240861.1_RP11-572F | ENSG00000160789.18_LMNA | 0.02299  | -0.13670617  | 0.181531138 | 7.79E-01 | 9.09E-01 | 1.00E+00 |
| ENSG00000213816.3_CNN2P4    | ENSG00000160789.18_LMNA | 0.0671   | -0.093092155 | 0.223911723 | 4.11E-01 | 6.85E-01 | 1.00E+00 |
| ENSG00000226191.3_CLK3P2    | ENSG00000160789.18_LMNA | -0.06554 | -0.222418553 | 0.094649739 | 4.22E-01 | 6.94E-01 | 1.00E+00 |
| ENSG00000226641.1_RP13-13A3 | ENSG00000160789.18_LMNA | 0.00797  | -0.151427323 | 0.166954391 | 9.22E-01 | 9.70E-01 | 1.00E+00 |
| ENSG00000170935.6_NCBP2L    | ENSG00000160789.18_LMNA | -0.20855 | -0.355933277 | -0.05104405 | 9.93E-03 | 6.53E-02 | 1.00E+00 |
| ENSG00000264472.3_RP11-861L | ENSG00000160789.18_LMNA | 0.03818  | -0.121760707 | 0.196188304 | 6.40E-01 | 8.39E-01 | 1.00E+00 |
| ENSG00000255094.1_RP11-406D | ENSG00000160789.18_LMNA | -0.11973 | -0.273713487 | 0.040237607 | 1.42E-01 | 3.84E-01 | 1.00E+00 |
| ENSG00000260019.1_RP11-218F | ENSG00000160789.18_LMNA | -0.32418 | -0.459660583 | -0.17396047 | 4.61E-05 | 1.01E-03 | 1.00E+00 |
| ENSG00000177736.4_FXNP2     | ENSG00000160789.18_LMNA | -0.15446 | -0.306130594 | 0.004862707 | 5.74E-02 | 2.19E-01 | 1.00E+00 |
| ENSG00000243944.4_RP11-167H | ENSG00000160789.18_LMNA | -0.0343  | -0.192449309 | 0.125586993 | 6.75E-01 | 8.58E-01 | 1.00E+00 |
| ENSG00000178193.5_RP4-682C2 | ENSG00000160789.18_LMNA | 0.06592  | -0.094272103 | 0.222780709 | 4.20E-01 | 6.91E-01 | 1.00E+00 |
| ENSG00000229815.1_CCNB1IP1f | ENSG00000160789.18_LMNA | -0.01575 | -0.174517965 | 0.143806408 | 8.47E-01 | 9.40E-01 | 1.00E+00 |
| ENSG00000255663.1_RP11-212D | ENSG00000160789.18_LMNA | -0.07309 | -0.229620712 | 0.087122542 | 3.71E-01 | 6.51E-01 | 1.00E+00 |
| ENSG00000249876.1_CTC-563A5 | ENSG00000160789.18_LMNA | -0.1212  | -0.275090927 | 0.038750329 | 1.37E-01 | 3.77E-01 | 1.00E+00 |
| ENSG00000214210.4_RP11-208P | ENSG00000160789.18_LMNA | 0.06683  | -0.093365936 | 0.223649372 | 4.13E-01 | 6.87E-01 | 1.00E+00 |
| ENSG00000273824.1_RP11-81H1 | ENSG00000160789.18_LMNA | -0.03179 | -0.190030156 | 0.128057593 | 6.97E-01 | 8.70E-01 | 1.00E+00 |

|                              |                         |          |              |             |          |          |          |
|------------------------------|-------------------------|----------|--------------|-------------|----------|----------|----------|
| ENSG00000197882.3_OR7E13P    | ENSG00000160789.18_LMNA | -0.06213 | -0.219167521 | 0.098035658 | 4.47E-01 | 7.13E-01 | 1.00E+00 |
| ENSG00000265907.1_RP11-737C  | ENSG00000160789.18_LMNA | 0.07844  | -0.081779165 | 0.234712386 | 3.37E-01 | 6.22E-01 | 1.00E+00 |
| ENSG00000132972.17_RNF17     | ENSG00000160789.18_LMNA | -0.09485 | -0.250271493 | 0.065337373 | 2.45E-01 | 5.25E-01 | 1.00E+00 |
| ENSG00000228372.6_RP11-85L2  | ENSG00000160789.18_LMNA | 0.05814  | -0.10200021  | 0.215351934 | 4.77E-01 | 7.35E-01 | 1.00E+00 |
| ENSG00000183663.6_RP11-44N1  | ENSG00000160789.18_LMNA | 0.05949  | -0.10066635  | 0.216636758 | 4.67E-01 | 7.28E-01 | 1.00E+00 |
| ENSG00000258828.2_KRT8P2     | ENSG00000160789.18_LMNA | -0.17779 | -0.327713882 | -0.01912957 | 2.84E-02 | 1.38E-01 | 1.00E+00 |
| ENSG00000279094.2_CH507-24F  | ENSG00000160789.18_LMNA | 0.00386  | -0.155435161 | 0.162961617 | 9.62E-01 | 9.85E-01 | 1.00E+00 |
| ENSG00000236451.2_AC067956.  | ENSG00000160789.18_LMNA | -0.14715 | -0.299338517 | 0.012339528 | 7.04E-02 | 2.51E-01 | 1.00E+00 |
| ENSG00000205359.8_SLCO6A1    | ENSG00000160789.18_LMNA | -0.22029 | -0.366628836 | -0.06330506 | 6.39E-03 | 4.71E-02 | 1.00E+00 |
| ENSG00000228809.2_RP4-705D1  | ENSG00000160789.18_LMNA | 0.09201  | -0.068186978 | 0.247586498 | 2.60E-01 | 5.43E-01 | 1.00E+00 |
| ENSG00000234720.3_ATP5A1P8   | ENSG00000160789.18_LMNA | -0.05586 | -0.213161924 | 0.104271176 | 4.94E-01 | 7.49E-01 | 1.00E+00 |
| ENSG00000215186.6_GOLGA6B    | ENSG00000160789.18_LMNA | 0.07464  | -0.085580567 | 0.231091833 | 3.61E-01 | 6.43E-01 | 1.00E+00 |
| ENSG00000254536.1_RP11-108K  | ENSG00000160789.18_LMNA | 0.08427  | -0.07595213  | 0.240245209 | 3.02E-01 | 5.89E-01 | 1.00E+00 |
| ENSG00000268926.2_RP11-180I4 | ENSG00000160789.18_LMNA | -0.11793 | -0.27202121  | 0.042062925 | 1.48E-01 | 3.94E-01 | 1.00E+00 |
| ENSG00000250290.1_NCAPGP1    | ENSG00000160789.18_LMNA | 0.18443  | 0.025996017  | 0.333832171 | 2.29E-02 | 1.19E-01 | 1.00E+00 |
| ENSG00000261646.1_RP11-489G  | ENSG00000160789.18_LMNA | 0.10763  | -0.052472189 | 0.262333372 | 1.87E-01 | 4.53E-01 | 1.00E+00 |
| ENSG00000236299.6_RP11-340I6 | ENSG00000160789.18_LMNA | 0.00765  | -0.151738679 | 0.166644579 | 9.26E-01 | 9.71E-01 | 1.00E+00 |
| ENSG00000163915.6_IGF2BP2-A  | ENSG00000160789.18_LMNA | -0.01353 | -0.172362931 | 0.145981633 | 8.69E-01 | 9.49E-01 | 1.00E+00 |
| ENSG00000196273.6_LINC00523  | ENSG00000160789.18_LMNA | 0.0438   | -0.116215366 | 0.201590775 | 5.92E-01 | 8.11E-01 | 1.00E+00 |
| ENSG00000226954.1_RP5-983L1  | ENSG00000160789.18_LMNA | -0.03371 | -0.191882941 | 0.12616576  | 6.80E-01 | 8.60E-01 | 1.00E+00 |
| ENSG00000242048.3_RP13-452N  | ENSG00000160789.18_LMNA | 0.06569  | -0.094496386 | 0.22256563  | 4.21E-01 | 6.93E-01 | 1.00E+00 |
| ENSG00000106384.9_MOGAT3     | ENSG00000160789.18_LMNA | -0.02322 | -0.181748192 | 0.136485899 | 7.76E-01 | 9.08E-01 | 1.00E+00 |
| ENSG00000256500.5_RP11-73M1  | ENSG00000160789.18_LMNA | -0.04587 | -0.203581667 | 0.114166816 | 5.75E-01 | 8.02E-01 | 1.00E+00 |
| ENSG00000246211.2_RP11-632K  | ENSG00000160789.18_LMNA | 0.08186  | -0.078357844 | 0.237963449 | 3.16E-01 | 6.03E-01 | 1.00E+00 |
| ENSG00000233003.4_CICP26     | ENSG00000160789.18_LMNA | 0.12006  | -0.039905188 | 0.274021469 | 1.41E-01 | 3.83E-01 | 1.00E+00 |
| ENSG00000279714.1_CTA-212A2  | ENSG00000160789.18_LMNA | 0.09712  | -0.06306004  | 0.252413789 | 2.34E-01 | 5.12E-01 | 1.00E+00 |
| ENSG00000260220.4_CCDC187    | ENSG00000160789.18_LMNA | -0.05593 | -0.213227439 | 0.104203287 | 4.94E-01 | 7.49E-01 | 1.00E+00 |
| ENSG00000230448.4_LINC00276  | ENSG00000160789.18_LMNA | 0.10533  | -0.054792992 | 0.260164728 | 1.97E-01 | 4.66E-01 | 1.00E+00 |
| ENSG00000263738.2_           | ENSG00000160789.18_LMNA | -0.28207 | -0.422304464 | -0.12864357 | 4.31E-04 | 6.00E-03 | 1.00E+00 |
| ENSG00000253333.1_RP11-497H  | ENSG00000160789.18_LMNA | -0.0473  | -0.204959889 | 0.112747096 | 5.63E-01 | 7.94E-01 | 1.00E+00 |
| ENSG00000261145.1_RP11-296I1 | ENSG00000160789.18_LMNA | 0.11583  | -0.044181839 | 0.270054298 | 1.55E-01 | 4.07E-01 | 1.00E+00 |
| ENSG00000276961.1_MIR7848    | ENSG00000160789.18_LMNA | 0.00544  | -0.153896991 | 0.16449524  | 9.47E-01 | 9.79E-01 | 1.00E+00 |
| ENSG00000258914.1_CTD-2134A  | ENSG00000160789.18_LMNA | 0.03851  | -0.121438539 | 0.196502701 | 6.38E-01 | 8.38E-01 | 1.00E+00 |

|                              |                         |          |              |             |          |          |          |
|------------------------------|-------------------------|----------|--------------|-------------|----------|----------|----------|
| ENSG00000281749.1_           | ENSG00000160789.18_LMNA | 0.02939  | -0.13042126  | 0.187712088 | 7.19E-01 | 8.81E-01 | 1.00E+00 |
| ENSG00000225644.1_RPL35AP4   | ENSG00000160789.18_LMNA | 0.09229  | -0.067910856 | 0.247846882 | 2.58E-01 | 5.41E-01 | 1.00E+00 |
| ENSG00000223177.1_RNA5SP39   | ENSG00000160789.18_LMNA | 0.02686  | -0.132907306 | 0.185270173 | 7.43E-01 | 8.92E-01 | 1.00E+00 |
| ENSG00000242531.1_RP11-299J  | ENSG00000160789.18_LMNA | 0.08148  | -0.078740787 | 0.237599915 | 3.18E-01 | 6.05E-01 | 1.00E+00 |
| ENSG00000252614.1_RNU6-807F  | ENSG00000160789.18_LMNA | -0.01242 | -0.17128432  | 0.147069195 | 8.79E-01 | 9.53E-01 | 1.00E+00 |
| ENSG00000281842.1_MIR1291    | ENSG00000160789.18_LMNA | 0.0086   | -0.150807418 | 0.167571035 | 9.16E-01 | 9.68E-01 | 1.00E+00 |
| ENSG00000206791.1_RNU1-129F  | ENSG00000160789.18_LMNA | -0.13733 | -0.290185056 | 0.02236096  | 9.16E-02 | 2.95E-01 | 1.00E+00 |
| ENSG00000226394.2_RP11-413E  | ENSG00000160789.18_LMNA | -0.12238 | -0.276198025 | 0.037553941 | 1.33E-01 | 3.70E-01 | 1.00E+00 |
| ENSG00000231123.1_SPATA20P   | ENSG00000160789.18_LMNA | 0.19134  | 0.03315036   | 0.340179516 | 1.82E-02 | 1.01E-01 | 1.00E+00 |
| ENSG00000268036.1_AC007228   | ENSG00000160789.18_LMNA | 0.00584  | -0.153500721 | 0.164890089 | 9.43E-01 | 9.77E-01 | 1.00E+00 |
| ENSG00000244267.1_RPL34P22   | ENSG00000160789.18_LMNA | -0.07717 | -0.233497949 | 0.083055292 | 3.45E-01 | 6.29E-01 | 1.00E+00 |
| ENSG00000263637.1_RP11-106E  | ENSG00000160789.18_LMNA | 0.21619  | 0.059017702  | 0.36289797  | 7.47E-03 | 5.28E-02 | 1.00E+00 |
| ENSG00000261053.1_NAMPTP3    | ENSG00000160789.18_LMNA | 0.10847  | -0.051624303 | 0.263124875 | 1.83E-01 | 4.48E-01 | 1.00E+00 |
| ENSG00000265095.1_FTL12      | ENSG00000160789.18_LMNA | 0.06706  | -0.093139063 | 0.223866777 | 4.12E-01 | 6.86E-01 | 1.00E+00 |
| ENSG00000250284.1_CTB-1I21.1 | ENSG00000160789.18_LMNA | -0.32784 | -0.462883662 | -0.17792794 | 3.74E-05 | 8.51E-04 | 1.00E+00 |
| ENSG00000228807.1_MRPS18CF   | ENSG00000160789.18_LMNA | 0.12645  | -0.03342822  | 0.280009455 | 1.21E-01 | 3.49E-01 | 1.00E+00 |
| ENSG00000273549.1_Metazoa_SI | ENSG00000160789.18_LMNA | 0.01954  | -0.140096029 | 0.178186879 | 8.11E-01 | 9.26E-01 | 1.00E+00 |
| ENSG00000244413.1_RPL23AP5   | ENSG00000160789.18_LMNA | -0.10574 | -0.260552061 | 0.054378733 | 1.95E-01 | 4.64E-01 | 1.00E+00 |
| ENSG00000241568.3_RN7SL338F  | ENSG00000160789.18_LMNA | 0.17162  | 0.012766473  | 0.322020895 | 3.45E-02 | 1.57E-01 | 1.00E+00 |
| ENSG00000244142.1_ATP6V0CP   | ENSG00000160789.18_LMNA | 0.09733  | -0.062844524 | 0.252616366 | 2.33E-01 | 5.11E-01 | 1.00E+00 |
| ENSG00000261970.1_RP11-342L  | ENSG00000160789.18_LMNA | -0.08124 | -0.237368921 | 0.078984065 | 3.20E-01 | 6.06E-01 | 1.00E+00 |
| ENSG00000261816.1_RP11-863P  | ENSG00000160789.18_LMNA | -0.21685 | -0.363504493 | -0.05971393 | 7.29E-03 | 5.18E-02 | 1.00E+00 |
| ENSG00000234026.1_RP11-310E  | ENSG00000160789.18_LMNA | 0.05881  | -0.101341251 | 0.215986805 | 4.72E-01 | 7.32E-01 | 1.00E+00 |
| ENSG00000241959.3_RN7SL76P   | ENSG00000160789.18_LMNA | -0.06833 | -0.225085714 | 0.091866428 | 4.03E-01 | 6.79E-01 | 1.00E+00 |
| ENSG00000254372.1_RP11-343P  | ENSG00000160789.18_LMNA | 0.02399  | -0.135725213 | 0.182497527 | 7.69E-01 | 9.04E-01 | 1.00E+00 |
| ENSG00000235700.1_CYCSP52    | ENSG00000160789.18_LMNA | 0.04482  | -0.115207545 | 0.202570559 | 5.84E-01 | 8.06E-01 | 1.00E+00 |
| ENSG00000241721.1_SUMO1P1    | ENSG00000160789.18_LMNA | -0.00997 | -0.168906384 | 0.149464148 | 9.03E-01 | 9.63E-01 | 1.00E+00 |
| ENSG00000253332.1_KB-1582A1  | ENSG00000160789.18_LMNA | -0.01069 | -0.169603833 | 0.148762095 | 8.96E-01 | 9.59E-01 | 1.00E+00 |
| ENSG00000227260.1_AC116035   | ENSG00000160789.18_LMNA | 0.05032  | -0.109760392 | 0.207855183 | 5.38E-01 | 7.78E-01 | 1.00E+00 |
| ENSG00000261434.1_CTD-2083E  | ENSG00000160789.18_LMNA | -0.00677 | -0.165790317 | 0.152596871 | 9.34E-01 | 9.74E-01 | 1.00E+00 |
| ENSG00000276763.1_RP11-381E  | ENSG00000160789.18_LMNA | 0.01976  | -0.13988341  | 0.178396854 | 8.09E-01 | 9.24E-01 | 1.00E+00 |
| ENSG00000216365.2_RPL37P15   | ENSG00000160789.18_LMNA | 0.03     | -0.129823985 | 0.188298175 | 7.14E-01 | 8.78E-01 | 1.00E+00 |
| ENSG00000280127.1_AC055733   | ENSG00000160789.18_LMNA | 0.10176  | -0.058386134 | 0.256800884 | 2.12E-01 | 4.86E-01 | 1.00E+00 |

|                              |                         |          |              |             |          |          |          |
|------------------------------|-------------------------|----------|--------------|-------------|----------|----------|----------|
| ENSG00000224220.1_AC104699.  | ENSG00000160789.18_LMNA | -0.08585 | -0.241742107 | 0.074371912 | 2.93E-01 | 5.79E-01 | 1.00E+00 |
| ENSG00000232754.1_RP1-85F18  | ENSG00000160789.18_LMNA | 0.01339  | -0.146123172 | 0.1722226   | 8.70E-01 | 9.49E-01 | 1.00E+00 |
| ENSG00000223956.1_RP4-710M1  | ENSG00000160789.18_LMNA | 0.03919  | -0.120765074 | 0.197159709 | 6.32E-01 | 8.35E-01 | 1.00E+00 |
| ENSG00000231660.1_RPS8P6     | ENSG00000160789.18_LMNA | -0.00171 | -0.1608686   | 0.157531895 | 9.83E-01 | 9.94E-01 | 1.00E+00 |
| ENSG00000224060.3_ARSEP1     | ENSG00000160789.18_LMNA | 0.11732  | -0.042676782 | 0.271451659 | 1.50E-01 | 3.98E-01 | 1.00E+00 |
| ENSG00000219699.2_RP11-325O  | ENSG00000160789.18_LMNA | 0.08147  | -0.078750116 | 0.237591057 | 3.18E-01 | 6.05E-01 | 1.00E+00 |
| ENSG00000229065.1_RP11-80I15 | ENSG00000160789.18_LMNA | -0.00298 | -0.162103723 | 0.156294925 | 9.71E-01 | 9.89E-01 | 1.00E+00 |
| ENSG00000236202.1_GRM7-AS1   | ENSG00000160789.18_LMNA | -0.14936 | -0.301396022 | 0.010078269 | 6.63E-02 | 2.41E-01 | 1.00E+00 |
| ENSG00000266050.2_RP11-822E  | ENSG00000160789.18_LMNA | -0.14712 | -0.299308495 | 0.012372498 | 7.05E-02 | 2.51E-01 | 1.00E+00 |
| ENSG00000235243.1_AC093716.  | ENSG00000160789.18_LMNA | 0.0894   | -0.070805219 | 0.24511522  | 2.73E-01 | 5.58E-01 | 1.00E+00 |
| ENSG00000250862.1_HMGB1P29   | ENSG00000160789.18_LMNA | -0.14949 | -0.301518294 | 0.009943787 | 6.60E-02 | 2.40E-01 | 1.00E+00 |
| ENSG00000229660.1_RP5-1142J  | ENSG00000160789.18_LMNA | 0.22239  | 0.065513515  | 0.368546842 | 5.89E-03 | 4.44E-02 | 1.00E+00 |
| ENSG00000251409.1_AC008592.  | ENSG00000160789.18_LMNA | -0.00389 | -0.162993917 | 0.155402781 | 9.62E-01 | 9.85E-01 | 1.00E+00 |
| ENSG00000254935.1_RP11-266E  | ENSG00000160789.18_LMNA | 0.15511  | -0.004192881 | 0.306737535 | 5.64E-02 | 2.17E-01 | 1.00E+00 |
| ENSG00000236213.1_AC006369.  | ENSG00000160789.18_LMNA | -0.10315 | -0.258114435 | 0.056984016 | 2.06E-01 | 4.78E-01 | 1.00E+00 |
| ENSG00000239203.1_AC093484.  | ENSG00000160789.18_LMNA | 0.03185  | -0.1279975   | 0.190089043 | 6.97E-01 | 8.70E-01 | 1.00E+00 |
| ENSG00000270591.1_RP11-73M1  | ENSG00000160789.18_LMNA | -0.01119 | -0.170088688 | 0.148273851 | 8.91E-01 | 9.57E-01 | 1.00E+00 |
| ENSG00000262339.4_RP11-1197I | ENSG00000160789.18_LMNA | -0.01872 | -0.177394494 | 0.140898127 | 8.19E-01 | 9.30E-01 | 1.00E+00 |
| ENSG00000264932.3_CTD-2104P  | ENSG00000160789.18_LMNA | -0.01631 | -0.175051357 | 0.143267544 | 8.42E-01 | 9.38E-01 | 1.00E+00 |
| ENSG00000238042.4_RP11-815M  | ENSG00000160789.18_LMNA | 0.12727  | -0.03259202  | 0.280780753 | 1.18E-01 | 3.45E-01 | 1.00E+00 |
| ENSG00000250407.1_CTB-99A3.  | ENSG00000160789.18_LMNA | -0.18745 | -0.336607961 | -0.02912084 | 2.07E-02 | 1.11E-01 | 1.00E+00 |
| ENSG00000270791.1_DPRXP6     | ENSG00000160789.18_LMNA | 0.03553  | -0.124378982 | 0.19363076  | 6.64E-01 | 8.52E-01 | 1.00E+00 |
| ENSG00000131484.4_RP11-798G  | ENSG00000160789.18_LMNA | 0.1193   | -0.040672578 | 0.273310396 | 1.43E-01 | 3.87E-01 | 1.00E+00 |
| ENSG00000241319.1_SETP6      | ENSG00000160789.18_LMNA | -0.16082 | -0.312031054 | -0.00166096 | 4.78E-02 | 1.95E-01 | 1.00E+00 |
| ENSG00000269792.1_CTB-60E11  | ENSG00000160789.18_LMNA | -0.0634  | -0.220374385 | 0.096779578 | 4.38E-01 | 7.06E-01 | 1.00E+00 |
| ENSG00000258648.1_UBE2CP1    | ENSG00000160789.18_LMNA | 0.00889  | -0.150525746 | 0.167851143 | 9.13E-01 | 9.67E-01 | 1.00E+00 |
| ENSG00000224048.4_AC104777.  | ENSG00000160789.18_LMNA | -0.06422 | -0.221155168 | 0.095966415 | 4.32E-01 | 7.01E-01 | 1.00E+00 |
| ENSG00000260041.4_RP11-355E  | ENSG00000160789.18_LMNA | -0.1669  | -0.317658151 | -0.00790709 | 3.99E-02 | 1.73E-01 | 1.00E+00 |
| ENSG00000258976.1_CTD-2207P  | ENSG00000160789.18_LMNA | 0.08742  | -0.072794869 | 0.2432345   | 2.84E-01 | 5.70E-01 | 1.00E+00 |
| ENSG00000263667.1_RP3-416J7  | ENSG00000160789.18_LMNA | -0.16933 | -0.319907141 | -0.01041027 | 3.70E-02 | 1.64E-01 | 1.00E+00 |
| ENSG00000261548.1_HLA-P      | ENSG00000160789.18_LMNA | 0.11282  | -0.047227533 | 0.267222487 | 1.66E-01 | 4.23E-01 | 1.00E+00 |
| ENSG00000224255.2_PDCL3P6    | ENSG00000160789.18_LMNA | -0.0939  | -0.249374141 | 0.066290313 | 2.50E-01 | 5.30E-01 | 1.00E+00 |
| ENSG00000228604.3_RP5-872K7  | ENSG00000160789.18_LMNA | 0.0062   | -0.15314895  | 0.165240513 | 9.40E-01 | 9.76E-01 | 1.00E+00 |

|                              |                         |          |              |             |          |          |          |
|------------------------------|-------------------------|----------|--------------|-------------|----------|----------|----------|
| ENSG00000253961.1_RP11-363L  | ENSG00000160789.18_LMNA | 0.11327  | -0.046779209 | 0.267639668 | 1.65E-01 | 4.21E-01 | 1.00E+00 |
| ENSG00000176970.8_RPL7L1P11  | ENSG00000160789.18_LMNA | 0.02199  | -0.13769015  | 0.180561152 | 7.88E-01 | 9.14E-01 | 1.00E+00 |
| ENSG00000278518.1_RP11-108K  | ENSG00000160789.18_LMNA | -0.18279 | -0.332324238 | -0.02430099 | 2.42E-02 | 1.24E-01 | 1.00E+00 |
| ENSG00000236366.1_RP11-440G  | ENSG00000160789.18_LMNA | -0.02812 | -0.186483224 | 0.131672833 | 7.31E-01 | 8.87E-01 | 1.00E+00 |
| ENSG00000259504.2_RP11-352D  | ENSG00000160789.18_LMNA | -0.10276 | -0.257746825 | 0.057376538 | 2.08E-01 | 4.80E-01 | 1.00E+00 |
| ENSG00000197320.5_AC060834.  | ENSG00000160789.18_LMNA | 0.09262  | -0.06757583  | 0.248162752 | 2.56E-01 | 5.39E-01 | 1.00E+00 |
| ENSG00000256331.1_NIFKP3     | ENSG00000160789.18_LMNA | 0.0033   | -0.155978764 | 0.162419252 | 9.68E-01 | 9.87E-01 | 1.00E+00 |
| ENSG00000179934.6_CCR8       | ENSG00000160789.18_LMNA | 0.14391  | -0.015654088 | 0.296317372 | 7.69E-02 | 2.66E-01 | 1.00E+00 |
| ENSG00000134762.15_DSC3      | ENSG00000160789.18_LMNA | 0.02984  | -0.12997783  | 0.188147234 | 7.15E-01 | 8.79E-01 | 1.00E+00 |
| ENSG00000251215.1_GOLGA5P1   | ENSG00000160789.18_LMNA | 0.21484  | 0.05761447   | 0.361674755 | 7.86E-03 | 5.48E-02 | 1.00E+00 |
| ENSG00000232728.1_PHB2P1     | ENSG00000160789.18_LMNA | -0.04678 | -0.204454341 | 0.113268017 | 5.67E-01 | 7.97E-01 | 1.00E+00 |
| ENSG00000224821.5_COL4A2-A5  | ENSG00000160789.18_LMNA | 0.05178  | -0.108317358 | 0.209252061 | 5.26E-01 | 7.71E-01 | 1.00E+00 |
| ENSG00000136695.13_IL36RN    | ENSG00000160789.18_LMNA | -0.029   | -0.187338537 | 0.130801821 | 7.23E-01 | 8.83E-01 | 1.00E+00 |
| ENSG00000241219.1_RP11-572M  | ENSG00000160789.18_LMNA | 0.06456  | -0.095625222 | 0.221482654 | 4.29E-01 | 6.99E-01 | 1.00E+00 |
| ENSG00000273269.1_RP11-761B  | ENSG00000160789.18_LMNA | -0.08523 | -0.241158019 | 0.074988701 | 2.96E-01 | 5.82E-01 | 1.00E+00 |
| ENSG00000224761.3_RP11-508N  | ENSG00000160789.18_LMNA | 0.07606  | -0.084164606 | 0.232441456 | 3.52E-01 | 6.35E-01 | 1.00E+00 |
| ENSG00000256188.2_TAS2R30    | ENSG00000160789.18_LMNA | 0.0542   | -0.105909932 | 0.211579603 | 5.07E-01 | 7.57E-01 | 1.00E+00 |
| ENSG00000274791.1_F8A2       | ENSG00000160789.18_LMNA | 0.26969  | 0.115450131  | 0.411237939 | 7.79E-04 | 9.52E-03 | 1.00E+00 |
| ENSG00000280323.1_AC053503.  | ENSG00000160789.18_LMNA | 0.05558  | -0.104543465 | 0.212899128 | 4.96E-01 | 7.51E-01 | 1.00E+00 |
| ENSG00000176318.8_FOXN3P1    | ENSG00000160789.18_LMNA | 0.12921  | -0.030617051 | 0.282600826 | 1.13E-01 | 3.35E-01 | 1.00E+00 |
| ENSG00000250292.1_RP11-451F  | ENSG00000160789.18_LMNA | -0.24878 | -0.3924374   | -0.09327298 | 2.00E-03 | 1.95E-02 | 1.00E+00 |
| ENSG00000259300.2_TUBBP8     | ENSG00000160789.18_LMNA | 0.0219   | -0.137782386 | 0.180470196 | 7.89E-01 | 9.14E-01 | 1.00E+00 |
| ENSG00000179038.8_RP11-157K  | ENSG00000160789.18_LMNA | -0.09853 | -0.253747706 | 0.061640379 | 2.27E-01 | 5.04E-01 | 1.00E+00 |
| ENSG00000228044.2_RP4-781K5  | ENSG00000160789.18_LMNA | -0.05163 | -0.209109444 | 0.108464748 | 5.28E-01 | 7.72E-01 | 1.00E+00 |
| ENSG00000259080.1_RP11-158I1 | ENSG00000160789.18_LMNA | -0.04609 | -0.203792236 | 0.113949991 | 5.73E-01 | 8.01E-01 | 1.00E+00 |
| ENSG00000197891.10_SLC22A12  | ENSG00000160789.18_LMNA | -0.02899 | -0.187321928 | 0.13081874  | 7.23E-01 | 8.83E-01 | 1.00E+00 |
| ENSG00000140274.12_DUOXA2    | ENSG00000160789.18_LMNA | -0.10714 | -0.261873463 | 0.052964651 | 1.89E-01 | 4.56E-01 | 1.00E+00 |
| ENSG00000167046.4_RP11-93B1  | ENSG00000160789.18_LMNA | -0.00036 | -0.159554105 | 0.158847259 | 9.96E-01 | 9.99E-01 | 1.00E+00 |
| ENSG00000149534.7_MS4A2      | ENSG00000160789.18_LMNA | -0.04066 | -0.198576978 | 0.11931131  | 6.19E-01 | 8.27E-01 | 1.00E+00 |
| ENSG00000235303.1_RP1-79C4.  | ENSG00000160789.18_LMNA | 0.02722  | -0.132550727 | 0.185620663 | 7.39E-01 | 8.90E-01 | 1.00E+00 |
| ENSG00000279096.1_AL356289.1 | ENSG00000160789.18_LMNA | -0.06058 | -0.217681887 | 0.099580491 | 4.58E-01 | 7.22E-01 | 1.00E+00 |
| ENSG00000266979.1_LINC01180  | ENSG00000160789.18_LMNA | -0.05139 | -0.208884557 | 0.108697135 | 5.29E-01 | 7.73E-01 | 1.00E+00 |
| ENSG00000265043.1_RP11-728E  | ENSG00000160789.18_LMNA | -0.05517 | -0.21250524  | 0.104951491 | 5.00E-01 | 7.52E-01 | 1.00E+00 |

|                              |                         |          |              |             |          |          |          |
|------------------------------|-------------------------|----------|--------------|-------------|----------|----------|----------|
| ENSG00000204952.2_FBXO47     | ENSG00000160789.18_LMNA | 0.00387  | -0.155426859 | 0.162969898 | 9.62E-01 | 9.85E-01 | 1.00E+00 |
| ENSG00000184999.10_SLC22A1C  | ENSG00000160789.18_LMNA | -0.1857  | -0.334997721 | -0.0273074  | 2.20E-02 | 1.16E-01 | 1.00E+00 |
| ENSG00000270921.1_CICP23     | ENSG00000160789.18_LMNA | 0.14229  | -0.017302311 | 0.294812727 | 8.03E-02 | 2.73E-01 | 1.00E+00 |
| ENSG00000255730.3_CTC-435M1  | ENSG00000160789.18_LMNA | -0.00772 | -0.166716406 | 0.1516665   | 9.25E-01 | 9.71E-01 | 1.00E+00 |
| ENSG00000261272.1_MUC22      | ENSG00000160789.18_LMNA | 0.07543  | -0.084791946 | 0.231843658 | 3.56E-01 | 6.39E-01 | 1.00E+00 |
| ENSG00000262833.1_RP11-28G8  | ENSG00000160789.18_LMNA | -0.08658 | -0.24244163  | 0.073632909 | 2.89E-01 | 5.74E-01 | 1.00E+00 |
| ENSG00000234667.1_ACTBP13    | ENSG00000160789.18_LMNA | -0.06655 | -0.223380601 | 0.093646367 | 4.15E-01 | 6.88E-01 | 1.00E+00 |
| ENSG00000177138.14_FAM9B     | ENSG00000160789.18_LMNA | 0.00773  | -0.151654552 | 0.166728295 | 9.25E-01 | 9.71E-01 | 1.00E+00 |
| ENSG00000279185.1_           | ENSG00000160789.18_LMNA | -0.16912 | -0.319709748 | -0.01019041 | 3.73E-02 | 1.65E-01 | 1.00E+00 |
| ENSG00000276733.1_MIR7158    | ENSG00000160789.18_LMNA | -0.24255 | -0.386815251 | -0.08669825 | 2.61E-03 | 2.39E-02 | 1.00E+00 |
| ENSG00000232835.1_AC107057.  | ENSG00000160789.18_LMNA | -0.06071 | -0.217802289 | 0.099455348 | 4.58E-01 | 7.22E-01 | 1.00E+00 |
| ENSG00000266559.1_MIR4530    | ENSG00000160789.18_LMNA | 0.03101  | -0.128825099 | 0.189277846 | 7.04E-01 | 8.74E-01 | 1.00E+00 |
| ENSG00000207491.1_           | ENSG00000160789.18_LMNA | 0.14318  | -0.016390226 | 0.29564555  | 7.84E-02 | 2.69E-01 | 1.00E+00 |
| ENSG00000265658.4_MIR3690    | ENSG00000160789.18_LMNA | 0.06793  | -0.092265622 | 0.22470347  | 4.06E-01 | 6.81E-01 | 1.00E+00 |
| ENSG00000251768.1_RNA5SP21   | ENSG00000160789.18_LMNA | 0.23928  | 0.083247848  | 0.383855813 | 2.99E-03 | 2.67E-02 | 1.00E+00 |
| ENSG00000280102.2_           | ENSG00000160789.18_LMNA | 0.01241  | -0.1470823   | 0.171271318 | 8.79E-01 | 9.53E-01 | 1.00E+00 |
| ENSG00000226338.1_AC079150.  | ENSG00000160789.18_LMNA | 0.02496  | -0.13477975  | 0.183428369 | 7.60E-01 | 9.00E-01 | 1.00E+00 |
| ENSG00000242021.2_RP11-268G  | ENSG00000160789.18_LMNA | -0.25234 | -0.395646953 | -0.09703808 | 1.71E-03 | 1.74E-02 | 1.00E+00 |
| ENSG00000202279.1_Y_RNA      | ENSG00000160789.18_LMNA | 0.09621  | -0.063970122 | 0.251558042 | 2.38E-01 | 5.17E-01 | 1.00E+00 |
| ENSG00000280333.1_RP11-667K  | ENSG00000160789.18_LMNA | 0.06825  | -0.091950018 | 0.225005682 | 4.03E-01 | 6.79E-01 | 1.00E+00 |
| ENSG00000223941.4_LINC01014  | ENSG00000160789.18_LMNA | -0.22194 | -0.368135702 | -0.06503986 | 5.99E-03 | 4.50E-02 | 1.00E+00 |
| ENSG00000223751.1_AC116609.  | ENSG00000160789.18_LMNA | 0.05841  | -0.101736217 | 0.215606309 | 4.75E-01 | 7.34E-01 | 1.00E+00 |
| ENSG00000270522.1_RP11-168P  | ENSG00000160789.18_LMNA | -0.00864 | -0.167611235 | 0.150766997 | 9.16E-01 | 9.68E-01 | 1.00E+00 |
| ENSG00000257159.1_RP11-58A1  | ENSG00000160789.18_LMNA | -0.11877 | -0.272810443 | 0.041211907 | 1.45E-01 | 3.90E-01 | 1.00E+00 |
| ENSG00000217455.7_AC091801.  | ENSG00000160789.18_LMNA | 0.02469  | -0.135045264 | 0.183167019 | 7.63E-01 | 9.01E-01 | 1.00E+00 |
| ENSG00000237139.1_RPS26P41   | ENSG00000160789.18_LMNA | -0.01846 | -0.177135536 | 0.141160168 | 8.21E-01 | 9.30E-01 | 1.00E+00 |
| ENSG00000274508.1_RP11-212I2 | ENSG00000160789.18_LMNA | 0.00452  | -0.154795549 | 0.163599524 | 9.56E-01 | 9.82E-01 | 1.00E+00 |
| ENSG00000256972.1_AP000462.  | ENSG00000160789.18_LMNA | -0.07776 | -0.234061135 | 0.082463626 | 3.41E-01 | 6.26E-01 | 1.00E+00 |
| ENSG00000239868.3_RN7SL34P   | ENSG00000160789.18_LMNA | -0.03393 | -0.192095926 | 0.125948138 | 6.78E-01 | 8.60E-01 | 1.00E+00 |
| ENSG00000126545.12_CSN1S1    | ENSG00000160789.18_LMNA | 0.13649  | -0.023215798 | 0.289401601 | 9.36E-02 | 2.99E-01 | 1.00E+00 |
| ENSG00000224671.2_RP11-335O  | ENSG00000160789.18_LMNA | 0.14136  | -0.018254649 | 0.293942642 | 8.24E-02 | 2.77E-01 | 1.00E+00 |
| ENSG00000255541.1_RP11-727A  | ENSG00000160789.18_LMNA | 0.00366  | -0.155636034 | 0.162761224 | 9.64E-01 | 9.86E-01 | 1.00E+00 |
| ENSG00000211728.2_TRBV5-6    | ENSG00000160789.18_LMNA | -0.04934 | -0.206916505 | 0.110729334 | 5.46E-01 | 7.84E-01 | 1.00E+00 |



|                              |                         |          |              |             |          |          |          |
|------------------------------|-------------------------|----------|--------------|-------------|----------|----------|----------|
| ENSG00000256083.1_RP11-366L  | ENSG00000160789.18_LMNA | 0.17125  | 0.012390105  | 0.321683461 | 3.49E-02 | 1.58E-01 | 1.00E+00 |
| ENSG00000257748.1_RP11-966I7 | ENSG00000160789.18_LMNA | 0.04323  | -0.116778937 | 0.201042606 | 5.97E-01 | 8.14E-01 | 1.00E+00 |
| ENSG00000260877.1_RP11-211G  | ENSG00000160789.18_LMNA | 0.15446  | -0.004865031 | 0.306128488 | 5.74E-02 | 2.19E-01 | 1.00E+00 |
| ENSG00000228194.1_CTA-415G2  | ENSG00000160789.18_LMNA | -0.04962 | -0.207182721 | 0.110454596 | 5.44E-01 | 7.82E-01 | 1.00E+00 |
| ENSG00000256827.1_RP11-214K  | ENSG00000160789.18_LMNA | -0.08017 | -0.236358181 | 0.080048112 | 3.26E-01 | 6.13E-01 | 1.00E+00 |
| ENSG00000211706.2_TRBV6-1    | ENSG00000160789.18_LMNA | 0.07243  | -0.087782168 | 0.228990954 | 3.75E-01 | 6.55E-01 | 1.00E+00 |
| ENSG00000272880.1_RP11-33M2  | ENSG00000160789.18_LMNA | -0.31459 | -0.451194274 | -0.16358279 | 7.91E-05 | 1.56E-03 | 1.00E+00 |
| ENSG00000273923.1_CTD-2536I1 | ENSG00000160789.18_LMNA | 0.04542  | -0.114607743 | 0.203153372 | 5.78E-01 | 8.03E-01 | 1.00E+00 |
| ENSG00000259056.1_DUXAP1     | ENSG00000160789.18_LMNA | 0.02268  | -0.137018078 | 0.181223732 | 7.82E-01 | 9.10E-01 | 1.00E+00 |
| ENSG00000236069.1_RP5-1011O  | ENSG00000160789.18_LMNA | 0.14269  | -0.016895106 | 0.295184604 | 7.95E-02 | 2.71E-01 | 1.00E+00 |
| ENSG00000255006.1_TCEB1P22   | ENSG00000160789.18_LMNA | 0.08624  | -0.073974015 | 0.242118788 | 2.91E-01 | 5.76E-01 | 1.00E+00 |
| ENSG00000233216.1_RP11-414C  | ENSG00000160789.18_LMNA | -0.03573 | -0.193829924 | 0.124175247 | 6.62E-01 | 8.51E-01 | 1.00E+00 |
| ENSG00000230053.2_RP11-76N2  | ENSG00000160789.18_LMNA | -0.02319 | -0.181716582 | 0.136517979 | 7.77E-01 | 9.08E-01 | 1.00E+00 |
| ENSG00000181997.8_AQP7P2     | ENSG00000160789.18_LMNA | -0.04167 | -0.199542328 | 0.118320319 | 6.10E-01 | 8.22E-01 | 1.00E+00 |
| ENSG00000266950.1_CTD-2623N  | ENSG00000160789.18_LMNA | 0.2037   | 0.045994277  | 0.351504893 | 1.18E-02 | 7.40E-02 | 1.00E+00 |
| ENSG00000237162.1_RP11-443F  | ENSG00000160789.18_LMNA | 0.04741  | -0.112639706 | 0.205064088 | 5.62E-01 | 7.93E-01 | 1.00E+00 |
| ENSG00000269586.6_CT45A10    | ENSG00000160789.18_LMNA | -0.19622 | -0.344654768 | -0.03821358 | 1.54E-02 | 8.95E-02 | 1.00E+00 |
| ENSG00000251586.1_TET2-AS1   | ENSG00000160789.18_LMNA | -0.03797 | -0.195986126 | 0.121967846 | 6.42E-01 | 8.41E-01 | 1.00E+00 |
| ENSG00000269400.1_CTD-2529P  | ENSG00000160789.18_LMNA | -0.01132 | -0.170215211 | 0.148146417 | 8.90E-01 | 9.57E-01 | 1.00E+00 |
| ENSG00000260148.1_RP11-407G  | ENSG00000160789.18_LMNA | 0.01144  | -0.148027506 | 0.170333263 | 8.89E-01 | 9.57E-01 | 1.00E+00 |
| ENSG00000233307.1_AC109815.1 | ENSG00000160789.18_LMNA | 0.13931  | -0.020337903 | 0.292037512 | 8.69E-02 | 2.87E-01 | 1.00E+00 |
| ENSG00000251656.1_PRELID3BF  | ENSG00000160789.18_LMNA | -0.0904  | -0.246062204 | 0.069802434 | 2.68E-01 | 5.52E-01 | 1.00E+00 |
| ENSG00000255148.2_RP4-791M1  | ENSG00000160789.18_LMNA | -0.06667 | -0.223501571 | 0.093520156 | 4.14E-01 | 6.87E-01 | 1.00E+00 |
| ENSG00000254746.4_RP11-958J  | ENSG00000160789.18_LMNA | -0.14378 | -0.296202276 | 0.015780226 | 7.72E-02 | 2.66E-01 | 1.00E+00 |
| ENSG00000213148.3_AC073465.1 | ENSG00000160789.18_LMNA | -0.14674 | -0.298961254 | 0.012753805 | 7.12E-02 | 2.52E-01 | 1.00E+00 |
| ENSG00000269177.1_L34079.3   | ENSG00000160789.18_LMNA | 0.08025  | -0.079967807 | 0.236434486 | 3.26E-01 | 6.12E-01 | 1.00E+00 |
| ENSG00000267070.1_RP11-10K1  | ENSG00000160789.18_LMNA | -0.04835 | -0.205967259 | 0.111708572 | 5.54E-01 | 7.89E-01 | 1.00E+00 |
| ENSG00000244071.1_RPL9P33    | ENSG00000160789.18_LMNA | 0.0213   | -0.138372886 | 0.179887762 | 7.95E-01 | 9.17E-01 | 1.00E+00 |
| ENSG00000230495.1_RP11-462D  | ENSG00000160789.18_LMNA | 0.23216  | 0.075754953  | 0.37740775  | 4.00E-03 | 3.32E-02 | 1.00E+00 |
| ENSG00000231556.1_RSL24D1P   | ENSG00000160789.18_LMNA | -0.0784  | -0.234670622 | 0.081823068 | 3.37E-01 | 6.22E-01 | 1.00E+00 |
| ENSG00000275665.1_CTB-58E17  | ENSG00000160789.18_LMNA | 0.01686  | -0.142723114 | 0.175590068 | 8.37E-01 | 9.37E-01 | 1.00E+00 |
| ENSG00000227659.1_CLYBL-AS2  | ENSG00000160789.18_LMNA | -0.08118 | -0.237312647 | 0.079043325 | 3.20E-01 | 6.07E-01 | 1.00E+00 |
| ENSG00000249138.1_SLED1      | ENSG00000160789.18_LMNA | 0.02596  | -0.133797526 | 0.184394799 | 7.51E-01 | 8.96E-01 | 1.00E+00 |

|                              |                         |          |              |             |          |          |          |
|------------------------------|-------------------------|----------|--------------|-------------|----------|----------|----------|
| ENSG00000278068.1_RP11-15E1  | ENSG00000160789.18_LMNA | -0.13224 | -0.285434817 | 0.027537    | 1.04E-01 | 3.20E-01 | 1.00E+00 |
| ENSG00000257612.1_MIR4307HC  | ENSG00000160789.18_LMNA | -0.14879 | -0.300866532 | 0.010660498 | 6.73E-02 | 2.43E-01 | 1.00E+00 |
| ENSG00000257264.3_MIR3179-1  | ENSG00000160789.18_LMNA | -0.10932 | -0.263925328 | 0.050766369 | 1.80E-01 | 4.43E-01 | 1.00E+00 |
| ENSG00000280113.1_AL357140.1 | ENSG00000160789.18_LMNA | 0.05763  | -0.10251045  | 0.214860162 | 4.81E-01 | 7.38E-01 | 1.00E+00 |
| ENSG00000231536.1_AC123886.1 | ENSG00000160789.18_LMNA | -0.08428 | -0.240259144 | 0.075937426 | 3.02E-01 | 5.89E-01 | 1.00E+00 |
| ENSG00000230433.1_RP1-20B11  | ENSG00000160789.18_LMNA | -0.01065 | -0.169563182 | 0.148803023 | 8.96E-01 | 9.60E-01 | 1.00E+00 |
| ENSG00000237557.1_YWHABP1    | ENSG00000160789.18_LMNA | -0.01562 | -0.174383808 | 0.143941912 | 8.49E-01 | 9.41E-01 | 1.00E+00 |
| ENSG00000253567.1_RP11-181B  | ENSG00000160789.18_LMNA | -0.01075 | -0.16966228  | 0.148703248 | 8.95E-01 | 9.59E-01 | 1.00E+00 |
| ENSG00000267313.5_KC6        | ENSG00000160789.18_LMNA | 0.08644  | -0.073777108 | 0.242305161 | 2.90E-01 | 5.75E-01 | 1.00E+00 |
| ENSG00000230951.1_GPS2P2     | ENSG00000160789.18_LMNA | 0.06009  | -0.100067824 | 0.217212923 | 4.62E-01 | 7.25E-01 | 1.00E+00 |
| ENSG00000256981.1_TAS2R18    | ENSG00000160789.18_LMNA | -0.02084 | -0.179447831 | 0.138818759 | 7.99E-01 | 9.19E-01 | 1.00E+00 |
| ENSG00000223429.1_RP4-800M2  | ENSG00000160789.18_LMNA | -0.0205  | -0.179118423 | 0.139152532 | 8.02E-01 | 9.21E-01 | 1.00E+00 |
| ENSG00000130700.6_GATA5      | ENSG00000160789.18_LMNA | 0.03914  | -0.120815905 | 0.19711013  | 6.32E-01 | 8.35E-01 | 1.00E+00 |
| ENSG00000258863.1_SETP1      | ENSG00000160789.18_LMNA | 0.10193  | -0.058215818 | 0.256960504 | 2.11E-01 | 4.85E-01 | 1.00E+00 |
| ENSG00000234569.1_RAD1P1     | ENSG00000160789.18_LMNA | -0.21897 | -0.365433015 | -0.06192965 | 6.72E-03 | 4.89E-02 | 1.00E+00 |
| ENSG00000280164.1_CH507-254  | ENSG00000160789.18_LMNA | -0.0294  | -0.187717685 | 0.130415558 | 7.19E-01 | 8.81E-01 | 1.00E+00 |
| ENSG00000227301.1_RP11-384P  | ENSG00000160789.18_LMNA | -0.20612 | -0.353710876 | -0.04850785 | 1.08E-02 | 6.94E-02 | 1.00E+00 |
| ENSG00000266365.1_RP11-51L5  | ENSG00000160789.18_LMNA | -0.02012 | -0.178752987 | 0.139522727 | 8.06E-01 | 9.22E-01 | 1.00E+00 |
| ENSG00000259150.4_LINC00929  | ENSG00000160789.18_LMNA | #####    | -0.159261023 | 0.15914038  | 9.99E-01 | 1.00E+00 | 1.00E+00 |
| ENSG00000254102.1_RP11-21C4  | ENSG00000160789.18_LMNA | -0.08244 | -0.238509428 | 0.07778254  | 3.13E-01 | 5.99E-01 | 1.00E+00 |
| ENSG00000249266.1_MTHFD2P6   | ENSG00000160789.18_LMNA | -0.16232 | -0.313417119 | -0.00319726 | 4.57E-02 | 1.90E-01 | 1.00E+00 |
| ENSG00000236893.1_ASS1P7     | ENSG00000160789.18_LMNA | 0.11599  | -0.044027964 | 0.270197223 | 1.55E-01 | 4.06E-01 | 1.00E+00 |
| ENSG00000205846.3_CLEC6A     | ENSG00000160789.18_LMNA | -0.12287 | -0.276655032 | 0.037059813 | 1.32E-01 | 3.68E-01 | 1.00E+00 |
| ENSG00000251191.6_LINC00589  | ENSG00000160789.18_LMNA | 0.10351  | -0.056624581 | 0.258450978 | 2.04E-01 | 4.76E-01 | 1.00E+00 |
| ENSG00000223727.5_AC026188.1 | ENSG00000160789.18_LMNA | 0.02044  | -0.139209496 | 0.179062198 | 8.03E-01 | 9.21E-01 | 1.00E+00 |
| ENSG00000268104.2_SLC6A14    | ENSG00000160789.18_LMNA | -0.08734 | -0.24316181  | 0.072871718 | 2.85E-01 | 5.70E-01 | 1.00E+00 |
| ENSG00000248850.1_RP11-605F  | ENSG00000160789.18_LMNA | -0.0123  | -0.171165583 | 0.14718887  | 8.80E-01 | 9.54E-01 | 1.00E+00 |
| ENSG00000227681.4_RP11-307P  | ENSG00000160789.18_LMNA | -0.04277 | -0.200607287 | 0.11722634  | 6.01E-01 | 8.16E-01 | 1.00E+00 |
| ENSG00000257434.1_RP11-81K1  | ENSG00000160789.18_LMNA | -0.15652 | -0.308041035 | 0.002753381 | 5.42E-02 | 2.12E-01 | 1.00E+00 |
| ENSG00000278908.1_RP11-523J  | ENSG00000160789.18_LMNA | -0.01766 | -0.176361682 | 0.141942972 | 8.29E-01 | 9.33E-01 | 1.00E+00 |
| ENSG00000280083.1_RP11-317J  | ENSG00000160789.18_LMNA | 0.02217  | -0.13751386  | 0.18073498  | 7.86E-01 | 9.13E-01 | 1.00E+00 |
| ENSG00000262786.1_RP11-214O  | ENSG00000160789.18_LMNA | 0.25882  | 0.103896381  | 0.401474622 | 1.28E-03 | 1.40E-02 | 1.00E+00 |
| ENSG00000274993.1_RP11-395B  | ENSG00000160789.18_LMNA | 0.09884  | -0.061329383 | 0.254039759 | 2.26E-01 | 5.02E-01 | 1.00E+00 |

|                              |                         |          |              |             |          |          |          |
|------------------------------|-------------------------|----------|--------------|-------------|----------|----------|----------|
| ENSG00000254254.4_RP11-17A4  | ENSG00000160789.18_LMNA | 0.1866   | 0.028238696  | 0.335824888 | 2.13E-02 | 1.13E-01 | 1.00E+00 |
| ENSG00000228750.4_RP11-242F  | ENSG00000160789.18_LMNA | 0.12854  | -0.031302709 | 0.281969199 | 1.15E-01 | 3.38E-01 | 1.00E+00 |
| ENSG00000235683.1_AC018442.  | ENSG00000160789.18_LMNA | 0.00518  | -0.15415238  | 0.164240712 | 9.50E-01 | 9.80E-01 | 1.00E+00 |
| ENSG00000260416.1_RP5-963E2  | ENSG00000160789.18_LMNA | 0.12438  | -0.03552221  | 0.278076216 | 1.27E-01 | 3.60E-01 | 1.00E+00 |
| ENSG00000161031.11_PGLYRP2   | ENSG00000160789.18_LMNA | -0.01807 | -0.176764531 | 0.141535514 | 8.25E-01 | 9.31E-01 | 1.00E+00 |
| ENSG00000279428.1_RP11-258F  | ENSG00000160789.18_LMNA | 0.04218  | -0.117815001 | 0.200034335 | 6.06E-01 | 8.20E-01 | 1.00E+00 |
| ENSG00000186335.7_SLC36A2    | ENSG00000160789.18_LMNA | -0.19351 | -0.342169197 | -0.0353995  | 1.69E-02 | 9.57E-02 | 1.00E+00 |
| ENSG00000230246.6_SPATA31C   | ENSG00000160789.18_LMNA | -0.073   | -0.229530123 | 0.087217445 | 3.71E-01 | 6.52E-01 | 1.00E+00 |
| ENSG00000260280.4_SLX1B-SUL  | ENSG00000160789.18_LMNA | -0.04052 | -0.198435906 | 0.119456075 | 6.20E-01 | 8.28E-01 | 1.00E+00 |
| ENSG00000189332.5_RP11-113D  | ENSG00000160789.18_LMNA | 0.01497  | -0.144572581 | 0.173759252 | 8.55E-01 | 9.43E-01 | 1.00E+00 |
| ENSG00000167634.11_NLRP7     | ENSG00000160789.18_LMNA | 0.14311  | -0.01646999  | 0.295572737 | 7.86E-02 | 2.69E-01 | 1.00E+00 |
| ENSG00000112486.13_CCR6      | ENSG00000160789.18_LMNA | -0.00762 | -0.166620365 | 0.151763011 | 9.26E-01 | 9.71E-01 | 1.00E+00 |
| ENSG00000280684.1_AC069499.  | ENSG00000160789.18_LMNA | -0.23366 | -0.378773394 | -0.07733905 | 3.76E-03 | 3.17E-02 | 1.00E+00 |
| ENSG00000265252.1_MIR3132    | ENSG00000160789.18_LMNA | 0.12378  | -0.036137096 | 0.27750805  | 1.29E-01 | 3.63E-01 | 1.00E+00 |
| ENSG00000257935.2_LHX5-AS1   | ENSG00000160789.18_LMNA | -0.22931 | -0.374829449 | -0.07276837 | 4.49E-03 | 3.62E-02 | 1.00E+00 |
| ENSG00000264834.1_MIR1273F   | ENSG00000160789.18_LMNA | -0.26113 | -0.403554589 | -0.10635107 | 1.16E-03 | 1.29E-02 | 1.00E+00 |
| ENSG00000278592.1_HOXA11-AS  | ENSG00000160789.18_LMNA | -0.26388 | -0.406024154 | -0.10927025 | 1.02E-03 | 1.18E-02 | 1.00E+00 |
| ENSG00000280608.1_           | ENSG00000160789.18_LMNA | -0.06541 | -0.222298401 | 0.094775008 | 4.23E-01 | 6.94E-01 | 1.00E+00 |
| ENSG00000252135.1_RNVU1-2    | ENSG00000160789.18_LMNA | 0.07635  | -0.083874403 | 0.232717913 | 3.50E-01 | 6.33E-01 | 1.00E+00 |
| ENSG00000281719.1_           | ENSG00000160789.18_LMNA | -0.0591  | -0.216268083 | 0.101049213 | 4.70E-01 | 7.30E-01 | 1.00E+00 |
| ENSG00000267004.1_CTD-2659N  | ENSG00000160789.18_LMNA | 0.08204  | -0.078176943 | 0.23813515  | 3.15E-01 | 6.01E-01 | 1.00E+00 |
| ENSG00000206582.1_Y_RNA      | ENSG00000160789.18_LMNA | 0.155    | -0.004303931 | 0.306636928 | 5.66E-02 | 2.17E-01 | 1.00E+00 |
| ENSG00000221518.1_RNU6ATAC   | ENSG00000160789.18_LMNA | -0.06679 | -0.223611848 | 0.093405091 | 4.14E-01 | 6.87E-01 | 1.00E+00 |
| ENSG00000229865.1_RPL31P54   | ENSG00000160789.18_LMNA | -0.11689 | -0.271044488 | 0.043115481 | 1.52E-01 | 4.00E-01 | 1.00E+00 |
| ENSG00000270837.1_HNRNPDLF   | ENSG00000160789.18_LMNA | -0.01832 | -0.177006458 | 0.141290767 | 8.23E-01 | 9.31E-01 | 1.00E+00 |
| ENSG00000228704.1_RP11-138M  | ENSG00000160789.18_LMNA | -0.17317 | -0.323452092 | -0.01436378 | 3.29E-02 | 1.52E-01 | 1.00E+00 |
| ENSG00000231405.1_CTA-992D9  | ENSG00000160789.18_LMNA | -0.2562  | -0.399124535 | -0.10112727 | 1.44E-03 | 1.52E-02 | 1.00E+00 |
| ENSG00000229407.4_RP11-12M5  | ENSG00000160789.18_LMNA | -0.00827 | -0.167250738 | 0.15112944  | 9.19E-01 | 9.69E-01 | 1.00E+00 |
| ENSG00000267788.1_CTD-2534I2 | ENSG00000160789.18_LMNA | -0.15877 | -0.310130864 | 0.000442819 | 5.07E-02 | 2.03E-01 | 1.00E+00 |
| ENSG00000233403.1_RP11-86A5  | ENSG00000160789.18_LMNA | 0.00617  | -0.153185042 | 0.165204563 | 9.40E-01 | 9.76E-01 | 1.00E+00 |
| ENSG00000232524.1_RP11-332K  | ENSG00000160789.18_LMNA | 0.04919  | -0.110879435 | 0.20677104  | 5.47E-01 | 7.85E-01 | 1.00E+00 |
| ENSG00000264530.2_RN7SL25P   | ENSG00000160789.18_LMNA | -0.03938 | -0.19734541  | 0.120574669 | 6.30E-01 | 8.34E-01 | 1.00E+00 |
| ENSG00000270412.1_RP11-92C4  | ENSG00000160789.18_LMNA | 0.17199  | 0.013146657  | 0.32236167  | 3.41E-02 | 1.56E-01 | 1.00E+00 |

|                              |                         |          |              |             |          |          |          |
|------------------------------|-------------------------|----------|--------------|-------------|----------|----------|----------|
| ENSG00000254879.1_PTPRJ-AS1  | ENSG00000160789.18_LMNA | 0.00461  | -0.154704331 | 0.163690478 | 9.55E-01 | 9.82E-01 | 1.00E+00 |
| ENSG00000272407.1_RP3-511B2  | ENSG00000160789.18_LMNA | 0.08411  | -0.076114525 | 0.240091292 | 3.03E-01 | 5.89E-01 | 1.00E+00 |
| ENSG00000251168.1_CTD-2072L2 | ENSG00000160789.18_LMNA | -0.00813 | -0.167111698 | 0.151269208 | 9.21E-01 | 9.70E-01 | 1.00E+00 |
| ENSG00000276298.1_LL0XNC01-  | ENSG00000160789.18_LMNA | -0.01153 | -0.170419552 | 0.147940584 | 8.88E-01 | 9.56E-01 | 1.00E+00 |
| ENSG00000232608.1_TIMM9P2    | ENSG00000160789.18_LMNA | -0.06849 | -0.225232029 | 0.091713599 | 4.02E-01 | 6.78E-01 | 1.00E+00 |
| ENSG00000248874.4_C5orf17    | ENSG00000160789.18_LMNA | -0.05193 | -0.209401754 | 0.10816264  | 5.25E-01 | 7.70E-01 | 1.00E+00 |
| ENSG00000224797.1_RP11-57C1  | ENSG00000160789.18_LMNA | 0.09194  | -0.068256321 | 0.247521101 | 2.60E-01 | 5.43E-01 | 1.00E+00 |
| ENSG00000277950.1_Metazoa_SI | ENSG00000160789.18_LMNA | 0.10969  | -0.050395357 | 0.264271348 | 1.79E-01 | 4.41E-01 | 1.00E+00 |
| ENSG00000257761.1_RP11-186F  | ENSG00000160789.18_LMNA | -0.17908 | -0.32890112  | -0.02045972 | 2.73E-02 | 1.34E-01 | 1.00E+00 |
| ENSG00000211787.1_TRAV8-3    | ENSG00000160789.18_LMNA | -0.01667 | -0.175401264 | 0.142913944 | 8.39E-01 | 9.37E-01 | 1.00E+00 |
| ENSG00000233460.1_RPL35AP3   | ENSG00000160789.18_LMNA | -0.04818 | -0.205799102 | 0.111881978 | 5.56E-01 | 7.90E-01 | 1.00E+00 |
| ENSG00000217159.2_LARP1P1    | ENSG00000160789.18_LMNA | -0.03091 | -0.189180311 | 0.128924575 | 7.05E-01 | 8.75E-01 | 1.00E+00 |
| ENSG00000225798.1_AC025918.  | ENSG00000160789.18_LMNA | 0.15423  | -0.00509289  | 0.305921963 | 5.78E-02 | 2.20E-01 | 1.00E+00 |
| ENSG00000234455.1_AC067960.  | ENSG00000160789.18_LMNA | -0.0362  | -0.194283927 | 0.123710725 | 6.58E-01 | 8.49E-01 | 1.00E+00 |
| ENSG00000257070.1_RP11-667M  | ENSG00000160789.18_LMNA | -0.06614 | -0.222991465 | 0.094052296 | 4.18E-01 | 6.90E-01 | 1.00E+00 |
| ENSG00000250060.1_RP11-332J  | ENSG00000160789.18_LMNA | -0.21383 | -0.360749336 | -0.05655366 | 8.17E-03 | 5.65E-02 | 1.00E+00 |
| ENSG00000234919.1_AC064834.  | ENSG00000160789.18_LMNA | -0.08972 | -0.245416045 | 0.070486737 | 2.72E-01 | 5.56E-01 | 1.00E+00 |
| ENSG00000232891.1_RP11-136K  | ENSG00000160789.18_LMNA | 0.00156  | -0.157684342 | 0.160716311 | 9.85E-01 | 9.94E-01 | 1.00E+00 |
| ENSG00000231724.1_RP11-573D  | ENSG00000160789.18_LMNA | -0.10703 | -0.26177405  | 0.053071081 | 1.89E-01 | 4.57E-01 | 1.00E+00 |
| ENSG00000254321.1_RP11-495O  | ENSG00000160789.18_LMNA | 0.0803   | -0.079925387 | 0.236474792 | 3.25E-01 | 6.12E-01 | 1.00E+00 |
| ENSG00000211809.2_TRAV27     | ENSG00000160789.18_LMNA | 0.0647   | -0.095482998 | 0.221619143 | 4.28E-01 | 6.99E-01 | 1.00E+00 |
| ENSG00000242979.1_RPS15AP1   | ENSG00000160789.18_LMNA | -0.20835 | -0.355747713 | -0.05083214 | 1.00E-02 | 6.56E-02 | 1.00E+00 |
| ENSG00000171401.13_KRT13     | ENSG00000160789.18_LMNA | 0.07206  | -0.088155365 | 0.228634538 | 3.78E-01 | 6.57E-01 | 1.00E+00 |
| ENSG00000268705.1_BNIP3P26   | ENSG00000160789.18_LMNA | -0.15793 | -0.309357289 | 0.001298487 | 5.20E-02 | 2.06E-01 | 1.00E+00 |
| ENSG00000236485.1_RP1-156L9  | ENSG00000160789.18_LMNA | -0.07282 | -0.229365792 | 0.087389586 | 3.73E-01 | 6.53E-01 | 1.00E+00 |
| ENSG00000235629.1_AC090952.  | ENSG00000160789.18_LMNA | -0.1813  | -0.330951467 | -0.02275943 | 2.54E-02 | 1.28E-01 | 1.00E+00 |
| ENSG00000277541.1_ZNF630-AS  | ENSG00000160789.18_LMNA | -0.08308 | -0.239119274 | 0.077139691 | 3.09E-01 | 5.95E-01 | 1.00E+00 |
| ENSG00000278626.1_RP11-467L  | ENSG00000160789.18_LMNA | 0.00899  | -0.150425065 | 0.167951253 | 9.12E-01 | 9.67E-01 | 1.00E+00 |
| ENSG00000223742.1_RP11-149B  | ENSG00000160789.18_LMNA | -0.25895 | -0.401591036 | -0.10403367 | 1.28E-03 | 1.39E-02 | 1.00E+00 |
| ENSG00000270751.1_DEAR       | ENSG00000160789.18_LMNA | 0.01878  | -0.140844299 | 0.177447684 | 8.18E-01 | 9.29E-01 | 1.00E+00 |
| ENSG00000235226.1_RP11-419N  | ENSG00000160789.18_LMNA | 0.03279  | -0.127075387 | 0.190992372 | 6.88E-01 | 8.66E-01 | 1.00E+00 |
| ENSG00000253155.1_CTB-47B11  | ENSG00000160789.18_LMNA | -0.09574 | -0.251112565 | 0.064443676 | 2.41E-01 | 5.20E-01 | 1.00E+00 |
| ENSG00000270190.1_RP11-803D  | ENSG00000160789.18_LMNA | 0.17689  | 0.018199056  | 0.326882757 | 2.93E-02 | 1.41E-01 | 1.00E+00 |

|                              |                         |          |              |             |          |          |          |
|------------------------------|-------------------------|----------|--------------|-------------|----------|----------|----------|
| ENSG00000220131.1_RP4-570O1  | ENSG00000160789.18_LMNA | 0.01864  | -0.14098039  | 0.177313204 | 8.20E-01 | 9.30E-01 | 1.00E+00 |
| ENSG00000253334.1_RP13-923O  | ENSG00000160789.18_LMNA | -0.04314 | -0.200962251 | 0.116861532 | 5.98E-01 | 8.14E-01 | 1.00E+00 |
| ENSG00000229263.1_AC004691.1 | ENSG00000160789.18_LMNA | 0.05733  | -0.102804441 | 0.214576737 | 4.83E-01 | 7.40E-01 | 1.00E+00 |
| ENSG00000255119.1_RP11-655M  | ENSG00000160789.18_LMNA | -0.06877 | -0.225505579 | 0.091427828 | 4.00E-01 | 6.76E-01 | 1.00E+00 |
| ENSG00000236242.1_MYO16-AS   | ENSG00000160789.18_LMNA | 0.10797  | -0.052128853 | 0.262653927 | 1.86E-01 | 4.51E-01 | 1.00E+00 |
| ENSG00000261469.1_RP11-96D1  | ENSG00000160789.18_LMNA | 0.15443  | -0.004892782 | 0.306103336 | 5.75E-02 | 2.19E-01 | 1.00E+00 |
| ENSG00000225239.1_RPL21P107  | ENSG00000160789.18_LMNA | -0.072   | -0.228583049 | 0.08820927  | 3.78E-01 | 6.57E-01 | 1.00E+00 |
| ENSG00000262332.1_RP11-517A  | ENSG00000160789.18_LMNA | -0.09811 | -0.253350849 | 0.06206288  | 2.29E-01 | 5.06E-01 | 1.00E+00 |
| ENSG00000244237.1_RP11-1046I | ENSG00000160789.18_LMNA | 0.0607   | -0.099466243 | 0.217791807 | 4.58E-01 | 7.22E-01 | 1.00E+00 |
| ENSG00000236915.1_RP4-651E1  | ENSG00000160789.18_LMNA | -0.05367 | -0.211064744 | 0.106442783 | 5.11E-01 | 7.60E-01 | 1.00E+00 |
| ENSG00000250886.1_CTD-2046J  | ENSG00000160789.18_LMNA | 0.07015  | -0.090052655 | 0.226821244 | 3.90E-01 | 6.69E-01 | 1.00E+00 |
| ENSG00000205494.8_OR52A4P    | ENSG00000160789.18_LMNA | -0.12138 | -0.27526023  | 0.03856743  | 1.36E-01 | 3.76E-01 | 1.00E+00 |
| ENSG00000259548.1_RP11-38G5  | ENSG00000160789.18_LMNA | 0.02781  | -0.131977812 | 0.186183627 | 7.34E-01 | 8.88E-01 | 1.00E+00 |
| ENSG00000170369.3_CST2       | ENSG00000160789.18_LMNA | 0.0311   | -0.128737812 | 0.189363423 | 7.04E-01 | 8.74E-01 | 1.00E+00 |
| ENSG00000257759.2_RP11-486O  | ENSG00000160789.18_LMNA | 0.18324  | 0.024757005  | 0.332730074 | 2.38E-02 | 1.22E-01 | 1.00E+00 |
| ENSG00000271716.1_RP11-169K  | ENSG00000160789.18_LMNA | 0.02646  | -0.133297593 | 0.184886457 | 7.46E-01 | 8.94E-01 | 1.00E+00 |
| ENSG00000236605.1_AC023115.4 | ENSG00000160789.18_LMNA | 0.08748  | -0.07273032  | 0.243295553 | 2.84E-01 | 5.69E-01 | 1.00E+00 |
| ENSG00000268643.1_AC006486.1 | ENSG00000160789.18_LMNA | 0.12422  | -0.035687559 | 0.277923452 | 1.27E-01 | 3.61E-01 | 1.00E+00 |
| ENSG00000260650.1_RP11-403P  | ENSG00000160789.18_LMNA | 0.02827  | -0.131521196 | 0.186632163 | 7.30E-01 | 8.86E-01 | 1.00E+00 |
| ENSG00000225336.2_HMGB3P1    | ENSG00000160789.18_LMNA | -0.05124 | -0.208742289 | 0.108844129 | 5.31E-01 | 7.74E-01 | 1.00E+00 |
| ENSG00000271366.1_AC002128.1 | ENSG00000160789.18_LMNA | -0.06001 | -0.217139347 | 0.100144269 | 4.63E-01 | 7.26E-01 | 1.00E+00 |
| ENSG00000237024.1_RPL21P33   | ENSG00000160789.18_LMNA | -0.09758 | -0.252856389 | 0.062589131 | 2.32E-01 | 5.09E-01 | 1.00E+00 |
| ENSG00000235733.2_RP3-522P1  | ENSG00000160789.18_LMNA | 0.03357  | -0.126301266 | 0.191750307 | 6.81E-01 | 8.61E-01 | 1.00E+00 |
| ENSG00000251173.1_UCHL1-AS   | ENSG00000160789.18_LMNA | -0.14563 | -0.297921651 | 0.013894853 | 7.34E-02 | 2.58E-01 | 1.00E+00 |
| ENSG00000225499.1_RPL15P4    | ENSG00000160789.18_LMNA | -0.08401 | -0.240000689 | 0.076210109 | 3.03E-01 | 5.90E-01 | 1.00E+00 |
| ENSG00000224765.1_RP1-137H1  | ENSG00000160789.18_LMNA | -0.16905 | -0.319649535 | -0.01012335 | 3.73E-02 | 1.65E-01 | 1.00E+00 |
| ENSG00000205267.5_DGAT2L7P   | ENSG00000160789.18_LMNA | 0.12236  | -0.037567861 | 0.276185148 | 1.33E-01 | 3.70E-01 | 1.00E+00 |
| ENSG00000215085.4_RP11-471G  | ENSG00000160789.18_LMNA | -0.11568 | -0.269912015 | 0.044335008 | 1.56E-01 | 4.07E-01 | 1.00E+00 |
| ENSG00000276110.1_RP4-790G1  | ENSG00000160789.18_LMNA | -0.08188 | -0.237974147 | 0.078346573 | 3.16E-01 | 6.03E-01 | 1.00E+00 |
| ENSG00000233536.2_RP11-867G  | ENSG00000160789.18_LMNA | -0.06885 | -0.225580128 | 0.091349939 | 3.99E-01 | 6.76E-01 | 1.00E+00 |
| ENSG00000170367.4_CST5       | ENSG00000160789.18_LMNA | -0.08092 | -0.237064166 | 0.079304968 | 3.22E-01 | 6.08E-01 | 1.00E+00 |
| ENSG00000113430.8_IRX4       | ENSG00000160789.18_LMNA | 0.07166  | -0.088547125 | 0.228260302 | 3.80E-01 | 6.59E-01 | 1.00E+00 |
| ENSG00000218632.3_RPL7P28    | ENSG00000160789.18_LMNA | 0.0649   | -0.095289319 | 0.221804993 | 4.27E-01 | 6.98E-01 | 1.00E+00 |

|                              |                         |          |              |             |          |          |          |
|------------------------------|-------------------------|----------|--------------|-------------|----------|----------|----------|
| ENSG00000259719.4_RP11-930C  | ENSG00000160789.18_LMNA | -0.0255  | -0.183955932 | 0.134243642 | 7.55E-01 | 8.98E-01 | 1.00E+00 |
| ENSG00000227573.2_RP5-1166A  | ENSG00000160789.18_LMNA | 0.25383  | 0.098610586  | 0.39698528  | 1.60E-03 | 1.65E-02 | 1.00E+00 |
| ENSG00000269236.1_CTD-2619J  | ENSG00000160789.18_LMNA | -0.11703 | -0.271182593 | 0.042966696 | 1.51E-01 | 4.00E-01 | 1.00E+00 |
| ENSG00000271564.1_RP13-444H  | ENSG00000160789.18_LMNA | -0.00745 | -0.166453605 | 0.151930573 | 9.27E-01 | 9.72E-01 | 1.00E+00 |
| ENSG00000253174.2_RP11-360L  | ENSG00000160789.18_LMNA | 0.08148  | -0.07874515  | 0.237595772 | 3.18E-01 | 6.05E-01 | 1.00E+00 |
| ENSG00000253190.3_AC084082.  | ENSG00000160789.18_LMNA | 0.01552  | -0.14403891  | 0.174287767 | 8.50E-01 | 9.41E-01 | 1.00E+00 |
| ENSG00000278842.1_RP3-405J1  | ENSG00000160789.18_LMNA | -0.09147 | -0.247072069 | 0.068732359 | 2.62E-01 | 5.46E-01 | 1.00E+00 |
| ENSG00000186160.4_CYP4Z1     | ENSG00000160789.18_LMNA | -0.08196 | -0.238053836 | 0.078262617 | 3.15E-01 | 6.02E-01 | 1.00E+00 |
| ENSG00000198178.9_CLEC4C     | ENSG00000160789.18_LMNA | -0.02214 | -0.180706157 | 0.137543093 | 7.87E-01 | 9.13E-01 | 1.00E+00 |
| ENSG00000254237.4_RP11-115J  | ENSG00000160789.18_LMNA | -0.0623  | -0.219327873 | 0.097868825 | 4.46E-01 | 7.12E-01 | 1.00E+00 |
| ENSG00000234534.1_CSNK1G2F   | ENSG00000160789.18_LMNA | -0.01813 | -0.176824976 | 0.141474368 | 8.25E-01 | 9.31E-01 | 1.00E+00 |
| ENSG00000278385.1_RP11-89H1  | ENSG00000160789.18_LMNA | 0.1086   | -0.051485967 | 0.263253972 | 1.83E-01 | 4.47E-01 | 1.00E+00 |
| ENSG00000214822.7_KRT16P3    | ENSG00000160789.18_LMNA | -0.03017 | -0.188462599 | 0.129656381 | 7.12E-01 | 8.78E-01 | 1.00E+00 |
| ENSG00000147432.5_CHRNB3     | ENSG00000160789.18_LMNA | -0.17449 | -0.324674966 | -0.01572984 | 3.16E-02 | 1.48E-01 | 1.00E+00 |
| ENSG00000260757.1_RP11-120K  | ENSG00000160789.18_LMNA | 0.08303  | -0.077191521 | 0.239070114 | 3.09E-01 | 5.96E-01 | 1.00E+00 |
| ENSG00000279410.1_RP11-1102  | ENSG00000160789.18_LMNA | -0.21126 | -0.358407944 | -0.05387277 | 8.98E-03 | 6.07E-02 | 1.00E+00 |
| ENSG00000187988.5_KCTD9P3    | ENSG00000160789.18_LMNA | 0.17427  | 0.015504105  | 0.324472965 | 3.18E-02 | 1.49E-01 | 1.00E+00 |
| ENSG00000270429.1_KNOP1P2    | ENSG00000160789.18_LMNA | -0.0522  | -0.209653782 | 0.107902115 | 5.23E-01 | 7.69E-01 | 1.00E+00 |
| ENSG00000229259.1_LRRC37A1   | ENSG00000160789.18_LMNA | -0.02744 | -0.185826401 | 0.132341378 | 7.37E-01 | 8.90E-01 | 1.00E+00 |
| ENSG00000242290.2_RP11-197K  | ENSG00000160789.18_LMNA | -0.08536 | -0.241281243 | 0.074858598 | 2.96E-01 | 5.82E-01 | 1.00E+00 |
| ENSG00000261647.1_IMP DH1P1  | ENSG00000160789.18_LMNA | 0.05367  | -0.106436574 | 0.211070744 | 5.11E-01 | 7.60E-01 | 1.00E+00 |
| ENSG00000251389.1_YTHDF1P1   | ENSG00000160789.18_LMNA | -0.05455 | -0.211910905 | 0.105566956 | 5.04E-01 | 7.55E-01 | 1.00E+00 |
| ENSG00000121335.11_PRB2      | ENSG00000160789.18_LMNA | 0.05568  | -0.104445574 | 0.212993611 | 4.96E-01 | 7.50E-01 | 1.00E+00 |
| ENSG00000165066.12_NKX6-3    | ENSG00000160789.18_LMNA | -0.10099 | -0.256076265 | 0.05915908  | 2.16E-01 | 4.90E-01 | 1.00E+00 |
| ENSG00000166220.11_TBATA     | ENSG00000160789.18_LMNA | 0.00198  | -0.15726642  | 0.161133762 | 9.81E-01 | 9.93E-01 | 1.00E+00 |
| ENSG00000258758.1_RP11-613G  | ENSG00000160789.18_LMNA | 0.0129   | -0.146598096 | 0.171751635 | 8.75E-01 | 9.51E-01 | 1.00E+00 |
| ENSG00000173124.13_ACSM6     | ENSG00000160789.18_LMNA | 0.08215  | -0.078068306 | 0.238238253 | 3.14E-01 | 6.01E-01 | 1.00E+00 |
| ENSG00000237799.2_CICP11     | ENSG00000160789.18_LMNA | 0.0279   | -0.131890899 | 0.186269012 | 7.33E-01 | 8.88E-01 | 1.00E+00 |
| ENSG00000187758.6_ADH1A      | ENSG00000160789.18_LMNA | 0.09249  | -0.06770553  | 0.248040476 | 2.57E-01 | 5.39E-01 | 1.00E+00 |
| ENSG00000187855.5_ASCL4      | ENSG00000160789.18_LMNA | -0.0226  | -0.181150241 | 0.137092637 | 7.82E-01 | 9.11E-01 | 1.00E+00 |
| ENSG00000264739.1_RP11-138I1 | ENSG00000160789.18_LMNA | 0.08757  | -0.072647041 | 0.243374316 | 2.83E-01 | 5.69E-01 | 1.00E+00 |
| ENSG00000180066.8_C10orf91   | ENSG00000160789.18_LMNA | 0.17307  | 0.014258123  | 0.323357466 | 3.30E-02 | 1.52E-01 | 1.00E+00 |
| ENSG00000260053.2_ABCB10P4   | ENSG00000160789.18_LMNA | -0.064   | -0.220947268 | 0.096182977 | 4.33E-01 | 7.03E-01 | 1.00E+00 |

|                             |                         |          |              |             |          |          |          |
|-----------------------------|-------------------------|----------|--------------|-------------|----------|----------|----------|
| ENSG00000148156.7_ACTL7B    | ENSG00000160789.18_LMNA | -0.04549 | -0.203219318 | 0.114539861 | 5.78E-01 | 8.03E-01 | 1.00E+00 |
| ENSG00000248586.2_CTD-2516K | ENSG00000160789.18_LMNA | 0.134    | -0.02574618  | 0.287080058 | 9.98E-02 | 3.11E-01 | 1.00E+00 |
| ENSG00000247699.2_CTB-127C1 | ENSG00000160789.18_LMNA | 0.0021   | -0.157153034 | 0.161247001 | 9.80E-01 | 9.92E-01 | 1.00E+00 |
| ENSG00000182521.5_TBPL2     | ENSG00000160789.18_LMNA | -0.00191 | -0.161063479 | 0.157336791 | 9.81E-01 | 9.93E-01 | 1.00E+00 |
| ENSG00000205488.7_CALML3-A5 | ENSG00000160789.18_LMNA | 0.06891  | -0.091295583 | 0.225632151 | 3.99E-01 | 6.76E-01 | 1.00E+00 |
| ENSG00000249359.2_RP11-374A | ENSG00000160789.18_LMNA | 0.04403  | -0.115984968 | 0.20181482  | 5.90E-01 | 8.10E-01 | 1.00E+00 |
| ENSG00000260059.1_RP11-231E | ENSG00000160789.18_LMNA | 0.0113   | -0.148165324 | 0.17019644  | 8.90E-01 | 9.57E-01 | 1.00E+00 |
| ENSG00000111732.9_AICDA     | ENSG00000160789.18_LMNA | 0.01206  | -0.147419965 | 0.170936274 | 8.83E-01 | 9.55E-01 | 1.00E+00 |
| ENSG00000134760.5_DSG1      | ENSG00000160789.18_LMNA | 0.02621  | -0.133543051 | 0.184645081 | 7.49E-01 | 8.95E-01 | 1.00E+00 |
| ENSG00000240535.7_CTD-2313F | ENSG00000160789.18_LMNA | 0.13195  | -0.027835365 | 0.285160527 | 1.05E-01 | 3.22E-01 | 1.00E+00 |
| ENSG00000164393.7_ADGRF2    | ENSG00000160789.18_LMNA | 0.12715  | -0.032715828 | 0.280666579 | 1.19E-01 | 3.45E-01 | 1.00E+00 |
| ENSG00000232190.2_RP11-134D | ENSG00000160789.18_LMNA | -0.0154  | -0.174173207 | 0.144154603 | 8.51E-01 | 9.41E-01 | 1.00E+00 |
| ENSG00000265465.1_MIR4768   | ENSG00000160789.18_LMNA | 0.03874  | -0.121203966 | 0.196731574 | 6.36E-01 | 8.37E-01 | 1.00E+00 |
| ENSG00000264201.1_MIR4701   | ENSG00000160789.18_LMNA | 0.14114  | -0.018475745 | 0.293740568 | 8.28E-02 | 2.78E-01 | 1.00E+00 |
| ENSG00000221740.1_SNORD93   | ENSG00000160789.18_LMNA | 0.10509  | -0.05502636  | 0.259946485 | 1.98E-01 | 4.67E-01 | 1.00E+00 |
| ENSG00000226767.1_RP11-328P | ENSG00000160789.18_LMNA | -0.02145 | -0.180034881 | 0.138223751 | 7.93E-01 | 9.16E-01 | 1.00E+00 |
| ENSG00000255442.1_RP11-347H | ENSG00000160789.18_LMNA | -0.22953 | -0.375024841 | -0.07299452 | 4.45E-03 | 3.59E-02 | 1.00E+00 |
| ENSG00000207008.1_SNORA54   | ENSG00000160789.18_LMNA | -0.05025 | -0.207791239 | 0.109826416 | 5.39E-01 | 7.79E-01 | 1.00E+00 |
| ENSG00000200610.1_Y_RNA     | ENSG00000160789.18_LMNA | -0.00944 | -0.168390615 | 0.149983116 | 9.08E-01 | 9.65E-01 | 1.00E+00 |
| ENSG00000200095.1_RNU6-181F | ENSG00000160789.18_LMNA | -0.03184 | -0.190081378 | 0.128005323 | 6.97E-01 | 8.70E-01 | 1.00E+00 |
| ENSG00000202566.3_MIR421    | ENSG00000160789.18_LMNA | 0.01775  | -0.141853393 | 0.176450257 | 8.28E-01 | 9.33E-01 | 1.00E+00 |
| ENSG00000200394.1_SNORA38E  | ENSG00000160789.18_LMNA | -0.24688 | -0.390728205 | -0.09127143 | 2.17E-03 | 2.08E-02 | 1.00E+00 |
| ENSG00000251939.1_RNU6-1278 | ENSG00000160789.18_LMNA | 0.00724  | -0.152139923 | 0.166245232 | 9.29E-01 | 9.73E-01 | 1.00E+00 |
| ENSG00000207704.2_MIR548AA1 | ENSG00000160789.18_LMNA | 0.06012  | -0.100040514 | 0.217239208 | 4.62E-01 | 7.25E-01 | 1.00E+00 |
| ENSG00000200446.1_RNU6-1085 | ENSG00000160789.18_LMNA | -0.07081 | -0.227444197 | 0.089401105 | 3.86E-01 | 6.64E-01 | 1.00E+00 |
| ENSG00000271798.1_SNORA51   | ENSG00000160789.18_LMNA | 0.11781  | -0.042181006 | 0.271911669 | 1.48E-01 | 3.95E-01 | 1.00E+00 |
| ENSG00000212517.1_SNORA26   | ENSG00000160789.18_LMNA | -0.11835 | -0.272422593 | 0.041630177 | 1.46E-01 | 3.92E-01 | 1.00E+00 |
| ENSG00000239005.1_ACA64     | ENSG00000160789.18_LMNA | 0.01025  | -0.149197112 | 0.169171706 | 9.00E-01 | 9.61E-01 | 1.00E+00 |
| ENSG00000252569.1_RNU6-1153 | ENSG00000160789.18_LMNA | -0.04003 | -0.197968704 | 0.119935414 | 6.24E-01 | 8.31E-01 | 1.00E+00 |
| ENSG00000221406.1_MIR320B2  | ENSG00000160789.18_LMNA | 0.10729  | -0.052810699 | 0.262017254 | 1.88E-01 | 4.55E-01 | 1.00E+00 |
| ENSG00000243562.3_RN7SL838F | ENSG00000160789.18_LMNA | 0.11902  | -0.040956956 | 0.273046802 | 1.44E-01 | 3.88E-01 | 1.00E+00 |
| ENSG00000250597.4_RP11-725M | ENSG00000160789.18_LMNA | 0.05552  | -0.104602254 | 0.212842382 | 4.97E-01 | 7.51E-01 | 1.00E+00 |
| ENSG00000201170.1_RNU1-132F | ENSG00000160789.18_LMNA | -0.09633 | -0.251669815 | 0.063851282 | 2.38E-01 | 5.16E-01 | 1.00E+00 |

|                             |                         |          |              |             |          |          |          |
|-----------------------------|-------------------------|----------|--------------|-------------|----------|----------|----------|
| ENSG00000263709.1_RP11-321A | ENSG00000160789.18_LMNA | 0.0653   | -0.094886642 | 0.222191317 | 4.24E-01 | 6.95E-01 | 1.00E+00 |
| ENSG00000170152.4_RP11-374M | ENSG00000160789.18_LMNA | -0.06234 | -0.219358921 | 0.09783652  | 4.46E-01 | 7.12E-01 | 1.00E+00 |
| ENSG00000254283.1_RP11-267M | ENSG00000160789.18_LMNA | 0.03628  | -0.123637922 | 0.194355069 | 6.57E-01 | 8.48E-01 | 1.00E+00 |
| ENSG00000235185.1_RP5-1056L | ENSG00000160789.18_LMNA | -0.03129 | -0.189544463 | 0.128552969 | 7.02E-01 | 8.73E-01 | 1.00E+00 |
| ENSG00000227550.2_TRBV7-5   | ENSG00000160789.18_LMNA | -0.14945 | -0.301478112 | 0.009987983 | 6.61E-02 | 2.40E-01 | 1.00E+00 |
| ENSG00000256951.1_AC055876. | ENSG00000160789.18_LMNA | -0.02139 | -0.17998114  | 0.13827823  | 7.94E-01 | 9.17E-01 | 1.00E+00 |
| ENSG00000229733.1_RP5-1189B | ENSG00000160789.18_LMNA | -0.08789 | -0.243677852 | 0.072326065 | 2.82E-01 | 5.67E-01 | 1.00E+00 |
| ENSG00000265015.1_RP11-454P | ENSG00000160789.18_LMNA | -0.19885 | -0.347066173 | -0.04094834 | 1.41E-02 | 8.38E-02 | 1.00E+00 |
| ENSG00000225858.1_RP1-172N1 | ENSG00000160789.18_LMNA | -0.08807 | -0.243848471 | 0.072145614 | 2.81E-01 | 5.66E-01 | 1.00E+00 |
| ENSG00000211710.3_TRBV4-1   | ENSG00000160789.18_LMNA | 0.03361  | -0.126263593 | 0.191787183 | 6.81E-01 | 8.61E-01 | 1.00E+00 |
| ENSG00000234272.1_RPL30P2   | ENSG00000160789.18_LMNA | 0.01199  | -0.147492601 | 0.170864192 | 8.83E-01 | 9.55E-01 | 1.00E+00 |
| ENSG00000275493.1_FAM27D1   | ENSG00000160789.18_LMNA | 0.14182  | -0.017787136 | 0.29436984  | 8.14E-02 | 2.75E-01 | 1.00E+00 |
| ENSG00000236611.1_AP000343. | ENSG00000160789.18_LMNA | -0.05464 | -0.211999226 | 0.105475511 | 5.04E-01 | 7.55E-01 | 1.00E+00 |
| ENSG00000276309.1_RN7SKP25  | ENSG00000160789.18_LMNA | -0.13668 | -0.289582869 | 0.023018055 | 9.31E-02 | 2.98E-01 | 1.00E+00 |
| ENSG00000228700.1_RP11-155G | ENSG00000160789.18_LMNA | -0.17005 | -0.320570288 | -0.01114911 | 3.62E-02 | 1.62E-01 | 1.00E+00 |
| ENSG00000211727.3_TRBV7-6   | ENSG00000160789.18_LMNA | 0.08029  | -0.079934205 | 0.236466413 | 3.25E-01 | 6.12E-01 | 1.00E+00 |
| ENSG00000218749.1_RP3-340B1 | ENSG00000160789.18_LMNA | -0.05615 | -0.21344428  | 0.103978568 | 4.92E-01 | 7.47E-01 | 1.00E+00 |
| ENSG00000211778.2_TRAV4     | ENSG00000160789.18_LMNA | 0.10119  | -0.058965315 | 0.256257949 | 2.15E-01 | 4.89E-01 | 1.00E+00 |
| ENSG00000279444.1_RP11-715H | ENSG00000160789.18_LMNA | 0.03727  | -0.122654177 | 0.195316044 | 6.48E-01 | 8.44E-01 | 1.00E+00 |
| ENSG00000211791.2_TRAV13-2  | ENSG00000160789.18_LMNA | 0.01345  | -0.146066147 | 0.172279139 | 8.69E-01 | 9.49E-01 | 1.00E+00 |
| ENSG00000250282.1_RP5-875H1 | ENSG00000160789.18_LMNA | -0.03861 | -0.196605044 | 0.121333651 | 6.37E-01 | 8.37E-01 | 1.00E+00 |
| ENSG00000236799.1_RP11-383C | ENSG00000160789.18_LMNA | 0.02202  | -0.137665523 | 0.180585436 | 7.88E-01 | 9.14E-01 | 1.00E+00 |
| ENSG00000278679.1_          | ENSG00000160789.18_LMNA | -0.02394 | -0.182443374 | 0.1357802   | 7.70E-01 | 9.05E-01 | 1.00E+00 |
| ENSG00000241413.3_RN7SL441F | ENSG00000160789.18_LMNA | -0.12092 | -0.274833056 | 0.039028869 | 1.38E-01 | 3.78E-01 | 1.00E+00 |
| ENSG00000264263.1_RP11-671P | ENSG00000160789.18_LMNA | 0.21267  | 0.055340797  | 0.35969054  | 8.53E-03 | 5.84E-02 | 1.00E+00 |
| ENSG00000231102.1_RP11-298J | ENSG00000160789.18_LMNA | 0.12895  | -0.030883368 | 0.282355527 | 1.13E-01 | 3.36E-01 | 1.00E+00 |
| ENSG00000258500.2_CTD-2062F | ENSG00000160789.18_LMNA | 0.00474  | -0.154577288 | 0.163817144 | 9.54E-01 | 9.81E-01 | 1.00E+00 |
| ENSG00000250946.2_RP11-358N | ENSG00000160789.18_LMNA | -0.35907 | -0.490244314 | -0.21198505 | 5.55E-06 | 1.81E-04 | 2.85E-01 |
| ENSG00000259970.1_AC099668. | ENSG00000160789.18_LMNA | 0.11676  | -0.04324804  | 0.270921434 | 1.52E-01 | 4.01E-01 | 1.00E+00 |
| ENSG00000230649.2_AC024084. | ENSG00000160789.18_LMNA | -0.02225 | -0.180810059 | 0.137437712 | 7.86E-01 | 9.13E-01 | 1.00E+00 |
| ENSG00000274364.1_RP3-324O1 | ENSG00000160789.18_LMNA | 0.14748  | -0.012001175 | 0.299646566 | 6.98E-02 | 2.49E-01 | 1.00E+00 |
| ENSG00000265374.1_RP11-57J1 | ENSG00000160789.18_LMNA | -0.23934 | -0.383911008 | -0.08331213 | 2.98E-03 | 2.66E-02 | 1.00E+00 |
| ENSG00000249493.1_ANKRD20A  | ENSG00000160789.18_LMNA | 0.16069  | 0.001527185  | 0.311910302 | 4.80E-02 | 1.96E-01 | 1.00E+00 |



|                              |                         |          |              |             |          |          |          |
|------------------------------|-------------------------|----------|--------------|-------------|----------|----------|----------|
| ENSG00000225043.1_RPL18AP2   | ENSG00000160789.18_LMNA | 0.12931  | -0.030520873 | 0.282689403 | 1.12E-01 | 3.34E-01 | 1.00E+00 |
| ENSG00000198153.8_ZNF849P    | ENSG00000160789.18_LMNA | -0.32638 | -0.461598997 | -0.17634546 | 4.07E-05 | 9.14E-04 | 1.00E+00 |
| ENSG00000268845.1_RP11-1137  | ENSG00000160789.18_LMNA | 0.04342  | -0.116581897 | 0.201234284 | 5.95E-01 | 8.13E-01 | 1.00E+00 |
| ENSG00000280167.1_RP11-867G  | ENSG00000160789.18_LMNA | 0.07285  | -0.087363274 | 0.229390911 | 3.72E-01 | 6.53E-01 | 1.00E+00 |
| ENSG00000224064.1_RP11-344H  | ENSG00000160789.18_LMNA | -0.0618  | -0.218844326 | 0.098371862 | 4.49E-01 | 7.15E-01 | 1.00E+00 |
| ENSG00000280183.1_RP11-400F  | ENSG00000160789.18_LMNA | -0.09008 | -0.245756655 | 0.070126057 | 2.70E-01 | 5.54E-01 | 1.00E+00 |
| ENSG00000233860.1_RP11-359D  | ENSG00000160789.18_LMNA | 0.1341   | -0.025651588 | 0.28716691  | 9.95E-02 | 3.11E-01 | 1.00E+00 |
| ENSG00000237331.1_XIAP-AS1   | ENSG00000160789.18_LMNA | 0.03682  | -0.123104268 | 0.194876446 | 6.52E-01 | 8.46E-01 | 1.00E+00 |
| ENSG00000273551.1_RP11-616M  | ENSG00000160789.18_LMNA | 0.00716  | -0.152214114 | 0.16617138  | 9.30E-01 | 9.73E-01 | 1.00E+00 |
| ENSG00000255092.1_RP11-58K2  | ENSG00000160789.18_LMNA | -0.01447 | -0.17327167  | 0.145064755 | 8.60E-01 | 9.45E-01 | 1.00E+00 |
| ENSG00000259717.1_LINC00677  | ENSG00000160789.18_LMNA | 0.03739  | -0.122537084 | 0.195430386 | 6.47E-01 | 8.43E-01 | 1.00E+00 |
| ENSG00000260033.1_CTC-527H2  | ENSG00000160789.18_LMNA | -0.141   | -0.293613612 | 0.018614636 | 8.31E-02 | 2.79E-01 | 1.00E+00 |
| ENSG00000236136.1_ADORA2BF   | ENSG00000160789.18_LMNA | -0.0529  | -0.210330458 | 0.107202412 | 5.17E-01 | 7.64E-01 | 1.00E+00 |
| ENSG00000226425.1_RP11-348J  | ENSG00000160789.18_LMNA | -0.03612 | -0.1942056   | 0.123790877 | 6.59E-01 | 8.49E-01 | 1.00E+00 |
| ENSG00000279042.1_RP11-805F  | ENSG00000160789.18_LMNA | -0.09529 | -0.25068866  | 0.064894168 | 2.43E-01 | 5.22E-01 | 1.00E+00 |
| ENSG00000226434.1_RP11-1L9.1 | ENSG00000160789.18_LMNA | -0.11149 | -0.265969861 | 0.048572904 | 1.71E-01 | 4.31E-01 | 1.00E+00 |
| ENSG00000261291.1_RP11-295M  | ENSG00000160789.18_LMNA | 0.06519  | -0.094993896 | 0.222088428 | 4.25E-01 | 6.96E-01 | 1.00E+00 |
| ENSG00000279781.1_RP11-466A  | ENSG00000160789.18_LMNA | 0.00264  | -0.156623404 | 0.161775831 | 9.74E-01 | 9.90E-01 | 1.00E+00 |
| ENSG00000215096.3_IFITM8P    | ENSG00000160789.18_LMNA | 0.13456  | -0.025181903 | 0.287598083 | 9.84E-02 | 3.09E-01 | 1.00E+00 |
| ENSG00000230769.1_RP3-408N2  | ENSG00000160789.18_LMNA | 0.04791  | -0.11214733  | 0.205541745 | 5.58E-01 | 7.91E-01 | 1.00E+00 |
| ENSG00000251164.1_HULC       | ENSG00000160789.18_LMNA | 0.17772  | 0.019063446  | 0.327654835 | 2.85E-02 | 1.38E-01 | 1.00E+00 |
| ENSG00000255308.1_RP11-428C  | ENSG00000160789.18_LMNA | 0.05775  | -0.102387452 | 0.214978722 | 4.80E-01 | 7.38E-01 | 1.00E+00 |
| ENSG00000277103.1_RP11-520B  | ENSG00000160789.18_LMNA | 0.1025   | -0.057641299 | 0.257498816 | 2.09E-01 | 4.82E-01 | 1.00E+00 |
| ENSG00000264270.1_RP11-474I1 | ENSG00000160789.18_LMNA | 0.07368  | -0.086538689 | 0.230177907 | 3.67E-01 | 6.48E-01 | 1.00E+00 |
| ENSG00000279465.1_RP11-44D5  | ENSG00000160789.18_LMNA | -0.06461 | -0.221533951 | 0.095571771 | 4.29E-01 | 6.99E-01 | 1.00E+00 |
| ENSG00000244283.1_RPL23AP7   | ENSG00000160789.18_LMNA | 0.10115  | -0.059000235 | 0.256225208 | 2.15E-01 | 4.89E-01 | 1.00E+00 |
| ENSG00000253908.1_RP11-252I1 | ENSG00000160789.18_LMNA | 0.12888  | -0.03095564  | 0.282288953 | 1.14E-01 | 3.37E-01 | 1.00E+00 |
| ENSG00000187904.3_AC097382.1 | ENSG00000160789.18_LMNA | 0.08717  | -0.073043363 | 0.242999444 | 2.86E-01 | 5.71E-01 | 1.00E+00 |
| ENSG00000271705.1_RPL17P3    | ENSG00000160789.18_LMNA | -0.0639  | -0.22085539  | 0.096278675 | 4.34E-01 | 7.03E-01 | 1.00E+00 |
| ENSG00000253355.1_KB-1460A1  | ENSG00000160789.18_LMNA | -0.231   | -0.376359578 | -0.07454015 | 4.19E-03 | 3.44E-02 | 1.00E+00 |
| ENSG00000258642.1_RP11-219E  | ENSG00000160789.18_LMNA | 0.01073  | -0.148726252 | 0.169639432 | 8.96E-01 | 9.59E-01 | 1.00E+00 |
| ENSG00000240031.1_OR9A3P     | ENSG00000160789.18_LMNA | -0.08303 | -0.239071451 | 0.077190111 | 3.09E-01 | 5.96E-01 | 1.00E+00 |
| ENSG00000220541.4_RP5-1170D  | ENSG00000160789.18_LMNA | -0.09075 | -0.246392565 | 0.069452456 | 2.66E-01 | 5.50E-01 | 1.00E+00 |

|                              |                         |          |              |             |          |          |          |
|------------------------------|-------------------------|----------|--------------|-------------|----------|----------|----------|
| ENSG00000237063.1_RP4-550H1  | ENSG00000160789.18_LMNA | 0.02964  | -0.13017223  | 0.187956481 | 7.17E-01 | 8.80E-01 | 1.00E+00 |
| ENSG00000253366.3_RP11-589F  | ENSG00000160789.18_LMNA | -0.00694 | -0.165957529 | 0.152428927 | 9.32E-01 | 9.74E-01 | 1.00E+00 |
| ENSG00000233800.3_           | ENSG00000160789.18_LMNA | 0.02488  | -0.134857788 | 0.183351559 | 7.61E-01 | 9.00E-01 | 1.00E+00 |
| ENSG00000250442.1	EIF3KP3    | ENSG00000160789.18_LMNA | -0.02623 | -0.184664289 | 0.13352352  | 7.48E-01 | 8.95E-01 | 1.00E+00 |
| ENSG00000237813.3_AC002066.  | ENSG00000160789.18_LMNA | 0.07825  | -0.08197513  | 0.234525958 | 3.38E-01 | 6.24E-01 | 1.00E+00 |
| ENSG00000268193.4_AC002985.  | ENSG00000160789.18_LMNA | 0.19148  | 0.033294423  | 0.340307042 | 1.81E-02 | 1.01E-01 | 1.00E+00 |
| ENSG00000271127.1_LL22NC03-  | ENSG00000160789.18_LMNA | -0.08702 | -0.242858753 | 0.073192078 | 2.86E-01 | 5.72E-01 | 1.00E+00 |
| ENSG00000261848.4_CTD-2309C  | ENSG00000160789.18_LMNA | -0.21355 | -0.360497162 | -0.05626471 | 8.25E-03 | 5.70E-02 | 1.00E+00 |
| ENSG00000229010.1_RP5-979D1  | ENSG00000160789.18_LMNA | 0.04791  | -0.112148154 | 0.205540946 | 5.58E-01 | 7.91E-01 | 1.00E+00 |
| ENSG00000243896.3_OR2A7      | ENSG00000160789.18_LMNA | 0.05774  | -0.102400666 | 0.214965985 | 4.80E-01 | 7.38E-01 | 1.00E+00 |
| ENSG00000231909.7_MAP1LC3B   | ENSG00000160789.18_LMNA | 0.03745  | -0.122483542 | 0.195482667 | 6.47E-01 | 8.43E-01 | 1.00E+00 |
| ENSG00000213892.9_CEACAM1    | ENSG00000160789.18_LMNA | 0.17766  | 0.019000555  | 0.327598674 | 2.85E-02 | 1.38E-01 | 1.00E+00 |
| ENSG00000259371.2_RP11-468E  | ENSG00000160789.18_LMNA | 0.03772  | -0.122213552 | 0.195746272 | 6.45E-01 | 8.42E-01 | 1.00E+00 |
| ENSG00000234884.1_CTA-407F1  | ENSG00000160789.18_LMNA | -0.21995 | -0.36631964  | -0.06294932 | 6.47E-03 | 4.76E-02 | 1.00E+00 |
| ENSG00000233980.1_FDPSP2     | ENSG00000160789.18_LMNA | -0.0879  | -0.243689443 | 0.072313806 | 2.82E-01 | 5.67E-01 | 1.00E+00 |
| ENSG00000229502.4_RP11-52J3. | ENSG00000160789.18_LMNA | 0.00349  | -0.155798752 | 0.162598875 | 9.66E-01 | 9.87E-01 | 1.00E+00 |
| ENSG00000236243.2_RPL6P29    | ENSG00000160789.18_LMNA | 0.12763  | -0.032227307 | 0.281117031 | 1.17E-01 | 3.43E-01 | 1.00E+00 |
| ENSG00000214660.6_SLC29A4P.  | ENSG00000160789.18_LMNA | 0.01653  | -0.143044038 | 0.175272538 | 8.40E-01 | 9.38E-01 | 1.00E+00 |
| ENSG00000241525.4_AC108004.  | ENSG00000160789.18_LMNA | 0.11299  | -0.047055987 | 0.26738213  | 1.66E-01 | 4.23E-01 | 1.00E+00 |
| ENSG00000279106.1_RP11-426C  | ENSG00000160789.18_LMNA | 0.09304  | -0.067152538 | 0.248561744 | 2.54E-01 | 5.36E-01 | 1.00E+00 |
| ENSG00000204183.1_GDF5OS     | ENSG00000160789.18_LMNA | 0.02838  | -0.131417784 | 0.186733726 | 7.29E-01 | 8.85E-01 | 1.00E+00 |
| ENSG00000237862.1_RP1-63G5.  | ENSG00000160789.18_LMNA | -0.13491 | -0.287926816 | 0.024823715 | 9.75E-02 | 3.07E-01 | 1.00E+00 |
| ENSG00000253213.1_RP11-546B  | ENSG00000160789.18_LMNA | -0.12142 | -0.275300568 | 0.038523849 | 1.36E-01 | 3.76E-01 | 1.00E+00 |
| ENSG00000224809.2_BEND3P2    | ENSG00000160789.18_LMNA | -0.01812 | -0.176814222 | 0.141485247 | 8.25E-01 | 9.31E-01 | 1.00E+00 |
| ENSG00000230450.1_NEK2P4     | ENSG00000160789.18_LMNA | 0.04931  | -0.110758858 | 0.206887895 | 5.46E-01 | 7.84E-01 | 1.00E+00 |
| ENSG00000250374.3_TRIM75P    | ENSG00000160789.18_LMNA | -0.05277 | -0.21020527  | 0.107331883 | 5.18E-01 | 7.65E-01 | 1.00E+00 |
| ENSG00000242550.4_SERPINB1   | ENSG00000160789.18_LMNA | -0.00684 | -0.165859814 | 0.152527072 | 9.33E-01 | 9.74E-01 | 1.00E+00 |
| ENSG00000268864.3_CTB-167G5  | ENSG00000160789.18_LMNA | 0.019    | -0.140628346 | 0.177661054 | 8.16E-01 | 9.28E-01 | 1.00E+00 |
| ENSG00000259002.2_RP11-671J  | ENSG00000160789.18_LMNA | -0.09237 | -0.247925913 | 0.067827039 | 2.58E-01 | 5.40E-01 | 1.00E+00 |
| ENSG00000197595.3_ATP11AUN   | ENSG00000160789.18_LMNA | -0.00045 | -0.159634807 | 0.158766536 | 9.96E-01 | 9.98E-01 | 1.00E+00 |
| ENSG00000224458.3_GUSBP6     | ENSG00000160789.18_LMNA | -0.03743 | -0.195462167 | 0.122504537 | 6.47E-01 | 8.43E-01 | 1.00E+00 |
| ENSG00000277297.1_ATP5A1P1   | ENSG00000160789.18_LMNA | 0.01303  | -0.146472217 | 0.171876479 | 8.73E-01 | 9.51E-01 | 1.00E+00 |
| ENSG00000237206.1_IMPDP1P4   | ENSG00000160789.18_LMNA | 0.04691  | -0.113139285 | 0.204579289 | 5.66E-01 | 7.97E-01 | 1.00E+00 |

|                              |                         |          |              |             |          |          |          |
|------------------------------|-------------------------|----------|--------------|-------------|----------|----------|----------|
| ENSG00000279433.1_RP11-4B16  | ENSG00000160789.18_LMNA | 0.09767  | -0.062499256 | 0.252940846 | 2.31E-01 | 5.09E-01 | 1.00E+00 |
| ENSG00000264895.1_RP11-421E  | ENSG00000160789.18_LMNA | 0.00409  | -0.155215015 | 0.163181206 | 9.60E-01 | 9.84E-01 | 1.00E+00 |
| ENSG00000225929.1_AC000036.4 | ENSG00000160789.18_LMNA | 0.1347   | -0.02503964  | 0.287728656 | 9.80E-02 | 3.08E-01 | 1.00E+00 |
| ENSG00000274979.1_RP11-1143  | ENSG00000160789.18_LMNA | 0.00449  | -0.154823229 | 0.163571924 | 9.56E-01 | 9.82E-01 | 1.00E+00 |
| ENSG00000197421.8_GGT3P      | ENSG00000160789.18_LMNA | -0.13889 | -0.291643515 | 0.020768399 | 8.79E-02 | 2.88E-01 | 1.00E+00 |
| ENSG00000260417.1_CTD-2542L  | ENSG00000160789.18_LMNA | -0.03216 | -0.190382422 | 0.127698081 | 6.94E-01 | 8.69E-01 | 1.00E+00 |
| ENSG00000184507.14_NUTM1     | ENSG00000160789.18_LMNA | -0.01288 | -0.171727358 | 0.146622574 | 8.75E-01 | 9.51E-01 | 1.00E+00 |
| ENSG00000252866.1_RNA5SP24   | ENSG00000160789.18_LMNA | 0.05467  | -0.105451919 | 0.212022011 | 5.04E-01 | 7.55E-01 | 1.00E+00 |
| ENSG00000265407.1_MIR4324    | ENSG00000160789.18_LMNA | -0.08919 | -0.24491099  | 0.0710214   | 2.75E-01 | 5.59E-01 | 1.00E+00 |
| ENSG00000265717.1_RP11-94B1  | ENSG00000160789.18_LMNA | -0.22292 | -0.369020107 | -0.0660589  | 5.77E-03 | 4.37E-02 | 1.00E+00 |
| ENSG00000207047.2_SNORD51    | ENSG00000160789.18_LMNA | -0.03937 | -0.19733742  | 0.120582862 | 6.30E-01 | 8.34E-01 | 1.00E+00 |
| ENSG00000258116.1_RP11-493L  | ENSG00000160789.18_LMNA | -0.06215 | -0.219181515 | 0.0980211   | 4.47E-01 | 7.13E-01 | 1.00E+00 |
| ENSG00000211750.2_TRBV24-1   | ENSG00000160789.18_LMNA | 0.00808  | -0.151317835 | 0.167063321 | 9.21E-01 | 9.70E-01 | 1.00E+00 |
| ENSG00000252172.1_RNU6-720F  | ENSG00000160789.18_LMNA | -0.24246 | -0.386736256 | -0.08660605 | 2.62E-03 | 2.40E-02 | 1.00E+00 |
| ENSG00000277740.1_Metazoa_SI | ENSG00000160789.18_LMNA | -0.33182 | -0.466383735 | -0.1822469  | 2.97E-05 | 7.07E-04 | 1.00E+00 |
| ENSG00000232879.2_RP11-544M  | ENSG00000160789.18_LMNA | 0.21897  | 0.06192827   | 0.365431816 | 6.72E-03 | 4.89E-02 | 1.00E+00 |
| ENSG00000199627.1_RNU6-1010  | ENSG00000160789.18_LMNA | 0.14882  | -0.010632509 | 0.30089199  | 6.73E-02 | 2.43E-01 | 1.00E+00 |
| ENSG00000223086.1_RNA5SP15   | ENSG00000160789.18_LMNA | -0.03829 | -0.19628959  | 0.121656925 | 6.40E-01 | 8.39E-01 | 1.00E+00 |
| ENSG00000201944.1_SNORA72    | ENSG00000160789.18_LMNA | 0.0315   | -0.128342901 | 0.18975054  | 7.00E-01 | 8.72E-01 | 1.00E+00 |
| ENSG00000280744.1_LINC01173  | ENSG00000160789.18_LMNA | 0.19251  | 0.034357697  | 0.341247916 | 1.75E-02 | 9.80E-02 | 1.00E+00 |
| ENSG00000237626.1_RP11-406A  | ENSG00000160789.18_LMNA | -0.26038 | -0.402880188 | -0.10555477 | 1.20E-03 | 1.33E-02 | 1.00E+00 |
| ENSG00000263655.1_RP11-25L3  | ENSG00000160789.18_LMNA | 0.06396  | -0.096218816 | 0.220912861 | 4.34E-01 | 7.03E-01 | 1.00E+00 |
| ENSG00000230287.3_RP11-305E  | ENSG00000160789.18_LMNA | 1.35E-06 | -0.159199382 | 0.159202022 | 1.00E+00 | 1.00E+00 | 1.00E+00 |
| ENSG00000223336.1_RNU2-6P    | ENSG00000160789.18_LMNA | 0.11686  | -0.043145767 | 0.271016375 | 1.52E-01 | 4.00E-01 | 1.00E+00 |
| ENSG00000269099.2_LSP1P1     | ENSG00000160789.18_LMNA | 0.14758  | -0.011895447 | 0.299742812 | 6.96E-02 | 2.49E-01 | 1.00E+00 |
| ENSG00000266187.2_RN7SL480F  | ENSG00000160789.18_LMNA | -0.0072  | -0.166213099 | 0.152172204 | 9.30E-01 | 9.73E-01 | 1.00E+00 |
| ENSG00000251603.1_RP11-164P  | ENSG00000160789.18_LMNA | -0.03656 | -0.194626172 | 0.123360458 | 6.55E-01 | 8.47E-01 | 1.00E+00 |
| ENSG00000243870.3_RN7SL236F  | ENSG00000160789.18_LMNA | 0.18747  | 0.02913456   | 0.336620133 | 2.07E-02 | 1.11E-01 | 1.00E+00 |
| ENSG00000254328.1 CTC-308K2  | ENSG00000160789.18_LMNA | -0.03427 | -0.192422913 | 0.125613972 | 6.75E-01 | 8.58E-01 | 1.00E+00 |
| ENSG00000279720.1_bP-2171C2  | ENSG00000160789.18_LMNA | -0.12959 | -0.282954653 | 0.030232828 | 1.12E-01 | 3.33E-01 | 1.00E+00 |
| ENSG00000272366.1_RP11-573G  | ENSG00000160789.18_LMNA | 0.06608  | -0.094113901 | 0.222932399 | 4.19E-01 | 6.91E-01 | 1.00E+00 |
| ENSG00000241693.2_RN7SL704F  | ENSG00000160789.18_LMNA | 0.0437   | -0.116311469 | 0.201497313 | 5.93E-01 | 8.12E-01 | 1.00E+00 |
| ENSG00000230621.1_AC080002.1 | ENSG00000160789.18_LMNA | -0.03315 | -0.191344735 | 0.126715547 | 6.85E-01 | 8.63E-01 | 1.00E+00 |

|                              |                         |          |              |             |          |          |          |
|------------------------------|-------------------------|----------|--------------|-------------|----------|----------|----------|
| ENSG00000228292.1_RP11-220I1 | ENSG00000160789.18_LMNA | -0.02231 | -0.180867812 | 0.137379134 | 7.85E-01 | 9.12E-01 | 1.00E+00 |
| ENSG00000237259.1_RP4-568F9  | ENSG00000160789.18_LMNA | 0.07475  | -0.085465831 | 0.231201239 | 3.60E-01 | 6.42E-01 | 1.00E+00 |
| ENSG00000232487.1_RASA3-IT1  | ENSG00000160789.18_LMNA | -0.16243 | -0.313526685 | -0.00331876 | 4.56E-02 | 1.89E-01 | 1.00E+00 |
| ENSG00000232983.2_RP11-296L  | ENSG00000160789.18_LMNA | -0.03456 | -0.192698914 | 0.125331856 | 6.73E-01 | 8.56E-01 | 1.00E+00 |
| ENSG00000258408.1_NT5CP2     | ENSG00000160789.18_LMNA | 0.08475  | -0.075468507 | 0.240703492 | 2.99E-01 | 5.86E-01 | 1.00E+00 |
| ENSG00000280936.1_RP11-358D  | ENSG00000160789.18_LMNA | -0.2108  | -0.357987224 | -0.05339152 | 9.14E-03 | 6.14E-02 | 1.00E+00 |
| ENSG00000267143.1_RP11-677O  | ENSG00000160789.18_LMNA | 0.10001  | -0.06015325  | 0.255143732 | 2.20E-01 | 4.95E-01 | 1.00E+00 |
| ENSG00000224649.1_AF124730.4 | ENSG00000160789.18_LMNA | 0.17478  | 0.016025205  | 0.32493924  | 3.13E-02 | 1.47E-01 | 1.00E+00 |
| ENSG00000271182.1_RP11-678G  | ENSG00000160789.18_LMNA | -0.04439 | -0.202157472 | 0.115632533 | 5.87E-01 | 8.08E-01 | 1.00E+00 |
| ENSG00000257456.1_RP11-310I2 | ENSG00000160789.18_LMNA | 0.04755  | -0.112499671 | 0.205199953 | 5.61E-01 | 7.93E-01 | 1.00E+00 |
| ENSG00000258331.1_RP11-118A  | ENSG00000160789.18_LMNA | 0.04689  | -0.113157292 | 0.204561812 | 5.66E-01 | 7.97E-01 | 1.00E+00 |
| ENSG00000260466.1_RP4-536B2  | ENSG00000160789.18_LMNA | -0.03341 | -0.191596398 | 0.126458493 | 6.83E-01 | 8.62E-01 | 1.00E+00 |
| ENSG00000235982.1_           | ENSG00000160789.18_LMNA | 0.0354   | -0.124506163 | 0.193506419 | 6.65E-01 | 8.52E-01 | 1.00E+00 |
| ENSG00000211777.2_TRAV3      | ENSG00000160789.18_LMNA | 0.07144  | -0.088771123 | 0.228046281 | 3.82E-01 | 6.60E-01 | 1.00E+00 |
| ENSG00000233661.1_SPIN4-AS1  | ENSG00000160789.18_LMNA | 0.07185  | -0.088357682 | 0.228441282 | 3.79E-01 | 6.58E-01 | 1.00E+00 |
| ENSG00000248802.1_RP11-184M  | ENSG00000160789.18_LMNA | 0.05925  | -0.100903114 | 0.216408778 | 4.68E-01 | 7.29E-01 | 1.00E+00 |
| ENSG00000233306.2_TRGV2      | ENSG00000160789.18_LMNA | 0.12324  | -0.036676135 | 0.277009788 | 1.30E-01 | 3.66E-01 | 1.00E+00 |
| ENSG00000256564.1_RP11-424M  | ENSG00000160789.18_LMNA | 0.16458  | 0.005521078  | 0.315511181 | 4.28E-02 | 1.81E-01 | 1.00E+00 |
| ENSG00000270883.1_RP11-461L  | ENSG00000160789.18_LMNA | -0.07358 | -0.230089449 | 0.086631394 | 3.68E-01 | 6.48E-01 | 1.00E+00 |
| ENSG00000279718.1_SNX18P12   | ENSG00000160789.18_LMNA | 0.05555  | -0.104572147 | 0.212871442 | 4.97E-01 | 7.51E-01 | 1.00E+00 |
| ENSG00000240677.1_MYL6P4     | ENSG00000160789.18_LMNA | -0.00654 | -0.165566908 | 0.152821229 | 9.36E-01 | 9.75E-01 | 1.00E+00 |
| ENSG00000270585.1_RP11-568G  | ENSG00000160789.18_LMNA | 0.07854  | -0.081679945 | 0.234806768 | 3.36E-01 | 6.22E-01 | 1.00E+00 |
| ENSG00000223786.1_RP11-554D  | ENSG00000160789.18_LMNA | 0.00888  | -0.150531703 | 0.167845219 | 9.14E-01 | 9.67E-01 | 1.00E+00 |
| ENSG00000258449.1_RP11-713N  | ENSG00000160789.18_LMNA | -0.19351 | -0.342173912 | -0.03540484 | 1.69E-02 | 9.57E-02 | 1.00E+00 |
| ENSG00000267295.1_CTD-2319I1 | ENSG00000160789.18_LMNA | -0.1203  | -0.274250348 | 0.039658102 | 1.40E-01 | 3.81E-01 | 1.00E+00 |
| ENSG00000223619.1_MTCO1P17   | ENSG00000160789.18_LMNA | -0.07647 | -0.23283646  | 0.083749945 | 3.49E-01 | 6.33E-01 | 1.00E+00 |
| ENSG00000236005.1_RP11-438P  | ENSG00000160789.18_LMNA | -0.07141 | -0.228020058 | 0.088798566 | 3.82E-01 | 6.61E-01 | 1.00E+00 |
| ENSG00000094796.4_KRT31      | ENSG00000160789.18_LMNA | -0.22844 | -0.374039738 | -0.07185469 | 4.64E-03 | 3.70E-02 | 1.00E+00 |
| ENSG00000178919.8_FOXE1      | ENSG00000160789.18_LMNA | -0.00087 | -0.160049099 | 0.15835207  | 9.92E-01 | 9.97E-01 | 1.00E+00 |
| ENSG00000254900.1_RP11-152H  | ENSG00000160789.18_LMNA | 0.04386  | -0.116153371 | 0.201651064 | 5.92E-01 | 8.11E-01 | 1.00E+00 |
| ENSG00000261243.1_RP11-517C  | ENSG00000160789.18_LMNA | 0.04607  | -0.113966836 | 0.203775879 | 5.73E-01 | 8.01E-01 | 1.00E+00 |
| ENSG00000278716.1_LA16c-352F | ENSG00000160789.18_LMNA | -0.007   | -0.166014054 | 0.152372151 | 9.32E-01 | 9.73E-01 | 1.00E+00 |
| ENSG00000225606.1_AC005281.1 | ENSG00000160789.18_LMNA | -0.02903 | -0.187364839 | 0.130775029 | 7.23E-01 | 8.83E-01 | 1.00E+00 |

|                              |                         |          |              |             |          |          |          |
|------------------------------|-------------------------|----------|--------------|-------------|----------|----------|----------|
| ENSG00000249056.1_RP11-326I1 | ENSG00000160789.18_LMNA | -0.06057 | -0.217670797 | 0.099592017 | 4.59E-01 | 7.22E-01 | 1.00E+00 |
| ENSG00000218965.1_NACAP7     | ENSG00000160789.18_LMNA | -0.1358  | -0.288761249 | 0.023914154 | 9.53E-02 | 3.02E-01 | 1.00E+00 |
| ENSG00000260411.4_RP11-420N  | ENSG00000160789.18_LMNA | -0.17314 | -0.323423504 | -0.01433186 | 3.29E-02 | 1.52E-01 | 1.00E+00 |
| ENSG00000226676.1_RP11-589B  | ENSG00000160789.18_LMNA | -0.13477 | -0.287793876 | 0.024968576 | 9.78E-02 | 3.08E-01 | 1.00E+00 |
| ENSG00000243508.1_RP11-775J  | ENSG00000160789.18_LMNA | 0.12903  | -0.03080334  | 0.282429244 | 1.13E-01 | 3.36E-01 | 1.00E+00 |
| ENSG00000239608.1_RUVBL1-A   | ENSG00000160789.18_LMNA | 0.03382  | -0.126060885 | 0.191985585 | 6.79E-01 | 8.60E-01 | 1.00E+00 |
| ENSG00000224017.1_LINC01449  | ENSG00000160789.18_LMNA | 0.03487  | -0.125027477 | 0.192996637 | 6.70E-01 | 8.55E-01 | 1.00E+00 |
| ENSG00000223850.1_MYCNUT     | ENSG00000160789.18_LMNA | -0.06051 | -0.217609719 | 0.099655495 | 4.59E-01 | 7.23E-01 | 1.00E+00 |
| ENSG00000260972.1_RP1-58B11  | ENSG00000160789.18_LMNA | -0.21894 | -0.365405371 | -0.06189787 | 6.73E-03 | 4.89E-02 | 1.00E+00 |
| ENSG00000268738.2_HSFX2      | ENSG00000160789.18_LMNA | -0.11568 | -0.269908229 | 0.044339083 | 1.56E-01 | 4.07E-01 | 1.00E+00 |
| ENSG00000256081.2_AE000658.2 | ENSG00000160789.18_LMNA | 0.15748  | -0.00176415  | 0.308936129 | 5.27E-02 | 2.08E-01 | 1.00E+00 |
| ENSG00000158874.10_APOA2     | ENSG00000160789.18_LMNA | 0.17326  | 0.0144554    | 0.323534141 | 3.28E-02 | 1.52E-01 | 1.00E+00 |
| ENSG00000248305.1_RP11-310A  | ENSG00000160789.18_LMNA | -0.00491 | -0.163978044 | 0.154415892 | 9.52E-01 | 9.81E-01 | 1.00E+00 |
| ENSG00000056291.16_NPFFR2    | ENSG00000160789.18_LMNA | -0.06173 | -0.218780574 | 0.098438171 | 4.50E-01 | 7.16E-01 | 1.00E+00 |
| ENSG00000260385.1_RP11-450H  | ENSG00000160789.18_LMNA | -0.12146 | -0.275339502 | 0.038481784 | 1.36E-01 | 3.75E-01 | 1.00E+00 |
| ENSG00000203335.4_AC006019.2 | ENSG00000160789.18_LMNA | 0.10557  | -0.054544562 | 0.260397022 | 1.96E-01 | 4.64E-01 | 1.00E+00 |
| ENSG00000217783.2_LDHAL6FP   | ENSG00000160789.18_LMNA | -0.10538 | -0.260211442 | 0.054743036 | 1.96E-01 | 4.66E-01 | 1.00E+00 |
| ENSG00000249558.1_RCC2P4     | ENSG00000160789.18_LMNA | 0.02344  | -0.13626827  | 0.181962611 | 7.74E-01 | 9.07E-01 | 1.00E+00 |
| ENSG00000268472.2_RP11-356J  | ENSG00000160789.18_LMNA | 0.00316  | -0.156122184 | 0.162276126 | 9.69E-01 | 9.88E-01 | 1.00E+00 |
| ENSG00000259188.4_CTD-2647E  | ENSG00000160789.18_LMNA | -0.16791 | -0.318591694 | -0.00894568 | 3.87E-02 | 1.69E-01 | 1.00E+00 |
| ENSG00000214961.2_RP11-355K  | ENSG00000160789.18_LMNA | -0.15888 | -0.310233172 | 0.00032962  | 5.06E-02 | 2.03E-01 | 1.00E+00 |
| ENSG00000243130.6_PSG11      | ENSG00000160789.18_LMNA | 0.06704  | -0.093153916 | 0.223852544 | 4.12E-01 | 6.86E-01 | 1.00E+00 |
| ENSG00000258629.1_CTD-2014B  | ENSG00000160789.18_LMNA | -0.06041 | -0.21751462  | 0.099754327 | 4.60E-01 | 7.23E-01 | 1.00E+00 |
| ENSG00000239696.3_RP11-397J  | ENSG00000160789.18_LMNA | -0.00539 | -0.164445607 | 0.153946795 | 9.47E-01 | 9.79E-01 | 1.00E+00 |
| ENSG00000226717.2_PTPRD-AS   | ENSG00000160789.18_LMNA | -0.05321 | -0.210630736 | 0.106891815 | 5.15E-01 | 7.63E-01 | 1.00E+00 |
| ENSG00000269911.1_RP1-172N1  | ENSG00000160789.18_LMNA | -0.10651 | -0.261280271 | 0.053599604 | 1.92E-01 | 4.59E-01 | 1.00E+00 |
| ENSG00000154611.13_PSMAB     | ENSG00000160789.18_LMNA | -0.05086 | -0.208369379 | 0.109229361 | 5.34E-01 | 7.76E-01 | 1.00E+00 |
| ENSG00000241469.6_LINC00635  | ENSG00000160789.18_LMNA | -0.17447 | -0.324651839 | -0.01570399 | 3.16E-02 | 1.48E-01 | 1.00E+00 |
| ENSG00000232486.1_RP11-18B3  | ENSG00000160789.18_LMNA | 0.09603  | -0.064147091 | 0.251391581 | 2.39E-01 | 5.18E-01 | 1.00E+00 |
| ENSG00000259458.1_MGC15885   | ENSG00000160789.18_LMNA | -0.0696  | -0.226292928 | 0.090605012 | 3.94E-01 | 6.72E-01 | 1.00E+00 |
| ENSG00000184906.8_AC129778.2 | ENSG00000160789.18_LMNA | -0.08373 | -0.239739114 | 0.076486036 | 3.05E-01 | 5.92E-01 | 1.00E+00 |
| ENSG00000226057.5_PHF2P2     | ENSG00000160789.18_LMNA | -0.0548  | -0.212145568 | 0.10532398  | 5.03E-01 | 7.54E-01 | 1.00E+00 |
| ENSG00000231924.8_PSG1       | ENSG00000160789.18_LMNA | 0.00208  | -0.157168269 | 0.161231787 | 9.80E-01 | 9.92E-01 | 1.00E+00 |

|                              |                         |          |              |             |          |          |          |
|------------------------------|-------------------------|----------|--------------|-------------|----------|----------|----------|
| ENSG00000167798.15_C3P1      | ENSG00000160789.18_LMNA | 0.02496  | -0.13478102  | 0.183427119 | 7.60E-01 | 9.00E-01 | 1.00E+00 |
| ENSG00000263590.2_RP11-403I1 | ENSG00000160789.18_LMNA | -0.08975 | -0.245439885 | 0.070461495 | 2.72E-01 | 5.56E-01 | 1.00E+00 |
| ENSG00000211964.3_IGHV3-48   | ENSG00000160789.18_LMNA | 0.01131  | -0.148159238 | 0.170202482 | 8.90E-01 | 9.57E-01 | 1.00E+00 |
| ENSG00000207971.1_MIR125B1   | ENSG00000160789.18_LMNA | 0.01877  | -0.140855345 | 0.177436768 | 8.18E-01 | 9.29E-01 | 1.00E+00 |
| ENSG00000280746.1_           | ENSG00000160789.18_LMNA | -0.03067 | -0.188950968 | 0.12915846  | 7.08E-01 | 8.76E-01 | 1.00E+00 |
| ENSG00000222601.1_Y_RNA      | ENSG00000160789.18_LMNA | 0.04786  | -0.112193795 | 0.205496676 | 5.58E-01 | 7.91E-01 | 1.00E+00 |
| ENSG00000215973.1_MIR933     | ENSG00000160789.18_LMNA | -0.00846 | -0.167439028 | 0.150940144 | 9.18E-01 | 9.69E-01 | 1.00E+00 |
| ENSG00000275467.1_RP11-240G  | ENSG00000160789.18_LMNA | 0.06629  | -0.093899716 | 0.223137744 | 4.17E-01 | 6.89E-01 | 1.00E+00 |
| ENSG00000229629.1_RP11-302K  | ENSG00000160789.18_LMNA | -0.06271 | -0.219717829 | 0.097463034 | 4.43E-01 | 7.10E-01 | 1.00E+00 |
| ENSG00000241825.2_RPL7P42    | ENSG00000160789.18_LMNA | 0.04243  | -0.11756968  | 0.200273136 | 6.04E-01 | 8.18E-01 | 1.00E+00 |
| ENSG00000266297.1_MIR744     | ENSG00000160789.18_LMNA | -0.07618 | -0.232559478 | 0.084040722 | 3.51E-01 | 6.35E-01 | 1.00E+00 |
| ENSG00000264916.2_RN7SL230F  | ENSG00000160789.18_LMNA | -0.11144 | -0.265924379 | 0.048621733 | 1.72E-01 | 4.31E-01 | 1.00E+00 |
| ENSG00000206832.1_RNU6V      | ENSG00000160789.18_LMNA | 0.01564  | -0.143916683 | 0.174408787 | 8.48E-01 | 9.41E-01 | 1.00E+00 |
| ENSG00000252546.1_RNA5SP46   | ENSG00000160789.18_LMNA | -0.04119 | -0.199083156 | 0.118791766 | 6.14E-01 | 8.25E-01 | 1.00E+00 |
| ENSG00000234523.1_NDUFB1P2   | ENSG00000160789.18_LMNA | -0.064   | -0.220948601 | 0.09618159  | 4.33E-01 | 7.03E-01 | 1.00E+00 |
| ENSG00000276213.1_Metazoa_SI | ENSG00000160789.18_LMNA | 0.09041  | -0.069796696 | 0.246067621 | 2.68E-01 | 5.52E-01 | 1.00E+00 |
| ENSG00000244671.3_RN7SL280F  | ENSG00000160789.18_LMNA | -0.05694 | -0.21419877  | 0.103196414 | 4.86E-01 | 7.43E-01 | 1.00E+00 |
| ENSG00000263969.2_RN7SL678F  | ENSG00000160789.18_LMNA | 0.19192  | 0.033748178  | 0.340708638 | 1.79E-02 | 9.94E-02 | 1.00E+00 |
| ENSG00000253832.1_CTD-2168K  | ENSG00000160789.18_LMNA | 0.08703  | -0.073187503 | 0.242863082 | 2.86E-01 | 5.72E-01 | 1.00E+00 |
| ENSG00000228423.2_RP4-633I8. | ENSG00000160789.18_LMNA | -0.03094 | -0.189209014 | 0.128895301 | 7.05E-01 | 8.74E-01 | 1.00E+00 |
| ENSG00000253750.1_RP11-21C4  | ENSG00000160789.18_LMNA | 0.00185  | -0.15739221  | 0.161008126 | 9.82E-01 | 9.93E-01 | 1.00E+00 |
| ENSG00000211725.3_TRBV5-5    | ENSG00000160789.18_LMNA | -0.03764 | -0.195667627 | 0.122294106 | 6.45E-01 | 8.42E-01 | 1.00E+00 |
| ENSG00000233114.2_RP4-533D7  | ENSG00000160789.18_LMNA | -0.0373  | -0.195339195 | 0.122630469 | 6.48E-01 | 8.44E-01 | 1.00E+00 |
| ENSG00000267220.1_CTC-260E6  | ENSG00000160789.18_LMNA | -0.03849 | -0.196482552 | 0.121459187 | 6.38E-01 | 8.38E-01 | 1.00E+00 |
| ENSG00000237005.1_HIGD1AP1   | ENSG00000160789.18_LMNA | -0.02699 | -0.185393581 | 0.132781763 | 7.41E-01 | 8.91E-01 | 1.00E+00 |
| ENSG00000278147.1_CTD-3028N  | ENSG00000160789.18_LMNA | -0.00088 | -0.160056726 | 0.158344438 | 9.91E-01 | 9.97E-01 | 1.00E+00 |
| ENSG00000213877.3_CFL1P7     | ENSG00000160789.18_LMNA | 0.13777  | -0.021908327 | 0.290599723 | 9.05E-02 | 2.93E-01 | 1.00E+00 |
| ENSG00000248197.1_LINC00290  | ENSG00000160789.18_LMNA | -0.17354 | -0.323796795 | -0.01474873 | 3.25E-02 | 1.51E-01 | 1.00E+00 |
| ENSG00000228973.1_AC009955.I | ENSG00000160789.18_LMNA | 0.17625  | 0.01753996   | 0.326293772 | 2.99E-02 | 1.43E-01 | 1.00E+00 |
| ENSG00000248478.2_RP11-3G20  | ENSG00000160789.18_LMNA | -0.13291 | -0.286054174 | 0.026863075 | 1.03E-01 | 3.17E-01 | 1.00E+00 |
| ENSG00000231062.1_AC103563.I | ENSG00000160789.18_LMNA | -0.14519 | -0.297516254 | 0.01433959  | 7.43E-02 | 2.60E-01 | 1.00E+00 |
| ENSG00000273997.1_RP11-361F  | ENSG00000160789.18_LMNA | 0.04791  | -0.11215026  | 0.205538903 | 5.58E-01 | 7.91E-01 | 1.00E+00 |
| ENSG00000243871.3_RN7SL487F  | ENSG00000160789.18_LMNA | 0.06451  | -0.095674953 | 0.221434925 | 4.30E-01 | 7.00E-01 | 1.00E+00 |

|                              |                         |          |              |             |          |          |          |
|------------------------------|-------------------------|----------|--------------|-------------|----------|----------|----------|
| ENSG00000234559.1_AC079776.  | ENSG00000160789.18_LMNA | 0.06891  | -0.09129576  | 0.225631981 | 3.99E-01 | 6.76E-01 | 1.00E+00 |
| ENSG00000231098.1_AC008154.  | ENSG00000160789.18_LMNA | 0.14169  | -0.017912049 | 0.294255711 | 8.16E-02 | 2.76E-01 | 1.00E+00 |
| ENSG00000260519.1_RP11-109E  | ENSG00000160789.18_LMNA | -0.13791 | -0.290730495 | 0.021765554 | 9.02E-02 | 2.92E-01 | 1.00E+00 |
| ENSG00000230425.1_RSU1P1     | ENSG00000160789.18_LMNA | 0.07813  | -0.08208991  | 0.234416754 | 3.39E-01 | 6.24E-01 | 1.00E+00 |
| ENSG00000240790.1_AC073934.  | ENSG00000160789.18_LMNA | -0.05421 | -0.211583225 | 0.105906183 | 5.07E-01 | 7.57E-01 | 1.00E+00 |
| ENSG00000230804.2_C2orf27AP3 | ENSG00000160789.18_LMNA | 0.02764  | -0.132137813 | 0.186026427 | 7.35E-01 | 8.89E-01 | 1.00E+00 |
| ENSG00000277543.1_RP11-452L  | ENSG00000160789.18_LMNA | -0.04378 | -0.201572264 | 0.116234401 | 5.92E-01 | 8.11E-01 | 1.00E+00 |
| ENSG00000231482.2_AC141930.  | ENSG00000160789.18_LMNA | 0.22467  | 0.067895189  | 0.370612397 | 5.39E-03 | 4.15E-02 | 1.00E+00 |
| ENSG00000236867.1_RP3-522J7  | ENSG00000160789.18_LMNA | 0.05022  | -0.109854731 | 0.207763816 | 5.39E-01 | 7.79E-01 | 1.00E+00 |
| ENSG00000227083.1_L29074.3   | ENSG00000160789.18_LMNA | -0.07558 | -0.231990696 | 0.084637665 | 3.55E-01 | 6.38E-01 | 1.00E+00 |
| ENSG00000259889.1_RP11-315F  | ENSG00000160789.18_LMNA | -0.14754 | -0.299705341 | 0.01193661  | 6.97E-02 | 2.49E-01 | 1.00E+00 |
| ENSG00000249125.1_RP11-381N  | ENSG00000160789.18_LMNA | 0.21982  | 0.062817834  | 0.366205345 | 6.51E-03 | 4.78E-02 | 1.00E+00 |
| ENSG00000137077.6_CCL21      | ENSG00000160789.18_LMNA | -0.01048 | -0.169396244 | 0.148971088 | 8.98E-01 | 9.60E-01 | 1.00E+00 |
| ENSG00000225870.1_LINC00368  | ENSG00000160789.18_LMNA | -0.16201 | -0.313138304 | -0.0028881  | 4.61E-02 | 1.91E-01 | 1.00E+00 |
| ENSG00000225111.1_AC083900.  | ENSG00000160789.18_LMNA | -0.046   | -0.203704237 | 0.114040609 | 5.74E-01 | 8.01E-01 | 1.00E+00 |
| ENSG00000248757.1_CTD-2193C  | ENSG00000160789.18_LMNA | -0.05507 | -0.212406539 | 0.105053718 | 5.00E-01 | 7.53E-01 | 1.00E+00 |
| ENSG00000259396.1_RP11-16O9  | ENSG00000160789.18_LMNA | -0.20199 | -0.349936352 | -0.04420938 | 1.26E-02 | 7.72E-02 | 1.00E+00 |
| ENSG00000213147.3_RPL23AP6   | ENSG00000160789.18_LMNA | 0.09865  | -0.061518155 | 0.253862493 | 2.27E-01 | 5.03E-01 | 1.00E+00 |
| ENSG00000265908.1_RP11-20B2  | ENSG00000160789.18_LMNA | 0.05656  | -0.103568845 | 0.213839559 | 4.89E-01 | 7.45E-01 | 1.00E+00 |
| ENSG00000255165.1_CTD-2609K  | ENSG00000160789.18_LMNA | 0.08957  | -0.070639713 | 0.245271558 | 2.72E-01 | 5.57E-01 | 1.00E+00 |
| ENSG00000255125.1_RP11-685M  | ENSG00000160789.18_LMNA | 0.0357   | -0.124203984 | 0.193801833 | 6.62E-01 | 8.51E-01 | 1.00E+00 |
| ENSG00000271977.1_AC226119.  | ENSG00000160789.18_LMNA | 0.12947  | -0.0303577   | 0.282839669 | 1.12E-01 | 3.34E-01 | 1.00E+00 |
| ENSG00000213155.4_RP11-252O  | ENSG00000160789.18_LMNA | -0.06301 | -0.22000067  | 0.097168641 | 4.41E-01 | 7.08E-01 | 1.00E+00 |
| ENSG00000273165.1_RP11-1057I | ENSG00000160789.18_LMNA | -0.01223 | -0.171095781 | 0.14725922  | 8.81E-01 | 9.54E-01 | 1.00E+00 |
| ENSG00000256100.1_AP000721.  | ENSG00000160789.18_LMNA | -0.10174 | -0.256781007 | 0.058407342 | 2.12E-01 | 4.86E-01 | 1.00E+00 |
| ENSG00000254018.1_RP11-785H  | ENSG00000160789.18_LMNA | -0.04669 | -0.204368052 | 0.113356912 | 5.68E-01 | 7.98E-01 | 1.00E+00 |
| ENSG00000258400.1_RP11-831F  | ENSG00000160789.18_LMNA | -0.09121 | -0.246822176 | 0.068997218 | 2.64E-01 | 5.47E-01 | 1.00E+00 |
| ENSG00000131982.5_UBE2L2     | ENSG00000160789.18_LMNA | 0.10336  | -0.056773129 | 0.2583119   | 2.05E-01 | 4.77E-01 | 1.00E+00 |
| ENSG00000237337.1_RP11-567C  | ENSG00000160789.18_LMNA | -0.046   | -0.203709706 | 0.114034977 | 5.74E-01 | 8.01E-01 | 1.00E+00 |
| ENSG00000265402.1_RSL24D1P1  | ENSG00000160789.18_LMNA | 0.00844  | -0.150963239 | 0.167416058 | 9.18E-01 | 9.69E-01 | 1.00E+00 |
| ENSG00000249734.1_RP11-332J  | ENSG00000160789.18_LMNA | 0.07238  | -0.08783123  | 0.228944103 | 3.76E-01 | 6.56E-01 | 1.00E+00 |
| ENSG00000230435.1_AC004160.  | ENSG00000160789.18_LMNA | -0.09849 | -0.253709495 | 0.061681065 | 2.27E-01 | 5.04E-01 | 1.00E+00 |
| ENSG00000241183.1_RP11-106J  | ENSG00000160789.18_LMNA | -0.12431 | -0.278012437 | 0.035591246 | 1.27E-01 | 3.61E-01 | 1.00E+00 |

|                              |                         |          |              |             |          |          |          |
|------------------------------|-------------------------|----------|--------------|-------------|----------|----------|----------|
| ENSG00000237845.1_RP5-940F7  | ENSG00000160789.18_LMNA | 0.32131  | 0.17084876   | 0.45712743  | 5.43E-05 | 1.15E-03 | 1.00E+00 |
| ENSG00000135346.7_CGA        | ENSG00000160789.18_LMNA | -0.16658 | -0.317368342 | -0.00758481 | 4.02E-02 | 1.74E-01 | 1.00E+00 |
| ENSG00000213264.3_NIP7P2     | ENSG00000160789.18_LMNA | -0.04477 | -0.202531499 | 0.115247735 | 5.84E-01 | 8.07E-01 | 1.00E+00 |
| ENSG00000196260.3_SFTA2      | ENSG00000160789.18_LMNA | -0.03714 | -0.195186789 | 0.122786531 | 6.50E-01 | 8.44E-01 | 1.00E+00 |
| ENSG00000253217.1_KB-1991G8  | ENSG00000160789.18_LMNA | -0.10384 | -0.25875911  | 0.056295417 | 2.03E-01 | 4.74E-01 | 1.00E+00 |
| ENSG00000232077.1_LINC01031  | ENSG00000160789.18_LMNA | 0.10948  | -0.05059796  | 0.264082402 | 1.79E-01 | 4.42E-01 | 1.00E+00 |
| ENSG00000259055.1_RP11-1140  | ENSG00000160789.18_LMNA | 0.01752  | -0.142077849 | 0.176228307 | 8.30E-01 | 9.34E-01 | 1.00E+00 |
| ENSG00000258580.1_RP11-320M  | ENSG00000160789.18_LMNA | 0.12466  | -0.035237447 | 0.278339268 | 1.26E-01 | 3.59E-01 | 1.00E+00 |
| ENSG00000249488.1_NACAP5     | ENSG00000160789.18_LMNA | 0.04562  | -0.114413851 | 0.203341725 | 5.77E-01 | 8.03E-01 | 1.00E+00 |
| ENSG00000214754.3_AC004870.1 | ENSG00000160789.18_LMNA | 0.00714  | -0.152231599 | 0.166153975 | 9.30E-01 | 9.73E-01 | 1.00E+00 |
| ENSG00000238069.1_RPLP0P7    | ENSG00000160789.18_LMNA | 0.09     | -0.070207658 | 0.245679601 | 2.70E-01 | 5.55E-01 | 1.00E+00 |
| ENSG00000233562.1_RP11-548N  | ENSG00000160789.18_LMNA | 0.10169  | -0.058453055 | 0.256738162 | 2.13E-01 | 4.86E-01 | 1.00E+00 |
| ENSG00000229721.3_RP11-2521  | ENSG00000160789.18_LMNA | -0.09674 | -0.252059807 | 0.063436561 | 2.36E-01 | 5.14E-01 | 1.00E+00 |
| ENSG00000253799.1_LINC01030  | ENSG00000160789.18_LMNA | 0.07992  | -0.080302023 | 0.236116889 | 3.28E-01 | 6.14E-01 | 1.00E+00 |
| ENSG00000262151.1_RP11-876N  | ENSG00000160789.18_LMNA | 0.11737  | -0.042630253 | 0.271494837 | 1.50E-01 | 3.98E-01 | 1.00E+00 |
| ENSG00000219575.1_RP1-288M2  | ENSG00000160789.18_LMNA | -0.10193 | -0.256964199 | 0.058211876 | 2.11E-01 | 4.85E-01 | 1.00E+00 |
| ENSG00000235339.1_GEMIN2P2   | ENSG00000160789.18_LMNA | 0.03706  | -0.122861662 | 0.195113412 | 6.50E-01 | 8.45E-01 | 1.00E+00 |
| ENSG00000254948.1_OR7E158P   | ENSG00000160789.18_LMNA | 0.04844  | -0.11161973  | 0.206053405 | 5.53E-01 | 7.88E-01 | 1.00E+00 |
| ENSG00000255004.1_RP1-68D18  | ENSG00000160789.18_LMNA | 0.1449   | -0.014634497 | 0.297247371 | 7.49E-02 | 2.61E-01 | 1.00E+00 |
| ENSG00000233523.1_PHBP5      | ENSG00000160789.18_LMNA | -0.00598 | -0.165021749 | 0.153368565 | 9.42E-01 | 9.77E-01 | 1.00E+00 |
| ENSG00000127362.2_TAS2R3     | ENSG00000160789.18_LMNA | -0.09793 | -0.253182152 | 0.062242443 | 2.30E-01 | 5.07E-01 | 1.00E+00 |
| ENSG00000272741.1_RP11-447L  | ENSG00000160789.18_LMNA | -0.06001 | -0.217132076 | 0.100151823 | 4.63E-01 | 7.26E-01 | 1.00E+00 |
| ENSG00000143278.3_F13B       | ENSG00000160789.18_LMNA | -0.32039 | -0.456314611 | -0.16985151 | 5.72E-05 | 1.19E-03 | 1.00E+00 |
| ENSG00000269526.1_ERVV-1     | ENSG00000160789.18_LMNA | 0.10387  | -0.056262972 | 0.25878948  | 2.03E-01 | 4.74E-01 | 1.00E+00 |
| ENSG00000164645.2_C7orf62    | ENSG00000160789.18_LMNA | 0.01325  | -0.14626377  | 0.17208319  | 8.71E-01 | 9.50E-01 | 1.00E+00 |
| ENSG00000166118.6_SPATA19    | ENSG00000160789.18_LMNA | -0.1247  | -0.278378312 | 0.035195176 | 1.26E-01 | 3.58E-01 | 1.00E+00 |
| ENSG00000177673.3_C2orf57    | ENSG00000160789.18_LMNA | 0.10921  | -0.050879615 | 0.263819694 | 1.80E-01 | 4.44E-01 | 1.00E+00 |
| ENSG00000176654.11_NANOGP1   | ENSG00000160789.18_LMNA | 0.16342  | 0.004334394  | 0.314442203 | 4.42E-02 | 1.86E-01 | 1.00E+00 |
| ENSG00000226571.1_RP11-445F  | ENSG00000160789.18_LMNA | -0.04577 | -0.203487953 | 0.114263306 | 5.76E-01 | 8.02E-01 | 1.00E+00 |
| ENSG00000171433.10_GLOD5     | ENSG00000160789.18_LMNA | -0.13252 | -0.285697248 | 0.027251482 | 1.04E-01 | 3.19E-01 | 1.00E+00 |
| ENSG00000223445.1_RPL6P21    | ENSG00000160789.18_LMNA | 0.07442  | -0.085796355 | 0.230886048 | 3.62E-01 | 6.44E-01 | 1.00E+00 |
| ENSG00000234627.3_NUS1P3     | ENSG00000160789.18_LMNA | 0.12696  | -0.03290515  | 0.280491974 | 1.19E-01 | 3.46E-01 | 1.00E+00 |
| ENSG00000258279.2_LINC00592  | ENSG00000160789.18_LMNA | -0.01161 | -0.170493853 | 0.147865734 | 8.87E-01 | 9.56E-01 | 1.00E+00 |



|                              |                         |          |              |             |          |          |          |
|------------------------------|-------------------------|----------|--------------|-------------|----------|----------|----------|
| ENSG00000260661.1_RP11-152L  | ENSG00000160789.18_LMNA | -0.0825  | -0.23857064  | 0.077718027 | 3.12E-01 | 5.99E-01 | 1.00E+00 |
| ENSG00000086548.8_CEACAM6    | ENSG00000160789.18_LMNA | -0.01875 | -0.177424649 | 0.14086761  | 8.19E-01 | 9.29E-01 | 1.00E+00 |
| ENSG00000276759.2_RP11-80I3  | ENSG00000160789.18_LMNA | -0.19674 | -0.345126924 | -0.03874868 | 1.51E-02 | 8.84E-02 | 1.00E+00 |
| ENSG00000166396.11_SERPINB7  | ENSG00000160789.18_LMNA | 0.03962  | -0.12033717  | 0.197577009 | 6.28E-01 | 8.33E-01 | 1.00E+00 |
| ENSG00000269012.2_KRT18P40   | ENSG00000160789.18_LMNA | 0.10328  | -0.056857745 | 0.258232672 | 2.05E-01 | 4.77E-01 | 1.00E+00 |
| ENSG00000257758.1_KRT18P20   | ENSG00000160789.18_LMNA | -0.04337 | -0.201180614 | 0.116637071 | 5.96E-01 | 8.13E-01 | 1.00E+00 |
| ENSG00000237223.5_SULT1C2P   | ENSG00000160789.18_LMNA | -0.05789 | -0.215112759 | 0.102248387 | 4.79E-01 | 7.37E-01 | 1.00E+00 |
| ENSG00000231128.4_RP5-1073O  | ENSG00000160789.18_LMNA | -0.04532 | -0.20305549  | 0.114708495 | 5.79E-01 | 8.04E-01 | 1.00E+00 |
| ENSG00000233272.1_PNPT1P2    | ENSG00000160789.18_LMNA | -0.12852 | -0.281947249 | 0.031326532 | 1.15E-01 | 3.38E-01 | 1.00E+00 |
| ENSG00000254967.5_           | ENSG00000160789.18_LMNA | -0.00869 | -0.167662404 | 0.150715545 | 9.15E-01 | 9.68E-01 | 1.00E+00 |
| ENSG00000225493.1_LINC01107  | ENSG00000160789.18_LMNA | 0.10876  | -0.051332303 | 0.26339736  | 1.82E-01 | 4.47E-01 | 1.00E+00 |
| ENSG00000212128.2_TAS2R13    | ENSG00000160789.18_LMNA | -0.1567  | -0.308209896 | 0.002566807 | 5.39E-02 | 2.11E-01 | 1.00E+00 |
| ENSG00000219088.1_RP3-359N1  | ENSG00000160789.18_LMNA | 0.08991  | -0.070296819 | 0.245595404 | 2.71E-01 | 5.55E-01 | 1.00E+00 |
| ENSG00000204296.10_C6orf10   | ENSG00000160789.18_LMNA | -0.02503 | -0.183504253 | 0.134702648 | 7.59E-01 | 9.00E-01 | 1.00E+00 |
| ENSG00000264630.4_PRKCA-AS   | ENSG00000160789.18_LMNA | 0.11226  | -0.047791049 | 0.266697946 | 1.69E-01 | 4.27E-01 | 1.00E+00 |
| ENSG00000232852.1_CICP4      | ENSG00000160789.18_LMNA | 0.13236  | -0.027416546 | 0.285545537 | 1.04E-01 | 3.20E-01 | 1.00E+00 |
| ENSG00000099399.5_MAGEB2     | ENSG00000160789.18_LMNA | 0.03705  | -0.122878762 | 0.195096711 | 6.50E-01 | 8.45E-01 | 1.00E+00 |
| ENSG00000279977.1_CTD-3222D  | ENSG00000160789.18_LMNA | 0.01572  | -0.143841609 | 0.174483115 | 8.48E-01 | 9.40E-01 | 1.00E+00 |
| ENSG00000268170.2_RP11-556I1 | ENSG00000160789.18_LMNA | 0.19555  | 0.037514738  | 0.344037909 | 1.58E-02 | 9.09E-02 | 1.00E+00 |
| ENSG00000267740.4_AC024592   | ENSG00000160789.18_LMNA | 0.1003   | -0.059860808 | 0.255418104 | 2.19E-01 | 4.94E-01 | 1.00E+00 |
| ENSG00000238009.5_RP11-34P1  | ENSG00000160789.18_LMNA | 0.05595  | -0.104180118 | 0.213249797 | 4.94E-01 | 7.49E-01 | 1.00E+00 |
| ENSG00000268240.1_RP11-678G  | ENSG00000160789.18_LMNA | 0.04955  | -0.110521757 | 0.207117648 | 5.44E-01 | 7.82E-01 | 1.00E+00 |
| ENSG00000181358.3_CTAGE10P   | ENSG00000160789.18_LMNA | 0.00835  | -0.151054106 | 0.167325674 | 9.19E-01 | 9.69E-01 | 1.00E+00 |
| ENSG00000260648.3_RP11-133K  | ENSG00000160789.18_LMNA | -0.08344 | -0.239458215 | 0.076782293 | 3.07E-01 | 5.93E-01 | 1.00E+00 |
| ENSG00000177947.12_ODF3      | ENSG00000160789.18_LMNA | 0.06682  | -0.093370439 | 0.223645057 | 4.13E-01 | 6.87E-01 | 1.00E+00 |
| ENSG00000230628.1_RP4-781K5  | ENSG00000160789.18_LMNA | -0.05256 | -0.210003108 | 0.107540941 | 5.20E-01 | 7.66E-01 | 1.00E+00 |
| ENSG00000230987.2_RP11-113I2 | ENSG00000160789.18_LMNA | 0.08295  | -0.077273859 | 0.238992014 | 3.10E-01 | 5.96E-01 | 1.00E+00 |
| ENSG00000122194.17_PLG       | ENSG00000160789.18_LMNA | -0.1914  | -0.340231128 | -0.03320866 | 1.82E-02 | 1.01E-01 | 1.00E+00 |
| ENSG00000181626.11_ANKRD62   | ENSG00000160789.18_LMNA | -0.13092 | -0.284197856 | 0.028882091 | 1.08E-01 | 3.27E-01 | 1.00E+00 |
| ENSG00000260072.1_CTD-2313J  | ENSG00000160789.18_LMNA | -0.10214 | -0.25715455  | 0.058008745 | 2.11E-01 | 4.84E-01 | 1.00E+00 |
| ENSG00000148584.13_A1CF      | ENSG00000160789.18_LMNA | -0.12212 | -0.275953163 | 0.037818629 | 1.34E-01 | 3.72E-01 | 1.00E+00 |
| ENSG00000230623.2_RP11-469A  | ENSG00000160789.18_LMNA | 0.10148  | -0.058670493 | 0.256534346 | 2.14E-01 | 4.87E-01 | 1.00E+00 |
| ENSG00000252244.1_RNU7-3P    | ENSG00000160789.18_LMNA | -0.18753 | -0.336679366 | -0.02920131 | 2.07E-02 | 1.10E-01 | 1.00E+00 |

|                              |                         |          |              |             |          |          |          |
|------------------------------|-------------------------|----------|--------------|-------------|----------|----------|----------|
| ENSG00000211625.2_IGKV3D-20  | ENSG00000160789.18_LMNA | 0.0108   | -0.148657117 | 0.169708095 | 8.95E-01 | 9.59E-01 | 1.00E+00 |
| ENSG00000199466.1_Y_RNA      | ENSG00000160789.18_LMNA | 0.04811  | -0.111947004 | 0.205736039 | 5.56E-01 | 7.90E-01 | 1.00E+00 |
| ENSG00000199676.1_Y_RNA      | ENSG00000160789.18_LMNA | -0.03284 | -0.191044523 | 0.127022135 | 6.88E-01 | 8.65E-01 | 1.00E+00 |
| ENSG00000252539.1_RNA5SP46   | ENSG00000160789.18_LMNA | 0.07245  | -0.087760351 | 0.229011787 | 3.75E-01 | 6.55E-01 | 1.00E+00 |
| ENSG00000201563.1_Y_RNA      | ENSG00000160789.18_LMNA | -0.08585 | -0.241747928 | 0.074365764 | 2.93E-01 | 5.79E-01 | 1.00E+00 |
| ENSG00000221319.1_           | ENSG00000160789.18_LMNA | -0.15674 | -0.308250657 | 0.002521767 | 5.38E-02 | 2.11E-01 | 1.00E+00 |
| ENSG00000260166.1_RP11-863P  | ENSG00000160789.18_LMNA | -0.01933 | -0.177987636 | 0.140297755 | 8.13E-01 | 9.26E-01 | 1.00E+00 |
| ENSG00000222248.1_RNA5SP20   | ENSG00000160789.18_LMNA | 0.12082  | -0.039132774 | 0.274736849 | 1.38E-01 | 3.79E-01 | 1.00E+00 |
| ENSG00000270576.1_RP5-1021I2 | ENSG00000160789.18_LMNA | -0.00102 | -0.160192798 | 0.158208284 | 9.90E-01 | 9.96E-01 | 1.00E+00 |
| ENSG00000239944.1_TRBV8-2    | ENSG00000160789.18_LMNA | 0.11368  | -0.046358535 | 0.268031014 | 1.63E-01 | 4.19E-01 | 1.00E+00 |
| ENSG00000206903.1_SNORA24    | ENSG00000160789.18_LMNA | 0.00833  | -0.151071588 | 0.167308286 | 9.19E-01 | 9.69E-01 | 1.00E+00 |
| ENSG00000280776.1_LINC01202  | ENSG00000160789.18_LMNA | -0.25033 | -0.393831719 | -0.09490759 | 1.87E-03 | 1.86E-02 | 1.00E+00 |
| ENSG00000224132.2_AC112715.1 | ENSG00000160789.18_LMNA | -0.09917 | -0.254356294 | 0.060992248 | 2.24E-01 | 5.00E-01 | 1.00E+00 |
| ENSG00000252051.1_RN7SKP27   | ENSG00000160789.18_LMNA | -0.12084 | -0.274753533 | 0.039114756 | 1.38E-01 | 3.79E-01 | 1.00E+00 |
| ENSG00000268375.1_CTD-2568A  | ENSG00000160789.18_LMNA | 0.03884  | -0.12110494  | 0.196828184 | 6.35E-01 | 8.36E-01 | 1.00E+00 |
| ENSG00000230758.1_SNAP23P1   | ENSG00000160789.18_LMNA | -0.08515 | -0.241080933 | 0.075070084 | 2.97E-01 | 5.83E-01 | 1.00E+00 |
| ENSG00000253299.1_RP11-316J  | ENSG00000160789.18_LMNA | -0.0709  | -0.227532425 | 0.089308805 | 3.85E-01 | 6.64E-01 | 1.00E+00 |
| ENSG00000281884.1_           | ENSG00000160789.18_LMNA | -0.05563 | -0.212945092 | 0.104495844 | 4.96E-01 | 7.50E-01 | 1.00E+00 |
| ENSG00000267879.1_CTB-147C2  | ENSG00000160789.18_LMNA | -0.06224 | -0.219268551 | 0.097930546 | 4.46E-01 | 7.13E-01 | 1.00E+00 |
| ENSG00000225030.1_RP4-784A1  | ENSG00000160789.18_LMNA | 0.05415  | -0.105961279 | 0.211529998 | 5.08E-01 | 7.58E-01 | 1.00E+00 |
| ENSG00000256686.1_RP11-443N  | ENSG00000160789.18_LMNA | -0.06342 | -0.220392494 | 0.096760722 | 4.38E-01 | 7.06E-01 | 1.00E+00 |
| ENSG00000276557.1_TRBV18     | ENSG00000160789.18_LMNA | -0.02713 | -0.185533306 | 0.132639609 | 7.40E-01 | 8.91E-01 | 1.00E+00 |
| ENSG00000263924.1_RP11-210K  | ENSG00000160789.18_LMNA | -0.02681 | -0.185217678 | 0.132960705 | 7.43E-01 | 8.92E-01 | 1.00E+00 |
| ENSG00000264113.2_RN7SL784f  | ENSG00000160789.18_LMNA | -0.08804 | -0.243827908 | 0.072167363 | 2.81E-01 | 5.66E-01 | 1.00E+00 |
| ENSG00000261722.1_RP11-679B  | ENSG00000160789.18_LMNA | -0.14259 | -0.295093222 | 0.016995178 | 7.97E-02 | 2.71E-01 | 1.00E+00 |
| ENSG00000233473.2_RAD1P2     | ENSG00000160789.18_LMNA | -0.23679 | -0.381606203 | -0.08062985 | 3.31E-03 | 2.88E-02 | 1.00E+00 |
| ENSG00000227745.1_AC098826.1 | ENSG00000160789.18_LMNA | -0.06408 | -0.221024837 | 0.09610218  | 4.33E-01 | 7.02E-01 | 1.00E+00 |
| ENSG00000251682.1_RP11-631M  | ENSG00000160789.18_LMNA | -0.03383 | -0.192000427 | 0.12604572  | 6.79E-01 | 8.60E-01 | 1.00E+00 |
| ENSG00000259232.2_RP11-349G  | ENSG00000160789.18_LMNA | -0.06754 | -0.224324562 | 0.092661233 | 4.08E-01 | 6.83E-01 | 1.00E+00 |
| ENSG00000225443.1_AC004938.1 | ENSG00000160789.18_LMNA | 0.1281   | -0.031746655 | 0.281560092 | 1.16E-01 | 3.40E-01 | 1.00E+00 |
| ENSG00000278532.1_RP11-17E3  | ENSG00000160789.18_LMNA | -0.24387 | -0.388006827 | -0.08808954 | 2.46E-03 | 2.30E-02 | 1.00E+00 |
| ENSG00000268723.1_CTC-444N2  | ENSG00000160789.18_LMNA | 0.05965  | -0.100505342 | 0.216791772 | 4.65E-01 | 7.27E-01 | 1.00E+00 |
| ENSG00000259181.1_RP11-463I2 | ENSG00000160789.18_LMNA | 0.03012  | -0.129705281 | 0.188414629 | 7.13E-01 | 8.78E-01 | 1.00E+00 |

|                              |                         |          |              |             |          |          |          |
|------------------------------|-------------------------|----------|--------------|-------------|----------|----------|----------|
| ENSG00000270742.1_RP4-802A1  | ENSG00000160789.18_LMNA | 0.05054  | -0.109546203 | 0.208062602 | 5.36E-01 | 7.77E-01 | 1.00E+00 |
| ENSG00000278475.1_RP11-19E1  | ENSG00000160789.18_LMNA | 0.06919  | -0.09101412  | 0.225901506 | 3.97E-01 | 6.74E-01 | 1.00E+00 |
| ENSG00000260558.1_RP11-63M2  | ENSG00000160789.18_LMNA | -0.0199  | -0.178538297 | 0.13974017  | 8.08E-01 | 9.23E-01 | 1.00E+00 |
| ENSG00000168148.3_HIST3H3    | ENSG00000160789.18_LMNA | 0.12238  | -0.037556224 | 0.276195913 | 1.33E-01 | 3.70E-01 | 1.00E+00 |
| ENSG00000229822.2_RP5-1174J  | ENSG00000160789.18_LMNA | 0.01628  | -0.143293479 | 0.175025689 | 8.42E-01 | 9.39E-01 | 1.00E+00 |
| ENSG00000236206.1_RP11-306I1 | ENSG00000160789.18_LMNA | 0.14442  | -0.015129993 | 0.296795488 | 7.59E-02 | 2.63E-01 | 1.00E+00 |
| ENSG00000256361.1_RP11-613F  | ENSG00000160789.18_LMNA | 0.01552  | -0.144037265 | 0.174289396 | 8.49E-01 | 9.41E-01 | 1.00E+00 |
| ENSG00000259385.1_RP11-605F  | ENSG00000160789.18_LMNA | -0.10891 | -0.26353682  | 0.051182834 | 1.82E-01 | 4.46E-01 | 1.00E+00 |
| ENSG00000261714.2_CTD-2562C  | ENSG00000160789.18_LMNA | 0.10595  | -0.054164822 | 0.260752027 | 1.94E-01 | 4.63E-01 | 1.00E+00 |
| ENSG00000255394.4_C8orf49    | ENSG00000160789.18_LMNA | 0.08076  | -0.079466011 | 0.236911204 | 3.23E-01 | 6.09E-01 | 1.00E+00 |
| ENSG00000237614.1_AC073257.  | ENSG00000160789.18_LMNA | 0.0612   | -0.098969511 | 0.21826963  | 4.54E-01 | 7.19E-01 | 1.00E+00 |
| ENSG00000224019.1_RPL21P32   | ENSG00000160789.18_LMNA | -0.00515 | -0.164220717 | 0.15417244  | 9.50E-01 | 9.80E-01 | 1.00E+00 |
| ENSG00000244708.1_RPL23P10   | ENSG00000160789.18_LMNA | -0.03881 | -0.196792158 | 0.121141868 | 6.35E-01 | 8.36E-01 | 1.00E+00 |
| ENSG00000228816.1_AK3P5      | ENSG00000160789.18_LMNA | 0.11152  | -0.048546086 | 0.265994841 | 1.71E-01 | 4.31E-01 | 1.00E+00 |
| ENSG00000279466.1_RP11-386I8 | ENSG00000160789.18_LMNA | -0.06738 | -0.224174599 | 0.092817778 | 4.09E-01 | 6.84E-01 | 1.00E+00 |
| ENSG00000254315.1_RP11-267M  | ENSG00000160789.18_LMNA | -0.02765 | -0.1860359   | 0.132128171 | 7.35E-01 | 8.89E-01 | 1.00E+00 |
| ENSG00000250037.1_RP11-480D  | ENSG00000160789.18_LMNA | 0.07033  | -0.089880496 | 0.226985872 | 3.89E-01 | 6.67E-01 | 1.00E+00 |
| ENSG00000225381.2_RPS5P7     | ENSG00000160789.18_LMNA | -0.07248 | -0.229037448 | 0.087733478 | 3.75E-01 | 6.55E-01 | 1.00E+00 |
| ENSG00000224853.1_LINC00393  | ENSG00000160789.18_LMNA | -0.11221 | -0.266651961 | 0.047840443 | 1.69E-01 | 4.27E-01 | 1.00E+00 |
| ENSG00000266335.1_RP11-25O3  | ENSG00000160789.18_LMNA | -0.39912 | -0.524967753 | -0.25620254 | 3.52E-07 | 2.00E-05 | 1.80E-02 |
| ENSG00000256937.1_KRT17P8    | ENSG00000160789.18_LMNA | -0.06714 | -0.223950144 | 0.093052056 | 4.11E-01 | 6.85E-01 | 1.00E+00 |
| ENSG00000217334.1_RP11-33E2  | ENSG00000160789.18_LMNA | 0.02547  | -0.134278008 | 0.18392212  | 7.55E-01 | 8.98E-01 | 1.00E+00 |
| ENSG00000259499.1_RP11-616K  | ENSG00000160789.18_LMNA | -0.00126 | -0.160424469 | 0.157976445 | 9.88E-01 | 9.95E-01 | 1.00E+00 |
| ENSG00000267298.1_AC006116.  | ENSG00000160789.18_LMNA | -0.11938 | -0.273381657 | 0.04059569  | 1.43E-01 | 3.86E-01 | 1.00E+00 |
| ENSG00000259469.1_RP11-227D  | ENSG00000160789.18_LMNA | 0.09857  | -0.061594544 | 0.253790753 | 2.27E-01 | 5.04E-01 | 1.00E+00 |
| ENSG00000267057.4_RP11-456C  | ENSG00000160789.18_LMNA | -0.31561 | -0.452094002 | -0.16468263 | 7.47E-05 | 1.49E-03 | 1.00E+00 |
| ENSG00000150676.11_CCDC83    | ENSG00000160789.18_LMNA | 0.126    | -0.033878318 | 0.279594124 | 1.22E-01 | 3.51E-01 | 1.00E+00 |
| ENSG00000235091.1_WI2-85898I | ENSG00000160789.18_LMNA | -0.22205 | -0.368229565 | -0.06514799 | 5.97E-03 | 4.49E-02 | 1.00E+00 |
| ENSG00000255479.1_RP11-672A  | ENSG00000160789.18_LMNA | -0.00751 | -0.166516413 | 0.151867465 | 9.27E-01 | 9.72E-01 | 1.00E+00 |
| ENSG00000186329.8_TMEM212    | ENSG00000160789.18_LMNA | -0.16126 | -0.312436844 | -0.00211058 | 4.72E-02 | 1.94E-01 | 1.00E+00 |
| ENSG00000228547.5_OR7E26P    | ENSG00000160789.18_LMNA | -0.16779 | -0.318479711 | -0.00882106 | 3.88E-02 | 1.70E-01 | 1.00E+00 |
| ENSG00000239503.1_MARK2P8    | ENSG00000160789.18_LMNA | 0.08989  | -0.070314583 | 0.245578629 | 2.71E-01 | 5.55E-01 | 1.00E+00 |
| ENSG00000134438.9_RAX        | ENSG00000160789.18_LMNA | 0.02417  | -0.135555346 | 0.18266481  | 7.68E-01 | 9.04E-01 | 1.00E+00 |

|                              |                         |          |              |             |          |          |          |
|------------------------------|-------------------------|----------|--------------|-------------|----------|----------|----------|
| ENSG00000231307.1_RPS3P2     | ENSG00000160789.18_LMNA | 0.002    | -0.157247572 | 0.161152587 | 9.80E-01 | 9.93E-01 | 1.00E+00 |
| ENSG00000253256.1_CTB-11I22. | ENSG00000160789.18_LMNA | -0.01462 | -0.173418229 | 0.144916832 | 8.58E-01 | 9.44E-01 | 1.00E+00 |
| ENSG00000224328.1_MDC1-AS1   | ENSG00000160789.18_LMNA | -0.02567 | -0.184116306 | 0.134080634 | 7.54E-01 | 8.98E-01 | 1.00E+00 |
| ENSG00000279067.1_GS1-25M2.  | ENSG00000160789.18_LMNA | -0.2612  | -0.403621131 | -0.10642966 | 1.15E-03 | 1.29E-02 | 1.00E+00 |
| ENSG00000259241.1_RP11-313P  | ENSG00000160789.18_LMNA | -0.07632 | -0.23269467  | 0.083898804 | 3.50E-01 | 6.34E-01 | 1.00E+00 |
| ENSG00000224228.2_RP1-15D23  | ENSG00000160789.18_LMNA | -0.00793 | -0.166921719 | 0.151460161 | 9.23E-01 | 9.70E-01 | 1.00E+00 |
| ENSG00000243499.1_RPS6P21    | ENSG00000160789.18_LMNA | -0.18549 | -0.334807486 | -0.02709329 | 2.21E-02 | 1.16E-01 | 1.00E+00 |
| ENSG00000259351.1_RP11-111E  | ENSG00000160789.18_LMNA | -0.17499 | -0.325133062 | -0.01624187 | 3.11E-02 | 1.47E-01 | 1.00E+00 |
| ENSG00000230258.5_AC002539.  | ENSG00000160789.18_LMNA | 0.04856  | -0.111507643 | 0.206162083 | 5.52E-01 | 7.88E-01 | 1.00E+00 |
| ENSG00000258785.4_LINC01580  | ENSG00000160789.18_LMNA | -0.00992 | -0.168854748 | 0.149516112 | 9.03E-01 | 9.63E-01 | 1.00E+00 |
| ENSG00000270249.1_RP11-514P  | ENSG00000160789.18_LMNA | -0.03848 | -0.196478142 | 0.121463707 | 6.38E-01 | 8.38E-01 | 1.00E+00 |
| ENSG00000235128.1_AC013474.  | ENSG00000160789.18_LMNA | 0.04029  | -0.119681594 | 0.198216115 | 6.22E-01 | 8.29E-01 | 1.00E+00 |
| ENSG00000228354.1_RP11-552J. | ENSG00000160789.18_LMNA | -0.09247 | -0.248018601 | 0.067728732 | 2.57E-01 | 5.40E-01 | 1.00E+00 |
| ENSG00000228835.1_AC012123.  | ENSG00000160789.18_LMNA | -0.04114 | -0.199037838 | 0.118838288 | 6.15E-01 | 8.25E-01 | 1.00E+00 |
| ENSG00000226703.1_NPM1P4     | ENSG00000160789.18_LMNA | 0.00335  | -0.155930883 | 0.162467032 | 9.67E-01 | 9.87E-01 | 1.00E+00 |
| ENSG00000234890.1_HNRNPDLF   | ENSG00000160789.18_LMNA | 0.0042   | -0.155107092 | 0.163288845 | 9.59E-01 | 9.84E-01 | 1.00E+00 |
| ENSG00000274173.1_RP4-568C1  | ENSG00000160789.18_LMNA | -0.00706 | -0.166071657 | 0.15231429  | 9.31E-01 | 9.73E-01 | 1.00E+00 |
| ENSG00000267006.1_CTC-448F2  | ENSG00000160789.18_LMNA | -0.07428 | -0.230754539 | 0.08593424  | 3.63E-01 | 6.45E-01 | 1.00E+00 |
| ENSG00000259026.1_RP11-907D  | ENSG00000160789.18_LMNA | 0.08439  | -0.075831275 | 0.240359745 | 3.01E-01 | 5.88E-01 | 1.00E+00 |
| ENSG00000256394.2_ASIC5      | ENSG00000160789.18_LMNA | 0.0067   | -0.152664482 | 0.165722995 | 9.35E-01 | 9.74E-01 | 1.00E+00 |
| ENSG00000259727.1_RP11-1069  | ENSG00000160789.18_LMNA | 0.15434  | -0.004984306 | 0.306020384 | 5.76E-02 | 2.20E-01 | 1.00E+00 |
| ENSG00000188771.4_PLET1      | ENSG00000160789.18_LMNA | 0.02752  | -0.132259469 | 0.185906889 | 7.36E-01 | 8.89E-01 | 1.00E+00 |
| ENSG00000253301.4_LINC01606  | ENSG00000160789.18_LMNA | -0.19898 | -0.347187256 | -0.04108578 | 1.40E-02 | 8.35E-02 | 1.00E+00 |
| ENSG00000235563.1_RP11-334A  | ENSG00000160789.18_LMNA | -0.08004 | -0.236226343 | 0.080186849 | 3.27E-01 | 6.14E-01 | 1.00E+00 |
| ENSG00000205822.9_TPTE2P6    | ENSG00000160789.18_LMNA | -0.07625 | -0.232629509 | 0.083967209 | 3.50E-01 | 6.34E-01 | 1.00E+00 |
| ENSG00000215833.3_QRSL1P1    | ENSG00000160789.18_LMNA | -0.07799 | -0.234283897 | 0.082229538 | 3.40E-01 | 6.25E-01 | 1.00E+00 |
| ENSG00000168267.5_PTF1A      | ENSG00000160789.18_LMNA | -0.16442 | -0.315369735 | -0.00536401 | 4.29E-02 | 1.82E-01 | 1.00E+00 |
| ENSG00000261529.1_RP13-487P  | ENSG00000160789.18_LMNA | 0.08477  | -0.075451605 | 0.240719506 | 2.99E-01 | 5.86E-01 | 1.00E+00 |
| ENSG00000249926.2_RP11-495K  | ENSG00000160789.18_LMNA | 0.00283  | -0.156439656 | 0.16195926  | 9.72E-01 | 9.89E-01 | 1.00E+00 |
| ENSG00000231877.1_RP11-177F  | ENSG00000160789.18_LMNA | 0.16296  | 0.00385862   | 0.314013399 | 4.49E-02 | 1.87E-01 | 1.00E+00 |
| ENSG00000249341.1_RP11-317M  | ENSG00000160789.18_LMNA | -0.23054 | -0.375945975 | -0.07406104 | 4.27E-03 | 3.48E-02 | 1.00E+00 |
| ENSG00000267733.4_RP11-64C1  | ENSG00000160789.18_LMNA | -0.26162 | -0.403998479 | -0.1068754  | 1.13E-03 | 1.27E-02 | 1.00E+00 |
| ENSG00000224506.2_RP1-293L8  | ENSG00000160789.18_LMNA | -0.13338 | -0.286501663 | 0.026375984 | 1.01E-01 | 3.14E-01 | 1.00E+00 |

|                              |                         |          |              |             |          |          |          |
|------------------------------|-------------------------|----------|--------------|-------------|----------|----------|----------|
| ENSG00000250049.4_RP11-348J  | ENSG00000160789.18_LMNA | -0.29926 | -0.437614007 | -0.14706851 | 1.80E-04 | 3.01E-03 | 1.00E+00 |
| ENSG00000125998.7_FAM83C     | ENSG00000160789.18_LMNA | 0.03718  | -0.122752161 | 0.195220356 | 6.49E-01 | 8.44E-01 | 1.00E+00 |
| ENSG00000140506.15_LMAN1L    | ENSG00000160789.18_LMNA | -0.0681  | -0.224862412 | 0.092099645 | 4.04E-01 | 6.80E-01 | 1.00E+00 |
| ENSG00000279220.1_GPR1-AS    | ENSG00000160789.18_LMNA | -0.14608 | -0.298341243 | 0.013434415 | 7.25E-02 | 2.56E-01 | 1.00E+00 |
| ENSG00000228075.4_BOD1L2     | ENSG00000160789.18_LMNA | 0.01326  | -0.146247462 | 0.17209936  | 8.71E-01 | 9.50E-01 | 1.00E+00 |
| ENSG00000173366.11_RP11-330  | ENSG00000160789.18_LMNA | 0.15154  | -0.007848966 | 0.303421615 | 6.24E-02 | 2.31E-01 | 1.00E+00 |
| ENSG00000274479.1_           | ENSG00000160789.18_LMNA | -0.07106 | -0.227686013 | 0.089148115 | 3.84E-01 | 6.63E-01 | 1.00E+00 |
| ENSG00000200354.1_SNORA71C   | ENSG00000160789.18_LMNA | -0.14547 | -0.297773578 | 0.014057309 | 7.37E-02 | 2.58E-01 | 1.00E+00 |
| ENSG00000225826.1_LINC00626  | ENSG00000160789.18_LMNA | 0.06194  | -0.098231692 | 0.218979081 | 4.48E-01 | 7.15E-01 | 1.00E+00 |
| ENSG00000206763.1_RNU6-10P   | ENSG00000160789.18_LMNA | 0.01757  | -0.142026889 | 0.176278702 | 8.30E-01 | 9.34E-01 | 1.00E+00 |
| ENSG00000206817.1_Y_RNA      | ENSG00000160789.18_LMNA | -0.04697 | -0.204641375 | 0.113075316 | 5.66E-01 | 7.96E-01 | 1.00E+00 |
| ENSG00000201643.1_SNORA14A   | ENSG00000160789.18_LMNA | -0.01576 | -0.174520356 | 0.143803993 | 8.47E-01 | 9.40E-01 | 1.00E+00 |
| ENSG00000222051.1_RNU6-1165  | ENSG00000160789.18_LMNA | -0.03183 | -0.190067201 | 0.12801979  | 6.97E-01 | 8.70E-01 | 1.00E+00 |
| ENSG00000207032.1_Y_RNA      | ENSG00000160789.18_LMNA | -0.0143  | -0.173107253 | 0.145230685 | 8.61E-01 | 9.46E-01 | 1.00E+00 |
| ENSG00000272342.1_RP13-539J  | ENSG00000160789.18_LMNA | -0.02708 | -0.185481011 | 0.132692815 | 7.41E-01 | 8.91E-01 | 1.00E+00 |
| ENSG00000211518.1_           | ENSG00000160789.18_LMNA | -0.21408 | -0.360977413 | -0.05681504 | 8.09E-03 | 5.61E-02 | 1.00E+00 |
| ENSG00000210709.1_RNU6ATAC   | ENSG00000160789.18_LMNA | -0.16669 | -0.317468736 | -0.00769644 | 4.01E-02 | 1.74E-01 | 1.00E+00 |
| ENSG00000265345.1_MIR5188    | ENSG00000160789.18_LMNA | -0.0772  | -0.233531328 | 0.08302023  | 3.44E-01 | 6.29E-01 | 1.00E+00 |
| ENSG00000201217.1_Y_RNA      | ENSG00000160789.18_LMNA | -0.12693 | -0.280458983 | 0.032940919 | 1.19E-01 | 3.47E-01 | 1.00E+00 |
| ENSG00000208002.1_MIR643     | ENSG00000160789.18_LMNA | 0.0884   | -0.071809958 | 0.244165786 | 2.79E-01 | 5.64E-01 | 1.00E+00 |
| ENSG00000207327.1_RNU6-883F  | ENSG00000160789.18_LMNA | -0.0617  | -0.218753264 | 0.098466576 | 4.50E-01 | 7.16E-01 | 1.00E+00 |
| ENSG00000265944.1_LINC01387  | ENSG00000160789.18_LMNA | -0.37041 | -0.500115687 | -0.2244406  | 2.64E-06 | 9.88E-05 | 1.35E-01 |
| ENSG00000224239.1_AC090044.  | ENSG00000160789.18_LMNA | -0.00885 | -0.167814685 | 0.15056241  | 9.14E-01 | 9.67E-01 | 1.00E+00 |
| ENSG00000279040.1_RP11-667K  | ENSG00000160789.18_LMNA | 0.00526  | -0.154068243 | 0.16432457  | 9.49E-01 | 9.79E-01 | 1.00E+00 |
| ENSG00000223433.1_RPS29P9    | ENSG00000160789.18_LMNA | 0.03981  | -0.12015568  | 0.197753967 | 6.26E-01 | 8.32E-01 | 1.00E+00 |
| ENSG00000257927.1_MRPS36P5   | ENSG00000160789.18_LMNA | -0.12838 | -0.281818076 | 0.031466716 | 1.15E-01 | 3.39E-01 | 1.00E+00 |
| ENSG00000259052.1_AL157871.2 | ENSG00000160789.18_LMNA | -0.01957 | -0.17821126  | 0.140071343 | 8.11E-01 | 9.25E-01 | 1.00E+00 |
| ENSG00000231934.1_LINC01598  | ENSG00000160789.18_LMNA | -0.35909 | -0.49026305  | -0.2120086  | 5.54E-06 | 1.81E-04 | 2.84E-01 |
| ENSG00000236890.2_XXbac-B47  | ENSG00000160789.18_LMNA | 0.01034  | -0.149106235 | 0.16926199  | 8.99E-01 | 9.61E-01 | 1.00E+00 |
| ENSG00000225105.2_LINC01076  | ENSG00000160789.18_LMNA | -0.30495 | -0.44266085  | -0.15318687 | 1.33E-04 | 2.38E-03 | 1.00E+00 |
| ENSG00000223600.1_EEF1A1P4   | ENSG00000160789.18_LMNA | -0.00813 | -0.16711289  | 0.15126801  | 9.21E-01 | 9.70E-01 | 1.00E+00 |
| ENSG00000202512.1_RN7SKP23   | ENSG00000160789.18_LMNA | -0.12979 | -0.283135995 | 0.030035872 | 1.11E-01 | 3.32E-01 | 1.00E+00 |
| ENSG00000276746.1_Metazoa_SI | ENSG00000160789.18_LMNA | -0.04079 | -0.198701867 | 0.119183138 | 6.18E-01 | 8.27E-01 | 1.00E+00 |

|                              |                         |          |              |             |          |          |          |
|------------------------------|-------------------------|----------|--------------|-------------|----------|----------|----------|
| ENSG00000254050.1_RP11-577N  | ENSG00000160789.18_LMNA | -0.27161 | -0.412956042 | -0.11749162 | 7.12E-04 | 8.89E-03 | 1.00E+00 |
| ENSG00000276972.1_RP11-116D  | ENSG00000160789.18_LMNA | -0.11022 | -0.264777922 | 0.049852038 | 1.76E-01 | 4.38E-01 | 1.00E+00 |
| ENSG00000243020.1_RPL7P39    | ENSG00000160789.18_LMNA | 0.03595  | -0.123956009 | 0.194044215 | 6.60E-01 | 8.50E-01 | 1.00E+00 |
| ENSG00000223504.1_RP11-542F  | ENSG00000160789.18_LMNA | -0.19534 | -0.343844301 | -0.03729546 | 1.59E-02 | 9.14E-02 | 1.00E+00 |
| ENSG00000228041.2_RP4-581F1  | ENSG00000160789.18_LMNA | 0.03361  | -0.126263789 | 0.191786991 | 6.81E-01 | 8.61E-01 | 1.00E+00 |
| ENSG00000240964.3_RN7SL751F  | ENSG00000160789.18_LMNA | 0.04081  | -0.119169254 | 0.198715396 | 6.18E-01 | 8.27E-01 | 1.00E+00 |
| ENSG00000270282.1_RP5-1115A  | ENSG00000160789.18_LMNA | -0.15569 | -0.30727318  | 0.003601505 | 5.55E-02 | 2.15E-01 | 1.00E+00 |
| ENSG00000249453.1_RP13-497K  | ENSG00000160789.18_LMNA | 0.01896  | -0.14066981  | 0.177620089 | 8.17E-01 | 9.28E-01 | 1.00E+00 |
| ENSG00000255274.7_TMPRSS4-   | ENSG00000160789.18_LMNA | -0.22984 | -0.375303757 | -0.07331738 | 4.39E-03 | 3.55E-02 | 1.00E+00 |
| ENSG00000259631.1_RP11-557C  | ENSG00000160789.18_LMNA | 0.02722  | -0.132559725 | 0.18561182  | 7.39E-01 | 8.90E-01 | 1.00E+00 |
| ENSG00000123572.15_NRK       | ENSG00000160789.18_LMNA | 0.04869  | -0.11137155  | 0.206294026 | 5.51E-01 | 7.87E-01 | 1.00E+00 |
| ENSG00000239731.3_RN7SL825F  | ENSG00000160789.18_LMNA | 0.22615  | 0.069449802  | 0.371959051 | 5.09E-03 | 3.98E-02 | 1.00E+00 |
| ENSG00000226206.1_RP5-1050E  | ENSG00000160789.18_LMNA | -0.19284 | -0.341557216 | -0.03470739 | 1.73E-02 | 9.73E-02 | 1.00E+00 |
| ENSG00000275791.1_TRBV10-3   | ENSG00000160789.18_LMNA | 0.02127  | -0.138396802 | 0.179864168 | 7.95E-01 | 9.17E-01 | 1.00E+00 |
| ENSG00000231682.1_AC097713.  | ENSG00000160789.18_LMNA | 0.16395  | 0.004879773  | 0.314933584 | 4.36E-02 | 1.84E-01 | 1.00E+00 |
| ENSG00000223779.5_RP11-403I1 | ENSG00000160789.18_LMNA | -0.04454 | -0.202303644 | 0.115482163 | 5.86E-01 | 8.08E-01 | 1.00E+00 |
| ENSG00000267694.1_RP11-691H  | ENSG00000160789.18_LMNA | -0.04769 | -0.205334539 | 0.11236094  | 5.60E-01 | 7.92E-01 | 1.00E+00 |
| ENSG00000243129.2_RP11-377D  | ENSG00000160789.18_LMNA | 0.15917  | -3.42E-05    | 0.310500105 | 5.02E-02 | 2.02E-01 | 1.00E+00 |
| ENSG00000227374.1_RP11-109A  | ENSG00000160789.18_LMNA | 0.06913  | -0.09107612  | 0.225842177 | 3.97E-01 | 6.74E-01 | 1.00E+00 |
| ENSG00000228081.2_RP11-385M  | ENSG00000160789.18_LMNA | 0.01166  | -0.147811628 | 0.170547558 | 8.87E-01 | 9.56E-01 | 1.00E+00 |
| ENSG00000220392.1_FCF1P5     | ENSG00000160789.18_LMNA | -0.00514 | -0.164208121 | 0.154185078 | 9.50E-01 | 9.80E-01 | 1.00E+00 |
| ENSG00000267140.1_RP11-322E  | ENSG00000160789.18_LMNA | 0.01171  | -0.147770795 | 0.170588089 | 8.86E-01 | 9.56E-01 | 1.00E+00 |
| ENSG00000259763.1_RP11-327J  | ENSG00000160789.18_LMNA | 0.03818  | -0.121758744 | 0.19619022  | 6.40E-01 | 8.39E-01 | 1.00E+00 |
| ENSG00000267145.1_AC006116.  | ENSG00000160789.18_LMNA | 0.02007  | -0.139572375 | 0.17870397  | 8.06E-01 | 9.23E-01 | 1.00E+00 |
| ENSG00000270141.3_TERC       | ENSG00000160789.18_LMNA | -0.04225 | -0.200105994 | 0.11774139  | 6.05E-01 | 8.19E-01 | 1.00E+00 |
| ENSG00000188620.9_HMX3       | ENSG00000160789.18_LMNA | -0.05592 | -0.21322354  | 0.104207328 | 4.94E-01 | 7.49E-01 | 1.00E+00 |
| ENSG00000276121.1_CTD-2008A  | ENSG00000160789.18_LMNA | -0.13609 | -0.28902839  | 0.023622852 | 9.46E-02 | 3.01E-01 | 1.00E+00 |
| ENSG00000237852.1_RP4-630A1  | ENSG00000160789.18_LMNA | 0.1227   | -0.037227296 | 0.276500147 | 1.32E-01 | 3.69E-01 | 1.00E+00 |
| ENSG00000277229.1_RP11-355N  | ENSG00000160789.18_LMNA | -0.0679  | -0.22467623  | 0.092294066 | 4.06E-01 | 6.81E-01 | 1.00E+00 |
| ENSG00000234073.1_AC011816.  | ENSG00000160789.18_LMNA | 0.04244  | -0.117551888 | 0.200290453 | 6.04E-01 | 8.18E-01 | 1.00E+00 |
| ENSG00000255807.1_PTP4A1P2   | ENSG00000160789.18_LMNA | 0.11394  | -0.046099865 | 0.268271598 | 1.62E-01 | 4.17E-01 | 1.00E+00 |
| ENSG00000251482.1_AKIRIN2P1  | ENSG00000160789.18_LMNA | -0.01276 | -0.171616767 | 0.146734071 | 8.76E-01 | 9.52E-01 | 1.00E+00 |
| ENSG00000281772.1_RP11-567F  | ENSG00000160789.18_LMNA | -0.02685 | -0.185255348 | 0.132922386 | 7.43E-01 | 8.92E-01 | 1.00E+00 |

|                              |                         |          |              |             |          |          |          |
|------------------------------|-------------------------|----------|--------------|-------------|----------|----------|----------|
| ENSG00000188078.5_RP5-1119A  | ENSG00000160789.18_LMNA | -0.062   | -0.219038773 | 0.098169597 | 4.48E-01 | 7.14E-01 | 1.00E+00 |
| ENSG00000254061.1_RP11-359B  | ENSG00000160789.18_LMNA | 0.00869  | -0.150717425 | 0.167660534 | 9.15E-01 | 9.68E-01 | 1.00E+00 |
| ENSG00000263300.1_RP5-1029F  | ENSG00000160789.18_LMNA | -0.01477 | -0.173558694 | 0.144775046 | 8.57E-01 | 9.44E-01 | 1.00E+00 |
| ENSG00000273445.1_RP11-1399  | ENSG00000160789.18_LMNA | 0.14064  | -0.018980947 | 0.293278726 | 8.39E-02 | 2.80E-01 | 1.00E+00 |
| ENSG00000237551.1_AC096775.1 | ENSG00000160789.18_LMNA | -0.07896 | -0.235208135 | 0.081257935 | 3.34E-01 | 6.19E-01 | 1.00E+00 |
| ENSG00000241438.1_TDGF1P6    | ENSG00000160789.18_LMNA | -0.15679 | -0.308291615 | 0.002476508 | 5.37E-02 | 2.11E-01 | 1.00E+00 |
| ENSG00000279772.1_CTD-2169H  | ENSG00000160789.18_LMNA | -0.04461 | -0.202369848 | 0.115414053 | 5.85E-01 | 8.07E-01 | 1.00E+00 |
| ENSG00000256021.1_TCEB1P31   | ENSG00000160789.18_LMNA | 0.10666  | -0.053452526 | 0.261417697 | 1.91E-01 | 4.59E-01 | 1.00E+00 |
| ENSG00000240995.2_RP11-708H  | ENSG00000160789.18_LMNA | -0.11031 | -0.264860109 | 0.049763872 | 1.76E-01 | 4.37E-01 | 1.00E+00 |
| ENSG00000232145.1_RP11-307I2 | ENSG00000160789.18_LMNA | -0.0684  | -0.225151078 | 0.091798156 | 4.02E-01 | 6.78E-01 | 1.00E+00 |
| ENSG00000276454.1_RP11-493L  | ENSG00000160789.18_LMNA | -0.08623 | -0.242110913 | 0.073982335 | 2.91E-01 | 5.76E-01 | 1.00E+00 |
| ENSG00000258913.1_RP11-260M  | ENSG00000160789.18_LMNA | -0.04865 | -0.206254851 | 0.111411958 | 5.52E-01 | 7.87E-01 | 1.00E+00 |
| ENSG00000224473.1_CCND3P1    | ENSG00000160789.18_LMNA | 0.06159  | -0.098580161 | 0.218644052 | 4.51E-01 | 7.17E-01 | 1.00E+00 |
| ENSG00000262171.1_CTA-972D3  | ENSG00000160789.18_LMNA | 0.03319  | -0.126679206 | 0.191380316 | 6.85E-01 | 8.63E-01 | 1.00E+00 |
| ENSG00000244433.2_           | ENSG00000160789.18_LMNA | 0.04416  | -0.115855647 | 0.20194056  | 5.89E-01 | 8.09E-01 | 1.00E+00 |
| ENSG00000270077.1_KB-1958F4  | ENSG00000160789.18_LMNA | 0.01316  | -0.146349245 | 0.17199843  | 8.72E-01 | 9.50E-01 | 1.00E+00 |
| ENSG00000259539.1_CTD-2651B  | ENSG00000160789.18_LMNA | 0.03098  | -0.128851365 | 0.189252092 | 7.05E-01 | 8.74E-01 | 1.00E+00 |
| ENSG00000233123.1_LINC01007  | ENSG00000160789.18_LMNA | -0.17693 | -0.326922351 | -0.01824337 | 2.92E-02 | 1.41E-01 | 1.00E+00 |
| ENSG00000228838.1_RP4-784A1  | ENSG00000160789.18_LMNA | -0.07786 | -0.23416281  | 0.082356786 | 3.40E-01 | 6.25E-01 | 1.00E+00 |
| ENSG00000253572.2_RP11-107N  | ENSG00000160789.18_LMNA | 0.00771  | -0.151677376 | 0.166705583 | 9.25E-01 | 9.71E-01 | 1.00E+00 |
| ENSG00000234650.4_PCCA-AS1   | ENSG00000160789.18_LMNA | 0.02886  | -0.130939881 | 0.187202998 | 7.24E-01 | 8.83E-01 | 1.00E+00 |
| ENSG00000258820.4_RP11-293M  | ENSG00000160789.18_LMNA | 0.0093   | -0.150120828 | 0.168253723 | 9.09E-01 | 9.65E-01 | 1.00E+00 |
| ENSG00000253164.4_RP11-563N  | ENSG00000160789.18_LMNA | -0.06146 | -0.218523326 | 0.09870571  | 4.52E-01 | 7.17E-01 | 1.00E+00 |
| ENSG00000273090.1_RP11-78I14 | ENSG00000160789.18_LMNA | 0.14857  | -0.010890314 | 0.30065748  | 6.77E-02 | 2.44E-01 | 1.00E+00 |
| ENSG00000154165.4_GPR15      | ENSG00000160789.18_LMNA | -0.07577 | -0.232166262 | 0.084453431 | 3.54E-01 | 6.37E-01 | 1.00E+00 |
| ENSG00000260744.1_RP11-329J  | ENSG00000160789.18_LMNA | -0.03157 | -0.189818554 | 0.128273508 | 6.99E-01 | 8.71E-01 | 1.00E+00 |
| ENSG00000181323.7_SPEM1      | ENSG00000160789.18_LMNA | -0.20454 | -0.352273366 | -0.04686946 | 1.15E-02 | 7.23E-02 | 1.00E+00 |
| ENSG00000231310.3_TBL1XR1-A  | ENSG00000160789.18_LMNA | -0.02026 | -0.178886933 | 0.139387047 | 8.04E-01 | 9.22E-01 | 1.00E+00 |
| ENSG00000239572.1_RP11-451B  | ENSG00000160789.18_LMNA | 0.06041  | -0.099751959 | 0.217516899 | 4.60E-01 | 7.23E-01 | 1.00E+00 |
| ENSG00000237853.5_NFIA-AS1   | ENSG00000160789.18_LMNA | -0.00868 | -0.167649643 | 0.150728377 | 9.15E-01 | 9.68E-01 | 1.00E+00 |
| ENSG00000204113.6_BMP2KL     | ENSG00000160789.18_LMNA | -0.02912 | -0.187455715 | 0.130682455 | 7.22E-01 | 8.82E-01 | 1.00E+00 |
| ENSG00000275443.1_RP11-759A  | ENSG00000160789.18_LMNA | -0.15721 | -0.308685501 | 0.002041198 | 5.31E-02 | 2.09E-01 | 1.00E+00 |
| ENSG00000182447.4_OTOL1      | ENSG00000160789.18_LMNA | -0.10497 | -0.259824083 | 0.05515723  | 1.98E-01 | 4.68E-01 | 1.00E+00 |

|                              |                         |          |              |             |          |          |          |
|------------------------------|-------------------------|----------|--------------|-------------|----------|----------|----------|
| ENSG00000227513.1_AC114755.1 | ENSG00000160789.18_LMNA | 0.10199  | -0.058155685 | 0.257016857 | 2.11E-01 | 4.85E-01 | 1.00E+00 |
| ENSG00000186190.7_BP1FB3     | ENSG00000160789.18_LMNA | 0.10039  | -0.059769296 | 0.255503951 | 2.18E-01 | 4.93E-01 | 1.00E+00 |
| ENSG00000243849.1_CFAP44-A5  | ENSG00000160789.18_LMNA | -0.02359 | -0.182107933 | 0.136120755 | 7.73E-01 | 9.06E-01 | 1.00E+00 |
| ENSG00000259664.2_CTD-2147F  | ENSG00000160789.18_LMNA | -0.21136 | -0.35849749  | -0.05397522 | 8.95E-03 | 6.05E-02 | 1.00E+00 |
| ENSG00000225457.1_RP11-736E  | ENSG00000160789.18_LMNA | -0.00236 | -0.161498965 | 0.156900712 | 9.77E-01 | 9.91E-01 | 1.00E+00 |
| ENSG00000259986.1_RP11-382A  | ENSG00000160789.18_LMNA | -0.04229 | -0.200143095 | 0.117703277 | 6.05E-01 | 8.19E-01 | 1.00E+00 |
| ENSG00000277619.1_CTC-276P9  | ENSG00000160789.18_LMNA | 0.10848  | -0.051614355 | 0.26313416  | 1.83E-01 | 4.48E-01 | 1.00E+00 |
| ENSG00000228723.5_SRGP3-A    | ENSG00000160789.18_LMNA | -0.06255 | -0.219566251 | 0.097620779 | 4.44E-01 | 7.11E-01 | 1.00E+00 |
| ENSG00000251576.1_LINC01267  | ENSG00000160789.18_LMNA | -0.03256 | -0.190771484 | 0.127300919 | 6.90E-01 | 8.67E-01 | 1.00E+00 |
| ENSG00000218643.2_RPL5P20    | ENSG00000160789.18_LMNA | 0.08149  | -0.078728005 | 0.23761205  | 3.18E-01 | 6.05E-01 | 1.00E+00 |
| ENSG00000231605.4_LINC01363  | ENSG00000160789.18_LMNA | 0.20538  | 0.047738039  | 0.353035626 | 1.11E-02 | 7.07E-02 | 1.00E+00 |
| ENSG00000260170.1_RP11-96O2  | ENSG00000160789.18_LMNA | 0.0737   | -0.086514191 | 0.230201282 | 3.67E-01 | 6.48E-01 | 1.00E+00 |
| ENSG00000259336.1_RP11-323I1 | ENSG00000160789.18_LMNA | 0.02992  | -0.129897896 | 0.188225661 | 7.14E-01 | 8.79E-01 | 1.00E+00 |
| ENSG00000166569.7_CPLX4      | ENSG00000160789.18_LMNA | 0.0217   | -0.137975471 | 0.180279773 | 7.91E-01 | 9.15E-01 | 1.00E+00 |
| ENSG00000253415.1_RP11-44N1  | ENSG00000160789.18_LMNA | 0.15224  | -0.00713676  | 0.304068148 | 6.12E-02 | 2.29E-01 | 1.00E+00 |
| ENSG00000242441.6_GTF2A1L    | ENSG00000160789.18_LMNA | -0.02541 | -0.183865157 | 0.134335901 | 7.56E-01 | 8.98E-01 | 1.00E+00 |
| ENSG00000267046.1_E2F3P1     | ENSG00000160789.18_LMNA | -0.01009 | -0.169020232 | 0.149349571 | 9.02E-01 | 9.62E-01 | 1.00E+00 |
| ENSG00000272395.4_IFNL4      | ENSG00000160789.18_LMNA | -0.0507  | -0.208218352 | 0.109385352 | 5.35E-01 | 7.76E-01 | 1.00E+00 |
| ENSG00000106302.8_HYAL4      | ENSG00000160789.18_LMNA | 0.02089  | -0.138776978 | 0.179489061 | 7.98E-01 | 9.19E-01 | 1.00E+00 |
| ENSG00000172478.16_C2orf54   | ENSG00000160789.18_LMNA | -0.00502 | -0.164090854 | 0.154302725 | 9.51E-01 | 9.80E-01 | 1.00E+00 |
| ENSG00000229415.8_SFTA3      | ENSG00000160789.18_LMNA | -0.26351 | -0.405688476 | -0.10887315 | 1.04E-03 | 1.19E-02 | 1.00E+00 |
| ENSG00000215867.4_KRT18P57   | ENSG00000160789.18_LMNA | 0.04708  | -0.112962912 | 0.204750462 | 5.65E-01 | 7.95E-01 | 1.00E+00 |
| ENSG00000248318.1_RP11-713M  | ENSG00000160789.18_LMNA | 0.06797  | -0.092232458 | 0.22473523  | 4.05E-01 | 6.81E-01 | 1.00E+00 |
| ENSG00000279609.1_RP11-235C  | ENSG00000160789.18_LMNA | -0.15171 | -0.303576567 | 0.007678304 | 6.21E-02 | 2.31E-01 | 1.00E+00 |
| ENSG00000253281.5_RP11-716D  | ENSG00000160789.18_LMNA | -0.0483  | -0.205917522 | 0.111759863 | 5.55E-01 | 7.89E-01 | 1.00E+00 |
| ENSG00000276612.2_CH507-9B2  | ENSG00000160789.18_LMNA | -0.03197 | -0.190199792 | 0.127884478 | 6.96E-01 | 8.70E-01 | 1.00E+00 |
| ENSG00000263096.1_RP11-515O  | ENSG00000160789.18_LMNA | -0.19272 | -0.341441009 | -0.034576   | 1.74E-02 | 9.75E-02 | 1.00E+00 |
| ENSG00000279404.1_CTD-2542C  | ENSG00000160789.18_LMNA | 0.09794  | -0.062231797 | 0.253192154 | 2.30E-01 | 5.07E-01 | 1.00E+00 |
| ENSG00000268324.2_LRR2-AS    | ENSG00000160789.18_LMNA | 0.13856  | -0.021104518 | 0.29133582  | 8.87E-02 | 2.90E-01 | 1.00E+00 |
| ENSG00000255267.3_RP11-430H  | ENSG00000160789.18_LMNA | -0.14658 | -0.298808187 | 0.012921859 | 7.15E-02 | 2.53E-01 | 1.00E+00 |
| ENSG00000165584.14_SSX3      | ENSG00000160789.18_LMNA | 0.11336  | -0.046680194 | 0.267731789 | 1.64E-01 | 4.20E-01 | 1.00E+00 |
| ENSG00000262999.1_CTD-3088C  | ENSG00000160789.18_LMNA | -0.05518 | -0.212515891 | 0.104940459 | 5.00E-01 | 7.52E-01 | 1.00E+00 |
| ENSG00000278905.1_RP11-65F1  | ENSG00000160789.18_LMNA | -0.05517 | -0.212503513 | 0.10495328  | 5.00E-01 | 7.52E-01 | 1.00E+00 |



|                              |                         |          |              |             |          |          |          |
|------------------------------|-------------------------|----------|--------------|-------------|----------|----------|----------|
| ENSG00000198570.5_RD3        | ENSG00000160789.18_LMNA | -0.26321 | -0.405425382 | -0.10856199 | 1.05E-03 | 1.20E-02 | 1.00E+00 |
| ENSG00000231475.3_IGHV4-31   | ENSG00000160789.18_LMNA | 0.14193  | -0.017673635 | 0.294473536 | 8.11E-02 | 2.75E-01 | 1.00E+00 |
| ENSG00000207611.1_MIR149     | ENSG00000160789.18_LMNA | 0.16981  | 0.010899069  | 0.320345896 | 3.65E-02 | 1.63E-01 | 1.00E+00 |
| ENSG00000211670.2_IGLV3-9    | ENSG00000160789.18_LMNA | 0.01923  | -0.140404632 | 0.177882062 | 8.14E-01 | 9.27E-01 | 1.00E+00 |
| ENSG00000264819.4_           | ENSG00000160789.18_LMNA | 0.04328  | -0.116722391 | 0.201097616 | 5.96E-01 | 8.14E-01 | 1.00E+00 |
| ENSG00000221540.1_MIR1180    | ENSG00000160789.18_LMNA | 0.15107  | -0.008334326 | 0.302980846 | 6.32E-02 | 2.34E-01 | 1.00E+00 |
| ENSG00000206596.1_RNU1-27P   | ENSG00000160789.18_LMNA | -0.01668 | -0.17541381  | 0.142901263 | 8.38E-01 | 9.37E-01 | 1.00E+00 |
| ENSG00000222282.1_RNU6-584F  | ENSG00000160789.18_LMNA | 0.02323  | -0.136474192 | 0.181759726 | 7.76E-01 | 9.08E-01 | 1.00E+00 |
| ENSG00000201432.1_Y_RNA      | ENSG00000160789.18_LMNA | -0.13532 | -0.288312425 | 0.024403452 | 9.65E-02 | 3.05E-01 | 1.00E+00 |
| ENSG00000274428.1_U1         | ENSG00000160789.18_LMNA | 0.04107  | -0.118906867 | 0.19897103  | 6.15E-01 | 8.26E-01 | 1.00E+00 |
| ENSG00000207087.1_RNU6-242F  | ENSG00000160789.18_LMNA | -0.02955 | -0.18786717  | 0.130263241 | 7.18E-01 | 8.80E-01 | 1.00E+00 |
| ENSG00000221535.1_           | ENSG00000160789.18_LMNA | 0.0002   | -0.159006497 | 0.159394894 | 9.98E-01 | 9.99E-01 | 1.00E+00 |
| ENSG00000274967.1_Y_RNA      | ENSG00000160789.18_LMNA | 0.13781  | -0.021867897 | 0.290636756 | 9.04E-02 | 2.93E-01 | 1.00E+00 |
| ENSG00000277411.1_5S_rRNA    | ENSG00000160789.18_LMNA | 0.0118   | -0.147682286 | 0.170675939 | 8.85E-01 | 9.56E-01 | 1.00E+00 |
| ENSG00000207001.1_SNORD116   | ENSG00000160789.18_LMNA | 0.06649  | -0.09370219  | 0.223327094 | 4.16E-01 | 6.88E-01 | 1.00E+00 |
| ENSG00000250821.1_RP11-345F  | ENSG00000160789.18_LMNA | -0.05551 | -0.212834446 | 0.104610475 | 4.97E-01 | 7.51E-01 | 1.00E+00 |
| ENSG00000207034.1_Y_RNA      | ENSG00000160789.18_LMNA | -0.0925  | -0.24804723  | 0.067698367 | 2.57E-01 | 5.39E-01 | 1.00E+00 |
| ENSG00000240474.3_RN7SL116F  | ENSG00000160789.18_LMNA | 0.04904  | -0.111025258 | 0.206629708 | 5.49E-01 | 7.85E-01 | 1.00E+00 |
| ENSG00000199237.1_RNU6-834F  | ENSG00000160789.18_LMNA | 0.07346  | -0.086756518 | 0.229970048 | 3.68E-01 | 6.49E-01 | 1.00E+00 |
| ENSG00000251916.1_RNU1-61P   | ENSG00000160789.18_LMNA | 0.06793  | -0.092270624 | 0.22469868  | 4.06E-01 | 6.81E-01 | 1.00E+00 |
| ENSG00000255058.1_PDCL2P2    | ENSG00000160789.18_LMNA | 0.12796  | -0.031895175 | 0.281423202 | 1.16E-01 | 3.41E-01 | 1.00E+00 |
| ENSG00000264391.2_RN7SL208F  | ENSG00000160789.18_LMNA | 0.11448  | -0.045547318 | 0.268785381 | 1.60E-01 | 4.14E-01 | 1.00E+00 |
| ENSG00000236574.1_RP11-340I  | ENSG00000160789.18_LMNA | -0.08151 | -0.237629294 | 0.078709843 | 3.18E-01 | 6.05E-01 | 1.00E+00 |
| ENSG00000231812.1_SNRPCP9    | ENSG00000160789.18_LMNA | -0.09866 | -0.253874688 | 0.061505169 | 2.27E-01 | 5.03E-01 | 1.00E+00 |
| ENSG00000267590.1_NDUFA3P1   | ENSG00000160789.18_LMNA | -0.00599 | -0.16503638  | 0.153353878 | 9.42E-01 | 9.77E-01 | 1.00E+00 |
| ENSG00000254683.1_SNRPCP6    | ENSG00000160789.18_LMNA | 0.07971  | -0.080516604 | 0.235912942 | 3.29E-01 | 6.15E-01 | 1.00E+00 |
| ENSG00000264015.1_RP11-176N  | ENSG00000160789.18_LMNA | 0.04305  | -0.116955519 | 0.200870808 | 5.98E-01 | 8.15E-01 | 1.00E+00 |
| ENSG00000227265.2_AC073464.  | ENSG00000160789.18_LMNA | -0.04217 | -0.200025698 | 0.117823874 | 6.06E-01 | 8.20E-01 | 1.00E+00 |
| ENSG00000211793.2_TRAV9-2    | ENSG00000160789.18_LMNA | 0.0355   | -0.124406319 | 0.193604034 | 6.64E-01 | 8.52E-01 | 1.00E+00 |
| ENSG00000226890.1_LA16c-395F | ENSG00000160789.18_LMNA | -0.04352 | -0.201328498 | 0.116485038 | 5.94E-01 | 8.13E-01 | 1.00E+00 |
| ENSG00000264317.2_RN7SL154F  | ENSG00000160789.18_LMNA | 0.06889  | -0.091315532 | 0.225613058 | 3.99E-01 | 6.76E-01 | 1.00E+00 |
| ENSG00000259317.1_RP11-561C  | ENSG00000160789.18_LMNA | -0.00394 | -0.163036723 | 0.155359868 | 9.62E-01 | 9.85E-01 | 1.00E+00 |
| ENSG00000264275.1_RN7SL753F  | ENSG00000160789.18_LMNA | 0.10584  | -0.054273997 | 0.260649972 | 1.94E-01 | 4.63E-01 | 1.00E+00 |

|                             |                         |          |              |             |          |          |          |
|-----------------------------|-------------------------|----------|--------------|-------------|----------|----------|----------|
| ENSG00000233492.1_RP5-984P4 | ENSG00000160789.18_LMNA | -0.03555 | -0.193652128 | 0.124357124 | 6.64E-01 | 8.52E-01 | 1.00E+00 |
| ENSG00000258179.1_RP11-248E | ENSG00000160789.18_LMNA | -0.09832 | -0.253554444 | 0.061846144 | 2.28E-01 | 5.05E-01 | 1.00E+00 |
| ENSG00000273132.1_RP11-350J | ENSG00000160789.18_LMNA | -0.09128 | -0.246889766 | 0.068925584 | 2.63E-01 | 5.47E-01 | 1.00E+00 |
| ENSG00000223402.1_AC074121  | ENSG00000160789.18_LMNA | -0.10281 | -0.257789359 | 0.057331127 | 2.08E-01 | 4.80E-01 | 1.00E+00 |
| ENSG00000259907.1_RP6-91H8  | ENSG00000160789.18_LMNA | 0.11155  | -0.04851164  | 0.266026925 | 1.71E-01 | 4.30E-01 | 1.00E+00 |
| ENSG00000255973.1_RP11-592H | ENSG00000160789.18_LMNA | -0.03472 | -0.192856674 | 0.125170576 | 6.71E-01 | 8.56E-01 | 1.00E+00 |
| ENSG00000253399.1_AC078852  | ENSG00000160789.18_LMNA | -0.06996 | -0.22663994  | 0.090242232 | 3.92E-01 | 6.70E-01 | 1.00E+00 |
| ENSG00000266696.1_RP11-30L3 | ENSG00000160789.18_LMNA | -0.04584 | -0.203555917 | 0.114193329 | 5.75E-01 | 8.02E-01 | 1.00E+00 |
| ENSG00000259274.1_CTD-2501E | ENSG00000160789.18_LMNA | -0.00683 | -0.165845753 | 0.152541195 | 9.33E-01 | 9.74E-01 | 1.00E+00 |
| ENSG00000236975.1_RP5-1065P | ENSG00000160789.18_LMNA | -0.21291 | -0.359908773 | -0.05559071 | 8.45E-03 | 5.80E-02 | 1.00E+00 |
| ENSG00000267550.1_CTC-482H1 | ENSG00000160789.18_LMNA | 0.04943  | -0.110639428 | 0.207003627 | 5.45E-01 | 7.83E-01 | 1.00E+00 |
| ENSG00000226963.1_AC078883  | ENSG00000160789.18_LMNA | -0.08341 | -0.239429476 | 0.0768126   | 3.07E-01 | 5.93E-01 | 1.00E+00 |
| ENSG00000259676.1_RP11-343B | ENSG00000160789.18_LMNA | 0.09169  | -0.068506065 | 0.247285541 | 2.61E-01 | 5.44E-01 | 1.00E+00 |
| ENSG00000280447.1_AC109486  | ENSG00000160789.18_LMNA | 0.0594   | -0.100754921 | 0.216551477 | 4.67E-01 | 7.29E-01 | 1.00E+00 |
| ENSG00000251679.1_RP11-669M | ENSG00000160789.18_LMNA | -0.00667 | -0.165699331 | 0.152688247 | 9.35E-01 | 9.74E-01 | 1.00E+00 |
| ENSG00000256571.1_RP11-274J | ENSG00000160789.18_LMNA | 0.03982  | -0.120139443 | 0.197769797 | 6.26E-01 | 8.31E-01 | 1.00E+00 |
| ENSG00000230226.1_RP4-697K1 | ENSG00000160789.18_LMNA | 0.11293  | -0.04711521  | 0.267327018 | 1.66E-01 | 4.23E-01 | 1.00E+00 |
| ENSG00000241228.1_RPL12P31  | ENSG00000160789.18_LMNA | 0.06957  | -0.090634064 | 0.226265135 | 3.94E-01 | 6.72E-01 | 1.00E+00 |
| ENSG00000228825.1_LAMTOR3F  | ENSG00000160789.18_LMNA | -0.09991 | -0.255050166 | 0.060252966 | 2.21E-01 | 4.96E-01 | 1.00E+00 |
| ENSG00000241853.1_RP11-147K | ENSG00000160789.18_LMNA | 0.13208  | -0.027706975 | 0.285278563 | 1.05E-01 | 3.21E-01 | 1.00E+00 |
| ENSG00000260468.1_LINC01290 | ENSG00000160789.18_LMNA | 0.12222  | -0.037711213 | 0.276052538 | 1.34E-01 | 3.71E-01 | 1.00E+00 |
| ENSG00000211807.3_TRAV26-1  | ENSG00000160789.18_LMNA | 0.08528  | -0.074939937 | 0.241204206 | 2.96E-01 | 5.82E-01 | 1.00E+00 |
| ENSG00000223987.1_RPL26P28  | ENSG00000160789.18_LMNA | 0.07495  | -0.085267386 | 0.231390447 | 3.59E-01 | 6.42E-01 | 1.00E+00 |
| ENSG00000278029.1_CTD-2240J | ENSG00000160789.18_LMNA | 0.02061  | -0.139048472 | 0.17922113  | 8.01E-01 | 9.20E-01 | 1.00E+00 |
| ENSG00000225231.1_AC091814  | ENSG00000160789.18_LMNA | -0.10206 | -0.257080475 | 0.058087796 | 2.11E-01 | 4.84E-01 | 1.00E+00 |
| ENSG00000233590.1_RP11-153K | ENSG00000160789.18_LMNA | -0.01304 | -0.171883219 | 0.146465421 | 8.73E-01 | 9.51E-01 | 1.00E+00 |
| ENSG00000253760.1_RP11-48B3 | ENSG00000160789.18_LMNA | 0.05553  | -0.104592945 | 0.212851367 | 4.97E-01 | 7.51E-01 | 1.00E+00 |
| ENSG00000269915.1_AP006621  | ENSG00000160789.18_LMNA | -0.02254 | -0.181090921 | 0.137152816 | 7.83E-01 | 9.11E-01 | 1.00E+00 |
| ENSG00000213287.3_RP11-680L | ENSG00000160789.18_LMNA | 0.0855   | -0.074721407 | 0.24141117  | 2.95E-01 | 5.81E-01 | 1.00E+00 |
| ENSG00000250302.1_LINC01618 | ENSG00000160789.18_LMNA | -0.0344  | -0.192550685 | 0.125483375 | 6.74E-01 | 8.57E-01 | 1.00E+00 |
| ENSG00000267162.1_SDHDP1    | ENSG00000160789.18_LMNA | -0.05613 | -0.213418776 | 0.104005    | 4.92E-01 | 7.48E-01 | 1.00E+00 |
| ENSG00000253227.1_RP11-383J | ENSG00000160789.18_LMNA | 0.03347  | -0.126401466 | 0.191652223 | 6.82E-01 | 8.62E-01 | 1.00E+00 |
| ENSG00000224342.1_AC007879  | ENSG00000160789.18_LMNA | 0.00399  | -0.155308717 | 0.163087745 | 9.61E-01 | 9.84E-01 | 1.00E+00 |

|                             |                         |          |              |             |          |          |          |
|-----------------------------|-------------------------|----------|--------------|-------------|----------|----------|----------|
| ENSG00000265593.1_NPM1P45   | ENSG00000160789.18_LMNA | -0.12012 | -0.274075957 | 0.039846368 | 1.40E-01 | 3.82E-01 | 1.00E+00 |
| ENSG00000251566.1_HMGB1P35  | ENSG00000160789.18_LMNA | -0.01779 | -0.176486809 | 0.141816425 | 8.28E-01 | 9.33E-01 | 1.00E+00 |
| ENSG00000227267.3_RP11-305O | ENSG00000160789.18_LMNA | 0.06386  | -0.096320756 | 0.220814986 | 4.34E-01 | 7.03E-01 | 1.00E+00 |
| ENSG00000259294.1_CTA-339C1 | ENSG00000160789.18_LMNA | 0.09033  | -0.069879677 | 0.24598928  | 2.68E-01 | 5.52E-01 | 1.00E+00 |
| ENSG00000108759.3_KRT32     | ENSG00000160789.18_LMNA | 0.21808  | 0.060992998  | 0.364618089 | 6.95E-03 | 5.02E-02 | 1.00E+00 |
| ENSG00000266202.1_RP1-66C13 | ENSG00000160789.18_LMNA | -0.09739 | -0.252668793 | 0.062788744 | 2.33E-01 | 5.11E-01 | 1.00E+00 |
| ENSG00000236928.3_RP11-792A | ENSG00000160789.18_LMNA | 0.08528  | -0.074939578 | 0.241204546 | 2.96E-01 | 5.82E-01 | 1.00E+00 |
| ENSG00000260895.1_RP11-554A | ENSG00000160789.18_LMNA | -0.13894 | -0.291689881 | 0.020717744 | 8.78E-02 | 2.88E-01 | 1.00E+00 |
| ENSG00000255478.1_RP11-867O | ENSG00000160789.18_LMNA | 0.18371  | 0.025248233  | 0.33316712  | 2.35E-02 | 1.21E-01 | 1.00E+00 |
| ENSG00000267952.1_CTD-2207C | ENSG00000160789.18_LMNA | -0.04895 | -0.206537519 | 0.111120369 | 5.49E-01 | 7.86E-01 | 1.00E+00 |
| ENSG00000236751.1_LINC01186 | ENSG00000160789.18_LMNA | -0.07056 | -0.227211735 | 0.08964427  | 3.88E-01 | 6.66E-01 | 1.00E+00 |
| ENSG00000267686.1_RP11-795H | ENSG00000160789.18_LMNA | -0.05261 | -0.210049363 | 0.10749311  | 5.20E-01 | 7.66E-01 | 1.00E+00 |
| ENSG00000279816.1_AC010287. | ENSG00000160789.18_LMNA | 0.11196  | -0.04809891  | 0.266411301 | 1.70E-01 | 4.28E-01 | 1.00E+00 |
| ENSG00000223466.1_AC064834. | ENSG00000160789.18_LMNA | 0.02492  | -0.134817159 | 0.183391549 | 7.61E-01 | 9.00E-01 | 1.00E+00 |
| ENSG00000214190.2_RNF152P1  | ENSG00000160789.18_LMNA | 0.04952  | -0.110552184 | 0.207088166 | 5.45E-01 | 7.83E-01 | 1.00E+00 |
| ENSG00000257202.1_RP11-512N | ENSG00000160789.18_LMNA | 0.11362  | -0.04642113  | 0.267972789 | 1.63E-01 | 4.19E-01 | 1.00E+00 |
| ENSG00000277350.1_RP11-395E | ENSG00000160789.18_LMNA | -0.03767 | -0.195697522 | 0.122263486 | 6.45E-01 | 8.42E-01 | 1.00E+00 |
| ENSG00000179300.3_ZCCHC5    | ENSG00000160789.18_LMNA | 0.1563   | -0.00297459  | 0.307840801 | 5.45E-02 | 2.13E-01 | 1.00E+00 |
| ENSG00000235294.1_RPL7AP25  | ENSG00000160789.18_LMNA | -0.01964 | -0.178279998 | 0.140001742 | 8.10E-01 | 9.25E-01 | 1.00E+00 |
| ENSG00000254431.1_RP11-550A | ENSG00000160789.18_LMNA | 0.04724  | -0.112809638 | 0.204899201 | 5.63E-01 | 7.94E-01 | 1.00E+00 |
| ENSG00000255910.1_RP11-405A | ENSG00000160789.18_LMNA | 0.02838  | -0.131412508 | 0.186738908 | 7.29E-01 | 8.85E-01 | 1.00E+00 |
| ENSG00000258771.1_BCAR1P2   | ENSG00000160789.18_LMNA | 0.12483  | -0.035065279 | 0.278498286 | 1.25E-01 | 3.58E-01 | 1.00E+00 |
| ENSG00000203520.3_RP11-697H | ENSG00000160789.18_LMNA | -0.00884 | -0.167805577 | 0.15057157  | 9.14E-01 | 9.67E-01 | 1.00E+00 |
| ENSG00000258397.1_BCAR1P1   | ENSG00000160789.18_LMNA | -0.036   | -0.194092495 | 0.12390661  | 6.60E-01 | 8.50E-01 | 1.00E+00 |
| ENSG00000261528.2_AC002400. | ENSG00000160789.18_LMNA | -0.04518 | -0.202922132 | 0.114845752 | 5.80E-01 | 8.04E-01 | 1.00E+00 |
| ENSG00000255192.5_NANOGP8   | ENSG00000160789.18_LMNA | 0.1766   | 0.017900146  | 0.326615673 | 2.95E-02 | 1.42E-01 | 1.00E+00 |
| ENSG00000236920.2_RP11-111D | ENSG00000160789.18_LMNA | -0.00844 | -0.167414147 | 0.15096516  | 9.18E-01 | 9.69E-01 | 1.00E+00 |
| ENSG00000226761.3_TAS2R46   | ENSG00000160789.18_LMNA | 0.04336  | -0.116645352 | 0.201172558 | 5.96E-01 | 8.13E-01 | 1.00E+00 |
| ENSG00000225166.1_AC012462. | ENSG00000160789.18_LMNA | 0.10535  | -0.054765647 | 0.260190299 | 1.96E-01 | 4.66E-01 | 1.00E+00 |
| ENSG00000266853.1_ITM2BP1   | ENSG00000160789.18_LMNA | 0.01088  | -0.14858044  | 0.169784245 | 8.94E-01 | 9.59E-01 | 1.00E+00 |
| ENSG00000278911.1_RP11-405M | ENSG00000160789.18_LMNA | -0.05191 | -0.209384766 | 0.108180198 | 5.25E-01 | 7.70E-01 | 1.00E+00 |
| ENSG00000138308.5_PLA2G12B  | ENSG00000160789.18_LMNA | -0.04821 | -0.205826788 | 0.111853429 | 5.55E-01 | 7.89E-01 | 1.00E+00 |
| ENSG00000267504.1_RP11-845C | ENSG00000160789.18_LMNA | 0.06833  | -0.091868046 | 0.225084165 | 4.03E-01 | 6.79E-01 | 1.00E+00 |

|                              |                         |          |              |             |          |          |          |
|------------------------------|-------------------------|----------|--------------|-------------|----------|----------|----------|
| ENSG00000223991.1_AC104809.  | ENSG00000160789.18_LMNA | 0.03857  | -0.121378392 | 0.196561389 | 6.37E-01 | 8.38E-01 | 1.00E+00 |
| ENSG00000213262.3_VDAC2P3    | ENSG00000160789.18_LMNA | -0.0349  | -0.19302712  | 0.12499631  | 6.69E-01 | 8.55E-01 | 1.00E+00 |
| ENSG00000270799.1_RP11-451F  | ENSG00000160789.18_LMNA | 0.01927  | -0.140361364 | 0.177924804 | 8.14E-01 | 9.27E-01 | 1.00E+00 |
| ENSG00000250185.2_RCC2P8     | ENSG00000160789.18_LMNA | -0.07498 | -0.231418482 | 0.08523798  | 3.59E-01 | 6.41E-01 | 1.00E+00 |
| ENSG00000186645.7_SPDYE17    | ENSG00000160789.18_LMNA | 0.0785   | -0.081718454 | 0.234770137 | 3.36E-01 | 6.22E-01 | 1.00E+00 |
| ENSG00000253286.4_CTD-2552K  | ENSG00000160789.18_LMNA | -0.05737 | -0.214607225 | 0.102772819 | 4.83E-01 | 7.40E-01 | 1.00E+00 |
| ENSG00000237361.2_TUSC8      | ENSG00000160789.18_LMNA | -0.15754 | -0.308992456 | 0.00170188  | 5.26E-02 | 2.08E-01 | 1.00E+00 |
| ENSG00000266978.1_CTD-2369P  | ENSG00000160789.18_LMNA | 0.20955  | 0.052089773  | 0.356848609 | 9.57E-03 | 6.35E-02 | 1.00E+00 |
| ENSG00000213972.3_RP3-522P1  | ENSG00000160789.18_LMNA | -0.04238 | -0.200229992 | 0.117614005 | 6.04E-01 | 8.18E-01 | 1.00E+00 |
| ENSG00000197241.3_SLC2A7     | ENSG00000160789.18_LMNA | -0.10401 | -0.258926988 | 0.056116053 | 2.02E-01 | 4.73E-01 | 1.00E+00 |
| ENSG00000230005.2_SNAP47-A5  | ENSG00000160789.18_LMNA | -0.01335 | -0.17218388  | 0.146162223 | 8.70E-01 | 9.50E-01 | 1.00E+00 |
| ENSG00000214273.4_AGGF1P1    | ENSG00000160789.18_LMNA | -0.07875 | -0.23500091  | 0.081475832 | 3.35E-01 | 6.21E-01 | 1.00E+00 |
| ENSG00000231870.4_KRT17P3    | ENSG00000160789.18_LMNA | 0.06332  | -0.096852667 | 0.220304185 | 4.38E-01 | 7.06E-01 | 1.00E+00 |
| ENSG00000258676.4_RP11-386M  | ENSG00000160789.18_LMNA | -0.00047 | -0.159655077 | 0.158746259 | 9.95E-01 | 9.98E-01 | 1.00E+00 |
| ENSG00000278766.2_AC159540.  | ENSG00000160789.18_LMNA | 0.08808  | -0.072129074 | 0.243864108 | 2.81E-01 | 5.66E-01 | 1.00E+00 |
| ENSG00000226185.1_TRIM64FP   | ENSG00000160789.18_LMNA | -0.04282 | -0.20064933  | 0.117183135 | 6.00E-01 | 8.16E-01 | 1.00E+00 |
| ENSG00000259465.2_AHCYP7     | ENSG00000160789.18_LMNA | 0.01984  | -0.139801287 | 0.178477949 | 8.08E-01 | 9.24E-01 | 1.00E+00 |
| ENSG00000162398.10_LEXM      | ENSG00000160789.18_LMNA | -0.01763 | -0.176332037 | 0.141972952 | 8.29E-01 | 9.33E-01 | 1.00E+00 |
| ENSG00000112273.6_HDGFL1     | ENSG00000160789.18_LMNA | 0.05577  | -0.104354854 | 0.213081169 | 4.95E-01 | 7.50E-01 | 1.00E+00 |
| ENSG00000175699.11_LINC0052  | ENSG00000160789.18_LMNA | -0.05286 | -0.210294525 | 0.107239576 | 5.18E-01 | 7.64E-01 | 1.00E+00 |
| ENSG00000279390.1_AF127577.1 | ENSG00000160789.18_LMNA | 0.04695  | -0.113098143 | 0.20461922  | 5.66E-01 | 7.96E-01 | 1.00E+00 |
| ENSG00000261208.1_RP11-452D  | ENSG00000160789.18_LMNA | 0.01211  | -0.147376445 | 0.170979461 | 8.82E-01 | 9.54E-01 | 1.00E+00 |
| ENSG00000266076.1_CTD-2535L  | ENSG00000160789.18_LMNA | 0.08074  | -0.079484142 | 0.236893982 | 3.23E-01 | 6.09E-01 | 1.00E+00 |
| ENSG00000253706.4_RP11-758M  | ENSG00000160789.18_LMNA | -0.12388 | -0.277603966 | 0.03603331  | 1.28E-01 | 3.63E-01 | 1.00E+00 |
| ENSG00000278972.1_CTD-3022L  | ENSG00000160789.18_LMNA | -0.15794 | -0.309366137 | 0.001288703 | 5.20E-02 | 2.06E-01 | 1.00E+00 |
| ENSG00000251408.1_RP11-586D  | ENSG00000160789.18_LMNA | -0.17052 | -0.321010142 | -0.01163936 | 3.57E-02 | 1.61E-01 | 1.00E+00 |
| ENSG00000205108.5_FAM205A    | ENSG00000160789.18_LMNA | 0.01941  | -0.140219225 | 0.178065202 | 8.12E-01 | 9.26E-01 | 1.00E+00 |
| ENSG00000262660.1_RP13-1032  | ENSG00000160789.18_LMNA | -0.02326 | -0.181788867 | 0.136444617 | 7.76E-01 | 9.08E-01 | 1.00E+00 |
| ENSG00000240505.7_TNFRSF13I  | ENSG00000160789.18_LMNA | -0.00085 | -0.16002581  | 0.158375372 | 9.92E-01 | 9.97E-01 | 1.00E+00 |
| ENSG00000132704.14_FCRL2     | ENSG00000160789.18_LMNA | -0.03602 | -0.194110379 | 0.123888311 | 6.60E-01 | 8.50E-01 | 1.00E+00 |
| ENSG00000258946.4_           | ENSG00000160789.18_LMNA | 0.04217  | -0.117821154 | 0.200028345 | 6.06E-01 | 8.20E-01 | 1.00E+00 |
| ENSG00000186334.8_SLC36A3    | ENSG00000160789.18_LMNA | 0.01178  | -0.147698402 | 0.170659943 | 8.85E-01 | 9.56E-01 | 1.00E+00 |
| ENSG00000121446.16_RGSL1     | ENSG00000160789.18_LMNA | 0.06295  | -0.097229394 | 0.219942305 | 4.41E-01 | 7.09E-01 | 1.00E+00 |

|                              |                         |          |              |             |          |          |          |
|------------------------------|-------------------------|----------|--------------|-------------|----------|----------|----------|
| ENSG00000208005.1_MIR503     | ENSG00000160789.18_LMNA | -0.01546 | -0.174229489 | 0.144097765 | 8.50E-01 | 9.41E-01 | 1.00E+00 |
| ENSG00000211950.2_IGHV1-24   | ENSG00000160789.18_LMNA | 0.13716  | -0.022531655 | 0.290028648 | 9.20E-02 | 2.96E-01 | 1.00E+00 |
| ENSG00000240455.2_           | ENSG00000160789.18_LMNA | -0.01432 | -0.173129347 | 0.145208389 | 8.61E-01 | 9.46E-01 | 1.00E+00 |
| ENSG00000278420.1_MIR6819    | ENSG00000160789.18_LMNA | 0.13176  | -0.028027245 | 0.284984103 | 1.06E-01 | 3.23E-01 | 1.00E+00 |
| ENSG00000208037.1_MIR320A    | ENSG00000160789.18_LMNA | 0.10456  | -0.055561874 | 0.259445555 | 2.00E-01 | 4.70E-01 | 1.00E+00 |
| ENSG00000263371.2_           | ENSG00000160789.18_LMNA | -0.16638 | -0.317182184 | -0.00737783 | 4.05E-02 | 1.75E-01 | 1.00E+00 |
| ENSG00000221634.1_MIR1276    | ENSG00000160789.18_LMNA | 0.06277  | -0.097401685 | 0.219776775 | 4.42E-01 | 7.10E-01 | 1.00E+00 |
| ENSG00000221025.1_MIR1250    | ENSG00000160789.18_LMNA | -0.04116 | -0.199055469 | 0.118820189 | 6.15E-01 | 8.25E-01 | 1.00E+00 |
| ENSG00000200169.1_RNU5D-1    | ENSG00000160789.18_LMNA | -0.18505 | -0.334399755 | -0.02663448 | 2.25E-02 | 1.17E-01 | 1.00E+00 |
| ENSG00000278596.1_MIR6077    | ENSG00000160789.18_LMNA | 0.20266  | 0.04490698   | 0.350549599 | 1.23E-02 | 7.60E-02 | 1.00E+00 |
| ENSG00000200942.1_RNU6-501F  | ENSG00000160789.18_LMNA | -0.02054 | -0.179157662 | 0.139112777 | 8.02E-01 | 9.20E-01 | 1.00E+00 |
| ENSG00000207195.1_Y_RNA      | ENSG00000160789.18_LMNA | -0.20252 | -0.350423917 | -0.04476399 | 1.23E-02 | 7.63E-02 | 1.00E+00 |
| ENSG00000251728.1_Y_RNA      | ENSG00000160789.18_LMNA | 0.01931  | -0.140321009 | 0.177964666 | 8.13E-01 | 9.27E-01 | 1.00E+00 |
| ENSG00000239096.1_snoU13     | ENSG00000160789.18_LMNA | 0.05246  | -0.107635368 | 0.209911786 | 5.21E-01 | 7.67E-01 | 1.00E+00 |
| ENSG00000224854.3_CDKN2A-A:  | ENSG00000160789.18_LMNA | -0.02058 | -0.179192119 | 0.139077866 | 8.01E-01 | 9.20E-01 | 1.00E+00 |
| ENSG00000199407.1_RNA5SP30   | ENSG00000160789.18_LMNA | -0.03909 | -0.197065108 | 0.120862063 | 6.33E-01 | 8.35E-01 | 1.00E+00 |
| ENSG00000252919.1_Y_RNA      | ENSG00000160789.18_LMNA | 0.03959  | -0.120374227 | 0.197540875 | 6.28E-01 | 8.33E-01 | 1.00E+00 |
| ENSG00000207234.1_RNU6-125F  | ENSG00000160789.18_LMNA | 0.15958  | 0.000391831  | 0.310885041 | 4.95E-02 | 2.00E-01 | 1.00E+00 |
| ENSG00000279421.1_RP11-335K  | ENSG00000160789.18_LMNA | -0.0092  | -0.168155443 | 0.150219689 | 9.10E-01 | 9.66E-01 | 1.00E+00 |
| ENSG00000252585.1_Y_RNA      | ENSG00000160789.18_LMNA | -0.0715  | -0.228100326 | 0.088714561 | 3.81E-01 | 6.60E-01 | 1.00E+00 |
| ENSG00000199349.1_Y_RNA      | ENSG00000160789.18_LMNA | 0.12417  | -0.035735568 | 0.277879094 | 1.27E-01 | 3.61E-01 | 1.00E+00 |
| ENSG00000197123.8_ZNF679     | ENSG00000160789.18_LMNA | -0.09737 | -0.252657173 | 0.062801106 | 2.33E-01 | 5.11E-01 | 1.00E+00 |
| ENSG00000276956.1_RN7SL769F  | ENSG00000160789.18_LMNA | -0.04474 | -0.202497814 | 0.115282394 | 5.84E-01 | 8.07E-01 | 1.00E+00 |
| ENSG00000222276.1_RNU2-33P   | ENSG00000160789.18_LMNA | -0.01619 | -0.174939233 | 0.143380834 | 8.43E-01 | 9.39E-01 | 1.00E+00 |
| ENSG00000244384.3_RN7SL359F  | ENSG00000160789.18_LMNA | -0.02026 | -0.178883961 | 0.139390057 | 8.04E-01 | 9.22E-01 | 1.00E+00 |
| ENSG00000261567.1_           | ENSG00000160789.18_LMNA | -0.09552 | -0.250903851 | 0.064665497 | 2.42E-01 | 5.21E-01 | 1.00E+00 |
| ENSG00000211655.3_IGLV1-36   | ENSG00000160789.18_LMNA | -0.06694 | -0.223754003 | 0.093256752 | 4.13E-01 | 6.86E-01 | 1.00E+00 |
| ENSG00000234638.1_AC053503.f | ENSG00000160789.18_LMNA | 0.11146  | -0.048607326 | 0.265937798 | 1.72E-01 | 4.31E-01 | 1.00E+00 |
| ENSG00000201699.1_RNU1-59P   | ENSG00000160789.18_LMNA | -0.04463 | -0.202395873 | 0.115387278 | 5.85E-01 | 8.07E-01 | 1.00E+00 |
| ENSG00000241175.3_RN7SL494f  | ENSG00000160789.18_LMNA | 0.11686  | -0.043145806 | 0.271016339 | 1.52E-01 | 4.00E-01 | 1.00E+00 |
| ENSG00000256725.1_RP11-662M  | ENSG00000160789.18_LMNA | 0.01309  | -0.146415731 | 0.171932497 | 8.73E-01 | 9.51E-01 | 1.00E+00 |
| ENSG00000226753.1_RP11-212D  | ENSG00000160789.18_LMNA | 0.02746  | -0.132321799 | 0.18584564  | 7.37E-01 | 8.89E-01 | 1.00E+00 |
| ENSG00000244159.1_RPS27AP1:  | ENSG00000160789.18_LMNA | 0.04796  | -0.112100266 | 0.205587394 | 5.57E-01 | 7.91E-01 | 1.00E+00 |

|                               |                         |          |              |             |          |          |          |
|-------------------------------|-------------------------|----------|--------------|-------------|----------|----------|----------|
| ENSG00000259280.1_RP11-122D   | ENSG00000160789.18_LMNA | -0.13366 | -0.286756466 | 0.026098564 | 1.01E-01 | 3.13E-01 | 1.00E+00 |
| ENSG00000231171.3_LINC01098   | ENSG00000160789.18_LMNA | -0.21478 | -0.361614537 | -0.05754542 | 7.88E-03 | 5.50E-02 | 1.00E+00 |
| ENSG00000244080.3_RN7SL833f   | ENSG00000160789.18_LMNA | 0.05849  | -0.101659678 | 0.215680051 | 4.74E-01 | 7.34E-01 | 1.00E+00 |
| ENSG00000281080.1_            | ENSG00000160789.18_LMNA | 0.07605  | -0.084172508 | 0.232433928 | 3.52E-01 | 6.35E-01 | 1.00E+00 |
| ENSG00000162344.3_FGF19       | ENSG00000160789.18_LMNA | -0.07638 | -0.232746877 | 0.083843995 | 3.50E-01 | 6.33E-01 | 1.00E+00 |
| ENSG00000268289.1_CTD-2528A   | ENSG00000160789.18_LMNA | 0.07873  | -0.081489407 | 0.234987999 | 3.35E-01 | 6.21E-01 | 1.00E+00 |
| ENSG00000279815.1_RP11-394B   | ENSG00000160789.18_LMNA | 0.16652  | 0.007520802  | 0.317310778 | 4.03E-02 | 1.74E-01 | 1.00E+00 |
| ENSG00000257256.1_RP3-405J1f  | ENSG00000160789.18_LMNA | -0.00201 | -0.161155735 | 0.157244419 | 9.80E-01 | 9.93E-01 | 1.00E+00 |
| ENSG00000253952.1_HIGD1AP1f   | ENSG00000160789.18_LMNA | -0.01592 | -0.174680546 | 0.143642179 | 8.46E-01 | 9.40E-01 | 1.00E+00 |
| ENSG00000203756.6_TMEM244     | ENSG00000160789.18_LMNA | -0.0802  | -0.236385123 | 0.080019758 | 3.26E-01 | 6.13E-01 | 1.00E+00 |
| ENSG00000266614.1_RP11-94B1   | ENSG00000160789.18_LMNA | -0.11147 | -0.265952041 | 0.048592035 | 1.72E-01 | 4.31E-01 | 1.00E+00 |
| ENSG00000232448.1_RP11-416N   | ENSG00000160789.18_LMNA | 0.07447  | -0.085751786 | 0.230928553 | 3.62E-01 | 6.44E-01 | 1.00E+00 |
| ENSG00000218690.1_HIST1H2AF   | ENSG00000160789.18_LMNA | 0.09799  | -0.062181829 | 0.2532391   | 2.30E-01 | 5.07E-01 | 1.00E+00 |
| ENSG00000227950.1_RP11-312B   | ENSG00000160789.18_LMNA | -0.01557 | -0.174341657 | 0.143984483 | 8.49E-01 | 9.41E-01 | 1.00E+00 |
| ENSG00000226141.1_AF277315.f  | ENSG00000160789.18_LMNA | -0.01076 | -0.16967335  | 0.148692102 | 8.95E-01 | 9.59E-01 | 1.00E+00 |
| ENSG00000260183.1_RP11-109P   | ENSG00000160789.18_LMNA | 0.04724  | -0.112805364 | 0.204903349 | 5.63E-01 | 7.94E-01 | 1.00E+00 |
| ENSG00000259092.1_TRAV30      | ENSG00000160789.18_LMNA | 0.05597  | -0.104161793 | 0.213267481 | 4.93E-01 | 7.49E-01 | 1.00E+00 |
| ENSG00000234816.2_HIST1H2AF   | ENSG00000160789.18_LMNA | 0.14521  | -0.014322312 | 0.297532005 | 7.43E-02 | 2.60E-01 | 1.00E+00 |
| ENSG00000254620.1_RP5-907D1   | ENSG00000160789.18_LMNA | 0.18198  | 0.023458874  | 0.331574488 | 2.48E-02 | 1.26E-01 | 1.00E+00 |
| ENSG00000271192.1_RP4-555D2   | ENSG00000160789.18_LMNA | -0.29079 | -0.430078074 | -0.13797379 | 2.79E-04 | 4.25E-03 | 1.00E+00 |
| ENSG00000254138.1_RP11-152K   | ENSG00000160789.18_LMNA | -0.00751 | -0.166512264 | 0.151871634 | 9.27E-01 | 9.72E-01 | 1.00E+00 |
| ENSG00000266513.1_RP11-874J.f | ENSG00000160789.18_LMNA | -0.09921 | -0.254395451 | 0.060950537 | 2.24E-01 | 5.00E-01 | 1.00E+00 |
| ENSG00000106436.4_MYL10       | ENSG00000160789.18_LMNA | 0.13223  | -0.027549742 | 0.285423104 | 1.04E-01 | 3.20E-01 | 1.00E+00 |
| ENSG00000231859.1_AC007875.f  | ENSG00000160789.18_LMNA | 0.11475  | -0.04527308  | 0.269040313 | 1.59E-01 | 4.12E-01 | 1.00E+00 |
| ENSG00000267304.1_AC004637.f  | ENSG00000160789.18_LMNA | 0.09207  | -0.06812716  | 0.247642911 | 2.59E-01 | 5.42E-01 | 1.00E+00 |
| ENSG00000228485.1_GRK5-IT1    | ENSG00000160789.18_LMNA | 0.10231  | -0.057829203 | 0.257322776 | 2.10E-01 | 4.83E-01 | 1.00E+00 |
| ENSG00000272855.1_RP5-1102E   | ENSG00000160789.18_LMNA | -0.27179 | -0.413111807 | -0.11767683 | 7.06E-04 | 8.84E-03 | 1.00E+00 |
| ENSG00000267670.1_CTB-55O6.f  | ENSG00000160789.18_LMNA | 0.11331  | -0.046732466 | 0.267683157 | 1.65E-01 | 4.21E-01 | 1.00E+00 |
| ENSG00000270809.1_CHCHD2P1    | ENSG00000160789.18_LMNA | -0.02402 | -0.182525338 | 0.135696974 | 7.69E-01 | 9.04E-01 | 1.00E+00 |
| ENSG00000250928.1_CTB-161M1   | ENSG00000160789.18_LMNA | -0.07651 | -0.232871184 | 0.083713488 | 3.49E-01 | 6.33E-01 | 1.00E+00 |
| ENSG00000267654.1_RP11-973H   | ENSG00000160789.18_LMNA | 0.12214  | -0.037796084 | 0.275974021 | 1.34E-01 | 3.71E-01 | 1.00E+00 |
| ENSG00000229380.1_AC147651.f  | ENSG00000160789.18_LMNA | 0.07479  | -0.085424476 | 0.231240671 | 3.60E-01 | 6.42E-01 | 1.00E+00 |
| ENSG00000237851.1_RP1-67K17   | ENSG00000160789.18_LMNA | -0.01247 | -0.171332675 | 0.147020455 | 8.79E-01 | 9.53E-01 | 1.00E+00 |

|                              |                         |          |              |             |          |          |          |
|------------------------------|-------------------------|----------|--------------|-------------|----------|----------|----------|
| ENSG00000232335.1_RP11-435D  | ENSG00000160789.18_LMNA | -0.03631 | -0.194387087 | 0.123605156 | 6.57E-01 | 8.48E-01 | 1.00E+00 |
| ENSG00000224565.1_RP1-148H1  | ENSG00000160789.18_LMNA | -0.09441 | -0.2498565   | 0.065778145 | 2.47E-01 | 5.27E-01 | 1.00E+00 |
| ENSG00000204566.6_           | ENSG00000160789.18_LMNA | -0.12922 | -0.282607086 | 0.030610255 | 1.13E-01 | 3.35E-01 | 1.00E+00 |
| ENSG00000205899.3_BHLHA9     | ENSG00000160789.18_LMNA | -0.03247 | -0.190680718 | 0.127393584 | 6.91E-01 | 8.67E-01 | 1.00E+00 |
| ENSG00000249400.1_HMGB3P17   | ENSG00000160789.18_LMNA | 0.08087  | -0.079357116 | 0.237014637 | 3.22E-01 | 6.09E-01 | 1.00E+00 |
| ENSG00000240934.2_RP11-925D  | ENSG00000160789.18_LMNA | -0.02064 | -0.179251321 | 0.139017882 | 8.01E-01 | 9.20E-01 | 1.00E+00 |
| ENSG00000268058.1_BNIP3P40   | ENSG00000160789.18_LMNA | -0.09469 | -0.250120159 | 0.065498122 | 2.46E-01 | 5.26E-01 | 1.00E+00 |
| ENSG00000182333.13_LIPF      | ENSG00000160789.18_LMNA | -0.02803 | -0.186402268 | 0.131755249 | 7.32E-01 | 8.87E-01 | 1.00E+00 |
| ENSG00000253405.1_EVX1-AS    | ENSG00000160789.18_LMNA | -0.29572 | -0.434462194 | -0.14325877 | 2.17E-04 | 3.47E-03 | 1.00E+00 |
| ENSG00000216616.1_RP11-550C  | ENSG00000160789.18_LMNA | -0.10058 | -0.255689539 | 0.059571443 | 2.18E-01 | 4.92E-01 | 1.00E+00 |
| ENSG00000278654.1_RP11-434C  | ENSG00000160789.18_LMNA | -0.0073  | -0.166303324 | 0.152081561 | 9.29E-01 | 9.73E-01 | 1.00E+00 |
| ENSG00000228540.1_AC073326.1 | ENSG00000160789.18_LMNA | 0.13969  | -0.019958995 | 0.292384207 | 8.61E-02 | 2.85E-01 | 1.00E+00 |
| ENSG00000174408.8_PPIAP24    | ENSG00000160789.18_LMNA | 0.16998  | 0.011081041  | 0.320509204 | 3.63E-02 | 1.62E-01 | 1.00E+00 |
| ENSG00000101200.5_AVP        | ENSG00000160789.18_LMNA | 0.09381  | -0.066383408 | 0.249286447 | 2.50E-01 | 5.31E-01 | 1.00E+00 |
| ENSG00000253463.1_HMGB1P19   | ENSG00000160789.18_LMNA | 0.0094   | -0.150028557 | 0.168345445 | 9.09E-01 | 9.65E-01 | 1.00E+00 |
| ENSG00000203737.3_GPR52      | ENSG00000160789.18_LMNA | -0.13444 | -0.287487391 | 0.025302494 | 9.87E-02 | 3.09E-01 | 1.00E+00 |
| ENSG00000233516.1_RP11-388N  | ENSG00000160789.18_LMNA | -0.15539 | -0.306998571 | 0.003904713 | 5.59E-02 | 2.16E-01 | 1.00E+00 |
| ENSG00000250227.1_TRIM60P14  | ENSG00000160789.18_LMNA | -0.10718 | -0.261910684 | 0.052924801 | 1.89E-01 | 4.56E-01 | 1.00E+00 |
| ENSG00000247872.2_SPCS2P3    | ENSG00000160789.18_LMNA | 0.04874  | -0.11132343  | 0.206340676 | 5.51E-01 | 7.87E-01 | 1.00E+00 |
| ENSG00000227645.2_RPL7P54    | ENSG00000160789.18_LMNA | -0.05691 | -0.21417343  | 0.103222689 | 4.86E-01 | 7.43E-01 | 1.00E+00 |
| ENSG00000230863.2_RP4-595K1  | ENSG00000160789.18_LMNA | -0.01654 | -0.175282038 | 0.143034437 | 8.40E-01 | 9.38E-01 | 1.00E+00 |
| ENSG00000227945.1_RP11-103C  | ENSG00000160789.18_LMNA | -0.21696 | -0.363603257 | -0.05982733 | 7.26E-03 | 5.17E-02 | 1.00E+00 |
| ENSG00000226883.1_RP4-782L2  | ENSG00000160789.18_LMNA | -0.03057 | -0.188852217 | 0.129259155 | 7.08E-01 | 8.76E-01 | 1.00E+00 |
| ENSG00000142484.6_TM4SF5     | ENSG00000160789.18_LMNA | -0.04612 | -0.203820481 | 0.113920904 | 5.73E-01 | 8.00E-01 | 1.00E+00 |
| ENSG00000228764.1_ZNF885P    | ENSG00000160789.18_LMNA | -0.14449 | -0.296865678 | 0.015053039 | 7.57E-02 | 2.63E-01 | 1.00E+00 |
| ENSG00000149735.5_GPHA2      | ENSG00000160789.18_LMNA | -0.20087 | -0.348916056 | -0.04304939 | 1.31E-02 | 7.95E-02 | 1.00E+00 |
| ENSG00000242599.6_CSAG4      | ENSG00000160789.18_LMNA | -0.12818 | -0.281633728 | 0.031666757 | 1.16E-01 | 3.40E-01 | 1.00E+00 |
| ENSG00000167104.10_BPIFB6    | ENSG00000160789.18_LMNA | -0.03858 | -0.196577675 | 0.121361701 | 6.37E-01 | 8.38E-01 | 1.00E+00 |
| ENSG00000231504.1_NMD3P2     | ENSG00000160789.18_LMNA | 0.13399  | -0.025755247 | 0.287071733 | 9.98E-02 | 3.11E-01 | 1.00E+00 |
| ENSG00000256748.1_RP11-234B  | ENSG00000160789.18_LMNA | -0.23537 | -0.38031897  | -0.07913369 | 3.51E-03 | 3.01E-02 | 1.00E+00 |
| ENSG00000232185.1_CNOT7P2    | ENSG00000160789.18_LMNA | -0.10343 | -0.258372262 | 0.056708659 | 2.05E-01 | 4.76E-01 | 1.00E+00 |
| ENSG00000263914.1_MTND2P13   | ENSG00000160789.18_LMNA | 0.02876  | -0.131044104 | 0.18710067  | 7.25E-01 | 8.83E-01 | 1.00E+00 |
| ENSG00000255000.1_AC139103.1 | ENSG00000160789.18_LMNA | -0.05354 | -0.210939723 | 0.106572145 | 5.12E-01 | 7.61E-01 | 1.00E+00 |

|                              |                         |          |              |             |          |          |          |
|------------------------------|-------------------------|----------|--------------|-------------|----------|----------|----------|
| ENSG00000263499.1_RP11-118E  | ENSG00000160789.18_LMNA | 0.05119  | -0.108894433 | 0.208693599 | 5.31E-01 | 7.74E-01 | 1.00E+00 |
| ENSG00000280155.1_RP3-523C2  | ENSG00000160789.18_LMNA | -0.10659 | -0.261359564 | 0.053514743 | 1.91E-01 | 4.59E-01 | 1.00E+00 |
| ENSG00000113196.2_HAND1      | ENSG00000160789.18_LMNA | 0.06302  | -0.097152874 | 0.220015817 | 4.41E-01 | 7.08E-01 | 1.00E+00 |
| ENSG00000223642.6_AC008277.  | ENSG00000160789.18_LMNA | -0.13977 | -0.292460361 | 0.019875752 | 8.59E-02 | 2.84E-01 | 1.00E+00 |
| ENSG00000278131.1_AC116050.  | ENSG00000160789.18_LMNA | 0.03425  | -0.125631785 | 0.192405484 | 6.75E-01 | 8.58E-01 | 1.00E+00 |
| ENSG00000258150.4_RP11-345J. | ENSG00000160789.18_LMNA | 0.03226  | -0.127593859 | 0.190484528 | 6.93E-01 | 8.68E-01 | 1.00E+00 |
| ENSG00000232551.2_MTCO1P14   | ENSG00000160789.18_LMNA | 0.03533  | -0.12457426  | 0.193439838 | 6.66E-01 | 8.53E-01 | 1.00E+00 |
| ENSG00000276397.1_AC034110.  | ENSG00000160789.18_LMNA | 0.02523  | -0.134506621 | 0.183697168 | 7.58E-01 | 8.99E-01 | 1.00E+00 |
| ENSG00000279960.1_RP5-1181K  | ENSG00000160789.18_LMNA | -0.03245 | -0.190661468 | 0.127413235 | 6.92E-01 | 8.67E-01 | 1.00E+00 |
| ENSG00000243772.5_KIR2DL3    | ENSG00000160789.18_LMNA | 0.14715  | -0.012342521 | 0.299335792 | 7.04E-02 | 2.51E-01 | 1.00E+00 |
| ENSG00000131864.9_USP29      | ENSG00000160789.18_LMNA | 0.00556  | -0.153773915 | 0.164617885 | 9.46E-01 | 9.78E-01 | 1.00E+00 |
| ENSG00000275850.1_RP11-543P  | ENSG00000160789.18_LMNA | 0.10398  | -0.056152774 | 0.25889262  | 2.02E-01 | 4.73E-01 | 1.00E+00 |
| ENSG00000271461.1_RP4-673D2  | ENSG00000160789.18_LMNA | 0.00895  | -0.150469204 | 0.167907364 | 9.13E-01 | 9.67E-01 | 1.00E+00 |
| ENSG00000214249.3_CTAGE11P   | ENSG00000160789.18_LMNA | 0.05819  | -0.101956397 | 0.215394154 | 4.76E-01 | 7.35E-01 | 1.00E+00 |
| ENSG00000203730.2_TEDDM1     | ENSG00000160789.18_LMNA | 0.0294   | -0.130414589 | 0.187718636 | 7.19E-01 | 8.81E-01 | 1.00E+00 |
| ENSG00000279645.1_RP11-759A  | ENSG00000160789.18_LMNA | -0.03275 | -0.190950662 | 0.127117976 | 6.89E-01 | 8.66E-01 | 1.00E+00 |
| ENSG00000266290.1_RP11-159D  | ENSG00000160789.18_LMNA | 0.18187  | 0.023342756  | 0.331471076 | 2.49E-02 | 1.26E-01 | 1.00E+00 |
| ENSG00000113905.4_HRG        | ENSG00000160789.18_LMNA | 0.04454  | -0.115478762 | 0.20230695  | 5.86E-01 | 8.08E-01 | 1.00E+00 |
| ENSG00000229089.5_ANKRD20A   | ENSG00000160789.18_LMNA | -0.11242 | -0.266843283 | 0.047634934 | 1.68E-01 | 4.26E-01 | 1.00E+00 |
| ENSG00000278783.1_MIR6071    | ENSG00000160789.18_LMNA | -0.10395 | -0.258865782 | 0.056181449 | 2.03E-01 | 4.73E-01 | 1.00E+00 |
| ENSG00000264175.1_MIR3189    | ENSG00000160789.18_LMNA | 0.26614  | 0.111669157  | 0.408050339 | 9.19E-04 | 1.09E-02 | 1.00E+00 |
| ENSG00000211967.3_IGHV3-53   | ENSG00000160789.18_LMNA | 0.06872  | -0.09148443  | 0.225451401 | 4.00E-01 | 6.77E-01 | 1.00E+00 |
| ENSG00000189377.7_CXCL17     | ENSG00000160789.18_LMNA | -0.04408 | -0.201868316 | 0.11592995  | 5.90E-01 | 8.10E-01 | 1.00E+00 |
| ENSG00000264814.1_MIR1273C   | ENSG00000160789.18_LMNA | 0.09408  | -0.066108347 | 0.249545534 | 2.49E-01 | 5.29E-01 | 1.00E+00 |
| ENSG00000224196.1_           | ENSG00000160789.18_LMNA | -0.1487  | -0.300780434 | 0.010755153 | 6.75E-02 | 2.44E-01 | 1.00E+00 |
| ENSG00000264931.1_MIR3138    | ENSG00000160789.18_LMNA | 0.15332  | -0.006023979 | 0.305077746 | 5.93E-02 | 2.24E-01 | 1.00E+00 |
| ENSG00000264441.1_           | ENSG00000160789.18_LMNA | 0.0565   | -0.103633657 | 0.213777039 | 4.89E-01 | 7.45E-01 | 1.00E+00 |
| ENSG00000201900.1_RNY1P13    | ENSG00000160789.18_LMNA | 0.01571  | -0.143851862 | 0.174472964 | 8.48E-01 | 9.41E-01 | 1.00E+00 |
| ENSG00000281302.1_           | ENSG00000160789.18_LMNA | -0.04464 | -0.202400484 | 0.115382534 | 5.85E-01 | 8.07E-01 | 1.00E+00 |
| ENSG00000201441.1_RNU6-646F  | ENSG00000160789.18_LMNA | 0.04456  | -0.115463333 | 0.202321947 | 5.86E-01 | 8.08E-01 | 1.00E+00 |
| ENSG00000201129.1_SNORA58    | ENSG00000160789.18_LMNA | 0.07115  | -0.089058825 | 0.22777135  | 3.84E-01 | 6.62E-01 | 1.00E+00 |
| ENSG00000276751.1_           | ENSG00000160789.18_LMNA | -0.0423  | -0.200154532 | 0.117691527 | 6.05E-01 | 8.19E-01 | 1.00E+00 |
| ENSG00000237848.1_RP11-739N  | ENSG00000160789.18_LMNA | -0.01863 | -0.177303498 | 0.140990212 | 8.20E-01 | 9.30E-01 | 1.00E+00 |



|                              |                         |          |              |             |          |          |          |
|------------------------------|-------------------------|----------|--------------|-------------|----------|----------|----------|
| ENSG00000266129.1_SRP68P1    | ENSG00000160789.18_LMNA | -0.04407 | -0.201850796 | 0.115947968 | 5.90E-01 | 8.10E-01 | 1.00E+00 |
| ENSG00000259813.1_RP5-1142A  | ENSG00000160789.18_LMNA | -0.0156  | -0.174363035 | 0.143962893 | 8.49E-01 | 9.41E-01 | 1.00E+00 |
| ENSG00000263015.1_RP5-1029F  | ENSG00000160789.18_LMNA | -0.07864 | -0.2348978   | 0.081584241 | 3.36E-01 | 6.21E-01 | 1.00E+00 |
| ENSG00000268407.1_AC006115.1 | ENSG00000160789.18_LMNA | -0.19166 | -0.34047508  | -0.03348427 | 1.80E-02 | 1.00E-01 | 1.00E+00 |
| ENSG00000125363.13_AMELX     | ENSG00000160789.18_LMNA | -0.13246 | -0.28563269  | 0.027321724 | 1.04E-01 | 3.19E-01 | 1.00E+00 |
| ENSG00000227947.1_RP11-543D  | ENSG00000160789.18_LMNA | 0.00072  | -0.158498384 | 0.159902858 | 9.93E-01 | 9.97E-01 | 1.00E+00 |
| ENSG00000233444.1_AC013262.1 | ENSG00000160789.18_LMNA | -0.05972 | -0.216855878 | 0.100438753 | 4.65E-01 | 7.27E-01 | 1.00E+00 |
| ENSG00000239742.3_RN7SL672f  | ENSG00000160789.18_LMNA | 0.06378  | -0.096399361 | 0.220739512 | 4.35E-01 | 7.03E-01 | 1.00E+00 |
| ENSG00000230852.1_RP11-51G5  | ENSG00000160789.18_LMNA | -0.16398 | -0.314960953 | -0.00491015 | 4.35E-02 | 1.84E-01 | 1.00E+00 |
| ENSG00000199683.1_RN7SKP18   | ENSG00000160789.18_LMNA | -0.1751  | -0.325232318 | -0.01635283 | 3.10E-02 | 1.46E-01 | 1.00E+00 |
| ENSG00000266379.5_RP11-640N  | ENSG00000160789.18_LMNA | -0.15602 | -0.307578495 | 0.003264326 | 5.49E-02 | 2.14E-01 | 1.00E+00 |
| ENSG00000253639.1_SUMO2P18   | ENSG00000160789.18_LMNA | 0.14627  | -0.013235447 | 0.298522523 | 7.21E-02 | 2.55E-01 | 1.00E+00 |
| ENSG00000228568.1_AC006461.1 | ENSG00000160789.18_LMNA | -0.14415 | -0.296543437 | 0.015406304 | 7.64E-02 | 2.64E-01 | 1.00E+00 |
| ENSG00000262870.1_CYCSP40    | ENSG00000160789.18_LMNA | -0.04119 | -0.199082915 | 0.118792013 | 6.14E-01 | 8.25E-01 | 1.00E+00 |
| ENSG00000254762.1_RP11-867G  | ENSG00000160789.18_LMNA | 0.07413  | -0.086082128 | 0.230613478 | 3.64E-01 | 6.46E-01 | 1.00E+00 |
| ENSG00000278456.1_RP11-66B2  | ENSG00000160789.18_LMNA | -0.08423 | -0.240210406 | 0.075988851 | 3.02E-01 | 5.89E-01 | 1.00E+00 |
| ENSG00000254302.1_RP11-431M  | ENSG00000160789.18_LMNA | -0.23055 | -0.375956032 | -0.07407269 | 4.27E-03 | 3.48E-02 | 1.00E+00 |
| ENSG00000243267.3_RN7SL614f  | ENSG00000160789.18_LMNA | 0.1664   | 0.007397226  | 0.317199634 | 4.05E-02 | 1.75E-01 | 1.00E+00 |
| ENSG00000226903.1_LINC00354  | ENSG00000160789.18_LMNA | -0.07593 | -0.232318558 | 0.084293599 | 3.53E-01 | 6.36E-01 | 1.00E+00 |
| ENSG00000242853.3_RN7SL749f  | ENSG00000160789.18_LMNA | 0.01464  | -0.144895088 | 0.173439771 | 8.58E-01 | 9.44E-01 | 1.00E+00 |
| ENSG00000242999.3_RN7SL239f  | ENSG00000160789.18_LMNA | -0.06082 | -0.217906539 | 0.099346985 | 4.57E-01 | 7.21E-01 | 1.00E+00 |
| ENSG00000243920.2_RPS26P24   | ENSG00000160789.18_LMNA | 0.0637   | -0.096482556 | 0.220659626 | 4.36E-01 | 7.04E-01 | 1.00E+00 |
| ENSG00000275061.1_RP11-220H  | ENSG00000160789.18_LMNA | 0.14134  | -0.018268848 | 0.293929665 | 8.24E-02 | 2.77E-01 | 1.00E+00 |
| ENSG00000243519.1_IGLVIVOR2  | ENSG00000160789.18_LMNA | 0.00345  | -0.155832607 | 0.162565095 | 9.66E-01 | 9.87E-01 | 1.00E+00 |
| ENSG00000211797.2_TRAV17     | ENSG00000160789.18_LMNA | 0.1479   | -0.011576297 | 0.3000333   | 6.90E-02 | 2.47E-01 | 1.00E+00 |
| ENSG00000224031.1_TCEAL3-A5  | ENSG00000160789.18_LMNA | -0.04484 | -0.20259446  | 0.115182951 | 5.83E-01 | 8.06E-01 | 1.00E+00 |
| ENSG00000237419.1_RP11-885N  | ENSG00000160789.18_LMNA | 0.00596  | -0.153390443 | 0.164999953 | 9.42E-01 | 9.77E-01 | 1.00E+00 |
| ENSG00000236580.1_RP11-95P9  | ENSG00000160789.18_LMNA | 0.06952  | -0.090681837 | 0.226219432 | 3.95E-01 | 6.72E-01 | 1.00E+00 |
| ENSG00000240912.1_RP11-274J  | ENSG00000160789.18_LMNA | -0.09416 | -0.249614145 | 0.066035497 | 2.49E-01 | 5.29E-01 | 1.00E+00 |
| ENSG00000274569.1_RP11-121C  | ENSG00000160789.18_LMNA | 0.09159  | -0.068606394 | 0.2471909   | 2.62E-01 | 5.45E-01 | 1.00E+00 |
| ENSG00000234181.1_RP11-182N  | ENSG00000160789.18_LMNA | -0.18458 | -0.333970201 | -0.02615126 | 2.28E-02 | 1.19E-01 | 1.00E+00 |
| ENSG00000224416.2_IFNA22P    | ENSG00000160789.18_LMNA | 0.01371  | -0.145810834 | 0.172532255 | 8.67E-01 | 9.48E-01 | 1.00E+00 |
| ENSG00000214374.2_RPLP2P1    | ENSG00000160789.18_LMNA | -0.06135 | -0.218418412 | 0.098814809 | 4.53E-01 | 7.18E-01 | 1.00E+00 |

|                              |                         |          |              |             |          |          |          |
|------------------------------|-------------------------|----------|--------------|-------------|----------|----------|----------|
| ENSG00000254038.1_RP11-419C  | ENSG00000160789.18_LMNA | 0.01992  | -0.139719343 | 0.178558862 | 8.08E-01 | 9.23E-01 | 1.00E+00 |
| ENSG00000254114.1_HMGN1P28   | ENSG00000160789.18_LMNA | 0.13387  | -0.025885123 | 0.286952476 | 1.00E-01 | 3.12E-01 | 1.00E+00 |
| ENSG00000226036.1_RP11-338C  | ENSG00000160789.18_LMNA | 0.22236  | 0.065476485  | 0.368514704 | 5.90E-03 | 4.45E-02 | 1.00E+00 |
| ENSG00000215399.2_HMGB3P7    | ENSG00000160789.18_LMNA | -0.11847 | -0.272532649 | 0.041511499 | 1.46E-01 | 3.91E-01 | 1.00E+00 |
| ENSG00000211810.3_TRAV29DV   | ENSG00000160789.18_LMNA | -0.02602 | -0.184456661 | 0.133734632 | 7.50E-01 | 8.96E-01 | 1.00E+00 |
| ENSG00000236512.1_RP3-336K2  | ENSG00000160789.18_LMNA | 0.08476  | -0.07546087  | 0.240710728 | 2.99E-01 | 5.86E-01 | 1.00E+00 |
| ENSG00000224980.1_RPL23AP8   | ENSG00000160789.18_LMNA | -0.05611 | -0.213407615 | 0.104016568 | 4.92E-01 | 7.48E-01 | 1.00E+00 |
| ENSG00000253754.1_RP11-35G2  | ENSG00000160789.18_LMNA | -0.00252 | -0.161658052 | 0.156741377 | 9.75E-01 | 9.91E-01 | 1.00E+00 |
| ENSG00000272609.1_RP11-461M  | ENSG00000160789.18_LMNA | -0.1057  | -0.260513512 | 0.054419966 | 1.95E-01 | 4.64E-01 | 1.00E+00 |
| ENSG00000271011.1_RP11-171I2 | ENSG00000160789.18_LMNA | 0.01885  | -0.1407741   | 0.177517047 | 8.18E-01 | 9.29E-01 | 1.00E+00 |
| ENSG00000258304.1_RP11-453D  | ENSG00000160789.18_LMNA | 0.0501   | -0.109974379 | 0.20764793  | 5.40E-01 | 7.80E-01 | 1.00E+00 |
| ENSG00000205663.5_RP11-706O  | ENSG00000160789.18_LMNA | 0.011    | -0.148456715 | 0.169907111 | 8.93E-01 | 9.58E-01 | 1.00E+00 |
| ENSG00000262668.1_AJ003147.5 | ENSG00000160789.18_LMNA | -0.10862 | -0.263266433 | 0.051472614 | 1.83E-01 | 4.47E-01 | 1.00E+00 |
| ENSG00000211786.3_TRAV8-2    | ENSG00000160789.18_LMNA | 0.22898  | 0.072418527  | 0.374527123 | 4.55E-03 | 3.65E-02 | 1.00E+00 |
| ENSG00000218896.1_TUBB8P2    | ENSG00000160789.18_LMNA | 0.04798  | -0.112074885 | 0.205612012 | 5.57E-01 | 7.91E-01 | 1.00E+00 |
| ENSG00000223479.3_RP4-788P1  | ENSG00000160789.18_LMNA | -0.12944 | -0.282808551 | 0.030391493 | 1.12E-01 | 3.34E-01 | 1.00E+00 |
| ENSG00000251470.1_ASNSP4     | ENSG00000160789.18_LMNA | 0.01549  | -0.144069531 | 0.174257447 | 8.50E-01 | 9.41E-01 | 1.00E+00 |
| ENSG00000236677.1_AP000688.  | ENSG00000160789.18_LMNA | 0.01299  | -0.146516059 | 0.171832999 | 8.74E-01 | 9.51E-01 | 1.00E+00 |
| ENSG00000234896.1_OR7E62P    | ENSG00000160789.18_LMNA | 0.0891   | -0.071113614 | 0.244823865 | 2.75E-01 | 5.59E-01 | 1.00E+00 |
| ENSG00000230215.1{EIF2B5-AS  | ENSG00000160789.18_LMNA | -0.17202 | -0.322394768 | -0.01318359 | 3.41E-02 | 1.56E-01 | 1.00E+00 |
| ENSG00000233956.1_BTF3P6     | ENSG00000160789.18_LMNA | 0.04977  | -0.110305988 | 0.2073267   | 5.43E-01 | 7.81E-01 | 1.00E+00 |
| ENSG00000235840.1_AC012363.  | ENSG00000160789.18_LMNA | -0.06643 | -0.223266465 | 0.093765439 | 4.16E-01 | 6.89E-01 | 1.00E+00 |
| ENSG00000268107.4_AC003005.  | ENSG00000160789.18_LMNA | 0.01329  | -0.146219808 | 0.172126781 | 8.71E-01 | 9.50E-01 | 1.00E+00 |
| ENSG00000241456.1_RP4-555L1. | ENSG00000160789.18_LMNA | 0.0431   | -0.116905964 | 0.200919022 | 5.98E-01 | 8.15E-01 | 1.00E+00 |
| ENSG00000270992.1_RP11-190G  | ENSG00000160789.18_LMNA | 0.11156  | -0.04850403  | 0.266034013 | 1.71E-01 | 4.30E-01 | 1.00E+00 |
| ENSG00000232306.1_AC012485.  | ENSG00000160789.18_LMNA | 0.00815  | -0.15125103  | 0.167129782 | 9.21E-01 | 9.70E-01 | 1.00E+00 |
| ENSG00000234793.1_AC114730.  | ENSG00000160789.18_LMNA | 0.06816  | -0.092043237 | 0.224916424 | 4.04E-01 | 6.80E-01 | 1.00E+00 |
| ENSG00000261837.1_RP11-264L  | ENSG00000160789.18_LMNA | 0.0066   | -0.152759905 | 0.165627975 | 9.36E-01 | 9.75E-01 | 1.00E+00 |
| ENSG00000279607.1_RP11-348J  | ENSG00000160789.18_LMNA | 0.15026  | -0.009159995 | 0.302230726 | 6.46E-02 | 2.37E-01 | 1.00E+00 |
| ENSG00000236676.1_RP5-837I24 | ENSG00000160789.18_LMNA | -0.08345 | -0.239469141 | 0.07677077  | 3.07E-01 | 5.93E-01 | 1.00E+00 |
| ENSG00000258707.2_RP11-467L  | ENSG00000160789.18_LMNA | 0.07061  | -0.089594934 | 0.227258902 | 3.87E-01 | 6.66E-01 | 1.00E+00 |
| ENSG00000255395.1_CTD-2562J  | ENSG00000160789.18_LMNA | 0.06935  | -0.090849677 | 0.226058853 | 3.96E-01 | 6.73E-01 | 1.00E+00 |
| ENSG00000239454.1_RP11-508O  | ENSG00000160789.18_LMNA | -0.39765 | -0.523696812 | -0.25456402 | 3.92E-07 | 2.17E-05 | 2.01E-02 |

|                              |                         |          |              |             |          |          |          |
|------------------------------|-------------------------|----------|--------------|-------------|----------|----------|----------|
| ENSG00000251388.1_RP11-427M  | ENSG00000160789.18_LMNA | 0.07393  | -0.086283265 | 0.230421604 | 3.65E-01 | 6.47E-01 | 1.00E+00 |
| ENSG00000236516.1_KLF2P4     | ENSG00000160789.18_LMNA | 0.02879  | -0.131013072 | 0.187131138 | 7.25E-01 | 8.83E-01 | 1.00E+00 |
| ENSG00000215448.3_SRMP1      | ENSG00000160789.18_LMNA | 0.07525  | -0.084968512 | 0.231675363 | 3.57E-01 | 6.40E-01 | 1.00E+00 |
| ENSG00000251148.1_RP11-478C  | ENSG00000160789.18_LMNA | 0.03079  | -0.129044426 | 0.189062792 | 7.07E-01 | 8.75E-01 | 1.00E+00 |
| ENSG00000260302.1_RP11-973H  | ENSG00000160789.18_LMNA | 0.00354  | -0.155746417 | 0.162651093 | 9.65E-01 | 9.86E-01 | 1.00E+00 |
| ENSG00000281909.1_RP11-439M  | ENSG00000160789.18_LMNA | 0.07716  | -0.08306475  | 0.233488944 | 3.45E-01 | 6.29E-01 | 1.00E+00 |
| ENSG00000226468.2_AC018641.  | ENSG00000160789.18_LMNA | -0.04694 | -0.204614091 | 0.113103427 | 5.66E-01 | 7.96E-01 | 1.00E+00 |
| ENSG00000237265.4_RP11-402P  | ENSG00000160789.18_LMNA | -0.03707 | -0.19511606  | 0.12285895  | 6.50E-01 | 8.45E-01 | 1.00E+00 |
| ENSG00000278531.1_RP11-432I1 | ENSG00000160789.18_LMNA | 0.12092  | -0.039035301 | 0.2748271   | 1.38E-01 | 3.78E-01 | 1.00E+00 |
| ENSG00000232124.1_AP001057.  | ENSG00000160789.18_LMNA | 0.05087  | -0.109210444 | 0.208387694 | 5.34E-01 | 7.76E-01 | 1.00E+00 |
| ENSG00000280014.1_AC006129.  | ENSG00000160789.18_LMNA | -0.15035 | -0.302309991 | 0.009072767 | 6.45E-02 | 2.36E-01 | 1.00E+00 |
| ENSG00000249363.1_CTB-78O21  | ENSG00000160789.18_LMNA | -0.03019 | -0.188486285 | 0.129632236 | 7.12E-01 | 8.78E-01 | 1.00E+00 |
| ENSG00000256779.1_RP11-60C6  | ENSG00000160789.18_LMNA | 0.02727  | -0.132503365 | 0.185667211 | 7.39E-01 | 8.90E-01 | 1.00E+00 |
| ENSG00000243116.1_RP11-564C  | ENSG00000160789.18_LMNA | 0.09144  | -0.068760872 | 0.247045168 | 2.63E-01 | 5.46E-01 | 1.00E+00 |
| ENSG00000236760.1_AC019118.  | ENSG00000160789.18_LMNA | -0.06749 | -0.224285249 | 0.092702272 | 4.09E-01 | 6.83E-01 | 1.00E+00 |
| ENSG00000267036.2_AC005559.  | ENSG00000160789.18_LMNA | 0.02738  | -0.132401892 | 0.185766933 | 7.38E-01 | 8.90E-01 | 1.00E+00 |
| ENSG00000225442.2_MPRIP-AS1  | ENSG00000160789.18_LMNA | -0.04056 | -0.198481715 | 0.119409068 | 6.20E-01 | 8.28E-01 | 1.00E+00 |
| ENSG00000234389.1_AC007278.  | ENSG00000160789.18_LMNA | 0.05733  | -0.102808716 | 0.214572616 | 4.83E-01 | 7.40E-01 | 1.00E+00 |
| ENSG00000272094.1_RP4-665J2  | ENSG00000160789.18_LMNA | 0.04755  | -0.112500804 | 0.205198854 | 5.61E-01 | 7.93E-01 | 1.00E+00 |
| ENSG00000249237.4_RP11-376N  | ENSG00000160789.18_LMNA | 0.122    | -0.037934839 | 0.275845645 | 1.34E-01 | 3.72E-01 | 1.00E+00 |
| ENSG00000223484.5_TRPC6P     | ENSG00000160789.18_LMNA | 0.03035  | -0.129479385 | 0.188636217 | 7.11E-01 | 8.77E-01 | 1.00E+00 |
| ENSG00000226933.1_NRBF2P2    | ENSG00000160789.18_LMNA | -0.04623 | -0.203932938 | 0.113805091 | 5.72E-01 | 8.00E-01 | 1.00E+00 |
| ENSG00000258593.2_CTD-3051D  | ENSG00000160789.18_LMNA | 0.08413  | -0.076086145 | 0.240118191 | 3.03E-01 | 5.89E-01 | 1.00E+00 |
| ENSG00000233729.1_AC016909.  | ENSG00000160789.18_LMNA | -0.13826 | -0.291057862 | 0.021408092 | 8.94E-02 | 2.91E-01 | 1.00E+00 |
| ENSG00000239212.2_RPL6P7     | ENSG00000160789.18_LMNA | 0.11885  | -0.041129085 | 0.272887228 | 1.45E-01 | 3.89E-01 | 1.00E+00 |
| ENSG00000214336.4_FOXI3      | ENSG00000160789.18_LMNA | 0.07475  | -0.085469439 | 0.231197799 | 3.60E-01 | 6.42E-01 | 1.00E+00 |
| ENSG00000185198.10_PRSS57    | ENSG00000160789.18_LMNA | 0.05653  | -0.103598743 | 0.213810719 | 4.89E-01 | 7.45E-01 | 1.00E+00 |
| ENSG00000177558.3_FAM187B    | ENSG00000160789.18_LMNA | -0.06615 | -0.222999502 | 0.094043913 | 4.18E-01 | 6.90E-01 | 1.00E+00 |
| ENSG00000280326.1_RP11-642A  | ENSG00000160789.18_LMNA | -0.03779 | -0.195811863 | 0.122146364 | 6.44E-01 | 8.42E-01 | 1.00E+00 |
| ENSG00000257872.1_RP11-453D  | ENSG00000160789.18_LMNA | 0.08344  | -0.076777141 | 0.2394631   | 3.07E-01 | 5.93E-01 | 1.00E+00 |
| ENSG00000215131.9_C16orf90   | ENSG00000160789.18_LMNA | 0.01087  | -0.148584616 | 0.169780098 | 8.94E-01 | 9.59E-01 | 1.00E+00 |
| ENSG00000253138.4_LINC00967  | ENSG00000160789.18_LMNA | -0.04452 | -0.202286908 | 0.115499381 | 5.86E-01 | 8.08E-01 | 1.00E+00 |
| ENSG00000224442.1_AC017035.  | ENSG00000160789.18_LMNA | -0.00416 | -0.163250396 | 0.155145643 | 9.59E-01 | 9.84E-01 | 1.00E+00 |

|                             |                         |          |              |             |          |          |          |
|-----------------------------|-------------------------|----------|--------------|-------------|----------|----------|----------|
| ENSG00000229515.1_FLT1P1    | ENSG00000160789.18_LMNA | -0.03589 | -0.193985645 | 0.124015934 | 6.61E-01 | 8.50E-01 | 1.00E+00 |
| ENSG00000279593.1_RP11-131H | ENSG00000160789.18_LMNA | 0.00985  | -0.149585492 | 0.168785804 | 9.04E-01 | 9.63E-01 | 1.00E+00 |
| ENSG00000149742.8_SLC22A9   | ENSG00000160789.18_LMNA | -0.06992 | -0.226593866 | 0.090290404 | 3.92E-01 | 6.70E-01 | 1.00E+00 |
| ENSG00000236426.4_RP11-79M1 | ENSG00000160789.18_LMNA | 0.14776  | -0.011719246 | 0.299903196 | 6.93E-02 | 2.48E-01 | 1.00E+00 |
| ENSG00000236583.1_AP004290. | ENSG00000160789.18_LMNA | 0.05316  | -0.106948233 | 0.210576197 | 5.15E-01 | 7.63E-01 | 1.00E+00 |
| ENSG00000281325.1_AC016549. | ENSG00000160789.18_LMNA | 0.15048  | -0.008935497 | 0.302434721 | 6.42E-02 | 2.36E-01 | 1.00E+00 |
| ENSG00000270661.1_RP1-142L7 | ENSG00000160789.18_LMNA | 0.09421  | -0.065984966 | 0.249661735 | 2.48E-01 | 5.29E-01 | 1.00E+00 |
| ENSG00000224973.4_LARGE-AS  | ENSG00000160789.18_LMNA | -0.12348 | -0.277229248 | 0.036438738 | 1.30E-01 | 3.65E-01 | 1.00E+00 |
| ENSG00000274553.1_AC138035. | ENSG00000160789.18_LMNA | 0.01928  | -0.140348482 | 0.177937528 | 8.14E-01 | 9.27E-01 | 1.00E+00 |
| ENSG00000215223.3_CYP51A1P  | ENSG00000160789.18_LMNA | -0.0188  | -0.177472162 | 0.140819525 | 8.18E-01 | 9.29E-01 | 1.00E+00 |
| ENSG00000187172.14_BAGE2    | ENSG00000160789.18_LMNA | -0.13149 | -0.284731578 | 0.028301852 | 1.06E-01 | 3.24E-01 | 1.00E+00 |
| ENSG00000279020.1_C18orf15  | ENSG00000160789.18_LMNA | -0.02535 | -0.183804675 | 0.134397369 | 7.57E-01 | 8.99E-01 | 1.00E+00 |
| ENSG00000185313.6_SCN10A    | ENSG00000160789.18_LMNA | -0.17832 | -0.328205303 | -0.01968001 | 2.79E-02 | 1.36E-01 | 1.00E+00 |
| ENSG00000279474.1_CTD-2286N | ENSG00000160789.18_LMNA | -0.00521 | -0.164270406 | 0.154122588 | 9.49E-01 | 9.80E-01 | 1.00E+00 |
| ENSG00000265555.1_RP11-638L | ENSG00000160789.18_LMNA | 0.11359  | -0.046447481 | 0.267948277 | 1.63E-01 | 4.19E-01 | 1.00E+00 |
| ENSG00000273777.3_CEACAM2C  | ENSG00000160789.18_LMNA | -0.05314 | -0.210561756 | 0.106963171 | 5.16E-01 | 7.63E-01 | 1.00E+00 |
| ENSG00000235725.1_AC007389. | ENSG00000160789.18_LMNA | 0.0516   | -0.108490929 | 0.20908411  | 5.28E-01 | 7.72E-01 | 1.00E+00 |
| ENSG00000242948.1_EPS15P1   | ENSG00000160789.18_LMNA | 0.07168  | -0.088531332 | 0.22827539  | 3.80E-01 | 6.59E-01 | 1.00E+00 |
| ENSG00000254781.1_GVINP2    | ENSG00000160789.18_LMNA | -0.12914 | -0.28253636  | 0.030687045 | 1.13E-01 | 3.35E-01 | 1.00E+00 |
| ENSG00000113302.4_IL12B     | ENSG00000160789.18_LMNA | -0.06725 | -0.224053136 | 0.092944561 | 4.10E-01 | 6.85E-01 | 1.00E+00 |
| ENSG00000225358.1_MIPEPP1   | ENSG00000160789.18_LMNA | 0.10151  | -0.058643051 | 0.25656007  | 2.13E-01 | 4.87E-01 | 1.00E+00 |
| ENSG00000223387.5_RP11-408H | ENSG00000160789.18_LMNA | 0.20517  | 0.04752631   | 0.35284985  | 1.12E-02 | 7.11E-02 | 1.00E+00 |
| ENSG00000235532.1_LINC00402 | ENSG00000160789.18_LMNA | -0.03621 | -0.194294137 | 0.123700277 | 6.58E-01 | 8.49E-01 | 1.00E+00 |
| ENSG00000265261.1_RP11-162A | ENSG00000160789.18_LMNA | -0.03144 | -0.189689604 | 0.128405071 | 7.01E-01 | 8.72E-01 | 1.00E+00 |
| ENSG00000247775.2_SNCA-AS1  | ENSG00000160789.18_LMNA | -0.1645  | -0.315437038 | -0.00543874 | 4.29E-02 | 1.82E-01 | 1.00E+00 |
| ENSG00000243478.6_AOX2P     | ENSG00000160789.18_LMNA | -0.19754 | -0.345860223 | -0.0395801  | 1.47E-02 | 8.67E-02 | 1.00E+00 |
| ENSG00000175097.6_RAG2      | ENSG00000160789.18_LMNA | -0.11234 | -0.266767087 | 0.047716782 | 1.68E-01 | 4.26E-01 | 1.00E+00 |
| ENSG00000177324.12_BEND2    | ENSG00000160789.18_LMNA | -0.02132 | -0.17991361  | 0.138346685 | 7.94E-01 | 9.17E-01 | 1.00E+00 |
| ENSG00000185823.3_NPAP1     | ENSG00000160789.18_LMNA | -0.14319 | -0.295651357 | 0.016383865 | 7.84E-02 | 2.69E-01 | 1.00E+00 |
| ENSG00000261599.4_HERC2P8   | ENSG00000160789.18_LMNA | -0.03315 | -0.191345714 | 0.126714547 | 6.85E-01 | 8.63E-01 | 1.00E+00 |
| ENSG00000257127.5_CLLU1     | ENSG00000160789.18_LMNA | -0.13232 | -0.285505664 | 0.027459925 | 1.04E-01 | 3.20E-01 | 1.00E+00 |
| ENSG00000232111.1_RP11-126O | ENSG00000160789.18_LMNA | 0.05851  | -0.101638709 | 0.215700254 | 4.74E-01 | 7.34E-01 | 1.00E+00 |
| ENSG00000274034.1_MIR6813   | ENSG00000160789.18_LMNA | 0.04723  | -0.11282092  | 0.204888254 | 5.63E-01 | 7.95E-01 | 1.00E+00 |

|                              |                         |          |              |             |          |          |          |
|------------------------------|-------------------------|----------|--------------|-------------|----------|----------|----------|
| ENSG00000274816.1_MIR6772    | ENSG00000160789.18_LMNA | 0.00338  | -0.155909251 | 0.162488618 | 9.67E-01 | 9.87E-01 | 1.00E+00 |
| ENSG00000199165.2_MIRLET7A1  | ENSG00000160789.18_LMNA | 0.18571  | 0.027318135  | 0.335007263 | 2.20E-02 | 1.15E-01 | 1.00E+00 |
| ENSG00000274509.1_           | ENSG00000160789.18_LMNA | 0.03028  | -0.129549686 | 0.188567261 | 7.11E-01 | 8.77E-01 | 1.00E+00 |
| ENSG00000278421.1_FTX_1      | ENSG00000160789.18_LMNA | -0.09146 | -0.247065538 | 0.068739281 | 2.62E-01 | 5.46E-01 | 1.00E+00 |
| ENSG00000276629.1_           | ENSG00000160789.18_LMNA | 0.05584  | -0.104287183 | 0.213146477 | 4.94E-01 | 7.49E-01 | 1.00E+00 |
| ENSG00000276830.1_MIR6730    | ENSG00000160789.18_LMNA | 0.01142  | -0.148052804 | 0.170308148 | 8.89E-01 | 9.57E-01 | 1.00E+00 |
| ENSG00000207559.1_MIR578     | ENSG00000160789.18_LMNA | -0.08467 | -0.240630914 | 0.075545108 | 3.00E-01 | 5.86E-01 | 1.00E+00 |
| ENSG00000207493.1_SNORA46    | ENSG00000160789.18_LMNA | -0.15802 | -0.309433072 | 0.001214683 | 5.19E-02 | 2.06E-01 | 1.00E+00 |
| ENSG00000239021.1_RNA5SP24   | ENSG00000160789.18_LMNA | -0.06992 | -0.226602712 | 0.090281155 | 3.92E-01 | 6.70E-01 | 1.00E+00 |
| ENSG00000201176.1_RNU6-853F  | ENSG00000160789.18_LMNA | -0.12919 | -0.282578838 | 0.030640925 | 1.13E-01 | 3.35E-01 | 1.00E+00 |
| ENSG00000265990.1_           | ENSG00000160789.18_LMNA | 0.12496  | -0.03493858  | 0.278615297 | 1.25E-01 | 3.57E-01 | 1.00E+00 |
| ENSG00000206728.1_Y_RNA      | ENSG00000160789.18_LMNA | -0.02987 | -0.188172922 | 0.129951649 | 7.15E-01 | 8.79E-01 | 1.00E+00 |
| ENSG00000212497.1_RNA5SP46   | ENSG00000160789.18_LMNA | 0.09902  | -0.061141455 | 0.254216212 | 2.25E-01 | 5.01E-01 | 1.00E+00 |
| ENSG00000257604.1_RP11-359M  | ENSG00000160789.18_LMNA | -0.07511 | -0.231543587 | 0.085106751 | 3.58E-01 | 6.41E-01 | 1.00E+00 |
| ENSG00000231996.1_RP4-581O6  | ENSG00000160789.18_LMNA | 0.01928  | -0.140350648 | 0.177935388 | 8.14E-01 | 9.27E-01 | 1.00E+00 |
| ENSG00000251363.2_RP11-129M  | ENSG00000160789.18_LMNA | -0.14893 | -0.300991033 | 0.010523615 | 6.71E-02 | 2.43E-01 | 1.00E+00 |
| ENSG00000249799.1_SNRPCP13   | ENSG00000160789.18_LMNA | -0.10011 | -0.255241208 | 0.06004936  | 2.20E-01 | 4.95E-01 | 1.00E+00 |
| ENSG00000259508.1_RP11-661D  | ENSG00000160789.18_LMNA | -0.07501 | -0.231445904 | 0.085209217 | 3.58E-01 | 6.41E-01 | 1.00E+00 |
| ENSG00000274618.1_HIST1H4F   | ENSG00000160789.18_LMNA | 0.09048  | -0.069727987 | 0.246132484 | 2.68E-01 | 5.52E-01 | 1.00E+00 |
| ENSG00000145839.1_IL9        | ENSG00000160789.18_LMNA | -0.3007  | -0.438889808 | -0.14861309 | 1.67E-04 | 2.84E-03 | 1.00E+00 |
| ENSG00000242113.3_RN7SL124f  | ENSG00000160789.18_LMNA | 0.08565  | -0.07457189  | 0.241552756 | 2.94E-01 | 5.80E-01 | 1.00E+00 |
| ENSG00000261978.1_CTD-2529C  | ENSG00000160789.18_LMNA | -0.05852 | -0.215713432 | 0.10162503  | 4.74E-01 | 7.33E-01 | 1.00E+00 |
| ENSG00000248979.2_LAMTOR3F   | ENSG00000160789.18_LMNA | 0.16136  | 0.002216936  | 0.312532817 | 4.70E-02 | 1.93E-01 | 1.00E+00 |
| ENSG00000232363.1_RP1-102D2  | ENSG00000160789.18_LMNA | 0.14628  | -0.013229545 | 0.298527899 | 7.21E-02 | 2.55E-01 | 1.00E+00 |
| ENSG00000235328.1_AC006946.  | ENSG00000160789.18_LMNA | 0.01672  | -0.142861605 | 0.17545305  | 8.38E-01 | 9.37E-01 | 1.00E+00 |
| ENSG00000258798.1_RP11-895M  | ENSG00000160789.18_LMNA | 0.08486  | -0.075361177 | 0.240805179 | 2.99E-01 | 5.85E-01 | 1.00E+00 |
| ENSG00000264647.1_RP11-68I3. | ENSG00000160789.18_LMNA | 0.05967  | -0.10048034  | 0.216815842 | 4.65E-01 | 7.27E-01 | 1.00E+00 |
| ENSG00000227625.2_RP11-520H  | ENSG00000160789.18_LMNA | -0.03082 | -0.189091587 | 0.129015061 | 7.06E-01 | 8.75E-01 | 1.00E+00 |
| ENSG00000270255.1_RP11-420B  | ENSG00000160789.18_LMNA | -0.17239 | -0.322737402 | -0.01356594 | 3.37E-02 | 1.55E-01 | 1.00E+00 |
| ENSG00000277319.1_RP11-326L  | ENSG00000160789.18_LMNA | 0.03369  | -0.126191663 | 0.191857587 | 6.80E-01 | 8.61E-01 | 1.00E+00 |
| ENSG00000260823.1_RP11-249C  | ENSG00000160789.18_LMNA | 0.10068  | -0.059475675 | 0.255779362 | 2.17E-01 | 4.92E-01 | 1.00E+00 |
| ENSG00000255184.1_RP11-313I2 | ENSG00000160789.18_LMNA | -0.38287 | -0.510925487 | -0.23818436 | 1.13E-06 | 5.07E-05 | 5.78E-02 |
| ENSG00000264617.1_AC144838.  | ENSG00000160789.18_LMNA | -0.20285 | -0.350729002 | -0.04511112 | 1.22E-02 | 7.56E-02 | 1.00E+00 |

|                              |                         |          |              |             |          |          |          |
|------------------------------|-------------------------|----------|--------------|-------------|----------|----------|----------|
| ENSG00000237254.2_TRBV30     | ENSG00000160789.18_LMNA | 0.00891  | -0.15050863  | 0.167868163 | 9.13E-01 | 9.67E-01 | 1.00E+00 |
| ENSG00000240440.1_AC007879.1 | ENSG00000160789.18_LMNA | 0.14077  | -0.018858038 | 0.293391099 | 8.37E-02 | 2.80E-01 | 1.00E+00 |
| ENSG00000274589.1_Metazoa_SI | ENSG00000160789.18_LMNA | 0.14202  | -0.017576512 | 0.294562261 | 8.09E-02 | 2.74E-01 | 1.00E+00 |
| ENSG00000233540.1_DNM3-IT1   | ENSG00000160789.18_LMNA | -0.13477 | -0.287794334 | 0.024968077 | 9.78E-02 | 3.08E-01 | 1.00E+00 |
| ENSG00000277332.1_AC145123.1 | ENSG00000160789.18_LMNA | -0.0204  | -0.17902158  | 0.139250645 | 8.03E-01 | 9.21E-01 | 1.00E+00 |
| ENSG00000237107.3_RP11-256G  | ENSG00000160789.18_LMNA | 0.09108  | -0.069121585 | 0.246704823 | 2.64E-01 | 5.48E-01 | 1.00E+00 |
| ENSG00000231787.4_RP11-370B  | ENSG00000160789.18_LMNA | -0.03643 | -0.194500825 | 0.123488753 | 6.56E-01 | 8.48E-01 | 1.00E+00 |
| ENSG00000255221.2_CARD17     | ENSG00000160789.18_LMNA | 0.00033  | -0.158879307 | 0.159522064 | 9.97E-01 | 9.99E-01 | 1.00E+00 |
| ENSG00000265394.1_RP11-1148  | ENSG00000160789.18_LMNA | -0.06769 | -0.224472287 | 0.092507008 | 4.07E-01 | 6.82E-01 | 1.00E+00 |
| ENSG00000266010.1_GATA6-AS   | ENSG00000160789.18_LMNA | 0.02211  | -0.137579615 | 0.180670146 | 7.87E-01 | 9.13E-01 | 1.00E+00 |
| ENSG00000274559.2_CH507-42P  | ENSG00000160789.18_LMNA | 0.00011  | -0.159091134 | 0.159310266 | 9.99E-01 | 1.00E+00 | 1.00E+00 |
| ENSG00000251367.1_RP11-231G  | ENSG00000160789.18_LMNA | 0.03714  | -0.122787689 | 0.195185657 | 6.50E-01 | 8.44E-01 | 1.00E+00 |
| ENSG00000269050.1_CTC-360G   | ENSG00000160789.18_LMNA | -0.04881 | -0.206404741 | 0.111257344 | 5.50E-01 | 7.87E-01 | 1.00E+00 |
| ENSG00000226562.3_CYP4F26P   | ENSG00000160789.18_LMNA | -0.00119 | -0.160357016 | 0.158043951 | 9.88E-01 | 9.96E-01 | 1.00E+00 |
| ENSG00000260431.2_RP11-382N  | ENSG00000160789.18_LMNA | 0.0017   | -0.157540813 | 0.160859691 | 9.83E-01 | 9.94E-01 | 1.00E+00 |
| ENSG00000234929.1_AC018685   | ENSG00000160789.18_LMNA | -0.15598 | -0.307543416 | 0.003303071 | 5.50E-02 | 2.14E-01 | 1.00E+00 |
| ENSG00000240237.1_CTD-2182N  | ENSG00000160789.18_LMNA | -0.0136  | -0.172424473 | 0.145919557 | 8.68E-01 | 9.48E-01 | 1.00E+00 |
| ENSG00000271787.1_RP11-254F  | ENSG00000160789.18_LMNA | 0.05841  | -0.101735739 | 0.21560677  | 4.75E-01 | 7.34E-01 | 1.00E+00 |
| ENSG00000280028.1_RP11-118E  | ENSG00000160789.18_LMNA | 0.04462  | -0.115397479 | 0.202385958 | 5.85E-01 | 8.07E-01 | 1.00E+00 |
| ENSG00000275995.1_CTD-2240J  | ENSG00000160789.18_LMNA | -0.00586 | -0.16490491  | 0.153485844 | 9.43E-01 | 9.77E-01 | 1.00E+00 |
| ENSG00000225767.1_RP5-850O1  | ENSG00000160789.18_LMNA | 0.06519  | -0.094992186 | 0.222090069 | 4.25E-01 | 6.96E-01 | 1.00E+00 |
| ENSG00000276063.1_RP11-817G  | ENSG00000160789.18_LMNA | 0.08219  | -0.078031964 | 0.238272743 | 3.14E-01 | 6.00E-01 | 1.00E+00 |
| ENSG00000187475.5_HIST1H1T   | ENSG00000160789.18_LMNA | -0.01635 | -0.175090937 | 0.14322755  | 8.42E-01 | 9.38E-01 | 1.00E+00 |
| ENSG00000231944.1_PHKA1-AS   | ENSG00000160789.18_LMNA | 0.00097  | -0.158251029 | 0.160150081 | 9.90E-01 | 9.96E-01 | 1.00E+00 |
| ENSG00000213172.3_RP1-228H1  | ENSG00000160789.18_LMNA | -0.07249 | -0.229042829 | 0.087727843 | 3.75E-01 | 6.55E-01 | 1.00E+00 |
| ENSG00000267758.1_RP11-358B  | ENSG00000160789.18_LMNA | -0.02713 | -0.185530308 | 0.13264266  | 7.40E-01 | 8.91E-01 | 1.00E+00 |
| ENSG00000254225.1_BTF3P1     | ENSG00000160789.18_LMNA | 0.08207  | -0.078149454 | 0.23816124  | 3.15E-01 | 6.01E-01 | 1.00E+00 |
| ENSG00000273396.1_LINC01396  | ENSG00000160789.18_LMNA | -0.01625 | -0.174998805 | 0.143320643 | 8.42E-01 | 9.39E-01 | 1.00E+00 |
| ENSG00000258044.1_RP11-530C  | ENSG00000160789.18_LMNA | 0.07624  | -0.083981437 | 0.232615955 | 3.51E-01 | 6.34E-01 | 1.00E+00 |
| ENSG00000225343.1_RPL21P66   | ENSG00000160789.18_LMNA | -0.13649 | -0.289398107 | 0.023219609 | 9.36E-02 | 2.99E-01 | 1.00E+00 |
| ENSG00000259058.1_RP11-488C  | ENSG00000160789.18_LMNA | -0.17235 | -0.322698174 | -0.01352216 | 3.37E-02 | 1.55E-01 | 1.00E+00 |
| ENSG00000255892.1_NDFIP1P1   | ENSG00000160789.18_LMNA | 0.06706  | -0.093130354 | 0.223875122 | 4.12E-01 | 6.86E-01 | 1.00E+00 |
| ENSG00000235612.1_RP1-158P9  | ENSG00000160789.18_LMNA | -0.1246  | -0.278277919 | 0.035303864 | 1.26E-01 | 3.59E-01 | 1.00E+00 |

|                              |                         |          |              |             |          |          |          |
|------------------------------|-------------------------|----------|--------------|-------------|----------|----------|----------|
| ENSG00000271045.1_NDUFB9P1   | ENSG00000160789.18_LMNA | -0.03042 | -0.18870235  | 0.129411961 | 7.10E-01 | 8.77E-01 | 1.00E+00 |
| ENSG00000237726.1_           | ENSG00000160789.18_LMNA | -0.033   | -0.191193844 | 0.12686965  | 6.87E-01 | 8.64E-01 | 1.00E+00 |
| ENSG00000271774.1_RP4-678D1  | ENSG00000160789.18_LMNA | 0.11993  | -0.040030744 | 0.27390515  | 1.41E-01 | 3.83E-01 | 1.00E+00 |
| ENSG00000233827.2_FAM58BP    | ENSG00000160789.18_LMNA | 0.04046  | -0.119507999 | 0.198385304 | 6.21E-01 | 8.28E-01 | 1.00E+00 |
| ENSG00000233721.1_RP11-205K  | ENSG00000160789.18_LMNA | -0.0401  | -0.198037772 | 0.119864561 | 6.24E-01 | 8.30E-01 | 1.00E+00 |
| ENSG00000167139.7_TBC1D21    | ENSG00000160789.18_LMNA | -0.04886 | -0.206459231 | 0.111201133 | 5.50E-01 | 7.86E-01 | 1.00E+00 |
| ENSG00000242741.1_RP11-20B7  | ENSG00000160789.18_LMNA | 0.0291   | -0.130710409 | 0.187428274 | 7.22E-01 | 8.82E-01 | 1.00E+00 |
| ENSG00000260532.1_LA16c-381C | ENSG00000160789.18_LMNA | -0.18412 | -0.333543534 | -0.02567143 | 2.32E-02 | 1.20E-01 | 1.00E+00 |
| ENSG00000224058.2_AC006509.  | ENSG00000160789.18_LMNA | -0.08231 | -0.238385498 | 0.077913145 | 3.13E-01 | 6.00E-01 | 1.00E+00 |
| ENSG00000185640.5_KRT79      | ENSG00000160789.18_LMNA | 0.09197  | -0.068231894 | 0.247544139 | 2.60E-01 | 5.43E-01 | 1.00E+00 |
| ENSG00000237661.1_RP11-169L  | ENSG00000160789.18_LMNA | 0.06225  | -0.097918577 | 0.219280055 | 4.46E-01 | 7.13E-01 | 1.00E+00 |
| ENSG00000255860.2_RP11-807H  | ENSG00000160789.18_LMNA | -0.02731 | -0.185701997 | 0.132467969 | 7.38E-01 | 8.90E-01 | 1.00E+00 |
| ENSG00000280379.1_RP11-573M  | ENSG00000160789.18_LMNA | 0.10691  | -0.053191245 | 0.261661799 | 1.90E-01 | 4.57E-01 | 1.00E+00 |
| ENSG00000204612.1_FOXB2      | ENSG00000160789.18_LMNA | 0.08417  | -0.076048162 | 0.240154192 | 3.03E-01 | 5.89E-01 | 1.00E+00 |
| ENSG00000229990.3_RP11-574K  | ENSG00000160789.18_LMNA | 0.04482  | -0.115201486 | 0.202576447 | 5.83E-01 | 8.06E-01 | 1.00E+00 |
| ENSG00000227685.1_AC087499.  | ENSG00000160789.18_LMNA | -0.0169  | -0.175628177 | 0.142684592 | 8.36E-01 | 9.37E-01 | 1.00E+00 |
| ENSG00000279884.1_RP11-483E  | ENSG00000160789.18_LMNA | 0.1069   | -0.053203042 | 0.261650779 | 1.90E-01 | 4.57E-01 | 1.00E+00 |
| ENSG00000271137.1_RP5-966M1  | ENSG00000160789.18_LMNA | -0.08867 | -0.2444202   | 0.071540787 | 2.77E-01 | 5.62E-01 | 1.00E+00 |
| ENSG00000230391.1_RPSAP23    | ENSG00000160789.18_LMNA | -0.15756 | -0.309012266 | 0.001679979 | 5.25E-02 | 2.08E-01 | 1.00E+00 |
| ENSG00000240375.1_VPS26AP1   | ENSG00000160789.18_LMNA | 0.0834   | -0.0768237   | 0.23941895  | 3.07E-01 | 5.93E-01 | 1.00E+00 |
| ENSG00000125498.18_KIR2DL1   | ENSG00000160789.18_LMNA | -0.05068 | -0.208204783 | 0.109399366 | 5.35E-01 | 7.76E-01 | 1.00E+00 |
| ENSG00000236719.2_OVAAL      | ENSG00000160789.18_LMNA | -0.11066 | -0.265186125 | 0.049414089 | 1.75E-01 | 4.35E-01 | 1.00E+00 |
| ENSG00000275011.1_RP11-599B  | ENSG00000160789.18_LMNA | -0.10507 | -0.259921037 | 0.055053569 | 1.98E-01 | 4.67E-01 | 1.00E+00 |
| ENSG00000167759.11_KLK13     | ENSG00000160789.18_LMNA | 0.13809  | -0.021582942 | 0.290897742 | 8.98E-02 | 2.92E-01 | 1.00E+00 |
| ENSG00000212712.2_AP002414.  | ENSG00000160789.18_LMNA | 0.16526  | 0.006221585  | 0.316141837 | 4.19E-02 | 1.79E-01 | 1.00E+00 |
| ENSG00000253111.1_RP11-136C  | ENSG00000160789.18_LMNA | 0.11947  | -0.040498637 | 0.273471601 | 1.43E-01 | 3.86E-01 | 1.00E+00 |
| ENSG00000169777.6_TAS2R1     | ENSG00000160789.18_LMNA | 0.01735  | -0.142245979 | 0.176062033 | 8.32E-01 | 9.35E-01 | 1.00E+00 |
| ENSG00000235945.1_AC002543.  | ENSG00000160789.18_LMNA | 0.00169  | -0.157552721 | 0.160847796 | 9.84E-01 | 9.94E-01 | 1.00E+00 |
| ENSG00000261789.1_RP11-709D  | ENSG00000160789.18_LMNA | 0.06281  | -0.097359806 | 0.219817012 | 4.42E-01 | 7.09E-01 | 1.00E+00 |
| ENSG00000110243.10_APOA5     | ENSG00000160789.18_LMNA | -0.01053 | -0.169442923 | 0.148924096 | 8.98E-01 | 9.60E-01 | 1.00E+00 |
| ENSG00000280055.1_TMEM75     | ENSG00000160789.18_LMNA | 0.08103  | -0.079189112 | 0.237174199 | 3.21E-01 | 6.07E-01 | 1.00E+00 |
| ENSG00000222004.6_C7orf71    | ENSG00000160789.18_LMNA | -0.10113 | -0.256202939 | 0.059023986 | 2.15E-01 | 4.89E-01 | 1.00E+00 |
| ENSG00000276747.1_PADI6      | ENSG00000160789.18_LMNA | 0.02414  | -0.135584368 | 0.18263623  | 7.68E-01 | 9.04E-01 | 1.00E+00 |

|                             |                         |          |              |             |          |          |          |
|-----------------------------|-------------------------|----------|--------------|-------------|----------|----------|----------|
| ENSG00000182111.8_ZNF716    | ENSG00000160789.18_LMNA | -0.15597 | -0.307538589 | 0.003308401 | 5.50E-02 | 2.14E-01 | 1.00E+00 |
| ENSG00000258830.1_RP11-123K | ENSG00000160789.18_LMNA | 0.09955  | -0.060609473 | 0.254715597 | 2.22E-01 | 4.98E-01 | 1.00E+00 |
| ENSG00000248880.1_ICE2P1    | ENSG00000160789.18_LMNA | -0.08419 | -0.240168542 | 0.076033022 | 3.02E-01 | 5.89E-01 | 1.00E+00 |
| ENSG00000214211.2_CTAGE14P  | ENSG00000160789.18_LMNA | -0.09916 | -0.254350026 | 0.060998925 | 2.24E-01 | 5.00E-01 | 1.00E+00 |
| ENSG00000102313.8_ITIH6     | ENSG00000160789.18_LMNA | -0.18818 | -0.337274281 | -0.02987185 | 2.03E-02 | 1.09E-01 | 1.00E+00 |
| ENSG00000234948.1_LINC01524 | ENSG00000160789.18_LMNA | -0.01654 | -0.175276516 | 0.143040017 | 8.40E-01 | 9.38E-01 | 1.00E+00 |
| ENSG00000133105.6_RXFP2     | ENSG00000160789.18_LMNA | -0.27416 | -0.415233503 | -0.12020161 | 6.31E-04 | 8.10E-03 | 1.00E+00 |
| ENSG00000278530.3_CHMP1B2F  | ENSG00000160789.18_LMNA | 0.04122  | -0.118757416 | 0.199116616 | 6.14E-01 | 8.25E-01 | 1.00E+00 |
| ENSG00000251637.5_RP11-119D | ENSG00000160789.18_LMNA | -0.0275  | -0.185886029 | 0.132280697 | 7.37E-01 | 8.89E-01 | 1.00E+00 |
| ENSG00000254692.1_RP11-468E | ENSG00000160789.18_LMNA | 0.01523  | -0.144322286 | 0.174007151 | 8.52E-01 | 9.42E-01 | 1.00E+00 |
| ENSG00000149452.14_SLC22A8  | ENSG00000160789.18_LMNA | -0.06809 | -0.224854455 | 0.092107954 | 4.05E-01 | 6.80E-01 | 1.00E+00 |
| ENSG00000167751.11_KLK2     | ENSG00000160789.18_LMNA | 0.00347  | -0.155818624 | 0.162579047 | 9.66E-01 | 9.87E-01 | 1.00E+00 |
| ENSG00000266433.5_TBC1D3P5  | ENSG00000160789.18_LMNA | 0.03167  | -0.128177137 | 0.189913004 | 6.99E-01 | 8.71E-01 | 1.00E+00 |
| ENSG00000211976.2_IGHV3-73  | ENSG00000160789.18_LMNA | -0.01475 | -0.173545008 | 0.144788862 | 8.57E-01 | 9.44E-01 | 1.00E+00 |
| ENSG00000266399.1_          | ENSG00000160789.18_LMNA | 0.06837  | -0.091831424 | 0.225119227 | 4.03E-01 | 6.79E-01 | 1.00E+00 |
| ENSG00000251787.1_RNU7-47P  | ENSG00000160789.18_LMNA | 0.00152  | -0.157721206 | 0.160679483 | 9.85E-01 | 9.94E-01 | 1.00E+00 |
| ENSG00000277478.1_MIR6165   | ENSG00000160789.18_LMNA | 0.05651  | -0.103627375 | 0.213783099 | 4.89E-01 | 7.45E-01 | 1.00E+00 |
| ENSG00000200834.1_Y_RNA     | ENSG00000160789.18_LMNA | -0.19272 | -0.341448589 | -0.03458457 | 1.74E-02 | 9.75E-02 | 1.00E+00 |
| ENSG00000265201.1_MIR4677   | ENSG00000160789.18_LMNA | 0.04213  | -0.117864151 | 0.199986487 | 6.06E-01 | 8.20E-01 | 1.00E+00 |
| ENSG00000242371.1_IGKV1-39  | ENSG00000160789.18_LMNA | 0.01263  | -0.146863592 | 0.171488289 | 8.77E-01 | 9.52E-01 | 1.00E+00 |
| ENSG00000277759.1_MIR6719   | ENSG00000160789.18_LMNA | 0.09775  | -0.06242273  | 0.253012756 | 2.31E-01 | 5.09E-01 | 1.00E+00 |
| ENSG00000208018.1_MIR645    | ENSG00000160789.18_LMNA | 0.17181  | 0.01296816   | 0.322201686 | 3.43E-02 | 1.56E-01 | 1.00E+00 |
| ENSG00000252782.1_RNU6-341F | ENSG00000160789.18_LMNA | 0.03871  | -0.121235396 | 0.19670091  | 6.36E-01 | 8.37E-01 | 1.00E+00 |
| ENSG00000206824.1_Y_RNA     | ENSG00000160789.18_LMNA | -0.0188  | -0.177467051 | 0.140824698 | 8.18E-01 | 9.29E-01 | 1.00E+00 |
| ENSG00000251630.1_RP11-241F | ENSG00000160789.18_LMNA | -0.04671 | -0.204390077 | 0.113334222 | 5.68E-01 | 7.98E-01 | 1.00E+00 |
| ENSG00000201746.1_RNU6-828F | ENSG00000160789.18_LMNA | -0.11496 | -0.2692365   | 0.045062004 | 1.58E-01 | 4.12E-01 | 1.00E+00 |
| ENSG00000208035.1_          | ENSG00000160789.18_LMNA | 0.05052  | -0.109557439 | 0.208051722 | 5.36E-01 | 7.77E-01 | 1.00E+00 |
| ENSG00000232211.1_RP11-395D | ENSG00000160789.18_LMNA | 0.03146  | -0.128382047 | 0.189712172 | 7.00E-01 | 8.72E-01 | 1.00E+00 |
| ENSG00000252494.1_RNU6-126F | ENSG00000160789.18_LMNA | -0.12374 | -0.27747758  | 0.036170065 | 1.29E-01 | 3.64E-01 | 1.00E+00 |
| ENSG00000280573.1_          | ENSG00000160789.18_LMNA | -0.0282  | -0.186567157 | 0.13158738  | 7.30E-01 | 8.86E-01 | 1.00E+00 |
| ENSG00000170590.7_LINC00266 | ENSG00000160789.18_LMNA | -0.17019 | -0.320701161 | -0.01129496 | 3.61E-02 | 1.62E-01 | 1.00E+00 |
| ENSG00000276398.1_RMST_9    | ENSG00000160789.18_LMNA | -0.04552 | -0.203251105 | 0.114507139 | 5.78E-01 | 8.03E-01 | 1.00E+00 |
| ENSG00000271390.1_RP11-89C3 | ENSG00000160789.18_LMNA | -0.05686 | -0.214121515 | 0.10327652  | 4.87E-01 | 7.43E-01 | 1.00E+00 |



|                              |                         |          |              |             |          |          |          |
|------------------------------|-------------------------|----------|--------------|-------------|----------|----------|----------|
| ENSG00000265984.1_RP11-699A  | ENSG00000160789.18_LMNA | -0.25509 | -0.398121868 | -0.09994723 | 1.52E-03 | 1.58E-02 | 1.00E+00 |
| ENSG00000224109.1_CENPVL3    | ENSG00000160789.18_LMNA | -0.13533 | -0.288320812 | 0.02439431  | 9.64E-02 | 3.05E-01 | 1.00E+00 |
| ENSG00000233258.1_RP11-219F  | ENSG00000160789.18_LMNA | -0.21252 | -0.359553546 | -0.05518394 | 8.57E-03 | 5.86E-02 | 1.00E+00 |
| ENSG00000211785.1_TRAV12-1   | ENSG00000160789.18_LMNA | 0.04209  | -0.117902796 | 0.199948864 | 6.07E-01 | 8.20E-01 | 1.00E+00 |
| ENSG00000231795.1_ITCH-IT1   | ENSG00000160789.18_LMNA | -0.01285 | -0.171697738 | 0.146652437 | 8.75E-01 | 9.51E-01 | 1.00E+00 |
| ENSG00000233870.1_AC007881.4 | ENSG00000160789.18_LMNA | 0.02561  | -0.134133463 | 0.184064332 | 7.54E-01 | 8.98E-01 | 1.00E+00 |
| ENSG00000281681.1_           | ENSG00000160789.18_LMNA | 0.00468  | -0.154639165 | 0.163755452 | 9.54E-01 | 9.82E-01 | 1.00E+00 |
| ENSG00000227425.1_MRPS21P2   | ENSG00000160789.18_LMNA | -0.12537 | -0.278999315 | 0.034522697 | 1.24E-01 | 3.55E-01 | 1.00E+00 |
| ENSG00000276088.1_RN7SL620F  | ENSG00000160789.18_LMNA | -0.02464 | -0.183126022 | 0.13508691  | 7.63E-01 | 9.01E-01 | 1.00E+00 |
| ENSG00000235963.1_MCCD1P1    | ENSG00000160789.18_LMNA | 0.06016  | -0.100001785 | 0.217276482 | 4.62E-01 | 7.25E-01 | 1.00E+00 |
| ENSG00000265168.1_RP11-192H  | ENSG00000160789.18_LMNA | -0.13928 | -0.292001657 | 0.020377084 | 8.70E-02 | 2.87E-01 | 1.00E+00 |
| ENSG00000229949.1_AC005094.1 | ENSG00000160789.18_LMNA | -0.04062 | -0.198541326 | 0.119347896 | 6.19E-01 | 8.28E-01 | 1.00E+00 |
| ENSG00000254246.1_CTB-120L2  | ENSG00000160789.18_LMNA | -0.0019  | -0.1610526   | 0.157347683 | 9.81E-01 | 9.93E-01 | 1.00E+00 |
| ENSG00000277198.1_RN7SL270F  | ENSG00000160789.18_LMNA | -0.0794  | -0.235618286 | 0.080826572 | 3.31E-01 | 6.17E-01 | 1.00E+00 |
| ENSG00000281353.1_           | ENSG00000160789.18_LMNA | 0.03141  | -0.128429028 | 0.189666122 | 7.01E-01 | 8.72E-01 | 1.00E+00 |
| ENSG00000243103.3_RN7SL452F  | ENSG00000160789.18_LMNA | -0.00869 | -0.167656043 | 0.150721941 | 9.15E-01 | 9.68E-01 | 1.00E+00 |
| ENSG00000229612.1_SUMO1P2    | ENSG00000160789.18_LMNA | -0.00462 | -0.163704526 | 0.154690241 | 9.55E-01 | 9.82E-01 | 1.00E+00 |
| ENSG00000270445.1_RP11-972P  | ENSG00000160789.18_LMNA | 0.16311  | 0.004017885  | 0.314156955 | 4.47E-02 | 1.87E-01 | 1.00E+00 |
| ENSG00000240294.2_RN7SKP24   | ENSG00000160789.18_LMNA | -0.0535  | -0.210908394 | 0.106604559 | 5.13E-01 | 7.61E-01 | 1.00E+00 |
| ENSG00000277371.1_Metazoa_SI | ENSG00000160789.18_LMNA | 0.13513  | -0.024597939 | 0.288133987 | 9.69E-02 | 3.06E-01 | 1.00E+00 |
| ENSG00000230997.5_RAB42P1    | ENSG00000160789.18_LMNA | 0.08003  | -0.080189965 | 0.236223383 | 3.27E-01 | 6.14E-01 | 1.00E+00 |
| ENSG00000229661.1_BUD31P2    | ENSG00000160789.18_LMNA | -0.09544 | -0.250826832 | 0.064747344 | 2.42E-01 | 5.21E-01 | 1.00E+00 |
| ENSG00000271612.1_HSPE1P14   | ENSG00000160789.18_LMNA | -0.01037 | -0.169293935 | 0.149074078 | 8.99E-01 | 9.61E-01 | 1.00E+00 |
| ENSG00000280319.1_RP11-897M  | ENSG00000160789.18_LMNA | 0.15208  | -0.007292942 | 0.303926393 | 6.14E-02 | 2.29E-01 | 1.00E+00 |
| ENSG00000229217.1_CYCSP11    | ENSG00000160789.18_LMNA | 0.03939  | -0.120563296 | 0.197356501 | 6.30E-01 | 8.34E-01 | 1.00E+00 |
| ENSG00000229245.2_RP11-542K  | ENSG00000160789.18_LMNA | -0.00535 | -0.164414084 | 0.153978426 | 9.48E-01 | 9.79E-01 | 1.00E+00 |
| ENSG00000232880.1_NDUFB4P1   | ENSG00000160789.18_LMNA | -0.17102 | -0.321465447 | -0.01214698 | 3.52E-02 | 1.59E-01 | 1.00E+00 |
| ENSG00000229912.1_AC128709.4 | ENSG00000160789.18_LMNA | -0.02891 | -0.187250463 | 0.130891534 | 7.24E-01 | 8.83E-01 | 1.00E+00 |
| ENSG00000250258.1_CTC-431G1  | ENSG00000160789.18_LMNA | -0.00775 | -0.166747473 | 0.151635279 | 9.24E-01 | 9.71E-01 | 1.00E+00 |
| ENSG00000234766.1_LINC01496  | ENSG00000160789.18_LMNA | -0.33151 | -0.46610706  | -0.1819051  | 3.02E-05 | 7.17E-04 | 1.00E+00 |
| ENSG00000215905.4_RP11-4M23  | ENSG00000160789.18_LMNA | 0.01596  | -0.143602424 | 0.174719899 | 8.45E-01 | 9.40E-01 | 1.00E+00 |
| ENSG00000228909.1_AC008281.7 | ENSG00000160789.18_LMNA | -0.14284 | -0.295329542 | 0.016736371 | 7.92E-02 | 2.70E-01 | 1.00E+00 |
| ENSG00000253993.1_RP11-451C  | ENSG00000160789.18_LMNA | 0.15139  | -0.008002289 | 0.303282393 | 6.26E-02 | 2.32E-01 | 1.00E+00 |

|                              |                         |          |              |             |          |          |          |
|------------------------------|-------------------------|----------|--------------|-------------|----------|----------|----------|
| ENSG00000263955.2_RN7SL850F  | ENSG00000160789.18_LMNA | -0.08609 | -0.241976647 | 0.074124174 | 2.92E-01 | 5.77E-01 | 1.00E+00 |
| ENSG00000205076.4_LGALS7     | ENSG00000160789.18_LMNA | 0.3204   | 0.169867241  | 0.456327439 | 5.72E-05 | 1.19E-03 | 1.00E+00 |
| ENSG00000229280.1_EEF1DP6    | ENSG00000160789.18_LMNA | 0.10362  | -0.056514264 | 0.258554254 | 2.04E-01 | 4.75E-01 | 1.00E+00 |
| ENSG00000225761.1_RP11-417O  | ENSG00000160789.18_LMNA | -0.07283 | -0.229371943 | 0.087383143 | 3.73E-01 | 6.53E-01 | 1.00E+00 |
| ENSG00000248473.1_CTC-338M1  | ENSG00000160789.18_LMNA | -0.1131  | -0.267482145 | 0.046948505 | 1.65E-01 | 4.22E-01 | 1.00E+00 |
| ENSG00000267054.1_CTD-2540B  | ENSG00000160789.18_LMNA | -0.13991 | -0.292593952 | 0.019729718 | 8.56E-02 | 2.84E-01 | 1.00E+00 |
| ENSG00000228933.6_RP11-268G  | ENSG00000160789.18_LMNA | -0.33617 | -0.470202886 | -0.18697213 | 2.29E-05 | 5.77E-04 | 1.00E+00 |
| ENSG00000229521.2_MYCBP2-A   | ENSG00000160789.18_LMNA | 0.0274   | -0.132375872 | 0.185792503 | 7.38E-01 | 8.90E-01 | 1.00E+00 |
| ENSG00000258859.1_RP11-594C  | ENSG00000160789.18_LMNA | 0.07131  | -0.088900289 | 0.227922854 | 3.83E-01 | 6.61E-01 | 1.00E+00 |
| ENSG00000274001.1_RP11-5G9.I | ENSG00000160789.18_LMNA | 0.05698  | -0.103161334 | 0.214232601 | 4.86E-01 | 7.42E-01 | 1.00E+00 |
| ENSG00000274834.1_CTD-3037C  | ENSG00000160789.18_LMNA | -0.10924 | -0.263847854 | 0.050849427 | 1.80E-01 | 4.44E-01 | 1.00E+00 |
| ENSG00000233159.1_AC007390.  | ENSG00000160789.18_LMNA | 0.01874  | -0.14088373  | 0.17740872  | 8.19E-01 | 9.30E-01 | 1.00E+00 |
| ENSG00000233847.1_AC104113.  | ENSG00000160789.18_LMNA | -0.05056 | -0.208087013 | 0.109520995 | 5.36E-01 | 7.77E-01 | 1.00E+00 |
| ENSG00000257452.1_RP1-71H24  | ENSG00000160789.18_LMNA | 0.02983  | -0.129990212 | 0.188135085 | 7.15E-01 | 8.79E-01 | 1.00E+00 |
| ENSG00000248564.1_RP11-478C  | ENSG00000160789.18_LMNA | -0.0185  | -0.17717647  | 0.14111875  | 8.21E-01 | 9.30E-01 | 1.00E+00 |
| ENSG00000234826.1_AC003084.  | ENSG00000160789.18_LMNA | -0.02499 | -0.18345747  | 0.134750183 | 7.60E-01 | 9.00E-01 | 1.00E+00 |
| ENSG00000235549.1_EIF1P2     | ENSG00000160789.18_LMNA | -0.0677  | -0.224484585 | 0.092494168 | 4.07E-01 | 6.82E-01 | 1.00E+00 |
| ENSG00000259341.1_RP11-20G1  | ENSG00000160789.18_LMNA | 0.04911  | -0.110961372 | 0.206691628 | 5.48E-01 | 7.85E-01 | 1.00E+00 |
| ENSG00000219430.2_MBL3P      | ENSG00000160789.18_LMNA | -0.08696 | -0.242801098 | 0.073253017 | 2.87E-01 | 5.72E-01 | 1.00E+00 |
| ENSG00000266265.2_KLF14      | ENSG00000160789.18_LMNA | 0.10033  | -0.059830818 | 0.255446238 | 2.19E-01 | 4.94E-01 | 1.00E+00 |
| ENSG00000188816.3_HMX2       | ENSG00000160789.18_LMNA | -0.10958 | -0.264173312 | 0.050500482 | 1.79E-01 | 4.41E-01 | 1.00E+00 |
| ENSG00000251687.1_RP11-181K  | ENSG00000160789.18_LMNA | 0.00662  | -0.152739793 | 0.165648003 | 9.35E-01 | 9.75E-01 | 1.00E+00 |
| ENSG00000260870.1_NDUFB10P   | ENSG00000160789.18_LMNA | 0.05699  | -0.103144881 | 0.214248467 | 4.86E-01 | 7.42E-01 | 1.00E+00 |
| ENSG00000257878.1_RP11-256L  | ENSG00000160789.18_LMNA | 0.12073  | -0.039227862 | 0.274648801 | 1.38E-01 | 3.79E-01 | 1.00E+00 |
| ENSG00000259645.1_RP11-253M  | ENSG00000160789.18_LMNA | 0.13569  | -0.024032348 | 0.288652845 | 9.56E-02 | 3.03E-01 | 1.00E+00 |
| ENSG00000225401.2_TGIF2P1    | ENSG00000160789.18_LMNA | 0.11929  | -0.040685327 | 0.27329858  | 1.43E-01 | 3.87E-01 | 1.00E+00 |
| ENSG00000255627.1_RP11-547L  | ENSG00000160789.18_LMNA | -0.01326 | -0.172097725 | 0.146249111 | 8.71E-01 | 9.50E-01 | 1.00E+00 |
| ENSG00000227777.1_RP4-738P1  | ENSG00000160789.18_LMNA | 0.01592  | -0.143648962 | 0.174673831 | 8.46E-01 | 9.40E-01 | 1.00E+00 |
| ENSG00000265790.1_RNASEH1F   | ENSG00000160789.18_LMNA | -0.04937 | -0.206940731 | 0.110704335 | 5.46E-01 | 7.84E-01 | 1.00E+00 |
| ENSG00000223662.1_SAMSN1-A   | ENSG00000160789.18_LMNA | -0.15991 | -0.311185047 | -0.00072397 | 4.91E-02 | 1.99E-01 | 1.00E+00 |
| ENSG00000255361.1_RP11-412B  | ENSG00000160789.18_LMNA | -0.02213 | -0.180693304 | 0.137556129 | 7.87E-01 | 9.13E-01 | 1.00E+00 |
| ENSG00000253121.1_RP11-659E  | ENSG00000160789.18_LMNA | -0.00653 | -0.165558406 | 0.152829766 | 9.36E-01 | 9.75E-01 | 1.00E+00 |
| ENSG00000250129.4_RP11-265F  | ENSG00000160789.18_LMNA | -0.10882 | -0.263453397 | 0.051272246 | 1.82E-01 | 4.46E-01 | 1.00E+00 |

|                             |                         |          |              |             |          |          |          |
|-----------------------------|-------------------------|----------|--------------|-------------|----------|----------|----------|
| ENSG00000270174.1_RP1-256G2 | ENSG00000160789.18_LMNA | 0.0364   | -0.123520151 | 0.194470146 | 6.56E-01 | 8.48E-01 | 1.00E+00 |
| ENSG00000258084.4_RP11-754N | ENSG00000160789.18_LMNA | -0.1594  | -0.310717349 | -0.00020621 | 4.98E-02 | 2.01E-01 | 1.00E+00 |
| ENSG00000240541.2_TM4SF1-A5 | ENSG00000160789.18_LMNA | -0.07125 | -0.227862689 | 0.088963249 | 3.83E-01 | 6.62E-01 | 1.00E+00 |
| ENSG00000259242.2_AC002306  | ENSG00000160789.18_LMNA | -0.01312 | -0.171961995 | 0.146385986 | 8.73E-01 | 9.51E-01 | 1.00E+00 |
| ENSG00000259471.1_LINC01169 | ENSG00000160789.18_LMNA | 0.07141  | -0.088799116 | 0.228019533 | 3.82E-01 | 6.61E-01 | 1.00E+00 |
| ENSG00000253535.4_RP11-624C | ENSG00000160789.18_LMNA | -0.12026 | -0.27420663  | 0.0397053   | 1.40E-01 | 3.82E-01 | 1.00E+00 |
| ENSG00000168412.6_MTNR1A    | ENSG00000160789.18_LMNA | -0.02962 | -0.187935627 | 0.130193481 | 7.17E-01 | 8.80E-01 | 1.00E+00 |
| ENSG00000256399.1_RP11-274J | ENSG00000160789.18_LMNA | 0.02141  | -0.138258562 | 0.180000542 | 7.93E-01 | 9.16E-01 | 1.00E+00 |
| ENSG00000259546.1_RP11-351M | ENSG00000160789.18_LMNA | -0.07782 | -0.234120753 | 0.08240098  | 3.41E-01 | 6.26E-01 | 1.00E+00 |
| ENSG00000185863.7_TMEM210   | ENSG00000160789.18_LMNA | 0.05106  | -0.109027213 | 0.208565073 | 5.32E-01 | 7.75E-01 | 1.00E+00 |
| ENSG00000170279.2_C7orf33   | ENSG00000160789.18_LMNA | 0.01977  | -0.139868597 | 0.178411482 | 8.09E-01 | 9.24E-01 | 1.00E+00 |
| ENSG00000262995.1_CTD-2194A | ENSG00000160789.18_LMNA | -0.16263 | -0.313710551 | -0.00352268 | 4.53E-02 | 1.88E-01 | 1.00E+00 |
| ENSG00000214434.2_NIFKP1    | ENSG00000160789.18_LMNA | 0.08847  | -0.071738642 | 0.244233196 | 2.78E-01 | 5.64E-01 | 1.00E+00 |
| ENSG00000216621.7_RP11-244K | ENSG00000160789.18_LMNA | -0.17758 | -0.327518593 | -0.01891088 | 2.86E-02 | 1.39E-01 | 1.00E+00 |
| ENSG00000221845.4_C7orf65   | ENSG00000160789.18_LMNA | -0.20179 | -0.349754063 | -0.04400207 | 1.27E-02 | 7.77E-02 | 1.00E+00 |
| ENSG00000100121.11_GGTLC2   | ENSG00000160789.18_LMNA | 0.15261  | -0.006759098 | 0.30441087  | 6.05E-02 | 2.27E-01 | 1.00E+00 |
| ENSG00000263201.1_CTC-479C5 | ENSG00000160789.18_LMNA | -0.02159 | -0.180167772 | 0.138089027 | 7.92E-01 | 9.16E-01 | 1.00E+00 |
| ENSG00000228513.1_AC023271  | ENSG00000160789.18_LMNA | 0.07169  | -0.088519188 | 0.228286992 | 3.80E-01 | 6.59E-01 | 1.00E+00 |
| ENSG00000250979.1_RP11-656G | ENSG00000160789.18_LMNA | 0.00586  | -0.153486434 | 0.164904323 | 9.43E-01 | 9.77E-01 | 1.00E+00 |
| ENSG00000164458.8_T         | ENSG00000160789.18_LMNA | -0.01675 | -0.175478256 | 0.142836128 | 8.38E-01 | 9.37E-01 | 1.00E+00 |
| ENSG00000244211.3_PDZK1P1   | ENSG00000160789.18_LMNA | -0.01813 | -0.176816999 | 0.141482438 | 8.25E-01 | 9.31E-01 | 1.00E+00 |
| ENSG00000223602.2_AC125634  | ENSG00000160789.18_LMNA | -0.03112 | -0.189384694 | 0.128716115 | 7.03E-01 | 8.73E-01 | 1.00E+00 |
| ENSG00000213924.3_HNRNPH1F  | ENSG00000160789.18_LMNA | 0.06356  | -0.096615279 | 0.220532173 | 4.37E-01 | 7.05E-01 | 1.00E+00 |
| ENSG00000224822.1_THRB-IT1  | ENSG00000160789.18_LMNA | -0.15281 | -0.304597905 | 0.006552957 | 6.02E-02 | 2.26E-01 | 1.00E+00 |
| ENSG00000227881.1_ASS1P5    | ENSG00000160789.18_LMNA | 0.13466  | -0.02507511  | 0.287696101 | 9.81E-02 | 3.08E-01 | 1.00E+00 |
| ENSG00000129744.2_ART1      | ENSG00000160789.18_LMNA | -0.21026 | -0.357491166 | -0.05282426 | 9.32E-03 | 6.23E-02 | 1.00E+00 |
| ENSG00000232133.1_IMPDH1P1  | ENSG00000160789.18_LMNA | 0.21516  | 0.05794519   | 0.361963142 | 7.77E-03 | 5.44E-02 | 1.00E+00 |
| ENSG00000256896.1_PSMC1P8   | ENSG00000160789.18_LMNA | -0.09909 | -0.254283225 | 0.061070079 | 2.25E-01 | 5.01E-01 | 1.00E+00 |
| ENSG00000215127.6_SYT14P1   | ENSG00000160789.18_LMNA | -0.13074 | -0.284024578 | 0.029070426 | 1.08E-01 | 3.28E-01 | 1.00E+00 |
| ENSG00000164451.12_FAM26D   | ENSG00000160789.18_LMNA | 0.07126  | -0.088945178 | 0.227879958 | 3.83E-01 | 6.61E-01 | 1.00E+00 |
| ENSG00000237752.2_RP13-75G2 | ENSG00000160789.18_LMNA | -0.03048 | -0.188767683 | 0.129345348 | 7.09E-01 | 8.76E-01 | 1.00E+00 |
| ENSG00000249631.4_RP11-281P | ENSG00000160789.18_LMNA | -0.17404 | -0.324257896 | -0.0152638  | 3.20E-02 | 1.50E-01 | 1.00E+00 |
| ENSG00000276950.3_GSTTP1    | ENSG00000160789.18_LMNA | -0.0685  | -0.225246078 | 0.091698923 | 4.02E-01 | 6.78E-01 | 1.00E+00 |

|                              |                         |          |              |             |          |          |          |
|------------------------------|-------------------------|----------|--------------|-------------|----------|----------|----------|
| ENSG00000268100.1_ZNF725P    | ENSG00000160789.18_LMNA | -0.07911 | -0.235351408 | 0.081107266 | 3.33E-01 | 6.18E-01 | 1.00E+00 |
| ENSG00000204779.2_FOXP4L5    | ENSG00000160789.18_LMNA | -0.04238 | -0.2002303   | 0.117613689 | 6.04E-01 | 8.18E-01 | 1.00E+00 |
| ENSG00000271615.1_ACTG1P22   | ENSG00000160789.18_LMNA | -0.00213 | -0.161277328 | 0.157122666 | 9.79E-01 | 9.92E-01 | 1.00E+00 |
| ENSG00000259601.2_RP11-568G  | ENSG00000160789.18_LMNA | -0.04799 | -0.205624351 | 0.112062162 | 5.57E-01 | 7.91E-01 | 1.00E+00 |
| ENSG00000166589.11_CDH16     | ENSG00000160789.18_LMNA | 0.13121  | -0.028591856 | 0.284464847 | 1.07E-01 | 3.25E-01 | 1.00E+00 |
| ENSG00000237463.4_RP11-280C  | ENSG00000160789.18_LMNA | -0.18484 | -0.334207914 | -0.02641866 | 2.26E-02 | 1.18E-01 | 1.00E+00 |
| ENSG00000158553.4_POM121L2   | ENSG00000160789.18_LMNA | -0.07227 | -0.228834889 | 0.087945592 | 3.76E-01 | 6.56E-01 | 1.00E+00 |
| ENSG00000237339.4_LINC01502  | ENSG00000160789.18_LMNA | -0.03899 | -0.196971621 | 0.120957904 | 6.33E-01 | 8.36E-01 | 1.00E+00 |
| ENSG00000234859.4_AC003958.1 | ENSG00000160789.18_LMNA | 0.04598  | -0.114058721 | 0.203686647 | 5.74E-01 | 8.01E-01 | 1.00E+00 |
| ENSG00000240021.8_TEX35      | ENSG00000160789.18_LMNA | -0.10122 | -0.25629071  | 0.058930373 | 2.15E-01 | 4.89E-01 | 1.00E+00 |
| ENSG00000243137.6_PSG4       | ENSG00000160789.18_LMNA | 0.03191  | -0.127937846 | 0.190147499 | 6.96E-01 | 8.70E-01 | 1.00E+00 |
| ENSG00000231898.7_AC012594.1 | ENSG00000160789.18_LMNA | -0.00207 | -0.16121396  | 0.157186119 | 9.80E-01 | 9.93E-01 | 1.00E+00 |
| ENSG00000169876.12_MUC17     | ENSG00000160789.18_LMNA | 0.06742  | -0.092778529 | 0.224212199 | 4.09E-01 | 6.83E-01 | 1.00E+00 |
| ENSG00000083782.6_EPYC       | ENSG00000160789.18_LMNA | 0.1594   | 0.000204483  | 0.310715791 | 4.98E-02 | 2.01E-01 | 1.00E+00 |
| ENSG00000243238.1_IGKV2-30   | ENSG00000160789.18_LMNA | -0.00113 | -0.160302776 | 0.158098231 | 9.89E-01 | 9.96E-01 | 1.00E+00 |
| ENSG00000274740.1_AC013791.1 | ENSG00000160789.18_LMNA | -0.09734 | -0.252622561 | 0.062837933 | 2.33E-01 | 5.11E-01 | 1.00E+00 |
| ENSG00000201109.1_RNA5SP24   | ENSG00000160789.18_LMNA | -0.08138 | -0.237502626 | 0.078843254 | 3.19E-01 | 6.06E-01 | 1.00E+00 |
| ENSG00000265706.1_SNORD53    | ENSG00000160789.18_LMNA | -0.01093 | -0.169836099 | 0.148528224 | 8.94E-01 | 9.58E-01 | 1.00E+00 |
| ENSG00000202358.1_RNU6-652F  | ENSG00000160789.18_LMNA | -0.05421 | -0.211587498 | 0.10590176  | 5.07E-01 | 7.57E-01 | 1.00E+00 |
| ENSG00000211970.3_IGHV4-61   | ENSG00000160789.18_LMNA | 0.06549  | -0.094697089 | 0.222373139 | 4.23E-01 | 6.94E-01 | 1.00E+00 |
| ENSG00000238554.1_RNU1-88P   | ENSG00000160789.18_LMNA | 0.00825  | -0.151150157 | 0.167230129 | 9.20E-01 | 9.69E-01 | 1.00E+00 |
| ENSG00000269900.3_RMRP       | ENSG00000160789.18_LMNA | -0.18605 | -0.335315307 | -0.0276649  | 2.17E-02 | 1.15E-01 | 1.00E+00 |
| ENSG00000200594.1_RNU6-824F  | ENSG00000160789.18_LMNA | -0.09091 | -0.246538281 | 0.069298063 | 2.65E-01 | 5.49E-01 | 1.00E+00 |
| ENSG00000200525.1_RNU6-1209  | ENSG00000160789.18_LMNA | 0.08536  | -0.074854358 | 0.241285259 | 2.96E-01 | 5.82E-01 | 1.00E+00 |
| ENSG00000212240.1_RNU6-930F  | ENSG00000160789.18_LMNA | 0.0192   | -0.140426292 | 0.177860666 | 8.14E-01 | 9.27E-01 | 1.00E+00 |
| ENSG00000222268.1_RNA5SP42   | ENSG00000160789.18_LMNA | -0.03138 | -0.189633395 | 0.128462415 | 7.01E-01 | 8.72E-01 | 1.00E+00 |
| ENSG00000258506.2_RP11-688D  | ENSG00000160789.18_LMNA | -0.12572 | -0.279326758 | 0.034167998 | 1.23E-01 | 3.53E-01 | 1.00E+00 |
| ENSG00000231691.1_RP11-203F  | ENSG00000160789.18_LMNA | -0.1602  | -0.311453971 | -0.00102175 | 4.87E-02 | 1.98E-01 | 1.00E+00 |
| ENSG00000238963.2_U8         | ENSG00000160789.18_LMNA | 0.1062   | -0.053915573 | 0.260984995 | 1.93E-01 | 4.61E-01 | 1.00E+00 |
| ENSG00000257662.1	EIF4A1P12  | ENSG00000160789.18_LMNA | -0.01939 | -0.178044307 | 0.14024038  | 8.13E-01 | 9.26E-01 | 1.00E+00 |
| ENSG00000164821.4_DEFA4      | ENSG00000160789.18_LMNA | 0.07849  | -0.081735814 | 0.234753624 | 3.36E-01 | 6.22E-01 | 1.00E+00 |
| ENSG00000240457.3_RN7SL472f  | ENSG00000160789.18_LMNA | 0.10019  | -0.059965335 | 0.255320041 | 2.19E-01 | 4.94E-01 | 1.00E+00 |
| ENSG00000273727.1_U1         | ENSG00000160789.18_LMNA | 0.03765  | -0.122285063 | 0.195676456 | 6.45E-01 | 8.42E-01 | 1.00E+00 |

|                              |                         |          |              |             |          |          |          |
|------------------------------|-------------------------|----------|--------------|-------------|----------|----------|----------|
| ENSG00000202347.1_RNU1-16P   | ENSG00000160789.18_LMNA | -0.11444 | -0.268742607 | 0.045593326 | 1.60E-01 | 4.14E-01 | 1.00E+00 |
| ENSG00000171234.12_UGT2B7    | ENSG00000160789.18_LMNA | -0.25762 | -0.400401919 | -0.10263184 | 1.35E-03 | 1.46E-02 | 1.00E+00 |
| ENSG00000204110.6_RP1-153P1  | ENSG00000160789.18_LMNA | -0.188   | -0.337106649 | -0.02968288 | 2.04E-02 | 1.09E-01 | 1.00E+00 |
| ENSG00000235361.1_AC016292.  | ENSG00000160789.18_LMNA | -0.11541 | -0.269653466 | 0.044613301 | 1.57E-01 | 4.09E-01 | 1.00E+00 |
| ENSG00000251689.1_RP11-478C  | ENSG00000160789.18_LMNA | 0.00798  | -0.1514153   | 0.166966353 | 9.22E-01 | 9.70E-01 | 1.00E+00 |
| ENSG00000235627.1_SNRFP4     | ENSG00000160789.18_LMNA | -0.05685 | -0.214108928 | 0.103289572 | 4.87E-01 | 7.43E-01 | 1.00E+00 |
| ENSG00000261049.2_RP11-357N  | ENSG00000160789.18_LMNA | 0.03041  | -0.129420056 | 0.188694411 | 7.10E-01 | 8.77E-01 | 1.00E+00 |
| ENSG00000255219.1_RP11-716H  | ENSG00000160789.18_LMNA | -0.33161 | -0.466199822 | -0.18201969 | 3.00E-05 | 7.14E-04 | 1.00E+00 |
| ENSG00000237664.1_LINC00316  | ENSG00000160789.18_LMNA | 0.05511  | -0.105011287 | 0.212447507 | 5.00E-01 | 7.53E-01 | 1.00E+00 |
| ENSG00000238185.1_RP11-252M  | ENSG00000160789.18_LMNA | 0.1007   | -0.059455983 | 0.255797831 | 2.17E-01 | 4.92E-01 | 1.00E+00 |
| ENSG00000220867.1_HSPE1P26   | ENSG00000160789.18_LMNA | 0.02434  | -0.135383556 | 0.182833967 | 7.66E-01 | 9.03E-01 | 1.00E+00 |
| ENSG00000255772.4_LINC01479  | ENSG00000160789.18_LMNA | -0.12567 | -0.279285494 | 0.034212701 | 1.23E-01 | 3.53E-01 | 1.00E+00 |
| ENSG00000241354.2_RP11-1042I | ENSG00000160789.18_LMNA | -0.17949 | -0.329281768 | -0.02088641 | 2.69E-02 | 1.33E-01 | 1.00E+00 |
| ENSG00000231777.1_MTND4P21   | ENSG00000160789.18_LMNA | -0.09701 | -0.252315537 | 0.063164557 | 2.34E-01 | 5.12E-01 | 1.00E+00 |
| ENSG00000277265.1_RN7SL556f  | ENSG00000160789.18_LMNA | -0.07908 | -0.235314612 | 0.081145963 | 3.33E-01 | 6.18E-01 | 1.00E+00 |
| ENSG00000255089.1_RP11-326C  | ENSG00000160789.18_LMNA | 0.03518  | -0.124722236 | 0.193295146 | 6.67E-01 | 8.53E-01 | 1.00E+00 |
| ENSG00000275901.1_Metazoa_SI | ENSG00000160789.18_LMNA | -0.03555 | -0.193655396 | 0.124353782 | 6.64E-01 | 8.52E-01 | 1.00E+00 |
| ENSG00000204805.8_FAM27E4    | ENSG00000160789.18_LMNA | 0.17488  | 0.016127357  | 0.325030626 | 3.12E-02 | 1.47E-01 | 1.00E+00 |
| ENSG00000227416.2_RP11-109P  | ENSG00000160789.18_LMNA | 0.05931  | -0.100843729 | 0.216465963 | 4.68E-01 | 7.29E-01 | 1.00E+00 |
| ENSG00000211803.2_TRAV23DV   | ENSG00000160789.18_LMNA | 0.01372  | -0.145797593 | 0.17254538  | 8.67E-01 | 9.48E-01 | 1.00E+00 |
| ENSG00000229687.2_RP4-654H1  | ENSG00000160789.18_LMNA | 0.07549  | -0.084731442 | 0.231901323 | 3.55E-01 | 6.39E-01 | 1.00E+00 |
| ENSG00000260510.1_AC004381.  | ENSG00000160789.18_LMNA | 0.04582  | -0.114212598 | 0.203537203 | 5.75E-01 | 8.02E-01 | 1.00E+00 |
| ENSG00000211790.2_TRAV8-4    | ENSG00000160789.18_LMNA | -0.00359 | -0.162697722 | 0.155699683 | 9.65E-01 | 9.86E-01 | 1.00E+00 |
| ENSG00000275392.1_RP11-164O  | ENSG00000160789.18_LMNA | -0.20787 | -0.355309427 | -0.05033172 | 1.02E-02 | 6.64E-02 | 1.00E+00 |
| ENSG00000226598.1_           | ENSG00000160789.18_LMNA | 0.1583   | -0.000927403 | 0.309692822 | 5.14E-02 | 2.05E-01 | 1.00E+00 |
| ENSG00000232241.1_DYNLT3P1   | ENSG00000160789.18_LMNA | -0.04792 | -0.205553    | 0.112135727 | 5.58E-01 | 7.91E-01 | 1.00E+00 |
| ENSG00000227213.1_SPATA13-A  | ENSG00000160789.18_LMNA | -0.06679 | -0.223614406 | 0.093402422 | 4.14E-01 | 6.87E-01 | 1.00E+00 |
| ENSG00000233981.1_RP3-380E1  | ENSG00000160789.18_LMNA | -0.05135 | -0.208848127 | 0.108734776 | 5.30E-01 | 7.73E-01 | 1.00E+00 |
| ENSG00000279126.1_AC008810.  | ENSG00000160789.18_LMNA | -0.0383  | -0.196301224 | 0.121645004 | 6.39E-01 | 8.39E-01 | 1.00E+00 |
| ENSG00000249406.1_RP11-893F  | ENSG00000160789.18_LMNA | 0.14259  | -0.016996056 | 0.29509242  | 7.97E-02 | 2.71E-01 | 1.00E+00 |
| ENSG00000229976.1_RP5-1031Ji | ENSG00000160789.18_LMNA | -0.15794 | -0.309357555 | 0.001298193 | 5.20E-02 | 2.06E-01 | 1.00E+00 |
| ENSG00000253116.1_RP11-648L  | ENSG00000160789.18_LMNA | -0.0721  | -0.228671234 | 0.088116945 | 3.77E-01 | 6.57E-01 | 1.00E+00 |
| ENSG00000278022.1_RP11-35O1  | ENSG00000160789.18_LMNA | 0.05281  | -0.107297248 | 0.21023876  | 5.18E-01 | 7.65E-01 | 1.00E+00 |

|                              |                         |          |              |             |          |          |          |
|------------------------------|-------------------------|----------|--------------|-------------|----------|----------|----------|
| ENSG00000260157.3_CH17-53B9  | ENSG00000160789.18_LMNA | -0.23155 | -0.37685872  | -0.07511853 | 4.10E-03 | 3.38E-02 | 1.00E+00 |
| ENSG00000272774.1_RP11-433A  | ENSG00000160789.18_LMNA | -0.08662 | -0.242476374 | 0.073596194 | 2.89E-01 | 5.74E-01 | 1.00E+00 |
| ENSG00000255342.1_RP11-762B  | ENSG00000160789.18_LMNA | 0.14044  | -0.019187365 | 0.293089982 | 8.44E-02 | 2.81E-01 | 1.00E+00 |
| ENSG00000230898.1_RP11-9L18  | ENSG00000160789.18_LMNA | 0.12406  | -0.035852927 | 0.277770655 | 1.28E-01 | 3.62E-01 | 1.00E+00 |
| ENSG00000257022.1_RP11-7291  | ENSG00000160789.18_LMNA | -0.11741 | -0.271535662 | 0.042586259 | 1.50E-01 | 3.97E-01 | 1.00E+00 |
| ENSG00000236390.1_RP11-25B7  | ENSG00000160789.18_LMNA | -0.12078 | -0.274694693 | 0.039178302 | 1.38E-01 | 3.79E-01 | 1.00E+00 |
| ENSG00000213210.4_AC005229.1 | ENSG00000160789.18_LMNA | 0.07292  | -0.08729402  | 0.229457024 | 3.72E-01 | 6.52E-01 | 1.00E+00 |
| ENSG00000251360.2_KHDC1P1    | ENSG00000160789.18_LMNA | 0.00369  | -0.155605903 | 0.162791284 | 9.64E-01 | 9.86E-01 | 1.00E+00 |
| ENSG00000277089.3_AC069363.1 | ENSG00000160789.18_LMNA | 0.03184  | -0.128014062 | 0.190072814 | 6.97E-01 | 8.70E-01 | 1.00E+00 |
| ENSG00000257271.1_KIRREL3-A  | ENSG00000160789.18_LMNA | 0.02241  | -0.137279773 | 0.180965768 | 7.84E-01 | 9.12E-01 | 1.00E+00 |
| ENSG00000237490.3_RPS27AP1   | ENSG00000160789.18_LMNA | 0.09132  | -0.068885083 | 0.24692798  | 2.63E-01 | 5.47E-01 | 1.00E+00 |
| ENSG00000279527.1_RP11-83B2  | ENSG00000160789.18_LMNA | 0.20284  | 0.045099741  | 0.350719004 | 1.22E-02 | 7.57E-02 | 1.00E+00 |
| ENSG00000227813.1_RP1-180M1  | ENSG00000160789.18_LMNA | -0.14265 | -0.295149493 | 0.016933557 | 7.96E-02 | 2.71E-01 | 1.00E+00 |
| ENSG00000256458.1_RP11-363J  | ENSG00000160789.18_LMNA | 0.01592  | -0.143645836 | 0.174676926 | 8.46E-01 | 9.40E-01 | 1.00E+00 |
| ENSG00000226383.4_AC093375.1 | ENSG00000160789.18_LMNA | 0.0434   | -0.116606207 | 0.201210636 | 5.95E-01 | 8.13E-01 | 1.00E+00 |
| ENSG00000242729.1_RP11-124G  | ENSG00000160789.18_LMNA | -0.05484 | -0.212191358 | 0.105276563 | 5.02E-01 | 7.54E-01 | 1.00E+00 |
| ENSG00000227722.1_RP5-1059H  | ENSG00000160789.18_LMNA | 0.0388   | -0.121146303 | 0.19678783  | 6.35E-01 | 8.36E-01 | 1.00E+00 |
| ENSG00000237708.1_RP11-445C  | ENSG00000160789.18_LMNA | 0.12864  | -0.031200775 | 0.282063117 | 1.14E-01 | 3.38E-01 | 1.00E+00 |
| ENSG00000258945.1_RP11-497E  | ENSG00000160789.18_LMNA | 0.00326  | -0.156020383 | 0.162377721 | 9.68E-01 | 9.87E-01 | 1.00E+00 |
| ENSG00000204006.7_C1orf185   | ENSG00000160789.18_LMNA | 0.0614   | -0.098762676 | 0.218468546 | 4.52E-01 | 7.18E-01 | 1.00E+00 |
| ENSG00000230661.1_YY1P1      | ENSG00000160789.18_LMNA | 0.02675  | -0.133013707 | 0.185165572 | 7.44E-01 | 8.92E-01 | 1.00E+00 |
| ENSG00000230201.5_ATP6V0CP   | ENSG00000160789.18_LMNA | -0.00871 | -0.167677115 | 0.150700752 | 9.15E-01 | 9.68E-01 | 1.00E+00 |
| ENSG00000265739.1_RP11-354P  | ENSG00000160789.18_LMNA | -0.04891 | -0.206503097 | 0.111115588 | 5.50E-01 | 7.86E-01 | 1.00E+00 |
| ENSG00000262881.1_RP11-669E  | ENSG00000160789.18_LMNA | -0.06055 | -0.217654472 | 0.099608984 | 4.59E-01 | 7.22E-01 | 1.00E+00 |
| ENSG00000224259.4_LINC01133  | ENSG00000160789.18_LMNA | 0.06383  | -0.096346442 | 0.220790323 | 4.35E-01 | 7.03E-01 | 1.00E+00 |
| ENSG00000269966.1_RP3-331H2  | ENSG00000160789.18_LMNA | 0.13933  | -0.020322978 | 0.292051169 | 8.69E-02 | 2.86E-01 | 1.00E+00 |
| ENSG00000187616.4_TMEM8C     | ENSG00000160789.18_LMNA | -0.05868 | -0.215859743 | 0.101473157 | 4.73E-01 | 7.33E-01 | 1.00E+00 |
| ENSG00000227261.1_YWHAZP7    | ENSG00000160789.18_LMNA | -0.0635  | -0.220469869 | 0.096680156 | 4.37E-01 | 7.05E-01 | 1.00E+00 |
| ENSG00000234566.1_RPL7AP71   | ENSG00000160789.18_LMNA | 0.12947  | -0.030353921 | 0.282843149 | 1.12E-01 | 3.34E-01 | 1.00E+00 |
| ENSG00000230077.1_MTAPP2     | ENSG00000160789.18_LMNA | 0.0064   | -0.152954953 | 0.165433733 | 9.38E-01 | 9.75E-01 | 1.00E+00 |
| ENSG00000259466.1_NPM1P47    | ENSG00000160789.18_LMNA | -0.08043 | -0.236600483 | 0.079793095 | 3.25E-01 | 6.11E-01 | 1.00E+00 |
| ENSG00000203266.2_RP11-560A  | ENSG00000160789.18_LMNA | 0.03925  | -0.120707471 | 0.197215891 | 6.31E-01 | 8.34E-01 | 1.00E+00 |
| ENSG00000255666.4_RP11-867G  | ENSG00000160789.18_LMNA | -0.25694 | -0.399790034 | -0.10191096 | 1.40E-03 | 1.49E-02 | 1.00E+00 |

|                              |                         |          |              |             |          |          |          |
|------------------------------|-------------------------|----------|--------------|-------------|----------|----------|----------|
| ENSG00000214976.2_VDAC2P1    | ENSG00000160789.18_LMNA | -0.01848 | -0.177158026 | 0.141137413 | 8.21E-01 | 9.30E-01 | 1.00E+00 |
| ENSG00000259449.1_NIFKP8     | ENSG00000160789.18_LMNA | 0.01364  | -0.145877016 | 0.172466646 | 8.68E-01 | 9.48E-01 | 1.00E+00 |
| ENSG00000255595.1_RP4-809F1  | ENSG00000160789.18_LMNA | 0.01536  | -0.14419128  | 0.174136887 | 8.51E-01 | 9.42E-01 | 1.00E+00 |
| ENSG00000225212.4_AKR1B1P6   | ENSG00000160789.18_LMNA | 0.00543  | -0.153901853 | 0.164490395 | 9.47E-01 | 9.79E-01 | 1.00E+00 |
| ENSG00000235879.1_FAR1P1     | ENSG00000160789.18_LMNA | 0.07678  | -0.083435812 | 0.233135632 | 3.47E-01 | 6.31E-01 | 1.00E+00 |
| ENSG00000248869.4_RP11-138I1 | ENSG00000160789.18_LMNA | 0.14683  | -0.012662018 | 0.299044848 | 7.11E-02 | 2.52E-01 | 1.00E+00 |
| ENSG00000255776.1_VDAC2P2    | ENSG00000160789.18_LMNA | 0.05004  | -0.110035487 | 0.207588739 | 5.40E-01 | 7.80E-01 | 1.00E+00 |
| ENSG00000253105.4_KB-1448A5  | ENSG00000160789.18_LMNA | -0.1671  | -0.317849244 | -0.00811963 | 3.96E-02 | 1.72E-01 | 1.00E+00 |
| ENSG00000266227.1_NPM1P2     | ENSG00000160789.18_LMNA | 0.01563  | -0.143925753 | 0.174399806 | 8.48E-01 | 9.41E-01 | 1.00E+00 |
| ENSG00000137252.8_HCRTR2     | ENSG00000160789.18_LMNA | -0.09914 | -0.254322944 | 0.061027772 | 2.24E-01 | 5.00E-01 | 1.00E+00 |
| ENSG00000253218.1_KLF3P1     | ENSG00000160789.18_LMNA | 0.06464  | -0.095548362 | 0.221556416 | 4.29E-01 | 6.99E-01 | 1.00E+00 |
| ENSG00000230140.4_AC016738.1 | ENSG00000160789.18_LMNA | 0.16589  | 0.006873915  | 0.316728874 | 4.11E-02 | 1.77E-01 | 1.00E+00 |
| ENSG00000177462.6_OR2T8      | ENSG00000160789.18_LMNA | -0.1474  | -0.299571438 | 0.0120837   | 7.00E-02 | 2.49E-01 | 1.00E+00 |
| ENSG00000229702.1_           | ENSG00000160789.18_LMNA | -0.1915  | -0.340328289 | -0.03331843 | 1.81E-02 | 1.00E-01 | 1.00E+00 |
| ENSG00000234473.1_ZNF101P2   | ENSG00000160789.18_LMNA | -0.03534 | -0.193455382 | 0.124558362 | 6.66E-01 | 8.53E-01 | 1.00E+00 |
| ENSG00000186152.6_LILRP1     | ENSG00000160789.18_LMNA | 0.0629   | -0.097278611 | 0.219895021 | 4.41E-01 | 7.09E-01 | 1.00E+00 |
| ENSG00000219249.2_AMZ2P2     | ENSG00000160789.18_LMNA | -0.13324 | -0.286364656 | 0.026525132 | 1.02E-01 | 3.15E-01 | 1.00E+00 |
| ENSG00000279670.1_RP11-70L8  | ENSG00000160789.18_LMNA | -0.07661 | -0.232965225 | 0.083614749 | 3.48E-01 | 6.32E-01 | 1.00E+00 |
| ENSG00000139648.6_KRT71      | ENSG00000160789.18_LMNA | -0.13993 | -0.292609108 | 0.019713149 | 8.55E-02 | 2.84E-01 | 1.00E+00 |
| ENSG00000148377.5_IDI2       | ENSG00000160789.18_LMNA | -0.01045 | -0.169370373 | 0.148997132 | 8.98E-01 | 9.60E-01 | 1.00E+00 |
| ENSG00000264958.2_ALOX12P1   | ENSG00000160789.18_LMNA | 0.00336  | -0.155924358 | 0.162473543 | 9.67E-01 | 9.87E-01 | 1.00E+00 |
| ENSG00000225092.2_RP11-405O  | ENSG00000160789.18_LMNA | 0.03879  | -0.121162139 | 0.196772381 | 6.35E-01 | 8.37E-01 | 1.00E+00 |
| ENSG00000154143.2_PANX3      | ENSG00000160789.18_LMNA | -0.05773 | -0.21495332  | 0.102413805 | 4.80E-01 | 7.38E-01 | 1.00E+00 |
| ENSG00000239677.5_PDZRN3-A1  | ENSG00000160789.18_LMNA | -0.10714 | -0.26187218  | 0.052966025 | 1.89E-01 | 4.56E-01 | 1.00E+00 |
| ENSG00000254445.1_HSPB2-C11  | ENSG00000160789.18_LMNA | -0.07285 | -0.229386742 | 0.087367641 | 3.72E-01 | 6.53E-01 | 1.00E+00 |
| ENSG00000279391.1_RP11-236J  | ENSG00000160789.18_LMNA | 0.02912  | -0.130691075 | 0.187447253 | 7.22E-01 | 8.82E-01 | 1.00E+00 |
| ENSG00000248954.1_RP11-304F  | ENSG00000160789.18_LMNA | 0.1412   | -0.01841568  | 0.293795468 | 8.27E-02 | 2.78E-01 | 1.00E+00 |
| ENSG00000198358.4_RP11-544M  | ENSG00000160789.18_LMNA | -0.03142 | -0.189673241 | 0.128421765 | 7.01E-01 | 8.72E-01 | 1.00E+00 |
| ENSG00000214513.3_NOTO       | ENSG00000160789.18_LMNA | -0.00347 | -0.162579297 | 0.155818374 | 9.66E-01 | 9.87E-01 | 1.00E+00 |
| ENSG00000180869.4_LINC01555  | ENSG00000160789.18_LMNA | 0.04099  | -0.118987873 | 0.198892114 | 6.16E-01 | 8.26E-01 | 1.00E+00 |
| ENSG00000133980.4_VRTN       | ENSG00000160789.18_LMNA | 0.0191   | -0.140531255 | 0.177756975 | 8.15E-01 | 9.28E-01 | 1.00E+00 |
| ENSG00000258730.1_ITPK1-AS1  | ENSG00000160789.18_LMNA | -0.01731 | -0.17602294  | 0.142285506 | 8.32E-01 | 9.35E-01 | 1.00E+00 |
| ENSG00000006788.11_MYH13     | ENSG00000160789.18_LMNA | 0.00056  | -0.158659276 | 0.159742033 | 9.95E-01 | 9.98E-01 | 1.00E+00 |

|                              |                         |          |              |             |          |          |          |
|------------------------------|-------------------------|----------|--------------|-------------|----------|----------|----------|
| ENSG00000273398.4_RP11-474G  | ENSG00000160789.18_LMNA | -0.03525 | -0.193368166 | 0.12464756  | 6.66E-01 | 8.53E-01 | 1.00E+00 |
| ENSG00000166049.10_PASD1     | ENSG00000160789.18_LMNA | -0.11141 | -0.265891711 | 0.048656803 | 1.72E-01 | 4.31E-01 | 1.00E+00 |
| ENSG00000229563.5_LINC01204  | ENSG00000160789.18_LMNA | 0.0792   | -0.081025359 | 0.235429288 | 3.32E-01 | 6.18E-01 | 1.00E+00 |
| ENSG00000261771.4_DYX1C1-C   | ENSG00000160789.18_LMNA | -0.02882 | -0.187158063 | 0.130985649 | 7.25E-01 | 8.83E-01 | 1.00E+00 |
| ENSG00000168907.12_PLA2G4F   | ENSG00000160789.18_LMNA | -0.04486 | -0.20261338  | 0.115163483 | 5.83E-01 | 8.06E-01 | 1.00E+00 |
| ENSG00000150244.11_TRIM48    | ENSG00000160789.18_LMNA | -0.18253 | -0.332076314 | -0.02402247 | 2.44E-02 | 1.24E-01 | 1.00E+00 |
| ENSG00000276566.1_IGKV1D-13  | ENSG00000160789.18_LMNA | -0.03861 | -0.196606569 | 0.121332089 | 6.37E-01 | 8.37E-01 | 1.00E+00 |
| ENSG00000207460.1_SNORD116   | ENSG00000160789.18_LMNA | -0.06241 | -0.219431199 | 0.097761314 | 4.45E-01 | 7.12E-01 | 1.00E+00 |
| ENSG00000207613.1_MIR181C    | ENSG00000160789.18_LMNA | 0.01107  | -0.148396146 | 0.169967256 | 8.92E-01 | 9.58E-01 | 1.00E+00 |
| ENSG00000271201.1_AB019440.1 | ENSG00000160789.18_LMNA | -0.20732 | -0.354808399 | -0.04975985 | 1.04E-02 | 6.73E-02 | 1.00E+00 |
| ENSG00000201823.1_SNORD48    | ENSG00000160789.18_LMNA | -0.03141 | -0.189657557 | 0.128437766 | 7.01E-01 | 8.72E-01 | 1.00E+00 |
| ENSG00000238728.1_MIR1972-1  | ENSG00000160789.18_LMNA | 0.03953  | -0.120425319 | 0.197491054 | 6.29E-01 | 8.33E-01 | 1.00E+00 |
| ENSG00000206588.1_RNU1-28P   | ENSG00000160789.18_LMNA | -0.10307 | -0.258034794 | 0.057069062 | 2.06E-01 | 4.78E-01 | 1.00E+00 |
| ENSG00000199335.1_RNU6-204F  | ENSG00000160789.18_LMNA | -0.01162 | -0.170507009 | 0.147852479 | 8.87E-01 | 9.56E-01 | 1.00E+00 |
| ENSG00000212190.1_RNU6-298F  | ENSG00000160789.18_LMNA | 0.00149  | -0.157752482 | 0.160648237 | 9.86E-01 | 9.94E-01 | 1.00E+00 |
| ENSG00000200917.1_RNU6-553F  | ENSG00000160789.18_LMNA | -0.10961 | -0.264197238 | 0.050474826 | 1.79E-01 | 4.41E-01 | 1.00E+00 |
| ENSG00000200814.1_RNU6-595F  | ENSG00000160789.18_LMNA | 0.06846  | -0.091737164 | 0.225209469 | 4.02E-01 | 6.78E-01 | 1.00E+00 |
| ENSG00000266446.1_RP11-149I2 | ENSG00000160789.18_LMNA | 0.10572  | -0.05439425  | 0.260537554 | 1.95E-01 | 4.64E-01 | 1.00E+00 |
| ENSG00000222465.1_RNU2-5P    | ENSG00000160789.18_LMNA | -0.01015 | -0.169073135 | 0.149296326 | 9.01E-01 | 9.62E-01 | 1.00E+00 |
| ENSG00000275014.1_RN7SL166F  | ENSG00000160789.18_LMNA | 0.02588  | -0.133871144 | 0.184322386 | 7.52E-01 | 8.96E-01 | 1.00E+00 |
| ENSG00000130957.4_FBP2       | ENSG00000160789.18_LMNA | 0.00781  | -0.151579116 | 0.166803358 | 9.24E-01 | 9.71E-01 | 1.00E+00 |
| ENSG00000252212.1_RNU2-58P   | ENSG00000160789.18_LMNA | -0.05645 | -0.213732482 | 0.103679845 | 4.90E-01 | 7.46E-01 | 1.00E+00 |
| ENSG00000252355.1_RN7SKP28   | ENSG00000160789.18_LMNA | 0.06962  | -0.090589411 | 0.226307853 | 3.94E-01 | 6.72E-01 | 1.00E+00 |
| ENSG00000278044.1_XXbac-B33I | ENSG00000160789.18_LMNA | -0.10985 | -0.264424652 | 0.050230952 | 1.78E-01 | 4.40E-01 | 1.00E+00 |
| ENSG00000265123.2_RN7SL200F  | ENSG00000160789.18_LMNA | -0.04197 | -0.199836816 | 0.118017884 | 6.08E-01 | 8.21E-01 | 1.00E+00 |
| ENSG00000251611.1_RP11-610P  | ENSG00000160789.18_LMNA | 0.04378  | -0.11623211  | 0.201574492 | 5.92E-01 | 8.11E-01 | 1.00E+00 |
| ENSG00000241652.3_RN7SL253F  | ENSG00000160789.18_LMNA | 0.05355  | -0.106555801 | 0.210955518 | 5.12E-01 | 7.61E-01 | 1.00E+00 |
| ENSG00000241709.3_RN7SL265F  | ENSG00000160789.18_LMNA | 0.17305  | 0.014241942  | 0.323342974 | 3.30E-02 | 1.52E-01 | 1.00E+00 |
| ENSG00000236794.5_BCRP8      | ENSG00000160789.18_LMNA | 0.00202  | -0.157226829 | 0.161173303 | 9.80E-01 | 9.93E-01 | 1.00E+00 |
| ENSG00000223432.1_RP11-62L1  | ENSG00000160789.18_LMNA | -0.12017 | -0.274129823 | 0.039788219 | 1.40E-01 | 3.82E-01 | 1.00E+00 |
| ENSG00000256263.1_DDX11L8    | ENSG00000160789.18_LMNA | -0.04281 | -0.200647566 | 0.117184949 | 6.00E-01 | 8.16E-01 | 1.00E+00 |
| ENSG00000275287.3_Metazoa_SI | ENSG00000160789.18_LMNA | 0.11029  | -0.049788335 | 0.264837305 | 1.76E-01 | 4.37E-01 | 1.00E+00 |
| ENSG00000204011.4_COL5A1-A5  | ENSG00000160789.18_LMNA | 0.17405  | 0.015276282  | 0.324269064 | 3.20E-02 | 1.49E-01 | 1.00E+00 |



|                              |                         |          |              |             |          |          |          |
|------------------------------|-------------------------|----------|--------------|-------------|----------|----------|----------|
| ENSG00000266538.1_RP11-385D  | ENSG00000160789.18_LMNA | 0.04466  | -0.115361353 | 0.202421071 | 5.85E-01 | 8.07E-01 | 1.00E+00 |
| ENSG00000253444.1_AC133633.  | ENSG00000160789.18_LMNA | -0.19278 | -0.341497707 | -0.0346401  | 1.73E-02 | 9.74E-02 | 1.00E+00 |
| ENSG00000278901.1_AC005609.  | ENSG00000160789.18_LMNA | 0.03426  | -0.125629609 | 0.192407613 | 6.75E-01 | 8.58E-01 | 1.00E+00 |
| ENSG00000259513.1_CYCSP38    | ENSG00000160789.18_LMNA | -0.0784  | -0.234675462 | 0.08181798  | 3.37E-01 | 6.22E-01 | 1.00E+00 |
| ENSG00000243187.1_CCDC39-A   | ENSG00000160789.18_LMNA | -0.07381 | -0.230307088 | 0.086403297 | 3.66E-01 | 6.47E-01 | 1.00E+00 |
| ENSG00000232654.1_FAM136BP   | ENSG00000160789.18_LMNA | 0.13449  | -0.025253717 | 0.287532166 | 9.86E-02 | 3.09E-01 | 1.00E+00 |
| ENSG00000267151.3_MIR2117HC  | ENSG00000160789.18_LMNA | 0.2011   | 0.043282355  | 0.349121026 | 1.30E-02 | 7.90E-02 | 1.00E+00 |
| ENSG00000211752.3_TRBV27     | ENSG00000160789.18_LMNA | 0.04998  | -0.110098455 | 0.207527745 | 5.41E-01 | 7.80E-01 | 1.00E+00 |
| ENSG00000274727.1_RP11-476I1 | ENSG00000160789.18_LMNA | 0.02271  | -0.136983444 | 0.18125787  | 7.81E-01 | 9.10E-01 | 1.00E+00 |
| ENSG00000274128.1_RP11-342A  | ENSG00000160789.18_LMNA | 0.00425  | -0.155051341 | 0.163344446 | 9.59E-01 | 9.83E-01 | 1.00E+00 |
| ENSG00000231621.1_AC013264.  | ENSG00000160789.18_LMNA | -0.02392 | -0.182429952 | 0.135793828 | 7.70E-01 | 9.05E-01 | 1.00E+00 |
| ENSG00000267446.1_CTB-39G8.  | ENSG00000160789.18_LMNA | 0.00328  | -0.156002919 | 0.162395148 | 9.68E-01 | 9.87E-01 | 1.00E+00 |
| ENSG00000271044.1_RP11-255M  | ENSG00000160789.18_LMNA | -0.02116 | -0.179755781 | 0.138506663 | 7.96E-01 | 9.18E-01 | 1.00E+00 |
| ENSG00000249417.1_RP11-438D  | ENSG00000160789.18_LMNA | 0.0731   | -0.087115953 | 0.229627002 | 3.71E-01 | 6.51E-01 | 1.00E+00 |
| ENSG00000251308.1_MRPS33P3   | ENSG00000160789.18_LMNA | 0.03797  | -0.121972032 | 0.195982041 | 6.42E-01 | 8.41E-01 | 1.00E+00 |
| ENSG00000223726.1_CTA-929C8  | ENSG00000160789.18_LMNA | 0.05204  | -0.108059666 | 0.209501374 | 5.24E-01 | 7.69E-01 | 1.00E+00 |
| ENSG00000232316.1_RP1-124C6  | ENSG00000160789.18_LMNA | -0.28092 | -0.421280067 | -0.12741791 | 4.55E-04 | 6.27E-03 | 1.00E+00 |
| ENSG00000227438.1_AP001471.  | ENSG00000160789.18_LMNA | 0.42217  | 0.281911958  | 0.544753922 | 6.05E-08 | 4.79E-06 | 3.10E-03 |
| ENSG00000145835.6_CDKN2AIP1  | ENSG00000160789.18_LMNA | -0.14979 | -0.301798239 | 0.009635847 | 6.55E-02 | 2.39E-01 | 1.00E+00 |
| ENSG00000250476.1_ENPP7P9    | ENSG00000160789.18_LMNA | -0.10962 | -0.264212333 | 0.05045864  | 1.79E-01 | 4.41E-01 | 1.00E+00 |
| ENSG00000256041.1_RP11-959F  | ENSG00000160789.18_LMNA | 0.15573  | -0.00356237  | 0.30730862  | 5.54E-02 | 2.15E-01 | 1.00E+00 |
| ENSG00000227700.1_RP11-301M  | ENSG00000160789.18_LMNA | 0.12447  | -0.03543743  | 0.278154537 | 1.27E-01 | 3.60E-01 | 1.00E+00 |
| ENSG00000249068.1_CTC-287O8  | ENSG00000160789.18_LMNA | 0.20031  | 0.0424681    | 0.348404496 | 1.33E-02 | 8.06E-02 | 1.00E+00 |
| ENSG00000250623.1_RP11-317B  | ENSG00000160789.18_LMNA | -0.13456 | -0.28759905  | 0.025180849 | 9.84E-02 | 3.09E-01 | 1.00E+00 |
| ENSG00000213644.2_SAPCD2P1   | ENSG00000160789.18_LMNA | 0.08631  | -0.073906325 | 0.242182859 | 2.90E-01 | 5.76E-01 | 1.00E+00 |
| ENSG00000266877.1_RP1-41C23  | ENSG00000160789.18_LMNA | 0.21852  | 0.061459145  | 0.365023715 | 6.84E-03 | 4.95E-02 | 1.00E+00 |
| ENSG00000237217.1_AC008074.  | ENSG00000160789.18_LMNA | -0.13799 | -0.290802166 | 0.021687302 | 9.00E-02 | 2.92E-01 | 1.00E+00 |
| ENSG00000217767.2_NDUFAB1F   | ENSG00000160789.18_LMNA | -0.00734 | -0.166349543 | 0.152035126 | 9.28E-01 | 9.73E-01 | 1.00E+00 |
| ENSG00000251163.1_PRELID3BF  | ENSG00000160789.18_LMNA | -0.04369 | -0.20148474  | 0.116324397 | 5.93E-01 | 8.12E-01 | 1.00E+00 |
| ENSG00000243503.2_AC090453.  | ENSG00000160789.18_LMNA | 0.01169  | -0.147781191 | 0.17057777  | 8.86E-01 | 9.56E-01 | 1.00E+00 |
| ENSG00000229720.1_RP3-495K2  | ENSG00000160789.18_LMNA | 0.02634  | -0.133417111 | 0.184768931 | 7.47E-01 | 8.94E-01 | 1.00E+00 |
| ENSG00000227050.1_RP11-460I1 | ENSG00000160789.18_LMNA | -0.05578 | -0.21309113  | 0.104344532 | 4.95E-01 | 7.50E-01 | 1.00E+00 |
| ENSG00000251111.2_FCF1P8     | ENSG00000160789.18_LMNA | -0.00394 | -0.163037086 | 0.155359504 | 9.62E-01 | 9.85E-01 | 1.00E+00 |

|                             |                         |          |              |             |          |          |          |
|-----------------------------|-------------------------|----------|--------------|-------------|----------|----------|----------|
| ENSG00000256732.1_RP11-407A | ENSG00000160789.18_LMNA | -0.20671 | -0.354249711 | -0.04912241 | 1.06E-02 | 6.84E-02 | 1.00E+00 |
| ENSG00000225214.1_AC079790. | ENSG00000160789.18_LMNA | -0.01386 | -0.172683984 | 0.145657767 | 8.65E-01 | 9.47E-01 | 1.00E+00 |
| ENSG00000267308.1_AC004510. | ENSG00000160789.18_LMNA | 0.06405  | -0.096131798 | 0.220996403 | 4.33E-01 | 7.02E-01 | 1.00E+00 |
| ENSG00000230853.1_RPL10P11  | ENSG00000160789.18_LMNA | 0.12344  | -0.036475591 | 0.277195181 | 1.30E-01 | 3.65E-01 | 1.00E+00 |
| ENSG00000234235.1_BOK-AS1   | ENSG00000160789.18_LMNA | 0.04045  | -0.119521012 | 0.198372622 | 6.21E-01 | 8.28E-01 | 1.00E+00 |
| ENSG00000229190.1_RP11-390B | ENSG00000160789.18_LMNA | -0.05483 | -0.212178831 | 0.105289535 | 5.02E-01 | 7.54E-01 | 1.00E+00 |
| ENSG00000226501.2_USF1P1    | ENSG00000160789.18_LMNA | 0.02486  | -0.134872045 | 0.183337527 | 7.61E-01 | 9.00E-01 | 1.00E+00 |
| ENSG00000261480.1_RP11-578F | ENSG00000160789.18_LMNA | 0.01301  | -0.146497568 | 0.171851337 | 8.74E-01 | 9.51E-01 | 1.00E+00 |
| ENSG00000132671.5_SSTR4     | ENSG00000160789.18_LMNA | -0.12529 | -0.278925579 | 0.03460256  | 1.24E-01 | 3.55E-01 | 1.00E+00 |
| ENSG00000235832.2_CNN2P3    | ENSG00000160789.18_LMNA | -0.07166 | -0.228255377 | 0.088552279 | 3.80E-01 | 6.59E-01 | 1.00E+00 |
| ENSG00000225106.1_RP11-429E | ENSG00000160789.18_LMNA | -0.01239 | -0.17125362  | 0.147100139 | 8.80E-01 | 9.53E-01 | 1.00E+00 |
| ENSG00000237919.4_RP11-181B | ENSG00000160789.18_LMNA | -0.11877 | -0.272815999 | 0.041205914 | 1.45E-01 | 3.90E-01 | 1.00E+00 |
| ENSG00000215267.7_AKR1C7P   | ENSG00000160789.18_LMNA | 0.0681   | -0.09209746  | 0.224864504 | 4.04E-01 | 6.80E-01 | 1.00E+00 |
| ENSG00000238087.3_FMO8P     | ENSG00000160789.18_LMNA | 0.02849  | -0.131306697 | 0.18684282  | 7.28E-01 | 8.85E-01 | 1.00E+00 |
| ENSG00000176243.9_CDV3P1    | ENSG00000160789.18_LMNA | 0.02758  | -0.132199613 | 0.185965703 | 7.36E-01 | 8.89E-01 | 1.00E+00 |
| ENSG00000280243.1_MTCO1P1   | ENSG00000160789.18_LMNA | -0.06834 | -0.225092017 | 0.091859845 | 4.03E-01 | 6.79E-01 | 1.00E+00 |
| ENSG00000231802.1_AC009502. | ENSG00000160789.18_LMNA | 0.09918  | -0.060980684 | 0.25436715  | 2.24E-01 | 5.00E-01 | 1.00E+00 |
| ENSG00000237576.1_AC097495. | ENSG00000160789.18_LMNA | -0.04668 | -0.204363622 | 0.113361476 | 5.68E-01 | 7.98E-01 | 1.00E+00 |
| ENSG00000225652.1_KCNMA1-A  | ENSG00000160789.18_LMNA | 0.01077  | -0.148682729 | 0.169682659 | 8.95E-01 | 9.59E-01 | 1.00E+00 |
| ENSG00000184795.9_UNC93B5   | ENSG00000160789.18_LMNA | -0.02233 | -0.18088421  | 0.137362501 | 7.85E-01 | 9.12E-01 | 1.00E+00 |
| ENSG00000227032.1_RPS2P36   | ENSG00000160789.18_LMNA | -0.01139 | -0.170283048 | 0.148078088 | 8.89E-01 | 9.57E-01 | 1.00E+00 |
| ENSG00000171489.9_SPACA5    | ENSG00000160789.18_LMNA | 0.00706  | -0.152308412 | 0.166077508 | 9.31E-01 | 9.73E-01 | 1.00E+00 |
| ENSG00000206187.3_RP11-1084 | ENSG00000160789.18_LMNA | -0.21974 | -0.366134229 | -0.06273603 | 6.53E-03 | 4.79E-02 | 1.00E+00 |
| ENSG00000279581.1_RP11-243M | ENSG00000160789.18_LMNA | -0.02956 | -0.187879495 | 0.130250682 | 7.18E-01 | 8.80E-01 | 1.00E+00 |
| ENSG00000183251.3_OR51B4    | ENSG00000160789.18_LMNA | -0.01076 | -0.169673307 | 0.148692145 | 8.95E-01 | 9.59E-01 | 1.00E+00 |
| ENSG00000263368.1_RP11-720N | ENSG00000160789.18_LMNA | -0.0536  | -0.210996602 | 0.106513292 | 5.12E-01 | 7.61E-01 | 1.00E+00 |
| ENSG00000213187.3_COPS5P1   | ENSG00000160789.18_LMNA | -0.11685 | -0.271006276 | 0.043156646 | 1.52E-01 | 4.01E-01 | 1.00E+00 |
| ENSG00000245662.2_RP11-184E | ENSG00000160789.18_LMNA | 0.02353  | -0.136185551 | 0.182044103 | 7.74E-01 | 9.07E-01 | 1.00E+00 |
| ENSG00000214200.2_TPM3P2    | ENSG00000160789.18_LMNA | -0.03481 | -0.19294219  | 0.125083146 | 6.70E-01 | 8.55E-01 | 1.00E+00 |
| ENSG00000253523.1_RP11-1112 | ENSG00000160789.18_LMNA | 0.01039  | -0.149053349 | 0.169314528 | 8.99E-01 | 9.61E-01 | 1.00E+00 |
| ENSG00000237872.4_POU5F1P4  | ENSG00000160789.18_LMNA | 0.07759  | -0.08262774  | 0.233904942 | 3.42E-01 | 6.27E-01 | 1.00E+00 |
| ENSG00000183324.9_REC114    | ENSG00000160789.18_LMNA | 0.03091  | -0.128921544 | 0.189183284 | 7.05E-01 | 8.75E-01 | 1.00E+00 |
| ENSG00000253266.1_RP11-128L | ENSG00000160789.18_LMNA | -0.14311 | -0.295578964 | 0.016463169 | 7.86E-02 | 2.69E-01 | 1.00E+00 |

|                              |                         |          |              |             |          |          |          |
|------------------------------|-------------------------|----------|--------------|-------------|----------|----------|----------|
| ENSG00000264359.1_NEK4P2     | ENSG00000160789.18_LMNA | -0.04033 | -0.198258204 | 0.119638411 | 6.22E-01 | 8.29E-01 | 1.00E+00 |
| ENSG00000229435.2_PIP5K1P2   | ENSG00000160789.18_LMNA | -0.11586 | -0.270078876 | 0.044155379 | 1.55E-01 | 4.06E-01 | 1.00E+00 |
| ENSG00000248663.5_LINC00992  | ENSG00000160789.18_LMNA | -0.09472 | -0.250153002 | 0.065463237 | 2.46E-01 | 5.25E-01 | 1.00E+00 |
| ENSG00000230836.1_LINC01293  | ENSG00000160789.18_LMNA | -0.04524 | -0.202974428 | 0.114791928 | 5.80E-01 | 8.04E-01 | 1.00E+00 |
| ENSG00000258803.1_RP11-624J  | ENSG00000160789.18_LMNA | 0.29613  | 0.143701686  | 0.434828986 | 2.12E-04 | 3.41E-03 | 1.00E+00 |
| ENSG00000226877.6_RP11-575L  | ENSG00000160789.18_LMNA | 0.04797  | -0.112089253 | 0.205598076 | 5.57E-01 | 7.91E-01 | 1.00E+00 |
| ENSG00000172421.6_EFCAB3     | ENSG00000160789.18_LMNA | 0.02395  | -0.135765156 | 0.18245819  | 7.70E-01 | 9.05E-01 | 1.00E+00 |
| ENSG00000250261.1_CCDC74BF   | ENSG00000160789.18_LMNA | 0.07595  | -0.084274038 | 0.232337195 | 3.52E-01 | 6.36E-01 | 1.00E+00 |
| ENSG00000212657.1_KRTAP16-1  | ENSG00000160789.18_LMNA | -0.02795 | -0.186326109 | 0.131832778 | 7.32E-01 | 8.87E-01 | 1.00E+00 |
| ENSG00000213423.4_RBMX2P2    | ENSG00000160789.18_LMNA | -0.01208 | -0.170952574 | 0.147403539 | 8.83E-01 | 9.55E-01 | 1.00E+00 |
| ENSG00000254750.1_CASP1P2    | ENSG00000160789.18_LMNA | -0.09837 | -0.253598653 | 0.061799077 | 2.28E-01 | 5.05E-01 | 1.00E+00 |
| ENSG00000226647.2_RP11-336A  | ENSG00000160789.18_LMNA | -0.02258 | -0.18112555  | 0.137117686 | 7.82E-01 | 9.11E-01 | 1.00E+00 |
| ENSG00000205022.8_PABPN1L    | ENSG00000160789.18_LMNA | -0.02738 | -0.185770078 | 0.132398693 | 7.38E-01 | 8.90E-01 | 1.00E+00 |
| ENSG00000114771.12_AADAC     | ENSG00000160789.18_LMNA | 0.12961  | -0.030216831 | 0.282969383 | 1.12E-01 | 3.33E-01 | 1.00E+00 |
| ENSG00000092345.12_DAZL      | ENSG00000160789.18_LMNA | -0.08279 | -0.23884299  | 0.077430959 | 3.11E-01 | 5.97E-01 | 1.00E+00 |
| ENSG00000279305.1_RP11-316N  | ENSG00000160789.18_LMNA | -0.22059 | -0.366908706 | -0.06362712 | 6.32E-03 | 4.67E-02 | 1.00E+00 |
| ENSG00000266529.1_MTCYBP13   | ENSG00000160789.18_LMNA | -0.00646 | -0.165488721 | 0.15289974  | 9.37E-01 | 9.75E-01 | 1.00E+00 |
| ENSG00000248216.1_KCTD9P5    | ENSG00000160789.18_LMNA | -0.05375 | -0.211144994 | 0.10635974  | 5.11E-01 | 7.59E-01 | 1.00E+00 |
| ENSG00000279416.1_RP11-849I1 | ENSG00000160789.18_LMNA | -0.05293 | -0.210357627 | 0.107174311 | 5.17E-01 | 7.64E-01 | 1.00E+00 |
| ENSG00000221874.4_ZNF816-ZN  | ENSG00000160789.18_LMNA | -0.01338 | -0.172211227 | 0.146134642 | 8.70E-01 | 9.50E-01 | 1.00E+00 |
| ENSG00000159495.7_TGM7       | ENSG00000160789.18_LMNA | 0.09598  | -0.064202509 | 0.25133945  | 2.39E-01 | 5.18E-01 | 1.00E+00 |
| ENSG00000259928.1_RP11-218M  | ENSG00000160789.18_LMNA | -0.08069 | -0.236850797 | 0.079529604 | 3.23E-01 | 6.10E-01 | 1.00E+00 |
| ENSG00000278967.1_RP5-849H1  | ENSG00000160789.18_LMNA | -0.015   | -0.173784972 | 0.144546614 | 8.54E-01 | 9.43E-01 | 1.00E+00 |
| ENSG00000242841.1_KRT8P35    | ENSG00000160789.18_LMNA | -0.0124  | -0.171266589 | 0.147087067 | 8.79E-01 | 9.53E-01 | 1.00E+00 |
| ENSG00000203878.10_CHIAP2    | ENSG00000160789.18_LMNA | -0.01714 | -0.175858962 | 0.142451292 | 8.34E-01 | 9.35E-01 | 1.00E+00 |
| ENSG00000170484.8_KRT74      | ENSG00000160789.18_LMNA | -0.2641  | -0.406219005 | -0.10950079 | 1.01E-03 | 1.17E-02 | 1.00E+00 |
| ENSG00000178772.6_CPN2       | ENSG00000160789.18_LMNA | 0.26181  | 0.10707718   | 0.40416927  | 1.12E-03 | 1.26E-02 | 1.00E+00 |
| ENSG00000248516.1_RP11-265O  | ENSG00000160789.18_LMNA | -0.08362 | -0.239626956 | 0.076604333 | 3.06E-01 | 5.92E-01 | 1.00E+00 |
| ENSG00000254042.1_CTC-558O2  | ENSG00000160789.18_LMNA | -0.09804 | -0.253286081 | 0.062131823 | 2.30E-01 | 5.07E-01 | 1.00E+00 |
| ENSG00000271500.1_RP11-288K  | ENSG00000160789.18_LMNA | -0.04544 | -0.203171193 | 0.114589399 | 5.78E-01 | 8.03E-01 | 1.00E+00 |
| ENSG00000227964.1_LINC01429  | ENSG00000160789.18_LMNA | 0.01482  | -0.144726959 | 0.173606331 | 8.56E-01 | 9.43E-01 | 1.00E+00 |
| ENSG00000234592.1_RP11-41L1  | ENSG00000160789.18_LMNA | 0.04896  | -0.111101833 | 0.206555486 | 5.49E-01 | 7.86E-01 | 1.00E+00 |
| ENSG00000280074.1_           | ENSG00000160789.18_LMNA | 0.13626  | -0.023449158 | 0.289187654 | 9.42E-02 | 3.00E-01 | 1.00E+00 |

|                              |                         |          |              |             |          |          |          |
|------------------------------|-------------------------|----------|--------------|-------------|----------|----------|----------|
| ENSG00000268257.2_AIRN       | ENSG00000160789.18_LMNA | 0.05719  | -0.102951894 | 0.214434564 | 4.84E-01 | 7.41E-01 | 1.00E+00 |
| ENSG00000183747.10_ACSM2A    | ENSG00000160789.18_LMNA | -0.184   | -0.333434237 | -0.02554854 | 2.33E-02 | 1.20E-01 | 1.00E+00 |
| ENSG00000163440.9_PDCL2      | ENSG00000160789.18_LMNA | -0.13827 | -0.291061476 | 0.021404145 | 8.94E-02 | 2.91E-01 | 1.00E+00 |
| ENSG00000225698.3_IGHV3-72   | ENSG00000160789.18_LMNA | -0.02544 | -0.183896484 | 0.134304063 | 7.56E-01 | 8.98E-01 | 1.00E+00 |
| ENSG00000252469.1_RNU7-160F  | ENSG00000160789.18_LMNA | -0.00349 | -0.162600454 | 0.15579717  | 9.66E-01 | 9.87E-01 | 1.00E+00 |
| ENSG00000206621.1_SNORD116   | ENSG00000160789.18_LMNA | 0.01015  | -0.149287109 | 0.169082292 | 9.01E-01 | 9.62E-01 | 1.00E+00 |
| ENSG00000212296.1_SNORD72    | ENSG00000160789.18_LMNA | 0.11689  | -0.043114928 | 0.271045002 | 1.52E-01 | 4.00E-01 | 1.00E+00 |
| ENSG00000251821.1_RNU6-583F  | ENSG00000160789.18_LMNA | -0.09078 | -0.246423462 | 0.06941972  | 2.66E-01 | 5.50E-01 | 1.00E+00 |
| ENSG00000207725.2_MIR222     | ENSG00000160789.18_LMNA | 0.24767  | 0.092100361  | 0.391436312 | 2.10E-03 | 2.03E-02 | 1.00E+00 |
| ENSG00000264373.1_RP11-227G  | ENSG00000160789.18_LMNA | -0.07485 | -0.231297078 | 0.085365317 | 3.59E-01 | 6.42E-01 | 1.00E+00 |
| ENSG00000206881.1_RNU6-190F  | ENSG00000160789.18_LMNA | -0.05343 | -0.210834882 | 0.106680618 | 5.13E-01 | 7.61E-01 | 1.00E+00 |
| ENSG00000207344.1_SNORA22    | ENSG00000160789.18_LMNA | 0.0427   | -0.11730174  | 0.200533911 | 6.01E-01 | 8.17E-01 | 1.00E+00 |
| ENSG00000212579.1_SNORA40    | ENSG00000160789.18_LMNA | -0.11294 | -0.267331636 | 0.047110247 | 1.66E-01 | 4.23E-01 | 1.00E+00 |
| ENSG00000206715.1_RNU6-444F  | ENSG00000160789.18_LMNA | -0.05927 | -0.21642733  | 0.100883849 | 4.68E-01 | 7.29E-01 | 1.00E+00 |
| ENSG00000228735.1_GS1-18A18  | ENSG00000160789.18_LMNA | -0.00708 | -0.166088806 | 0.152297063 | 9.31E-01 | 9.73E-01 | 1.00E+00 |
| ENSG00000206675.1_RNU6-32P   | ENSG00000160789.18_LMNA | 0.03511  | -0.124790713 | 0.193228185 | 6.68E-01 | 8.54E-01 | 1.00E+00 |
| ENSG00000236164.1_RP11-268F  | ENSG00000160789.18_LMNA | -0.21679 | -0.363445225 | -0.05964588 | 7.30E-03 | 5.20E-02 | 1.00E+00 |
| ENSG00000266467.2_RN7SL220F  | ENSG00000160789.18_LMNA | 0.00332  | -0.15596135  | 0.162436629 | 9.68E-01 | 9.87E-01 | 1.00E+00 |
| ENSG00000269954.1_RP11-148O  | ENSG00000160789.18_LMNA | -0.19344 | -0.342106591 | -0.03532869 | 1.69E-02 | 9.58E-02 | 1.00E+00 |
| ENSG00000232355.2_RP11-263F  | ENSG00000160789.18_LMNA | 0.21362  | 0.056339734  | 0.360562642 | 8.23E-03 | 5.68E-02 | 1.00E+00 |
| ENSG00000212342.1_SNORA12    | ENSG00000160789.18_LMNA | -0.00554 | -0.164595976 | 0.153795902 | 9.46E-01 | 9.78E-01 | 1.00E+00 |
| ENSG00000176320.2_RP11-404O  | ENSG00000160789.18_LMNA | -0.02262 | -0.181167028 | 0.137075607 | 7.82E-01 | 9.11E-01 | 1.00E+00 |
| ENSG00000225208.1_RP11-107I1 | ENSG00000160789.18_LMNA | -0.04073 | -0.198644916 | 0.119241587 | 6.18E-01 | 8.27E-01 | 1.00E+00 |
| ENSG00000231292.6_IGKV1OR2   | ENSG00000160789.18_LMNA | 0.14653  | -0.012973305 | 0.298761326 | 7.16E-02 | 2.53E-01 | 1.00E+00 |
| ENSG00000229601.1_AL590762.1 | ENSG00000160789.18_LMNA | 0.03577  | -0.124138008 | 0.193866325 | 6.62E-01 | 8.51E-01 | 1.00E+00 |
| ENSG00000233934.2_RPL21P38   | ENSG00000160789.18_LMNA | 0.0126   | -0.146897201 | 0.171454949 | 8.78E-01 | 9.52E-01 | 1.00E+00 |
| ENSG00000268902.2_CSAG2      | ENSG00000160789.18_LMNA | -0.10411 | -0.259015491 | 0.056021485 | 2.02E-01 | 4.72E-01 | 1.00E+00 |
| ENSG00000236425.1_AC090018   | ENSG00000160789.18_LMNA | 0.01548  | -0.144073642 | 0.174253375 | 8.50E-01 | 9.41E-01 | 1.00E+00 |
| ENSG00000251555.1_RP11-745L  | ENSG00000160789.18_LMNA | -0.0828  | -0.238848778 | 0.077424857 | 3.11E-01 | 5.97E-01 | 1.00E+00 |
| ENSG00000231662.1_RP11-686D  | ENSG00000160789.18_LMNA | -0.14572 | -0.298008033 | 0.013800073 | 7.32E-02 | 2.57E-01 | 1.00E+00 |
| ENSG00000231018.1{EIF4A1P3   | ENSG00000160789.18_LMNA | 0.04935  | -0.110721235 | 0.206924354 | 5.46E-01 | 7.84E-01 | 1.00E+00 |
| ENSG00000226519.1_LINC00390  | ENSG00000160789.18_LMNA | -0.02061 | -0.179227288 | 0.139042233 | 8.01E-01 | 9.20E-01 | 1.00E+00 |
| ENSG00000276953.1_TRBV12-4   | ENSG00000160789.18_LMNA | 0.22137  | 0.06444102   | 0.367615722 | 6.13E-03 | 4.57E-02 | 1.00E+00 |

|                              |                         |          |              |             |          |          |          |
|------------------------------|-------------------------|----------|--------------|-------------|----------|----------|----------|
| ENSG00000229996.1_AC093585.1 | ENSG00000160789.18_LMNA | 0.1604   | 0.001228857  | 0.311640972 | 4.84E-02 | 1.97E-01 | 1.00E+00 |
| ENSG00000198681.6_MAGEA1     | ENSG00000160789.18_LMNA | -0.22764 | -0.373307899 | -0.07100842 | 4.80E-03 | 3.80E-02 | 1.00E+00 |
| ENSG00000262267.4_U95743.1   | ENSG00000160789.18_LMNA | -0.08841 | -0.244176147 | 0.071798996 | 2.79E-01 | 5.64E-01 | 1.00E+00 |
| ENSG00000263974.2_RN7SL121F  | ENSG00000160789.18_LMNA | 0.09056  | -0.069642322 | 0.24621335  | 2.67E-01 | 5.51E-01 | 1.00E+00 |
| ENSG00000266654.1_RP11-1376I | ENSG00000160789.18_LMNA | 0.19946  | 0.041578662  | 0.347621398 | 1.38E-02 | 8.24E-02 | 1.00E+00 |
| ENSG00000266770.2_RN7SL619F  | ENSG00000160789.18_LMNA | 0.18016  | 0.021576811  | 0.329897446 | 2.63E-02 | 1.31E-01 | 1.00E+00 |
| ENSG00000279028.1_CTC-270D5  | ENSG00000160789.18_LMNA | -0.00518 | -0.16424977  | 0.154143292 | 9.49E-01 | 9.80E-01 | 1.00E+00 |
| ENSG00000231829.2_RP11-310E  | ENSG00000160789.18_LMNA | 0.10378  | -0.056352503 | 0.258705677 | 2.03E-01 | 4.74E-01 | 1.00E+00 |
| ENSG00000186910.3_SERPINA1   | ENSG00000160789.18_LMNA | -0.06162 | -0.218678007 | 0.098544846 | 4.51E-01 | 7.16E-01 | 1.00E+00 |
| ENSG00000259434.1_RP11-720L  | ENSG00000160789.18_LMNA | -0.13121 | -0.284472563 | 0.028583468 | 1.07E-01 | 3.25E-01 | 1.00E+00 |
| ENSG00000272254.1_RP11-531A  | ENSG00000160789.18_LMNA | -0.05385 | -0.211240041 | 0.106261381 | 5.10E-01 | 7.59E-01 | 1.00E+00 |
| ENSG00000229257.2_RP11-229P  | ENSG00000160789.18_LMNA | -0.1917  | -0.340510851 | -0.03352469 | 1.80E-02 | 1.00E-01 | 1.00E+00 |
| ENSG00000236377.1_AC084809.1 | ENSG00000160789.18_LMNA | 0.03576  | -0.124143769 | 0.193860694 | 6.62E-01 | 8.51E-01 | 1.00E+00 |
| ENSG00000253880.1_RP11-124B  | ENSG00000160789.18_LMNA | -0.11297 | -0.267359363 | 0.047080453 | 1.66E-01 | 4.23E-01 | 1.00E+00 |
| ENSG00000249367.1_FABP5P12   | ENSG00000160789.18_LMNA | 0.05853  | -0.10161769  | 0.215720504 | 4.74E-01 | 7.33E-01 | 1.00E+00 |
| ENSG00000270513.1_RP11-116B  | ENSG00000160789.18_LMNA | -0.15013 | -0.302111341 | 0.009291365 | 6.49E-02 | 2.37E-01 | 1.00E+00 |
| ENSG00000265094.1_RP11-178F  | ENSG00000160789.18_LMNA | 0.01441  | -0.145124858 | 0.173212117 | 8.60E-01 | 9.45E-01 | 1.00E+00 |
| ENSG00000123407.3_HOXC12     | ENSG00000160789.18_LMNA | -0.05877 | -0.215952012 | 0.101377372 | 4.72E-01 | 7.32E-01 | 1.00E+00 |
| ENSG00000231965.4_AF131215.1 | ENSG00000160789.18_LMNA | 0.00646  | -0.152895635 | 0.165492808 | 9.37E-01 | 9.75E-01 | 1.00E+00 |
| ENSG00000229497.1_AC005189.1 | ENSG00000160789.18_LMNA | -0.07252 | -0.229076052 | 0.08769305  | 3.75E-01 | 6.55E-01 | 1.00E+00 |
| ENSG00000254596.1_CTD-3074C  | ENSG00000160789.18_LMNA | 0.06362  | -0.096561284 | 0.220584026 | 4.36E-01 | 7.04E-01 | 1.00E+00 |
| ENSG00000224968.1_RP1-35C21  | ENSG00000160789.18_LMNA | -0.09079 | -0.246430323 | 0.069412451 | 2.66E-01 | 5.50E-01 | 1.00E+00 |
| ENSG00000251324.1_LINC01386  | ENSG00000160789.18_LMNA | -0.12144 | -0.275321564 | 0.038501165 | 1.36E-01 | 3.76E-01 | 1.00E+00 |
| ENSG00000224361.1_AC011239.1 | ENSG00000160789.18_LMNA | 0.0367   | -0.123223734 | 0.194759744 | 6.54E-01 | 8.47E-01 | 1.00E+00 |
| ENSG00000270930.1_GRAMD4P8   | ENSG00000160789.18_LMNA | -0.07633 | -0.232703471 | 0.083889565 | 3.50E-01 | 6.34E-01 | 1.00E+00 |
| ENSG00000225933.1_AC133965.1 | ENSG00000160789.18_LMNA | 0.10474  | -0.055380496 | 0.259615239 | 1.99E-01 | 4.69E-01 | 1.00E+00 |
| ENSG00000276735.1_Metazoa_SI | ENSG00000160789.18_LMNA | -0.01036 | -0.169277988 | 0.149090131 | 8.99E-01 | 9.61E-01 | 1.00E+00 |
| ENSG00000255276.1_RRM1-AS1   | ENSG00000160789.18_LMNA | 0.157    | -0.002252193 | 0.308494598 | 5.34E-02 | 2.10E-01 | 1.00E+00 |
| ENSG00000273044.1_RP4-569D1  | ENSG00000160789.18_LMNA | -0.02561 | -0.184057688 | 0.134140217 | 7.54E-01 | 8.98E-01 | 1.00E+00 |
| ENSG00000267044.1_AC005757.1 | ENSG00000160789.18_LMNA | 0.15441  | -0.004916511 | 0.30608183  | 5.75E-02 | 2.20E-01 | 1.00E+00 |
| ENSG00000205864.1_KRTAP5-6   | ENSG00000160789.18_LMNA | 0.01298  | -0.146519504 | 0.171829582 | 8.74E-01 | 9.51E-01 | 1.00E+00 |
| ENSG00000267780.2_RP11-154H  | ENSG00000160789.18_LMNA | 0.01529  | -0.14426343  | 0.174065438 | 8.52E-01 | 9.42E-01 | 1.00E+00 |
| ENSG00000270325.1_BNIP3P9    | ENSG00000160789.18_LMNA | -0.10144 | -0.256497444 | 0.058709858 | 2.14E-01 | 4.88E-01 | 1.00E+00 |

|                              |                         |          |              |             |          |          |          |
|------------------------------|-------------------------|----------|--------------|-------------|----------|----------|----------|
| ENSG00000226649.1_AC019118.4 | ENSG00000160789.18_LMNA | 0.10134  | -0.058805495 | 0.256407787 | 2.14E-01 | 4.88E-01 | 1.00E+00 |
| ENSG00000254687.1_RP11-162D  | ENSG00000160789.18_LMNA | -0.15263 | -0.3044312   | 0.006736693 | 6.05E-02 | 2.27E-01 | 1.00E+00 |
| ENSG00000255723.1_RP11-529H  | ENSG00000160789.18_LMNA | 0.02458  | -0.135153633 | 0.183060337 | 7.64E-01 | 9.02E-01 | 1.00E+00 |
| ENSG00000259481.1_RP11-39M2  | ENSG00000160789.18_LMNA | 0.13989  | -0.019751371 | 0.292574144 | 8.56E-02 | 2.84E-01 | 1.00E+00 |
| ENSG00000256681.1_CCDC58P5   | ENSG00000160789.18_LMNA | -0.04953 | -0.207099165 | 0.110540833 | 5.45E-01 | 7.83E-01 | 1.00E+00 |
| ENSG00000270926.1_RP11-551L  | ENSG00000160789.18_LMNA | -0.13133 | -0.284582892 | 0.028463518 | 1.07E-01 | 3.25E-01 | 1.00E+00 |
| ENSG00000219814.2_RPL23AP4   | ENSG00000160789.18_LMNA | 0.04166  | -0.118324327 | 0.199538426 | 6.10E-01 | 8.22E-01 | 1.00E+00 |
| ENSG00000267905.4_CTD-2616J  | ENSG00000160789.18_LMNA | 0.08134  | -0.078878629 | 0.237469037 | 3.19E-01 | 6.06E-01 | 1.00E+00 |
| ENSG00000241535.1_CBX5P1     | ENSG00000160789.18_LMNA | 0.00777  | -0.151613458 | 0.166769186 | 9.24E-01 | 9.71E-01 | 1.00E+00 |
| ENSG00000253102.1_RP1-117B1  | ENSG00000160789.18_LMNA | 0.33594  | 0.186726726  | 0.470004797 | 2.32E-05 | 5.82E-04 | 1.00E+00 |
| ENSG00000233477.1_RP11-45P2  | ENSG00000160789.18_LMNA | -0.01391 | -0.172726223 | 0.145615153 | 8.65E-01 | 9.47E-01 | 1.00E+00 |
| ENSG00000257121.1_RP11-129B  | ENSG00000160789.18_LMNA | 0.06284  | -0.097333069 | 0.219842701 | 4.42E-01 | 7.09E-01 | 1.00E+00 |
| ENSG00000278998.1_RP11-1430  | ENSG00000160789.18_LMNA | 0.06607  | -0.094124633 | 0.22292211  | 4.19E-01 | 6.91E-01 | 1.00E+00 |
| ENSG00000259234.4_ANKRD34C   | ENSG00000160789.18_LMNA | -0.13053 | -0.283829014 | 0.029282956 | 1.09E-01 | 3.28E-01 | 1.00E+00 |
| ENSG00000240870.2_RPL19P14   | ENSG00000160789.18_LMNA | -0.19156 | -0.340382307 | -0.03337945 | 1.81E-02 | 1.00E-01 | 1.00E+00 |
| ENSG00000185479.5_KRT6B      | ENSG00000160789.18_LMNA | 0.16633  | 0.007324405  | 0.317134135 | 4.06E-02 | 1.75E-01 | 1.00E+00 |
| ENSG00000197487.7_GALP       | ENSG00000160789.18_LMNA | -0.01051 | -0.169426363 | 0.148940767 | 8.98E-01 | 9.60E-01 | 1.00E+00 |
| ENSG00000240296.1_AC010492.1 | ENSG00000160789.18_LMNA | 0.0922   | -0.067997405 | 0.247765271 | 2.59E-01 | 5.42E-01 | 1.00E+00 |
| ENSG00000226548.1_AC016722.1 | ENSG00000160789.18_LMNA | 0.05778  | -0.102360386 | 0.215004811 | 4.80E-01 | 7.38E-01 | 1.00E+00 |
| ENSG00000235262.1_KDM5C-IT1  | ENSG00000160789.18_LMNA | -0.06077 | -0.217863273 | 0.099391959 | 4.57E-01 | 7.21E-01 | 1.00E+00 |
| ENSG00000250507.1_AC008984.1 | ENSG00000160789.18_LMNA | -0.15053 | -0.302485269 | 0.008879863 | 6.41E-02 | 2.36E-01 | 1.00E+00 |
| ENSG00000182531.7_OR7E115P   | ENSG00000160789.18_LMNA | -0.15351 | -0.305248338 | 0.005835876 | 5.90E-02 | 2.23E-01 | 1.00E+00 |
| ENSG00000228069.1_MTCO3P29   | ENSG00000160789.18_LMNA | 0.10615  | -0.053959256 | 0.260944167 | 1.93E-01 | 4.61E-01 | 1.00E+00 |
| ENSG00000223598.1_RP1-292B1  | ENSG00000160789.18_LMNA | 0.15076  | -0.008652304 | 0.302692009 | 6.38E-02 | 2.35E-01 | 1.00E+00 |
| ENSG00000244215.1_RP11-88I21 | ENSG00000160789.18_LMNA | -0.20236 | -0.350275154 | -0.04459475 | 1.24E-02 | 7.66E-02 | 1.00E+00 |
| ENSG00000248826.2_PCBP2P3    | ENSG00000160789.18_LMNA | 0.21533  | 0.058119979  | 0.362115534 | 7.72E-03 | 5.41E-02 | 1.00E+00 |
| ENSG00000228024.1_CYP1D1P    | ENSG00000160789.18_LMNA | 0.07218  | -0.088029154 | 0.228755083 | 3.77E-01 | 6.57E-01 | 1.00E+00 |
| ENSG00000258882.1_           | ENSG00000160789.18_LMNA | -0.21997 | -0.36634128  | -0.06297421 | 6.47E-03 | 4.76E-02 | 1.00E+00 |
| ENSG00000234451.1_RP11-211N  | ENSG00000160789.18_LMNA | -0.00686 | -0.165884399 | 0.15250238  | 9.33E-01 | 9.74E-01 | 1.00E+00 |
| ENSG00000253554.4_RP11-32K4  | ENSG00000160789.18_LMNA | -0.14921 | -0.301251115 | 0.01023763  | 6.66E-02 | 2.41E-01 | 1.00E+00 |
| ENSG00000197617.6_VN1R5      | ENSG00000160789.18_LMNA | 0.00355  | -0.155739318 | 0.162658177 | 9.65E-01 | 9.86E-01 | 1.00E+00 |
| ENSG00000228613.1_AC144450.1 | ENSG00000160789.18_LMNA | 0.28019  | 0.126642814  | 0.420631862 | 4.72E-04 | 6.44E-03 | 1.00E+00 |
| ENSG00000277883.1_NLRP3P1    | ENSG00000160789.18_LMNA | 0.10446  | -0.05566146  | 0.259352382 | 2.00E-01 | 4.71E-01 | 1.00E+00 |

|                              |                         |          |              |             |          |          |          |
|------------------------------|-------------------------|----------|--------------|-------------|----------|----------|----------|
| ENSG00000248401.2_RP11-576N  | ENSG00000160789.18_LMNA | -0.05764 | -0.214866398 | 0.10250398  | 4.81E-01 | 7.38E-01 | 1.00E+00 |
| ENSG00000251568.1_ALG3P1     | ENSG00000160789.18_LMNA | 0.14121  | -0.018402928 | 0.293807123 | 8.27E-02 | 2.78E-01 | 1.00E+00 |
| ENSG00000265264.4_           | ENSG00000160789.18_LMNA | -0.07585 | -0.232244211 | 0.084371626 | 3.53E-01 | 6.37E-01 | 1.00E+00 |
| ENSG00000255159.1_RP11-318C  | ENSG00000160789.18_LMNA | 0.03532  | -0.124578877 | 0.193435323 | 6.66E-01 | 8.53E-01 | 1.00E+00 |
| ENSG00000241772.2_AC092620.1 | ENSG00000160789.18_LMNA | -0.10101 | -0.256095248 | 0.059138836 | 2.16E-01 | 4.90E-01 | 1.00E+00 |
| ENSG00000267757.3_EML2-AS1   | ENSG00000160789.18_LMNA | 0.01774  | -0.141864565 | 0.17643921  | 8.28E-01 | 9.33E-01 | 1.00E+00 |
| ENSG00000241947.1_HNRNPA1F   | ENSG00000160789.18_LMNA | -0.02539 | -0.183848599 | 0.134352728 | 7.56E-01 | 8.98E-01 | 1.00E+00 |
| ENSG00000218153.2_KRT18P22   | ENSG00000160789.18_LMNA | -0.09263 | -0.248171886 | 0.067566141 | 2.56E-01 | 5.39E-01 | 1.00E+00 |
| ENSG00000224396.1_METTL15P   | ENSG00000160789.18_LMNA | -0.0045  | -0.163580893 | 0.154814234 | 9.56E-01 | 9.82E-01 | 1.00E+00 |
| ENSG00000260889.1_CKBP1      | ENSG00000160789.18_LMNA | -0.06291 | -0.219908195 | 0.097264899 | 4.41E-01 | 7.09E-01 | 1.00E+00 |
| ENSG00000176988.7_FMR1NB     | ENSG00000160789.18_LMNA | 0.00915  | -0.150268576 | 0.16810684  | 9.11E-01 | 9.66E-01 | 1.00E+00 |
| ENSG00000233746.1_LINC00656  | ENSG00000160789.18_LMNA | 0.1169   | -0.043104917 | 0.271054295 | 1.52E-01 | 4.00E-01 | 1.00E+00 |
| ENSG00000261298.1_RP11-309M  | ENSG00000160789.18_LMNA | 0.02943  | -0.130383915 | 0.18774874  | 7.19E-01 | 8.81E-01 | 1.00E+00 |
| ENSG00000237910.1_MTCO1P18   | ENSG00000160789.18_LMNA | -0.07463 | -0.231080918 | 0.085592014 | 3.61E-01 | 6.43E-01 | 1.00E+00 |
| ENSG00000218189.4_POM121L1   | ENSG00000160789.18_LMNA | -0.00243 | -0.161569367 | 0.156830203 | 9.76E-01 | 9.91E-01 | 1.00E+00 |
| ENSG00000280515.1_SALRNA2    | ENSG00000160789.18_LMNA | 0.02877  | -0.131030782 | 0.18711375  | 7.25E-01 | 8.83E-01 | 1.00E+00 |
| ENSG00000117507.4_FMO6P      | ENSG00000160789.18_LMNA | -0.02623 | -0.184662433 | 0.133525407 | 7.48E-01 | 8.95E-01 | 1.00E+00 |
| ENSG00000279294.1_RP11-274A  | ENSG00000160789.18_LMNA | -0.12212 | -0.275953274 | 0.037818508 | 1.34E-01 | 3.72E-01 | 1.00E+00 |
| ENSG00000253658.4_LINC01592  | ENSG00000160789.18_LMNA | -0.20724 | -0.354737634 | -0.0496791  | 1.04E-02 | 6.74E-02 | 1.00E+00 |
| ENSG00000183034.11_OTOP2     | ENSG00000160789.18_LMNA | -0.03337 | -0.191556678 | 0.126499067 | 6.83E-01 | 8.62E-01 | 1.00E+00 |
| ENSG00000280035.1_RP11-10J2  | ENSG00000160789.18_LMNA | -0.04539 | -0.20312659  | 0.114635311 | 5.79E-01 | 8.04E-01 | 1.00E+00 |
| ENSG00000275100.1_           | ENSG00000160789.18_LMNA | 0.02486  | -0.134876163 | 0.183333473 | 7.61E-01 | 9.00E-01 | 1.00E+00 |
| ENSG00000211973.2_IGHV1-69   | ENSG00000160789.18_LMNA | 0.05385  | -0.10625777  | 0.211243529 | 5.10E-01 | 7.59E-01 | 1.00E+00 |
| ENSG00000252733.1_           | ENSG00000160789.18_LMNA | -0.02682 | -0.185230854 | 0.132947302 | 7.43E-01 | 8.92E-01 | 1.00E+00 |
| ENSG00000199490.1_Y_RNA      | ENSG00000160789.18_LMNA | 0.0974   | -0.062773146 | 0.252683452 | 2.33E-01 | 5.10E-01 | 1.00E+00 |
| ENSG00000207442.1_SNORD116   | ENSG00000160789.18_LMNA | -0.03299 | -0.191189839 | 0.126873741 | 6.87E-01 | 8.64E-01 | 1.00E+00 |
| ENSG00000263425.1_           | ENSG00000160789.18_LMNA | -0.02252 | -0.18106669  | 0.137177397 | 7.83E-01 | 9.11E-01 | 1.00E+00 |
| ENSG00000207005.1_RNU1-2     | ENSG00000160789.18_LMNA | -0.03012 | -0.18842175  | 0.129698022 | 7.13E-01 | 8.78E-01 | 1.00E+00 |
| ENSG00000225660.1_RP1-73A14  | ENSG00000160789.18_LMNA | -0.29782 | -0.436334019 | -0.14552029 | 1.94E-04 | 3.19E-03 | 1.00E+00 |
| ENSG00000202227.1_RNU6-282F  | ENSG00000160789.18_LMNA | -0.08214 | -0.238229811 | 0.078077202 | 3.14E-01 | 6.01E-01 | 1.00E+00 |
| ENSG00000201573.1_Y_RNA      | ENSG00000160789.18_LMNA | 0.00053  | -0.158679736 | 0.159721579 | 9.95E-01 | 9.98E-01 | 1.00E+00 |
| ENSG00000274230.1_RMST_3     | ENSG00000160789.18_LMNA | 0.03959  | -0.120369331 | 0.197545649 | 6.28E-01 | 8.33E-01 | 1.00E+00 |
| ENSG00000222032.1_AC112721.1 | ENSG00000160789.18_LMNA | 0.25937  | 0.104483356  | 0.401972272 | 1.25E-03 | 1.37E-02 | 1.00E+00 |

|                              |                         |          |              |             |          |          |          |
|------------------------------|-------------------------|----------|--------------|-------------|----------|----------|----------|
| ENSG00000274366.1_           | ENSG00000160789.18_LMNA | 0.13433  | -0.025412829 | 0.287386108 | 9.90E-02 | 3.10E-01 | 1.00E+00 |
| ENSG00000199471.1_Y_RNA      | ENSG00000160789.18_LMNA | -0.05206 | -0.209523514 | 0.10803678  | 5.24E-01 | 7.69E-01 | 1.00E+00 |
| ENSG00000274353.1_RP11-788A  | ENSG00000160789.18_LMNA | -0.09125 | -0.246865331 | 0.068951482 | 2.64E-01 | 5.47E-01 | 1.00E+00 |
| ENSG00000207231.1_Y_RNA      | ENSG00000160789.18_LMNA | 0.04403  | -0.115987316 | 0.201812536 | 5.90E-01 | 8.10E-01 | 1.00E+00 |
| ENSG00000202290.1_RNA5SP37   | ENSG00000160789.18_LMNA | -0.03987 | -0.197815548 | 0.120092516 | 6.26E-01 | 8.31E-01 | 1.00E+00 |
| ENSG00000241032.3_RN7SL709F  | ENSG00000160789.18_LMNA | 0.04906  | -0.111008288 | 0.206646156 | 5.48E-01 | 7.85E-01 | 1.00E+00 |
| ENSG00000273388.1_RP11-401C  | ENSG00000160789.18_LMNA | 0.06885  | -0.091349303 | 0.225580737 | 3.99E-01 | 6.76E-01 | 1.00E+00 |
| ENSG00000271697.1_RP11-1012  | ENSG00000160789.18_LMNA | -0.01576 | -0.174523377 | 0.143800942 | 8.47E-01 | 9.40E-01 | 1.00E+00 |
| ENSG00000240750.3_RN7SL559F  | ENSG00000160789.18_LMNA | 0.10126  | -0.058888566 | 0.256329906 | 2.14E-01 | 4.89E-01 | 1.00E+00 |
| ENSG00000235510.1_BX842568.  | ENSG00000160789.18_LMNA | 0.03863  | -0.121314334 | 0.196623892 | 6.37E-01 | 8.37E-01 | 1.00E+00 |
| ENSG00000277948.1_uc_338     | ENSG00000160789.18_LMNA | 0.07542  | -0.084797615 | 0.231838255 | 3.56E-01 | 6.39E-01 | 1.00E+00 |
| ENSG00000279599.1_AC005514.  | ENSG00000160789.18_LMNA | 0.25088  | 0.095494222  | 0.394331777 | 1.82E-03 | 1.83E-02 | 1.00E+00 |
| ENSG00000258732.1_RP11-603B  | ENSG00000160789.18_LMNA | -0.01791 | -0.176603821 | 0.141698076 | 8.27E-01 | 9.32E-01 | 1.00E+00 |
| ENSG00000228826.2_RP11-344P  | ENSG00000160789.18_LMNA | 0.11671  | -0.043296598 | 0.270876355 | 1.52E-01 | 4.01E-01 | 1.00E+00 |
| ENSG00000249381.1_LINC00500  | ENSG00000160789.18_LMNA | -0.13769 | -0.290525028 | 0.02198987  | 9.07E-02 | 2.93E-01 | 1.00E+00 |
| ENSG00000241188.3_RN7SL165F  | ENSG00000160789.18_LMNA | 0.03462  | -0.125271418 | 0.192758035 | 6.72E-01 | 8.56E-01 | 1.00E+00 |
| ENSG00000164400.5_CSF2       | ENSG00000160789.18_LMNA | 0.14699  | -0.012507891 | 0.299185208 | 7.08E-02 | 2.51E-01 | 1.00E+00 |
| ENSG00000260999.1_RP11-521L  | ENSG00000160789.18_LMNA | 0.06515  | -0.095037826 | 0.222046284 | 4.25E-01 | 6.96E-01 | 1.00E+00 |
| ENSG00000265556.1_RP11-434D  | ENSG00000160789.18_LMNA | -0.01061 | -0.169520277 | 0.14884622  | 8.97E-01 | 9.60E-01 | 1.00E+00 |
| ENSG00000262768.2_RP11-353N  | ENSG00000160789.18_LMNA | -0.11981 | -0.273784632 | 0.040160824 | 1.42E-01 | 3.84E-01 | 1.00E+00 |
| ENSG00000237959.1_RPL36AP1C  | ENSG00000160789.18_LMNA | -0.04277 | -0.200603719 | 0.117230007 | 6.01E-01 | 8.16E-01 | 1.00E+00 |
| ENSG00000143839.13_REN       | ENSG00000160789.18_LMNA | -0.04507 | -0.202815582 | 0.114955408 | 5.81E-01 | 8.05E-01 | 1.00E+00 |
| ENSG00000248329.4_APELA      | ENSG00000160789.18_LMNA | 0.01492  | -0.144625268 | 0.173707064 | 8.55E-01 | 9.43E-01 | 1.00E+00 |
| ENSG00000239671.1_CTD-3193K  | ENSG00000160789.18_LMNA | -0.06435 | -0.221283872 | 0.095832333 | 4.31E-01 | 7.00E-01 | 1.00E+00 |
| ENSG00000238324.1_RN7SKP19   | ENSG00000160789.18_LMNA | 0.04562  | -0.114412147 | 0.20334338  | 5.77E-01 | 8.03E-01 | 1.00E+00 |
| ENSG00000211779.3_TRAV5      | ENSG00000160789.18_LMNA | 0.07299  | -0.087223452 | 0.229524388 | 3.72E-01 | 6.52E-01 | 1.00E+00 |
| ENSG00000244730.1_RP13-1056I | ENSG00000160789.18_LMNA | 0.18113  | 0.022585176  | 0.330796207 | 2.55E-02 | 1.28E-01 | 1.00E+00 |
| ENSG00000243607.3_RPL35AP2I  | ENSG00000160789.18_LMNA | -0.08154 | -0.237653128 | 0.078684739 | 3.18E-01 | 6.05E-01 | 1.00E+00 |
| ENSG00000258571.1_PTTG4P     | ENSG00000160789.18_LMNA | 0.04933  | -0.110739478 | 0.206906675 | 5.46E-01 | 7.84E-01 | 1.00E+00 |
| ENSG00000238166.2_RP11-160C  | ENSG00000160789.18_LMNA | -0.11593 | -0.270142199 | 0.044087205 | 1.55E-01 | 4.06E-01 | 1.00E+00 |
| ENSG00000225948.2_RP11-554I  | ENSG00000160789.18_LMNA | -0.21136 | -0.358493295 | -0.05397042 | 8.95E-03 | 6.05E-02 | 1.00E+00 |
| ENSG00000273118.1_AC079610.  | ENSG00000160789.18_LMNA | -0.13734 | -0.29019232  | 0.022353032 | 9.16E-02 | 2.95E-01 | 1.00E+00 |
| ENSG00000250509.1_CTC-573N1  | ENSG00000160789.18_LMNA | 0.01703  | -0.142554403 | 0.175756967 | 8.35E-01 | 9.36E-01 | 1.00E+00 |



|                              |                         |          |              |             |          |          |          |
|------------------------------|-------------------------|----------|--------------|-------------|----------|----------|----------|
| ENSG00000227803.2_RP11-239H  | ENSG00000160789.18_LMNA | 0.07762  | -0.082603435 | 0.233928075 | 3.42E-01 | 6.27E-01 | 1.00E+00 |
| ENSG00000278892.1_RP11-183A  | ENSG00000160789.18_LMNA | 0.02837  | -0.131420784 | 0.18673078  | 7.29E-01 | 8.85E-01 | 1.00E+00 |
| ENSG00000229831.2_AC108039.  | ENSG00000160789.18_LMNA | -0.01994 | -0.178575698 | 0.139702292 | 8.07E-01 | 9.23E-01 | 1.00E+00 |
| ENSG00000185631.7_AC017079.  | ENSG00000160789.18_LMNA | 0.15099  | -0.008414791 | 0.302907761 | 6.33E-02 | 2.34E-01 | 1.00E+00 |
| ENSG00000262921.1_RP11-141J  | ENSG00000160789.18_LMNA | -0.07594 | -0.232333    | 0.08427844  | 3.52E-01 | 6.36E-01 | 1.00E+00 |
| ENSG00000279810.1_RP3-495K2  | ENSG00000160789.18_LMNA | -0.03069 | -0.188969973 | 0.12913908  | 7.07E-01 | 8.76E-01 | 1.00E+00 |
| ENSG00000270072.1_RP11-750H  | ENSG00000160789.18_LMNA | -0.14055 | -0.29318745  | 0.019080773 | 8.42E-02 | 2.81E-01 | 1.00E+00 |
| ENSG00000205584.6_AC005488.  | ENSG00000160789.18_LMNA | 0.12875  | -0.031092893 | 0.28216251  | 1.14E-01 | 3.37E-01 | 1.00E+00 |
| ENSG00000280308.1_AF111168.  | ENSG00000160789.18_LMNA | 0.15921  | 8.06E-06     | 0.310538319 | 5.01E-02 | 2.02E-01 | 1.00E+00 |
| ENSG00000226801.2_OSTCP8     | ENSG00000160789.18_LMNA | 0.02278  | -0.136919875 | 0.181320525 | 7.81E-01 | 9.10E-01 | 1.00E+00 |
| ENSG00000256947.1_RP11-64D2  | ENSG00000160789.18_LMNA | 0.08552  | -0.074694794 | 0.241436372 | 2.95E-01 | 5.81E-01 | 1.00E+00 |
| ENSG00000229332.2_PGBD4P8    | ENSG00000160789.18_LMNA | -0.11485 | -0.269133383 | 0.045172951 | 1.59E-01 | 4.12E-01 | 1.00E+00 |
| ENSG00000254274.1_TDGF1P5    | ENSG00000160789.18_LMNA | -0.06665 | -0.223476522 | 0.09354629  | 4.15E-01 | 6.88E-01 | 1.00E+00 |
| ENSG00000251523.1_RP11-724M  | ENSG00000160789.18_LMNA | -0.07739 | -0.233714772 | 0.08282753  | 3.43E-01 | 6.28E-01 | 1.00E+00 |
| ENSG00000233338.1_TLR8-AS1   | ENSG00000160789.18_LMNA | 0.15914  | -5.88E-05    | 0.310477944 | 5.02E-02 | 2.02E-01 | 1.00E+00 |
| ENSG00000108702.3_CCL1       | ENSG00000160789.18_LMNA | -0.14725 | -0.299435695 | 0.012232798 | 7.02E-02 | 2.50E-01 | 1.00E+00 |
| ENSG00000258175.1_RP11-412H  | ENSG00000160789.18_LMNA | 0.07439  | -0.085824067 | 0.230859619 | 3.62E-01 | 6.44E-01 | 1.00E+00 |
| ENSG00000232824.1_PRR13P1    | ENSG00000160789.18_LMNA | 0.11436  | -0.045676929 | 0.268664879 | 1.61E-01 | 4.15E-01 | 1.00E+00 |
| ENSG00000232987.1_LINC01219  | ENSG00000160789.18_LMNA | 0.1709   | 0.012031558  | 0.321361932 | 3.53E-02 | 1.59E-01 | 1.00E+00 |
| ENSG00000248901.1_AC008834.  | ENSG00000160789.18_LMNA | 0.07497  | -0.085249368 | 0.231407625 | 3.59E-01 | 6.41E-01 | 1.00E+00 |
| ENSG00000254932.2_RP11-687M  | ENSG00000160789.18_LMNA | 0.08231  | -0.07791627  | 0.238382533 | 3.13E-01 | 6.00E-01 | 1.00E+00 |
| ENSG00000280168.1_RP11-1090I | ENSG00000160789.18_LMNA | -0.16734 | -0.318064407 | -0.00835898 | 3.93E-02 | 1.71E-01 | 1.00E+00 |
| ENSG00000224972.1_RP11-403H  | ENSG00000160789.18_LMNA | -0.15031 | -0.302277776 | 0.009108219 | 6.45E-02 | 2.37E-01 | 1.00E+00 |
| ENSG00000256642.1_LINC00273  | ENSG00000160789.18_LMNA | -0.02767 | -0.186048983 | 0.132114855 | 7.35E-01 | 8.89E-01 | 1.00E+00 |
| ENSG00000186226.8_LCE1E      | ENSG00000160789.18_LMNA | -0.20373 | -0.351530703 | -0.04602366 | 1.18E-02 | 7.39E-02 | 1.00E+00 |
| ENSG00000250390.2_RP11-338H  | ENSG00000160789.18_LMNA | 0.01127  | -0.148195602 | 0.170166379 | 8.90E-01 | 9.57E-01 | 1.00E+00 |
| ENSG00000256257.1_CACNA1C-   | ENSG00000160789.18_LMNA | -0.01285 | -0.171696263 | 0.146653924 | 8.75E-01 | 9.51E-01 | 1.00E+00 |
| ENSG00000226272.4_ARHGAP26   | ENSG00000160789.18_LMNA | 0.04958  | -0.110488807 | 0.207149575 | 5.44E-01 | 7.82E-01 | 1.00E+00 |
| ENSG00000253315.1_CTB-11I22. | ENSG00000160789.18_LMNA | 0.00017  | -0.159033198 | 0.159368196 | 9.98E-01 | 9.99E-01 | 1.00E+00 |
| ENSG00000129152.3_MYOD1      | ENSG00000160789.18_LMNA | -0.18935 | -0.338351842 | -0.03108709 | 1.95E-02 | 1.06E-01 | 1.00E+00 |
| ENSG00000232136.2_DUXAP7     | ENSG00000160789.18_LMNA | 0.04055  | -0.11942221  | 0.198468908 | 6.20E-01 | 8.28E-01 | 1.00E+00 |
| ENSG00000249481.5_SPATS1     | ENSG00000160789.18_LMNA | -0.14096 | -0.29357308  | 0.018658975 | 8.32E-02 | 2.79E-01 | 1.00E+00 |
| ENSG00000269802.1_CTB-180A7  | ENSG00000160789.18_LMNA | 0.08537  | -0.074843779 | 0.241295278 | 2.96E-01 | 5.82E-01 | 1.00E+00 |

|                             |                         |          |              |             |          |          |          |
|-----------------------------|-------------------------|----------|--------------|-------------|----------|----------|----------|
| ENSG00000254821.1_RP3-400B1 | ENSG00000160789.18_LMNA | -0.02013 | -0.178753086 | 0.139522626 | 8.06E-01 | 9.22E-01 | 1.00E+00 |
| ENSG00000226827.1_NPM1P11   | ENSG00000160789.18_LMNA | -0.04144 | -0.199326678 | 0.118541753 | 6.12E-01 | 8.24E-01 | 1.00E+00 |
| ENSG00000229590.3_MSX2P1    | ENSG00000160789.18_LMNA | -0.15083 | -0.302760303 | 0.008577125 | 6.36E-02 | 2.35E-01 | 1.00E+00 |
| ENSG00000275488.1_RP11-793H | ENSG00000160789.18_LMNA | -0.08756 | -0.243366104 | 0.072655725 | 2.83E-01 | 5.69E-01 | 1.00E+00 |
| ENSG00000226089.2_RP1-300G1 | ENSG00000160789.18_LMNA | 0.08628  | -0.073932675 | 0.242157918 | 2.91E-01 | 5.76E-01 | 1.00E+00 |
| ENSG00000237621.3_OR9A1P    | ENSG00000160789.18_LMNA | -0.07407 | -0.230549946 | 0.08614873  | 3.64E-01 | 6.46E-01 | 1.00E+00 |
| ENSG00000203601.3_LINC00970 | ENSG00000160789.18_LMNA | -0.12329 | -0.277054418 | 0.03662786  | 1.30E-01 | 3.66E-01 | 1.00E+00 |
| ENSG00000182896.11_TMEN95   | ENSG00000160789.18_LMNA | -0.01034 | -0.16925958  | 0.149108661 | 8.99E-01 | 9.61E-01 | 1.00E+00 |
| ENSG00000168260.2_          | ENSG00000160789.18_LMNA | -0.01541 | -0.174184003 | 0.144143701 | 8.51E-01 | 9.41E-01 | 1.00E+00 |
| ENSG00000273327.1_OR6L2P    | ENSG00000160789.18_LMNA | 0.07721  | -0.083011591 | 0.233539553 | 3.44E-01 | 6.29E-01 | 1.00E+00 |
| ENSG00000265780.1_          | ENSG00000160789.18_LMNA | -0.24482 | -0.388866838 | -0.08909442 | 2.37E-03 | 2.23E-02 | 1.00E+00 |
| ENSG00000224417.2_RP11-503C | ENSG00000160789.18_LMNA | -0.10601 | -0.260811515 | 0.054101181 | 1.94E-01 | 4.62E-01 | 1.00E+00 |
| ENSG00000271443.1_RP11-541E | ENSG00000160789.18_LMNA | -0.1043  | -0.259197402 | 0.055827093 | 2.01E-01 | 4.71E-01 | 1.00E+00 |
| ENSG00000242248.2_RPL7AP57  | ENSG00000160789.18_LMNA | -0.16157 | -0.312726373 | -0.00243146 | 4.67E-02 | 1.92E-01 | 1.00E+00 |
| ENSG00000255028.4_RP11-708B | ENSG00000160789.18_LMNA | -0.06445 | -0.221379177 | 0.095733038 | 4.30E-01 | 7.00E-01 | 1.00E+00 |
| ENSG00000227832.1_ST13P21   | ENSG00000160789.18_LMNA | -0.03576 | -0.193856039 | 0.124148531 | 6.62E-01 | 8.51E-01 | 1.00E+00 |
| ENSG00000249680.1_TUBA3GP   | ENSG00000160789.18_LMNA | 0.01037  | -0.149081435 | 0.169286627 | 8.99E-01 | 9.61E-01 | 1.00E+00 |
| ENSG00000223568.1_RPL3P11   | ENSG00000160789.18_LMNA | 0.08996  | -0.070242442 | 0.245646755 | 2.70E-01 | 5.55E-01 | 1.00E+00 |
| ENSG00000188394.6_GPR21     | ENSG00000160789.18_LMNA | -0.11403 | -0.268356708 | 0.046008347 | 1.62E-01 | 4.17E-01 | 1.00E+00 |
| ENSG00000130950.12_NUTM2F   | ENSG00000160789.18_LMNA | 0.11353  | -0.046513441 | 0.267886919 | 1.64E-01 | 4.19E-01 | 1.00E+00 |
| ENSG00000279380.1_AC069063. | ENSG00000160789.18_LMNA | -0.09226 | -0.247820702 | 0.067938621 | 2.58E-01 | 5.41E-01 | 1.00E+00 |
| ENSG00000230542.4_LINC00102 | ENSG00000160789.18_LMNA | 0.1392   | -0.020450253 | 0.291934697 | 8.72E-02 | 2.87E-01 | 1.00E+00 |
| ENSG00000254863.1_RP11-831A | ENSG00000160789.18_LMNA | -0.2031  | -0.350956609 | -0.04537014 | 1.21E-02 | 7.52E-02 | 1.00E+00 |
| ENSG00000253394.4_LINC00534 | ENSG00000160789.18_LMNA | -0.07034 | -0.226997576 | 0.089868256 | 3.89E-01 | 6.67E-01 | 1.00E+00 |
| ENSG00000230716.3_KRT8P7    | ENSG00000160789.18_LMNA | -0.04344 | -0.201246139 | 0.116569709 | 5.95E-01 | 8.13E-01 | 1.00E+00 |
| ENSG00000256321.4_RP11-153K | ENSG00000160789.18_LMNA | -0.14908 | -0.301131483 | 0.010369183 | 6.68E-02 | 2.42E-01 | 1.00E+00 |
| ENSG00000182631.6_RXFP3     | ENSG00000160789.18_LMNA | -0.00701 | -0.166025397 | 0.152360757 | 9.32E-01 | 9.73E-01 | 1.00E+00 |
| ENSG00000258856.2_CTD-2325K | ENSG00000160789.18_LMNA | 0.10463  | -0.055499046 | 0.259504335 | 2.00E-01 | 4.70E-01 | 1.00E+00 |
| ENSG00000227189.2_AC092535. | ENSG00000160789.18_LMNA | 0.0186   | -0.141014761 | 0.177279238 | 8.20E-01 | 9.30E-01 | 1.00E+00 |
| ENSG00000248771.4_LINC01207 | ENSG00000160789.18_LMNA | -0.10706 | -0.26180304  | 0.053040045 | 1.89E-01 | 4.56E-01 | 1.00E+00 |
| ENSG00000272167.2_PROX1-AS  | ENSG00000160789.18_LMNA | 0.05493  | -0.105193709 | 0.212271366 | 5.02E-01 | 7.53E-01 | 1.00E+00 |
| ENSG00000255311.4_RP11-160H | ENSG00000160789.18_LMNA | 0.00384  | -0.155457781 | 0.162939051 | 9.63E-01 | 9.85E-01 | 1.00E+00 |
| ENSG00000216817.1_R3HDM2P2  | ENSG00000160789.18_LMNA | -0.03941 | -0.197375854 | 0.120543452 | 6.30E-01 | 8.33E-01 | 1.00E+00 |

|                              |                         |          |              |             |          |          |          |
|------------------------------|-------------------------|----------|--------------|-------------|----------|----------|----------|
| ENSG00000272485.1_RP11-284J  | ENSG00000160789.18_LMNA | -0.10154 | -0.256593225 | 0.058607682 | 2.13E-01 | 4.87E-01 | 1.00E+00 |
| ENSG00000146926.9_AS10       | ENSG00000160789.18_LMNA | -0.01289 | -0.171740639 | 0.146609183 | 8.75E-01 | 9.51E-01 | 1.00E+00 |
| ENSG00000237447.1_CDC27P2    | ENSG00000160789.18_LMNA | -0.03495 | -0.193079662 | 0.124942586 | 6.69E-01 | 8.54E-01 | 1.00E+00 |
| ENSG00000279839.1_RP11-193J  | ENSG00000160789.18_LMNA | 0.06375  | -0.096426278 | 0.220713666 | 4.35E-01 | 7.04E-01 | 1.00E+00 |
| ENSG00000196188.9_CTSE       | ENSG00000160789.18_LMNA | 0.09714  | -0.063036691 | 0.252435737 | 2.34E-01 | 5.12E-01 | 1.00E+00 |
| ENSG00000242537.1_MRE11P1    | ENSG00000160789.18_LMNA | -0.19197 | -0.340752915 | -0.03379821 | 1.78E-02 | 9.93E-02 | 1.00E+00 |
| ENSG00000204688.8_OR2H1      | ENSG00000160789.18_LMNA | 0.02643  | -0.133330002 | 0.184854589 | 7.47E-01 | 8.94E-01 | 1.00E+00 |
| ENSG00000154342.5_WNT3A      | ENSG00000160789.18_LMNA | 0.21915  | 0.062119997  | 0.365598569 | 6.67E-03 | 4.86E-02 | 1.00E+00 |
| ENSG00000140505.6_CYP1A2     | ENSG00000160789.18_LMNA | 0.05474  | -0.105383877 | 0.212087724 | 5.03E-01 | 7.54E-01 | 1.00E+00 |
| ENSG00000280650.1_KCNIP4-IT1 | ENSG00000160789.18_LMNA | -0.20506 | -0.352746866 | -0.04740895 | 1.13E-02 | 7.13E-02 | 1.00E+00 |
| ENSG00000280296.1_RP11-78J2  | ENSG00000160789.18_LMNA | -0.02862 | -0.186972983 | 0.131174145 | 7.26E-01 | 8.84E-01 | 1.00E+00 |
| ENSG00000186452.9_TMPRSS12   | ENSG00000160789.18_LMNA | -0.07891 | -0.235154959 | 0.081313852 | 3.34E-01 | 6.20E-01 | 1.00E+00 |
| ENSG00000234710.1_AC060834.1 | ENSG00000160789.18_LMNA | -0.04168 | -0.199560376 | 0.118301786 | 6.10E-01 | 8.22E-01 | 1.00E+00 |
| ENSG00000263515.1_MIR548AN   | ENSG00000160789.18_LMNA | -0.15687 | -0.308369801 | 0.002390109 | 5.36E-02 | 2.10E-01 | 1.00E+00 |
| ENSG00000264908.1_           | ENSG00000160789.18_LMNA | 0.23991  | 0.083919076  | 0.384432016 | 2.91E-03 | 2.61E-02 | 1.00E+00 |
| ENSG00000264190.1_           | ENSG00000160789.18_LMNA | -0.33505 | -0.469222642 | -0.18575808 | 2.45E-05 | 6.09E-04 | 1.00E+00 |
| ENSG00000277129.1_AC012531.1 | ENSG00000160789.18_LMNA | 0.01768  | -0.141919353 | 0.176385037 | 8.29E-01 | 9.33E-01 | 1.00E+00 |
| ENSG00000206846.1_Y_RNA      | ENSG00000160789.18_LMNA | 0.09185  | -0.068353372 | 0.247429566 | 2.60E-01 | 5.44E-01 | 1.00E+00 |
| ENSG00000273781.1_           | ENSG00000160789.18_LMNA | -0.00839 | -0.16736344  | 0.151016139 | 9.18E-01 | 9.69E-01 | 1.00E+00 |
| ENSG00000207370.1_Y_RNA      | ENSG00000160789.18_LMNA | 0.04497  | -0.115058069 | 0.202715823 | 5.82E-01 | 8.06E-01 | 1.00E+00 |
| ENSG00000252391.1_RNU6-638F  | ENSG00000160789.18_LMNA | 0.00635  | -0.153010141 | 0.165378769 | 9.38E-01 | 9.76E-01 | 1.00E+00 |
| ENSG00000207635.1_MIR499A    | ENSG00000160789.18_LMNA | 0.08709  | -0.073121884 | 0.242925161 | 2.86E-01 | 5.72E-01 | 1.00E+00 |
| ENSG00000251898.1_SCARNA11   | ENSG00000160789.18_LMNA | 0.02229  | -0.137401445 | 0.180845816 | 7.85E-01 | 9.12E-01 | 1.00E+00 |
| ENSG00000200243.1_RN7SKP79   | ENSG00000160789.18_LMNA | -0.03006 | -0.188357269 | 0.129763751 | 7.13E-01 | 8.78E-01 | 1.00E+00 |
| ENSG00000252680.1_RNA5SP44   | ENSG00000160789.18_LMNA | -0.01887 | -0.177536875 | 0.140754032 | 8.18E-01 | 9.29E-01 | 1.00E+00 |
| ENSG00000235119.1_RP11-9M16  | ENSG00000160789.18_LMNA | -0.01317 | -0.172013391 | 0.146334158 | 8.72E-01 | 9.50E-01 | 1.00E+00 |
| ENSG00000235292.1_RP4-796I8  | ENSG00000160789.18_LMNA | -0.33106 | -0.465717355 | -0.18142377 | 3.10E-05 | 7.33E-04 | 1.00E+00 |
| ENSG00000230834.1_AC068580.1 | ENSG00000160789.18_LMNA | 0.23895  | 0.0829056    | 0.383561927 | 3.03E-03 | 2.70E-02 | 1.00E+00 |
| ENSG00000172155.9_LCE1D      | ENSG00000160789.18_LMNA | -0.2353  | -0.380257544 | -0.07906233 | 3.52E-03 | 3.02E-02 | 1.00E+00 |
| ENSG00000201758.1_RN7SKP55   | ENSG00000160789.18_LMNA | 0.01844  | -0.141176366 | 0.177119528 | 8.22E-01 | 9.30E-01 | 1.00E+00 |
| ENSG00000233677.1_DDX39BP1   | ENSG00000160789.18_LMNA | 0.10334  | -0.056790348 | 0.258295778 | 2.05E-01 | 4.77E-01 | 1.00E+00 |
| ENSG00000234161.1_PABPC5-A1  | ENSG00000160789.18_LMNA | -0.2752  | -0.416166813 | -0.12131344 | 6.01E-04 | 7.79E-03 | 1.00E+00 |
| ENSG00000259738.1_ZNF444P1   | ENSG00000160789.18_LMNA | -0.1397  | -0.292397228 | 0.019944761 | 8.61E-02 | 2.85E-01 | 1.00E+00 |

|                              |                         |          |              |             |          |          |          |
|------------------------------|-------------------------|----------|--------------|-------------|----------|----------|----------|
| ENSG00000237163.1_RP4-771M4  | ENSG00000160789.18_LMNA | -0.19519 | -0.34371147  | -0.03714504 | 1.60E-02 | 9.17E-02 | 1.00E+00 |
| ENSG00000234446.2_AC068489.  | ENSG00000160789.18_LMNA | -0.11194 | -0.266388787 | 0.048123087 | 1.70E-01 | 4.28E-01 | 1.00E+00 |
| ENSG00000258013.2_RPL3P13    | ENSG00000160789.18_LMNA | 0.02298  | -0.136723074 | 0.181514479 | 7.79E-01 | 9.09E-01 | 1.00E+00 |
| ENSG00000243794.1_SNRPCP10   | ENSG00000160789.18_LMNA | 0.07759  | -0.082634934 | 0.233898095 | 3.42E-01 | 6.27E-01 | 1.00E+00 |
| ENSG00000274883.1_Metazoa_SI | ENSG00000160789.18_LMNA | -0.21034 | -0.357571612 | -0.05291624 | 9.29E-03 | 6.22E-02 | 1.00E+00 |
| ENSG00000230515.1_AC092580.  | ENSG00000160789.18_LMNA | -0.07191 | -0.228496943 | 0.088299414 | 3.79E-01 | 6.58E-01 | 1.00E+00 |
| ENSG00000182351.7_CRIP1P4    | ENSG00000160789.18_LMNA | 0.08755  | -0.072662539 | 0.243359659 | 2.83E-01 | 5.69E-01 | 1.00E+00 |
| ENSG00000260859.1_RP11-254F  | ENSG00000160789.18_LMNA | -0.06394 | -0.220890019 | 0.096242608 | 4.34E-01 | 7.03E-01 | 1.00E+00 |
| ENSG00000276047.1_RN7SL711f  | ENSG00000160789.18_LMNA | -0.08083 | -0.236981794 | 0.079391694 | 3.22E-01 | 6.09E-01 | 1.00E+00 |
| ENSG00000233031.1_AC125238.  | ENSG00000160789.18_LMNA | 0.03523  | -0.124673516 | 0.193342786 | 6.67E-01 | 8.53E-01 | 1.00E+00 |
| ENSG00000211792.2_TRAV14DV   | ENSG00000160789.18_LMNA | 0.08811  | -0.072100999 | 0.243890651 | 2.80E-01 | 5.66E-01 | 1.00E+00 |
| ENSG00000240006.1_RP11-200A  | ENSG00000160789.18_LMNA | -0.04415 | -0.201929831 | 0.115866682 | 5.89E-01 | 8.09E-01 | 1.00E+00 |
| ENSG00000263608.2_RN7SL353f  | ENSG00000160789.18_LMNA | 0.08292  | -0.077303058 | 0.238964318 | 3.10E-01 | 5.96E-01 | 1.00E+00 |
| ENSG00000224987.1_RP1-191J1i | ENSG00000160789.18_LMNA | 0.03573  | -0.12417218  | 0.193832922 | 6.62E-01 | 8.51E-01 | 1.00E+00 |
| ENSG00000268683.1_CTD-2553L  | ENSG00000160789.18_LMNA | 0.0152   | -0.144347188 | 0.173982489 | 8.53E-01 | 9.42E-01 | 1.00E+00 |
| ENSG00000239614.1_HMGN1P7    | ENSG00000160789.18_LMNA | -0.11944 | -0.273439052 | 0.04053376  | 1.43E-01 | 3.86E-01 | 1.00E+00 |
| ENSG00000225195.2_RP11-338E  | ENSG00000160789.18_LMNA | -0.0389  | -0.196884601 | 0.121047109 | 6.34E-01 | 8.36E-01 | 1.00E+00 |
| ENSG00000238055.1_RP1-128O3  | ENSG00000160789.18_LMNA | 0.12186  | -0.038082178 | 0.275709314 | 1.35E-01 | 3.73E-01 | 1.00E+00 |
| ENSG00000201581.1_RN7SKP78   | ENSG00000160789.18_LMNA | 0.13065  | -0.029158257 | 0.283943761 | 1.09E-01 | 3.28E-01 | 1.00E+00 |
| ENSG00000273582.1_RP11-426C  | ENSG00000160789.18_LMNA | -0.06175 | -0.218801977 | 0.098415909 | 4.50E-01 | 7.15E-01 | 1.00E+00 |
| ENSG00000249540.1_RP11-789L  | ENSG00000160789.18_LMNA | 0.03398  | -0.125899513 | 0.19214351  | 6.78E-01 | 8.59E-01 | 1.00E+00 |
| ENSG00000263558.2_RN7SL716f  | ENSG00000160789.18_LMNA | -0.02324 | -0.181765144 | 0.136468694 | 7.76E-01 | 9.08E-01 | 1.00E+00 |
| ENSG00000263688.1_RP11-386P  | ENSG00000160789.18_LMNA | -0.14911 | -0.301163317 | 0.010334178 | 6.67E-02 | 2.42E-01 | 1.00E+00 |
| ENSG00000260514.1_RP11-368N  | ENSG00000160789.18_LMNA | -0.01949 | -0.178133984 | 0.140149586 | 8.12E-01 | 9.26E-01 | 1.00E+00 |
| ENSG00000231892.1_AC073316.  | ENSG00000160789.18_LMNA | 0.24512  | 0.089412699  | 0.389139125 | 2.34E-03 | 2.20E-02 | 1.00E+00 |
| ENSG00000261430.1_LA16c-390E | ENSG00000160789.18_LMNA | -0.00533 | -0.164387553 | 0.154005047 | 9.48E-01 | 9.79E-01 | 1.00E+00 |
| ENSG00000270655.1_RP1-20N2.  | ENSG00000160789.18_LMNA | -0.05789 | -0.215112514 | 0.102248642 | 4.79E-01 | 7.37E-01 | 1.00E+00 |
| ENSG00000229203.1_AC103564.  | ENSG00000160789.18_LMNA | -0.26127 | -0.403682998 | -0.10650273 | 1.15E-03 | 1.29E-02 | 1.00E+00 |
| ENSG00000229087.1_RP11-32P2  | ENSG00000160789.18_LMNA | -0.03139 | -0.189640506 | 0.128455161 | 7.01E-01 | 8.72E-01 | 1.00E+00 |
| ENSG00000240631.1_RPL30P12   | ENSG00000160789.18_LMNA | -0.00833 | -0.16731018  | 0.151069683 | 9.19E-01 | 9.69E-01 | 1.00E+00 |
| ENSG00000236722.1_RP11-359I1 | ENSG00000160789.18_LMNA | 0.06441  | -0.095768788 | 0.221344864 | 4.30E-01 | 7.00E-01 | 1.00E+00 |
| ENSG00000279463.1_RP11-157H  | ENSG00000160789.18_LMNA | -0.07229 | -0.228852685 | 0.087926958 | 3.76E-01 | 6.56E-01 | 1.00E+00 |
| ENSG00000273975.1_Metazoa_SI | ENSG00000160789.18_LMNA | 0.03387  | -0.126009403 | 0.192035969 | 6.79E-01 | 8.60E-01 | 1.00E+00 |

|                              |                         |          |              |             |          |          |          |
|------------------------------|-------------------------|----------|--------------|-------------|----------|----------|----------|
| ENSG00000230403.1_LINC01066  | ENSG00000160789.18_LMNA | 0.01534  | -0.144211239 | 0.174117123 | 8.51E-01 | 9.42E-01 | 1.00E+00 |
| ENSG00000273093.1_RP11-532L  | ENSG00000160789.18_LMNA | -0.04828 | -0.205893796 | 0.111784331 | 5.55E-01 | 7.89E-01 | 1.00E+00 |
| ENSG00000260721.1_AF067845.1 | ENSG00000160789.18_LMNA | -0.03409 | -0.192249563 | 0.125791136 | 6.77E-01 | 8.59E-01 | 1.00E+00 |
| ENSG00000203364.2_RP11-370F  | ENSG00000160789.18_LMNA | -0.00274 | -0.161871951 | 0.156527119 | 9.73E-01 | 9.90E-01 | 1.00E+00 |
| ENSG00000257477.1_LINC01154  | ENSG00000160789.18_LMNA | -0.0115  | -0.170391319 | 0.147969024 | 8.88E-01 | 9.57E-01 | 1.00E+00 |
| ENSG00000226134.1_RP11-120E  | ENSG00000160789.18_LMNA | -0.08692 | -0.242762199 | 0.073294131 | 2.87E-01 | 5.72E-01 | 1.00E+00 |
| ENSG00000215734.3_MRPL20P1   | ENSG00000160789.18_LMNA | -0.00258 | -0.161711363 | 0.15668798  | 9.75E-01 | 9.90E-01 | 1.00E+00 |
| ENSG00000223974.1_BNIP3P42   | ENSG00000160789.18_LMNA | -0.14106 | -0.293669524 | 0.018553469 | 8.30E-02 | 2.78E-01 | 1.00E+00 |
| ENSG00000220960.1_RP1-72A23  | ENSG00000160789.18_LMNA | -0.00041 | -0.159598702 | 0.15880265  | 9.96E-01 | 9.98E-01 | 1.00E+00 |
| ENSG00000251108.1_YBX1P5     | ENSG00000160789.18_LMNA | 0.03944  | -0.12051543  | 0.197403181 | 6.29E-01 | 8.33E-01 | 1.00E+00 |
| ENSG00000258651.1_RP11-545M  | ENSG00000160789.18_LMNA | 0.01117  | -0.148298554 | 0.170064159 | 8.91E-01 | 9.57E-01 | 1.00E+00 |
| ENSG00000251106.1_FAM206BP   | ENSG00000160789.18_LMNA | -0.07843 | -0.234703066 | 0.081788963 | 3.37E-01 | 6.22E-01 | 1.00E+00 |
| ENSG00000233625.1_RP5-905G1  | ENSG00000160789.18_LMNA | 0.20454  | 0.046864948  | 0.352269401 | 1.15E-02 | 7.23E-02 | 1.00E+00 |
| ENSG00000257173.1_AK6P2      | ENSG00000160789.18_LMNA | 0.13019  | -0.029625035 | 0.283514189 | 1.10E-01 | 3.30E-01 | 1.00E+00 |
| ENSG00000253991.1_KB-1562D1  | ENSG00000160789.18_LMNA | -0.03794 | -0.195953572 | 0.122001198 | 6.43E-01 | 8.41E-01 | 1.00E+00 |
| ENSG00000226302.1_RP11-528N  | ENSG00000160789.18_LMNA | 0.03806  | -0.121883528 | 0.196068428 | 6.42E-01 | 8.40E-01 | 1.00E+00 |
| ENSG00000237281.1_CATIP-AS2  | ENSG00000160789.18_LMNA | -0.04961 | -0.207173891 | 0.11046371  | 5.44E-01 | 7.82E-01 | 1.00E+00 |
| ENSG00000226438.1_RP11-420K  | ENSG00000160789.18_LMNA | -0.01535 | -0.174128298 | 0.144199954 | 8.51E-01 | 9.42E-01 | 1.00E+00 |
| ENSG00000278445.1_RP11-255P  | ENSG00000160789.18_LMNA | -0.03153 | -0.189780856 | 0.128311971 | 7.00E-01 | 8.72E-01 | 1.00E+00 |
| ENSG00000237937.4_AP000770.1 | ENSG00000160789.18_LMNA | 0.06424  | -0.095941763 | 0.221178832 | 4.32E-01 | 7.01E-01 | 1.00E+00 |
| ENSG00000269758.1_CTD-2245F  | ENSG00000160789.18_LMNA | 0.01538  | -0.144174901 | 0.174153107 | 8.51E-01 | 9.41E-01 | 1.00E+00 |
| ENSG00000231210.2_LINC01510  | ENSG00000160789.18_LMNA | -0.01164 | -0.170522896 | 0.147836475 | 8.87E-01 | 9.56E-01 | 1.00E+00 |
| ENSG00000255946.1_RP11-173P  | ENSG00000160789.18_LMNA | -0.00638 | -0.165413828 | 0.152974939 | 9.38E-01 | 9.75E-01 | 1.00E+00 |
| ENSG00000229228.1_LINC00582  | ENSG00000160789.18_LMNA | 0.06604  | -0.094154108 | 0.222893849 | 4.19E-01 | 6.91E-01 | 1.00E+00 |
| ENSG00000105550.7_FGF21      | ENSG00000160789.18_LMNA | -0.21951 | -0.365923408 | -0.06249355 | 6.58E-03 | 4.82E-02 | 1.00E+00 |
| ENSG00000229533.1_AC003986.1 | ENSG00000160789.18_LMNA | -0.15807 | -0.309483968 | 0.001158396 | 5.18E-02 | 2.06E-01 | 1.00E+00 |
| ENSG00000268794.1_VN1R90P    | ENSG00000160789.18_LMNA | -0.11555 | -0.269790887 | 0.044465391 | 1.56E-01 | 4.08E-01 | 1.00E+00 |
| ENSG00000237731.1_RNGTTP1    | ENSG00000160789.18_LMNA | -0.08191 | -0.238011297 | 0.078307434 | 3.16E-01 | 6.02E-01 | 1.00E+00 |
| ENSG00000241358.1_RP11-758I1 | ENSG00000160789.18_LMNA | -0.16666 | -0.317439783 | -0.00766425 | 4.02E-02 | 1.74E-01 | 1.00E+00 |
| ENSG00000260395.1_CTD-2649C  | ENSG00000160789.18_LMNA | -0.24489 | -0.388932217 | -0.08917083 | 2.36E-03 | 2.22E-02 | 1.00E+00 |
| ENSG00000241045.1_RPL7P43    | ENSG00000160789.18_LMNA | -0.0908  | -0.246442614 | 0.069399429 | 2.66E-01 | 5.50E-01 | 1.00E+00 |
| ENSG00000258657.4_RP11-104E  | ENSG00000160789.18_LMNA | 0.00969  | -0.149737175 | 0.168635062 | 9.06E-01 | 9.64E-01 | 1.00E+00 |
| ENSG00000176716.4_OR10AB1P   | ENSG00000160789.18_LMNA | -0.15545 | -0.307049415 | 0.003848578 | 5.58E-02 | 2.16E-01 | 1.00E+00 |

|                              |                         |          |              |             |          |          |          |
|------------------------------|-------------------------|----------|--------------|-------------|----------|----------|----------|
| ENSG00000271426.1_RP4-718P1  | ENSG00000160789.18_LMNA | -0.03235 | -0.190573437 | 0.127503102 | 6.92E-01 | 8.68E-01 | 1.00E+00 |
| ENSG00000260973.1_RP11-105C  | ENSG00000160789.18_LMNA | 0.00188  | -0.157369484 | 0.161030825 | 9.82E-01 | 9.93E-01 | 1.00E+00 |
| ENSG00000251377.1_RP11-18H2  | ENSG00000160789.18_LMNA | -0.09749 | -0.252768191 | 0.062682982 | 2.32E-01 | 5.10E-01 | 1.00E+00 |
| ENSG00000226779.1_NAALADL2   | ENSG00000160789.18_LMNA | 0.21226  | 0.054917437  | 0.359320772 | 8.66E-03 | 5.90E-02 | 1.00E+00 |
| ENSG00000261729.1_GS1-204I12 | ENSG00000160789.18_LMNA | 0.00972  | -0.149710899 | 0.168661176 | 9.05E-01 | 9.64E-01 | 1.00E+00 |
| ENSG00000235710.4_RP5-1097F  | ENSG00000160789.18_LMNA | -0.29889 | -0.437284187 | -0.14666944 | 1.84E-04 | 3.05E-03 | 1.00E+00 |
| ENSG00000139151.13_PL CZ1    | ENSG00000160789.18_LMNA | -0.08798 | -0.243765739 | 0.072233116 | 2.81E-01 | 5.67E-01 | 1.00E+00 |
| ENSG00000226148.1_SLC25A39F  | ENSG00000160789.18_LMNA | 0.09663  | -0.063548893 | 0.251954184 | 2.36E-01 | 5.15E-01 | 1.00E+00 |
| ENSG00000254025.1_BR IX1P1   | ENSG00000160789.18_LMNA | -0.05784 | -0.21506145  | 0.102301622 | 4.79E-01 | 7.37E-01 | 1.00E+00 |
| ENSG00000269506.2_RP11-571I1 | ENSG00000160789.18_LMNA | -0.08581 | -0.241708385 | 0.074407529 | 2.93E-01 | 5.79E-01 | 1.00E+00 |
| ENSG00000230960.1_RP5-1086L  | ENSG00000160789.18_LMNA | -0.30095 | -0.43911149  | -0.14888161 | 1.65E-04 | 2.81E-03 | 1.00E+00 |
| ENSG00000230342.2_FANCD2P2   | ENSG00000160789.18_LMNA | -0.00646 | -0.165494226 | 0.152894212 | 9.37E-01 | 9.75E-01 | 1.00E+00 |
| ENSG00000234564.1_HSPA8P20   | ENSG00000160789.18_LMNA | 0.06964  | -0.090568241 | 0.226328105 | 3.94E-01 | 6.71E-01 | 1.00E+00 |
| ENSG00000229205.2_LINC00200  | ENSG00000160789.18_LMNA | 0.10883  | -0.051262857 | 0.263462157 | 1.82E-01 | 4.46E-01 | 1.00E+00 |
| ENSG00000280361.1_           | ENSG00000160789.18_LMNA | 0.03023  | -0.129592069 | 0.188525687 | 7.12E-01 | 8.77E-01 | 1.00E+00 |
| ENSG00000168634.4_WFDC13     | ENSG00000160789.18_LMNA | 0.03006  | -0.129764735 | 0.188356304 | 7.13E-01 | 8.78E-01 | 1.00E+00 |
| ENSG00000177047.6_IFNW1      | ENSG00000160789.18_LMNA | -0.15236 | -0.304183659 | 0.007009483 | 6.09E-02 | 2.28E-01 | 1.00E+00 |
| ENSG00000170423.11_KRT78     | ENSG00000160789.18_LMNA | 0.14669  | -0.012812426 | 0.298907863 | 7.13E-02 | 2.53E-01 | 1.00E+00 |
| ENSG00000205745.2_AC083864.  | ENSG00000160789.18_LMNA | -0.19509 | -0.343618722 | -0.03704001 | 1.60E-02 | 9.20E-02 | 1.00E+00 |
| ENSG00000250563.1_KNOP1P5    | ENSG00000160789.18_LMNA | -0.13516 | -0.288156768 | 0.02457311  | 9.69E-02 | 3.06E-01 | 1.00E+00 |
| ENSG00000214788.2_OOSP1      | ENSG00000160789.18_LMNA | -0.02995 | -0.188252438 | 0.129870604 | 7.14E-01 | 8.79E-01 | 1.00E+00 |
| ENSG00000187823.3_ZCCHC16    | ENSG00000160789.18_LMNA | -0.07701 | -0.233349718 | 0.083210981 | 3.46E-01 | 6.30E-01 | 1.00E+00 |
| ENSG00000275152.3_CCL16      | ENSG00000160789.18_LMNA | -0.09452 | -0.249958297 | 0.065670035 | 2.47E-01 | 5.27E-01 | 1.00E+00 |
| ENSG00000236922.8_LINC01378  | ENSG00000160789.18_LMNA | -0.21088 | -0.358062895 | -0.05347807 | 9.11E-03 | 6.13E-02 | 1.00E+00 |
| ENSG00000214866.6_DCDC2C     | ENSG00000160789.18_LMNA | 0.11125  | -0.048819318 | 0.26574032  | 1.72E-01 | 4.32E-01 | 1.00E+00 |
| ENSG00000272489.1_RP11-182L  | ENSG00000160789.18_LMNA | -0.05992 | -0.217046581 | 0.100240645 | 4.63E-01 | 7.26E-01 | 1.00E+00 |
| ENSG00000105492.14_SIGLEC6   | ENSG00000160789.18_LMNA | -0.08093 | -0.237076504 | 0.079291978 | 3.22E-01 | 6.08E-01 | 1.00E+00 |
| ENSG00000262884.1_CTD-3060P  | ENSG00000160789.18_LMNA | 0.16929  | 0.01036839   | 0.319869541 | 3.71E-02 | 1.65E-01 | 1.00E+00 |
| ENSG00000235731.1_AC124997.  | ENSG00000160789.18_LMNA | 0.04344  | -0.11656756  | 0.201248229 | 5.95E-01 | 8.13E-01 | 1.00E+00 |
| ENSG00000265480.4_KRT18P55   | ENSG00000160789.18_LMNA | -0.02089 | -0.17949238  | 0.138773614 | 7.98E-01 | 9.19E-01 | 1.00E+00 |
| ENSG00000271321.1_CTAGE6     | ENSG00000160789.18_LMNA | 0.18962  | 0.031366098  | 0.33859913  | 1.93E-02 | 1.05E-01 | 1.00E+00 |
| ENSG00000235268.2_KDM4E      | ENSG00000160789.18_LMNA | -0.14604 | -0.29830953  | 0.01346922  | 7.26E-02 | 2.56E-01 | 1.00E+00 |
| ENSG00000280076.1_RP11-326A  | ENSG00000160789.18_LMNA | 0.0329   | -0.126966517 | 0.191098989 | 6.87E-01 | 8.65E-01 | 1.00E+00 |

|                              |                         |          |              |             |          |          |          |
|------------------------------|-------------------------|----------|--------------|-------------|----------|----------|----------|
| ENSG00000110975.7_SYT10      | ENSG00000160789.18_LMNA | -0.19633 | -0.344757807 | -0.03833034 | 1.53E-02 | 8.93E-02 | 1.00E+00 |
| ENSG00000224414.1_AC010886.1 | ENSG00000160789.18_LMNA | -0.09442 | -0.24986217  | 0.065772123 | 2.47E-01 | 5.27E-01 | 1.00E+00 |
| ENSG00000267618.4_RAD51L3-R  | ENSG00000160789.18_LMNA | 0.10902  | -0.051068297 | 0.263643678 | 1.81E-01 | 4.45E-01 | 1.00E+00 |
| ENSG00000279684.1_RP11-755E  | ENSG00000160789.18_LMNA | 0.0075   | -0.151878032 | 0.166505896 | 9.27E-01 | 9.72E-01 | 1.00E+00 |
| ENSG00000275139.1_RP1-101D8  | ENSG00000160789.18_LMNA | -0.07225 | -0.228816051 | 0.087965316 | 3.76E-01 | 6.56E-01 | 1.00E+00 |
| ENSG00000175728.3_C11orf44   | ENSG00000160789.18_LMNA | 0.15721  | -0.002042643 | 0.308684194 | 5.31E-02 | 2.09E-01 | 1.00E+00 |
| ENSG00000183535.8_COL18A1-A  | ENSG00000160789.18_LMNA | 0.05262  | -0.107479716 | 0.210062317 | 5.20E-01 | 7.66E-01 | 1.00E+00 |
| ENSG00000241490.1_RP11-553L  | ENSG00000160789.18_LMNA | 0.08085  | -0.079371995 | 0.237000505 | 3.22E-01 | 6.09E-01 | 1.00E+00 |
| ENSG00000132746.13_ALDH3B2   | ENSG00000160789.18_LMNA | 0.19006  | 0.03182648   | 0.339007073 | 1.90E-02 | 1.04E-01 | 1.00E+00 |
| ENSG00000224715.1_CITF22-49C | ENSG00000160789.18_LMNA | 0.01416  | -0.145365426 | 0.172973728 | 8.63E-01 | 9.46E-01 | 1.00E+00 |
| ENSG00000204613.9_TRIM10     | ENSG00000160789.18_LMNA | 0.13962  | -0.020020776 | 0.292327684 | 8.62E-02 | 2.85E-01 | 1.00E+00 |
| ENSG00000181092.8_ADIPOQ     | ENSG00000160789.18_LMNA | -0.11196 | -0.266408424 | 0.048101999 | 1.70E-01 | 4.28E-01 | 1.00E+00 |
| ENSG00000248672.4_LY75-CD30  | ENSG00000160789.18_LMNA | 0.15531  | -0.003994268 | 0.306917452 | 5.61E-02 | 2.16E-01 | 1.00E+00 |
| ENSG00000268416.1_CTD-2626C  | ENSG00000160789.18_LMNA | -0.10251 | -0.257509838 | 0.057629533 | 2.09E-01 | 4.82E-01 | 1.00E+00 |
| ENSG00000211767.1_TRBJ2-3    | ENSG00000160789.18_LMNA | -0.08996 | -0.245644351 | 0.070244988 | 2.70E-01 | 5.55E-01 | 1.00E+00 |
| ENSG00000252739.1_RNU7-151F  | ENSG00000160789.18_LMNA | 0.03996  | -0.120002647 | 0.197903162 | 6.25E-01 | 8.31E-01 | 1.00E+00 |
| ENSG00000206702.1_RNU1-11P   | ENSG00000160789.18_LMNA | -0.03659 | -0.194659232 | 0.123326619 | 6.54E-01 | 8.47E-01 | 1.00E+00 |
| ENSG00000278598.1_MIR6775    | ENSG00000160789.18_LMNA | -0.02438 | -0.182870176 | 0.13534678  | 7.66E-01 | 9.03E-01 | 1.00E+00 |
| ENSG00000216031.1_MIR298     | ENSG00000160789.18_LMNA | 0.09066  | -0.069547029 | 0.246303301 | 2.67E-01 | 5.51E-01 | 1.00E+00 |
| ENSG00000235284.1_SNORD62A   | ENSG00000160789.18_LMNA | 0.00115  | -0.158077315 | 0.160323677 | 9.89E-01 | 9.96E-01 | 1.00E+00 |
| ENSG00000251896.1_SNORD116   | ENSG00000160789.18_LMNA | -0.06271 | -0.219713636 | 0.097467397 | 4.43E-01 | 7.10E-01 | 1.00E+00 |
| ENSG00000265137.2_MIR3192    | ENSG00000160789.18_LMNA | 0.15554  | -0.003750422 | 0.307138315 | 5.57E-02 | 2.15E-01 | 1.00E+00 |
| ENSG00000263933.1_           | ENSG00000160789.18_LMNA | 0.08947  | -0.070737054 | 0.245179611 | 2.73E-01 | 5.58E-01 | 1.00E+00 |
| ENSG00000222503.1_Y_RNA      | ENSG00000160789.18_LMNA | 0.06176  | -0.098406232 | 0.218811281 | 4.50E-01 | 7.15E-01 | 1.00E+00 |
| ENSG00000241592.1_RP11-372E  | ENSG00000160789.18_LMNA | -0.04775 | -0.205394118 | 0.112299523 | 5.59E-01 | 7.92E-01 | 1.00E+00 |
| ENSG00000221269.1_MIR1302-8  | ENSG00000160789.18_LMNA | -0.01132 | -0.170212565 | 0.148149082 | 8.90E-01 | 9.57E-01 | 1.00E+00 |
| ENSG00000199872.1_RNU6-942F  | ENSG00000160789.18_LMNA | -0.02521 | -0.183675134 | 0.134529012 | 7.58E-01 | 8.99E-01 | 1.00E+00 |
| ENSG00000271143.1_RP11-12L8  | ENSG00000160789.18_LMNA | -0.14268 | -0.295176595 | 0.016903877 | 7.95E-02 | 2.71E-01 | 1.00E+00 |
| ENSG00000270321.1_RP11-2L8.2 | ENSG00000160789.18_LMNA | -0.07493 | -0.231372415 | 0.085286299 | 3.59E-01 | 6.42E-01 | 1.00E+00 |
| ENSG00000263426.2_RN7SL471F  | ENSG00000160789.18_LMNA | -0.20374 | -0.351537129 | -0.04603098 | 1.18E-02 | 7.39E-02 | 1.00E+00 |
| ENSG00000201801.1_RNU5E-4P   | ENSG00000160789.18_LMNA | -0.05142 | -0.208914766 | 0.10866592  | 5.29E-01 | 7.73E-01 | 1.00E+00 |
| ENSG00000201340.1_Y_RNA      | ENSG00000160789.18_LMNA | -0.09676 | -0.252078995 | 0.063416154 | 2.36E-01 | 5.14E-01 | 1.00E+00 |
| ENSG00000199890.1_Y_RNA      | ENSG00000160789.18_LMNA | -0.00675 | -0.165773252 | 0.152614009 | 9.34E-01 | 9.74E-01 | 1.00E+00 |

|                             |                         |          |              |             |          |          |          |
|-----------------------------|-------------------------|----------|--------------|-------------|----------|----------|----------|
| ENSG00000218512.2_SPTLC1P2  | ENSG00000160789.18_LMNA | 0.01199  | -0.147492717 | 0.170864077 | 8.83E-01 | 9.55E-01 | 1.00E+00 |
| ENSG00000222724.1_RNU2-63P  | ENSG00000160789.18_LMNA | 0.04775  | -0.112302736 | 0.205391001 | 5.59E-01 | 7.92E-01 | 1.00E+00 |
| ENSG00000241226.3_RN7SL836F | ENSG00000160789.18_LMNA | -0.04451 | -0.202277154 | 0.115509414 | 5.86E-01 | 8.08E-01 | 1.00E+00 |
| ENSG00000226709.1_FGF12-AS3 | ENSG00000160789.18_LMNA | -0.19675 | -0.345135854 | -0.03875881 | 1.51E-02 | 8.84E-02 | 1.00E+00 |
| ENSG00000222810.1_RNU2-68P  | ENSG00000160789.18_LMNA | -0.08451 | -0.240473302 | 0.075711444 | 3.01E-01 | 5.87E-01 | 1.00E+00 |
| ENSG00000231421.6_AC006050. | ENSG00000160789.18_LMNA | -0.00485 | -0.163927329 | 0.154466765 | 9.53E-01 | 9.81E-01 | 1.00E+00 |
| ENSG00000215841.3_RP11-800A | ENSG00000160789.18_LMNA | 0.05564  | -0.104483892 | 0.212956627 | 4.96E-01 | 7.50E-01 | 1.00E+00 |
| ENSG00000269043.1_CTC-513N1 | ENSG00000160789.18_LMNA | -0.13486 | -0.287878983 | 0.024875838 | 9.76E-02 | 3.07E-01 | 1.00E+00 |
| ENSG00000235112.1_HSPE1P27  | ENSG00000160789.18_LMNA | 0.03228  | -0.127576402 | 0.19050163  | 6.93E-01 | 8.68E-01 | 1.00E+00 |
| ENSG00000267375.1_CTB-186G2 | ENSG00000160789.18_LMNA | 0.14865  | -0.010804756 | 0.300735312 | 6.76E-02 | 2.44E-01 | 1.00E+00 |
| ENSG00000254915.1_RP11-263C | ENSG00000160789.18_LMNA | 0.10722  | -0.052879798 | 0.261952717 | 1.89E-01 | 4.56E-01 | 1.00E+00 |
| ENSG00000253475.1_RP11-110G | ENSG00000160789.18_LMNA | -0.1731  | -0.323391375 | -0.01429598 | 3.30E-02 | 1.52E-01 | 1.00E+00 |
| ENSG00000270861.1_KB-1589B1 | ENSG00000160789.18_LMNA | 0.00728  | -0.152094067 | 0.166290876 | 9.29E-01 | 9.73E-01 | 1.00E+00 |
| ENSG00000280382.1_RP11-804H | ENSG00000160789.18_LMNA | 0.05126  | -0.108832774 | 0.20875328  | 5.31E-01 | 7.73E-01 | 1.00E+00 |
| ENSG00000251228.1_RP11-192C | ENSG00000160789.18_LMNA | -0.02328 | -0.181806412 | 0.136426809 | 7.76E-01 | 9.08E-01 | 1.00E+00 |
| ENSG00000266575.1_BOLA2P1   | ENSG00000160789.18_LMNA | 0.01286  | -0.146636392 | 0.171713652 | 8.75E-01 | 9.51E-01 | 1.00E+00 |
| ENSG00000255226.1_CTD-2210P | ENSG00000160789.18_LMNA | -0.07362 | -0.230120795 | 0.086598544 | 3.67E-01 | 6.48E-01 | 1.00E+00 |
| ENSG00000253805.1_RP11-1049 | ENSG00000160789.18_LMNA | -0.08801 | -0.243796641 | 0.072200432 | 2.81E-01 | 5.67E-01 | 1.00E+00 |
| ENSG00000274752.1_TRBV12-3  | ENSG00000160789.18_LMNA | 0.0419   | -0.118088086 | 0.199768463 | 6.08E-01 | 8.21E-01 | 1.00E+00 |
| ENSG00000266308.2_RN7SL510F | ENSG00000160789.18_LMNA | 0.02065  | -0.139008447 | 0.179260633 | 8.01E-01 | 9.20E-01 | 1.00E+00 |
| ENSG00000227523.1_RPS20P15  | ENSG00000160789.18_LMNA | 0.10447  | -0.055654232 | 0.259359145 | 2.00E-01 | 4.71E-01 | 1.00E+00 |
| ENSG00000273956.1_CTB-31N19 | ENSG00000160789.18_LMNA | -0.15533 | -0.30693921  | 0.003970248 | 5.60E-02 | 2.16E-01 | 1.00E+00 |
| ENSG00000230958.1_AC093166. | ENSG00000160789.18_LMNA | -0.04131 | -0.199202211 | 0.118669542 | 6.13E-01 | 8.24E-01 | 1.00E+00 |
| ENSG00000270382.1_RP1-152L7 | ENSG00000160789.18_LMNA | 0.11925  | -0.040721682 | 0.273264884 | 1.43E-01 | 3.87E-01 | 1.00E+00 |
| ENSG00000230065.1_AC010974. | ENSG00000160789.18_LMNA | 0.16291  | 0.003803835  | 0.313964015 | 4.49E-02 | 1.88E-01 | 1.00E+00 |
| ENSG00000258979.1_RP11-433J | ENSG00000160789.18_LMNA | 0.1851   | 0.026683919  | 0.334443694 | 2.24E-02 | 1.17E-01 | 1.00E+00 |
| ENSG00000279014.1_CTD-2651B | ENSG00000160789.18_LMNA | -0.25506 | -0.398095771 | -0.09991652 | 1.52E-03 | 1.58E-02 | 1.00E+00 |
| ENSG00000251491.2_OR7E28P   | ENSG00000160789.18_LMNA | -0.30232 | -0.440332201 | -0.15036106 | 1.53E-04 | 2.65E-03 | 1.00E+00 |
| ENSG00000233060.1_AC016700. | ENSG00000160789.18_LMNA | 0.16453  | 0.005468029  | 0.315463412 | 4.28E-02 | 1.82E-01 | 1.00E+00 |
| ENSG00000235426.2_RP11-342M | ENSG00000160789.18_LMNA | -0.11103 | -0.26553473  | 0.049039986 | 1.73E-01 | 4.33E-01 | 1.00E+00 |
| ENSG00000232466.1_RP11-337A | ENSG00000160789.18_LMNA | -0.02861 | -0.186956489 | 0.131190942 | 7.26E-01 | 8.84E-01 | 1.00E+00 |
| ENSG00000225263.1_PCDH9-AS  | ENSG00000160789.18_LMNA | -0.02868 | -0.187030744 | 0.131115321 | 7.26E-01 | 8.84E-01 | 1.00E+00 |
| ENSG00000259019.1_EIF4BP1   | ENSG00000160789.18_LMNA | 0.01395  | -0.145573265 | 0.17276774  | 8.65E-01 | 9.47E-01 | 1.00E+00 |



|                             |                         |          |              |             |          |          |          |
|-----------------------------|-------------------------|----------|--------------|-------------|----------|----------|----------|
| ENSG00000236132.1_CTA-440B3 | ENSG00000160789.18_LMNA | 0.0389   | -0.12105051  | 0.196881283 | 6.34E-01 | 8.36E-01 | 1.00E+00 |
| ENSG00000213470.4_RP11-972K | ENSG00000160789.18_LMNA | -0.09822 | -0.253453091 | 0.061954042 | 2.29E-01 | 5.06E-01 | 1.00E+00 |
| ENSG00000239893.1_ZNF736P9\ | ENSG00000160789.18_LMNA | -0.03216 | -0.190382649 | 0.127697849 | 6.94E-01 | 8.69E-01 | 1.00E+00 |
| ENSG00000257951.1_RP11-554D | ENSG00000160789.18_LMNA | -0.1185  | -0.272556638 | 0.041485631 | 1.46E-01 | 3.91E-01 | 1.00E+00 |
| ENSG00000259909.1_RP11-1006 | ENSG00000160789.18_LMNA | 0.07049  | -0.089722289 | 0.227137142 | 3.88E-01 | 6.66E-01 | 1.00E+00 |
| ENSG00000237389.1_RP11-402L | ENSG00000160789.18_LMNA | -0.08448 | -0.240450015 | 0.075736018 | 3.01E-01 | 5.87E-01 | 1.00E+00 |
| ENSG00000226872.1_AC002472. | ENSG00000160789.18_LMNA | -0.04468 | -0.20243867  | 0.115343246 | 5.85E-01 | 8.07E-01 | 1.00E+00 |
| ENSG00000101292.7_PROKR2    | ENSG00000160789.18_LMNA | 0.00533  | -0.154000262 | 0.164392322 | 9.48E-01 | 9.79E-01 | 1.00E+00 |
| ENSG00000230578.3_RP13-228J | ENSG00000160789.18_LMNA | 0.00038  | -0.158828439 | 0.15957292  | 9.96E-01 | 9.99E-01 | 1.00E+00 |
| ENSG00000224077.1_AP000936. | ENSG00000160789.18_LMNA | 0.0622   | -0.097971964 | 0.219228742 | 4.47E-01 | 7.13E-01 | 1.00E+00 |
| ENSG00000259950.1_RP11-170L | ENSG00000160789.18_LMNA | -0.10045 | -0.255562935 | 0.059706416 | 2.18E-01 | 4.93E-01 | 1.00E+00 |
| ENSG00000253825.1_RP11-96A1 | ENSG00000160789.18_LMNA | -0.05223 | -0.209687948 | 0.107866794 | 5.23E-01 | 7.68E-01 | 1.00E+00 |
| ENSG00000250101.1_RP11-1252 | ENSG00000160789.18_LMNA | -0.12586 | -0.279465084 | 0.034018135 | 1.22E-01 | 3.52E-01 | 1.00E+00 |
| ENSG00000228808.1_HMGB3P4   | ENSG00000160789.18_LMNA | -0.09256 | -0.248101993 | 0.067640279 | 2.57E-01 | 5.39E-01 | 1.00E+00 |
| ENSG00000253659.1_RP11-1114 | ENSG00000160789.18_LMNA | 0.02183  | -0.137852587 | 0.180400966 | 7.90E-01 | 9.14E-01 | 1.00E+00 |
| ENSG00000225272.2_RP11-466F | ENSG00000160789.18_LMNA | 0.04089  | -0.11908754  | 0.198795011 | 6.17E-01 | 8.26E-01 | 1.00E+00 |
| ENSG00000270110.1_RP5-1139B | ENSG00000160789.18_LMNA | -0.01293 | -0.171776005 | 0.146573525 | 8.74E-01 | 9.51E-01 | 1.00E+00 |
| ENSG00000226533.1_BTBD9-AS  | ENSG00000160789.18_LMNA | -0.01934 | -0.177987888 | 0.140297499 | 8.13E-01 | 9.26E-01 | 1.00E+00 |
| ENSG00000258480.1_RP11-662J | ENSG00000160789.18_LMNA | -0.17168 | -0.322079011 | -0.0128313  | 3.44E-02 | 1.57E-01 | 1.00E+00 |
| ENSG00000239659.2_RPL9P31   | ENSG00000160789.18_LMNA | -0.10696 | -0.261706816 | 0.053143056 | 1.90E-01 | 4.57E-01 | 1.00E+00 |
| ENSG00000270610.1_RP11-486C | ENSG00000160789.18_LMNA | 0.02465  | -0.135077873 | 0.183134918 | 7.63E-01 | 9.01E-01 | 1.00E+00 |
| ENSG00000179253.3_RP11-429E | ENSG00000160789.18_LMNA | 0.08911  | -0.071096997 | 0.244839565 | 2.75E-01 | 5.59E-01 | 1.00E+00 |
| ENSG00000232508.1_MRPL45P1  | ENSG00000160789.18_LMNA | 0.11483  | -0.045196591 | 0.269111409 | 1.59E-01 | 4.12E-01 | 1.00E+00 |
| ENSG00000229672.2_RP11-184A | ENSG00000160789.18_LMNA | -0.01021 | -0.169133857 | 0.14923521  | 9.01E-01 | 9.62E-01 | 1.00E+00 |
| ENSG00000158485.9_CD1B      | ENSG00000160789.18_LMNA | 0.02728  | -0.132491563 | 0.185678809 | 7.39E-01 | 8.90E-01 | 1.00E+00 |
| ENSG00000279642.1_RP5-1033E | ENSG00000160789.18_LMNA | 0.16161  | 0.002468544  | 0.312759832 | 4.67E-02 | 1.92E-01 | 1.00E+00 |
| ENSG00000242931.1_RPL7P49   | ENSG00000160789.18_LMNA | 0.06825  | -0.091954656 | 0.225001241 | 4.03E-01 | 6.79E-01 | 1.00E+00 |
| ENSG00000231514.1_FAM58CP   | ENSG00000160789.18_LMNA | 0.03422  | -0.125666535 | 0.192371483 | 6.76E-01 | 8.58E-01 | 1.00E+00 |
| ENSG00000228679.1_RP4-676J1 | ENSG00000160789.18_LMNA | -0.06509 | -0.221988162 | 0.095098409 | 4.26E-01 | 6.96E-01 | 1.00E+00 |
| ENSG00000251056.1_ANKRD20A  | ENSG00000160789.18_LMNA | -0.17897 | -0.328800876 | -0.02034736 | 2.74E-02 | 1.35E-01 | 1.00E+00 |
| ENSG00000238268.2_RP11-229P | ENSG00000160789.18_LMNA | -0.06461 | -0.221532089 | 0.095573711 | 4.29E-01 | 6.99E-01 | 1.00E+00 |
| ENSG00000237065.2_NANOGP4   | ENSG00000160789.18_LMNA | 0.05007  | -0.110009414 | 0.207613995 | 5.40E-01 | 7.80E-01 | 1.00E+00 |
| ENSG00000213358.3_AC092933. | ENSG00000160789.18_LMNA | 0.11333  | -0.046717671 | 0.267696922 | 1.64E-01 | 4.20E-01 | 1.00E+00 |

|                              |                         |          |              |             |          |          |          |
|------------------------------|-------------------------|----------|--------------|-------------|----------|----------|----------|
| ENSG00000256019.1_TAS2R63P   | ENSG00000160789.18_LMNA | 0.1346   | -0.025139185 | 0.287637292 | 9.83E-02 | 3.08E-01 | 1.00E+00 |
| ENSG00000102195.8_GPR50      | ENSG00000160789.18_LMNA | -0.06597 | -0.222835005 | 0.094215478 | 4.19E-01 | 6.91E-01 | 1.00E+00 |
| ENSG00000226695.1_ANKRD20A   | ENSG00000160789.18_LMNA | -0.20804 | -0.355464456 | -0.05050871 | 1.01E-02 | 6.61E-02 | 1.00E+00 |
| ENSG00000235440.1_RP11-214J  | ENSG00000160789.18_LMNA | 0.12564  | -0.034240837 | 0.279259523 | 1.23E-01 | 3.53E-01 | 1.00E+00 |
| ENSG00000238090.1_AC006195.1 | ENSG00000160789.18_LMNA | 0.08665  | -0.073561048 | 0.242509634 | 2.88E-01 | 5.74E-01 | 1.00E+00 |
| ENSG00000259441.2_MRPL15P1   | ENSG00000160789.18_LMNA | -0.03577 | -0.19386942  | 0.124134841 | 6.62E-01 | 8.51E-01 | 1.00E+00 |
| ENSG00000226985.4_LINC01203  | ENSG00000160789.18_LMNA | 0.01153  | -0.147940672 | 0.170419464 | 8.88E-01 | 9.56E-01 | 1.00E+00 |
| ENSG00000278928.1_RP11-481F  | ENSG00000160789.18_LMNA | -0.11492 | -0.269198625 | 0.045102756 | 1.59E-01 | 4.12E-01 | 1.00E+00 |
| ENSG00000255141.1_HNRNPA1F   | ENSG00000160789.18_LMNA | -0.08405 | -0.240034567 | 0.076174369 | 3.03E-01 | 5.90E-01 | 1.00E+00 |
| ENSG00000230948.1_AP001331.1 | ENSG00000160789.18_LMNA | 0.03897  | -0.120977455 | 0.196952549 | 6.34E-01 | 8.36E-01 | 1.00E+00 |
| ENSG00000250609.1_RP11-158C  | ENSG00000160789.18_LMNA | 0.05615  | -0.103978965 | 0.213443897 | 4.92E-01 | 7.47E-01 | 1.00E+00 |
| ENSG00000236232.1_MTCYBP24   | ENSG00000160789.18_LMNA | 0.18127  | 0.02272206   | 0.33091817  | 2.54E-02 | 1.28E-01 | 1.00E+00 |
| ENSG00000257360.1_RP11-74K1  | ENSG00000160789.18_LMNA | -0.11302 | -0.267409547 | 0.047026524 | 1.66E-01 | 4.22E-01 | 1.00E+00 |
| ENSG00000241929.1_RP11-278L  | ENSG00000160789.18_LMNA | -0.14351 | -0.295950524 | 0.016056098 | 7.78E-02 | 2.67E-01 | 1.00E+00 |
| ENSG00000175514.2_GPR152     | ENSG00000160789.18_LMNA | 0.1149   | -0.045122364 | 0.269180401 | 1.59E-01 | 4.12E-01 | 1.00E+00 |
| ENSG00000188038.6_NRN1L      | ENSG00000160789.18_LMNA | 0.02666  | -0.133104421 | 0.185076389 | 7.44E-01 | 8.93E-01 | 1.00E+00 |
| ENSG00000235643.1_RP1-69M21  | ENSG00000160789.18_LMNA | -0.02782 | -0.186199425 | 0.131961732 | 7.34E-01 | 8.88E-01 | 1.00E+00 |
| ENSG00000254980.1_RP11-794P  | ENSG00000160789.18_LMNA | 0.04106  | -0.11891875  | 0.198959454 | 6.15E-01 | 8.26E-01 | 1.00E+00 |
| ENSG00000173627.7_APOBEC4    | ENSG00000160789.18_LMNA | -0.01302 | -0.171866677 | 0.146482101 | 8.73E-01 | 9.51E-01 | 1.00E+00 |
| ENSG00000264490.3_WI2-87327I | ENSG00000160789.18_LMNA | 0.07783  | -0.082394095 | 0.234127305 | 3.41E-01 | 6.26E-01 | 1.00E+00 |
| ENSG00000220748.2_RP1-59B16  | ENSG00000160789.18_LMNA | 0.07809  | -0.082134388 | 0.234374434 | 3.39E-01 | 6.24E-01 | 1.00E+00 |
| ENSG00000232915.1_AC097721.1 | ENSG00000160789.18_LMNA | -0.00321 | -0.162331807 | 0.156066391 | 9.69E-01 | 9.88E-01 | 1.00E+00 |
| ENSG00000254590.1_RP11-334E  | ENSG00000160789.18_LMNA | -0.12897 | -0.282376694 | 0.03086039  | 1.13E-01 | 3.36E-01 | 1.00E+00 |
| ENSG00000213697.3_CTBP2P6    | ENSG00000160789.18_LMNA | -0.05761 | -0.214839462 | 0.102531923 | 4.81E-01 | 7.39E-01 | 1.00E+00 |
| ENSG00000177494.5_ZBED2      | ENSG00000160789.18_LMNA | 0.08271  | -0.077510807 | 0.238767241 | 3.11E-01 | 5.97E-01 | 1.00E+00 |
| ENSG00000254843.1_XIAPP2     | ENSG00000160789.18_LMNA | -0.09482 | -0.250238936 | 0.065371957 | 2.45E-01 | 5.25E-01 | 1.00E+00 |
| ENSG00000225510.2_PCDH8P1    | ENSG00000160789.18_LMNA | -0.12639 | -0.279956046 | 0.033486107 | 1.21E-01 | 3.49E-01 | 1.00E+00 |
| ENSG00000276807.1_RP11-8P11  | ENSG00000160789.18_LMNA | 0.07762  | -0.082602391 | 0.233929069 | 3.42E-01 | 6.27E-01 | 1.00E+00 |
| ENSG00000229855.7 CTC-546K2  | ENSG00000160789.18_LMNA | -0.22203 | -0.368211678 | -0.06512738 | 5.98E-03 | 4.49E-02 | 1.00E+00 |
| ENSG00000228035.1_RP4-663N1  | ENSG00000160789.18_LMNA | -0.08048 | -0.236650315 | 0.079740644 | 3.24E-01 | 6.11E-01 | 1.00E+00 |
| ENSG00000217261.4_POM121L4I  | ENSG00000160789.18_LMNA | 0.09445  | -0.06573801  | 0.249894293 | 2.47E-01 | 5.27E-01 | 1.00E+00 |
| ENSG00000280220.1_RP11-560A  | ENSG00000160789.18_LMNA | 0.08717  | -0.073040925 | 0.24300175  | 2.86E-01 | 5.71E-01 | 1.00E+00 |
| ENSG00000228262.7_LINC01320  | ENSG00000160789.18_LMNA | -0.02086 | -0.179462945 | 0.138803443 | 7.99E-01 | 9.19E-01 | 1.00E+00 |

|                             |                         |          |              |             |          |          |          |
|-----------------------------|-------------------------|----------|--------------|-------------|----------|----------|----------|
| ENSG00000183378.10_OVCH2    | ENSG00000160789.18_LMNA | -0.12937 | -0.282746686 | 0.030458672 | 1.12E-01 | 3.34E-01 | 1.00E+00 |
| ENSG00000232892.1_RP11-267N | ENSG00000160789.18_LMNA | 0.01453  | -0.145005801 | 0.173330082 | 8.59E-01 | 9.45E-01 | 1.00E+00 |
| ENSG00000206026.6_SMIM21    | ENSG00000160789.18_LMNA | 0.10438  | -0.055749755 | 0.259269768 | 2.01E-01 | 4.71E-01 | 1.00E+00 |
| ENSG00000173976.14_RAX2     | ENSG00000160789.18_LMNA | -0.06641 | -0.2232533   | 0.093779173 | 4.16E-01 | 6.89E-01 | 1.00E+00 |
| ENSG00000229433.1_RP11-329B | ENSG00000160789.18_LMNA | -0.04183 | -0.199697475 | 0.118160993 | 6.09E-01 | 8.21E-01 | 1.00E+00 |
| ENSG00000169435.12_RASSF6   | ENSG00000160789.18_LMNA | 0.15932  | 0.000126066  | 0.310644942 | 4.99E-02 | 2.01E-01 | 1.00E+00 |
| ENSG00000250497.1_AC007126. | ENSG00000160789.18_LMNA | -0.01134 | -0.17023699  | 0.14812448  | 8.90E-01 | 9.57E-01 | 1.00E+00 |
| ENSG00000160683.4_CXCR5     | ENSG00000160789.18_LMNA | 0.03737  | -0.122557484 | 0.195410466 | 6.48E-01 | 8.43E-01 | 1.00E+00 |
| ENSG00000158786.4_PLA2G2F   | ENSG00000160789.18_LMNA | 0.07716  | -0.083064833 | 0.233488865 | 3.45E-01 | 6.29E-01 | 1.00E+00 |
| ENSG00000199575.1_SNORD114  | ENSG00000160789.18_LMNA | 0.00879  | -0.150625778 | 0.167751672 | 9.14E-01 | 9.67E-01 | 1.00E+00 |
| ENSG00000264539.1_MIR548AR  | ENSG00000160789.18_LMNA | 0.09761  | -0.062567172 | 0.252877025 | 2.32E-01 | 5.09E-01 | 1.00E+00 |
| ENSG00000239112.1_SNORD123  | ENSG00000160789.18_LMNA | 0.08532  | -0.07489593  | 0.241245886 | 2.96E-01 | 5.82E-01 | 1.00E+00 |
| ENSG00000212071.1_          | ENSG00000160789.18_LMNA | -0.09348 | -0.248974365 | 0.066714667 | 2.52E-01 | 5.33E-01 | 1.00E+00 |
| ENSG00000162624.13_LHX8     | ENSG00000160789.18_LMNA | -0.02618 | -0.184612281 | 0.133576403 | 7.49E-01 | 8.95E-01 | 1.00E+00 |
| ENSG00000276797.1_          | ENSG00000160789.18_LMNA | 0.11739  | -0.042605308 | 0.271517985 | 1.50E-01 | 3.98E-01 | 1.00E+00 |
| ENSG00000251927.1_          | ENSG00000160789.18_LMNA | 0.1164   | -0.043609969 | 0.270585403 | 1.53E-01 | 4.03E-01 | 1.00E+00 |
| ENSG00000231855.1_GLUDP5    | ENSG00000160789.18_LMNA | 0.03545  | -0.124448555 | 0.193562741 | 6.65E-01 | 8.52E-01 | 1.00E+00 |
| ENSG00000252321.1_RN7SKP83  | ENSG00000160789.18_LMNA | -0.24948 | -0.393066014 | -0.09400973 | 1.94E-03 | 1.91E-02 | 1.00E+00 |
| ENSG00000253030.1_MIR2116   | ENSG00000160789.18_LMNA | 0.03028  | -0.129542306 | 0.1885745   | 7.11E-01 | 8.77E-01 | 1.00E+00 |
| ENSG00000263835.4_          | ENSG00000160789.18_LMNA | 0.00296  | -0.156318459 | 0.162080233 | 9.71E-01 | 9.89E-01 | 1.00E+00 |
| ENSG00000274817.1_AC012531. | ENSG00000160789.18_LMNA | -0.04644 | -0.204134764 | 0.113597221 | 5.70E-01 | 7.99E-01 | 1.00E+00 |
| ENSG00000221241.1_SNORD88A  | ENSG00000160789.18_LMNA | 0.03178  | -0.128067608 | 0.190020342 | 6.98E-01 | 8.70E-01 | 1.00E+00 |
| ENSG00000248294.1_CTD-2023N | ENSG00000160789.18_LMNA | -0.05623 | -0.213517087 | 0.103903109 | 4.91E-01 | 7.47E-01 | 1.00E+00 |
| ENSG00000207293.1_Y_RNA     | ENSG00000160789.18_LMNA | -0.00877 | -0.167740033 | 0.150637483 | 9.15E-01 | 9.67E-01 | 1.00E+00 |
| ENSG00000249808.2_LINC01377 | ENSG00000160789.18_LMNA | -0.35026 | -0.482550518 | -0.20233942 | 9.71E-06 | 2.85E-04 | 4.98E-01 |
| ENSG00000263960.1_          | ENSG00000160789.18_LMNA | 0.05382  | -0.106288607 | 0.211213732 | 5.10E-01 | 7.59E-01 | 1.00E+00 |
| ENSG00000249263.2_PARP4P3   | ENSG00000160789.18_LMNA | -0.27312 | -0.414309083 | -0.1191011  | 6.63E-04 | 8.40E-03 | 1.00E+00 |
| ENSG00000211563.3_MIR3065   | ENSG00000160789.18_LMNA | 0.16808  | 0.009128273  | 0.318755761 | 3.85E-02 | 1.69E-01 | 1.00E+00 |
| ENSG00000252312.1_RN7SKP21  | ENSG00000160789.18_LMNA | -0.28115 | -0.421482677 | -0.12766025 | 4.50E-04 | 6.22E-03 | 1.00E+00 |
| ENSG00000222585.1_RNA5SP49  | ENSG00000160789.18_LMNA | 0.07057  | -0.089634015 | 0.227221539 | 3.88E-01 | 6.66E-01 | 1.00E+00 |
| ENSG00000215117.5_LINC00588 | ENSG00000160789.18_LMNA | -0.02796 | -0.186329819 | 0.131829001 | 7.32E-01 | 8.87E-01 | 1.00E+00 |
| ENSG00000274798.1_CTD-2129N | ENSG00000160789.18_LMNA | 0.11551  | -0.044513956 | 0.269745768 | 1.56E-01 | 4.08E-01 | 1.00E+00 |
| ENSG00000273906.1_RP11-115H | ENSG00000160789.18_LMNA | -0.26511 | -0.407127082 | -0.11057564 | 9.64E-04 | 1.13E-02 | 1.00E+00 |

|                              |                         |          |              |             |          |          |          |
|------------------------------|-------------------------|----------|--------------|-------------|----------|----------|----------|
| ENSG00000275567.1_RP11-729I1 | ENSG00000160789.18_LMNA | -0.05924 | -0.216397699 | 0.10091462  | 4.68E-01 | 7.29E-01 | 1.00E+00 |
| ENSG00000236358.1_RP5-827C2  | ENSG00000160789.18_LMNA | 0.09617  | -0.064006898 | 0.251523452 | 2.39E-01 | 5.17E-01 | 1.00E+00 |
| ENSG00000278146.1_RP11-327J  | ENSG00000160789.18_LMNA | -0.02519 | -0.183649792 | 0.134554763 | 7.58E-01 | 8.99E-01 | 1.00E+00 |
| ENSG00000230935.1_RPS3P1     | ENSG00000160789.18_LMNA | -0.1477  | -0.299847125 | 0.011780849 | 6.94E-02 | 2.48E-01 | 1.00E+00 |
| ENSG00000275691.1_RP11-249C  | ENSG00000160789.18_LMNA | 0.03718  | -0.122751993 | 0.19522052  | 6.49E-01 | 8.44E-01 | 1.00E+00 |
| ENSG00000265327.2_RN7SL411f  | ENSG00000160789.18_LMNA | 0.00688  | -0.152487268 | 0.165899444 | 9.33E-01 | 9.74E-01 | 1.00E+00 |
| ENSG00000274656.1_RN7SL625f  | ENSG00000160789.18_LMNA | 0.10827  | -0.051825051 | 0.262937515 | 1.84E-01 | 4.50E-01 | 1.00E+00 |
| ENSG00000234784.2_RP11-182I1 | ENSG00000160789.18_LMNA | -0.04434 | -0.20211817  | 0.115672961 | 5.87E-01 | 8.08E-01 | 1.00E+00 |
| ENSG00000281769.1_LINC01230  | ENSG00000160789.18_LMNA | -0.03634 | -0.194412757 | 0.123578885 | 6.57E-01 | 8.48E-01 | 1.00E+00 |
| ENSG00000237343.1_RP11-763B  | ENSG00000160789.18_LMNA | -0.02894 | -0.187281434 | 0.130859987 | 7.23E-01 | 8.83E-01 | 1.00E+00 |
| ENSG00000234271.1_RP1-138B7  | ENSG00000160789.18_LMNA | -0.00765 | -0.166651168 | 0.151732058 | 9.25E-01 | 9.71E-01 | 1.00E+00 |
| ENSG00000258743.4_RP11-406A  | ENSG00000160789.18_LMNA | -0.14372 | -0.29614572  | 0.015842205 | 7.73E-02 | 2.66E-01 | 1.00E+00 |
| ENSG00000244308.2_RN7SL762f  | ENSG00000160789.18_LMNA | 0.02963  | -0.130186931 | 0.187942056 | 7.17E-01 | 8.80E-01 | 1.00E+00 |
| ENSG00000232895.2_RP4-543J1  | ENSG00000160789.18_LMNA | -0.15949 | -0.310800558 | -0.00029831 | 4.97E-02 | 2.01E-01 | 1.00E+00 |
| ENSG00000235246.1_RP1-506.5  | ENSG00000160789.18_LMNA | 0.10577  | -0.054345016 | 0.260583581 | 1.95E-01 | 4.63E-01 | 1.00E+00 |
| ENSG00000233502.1_AC104794.  | ENSG00000160789.18_LMNA | 0.01296  | -0.146538964 | 0.171810282 | 8.74E-01 | 9.51E-01 | 1.00E+00 |
| ENSG00000235578.1_XXbac-B33l | ENSG00000160789.18_LMNA | -0.01408 | -0.172891849 | 0.145448044 | 8.63E-01 | 9.47E-01 | 1.00E+00 |
| ENSG00000203436.2_Metazoa_SI | ENSG00000160789.18_LMNA | -0.0131  | -0.171938151 | 0.14641003  | 8.73E-01 | 9.51E-01 | 1.00E+00 |
| ENSG00000237691.1_IFNWP2     | ENSG00000160789.18_LMNA | 0.02892  | -0.130880779 | 0.187261023 | 7.24E-01 | 8.83E-01 | 1.00E+00 |
| ENSG00000230322.1_RP3-323N1  | ENSG00000160789.18_LMNA | -0.01429 | -0.173098203 | 0.145239818 | 8.61E-01 | 9.46E-01 | 1.00E+00 |
| ENSG00000235526.1_RP5-1028L  | ENSG00000160789.18_LMNA | -0.20586 | -0.353480408 | -0.04824507 | 1.09E-02 | 6.99E-02 | 1.00E+00 |
| ENSG00000223564.1_CYP4F32P   | ENSG00000160789.18_LMNA | -0.08108 | -0.237222378 | 0.079138381 | 3.21E-01 | 6.07E-01 | 1.00E+00 |
| ENSG00000225620.1_RP11-569A  | ENSG00000160789.18_LMNA | -0.04629 | -0.203991365 | 0.113744918 | 5.71E-01 | 8.00E-01 | 1.00E+00 |
| ENSG00000226908.1_HIST1H2BF  | ENSG00000160789.18_LMNA | 0.07447  | -0.085744416 | 0.230935582 | 3.62E-01 | 6.44E-01 | 1.00E+00 |
| ENSG00000242012.1_RP11-338L  | ENSG00000160789.18_LMNA | 0.01568  | -0.143878762 | 0.174446332 | 8.48E-01 | 9.41E-01 | 1.00E+00 |
| ENSG00000240718.3_RN7SL851f  | ENSG00000160789.18_LMNA | -0.00961 | -0.168548983 | 0.149823784 | 9.06E-01 | 9.64E-01 | 1.00E+00 |
| ENSG00000259910.1_RP11-616M  | ENSG00000160789.18_LMNA | -0.07017 | -0.226839379 | 0.090033692 | 3.90E-01 | 6.69E-01 | 1.00E+00 |
| ENSG00000270488.1_RP11-245G  | ENSG00000160789.18_LMNA | -0.04645 | -0.204136782 | 0.113595142 | 5.70E-01 | 7.99E-01 | 1.00E+00 |
| ENSG00000253563.2_NKX2-1-AS  | ENSG00000160789.18_LMNA | -0.20494 | -0.35263555  | -0.04728211 | 1.13E-02 | 7.15E-02 | 1.00E+00 |
| ENSG00000279510.1_AC243945.  | ENSG00000160789.18_LMNA | 0.12907  | -0.030759965 | 0.282469196 | 1.13E-01 | 3.36E-01 | 1.00E+00 |
| ENSG00000225689.1_RP1-30E17  | ENSG00000160789.18_LMNA | -0.26228 | -0.40459111  | -0.10757568 | 1.10E-03 | 1.24E-02 | 1.00E+00 |
| ENSG00000261419.1_RP11-57A1  | ENSG00000160789.18_LMNA | 0.02234  | -0.1373459   | 0.180900576 | 7.85E-01 | 9.12E-01 | 1.00E+00 |
| ENSG00000280207.1_RP11-423H  | ENSG00000160789.18_LMNA | -0.03897 | -0.196951446 | 0.120978585 | 6.34E-01 | 8.36E-01 | 1.00E+00 |

|                              |                         |          |              |             |          |          |          |
|------------------------------|-------------------------|----------|--------------|-------------|----------|----------|----------|
| ENSG00000228234.1_GLRXP1     | ENSG00000160789.18_LMNA | 0.02293  | -0.136767975 | 0.18147023  | 7.79E-01 | 9.09E-01 | 1.00E+00 |
| ENSG00000237179.4_AC007392.4 | ENSG00000160789.18_LMNA | -0.04857 | -0.206174859 | 0.111494465 | 5.52E-01 | 7.88E-01 | 1.00E+00 |
| ENSG00000237571.1_AC073284.4 | ENSG00000160789.18_LMNA | -0.03481 | -0.192945418 | 0.125079846 | 6.70E-01 | 8.55E-01 | 1.00E+00 |
| ENSG00000229723.1_LINC01054  | ENSG00000160789.18_LMNA | 0.00418  | -0.15512427  | 0.163271713 | 9.59E-01 | 9.84E-01 | 1.00E+00 |
| ENSG00000230790.2_AC012456.4 | ENSG00000160789.18_LMNA | -0.06034 | -0.217451193 | 0.09982024  | 4.60E-01 | 7.24E-01 | 1.00E+00 |
| ENSG00000280230.1_AL590235.1 | ENSG00000160789.18_LMNA | -0.01754 | -0.176247523 | 0.142058418 | 8.30E-01 | 9.34E-01 | 1.00E+00 |
| ENSG00000236940.1_RP11-98D1  | ENSG00000160789.18_LMNA | -0.1368  | -0.289688244 | 0.02290309  | 9.29E-02 | 2.98E-01 | 1.00E+00 |
| ENSG00000251303.1_CAB39P1    | ENSG00000160789.18_LMNA | 0.13469  | -0.025042999 | 0.287725573 | 9.80E-02 | 3.08E-01 | 1.00E+00 |
| ENSG00000259528.1_RP11-272D  | ENSG00000160789.18_LMNA | 0.08054  | -0.079680518 | 0.236707436 | 3.24E-01 | 6.11E-01 | 1.00E+00 |
| ENSG00000255021.1_RP11-536I6 | ENSG00000160789.18_LMNA | -0.03713 | -0.195177895 | 0.122795638 | 6.50E-01 | 8.44E-01 | 1.00E+00 |
| ENSG00000236278.2_PEBP1P3    | ENSG00000160789.18_LMNA | -0.0093  | -0.168251999 | 0.150122562 | 9.09E-01 | 9.65E-01 | 1.00E+00 |
| ENSG00000255097.1_RP11-5L12  | ENSG00000160789.18_LMNA | -0.03241 | -0.190624178 | 0.127451304 | 6.92E-01 | 8.67E-01 | 1.00E+00 |
| ENSG00000244332.1_RP11-119K  | ENSG00000160789.18_LMNA | -0.05327 | -0.21068814  | 0.106832431 | 5.14E-01 | 7.62E-01 | 1.00E+00 |
| ENSG00000253421.1_ZNHIT1P1   | ENSG00000160789.18_LMNA | 0.13325  | -0.026510316 | 0.286378266 | 1.02E-01 | 3.15E-01 | 1.00E+00 |
| ENSG00000235547.3_NDUFB11P   | ENSG00000160789.18_LMNA | 0.02741  | -0.132366068 | 0.185802138 | 7.37E-01 | 8.90E-01 | 1.00E+00 |
| ENSG00000234132.2_RP11-168O  | ENSG00000160789.18_LMNA | -0.24393 | -0.38806383  | -0.08815612 | 2.46E-03 | 2.29E-02 | 1.00E+00 |
| ENSG00000226510.1_UPK1A-AS1  | ENSG00000160789.18_LMNA | 0.04948  | -0.110587359 | 0.207054083 | 5.45E-01 | 7.83E-01 | 1.00E+00 |
| ENSG00000259784.1_RP11-20I23 | ENSG00000160789.18_LMNA | 0.05731  | -0.102829396 | 0.214552677 | 4.83E-01 | 7.40E-01 | 1.00E+00 |
| ENSG00000259467.1_NDUFAF4P   | ENSG00000160789.18_LMNA | -0.10389 | -0.258810279 | 0.05624075  | 2.03E-01 | 4.74E-01 | 1.00E+00 |
| ENSG00000250658.1_RP11-138B  | ENSG00000160789.18_LMNA | 0.03006  | -0.129759852 | 0.188361094 | 7.13E-01 | 8.78E-01 | 1.00E+00 |
| ENSG00000259423.2_RP11-265N  | ENSG00000160789.18_LMNA | -0.11629 | -0.270478585 | 0.043725002 | 1.54E-01 | 4.04E-01 | 1.00E+00 |
| ENSG00000255459.1_RP11-52B1  | ENSG00000160789.18_LMNA | -0.03936 | -0.197319525 | 0.120601211 | 6.30E-01 | 8.34E-01 | 1.00E+00 |
| ENSG00000224593.1_RP11-30B1  | ENSG00000160789.18_LMNA | -0.07407 | -0.230549827 | 0.086148854 | 3.64E-01 | 6.46E-01 | 1.00E+00 |
| ENSG00000258917.1_ZMYND19F   | ENSG00000160789.18_LMNA | 0.02248  | -0.137212277 | 0.181032306 | 7.83E-01 | 9.11E-01 | 1.00E+00 |
| ENSG00000237328.1_RAI1-AS1   | ENSG00000160789.18_LMNA | -0.047   | -0.204670364 | 0.113045446 | 5.65E-01 | 7.96E-01 | 1.00E+00 |
| ENSG00000255515.1_RP11-178H  | ENSG00000160789.18_LMNA | -0.04882 | -0.206411818 | 0.111250044 | 5.50E-01 | 7.87E-01 | 1.00E+00 |
| ENSG00000220721.1_OR1F12     | ENSG00000160789.18_LMNA | -0.01164 | -0.170520784 | 0.147838602 | 8.87E-01 | 9.56E-01 | 1.00E+00 |
| ENSG00000244131.2_RPSAP51    | ENSG00000160789.18_LMNA | -0.16027 | -0.311519135 | -0.00109392 | 4.86E-02 | 1.98E-01 | 1.00E+00 |
| ENSG00000205325.1_AC005863.1 | ENSG00000160789.18_LMNA | 0.1485   | -0.010956774 | 0.30059702  | 6.79E-02 | 2.44E-01 | 1.00E+00 |
| ENSG00000261581.1_HERC2P11   | ENSG00000160789.18_LMNA | 0.04247  | -0.11752283  | 0.200318736 | 6.03E-01 | 8.18E-01 | 1.00E+00 |
| ENSG00000206014.6_OR7E161P   | ENSG00000160789.18_LMNA | -0.06449 | -0.221416109 | 0.095694558 | 4.30E-01 | 7.00E-01 | 1.00E+00 |
| ENSG00000182477.5_OR2B8P     | ENSG00000160789.18_LMNA | -0.07612 | -0.232504918 | 0.084097994 | 3.51E-01 | 6.35E-01 | 1.00E+00 |
| ENSG00000232809.1_VDAC1P10   | ENSG00000160789.18_LMNA | -0.08574 | -0.241644361 | 0.074475147 | 2.94E-01 | 5.79E-01 | 1.00E+00 |

|                              |                         |          |              |             |          |          |          |
|------------------------------|-------------------------|----------|--------------|-------------|----------|----------|----------|
| ENSG00000239648.1_MTND1P3    | ENSG00000160789.18_LMNA | 0.00139  | -0.15784088  | 0.16055992  | 9.86E-01 | 9.95E-01 | 1.00E+00 |
| ENSG00000259200.1_RP11-718C  | ENSG00000160789.18_LMNA | -0.17347 | -0.323726474 | -0.01467019 | 3.26E-02 | 1.51E-01 | 1.00E+00 |
| ENSG00000259926.1_RP11-44F1  | ENSG00000160789.18_LMNA | -0.11066 | -0.265190591 | 0.049409297 | 1.75E-01 | 4.35E-01 | 1.00E+00 |
| ENSG00000268975.1_MIA-RAB4E  | ENSG00000160789.18_LMNA | 0.05325  | -0.106852327 | 0.210668908 | 5.15E-01 | 7.62E-01 | 1.00E+00 |
| ENSG00000237475.2_RPL7P53    | ENSG00000160789.18_LMNA | -0.13621 | -0.28913817  | 0.023503128 | 9.43E-02 | 3.01E-01 | 1.00E+00 |
| ENSG00000260286.2_C6orf229   | ENSG00000160789.18_LMNA | 0.06262  | -0.097552338 | 0.219632018 | 4.43E-01 | 7.11E-01 | 1.00E+00 |
| ENSG00000274455.1_CTD-2012B  | ENSG00000160789.18_LMNA | 0.09677  | -0.063405208 | 0.252089287 | 2.36E-01 | 5.14E-01 | 1.00E+00 |
| ENSG00000253966.1_CTC-455F1  | ENSG00000160789.18_LMNA | -0.20147 | -0.349461232 | -0.0436691  | 1.28E-02 | 7.83E-02 | 1.00E+00 |
| ENSG00000227646.6_STEAP2-A5  | ENSG00000160789.18_LMNA | 0.12207  | -0.037862265 | 0.275912792 | 1.34E-01 | 3.72E-01 | 1.00E+00 |
| ENSG00000230607.3_AC005722.4 | ENSG00000160789.18_LMNA | -0.10536 | -0.260196094 | 0.05475945  | 1.96E-01 | 4.66E-01 | 1.00E+00 |
| ENSG00000232718.1_GAPDHP48   | ENSG00000160789.18_LMNA | 0.05485  | -0.105269736 | 0.21219795  | 5.02E-01 | 7.54E-01 | 1.00E+00 |
| ENSG00000242731.3_FAM86LP    | ENSG00000160789.18_LMNA | 0.02183  | -0.13784573  | 0.180407728 | 7.89E-01 | 9.14E-01 | 1.00E+00 |
| ENSG00000258262.1_RP11-693J  | ENSG00000160789.18_LMNA | 0.14529  | -0.014237382 | 0.297609431 | 7.41E-02 | 2.59E-01 | 1.00E+00 |
| ENSG00000253521.1_HPYR1      | ENSG00000160789.18_LMNA | -0.08361 | -0.239625247 | 0.076606135 | 3.06E-01 | 5.92E-01 | 1.00E+00 |
| ENSG00000214883.4_RP11-574M  | ENSG00000160789.18_LMNA | -0.05416 | -0.211534704 | 0.105956408 | 5.08E-01 | 7.58E-01 | 1.00E+00 |
| ENSG00000258927.1_RP11-1070I | ENSG00000160789.18_LMNA | 0.0036   | -0.155690042 | 0.16270734  | 9.65E-01 | 9.86E-01 | 1.00E+00 |
| ENSG00000175841.8_FAM172BP   | ENSG00000160789.18_LMNA | 0.12612  | -0.033759162 | 0.279704088 | 1.22E-01 | 3.51E-01 | 1.00E+00 |
| ENSG00000233402.1_TARDBPP1   | ENSG00000160789.18_LMNA | -0.05287 | -0.210301796 | 0.107232056 | 5.18E-01 | 7.64E-01 | 1.00E+00 |
| ENSG00000197870.11_PRB3      | ENSG00000160789.18_LMNA | 0.18781  | 0.02949168   | 0.33693702  | 2.05E-02 | 1.10E-01 | 1.00E+00 |
| ENSG00000180919.3_OR56B4     | ENSG00000160789.18_LMNA | 0.18712  | 0.028775345  | 0.336301316 | 2.10E-02 | 1.12E-01 | 1.00E+00 |
| ENSG00000242525.1_OR7E100P   | ENSG00000160789.18_LMNA | 0.12686  | -0.033010178 | 0.280395101 | 1.19E-01 | 3.47E-01 | 1.00E+00 |
| ENSG00000258316.1_KLF17P1    | ENSG00000160789.18_LMNA | 0.13086  | -0.028942309 | 0.284142454 | 1.08E-01 | 3.27E-01 | 1.00E+00 |
| ENSG00000233228.1_LPCAT2BP   | ENSG00000160789.18_LMNA | -0.11465 | -0.268945912 | 0.045374635 | 1.60E-01 | 4.13E-01 | 1.00E+00 |
| ENSG00000248257.6_PSG10P     | ENSG00000160789.18_LMNA | -0.23669 | -0.38151871  | -0.08052811 | 3.33E-03 | 2.89E-02 | 1.00E+00 |
| ENSG00000276633.1_AJ011931.1 | ENSG00000160789.18_LMNA | -0.03545 | -0.193561494 | 0.12444983  | 6.65E-01 | 8.52E-01 | 1.00E+00 |
| ENSG00000204195.3_AWAT1      | ENSG00000160789.18_LMNA | -0.00023 | -0.159425942 | 0.158975445 | 9.98E-01 | 9.99E-01 | 1.00E+00 |
| ENSG00000279616.1_RP1-102H1  | ENSG00000160789.18_LMNA | -0.12459 | -0.278275668 | 0.035306301 | 1.26E-01 | 3.59E-01 | 1.00E+00 |
| ENSG00000226430.5_USP17L7    | ENSG00000160789.18_LMNA | 0.12321  | -0.036714928 | 0.276973923 | 1.30E-01 | 3.66E-01 | 1.00E+00 |
| ENSG00000225300.1_RP11-1086I | ENSG00000160789.18_LMNA | 0.06271  | -0.097464182 | 0.219716725 | 4.43E-01 | 7.10E-01 | 1.00E+00 |
| ENSG00000237174.6_RP11-415D  | ENSG00000160789.18_LMNA | -0.1864  | -0.335643754 | -0.02803471 | 2.15E-02 | 1.14E-01 | 1.00E+00 |
| ENSG00000248571.1_RP11-768B  | ENSG00000160789.18_LMNA | 0.12801  | -0.031842827 | 0.281471453 | 1.16E-01 | 3.41E-01 | 1.00E+00 |
| ENSG00000145863.9_GABRA6     | ENSG00000160789.18_LMNA | 0.01697  | -0.142616585 | 0.175695455 | 8.36E-01 | 9.36E-01 | 1.00E+00 |
| ENSG00000230894.1_RP11-67K1  | ENSG00000160789.18_LMNA | 0.01726  | -0.142335175 | 0.175973815 | 8.33E-01 | 9.35E-01 | 1.00E+00 |

|                             |                         |          |              |             |          |          |          |
|-----------------------------|-------------------------|----------|--------------|-------------|----------|----------|----------|
| ENSG00000279796.1_RP11-317F | ENSG00000160789.18_LMNA | -0.19677 | -0.345154289 | -0.0387797  | 1.51E-02 | 8.84E-02 | 1.00E+00 |
| ENSG00000261524.1_ABCB10P3  | ENSG00000160789.18_LMNA | 0.00957  | -0.149857082 | 0.168515888 | 9.07E-01 | 9.64E-01 | 1.00E+00 |
| ENSG00000188660.3_LINC00319 | ENSG00000160789.18_LMNA | -0.08258 | -0.238643234 | 0.077641515 | 3.12E-01 | 5.98E-01 | 1.00E+00 |
| ENSG00000153303.15_FRMD1    | ENSG00000160789.18_LMNA | -0.08544 | -0.241355589 | 0.074780097 | 2.95E-01 | 5.81E-01 | 1.00E+00 |
| ENSG00000188089.12_PLA2G4E  | ENSG00000160789.18_LMNA | 0.06796  | -0.092235392 | 0.224732421 | 4.05E-01 | 6.81E-01 | 1.00E+00 |
| ENSG00000211685.3_IGLC7     | ENSG00000160789.18_LMNA | 0.01845  | -0.14116318  | 0.17713256  | 8.21E-01 | 9.30E-01 | 1.00E+00 |
| ENSG00000278447.1_MIR6781   | ENSG00000160789.18_LMNA | -0.03858 | -0.196569187 | 0.121370401 | 6.37E-01 | 8.38E-01 | 1.00E+00 |
| ENSG00000277979.1_RP11-157L | ENSG00000160789.18_LMNA | -0.08927 | -0.2449856   | 0.070942427 | 2.74E-01 | 5.59E-01 | 1.00E+00 |
| ENSG00000223350.2_IGLV9-49  | ENSG00000160789.18_LMNA | -0.01048 | -0.169400132 | 0.148967175 | 8.98E-01 | 9.60E-01 | 1.00E+00 |
| ENSG00000266240.1_MIR5091   | ENSG00000160789.18_LMNA | -0.0216  | -0.180179674 | 0.13807696  | 7.92E-01 | 9.16E-01 | 1.00E+00 |
| ENSG00000207313.1_SNORA2B   | ENSG00000160789.18_LMNA | 0.01774  | -0.141863187 | 0.176440573 | 8.28E-01 | 9.33E-01 | 1.00E+00 |
| ENSG00000201861.1_RNA5SP29  | ENSG00000160789.18_LMNA | -0.06106 | -0.218143125 | 0.099101038 | 4.55E-01 | 7.20E-01 | 1.00E+00 |
| ENSG00000265650.1_          | ENSG00000160789.18_LMNA | 0.0011   | -0.158127466 | 0.160273562 | 9.89E-01 | 9.96E-01 | 1.00E+00 |
| ENSG00000266183.1_          | ENSG00000160789.18_LMNA | -0.0509  | -0.208408695 | 0.10918875  | 5.33E-01 | 7.75E-01 | 1.00E+00 |
| ENSG00000212207.1_RNU6-1321 | ENSG00000160789.18_LMNA | -0.0464  | -0.204090755 | 0.11364255  | 5.70E-01 | 7.99E-01 | 1.00E+00 |
| ENSG00000238366.1_Y_RNA     | ENSG00000160789.18_LMNA | 0.02226  | -0.137430854 | 0.180816821 | 7.85E-01 | 9.13E-01 | 1.00E+00 |
| ENSG00000228626.1_RP11-495P | ENSG00000160789.18_LMNA | 0.01544  | -0.144112358 | 0.174215039 | 8.50E-01 | 9.41E-01 | 1.00E+00 |
| ENSG00000243353.1_RPS29P19  | ENSG00000160789.18_LMNA | 0.03382  | -0.126061876 | 0.191984615 | 6.79E-01 | 8.60E-01 | 1.00E+00 |
| ENSG00000255372.1_CTD-3064C | ENSG00000160789.18_LMNA | -0.25042 | -0.393915976 | -0.09500642 | 1.86E-03 | 1.85E-02 | 1.00E+00 |
| ENSG00000277306.1_uc_338    | ENSG00000160789.18_LMNA | 0.12266  | -0.037271106 | 0.276459629 | 1.32E-01 | 3.69E-01 | 1.00E+00 |
| ENSG00000223890.1_AC008171. | ENSG00000160789.18_LMNA | 0.03817  | -0.121769733 | 0.196179494 | 6.41E-01 | 8.39E-01 | 1.00E+00 |
| ENSG00000220154.2_RP11-46B1 | ENSG00000160789.18_LMNA | 0.03891  | -0.121044796 | 0.196886857 | 6.34E-01 | 8.36E-01 | 1.00E+00 |
| ENSG00000271415.1_RPL23AP9  | ENSG00000160789.18_LMNA | -0.01026 | -0.169181164 | 0.149187592 | 9.00E-01 | 9.61E-01 | 1.00E+00 |
| ENSG00000227949.1_CYCSP46   | ENSG00000160789.18_LMNA | 0.07444  | -0.085781718 | 0.230900007 | 3.62E-01 | 6.44E-01 | 1.00E+00 |
| ENSG00000262529.1_CTA-276F8 | ENSG00000160789.18_LMNA | -0.0475  | -0.205153022 | 0.112548044 | 5.61E-01 | 7.93E-01 | 1.00E+00 |
| ENSG00000240098.3_RN7SL351F | ENSG00000160789.18_LMNA | 0.11188  | -0.048175125 | 0.266340329 | 1.70E-01 | 4.29E-01 | 1.00E+00 |
| ENSG00000240589.3_RN7SL258F | ENSG00000160789.18_LMNA | -0.03291 | -0.191107366 | 0.126957962 | 6.87E-01 | 8.65E-01 | 1.00E+00 |
| ENSG00000235285.1_SMIM2-IT1 | ENSG00000160789.18_LMNA | 0.015    | -0.144543334 | 0.17378822  | 8.54E-01 | 9.43E-01 | 1.00E+00 |
| ENSG00000248221.1_STX18-IT1 | ENSG00000160789.18_LMNA | -0.00707 | -0.166086482 | 0.152299398 | 9.31E-01 | 9.73E-01 | 1.00E+00 |
| ENSG00000230157.1_ATP5G1P1  | ENSG00000160789.18_LMNA | 0.04826  | -0.111801451 | 0.205877194 | 5.55E-01 | 7.89E-01 | 1.00E+00 |
| ENSG00000236240.1_GPC5-IT1  | ENSG00000160789.18_LMNA | 0.00129  | -0.157943603 | 0.160457285 | 9.87E-01 | 9.95E-01 | 1.00E+00 |
| ENSG00000213400.3_RPL12P18  | ENSG00000160789.18_LMNA | 0.05917  | -0.100980837 | 0.216333931 | 4.69E-01 | 7.30E-01 | 1.00E+00 |
| ENSG00000264028.2_RN7SL744F | ENSG00000160789.18_LMNA | 0.01398  | -0.145548633 | 0.172792154 | 8.64E-01 | 9.47E-01 | 1.00E+00 |

|                              |                         |          |              |             |          |          |          |
|------------------------------|-------------------------|----------|--------------|-------------|----------|----------|----------|
| ENSG00000228213.4_NLGN1-AS   | ENSG00000160789.18_LMNA | -0.01459 | -0.173392116 | 0.144943189 | 8.58E-01 | 9.44E-01 | 1.00E+00 |
| ENSG00000266579.1_RP1-71H19  | ENSG00000160789.18_LMNA | -0.00566 | -0.164712954 | 0.153678506 | 9.45E-01 | 9.78E-01 | 1.00E+00 |
| ENSG00000279999.1_AL353997.3 | ENSG00000160789.18_LMNA | -0.13605 | -0.288989924 | 0.0236648   | 9.47E-02 | 3.01E-01 | 1.00E+00 |
| ENSG00000242510.1_NDUFB4P1   | ENSG00000160789.18_LMNA | 0.01452  | -0.145014296 | 0.173321665 | 8.59E-01 | 9.45E-01 | 1.00E+00 |
| ENSG00000244748.3_RN7SL153F  | ENSG00000160789.18_LMNA | 0.02413  | -0.135590602 | 0.182630092 | 7.68E-01 | 9.04E-01 | 1.00E+00 |
| ENSG00000214326.2_RPL31P1    | ENSG00000160789.18_LMNA | -0.04763 | -0.205274369 | 0.112422965 | 5.60E-01 | 7.93E-01 | 1.00E+00 |
| ENSG00000217314.2_UQCRFS1F   | ENSG00000160789.18_LMNA | -0.21477 | -0.361609833 | -0.05754003 | 7.88E-03 | 5.50E-02 | 1.00E+00 |
| ENSG00000259554.1_RP11-408Jf | ENSG00000160789.18_LMNA | -0.00836 | -0.167342513 | 0.151037178 | 9.19E-01 | 9.69E-01 | 1.00E+00 |
| ENSG00000255370.1_CYCSP25    | ENSG00000160789.18_LMNA | -0.06856 | -0.22530432  | 0.091638083 | 4.01E-01 | 6.78E-01 | 1.00E+00 |
| ENSG00000235163.2_RP11-410C  | ENSG00000160789.18_LMNA | -0.0731  | -0.229624962 | 0.087118089 | 3.71E-01 | 6.51E-01 | 1.00E+00 |
| ENSG00000254388.1_DUTP2      | ENSG00000160789.18_LMNA | 0.14452  | -0.015029429 | 0.296887211 | 7.57E-02 | 2.63E-01 | 1.00E+00 |
| ENSG00000236929.2_RP11-699A  | ENSG00000160789.18_LMNA | 0.04043  | -0.119535633 | 0.198358372 | 6.21E-01 | 8.28E-01 | 1.00E+00 |
| ENSG00000241084.1_RP11-344B  | ENSG00000160789.18_LMNA | -0.0231  | -0.181636068 | 0.136599688 | 7.78E-01 | 9.09E-01 | 1.00E+00 |
| ENSG00000254001.4_RP11-91P1  | ENSG00000160789.18_LMNA | -0.30181 | -0.439876912 | -0.14980912 | 1.58E-04 | 2.71E-03 | 1.00E+00 |
| ENSG00000231619.1_GS1-542M4  | ENSG00000160789.18_LMNA | 0.04244  | -0.117550347 | 0.200291953 | 6.04E-01 | 8.18E-01 | 1.00E+00 |
| ENSG00000271370.1_RP11-253I1 | ENSG00000160789.18_LMNA | -0.01739 | -0.176102112 | 0.142205455 | 8.32E-01 | 9.34E-01 | 1.00E+00 |
| ENSG00000279430.1_RP11-190A  | ENSG00000160789.18_LMNA | 0.27024  | 0.116031928  | 0.411727789 | 7.60E-04 | 9.33E-03 | 1.00E+00 |
| ENSG00000218730.1_RP3-453I5. | ENSG00000160789.18_LMNA | 0.22183  | 0.06492421   | 0.368035294 | 6.02E-03 | 4.51E-02 | 1.00E+00 |
| ENSG00000279121.1_RP11-83B2  | ENSG00000160789.18_LMNA | 0.05999  | -0.100167741 | 0.217116754 | 4.63E-01 | 7.26E-01 | 1.00E+00 |
| ENSG00000258538.4_RP11-753D  | ENSG00000160789.18_LMNA | 0.11395  | -0.046084103 | 0.268286256 | 1.62E-01 | 4.17E-01 | 1.00E+00 |
| ENSG00000234481.1_RP4-614N2  | ENSG00000160789.18_LMNA | -0.20755 | -0.355017177 | -0.04999813 | 1.03E-02 | 6.69E-02 | 1.00E+00 |
| ENSG00000243574.1_RP11-264K  | ENSG00000160789.18_LMNA | 0.07286  | -0.087349064 | 0.229404477 | 3.72E-01 | 6.53E-01 | 1.00E+00 |
| ENSG00000230273.1_AC087163.  | ENSG00000160789.18_LMNA | 0.0419   | -0.118086591 | 0.19976992  | 6.08E-01 | 8.21E-01 | 1.00E+00 |
| ENSG00000225037.1_EIF1AX-AS  | ENSG00000160789.18_LMNA | -0.04769 | -0.2053273   | 0.112368403 | 5.60E-01 | 7.92E-01 | 1.00E+00 |
| ENSG00000255432.1_RP11-831H  | ENSG00000160789.18_LMNA | -0.0638  | -0.220757707 | 0.096380411 | 4.35E-01 | 7.03E-01 | 1.00E+00 |
| ENSG00000262031.1_RP11-63A1  | ENSG00000160789.18_LMNA | -0.04529 | -0.203024426 | 0.114740468 | 5.80E-01 | 8.04E-01 | 1.00E+00 |
| ENSG00000257614.1_RP11-116N  | ENSG00000160789.18_LMNA | -0.2064  | -0.353968881 | -0.04880209 | 1.07E-02 | 6.89E-02 | 1.00E+00 |
| ENSG00000270690.1_RP11-349G  | ENSG00000160789.18_LMNA | -0.01836 | -0.177038994 | 0.141257849 | 8.22E-01 | 9.31E-01 | 1.00E+00 |
| ENSG00000231134.1_TCF7L1-IT1 | ENSG00000160789.18_LMNA | -0.05607 | -0.213365727 | 0.104059979 | 4.93E-01 | 7.48E-01 | 1.00E+00 |
| ENSG00000213669.2_RP11-476B  | ENSG00000160789.18_LMNA | 0.01346  | -0.146056583 | 0.172288622 | 8.69E-01 | 9.49E-01 | 1.00E+00 |
| ENSG00000260256.1_AP001063.  | ENSG00000160789.18_LMNA | -0.08638 | -0.242245544 | 0.073840097 | 2.90E-01 | 5.75E-01 | 1.00E+00 |
| ENSG00000229742.1_RP11-365O  | ENSG00000160789.18_LMNA | -0.12923 | -0.282612336 | 0.030604554 | 1.13E-01 | 3.35E-01 | 1.00E+00 |
| ENSG00000242320.2_RPL21P12f  | ENSG00000160789.18_LMNA | 0.04668  | -0.113362864 | 0.204362275 | 5.68E-01 | 7.98E-01 | 1.00E+00 |



|                              |                         |          |              |             |          |          |          |
|------------------------------|-------------------------|----------|--------------|-------------|----------|----------|----------|
| ENSG00000236520.2_GPC6-AS1   | ENSG00000160789.18_LMNA | -0.11969 | -0.273678918 | 0.040274915 | 1.42E-01 | 3.85E-01 | 1.00E+00 |
| ENSG00000233735.4_RP11-567G  | ENSG00000160789.18_LMNA | -0.04672 | -0.204397563 | 0.113326511 | 5.68E-01 | 7.98E-01 | 1.00E+00 |
| ENSG00000215444.2_RP5-827A1  | ENSG00000160789.18_LMNA | -0.15604 | -0.30759522  | 0.003245854 | 5.49E-02 | 2.14E-01 | 1.00E+00 |
| ENSG00000234756.1_RP11-120C  | ENSG00000160789.18_LMNA | 0.08341  | -0.07681423  | 0.23942793  | 3.07E-01 | 5.93E-01 | 1.00E+00 |
| ENSG00000180152.3_XIAPP3     | ENSG00000160789.18_LMNA | 0.11069  | -0.049383225 | 0.265214889 | 1.75E-01 | 4.35E-01 | 1.00E+00 |
| ENSG00000259598.1_RP11-275I4 | ENSG00000160789.18_LMNA | -0.0244  | -0.182885612 | 0.135331103 | 7.65E-01 | 9.03E-01 | 1.00E+00 |
| ENSG00000251292.1_ERVH-1     | ENSG00000160789.18_LMNA | 0.08439  | -0.075826996 | 0.2403638   | 3.01E-01 | 5.88E-01 | 1.00E+00 |
| ENSG00000259377.1_CTD-2308C  | ENSG00000160789.18_LMNA | -0.07171 | -0.228303677 | 0.088501723 | 3.80E-01 | 6.59E-01 | 1.00E+00 |
| ENSG00000271286.1_LL0XNC01-  | ENSG00000160789.18_LMNA | 0.02049  | -0.139162792 | 0.179108297 | 8.02E-01 | 9.21E-01 | 1.00E+00 |
| ENSG00000205420.9_KRT6A      | ENSG00000160789.18_LMNA | 0.01929  | -0.140343214 | 0.177942731 | 8.14E-01 | 9.27E-01 | 1.00E+00 |
| ENSG00000179914.4_ITLN1      | ENSG00000160789.18_LMNA | -0.06567 | -0.222543792 | 0.094519157 | 4.22E-01 | 6.93E-01 | 1.00E+00 |
| ENSG00000253177.1_RP11-100L  | ENSG00000160789.18_LMNA | -0.14948 | -0.301503826 | 0.009959702 | 6.61E-02 | 2.40E-01 | 1.00E+00 |
| ENSG00000205897.5_OR7E136P   | ENSG00000160789.18_LMNA | 0.02103  | -0.138630178 | 0.179633914 | 7.97E-01 | 9.18E-01 | 1.00E+00 |
| ENSG00000274024.1_RP13-210D  | ENSG00000160789.18_LMNA | 0.14381  | -0.015754766 | 0.296225508 | 7.71E-02 | 2.66E-01 | 1.00E+00 |
| ENSG00000260550.2_RP11-457I1 | ENSG00000160789.18_LMNA | 0.01831  | -0.141298633 | 0.176998683 | 8.23E-01 | 9.31E-01 | 1.00E+00 |
| ENSG00000216347.1_RPL10P10   | ENSG00000160789.18_LMNA | -0.01315 | -0.171988192 | 0.146359569 | 8.72E-01 | 9.50E-01 | 1.00E+00 |
| ENSG00000225650.2	EIF2S2P5   | ENSG00000160789.18_LMNA | 0.16354  | 0.004451414  | 0.314547651 | 4.41E-02 | 1.85E-01 | 1.00E+00 |
| ENSG00000254367.4_RP11-211C  | ENSG00000160789.18_LMNA | -0.14087 | -0.293490361 | 0.018749463 | 8.34E-02 | 2.79E-01 | 1.00E+00 |
| ENSG00000250962.1_RP11-69I13 | ENSG00000160789.18_LMNA | 0.06747  | -0.092728327 | 0.22426029  | 4.09E-01 | 6.83E-01 | 1.00E+00 |
| ENSG00000261696.1_RP11-354P  | ENSG00000160789.18_LMNA | -0.16888 | -0.319495172 | -0.00995145 | 3.75E-02 | 1.66E-01 | 1.00E+00 |
| ENSG00000257008.5_GPR142     | ENSG00000160789.18_LMNA | -0.10328 | -0.258232985 | 0.056857411 | 2.05E-01 | 4.77E-01 | 1.00E+00 |
| ENSG00000228219.1_NPM1P30    | ENSG00000160789.18_LMNA | -0.00786 | -0.166854013 | 0.151528209 | 9.23E-01 | 9.71E-01 | 1.00E+00 |
| ENSG00000161849.3_KRT84      | ENSG00000160789.18_LMNA | 0.00152  | -0.157714056 | 0.160686626 | 9.85E-01 | 9.94E-01 | 1.00E+00 |
| ENSG00000251018.2_HMMR-AS1   | ENSG00000160789.18_LMNA | 0.05854  | -0.101603268 | 0.215734398 | 4.74E-01 | 7.33E-01 | 1.00E+00 |
| ENSG00000253775.1_AC100802.  | ENSG00000160789.18_LMNA | 0.17902  | 0.020396291  | 0.328844532 | 2.73E-02 | 1.35E-01 | 1.00E+00 |
| ENSG00000214533.3_KRT18P33   | ENSG00000160789.18_LMNA | 0.28585  | 0.132686263  | 0.425678003 | 3.57E-04 | 5.15E-03 | 1.00E+00 |
| ENSG00000266369.1_RP11-344E  | ENSG00000160789.18_LMNA | -0.23226 | -0.377500726 | -0.07586275 | 3.99E-03 | 3.31E-02 | 1.00E+00 |
| ENSG00000231857.1_MORF4L1P   | ENSG00000160789.18_LMNA | -0.28862 | -0.428148657 | -0.13565318 | 3.11E-04 | 4.63E-03 | 1.00E+00 |
| ENSG00000261024.5_GS1-279B7  | ENSG00000160789.18_LMNA | -0.11025 | -0.264800566 | 0.049827747 | 1.76E-01 | 4.38E-01 | 1.00E+00 |
| ENSG00000182347.10_PDSS1P1   | ENSG00000160789.18_LMNA | 0.05897  | -0.101178788 | 0.216143289 | 4.70E-01 | 7.31E-01 | 1.00E+00 |
| ENSG00000261210.4_CLEC19A    | ENSG00000160789.18_LMNA | 0.05997  | -0.100184337 | 0.21710078  | 4.63E-01 | 7.26E-01 | 1.00E+00 |
| ENSG00000243674.1_OR7E66P    | ENSG00000160789.18_LMNA | -0.09761 | -0.252883963 | 0.062559789 | 2.32E-01 | 5.09E-01 | 1.00E+00 |
| ENSG00000280312.1_RP1-111J2  | ENSG00000160789.18_LMNA | 0.07132  | -0.088889934 | 0.227932749 | 3.83E-01 | 6.61E-01 | 1.00E+00 |

|                             |                         |          |              |             |          |          |          |
|-----------------------------|-------------------------|----------|--------------|-------------|----------|----------|----------|
| ENSG00000232422.1_KNOP1P4   | ENSG00000160789.18_LMNA | -0.1386  | -0.291375125 | 0.021061586 | 8.86E-02 | 2.90E-01 | 1.00E+00 |
| ENSG00000105507.2_CABP5     | ENSG00000160789.18_LMNA | 0.03344  | -0.126434196 | 0.191620183 | 6.83E-01 | 8.62E-01 | 1.00E+00 |
| ENSG00000128250.5_RFPL1     | ENSG00000160789.18_LMNA | -0.21695 | -0.363588622 | -0.05981053 | 7.26E-03 | 5.17E-02 | 1.00E+00 |
| ENSG00000236211.1_MTCO1P7   | ENSG00000160789.18_LMNA | 0.0268   | -0.132971801 | 0.18520677  | 7.43E-01 | 8.92E-01 | 1.00E+00 |
| ENSG00000266554.1_LINC01443 | ENSG00000160789.18_LMNA | -0.21342 | -0.360378483 | -0.05612874 | 8.29E-03 | 5.72E-02 | 1.00E+00 |
| ENSG00000173231.6_TERF1P1   | ENSG00000160789.18_LMNA | -0.09334 | -0.248845446 | 0.066851488 | 2.53E-01 | 5.34E-01 | 1.00E+00 |
| ENSG00000226627.1_SHANK2-A  | ENSG00000160789.18_LMNA | -0.0957  | -0.251073411 | 0.064485292 | 2.41E-01 | 5.20E-01 | 1.00E+00 |
| ENSG00000205015.1_RP11-46C2 | ENSG00000160789.18_LMNA | -0.0749  | -0.231339229 | 0.085321106 | 3.59E-01 | 6.42E-01 | 1.00E+00 |
| ENSG00000237870.5_AC073130  | ENSG00000160789.18_LMNA | 0.18039  | 0.021815362  | 0.330110118 | 2.62E-02 | 1.31E-01 | 1.00E+00 |
| ENSG00000235805.1_SOCS5P3   | ENSG00000160789.18_LMNA | -0.05381 | -0.211205316 | 0.106297317 | 5.10E-01 | 7.59E-01 | 1.00E+00 |
| ENSG00000228290.5_TBX18-AS1 | ENSG00000160789.18_LMNA | 0.0891   | -0.071108554 | 0.244828646 | 2.75E-01 | 5.59E-01 | 1.00E+00 |
| ENSG00000174948.5_GPR149    | ENSG00000160789.18_LMNA | -0.15354 | -0.30527745  | 0.005803774 | 5.90E-02 | 2.23E-01 | 1.00E+00 |
| ENSG00000242703.1_CCT4P1    | ENSG00000160789.18_LMNA | -0.2372  | -0.381980731 | -0.08106542 | 3.26E-03 | 2.84E-02 | 1.00E+00 |
| ENSG00000279537.1_RP11-133K | ENSG00000160789.18_LMNA | 0.04393  | -0.116078196 | 0.201724166 | 5.91E-01 | 8.10E-01 | 1.00E+00 |
| ENSG00000249396.1_RP11-1C1  | ENSG00000160789.18_LMNA | -0.0051  | -0.164171837 | 0.154221481 | 9.50E-01 | 9.80E-01 | 1.00E+00 |
| ENSG00000174678.9_FAM47DP   | ENSG00000160789.18_LMNA | 0.18643  | 0.028060921  | 0.335667027 | 2.15E-02 | 1.13E-01 | 1.00E+00 |
| ENSG00000258710.6_LINC01193 | ENSG00000160789.18_LMNA | -0.05401 | -0.211390438 | 0.106105728 | 5.09E-01 | 7.58E-01 | 1.00E+00 |
| ENSG00000234715.1_CTB-107G1 | ENSG00000160789.18_LMNA | -0.12744 | -0.280942703 | 0.032416386 | 1.18E-01 | 3.44E-01 | 1.00E+00 |
| ENSG00000198685.3_LINC01565 | ENSG00000160789.18_LMNA | 0.04345  | -0.116561557 | 0.201254068 | 5.95E-01 | 8.13E-01 | 1.00E+00 |
| ENSG00000170820.10_FSHR     | ENSG00000160789.18_LMNA | -0.13234 | -0.285520739 | 0.027443525 | 1.04E-01 | 3.20E-01 | 1.00E+00 |
| ENSG00000280228.1_RP11-67L1 | ENSG00000160789.18_LMNA | 0.0609   | -0.099260786 | 0.217989461 | 4.56E-01 | 7.21E-01 | 1.00E+00 |
| ENSG00000171495.15_MROH2B   | ENSG00000160789.18_LMNA | 0.11381  | -0.046225519 | 0.268154734 | 1.63E-01 | 4.18E-01 | 1.00E+00 |
| ENSG00000178645.11_C10orf53 | ENSG00000160789.18_LMNA | 0.00409  | -0.155212555 | 0.163183659 | 9.60E-01 | 9.84E-01 | 1.00E+00 |
| ENSG00000170777.10_TPD52L3  | ENSG00000160789.18_LMNA | -0.014   | -0.172816144 | 0.145524429 | 8.64E-01 | 9.47E-01 | 1.00E+00 |
| ENSG00000236445.4_LINC00608 | ENSG00000160789.18_LMNA | -0.12838 | -0.281820362 | 0.031464236 | 1.15E-01 | 3.39E-01 | 1.00E+00 |
| ENSG00000183629.12_GOLGA8C  | ENSG00000160789.18_LMNA | 0.15136  | -0.008029415 | 0.30325776  | 6.27E-02 | 2.32E-01 | 1.00E+00 |
| ENSG00000260254.1_AP000997  | ENSG00000160789.18_LMNA | 0.02932  | -0.130490336 | 0.187644292 | 7.20E-01 | 8.81E-01 | 1.00E+00 |
| ENSG00000280391.1           | ENSG00000160789.18_LMNA | -0.05924 | -0.216400371 | 0.100911844 | 4.68E-01 | 7.29E-01 | 1.00E+00 |
| ENSG00000252590.1_RNU7-143F | ENSG00000160789.18_LMNA | -0.05494 | -0.212286754 | 0.105177773 | 5.01E-01 | 7.53E-01 | 1.00E+00 |
| ENSG00000274621.1_MIR6867   | ENSG00000160789.18_LMNA | 0.0636   | -0.096575649 | 0.220570231 | 4.36E-01 | 7.04E-01 | 1.00E+00 |
| ENSG00000263834.1_MIR4635   | ENSG00000160789.18_LMNA | 0.06289  | -0.097287627 | 0.219886359 | 4.41E-01 | 7.09E-01 | 1.00E+00 |
| ENSG00000260524.1_CYP3A52P  | ENSG00000160789.18_LMNA | 0.04364  | -0.116366413 | 0.201443876 | 5.93E-01 | 8.12E-01 | 1.00E+00 |
| ENSG00000273767.1_ZNRD1-AS  | ENSG00000160789.18_LMNA | -0.0109  | -0.16980333  | 0.148561223 | 8.94E-01 | 9.59E-01 | 1.00E+00 |

|                              |                         |          |              |             |          |          |          |
|------------------------------|-------------------------|----------|--------------|-------------|----------|----------|----------|
| ENSG00000278439.1_           | ENSG00000160789.18_LMNA | 0.06952  | -0.090686784 | 0.226214699 | 3.95E-01 | 6.72E-01 | 1.00E+00 |
| ENSG00000211972.2_IGHV3-66   | ENSG00000160789.18_LMNA | 0.0356   | -0.124300288 | 0.193707691 | 6.63E-01 | 8.51E-01 | 1.00E+00 |
| ENSG00000207128.1_RNU6-729F  | ENSG00000160789.18_LMNA | -0.17462 | -0.324794229 | -0.01586313 | 3.14E-02 | 1.48E-01 | 1.00E+00 |
| ENSG00000276575.1_MIR6895    | ENSG00000160789.18_LMNA | 0.06096  | -0.099206367 | 0.218041809 | 4.56E-01 | 7.20E-01 | 1.00E+00 |
| ENSG00000199697.1_RNU6-446F  | ENSG00000160789.18_LMNA | 0.07971  | -0.080517249 | 0.235912329 | 3.29E-01 | 6.15E-01 | 1.00E+00 |
| ENSG00000206660.1_Y_RNA      | ENSG00000160789.18_LMNA | 0.01684  | -0.142741236 | 0.175572138 | 8.37E-01 | 9.37E-01 | 1.00E+00 |
| ENSG00000206895.1_Y_RNA      | ENSG00000160789.18_LMNA | 0.05246  | -0.107638644 | 0.209908619 | 5.21E-01 | 7.67E-01 | 1.00E+00 |
| ENSG00000222747.1_RNA5SP25   | ENSG00000160789.18_LMNA | -0.02582 | -0.184266213 | 0.133928249 | 7.52E-01 | 8.97E-01 | 1.00E+00 |
| ENSG00000202502.1_RNA5SP15   | ENSG00000160789.18_LMNA | -0.07453 | -0.230989712 | 0.085687656 | 3.61E-01 | 6.43E-01 | 1.00E+00 |
| ENSG00000252892.1_RNU6-548F  | ENSG00000160789.18_LMNA | -0.07177 | -0.22836597  | 0.088436518 | 3.80E-01 | 6.58E-01 | 1.00E+00 |
| ENSG00000227895.5_ISX-AS1    | ENSG00000160789.18_LMNA | -0.41868 | -0.541771918 | -0.27801294 | 7.96E-08 | 5.96E-06 | 4.09E-03 |
| ENSG00000265429.2_MIR4782    | ENSG00000160789.18_LMNA | 0.01154  | -0.147929381 | 0.170430673 | 8.88E-01 | 9.56E-01 | 1.00E+00 |
| ENSG00000207295.1_RNU6-851F  | ENSG00000160789.18_LMNA | -0.08244 | -0.238510351 | 0.077781567 | 3.13E-01 | 5.99E-01 | 1.00E+00 |
| ENSG00000207022.1_SNORA51    | ENSG00000160789.18_LMNA | -0.26854 | -0.410207938 | -0.11422746 | 8.22E-04 | 9.93E-03 | 1.00E+00 |
| ENSG00000221048.1_           | ENSG00000160789.18_LMNA | -0.00587 | -0.164912588 | 0.153478138 | 9.43E-01 | 9.77E-01 | 1.00E+00 |
| ENSG00000201469.1_RNA5SP37   | ENSG00000160789.18_LMNA | -0.01964 | -0.178280179 | 0.140001558 | 8.10E-01 | 9.25E-01 | 1.00E+00 |
| ENSG00000234120.1_AF228730.8 | ENSG00000160789.18_LMNA | -0.10649 | -0.261256753 | 0.053624772 | 1.92E-01 | 4.59E-01 | 1.00E+00 |
| ENSG00000207168.1_SNORA15    | ENSG00000160789.18_LMNA | 0.04456  | -0.115464205 | 0.202321099 | 5.86E-01 | 8.08E-01 | 1.00E+00 |
| ENSG00000256237.1_RP11-434C  | ENSG00000160789.18_LMNA | -0.16398 | -0.314956444 | -0.00490515 | 4.35E-02 | 1.84E-01 | 1.00E+00 |
| ENSG00000271014.1_RP11-717A  | ENSG00000160789.18_LMNA | -0.28342 | -0.423509464 | -0.13008647 | 4.03E-04 | 5.69E-03 | 1.00E+00 |
| ENSG00000261628.1_RP11-540B  | ENSG00000160789.18_LMNA | -0.14015 | -0.292819684 | 0.019482928 | 8.50E-02 | 2.83E-01 | 1.00E+00 |
| ENSG00000259142.1_LINC00644  | ENSG00000160789.18_LMNA | -0.2518  | -0.395155674 | -0.09646121 | 1.75E-03 | 1.77E-02 | 1.00E+00 |
| ENSG00000108452.1_ZNF29P     | ENSG00000160789.18_LMNA | 0.01497  | -0.144573039 | 0.173758798 | 8.55E-01 | 9.43E-01 | 1.00E+00 |
| ENSG00000277096.1_RP11-324J  | ENSG00000160789.18_LMNA | 0.05798  | -0.102159408 | 0.215198516 | 4.78E-01 | 7.36E-01 | 1.00E+00 |
| ENSG00000225990.2_SNRPEP7    | ENSG00000160789.18_LMNA | -0.00324 | -0.162353219 | 0.156044935 | 9.68E-01 | 9.88E-01 | 1.00E+00 |
| ENSG00000264956.1_RP11-1109I | ENSG00000160789.18_LMNA | -0.13539 | -0.288373786 | 0.024336567 | 9.63E-02 | 3.05E-01 | 1.00E+00 |
| ENSG00000233213.1_KCNJ6-AS1  | ENSG00000160789.18_LMNA | -0.19041 | -0.339322417 | -0.03218245 | 1.88E-02 | 1.03E-01 | 1.00E+00 |
| ENSG00000241346.1_SNRPCP11   | ENSG00000160789.18_LMNA | 0.05929  | -0.100858768 | 0.216451482 | 4.68E-01 | 7.29E-01 | 1.00E+00 |
| ENSG00000212182.2_U3         | ENSG00000160789.18_LMNA | 0.17026  | 0.01136608   | 0.320764971 | 3.60E-02 | 1.62E-01 | 1.00E+00 |
| ENSG00000242719.3_RN7SL806F  | ENSG00000160789.18_LMNA | 0.03933  | -0.12062744  | 0.197293945 | 6.30E-01 | 8.34E-01 | 1.00E+00 |
| ENSG00000279074.1_RP11-322E  | ENSG00000160789.18_LMNA | 0.10985  | -0.050232174 | 0.264423513 | 1.78E-01 | 4.40E-01 | 1.00E+00 |
| ENSG00000236248.1_AC104389.3 | ENSG00000160789.18_LMNA | -0.09682 | -0.25213784  | 0.063353567 | 2.35E-01 | 5.13E-01 | 1.00E+00 |
| ENSG00000255266.1_RP11-734C  | ENSG00000160789.18_LMNA | 0.03033  | -0.129492949 | 0.188622914 | 7.11E-01 | 8.77E-01 | 1.00E+00 |

|                              |                         |          |              |             |          |          |          |
|------------------------------|-------------------------|----------|--------------|-------------|----------|----------|----------|
| ENSG00000267363.1_CTD-3162L  | ENSG00000160789.18_LMNA | 0.09719  | -0.062988309 | 0.252481217 | 2.34E-01 | 5.11E-01 | 1.00E+00 |
| ENSG00000235062.4_BCRP5      | ENSG00000160789.18_LMNA | -0.05159 | -0.20907597  | 0.108499341 | 5.28E-01 | 7.72E-01 | 1.00E+00 |
| ENSG00000243550.2_LINC01214  | ENSG00000160789.18_LMNA | 0.03744  | -0.122492087 | 0.195474323 | 6.47E-01 | 8.43E-01 | 1.00E+00 |
| ENSG00000227170.1_AF178030.2 | ENSG00000160789.18_LMNA | -0.00132 | -0.160487436 | 0.157913427 | 9.87E-01 | 9.95E-01 | 1.00E+00 |
| ENSG00000229014.3_RPL30P13   | ENSG00000160789.18_LMNA | -0.00035 | -0.159543217 | 0.158858149 | 9.97E-01 | 9.99E-01 | 1.00E+00 |
| ENSG00000239216.1_RP4-712E4  | ENSG00000160789.18_LMNA | 0.06163  | -0.098533011 | 0.218689388 | 4.51E-01 | 7.16E-01 | 1.00E+00 |
| ENSG00000228210.1_RPL7AL2    | ENSG00000160789.18_LMNA | 0.07288  | -0.087334039 | 0.229418821 | 3.72E-01 | 6.52E-01 | 1.00E+00 |
| ENSG00000248127.1_CTC-235G5  | ENSG00000160789.18_LMNA | -0.08529 | -0.241213579 | 0.074930041 | 2.96E-01 | 5.82E-01 | 1.00E+00 |
| ENSG00000254733.1_RP11-317J  | ENSG00000160789.18_LMNA | 0.00752  | -0.151858539 | 0.166525297 | 9.27E-01 | 9.72E-01 | 1.00E+00 |
| ENSG00000264514.1_RP11-720L  | ENSG00000160789.18_LMNA | 0.07768  | -0.082538939 | 0.233989459 | 3.41E-01 | 6.26E-01 | 1.00E+00 |
| ENSG00000100448.3_CTSG       | ENSG00000160789.18_LMNA | 0.13009  | -0.029722846 | 0.283424158 | 1.10E-01 | 3.31E-01 | 1.00E+00 |
| ENSG00000232360.1_AP000281.2 | ENSG00000160789.18_LMNA | 0.03465  | -0.125242409 | 0.19278641  | 6.72E-01 | 8.56E-01 | 1.00E+00 |
| ENSG00000226489.1_AC104308.1 | ENSG00000160789.18_LMNA | -0.06446 | -0.221389044 | 0.095722757 | 4.30E-01 | 7.00E-01 | 1.00E+00 |
| ENSG00000257643.1_RP11-278C  | ENSG00000160789.18_LMNA | -0.05807 | -0.21527975  | 0.102075115 | 4.77E-01 | 7.36E-01 | 1.00E+00 |
| ENSG00000279243.1_CMB9-22P1  | ENSG00000160789.18_LMNA | -0.04266 | -0.200497607 | 0.117339045 | 6.02E-01 | 8.17E-01 | 1.00E+00 |
| ENSG00000235570.1_LINC00533  | ENSG00000160789.18_LMNA | -0.09084 | -0.246474625 | 0.069365511 | 2.66E-01 | 5.50E-01 | 1.00E+00 |
| ENSG00000205186.2_FABP9      | ENSG00000160789.18_LMNA | 0.06429  | -0.095889721 | 0.221228787 | 4.31E-01 | 7.01E-01 | 1.00E+00 |
| ENSG00000276434.1_RP11-391H  | ENSG00000160789.18_LMNA | 0.06735  | -0.092846337 | 0.22414724  | 4.10E-01 | 6.84E-01 | 1.00E+00 |
| ENSG00000266357.4_RP11-101O  | ENSG00000160789.18_LMNA | 0.00815  | -0.151243561 | 0.167137212 | 9.21E-01 | 9.70E-01 | 1.00E+00 |
| ENSG00000235573.2_RP3-412A9  | ENSG00000160789.18_LMNA | 0.05463  | -0.105492733 | 0.211982593 | 5.04E-01 | 7.55E-01 | 1.00E+00 |
| ENSG00000230452.1_LINC01381  | ENSG00000160789.18_LMNA | -0.07205 | -0.228629263 | 0.088160887 | 3.78E-01 | 6.57E-01 | 1.00E+00 |
| ENSG00000172023.6_REG1B      | ENSG00000160789.18_LMNA | 0.143    | -0.016573117 | 0.295478591 | 7.88E-02 | 2.70E-01 | 1.00E+00 |
| ENSG00000270814.1_TMEN261P   | ENSG00000160789.18_LMNA | -0.10713 | -0.261869198 | 0.052969217 | 1.89E-01 | 4.56E-01 | 1.00E+00 |
| ENSG00000253317.1_RP11-142A  | ENSG00000160789.18_LMNA | -0.10959 | -0.264184802 | 0.050488162 | 1.79E-01 | 4.41E-01 | 1.00E+00 |
| ENSG00000255858.1_RP11-612B  | ENSG00000160789.18_LMNA | 0.01141  | -0.148057619 | 0.170303368 | 8.89E-01 | 9.57E-01 | 1.00E+00 |
| ENSG00000274214.1_RP11-757O  | ENSG00000160789.18_LMNA | 0.05307  | -0.107037864 | 0.210489546 | 5.16E-01 | 7.63E-01 | 1.00E+00 |
| ENSG00000224563.1_LPP-AS1    | ENSG00000160789.18_LMNA | 0.21601  | 0.058834448  | 0.362738284 | 7.52E-03 | 5.31E-02 | 1.00E+00 |
| ENSG00000237262.1_AC068492.1 | ENSG00000160789.18_LMNA | -0.01805 | -0.176746975 | 0.141553273 | 8.25E-01 | 9.31E-01 | 1.00E+00 |
| ENSG00000230126.1_FGF12-AS2  | ENSG00000160789.18_LMNA | 0.00455  | -0.154766716 | 0.163628274 | 9.56E-01 | 9.82E-01 | 1.00E+00 |
| ENSG00000253321.1_RP11-61G2  | ENSG00000160789.18_LMNA | -0.20971 | -0.35699672  | -0.05225905 | 9.51E-03 | 6.32E-02 | 1.00E+00 |
| ENSG00000226172.2_RP4-712E4  | ENSG00000160789.18_LMNA | -0.14318 | -0.295639087 | 0.016397307 | 7.85E-02 | 2.69E-01 | 1.00E+00 |
| ENSG00000233845.1_AC093732.1 | ENSG00000160789.18_LMNA | -0.00327 | -0.162385261 | 0.156012826 | 9.68E-01 | 9.87E-01 | 1.00E+00 |
| ENSG00000261914.2_RPL23AP8.2 | ENSG00000160789.18_LMNA | 0.00642  | -0.152935308 | 0.165453298 | 9.37E-01 | 9.75E-01 | 1.00E+00 |

|                              |                         |          |              |             |          |          |          |
|------------------------------|-------------------------|----------|--------------|-------------|----------|----------|----------|
| ENSG00000266667.1_RP11-849N  | ENSG00000160789.18_LMNA | -0.06092 | -0.218006835 | 0.099242725 | 4.56E-01 | 7.20E-01 | 1.00E+00 |
| ENSG00000277558.1_RP3-468O1  | ENSG00000160789.18_LMNA | -0.01908 | -0.177743347 | 0.140545049 | 8.15E-01 | 9.28E-01 | 1.00E+00 |
| ENSG00000235804.2_RP4-535B2  | ENSG00000160789.18_LMNA | -0.08198 | -0.238070087 | 0.078245495 | 3.15E-01 | 6.02E-01 | 1.00E+00 |
| ENSG00000273336.1_OR7M1P     | ENSG00000160789.18_LMNA | -0.11755 | -0.271668007 | 0.042443632 | 1.49E-01 | 3.96E-01 | 1.00E+00 |
| ENSG00000233936.1_RP11-399H  | ENSG00000160789.18_LMNA | -0.07012 | -0.226785693 | 0.09008983  | 3.91E-01 | 6.69E-01 | 1.00E+00 |
| ENSG00000242922.2_RPL21P104  | ENSG00000160789.18_LMNA | -0.08681 | -0.242661529 | 0.073400527 | 2.88E-01 | 5.73E-01 | 1.00E+00 |
| ENSG00000261070.1_RP11-554A  | ENSG00000160789.18_LMNA | -0.19353 | -0.342188181 | -0.03542098 | 1.69E-02 | 9.56E-02 | 1.00E+00 |
| ENSG00000228792.2_RP11-354K  | ENSG00000160789.18_LMNA | -0.16494 | -0.315851333 | -0.00589887 | 4.23E-02 | 1.80E-01 | 1.00E+00 |
| ENSG00000226226.1_PRELID3BF  | ENSG00000160789.18_LMNA | -0.0524  | -0.209853176 | 0.107695968 | 5.21E-01 | 7.67E-01 | 1.00E+00 |
| ENSG00000234068.5_PAGE2      | ENSG00000160789.18_LMNA | -0.01647 | -0.175211353 | 0.143105869 | 8.40E-01 | 9.38E-01 | 1.00E+00 |
| ENSG00000251526.1_RP11-381N  | ENSG00000160789.18_LMNA | -0.15019 | -0.302163862 | 0.009233573 | 6.48E-02 | 2.37E-01 | 1.00E+00 |
| ENSG00000180475.4_OR10Q1     | ENSG00000160789.18_LMNA | -0.19354 | -0.34219694  | -0.03543089 | 1.69E-02 | 9.56E-02 | 1.00E+00 |
| ENSG00000254417.1_ANO1-AS2   | ENSG00000160789.18_LMNA | 0.27672  | 0.122939114  | 0.417530342 | 5.58E-04 | 7.34E-03 | 1.00E+00 |
| ENSG00000255583.2_RP11-415I1 | ENSG00000160789.18_LMNA | -0.16739 | -0.318116189 | -0.00841658 | 3.93E-02 | 1.71E-01 | 1.00E+00 |
| ENSG00000213285.4_RPL23AP44  | ENSG00000160789.18_LMNA | -0.11587 | -0.27008637  | 0.044147311 | 1.55E-01 | 4.06E-01 | 1.00E+00 |
| ENSG00000240393.1_RP11-768G  | ENSG00000160789.18_LMNA | -0.15491 | -0.306548631 | 0.004401387 | 5.67E-02 | 2.18E-01 | 1.00E+00 |
| ENSG00000188508.9_KRTDAP     | ENSG00000160789.18_LMNA | 0.02419  | -0.135532533 | 0.182687274 | 7.67E-01 | 9.04E-01 | 1.00E+00 |
| ENSG00000266938.1_AC119403.  | ENSG00000160789.18_LMNA | -0.11504 | -0.269311939 | 0.044980833 | 1.58E-01 | 4.11E-01 | 1.00E+00 |
| ENSG00000225934.2_RP4-566D2  | ENSG00000160789.18_LMNA | -0.00322 | -0.162339371 | 0.156058811 | 9.69E-01 | 9.88E-01 | 1.00E+00 |
| ENSG00000205537.2_RP11-89H1  | ENSG00000160789.18_LMNA | 0.08188  | -0.078342123 | 0.237978372 | 3.16E-01 | 6.03E-01 | 1.00E+00 |
| ENSG00000226273.2_AC079305.1 | ENSG00000160789.18_LMNA | 0.06562  | -0.094570754 | 0.222494308 | 4.22E-01 | 6.93E-01 | 1.00E+00 |
| ENSG00000231905.2_SETP10     | ENSG00000160789.18_LMNA | -0.06798 | -0.224750793 | 0.092216207 | 4.05E-01 | 6.81E-01 | 1.00E+00 |
| ENSG00000233263.1_AC009518.1 | ENSG00000160789.18_LMNA | 0.27032  | 0.116117833  | 0.411800104 | 7.57E-04 | 9.31E-03 | 1.00E+00 |
| ENSG00000224807.5_DUX4L9     | ENSG00000160789.18_LMNA | 0.04663  | -0.113416444 | 0.204310263 | 5.68E-01 | 7.98E-01 | 1.00E+00 |
| ENSG00000279176.1_RP11-43D4  | ENSG00000160789.18_LMNA | 0.12323  | -0.036694578 | 0.276992738 | 1.30E-01 | 3.66E-01 | 1.00E+00 |
| ENSG00000214878.2_RPL5P31    | ENSG00000160789.18_LMNA | -0.06486 | -0.221770498 | 0.095325268 | 4.27E-01 | 6.98E-01 | 1.00E+00 |
| ENSG00000279237.1_RP11-212E  | ENSG00000160789.18_LMNA | 0.00392  | -0.155377422 | 0.163019213 | 9.62E-01 | 9.85E-01 | 1.00E+00 |
| ENSG00000251357.4_AP000350.1 | ENSG00000160789.18_LMNA | -0.13884 | -0.291594874 | 0.020821538 | 8.80E-02 | 2.89E-01 | 1.00E+00 |
| ENSG00000261527.1_RP11-343C  | ENSG00000160789.18_LMNA | -0.04348 | -0.201288228 | 0.116526438 | 5.95E-01 | 8.13E-01 | 1.00E+00 |
| ENSG00000265713.1_RP11-82O1  | ENSG00000160789.18_LMNA | -0.08655 | -0.242406217 | 0.073670329 | 2.89E-01 | 5.74E-01 | 1.00E+00 |
| ENSG00000236510.1_AC011284.1 | ENSG00000160789.18_LMNA | 0.15046  | -0.008956683 | 0.302415471 | 6.43E-02 | 2.36E-01 | 1.00E+00 |
| ENSG00000248283.2_CCNL2P1    | ENSG00000160789.18_LMNA | -0.26108 | -0.403511447 | -0.10630011 | 1.16E-03 | 1.29E-02 | 1.00E+00 |
| ENSG00000183024.3_OR1G1      | ENSG00000160789.18_LMNA | -0.20094 | -0.348973586 | -0.04311477 | 1.31E-02 | 7.94E-02 | 1.00E+00 |

|                              |                         |          |              |             |          |          |          |
|------------------------------|-------------------------|----------|--------------|-------------|----------|----------|----------|
| ENSG00000257045.1_RP11-486F  | ENSG00000160789.18_LMNA | -0.05203 | -0.209490936 | 0.108070456 | 5.24E-01 | 7.70E-01 | 1.00E+00 |
| ENSG00000226555.1_AGKP1      | ENSG00000160789.18_LMNA | 0.11766  | -0.042333031 | 0.271770627 | 1.49E-01 | 3.96E-01 | 1.00E+00 |
| ENSG00000236417.2_CTSLP1     | ENSG00000160789.18_LMNA | 0.02679  | -0.132977088 | 0.185201573 | 7.43E-01 | 8.92E-01 | 1.00E+00 |
| ENSG00000267078.1_RP11-666A  | ENSG00000160789.18_LMNA | 0.1415   | -0.018111286 | 0.294073656 | 8.21E-02 | 2.76E-01 | 1.00E+00 |
| ENSG00000229019.1_RP11-881E  | ENSG00000160789.18_LMNA | -0.13441 | -0.287460165 | 0.025332154 | 9.87E-02 | 3.09E-01 | 1.00E+00 |
| ENSG00000235813.1_RP11-308B  | ENSG00000160789.18_LMNA | 0.05029  | -0.109785053 | 0.207831299 | 5.38E-01 | 7.79E-01 | 1.00E+00 |
| ENSG00000186136.1_TAS2R42    | ENSG00000160789.18_LMNA | 0.03668  | -0.12324097  | 0.194742907 | 6.54E-01 | 8.47E-01 | 1.00E+00 |
| ENSG00000236357.1_EI24P1     | ENSG00000160789.18_LMNA | -0.00291 | -0.162036676 | 0.156362098 | 9.72E-01 | 9.89E-01 | 1.00E+00 |
| ENSG00000254258.1_RP11-398H  | ENSG00000160789.18_LMNA | -0.039   | -0.196980992 | 0.120948296 | 6.33E-01 | 8.36E-01 | 1.00E+00 |
| ENSG00000279459.1_RP11-826F  | ENSG00000160789.18_LMNA | -0.18232 | -0.33188317  | -0.02380553 | 2.46E-02 | 1.25E-01 | 1.00E+00 |
| ENSG00000226196.1_GAPDHP75   | ENSG00000160789.18_LMNA | 0.05399  | -0.106120225 | 0.211376431 | 5.09E-01 | 7.58E-01 | 1.00E+00 |
| ENSG00000226074.4_PRSS44     | ENSG00000160789.18_LMNA | -0.07329 | -0.22980924  | 0.086925018 | 3.70E-01 | 6.50E-01 | 1.00E+00 |
| ENSG00000259814.1_RP11-300A  | ENSG00000160789.18_LMNA | -0.03766 | -0.195687209 | 0.122274049 | 6.45E-01 | 8.42E-01 | 1.00E+00 |
| ENSG00000234438.3_KBTBD13    | ENSG00000160789.18_LMNA | -0.14505 | -0.297380364 | 0.014488638 | 7.46E-02 | 2.60E-01 | 1.00E+00 |
| ENSG00000232048.2_HNRNPCP5   | ENSG00000160789.18_LMNA | 0.07805  | -0.082170464 | 0.234340108 | 3.39E-01 | 6.24E-01 | 1.00E+00 |
| ENSG00000233288.1_RP11-760D  | ENSG00000160789.18_LMNA | -0.04928 | -0.206858133 | 0.110789568 | 5.47E-01 | 7.84E-01 | 1.00E+00 |
| ENSG00000256906.1_RP11-474D  | ENSG00000160789.18_LMNA | -0.11743 | -0.271554614 | 0.042565835 | 1.50E-01 | 3.97E-01 | 1.00E+00 |
| ENSG00000249542.2_EEF1A1P2   | ENSG00000160789.18_LMNA | 0.05148  | -0.108609083 | 0.208969771 | 5.29E-01 | 7.73E-01 | 1.00E+00 |
| ENSG00000268964.1_ERVV-2     | ENSG00000160789.18_LMNA | 0.19397  | 0.035881885  | 0.342595572 | 1.66E-02 | 9.46E-02 | 1.00E+00 |
| ENSG00000255282.5_WTAPP1     | ENSG00000160789.18_LMNA | 0.02558  | -0.134171009 | 0.184027394 | 7.54E-01 | 8.98E-01 | 1.00E+00 |
| ENSG00000243197.6_TUSC7      | ENSG00000160789.18_LMNA | -0.14064 | -0.293270825 | 0.018989588 | 8.40E-02 | 2.80E-01 | 1.00E+00 |
| ENSG00000214265.10_RP11-701I | ENSG00000160789.18_LMNA | -0.11238 | -0.266803064 | 0.047678137 | 1.68E-01 | 4.26E-01 | 1.00E+00 |
| ENSG00000231147.2_ARHGAP42   | ENSG00000160789.18_LMNA | -0.12258 | -0.27638295  | 0.037354013 | 1.32E-01 | 3.69E-01 | 1.00E+00 |
| ENSG00000280719.1_PCAT5      | ENSG00000160789.18_LMNA | -0.04198 | -0.199840518 | 0.118014081 | 6.08E-01 | 8.21E-01 | 1.00E+00 |
| ENSG00000279394.1_RP11-81A1  | ENSG00000160789.18_LMNA | 0.03628  | -0.123637031 | 0.19435594  | 6.57E-01 | 8.48E-01 | 1.00E+00 |
| ENSG00000238033.1_AC002480.1 | ENSG00000160789.18_LMNA | -0.09972 | -0.254875624 | 0.060438963 | 2.22E-01 | 4.97E-01 | 1.00E+00 |
| ENSG00000261426.1_AC144833.1 | ENSG00000160789.18_LMNA | 0.17538  | 0.016649113  | 0.325497308 | 3.07E-02 | 1.45E-01 | 1.00E+00 |
| ENSG00000224559.2_LINC01087  | ENSG00000160789.18_LMNA | 0.04888  | -0.111189417 | 0.206470588 | 5.50E-01 | 7.86E-01 | 1.00E+00 |
| ENSG00000163283.6_ALPP       | ENSG00000160789.18_LMNA | -0.0772  | -0.233526082 | 0.083025741 | 3.45E-01 | 6.29E-01 | 1.00E+00 |
| ENSG00000237638.1_AC007386.1 | ENSG00000160789.18_LMNA | 0.01811  | -0.141501136 | 0.176798515 | 8.25E-01 | 9.31E-01 | 1.00E+00 |
| ENSG00000265817.1_FSBP       | ENSG00000160789.18_LMNA | -0.05004 | -0.207585259 | 0.11003908  | 5.40E-01 | 7.80E-01 | 1.00E+00 |
| ENSG00000265489.1_RP11-1090I | ENSG00000160789.18_LMNA | -0.01324 | -0.172074484 | 0.146272549 | 8.71E-01 | 9.50E-01 | 1.00E+00 |
| ENSG00000167080.7_B4GALNT2   | ENSG00000160789.18_LMNA | 0.082    | -0.078224506 | 0.238090008 | 3.15E-01 | 6.02E-01 | 1.00E+00 |

|                              |                         |          |              |             |          |          |          |
|------------------------------|-------------------------|----------|--------------|-------------|----------|----------|----------|
| ENSG00000242641.4_LINC00971  | ENSG00000160789.18_LMNA | -0.06405 | -0.22099629  | 0.096131916 | 4.33E-01 | 7.02E-01 | 1.00E+00 |
| ENSG00000112038.16_OPRM1     | ENSG00000160789.18_LMNA | 0.06319  | -0.096982594 | 0.220179389 | 4.39E-01 | 7.07E-01 | 1.00E+00 |
| ENSG00000066813.13_ACSM2B    | ENSG00000160789.18_LMNA | 0.01352  | -0.145990608 | 0.172354033 | 8.69E-01 | 9.49E-01 | 1.00E+00 |
| ENSG00000253041.1_SNORA31    | ENSG00000160789.18_LMNA | -0.32493 | -0.460316386 | -0.17476698 | 4.42E-05 | 9.71E-04 | 1.00E+00 |
| ENSG00000243264.2_IGKV2D-29  | ENSG00000160789.18_LMNA | -0.14083 | -0.293455969 | 0.018787082 | 8.35E-02 | 2.80E-01 | 1.00E+00 |
| ENSG00000274576.2_IGHV2-70   | ENSG00000160789.18_LMNA | 0.08092  | -0.079301241 | 0.237067706 | 3.22E-01 | 6.08E-01 | 1.00E+00 |
| ENSG00000281855.1_AC105009   | ENSG00000160789.18_LMNA | -0.01314 | -0.171978915 | 0.146368924 | 8.72E-01 | 9.50E-01 | 1.00E+00 |
| ENSG00000211491.2_MIR320D1   | ENSG00000160789.18_LMNA | -0.0878  | -0.243591928 | 0.072416933 | 2.82E-01 | 5.67E-01 | 1.00E+00 |
| ENSG00000251868.1_RNU7-71P   | ENSG00000160789.18_LMNA | -0.06611 | -0.222964332 | 0.094080596 | 4.18E-01 | 6.90E-01 | 1.00E+00 |
| ENSG00000200677.1_SNORD18    | ENSG00000160789.18_LMNA | 0.05912  | -0.101028367 | 0.216288158 | 4.69E-01 | 7.30E-01 | 1.00E+00 |
| ENSG00000274134.1_MIR6774    | ENSG00000160789.18_LMNA | 0.04454  | -0.11547948  | 0.202306251 | 5.86E-01 | 8.08E-01 | 1.00E+00 |
| ENSG00000264901.1_MIR3616    | ENSG00000160789.18_LMNA | 0.16725  | 0.008270206  | 0.317984609 | 3.94E-02 | 1.72E-01 | 1.00E+00 |
| ENSG00000278557.1_           | ENSG00000160789.18_LMNA | -0.12872 | -0.282139643 | 0.031117714 | 1.14E-01 | 3.37E-01 | 1.00E+00 |
| ENSG00000207174.1_SNORD116   | ENSG00000160789.18_LMNA | 0.12741  | -0.032453381 | 0.280908592 | 1.18E-01 | 3.44E-01 | 1.00E+00 |
| ENSG00000281156.1_MIR3651    | ENSG00000160789.18_LMNA | 0.08543  | -0.074786042 | 0.241349959 | 2.95E-01 | 5.81E-01 | 1.00E+00 |
| ENSG00000200241.1_Y_RNA      | ENSG00000160789.18_LMNA | -0.13384 | -0.286930848 | 0.025908677 | 1.00E-01 | 3.12E-01 | 1.00E+00 |
| ENSG00000249619.1_HMGNI1P13  | ENSG00000160789.18_LMNA | -0.03599 | -0.194081567 | 0.123917791 | 6.60E-01 | 8.50E-01 | 1.00E+00 |
| ENSG00000279550.1_RP11-165I5 | ENSG00000160789.18_LMNA | -0.13483 | -0.287855854 | 0.024901042 | 9.77E-02 | 3.07E-01 | 1.00E+00 |
| ENSG00000274693.1_HTT-AS1_2  | ENSG00000160789.18_LMNA | 0.02914  | -0.130668787 | 0.187469131 | 7.22E-01 | 8.82E-01 | 1.00E+00 |
| ENSG00000275515.1_RP11-295D  | ENSG00000160789.18_LMNA | 0.02902  | -0.130786587 | 0.187353493 | 7.23E-01 | 8.83E-01 | 1.00E+00 |
| ENSG00000275878.1_RN7SL43P   | ENSG00000160789.18_LMNA | 0.00866  | -0.150747639 | 0.167630487 | 9.16E-01 | 9.68E-01 | 1.00E+00 |
| ENSG00000254771.1_RP11-50B3  | ENSG00000160789.18_LMNA | -0.09553 | -0.250916291 | 0.064652277 | 2.42E-01 | 5.21E-01 | 1.00E+00 |
| ENSG00000277720.1_RP1-34B20  | ENSG00000160789.18_LMNA | -0.10182 | -0.25685621  | 0.058327104 | 2.12E-01 | 4.86E-01 | 1.00E+00 |
| ENSG00000270354.1_RP11-547M  | ENSG00000160789.18_LMNA | -0.13923 | -0.291961226 | 0.020421265 | 8.71E-02 | 2.87E-01 | 1.00E+00 |
| ENSG00000217646.1_HIST1H2BF  | ENSG00000160789.18_LMNA | 0.06895  | -0.091247735 | 0.225677944 | 3.99E-01 | 6.75E-01 | 1.00E+00 |
| ENSG00000229272.1_RP11-498J1 | ENSG00000160789.18_LMNA | 0.04718  | -0.112865906 | 0.2048446   | 5.64E-01 | 7.95E-01 | 1.00E+00 |
| ENSG00000273524.1_Metazoa_SI | ENSG00000160789.18_LMNA | -0.01124 | -0.170137139 | 0.148225052 | 8.91E-01 | 9.57E-01 | 1.00E+00 |
| ENSG00000268879.1_IGFL1P1    | ENSG00000160789.18_LMNA | 0.00228  | -0.156975002 | 0.161424784 | 9.78E-01 | 9.92E-01 | 1.00E+00 |
| ENSG00000253702.1_RP11-567J1 | ENSG00000160789.18_LMNA | 0.24385  | 0.088072183  | 0.387991971 | 2.47E-03 | 2.30E-02 | 1.00E+00 |
| ENSG00000228403.1_RP11-563N  | ENSG00000160789.18_LMNA | -0.04232 | -0.200169264 | 0.117676393 | 6.05E-01 | 8.19E-01 | 1.00E+00 |
| ENSG00000270431.1_RP1-241P1  | ENSG00000160789.18_LMNA | 0.1366   | -0.023106409 | 0.289501878 | 9.33E-02 | 2.99E-01 | 1.00E+00 |
| ENSG00000261276.1_RP11-554A  | ENSG00000160789.18_LMNA | 0.0925   | -0.067699418 | 0.248046239 | 2.57E-01 | 5.39E-01 | 1.00E+00 |
| ENSG00000111536.4_IL26       | ENSG00000160789.18_LMNA | -0.18383 | -0.333281451 | -0.02537676 | 2.34E-02 | 1.21E-01 | 1.00E+00 |

|                              |                         |          |              |             |          |          |          |
|------------------------------|-------------------------|----------|--------------|-------------|----------|----------|----------|
| ENSG00000226229.2_RPLP0P1    | ENSG00000160789.18_LMNA | 0.26375  | 0.109133475  | 0.405908543 | 1.03E-03 | 1.18E-02 | 1.00E+00 |
| ENSG00000255671.1_RP11-283I3 | ENSG00000160789.18_LMNA | -0.01119 | -0.170091144 | 0.148271377 | 8.91E-01 | 9.57E-01 | 1.00E+00 |
| ENSG00000275881.1_Metazoa_SI | ENSG00000160789.18_LMNA | -0.05555 | -0.212870888 | 0.104572721 | 4.97E-01 | 7.51E-01 | 1.00E+00 |
| ENSG00000213247.3_RP11-479A  | ENSG00000160789.18_LMNA | 0.06679  | -0.093403867 | 0.223613021 | 4.14E-01 | 6.87E-01 | 1.00E+00 |
| ENSG00000274017.1_Metazoa_SI | ENSG00000160789.18_LMNA | 0.04372  | -0.116287696 | 0.201520433 | 5.93E-01 | 8.12E-01 | 1.00E+00 |
| ENSG00000236356.1_AC079584.  | ENSG00000160789.18_LMNA | 0.01121  | -0.148257994 | 0.170104431 | 8.91E-01 | 9.57E-01 | 1.00E+00 |
| ENSG00000240651.1_SEPT7P4    | ENSG00000160789.18_LMNA | -0.07468 | -0.231136105 | 0.08553414  | 3.60E-01 | 6.43E-01 | 1.00E+00 |
| ENSG00000274275.1_RP11-326K  | ENSG00000160789.18_LMNA | -0.05244 | -0.209885201 | 0.107662856 | 5.21E-01 | 7.67E-01 | 1.00E+00 |
| ENSG00000249725.1_RP11-469L  | ENSG00000160789.18_LMNA | -0.16728 | -0.318009255 | -0.00829762 | 3.94E-02 | 1.72E-01 | 1.00E+00 |
| ENSG00000269321.1_CTC-453G2  | ENSG00000160789.18_LMNA | 0.03688  | -0.123047469 | 0.194931929 | 6.52E-01 | 8.46E-01 | 1.00E+00 |
| ENSG00000261273.1_LA16c-444C | ENSG00000160789.18_LMNA | -0.02028 | -0.178906973 | 0.139366746 | 8.04E-01 | 9.22E-01 | 1.00E+00 |
| ENSG00000205767.4_CTD-2302E  | ENSG00000160789.18_LMNA | -0.02322 | -0.181744659 | 0.136489484 | 7.76E-01 | 9.08E-01 | 1.00E+00 |
| ENSG00000278902.1_RP11-25L3  | ENSG00000160789.18_LMNA | 0.12459  | -0.035308399 | 0.27827373  | 1.26E-01 | 3.59E-01 | 1.00E+00 |
| ENSG00000262265.1_RP5-867C2  | ENSG00000160789.18_LMNA | -0.03345 | -0.191632505 | 0.126421609 | 6.82E-01 | 8.62E-01 | 1.00E+00 |
| ENSG00000228561.2_RP11-114M  | ENSG00000160789.18_LMNA | -0.11079 | -0.265315267 | 0.049275512 | 1.74E-01 | 4.34E-01 | 1.00E+00 |
| ENSG00000253855.1_AC133633.  | ENSG00000160789.18_LMNA | -0.12385 | -0.277573095 | 0.036066715 | 1.28E-01 | 3.63E-01 | 1.00E+00 |
| ENSG00000250957.1_RP11-248N  | ENSG00000160789.18_LMNA | -0.17337 | -0.32363501  | -0.01456804 | 3.27E-02 | 1.51E-01 | 1.00E+00 |
| ENSG00000232830.5_RP11-144C  | ENSG00000160789.18_LMNA | 0.0119   | -0.14758342  | 0.170774062 | 8.84E-01 | 9.55E-01 | 1.00E+00 |
| ENSG00000213731.2_RAB5CP1    | ENSG00000160789.18_LMNA | -0.08864 | -0.2443938   | 0.07156872  | 2.77E-01 | 5.62E-01 | 1.00E+00 |
| ENSG00000226542.1_AC114814.  | ENSG00000160789.18_LMNA | -0.05716 | -0.214409307 | 0.102978087 | 4.84E-01 | 7.41E-01 | 1.00E+00 |
| ENSG00000250140.1_CTD-2517C  | ENSG00000160789.18_LMNA | -0.01889 | -0.177557368 | 0.140733291 | 8.17E-01 | 9.29E-01 | 1.00E+00 |
| ENSG00000258490.1_RP11-862P  | ENSG00000160789.18_LMNA | -0.07383 | -0.230327723 | 0.086381668 | 3.66E-01 | 6.47E-01 | 1.00E+00 |
| ENSG00000258987.1_RP11-131H  | ENSG00000160789.18_LMNA | 0.02036  | -0.13929439  | 0.1789784   | 8.03E-01 | 9.21E-01 | 1.00E+00 |
| ENSG00000250234.1_CTD-2024P  | ENSG00000160789.18_LMNA | -0.00696 | -0.165977038 | 0.152409332 | 9.32E-01 | 9.74E-01 | 1.00E+00 |
| ENSG00000261630.1_RP11-357N  | ENSG00000160789.18_LMNA | 0.00685  | -0.152512836 | 0.165873988 | 9.33E-01 | 9.74E-01 | 1.00E+00 |
| ENSG00000256708.1_RP11-444B  | ENSG00000160789.18_LMNA | -0.05912 | -0.216281797 | 0.101034972 | 4.69E-01 | 7.30E-01 | 1.00E+00 |
| ENSG00000234136.1_AC055764.  | ENSG00000160789.18_LMNA | 0.03286  | -0.127008215 | 0.191058154 | 6.88E-01 | 8.65E-01 | 1.00E+00 |
| ENSG00000173673.7_HES3       | ENSG00000160789.18_LMNA | 0.06387  | -0.096305204 | 0.220829919 | 4.34E-01 | 7.03E-01 | 1.00E+00 |
| ENSG00000224995.1_LINC01526  | ENSG00000160789.18_LMNA | 0.13099  | -0.028808024 | 0.284265996 | 1.08E-01 | 3.26E-01 | 1.00E+00 |
| ENSG00000266990.1_LLNLR-284  | ENSG00000160789.18_LMNA | 0.18154  | 0.023005039  | 0.331170269 | 2.52E-02 | 1.27E-01 | 1.00E+00 |
| ENSG00000273415.1_RP11-702B  | ENSG00000160789.18_LMNA | -0.04755 | -0.205198442 | 0.112501227 | 5.61E-01 | 7.93E-01 | 1.00E+00 |
| ENSG00000258517.1_RP6-91H8.  | ENSG00000160789.18_LMNA | -0.07079 | -0.227427636 | 0.089418429 | 3.86E-01 | 6.64E-01 | 1.00E+00 |
| ENSG00000227817.4_ARHGAP42   | ENSG00000160789.18_LMNA | -0.02782 | -0.186191884 | 0.131969408 | 7.34E-01 | 8.88E-01 | 1.00E+00 |



|                              |                         |          |              |             |          |          |          |
|------------------------------|-------------------------|----------|--------------|-------------|----------|----------|----------|
| ENSG00000279570.1_CTD-2357A  | ENSG00000160789.18_LMNA | -0.07803 | -0.234320629 | 0.082190935 | 3.39E-01 | 6.25E-01 | 1.00E+00 |
| ENSG00000223523.1_AC079613.  | ENSG00000160789.18_LMNA | -0.00011 | -0.159309783 | 0.159091617 | 9.99E-01 | 1.00E+00 | 1.00E+00 |
| ENSG00000226070.1_RP11-552E  | ENSG00000160789.18_LMNA | -0.10206 | -0.257084144 | 0.058083881 | 2.11E-01 | 4.84E-01 | 1.00E+00 |
| ENSG00000224194.1_AC008278.  | ENSG00000160789.18_LMNA | -0.13319 | -0.286320048 | 0.026573689 | 1.02E-01 | 3.15E-01 | 1.00E+00 |
| ENSG00000278610.1_RP11-455P  | ENSG00000160789.18_LMNA | 0.0206   | -0.139056363 | 0.179213342 | 8.01E-01 | 9.20E-01 | 1.00E+00 |
| ENSG00000249745.1_HMGB1P28   | ENSG00000160789.18_LMNA | -0.10776 | -0.262455904 | 0.052340958 | 1.86E-01 | 4.52E-01 | 1.00E+00 |
| ENSG00000225665.4_SAR1P3     | ENSG00000160789.18_LMNA | -0.03023 | -0.188526521 | 0.129591219 | 7.12E-01 | 8.77E-01 | 1.00E+00 |
| ENSG00000270218.1_RP11-325L  | ENSG00000160789.18_LMNA | -0.07191 | -0.22849647  | 0.088299909 | 3.79E-01 | 6.58E-01 | 1.00E+00 |
| ENSG00000231460.2_RP11-321L  | ENSG00000160789.18_LMNA | -0.32157 | -0.457357691 | -0.17113137 | 5.35E-05 | 1.14E-03 | 1.00E+00 |
| ENSG00000206069.5_TMEN211    | ENSG00000160789.18_LMNA | -0.11326 | -0.267637144 | 0.046781921 | 1.65E-01 | 4.21E-01 | 1.00E+00 |
| ENSG00000228000.1_RPL7AP65   | ENSG00000160789.18_LMNA | 0.03066  | -0.129171149 | 0.188938524 | 7.08E-01 | 8.76E-01 | 1.00E+00 |
| ENSG00000233623.2_PGAM1P11   | ENSG00000160789.18_LMNA | 0.13299  | -0.026776663 | 0.28613357  | 1.02E-01 | 3.16E-01 | 1.00E+00 |
| ENSG00000258485.2_SRMP2      | ENSG00000160789.18_LMNA | -0.06601 | -0.222868489 | 0.094180557 | 4.19E-01 | 6.91E-01 | 1.00E+00 |
| ENSG00000239683.1_RP11-322E  | ENSG00000160789.18_LMNA | 0.06974  | -0.090467943 | 0.226424049 | 3.93E-01 | 6.71E-01 | 1.00E+00 |
| ENSG00000223621.1_AK4P4      | ENSG00000160789.18_LMNA | -0.04294 | -0.200770094 | 0.117059028 | 5.99E-01 | 8.16E-01 | 1.00E+00 |
| ENSG00000224688.1_E2F6P2     | ENSG00000160789.18_LMNA | 0.02074  | -0.138914935 | 0.17935292  | 8.00E-01 | 9.20E-01 | 1.00E+00 |
| ENSG00000231270.1_RP13-347D  | ENSG00000160789.18_LMNA | 0.01309  | -0.146415205 | 0.171933019 | 8.73E-01 | 9.51E-01 | 1.00E+00 |
| ENSG00000261369.1_RP11-474B  | ENSG00000160789.18_LMNA | -0.12254 | -0.276353993 | 0.037385321 | 1.33E-01 | 3.69E-01 | 1.00E+00 |
| ENSG00000277171.1_RP11-191H  | ENSG00000160789.18_LMNA | -0.14469 | -0.29705031  | 0.014850595 | 7.53E-02 | 2.62E-01 | 1.00E+00 |
| ENSG00000184055.4_OR7E87P    | ENSG00000160789.18_LMNA | -0.01142 | -0.170306372 | 0.148054594 | 8.89E-01 | 9.57E-01 | 1.00E+00 |
| ENSG00000237434.1_RP11-15P1  | ENSG00000160789.18_LMNA | -0.18148 | -0.331113403 | -0.0229412  | 2.52E-02 | 1.27E-01 | 1.00E+00 |
| ENSG00000185040.12_SPDYE16   | ENSG00000160789.18_LMNA | -0.02334 | -0.181860527 | 0.136371885 | 7.75E-01 | 9.08E-01 | 1.00E+00 |
| ENSG00000248491.4_RP11-125O  | ENSG00000160789.18_LMNA | 0.16488  | 0.005836837  | 0.315795489 | 4.24E-02 | 1.80E-01 | 1.00E+00 |
| ENSG00000261090.1_RP11-20G6  | ENSG00000160789.18_LMNA | -0.01817 | -0.176863091 | 0.14143581  | 8.24E-01 | 9.31E-01 | 1.00E+00 |
| ENSG00000255087.2_RP11-168K  | ENSG00000160789.18_LMNA | -0.20584 | -0.353461539 | -0.04822356 | 1.10E-02 | 6.99E-02 | 1.00E+00 |
| ENSG00000198610.9_AKR1C4     | ENSG00000160789.18_LMNA | -0.20247 | -0.350381037 | -0.0447152  | 1.24E-02 | 7.64E-02 | 1.00E+00 |
| ENSG00000270025.2_BMS1P7     | ENSG00000160789.18_LMNA | -0.17579 | -0.325873291 | -0.01706959 | 3.03E-02 | 1.44E-01 | 1.00E+00 |
| ENSG00000254423.1_RP11-351I2 | ENSG00000160789.18_LMNA | 0.01668  | -0.142899596 | 0.17541546  | 8.38E-01 | 9.37E-01 | 1.00E+00 |
| ENSG00000236091.1_RP3-473B4  | ENSG00000160789.18_LMNA | 0.07677  | -0.083449133 | 0.233122946 | 3.47E-01 | 6.31E-01 | 1.00E+00 |
| ENSG00000253663.1_NPM1P52    | ENSG00000160789.18_LMNA | -0.07085 | -0.227482011 | 0.089361546 | 3.86E-01 | 6.64E-01 | 1.00E+00 |
| ENSG00000178084.1_HTR3C      | ENSG00000160789.18_LMNA | 0.10518  | -0.054943214 | 0.260024246 | 1.97E-01 | 4.67E-01 | 1.00E+00 |
| ENSG00000234261.2_RP11-146I2 | ENSG00000160789.18_LMNA | 0.09512  | -0.06506954  | 0.250523605 | 2.44E-01 | 5.23E-01 | 1.00E+00 |
| ENSG00000250575.1_RP4-669L1  | ENSG00000160789.18_LMNA | -0.03395 | -0.192111119 | 0.125932613 | 6.78E-01 | 8.59E-01 | 1.00E+00 |

|                             |                         |          |              |             |          |          |          |
|-----------------------------|-------------------------|----------|--------------|-------------|----------|----------|----------|
| ENSG00000204571.5_KRTAP5-11 | ENSG00000160789.18_LMNA | 0.06217  | -0.098002855 | 0.219199051 | 4.47E-01 | 7.13E-01 | 1.00E+00 |
| ENSG00000271095.1_BNIP3P28  | ENSG00000160789.18_LMNA | -0.14351 | -0.295946266 | 0.016060764 | 7.78E-02 | 2.67E-01 | 1.00E+00 |
| ENSG00000258998.1_RP11-398E | ENSG00000160789.18_LMNA | -0.08838 | -0.244140917 | 0.071836267 | 2.79E-01 | 5.64E-01 | 1.00E+00 |
| ENSG00000279887.1_RP11-264L | ENSG00000160789.18_LMNA | 0.07662  | -0.083600716 | 0.232978589 | 3.48E-01 | 6.32E-01 | 1.00E+00 |
| ENSG00000264801.1_ERVFRD-3  | ENSG00000160789.18_LMNA | 0.07956  | -0.080659501 | 0.235777111 | 3.30E-01 | 6.16E-01 | 1.00E+00 |
| ENSG00000256987.1_RP11-428G | ENSG00000160789.18_LMNA | 0.10217  | -0.057971983 | 0.257188996 | 2.10E-01 | 4.83E-01 | 1.00E+00 |
| ENSG00000204049.1_RP11-126H | ENSG00000160789.18_LMNA | 0.01456  | -0.144981528 | 0.173354131 | 8.59E-01 | 9.44E-01 | 1.00E+00 |
| ENSG00000254629.1_RP11-160H | ENSG00000160789.18_LMNA | -0.04142 | -0.199304665 | 0.118564354 | 6.12E-01 | 8.24E-01 | 1.00E+00 |
| ENSG00000280409.1_LINC01101 | ENSG00000160789.18_LMNA | 0.04289  | -0.117107529 | 0.200722901 | 6.00E-01 | 8.16E-01 | 1.00E+00 |
| ENSG00000260392.4_RP11-1129 | ENSG00000160789.18_LMNA | -0.0176  | -0.176306207 | 0.141999074 | 8.30E-01 | 9.33E-01 | 1.00E+00 |
| ENSG00000259450.1_RP11-265N | ENSG00000160789.18_LMNA | -0.02703 | -0.185428    | 0.132746747 | 7.41E-01 | 8.91E-01 | 1.00E+00 |
| ENSG00000214919.3_RP11-674E | ENSG00000160789.18_LMNA | 0.10938  | -0.050699839 | 0.263987382 | 1.80E-01 | 4.43E-01 | 1.00E+00 |
| ENSG00000237740.1_NPAP1P3   | ENSG00000160789.18_LMNA | -0.0817  | -0.237807582 | 0.078522044 | 3.17E-01 | 6.04E-01 | 1.00E+00 |
| ENSG00000183434.9_TFDP3     | ENSG00000160789.18_LMNA | -0.02415 | -0.182652374 | 0.135567974 | 7.68E-01 | 9.04E-01 | 1.00E+00 |
| ENSG00000223806.6_LINC00114 | ENSG00000160789.18_LMNA | -0.12602 | -0.279614465 | 0.033856278 | 1.22E-01 | 3.51E-01 | 1.00E+00 |
| ENSG00000259293.1_LIPC-AS1  | ENSG00000160789.18_LMNA | -0.02281 | -0.181356037 | 0.136883843 | 7.80E-01 | 9.10E-01 | 1.00E+00 |
| ENSG00000232125.2_DYTN      | ENSG00000160789.18_LMNA | -0.08838 | -0.244140973 | 0.071836208 | 2.79E-01 | 5.64E-01 | 1.00E+00 |
| ENSG00000230304.1_CICP6     | ENSG00000160789.18_LMNA | -0.02459 | -0.183071773 | 0.135142016 | 7.64E-01 | 9.02E-01 | 1.00E+00 |
| ENSG00000169067.3_ACTBL2    | ENSG00000160789.18_LMNA | 0.17082  | 0.011939448  | 0.32127932  | 3.54E-02 | 1.60E-01 | 1.00E+00 |
| ENSG00000256892.2_MTRNR2L7  | ENSG00000160789.18_LMNA | -0.15469 | -0.306344126 | 0.004627083 | 5.71E-02 | 2.18E-01 | 1.00E+00 |
| ENSG00000235205.1_TATDN2P3  | ENSG00000160789.18_LMNA | -0.02142 | -0.180006382 | 0.138252642 | 7.93E-01 | 9.16E-01 | 1.00E+00 |
| ENSG00000259500.1_KRT8P24   | ENSG00000160789.18_LMNA | -0.00557 | -0.164629458 | 0.153762301 | 9.46E-01 | 9.78E-01 | 1.00E+00 |
| ENSG00000226631.1_SLC9A3P3  | ENSG00000160789.18_LMNA | 0.05991  | -0.10024276  | 0.217044545 | 4.63E-01 | 7.26E-01 | 1.00E+00 |
| ENSG00000021852.11_C8B      | ENSG00000160789.18_LMNA | 0.03769  | -0.122241431 | 0.195719054 | 6.45E-01 | 8.42E-01 | 1.00E+00 |
| ENSG00000228918.3_LINC01344 | ENSG00000160789.18_LMNA | -0.06373 | -0.220687245 | 0.096453794 | 4.35E-01 | 7.04E-01 | 1.00E+00 |
| ENSG00000260585.1_RP13-192B | ENSG00000160789.18_LMNA | -0.02679 | -0.185203782 | 0.132974841 | 7.43E-01 | 8.92E-01 | 1.00E+00 |
| ENSG00000187054.13_TMPRSS1  | ENSG00000160789.18_LMNA | -0.04637 | -0.204065185 | 0.113668888 | 5.71E-01 | 7.99E-01 | 1.00E+00 |
| ENSG00000233766.6_AC098617. | ENSG00000160789.18_LMNA | -0.15095 | -0.30287431  | 0.008451617 | 6.34E-02 | 2.34E-01 | 1.00E+00 |
| ENSG00000253406.1_AC012613. | ENSG00000160789.18_LMNA | 0.00897  | -0.150441051 | 0.167935357 | 9.13E-01 | 9.67E-01 | 1.00E+00 |
| ENSG00000090402.6_SI        | ENSG00000160789.18_LMNA | -0.03185 | -0.190088001 | 0.127998565 | 6.97E-01 | 8.70E-01 | 1.00E+00 |
| ENSG00000153684.13_GOLGA8F  | ENSG00000160789.18_LMNA | -0.0133  | -0.172137024 | 0.146209478 | 8.71E-01 | 9.50E-01 | 1.00E+00 |
| ENSG00000186526.11_CYP4F8   | ENSG00000160789.18_LMNA | -0.05682 | -0.214079408 | 0.103320179 | 4.87E-01 | 7.44E-01 | 1.00E+00 |
| ENSG00000211951.2_IGHV2-26  | ENSG00000160789.18_LMNA | 0.16738  | 0.008399979  | 0.318101264 | 3.93E-02 | 1.71E-01 | 1.00E+00 |

|                             |                         |          |              |             |          |          |          |
|-----------------------------|-------------------------|----------|--------------|-------------|----------|----------|----------|
| ENSG00000251880.1_RNU7-75P  | ENSG00000160789.18_LMNA | -0.05027 | -0.207811174 | 0.109805833 | 5.38E-01 | 7.79E-01 | 1.00E+00 |
| ENSG00000263898.1_          | ENSG00000160789.18_LMNA | -0.065   | -0.22190053  | 0.095189747 | 4.26E-01 | 6.97E-01 | 1.00E+00 |
| ENSG00000277052.1_MIR6763   | ENSG00000160789.18_LMNA | 0.03194  | -0.127913914 | 0.190170949 | 6.96E-01 | 8.70E-01 | 1.00E+00 |
| ENSG00000207625.1_MIR128-2  | ENSG00000160789.18_LMNA | -0.0217  | -0.180274354 | 0.137980966 | 7.91E-01 | 9.15E-01 | 1.00E+00 |
| ENSG00000278660.1_          | ENSG00000160789.18_LMNA | -0.14516 | -0.297486619 | 0.014372096 | 7.44E-02 | 2.60E-01 | 1.00E+00 |
| ENSG00000252479.1_RNA5SP30  | ENSG00000160789.18_LMNA | 0.01203  | -0.147448238 | 0.170908217 | 8.83E-01 | 9.55E-01 | 1.00E+00 |
| ENSG00000252581.1_RNU6-1098 | ENSG00000160789.18_LMNA | 0.19696  | 0.038977105  | 0.345328425 | 1.50E-02 | 8.79E-02 | 1.00E+00 |
| ENSG00000206743.1_RNU6-484F | ENSG00000160789.18_LMNA | 0.0452   | -0.114824009 | 0.202943258 | 5.80E-01 | 8.04E-01 | 1.00E+00 |
| ENSG00000207248.1_RNU6-1005 | ENSG00000160789.18_LMNA | -0.09147 | -0.247075864 | 0.068728336 | 2.62E-01 | 5.46E-01 | 1.00E+00 |
| ENSG00000223437.1_TMSB4XP3  | ENSG00000160789.18_LMNA | -0.13341 | -0.28652514  | 0.026350425 | 1.01E-01 | 3.14E-01 | 1.00E+00 |
| ENSG00000199047.2_MIR378A   | ENSG00000160789.18_LMNA | 0.11693  | -0.043074539 | 0.271082492 | 1.51E-01 | 4.00E-01 | 1.00E+00 |
| ENSG00000270313.1_COX6CP16  | ENSG00000160789.18_LMNA | -0.14818 | -0.300295027 | 0.011288691 | 6.85E-02 | 2.46E-01 | 1.00E+00 |
| ENSG00000252637.1_RNA5SP26  | ENSG00000160789.18_LMNA | -0.06774 | -0.224522416 | 0.092454669 | 4.07E-01 | 6.82E-01 | 1.00E+00 |
| ENSG00000162685.6_LSP1P3    | ENSG00000160789.18_LMNA | -0.02149 | -0.180076369 | 0.138181692 | 7.93E-01 | 9.16E-01 | 1.00E+00 |
| ENSG00000232579.1_MTCO1P27  | ENSG00000160789.18_LMNA | -0.03022 | -0.188517833 | 0.129600076 | 7.12E-01 | 8.77E-01 | 1.00E+00 |
| ENSG00000272676.1_OR5AO1P   | ENSG00000160789.18_LMNA | -0.04164 | -0.199520974 | 0.118342248 | 6.10E-01 | 8.22E-01 | 1.00E+00 |
| ENSG00000240983.1_RP11-742D | ENSG00000160789.18_LMNA | 0.06955  | -0.090654102 | 0.226245965 | 3.95E-01 | 6.72E-01 | 1.00E+00 |
| ENSG00000255522.1_SNRPCP5   | ENSG00000160789.18_LMNA | 0.11339  | -0.04665193  | 0.267758084 | 1.64E-01 | 4.20E-01 | 1.00E+00 |
| ENSG00000230394.1_RP11-692P | ENSG00000160789.18_LMNA | 0.12435  | -0.035559399 | 0.278041859 | 1.27E-01 | 3.61E-01 | 1.00E+00 |
| ENSG00000264067.1_RP11-401O | ENSG00000160789.18_LMNA | 0.08664  | -0.073580221 | 0.24249149  | 2.89E-01 | 5.74E-01 | 1.00E+00 |
| ENSG00000269799.1_CTD-2538C | ENSG00000160789.18_LMNA | 0.06577  | -0.094424208 | 0.22263485  | 4.21E-01 | 6.92E-01 | 1.00E+00 |
| ENSG00000220113.2_MTCYBP4   | ENSG00000160789.18_LMNA | -0.03927 | -0.197234937 | 0.120687944 | 6.31E-01 | 8.34E-01 | 1.00E+00 |
| ENSG00000240733.3_RN7SL502F | ENSG00000160789.18_LMNA | -0.0728  | -0.22934556  | 0.087410778 | 3.73E-01 | 6.53E-01 | 1.00E+00 |
| ENSG00000231471.1_HMGN2P34  | ENSG00000160789.18_LMNA | -0.12331 | -0.277069599 | 0.036611439 | 1.30E-01 | 3.66E-01 | 1.00E+00 |
| ENSG00000271736.1_RP11-85G2 | ENSG00000160789.18_LMNA | 0.18843  | 0.030129422  | 0.337502743 | 2.01E-02 | 1.08E-01 | 1.00E+00 |
| ENSG00000240235.3_RN7SL794F | ENSG00000160789.18_LMNA | 0.0217   | -0.137973278 | 0.180281936 | 7.91E-01 | 9.15E-01 | 1.00E+00 |
| ENSG00000251550.1_RP11-501C | ENSG00000160789.18_LMNA | -0.06256 | -0.219574243 | 0.097612463 | 4.44E-01 | 7.11E-01 | 1.00E+00 |
| ENSG00000253660.1_CTC-353G1 | ENSG00000160789.18_LMNA | -0.16674 | -0.317509983 | -0.00774231 | 4.01E-02 | 1.74E-01 | 1.00E+00 |
| ENSG00000243051.3_RN7SL269F | ENSG00000160789.18_LMNA | -0.13876 | -0.291520853 | 0.020902401 | 8.82E-02 | 2.89E-01 | 1.00E+00 |
| ENSG00000253220.1_RP11-103H | ENSG00000160789.18_LMNA | -0.19151 | -0.340331724 | -0.03332231 | 1.81E-02 | 1.00E-01 | 1.00E+00 |
| ENSG00000259931.2_CTD-2323K | ENSG00000160789.18_LMNA | 0.01146  | -0.148013366 | 0.1703473   | 8.89E-01 | 9.57E-01 | 1.00E+00 |
| ENSG00000234521.1_AC005041. | ENSG00000160789.18_LMNA | -0.17346 | -0.323720463 | -0.01466348 | 3.26E-02 | 1.51E-01 | 1.00E+00 |
| ENSG00000230671.2_NDUFS5P5  | ENSG00000160789.18_LMNA | -0.03597 | -0.194060762 | 0.123939078 | 6.60E-01 | 8.50E-01 | 1.00E+00 |

|                              |                         |          |              |             |          |          |          |
|------------------------------|-------------------------|----------|--------------|-------------|----------|----------|----------|
| ENSG00000272312.1_RP11-239L  | ENSG00000160789.18_LMNA | -0.03204 | -0.19027466  | 0.127808069 | 6.95E-01 | 8.69E-01 | 1.00E+00 |
| ENSG00000263882.2_RN7SL774F  | ENSG00000160789.18_LMNA | 0.07429  | -0.085925857 | 0.230762535 | 3.63E-01 | 6.45E-01 | 1.00E+00 |
| ENSG00000266863.2_RN7SL123F  | ENSG00000160789.18_LMNA | 0.09713  | -0.063049117 | 0.252424057 | 2.34E-01 | 5.12E-01 | 1.00E+00 |
| ENSG00000269902.1_RP6-99M1.  | ENSG00000160789.18_LMNA | 0.13821  | -0.021461606 | 0.291008858 | 8.95E-02 | 2.91E-01 | 1.00E+00 |
| ENSG00000255649.1_RP11-502N  | ENSG00000160789.18_LMNA | -0.02902 | -0.187351314 | 0.130788806 | 7.23E-01 | 8.83E-01 | 1.00E+00 |
| ENSG00000211806.2_TRAV25     | ENSG00000160789.18_LMNA | 0.1427   | -0.016880166 | 0.295198246 | 7.95E-02 | 2.71E-01 | 1.00E+00 |
| ENSG00000213403.2_CISD1P1    | ENSG00000160789.18_LMNA | -0.02564 | -0.184091493 | 0.134105856 | 7.54E-01 | 8.98E-01 | 1.00E+00 |
| ENSG00000278698.1_RP11-282A  | ENSG00000160789.18_LMNA | -0.05537 | -0.212695373 | 0.104754547 | 4.98E-01 | 7.51E-01 | 1.00E+00 |
| ENSG00000258713.2_C20orf141  | ENSG00000160789.18_LMNA | 0.09677  | -0.063408975 | 0.252085745 | 2.36E-01 | 5.14E-01 | 1.00E+00 |
| ENSG00000258544.1_GLRXP2     | ENSG00000160789.18_LMNA | 0.2027   | 0.044954299  | 0.350591186 | 1.23E-02 | 7.59E-02 | 1.00E+00 |
| ENSG00000261706.1_LINC00165  | ENSG00000160789.18_LMNA | -0.08868 | -0.244430628 | 0.071529754 | 2.77E-01 | 5.62E-01 | 1.00E+00 |
| ENSG00000229792.1_LINC00399  | ENSG00000160789.18_LMNA | -0.08685 | -0.24269339  | 0.073366854 | 2.87E-01 | 5.73E-01 | 1.00E+00 |
| ENSG00000248673.1_LINC01331  | ENSG00000160789.18_LMNA | -0.22454 | -0.37049977  | -0.06776524 | 5.42E-03 | 4.16E-02 | 1.00E+00 |
| ENSG00000276645.1_Metazoa_SI | ENSG00000160789.18_LMNA | 0.00074  | -0.15847495  | 0.159926282 | 9.93E-01 | 9.97E-01 | 1.00E+00 |
| ENSG00000251206.1_CTD-2187J  | ENSG00000160789.18_LMNA | 0.11858  | -0.041403995 | 0.272632338 | 1.46E-01 | 3.91E-01 | 1.00E+00 |
| ENSG00000224394.1_GPC6-AS2   | ENSG00000160789.18_LMNA | -0.12103 | -0.274934627 | 0.038919162 | 1.37E-01 | 3.78E-01 | 1.00E+00 |
| ENSG00000271649.1_LINC00904  | ENSG00000160789.18_LMNA | -0.17011 | -0.320629465 | -0.01121506 | 3.61E-02 | 1.62E-01 | 1.00E+00 |
| ENSG00000225244.3_RP11-220H  | ENSG00000160789.18_LMNA | 0.11503  | -0.044990712 | 0.269302757 | 1.58E-01 | 4.11E-01 | 1.00E+00 |
| ENSG00000215297.3_RP11-62E1  | ENSG00000160789.18_LMNA | 0.0234   | -0.136310441 | 0.181921064 | 7.75E-01 | 9.07E-01 | 1.00E+00 |
| ENSG00000226377.1_AC084809.  | ENSG00000160789.18_LMNA | -0.06192 | -0.218964939 | 0.098246403 | 4.49E-01 | 7.15E-01 | 1.00E+00 |
| ENSG00000188646.6_RP11-361A  | ENSG00000160789.18_LMNA | -0.03512 | -0.193240078 | 0.124778551 | 6.68E-01 | 8.54E-01 | 1.00E+00 |
| ENSG00000253562.1_CTD-2340D  | ENSG00000160789.18_LMNA | 0.02544  | -0.134307568 | 0.183893035 | 7.56E-01 | 8.98E-01 | 1.00E+00 |
| ENSG00000230965.1_SNX18P13   | ENSG00000160789.18_LMNA | -0.0227  | -0.181245108 | 0.136996392 | 7.81E-01 | 9.10E-01 | 1.00E+00 |
| ENSG00000241187.1_CTC-209L1  | ENSG00000160789.18_LMNA | -0.05998 | -0.21710514  | 0.100179808 | 4.63E-01 | 7.26E-01 | 1.00E+00 |
| ENSG00000213126.2_AC092642.  | ENSG00000160789.18_LMNA | 0.04742  | -0.112626059 | 0.205077329 | 5.62E-01 | 7.93E-01 | 1.00E+00 |
| ENSG00000228453.1_RPS15AP9   | ENSG00000160789.18_LMNA | 0.08093  | -0.079289726 | 0.237078643 | 3.22E-01 | 6.08E-01 | 1.00E+00 |
| ENSG00000223944.1_RP5-1180C  | ENSG00000160789.18_LMNA | -0.194   | -0.342614443 | -0.03590324 | 1.66E-02 | 9.45E-02 | 1.00E+00 |
| ENSG00000280092.1_AC002044.  | ENSG00000160789.18_LMNA | -0.05836 | -0.215560466 | 0.101783796 | 4.75E-01 | 7.34E-01 | 1.00E+00 |
| ENSG00000230260.1_RP11-75C2  | ENSG00000160789.18_LMNA | -0.23562 | -0.380549431 | -0.07940146 | 3.48E-03 | 2.99E-02 | 1.00E+00 |
| ENSG00000269445.1_AC067969.  | ENSG00000160789.18_LMNA | -0.07849 | -0.23475846  | 0.08173073  | 3.36E-01 | 6.22E-01 | 1.00E+00 |
| ENSG00000264695.1_RP11-178F  | ENSG00000160789.18_LMNA | 0.0535   | -0.106610003 | 0.210903133 | 5.13E-01 | 7.61E-01 | 1.00E+00 |
| ENSG00000233902.1_XXbac-BPG  | ENSG00000160789.18_LMNA | -0.02417 | -0.182666256 | 0.135553877 | 7.68E-01 | 9.04E-01 | 1.00E+00 |
| ENSG00000264529.1_RP11-556C  | ENSG00000160789.18_LMNA | -0.15165 | -0.303518796 | 0.007741934 | 6.22E-02 | 2.31E-01 | 1.00E+00 |

|                             |                         |          |              |             |          |          |          |
|-----------------------------|-------------------------|----------|--------------|-------------|----------|----------|----------|
| ENSG00000233581.1_AC069155. | ENSG00000160789.18_LMNA | 0.03166  | -0.12818878  | 0.189901593 | 6.99E-01 | 8.71E-01 | 1.00E+00 |
| ENSG00000228391.1_AC011995. | ENSG00000160789.18_LMNA | -0.0065  | -0.165528983 | 0.152859311 | 9.37E-01 | 9.75E-01 | 1.00E+00 |
| ENSG00000247372.2_CTD-2235C | ENSG00000160789.18_LMNA | 0.07129  | -0.088915313 | 0.227908497 | 3.83E-01 | 6.61E-01 | 1.00E+00 |
| ENSG00000237816.1_RPL21P10  | ENSG00000160789.18_LMNA | -0.09654 | -0.25187414  | 0.063634015 | 2.37E-01 | 5.15E-01 | 1.00E+00 |
| ENSG00000242317.1_RP11-875H | ENSG00000160789.18_LMNA | -0.02513 | -0.183599446 | 0.134605923 | 7.59E-01 | 8.99E-01 | 1.00E+00 |
| ENSG00000263257.1_RP11-65J2 | ENSG00000160789.18_LMNA | 0.00721  | -0.152166924 | 0.166218355 | 9.30E-01 | 9.73E-01 | 1.00E+00 |
| ENSG00000253468.1_KB-1517D1 | ENSG00000160789.18_LMNA | 0.01287  | -0.146630726 | 0.171719272 | 8.75E-01 | 9.51E-01 | 1.00E+00 |
| ENSG00000264050.1_RP11-22N1 | ENSG00000160789.18_LMNA | -0.11902 | -0.273046097 | 0.040957716 | 1.44E-01 | 3.88E-01 | 1.00E+00 |
| ENSG00000134389.9_CFHR5     | ENSG00000160789.18_LMNA | -0.01214 | -0.171009486 | 0.147346187 | 8.82E-01 | 9.54E-01 | 1.00E+00 |
| ENSG00000231404.2_RAC1P3    | ENSG00000160789.18_LMNA | 0.00679  | -0.152579875 | 0.165807239 | 9.34E-01 | 9.74E-01 | 1.00E+00 |
| ENSG00000169662.8_BCRP6     | ENSG00000160789.18_LMNA | -0.04394 | -0.201727164 | 0.116075114 | 5.91E-01 | 8.10E-01 | 1.00E+00 |
| ENSG00000259457.1_RP11-279F | ENSG00000160789.18_LMNA | -0.27016 | -0.411654473 | -0.11594484 | 7.62E-04 | 9.35E-03 | 1.00E+00 |
| ENSG00000232994.1_RPL7P14   | ENSG00000160789.18_LMNA | -0.0161  | -0.17485365  | 0.143467301 | 8.44E-01 | 9.39E-01 | 1.00E+00 |
| ENSG00000232530.1_RP1-102K2 | ENSG00000160789.18_LMNA | 0.20826  | 0.050741939  | 0.355668723 | 1.00E-02 | 6.58E-02 | 1.00E+00 |
| ENSG00000229853.1_RP5-1049G | ENSG00000160789.18_LMNA | -0.18178 | -0.331391963 | -0.02325393 | 2.50E-02 | 1.26E-01 | 1.00E+00 |
| ENSG00000205678.6_TECRL     | ENSG00000160789.18_LMNA | -0.08582 | -0.241714302 | 0.07440128  | 2.93E-01 | 5.79E-01 | 1.00E+00 |
| ENSG00000234900.1_RP1-278O2 | ENSG00000160789.18_LMNA | 0.01678  | -0.142805143 | 0.175508912 | 8.37E-01 | 9.37E-01 | 1.00E+00 |
| ENSG00000254544.1_PCNP4     | ENSG00000160789.18_LMNA | 0.07377  | -0.086447435 | 0.230264976 | 3.66E-01 | 6.47E-01 | 1.00E+00 |
| ENSG00000226899.1_RP11-298J | ENSG00000160789.18_LMNA | -0.10355 | -0.258492803 | 0.056579905 | 2.04E-01 | 4.76E-01 | 1.00E+00 |
| ENSG00000227480.2_CCDC148   | ENSG00000160789.18_LMNA | -0.06105 | -0.218127631 | 0.099117145 | 4.55E-01 | 7.20E-01 | 1.00E+00 |
| ENSG00000226885.1_E2F6P3    | ENSG00000160789.18_LMNA | -0.02095 | -0.179547834 | 0.138717417 | 7.98E-01 | 9.19E-01 | 1.00E+00 |
| ENSG00000186543.7_CROCCP5   | ENSG00000160789.18_LMNA | 0.21499  | 0.057770077  | 0.361810451 | 7.82E-03 | 5.46E-02 | 1.00E+00 |
| ENSG00000230833.1_RPEP3     | ENSG00000160789.18_LMNA | 0.13178  | -0.028011774 | 0.284998328 | 1.06E-01 | 3.22E-01 | 1.00E+00 |
| ENSG00000233869.1_RPSAP27   | ENSG00000160789.18_LMNA | 0.02461  | -0.135118843 | 0.183094585 | 7.63E-01 | 9.02E-01 | 1.00E+00 |
| ENSG00000251009.2_RP13-494C | ENSG00000160789.18_LMNA | -0.02033 | -0.178955598 | 0.139317488 | 8.04E-01 | 9.21E-01 | 1.00E+00 |
| ENSG00000179913.9_B3GNT3    | ENSG00000160789.18_LMNA | 0.10016  | -0.059999985 | 0.255287533 | 2.20E-01 | 4.95E-01 | 1.00E+00 |
| ENSG00000249833.4_CCDC37-A  | ENSG00000160789.18_LMNA | 0.02858  | -0.131216446 | 0.186931445 | 7.27E-01 | 8.84E-01 | 1.00E+00 |
| ENSG00000224863.1_LINC01398 | ENSG00000160789.18_LMNA | 0.00978  | -0.149655435 | 0.168716297 | 9.05E-01 | 9.63E-01 | 1.00E+00 |
| ENSG00000230520.1_RP11-533K | ENSG00000160789.18_LMNA | -0.00995 | -0.168880319 | 0.149490379 | 9.03E-01 | 9.63E-01 | 1.00E+00 |
| ENSG00000260861.5_RP4-576H2 | ENSG00000160789.18_LMNA | -0.02511 | -0.183572752 | 0.134633047 | 7.59E-01 | 8.99E-01 | 1.00E+00 |
| ENSG00000120210.6_INSL6     | ENSG00000160789.18_LMNA | -0.00715 | -0.166161096 | 0.152224445 | 9.30E-01 | 9.73E-01 | 1.00E+00 |
| ENSG00000248521.1_RP11-174F | ENSG00000160789.18_LMNA | 0.09239  | -0.067803441 | 0.247948163 | 2.58E-01 | 5.40E-01 | 1.00E+00 |
| ENSG00000255733.4_IFNG-AS1  | ENSG00000160789.18_LMNA | 0.00022  | -0.158990575 | 0.159410814 | 9.98E-01 | 9.99E-01 | 1.00E+00 |

|                              |                         |          |              |             |          |          |          |
|------------------------------|-------------------------|----------|--------------|-------------|----------|----------|----------|
| ENSG00000234466.1_RP11-266I3 | ENSG00000160789.18_LMNA | 0.01761  | -0.141992972 | 0.176312241 | 8.30E-01 | 9.33E-01 | 1.00E+00 |
| ENSG00000266049.1_RP11-703M  | ENSG00000160789.18_LMNA | -0.00477 | -0.163849496 | 0.154544837 | 9.53E-01 | 9.81E-01 | 1.00E+00 |
| ENSG00000241884.2_RP11-85I21 | ENSG00000160789.18_LMNA | 0.02874  | -0.131055519 | 0.187089462 | 7.25E-01 | 8.84E-01 | 1.00E+00 |
| ENSG00000227427.1_RP1-49C23  | ENSG00000160789.18_LMNA | -0.14187 | -0.294418968 | 0.017733364 | 8.13E-02 | 2.75E-01 | 1.00E+00 |
| ENSG00000230133.1_FLJ33581   | ENSG00000160789.18_LMNA | -0.31077 | -0.447818312 | -0.15946235 | 9.75E-05 | 1.84E-03 | 1.00E+00 |
| ENSG00000233671.1_AC083899.  | ENSG00000160789.18_LMNA | 0.1229   | -0.037023691 | 0.276688434 | 1.31E-01 | 3.68E-01 | 1.00E+00 |
| ENSG00000215805.3_RP11-438O  | ENSG00000160789.18_LMNA | -0.13445 | -0.287499006 | 0.025289842 | 9.86E-02 | 3.09E-01 | 1.00E+00 |
| ENSG00000121351.6_IAPP       | ENSG00000160789.18_LMNA | -0.271   | -0.412411846 | -0.11684472 | 7.33E-04 | 9.07E-03 | 1.00E+00 |
| ENSG00000145879.9_SPINK7     | ENSG00000160789.18_LMNA | -0.13864 | -0.291404798 | 0.021029174 | 8.85E-02 | 2.90E-01 | 1.00E+00 |
| ENSG00000224346.1_BICD1P1    | ENSG00000160789.18_LMNA | 0.08792  | -0.072293427 | 0.243708713 | 2.81E-01 | 5.67E-01 | 1.00E+00 |
| ENSG00000203635.2_AC144450.  | ENSG00000160789.18_LMNA | 0.0292   | -0.130603757 | 0.187532964 | 7.21E-01 | 8.82E-01 | 1.00E+00 |
| ENSG00000228036.1_HSPD1P9    | ENSG00000160789.18_LMNA | 0.04025  | -0.119712961 | 0.198185543 | 6.22E-01 | 8.29E-01 | 1.00E+00 |
| ENSG00000234119.1_AC079248.  | ENSG00000160789.18_LMNA | 0.00923  | -0.150187765 | 0.168187179 | 9.10E-01 | 9.66E-01 | 1.00E+00 |
| ENSG00000227238.1_TTC39DP    | ENSG00000160789.18_LMNA | 0.1049   | -0.055227182 | 0.259758652 | 1.98E-01 | 4.68E-01 | 1.00E+00 |
| ENSG00000101812.11_H2BFM     | ENSG00000160789.18_LMNA | -0.17066 | -0.321135267 | -0.01177884 | 3.55E-02 | 1.60E-01 | 1.00E+00 |
| ENSG00000278896.1_RP11-474P  | ENSG00000160789.18_LMNA | -0.01823 | -0.176918706 | 0.141379547 | 8.24E-01 | 9.31E-01 | 1.00E+00 |
| ENSG00000186766.7_FOXI2      | ENSG00000160789.18_LMNA | -0.03428 | -0.192429248 | 0.125607497 | 6.75E-01 | 8.58E-01 | 1.00E+00 |
| ENSG00000234828.6_RP11-526A  | ENSG00000160789.18_LMNA | -0.07813 | -0.234418172 | 0.082088419 | 3.39E-01 | 6.24E-01 | 1.00E+00 |
| ENSG00000279548.1_CTA-243E7  | ENSG00000160789.18_LMNA | -0.01494 | -0.173724344 | 0.144607822 | 8.55E-01 | 9.43E-01 | 1.00E+00 |
| ENSG00000204117.1_RP4-640H8  | ENSG00000160789.18_LMNA | 0.02102  | -0.138644461 | 0.179619822 | 7.97E-01 | 9.18E-01 | 1.00E+00 |
| ENSG00000242094.1_FOXP1-IT1  | ENSG00000160789.18_LMNA | -0.05    | -0.207544134 | 0.110081536 | 5.41E-01 | 7.80E-01 | 1.00E+00 |
| ENSG00000261043.3_MIR4313    | ENSG00000160789.18_LMNA | 0.0572   | -0.102934915 | 0.214450936 | 4.84E-01 | 7.41E-01 | 1.00E+00 |
| ENSG00000236678.6_LINC00347  | ENSG00000160789.18_LMNA | -0.05837 | -0.215570909 | 0.101772958 | 4.75E-01 | 7.34E-01 | 1.00E+00 |
| ENSG00000232913.6_PLCE1-AS2  | ENSG00000160789.18_LMNA | 0.02042  | -0.139232566 | 0.179039426 | 8.03E-01 | 9.21E-01 | 1.00E+00 |
| ENSG00000188386.5_PPP3R2     | ENSG00000160789.18_LMNA | -0.01516 | -0.173944259 | 0.14438579  | 8.53E-01 | 9.42E-01 | 1.00E+00 |
| ENSG00000251158.1_RP11-98J2: | ENSG00000160789.18_LMNA | -0.10574 | -0.260553366 | 0.054377337 | 1.95E-01 | 4.64E-01 | 1.00E+00 |
| ENSG00000204941.12_PSG5      | ENSG00000160789.18_LMNA | 0.02376  | -0.135956396 | 0.182269833 | 7.71E-01 | 9.06E-01 | 1.00E+00 |
| ENSG00000132297.10_HHLA1     | ENSG00000160789.18_LMNA | -0.08175 | -0.237850517 | 0.078476815 | 3.17E-01 | 6.04E-01 | 1.00E+00 |
| ENSG00000201382.1_RNU6-558F  | ENSG00000160789.18_LMNA | -0.07416 | -0.230633761 | 0.086060864 | 3.64E-01 | 6.45E-01 | 1.00E+00 |
| ENSG00000257817.1_RP4-601P9  | ENSG00000160789.18_LMNA | -0.31026 | -0.447365137 | -0.15891    | 1.00E-04 | 1.89E-03 | 1.00E+00 |
| ENSG00000211942.3_IGHV3-13   | ENSG00000160789.18_LMNA | 0.0468   | -0.11323977  | 0.204481758 | 5.67E-01 | 7.97E-01 | 1.00E+00 |
| ENSG00000251546.1_IGKV1D-39  | ENSG00000160789.18_LMNA | 0.01083  | -0.148624474 | 0.169740514 | 8.95E-01 | 9.59E-01 | 1.00E+00 |
| ENSG00000252986.1_           | ENSG00000160789.18_LMNA | -0.01097 | -0.169877907 | 0.148486124 | 8.93E-01 | 9.58E-01 | 1.00E+00 |

|                              |                         |          |              |             |          |          |          |
|------------------------------|-------------------------|----------|--------------|-------------|----------|----------|----------|
| ENSG00000277653.1_CDKN2B-A   | ENSG00000160789.18_LMNA | 0.04867  | -0.11139592  | 0.2062704   | 5.52E-01 | 7.87E-01 | 1.00E+00 |
| ENSG00000273830.1_MIR7843    | ENSG00000160789.18_LMNA | -0.00773 | -0.166724463 | 0.151658403 | 9.25E-01 | 9.71E-01 | 1.00E+00 |
| ENSG00000236717.2_RP11-100G  | ENSG00000160789.18_LMNA | 0.09141  | -0.068787802 | 0.247019762 | 2.63E-01 | 5.46E-01 | 1.00E+00 |
| ENSG00000201134.1_Y_RNA      | ENSG00000160789.18_LMNA | 0.11222  | -0.047835061 | 0.266656971 | 1.69E-01 | 4.27E-01 | 1.00E+00 |
| ENSG00000232155.1_AF277315.1 | ENSG00000160789.18_LMNA | -0.14084 | -0.293465047 | 0.018777152 | 8.35E-02 | 2.79E-01 | 1.00E+00 |
| ENSG00000222455.1_RNA5SP29   | ENSG00000160789.18_LMNA | 0.13325  | -0.026508632 | 0.286379813 | 1.02E-01 | 3.15E-01 | 1.00E+00 |
| ENSG00000240671.2_IGKV1-8    | ENSG00000160789.18_LMNA | 0.01299  | -0.146512483 | 0.171836546 | 8.74E-01 | 9.51E-01 | 1.00E+00 |
| ENSG00000199306.1_RNU6-858F  | ENSG00000160789.18_LMNA | 0.10754  | -0.052564    | 0.262247641 | 1.87E-01 | 4.54E-01 | 1.00E+00 |
| ENSG00000221562.1_RNU6ATAC   | ENSG00000160789.18_LMNA | 0.05095  | -0.109132928 | 0.208462736 | 5.33E-01 | 7.75E-01 | 1.00E+00 |
| ENSG00000200388.1_RNU6-618F  | ENSG00000160789.18_LMNA | 0.04614  | -0.113900329 | 0.203840461 | 5.72E-01 | 8.00E-01 | 1.00E+00 |
| ENSG00000207171.1_SNORA51    | ENSG00000160789.18_LMNA | 0.11359  | -0.046450783 | 0.267945206 | 1.64E-01 | 4.19E-01 | 1.00E+00 |
| ENSG00000199836.1_RNU1-47P   | ENSG00000160789.18_LMNA | 0.04168  | -0.118305048 | 0.1995572   | 6.10E-01 | 8.22E-01 | 1.00E+00 |
| ENSG00000238117.1_AP004372.1 | ENSG00000160789.18_LMNA | 0.20581  | 0.048188751  | 0.35343101  | 1.10E-02 | 7.00E-02 | 1.00E+00 |
| ENSG00000223946.1_RP11-533C  | ENSG00000160789.18_LMNA | -0.03762 | -0.195650204 | 0.122311953 | 6.45E-01 | 8.42E-01 | 1.00E+00 |
| ENSG00000280440.1_AC002064.1 | ENSG00000160789.18_LMNA | 0.0502   | -0.10987883  | 0.207740476 | 5.39E-01 | 7.79E-01 | 1.00E+00 |
| ENSG00000229646.2_RP11-330A  | ENSG00000160789.18_LMNA | 0.15969  | 0.000506315  | 0.310988456 | 4.94E-02 | 2.00E-01 | 1.00E+00 |
| ENSG00000239398.3_RN7SL342F  | ENSG00000160789.18_LMNA | 0.05973  | -0.100427183 | 0.216867016 | 4.65E-01 | 7.27E-01 | 1.00E+00 |
| ENSG00000278218.1_uc_338     | ENSG00000160789.18_LMNA | -0.06774 | -0.224520141 | 0.092457045 | 4.07E-01 | 6.82E-01 | 1.00E+00 |
| ENSG00000231412.2_CTC-490G2  | ENSG00000160789.18_LMNA | -0.07368 | -0.230176565 | 0.086540096 | 3.67E-01 | 6.48E-01 | 1.00E+00 |
| ENSG00000243704.3_RN7SL105F  | ENSG00000160789.18_LMNA | 0.0787   | -0.081525998 | 0.234953197 | 3.35E-01 | 6.21E-01 | 1.00E+00 |
| ENSG00000227002.2_SNRPEP10   | ENSG00000160789.18_LMNA | 0.00331  | -0.15597686  | 0.162421152 | 9.68E-01 | 9.87E-01 | 1.00E+00 |
| ENSG00000260068.1_RP11-439I1 | ENSG00000160789.18_LMNA | -0.09067 | -0.246313563 | 0.069536156 | 2.67E-01 | 5.51E-01 | 1.00E+00 |
| ENSG00000272088.1_RP11-168F  | ENSG00000160789.18_LMNA | -0.20706 | -0.354572517 | -0.04949069 | 1.05E-02 | 6.78E-02 | 1.00E+00 |
| ENSG00000267693.1_CTC-559E9  | ENSG00000160789.18_LMNA | 0.08805  | -0.072159076 | 0.243835743 | 2.81E-01 | 5.66E-01 | 1.00E+00 |
| ENSG00000238225.1_CRIP1P2    | ENSG00000160789.18_LMNA | 0.11134  | -0.048725706 | 0.265827526 | 1.72E-01 | 4.31E-01 | 1.00E+00 |
| ENSG00000250580.1_SNRPCP8    | ENSG00000160789.18_LMNA | -0.09438 | -0.249828418 | 0.065807967 | 2.47E-01 | 5.28E-01 | 1.00E+00 |
| ENSG00000228667.1_RP11-129C  | ENSG00000160789.18_LMNA | -0.09348 | -0.248975733 | 0.066713216 | 2.52E-01 | 5.33E-01 | 1.00E+00 |
| ENSG00000275743.1_TRBV14     | ENSG00000160789.18_LMNA | 0.05384  | -0.106272652 | 0.211229149 | 5.10E-01 | 7.59E-01 | 1.00E+00 |
| ENSG00000225750.1_RP11-242C  | ENSG00000160789.18_LMNA | 0.10078  | -0.059369874 | 0.255878589 | 2.17E-01 | 4.91E-01 | 1.00E+00 |
| ENSG00000274670.1_RP13-820C  | ENSG00000160789.18_LMNA | -0.05512 | -0.212460279 | 0.104998058 | 5.00E-01 | 7.53E-01 | 1.00E+00 |
| ENSG00000237180.1_CYP46A4P   | ENSG00000160789.18_LMNA | -0.16656 | -0.317345845 | -0.00755979 | 4.03E-02 | 1.74E-01 | 1.00E+00 |
| ENSG00000270333.1_RP11-566F  | ENSG00000160789.18_LMNA | -0.07066 | -0.227299642 | 0.08955232  | 3.87E-01 | 6.65E-01 | 1.00E+00 |
| ENSG00000241451.2_RPS27P22   | ENSG00000160789.18_LMNA | 0.11597  | -0.044048499 | 0.27017815  | 1.55E-01 | 4.06E-01 | 1.00E+00 |

|                              |                         |          |              |             |          |          |          |
|------------------------------|-------------------------|----------|--------------|-------------|----------|----------|----------|
| ENSG00000232678.2_SPTLC1P4   | ENSG00000160789.18_LMNA | 0.10694  | -0.053170712 | 0.261680981 | 1.90E-01 | 4.57E-01 | 1.00E+00 |
| ENSG00000229379.1_AC006041.  | ENSG00000160789.18_LMNA | -0.0263  | -0.184722569 | 0.133464257 | 7.48E-01 | 8.95E-01 | 1.00E+00 |
| ENSG00000228829.1_AC005077.  | ENSG00000160789.18_LMNA | 0.15291  | -0.006449863 | 0.304691436 | 6.00E-02 | 2.26E-01 | 1.00E+00 |
| ENSG00000278794.1_Metazoa_S  | ENSG00000160789.18_LMNA | 0.02198  | -0.137706732 | 0.1805448   | 7.88E-01 | 9.14E-01 | 1.00E+00 |
| ENSG00000235996.1_RP11-97N1  | ENSG00000160789.18_LMNA | -0.08642 | -0.242284516 | 0.07379892  | 2.90E-01 | 5.75E-01 | 1.00E+00 |
| ENSG00000237606.2_RP11-203P  | ENSG00000160789.18_LMNA | -0.08713 | -0.24296467  | 0.073080122 | 2.86E-01 | 5.71E-01 | 1.00E+00 |
| ENSG00000187762.5_HSPE1P11   | ENSG00000160789.18_LMNA | 0.08158  | -0.078645619 | 0.237690268 | 3.18E-01 | 6.04E-01 | 1.00E+00 |
| ENSG00000261244.1_RP11-114H  | ENSG00000160789.18_LMNA | 0.05853  | -0.101620208 | 0.215718078 | 4.74E-01 | 7.33E-01 | 1.00E+00 |
| ENSG00000274507.1_RP5-965G2  | ENSG00000160789.18_LMNA | 0.07994  | -0.080281144 | 0.236136732 | 3.28E-01 | 6.14E-01 | 1.00E+00 |
| ENSG00000229206.3_RP11-397O  | ENSG00000160789.18_LMNA | -0.03712 | -0.195164071 | 0.122809792 | 6.50E-01 | 8.45E-01 | 1.00E+00 |
| ENSG00000265592.2_           | ENSG00000160789.18_LMNA | 0.05354  | -0.106566915 | 0.210944778 | 5.12E-01 | 7.61E-01 | 1.00E+00 |
| ENSG00000213310.3_CYCSP19    | ENSG00000160789.18_LMNA | -0.06009 | -0.217215912 | 0.100064719 | 4.62E-01 | 7.25E-01 | 1.00E+00 |
| ENSG00000230945.1_LINC01507  | ENSG00000160789.18_LMNA | -0.28808 | -0.42766336  | -0.13506999 | 3.20E-04 | 4.72E-03 | 1.00E+00 |
| ENSG00000277128.1_RP11-146E  | ENSG00000160789.18_LMNA | 0.01063  | -0.14882114  | 0.169545188 | 8.97E-01 | 9.60E-01 | 1.00E+00 |
| ENSG00000259752.2_AC066615.  | ENSG00000160789.18_LMNA | -0.0434  | -0.201212087 | 0.116604716 | 5.95E-01 | 8.13E-01 | 1.00E+00 |
| ENSG00000266987.1_RP11-354P  | ENSG00000160789.18_LMNA | 0.16767  | 0.008700168  | 0.318371071 | 3.89E-02 | 1.70E-01 | 1.00E+00 |
| ENSG00000222337.1_RN7SKP22   | ENSG00000160789.18_LMNA | -0.12293 | -0.276712482 | 0.036997686 | 1.31E-01 | 3.67E-01 | 1.00E+00 |
| ENSG00000241134.3_BET1P1     | ENSG00000160789.18_LMNA | -0.06193 | -0.218972285 | 0.098238761 | 4.48E-01 | 7.15E-01 | 1.00E+00 |
| ENSG00000224662.2_ATP6V1G1   | ENSG00000160789.18_LMNA | -0.04085 | -0.198757614 | 0.119125924 | 6.17E-01 | 8.27E-01 | 1.00E+00 |
| ENSG00000238120.1_LINC01589  | ENSG00000160789.18_LMNA | 0.04063  | -0.119345179 | 0.198543974 | 6.19E-01 | 8.28E-01 | 1.00E+00 |
| ENSG00000253512.1_CTC-535M1  | ENSG00000160789.18_LMNA | -0.01881 | -0.177474699 | 0.140816958 | 8.18E-01 | 9.29E-01 | 1.00E+00 |
| ENSG00000189181.4_OR14I1     | ENSG00000160789.18_LMNA | -0.18159 | -0.331213609 | -0.02305369 | 2.52E-02 | 1.27E-01 | 1.00E+00 |
| ENSG00000185662.7_SMIM23     | ENSG00000160789.18_LMNA | 0.04775  | -0.112300837 | 0.205392843 | 5.59E-01 | 7.92E-01 | 1.00E+00 |
| ENSG00000258870.1_EIF4EBP1F  | ENSG00000160789.18_LMNA | 0.18532  | 0.026912246  | 0.334646612 | 2.23E-02 | 1.17E-01 | 1.00E+00 |
| ENSG00000224685.1_RP11-84O1  | ENSG00000160789.18_LMNA | 0.04183  | -0.118154226 | 0.199704064 | 6.09E-01 | 8.21E-01 | 1.00E+00 |
| ENSG00000220237.1_RPS24P12   | ENSG00000160789.18_LMNA | -0.0112  | -0.170100691 | 0.148261761 | 8.91E-01 | 9.57E-01 | 1.00E+00 |
| ENSG00000255354.1_RP11-148O  | ENSG00000160789.18_LMNA | -0.03166 | -0.18990198  | 0.128188385 | 6.99E-01 | 8.71E-01 | 1.00E+00 |
| ENSG00000233844.1_KCNQ5-IT1  | ENSG00000160789.18_LMNA | -0.16949 | -0.320056848 | -0.01057704 | 3.68E-02 | 1.64E-01 | 1.00E+00 |
| ENSG00000241179.1_CTB-2L9.1  | ENSG00000160789.18_LMNA | 0.11474  | -0.045283409 | 0.269030712 | 1.59E-01 | 4.12E-01 | 1.00E+00 |
| ENSG00000248511.1_RP11-9B6.1 | ENSG00000160789.18_LMNA | -0.33801 | -0.471823802 | -0.18898158 | 2.05E-05 | 5.28E-04 | 1.00E+00 |
| ENSG00000279188.1_           | ENSG00000160789.18_LMNA | 0.12269  | -0.037238467 | 0.276489815 | 1.32E-01 | 3.69E-01 | 1.00E+00 |
| ENSG00000257035.1_RP11-351O  | ENSG00000160789.18_LMNA | -0.15996 | -0.311235556 | -0.00077989 | 4.90E-02 | 1.99E-01 | 1.00E+00 |
| ENSG00000228997.1_RP1-186E2  | ENSG00000160789.18_LMNA | -0.02972 | -0.188027501 | 0.130099855 | 7.16E-01 | 8.79E-01 | 1.00E+00 |



|                              |                         |          |              |             |          |          |          |
|------------------------------|-------------------------|----------|--------------|-------------|----------|----------|----------|
| ENSG00000257875.1_RP11-263K  | ENSG00000160789.18_LMNA | -0.04107 | -0.198974135 | 0.11890368  | 6.15E-01 | 8.26E-01 | 1.00E+00 |
| ENSG00000253335.1_RP11-420B  | ENSG00000160789.18_LMNA | 0.0788   | -0.08141798  | 0.235055931 | 3.35E-01 | 6.20E-01 | 1.00E+00 |
| ENSG00000264659.1_CTD-2006K  | ENSG00000160789.18_LMNA | -0.00656 | -0.165585153 | 0.152802907 | 9.36E-01 | 9.75E-01 | 1.00E+00 |
| ENSG00000248229.1_RP11-366M  | ENSG00000160789.18_LMNA | -0.11087 | -0.265389829 | 0.049195496 | 1.74E-01 | 4.34E-01 | 1.00E+00 |
| ENSG00000274378.1_RP11-178C  | ENSG00000160789.18_LMNA | 0.0245   | -0.135224603 | 0.182990467 | 7.64E-01 | 9.02E-01 | 1.00E+00 |
| ENSG00000254303.1_RP11-398G  | ENSG00000160789.18_LMNA | -0.13012 | -0.283451831 | 0.029692782 | 1.10E-01 | 3.31E-01 | 1.00E+00 |
| ENSG00000213664.4_RPS16P8    | ENSG00000160789.18_LMNA | -0.1715  | -0.321914878 | -0.01264821 | 3.46E-02 | 1.57E-01 | 1.00E+00 |
| ENSG00000255243.1_CTD-2507C  | ENSG00000160789.18_LMNA | -0.10776 | -0.262460889 | 0.052335619 | 1.86E-01 | 4.52E-01 | 1.00E+00 |
| ENSG00000228190.2_RPL23AP1   | ENSG00000160789.18_LMNA | 0.02121  | -0.138459306 | 0.179802504 | 7.95E-01 | 9.18E-01 | 1.00E+00 |
| ENSG00000261199.1_UBE2FP2    | ENSG00000160789.18_LMNA | 0.04377  | -0.116243223 | 0.201563685 | 5.92E-01 | 8.11E-01 | 1.00E+00 |
| ENSG00000268940.4_CT45A1     | ENSG00000160789.18_LMNA | -0.20211 | -0.350050068 | -0.04433871 | 1.25E-02 | 7.70E-02 | 1.00E+00 |
| ENSG00000242135.2_RPL17P2    | ENSG00000160789.18_LMNA | 0.06197  | -0.098196444 | 0.219012965 | 4.48E-01 | 7.14E-01 | 1.00E+00 |
| ENSG00000214915.3_XX-FW802   | ENSG00000160789.18_LMNA | 0.04162  | -0.118368077 | 0.19949582  | 6.11E-01 | 8.22E-01 | 1.00E+00 |
| ENSG00000235538.1_RP1-230L1  | ENSG00000160789.18_LMNA | -0.04324 | -0.201060806 | 0.116760228 | 5.97E-01 | 8.14E-01 | 1.00E+00 |
| ENSG00000264673.1_RP11-92B1  | ENSG00000160789.18_LMNA | -0.11479 | -0.269074621 | 0.04523617  | 1.59E-01 | 4.12E-01 | 1.00E+00 |
| ENSG00000227515.3_C1DP4      | ENSG00000160789.18_LMNA | -0.17639 | -0.326420929 | -0.01768223 | 2.97E-02 | 1.42E-01 | 1.00E+00 |
| ENSG00000255446.1_CTD-2531D  | ENSG00000160789.18_LMNA | -0.13027 | -0.283585679 | 0.029547363 | 1.10E-01 | 3.30E-01 | 1.00E+00 |
| ENSG00000257355.1_CTD-2006C  | ENSG00000160789.18_LMNA | 0.13994  | -0.019696507 | 0.292624331 | 8.55E-02 | 2.84E-01 | 1.00E+00 |
| ENSG00000241890.1_RPL13P4    | ENSG00000160789.18_LMNA | -0.07002 | -0.226692819 | 0.090186942 | 3.91E-01 | 6.69E-01 | 1.00E+00 |
| ENSG00000227541.1_SFR1P1     | ENSG00000160789.18_LMNA | -0.05985 | -0.216981247 | 0.100308519 | 4.64E-01 | 7.26E-01 | 1.00E+00 |
| ENSG00000254230.1_RP11-582J  | ENSG00000160789.18_LMNA | 0.13983  | -0.019810887 | 0.292519701 | 8.58E-02 | 2.84E-01 | 1.00E+00 |
| ENSG00000229356.1_LRRC3-AS   | ENSG00000160789.18_LMNA | -0.12385 | -0.277580694 | 0.036058493 | 1.28E-01 | 3.63E-01 | 1.00E+00 |
| ENSG00000258860.1_RP11-561B  | ENSG00000160789.18_LMNA | 0.12514  | -0.034749676 | 0.278789741 | 1.24E-01 | 3.56E-01 | 1.00E+00 |
| ENSG00000240549.2_THOC7-AS   | ENSG00000160789.18_LMNA | -0.04507 | -0.202816578 | 0.114954383 | 5.81E-01 | 8.05E-01 | 1.00E+00 |
| ENSG00000267526.1_RP11-178C  | ENSG00000160789.18_LMNA | -0.13557 | -0.288542944 | 0.024152165 | 9.58E-02 | 3.04E-01 | 1.00E+00 |
| ENSG00000272762.4_RP11-155D  | ENSG00000160789.18_LMNA | 0.12472  | -0.035183457 | 0.278389136 | 1.26E-01 | 3.58E-01 | 1.00E+00 |
| ENSG00000250994.1_AC005355   | ENSG00000160789.18_LMNA | 0.0929   | -0.067297836 | 0.248424799 | 2.55E-01 | 5.37E-01 | 1.00E+00 |
| ENSG00000263787.1_RP11-456D  | ENSG00000160789.18_LMNA | 0.01888  | -0.140741722 | 0.177549038 | 8.17E-01 | 9.29E-01 | 1.00E+00 |
| ENSG00000240770.4_C21orf91-O | ENSG00000160789.18_LMNA | -0.19823 | -0.346491582 | -0.04029628 | 1.44E-02 | 8.52E-02 | 1.00E+00 |
| ENSG00000092009.9_CMA1       | ENSG00000160789.18_LMNA | 0.13702  | -0.022671258 | 0.289900717 | 9.23E-02 | 2.97E-01 | 1.00E+00 |
| ENSG00000279572.1_RP11-13K1  | ENSG00000160789.18_LMNA | -0.34874 | -0.481225842 | -0.20068415 | 1.07E-05 | 3.07E-04 | 5.47E-01 |
| ENSG00000187763.3_OR2B7P     | ENSG00000160789.18_LMNA | -0.17148 | -0.321892457 | -0.0126232  | 3.47E-02 | 1.57E-01 | 1.00E+00 |
| ENSG00000253623.1_RP11-346I3 | ENSG00000160789.18_LMNA | -0.16918 | -0.319769325 | -0.01025677 | 3.72E-02 | 1.65E-01 | 1.00E+00 |

|                              |                         |          |              |             |          |          |          |
|------------------------------|-------------------------|----------|--------------|-------------|----------|----------|----------|
| ENSG00000214278.4_CTD-2228K  | ENSG00000160789.18_LMNA | 0.23027  | 0.073775529  | 0.375699446 | 4.32E-03 | 3.51E-02 | 1.00E+00 |
| ENSG00000233321.1_RP11-482E  | ENSG00000160789.18_LMNA | -0.01549 | -0.174261027 | 0.144065915 | 8.50E-01 | 9.41E-01 | 1.00E+00 |
| ENSG00000216425.4_AC004066.  | ENSG00000160789.18_LMNA | -0.07464 | -0.231098497 | 0.085573579 | 3.61E-01 | 6.43E-01 | 1.00E+00 |
| ENSG00000249201.2_CTD-3080P  | ENSG00000160789.18_LMNA | -0.02063 | -0.179243456 | 0.139025851 | 8.01E-01 | 9.20E-01 | 1.00E+00 |
| ENSG00000218109.5_KIRREL3-A  | ENSG00000160789.18_LMNA | -0.25749 | -0.40027976  | -0.1024879  | 1.36E-03 | 1.46E-02 | 1.00E+00 |
| ENSG00000229948.2_B3GALNT1   | ENSG00000160789.18_LMNA | 0.1631   | 0.00399863   | 0.3141396   | 4.47E-02 | 1.87E-01 | 1.00E+00 |
| ENSG00000174417.2_TRHR       | ENSG00000160789.18_LMNA | -0.03639 | -0.194465078 | 0.123525338 | 6.56E-01 | 8.48E-01 | 1.00E+00 |
| ENSG00000259072.1_RP11-96D2  | ENSG00000160789.18_LMNA | -0.18629 | -0.3355414   | -0.02791946 | 2.16E-02 | 1.14E-01 | 1.00E+00 |
| ENSG00000204990.3_RP5-842K1  | ENSG00000160789.18_LMNA | -0.13125 | -0.284503025 | 0.028550351 | 1.07E-01 | 3.25E-01 | 1.00E+00 |
| ENSG00000179755.3_CTD-2144E  | ENSG00000160789.18_LMNA | -0.13131 | -0.284557968 | 0.028490617 | 1.07E-01 | 3.25E-01 | 1.00E+00 |
| ENSG00000214671.4_RPL6P12    | ENSG00000160789.18_LMNA | 0.00993  | -0.149503284 | 0.168867495 | 9.03E-01 | 9.63E-01 | 1.00E+00 |
| ENSG00000223928.1_NUP35P1    | ENSG00000160789.18_LMNA | -0.07396 | -0.230442952 | 0.086260887 | 3.65E-01 | 6.47E-01 | 1.00E+00 |
| ENSG00000276172.1_ELMO2P1    | ENSG00000160789.18_LMNA | -0.08999 | -0.245672844 | 0.070214815 | 2.70E-01 | 5.55E-01 | 1.00E+00 |
| ENSG00000188280.10_AC007731  | ENSG00000160789.18_LMNA | -0.21742 | -0.364019764 | -0.06030564 | 7.13E-03 | 5.11E-02 | 1.00E+00 |
| ENSG00000249601.2_LINC01187  | ENSG00000160789.18_LMNA | 0.08053  | -0.079689956 | 0.23669847  | 3.24E-01 | 6.11E-01 | 1.00E+00 |
| ENSG00000197408.7_CYP2B6     | ENSG00000160789.18_LMNA | -0.00212 | -0.161267949 | 0.157132058 | 9.79E-01 | 9.92E-01 | 1.00E+00 |
| ENSG00000218772.2_FAM8A6P    | ENSG00000160789.18_LMNA | -0.04131 | -0.19919878  | 0.118673065 | 6.13E-01 | 8.24E-01 | 1.00E+00 |
| ENSG00000225254.2_ARMC8P1    | ENSG00000160789.18_LMNA | -0.10373 | -0.258655764 | 0.056405825 | 2.03E-01 | 4.74E-01 | 1.00E+00 |
| ENSG00000267261.4_CTD-2132N  | ENSG00000160789.18_LMNA | -0.04968 | -0.207239426 | 0.11039607  | 5.43E-01 | 7.82E-01 | 1.00E+00 |
| ENSG00000280190.1_RP11-319G  | ENSG00000160789.18_LMNA | 0.00316  | -0.156118729 | 0.162279576 | 9.69E-01 | 9.88E-01 | 1.00E+00 |
| ENSG00000214745.2_RP11-54I5. | ENSG00000160789.18_LMNA | 0.10813  | -0.051961276 | 0.262810361 | 1.85E-01 | 4.50E-01 | 1.00E+00 |
| ENSG00000280429.1_AF001548.  | ENSG00000160789.18_LMNA | 0.02584  | -0.133906925 | 0.184287189 | 7.52E-01 | 8.97E-01 | 1.00E+00 |
| ENSG00000245928.2_RP11-630D  | ENSG00000160789.18_LMNA | 0.09564  | -0.064542882 | 0.251019225 | 2.41E-01 | 5.20E-01 | 1.00E+00 |
| ENSG00000279637.1_RP11-196B  | ENSG00000160789.18_LMNA | 0.08632  | -0.073894386 | 0.24219416  | 2.90E-01 | 5.76E-01 | 1.00E+00 |
| ENSG00000280240.1_AL049794.1 | ENSG00000160789.18_LMNA | 0.00907  | -0.150346569 | 0.168029298 | 9.12E-01 | 9.66E-01 | 1.00E+00 |
| ENSG00000260542.1_RP13-379C  | ENSG00000160789.18_LMNA | 0.09074  | -0.069461155 | 0.246384354 | 2.66E-01 | 5.50E-01 | 1.00E+00 |
| ENSG00000279409.1_RP11-133K  | ENSG00000160789.18_LMNA | 0.164    | 0.004932503  | 0.314981085 | 4.35E-02 | 1.84E-01 | 1.00E+00 |
| ENSG00000087128.8_TMPRSS11   | ENSG00000160789.18_LMNA | 0.00605  | -0.153294869 | 0.165095162 | 9.41E-01 | 9.77E-01 | 1.00E+00 |
| ENSG00000246422.2_CTD-2024I7 | ENSG00000160789.18_LMNA | 0.01936  | -0.140273682 | 0.178011413 | 8.13E-01 | 9.26E-01 | 1.00E+00 |
| ENSG00000266988.4_RP11-749H  | ENSG00000160789.18_LMNA | -0.05288 | -0.210310068 | 0.1072235   | 5.18E-01 | 7.64E-01 | 1.00E+00 |
| ENSG00000259925.1_CTA-363E6  | ENSG00000160789.18_LMNA | 0.03435  | -0.125538715 | 0.192496543 | 6.74E-01 | 8.57E-01 | 1.00E+00 |
| ENSG00000278239.1_AC020956.  | ENSG00000160789.18_LMNA | 0.01918  | -0.140449748 | 0.177837494 | 8.15E-01 | 9.27E-01 | 1.00E+00 |
| ENSG00000189182.8_KRT77      | ENSG00000160789.18_LMNA | -0.03329 | -0.191474358 | 0.126583153 | 6.84E-01 | 8.63E-01 | 1.00E+00 |

|                             |                         |          |              |             |          |          |          |
|-----------------------------|-------------------------|----------|--------------|-------------|----------|----------|----------|
| ENSG00000175676.14_GOLGA8E  | ENSG00000160789.18_LMNA | 0.02735  | -0.132431813 | 0.185737529 | 7.38E-01 | 8.90E-01 | 1.00E+00 |
| ENSG00000280117.1_RP11-158L | ENSG00000160789.18_LMNA | -0.05569 | -0.213001222 | 0.104437688 | 4.96E-01 | 7.50E-01 | 1.00E+00 |
| ENSG00000279003.1_          | ENSG00000160789.18_LMNA | 0.09194  | -0.068260076 | 0.24751756  | 2.60E-01 | 5.43E-01 | 1.00E+00 |
| ENSG00000278047.1_          | ENSG00000160789.18_LMNA | 0.02344  | -0.136264384 | 0.181966439 | 7.74E-01 | 9.07E-01 | 1.00E+00 |
| ENSG00000200792.1_SNORA80A  | ENSG00000160789.18_LMNA | -0.08864 | -0.244390766 | 0.071571931 | 2.78E-01 | 5.62E-01 | 1.00E+00 |
| ENSG00000260445.1_CTD-3244C | ENSG00000160789.18_LMNA | -0.00251 | -0.161646013 | 0.156753436 | 9.76E-01 | 9.91E-01 | 1.00E+00 |
| ENSG00000211639.2_IGLV4-60  | ENSG00000160789.18_LMNA | -0.03817 | -0.196177933 | 0.121771333 | 6.41E-01 | 8.39E-01 | 1.00E+00 |
| ENSG00000278517.1_MIR6865   | ENSG00000160789.18_LMNA | -0.01293 | -0.171779172 | 0.146570332 | 8.74E-01 | 9.51E-01 | 1.00E+00 |
| ENSG00000221786.1_          | ENSG00000160789.18_LMNA | 0.05816  | -0.101984444 | 0.215367126 | 4.77E-01 | 7.35E-01 | 1.00E+00 |
| ENSG00000280855.1_          | ENSG00000160789.18_LMNA | 0.14311  | -0.01646967  | 0.295573029 | 7.86E-02 | 2.69E-01 | 1.00E+00 |
| ENSG00000274300.1_MIR6864   | ENSG00000160789.18_LMNA | -0.0196  | -0.178249314 | 0.140032812 | 8.11E-01 | 9.25E-01 | 1.00E+00 |
| ENSG00000265176.1_MIR3202-1 | ENSG00000160789.18_LMNA | -0.04279 | -0.200622904 | 0.117210292 | 6.01E-01 | 8.16E-01 | 1.00E+00 |
| ENSG00000275126.1_HIST1H4L  | ENSG00000160789.18_LMNA | 0.00356  | -0.155733199 | 0.162664282 | 9.65E-01 | 9.86E-01 | 1.00E+00 |
| ENSG00000211664.2_IGLV2-18  | ENSG00000160789.18_LMNA | -0.01195 | -0.170828554 | 0.147528512 | 8.84E-01 | 9.55E-01 | 1.00E+00 |
| ENSG00000222339.1_          | ENSG00000160789.18_LMNA | -0.03869 | -0.196675948 | 0.12126098  | 6.36E-01 | 8.37E-01 | 1.00E+00 |
| ENSG00000207207.1_Y_RNA     | ENSG00000160789.18_LMNA | -0.09349 | -0.248989284 | 0.066698833 | 2.52E-01 | 5.33E-01 | 1.00E+00 |
| ENSG00000207361.1_RNU6-178F | ENSG00000160789.18_LMNA | -0.09476 | -0.250187276 | 0.065426832 | 2.46E-01 | 5.25E-01 | 1.00E+00 |
| ENSG00000207233.1_SNORA37   | ENSG00000160789.18_LMNA | -0.09813 | -0.2533696   | 0.06204292  | 2.29E-01 | 5.06E-01 | 1.00E+00 |
| ENSG00000265450.1_MIR4502   | ENSG00000160789.18_LMNA | -0.01448 | -0.173285691 | 0.145050604 | 8.59E-01 | 9.45E-01 | 1.00E+00 |
| ENSG00000216001.2_MIR450B   | ENSG00000160789.18_LMNA | 0.06381  | -0.096371716 | 0.220766056 | 4.35E-01 | 7.03E-01 | 1.00E+00 |
| ENSG00000199415.1_RNA5SP37  | ENSG00000160789.18_LMNA | -0.08612 | -0.242005359 | 0.074093843 | 2.91E-01 | 5.77E-01 | 1.00E+00 |
| ENSG00000252148.1_RNU6-1206 | ENSG00000160789.18_LMNA | 0.02693  | -0.132842312 | 0.185334063 | 7.42E-01 | 8.92E-01 | 1.00E+00 |
| ENSG00000274685.1_RP11-122K | ENSG00000160789.18_LMNA | 0.11478  | -0.045243633 | 0.269067684 | 1.59E-01 | 4.12E-01 | 1.00E+00 |
| ENSG00000207162.1_RNU6-549F | ENSG00000160789.18_LMNA | -0.08896 | -0.244693612 | 0.071251465 | 2.76E-01 | 5.60E-01 | 1.00E+00 |
| ENSG00000212045.1_          | ENSG00000160789.18_LMNA | 0.01819  | -0.141424874 | 0.176873901 | 8.24E-01 | 9.31E-01 | 1.00E+00 |
| ENSG00000199667.1_Y_RNA     | ENSG00000160789.18_LMNA | -0.02662 | -0.185035943 | 0.133145559 | 7.45E-01 | 8.93E-01 | 1.00E+00 |
| ENSG00000277945.1_RP11-677M | ENSG00000160789.18_LMNA | 0.2391   | 0.083060326  | 0.383694796 | 3.01E-03 | 2.68E-02 | 1.00E+00 |
| ENSG00000254337.1_RP11-865I | ENSG00000160789.18_LMNA | -0.13084 | -0.284119629 | 0.028967118 | 1.08E-01 | 3.27E-01 | 1.00E+00 |
| ENSG00000252002.1_RNA5SP15  | ENSG00000160789.18_LMNA | -0.04952 | -0.20708802  | 0.110552334 | 5.45E-01 | 7.83E-01 | 1.00E+00 |
| ENSG00000252211.1_RNA5SP47  | ENSG00000160789.18_LMNA | 0.09867  | -0.061493219 | 0.25388591  | 2.26E-01 | 5.03E-01 | 1.00E+00 |
| ENSG00000238575.1_snoU109   | ENSG00000160789.18_LMNA | 0.10434  | -0.055783346 | 0.259238337 | 2.01E-01 | 4.71E-01 | 1.00E+00 |
| ENSG00000212605.1_RNU1-56P  | ENSG00000160789.18_LMNA | 0.02127  | -0.138402023 | 0.179859017 | 7.95E-01 | 9.17E-01 | 1.00E+00 |
| ENSG00000254774.1_RP11-148C | ENSG00000160789.18_LMNA | -0.10264 | -0.257626596 | 0.057504893 | 2.08E-01 | 4.81E-01 | 1.00E+00 |

|                              |                         |          |              |             |          |          |          |
|------------------------------|-------------------------|----------|--------------|-------------|----------|----------|----------|
| ENSG00000231505.1_AC108868.1 | ENSG00000160789.18_LMNA | -0.00278 | -0.161911075 | 0.156487927 | 9.73E-01 | 9.89E-01 | 1.00E+00 |
| ENSG00000236921.1_RP11-408N  | ENSG00000160789.18_LMNA | 0.02742  | -0.132363026 | 0.185805128 | 7.37E-01 | 8.90E-01 | 1.00E+00 |
| ENSG00000233633.1_AC093326.1 | ENSG00000160789.18_LMNA | -0.2195  | -0.365917434 | -0.06248668 | 6.59E-03 | 4.82E-02 | 1.00E+00 |
| ENSG00000244514.3_RN7SL125F  | ENSG00000160789.18_LMNA | 0.03074  | -0.129097194 | 0.189011048 | 7.07E-01 | 8.75E-01 | 1.00E+00 |
| ENSG00000236842.1_RP11-399K  | ENSG00000160789.18_LMNA | 0.02245  | -0.137237004 | 0.18100793  | 7.84E-01 | 9.11E-01 | 1.00E+00 |
| ENSG00000277479.1_AL022345.1 | ENSG00000160789.18_LMNA | -0.07196 | -0.228539468 | 0.088254896 | 3.78E-01 | 6.58E-01 | 1.00E+00 |
| ENSG00000242170.3_RN7SL329F  | ENSG00000160789.18_LMNA | -0.01371 | -0.172530854 | 0.145812247 | 8.67E-01 | 9.48E-01 | 1.00E+00 |
| ENSG00000224162.1_UQCRHP3    | ENSG00000160789.18_LMNA | 0.00597  | -0.153373198 | 0.165017133 | 9.42E-01 | 9.77E-01 | 1.00E+00 |
| ENSG00000211776.2_TRAV2      | ENSG00000160789.18_LMNA | 0.08167  | -0.078555901 | 0.237775441 | 3.17E-01 | 6.04E-01 | 1.00E+00 |
| ENSG00000260483.2_RP11-151H  | ENSG00000160789.18_LMNA | -0.06047 | -0.217572845 | 0.099693818 | 4.59E-01 | 7.23E-01 | 1.00E+00 |
| ENSG00000250455.1_RP11-648M  | ENSG00000160789.18_LMNA | 0.13588  | -0.023835323 | 0.288833547 | 9.51E-02 | 3.02E-01 | 1.00E+00 |
| ENSG00000265490.1_RP11-806L  | ENSG00000160789.18_LMNA | 0.0944   | -0.065791449 | 0.249843972 | 2.47E-01 | 5.27E-01 | 1.00E+00 |
| ENSG00000235131.1_RP5-1092A  | ENSG00000160789.18_LMNA | 0.05019  | -0.109886244 | 0.207733295 | 5.39E-01 | 7.79E-01 | 1.00E+00 |
| ENSG00000239316.3_RN7SL11P   | ENSG00000160789.18_LMNA | -0.01493 | -0.173715271 | 0.144616982 | 8.55E-01 | 9.43E-01 | 1.00E+00 |
| ENSG00000258446.1_RP11-895M  | ENSG00000160789.18_LMNA | -0.04432 | -0.202096425 | 0.115695328 | 5.88E-01 | 8.08E-01 | 1.00E+00 |
| ENSG00000228142.2_RP11-180I4 | ENSG00000160789.18_LMNA | -0.04149 | -0.199373603 | 0.118493571 | 6.12E-01 | 8.23E-01 | 1.00E+00 |
| ENSG00000237768.2_RP11-344N  | ENSG00000160789.18_LMNA | 0.01642  | -0.143154933 | 0.1751628   | 8.41E-01 | 9.38E-01 | 1.00E+00 |
| ENSG00000228569.1_AC073133.1 | ENSG00000160789.18_LMNA | -0.11768 | -0.271785162 | 0.042317365 | 1.49E-01 | 3.96E-01 | 1.00E+00 |
| ENSG00000276405.1_TRBV13     | ENSG00000160789.18_LMNA | -0.02864 | -0.18698987  | 0.131156948 | 7.26E-01 | 8.84E-01 | 1.00E+00 |
| ENSG00000256553.1_TRAV1-2    | ENSG00000160789.18_LMNA | 0.05672  | -0.103413174 | 0.213989714 | 4.88E-01 | 7.44E-01 | 1.00E+00 |
| ENSG00000214429.3_CYCSP6     | ENSG00000160789.18_LMNA | -0.12253 | -0.276342071 | 0.037398211 | 1.33E-01 | 3.69E-01 | 1.00E+00 |
| ENSG00000254789.1_RP11-531H  | ENSG00000160789.18_LMNA | -0.08009 | -0.236274911 | 0.080135741 | 3.27E-01 | 6.13E-01 | 1.00E+00 |
| ENSG00000230051.1_CTA-929C8  | ENSG00000160789.18_LMNA | -0.13077 | -0.284057932 | 0.029034175 | 1.08E-01 | 3.27E-01 | 1.00E+00 |
| ENSG00000203472.3_RP11-77K1  | ENSG00000160789.18_LMNA | 0.14452  | -0.015024955 | 0.296891293 | 7.57E-02 | 2.63E-01 | 1.00E+00 |
| ENSG00000259123.1_RP11-76E1  | ENSG00000160789.18_LMNA | -0.08858 | -0.244338986 | 0.071626717 | 2.78E-01 | 5.63E-01 | 1.00E+00 |
| ENSG00000266102.1_RP11-243E  | ENSG00000160789.18_LMNA | -0.07221 | -0.228778661 | 0.088004466 | 3.77E-01 | 6.56E-01 | 1.00E+00 |
| ENSG00000226878.1_GSTM3P2    | ENSG00000160789.18_LMNA | -0.12936 | -0.282735306 | 0.030471029 | 1.12E-01 | 3.34E-01 | 1.00E+00 |
| ENSG00000239600.1_AP000797.1 | ENSG00000160789.18_LMNA | -0.02957 | -0.187889872 | 0.130240107 | 7.18E-01 | 8.80E-01 | 1.00E+00 |
| ENSG00000263893.2_CTD-3010D  | ENSG00000160789.18_LMNA | 0.06777  | -0.09242599  | 0.224549884 | 4.07E-01 | 6.82E-01 | 1.00E+00 |
| ENSG00000274328.1_RP11-239C  | ENSG00000160789.18_LMNA | 0.01901  | -0.140619367 | 0.177669925 | 8.16E-01 | 9.28E-01 | 1.00E+00 |
| ENSG00000223795.2_RP11-473E  | ENSG00000160789.18_LMNA | 0.02816  | -0.131626816 | 0.186528423 | 7.31E-01 | 8.86E-01 | 1.00E+00 |
| ENSG00000256789.1_RP11-697H  | ENSG00000160789.18_LMNA | -0.00995 | -0.168880388 | 0.14949031  | 9.03E-01 | 9.63E-01 | 1.00E+00 |
| ENSG00000228705.1_LINC00659  | ENSG00000160789.18_LMNA | 0.2134   | 0.05610684   | 0.360359366 | 8.30E-03 | 5.72E-02 | 1.00E+00 |

|                              |                         |          |              |             |          |          |          |
|------------------------------|-------------------------|----------|--------------|-------------|----------|----------|----------|
| ENSG00000255605.1_RP11-644L  | ENSG00000160789.18_LMNA | -0.00787 | -0.166858662 | 0.151523536 | 9.23E-01 | 9.71E-01 | 1.00E+00 |
| ENSG00000266288.1_CTD-3096M  | ENSG00000160789.18_LMNA | -0.08367 | -0.239674618 | 0.076554063 | 3.05E-01 | 5.92E-01 | 1.00E+00 |
| ENSG00000237756.1_RP11-77M5  | ENSG00000160789.18_LMNA | -0.15133 | -0.303223771 | 0.008066843 | 6.27E-02 | 2.32E-01 | 1.00E+00 |
| ENSG00000258416.1_RP11-526N  | ENSG00000160789.18_LMNA | -0.02645 | -0.184877054 | 0.133307155 | 7.46E-01 | 8.94E-01 | 1.00E+00 |
| ENSG00000243822.1_RP11-2G17  | ENSG00000160789.18_LMNA | -0.17327 | -0.323547246 | -0.01447003 | 3.28E-02 | 1.52E-01 | 1.00E+00 |
| ENSG00000225328.1_LINC01594  | ENSG00000160789.18_LMNA | 0.12628  | -0.033596924 | 0.279853796 | 1.21E-01 | 3.50E-01 | 1.00E+00 |
| ENSG00000228814.4_RP11-119H  | ENSG00000160789.18_LMNA | -0.08117 | -0.237300909 | 0.079055686 | 3.20E-01 | 6.07E-01 | 1.00E+00 |
| ENSG00000271010.1_CTC-539A1  | ENSG00000160789.18_LMNA | -0.02949 | -0.187809561 | 0.130321943 | 7.18E-01 | 8.80E-01 | 1.00E+00 |
| ENSG00000275186.1_RP11-196B  | ENSG00000160789.18_LMNA | -0.17354 | -0.3237949   | -0.01474661 | 3.25E-02 | 1.51E-01 | 1.00E+00 |
| ENSG00000277655.1_RP11-640M  | ENSG00000160789.18_LMNA | -0.07086 | -0.227498359 | 0.089344443 | 3.86E-01 | 6.64E-01 | 1.00E+00 |
| ENSG00000253112.1_CTD-2373N  | ENSG00000160789.18_LMNA | 0.02495  | -0.134785908 | 0.183422308 | 7.60E-01 | 9.00E-01 | 1.00E+00 |
| ENSG00000228275.1_ARMCX3-A   | ENSG00000160789.18_LMNA | -0.10431 | -0.259208333 | 0.055815411 | 2.01E-01 | 4.71E-01 | 1.00E+00 |
| ENSG00000234019.1_RP11-236P  | ENSG00000160789.18_LMNA | -0.134   | -0.287074854 | 0.025751849 | 9.98E-02 | 3.11E-01 | 1.00E+00 |
| ENSG00000257880.1_RP11-769N  | ENSG00000160789.18_LMNA | -0.07534 | -0.231759931 | 0.08487979  | 3.56E-01 | 6.40E-01 | 1.00E+00 |
| ENSG00000235544.1_RPS11P1    | ENSG00000160789.18_LMNA | 0.00858  | -0.150822196 | 0.167556338 | 9.16E-01 | 9.68E-01 | 1.00E+00 |
| ENSG00000234758.1_AC034228.  | ENSG00000160789.18_LMNA | -0.16277 | -0.313841128 | -0.00366752 | 4.51E-02 | 1.88E-01 | 1.00E+00 |
| ENSG00000253595.4_LINC01300  | ENSG00000160789.18_LMNA | -0.12893 | -0.282337824 | 0.030902587 | 1.13E-01 | 3.36E-01 | 1.00E+00 |
| ENSG00000235669.1_AC004593.  | ENSG00000160789.18_LMNA | 0.17843  | 0.019788772  | 0.328302382 | 2.79E-02 | 1.36E-01 | 1.00E+00 |
| ENSG00000109132.6_PHOX2B     | ENSG00000160789.18_LMNA | -0.16925 | -0.319836474 | -0.01033156 | 3.71E-02 | 1.65E-01 | 1.00E+00 |
| ENSG00000249163.3_CTD-3028N  | ENSG00000160789.18_LMNA | 0.03179  | -0.128058057 | 0.190029702 | 6.97E-01 | 8.70E-01 | 1.00E+00 |
| ENSG00000239941.1_RP11-246A  | ENSG00000160789.18_LMNA | -0.02937 | -0.187693333 | 0.13044037  | 7.19E-01 | 8.81E-01 | 1.00E+00 |
| ENSG00000276662.1_RP11-631M  | ENSG00000160789.18_LMNA | 0.0346   | -0.125289353 | 0.19274049  | 6.72E-01 | 8.56E-01 | 1.00E+00 |
| ENSG00000249077.1_RP11-478C  | ENSG00000160789.18_LMNA | 0.07939  | -0.08083586  | 0.235609455 | 3.31E-01 | 6.17E-01 | 1.00E+00 |
| ENSG00000264007.1_RP11-68I3. | ENSG00000160789.18_LMNA | -0.12441 | -0.278100763 | 0.03549564  | 1.27E-01 | 3.60E-01 | 1.00E+00 |
| ENSG00000267476.1_RP11-126O  | ENSG00000160789.18_LMNA | 0.15172  | -0.007669463 | 0.303584593 | 6.21E-02 | 2.31E-01 | 1.00E+00 |
| ENSG00000239500.2_RP1-169K1  | ENSG00000160789.18_LMNA | 0.00312  | -0.156161988 | 0.162236402 | 9.70E-01 | 9.88E-01 | 1.00E+00 |
| ENSG00000249084.1_RP11-376O  | ENSG00000160789.18_LMNA | 0.03914  | -0.120815632 | 0.197110397 | 6.32E-01 | 8.35E-01 | 1.00E+00 |
| ENSG00000238048.1_ART2P      | ENSG00000160789.18_LMNA | -0.27026 | -0.411748052 | -0.116056   | 7.59E-04 | 9.32E-03 | 1.00E+00 |
| ENSG00000248456.1_RP11-553P  | ENSG00000160789.18_LMNA | 0.04965  | -0.110418944 | 0.207217264 | 5.44E-01 | 7.82E-01 | 1.00E+00 |
| ENSG00000220734.1_RP3-510O8  | ENSG00000160789.18_LMNA | 0.04291  | -0.117094377 | 0.200735698 | 6.00E-01 | 8.16E-01 | 1.00E+00 |
| ENSG00000230601.4_RP11-402G  | ENSG00000160789.18_LMNA | -0.01599 | -0.174742959 | 0.143579129 | 8.45E-01 | 9.40E-01 | 1.00E+00 |
| ENSG00000259384.5_GH1        | ENSG00000160789.18_LMNA | 0.01297  | -0.146528567 | 0.171820594 | 8.74E-01 | 9.51E-01 | 1.00E+00 |
| ENSG00000243799.1_PEX5L-AS1  | ENSG00000160789.18_LMNA | -0.01839 | -0.177076948 | 0.141219449 | 8.22E-01 | 9.30E-01 | 1.00E+00 |

|                              |                         |          |              |             |          |          |          |
|------------------------------|-------------------------|----------|--------------|-------------|----------|----------|----------|
| ENSG00000253147.4_RP11-369E  | ENSG00000160789.18_LMNA | 0.03534  | -0.124564142 | 0.193449731 | 6.66E-01 | 8.53E-01 | 1.00E+00 |
| ENSG00000235416.1_RP3-339A1  | ENSG00000160789.18_LMNA | 0.07547  | -0.084745428 | 0.231887994 | 3.55E-01 | 6.39E-01 | 1.00E+00 |
| ENSG00000254991.1_RP13-631K  | ENSG00000160789.18_LMNA | -0.01586 | -0.174620236 | 0.143703102 | 8.46E-01 | 9.40E-01 | 1.00E+00 |
| ENSG00000232492.1_NPM1P13    | ENSG00000160789.18_LMNA | 0.01854  | -0.141076291 | 0.177218431 | 8.21E-01 | 9.30E-01 | 1.00E+00 |
| ENSG00000248926.1_RP11-777B  | ENSG00000160789.18_LMNA | 0.07328  | -0.08693072  | 0.229803799 | 3.70E-01 | 6.50E-01 | 1.00E+00 |
| ENSG00000213561.4_RP11-386I1 | ENSG00000160789.18_LMNA | 0.04215  | -0.117837932 | 0.200012012 | 6.06E-01 | 8.20E-01 | 1.00E+00 |
| ENSG00000254006.4_RP11-1D12  | ENSG00000160789.18_LMNA | -0.06167 | -0.218721821 | 0.098499278 | 4.50E-01 | 7.16E-01 | 1.00E+00 |
| ENSG00000234764.2_E2F6P1     | ENSG00000160789.18_LMNA | 0.04497  | -0.115052812 | 0.202720931 | 5.82E-01 | 8.06E-01 | 1.00E+00 |
| ENSG00000165370.1_GPR101     | ENSG00000160789.18_LMNA | -0.11352 | -0.267881479 | 0.046519289 | 1.64E-01 | 4.19E-01 | 1.00E+00 |
| ENSG00000229531.4_RP1-102G2  | ENSG00000160789.18_LMNA | -0.03298 | -0.1911793   | 0.126884503 | 6.87E-01 | 8.64E-01 | 1.00E+00 |
| ENSG00000105428.5_ZNRF4      | ENSG00000160789.18_LMNA | 0.00575  | -0.153589932 | 0.164801206 | 9.44E-01 | 9.78E-01 | 1.00E+00 |
| ENSG00000224354.2_MTND2P5    | ENSG00000160789.18_LMNA | -0.10449 | -0.259379996 | 0.055631947 | 2.00E-01 | 4.71E-01 | 1.00E+00 |
| ENSG00000231368.1_RPSAP40    | ENSG00000160789.18_LMNA | -0.13102 | -0.284294065 | 0.028777512 | 1.08E-01 | 3.26E-01 | 1.00E+00 |
| ENSG00000226806.1_AC011893.1 | ENSG00000160789.18_LMNA | 0.23068  | 0.074207285  | 0.37607224  | 4.25E-03 | 3.47E-02 | 1.00E+00 |
| ENSG00000205882.7_DEFB134    | ENSG00000160789.18_LMNA | -0.08705 | -0.242885948 | 0.073163333 | 2.86E-01 | 5.72E-01 | 1.00E+00 |
| ENSG00000205634.5_LINC00898  | ENSG00000160789.18_LMNA | -0.08629 | -0.242160886 | 0.07392954  | 2.91E-01 | 5.76E-01 | 1.00E+00 |
| ENSG00000279017.1_RP11-697K  | ENSG00000160789.18_LMNA | 0.10827  | -0.051827138 | 0.262935567 | 1.84E-01 | 4.50E-01 | 1.00E+00 |
| ENSG00000171505.5_OR1N1      | ENSG00000160789.18_LMNA | 0.039    | -0.120953791 | 0.196975632 | 6.33E-01 | 8.36E-01 | 1.00E+00 |
| ENSG00000259788.1_RP11-359K  | ENSG00000160789.18_LMNA | 0.07228  | -0.087937513 | 0.228842604 | 3.76E-01 | 6.56E-01 | 1.00E+00 |
| ENSG00000236569.3_HNRNPA1F   | ENSG00000160789.18_LMNA | 0.08148  | -0.078738394 | 0.237602186 | 3.18E-01 | 6.05E-01 | 1.00E+00 |
| ENSG00000250361.5_GYPB       | ENSG00000160789.18_LMNA | -0.28485 | -0.424790855 | -0.1316222  | 3.75E-04 | 5.37E-03 | 1.00E+00 |
| ENSG00000234402.1_ELK2BP     | ENSG00000160789.18_LMNA | 0.11631  | -0.04369907  | 0.270502666 | 1.54E-01 | 4.04E-01 | 1.00E+00 |
| ENSG00000183674.10_LINC00511 | ENSG00000160789.18_LMNA | -0.17174 | -0.322135188 | -0.01289397 | 3.44E-02 | 1.57E-01 | 1.00E+00 |
| ENSG00000231512.4_LINC01347  | ENSG00000160789.18_LMNA | -0.10358 | -0.258516057 | 0.056555066 | 2.04E-01 | 4.75E-01 | 1.00E+00 |
| ENSG00000218186.2_KRT8P43    | ENSG00000160789.18_LMNA | 0.00025  | -0.158958442 | 0.159442943 | 9.98E-01 | 9.99E-01 | 1.00E+00 |
| ENSG00000142182.7_DNMT3L     | ENSG00000160789.18_LMNA | 0.02861  | -0.131189175 | 0.186958225 | 7.26E-01 | 8.84E-01 | 1.00E+00 |
| ENSG00000203395.2_AC015969.1 | ENSG00000160789.18_LMNA | -0.13111 | -0.284379011 | 0.028685171 | 1.07E-01 | 3.26E-01 | 1.00E+00 |
| ENSG00000215864.5_NBPF7      | ENSG00000160789.18_LMNA | 0.07305  | -0.087168715 | 0.229576638 | 3.71E-01 | 6.51E-01 | 1.00E+00 |
| ENSG00000268530.4 CTC-273B1  | ENSG00000160789.18_LMNA | -0.04661 | -0.204292313 | 0.113434935 | 5.69E-01 | 7.98E-01 | 1.00E+00 |
| ENSG00000102794.8_ACOD1      | ENSG00000160789.18_LMNA | 0.02612  | -0.133635886 | 0.18455378  | 7.49E-01 | 8.95E-01 | 1.00E+00 |
| ENSG00000248730.1_EGFLAM-A   | ENSG00000160789.18_LMNA | 0.0978   | -0.062372541 | 0.253059915 | 2.31E-01 | 5.08E-01 | 1.00E+00 |
| ENSG00000237525.5_AC012668.1 | ENSG00000160789.18_LMNA | 0.12624  | -0.033635812 | 0.279817913 | 1.21E-01 | 3.50E-01 | 1.00E+00 |
| ENSG00000225637.1_AP001046.1 | ENSG00000160789.18_LMNA | 0.08671  | -0.073500708 | 0.242566733 | 2.88E-01 | 5.74E-01 | 1.00E+00 |

|                              |                         |          |              |             |          |          |          |
|------------------------------|-------------------------|----------|--------------|-------------|----------|----------|----------|
| ENSG00000188782.6_CATSPER4   | ENSG00000160789.18_LMNA | 0.06193  | -0.09823654  | 0.21897442  | 4.48E-01 | 7.15E-01 | 1.00E+00 |
| ENSG00000258135.4_RP11-70F1  | ENSG00000160789.18_LMNA | 0.11025  | -0.049822894 | 0.26480509  | 1.76E-01 | 4.38E-01 | 1.00E+00 |
| ENSG00000214215.3_C12orf74   | ENSG00000160789.18_LMNA | -0.1094  | -0.263998583 | 0.05068783  | 1.80E-01 | 4.43E-01 | 1.00E+00 |
| ENSG00000279774.1_RP11-278H  | ENSG00000160789.18_LMNA | -0.05396 | -0.21134228  | 0.106155571 | 5.09E-01 | 7.59E-01 | 1.00E+00 |
| ENSG00000134757.4_DSG3       | ENSG00000160789.18_LMNA | -0.06259 | -0.219599067 | 0.09758663  | 4.44E-01 | 7.11E-01 | 1.00E+00 |
| ENSG00000279885.1_RP11-637N  | ENSG00000160789.18_LMNA | -0.14818 | -0.30029363  | 0.011290226 | 6.85E-02 | 2.46E-01 | 1.00E+00 |
| ENSG00000181123.7_RP4-539M6  | ENSG00000160789.18_LMNA | 0.23747  | 0.081349365  | 0.382224828 | 3.22E-03 | 2.82E-02 | 1.00E+00 |
| ENSG00000138892.10_TTLL8     | ENSG00000160789.18_LMNA | 0.10733  | -0.052772913 | 0.262052543 | 1.88E-01 | 4.55E-01 | 1.00E+00 |
| ENSG00000261502.3_RP11-96H1  | ENSG00000160789.18_LMNA | -0.12021 | -0.274165304 | 0.039749915 | 1.40E-01 | 3.82E-01 | 1.00E+00 |
| ENSG00000237250.3_RP11-193H  | ENSG00000160789.18_LMNA | 0.06954  | -0.090660362 | 0.226239976 | 3.95E-01 | 6.72E-01 | 1.00E+00 |
| ENSG00000260862.1_RP11-22H5  | ENSG00000160789.18_LMNA | -0.14044 | -0.293086192 | 0.01919151  | 8.44E-02 | 2.81E-01 | 1.00E+00 |
| ENSG00000231749.2_ABCA9-AS   | ENSG00000160789.18_LMNA | 0.08891  | -0.071304012 | 0.244643958 | 2.76E-01 | 5.61E-01 | 1.00E+00 |
| ENSG00000182352.7_C17orf77   | ENSG00000160789.18_LMNA | -0.02185 | -0.180423022 | 0.137830222 | 7.89E-01 | 9.14E-01 | 1.00E+00 |
| ENSG00000169040.13_PMCHL2    | ENSG00000160789.18_LMNA | 0.03619  | -0.123721557 | 0.194273342 | 6.58E-01 | 8.49E-01 | 1.00E+00 |
| ENSG00000228184.1_SNX19P1    | ENSG00000160789.18_LMNA | 0.10692  | -0.053191043 | 0.261661988 | 1.90E-01 | 4.57E-01 | 1.00E+00 |
| ENSG00000226741.1_CTA-929C8  | ENSG00000160789.18_LMNA | 0.05715  | -0.102983935 | 0.214403669 | 4.84E-01 | 7.41E-01 | 1.00E+00 |
| ENSG00000235012.1_AF121897.4 | ENSG00000160789.18_LMNA | -0.06718 | -0.223983813 | 0.093016916 | 4.11E-01 | 6.85E-01 | 1.00E+00 |
| ENSG00000270181.1_BIVM-ERC   | ENSG00000160789.18_LMNA | -0.04903 | -0.206617822 | 0.111037521 | 5.49E-01 | 7.86E-01 | 1.00E+00 |
| ENSG00000173769.4_TOPAZ1     | ENSG00000160789.18_LMNA | -0.12168 | -0.275544236 | 0.038260568 | 1.35E-01 | 3.74E-01 | 1.00E+00 |
| ENSG00000271287.1_BCRP9      | ENSG00000160789.18_LMNA | -0.00377 | -0.162877367 | 0.155519615 | 9.63E-01 | 9.85E-01 | 1.00E+00 |
| ENSG00000274824.1_MIR7152    | ENSG00000160789.18_LMNA | 0.09477  | -0.065413989 | 0.250199367 | 2.45E-01 | 5.25E-01 | 1.00E+00 |
| ENSG00000200279.1_SNORD114   | ENSG00000160789.18_LMNA | 0.01781  | -0.141795032 | 0.176507961 | 8.28E-01 | 9.33E-01 | 1.00E+00 |
| ENSG00000277960.1_           | ENSG00000160789.18_LMNA | -0.10275 | -0.257738799 | 0.057385107 | 2.08E-01 | 4.80E-01 | 1.00E+00 |
| ENSG00000232216.1_IGHV3-43   | ENSG00000160789.18_LMNA | 0.07742  | -0.082801508 | 0.233739542 | 3.43E-01 | 6.28E-01 | 1.00E+00 |
| ENSG00000274805.1_MIR6768    | ENSG00000160789.18_LMNA | -0.04237 | -0.200221136 | 0.117623103 | 6.04E-01 | 8.18E-01 | 1.00E+00 |
| ENSG00000251912.1_           | ENSG00000160789.18_LMNA | -0.09865 | -0.2538598   | 0.061521022 | 2.27E-01 | 5.03E-01 | 1.00E+00 |
| ENSG00000251893.2_SNORA70    | ENSG00000160789.18_LMNA | 0.02649  | -0.133269166 | 0.184914408 | 7.46E-01 | 8.94E-01 | 1.00E+00 |
| ENSG00000264899.1_           | ENSG00000160789.18_LMNA | -0.0744  | -0.230868744 | 0.085814498 | 3.62E-01 | 6.44E-01 | 1.00E+00 |
| ENSG00000200711.1_RNA5SP28   | ENSG00000160789.18_LMNA | -0.04399 | -0.201773991 | 0.116026957 | 5.91E-01 | 8.10E-01 | 1.00E+00 |
| ENSG00000207242.1_RNU6-1065  | ENSG00000160789.18_LMNA | 0.00952  | -0.149903361 | 0.16846989  | 9.07E-01 | 9.64E-01 | 1.00E+00 |
| ENSG00000252339.1_RNU6-1061  | ENSG00000160789.18_LMNA | 0.0344   | -0.125491606 | 0.192542632 | 6.74E-01 | 8.57E-01 | 1.00E+00 |
| ENSG00000201654.1_RNU6-7     | ENSG00000160789.18_LMNA | -0.03476 | -0.192894472 | 0.125131933 | 6.71E-01 | 8.56E-01 | 1.00E+00 |
| ENSG00000281108.1_           | ENSG00000160789.18_LMNA | -0.01986 | -0.178492023 | 0.139787034 | 8.08E-01 | 9.24E-01 | 1.00E+00 |

|                              |                         |          |              |             |          |          |          |
|------------------------------|-------------------------|----------|--------------|-------------|----------|----------|----------|
| ENSG00000276889.1_           | ENSG00000160789.18_LMNA | 0.07356  | -0.086655392 | 0.23006655  | 3.68E-01 | 6.48E-01 | 1.00E+00 |
| ENSG00000263641.1_MIR4777    | ENSG00000160789.18_LMNA | 0.05323  | -0.10688033  | 0.210641838 | 5.15E-01 | 7.63E-01 | 1.00E+00 |
| ENSG00000200914.1_RNA5SP43   | ENSG00000160789.18_LMNA | -0.05107 | -0.208578916 | 0.109012912 | 5.32E-01 | 7.75E-01 | 1.00E+00 |
| ENSG00000254299.1_CTB-54I1.1 | ENSG00000160789.18_LMNA | -0.13604 | -0.288978138 | 0.023677653 | 9.47E-02 | 3.01E-01 | 1.00E+00 |
| ENSG00000251815.1_SNORD116   | ENSG00000160789.18_LMNA | 0.00337  | -0.155912823 | 0.162485053 | 9.67E-01 | 9.87E-01 | 1.00E+00 |
| ENSG00000266370.1_MIR3657    | ENSG00000160789.18_LMNA | 0.01266  | -0.146839378 | 0.171512309 | 8.77E-01 | 9.52E-01 | 1.00E+00 |
| ENSG00000207113.1_RNU6-16P   | ENSG00000160789.18_LMNA | -0.15094 | -0.302860716 | 0.008466583 | 6.34E-02 | 2.34E-01 | 1.00E+00 |
| ENSG00000252947.1_SCARNA1    | ENSG00000160789.18_LMNA | -0.1285  | -0.281936887 | 0.031337777 | 1.15E-01 | 3.38E-01 | 1.00E+00 |
| ENSG00000270767.1_RP11-733D  | ENSG00000160789.18_LMNA | -0.06508 | -0.221976952 | 0.095110093 | 4.26E-01 | 6.96E-01 | 1.00E+00 |
| ENSG00000252992.1_SCARNA11   | ENSG00000160789.18_LMNA | 0.02392  | -0.135796256 | 0.18242756  | 7.70E-01 | 9.05E-01 | 1.00E+00 |
| ENSG00000234594.1_RP11-263C  | ENSG00000160789.18_LMNA | -0.02097 | -0.179569057 | 0.138695909 | 7.98E-01 | 9.19E-01 | 1.00E+00 |
| ENSG00000255464.1_SEPT14P8   | ENSG00000160789.18_LMNA | -0.20317 | -0.351012886 | -0.04543419 | 1.21E-02 | 7.51E-02 | 1.00E+00 |
| ENSG00000251320.1_CTC-327F1  | ENSG00000160789.18_LMNA | 0.13744  | -0.022251813 | 0.290285059 | 9.13E-02 | 2.95E-01 | 1.00E+00 |
| ENSG00000234044.1_AC108059.  | ENSG00000160789.18_LMNA | -0.01943 | -0.178075893 | 0.140208401 | 8.12E-01 | 9.26E-01 | 1.00E+00 |
| ENSG00000233018.1_RP4-597N1  | ENSG00000160789.18_LMNA | 0.11571  | -0.044304446 | 0.269940406 | 1.56E-01 | 4.07E-01 | 1.00E+00 |
| ENSG00000253189.1_RP11-158A  | ENSG00000160789.18_LMNA | -0.16096 | -0.312162568 | -0.00180666 | 4.76E-02 | 1.95E-01 | 1.00E+00 |
| ENSG00000238008.1_COX6CP10   | ENSG00000160789.18_LMNA | -0.23379 | -0.378891668 | -0.07747631 | 3.74E-03 | 3.16E-02 | 1.00E+00 |
| ENSG00000280238.1_RP11-574K  | ENSG00000160789.18_LMNA | 0.0815   | -0.078724542 | 0.237615338 | 3.18E-01 | 6.05E-01 | 1.00E+00 |
| ENSG00000254207.1_RP11-43A1  | ENSG00000160789.18_LMNA | 0.03583  | -0.124080184 | 0.193922845 | 6.61E-01 | 8.50E-01 | 1.00E+00 |
| ENSG00000249330.1_RP11-436F  | ENSG00000160789.18_LMNA | -0.13746 | -0.290308244 | 0.022226506 | 9.13E-02 | 2.95E-01 | 1.00E+00 |
| ENSG00000277233.1_Metazoa_Sl | ENSG00000160789.18_LMNA | -0.10437 | -0.259263243 | 0.055756728 | 2.01E-01 | 4.71E-01 | 1.00E+00 |
| ENSG00000232142.1_RPS25P9    | ENSG00000160789.18_LMNA | -0.01165 | -0.170539195 | 0.147820054 | 8.87E-01 | 9.56E-01 | 1.00E+00 |
| ENSG00000240723.3_RN7SL382f  | ENSG00000160789.18_LMNA | 0.03254  | -0.127319959 | 0.190752834 | 6.91E-01 | 8.67E-01 | 1.00E+00 |
| ENSG00000226643.2_RP11-358H  | ENSG00000160789.18_LMNA | 0.14062  | -0.019008305 | 0.293253712 | 8.40E-02 | 2.80E-01 | 1.00E+00 |
| ENSG00000265380.1_RP11-126K  | ENSG00000160789.18_LMNA | 0.02468  | -0.135048392 | 0.18316394  | 7.63E-01 | 9.01E-01 | 1.00E+00 |
| ENSG00000254260.1_RP11-369E  | ENSG00000160789.18_LMNA | -0.01327 | -0.17210716  | 0.146239597 | 8.71E-01 | 9.50E-01 | 1.00E+00 |
| ENSG00000237530.1_RP3-449H6  | ENSG00000160789.18_LMNA | -0.23436 | -0.379401176 | -0.07806776 | 3.66E-03 | 3.10E-02 | 1.00E+00 |
| ENSG00000229015.1_RP11-265D  | ENSG00000160789.18_LMNA | -0.06493 | -0.221836834 | 0.095256134 | 4.27E-01 | 6.97E-01 | 1.00E+00 |
| ENSG00000265356.1_RP11-17M2  | ENSG00000160789.18_LMNA | -0.05481 | -0.212156227 | 0.105312942 | 5.02E-01 | 7.54E-01 | 1.00E+00 |
| ENSG00000248633.1_WRBP1      | ENSG00000160789.18_LMNA | -0.09717 | -0.252465768 | 0.063004743 | 2.34E-01 | 5.11E-01 | 1.00E+00 |
| ENSG00000236457.1_AC130689.1 | ENSG00000160789.18_LMNA | -0.13168 | -0.284909378 | 0.028108509 | 1.06E-01 | 3.23E-01 | 1.00E+00 |
| ENSG00000262172.1_CTD-2529C  | ENSG00000160789.18_LMNA | 0.0093   | -0.150125904 | 0.168248677 | 9.09E-01 | 9.65E-01 | 1.00E+00 |
| ENSG00000238205.2_MPC1L      | ENSG00000160789.18_LMNA | 0.11613  | -0.043877706 | 0.270336775 | 1.54E-01 | 4.05E-01 | 1.00E+00 |



|                              |                         |          |              |             |          |          |          |
|------------------------------|-------------------------|----------|--------------|-------------|----------|----------|----------|
| ENSG00000255817.1_RP11-196H  | ENSG00000160789.18_LMNA | 0.04055  | -0.119424657 | 0.198466523 | 6.20E-01 | 8.28E-01 | 1.00E+00 |
| ENSG00000229421.1_AC133141.  | ENSG00000160789.18_LMNA | -0.05355 | -0.210951597 | 0.106559859 | 5.12E-01 | 7.61E-01 | 1.00E+00 |
| ENSG00000280250.1_RP11-6L6.  | ENSG00000160789.18_LMNA | -0.07492 | -0.231365333 | 0.085293727 | 3.59E-01 | 6.42E-01 | 1.00E+00 |
| ENSG00000269543.4_CTD-2291D  | ENSG00000160789.18_LMNA | -0.03663 | -0.1946914   | 0.123293693 | 6.54E-01 | 8.47E-01 | 1.00E+00 |
| ENSG00000228800.1_RP11-253D  | ENSG00000160789.18_LMNA | -0.20067 | -0.348730283 | -0.04283827 | 1.32E-02 | 7.99E-02 | 1.00E+00 |
| ENSG00000231047.1_GCNT1P3    | ENSG00000160789.18_LMNA | 0.03661  | -0.123304895 | 0.194680457 | 6.54E-01 | 8.47E-01 | 1.00E+00 |
| ENSG00000092377.12_TBL1Y     | ENSG00000160789.18_LMNA | -0.22125 | -0.367507056 | -0.0643159  | 6.16E-03 | 4.58E-02 | 1.00E+00 |
| ENSG00000278702.1_Metazoa_SI | ENSG00000160789.18_LMNA | -0.02104 | -0.179640543 | 0.13862346  | 7.97E-01 | 9.18E-01 | 1.00E+00 |
| ENSG00000226113.1_RP11-672F  | ENSG00000160789.18_LMNA | -0.03762 | -0.195645427 | 0.122316845 | 6.45E-01 | 8.42E-01 | 1.00E+00 |
| ENSG00000249022.1_RP11-285C  | ENSG00000160789.18_LMNA | -0.07406 | -0.230539767 | 0.086159401 | 3.65E-01 | 6.46E-01 | 1.00E+00 |
| ENSG00000270066.3_SCARNA2    | ENSG00000160789.18_LMNA | -0.00391 | -0.163004728 | 0.155391943 | 9.62E-01 | 9.85E-01 | 1.00E+00 |
| ENSG00000223660.1_AC012314.  | ENSG00000160789.18_LMNA | 0.04849  | -0.111575998 | 0.206095808 | 5.53E-01 | 7.88E-01 | 1.00E+00 |
| ENSG00000249516.1_PRELID3Bf  | ENSG00000160789.18_LMNA | 0.19289  | 0.034758968  | 0.341602834 | 1.73E-02 | 9.72E-02 | 1.00E+00 |
| ENSG00000231096.1_NDUFB4P3   | ENSG00000160789.18_LMNA | -0.10871 | -0.263354448 | 0.051378292 | 1.82E-01 | 4.47E-01 | 1.00E+00 |
| ENSG00000237646.1_HLCS-IT1   | ENSG00000160789.18_LMNA | 0.00538  | -0.153954027 | 0.1644384   | 9.48E-01 | 9.79E-01 | 1.00E+00 |
| ENSG00000227098.1_AC073636.  | ENSG00000160789.18_LMNA | -0.04807 | -0.205694864 | 0.11198946  | 5.56E-01 | 7.90E-01 | 1.00E+00 |
| ENSG00000239861.1_RP11-690D  | ENSG00000160789.18_LMNA | 0.07561  | -0.084612241 | 0.232014925 | 3.55E-01 | 6.38E-01 | 1.00E+00 |
| ENSG00000223882.1_ABCC5-AS   | ENSG00000160789.18_LMNA | -0.01209 | -0.170962698 | 0.147393337 | 8.82E-01 | 9.54E-01 | 1.00E+00 |
| ENSG00000261248.1_AC009120.  | ENSG00000160789.18_LMNA | 0.04257  | -0.11742521  | 0.200413749 | 6.03E-01 | 8.18E-01 | 1.00E+00 |
| ENSG00000228432.1_DHFRP2     | ENSG00000160789.18_LMNA | 0.07608  | -0.084144772 | 0.232460353 | 3.52E-01 | 6.35E-01 | 1.00E+00 |
| ENSG00000227773.1_ASH1L-IT1  | ENSG00000160789.18_LMNA | -0.04484 | -0.202598509 | 0.115178786 | 5.83E-01 | 8.06E-01 | 1.00E+00 |
| ENSG00000263904.1_RP11-344B  | ENSG00000160789.18_LMNA | 0.26486  | 0.110311585  | 0.406904054 | 9.75E-04 | 1.14E-02 | 1.00E+00 |
| ENSG00000248416.1_RP11-1191. | ENSG00000160789.18_LMNA | 0.01996  | -0.139685585 | 0.178592194 | 8.07E-01 | 9.23E-01 | 1.00E+00 |
| ENSG00000224034.1_RP11-445P  | ENSG00000160789.18_LMNA | 0.09879  | -0.061378432 | 0.253993702 | 2.26E-01 | 5.02E-01 | 1.00E+00 |
| ENSG00000259307.1_PLCB2-AS1  | ENSG00000160789.18_LMNA | 0.04052  | -0.119449374 | 0.198442436 | 6.20E-01 | 8.28E-01 | 1.00E+00 |
| ENSG00000278134.1_RP11-12A2  | ENSG00000160789.18_LMNA | -0.01762 | -0.176329308 | 0.141975712 | 8.29E-01 | 9.33E-01 | 1.00E+00 |
| ENSG00000230525.4_AC007403.  | ENSG00000160789.18_LMNA | -0.20688 | -0.354410808 | -0.04930619 | 1.05E-02 | 6.81E-02 | 1.00E+00 |
| ENSG00000253172.1_CTC-209H2  | ENSG00000160789.18_LMNA | -0.01674 | -0.175475865 | 0.142838545 | 8.38E-01 | 9.37E-01 | 1.00E+00 |
| ENSG00000250974.1_RP11-122F  | ENSG00000160789.18_LMNA | -0.17456 | -0.324740073 | -0.0158026  | 3.15E-02 | 1.48E-01 | 1.00E+00 |
| ENSG00000258562.2_CTD-2313J  | ENSG00000160789.18_LMNA | 0.09645  | -0.06373266  | 0.251781375 | 2.37E-01 | 5.16E-01 | 1.00E+00 |
| ENSG00000235120.1_BSN-AS1    | ENSG00000160789.18_LMNA | 0.07934  | -0.080884212 | 0.235563487 | 3.31E-01 | 6.17E-01 | 1.00E+00 |
| ENSG00000229088.1_MTND1P10   | ENSG00000160789.18_LMNA | 0.05637  | -0.103761713 | 0.213653503 | 4.90E-01 | 7.46E-01 | 1.00E+00 |
| ENSG00000230611.1_HMGB1P27   | ENSG00000160789.18_LMNA | -0.08952 | -0.245223818 | 0.070690254 | 2.73E-01 | 5.57E-01 | 1.00E+00 |

|                              |                         |          |              |             |          |          |          |
|------------------------------|-------------------------|----------|--------------|-------------|----------|----------|----------|
| ENSG00000253420.1_RP11-642D  | ENSG00000160789.18_LMNA | 0.10827  | -0.051824234 | 0.262938277 | 1.84E-01 | 4.50E-01 | 1.00E+00 |
| ENSG00000213605.2_AC111200.1 | ENSG00000160789.18_LMNA | -0.04296 | -0.200787125 | 0.117041525 | 5.99E-01 | 8.16E-01 | 1.00E+00 |
| ENSG00000226506.4_AC007463.1 | ENSG00000160789.18_LMNA | -0.09538 | -0.250771637 | 0.064805997 | 2.42E-01 | 5.22E-01 | 1.00E+00 |
| ENSG00000249112.1_RP11-43D2  | ENSG00000160789.18_LMNA | 0.05319  | -0.10691322  | 0.210610044 | 5.15E-01 | 7.63E-01 | 1.00E+00 |
| ENSG00000253282.1_KB-1410C5  | ENSG00000160789.18_LMNA | 0.17983  | 0.021235843  | 0.329593413 | 2.66E-02 | 1.32E-01 | 1.00E+00 |
| ENSG00000244203.2_FOXP1-AS1  | ENSG00000160789.18_LMNA | -0.05307 | -0.210487658 | 0.107039818 | 5.16E-01 | 7.63E-01 | 1.00E+00 |
| ENSG00000260007.1_RP11-315D  | ENSG00000160789.18_LMNA | 0.02018  | -0.139471776 | 0.178803288 | 8.05E-01 | 9.22E-01 | 1.00E+00 |
| ENSG00000235606.3_AK4P6      | ENSG00000160789.18_LMNA | 0.01754  | -0.142053263 | 0.17625262  | 8.30E-01 | 9.34E-01 | 1.00E+00 |
| ENSG00000254582.1_PSM2P1     | ENSG00000160789.18_LMNA | -0.01398 | -0.172798995 | 0.145541732 | 8.64E-01 | 9.47E-01 | 1.00E+00 |
| ENSG00000235661.2_MIR670HG   | ENSG00000160789.18_LMNA | -0.10931 | -0.263915141 | 0.05077729  | 1.80E-01 | 4.43E-01 | 1.00E+00 |
| ENSG00000178804.6_H1FOO      | ENSG00000160789.18_LMNA | -0.01113 | -0.170025318 | 0.148337672 | 8.92E-01 | 9.58E-01 | 1.00E+00 |
| ENSG00000256747.1_RP11-860B  | ENSG00000160789.18_LMNA | -0.0177  | -0.176401517 | 0.141902686 | 8.29E-01 | 9.33E-01 | 1.00E+00 |
| ENSG00000237007.4_KRT18P52   | ENSG00000160789.18_LMNA | 0.10061  | -0.059540082 | 0.255718954 | 2.17E-01 | 4.92E-01 | 1.00E+00 |
| ENSG00000257568.1_RP11-863H  | ENSG00000160789.18_LMNA | 0.16281  | 0.003705566  | 0.313875429 | 4.51E-02 | 1.88E-01 | 1.00E+00 |
| ENSG00000250781.1_RP11-63A1  | ENSG00000160789.18_LMNA | -0.1156  | -0.269831498 | 0.044421679 | 1.56E-01 | 4.08E-01 | 1.00E+00 |
| ENSG00000260177.1_RP4-536B2  | ENSG00000160789.18_LMNA | 0.01824  | -0.141367521 | 0.176930593 | 8.23E-01 | 9.31E-01 | 1.00E+00 |
| ENSG00000261265.1_CTD-2515H  | ENSG00000160789.18_LMNA | 0.05322  | -0.10688467  | 0.210637643 | 5.15E-01 | 7.63E-01 | 1.00E+00 |
| ENSG00000255856.2_RP11-87C1  | ENSG00000160789.18_LMNA | -0.16125 | -0.312434227 | -0.00210768 | 4.72E-02 | 1.94E-01 | 1.00E+00 |
| ENSG00000271400.1_RP13-266I1 | ENSG00000160789.18_LMNA | -0.13044 | -0.283745484 | 0.029373724 | 1.09E-01 | 3.29E-01 | 1.00E+00 |
| ENSG00000116726.4_PRAMEF12   | ENSG00000160789.18_LMNA | 0.00268  | -0.156583163 | 0.161816004 | 9.74E-01 | 9.90E-01 | 1.00E+00 |
| ENSG00000204949.7_FAM83A-AS1 | ENSG00000160789.18_LMNA | -0.06229 | -0.219320609 | 0.097876383 | 4.46E-01 | 7.12E-01 | 1.00E+00 |
| ENSG00000225982.1_RP11-538D  | ENSG00000160789.18_LMNA | -0.02299 | -0.181530592 | 0.136706724 | 7.79E-01 | 9.09E-01 | 1.00E+00 |
| ENSG00000260612.1_RP11-432I5 | ENSG00000160789.18_LMNA | -0.0949  | -0.250315695 | 0.065290419 | 2.45E-01 | 5.25E-01 | 1.00E+00 |
| ENSG00000260171.1_RP11-95H1  | ENSG00000160789.18_LMNA | 0.06066  | -0.099501533 | 0.217757855 | 4.58E-01 | 7.22E-01 | 1.00E+00 |
| ENSG00000223620.3_RBM48P1    | ENSG00000160789.18_LMNA | 0.01132  | -0.148150369 | 0.170211288 | 8.90E-01 | 9.57E-01 | 1.00E+00 |
| ENSG00000226967.1_HAUS4P1    | ENSG00000160789.18_LMNA | 0.10472  | -0.05540765  | 0.259589837 | 1.99E-01 | 4.69E-01 | 1.00E+00 |
| ENSG00000260677.1_RP11-546C  | ENSG00000160789.18_LMNA | 0.08272  | -0.077501288 | 0.238776272 | 3.11E-01 | 5.97E-01 | 1.00E+00 |
| ENSG00000251342.1_CTC-235G5  | ENSG00000160789.18_LMNA | 0.15433  | -0.00498929  | 0.306015867 | 5.76E-02 | 2.20E-01 | 1.00E+00 |
| ENSG00000258038.4_CTD-2384A  | ENSG00000160789.18_LMNA | 0.07537  | -0.084844565 | 0.231793506 | 3.56E-01 | 6.39E-01 | 1.00E+00 |
| ENSG00000248574.1_ADAM20P2   | ENSG00000160789.18_LMNA | -0.21895 | -0.365415867 | -0.06190993 | 6.73E-03 | 4.89E-02 | 1.00E+00 |
| ENSG00000263405.1_PA2G4P3    | ENSG00000160789.18_LMNA | -0.18219 | -0.331763644 | -0.02367129 | 2.47E-02 | 1.25E-01 | 1.00E+00 |
| ENSG00000214815.2_IMP1P3     | ENSG00000160789.18_LMNA | 0.06748  | -0.09271707  | 0.224271074 | 4.09E-01 | 6.83E-01 | 1.00E+00 |
| ENSG00000175809.4_ZNF645     | ENSG00000160789.18_LMNA | 0.00794  | -0.151450319 | 0.166931511 | 9.23E-01 | 9.70E-01 | 1.00E+00 |

|                             |                         |          |              |             |          |          |          |
|-----------------------------|-------------------------|----------|--------------|-------------|----------|----------|----------|
| ENSG00000248560.1_CTB-14A14 | ENSG00000160789.18_LMNA | -0.12569 | -0.279305726 | 0.034190784 | 1.23E-01 | 3.53E-01 | 1.00E+00 |
| ENSG00000233693.1_RP11-506C | ENSG00000160789.18_LMNA | 0.1516   | -0.007791929 | 0.303473403 | 6.23E-02 | 2.31E-01 | 1.00E+00 |
| ENSG00000250768.1_DPP3P1    | ENSG00000160789.18_LMNA | -0.05338 | -0.210787821 | 0.106729307 | 5.14E-01 | 7.62E-01 | 1.00E+00 |
| ENSG00000277349.1_RP11-356C | ENSG00000160789.18_LMNA | -0.03979 | -0.197740209 | 0.120169791 | 6.26E-01 | 8.32E-01 | 1.00E+00 |
| ENSG00000270490.1_RP11-622C | ENSG00000160789.18_LMNA | 0.11173  | -0.048332402 | 0.266193862 | 1.71E-01 | 4.29E-01 | 1.00E+00 |
| ENSG00000116748.18_AMPD1    | ENSG00000160789.18_LMNA | -0.02231 | -0.180870176 | 0.137376736 | 7.85E-01 | 9.12E-01 | 1.00E+00 |
| ENSG00000279942.1_RP1-153P1 | ENSG00000160789.18_LMNA | -0.18484 | -0.334206454 | -0.02641701 | 2.26E-02 | 1.18E-01 | 1.00E+00 |
| ENSG00000157060.13_SHCBP1L  | ENSG00000160789.18_LMNA | -0.02057 | -0.17918187  | 0.139088251 | 8.01E-01 | 9.20E-01 | 1.00E+00 |
| ENSG00000237574.1_AC079776. | ENSG00000160789.18_LMNA | -0.10733 | -0.262056221 | 0.052768975 | 1.88E-01 | 4.55E-01 | 1.00E+00 |
| ENSG00000230709.1_AC104024. | ENSG00000160789.18_LMNA | 0.01097  | -0.148488052 | 0.169875992 | 8.93E-01 | 9.58E-01 | 1.00E+00 |
| ENSG00000016490.14_CLCA1    | ENSG00000160789.18_LMNA | -0.04528 | -0.203012645 | 0.114752594 | 5.80E-01 | 8.04E-01 | 1.00E+00 |
| ENSG00000196408.10_NOXO1    | ENSG00000160789.18_LMNA | -0.02523 | -0.183692055 | 0.134511816 | 7.58E-01 | 8.99E-01 | 1.00E+00 |
| ENSG00000261501.1_RP11-63B1 | ENSG00000160789.18_LMNA | 0.10619  | -0.053922609 | 0.260978419 | 1.93E-01 | 4.61E-01 | 1.00E+00 |
| ENSG00000227233.1_CICP17    | ENSG00000160789.18_LMNA | 0.03278  | -0.127087026 | 0.190980974 | 6.89E-01 | 8.66E-01 | 1.00E+00 |
| ENSG00000236253.6_SLC25A3P  | ENSG00000160789.18_LMNA | -0.07418 | -0.230657492 | 0.086035985 | 3.64E-01 | 6.45E-01 | 1.00E+00 |
| ENSG00000148513.16_ANKRD30  | ENSG00000160789.18_LMNA | -0.05164 | -0.209120242 | 0.108453589 | 5.28E-01 | 7.72E-01 | 1.00E+00 |
| ENSG00000277837.1_RP11-714M | ENSG00000160789.18_LMNA | -0.02465 | -0.183128621 | 0.13508427  | 7.63E-01 | 9.01E-01 | 1.00E+00 |
| ENSG00000226203.1_RP4-760C5 | ENSG00000160789.18_LMNA | 0.1417   | -0.017899759 | 0.294266941 | 8.16E-02 | 2.75E-01 | 1.00E+00 |
| ENSG00000200959.1_SNORA74A  | ENSG00000160789.18_LMNA | -0.04632 | -0.20401229  | 0.113723366 | 5.71E-01 | 7.99E-01 | 1.00E+00 |
| ENSG00000207959.1_MIR656    | ENSG00000160789.18_LMNA | 0.14183  | -0.017772015 | 0.294383656 | 8.13E-02 | 2.75E-01 | 1.00E+00 |
| ENSG00000277588.1_MIR6806   | ENSG00000160789.18_LMNA | -0.0352  | -0.193315335 | 0.12470159  | 6.67E-01 | 8.53E-01 | 1.00E+00 |
| ENSG00000264510.4_          | ENSG00000160789.18_LMNA | 0.05552  | -0.104604693 | 0.212840027 | 4.97E-01 | 7.51E-01 | 1.00E+00 |
| ENSG00000199030.1_MIRLET7C  | ENSG00000160789.18_LMNA | -0.01262 | -0.171474055 | 0.146877941 | 8.77E-01 | 9.52E-01 | 1.00E+00 |
| ENSG00000207750.1_MIR553    | ENSG00000160789.18_LMNA | -0.075   | -0.231442014 | 0.085213296 | 3.58E-01 | 6.41E-01 | 1.00E+00 |
| ENSG00000266232.1_MIR3178   | ENSG00000160789.18_LMNA | 0.02429  | -0.135430592 | 0.182787654 | 7.66E-01 | 9.03E-01 | 1.00E+00 |
| ENSG00000251883.1_RNU6ATAC  | ENSG00000160789.18_LMNA | -0.0036  | -0.162703127 | 0.155694265 | 9.65E-01 | 9.86E-01 | 1.00E+00 |
| ENSG00000277521.1_MIR8078   | ENSG00000160789.18_LMNA | 0.05204  | -0.108058715 | 0.209502294 | 5.24E-01 | 7.69E-01 | 1.00E+00 |
| ENSG00000266832.1_          | ENSG00000160789.18_LMNA | -0.14807 | -0.300193058 | 0.011400749 | 6.87E-02 | 2.46E-01 | 1.00E+00 |
| ENSG00000239043.1_SNORD127  | ENSG00000160789.18_LMNA | -0.11692 | -0.271075717 | 0.043081838 | 1.51E-01 | 4.00E-01 | 1.00E+00 |
| ENSG00000200120.1_Y_RNA     | ENSG00000160789.18_LMNA | 0.00534  | -0.153988566 | 0.164403978 | 9.48E-01 | 9.79E-01 | 1.00E+00 |
| ENSG00000278509.1_          | ENSG00000160789.18_LMNA | -0.02741 | -0.185803165 | 0.132365023 | 7.37E-01 | 8.90E-01 | 1.00E+00 |
| ENSG00000254395.1_IGHV4-55  | ENSG00000160789.18_LMNA | 0.15406  | -0.005271243 | 0.305760288 | 5.81E-02 | 2.21E-01 | 1.00E+00 |
| ENSG00000207588.1_MIR593    | ENSG00000160789.18_LMNA | -0.00214 | -0.16128277  | 0.157117217 | 9.79E-01 | 9.92E-01 | 1.00E+00 |

|                              |                         |          |              |             |          |          |          |
|------------------------------|-------------------------|----------|--------------|-------------|----------|----------|----------|
| ENSG00000252942.1_RNA5SP29   | ENSG00000160789.18_LMNA | -0.0664  | -0.223240268 | 0.093792768 | 4.16E-01 | 6.89E-01 | 1.00E+00 |
| ENSG00000266252.1_           | ENSG00000160789.18_LMNA | 0.07929  | -0.080933607 | 0.235516525 | 3.32E-01 | 6.17E-01 | 1.00E+00 |
| ENSG00000235984.4_GPC5-AS1   | ENSG00000160789.18_LMNA | -0.19344 | -0.34210435  | -0.03532615 | 1.70E-02 | 9.58E-02 | 1.00E+00 |
| ENSG00000279381.1_bP-2171C2  | ENSG00000160789.18_LMNA | -0.10121 | -0.256283903 | 0.058937633 | 2.15E-01 | 4.89E-01 | 1.00E+00 |
| ENSG00000265349.1_RP11-55L4  | ENSG00000160789.18_LMNA | -0.29028 | -0.429623891 | -0.13742723 | 2.86E-04 | 4.33E-03 | 1.00E+00 |
| ENSG00000250360.1_CTD-2089N  | ENSG00000160789.18_LMNA | -0.15388 | -0.305594737 | 0.005453852 | 5.84E-02 | 2.21E-01 | 1.00E+00 |
| ENSG00000249771.1_RP11-457P  | ENSG00000160789.18_LMNA | -0.36555 | -0.49589308  | -0.21910153 | 3.64E-06 | 1.29E-04 | 1.87E-01 |
| ENSG00000222022.1_AC112721.  | ENSG00000160789.18_LMNA | 0.20902  | 0.051531612  | 0.356360116 | 9.76E-03 | 6.45E-02 | 1.00E+00 |
| ENSG00000221737.1_MIR548I1   | ENSG00000160789.18_LMNA | 0.04536  | -0.114666754 | 0.203096043 | 5.79E-01 | 8.04E-01 | 1.00E+00 |
| ENSG00000199672.1_RNU4-21P   | ENSG00000160789.18_LMNA | -0.05123 | -0.208728253 | 0.10885863  | 5.31E-01 | 7.74E-01 | 1.00E+00 |
| ENSG00000199318.1_RNA5SP52   | ENSG00000160789.18_LMNA | 0.1304   | -0.0294078   | 0.283714125 | 1.09E-01 | 3.29E-01 | 1.00E+00 |
| ENSG00000254563.1_RP11-673F  | ENSG00000160789.18_LMNA | -0.10776 | -0.262456013 | 0.052340842 | 1.86E-01 | 4.52E-01 | 1.00E+00 |
| ENSG00000255928.1_RP11-456I1 | ENSG00000160789.18_LMNA | 0.03907  | -0.120878057 | 0.197049507 | 6.33E-01 | 8.35E-01 | 1.00E+00 |
| ENSG00000239702.3_RN7SL507F  | ENSG00000160789.18_LMNA | -0.01834 | -0.177028506 | 0.14126846  | 8.23E-01 | 9.31E-01 | 1.00E+00 |
| ENSG00000224265.1_RP11-168L  | ENSG00000160789.18_LMNA | -0.10622 | -0.261010145 | 0.053888663 | 1.93E-01 | 4.61E-01 | 1.00E+00 |
| ENSG00000278236.1_uc_338     | ENSG00000160789.18_LMNA | -0.12034 | -0.274283059 | 0.039622786 | 1.40E-01 | 3.81E-01 | 1.00E+00 |
| ENSG00000272319.1_AL022345.7 | ENSG00000160789.18_LMNA | -0.00511 | -0.164177823 | 0.154215475 | 9.50E-01 | 9.80E-01 | 1.00E+00 |
| ENSG00000227466.1_RP11-397C  | ENSG00000160789.18_LMNA | -0.01334 | -0.172178417 | 0.146167732 | 8.70E-01 | 9.50E-01 | 1.00E+00 |
| ENSG00000276693.1_RP13-977J  | ENSG00000160789.18_LMNA | -0.10091 | -0.25599893  | 0.05924155  | 2.16E-01 | 4.90E-01 | 1.00E+00 |
| ENSG00000226884.1_RPS29P10   | ENSG00000160789.18_LMNA | -0.06265 | -0.219662561 | 0.097520552 | 4.43E-01 | 7.10E-01 | 1.00E+00 |
| ENSG00000262095.1_MTATP6P2   | ENSG00000160789.18_LMNA | 0.01944  | -0.140193152 | 0.178090955 | 8.12E-01 | 9.26E-01 | 1.00E+00 |
| ENSG00000239468.3_RN7SL569F  | ENSG00000160789.18_LMNA | 0.14549  | -0.014039128 | 0.297790151 | 7.37E-02 | 2.58E-01 | 1.00E+00 |
| ENSG00000230500.1_MKX-AS1    | ENSG00000160789.18_LMNA | -0.11998 | -0.273950829 | 0.039981438 | 1.41E-01 | 3.83E-01 | 1.00E+00 |
| ENSG00000234626.1_RP1-149A1  | ENSG00000160789.18_LMNA | -0.04086 | -0.198765253 | 0.119118083 | 6.17E-01 | 8.27E-01 | 1.00E+00 |
| ENSG00000225903.1_RP1-144F1  | ENSG00000160789.18_LMNA | -0.07747 | -0.233790291 | 0.082748194 | 3.43E-01 | 6.27E-01 | 1.00E+00 |
| ENSG00000240513.1_RP11-829H  | ENSG00000160789.18_LMNA | 0.0372   | -0.122727536 | 0.195244404 | 6.49E-01 | 8.44E-01 | 1.00E+00 |
| ENSG00000272814.1_RP11-15I2C | ENSG00000160789.18_LMNA | 0.0896   | -0.070605593 | 0.245303786 | 2.72E-01 | 5.57E-01 | 1.00E+00 |
| ENSG00000271159.1_HINT1P2    | ENSG00000160789.18_LMNA | 0.13825  | -0.021417742 | 0.291049025 | 8.94E-02 | 2.91E-01 | 1.00E+00 |
| ENSG00000274686.1_Metazoa_SI | ENSG00000160789.18_LMNA | 0.10119  | -0.058959051 | 0.256263822 | 2.15E-01 | 4.89E-01 | 1.00E+00 |
| ENSG00000259485.1_CTD-2147F  | ENSG00000160789.18_LMNA | -0.08793 | -0.243716366 | 0.072285333 | 2.81E-01 | 5.67E-01 | 1.00E+00 |
| ENSG00000233099.1_RP11-375A  | ENSG00000160789.18_LMNA | -0.20308 | -0.350932784 | -0.04534303 | 1.21E-02 | 7.52E-02 | 1.00E+00 |
| ENSG00000253409.1_TRBV7-4    | ENSG00000160789.18_LMNA | 0.07158  | -0.088626228 | 0.228184726 | 3.81E-01 | 6.60E-01 | 1.00E+00 |
| ENSG00000261673.1_RP11-328J  | ENSG00000160789.18_LMNA | -0.09927 | -0.254450461 | 0.060891939 | 2.24E-01 | 4.99E-01 | 1.00E+00 |

|                              |                         |          |              |             |          |          |          |
|------------------------------|-------------------------|----------|--------------|-------------|----------|----------|----------|
| ENSG00000199975.1_RN7SKP24   | ENSG00000160789.18_LMNA | 0.00447  | -0.154839714 | 0.163555486 | 9.56E-01 | 9.83E-01 | 1.00E+00 |
| ENSG00000261774.1_RP11-328J  | ENSG00000160789.18_LMNA | -0.08126 | -0.237387324 | 0.078964685 | 3.20E-01 | 6.06E-01 | 1.00E+00 |
| ENSG00000261212.1_RP3-507I15 | ENSG00000160789.18_LMNA | -0.24488 | -0.388917706 | -0.08915387 | 2.36E-03 | 2.22E-02 | 1.00E+00 |
| ENSG00000243675.1_RP11-379F  | ENSG00000160789.18_LMNA | 0.02902  | -0.130783492 | 0.187356531 | 7.23E-01 | 8.83E-01 | 1.00E+00 |
| ENSG00000224251.5_RP11-499O  | ENSG00000160789.18_LMNA | -0.16427 | -0.31522373  | -0.00520189 | 4.32E-02 | 1.83E-01 | 1.00E+00 |
| ENSG00000276002.1_Metazoa_SI | ENSG00000160789.18_LMNA | -0.01961 | -0.178251478 | 0.14003062  | 8.11E-01 | 9.25E-01 | 1.00E+00 |
| ENSG00000223324.1_RN7SKP27   | ENSG00000160789.18_LMNA | -0.10919 | -0.263800467 | 0.050900227 | 1.81E-01 | 4.44E-01 | 1.00E+00 |
| ENSG00000227224.1_RP11-72H1  | ENSG00000160789.18_LMNA | 0.01521  | -0.144343223 | 0.173986416 | 8.52E-01 | 9.42E-01 | 1.00E+00 |
| ENSG00000249012.2_RP11-731D  | ENSG00000160789.18_LMNA | -0.13018 | -0.283507498 | 0.029632304 | 1.10E-01 | 3.30E-01 | 1.00E+00 |
| ENSG00000267518.1_RP11-794C  | ENSG00000160789.18_LMNA | 0.11059  | -0.049478386 | 0.265126203 | 1.75E-01 | 4.36E-01 | 1.00E+00 |
| ENSG00000281807.1_           | ENSG00000160789.18_LMNA | -0.04987 | -0.207422492 | 0.110207109 | 5.42E-01 | 7.81E-01 | 1.00E+00 |
| ENSG00000228033.4_AC010967.  | ENSG00000160789.18_LMNA | 0.11442  | -0.045614747 | 0.268722692 | 1.60E-01 | 4.14E-01 | 1.00E+00 |
| ENSG00000225299.1_RP11-344A  | ENSG00000160789.18_LMNA | -0.2345  | -0.379530058 | -0.0782174  | 3.64E-03 | 3.09E-02 | 1.00E+00 |
| ENSG00000265408.1_RP11-361L  | ENSG00000160789.18_LMNA | 0.06663  | -0.093565264 | 0.223458337 | 4.15E-01 | 6.88E-01 | 1.00E+00 |
| ENSG00000239820.3_RN7SL213f  | ENSG00000160789.18_LMNA | -0.05406 | -0.211437032 | 0.106057503 | 5.08E-01 | 7.58E-01 | 1.00E+00 |
| ENSG00000234842.1_MTCO2P16   | ENSG00000160789.18_LMNA | -0.15148 | -0.303366497 | 0.007909669 | 6.25E-02 | 2.32E-01 | 1.00E+00 |
| ENSG00000275216.1_RP11-54H7  | ENSG00000160789.18_LMNA | 0.11332  | -0.046719074 | 0.267695617 | 1.64E-01 | 4.20E-01 | 1.00E+00 |
| ENSG00000271963.1_CTD-2140B  | ENSG00000160789.18_LMNA | 0.06591  | -0.094275824 | 0.222777141 | 4.20E-01 | 6.91E-01 | 1.00E+00 |
| ENSG00000249514.1_TM251P     | ENSG00000160789.18_LMNA | -0.07708 | -0.233414929 | 0.083142491 | 3.45E-01 | 6.29E-01 | 1.00E+00 |
| ENSG0000006059.3_KRT33A      | ENSG00000160789.18_LMNA | -0.12528 | -0.27892168  | 0.034606783 | 1.24E-01 | 3.55E-01 | 1.00E+00 |
| ENSG00000276012.1_RP11-397O  | ENSG00000160789.18_LMNA | -0.04171 | -0.199581607 | 0.118279984 | 6.10E-01 | 8.22E-01 | 1.00E+00 |
| ENSG00000240051.1_RPL23AP1   | ENSG00000160789.18_LMNA | 0.1634   | 0.004316435  | 0.31442602  | 4.43E-02 | 1.86E-01 | 1.00E+00 |
| ENSG00000235635.1_AC016644.  | ENSG00000160789.18_LMNA | -0.0475  | -0.205145021 | 0.112556291 | 5.61E-01 | 7.93E-01 | 1.00E+00 |
| ENSG00000264914.1_RP11-343K  | ENSG00000160789.18_LMNA | -0.00626 | -0.165297106 | 0.153092133 | 9.39E-01 | 9.76E-01 | 1.00E+00 |
| ENSG00000271216.1_LINC01050  | ENSG00000160789.18_LMNA | 0.04241  | -0.117587264 | 0.200256021 | 6.04E-01 | 8.18E-01 | 1.00E+00 |
| ENSG00000235623.2_OR7E110P   | ENSG00000160789.18_LMNA | 0.08363  | -0.076587165 | 0.239643234 | 3.06E-01 | 5.92E-01 | 1.00E+00 |
| ENSG00000270159.1_RP11-568J  | ENSG00000160789.18_LMNA | -0.02116 | -0.179754663 | 0.138507797 | 7.96E-01 | 9.18E-01 | 1.00E+00 |
| ENSG00000232370.1_AF241726.2 | ENSG00000160789.18_LMNA | 0.09048  | -0.06972698  | 0.246133434 | 2.68E-01 | 5.52E-01 | 1.00E+00 |
| ENSG00000259290.1_RP11-687M  | ENSG00000160789.18_LMNA | -0.10618 | -0.260971944 | 0.053929537 | 1.93E-01 | 4.61E-01 | 1.00E+00 |
| ENSG00000260882.1_RP11-10K1  | ENSG00000160789.18_LMNA | -0.06241 | -0.219428285 | 0.097764346 | 4.45E-01 | 7.12E-01 | 1.00E+00 |
| ENSG00000259617.1_RP11-540C  | ENSG00000160789.18_LMNA | 0.09092  | -0.069286184 | 0.246549491 | 2.65E-01 | 5.49E-01 | 1.00E+00 |
| ENSG00000205044.3_RP11-56P9  | ENSG00000160789.18_LMNA | -0.30477 | -0.442502632 | -0.15299472 | 1.35E-04 | 2.39E-03 | 1.00E+00 |
| ENSG00000225542.1_ZNF385D-A  | ENSG00000160789.18_LMNA | -0.16701 | -0.317758143 | -0.0080183  | 3.97E-02 | 1.73E-01 | 1.00E+00 |

|                              |                         |          |              |             |          |          |          |
|------------------------------|-------------------------|----------|--------------|-------------|----------|----------|----------|
| ENSG00000256969.1_RP11-320N  | ENSG00000160789.18_LMNA | -0.15441 | -0.30608416  | 0.00491394  | 5.75E-02 | 2.20E-01 | 1.00E+00 |
| ENSG00000226876.2_RP11-36N2  | ENSG00000160789.18_LMNA | -0.11174 | -0.266202834 | 0.048322768 | 1.71E-01 | 4.29E-01 | 1.00E+00 |
| ENSG00000255440.1_RP11-632K  | ENSG00000160789.18_LMNA | 0.16841  | 0.009463987  | 0.319057358 | 3.81E-02 | 1.68E-01 | 1.00E+00 |
| ENSG00000260284.1_TPSP2      | ENSG00000160789.18_LMNA | 0.07777  | -0.082451501 | 0.234072674 | 3.41E-01 | 6.26E-01 | 1.00E+00 |
| ENSG00000240868.1_C1QTNF9-1  | ENSG00000160789.18_LMNA | 0.03516  | -0.124736375 | 0.19328132  | 6.67E-01 | 8.53E-01 | 1.00E+00 |
| ENSG00000250747.1_RP11-232L  | ENSG00000160789.18_LMNA | -0.16597 | -0.316801691 | -0.00695485 | 4.10E-02 | 1.76E-01 | 1.00E+00 |
| ENSG00000254839.1_AF131215.6 | ENSG00000160789.18_LMNA | -0.14173 | -0.294289361 | 0.017875221 | 8.16E-02 | 2.75E-01 | 1.00E+00 |
| ENSG00000260021.1_RP11-480I1 | ENSG00000160789.18_LMNA | 0.02883  | -0.130968565 | 0.187174836 | 7.24E-01 | 8.83E-01 | 1.00E+00 |
| ENSG00000256915.1_RP11-221N  | ENSG00000160789.18_LMNA | 0.06588  | -0.094308083 | 0.222746208 | 4.20E-01 | 6.92E-01 | 1.00E+00 |
| ENSG00000267748.4_CTB-102L5  | ENSG00000160789.18_LMNA | -0.10678 | -0.26153419  | 0.053327841 | 1.90E-01 | 4.58E-01 | 1.00E+00 |
| ENSG00000231911.1_TPRKBP1    | ENSG00000160789.18_LMNA | 0.00284  | -0.156432741 | 0.161966163 | 9.72E-01 | 9.89E-01 | 1.00E+00 |
| ENSG00000249426.1_CTC-448D2  | ENSG00000160789.18_LMNA | -0.08718 | -0.243012313 | 0.073029759 | 2.85E-01 | 5.71E-01 | 1.00E+00 |
| ENSG00000261058.1_RP11-252E  | ENSG00000160789.18_LMNA | -0.05571 | -0.213020404 | 0.104417814 | 4.95E-01 | 7.50E-01 | 1.00E+00 |
| ENSG00000223753.2_GHc-602D8  | ENSG00000160789.18_LMNA | 0.03854  | -0.121403797 | 0.1965366   | 6.37E-01 | 8.38E-01 | 1.00E+00 |
| ENSG00000226520.1_KIRREL-IT1 | ENSG00000160789.18_LMNA | 0.07464  | -0.08557497  | 0.23109717  | 3.61E-01 | 6.43E-01 | 1.00E+00 |
| ENSG00000230539.1_AOAH-IT1   | ENSG00000160789.18_LMNA | -0.01816 | -0.176851266 | 0.141447773 | 8.24E-01 | 9.31E-01 | 1.00E+00 |
| ENSG00000223733.1_RPL18AP1-4 | ENSG00000160789.18_LMNA | -0.08531 | -0.241238284 | 0.074903957 | 2.96E-01 | 5.82E-01 | 1.00E+00 |
| ENSG00000237280.1_RP11-96C2  | ENSG00000160789.18_LMNA | -0.05345 | -0.210852359 | 0.106662536 | 5.13E-01 | 7.61E-01 | 1.00E+00 |
| ENSG00000267132.1_HMGB3P27   | ENSG00000160789.18_LMNA | 0.05254  | -0.107555806 | 0.209988732 | 5.20E-01 | 7.66E-01 | 1.00E+00 |
| ENSG00000187103.3_FUNDC2P3   | ENSG00000160789.18_LMNA | 0.10727  | -0.052837506 | 0.261992217 | 1.88E-01 | 4.55E-01 | 1.00E+00 |
| ENSG00000214875.2_MED28P1    | ENSG00000160789.18_LMNA | -0.05859 | -0.215775248 | 0.101560866 | 4.73E-01 | 7.33E-01 | 1.00E+00 |
| ENSG00000256108.1_RP13-672B  | ENSG00000160789.18_LMNA | 0.31685  | 0.166024073  | 0.453190585 | 6.98E-05 | 1.41E-03 | 1.00E+00 |
| ENSG00000231562.1_RP11-508N  | ENSG00000160789.18_LMNA | -0.0818  | -0.237904207 | 0.078420255 | 3.16E-01 | 6.03E-01 | 1.00E+00 |
| ENSG00000262662.1_CTD-2561B  | ENSG00000160789.18_LMNA | 0.1291   | -0.030729462 | 0.282497292 | 1.13E-01 | 3.35E-01 | 1.00E+00 |
| ENSG00000223525.1_RABGAP1L   | ENSG00000160789.18_LMNA | -0.08704 | -0.242875584 | 0.073174287 | 2.86E-01 | 5.72E-01 | 1.00E+00 |
| ENSG00000223349.1_KLF2P3     | ENSG00000160789.18_LMNA | -0.28091 | -0.421270854 | -0.12740689 | 4.56E-04 | 6.27E-03 | 1.00E+00 |
| ENSG00000259571.1_BLID       | ENSG00000160789.18_LMNA | 0.09877  | -0.061391815 | 0.253981135 | 2.26E-01 | 5.02E-01 | 1.00E+00 |
| ENSG00000237167.1_AC128709.1 | ENSG00000160789.18_LMNA | 0.08441  | -0.075813593 | 0.240376502 | 3.01E-01 | 5.88E-01 | 1.00E+00 |
| ENSG00000233176.3_OR7E157P   | ENSG00000160789.18_LMNA | -0.00362 | -0.162725289 | 0.155672052 | 9.65E-01 | 9.86E-01 | 1.00E+00 |
| ENSG00000233644.1_ARHGEF7-1  | ENSG00000160789.18_LMNA | -0.14936 | -0.301398351 | 0.010075708 | 6.63E-02 | 2.41E-01 | 1.00E+00 |
| ENSG00000233714.1_AC012506.1 | ENSG00000160789.18_LMNA | 0.06153  | -0.09863198  | 0.218594225 | 4.51E-01 | 7.17E-01 | 1.00E+00 |
| ENSG00000240524.2_RP5-1061H  | ENSG00000160789.18_LMNA | 0.06178  | -0.098388491 | 0.218828338 | 4.50E-01 | 7.15E-01 | 1.00E+00 |
| ENSG00000242444.3_RP11-320N  | ENSG00000160789.18_LMNA | 0.02956  | -0.130249737 | 0.187880422 | 7.18E-01 | 8.80E-01 | 1.00E+00 |

|                              |                         |          |              |             |          |          |          |
|------------------------------|-------------------------|----------|--------------|-------------|----------|----------|----------|
| ENSG00000225243.4_RP1-127D3  | ENSG00000160789.18_LMNA | 0.0047   | -0.154621258 | 0.163773305 | 9.54E-01 | 9.82E-01 | 1.00E+00 |
| ENSG00000233755.1_RP4-799D1  | ENSG00000160789.18_LMNA | -0.12856 | -0.281985505 | 0.031285012 | 1.14E-01 | 3.38E-01 | 1.00E+00 |
| ENSG00000258232.2_RP11-161H  | ENSG00000160789.18_LMNA | 0.04726  | -0.112792137 | 0.204916184 | 5.63E-01 | 7.94E-01 | 1.00E+00 |
| ENSG00000261013.1_CTD-2050B  | ENSG00000160789.18_LMNA | 0.02738  | -0.13239928  | 0.185769501 | 7.38E-01 | 8.90E-01 | 1.00E+00 |
| ENSG00000267284.1_RP11-397A  | ENSG00000160789.18_LMNA | -0.03458 | -0.192719972 | 0.125310328 | 6.72E-01 | 8.56E-01 | 1.00E+00 |
| ENSG00000235101.1_SETP9      | ENSG00000160789.18_LMNA | 0.09245  | -0.067745933 | 0.248002384 | 2.57E-01 | 5.40E-01 | 1.00E+00 |
| ENSG00000281196.1_LINC00934  | ENSG00000160789.18_LMNA | -0.19005 | -0.338995277 | -0.03181317 | 1.90E-02 | 1.04E-01 | 1.00E+00 |
| ENSG00000226935.5_LINC00161  | ENSG00000160789.18_LMNA | 0.06231  | -0.097858624 | 0.219337677 | 4.46E-01 | 7.12E-01 | 1.00E+00 |
| ENSG00000234225.2_RP4-704D2  | ENSG00000160789.18_LMNA | -0.07761 | -0.233916066 | 0.082616052 | 3.42E-01 | 6.27E-01 | 1.00E+00 |
| ENSG00000233020.1_RP11-42O1  | ENSG00000160789.18_LMNA | -0.10621 | -0.260999322 | 0.053900243 | 1.93E-01 | 4.61E-01 | 1.00E+00 |
| ENSG00000233915.4_UBE2Q2P1   | ENSG00000160789.18_LMNA | 0.00535  | -0.153984214 | 0.164408315 | 9.48E-01 | 9.79E-01 | 1.00E+00 |
| ENSG00000259550.2_HNRNPA1F   | ENSG00000160789.18_LMNA | -0.03341 | -0.191586873 | 0.126468223 | 6.83E-01 | 8.62E-01 | 1.00E+00 |
| ENSG00000256916.1_RP11-817J  | ENSG00000160789.18_LMNA | -0.03614 | -0.194220251 | 0.123775885 | 6.58E-01 | 8.49E-01 | 1.00E+00 |
| ENSG00000256450.1_RP11-424M  | ENSG00000160789.18_LMNA | -0.03461 | -0.192752761 | 0.12527681  | 6.72E-01 | 8.56E-01 | 1.00E+00 |
| ENSG00000254151.1_NIPA2P4    | ENSG00000160789.18_LMNA | -0.00846 | -0.167431935 | 0.150947276 | 9.18E-01 | 9.69E-01 | 1.00E+00 |
| ENSG00000170099.5_SERPINA6   | ENSG00000160789.18_LMNA | 0.06952  | -0.09068164  | 0.22621962  | 3.95E-01 | 6.72E-01 | 1.00E+00 |
| ENSG00000249505.1_RP11-434H  | ENSG00000160789.18_LMNA | 0.11993  | -0.040037917 | 0.273898504 | 1.41E-01 | 3.83E-01 | 1.00E+00 |
| ENSG00000223970.1_RP11-598O  | ENSG00000160789.18_LMNA | 0.10918  | -0.050903587 | 0.263797333 | 1.81E-01 | 4.44E-01 | 1.00E+00 |
| ENSG00000249713.1_CTD-2236F  | ENSG00000160789.18_LMNA | 0.14485  | -0.014684974 | 0.297201343 | 7.50E-02 | 2.61E-01 | 1.00E+00 |
| ENSG00000261076.1_RP11-179B  | ENSG00000160789.18_LMNA | -0.03977 | -0.197715903 | 0.120194721 | 6.27E-01 | 8.32E-01 | 1.00E+00 |
| ENSG00000258546.1_CENPUP2    | ENSG00000160789.18_LMNA | -0.06735 | -0.22414556  | 0.09284809  | 4.10E-01 | 6.84E-01 | 1.00E+00 |
| ENSG00000134365.11_CFHR4     | ENSG00000160789.18_LMNA | -0.15764 | -0.309084159 | 0.001600494 | 5.24E-02 | 2.07E-01 | 1.00E+00 |
| ENSG00000189253.7_TRIM64B    | ENSG00000160789.18_LMNA | 0.00157  | -0.157670285 | 0.160730354 | 9.85E-01 | 9.94E-01 | 1.00E+00 |
| ENSG00000260715.1_RP11-744D  | ENSG00000160789.18_LMNA | 0.06612  | -0.094070119 | 0.222974376 | 4.18E-01 | 6.90E-01 | 1.00E+00 |
| ENSG00000254579.1_RP11-407P  | ENSG00000160789.18_LMNA | -0.15553 | -0.307124966 | 0.003765162 | 5.57E-02 | 2.15E-01 | 1.00E+00 |
| ENSG00000250727.1_RP11-959I1 | ENSG00000160789.18_LMNA | 0.18682  | 0.028468555  | 0.336028971 | 2.12E-02 | 1.12E-01 | 1.00E+00 |
| ENSG00000214651.4_RP11-477J  | ENSG00000160789.18_LMNA | 0.00426  | -0.155042904 | 0.16335286  | 9.58E-01 | 9.83E-01 | 1.00E+00 |
| ENSG00000278455.1_RP11-261C  | ENSG00000160789.18_LMNA | 0.04283  | -0.117165159 | 0.200666823 | 6.00E-01 | 8.16E-01 | 1.00E+00 |
| ENSG00000241280.1_RP11-221J  | ENSG00000160789.18_LMNA | 0.0912   | -0.069005281 | 0.246814568 | 2.64E-01 | 5.47E-01 | 1.00E+00 |
| ENSG00000197503.4_LINC00477  | ENSG00000160789.18_LMNA | -0.16329 | -0.314320614 | -0.00419947 | 4.44E-02 | 1.86E-01 | 1.00E+00 |
| ENSG00000269138.1_ZNF209P    | ENSG00000160789.18_LMNA | -0.05267 | -0.210105952 | 0.107434593 | 5.19E-01 | 7.65E-01 | 1.00E+00 |
| ENSG00000250230.2_RP11-855O  | ENSG00000160789.18_LMNA | 0.02857  | -0.131229878 | 0.186918255 | 7.27E-01 | 8.84E-01 | 1.00E+00 |
| ENSG00000261645.4_DISC1FP1   | ENSG00000160789.18_LMNA | -0.24725 | -0.391059119 | -0.09165875 | 2.13E-03 | 2.05E-02 | 1.00E+00 |

|                             |                         |          |              |             |          |          |          |
|-----------------------------|-------------------------|----------|--------------|-------------|----------|----------|----------|
| ENSG00000263198.1_          | ENSG00000160789.18_LMNA | 0.03042  | -0.129404057 | 0.188710102 | 7.10E-01 | 8.77E-01 | 1.00E+00 |
| ENSG00000264424.1_MYH4      | ENSG00000160789.18_LMNA | -0.13521 | -0.288206929 | 0.02451844  | 9.67E-02 | 3.05E-01 | 1.00E+00 |
| ENSG00000105398.3_SULT2A1   | ENSG00000160789.18_LMNA | 1.09E-05 | -0.159190064 | 0.15921134  | 1.00E+00 | 1.00E+00 | 1.00E+00 |
| ENSG00000232458.1_LINC01450 | ENSG00000160789.18_LMNA | 0.07436  | -0.085856324 | 0.230828854 | 3.63E-01 | 6.44E-01 | 1.00E+00 |
| ENSG00000162365.10_CYP4A22  | ENSG00000160789.18_LMNA | -0.03468 | -0.192811979 | 0.12521627  | 6.71E-01 | 8.56E-01 | 1.00E+00 |
| ENSG00000267391.2_MIR122    | ENSG00000160789.18_LMNA | -0.07423 | -0.230699762 | 0.08599167  | 3.63E-01 | 6.45E-01 | 1.00E+00 |
| ENSG00000156920.9_ADGRG4    | ENSG00000160789.18_LMNA | 0.03322  | -0.126653501 | 0.191405484 | 6.85E-01 | 8.63E-01 | 1.00E+00 |
| ENSG00000233183.2_RP3-468B3 | ENSG00000160789.18_LMNA | 0.04906  | -0.111008861 | 0.206645601 | 5.48E-01 | 7.85E-01 | 1.00E+00 |
| ENSG00000200434.1_RNA5-8SP2 | ENSG00000160789.18_LMNA | 0.04503  | -0.114992425 | 0.202779612 | 5.82E-01 | 8.05E-01 | 1.00E+00 |
| ENSG00000211658.2_IGLV3-27  | ENSG00000160789.18_LMNA | 0.0614   | -0.098763857 | 0.21846741  | 4.52E-01 | 7.18E-01 | 1.00E+00 |
| ENSG00000238766.2_          | ENSG00000160789.18_LMNA | -0.16517 | -0.316064168 | -0.0061353  | 4.20E-02 | 1.79E-01 | 1.00E+00 |
| ENSG00000277030.1_MIR8071-2 | ENSG00000160789.18_LMNA | -0.00475 | -0.163825418 | 0.154568988 | 9.54E-01 | 9.81E-01 | 1.00E+00 |
| ENSG00000207367.1_RNU6-29P  | ENSG00000160789.18_LMNA | 0.03621  | -0.123702056 | 0.194292399 | 6.58E-01 | 8.49E-01 | 1.00E+00 |
| ENSG00000265244.1_          | ENSG00000160789.18_LMNA | 0.15592  | -0.0033677   | 0.307484897 | 5.51E-02 | 2.14E-01 | 1.00E+00 |
| ENSG00000206803.1_RNU6-968F | ENSG00000160789.18_LMNA | 0.205    | 0.047341539  | 0.352687708 | 1.13E-02 | 7.14E-02 | 1.00E+00 |
| ENSG00000252098.1_Y_RNA     | ENSG00000160789.18_LMNA | 0.02774  | -0.132045739 | 0.186116891 | 7.34E-01 | 8.88E-01 | 1.00E+00 |
| ENSG00000250342.1_SNRPCP16  | ENSG00000160789.18_LMNA | -0.08937 | -0.2450797   | 0.070842819 | 2.74E-01 | 5.58E-01 | 1.00E+00 |
| ENSG00000221521.1_          | ENSG00000160789.18_LMNA | -0.043   | -0.200830339 | 0.116997112 | 5.99E-01 | 8.15E-01 | 1.00E+00 |
| ENSG00000236073.2_RP11-487E | ENSG00000160789.18_LMNA | 0.03401  | -0.12587203  | 0.192170404 | 6.77E-01 | 8.59E-01 | 1.00E+00 |
| ENSG00000207151.1_Y_RNA     | ENSG00000160789.18_LMNA | 0.05912  | -0.101034543 | 0.21628221  | 4.69E-01 | 7.30E-01 | 1.00E+00 |
| ENSG00000241526.1_RP11-144C | ENSG00000160789.18_LMNA | 0.20413  | 0.046435637  | 0.351892488 | 1.17E-02 | 7.31E-02 | 1.00E+00 |
| ENSG00000212533.1_SNORA75   | ENSG00000160789.18_LMNA | 0.12408  | -0.035828828 | 0.277792923 | 1.28E-01 | 3.62E-01 | 1.00E+00 |
| ENSG00000251144.1_CTD-2532K | ENSG00000160789.18_LMNA | -0.10578 | -0.260591216 | 0.05433685  | 1.95E-01 | 4.63E-01 | 1.00E+00 |
| ENSG00000254256.1_RPSAP71   | ENSG00000160789.18_LMNA | -0.2218  | -0.368004273 | -0.06488848 | 6.03E-03 | 4.52E-02 | 1.00E+00 |
| ENSG00000225366.4_TDGF1P3   | ENSG00000160789.18_LMNA | -0.18419 | -0.33360743  | -0.02574328 | 2.31E-02 | 1.20E-01 | 1.00E+00 |
| ENSG00000258978.1_HIF1AP1   | ENSG00000160789.18_LMNA | 0.05023  | -0.109853183 | 0.207765316 | 5.39E-01 | 7.79E-01 | 1.00E+00 |
| ENSG00000227109.1_CRIP1P3   | ENSG00000160789.18_LMNA | -0.01026 | -0.169180156 | 0.149188608 | 9.00E-01 | 9.61E-01 | 1.00E+00 |
| ENSG00000271779.1_RP11-87N3 | ENSG00000160789.18_LMNA | 0.10351  | -0.056627592 | 0.258448159 | 2.04E-01 | 4.76E-01 | 1.00E+00 |
| ENSG00000214252.4_AZGP1P2   | ENSG00000160789.18_LMNA | 0.0168   | -0.142785097 | 0.175528745 | 8.37E-01 | 9.37E-01 | 1.00E+00 |
| ENSG00000240853.3_RN7SL328f | ENSG00000160789.18_LMNA | 0.08648  | -0.073737929 | 0.24234224  | 2.89E-01 | 5.75E-01 | 1.00E+00 |
| ENSG00000236712.1_AC079448  | ENSG00000160789.18_LMNA | 0.03358  | -0.126296733 | 0.191754745 | 6.81E-01 | 8.61E-01 | 1.00E+00 |
| ENSG00000254960.2_KIRREL3-A | ENSG00000160789.18_LMNA | -0.27262 | -0.413861391 | -0.11856838 | 6.79E-04 | 8.57E-03 | 1.00E+00 |
| ENSG00000265313.4_LINC01476 | ENSG00000160789.18_LMNA | -0.18762 | -0.336765525 | -0.0292984  | 2.06E-02 | 1.10E-01 | 1.00E+00 |



|                              |                         |          |              |             |          |          |          |
|------------------------------|-------------------------|----------|--------------|-------------|----------|----------|----------|
| ENSG00000230604.2_TSEN15P2   | ENSG00000160789.18_LMNA | -0.08734 | -0.243157554 | 0.072876218 | 2.85E-01 | 5.70E-01 | 1.00E+00 |
| ENSG00000258503.1_RP11-368P  | ENSG00000160789.18_LMNA | -0.11556 | -0.269796657 | 0.044459181 | 1.56E-01 | 4.08E-01 | 1.00E+00 |
| ENSG00000231748.1_RP11-227H  | ENSG00000160789.18_LMNA | 0.11008  | -0.049996003 | 0.26464371  | 1.77E-01 | 4.38E-01 | 1.00E+00 |
| ENSG00000228874.1_AC090954.1 | ENSG00000160789.18_LMNA | 0.01054  | -0.148911796 | 0.169455141 | 8.97E-01 | 9.60E-01 | 1.00E+00 |
| ENSG00000244134.1_RPS12P20   | ENSG00000160789.18_LMNA | 0.06496  | -0.095227621 | 0.221864192 | 4.27E-01 | 6.97E-01 | 1.00E+00 |
| ENSG00000259682.1_RP11-702L  | ENSG00000160789.18_LMNA | -0.07908 | -0.235321725 | 0.081138483 | 3.33E-01 | 6.18E-01 | 1.00E+00 |
| ENSG00000261472.1_RP11-467I1 | ENSG00000160789.18_LMNA | -0.05365 | -0.211047889 | 0.106460224 | 5.12E-01 | 7.60E-01 | 1.00E+00 |
| ENSG00000248336.1_HMGN1P11   | ENSG00000160789.18_LMNA | -0.01505 | -0.173831528 | 0.144499611 | 8.54E-01 | 9.43E-01 | 1.00E+00 |
| ENSG00000214281.3_HMGN2P39   | ENSG00000160789.18_LMNA | -0.00688 | -0.165900954 | 0.152485751 | 9.33E-01 | 9.74E-01 | 1.00E+00 |
| ENSG00000273115.1_KB-1466C5  | ENSG00000160789.18_LMNA | -0.10634 | -0.261117395 | 0.053773902 | 1.92E-01 | 4.60E-01 | 1.00E+00 |
| ENSG00000211800.3_TRAV20     | ENSG00000160789.18_LMNA | 0.1162   | -0.043815183 | 0.270394839 | 1.54E-01 | 4.04E-01 | 1.00E+00 |
| ENSG00000234865.3_CTD-2138C  | ENSG00000160789.18_LMNA | -0.10215 | -0.2571689   | 0.05799343  | 2.10E-01 | 4.84E-01 | 1.00E+00 |
| ENSG00000253513.1_RP11-6D1.1 | ENSG00000160789.18_LMNA | -0.06706 | -0.22386777  | 0.093138027 | 4.12E-01 | 6.86E-01 | 1.00E+00 |
| ENSG00000254263.1_RP11-473O  | ENSG00000160789.18_LMNA | -0.0144  | -0.173208079 | 0.145128933 | 8.60E-01 | 9.45E-01 | 1.00E+00 |
| ENSG00000237327.1_UPP2-IT1   | ENSG00000160789.18_LMNA | -0.07273 | -0.229278684 | 0.087480826 | 3.73E-01 | 6.53E-01 | 1.00E+00 |
| ENSG00000232970.1_POLHP1     | ENSG00000160789.18_LMNA | 0.04628  | -0.113760701 | 0.20397604  | 5.71E-01 | 8.00E-01 | 1.00E+00 |
| ENSG00000249710.1_RP11-588P  | ENSG00000160789.18_LMNA | -0.0325  | -0.190717353 | 0.127356183 | 6.91E-01 | 8.67E-01 | 1.00E+00 |
| ENSG00000267305.2_RP11-378J  | ENSG00000160789.18_LMNA | -0.01582 | -0.174585846 | 0.143737841 | 8.47E-01 | 9.40E-01 | 1.00E+00 |
| ENSG00000241101.1_PRICKLE2-  | ENSG00000160789.18_LMNA | -0.13022 | -0.283545022 | 0.029591536 | 1.10E-01 | 3.30E-01 | 1.00E+00 |
| ENSG00000251054.1_CTD-2215E  | ENSG00000160789.18_LMNA | -0.05594 | -0.213237688 | 0.104192667 | 4.94E-01 | 7.49E-01 | 1.00E+00 |
| ENSG00000212952.6_RP11-475I2 | ENSG00000160789.18_LMNA | 0.00475  | -0.15456625  | 0.163828148 | 9.54E-01 | 9.81E-01 | 1.00E+00 |
| ENSG00000263715.5_CRHR1      | ENSG00000160789.18_LMNA | -0.22781 | -0.373469747 | -0.07119554 | 4.76E-03 | 3.78E-02 | 1.00E+00 |
| ENSG00000232693.2_AC012370.1 | ENSG00000160789.18_LMNA | 0.099    | -0.06116951  | 0.254189872 | 2.25E-01 | 5.01E-01 | 1.00E+00 |
| ENSG00000241143.1_RPL32P9    | ENSG00000160789.18_LMNA | -0.1206  | -0.274526616 | 0.039359806 | 1.39E-01 | 3.80E-01 | 1.00E+00 |
| ENSG00000233733.1_H2AFZP6    | ENSG00000160789.18_LMNA | -0.07876 | -0.235010435 | 0.081465817 | 3.35E-01 | 6.21E-01 | 1.00E+00 |
| ENSG00000260919.1_CTD-3154N  | ENSG00000160789.18_LMNA | 0.10834  | -0.051757909 | 0.263000182 | 1.84E-01 | 4.49E-01 | 1.00E+00 |
| ENSG00000258965.2_RP11-446P  | ENSG00000160789.18_LMNA | -0.04429 | -0.202070679 | 0.115721811 | 5.88E-01 | 8.08E-01 | 1.00E+00 |
| ENSG00000223536.4_AC008069.1 | ENSG00000160789.18_LMNA | 0.01382  | -0.145699788 | 0.172642332 | 8.66E-01 | 9.48E-01 | 1.00E+00 |
| ENSG00000250708.1_RP11-161D  | ENSG00000160789.18_LMNA | -0.21433 | -0.361204536 | -0.05707537 | 8.01E-03 | 5.57E-02 | 1.00E+00 |
| ENSG00000231373.1_GNA14-AS   | ENSG00000160789.18_LMNA | 0.10479  | -0.055334239 | 0.25965851  | 1.99E-01 | 4.69E-01 | 1.00E+00 |
| ENSG00000257769.1_CTB-193M1  | ENSG00000160789.18_LMNA | 0.0644   | -0.095782405 | 0.221331794 | 4.31E-01 | 7.00E-01 | 1.00E+00 |
| ENSG00000276963.1_RP11-318K  | ENSG00000160789.18_LMNA | -0.00827 | -0.16724595  | 0.151134254 | 9.20E-01 | 9.69E-01 | 1.00E+00 |
| ENSG00000227096.1_HMGB3P8    | ENSG00000160789.18_LMNA | -0.08205 | -0.238144559 | 0.07816703  | 3.15E-01 | 6.01E-01 | 1.00E+00 |

|                              |                         |          |              |             |          |          |          |
|------------------------------|-------------------------|----------|--------------|-------------|----------|----------|----------|
| ENSG00000232873.1_RPL23AP9   | ENSG00000160789.18_LMNA | 0.15976  | 0.000571612  | 0.311047437 | 4.93E-02 | 2.00E-01 | 1.00E+00 |
| ENSG00000234607.2_RP11-5P18  | ENSG00000160789.18_LMNA | -0.06888 | -0.225610361 | 0.09131835  | 3.99E-01 | 6.76E-01 | 1.00E+00 |
| ENSG00000259749.1_NCAPGP2    | ENSG00000160789.18_LMNA | -0.15715 | -0.308630855 | 0.002101598 | 5.32E-02 | 2.09E-01 | 1.00E+00 |
| ENSG00000216316.1_RP3-354N1  | ENSG00000160789.18_LMNA | -0.06237 | -0.219394384 | 0.097799621 | 4.45E-01 | 7.12E-01 | 1.00E+00 |
| ENSG00000260617.1_RP5-1142A  | ENSG00000160789.18_LMNA | -0.10335 | -0.258302004 | 0.056783698 | 2.05E-01 | 4.77E-01 | 1.00E+00 |
| ENSG00000271278.1_TCEB1P33   | ENSG00000160789.18_LMNA | -0.07742 | -0.233738321 | 0.082802792 | 3.43E-01 | 6.28E-01 | 1.00E+00 |
| ENSG00000260798.1_RP11-354M  | ENSG00000160789.18_LMNA | 0.06493  | -0.095250412 | 0.221842324 | 4.27E-01 | 6.97E-01 | 1.00E+00 |
| ENSG00000270137.1_CTC-137K3  | ENSG00000160789.18_LMNA | -0.07734 | -0.233666328 | 0.082878421 | 3.44E-01 | 6.28E-01 | 1.00E+00 |
| ENSG00000234191.1_RP11-157D  | ENSG00000160789.18_LMNA | 0.04505  | -0.114971509 | 0.202799937 | 5.82E-01 | 8.05E-01 | 1.00E+00 |
| ENSG00000253539.1_RP11-402L  | ENSG00000160789.18_LMNA | -0.08505 | -0.240983252 | 0.075173205 | 2.98E-01 | 5.83E-01 | 1.00E+00 |
| ENSG00000170788.12_DYDC1     | ENSG00000160789.18_LMNA | -0.05391 | -0.21129695  | 0.106202485 | 5.09E-01 | 7.59E-01 | 1.00E+00 |
| ENSG00000259805.1_RP11-382A  | ENSG00000160789.18_LMNA | -0.12885 | -0.282261324 | 0.030985632 | 1.14E-01 | 3.37E-01 | 1.00E+00 |
| ENSG00000147873.5_IFNA5      | ENSG00000160789.18_LMNA | 0.13108  | -0.028716122 | 0.28435054  | 1.07E-01 | 3.26E-01 | 1.00E+00 |
| ENSG00000167656.4_LY6D       | ENSG00000160789.18_LMNA | -0.14007 | -0.292745179 | 0.019564387 | 8.52E-02 | 2.83E-01 | 1.00E+00 |
| ENSG00000273769.3_LCA10      | ENSG00000160789.18_LMNA | -0.16467 | -0.315594928 | -0.00561408 | 4.26E-02 | 1.81E-01 | 1.00E+00 |
| ENSG00000224141.4_MIR548XH   | ENSG00000160789.18_LMNA | -0.15505 | -0.306677264 | 0.004259409 | 5.65E-02 | 2.17E-01 | 1.00E+00 |
| ENSG00000214457.3_RPL7P29    | ENSG00000160789.18_LMNA | 0.09089  | -0.069315592 | 0.246521738 | 2.65E-01 | 5.49E-01 | 1.00E+00 |
| ENSG00000254538.1_RP11-463D  | ENSG00000160789.18_LMNA | 0.00153  | -0.157709274 | 0.160691403 | 9.85E-01 | 9.94E-01 | 1.00E+00 |
| ENSG00000217653.1_RP11-63K6  | ENSG00000160789.18_LMNA | 0.00554  | -0.153793956 | 0.164597915 | 9.46E-01 | 9.78E-01 | 1.00E+00 |
| ENSG00000260042.1_CTD-2034I2 | ENSG00000160789.18_LMNA | -0.13157 | -0.284802819 | 0.028224386 | 1.06E-01 | 3.23E-01 | 1.00E+00 |
| ENSG00000231701.1_BMS1P13    | ENSG00000160789.18_LMNA | 0.04439  | -0.115629283 | 0.202160631 | 5.87E-01 | 8.08E-01 | 1.00E+00 |
| ENSG00000265222.1_RP11-466A  | ENSG00000160789.18_LMNA | -0.02491 | -0.183385369 | 0.134823438 | 7.61E-01 | 9.00E-01 | 1.00E+00 |
| ENSG00000254248.1_RP11-320N  | ENSG00000160789.18_LMNA | 0.08202  | -0.078199749 | 0.238113505 | 3.15E-01 | 6.01E-01 | 1.00E+00 |
| ENSG00000258026.1_RP11-543H  | ENSG00000160789.18_LMNA | 0.13535  | -0.024374967 | 0.288338558 | 9.64E-02 | 3.05E-01 | 1.00E+00 |
| ENSG00000206073.9_SERPINB4   | ENSG00000160789.18_LMNA | 0.14752  | -0.011966066 | 0.299678527 | 6.97E-02 | 2.49E-01 | 1.00E+00 |
| ENSG00000259703.4_LINC00593  | ENSG00000160789.18_LMNA | -0.03836 | -0.196363222 | 0.121581474 | 6.39E-01 | 8.39E-01 | 1.00E+00 |
| ENSG00000228174.6_RP11-244N  | ENSG00000160789.18_LMNA | 0.05697  | -0.103162864 | 0.214231126 | 4.86E-01 | 7.42E-01 | 1.00E+00 |
| ENSG00000164334.14_FAM170A   | ENSG00000160789.18_LMNA | 0.01558  | -0.143978009 | 0.174348068 | 8.49E-01 | 9.41E-01 | 1.00E+00 |
| ENSG00000242507.5_RP3-477O4  | ENSG00000160789.18_LMNA | 0.09367  | -0.06652364  | 0.249154342 | 2.51E-01 | 5.32E-01 | 1.00E+00 |
| ENSG00000196468.7_FGF16      | ENSG00000160789.18_LMNA | -0.08245 | -0.238520252 | 0.077771132 | 3.13E-01 | 5.99E-01 | 1.00E+00 |
| ENSG00000231163.4_CSMD2-AS   | ENSG00000160789.18_LMNA | 0.05446  | -0.105655784 | 0.211825108 | 5.05E-01 | 7.56E-01 | 1.00E+00 |
| ENSG00000225269.2_LINC00705  | ENSG00000160789.18_LMNA | 0.04808  | -0.111973003 | 0.205710824 | 5.56E-01 | 7.90E-01 | 1.00E+00 |
| ENSG00000278898.1_CTD-2342N  | ENSG00000160789.18_LMNA | -0.15039 | -0.30234914  | 0.009029684 | 6.44E-02 | 2.36E-01 | 1.00E+00 |

|                             |                         |          |              |             |          |          |          |
|-----------------------------|-------------------------|----------|--------------|-------------|----------|----------|----------|
| ENSG00000182077.9_PTCHD3    | ENSG00000160789.18_LMNA | 0.17364  | 0.014847118  | 0.323884887 | 3.24E-02 | 1.51E-01 | 1.00E+00 |
| ENSG00000235864.1_HSPA8P6   | ENSG00000160789.18_LMNA | -0.03647 | -0.19453775  | 0.123450961 | 6.56E-01 | 8.48E-01 | 1.00E+00 |
| ENSG00000170486.9_KRT72     | ENSG00000160789.18_LMNA | -0.02304 | -0.181570347 | 0.136666382 | 7.78E-01 | 9.09E-01 | 1.00E+00 |
| ENSG00000249690.1_RP11-1336 | ENSG00000160789.18_LMNA | 0.02442  | -0.135304178 | 0.182912121 | 7.65E-01 | 9.02E-01 | 1.00E+00 |
| ENSG00000261697.4_RP11-178L | ENSG00000160789.18_LMNA | 0.1125   | -0.047549233 | 0.26692306  | 1.68E-01 | 4.25E-01 | 1.00E+00 |
| ENSG00000229495.1_RP11-173D | ENSG00000160789.18_LMNA | 0.10632  | -0.053787632 | 0.261104564 | 1.92E-01 | 4.61E-01 | 1.00E+00 |
| ENSG00000233048.1_RP5-1069C | ENSG00000160789.18_LMNA | 0.07717  | -0.083053997 | 0.233499181 | 3.45E-01 | 6.29E-01 | 1.00E+00 |
| ENSG00000184735.6_DDX53     | ENSG00000160789.18_LMNA | 0.14639  | -0.013115264 | 0.29863201  | 7.19E-02 | 2.54E-01 | 1.00E+00 |
| ENSG00000279006.1_CTA-243E7 | ENSG00000160789.18_LMNA | 0.02734  | -0.132432867 | 0.185736493 | 7.38E-01 | 8.90E-01 | 1.00E+00 |
| ENSG00000198326.9_TMEM239   | ENSG00000160789.18_LMNA | 0.08341  | -0.076811862 | 0.239430176 | 3.07E-01 | 5.93E-01 | 1.00E+00 |
| ENSG00000169953.11_HSFY2    | ENSG00000160789.18_LMNA | -0.19353 | -0.342189209 | -0.03542214 | 1.69E-02 | 9.56E-02 | 1.00E+00 |
| ENSG00000212939.2_RP1-29C18 | ENSG00000160789.18_LMNA | 0.07173  | -0.088478098 | 0.228326247 | 3.80E-01 | 6.59E-01 | 1.00E+00 |
| ENSG00000234429.1_AC105342  | ENSG00000160789.18_LMNA | 0.02038  | -0.139271551 | 0.179000944 | 8.03E-01 | 9.21E-01 | 1.00E+00 |
| ENSG00000264177.1_RP1-37N7  | ENSG00000160789.18_LMNA | -0.07776 | -0.234067417 | 0.082457025 | 3.41E-01 | 6.26E-01 | 1.00E+00 |
| ENSG00000274913.1           | ENSG00000160789.18_LMNA | -0.03041 | -0.188698275 | 0.129416116 | 7.10E-01 | 8.77E-01 | 1.00E+00 |
| ENSG00000279963.1_AL049872  | ENSG00000160789.18_LMNA | 0.06663  | -0.093562892 | 0.22346061  | 4.15E-01 | 6.88E-01 | 1.00E+00 |
| ENSG00000281192.1_AC018867  | ENSG00000160789.18_LMNA | 0.06041  | -0.099748867 | 0.217519874 | 4.60E-01 | 7.23E-01 | 1.00E+00 |
| ENSG00000202031.1_SNORD38A  | ENSG00000160789.18_LMNA | 0.04383  | -0.11618385  | 0.201621424 | 5.92E-01 | 8.11E-01 | 1.00E+00 |
| ENSG00000252103.1_RNU6-917F | ENSG00000160789.18_LMNA | -0.08558 | -0.241493742 | 0.074634212 | 2.94E-01 | 5.80E-01 | 1.00E+00 |
| ENSG00000265370.1_MIR4682   | ENSG00000160789.18_LMNA | 0.12031  | -0.039649019 | 0.274258761 | 1.40E-01 | 3.81E-01 | 1.00E+00 |
| ENSG00000251447.1_RP11-517B | ENSG00000160789.18_LMNA | 0.11385  | -0.046187864 | 0.268189756 | 1.63E-01 | 4.18E-01 | 1.00E+00 |
| ENSG00000215972.1           | ENSG00000160789.18_LMNA | -0.02169 | -0.180266294 | 0.137989138 | 7.91E-01 | 9.15E-01 | 1.00E+00 |
| ENSG00000239183.1_SNORA84   | ENSG00000160789.18_LMNA | 0.10422  | -0.055910751 | 0.259119118 | 2.01E-01 | 4.72E-01 | 1.00E+00 |
| ENSG00000257110.2           | ENSG00000160789.18_LMNA | 0.13599  | -0.023719968 | 0.288939334 | 9.48E-02 | 3.01E-01 | 1.00E+00 |
| ENSG00000239819.2_IGKV1D-8  | ENSG00000160789.18_LMNA | -0.05431 | -0.211680021 | 0.105805984 | 5.06E-01 | 7.57E-01 | 1.00E+00 |
| ENSG00000252414.1_RNU6-100F | ENSG00000160789.18_LMNA | 0.03175  | -0.128097632 | 0.189990919 | 6.98E-01 | 8.71E-01 | 1.00E+00 |
| ENSG00000224041.3_IGKV3D-15 | ENSG00000160789.18_LMNA | 0.12412  | -0.035789108 | 0.277829624 | 1.28E-01 | 3.62E-01 | 1.00E+00 |
| ENSG00000252297.1_RNU6-875F | ENSG00000160789.18_LMNA | 0.0935   | -0.066696501 | 0.248991481 | 2.52E-01 | 5.33E-01 | 1.00E+00 |
| ENSG00000252254.1_Y_RNA     | ENSG00000160789.18_LMNA | 0.21122  | 0.053826406  | 0.358367414 | 9.00E-03 | 6.07E-02 | 1.00E+00 |
| ENSG00000223044.1_RNU6-130F | ENSG00000160789.18_LMNA | -0.00146 | -0.160624174 | 0.157776567 | 9.86E-01 | 9.94E-01 | 1.00E+00 |
| ENSG00000199963.1_RNU6-605F | ENSG00000160789.18_LMNA | 0.07002  | -0.09018963  | 0.226690248 | 3.91E-01 | 6.69E-01 | 1.00E+00 |
| ENSG00000199530.1_Y_RNA     | ENSG00000160789.18_LMNA | -0.08308 | -0.239117646 | 0.077141407 | 3.09E-01 | 5.95E-01 | 1.00E+00 |
| ENSG00000264344.1           | ENSG00000160789.18_LMNA | -0.00323 | -0.162346984 | 0.156051182 | 9.68E-01 | 9.88E-01 | 1.00E+00 |

|                              |                         |          |              |             |          |          |          |
|------------------------------|-------------------------|----------|--------------|-------------|----------|----------|----------|
| ENSG00000202569.3_MIR146B    | ENSG00000160789.18_LMNA | 0.12595  | -0.033930151 | 0.279546288 | 1.22E-01 | 3.52E-01 | 1.00E+00 |
| ENSG00000281394.1_SCARNA4    | ENSG00000160789.18_LMNA | -0.00368 | -0.162788144 | 0.15560905  | 9.64E-01 | 9.86E-01 | 1.00E+00 |
| ENSG00000201595.1_RNA5SP13   | ENSG00000160789.18_LMNA | 0.05338  | -0.106723405 | 0.210793526 | 5.14E-01 | 7.62E-01 | 1.00E+00 |
| ENSG00000199787.1_SNORA42    | ENSG00000160789.18_LMNA | 0.16825  | 0.009295644  | 0.318906131 | 3.83E-02 | 1.68E-01 | 1.00E+00 |
| ENSG00000231465.2_RP11-542K  | ENSG00000160789.18_LMNA | -0.04753 | -0.205177152 | 0.112523173 | 5.61E-01 | 7.93E-01 | 1.00E+00 |
| ENSG00000260614.1_RP11-491F  | ENSG00000160789.18_LMNA | -0.30467 | -0.442408128 | -0.15287996 | 1.35E-04 | 2.40E-03 | 1.00E+00 |
| ENSG00000249116.1_CTD-2194D  | ENSG00000160789.18_LMNA | 0.03248  | -0.127378878 | 0.190695123 | 6.91E-01 | 8.67E-01 | 1.00E+00 |
| ENSG00000271440.1_RP11-373N  | ENSG00000160789.18_LMNA | -0.24237 | -0.386653329 | -0.08650927 | 2.63E-03 | 2.41E-02 | 1.00E+00 |
| ENSG00000237864.1_LINC00322  | ENSG00000160789.18_LMNA | 0.01066  | -0.148790155 | 0.169575963 | 8.96E-01 | 9.59E-01 | 1.00E+00 |
| ENSG00000222627.1_RNU2-37P   | ENSG00000160789.18_LMNA | -0.0484  | -0.206010939 | 0.111663525 | 5.54E-01 | 7.88E-01 | 1.00E+00 |
| ENSG00000177468.6_OLIG3      | ENSG00000160789.18_LMNA | -0.13241 | -0.285593038 | 0.027364866 | 1.04E-01 | 3.19E-01 | 1.00E+00 |
| ENSG00000254350.1_RP11-542A  | ENSG00000160789.18_LMNA | 0.02706  | -0.132717077 | 0.185457164 | 7.41E-01 | 8.91E-01 | 1.00E+00 |
| ENSG00000258104.1_HIGD1AP9   | ENSG00000160789.18_LMNA | 0.02262  | -0.137075855 | 0.181166783 | 7.82E-01 | 9.11E-01 | 1.00E+00 |
| ENSG00000258918.1_RP11-219E  | ENSG00000160789.18_LMNA | -0.0111  | -0.170001862 | 0.148361294 | 8.92E-01 | 9.58E-01 | 1.00E+00 |
| ENSG00000275115.1_RP11-613H  | ENSG00000160789.18_LMNA | 0.06643  | -0.093764086 | 0.223267763 | 4.16E-01 | 6.89E-01 | 1.00E+00 |
| ENSG00000237377.2_AC005703.  | ENSG00000160789.18_LMNA | -0.02325 | -0.181776578 | 0.136457089 | 7.76E-01 | 9.08E-01 | 1.00E+00 |
| ENSG00000203523.3_TAS2R2P    | ENSG00000160789.18_LMNA | -0.01803 | -0.176723045 | 0.141577479 | 8.26E-01 | 9.32E-01 | 1.00E+00 |
| ENSG00000254127.1_IGLCOR22-  | ENSG00000160789.18_LMNA | -0.02096 | -0.179558613 | 0.138706494 | 7.98E-01 | 9.19E-01 | 1.00E+00 |
| ENSG00000236365.1_RP5-849L7  | ENSG00000160789.18_LMNA | 0.1781   | 0.019447474  | 0.327997719 | 2.82E-02 | 1.37E-01 | 1.00E+00 |
| ENSG00000255115.2_RP11-91P2  | ENSG00000160789.18_LMNA | 0.05285  | -0.107248514 | 0.210285883 | 5.18E-01 | 7.64E-01 | 1.00E+00 |
| ENSG00000224121.1_ATG12P2    | ENSG00000160789.18_LMNA | 0.03891  | -0.121037001 | 0.196894461 | 6.34E-01 | 8.36E-01 | 1.00E+00 |
| ENSG00000235266.1_RPL22P17   | ENSG00000160789.18_LMNA | -0.0286  | -0.186948001 | 0.131199586 | 7.27E-01 | 8.84E-01 | 1.00E+00 |
| ENSG00000264217.2_RPL35AP2   | ENSG00000160789.18_LMNA | 0.00889  | -0.150526908 | 0.167849988 | 9.13E-01 | 9.67E-01 | 1.00E+00 |
| ENSG00000276729.1_Metazoa_SI | ENSG00000160789.18_LMNA | 0.05467  | -0.105445708 | 0.212028009 | 5.04E-01 | 7.55E-01 | 1.00E+00 |
| ENSG00000225460.1_RP13-93L1  | ENSG00000160789.18_LMNA | -0.0759  | -0.232295809 | 0.084317474 | 3.53E-01 | 6.36E-01 | 1.00E+00 |
| ENSG00000226216.1_RPS12P5    | ENSG00000160789.18_LMNA | -0.01781 | -0.176508863 | 0.141794119 | 8.28E-01 | 9.33E-01 | 1.00E+00 |
| ENSG00000253454.1_NDUFA5P2   | ENSG00000160789.18_LMNA | 0.00734  | -0.152037421 | 0.166347259 | 9.28E-01 | 9.73E-01 | 1.00E+00 |
| ENSG00000277127.1_Metazoa_SI | ENSG00000160789.18_LMNA | -0.01608 | -0.174829687 | 0.14349151  | 8.44E-01 | 9.39E-01 | 1.00E+00 |
| ENSG00000164532.10_TBX20     | ENSG00000160789.18_LMNA | 0.02664  | -0.133122772 | 0.185058346 | 7.45E-01 | 8.93E-01 | 1.00E+00 |
| ENSG00000279983.1_CH17-140K  | ENSG00000160789.18_LMNA | 0.11545  | -0.044574705 | 0.269689326 | 1.57E-01 | 4.09E-01 | 1.00E+00 |
| ENSG00000253849.1_RP11-759A  | ENSG00000160789.18_LMNA | -0.07798 | -0.234270354 | 0.082243771 | 3.40E-01 | 6.25E-01 | 1.00E+00 |
| ENSG00000220739.2_RP11-277I2 | ENSG00000160789.18_LMNA | -0.13874 | -0.29150651  | 0.020918069 | 8.83E-02 | 2.89E-01 | 1.00E+00 |
| ENSG00000253115.1_RP11-6I2.4 | ENSG00000160789.18_LMNA | 0.00045  | -0.158762738 | 0.159638604 | 9.96E-01 | 9.98E-01 | 1.00E+00 |

|                              |                         |          |              |             |          |          |          |
|------------------------------|-------------------------|----------|--------------|-------------|----------|----------|----------|
| ENSG00000244441.1_RP11-359H  | ENSG00000160789.18_LMNA | -0.02696 | -0.185368845 | 0.132806928 | 7.42E-01 | 8.92E-01 | 1.00E+00 |
| ENSG00000276508.1_CTD-3194C  | ENSG00000160789.18_LMNA | 0.04774  | -0.112310444 | 0.205383524 | 5.59E-01 | 7.92E-01 | 1.00E+00 |
| ENSG00000186244.7_RP11-1079I | ENSG00000160789.18_LMNA | 0.03398  | -0.125899995 | 0.192143039 | 6.78E-01 | 8.59E-01 | 1.00E+00 |
| ENSG00000267604.1_RP5-905N1  | ENSG00000160789.18_LMNA | 0.01589  | -0.143677441 | 0.174645639 | 8.46E-01 | 9.40E-01 | 1.00E+00 |
| ENSG00000258770.1_CTD-2007A  | ENSG00000160789.18_LMNA | -0.09945 | -0.254622613 | 0.060708541 | 2.23E-01 | 4.98E-01 | 1.00E+00 |
| ENSG00000268696.1_ZNF723P    | ENSG00000160789.18_LMNA | -0.24317 | -0.387375618 | -0.08735239 | 2.54E-03 | 2.35E-02 | 1.00E+00 |
| ENSG00000262837.1_RP11-304F  | ENSG00000160789.18_LMNA | 0.04897  | -0.111095984 | 0.206561155 | 5.49E-01 | 7.86E-01 | 1.00E+00 |
| ENSG00000232482.2_RP4-654C1  | ENSG00000160789.18_LMNA | 0.06218  | -0.097989612 | 0.21921178  | 4.47E-01 | 7.13E-01 | 1.00E+00 |
| ENSG00000232105.1_RPL32P28   | ENSG00000160789.18_LMNA | -0.01685 | -0.175584331 | 0.142728912 | 8.37E-01 | 9.37E-01 | 1.00E+00 |
| ENSG00000229992.1_HMGB3P9    | ENSG00000160789.18_LMNA | -0.07537 | -0.231790347 | 0.084847879 | 3.56E-01 | 6.39E-01 | 1.00E+00 |
| ENSG00000268361.1_L34079.2   | ENSG00000160789.18_LMNA | 0.06986  | -0.090348866 | 0.226537949 | 3.92E-01 | 6.70E-01 | 1.00E+00 |
| ENSG00000256582.1_RP11-75L1  | ENSG00000160789.18_LMNA | -0.14855 | -0.300636715 | 0.01091314  | 6.78E-02 | 2.44E-01 | 1.00E+00 |
| ENSG00000267112.1_RP11-839G  | ENSG00000160789.18_LMNA | -0.16355 | -0.314559805 | -0.0044649  | 4.41E-02 | 1.85E-01 | 1.00E+00 |
| ENSG00000279797.1_RP11-432J  | ENSG00000160789.18_LMNA | -0.16584 | -0.316675516 | -0.00681461 | 4.12E-02 | 1.77E-01 | 1.00E+00 |
| ENSG00000250522.1_AC004066.  | ENSG00000160789.18_LMNA | -0.11494 | -0.269215066 | 0.045085066 | 1.59E-01 | 4.12E-01 | 1.00E+00 |
| ENSG00000263369.5_RP11-640N  | ENSG00000160789.18_LMNA | -0.13162 | -0.284853864 | 0.028168879 | 1.06E-01 | 3.23E-01 | 1.00E+00 |
| ENSG00000262516.1_RP11-95J1  | ENSG00000160789.18_LMNA | 0.02792  | -0.131871634 | 0.186287938 | 7.33E-01 | 8.88E-01 | 1.00E+00 |
| ENSG00000234300.1_LINC00229  | ENSG00000160789.18_LMNA | -0.07535 | -0.231768076 | 0.084871245 | 3.56E-01 | 6.40E-01 | 1.00E+00 |
| ENSG00000235126.1_AC128709.  | ENSG00000160789.18_LMNA | 0.00435  | -0.154958552 | 0.163436981 | 9.58E-01 | 9.83E-01 | 1.00E+00 |
| ENSG00000253744.1_AC025442.  | ENSG00000160789.18_LMNA | -0.10397 | -0.258887117 | 0.056158654 | 2.02E-01 | 4.73E-01 | 1.00E+00 |
| ENSG00000175121.10_WFDC5     | ENSG00000160789.18_LMNA | -0.1981  | -0.346378559 | -0.04016805 | 1.44E-02 | 8.55E-02 | 1.00E+00 |
| ENSG00000174325.4_DIRC1      | ENSG00000160789.18_LMNA | 0.24654  | 0.090903411  | 0.390413721 | 2.20E-03 | 2.10E-02 | 1.00E+00 |
| ENSG00000226059.2_HMGB3P2C   | ENSG00000160789.18_LMNA | 0.02302  | -0.136679091 | 0.181557823 | 7.78E-01 | 9.09E-01 | 1.00E+00 |
| ENSG00000265425.1_RP11-128D  | ENSG00000160789.18_LMNA | 0.03922  | -0.120731661 | 0.197192299 | 6.31E-01 | 8.35E-01 | 1.00E+00 |
| ENSG00000232294.4_RP4-715N1  | ENSG00000160789.18_LMNA | -0.00066 | -0.159847102 | 0.158554165 | 9.94E-01 | 9.97E-01 | 1.00E+00 |
| ENSG00000237138.1_HUNK-AS1   | ENSG00000160789.18_LMNA | -0.01542 | -0.174188888 | 0.144138767 | 8.50E-01 | 9.41E-01 | 1.00E+00 |
| ENSG00000224899.1_RP11-3B12  | ENSG00000160789.18_LMNA | -0.01226 | -0.171129475 | 0.147225261 | 8.81E-01 | 9.54E-01 | 1.00E+00 |
| ENSG00000258323.1_RP1-267L1  | ENSG00000160789.18_LMNA | -0.0472  | -0.204862338 | 0.112847627 | 5.64E-01 | 7.95E-01 | 1.00E+00 |
| ENSG00000278884.1_CH507-236  | ENSG00000160789.18_LMNA | 0.049    | -0.111068431 | 0.206587862 | 5.49E-01 | 7.86E-01 | 1.00E+00 |
| ENSG00000225979.1_AC010746.  | ENSG00000160789.18_LMNA | -0.23668 | -0.381502451 | -0.08050921 | 3.33E-03 | 2.89E-02 | 1.00E+00 |
| ENSG00000227660.1_UST-AS1    | ENSG00000160789.18_LMNA | -0.06466 | -0.221581737 | 0.095521977 | 4.29E-01 | 6.99E-01 | 1.00E+00 |
| ENSG00000183733.6_FIGLA      | ENSG00000160789.18_LMNA | -0.14701 | -0.29921082  | 0.012479765 | 7.07E-02 | 2.51E-01 | 1.00E+00 |
| ENSG00000267420.1_RP11-527L  | ENSG00000160789.18_LMNA | -0.07995 | -0.236144433 | 0.08027304  | 3.28E-01 | 6.14E-01 | 1.00E+00 |

|                              |                         |          |              |             |          |          |          |
|------------------------------|-------------------------|----------|--------------|-------------|----------|----------|----------|
| ENSG00000263237.1_RP11-429K  | ENSG00000160789.18_LMNA | -0.13016 | -0.283491076 | 0.029650146 | 1.10E-01 | 3.30E-01 | 1.00E+00 |
| ENSG00000259967.1_RP11-2E17  | ENSG00000160789.18_LMNA | 0.00672  | -0.152640731 | 0.165746645 | 9.34E-01 | 9.74E-01 | 1.00E+00 |
| ENSG00000236681.1_DSTNP5     | ENSG00000160789.18_LMNA | 0.12948  | -0.030346938 | 0.282849579 | 1.12E-01 | 3.34E-01 | 1.00E+00 |
| ENSG00000268804.1_RP11-542M  | ENSG00000160789.18_LMNA | -0.02966 | -0.187972916 | 0.130155482 | 7.17E-01 | 8.80E-01 | 1.00E+00 |
| ENSG00000215544.6_BCRP7      | ENSG00000160789.18_LMNA | -0.04069 | -0.198600219 | 0.119287458 | 6.19E-01 | 8.27E-01 | 1.00E+00 |
| ENSG00000248834.2_MARK2P5    | ENSG00000160789.18_LMNA | 0.01401  | -0.145512379 | 0.172828087 | 8.64E-01 | 9.47E-01 | 1.00E+00 |
| ENSG00000271113.1_RP11-159H  | ENSG00000160789.18_LMNA | -0.00236 | -0.161497325 | 0.156902355 | 9.77E-01 | 9.91E-01 | 1.00E+00 |
| ENSG00000119919.10_NKX2-3    | ENSG00000160789.18_LMNA | 0.07617  | -0.084053615 | 0.232547196 | 3.51E-01 | 6.35E-01 | 1.00E+00 |
| ENSG00000270528.1_RP11-674I1 | ENSG00000160789.18_LMNA | -0.02308 | -0.181616841 | 0.136619201 | 7.78E-01 | 9.09E-01 | 1.00E+00 |
| ENSG00000255538.1_OR10V2P    | ENSG00000160789.18_LMNA | 0.12312  | -0.036799269 | 0.276895946 | 1.31E-01 | 3.67E-01 | 1.00E+00 |
| ENSG00000255838.1_RP11-753B  | ENSG00000160789.18_LMNA | -0.10776 | -0.262459705 | 0.052336888 | 1.86E-01 | 4.52E-01 | 1.00E+00 |
| ENSG00000253733.3_LZTS1-AS1  | ENSG00000160789.18_LMNA | 0.06965  | -0.090551282 | 0.226344327 | 3.94E-01 | 6.71E-01 | 1.00E+00 |
| ENSG00000125522.3_NPBWR2     | ENSG00000160789.18_LMNA | -0.02692 | -0.18532304  | 0.132853525 | 7.42E-01 | 8.92E-01 | 1.00E+00 |
| ENSG00000254547.1_RP11-738O  | ENSG00000160789.18_LMNA | -0.17097 | -0.321419512 | -0.01209576 | 3.52E-02 | 1.59E-01 | 1.00E+00 |
| ENSG00000225936.1_RP11-501J  | ENSG00000160789.18_LMNA | 0.01195  | -0.147529746 | 0.17082733  | 8.84E-01 | 9.55E-01 | 1.00E+00 |
| ENSG00000174407.10_MIR1-1HG  | ENSG00000160789.18_LMNA | -0.00069 | -0.159871215 | 0.158530042 | 9.93E-01 | 9.97E-01 | 1.00E+00 |
| ENSG00000251385.2_MTCYBP16   | ENSG00000160789.18_LMNA | -0.04425 | -0.202027991 | 0.11576572  | 5.88E-01 | 8.09E-01 | 1.00E+00 |
| ENSG00000230927.2_TMBIM7P    | ENSG00000160789.18_LMNA | 0.21635  | 0.059191674  | 0.363049551 | 7.43E-03 | 5.26E-02 | 1.00E+00 |
| ENSG00000249646.2_OR7E94P    | ENSG00000160789.18_LMNA | -0.01735 | -0.176059849 | 0.142248188 | 8.32E-01 | 9.35E-01 | 1.00E+00 |
| ENSG00000234415.1_RPL5P7     | ENSG00000160789.18_LMNA | -0.18347 | -0.332948236 | -0.02500219 | 2.37E-02 | 1.22E-01 | 1.00E+00 |
| ENSG00000258924.4_CTB-96E2.1 | ENSG00000160789.18_LMNA | -0.03171 | -0.18994886  | 0.12814055  | 6.98E-01 | 8.71E-01 | 1.00E+00 |
| ENSG00000227321.2_MTND4P15   | ENSG00000160789.18_LMNA | 0.01486  | -0.144680652 | 0.173652202 | 8.56E-01 | 9.43E-01 | 1.00E+00 |
| ENSG00000264404.2_LINC00864  | ENSG00000160789.18_LMNA | -0.23322 | -0.378374161 | -0.07687579 | 3.83E-03 | 3.21E-02 | 1.00E+00 |
| ENSG00000257848.1_RP11-474C  | ENSG00000160789.18_LMNA | 0.04886  | -0.111202424 | 0.20645798  | 5.50E-01 | 7.86E-01 | 1.00E+00 |
| ENSG00000279146.1_RP11-117L  | ENSG00000160789.18_LMNA | 0.0266   | -0.133167501 | 0.185014369 | 7.45E-01 | 8.93E-01 | 1.00E+00 |
| ENSG00000235218.2_AC092638.1 | ENSG00000160789.18_LMNA | 0.05709  | -0.103051572 | 0.214338448 | 4.85E-01 | 7.42E-01 | 1.00E+00 |
| ENSG00000227538.1_HNRNPFP1   | ENSG00000160789.18_LMNA | 0.0825   | -0.077717734 | 0.238570919 | 3.12E-01 | 5.99E-01 | 1.00E+00 |
| ENSG00000226356.2_RPS6P20    | ENSG00000160789.18_LMNA | 0.01976  | -0.139879782 | 0.178400437 | 8.09E-01 | 9.24E-01 | 1.00E+00 |
| ENSG00000240405.4_SAMMSON    | ENSG00000160789.18_LMNA | -0.0428  | -0.200630126 | 0.11720287  | 6.01E-01 | 8.16E-01 | 1.00E+00 |
| ENSG00000264736.1_BDP1P      | ENSG00000160789.18_LMNA | 0.07434  | -0.085877809 | 0.230808362 | 3.63E-01 | 6.44E-01 | 1.00E+00 |
| ENSG00000172538.6_FAM170B    | ENSG00000160789.18_LMNA | -0.08545 | -0.241370893 | 0.074763937 | 2.95E-01 | 5.81E-01 | 1.00E+00 |
| ENSG00000204669.8_C9orf57    | ENSG00000160789.18_LMNA | -0.04741 | -0.205063883 | 0.112639918 | 5.62E-01 | 7.93E-01 | 1.00E+00 |
| ENSG00000261303.4_RP11-160C  | ENSG00000160789.18_LMNA | -0.16325 | -0.314278069 | -0.00415226 | 4.45E-02 | 1.86E-01 | 1.00E+00 |

|                             |                         |          |              |             |          |          |          |
|-----------------------------|-------------------------|----------|--------------|-------------|----------|----------|----------|
| ENSG00000233891.6_AC007131. | ENSG00000160789.18_LMNA | -0.09798 | -0.253232044 | 0.062189339 | 2.30E-01 | 5.07E-01 | 1.00E+00 |
| ENSG00000137634.8_NXPE4     | ENSG00000160789.18_LMNA | 0.07369  | -0.086522308 | 0.230193537 | 3.67E-01 | 6.48E-01 | 1.00E+00 |
| ENSG00000215357.2_HSPD1P8   | ENSG00000160789.18_LMNA | 0.03589  | -0.124023533 | 0.193978218 | 6.61E-01 | 8.50E-01 | 1.00E+00 |
| ENSG00000280091.1_CTC-312O1 | ENSG00000160789.18_LMNA | 0.02878  | -0.131021343 | 0.187123018 | 7.25E-01 | 8.83E-01 | 1.00E+00 |
| ENSG00000169903.6_TM4SF4    | ENSG00000160789.18_LMNA | -0.13194 | -0.285152892 | 0.02784367  | 1.05E-01 | 3.22E-01 | 1.00E+00 |
| ENSG00000229859.7_PGA3      | ENSG00000160789.18_LMNA | -0.23127 | -0.376602218 | -0.07482128 | 4.15E-03 | 3.41E-02 | 1.00E+00 |
| ENSG00000232490.5_OSBPL10-A | ENSG00000160789.18_LMNA | -0.06647 | -0.22330464  | 0.093725614 | 4.16E-01 | 6.88E-01 | 1.00E+00 |
| ENSG00000254440.3_PBOV1     | ENSG00000160789.18_LMNA | -0.04178 | -0.199656704 | 0.118202864 | 6.09E-01 | 8.22E-01 | 1.00E+00 |
| ENSG00000256249.1_RP11-324E | ENSG00000160789.18_LMNA | -0.00849 | -0.167464248 | 0.150914787 | 9.17E-01 | 9.69E-01 | 1.00E+00 |
| ENSG00000251046.2_ZNF969P   | ENSG00000160789.18_LMNA | -0.05802 | -0.21523227  | 0.102124383 | 4.78E-01 | 7.36E-01 | 1.00E+00 |
| ENSG00000250799.8_PRODH2    | ENSG00000160789.18_LMNA | 0.05899  | -0.101162615 | 0.216158865 | 4.70E-01 | 7.31E-01 | 1.00E+00 |
| ENSG00000101448.12_EPPIN    | ENSG00000160789.18_LMNA | 0.17397  | 0.015188521  | 0.324190511 | 3.21E-02 | 1.50E-01 | 1.00E+00 |
| ENSG00000143520.6_FLG2      | ENSG00000160789.18_LMNA | -0.01982 | -0.17845774  | 0.139821752 | 8.08E-01 | 9.24E-01 | 1.00E+00 |
| ENSG00000212380.1_SNORD115  | ENSG00000160789.18_LMNA | -0.01114 | -0.170042173 | 0.148320697 | 8.92E-01 | 9.57E-01 | 1.00E+00 |
| ENSG00000251835.1_RNU6ATAC  | ENSG00000160789.18_LMNA | -0.13121 | -0.284467447 | 0.02858903  | 1.07E-01 | 3.25E-01 | 1.00E+00 |
| ENSG00000207148.1_Y_RNA     | ENSG00000160789.18_LMNA | 0.01011  | -0.14933418  | 0.169035525 | 9.02E-01 | 9.62E-01 | 1.00E+00 |
| ENSG00000200985.1_RNA5SP49  | ENSG00000160789.18_LMNA | -0.04322 | -0.201041993 | 0.116779567 | 5.97E-01 | 8.14E-01 | 1.00E+00 |
| ENSG00000238405.1_RNA5SP31  | ENSG00000160789.18_LMNA | 0.04804  | -0.112016443 | 0.205668694 | 5.57E-01 | 7.90E-01 | 1.00E+00 |
| ENSG00000269419.1_CTD-2538C | ENSG00000160789.18_LMNA | -0.00554 | -0.164593634 | 0.153798252 | 9.46E-01 | 9.78E-01 | 1.00E+00 |
| ENSG00000211632.3_IGKV3D-11 | ENSG00000160789.18_LMNA | -0.0755  | -0.231916369 | 0.084715655 | 3.55E-01 | 6.39E-01 | 1.00E+00 |
| ENSG00000199805.1_RNU1-134F | ENSG00000160789.18_LMNA | 0.0476   | -0.112457569 | 0.205240798 | 5.60E-01 | 7.93E-01 | 1.00E+00 |
| ENSG00000199731.1_RNU6-1079 | ENSG00000160789.18_LMNA | -0.14649 | -0.298722227 | 0.013016229 | 7.17E-02 | 2.53E-01 | 1.00E+00 |
| ENSG00000241042.1_RP11-145M | ENSG00000160789.18_LMNA | 0.0854   | -0.074814394 | 0.241323107 | 2.95E-01 | 5.81E-01 | 1.00E+00 |
| ENSG00000254223.1_RP11-419K | ENSG00000160789.18_LMNA | -0.30175 | -0.439821645 | -0.14974213 | 1.58E-04 | 2.72E-03 | 1.00E+00 |
| ENSG00000206627.1_RNU6-969F | ENSG00000160789.18_LMNA | -0.00624 | -0.165278406 | 0.153110906 | 9.39E-01 | 9.76E-01 | 1.00E+00 |
| ENSG00000237173.1_RP5-866L2 | ENSG00000160789.18_LMNA | 0.05915  | -0.101003164 | 0.21631243  | 4.69E-01 | 7.30E-01 | 1.00E+00 |
| ENSG00000233999.3_IGKV3OR2- | ENSG00000160789.18_LMNA | -0.01493 | -0.173715378 | 0.144616874 | 8.55E-01 | 9.43E-01 | 1.00E+00 |
| ENSG00000261275.1_RP11-760D | ENSG00000160789.18_LMNA | 0.07558  | -0.084636984 | 0.231991345 | 3.55E-01 | 6.38E-01 | 1.00E+00 |
| ENSG00000275939.1_uc_338    | ENSG00000160789.18_LMNA | -0.04672 | -0.204405022 | 0.113318826 | 5.68E-01 | 7.98E-01 | 1.00E+00 |
| ENSG00000225602.4_MTOR-AS1  | ENSG00000160789.18_LMNA | 0.02626  | -0.133496911 | 0.184690457 | 7.48E-01 | 8.95E-01 | 1.00E+00 |
| ENSG00000259281.1_LINGO1-AS | ENSG00000160789.18_LMNA | -0.1735  | -0.323755927 | -0.01470308 | 3.25E-02 | 1.51E-01 | 1.00E+00 |
| ENSG00000238097.1_RP11-513G | ENSG00000160789.18_LMNA | -0.00478 | -0.163853203 | 0.154541119 | 9.53E-01 | 9.81E-01 | 1.00E+00 |
| ENSG00000241590.1_RPL17P37  | ENSG00000160789.18_LMNA | -0.03877 | -0.196753656 | 0.121181333 | 6.35E-01 | 8.37E-01 | 1.00E+00 |

|                              |                         |          |              |             |          |          |          |
|------------------------------|-------------------------|----------|--------------|-------------|----------|----------|----------|
| ENSG00000270095.1_RP11-214K  | ENSG00000160789.18_LMNA | -0.05629 | -0.213574561 | 0.103843538 | 4.91E-01 | 7.47E-01 | 1.00E+00 |
| ENSG00000243854.3_RN7SL67P   | ENSG00000160789.18_LMNA | 0.13446  | -0.0252807   | 0.287507397 | 9.86E-02 | 3.09E-01 | 1.00E+00 |
| ENSG00000224256.1_CTA-292E1  | ENSG00000160789.18_LMNA | -0.03328 | -0.19146268  | 0.126595081 | 6.84E-01 | 8.63E-01 | 1.00E+00 |
| ENSG00000278185.1_           | ENSG00000160789.18_LMNA | 0.1285   | -0.031339696 | 0.28193512  | 1.15E-01 | 3.38E-01 | 1.00E+00 |
| ENSG00000260113.3_RP11-146F  | ENSG00000160789.18_LMNA | -0.02483 | -0.183309325 | 0.134900696 | 7.61E-01 | 9.01E-01 | 1.00E+00 |
| ENSG00000243029.3_RN7SL635F  | ENSG00000160789.18_LMNA | 0.04337  | -0.116634586 | 0.20118303  | 5.96E-01 | 8.13E-01 | 1.00E+00 |
| ENSG00000241120.1_HMGN1P8    | ENSG00000160789.18_LMNA | 0.1588   | -0.000415538 | 0.31015552  | 5.07E-02 | 2.03E-01 | 1.00E+00 |
| ENSG00000268981.4_CTC-457E2  | ENSG00000160789.18_LMNA | -0.29617 | -0.434862095 | -0.14374167 | 2.12E-04 | 3.41E-03 | 1.00E+00 |
| ENSG00000237953.1_AC013267.  | ENSG00000160789.18_LMNA | -0.11154 | -0.26602161  | 0.048517346 | 1.71E-01 | 4.30E-01 | 1.00E+00 |
| ENSG00000249928.2_UQCRBP3    | ENSG00000160789.18_LMNA | 0.10487  | -0.05524836  | 0.259738843 | 1.98E-01 | 4.68E-01 | 1.00E+00 |
| ENSG00000228358.4_AC113617.  | ENSG00000160789.18_LMNA | -0.20224 | -0.350165618 | -0.04447014 | 1.25E-02 | 7.68E-02 | 1.00E+00 |
| ENSG00000264840.1_RN7SL404F  | ENSG00000160789.18_LMNA | 0.05539  | -0.104729366 | 0.21271968  | 4.98E-01 | 7.51E-01 | 1.00E+00 |
| ENSG00000227356.2_LINC00866  | ENSG00000160789.18_LMNA | -0.10125 | -0.256320264 | 0.058898851 | 2.15E-01 | 4.89E-01 | 1.00E+00 |
| ENSG00000274312.1_RP11-167B  | ENSG00000160789.18_LMNA | -0.07745 | -0.233764925 | 0.082774843 | 3.43E-01 | 6.28E-01 | 1.00E+00 |
| ENSG00000233674.2_RP11-184I1 | ENSG00000160789.18_LMNA | 0.11219  | -0.047870508 | 0.266623969 | 1.69E-01 | 4.27E-01 | 1.00E+00 |
| ENSG00000237552.1_RP11-415A  | ENSG00000160789.18_LMNA | -0.04234 | -0.200191323 | 0.117653731 | 6.05E-01 | 8.18E-01 | 1.00E+00 |
| ENSG00000230285.1_RP11-290M  | ENSG00000160789.18_LMNA | 0.19034  | 0.032112356  | 0.339260329 | 1.88E-02 | 1.03E-01 | 1.00E+00 |
| ENSG00000248828.1_RP11-673E  | ENSG00000160789.18_LMNA | -0.35285 | -0.484813447 | -0.2051708  | 8.25E-06 | 2.49E-04 | 4.23E-01 |
| ENSG00000256025.1_CACNA1C-   | ENSG00000160789.18_LMNA | -0.17804 | -0.32794766  | -0.0193914  | 2.82E-02 | 1.37E-01 | 1.00E+00 |
| ENSG00000250330.1_CTC-422A1  | ENSG00000160789.18_LMNA | -0.0907  | -0.246340853 | 0.069507243 | 2.66E-01 | 5.50E-01 | 1.00E+00 |
| ENSG00000224104.1_AC079809.  | ENSG00000160789.18_LMNA | -0.05305 | -0.210477644 | 0.107050176 | 5.16E-01 | 7.63E-01 | 1.00E+00 |
| ENSG00000232158.1_C11orf98P1 | ENSG00000160789.18_LMNA | -0.01586 | -0.17462203  | 0.14370129  | 8.46E-01 | 9.40E-01 | 1.00E+00 |
| ENSG00000251639.2_RP11-20I2C | ENSG00000160789.18_LMNA | 0.04384  | -0.116170013 | 0.201634881 | 5.92E-01 | 8.11E-01 | 1.00E+00 |
| ENSG00000271171.1_CTC-523E2  | ENSG00000160789.18_LMNA | -0.01225 | -0.171115996 | 0.147238846 | 8.81E-01 | 9.54E-01 | 1.00E+00 |
| ENSG00000232784.1_           | ENSG00000160789.18_LMNA | -0.23226 | -0.377506676 | -0.07586965 | 3.98E-03 | 3.31E-02 | 1.00E+00 |
| ENSG00000279735.1_AC124312.  | ENSG00000160789.18_LMNA | 0.1398   | -0.019845303 | 0.292488217 | 8.58E-02 | 2.84E-01 | 1.00E+00 |
| ENSG00000261285.4_RP11-481E  | ENSG00000160789.18_LMNA | 0.09393  | -0.066261191 | 0.249401572 | 2.50E-01 | 5.30E-01 | 1.00E+00 |
| ENSG00000224340.1_RP11-496H  | ENSG00000160789.18_LMNA | 0.07709  | -0.083130877 | 0.233425986 | 3.45E-01 | 6.29E-01 | 1.00E+00 |
| ENSG00000214978.7_GSG1L2     | ENSG00000160789.18_LMNA | -0.14015 | -0.292821543 | 0.019480895 | 8.50E-02 | 2.83E-01 | 1.00E+00 |
| ENSG00000258595.2_RP11-371E  | ENSG00000160789.18_LMNA | -0.01069 | -0.169597287 | 0.148768686 | 8.96E-01 | 9.59E-01 | 1.00E+00 |
| ENSG00000229761.1_RPS20P1    | ENSG00000160789.18_LMNA | 0.01108  | -0.148385252 | 0.169978073 | 8.92E-01 | 9.58E-01 | 1.00E+00 |
| ENSG00000230098.1_TCERG1L-   | ENSG00000160789.18_LMNA | 0.07244  | -0.087770789 | 0.22900182  | 3.75E-01 | 6.55E-01 | 1.00E+00 |
| ENSG00000280252.1_AC009060.  | ENSG00000160789.18_LMNA | 0.10487  | -0.055252854 | 0.259734639 | 1.99E-01 | 4.68E-01 | 1.00E+00 |



|                              |                         |          |              |             |          |          |          |
|------------------------------|-------------------------|----------|--------------|-------------|----------|----------|----------|
| ENSG00000275929.1_AC068831.  | ENSG00000160789.18_LMNA | 0.02751  | -0.132271247 | 0.185895315 | 7.37E-01 | 8.89E-01 | 1.00E+00 |
| ENSG00000231054.1_AC009236.  | ENSG00000160789.18_LMNA | 0.16075  | 0.001593909  | 0.311970534 | 4.79E-02 | 1.96E-01 | 1.00E+00 |
| ENSG00000251306.1_NDUFB4P2   | ENSG00000160789.18_LMNA | -0.11128 | -0.265772231 | 0.048785063 | 1.72E-01 | 4.31E-01 | 1.00E+00 |
| ENSG00000184111.6_RPL11P4    | ENSG00000160789.18_LMNA | 0.22076  | 0.06379779   | 0.36705699  | 6.28E-03 | 4.65E-02 | 1.00E+00 |
| ENSG00000227948.4_AC003989.  | ENSG00000160789.18_LMNA | -0.05713 | -0.21438538  | 0.103002902 | 4.84E-01 | 7.41E-01 | 1.00E+00 |
| ENSG00000236679.2_RPL23AP2   | ENSG00000160789.18_LMNA | -0.05568 | -0.212989482 | 0.104449852 | 4.96E-01 | 7.50E-01 | 1.00E+00 |
| ENSG00000263611.1_RP11-612A  | ENSG00000160789.18_LMNA | -0.12214 | -0.275970856 | 0.037799505 | 1.34E-01 | 3.71E-01 | 1.00E+00 |
| ENSG00000217896.2_ZNF839P1   | ENSG00000160789.18_LMNA | -0.07063 | -0.227278875 | 0.089574043 | 3.87E-01 | 6.66E-01 | 1.00E+00 |
| ENSG00000255269.1_RP11-702F  | ENSG00000160789.18_LMNA | 0.23676  | 0.080593688  | 0.381575105 | 3.32E-03 | 2.88E-02 | 1.00E+00 |
| ENSG00000279707.1_RP11-380M  | ENSG00000160789.18_LMNA | 0.09769  | -0.062480374 | 0.25295859  | 2.31E-01 | 5.09E-01 | 1.00E+00 |
| ENSG00000254846.1_RP11-203M  | ENSG00000160789.18_LMNA | 0.01255  | -0.146943055 | 0.171409461 | 8.78E-01 | 9.53E-01 | 1.00E+00 |
| ENSG00000250711.1_PRELID3BF  | ENSG00000160789.18_LMNA | 0.0146   | -0.144938426 | 0.173396835 | 8.58E-01 | 9.44E-01 | 1.00E+00 |
| ENSG00000187012.9_LINC00207  | ENSG00000160789.18_LMNA | -0.05902 | -0.216189106 | 0.101131217 | 4.70E-01 | 7.30E-01 | 1.00E+00 |
| ENSG00000232072.1_AC004901.  | ENSG00000160789.18_LMNA | 0.05859  | -0.101554908 | 0.215780988 | 4.73E-01 | 7.33E-01 | 1.00E+00 |
| ENSG00000279418.1_LINC00244  | ENSG00000160789.18_LMNA | -0.00768 | -0.16667548  | 0.151707627 | 9.25E-01 | 9.71E-01 | 1.00E+00 |
| ENSG00000262815.1_RP11-565F  | ENSG00000160789.18_LMNA | 0.12077  | -0.039188917 | 0.274684863 | 1.38E-01 | 3.79E-01 | 1.00E+00 |
| ENSG00000231576.1_MTCO2P20   | ENSG00000160789.18_LMNA | -0.02509 | -0.183558    | 0.134648037 | 7.59E-01 | 8.99E-01 | 1.00E+00 |
| ENSG00000236849.4_LINC01474  | ENSG00000160789.18_LMNA | 0.09029  | -0.069911586 | 0.245959155 | 2.69E-01 | 5.53E-01 | 1.00E+00 |
| ENSG00000254295.1_CTC-308K2  | ENSG00000160789.18_LMNA | -0.02757 | -0.185951191 | 0.132214383 | 7.36E-01 | 8.89E-01 | 1.00E+00 |
| ENSG00000232998.1_VPS13A-AS  | ENSG00000160789.18_LMNA | -0.00364 | -0.162750712 | 0.15564657  | 9.64E-01 | 9.86E-01 | 1.00E+00 |
| ENSG00000260488.1_RP11-166B  | ENSG00000160789.18_LMNA | 0.11676  | -0.043245237 | 0.270924036 | 1.52E-01 | 4.01E-01 | 1.00E+00 |
| ENSG00000213159.4_CEND1P1    | ENSG00000160789.18_LMNA | -0.20236 | -0.350276869 | -0.0445967  | 1.24E-02 | 7.66E-02 | 1.00E+00 |
| ENSG00000259413.2_RP11-5O23  | ENSG00000160789.18_LMNA | -0.07555 | -0.231963089 | 0.084666633 | 3.55E-01 | 6.38E-01 | 1.00E+00 |
| ENSG00000185847.6_LINC01405  | ENSG00000160789.18_LMNA | -0.21198 | -0.359059779 | -0.05461868 | 8.75E-03 | 5.95E-02 | 1.00E+00 |
| ENSG00000226755.2_VPS25P1    | ENSG00000160789.18_LMNA | -0.05343 | -0.210836404 | 0.106679043 | 5.13E-01 | 7.61E-01 | 1.00E+00 |
| ENSG00000233555.2_RP11-452D  | ENSG00000160789.18_LMNA | 0.04666  | -0.113386062 | 0.204339756 | 5.68E-01 | 7.98E-01 | 1.00E+00 |
| ENSG00000279952.1_RP11-483I2 | ENSG00000160789.18_LMNA | -0.06776 | -0.224543114 | 0.092433059 | 4.07E-01 | 6.82E-01 | 1.00E+00 |
| ENSG00000259672.1_RP11-69G7  | ENSG00000160789.18_LMNA | -0.03533 | -0.193439356 | 0.124574752 | 6.66E-01 | 8.53E-01 | 1.00E+00 |
| ENSG00000243220.1_AC006159.  | ENSG00000160789.18_LMNA | 0.12634  | -0.033532159 | 0.279913555 | 1.21E-01 | 3.50E-01 | 1.00E+00 |
| ENSG00000258700.4_LINC00871  | ENSG00000160789.18_LMNA | -0.22887 | -0.37443218  | -0.07230868 | 4.57E-03 | 3.66E-02 | 1.00E+00 |
| ENSG00000228548.1_ITPKB-AS1  | ENSG00000160789.18_LMNA | 0.01936  | -0.140277874 | 0.178007273 | 8.13E-01 | 9.26E-01 | 1.00E+00 |
| ENSG00000158482.9_SNX29P1    | ENSG00000160789.18_LMNA | -0.00733 | -0.166334235 | 0.152050506 | 9.29E-01 | 9.73E-01 | 1.00E+00 |
| ENSG00000204140.9_CLPSL1     | ENSG00000160789.18_LMNA | 0.00173  | -0.157517681 | 0.160882798 | 9.83E-01 | 9.94E-01 | 1.00E+00 |

|                              |                         |          |              |             |          |          |          |
|------------------------------|-------------------------|----------|--------------|-------------|----------|----------|----------|
| ENSG00000237667.4_LINC01115  | ENSG00000160789.18_LMNA | -0.08322 | -0.239250308 | 0.077001531 | 3.08E-01 | 5.95E-01 | 1.00E+00 |
| ENSG00000261379.1_RP11-395N  | ENSG00000160789.18_LMNA | -0.10392 | -0.258836805 | 0.056212409 | 2.03E-01 | 4.73E-01 | 1.00E+00 |
| ENSG00000243022.1_MARK3P3    | ENSG00000160789.18_LMNA | -0.02043 | -0.179049319 | 0.139222544 | 8.03E-01 | 9.21E-01 | 1.00E+00 |
| ENSG00000253917.4_AC226119.1 | ENSG00000160789.18_LMNA | 0.0539   | -0.106208082 | 0.211291542 | 5.10E-01 | 7.59E-01 | 1.00E+00 |
| ENSG00000162761.13_LMX1A     | ENSG00000160789.18_LMNA | -0.28071 | -0.421095474 | -0.12719714 | 4.60E-04 | 6.32E-03 | 1.00E+00 |
| ENSG00000237311.1_RP6-159A1  | ENSG00000160789.18_LMNA | -0.00428 | -0.163368948 | 0.155026772 | 9.58E-01 | 9.83E-01 | 1.00E+00 |
| ENSG00000255504.1_RP11-788M  | ENSG00000160789.18_LMNA | -0.13685 | -0.289737627 | 0.022849212 | 9.27E-02 | 2.98E-01 | 1.00E+00 |
| ENSG00000258563.2_PSMA3P     | ENSG00000160789.18_LMNA | -0.08711 | -0.242940844 | 0.073105307 | 2.86E-01 | 5.71E-01 | 1.00E+00 |
| ENSG00000168746.7_LINC01620  | ENSG00000160789.18_LMNA | -0.08375 | -0.239757592 | 0.076466546 | 3.05E-01 | 5.92E-01 | 1.00E+00 |
| ENSG00000261314.1_RP11-359E  | ENSG00000160789.18_LMNA | -0.01578 | -0.17454236  | 0.143781767 | 8.47E-01 | 9.40E-01 | 1.00E+00 |
| ENSG00000274397.1_CTD-2540L  | ENSG00000160789.18_LMNA | 0.03641  | -0.123501957 | 0.194487924 | 6.56E-01 | 8.48E-01 | 1.00E+00 |
| ENSG00000255437.1_RP11-510I2 | ENSG00000160789.18_LMNA | -0.07523 | -0.231659892 | 0.084984742 | 3.57E-01 | 6.40E-01 | 1.00E+00 |
| ENSG00000264790.1_RP11-26N1  | ENSG00000160789.18_LMNA | -0.18493 | -0.334289562 | -0.02651051 | 2.26E-02 | 1.18E-01 | 1.00E+00 |
| ENSG00000242180.3_OR51B5     | ENSG00000160789.18_LMNA | -0.05435 | -0.211720441 | 0.105764141 | 5.06E-01 | 7.57E-01 | 1.00E+00 |
| ENSG00000279620.1_RP11-1102  | ENSG00000160789.18_LMNA | -0.16273 | -0.313801247 | -0.00362328 | 4.52E-02 | 1.88E-01 | 1.00E+00 |
| ENSG00000268721.1_           | ENSG00000160789.18_LMNA | -0.04242 | -0.200269506 | 0.117573409 | 6.04E-01 | 8.18E-01 | 1.00E+00 |
| ENSG00000241361.7_SLC25A24F  | ENSG00000160789.18_LMNA | 0.09667  | -0.063504725 | 0.251995715 | 2.36E-01 | 5.14E-01 | 1.00E+00 |
| ENSG00000232908.3_HSD17B7P   | ENSG00000160789.18_LMNA | 0.02625  | -0.133506713 | 0.184680817 | 7.48E-01 | 8.95E-01 | 1.00E+00 |
| ENSG00000228496.1_AC106875.1 | ENSG00000160789.18_LMNA | -0.11308 | -0.267464332 | 0.046967649 | 1.65E-01 | 4.22E-01 | 1.00E+00 |
| ENSG00000096006.10_CRISP3    | ENSG00000160789.18_LMNA | -0.11102 | -0.265525195 | 0.04905022  | 1.73E-01 | 4.33E-01 | 1.00E+00 |
| ENSG00000188029.7_CTSL3P     | ENSG00000160789.18_LMNA | -0.08257 | -0.238631477 | 0.077653907 | 3.12E-01 | 5.98E-01 | 1.00E+00 |
| ENSG00000237378.2_RP11-473M  | ENSG00000160789.18_LMNA | -0.1148  | -0.26908727  | 0.045222562 | 1.59E-01 | 4.12E-01 | 1.00E+00 |
| ENSG00000232057.1_AC093390.1 | ENSG00000160789.18_LMNA | -0.08791 | -0.243700649 | 0.072301955 | 2.81E-01 | 5.67E-01 | 1.00E+00 |
| ENSG00000232268.5_OR52I1     | ENSG00000160789.18_LMNA | -0.00646 | -0.165491739 | 0.152896709 | 9.37E-01 | 9.75E-01 | 1.00E+00 |
| ENSG00000225117.1_ARSDP1     | ENSG00000160789.18_LMNA | 0.08341  | -0.076810627 | 0.239431346 | 3.07E-01 | 5.93E-01 | 1.00E+00 |
| ENSG00000240194.5_CYMP       | ENSG00000160789.18_LMNA | -0.03094 | -0.189211925 | 0.128892333 | 7.05E-01 | 8.74E-01 | 1.00E+00 |
| ENSG00000263733.1_RP11-47G4  | ENSG00000160789.18_LMNA | -0.14655 | -0.298782006 | 0.012950602 | 7.16E-02 | 2.53E-01 | 1.00E+00 |
| ENSG00000233365.2_RP4-655C5  | ENSG00000160789.18_LMNA | -0.04717 | -0.204835757 | 0.112875019 | 5.64E-01 | 7.95E-01 | 1.00E+00 |
| ENSG00000177414.12_UBE2U     | ENSG00000160789.18_LMNA | -0.11425 | -0.268566129 | 0.045783135 | 1.61E-01 | 4.15E-01 | 1.00E+00 |
| ENSG00000226358.1_KRT8P38    | ENSG00000160789.18_LMNA | 0.01677  | -0.142808979 | 0.175505117 | 8.37E-01 | 9.37E-01 | 1.00E+00 |
| ENSG00000232743.2_XXyac-YM2  | ENSG00000160789.18_LMNA | -0.05928 | -0.216437478 | 0.10087331  | 4.68E-01 | 7.29E-01 | 1.00E+00 |
| ENSG00000226926.5_PDZPH1P    | ENSG00000160789.18_LMNA | -0.23749 | -0.382239536 | -0.08136647 | 3.22E-03 | 2.82E-02 | 1.00E+00 |
| ENSG00000237353.5_PATE4      | ENSG00000160789.18_LMNA | 0.02136  | -0.138310377 | 0.179949428 | 7.94E-01 | 9.17E-01 | 1.00E+00 |

|                              |                         |          |              |             |          |          |          |
|------------------------------|-------------------------|----------|--------------|-------------|----------|----------|----------|
| ENSG00000142224.14_IL19      | ENSG00000160789.18_LMNA | 0.14961  | -0.009820508 | 0.301630373 | 6.58E-02 | 2.40E-01 | 1.00E+00 |
| ENSG00000280038.1_DNM1P41    | ENSG00000160789.18_LMNA | -0.09037 | -0.246034486 | 0.069831795 | 2.68E-01 | 5.52E-01 | 1.00E+00 |
| ENSG00000271466.1_CICP24     | ENSG00000160789.18_LMNA | -0.07401 | -0.230495356 | 0.086205955 | 3.65E-01 | 6.46E-01 | 1.00E+00 |
| ENSG00000235295.1_FLJ41941   | ENSG00000160789.18_LMNA | -0.03897 | -0.196949636 | 0.120980441 | 6.34E-01 | 8.36E-01 | 1.00E+00 |
| ENSG00000206075.12_SERPINB1  | ENSG00000160789.18_LMNA | 0.12543  | -0.034454273 | 0.279062488 | 1.24E-01 | 3.54E-01 | 1.00E+00 |
| ENSG00000225371.1_CICP8      | ENSG00000160789.18_LMNA | -0.00494 | -0.164010824 | 0.15438301  | 9.52E-01 | 9.81E-01 | 1.00E+00 |
| ENSG00000204544.5_MUC21      | ENSG00000160789.18_LMNA | 0.12619  | -0.033682985 | 0.279774384 | 1.21E-01 | 3.51E-01 | 1.00E+00 |
| ENSG00000217929.3_CICP18     | ENSG00000160789.18_LMNA | -0.05085 | -0.20836239  | 0.10923658  | 5.34E-01 | 7.76E-01 | 1.00E+00 |
| ENSG00000081800.7_SLC13A1    | ENSG00000160789.18_LMNA | -0.07388 | -0.230371273 | 0.086336021 | 3.66E-01 | 6.47E-01 | 1.00E+00 |
| ENSG00000279440.1_CTA-992D9  | ENSG00000160789.18_LMNA | -0.01606 | -0.174816808 | 0.143504522 | 8.44E-01 | 9.39E-01 | 1.00E+00 |
| ENSG00000261316.1_CTC-400I9  | ENSG00000160789.18_LMNA | -0.20705 | -0.354564557 | -0.04948161 | 1.05E-02 | 6.78E-02 | 1.00E+00 |
| ENSG00000232598.2_RP1-90K10  | ENSG00000160789.18_LMNA | -0.1719  | -0.322281745 | -0.01305748 | 3.42E-02 | 1.56E-01 | 1.00E+00 |
| ENSG00000238300.1_SNORD121   | ENSG00000160789.18_LMNA | 0.0868   | -0.073412552 | 0.242650151 | 2.88E-01 | 5.73E-01 | 1.00E+00 |
| ENSG00000275810.1_MIR8082    | ENSG00000160789.18_LMNA | -0.07244 | -0.228998504 | 0.087774261 | 3.75E-01 | 6.55E-01 | 1.00E+00 |
| ENSG00000206737.1_RNVU1-18   | ENSG00000160789.18_LMNA | -0.10273 | -0.257713997 | 0.057411586 | 2.08E-01 | 4.80E-01 | 1.00E+00 |
| ENSG00000252820.1_Y_RNA      | ENSG00000160789.18_LMNA | 0.00424  | -0.155068249 | 0.163327584 | 9.59E-01 | 9.83E-01 | 1.00E+00 |
| ENSG00000200785.1_SNORD8     | ENSG00000160789.18_LMNA | 0.10466  | -0.055461402 | 0.259539552 | 1.99E-01 | 4.70E-01 | 1.00E+00 |
| ENSG00000202357.1_Y_RNA      | ENSG00000160789.18_LMNA | 0.08111  | -0.079114415 | 0.237245137 | 3.21E-01 | 6.07E-01 | 1.00E+00 |
| ENSG00000218281.1_HIST1H2AF  | ENSG00000160789.18_LMNA | 0.12263  | -0.037295533 | 0.276437038 | 1.32E-01 | 3.69E-01 | 1.00E+00 |
| ENSG00000200391.1_Y_RNA      | ENSG00000160789.18_LMNA | -0.03049 | -0.188775653 | 0.129337222 | 7.09E-01 | 8.76E-01 | 1.00E+00 |
| ENSG00000199150.2_MIRLET7G   | ENSG00000160789.18_LMNA | 0.01849  | -0.141123687 | 0.177171591 | 8.21E-01 | 9.30E-01 | 1.00E+00 |
| ENSG00000207614.1_MIR193A    | ENSG00000160789.18_LMNA | 0.21323  | 0.055926667  | 0.360202087 | 8.35E-03 | 5.75E-02 | 1.00E+00 |
| ENSG00000273531.1_           | ENSG00000160789.18_LMNA | -0.17417 | -0.324379191 | -0.01539932 | 3.19E-02 | 1.49E-01 | 1.00E+00 |
| ENSG00000211937.3_IGHV2-5    | ENSG00000160789.18_LMNA | -0.01501 | -0.173798883 | 0.144532569 | 8.54E-01 | 9.43E-01 | 1.00E+00 |
| ENSG00000199122.2_MIR148B    | ENSG00000160789.18_LMNA | -0.09927 | -0.254448771 | 0.060893739 | 2.24E-01 | 4.99E-01 | 1.00E+00 |
| ENSG00000274355.1_FAM74A3    | ENSG00000160789.18_LMNA | 0.08322  | -0.077003869 | 0.23924809  | 3.08E-01 | 5.95E-01 | 1.00E+00 |
| ENSG00000281201.1_           | ENSG00000160789.18_LMNA | 0.09735  | -0.062825529 | 0.252634219 | 2.33E-01 | 5.11E-01 | 1.00E+00 |
| ENSG00000228304.1_OR4K6P     | ENSG00000160789.18_LMNA | -0.29599 | -0.434708741 | -0.14355647 | 2.14E-04 | 3.43E-03 | 1.00E+00 |
| ENSG00000262855.1_RP11-46I8. | ENSG00000160789.18_LMNA | -0.10711 | -0.261849284 | 0.052990537 | 1.89E-01 | 4.56E-01 | 1.00E+00 |
| ENSG00000206731.1_SNORA36    | ENSG00000160789.18_LMNA | 0.00046  | -0.158754251 | 0.159647088 | 9.96E-01 | 9.98E-01 | 1.00E+00 |
| ENSG00000252131.1_           | ENSG00000160789.18_LMNA | -0.20683 | -0.354365216 | -0.04925418 | 1.06E-02 | 6.81E-02 | 1.00E+00 |
| ENSG00000255186.1_RP11-514F  | ENSG00000160789.18_LMNA | 0.11394  | -0.046093254 | 0.268277746 | 1.62E-01 | 4.17E-01 | 1.00E+00 |
| ENSG00000186895.2_FGF3       | ENSG00000160789.18_LMNA | -0.05522 | -0.212554798 | 0.10490016  | 4.99E-01 | 7.52E-01 | 1.00E+00 |

|                              |                         |          |              |             |          |          |          |
|------------------------------|-------------------------|----------|--------------|-------------|----------|----------|----------|
| ENSG00000244264.3_RN7SL597F  | ENSG00000160789.18_LMNA | 0.19241  | 0.034258307  | 0.341159993 | 1.76E-02 | 9.83E-02 | 1.00E+00 |
| ENSG00000263107.1_RP11-1113I | ENSG00000160789.18_LMNA | -0.00582 | -0.164867078 | 0.153523818 | 9.43E-01 | 9.77E-01 | 1.00E+00 |
| ENSG00000272075.2_RN7SL828F  | ENSG00000160789.18_LMNA | -0.01343 | -0.17226108  | 0.146084362 | 8.70E-01 | 9.49E-01 | 1.00E+00 |
| ENSG00000237061.1_RP11-956J  | ENSG00000160789.18_LMNA | -0.073   | -0.229536345 | 0.087210927 | 3.71E-01 | 6.52E-01 | 1.00E+00 |
| ENSG00000229054.1_RPS29P14   | ENSG00000160789.18_LMNA | -0.046   | -0.203706505 | 0.114038273 | 5.74E-01 | 8.01E-01 | 1.00E+00 |
| ENSG00000263388.1_CTC-297N7  | ENSG00000160789.18_LMNA | -0.10862 | -0.263265228 | 0.051473905 | 1.83E-01 | 4.47E-01 | 1.00E+00 |
| ENSG00000266794.2_RN7SL7P    | ENSG00000160789.18_LMNA | 0.00876  | -0.150650746 | 0.167726844 | 9.15E-01 | 9.67E-01 | 1.00E+00 |
| ENSG00000202268.2_U3         | ENSG00000160789.18_LMNA | 0.11615  | -0.043859949 | 0.270353266 | 1.54E-01 | 4.05E-01 | 1.00E+00 |
| ENSG00000236481.1_AC002331   | ENSG00000160789.18_LMNA | -0.02978 | -0.188090738 | 0.130035409 | 7.16E-01 | 8.79E-01 | 1.00E+00 |
| ENSG00000267084.1_RP11-666A  | ENSG00000160789.18_LMNA | -0.05625 | -0.213535699 | 0.103883818 | 4.91E-01 | 7.47E-01 | 1.00E+00 |
| ENSG00000229971.1_RP5-1119A  | ENSG00000160789.18_LMNA | -0.05537 | -0.212692569 | 0.104757451 | 4.98E-01 | 7.51E-01 | 1.00E+00 |
| ENSG00000258577.1_SNRPGP1    | ENSG00000160789.18_LMNA | -0.14387 | -0.296283649 | 0.015691047 | 7.70E-02 | 2.66E-01 | 1.00E+00 |
| ENSG00000275997.1_RP11-216P  | ENSG00000160789.18_LMNA | -0.00072 | -0.159899249 | 0.158501995 | 9.93E-01 | 9.97E-01 | 1.00E+00 |
| ENSG00000233756.4_DSCAM-IT1  | ENSG00000160789.18_LMNA | -0.38389 | -0.511808639 | -0.23931206 | 1.05E-06 | 4.78E-05 | 5.38E-02 |
| ENSG00000239726.3_RN7SL688F  | ENSG00000160789.18_LMNA | 0.00991  | -0.149521944 | 0.168848953 | 9.04E-01 | 9.63E-01 | 1.00E+00 |
| ENSG00000251598.1_RP11-789C  | ENSG00000160789.18_LMNA | -0.06553 | -0.222412071 | 0.094656498 | 4.22E-01 | 6.94E-01 | 1.00E+00 |
| ENSG00000211796.1_TRAV16     | ENSG00000160789.18_LMNA | 0.04974  | -0.110338993 | 0.207294724 | 5.43E-01 | 7.82E-01 | 1.00E+00 |
| ENSG00000271532.1_RP11-426K  | ENSG00000160789.18_LMNA | -0.0456  | -0.203322868 | 0.114433264 | 5.77E-01 | 8.03E-01 | 1.00E+00 |
| ENSG00000271118.1_RP11-175E  | ENSG00000160789.18_LMNA | 0.04746  | -0.112591892 | 0.205110479 | 5.61E-01 | 7.93E-01 | 1.00E+00 |
| ENSG00000254391.1_CTC-529G1  | ENSG00000160789.18_LMNA | -0.20896 | -0.35631029  | -0.05147469 | 9.78E-03 | 6.45E-02 | 1.00E+00 |
| ENSG00000243782.3_RN7SL78P   | ENSG00000160789.18_LMNA | 0.04563  | -0.114404429 | 0.203350877 | 5.77E-01 | 8.03E-01 | 1.00E+00 |
| ENSG00000257500.1_RP11-1020I | ENSG00000160789.18_LMNA | 0.12123  | -0.038717016 | 0.275121765 | 1.37E-01 | 3.76E-01 | 1.00E+00 |
| ENSG00000271482.1_CTB-152G1  | ENSG00000160789.18_LMNA | 0.04363  | -0.116377991 | 0.201432615 | 5.94E-01 | 8.12E-01 | 1.00E+00 |
| ENSG00000251366.1_DBIP2      | ENSG00000160789.18_LMNA | 0.01425  | -0.145282436 | 0.173055971 | 8.62E-01 | 9.46E-01 | 1.00E+00 |
| ENSG00000233340.1_RP11-25C1  | ENSG00000160789.18_LMNA | -0.09492 | -0.250342123 | 0.065262344 | 2.45E-01 | 5.25E-01 | 1.00E+00 |
| ENSG00000230350.1_RPL35AP3   | ENSG00000160789.18_LMNA | 0.0568   | -0.103334682 | 0.21406542  | 4.87E-01 | 7.44E-01 | 1.00E+00 |
| ENSG00000225152.1_RP11-338O  | ENSG00000160789.18_LMNA | -0.00372 | -0.162825749 | 0.155571357 | 9.64E-01 | 9.86E-01 | 1.00E+00 |
| ENSG00000271585.1_CTB-88F18  | ENSG00000160789.18_LMNA | -0.09354 | -0.249031898 | 0.066653605 | 2.52E-01 | 5.33E-01 | 1.00E+00 |
| ENSG00000228668.1_TRGV5P     | ENSG00000160789.18_LMNA | 0.05635  | -0.103777347 | 0.213638421 | 4.90E-01 | 7.46E-01 | 1.00E+00 |
| ENSG00000263815.2_RN7SL426F  | ENSG00000160789.18_LMNA | -0.06061 | -0.217714432 | 0.099546665 | 4.58E-01 | 7.22E-01 | 1.00E+00 |
| ENSG00000233995.1_KB-67B5.12 | ENSG00000160789.18_LMNA | -0.15075 | -0.302688449 | 0.008656222 | 6.38E-02 | 2.35E-01 | 1.00E+00 |
| ENSG00000248550.3_OTX2-AS1   | ENSG00000160789.18_LMNA | -0.10653 | -0.261302466 | 0.053575851 | 1.91E-01 | 4.59E-01 | 1.00E+00 |
| ENSG00000226904.1_RP11-561O  | ENSG00000160789.18_LMNA | 0.03078  | -0.129050937 | 0.189056407 | 7.07E-01 | 8.75E-01 | 1.00E+00 |

|                              |                         |          |              |             |          |          |          |
|------------------------------|-------------------------|----------|--------------|-------------|----------|----------|----------|
| ENSG00000225387.1_RP11-422P  | ENSG00000160789.18_LMNA | 0.18117  | 0.022618977  | 0.330826325 | 2.55E-02 | 1.28E-01 | 1.00E+00 |
| ENSG00000255286.2_RP11-708L  | ENSG00000160789.18_LMNA | -0.03539 | -0.193504869 | 0.124507747 | 6.65E-01 | 8.52E-01 | 1.00E+00 |
| ENSG00000243027.3_RN7SL354F  | ENSG00000160789.18_LMNA | 0.07245  | -0.087766157 | 0.229006243 | 3.75E-01 | 6.55E-01 | 1.00E+00 |
| ENSG00000266924.1_RP11-154H  | ENSG00000160789.18_LMNA | -0.07418 | -0.230658738 | 0.086034679 | 3.64E-01 | 6.45E-01 | 1.00E+00 |
| ENSG00000231756.1_RP11-183I  | ENSG00000160789.18_LMNA | -0.03291 | -0.191112948 | 0.126952261 | 6.87E-01 | 8.65E-01 | 1.00E+00 |
| ENSG00000255480.1_RP4-710M3  | ENSG00000160789.18_LMNA | -0.07902 | -0.235257762 | 0.081205747 | 3.33E-01 | 6.19E-01 | 1.00E+00 |
| ENSG00000235323.2_COTL1P2    | ENSG00000160789.18_LMNA | 0.00411  | -0.155189548 | 0.163206607 | 9.60E-01 | 9.84E-01 | 1.00E+00 |
| ENSG00000255191.1_RP11-626H  | ENSG00000160789.18_LMNA | 0.25092  | 0.095530907  | 0.394363041 | 1.82E-03 | 1.82E-02 | 1.00E+00 |
| ENSG00000256811.1_RP11-7M8.  | ENSG00000160789.18_LMNA | 0.08049  | -0.079727692 | 0.23666262  | 3.24E-01 | 6.11E-01 | 1.00E+00 |
| ENSG00000223807.1_BOLA3P4    | ENSG00000160789.18_LMNA | -0.10182 | -0.256852704 | 0.058330844 | 2.12E-01 | 4.86E-01 | 1.00E+00 |
| ENSG00000267072.1_RP11-165E  | ENSG00000160789.18_LMNA | -0.16028 | -0.311535916 | -0.0011125  | 4.85E-02 | 1.98E-01 | 1.00E+00 |
| ENSG00000217512.1_RP11-477E  | ENSG00000160789.18_LMNA | -0.09796 | -0.25320885  | 0.062214027 | 2.30E-01 | 5.07E-01 | 1.00E+00 |
| ENSG00000249849.1_RP11-1101I | ENSG00000160789.18_LMNA | -0.19463 | -0.343201002 | -0.03656709 | 1.63E-02 | 9.31E-02 | 1.00E+00 |
| ENSG00000278448.1_CTD-2240J  | ENSG00000160789.18_LMNA | -0.12813 | -0.281585777 | 0.031718786 | 1.16E-01 | 3.40E-01 | 1.00E+00 |
| ENSG00000248740.4_RP11-328K  | ENSG00000160789.18_LMNA | -0.13315 | -0.286277747 | 0.026619734 | 1.02E-01 | 3.15E-01 | 1.00E+00 |
| ENSG00000227278.1_RP11-656D  | ENSG00000160789.18_LMNA | -0.03552 | -0.193624347 | 0.124385541 | 6.64E-01 | 8.52E-01 | 1.00E+00 |
| ENSG00000274354.1_RP11-1151I | ENSG00000160789.18_LMNA | 0.07884  | -0.081379025 | 0.235092979 | 3.34E-01 | 6.20E-01 | 1.00E+00 |
| ENSG00000241026.1_CTD-2036J  | ENSG00000160789.18_LMNA | 0.04762  | -0.112433678 | 0.205263976 | 5.60E-01 | 7.93E-01 | 1.00E+00 |
| ENSG00000279098.1_RP11-15B1  | ENSG00000160789.18_LMNA | -0.07408 | -0.230564787 | 0.086133172 | 3.64E-01 | 6.46E-01 | 1.00E+00 |
| ENSG00000233148.2_SYF2P2     | ENSG00000160789.18_LMNA | 0.08703  | -0.073180257 | 0.242869936 | 2.86E-01 | 5.72E-01 | 1.00E+00 |
| ENSG00000271428.1_RP1-224A6  | ENSG00000160789.18_LMNA | -0.01539 | -0.174160241 | 0.144167696 | 8.51E-01 | 9.41E-01 | 1.00E+00 |
| ENSG00000226797.1_AC015923.  | ENSG00000160789.18_LMNA | 0.11342  | -0.046626867 | 0.267781401 | 1.64E-01 | 4.20E-01 | 1.00E+00 |
| ENSG00000263305.1_AP005530.  | ENSG00000160789.18_LMNA | -0.21511 | -0.361919146 | -0.05789473 | 7.78E-03 | 5.44E-02 | 1.00E+00 |
| ENSG00000238267.1_RP11-241K  | ENSG00000160789.18_LMNA | 0.16264  | 0.003530078  | 0.313717218 | 4.53E-02 | 1.88E-01 | 1.00E+00 |
| ENSG00000223389.1_SDCBP2P1   | ENSG00000160789.18_LMNA | -0.13415 | -0.287215576 | 0.025598582 | 9.94E-02 | 3.10E-01 | 1.00E+00 |
| ENSG00000224271.4_RP11-191L  | ENSG00000160789.18_LMNA | -0.19982 | -0.34795146  | -0.04195349 | 1.36E-02 | 8.16E-02 | 1.00E+00 |
| ENSG00000257226.1_CTD-2252P  | ENSG00000160789.18_LMNA | 0.0234   | -0.136311629 | 0.181919894 | 7.75E-01 | 9.07E-01 | 1.00E+00 |
| ENSG00000250105.1_CTD-3074C  | ENSG00000160789.18_LMNA | -0.04348 | -0.201291729 | 0.116522839 | 5.95E-01 | 8.13E-01 | 1.00E+00 |
| ENSG00000251488.1_RP11-404I7 | ENSG00000160789.18_LMNA | 0.05367  | -0.106442225 | 0.211065283 | 5.11E-01 | 7.60E-01 | 1.00E+00 |
| ENSG00000280444.1_RP11-83B2  | ENSG00000160789.18_LMNA | 0.10608  | -0.054034987 | 0.260873386 | 1.93E-01 | 4.62E-01 | 1.00E+00 |
| ENSG00000238188.1_RP5-875H3  | ENSG00000160789.18_LMNA | 0.2141   | 0.056837769  | 0.360997244 | 8.08E-03 | 5.60E-02 | 1.00E+00 |
| ENSG00000230063.1_RP11-384C  | ENSG00000160789.18_LMNA | -0.0095  | -0.168448479 | 0.149924903 | 9.08E-01 | 9.65E-01 | 1.00E+00 |
| ENSG00000235096.2_RP11-83A1  | ENSG00000160789.18_LMNA | -0.17453 | -0.324712565 | -0.01577186 | 3.15E-02 | 1.48E-01 | 1.00E+00 |

|                             |                         |          |              |             |          |          |          |
|-----------------------------|-------------------------|----------|--------------|-------------|----------|----------|----------|
| ENSG00000258654.1_RP11-509A | ENSG00000160789.18_LMNA | -0.00633 | -0.165361408 | 0.153027572 | 9.38E-01 | 9.76E-01 | 1.00E+00 |
| ENSG00000275676.1_RP11-101E | ENSG00000160789.18_LMNA | -0.05611 | -0.213405287 | 0.104018981 | 4.92E-01 | 7.48E-01 | 1.00E+00 |
| ENSG00000234148.2_RP11-395L | ENSG00000160789.18_LMNA | -0.15414 | -0.30583483  | 0.005189014 | 5.80E-02 | 2.21E-01 | 1.00E+00 |
| ENSG00000251623.1_RP11-826N | ENSG00000160789.18_LMNA | -0.0878  | -0.243599722 | 0.072408691 | 2.82E-01 | 5.67E-01 | 1.00E+00 |
| ENSG00000226263.1_ISM1-AS1  | ENSG00000160789.18_LMNA | 0.0533   | -0.10680754  | 0.210712201 | 5.14E-01 | 7.62E-01 | 1.00E+00 |
| ENSG00000258050.2_RP11-698F | ENSG00000160789.18_LMNA | -0.04319 | -0.201006946 | 0.116815592 | 5.97E-01 | 8.14E-01 | 1.00E+00 |
| ENSG00000215586.2_RP5-836E8 | ENSG00000160789.18_LMNA | -0.11114 | -0.265639207 | 0.048927851 | 1.73E-01 | 4.32E-01 | 1.00E+00 |
| ENSG00000255051.1_BCAS2P1   | ENSG00000160789.18_LMNA | -0.10201 | -0.257036309 | 0.058134927 | 2.11E-01 | 4.84E-01 | 1.00E+00 |
| ENSG00000253273.2_RP11-99A1 | ENSG00000160789.18_LMNA | 0.07731  | -0.082909759 | 0.233636496 | 3.44E-01 | 6.28E-01 | 1.00E+00 |
| ENSG00000203605.3_RP11-335E | ENSG00000160789.18_LMNA | 0.03547  | -0.124430652 | 0.193580245 | 6.64E-01 | 8.52E-01 | 1.00E+00 |
| ENSG00000250348.1_RP11-466P | ENSG00000160789.18_LMNA | -0.07552 | -0.231933683 | 0.084697488 | 3.55E-01 | 6.39E-01 | 1.00E+00 |
| ENSG00000224637.1_PDSS1P2   | ENSG00000160789.18_LMNA | -0.00415 | -0.163245701 | 0.15515035  | 9.60E-01 | 9.84E-01 | 1.00E+00 |
| ENSG00000232762.1_RP4-784A1 | ENSG00000160789.18_LMNA | -0.12626 | -0.27984025  | 0.033611604 | 1.21E-01 | 3.50E-01 | 1.00E+00 |
| ENSG00000228729.1_RP11-211A | ENSG00000160789.18_LMNA | 0.05292  | -0.107188135 | 0.210344262 | 5.17E-01 | 7.64E-01 | 1.00E+00 |
| ENSG00000224625.2_TUBB8P6   | ENSG00000160789.18_LMNA | 0.09554  | -0.064644375 | 0.250923726 | 2.42E-01 | 5.21E-01 | 1.00E+00 |
| ENSG00000163825.3_RTP3      | ENSG00000160789.18_LMNA | 0.02012  | -0.139523848 | 0.17875188  | 8.06E-01 | 9.22E-01 | 1.00E+00 |
| ENSG00000214286.2_PDCL3P3   | ENSG00000160789.18_LMNA | -0.09057 | -0.24621814  | 0.069637248 | 2.67E-01 | 5.51E-01 | 1.00E+00 |
| ENSG00000250712.1_RP11-366M | ENSG00000160789.18_LMNA | -0.02046 | -0.179077214 | 0.139194283 | 8.02E-01 | 9.21E-01 | 1.00E+00 |
| ENSG00000233518.1_RPL7P35   | ENSG00000160789.18_LMNA | -0.02485 | -0.18332569  | 0.13488407  | 7.61E-01 | 9.00E-01 | 1.00E+00 |
| ENSG00000261401.1_RP11-578F | ENSG00000160789.18_LMNA | 0.00075  | -0.158474047 | 0.159927184 | 9.93E-01 | 9.97E-01 | 1.00E+00 |
| ENSG00000224235.1_RP5-1027O | ENSG00000160789.18_LMNA | -0.03916 | -0.197130644 | 0.120794874 | 6.32E-01 | 8.35E-01 | 1.00E+00 |
| ENSG00000137080.4_IFNA21    | ENSG00000160789.18_LMNA | -0.05164 | -0.209125738 | 0.10844791  | 5.27E-01 | 7.72E-01 | 1.00E+00 |
| ENSG00000276786.1_WI2-8325B | ENSG00000160789.18_LMNA | 0.11368  | -0.046358648 | 0.268030908 | 1.63E-01 | 4.19E-01 | 1.00E+00 |
| ENSG00000229401.1_MIR5689HC | ENSG00000160789.18_LMNA | -0.33361 | -0.467954748 | -0.18418904 | 2.67E-05 | 6.52E-04 | 1.00E+00 |
| ENSG00000232230.1_TPM4P1    | ENSG00000160789.18_LMNA | 0.10993  | -0.050144224 | 0.264505518 | 1.78E-01 | 4.39E-01 | 1.00E+00 |
| ENSG00000261427.5_CTD-2349B | ENSG00000160789.18_LMNA | -0.06306 | -0.220054121 | 0.097113    | 4.40E-01 | 7.08E-01 | 1.00E+00 |
| ENSG00000254672.1_RP5-916O1 | ENSG00000160789.18_LMNA | -0.04999 | -0.207540692 | 0.11008509  | 5.41E-01 | 7.80E-01 | 1.00E+00 |
| ENSG00000275239.3_RP11-157L | ENSG00000160789.18_LMNA | -0.09269 | -0.248224833 | 0.067509975 | 2.56E-01 | 5.38E-01 | 1.00E+00 |
| ENSG00000240002.1_YBX1P3    | ENSG00000160789.18_LMNA | -0.0364  | -0.194477417 | 0.12351271  | 6.56E-01 | 8.48E-01 | 1.00E+00 |
| ENSG00000225814.1_GRPEL2P2  | ENSG00000160789.18_LMNA | -0.03115 | -0.189409593 | 0.128690718 | 7.03E-01 | 8.73E-01 | 1.00E+00 |
| ENSG00000204424.9_LY6G6F    | ENSG00000160789.18_LMNA | 0.07392  | -0.086297072 | 0.230408432 | 3.65E-01 | 6.47E-01 | 1.00E+00 |
| ENSG00000254713.2_HNRNPA1F  | ENSG00000160789.18_LMNA | 0.05608  | -0.104054133 | 0.213371368 | 4.93E-01 | 7.48E-01 | 1.00E+00 |
| ENSG00000268083.4_AC104534. | ENSG00000160789.18_LMNA | -0.06802 | -0.224788563 | 0.092176765 | 4.05E-01 | 6.81E-01 | 1.00E+00 |

|                              |                         |          |              |             |          |          |          |
|------------------------------|-------------------------|----------|--------------|-------------|----------|----------|----------|
| ENSG00000258489.3_RP11-398J  | ENSG00000160789.18_LMNA | 0.12238  | -0.037548426 | 0.276203126 | 1.33E-01 | 3.70E-01 | 1.00E+00 |
| ENSG00000165556.9_CDX2       | ENSG00000160789.18_LMNA | -0.11954 | -0.273536202 | 0.040428928 | 1.42E-01 | 3.85E-01 | 1.00E+00 |
| ENSG00000125861.13_GFRA4     | ENSG00000160789.18_LMNA | -0.14159 | -0.294159521 | 0.01801732  | 8.19E-02 | 2.76E-01 | 1.00E+00 |
| ENSG00000229957.1_RP5-998H6  | ENSG00000160789.18_LMNA | -0.10968 | -0.264266674 | 0.050400369 | 1.79E-01 | 4.41E-01 | 1.00E+00 |
| ENSG00000175018.11_TEX36     | ENSG00000160789.18_LMNA | -0.02007 | -0.178699023 | 0.139577386 | 8.06E-01 | 9.23E-01 | 1.00E+00 |
| ENSG00000235143.1_RP1-65J11  | ENSG00000160789.18_LMNA | 0.05513  | -0.104988664 | 0.212469349 | 5.00E-01 | 7.53E-01 | 1.00E+00 |
| ENSG00000231203.1_KRT8P10    | ENSG00000160789.18_LMNA | 0.07103  | -0.089182777 | 0.227652884 | 3.85E-01 | 6.63E-01 | 1.00E+00 |
| ENSG00000271639.1_RP11-289A  | ENSG00000160789.18_LMNA | -0.07823 | -0.234512694 | 0.081989072 | 3.38E-01 | 6.24E-01 | 1.00E+00 |
| ENSG00000235097.1_LINC00330  | ENSG00000160789.18_LMNA | -0.18656 | -0.335786288 | -0.02819522 | 2.14E-02 | 1.13E-01 | 1.00E+00 |
| ENSG00000261018.1_LL09NC01   | ENSG00000160789.18_LMNA | -0.05746 | -0.214699645 | 0.102676958 | 4.82E-01 | 7.40E-01 | 1.00E+00 |
| ENSG00000253547.2_RP11-959F  | ENSG00000160789.18_LMNA | -0.08177 | -0.237876251 | 0.078449706 | 3.17E-01 | 6.03E-01 | 1.00E+00 |
| ENSG00000277253.1_RP13-580B  | ENSG00000160789.18_LMNA | -0.02678 | -0.185190677 | 0.132988172 | 7.43E-01 | 8.92E-01 | 1.00E+00 |
| ENSG00000268531.3_RP11-32B5  | ENSG00000160789.18_LMNA | 0.03851  | -0.121432173 | 0.196508912 | 6.38E-01 | 8.38E-01 | 1.00E+00 |
| ENSG00000225546.4_LVCAT5     | ENSG00000160789.18_LMNA | -0.01489 | -0.173674382 | 0.144658261 | 8.56E-01 | 9.43E-01 | 1.00E+00 |
| ENSG00000130701.3_RBBP8NL    | ENSG00000160789.18_LMNA | -0.10216 | -0.257182178 | 0.05797926  | 2.10E-01 | 4.84E-01 | 1.00E+00 |
| ENSG00000267642.1_RP11-258B  | ENSG00000160789.18_LMNA | -0.3472  | -0.479875717 | -0.19899874 | 1.17E-05 | 3.32E-04 | 6.02E-01 |
| ENSG00000205667.2_ARSH       | ENSG00000160789.18_LMNA | 0.03904  | -0.120909963 | 0.197018384 | 6.33E-01 | 8.35E-01 | 1.00E+00 |
| ENSG00000256977.9_LIMS3      | ENSG00000160789.18_LMNA | 0.0709   | -0.089313485 | 0.227527951 | 3.85E-01 | 6.64E-01 | 1.00E+00 |
| ENSG00000233433.1_RP1-296G1  | ENSG00000160789.18_LMNA | 0.07344  | -0.086778097 | 0.229949455 | 3.69E-01 | 6.49E-01 | 1.00E+00 |
| ENSG00000113492.12_AGXT2     | ENSG00000160789.18_LMNA | -0.20269 | -0.350576259 | -0.04493731 | 1.23E-02 | 7.59E-02 | 1.00E+00 |
| ENSG00000279189.1_RP11-861E  | ENSG00000160789.18_LMNA | -0.09492 | -0.250336053 | 0.065268792 | 2.45E-01 | 5.25E-01 | 1.00E+00 |
| ENSG00000223760.4_MED15P9    | ENSG00000160789.18_LMNA | -0.09724 | -0.25253178  | 0.062934517 | 2.33E-01 | 5.11E-01 | 1.00E+00 |
| ENSG00000230538.1_RP3-428A1  | ENSG00000160789.18_LMNA | -0.03117 | -0.189433214 | 0.128666624 | 7.03E-01 | 8.73E-01 | 1.00E+00 |
| ENSG00000224826.1_AC019109   | ENSG00000160789.18_LMNA | 0.07298  | -0.087234374 | 0.229513962 | 3.72E-01 | 6.52E-01 | 1.00E+00 |
| ENSG00000224363.2_RP11-289H  | ENSG00000160789.18_LMNA | -0.02138 | -0.179965488 | 0.138294097 | 7.94E-01 | 9.17E-01 | 1.00E+00 |
| ENSG00000259941.1_RP11-48G1  | ENSG00000160789.18_LMNA | -0.02004 | -0.178669564 | 0.139607223 | 8.06E-01 | 9.23E-01 | 1.00E+00 |
| ENSG00000236295.1_AC007563   | ENSG00000160789.18_LMNA | 0.19929  | 0.04140228   | 0.347466053 | 1.38E-02 | 8.28E-02 | 1.00E+00 |
| ENSG00000279054.1_AL445183.1 | ENSG00000160789.18_LMNA | 0.03682  | -0.123099448 | 0.194881155 | 6.52E-01 | 8.46E-01 | 1.00E+00 |
| ENSG00000269345.1_VN1R85P    | ENSG00000160789.18_LMNA | -0.31622 | -0.452638136 | -0.16534813 | 7.22E-05 | 1.45E-03 | 1.00E+00 |
| ENSG00000264395.1_MIR3193    | ENSG00000160789.18_LMNA | 0.04962  | -0.110449997 | 0.207187178 | 5.44E-01 | 7.82E-01 | 1.00E+00 |
| ENSG00000265178.1_MIR4728    | ENSG00000160789.18_LMNA | 0.15833  | -0.000895972 | 0.309721238 | 5.14E-02 | 2.05E-01 | 1.00E+00 |
| ENSG00000275640.1_MIR6793    | ENSG00000160789.18_LMNA | 0.07942  | -0.080803372 | 0.235640342 | 3.31E-01 | 6.17E-01 | 1.00E+00 |
| ENSG00000242407.1_CTD-2377D  | ENSG00000160789.18_LMNA | -0.04222 | -0.200073804 | 0.117774457 | 6.06E-01 | 8.19E-01 | 1.00E+00 |

|                              |                         |          |              |             |          |          |          |
|------------------------------|-------------------------|----------|--------------|-------------|----------|----------|----------|
| ENSG00000235386.1_RP11-397A  | ENSG00000160789.18_LMNA | 0.02056  | -0.139098586 | 0.179171668 | 8.02E-01 | 9.20E-01 | 1.00E+00 |
| ENSG00000199085.2_MIR148A    | ENSG00000160789.18_LMNA | -0.03814 | -0.196150729 | 0.121799206 | 6.41E-01 | 8.40E-01 | 1.00E+00 |
| ENSG00000207453.1_RNU6-535F  | ENSG00000160789.18_LMNA | -0.23488 | -0.379874045 | -0.07861686 | 3.58E-03 | 3.05E-02 | 1.00E+00 |
| ENSG00000265462.1_MIR3680-1  | ENSG00000160789.18_LMNA | -0.0526  | -0.210038237 | 0.107504616 | 5.20E-01 | 7.66E-01 | 1.00E+00 |
| ENSG00000222954.1_           | ENSG00000160789.18_LMNA | -0.05036 | -0.207890875 | 0.109723537 | 5.38E-01 | 7.78E-01 | 1.00E+00 |
| ENSG00000207331.1_RNU6-1263  | ENSG00000160789.18_LMNA | 0.17853  | 0.019895848  | 0.328397952 | 2.78E-02 | 1.36E-01 | 1.00E+00 |
| ENSG00000277819.1_           | ENSG00000160789.18_LMNA | 0.05318  | -0.106923677 | 0.210599936 | 5.15E-01 | 7.63E-01 | 1.00E+00 |
| ENSG00000223188.1_Y_RNA      | ENSG00000160789.18_LMNA | 0.09407  | -0.066120754 | 0.249533849 | 2.49E-01 | 5.29E-01 | 1.00E+00 |
| ENSG00000264535.1_           | ENSG00000160789.18_LMNA | -0.03465 | -0.192790375 | 0.125238357 | 6.72E-01 | 8.56E-01 | 1.00E+00 |
| ENSG00000276602.2_           | ENSG00000160789.18_LMNA | -0.20118 | -0.349196546 | -0.0433682  | 1.29E-02 | 7.89E-02 | 1.00E+00 |
| ENSG00000251325.1_RP11-415C  | ENSG00000160789.18_LMNA | -0.28547 | -0.425336748 | -0.13227687 | 3.64E-04 | 5.23E-03 | 1.00E+00 |
| ENSG00000199444.1_Y_RNA      | ENSG00000160789.18_LMNA | -0.02001 | -0.178645144 | 0.139631956 | 8.07E-01 | 9.23E-01 | 1.00E+00 |
| ENSG00000265390.1_MIR4999    | ENSG00000160789.18_LMNA | 0.01167  | -0.147803634 | 0.170555494 | 8.87E-01 | 9.56E-01 | 1.00E+00 |
| ENSG00000280862.1_           | ENSG00000160789.18_LMNA | -0.06449 | -0.221414919 | 0.095695797 | 4.30E-01 | 7.00E-01 | 1.00E+00 |
| ENSG00000264604.1_           | ENSG00000160789.18_LMNA | -0.08666 | -0.242517513 | 0.073552722 | 2.88E-01 | 5.74E-01 | 1.00E+00 |
| ENSG00000264620.1_           | ENSG00000160789.18_LMNA | -0.00194 | -0.161086349 | 0.157313892 | 9.81E-01 | 9.93E-01 | 1.00E+00 |
| ENSG00000202255.1_Y_RNA      | ENSG00000160789.18_LMNA | 0.09676  | -0.063422516 | 0.252073013 | 2.36E-01 | 5.14E-01 | 1.00E+00 |
| ENSG00000267376.1_ATP5LP6    | ENSG00000160789.18_LMNA | 0.10133  | -0.058817617 | 0.256396422 | 2.14E-01 | 4.88E-01 | 1.00E+00 |
| ENSG00000232889.2_AC087499.  | ENSG00000160789.18_LMNA | 0.00679  | -0.152570939 | 0.165816137 | 9.34E-01 | 9.74E-01 | 1.00E+00 |
| ENSG00000262296.1_RP11-55L4  | ENSG00000160789.18_LMNA | -0.32217 | -0.457887483 | -0.1717818  | 5.17E-05 | 1.11E-03 | 1.00E+00 |
| ENSG00000243049.3_RN7SL33P   | ENSG00000160789.18_LMNA | -0.06652 | -0.223356148 | 0.093671879 | 4.15E-01 | 6.88E-01 | 1.00E+00 |
| ENSG00000252118.1_RNU6ATAC   | ENSG00000160789.18_LMNA | 0.07014  | -0.090065123 | 0.22680932  | 3.91E-01 | 6.69E-01 | 1.00E+00 |
| ENSG00000276399.1_FLJ36000   | ENSG00000160789.18_LMNA | -0.10634 | -0.261116534 | 0.053774823 | 1.92E-01 | 4.60E-01 | 1.00E+00 |
| ENSG00000279683.1_RP11-31H5  | ENSG00000160789.18_LMNA | 0.01431  | -0.145222336 | 0.173115526 | 8.61E-01 | 9.46E-01 | 1.00E+00 |
| ENSG00000199883.1_RN7SKP90   | ENSG00000160789.18_LMNA | 0.00286  | -0.156414314 | 0.161984556 | 9.72E-01 | 9.89E-01 | 1.00E+00 |
| ENSG00000243664.1_RPS29P12   | ENSG00000160789.18_LMNA | -0.15703 | -0.308513695 | 0.002231088 | 5.34E-02 | 2.10E-01 | 1.00E+00 |
| ENSG00000275312.1_RP11-432I1 | ENSG00000160789.18_LMNA | -0.07319 | -0.229717676 | 0.087020955 | 3.70E-01 | 6.51E-01 | 1.00E+00 |
| ENSG00000258598.1_RP11-260M  | ENSG00000160789.18_LMNA | -0.24338 | -0.387566349 | -0.0875751  | 2.52E-03 | 2.33E-02 | 1.00E+00 |
| ENSG00000231241.1_RPS3AP3    | ENSG00000160789.18_LMNA | -0.08213 | -0.238219338 | 0.078088238 | 3.14E-01 | 6.01E-01 | 1.00E+00 |
| ENSG00000259013.2_RP11-1017  | ENSG00000160789.18_LMNA | 0.03583  | -0.12407606  | 0.193926877 | 6.61E-01 | 8.50E-01 | 1.00E+00 |
| ENSG00000279337.1_CTD-2349P  | ENSG00000160789.18_LMNA | 0.03117  | -0.128665197 | 0.189434612 | 7.03E-01 | 8.73E-01 | 1.00E+00 |
| ENSG00000243359.3_RN7SL815F  | ENSG00000160789.18_LMNA | -0.01634 | -0.175081081 | 0.143237509 | 8.42E-01 | 9.38E-01 | 1.00E+00 |
| ENSG00000235685.2_RP11-126D  | ENSG00000160789.18_LMNA | -0.02693 | -0.18533924  | 0.132837045 | 7.42E-01 | 8.92E-01 | 1.00E+00 |



|                              |                         |          |              |             |          |          |          |
|------------------------------|-------------------------|----------|--------------|-------------|----------|----------|----------|
| ENSG00000239953.3_RN7SL273F  | ENSG00000160789.18_LMNA | 0.13431  | -0.025429607 | 0.287370705 | 9.90E-02 | 3.10E-01 | 1.00E+00 |
| ENSG00000242175.3_RN7SL127F  | ENSG00000160789.18_LMNA | 0.06769  | -0.092504566 | 0.224474626 | 4.07E-01 | 6.82E-01 | 1.00E+00 |
| ENSG00000241785.3_RN7SL390F  | ENSG00000160789.18_LMNA | 0.04286  | -0.117143058 | 0.200688329 | 6.00E-01 | 8.16E-01 | 1.00E+00 |
| ENSG00000231335.1_AC107072.  | ENSG00000160789.18_LMNA | 0.20931  | 0.051832366  | 0.356623352 | 9.66E-03 | 6.40E-02 | 1.00E+00 |
| ENSG00000250659.2_RP11-864I4 | ENSG00000160789.18_LMNA | 0.1292   | -0.03063449  | 0.282584764 | 1.13E-01 | 3.35E-01 | 1.00E+00 |
| ENSG00000240203.3_RN7SL567F  | ENSG00000160789.18_LMNA | 0.01241  | -0.147078644 | 0.171274945 | 8.79E-01 | 9.53E-01 | 1.00E+00 |
| ENSG00000248929.1_HIGD1AP3   | ENSG00000160789.18_LMNA | -0.09157 | -0.247170989 | 0.068627502 | 2.62E-01 | 5.45E-01 | 1.00E+00 |
| ENSG00000264300.1_RP11-640N  | ENSG00000160789.18_LMNA | -0.1305  | -0.283805867 | 0.02930811  | 1.09E-01 | 3.29E-01 | 1.00E+00 |
| ENSG00000211805.1_TRAV24     | ENSG00000160789.18_LMNA | -0.02314 | -0.18167614  | 0.136559021 | 7.77E-01 | 9.08E-01 | 1.00E+00 |
| ENSG00000234646.4_RP4-753D1  | ENSG00000160789.18_LMNA | -0.18748 | -0.336636256 | -0.02915273 | 2.07E-02 | 1.11E-01 | 1.00E+00 |
| ENSG00000258699.1_RP11-356K  | ENSG00000160789.18_LMNA | 0.00681  | -0.152553223 | 0.165833777 | 9.34E-01 | 9.74E-01 | 1.00E+00 |
| ENSG00000262920.4_RP11-1260I | ENSG00000160789.18_LMNA | -0.0646  | -0.221520541 | 0.095585744 | 4.29E-01 | 6.99E-01 | 1.00E+00 |
| ENSG00000226020.4_CDK2AP2P   | ENSG00000160789.18_LMNA | -0.17712 | -0.327097594 | -0.01843953 | 2.90E-02 | 1.40E-01 | 1.00E+00 |
| ENSG00000258737.1_SUB1P2     | ENSG00000160789.18_LMNA | -0.04065 | -0.198564513 | 0.119324101 | 6.19E-01 | 8.28E-01 | 1.00E+00 |
| ENSG00000237349.1_RP5-1065J  | ENSG00000160789.18_LMNA | -0.12781 | -0.28129166  | 0.032037879 | 1.17E-01 | 3.42E-01 | 1.00E+00 |
| ENSG00000233286.1_MTND3P10   | ENSG00000160789.18_LMNA | -0.06168 | -0.21873598  | 0.098484553 | 4.50E-01 | 7.16E-01 | 1.00E+00 |
| ENSG00000227814.3_MRPS17P9   | ENSG00000160789.18_LMNA | 0.06019  | -0.099967652 | 0.217309331 | 4.61E-01 | 7.25E-01 | 1.00E+00 |
| ENSG00000248249.1_RP11-598O  | ENSG00000160789.18_LMNA | -0.07704 | -0.233374515 | 0.083184937 | 3.46E-01 | 6.30E-01 | 1.00E+00 |
| ENSG00000280170.1_AP000687.  | ENSG00000160789.18_LMNA | 0.12697  | -0.03289738  | 0.28049914  | 1.19E-01 | 3.46E-01 | 1.00E+00 |
| ENSG00000230683.1_DDTP1      | ENSG00000160789.18_LMNA | 0.07737  | -0.082849059 | 0.233694278 | 3.43E-01 | 6.28E-01 | 1.00E+00 |
| ENSG00000253358.1_GS1-251I9. | ENSG00000160789.18_LMNA | 0.1564   | -0.002876071 | 0.307929981 | 5.43E-02 | 2.12E-01 | 1.00E+00 |
| ENSG00000249960.2_RP11-791G  | ENSG00000160789.18_LMNA | 0.0119   | -0.147583039 | 0.17077444  | 8.84E-01 | 9.55E-01 | 1.00E+00 |
| ENSG00000259587.2_RP11-463I2 | ENSG00000160789.18_LMNA | -0.12687 | -0.280405075 | 0.032999364 | 1.19E-01 | 3.47E-01 | 1.00E+00 |
| ENSG00000279859.1_RP11-539L  | ENSG00000160789.18_LMNA | -0.0165  | -0.175241027 | 0.143075882 | 8.40E-01 | 9.38E-01 | 1.00E+00 |
| ENSG00000267231.1_AC005786.  | ENSG00000160789.18_LMNA | -0.06208 | -0.219114082 | 0.098091253 | 4.47E-01 | 7.14E-01 | 1.00E+00 |
| ENSG00000211782.2_TRAV8-1    | ENSG00000160789.18_LMNA | 0.06483  | -0.095359634 | 0.221737522 | 4.28E-01 | 6.98E-01 | 1.00E+00 |
| ENSG00000270697.1_RP11-381K  | ENSG00000160789.18_LMNA | -0.13166 | -0.284893207 | 0.028126095 | 1.06E-01 | 3.23E-01 | 1.00E+00 |
| ENSG00000230682.1_GRPEL2P3   | ENSG00000160789.18_LMNA | 0.14418  | -0.015376876 | 0.296570283 | 7.64E-02 | 2.64E-01 | 1.00E+00 |
| ENSG00000251200.1_RP11-6E9.  | ENSG00000160789.18_LMNA | -0.08    | -0.236188656 | 0.080226506 | 3.27E-01 | 6.14E-01 | 1.00E+00 |
| ENSG00000237844.1_AC092684.  | ENSG00000160789.18_LMNA | -0.28067 | -0.421061059 | -0.12715599 | 4.61E-04 | 6.32E-03 | 1.00E+00 |
| ENSG00000236856.1_AC105393.  | ENSG00000160789.18_LMNA | 0.11072  | -0.049353791 | 0.265242319 | 1.74E-01 | 4.35E-01 | 1.00E+00 |
| ENSG00000266598.1_RP11-583F  | ENSG00000160789.18_LMNA | 0.0025   | -0.156762977 | 0.161636487 | 9.76E-01 | 9.91E-01 | 1.00E+00 |
| ENSG00000255160.4_RP11-428C  | ENSG00000160789.18_LMNA | 0.00163  | -0.157608723 | 0.160791853 | 9.84E-01 | 9.94E-01 | 1.00E+00 |

|                              |                         |          |              |             |          |          |          |
|------------------------------|-------------------------|----------|--------------|-------------|----------|----------|----------|
| ENSG00000234891.1_RP1-288L1  | ENSG00000160789.18_LMNA | -0.32089 | -0.456757623 | -0.17039497 | 5.56E-05 | 1.17E-03 | 1.00E+00 |
| ENSG00000241479.1_RP11-641D  | ENSG00000160789.18_LMNA | -0.18194 | -0.331534415 | -0.02341388 | 2.49E-02 | 1.26E-01 | 1.00E+00 |
| ENSG00000186207.4_LCE5A      | ENSG00000160789.18_LMNA | -0.07398 | -0.230466877 | 0.086235809 | 3.65E-01 | 6.46E-01 | 1.00E+00 |
| ENSG00000229941.4_AC012499   | ENSG00000160789.18_LMNA | -0.10347 | -0.258413279 | 0.056664848 | 2.05E-01 | 4.76E-01 | 1.00E+00 |
| ENSG00000249737.1_RP1-167G2  | ENSG00000160789.18_LMNA | -0.06081 | -0.217904071 | 0.099349551 | 4.57E-01 | 7.21E-01 | 1.00E+00 |
| ENSG00000217067.2_RP11-448N  | ENSG00000160789.18_LMNA | 0.10239  | -0.057750728 | 0.257396298 | 2.09E-01 | 4.82E-01 | 1.00E+00 |
| ENSG00000234612.1_H2AFZP5    | ENSG00000160789.18_LMNA | -0.00962 | -0.168567278 | 0.149805378 | 9.06E-01 | 9.64E-01 | 1.00E+00 |
| ENSG00000250961.1_CTD-2023N  | ENSG00000160789.18_LMNA | -0.01783 | -0.176526593 | 0.141776187 | 8.27E-01 | 9.32E-01 | 1.00E+00 |
| ENSG00000254898.1_RP11-513D  | ENSG00000160789.18_LMNA | -0.07436 | -0.230832651 | 0.085852342 | 3.63E-01 | 6.44E-01 | 1.00E+00 |
| ENSG00000240813.2_RP11-963H  | ENSG00000160789.18_LMNA | -0.02053 | -0.179149582 | 0.139120964 | 8.02E-01 | 9.20E-01 | 1.00E+00 |
| ENSG00000237787.4_C3orf79    | ENSG00000160789.18_LMNA | -0.25165 | -0.395021999 | -0.09630428 | 1.76E-03 | 1.78E-02 | 1.00E+00 |
| ENSG00000271021.1_RP5-878I13 | ENSG00000160789.18_LMNA | 0.1708   | 0.011925773  | 0.321267055 | 3.54E-02 | 1.60E-01 | 1.00E+00 |
| ENSG00000231586.2_RPS23P9    | ENSG00000160789.18_LMNA | 0.07767  | -0.082553998 | 0.233975127 | 3.42E-01 | 6.26E-01 | 1.00E+00 |
| ENSG00000237338.1_FTCD-AS1   | ENSG00000160789.18_LMNA | 0.09009  | -0.070116223 | 0.245765941 | 2.70E-01 | 5.54E-01 | 1.00E+00 |
| ENSG00000171855.6_IFNB1      | ENSG00000160789.18_LMNA | 0.13773  | -0.021948185 | 0.290563212 | 9.06E-02 | 2.93E-01 | 1.00E+00 |
| ENSG00000255151.2_GLYATL1P   | ENSG00000160789.18_LMNA | 0.0254   | -0.134344433 | 0.183856762 | 7.56E-01 | 8.98E-01 | 1.00E+00 |
| ENSG00000269806.1_GLTSCR1-7  | ENSG00000160789.18_LMNA | -0.00551 | -0.164568658 | 0.153823316 | 9.46E-01 | 9.79E-01 | 1.00E+00 |
| ENSG00000226349.1_RP11-145A  | ENSG00000160789.18_LMNA | -0.09013 | -0.245803899 | 0.070076023 | 2.69E-01 | 5.54E-01 | 1.00E+00 |
| ENSG00000231226.1_TRIM31-AS  | ENSG00000160789.18_LMNA | 0.06352  | -0.096662955 | 0.220486388 | 4.37E-01 | 7.05E-01 | 1.00E+00 |
| ENSG00000258159.1_IMM1P2     | ENSG00000160789.18_LMNA | -0.01185 | -0.170728675 | 0.14762915  | 8.85E-01 | 9.55E-01 | 1.00E+00 |
| ENSG00000232746.1_RP11-767C  | ENSG00000160789.18_LMNA | -0.11054 | -0.265075952 | 0.049532303 | 1.75E-01 | 4.36E-01 | 1.00E+00 |
| ENSG00000227350.1_RP11-438P  | ENSG00000160789.18_LMNA | 0.08851  | -0.071700939 | 0.244268834 | 2.78E-01 | 5.63E-01 | 1.00E+00 |
| ENSG00000234484.1_RP1-55C23  | ENSG00000160789.18_LMNA | -0.01569 | -0.17445595  | 0.143869047 | 8.48E-01 | 9.41E-01 | 1.00E+00 |
| ENSG00000248956.1_HMGB1P44   | ENSG00000160789.18_LMNA | 0.00104  | -0.158190842 | 0.160210229 | 9.90E-01 | 9.96E-01 | 1.00E+00 |
| ENSG00000272164.1_RP11-180P  | ENSG00000160789.18_LMNA | -0.04453 | -0.202298825 | 0.11548712  | 5.86E-01 | 8.08E-01 | 1.00E+00 |
| ENSG00000236983.1_           | ENSG00000160789.18_LMNA | 0.02369  | -0.136021763 | 0.182205446 | 7.72E-01 | 9.06E-01 | 1.00E+00 |
| ENSG00000258448.1_RP11-109N  | ENSG00000160789.18_LMNA | 0.04007  | -0.119891604 | 0.198011411 | 6.24E-01 | 8.30E-01 | 1.00E+00 |
| ENSG00000230447.2_CTF2P      | ENSG00000160789.18_LMNA | 0.06357  | -0.096607899 | 0.220539261 | 4.37E-01 | 7.05E-01 | 1.00E+00 |
| ENSG00000224451.2_ATP5F1P1   | ENSG00000160789.18_LMNA | -0.01828 | -0.176961597 | 0.141336154 | 8.23E-01 | 9.31E-01 | 1.00E+00 |
| ENSG00000259222.2_RP11-809H  | ENSG00000160789.18_LMNA | -0.06253 | -0.219541475 | 0.097646562 | 4.44E-01 | 7.11E-01 | 1.00E+00 |
| ENSG00000255375.1_RP1-65P5.5 | ENSG00000160789.18_LMNA | 1.26E-05 | -0.15918838  | 0.159213024 | 1.00E+00 | 1.00E+00 | 1.00E+00 |
| ENSG00000231015.1_RP5-860P4  | ENSG00000160789.18_LMNA | -0.09469 | -0.250117215 | 0.065501249 | 2.46E-01 | 5.26E-01 | 1.00E+00 |
| ENSG00000196711.7_FAM150A    | ENSG00000160789.18_LMNA | -0.07662 | -0.232978411 | 0.083600903 | 3.48E-01 | 6.32E-01 | 1.00E+00 |

|                              |                         |          |              |             |          |          |          |
|------------------------------|-------------------------|----------|--------------|-------------|----------|----------|----------|
| ENSG00000271208.1_RP1-142L7  | ENSG00000160789.18_LMNA | 0.01544  | -0.144111104 | 0.174216281 | 8.50E-01 | 9.41E-01 | 1.00E+00 |
| ENSG00000230313.1_HCG24      | ENSG00000160789.18_LMNA | -0.01734 | -0.176050819 | 0.142257318 | 8.32E-01 | 9.35E-01 | 1.00E+00 |
| ENSG00000124196.5_GTSF1L     | ENSG00000160789.18_LMNA | 0.24243  | 0.086573287  | 0.38670818  | 2.62E-03 | 2.40E-02 | 1.00E+00 |
| ENSG00000203855.7_HSD3BP4    | ENSG00000160789.18_LMNA | 0.05775  | -0.102392032 | 0.214974308 | 4.80E-01 | 7.38E-01 | 1.00E+00 |
| ENSG00000248843.1_RP11-357G  | ENSG00000160789.18_LMNA | -0.2032  | -0.351040931 | -0.04546611 | 1.20E-02 | 7.50E-02 | 1.00E+00 |
| ENSG00000234770.1_GULOP      | ENSG00000160789.18_LMNA | -0.01964 | -0.178280746 | 0.140000984 | 8.10E-01 | 9.25E-01 | 1.00E+00 |
| ENSG00000271624.1_RP11-651K  | ENSG00000160789.18_LMNA | -0.1425  | -0.295004782 | 0.017092023 | 7.99E-02 | 2.72E-01 | 1.00E+00 |
| ENSG00000231201.1_AF127577.  | ENSG00000160789.18_LMNA | -0.05538 | -0.212708972 | 0.104740459 | 4.98E-01 | 7.51E-01 | 1.00E+00 |
| ENSG00000243518.1_RP11-639F  | ENSG00000160789.18_LMNA | -0.04057 | -0.198488608 | 0.119401995 | 6.20E-01 | 8.28E-01 | 1.00E+00 |
| ENSG00000257253.2_RP11-70F1  | ENSG00000160789.18_LMNA | -0.08349 | -0.23950945  | 0.076728261 | 3.06E-01 | 5.93E-01 | 1.00E+00 |
| ENSG00000225626.2_C9orf135-A | ENSG00000160789.18_LMNA | 0.16847  | 0.009529632  | 0.319116325 | 3.80E-02 | 1.67E-01 | 1.00E+00 |
| ENSG00000227738.1_AC092646.  | ENSG00000160789.18_LMNA | -0.03116 | -0.189419187 | 0.128680932 | 7.03E-01 | 8.73E-01 | 1.00E+00 |
| ENSG00000237711.1_MTCO3P11   | ENSG00000160789.18_LMNA | -0.08125 | -0.237384059 | 0.078968122 | 3.20E-01 | 6.06E-01 | 1.00E+00 |
| ENSG00000262445.3_CTD-2545H  | ENSG00000160789.18_LMNA | -0.07722 | -0.233544847 | 0.08300603  | 3.44E-01 | 6.29E-01 | 1.00E+00 |
| ENSG00000172680.1_MOS        | ENSG00000160789.18_LMNA | -0.12833 | -0.281769385 | 0.031519554 | 1.15E-01 | 3.39E-01 | 1.00E+00 |
| ENSG00000121634.5_GJA8       | ENSG00000160789.18_LMNA | 0.05181  | -0.108284063 | 0.209284276 | 5.26E-01 | 7.71E-01 | 1.00E+00 |
| ENSG00000240045.1_RP11-451G  | ENSG00000160789.18_LMNA | -0.07291 | -0.229452014 | 0.087299268 | 3.72E-01 | 6.52E-01 | 1.00E+00 |
| ENSG00000176787.2_OR52E2     | ENSG00000160789.18_LMNA | -0.09303 | -0.248549061 | 0.067165995 | 2.54E-01 | 5.36E-01 | 1.00E+00 |
| ENSG00000273552.1_RP11-87C7  | ENSG00000160789.18_LMNA | 0.04853  | -0.111531734 | 0.206138725 | 5.53E-01 | 7.88E-01 | 1.00E+00 |
| ENSG00000253197.4_CTD-3239E  | ENSG00000160789.18_LMNA | -0.03242 | -0.190640122 | 0.127435027 | 6.92E-01 | 8.67E-01 | 1.00E+00 |
| ENSG00000263862.1_LINC01543  | ENSG00000160789.18_LMNA | -0.0241  | -0.182602928 | 0.135618186 | 7.68E-01 | 9.04E-01 | 1.00E+00 |
| ENSG00000172238.4_ATOH1      | ENSG00000160789.18_LMNA | -0.04661 | -0.204297732 | 0.113429353 | 5.69E-01 | 7.98E-01 | 1.00E+00 |
| ENSG00000233716.1_AC074367.  | ENSG00000160789.18_LMNA | -0.10304 | -0.258009611 | 0.057095953 | 2.06E-01 | 4.78E-01 | 1.00E+00 |
| ENSG00000229238.3_PPP1R12B   | ENSG00000160789.18_LMNA | -0.20427 | -0.352024709 | -0.04658623 | 1.16E-02 | 7.28E-02 | 1.00E+00 |
| ENSG00000253571.1_RP11-728L  | ENSG00000160789.18_LMNA | -0.1079  | -0.262588313 | 0.052199137 | 1.86E-01 | 4.52E-01 | 1.00E+00 |
| ENSG00000234586.2_RP11-382H  | ENSG00000160789.18_LMNA | 0.10068  | -0.059475345 | 0.255779672 | 2.17E-01 | 4.92E-01 | 1.00E+00 |
| ENSG00000215589.3_KANK1P1    | ENSG00000160789.18_LMNA | -0.18719 | -0.336369202 | -0.02885183 | 2.09E-02 | 1.11E-01 | 1.00E+00 |
| ENSG00000279957.1_RP11-141B  | ENSG00000160789.18_LMNA | -0.03784 | -0.195860539 | 0.122096502 | 6.43E-01 | 8.41E-01 | 1.00E+00 |
| ENSG00000203870.5_SMIM9      | ENSG00000160789.18_LMNA | 0.08099  | -0.079227461 | 0.237137778 | 3.21E-01 | 6.08E-01 | 1.00E+00 |
| ENSG00000233332.1_RP4-799P1  | ENSG00000160789.18_LMNA | -0.18011 | -0.329855974 | -0.0215303  | 2.64E-02 | 1.31E-01 | 1.00E+00 |
| ENSG00000105388.13_CEACAM5   | ENSG00000160789.18_LMNA | -0.04672 | -0.204398788 | 0.113325248 | 5.68E-01 | 7.98E-01 | 1.00E+00 |
| ENSG00000268892.1_CTD-3233P  | ENSG00000160789.18_LMNA | -0.04068 | -0.198596086 | 0.1192917   | 6.19E-01 | 8.27E-01 | 1.00E+00 |
| ENSG00000266306.1_CTD-2008P  | ENSG00000160789.18_LMNA | -0.1097  | -0.264285955 | 0.050379693 | 1.79E-01 | 4.41E-01 | 1.00E+00 |

|                             |                         |          |              |             |          |          |          |
|-----------------------------|-------------------------|----------|--------------|-------------|----------|----------|----------|
| ENSG00000249438.2_KRT18P45  | ENSG00000160789.18_LMNA | -0.07662 | -0.232975384 | 0.083604082 | 3.48E-01 | 6.32E-01 | 1.00E+00 |
| ENSG00000228948.2_SLC25A6P1 | ENSG00000160789.18_LMNA | -0.00633 | -0.165361099 | 0.153027882 | 9.38E-01 | 9.76E-01 | 1.00E+00 |
| ENSG00000235368.1_SAPCD2P2  | ENSG00000160789.18_LMNA | -0.08597 | -0.241856536 | 0.074251049 | 2.92E-01 | 5.78E-01 | 1.00E+00 |
| ENSG00000231213.5_PLSCR5    | ENSG00000160789.18_LMNA | -0.03521 | -0.193326604 | 0.124690065 | 6.67E-01 | 8.53E-01 | 1.00E+00 |
| ENSG00000196427.12_NBPF4    | ENSG00000160789.18_LMNA | -0.00074 | -0.15992032  | 0.158480914 | 9.93E-01 | 9.97E-01 | 1.00E+00 |
| ENSG00000228656.1_MYO5BP3   | ENSG00000160789.18_LMNA | -0.02894 | -0.187277483 | 0.130864012 | 7.23E-01 | 8.83E-01 | 1.00E+00 |
| ENSG00000106331.13_PAX4     | ENSG00000160789.18_LMNA | 0.04438  | -0.115641147 | 0.202149097 | 5.87E-01 | 8.08E-01 | 1.00E+00 |
| ENSG00000240403.4_KIR3DL2   | ENSG00000160789.18_LMNA | 0.09385  | -0.066342806 | 0.249324694 | 2.50E-01 | 5.31E-01 | 1.00E+00 |
| ENSG00000248684.1_BIN2P2    | ENSG00000160789.18_LMNA | -0.03059 | -0.188870536 | 0.129240477 | 7.08E-01 | 8.76E-01 | 1.00E+00 |
| ENSG00000203971.1_RP13-379L | ENSG00000160789.18_LMNA | 0.1455   | -0.014029564 | 0.297798868 | 7.37E-02 | 2.58E-01 | 1.00E+00 |
| ENSG00000233993.1_RP11-379J | ENSG00000160789.18_LMNA | -0.16079 | -0.312003224 | -0.00163012 | 4.78E-02 | 1.95E-01 | 1.00E+00 |
| ENSG00000276076.3_CH507-152 | ENSG00000160789.18_LMNA | 0.03215  | -0.127700096 | 0.190380448 | 6.94E-01 | 8.69E-01 | 1.00E+00 |
| ENSG00000280000.1_RP11-509E | ENSG00000160789.18_LMNA | -0.04778 | -0.205416857 | 0.112276082 | 5.59E-01 | 7.92E-01 | 1.00E+00 |
| ENSG00000230549.3_USP17L1   | ENSG00000160789.18_LMNA | -0.04411 | -0.201888229 | 0.11590947  | 5.90E-01 | 8.09E-01 | 1.00E+00 |
| ENSG00000244260.1_RP11-521D | ENSG00000160789.18_LMNA | -0.04696 | -0.20463051  | 0.11308651  | 5.66E-01 | 7.96E-01 | 1.00E+00 |
| ENSG00000253925.1_CTB-178M2 | ENSG00000160789.18_LMNA | -0.07662 | -0.232981541 | 0.083597617 | 3.48E-01 | 6.32E-01 | 1.00E+00 |
| ENSG00000279202.1_CTA-113A6 | ENSG00000160789.18_LMNA | -0.01815 | -0.176837901 | 0.141461293 | 8.24E-01 | 9.31E-01 | 1.00E+00 |
| ENSG00000138813.8_C4orf17   | ENSG00000160789.18_LMNA | -0.0549  | -0.212241652 | 0.10522448  | 5.02E-01 | 7.54E-01 | 1.00E+00 |
| ENSG00000180043.10_FAM71E2  | ENSG00000160789.18_LMNA | 0.09606  | -0.064119461 | 0.251417572 | 2.39E-01 | 5.18E-01 | 1.00E+00 |
| ENSG00000134240.10_HMGCS2   | ENSG00000160789.18_LMNA | -0.2419  | -0.38622512  | -0.08600964 | 2.68E-03 | 2.45E-02 | 1.00E+00 |
| ENSG00000227463.2_RP11-158D | ENSG00000160789.18_LMNA | 0.05827  | -0.101878263 | 0.215469444 | 4.76E-01 | 7.34E-01 | 1.00E+00 |
| ENSG00000273513.1_TBC1D3K   | ENSG00000160789.18_LMNA | 0.02417  | -0.135550369 | 0.18266971  | 7.68E-01 | 9.04E-01 | 1.00E+00 |
| ENSG00000248191.1_PES1P1    | ENSG00000160789.18_LMNA | -0.00611 | -0.165153927 | 0.153235876 | 9.40E-01 | 9.76E-01 | 1.00E+00 |
| ENSG00000145384.3_FABP2     | ENSG00000160789.18_LMNA | 0.0111   | -0.1483646   | 0.16999858  | 8.92E-01 | 9.58E-01 | 1.00E+00 |
| ENSG00000108242.11_CYP2C18  | ENSG00000160789.18_LMNA | -0.12312 | -0.276889769 | 0.03680595  | 1.31E-01 | 3.67E-01 | 1.00E+00 |
| ENSG00000271820.1_RP5-894D1 | ENSG00000160789.18_LMNA | -0.07634 | -0.232717094 | 0.083875263 | 3.50E-01 | 6.33E-01 | 1.00E+00 |
| ENSG00000277797.1_RP11-244G | ENSG00000160789.18_LMNA | 0.06873  | -0.091467556 | 0.225467552 | 4.00E-01 | 6.77E-01 | 1.00E+00 |
| ENSG00000198414.5_TATDN2P1  | ENSG00000160789.18_LMNA | -0.00515 | -0.164219561 | 0.1541736   | 9.50E-01 | 9.80E-01 | 1.00E+00 |
| ENSG00000223738.3_RP11-781E | ENSG00000160789.18_LMNA | 0.06408  | -0.096102867 | 0.221024177 | 4.33E-01 | 7.02E-01 | 1.00E+00 |
| ENSG00000259844.2_GNPATP    | ENSG00000160789.18_LMNA | 0.01751  | -0.142082181 | 0.176224023 | 8.30E-01 | 9.34E-01 | 1.00E+00 |
| ENSG00000271078.1_RP13-395E | ENSG00000160789.18_LMNA | 0.16099  | 0.001836114  | 0.31218915  | 4.75E-02 | 1.95E-01 | 1.00E+00 |
| ENSG00000253894.1_RP11-45K1 | ENSG00000160789.18_LMNA | 0.02082  | -0.138838785 | 0.17942807  | 7.99E-01 | 9.19E-01 | 1.00E+00 |
| ENSG00000174992.7_ZG16      | ENSG00000160789.18_LMNA | -0.00201 | -0.1611597   | 0.157240449 | 9.80E-01 | 9.93E-01 | 1.00E+00 |

|                              |                         |          |              |             |          |          |          |
|------------------------------|-------------------------|----------|--------------|-------------|----------|----------|----------|
| ENSG00000250280.2_RP11-305O  | ENSG00000160789.18_LMNA | 0.02608  | -0.133673664 | 0.184516625 | 7.50E-01 | 8.95E-01 | 1.00E+00 |
| ENSG00000279417.1_RP11-382B  | ENSG00000160789.18_LMNA | -0.044   | -0.201785039 | 0.116015595 | 5.90E-01 | 8.10E-01 | 1.00E+00 |
| ENSG00000279712.1_CTA-280A3  | ENSG00000160789.18_LMNA | -0.09041 | -0.246067659 | 0.069796656 | 2.68E-01 | 5.52E-01 | 1.00E+00 |
| ENSG00000115665.7_SLC5A7     | ENSG00000160789.18_LMNA | -0.04269 | -0.200531209 | 0.117304517 | 6.01E-01 | 8.17E-01 | 1.00E+00 |
| ENSG00000266315.1_MIR4668    | ENSG00000160789.18_LMNA | -0.05278 | -0.210215642 | 0.107321157 | 5.18E-01 | 7.65E-01 | 1.00E+00 |
| ENSG00000277387.1_MIR8058    | ENSG00000160789.18_LMNA | -0.14078 | -0.293408723 | 0.018838761 | 8.36E-02 | 2.80E-01 | 1.00E+00 |
| ENSG00000274986.1_MIR6750    | ENSG00000160789.18_LMNA | 0.03348  | -0.126395667 | 0.1916579   | 6.82E-01 | 8.62E-01 | 1.00E+00 |
| ENSG00000211952.3_IGHV4-28   | ENSG00000160789.18_LMNA | 0.12106  | -0.038891314 | 0.274960409 | 1.37E-01 | 3.77E-01 | 1.00E+00 |
| ENSG00000200816.1_SNORA38    | ENSG00000160789.18_LMNA | 0.02437  | -0.135355475 | 0.182861616 | 7.66E-01 | 9.03E-01 | 1.00E+00 |
| ENSG00000265871.1_MIR3174    | ENSG00000160789.18_LMNA | -0.0115  | -0.170391838 | 0.147968501 | 8.88E-01 | 9.57E-01 | 1.00E+00 |
| ENSG00000265724.1_MIR4284    | ENSG00000160789.18_LMNA | 0.01736  | -0.142233729 | 0.176074149 | 8.32E-01 | 9.35E-01 | 1.00E+00 |
| ENSG00000222219.1_           | ENSG00000160789.18_LMNA | -0.12969 | -0.2830457   | 0.030133945 | 1.11E-01 | 3.33E-01 | 1.00E+00 |
| ENSG00000207263.1_SNORD116   | ENSG00000160789.18_LMNA | 0.06437  | -0.095809551 | 0.221305739 | 4.31E-01 | 7.00E-01 | 1.00E+00 |
| ENSG00000264256.1_           | ENSG00000160789.18_LMNA | 0.08607  | -0.074142162 | 0.241959619 | 2.92E-01 | 5.77E-01 | 1.00E+00 |
| ENSG00000229509.1_RP11-421E  | ENSG00000160789.18_LMNA | 0.0265   | -0.133265835 | 0.184917684 | 7.46E-01 | 8.94E-01 | 1.00E+00 |
| ENSG00000207072.1_RNU6-39P   | ENSG00000160789.18_LMNA | -0.08775 | -0.243548372 | 0.072462993 | 2.82E-01 | 5.68E-01 | 1.00E+00 |
| ENSG00000206859.1_RNU6-767F  | ENSG00000160789.18_LMNA | 0.03021  | -0.129612111 | 0.188506027 | 7.12E-01 | 8.77E-01 | 1.00E+00 |
| ENSG00000275761.1_           | ENSG00000160789.18_LMNA | 0.19848  | 0.040563075  | 0.34672671  | 1.42E-02 | 8.47E-02 | 1.00E+00 |
| ENSG00000252096.1_SNORA31    | ENSG00000160789.18_LMNA | -0.08944 | -0.245152381 | 0.07076588  | 2.73E-01 | 5.58E-01 | 1.00E+00 |
| ENSG00000252410.1_RNU5B-3P   | ENSG00000160789.18_LMNA | -0.0393  | -0.197271001 | 0.120650966 | 6.31E-01 | 8.34E-01 | 1.00E+00 |
| ENSG00000277966.1_HOXA11-A:  | ENSG00000160789.18_LMNA | -0.33431 | -0.468576115 | -0.18495781 | 2.56E-05 | 6.29E-04 | 1.00E+00 |
| ENSG00000206629.1_RNU1-63P   | ENSG00000160789.18_LMNA | -0.05442 | -0.211787037 | 0.105695198 | 5.05E-01 | 7.56E-01 | 1.00E+00 |
| ENSG00000207430.1_U8         | ENSG00000160789.18_LMNA | -0.05533 | -0.212661059 | 0.104790091 | 4.98E-01 | 7.52E-01 | 1.00E+00 |
| ENSG00000275550.1_RP4-744I24 | ENSG00000160789.18_LMNA | -0.0968  | -0.252118399 | 0.063374245 | 2.35E-01 | 5.13E-01 | 1.00E+00 |
| ENSG00000232768.1_RP11-201O  | ENSG00000160789.18_LMNA | -0.06257 | -0.219580967 | 0.097605465 | 4.44E-01 | 7.11E-01 | 1.00E+00 |
| ENSG00000253818.1_IGLV1-41   | ENSG00000160789.18_LMNA | -0.0542  | -0.211575405 | 0.105914278 | 5.07E-01 | 7.57E-01 | 1.00E+00 |
| ENSG00000239227.1_RP11-12K1  | ENSG00000160789.18_LMNA | 0.08119  | -0.079035281 | 0.237320286 | 3.20E-01 | 6.07E-01 | 1.00E+00 |
| ENSG00000241868.3_RN7SL434F  | ENSG00000160789.18_LMNA | -0.08407 | -0.240061155 | 0.076146319 | 3.03E-01 | 5.90E-01 | 1.00E+00 |
| ENSG00000224419.1_KRT18P27   | ENSG00000160789.18_LMNA | 0.32912  | 0.179313354  | 0.464007365 | 3.47E-05 | 8.06E-04 | 1.00E+00 |
| ENSG00000266120.1_RP11-354P  | ENSG00000160789.18_LMNA | -0.10564 | -0.260458223 | 0.054479104 | 1.95E-01 | 4.64E-01 | 1.00E+00 |
| ENSG00000260679.1_RP11-643C  | ENSG00000160789.18_LMNA | -0.03823 | -0.196237351 | 0.121710452 | 6.40E-01 | 8.39E-01 | 1.00E+00 |
| ENSG00000258481.1_RP11-472N  | ENSG00000160789.18_LMNA | -0.18308 | -0.332586082 | -0.02459519 | 2.40E-02 | 1.23E-01 | 1.00E+00 |
| ENSG00000232646.1_RP11-344N  | ENSG00000160789.18_LMNA | 0.01435  | -0.145179475 | 0.173157998 | 8.61E-01 | 9.45E-01 | 1.00E+00 |

|                              |                         |          |              |             |          |          |          |
|------------------------------|-------------------------|----------|--------------|-------------|----------|----------|----------|
| ENSG00000164438.5_TLX3       | ENSG00000160789.18_LMNA | -0.25826 | -0.400975238 | -0.10330757 | 1.32E-03 | 1.43E-02 | 1.00E+00 |
| ENSG00000211780.3_TRAV6      | ENSG00000160789.18_LMNA | 0.10305  | -0.057085688 | 0.258019225 | 2.06E-01 | 4.78E-01 | 1.00E+00 |
| ENSG00000234319.1_RPS12P2    | ENSG00000160789.18_LMNA | 0.02681  | -0.132959095 | 0.185219261 | 7.43E-01 | 8.92E-01 | 1.00E+00 |
| ENSG00000274841.1_Metazoa_SI | ENSG00000160789.18_LMNA | 0.10522  | -0.054900899 | 0.260063819 | 1.97E-01 | 4.66E-01 | 1.00E+00 |
| ENSG00000248545.2_RP11-302F  | ENSG00000160789.18_LMNA | -0.02487 | -0.18334091  | 0.134868608 | 7.61E-01 | 9.00E-01 | 1.00E+00 |
| ENSG00000263672.2_RN7SL750F  | ENSG00000160789.18_LMNA | 0.10848  | -0.051607498 | 0.263140559 | 1.83E-01 | 4.48E-01 | 1.00E+00 |
| ENSG00000229821.1_RP11-567E  | ENSG00000160789.18_LMNA | -0.27958 | -0.420080274 | -0.12598353 | 4.86E-04 | 6.59E-03 | 1.00E+00 |
| ENSG00000242182.3_RN7SL745F  | ENSG00000160789.18_LMNA | -0.10333 | -0.258285838 | 0.056800964 | 2.05E-01 | 4.77E-01 | 1.00E+00 |
| ENSG00000248767.1_WI2-2373I1 | ENSG00000160789.18_LMNA | 0.29199  | 0.139261165  | 0.431147275 | 2.62E-04 | 4.04E-03 | 1.00E+00 |
| ENSG00000200472.1_RN7SKP44   | ENSG00000160789.18_LMNA | -0.07791 | -0.23420477  | 0.082312692 | 3.40E-01 | 6.25E-01 | 1.00E+00 |
| ENSG00000279455.1_RP11-495K  | ENSG00000160789.18_LMNA | -0.22018 | -0.366536766 | -0.06319912 | 6.42E-03 | 4.73E-02 | 1.00E+00 |
| ENSG00000211816.2_TRAV38-1   | ENSG00000160789.18_LMNA | 0.05078  | -0.109306573 | 0.208294626 | 5.34E-01 | 7.76E-01 | 1.00E+00 |
| ENSG00000257403.2_CTD-2547E  | ENSG00000160789.18_LMNA | 0.07669  | -0.083535318 | 0.233040872 | 3.48E-01 | 6.32E-01 | 1.00E+00 |
| ENSG00000263443.1_RP11-973F  | ENSG00000160789.18_LMNA | -0.14905 | -0.301103849 | 0.010399569 | 6.69E-02 | 2.42E-01 | 1.00E+00 |
| ENSG00000230047.1_AC017104.  | ENSG00000160789.18_LMNA | -0.079   | -0.23524226  | 0.08122205  | 3.33E-01 | 6.19E-01 | 1.00E+00 |
| ENSG00000222179.1_RN7SKP26   | ENSG00000160789.18_LMNA | -0.04245 | -0.200293686 | 0.117548567 | 6.04E-01 | 8.18E-01 | 1.00E+00 |
| ENSG00000267159.2_AC005391.  | ENSG00000160789.18_LMNA | -0.03645 | -0.194523264 | 0.123465787 | 6.56E-01 | 8.48E-01 | 1.00E+00 |
| ENSG00000223784.1_LINP1      | ENSG00000160789.18_LMNA | 0.006    | -0.153344102 | 0.165046118 | 9.41E-01 | 9.77E-01 | 1.00E+00 |
| ENSG00000228879.1_RP11-439E  | ENSG00000160789.18_LMNA | 0.02008  | -0.139566004 | 0.17871026  | 8.06E-01 | 9.23E-01 | 1.00E+00 |
| ENSG00000276493.1_Metazoa_SI | ENSG00000160789.18_LMNA | -0.01361 | -0.172436081 | 0.145907848 | 8.68E-01 | 9.48E-01 | 1.00E+00 |
| ENSG00000229875.1	EIF1P1     | ENSG00000160789.18_LMNA | -0.02728 | -0.185676942 | 0.132493463 | 7.39E-01 | 8.90E-01 | 1.00E+00 |
| ENSG00000275417.1_RP11-844G  | ENSG00000160789.18_LMNA | -0.07831 | -0.234584649 | 0.081913439 | 3.38E-01 | 6.23E-01 | 1.00E+00 |
| ENSG00000259196.1_HMBOX1-IT  | ENSG00000160789.18_LMNA | -0.06937 | -0.226074395 | 0.090833432 | 3.96E-01 | 6.73E-01 | 1.00E+00 |
| ENSG00000232001.1_AC108868.  | ENSG00000160789.18_LMNA | -0.03829 | -0.196296161 | 0.121650192 | 6.40E-01 | 8.39E-01 | 1.00E+00 |
| ENSG00000251621.1_AC009487.  | ENSG00000160789.18_LMNA | -0.08589 | -0.241780731 | 0.074331117 | 2.93E-01 | 5.79E-01 | 1.00E+00 |
| ENSG00000234915.1_RP11-384C  | ENSG00000160789.18_LMNA | -0.0222  | -0.180765807 | 0.137482595 | 7.86E-01 | 9.13E-01 | 1.00E+00 |
| ENSG00000231508.1_RPL34P20   | ENSG00000160789.18_LMNA | 0.01525  | -0.144299349 | 0.174029867 | 8.52E-01 | 9.42E-01 | 1.00E+00 |
| ENSG00000225854.2_RP11-569G  | ENSG00000160789.18_LMNA | 0.05465  | -0.105472494 | 0.21200214  | 5.04E-01 | 7.55E-01 | 1.00E+00 |
| ENSG00000224967.1_AC009303.  | ENSG00000160789.18_LMNA | -0.0679  | -0.224670787 | 0.09229975  | 4.06E-01 | 6.81E-01 | 1.00E+00 |
| ENSG00000271958.1_RP11-617D  | ENSG00000160789.18_LMNA | -0.00161 | -0.160772895 | 0.157627701 | 9.84E-01 | 9.94E-01 | 1.00E+00 |
| ENSG00000230015.3_RP11-80B9  | ENSG00000160789.18_LMNA | -0.15298 | -0.30476158  | 0.006372541 | 5.99E-02 | 2.25E-01 | 1.00E+00 |
| ENSG00000224136.1_AC007568.  | ENSG00000160789.18_LMNA | -0.22365 | -0.3696898   | -0.06683097 | 5.61E-03 | 4.28E-02 | 1.00E+00 |
| ENSG00000279533.1_AC009022.  | ENSG00000160789.18_LMNA | 0.15347  | -0.005877934 | 0.305210197 | 5.91E-02 | 2.23E-01 | 1.00E+00 |

|                              |                         |          |              |             |          |          |          |
|------------------------------|-------------------------|----------|--------------|-------------|----------|----------|----------|
| ENSG00000147183.8_CPXCR1     | ENSG00000160789.18_LMNA | -0.04115 | -0.199044212 | 0.118831744 | 6.15E-01 | 8.25E-01 | 1.00E+00 |
| ENSG00000211802.3_TRAV22     | ENSG00000160789.18_LMNA | -0.07297 | -0.229505701 | 0.087243029 | 3.72E-01 | 6.52E-01 | 1.00E+00 |
| ENSG00000248878.1_RP11-5N11  | ENSG00000160789.18_LMNA | -0.02589 | -0.184333752 | 0.133859589 | 7.52E-01 | 8.96E-01 | 1.00E+00 |
| ENSG00000268187.6_AC118758.  | ENSG00000160789.18_LMNA | -0.0007  | -0.159879399 | 0.158521855 | 9.93E-01 | 9.97E-01 | 1.00E+00 |
| ENSG00000278419.1_RP11-298E  | ENSG00000160789.18_LMNA | 0.02445  | -0.135274924 | 0.182940924 | 7.65E-01 | 9.02E-01 | 1.00E+00 |
| ENSG00000276473.1_CTD-2026J  | ENSG00000160789.18_LMNA | 0.06473  | -0.095454391 | 0.221646595 | 4.28E-01 | 6.99E-01 | 1.00E+00 |
| ENSG00000278725.1_RP11-666O  | ENSG00000160789.18_LMNA | 0.0162   | -0.14337533  | 0.17494468  | 8.43E-01 | 9.39E-01 | 1.00E+00 |
| ENSG00000227338.1_RP11-195B  | ENSG00000160789.18_LMNA | -0.08688 | -0.242725981 | 0.073332409 | 2.87E-01 | 5.73E-01 | 1.00E+00 |
| ENSG00000237382.2_RPL21P121  | ENSG00000160789.18_LMNA | -0.02298 | -0.181517818 | 0.136719686 | 7.79E-01 | 9.09E-01 | 1.00E+00 |
| ENSG00000227187.1_RP11-6C10  | ENSG00000160789.18_LMNA | 0.00648  | -0.1528819   | 0.165506487 | 9.37E-01 | 9.75E-01 | 1.00E+00 |
| ENSG00000238001.2_SNRPCP1    | ENSG00000160789.18_LMNA | 0.0524   | -0.10769563  | 0.209853504 | 5.21E-01 | 7.67E-01 | 1.00E+00 |
| ENSG00000227568.1_SNX18P26   | ENSG00000160789.18_LMNA | -0.01189 | -0.170766366 | 0.147591174 | 8.84E-01 | 9.55E-01 | 1.00E+00 |
| ENSG00000255289.1_RP11-91I2C | ENSG00000160789.18_LMNA | -0.10145 | -0.256503634 | 0.058703254 | 2.14E-01 | 4.88E-01 | 1.00E+00 |
| ENSG00000165623.8_UCMA       | ENSG00000160789.18_LMNA | -0.18983 | -0.33879076  | -0.03158234 | 1.92E-02 | 1.05E-01 | 1.00E+00 |
| ENSG00000255381.1_AP001258.1 | ENSG00000160789.18_LMNA | 0.03475  | -0.125140324 | 0.192886265 | 6.71E-01 | 8.56E-01 | 1.00E+00 |
| ENSG00000257639.1_CTB-31N19  | ENSG00000160789.18_LMNA | -0.06061 | -0.217709171 | 0.099552133 | 4.58E-01 | 7.22E-01 | 1.00E+00 |
| ENSG00000167531.5_LALBA      | ENSG00000160789.18_LMNA | 0.1483   | -0.011164335 | 0.300408179 | 6.82E-02 | 2.45E-01 | 1.00E+00 |
| ENSG00000278213.1_CNTNAP3F   | ENSG00000160789.18_LMNA | -0.0974  | -0.252680679 | 0.062776096 | 2.33E-01 | 5.10E-01 | 1.00E+00 |
| ENSG00000240624.1_RP11-45P1  | ENSG00000160789.18_LMNA | -0.00296 | -0.162080777 | 0.156317914 | 9.71E-01 | 9.89E-01 | 1.00E+00 |
| ENSG00000270832.1_RP1-168P1  | ENSG00000160789.18_LMNA | 0.01437  | -0.145158636 | 0.173178647 | 8.60E-01 | 9.45E-01 | 1.00E+00 |
| ENSG00000260479.1_RP11-556H  | ENSG00000160789.18_LMNA | -0.02535 | -0.183813307 | 0.134388596 | 7.57E-01 | 8.99E-01 | 1.00E+00 |
| ENSG00000267409.1_RP11-567M  | ENSG00000160789.18_LMNA | -0.09067 | -0.246315596 | 0.069534002 | 2.67E-01 | 5.51E-01 | 1.00E+00 |
| ENSG00000253445.1_CTB-79E8.1 | ENSG00000160789.18_LMNA | 0.10175  | -0.058396162 | 0.256791486 | 2.12E-01 | 4.86E-01 | 1.00E+00 |
| ENSG00000258826.4_RP11-300J  | ENSG00000160789.18_LMNA | 0.00337  | -0.155918968 | 0.162478922 | 9.67E-01 | 9.87E-01 | 1.00E+00 |
| ENSG00000260675.1_CTD-2576D  | ENSG00000160789.18_LMNA | 0.08429  | -0.075934379 | 0.240262032 | 3.02E-01 | 5.89E-01 | 1.00E+00 |
| ENSG00000234427.1_RP3-413H6  | ENSG00000160789.18_LMNA | 0.05035  | -0.10973204  | 0.20788264  | 5.38E-01 | 7.78E-01 | 1.00E+00 |
| ENSG00000253300.1_RP11-108E  | ENSG00000160789.18_LMNA | -0.1821  | -0.331686842 | -0.02358504 | 2.47E-02 | 1.25E-01 | 1.00E+00 |
| ENSG00000218806.2_RP3-369A1  | ENSG00000160789.18_LMNA | 0.05843  | -0.101714054 | 0.215627663 | 4.75E-01 | 7.34E-01 | 1.00E+00 |
| ENSG00000232174.3_CTB-164L2  | ENSG00000160789.18_LMNA | -0.07241 | -0.228966586 | 0.087807686 | 3.75E-01 | 6.55E-01 | 1.00E+00 |
| ENSG00000266955.1_RP11-820I1 | ENSG00000160789.18_LMNA | 0.16858  | 0.009635263  | 0.319211205 | 3.79E-02 | 1.67E-01 | 1.00E+00 |
| ENSG00000243402.1_RP11-473O  | ENSG00000160789.18_LMNA | 0.05889  | -0.101256925 | 0.216068029 | 4.71E-01 | 7.31E-01 | 1.00E+00 |
| ENSG00000178522.13_AMBN      | ENSG00000160789.18_LMNA | -0.03587 | -0.193967505 | 0.124034494 | 6.61E-01 | 8.50E-01 | 1.00E+00 |
| ENSG00000258587.1_RP11-316E  | ENSG00000160789.18_LMNA | 0.06036  | -0.099798186 | 0.217472416 | 4.60E-01 | 7.23E-01 | 1.00E+00 |

|                               |                         |          |              |             |          |          |          |
|-------------------------------|-------------------------|----------|--------------|-------------|----------|----------|----------|
| ENSG00000248245.1_CTB-49A3.1  | ENSG00000160789.18_LMNA | -0.09879 | -0.253994624 | 0.06137745  | 2.26E-01 | 5.02E-01 | 1.00E+00 |
| ENSG00000254219.1_GS1-251I9.1 | ENSG00000160789.18_LMNA | 0.01228  | -0.147210806 | 0.171143818 | 8.81E-01 | 9.54E-01 | 1.00E+00 |
| ENSG00000236709.1_DAPK1-IT1   | ENSG00000160789.18_LMNA | 0.07725  | -0.082966613 | 0.233582373 | 3.44E-01 | 6.29E-01 | 1.00E+00 |
| ENSG00000248132.2_CTD-2037L   | ENSG00000160789.18_LMNA | -0.10495 | -0.259811665 | 0.055170505 | 1.98E-01 | 4.68E-01 | 1.00E+00 |
| ENSG00000271290.1_RP11-345E   | ENSG00000160789.18_LMNA | -0.0057  | -0.164752648 | 0.153638667 | 9.44E-01 | 9.78E-01 | 1.00E+00 |
| ENSG00000232374.5_GPR79       | ENSG00000160789.18_LMNA | 0.01705  | -0.142533169 | 0.175777972 | 8.35E-01 | 9.36E-01 | 1.00E+00 |
| ENSG00000257863.1_RP11-587P   | ENSG00000160789.18_LMNA | -0.02642 | -0.184843028 | 0.133341759 | 7.47E-01 | 8.94E-01 | 1.00E+00 |
| ENSG00000239263.1_RBM43P1     | ENSG00000160789.18_LMNA | -0.03978 | -0.197728784 | 0.120181509 | 6.27E-01 | 8.32E-01 | 1.00E+00 |
| ENSG00000223631.1_LINC01120   | ENSG00000160789.18_LMNA | -0.08315 | -0.239185632 | 0.077069725 | 3.08E-01 | 5.95E-01 | 1.00E+00 |
| ENSG00000257883.1_RP11-497G   | ENSG00000160789.18_LMNA | -0.10394 | -0.258861242 | 0.0561863   | 2.03E-01 | 4.73E-01 | 1.00E+00 |
| ENSG00000256847.1_CCND2P1     | ENSG00000160789.18_LMNA | -0.15083 | -0.302764057 | 0.008572993 | 6.36E-02 | 2.35E-01 | 1.00E+00 |
| ENSG00000226301.3_PDCL3P1     | ENSG00000160789.18_LMNA | 0.00761  | -0.151776467 | 0.166606974 | 9.26E-01 | 9.72E-01 | 1.00E+00 |
| ENSG00000280410.1_AC104073.1  | ENSG00000160789.18_LMNA | 0.05154  | -0.10855489  | 0.209022216 | 5.28E-01 | 7.72E-01 | 1.00E+00 |
| ENSG00000225569.1_CCT4P2      | ENSG00000160789.18_LMNA | -0.15406 | -0.305761298 | 0.005270129 | 5.81E-02 | 2.21E-01 | 1.00E+00 |
| ENSG00000231401.1_AC023481.1  | ENSG00000160789.18_LMNA | -0.05801 | -0.215222874 | 0.102134132 | 4.78E-01 | 7.36E-01 | 1.00E+00 |
| ENSG00000261632.1_RP11-390D   | ENSG00000160789.18_LMNA | 0.02708  | -0.132689048 | 0.185484714 | 7.40E-01 | 8.91E-01 | 1.00E+00 |
| ENSG00000236747.1_LINC01282   | ENSG00000160789.18_LMNA | -0.08231 | -0.238387076 | 0.077911482 | 3.13E-01 | 6.00E-01 | 1.00E+00 |
| ENSG00000260438.1_RP11-405F   | ENSG00000160789.18_LMNA | -0.00898 | -0.167944639 | 0.150431717 | 9.13E-01 | 9.67E-01 | 1.00E+00 |
| ENSG00000255331.1_RP11-736I1  | ENSG00000160789.18_LMNA | 0.00353  | -0.155756516 | 0.162641017 | 9.66E-01 | 9.87E-01 | 1.00E+00 |
| ENSG00000260765.2_CES1P2      | ENSG00000160789.18_LMNA | -0.18317 | -0.332672439 | -0.02469224 | 2.39E-02 | 1.23E-01 | 1.00E+00 |
| ENSG00000232036.2_GS1-115G2   | ENSG00000160789.18_LMNA | -0.01194 | -0.170819416 | 0.14753772  | 8.84E-01 | 9.55E-01 | 1.00E+00 |
| ENSG00000270874.1_RPAP2P1     | ENSG00000160789.18_LMNA | -0.09529 | -0.250684547 | 0.064898539 | 2.43E-01 | 5.22E-01 | 1.00E+00 |
| ENSG00000270554.1_RP11-225N   | ENSG00000160789.18_LMNA | -0.02285 | -0.181395124 | 0.136844184 | 7.80E-01 | 9.10E-01 | 1.00E+00 |
| ENSG00000237053.1_FUCA1P1     | ENSG00000160789.18_LMNA | -0.30038 | -0.43860246  | -0.14826508 | 1.70E-04 | 2.88E-03 | 1.00E+00 |
| ENSG00000256206.2_RP11-140L   | ENSG00000160789.18_LMNA | -0.01683 | -0.175557615 | 0.142755917 | 8.37E-01 | 9.37E-01 | 1.00E+00 |
| ENSG00000234485.5_OR7E46P     | ENSG00000160789.18_LMNA | -0.11689 | -0.271044285 | 0.0431157   | 1.52E-01 | 4.00E-01 | 1.00E+00 |
| ENSG00000232342.6_RP11-46O2   | ENSG00000160789.18_LMNA | 0.00071  | -0.158511774 | 0.159889475 | 9.93E-01 | 9.97E-01 | 1.00E+00 |
| ENSG00000279315.1_RP11-57H1   | ENSG00000160789.18_LMNA | -0.13893 | -0.291682122 | 0.02072622  | 8.78E-02 | 2.88E-01 | 1.00E+00 |
| ENSG00000272508.1_RP11-96C2   | ENSG00000160789.18_LMNA | -0.04268 | -0.200516129 | 0.117320013 | 6.02E-01 | 8.17E-01 | 1.00E+00 |
| ENSG00000162891.9_IL20        | ENSG00000160789.18_LMNA | 0.12303  | -0.036893604 | 0.276808723 | 1.31E-01 | 3.67E-01 | 1.00E+00 |
| ENSG00000250914.1_RP11-1084   | ENSG00000160789.18_LMNA | -0.00387 | -0.162966272 | 0.155430494 | 9.62E-01 | 9.85E-01 | 1.00E+00 |
| ENSG00000281131.1_SCHLAP1     | ENSG00000160789.18_LMNA | -0.114   | -0.268327985 | 0.046039232 | 1.62E-01 | 4.17E-01 | 1.00E+00 |
| ENSG00000279236.1_RP11-120K   | ENSG00000160789.18_LMNA | -0.12003 | -0.273991267 | 0.039937788 | 1.41E-01 | 3.83E-01 | 1.00E+00 |



|                              |                         |          |              |             |          |          |          |
|------------------------------|-------------------------|----------|--------------|-------------|----------|----------|----------|
| ENSG00000275718.1_CCL15      | ENSG00000160789.18_LMNA | 0.15153  | -0.0078584   | 0.303413049 | 6.24E-02 | 2.31E-01 | 1.00E+00 |
| ENSG00000279134.1_RP11-489P  | ENSG00000160789.18_LMNA | -0.16539 | -0.316259852 | -0.0063527  | 4.17E-02 | 1.78E-01 | 1.00E+00 |
| ENSG00000133020.4_MYH8       | ENSG00000160789.18_LMNA | -0.09262 | -0.248157671 | 0.067581219 | 2.56E-01 | 5.39E-01 | 1.00E+00 |
| ENSG00000214602.3_CTBP2P5    | ENSG00000160789.18_LMNA | 0.01948  | -0.140151827 | 0.17813177  | 8.12E-01 | 9.26E-01 | 1.00E+00 |
| ENSG00000235535.6_RP11-532N  | ENSG00000160789.18_LMNA | -0.1643  | -0.315253037 | -0.00523443 | 4.31E-02 | 1.82E-01 | 1.00E+00 |
| ENSG00000077498.8_TYR        | ENSG00000160789.18_LMNA | -0.15516 | -0.306780475 | 0.004145481 | 5.63E-02 | 2.17E-01 | 1.00E+00 |
| ENSG00000243715.1_CACNA2D3   | ENSG00000160789.18_LMNA | -0.15684 | -0.308343686 | 0.002418968 | 5.36E-02 | 2.10E-01 | 1.00E+00 |
| ENSG00000223724.1_RAD17P2    | ENSG00000160789.18_LMNA | -0.03066 | -0.188934523 | 0.129175229 | 7.08E-01 | 8.76E-01 | 1.00E+00 |
| ENSG00000226683.2_PWWP2AP    | ENSG00000160789.18_LMNA | -0.07933 | -0.235560355 | 0.080887506 | 3.31E-01 | 6.17E-01 | 1.00E+00 |
| ENSG00000234795.8_RFTN1P1    | ENSG00000160789.18_LMNA | -0.02265 | -0.181198707 | 0.137043468 | 7.82E-01 | 9.10E-01 | 1.00E+00 |
| ENSG00000229261.1_RP11-227H  | ENSG00000160789.18_LMNA | 0.08832  | -0.071895748 | 0.24408469  | 2.79E-01 | 5.65E-01 | 1.00E+00 |
| ENSG00000260505.1_RP11-410C  | ENSG00000160789.18_LMNA | -0.15616 | -0.307706531 | 0.003122907 | 5.47E-02 | 2.13E-01 | 1.00E+00 |
| ENSG00000196115.11_ADAM5     | ENSG00000160789.18_LMNA | 0.11036  | -0.049711856 | 0.264908595 | 1.76E-01 | 4.37E-01 | 1.00E+00 |
| ENSG00000237914.4_SIRPG-AS1  | ENSG00000160789.18_LMNA | 0.00889  | -0.150525988 | 0.167850903 | 9.13E-01 | 9.67E-01 | 1.00E+00 |
| ENSG00000279946.1_CH17-76K2  | ENSG00000160789.18_LMNA | -0.03776 | -0.195780105 | 0.122178896 | 6.44E-01 | 8.42E-01 | 1.00E+00 |
| ENSG00000280395.1_RP5-898I4. | ENSG00000160789.18_LMNA | 0.12413  | -0.035778782 | 0.277839165 | 1.28E-01 | 3.62E-01 | 1.00E+00 |
| ENSG00000280309.1_RP11-60L3  | ENSG00000160789.18_LMNA | 0.05315  | -0.106951439 | 0.210573097 | 5.15E-01 | 7.63E-01 | 1.00E+00 |
| ENSG00000237222.3_AC090505.1 | ENSG00000160789.18_LMNA | 0.14562  | -0.013905609 | 0.297911849 | 7.34E-02 | 2.58E-01 | 1.00E+00 |
| ENSG00000174358.14_SLC6A19   | ENSG00000160789.18_LMNA | 0.01944  | -0.140196654 | 0.178087496 | 8.12E-01 | 9.26E-01 | 1.00E+00 |
| ENSG00000274172.1_MIR8071-1  | ENSG00000160789.18_LMNA | -0.05057 | -0.20809305  | 0.10951476  | 5.36E-01 | 7.77E-01 | 1.00E+00 |
| ENSG00000207037.1_RNU6-339F  | ENSG00000160789.18_LMNA | -0.17174 | -0.32213066  | -0.01288892 | 3.44E-02 | 1.57E-01 | 1.00E+00 |
| ENSG00000276641.1_MIR6769A   | ENSG00000160789.18_LMNA | 0.14091  | -0.018708107 | 0.293528166 | 8.33E-02 | 2.79E-01 | 1.00E+00 |
| ENSG00000207137.1_SNORD116   | ENSG00000160789.18_LMNA | -0.0427  | -0.200533872 | 0.117301781 | 6.01E-01 | 8.17E-01 | 1.00E+00 |
| ENSG00000276029.1_MIR4477A   | ENSG00000160789.18_LMNA | -0.14425 | -0.296640533 | 0.015299868 | 7.62E-02 | 2.64E-01 | 1.00E+00 |
| ENSG00000230964.1_AC018696.4 | ENSG00000160789.18_LMNA | -0.06613 | -0.222982546 | 0.094061599 | 4.18E-01 | 6.90E-01 | 1.00E+00 |
| ENSG00000274258.1_MIR6728    | ENSG00000160789.18_LMNA | 0.19818  | 0.040245961  | 0.346447232 | 1.44E-02 | 8.53E-02 | 1.00E+00 |
| ENSG00000202522.1_Y_RNA      | ENSG00000160789.18_LMNA | 0.01786  | -0.1417478   | 0.17655466  | 8.27E-01 | 9.32E-01 | 1.00E+00 |
| ENSG00000241244.1_IGKV1D-16  | ENSG00000160789.18_LMNA | -0.01749 | -0.176196444 | 0.142110069 | 8.31E-01 | 9.34E-01 | 1.00E+00 |
| ENSG00000277590.1_MIR7845    | ENSG00000160789.18_LMNA | 0.17399  | 0.015212297  | 0.324211793 | 3.21E-02 | 1.50E-01 | 1.00E+00 |
| ENSG00000266580.1_MIR4254    | ENSG00000160789.18_LMNA | 0.07612  | -0.084099261 | 0.232503711 | 3.51E-01 | 6.35E-01 | 1.00E+00 |
| ENSG00000276198.1_           | ENSG00000160789.18_LMNA | 0.125    | -0.034893407 | 0.278657015 | 1.25E-01 | 3.57E-01 | 1.00E+00 |
| ENSG00000200629.1_RNY1P11    | ENSG00000160789.18_LMNA | -0.0635  | -0.220471728 | 0.096678221 | 4.37E-01 | 7.05E-01 | 1.00E+00 |
| ENSG00000207720.1_           | ENSG00000160789.18_LMNA | 0.01954  | -0.140097176 | 0.178185747 | 8.11E-01 | 9.26E-01 | 1.00E+00 |

|                             |                         |          |              |             |          |          |          |
|-----------------------------|-------------------------|----------|--------------|-------------|----------|----------|----------|
| ENSG00000207693.1_MIR602    | ENSG00000160789.18_LMNA | 0.0445   | -0.115522679 | 0.202264261 | 5.86E-01 | 8.08E-01 | 1.00E+00 |
| ENSG00000271907.1_SNORA35   | ENSG00000160789.18_LMNA | -0.07915 | -0.23538884  | 0.081067899 | 3.32E-01 | 6.18E-01 | 1.00E+00 |
| ENSG00000199944.1_RNU6-653F | ENSG00000160789.18_LMNA | -0.09308 | -0.248597381 | 0.067114725 | 2.54E-01 | 5.36E-01 | 1.00E+00 |
| ENSG00000212396.1_RNA5SP32  | ENSG00000160789.18_LMNA | 0.03854  | -0.121405652 | 0.196534791 | 6.37E-01 | 8.38E-01 | 1.00E+00 |
| ENSG00000221216.1_RNU6ATAC  | ENSG00000160789.18_LMNA | -0.04137 | -0.199261616 | 0.118608552 | 6.13E-01 | 8.24E-01 | 1.00E+00 |
| ENSG00000199874.1_RNA5SP45  | ENSG00000160789.18_LMNA | 0.02999  | -0.129833279 | 0.188289058 | 7.14E-01 | 8.78E-01 | 1.00E+00 |
| ENSG00000276178.1_Y_RNA     | ENSG00000160789.18_LMNA | -0.005   | -0.164068085 | 0.154325567 | 9.51E-01 | 9.80E-01 | 1.00E+00 |
| ENSG00000249020.1_SNORA58   | ENSG00000160789.18_LMNA | -0.01387 | -0.172691083 | 0.145650605 | 8.65E-01 | 9.47E-01 | 1.00E+00 |
| ENSG00000256658.1_RP11-180M | ENSG00000160789.18_LMNA | 0.06141  | -0.098754726 | 0.218476191 | 4.52E-01 | 7.18E-01 | 1.00E+00 |
| ENSG00000277493.1_RP11-255H | ENSG00000160789.18_LMNA | -0.01516 | -0.173939185 | 0.144390913 | 8.53E-01 | 9.42E-01 | 1.00E+00 |
| ENSG00000241439.1_RP11-666A | ENSG00000160789.18_LMNA | -0.07711 | -0.233443614 | 0.083112362 | 3.45E-01 | 6.29E-01 | 1.00E+00 |
| ENSG00000259538.1_UBE2Q2P1  | ENSG00000160789.18_LMNA | -0.125   | -0.278653661 | 0.034897038 | 1.25E-01 | 3.57E-01 | 1.00E+00 |
| ENSG00000181617.5_FDCSP     | ENSG00000160789.18_LMNA | 0.11934  | -0.04063514  | 0.273345094 | 1.43E-01 | 3.87E-01 | 1.00E+00 |
| ENSG00000237396.1_LINC01384 | ENSG00000160789.18_LMNA | -0.14632 | -0.298562802 | 0.013191234 | 7.21E-02 | 2.54E-01 | 1.00E+00 |
| ENSG00000251573.2_CTD-2089N | ENSG00000160789.18_LMNA | -0.2915  | -0.430711627 | -0.1387365  | 2.69E-04 | 4.12E-03 | 1.00E+00 |
| ENSG00000262408.1_RP11-670E | ENSG00000160789.18_LMNA | -0.03009 | -0.188389035 | 0.129731371 | 7.13E-01 | 8.78E-01 | 1.00E+00 |
| ENSG00000239365.2_RPS26P49  | ENSG00000160789.18_LMNA | 0.21747  | 0.060359279  | 0.364066462 | 7.12E-03 | 5.10E-02 | 1.00E+00 |
| ENSG00000266720.2_RN7SL14P  | ENSG00000160789.18_LMNA | 0.04049  | -0.119480445 | 0.198412157 | 6.20E-01 | 8.28E-01 | 1.00E+00 |
| ENSG00000258462.2_RP11-831F | ENSG00000160789.18_LMNA | -0.10619 | -0.260976139 | 0.053925049 | 1.93E-01 | 4.61E-01 | 1.00E+00 |
| ENSG00000232032.1_AC079781. | ENSG00000160789.18_LMNA | 0.02088  | -0.138780115 | 0.179485966 | 7.98E-01 | 9.19E-01 | 1.00E+00 |
| ENSG00000279268.1_RP11-628M | ENSG00000160789.18_LMNA | -0.05505 | -0.212387687 | 0.105073243 | 5.01E-01 | 7.53E-01 | 1.00E+00 |
| ENSG00000275940.1_MRPL57P3  | ENSG00000160789.18_LMNA | -0.04913 | -0.206717389 | 0.110934793 | 5.48E-01 | 7.85E-01 | 1.00E+00 |
| ENSG00000270842.1_RP11-57B2 | ENSG00000160789.18_LMNA | -0.12069 | -0.27461634  | 0.039262917 | 1.39E-01 | 3.79E-01 | 1.00E+00 |
| ENSG00000225839.2_TRMT2B-A  | ENSG00000160789.18_LMNA | -0.05083 | -0.208348587 | 0.109250838 | 5.34E-01 | 7.76E-01 | 1.00E+00 |
| ENSG00000240974.1_RPS27AP1  | ENSG00000160789.18_LMNA | 0.10112  | -0.059029904 | 0.256197389 | 2.15E-01 | 4.89E-01 | 1.00E+00 |
| ENSG00000267448.4_AC010649. | ENSG00000160789.18_LMNA | 0.06201  | -0.098159768 | 0.219048221 | 4.48E-01 | 7.14E-01 | 1.00E+00 |
| ENSG00000236938.1_AC003092. | ENSG00000160789.18_LMNA | 0.09767  | -0.062505297 | 0.25293517  | 2.31E-01 | 5.09E-01 | 1.00E+00 |
| ENSG00000273693.1_C2orf27AP | ENSG00000160789.18_LMNA | -0.04619 | -0.203892308 | 0.113846936 | 5.72E-01 | 8.00E-01 | 1.00E+00 |
| ENSG00000274541.1_RP1-62D2. | ENSG00000160789.18_LMNA | 0.13193  | -0.02785551  | 0.285142006 | 1.05E-01 | 3.22E-01 | 1.00E+00 |
| ENSG00000275586.1_Metazoa_S | ENSG00000160789.18_LMNA | -0.05056 | -0.208084406 | 0.109523687 | 5.36E-01 | 7.77E-01 | 1.00E+00 |
| ENSG00000240027.2_RP11-4151 | ENSG00000160789.18_LMNA | -0.04572 | -0.203435418 | 0.114317393 | 5.76E-01 | 8.02E-01 | 1.00E+00 |
| ENSG00000271025.1_RP11-708L | ENSG00000160789.18_LMNA | -0.05444 | -0.211800816 | 0.105680933 | 5.05E-01 | 7.56E-01 | 1.00E+00 |
| ENSG00000260405.1_CTD-2576D | ENSG00000160789.18_LMNA | 0.03289  | -0.126972964 | 0.191092675 | 6.87E-01 | 8.65E-01 | 1.00E+00 |

|                              |                         |          |              |             |          |          |          |
|------------------------------|-------------------------|----------|--------------|-------------|----------|----------|----------|
| ENSG00000244619.2_RP11-315I2 | ENSG00000160789.18_LMNA | 0.2054   | 0.047760819  | 0.353055612 | 1.11E-02 | 7.07E-02 | 1.00E+00 |
| ENSG00000255227.1_RP11-460B  | ENSG00000160789.18_LMNA | 0.26889  | 0.114593529  | 0.410516403 | 8.09E-04 | 9.81E-03 | 1.00E+00 |
| ENSG00000278770.1_Metazoa_SI | ENSG00000160789.18_LMNA | 0.03748  | -0.122448348 | 0.195517032 | 6.47E-01 | 8.43E-01 | 1.00E+00 |
| ENSG00000277721.1_Metazoa_SI | ENSG00000160789.18_LMNA | -0.05242 | -0.209873595 | 0.107674856 | 5.21E-01 | 7.67E-01 | 1.00E+00 |
| ENSG00000266905.1_RP11-1058I | ENSG00000160789.18_LMNA | -0.0213  | -0.179889103 | 0.138371527 | 7.95E-01 | 9.17E-01 | 1.00E+00 |
| ENSG00000233702.1_AC107083.  | ENSG00000160789.18_LMNA | 0.02902  | -0.130781706 | 0.187358285 | 7.23E-01 | 8.83E-01 | 1.00E+00 |
| ENSG00000102891.3_MT4        | ENSG00000160789.18_LMNA | -0.10143 | -0.256491167 | 0.058716554 | 2.14E-01 | 4.88E-01 | 1.00E+00 |
| ENSG00000266549.1_RP11-526I8 | ENSG00000160789.18_LMNA | -0.04725 | -0.204907821 | 0.112800755 | 5.63E-01 | 7.94E-01 | 1.00E+00 |
| ENSG00000255518.1_RP11-148O  | ENSG00000160789.18_LMNA | -0.19686 | -0.345242253 | -0.03887942 | 1.51E-02 | 8.81E-02 | 1.00E+00 |
| ENSG00000242222.1_RP11-237P  | ENSG00000160789.18_LMNA | -0.14362 | -0.296052837 | 0.015943988 | 7.75E-02 | 2.67E-01 | 1.00E+00 |
| ENSG00000269681.1_CTD-3187F  | ENSG00000160789.18_LMNA | 0.06136  | -0.098806022 | 0.218426862 | 4.53E-01 | 7.18E-01 | 1.00E+00 |
| ENSG00000260015.1_RP11-510M  | ENSG00000160789.18_LMNA | 0.16074  | 0.001582556  | 0.311960286 | 4.79E-02 | 1.96E-01 | 1.00E+00 |
| ENSG00000281514.1_           | ENSG00000160789.18_LMNA | -0.02116 | -0.179754906 | 0.13850755  | 7.96E-01 | 9.18E-01 | 1.00E+00 |
| ENSG00000255003.1_CYCSP28    | ENSG00000160789.18_LMNA | 0.01445  | -0.145086124 | 0.173250497 | 8.60E-01 | 9.45E-01 | 1.00E+00 |
| ENSG00000269009.1_SLC6A21P   | ENSG00000160789.18_LMNA | 0.04106  | -0.11892199  | 0.198956298 | 6.16E-01 | 8.26E-01 | 1.00E+00 |
| ENSG00000276627.1_RP5-1016A  | ENSG00000160789.18_LMNA | -0.14573 | -0.298018234 | 0.01378888  | 7.32E-02 | 2.57E-01 | 1.00E+00 |
| ENSG00000226004.1_RP11-10J5. | ENSG00000160789.18_LMNA | 0.18557  | 0.027175233  | 0.334880298 | 2.21E-02 | 1.16E-01 | 1.00E+00 |
| ENSG00000226729.3_RPL35AP3(  | ENSG00000160789.18_LMNA | -0.09628 | -0.251624239 | 0.063899741 | 2.38E-01 | 5.17E-01 | 1.00E+00 |
| ENSG00000224299.1_MTATP6P1   | ENSG00000160789.18_LMNA | -0.18657 | -0.335795246 | -0.02820531 | 2.14E-02 | 1.13E-01 | 1.00E+00 |
| ENSG00000279007.1_AL136097.1 | ENSG00000160789.18_LMNA | 0.04236  | -0.117630685 | 0.200213756 | 6.04E-01 | 8.18E-01 | 1.00E+00 |
| ENSG00000232462.1_           | ENSG00000160789.18_LMNA | 0.05498  | -0.105143099 | 0.212320235 | 5.01E-01 | 7.53E-01 | 1.00E+00 |
| ENSG00000224276.1_RP11-336K  | ENSG00000160789.18_LMNA | -0.0074  | -0.166407496 | 0.151976901 | 9.28E-01 | 9.72E-01 | 1.00E+00 |
| ENSG00000242364.1_RP11-451J; | ENSG00000160789.18_LMNA | 0.08404  | -0.076183264 | 0.240026135 | 3.03E-01 | 5.90E-01 | 1.00E+00 |
| ENSG00000251476.2_MTCO1P31   | ENSG00000160789.18_LMNA | 0.14203  | -0.017564719 | 0.294573034 | 8.09E-02 | 2.74E-01 | 1.00E+00 |
| ENSG00000225532.1_XX-C2158C  | ENSG00000160789.18_LMNA | 0.03442  | -0.125467248 | 0.192566463 | 6.74E-01 | 8.57E-01 | 1.00E+00 |
| ENSG00000238263.1_RPL21P88   | ENSG00000160789.18_LMNA | -0.11267 | -0.267081792 | 0.047378702 | 1.67E-01 | 4.24E-01 | 1.00E+00 |
| ENSG00000233236.1_AP001171.  | ENSG00000160789.18_LMNA | 0.03402  | -0.125863945 | 0.192178316 | 6.77E-01 | 8.59E-01 | 1.00E+00 |
| ENSG00000226771.1_AP001136.2 | ENSG00000160789.18_LMNA | -0.09855 | -0.253764811 | 0.061622167 | 2.27E-01 | 5.04E-01 | 1.00E+00 |
| ENSG00000233219.1_RP11-89N1  | ENSG00000160789.18_LMNA | 0.06135  | -0.098819339 | 0.218414055 | 4.53E-01 | 7.18E-01 | 1.00E+00 |
| ENSG00000233397.1_AC008063.  | ENSG00000160789.18_LMNA | 0.03888  | -0.121067683 | 0.19686453  | 6.34E-01 | 8.36E-01 | 1.00E+00 |
| ENSG00000236217.4_C1DP2      | ENSG00000160789.18_LMNA | -0.11416 | -0.268481135 | 0.045874542 | 1.61E-01 | 4.16E-01 | 1.00E+00 |
| ENSG00000259999.1_RP11-252K  | ENSG00000160789.18_LMNA | 0.13382  | -0.02593703  | 0.286904811 | 1.00E-01 | 3.12E-01 | 1.00E+00 |
| ENSG00000243810.1_RP5-1096J  | ENSG00000160789.18_LMNA | 0.01473  | -0.144811463 | 0.173522618 | 8.57E-01 | 9.44E-01 | 1.00E+00 |

|                              |                         |          |              |             |          |          |          |
|------------------------------|-------------------------|----------|--------------|-------------|----------|----------|----------|
| ENSG00000260194.1_RP11-357N  | ENSG00000160789.18_LMNA | 0.04961  | -0.110458588 | 0.207178854 | 5.44E-01 | 7.82E-01 | 1.00E+00 |
| ENSG00000235492.1_LINC01221  | ENSG00000160789.18_LMNA | -0.33357 | -0.467921273 | -0.18414764 | 2.68E-05 | 6.53E-04 | 1.00E+00 |
| ENSG00000226576.1_RP11-523O  | ENSG00000160789.18_LMNA | 0.0207   | -0.138955638 | 0.179312751 | 8.00E-01 | 9.20E-01 | 1.00E+00 |
| ENSG00000249409.1_RP11-501E  | ENSG00000160789.18_LMNA | 0.05988  | -0.100275435 | 0.217013094 | 4.64E-01 | 7.26E-01 | 1.00E+00 |
| ENSG00000267587.1_RP11-687F  | ENSG00000160789.18_LMNA | 0.03709  | -0.122832845 | 0.195141557 | 6.50E-01 | 8.45E-01 | 1.00E+00 |
| ENSG00000240292.1_           | ENSG00000160789.18_LMNA | -0.13981 | -0.292500637 | 0.019831726 | 8.58E-02 | 2.84E-01 | 1.00E+00 |
| ENSG00000256810.1_RP11-76C1  | ENSG00000160789.18_LMNA | -0.00155 | -0.160708105 | 0.157692556 | 9.85E-01 | 9.94E-01 | 1.00E+00 |
| ENSG00000249988.1_RP11-669M  | ENSG00000160789.18_LMNA | -0.09696 | -0.252262782 | 0.063220673 | 2.35E-01 | 5.13E-01 | 1.00E+00 |
| ENSG00000260828.1_HMGB3P32   | ENSG00000160789.18_LMNA | 0.04144  | -0.118546633 | 0.199321924 | 6.12E-01 | 8.24E-01 | 1.00E+00 |
| ENSG00000249851.1_RPS27AP1   | ENSG00000160789.18_LMNA | 0.01492  | -0.14462409  | 0.17370823  | 8.55E-01 | 9.43E-01 | 1.00E+00 |
| ENSG00000263212.2_LA16c-306E | ENSG00000160789.18_LMNA | -0.10193 | -0.25696189  | 0.05821434  | 2.11E-01 | 4.85E-01 | 1.00E+00 |
| ENSG00000273065.1_           | ENSG00000160789.18_LMNA | -0.07748 | -0.233800205 | 0.082737779 | 3.43E-01 | 6.27E-01 | 1.00E+00 |
| ENSG00000260109.1_RP11-883G  | ENSG00000160789.18_LMNA | -0.00119 | -0.160357427 | 0.158043539 | 9.88E-01 | 9.96E-01 | 1.00E+00 |
| ENSG00000259046.1_RP11-857B  | ENSG00000160789.18_LMNA | -0.0564  | -0.213682763 | 0.103731384 | 4.90E-01 | 7.46E-01 | 1.00E+00 |
| ENSG00000260172.1_LINC01413  | ENSG00000160789.18_LMNA | 0.01008  | -0.149360698 | 0.169009176 | 9.02E-01 | 9.62E-01 | 1.00E+00 |
| ENSG00000236408.1_RP11-476H  | ENSG00000160789.18_LMNA | -0.09024 | -0.245903454 | 0.069970582 | 2.69E-01 | 5.53E-01 | 1.00E+00 |
| ENSG00000261736.1_AC002551.  | ENSG00000160789.18_LMNA | 0.02329  | -0.136414037 | 0.181818997 | 7.76E-01 | 9.08E-01 | 1.00E+00 |
| ENSG00000239570.1_SETP11     | ENSG00000160789.18_LMNA | 0.03617  | -0.123741961 | 0.194253403 | 6.58E-01 | 8.49E-01 | 1.00E+00 |
| ENSG00000272917.1_RP11-705C  | ENSG00000160789.18_LMNA | 0.02131  | -0.138359859 | 0.179900613 | 7.94E-01 | 9.17E-01 | 1.00E+00 |
| ENSG00000203437.3_RP11-820K  | ENSG00000160789.18_LMNA | -0.06681 | -0.223627927 | 0.093388313 | 4.14E-01 | 6.87E-01 | 1.00E+00 |
| ENSG00000249170.1_RP11-1J11  | ENSG00000160789.18_LMNA | 0.06965  | -0.090555226 | 0.226340555 | 3.94E-01 | 6.71E-01 | 1.00E+00 |
| ENSG00000233754.1_AP001628.  | ENSG00000160789.18_LMNA | -0.20847 | -0.355858697 | -0.05095888 | 9.96E-03 | 6.54E-02 | 1.00E+00 |
| ENSG00000233533.1_MKNK2P1    | ENSG00000160789.18_LMNA | 0.02028  | -0.139374426 | 0.178899392 | 8.04E-01 | 9.22E-01 | 1.00E+00 |
| ENSG00000159961.1_OR3A3      | ENSG00000160789.18_LMNA | -0.1668  | -0.317566265 | -0.0078049  | 4.00E-02 | 1.73E-01 | 1.00E+00 |
| ENSG00000234763.1_RP11-203H  | ENSG00000160789.18_LMNA | -0.02752 | -0.185908027 | 0.132258311 | 7.36E-01 | 8.89E-01 | 1.00E+00 |
| ENSG00000251286.2_RP11-588F  | ENSG00000160789.18_LMNA | -0.04761 | -0.205250401 | 0.11244767  | 5.60E-01 | 7.93E-01 | 1.00E+00 |
| ENSG00000205452.4_RP11-812E  | ENSG00000160789.18_LMNA | -0.08422 | -0.240204012 | 0.075995597 | 3.02E-01 | 5.89E-01 | 1.00E+00 |
| ENSG00000231212.1_RP11-111F  | ENSG00000160789.18_LMNA | -0.1598  | -0.311086369 | -0.00061471 | 4.92E-02 | 1.99E-01 | 1.00E+00 |
| ENSG00000165202.3_OR1Q1      | ENSG00000160789.18_LMNA | -0.03981 | -0.197756991 | 0.120152578 | 6.26E-01 | 8.32E-01 | 1.00E+00 |
| ENSG00000234655.3_OR7E155P   | ENSG00000160789.18_LMNA | -0.21956 | -0.365967068 | -0.06254376 | 6.57E-03 | 4.81E-02 | 1.00E+00 |
| ENSG00000225502.2_GAPDHP1    | ENSG00000160789.18_LMNA | -0.022   | -0.180564796 | 0.137686455 | 7.88E-01 | 9.14E-01 | 1.00E+00 |
| ENSG00000245311.2_ARNTL2-A   | ENSG00000160789.18_LMNA | 0.01018  | -0.149262973 | 0.169106272 | 9.01E-01 | 9.62E-01 | 1.00E+00 |
| ENSG00000249633.1_OR52V1P    | ENSG00000160789.18_LMNA | 0.19702  | 0.039041503  | 0.345385228 | 1.50E-02 | 8.78E-02 | 1.00E+00 |

|                             |                         |          |              |             |          |          |          |
|-----------------------------|-------------------------|----------|--------------|-------------|----------|----------|----------|
| ENSG00000111245.13_MYL2     | ENSG00000160789.18_LMNA | -0.1226  | -0.276406989 | 0.037328022 | 1.32E-01 | 3.69E-01 | 1.00E+00 |
| ENSG00000185594.4_SPATA8    | ENSG00000160789.18_LMNA | -0.09513 | -0.250539375 | 0.065052786 | 2.44E-01 | 5.23E-01 | 1.00E+00 |
| ENSG00000203531.3_AC016712. | ENSG00000160789.18_LMNA | -0.06746 | -0.224249199 | 0.092739905 | 4.09E-01 | 6.83E-01 | 1.00E+00 |
| ENSG00000242609.1_RP11-398A | ENSG00000160789.18_LMNA | 0.13803  | -0.021651412 | 0.290835036 | 8.99E-02 | 2.92E-01 | 1.00E+00 |
| ENSG00000235470.4_NEURL1-A  | ENSG00000160789.18_LMNA | -0.10834 | -0.263002609 | 0.051755309 | 1.84E-01 | 4.49E-01 | 1.00E+00 |
| ENSG00000181109.3_OR52P1P   | ENSG00000160789.18_LMNA | 0.0663   | -0.093891219 | 0.223145891 | 4.17E-01 | 6.89E-01 | 1.00E+00 |
| ENSG00000183318.10_SPDYE4   | ENSG00000160789.18_LMNA | 0.01995  | -0.139695732 | 0.178582175 | 8.07E-01 | 9.23E-01 | 1.00E+00 |
| ENSG00000203858.3_HSD3BP2   | ENSG00000160789.18_LMNA | -0.0902  | -0.245874059 | 0.070001716 | 2.69E-01 | 5.53E-01 | 1.00E+00 |
| ENSG00000131737.5_KRT34     | ENSG00000160789.18_LMNA | 0.02225  | -0.137433363 | 0.180814347 | 7.86E-01 | 9.13E-01 | 1.00E+00 |
| ENSG00000230999.1_MTND5P8   | ENSG00000160789.18_LMNA | -0.11312 | -0.267506027 | 0.04692284  | 1.65E-01 | 4.22E-01 | 1.00E+00 |
| ENSG00000203363.2_AC012454. | ENSG00000160789.18_LMNA | -0.09557 | -0.250950908 | 0.064615488 | 2.42E-01 | 5.21E-01 | 1.00E+00 |
| ENSG00000248152.1_RP11-650J | ENSG00000160789.18_LMNA | -0.01281 | -0.171658399 | 0.146692099 | 8.76E-01 | 9.52E-01 | 1.00E+00 |
| ENSG00000230223.5_ATXN8OS   | ENSG00000160789.18_LMNA | -0.21651 | -0.363193487 | -0.05935689 | 7.38E-03 | 5.23E-02 | 1.00E+00 |
| ENSG00000260769.1_RP11-491F | ENSG00000160789.18_LMNA | -0.17893 | -0.328763636 | -0.02030563 | 2.74E-02 | 1.35E-01 | 1.00E+00 |
| ENSG00000270911.1_RP11-272L | ENSG00000160789.18_LMNA | 0.07787  | -0.08234916  | 0.234170067 | 3.40E-01 | 6.25E-01 | 1.00E+00 |
| ENSG00000229031.1_MTCO1P25  | ENSG00000160789.18_LMNA | -0.17303 | -0.323324367 | -0.01422117 | 3.30E-02 | 1.52E-01 | 1.00E+00 |
| ENSG00000233017.2_RP5-908M1 | ENSG00000160789.18_LMNA | -0.13204 | -0.285244572 | 0.027743949 | 1.05E-01 | 3.21E-01 | 1.00E+00 |
| ENSG00000251665.1_RP11-700H | ENSG00000160789.18_LMNA | -0.01194 | -0.17081377  | 0.147543409 | 8.84E-01 | 9.55E-01 | 1.00E+00 |
| ENSG00000143536.7_CRNN      | ENSG00000160789.18_LMNA | 0.07529  | -0.084930912 | 0.231711203 | 3.57E-01 | 6.40E-01 | 1.00E+00 |
| ENSG00000263718.2_RP11-285E | ENSG00000160789.18_LMNA | 0.36906  | 0.222955331  | 0.498942321 | 2.89E-06 | 1.07E-04 | 1.48E-01 |
| ENSG00000164485.13_IL22RA2  | ENSG00000160789.18_LMNA | 0.08867  | -0.071542171 | 0.244418892 | 2.77E-01 | 5.62E-01 | 1.00E+00 |
| ENSG00000260390.1_RP11-575I | ENSG00000160789.18_LMNA | 0.06847  | -0.09173081  | 0.225215551 | 4.02E-01 | 6.78E-01 | 1.00E+00 |
| ENSG00000230782.1_RP11-508N | ENSG00000160789.18_LMNA | -0.13909 | -0.291830456 | 0.020564155 | 8.75E-02 | 2.88E-01 | 1.00E+00 |
| ENSG00000225796.2_MTND4P23  | ENSG00000160789.18_LMNA | 0.08107  | -0.079156649 | 0.237205029 | 3.21E-01 | 6.07E-01 | 1.00E+00 |
| ENSG00000227236.2_RP11-365D | ENSG00000160789.18_LMNA | 0.03763  | -0.122306013 | 0.195656003 | 6.45E-01 | 8.42E-01 | 1.00E+00 |
| ENSG00000235740.1_PHACTR2-  | ENSG00000160789.18_LMNA | -0.15445 | -0.306125954 | 0.004867826 | 5.74E-02 | 2.19E-01 | 1.00E+00 |
| ENSG00000186367.6_KIAA1024L | ENSG00000160789.18_LMNA | -0.07942 | -0.23564377  | 0.080799766 | 3.31E-01 | 6.17E-01 | 1.00E+00 |
| ENSG00000228759.1_FAF2P1    | ENSG00000160789.18_LMNA | 0.02872  | -0.131079503 | 0.187065913 | 7.25E-01 | 8.84E-01 | 1.00E+00 |
| ENSG00000281202.1_LINC01097 | ENSG00000160789.18_LMNA | 0.02373  | -0.135984558 | 0.182242094 | 7.72E-01 | 9.06E-01 | 1.00E+00 |
| ENSG00000240487.1_RP11-553L | ENSG00000160789.18_LMNA | 0.09993  | -0.060229478 | 0.255072206 | 2.21E-01 | 4.96E-01 | 1.00E+00 |
| ENSG00000196620.7_UGT2B15   | ENSG00000160789.18_LMNA | -0.05759 | -0.2148242   | 0.102547755 | 4.81E-01 | 7.39E-01 | 1.00E+00 |
| ENSG00000258724.1_CTD-2135J | ENSG00000160789.18_LMNA | -0.07575 | -0.232146335 | 0.084474343 | 3.54E-01 | 6.37E-01 | 1.00E+00 |
| ENSG00000250733.5_C8orf17   | ENSG00000160789.18_LMNA | 0.06426  | -0.095921467 | 0.221198314 | 4.32E-01 | 7.01E-01 | 1.00E+00 |

|                              |                         |          |              |             |          |          |          |
|------------------------------|-------------------------|----------|--------------|-------------|----------|----------|----------|
| ENSG00000230219.3_FAM92A1P   | ENSG00000160789.18_LMNA | -0.00408 | -0.163179251 | 0.155216975 | 9.60E-01 | 9.84E-01 | 1.00E+00 |
| ENSG00000258573.4_RP11-14J7  | ENSG00000160789.18_LMNA | 0.11643  | -0.04357776  | 0.27061531  | 1.53E-01 | 4.03E-01 | 1.00E+00 |
| ENSG00000105141.5_CASP14     | ENSG00000160789.18_LMNA | 0.03789  | -0.122049138 | 0.195906775 | 6.43E-01 | 8.41E-01 | 1.00E+00 |
| ENSG00000219926.9_RP11-394A  | ENSG00000160789.18_LMNA | -0.09117 | -0.246788264 | 0.069033157 | 2.64E-01 | 5.47E-01 | 1.00E+00 |
| ENSG00000167117.7_LINC00483  | ENSG00000160789.18_LMNA | -0.04978 | -0.207333011 | 0.110299474 | 5.43E-01 | 7.81E-01 | 1.00E+00 |
| ENSG00000171487.13_NLRP5     | ENSG00000160789.18_LMNA | -0.0111  | -0.170004858 | 0.148358278 | 8.92E-01 | 9.58E-01 | 1.00E+00 |
| ENSG00000279359.1_RP11-36D1  | ENSG00000160789.18_LMNA | -0.10603 | -0.260826556 | 0.054085089 | 1.94E-01 | 4.62E-01 | 1.00E+00 |
| ENSG00000279249.1_RP11-491F  | ENSG00000160789.18_LMNA | -0.10461 | -0.259490408 | 0.055513932 | 2.00E-01 | 4.70E-01 | 1.00E+00 |
| ENSG00000274426.1_           | ENSG00000160789.18_LMNA | -0.06669 | -0.22351448  | 0.093506686 | 4.14E-01 | 6.87E-01 | 1.00E+00 |
| ENSG00000266676.1_MIR4297    | ENSG00000160789.18_LMNA | -0.01237 | -0.171230525 | 0.147123416 | 8.80E-01 | 9.53E-01 | 1.00E+00 |
| ENSG00000263681.1_MIR3197    | ENSG00000160789.18_LMNA | 0.11021  | -0.04986259  | 0.264768085 | 1.76E-01 | 4.38E-01 | 1.00E+00 |
| ENSG00000199072.2_MIRLET7F1  | ENSG00000160789.18_LMNA | 0.03522  | -0.124681579 | 0.193334903 | 6.67E-01 | 8.53E-01 | 1.00E+00 |
| ENSG00000206688.1_SNORD116   | ENSG00000160789.18_LMNA | -0.12404 | -0.2777516   | 0.035873548 | 1.28E-01 | 3.62E-01 | 1.00E+00 |
| ENSG00000235301.1_HLA-Z      | ENSG00000160789.18_LMNA | -0.10649 | -0.261265673 | 0.053615226 | 1.92E-01 | 4.59E-01 | 1.00E+00 |
| ENSG00000238835.1_SCARNA18   | ENSG00000160789.18_LMNA | -0.108   | -0.262683907 | 0.05209674  | 1.85E-01 | 4.51E-01 | 1.00E+00 |
| ENSG00000216168.1_           | ENSG00000160789.18_LMNA | -0.05226 | -0.209718264 | 0.107835452 | 5.23E-01 | 7.68E-01 | 1.00E+00 |
| ENSG00000270378.1_RP11-108K  | ENSG00000160789.18_LMNA | -0.0441  | -0.201883561 | 0.115914271 | 5.90E-01 | 8.09E-01 | 1.00E+00 |
| ENSG00000266044.1_           | ENSG00000160789.18_LMNA | -0.02433 | -0.182825629 | 0.135392024 | 7.66E-01 | 9.03E-01 | 1.00E+00 |
| ENSG00000207642.1_MIR571     | ENSG00000160789.18_LMNA | -0.03583 | -0.193926267 | 0.124076683 | 6.61E-01 | 8.50E-01 | 1.00E+00 |
| ENSG00000252097.1_RNU6-346F  | ENSG00000160789.18_LMNA | -0.08999 | -0.245674598 | 0.070212956 | 2.70E-01 | 5.55E-01 | 1.00E+00 |
| ENSG00000200135.1_Y_RNA      | ENSG00000160789.18_LMNA | -0.06968 | -0.226365656 | 0.090528986 | 3.94E-01 | 6.71E-01 | 1.00E+00 |
| ENSG00000200537.1_RNY4P6     | ENSG00000160789.18_LMNA | -0.00875 | -0.167713021 | 0.150664645 | 9.15E-01 | 9.68E-01 | 1.00E+00 |
| ENSG00000281112.1_AL355480.2 | ENSG00000160789.18_LMNA | -0.0081  | -0.167087608 | 0.151293422 | 9.21E-01 | 9.70E-01 | 1.00E+00 |
| ENSG00000252060.1_RNA5SP46   | ENSG00000160789.18_LMNA | 0.0178   | -0.141801793 | 0.176501276 | 8.28E-01 | 9.33E-01 | 1.00E+00 |
| ENSG00000281070.1_           | ENSG00000160789.18_LMNA | -0.0582  | -0.215401042 | 0.101949248 | 4.76E-01 | 7.35E-01 | 1.00E+00 |
| ENSG00000278203.1_           | ENSG00000160789.18_LMNA | 0.08708  | -0.073138815 | 0.242909144 | 2.86E-01 | 5.72E-01 | 1.00E+00 |
| ENSG00000280589.1_           | ENSG00000160789.18_LMNA | 0.03813  | -0.121808321 | 0.196141833 | 6.41E-01 | 8.40E-01 | 1.00E+00 |
| ENSG00000223300.1_Y_RNA      | ENSG00000160789.18_LMNA | -0.05504 | -0.212381384 | 0.10507977  | 5.01E-01 | 7.53E-01 | 1.00E+00 |
| ENSG00000212072.1_           | ENSG00000160789.18_LMNA | -0.12947 | -0.282837459 | 0.0303601   | 1.12E-01 | 3.34E-01 | 1.00E+00 |
| ENSG00000207180.1_RNU6-411F  | ENSG00000160789.18_LMNA | 0.12238  | -0.03755609  | 0.276196037 | 1.33E-01 | 3.70E-01 | 1.00E+00 |
| ENSG00000200033.1_RNU6-403F  | ENSG00000160789.18_LMNA | -0.08301 | -0.239054122 | 0.077208381 | 3.09E-01 | 5.96E-01 | 1.00E+00 |
| ENSG00000016082.13_ISL1      | ENSG00000160789.18_LMNA | -0.09751 | -0.25278199  | 0.062668299 | 2.32E-01 | 5.10E-01 | 1.00E+00 |
| ENSG00000202019.1_Y_RNA      | ENSG00000160789.18_LMNA | -0.02473 | -0.183205636 | 0.135006034 | 7.62E-01 | 9.01E-01 | 1.00E+00 |

|                             |                         |          |              |             |          |          |          |
|-----------------------------|-------------------------|----------|--------------|-------------|----------|----------|----------|
| ENSG00000266825.1_          | ENSG00000160789.18_LMNA | 0.13918  | -0.020479064 | 0.29190833  | 8.73E-02 | 2.87E-01 | 1.00E+00 |
| ENSG00000204982.3_PRSS3P4   | ENSG00000160789.18_LMNA | -0.11849 | -0.272544843 | 0.04149835  | 1.46E-01 | 3.91E-01 | 1.00E+00 |
| ENSG00000251774.1_RNU6-377F | ENSG00000160789.18_LMNA | -0.03151 | -0.189757827 | 0.128335467 | 7.00E-01 | 8.72E-01 | 1.00E+00 |
| ENSG00000206941.1_SNORD15A  | ENSG00000160789.18_LMNA | 0.01159  | -0.147886353 | 0.170473385 | 8.87E-01 | 9.56E-01 | 1.00E+00 |
| ENSG00000255965.1_RP11-4081 | ENSG00000160789.18_LMNA | -0.05886 | -0.216033054 | 0.101293237 | 4.71E-01 | 7.31E-01 | 1.00E+00 |
| ENSG00000274420.1_uc_338    | ENSG00000160789.18_LMNA | -0.06801 | -0.224774157 | 0.092191808 | 4.05E-01 | 6.81E-01 | 1.00E+00 |
| ENSG00000275285.1_RP4-564F2 | ENSG00000160789.18_LMNA | 0.03831  | -0.121637015 | 0.196309019 | 6.39E-01 | 8.39E-01 | 1.00E+00 |
| ENSG00000275693.1_FAS-AS1   | ENSG00000160789.18_LMNA | -0.02537 | -0.183832072 | 0.134369526 | 7.56E-01 | 8.98E-01 | 1.00E+00 |
| ENSG00000227758.1_HCG9P5    | ENSG00000160789.18_LMNA | 0.05518  | -0.10494016  | 0.21251618  | 5.00E-01 | 7.52E-01 | 1.00E+00 |
| ENSG00000237423.1_LINC01522 | ENSG00000160789.18_LMNA | -0.16512 | -0.316009073 | -0.00607409 | 4.21E-02 | 1.79E-01 | 1.00E+00 |
| ENSG00000264322.2_RN7SL448F | ENSG00000160789.18_LMNA | 0.03852  | -0.121423287 | 0.196517583 | 6.38E-01 | 8.38E-01 | 1.00E+00 |
| ENSG00000211647.1_IGLV5-48  | ENSG00000160789.18_LMNA | -0.16212 | -0.313234128 | -0.00299435 | 4.60E-02 | 1.90E-01 | 1.00E+00 |
| ENSG00000274373.1_RP13-714J | ENSG00000160789.18_LMNA | 0.11688  | -0.043122343 | 0.271038118 | 1.52E-01 | 4.00E-01 | 1.00E+00 |
| ENSG00000256650.1_RERG-IT1  | ENSG00000160789.18_LMNA | -0.11145 | -0.265931896 | 0.048613663 | 1.72E-01 | 4.31E-01 | 1.00E+00 |
| ENSG00000257458.1_RP11-473C | ENSG00000160789.18_LMNA | -0.11821 | -0.272283371 | 0.041780292 | 1.47E-01 | 3.93E-01 | 1.00E+00 |
| ENSG00000270285.1_RP11-1029 | ENSG00000160789.18_LMNA | 0.04205  | -0.11794484  | 0.199907931 | 6.07E-01 | 8.20E-01 | 1.00E+00 |
| ENSG00000220370.1_RP3-399J4 | ENSG00000160789.18_LMNA | -0.00559 | -0.164639473 | 0.153752251 | 9.46E-01 | 9.78E-01 | 1.00E+00 |
| ENSG00000266627.2_RN7SL202F | ENSG00000160789.18_LMNA | 0.00714  | -0.152238417 | 0.166147187 | 9.30E-01 | 9.73E-01 | 1.00E+00 |
| ENSG00000225458.1_RP5-1121H | ENSG00000160789.18_LMNA | -0.36473 | -0.495179319 | -0.21820068 | 3.84E-06 | 1.34E-04 | 1.97E-01 |
| ENSG00000271264.1_MZT1P1    | ENSG00000160789.18_LMNA | -0.13376 | -0.28685286  | 0.025993602 | 1.00E-01 | 3.12E-01 | 1.00E+00 |
| ENSG00000239994.2_RP11-169N | ENSG00000160789.18_LMNA | 0.02192  | -0.13776454  | 0.180487795 | 7.89E-01 | 9.14E-01 | 1.00E+00 |
| ENSG00000229642.1_AC027119  | ENSG00000160789.18_LMNA | -0.04723 | -0.204886596 | 0.112822628 | 5.63E-01 | 7.95E-01 | 1.00E+00 |
| ENSG00000253188.1_TRBV6-7   | ENSG00000160789.18_LMNA | -0.15592 | -0.307483451 | 0.003369298 | 5.51E-02 | 2.14E-01 | 1.00E+00 |
| ENSG00000224664.2_RPL36AP5  | ENSG00000160789.18_LMNA | 0.11862  | -0.041365598 | 0.272667941 | 1.46E-01 | 3.91E-01 | 1.00E+00 |
| ENSG00000251635.1_RP11-213G | ENSG00000160789.18_LMNA | -0.09349 | -0.248981046 | 0.066707577 | 2.52E-01 | 5.33E-01 | 1.00E+00 |
| ENSG00000211812.1_TRAV26-2  | ENSG00000160789.18_LMNA | 0.0322   | -0.12765436  | 0.190425257 | 6.94E-01 | 8.68E-01 | 1.00E+00 |
| ENSG00000251085.1_RP11-893F | ENSG00000160789.18_LMNA | 0.1853   | 0.026889519  | 0.334626415 | 2.23E-02 | 1.17E-01 | 1.00E+00 |
| ENSG00000250197.1_HMG1N1P15 | ENSG00000160789.18_LMNA | -0.0734  | -0.229912163 | 0.086817174 | 3.69E-01 | 6.50E-01 | 1.00E+00 |
| ENSG00000264910.2_RN7SL525F | ENSG00000160789.18_LMNA | -0.02598 | -0.184417347 | 0.133774602 | 7.51E-01 | 8.96E-01 | 1.00E+00 |
| ENSG00000259474.1_RP11-650L | ENSG00000160789.18_LMNA | -0.04052 | -0.198444565 | 0.11944719  | 6.20E-01 | 8.28E-01 | 1.00E+00 |
| ENSG00000255569.1_TRAV1-1   | ENSG00000160789.18_LMNA | 0.03842  | -0.121519424 | 0.196423773 | 6.38E-01 | 8.38E-01 | 1.00E+00 |
| ENSG00000259346.2_RP11-349G | ENSG00000160789.18_LMNA | 0.09017  | -0.070031646 | 0.245845799 | 2.69E-01 | 5.53E-01 | 1.00E+00 |
| ENSG00000259173.2_RP11-30K9 | ENSG00000160789.18_LMNA | -0.00419 | -0.163279315 | 0.155116647 | 9.59E-01 | 9.84E-01 | 1.00E+00 |

|                              |                         |          |              |             |          |          |          |
|------------------------------|-------------------------|----------|--------------|-------------|----------|----------|----------|
| ENSG00000235085.3_AC091153.4 | ENSG00000160789.18_LMNA | 0.01005  | -0.149393167 | 0.168976915 | 9.02E-01 | 9.62E-01 | 1.00E+00 |
| ENSG00000233357.2_RPL30P15   | ENSG00000160789.18_LMNA | 0.09188  | -0.068323278 | 0.247457951 | 2.60E-01 | 5.43E-01 | 1.00E+00 |
| ENSG00000242795.2_RP11-3K16  | ENSG00000160789.18_LMNA | -0.22106 | -0.367329956 | -0.06411201 | 6.20E-03 | 4.61E-02 | 1.00E+00 |
| ENSG00000235357.1_LINC01621  | ENSG00000160789.18_LMNA | -0.16255 | -0.31363437  | -0.00343819 | 4.54E-02 | 1.89E-01 | 1.00E+00 |
| ENSG00000255007.1_CTD-2589M  | ENSG00000160789.18_LMNA | -0.10778 | -0.262473358 | 0.052322265 | 1.86E-01 | 4.52E-01 | 1.00E+00 |
| ENSG00000225226.1_AC007250.4 | ENSG00000160789.18_LMNA | -0.44078 | -0.560638825 | -0.30282904 | 1.32E-08 | 1.37E-06 | 6.78E-04 |
| ENSG00000265265.1_RP11-822E  | ENSG00000160789.18_LMNA | -0.09199 | -0.247564861 | 0.068209921 | 2.60E-01 | 5.43E-01 | 1.00E+00 |
| ENSG00000257925.1_RP11-493L  | ENSG00000160789.18_LMNA | -0.13315 | -0.286277586 | 0.02661991  | 1.02E-01 | 3.15E-01 | 1.00E+00 |
| ENSG00000225270.1_CICP12     | ENSG00000160789.18_LMNA | -0.13304 | -0.286175831 | 0.026730667 | 1.02E-01 | 3.16E-01 | 1.00E+00 |
| ENSG00000249994.1_CTD-2383L  | ENSG00000160789.18_LMNA | -0.22114 | -0.367410228 | -0.06420442 | 6.18E-03 | 4.60E-02 | 1.00E+00 |
| ENSG00000230249.1_RP13-824C  | ENSG00000160789.18_LMNA | 0.0012   | -0.158030529 | 0.160370428 | 9.88E-01 | 9.96E-01 | 1.00E+00 |
| ENSG00000250252.1_RP11-342A  | ENSG00000160789.18_LMNA | -0.00714 | -0.166152556 | 0.152233024 | 9.30E-01 | 9.73E-01 | 1.00E+00 |
| ENSG00000241169.1_RP4-752L6  | ENSG00000160789.18_LMNA | 0.03444  | -0.12544528  | 0.192587954 | 6.74E-01 | 8.57E-01 | 1.00E+00 |
| ENSG00000231378.1_NDUFAF4P   | ENSG00000160789.18_LMNA | -0.07276 | -0.229307344 | 0.087450807 | 3.73E-01 | 6.53E-01 | 1.00E+00 |
| ENSG00000224881.1_AC068279.3 | ENSG00000160789.18_LMNA | -0.0156  | -0.174364717 | 0.143961193 | 8.49E-01 | 9.41E-01 | 1.00E+00 |
| ENSG00000244468.1_RP11-206M  | ENSG00000160789.18_LMNA | -0.04007 | -0.198003587 | 0.11989963  | 6.24E-01 | 8.31E-01 | 1.00E+00 |
| ENSG00000232778.1_RPL23AP5   | ENSG00000160789.18_LMNA | 0.09505  | -0.065134271 | 0.250462678 | 2.44E-01 | 5.24E-01 | 1.00E+00 |
| ENSG00000236509.2_RPL21P13   | ENSG00000160789.18_LMNA | -0.0592  | -0.216358326 | 0.100955506 | 4.69E-01 | 7.30E-01 | 1.00E+00 |
| ENSG00000214342.2_ATP5F1P2   | ENSG00000160789.18_LMNA | -0.08308 | -0.239122675 | 0.077136104 | 3.09E-01 | 5.95E-01 | 1.00E+00 |
| ENSG00000237249.1_RP1-102G2  | ENSG00000160789.18_LMNA | 0.07652  | -0.083699561 | 0.232884448 | 3.49E-01 | 6.33E-01 | 1.00E+00 |
| ENSG00000235820.1_RP5-1022P  | ENSG00000160789.18_LMNA | -0.06189 | -0.21893612  | 0.098276381 | 4.49E-01 | 7.15E-01 | 1.00E+00 |
| ENSG00000249253.1_RP11-77P1  | ENSG00000160789.18_LMNA | 0.01148  | -0.147988206 | 0.170372277 | 8.88E-01 | 9.57E-01 | 1.00E+00 |
| ENSG00000224638.1_AC106900.1 | ENSG00000160789.18_LMNA | 0.10423  | -0.055899972 | 0.259129205 | 2.01E-01 | 4.72E-01 | 1.00E+00 |
| ENSG00000267555.1_CTD-2085J  | ENSG00000160789.18_LMNA | 0.09457  | -0.065616944 | 0.250008286 | 2.46E-01 | 5.27E-01 | 1.00E+00 |
| ENSG00000259067.1_CTD-3051D  | ENSG00000160789.18_LMNA | 0.22978  | 0.073255523  | 0.375250324 | 4.40E-03 | 3.56E-02 | 1.00E+00 |
| ENSG00000254987.1_RP11-563P  | ENSG00000160789.18_LMNA | 0.16737  | 0.008394511  | 0.318096348 | 3.93E-02 | 1.71E-01 | 1.00E+00 |
| ENSG00000256797.1_KLRF2      | ENSG00000160789.18_LMNA | 0.16775  | 0.008779586  | 0.318442443 | 3.89E-02 | 1.70E-01 | 1.00E+00 |
| ENSG00000233448.2_PMS2P9     | ENSG00000160789.18_LMNA | -0.01734 | -0.176054819 | 0.142253273 | 8.32E-01 | 9.35E-01 | 1.00E+00 |
| ENSG00000254269.4_           | ENSG00000160789.18_LMNA | -0.17681 | -0.326815688 | -0.01812399 | 2.93E-02 | 1.41E-01 | 1.00E+00 |
| ENSG00000197692.5_CBX3P7     | ENSG00000160789.18_LMNA | -0.22432 | -0.370296761 | -0.06753102 | 5.46E-03 | 4.19E-02 | 1.00E+00 |
| ENSG00000259106.1_RP11-242P  | ENSG00000160789.18_LMNA | 0.08085  | -0.079371114 | 0.237001341 | 3.22E-01 | 6.09E-01 | 1.00E+00 |
| ENSG00000241048.1_RP11-167H  | ENSG00000160789.18_LMNA | -0.04167 | -0.199544511 | 0.118318078 | 6.10E-01 | 8.22E-01 | 1.00E+00 |
| ENSG00000261872.1_RP5-867C2  | ENSG00000160789.18_LMNA | -0.05585 | -0.213151727 | 0.104281742 | 4.94E-01 | 7.49E-01 | 1.00E+00 |



|                              |                         |          |              |             |          |          |          |
|------------------------------|-------------------------|----------|--------------|-------------|----------|----------|----------|
| ENSG00000249332.1_RP1-251I12 | ENSG00000160789.18_LMNA | -0.20379 | -0.351582139 | -0.04608223 | 1.18E-02 | 7.38E-02 | 1.00E+00 |
| ENSG00000230739.1_RP11-331H  | ENSG00000160789.18_LMNA | -0.00699 | -0.166007021 | 0.152379215 | 9.32E-01 | 9.73E-01 | 1.00E+00 |
| ENSG00000255580.1_AP000462.1 | ENSG00000160789.18_LMNA | -0.10599 | -0.260787658 | 0.054126704 | 1.94E-01 | 4.62E-01 | 1.00E+00 |
| ENSG00000256614.1_AK6P1      | ENSG00000160789.18_LMNA | 0.0383   | -0.121637732 | 0.19630832  | 6.39E-01 | 8.39E-01 | 1.00E+00 |
| ENSG00000250137.1_RP11-380P  | ENSG00000160789.18_LMNA | 0.02192  | -0.137758974 | 0.180493284 | 7.89E-01 | 9.14E-01 | 1.00E+00 |
| ENSG00000237961.4_RP11-1281I | ENSG00000160789.18_LMNA | -0.13469 | -0.287725037 | 0.025043583 | 9.80E-02 | 3.08E-01 | 1.00E+00 |
| ENSG00000261346.1_RP11-297C  | ENSG00000160789.18_LMNA | -0.2016  | -0.349577575 | -0.04380138 | 1.28E-02 | 7.81E-02 | 1.00E+00 |
| ENSG00000257438.1_RP11-114F  | ENSG00000160789.18_LMNA | -0.10621 | -0.26100214  | 0.053897228 | 1.93E-01 | 4.61E-01 | 1.00E+00 |
| ENSG00000230001.1_RP11-70J1  | ENSG00000160789.18_LMNA | 0.02444  | -0.135287396 | 0.182928644 | 7.65E-01 | 9.02E-01 | 1.00E+00 |
| ENSG00000171403.8_KRT9       | ENSG00000160789.18_LMNA | -0.06581 | -0.222674306 | 0.094383063 | 4.21E-01 | 6.92E-01 | 1.00E+00 |
| ENSG00000186442.7_KRT3       | ENSG00000160789.18_LMNA | -0.0697  | -0.226386542 | 0.090507152 | 3.94E-01 | 6.71E-01 | 1.00E+00 |
| ENSG00000254710.1_CTD-2216M  | ENSG00000160789.18_LMNA | 0.017    | -0.14258433  | 0.175727363 | 8.35E-01 | 9.36E-01 | 1.00E+00 |
| ENSG00000254376.2_SOX5P1     | ENSG00000160789.18_LMNA | -0.12614 | -0.279721116 | 0.03374071  | 1.22E-01 | 3.51E-01 | 1.00E+00 |
| ENSG00000250697.1_CTD-2066L  | ENSG00000160789.18_LMNA | 0.06326  | -0.096919414 | 0.220240075 | 4.39E-01 | 7.07E-01 | 1.00E+00 |
| ENSG00000268955.2_RP11-556O  | ENSG00000160789.18_LMNA | 0.01497  | -0.144574053 | 0.173757793 | 8.55E-01 | 9.43E-01 | 1.00E+00 |
| ENSG00000271360.1_RP11-138I1 | ENSG00000160789.18_LMNA | 0.02959  | -0.130220277 | 0.187909332 | 7.17E-01 | 8.80E-01 | 1.00E+00 |
| ENSG00000228650.2_AC008940.1 | ENSG00000160789.18_LMNA | -0.16225 | -0.313359419 | -0.00313327 | 4.58E-02 | 1.90E-01 | 1.00E+00 |
| ENSG00000269826.1_RP11-158I3 | ENSG00000160789.18_LMNA | 0.03163  | -0.128212805 | 0.189878047 | 6.99E-01 | 8.71E-01 | 1.00E+00 |
| ENSG00000230576.1_OR6R1P     | ENSG00000160789.18_LMNA | -0.04992 | -0.207468569 | 0.110159544 | 5.41E-01 | 7.81E-01 | 1.00E+00 |
| ENSG00000251552.1_COQ10BP2   | ENSG00000160789.18_LMNA | 0.07979  | -0.080433332 | 0.23599209  | 3.28E-01 | 6.15E-01 | 1.00E+00 |
| ENSG00000249209.2_AP000304.1 | ENSG00000160789.18_LMNA | 0.02353  | -0.136176051 | 0.18205346  | 7.73E-01 | 9.07E-01 | 1.00E+00 |
| ENSG00000237876.1_AKR1B1P4   | ENSG00000160789.18_LMNA | -0.07992 | -0.23611267  | 0.080306462 | 3.28E-01 | 6.14E-01 | 1.00E+00 |
| ENSG00000258083.1_OR9A4      | ENSG00000160789.18_LMNA | 0.21421  | 0.056951779  | 0.361096714 | 8.05E-03 | 5.59E-02 | 1.00E+00 |
| ENSG00000197110.7_IFNL3      | ENSG00000160789.18_LMNA | 0.0621   | -0.098067745 | 0.219136679 | 4.47E-01 | 7.13E-01 | 1.00E+00 |
| ENSG00000275756.1_RP11-100G  | ENSG00000160789.18_LMNA | 0.13005  | -0.029766489 | 0.283383985 | 1.10E-01 | 3.31E-01 | 1.00E+00 |
| ENSG00000249856.1_CTD-2503C  | ENSG00000160789.18_LMNA | 0.07105  | -0.089161864 | 0.227672872 | 3.84E-01 | 6.63E-01 | 1.00E+00 |
| ENSG00000266079.3_SNORA59E   | ENSG00000160789.18_LMNA | -0.06408 | -0.221028225 | 0.096098652 | 4.33E-01 | 7.02E-01 | 1.00E+00 |
| ENSG00000183822.3_CTA-833B7  | ENSG00000160789.18_LMNA | 0.01318  | -0.14632802  | 0.172019477 | 8.72E-01 | 9.50E-01 | 1.00E+00 |
| ENSG00000277661.3_XXbac-BPC  | ENSG00000160789.18_LMNA | -0.12243 | -0.276244271 | 0.037503945 | 1.33E-01 | 3.70E-01 | 1.00E+00 |
| ENSG00000122852.13_SFTPA1    | ENSG00000160789.18_LMNA | -0.05452 | -0.211879326 | 0.105599651 | 5.05E-01 | 7.56E-01 | 1.00E+00 |
| ENSG00000253292.1_MIOXP1     | ENSG00000160789.18_LMNA | 0.13669  | -0.02300671  | 0.289593268 | 9.31E-02 | 2.98E-01 | 1.00E+00 |
| ENSG00000196403.4_OR10D1P    | ENSG00000160789.18_LMNA | 0.10039  | -0.0597662   | 0.255506856 | 2.18E-01 | 4.93E-01 | 1.00E+00 |
| ENSG00000224656.1_RP1-212G6  | ENSG00000160789.18_LMNA | 0.1471   | -0.012390232 | 0.299292348 | 7.05E-02 | 2.51E-01 | 1.00E+00 |

|                              |                         |          |              |             |          |          |          |
|------------------------------|-------------------------|----------|--------------|-------------|----------|----------|----------|
| ENSG00000237099.1_GYG1P2     | ENSG00000160789.18_LMNA | 0.02535  | -0.134395361 | 0.18380665  | 7.57E-01 | 8.99E-01 | 1.00E+00 |
| ENSG00000256070.1_RP11-56H1  | ENSG00000160789.18_LMNA | -0.05715 | -0.21439783  | 0.10298999  | 4.84E-01 | 7.41E-01 | 1.00E+00 |
| ENSG00000260192.1_RP11-756H  | ENSG00000160789.18_LMNA | -0.03656 | -0.194629449 | 0.123357105 | 6.55E-01 | 8.47E-01 | 1.00E+00 |
| ENSG00000232556.1_AC092570.4 | ENSG00000160789.18_LMNA | -0.01754 | -0.176252375 | 0.142053511 | 8.30E-01 | 9.34E-01 | 1.00E+00 |
| ENSG00000279940.1_RP11-243M  | ENSG00000160789.18_LMNA | -0.03186 | -0.190099976 | 0.127986344 | 6.97E-01 | 8.70E-01 | 1.00E+00 |
| ENSG00000231689.1_LINC01090  | ENSG00000160789.18_LMNA | -0.00139 | -0.160558509 | 0.157842292 | 9.86E-01 | 9.95E-01 | 1.00E+00 |
| ENSG00000251536.2_RP11-572C  | ENSG00000160789.18_LMNA | -0.24915 | -0.392767178 | -0.09365945 | 1.97E-03 | 1.93E-02 | 1.00E+00 |
| ENSG00000261055.1_RP11-195M  | ENSG00000160789.18_LMNA | 0.14145  | -0.018161491 | 0.294027776 | 8.22E-02 | 2.77E-01 | 1.00E+00 |
| ENSG00000258692.2_SALL4P7    | ENSG00000160789.18_LMNA | -0.0977  | -0.252962066 | 0.062476675 | 2.31E-01 | 5.09E-01 | 1.00E+00 |
| ENSG00000240521.1_RP11-680B  | ENSG00000160789.18_LMNA | -0.05276 | -0.21019888  | 0.107338492 | 5.19E-01 | 7.65E-01 | 1.00E+00 |
| ENSG00000226065.1_ZBTB45P2   | ENSG00000160789.18_LMNA | 0.0206   | -0.139053428 | 0.179216239 | 8.01E-01 | 9.20E-01 | 1.00E+00 |
| ENSG00000236988.2_RP11-402K  | ENSG00000160789.18_LMNA | -0.06478 | -0.221691642 | 0.095407447 | 4.28E-01 | 6.98E-01 | 1.00E+00 |
| ENSG00000263482.3_ANTXRPL1   | ENSG00000160789.18_LMNA | -0.01785 | -0.176548623 | 0.141753906 | 8.27E-01 | 9.32E-01 | 1.00E+00 |
| ENSG00000249028.2_RP5-951N9  | ENSG00000160789.18_LMNA | -0.04244 | -0.200284865 | 0.117557629 | 6.04E-01 | 8.18E-01 | 1.00E+00 |
| ENSG00000223443.2_USP17L2    | ENSG00000160789.18_LMNA | -0.00706 | -0.166070778 | 0.152315172 | 9.31E-01 | 9.73E-01 | 1.00E+00 |
| ENSG00000254939.1_CTD-2342I5 | ENSG00000160789.18_LMNA | -0.13772 | -0.290547029 | 0.021965852 | 9.07E-02 | 2.93E-01 | 1.00E+00 |
| ENSG00000269547.1 CTC-360G5  | ENSG00000160789.18_LMNA | 0.13184  | -0.027947277 | 0.285057632 | 1.05E-01 | 3.22E-01 | 1.00E+00 |
| ENSG00000231199.2_MTND5P19   | ENSG00000160789.18_LMNA | 0.04778  | -0.11227807  | 0.205414928 | 5.59E-01 | 7.92E-01 | 1.00E+00 |
| ENSG00000255428.1_RP11-794P  | ENSG00000160789.18_LMNA | -0.20772 | -0.355172045 | -0.05017489 | 1.02E-02 | 6.66E-02 | 1.00E+00 |
| ENSG00000137251.14_TINAG     | ENSG00000160789.18_LMNA | -0.00697 | -0.165983437 | 0.152402904 | 9.32E-01 | 9.73E-01 | 1.00E+00 |
| ENSG00000250371.1_RP11-22A3  | ENSG00000160789.18_LMNA | 0.00708  | -0.152287552 | 0.166098274 | 9.31E-01 | 9.73E-01 | 1.00E+00 |
| ENSG00000279598.1_RP11-65L3  | ENSG00000160789.18_LMNA | 0.02973  | -0.130091181 | 0.188036013 | 7.16E-01 | 8.79E-01 | 1.00E+00 |
| ENSG00000251538.4_RP11-166A  | ENSG00000160789.18_LMNA | 0.10746  | -0.052638542 | 0.262178031 | 1.88E-01 | 4.54E-01 | 1.00E+00 |
| ENSG00000249781.5_CTD-2143L  | ENSG00000160789.18_LMNA | -0.0947  | -0.250131761 | 0.065485799 | 2.46E-01 | 5.26E-01 | 1.00E+00 |
| ENSG00000279221.1_RP11-543H  | ENSG00000160789.18_LMNA | -0.12298 | -0.276759847 | 0.036946463 | 1.31E-01 | 3.67E-01 | 1.00E+00 |
| ENSG00000240632.5_SPATA31D   | ENSG00000160789.18_LMNA | 0.0785   | -0.081718712 | 0.234769892 | 3.36E-01 | 6.22E-01 | 1.00E+00 |
| ENSG00000205301.10_MGAT4D    | ENSG00000160789.18_LMNA | -0.05475 | -0.212099482 | 0.105371702 | 5.03E-01 | 7.54E-01 | 1.00E+00 |
| ENSG00000272259.4_RP11-305P  | ENSG00000160789.18_LMNA | -0.14079 | -0.293412589 | 0.018834532 | 8.36E-02 | 2.80E-01 | 1.00E+00 |
| ENSG00000231299.1_SEPT14P2.4 | ENSG00000160789.18_LMNA | -0.02719 | -0.185590441 | 0.132581478 | 7.39E-01 | 8.91E-01 | 1.00E+00 |
| ENSG00000276758.1_AC010518.1 | ENSG00000160789.18_LMNA | 0.16326  | 0.004163045  | 0.314287785 | 4.45E-02 | 1.86E-01 | 1.00E+00 |
| ENSG00000211688.1_TRGJP2     | ENSG00000160789.18_LMNA | -0.20818 | -0.355592026 | -0.05065436 | 1.01E-02 | 6.59E-02 | 1.00E+00 |
| ENSG00000199839.1_RNA5SP15   | ENSG00000160789.18_LMNA | -0.13591 | -0.288859234 | 0.023807313 | 9.50E-02 | 3.02E-01 | 1.00E+00 |
| ENSG00000265527.1_MIR5690    | ENSG00000160789.18_LMNA | 0.0256   | -0.134142778 | 0.184055169 | 7.54E-01 | 8.98E-01 | 1.00E+00 |

|                              |                         |          |              |             |          |          |          |
|------------------------------|-------------------------|----------|--------------|-------------|----------|----------|----------|
| ENSG00000207816.1_MIR124-2   | ENSG00000160789.18_LMNA | -0.15848 | -0.309860648 | 0.000741763 | 5.12E-02 | 2.04E-01 | 1.00E+00 |
| ENSG00000276169.1_MIR6871    | ENSG00000160789.18_LMNA | 0.06565  | -0.094543256 | 0.22252068  | 4.22E-01 | 6.93E-01 | 1.00E+00 |
| ENSG00000207975.1_MIR181B1   | ENSG00000160789.18_LMNA | -0.10526 | -0.26010459  | 0.054857302 | 1.97E-01 | 4.66E-01 | 1.00E+00 |
| ENSG00000278281.1_MIR7856    | ENSG00000160789.18_LMNA | 0.00379  | -0.155508093 | 0.162888862 | 9.63E-01 | 9.85E-01 | 1.00E+00 |
| ENSG00000276236.1_           | ENSG00000160789.18_LMNA | 0.04876  | -0.111300505 | 0.206362901 | 5.51E-01 | 7.87E-01 | 1.00E+00 |
| ENSG00000275519.1_MIR6804    | ENSG00000160789.18_LMNA | -0.02509 | -0.183556689 | 0.134649369 | 7.59E-01 | 8.99E-01 | 1.00E+00 |
| ENSG00000266555.1_MIR3145    | ENSG00000160789.18_LMNA | 0.0337   | -0.126174943 | 0.191873953 | 6.80E-01 | 8.61E-01 | 1.00E+00 |
| ENSG00000264268.1_MIR4767    | ENSG00000160789.18_LMNA | 0.12539  | -0.034498276 | 0.279021862 | 1.24E-01 | 3.55E-01 | 1.00E+00 |
| ENSG00000265339.1_           | ENSG00000160789.18_LMNA | -0.03188 | -0.190113247 | 0.127972801 | 6.97E-01 | 8.70E-01 | 1.00E+00 |
| ENSG00000239035.1_snoU13     | ENSG00000160789.18_LMNA | -0.07767 | -0.233978523 | 0.08255043  | 3.42E-01 | 6.26E-01 | 1.00E+00 |
| ENSG00000252349.1_SNORA31    | ENSG00000160789.18_LMNA | -0.08565 | -0.241554275 | 0.074570287 | 2.94E-01 | 5.80E-01 | 1.00E+00 |
| ENSG00000212027.2_MIR374B    | ENSG00000160789.18_LMNA | 0.05101  | -0.109072886 | 0.20852086  | 5.33E-01 | 7.75E-01 | 1.00E+00 |
| ENSG00000252652.1_Y_RNA      | ENSG00000160789.18_LMNA | 0.10726  | -0.05284068  | 0.261989252 | 1.88E-01 | 4.55E-01 | 1.00E+00 |
| ENSG00000199536.1_RNU6-315F  | ENSG00000160789.18_LMNA | -0.13524 | -0.28823109  | 0.024492105 | 9.67E-02 | 3.05E-01 | 1.00E+00 |
| ENSG00000226592.1_AC004911.  | ENSG00000160789.18_LMNA | -0.08606 | -0.241942482 | 0.074160264 | 2.92E-01 | 5.77E-01 | 1.00E+00 |
| ENSG00000201372.1_RNU6-1251  | ENSG00000160789.18_LMNA | 0.03584  | -0.124067142 | 0.193935594 | 6.61E-01 | 8.50E-01 | 1.00E+00 |
| ENSG00000242076.2_IGKV1-33   | ENSG00000160789.18_LMNA | -0.08751 | -0.24332381  | 0.072700443 | 2.84E-01 | 5.69E-01 | 1.00E+00 |
| ENSG00000212542.1_RNA5SP49   | ENSG00000160789.18_LMNA | 0.08153  | -0.07869409  | 0.237644249 | 3.18E-01 | 6.05E-01 | 1.00E+00 |
| ENSG00000238311.1_snoU13     | ENSG00000160789.18_LMNA | 0.054    | -0.106114662 | 0.211381807 | 5.09E-01 | 7.58E-01 | 1.00E+00 |
| ENSG00000222363.1_RNU4-34P   | ENSG00000160789.18_LMNA | 0.1006   | -0.059555787 | 0.255704224 | 2.18E-01 | 4.92E-01 | 1.00E+00 |
| ENSG00000275930.1_Y_RNA      | ENSG00000160789.18_LMNA | 0.11624  | -0.043765765 | 0.270440731 | 1.54E-01 | 4.04E-01 | 1.00E+00 |
| ENSG00000226374.1_RP13-614K  | ENSG00000160789.18_LMNA | -0.07856 | -0.234828029 | 0.081657593 | 3.36E-01 | 6.22E-01 | 1.00E+00 |
| ENSG00000206600.1_RNU6-25P   | ENSG00000160789.18_LMNA | 0.00485  | -0.154469189 | 0.163924912 | 9.53E-01 | 9.81E-01 | 1.00E+00 |
| ENSG00000202379.1_SNORA70    | ENSG00000160789.18_LMNA | -0.15481 | -0.30646187  | 0.004497142 | 5.69E-02 | 2.18E-01 | 1.00E+00 |
| ENSG00000231361.1_RPS29P23   | ENSG00000160789.18_LMNA | -0.0154  | -0.174174355 | 0.144153443 | 8.51E-01 | 9.41E-01 | 1.00E+00 |
| ENSG00000240927.3_RN7SL209F  | ENSG00000160789.18_LMNA | 0.07263  | -0.087585243 | 0.22917899  | 3.74E-01 | 6.54E-01 | 1.00E+00 |
| ENSG00000250600.1_RPN1L-A:   | ENSG00000160789.18_LMNA | -0.00338 | -0.162491264 | 0.155906599 | 9.67E-01 | 9.87E-01 | 1.00E+00 |
| ENSG00000222259.1_RN7SKP11   | ENSG00000160789.18_LMNA | -0.10664 | -0.261406309 | 0.053464714 | 1.91E-01 | 4.59E-01 | 1.00E+00 |
| ENSG00000219150.2_RP11-569A  | ENSG00000160789.18_LMNA | 0.0144   | -0.145136895 | 0.17320019  | 8.60E-01 | 9.45E-01 | 1.00E+00 |
| ENSG00000234190.1_RP11-433J: | ENSG00000160789.18_LMNA | -0.00538 | -0.164443364 | 0.153949045 | 9.48E-01 | 9.79E-01 | 1.00E+00 |
| ENSG00000249101.1_AC008834.  | ENSG00000160789.18_LMNA | -0.1847  | -0.334080642 | -0.02627549 | 2.27E-02 | 1.18E-01 | 1.00E+00 |
| ENSG00000248322.1_RP4-559A3  | ENSG00000160789.18_LMNA | -0.0128  | -0.171655126 | 0.146695399 | 8.76E-01 | 9.52E-01 | 1.00E+00 |
| ENSG00000248758.1_CTD-2215E  | ENSG00000160789.18_LMNA | -0.11004 | -0.264605316 | 0.050037185 | 1.77E-01 | 4.39E-01 | 1.00E+00 |

|                              |                         |          |              |             |          |          |          |
|------------------------------|-------------------------|----------|--------------|-------------|----------|----------|----------|
| ENSG00000223039.1_RN7SKP26   | ENSG00000160789.18_LMNA | 0.17007  | 0.011168585  | 0.320587762 | 3.62E-02 | 1.62E-01 | 1.00E+00 |
| ENSG00000270413.1_RP11-810C  | ENSG00000160789.18_LMNA | 0.03975  | -0.120210057 | 0.19770095  | 6.27E-01 | 8.32E-01 | 1.00E+00 |
| ENSG00000264862.2_RN7SL45P   | ENSG00000160789.18_LMNA | -0.03346 | -0.191639184 | 0.126414786 | 6.82E-01 | 8.62E-01 | 1.00E+00 |
| ENSG00000234144.1_COX6CP13   | ENSG00000160789.18_LMNA | -0.17651 | -0.326535386 | -0.0178103  | 2.96E-02 | 1.42E-01 | 1.00E+00 |
| ENSG00000231776.4_LINC01611  | ENSG00000160789.18_LMNA | -0.00393 | -0.163028928 | 0.155367683 | 9.62E-01 | 9.85E-01 | 1.00E+00 |
| ENSG00000234689.1_LINC00444  | ENSG00000160789.18_LMNA | -0.06298 | -0.219978542 | 0.097191674 | 4.41E-01 | 7.08E-01 | 1.00E+00 |
| ENSG00000234703.1_AF015262.2 | ENSG00000160789.18_LMNA | 0.16972  | 0.010809539  | 0.320265542 | 3.66E-02 | 1.63E-01 | 1.00E+00 |
| ENSG00000237609.1_AF064858.1 | ENSG00000160789.18_LMNA | -0.20568 | -0.35330894  | -0.04804959 | 1.10E-02 | 7.02E-02 | 1.00E+00 |
| ENSG00000229120.2_CYCSP4     | ENSG00000160789.18_LMNA | 0.05708  | -0.103054316 | 0.214335802 | 4.85E-01 | 7.42E-01 | 1.00E+00 |
| ENSG00000255348.1_RP11-700F  | ENSG00000160789.18_LMNA | 0.07474  | -0.085473687 | 0.231193748 | 3.60E-01 | 6.42E-01 | 1.00E+00 |
| ENSG00000234460.1_XXyac-YM2  | ENSG00000160789.18_LMNA | 0.1797   | 0.021105099  | 0.329476815 | 2.67E-02 | 1.33E-01 | 1.00E+00 |
| ENSG00000263343.1_RP11-388M  | ENSG00000160789.18_LMNA | -0.01686 | -0.17559271  | 0.142720443 | 8.37E-01 | 9.37E-01 | 1.00E+00 |
| ENSG00000269742.1_BNIP3P29   | ENSG00000160789.18_LMNA | -0.181   | -0.330673834 | -0.02244784 | 2.56E-02 | 1.29E-01 | 1.00E+00 |
| ENSG00000260436.1_RP11-20I23 | ENSG00000160789.18_LMNA | -0.12965 | -0.283005112 | 0.030178026 | 1.11E-01 | 3.33E-01 | 1.00E+00 |
| ENSG00000164740.5_SEPT7P5    | ENSG00000160789.18_LMNA | -0.02252 | -0.18106796  | 0.137176109 | 7.83E-01 | 9.11E-01 | 1.00E+00 |
| ENSG00000227925.1_RP11-191N  | ENSG00000160789.18_LMNA | 0.09595  | -0.064231729 | 0.251311963 | 2.40E-01 | 5.18E-01 | 1.00E+00 |
| ENSG00000233318.2_RPL31P45   | ENSG00000160789.18_LMNA | 0.04307  | -0.116937019 | 0.200888808 | 5.98E-01 | 8.15E-01 | 1.00E+00 |
| ENSG00000243507.1_RP11-476M  | ENSG00000160789.18_LMNA | -0.21171 | -0.358821288 | -0.05434573 | 8.83E-03 | 5.99E-02 | 1.00E+00 |
| ENSG00000260282.1	EIF4EBP2F  | ENSG00000160789.18_LMNA | -0.09957 | -0.254729574 | 0.060594582 | 2.22E-01 | 4.98E-01 | 1.00E+00 |
| ENSG00000169688.10_MT1B      | ENSG00000160789.18_LMNA | 0.05692  | -0.103216163 | 0.214179724 | 4.86E-01 | 7.43E-01 | 1.00E+00 |
| ENSG00000254791.1_FAR1-IT1   | ENSG00000160789.18_LMNA | 0.01542  | -0.144130558 | 0.174197017 | 8.50E-01 | 9.41E-01 | 1.00E+00 |
| ENSG00000260310.1_RP11-27M2  | ENSG00000160789.18_LMNA | 0.12114  | -0.038806635 | 0.275038802 | 1.37E-01 | 3.77E-01 | 1.00E+00 |
| ENSG00000271480.1_MTND3P19   | ENSG00000160789.18_LMNA | 0.01941  | -0.140220755 | 0.178063691 | 8.12E-01 | 9.26E-01 | 1.00E+00 |
| ENSG00000228248.1_NUTF2P3    | ENSG00000160789.18_LMNA | -0.01476 | -0.173551589 | 0.144782218 | 8.57E-01 | 9.44E-01 | 1.00E+00 |
| ENSG00000274319.1_RPSAP73    | ENSG00000160789.18_LMNA | 0.06619  | -0.093997863 | 0.223043652 | 4.18E-01 | 6.90E-01 | 1.00E+00 |
| ENSG00000276819.1_TRBV15     | ENSG00000160789.18_LMNA | -0.00731 | -0.166321585 | 0.152063216 | 9.29E-01 | 9.73E-01 | 1.00E+00 |
| ENSG00000227516.1_RP5-973N2  | ENSG00000160789.18_LMNA | -0.10236 | -0.257363943 | 0.057785263 | 2.10E-01 | 4.82E-01 | 1.00E+00 |
| ENSG00000260185.1_RP11-432I5 | ENSG00000160789.18_LMNA | 0.00995  | -0.149487581 | 0.168883099 | 9.03E-01 | 9.63E-01 | 1.00E+00 |
| ENSG00000267703.1_CTD-2013N  | ENSG00000160789.18_LMNA | 0.00889  | -0.150523961 | 0.167852918 | 9.13E-01 | 9.67E-01 | 1.00E+00 |
| ENSG00000238190.1_HMGB1P15   | ENSG00000160789.18_LMNA | -0.03438 | -0.192530838 | 0.125503661 | 6.74E-01 | 8.57E-01 | 1.00E+00 |
| ENSG00000253215.1_RP11-156K  | ENSG00000160789.18_LMNA | 0.01226  | -0.147229953 | 0.171124821 | 8.81E-01 | 9.54E-01 | 1.00E+00 |
| ENSG00000235817.2_RP11-543E  | ENSG00000160789.18_LMNA | 0.02159  | -0.138088144 | 0.180168642 | 7.92E-01 | 9.16E-01 | 1.00E+00 |
| ENSG00000270259.2_RP13-122B  | ENSG00000160789.18_LMNA | 0.05965  | -0.100509079 | 0.216788175 | 4.65E-01 | 7.27E-01 | 1.00E+00 |

|                              |                         |          |              |             |          |          |          |
|------------------------------|-------------------------|----------|--------------|-------------|----------|----------|----------|
| ENSG00000223638.3_RFPL4A     | ENSG00000160789.18_LMNA | 0.13183  | -0.027953478 | 0.28505193  | 1.05E-01 | 3.22E-01 | 1.00E+00 |
| ENSG00000264296.1_RP11-116K  | ENSG00000160789.18_LMNA | 0.17704  | 0.018352099  | 0.327019486 | 2.91E-02 | 1.40E-01 | 1.00E+00 |
| ENSG00000254998.1_RP11-94P1  | ENSG00000160789.18_LMNA | -0.12522 | -0.278857498 | 0.034676295 | 1.24E-01 | 3.56E-01 | 1.00E+00 |
| ENSG00000232358.1_RP5-955M1  | ENSG00000160789.18_LMNA | -0.00648 | -0.165510656 | 0.152877714 | 9.37E-01 | 9.75E-01 | 1.00E+00 |
| ENSG00000237728.2_RP3-453P2  | ENSG00000160789.18_LMNA | 0.15202  | -0.007363281 | 0.303862546 | 6.15E-02 | 2.29E-01 | 1.00E+00 |
| ENSG00000234421.2_SLC25A5P4  | ENSG00000160789.18_LMNA | 0.07761  | -0.082616078 | 0.233916041 | 3.42E-01 | 6.27E-01 | 1.00E+00 |
| ENSG00000236466.1_RP11-795J  | ENSG00000160789.18_LMNA | -0.25183 | -0.395187667 | -0.09649877 | 1.75E-03 | 1.77E-02 | 1.00E+00 |
| ENSG00000136834.3_OR1J1      | ENSG00000160789.18_LMNA | -0.00096 | -0.160135957 | 0.158265161 | 9.91E-01 | 9.96E-01 | 1.00E+00 |
| ENSG00000279064.1_CH507-39C  | ENSG00000160789.18_LMNA | 0.04879  | -0.111277474 | 0.206385228 | 5.51E-01 | 7.87E-01 | 1.00E+00 |
| ENSG00000238065.1_AC010740   | ENSG00000160789.18_LMNA | -0.01175 | -0.170628956 | 0.147729622 | 8.86E-01 | 9.56E-01 | 1.00E+00 |
| ENSG00000276474.1_RP11-363G  | ENSG00000160789.18_LMNA | 0.06242  | -0.097752376 | 0.219439788 | 4.45E-01 | 7.12E-01 | 1.00E+00 |
| ENSG00000232175.1_RP4-659I19 | ENSG00000160789.18_LMNA | -0.14605 | -0.298315307 | 0.01346288  | 7.26E-02 | 2.56E-01 | 1.00E+00 |
| ENSG00000248551.1_RP11-287F  | ENSG00000160789.18_LMNA | -0.05488 | -0.212231175 | 0.10523533  | 5.02E-01 | 7.54E-01 | 1.00E+00 |
| ENSG00000279886.1_RP11-219G  | ENSG00000160789.18_LMNA | -0.07711 | -0.233446151 | 0.083109697 | 3.45E-01 | 6.29E-01 | 1.00E+00 |
| ENSG00000258620.1_RP11-362L  | ENSG00000160789.18_LMNA | 0.06502  | -0.095170661 | 0.221918842 | 4.26E-01 | 6.97E-01 | 1.00E+00 |
| ENSG00000274023.1_RP11-732M  | ENSG00000160789.18_LMNA | -0.09854 | -0.253759817 | 0.061627484 | 2.27E-01 | 5.04E-01 | 1.00E+00 |
| ENSG00000228351.1_AC018832   | ENSG00000160789.18_LMNA | -0.09122 | -0.246840503 | 0.068977795 | 2.64E-01 | 5.47E-01 | 1.00E+00 |
| ENSG00000233635.2_AC037445   | ENSG00000160789.18_LMNA | -0.00467 | -0.163744733 | 0.154649916 | 9.55E-01 | 9.82E-01 | 1.00E+00 |
| ENSG00000249173.4_LINC01093  | ENSG00000160789.18_LMNA | -0.00703 | -0.166043101 | 0.152342974 | 9.32E-01 | 9.73E-01 | 1.00E+00 |
| ENSG00000225803.1_MRPS11P1   | ENSG00000160789.18_LMNA | -0.09924 | -0.254422911 | 0.060921286 | 2.24E-01 | 5.00E-01 | 1.00E+00 |
| ENSG00000206249.3_CTD-2308N  | ENSG00000160789.18_LMNA | 0.05232  | -0.107774925 | 0.209776809 | 5.22E-01 | 7.68E-01 | 1.00E+00 |
| ENSG00000224895.1_VPS26BP1   | ENSG00000160789.18_LMNA | 0.04425  | -0.11576617  | 0.202027553 | 5.88E-01 | 8.09E-01 | 1.00E+00 |
| ENSG00000183432.6_ZBTB8OSP   | ENSG00000160789.18_LMNA | 0.02314  | -0.136564424 | 0.181670817 | 7.77E-01 | 9.08E-01 | 1.00E+00 |
| ENSG00000268051.1_CTC-244M1  | ENSG00000160789.18_LMNA | -0.1397  | -0.292400969 | 0.019940672 | 8.61E-02 | 2.85E-01 | 1.00E+00 |
| ENSG00000258808.1_RP11-255G  | ENSG00000160789.18_LMNA | -0.05071 | -0.208228012 | 0.109375375 | 5.35E-01 | 7.76E-01 | 1.00E+00 |
| ENSG00000233235.1_RP5-908D6  | ENSG00000160789.18_LMNA | -0.03548 | -0.193589441 | 0.124421245 | 6.64E-01 | 8.52E-01 | 1.00E+00 |
| ENSG00000225673.3_RP11-641C  | ENSG00000160789.18_LMNA | 0.01375  | -0.14577259  | 0.172570166 | 8.67E-01 | 9.48E-01 | 1.00E+00 |
| ENSG00000279431.1_RP11-218M  | ENSG00000160789.18_LMNA | -0.0287  | -0.18704268  | 0.131103165 | 7.26E-01 | 8.84E-01 | 1.00E+00 |
| ENSG00000253942.1_KB-1410C5  | ENSG00000160789.18_LMNA | 0.01442  | -0.14511742  | 0.173219487 | 8.60E-01 | 9.45E-01 | 1.00E+00 |
| ENSG00000225539.4_AC018799   | ENSG00000160789.18_LMNA | -0.22071 | -0.367012738 | -0.06374686 | 6.29E-03 | 4.66E-02 | 1.00E+00 |
| ENSG00000216639.1_RP3-355L5  | ENSG00000160789.18_LMNA | -0.06049 | -0.217595712 | 0.099670052 | 4.59E-01 | 7.23E-01 | 1.00E+00 |
| ENSG00000259720.1_RP11-348B  | ENSG00000160789.18_LMNA | -0.07952 | -0.235736671 | 0.080702043 | 3.30E-01 | 6.16E-01 | 1.00E+00 |
| ENSG00000254814.1_RP11-535A  | ENSG00000160789.18_LMNA | 0.01619  | -0.143375599 | 0.174944414 | 8.43E-01 | 9.39E-01 | 1.00E+00 |

|                              |                         |          |              |             |          |          |          |
|------------------------------|-------------------------|----------|--------------|-------------|----------|----------|----------|
| ENSG00000230497.2_EEF1B2P8   | ENSG00000160789.18_LMNA | -0.06385 | -0.220803391 | 0.096332833 | 4.35E-01 | 7.03E-01 | 1.00E+00 |
| ENSG00000203496.7_RP11-291L  | ENSG00000160789.18_LMNA | -0.03551 | -0.193613421 | 0.124396717 | 6.64E-01 | 8.52E-01 | 1.00E+00 |
| ENSG00000249410.1_AK4P2      | ENSG00000160789.18_LMNA | 0.09778  | -0.062392963 | 0.253040726 | 2.31E-01 | 5.08E-01 | 1.00E+00 |
| ENSG00000248585.2_RP11-90P5  | ENSG00000160789.18_LMNA | -0.0432  | -0.201018878 | 0.116803327 | 5.97E-01 | 8.14E-01 | 1.00E+00 |
| ENSG00000237993.1_RP11-159M  | ENSG00000160789.18_LMNA | 0.06043  | -0.09972894  | 0.217539049 | 4.60E-01 | 7.23E-01 | 1.00E+00 |
| ENSG00000231929.2_HMGB3P31   | ENSG00000160789.18_LMNA | -0.13645 | -0.289361476 | 0.023259567 | 9.37E-02 | 2.99E-01 | 1.00E+00 |
| ENSG00000235673.1_RP11-109P  | ENSG00000160789.18_LMNA | 0.06245  | -0.097719585 | 0.219471301 | 4.45E-01 | 7.12E-01 | 1.00E+00 |
| ENSG00000241815.1_RP11-124D  | ENSG00000160789.18_LMNA | 0.10555  | -0.054569159 | 0.260374025 | 1.96E-01 | 4.65E-01 | 1.00E+00 |
| ENSG00000226448.1_RPL7AP51   | ENSG00000160789.18_LMNA | -0.06412 | -0.22106746  | 0.096057781 | 4.33E-01 | 7.02E-01 | 1.00E+00 |
| ENSG00000235366.2_LINC01055  | ENSG00000160789.18_LMNA | -0.26073 | -0.403197603 | -0.10592951 | 1.18E-03 | 1.31E-02 | 1.00E+00 |
| ENSG00000250511.1_RP11-380D  | ENSG00000160789.18_LMNA | -0.12591 | -0.2795082   | 0.033971419 | 1.22E-01 | 3.52E-01 | 1.00E+00 |
| ENSG00000179468.5_OR9A2      | ENSG00000160789.18_LMNA | -0.0647  | -0.221615174 | 0.095487134 | 4.28E-01 | 6.99E-01 | 1.00E+00 |
| ENSG00000258134.1_RP11-956A  | ENSG00000160789.18_LMNA | 0.02738  | -0.132396869 | 0.18577187  | 7.38E-01 | 8.90E-01 | 1.00E+00 |
| ENSG00000257228.4_RP11-413B  | ENSG00000160789.18_LMNA | -0.17997 | -0.329724456 | -0.0213828  | 2.65E-02 | 1.32E-01 | 1.00E+00 |
| ENSG00000279154.1_RP11-345K  | ENSG00000160789.18_LMNA | 0.00804  | -0.151352817 | 0.167028518 | 9.22E-01 | 9.70E-01 | 1.00E+00 |
| ENSG00000177590.7_GIMAP3P    | ENSG00000160789.18_LMNA | -0.001   | -0.160174874 | 0.15822622  | 9.90E-01 | 9.96E-01 | 1.00E+00 |
| ENSG00000214604.3_NPM1P36    | ENSG00000160789.18_LMNA | -0.00539 | -0.164450193 | 0.153942193 | 9.47E-01 | 9.79E-01 | 1.00E+00 |
| ENSG00000234548.4_RP11-78H2  | ENSG00000160789.18_LMNA | -0.08929 | -0.245003467 | 0.070923514 | 2.74E-01 | 5.59E-01 | 1.00E+00 |
| ENSG00000261235.1_RP11-510J  | ENSG00000160789.18_LMNA | -0.05143 | -0.208915986 | 0.10866466  | 5.29E-01 | 7.73E-01 | 1.00E+00 |
| ENSG00000276266.1_CH17-80A1  | ENSG00000160789.18_LMNA | 0.01746  | -0.142132813 | 0.176173952 | 8.31E-01 | 9.34E-01 | 1.00E+00 |
| ENSG00000125823.11_CSTL1     | ENSG00000160789.18_LMNA | -0.16274 | -0.31381151  | -0.00363466 | 4.52E-02 | 1.88E-01 | 1.00E+00 |
| ENSG00000271793.1_RP11-321N  | ENSG00000160789.18_LMNA | 0.06378  | -0.096398316 | 0.220740516 | 4.35E-01 | 7.03E-01 | 1.00E+00 |
| ENSG00000181965.5_NEUROG1    | ENSG00000160789.18_LMNA | -0.03372 | -0.191892189 | 0.126156311 | 6.80E-01 | 8.60E-01 | 1.00E+00 |
| ENSG00000253348.1_CTC-455F1  | ENSG00000160789.18_LMNA | -0.09948 | -0.254643217 | 0.060686589 | 2.23E-01 | 4.98E-01 | 1.00E+00 |
| ENSG00000250860.1_CTD-2265D  | ENSG00000160789.18_LMNA | 0.00268  | -0.156589409 | 0.161809769 | 9.74E-01 | 9.90E-01 | 1.00E+00 |
| ENSG00000260151.1_RP11-748L  | ENSG00000160789.18_LMNA | -0.06461 | -0.221534693 | 0.095570998 | 4.29E-01 | 6.99E-01 | 1.00E+00 |
| ENSG00000162460.6_TMEN82     | ENSG00000160789.18_LMNA | 0.07635  | -0.083873677 | 0.232718605 | 3.50E-01 | 6.33E-01 | 1.00E+00 |
| ENSG00000272472.1_RP11-95G1  | ENSG00000160789.18_LMNA | 0.02566  | -0.134088597 | 0.184108473 | 7.54E-01 | 8.98E-01 | 1.00E+00 |
| ENSG00000225932.3_CTAGE4     | ENSG00000160789.18_LMNA | 0.10532  | -0.054800158 | 0.260158027 | 1.97E-01 | 4.66E-01 | 1.00E+00 |
| ENSG00000250546.4_RP11-8L2.1 | ENSG00000160789.18_LMNA | -0.06325 | -0.220234369 | 0.096925356 | 4.39E-01 | 7.07E-01 | 1.00E+00 |
| ENSG00000164299.6_SPZ1       | ENSG00000160789.18_LMNA | 0.09934  | -0.060824103 | 0.254514139 | 2.23E-01 | 4.99E-01 | 1.00E+00 |
| ENSG00000260799.1_KRT8P50    | ENSG00000160789.18_LMNA | 0.19374  | 0.03563886   | 0.342380778 | 1.68E-02 | 9.51E-02 | 1.00E+00 |
| ENSG00000267573.1_KRT8P5     | ENSG00000160789.18_LMNA | 0.06686  | -0.093335121 | 0.223678903 | 4.13E-01 | 6.86E-01 | 1.00E+00 |

|                              |                         |          |              |             |          |          |          |
|------------------------------|-------------------------|----------|--------------|-------------|----------|----------|----------|
| ENSG00000164729.7_SLC35G3    | ENSG00000160789.18_LMNA | -0.04213 | -0.199984637 | 0.117866051 | 6.06E-01 | 8.20E-01 | 1.00E+00 |
| ENSG00000143006.7_DMRTB1     | ENSG00000160789.18_LMNA | -0.30425 | -0.442035519 | -0.15242757 | 1.39E-04 | 2.44E-03 | 1.00E+00 |
| ENSG00000268455.1_RP11-359H  | ENSG00000160789.18_LMNA | -0.15213 | -0.303972445 | 0.007242204 | 6.13E-02 | 2.29E-01 | 1.00E+00 |
| ENSG00000215151.4_ABCD1P2    | ENSG00000160789.18_LMNA | 0.01815  | -0.141454648 | 0.17684447  | 8.24E-01 | 9.31E-01 | 1.00E+00 |
| ENSG00000279717.1_LLNLF-158I | ENSG00000160789.18_LMNA | -0.07396 | -0.230449825 | 0.086253682 | 3.65E-01 | 6.47E-01 | 1.00E+00 |
| ENSG00000239649.3_MYADML     | ENSG00000160789.18_LMNA | 0.02725  | -0.132523196 | 0.185647721 | 7.39E-01 | 8.90E-01 | 1.00E+00 |
| ENSG00000237750.2_AC007740.  | ENSG00000160789.18_LMNA | -0.17118 | -0.321613814 | -0.01231243 | 3.50E-02 | 1.59E-01 | 1.00E+00 |
| ENSG00000170858.9_LILRP2     | ENSG00000160789.18_LMNA | 0.11342  | -0.046627458 | 0.267780851 | 1.64E-01 | 4.20E-01 | 1.00E+00 |
| ENSG00000248809.4_LINC01095  | ENSG00000160789.18_LMNA | -0.16804 | -0.318716562 | -0.00908464 | 3.85E-02 | 1.69E-01 | 1.00E+00 |
| ENSG00000233139.1_RP11-38O2  | ENSG00000160789.18_LMNA | -0.01159 | -0.170475567 | 0.147884155 | 8.87E-01 | 9.56E-01 | 1.00E+00 |
| ENSG00000280105.1_RP11-334E  | ENSG00000160789.18_LMNA | -0.16964 | -0.320190755 | -0.01072622 | 3.67E-02 | 1.63E-01 | 1.00E+00 |
| ENSG00000109061.9_MYH1       | ENSG00000160789.18_LMNA | -0.19019 | -0.339119513 | -0.0319534  | 1.89E-02 | 1.04E-01 | 1.00E+00 |
| ENSG00000279981.1_RP11-196B  | ENSG00000160789.18_LMNA | -0.08346 | -0.239481197 | 0.076758056 | 3.07E-01 | 5.93E-01 | 1.00E+00 |
| ENSG00000177992.9_SPATA31E   | ENSG00000160789.18_LMNA | 0.11116  | -0.048905746 | 0.265659801 | 1.73E-01 | 4.32E-01 | 1.00E+00 |
| ENSG00000203987.2_RP11-188C  | ENSG00000160789.18_LMNA | -0.06636 | -0.223200863 | 0.093833875 | 4.17E-01 | 6.89E-01 | 1.00E+00 |
| ENSG00000279840.1_RP1-228P1  | ENSG00000160789.18_LMNA | -0.01883 | -0.177501759 | 0.140789572 | 8.18E-01 | 9.29E-01 | 1.00E+00 |
| ENSG00000176515.1_RP5-856G1  | ENSG00000160789.18_LMNA | -0.08064 | -0.236799988 | 0.079583092 | 3.23E-01 | 6.10E-01 | 1.00E+00 |
| ENSG00000205236.6_RP11-514P  | ENSG00000160789.18_LMNA | -0.01694 | -0.175667056 | 0.142645292 | 8.36E-01 | 9.36E-01 | 1.00E+00 |
| ENSG00000203690.10_TCP10     | ENSG00000160789.18_LMNA | -0.02392 | -0.182427233 | 0.135796588 | 7.70E-01 | 9.05E-01 | 1.00E+00 |
| ENSG00000279582.1_           | ENSG00000160789.18_LMNA | 0.04328  | -0.116727154 | 0.201092982 | 5.97E-01 | 8.14E-01 | 1.00E+00 |
| ENSG00000232558.1_KCND3-IT1  | ENSG00000160789.18_LMNA | -0.14014 | -0.292805356 | 0.019498593 | 8.51E-02 | 2.83E-01 | 1.00E+00 |
| ENSG00000277244.1_           | ENSG00000160789.18_LMNA | 0.08233  | -0.077891854 | 0.238405701 | 3.13E-01 | 6.00E-01 | 1.00E+00 |
| ENSG00000211968.3_IGHV1-58   | ENSG00000160789.18_LMNA | 0.06058  | -0.099579785 | 0.217682566 | 4.58E-01 | 7.22E-01 | 1.00E+00 |
| ENSG00000172156.3_CCL11      | ENSG00000160789.18_LMNA | 0.15197  | -0.007406845 | 0.303823002 | 6.16E-02 | 2.30E-01 | 1.00E+00 |
| ENSG00000238419.1_RNU7-186F  | ENSG00000160789.18_LMNA | 0.10581  | -0.05430993  | 0.260616381 | 1.95E-01 | 4.63E-01 | 1.00E+00 |
| ENSG00000266203.1_MIR5585    | ENSG00000160789.18_LMNA | -0.04489 | -0.202641937 | 0.115134099 | 5.83E-01 | 8.06E-01 | 1.00E+00 |
| ENSG00000252408.1_SNORD38    | ENSG00000160789.18_LMNA | 0.18139  | 0.022849781  | 0.331031959 | 2.53E-02 | 1.27E-01 | 1.00E+00 |
| ENSG00000207039.1_Y_RNA      | ENSG00000160789.18_LMNA | -0.02938 | -0.18770068  | 0.130432883 | 7.19E-01 | 8.81E-01 | 1.00E+00 |
| ENSG00000252789.1_           | ENSG00000160789.18_LMNA | 0.04155  | -0.118429957 | 0.199435558 | 6.11E-01 | 8.23E-01 | 1.00E+00 |
| ENSG00000207956.1_MIR579     | ENSG00000160789.18_LMNA | 0.11558  | -0.044434327 | 0.269819747 | 1.56E-01 | 4.08E-01 | 1.00E+00 |
| ENSG00000274992.1_           | ENSG00000160789.18_LMNA | 0.03195  | -0.127901044 | 0.19018356  | 6.96E-01 | 8.70E-01 | 1.00E+00 |
| ENSG00000278099.1_U1         | ENSG00000160789.18_LMNA | -0.18255 | -0.332096087 | -0.02404469 | 2.44E-02 | 1.24E-01 | 1.00E+00 |
| ENSG00000280685.1_           | ENSG00000160789.18_LMNA | -0.00981 | -0.168750064 | 0.149621457 | 9.04E-01 | 9.63E-01 | 1.00E+00 |

|                              |                         |          |              |             |          |          |          |
|------------------------------|-------------------------|----------|--------------|-------------|----------|----------|----------|
| ENSG00000274004.1_H19_3      | ENSG00000160789.18_LMNA | 0.12325  | -0.03666956  | 0.277015867 | 1.30E-01 | 3.66E-01 | 1.00E+00 |
| ENSG00000207042.1_RNU6-196F  | ENSG00000160789.18_LMNA | 0.02046  | -0.139197275 | 0.17907426  | 8.02E-01 | 9.21E-01 | 1.00E+00 |
| ENSG00000206951.1_Y_RNA      | ENSG00000160789.18_LMNA | -0.1163  | -0.270491858 | 0.043710709 | 1.54E-01 | 4.04E-01 | 1.00E+00 |
| ENSG00000200888.1_Y_RNA      | ENSG00000160789.18_LMNA | -0.09618 | -0.251530567 | 0.063999333 | 2.38E-01 | 5.17E-01 | 1.00E+00 |
| ENSG00000271490.1_RP11-60E8  | ENSG00000160789.18_LMNA | 0.08611  | -0.074108358 | 0.241991619 | 2.92E-01 | 5.77E-01 | 1.00E+00 |
| ENSG00000277962.1_           | ENSG00000160789.18_LMNA | 0.05912  | -0.101030185 | 0.216286408 | 4.69E-01 | 7.30E-01 | 1.00E+00 |
| ENSG00000276036.1_RNA5SP44   | ENSG00000160789.18_LMNA | -0.1543  | -0.305986048 | 0.005022188 | 5.77E-02 | 2.20E-01 | 1.00E+00 |
| ENSG00000199959.1_SNORA2     | ENSG00000160789.18_LMNA | 0.06595  | -0.094240604 | 0.222810913 | 4.20E-01 | 6.91E-01 | 1.00E+00 |
| ENSG00000268079.1_BNIP3P30   | ENSG00000160789.18_LMNA | -0.34019 | -0.473736263 | -0.1913555  | 1.80E-05 | 4.73E-04 | 9.24E-01 |
| ENSG00000228648.1_RP11-568A  | ENSG00000160789.18_LMNA | -0.22851 | -0.374097403 | -0.07192139 | 4.63E-03 | 3.70E-02 | 1.00E+00 |
| ENSG00000225545.1_RP11-545I1 | ENSG00000160789.18_LMNA | -0.06381 | -0.220766091 | 0.096371679 | 4.35E-01 | 7.03E-01 | 1.00E+00 |
| ENSG00000221387.1_RNU6ATAC   | ENSG00000160789.18_LMNA | -0.03404 | -0.192203216 | 0.1258385   | 6.77E-01 | 8.59E-01 | 1.00E+00 |
| ENSG00000263635.1_RP11-805F  | ENSG00000160789.18_LMNA | -0.1286  | -0.282030671 | 0.031235992 | 1.14E-01 | 3.38E-01 | 1.00E+00 |
| ENSG00000163206.5_SMCP       | ENSG00000160789.18_LMNA | -0.23692 | -0.381719312 | -0.08076138 | 3.30E-03 | 2.87E-02 | 1.00E+00 |
| ENSG00000239888.3_RN7SL792f  | ENSG00000160789.18_LMNA | 0.01967  | -0.139965403 | 0.178315885 | 8.10E-01 | 9.25E-01 | 1.00E+00 |
| ENSG00000271792.1_CTB-35F21  | ENSG00000160789.18_LMNA | 0.06781  | -0.092392587 | 0.224581876 | 4.07E-01 | 6.82E-01 | 1.00E+00 |
| ENSG00000238837.3_RP11-646E  | ENSG00000160789.18_LMNA | 0.10869  | -0.051395098 | 0.263338766 | 1.83E-01 | 4.47E-01 | 1.00E+00 |
| ENSG00000276281.1_RN7SL126f  | ENSG00000160789.18_LMNA | 0.14845  | -0.011008648 | 0.300549827 | 6.80E-02 | 2.45E-01 | 1.00E+00 |
| ENSG00000241162.3_RN7SL617f  | ENSG00000160789.18_LMNA | 0.10797  | -0.052124767 | 0.262657742 | 1.85E-01 | 4.51E-01 | 1.00E+00 |
| ENSG00000243426.3_RN7SL454f  | ENSG00000160789.18_LMNA | 0.04262  | -0.117374537 | 0.200463066 | 6.02E-01 | 8.17E-01 | 1.00E+00 |
| ENSG00000240385.1_RPS29P20   | ENSG00000160789.18_LMNA | 0.11257  | -0.047479775 | 0.266987714 | 1.67E-01 | 4.25E-01 | 1.00E+00 |
| ENSG00000240156.1_COX6CP6    | ENSG00000160789.18_LMNA | -0.04817 | -0.205790163 | 0.111891195 | 5.56E-01 | 7.90E-01 | 1.00E+00 |
| ENSG00000253235.1_RP11-434I1 | ENSG00000160789.18_LMNA | -0.05387 | -0.211258967 | 0.106241794 | 5.10E-01 | 7.59E-01 | 1.00E+00 |
| ENSG00000243621.1_AC003989.  | ENSG00000160789.18_LMNA | 0.0183   | -0.141310762 | 0.176986695 | 8.23E-01 | 9.31E-01 | 1.00E+00 |
| ENSG00000232503.1_CYCSP8     | ENSG00000160789.18_LMNA | -0.06198 | -0.219019609 | 0.098189532 | 4.48E-01 | 7.14E-01 | 1.00E+00 |
| ENSG00000232851.3_ATP5J2P3   | ENSG00000160789.18_LMNA | -0.05669 | -0.21396316  | 0.103440706 | 4.88E-01 | 7.44E-01 | 1.00E+00 |
| ENSG00000277911.1_RP11-333J  | ENSG00000160789.18_LMNA | -0.1481  | -0.300224255 | 0.011366466 | 6.86E-02 | 2.46E-01 | 1.00E+00 |
| ENSG00000258993.1_RP11-368P  | ENSG00000160789.18_LMNA | 0.05847  | -0.101681835 | 0.215658704 | 4.74E-01 | 7.34E-01 | 1.00E+00 |
| ENSG00000205716.4_FAM183DP   | ENSG00000160789.18_LMNA | 0.11232  | -0.047735284 | 0.266749863 | 1.68E-01 | 4.26E-01 | 1.00E+00 |
| ENSG00000227785.1_AC092013.  | ENSG00000160789.18_LMNA | -0.12872 | -0.282135235 | 0.031122498 | 1.14E-01 | 3.37E-01 | 1.00E+00 |
| ENSG00000249888.1_RP11-447H  | ENSG00000160789.18_LMNA | -0.05137 | -0.208857804 | 0.108724777 | 5.30E-01 | 7.73E-01 | 1.00E+00 |
| ENSG00000248820.2_DYNLL1P6   | ENSG00000160789.18_LMNA | -0.15273 | -0.304529025 | 0.006628876 | 6.03E-02 | 2.26E-01 | 1.00E+00 |
| ENSG00000228153.1_RP11-23I7. | ENSG00000160789.18_LMNA | 0.00141  | -0.157822059 | 0.160578725 | 9.86E-01 | 9.95E-01 | 1.00E+00 |



|                              |                         |          |              |             |          |          |          |
|------------------------------|-------------------------|----------|--------------|-------------|----------|----------|----------|
| ENSG00000240299.3_RN7SL187F  | ENSG00000160789.18_LMNA | -0.03228 | -0.190506216 | 0.127571721 | 6.93E-01 | 8.68E-01 | 1.00E+00 |
| ENSG00000243053.2_RPL31P58   | ENSG00000160789.18_LMNA | 0.10103  | -0.05912467  | 0.256108531 | 2.16E-01 | 4.90E-01 | 1.00E+00 |
| ENSG00000232627.1_AC021876.4 | ENSG00000160789.18_LMNA | -0.07368 | -0.230182707 | 0.086533659 | 3.67E-01 | 6.48E-01 | 1.00E+00 |
| ENSG00000233299.1_HIGD1AP4   | ENSG00000160789.18_LMNA | 0.11524  | -0.044778    | 0.26950043  | 1.57E-01 | 4.10E-01 | 1.00E+00 |
| ENSG00000271660.1_RP1-73A14  | ENSG00000160789.18_LMNA | -0.21553 | -0.36229914  | -0.05833059 | 7.66E-03 | 5.38E-02 | 1.00E+00 |
| ENSG00000252757.1_RN7SKP96   | ENSG00000160789.18_LMNA | -0.13467 | -0.287700314 | 0.025070521 | 9.81E-02 | 3.08E-01 | 1.00E+00 |
| ENSG00000238038.1_ATP6V0E1I  | ENSG00000160789.18_LMNA | 0.0138   | -0.145716258 | 0.172626006 | 8.66E-01 | 9.48E-01 | 1.00E+00 |
| ENSG00000241180.1_RP11-54O7  | ENSG00000160789.18_LMNA | -0.09831 | -0.253538515 | 0.061863102 | 2.28E-01 | 5.05E-01 | 1.00E+00 |
| ENSG00000228349.1_RPS26P4    | ENSG00000160789.18_LMNA | 0.02821  | -0.131580437 | 0.186573977 | 7.30E-01 | 8.86E-01 | 1.00E+00 |
| ENSG00000233256.1_RP11-445K  | ENSG00000160789.18_LMNA | -0.19352 | -0.342182157 | -0.03541416 | 1.69E-02 | 9.56E-02 | 1.00E+00 |
| ENSG00000251670.1_CTD-2532K  | ENSG00000160789.18_LMNA | -0.29266 | -0.431740608 | -0.13997599 | 2.53E-04 | 3.94E-03 | 1.00E+00 |
| ENSG00000256590.2_TRDV3      | ENSG00000160789.18_LMNA | -0.11854 | -0.272600523 | 0.041438305 | 1.46E-01 | 3.91E-01 | 1.00E+00 |
| ENSG00000265648.2_RN7SL279F  | ENSG00000160789.18_LMNA | -0.07447 | -0.230932797 | 0.085747336 | 3.62E-01 | 6.44E-01 | 1.00E+00 |
| ENSG00000256712.1_RP11-785H  | ENSG00000160789.18_LMNA | 0.00062  | -0.158592619 | 0.159808664 | 9.94E-01 | 9.98E-01 | 1.00E+00 |
| ENSG00000254247.1_RP11-278I4 | ENSG00000160789.18_LMNA | -0.02071 | -0.179323411 | 0.138944836 | 8.00E-01 | 9.20E-01 | 1.00E+00 |
| ENSG00000272967.1_RP11-190C  | ENSG00000160789.18_LMNA | -0.06437 | -0.221302754 | 0.09581266  | 4.31E-01 | 7.00E-01 | 1.00E+00 |
| ENSG00000232056.1_AC092687.4 | ENSG00000160789.18_LMNA | -0.04731 | -0.204967992 | 0.112738745 | 5.63E-01 | 7.94E-01 | 1.00E+00 |
| ENSG00000244493.1_SLC9A9-AS  | ENSG00000160789.18_LMNA | 0.04194  | -0.118047634 | 0.19980785  | 6.08E-01 | 8.21E-01 | 1.00E+00 |
| ENSG00000227560.1_RPS15AP3I  | ENSG00000160789.18_LMNA | -0.00327 | -0.16238945  | 0.156008629 | 9.68E-01 | 9.87E-01 | 1.00E+00 |
| ENSG00000250835.1_LSM3P4     | ENSG00000160789.18_LMNA | -0.0025  | -0.16164075  | 0.156758708 | 9.76E-01 | 9.91E-01 | 1.00E+00 |
| ENSG00000238207.1_AC009312.7 | ENSG00000160789.18_LMNA | 0.03989  | -0.120077079 | 0.197830598 | 6.26E-01 | 8.31E-01 | 1.00E+00 |
| ENSG00000259392.2_RP11-758N  | ENSG00000160789.18_LMNA | -0.00269 | -0.161819125 | 0.156580037 | 9.74E-01 | 9.90E-01 | 1.00E+00 |
| ENSG00000243012.1_RP11-292E  | ENSG00000160789.18_LMNA | 0.11033  | -0.049748473 | 0.264874463 | 1.76E-01 | 4.37E-01 | 1.00E+00 |
| ENSG00000255801.1_RP11-561P  | ENSG00000160789.18_LMNA | -0.03273 | -0.190940397 | 0.127128457 | 6.89E-01 | 8.66E-01 | 1.00E+00 |
| ENSG00000219159.4_AC011298.1 | ENSG00000160789.18_LMNA | -0.14394 | -0.296349875 | 0.015618464 | 7.69E-02 | 2.65E-01 | 1.00E+00 |
| ENSG00000254358.1_CYCSP22    | ENSG00000160789.18_LMNA | 0.00667  | -0.152691201 | 0.16569639  | 9.35E-01 | 9.74E-01 | 1.00E+00 |
| ENSG00000228739.1_RP11-218I7 | ENSG00000160789.18_LMNA | 0.09995  | -0.060205961 | 0.255094273 | 2.21E-01 | 4.96E-01 | 1.00E+00 |
| ENSG00000278655.1_KB-1572G7  | ENSG00000160789.18_LMNA | -0.0939  | -0.249374232 | 0.066290216 | 2.50E-01 | 5.30E-01 | 1.00E+00 |
| ENSG00000202360.1_RN7SKP24   | ENSG00000160789.18_LMNA | -0.00539 | -0.164454057 | 0.153938316 | 9.47E-01 | 9.79E-01 | 1.00E+00 |
| ENSG00000236535.1_RC3H1-IT1  | ENSG00000160789.18_LMNA | -0.00627 | -0.165303883 | 0.153085328 | 9.39E-01 | 9.76E-01 | 1.00E+00 |
| ENSG00000259240.1_RP11-108K  | ENSG00000160789.18_LMNA | -0.23404 | -0.379115571 | -0.07773619 | 3.71E-03 | 3.13E-02 | 1.00E+00 |
| ENSG00000255273.1_AF238378.7 | ENSG00000160789.18_LMNA | 0.07133  | -0.088882676 | 0.227939686 | 3.83E-01 | 6.61E-01 | 1.00E+00 |
| ENSG00000276823.1_Metazoa_Sl | ENSG00000160789.18_LMNA | 0.01674  | -0.142843499 | 0.175470963 | 8.38E-01 | 9.37E-01 | 1.00E+00 |

|                              |                         |          |              |             |          |          |          |
|------------------------------|-------------------------|----------|--------------|-------------|----------|----------|----------|
| ENSG00000263571.1_CTC-304I17 | ENSG00000160789.18_LMNA | -0.24193 | -0.386256746 | -0.08604653 | 2.67E-03 | 2.44E-02 | 1.00E+00 |
| ENSG00000257061.1_           | ENSG00000160789.18_LMNA | -0.10953 | -0.264122704 | 0.050554748 | 1.79E-01 | 4.42E-01 | 1.00E+00 |
| ENSG00000253135.1_RP11-589C  | ENSG00000160789.18_LMNA | 0.02644  | -0.133319865 | 0.184864557 | 7.46E-01 | 8.94E-01 | 1.00E+00 |
| ENSG00000230044.1_AC110754.  | ENSG00000160789.18_LMNA | 0.0065   | -0.152860375 | 0.165527923 | 9.37E-01 | 9.75E-01 | 1.00E+00 |
| ENSG00000225711.1_RP11-345I1 | ENSG00000160789.18_LMNA | -0.06963 | -0.226324911 | 0.090571579 | 3.94E-01 | 6.72E-01 | 1.00E+00 |
| ENSG00000278552.1_RP11-467N  | ENSG00000160789.18_LMNA | 0.05747  | -0.102671058 | 0.214705332 | 4.82E-01 | 7.40E-01 | 1.00E+00 |
| ENSG00000253428.1_CTB-43E15  | ENSG00000160789.18_LMNA | -0.16792 | -0.318606808 | -0.0089625  | 3.86E-02 | 1.69E-01 | 1.00E+00 |
| ENSG00000231208.4_ZBTB46-AS  | ENSG00000160789.18_LMNA | -0.05723 | -0.214479951 | 0.102904823 | 4.84E-01 | 7.41E-01 | 1.00E+00 |
| ENSG00000279777.1_AC004813.  | ENSG00000160789.18_LMNA | 0.0615   | -0.098666178 | 0.218561341 | 4.52E-01 | 7.17E-01 | 1.00E+00 |
| ENSG00000227845.2_RP11-184B  | ENSG00000160789.18_LMNA | -0.15034 | -0.302300867 | 0.009082808 | 6.45E-02 | 2.37E-01 | 1.00E+00 |
| ENSG00000231188.1_RP11-34D1  | ENSG00000160789.18_LMNA | -0.07048 | -0.227133571 | 0.089726024 | 3.88E-01 | 6.66E-01 | 1.00E+00 |
| ENSG00000257514.4_RP11-755O  | ENSG00000160789.18_LMNA | -0.05246 | -0.209910101 | 0.107637111 | 5.21E-01 | 7.67E-01 | 1.00E+00 |
| ENSG00000254407.1_PHBP17     | ENSG00000160789.18_LMNA | -0.06366 | -0.220623739 | 0.096519928 | 4.36E-01 | 7.04E-01 | 1.00E+00 |
| ENSG00000253430.1_RP11-14I17 | ENSG00000160789.18_LMNA | -0.06385 | -0.22080795  | 0.096328084 | 4.34E-01 | 7.03E-01 | 1.00E+00 |
| ENSG00000248729.1_MTCO1P30   | ENSG00000160789.18_LMNA | 0.06978  | -0.090429398 | 0.226460919 | 3.93E-01 | 6.71E-01 | 1.00E+00 |
| ENSG00000235018.1_RP11-11M2  | ENSG00000160789.18_LMNA | 0.10518  | -0.054938276 | 0.260028864 | 1.97E-01 | 4.67E-01 | 1.00E+00 |
| ENSG00000228489.1_RPL21P50   | ENSG00000160789.18_LMNA | 0.13443  | -0.025312107 | 0.287478567 | 9.87E-02 | 3.09E-01 | 1.00E+00 |
| ENSG00000250842.1_CTC-806A2  | ENSG00000160789.18_LMNA | -0.03288 | -0.191078901 | 0.126987029 | 6.88E-01 | 8.65E-01 | 1.00E+00 |
| ENSG00000248659.1_RP11-263I1 | ENSG00000160789.18_LMNA | -0.00789 | -0.166882287 | 0.151499792 | 9.23E-01 | 9.71E-01 | 1.00E+00 |
| ENSG00000249302.2_FTH1P24    | ENSG00000160789.18_LMNA | -0.03503 | -0.193153723 | 0.124866856 | 6.68E-01 | 8.54E-01 | 1.00E+00 |
| ENSG00000279509.1_RP11-329J  | ENSG00000160789.18_LMNA | 0.08873  | -0.071476985 | 0.244480497 | 2.77E-01 | 5.62E-01 | 1.00E+00 |
| ENSG00000235497.4_AC012506.  | ENSG00000160789.18_LMNA | 0.09989  | -0.060272846 | 0.255031511 | 2.21E-01 | 4.96E-01 | 1.00E+00 |
| ENSG00000269583.1_L34079.4   | ENSG00000160789.18_LMNA | 0.10381  | -0.0563256   | 0.258730859 | 2.03E-01 | 4.74E-01 | 1.00E+00 |
| ENSG00000240254.1_B4GALT4-A  | ENSG00000160789.18_LMNA | -0.01139 | -0.170282866 | 0.148078271 | 8.89E-01 | 9.57E-01 | 1.00E+00 |
| ENSG00000270981.1_RP11-550I2 | ENSG00000160789.18_LMNA | -0.19446 | -0.34304487  | -0.03639035 | 1.64E-02 | 9.34E-02 | 1.00E+00 |
| ENSG00000224844.1_AC107079.  | ENSG00000160789.18_LMNA | 0.13616  | -0.023554105 | 0.289091428 | 9.44E-02 | 3.01E-01 | 1.00E+00 |
| ENSG00000251186.1_RP11-689P  | ENSG00000160789.18_LMNA | 0.0262   | -0.133559243 | 0.184629157 | 7.49E-01 | 8.95E-01 | 1.00E+00 |
| ENSG00000266537.1_SPDYE22P   | ENSG00000160789.18_LMNA | 0.09785  | -0.062323327 | 0.253106156 | 2.30E-01 | 5.08E-01 | 1.00E+00 |
| ENSG00000235467.1_RPL10AP5   | ENSG00000160789.18_LMNA | 0.06913  | -0.091068781 | 0.2258492   | 3.97E-01 | 6.74E-01 | 1.00E+00 |
| ENSG00000248340.2_RP11-293A  | ENSG00000160789.18_LMNA | -0.00503 | -0.164103545 | 0.154289994 | 9.51E-01 | 9.80E-01 | 1.00E+00 |
| ENSG00000230647.1_AC022816.  | ENSG00000160789.18_LMNA | -0.01033 | -0.16924867  | 0.149119643 | 9.00E-01 | 9.61E-01 | 1.00E+00 |
| ENSG00000262020.1_RP11-66H6  | ENSG00000160789.18_LMNA | 0.03564  | -0.124262391 | 0.193744738 | 6.63E-01 | 8.51E-01 | 1.00E+00 |
| ENSG00000231122.4_FAM25E     | ENSG00000160789.18_LMNA | -0.02957 | -0.187887245 | 0.130242784 | 7.18E-01 | 8.80E-01 | 1.00E+00 |

|                              |                         |          |              |             |          |          |          |
|------------------------------|-------------------------|----------|--------------|-------------|----------|----------|----------|
| ENSG00000183560.7_IZUMO1R    | ENSG00000160789.18_LMNA | 0.15645  | -0.00282213  | 0.307978807 | 5.43E-02 | 2.12E-01 | 1.00E+00 |
| ENSG00000275597.1_RP11-1378  | ENSG00000160789.18_LMNA | 0.00475  | -0.15456383  | 0.163830561 | 9.54E-01 | 9.81E-01 | 1.00E+00 |
| ENSG00000227995.1_RAB11AP1   | ENSG00000160789.18_LMNA | -0.03423 | -0.192378837 | 0.12565902  | 6.76E-01 | 8.58E-01 | 1.00E+00 |
| ENSG00000227762.4_GUSBP8     | ENSG00000160789.18_LMNA | 0.04392  | -0.11608982  | 0.201712863 | 5.91E-01 | 8.10E-01 | 1.00E+00 |
| ENSG00000224802.2_TUBB4BP2   | ENSG00000160789.18_LMNA | -0.05802 | -0.215230512 | 0.102126207 | 4.78E-01 | 7.36E-01 | 1.00E+00 |
| ENSG00000260262.1_RP11-440L  | ENSG00000160789.18_LMNA | 0.06019  | -0.099970356 | 0.217306729 | 4.61E-01 | 7.25E-01 | 1.00E+00 |
| ENSG00000243179.1_AC110769.1 | ENSG00000160789.18_LMNA | 0.16018  | 0.001008294  | 0.311441817 | 4.87E-02 | 1.98E-01 | 1.00E+00 |
| ENSG00000228076.2_RP11-475E  | ENSG00000160789.18_LMNA | -0.00342 | -0.162527595 | 0.155870189 | 9.67E-01 | 9.87E-01 | 1.00E+00 |
| ENSG00000250472.1_TRIM36-IT1 | ENSG00000160789.18_LMNA | 0.01685  | -0.142733349 | 0.175579942 | 8.37E-01 | 9.37E-01 | 1.00E+00 |
| ENSG00000251421.2_CTC-369A1  | ENSG00000160789.18_LMNA | -0.07249 | -0.229044265 | 0.087726339 | 3.75E-01 | 6.55E-01 | 1.00E+00 |
| ENSG00000242888.1_RP11-436M  | ENSG00000160789.18_LMNA | -0.01543 | -0.174200601 | 0.144126938 | 8.50E-01 | 9.41E-01 | 1.00E+00 |
| ENSG00000216306.3_KRT19P2    | ENSG00000160789.18_LMNA | -0.18864 | -0.337702044 | -0.03035415 | 1.99E-02 | 1.08E-01 | 1.00E+00 |
| ENSG00000165204.3_OR1K1      | ENSG00000160789.18_LMNA | -0.01602 | -0.174775858 | 0.143545892 | 8.45E-01 | 9.39E-01 | 1.00E+00 |
| ENSG00000254444.1_RP11-290F  | ENSG00000160789.18_LMNA | -0.0009  | -0.160079082 | 0.15832207  | 9.91E-01 | 9.97E-01 | 1.00E+00 |
| ENSG00000230190.1_AC005518.1 | ENSG00000160789.18_LMNA | -0.29805 | -0.436538438 | -0.14576745 | 1.92E-04 | 3.16E-03 | 1.00E+00 |
| ENSG00000234187.1_AIMP1P1    | ENSG00000160789.18_LMNA | 0.084    | -0.076215795 | 0.2399953   | 3.04E-01 | 5.90E-01 | 1.00E+00 |
| ENSG00000250561.2_OR7E59P    | ENSG00000160789.18_LMNA | -0.0039  | -0.162996741 | 0.15539995  | 9.62E-01 | 9.85E-01 | 1.00E+00 |
| ENSG00000254871.1_RP11-702F  | ENSG00000160789.18_LMNA | 0.12944  | -0.030384326 | 0.28281515  | 1.12E-01 | 3.34E-01 | 1.00E+00 |
| ENSG00000258760.1_CTD-2509C  | ENSG00000160789.18_LMNA | -0.00935 | -0.168295996 | 0.150078303 | 9.09E-01 | 9.65E-01 | 1.00E+00 |
| ENSG00000213153.3_RP11-259P  | ENSG00000160789.18_LMNA | 0.21761  | 0.060505986  | 0.364194184 | 7.08E-03 | 5.08E-02 | 1.00E+00 |
| ENSG00000135443.7_KRT85      | ENSG00000160789.18_LMNA | -0.04508 | -0.202829595 | 0.114940987 | 5.81E-01 | 8.05E-01 | 1.00E+00 |
| ENSG00000223592.2_FNDC3CP    | ENSG00000160789.18_LMNA | 0.06875  | -0.091446746 | 0.225487471 | 4.00E-01 | 6.77E-01 | 1.00E+00 |
| ENSG00000227999.1_MTND5P1    | ENSG00000160789.18_LMNA | -0.08117 | -0.237303127 | 0.07905335  | 3.20E-01 | 6.07E-01 | 1.00E+00 |
| ENSG00000268509.2_RP11-572B  | ENSG00000160789.18_LMNA | -0.02845 | -0.186801817 | 0.13134845  | 7.28E-01 | 8.85E-01 | 1.00E+00 |
| ENSG00000273963.1_ENPP7P14   | ENSG00000160789.18_LMNA | -0.03442 | -0.192567286 | 0.125466406 | 6.74E-01 | 8.57E-01 | 1.00E+00 |
| ENSG00000150750.6_C11orf53   | ENSG00000160789.18_LMNA | -0.02437 | -0.182865537 | 0.135351493 | 7.66E-01 | 9.03E-01 | 1.00E+00 |
| ENSG00000234639.1_AC009263.1 | ENSG00000160789.18_LMNA | 0.0307   | -0.129134781 | 0.188974189 | 7.07E-01 | 8.76E-01 | 1.00E+00 |
| ENSG00000232783.4_FRG2FP     | ENSG00000160789.18_LMNA | 0.11875  | -0.041233957 | 0.272789999 | 1.45E-01 | 3.90E-01 | 1.00E+00 |
| ENSG00000226996.4_AP000477.1 | ENSG00000160789.18_LMNA | -0.06151 | -0.218572757 | 0.098654305 | 4.52E-01 | 7.17E-01 | 1.00E+00 |
| ENSG00000256581.1_NLRP9P1    | ENSG00000160789.18_LMNA | -0.17049 | -0.320976805 | -0.0116022  | 3.57E-02 | 1.61E-01 | 1.00E+00 |
| ENSG00000042813.6_ZBPB       | ENSG00000160789.18_LMNA | -0.21043 | -0.357647278 | -0.05300276 | 9.27E-03 | 6.20E-02 | 1.00E+00 |
| ENSG00000273851.1_RP11-809H  | ENSG00000160789.18_LMNA | -0.00175 | -0.160910309 | 0.15749014  | 9.83E-01 | 9.94E-01 | 1.00E+00 |
| ENSG00000231976.6_LINC00202  | ENSG00000160789.18_LMNA | 0.03918  | -0.120777656 | 0.197147437 | 6.32E-01 | 8.35E-01 | 1.00E+00 |

|                             |                         |          |              |             |          |          |          |
|-----------------------------|-------------------------|----------|--------------|-------------|----------|----------|----------|
| ENSG00000276850.3_CH17-360D | ENSG00000160789.18_LMNA | -0.11423 | -0.268543012 | 0.045807997 | 1.61E-01 | 4.16E-01 | 1.00E+00 |
| ENSG00000229404.4_LINC00858 | ENSG00000160789.18_LMNA | -0.07912 | -0.235352677 | 0.081105931 | 3.33E-01 | 6.18E-01 | 1.00E+00 |
| ENSG00000223940.1_KRT8P8    | ENSG00000160789.18_LMNA | -0.09361 | -0.24909785  | 0.066583603 | 2.51E-01 | 5.32E-01 | 1.00E+00 |
| ENSG00000248472.7_DDX11L9   | ENSG00000160789.18_LMNA | -0.14383 | -0.29624708  | 0.015731125 | 7.71E-02 | 2.66E-01 | 1.00E+00 |
| ENSG00000231060.1_FARSBP1   | ENSG00000160789.18_LMNA | -0.01863 | -0.177304832 | 0.140988862 | 8.20E-01 | 9.30E-01 | 1.00E+00 |
| ENSG00000231304.1_SGO1-AS1  | ENSG00000160789.18_LMNA | -0.00583 | -0.164877887 | 0.153512968 | 9.43E-01 | 9.77E-01 | 1.00E+00 |
| ENSG00000215887.5_ZNF859P   | ENSG00000160789.18_LMNA | -0.19082 | -0.339701169 | -0.0326101  | 1.85E-02 | 1.02E-01 | 1.00E+00 |
| ENSG00000223488.2_MAPK6PS2  | ENSG00000160789.18_LMNA | 0.18255  | 0.024049446  | 0.332100325 | 2.44E-02 | 1.24E-01 | 1.00E+00 |
| ENSG00000196364.9_PRSS29P   | ENSG00000160789.18_LMNA | 0.01599  | -0.143573919 | 0.174748116 | 8.45E-01 | 9.40E-01 | 1.00E+00 |
| ENSG00000176571.10_CNBD1    | ENSG00000160789.18_LMNA | -0.14612 | -0.298380715 | 0.013391094 | 7.24E-02 | 2.55E-01 | 1.00E+00 |
| ENSG00000196242.7_OR2C3     | ENSG00000160789.18_LMNA | -0.00593 | -0.164971973 | 0.153418529 | 9.42E-01 | 9.77E-01 | 1.00E+00 |
| ENSG00000239516.1_FLYWCH1F  | ENSG00000160789.18_LMNA | 0.0412   | -0.118776988 | 0.199097551 | 6.14E-01 | 8.25E-01 | 1.00E+00 |
| ENSG00000204610.11_TRIM15   | ENSG00000160789.18_LMNA | 0.06599  | -0.094203184 | 0.222846793 | 4.19E-01 | 6.91E-01 | 1.00E+00 |
| ENSG00000203527.2_Z99756.1  | ENSG00000160789.18_LMNA | 0.09106  | -0.069146159 | 0.246681633 | 2.65E-01 | 5.48E-01 | 1.00E+00 |
| ENSG00000260840.1_RP11-60H5 | ENSG00000160789.18_LMNA | 0.11155  | -0.04850873  | 0.266029635 | 1.71E-01 | 4.30E-01 | 1.00E+00 |
| ENSG00000185002.8_RFX6      | ENSG00000160789.18_LMNA | -0.10154 | -0.256597478 | 0.058603145 | 2.13E-01 | 4.87E-01 | 1.00E+00 |
| ENSG00000278862.1_RP11-571O | ENSG00000160789.18_LMNA | 0.11732  | -0.042679644 | 0.271449003 | 1.50E-01 | 3.98E-01 | 1.00E+00 |
| ENSG00000267022.1_AC084219. | ENSG00000160789.18_LMNA | 0.02361  | -0.13610006  | 0.18212832  | 7.73E-01 | 9.06E-01 | 1.00E+00 |
| ENSG00000234854.1_LINC00676 | ENSG00000160789.18_LMNA | 0.02693  | -0.13283744  | 0.185338852 | 7.42E-01 | 8.92E-01 | 1.00E+00 |
| ENSG00000159182.4_PRAC1     | ENSG00000160789.18_LMNA | -0.02307 | -0.181606875 | 0.136629314 | 7.78E-01 | 9.09E-01 | 1.00E+00 |
| ENSG00000211766.1_TRBJ2-2P  | ENSG00000160789.18_LMNA | -0.00527 | -0.164331058 | 0.154061733 | 9.49E-01 | 9.79E-01 | 1.00E+00 |
| ENSG00000200408.1_RNA5SP74  | ENSG00000160789.18_LMNA | -0.08321 | -0.239236955 | 0.077015611 | 3.08E-01 | 5.95E-01 | 1.00E+00 |
| ENSG00000211611.2_IGKV6-21  | ENSG00000160789.18_LMNA | -0.12688 | -0.28041547  | 0.032988095 | 1.19E-01 | 3.47E-01 | 1.00E+00 |
| ENSG00000264380.1_          | ENSG00000160789.18_LMNA | 0.01863  | -0.140986611 | 0.177307057 | 8.20E-01 | 9.30E-01 | 1.00E+00 |
| ENSG00000277846.1_SNORD30   | ENSG00000160789.18_LMNA | 0.04586  | -0.114178189 | 0.203570621 | 5.75E-01 | 8.02E-01 | 1.00E+00 |
| ENSG00000264056.1_MIR5685   | ENSG00000160789.18_LMNA | -0.04334 | -0.201149612 | 0.11666894  | 5.96E-01 | 8.14E-01 | 1.00E+00 |
| ENSG00000199545.1_RNA5SP19  | ENSG00000160789.18_LMNA | 0.05639  | -0.103746646 | 0.213668039 | 4.90E-01 | 7.46E-01 | 1.00E+00 |
| ENSG00000238420.1_RNU6-437F | ENSG00000160789.18_LMNA | -0.06286 | -0.219858833 | 0.097316277 | 4.42E-01 | 7.09E-01 | 1.00E+00 |
| ENSG00000238886.1_SNORD121  | ENSG00000160789.18_LMNA | -0.06607 | -0.222923968 | 0.094122695 | 4.19E-01 | 6.91E-01 | 1.00E+00 |
| ENSG00000252101.2_RNU6-758F | ENSG00000160789.18_LMNA | -0.06387 | -0.220829957 | 0.096305164 | 4.34E-01 | 7.03E-01 | 1.00E+00 |
| ENSG00000280888.1_          | ENSG00000160789.18_LMNA | 0.04313  | -0.116869296 | 0.200954698 | 5.98E-01 | 8.15E-01 | 1.00E+00 |
| ENSG00000276775.1_IGHV4-4   | ENSG00000160789.18_LMNA | 0.07987  | -0.08035738  | 0.236064278 | 3.28E-01 | 6.14E-01 | 1.00E+00 |
| ENSG00000252615.1_Y_RNA     | ENSG00000160789.18_LMNA | 0.13434  | -0.025402078 | 0.287395977 | 9.89E-02 | 3.10E-01 | 1.00E+00 |

|                              |                         |          |              |             |          |          |          |
|------------------------------|-------------------------|----------|--------------|-------------|----------|----------|----------|
| ENSG00000252246.1_RNA5SP92   | ENSG00000160789.18_LMNA | 0.00966  | -0.149767474 | 0.168604949 | 9.06E-01 | 9.64E-01 | 1.00E+00 |
| ENSG00000252466.1_MIR2115    | ENSG00000160789.18_LMNA | -0.04312 | -0.200937297 | 0.116887181 | 5.98E-01 | 8.15E-01 | 1.00E+00 |
| ENSG00000207093.1_SNORD116   | ENSG00000160789.18_LMNA | -0.0365  | -0.194569461 | 0.123418504 | 6.55E-01 | 8.47E-01 | 1.00E+00 |
| ENSG00000207964.2_           | ENSG00000160789.18_LMNA | -0.10231 | -0.257324146 | 0.05782774  | 2.10E-01 | 4.83E-01 | 1.00E+00 |
| ENSG00000206954.1_RNU6-1201  | ENSG00000160789.18_LMNA | 0.00272  | -0.156550644 | 0.161848468 | 9.73E-01 | 9.90E-01 | 1.00E+00 |
| ENSG00000222316.1_           | ENSG00000160789.18_LMNA | -0.08993 | -0.245610705 | 0.070280617 | 2.71E-01 | 5.55E-01 | 1.00E+00 |
| ENSG00000201641.1_RNU6-1187  | ENSG00000160789.18_LMNA | 0.02156  | -0.138119415 | 0.180137798 | 7.92E-01 | 9.16E-01 | 1.00E+00 |
| ENSG00000256502.1_RP11-955H  | ENSG00000160789.18_LMNA | -0.04317 | -0.200992179 | 0.11683077  | 5.97E-01 | 8.14E-01 | 1.00E+00 |
| ENSG00000201898.1_SNORA72    | ENSG00000160789.18_LMNA | 0.10201  | -0.058136671 | 0.257034675 | 2.11E-01 | 4.84E-01 | 1.00E+00 |
| ENSG00000252218.1_SCARNA15   | ENSG00000160789.18_LMNA | -0.13074 | -0.284030801 | 0.029063662 | 1.08E-01 | 3.28E-01 | 1.00E+00 |
| ENSG00000194297.2_RNU1-75P   | ENSG00000160789.18_LMNA | 0.08618  | -0.074038239 | 0.242057995 | 2.91E-01 | 5.77E-01 | 1.00E+00 |
| ENSG00000281460.1_RP5-991B1  | ENSG00000160789.18_LMNA | -0.20725 | -0.35474822  | -0.04969118 | 1.04E-02 | 6.74E-02 | 1.00E+00 |
| ENSG00000277828.1_AL137067.2 | ENSG00000160789.18_LMNA | 0.01193  | -0.147552747 | 0.170804502 | 8.84E-01 | 9.55E-01 | 1.00E+00 |
| ENSG00000206922.1_RNU6-80P   | ENSG00000160789.18_LMNA | -0.0466  | -0.204286034 | 0.113441403 | 5.69E-01 | 7.98E-01 | 1.00E+00 |
| ENSG00000201315.1_RN7SKP22   | ENSG00000160789.18_LMNA | -0.0721  | -0.22867192  | 0.088116226 | 3.77E-01 | 6.57E-01 | 1.00E+00 |
| ENSG00000240454.1_RPL39P26   | ENSG00000160789.18_LMNA | 0.05219  | -0.107910788 | 0.209645393 | 5.23E-01 | 7.69E-01 | 1.00E+00 |
| ENSG00000201901.1_RN7SKP48   | ENSG00000160789.18_LMNA | -0.06444 | -0.221372372 | 0.095740128 | 4.30E-01 | 7.00E-01 | 1.00E+00 |
| ENSG00000206698.1_RNU1-73P   | ENSG00000160789.18_LMNA | -0.11661 | -0.270786285 | 0.043393615 | 1.53E-01 | 4.02E-01 | 1.00E+00 |
| ENSG00000241636.1_LINC01323  | ENSG00000160789.18_LMNA | -0.17927 | -0.329078516 | -0.02065856 | 2.71E-02 | 1.34E-01 | 1.00E+00 |
| ENSG00000264869.1_RP11-526H  | ENSG00000160789.18_LMNA | 0.00268  | -0.156589436 | 0.161809742 | 9.74E-01 | 9.90E-01 | 1.00E+00 |
| ENSG00000255029.1_CTD-3012A  | ENSG00000160789.18_LMNA | 0.23832  | 0.082239938  | 0.382990152 | 3.11E-03 | 2.75E-02 | 1.00E+00 |
| ENSG00000205360.6_MT1CP      | ENSG00000160789.18_LMNA | 0.1462   | -0.013308378 | 0.298456078 | 7.23E-02 | 2.55E-01 | 1.00E+00 |
| ENSG00000276563.1_RP11-568K  | ENSG00000160789.18_LMNA | 0.18147  | 0.022926845  | 0.331100613 | 2.53E-02 | 1.27E-01 | 1.00E+00 |
| ENSG00000264978.2_RN7SL630F  | ENSG00000160789.18_LMNA | 0.01663  | -0.142946883 | 0.175368672 | 8.39E-01 | 9.37E-01 | 1.00E+00 |
| ENSG00000240183.3_RN7SL297F  | ENSG00000160789.18_LMNA | 0.07037  | -0.089838453 | 0.227026073 | 3.89E-01 | 6.67E-01 | 1.00E+00 |
| ENSG00000228206.2_AC016717.  | ENSG00000160789.18_LMNA | -0.17928 | -0.32908533  | -0.0206662  | 2.71E-02 | 1.34E-01 | 1.00E+00 |
| ENSG00000236115.1_RP11-62C3  | ENSG00000160789.18_LMNA | -0.03214 | -0.190362323 | 0.127718596 | 6.94E-01 | 8.69E-01 | 1.00E+00 |
| ENSG00000275609.1_KB-1572G7  | ENSG00000160789.18_LMNA | 0.1053   | -0.054816133 | 0.260143089 | 1.97E-01 | 4.66E-01 | 1.00E+00 |
| ENSG00000232348.2_LINC00279  | ENSG00000160789.18_LMNA | -0.38022 | -0.5086291   | -0.23525553 | 1.35E-06 | 5.91E-05 | 6.95E-02 |
| ENSG00000226764.2_AC010145.  | ENSG00000160789.18_LMNA | -0.16247 | -0.31355786  | -0.00335334 | 4.55E-02 | 1.89E-01 | 1.00E+00 |
| ENSG00000240452.1_MTCO1P29   | ENSG00000160789.18_LMNA | -0.14018 | -0.292845747 | 0.019454431 | 8.50E-02 | 2.83E-01 | 1.00E+00 |
| ENSG00000235619.1_RPL36AP3   | ENSG00000160789.18_LMNA | -0.04154 | -0.199420729 | 0.118445183 | 6.11E-01 | 8.23E-01 | 1.00E+00 |
| ENSG00000240121.1_RPS27P20   | ENSG00000160789.18_LMNA | 0.00935  | -0.150070486 | 0.168303767 | 9.09E-01 | 9.65E-01 | 1.00E+00 |

|                              |                         |          |              |             |          |          |          |
|------------------------------|-------------------------|----------|--------------|-------------|----------|----------|----------|
| ENSG00000268295.1_POLR3GP1   | ENSG00000160789.18_LMNA | 0.02818  | -0.131609759 | 0.186545177 | 7.30E-01 | 8.86E-01 | 1.00E+00 |
| ENSG00000242147.1_RP13-463N  | ENSG00000160789.18_LMNA | 0.22286  | 0.066003682  | 0.368972194 | 5.78E-03 | 4.38E-02 | 1.00E+00 |
| ENSG00000230470.1_GS1-115G2  | ENSG00000160789.18_LMNA | 0.01843  | -0.141181569 | 0.177114386 | 8.22E-01 | 9.30E-01 | 1.00E+00 |
| ENSG00000231990.1_RP11-53B5  | ENSG00000160789.18_LMNA | -0.05659 | -0.213859537 | 0.103548134 | 4.89E-01 | 7.45E-01 | 1.00E+00 |
| ENSG00000275655.1_RN7SL313F  | ENSG00000160789.18_LMNA | 0.04355  | -0.11645944  | 0.201353396 | 5.94E-01 | 8.13E-01 | 1.00E+00 |
| ENSG00000264829.1_RP11-474I1 | ENSG00000160789.18_LMNA | 0.0385   | -0.121444473 | 0.196496911 | 6.38E-01 | 8.38E-01 | 1.00E+00 |
| ENSG00000263537.2_RN7SL387F  | ENSG00000160789.18_LMNA | -0.1117  | -0.266169732 | 0.048358311 | 1.71E-01 | 4.30E-01 | 1.00E+00 |
| ENSG00000233764.1_MTCO1P20   | ENSG00000160789.18_LMNA | 0.05549  | -0.104636037 | 0.212809772 | 4.97E-01 | 7.51E-01 | 1.00E+00 |
| ENSG00000276653.1_RN7SL856F  | ENSG00000160789.18_LMNA | -0.10866 | -0.263307358 | 0.051428757 | 1.83E-01 | 4.47E-01 | 1.00E+00 |
| ENSG00000232529.1_RP1-257I9. | ENSG00000160789.18_LMNA | -0.17965 | -0.329425788 | -0.02104788 | 2.68E-02 | 1.33E-01 | 1.00E+00 |
| ENSG00000277628.1_Metazoa_SI | ENSG00000160789.18_LMNA | 0.09146  | -0.068745481 | 0.247059689 | 2.62E-01 | 5.46E-01 | 1.00E+00 |
| ENSG00000226780.1_RP11-38J2  | ENSG00000160789.18_LMNA | 0.01072  | -0.148731848 | 0.169633875 | 8.96E-01 | 9.59E-01 | 1.00E+00 |
| ENSG00000242151.1_DYNLL1P5   | ENSG00000160789.18_LMNA | 0.02026  | -0.139391329 | 0.178882706 | 8.04E-01 | 9.22E-01 | 1.00E+00 |
| ENSG00000265093.2_RN7SL246F  | ENSG00000160789.18_LMNA | -0.14567 | -0.297959328 | 0.013853514 | 7.33E-02 | 2.57E-01 | 1.00E+00 |
| ENSG00000228988.1_RP4-677H1  | ENSG00000160789.18_LMNA | 0.12795  | -0.031898598 | 0.281420046 | 1.16E-01 | 3.41E-01 | 1.00E+00 |
| ENSG00000229224.1_AC105398.  | ENSG00000160789.18_LMNA | -0.05743 | -0.214669285 | 0.102708449 | 4.82E-01 | 7.40E-01 | 1.00E+00 |
| ENSG00000225681.2_AC005730.  | ENSG00000160789.18_LMNA | 0.07661  | -0.08360827  | 0.232971395 | 3.48E-01 | 6.32E-01 | 1.00E+00 |
| ENSG00000263717.1_RP11-466A  | ENSG00000160789.18_LMNA | 0.06763  | -0.092563394 | 0.224418279 | 4.08E-01 | 6.83E-01 | 1.00E+00 |
| ENSG00000271657.1_RP11-270B  | ENSG00000160789.18_LMNA | -0.00223 | -0.161377639 | 0.157022216 | 9.78E-01 | 9.92E-01 | 1.00E+00 |
| ENSG00000223732.2_RP11-321C  | ENSG00000160789.18_LMNA | -0.14266 | -0.295156108 | 0.016926312 | 7.96E-02 | 2.71E-01 | 1.00E+00 |
| ENSG00000250622.1_RP11-612J  | ENSG00000160789.18_LMNA | 0.0446   | -0.115422193 | 0.202361936 | 5.85E-01 | 8.07E-01 | 1.00E+00 |
| ENSG00000279325.1_RP11-24H2  | ENSG00000160789.18_LMNA | -0.16537 | -0.31624621  | -0.00633755 | 4.17E-02 | 1.78E-01 | 1.00E+00 |
| ENSG00000260173.1_RP11-2I17. | ENSG00000160789.18_LMNA | 0.18454  | 0.026111289  | 0.333934662 | 2.28E-02 | 1.19E-01 | 1.00E+00 |
| ENSG00000279334.1_RP11-83B2  | ENSG00000160789.18_LMNA | -0.03345 | -0.191634234 | 0.126419842 | 6.82E-01 | 8.62E-01 | 1.00E+00 |
| ENSG00000257579.1_RP11-128P  | ENSG00000160789.18_LMNA | -0.08267 | -0.238732048 | 0.077547903 | 3.11E-01 | 5.98E-01 | 1.00E+00 |
| ENSG00000276471.1_RP11-398A  | ENSG00000160789.18_LMNA | -0.09986 | -0.255009044 | 0.060296788 | 2.21E-01 | 4.96E-01 | 1.00E+00 |
| ENSG00000226838.1_AC096582.  | ENSG00000160789.18_LMNA | -0.04279 | -0.200627364 | 0.117205709 | 6.01E-01 | 8.16E-01 | 1.00E+00 |
| ENSG00000267051.1_RP11-128P  | ENSG00000160789.18_LMNA | -0.04141 | -0.199292917 | 0.118576415 | 6.13E-01 | 8.24E-01 | 1.00E+00 |
| ENSG00000227383.1_RP11-571F  | ENSG00000160789.18_LMNA | -0.11382 | -0.268158545 | 0.046221421 | 1.63E-01 | 4.18E-01 | 1.00E+00 |
| ENSG00000236807.1_AC092066.  | ENSG00000160789.18_LMNA | 0.07337  | -0.086842516 | 0.229887978 | 3.69E-01 | 6.50E-01 | 1.00E+00 |
| ENSG00000254735.1_HMGB1P42   | ENSG00000160789.18_LMNA | -0.15978 | -0.311070411 | -0.00059705 | 4.93E-02 | 1.99E-01 | 1.00E+00 |
| ENSG00000228622.1_RP1-302D9  | ENSG00000160789.18_LMNA | -0.13288 | -0.286028795 | 0.026890695 | 1.03E-01 | 3.17E-01 | 1.00E+00 |
| ENSG00000261538.1_RP11-3M1.  | ENSG00000160789.18_LMNA | 0.04364  | -0.116366901 | 0.201443401 | 5.93E-01 | 8.12E-01 | 1.00E+00 |

|                              |                         |          |              |             |          |          |          |
|------------------------------|-------------------------|----------|--------------|-------------|----------|----------|----------|
| ENSG00000227433.1_AC069213.4 | ENSG00000160789.18_LMNA | 0.04987  | -0.11020218  | 0.207427267 | 5.42E-01 | 7.81E-01 | 1.00E+00 |
| ENSG00000215184.2_RPS12P16   | ENSG00000160789.18_LMNA | 0.08226  | -0.077959326 | 0.238341675 | 3.14E-01 | 6.00E-01 | 1.00E+00 |
| ENSG00000225315.2_RP11-293P  | ENSG00000160789.18_LMNA | 0.04176  | -0.118231065 | 0.199629243 | 6.10E-01 | 8.22E-01 | 1.00E+00 |
| ENSG00000257281.1_RP11-1K3.1 | ENSG00000160789.18_LMNA | 0.09334  | -0.06685048  | 0.248846397 | 2.53E-01 | 5.34E-01 | 1.00E+00 |
| ENSG00000256358.1_RPL31P57   | ENSG00000160789.18_LMNA | 0.24423  | 0.088469303  | 0.388331905 | 2.43E-03 | 2.27E-02 | 1.00E+00 |
| ENSG00000267234.1_CTB-184G2  | ENSG00000160789.18_LMNA | -0.0697  | -0.226385165 | 0.090508591 | 3.94E-01 | 6.71E-01 | 1.00E+00 |
| ENSG00000259087.4_RP11-356O  | ENSG00000160789.18_LMNA | -0.10031 | -0.255431474 | 0.059846556 | 2.19E-01 | 4.94E-01 | 1.00E+00 |
| ENSG00000267373.1_CTD-2231E  | ENSG00000160789.18_LMNA | 0.0635   | -0.096676994 | 0.220472906 | 4.37E-01 | 7.05E-01 | 1.00E+00 |
| ENSG00000248846.2_CTD-2016C  | ENSG00000160789.18_LMNA | -0.07764 | -0.233945108 | 0.082585538 | 3.42E-01 | 6.27E-01 | 1.00E+00 |
| ENSG00000225956.1_RP5-1077I2 | ENSG00000160789.18_LMNA | 0.05881  | -0.101339779 | 0.215988223 | 4.72E-01 | 7.32E-01 | 1.00E+00 |
| ENSG00000256079.1_RP11-318G  | ENSG00000160789.18_LMNA | -0.19462 | -0.343183611 | -0.0365474  | 1.63E-02 | 9.31E-02 | 1.00E+00 |
| ENSG00000236665.1_AC114808.1 | ENSG00000160789.18_LMNA | 0.14599  | -0.013526857 | 0.298257011 | 7.27E-02 | 2.56E-01 | 1.00E+00 |
| ENSG00000241882.1_RP11-637O  | ENSG00000160789.18_LMNA | 0.04083  | -0.119144916 | 0.198739109 | 6.17E-01 | 8.27E-01 | 1.00E+00 |
| ENSG00000256292.1_RP11-955H  | ENSG00000160789.18_LMNA | 0.19178  | 0.033606168  | 0.340582964 | 1.79E-02 | 9.98E-02 | 1.00E+00 |
| ENSG00000268108.1_CTB-60B18  | ENSG00000160789.18_LMNA | 0.07836  | -0.081859707 | 0.234635767 | 3.37E-01 | 6.23E-01 | 1.00E+00 |
| ENSG00000258796.1_CTD-2560C  | ENSG00000160789.18_LMNA | 0.11785  | -0.042137337 | 0.271952181 | 1.48E-01 | 3.95E-01 | 1.00E+00 |
| ENSG00000259876.1_CTD-3037C  | ENSG00000160789.18_LMNA | -0.04715 | -0.204808919 | 0.112902675 | 5.64E-01 | 7.95E-01 | 1.00E+00 |
| ENSG00000228772.2_RP1-309H1  | ENSG00000160789.18_LMNA | -0.20208 | -0.350020051 | -0.04430457 | 1.25E-02 | 7.71E-02 | 1.00E+00 |
| ENSG00000260338.1_LINC01570  | ENSG00000160789.18_LMNA | -0.13762 | -0.290453534 | 0.022067915 | 9.09E-02 | 2.94E-01 | 1.00E+00 |
| ENSG00000232474.1_NCKAP5-IT  | ENSG00000160789.18_LMNA | 0.0276   | -0.132181795 | 0.185983211 | 7.36E-01 | 8.89E-01 | 1.00E+00 |
| ENSG00000163216.6_SPRR2D     | ENSG00000160789.18_LMNA | -0.07528 | -0.231702873 | 0.084939652 | 3.57E-01 | 6.40E-01 | 1.00E+00 |
| ENSG00000240015.2_RP11-90P5  | ENSG00000160789.18_LMNA | 0.0656   | -0.094592351 | 0.222473594 | 4.22E-01 | 6.93E-01 | 1.00E+00 |
| ENSG00000122711.7_SPINK4     | ENSG00000160789.18_LMNA | 0.199    | 0.041104635  | 0.34720387  | 1.40E-02 | 8.34E-02 | 1.00E+00 |
| ENSG00000271771.1_RP11-1250I | ENSG00000160789.18_LMNA | -0.02568 | -0.184132584 | 0.134064088 | 7.53E-01 | 8.97E-01 | 1.00E+00 |
| ENSG00000256029.4_RP11-190A  | ENSG00000160789.18_LMNA | 0.04174  | -0.118242791 | 0.199617825 | 6.10E-01 | 8.22E-01 | 1.00E+00 |
| ENSG00000171136.6_RLN3       | ENSG00000160789.18_LMNA | 0.08015  | -0.080071464 | 0.236335991 | 3.26E-01 | 6.13E-01 | 1.00E+00 |
| ENSG00000236985.1_RP5-1195D  | ENSG00000160789.18_LMNA | -0.04198 | -0.199843147 | 0.118011382 | 6.08E-01 | 8.21E-01 | 1.00E+00 |
| ENSG00000270314.1_GS1-165B1  | ENSG00000160789.18_LMNA | -0.05549 | -0.212813679 | 0.10463199  | 4.97E-01 | 7.51E-01 | 1.00E+00 |
| ENSG00000236531.2_RP5-945F2  | ENSG00000160789.18_LMNA | 0.04872  | -0.111344621 | 0.206320133 | 5.51E-01 | 7.87E-01 | 1.00E+00 |
| ENSG00000230826.1_RP11-417B  | ENSG00000160789.18_LMNA | -0.0309  | -0.189166567 | 0.128938592 | 7.06E-01 | 8.75E-01 | 1.00E+00 |
| ENSG00000109205.15_ODAM      | ENSG00000160789.18_LMNA | 0.19118  | 0.032981167  | 0.34002973  | 1.83E-02 | 1.01E-01 | 1.00E+00 |
| ENSG00000261392.1_RP11-473I1 | ENSG00000160789.18_LMNA | 0.13018  | -0.029631952 | 0.283507822 | 1.10E-01 | 3.30E-01 | 1.00E+00 |
| ENSG00000233385.1_MTCO3P8    | ENSG00000160789.18_LMNA | -0.10084 | -0.255927557 | 0.059317659 | 2.16E-01 | 4.91E-01 | 1.00E+00 |

|                              |                         |          |              |             |          |          |          |
|------------------------------|-------------------------|----------|--------------|-------------|----------|----------|----------|
| ENSG00000236989.4_AC142119.  | ENSG00000160789.18_LMNA | 0.01196  | -0.147522566 | 0.170834455 | 8.84E-01 | 9.55E-01 | 1.00E+00 |
| ENSG00000224007.1_AC019070.  | ENSG00000160789.18_LMNA | -0.23035 | -0.375767965 | -0.07385488 | 4.30E-03 | 3.50E-02 | 1.00E+00 |
| ENSG00000259003.1_AE000662.  | ENSG00000160789.18_LMNA | -0.00191 | -0.161059149 | 0.157341126 | 9.81E-01 | 9.93E-01 | 1.00E+00 |
| ENSG00000231231.4_LINC01423  | ENSG00000160789.18_LMNA | -0.00981 | -0.168747108 | 0.149624431 | 9.05E-01 | 9.63E-01 | 1.00E+00 |
| ENSG00000259594.4_CTD-2034I  | ENSG00000160789.18_LMNA | -0.20152 | -0.349504654 | -0.04371847 | 1.28E-02 | 7.83E-02 | 1.00E+00 |
| ENSG00000229104.1_YY1P2      | ENSG00000160789.18_LMNA | -0.22596 | -0.371787456 | -0.06925163 | 5.12E-03 | 4.00E-02 | 1.00E+00 |
| ENSG00000261072.2_RP11-5N19  | ENSG00000160789.18_LMNA | -0.04113 | -0.199026665 | 0.118849757 | 6.15E-01 | 8.25E-01 | 1.00E+00 |
| ENSG00000226770.1_AC000124.  | ENSG00000160789.18_LMNA | -0.01069 | -0.169603352 | 0.148762579 | 8.96E-01 | 9.59E-01 | 1.00E+00 |
| ENSG00000253114.2_RP11-550I1 | ENSG00000160789.18_LMNA | -0.07983 | -0.236028064 | 0.080395483 | 3.28E-01 | 6.14E-01 | 1.00E+00 |
| ENSG00000228482.1_RP5-859D4  | ENSG00000160789.18_LMNA | -0.10673 | -0.2614901   | 0.053375032 | 1.91E-01 | 4.58E-01 | 1.00E+00 |
| ENSG00000244791.2_RP11-65D1  | ENSG00000160789.18_LMNA | -0.18314 | -0.332644053 | -0.02466034 | 2.39E-02 | 1.23E-01 | 1.00E+00 |
| ENSG00000260860.2_RP11-615I2 | ENSG00000160789.18_LMNA | 0.1354   | -0.024328994 | 0.288380733 | 9.63E-02 | 3.05E-01 | 1.00E+00 |
| ENSG00000203581.7_OR1F2P     | ENSG00000160789.18_LMNA | -0.13873 | -0.291494193 | 0.020931524 | 8.83E-02 | 2.89E-01 | 1.00E+00 |
| ENSG00000187229.3_RP11-161I2 | ENSG00000160789.18_LMNA | 0.00428  | -0.155024671 | 0.163371044 | 9.58E-01 | 9.83E-01 | 1.00E+00 |
| ENSG00000273933.1_RP11-48O2  | ENSG00000160789.18_LMNA | -0.02852 | -0.186867837 | 0.131281221 | 7.27E-01 | 8.85E-01 | 1.00E+00 |
| ENSG00000185899.1_TAS2R60    | ENSG00000160789.18_LMNA | 0.14335  | -0.016221736 | 0.295799347 | 7.81E-02 | 2.68E-01 | 1.00E+00 |
| ENSG00000257341.4_AL928654.7 | ENSG00000160789.18_LMNA | -0.02762 | -0.186004207 | 0.132160427 | 7.36E-01 | 8.89E-01 | 1.00E+00 |
| ENSG00000253646.1_CTD-2311A  | ENSG00000160789.18_LMNA | 0.02893  | -0.13087608  | 0.187265635 | 7.24E-01 | 8.83E-01 | 1.00E+00 |
| ENSG00000250501.2_RP11-98O2  | ENSG00000160789.18_LMNA | -0.03439 | -0.192538901 | 0.12549542  | 6.74E-01 | 8.57E-01 | 1.00E+00 |
| ENSG00000258990.2_MPPE1P1    | ENSG00000160789.18_LMNA | 0.08143  | -0.078794229 | 0.237549174 | 3.19E-01 | 6.05E-01 | 1.00E+00 |
| ENSG00000280778.1_CH17-270A  | ENSG00000160789.18_LMNA | -0.04319 | -0.201009851 | 0.116812605 | 5.97E-01 | 8.14E-01 | 1.00E+00 |
| ENSG00000267083.1_KRT18P61   | ENSG00000160789.18_LMNA | -0.07481 | -0.23125926  | 0.08540498  | 3.60E-01 | 6.42E-01 | 1.00E+00 |
| ENSG00000237579.2_LINC01514  | ENSG00000160789.18_LMNA | -0.0485  | -0.206110664 | 0.111560676 | 5.53E-01 | 7.88E-01 | 1.00E+00 |
| ENSG00000214825.2_EI24P3     | ENSG00000160789.18_LMNA | -0.11    | -0.26457057  | 0.050074452 | 1.77E-01 | 4.39E-01 | 1.00E+00 |
| ENSG00000227913.1_KRT8P44    | ENSG00000160789.18_LMNA | -0.05739 | -0.21463191  | 0.102747216 | 4.82E-01 | 7.40E-01 | 1.00E+00 |
| ENSG00000178363.4_CALML3     | ENSG00000160789.18_LMNA | -0.00068 | -0.159860765 | 0.158540497 | 9.93E-01 | 9.97E-01 | 1.00E+00 |
| ENSG00000269692.1_FKBP4P2    | ENSG00000160789.18_LMNA | -0.13887 | -0.291626488 | 0.020787001 | 8.80E-02 | 2.89E-01 | 1.00E+00 |
| ENSG00000233471.2_KRT18P62   | ENSG00000160789.18_LMNA | -0.05848 | -0.215674721 | 0.101665211 | 4.74E-01 | 7.34E-01 | 1.00E+00 |
| ENSG00000222030.1_AC007131.  | ENSG00000160789.18_LMNA | -0.1767  | -0.326712934 | -0.01800899 | 2.94E-02 | 1.41E-01 | 1.00E+00 |
| ENSG00000250247.1_SEPHS2P1   | ENSG00000160789.18_LMNA | 0.16587  | 0.006852707  | 0.316709793 | 4.11E-02 | 1.77E-01 | 1.00E+00 |
| ENSG00000125975.12_C20orf173 | ENSG00000160789.18_LMNA | 0.01085  | -0.148604088 | 0.16976076  | 8.94E-01 | 9.59E-01 | 1.00E+00 |
| ENSG00000234805.1_AC090505.  | ENSG00000160789.18_LMNA | 0.06301  | -0.097167531 | 0.220001736 | 4.41E-01 | 7.08E-01 | 1.00E+00 |
| ENSG00000270816.4_LINC00221  | ENSG00000160789.18_LMNA | -0.03157 | -0.189819442 | 0.128272602 | 6.99E-01 | 8.71E-01 | 1.00E+00 |



|                              |                         |          |              |             |          |          |          |
|------------------------------|-------------------------|----------|--------------|-------------|----------|----------|----------|
| ENSG00000281708.1_ERC2-IT1   | ENSG00000160789.18_LMNA | -0.15141 | -0.303301799 | 0.007980918 | 6.26E-02 | 2.32E-01 | 1.00E+00 |
| ENSG00000234647.1_RP11-503C  | ENSG00000160789.18_LMNA | -0.08058 | -0.236746661 | 0.079639228 | 3.24E-01 | 6.10E-01 | 1.00E+00 |
| ENSG00000215354.8_FAM90A24I  | ENSG00000160789.18_LMNA | -0.02655 | -0.184964093 | 0.133218635 | 7.45E-01 | 8.94E-01 | 1.00E+00 |
| ENSG00000227395.1	EIF2AP4    | ENSG00000160789.18_LMNA | -0.18604 | -0.335312746 | -0.02766202 | 2.17E-02 | 1.15E-01 | 1.00E+00 |
| ENSG00000261279.4_ULK4P1     | ENSG00000160789.18_LMNA | -0.09403 | -0.249497476 | 0.066159372 | 2.49E-01 | 5.30E-01 | 1.00E+00 |
| ENSG00000223611.5_SUPT20HL   | ENSG00000160789.18_LMNA | 0.13202  | -0.027760185 | 0.285229646 | 1.05E-01 | 3.21E-01 | 1.00E+00 |
| ENSG00000170054.13_SERPINA5  | ENSG00000160789.18_LMNA | 0.22478  | 0.068017667  | 0.370718536 | 5.37E-03 | 4.13E-02 | 1.00E+00 |
| ENSG00000253872.1_RP11-90D1  | ENSG00000160789.18_LMNA | -0.03703 | -0.195076671 | 0.122899281 | 6.51E-01 | 8.45E-01 | 1.00E+00 |
| ENSG00000213648.9_SULT1A4    | ENSG00000160789.18_LMNA | -0.02643 | -0.184848957 | 0.133335729 | 7.47E-01 | 8.94E-01 | 1.00E+00 |
| ENSG00000274570.3_SPDYE10P   | ENSG00000160789.18_LMNA | 0.08904  | -0.071167532 | 0.24477292  | 2.75E-01 | 5.60E-01 | 1.00E+00 |
| ENSG00000280205.1_RP11-504I1 | ENSG00000160789.18_LMNA | -0.12968 | -0.283041729 | 0.030138257 | 1.11E-01 | 3.33E-01 | 1.00E+00 |
| ENSG00000226759.6_DAB1-AS1   | ENSG00000160789.18_LMNA | -0.24549 | -0.389471459 | -0.08980125 | 2.30E-03 | 2.18E-02 | 1.00E+00 |
| ENSG00000185231.4_MC2R       | ENSG00000160789.18_LMNA | 0.02162  | -0.138054246 | 0.180202077 | 7.91E-01 | 9.16E-01 | 1.00E+00 |
| ENSG00000069206.14_ADAM7     | ENSG00000160789.18_LMNA | -0.08696 | -0.242796854 | 0.073257503 | 2.87E-01 | 5.72E-01 | 1.00E+00 |
| ENSG00000214335.3_CTAGE16P   | ENSG00000160789.18_LMNA | 0.05243  | -0.10767036  | 0.209877944 | 5.21E-01 | 7.67E-01 | 1.00E+00 |
| ENSG00000224074.3_LINC00691  | ENSG00000160789.18_LMNA | -0.10306 | -0.258031159 | 0.057072944 | 2.06E-01 | 4.78E-01 | 1.00E+00 |
| ENSG00000205333.5_GOLGA2P1   | ENSG00000160789.18_LMNA | 0.16764  | 0.008672523  | 0.318346226 | 3.90E-02 | 1.70E-01 | 1.00E+00 |
| ENSG00000274933.3_TBC1D3I    | ENSG00000160789.18_LMNA | 0.02042  | -0.139234113 | 0.179037898 | 8.03E-01 | 9.21E-01 | 1.00E+00 |
| ENSG00000205777.16_GAGE1     | ENSG00000160789.18_LMNA | 0.02706  | -0.132716125 | 0.185458099 | 7.41E-01 | 8.91E-01 | 1.00E+00 |
| ENSG00000274255.1_           | ENSG00000160789.18_LMNA | 0.11836  | -0.041623647 | 0.272428648 | 1.46E-01 | 3.92E-01 | 1.00E+00 |
| ENSG00000207815.1_MIR563     | ENSG00000160789.18_LMNA | -0.08031 | -0.236483454 | 0.079916271 | 3.25E-01 | 6.12E-01 | 1.00E+00 |
| ENSG00000199102.1_MIR302C    | ENSG00000160789.18_LMNA | 0.06803  | -0.09217042  | 0.224794639 | 4.05E-01 | 6.81E-01 | 1.00E+00 |
| ENSG00000223648.3_IGHV3-64   | ENSG00000160789.18_LMNA | -0.02136 | -0.179950553 | 0.138309237 | 7.94E-01 | 9.17E-01 | 1.00E+00 |
| ENSG00000251887.2_RNU6-760F  | ENSG00000160789.18_LMNA | -0.04226 | -0.200114784 | 0.11773236  | 6.05E-01 | 8.19E-01 | 1.00E+00 |
| ENSG00000248995.2_RP11-766N  | ENSG00000160789.18_LMNA | -0.10589 | -0.26069932  | 0.054221208 | 1.94E-01 | 4.63E-01 | 1.00E+00 |
| ENSG00000264386.1_MIR4513    | ENSG00000160789.18_LMNA | 0.11687  | -0.043137583 | 0.271023972 | 1.52E-01 | 4.00E-01 | 1.00E+00 |
| ENSG00000281684.1_           | ENSG00000160789.18_LMNA | 0.00905  | -0.15036844  | 0.168007553 | 9.12E-01 | 9.66E-01 | 1.00E+00 |
| ENSG00000281795.1_           | ENSG00000160789.18_LMNA | 0.1125   | -0.047551288 | 0.266921147 | 1.68E-01 | 4.25E-01 | 1.00E+00 |
| ENSG00000271905.1_           | ENSG00000160789.18_LMNA | 0.15618  | -0.003102214 | 0.307725265 | 5.47E-02 | 2.13E-01 | 1.00E+00 |
| ENSG00000212457.1_RNU6-644F  | ENSG00000160789.18_LMNA | -0.07485 | -0.231298899 | 0.085363406 | 3.59E-01 | 6.42E-01 | 1.00E+00 |
| ENSG00000251870.1_RNU2-69P   | ENSG00000160789.18_LMNA | 0.0346   | -0.125287981 | 0.192741833 | 6.72E-01 | 8.56E-01 | 1.00E+00 |
| ENSG00000201916.1_Y_RNA      | ENSG00000160789.18_LMNA | -0.05464 | -0.211994634 | 0.105480266 | 5.04E-01 | 7.55E-01 | 1.00E+00 |
| ENSG00000280869.1_           | ENSG00000160789.18_LMNA | -0.13457 | -0.287612247 | 0.025166471 | 9.83E-02 | 3.08E-01 | 1.00E+00 |

|                             |                         |          |              |             |          |          |          |
|-----------------------------|-------------------------|----------|--------------|-------------|----------|----------|----------|
| ENSG00000244116.3_IGKV2-28  | ENSG00000160789.18_LMNA | -0.15081 | -0.302745928 | 0.008592949 | 6.36E-02 | 2.35E-01 | 1.00E+00 |
| ENSG00000200759.1_RNU6-884F | ENSG00000160789.18_LMNA | -0.0466  | -0.204289665 | 0.113437662 | 5.69E-01 | 7.98E-01 | 1.00E+00 |
| ENSG00000223495.2_RP11-763B | ENSG00000160789.18_LMNA | -0.19835 | -0.346608088 | -0.04042847 | 1.43E-02 | 8.50E-02 | 1.00E+00 |
| ENSG00000207021.1_Y_RNA     | ENSG00000160789.18_LMNA | 0.11183  | -0.048233966 | 0.266285534 | 1.70E-01 | 4.29E-01 | 1.00E+00 |
| ENSG00000207260.1_RNU6-35P  | ENSG00000160789.18_LMNA | 0.02292  | -0.136781419 | 0.181456981 | 7.79E-01 | 9.09E-01 | 1.00E+00 |
| ENSG00000252552.1_RNU6-307F | ENSG00000160789.18_LMNA | -0.046   | -0.203709811 | 0.114034868 | 5.74E-01 | 8.01E-01 | 1.00E+00 |
| ENSG00000202041.1_Y_RNA     | ENSG00000160789.18_LMNA | 0.07575  | -0.084471673 | 0.232148879 | 3.54E-01 | 6.37E-01 | 1.00E+00 |
| ENSG00000270916.1_RPL12P50  | ENSG00000160789.18_LMNA | 0.02705  | -0.132721815 | 0.185452506 | 7.41E-01 | 8.91E-01 | 1.00E+00 |
| ENSG00000200235.1_SNORA27   | ENSG00000160789.18_LMNA | -0.02765 | -0.186036086 | 0.132127982 | 7.35E-01 | 8.89E-01 | 1.00E+00 |
| ENSG00000276003.1_FAM13A-AS | ENSG00000160789.18_LMNA | 0.0387   | -0.121248869 | 0.196687765 | 6.36E-01 | 8.37E-01 | 1.00E+00 |
| ENSG00000269460.1_AC093063. | ENSG00000160789.18_LMNA | -0.02971 | -0.188021794 | 0.130105672 | 7.16E-01 | 8.79E-01 | 1.00E+00 |
| ENSG00000259430.1_CERS3-AS  | ENSG00000160789.18_LMNA | 0.06563  | -0.094563021 | 0.222501724 | 4.22E-01 | 6.93E-01 | 1.00E+00 |
| ENSG00000257645.1_RP11-804F | ENSG00000160789.18_LMNA | 0.04156  | -0.118425153 | 0.199440237 | 6.11E-01 | 8.23E-01 | 1.00E+00 |
| ENSG00000239942.2_RN7SL394F | ENSG00000160789.18_LMNA | -0.04459 | -0.202354515 | 0.115429827 | 5.85E-01 | 8.08E-01 | 1.00E+00 |
| ENSG00000254271.1_RP11-131N | ENSG00000160789.18_LMNA | 0.18857  | 0.030282029  | 0.337638083 | 2.00E-02 | 1.08E-01 | 1.00E+00 |
| ENSG00000224933.2_LINC01034 | ENSG00000160789.18_LMNA | -0.01119 | -0.170085918 | 0.14827664  | 8.91E-01 | 9.57E-01 | 1.00E+00 |
| ENSG00000239906.1_RP11-34P1 | ENSG00000160789.18_LMNA | 0.12923  | -0.03060076  | 0.28261583  | 1.13E-01 | 3.35E-01 | 1.00E+00 |
| ENSG00000250778.1_AC004980. | ENSG00000160789.18_LMNA | 0.03464  | -0.125252039 | 0.192776991 | 6.72E-01 | 8.56E-01 | 1.00E+00 |
| ENSG00000269181.1_CTD-3073N | ENSG00000160789.18_LMNA | -0.11431 | -0.268624807 | 0.045720027 | 1.61E-01 | 4.15E-01 | 1.00E+00 |
| ENSG00000243365.3_RN7SL278F | ENSG00000160789.18_LMNA | -0.05279 | -0.210224786 | 0.107311701 | 5.18E-01 | 7.65E-01 | 1.00E+00 |
| ENSG00000266155.2_RP11-927P | ENSG00000160789.18_LMNA | 0.10008  | -0.060073433 | 0.255218622 | 2.20E-01 | 4.95E-01 | 1.00E+00 |
| ENSG00000240680.1_AC016831. | ENSG00000160789.18_LMNA | 0.14467  | -0.014873994 | 0.297028971 | 7.54E-02 | 2.62E-01 | 1.00E+00 |
| ENSG00000227689.1_SRP68P2   | ENSG00000160789.18_LMNA | -0.03458 | -0.192717477 | 0.125312879 | 6.72E-01 | 8.56E-01 | 1.00E+00 |
| ENSG00000225676.1_RP3-438O4 | ENSG00000160789.18_LMNA | 0.22686  | 0.070199641  | 0.372608131 | 4.94E-03 | 3.89E-02 | 1.00E+00 |
| ENSG00000223128.1_RN7SKP14  | ENSG00000160789.18_LMNA | 0.04441  | -0.115604483 | 0.20218474  | 5.87E-01 | 8.08E-01 | 1.00E+00 |
| ENSG00000230428.1_RP1-196A1 | ENSG00000160789.18_LMNA | -0.07921 | -0.235444601 | 0.081009254 | 3.32E-01 | 6.18E-01 | 1.00E+00 |
| ENSG00000240940.3_RN7SL591F | ENSG00000160789.18_LMNA | -0.0522  | -0.209658972 | 0.10789675  | 5.23E-01 | 7.69E-01 | 1.00E+00 |
| ENSG00000257048.1_RP11-476M | ENSG00000160789.18_LMNA | 0.27058  | 0.116392446  | 0.412031245 | 7.48E-04 | 9.22E-03 | 1.00E+00 |
| ENSG00000256064.1_RP11-117L | ENSG00000160789.18_LMNA | -0.12256 | -0.276370819 | 0.037367129 | 1.33E-01 | 3.69E-01 | 1.00E+00 |
| ENSG00000260865.1_CTA-331F8 | ENSG00000160789.18_LMNA | -0.00285 | -0.161980245 | 0.156418633 | 9.72E-01 | 9.89E-01 | 1.00E+00 |
| ENSG00000280743.1_          | ENSG00000160789.18_LMNA | -0.13149 | -0.284733208 | 0.028300079 | 1.06E-01 | 3.24E-01 | 1.00E+00 |
| ENSG00000261810.1_RP11-895K | ENSG00000160789.18_LMNA | -0.0252  | -0.183659779 | 0.134544614 | 7.58E-01 | 8.99E-01 | 1.00E+00 |
| ENSG00000258091.1_RP11-290L | ENSG00000160789.18_LMNA | -0.1941  | -0.342707155 | -0.03600815 | 1.66E-02 | 9.43E-02 | 1.00E+00 |

|                              |                         |          |              |             |          |          |          |
|------------------------------|-------------------------|----------|--------------|-------------|----------|----------|----------|
| ENSG00000231705.1_RP11-432J  | ENSG00000160789.18_LMNA | 0.09808  | -0.062089622 | 0.253325726 | 2.29E-01 | 5.06E-01 | 1.00E+00 |
| ENSG00000230899.1_MAGEA8-A   | ENSG00000160789.18_LMNA | -0.00124 | -0.160404863 | 0.157996067 | 9.88E-01 | 9.95E-01 | 1.00E+00 |
| ENSG00000224445.2_RP11-413P  | ENSG00000160789.18_LMNA | -0.02629 | -0.184721605 | 0.133465237 | 7.48E-01 | 8.95E-01 | 1.00E+00 |
| ENSG00000227753.3_RP11-216N  | ENSG00000160789.18_LMNA | 0.15455  | -0.004771042 | 0.306213668 | 5.73E-02 | 2.19E-01 | 1.00E+00 |
| ENSG00000244155.1_CYP4F34P   | ENSG00000160789.18_LMNA | -0.12605 | -0.279638364 | 0.033830382 | 1.22E-01 | 3.51E-01 | 1.00E+00 |
| ENSG00000256007.1_ARAP1-AS   | ENSG00000160789.18_LMNA | 0.02068  | -0.138982308 | 0.17928643  | 8.00E-01 | 9.20E-01 | 1.00E+00 |
| ENSG00000240518.2_RP11-515C  | ENSG00000160789.18_LMNA | -0.06511 | -0.222006344 | 0.095079458 | 4.26E-01 | 6.96E-01 | 1.00E+00 |
| ENSG00000227352.1_ARHGEF7-   | ENSG00000160789.18_LMNA | -0.11142 | -0.265905591 | 0.048641903 | 1.72E-01 | 4.31E-01 | 1.00E+00 |
| ENSG00000242463.3_           | ENSG00000160789.18_LMNA | 0.07964  | -0.080580747 | 0.235851972 | 3.29E-01 | 6.15E-01 | 1.00E+00 |
| ENSG00000235258.1_NDUFB4P6   | ENSG00000160789.18_LMNA | 0.00329  | -0.155990701 | 0.16240734  | 9.68E-01 | 9.87E-01 | 1.00E+00 |
| ENSG00000241383.1_RP11-152C  | ENSG00000160789.18_LMNA | -0.21918 | -0.365624201 | -0.06214947 | 6.67E-03 | 4.86E-02 | 1.00E+00 |
| ENSG00000267437.1_CTC-454I21 | ENSG00000160789.18_LMNA | -0.01732 | -0.176030661 | 0.1422777   | 8.32E-01 | 9.35E-01 | 1.00E+00 |
| ENSG00000264071.2_RN7SL531F  | ENSG00000160789.18_LMNA | -0.06047 | -0.217577055 | 0.099689442 | 4.59E-01 | 7.23E-01 | 1.00E+00 |
| ENSG00000244158.1_RP1-93H18  | ENSG00000160789.18_LMNA | 0.04718  | -0.11287219  | 0.204838502 | 5.64E-01 | 7.95E-01 | 1.00E+00 |
| ENSG00000275680.1_Metazoa_SI | ENSG00000160789.18_LMNA | 0.08191  | -0.078314735 | 0.238004367 | 3.16E-01 | 6.02E-01 | 1.00E+00 |
| ENSG00000234373.1_SNX18P7    | ENSG00000160789.18_LMNA | 0.11054  | -0.0495355   | 0.265072972 | 1.75E-01 | 4.36E-01 | 1.00E+00 |
| ENSG00000254644.1_RP11-5A11  | ENSG00000160789.18_LMNA | -0.05728 | -0.214526004 | 0.10285706  | 4.83E-01 | 7.41E-01 | 1.00E+00 |
| ENSG00000251076.1_RP11-526F  | ENSG00000160789.18_LMNA | -0.03353 | -0.191712039 | 0.12634036  | 6.82E-01 | 8.61E-01 | 1.00E+00 |
| ENSG00000271227.1_RP1-152L7  | ENSG00000160789.18_LMNA | -0.00625 | -0.165286655 | 0.153102625 | 9.39E-01 | 9.76E-01 | 1.00E+00 |
| ENSG00000257325.1_RP11-263E  | ENSG00000160789.18_LMNA | -0.1005  | -0.255612104 | 0.059653999 | 2.18E-01 | 4.93E-01 | 1.00E+00 |
| ENSG00000234853.2_NDUFA5P3   | ENSG00000160789.18_LMNA | 0.06208  | -0.098086433 | 0.219118715 | 4.47E-01 | 7.14E-01 | 1.00E+00 |
| ENSG00000213557.4_RP11-240E  | ENSG00000160789.18_LMNA | -0.14614 | -0.29839408  | 0.013376425 | 7.24E-02 | 2.55E-01 | 1.00E+00 |
| ENSG00000237782.3_RP1-192P9  | ENSG00000160789.18_LMNA | -0.10062 | -0.255728781 | 0.059529605 | 2.17E-01 | 4.92E-01 | 1.00E+00 |
| ENSG00000276795.1_RP11-374M  | ENSG00000160789.18_LMNA | 0.05574  | -0.104389895 | 0.213047349 | 4.95E-01 | 7.50E-01 | 1.00E+00 |
| ENSG00000239615.1_CTD-2410N  | ENSG00000160789.18_LMNA | -0.08052 | -0.236685106 | 0.079704024 | 3.24E-01 | 6.11E-01 | 1.00E+00 |
| ENSG00000224409.1_RP11-114B  | ENSG00000160789.18_LMNA | 0.0632   | -0.096979156 | 0.220182692 | 4.39E-01 | 7.07E-01 | 1.00E+00 |
| ENSG00000203818.6_HIST2H3P5  | ENSG00000160789.18_LMNA | 0.01548  | -0.144075668 | 0.174251369 | 8.50E-01 | 9.41E-01 | 1.00E+00 |
| ENSG00000231845.3_HMGB3P14   | ENSG00000160789.18_LMNA | -0.05099 | -0.208501253 | 0.109093141 | 5.33E-01 | 7.75E-01 | 1.00E+00 |
| ENSG00000217330.1_SSXP10     | ENSG00000160789.18_LMNA | 0.05437  | -0.105741987 | 0.211741841 | 5.06E-01 | 7.56E-01 | 1.00E+00 |
| ENSG00000256879.1_RP11-284H  | ENSG00000160789.18_LMNA | 0.06303  | -0.097141311 | 0.220026925 | 4.40E-01 | 7.08E-01 | 1.00E+00 |
| ENSG00000233440.2_HMGA1P6    | ENSG00000160789.18_LMNA | 0.12382  | -0.036092049 | 0.277549682 | 1.29E-01 | 3.63E-01 | 1.00E+00 |
| ENSG00000261394.1_RP11-165M  | ENSG00000160789.18_LMNA | 0.01544  | -0.144112195 | 0.174215201 | 8.50E-01 | 9.41E-01 | 1.00E+00 |
| ENSG00000229294.1_RP5-1044H  | ENSG00000160789.18_LMNA | -0.11785 | -0.271949239 | 0.042140508 | 1.48E-01 | 3.95E-01 | 1.00E+00 |

|                              |                         |          |              |             |          |          |          |
|------------------------------|-------------------------|----------|--------------|-------------|----------|----------|----------|
| ENSG00000227911.3_RP11-141M  | ENSG00000160789.18_LMNA | -0.07705 | -0.233387856 | 0.083170925 | 3.45E-01 | 6.30E-01 | 1.00E+00 |
| ENSG00000259637.1_DNM1P38    | ENSG00000160789.18_LMNA | 0.04701  | -0.113040617 | 0.204675051 | 5.65E-01 | 7.96E-01 | 1.00E+00 |
| ENSG00000273925.1_RP11-227D  | ENSG00000160789.18_LMNA | 0.02666  | -0.133102184 | 0.185078588 | 7.44E-01 | 8.93E-01 | 1.00E+00 |
| ENSG00000269763.1_EXOSC3P2   | ENSG00000160789.18_LMNA | 0.06409  | -0.096094874 | 0.221031851 | 4.33E-01 | 7.02E-01 | 1.00E+00 |
| ENSG00000258428.4_RP11-1085I | ENSG00000160789.18_LMNA | 0.13983  | -0.019807376 | 0.292522913 | 8.58E-02 | 2.84E-01 | 1.00E+00 |
| ENSG00000242435.1_UPK3BP1    | ENSG00000160789.18_LMNA | 0.0141   | -0.145427813 | 0.1729119   | 8.63E-01 | 9.46E-01 | 1.00E+00 |
| ENSG00000231108.2_PRELID3BF  | ENSG00000160789.18_LMNA | -0.10342 | -0.258368466 | 0.056712713 | 2.05E-01 | 4.76E-01 | 1.00E+00 |
| ENSG00000256072.1_RP11-335I1 | ENSG00000160789.18_LMNA | 0.09889  | -0.061274154 | 0.254091618 | 2.25E-01 | 5.02E-01 | 1.00E+00 |
| ENSG00000242440.1_RP11-501O  | ENSG00000160789.18_LMNA | -0.13762 | -0.290459669 | 0.022061218 | 9.09E-02 | 2.94E-01 | 1.00E+00 |
| ENSG00000179600.3_GPHB5      | ENSG00000160789.18_LMNA | -0.08097 | -0.237113024 | 0.079253526 | 3.21E-01 | 6.08E-01 | 1.00E+00 |
| ENSG00000251629.5_RP11-774D  | ENSG00000160789.18_LMNA | -0.04786 | -0.205494355 | 0.112196187 | 5.58E-01 | 7.91E-01 | 1.00E+00 |
| ENSG00000234520.4_HRAT17     | ENSG00000160789.18_LMNA | 0.07965  | -0.080572059 | 0.23586023  | 3.29E-01 | 6.15E-01 | 1.00E+00 |
| ENSG00000237556.1_KCND3-AS   | ENSG00000160789.18_LMNA | 0.03961  | -0.120352571 | 0.197561992 | 6.28E-01 | 8.33E-01 | 1.00E+00 |
| ENSG00000248752.1_RP11-114J  | ENSG00000160789.18_LMNA | -0.03078 | -0.189051356 | 0.129056088 | 7.07E-01 | 8.75E-01 | 1.00E+00 |
| ENSG00000259402.1_RP11-30K9  | ENSG00000160789.18_LMNA | -0.05654 | -0.21381159  | 0.103597839 | 4.89E-01 | 7.45E-01 | 1.00E+00 |
| ENSG00000249881.1_CTB-57H20  | ENSG00000160789.18_LMNA | -0.21958 | -0.365983041 | -0.06256213 | 6.57E-03 | 4.81E-02 | 1.00E+00 |
| ENSG00000254192.1_CTC-558O2  | ENSG00000160789.18_LMNA | 0.04053  | -0.119436487 | 0.198454995 | 6.20E-01 | 8.28E-01 | 1.00E+00 |
| ENSG00000229369.1_RP13-225O  | ENSG00000160789.18_LMNA | 0.04023  | -0.119741215 | 0.198158003 | 6.23E-01 | 8.30E-01 | 1.00E+00 |
| ENSG00000229854.1_RP11-524G  | ENSG00000160789.18_LMNA | -0.16899 | -0.319592133 | -0.01005943 | 3.74E-02 | 1.66E-01 | 1.00E+00 |
| ENSG00000256514.1_AP003419   | ENSG00000160789.18_LMNA | 0.26223  | 0.107521797  | 0.404545522 | 1.10E-03 | 1.25E-02 | 1.00E+00 |
| ENSG00000236648.1_RP11-473A  | ENSG00000160789.18_LMNA | -0.05291 | -0.210336472 | 0.107196192 | 5.17E-01 | 7.64E-01 | 1.00E+00 |
| ENSG00000224871.1_           | ENSG00000160789.18_LMNA | 0.02401  | -0.135707379 | 0.182515091 | 7.69E-01 | 9.04E-01 | 1.00E+00 |
| ENSG00000249860.3_MTRNR2L5   | ENSG00000160789.18_LMNA | -0.02746 | -0.185849488 | 0.132317883 | 7.37E-01 | 8.89E-01 | 1.00E+00 |
| ENSG00000238007.1_AC024619   | ENSG00000160789.18_LMNA | -0.06015 | -0.217269298 | 0.100009249 | 4.62E-01 | 7.25E-01 | 1.00E+00 |
| ENSG00000255138.1_GLTPP1     | ENSG00000160789.18_LMNA | -0.04373 | -0.201529797 | 0.116278068 | 5.93E-01 | 8.12E-01 | 1.00E+00 |
| ENSG00000241671.1_RP11-529G  | ENSG00000160789.18_LMNA | -0.1594  | -0.310713754 | -0.00020223 | 4.98E-02 | 2.01E-01 | 1.00E+00 |
| ENSG00000229846.1_RP11-141A  | ENSG00000160789.18_LMNA | -0.0455  | -0.203231343 | 0.114527483 | 5.78E-01 | 8.03E-01 | 1.00E+00 |
| ENSG00000233379.1_RP11-318G  | ENSG00000160789.18_LMNA | -0.19822 | -0.346485146 | -0.04028898 | 1.44E-02 | 8.52E-02 | 1.00E+00 |
| ENSG00000235070.3_AC068138   | ENSG00000160789.18_LMNA | 0.1521   | -0.007272299 | 0.30394513  | 6.14E-02 | 2.29E-01 | 1.00E+00 |
| ENSG00000249582.1_RPL7L1P4   | ENSG00000160789.18_LMNA | 0.13385  | -0.025901256 | 0.286937662 | 1.00E-01 | 3.12E-01 | 1.00E+00 |
| ENSG00000234653.1_AC079117   | ENSG00000160789.18_LMNA | -0.17882 | -0.328662431 | -0.02019221 | 2.75E-02 | 1.35E-01 | 1.00E+00 |
| ENSG00000227197.1_AC009518   | ENSG00000160789.18_LMNA | -0.04481 | -0.202569925 | 0.115208198 | 5.84E-01 | 8.06E-01 | 1.00E+00 |
| ENSG00000230569.1_AC114763   | ENSG00000160789.18_LMNA | -0.12978 | -0.283133437 | 0.03003865  | 1.11E-01 | 3.32E-01 | 1.00E+00 |

|                              |                         |          |              |             |          |          |          |
|------------------------------|-------------------------|----------|--------------|-------------|----------|----------|----------|
| ENSG00000233431.1_RP11-63N8  | ENSG00000160789.18_LMNA | 0.11863  | -0.041351411 | 0.272681096 | 1.45E-01 | 3.91E-01 | 1.00E+00 |
| ENSG00000258964.1_RP11-618G  | ENSG00000160789.18_LMNA | 0.28467  | 0.131427486  | 0.424628454 | 3.79E-04 | 5.41E-03 | 1.00E+00 |
| ENSG00000254186.1_RP11-167P  | ENSG00000160789.18_LMNA | -0.1353  | -0.288295334 | 0.024422082 | 9.65E-02 | 3.05E-01 | 1.00E+00 |
| ENSG00000258685.2_CTD-2315A  | ENSG00000160789.18_LMNA | 0.03389  | -0.125990185 | 0.192054777 | 6.79E-01 | 8.60E-01 | 1.00E+00 |
| ENSG00000241409.1_AC064852.4 | ENSG00000160789.18_LMNA | 0.01783  | -0.141771458 | 0.176531269 | 8.27E-01 | 9.32E-01 | 1.00E+00 |
| ENSG00000250582.1_SMAD1-AS   | ENSG00000160789.18_LMNA | -0.0284  | -0.186760007 | 0.131391024 | 7.28E-01 | 8.85E-01 | 1.00E+00 |
| ENSG00000168269.8_FOXI1      | ENSG00000160789.18_LMNA | 0.10045  | -0.059706607 | 0.255562756 | 2.18E-01 | 4.93E-01 | 1.00E+00 |
| ENSG00000110244.6_APOA4      | ENSG00000160789.18_LMNA | -0.0563  | -0.213590362 | 0.103827161 | 4.91E-01 | 7.47E-01 | 1.00E+00 |
| ENSG00000225133.1_MORF4L1P   | ENSG00000160789.18_LMNA | -0.03115 | -0.189406907 | 0.128693458 | 7.03E-01 | 8.73E-01 | 1.00E+00 |
| ENSG00000249581.2_CLRN2      | ENSG00000160789.18_LMNA | 0.01327  | -0.146237222 | 0.172109514 | 8.71E-01 | 9.50E-01 | 1.00E+00 |
| ENSG00000279073.2_RP11-229P  | ENSG00000160789.18_LMNA | 0.03696  | -0.122966789 | 0.195010734 | 6.51E-01 | 8.45E-01 | 1.00E+00 |
| ENSG00000203989.3_RHOXF2B    | ENSG00000160789.18_LMNA | -0.04559 | -0.203315574 | 0.114440772 | 5.77E-01 | 8.03E-01 | 1.00E+00 |
| ENSG00000125207.6_PIWIL1     | ENSG00000160789.18_LMNA | 0.02977  | -0.130046702 | 0.188079657 | 7.16E-01 | 8.79E-01 | 1.00E+00 |
| ENSG00000269446.2_RP4-639J1  | ENSG00000160789.18_LMNA | -0.08773 | -0.243529613 | 0.07248283  | 2.82E-01 | 5.68E-01 | 1.00E+00 |
| ENSG00000248281.1_RP11-174E  | ENSG00000160789.18_LMNA | 0.23915  | 0.083110947  | 0.383738264 | 3.00E-03 | 2.68E-02 | 1.00E+00 |
| ENSG00000203262.3_RP5-961K1  | ENSG00000160789.18_LMNA | 0.06394  | -0.096239114 | 0.220893373 | 4.34E-01 | 7.03E-01 | 1.00E+00 |
| ENSG00000274499.1_RP11-403B  | ENSG00000160789.18_LMNA | 0.16107  | 0.0019149    | 0.312260256 | 4.74E-02 | 1.94E-01 | 1.00E+00 |
| ENSG00000235275.3_KRT18P16   | ENSG00000160789.18_LMNA | 0.15555  | -0.003747295 | 0.307141148 | 5.57E-02 | 2.15E-01 | 1.00E+00 |
| ENSG00000214070.3_AC011999   | ENSG00000160789.18_LMNA | 0.18823  | 0.029930938  | 0.337326697 | 2.02E-02 | 1.09E-01 | 1.00E+00 |
| ENSG00000158901.10_WFDC8     | ENSG00000160789.18_LMNA | 0.10432  | -0.055803185 | 0.259219774 | 2.01E-01 | 4.71E-01 | 1.00E+00 |
| ENSG00000255181.3_CCDC166    | ENSG00000160789.18_LMNA | 0.03061  | -0.129222163 | 0.188888496 | 7.08E-01 | 8.76E-01 | 1.00E+00 |
| ENSG00000248385.6_TARM1      | ENSG00000160789.18_LMNA | 0.11128  | -0.048783391 | 0.265773788 | 1.72E-01 | 4.31E-01 | 1.00E+00 |
| ENSG00000254897.1_RP11-482L  | ENSG00000160789.18_LMNA | 0.14592  | -0.013597293 | 0.298192828 | 7.28E-02 | 2.56E-01 | 1.00E+00 |
| ENSG00000160202.6_CRYAA      | ENSG00000160789.18_LMNA | -0.06485 | -0.221759106 | 0.095337141 | 4.27E-01 | 6.98E-01 | 1.00E+00 |
| ENSG00000228049.6_POLR2J2    | ENSG00000160789.18_LMNA | 0.02188  | -0.13779664  | 0.18045614  | 7.89E-01 | 9.14E-01 | 1.00E+00 |
| ENSG00000102243.11_VGLL1     | ENSG00000160789.18_LMNA | -0.06288 | -0.219877601 | 0.097296743 | 4.42E-01 | 7.09E-01 | 1.00E+00 |
| ENSG00000274658.1_TBC1D3J    | ENSG00000160789.18_LMNA | 0.02583  | -0.13392104  | 0.184273305 | 7.52E-01 | 8.97E-01 | 1.00E+00 |
| ENSG00000266965.1_RP11-712P  | ENSG00000160789.18_LMNA | -0.11554 | -0.269773999 | 0.044483569 | 1.56E-01 | 4.08E-01 | 1.00E+00 |
| ENSG00000126251.6_GPR42      | ENSG00000160789.18_LMNA | 0.0131   | -0.146404563 | 0.171943573 | 8.73E-01 | 9.51E-01 | 1.00E+00 |
| ENSG00000227555.1_MIR4290HC  | ENSG00000160789.18_LMNA | -0.30963 | -0.446807172 | -0.15823017 | 1.04E-04 | 1.94E-03 | 1.00E+00 |
| ENSG00000272162.1_RP11-637C  | ENSG00000160789.18_LMNA | -0.10674 | -0.261499617 | 0.053364845 | 1.91E-01 | 4.58E-01 | 1.00E+00 |
| ENSG00000243307.2_POM121L6I  | ENSG00000160789.18_LMNA | 0.06238  | -0.097794861 | 0.219398958 | 4.45E-01 | 7.12E-01 | 1.00E+00 |
| ENSG00000280036.1_RP11-540C  | ENSG00000160789.18_LMNA | 0.15211  | -0.007265286 | 0.303951495 | 6.14E-02 | 2.29E-01 | 1.00E+00 |

|                              |                         |          |              |             |          |          |          |
|------------------------------|-------------------------|----------|--------------|-------------|----------|----------|----------|
| ENSG00000269118.1_FAM90A28I  | ENSG00000160789.18_LMNA | 0.10206  | -0.058085752 | 0.257082391 | 2.11E-01 | 4.84E-01 | 1.00E+00 |
| ENSG00000178928.7_TPRX1      | ENSG00000160789.18_LMNA | 0.07117  | -0.089036572 | 0.227792616 | 3.84E-01 | 6.62E-01 | 1.00E+00 |
| ENSG00000278913.1_CTD-2299N  | ENSG00000160789.18_LMNA | -0.21123 | -0.358382583 | -0.05384376 | 8.99E-03 | 6.07E-02 | 1.00E+00 |
| ENSG00000232084.4_LINC01104  | ENSG00000160789.18_LMNA | -0.20226 | -0.350184518 | -0.04449164 | 1.25E-02 | 7.68E-02 | 1.00E+00 |
| ENSG00000177725.5_CTD-2530N  | ENSG00000160789.18_LMNA | 0.07991  | -0.080315279 | 0.236104291 | 3.28E-01 | 6.14E-01 | 1.00E+00 |
| ENSG00000260357.1_DNM1P34    | ENSG00000160789.18_LMNA | 0.05434  | -0.105779385 | 0.211705715 | 5.06E-01 | 7.57E-01 | 1.00E+00 |
| ENSG00000118972.1_FGF23      | ENSG00000160789.18_LMNA | -0.0924  | -0.24795784  | 0.067793177 | 2.58E-01 | 5.40E-01 | 1.00E+00 |
| ENSG00000229311.1_RP11-475I2 | ENSG00000160789.18_LMNA | -0.26257 | -0.404846907 | -0.10787803 | 1.08E-03 | 1.23E-02 | 1.00E+00 |
| ENSG00000181355.19_OFCC1     | ENSG00000160789.18_LMNA | -0.04186 | -0.19973212  | 0.118125412 | 6.09E-01 | 8.21E-01 | 1.00E+00 |
| ENSG00000254451.2_RP11-560G  | ENSG00000160789.18_LMNA | 0.01952  | -0.140118567 | 0.17816462  | 8.11E-01 | 9.26E-01 | 1.00E+00 |
| ENSG00000229172.1_AC073065.  | ENSG00000160789.18_LMNA | -0.05424 | -0.211616343 | 0.105871902 | 5.07E-01 | 7.57E-01 | 1.00E+00 |
| ENSG00000176584.14_DMBT1P1   | ENSG00000160789.18_LMNA | -0.08035 | -0.236529035 | 0.079868297 | 3.25E-01 | 6.12E-01 | 1.00E+00 |
| ENSG00000259288.4_BUB1B-PAI  | ENSG00000160789.18_LMNA | 0.0034   | -0.155883583 | 0.162514231 | 9.67E-01 | 9.87E-01 | 1.00E+00 |
| ENSG00000256870.2_SLC5A8     | ENSG00000160789.18_LMNA | -0.14963 | -0.301646042 | 0.009803272 | 6.58E-02 | 2.39E-01 | 1.00E+00 |
| ENSG00000235824.4_LINC00837  | ENSG00000160789.18_LMNA | -0.0234  | -0.181924975 | 0.136306472 | 7.75E-01 | 9.07E-01 | 1.00E+00 |
| ENSG00000280356.1_RP1-101G1  | ENSG00000160789.18_LMNA | 0.03461  | -0.12528054  | 0.192749112 | 6.72E-01 | 8.56E-01 | 1.00E+00 |
| ENSG00000277542.1_HOXB13-A3  | ENSG00000160789.18_LMNA | -0.00426 | -0.163353183 | 0.15504258  | 9.58E-01 | 9.83E-01 | 1.00E+00 |
| ENSG00000211599.2_IGKV5-2    | ENSG00000160789.18_LMNA | -0.01366 | -0.172482355 | 0.14586117  | 8.67E-01 | 9.48E-01 | 1.00E+00 |
| ENSG00000248955.1_RP11-114H  | ENSG00000160789.18_LMNA | 0.06642  | -0.093776284 | 0.22325607  | 4.16E-01 | 6.89E-01 | 1.00E+00 |
| ENSG00000210194.1_MT-TE      | ENSG00000160789.18_LMNA | -0.09639 | -0.251728972 | 0.063788381 | 2.37E-01 | 5.16E-01 | 1.00E+00 |
| ENSG00000238880.1_RNU7-59P   | ENSG00000160789.18_LMNA | -0.10087 | -0.255962704 | 0.059280181 | 2.16E-01 | 4.91E-01 | 1.00E+00 |
| ENSG00000278375.1_           | ENSG00000160789.18_LMNA | -0.02891 | -0.187245429 | 0.130896662 | 7.24E-01 | 8.83E-01 | 1.00E+00 |
| ENSG00000221247.1_           | ENSG00000160789.18_LMNA | -0.20285 | -0.350723169 | -0.04510448 | 1.22E-02 | 7.56E-02 | 1.00E+00 |
| ENSG00000266745.1_MIR3135A   | ENSG00000160789.18_LMNA | -0.10553 | -0.260352376 | 0.054592312 | 1.96E-01 | 4.65E-01 | 1.00E+00 |
| ENSG00000252549.1_RNU6-759F  | ENSG00000160789.18_LMNA | 0.02851  | -0.131283551 | 0.18686555  | 7.27E-01 | 8.85E-01 | 1.00E+00 |
| ENSG00000221077.1_           | ENSG00000160789.18_LMNA | -0.16005 | -0.311315016 | -0.00086788 | 4.89E-02 | 1.98E-01 | 1.00E+00 |
| ENSG00000226012.1_AP001434.  | ENSG00000160789.18_LMNA | 0.16769  | 0.008722129  | 0.318390808 | 3.89E-02 | 1.70E-01 | 1.00E+00 |
| ENSG00000222055.1_           | ENSG00000160789.18_LMNA | -0.0085  | -0.167474276 | 0.150904705 | 9.17E-01 | 9.69E-01 | 1.00E+00 |
| ENSG00000264226.1_MIR3168    | ENSG00000160789.18_LMNA | -0.07943 | -0.235654798 | 0.080788166 | 3.31E-01 | 6.17E-01 | 1.00E+00 |
| ENSG00000223220.1_Y_RNA      | ENSG00000160789.18_LMNA | 0.02759  | -0.132195417 | 0.185969827 | 7.36E-01 | 8.89E-01 | 1.00E+00 |
| ENSG00000252210.1_Y_RNA      | ENSG00000160789.18_LMNA | 0.11671  | -0.043291523 | 0.270881066 | 1.52E-01 | 4.01E-01 | 1.00E+00 |
| ENSG00000199880.1_RNU6-888F  | ENSG00000160789.18_LMNA | 0.00125  | -0.157978706 | 0.16042221  | 9.88E-01 | 9.95E-01 | 1.00E+00 |
| ENSG00000202542.1_Y_RNA      | ENSG00000160789.18_LMNA | 0.16173  | 0.002596632  | 0.312875387 | 4.65E-02 | 1.92E-01 | 1.00E+00 |

|                              |                         |          |              |             |          |          |          |
|------------------------------|-------------------------|----------|--------------|-------------|----------|----------|----------|
| ENSG00000222255.1_RNU6-101F  | ENSG00000160789.18_LMNA | -0.11957 | -0.273565362 | 0.040397461 | 1.42E-01 | 3.85E-01 | 1.00E+00 |
| ENSG00000238326.1_snoU13     | ENSG00000160789.18_LMNA | 0.03233  | -0.127526766 | 0.190550256 | 6.93E-01 | 8.68E-01 | 1.00E+00 |
| ENSG00000201104.1_RNU6-11P   | ENSG00000160789.18_LMNA | -0.00836 | -0.167342585 | 0.151037106 | 9.19E-01 | 9.69E-01 | 1.00E+00 |
| ENSG00000200473.1_RNA5SP50   | ENSG00000160789.18_LMNA | -0.01284 | -0.171694165 | 0.14665604  | 8.75E-01 | 9.51E-01 | 1.00E+00 |
| ENSG00000199875.1_Y_RNA      | ENSG00000160789.18_LMNA | 0.09844  | -0.061723412 | 0.253669722 | 2.28E-01 | 5.04E-01 | 1.00E+00 |
| ENSG00000211938.2_IGHV3-7    | ENSG00000160789.18_LMNA | -0.04615 | -0.20385451  | 0.113885862 | 5.72E-01 | 8.00E-01 | 1.00E+00 |
| ENSG00000222409.1_           | ENSG00000160789.18_LMNA | 0.09379  | -0.06640553  | 0.249265608 | 2.50E-01 | 5.31E-01 | 1.00E+00 |
| ENSG00000266542.1_           | ENSG00000160789.18_LMNA | 0.07322  | -0.086991764 | 0.229745537 | 3.70E-01 | 6.50E-01 | 1.00E+00 |
| ENSG00000272412.2_RN7SL778F  | ENSG00000160789.18_LMNA | -0.06375 | -0.220706233 | 0.096434019 | 4.35E-01 | 7.04E-01 | 1.00E+00 |
| ENSG00000233133.1_AC104451.1 | ENSG00000160789.18_LMNA | -0.0923  | -0.247861255 | 0.067895613 | 2.58E-01 | 5.41E-01 | 1.00E+00 |
| ENSG00000236028.1_RP11-323C  | ENSG00000160789.18_LMNA | 0.29174  | 0.138994588  | 0.430925942 | 2.66E-04 | 4.08E-03 | 1.00E+00 |
| ENSG00000250229.1_RP11-397D  | ENSG00000160789.18_LMNA | -0.004   | -0.163096754 | 0.155299685 | 9.61E-01 | 9.84E-01 | 1.00E+00 |
| ENSG00000258486.3_           | ENSG00000160789.18_LMNA | -0.04329 | -0.201108216 | 0.116711494 | 5.96E-01 | 8.14E-01 | 1.00E+00 |
| ENSG00000202374.1_SNORA62    | ENSG00000160789.18_LMNA | -0.12046 | -0.274402366 | 0.039493971 | 1.39E-01 | 3.81E-01 | 1.00E+00 |
| ENSG00000279340.1_RP11-667K  | ENSG00000160789.18_LMNA | -0.00841 | -0.167390972 | 0.150988459 | 9.18E-01 | 9.69E-01 | 1.00E+00 |
| ENSG00000250703.1_CTD-2533K  | ENSG00000160789.18_LMNA | -0.17181 | -0.322194704 | -0.01296037 | 3.43E-02 | 1.57E-01 | 1.00E+00 |
| ENSG00000227726.1_AP001271.1 | ENSG00000160789.18_LMNA | -0.05475 | -0.212105206 | 0.105365775 | 5.03E-01 | 7.54E-01 | 1.00E+00 |
| ENSG00000254699.1_RP11-12D1  | ENSG00000160789.18_LMNA | 0.04551  | -0.11452163  | 0.203237028 | 5.78E-01 | 8.03E-01 | 1.00E+00 |
| ENSG00000231630.1_RP11-740P  | ENSG00000160789.18_LMNA | -0.05788 | -0.215095415 | 0.102266383 | 4.79E-01 | 7.37E-01 | 1.00E+00 |
| ENSG00000127928.11_GNGT1     | ENSG00000160789.18_LMNA | -0.04277 | -0.200600594 | 0.117233218 | 6.01E-01 | 8.17E-01 | 1.00E+00 |
| ENSG00000203462.2_RP11-814E  | ENSG00000160789.18_LMNA | 0.05051  | -0.10957509  | 0.208034631 | 5.37E-01 | 7.77E-01 | 1.00E+00 |
| ENSG00000259270.1_RP11-561C  | ENSG00000160789.18_LMNA | 0.10788  | -0.052214309 | 0.262574149 | 1.86E-01 | 4.52E-01 | 1.00E+00 |
| ENSG00000244510.1_GS1-124K5  | ENSG00000160789.18_LMNA | 0.07021  | -0.089999181 | 0.226872381 | 3.90E-01 | 6.68E-01 | 1.00E+00 |
| ENSG00000273119.1_RP11-128P  | ENSG00000160789.18_LMNA | -0.12883 | -0.282244705 | 0.031003672 | 1.14E-01 | 3.37E-01 | 1.00E+00 |
| ENSG00000233683.1_RP5-1106H  | ENSG00000160789.18_LMNA | -0.1725  | -0.322832678 | -0.01367228 | 3.36E-02 | 1.54E-01 | 1.00E+00 |
| ENSG00000249782.1_RP11-417J  | ENSG00000160789.18_LMNA | 0.01195  | -0.147527657 | 0.170829402 | 8.84E-01 | 9.55E-01 | 1.00E+00 |
| ENSG00000241333.3_RN7SL385F  | ENSG00000160789.18_LMNA | -0.01384 | -0.172657052 | 0.145684938 | 8.66E-01 | 9.47E-01 | 1.00E+00 |
| ENSG00000242102.3_RN7SL152F  | ENSG00000160789.18_LMNA | -0.01771 | -0.176412028 | 0.141892056 | 8.29E-01 | 9.33E-01 | 1.00E+00 |
| ENSG00000250259.1_RP11-460I1 | ENSG00000160789.18_LMNA | 0.18555  | 0.027146464  | 0.334854736 | 2.21E-02 | 1.16E-01 | 1.00E+00 |
| ENSG00000268789.1_VN1R87P    | ENSG00000160789.18_LMNA | -0.23099 | -0.376354221 | -0.07453394 | 4.19E-03 | 3.44E-02 | 1.00E+00 |
| ENSG00000271429.1_RPL17P51   | ENSG00000160789.18_LMNA | -0.12542 | -0.279048803 | 0.034469096 | 1.24E-01 | 3.55E-01 | 1.00E+00 |
| ENSG00000187026.2_KRTAP21-2  | ENSG00000160789.18_LMNA | -0.06552 | -0.2223976   | 0.094671585 | 4.23E-01 | 6.94E-01 | 1.00E+00 |
| ENSG00000248362.1_CTC-327F1  | ENSG00000160789.18_LMNA | 0.1472   | -0.012287918 | 0.299385509 | 7.03E-02 | 2.50E-01 | 1.00E+00 |

|                              |                         |          |              |             |          |          |          |
|------------------------------|-------------------------|----------|--------------|-------------|----------|----------|----------|
| ENSG00000228255.1_RP11-323I1 | ENSG00000160789.18_LMNA | -0.01874 | -0.177409895 | 0.140882542 | 8.19E-01 | 9.30E-01 | 1.00E+00 |
| ENSG00000243313.2_RN7SL285F  | ENSG00000160789.18_LMNA | 0.03245  | -0.127413201 | 0.190661502 | 6.92E-01 | 8.67E-01 | 1.00E+00 |
| ENSG00000265643.1_RP11-465I4 | ENSG00000160789.18_LMNA | -0.16948 | -0.320042983 | -0.01056159 | 3.69E-02 | 1.64E-01 | 1.00E+00 |
| ENSG00000235088.1_RP4-620E1  | ENSG00000160789.18_LMNA | 0.04666  | -0.113378545 | 0.204347053 | 5.68E-01 | 7.98E-01 | 1.00E+00 |
| ENSG00000253015.1_RN7SKP64   | ENSG00000160789.18_LMNA | -0.05151 | -0.208996367 | 0.1085816   | 5.29E-01 | 7.72E-01 | 1.00E+00 |
| ENSG00000256417.1_RP11-1038. | ENSG00000160789.18_LMNA | -0.09913 | -0.254312503 | 0.061038893 | 2.24E-01 | 5.00E-01 | 1.00E+00 |
| ENSG00000241461.3_RN7SL182F  | ENSG00000160789.18_LMNA | -0.1045  | -0.259386428 | 0.055625072 | 2.00E-01 | 4.71E-01 | 1.00E+00 |
| ENSG00000240100.1_RP11-240G  | ENSG00000160789.18_LMNA | -0.0681  | -0.224858837 | 0.092103378 | 4.05E-01 | 6.80E-01 | 1.00E+00 |
| ENSG00000200966.1_RN7SKP87   | ENSG00000160789.18_LMNA | -0.08284 | -0.238893316 | 0.077377907 | 3.10E-01 | 5.97E-01 | 1.00E+00 |
| ENSG00000211804.3_TRDV1      | ENSG00000160789.18_LMNA | 0.03815  | -0.121790612 | 0.196159117 | 6.41E-01 | 8.40E-01 | 1.00E+00 |
| ENSG00000280981.1_           | ENSG00000160789.18_LMNA | 0.03113  | -0.128704799 | 0.189395789 | 7.03E-01 | 8.73E-01 | 1.00E+00 |
| ENSG00000251285.2_RP11-147K  | ENSG00000160789.18_LMNA | 0.01904  | -0.140582222 | 0.177706623 | 8.16E-01 | 9.28E-01 | 1.00E+00 |
| ENSG00000241130.1_RP11-507J  | ENSG00000160789.18_LMNA | -0.05133 | -0.208827024 | 0.10875658  | 5.30E-01 | 7.73E-01 | 1.00E+00 |
| ENSG00000233607.1_LINC01392  | ENSG00000160789.18_LMNA | 0.18612  | 0.027744694  | 0.335386182 | 2.17E-02 | 1.14E-01 | 1.00E+00 |
| ENSG00000254526.1_RP11-466I1 | ENSG00000160789.18_LMNA | 0.2989   | 0.146675248  | 0.437288989 | 1.84E-04 | 3.05E-03 | 1.00E+00 |
| ENSG00000233928.4_RP11-305F  | ENSG00000160789.18_LMNA | -0.11142 | -0.265908194 | 0.048639108 | 1.72E-01 | 4.31E-01 | 1.00E+00 |
| ENSG00000258066.1_RP11-781A  | ENSG00000160789.18_LMNA | -0.07819 | -0.234473302 | 0.082030476 | 3.38E-01 | 6.24E-01 | 1.00E+00 |
| ENSG00000241391.3_RN7SL234F  | ENSG00000160789.18_LMNA | 0.11809  | -0.041903319 | 0.272169261 | 1.47E-01 | 3.93E-01 | 1.00E+00 |
| ENSG00000277223.1_RP11-578B  | ENSG00000160789.18_LMNA | -0.2903  | -0.42964133  | -0.13744822 | 2.86E-04 | 4.33E-03 | 1.00E+00 |
| ENSG00000242197.2_RP11-588L  | ENSG00000160789.18_LMNA | 0.04286  | -0.117144824 | 0.20068661  | 6.00E-01 | 8.16E-01 | 1.00E+00 |
| ENSG00000260030.1_RP11-686F  | ENSG00000160789.18_LMNA | -0.05851 | -0.215702577 | 0.101636298 | 4.74E-01 | 7.34E-01 | 1.00E+00 |
| ENSG00000230184.1_SMYD3-IT1  | ENSG00000160789.18_LMNA | 0.01188  | -0.147604735 | 0.170752907 | 8.85E-01 | 9.55E-01 | 1.00E+00 |
| ENSG00000242598.1_MED28P8    | ENSG00000160789.18_LMNA | -0.112   | -0.266451586 | 0.048055647 | 1.70E-01 | 4.28E-01 | 1.00E+00 |
| ENSG00000254972.1_RP11-167J  | ENSG00000160789.18_LMNA | 0.07458  | -0.085632572 | 0.231042241 | 3.61E-01 | 6.43E-01 | 1.00E+00 |
| ENSG00000237129.1_MTCYBP34   | ENSG00000160789.18_LMNA | 0.01572  | -0.143842305 | 0.174482426 | 8.48E-01 | 9.40E-01 | 1.00E+00 |
| ENSG00000274637.1_RP11-279O  | ENSG00000160789.18_LMNA | -0.0249  | -0.183374973 | 0.134834    | 7.61E-01 | 9.00E-01 | 1.00E+00 |
| ENSG00000222007.5_AC064874.  | ENSG00000160789.18_LMNA | -0.07734 | -0.233665889 | 0.082878882 | 3.44E-01 | 6.28E-01 | 1.00E+00 |
| ENSG00000273252.1_OR7E39P    | ENSG00000160789.18_LMNA | 0.19068  | 0.032464604  | 0.339572322 | 1.86E-02 | 1.02E-01 | 1.00E+00 |
| ENSG00000263098.1_RP11-567O  | ENSG00000160789.18_LMNA | 0.11139  | -0.048670024 | 0.265879395 | 1.72E-01 | 4.31E-01 | 1.00E+00 |
| ENSG00000235242.1_AC010982.  | ENSG00000160789.18_LMNA | -0.18517 | -0.334507195 | -0.02675537 | 2.24E-02 | 1.17E-01 | 1.00E+00 |
| ENSG00000258868.1_RP11-816J  | ENSG00000160789.18_LMNA | -0.14135 | -0.293934175 | 0.018263913 | 8.24E-02 | 2.77E-01 | 1.00E+00 |
| ENSG00000261363.2_RP11-134D  | ENSG00000160789.18_LMNA | 0.07148  | -0.088729639 | 0.22808592  | 3.82E-01 | 6.60E-01 | 1.00E+00 |
| ENSG00000260701.1_RP11-449J  | ENSG00000160789.18_LMNA | 0.06102  | -0.09914019  | 0.218105465 | 4.55E-01 | 7.20E-01 | 1.00E+00 |



|                              |                         |          |              |             |          |          |          |
|------------------------------|-------------------------|----------|--------------|-------------|----------|----------|----------|
| ENSG00000239280.1_RP11-271C  | ENSG00000160789.18_LMNA | -0.00956 | -0.16850033  | 0.149872736 | 9.07E-01 | 9.64E-01 | 1.00E+00 |
| ENSG00000255015.1_RP11-716H  | ENSG00000160789.18_LMNA | -0.17724 | -0.327204805 | -0.01855955 | 2.89E-02 | 1.40E-01 | 1.00E+00 |
| ENSG00000240661.1_RP11-174O  | ENSG00000160789.18_LMNA | -0.00841 | -0.167388654 | 0.15099079  | 9.18E-01 | 9.69E-01 | 1.00E+00 |
| ENSG00000226037.1_LINC01040  | ENSG00000160789.18_LMNA | -0.12564 | -0.279253693 | 0.034247153 | 1.23E-01 | 3.53E-01 | 1.00E+00 |
| ENSG00000256953.1_RP11-6B19  | ENSG00000160789.18_LMNA | -0.0787  | -0.234959092 | 0.081519801 | 3.35E-01 | 6.21E-01 | 1.00E+00 |
| ENSG00000254984.1_FTLTP6     | ENSG00000160789.18_LMNA | 0.10624  | -0.053874731 | 0.261023165 | 1.93E-01 | 4.61E-01 | 1.00E+00 |
| ENSG00000233309.1_RPS6P12    | ENSG00000160789.18_LMNA | -0.07152 | -0.228123469 | 0.08869034  | 3.81E-01 | 6.60E-01 | 1.00E+00 |
| ENSG00000256258.1_RP11-495K  | ENSG00000160789.18_LMNA | -0.20769 | -0.35514947  | -0.05014913 | 1.02E-02 | 6.67E-02 | 1.00E+00 |
| ENSG00000272311.1_IFNL4P1    | ENSG00000160789.18_LMNA | 0.03436  | -0.125522833 | 0.192512082 | 6.74E-01 | 8.57E-01 | 1.00E+00 |
| ENSG00000277579.1_CTC-268N1  | ENSG00000160789.18_LMNA | 0.02445  | -0.135277354 | 0.182938532 | 7.65E-01 | 9.02E-01 | 1.00E+00 |
| ENSG00000232514.1_RP11-329A  | ENSG00000160789.18_LMNA | -0.14005 | -0.29272279  | 0.019588866 | 8.53E-02 | 2.83E-01 | 1.00E+00 |
| ENSG00000253385.1_KB-1254G8  | ENSG00000160789.18_LMNA | -0.07236 | -0.228920498 | 0.087855948 | 3.76E-01 | 6.56E-01 | 1.00E+00 |
| ENSG00000215893.3_RPL23AP1   | ENSG00000160789.18_LMNA | -0.09114 | -0.246761661 | 0.069061351 | 2.64E-01 | 5.48E-01 | 1.00E+00 |
| ENSG00000220600.2_RP3-509I19 | ENSG00000160789.18_LMNA | 0.07102  | -0.089184661 | 0.227651083 | 3.85E-01 | 6.63E-01 | 1.00E+00 |
| ENSG00000115263.13_GCG       | ENSG00000160789.18_LMNA | 0.01125  | -0.148213434 | 0.170148674 | 8.91E-01 | 9.57E-01 | 1.00E+00 |
| ENSG00000277690.2_XXbac-B33I | ENSG00000160789.18_LMNA | -0.07961 | -0.235824709 | 0.080609428 | 3.30E-01 | 6.16E-01 | 1.00E+00 |
| ENSG00000267047.1_RP11-589P  | ENSG00000160789.18_LMNA | -0.19084 | -0.339720563 | -0.032632   | 1.85E-02 | 1.02E-01 | 1.00E+00 |
| ENSG00000248624.1_RP11-5N11  | ENSG00000160789.18_LMNA | 0.04511  | -0.114912822 | 0.202856963 | 5.81E-01 | 8.05E-01 | 1.00E+00 |
| ENSG00000229876.1_CASC20     | ENSG00000160789.18_LMNA | -0.17864 | -0.328495143 | -0.02000475 | 2.77E-02 | 1.36E-01 | 1.00E+00 |
| ENSG00000260658.4_RP11-368L  | ENSG00000160789.18_LMNA | -0.08112 | -0.237261161 | 0.079097542 | 3.20E-01 | 6.07E-01 | 1.00E+00 |
| ENSG00000248346.1_RP11-292D  | ENSG00000160789.18_LMNA | -0.11039 | -0.264936471 | 0.04968195  | 1.76E-01 | 4.37E-01 | 1.00E+00 |
| ENSG00000236003.1_AC007050   | ENSG00000160789.18_LMNA | 0.01274  | -0.14675755  | 0.171593478 | 8.76E-01 | 9.52E-01 | 1.00E+00 |
| ENSG00000234247.1_RP11-100E  | ENSG00000160789.18_LMNA | 0.10458  | -0.055544832 | 0.259461499 | 2.00E-01 | 4.70E-01 | 1.00E+00 |
| ENSG00000231265.1_TRERNA1    | ENSG00000160789.18_LMNA | 0.03466  | -0.125229291 | 0.192799243 | 6.72E-01 | 8.56E-01 | 1.00E+00 |
| ENSG00000259899.1_CTD-3037C  | ENSG00000160789.18_LMNA | 0.05798  | -0.102164705 | 0.21519341  | 4.78E-01 | 7.36E-01 | 1.00E+00 |
| ENSG00000213069.3_KRT8P40    | ENSG00000160789.18_LMNA | 0.04453  | -0.115491219 | 0.202294841 | 5.86E-01 | 8.08E-01 | 1.00E+00 |
| ENSG00000275002.1_RP11-187E  | ENSG00000160789.18_LMNA | -0.0813  | -0.237426964 | 0.078922938 | 3.19E-01 | 6.06E-01 | 1.00E+00 |
| ENSG00000243886.1_RP11-575C  | ENSG00000160789.18_LMNA | 0.02314  | -0.136562296 | 0.181672914 | 7.77E-01 | 9.08E-01 | 1.00E+00 |
| ENSG00000167791.10_CABP2     | ENSG00000160789.18_LMNA | -0.05601 | -0.213312468 | 0.104115173 | 4.93E-01 | 7.48E-01 | 1.00E+00 |
| ENSG00000259161.2_CTD-2017C  | ENSG00000160789.18_LMNA | -0.19523 | -0.343751241 | -0.03719007 | 1.59E-02 | 9.16E-02 | 1.00E+00 |
| ENSG00000205628.2_LINC01446  | ENSG00000160789.18_LMNA | 0.0025   | -0.156761143 | 0.161638318 | 9.76E-01 | 9.91E-01 | 1.00E+00 |
| ENSG00000223770.4_AC006145   | ENSG00000160789.18_LMNA | 0.05757  | -0.102567812 | 0.214804865 | 4.81E-01 | 7.39E-01 | 1.00E+00 |
| ENSG00000254988.1_CTD-2547H  | ENSG00000160789.18_LMNA | -0.01276 | -0.171616006 | 0.146734838 | 8.76E-01 | 9.52E-01 | 1.00E+00 |

|                              |                         |          |              |             |          |          |          |
|------------------------------|-------------------------|----------|--------------|-------------|----------|----------|----------|
| ENSG00000235784.2_HNRNPA1F   | ENSG00000160789.18_LMNA | -0.00564 | -0.164697067 | 0.15369445  | 9.45E-01 | 9.78E-01 | 1.00E+00 |
| ENSG00000280080.1_U51561.1   | ENSG00000160789.18_LMNA | 0.18465  | 0.026220102  | 0.334031404 | 2.28E-02 | 1.18E-01 | 1.00E+00 |
| ENSG00000259663.2_CTD-2314G  | ENSG00000160789.18_LMNA | -0.12336 | -0.277121377 | 0.03655543  | 1.30E-01 | 3.65E-01 | 1.00E+00 |
| ENSG00000215165.3_TCEA1P3    | ENSG00000160789.18_LMNA | 0.0021   | -0.157151028 | 0.161249005 | 9.79E-01 | 9.92E-01 | 1.00E+00 |
| ENSG00000264243.1_RP11-6N17  | ENSG00000160789.18_LMNA | 0.02141  | -0.138263204 | 0.179995962 | 7.93E-01 | 9.16E-01 | 1.00E+00 |
| ENSG00000176009.3_ASCL3      | ENSG00000160789.18_LMNA | 0.03593  | -0.123980225 | 0.194020546 | 6.60E-01 | 8.50E-01 | 1.00E+00 |
| ENSG00000185087.10_FAM169B   | ENSG00000160789.18_LMNA | 0.04026  | -0.119709944 | 0.198188483 | 6.22E-01 | 8.29E-01 | 1.00E+00 |
| ENSG00000251464.2_RPL7L1P13  | ENSG00000160789.18_LMNA | 0.03191  | -0.127938953 | 0.190146414 | 6.96E-01 | 8.70E-01 | 1.00E+00 |
| ENSG00000242488.2_RP11-270M  | ENSG00000160789.18_LMNA | 0.02892  | -0.130883257 | 0.18725859  | 7.24E-01 | 8.83E-01 | 1.00E+00 |
| ENSG00000228259.3_RP11-1379  | ENSG00000160789.18_LMNA | -0.06274 | -0.219750093 | 0.097429455 | 4.43E-01 | 7.10E-01 | 1.00E+00 |
| ENSG00000261715.1_LINC01477  | ENSG00000160789.18_LMNA | -0.2199  | -0.366273531 | -0.06289627 | 6.49E-03 | 4.77E-02 | 1.00E+00 |
| ENSG00000239978.1_OR7E53P    | ENSG00000160789.18_LMNA | -0.05475 | -0.212097732 | 0.105373514 | 5.03E-01 | 7.54E-01 | 1.00E+00 |
| ENSG00000238025.1_ZDHHC4P1   | ENSG00000160789.18_LMNA | 0.01194  | -0.147545676 | 0.17081152  | 8.84E-01 | 9.55E-01 | 1.00E+00 |
| ENSG00000260188.1_CTA-331P3  | ENSG00000160789.18_LMNA | 0.11065  | -0.049423457 | 0.265177395 | 1.75E-01 | 4.35E-01 | 1.00E+00 |
| ENSG00000198889.4_DCAF12L1   | ENSG00000160789.18_LMNA | -0.12319 | -0.276960279 | 0.036729686 | 1.31E-01 | 3.66E-01 | 1.00E+00 |
| ENSG00000228963.3_OR7E93P    | ENSG00000160789.18_LMNA | -0.00471 | -0.163792172 | 0.154602334 | 9.54E-01 | 9.82E-01 | 1.00E+00 |
| ENSG00000254008.1_LINC00051  | ENSG00000160789.18_LMNA | 0.04992  | -0.110156699 | 0.207471325 | 5.41E-01 | 7.81E-01 | 1.00E+00 |
| ENSG00000280225.1_RP11-114G  | ENSG00000160789.18_LMNA | -0.102   | -0.257026515 | 0.058145379 | 2.11E-01 | 4.84E-01 | 1.00E+00 |
| ENSG00000269895.1_AP000654.4 | ENSG00000160789.18_LMNA | 0.05832  | -0.101826304 | 0.215519509 | 4.75E-01 | 7.34E-01 | 1.00E+00 |
| ENSG00000256852.1_KNOP1P1    | ENSG00000160789.18_LMNA | 0.10334  | -0.056795391 | 0.258291056 | 2.05E-01 | 4.77E-01 | 1.00E+00 |
| ENSG00000248848.1_PPBPP2     | ENSG00000160789.18_LMNA | 0.16937  | 0.010454798  | 0.319947114 | 3.70E-02 | 1.64E-01 | 1.00E+00 |
| ENSG00000229105.1_ASTN2-AS1  | ENSG00000160789.18_LMNA | -0.03974 | -0.197687085 | 0.120224277 | 6.27E-01 | 8.32E-01 | 1.00E+00 |
| ENSG00000161850.2_KRT82      | ENSG00000160789.18_LMNA | -0.01814 | -0.176832957 | 0.141466294 | 8.24E-01 | 9.31E-01 | 1.00E+00 |
| ENSG00000173335.4_CST9       | ENSG00000160789.18_LMNA | -0.17203 | -0.322400871 | -0.0131904  | 3.41E-02 | 1.56E-01 | 1.00E+00 |
| ENSG00000223896.2_CCNJ2P2    | ENSG00000160789.18_LMNA | -0.00625 | -0.165287336 | 0.153101941 | 9.39E-01 | 9.76E-01 | 1.00E+00 |
| ENSG00000224289.1_IFIT6P     | ENSG00000160789.18_LMNA | -0.19843 | -0.346680731 | -0.0405109  | 1.43E-02 | 8.48E-02 | 1.00E+00 |
| ENSG00000255178.1_RP11-686G  | ENSG00000160789.18_LMNA | -0.20246 | -0.350369133 | -0.04470166 | 1.24E-02 | 7.64E-02 | 1.00E+00 |
| ENSG00000279764.1_RP11-441F  | ENSG00000160789.18_LMNA | -0.00988 | -0.168817884 | 0.14955321  | 9.04E-01 | 9.63E-01 | 1.00E+00 |
| ENSG00000275016.3_RP11-61O1  | ENSG00000160789.18_LMNA | -0.03432 | -0.192466773 | 0.125569143 | 6.75E-01 | 8.57E-01 | 1.00E+00 |
| ENSG00000269855.2_RNF225     | ENSG00000160789.18_LMNA | 0.00598  | -0.153368964 | 0.16502135  | 9.42E-01 | 9.77E-01 | 1.00E+00 |
| ENSG00000237104.1_           | ENSG00000160789.18_LMNA | 0.00031  | -0.158897916 | 0.159503458 | 9.97E-01 | 9.99E-01 | 1.00E+00 |
| ENSG00000272975.1_MYHAS      | ENSG00000160789.18_LMNA | 0.03813  | -0.121807702 | 0.196142437 | 6.41E-01 | 8.40E-01 | 1.00E+00 |
| ENSG00000257037.1_RARSP1     | ENSG00000160789.18_LMNA | 0.14464  | -0.014906547 | 0.296999283 | 7.54E-02 | 2.62E-01 | 1.00E+00 |

|                              |                         |          |              |             |          |          |          |
|------------------------------|-------------------------|----------|--------------|-------------|----------|----------|----------|
| ENSG00000279128.1_RP11-76C1  | ENSG00000160789.18_LMNA | -0.024   | -0.182506422 | 0.135716181 | 7.69E-01 | 9.04E-01 | 1.00E+00 |
| ENSG00000236461.1_RP11-523L  | ENSG00000160789.18_LMNA | 0.00142  | -0.157812237 | 0.160588538 | 9.86E-01 | 9.95E-01 | 1.00E+00 |
| ENSG00000267478.1_RP11-815J  | ENSG00000160789.18_LMNA | 0.00529  | -0.154037496 | 0.164355214 | 9.48E-01 | 9.79E-01 | 1.00E+00 |
| ENSG00000226145.6_KRT16P6    | ENSG00000160789.18_LMNA | -0.11857 | -0.272628866 | 0.041407739 | 1.46E-01 | 3.91E-01 | 1.00E+00 |
| ENSG00000175658.4_DRD5P2     | ENSG00000160789.18_LMNA | 0.20938  | 0.051912585  | 0.356693555 | 9.63E-03 | 6.38E-02 | 1.00E+00 |
| ENSG00000237001.5_WASF3-AS   | ENSG00000160789.18_LMNA | -0.01632 | -0.175067631 | 0.143251099 | 8.42E-01 | 9.38E-01 | 1.00E+00 |
| ENSG00000260695.1_RP11-513N  | ENSG00000160789.18_LMNA | -0.03022 | -0.188511695 | 0.129606333 | 7.12E-01 | 8.77E-01 | 1.00E+00 |
| ENSG00000258169.1_LINC00485  | ENSG00000160789.18_LMNA | -0.34294 | -0.476143141 | -0.19434783 | 1.53E-05 | 4.14E-04 | 7.83E-01 |
| ENSG00000179213.12_SIGLECL1  | ENSG00000160789.18_LMNA | 0.12141  | -0.038535786 | 0.275289519 | 1.36E-01 | 3.76E-01 | 1.00E+00 |
| ENSG00000256861.1_RP11-512M  | ENSG00000160789.18_LMNA | -0.06712 | -0.22393031  | 0.093072756 | 4.11E-01 | 6.85E-01 | 1.00E+00 |
| ENSG00000249699.1_RP11-415C  | ENSG00000160789.18_LMNA | 0.18754  | 0.029216305  | 0.336692674 | 2.07E-02 | 1.10E-01 | 1.00E+00 |
| ENSG00000269332.4_GOLGA2P9   | ENSG00000160789.18_LMNA | -0.1602  | -0.311459522 | -0.0010279  | 4.87E-02 | 1.98E-01 | 1.00E+00 |
| ENSG00000260386.4_LINC01225  | ENSG00000160789.18_LMNA | 0.04235  | -0.117646731 | 0.200198136 | 6.04E-01 | 8.18E-01 | 1.00E+00 |
| ENSG00000232079.5_AL035610.1 | ENSG00000160789.18_LMNA | -0.09842 | -0.253644186 | 0.0617506   | 2.28E-01 | 5.04E-01 | 1.00E+00 |
| ENSG00000260599.1_CTC-457E2  | ENSG00000160789.18_LMNA | -0.20899 | -0.35633161  | -0.05149905 | 9.77E-03 | 6.45E-02 | 1.00E+00 |
| ENSG00000279912.1_RP11-624A  | ENSG00000160789.18_LMNA | 0.00529  | -0.154042317 | 0.164350409 | 9.48E-01 | 9.79E-01 | 1.00E+00 |
| ENSG00000252316.1_RNY4       | ENSG00000160789.18_LMNA | -0.18728 | -0.336452986 | -0.02894622 | 2.09E-02 | 1.11E-01 | 1.00E+00 |
| ENSG00000278223.1_MIR6783    | ENSG00000160789.18_LMNA | -0.08423 | -0.240211081 | 0.075988139 | 3.02E-01 | 5.89E-01 | 1.00E+00 |
| ENSG00000264314.1_MIR548AT   | ENSG00000160789.18_LMNA | 0.05122  | -0.108866358 | 0.208720773 | 5.31E-01 | 7.74E-01 | 1.00E+00 |
| ENSG00000239082.1_RNU7-170F  | ENSG00000160789.18_LMNA | 0.09766  | -0.062514383 | 0.252926632 | 2.31E-01 | 5.09E-01 | 1.00E+00 |
| ENSG00000252333.1_RNU6-964F  | ENSG00000160789.18_LMNA | -0.04664 | -0.204319829 | 0.113406589 | 5.68E-01 | 7.98E-01 | 1.00E+00 |
| ENSG00000281640.1_           | ENSG00000160789.18_LMNA | 0.0158   | -0.14376016  | 0.174563751 | 8.47E-01 | 9.40E-01 | 1.00E+00 |
| ENSG00000221280.2_           | ENSG00000160789.18_LMNA | 0.04795  | -0.112101962 | 0.205585749 | 5.57E-01 | 7.91E-01 | 1.00E+00 |
| ENSG00000264203.1_           | ENSG00000160789.18_LMNA | 0.09461  | -0.065574573 | 0.250048181 | 2.46E-01 | 5.26E-01 | 1.00E+00 |
| ENSG00000263678.1_           | ENSG00000160789.18_LMNA | -0.06373 | -0.220691412 | 0.096449454 | 4.35E-01 | 7.04E-01 | 1.00E+00 |
| ENSG00000266209.1_           | ENSG00000160789.18_LMNA | -0.03902 | -0.196992814 | 0.120936177 | 6.33E-01 | 8.35E-01 | 1.00E+00 |
| ENSG00000221053.1_           | ENSG00000160789.18_LMNA | -0.01683 | -0.175561853 | 0.142751633 | 8.37E-01 | 9.37E-01 | 1.00E+00 |
| ENSG00000267959.3_MIR3188    | ENSG00000160789.18_LMNA | -0.04753 | -0.205177056 | 0.112523272 | 5.61E-01 | 7.93E-01 | 1.00E+00 |
| ENSG00000263645.1_           | ENSG00000160789.18_LMNA | 0.13884  | -0.020825067 | 0.291591644 | 8.80E-02 | 2.89E-01 | 1.00E+00 |
| ENSG00000212024.2_MIR550A3   | ENSG00000160789.18_LMNA | 0.04884  | -0.111226431 | 0.206434708 | 5.50E-01 | 7.87E-01 | 1.00E+00 |
| ENSG00000276305.1_           | ENSG00000160789.18_LMNA | -0.05326 | -0.210677504 | 0.106843434 | 5.15E-01 | 7.62E-01 | 1.00E+00 |
| ENSG00000126890.13_CTAG2     | ENSG00000160789.18_LMNA | 0.0392   | -0.120752355 | 0.197172115 | 6.32E-01 | 8.35E-01 | 1.00E+00 |
| ENSG00000222335.1_Y_RNA      | ENSG00000160789.18_LMNA | 0.07267  | -0.087548023 | 0.229214527 | 3.74E-01 | 6.54E-01 | 1.00E+00 |

|                              |                         |          |              |             |          |          |          |
|------------------------------|-------------------------|----------|--------------|-------------|----------|----------|----------|
| ENSG00000207947.2_MIR152     | ENSG00000160789.18_LMNA | -0.01978 | -0.178415038 | 0.139864997 | 8.09E-01 | 9.24E-01 | 1.00E+00 |
| ENSG00000276696.1_Y_RNA      | ENSG00000160789.18_LMNA | -0.04104 | -0.198942856 | 0.118935788 | 6.16E-01 | 8.26E-01 | 1.00E+00 |
| ENSG00000199398.1_Y_RNA      | ENSG00000160789.18_LMNA | -0.06094 | -0.218029592 | 0.099219068 | 4.56E-01 | 7.20E-01 | 1.00E+00 |
| ENSG00000201586.1_RNU6-593F  | ENSG00000160789.18_LMNA | -0.00183 | -0.160980963 | 0.157419405 | 9.82E-01 | 9.93E-01 | 1.00E+00 |
| ENSG00000200972.1_RNU5A-8P   | ENSG00000160789.18_LMNA | -0.04271 | -0.200550824 | 0.117284361 | 6.01E-01 | 8.17E-01 | 1.00E+00 |
| ENSG00000265882.2_RN7SL73P   | ENSG00000160789.18_LMNA | 0.12744  | -0.032422194 | 0.280937348 | 1.18E-01 | 3.44E-01 | 1.00E+00 |
| ENSG00000202523.1_Y_RNA      | ENSG00000160789.18_LMNA | 0.01221  | -0.147281381 | 0.171073792 | 8.81E-01 | 9.54E-01 | 1.00E+00 |
| ENSG00000207494.1_Y_RNA      | ENSG00000160789.18_LMNA | 0.04633  | -0.113705685 | 0.204029458 | 5.71E-01 | 7.99E-01 | 1.00E+00 |
| ENSG00000210181.1_RNU6ATAC   | ENSG00000160789.18_LMNA | 0.07853  | -0.081693783 | 0.234793605 | 3.36E-01 | 6.22E-01 | 1.00E+00 |
| ENSG00000206869.1_SNORA70F   | ENSG00000160789.18_LMNA | -0.02611 | -0.18454716  | 0.133642618 | 7.49E-01 | 8.95E-01 | 1.00E+00 |
| ENSG00000206977.1_SNORA8     | ENSG00000160789.18_LMNA | -0.22305 | -0.369146097 | -0.06620413 | 5.74E-03 | 4.35E-02 | 1.00E+00 |
| ENSG00000270487.1_RP11-230C  | ENSG00000160789.18_LMNA | 0.12048  | -0.03948185  | 0.274413591 | 1.39E-01 | 3.81E-01 | 1.00E+00 |
| ENSG00000230502.1_CTD-2230M  | ENSG00000160789.18_LMNA | -0.09568 | -0.251060311 | 0.064499215 | 2.41E-01 | 5.20E-01 | 1.00E+00 |
| ENSG00000241625.3_RN7SL18P   | ENSG00000160789.18_LMNA | 0.07677  | -0.083450859 | 0.233121303 | 3.47E-01 | 6.31E-01 | 1.00E+00 |
| ENSG00000276532.1_Metazoa_SI | ENSG00000160789.18_LMNA | 0.034    | -0.125878693 | 0.192163885 | 6.77E-01 | 8.59E-01 | 1.00E+00 |
| ENSG00000231173.1_AC116609.  | ENSG00000160789.18_LMNA | -0.15876 | -0.310120916 | 0.000453826 | 5.08E-02 | 2.03E-01 | 1.00E+00 |
| ENSG00000275418.1_RP11-126O  | ENSG00000160789.18_LMNA | -0.0363  | -0.19437349  | 0.12361907  | 6.57E-01 | 8.48E-01 | 1.00E+00 |
| ENSG00000239715.1_AC093627.  | ENSG00000160789.18_LMNA | 0.16602  | 0.007007309  | 0.316848887 | 4.09E-02 | 1.76E-01 | 1.00E+00 |
| ENSG00000244112.3_RN7SL508F  | ENSG00000160789.18_LMNA | 0.0671   | -0.093095571 | 0.22390845  | 4.11E-01 | 6.85E-01 | 1.00E+00 |
| ENSG00000278333.1_uc_338     | ENSG00000160789.18_LMNA | 0.0416   | -0.11837988  | 0.199484326 | 6.11E-01 | 8.22E-01 | 1.00E+00 |
| ENSG00000243845.3_RN7SL30P   | ENSG00000160789.18_LMNA | 0.06739  | -0.09281105  | 0.224181045 | 4.09E-01 | 6.84E-01 | 1.00E+00 |
| ENSG00000279882.1_CTB-151G2  | ENSG00000160789.18_LMNA | 0.04927  | -0.110804082 | 0.206844068 | 5.47E-01 | 7.84E-01 | 1.00E+00 |
| ENSG00000223863.1_AC008074.  | ENSG00000160789.18_LMNA | -0.02211 | -0.180679323 | 0.137570308 | 7.87E-01 | 9.13E-01 | 1.00E+00 |
| ENSG00000235819.1_RP11-359Ji | ENSG00000160789.18_LMNA | 0.06529  | -0.094900005 | 0.222178498 | 4.24E-01 | 6.95E-01 | 1.00E+00 |
| ENSG00000258698.1_RP11-589M  | ENSG00000160789.18_LMNA | -0.0482  | -0.205819294 | 0.111861157 | 5.55E-01 | 7.89E-01 | 1.00E+00 |
| ENSG00000253569.1_VENTXP5    | ENSG00000160789.18_LMNA | -0.09617 | -0.251515574 | 0.064015273 | 2.39E-01 | 5.17E-01 | 1.00E+00 |
| ENSG00000277869.1_RP11-250H  | ENSG00000160789.18_LMNA | 0.01716  | -0.142429454 | 0.175880563 | 8.34E-01 | 9.35E-01 | 1.00E+00 |
| ENSG00000201967.1_RN7SKP22   | ENSG00000160789.18_LMNA | 0.03984  | -0.120122016 | 0.197786788 | 6.26E-01 | 8.31E-01 | 1.00E+00 |
| ENSG00000259817.1_RP11-53L2  | ENSG00000160789.18_LMNA | 0.01786  | -0.141747916 | 0.176554545 | 8.27E-01 | 9.32E-01 | 1.00E+00 |
| ENSG00000272197.2_RN7SL803F  | ENSG00000160789.18_LMNA | 0.1024   | -0.057743679 | 0.257402902 | 2.09E-01 | 4.82E-01 | 1.00E+00 |
| ENSG00000267637.1_RP11-619I2 | ENSG00000160789.18_LMNA | 0.0286   | -0.13120287  | 0.186944776 | 7.27E-01 | 8.84E-01 | 1.00E+00 |
| ENSG00000258380.1_RP11-33N1  | ENSG00000160789.18_LMNA | -0.09169 | -0.247280886 | 0.068511001 | 2.61E-01 | 5.44E-01 | 1.00E+00 |
| ENSG00000224012.3_RP11-756G  | ENSG00000160789.18_LMNA | 0.06749  | -0.092705206 | 0.224282439 | 4.09E-01 | 6.83E-01 | 1.00E+00 |

|                               |                         |          |              |             |          |          |          |
|-------------------------------|-------------------------|----------|--------------|-------------|----------|----------|----------|
| ENSG00000278701.1_Metazoa_SI  | ENSG00000160789.18_LMNA | -0.04012 | -0.198050949 | 0.119851043 | 6.24E-01 | 8.30E-01 | 1.00E+00 |
| ENSG00000226115.1_AP001476.1  | ENSG00000160789.18_LMNA | 0.24883  | 0.093322673  | 0.392479807 | 1.99E-03 | 1.95E-02 | 1.00E+00 |
| ENSG00000240803.3_RN7SL231F   | ENSG00000160789.18_LMNA | 0.07014  | -0.090065286 | 0.226809165 | 3.91E-01 | 6.69E-01 | 1.00E+00 |
| ENSG00000278732.1_Metazoa_SI  | ENSG00000160789.18_LMNA | -0.0871  | -0.242935425 | 0.073111035 | 2.86E-01 | 5.71E-01 | 1.00E+00 |
| ENSG00000281304.1_            | ENSG00000160789.18_LMNA | 0.0785   | -0.081718852 | 0.234769758 | 3.36E-01 | 6.22E-01 | 1.00E+00 |
| ENSG00000248660.1_SRIP1       | ENSG00000160789.18_LMNA | -0.08559 | -0.241496852 | 0.074630928 | 2.94E-01 | 5.80E-01 | 1.00E+00 |
| ENSG00000260049.1_            | ENSG00000160789.18_LMNA | -0.14868 | -0.300765716 | 0.010771332 | 6.75E-02 | 2.44E-01 | 1.00E+00 |
| ENSG00000230684.1_RP11-409K   | ENSG00000160789.18_LMNA | -0.01368 | -0.172509114 | 0.145834178 | 8.67E-01 | 9.48E-01 | 1.00E+00 |
| ENSG00000230801.1_RP11-243J   | ENSG00000160789.18_LMNA | 0.00604  | -0.153308746 | 0.165081339 | 9.41E-01 | 9.77E-01 | 1.00E+00 |
| ENSG00000270947.1_AC025811.1  | ENSG00000160789.18_LMNA | -0.16284 | -0.313904391 | -0.00373769 | 4.50E-02 | 1.88E-01 | 1.00E+00 |
| ENSG00000249553.1_PPP2R2B-I   | ENSG00000160789.18_LMNA | -0.06291 | -0.219907827 | 0.097265282 | 4.41E-01 | 7.09E-01 | 1.00E+00 |
| ENSG00000235869.1_RP1-102G2   | ENSG00000160789.18_LMNA | -0.10789 | -0.262580602 | 0.052207396 | 1.86E-01 | 4.52E-01 | 1.00E+00 |
| ENSG00000255519.1_RP11-958J   | ENSG00000160789.18_LMNA | 0.11908  | -0.040891649 | 0.273107339 | 1.44E-01 | 3.88E-01 | 1.00E+00 |
| ENSG00000233978.1_AC016735.1  | ENSG00000160789.18_LMNA | -0.08107 | -0.237206759 | 0.079154827 | 3.21E-01 | 6.07E-01 | 1.00E+00 |
| ENSG00000235988.1_RP11-495P   | ENSG00000160789.18_LMNA | 0.11554  | -0.044481944 | 0.269775509 | 1.56E-01 | 4.08E-01 | 1.00E+00 |
| ENSG00000281397.1_            | ENSG00000160789.18_LMNA | 0.08788  | -0.072333797 | 0.243670541 | 2.82E-01 | 5.67E-01 | 1.00E+00 |
| ENSG00000235575.1_RP4-800F2   | ENSG00000160789.18_LMNA | -0.10848 | -0.263131968 | 0.051616703 | 1.83E-01 | 4.48E-01 | 1.00E+00 |
| ENSG00000277621.1_RP11-597M   | ENSG00000160789.18_LMNA | -0.1299  | -0.283242137 | 0.029920579 | 1.11E-01 | 3.32E-01 | 1.00E+00 |
| ENSG00000267732.1_RP11-456O   | ENSG00000160789.18_LMNA | -0.17532 | -0.325437475 | -0.01658221 | 3.07E-02 | 1.46E-01 | 1.00E+00 |
| ENSG00000267713.1_RP11-10I6.1 | ENSG00000160789.18_LMNA | 0.06544  | -0.094752587 | 0.222319906 | 4.23E-01 | 6.94E-01 | 1.00E+00 |
| ENSG00000249870.1_RP11-481C   | ENSG00000160789.18_LMNA | -0.08171 | -0.237814201 | 0.078515071 | 3.17E-01 | 6.04E-01 | 1.00E+00 |
| ENSG00000251620.1_STPG2-AS    | ENSG00000160789.18_LMNA | -0.04682 | -0.204495172 | 0.113225951 | 5.67E-01 | 7.97E-01 | 1.00E+00 |
| ENSG00000254885.1_RP11-802F   | ENSG00000160789.18_LMNA | -0.08184 | -0.237937004 | 0.078385704 | 3.16E-01 | 6.03E-01 | 1.00E+00 |
| ENSG00000254649.1_RP11-452H   | ENSG00000160789.18_LMNA | 0.024    | -0.135718705 | 0.182503936 | 7.69E-01 | 9.04E-01 | 1.00E+00 |
| ENSG00000258312.1_RP11-690J   | ENSG00000160789.18_LMNA | -0.06344 | -0.220415164 | 0.096737118 | 4.37E-01 | 7.06E-01 | 1.00E+00 |
| ENSG00000249563.1_RP11-751L   | ENSG00000160789.18_LMNA | 0.09409  | -0.066098897 | 0.249554434 | 2.49E-01 | 5.29E-01 | 1.00E+00 |
| ENSG00000239354.1_RPS17P15    | ENSG00000160789.18_LMNA | -0.08733 | -0.243149903 | 0.072884307 | 2.85E-01 | 5.70E-01 | 1.00E+00 |
| ENSG00000240484.1_RP11-386M   | ENSG00000160789.18_LMNA | 0.04456  | -0.115454849 | 0.202330194 | 5.86E-01 | 8.08E-01 | 1.00E+00 |
| ENSG00000271919.1_RP11-269G   | ENSG00000160789.18_LMNA | 0.10703  | -0.053070878 | 0.261774239 | 1.89E-01 | 4.57E-01 | 1.00E+00 |
| ENSG00000277605.1_Metazoa_SI  | ENSG00000160789.18_LMNA | 0.10445  | -0.055675072 | 0.259339647 | 2.00E-01 | 4.71E-01 | 1.00E+00 |
| ENSG00000242908.5_AADACL2-1   | ENSG00000160789.18_LMNA | 0.01834  | -0.141270998 | 0.177025998 | 8.23E-01 | 9.31E-01 | 1.00E+00 |
| ENSG00000278083.1_RP11-525G   | ENSG00000160789.18_LMNA | 0.06495  | -0.095232462 | 0.221859547 | 4.27E-01 | 6.97E-01 | 1.00E+00 |
| ENSG00000259389.2_H3F3AP1     | ENSG00000160789.18_LMNA | 0.03943  | -0.120527525 | 0.197391385 | 6.30E-01 | 8.33E-01 | 1.00E+00 |

|                              |                         |          |              |             |          |          |          |
|------------------------------|-------------------------|----------|--------------|-------------|----------|----------|----------|
| ENSG00000254566.1_RP11-514F  | ENSG00000160789.18_LMNA | -0.0716  | -0.228195076 | 0.088615394 | 3.81E-01 | 6.59E-01 | 1.00E+00 |
| ENSG00000230165.1_AURKAPS2   | ENSG00000160789.18_LMNA | -0.17456 | -0.324737274 | -0.01579947 | 3.15E-02 | 1.48E-01 | 1.00E+00 |
| ENSG00000236875.3_DDX11L5    | ENSG00000160789.18_LMNA | -0.15061 | -0.302558603 | 0.008799148 | 6.40E-02 | 2.35E-01 | 1.00E+00 |
| ENSG00000224730.1_AC009892.  | ENSG00000160789.18_LMNA | -0.01134 | -0.170230168 | 0.148131352 | 8.90E-01 | 9.57E-01 | 1.00E+00 |
| ENSG00000248634.1_CTC-573M5  | ENSG00000160789.18_LMNA | 0.04382  | -0.11619247  | 0.201613042 | 5.92E-01 | 8.11E-01 | 1.00E+00 |
| ENSG00000259532.1_RP11-138H  | ENSG00000160789.18_LMNA | 0.04928  | -0.110788703 | 0.206858972 | 5.47E-01 | 7.84E-01 | 1.00E+00 |
| ENSG00000260576.1_EIF5A2P1   | ENSG00000160789.18_LMNA | 0.0571   | -0.103036605 | 0.21435288  | 4.85E-01 | 7.42E-01 | 1.00E+00 |
| ENSG00000271763.1_RP11-386M  | ENSG00000160789.18_LMNA | 0.08013  | -0.080091098 | 0.236317334 | 3.26E-01 | 6.13E-01 | 1.00E+00 |
| ENSG00000279586.1_AP000711.  | ENSG00000160789.18_LMNA | -0.11675 | -0.270915709 | 0.043254207 | 1.52E-01 | 4.01E-01 | 1.00E+00 |
| ENSG00000228658.1_RP11-791O  | ENSG00000160789.18_LMNA | -0.09318 | -0.248691153 | 0.067015224 | 2.54E-01 | 5.35E-01 | 1.00E+00 |
| ENSG00000236894.2_RP11-128B  | ENSG00000160789.18_LMNA | -0.07765 | -0.233953875 | 0.082576327 | 3.42E-01 | 6.27E-01 | 1.00E+00 |
| ENSG00000268818.2_CITF22-62I | ENSG00000160789.18_LMNA | 0.16232  | 0.003202848  | 0.313422161 | 4.57E-02 | 1.90E-01 | 1.00E+00 |
| ENSG00000236212.1_AC009262.  | ENSG00000160789.18_LMNA | -0.17478 | -0.324937552 | -0.01602332 | 3.13E-02 | 1.47E-01 | 1.00E+00 |
| ENSG00000278313.1_RP11-1006  | ENSG00000160789.18_LMNA | 0.02584  | -0.133908468 | 0.184285671 | 7.52E-01 | 8.97E-01 | 1.00E+00 |
| ENSG00000250614.1_AC007078.  | ENSG00000160789.18_LMNA | -0.00108 | -0.160255641 | 0.1581454   | 9.89E-01 | 9.96E-01 | 1.00E+00 |
| ENSG00000223584.1_TVP23CP1   | ENSG00000160789.18_LMNA | 0.10803  | -0.052061551 | 0.262716757 | 1.85E-01 | 4.51E-01 | 1.00E+00 |
| ENSG00000279889.1_RP11-451N  | ENSG00000160789.18_LMNA | -0.11254 | -0.266960362 | 0.047509159 | 1.67E-01 | 4.25E-01 | 1.00E+00 |
| ENSG00000273180.1_RP11-335L  | ENSG00000160789.18_LMNA | -0.00865 | -0.167623944 | 0.150754217 | 9.16E-01 | 9.68E-01 | 1.00E+00 |
| ENSG00000254314.1_RP11-26M5  | ENSG00000160789.18_LMNA | -0.11875 | -0.27279287  | 0.04123086  | 1.45E-01 | 3.90E-01 | 1.00E+00 |
| ENSG00000274019.1_CH17-78J1  | ENSG00000160789.18_LMNA | -0.10345 | -0.258398841 | 0.05668027  | 2.05E-01 | 4.76E-01 | 1.00E+00 |
| ENSG00000262099.1_CTC-524C5  | ENSG00000160789.18_LMNA | 0.07387  | -0.086348974 | 0.230358915 | 3.66E-01 | 6.47E-01 | 1.00E+00 |
| ENSG00000234050.1_LL0XNC01-  | ENSG00000160789.18_LMNA | -0.01549 | -0.174259856 | 0.144067098 | 8.50E-01 | 9.41E-01 | 1.00E+00 |
| ENSG00000244286.1_ITGB5-AS1  | ENSG00000160789.18_LMNA | 0.20183  | 0.044049606  | 0.349795866 | 1.26E-02 | 7.76E-02 | 1.00E+00 |
| ENSG00000258345.1_RP11-603J  | ENSG00000160789.18_LMNA | 0.09699  | -0.063182046 | 0.252299096 | 2.35E-01 | 5.12E-01 | 1.00E+00 |
| ENSG00000280015.1_RP11-83C7  | ENSG00000160789.18_LMNA | -0.05648 | -0.213758975 | 0.103652383 | 4.89E-01 | 7.46E-01 | 1.00E+00 |
| ENSG00000212930.3_RP11-414H  | ENSG00000160789.18_LMNA | 0.0122   | -0.147284718 | 0.17107048  | 8.81E-01 | 9.54E-01 | 1.00E+00 |
| ENSG00000259756.1_RP11-625H  | ENSG00000160789.18_LMNA | -0.02053 | -0.179146567 | 0.139124018 | 8.02E-01 | 9.20E-01 | 1.00E+00 |
| ENSG00000230137.1_RP4-539M6  | ENSG00000160789.18_LMNA | -0.0327  | -0.190910325 | 0.127159162 | 6.89E-01 | 8.66E-01 | 1.00E+00 |
| ENSG00000264475.1_RP11-76K1  | ENSG00000160789.18_LMNA | 0.03136  | -0.128477511 | 0.189618598 | 7.01E-01 | 8.72E-01 | 1.00E+00 |
| ENSG00000228386.2_RP5-1125A  | ENSG00000160789.18_LMNA | -0.03738 | -0.195419468 | 0.122548265 | 6.48E-01 | 8.43E-01 | 1.00E+00 |
| ENSG00000273877.3_RP11-635O  | ENSG00000160789.18_LMNA | -0.31459 | -0.451194438 | -0.16358299 | 7.91E-05 | 1.56E-03 | 1.00E+00 |
| ENSG00000259914.1_RP11-298D  | ENSG00000160789.18_LMNA | -0.12386 | -0.277583711 | 0.036055228 | 1.28E-01 | 3.63E-01 | 1.00E+00 |
| ENSG00000225393.1_RP11-218L  | ENSG00000160789.18_LMNA | -0.02151 | -0.180097252 | 0.138160521 | 7.92E-01 | 9.16E-01 | 1.00E+00 |

|                              |                         |          |              |             |          |          |          |
|------------------------------|-------------------------|----------|--------------|-------------|----------|----------|----------|
| ENSG00000234355.3_FTH1P27    | ENSG00000160789.18_LMNA | 0.25339  | 0.098143691  | 0.396588048 | 1.63E-03 | 1.68E-02 | 1.00E+00 |
| ENSG00000249255.1_PGAM1P9    | ENSG00000160789.18_LMNA | -0.03005 | -0.18835307  | 0.129768031 | 7.13E-01 | 8.78E-01 | 1.00E+00 |
| ENSG00000269055.1_BNIP3P18   | ENSG00000160789.18_LMNA | -0.17468 | -0.324849061 | -0.01592441 | 3.14E-02 | 1.48E-01 | 1.00E+00 |
| ENSG00000234622.4_RP13-297E  | ENSG00000160789.18_LMNA | 0.04377  | -0.116236217 | 0.201570498 | 5.92E-01 | 8.11E-01 | 1.00E+00 |
| ENSG00000219807.2_ARF1P1     | ENSG00000160789.18_LMNA | 0.11692  | -0.043080857 | 0.271076628 | 1.51E-01 | 4.00E-01 | 1.00E+00 |
| ENSG00000259191.2_RP11-253M  | ENSG00000160789.18_LMNA | 0.05539  | -0.104734392 | 0.212714829 | 4.98E-01 | 7.51E-01 | 1.00E+00 |
| ENSG00000272406.1_RP11-185E  | ENSG00000160789.18_LMNA | 0.08351  | -0.076706893 | 0.239529711 | 3.06E-01 | 5.93E-01 | 1.00E+00 |
| ENSG00000261558.1_CTD-2291D  | ENSG00000160789.18_LMNA | -0.07993 | -0.236123569 | 0.080294994 | 3.28E-01 | 6.14E-01 | 1.00E+00 |
| ENSG00000188716.5_DUPD1      | ENSG00000160789.18_LMNA | 0.16303  | 0.003929997  | 0.314077738 | 4.48E-02 | 1.87E-01 | 1.00E+00 |
| ENSG00000258782.3_RP11-701B  | ENSG00000160789.18_LMNA | 0.09726  | -0.062915048 | 0.252550079 | 2.33E-01 | 5.11E-01 | 1.00E+00 |
| ENSG00000215197.4_PGAM4P1    | ENSG00000160789.18_LMNA | 0.09704  | -0.06313407  | 0.252344198 | 2.34E-01 | 5.12E-01 | 1.00E+00 |
| ENSG00000240047.2_RPS3AP32   | ENSG00000160789.18_LMNA | -0.08741 | -0.24322688  | 0.072802925 | 2.84E-01 | 5.70E-01 | 1.00E+00 |
| ENSG00000267467.3_APOC4      | ENSG00000160789.18_LMNA | 0.06221  | -0.097961731 | 0.219238578 | 4.46E-01 | 7.13E-01 | 1.00E+00 |
| ENSG00000120094.6_HOXB1      | ENSG00000160789.18_LMNA | 0.10674  | -0.053370406 | 0.261494422 | 1.91E-01 | 4.58E-01 | 1.00E+00 |
| ENSG00000264301.1_LINC01444  | ENSG00000160789.18_LMNA | -0.12742 | -0.280917626 | 0.032443583 | 1.18E-01 | 3.44E-01 | 1.00E+00 |
| ENSG00000135569.4_TAAR5      | ENSG00000160789.18_LMNA | -0.0977  | -0.252969964 | 0.06246827  | 2.31E-01 | 5.09E-01 | 1.00E+00 |
| ENSG00000259156.6_CHEK2P2    | ENSG00000160789.18_LMNA | 0.0698   | -0.090409545 | 0.226479908 | 3.93E-01 | 6.71E-01 | 1.00E+00 |
| ENSG00000278981.1_RP11-9N12  | ENSG00000160789.18_LMNA | 0.01726  | -0.14232941  | 0.175979517 | 8.33E-01 | 9.35E-01 | 1.00E+00 |
| ENSG00000237286.1_AC004906.1 | ENSG00000160789.18_LMNA | 0.04892  | -0.111145947 | 0.206512725 | 5.49E-01 | 7.86E-01 | 1.00E+00 |
| ENSG00000249878.1_CTD-2244C  | ENSG00000160789.18_LMNA | 0.19231  | 0.034156998  | 0.341070368 | 1.76E-02 | 9.85E-02 | 1.00E+00 |
| ENSG00000267361.1_LOC100421  | ENSG00000160789.18_LMNA | -0.01966 | -0.178299415 | 0.13998208  | 8.10E-01 | 9.25E-01 | 1.00E+00 |
| ENSG00000264735.1_RP11-498C  | ENSG00000160789.18_LMNA | 0.00528  | -0.154054961 | 0.164337808 | 9.49E-01 | 9.79E-01 | 1.00E+00 |
| ENSG00000265257.4_RP11-21J1  | ENSG00000160789.18_LMNA | -0.00231 | -0.161454072 | 0.156945672 | 9.77E-01 | 9.91E-01 | 1.00E+00 |
| ENSG00000263551.4_RP11-78F1  | ENSG00000160789.18_LMNA | -0.15513 | -0.306754423 | 0.004174239 | 5.63E-02 | 2.17E-01 | 1.00E+00 |
| ENSG00000230225.1_MTND5P14   | ENSG00000160789.18_LMNA | 0.06848  | -0.091724887 | 0.225221222 | 4.02E-01 | 6.78E-01 | 1.00E+00 |
| ENSG00000232927.1_USP12PY    | ENSG00000160789.18_LMNA | 0.05947  | -0.100680659 | 0.216622981 | 4.67E-01 | 7.28E-01 | 1.00E+00 |
| ENSG00000279668.1 CTC-304I17 | ENSG00000160789.18_LMNA | -0.0941  | -0.249564959 | 0.066087722 | 2.49E-01 | 5.29E-01 | 1.00E+00 |
| ENSG00000224110.3_MTRF1LP2   | ENSG00000160789.18_LMNA | -0.04869 | -0.206294367 | 0.111371199 | 5.51E-01 | 7.87E-01 | 1.00E+00 |
| ENSG00000118526.6_TCF21      | ENSG00000160789.18_LMNA | 0.10065  | -0.059499323 | 0.255757183 | 2.17E-01 | 4.92E-01 | 1.00E+00 |
| ENSG00000232518.2_AC074366.1 | ENSG00000160789.18_LMNA | 0.07457  | -0.085651413 | 0.231024275 | 3.61E-01 | 6.43E-01 | 1.00E+00 |
| ENSG00000179674.3_ARL14      | ENSG00000160789.18_LMNA | 0.09123  | -0.068969863 | 0.246847987 | 2.64E-01 | 5.47E-01 | 1.00E+00 |
| ENSG00000235716.1_KRT18P46   | ENSG00000160789.18_LMNA | 0.03983  | -0.120128756 | 0.197780217 | 6.26E-01 | 8.31E-01 | 1.00E+00 |
| ENSG00000267257.1_RP11-1151  | ENSG00000160789.18_LMNA | 0.0264   | -0.133360328 | 0.184824769 | 7.47E-01 | 8.94E-01 | 1.00E+00 |

|                              |                         |          |              |             |          |          |          |
|------------------------------|-------------------------|----------|--------------|-------------|----------|----------|----------|
| ENSG00000281657.1_LINC00976  | ENSG00000160789.18_LMNA | -0.16289 | -0.313952132 | -0.00379065 | 4.50E-02 | 1.88E-01 | 1.00E+00 |
| ENSG00000279925.1_RP11-481J1 | ENSG00000160789.18_LMNA | 0.04985  | -0.110222786 | 0.207407304 | 5.42E-01 | 7.81E-01 | 1.00E+00 |
| ENSG00000274281.1_RP11-326N  | ENSG00000160789.18_LMNA | -0.16022 | -0.311471811 | -0.00104151 | 4.86E-02 | 1.98E-01 | 1.00E+00 |
| ENSG00000248231.1_KRT8P4     | ENSG00000160789.18_LMNA | -0.02044 | -0.179060047 | 0.139211674 | 8.03E-01 | 9.21E-01 | 1.00E+00 |
| ENSG00000262292.2_RP11-160E  | ENSG00000160789.18_LMNA | -0.04257 | -0.200409663 | 0.117429408 | 6.03E-01 | 8.18E-01 | 1.00E+00 |
| ENSG00000279273.1_CTD-2526A  | ENSG00000160789.18_LMNA | 0.03534  | -0.124558002 | 0.193455734 | 6.66E-01 | 8.53E-01 | 1.00E+00 |
| ENSG00000235197.1_ZNF33CP    | ENSG00000160789.18_LMNA | -0.1299  | -0.283247437 | 0.029914822 | 1.11E-01 | 3.32E-01 | 1.00E+00 |
| ENSG00000259555.1_RP11-335K  | ENSG00000160789.18_LMNA | 0.07678  | -0.083444175 | 0.233127668 | 3.47E-01 | 6.31E-01 | 1.00E+00 |
| ENSG00000185176.11_AQP12B    | ENSG00000160789.18_LMNA | -0.01499 | -0.17377888  | 0.144552764 | 8.55E-01 | 9.43E-01 | 1.00E+00 |
| ENSG00000196859.6_KRT39      | ENSG00000160789.18_LMNA | 0.10155  | -0.058602377 | 0.256598198 | 2.13E-01 | 4.87E-01 | 1.00E+00 |
| ENSG00000261734.1_RP11-669C  | ENSG00000160789.18_LMNA | 0.1108   | -0.049270127 | 0.265320285 | 1.74E-01 | 4.34E-01 | 1.00E+00 |
| ENSG00000225271.1_RP11-66N5  | ENSG00000160789.18_LMNA | -0.09639 | -0.251724064 | 0.0637936   | 2.37E-01 | 5.16E-01 | 1.00E+00 |
| ENSG00000197550.3_RP11-460N  | ENSG00000160789.18_LMNA | 0.0944   | -0.065791156 | 0.249844248 | 2.47E-01 | 5.27E-01 | 1.00E+00 |
| ENSG00000259786.5_CTD-2118P  | ENSG00000160789.18_LMNA | -0.15052 | -0.302475645 | 0.008890456 | 6.42E-02 | 2.36E-01 | 1.00E+00 |
| ENSG00000250406.1_RP13-539F  | ENSG00000160789.18_LMNA | -0.0669  | -0.223722702 | 0.093289416 | 4.13E-01 | 6.86E-01 | 1.00E+00 |
| ENSG00000272815.1_RP11-219A  | ENSG00000160789.18_LMNA | 0.05355  | -0.106559579 | 0.210951868 | 5.12E-01 | 7.61E-01 | 1.00E+00 |
| ENSG00000259619.2_RP11-390M  | ENSG00000160789.18_LMNA | -0.06457 | -0.221497301 | 0.095609961 | 4.29E-01 | 6.99E-01 | 1.00E+00 |
| ENSG00000179407.3_DNAJB8     | ENSG00000160789.18_LMNA | -0.11632 | -0.270513133 | 0.043687798 | 1.54E-01 | 4.04E-01 | 1.00E+00 |
| ENSG00000272887.1_CSPG4P5    | ENSG00000160789.18_LMNA | -0.03636 | -0.194434067 | 0.123557076 | 6.57E-01 | 8.48E-01 | 1.00E+00 |
| ENSG00000147081.13_AKAP4     | ENSG00000160789.18_LMNA | 0.13094  | -0.028860061 | 0.284218124 | 1.08E-01 | 3.27E-01 | 1.00E+00 |
| ENSG00000206356.5_RP11-93O1  | ENSG00000160789.18_LMNA | 0.10251  | -0.057634011 | 0.257505643 | 2.09E-01 | 4.82E-01 | 1.00E+00 |
| ENSG00000256349.1_CTD-3074C  | ENSG00000160789.18_LMNA | -0.10694 | -0.26168134  | 0.053170327 | 1.90E-01 | 4.57E-01 | 1.00E+00 |
| ENSG00000007216.13_SLC13A2   | ENSG00000160789.18_LMNA | -0.13121 | -0.284469232 | 0.02858709  | 1.07E-01 | 3.25E-01 | 1.00E+00 |
| ENSG00000280070.1_RP11-907D  | ENSG00000160789.18_LMNA | -0.13164 | -0.284869065 | 0.028152348 | 1.06E-01 | 3.23E-01 | 1.00E+00 |
| ENSG00000261807.2_RP11-430C  | ENSG00000160789.18_LMNA | 0.04766  | -0.112393509 | 0.205302944 | 5.60E-01 | 7.92E-01 | 1.00E+00 |
| ENSG00000218819.4_TDRD15     | ENSG00000160789.18_LMNA | -0.02943 | -0.187754324 | 0.130378226 | 7.19E-01 | 8.81E-01 | 1.00E+00 |
| ENSG00000242887.1_IGHJ3      | ENSG00000160789.18_LMNA | -0.06471 | -0.221623446 | 0.095478514 | 4.28E-01 | 6.99E-01 | 1.00E+00 |
| ENSG00000275301.1_           | ENSG00000160789.18_LMNA | -0.05631 | -0.213598521 | 0.103818703 | 4.91E-01 | 7.47E-01 | 1.00E+00 |
| ENSG00000274725.1_           | ENSG00000160789.18_LMNA | -0.04089 | -0.198795216 | 0.11908733  | 6.17E-01 | 8.26E-01 | 1.00E+00 |
| ENSG00000207550.1_MIR99B     | ENSG00000160789.18_LMNA | 0.10375  | -0.056382799 | 0.258677318 | 2.03E-01 | 4.74E-01 | 1.00E+00 |
| ENSG00000263800.1_MIR5684    | ENSG00000160789.18_LMNA | 0.01826  | -0.141349578 | 0.176948328 | 8.23E-01 | 9.31E-01 | 1.00E+00 |
| ENSG00000256513.1_RP11-977P  | ENSG00000160789.18_LMNA | 0.00881  | -0.150600363 | 0.167776946 | 9.14E-01 | 9.67E-01 | 1.00E+00 |
| ENSG00000238386.1_RNU7-48P   | ENSG00000160789.18_LMNA | 0.07301  | -0.087206948 | 0.229540142 | 3.71E-01 | 6.52E-01 | 1.00E+00 |



|                             |                         |          |              |             |          |          |          |
|-----------------------------|-------------------------|----------|--------------|-------------|----------|----------|----------|
| ENSG00000207752.1_MIR199A1  | ENSG00000160789.18_LMNA | 0.05794  | -0.102208219 | 0.215151473 | 4.78E-01 | 7.37E-01 | 1.00E+00 |
| ENSG00000275114.1_          | ENSG00000160789.18_LMNA | -0.03461 | -0.192746833 | 0.12528287  | 6.72E-01 | 8.56E-01 | 1.00E+00 |
| ENSG00000266245.1_MIR4644   | ENSG00000160789.18_LMNA | 0.0078   | -0.151593086 | 0.166789458 | 9.24E-01 | 9.71E-01 | 1.00E+00 |
| ENSG00000209702.1_SNORD41   | ENSG00000160789.18_LMNA | -0.01498 | -0.173766495 | 0.144565268 | 8.55E-01 | 9.43E-01 | 1.00E+00 |
| ENSG00000199630.1_Y_RNA     | ENSG00000160789.18_LMNA | -0.05762 | -0.214845246 | 0.102525923 | 4.81E-01 | 7.39E-01 | 1.00E+00 |
| ENSG00000263979.1_MIR4672   | ENSG00000160789.18_LMNA | 0.02103  | -0.138632775 | 0.179631352 | 7.97E-01 | 9.18E-01 | 1.00E+00 |
| ENSG00000266780.1_MIR4444-2 | ENSG00000160789.18_LMNA | 0.06636  | -0.093836012 | 0.223198814 | 4.17E-01 | 6.89E-01 | 1.00E+00 |
| ENSG00000221493.1_MIR320C1  | ENSG00000160789.18_LMNA | -0.03735 | -0.195386776 | 0.122581744 | 6.48E-01 | 8.43E-01 | 1.00E+00 |
| ENSG00000211935.3_IGHV1-3   | ENSG00000160789.18_LMNA | -0.05576 | -0.213067379 | 0.104369142 | 4.95E-01 | 7.50E-01 | 1.00E+00 |
| ENSG00000222071.1_MIR1915   | ENSG00000160789.18_LMNA | -0.00415 | -0.163242828 | 0.155153231 | 9.60E-01 | 9.84E-01 | 1.00E+00 |
| ENSG00000207647.1_MIR153-1  | ENSG00000160789.18_LMNA | -0.01505 | -0.173838293 | 0.14449278  | 8.54E-01 | 9.43E-01 | 1.00E+00 |
| ENSG00000221066.1_SNORD111  | ENSG00000160789.18_LMNA | -0.02246 | -0.181015891 | 0.137228929 | 7.84E-01 | 9.11E-01 | 1.00E+00 |
| ENSG00000221464.1_MIR1271   | ENSG00000160789.18_LMNA | 0.10411  | -0.056021388 | 0.259015583 | 2.02E-01 | 4.72E-01 | 1.00E+00 |
| ENSG00000206723.1_RNU6-1056 | ENSG00000160789.18_LMNA | -0.01842 | -0.177099432 | 0.141196699 | 8.22E-01 | 9.30E-01 | 1.00E+00 |
| ENSG00000265208.2_          | ENSG00000160789.18_LMNA | -0.07456 | -0.231019761 | 0.085656145 | 3.61E-01 | 6.43E-01 | 1.00E+00 |
| ENSG00000206652.1_RNU1-1    | ENSG00000160789.18_LMNA | -0.0805  | -0.236666739 | 0.079723356 | 3.24E-01 | 6.11E-01 | 1.00E+00 |
| ENSG00000200350.1_RNU6-1285 | ENSG00000160789.18_LMNA | 0.01741  | -0.142181027 | 0.176126271 | 8.31E-01 | 9.34E-01 | 1.00E+00 |
| ENSG00000207839.1_MIR33B    | ENSG00000160789.18_LMNA | 0.136    | -0.023713388 | 0.288945369 | 9.48E-02 | 3.01E-01 | 1.00E+00 |
| ENSG00000212332.1_RNU6-780F | ENSG00000160789.18_LMNA | -0.002   | -0.161147322 | 0.157252843 | 9.81E-01 | 9.93E-01 | 1.00E+00 |
| ENSG00000265416.1_          | ENSG00000160789.18_LMNA | 0.03686  | -0.123057976 | 0.194921665 | 6.52E-01 | 8.46E-01 | 1.00E+00 |
| ENSG00000226160.1_LA16c-17H | ENSG00000160789.18_LMNA | 0.03458  | -0.125307293 | 0.192722941 | 6.72E-01 | 8.56E-01 | 1.00E+00 |
| ENSG00000207575.1_MIR649    | ENSG00000160789.18_LMNA | -0.05099 | -0.208495616 | 0.109098964 | 5.33E-01 | 7.75E-01 | 1.00E+00 |
| ENSG00000212572.1_RNU6-903F | ENSG00000160789.18_LMNA | -0.10609 | -0.260882656 | 0.054025069 | 1.93E-01 | 4.62E-01 | 1.00E+00 |
| ENSG00000201830.1_Y_RNA     | ENSG00000160789.18_LMNA | 0.00488  | -0.154435956 | 0.163958043 | 9.52E-01 | 9.81E-01 | 1.00E+00 |
| ENSG00000252913.1_RNU6-158F | ENSG00000160789.18_LMNA | 0.05039  | -0.109690591 | 0.207922781 | 5.38E-01 | 7.78E-01 | 1.00E+00 |
| ENSG00000207459.1_RNU6-1311 | ENSG00000160789.18_LMNA | -0.03913 | -0.19710714  | 0.12081897  | 6.32E-01 | 8.35E-01 | 1.00E+00 |
| ENSG00000239736.2_CEACAMP3  | ENSG00000160789.18_LMNA | -0.2075  | -0.354970939 | -0.04994535 | 1.03E-02 | 6.70E-02 | 1.00E+00 |
| ENSG00000221510.1_MIR548O   | ENSG00000160789.18_LMNA | 0.01299  | -0.14651695  | 0.171832115 | 8.74E-01 | 9.51E-01 | 1.00E+00 |
| ENSG00000206790.1_Y_RNA     | ENSG00000160789.18_LMNA | 0.05154  | -0.108553856 | 0.209023216 | 5.28E-01 | 7.72E-01 | 1.00E+00 |
| ENSG00000267771.1_CTC-260E6 | ENSG00000160789.18_LMNA | 0.00813  | -0.151261623 | 0.167119244 | 9.21E-01 | 9.70E-01 | 1.00E+00 |
| ENSG00000200114.1_RNA5SP12  | ENSG00000160789.18_LMNA | -0.0252  | -0.183662    | 0.134542358 | 7.58E-01 | 8.99E-01 | 1.00E+00 |
| ENSG00000280644.1_          | ENSG00000160789.18_LMNA | -0.0755  | -0.23191479  | 0.084717312 | 3.55E-01 | 6.39E-01 | 1.00E+00 |
| ENSG00000281467.1_          | ENSG00000160789.18_LMNA | 0.08369  | -0.076528417 | 0.239698933 | 3.05E-01 | 5.92E-01 | 1.00E+00 |

|                              |                         |          |              |             |          |          |          |
|------------------------------|-------------------------|----------|--------------|-------------|----------|----------|----------|
| ENSG00000259194.1_RP11-108K  | ENSG00000160789.18_LMNA | -0.04284 | -0.200667812 | 0.117164143 | 6.00E-01 | 8.16E-01 | 1.00E+00 |
| ENSG00000221507.1_RNU6ATAC   | ENSG00000160789.18_LMNA | 0.04133  | -0.11864962  | 0.199221616 | 6.13E-01 | 8.24E-01 | 1.00E+00 |
| ENSG00000247732.2_RP11-404K  | ENSG00000160789.18_LMNA | -0.06117 | -0.218248904 | 0.09899106  | 4.54E-01 | 7.19E-01 | 1.00E+00 |
| ENSG00000231985.1_RP11-82L2  | ENSG00000160789.18_LMNA | 0.03961  | -0.120344723 | 0.197569644 | 6.28E-01 | 8.33E-01 | 1.00E+00 |
| ENSG00000242650.3_RN7SL292F  | ENSG00000160789.18_LMNA | 0.07323  | -0.08698152  | 0.229755314 | 3.70E-01 | 6.50E-01 | 1.00E+00 |
| ENSG00000271100.1_RP11-697H  | ENSG00000160789.18_LMNA | -0.03948 | -0.197441031 | 0.120476617 | 6.29E-01 | 8.33E-01 | 1.00E+00 |
| ENSG00000228191.1_RP11-345I1 | ENSG00000160789.18_LMNA | -0.12086 | -0.27477774  | 0.039088612 | 1.38E-01 | 3.79E-01 | 1.00E+00 |
| ENSG00000270694.1_RP11-535E  | ENSG00000160789.18_LMNA | 0.16279  | 0.003682414  | 0.313854558 | 4.51E-02 | 1.88E-01 | 1.00E+00 |
| ENSG00000228027.1_RP1-251M9  | ENSG00000160789.18_LMNA | 0.05166  | -0.108436409 | 0.209136867 | 5.27E-01 | 7.72E-01 | 1.00E+00 |
| ENSG00000224611.1_AC007919.  | ENSG00000160789.18_LMNA | 0.0852   | -0.075015374 | 0.241132755 | 2.97E-01 | 5.83E-01 | 1.00E+00 |
| ENSG00000278763.1_FAM27B     | ENSG00000160789.18_LMNA | 0.04539  | -0.114637369 | 0.203124591 | 5.79E-01 | 8.04E-01 | 1.00E+00 |
| ENSG00000243872.3_RN7SL464F  | ENSG00000160789.18_LMNA | 0.04454  | -0.115481105 | 0.202304672 | 5.86E-01 | 8.08E-01 | 1.00E+00 |
| ENSG00000139797.7_RNF113B    | ENSG00000160789.18_LMNA | -0.0128  | -0.171650592 | 0.146699969 | 8.76E-01 | 9.52E-01 | 1.00E+00 |
| ENSG00000258825.1_AL133168.3 | ENSG00000160789.18_LMNA | 0.10586  | -0.054256496 | 0.260666333 | 1.94E-01 | 4.63E-01 | 1.00E+00 |
| ENSG00000277510.1_Metazoa_SI | ENSG00000160789.18_LMNA | 0.00664  | -0.152723097 | 0.165664628 | 9.35E-01 | 9.75E-01 | 1.00E+00 |
| ENSG00000253650.1_SMARCE1F   | ENSG00000160789.18_LMNA | 0.15424  | -0.005082986 | 0.30593094  | 5.78E-02 | 2.20E-01 | 1.00E+00 |
| ENSG00000252827.1_RN7SKP11   | ENSG00000160789.18_LMNA | 0.10109  | -0.059059181 | 0.256169938 | 2.15E-01 | 4.89E-01 | 1.00E+00 |
| ENSG00000203864.2_C1orf137   | ENSG00000160789.18_LMNA | -0.10986 | -0.264438342 | 0.05021627  | 1.78E-01 | 4.40E-01 | 1.00E+00 |
| ENSG00000272469.2_RN7SL760F  | ENSG00000160789.18_LMNA | 0.03868  | -0.121265538 | 0.196671502 | 6.36E-01 | 8.37E-01 | 1.00E+00 |
| ENSG00000263989.2_RN7SL615F  | ENSG00000160789.18_LMNA | -0.07376 | -0.230257384 | 0.086455392 | 3.66E-01 | 6.47E-01 | 1.00E+00 |
| ENSG00000235964.1_FXYD6P2    | ENSG00000160789.18_LMNA | -0.13281 | -0.285968156 | 0.026956689 | 1.03E-01 | 3.17E-01 | 1.00E+00 |
| ENSG00000280137.1_RP11-297C  | ENSG00000160789.18_LMNA | -0.03619 | -0.194268671 | 0.123726337 | 6.58E-01 | 8.49E-01 | 1.00E+00 |
| ENSG00000279244.1_AL645728.1 | ENSG00000160789.18_LMNA | -0.05219 | -0.209651348 | 0.107904631 | 5.23E-01 | 7.69E-01 | 1.00E+00 |
| ENSG00000243370.3_RN7SL775F  | ENSG00000160789.18_LMNA | -0.09586 | -0.251225146 | 0.064324014 | 2.40E-01 | 5.19E-01 | 1.00E+00 |
| ENSG00000224644.1_RP11-16L2  | ENSG00000160789.18_LMNA | -0.01991 | -0.178544586 | 0.139733801 | 8.08E-01 | 9.23E-01 | 1.00E+00 |
| ENSG00000229466.1_RP11-56I23 | ENSG00000160789.18_LMNA | -0.03249 | -0.190699965 | 0.127373935 | 6.91E-01 | 8.67E-01 | 1.00E+00 |
| ENSG00000248533.1_CTD-2130F  | ENSG00000160789.18_LMNA | -0.09731 | -0.252597218 | 0.062864896 | 2.33E-01 | 5.11E-01 | 1.00E+00 |
| ENSG00000279669.1_RP11-717F  | ENSG00000160789.18_LMNA | -0.06754 | -0.224325045 | 0.092660728 | 4.08E-01 | 6.83E-01 | 1.00E+00 |
| ENSG00000244328.3_RN7SL845F  | ENSG00000160789.18_LMNA | -0.05003 | -0.207578609 | 0.110045946 | 5.40E-01 | 7.80E-01 | 1.00E+00 |
| ENSG00000218359.1_SUMO2P13   | ENSG00000160789.18_LMNA | -0.00666 | -0.165680227 | 0.152707432 | 9.35E-01 | 9.74E-01 | 1.00E+00 |
| ENSG00000244104.3_RN7SL659F  | ENSG00000160789.18_LMNA | -0.09415 | -0.249609892 | 0.066040014 | 2.49E-01 | 5.29E-01 | 1.00E+00 |
| ENSG00000228400.1_AC079154.  | ENSG00000160789.18_LMNA | -0.09613 | -0.251480847 | 0.064052193 | 2.39E-01 | 5.17E-01 | 1.00E+00 |
| ENSG00000249998.1_RP11-141E  | ENSG00000160789.18_LMNA | -0.01548 | -0.174251656 | 0.144075379 | 8.50E-01 | 9.41E-01 | 1.00E+00 |

|                              |                         |          |              |             |          |          |          |
|------------------------------|-------------------------|----------|--------------|-------------|----------|----------|----------|
| ENSG00000258968.2_RP11-829H  | ENSG00000160789.18_LMNA | 0.00579  | -0.153551429 | 0.164839568 | 9.44E-01 | 9.78E-01 | 1.00E+00 |
| ENSG00000236355.2_RP3-503A6  | ENSG00000160789.18_LMNA | -0.2338  | -0.378893801 | -0.07747878 | 3.74E-03 | 3.16E-02 | 1.00E+00 |
| ENSG00000203573.4_Metazoa_SI | ENSG00000160789.18_LMNA | 0.02778  | -0.132003509 | 0.186158381 | 7.34E-01 | 8.88E-01 | 1.00E+00 |
| ENSG00000232687.1_RPL12P9    | ENSG00000160789.18_LMNA | -0.00296 | -0.162088816 | 0.15630986  | 9.71E-01 | 9.89E-01 | 1.00E+00 |
| ENSG00000224842.2_RP11-123K  | ENSG00000160789.18_LMNA | -0.20366 | -0.351469448 | -0.04595392 | 1.18E-02 | 7.41E-02 | 1.00E+00 |
| ENSG00000275728.1_RP4-777L9  | ENSG00000160789.18_LMNA | -0.03798 | -0.195990993 | 0.12196286  | 6.42E-01 | 8.41E-01 | 1.00E+00 |
| ENSG00000229177.1_AC008154.1 | ENSG00000160789.18_LMNA | -0.039   | -0.19697568  | 0.120953742 | 6.33E-01 | 8.36E-01 | 1.00E+00 |
| ENSG00000231200.1_AC068490.1 | ENSG00000160789.18_LMNA | -0.17386 | -0.324089378 | -0.01507554 | 3.22E-02 | 1.50E-01 | 1.00E+00 |
| ENSG00000235005.1_RP11-195M  | ENSG00000160789.18_LMNA | 0.08784  | -0.072374824 | 0.243631746 | 2.82E-01 | 5.67E-01 | 1.00E+00 |
| ENSG00000274996.1_CTB-58E17  | ENSG00000160789.18_LMNA | -0.17515 | -0.325277854 | -0.01640374 | 3.09E-02 | 1.46E-01 | 1.00E+00 |
| ENSG00000256031.1_RP11-364C  | ENSG00000160789.18_LMNA | -0.15486 | -0.30650118  | 0.004453758 | 5.68E-02 | 2.18E-01 | 1.00E+00 |
| ENSG00000229607.1_RP5-1125N  | ENSG00000160789.18_LMNA | 0.09047  | -0.069735849 | 0.246125062 | 2.68E-01 | 5.52E-01 | 1.00E+00 |
| ENSG00000259178.1_CTD-2184D  | ENSG00000160789.18_LMNA | 0.13613  | -0.023577422 | 0.289070048 | 9.45E-02 | 3.01E-01 | 1.00E+00 |
| ENSG00000253291.1_TRBV7-7    | ENSG00000160789.18_LMNA | -0.15904 | -0.310382176 | 0.000164739 | 5.03E-02 | 2.02E-01 | 1.00E+00 |
| ENSG00000280242.1_RP5-1037N  | ENSG00000160789.18_LMNA | 0.01237  | -0.147116655 | 0.171237234 | 8.80E-01 | 9.53E-01 | 1.00E+00 |
| ENSG00000244167.1_RP4-733B9  | ENSG00000160789.18_LMNA | 0.01918  | -0.140448774 | 0.177838457 | 8.15E-01 | 9.27E-01 | 1.00E+00 |
| ENSG00000218300.1_RP11-63K6  | ENSG00000160789.18_LMNA | 0.06518  | -0.095010383 | 0.222072612 | 4.25E-01 | 6.96E-01 | 1.00E+00 |
| ENSG00000231195.1_IFNA11P    | ENSG00000160789.18_LMNA | -0.27325 | -0.414423062 | -0.11923675 | 6.59E-04 | 8.36E-03 | 1.00E+00 |
| ENSG00000237373.1_BRWD1-IT1  | ENSG00000160789.18_LMNA | 0.11097  | -0.049096136 | 0.265482412 | 1.73E-01 | 4.33E-01 | 1.00E+00 |
| ENSG00000225846.4_RP11-630D  | ENSG00000160789.18_LMNA | -0.01037 | -0.169294757 | 0.149073251 | 8.99E-01 | 9.61E-01 | 1.00E+00 |
| ENSG00000270892.1_AC006077.1 | ENSG00000160789.18_LMNA | -0.09972 | -0.254876026 | 0.060438535 | 2.22E-01 | 4.97E-01 | 1.00E+00 |
| ENSG00000258473.1_RP11-7F17  | ENSG00000160789.18_LMNA | 0.05382  | -0.106291408 | 0.211211025 | 5.10E-01 | 7.59E-01 | 1.00E+00 |
| ENSG00000276393.1_RP11-106D  | ENSG00000160789.18_LMNA | -0.00079 | -0.159972322 | 0.158428887 | 9.92E-01 | 9.97E-01 | 1.00E+00 |
| ENSG00000280354.1_RP11-83B2  | ENSG00000160789.18_LMNA | 0.11791  | -0.042078687 | 0.272006589 | 1.48E-01 | 3.94E-01 | 1.00E+00 |
| ENSG00000278484.1_RP11-95I16 | ENSG00000160789.18_LMNA | 0.01326  | -0.1462507   | 0.172096149 | 8.71E-01 | 9.50E-01 | 1.00E+00 |
| ENSG00000269859.1_CTD-2537I5 | ENSG00000160789.18_LMNA | -0.05784 | -0.215059068 | 0.102304094 | 4.79E-01 | 7.37E-01 | 1.00E+00 |
| ENSG00000258935.1_RP11-1078I | ENSG00000160789.18_LMNA | -0.0062  | -0.165235207 | 0.153154277 | 9.40E-01 | 9.76E-01 | 1.00E+00 |
| ENSG00000257900.2_RP11-454K  | ENSG00000160789.18_LMNA | -0.07703 | -0.233365001 | 0.083194929 | 3.46E-01 | 6.30E-01 | 1.00E+00 |
| ENSG00000249645.1_RP11-552M  | ENSG00000160789.18_LMNA | -0.0317  | -0.189943621 | 0.128145895 | 6.98E-01 | 8.71E-01 | 1.00E+00 |
| ENSG00000254236.1_KB-1639H6  | ENSG00000160789.18_LMNA | -0.02852 | -0.186875105 | 0.13127382  | 7.27E-01 | 8.85E-01 | 1.00E+00 |
| ENSG00000270099.1_RP11-248J  | ENSG00000160789.18_LMNA | -0.03872 | -0.196703761 | 0.121232473 | 6.36E-01 | 8.37E-01 | 1.00E+00 |
| ENSG00000230867.1_RP11-462B  | ENSG00000160789.18_LMNA | 0.02115  | -0.138521687 | 0.179740958 | 7.96E-01 | 9.18E-01 | 1.00E+00 |
| ENSG00000227880.1_RP11-46E1  | ENSG00000160789.18_LMNA | -0.21856 | -0.36506256  | -0.06150379 | 6.83E-03 | 4.95E-02 | 1.00E+00 |

|                              |                         |          |              |             |          |          |          |
|------------------------------|-------------------------|----------|--------------|-------------|----------|----------|----------|
| ENSG00000259254.1_CTD-2339L  | ENSG00000160789.18_LMNA | -0.01277 | -0.17161939  | 0.146731427 | 8.76E-01 | 9.52E-01 | 1.00E+00 |
| ENSG00000266744.1_RP11-131K  | ENSG00000160789.18_LMNA | 0.00907  | -0.150351437 | 0.168024458 | 9.12E-01 | 9.66E-01 | 1.00E+00 |
| ENSG00000259359.1_RP11-327J  | ENSG00000160789.18_LMNA | -0.0845  | -0.240469994 | 0.075714935 | 3.01E-01 | 5.87E-01 | 1.00E+00 |
| ENSG00000242522.1_KLHL6-AS1  | ENSG00000160789.18_LMNA | 0.15416  | -0.005164157 | 0.305857362 | 5.79E-02 | 2.20E-01 | 1.00E+00 |
| ENSG00000258170.1_RP11-263K  | ENSG00000160789.18_LMNA | 0.11155  | -0.048517109 | 0.266021831 | 1.71E-01 | 4.30E-01 | 1.00E+00 |
| ENSG00000224530.1_PPIAP10    | ENSG00000160789.18_LMNA | -0.01308 | -0.171920192 | 0.146428139 | 8.73E-01 | 9.51E-01 | 1.00E+00 |
| ENSG00000237279.2_RP4-631H1  | ENSG00000160789.18_LMNA | -0.08437 | -0.240339766 | 0.075852356 | 3.01E-01 | 5.88E-01 | 1.00E+00 |
| ENSG00000238075.1_RPSAP32    | ENSG00000160789.18_LMNA | -0.04071 | -0.198619405 | 0.119267769 | 6.19E-01 | 8.27E-01 | 1.00E+00 |
| ENSG00000236818.1_ARL5AP2    | ENSG00000160789.18_LMNA | -0.07423 | -0.230700003 | 0.085991417 | 3.63E-01 | 6.45E-01 | 1.00E+00 |
| ENSG00000223542.1_RP1-283K1  | ENSG00000160789.18_LMNA | 0.09244  | -0.067760387 | 0.247988756 | 2.57E-01 | 5.40E-01 | 1.00E+00 |
| ENSG00000220868.2_MRPL35P1   | ENSG00000160789.18_LMNA | 0.0419   | -0.118091973 | 0.19976468  | 6.08E-01 | 8.21E-01 | 1.00E+00 |
| ENSG00000231490.1_RPL7L1P2   | ENSG00000160789.18_LMNA | -0.04697 | -0.204641327 | 0.113075365 | 5.66E-01 | 7.96E-01 | 1.00E+00 |
| ENSG00000234988.1_AC068538.  | ENSG00000160789.18_LMNA | -0.17516 | -0.325288738 | -0.01641591 | 3.09E-02 | 1.46E-01 | 1.00E+00 |
| ENSG00000229500.1_RPL17P1    | ENSG00000160789.18_LMNA | 0.03776  | -0.122171612 | 0.195787216 | 6.44E-01 | 8.42E-01 | 1.00E+00 |
| ENSG00000258672.1_RP11-543C  | ENSG00000160789.18_LMNA | -0.04649 | -0.204181467 | 0.113549115 | 5.70E-01 | 7.99E-01 | 1.00E+00 |
| ENSG00000257180.1_RP11-509E  | ENSG00000160789.18_LMNA | -0.14698 | -0.299182989 | 0.012510328 | 7.08E-02 | 2.51E-01 | 1.00E+00 |
| ENSG00000230231.1_FMO7P      | ENSG00000160789.18_LMNA | -0.03946 | -0.197424267 | 0.120493807 | 6.29E-01 | 8.33E-01 | 1.00E+00 |
| ENSG00000232832.1_LMLN-AS1   | ENSG00000160789.18_LMNA | 0.08627  | -0.073945881 | 0.242145418 | 2.91E-01 | 5.76E-01 | 1.00E+00 |
| ENSG00000275811.1_HTR1DP1    | ENSG00000160789.18_LMNA | 0.00173  | -0.157518475 | 0.160882005 | 9.83E-01 | 9.94E-01 | 1.00E+00 |
| ENSG00000228086.1_RP5-837M1  | ENSG00000160789.18_LMNA | 0.03817  | -0.121766071 | 0.196183069 | 6.41E-01 | 8.39E-01 | 1.00E+00 |
| ENSG00000250253.3_RP11-1072I | ENSG00000160789.18_LMNA | -0.01601 | -0.17476849  | 0.143553336 | 8.45E-01 | 9.39E-01 | 1.00E+00 |
| ENSG00000254653.1_RP11-702F  | ENSG00000160789.18_LMNA | -0.13187 | -0.285082291 | 0.027920458 | 1.05E-01 | 3.22E-01 | 1.00E+00 |
| ENSG00000234956.4_RP11-356I2 | ENSG00000160789.18_LMNA | 0.13383  | -0.02592594  | 0.286914995 | 1.00E-01 | 3.12E-01 | 1.00E+00 |
| ENSG00000250122.1_CTD-2013M  | ENSG00000160789.18_LMNA | 0.09319  | -0.067007434 | 0.248698494 | 2.53E-01 | 5.35E-01 | 1.00E+00 |
| ENSG00000226626.2_NOP56P2    | ENSG00000160789.18_LMNA | -0.03777 | -0.195791717 | 0.122167001 | 6.44E-01 | 8.42E-01 | 1.00E+00 |
| ENSG00000258864.1_CTC-554D6  | ENSG00000160789.18_LMNA | -0.02948 | -0.18779899  | 0.130332714 | 7.18E-01 | 8.80E-01 | 1.00E+00 |
| ENSG00000237549.1_AC092570.  | ENSG00000160789.18_LMNA | -0.14496 | -0.297298918 | 0.014577965 | 7.48E-02 | 2.61E-01 | 1.00E+00 |
| ENSG00000254705.1_RP11-675M  | ENSG00000160789.18_LMNA | -0.06623 | -0.223080554 | 0.093959371 | 4.18E-01 | 6.90E-01 | 1.00E+00 |
| ENSG00000259987.1_DUX4L46    | ENSG00000160789.18_LMNA | -0.08428 | -0.240258861 | 0.075937725 | 3.02E-01 | 5.89E-01 | 1.00E+00 |
| ENSG00000205847.5_OR7E91P    | ENSG00000160789.18_LMNA | -0.01296 | -0.171801757 | 0.14654756  | 8.74E-01 | 9.51E-01 | 1.00E+00 |
| ENSG00000259289.2_RP11-798K  | ENSG00000160789.18_LMNA | 0.06887  | -0.091334177 | 0.225595213 | 3.99E-01 | 6.76E-01 | 1.00E+00 |
| ENSG00000230516.1_RP11-555J  | ENSG00000160789.18_LMNA | 0.06716  | -0.093031403 | 0.223969933 | 4.11E-01 | 6.85E-01 | 1.00E+00 |
| ENSG00000233071.3_RPSAP59    | ENSG00000160789.18_LMNA | 0.02976  | -0.130054327 | 0.188072175 | 7.16E-01 | 8.79E-01 | 1.00E+00 |

|                              |                         |          |              |             |          |          |          |
|------------------------------|-------------------------|----------|--------------|-------------|----------|----------|----------|
| ENSG00000221937.4_TAS2R40    | ENSG00000160789.18_LMNA | 0.01772  | -0.141876538 | 0.176427372 | 8.28E-01 | 9.33E-01 | 1.00E+00 |
| ENSG00000228734.2_RP11-335E  | ENSG00000160789.18_LMNA | -0.1688  | -0.319414592 | -0.00986172 | 3.76E-02 | 1.66E-01 | 1.00E+00 |
| ENSG00000270739.1_RP11-608O  | ENSG00000160789.18_LMNA | 0.09656  | -0.063620168 | 0.251887161 | 2.37E-01 | 5.15E-01 | 1.00E+00 |
| ENSG00000171481.3_OR1L3      | ENSG00000160789.18_LMNA | -0.02929 | -0.187618814 | 0.130516294 | 7.20E-01 | 8.81E-01 | 1.00E+00 |
| ENSG00000267799.1_MAN1A2P1   | ENSG00000160789.18_LMNA | -0.00714 | -0.166154135 | 0.152231438 | 9.30E-01 | 9.73E-01 | 1.00E+00 |
| ENSG00000260832.1_CTD-3253I1 | ENSG00000160789.18_LMNA | -0.12511 | -0.278762794 | 0.034778857 | 1.25E-01 | 3.56E-01 | 1.00E+00 |
| ENSG00000254712.1_RP11-560B  | ENSG00000160789.18_LMNA | 0.01501  | -0.144539496 | 0.173792023 | 8.54E-01 | 9.43E-01 | 1.00E+00 |
| ENSG00000142511.4_GPR32      | ENSG00000160789.18_LMNA | 0.06816  | -0.092042135 | 0.22491748  | 4.04E-01 | 6.80E-01 | 1.00E+00 |
| ENSG00000215480.4_OR7E37P    | ENSG00000160789.18_LMNA | -0.12094 | -0.27484709  | 0.039013711 | 1.38E-01 | 3.78E-01 | 1.00E+00 |
| ENSG00000230011.2_CTSLP4     | ENSG00000160789.18_LMNA | 0.0678   | -0.092397628 | 0.224577048 | 4.07E-01 | 6.82E-01 | 1.00E+00 |
| ENSG00000226507.1_IPMKP1     | ENSG00000160789.18_LMNA | -0.17187 | -0.322253188 | -0.01302562 | 3.42E-02 | 1.56E-01 | 1.00E+00 |
| ENSG00000264168.1_MTND1P15   | ENSG00000160789.18_LMNA | 0.02345  | -0.13626037  | 0.181970394 | 7.74E-01 | 9.07E-01 | 1.00E+00 |
| ENSG00000229009.6_TMPRSS11   | ENSG00000160789.18_LMNA | -0.05223 | -0.209683285 | 0.107871615 | 5.23E-01 | 7.68E-01 | 1.00E+00 |
| ENSG00000266985.1_CTD-2329C  | ENSG00000160789.18_LMNA | 0.02285  | -0.13684651  | 0.181392831 | 7.80E-01 | 9.10E-01 | 1.00E+00 |
| ENSG00000261835.1_RP11-429P  | ENSG00000160789.18_LMNA | -0.03462 | -0.192762846 | 0.125266499 | 6.72E-01 | 8.56E-01 | 1.00E+00 |
| ENSG00000264066.4_MIR4732    | ENSG00000160789.18_LMNA | -0.00611 | -0.16515131  | 0.153238503 | 9.40E-01 | 9.76E-01 | 1.00E+00 |
| ENSG00000223498.1_RP11-716A  | ENSG00000160789.18_LMNA | -0.02055 | -0.1791687   | 0.139101594 | 8.02E-01 | 9.20E-01 | 1.00E+00 |
| ENSG00000235347.1_RP1-37M3   | ENSG00000160789.18_LMNA | 0.07359  | -0.086623387 | 0.230097089 | 3.68E-01 | 6.48E-01 | 1.00E+00 |
| ENSG00000204700.4_OR2J2      | ENSG00000160789.18_LMNA | -0.06758 | -0.224367024 | 0.092616904 | 4.08E-01 | 6.83E-01 | 1.00E+00 |
| ENSG00000230655.3_OR7E55P    | ENSG00000160789.18_LMNA | 0.03957  | -0.120387755 | 0.197527684 | 6.28E-01 | 8.33E-01 | 1.00E+00 |
| ENSG00000259922.1_RP11-322D  | ENSG00000160789.18_LMNA | 0.07049  | -0.089715327 | 0.227143799 | 3.88E-01 | 6.66E-01 | 1.00E+00 |
| ENSG00000258872.2_FDPSP3     | ENSG00000160789.18_LMNA | 0.08188  | -0.078337237 | 0.237983009 | 3.16E-01 | 6.03E-01 | 1.00E+00 |
| ENSG00000228995.1_MTND1P9    | ENSG00000160789.18_LMNA | 0.18901  | 0.030738469  | 0.338042803 | 1.97E-02 | 1.07E-01 | 1.00E+00 |
| ENSG00000188101.5_ALOX15P2   | ENSG00000160789.18_LMNA | -0.11226 | -0.266690443 | 0.047799109 | 1.69E-01 | 4.27E-01 | 1.00E+00 |
| ENSG00000257474.4_RP11-359M  | ENSG00000160789.18_LMNA | 0.06342  | -0.096753385 | 0.220399541 | 4.38E-01 | 7.06E-01 | 1.00E+00 |
| ENSG00000281591.1_DBET       | ENSG00000160789.18_LMNA | -0.00787 | -0.166865923 | 0.151516238 | 9.23E-01 | 9.71E-01 | 1.00E+00 |
| ENSG00000214695.3_NPAP1P2    | ENSG00000160789.18_LMNA | -0.23045 | -0.375864522 | -0.0739667  | 4.29E-03 | 3.49E-02 | 1.00E+00 |
| ENSG00000261741.4_FRG2KP     | ENSG00000160789.18_LMNA | 0.08167  | -0.078549426 | 0.237781588 | 3.17E-01 | 6.04E-01 | 1.00E+00 |
| ENSG00000213107.2_AHCYP5     | ENSG00000160789.18_LMNA | -0.07741 | -0.233725954 | 0.082815783 | 3.43E-01 | 6.28E-01 | 1.00E+00 |
| ENSG00000175325.2_PROP1      | ENSG00000160789.18_LMNA | 0.01197  | -0.147508168 | 0.170848743 | 8.84E-01 | 9.55E-01 | 1.00E+00 |
| ENSG00000225017.1_AP004289   | ENSG00000160789.18_LMNA | -0.10397 | -0.258887091 | 0.056158681 | 2.02E-01 | 4.73E-01 | 1.00E+00 |
| ENSG00000169550.11_MUC15     | ENSG00000160789.18_LMNA | -0.12888 | -0.282286573 | 0.030958223 | 1.14E-01 | 3.37E-01 | 1.00E+00 |
| ENSG00000186086.15_NBPF6     | ENSG00000160789.18_LMNA | 0.02329  | -0.136415697 | 0.181817361 | 7.76E-01 | 9.08E-01 | 1.00E+00 |

|                             |                         |          |              |             |          |          |          |
|-----------------------------|-------------------------|----------|--------------|-------------|----------|----------|----------|
| ENSG00000262079.1_RP11-515O | ENSG00000160789.18_LMNA | 0.09343  | -0.066760352 | 0.24893132  | 2.52E-01 | 5.33E-01 | 1.00E+00 |
| ENSG00000229042.2_RP1-232N1 | ENSG00000160789.18_LMNA | -0.11844 | -0.272503726 | 0.041542689 | 1.46E-01 | 3.92E-01 | 1.00E+00 |
| ENSG00000278895.1_CTC-448F2 | ENSG00000160789.18_LMNA | -0.10576 | -0.260571443 | 0.054358    | 1.95E-01 | 4.63E-01 | 1.00E+00 |
| ENSG00000238125.1_SLC9A3P2  | ENSG00000160789.18_LMNA | -0.07846 | -0.234725353 | 0.081765533 | 3.37E-01 | 6.22E-01 | 1.00E+00 |
| ENSG00000237636.2_ANKRD26P  | ENSG00000160789.18_LMNA | -0.08576 | -0.241662557 | 0.07445593  | 2.93E-01 | 5.79E-01 | 1.00E+00 |
| ENSG00000265000.1_RP11-453A | ENSG00000160789.18_LMNA | 0.02088  | -0.138786115 | 0.179480045 | 7.99E-01 | 9.19E-01 | 1.00E+00 |
| ENSG00000251563.1_IARS2P1   | ENSG00000160789.18_LMNA | 0.00482  | -0.154497215 | 0.163896973 | 9.53E-01 | 9.81E-01 | 1.00E+00 |
| ENSG00000261437.1_RP11-22C1 | ENSG00000160789.18_LMNA | -0.04124 | -0.199130264 | 0.118743405 | 6.14E-01 | 8.25E-01 | 1.00E+00 |
| ENSG00000229572.1_EIF4BP4   | ENSG00000160789.18_LMNA | 0.09875  | -0.061412053 | 0.253962131 | 2.26E-01 | 5.02E-01 | 1.00E+00 |
| ENSG00000251127.2_RP11-280G | ENSG00000160789.18_LMNA | 0.16554  | 0.006510701  | 0.316402044 | 4.15E-02 | 1.78E-01 | 1.00E+00 |
| ENSG00000253734.1_LINC01289 | ENSG00000160789.18_LMNA | -0.13859 | -0.291363362 | 0.021074435 | 8.86E-02 | 2.90E-01 | 1.00E+00 |
| ENSG00000260205.1_RP11-108B | ENSG00000160789.18_LMNA | -0.07945 | -0.235672318 | 0.080769737 | 3.31E-01 | 6.17E-01 | 1.00E+00 |
| ENSG00000134812.6_GIF       | ENSG00000160789.18_LMNA | -0.12578 | -0.279388021 | 0.034101627 | 1.23E-01 | 3.53E-01 | 1.00E+00 |
| ENSG00000223907.1_          | ENSG00000160789.18_LMNA | 0.09304  | -0.067157228 | 0.248557324 | 2.54E-01 | 5.36E-01 | 1.00E+00 |
| ENSG00000179938.12_GOLGA8J  | ENSG00000160789.18_LMNA | -0.01712 | -0.175840204 | 0.142470256 | 8.34E-01 | 9.36E-01 | 1.00E+00 |
| ENSG00000234497.4_ERICH3-AS | ENSG00000160789.18_LMNA | -0.00413 | -0.163218547 | 0.155177576 | 9.60E-01 | 9.84E-01 | 1.00E+00 |
| ENSG00000201321.1_RNA5S9    | ENSG00000160789.18_LMNA | -0.00763 | -0.166632179 | 0.151751139 | 9.26E-01 | 9.71E-01 | 1.00E+00 |
| ENSG00000211764.1_TRBJ2-1   | ENSG00000160789.18_LMNA | 0.05352  | -0.106590593 | 0.210921893 | 5.13E-01 | 7.61E-01 | 1.00E+00 |
| ENSG00000252003.1_RNU7-154F | ENSG00000160789.18_LMNA | 0.00032  | -0.158892586 | 0.159508787 | 9.97E-01 | 9.99E-01 | 1.00E+00 |
| ENSG00000211946.3_IGHV3-20  | ENSG00000160789.18_LMNA | -0.10029 | -0.255410954 | 0.05986843  | 2.19E-01 | 4.94E-01 | 1.00E+00 |
| ENSG00000271369.1_RP11-350D | ENSG00000160789.18_LMNA | -0.09693 | -0.252240656 | 0.063244209 | 2.35E-01 | 5.13E-01 | 1.00E+00 |
| ENSG00000277817.1_MIR6738   | ENSG00000160789.18_LMNA | 0.04187  | -0.118122293 | 0.199735157 | 6.09E-01 | 8.21E-01 | 1.00E+00 |
| ENSG00000274555.1_          | ENSG00000160789.18_LMNA | 0.00963  | -0.149797459 | 0.168575148 | 9.06E-01 | 9.64E-01 | 1.00E+00 |
| ENSG00000264585.1_MIR4449   | ENSG00000160789.18_LMNA | -0.13226 | -0.285450589 | 0.027519842 | 1.04E-01 | 3.20E-01 | 1.00E+00 |
| ENSG00000279131.1_AC069063. | ENSG00000160789.18_LMNA | -0.19055 | -0.339449641 | -0.03232608 | 1.87E-02 | 1.03E-01 | 1.00E+00 |
| ENSG00000207133.1_SNORD116  | ENSG00000160789.18_LMNA | -0.01814 | -0.176832377 | 0.141466881 | 8.24E-01 | 9.31E-01 | 1.00E+00 |
| ENSG00000265195.1_MIR4312   | ENSG00000160789.18_LMNA | 0.14594  | -0.013577872 | 0.298210526 | 7.28E-02 | 2.56E-01 | 1.00E+00 |
| ENSG00000266637.1_          | ENSG00000160789.18_LMNA | 0.00735  | -0.152027847 | 0.166356789 | 9.28E-01 | 9.72E-01 | 1.00E+00 |
| ENSG00000223224.1_SNORD71   | ENSG00000160789.18_LMNA | -0.0221  | -0.180661453 | 0.137588431 | 7.87E-01 | 9.13E-01 | 1.00E+00 |
| ENSG00000229947.1_RP13-766D | ENSG00000160789.18_LMNA | 0.09734  | -0.062830406 | 0.252629635 | 2.33E-01 | 5.11E-01 | 1.00E+00 |
| ENSG00000265488.1_          | ENSG00000160789.18_LMNA | 0.16862  | 0.009678945  | 0.319250439 | 3.78E-02 | 1.67E-01 | 1.00E+00 |
| ENSG00000211654.2_IGLV5-37  | ENSG00000160789.18_LMNA | -0.13372 | -0.28681291  | 0.026037103 | 1.01E-01 | 3.12E-01 | 1.00E+00 |
| ENSG00000201592.1_snoU2_19  | ENSG00000160789.18_LMNA | 0.12055  | -0.039405639 | 0.274484171 | 1.39E-01 | 3.80E-01 | 1.00E+00 |

|                              |                         |          |              |             |          |          |          |
|------------------------------|-------------------------|----------|--------------|-------------|----------|----------|----------|
| ENSG00000200332.1_Y_RNA      | ENSG00000160789.18_LMNA | -0.1521  | -0.30393957  | 0.007278425 | 6.14E-02 | 2.29E-01 | 1.00E+00 |
| ENSG00000271852.1_SNORD11E   | ENSG00000160789.18_LMNA | 0.15434  | -0.004978468 | 0.306025675 | 5.76E-02 | 2.20E-01 | 1.00E+00 |
| ENSG00000211933.2_IGHV6-1    | ENSG00000160789.18_LMNA | 0.09252  | -0.067677601 | 0.248066807 | 2.57E-01 | 5.39E-01 | 1.00E+00 |
| ENSG00000207895.1_           | ENSG00000160789.18_LMNA | -0.04689 | -0.204565017 | 0.11315399  | 5.66E-01 | 7.97E-01 | 1.00E+00 |
| ENSG00000223322.2_           | ENSG00000160789.18_LMNA | -0.01437 | -0.173170152 | 0.145167209 | 8.61E-01 | 9.45E-01 | 1.00E+00 |
| ENSG00000275727.1_           | ENSG00000160789.18_LMNA | -0.03061 | -0.188891466 | 0.129219135 | 7.08E-01 | 8.76E-01 | 1.00E+00 |
| ENSG00000222266.1_RNU6-757F  | ENSG00000160789.18_LMNA | 0.04679  | -0.113252423 | 0.204469477 | 5.67E-01 | 7.97E-01 | 1.00E+00 |
| ENSG00000201547.1_Y_RNA      | ENSG00000160789.18_LMNA | -0.00865 | -0.167622255 | 0.150755915 | 9.16E-01 | 9.68E-01 | 1.00E+00 |
| ENSG00000226565.1_RP11-164O  | ENSG00000160789.18_LMNA | -0.0128  | -0.171650333 | 0.146700231 | 8.76E-01 | 9.52E-01 | 1.00E+00 |
| ENSG00000206975.1_RNU6-13P   | ENSG00000160789.18_LMNA | -0.05317 | -0.210587057 | 0.106936998 | 5.15E-01 | 7.63E-01 | 1.00E+00 |
| ENSG00000255253.1_RP11-303G  | ENSG00000160789.18_LMNA | -0.11116 | -0.265658172 | 0.048907494 | 1.73E-01 | 4.32E-01 | 1.00E+00 |
| ENSG00000200719.1_RNA5SP26   | ENSG00000160789.18_LMNA | 0.1553   | -0.003995316 | 0.306916503 | 5.61E-02 | 2.16E-01 | 1.00E+00 |
| ENSG00000207294.1_Y_RNA      | ENSG00000160789.18_LMNA | 0.11637  | -0.043638666 | 0.270558756 | 1.53E-01 | 4.03E-01 | 1.00E+00 |
| ENSG00000212576.1_RNA5SP46   | ENSG00000160789.18_LMNA | -0.00825 | -0.167226625 | 0.15115368  | 9.20E-01 | 9.69E-01 | 1.00E+00 |
| ENSG00000278857.1_IGKV1D-12  | ENSG00000160789.18_LMNA | 0.03461  | -0.1252855   | 0.19274426  | 6.72E-01 | 8.56E-01 | 1.00E+00 |
| ENSG00000265693.1_RP11-815I  | ENSG00000160789.18_LMNA | 0.04568  | -0.114349792 | 0.203403949 | 5.76E-01 | 8.02E-01 | 1.00E+00 |
| ENSG00000200437.1_RNU6-799F  | ENSG00000160789.18_LMNA | -0.00912 | -0.168081425 | 0.150294139 | 9.11E-01 | 9.66E-01 | 1.00E+00 |
| ENSG00000267027.1_AC011524.1 | ENSG00000160789.18_LMNA | -0.26663 | -0.408492374 | -0.11219296 | 8.99E-04 | 1.07E-02 | 1.00E+00 |
| ENSG00000258411.2_RP11-804M  | ENSG00000160789.18_LMNA | 0.12284  | -0.037087157 | 0.276629746 | 1.32E-01 | 3.68E-01 | 1.00E+00 |
| ENSG00000243072.1_GS1-388B5  | ENSG00000160789.18_LMNA | -0.18788 | -0.336999847 | -0.02956249 | 2.05E-02 | 1.10E-01 | 1.00E+00 |
| ENSG00000277035.1_uc_338     | ENSG00000160789.18_LMNA | -0.04663 | -0.204311824 | 0.113414835 | 5.68E-01 | 7.98E-01 | 1.00E+00 |
| ENSG00000255763.1_MRPS18CF   | ENSG00000160789.18_LMNA | 0.00987  | -0.149562593 | 0.16880856  | 9.04E-01 | 9.63E-01 | 1.00E+00 |
| ENSG00000254678.1_RP11-109L  | ENSG00000160789.18_LMNA | 0.04441  | -0.11560499  | 0.202184246 | 5.87E-01 | 8.08E-01 | 1.00E+00 |
| ENSG00000274835.1_RP11-566K  | ENSG00000160789.18_LMNA | -0.00896 | -0.167925409 | 0.150451057 | 9.13E-01 | 9.67E-01 | 1.00E+00 |
| ENSG00000244335.3_RN7SL687F  | ENSG00000160789.18_LMNA | -0.11209 | -0.266538247 | 0.047962576 | 1.69E-01 | 4.28E-01 | 1.00E+00 |
| ENSG00000263489.1_CTC-264K1  | ENSG00000160789.18_LMNA | 0.01916  | -0.140470692 | 0.177816805 | 8.15E-01 | 9.27E-01 | 1.00E+00 |
| ENSG00000277882.1_RP11-122G  | ENSG00000160789.18_LMNA | -0.13577 | -0.288733412 | 0.023944506 | 9.53E-02 | 3.03E-01 | 1.00E+00 |
| ENSG00000243085.1_RP11-392E  | ENSG00000160789.18_LMNA | 0.16161  | 0.002469987  | 0.312761134 | 4.67E-02 | 1.92E-01 | 1.00E+00 |
| ENSG00000240246.1_RP11-167H  | ENSG00000160789.18_LMNA | -0.06899 | -0.225713864 | 0.091210202 | 3.98E-01 | 6.75E-01 | 1.00E+00 |
| ENSG00000260858.1_RP11-558A  | ENSG00000160789.18_LMNA | -0.01253 | -0.171389429 | 0.146963247 | 8.78E-01 | 9.53E-01 | 1.00E+00 |
| ENSG00000278462.1_RP11-165D  | ENSG00000160789.18_LMNA | 0.02723  | -0.132543836 | 0.185627436 | 7.39E-01 | 8.90E-01 | 1.00E+00 |
| ENSG00000263708.2_RP11-85B7  | ENSG00000160789.18_LMNA | -0.00271 | -0.161838267 | 0.156560862 | 9.74E-01 | 9.90E-01 | 1.00E+00 |
| ENSG00000222764.1_RN7SKP10   | ENSG00000160789.18_LMNA | -0.01491 | -0.173698931 | 0.144633478 | 8.55E-01 | 9.43E-01 | 1.00E+00 |

|                              |                         |          |              |             |          |          |          |
|------------------------------|-------------------------|----------|--------------|-------------|----------|----------|----------|
| ENSG00000276568.1_Metazoa_SI | ENSG00000160789.18_LMNA | -0.03323 | -0.191420821 | 0.126637836 | 6.84E-01 | 8.63E-01 | 1.00E+00 |
| ENSG00000274326.1_AL359314.1 | ENSG00000160789.18_LMNA | 0.17429  | 0.015521069  | 0.324488146 | 3.18E-02 | 1.49E-01 | 1.00E+00 |
| ENSG00000234471.1_AC147651.1 | ENSG00000160789.18_LMNA | 0.06203  | -0.098143169 | 0.219064177 | 4.48E-01 | 7.14E-01 | 1.00E+00 |
| ENSG00000280974.1_           | ENSG00000160789.18_LMNA | 0.05209  | -0.108010534 | 0.209548904 | 5.24E-01 | 7.69E-01 | 1.00E+00 |
| ENSG00000257288.1_RP11-557F  | ENSG00000160789.18_LMNA | -0.11859 | -0.272643333 | 0.041392137 | 1.46E-01 | 3.91E-01 | 1.00E+00 |
| ENSG00000232982.1_MTCO1P45   | ENSG00000160789.18_LMNA | 0.05621  | -0.103920906 | 0.213499916 | 4.92E-01 | 7.47E-01 | 1.00E+00 |
| ENSG00000229858.2_AC016831.1 | ENSG00000160789.18_LMNA | -0.06641 | -0.22325127  | 0.093781291 | 4.16E-01 | 6.89E-01 | 1.00E+00 |
| ENSG00000234445.1_FGF14-AS1  | ENSG00000160789.18_LMNA | -0.05377 | -0.211158749 | 0.106345506 | 5.11E-01 | 7.59E-01 | 1.00E+00 |
| ENSG00000226952.1_RP4-714D9  | ENSG00000160789.18_LMNA | -0.08446 | -0.240426538 | 0.075760792 | 3.01E-01 | 5.87E-01 | 1.00E+00 |
| ENSG00000271507.1_RP11-603B  | ENSG00000160789.18_LMNA | 0.04204  | -0.117946246 | 0.199906563 | 6.07E-01 | 8.20E-01 | 1.00E+00 |
| ENSG00000280788.1_           | ENSG00000160789.18_LMNA | -0.04131 | -0.199201972 | 0.118669788 | 6.13E-01 | 8.24E-01 | 1.00E+00 |
| ENSG00000253434.4_RP11-1101  | ENSG00000160789.18_LMNA | -0.30562 | -0.443257857 | -0.1539121  | 1.29E-04 | 2.31E-03 | 1.00E+00 |
| ENSG00000223625.1_CYCSP32    | ENSG00000160789.18_LMNA | -0.07299 | -0.229525521 | 0.087222265 | 3.71E-01 | 6.52E-01 | 1.00E+00 |
| ENSG00000254205.1_RP11-92K1  | ENSG00000160789.18_LMNA | -0.1055  | -0.260330297 | 0.054615927 | 1.96E-01 | 4.65E-01 | 1.00E+00 |
| ENSG00000243959.3_RN7SL684F  | ENSG00000160789.18_LMNA | 0.02805  | -0.131743353 | 0.186413953 | 7.32E-01 | 8.87E-01 | 1.00E+00 |
| ENSG00000226398.1_AC013480.1 | ENSG00000160789.18_LMNA | -0.124   | -0.277721082 | 0.035906575 | 1.28E-01 | 3.62E-01 | 1.00E+00 |
| ENSG00000211784.2_TRAV10     | ENSG00000160789.18_LMNA | #####    | -0.159261345 | 0.159140058 | 9.99E-01 | 1.00E+00 | 1.00E+00 |
| ENSG00000250271.1_RP11-64D2  | ENSG00000160789.18_LMNA | 0.08103  | -0.079188217 | 0.237175049 | 3.21E-01 | 6.07E-01 | 1.00E+00 |
| ENSG00000205274.3_TRBV20OR   | ENSG00000160789.18_LMNA | -0.09961 | -0.25476962  | 0.060551914 | 2.22E-01 | 4.98E-01 | 1.00E+00 |
| ENSG00000254686.2_RP1-276E1  | ENSG00000160789.18_LMNA | 0.00138  | -0.157854505 | 0.160546308 | 9.87E-01 | 9.95E-01 | 1.00E+00 |
| ENSG00000227705.1_RP11-15M1  | ENSG00000160789.18_LMNA | 0.03515  | -0.12474668  | 0.193271244 | 6.67E-01 | 8.53E-01 | 1.00E+00 |
| ENSG00000261622.1_RP11-484P  | ENSG00000160789.18_LMNA | -0.12966 | -0.283020021 | 0.030161835 | 1.11E-01 | 3.33E-01 | 1.00E+00 |
| ENSG00000242123.1_RP11-51L5  | ENSG00000160789.18_LMNA | 0.00048  | -0.158731066 | 0.159670266 | 9.95E-01 | 9.98E-01 | 1.00E+00 |
| ENSG00000239261.1_RPL31P41   | ENSG00000160789.18_LMNA | -0.05322 | -0.210640832 | 0.106881371 | 5.15E-01 | 7.63E-01 | 1.00E+00 |
| ENSG00000220505.2{EIF4EBP2F  | ENSG00000160789.18_LMNA | -0.06631 | -0.223151057 | 0.093885829 | 4.17E-01 | 6.89E-01 | 1.00E+00 |
| ENSG00000236982.1_BLOC1S2P   | ENSG00000160789.18_LMNA | 0.01321  | -0.146295173 | 0.172052049 | 8.72E-01 | 9.50E-01 | 1.00E+00 |
| ENSG00000243303.1_RP11-268I  | ENSG00000160789.18_LMNA | 0.0593   | -0.100852572 | 0.216457447 | 4.68E-01 | 7.29E-01 | 1.00E+00 |
| ENSG00000258678.1_RP11-1078I | ENSG00000160789.18_LMNA | -0.1745  | -0.324678061 | -0.0157333  | 3.15E-02 | 1.48E-01 | 1.00E+00 |
| ENSG00000260137.1_RP11-258F  | ENSG00000160789.18_LMNA | -0.18346 | -0.332934897 | -0.0249872  | 2.37E-02 | 1.22E-01 | 1.00E+00 |
| ENSG00000227358.1_RP11-180I4 | ENSG00000160789.18_LMNA | 0.01605  | -0.143522047 | 0.174799461 | 8.44E-01 | 9.39E-01 | 1.00E+00 |
| ENSG00000224344.1_KNOP1P3    | ENSG00000160789.18_LMNA | -0.10655 | -0.261314141 | 0.053563357 | 1.91E-01 | 4.59E-01 | 1.00E+00 |
| ENSG00000271230.1_CTD-2195M  | ENSG00000160789.18_LMNA | 0.03971  | -0.120248475 | 0.197663492 | 6.27E-01 | 8.32E-01 | 1.00E+00 |
| ENSG00000230229.1_RP11-90J7  | ENSG00000160789.18_LMNA | 0.00419  | -0.155118181 | 0.163277786 | 9.59E-01 | 9.84E-01 | 1.00E+00 |



|                               |                         |          |              |             |          |          |          |
|-------------------------------|-------------------------|----------|--------------|-------------|----------|----------|----------|
| ENSG00000236783.1_RPS15AP2    | ENSG00000160789.18_LMNA | -0.09183 | -0.24741794  | 0.068365699 | 2.60E-01 | 5.44E-01 | 1.00E+00 |
| ENSG00000230947.2_AP000356.1  | ENSG00000160789.18_LMNA | -0.0634  | -0.220377374 | 0.096776465 | 4.38E-01 | 7.06E-01 | 1.00E+00 |
| ENSG00000274419.3_TBC1D3D     | ENSG00000160789.18_LMNA | -0.04008 | -0.198015478 | 0.119887431 | 6.24E-01 | 8.30E-01 | 1.00E+00 |
| ENSG00000225350.1_FREM2-AS    | ENSG00000160789.18_LMNA | 0.04043  | -0.119537848 | 0.198356214 | 6.21E-01 | 8.28E-01 | 1.00E+00 |
| ENSG00000253892.1_RP11-770E   | ENSG00000160789.18_LMNA | 0.00359  | -0.155699843 | 0.162697562 | 9.65E-01 | 9.86E-01 | 1.00E+00 |
| ENSG00000243273.1_RP11-166N   | ENSG00000160789.18_LMNA | 0.12749  | -0.032370566 | 0.28098495  | 1.18E-01 | 3.43E-01 | 1.00E+00 |
| ENSG00000251182.1_RP11-617I1  | ENSG00000160789.18_LMNA | -0.21752 | -0.364108635 | -0.06040772 | 7.10E-03 | 5.10E-02 | 1.00E+00 |
| ENSG00000236188.1_PRKX-AS1    | ENSG00000160789.18_LMNA | -0.05288 | -0.210312876 | 0.107220596 | 5.18E-01 | 7.64E-01 | 1.00E+00 |
| ENSG00000276422.1_RP11-144A   | ENSG00000160789.18_LMNA | -0.17356 | -0.32381334  | -0.01476721 | 3.25E-02 | 1.51E-01 | 1.00E+00 |
| ENSG00000251073.1_NUDT19P5    | ENSG00000160789.18_LMNA | -0.25618 | -0.399103945 | -0.10110303 | 1.44E-03 | 1.53E-02 | 1.00E+00 |
| ENSG00000243687.1_RP11-432B   | ENSG00000160789.18_LMNA | 0.05744  | -0.102701958 | 0.214675543 | 4.82E-01 | 7.40E-01 | 1.00E+00 |
| ENSG00000233852.1_AC005304.1  | ENSG00000160789.18_LMNA | -0.00854 | -0.167514985 | 0.150863775 | 9.17E-01 | 9.68E-01 | 1.00E+00 |
| ENSG00000226956.1_AP000432.1  | ENSG00000160789.18_LMNA | -0.11972 | -0.273704045 | 0.040247798 | 1.42E-01 | 3.84E-01 | 1.00E+00 |
| ENSG00000250930.4_LNX1-AS1    | ENSG00000160789.18_LMNA | -0.07007 | -0.226737496 | 0.090140227 | 3.91E-01 | 6.69E-01 | 1.00E+00 |
| ENSG00000124089.4_MC3R        | ENSG00000160789.18_LMNA | -0.00658 | -0.165608061 | 0.152779903 | 9.36E-01 | 9.75E-01 | 1.00E+00 |
| ENSG00000229209.1_AC073987.1  | ENSG00000160789.18_LMNA | 0.01268  | -0.146817108 | 0.171534401 | 8.77E-01 | 9.52E-01 | 1.00E+00 |
| ENSG00000265204.1_RP11-403A   | ENSG00000160789.18_LMNA | -0.02303 | -0.181566175 | 0.136670616 | 7.78E-01 | 9.09E-01 | 1.00E+00 |
| ENSG00000258234.1_RP11-370I1  | ENSG00000160789.18_LMNA | -0.06165 | -0.218699465 | 0.09852253  | 4.51E-01 | 7.16E-01 | 1.00E+00 |
| ENSG00000270038.1_RP11-1070I  | ENSG00000160789.18_LMNA | -0.03387 | -0.192037165 | 0.126008181 | 6.79E-01 | 8.60E-01 | 1.00E+00 |
| ENSG00000274749.1_KRTAP7-1    | ENSG00000160789.18_LMNA | -0.02557 | -0.184024872 | 0.134173572 | 7.54E-01 | 8.98E-01 | 1.00E+00 |
| ENSG00000232042.1_RP11-45J1.1 | ENSG00000160789.18_LMNA | -0.02452 | -0.183006954 | 0.135207856 | 7.64E-01 | 9.02E-01 | 1.00E+00 |
| ENSG00000230401.1_AC090505.1  | ENSG00000160789.18_LMNA | -0.05319 | -0.210605014 | 0.106918423 | 5.15E-01 | 7.63E-01 | 1.00E+00 |
| ENSG00000241577.1_RP11-523O   | ENSG00000160789.18_LMNA | 0.0068   | -0.152569194 | 0.165817875 | 9.34E-01 | 9.74E-01 | 1.00E+00 |
| ENSG00000228108.1_AC092839.1  | ENSG00000160789.18_LMNA | 0.08872  | -0.071494662 | 0.244463792 | 2.77E-01 | 5.62E-01 | 1.00E+00 |
| ENSG00000230634.1_RP5-996D2   | ENSG00000160789.18_LMNA | 0.0808   | -0.079427111 | 0.236948153 | 3.22E-01 | 6.09E-01 | 1.00E+00 |
| ENSG00000225703.1_AC005522.1  | ENSG00000160789.18_LMNA | 0.1168   | -0.043204538 | 0.270961818 | 1.52E-01 | 4.01E-01 | 1.00E+00 |
| ENSG00000231650.1_RFESDP1     | ENSG00000160789.18_LMNA | -0.05258 | -0.210020308 | 0.107523156 | 5.20E-01 | 7.66E-01 | 1.00E+00 |
| ENSG00000254616.1_RP11-700F   | ENSG00000160789.18_LMNA | -0.06057 | -0.217676107 | 0.099586498 | 4.58E-01 | 7.22E-01 | 1.00E+00 |
| ENSG00000255506.1_RP11-203F   | ENSG00000160789.18_LMNA | 0.02595  | -0.133804964 | 0.184387482 | 7.51E-01 | 8.96E-01 | 1.00E+00 |
| ENSG00000223824.1_AC019178.1  | ENSG00000160789.18_LMNA | 0.10045  | -0.059703635 | 0.255565544 | 2.18E-01 | 4.93E-01 | 1.00E+00 |
| ENSG00000242070.1_NPM1P17     | ENSG00000160789.18_LMNA | -0.06288 | -0.219875865 | 0.097298549 | 4.42E-01 | 7.09E-01 | 1.00E+00 |
| ENSG00000279883.1_CTD-2315M   | ENSG00000160789.18_LMNA | -0.07738 | -0.23370448  | 0.082838342 | 3.43E-01 | 6.28E-01 | 1.00E+00 |
| ENSG00000188909.4_BSX         | ENSG00000160789.18_LMNA | 0.11849  | -0.041493954 | 0.27254892  | 1.46E-01 | 3.91E-01 | 1.00E+00 |

|                              |                         |          |              |             |          |          |          |
|------------------------------|-------------------------|----------|--------------|-------------|----------|----------|----------|
| ENSG00000231148.1_HMGB1P7    | ENSG00000160789.18_LMNA | -0.10419 | -0.259097006 | 0.055934381 | 2.01E-01 | 4.72E-01 | 1.00E+00 |
| ENSG00000123569.8_H2BFWT     | ENSG00000160789.18_LMNA | -0.11581 | -0.270029245 | 0.04420881  | 1.55E-01 | 4.07E-01 | 1.00E+00 |
| ENSG00000279847.2_C8orf87    | ENSG00000160789.18_LMNA | -0.01229 | -0.171159708 | 0.147194791 | 8.81E-01 | 9.54E-01 | 1.00E+00 |
| ENSG00000231189.1_AC013448.  | ENSG00000160789.18_LMNA | 0.21091  | 0.053505413  | 0.358086805 | 9.10E-03 | 6.12E-02 | 1.00E+00 |
| ENSG00000229608.1_GOLGA2P4   | ENSG00000160789.18_LMNA | -0.07194 | -0.228522869 | 0.088272273 | 3.78E-01 | 6.58E-01 | 1.00E+00 |
| ENSG00000256777.1_PDCL3P7    | ENSG00000160789.18_LMNA | -0.06272 | -0.219724272 | 0.097456328 | 4.43E-01 | 7.10E-01 | 1.00E+00 |
| ENSG00000225063.1_RP11-383G  | ENSG00000160789.18_LMNA | -0.25422 | -0.397343918 | -0.09903223 | 1.57E-03 | 1.63E-02 | 1.00E+00 |
| ENSG00000068985.4_PAGE1      | ENSG00000160789.18_LMNA | 0.02241  | -0.137278196 | 0.180967323 | 7.84E-01 | 9.12E-01 | 1.00E+00 |
| ENSG00000255070.1_OSBPL9P3   | ENSG00000160789.18_LMNA | -0.09754 | -0.252816667 | 0.0626314   | 2.32E-01 | 5.10E-01 | 1.00E+00 |
| ENSG00000253176.3_RP11-1149I | ENSG00000160789.18_LMNA | 0.15426  | -0.00506633  | 0.305946037 | 5.78E-02 | 2.20E-01 | 1.00E+00 |
| ENSG00000279988.1_AL022578.1 | ENSG00000160789.18_LMNA | -0.05476 | -0.212108065 | 0.105362813 | 5.03E-01 | 7.54E-01 | 1.00E+00 |
| ENSG00000259725.1_CTD-3032H  | ENSG00000160789.18_LMNA | 0.21843  | 0.061360368  | 0.364937772 | 6.86E-03 | 4.97E-02 | 1.00E+00 |
| ENSG00000267675.1_RP11-1151I | ENSG00000160789.18_LMNA | 0.14149  | -0.018118314 | 0.294067233 | 8.21E-02 | 2.77E-01 | 1.00E+00 |
| ENSG00000273071.1_RP11-337C  | ENSG00000160789.18_LMNA | 0.01787  | -0.141736711 | 0.176565624 | 8.27E-01 | 9.32E-01 | 1.00E+00 |
| ENSG00000204393.6_RP11-410N  | ENSG00000160789.18_LMNA | -0.02794 | -0.186309808 | 0.131849372 | 7.33E-01 | 8.87E-01 | 1.00E+00 |
| ENSG00000267644.1_CTD-2008P  | ENSG00000160789.18_LMNA | 0.08356  | -0.076656887 | 0.239577126 | 3.06E-01 | 5.93E-01 | 1.00E+00 |
| ENSG00000216307.2_RP3-400B1  | ENSG00000160789.18_LMNA | 0.05143  | -0.108656532 | 0.208923852 | 5.29E-01 | 7.73E-01 | 1.00E+00 |
| ENSG00000268992.1_CDC42EP3   | ENSG00000160789.18_LMNA | -0.02274 | -0.181287808 | 0.136953069 | 7.81E-01 | 9.10E-01 | 1.00E+00 |
| ENSG00000231049.1_OR52B5P    | ENSG00000160789.18_LMNA | 0.07053  | -0.089680044 | 0.227177532 | 3.88E-01 | 6.66E-01 | 1.00E+00 |
| ENSG00000279482.1_RP11-401L  | ENSG00000160789.18_LMNA | 0.08882  | -0.071386631 | 0.244565885 | 2.77E-01 | 5.61E-01 | 1.00E+00 |
| ENSG00000240721.2_RPS4XP15   | ENSG00000160789.18_LMNA | -0.1884  | -0.337477525 | -0.03010099 | 2.01E-02 | 1.08E-01 | 1.00E+00 |
| ENSG00000227069.1_CNN2P2     | ENSG00000160789.18_LMNA | -0.04258 | -0.200420396 | 0.11741838  | 6.02E-01 | 8.18E-01 | 1.00E+00 |
| ENSG00000217315.1_OR2W2P     | ENSG00000160789.18_LMNA | -0.01629 | -0.175037693 | 0.14328135  | 8.42E-01 | 9.39E-01 | 1.00E+00 |
| ENSG00000261028.1_AC012322.  | ENSG00000160789.18_LMNA | -0.02729 | -0.185680804 | 0.132489534 | 7.39E-01 | 8.90E-01 | 1.00E+00 |
| ENSG00000227834.1_AP003385.1 | ENSG00000160789.18_LMNA | 0.0943   | -0.065887755 | 0.249753282 | 2.48E-01 | 5.28E-01 | 1.00E+00 |
| ENSG00000182393.2_IFNL1      | ENSG00000160789.18_LMNA | 0.05726  | -0.102882245 | 0.214501721 | 4.84E-01 | 7.41E-01 | 1.00E+00 |
| ENSG00000250475.1_RP11-312A  | ENSG00000160789.18_LMNA | -0.11787 | -0.271964135 | 0.042124451 | 1.48E-01 | 3.95E-01 | 1.00E+00 |
| ENSG00000227240.1_RP11-563D  | ENSG00000160789.18_LMNA | 0.06477  | -0.095413491 | 0.221685843 | 4.28E-01 | 6.98E-01 | 1.00E+00 |
| ENSG00000184303.5_DRD5P1     | ENSG00000160789.18_LMNA | 0.00356  | -0.155732822 | 0.162664657 | 9.65E-01 | 9.86E-01 | 1.00E+00 |
| ENSG00000236576.1_RP11-22B1  | ENSG00000160789.18_LMNA | -0.02898 | -0.187313792 | 0.130827027 | 7.23E-01 | 8.83E-01 | 1.00E+00 |
| ENSG00000218698.1_ST13P16    | ENSG00000160789.18_LMNA | 0.04514  | -0.114888335 | 0.202880756 | 5.81E-01 | 8.05E-01 | 1.00E+00 |
| ENSG00000229622.1_MTND5P2    | ENSG00000160789.18_LMNA | -0.01218 | -0.171049966 | 0.147305392 | 8.82E-01 | 9.54E-01 | 1.00E+00 |
| ENSG00000250858.1_IGBP1P5    | ENSG00000160789.18_LMNA | -0.04932 | -0.206892613 | 0.110753989 | 5.46E-01 | 7.84E-01 | 1.00E+00 |

|                              |                         |          |              |             |          |          |          |
|------------------------------|-------------------------|----------|--------------|-------------|----------|----------|----------|
| ENSG00000243485.3_MIR1302-2  | ENSG00000160789.18_LMNA | -0.12933 | -0.282708587 | 0.030500043 | 1.12E-01 | 3.34E-01 | 1.00E+00 |
| ENSG00000271071.1_RP11-457M  | ENSG00000160789.18_LMNA | -0.01901 | -0.177674396 | 0.140614842 | 8.16E-01 | 9.28E-01 | 1.00E+00 |
| ENSG00000250025.2_CTC-359M   | ENSG00000160789.18_LMNA | -0.002   | -0.161144641 | 0.157255528 | 9.81E-01 | 9.93E-01 | 1.00E+00 |
| ENSG00000215168.2_RP11-30M2  | ENSG00000160789.18_LMNA | -0.05375 | -0.211144666 | 0.10636008  | 5.11E-01 | 7.59E-01 | 1.00E+00 |
| ENSG00000251294.1_RP11-116O  | ENSG00000160789.18_LMNA | -0.00376 | -0.162858541 | 0.155538487 | 9.63E-01 | 9.85E-01 | 1.00E+00 |
| ENSG00000229781.1_AC013444   | ENSG00000160789.18_LMNA | -0.04349 | -0.201301636 | 0.116512654 | 5.95E-01 | 8.13E-01 | 1.00E+00 |
| ENSG00000269274.1_AC078899   | ENSG00000160789.18_LMNA | -0.10773 | -0.262428565 | 0.052370239 | 1.86E-01 | 4.53E-01 | 1.00E+00 |
| ENSG00000182271.11_TMIGD1    | ENSG00000160789.18_LMNA | -0.01382 | -0.172645557 | 0.145696534 | 8.66E-01 | 9.48E-01 | 1.00E+00 |
| ENSG00000261863.1_RP11-141J  | ENSG00000160789.18_LMNA | 0.0446   | -0.115424954 | 0.202359252 | 5.85E-01 | 8.07E-01 | 1.00E+00 |
| ENSG00000226320.4_AC018359   | ENSG00000160789.18_LMNA | -0.16514 | -0.31603287  | -0.00610053 | 4.20E-02 | 1.79E-01 | 1.00E+00 |
| ENSG00000254917.1_OR7E15P    | ENSG00000160789.18_LMNA | -0.00171 | -0.160867931 | 0.157532565 | 9.83E-01 | 9.94E-01 | 1.00E+00 |
| ENSG00000231698.2_AP002856   | ENSG00000160789.18_LMNA | -0.2008  | -0.348852219 | -0.04297684 | 1.31E-02 | 7.96E-02 | 1.00E+00 |
| ENSG00000197838.4_CYP2A13    | ENSG00000160789.18_LMNA | -0.03504 | -0.193160173 | 0.12486026  | 6.68E-01 | 8.54E-01 | 1.00E+00 |
| ENSG00000121314.2_TAS2R8     | ENSG00000160789.18_LMNA | -0.08662 | -0.242478601 | 0.073593841 | 2.89E-01 | 5.74E-01 | 1.00E+00 |
| ENSG00000224054.1_RP4-551E1  | ENSG00000160789.18_LMNA | 0.30423  | 0.152412466  | 0.442023081 | 1.39E-04 | 2.44E-03 | 1.00E+00 |
| ENSG00000250428.1_RP11-1082I | ENSG00000160789.18_LMNA | -0.06386 | -0.220815807 | 0.096319902 | 4.34E-01 | 7.03E-01 | 1.00E+00 |
| ENSG00000245688.1_CTB-26E19  | ENSG00000160789.18_LMNA | 0.1272   | -0.032662168 | 0.280716064 | 1.18E-01 | 3.45E-01 | 1.00E+00 |
| ENSG00000279648.1_AP000432   | ENSG00000160789.18_LMNA | -0.07467 | -0.231125172 | 0.085545605 | 3.61E-01 | 6.43E-01 | 1.00E+00 |
| ENSG00000236497.1_RP11-66A2  | ENSG00000160789.18_LMNA | -0.16232 | -0.313421025 | -0.00320159 | 4.57E-02 | 1.90E-01 | 1.00E+00 |
| ENSG00000148602.5_LRIT1      | ENSG00000160789.18_LMNA | -0.09757 | -0.252845934 | 0.062600257 | 2.32E-01 | 5.09E-01 | 1.00E+00 |
| ENSG00000144962.6_SPATA16    | ENSG00000160789.18_LMNA | -0.10578 | -0.2605938   | 0.054334085 | 1.95E-01 | 4.63E-01 | 1.00E+00 |
| ENSG00000280711.1_JADRR      | ENSG00000160789.18_LMNA | 0.14286  | -0.016718003 | 0.295346312 | 7.91E-02 | 2.70E-01 | 1.00E+00 |
| ENSG00000261435.1_RP13-126P  | ENSG00000160789.18_LMNA | -0.0572  | -0.214452158 | 0.102933648 | 4.84E-01 | 7.41E-01 | 1.00E+00 |
| ENSG00000224652.1_LINC00885  | ENSG00000160789.18_LMNA | 0.01518  | -0.144365507 | 0.173964347 | 8.53E-01 | 9.42E-01 | 1.00E+00 |
| ENSG00000163218.13_PGLYRP4   | ENSG00000160789.18_LMNA | -0.06934 | -0.226041076 | 0.090868255 | 3.96E-01 | 6.73E-01 | 1.00E+00 |
| ENSG00000265766.2_CXADRP3    | ENSG00000160789.18_LMNA | 0.06894  | -0.091259729 | 0.225666465 | 3.99E-01 | 6.75E-01 | 1.00E+00 |
| ENSG00000261200.1_RP11-989E  | ENSG00000160789.18_LMNA | -0.07466 | -0.231116595 | 0.0855546   | 3.61E-01 | 6.43E-01 | 1.00E+00 |
| ENSG00000271699.4_SNX29P2    | ENSG00000160789.18_LMNA | 0.07123  | -0.088977669 | 0.227848908 | 3.83E-01 | 6.62E-01 | 1.00E+00 |
| ENSG00000258722.2_CKAP2P1    | ENSG00000160789.18_LMNA | -0.04626 | -0.203955323 | 0.113782038 | 5.71E-01 | 8.00E-01 | 1.00E+00 |
| ENSG00000100665.10_SERPINA   | ENSG00000160789.18_LMNA | 0.13554  | -0.024182593 | 0.288515033 | 9.59E-02 | 3.04E-01 | 1.00E+00 |
| ENSG00000223489.1_NEFHP1     | ENSG00000160789.18_LMNA | -0.0898  | -0.245489494 | 0.070408967 | 2.71E-01 | 5.56E-01 | 1.00E+00 |
| ENSG00000183470.8_FLJ40288   | ENSG00000160789.18_LMNA | 0.12966  | -0.030166377 | 0.283015838 | 1.11E-01 | 3.33E-01 | 1.00E+00 |
| ENSG00000227059.5_ANHX       | ENSG00000160789.18_LMNA | 0.02898  | -0.130826352 | 0.187314456 | 7.23E-01 | 8.83E-01 | 1.00E+00 |

|                              |                         |          |              |             |          |          |          |
|------------------------------|-------------------------|----------|--------------|-------------|----------|----------|----------|
| ENSG00000268861.4_CTD-2207C  | ENSG00000160789.18_LMNA | 0.07604  | -0.084180475 | 0.232426338 | 3.52E-01 | 6.35E-01 | 1.00E+00 |
| ENSG00000265501.1_           | ENSG00000160789.18_LMNA | 0.11517  | -0.04485222  | 0.26943146  | 1.58E-01 | 4.10E-01 | 1.00E+00 |
| ENSG00000216073.3_           | ENSG00000160789.18_LMNA | -0.14865 | -0.300738263 | 0.010801512 | 6.76E-02 | 2.44E-01 | 1.00E+00 |
| ENSG00000222185.1_SNORD113   | ENSG00000160789.18_LMNA | 0.10637  | -0.053743745 | 0.261145577 | 1.92E-01 | 4.60E-01 | 1.00E+00 |
| ENSG00000274713.1_MIR7974    | ENSG00000160789.18_LMNA | 0.13607  | -0.023639313 | 0.289013296 | 9.46E-02 | 3.01E-01 | 1.00E+00 |
| ENSG00000265867.1_MIR4516    | ENSG00000160789.18_LMNA | 0.14748  | -0.011999029 | 0.299648519 | 6.98E-02 | 2.49E-01 | 1.00E+00 |
| ENSG00000221778.2_           | ENSG00000160789.18_LMNA | -0.00632 | -0.165357721 | 0.153031274 | 9.38E-01 | 9.76E-01 | 1.00E+00 |
| ENSG00000211974.3_IGHV2-70   | ENSG00000160789.18_LMNA | -0.06139 | -0.218454807 | 0.098776963 | 4.52E-01 | 7.18E-01 | 1.00E+00 |
| ENSG00000252648.1_           | ENSG00000160789.18_LMNA | 0.09394  | -0.066249814 | 0.249412288 | 2.50E-01 | 5.30E-01 | 1.00E+00 |
| ENSG00000265317.1_           | ENSG00000160789.18_LMNA | -0.06132 | -0.218385501 | 0.098849031 | 4.53E-01 | 7.18E-01 | 1.00E+00 |
| ENSG00000252269.1_RNU4ATAC   | ENSG00000160789.18_LMNA | 0.00797  | -0.151427074 | 0.166954638 | 9.22E-01 | 9.70E-01 | 1.00E+00 |
| ENSG00000265068.1_           | ENSG00000160789.18_LMNA | -0.07963 | -0.23584062  | 0.080592689 | 3.29E-01 | 6.15E-01 | 1.00E+00 |
| ENSG00000266531.1_MIR4706    | ENSG00000160789.18_LMNA | 0.0174   | -0.14219815  | 0.176109336 | 8.32E-01 | 9.34E-01 | 1.00E+00 |
| ENSG00000251703.1_RNU6-998F  | ENSG00000160789.18_LMNA | -0.0055  | -0.164561424 | 0.153830576 | 9.46E-01 | 9.79E-01 | 1.00E+00 |
| ENSG00000200183.1_RNU6-238F  | ENSG00000160789.18_LMNA | -0.15939 | -0.310702007 | -0.00018923 | 4.98E-02 | 2.01E-01 | 1.00E+00 |
| ENSG00000265367.1_           | ENSG00000160789.18_LMNA | 0.07067  | -0.089539249 | 0.227312137 | 3.87E-01 | 6.65E-01 | 1.00E+00 |
| ENSG00000207573.1_MIR550A2   | ENSG00000160789.18_LMNA | 0.06131  | -0.09885346  | 0.218381241 | 4.53E-01 | 7.18E-01 | 1.00E+00 |
| ENSG00000242534.2_IGKV2D-28  | ENSG00000160789.18_LMNA | -0.0748  | -0.231245029 | 0.085419906 | 3.60E-01 | 6.42E-01 | 1.00E+00 |
| ENSG00000221553.1_           | ENSG00000160789.18_LMNA | -0.01961 | -0.178256579 | 0.140025455 | 8.10E-01 | 9.25E-01 | 1.00E+00 |
| ENSG00000236958.1_RP11-264A  | ENSG00000160789.18_LMNA | -0.38891 | -0.516151723 | -0.24486848 | 7.36E-07 | 3.59E-05 | 3.78E-02 |
| ENSG00000261939.1_LARP7P2    | ENSG00000160789.18_LMNA | 0.01824  | -0.14137322  | 0.17692496  | 8.24E-01 | 9.31E-01 | 1.00E+00 |
| ENSG00000265636.1_           | ENSG00000160789.18_LMNA | 0.04406  | -0.11595635  | 0.201842646 | 5.90E-01 | 8.10E-01 | 1.00E+00 |
| ENSG00000200041.1_Y_RNA      | ENSG00000160789.18_LMNA | 0.03437  | -0.125514254 | 0.192520475 | 6.74E-01 | 8.57E-01 | 1.00E+00 |
| ENSG00000189064.8_GAGE2A     | ENSG00000160789.18_LMNA | -0.1361  | -0.289041793 | 0.023608235 | 9.45E-02 | 3.01E-01 | 1.00E+00 |
| ENSG00000274607.1_RNU6-866F  | ENSG00000160789.18_LMNA | 0.13269  | -0.027082387 | 0.285852648 | 1.03E-01 | 3.18E-01 | 1.00E+00 |
| ENSG00000206948.1_SNORA36A   | ENSG00000160789.18_LMNA | -0.02392 | -0.18243052  | 0.135793251 | 7.70E-01 | 9.05E-01 | 1.00E+00 |
| ENSG00000200789.1_RNU1-65P   | ENSG00000160789.18_LMNA | -0.05613 | -0.213426948 | 0.103996531 | 4.92E-01 | 7.48E-01 | 1.00E+00 |
| ENSG00000265918.2_RN7SL543F  | ENSG00000160789.18_LMNA | 0.10096  | -0.059191276 | 0.256046075 | 2.16E-01 | 4.90E-01 | 1.00E+00 |
| ENSG00000272160.1_RNU4-5P    | ENSG00000160789.18_LMNA | -0.02364 | -0.182155775 | 0.136072189 | 7.73E-01 | 9.06E-01 | 1.00E+00 |
| ENSG00000229436.1_AC073850.f | ENSG00000160789.18_LMNA | 0.11765  | -0.042340308 | 0.271763875 | 1.49E-01 | 3.96E-01 | 1.00E+00 |
| ENSG00000258615.1_RP11-725G  | ENSG00000160789.18_LMNA | -0.13526 | -0.288256125 | 0.024464818 | 9.66E-02 | 3.05E-01 | 1.00E+00 |
| ENSG00000258493.2_RP11-73E1  | ENSG00000160789.18_LMNA | -0.12112 | -0.275019325 | 0.038827674 | 1.37E-01 | 3.77E-01 | 1.00E+00 |
| ENSG00000244710.3_RN7SL47P   | ENSG00000160789.18_LMNA | 0.05575  | -0.104376395 | 0.213060378 | 4.95E-01 | 7.50E-01 | 1.00E+00 |

|                               |                         |          |              |             |          |          |          |
|-------------------------------|-------------------------|----------|--------------|-------------|----------|----------|----------|
| ENSG00000271196.1_RP11-461O   | ENSG00000160789.18_LMNA | -0.10117 | -0.256245471 | 0.058978624 | 2.15E-01 | 4.89E-01 | 1.00E+00 |
| ENSG00000263494.1_AC004702.1  | ENSG00000160789.18_LMNA | -0.13941 | -0.292126734 | 0.0202404   | 8.67E-02 | 2.86E-01 | 1.00E+00 |
| ENSG00000277482.1_RP11-762H   | ENSG00000160789.18_LMNA | 0.00984  | -0.149590608 | 0.16878072  | 9.04E-01 | 9.63E-01 | 1.00E+00 |
| ENSG00000241243.3_RN7SL629F   | ENSG00000160789.18_LMNA | -0.02141 | -0.179995853 | 0.138263315 | 7.93E-01 | 9.16E-01 | 1.00E+00 |
| ENSG00000275927.1_RP11-567P   | ENSG00000160789.18_LMNA | -0.00797 | -0.166957567 | 0.151424131 | 9.22E-01 | 9.70E-01 | 1.00E+00 |
| ENSG00000243954.3_RN7SL743F   | ENSG00000160789.18_LMNA | -0.00295 | -0.162075559 | 0.156323142 | 9.71E-01 | 9.89E-01 | 1.00E+00 |
| ENSG00000274848.1_Metazoa_SI  | ENSG00000160789.18_LMNA | 0.02157  | -0.138109751 | 0.18014733  | 7.92E-01 | 9.16E-01 | 1.00E+00 |
| ENSG00000269839.1_CTD-3233P   | ENSG00000160789.18_LMNA | -0.12934 | -0.282722049 | 0.030485425 | 1.12E-01 | 3.34E-01 | 1.00E+00 |
| ENSG00000211749.1_TRBV23-1    | ENSG00000160789.18_LMNA | -0.0294  | -0.18772366  | 0.130409469 | 7.19E-01 | 8.81E-01 | 1.00E+00 |
| ENSG00000275041.1_Metazoa_SI  | ENSG00000160789.18_LMNA | 0.09227  | -0.067923933 | 0.247834552 | 2.58E-01 | 5.41E-01 | 1.00E+00 |
| ENSG00000259692.4_RP11-499F   | ENSG00000160789.18_LMNA | -0.17363 | -0.323875185 | -0.01483628 | 3.24E-02 | 1.51E-01 | 1.00E+00 |
| ENSG00000225992.1_TRGVA       | ENSG00000160789.18_LMNA | 0.07404  | -0.08617575  | 0.23052417  | 3.65E-01 | 6.46E-01 | 1.00E+00 |
| ENSG00000251299.1_SLC25A15F   | ENSG00000160789.18_LMNA | -0.15637 | -0.307907498 | 0.002900909 | 5.44E-02 | 2.12E-01 | 1.00E+00 |
| ENSG00000228235.1_AP001476.4  | ENSG00000160789.18_LMNA | 0.25009  | 0.094661698  | 0.393622059 | 1.89E-03 | 1.87E-02 | 1.00E+00 |
| ENSG00000276839.1_Metazoa_SI  | ENSG00000160789.18_LMNA | 0.0804   | -0.079817567 | 0.236577234 | 3.25E-01 | 6.11E-01 | 1.00E+00 |
| ENSG00000230631.1_RP11-359N   | ENSG00000160789.18_LMNA | -0.03827 | -0.196274888 | 0.121671989 | 6.40E-01 | 8.39E-01 | 1.00E+00 |
| ENSG00000265905.2_RN7SL96P    | ENSG00000160789.18_LMNA | -0.0892  | -0.244923452 | 0.071008209 | 2.74E-01 | 5.59E-01 | 1.00E+00 |
| ENSG00000264250.2_RN7SL835F   | ENSG00000160789.18_LMNA | 0.00075  | -0.158467814 | 0.159933414 | 9.93E-01 | 9.97E-01 | 1.00E+00 |
| ENSG00000258144.1_RP11-554L   | ENSG00000160789.18_LMNA | -0.15518 | -0.306803814 | 0.004119717 | 5.63E-02 | 2.17E-01 | 1.00E+00 |
| ENSG00000184084.7_CTD-2372A   | ENSG00000160789.18_LMNA | -0.03716 | -0.195207376 | 0.122765451 | 6.49E-01 | 8.44E-01 | 1.00E+00 |
| ENSG00000273986.1_Metazoa_SI  | ENSG00000160789.18_LMNA | -0.12988 | -0.283219855 | 0.029944782 | 1.11E-01 | 3.32E-01 | 1.00E+00 |
| ENSG00000255358.1_RP11-567O   | ENSG00000160789.18_LMNA | -0.01911 | -0.17777274  | 0.140515297 | 8.15E-01 | 9.28E-01 | 1.00E+00 |
| ENSG00000239544.1_RP11-109N   | ENSG00000160789.18_LMNA | 0.04163  | -0.118355767 | 0.199507808 | 6.11E-01 | 8.22E-01 | 1.00E+00 |
| ENSG00000226490.1_AC138647.1  | ENSG00000160789.18_LMNA | -0.04196 | -0.199827665 | 0.118027283 | 6.08E-01 | 8.21E-01 | 1.00E+00 |
| ENSG00000260702.2_LA16c-349E  | ENSG00000160789.18_LMNA | -0.2007  | -0.348759342 | -0.04287129 | 1.32E-02 | 7.99E-02 | 1.00E+00 |
| ENSG00000239856.3_RN7SL225F   | ENSG00000160789.18_LMNA | -0.07637 | -0.232737565 | 0.083853772 | 3.50E-01 | 6.33E-01 | 1.00E+00 |
| ENSG00000271146.1_RP11-479F   | ENSG00000160789.18_LMNA | -0.04478 | -0.202538475 | 0.115240558 | 5.84E-01 | 8.07E-01 | 1.00E+00 |
| ENSG00000247381.2_PDX1-AS1    | ENSG00000160789.18_LMNA | -0.07712 | -0.233456429 | 0.083098902 | 3.45E-01 | 6.29E-01 | 1.00E+00 |
| ENSG00000270915.1_RP11-27M5   | ENSG00000160789.18_LMNA | 0.0945   | -0.065688186 | 0.249941207 | 2.47E-01 | 5.27E-01 | 1.00E+00 |
| ENSG00000259543.1_CTD-2034I.4 | ENSG00000160789.18_LMNA | -0.13898 | -0.291730453 | 0.020673417 | 8.77E-02 | 2.88E-01 | 1.00E+00 |
| ENSG00000220347.1_RP11-230C   | ENSG00000160789.18_LMNA | -0.07441 | -0.230879688 | 0.085803023 | 3.62E-01 | 6.44E-01 | 1.00E+00 |
| ENSG00000257924.1_RP11-493L   | ENSG00000160789.18_LMNA | -0.015   | -0.173787857 | 0.144543701 | 8.54E-01 | 9.43E-01 | 1.00E+00 |
| ENSG00000237520.1_RP11-443B   | ENSG00000160789.18_LMNA | 0.03471  | -0.125179373 | 0.19284807  | 6.71E-01 | 8.56E-01 | 1.00E+00 |

|                              |                         |          |              |             |          |          |          |
|------------------------------|-------------------------|----------|--------------|-------------|----------|----------|----------|
| ENSG00000235558.3_RP11-1198  | ENSG00000160789.18_LMNA | 0.08656  | -0.073651371 | 0.242424158 | 2.89E-01 | 5.74E-01 | 1.00E+00 |
| ENSG00000211798.3_TRAV18     | ENSG00000160789.18_LMNA | -0.17692 | -0.326912217 | -0.01823203 | 2.92E-02 | 1.41E-01 | 1.00E+00 |
| ENSG00000203498.2_RP11-556O  | ENSG00000160789.18_LMNA | -0.12399 | -0.27771161  | 0.035916825 | 1.28E-01 | 3.62E-01 | 1.00E+00 |
| ENSG00000233343.1_ATP6V1G1   | ENSG00000160789.18_LMNA | -0.06715 | -0.223955063 | 0.093046922 | 4.11E-01 | 6.85E-01 | 1.00E+00 |
| ENSG00000232031.1_RP5-991C6  | ENSG00000160789.18_LMNA | 0.16996  | 0.011059118  | 0.32048953  | 3.63E-02 | 1.62E-01 | 1.00E+00 |
| ENSG00000236658.1_RP11-83J2  | ENSG00000160789.18_LMNA | -0.05143 | -0.208920606 | 0.108659886 | 5.29E-01 | 7.73E-01 | 1.00E+00 |
| ENSG00000232305.1_CLCP1      | ENSG00000160789.18_LMNA | -0.0661  | -0.222958984 | 0.094086174 | 4.18E-01 | 6.90E-01 | 1.00E+00 |
| ENSG00000226047.1_RP11-196I1 | ENSG00000160789.18_LMNA | -0.09569 | -0.25106636  | 0.064492786 | 2.41E-01 | 5.20E-01 | 1.00E+00 |
| ENSG00000259103.1_RP11-270M  | ENSG00000160789.18_LMNA | 0.01053  | -0.148918671 | 0.169448312 | 8.98E-01 | 9.60E-01 | 1.00E+00 |
| ENSG00000258414.1_RP11-356O  | ENSG00000160789.18_LMNA | -0.26201 | -0.404345328 | -0.10728521 | 1.11E-03 | 1.26E-02 | 1.00E+00 |
| ENSG00000261544.1_RP11-16E2  | ENSG00000160789.18_LMNA | 0.13422  | -0.025523311 | 0.287284681 | 9.92E-02 | 3.10E-01 | 1.00E+00 |
| ENSG00000268174.1_BNIP3P22   | ENSG00000160789.18_LMNA | -0.11419 | -0.268511249 | 0.045842157 | 1.61E-01 | 4.16E-01 | 1.00E+00 |
| ENSG00000137392.8_CLPS       | ENSG00000160789.18_LMNA | -0.03361 | -0.191785394 | 0.12626542  | 6.81E-01 | 8.61E-01 | 1.00E+00 |
| ENSG00000134200.3_TSHB       | ENSG00000160789.18_LMNA | -0.08178 | -0.237884318 | 0.078441207 | 3.17E-01 | 6.03E-01 | 1.00E+00 |
| ENSG00000261680.1_RP11-146F  | ENSG00000160789.18_LMNA | -0.01279 | -0.171643957 | 0.146706659 | 8.76E-01 | 9.52E-01 | 1.00E+00 |
| ENSG00000256159.1_RP11-820K  | ENSG00000160789.18_LMNA | 0.20875  | 0.05124936   | 0.35611303  | 9.86E-03 | 6.49E-02 | 1.00E+00 |
| ENSG00000227481.1_RP11-89N1  | ENSG00000160789.18_LMNA | 0.09344  | -0.066755705 | 0.248935699 | 2.52E-01 | 5.33E-01 | 1.00E+00 |
| ENSG00000232792.2_FTH1P25    | ENSG00000160789.18_LMNA | -0.06699 | -0.223808104 | 0.093200295 | 4.12E-01 | 6.86E-01 | 1.00E+00 |
| ENSG00000230696.1_AC011753.1 | ENSG00000160789.18_LMNA | 0.12602  | -0.033858173 | 0.279612716 | 1.22E-01 | 3.51E-01 | 1.00E+00 |
| ENSG00000214669.3_RP11-18B1  | ENSG00000160789.18_LMNA | -0.01345 | -0.172283387 | 0.146061863 | 8.69E-01 | 9.49E-01 | 1.00E+00 |
| ENSG00000255886.1_RP11-196H  | ENSG00000160789.18_LMNA | 0.09378  | -0.066414041 | 0.24925759  | 2.50E-01 | 5.31E-01 | 1.00E+00 |
| ENSG00000205662.2_RP11-706O  | ENSG00000160789.18_LMNA | -0.02479 | -0.183271346 | 0.13493928  | 7.62E-01 | 9.01E-01 | 1.00E+00 |
| ENSG00000239995.2_TPT1P11    | ENSG00000160789.18_LMNA | -0.06765 | -0.224430343 | 0.092550798 | 4.08E-01 | 6.83E-01 | 1.00E+00 |
| ENSG00000236996.1_MLIP-IT1   | ENSG00000160789.18_LMNA | -0.05237 | -0.209823764 | 0.107726379 | 5.22E-01 | 7.67E-01 | 1.00E+00 |
| ENSG00000234142.1_RP11-276E  | ENSG00000160789.18_LMNA | -0.04067 | -0.198581821 | 0.119306339 | 6.19E-01 | 8.27E-01 | 1.00E+00 |
| ENSG00000248428.1_CTC-551A1  | ENSG00000160789.18_LMNA | 0.25753  | 0.102533452  | 0.400318423 | 1.36E-03 | 1.46E-02 | 1.00E+00 |
| ENSG00000235425.2_RPS7P13    | ENSG00000160789.18_LMNA | -0.05651 | -0.213782978 | 0.103627501 | 4.89E-01 | 7.45E-01 | 1.00E+00 |
| ENSG00000226028.2_PFN1P12    | ENSG00000160789.18_LMNA | 0.12836  | -0.031483073 | 0.281803003 | 1.15E-01 | 3.39E-01 | 1.00E+00 |
| ENSG00000248779.1_RP11-53O1  | ENSG00000160789.18_LMNA | -0.00564 | -0.164691905 | 0.153699631 | 9.45E-01 | 9.78E-01 | 1.00E+00 |
| ENSG00000261405.2_RP11-23E1  | ENSG00000160789.18_LMNA | 0.05313  | -0.106972569 | 0.210552671 | 5.16E-01 | 7.63E-01 | 1.00E+00 |
| ENSG00000159224.4_GIP        | ENSG00000160789.18_LMNA | 0.29211  | 0.139394284  | 0.431257788 | 2.61E-04 | 4.02E-03 | 1.00E+00 |
| ENSG00000219941.1_KRT18P50   | ENSG00000160789.18_LMNA | -0.25067 | -0.394138987 | -0.09526803 | 1.84E-03 | 1.84E-02 | 1.00E+00 |
| ENSG00000248986.1_RP11-774O  | ENSG00000160789.18_LMNA | -0.09967 | -0.254826308 | 0.060491512 | 2.22E-01 | 4.97E-01 | 1.00E+00 |

|                             |                         |          |              |             |          |          |          |
|-----------------------------|-------------------------|----------|--------------|-------------|----------|----------|----------|
| ENSG00000239997.1_FCF1P3    | ENSG00000160789.18_LMNA | -0.02496 | -0.183428849 | 0.134779262 | 7.60E-01 | 9.00E-01 | 1.00E+00 |
| ENSG00000254143.1_RP11-470M | ENSG00000160789.18_LMNA | -0.02023 | -0.178852125 | 0.139422306 | 8.05E-01 | 9.22E-01 | 1.00E+00 |
| ENSG00000251471.1_RP11-166D | ENSG00000160789.18_LMNA | -0.11342 | -0.267784144 | 0.046623919 | 1.64E-01 | 4.20E-01 | 1.00E+00 |
| ENSG00000255265.1_TMA16P1   | ENSG00000160789.18_LMNA | -0.01548 | -0.174251696 | 0.144075338 | 8.50E-01 | 9.41E-01 | 1.00E+00 |
| ENSG00000225078.2_RP11-123N | ENSG00000160789.18_LMNA | -0.17056 | -0.32104412  | -0.01167723 | 3.57E-02 | 1.61E-01 | 1.00E+00 |
| ENSG00000274252.1_GGTLC3    | ENSG00000160789.18_LMNA | -0.1512  | -0.303106012 | 0.008196512 | 6.30E-02 | 2.33E-01 | 1.00E+00 |
| ENSG00000226348.1_VN2R10P   | ENSG00000160789.18_LMNA | 0.1871   | 0.028760586  | 0.336288215 | 2.10E-02 | 1.12E-01 | 1.00E+00 |
| ENSG00000006659.11_LGALS14  | ENSG00000160789.18_LMNA | 0.06517  | -0.095013819 | 0.222069316 | 4.25E-01 | 6.96E-01 | 1.00E+00 |
| ENSG00000236616.3_BAK1P2    | ENSG00000160789.18_LMNA | 0.01251  | -0.146980192 | 0.171372619 | 8.78E-01 | 9.53E-01 | 1.00E+00 |
| ENSG00000267772.1_RP11-15E1 | ENSG00000160789.18_LMNA | -0.02188 | -0.180454808 | 0.13779799  | 7.89E-01 | 9.14E-01 | 1.00E+00 |
| ENSG00000262609.1_BTF3P14   | ENSG00000160789.18_LMNA | 0.07868  | -0.081537893 | 0.234941884 | 3.35E-01 | 6.21E-01 | 1.00E+00 |
| ENSG00000224661.1_AC010907  | ENSG00000160789.18_LMNA | 0.00698  | -0.152388234 | 0.165998043 | 9.32E-01 | 9.73E-01 | 1.00E+00 |
| ENSG00000253857.1_RP11-386G | ENSG00000160789.18_LMNA | -0.27316 | -0.414341903 | -0.11914016 | 6.62E-04 | 8.39E-03 | 1.00E+00 |
| ENSG00000235917.1_MTCO2P11  | ENSG00000160789.18_LMNA | -0.11419 | -0.268505022 | 0.045848853 | 1.61E-01 | 4.16E-01 | 1.00E+00 |
| ENSG00000204595.1_DPRX      | ENSG00000160789.18_LMNA | -0.01244 | -0.171299938 | 0.147053453 | 8.79E-01 | 9.53E-01 | 1.00E+00 |
| ENSG00000279497.1_RP11-654C | ENSG00000160789.18_LMNA | -0.22461 | -0.370558333 | -0.06783281 | 5.40E-03 | 4.15E-02 | 1.00E+00 |
| ENSG00000235410.1_RP11-397C | ENSG00000160789.18_LMNA | 0.01333  | -0.146178041 | 0.172168196 | 8.70E-01 | 9.50E-01 | 1.00E+00 |
| ENSG00000225084.1_AL450226  | ENSG00000160789.18_LMNA | -0.02913 | -0.187459105 | 0.130679001 | 7.22E-01 | 8.82E-01 | 1.00E+00 |
| ENSG00000262543.1_RP3-422G2 | ENSG00000160789.18_LMNA | -0.14491 | -0.297249392 | 0.01463228  | 7.49E-02 | 2.61E-01 | 1.00E+00 |
| ENSG00000197254.4_AP000445  | ENSG00000160789.18_LMNA | 0.0145   | -0.145038769 | 0.173297417 | 8.59E-01 | 9.45E-01 | 1.00E+00 |
| ENSG00000270710.1_RP11-293G | ENSG00000160789.18_LMNA | -0.0764  | -0.232765347 | 0.083824605 | 3.50E-01 | 6.33E-01 | 1.00E+00 |
| ENSG00000279976.1_RP11-243M | ENSG00000160789.18_LMNA | 0.00969  | -0.149739997 | 0.168632257 | 9.06E-01 | 9.64E-01 | 1.00E+00 |
| ENSG00000272328.1_RP4-594A5 | ENSG00000160789.18_LMNA | -0.11101 | -0.265518588 | 0.049057311 | 1.73E-01 | 4.33E-01 | 1.00E+00 |
| ENSG00000220581.1_VN1R12P   | ENSG00000160789.18_LMNA | -0.12122 | -0.275108932 | 0.038730878 | 1.37E-01 | 3.77E-01 | 1.00E+00 |
| ENSG00000235486.1_AC114755  | ENSG00000160789.18_LMNA | 0.07584  | -0.084379928 | 0.232236301 | 3.53E-01 | 6.37E-01 | 1.00E+00 |
| ENSG00000248765.1_MTCYBP37  | ENSG00000160789.18_LMNA | 0.21675  | 0.059606289  | 0.363410737 | 7.31E-03 | 5.20E-02 | 1.00E+00 |
| ENSG00000259257.1_RP11-616M | ENSG00000160789.18_LMNA | 0.07731  | -0.0829144   | 0.233632078 | 3.44E-01 | 6.28E-01 | 1.00E+00 |
| ENSG00000235379.1_RPL7P31   | ENSG00000160789.18_LMNA | -0.05392 | -0.21130499  | 0.106194164 | 5.09E-01 | 7.59E-01 | 1.00E+00 |
| ENSG00000235777.1_DPYD-AS2  | ENSG00000160789.18_LMNA | 0.12038  | -0.039580771 | 0.274321973 | 1.40E-01 | 3.81E-01 | 1.00E+00 |
| ENSG00000187806.6_TMEN202   | ENSG00000160789.18_LMNA | 0.08395  | -0.076273869 | 0.23994025  | 3.04E-01 | 5.90E-01 | 1.00E+00 |
| ENSG00000219700.1_PTCHD3P3  | ENSG00000160789.18_LMNA | -0.11971 | -0.273693183 | 0.04025952  | 1.42E-01 | 3.85E-01 | 1.00E+00 |
| ENSG00000196564.4_RP3-499B1 | ENSG00000160789.18_LMNA | 0.03677  | -0.12315179  | 0.194830025 | 6.53E-01 | 8.46E-01 | 1.00E+00 |
| ENSG00000259440.2_NPM1P43   | ENSG00000160789.18_LMNA | 0.04674  | -0.113303032 | 0.204420353 | 5.67E-01 | 7.97E-01 | 1.00E+00 |

|                             |                         |          |              |             |          |          |          |
|-----------------------------|-------------------------|----------|--------------|-------------|----------|----------|----------|
| ENSG00000215834.7_FMO9P     | ENSG00000160789.18_LMNA | -0.03664 | -0.19470941  | 0.123275258 | 6.54E-01 | 8.47E-01 | 1.00E+00 |
| ENSG00000214428.3_NPM1P10   | ENSG00000160789.18_LMNA | -0.00296 | -0.162080031 | 0.156318662 | 9.71E-01 | 9.89E-01 | 1.00E+00 |
| ENSG00000220891.1_LL22NC03- | ENSG00000160789.18_LMNA | -0.08166 | -0.237773222 | 0.078558239 | 3.17E-01 | 6.04E-01 | 1.00E+00 |
| ENSG00000248493.1_AC005351. | ENSG00000160789.18_LMNA | 0.14209  | -0.017506179 | 0.294626511 | 8.08E-02 | 2.74E-01 | 1.00E+00 |
| ENSG00000180105.11_AC017081 | ENSG00000160789.18_LMNA | 0.02102  | -0.138641459 | 0.179622783 | 7.97E-01 | 9.18E-01 | 1.00E+00 |
| ENSG00000233041.7_PHGR1     | ENSG00000160789.18_LMNA | 0.1953   | 0.037255462  | 0.343808981 | 1.59E-02 | 9.15E-02 | 1.00E+00 |
| ENSG00000280224.1_CTA-722E9 | ENSG00000160789.18_LMNA | 0.02058  | -0.139078181 | 0.179191809 | 8.01E-01 | 9.20E-01 | 1.00E+00 |
| ENSG00000228940.1_RP11-348A | ENSG00000160789.18_LMNA | 0.08658  | -0.073635304 | 0.242439363 | 2.89E-01 | 5.74E-01 | 1.00E+00 |
| ENSG00000279462.1_RP11-604N | ENSG00000160789.18_LMNA | 0.01932  | -0.140307763 | 0.17797775  | 8.13E-01 | 9.27E-01 | 1.00E+00 |
| ENSG00000261449.1_RP11-589C | ENSG00000160789.18_LMNA | -0.05477 | -0.212124451 | 0.105345846 | 5.03E-01 | 7.54E-01 | 1.00E+00 |
| ENSG00000253781.1_ZNF317P1  | ENSG00000160789.18_LMNA | -0.01296 | -0.171808927 | 0.14654033  | 8.74E-01 | 9.51E-01 | 1.00E+00 |
| ENSG00000257823.1_RP11-560G | ENSG00000160789.18_LMNA | -0.10762 | -0.26232463  | 0.052481551 | 1.87E-01 | 4.53E-01 | 1.00E+00 |
| ENSG00000258039.2_RP11-406H | ENSG00000160789.18_LMNA | -0.20027 | -0.348359659 | -0.04241716 | 1.34E-02 | 8.07E-02 | 1.00E+00 |
| ENSG00000267233.1_HNRNPA3F  | ENSG00000160789.18_LMNA | 0.09442  | -0.065769926 | 0.24986424  | 2.47E-01 | 5.27E-01 | 1.00E+00 |
| ENSG00000255804.1_OR6J1     | ENSG00000160789.18_LMNA | -0.00655 | -0.165579586 | 0.152808498 | 9.36E-01 | 9.75E-01 | 1.00E+00 |
| ENSG00000223965.2_ZNF587P1  | ENSG00000160789.18_LMNA | 0.10491  | -0.055210364 | 0.259774383 | 1.98E-01 | 4.68E-01 | 1.00E+00 |
| ENSG00000260427.1_AGGF1P9   | ENSG00000160789.18_LMNA | -0.00209 | -0.161233931 | 0.157166122 | 9.80E-01 | 9.92E-01 | 1.00E+00 |
| ENSG00000213487.3_ASS1P4    | ENSG00000160789.18_LMNA | -0.02059 | -0.179201029 | 0.139068839 | 8.01E-01 | 9.20E-01 | 1.00E+00 |
| ENSG00000273046.1_RP11-834C | ENSG00000160789.18_LMNA | 0.00309  | -0.156185825 | 0.162212612 | 9.70E-01 | 9.88E-01 | 1.00E+00 |
| ENSG00000215403.1_LL22NC01- | ENSG00000160789.18_LMNA | 0.02     | -0.139645436 | 0.178631835 | 8.07E-01 | 9.23E-01 | 1.00E+00 |
| ENSG00000164500.6_C7orf72   | ENSG00000160789.18_LMNA | -0.09164 | -0.247234284 | 0.068560404 | 2.61E-01 | 5.45E-01 | 1.00E+00 |
| ENSG00000231671.1_LINC01307 | ENSG00000160789.18_LMNA | -0.04546 | -0.203194309 | 0.114565605 | 5.78E-01 | 8.03E-01 | 1.00E+00 |
| ENSG00000265279.1_CLUHP6    | ENSG00000160789.18_LMNA | 0.07031  | -0.089899122 | 0.226968062 | 3.89E-01 | 6.68E-01 | 1.00E+00 |
| ENSG00000187600.11_TMEM247  | ENSG00000160789.18_LMNA | -0.12246 | -0.27627397  | 0.037471837 | 1.33E-01 | 3.70E-01 | 1.00E+00 |
| ENSG00000275954.3_TBC1D3F   | ENSG00000160789.18_LMNA | 0.05283  | -0.107276817 | 0.210258516 | 5.18E-01 | 7.64E-01 | 1.00E+00 |
| ENSG00000236254.1_MTND4P14  | ENSG00000160789.18_LMNA | 0.01323  | -0.146276475 | 0.172070591 | 8.71E-01 | 9.50E-01 | 1.00E+00 |
| ENSG00000237990.3_CNTN4-AS  | ENSG00000160789.18_LMNA | -0.07479 | -0.231237887 | 0.085427396 | 3.60E-01 | 6.42E-01 | 1.00E+00 |
| ENSG00000205976.4_RP11-404K | ENSG00000160789.18_LMNA | -0.03264 | -0.190844242 | 0.127226635 | 6.90E-01 | 8.66E-01 | 1.00E+00 |
| ENSG00000264859.4_DSG2-AS1  | ENSG00000160789.18_LMNA | -0.09082 | -0.246456599 | 0.06938461  | 2.66E-01 | 5.50E-01 | 1.00E+00 |
| ENSG00000255065.1_RP11-680E | ENSG00000160789.18_LMNA | 0.03468  | -0.125211341 | 0.1928168   | 6.71E-01 | 8.56E-01 | 1.00E+00 |
| ENSG00000149435.11_GGTLC1   | ENSG00000160789.18_LMNA | 0.02704  | -0.132734241 | 0.185440293 | 7.41E-01 | 8.91E-01 | 1.00E+00 |
| ENSG00000235749.2_RP11-634B | ENSG00000160789.18_LMNA | 0.00493  | -0.154395071 | 0.1639988   | 9.52E-01 | 9.81E-01 | 1.00E+00 |
| ENSG00000279065.1_RP11-264J | ENSG00000160789.18_LMNA | 0.18601  | 0.027626794  | 0.335281459 | 2.18E-02 | 1.15E-01 | 1.00E+00 |



|                             |                         |          |              |             |          |          |          |
|-----------------------------|-------------------------|----------|--------------|-------------|----------|----------|----------|
| ENSG00000219445.2_RP11-3B12 | ENSG00000160789.18_LMNA | -0.24202 | -0.386332245 | -0.08613462 | 2.67E-03 | 2.43E-02 | 1.00E+00 |
| ENSG00000223972.5_DDX11L1   | ENSG00000160789.18_LMNA | 0.02591  | -0.133844516 | 0.184348578 | 7.51E-01 | 8.96E-01 | 1.00E+00 |
| ENSG00000188525.3_AC010969. | ENSG00000160789.18_LMNA | -0.07305 | -0.229577045 | 0.087168289 | 3.71E-01 | 6.51E-01 | 1.00E+00 |
| ENSG00000235300.4_THRA1/BTF | ENSG00000160789.18_LMNA | -0.07881 | -0.235063378 | 0.08141015  | 3.34E-01 | 6.20E-01 | 1.00E+00 |
| ENSG00000168367.8_LINC00917 | ENSG00000160789.18_LMNA | -0.06496 | -0.22186375  | 0.095228081 | 4.27E-01 | 6.97E-01 | 1.00E+00 |
| ENSG00000268153.4_AC005176. | ENSG00000160789.18_LMNA | -0.11657 | -0.270750378 | 0.04343229  | 1.53E-01 | 4.02E-01 | 1.00E+00 |
| ENSG00000265069.1_RP11-781P | ENSG00000160789.18_LMNA | -0.00743 | -0.166436394 | 0.151947865 | 9.28E-01 | 9.72E-01 | 1.00E+00 |
| ENSG00000258609.2_LINC-ROR  | ENSG00000160789.18_LMNA | -0.16066 | -0.3118844   | -0.00149849 | 4.80E-02 | 1.96E-01 | 1.00E+00 |
| ENSG00000231980.1_AC011899. | ENSG00000160789.18_LMNA | -0.13132 | -0.284569695 | 0.028477867 | 1.07E-01 | 3.25E-01 | 1.00E+00 |
| ENSG00000171564.10_FGB      | ENSG00000160789.18_LMNA | 0.0393   | -0.12065509  | 0.197266979 | 6.31E-01 | 8.34E-01 | 1.00E+00 |
| ENSG00000254443.1_RP11-304C | ENSG00000160789.18_LMNA | 0.16879  | 0.009858527  | 0.319411724 | 3.76E-02 | 1.66E-01 | 1.00E+00 |
| ENSG00000277210.2_RP11-14C1 | ENSG00000160789.18_LMNA | -0.00421 | -0.163303699 | 0.155092198 | 9.59E-01 | 9.84E-01 | 1.00E+00 |
| ENSG00000261296.1_RP11-299H | ENSG00000160789.18_LMNA | -0.15734 | -0.308810117 | 0.001903452 | 5.29E-02 | 2.09E-01 | 1.00E+00 |
| ENSG00000134588.11_USP26    | ENSG00000160789.18_LMNA | -0.09519 | -0.250589279 | 0.064999763 | 2.43E-01 | 5.23E-01 | 1.00E+00 |
| ENSG00000257198.5_FAM205BP  | ENSG00000160789.18_LMNA | 0.05157  | -0.108521275 | 0.209054745 | 5.28E-01 | 7.72E-01 | 1.00E+00 |
| ENSG00000179709.7_NLRP8     | ENSG00000160789.18_LMNA | 0.02539  | -0.134355592 | 0.183845782 | 7.56E-01 | 8.98E-01 | 1.00E+00 |
| ENSG00000197210.7_KB-1592A4 | ENSG00000160789.18_LMNA | 0.11103  | -0.04903273  | 0.265541491 | 1.73E-01 | 4.33E-01 | 1.00E+00 |
| ENSG00000225564.5_LINC01492 | ENSG00000160789.18_LMNA | -0.17013 | -0.320650282 | -0.01123826 | 3.61E-02 | 1.62E-01 | 1.00E+00 |
| ENSG00000211828.1_TRDJ3     | ENSG00000160789.18_LMNA | 0.12257  | -0.037360606 | 0.276376852 | 1.32E-01 | 3.69E-01 | 1.00E+00 |
| ENSG00000199032.1_MIR425    | ENSG00000160789.18_LMNA | 0.05789  | -0.102249612 | 0.215111579 | 4.79E-01 | 7.37E-01 | 1.00E+00 |
| ENSG00000206908.1_RNU1-136F | ENSG00000160789.18_LMNA | -0.10271 | -0.257697743 | 0.057428938 | 2.08E-01 | 4.80E-01 | 1.00E+00 |
| ENSG00000212379.1_RNU6-269F | ENSG00000160789.18_LMNA | -0.15187 | -0.303725796 | 0.007513927 | 6.18E-02 | 2.30E-01 | 1.00E+00 |
| ENSG00000238517.1_MIR1270   | ENSG00000160789.18_LMNA | 0.02027  | -0.139380999 | 0.178892903 | 8.04E-01 | 9.22E-01 | 1.00E+00 |
| ENSG00000276102.1_MIR6747   | ENSG00000160789.18_LMNA | 0.00428  | -0.155027519 | 0.163368203 | 9.58E-01 | 9.83E-01 | 1.00E+00 |
| ENSG00000277634.1_Y_RNA     | ENSG00000160789.18_LMNA | 0.0239   | -0.135814211 | 0.182409877 | 7.70E-01 | 9.05E-01 | 1.00E+00 |
| ENSG00000251869.1_SCARNA23  | ENSG00000160789.18_LMNA | -0.06759 | -0.224378811 | 0.092604598 | 4.08E-01 | 6.83E-01 | 1.00E+00 |
| ENSG00000265981.1_MIR544B   | ENSG00000160789.18_LMNA | 0.19727  | 0.039308489  | 0.345620705 | 1.48E-02 | 8.73E-02 | 1.00E+00 |
| ENSG00000272337.1_RNU6-90P  | ENSG00000160789.18_LMNA | -0.00507 | -0.16413341  | 0.154260033 | 9.51E-01 | 9.80E-01 | 1.00E+00 |
| ENSG00000201725.1_RNU6-304F | ENSG00000160789.18_LMNA | -0.06789 | -0.22465927  | 0.092311776 | 4.06E-01 | 6.81E-01 | 1.00E+00 |
| ENSG00000201210.1_RNA5SP13  | ENSG00000160789.18_LMNA | 0.09399  | -0.06619677  | 0.249462251 | 2.49E-01 | 5.30E-01 | 1.00E+00 |
| ENSG00000251713.1_          | ENSG00000160789.18_LMNA | 0.16056  | 0.001395508  | 0.311791431 | 4.82E-02 | 1.96E-01 | 1.00E+00 |
| ENSG00000207073.1_Y_RNA     | ENSG00000160789.18_LMNA | -0.15251 | -0.304322976 | 0.006855962 | 6.07E-02 | 2.27E-01 | 1.00E+00 |
| ENSG00000266499.1_          | ENSG00000160789.18_LMNA | -0.12088 | -0.274789856 | 0.039075527 | 1.38E-01 | 3.78E-01 | 1.00E+00 |

|                              |                         |          |              |             |          |          |          |
|------------------------------|-------------------------|----------|--------------|-------------|----------|----------|----------|
| ENSG00000206727.1_SNORD116   | ENSG00000160789.18_LMNA | 0.02692  | -0.13284987  | 0.185326633 | 7.42E-01 | 8.92E-01 | 1.00E+00 |
| ENSG00000276338.1_           | ENSG00000160789.18_LMNA | 0.01128  | -0.148186776 | 0.170175141 | 8.90E-01 | 9.57E-01 | 1.00E+00 |
| ENSG00000238444.1_RNU6-893F  | ENSG00000160789.18_LMNA | 0.0529   | -0.107200473 | 0.210332332 | 5.17E-01 | 7.64E-01 | 1.00E+00 |
| ENSG00000224218.1_RP11-359D  | ENSG00000160789.18_LMNA | -0.05171 | -0.209184155 | 0.108387538 | 5.27E-01 | 7.72E-01 | 1.00E+00 |
| ENSG00000201709.1_RNU6-686F  | ENSG00000160789.18_LMNA | -0.06822 | -0.224977013 | 0.09197996  | 4.04E-01 | 6.79E-01 | 1.00E+00 |
| ENSG00000207117.1_Y_RNA      | ENSG00000160789.18_LMNA | 0.07713  | -0.08308714  | 0.233467627 | 3.45E-01 | 6.29E-01 | 1.00E+00 |
| ENSG00000264641.1_           | ENSG00000160789.18_LMNA | 0.001    | -0.158221983 | 0.160179108 | 9.90E-01 | 9.96E-01 | 1.00E+00 |
| ENSG00000207452.1_RNU6-606F  | ENSG00000160789.18_LMNA | -0.00076 | -0.159938653 | 0.158462573 | 9.93E-01 | 9.97E-01 | 1.00E+00 |
| ENSG00000277896.1_           | ENSG00000160789.18_LMNA | 0.08166  | -0.078566103 | 0.237765756 | 3.17E-01 | 6.04E-01 | 1.00E+00 |
| ENSG00000234406.1_AC004129.  | ENSG00000160789.18_LMNA | -0.28976 | -0.429164621 | -0.13687473 | 2.94E-04 | 4.42E-03 | 1.00E+00 |
| ENSG00000264095.1_           | ENSG00000160789.18_LMNA | -0.06733 | -0.224124196 | 0.092870389 | 4.10E-01 | 6.84E-01 | 1.00E+00 |
| ENSG00000199865.1_RNU6-495F  | ENSG00000160789.18_LMNA | -0.16035 | -0.311599927 | -0.0011834  | 4.84E-02 | 1.97E-01 | 1.00E+00 |
| ENSG00000199472.1_Y_RNA      | ENSG00000160789.18_LMNA | -0.03426 | -0.192410043 | 0.125627126 | 6.75E-01 | 8.58E-01 | 1.00E+00 |
| ENSG00000241834.3_RN7SL149F  | ENSG00000160789.18_LMNA | 0.05831  | -0.101837046 | 0.215509158 | 4.76E-01 | 7.34E-01 | 1.00E+00 |
| ENSG00000276555.1_           | ENSG00000160789.18_LMNA | -0.07288 | -0.229420285 | 0.087332504 | 3.72E-01 | 6.52E-01 | 1.00E+00 |
| ENSG00000252231.1_RNA5SP67   | ENSG00000160789.18_LMNA | 0.06608  | -0.094113731 | 0.222932563 | 4.19E-01 | 6.91E-01 | 1.00E+00 |
| ENSG00000222405.1_RNU4-65P   | ENSG00000160789.18_LMNA | -0.14881 | -0.300880961 | 0.010644635 | 6.73E-02 | 2.43E-01 | 1.00E+00 |
| ENSG00000241587.3_RN7SL482F  | ENSG00000160789.18_LMNA | -0.14315 | -0.295609532 | 0.016429684 | 7.85E-02 | 2.69E-01 | 1.00E+00 |
| ENSG00000233699.1_TTTY18     | ENSG00000160789.18_LMNA | -0.11996 | -0.273929599 | 0.040004354 | 1.41E-01 | 3.83E-01 | 1.00E+00 |
| ENSG00000238232.1_RP11-95P1  | ENSG00000160789.18_LMNA | 0.13083  | -0.028969308 | 0.284117614 | 1.08E-01 | 3.27E-01 | 1.00E+00 |
| ENSG00000244044.3_RN7SL735F  | ENSG00000160789.18_LMNA | 0.02161  | -0.138064105 | 0.180192353 | 7.92E-01 | 9.16E-01 | 1.00E+00 |
| ENSG00000251105.1_RP11-5711I | ENSG00000160789.18_LMNA | 0.00192  | -0.157324307 | 0.161075947 | 9.81E-01 | 9.93E-01 | 1.00E+00 |
| ENSG00000201164.1_RNU4-36P   | ENSG00000160789.18_LMNA | 0.07068  | -0.089530256 | 0.227320735 | 3.87E-01 | 6.65E-01 | 1.00E+00 |
| ENSG00000231788.4_RPL31P50   | ENSG00000160789.18_LMNA | 0.04624  | -0.113800129 | 0.203937757 | 5.72E-01 | 8.00E-01 | 1.00E+00 |
| ENSG00000233717.1_RPS29P29   | ENSG00000160789.18_LMNA | 0.00647  | -0.152891926 | 0.165496503 | 9.37E-01 | 9.75E-01 | 1.00E+00 |
| ENSG00000250753.2_RP11-241F  | ENSG00000160789.18_LMNA | -0.13491 | -0.287923958 | 0.024826829 | 9.75E-02 | 3.07E-01 | 1.00E+00 |
| ENSG00000260234.4_RP11-166N  | ENSG00000160789.18_LMNA | 0.07416  | -0.086056821 | 0.230637618 | 3.64E-01 | 6.45E-01 | 1.00E+00 |
| ENSG00000244356.3_RN7SL398F  | ENSG00000160789.18_LMNA | -0.07742 | -0.233742586 | 0.082798311 | 3.43E-01 | 6.28E-01 | 1.00E+00 |
| ENSG00000255960.1_RP11-459D  | ENSG00000160789.18_LMNA | -0.00708 | -0.166091393 | 0.152294465 | 9.31E-01 | 9.73E-01 | 1.00E+00 |
| ENSG00000255163.1_HSPE1P18   | ENSG00000160789.18_LMNA | 0.01146  | -0.148007009 | 0.170353611 | 8.89E-01 | 9.57E-01 | 1.00E+00 |
| ENSG00000231336.1_AC017006.  | ENSG00000160789.18_LMNA | -0.09683 | -0.25214681  | 0.063344027 | 2.35E-01 | 5.13E-01 | 1.00E+00 |
| ENSG00000276588.1_RN7SL322F  | ENSG00000160789.18_LMNA | -0.0777  | -0.23400637  | 0.08252117  | 3.41E-01 | 6.26E-01 | 1.00E+00 |
| ENSG00000264093.1_RP11-401F  | ENSG00000160789.18_LMNA | -0.08666 | -0.242512496 | 0.073558024 | 2.88E-01 | 5.74E-01 | 1.00E+00 |

|                              |                         |          |              |             |          |          |          |
|------------------------------|-------------------------|----------|--------------|-------------|----------|----------|----------|
| ENSG00000235494.1_RP11-498P  | ENSG00000160789.18_LMNA | -0.0349  | -0.193031531 | 0.1249918   | 6.69E-01 | 8.55E-01 | 1.00E+00 |
| ENSG00000269993.1_AF003625.3 | ENSG00000160789.18_LMNA | -0.21644 | -0.363124988 | -0.05927826 | 7.40E-03 | 5.24E-02 | 1.00E+00 |
| ENSG00000254175.1_IGLVI-42   | ENSG00000160789.18_LMNA | -0.01951 | -0.178159106 | 0.14012415  | 8.11E-01 | 9.26E-01 | 1.00E+00 |
| ENSG00000239703.3_RN7SL568F  | ENSG00000160789.18_LMNA | -0.03549 | -0.193596662 | 0.124413859 | 6.64E-01 | 8.52E-01 | 1.00E+00 |
| ENSG00000258185.2_RP11-202H  | ENSG00000160789.18_LMNA | -0.06758 | -0.224371001 | 0.092612752 | 4.08E-01 | 6.83E-01 | 1.00E+00 |
| ENSG00000265052.2_RN7SL622F  | ENSG00000160789.18_LMNA | -0.07513 | -0.231562399 | 0.085087016 | 3.58E-01 | 6.41E-01 | 1.00E+00 |
| ENSG00000273484.1_OR6R2P     | ENSG00000160789.18_LMNA | -0.00999 | -0.168917201 | 0.149453262 | 9.03E-01 | 9.62E-01 | 1.00E+00 |
| ENSG00000230118.1_AC092569.1 | ENSG00000160789.18_LMNA | -0.0255  | -0.183957564 | 0.134241984 | 7.55E-01 | 8.98E-01 | 1.00E+00 |
| ENSG00000271057.1_RP11-747H  | ENSG00000160789.18_LMNA | 0.03544  | -0.124460707 | 0.19355086  | 6.65E-01 | 8.52E-01 | 1.00E+00 |
| ENSG00000223563.1_AP001601.1 | ENSG00000160789.18_LMNA | -0.15741 | -0.308869951 | 0.001837309 | 5.28E-02 | 2.08E-01 | 1.00E+00 |
| ENSG00000189295.12_ANKRD62   | ENSG00000160789.18_LMNA | -0.29952 | -0.437844853 | -0.14734789 | 1.78E-04 | 2.97E-03 | 1.00E+00 |
| ENSG00000233840.1_PCDH9-AS   | ENSG00000160789.18_LMNA | 0.14179  | -0.017808749 | 0.294350094 | 8.14E-02 | 2.75E-01 | 1.00E+00 |
| ENSG00000202392.1_RN7SKP29   | ENSG00000160789.18_LMNA | 0.08667  | -0.073542883 | 0.242526824 | 2.88E-01 | 5.74E-01 | 1.00E+00 |
| ENSG00000280921.1_           | ENSG00000160789.18_LMNA | 0.15979  | 0.000608409  | 0.311080674 | 4.92E-02 | 1.99E-01 | 1.00E+00 |
| ENSG00000251270.1_RP11-231L  | ENSG00000160789.18_LMNA | -0.11628 | -0.270477567 | 0.043726098 | 1.54E-01 | 4.04E-01 | 1.00E+00 |
| ENSG00000240419.1_RP11-545E  | ENSG00000160789.18_LMNA | -0.08726 | -0.243083468 | 0.07295454  | 2.85E-01 | 5.71E-01 | 1.00E+00 |
| ENSG00000226989.1_AL049758.2 | ENSG00000160789.18_LMNA | 0.01702  | -0.142566857 | 0.175744647 | 8.35E-01 | 9.36E-01 | 1.00E+00 |
| ENSG00000242207.1_HOXB-AS4   | ENSG00000160789.18_LMNA | 0.11339  | -0.046648596 | 0.267761186 | 1.64E-01 | 4.20E-01 | 1.00E+00 |
| ENSG00000265777.2_RN7SL624F  | ENSG00000160789.18_LMNA | 0.22353  | 0.066701746  | 0.369577734 | 5.64E-03 | 4.29E-02 | 1.00E+00 |
| ENSG00000251508.1_RP5-862P8  | ENSG00000160789.18_LMNA | 0.03824  | -0.121701146 | 0.196246433 | 6.40E-01 | 8.39E-01 | 1.00E+00 |
| ENSG00000274976.1_RP11-8P13  | ENSG00000160789.18_LMNA | -0.05102 | -0.208526843 | 0.109066706 | 5.32E-01 | 7.75E-01 | 1.00E+00 |
| ENSG00000225112.1_RP11-295P  | ENSG00000160789.18_LMNA | 0.00315  | -0.156126165 | 0.162272154 | 9.69E-01 | 9.88E-01 | 1.00E+00 |
| ENSG00000279346.1_AC104389.1 | ENSG00000160789.18_LMNA | -0.0551  | -0.212438192 | 0.105020935 | 5.00E-01 | 7.53E-01 | 1.00E+00 |
| ENSG00000229988.1_HBBP1      | ENSG00000160789.18_LMNA | -0.06242 | -0.219439805 | 0.097752358 | 4.45E-01 | 7.12E-01 | 1.00E+00 |
| ENSG00000243758.1_RPL35AP1.1 | ENSG00000160789.18_LMNA | -0.06518 | -0.22207936  | 0.095003348 | 4.25E-01 | 6.96E-01 | 1.00E+00 |
| ENSG00000243314.1_RP11-538P  | ENSG00000160789.18_LMNA | 0.11209  | -0.047962531 | 0.266538288 | 1.69E-01 | 4.28E-01 | 1.00E+00 |
| ENSG00000230300.1_STARD13-1  | ENSG00000160789.18_LMNA | -0.09939 | -0.254560696 | 0.060774505 | 2.23E-01 | 4.99E-01 | 1.00E+00 |
| ENSG00000265113.1_RP11-70O5  | ENSG00000160789.18_LMNA | 0.0738   | -0.086413481 | 0.230297372 | 3.66E-01 | 6.47E-01 | 1.00E+00 |
| ENSG00000280298.1_AC007163.1 | ENSG00000160789.18_LMNA | -0.00765 | -0.166645223 | 0.151738032 | 9.26E-01 | 9.71E-01 | 1.00E+00 |
| ENSG00000266268.4_RP11-172F  | ENSG00000160789.18_LMNA | -0.07281 | -0.229356815 | 0.087398989 | 3.73E-01 | 6.53E-01 | 1.00E+00 |
| ENSG00000250306.1_CTC-498M1  | ENSG00000160789.18_LMNA | 0.03877  | -0.121180648 | 0.196754324 | 6.35E-01 | 8.37E-01 | 1.00E+00 |
| ENSG00000266569.2_RN7SL377F  | ENSG00000160789.18_LMNA | 0.04584  | -0.114194907 | 0.203554385 | 5.75E-01 | 8.02E-01 | 1.00E+00 |
| ENSG00000254024.1_KB-1562D1  | ENSG00000160789.18_LMNA | 0.06059  | -0.099570233 | 0.217691757 | 4.58E-01 | 7.22E-01 | 1.00E+00 |

|                              |                         |          |              |             |          |          |          |
|------------------------------|-------------------------|----------|--------------|-------------|----------|----------|----------|
| ENSG00000235656.1_RPL36P18   | ENSG00000160789.18_LMNA | 0.06705  | -0.093148984 | 0.22385727  | 4.12E-01 | 6.86E-01 | 1.00E+00 |
| ENSG00000244540.2_RP11-416A  | ENSG00000160789.18_LMNA | 0.07575  | -0.084464783 | 0.232155445 | 3.54E-01 | 6.37E-01 | 1.00E+00 |
| ENSG00000237659.1_RNASEH2C   | ENSG00000160789.18_LMNA | -0.07154 | -0.228146772 | 0.088665951 | 3.81E-01 | 6.60E-01 | 1.00E+00 |
| ENSG00000258763.4_RP11-110A  | ENSG00000160789.18_LMNA | 0.01473  | -0.144811627 | 0.173522455 | 8.57E-01 | 9.44E-01 | 1.00E+00 |
| ENSG00000267398.1_AC006130.  | ENSG00000160789.18_LMNA | -0.01286 | -0.171713893 | 0.146636149 | 8.75E-01 | 9.51E-01 | 1.00E+00 |
| ENSG00000229625.3_RP11-44N1  | ENSG00000160789.18_LMNA | 0.06515  | -0.095032946 | 0.222050966 | 4.25E-01 | 6.96E-01 | 1.00E+00 |
| ENSG00000253964.1_RPL31P40   | ENSG00000160789.18_LMNA | -0.02681 | -0.185221215 | 0.132957108 | 7.43E-01 | 8.92E-01 | 1.00E+00 |
| ENSG00000225144.2_AC018643.  | ENSG00000160789.18_LMNA | -0.0458  | -0.203518992 | 0.114231348 | 5.75E-01 | 8.02E-01 | 1.00E+00 |
| ENSG00000253346.1_CTD-3107M  | ENSG00000160789.18_LMNA | 0.06212  | -0.09804894  | 0.219154755 | 4.47E-01 | 7.13E-01 | 1.00E+00 |
| ENSG00000261692.1_RP1-168P1  | ENSG00000160789.18_LMNA | 0.05038  | -0.109698273 | 0.207915342 | 5.38E-01 | 7.78E-01 | 1.00E+00 |
| ENSG00000225359.1_RP11-540K  | ENSG00000160789.18_LMNA | 0.0117   | -0.147771465 | 0.170587424 | 8.86E-01 | 9.56E-01 | 1.00E+00 |
| ENSG00000280406.1_RP11-379L  | ENSG00000160789.18_LMNA | -0.17878 | -0.328622867 | -0.02014787 | 2.75E-02 | 1.35E-01 | 1.00E+00 |
| ENSG00000237130.1_MRPS6P2    | ENSG00000160789.18_LMNA | 0.01424  | -0.145293852 | 0.173044657 | 8.62E-01 | 9.46E-01 | 1.00E+00 |
| ENSG00000233848.1_RP3-348I23 | ENSG00000160789.18_LMNA | 0.15417  | -0.005153763 | 0.305866784 | 5.79E-02 | 2.20E-01 | 1.00E+00 |
| ENSG00000271850.1_RP11-16D2  | ENSG00000160789.18_LMNA | -0.05198 | -0.209445578 | 0.108117341 | 5.25E-01 | 7.70E-01 | 1.00E+00 |
| ENSG00000279197.1_CTB-3M24.  | ENSG00000160789.18_LMNA | -0.23985 | -0.384372029 | -0.08384918 | 2.92E-03 | 2.62E-02 | 1.00E+00 |
| ENSG00000233103.1_RP11-524P  | ENSG00000160789.18_LMNA | -0.08246 | -0.23852742  | 0.077763579 | 3.13E-01 | 5.99E-01 | 1.00E+00 |
| ENSG00000225349.2_RP11-820K  | ENSG00000160789.18_LMNA | 0.0309   | -0.128931011 | 0.189174001 | 7.05E-01 | 8.75E-01 | 1.00E+00 |
| ENSG00000241067.2_RPL17P40   | ENSG00000160789.18_LMNA | 0.07646  | -0.083755303 | 0.232831357 | 3.49E-01 | 6.33E-01 | 1.00E+00 |
| ENSG00000224819.1_AC093843.  | ENSG00000160789.18_LMNA | -0.04485 | -0.202606581 | 0.11517048  | 5.83E-01 | 8.06E-01 | 1.00E+00 |
| ENSG00000231476.1_AC074389.  | ENSG00000160789.18_LMNA | -0.08886 | -0.244598248 | 0.071352384 | 2.76E-01 | 5.61E-01 | 1.00E+00 |
| ENSG00000249916.1_CTD-2280E  | ENSG00000160789.18_LMNA | -0.01903 | -0.177694208 | 0.140594789 | 8.16E-01 | 9.28E-01 | 1.00E+00 |
| ENSG00000237089.2_PCNP4      | ENSG00000160789.18_LMNA | 0.05191  | -0.108187485 | 0.209377717 | 5.25E-01 | 7.70E-01 | 1.00E+00 |
| ENSG00000254542.1_NAV2-AS3   | ENSG00000160789.18_LMNA | 0.12711  | -0.03275411  | 0.280631275 | 1.19E-01 | 3.46E-01 | 1.00E+00 |
| ENSG00000266105.1_RP11-326K  | ENSG00000160789.18_LMNA | 0.00065  | -0.158567616 | 0.159833657 | 9.94E-01 | 9.98E-01 | 1.00E+00 |
| ENSG00000234578.1_RP4-784A1  | ENSG00000160789.18_LMNA | -0.03882 | -0.196799701 | 0.121134135 | 6.35E-01 | 8.36E-01 | 1.00E+00 |
| ENSG00000251260.1_WDFY3-AS   | ENSG00000160789.18_LMNA | -0.00421 | -0.163300501 | 0.155095405 | 9.59E-01 | 9.84E-01 | 1.00E+00 |
| ENSG00000255246.1_RP11-179A  | ENSG00000160789.18_LMNA | -0.27497 | -0.415961162 | -0.12106839 | 6.07E-04 | 7.86E-03 | 1.00E+00 |
| ENSG00000270880.1_RP11-255E  | ENSG00000160789.18_LMNA | 0.07462  | -0.085597561 | 0.231075628 | 3.61E-01 | 6.43E-01 | 1.00E+00 |
| ENSG00000229118.1_AC068491.  | ENSG00000160789.18_LMNA | 0.14229  | -0.017301102 | 0.294813831 | 8.03E-02 | 2.73E-01 | 1.00E+00 |
| ENSG00000269110.1_CTC-513N1  | ENSG00000160789.18_LMNA | 0.03742  | -0.122507552 | 0.195459222 | 6.47E-01 | 8.43E-01 | 1.00E+00 |
| ENSG00000169325.10_GUSBP12   | ENSG00000160789.18_LMNA | -0.12515 | -0.278797861 | 0.034740881 | 1.24E-01 | 3.56E-01 | 1.00E+00 |
| ENSG00000263644.1_RP11-269G  | ENSG00000160789.18_LMNA | -0.07775 | -0.234049623 | 0.082475723 | 3.41E-01 | 6.26E-01 | 1.00E+00 |

|                              |                         |          |              |             |          |          |          |
|------------------------------|-------------------------|----------|--------------|-------------|----------|----------|----------|
| ENSG00000229463.2_LYST-AS1   | ENSG00000160789.18_LMNA | 0.16356  | 0.004473073  | 0.314567167 | 4.41E-02 | 1.85E-01 | 1.00E+00 |
| ENSG00000226401.3_RP5-965K1  | ENSG00000160789.18_LMNA | -0.00538 | -0.164437865 | 0.153954564 | 9.48E-01 | 9.79E-01 | 1.00E+00 |
| ENSG00000236777.1_RP11-108B  | ENSG00000160789.18_LMNA | 0.03133  | -0.128515746 | 0.189581118 | 7.02E-01 | 8.72E-01 | 1.00E+00 |
| ENSG00000237666.2_AC108868.  | ENSG00000160789.18_LMNA | 0.01461  | -0.144923609 | 0.173411515 | 8.58E-01 | 9.44E-01 | 1.00E+00 |
| ENSG00000255606.1_AP000439.  | ENSG00000160789.18_LMNA | -0.11181 | -0.266273855 | 0.048246507 | 1.70E-01 | 4.29E-01 | 1.00E+00 |
| ENSG00000261440.1_DUX4L45    | ENSG00000160789.18_LMNA | -0.1136  | -0.267952582 | 0.046442854 | 1.63E-01 | 4.19E-01 | 1.00E+00 |
| ENSG00000233037.2_AC009237.  | ENSG00000160789.18_LMNA | 0.19619  | 0.038181916  | 0.344626826 | 1.54E-02 | 8.96E-02 | 1.00E+00 |
| ENSG00000260126.1_RP11-14N9  | ENSG00000160789.18_LMNA | -0.23777 | -0.382491464 | -0.08165958 | 3.18E-03 | 2.79E-02 | 1.00E+00 |
| ENSG00000259482.1_RORA-AS2   | ENSG00000160789.18_LMNA | 0.10462  | -0.055501158 | 0.259502359 | 2.00E-01 | 4.70E-01 | 1.00E+00 |
| ENSG00000263547.1_RP11-1O2.  | ENSG00000160789.18_LMNA | -0.1856  | -0.334902358 | -0.02720006 | 2.21E-02 | 1.16E-01 | 1.00E+00 |
| ENSG00000196289.6_BEEN2      | ENSG00000160789.18_LMNA | 0.15678  | -0.002484223 | 0.308284634 | 5.37E-02 | 2.11E-01 | 1.00E+00 |
| ENSG00000213652.3_HMGB3P3C   | ENSG00000160789.18_LMNA | -0.00656 | -0.16559231  | 0.15279572  | 9.36E-01 | 9.75E-01 | 1.00E+00 |
| ENSG00000257987.4_LINC00935  | ENSG00000160789.18_LMNA | 0.06411  | -0.096068085 | 0.221057568 | 4.33E-01 | 7.02E-01 | 1.00E+00 |
| ENSG00000229146.2_SNX18P4    | ENSG00000160789.18_LMNA | 0.0608   | -0.099358698 | 0.217895271 | 4.57E-01 | 7.21E-01 | 1.00E+00 |
| ENSG00000253452.4_RP11-473Ji | ENSG00000160789.18_LMNA | -0.06608 | -0.222935053 | 0.094111133 | 4.19E-01 | 6.91E-01 | 1.00E+00 |
| ENSG00000257767.2_RP11-162P  | ENSG00000160789.18_LMNA | -0.13462 | -0.287659417 | 0.025115079 | 9.82E-02 | 3.08E-01 | 1.00E+00 |
| ENSG00000239498.1_AC114765.  | ENSG00000160789.18_LMNA | -0.05912 | -0.216283681 | 0.101033016 | 4.69E-01 | 7.30E-01 | 1.00E+00 |
| ENSG00000233694.4_AC007365.  | ENSG00000160789.18_LMNA | 0.05624  | -0.103888247 | 0.213531426 | 4.91E-01 | 7.47E-01 | 1.00E+00 |
| ENSG00000253619.1_RP11-369K  | ENSG00000160789.18_LMNA | -0.09688 | -0.252188977 | 0.063299177 | 2.35E-01 | 5.13E-01 | 1.00E+00 |
| ENSG00000234788.1_HSPA8P3    | ENSG00000160789.18_LMNA | 0.1033   | -0.056830621 | 0.25825807  | 2.05E-01 | 4.77E-01 | 1.00E+00 |
| ENSG00000248725.3_RP11-218C  | ENSG00000160789.18_LMNA | -0.06978 | -0.226460518 | 0.090429817 | 3.93E-01 | 6.71E-01 | 1.00E+00 |
| ENSG00000235419.4_AC010149.  | ENSG00000160789.18_LMNA | -0.01623 | -0.174979673 | 0.143339974 | 8.43E-01 | 9.39E-01 | 1.00E+00 |
| ENSG00000228645.2_PHKG1P2    | ENSG00000160789.18_LMNA | 0.05901  | -0.101144813 | 0.216176011 | 4.70E-01 | 7.31E-01 | 1.00E+00 |
| ENSG00000281832.1_LINC00602  | ENSG00000160789.18_LMNA | -0.02969 | -0.188003863 | 0.130123945 | 7.17E-01 | 8.80E-01 | 1.00E+00 |
| ENSG00000278561.1_PTPN20CP   | ENSG00000160789.18_LMNA | -0.06583 | -0.222699287 | 0.094357013 | 4.20E-01 | 6.92E-01 | 1.00E+00 |
| ENSG00000234173.1_RP11-257I1 | ENSG00000160789.18_LMNA | -0.35519 | -0.486856204 | -0.20773072 | 7.12E-06 | 2.23E-04 | 3.65E-01 |
| ENSG00000214283.4_RAD51AP1   | ENSG00000160789.18_LMNA | -0.01676 | -0.175496192 | 0.142818    | 8.38E-01 | 9.37E-01 | 1.00E+00 |
| ENSG00000253224.1_PGAM5P1    | ENSG00000160789.18_LMNA | 0.26407  | 0.109467706  | 0.406191042 | 1.01E-03 | 1.17E-02 | 1.00E+00 |
| ENSG00000234502.2_FYTTD1P1   | ENSG00000160789.18_LMNA | -0.05173 | -0.209210297 | 0.108360521 | 5.27E-01 | 7.71E-01 | 1.00E+00 |
| ENSG00000180988.2_OR52N2     | ENSG00000160789.18_LMNA | -0.08441 | -0.240377359 | 0.075812688 | 3.01E-01 | 5.88E-01 | 1.00E+00 |
| ENSG00000214012.4_KRT18P38   | ENSG00000160789.18_LMNA | 0.07174  | -0.088472007 | 0.228332066 | 3.80E-01 | 6.59E-01 | 1.00E+00 |
| ENSG00000231297.3_RP11-459F  | ENSG00000160789.18_LMNA | 0.0093   | -0.150125342 | 0.168249235 | 9.09E-01 | 9.65E-01 | 1.00E+00 |
| ENSG00000260836.1_RP11-152F  | ENSG00000160789.18_LMNA | -0.09046 | -0.246114474 | 0.069747065 | 2.68E-01 | 5.52E-01 | 1.00E+00 |

|                              |                         |          |              |             |          |          |          |
|------------------------------|-------------------------|----------|--------------|-------------|----------|----------|----------|
| ENSG00000264876.1_RP11-138E  | ENSG00000160789.18_LMNA | -0.02642 | -0.184843425 | 0.133341355 | 7.47E-01 | 8.94E-01 | 1.00E+00 |
| ENSG00000185074.7_OR7E31P    | ENSG00000160789.18_LMNA | 0.01003  | -0.149412344 | 0.16895786  | 9.02E-01 | 9.62E-01 | 1.00E+00 |
| ENSG00000226299.2_RPSAP62    | ENSG00000160789.18_LMNA | -0.13974 | -0.292436004 | 0.019902377 | 8.60E-02 | 2.85E-01 | 1.00E+00 |
| ENSG00000263574.1_CTD-2532D  | ENSG00000160789.18_LMNA | -0.08216 | -0.238243776 | 0.078062487 | 3.14E-01 | 6.01E-01 | 1.00E+00 |
| ENSG00000138472.9_GUCA1C     | ENSG00000160789.18_LMNA | 0.073    | -0.087214997 | 0.229532459 | 3.71E-01 | 6.52E-01 | 1.00E+00 |
| ENSG00000170948.3_MBD3L1     | ENSG00000160789.18_LMNA | 0.19729  | 0.039319926  | 0.345630791 | 1.48E-02 | 8.73E-02 | 1.00E+00 |
| ENSG00000230239.1_RP11-108M  | ENSG00000160789.18_LMNA | -0.11614 | -0.270343248 | 0.043870736 | 1.54E-01 | 4.05E-01 | 1.00E+00 |
| ENSG00000218363.1_SLC25A20F  | ENSG00000160789.18_LMNA | -0.0855  | -0.241418815 | 0.074713334 | 2.95E-01 | 5.81E-01 | 1.00E+00 |
| ENSG00000276160.1_GGTLC5P    | ENSG00000160789.18_LMNA | -0.0455  | -0.203224521 | 0.114534505 | 5.78E-01 | 8.03E-01 | 1.00E+00 |
| ENSG00000146383.7_TAAR6      | ENSG00000160789.18_LMNA | -0.05206 | -0.209528093 | 0.108032046 | 5.24E-01 | 7.69E-01 | 1.00E+00 |
| ENSG00000227593.2_PHBP16     | ENSG00000160789.18_LMNA | 0.0756   | -0.08461661  | 0.232010762 | 3.55E-01 | 6.38E-01 | 1.00E+00 |
| ENSG00000129455.14_KLK8      | ENSG00000160789.18_LMNA | -0.00549 | -0.164544514 | 0.153847545 | 9.47E-01 | 9.79E-01 | 1.00E+00 |
| ENSG00000181211.1_HECW1-IT1  | ENSG00000160789.18_LMNA | 0.04023  | -0.119735697 | 0.198163382 | 6.23E-01 | 8.30E-01 | 1.00E+00 |
| ENSG00000236956.1_NF1P8      | ENSG00000160789.18_LMNA | 0.0096   | -0.149830491 | 0.168542318 | 9.07E-01 | 9.64E-01 | 1.00E+00 |
| ENSG00000259639.4_RP11-184D  | ENSG00000160789.18_LMNA | -0.0771  | -0.233433641 | 0.083122837 | 3.45E-01 | 6.29E-01 | 1.00E+00 |
| ENSG00000130385.5_BMP15      | ENSG00000160789.18_LMNA | -0.13625 | -0.289179246 | 0.023458329 | 9.42E-02 | 3.00E-01 | 1.00E+00 |
| ENSG00000264443.1_RP4-594I1C | ENSG00000160789.18_LMNA | 0.0092   | -0.150218186 | 0.168156937 | 9.10E-01 | 9.66E-01 | 1.00E+00 |
| ENSG00000233002.2_AC005324.1 | ENSG00000160789.18_LMNA | -0.00486 | -0.163929783 | 0.154464304 | 9.53E-01 | 9.81E-01 | 1.00E+00 |
| ENSG00000204174.5_NPY4R      | ENSG00000160789.18_LMNA | -0.12467 | -0.278348728 | 0.035227205 | 1.26E-01 | 3.59E-01 | 1.00E+00 |
| ENSG00000226097.4_AC099342.1 | ENSG00000160789.18_LMNA | 0.01939  | -0.140243223 | 0.178041499 | 8.13E-01 | 9.26E-01 | 1.00E+00 |
| ENSG00000205858.8_LRRC72     | ENSG00000160789.18_LMNA | -0.16553 | -0.31639721  | -0.00650533 | 4.15E-02 | 1.78E-01 | 1.00E+00 |
| ENSG00000235834.1_RP1-60N8.1 | ENSG00000160789.18_LMNA | -0.06542 | -0.222305529 | 0.094767576 | 4.23E-01 | 6.94E-01 | 1.00E+00 |
| ENSG00000266830.1_CTD-2008P  | ENSG00000160789.18_LMNA | -0.0981  | -0.25334811  | 0.062065796 | 2.29E-01 | 5.06E-01 | 1.00E+00 |
| ENSG00000249500.1_LINC01179  | ENSG00000160789.18_LMNA | 0.13334  | -0.026420219 | 0.28646103  | 1.01E-01 | 3.14E-01 | 1.00E+00 |
| ENSG00000279358.1_RP11-688I5 | ENSG00000160789.18_LMNA | -0.16349 | -0.314506786 | -0.00440606 | 4.42E-02 | 1.85E-01 | 1.00E+00 |
| ENSG00000223651.1_RP5-1121H  | ENSG00000160789.18_LMNA | -0.12183 | -0.275681626 | 0.0381121   | 1.35E-01 | 3.73E-01 | 1.00E+00 |
| ENSG00000229147.1_SMPD4P2    | ENSG00000160789.18_LMNA | 0.02142  | -0.138251282 | 0.180007723 | 7.93E-01 | 9.16E-01 | 1.00E+00 |
| ENSG00000242049.1_DNAJB8-A5  | ENSG00000160789.18_LMNA | -0.1693  | -0.319882926 | -0.0103833  | 3.71E-02 | 1.65E-01 | 1.00E+00 |
| ENSG00000248975.2_CTD-2251F  | ENSG00000160789.18_LMNA | 0.06271  | -0.097464747 | 0.219716183 | 4.43E-01 | 7.10E-01 | 1.00E+00 |
| ENSG00000185247.13_MAGEA11   | ENSG00000160789.18_LMNA | 0.12259  | -0.037342227 | 0.276393851 | 1.32E-01 | 3.69E-01 | 1.00E+00 |
| ENSG00000102021.9_LUZIP4     | ENSG00000160789.18_LMNA | -0.01985 | -0.178490342 | 0.139788736 | 8.08E-01 | 9.24E-01 | 1.00E+00 |
| ENSG00000184108.6_TRIML1     | ENSG00000160789.18_LMNA | 0.07642  | -0.08380015  | 0.23278864  | 3.49E-01 | 6.33E-01 | 1.00E+00 |
| ENSG00000169340.8_PDILT      | ENSG00000160789.18_LMNA | -0.11565 | -0.269879244 | 0.044370283 | 1.56E-01 | 4.07E-01 | 1.00E+00 |

|                              |                         |          |              |             |          |          |          |
|------------------------------|-------------------------|----------|--------------|-------------|----------|----------|----------|
| ENSG00000259043.1_BRD7P1     | ENSG00000160789.18_LMNA | -0.0274  | -0.185792521 | 0.132375855 | 7.38E-01 | 8.90E-01 | 1.00E+00 |
| ENSG00000279261.1_AL360294.1 | ENSG00000160789.18_LMNA | -0.00951 | -0.16845321  | 0.149920142 | 9.07E-01 | 9.65E-01 | 1.00E+00 |
| ENSG00000259779.1_RP11-231E  | ENSG00000160789.18_LMNA | -0.12151 | -0.275386215 | 0.038431313 | 1.36E-01 | 3.75E-01 | 1.00E+00 |
| ENSG00000243584.1_RP11-14I2. | ENSG00000160789.18_LMNA | -0.05599 | -0.213289118 | 0.104139371 | 4.93E-01 | 7.49E-01 | 1.00E+00 |
| ENSG00000239511.2_POM121L7   | ENSG00000160789.18_LMNA | 0.08258  | -0.077639139 | 0.238645488 | 3.12E-01 | 5.98E-01 | 1.00E+00 |
| ENSG00000253932.1_RP11-10C8  | ENSG00000160789.18_LMNA | 0.01059  | -0.148862923 | 0.169503686 | 8.97E-01 | 9.60E-01 | 1.00E+00 |
| ENSG00000186038.8_HTR3E      | ENSG00000160789.18_LMNA | -0.01208 | -0.170947671 | 0.14740848  | 8.83E-01 | 9.55E-01 | 1.00E+00 |
| ENSG00000263189.1_RP11-618P  | ENSG00000160789.18_LMNA | 0.13054  | -0.02926532  | 0.283845243 | 1.09E-01 | 3.28E-01 | 1.00E+00 |
| ENSG00000267706.3_CTD-2105E  | ENSG00000160789.18_LMNA | 0.04557  | -0.114465613 | 0.203291444 | 5.77E-01 | 8.03E-01 | 1.00E+00 |
| ENSG00000215296.8_TMCO5B     | ENSG00000160789.18_LMNA | 0.04813  | -0.111924684 | 0.205757685 | 5.56E-01 | 7.90E-01 | 1.00E+00 |
| ENSG00000206192.7_ANKRD20A   | ENSG00000160789.18_LMNA | 0.07642  | -0.083797787 | 0.232790892 | 3.49E-01 | 6.33E-01 | 1.00E+00 |
| ENSG00000276778.1_RP11-524N  | ENSG00000160789.18_LMNA | -0.04254 | -0.200388027 | 0.117451638 | 6.03E-01 | 8.18E-01 | 1.00E+00 |
| ENSG00000236532.4_AL035610.2 | ENSG00000160789.18_LMNA | 0.06298  | -0.097190518 | 0.219979653 | 4.41E-01 | 7.08E-01 | 1.00E+00 |
| ENSG00000131183.9_SLC34A1    | ENSG00000160789.18_LMNA | 0.11422  | -0.045814248 | 0.268537199 | 1.61E-01 | 4.16E-01 | 1.00E+00 |
| ENSG00000261177.1_RP11-805I2 | ENSG00000160789.18_LMNA | 0.01955  | -0.140091574 | 0.178191279 | 8.11E-01 | 9.26E-01 | 1.00E+00 |
| ENSG00000251264.1_RP11-545H  | ENSG00000160789.18_LMNA | -0.13811 | -0.290915162 | 0.021563921 | 8.97E-02 | 2.92E-01 | 1.00E+00 |
| ENSG00000278233.1_RNA5-8S5   | ENSG00000160789.18_LMNA | -0.02515 | -0.18361766  | 0.134587414 | 7.58E-01 | 8.99E-01 | 1.00E+00 |
| ENSG00000281676.1_AC012363.  | ENSG00000160789.18_LMNA | 0.0047   | -0.154620869 | 0.163773693 | 9.54E-01 | 9.82E-01 | 1.00E+00 |
| ENSG00000207954.1_MIR138-1   | ENSG00000160789.18_LMNA | -0.05958 | -0.216721413 | 0.100578424 | 4.66E-01 | 7.28E-01 | 1.00E+00 |
| ENSG00000212388.1_RNU6-796F  | ENSG00000160789.18_LMNA | -0.13962 | -0.292320673 | 0.020028439 | 8.62E-02 | 2.85E-01 | 1.00E+00 |
| ENSG00000266539.1_           | ENSG00000160789.18_LMNA | 0.02548  | -0.13426956  | 0.183930431 | 7.55E-01 | 8.98E-01 | 1.00E+00 |
| ENSG00000265820.1_MIR3177    | ENSG00000160789.18_LMNA | 0.02298  | -0.136723755 | 0.181513808 | 7.79E-01 | 9.09E-01 | 1.00E+00 |
| ENSG00000201882.1_snoU2-30   | ENSG00000160789.18_LMNA | 0.03398  | -0.125898018 | 0.192144973 | 6.78E-01 | 8.59E-01 | 1.00E+00 |
| ENSG00000266778.1_           | ENSG00000160789.18_LMNA | -0.01089 | -0.169797506 | 0.148567087 | 8.94E-01 | 9.59E-01 | 1.00E+00 |
| ENSG00000207497.1_Y_RNA      | ENSG00000160789.18_LMNA | -0.03988 | -0.197819952 | 0.120087999 | 6.26E-01 | 8.31E-01 | 1.00E+00 |
| ENSG00000266058.1_           | ENSG00000160789.18_LMNA | -0.03401 | -0.192174131 | 0.125868222 | 6.77E-01 | 8.59E-01 | 1.00E+00 |
| ENSG00000264675.1_MIR4285    | ENSG00000160789.18_LMNA | 0.00046  | -0.158755858 | 0.159645481 | 9.96E-01 | 9.98E-01 | 1.00E+00 |
| ENSG00000208009.1_MIR130A    | ENSG00000160789.18_LMNA | -0.16433 | -0.315281924 | -0.0052665  | 4.31E-02 | 1.82E-01 | 1.00E+00 |
| ENSG00000265295.1_           | ENSG00000160789.18_LMNA | -0.04768 | -0.205323593 | 0.112372224 | 5.60E-01 | 7.92E-01 | 1.00E+00 |
| ENSG00000212418.1_RNY4P36    | ENSG00000160789.18_LMNA | 0.08265  | -0.077574903 | 0.238706433 | 3.11E-01 | 5.98E-01 | 1.00E+00 |
| ENSG00000206927.1_Y_RNA      | ENSG00000160789.18_LMNA | -0.01791 | -0.176609705 | 0.141692124 | 8.27E-01 | 9.32E-01 | 1.00E+00 |
| ENSG00000207729.2_MIR556     | ENSG00000160789.18_LMNA | -0.11009 | -0.264653262 | 0.049985757 | 1.77E-01 | 4.38E-01 | 1.00E+00 |
| ENSG00000221233.2_           | ENSG00000160789.18_LMNA | -0.04084 | -0.198747371 | 0.119136437 | 6.17E-01 | 8.27E-01 | 1.00E+00 |

|                              |                         |          |              |             |          |          |          |
|------------------------------|-------------------------|----------|--------------|-------------|----------|----------|----------|
| ENSG00000206875.1_RNU6-761F  | ENSG00000160789.18_LMNA | -0.11528 | -0.269538142 | 0.044737415 | 1.57E-01 | 4.10E-01 | 1.00E+00 |
| ENSG00000207308.1_RNU6-878F  | ENSG00000160789.18_LMNA | 0.13026  | -0.029554247 | 0.283579342 | 1.10E-01 | 3.30E-01 | 1.00E+00 |
| ENSG00000207325.1_RNY1P4     | ENSG00000160789.18_LMNA | -0.0065  | -0.165529142 | 0.152859151 | 9.37E-01 | 9.75E-01 | 1.00E+00 |
| ENSG00000266358.1_           | ENSG00000160789.18_LMNA | 0.27694  | 0.123165052  | 0.417719742 | 5.53E-04 | 7.29E-03 | 1.00E+00 |
| ENSG00000263583.1_MIR4522    | ENSG00000160789.18_LMNA | 0.00283  | -0.156437153 | 0.161961758 | 9.72E-01 | 9.89E-01 | 1.00E+00 |
| ENSG00000264209.1_           | ENSG00000160789.18_LMNA | 0.02095  | -0.138711994 | 0.179553185 | 7.98E-01 | 9.19E-01 | 1.00E+00 |
| ENSG00000277987.1_RP11-167B  | ENSG00000160789.18_LMNA | -0.14563 | -0.297928117 | 0.013887759 | 7.34E-02 | 2.58E-01 | 1.00E+00 |
| ENSG00000201813.1_RNU6-915F  | ENSG00000160789.18_LMNA | -0.01859 | -0.177263063 | 0.141031129 | 8.20E-01 | 9.30E-01 | 1.00E+00 |
| ENSG00000222522.1_RNU6-519F  | ENSG00000160789.18_LMNA | 0.03169  | -0.128157306 | 0.189932438 | 6.98E-01 | 8.71E-01 | 1.00E+00 |
| ENSG00000200756.1_RNU6-236F  | ENSG00000160789.18_LMNA | 0.09086  | -0.069343381 | 0.246495511 | 2.66E-01 | 5.49E-01 | 1.00E+00 |
| ENSG00000252126.2_RNU6-313F  | ENSG00000160789.18_LMNA | 0.04765  | -0.112408084 | 0.205288805 | 5.60E-01 | 7.92E-01 | 1.00E+00 |
| ENSG00000208308.1_SNORA40    | ENSG00000160789.18_LMNA | -0.02078 | -0.179383588 | 0.138883859 | 7.99E-01 | 9.19E-01 | 1.00E+00 |
| ENSG00000234121.1_GPM6BP3    | ENSG00000160789.18_LMNA | -0.01406 | -0.172872205 | 0.145467865 | 8.64E-01 | 9.47E-01 | 1.00E+00 |
| ENSG00000235926.1_RPS29P15   | ENSG00000160789.18_LMNA | 0.04934  | -0.11072565  | 0.206920075 | 5.46E-01 | 7.84E-01 | 1.00E+00 |
| ENSG00000278084.1_RP11-87C1  | ENSG00000160789.18_LMNA | 0.11189  | -0.048168872 | 0.266346152 | 1.70E-01 | 4.29E-01 | 1.00E+00 |
| ENSG00000278171.1_RP11-476I1 | ENSG00000160789.18_LMNA | -0.06593 | -0.222789277 | 0.094263168 | 4.20E-01 | 6.91E-01 | 1.00E+00 |
| ENSG00000253058.1_RNA5SP43   | ENSG00000160789.18_LMNA | -0.09406 | -0.24952377  | 0.066131455 | 2.49E-01 | 5.29E-01 | 1.00E+00 |
| ENSG00000264767.2_RN7SL237F  | ENSG00000160789.18_LMNA | -0.10492 | -0.259779202 | 0.055205212 | 1.98E-01 | 4.68E-01 | 1.00E+00 |
| ENSG00000265141.2_RN7SL451F  | ENSG00000160789.18_LMNA | 0.00214  | -0.157113098 | 0.161286883 | 9.79E-01 | 9.92E-01 | 1.00E+00 |
| ENSG00000265894.2_RN7SL357F  | ENSG00000160789.18_LMNA | 0.2002   | 0.042351779  | 0.348302106 | 1.34E-02 | 8.08E-02 | 1.00E+00 |
| ENSG00000202125.1_RNU1-100F  | ENSG00000160789.18_LMNA | 0.00024  | -0.15896546  | 0.159435925 | 9.98E-01 | 9.99E-01 | 1.00E+00 |
| ENSG00000264582.2_RN7SL326F  | ENSG00000160789.18_LMNA | -0.0486  | -0.206200783 | 0.111467727 | 5.52E-01 | 7.88E-01 | 1.00E+00 |
| ENSG00000278883.1_AL591806.1 | ENSG00000160789.18_LMNA | 0.13883  | -0.020829844 | 0.291587271 | 8.81E-02 | 2.89E-01 | 1.00E+00 |
| ENSG00000253178.1_RP11-404E  | ENSG00000160789.18_LMNA | 0.0139   | -0.145627497 | 0.172713987 | 8.65E-01 | 9.47E-01 | 1.00E+00 |
| ENSG00000228873.1_AC012307.  | ENSG00000160789.18_LMNA | 0.06784  | -0.092355608 | 0.224617292 | 4.06E-01 | 6.82E-01 | 1.00E+00 |
| ENSG00000280016.1_RP11-191F  | ENSG00000160789.18_LMNA | 0.02079  | -0.138872189 | 0.179395105 | 7.99E-01 | 9.19E-01 | 1.00E+00 |
| ENSG00000255745.1_RP11-625L  | ENSG00000160789.18_LMNA | -0.10952 | -0.26411856  | 0.050559191 | 1.79E-01 | 4.42E-01 | 1.00E+00 |
| ENSG00000248109.1_CTC-295J1  | ENSG00000160789.18_LMNA | -0.03303 | -0.191225529 | 0.126837292 | 6.86E-01 | 8.64E-01 | 1.00E+00 |
| ENSG00000238195.1_CTA-503F6  | ENSG00000160789.18_LMNA | 0.03962  | -0.120342225 | 0.19757208  | 6.28E-01 | 8.33E-01 | 1.00E+00 |
| ENSG00000239674.2_RP1-127L4  | ENSG00000160789.18_LMNA | -0.05951 | -0.216656904 | 0.100645426 | 4.66E-01 | 7.28E-01 | 1.00E+00 |
| ENSG00000233603.1_JTBP1      | ENSG00000160789.18_LMNA | 0.00182  | -0.157423254 | 0.160977119 | 9.82E-01 | 9.93E-01 | 1.00E+00 |
| ENSG00000251410.1_AC007106.  | ENSG00000160789.18_LMNA | -0.28334 | -0.423437692 | -0.13000049 | 4.04E-04 | 5.71E-03 | 1.00E+00 |
| ENSG00000226212.2_TRGV6      | ENSG00000160789.18_LMNA | -0.13586 | -0.288810855 | 0.023860066 | 9.51E-02 | 3.02E-01 | 1.00E+00 |



|                              |                         |          |              |             |          |          |          |
|------------------------------|-------------------------|----------|--------------|-------------|----------|----------|----------|
| ENSG00000244236.3_RN7SL604F  | ENSG00000160789.18_LMNA | 0.15326  | -0.006088023 | 0.30501966  | 5.94E-02 | 2.24E-01 | 1.00E+00 |
| ENSG00000242595.1_RP11-648L  | ENSG00000160789.18_LMNA | -0.06386 | -0.220814526 | 0.096321236 | 4.34E-01 | 7.03E-01 | 1.00E+00 |
| ENSG00000142538.1_PTH2       | ENSG00000160789.18_LMNA | 0.06542  | -0.094767496 | 0.222305606 | 4.23E-01 | 6.94E-01 | 1.00E+00 |
| ENSG00000234871.1_LINC01032  | ENSG00000160789.18_LMNA | 0.0481   | -0.111959166 | 0.205724244 | 5.56E-01 | 7.90E-01 | 1.00E+00 |
| ENSG00000234208.1_CTA-256D1  | ENSG00000160789.18_LMNA | -0.03113 | -0.189393409 | 0.128707226 | 7.03E-01 | 8.73E-01 | 1.00E+00 |
| ENSG00000224192.2_RP11-259P  | ENSG00000160789.18_LMNA | -0.11633 | -0.270521633 | 0.043678645 | 1.54E-01 | 4.04E-01 | 1.00E+00 |
| ENSG00000257101.1_LRR37A1    | ENSG00000160789.18_LMNA | -0.06572 | -0.222593086 | 0.094467758 | 4.21E-01 | 6.93E-01 | 1.00E+00 |
| ENSG00000227708.1_AC079150.  | ENSG00000160789.18_LMNA | -0.21757 | -0.364154232 | -0.06046009 | 7.09E-03 | 5.09E-02 | 1.00E+00 |
| ENSG00000267250.1_RP11-118B  | ENSG00000160789.18_LMNA | -0.10194 | -0.256972313 | 0.058203217 | 2.11E-01 | 4.85E-01 | 1.00E+00 |
| ENSG00000278007.1_Metazoa_SI | ENSG00000160789.18_LMNA | 0.01903  | -0.140596852 | 0.177692169 | 8.16E-01 | 9.28E-01 | 1.00E+00 |
| ENSG00000242860.3_RN7SL180F  | ENSG00000160789.18_LMNA | -0.09345 | -0.248945325 | 0.066745489 | 2.52E-01 | 5.33E-01 | 1.00E+00 |
| ENSG00000279554.1_CTA-113A6  | ENSG00000160789.18_LMNA | -0.22495 | -0.370871138 | -0.06819377 | 5.33E-03 | 4.11E-02 | 1.00E+00 |
| ENSG00000260345.1_AC009052.  | ENSG00000160789.18_LMNA | -0.03927 | -0.197235332 | 0.120687538 | 6.31E-01 | 8.34E-01 | 1.00E+00 |
| ENSG00000124610.4_HIST1H1A   | ENSG00000160789.18_LMNA | 0.08209  | -0.0781311   | 0.238178659 | 3.15E-01 | 6.01E-01 | 1.00E+00 |
| ENSG00000229667.2_UBE2V1P9   | ENSG00000160789.18_LMNA | 0.05563  | -0.104496089 | 0.212944855 | 4.96E-01 | 7.50E-01 | 1.00E+00 |
| ENSG00000279251.1_RP11-78O7  | ENSG00000160789.18_LMNA | -0.00463 | -0.163709683 | 0.154685069 | 9.55E-01 | 9.82E-01 | 1.00E+00 |
| ENSG00000259773.1_RP11-507J  | ENSG00000160789.18_LMNA | -0.0162  | -0.174952284 | 0.143367647 | 8.43E-01 | 9.39E-01 | 1.00E+00 |
| ENSG00000224099.1_AC064834.  | ENSG00000160789.18_LMNA | -0.00679 | -0.16581044  | 0.152576661 | 9.34E-01 | 9.74E-01 | 1.00E+00 |
| ENSG00000224330.1_AC005019.  | ENSG00000160789.18_LMNA | 0.15979  | 0.000605533  | 0.311078076 | 4.92E-02 | 1.99E-01 | 1.00E+00 |
| ENSG00000278818.1_Metazoa_SI | ENSG00000160789.18_LMNA | 0.01228  | -0.147210385 | 0.171144236 | 8.81E-01 | 9.54E-01 | 1.00E+00 |
| ENSG00000227175.1_RP11-214D  | ENSG00000160789.18_LMNA | -0.11495 | -0.269224262 | 0.045075171 | 1.58E-01 | 4.12E-01 | 1.00E+00 |
| ENSG00000255280.1_CTD-2530H  | ENSG00000160789.18_LMNA | 0.03703  | -0.122893849 | 0.195081976 | 6.51E-01 | 8.45E-01 | 1.00E+00 |
| ENSG00000234117.2_RP11-259P  | ENSG00000160789.18_LMNA | -0.01471 | -0.173503198 | 0.144831066 | 8.57E-01 | 9.44E-01 | 1.00E+00 |
| ENSG00000269172.1_CTC-218B8  | ENSG00000160789.18_LMNA | -0.1133  | -0.267676983 | 0.046739102 | 1.65E-01 | 4.21E-01 | 1.00E+00 |
| ENSG00000274183.1_H2AFB1     | ENSG00000160789.18_LMNA | 0.18685  | 0.028498812  | 0.336055833 | 2.12E-02 | 1.12E-01 | 1.00E+00 |
| ENSG00000270265.1_RP11-731D  | ENSG00000160789.18_LMNA | 0.0952   | -0.064987268 | 0.25060104  | 2.43E-01 | 5.23E-01 | 1.00E+00 |
| ENSG00000228368.1_AC106873.  | ENSG00000160789.18_LMNA | 0.06065  | -0.099515516 | 0.217744401 | 4.58E-01 | 7.22E-01 | 1.00E+00 |
| ENSG00000258272.1_RP11-510I5 | ENSG00000160789.18_LMNA | 0.03833  | -0.121612398 | 0.196333044 | 6.39E-01 | 8.39E-01 | 1.00E+00 |
| ENSG00000226739.1_RP11-347L  | ENSG00000160789.18_LMNA | -0.0893  | -0.245021819 | 0.070904089 | 2.74E-01 | 5.59E-01 | 1.00E+00 |
| ENSG00000220447.1_RP1-276J1  | ENSG00000160789.18_LMNA | 0.05107  | -0.109015763 | 0.208576156 | 5.32E-01 | 7.75E-01 | 1.00E+00 |
| ENSG00000258440.1_RP11-1033I | ENSG00000160789.18_LMNA | 0.11619  | -0.043821049 | 0.270389392 | 1.54E-01 | 4.04E-01 | 1.00E+00 |
| ENSG00000213118.4_CHCHD2P4   | ENSG00000160789.18_LMNA | -0.08072 | -0.236879379 | 0.079499515 | 3.23E-01 | 6.09E-01 | 1.00E+00 |
| ENSG00000231868.1_RP1-202O8  | ENSG00000160789.18_LMNA | -0.08834 | -0.244110634 | 0.071868303 | 2.79E-01 | 5.65E-01 | 1.00E+00 |

|                              |                         |          |              |             |          |          |          |
|------------------------------|-------------------------|----------|--------------|-------------|----------|----------|----------|
| ENSG00000228596.1_AC013436.1 | ENSG00000160789.18_LMNA | 0.27216  | 0.11807306   | 0.413444992 | 6.94E-04 | 8.72E-03 | 1.00E+00 |
| ENSG00000254697.1_COPS8P3    | ENSG00000160789.18_LMNA | -0.05273 | -0.21016591  | 0.107372588 | 5.19E-01 | 7.65E-01 | 1.00E+00 |
| ENSG00000250882.1_CTC-459M5  | ENSG00000160789.18_LMNA | -0.00786 | -0.166849895 | 0.151532347 | 9.23E-01 | 9.71E-01 | 1.00E+00 |
| ENSG00000234030.1_TMEN97P1   | ENSG00000160789.18_LMNA | 0.17129  | 0.012432422  | 0.321721405 | 3.49E-02 | 1.58E-01 | 1.00E+00 |
| ENSG00000238111.1_AC066692.1 | ENSG00000160789.18_LMNA | 0.01121  | -0.148253203 | 0.170109188 | 8.91E-01 | 9.57E-01 | 1.00E+00 |
| ENSG00000279924.1_RP11-341D  | ENSG00000160789.18_LMNA | -0.07502 | -0.231458845 | 0.085195642 | 3.58E-01 | 6.41E-01 | 1.00E+00 |
| ENSG00000271202.1_PRR13P7    | ENSG00000160789.18_LMNA | -0.02757 | -0.185952072 | 0.132213486 | 7.36E-01 | 8.89E-01 | 1.00E+00 |
| ENSG00000188293.5_IGFL1      | ENSG00000160789.18_LMNA | -0.02436 | -0.182849938 | 0.135367335 | 7.66E-01 | 9.03E-01 | 1.00E+00 |
| ENSG00000235533.1_RP11-284P  | ENSG00000160789.18_LMNA | -0.14926 | -0.301303898 | 0.010179583 | 6.65E-02 | 2.41E-01 | 1.00E+00 |
| ENSG00000256287.1_RP11-664H  | ENSG00000160789.18_LMNA | 0.02957  | -0.130247714 | 0.187882407 | 7.18E-01 | 8.80E-01 | 1.00E+00 |
| ENSG00000239453.1_SIDT1-AS1  | ENSG00000160789.18_LMNA | -0.04417 | -0.201947675 | 0.115848329 | 5.89E-01 | 8.09E-01 | 1.00E+00 |
| ENSG00000280095.1_CH507-42P  | ENSG00000160789.18_LMNA | 0.18908  | 0.030804883  | 0.338101683 | 1.97E-02 | 1.07E-01 | 1.00E+00 |
| ENSG00000254626.1_RP11-27G2  | ENSG00000160789.18_LMNA | -0.15905 | -0.310393513 | 0.000152194 | 5.03E-02 | 2.02E-01 | 1.00E+00 |
| ENSG00000258570.1_RP11-452K  | ENSG00000160789.18_LMNA | 0.02378  | -0.135931565 | 0.182294291 | 7.71E-01 | 9.05E-01 | 1.00E+00 |
| ENSG00000280338.1_RP11-334G  | ENSG00000160789.18_LMNA | -0.00574 | -0.164794032 | 0.153597132 | 9.44E-01 | 9.78E-01 | 1.00E+00 |
| ENSG00000250344.1_RP11-647P  | ENSG00000160789.18_LMNA | -0.04029 | -0.198215927 | 0.119681787 | 6.22E-01 | 8.29E-01 | 1.00E+00 |
| ENSG00000224758.1_LINC01167  | ENSG00000160789.18_LMNA | 0.12869  | -0.031151833 | 0.282108209 | 1.14E-01 | 3.37E-01 | 1.00E+00 |
| ENSG00000258680.2_RP11-506K  | ENSG00000160789.18_LMNA | -0.02404 | -0.182539984 | 0.135682103 | 7.69E-01 | 9.04E-01 | 1.00E+00 |
| ENSG00000250947.1_TRPC7-AS2  | ENSG00000160789.18_LMNA | 0.02861  | -0.131192223 | 0.186955231 | 7.26E-01 | 8.84E-01 | 1.00E+00 |
| ENSG00000254287.1_RP11-44K6  | ENSG00000160789.18_LMNA | 0.00192  | -0.157332736 | 0.161067528 | 9.81E-01 | 9.93E-01 | 1.00E+00 |
| ENSG00000261174.2_HMGB1P33   | ENSG00000160789.18_LMNA | -0.02286 | -0.181400626 | 0.136838602 | 7.80E-01 | 9.10E-01 | 1.00E+00 |
| ENSG00000263279.1_RP11-109M  | ENSG00000160789.18_LMNA | -0.03388 | -0.192044122 | 0.126001073 | 6.79E-01 | 8.60E-01 | 1.00E+00 |
| ENSG00000244302.1_PEX5L-AS2  | ENSG00000160789.18_LMNA | -0.16517 | -0.316058084 | -0.00612854 | 4.20E-02 | 1.79E-01 | 1.00E+00 |
| ENSG00000241654.1_RPL19P18   | ENSG00000160789.18_LMNA | -0.16364 | -0.314647213 | -0.00456191 | 4.40E-02 | 1.85E-01 | 1.00E+00 |
| ENSG00000253712.1_RP11-697M  | ENSG00000160789.18_LMNA | -0.08876 | -0.244508004 | 0.071447879 | 2.77E-01 | 5.62E-01 | 1.00E+00 |
| ENSG00000233643.2_RP11-491H  | ENSG00000160789.18_LMNA | -0.17471 | -0.324871013 | -0.01594895 | 3.13E-02 | 1.48E-01 | 1.00E+00 |
| ENSG00000235108.1_IFNA12P    | ENSG00000160789.18_LMNA | -0.02144 | -0.180026384 | 0.138232365 | 7.93E-01 | 9.16E-01 | 1.00E+00 |
| ENSG00000223729.1_RP11-145E  | ENSG00000160789.18_LMNA | -0.16816 | -0.318821108 | -0.00920101 | 3.84E-02 | 1.69E-01 | 1.00E+00 |
| ENSG00000168703.5_WFDC12     | ENSG00000160789.18_LMNA | -0.05074 | -0.208256805 | 0.109345637 | 5.35E-01 | 7.76E-01 | 1.00E+00 |
| ENSG00000269350.1_CTD-2278I1 | ENSG00000160789.18_LMNA | 0.01507  | -0.144472705 | 0.173858177 | 8.54E-01 | 9.43E-01 | 1.00E+00 |
| ENSG00000223872.1_AC006372.1 | ENSG00000160789.18_LMNA | 0.11422  | -0.045810498 | 0.268540687 | 1.61E-01 | 4.16E-01 | 1.00E+00 |
| ENSG00000248870.1_CTD-2015A  | ENSG00000160789.18_LMNA | 0.07144  | -0.088775038 | 0.22804254  | 3.82E-01 | 6.60E-01 | 1.00E+00 |
| ENSG00000276411.1_RP11-494G  | ENSG00000160789.18_LMNA | -0.0726  | -0.229147592 | 0.087618127 | 3.74E-01 | 6.54E-01 | 1.00E+00 |

|                              |                         |          |              |             |          |          |          |
|------------------------------|-------------------------|----------|--------------|-------------|----------|----------|----------|
| ENSG00000228478.1_RP1-290I1C | ENSG00000160789.18_LMNA | 0.08537  | -0.074849086 | 0.241290252 | 2.96E-01 | 5.82E-01 | 1.00E+00 |
| ENSG00000233688.1_CTD-2183H  | ENSG00000160789.18_LMNA | -0.02163 | -0.180210556 | 0.13804565  | 7.91E-01 | 9.16E-01 | 1.00E+00 |
| ENSG00000223728.3_RP11-314N  | ENSG00000160789.18_LMNA | 0.05885  | -0.101301482 | 0.216025112 | 4.71E-01 | 7.31E-01 | 1.00E+00 |
| ENSG00000173357.11_AC007967  | ENSG00000160789.18_LMNA | 0.03007  | -0.129751593 | 0.188369197 | 7.13E-01 | 8.78E-01 | 1.00E+00 |
| ENSG00000240424.2_RP11-158N  | ENSG00000160789.18_LMNA | 0.02218  | -0.137503878 | 0.180744822 | 7.86E-01 | 9.13E-01 | 1.00E+00 |
| ENSG00000251418.2_ASS1P8     | ENSG00000160789.18_LMNA | -0.08749 | -0.243300005 | 0.072725612 | 2.84E-01 | 5.69E-01 | 1.00E+00 |
| ENSG00000248464.1_FGF10-AS1  | ENSG00000160789.18_LMNA | -0.04871 | -0.206311709 | 0.111353311 | 5.51E-01 | 7.87E-01 | 1.00E+00 |
| ENSG00000271654.1_RP11-685B  | ENSG00000160789.18_LMNA | -0.07462 | -0.231078795 | 0.08559424  | 3.61E-01 | 6.43E-01 | 1.00E+00 |
| ENSG00000273307.1_           | ENSG00000160789.18_LMNA | 0.15946  | 0.000261552  | 0.310767348 | 4.97E-02 | 2.01E-01 | 1.00E+00 |
| ENSG00000258858.1_RP11-982M  | ENSG00000160789.18_LMNA | 0.0059   | -0.15344481  | 0.164945791 | 9.42E-01 | 9.77E-01 | 1.00E+00 |
| ENSG00000258074.1_VT11BP3    | ENSG00000160789.18_LMNA | 0.00029  | -0.158920376 | 0.159481002 | 9.97E-01 | 9.99E-01 | 1.00E+00 |
| ENSG00000216781.2_RP1-290I1C | ENSG00000160789.18_LMNA | -0.13856 | -0.291334114 | 0.021106381 | 8.87E-02 | 2.90E-01 | 1.00E+00 |
| ENSG00000231525.1_AC002486.  | ENSG00000160789.18_LMNA | 0.0245   | -0.135228107 | 0.182987017 | 7.64E-01 | 9.02E-01 | 1.00E+00 |
| ENSG00000231461.1_HLA-DPA2   | ENSG00000160789.18_LMNA | 0.05174  | -0.10835669  | 0.209214004 | 5.27E-01 | 7.71E-01 | 1.00E+00 |
| ENSG00000244345.1_RP11-654C  | ENSG00000160789.18_LMNA | -0.1196  | -0.273593897 | 0.040366668 | 1.42E-01 | 3.85E-01 | 1.00E+00 |
| ENSG00000228957.1_RP11-23J9. | ENSG00000160789.18_LMNA | -0.24997 | -0.393510571 | -0.09453096 | 1.90E-03 | 1.88E-02 | 1.00E+00 |
| ENSG00000262294.1_RP11-1260  | ENSG00000160789.18_LMNA | -0.03005 | -0.188347467 | 0.129773742 | 7.13E-01 | 8.78E-01 | 1.00E+00 |
| ENSG00000269552.1_OR7A8P     | ENSG00000160789.18_LMNA | 0.04163  | -0.118352757 | 0.19951074  | 6.11E-01 | 8.22E-01 | 1.00E+00 |
| ENSG00000229797.1_AC140481.  | ENSG00000160789.18_LMNA | -0.27078 | -0.412209001 | -0.11660366 | 7.41E-04 | 9.16E-03 | 1.00E+00 |
| ENSG00000234308.2_AC093381.  | ENSG00000160789.18_LMNA | -0.05497 | -0.212316026 | 0.105147458 | 5.01E-01 | 7.53E-01 | 1.00E+00 |
| ENSG00000218213.1_FTH1P26    | ENSG00000160789.18_LMNA | 0.01932  | -0.140317102 | 0.177968525 | 8.13E-01 | 9.27E-01 | 1.00E+00 |
| ENSG00000180042.4_OR1R1P     | ENSG00000160789.18_LMNA | -0.07767 | -0.233972913 | 0.082556324 | 3.42E-01 | 6.26E-01 | 1.00E+00 |
| ENSG00000147896.3_IFNK       | ENSG00000160789.18_LMNA | -0.10669 | -0.261446372 | 0.053421835 | 1.91E-01 | 4.59E-01 | 1.00E+00 |
| ENSG00000205971.2_AC074389.  | ENSG00000160789.18_LMNA | -0.05622 | -0.213506843 | 0.103913726 | 4.92E-01 | 7.47E-01 | 1.00E+00 |
| ENSG00000237923.1_XXbac-BPG  | ENSG00000160789.18_LMNA | 0.09972  | -0.060443497 | 0.254871369 | 2.22E-01 | 4.97E-01 | 1.00E+00 |
| ENSG00000256362.1_RP11-955H  | ENSG00000160789.18_LMNA | 0.00925  | -0.150176573 | 0.168198306 | 9.10E-01 | 9.66E-01 | 1.00E+00 |
| ENSG00000259267.2_RP11-432J. | ENSG00000160789.18_LMNA | 0.02882  | -0.130981701 | 0.18716194  | 7.24E-01 | 8.83E-01 | 1.00E+00 |
| ENSG00000232301.1_RP11-132A  | ENSG00000160789.18_LMNA | -0.1363  | -0.289225845 | 0.023407504 | 9.41E-02 | 3.00E-01 | 1.00E+00 |
| ENSG00000276308.1_RP11-116D  | ENSG00000160789.18_LMNA | -0.1398  | -0.29249142  | 0.019841802 | 8.58E-02 | 2.84E-01 | 1.00E+00 |
| ENSG00000228543.1_GS1-519E5  | ENSG00000160789.18_LMNA | -0.04734 | -0.204991639 | 0.112714374 | 5.63E-01 | 7.94E-01 | 1.00E+00 |
| ENSG00000248543.2_NPM1P41    | ENSG00000160789.18_LMNA | -0.08923 | -0.244950899 | 0.070979158 | 2.74E-01 | 5.59E-01 | 1.00E+00 |
| ENSG00000234211.2_RP11-25K2  | ENSG00000160789.18_LMNA | 0.0526   | -0.107505778 | 0.210037113 | 5.20E-01 | 7.66E-01 | 1.00E+00 |
| ENSG00000213048.3_OR5S1P     | ENSG00000160789.18_LMNA | -0.10561 | -0.260433846 | 0.054505177 | 1.95E-01 | 4.64E-01 | 1.00E+00 |

|                             |                         |          |              |             |          |          |          |
|-----------------------------|-------------------------|----------|--------------|-------------|----------|----------|----------|
| ENSG00000234529.2_GAPDHP1   | ENSG00000160789.18_LMNA | 0.03822  | -0.12172507  | 0.196223084 | 6.40E-01 | 8.39E-01 | 1.00E+00 |
| ENSG00000279107.1_RP11-823P | ENSG00000160789.18_LMNA | 0.08069  | -0.079535854 | 0.236844861 | 3.23E-01 | 6.10E-01 | 1.00E+00 |
| ENSG00000236701.3_RP11-549A | ENSG00000160789.18_LMNA | 0.10741  | -0.052689993 | 0.262129983 | 1.88E-01 | 4.54E-01 | 1.00E+00 |
| ENSG00000228725.3_MTND2P12  | ENSG00000160789.18_LMNA | -0.06831 | -0.22506234  | 0.091890842 | 4.03E-01 | 6.79E-01 | 1.00E+00 |
| ENSG00000251545.2_RP11-798K | ENSG00000160789.18_LMNA | 0.1551   | -0.004206337 | 0.306725344 | 5.64E-02 | 2.17E-01 | 1.00E+00 |
| ENSG00000231532.4_LINC01249 | ENSG00000160789.18_LMNA | -0.26336 | -0.405555021 | -0.10871531 | 1.04E-03 | 1.20E-02 | 1.00E+00 |
| ENSG00000176134.5_RP11-574E | ENSG00000160789.18_LMNA | -0.11725 | -0.271385309 | 0.042748278 | 1.50E-01 | 3.98E-01 | 1.00E+00 |
| ENSG00000225718.1_RP11-3P22 | ENSG00000160789.18_LMNA | 0.02553  | -0.13421986  | 0.183979331 | 7.55E-01 | 8.98E-01 | 1.00E+00 |
| ENSG00000215124.2_AMD1P4    | ENSG00000160789.18_LMNA | 0.07793  | -0.082289639 | 0.234226707 | 3.40E-01 | 6.25E-01 | 1.00E+00 |
| ENSG00000264216.1_NOS2P1    | ENSG00000160789.18_LMNA | -0.0525  | -0.209949073 | 0.107596814 | 5.21E-01 | 7.66E-01 | 1.00E+00 |
| ENSG00000251246.1_RP11-540D | ENSG00000160789.18_LMNA | -0.0212  | -0.179797047 | 0.138464837 | 7.95E-01 | 9.18E-01 | 1.00E+00 |
| ENSG00000229877.1_PAICSP5   | ENSG00000160789.18_LMNA | 0.04742  | -0.11263415  | 0.205069479 | 5.62E-01 | 7.93E-01 | 1.00E+00 |
| ENSG00000262514.1_RP11-96D1 | ENSG00000160789.18_LMNA | -0.08763 | -0.243435916 | 0.072581907 | 2.83E-01 | 5.68E-01 | 1.00E+00 |
| ENSG00000258783.1_KRT18P6   | ENSG00000160789.18_LMNA | -0.04482 | -0.202572172 | 0.115205885 | 5.84E-01 | 8.06E-01 | 1.00E+00 |
| ENSG00000271602.1_KRT8P49   | ENSG00000160789.18_LMNA | -0.04143 | -0.199319451 | 0.118549172 | 6.12E-01 | 8.24E-01 | 1.00E+00 |
| ENSG00000116218.11_NPHS2    | ENSG00000160789.18_LMNA | -0.05401 | -0.211394223 | 0.106101811 | 5.09E-01 | 7.58E-01 | 1.00E+00 |
| ENSG00000187833.7_C2orf78   | ENSG00000160789.18_LMNA | -0.16536 | -0.316232773 | -0.00632262 | 4.18E-02 | 1.79E-01 | 1.00E+00 |
| ENSG00000234217.2_RBPJP7    | ENSG00000160789.18_LMNA | -0.23346 | -0.378592855 | -0.07712954 | 3.80E-03 | 3.19E-02 | 1.00E+00 |
| ENSG00000224942.1_RP11-51C1 | ENSG00000160789.18_LMNA | 0.02675  | -0.133017065 | 0.185162271 | 7.44E-01 | 8.92E-01 | 1.00E+00 |
| ENSG00000231388.1_RP11-702C | ENSG00000160789.18_LMNA | -0.05943 | -0.216580645 | 0.100724628 | 4.67E-01 | 7.29E-01 | 1.00E+00 |
| ENSG00000125414.17_MYH2     | ENSG00000160789.18_LMNA | -0.06778 | -0.224555593 | 0.09242003  | 4.07E-01 | 6.82E-01 | 1.00E+00 |
| ENSG00000233491.5_AC010091. | ENSG00000160789.18_LMNA | 0.19951  | 0.041633906  | 0.347670049 | 1.37E-02 | 8.23E-02 | 1.00E+00 |
| ENSG00000262714.1_RP11-44F1 | ENSG00000160789.18_LMNA | 0.11867  | -0.041311684 | 0.272717932 | 1.45E-01 | 3.90E-01 | 1.00E+00 |
| ENSG00000253656.1_KB-1568E2 | ENSG00000160789.18_LMNA | 0.05844  | -0.101711468 | 0.215630155 | 4.75E-01 | 7.34E-01 | 1.00E+00 |
| ENSG00000239921.2_LINC01471 | ENSG00000160789.18_LMNA | 0.08631  | -0.073906445 | 0.242182745 | 2.90E-01 | 5.76E-01 | 1.00E+00 |
| ENSG00000240893.1_RP11-572C | ENSG00000160789.18_LMNA | -0.13554 | -0.288518579 | 0.024178726 | 9.59E-02 | 3.04E-01 | 1.00E+00 |
| ENSG00000247844.1_CCAT1     | ENSG00000160789.18_LMNA | 0.05061  | -0.109470215 | 0.208136183 | 5.36E-01 | 7.77E-01 | 1.00E+00 |
| ENSG00000163518.9_FCRL4     | ENSG00000160789.18_LMNA | -0.05669 | -0.21396058  | 0.10344338  | 4.88E-01 | 7.44E-01 | 1.00E+00 |
| ENSG00000235050.5_MLIP-AS1  | ENSG00000160789.18_LMNA | -0.06797 | -0.224742129 | 0.092225254 | 4.05E-01 | 6.81E-01 | 1.00E+00 |
| ENSG00000280257.1_RP11-340F | ENSG00000160789.18_LMNA | 0.03686  | -0.123067253 | 0.194912604 | 6.52E-01 | 8.46E-01 | 1.00E+00 |
| ENSG00000146809.11_ASB15    | ENSG00000160789.18_LMNA | 0.18892  | 0.030639897  | 0.33795541  | 1.98E-02 | 1.07E-01 | 1.00E+00 |
| ENSG00000280380.1_RP11-326K | ENSG00000160789.18_LMNA | 0.01712  | -0.142469468 | 0.175840984 | 8.34E-01 | 9.36E-01 | 1.00E+00 |
| ENSG00000265992.1_ESRG      | ENSG00000160789.18_LMNA | -0.05338 | -0.210790075 | 0.106726975 | 5.14E-01 | 7.62E-01 | 1.00E+00 |

|                              |                         |          |              |             |          |          |          |
|------------------------------|-------------------------|----------|--------------|-------------|----------|----------|----------|
| ENSG00000244255.4_XXbac-BPG  | ENSG00000160789.18_LMNA | 0.04918  | -0.110885212 | 0.206765442 | 5.47E-01 | 7.85E-01 | 1.00E+00 |
| ENSG00000232771.2_PPP1R26P   | ENSG00000160789.18_LMNA | 0.06685  | -0.093347035 | 0.223667485 | 4.13E-01 | 6.86E-01 | 1.00E+00 |
| ENSG00000109101.6_FOXN1      | ENSG00000160789.18_LMNA | -0.04538 | -0.203115221 | 0.114647014 | 5.79E-01 | 8.04E-01 | 1.00E+00 |
| ENSG00000231683.5_RP1-27K12  | ENSG00000160789.18_LMNA | 0.00844  | -0.150959472 | 0.167419804 | 9.18E-01 | 9.69E-01 | 1.00E+00 |
| ENSG00000229981.6_LINC01435  | ENSG00000160789.18_LMNA | -0.03575 | -0.193847366 | 0.124157403 | 6.62E-01 | 8.51E-01 | 1.00E+00 |
| ENSG00000229762.1_RP11-419M  | ENSG00000160789.18_LMNA | -0.01513 | -0.173909962 | 0.144420419 | 8.53E-01 | 9.42E-01 | 1.00E+00 |
| ENSG00000253998.3_IGKV2-29   | ENSG00000160789.18_LMNA | -0.03662 | -0.194684497 | 0.123300759 | 6.54E-01 | 8.47E-01 | 1.00E+00 |
| ENSG00000271101.1_RP11-1003  | ENSG00000160789.18_LMNA | 0.14699  | -0.01250626  | 0.299186693 | 7.08E-02 | 2.51E-01 | 1.00E+00 |
| ENSG00000210077.1_MT-TV      | ENSG00000160789.18_LMNA | -0.07521 | -0.231637417 | 0.08500832  | 3.57E-01 | 6.40E-01 | 1.00E+00 |
| ENSG00000260611.1_RP11-352B  | ENSG00000160789.18_LMNA | -0.23476 | -0.379765642 | -0.07849097 | 3.60E-03 | 3.06E-02 | 1.00E+00 |
| ENSG00000201330.1_SNORD32E   | ENSG00000160789.18_LMNA | 0.04763  | -0.112419915 | 0.205277327 | 5.60E-01 | 7.92E-01 | 1.00E+00 |
| ENSG00000225240.1_AC117490.1 | ENSG00000160789.18_LMNA | 0.05748  | -0.102655791 | 0.214720051 | 4.82E-01 | 7.40E-01 | 1.00E+00 |
| ENSG00000251794.1_RNU6-237F  | ENSG00000160789.18_LMNA | 0.0933   | -0.06689345  | 0.248805906 | 2.53E-01 | 5.34E-01 | 1.00E+00 |
| ENSG00000264610.1_MIR4685    | ENSG00000160789.18_LMNA | -0.03108 | -0.189345103 | 0.128756499 | 7.04E-01 | 8.74E-01 | 1.00E+00 |
| ENSG00000207927.1_MIR302A    | ENSG00000160789.18_LMNA | 0.0572   | -0.102939603 | 0.214446416 | 4.84E-01 | 7.41E-01 | 1.00E+00 |
| ENSG00000216179.1_MIR541     | ENSG00000160789.18_LMNA | 0.12838  | -0.031467055 | 0.281817764 | 1.15E-01 | 3.39E-01 | 1.00E+00 |
| ENSG00000251922.1_SNORA14    | ENSG00000160789.18_LMNA | 0.12048  | -0.039472908 | 0.274421872 | 1.39E-01 | 3.81E-01 | 1.00E+00 |
| ENSG00000266668.1_MIR5692C2  | ENSG00000160789.18_LMNA | 0.06548  | -0.09470826  | 0.222362424 | 4.23E-01 | 6.94E-01 | 1.00E+00 |
| ENSG00000263575.1_MIR4665    | ENSG00000160789.18_LMNA | 0.03555  | -0.124356254 | 0.193652979 | 6.64E-01 | 8.52E-01 | 1.00E+00 |
| ENSG00000206769.1_RNU6-116F  | ENSG00000160789.18_LMNA | -0.16584 | -0.316682431 | -0.0068223  | 4.12E-02 | 1.77E-01 | 1.00E+00 |
| ENSG00000273632.1_           | ENSG00000160789.18_LMNA | -0.04886 | -0.206453691 | 0.111206848 | 5.50E-01 | 7.86E-01 | 1.00E+00 |
| ENSG00000250993.1_RP11-404J  | ENSG00000160789.18_LMNA | 0.20139  | 0.04358961   | 0.349391312 | 1.28E-02 | 7.85E-02 | 1.00E+00 |
| ENSG00000212534.1_SNORD70    | ENSG00000160789.18_LMNA | 0.04973  | -0.110346618 | 0.207287338 | 5.43E-01 | 7.82E-01 | 1.00E+00 |
| ENSG00000206751.1_Y_RNA      | ENSG00000160789.18_LMNA | 0.13749  | -0.022201362 | 0.29033128  | 9.12E-02 | 2.94E-01 | 1.00E+00 |
| ENSG00000252335.1_RNU6-62P   | ENSG00000160789.18_LMNA | -0.14295 | -0.295425172 | 0.016631629 | 7.89E-02 | 2.70E-01 | 1.00E+00 |
| ENSG00000207089.1_RNU6-921F  | ENSG00000160789.18_LMNA | -0.08375 | -0.239753316 | 0.076471056 | 3.05E-01 | 5.92E-01 | 1.00E+00 |
| ENSG00000275908.1_U4atac     | ENSG00000160789.18_LMNA | -0.06713 | -0.223936615 | 0.093066176 | 4.11E-01 | 6.85E-01 | 1.00E+00 |
| ENSG00000266758.1_MIR3680-2  | ENSG00000160789.18_LMNA | -0.0574  | -0.214634593 | 0.102744433 | 4.82E-01 | 7.40E-01 | 1.00E+00 |
| ENSG00000248999.1_WI2-2373I1 | ENSG00000160789.18_LMNA | 0.27763  | 0.123903772  | 0.418338819 | 5.34E-04 | 7.11E-03 | 1.00E+00 |
| ENSG00000199301.1_RNU6-208F  | ENSG00000160789.18_LMNA | -0.02281 | -0.181355658 | 0.136884228 | 7.80E-01 | 9.10E-01 | 1.00E+00 |
| ENSG00000212440.1_SNORA75    | ENSG00000160789.18_LMNA | 0.05309  | -0.107011473 | 0.210515061 | 5.16E-01 | 7.63E-01 | 1.00E+00 |
| ENSG00000273902.1_           | ENSG00000160789.18_LMNA | -0.07528 | -0.23170527  | 0.084937137 | 3.57E-01 | 6.40E-01 | 1.00E+00 |
| ENSG00000124939.5_SCGB2A1    | ENSG00000160789.18_LMNA | -0.05033 | -0.207861143 | 0.109754238 | 5.38E-01 | 7.78E-01 | 1.00E+00 |

|                              |                         |          |              |             |          |          |          |
|------------------------------|-------------------------|----------|--------------|-------------|----------|----------|----------|
| ENSG00000239975.2_IGKV1D-33  | ENSG00000160789.18_LMNA | 0.05625  | -0.103885472 | 0.213534103 | 4.91E-01 | 7.47E-01 | 1.00E+00 |
| ENSG00000201376.1_SNORA70    | ENSG00000160789.18_LMNA | 0.00706  | -0.152309171 | 0.166076753 | 9.31E-01 | 9.73E-01 | 1.00E+00 |
| ENSG00000201747.1_RNU6-534F  | ENSG00000160789.18_LMNA | -0.16755 | -0.318261694 | -0.00857847 | 3.91E-02 | 1.71E-01 | 1.00E+00 |
| ENSG00000278914.1_KB-1517D1  | ENSG00000160789.18_LMNA | -0.00264 | -0.161769603 | 0.156629643 | 9.74E-01 | 9.90E-01 | 1.00E+00 |
| ENSG00000239571.1_IGKV2D-30  | ENSG00000160789.18_LMNA | 0.01099  | -0.148466357 | 0.169897536 | 8.93E-01 | 9.58E-01 | 1.00E+00 |
| ENSG00000276147.1_MIR548AY   | ENSG00000160789.18_LMNA | 0.01391  | -0.145616498 | 0.17272489  | 8.65E-01 | 9.47E-01 | 1.00E+00 |
| ENSG00000259126.1_RP11-99L1  | ENSG00000160789.18_LMNA | -0.01046 | -0.169382175 | 0.148985252 | 8.98E-01 | 9.60E-01 | 1.00E+00 |
| ENSG00000280544.1_AC107081   | ENSG00000160789.18_LMNA | 0.05845  | -0.101695891 | 0.215645162 | 4.74E-01 | 7.34E-01 | 1.00E+00 |
| ENSG00000265869.1_           | ENSG00000160789.18_LMNA | 0.03618  | -0.12372855  | 0.194266508 | 6.58E-01 | 8.49E-01 | 1.00E+00 |
| ENSG00000210841.1_RNU6ATAC   | ENSG00000160789.18_LMNA | 0.03389  | -0.125993007 | 0.192052015 | 6.79E-01 | 8.60E-01 | 1.00E+00 |
| ENSG00000199643.1_RNU4-90P   | ENSG00000160789.18_LMNA | 0.02193  | -0.137746957 | 0.180505134 | 7.89E-01 | 9.14E-01 | 1.00E+00 |
| ENSG00000251185.1_RP11-542G  | ENSG00000160789.18_LMNA | -0.22329 | -0.369358418 | -0.06644889 | 5.69E-03 | 4.32E-02 | 1.00E+00 |
| ENSG00000280108.1_AJ239318   | ENSG00000160789.18_LMNA | -0.02459 | -0.183077499 | 0.135136199 | 7.64E-01 | 9.02E-01 | 1.00E+00 |
| ENSG00000234426.1_RP11-459C  | ENSG00000160789.18_LMNA | 0.0323   | -0.127559082 | 0.190518598 | 6.93E-01 | 8.68E-01 | 1.00E+00 |
| ENSG00000280655.1_RP11-361C  | ENSG00000160789.18_LMNA | -0.03734 | -0.195374542 | 0.122594273 | 6.48E-01 | 8.44E-01 | 1.00E+00 |
| ENSG00000278877.1_RP11-315A  | ENSG00000160789.18_LMNA | 0.07822  | -0.08199715  | 0.234505008 | 3.38E-01 | 6.24E-01 | 1.00E+00 |
| ENSG00000199420.1_RN7SKP17   | ENSG00000160789.18_LMNA | -0.10425 | -0.259152868 | 0.055874685 | 2.01E-01 | 4.72E-01 | 1.00E+00 |
| ENSG00000273979.1_Metazoa_SI | ENSG00000160789.18_LMNA | -0.148   | -0.300130918 | 0.011469033 | 6.88E-02 | 2.47E-01 | 1.00E+00 |
| ENSG00000197644.2_AC106870   | ENSG00000160789.18_LMNA | 0.03813  | -0.121807491 | 0.196142643 | 6.41E-01 | 8.40E-01 | 1.00E+00 |
| ENSG00000200318.2_U3         | ENSG00000160789.18_LMNA | 0.08871  | -0.071503306 | 0.244455623 | 2.77E-01 | 5.62E-01 | 1.00E+00 |
| ENSG00000275675.1_RP11-1021  | ENSG00000160789.18_LMNA | -0.09312 | -0.248632112 | 0.067077873 | 2.54E-01 | 5.35E-01 | 1.00E+00 |
| ENSG00000228780.2_RP1-50A13  | ENSG00000160789.18_LMNA | -0.00583 | -0.164873721 | 0.153517149 | 9.43E-01 | 9.77E-01 | 1.00E+00 |
| ENSG00000263159.1_RP11-462G  | ENSG00000160789.18_LMNA | 0.07669  | -0.08352943  | 0.233046479 | 3.48E-01 | 6.32E-01 | 1.00E+00 |
| ENSG00000263595.2_RN7SL823F  | ENSG00000160789.18_LMNA | 0.0175   | -0.142094478 | 0.176211863 | 8.31E-01 | 9.34E-01 | 1.00E+00 |
| ENSG00000244461.1_RP11-354H  | ENSG00000160789.18_LMNA | -0.15674 | -0.308253264 | 0.002518887 | 5.38E-02 | 2.11E-01 | 1.00E+00 |
| ENSG00000220643.1_RP3-391O2  | ENSG00000160789.18_LMNA | 0.09632  | -0.063861255 | 0.251660435 | 2.38E-01 | 5.16E-01 | 1.00E+00 |
| ENSG00000264400.2_RN7SL491F  | ENSG00000160789.18_LMNA | 0.04605  | -0.113987574 | 0.20375574  | 5.73E-01 | 8.01E-01 | 1.00E+00 |
| ENSG00000211891.5_IGHE       | ENSG00000160789.18_LMNA | 0.04346  | -0.116547521 | 0.201267721 | 5.95E-01 | 8.13E-01 | 1.00E+00 |
| ENSG00000231413.1_RP11-193P  | ENSG00000160789.18_LMNA | 0.01057  | -0.1488847   | 0.169482055 | 8.97E-01 | 9.60E-01 | 1.00E+00 |
| ENSG00000230390.1_LINC01048  | ENSG00000160789.18_LMNA | 0.22894  | 0.072380891  | 0.374494596 | 4.55E-03 | 3.65E-02 | 1.00E+00 |
| ENSG00000258766.1_DIO2-AS1   | ENSG00000160789.18_LMNA | -0.15587 | -0.307444055 | 0.003412806 | 5.52E-02 | 2.14E-01 | 1.00E+00 |
| ENSG00000231978.2_RP11-132G  | ENSG00000160789.18_LMNA | 0.11475  | -0.045279892 | 0.269033981 | 1.59E-01 | 4.12E-01 | 1.00E+00 |
| ENSG00000216519.2_RP3-406A7  | ENSG00000160789.18_LMNA | -0.06875 | -0.225486868 | 0.091447376 | 4.00E-01 | 6.77E-01 | 1.00E+00 |

|                              |                         |          |              |             |          |          |          |
|------------------------------|-------------------------|----------|--------------|-------------|----------|----------|----------|
| ENSG00000254500.1_RANP3      | ENSG00000160789.18_LMNA | 0.02523  | -0.134508024 | 0.183695787 | 7.58E-01 | 8.99E-01 | 1.00E+00 |
| ENSG00000248537.1_CTD-2201E  | ENSG00000160789.18_LMNA | 0.07461  | -0.085608614 | 0.231065088 | 3.61E-01 | 6.43E-01 | 1.00E+00 |
| ENSG00000186268.3_OR10D4P    | ENSG00000160789.18_LMNA | -0.10482 | -0.259687074 | 0.055303703 | 1.99E-01 | 4.69E-01 | 1.00E+00 |
| ENSG00000255379.1_CYCSP29    | ENSG00000160789.18_LMNA | 0.04043  | -0.119541672 | 0.198352487 | 6.21E-01 | 8.28E-01 | 1.00E+00 |
| ENSG00000255067.1_RP11-47J1  | ENSG00000160789.18_LMNA | -0.04484 | -0.202595722 | 0.115181653 | 5.83E-01 | 8.06E-01 | 1.00E+00 |
| ENSG00000225413.2_AP000345.4 | ENSG00000160789.18_LMNA | -0.07482 | -0.231266198 | 0.085397703 | 3.60E-01 | 6.42E-01 | 1.00E+00 |
| ENSG00000224274.1_ENSAP1     | ENSG00000160789.18_LMNA | 0.02286  | -0.136841764 | 0.181397509 | 7.80E-01 | 9.10E-01 | 1.00E+00 |
| ENSG00000234422.1_UBE2WP1    | ENSG00000160789.18_LMNA | -0.13947 | -0.292184349 | 0.020177433 | 8.66E-02 | 2.86E-01 | 1.00E+00 |
| ENSG00000233222.2_RP11-216N  | ENSG00000160789.18_LMNA | -0.09171 | -0.247295549 | 0.068495456 | 2.61E-01 | 5.44E-01 | 1.00E+00 |
| ENSG00000271587.1_GS1-531I17 | ENSG00000160789.18_LMNA | 0.00597  | -0.153373019 | 0.165017311 | 9.42E-01 | 9.77E-01 | 1.00E+00 |
| ENSG00000229774.1_AC018866.  | ENSG00000160789.18_LMNA | 0.17361  | 0.0148232    | 0.323863473 | 3.24E-02 | 1.51E-01 | 1.00E+00 |
| ENSG00000248696.1_AC011406.  | ENSG00000160789.18_LMNA | 0.08547  | -0.074747537 | 0.241386424 | 2.95E-01 | 5.81E-01 | 1.00E+00 |
| ENSG00000250473.1_DUTP7      | ENSG00000160789.18_LMNA | -0.01277 | -0.171621575 | 0.146729223 | 8.76E-01 | 9.52E-01 | 1.00E+00 |
| ENSG00000259761.1_RP11-138H  | ENSG00000160789.18_LMNA | 0.18551  | 0.027107396  | 0.334820023 | 2.21E-02 | 1.16E-01 | 1.00E+00 |
| ENSG00000264785.1_RP11-311F  | ENSG00000160789.18_LMNA | 0.03098  | -0.128855215 | 0.189248318 | 7.05E-01 | 8.74E-01 | 1.00E+00 |
| ENSG00000250383.1_CTD-2197I1 | ENSG00000160789.18_LMNA | -0.02551 | -0.183961114 | 0.134238376 | 7.55E-01 | 8.98E-01 | 1.00E+00 |
| ENSG00000213926.3_MSRB1P1    | ENSG00000160789.18_LMNA | 0.00497  | -0.15434994  | 0.164043789 | 9.52E-01 | 9.81E-01 | 1.00E+00 |
| ENSG00000178107.2_RP11-998D  | ENSG00000160789.18_LMNA | 0.06652  | -0.093668226 | 0.223359649 | 4.15E-01 | 6.88E-01 | 1.00E+00 |
| ENSG00000239946.1_ZBTB20-AS  | ENSG00000160789.18_LMNA | -0.09415 | -0.249605056 | 0.066045148 | 2.49E-01 | 5.29E-01 | 1.00E+00 |
| ENSG00000236427.1_RP11-107M  | ENSG00000160789.18_LMNA | 0.04968  | -0.110395934 | 0.207239557 | 5.43E-01 | 7.82E-01 | 1.00E+00 |
| ENSG00000218872.1_RP11-249L  | ENSG00000160789.18_LMNA | -0.03373 | -0.191901439 | 0.12614686  | 6.80E-01 | 8.60E-01 | 1.00E+00 |
| ENSG00000267393.1_RP11-691H  | ENSG00000160789.18_LMNA | -0.15766 | -0.309100792 | 0.001582104 | 5.24E-02 | 2.07E-01 | 1.00E+00 |
| ENSG00000237645.1_RP11-521A  | ENSG00000160789.18_LMNA | -0.00562 | -0.164675046 | 0.153716551 | 9.45E-01 | 9.78E-01 | 1.00E+00 |
| ENSG00000229382.1_BX322557.  | ENSG00000160789.18_LMNA | 0.12245  | -0.03748466  | 0.276262109 | 1.33E-01 | 3.70E-01 | 1.00E+00 |
| ENSG00000263176.1_RP11-893F  | ENSG00000160789.18_LMNA | 0.09156  | -0.068636232 | 0.247162753 | 2.62E-01 | 5.45E-01 | 1.00E+00 |
| ENSG00000258556.1_CTD-2568P  | ENSG00000160789.18_LMNA | -0.02972 | -0.188027842 | 0.130099507 | 7.16E-01 | 8.79E-01 | 1.00E+00 |
| ENSG00000228923.1_AP000355.  | ENSG00000160789.18_LMNA | 0.06579  | -0.094399571 | 0.222658476 | 4.21E-01 | 6.92E-01 | 1.00E+00 |
| ENSG00000225233.1_RP11-554K  | ENSG00000160789.18_LMNA | 0.01559  | -0.143967609 | 0.174358365 | 8.49E-01 | 9.41E-01 | 1.00E+00 |
| ENSG00000267563.1 CTC-503J8  | ENSG00000160789.18_LMNA | -0.0352  | -0.193318936 | 0.124697908 | 6.67E-01 | 8.53E-01 | 1.00E+00 |
| ENSG00000243483.1_RP11-572M  | ENSG00000160789.18_LMNA | 0.11849  | -0.041491887 | 0.272550836 | 1.46E-01 | 3.91E-01 | 1.00E+00 |
| ENSG00000228559.1_RP3-340B1  | ENSG00000160789.18_LMNA | 0.02137  | -0.138297979 | 0.179961658 | 7.94E-01 | 9.17E-01 | 1.00E+00 |
| ENSG00000234070.1_SPATA17-A  | ENSG00000160789.18_LMNA | 0.01353  | -0.145988395 | 0.172356227 | 8.69E-01 | 9.49E-01 | 1.00E+00 |
| ENSG00000229312.2_RP11-470P  | ENSG00000160789.18_LMNA | -0.14381 | -0.296233241 | 0.015746292 | 7.71E-02 | 2.66E-01 | 1.00E+00 |

|                              |                         |          |              |             |          |          |          |
|------------------------------|-------------------------|----------|--------------|-------------|----------|----------|----------|
| ENSG00000274346.1_RP11-40B2  | ENSG00000160789.18_LMNA | -0.03415 | -0.192304842 | 0.125734644 | 6.76E-01 | 8.58E-01 | 1.00E+00 |
| ENSG00000235102.1_AD1P1      | ENSG00000160789.18_LMNA | -0.1112  | -0.265694644 | 0.048868346 | 1.73E-01 | 4.32E-01 | 1.00E+00 |
| ENSG00000248211.1_TRPC7-AS   | ENSG00000160789.18_LMNA | 0.07098  | -0.089224393 | 0.227613108 | 3.85E-01 | 6.63E-01 | 1.00E+00 |
| ENSG00000275179.1_RP4-737E2  | ENSG00000160789.18_LMNA | 0.01799  | -0.141611926 | 0.176688991 | 8.26E-01 | 9.32E-01 | 1.00E+00 |
| ENSG00000236745.2_YRDCP2     | ENSG00000160789.18_LMNA | 0.20442  | 0.04673549   | 0.352155754 | 1.15E-02 | 7.25E-02 | 1.00E+00 |
| ENSG00000279180.1_RP11-417O  | ENSG00000160789.18_LMNA | -0.10791 | -0.262595464 | 0.052191477 | 1.86E-01 | 4.52E-01 | 1.00E+00 |
| ENSG00000229182.3_MRPS16P1   | ENSG00000160789.18_LMNA | -0.01132 | -0.170213977 | 0.14814766  | 8.90E-01 | 9.57E-01 | 1.00E+00 |
| ENSG00000226658.1_RPL23AP3   | ENSG00000160789.18_LMNA | 0.25239  | 0.097091105  | 0.395692103 | 1.71E-03 | 1.73E-02 | 1.00E+00 |
| ENSG00000259929.4_CTA-481E9  | ENSG00000160789.18_LMNA | -0.1971  | -0.345464369 | -0.03913123 | 1.49E-02 | 8.76E-02 | 1.00E+00 |
| ENSG00000277040.1_RP11-307N  | ENSG00000160789.18_LMNA | 0.01113  | -0.148336672 | 0.170026311 | 8.92E-01 | 9.58E-01 | 1.00E+00 |
| ENSG00000237734.1_RP11-298E  | ENSG00000160789.18_LMNA | -0.17575 | -0.32583372  | -0.01702533 | 3.03E-02 | 1.44E-01 | 1.00E+00 |
| ENSG00000251224.1_CNOT10-A   | ENSG00000160789.18_LMNA | -0.01731 | -0.176027439 | 0.142280957 | 8.32E-01 | 9.35E-01 | 1.00E+00 |
| ENSG00000212900.2_KRTAP3-2   | ENSG00000160789.18_LMNA | -0.06783 | -0.224609823 | 0.092363407 | 4.06E-01 | 6.82E-01 | 1.00E+00 |
| ENSG00000255774.1_AP000439   | ENSG00000160789.18_LMNA | -0.15422 | -0.305906201 | 0.005110279 | 5.78E-02 | 2.20E-01 | 1.00E+00 |
| ENSG00000266149.1_RP11-789C  | ENSG00000160789.18_LMNA | -0.2302  | -0.375631297 | -0.07369661 | 4.33E-03 | 3.52E-02 | 1.00E+00 |
| ENSG00000228876.1_AC010745   | ENSG00000160789.18_LMNA | -0.1062  | -0.260986082 | 0.05391441  | 1.93E-01 | 4.61E-01 | 1.00E+00 |
| ENSG00000225325.1_RP11-479J  | ENSG00000160789.18_LMNA | 0.13683  | -0.022873952 | 0.289714951 | 9.28E-02 | 2.98E-01 | 1.00E+00 |
| ENSG00000229167.1_RP11-73M7  | ENSG00000160789.18_LMNA | -0.10035 | -0.255472241 | 0.059803099 | 2.19E-01 | 4.94E-01 | 1.00E+00 |
| ENSG00000227421.1_RP11-476B  | ENSG00000160789.18_LMNA | 0.08173  | -0.078488698 | 0.237839237 | 3.17E-01 | 6.04E-01 | 1.00E+00 |
| ENSG00000279687.1_CH507-9B2  | ENSG00000160789.18_LMNA | 0.12806  | -0.031789196 | 0.281520884 | 1.16E-01 | 3.40E-01 | 1.00E+00 |
| ENSG00000229093.1_OR51AB1P   | ENSG00000160789.18_LMNA | -0.03644 | -0.194512888 | 0.123476407 | 6.56E-01 | 8.48E-01 | 1.00E+00 |
| ENSG00000254325.2_RP11-318K  | ENSG00000160789.18_LMNA | 0.00135  | -0.157886977 | 0.160513864 | 9.87E-01 | 9.95E-01 | 1.00E+00 |
| ENSG00000266497.1_RP11-995C  | ENSG00000160789.18_LMNA | 0.03148  | -0.128364865 | 0.189729012 | 7.00E-01 | 8.72E-01 | 1.00E+00 |
| ENSG00000235263.1_RP13-392I1 | ENSG00000160789.18_LMNA | 0.02387  | -0.13584907  | 0.182375544 | 7.70E-01 | 9.05E-01 | 1.00E+00 |
| ENSG00000274800.1_AC007204   | ENSG00000160789.18_LMNA | -0.17108 | -0.321524484 | -0.01221282 | 3.51E-02 | 1.59E-01 | 1.00E+00 |
| ENSG00000274928.3_KRT89P     | ENSG00000160789.18_LMNA | -0.03014 | -0.188434125 | 0.129685408 | 7.12E-01 | 8.78E-01 | 1.00E+00 |
| ENSG00000277545.1_RP11-73M1  | ENSG00000160789.18_LMNA | 0.16951  | 0.01059924   | 0.320076778 | 3.68E-02 | 1.64E-01 | 1.00E+00 |
| ENSG00000225505.1_RP11-330C  | ENSG00000160789.18_LMNA | 0.03589  | -0.124023157 | 0.193978585 | 6.61E-01 | 8.50E-01 | 1.00E+00 |
| ENSG00000233085.4_XXyac-YX6  | ENSG00000160789.18_LMNA | 0.24463  | 0.088888321  | 0.388690497 | 2.39E-03 | 2.24E-02 | 1.00E+00 |
| ENSG00000256306.1_RP11-4N23  | ENSG00000160789.18_LMNA | -0.10395 | -0.258862641 | 0.056184805 | 2.03E-01 | 4.73E-01 | 1.00E+00 |
| ENSG00000254253.1_RP11-343B  | ENSG00000160789.18_LMNA | -0.12004 | -0.274008012 | 0.039919714 | 1.41E-01 | 3.83E-01 | 1.00E+00 |
| ENSG00000253711.1_RP11-787D  | ENSG00000160789.18_LMNA | -0.095   | -0.250417155 | 0.065182633 | 2.44E-01 | 5.24E-01 | 1.00E+00 |
| ENSG00000063515.2_GSC2       | ENSG00000160789.18_LMNA | -0.12739 | -0.280895588 | 0.032467483 | 1.18E-01 | 3.44E-01 | 1.00E+00 |



|                              |                         |          |              |             |          |          |          |
|------------------------------|-------------------------|----------|--------------|-------------|----------|----------|----------|
| ENSG00000279021.1_RP11-391L  | ENSG00000160789.18_LMNA | -0.04747 | -0.205123467 | 0.112578506 | 5.61E-01 | 7.93E-01 | 1.00E+00 |
| ENSG00000231668.2_PPP2R2DP   | ENSG00000160789.18_LMNA | -0.18169 | -0.331306113 | -0.02315754 | 2.51E-02 | 1.27E-01 | 1.00E+00 |
| ENSG00000261429.2_DPPA2P4    | ENSG00000160789.18_LMNA | -0.03646 | -0.194529375 | 0.123459532 | 6.56E-01 | 8.48E-01 | 1.00E+00 |
| ENSG00000229173.1_AC108059.4 | ENSG00000160789.18_LMNA | -0.0719  | -0.228488234 | 0.08830853  | 3.79E-01 | 6.58E-01 | 1.00E+00 |
| ENSG00000236420.1_CHCHD3P1   | ENSG00000160789.18_LMNA | 0.05374  | -0.106368503 | 0.211136525 | 5.11E-01 | 7.60E-01 | 1.00E+00 |
| ENSG00000254019.1_RP11-10J2  | ENSG00000160789.18_LMNA | 0.11487  | -0.045152336 | 0.269152543 | 1.59E-01 | 4.12E-01 | 1.00E+00 |
| ENSG00000253364.1_RP11-731F  | ENSG00000160789.18_LMNA | 0.11349  | -0.04654797  | 0.267854799 | 1.64E-01 | 4.19E-01 | 1.00E+00 |
| ENSG00000243038.1_RP11-58E2  | ENSG00000160789.18_LMNA | -0.04982 | -0.207371814 | 0.110259421 | 5.42E-01 | 7.81E-01 | 1.00E+00 |
| ENSG00000224221.1_RPS6P8     | ENSG00000160789.18_LMNA | 0.05487  | -0.105253563 | 0.212213568 | 5.02E-01 | 7.54E-01 | 1.00E+00 |
| ENSG00000227491.1_CCNP1      | ENSG00000160789.18_LMNA | -0.07051 | -0.227156779 | 0.08970175  | 3.88E-01 | 6.66E-01 | 1.00E+00 |
| ENSG00000272595.1_OR10AH1P   | ENSG00000160789.18_LMNA | -0.12513 | -0.278774757 | 0.034765902 | 1.25E-01 | 3.56E-01 | 1.00E+00 |
| ENSG00000236834.1_LINC00421  | ENSG00000160789.18_LMNA | -0.16138 | -0.31255384  | -0.00224023 | 4.70E-02 | 1.93E-01 | 1.00E+00 |
| ENSG00000259496.2_RP11-19J5  | ENSG00000160789.18_LMNA | -0.02991 | -0.188213585 | 0.129910204 | 7.15E-01 | 8.79E-01 | 1.00E+00 |
| ENSG00000257726.1_RP11-116D  | ENSG00000160789.18_LMNA | 0.02823  | -0.13155909  | 0.186594944 | 7.30E-01 | 8.86E-01 | 1.00E+00 |
| ENSG00000268623.2_CTB-52I2.3 | ENSG00000160789.18_LMNA | 0.04326  | -0.116745165 | 0.20107546  | 5.97E-01 | 8.14E-01 | 1.00E+00 |
| ENSG00000258550.1_OR7E106P   | ENSG00000160789.18_LMNA | -0.06347 | -0.220444349 | 0.096706729 | 4.37E-01 | 7.05E-01 | 1.00E+00 |
| ENSG00000233366.1_ZNF90P2    | ENSG00000160789.18_LMNA | 0.04074  | -0.119235379 | 0.198650965 | 6.18E-01 | 8.27E-01 | 1.00E+00 |
| ENSG00000214626.2_POLR3DP1   | ENSG00000160789.18_LMNA | -0.02022 | -0.178844149 | 0.139430386 | 8.05E-01 | 9.22E-01 | 1.00E+00 |
| ENSG00000257065.1_RP3-468K1  | ENSG00000160789.18_LMNA | -0.00854 | -0.167516846 | 0.150861904 | 9.17E-01 | 9.68E-01 | 1.00E+00 |
| ENSG00000240590.1_RPSAP48    | ENSG00000160789.18_LMNA | -0.03028 | -0.188572415 | 0.129544431 | 7.11E-01 | 8.77E-01 | 1.00E+00 |
| ENSG00000172362.2_OR5B12     | ENSG00000160789.18_LMNA | -0.16155 | -0.312708468 | -0.00241161 | 4.68E-02 | 1.93E-01 | 1.00E+00 |
| ENSG00000215486.5_ARL2BPP3   | ENSG00000160789.18_LMNA | 0.1377   | -0.021979173 | 0.290534827 | 9.07E-02 | 2.93E-01 | 1.00E+00 |
| ENSG00000213140.3_ELK2AP     | ENSG00000160789.18_LMNA | 0.05984  | -0.100311774 | 0.216978114 | 4.64E-01 | 7.26E-01 | 1.00E+00 |
| ENSG00000236941.6_RP11-366M  | ENSG00000160789.18_LMNA | 0.10791  | -0.052187057 | 0.262599591 | 1.86E-01 | 4.52E-01 | 1.00E+00 |
| ENSG00000233653.3_CICP7      | ENSG00000160789.18_LMNA | 0.0509   | -0.109183853 | 0.208413437 | 5.33E-01 | 7.75E-01 | 1.00E+00 |
| ENSG00000131738.8_KRT33B     | ENSG00000160789.18_LMNA | -0.26006 | -0.402596896 | -0.10522039 | 1.21E-03 | 1.34E-02 | 1.00E+00 |
| ENSG00000226048.1_YBX1P8     | ENSG00000160789.18_LMNA | -0.05366 | -0.21105342  | 0.1064545   | 5.11E-01 | 7.60E-01 | 1.00E+00 |
| ENSG00000236343.1_EI24P4     | ENSG00000160789.18_LMNA | 0.1078   | -0.052294871 | 0.262498934 | 1.86E-01 | 4.52E-01 | 1.00E+00 |
| ENSG00000279083.1_RP11-395N  | ENSG00000160789.18_LMNA | 0.05183  | -0.108268529 | 0.209299306 | 5.26E-01 | 7.71E-01 | 1.00E+00 |
| ENSG00000240708.1_RP11-64C1  | ENSG00000160789.18_LMNA | -0.14996 | -0.301955164 | 0.009463205 | 6.52E-02 | 2.38E-01 | 1.00E+00 |
| ENSG00000217372.2_TUBB4BP7   | ENSG00000160789.18_LMNA | 0.05623  | -0.103897107 | 0.213522878 | 4.91E-01 | 7.47E-01 | 1.00E+00 |
| ENSG00000279739.1_CTB-105N1  | ENSG00000160789.18_LMNA | -0.02435 | -0.182843724 | 0.135373646 | 7.66E-01 | 9.03E-01 | 1.00E+00 |
| ENSG00000228303.1_RP11-10F1  | ENSG00000160789.18_LMNA | -0.12174 | -0.275601605 | 0.038198575 | 1.35E-01 | 3.74E-01 | 1.00E+00 |

|                              |                         |          |              |             |          |          |          |
|------------------------------|-------------------------|----------|--------------|-------------|----------|----------|----------|
| ENSG00000224090.1_AC097468.  | ENSG00000160789.18_LMNA | -0.06942 | -0.22611718  | 0.090788714 | 3.95E-01 | 6.73E-01 | 1.00E+00 |
| ENSG00000235550.1_ANKRD26P   | ENSG00000160789.18_LMNA | 0.00718  | -0.152196853 | 0.166188563 | 9.30E-01 | 9.73E-01 | 1.00E+00 |
| ENSG00000257137.4_C12orf80   | ENSG00000160789.18_LMNA | 0.11696  | -0.043044734 | 0.271110158 | 1.51E-01 | 4.00E-01 | 1.00E+00 |
| ENSG00000223910.1_ZNF32-AS3  | ENSG00000160789.18_LMNA | -0.13215 | -0.285348397 | 0.027631011 | 1.05E-01 | 3.21E-01 | 1.00E+00 |
| ENSG00000270909.1_RP11-24B1  | ENSG00000160789.18_LMNA | -0.20585 | -0.353468701 | -0.04823172 | 1.10E-02 | 6.99E-02 | 1.00E+00 |
| ENSG00000279029.1_RP11-144I2 | ENSG00000160789.18_LMNA | 0.09071  | -0.069494576 | 0.24635281  | 2.66E-01 | 5.50E-01 | 1.00E+00 |
| ENSG00000163114.5_PDHA2      | ENSG00000160789.18_LMNA | 0.15326  | -0.006092834 | 0.305015296 | 5.94E-02 | 2.24E-01 | 1.00E+00 |
| ENSG00000224981.1_AC000367.  | ENSG00000160789.18_LMNA | -0.0665  | -0.22333248  | 0.093696571 | 4.16E-01 | 6.88E-01 | 1.00E+00 |
| ENSG00000254704.3_RP11-1036I | ENSG00000160789.18_LMNA | 0.02925  | -0.130563402 | 0.187572575 | 7.21E-01 | 8.81E-01 | 1.00E+00 |
| ENSG00000271079.1_CTAGE15    | ENSG00000160789.18_LMNA | 0.07045  | -0.089759996 | 0.22710109  | 3.88E-01 | 6.67E-01 | 1.00E+00 |
| ENSG00000125514.8_LINC00029  | ENSG00000160789.18_LMNA | -0.02777 | -0.186144451 | 0.132017688 | 7.34E-01 | 8.88E-01 | 1.00E+00 |
| ENSG00000132693.11_CRP       | ENSG00000160789.18_LMNA | 0.03694  | -0.122983594 | 0.19499432  | 6.51E-01 | 8.45E-01 | 1.00E+00 |
| ENSG00000057149.13_SERPINB1  | ENSG00000160789.18_LMNA | -0.02574 | -0.184188114 | 0.134007641 | 7.53E-01 | 8.97E-01 | 1.00E+00 |
| ENSG00000236121.1_HAUS6P2    | ENSG00000160789.18_LMNA | -0.07791 | -0.234205218 | 0.082312221 | 3.40E-01 | 6.25E-01 | 1.00E+00 |
| ENSG00000281548.1_LINC00895  | ENSG00000160789.18_LMNA | -0.03466 | -0.192796198 | 0.125232404 | 6.72E-01 | 8.56E-01 | 1.00E+00 |
| ENSG00000239205.1_RP11-747D  | ENSG00000160789.18_LMNA | 0.01286  | -0.146637064 | 0.171712986 | 8.75E-01 | 9.51E-01 | 1.00E+00 |
| ENSG00000244693.1_CTAGE8     | ENSG00000160789.18_LMNA | -0.04436 | -0.202133054 | 0.115657651 | 5.87E-01 | 8.08E-01 | 1.00E+00 |
| ENSG00000162771.7_FAM71A     | ENSG00000160789.18_LMNA | 0.1314   | -0.028391061 | 0.284649533 | 1.07E-01 | 3.24E-01 | 1.00E+00 |
| ENSG00000174562.12_KLK15     | ENSG00000160789.18_LMNA | -0.06898 | -0.225697433 | 0.091227371 | 3.98E-01 | 6.75E-01 | 1.00E+00 |
| ENSG00000236692.1_RP11-1217I | ENSG00000160789.18_LMNA | -0.02724 | -0.185631038 | 0.132540171 | 7.39E-01 | 8.90E-01 | 1.00E+00 |
| ENSG00000186090.9_HTR3D      | ENSG00000160789.18_LMNA | 0.03699  | -0.122929933 | 0.195046732 | 6.51E-01 | 8.45E-01 | 1.00E+00 |
| ENSG00000124835.2_AC105760.1 | ENSG00000160789.18_LMNA | 0.01405  | -0.14547158  | 0.172868523 | 8.64E-01 | 9.47E-01 | 1.00E+00 |
| ENSG00000134538.2_SLCO1B1    | ENSG00000160789.18_LMNA | -0.28494 | -0.424864267 | -0.13171023 | 3.74E-04 | 5.35E-03 | 1.00E+00 |
| ENSG00000232327.4_RP11-395C  | ENSG00000160789.18_LMNA | -0.00881 | -0.167779399 | 0.150597896 | 9.14E-01 | 9.67E-01 | 1.00E+00 |
| ENSG00000279746.1_RP11-495K  | ENSG00000160789.18_LMNA | -0.06246 | -0.219477962 | 0.097712653 | 4.45E-01 | 7.12E-01 | 1.00E+00 |
| ENSG00000177354.10_C10orf71  | ENSG00000160789.18_LMNA | 0.088    | -0.072217243 | 0.243780747 | 2.81E-01 | 5.67E-01 | 1.00E+00 |
| ENSG00000189186.9_DCAF8L2    | ENSG00000160789.18_LMNA | -0.12779 | -0.281269997 | 0.032061379 | 1.17E-01 | 3.42E-01 | 1.00E+00 |
| ENSG00000279043.1_CTB-22K14  | ENSG00000160789.18_LMNA | -0.15278 | -0.304572836 | 0.006580589 | 6.02E-02 | 2.26E-01 | 1.00E+00 |
| ENSG00000253311.1_AC011343.  | ENSG00000160789.18_LMNA | -0.09872 | -0.253932889 | 0.061443192 | 2.26E-01 | 5.02E-01 | 1.00E+00 |
| ENSG00000183668.16_PSG9      | ENSG00000160789.18_LMNA | -0.04277 | -0.200608848 | 0.117224736 | 6.01E-01 | 8.16E-01 | 1.00E+00 |
| ENSG00000237189.1_RP11-85G2  | ENSG00000160789.18_LMNA | 0.04477  | -0.11524934  | 0.202529939 | 5.84E-01 | 8.07E-01 | 1.00E+00 |
| ENSG00000280696.1_           | ENSG00000160789.18_LMNA | -0.14888 | -0.300944479 | 0.010574801 | 6.72E-02 | 2.43E-01 | 1.00E+00 |
| ENSG00000242766.1_IGKV1D-17  | ENSG00000160789.18_LMNA | -0.12956 | -0.282927864 | 0.030261921 | 1.12E-01 | 3.33E-01 | 1.00E+00 |

|                             |                         |          |              |             |          |          |          |
|-----------------------------|-------------------------|----------|--------------|-------------|----------|----------|----------|
| ENSG00000252363.1_RNU7-43P  | ENSG00000160789.18_LMNA | 0.03859  | -0.121354405 | 0.196584794 | 6.37E-01 | 8.38E-01 | 1.00E+00 |
| ENSG00000235431.1_AC006373. | ENSG00000160789.18_LMNA | -0.0075  | -0.166499348 | 0.151884612 | 9.27E-01 | 9.72E-01 | 1.00E+00 |
| ENSG00000275912.1_          | ENSG00000160789.18_LMNA | 0.09942  | -0.060741321 | 0.254591844 | 2.23E-01 | 4.99E-01 | 1.00E+00 |
| ENSG00000274886.1_SEPT14P1  | ENSG00000160789.18_LMNA | 0.04876  | -0.111306412 | 0.206357174 | 5.51E-01 | 7.87E-01 | 1.00E+00 |
| ENSG00000221263.1_MIR548P   | ENSG00000160789.18_LMNA | 0.03538  | -0.124517472 | 0.193495362 | 6.65E-01 | 8.52E-01 | 1.00E+00 |
| ENSG00000221669.1_MIR548N   | ENSG00000160789.18_LMNA | 0.01669  | -0.142894476 | 0.175420526 | 8.38E-01 | 9.37E-01 | 1.00E+00 |
| ENSG00000265621.1_          | ENSG00000160789.18_LMNA | -0.01021 | -0.169131912 | 0.149237166 | 9.01E-01 | 9.62E-01 | 1.00E+00 |
| ENSG00000280842.1_          | ENSG00000160789.18_LMNA | 0.05449  | -0.105624527 | 0.211855299 | 5.05E-01 | 7.56E-01 | 1.00E+00 |
| ENSG00000207562.2_MIR34C    | ENSG00000160789.18_LMNA | -0.03056 | -0.188843983 | 0.129267551 | 7.09E-01 | 8.76E-01 | 1.00E+00 |
| ENSG00000206589.1_RNU6-354F | ENSG00000160789.18_LMNA | 0.03345  | -0.12642392  | 0.191630242 | 6.82E-01 | 8.62E-01 | 1.00E+00 |
| ENSG00000199506.1_RNU6-247F | ENSG00000160789.18_LMNA | 0.11294  | -0.047111634 | 0.267330346 | 1.66E-01 | 4.23E-01 | 1.00E+00 |
| ENSG00000223113.1_RNA5SP24  | ENSG00000160789.18_LMNA | -0.01732 | -0.176037061 | 0.142271228 | 8.32E-01 | 9.35E-01 | 1.00E+00 |
| ENSG00000207197.1_SNORD116  | ENSG00000160789.18_LMNA | 0.09836  | -0.061807175 | 0.253591047 | 2.28E-01 | 5.05E-01 | 1.00E+00 |
| ENSG00000207312.1_RNU6-429F | ENSG00000160789.18_LMNA | 0.00552  | -0.153811391 | 0.164580542 | 9.46E-01 | 9.78E-01 | 1.00E+00 |
| ENSG00000264052.1_          | ENSG00000160789.18_LMNA | 0.13306  | -0.026705463 | 0.286198987 | 1.02E-01 | 3.16E-01 | 1.00E+00 |
| ENSG00000222578.1_RNA5SP34  | ENSG00000160789.18_LMNA | -0.12278 | -0.276570525 | 0.037151196 | 1.32E-01 | 3.68E-01 | 1.00E+00 |
| ENSG00000264966.1_MIR5094   | ENSG00000160789.18_LMNA | 0.09272  | -0.067474789 | 0.248258002 | 2.56E-01 | 5.38E-01 | 1.00E+00 |
| ENSG00000222952.1_RNA5SP41  | ENSG00000160789.18_LMNA | 0.05911  | -0.101044654 | 0.216272473 | 4.69E-01 | 7.30E-01 | 1.00E+00 |
| ENSG00000206848.1_RNU6-890F | ENSG00000160789.18_LMNA | 0.03167  | -0.128180072 | 0.189910127 | 6.99E-01 | 8.71E-01 | 1.00E+00 |
| ENSG00000201034.1_Y_RNA     | ENSG00000160789.18_LMNA | 0.06007  | -0.100085611 | 0.217195804 | 4.62E-01 | 7.25E-01 | 1.00E+00 |
| ENSG00000207264.1_RNU6-15P  | ENSG00000160789.18_LMNA | -0.10697 | -0.261710838 | 0.05313875  | 1.90E-01 | 4.57E-01 | 1.00E+00 |
| ENSG00000207622.1_MIR619    | ENSG00000160789.18_LMNA | 0.18276  | 0.024270417  | 0.332297025 | 2.42E-02 | 1.24E-01 | 1.00E+00 |
| ENSG00000275207.1_MIR6740   | ENSG00000160789.18_LMNA | -0.07848 | -0.234743068 | 0.081746911 | 3.37E-01 | 6.22E-01 | 1.00E+00 |
| ENSG00000278405.1_          | ENSG00000160789.18_LMNA | -0.13495 | -0.287968375 | 0.024778426 | 9.74E-02 | 3.07E-01 | 1.00E+00 |
| ENSG00000200893.1_RNU6-944F | ENSG00000160789.18_LMNA | 0.06127  | -0.098895044 | 0.218341249 | 4.53E-01 | 7.18E-01 | 1.00E+00 |
| ENSG00000281802.1_          | ENSG00000160789.18_LMNA | -0.09768 | -0.252944718 | 0.062495136 | 2.31E-01 | 5.09E-01 | 1.00E+00 |
| ENSG00000252456.1_RNA5SP43  | ENSG00000160789.18_LMNA | -0.12214 | -0.27597645  | 0.037793459 | 1.34E-01 | 3.71E-01 | 1.00E+00 |
| ENSG00000267558.1_RP11-618K | ENSG00000160789.18_LMNA | -0.03056 | -0.188841587 | 0.129269995 | 7.09E-01 | 8.76E-01 | 1.00E+00 |
| ENSG00000200731.1_RNU1-124F | ENSG00000160789.18_LMNA | -0.03737 | -0.195410808 | 0.122557133 | 6.48E-01 | 8.43E-01 | 1.00E+00 |
| ENSG00000271886.1_MIR98     | ENSG00000160789.18_LMNA | -0.04782 | -0.20545902  | 0.112232616 | 5.59E-01 | 7.91E-01 | 1.00E+00 |
| ENSG00000229440.1_RP5-1033K | ENSG00000160789.18_LMNA | 0.14347  | -0.016095966 | 0.295914138 | 7.78E-02 | 2.67E-01 | 1.00E+00 |
| ENSG00000224404.1_LL22NC03- | ENSG00000160789.18_LMNA | -0.19103 | -0.339895992 | -0.03283012 | 1.84E-02 | 1.02E-01 | 1.00E+00 |
| ENSG00000240131.1_RP11-124D | ENSG00000160789.18_LMNA | 0.02458  | -0.135153251 | 0.183060712 | 7.64E-01 | 9.02E-01 | 1.00E+00 |

|                              |                         |          |              |             |          |          |          |
|------------------------------|-------------------------|----------|--------------|-------------|----------|----------|----------|
| ENSG00000276520.1_WI2-2118C  | ENSG00000160789.18_LMNA | -0.03317 | -0.191363356 | 0.126696529 | 6.85E-01 | 8.63E-01 | 1.00E+00 |
| ENSG00000241395.3_RN7SL344f  | ENSG00000160789.18_LMNA | -0.02281 | -0.181353247 | 0.136886674 | 7.80E-01 | 9.10E-01 | 1.00E+00 |
| ENSG00000276031.1_RN7SL197f  | ENSG00000160789.18_LMNA | 0.06907  | -0.091137255 | 0.225783674 | 3.98E-01 | 6.75E-01 | 1.00E+00 |
| ENSG00000241913.1_RPS29P21   | ENSG00000160789.18_LMNA | 0.07586  | -0.084363498 | 0.232251956 | 3.53E-01 | 6.37E-01 | 1.00E+00 |
| ENSG00000279646.1_AC016577.  | ENSG00000160789.18_LMNA | -0.03242 | -0.190632444 | 0.127442866 | 6.92E-01 | 8.67E-01 | 1.00E+00 |
| ENSG00000264592.2_RN7SL131f  | ENSG00000160789.18_LMNA | -0.03465 | -0.192791952 | 0.125236745 | 6.72E-01 | 8.56E-01 | 1.00E+00 |
| ENSG00000268080.2_RP11-388K  | ENSG00000160789.18_LMNA | -0.00528 | -0.164347164 | 0.154045572 | 9.48E-01 | 9.79E-01 | 1.00E+00 |
| ENSG00000244003.3_RN7SL143f  | ENSG00000160789.18_LMNA | 0.12763  | -0.032221797 | 0.281122111 | 1.17E-01 | 3.43E-01 | 1.00E+00 |
| ENSG00000279745.1_AL365202.1 | ENSG00000160789.18_LMNA | -0.07801 | -0.234304855 | 0.082207513 | 3.39E-01 | 6.25E-01 | 1.00E+00 |
| ENSG00000257870.1_RP11-616L  | ENSG00000160789.18_LMNA | -0.25953 | -0.402114013 | -0.10465058 | 1.24E-03 | 1.36E-02 | 1.00E+00 |
| ENSG00000249721.1_RP11-83M1  | ENSG00000160789.18_LMNA | 0.03995  | -0.120010747 | 0.197895265 | 6.25E-01 | 8.31E-01 | 1.00E+00 |
| ENSG00000257732.1_RP11-818F  | ENSG00000160789.18_LMNA | 0.22538  | 0.068644249  | 0.371261415 | 5.24E-03 | 4.07E-02 | 1.00E+00 |
| ENSG00000271357.1_RP11-843B  | ENSG00000160789.18_LMNA | 0.20873  | 0.051234201  | 0.356099758 | 9.86E-03 | 6.49E-02 | 1.00E+00 |
| ENSG00000254298.1_CTB-17P3.  | ENSG00000160789.18_LMNA | -0.00559 | -0.164645437 | 0.153746265 | 9.45E-01 | 9.78E-01 | 1.00E+00 |
| ENSG00000263417.4_GTSCR1     | ENSG00000160789.18_LMNA | 0.11816  | -0.041827881 | 0.272239233 | 1.47E-01 | 3.93E-01 | 1.00E+00 |
| ENSG00000224595.1_AC073626.  | ENSG00000160789.18_LMNA | -0.06462 | -0.221542549 | 0.095562812 | 4.29E-01 | 6.99E-01 | 1.00E+00 |
| ENSG00000264313.2_RN7SL644f  | ENSG00000160789.18_LMNA | -0.11066 | -0.265185298 | 0.049414976 | 1.75E-01 | 4.35E-01 | 1.00E+00 |
| ENSG00000258930.1_RP5-1163L  | ENSG00000160789.18_LMNA | -0.00255 | -0.161686187 | 0.156713197 | 9.75E-01 | 9.90E-01 | 1.00E+00 |
| ENSG00000260265.1_RP11-44F2  | ENSG00000160789.18_LMNA | -0.05749 | -0.214728969 | 0.102646541 | 4.82E-01 | 7.39E-01 | 1.00E+00 |
| ENSG00000256963.1_RP11-216P  | ENSG00000160789.18_LMNA | -0.09108 | -0.246701735 | 0.069124857 | 2.64E-01 | 5.48E-01 | 1.00E+00 |
| ENSG00000242657.3_RN7SL581f  | ENSG00000160789.18_LMNA | 0.03801  | -0.121932812 | 0.196020323 | 6.42E-01 | 8.41E-01 | 1.00E+00 |
| ENSG00000230353.5_AC114755.  | ENSG00000160789.18_LMNA | 0.03898  | -0.120969185 | 0.196960616 | 6.33E-01 | 8.36E-01 | 1.00E+00 |
| ENSG00000256844.1_MEF2BNBF   | ENSG00000160789.18_LMNA | -0.02961 | -0.187925447 | 0.130203856 | 7.17E-01 | 8.80E-01 | 1.00E+00 |
| ENSG00000223550.1_SNRBPB1    | ENSG00000160789.18_LMNA | 0.01773  | -0.141875942 | 0.176427962 | 8.28E-01 | 9.33E-01 | 1.00E+00 |
| ENSG00000211720.3_TRBV11-1   | ENSG00000160789.18_LMNA | -0.05284 | -0.210269424 | 0.107265536 | 5.18E-01 | 7.64E-01 | 1.00E+00 |
| ENSG00000234587.1_MRPL50P1   | ENSG00000160789.18_LMNA | -0.18705 | -0.336235749 | -0.02870148 | 2.10E-02 | 1.12E-01 | 1.00E+00 |
| ENSG00000180083.9_WFDC11     | ENSG00000160789.18_LMNA | 0.14266  | -0.016930166 | 0.29515259  | 7.96E-02 | 2.71E-01 | 1.00E+00 |
| ENSG00000266840.1_RP11-543H  | ENSG00000160789.18_LMNA | 0.07156  | -0.088651825 | 0.228160269 | 3.81E-01 | 6.60E-01 | 1.00E+00 |
| ENSG00000242651.3_RN7SL862f  | ENSG00000160789.18_LMNA | -0.03924 | -0.197212423 | 0.120711027 | 6.31E-01 | 8.34E-01 | 1.00E+00 |
| ENSG00000257677.1_RP1-81P11  | ENSG00000160789.18_LMNA | -0.09267 | -0.248204317 | 0.067531739 | 2.56E-01 | 5.38E-01 | 1.00E+00 |
| ENSG00000233262.1_RP11-380F  | ENSG00000160789.18_LMNA | -0.19454 | -0.343117419 | -0.03647247 | 1.63E-02 | 9.33E-02 | 1.00E+00 |
| ENSG00000264519.2_RN7SL596f  | ENSG00000160789.18_LMNA | 0.03457  | -0.125316545 | 0.192713891 | 6.72E-01 | 8.56E-01 | 1.00E+00 |
| ENSG00000227234.1_SPANXB1    | ENSG00000160789.18_LMNA | -0.01865 | -0.177326436 | 0.140967001 | 8.20E-01 | 9.30E-01 | 1.00E+00 |

|                              |                         |          |              |             |          |          |          |
|------------------------------|-------------------------|----------|--------------|-------------|----------|----------|----------|
| ENSG00000182187.3_CRYGB      | ENSG00000160789.18_LMNA | -0.20092 | -0.3489563   | -0.04309513 | 1.31E-02 | 7.94E-02 | 1.00E+00 |
| ENSG00000229769.2_TRBV10-2   | ENSG00000160789.18_LMNA | 0.01447  | -0.145063377 | 0.173273036 | 8.60E-01 | 9.45E-01 | 1.00E+00 |
| ENSG00000250603.1_CTC-228N2  | ENSG00000160789.18_LMNA | -0.02919 | -0.18752409  | 0.130612798 | 7.21E-01 | 8.82E-01 | 1.00E+00 |
| ENSG00000258418.1_RP11-662J  | ENSG00000160789.18_LMNA | -0.17239 | -0.322737557 | -0.01356612 | 3.37E-02 | 1.55E-01 | 1.00E+00 |
| ENSG00000229749.1_COTL1P1    | ENSG00000160789.18_LMNA | 0.0147   | -0.144837017 | 0.173497302 | 8.57E-01 | 9.44E-01 | 1.00E+00 |
| ENSG00000271423.1_CYCSP1     | ENSG00000160789.18_LMNA | -0.00661 | -0.165632578 | 0.152755283 | 9.36E-01 | 9.75E-01 | 1.00E+00 |
| ENSG00000227847.1_RP11-420H  | ENSG00000160789.18_LMNA | 0.01895  | -0.14067341  | 0.177616531 | 8.17E-01 | 9.28E-01 | 1.00E+00 |
| ENSG00000274591.1_RP11-474P  | ENSG00000160789.18_LMNA | -0.20411 | -0.351872153 | -0.04641248 | 1.17E-02 | 7.31E-02 | 1.00E+00 |
| ENSG00000254943.1_RP11-664I2 | ENSG00000160789.18_LMNA | -0.12085 | -0.274761174 | 0.039106503 | 1.38E-01 | 3.79E-01 | 1.00E+00 |
| ENSG00000237446.1_RHEBP3     | ENSG00000160789.18_LMNA | -0.1264  | -0.279966785 | 0.033474468 | 1.21E-01 | 3.49E-01 | 1.00E+00 |
| ENSG00000224927.2_NDUFA5P1   | ENSG00000160789.18_LMNA | -0.02536 | -0.183822109 | 0.13437965  | 7.56E-01 | 8.99E-01 | 1.00E+00 |
| ENSG00000235608.1_NKX1-1     | ENSG00000160789.18_LMNA | -0.11142 | -0.265906354 | 0.048641083 | 1.72E-01 | 4.31E-01 | 1.00E+00 |
| ENSG00000275293.1_Metazoa_SI | ENSG00000160789.18_LMNA | 0.09968  | -0.060477383 | 0.254839568 | 2.22E-01 | 4.97E-01 | 1.00E+00 |
| ENSG00000238201.1_AC114752.1 | ENSG00000160789.18_LMNA | 0.10611  | -0.053999871 | 0.260906207 | 1.93E-01 | 4.62E-01 | 1.00E+00 |
| ENSG00000255190.2_TRIM51DP   | ENSG00000160789.18_LMNA | -0.25086 | -0.394308908 | -0.09546739 | 1.83E-03 | 1.83E-02 | 1.00E+00 |
| ENSG00000280376.1_RP11-93O1  | ENSG00000160789.18_LMNA | -0.05439 | -0.211753229 | 0.105730198 | 5.06E-01 | 7.56E-01 | 1.00E+00 |
| ENSG00000230835.1_AP001187.1 | ENSG00000160789.18_LMNA | -0.10785 | -0.262541544 | 0.052249231 | 1.86E-01 | 4.52E-01 | 1.00E+00 |
| ENSG00000227054.1_FDX1P2     | ENSG00000160789.18_LMNA | 0.09736  | -0.062812028 | 0.252646908 | 2.33E-01 | 5.11E-01 | 1.00E+00 |
| ENSG00000214051.3_ARF4P3     | ENSG00000160789.18_LMNA | 0.02983  | -0.129984399 | 0.188140789 | 7.15E-01 | 8.79E-01 | 1.00E+00 |
| ENSG00000232542.1_DPYD-IT1   | ENSG00000160789.18_LMNA | 0.08256  | -0.077665245 | 0.23862072  | 3.12E-01 | 5.98E-01 | 1.00E+00 |
| ENSG00000226842.1_RP11-166N  | ENSG00000160789.18_LMNA | -0.00947 | -0.168420504 | 0.149953047 | 9.08E-01 | 9.65E-01 | 1.00E+00 |
| ENSG00000234855.1_SLIT1-AS1  | ENSG00000160789.18_LMNA | -0.02278 | -0.181326161 | 0.136914156 | 7.81E-01 | 9.10E-01 | 1.00E+00 |
| ENSG00000249977.1_RP11-155G  | ENSG00000160789.18_LMNA | 0.04034  | -0.119632502 | 0.198263963 | 6.22E-01 | 8.29E-01 | 1.00E+00 |
| ENSG00000225255.5_LINC01297  | ENSG00000160789.18_LMNA | -0.13247 | -0.285644187 | 0.027309215 | 1.04E-01 | 3.19E-01 | 1.00E+00 |
| ENSG00000232939.1_RP11-406O  | ENSG00000160789.18_LMNA | 0.22344  | 0.066607423  | 0.369495927 | 5.66E-03 | 4.30E-02 | 1.00E+00 |
| ENSG00000270222.1_DUXAP11    | ENSG00000160789.18_LMNA | -0.2426  | -0.386858073 | -0.08674823 | 2.60E-03 | 2.39E-02 | 1.00E+00 |
| ENSG00000255164.1_RP5-1047A  | ENSG00000160789.18_LMNA | -0.0386  | -0.196587979 | 0.121351141 | 6.37E-01 | 8.38E-01 | 1.00E+00 |
| ENSG00000228420.1_RP4-735C1  | ENSG00000160789.18_LMNA | 0.07425  | -0.085965066 | 0.230725137 | 3.63E-01 | 6.45E-01 | 1.00E+00 |
| ENSG00000266100.1_RP11-118E  | ENSG00000160789.18_LMNA | -0.04217 | -0.200030694 | 0.117818742 | 6.06E-01 | 8.20E-01 | 1.00E+00 |
| ENSG00000259028.1_RP11-325D  | ENSG00000160789.18_LMNA | -0.02685 | -0.185258052 | 0.132919635 | 7.43E-01 | 8.92E-01 | 1.00E+00 |
| ENSG00000253108.1_RP1-84O15  | ENSG00000160789.18_LMNA | -0.12638 | -0.279949007 | 0.033493736 | 1.21E-01 | 3.49E-01 | 1.00E+00 |
| ENSG00000237329.2_RP11-201O  | ENSG00000160789.18_LMNA | 0.09001  | -0.070198016 | 0.245688706 | 2.70E-01 | 5.55E-01 | 1.00E+00 |
| ENSG00000225752.1_RP1-45I4.2 | ENSG00000160789.18_LMNA | 0.0057   | -0.153640706 | 0.164750618 | 9.44E-01 | 9.78E-01 | 1.00E+00 |

|                              |                         |          |              |             |          |          |          |
|------------------------------|-------------------------|----------|--------------|-------------|----------|----------|----------|
| ENSG00000268987.1_CTC-435M1  | ENSG00000160789.18_LMNA | -0.02065 | -0.179258347 | 0.139010763 | 8.01E-01 | 9.20E-01 | 1.00E+00 |
| ENSG00000234601.1_CHRM3-AS   | ENSG00000160789.18_LMNA | 0.10788  | -0.052218169 | 0.262570545 | 1.86E-01 | 4.52E-01 | 1.00E+00 |
| ENSG00000261161.1_RP11-58A1  | ENSG00000160789.18_LMNA | 0.02795  | -0.131836103 | 0.186322842 | 7.32E-01 | 8.87E-01 | 1.00E+00 |
| ENSG00000279903.1_RP11-349F  | ENSG00000160789.18_LMNA | -0.26414 | -0.406260354 | -0.10954972 | 1.01E-03 | 1.17E-02 | 1.00E+00 |
| ENSG00000279597.1_RP4-566L2  | ENSG00000160789.18_LMNA | -0.13034 | -0.283659363 | 0.029467303 | 1.09E-01 | 3.29E-01 | 1.00E+00 |
| ENSG00000279757.1_CTD-2326C  | ENSG00000160789.18_LMNA | 0.14979  | -0.009639376 | 0.301795032 | 6.55E-02 | 2.39E-01 | 1.00E+00 |
| ENSG00000271638.1_BNIP3P19   | ENSG00000160789.18_LMNA | -0.06854 | -0.225278943 | 0.091664592 | 4.01E-01 | 6.78E-01 | 1.00E+00 |
| ENSG00000258560.1_CTD-2376L2 | ENSG00000160789.18_LMNA | 0.10072  | -0.059435638 | 0.255816912 | 2.17E-01 | 4.92E-01 | 1.00E+00 |
| ENSG00000213232.2_PPP1R2P1   | ENSG00000160789.18_LMNA | 0.01228  | -0.147208515 | 0.171146091 | 8.81E-01 | 9.54E-01 | 1.00E+00 |
| ENSG00000259534.1_RP11-522B  | ENSG00000160789.18_LMNA | -0.02423 | -0.182724285 | 0.135494947 | 7.67E-01 | 9.03E-01 | 1.00E+00 |
| ENSG00000235483.1_GYG2-AS1   | ENSG00000160789.18_LMNA | -0.05207 | -0.209534736 | 0.10802518  | 5.24E-01 | 7.69E-01 | 1.00E+00 |
| ENSG00000242973.5_RP11-446F  | ENSG00000160789.18_LMNA | -0.00902 | -0.16798341  | 0.150392722 | 9.12E-01 | 9.67E-01 | 1.00E+00 |
| ENSG00000204933.3_CD177P1    | ENSG00000160789.18_LMNA | -0.10876 | -0.263399274 | 0.051330252 | 1.82E-01 | 4.47E-01 | 1.00E+00 |
| ENSG00000243236.5_GSTA9P     | ENSG00000160789.18_LMNA | -0.04246 | -0.200310736 | 0.11753105  | 6.03E-01 | 8.18E-01 | 1.00E+00 |
| ENSG00000270986.1_HMGB1P51   | ENSG00000160789.18_LMNA | -0.04392 | -0.201710535 | 0.116092214 | 5.91E-01 | 8.10E-01 | 1.00E+00 |
| ENSG00000256734.1_RP11-613F  | ENSG00000160789.18_LMNA | 0.06853  | -0.091671872 | 0.225271974 | 4.02E-01 | 6.78E-01 | 1.00E+00 |
| ENSG00000224999.1_VTA1P1     | ENSG00000160789.18_LMNA | 0.04051  | -0.119457307 | 0.198434706 | 6.20E-01 | 8.28E-01 | 1.00E+00 |
| ENSG00000254552.1_XIRP2-AS1  | ENSG00000160789.18_LMNA | 0.01122  | -0.148249585 | 0.17011278  | 8.91E-01 | 9.57E-01 | 1.00E+00 |
| ENSG00000261629.1_RP5-842K1  | ENSG00000160789.18_LMNA | 0.08041  | -0.079817324 | 0.236577465 | 3.25E-01 | 6.11E-01 | 1.00E+00 |
| ENSG00000224574.1_COL18A1-A  | ENSG00000160789.18_LMNA | -0.16848 | -0.319120558 | -0.00953434 | 3.80E-02 | 1.67E-01 | 1.00E+00 |
| ENSG00000226423.1_AC093642.4 | ENSG00000160789.18_LMNA | 0.09353  | -0.066667677 | 0.249018639 | 2.52E-01 | 5.33E-01 | 1.00E+00 |
| ENSG00000250221.1_KRT8P32    | ENSG00000160789.18_LMNA | 0.19606  | 0.038043668  | 0.344504815 | 1.55E-02 | 8.98E-02 | 1.00E+00 |
| ENSG00000262133.1_RP11-676J  | ENSG00000160789.18_LMNA | 0.05256  | -0.107540094 | 0.210003927 | 5.20E-01 | 7.66E-01 | 1.00E+00 |
| ENSG00000258921.1_RP11-644F  | ENSG00000160789.18_LMNA | 0.03757  | -0.122365932 | 0.195597501 | 6.46E-01 | 8.43E-01 | 1.00E+00 |
| ENSG00000258437.1_RP11-661G  | ENSG00000160789.18_LMNA | 0.05891  | -0.101240685 | 0.216083672 | 4.71E-01 | 7.31E-01 | 1.00E+00 |
| ENSG00000203402.2_RP11-571E  | ENSG00000160789.18_LMNA | -0.00626 | -0.165296199 | 0.153093043 | 9.39E-01 | 9.76E-01 | 1.00E+00 |
| ENSG00000261638.1_RP11-700H  | ENSG00000160789.18_LMNA | 0.067    | -0.093190451 | 0.223817536 | 4.12E-01 | 6.86E-01 | 1.00E+00 |
| ENSG00000233367.1_RP11-307L  | ENSG00000160789.18_LMNA | -0.04839 | -0.206007921 | 0.111666638 | 5.54E-01 | 7.88E-01 | 1.00E+00 |
| ENSG00000203729.7_LINC00272  | ENSG00000160789.18_LMNA | -0.00754 | -0.166540608 | 0.151843154 | 9.27E-01 | 9.72E-01 | 1.00E+00 |
| ENSG00000238210.2_RP13-210D  | ENSG00000160789.18_LMNA | -0.01625 | -0.174996981 | 0.143322486 | 8.43E-01 | 9.39E-01 | 1.00E+00 |
| ENSG00000169575.4_VPREB1     | ENSG00000160789.18_LMNA | -0.15874 | -0.31010628  | 0.000470019 | 5.08E-02 | 2.03E-01 | 1.00E+00 |
| ENSG00000234025.1_RBPMS2P1   | ENSG00000160789.18_LMNA | -0.03012 | -0.188416505 | 0.129703369 | 7.13E-01 | 8.78E-01 | 1.00E+00 |
| ENSG00000105954.2_NPVF       | ENSG00000160789.18_LMNA | -0.0953  | -0.250694656 | 0.064887797 | 2.43E-01 | 5.22E-01 | 1.00E+00 |

|                             |                         |          |              |             |          |          |          |
|-----------------------------|-------------------------|----------|--------------|-------------|----------|----------|----------|
| ENSG00000233920.1_RP5-1061H | ENSG00000160789.18_LMNA | -0.00939 | -0.168334434 | 0.150039635 | 9.09E-01 | 9.65E-01 | 1.00E+00 |
| ENSG00000223920.2_RP11-430G | ENSG00000160789.18_LMNA | 0.21754  | 0.060435864  | 0.364133137 | 7.10E-03 | 5.09E-02 | 1.00E+00 |
| ENSG00000231509.1_RP11-574F | ENSG00000160789.18_LMNA | -0.01241 | -0.171276008 | 0.147077573 | 8.79E-01 | 9.53E-01 | 1.00E+00 |
| ENSG00000231022.1_RPS3AP9   | ENSG00000160789.18_LMNA | -0.20789 | -0.355333302 | -0.05035898 | 1.02E-02 | 6.64E-02 | 1.00E+00 |
| ENSG00000215089.3_KRT18P11  | ENSG00000160789.18_LMNA | 0.10708  | -0.053029617 | 0.26181278  | 1.89E-01 | 4.56E-01 | 1.00E+00 |
| ENSG00000260616.5_RP11-327F | ENSG00000160789.18_LMNA | 0.01576  | -0.143799546 | 0.174524758 | 8.47E-01 | 9.40E-01 | 1.00E+00 |
| ENSG00000254606.1_RP11-22P4 | ENSG00000160789.18_LMNA | -0.00881 | -0.167778003 | 0.1505993   | 9.14E-01 | 9.67E-01 | 1.00E+00 |
| ENSG00000231697.3_NANOGP5   | ENSG00000160789.18_LMNA | -0.06634 | -0.223184646 | 0.093850792 | 4.17E-01 | 6.89E-01 | 1.00E+00 |
| ENSG00000265400.1_RP11-471L | ENSG00000160789.18_LMNA | 0.04102  | -0.118962207 | 0.198917118 | 6.16E-01 | 8.26E-01 | 1.00E+00 |
| ENSG00000254621.1_SETP16    | ENSG00000160789.18_LMNA | 0.08371  | -0.076509076 | 0.23971727  | 3.05E-01 | 5.92E-01 | 1.00E+00 |
| ENSG00000237963.1_RP11-151G | ENSG00000160789.18_LMNA | -0.15951 | -0.310815864 | -0.00031525 | 4.97E-02 | 2.00E-01 | 1.00E+00 |
| ENSG00000176746.6_MAGEB6    | ENSG00000160789.18_LMNA | -0.07891 | -0.235156111 | 0.081312641 | 3.34E-01 | 6.20E-01 | 1.00E+00 |
| ENSG00000241744.1_RP11-399D | ENSG00000160789.18_LMNA | -0.05581 | -0.213116619 | 0.104318121 | 4.95E-01 | 7.50E-01 | 1.00E+00 |
| ENSG00000244281.1_RP11-564P | ENSG00000160789.18_LMNA | -0.12082 | -0.274731705 | 0.039138329 | 1.38E-01 | 3.79E-01 | 1.00E+00 |
| ENSG00000236274.1_RP4-728D4 | ENSG00000160789.18_LMNA | 0.08035  | -0.079876992 | 0.236520774 | 3.25E-01 | 6.12E-01 | 1.00E+00 |
| ENSG00000167098.10_SUN5     | ENSG00000160789.18_LMNA | -0.12092 | -0.274833249 | 0.03902866  | 1.38E-01 | 3.78E-01 | 1.00E+00 |
| ENSG00000255790.4_RP11-711K | ENSG00000160789.18_LMNA | -0.0912  | -0.246819084 | 0.069000495 | 2.64E-01 | 5.47E-01 | 1.00E+00 |
| ENSG00000269761.1_RP11-1137 | ENSG00000160789.18_LMNA | 0.1282   | -0.031641785 | 0.281656743 | 1.15E-01 | 3.40E-01 | 1.00E+00 |
| ENSG00000266858.1_RPSAP67   | ENSG00000160789.18_LMNA | 0.13199  | -0.027793334 | 0.285199169 | 1.05E-01 | 3.22E-01 | 1.00E+00 |
| ENSG00000204437.7_CTSLP6    | ENSG00000160789.18_LMNA | -0.01892 | -0.177582027 | 0.140708334 | 8.17E-01 | 9.29E-01 | 1.00E+00 |
| ENSG00000197549.8_PRAMENP   | ENSG00000160789.18_LMNA | 0.01971  | -0.139926686 | 0.17835412  | 8.10E-01 | 9.25E-01 | 1.00E+00 |
| ENSG00000234458.4_OR7E130P  | ENSG00000160789.18_LMNA | 0.00295  | -0.156328226 | 0.162070485 | 9.71E-01 | 9.89E-01 | 1.00E+00 |
| ENSG00000225172.4_RP11-16L9 | ENSG00000160789.18_LMNA | -0.22568 | -0.371531597 | -0.06895618 | 5.18E-03 | 4.04E-02 | 1.00E+00 |
| ENSG00000257858.1_MTND1P24  | ENSG00000160789.18_LMNA | -0.16079 | -0.312001379 | -0.00162808 | 4.78E-02 | 1.95E-01 | 1.00E+00 |
| ENSG00000223646.1_AC002463. | ENSG00000160789.18_LMNA | 0.09769  | -0.062480621 | 0.252958357 | 2.31E-01 | 5.09E-01 | 1.00E+00 |
| ENSG00000229791.1_RP11-385E | ENSG00000160789.18_LMNA | -0.32804 | -0.463057899 | -0.17814268 | 3.70E-05 | 8.46E-04 | 1.00E+00 |
| ENSG00000255203.1_OR7E2P    | ENSG00000160789.18_LMNA | 0.08787  | -0.072339155 | 0.243665474 | 2.82E-01 | 5.67E-01 | 1.00E+00 |
| ENSG00000242285.1_RPL6P8    | ENSG00000160789.18_LMNA | -0.04783 | -0.205463407 | 0.112228093 | 5.58E-01 | 7.91E-01 | 1.00E+00 |
| ENSG00000198454.2_PRR31     | ENSG00000160789.18_LMNA | 0.10857  | -0.051524364 | 0.26321814  | 1.83E-01 | 4.48E-01 | 1.00E+00 |
| ENSG00000257958.1_RP11-25E2 | ENSG00000160789.18_LMNA | -0.16646 | -0.317253916 | -0.00745758 | 4.04E-02 | 1.74E-01 | 1.00E+00 |
| ENSG00000230952.1_AC099344. | ENSG00000160789.18_LMNA | -0.09232 | -0.24787712  | 0.067878788 | 2.58E-01 | 5.41E-01 | 1.00E+00 |
| ENSG00000224124.3_POM121L1  | ENSG00000160789.18_LMNA | 0.12951  | -0.030311618 | 0.282882103 | 1.12E-01 | 3.33E-01 | 1.00E+00 |
| ENSG00000229258.4_RP11-552D | ENSG00000160789.18_LMNA | -0.03224 | -0.190459015 | 0.127619902 | 6.93E-01 | 8.68E-01 | 1.00E+00 |

|                              |                         |          |              |             |          |          |          |
|------------------------------|-------------------------|----------|--------------|-------------|----------|----------|----------|
| ENSG00000258285.1_TESC-AS1   | ENSG00000160789.18_LMNA | -0.09403 | -0.249496942 | 0.066159938 | 2.49E-01 | 5.30E-01 | 1.00E+00 |
| ENSG00000198284.8_NUP210P1   | ENSG00000160789.18_LMNA | 0.03496  | -0.124936725 | 0.193085394 | 6.69E-01 | 8.54E-01 | 1.00E+00 |
| ENSG00000224604.1_AC008069.  | ENSG00000160789.18_LMNA | -0.01088 | -0.16978389  | 0.148580797 | 8.94E-01 | 9.59E-01 | 1.00E+00 |
| ENSG00000271853.4_RP1-178F1  | ENSG00000160789.18_LMNA | 0.0351   | -0.124795882 | 0.19322313  | 6.68E-01 | 8.54E-01 | 1.00E+00 |
| ENSG00000225755.2_RP11-267N  | ENSG00000160789.18_LMNA | 0.01745  | -0.142144378 | 0.176162515 | 8.31E-01 | 9.34E-01 | 1.00E+00 |
| ENSG00000213115.2_AC104131.  | ENSG00000160789.18_LMNA | -0.07256 | -0.229117611 | 0.087649526 | 3.74E-01 | 6.54E-01 | 1.00E+00 |
| ENSG00000237016.1_AC013410.  | ENSG00000160789.18_LMNA | 0.08203  | -0.078194006 | 0.238118956 | 3.15E-01 | 6.01E-01 | 1.00E+00 |
| ENSG00000248908.1_RP11-730N  | ENSG00000160789.18_LMNA | 0.02258  | -0.137113016 | 0.181130153 | 7.82E-01 | 9.11E-01 | 1.00E+00 |
| ENSG00000223591.4_CENPVL1    | ENSG00000160789.18_LMNA | -0.02208 | -0.180644368 | 0.137605759 | 7.87E-01 | 9.13E-01 | 1.00E+00 |
| ENSG00000107447.6_DNTT       | ENSG00000160789.18_LMNA | -0.04514 | -0.202882957 | 0.114886069 | 5.81E-01 | 8.05E-01 | 1.00E+00 |
| ENSG00000214417.4_KRT18P13   | ENSG00000160789.18_LMNA | 0.20205  | 0.044272044  | 0.349991453 | 1.26E-02 | 7.71E-02 | 1.00E+00 |
| ENSG00000227790.5_AC015922.  | ENSG00000160789.18_LMNA | -0.07794 | -0.234236202 | 0.082279661 | 3.40E-01 | 6.25E-01 | 1.00E+00 |
| ENSG00000182083.7_OR6B2      | ENSG00000160789.18_LMNA | 0.00417  | -0.155137152 | 0.163258865 | 9.59E-01 | 9.84E-01 | 1.00E+00 |
| ENSG00000235054.1_RP5-1166F  | ENSG00000160789.18_LMNA | -0.05062 | -0.208145936 | 0.109460142 | 5.36E-01 | 7.77E-01 | 1.00E+00 |
| ENSG00000255162.1_RP11-358N  | ENSG00000160789.18_LMNA | -0.04548 | -0.203209149 | 0.114550329 | 5.78E-01 | 8.03E-01 | 1.00E+00 |
| ENSG00000279991.1_RP11-190D  | ENSG00000160789.18_LMNA | -0.03302 | -0.191212682 | 0.126850412 | 6.86E-01 | 8.64E-01 | 1.00E+00 |
| ENSG00000230056.1_DDX6P1     | ENSG00000160789.18_LMNA | 0.03074  | -0.12908927  | 0.189018818 | 7.07E-01 | 8.75E-01 | 1.00E+00 |
| ENSG00000276457.1_FKBP4P8    | ENSG00000160789.18_LMNA | -0.10231 | -0.257315057 | 0.057837441 | 2.10E-01 | 4.83E-01 | 1.00E+00 |
| ENSG00000250111.3_AC107982.  | ENSG00000160789.18_LMNA | -0.01764 | -0.176349891 | 0.141954897 | 8.29E-01 | 9.33E-01 | 1.00E+00 |
| ENSG00000230399.1_RBBP8P1    | ENSG00000160789.18_LMNA | 0.03948  | -0.120473996 | 0.197443586 | 6.29E-01 | 8.33E-01 | 1.00E+00 |
| ENSG00000137675.4_MMP27      | ENSG00000160789.18_LMNA | 0.05587  | -0.104253796 | 0.213178696 | 4.94E-01 | 7.49E-01 | 1.00E+00 |
| ENSG00000143105.6_KCNA10     | ENSG00000160789.18_LMNA | -0.00401 | -0.163104378 | 0.155292042 | 9.61E-01 | 9.84E-01 | 1.00E+00 |
| ENSG00000248347.3_RP11-1134  | ENSG00000160789.18_LMNA | -0.07203 | -0.228609048 | 0.088182051 | 3.78E-01 | 6.57E-01 | 1.00E+00 |
| ENSG00000279729.1_RP11-14N9  | ENSG00000160789.18_LMNA | -0.00701 | -0.166023765 | 0.152362397 | 9.32E-01 | 9.73E-01 | 1.00E+00 |
| ENSG00000237413.4_MGC27382   | ENSG00000160789.18_LMNA | 0.21025  | 0.052822103  | 0.357489279 | 9.32E-03 | 6.23E-02 | 1.00E+00 |
| ENSG00000232087.1_HCFC2P1    | ENSG00000160789.18_LMNA | 0.09405  | -0.066143208 | 0.2495127   | 2.49E-01 | 5.30E-01 | 1.00E+00 |
| ENSG00000233651.2_RP11-111F  | ENSG00000160789.18_LMNA | -0.03111 | -0.189377251 | 0.128723708 | 7.04E-01 | 8.73E-01 | 1.00E+00 |
| ENSG00000224294.1_RP3-326I13 | ENSG00000160789.18_LMNA | 0.25862  | 0.103686142  | 0.401296334 | 1.30E-03 | 1.41E-02 | 1.00E+00 |
| ENSG00000120211.4_INSL4      | ENSG00000160789.18_LMNA | 0.03361  | -0.126261954 | 0.191788787 | 6.81E-01 | 8.61E-01 | 1.00E+00 |
| ENSG00000225619.1_MYT1L-AS1  | ENSG00000160789.18_LMNA | -0.19613 | -0.34457487  | -0.03812304 | 1.54E-02 | 8.97E-02 | 1.00E+00 |
| ENSG00000160994.3_CCDC105    | ENSG00000160789.18_LMNA | 0.06863  | -0.091571275 | 0.225368272 | 4.01E-01 | 6.77E-01 | 1.00E+00 |
| ENSG00000231718.1_RP11-382E  | ENSG00000160789.18_LMNA | -0.19741 | -0.345743864 | -0.03944815 | 1.48E-02 | 8.69E-02 | 1.00E+00 |
| ENSG00000184624.4_ZNF72P     | ENSG00000160789.18_LMNA | 0.02915  | -0.130661605 | 0.187476182 | 7.22E-01 | 8.82E-01 | 1.00E+00 |



|                             |                         |          |              |             |          |          |          |
|-----------------------------|-------------------------|----------|--------------|-------------|----------|----------|----------|
| ENSG00000276375.1_RP11-339B | ENSG00000160789.18_LMNA | -0.03569 | -0.19378515  | 0.124221051 | 6.62E-01 | 8.51E-01 | 1.00E+00 |
| ENSG00000141946.1_ZIM3      | ENSG00000160789.18_LMNA | 0.08748  | -0.072733978 | 0.243292093 | 2.84E-01 | 5.69E-01 | 1.00E+00 |
| ENSG00000106410.13_NOBOX    | ENSG00000160789.18_LMNA | 0.03496  | -0.124931609 | 0.193090398 | 6.69E-01 | 8.54E-01 | 1.00E+00 |
| ENSG00000138109.9_CYP2C9    | ENSG00000160789.18_LMNA | -0.02424 | -0.182735776 | 0.135483277 | 7.67E-01 | 9.03E-01 | 1.00E+00 |
| ENSG00000226372.2_DCAF8L1   | ENSG00000160789.18_LMNA | 0.06524  | -0.09494644  | 0.222133954 | 4.25E-01 | 6.95E-01 | 1.00E+00 |
| ENSG00000249346.5_LINC01016 | ENSG00000160789.18_LMNA | 0.05129  | -0.108794266 | 0.208790551 | 5.30E-01 | 7.73E-01 | 1.00E+00 |
| ENSG00000183292.11_TISP43   | ENSG00000160789.18_LMNA | -0.03032 | -0.188611364 | 0.129504724 | 7.11E-01 | 8.77E-01 | 1.00E+00 |
| ENSG00000260303.1_RP11-203B | ENSG00000160789.18_LMNA | -0.06343 | -0.220403726 | 0.096749027 | 4.38E-01 | 7.06E-01 | 1.00E+00 |
| ENSG00000181984.11_GOLGA8C  | ENSG00000160789.18_LMNA | 0.17932  | 0.020710093  | 0.329124489 | 2.71E-02 | 1.34E-01 | 1.00E+00 |
| ENSG00000252906.1_SCARNA3   | ENSG00000160789.18_LMNA | -0.11631 | -0.270501436 | 0.043700395 | 1.54E-01 | 4.04E-01 | 1.00E+00 |
| ENSG00000266533.1_MIR3619   | ENSG00000160789.18_LMNA | -0.01838 | -0.177062571 | 0.141233994 | 8.22E-01 | 9.31E-01 | 1.00E+00 |
| ENSG00000266146.1_MIR5190   | ENSG00000160789.18_LMNA | -0.06947 | -0.226167836 | 0.090735768 | 3.95E-01 | 6.72E-01 | 1.00E+00 |
| ENSG00000252230.1_SNORD111  | ENSG00000160789.18_LMNA | 0.06659  | -0.093605057 | 0.223420196 | 4.15E-01 | 6.88E-01 | 1.00E+00 |
| ENSG00000266625.1_          | ENSG00000160789.18_LMNA | -0.02518 | -0.183649341 | 0.134555221 | 7.58E-01 | 8.99E-01 | 1.00E+00 |
| ENSG00000277155.1_          | ENSG00000160789.18_LMNA | -0.14205 | -0.294591858 | 0.017544114 | 8.09E-02 | 2.74E-01 | 1.00E+00 |
| ENSG00000225523.2_IGKV6D-21 | ENSG00000160789.18_LMNA | -0.16063 | -0.311859206 | -0.00147058 | 4.80E-02 | 1.96E-01 | 1.00E+00 |
| ENSG00000263921.1_          | ENSG00000160789.18_LMNA | -0.02138 | -0.179970761 | 0.138288751 | 7.94E-01 | 9.17E-01 | 1.00E+00 |
| ENSG00000252027.1_RNU6ATAC  | ENSG00000160789.18_LMNA | -0.32089 | -0.456760458 | -0.17039845 | 5.56E-05 | 1.17E-03 | 1.00E+00 |
| ENSG00000215943.1_MIR892A   | ENSG00000160789.18_LMNA | -0.23148 | -0.376794735 | -0.07504437 | 4.11E-03 | 3.39E-02 | 1.00E+00 |
| ENSG00000277563.1_AC063961. | ENSG00000160789.18_LMNA | 0.04956  | -0.110511457 | 0.207127628 | 5.44E-01 | 7.82E-01 | 1.00E+00 |
| ENSG00000278792.1_          | ENSG00000160789.18_LMNA | -0.00996 | -0.168894179 | 0.149476431 | 9.03E-01 | 9.63E-01 | 1.00E+00 |
| ENSG00000273885.1_snoU2-30  | ENSG00000160789.18_LMNA | -0.05386 | -0.211251853 | 0.106249156 | 5.10E-01 | 7.59E-01 | 1.00E+00 |
| ENSG00000199711.1_Y_RNA     | ENSG00000160789.18_LMNA | 0.00939  | -0.150032196 | 0.168341828 | 9.09E-01 | 9.65E-01 | 1.00E+00 |
| ENSG00000252427.1_SNORD67   | ENSG00000160789.18_LMNA | -0.06925 | -0.225960033 | 0.090952955 | 3.97E-01 | 6.73E-01 | 1.00E+00 |
| ENSG00000260182.1_RP11-616M | ENSG00000160789.18_LMNA | -0.11989 | -0.273868085 | 0.04007075  | 1.41E-01 | 3.84E-01 | 1.00E+00 |
| ENSG00000199824.1_RNU6-199F | ENSG00000160789.18_LMNA | -0.11843 | -0.272496422 | 0.041550565 | 1.46E-01 | 3.92E-01 | 1.00E+00 |
| ENSG00000206645.1_Y_RNA     | ENSG00000160789.18_LMNA | -0.10465 | -0.259524563 | 0.055477424 | 1.99E-01 | 4.70E-01 | 1.00E+00 |
| ENSG00000252712.1_SCARNA14  | ENSG00000160789.18_LMNA | 0.07049  | -0.089713479 | 0.227145566 | 3.88E-01 | 6.66E-01 | 1.00E+00 |
| ENSG00000274778.1_          | ENSG00000160789.18_LMNA | 0.01512  | -0.144425986 | 0.173904449 | 8.53E-01 | 9.42E-01 | 1.00E+00 |
| ENSG00000207448.1_RNU6-520F | ENSG00000160789.18_LMNA | 0.0621   | -0.098069042 | 0.219135432 | 4.47E-01 | 7.13E-01 | 1.00E+00 |
| ENSG00000201868.1_Y_RNA     | ENSG00000160789.18_LMNA | 0.14834  | -0.011122438 | 0.3004463   | 6.82E-02 | 2.45E-01 | 1.00E+00 |
| ENSG00000236505.1_RP1-63P18 | ENSG00000160789.18_LMNA | -0.08352 | -0.23953816  | 0.076697983 | 3.06E-01 | 5.93E-01 | 1.00E+00 |
| ENSG00000222398.1_RNU6-554F | ENSG00000160789.18_LMNA | -0.10273 | -0.257720299 | 0.057404858 | 2.08E-01 | 4.80E-01 | 1.00E+00 |

|                             |                         |          |              |             |          |          |          |
|-----------------------------|-------------------------|----------|--------------|-------------|----------|----------|----------|
| ENSG00000207389.1_RNU1-4    | ENSG00000160789.18_LMNA | -0.1021  | -0.257117554 | 0.058048227 | 2.11E-01 | 4.84E-01 | 1.00E+00 |
| ENSG00000249778.1_TRMT112P  | ENSG00000160789.18_LMNA | 0.03384  | -0.126038001 | 0.192007981 | 6.79E-01 | 8.60E-01 | 1.00E+00 |
| ENSG00000280760.1_          | ENSG00000160789.18_LMNA | -0.05317 | -0.210589085 | 0.106934901 | 5.15E-01 | 7.63E-01 | 1.00E+00 |
| ENSG00000281408.1_          | ENSG00000160789.18_LMNA | -0.02067 | -0.179280151 | 0.138988671 | 8.00E-01 | 9.20E-01 | 1.00E+00 |
| ENSG00000222760.1_RNU4-53P  | ENSG00000160789.18_LMNA | -0.05413 | -0.211506358 | 0.105985747 | 5.08E-01 | 7.58E-01 | 1.00E+00 |
| ENSG00000250971.1_RP11-696F | ENSG00000160789.18_LMNA | 0.03465  | -0.125244048 | 0.192784808 | 6.72E-01 | 8.56E-01 | 1.00E+00 |
| ENSG00000274231.1_RP11-131M | ENSG00000160789.18_LMNA | 0.03112  | -0.128716483 | 0.189384333 | 7.03E-01 | 8.73E-01 | 1.00E+00 |
| ENSG00000250001.1_CTD-2201E | ENSG00000160789.18_LMNA | -0.08082 | -0.236971225 | 0.079402822 | 3.22E-01 | 6.09E-01 | 1.00E+00 |
| ENSG00000242066.3_RN7SL214f | ENSG00000160789.18_LMNA | 0.11252  | -0.047530032 | 0.266940933 | 1.68E-01 | 4.25E-01 | 1.00E+00 |
| ENSG00000214897.3_U82695.5  | ENSG00000160789.18_LMNA | -0.01811 | -0.176796404 | 0.141503272 | 8.25E-01 | 9.31E-01 | 1.00E+00 |
| ENSG00000271178.1_IGHV3OR1  | ENSG00000160789.18_LMNA | -0.02503 | -0.183498147 | 0.134708852 | 7.60E-01 | 9.00E-01 | 1.00E+00 |
| ENSG00000222685.1_RN7SKP11  | ENSG00000160789.18_LMNA | -0.15854 | -0.309919376 | 0.000676796 | 5.11E-02 | 2.04E-01 | 1.00E+00 |
| ENSG00000236744.2_RP11-168O | ENSG00000160789.18_LMNA | -0.27785 | -0.418537824 | -0.12414131 | 5.29E-04 | 7.04E-03 | 1.00E+00 |
| ENSG00000231720.1_RP11-568A | ENSG00000160789.18_LMNA | -0.02181 | -0.180387988 | 0.137865747 | 7.90E-01 | 9.15E-01 | 1.00E+00 |
| ENSG00000201533.1_RN7SKP23  | ENSG00000160789.18_LMNA | -0.05849 | -0.215681046 | 0.101658646 | 4.74E-01 | 7.34E-01 | 1.00E+00 |
| ENSG00000257730.1_LSM6P2    | ENSG00000160789.18_LMNA | -0.06312 | -0.220111112 | 0.097053665 | 4.40E-01 | 7.08E-01 | 1.00E+00 |
| ENSG00000242912.3_RN7SL384f | ENSG00000160789.18_LMNA | 0.0682   | -0.091995342 | 0.224962285 | 4.04E-01 | 6.80E-01 | 1.00E+00 |
| ENSG00000258513.1_RP5-892G5 | ENSG00000160789.18_LMNA | -0.00898 | -0.167940047 | 0.150436335 | 9.13E-01 | 9.67E-01 | 1.00E+00 |
| ENSG00000118245.2_TNP1      | ENSG00000160789.18_LMNA | -0.17947 | -0.329260467 | -0.02086253 | 2.69E-02 | 1.33E-01 | 1.00E+00 |
| ENSG00000264232.1_RP11-453M | ENSG00000160789.18_LMNA | -0.34146 | -0.474850568 | -0.1927402  | 1.67E-05 | 4.44E-04 | 8.56E-01 |
| ENSG00000224549.1_RP11-370B | ENSG00000160789.18_LMNA | 0.133    | -0.026767269 | 0.286142201 | 1.02E-01 | 3.16E-01 | 1.00E+00 |
| ENSG00000217718.1_NDUFB4P4  | ENSG00000160789.18_LMNA | -0.01197 | -0.17084646  | 0.147510469 | 8.84E-01 | 9.55E-01 | 1.00E+00 |
| ENSG00000237759.1_RP11-278H | ENSG00000160789.18_LMNA | -0.20821 | -0.355626137 | -0.05069331 | 1.00E-02 | 6.58E-02 | 1.00E+00 |
| ENSG00000242493.3_RN7SL37P  | ENSG00000160789.18_LMNA | 0.10105  | -0.059102511 | 0.256129309 | 2.15E-01 | 4.90E-01 | 1.00E+00 |
| ENSG00000253020.2_RN7SKP40  | ENSG00000160789.18_LMNA | -0.04072 | -0.198634676 | 0.119252096 | 6.18E-01 | 8.27E-01 | 1.00E+00 |
| ENSG00000229150.1_CRYGEP    | ENSG00000160789.18_LMNA | -0.1196  | -0.273595676 | 0.040364748 | 1.42E-01 | 3.85E-01 | 1.00E+00 |
| ENSG00000249966.1_CTD-2194D | ENSG00000160789.18_LMNA | 0.04437  | -0.115648722 | 0.202141734 | 5.87E-01 | 8.08E-01 | 1.00E+00 |
| ENSG00000223450.1_RP11-521f | ENSG00000160789.18_LMNA | -0.09903 | -0.254226372 | 0.061130634 | 2.25E-01 | 5.01E-01 | 1.00E+00 |
| ENSG00000280150.1_RP13-895J | ENSG00000160789.18_LMNA | -0.10764 | -0.262344798 | 0.052459952 | 1.87E-01 | 4.53E-01 | 1.00E+00 |
| ENSG00000273012.1_RP11-90B2 | ENSG00000160789.18_LMNA | 0.04079  | -0.119183692 | 0.198701328 | 6.18E-01 | 8.27E-01 | 1.00E+00 |
| ENSG00000233069.1_RP5-930J4 | ENSG00000160789.18_LMNA | 0.03592  | -0.123993855 | 0.194007225 | 6.60E-01 | 8.50E-01 | 1.00E+00 |
| ENSG00000280404.1_AC005086. | ENSG00000160789.18_LMNA | 0.15672  | -0.002545527 | 0.308229155 | 5.38E-02 | 2.11E-01 | 1.00E+00 |
| ENSG00000263860.1_RP11-218M | ENSG00000160789.18_LMNA | -0.1095  | -0.264097335 | 0.050581949 | 1.79E-01 | 4.42E-01 | 1.00E+00 |

|                              |                         |          |              |             |          |          |          |
|------------------------------|-------------------------|----------|--------------|-------------|----------|----------|----------|
| ENSG00000239238.1_MEMO1P3    | ENSG00000160789.18_LMNA | 0.1419   | -0.017699252 | 0.294450132 | 8.12E-02 | 2.75E-01 | 1.00E+00 |
| ENSG00000217527.1_RPS16P5    | ENSG00000160789.18_LMNA | 0.01301  | -0.146494765 | 0.171854117 | 8.74E-01 | 9.51E-01 | 1.00E+00 |
| ENSG00000250118.1_RP11-136H  | ENSG00000160789.18_LMNA | -0.15118 | -0.303089454 | 0.008214744 | 6.30E-02 | 2.33E-01 | 1.00E+00 |
| ENSG00000278109.1_Metazoa_SI | ENSG00000160789.18_LMNA | 0.04638  | -0.113660609 | 0.204073223 | 5.70E-01 | 7.99E-01 | 1.00E+00 |
| ENSG00000271253.1_CTD-2320J  | ENSG00000160789.18_LMNA | -0.10379 | -0.258711689 | 0.05634608  | 2.03E-01 | 4.74E-01 | 1.00E+00 |
| ENSG00000281662.1_           | ENSG00000160789.18_LMNA | 0.06821  | -0.091987447 | 0.224969844 | 4.04E-01 | 6.79E-01 | 1.00E+00 |
| ENSG00000251652.1_RP11-20I2C | ENSG00000160789.18_LMNA | 0.0408   | -0.119175101 | 0.198709699 | 6.18E-01 | 8.27E-01 | 1.00E+00 |
| ENSG00000201201.1_RN7SKP11   | ENSG00000160789.18_LMNA | 0.06742  | -0.092779103 | 0.224211649 | 4.09E-01 | 6.83E-01 | 1.00E+00 |
| ENSG00000237141.1_DNAJC19P   | ENSG00000160789.18_LMNA | -0.0815  | -0.237619872 | 0.078719766 | 3.18E-01 | 6.05E-01 | 1.00E+00 |
| ENSG00000229338.1_RP11-92C4  | ENSG00000160789.18_LMNA | 0.15801  | -0.001219554 | 0.309428666 | 5.19E-02 | 2.06E-01 | 1.00E+00 |
| ENSG00000240426.1_RP11-356M  | ENSG00000160789.18_LMNA | 0.08626  | -0.073954606 | 0.24213716  | 2.91E-01 | 5.76E-01 | 1.00E+00 |
| ENSG00000258812.1_TRAV33     | ENSG00000160789.18_LMNA | 0.02068  | -0.138977598 | 0.179291079 | 8.00E-01 | 9.20E-01 | 1.00E+00 |
| ENSG00000224627.1_RPL37P10   | ENSG00000160789.18_LMNA | -0.09865 | -0.253865612 | 0.061514834 | 2.27E-01 | 5.03E-01 | 1.00E+00 |
| ENSG00000265019.1_NCOR1P2    | ENSG00000160789.18_LMNA | -0.02851 | -0.186864931 | 0.131284181 | 7.27E-01 | 8.85E-01 | 1.00E+00 |
| ENSG00000235086.1_FNDC1-IT1  | ENSG00000160789.18_LMNA | -0.05299 | -0.210414507 | 0.10711548  | 5.17E-01 | 7.64E-01 | 1.00E+00 |
| ENSG00000237674.1_GSTA7P     | ENSG00000160789.18_LMNA | -0.03079 | -0.189061903 | 0.129045332 | 7.07E-01 | 8.75E-01 | 1.00E+00 |
| ENSG00000257654.1_RP11-497G  | ENSG00000160789.18_LMNA | -0.0921  | -0.247668209 | 0.068100334 | 2.59E-01 | 5.42E-01 | 1.00E+00 |
| ENSG00000236024.1_PRRX2-AS   | ENSG00000160789.18_LMNA | 0.154    | -0.005335771 | 0.30570179  | 5.82E-02 | 2.21E-01 | 1.00E+00 |
| ENSG00000248185.1_CTD-2049C  | ENSG00000160789.18_LMNA | 0.01638  | -0.143191129 | 0.175126981 | 8.41E-01 | 9.38E-01 | 1.00E+00 |
| ENSG00000202344.1_RN7SKP20   | ENSG00000160789.18_LMNA | -0.04445 | -0.202219815 | 0.1155684   | 5.87E-01 | 8.08E-01 | 1.00E+00 |
| ENSG00000224579.1_AC012314.  | ENSG00000160789.18_LMNA | -0.07391 | -0.23040183  | 0.086303992 | 3.65E-01 | 6.47E-01 | 1.00E+00 |
| ENSG00000228289.1_RP4-640E2  | ENSG00000160789.18_LMNA | -0.22986 | -0.375326966 | -0.07334425 | 4.39E-03 | 3.55E-02 | 1.00E+00 |
| ENSG00000186328.4_RP11-140K  | ENSG00000160789.18_LMNA | -0.04349 | -0.201297529 | 0.116516877 | 5.95E-01 | 8.13E-01 | 1.00E+00 |
| ENSG00000271081.1_RP11-465K  | ENSG00000160789.18_LMNA | 0.01412  | -0.145407544 | 0.172931988 | 8.63E-01 | 9.46E-01 | 1.00E+00 |
| ENSG00000269986.1_RP11-96H1  | ENSG00000160789.18_LMNA | -0.0835  | -0.239520045 | 0.076717087 | 3.06E-01 | 5.93E-01 | 1.00E+00 |
| ENSG00000225836.1_RP11-80H5  | ENSG00000160789.18_LMNA | -0.06238 | -0.219402493 | 0.097791183 | 4.45E-01 | 7.12E-01 | 1.00E+00 |
| ENSG00000250829.2_RP11-11N5  | ENSG00000160789.18_LMNA | 0.0916   | -0.068598295 | 0.247198541 | 2.62E-01 | 5.45E-01 | 1.00E+00 |
| ENSG00000238143.1_RP11-70K1  | ENSG00000160789.18_LMNA | -0.23607 | -0.380952021 | -0.07986932 | 3.41E-03 | 2.94E-02 | 1.00E+00 |
| ENSG00000250250.1_CTD-2350J  | ENSG00000160789.18_LMNA | -0.03958 | -0.19754066  | 0.120374447 | 6.28E-01 | 8.33E-01 | 1.00E+00 |
| ENSG00000274244.1_RP11-697E  | ENSG00000160789.18_LMNA | 0.01246  | -0.147031591 | 0.171321627 | 8.79E-01 | 9.53E-01 | 1.00E+00 |
| ENSG00000267359.1_RP11-1094I | ENSG00000160789.18_LMNA | -0.05197 | -0.209436497 | 0.108126728 | 5.25E-01 | 7.70E-01 | 1.00E+00 |
| ENSG00000237880.1_AC096669.  | ENSG00000160789.18_LMNA | -0.27334 | -0.414502889 | -0.11933176 | 6.56E-04 | 8.34E-03 | 1.00E+00 |
| ENSG00000225483.1_RP11-38J2  | ENSG00000160789.18_LMNA | 0.02214  | -0.137544754 | 0.180704519 | 7.87E-01 | 9.13E-01 | 1.00E+00 |

|                              |                         |          |              |             |          |          |          |
|------------------------------|-------------------------|----------|--------------|-------------|----------|----------|----------|
| ENSG00000249347.1_RP11-747H  | ENSG00000160789.18_LMNA | -0.04688 | -0.204554981 | 0.113164331 | 5.66E-01 | 7.97E-01 | 1.00E+00 |
| ENSG00000261624.1_NDUFB10P   | ENSG00000160789.18_LMNA | 0.01173  | -0.147746421 | 0.170612282 | 8.86E-01 | 9.56E-01 | 1.00E+00 |
| ENSG00000218757.1_RP3-472M2  | ENSG00000160789.18_LMNA | -0.17407 | -0.324280388 | -0.01528893 | 3.20E-02 | 1.49E-01 | 1.00E+00 |
| ENSG00000233479.1_AC017074.  | ENSG00000160789.18_LMNA | -0.05711 | -0.214365342 | 0.103023682 | 4.85E-01 | 7.42E-01 | 1.00E+00 |
| ENSG00000227958.1_RP11-399H  | ENSG00000160789.18_LMNA | -0.08983 | -0.245522007 | 0.07037454  | 2.71E-01 | 5.55E-01 | 1.00E+00 |
| ENSG00000119660.4_DPPA5P4    | ENSG00000160789.18_LMNA | 0.14314  | -0.016432936 | 0.295606562 | 7.85E-02 | 2.69E-01 | 1.00E+00 |
| ENSG00000230698.1_CTD-2330K  | ENSG00000160789.18_LMNA | -0.25373 | -0.396894839 | -0.09850427 | 1.61E-03 | 1.66E-02 | 1.00E+00 |
| ENSG00000254640.1_           | ENSG00000160789.18_LMNA | -0.32005 | -0.456015287 | -0.16948441 | 5.83E-05 | 1.21E-03 | 1.00E+00 |
| ENSG00000280068.1_RP11-91H1  | ENSG00000160789.18_LMNA | -0.00692 | -0.165935078 | 0.152451478 | 9.33E-01 | 9.74E-01 | 1.00E+00 |
| ENSG00000263567.1_RP11-805L  | ENSG00000160789.18_LMNA | -0.20602 | -0.353623623 | -0.04840836 | 1.09E-02 | 6.96E-02 | 1.00E+00 |
| ENSG00000238288.1_MTND3P23   | ENSG00000160789.18_LMNA | 0.0061   | -0.153253597 | 0.165136275 | 9.41E-01 | 9.76E-01 | 1.00E+00 |
| ENSG00000197745.2_SCGB1D4    | ENSG00000160789.18_LMNA | -0.0712  | -0.227819308 | 0.089008643 | 3.83E-01 | 6.62E-01 | 1.00E+00 |
| ENSG00000249588.1_CTC-537E7  | ENSG00000160789.18_LMNA | 0.006    | -0.153350964 | 0.165039282 | 9.42E-01 | 9.77E-01 | 1.00E+00 |
| ENSG00000261304.1_CTD-2125J  | ENSG00000160789.18_LMNA | -0.09957 | -0.254736502 | 0.0605872   | 2.22E-01 | 4.98E-01 | 1.00E+00 |
| ENSG00000258901.2_CTD-2298J  | ENSG00000160789.18_LMNA | -0.07254 | -0.229095394 | 0.087672794 | 3.74E-01 | 6.55E-01 | 1.00E+00 |
| ENSG00000256504.2_RP11-1060. | ENSG00000160789.18_LMNA | -0.01944 | -0.178089728 | 0.140194393 | 8.12E-01 | 9.26E-01 | 1.00E+00 |
| ENSG00000234977.1_AC074389.  | ENSG00000160789.18_LMNA | -0.09479 | -0.250210251 | 0.065402427 | 2.45E-01 | 5.25E-01 | 1.00E+00 |
| ENSG00000249099.1_RP11-351N  | ENSG00000160789.18_LMNA | 0.18651  | 0.028146309  | 0.335742852 | 2.14E-02 | 1.13E-01 | 1.00E+00 |
| ENSG00000229424.1_AC007349.  | ENSG00000160789.18_LMNA | -0.0557  | -0.213015525 | 0.104422869 | 4.95E-01 | 7.50E-01 | 1.00E+00 |
| ENSG00000212951.5_RP11-211N  | ENSG00000160789.18_LMNA | -0.04319 | -0.201004623 | 0.116817979 | 5.97E-01 | 8.14E-01 | 1.00E+00 |
| ENSG00000258271.1_RP11-356O  | ENSG00000160789.18_LMNA | 0.09996  | -0.060195599 | 0.255103996 | 2.20E-01 | 4.96E-01 | 1.00E+00 |
| ENSG00000215800.2_RSL24D1P.  | ENSG00000160789.18_LMNA | -0.05028 | -0.207814684 | 0.109802209 | 5.38E-01 | 7.79E-01 | 1.00E+00 |
| ENSG00000224851.1_LINC00502  | ENSG00000160789.18_LMNA | 0.06443  | -0.095756719 | 0.221356448 | 4.30E-01 | 7.00E-01 | 1.00E+00 |
| ENSG00000251460.1_RP11-1258  | ENSG00000160789.18_LMNA | -0.13435 | -0.287405972 | 0.02539119  | 9.89E-02 | 3.09E-01 | 1.00E+00 |
| ENSG00000216475.1_RP1-91J24. | ENSG00000160789.18_LMNA | 0.1298   | -0.030016358 | 0.28315396  | 1.11E-01 | 3.32E-01 | 1.00E+00 |
| ENSG00000266106.1_RP11-647F. | ENSG00000160789.18_LMNA | 0.12448  | -0.035424528 | 0.278166456 | 1.27E-01 | 3.60E-01 | 1.00E+00 |
| ENSG00000270839.1_CTC-571O2  | ENSG00000160789.18_LMNA | 0.0432   | -0.116799517 | 0.201022584 | 5.97E-01 | 8.14E-01 | 1.00E+00 |
| ENSG00000218313.1_RP11-393I2 | ENSG00000160789.18_LMNA | -0.13716 | -0.290026736 | 0.022533742 | 9.20E-02 | 2.96E-01 | 1.00E+00 |
| ENSG00000255490.1_EIF4A2P5   | ENSG00000160789.18_LMNA | 0.11402  | -0.046020862 | 0.268345069 | 1.62E-01 | 4.17E-01 | 1.00E+00 |
| ENSG00000225533.1_PAWRP1     | ENSG00000160789.18_LMNA | -0.00332 | -0.162435434 | 0.155962548 | 9.68E-01 | 9.87E-01 | 1.00E+00 |
| ENSG00000274885.1_RP11-268P  | ENSG00000160789.18_LMNA | 0.102    | -0.058141655 | 0.257030005 | 2.11E-01 | 4.84E-01 | 1.00E+00 |
| ENSG00000243792.1_OR7E89P    | ENSG00000160789.18_LMNA | -0.23278 | -0.377970234 | -0.07640723 | 3.90E-03 | 3.26E-02 | 1.00E+00 |
| ENSG00000249454.1_GZMAP1     | ENSG00000160789.18_LMNA | -0.04241 | -0.200254776 | 0.117588543 | 6.04E-01 | 8.18E-01 | 1.00E+00 |

|                              |                         |          |              |             |          |          |          |
|------------------------------|-------------------------|----------|--------------|-------------|----------|----------|----------|
| ENSG00000224700.2_RP11-697E  | ENSG00000160789.18_LMNA | -0.01301 | -0.171851822 | 0.146497079 | 8.74E-01 | 9.51E-01 | 1.00E+00 |
| ENSG00000226601.1_RP11-239E  | ENSG00000160789.18_LMNA | -0.05141 | -0.208900977 | 0.108680169 | 5.29E-01 | 7.73E-01 | 1.00E+00 |
| ENSG00000260152.2_RP11-69H7  | ENSG00000160789.18_LMNA | -0.03522 | -0.193332428 | 0.12468411  | 6.67E-01 | 8.53E-01 | 1.00E+00 |
| ENSG00000224314.1_RP3-378P9  | ENSG00000160789.18_LMNA | -0.1582  | -0.30960447  | 0.001025124 | 5.16E-02 | 2.05E-01 | 1.00E+00 |
| ENSG00000234083.1_AJ006995.3 | ENSG00000160789.18_LMNA | -0.19101 | -0.339875078 | -0.0328065  | 1.84E-02 | 1.02E-01 | 1.00E+00 |
| ENSG00000254764.1_TRIM53CP   | ENSG00000160789.18_LMNA | 0.00863  | -0.150782501 | 0.167595815 | 9.16E-01 | 9.68E-01 | 1.00E+00 |
| ENSG00000235156.4_TMEN30CF   | ENSG00000160789.18_LMNA | -0.04877 | -0.20637184  | 0.111291284 | 5.51E-01 | 7.87E-01 | 1.00E+00 |
| ENSG00000267777.1_CTC-439O5  | ENSG00000160789.18_LMNA | 0.01146  | -0.148009009 | 0.170351626 | 8.89E-01 | 9.57E-01 | 1.00E+00 |
| ENSG00000253363.4_RP11-962G  | ENSG00000160789.18_LMNA | 0.11172  | -0.048343921 | 0.266183134 | 1.71E-01 | 4.30E-01 | 1.00E+00 |
| ENSG00000256441.1_RP11-300I6 | ENSG00000160789.18_LMNA | -0.05263 | -0.210073477 | 0.107468175 | 5.20E-01 | 7.66E-01 | 1.00E+00 |
| ENSG00000254146.1_HMGB1P46   | ENSG00000160789.18_LMNA | 0.08123  | -0.078996104 | 0.237357488 | 3.20E-01 | 6.06E-01 | 1.00E+00 |
| ENSG00000278486.1_YRDCP1     | ENSG00000160789.18_LMNA | 0.04633  | -0.113713103 | 0.204022255 | 5.71E-01 | 7.99E-01 | 1.00E+00 |
| ENSG00000149443.6_C20orf78   | ENSG00000160789.18_LMNA | 0.02285  | -0.136850608 | 0.181388792 | 7.80E-01 | 9.10E-01 | 1.00E+00 |
| ENSG00000276898.1_RP11-118H  | ENSG00000160789.18_LMNA | -0.07065 | -0.227297159 | 0.089554917 | 3.87E-01 | 6.65E-01 | 1.00E+00 |
| ENSG00000241926.1_MTCO1P55   | ENSG00000160789.18_LMNA | -0.12871 | -0.282133705 | 0.031124159 | 1.14E-01 | 3.37E-01 | 1.00E+00 |
| ENSG00000228097.1_MTATP6P1   | ENSG00000160789.18_LMNA | 0.09218  | -0.068014149 | 0.247749482 | 2.59E-01 | 5.42E-01 | 1.00E+00 |
| ENSG00000249320.1_RP11-206P  | ENSG00000160789.18_LMNA | -0.06761 | -0.224390847 | 0.092592033 | 4.08E-01 | 6.83E-01 | 1.00E+00 |
| ENSG00000277562.1_CTD-2525I3 | ENSG00000160789.18_LMNA | -0.07036 | -0.227022221 | 0.089842482 | 3.89E-01 | 6.67E-01 | 1.00E+00 |
| ENSG00000266960.1_FAM106DP   | ENSG00000160789.18_LMNA | -0.05878 | -0.215958574 | 0.101370559 | 4.72E-01 | 7.32E-01 | 1.00E+00 |
| ENSG00000280377.1_RP11-493E  | ENSG00000160789.18_LMNA | 0.00073  | -0.158491256 | 0.159909984 | 9.93E-01 | 9.97E-01 | 1.00E+00 |
| ENSG00000237642.1_HMGB3P5    | ENSG00000160789.18_LMNA | -0.00087 | -0.160050158 | 0.15835101  | 9.91E-01 | 9.97E-01 | 1.00E+00 |
| ENSG00000228166.1_MTND1P11   | ENSG00000160789.18_LMNA | 0.0702   | -0.090009247 | 0.226862755 | 3.90E-01 | 6.68E-01 | 1.00E+00 |
| ENSG00000196390.6_CTD-2503C  | ENSG00000160789.18_LMNA | -0.00031 | -0.159503537 | 0.158897837 | 9.97E-01 | 9.99E-01 | 1.00E+00 |
| ENSG00000184321.1_OR51J1     | ENSG00000160789.18_LMNA | 0.02335  | -0.136361342 | 0.181870916 | 7.75E-01 | 9.08E-01 | 1.00E+00 |
| ENSG00000248711.1_THUMPD3F   | ENSG00000160789.18_LMNA | 0.10392  | -0.056212989 | 0.258836262 | 2.03E-01 | 4.73E-01 | 1.00E+00 |
| ENSG00000244067.2_GSTA2      | ENSG00000160789.18_LMNA | 0.01717  | -0.142419504 | 0.175890405 | 8.34E-01 | 9.35E-01 | 1.00E+00 |
| ENSG00000271686.1_CTD-2230M  | ENSG00000160789.18_LMNA | 0.15028  | -0.009135113 | 0.302253337 | 6.46E-02 | 2.37E-01 | 1.00E+00 |
| ENSG00000233910.1_GTF2F2P2   | ENSG00000160789.18_LMNA | -0.13653 | -0.289439512 | 0.023174442 | 9.35E-02 | 2.99E-01 | 1.00E+00 |
| ENSG00000253449.1_CTC-436K1  | ENSG00000160789.18_LMNA | -0.12108 | -0.274984448 | 0.038865348 | 1.37E-01 | 3.77E-01 | 1.00E+00 |
| ENSG00000258268.1_RP11-570L  | ENSG00000160789.18_LMNA | 0.05161  | -0.108483072 | 0.209091713 | 5.28E-01 | 7.72E-01 | 1.00E+00 |
| ENSG00000251122.1_NIFKP2     | ENSG00000160789.18_LMNA | -0.05339 | -0.210801067 | 0.106715603 | 5.14E-01 | 7.62E-01 | 1.00E+00 |
| ENSG00000215148.6_PRSS41     | ENSG00000160789.18_LMNA | -0.09426 | -0.24971641  | 0.065926909 | 2.48E-01 | 5.28E-01 | 1.00E+00 |
| ENSG00000203648.3_AC007618.1 | ENSG00000160789.18_LMNA | -0.10533 | -0.26016376  | 0.054794027 | 1.97E-01 | 4.66E-01 | 1.00E+00 |

|                             |                         |          |              |             |          |          |          |
|-----------------------------|-------------------------|----------|--------------|-------------|----------|----------|----------|
| ENSG00000222024.2_AC004945. | ENSG00000160789.18_LMNA | 0.11403  | -0.046009492 | 0.268355643 | 1.62E-01 | 4.17E-01 | 1.00E+00 |
| ENSG00000213438.2_YBX2P1    | ENSG00000160789.18_LMNA | -0.0354  | -0.193514877 | 0.124497511 | 6.65E-01 | 8.52E-01 | 1.00E+00 |
| ENSG00000255403.1_AP000641. | ENSG00000160789.18_LMNA | -0.17629 | -0.326331181 | -0.01758181 | 2.98E-02 | 1.43E-01 | 1.00E+00 |
| ENSG00000258592.1_RP11-108M | ENSG00000160789.18_LMNA | -0.06229 | -0.219320486 | 0.097876511 | 4.46E-01 | 7.12E-01 | 1.00E+00 |
| ENSG00000162699.5_DNAJA1P5  | ENSG00000160789.18_LMNA | -0.02082 | -0.179428358 | 0.138838493 | 7.99E-01 | 9.19E-01 | 1.00E+00 |
| ENSG00000274863.1_RP11-97N1 | ENSG00000160789.18_LMNA | -0.12733 | -0.280840274 | 0.032527471 | 1.18E-01 | 3.44E-01 | 1.00E+00 |
| ENSG00000109471.4_IL2       | ENSG00000160789.18_LMNA | -0.00266 | -0.161791872 | 0.156607337 | 9.74E-01 | 9.90E-01 | 1.00E+00 |
| ENSG00000262952.1_AC139099. | ENSG00000160789.18_LMNA | 0.03303  | -0.12683821  | 0.19122463  | 6.86E-01 | 8.64E-01 | 1.00E+00 |
| ENSG00000236853.1_OR2R1P    | ENSG00000160789.18_LMNA | 0.13797  | -0.02170751  | 0.290783658 | 9.01E-02 | 2.92E-01 | 1.00E+00 |
| ENSG00000234186.2_C16orf82  | ENSG00000160789.18_LMNA | 0.19284  | 0.034706435  | 0.341556374 | 1.73E-02 | 9.73E-02 | 1.00E+00 |
| ENSG00000227454.2_MTND4P30  | ENSG00000160789.18_LMNA | -0.03949 | -0.197447087 | 0.120470406 | 6.29E-01 | 8.33E-01 | 1.00E+00 |
| ENSG00000228329.1_AC097495. | ENSG00000160789.18_LMNA | -0.03778 | -0.195805586 | 0.122152794 | 6.44E-01 | 8.42E-01 | 1.00E+00 |
| ENSG00000244065.1_MARK2P17  | ENSG00000160789.18_LMNA | 0.05987  | -0.100282923 | 0.217005885 | 4.64E-01 | 7.26E-01 | 1.00E+00 |
| ENSG00000181963.5_OR52K2    | ENSG00000160789.18_LMNA | -0.12181 | -0.275661194 | 0.038134181 | 1.35E-01 | 3.73E-01 | 1.00E+00 |
| ENSG00000223614.3_ZNF735    | ENSG00000160789.18_LMNA | -0.11299 | -0.267378166 | 0.047060246 | 1.66E-01 | 4.23E-01 | 1.00E+00 |
| ENSG00000236198.1_          | ENSG00000160789.18_LMNA | -0.07856 | -0.234820662 | 0.081665338 | 3.36E-01 | 6.22E-01 | 1.00E+00 |
| ENSG00000280245.1_RP11-466A | ENSG00000160789.18_LMNA | 0.03938  | -0.120580699 | 0.19733953  | 6.30E-01 | 8.34E-01 | 1.00E+00 |
| ENSG00000231280.1_SALL4P6   | ENSG00000160789.18_LMNA | -0.16993 | -0.320457037 | -0.01102291 | 3.64E-02 | 1.62E-01 | 1.00E+00 |
| ENSG00000254916.1_RP11-529A | ENSG00000160789.18_LMNA | -0.25412 | -0.397248613 | -0.09892017 | 1.58E-03 | 1.63E-02 | 1.00E+00 |
| ENSG00000248645.1_RP11-366M | ENSG00000160789.18_LMNA | 0.03638  | -0.123538566 | 0.194452154 | 6.56E-01 | 8.48E-01 | 1.00E+00 |
| ENSG00000235080.1_MTND5P23  | ENSG00000160789.18_LMNA | 0.04147  | -0.118515126 | 0.199352611 | 6.12E-01 | 8.23E-01 | 1.00E+00 |
| ENSG00000196475.5_GK2       | ENSG00000160789.18_LMNA | -0.08726 | -0.243081998 | 0.072956094 | 2.85E-01 | 5.71E-01 | 1.00E+00 |
| ENSG00000254714.1_RP11-163O | ENSG00000160789.18_LMNA | -0.11689 | -0.27105135  | 0.043108089 | 1.52E-01 | 4.00E-01 | 1.00E+00 |
| ENSG00000174930.4_VN2R1P    | ENSG00000160789.18_LMNA | 0.01006  | -0.149378422 | 0.168991565 | 9.02E-01 | 9.62E-01 | 1.00E+00 |
| ENSG00000168875.2_SOX14     | ENSG00000160789.18_LMNA | -0.01077 | -0.169683401 | 0.148681982 | 8.95E-01 | 9.59E-01 | 1.00E+00 |
| ENSG00000170477.11_KRT4     | ENSG00000160789.18_LMNA | 0.17779  | 0.019130522  | 0.32771473  | 2.84E-02 | 1.38E-01 | 1.00E+00 |
| ENSG00000235304.1_LINC01281 | ENSG00000160789.18_LMNA | 0.13529  | -0.024440934 | 0.288278038 | 9.66E-02 | 3.05E-01 | 1.00E+00 |
| ENSG00000176256.9_HMGB4     | ENSG00000160789.18_LMNA | 0.0638   | -0.096379643 | 0.220758445 | 4.35E-01 | 7.03E-01 | 1.00E+00 |
| ENSG00000203786.6_KPRP      | ENSG00000160789.18_LMNA | 0.02595  | -0.133807034 | 0.184385447 | 7.51E-01 | 8.96E-01 | 1.00E+00 |
| ENSG00000278926.1_RP11-264M | ENSG00000160789.18_LMNA | -0.1316  | -0.284833079 | 0.028191481 | 1.06E-01 | 3.23E-01 | 1.00E+00 |
| ENSG00000226921.5_LINC00454 | ENSG00000160789.18_LMNA | 0.13184  | -0.027951268 | 0.285053962 | 1.05E-01 | 3.22E-01 | 1.00E+00 |
| ENSG00000260125.1_AGBL1-AS' | ENSG00000160789.18_LMNA | -0.03874 | -0.196723724 | 0.121212012 | 6.36E-01 | 8.37E-01 | 1.00E+00 |
| ENSG00000204614.7_TRIM40    | ENSG00000160789.18_LMNA | 0.02976  | -0.130059697 | 0.188066906 | 7.16E-01 | 8.79E-01 | 1.00E+00 |

|                              |                         |          |              |             |          |          |          |
|------------------------------|-------------------------|----------|--------------|-------------|----------|----------|----------|
| ENSG00000198173.4_FAM47C     | ENSG00000160789.18_LMNA | #####    | -0.159233365 | 0.159168038 | 1.00E+00 | 1.00E+00 | 1.00E+00 |
| ENSG00000279525.1_GS1-306C1  | ENSG00000160789.18_LMNA | 0.01722  | -0.142372922 | 0.17593648  | 8.33E-01 | 9.35E-01 | 1.00E+00 |
| ENSG00000229717.2_RP11-556N  | ENSG00000160789.18_LMNA | 0.038    | -0.121936412 | 0.19601681  | 6.42E-01 | 8.41E-01 | 1.00E+00 |
| ENSG00000248307.4_LINC00616  | ENSG00000160789.18_LMNA | -0.03461 | -0.192745857 | 0.125283867 | 6.72E-01 | 8.56E-01 | 1.00E+00 |
| ENSG00000273111.4_LYPD4      | ENSG00000160789.18_LMNA | -0.0526  | -0.210037521 | 0.107505356 | 5.20E-01 | 7.66E-01 | 1.00E+00 |
| ENSG00000259176.4_           | ENSG00000160789.18_LMNA | -0.07774 | -0.234045825 | 0.082479714 | 3.41E-01 | 6.26E-01 | 1.00E+00 |
| ENSG00000232667.8_AC004862.1 | ENSG00000160789.18_LMNA | -0.09518 | -0.250586944 | 0.065002244 | 2.43E-01 | 5.23E-01 | 1.00E+00 |
| ENSG00000170848.14_PSG6      | ENSG00000160789.18_LMNA | -0.05912 | -0.216287951 | 0.101028582 | 4.69E-01 | 7.30E-01 | 1.00E+00 |
| ENSG00000142515.13_KLK3      | ENSG00000160789.18_LMNA | 0.05048  | -0.109596719 | 0.208013686 | 5.37E-01 | 7.78E-01 | 1.00E+00 |
| ENSG00000233828.3_CTC-242N1  | ENSG00000160789.18_LMNA | 0.10123  | -0.058923245 | 0.256297393 | 2.15E-01 | 4.89E-01 | 1.00E+00 |
| ENSG00000230937.8_MIR205HG   | ENSG00000160789.18_LMNA | -0.01054 | -0.169457129 | 0.148909794 | 8.97E-01 | 9.60E-01 | 1.00E+00 |
| ENSG00000229183.7_PGA4       | ENSG00000160789.18_LMNA | -0.29218 | -0.431317997 | -0.13946681 | 2.60E-04 | 4.01E-03 | 1.00E+00 |
| ENSG00000224750.5_RP11-94M1  | ENSG00000160789.18_LMNA | -0.03157 | -0.189820929 | 0.128271084 | 6.99E-01 | 8.71E-01 | 1.00E+00 |
| ENSG00000171060.9_C8orf74    | ENSG00000160789.18_LMNA | 0.03333  | -0.126545395 | 0.191511323 | 6.84E-01 | 8.63E-01 | 1.00E+00 |
| ENSG00000227475.1_RP11-810B  | ENSG00000160789.18_LMNA | -0.04331 | -0.201125284 | 0.116693949 | 5.96E-01 | 8.14E-01 | 1.00E+00 |
| ENSG00000275708.1_MIR3648-1  | ENSG00000160789.18_LMNA | 0.02466  | -0.135068483 | 0.183144162 | 7.63E-01 | 9.01E-01 | 1.00E+00 |
| ENSG00000266307.1_MIR5093    | ENSG00000160789.18_LMNA | -0.18832 | -0.337401432 | -0.0300152  | 2.02E-02 | 1.09E-01 | 1.00E+00 |
| ENSG00000207322.1_RNU1-89P   | ENSG00000160789.18_LMNA | -0.05689 | -0.214150329 | 0.103246643 | 4.86E-01 | 7.43E-01 | 1.00E+00 |
| ENSG00000200832.1_SNORD114   | ENSG00000160789.18_LMNA | -0.02987 | -0.18817868  | 0.12994578  | 7.15E-01 | 8.79E-01 | 1.00E+00 |
| ENSG00000281200.1_           | ENSG00000160789.18_LMNA | -0.09219 | -0.247757892 | 0.06800523  | 2.59E-01 | 5.42E-01 | 1.00E+00 |
| ENSG00000279363.1_AL162426.1 | ENSG00000160789.18_LMNA | -0.01267 | -0.171527875 | 0.146823686 | 8.77E-01 | 9.52E-01 | 1.00E+00 |
| ENSG00000266594.1_MIR4766    | ENSG00000160789.18_LMNA | 0.01512  | -0.14442758  | 0.17390287  | 8.53E-01 | 9.42E-01 | 1.00E+00 |
| ENSG00000238392.1_           | ENSG00000160789.18_LMNA | -0.06762 | -0.224403846 | 0.092578462 | 4.08E-01 | 6.83E-01 | 1.00E+00 |
| ENSG00000273629.1_U7         | ENSG00000160789.18_LMNA | 0.097    | -0.063172577 | 0.252307997 | 2.34E-01 | 5.12E-01 | 1.00E+00 |
| ENSG00000206775.1_SNORD37    | ENSG00000160789.18_LMNA | -0.12965 | -0.283006386 | 0.030176643 | 1.11E-01 | 3.33E-01 | 1.00E+00 |
| ENSG00000199092.3_MIR410     | ENSG00000160789.18_LMNA | 0.08912  | -0.071085996 | 0.24484996  | 2.75E-01 | 5.59E-01 | 1.00E+00 |
| ENSG00000275770.1_MIR6505    | ENSG00000160789.18_LMNA | -0.03424 | -0.19239614  | 0.125641335 | 6.75E-01 | 8.58E-01 | 1.00E+00 |
| ENSG00000207944.1_MIR574     | ENSG00000160789.18_LMNA | 0.04141  | -0.118568518 | 0.199300609 | 6.12E-01 | 8.24E-01 | 1.00E+00 |
| ENSG00000263407.1_MIR4660    | ENSG00000160789.18_LMNA | 0.15474  | -0.004570925 | 0.306395013 | 5.70E-02 | 2.18E-01 | 1.00E+00 |
| ENSG00000201085.1_RNU6-173F  | ENSG00000160789.18_LMNA | -0.00341 | -0.162523274 | 0.15587452  | 9.67E-01 | 9.87E-01 | 1.00E+00 |
| ENSG00000212391.1_SNORA48    | ENSG00000160789.18_LMNA | -0.09097 | -0.246600095 | 0.069232563 | 2.65E-01 | 5.49E-01 | 1.00E+00 |
| ENSG00000277082.1_           | ENSG00000160789.18_LMNA | 0.15373  | -0.00560443  | 0.305458212 | 5.86E-02 | 2.22E-01 | 1.00E+00 |
| ENSG00000206889.1_RNU6-1200  | ENSG00000160789.18_LMNA | -0.20577 | -0.353393885 | -0.04814643 | 1.10E-02 | 7.00E-02 | 1.00E+00 |

|                             |                         |          |              |             |          |          |          |
|-----------------------------|-------------------------|----------|--------------|-------------|----------|----------|----------|
| ENSG00000252347.1_RNU6-1046 | ENSG00000160789.18_LMNA | -0.11573 | -0.269960225 | 0.044283111 | 1.56E-01 | 4.07E-01 | 1.00E+00 |
| ENSG00000263932.1_MIR4448   | ENSG00000160789.18_LMNA | 0.19213  | 0.033970127  | 0.340905032 | 1.77E-02 | 9.90E-02 | 1.00E+00 |
| ENSG00000207256.1_RNU6-880F | ENSG00000160789.18_LMNA | 0.02773  | -0.132055573 | 0.186107229 | 7.35E-01 | 8.88E-01 | 1.00E+00 |
| ENSG00000207653.1_MIR558    | ENSG00000160789.18_LMNA | -0.13949 | -0.292200108 | 0.02016021  | 8.65E-02 | 2.86E-01 | 1.00E+00 |
| ENSG00000238295.1_snoU13    | ENSG00000160789.18_LMNA | -0.03758 | -0.195613567 | 0.122349477 | 6.46E-01 | 8.43E-01 | 1.00E+00 |
| ENSG00000223225.1_RNU6-1054 | ENSG00000160789.18_LMNA | -0.06377 | -0.22073283  | 0.096406319 | 4.35E-01 | 7.04E-01 | 1.00E+00 |
| ENSG00000275789.1_MIR8064   | ENSG00000160789.18_LMNA | -0.09079 | -0.246430407 | 0.069412362 | 2.66E-01 | 5.50E-01 | 1.00E+00 |
| ENSG00000221174.1_          | ENSG00000160789.18_LMNA | 0.19268  | 0.03453749   | 0.34140695  | 1.74E-02 | 9.76E-02 | 1.00E+00 |
| ENSG00000199605.1_RNY4P24   | ENSG00000160789.18_LMNA | 0.13741  | -0.022276126 | 0.290262783 | 9.14E-02 | 2.95E-01 | 1.00E+00 |
| ENSG00000265087.1_          | ENSG00000160789.18_LMNA | 0.06783  | -0.092365584 | 0.224607738 | 4.06E-01 | 6.82E-01 | 1.00E+00 |
| ENSG00000252671.1_Y_RNA     | ENSG00000160789.18_LMNA | -0.25575 | -0.398715354 | -0.1006456  | 1.47E-03 | 1.55E-02 | 1.00E+00 |
| ENSG00000206659.1_Y_RNA     | ENSG00000160789.18_LMNA | 0.04431  | -0.115706266 | 0.202085792 | 5.88E-01 | 8.08E-01 | 1.00E+00 |
| ENSG00000275291.1_U1        | ENSG00000160789.18_LMNA | 0.06775  | -0.092449407 | 0.224527457 | 4.07E-01 | 6.82E-01 | 1.00E+00 |
| ENSG00000222862.2_RNU6-1086 | ENSG00000160789.18_LMNA | -0.09402 | -0.249488012 | 0.066169419 | 2.49E-01 | 5.30E-01 | 1.00E+00 |
| ENSG00000207142.1_Y_RNA     | ENSG00000160789.18_LMNA | -0.0277  | -0.186083131 | 0.1320801   | 7.35E-01 | 8.89E-01 | 1.00E+00 |
| ENSG00000233036.1_KRTAP8-2F | ENSG00000160789.18_LMNA | -0.03747 | -0.195507733 | 0.122457871 | 6.47E-01 | 8.43E-01 | 1.00E+00 |
| ENSG00000212348.1_RNU6-1300 | ENSG00000160789.18_LMNA | 0.07703  | -0.083189685 | 0.233369994 | 3.46E-01 | 6.30E-01 | 1.00E+00 |
| ENSG00000199755.1_Y_RNA     | ENSG00000160789.18_LMNA | 0.05118  | -0.108908693 | 0.208679797 | 5.31E-01 | 7.74E-01 | 1.00E+00 |
| ENSG00000265518.1_          | ENSG00000160789.18_LMNA | 0.09515  | -0.065039325 | 0.250552044 | 2.44E-01 | 5.23E-01 | 1.00E+00 |
| ENSG00000239128.1_SNORD13F  | ENSG00000160789.18_LMNA | 0.05894  | -0.101213914 | 0.216109457 | 4.71E-01 | 7.31E-01 | 1.00E+00 |
| ENSG00000274151.1_          | ENSG00000160789.18_LMNA | 0.06735  | -0.092843479 | 0.224149978 | 4.10E-01 | 6.84E-01 | 1.00E+00 |
| ENSG00000201827.1_SNORA33   | ENSG00000160789.18_LMNA | 0.00999  | -0.149450505 | 0.168919942 | 9.03E-01 | 9.62E-01 | 1.00E+00 |
| ENSG00000207590.1_MIR215    | ENSG00000160789.18_LMNA | -0.0523  | -0.20975241  | 0.10780015  | 5.22E-01 | 7.68E-01 | 1.00E+00 |
| ENSG00000281902.1_          | ENSG00000160789.18_LMNA | -0.06399 | -0.22094419  | 0.096186184 | 4.33E-01 | 7.03E-01 | 1.00E+00 |
| ENSG00000207009.1_Y_RNA     | ENSG00000160789.18_LMNA | 0.0716   | -0.088609939 | 0.228200288 | 3.81E-01 | 6.59E-01 | 1.00E+00 |
| ENSG00000207609.2_MIR491    | ENSG00000160789.18_LMNA | 0.01588  | -0.143688285 | 0.174634904 | 8.46E-01 | 9.40E-01 | 1.00E+00 |
| ENSG00000222208.1_RNA5SP12  | ENSG00000160789.18_LMNA | -0.01526 | -0.174040965 | 0.144288143 | 8.52E-01 | 9.42E-01 | 1.00E+00 |
| ENSG00000200528.1_RNU6-1331 | ENSG00000160789.18_LMNA | 0.10973  | -0.050346788 | 0.264316639 | 1.78E-01 | 4.40E-01 | 1.00E+00 |
| ENSG00000201003.1_SNORA58   | ENSG00000160789.18_LMNA | 0.08385  | -0.07636795  | 0.239851064 | 3.04E-01 | 5.91E-01 | 1.00E+00 |
| ENSG00000263993.2_RN7SL786f | ENSG00000160789.18_LMNA | -0.02821 | -0.186574003 | 0.131580411 | 7.30E-01 | 8.86E-01 | 1.00E+00 |
| ENSG00000273571.1_ST7-OT4_2 | ENSG00000160789.18_LMNA | -0.00882 | -0.167787749 | 0.150589498 | 9.14E-01 | 9.67E-01 | 1.00E+00 |
| ENSG00000266553.2_RN7SL356f | ENSG00000160789.18_LMNA | 0.05021  | -0.109864291 | 0.207754558 | 5.39E-01 | 7.79E-01 | 1.00E+00 |
| ENSG00000281085.1_          | ENSG00000160789.18_LMNA | -0.21313 | -0.36011163  | -0.05582305 | 8.38E-03 | 5.77E-02 | 1.00E+00 |



|                              |                         |          |              |             |          |          |          |
|------------------------------|-------------------------|----------|--------------|-------------|----------|----------|----------|
| ENSG00000252982.1_RN7SKP23   | ENSG00000160789.18_LMNA | -0.00411 | -0.163202292 | 0.155193874 | 9.60E-01 | 9.84E-01 | 1.00E+00 |
| ENSG00000275961.1_RN7SL210F  | ENSG00000160789.18_LMNA | -0.05974 | -0.216878209 | 0.100415556 | 4.65E-01 | 7.27E-01 | 1.00E+00 |
| ENSG00000249951.1_RP11-554D  | ENSG00000160789.18_LMNA | -0.13534 | -0.288324344 | 0.02439046  | 9.64E-02 | 3.05E-01 | 1.00E+00 |
| ENSG00000254364.1_KB-1615E4  | ENSG00000160789.18_LMNA | 0.01344  | -0.14607661  | 0.172268766 | 8.69E-01 | 9.49E-01 | 1.00E+00 |
| ENSG00000276527.1_RP11-442J  | ENSG00000160789.18_LMNA | 0.01507  | -0.144476198 | 0.173854717 | 8.54E-01 | 9.43E-01 | 1.00E+00 |
| ENSG00000205883.2_DEFB135    | ENSG00000160789.18_LMNA | -0.18292 | -0.332440363 | -0.02443146 | 2.41E-02 | 1.23E-01 | 1.00E+00 |
| ENSG00000281608.1_RP11-395P  | ENSG00000160789.18_LMNA | -0.09804 | -0.253290057 | 0.06212759  | 2.29E-01 | 5.07E-01 | 1.00E+00 |
| ENSG00000222220.1_RN7SKP12   | ENSG00000160789.18_LMNA | 0.18841  | 0.030114728  | 0.337489711 | 2.01E-02 | 1.08E-01 | 1.00E+00 |
| ENSG00000243104.1_MTND4LP1   | ENSG00000160789.18_LMNA | 0.01269  | -0.146806106 | 0.171545314 | 8.77E-01 | 9.52E-01 | 1.00E+00 |
| ENSG00000258971.1_RP11-326A  | ENSG00000160789.18_LMNA | -0.12744 | -0.280941226 | 0.032417988 | 1.18E-01 | 3.44E-01 | 1.00E+00 |
| ENSG00000234275.1_AC017053   | ENSG00000160789.18_LMNA | -0.09901 | -0.254201537 | 0.061157086 | 2.25E-01 | 5.01E-01 | 1.00E+00 |
| ENSG00000264791.1_CTC-304I17 | ENSG00000160789.18_LMNA | -0.21767 | -0.364252552 | -0.06057304 | 7.06E-03 | 5.08E-02 | 1.00E+00 |
| ENSG00000229508.2_PHKG1P4    | ENSG00000160789.18_LMNA | 0.05475  | -0.105366095 | 0.212104896 | 5.03E-01 | 7.54E-01 | 1.00E+00 |
| ENSG00000236556.1_RP11-443C  | ENSG00000160789.18_LMNA | -0.06079 | -0.217884136 | 0.099370272 | 4.57E-01 | 7.21E-01 | 1.00E+00 |
| ENSG00000237131.1_RP1-69E11  | ENSG00000160789.18_LMNA | -0.04849 | -0.206103889 | 0.111567663 | 5.53E-01 | 7.88E-01 | 1.00E+00 |
| ENSG00000272232.2_RN7SL726F  | ENSG00000160789.18_LMNA | 0.10044  | -0.05971304  | 0.255556723 | 2.18E-01 | 4.93E-01 | 1.00E+00 |
| ENSG00000255231.1_MRPS36P4   | ENSG00000160789.18_LMNA | -0.07529 | -0.231710082 | 0.084932089 | 3.57E-01 | 6.40E-01 | 1.00E+00 |
| ENSG00000254310.1_CTD-2045M  | ENSG00000160789.18_LMNA | 0.00239  | -0.156873904 | 0.161525732 | 9.77E-01 | 9.91E-01 | 1.00E+00 |
| ENSG00000213896.4_RP11-546M  | ENSG00000160789.18_LMNA | -0.0516  | -0.209085506 | 0.108489487 | 5.28E-01 | 7.72E-01 | 1.00E+00 |
| ENSG00000234226.5_NDUFS5P2   | ENSG00000160789.18_LMNA | 0.00113  | -0.15809556  | 0.160305445 | 9.89E-01 | 9.96E-01 | 1.00E+00 |
| ENSG00000256774.1_RP11-268P  | ENSG00000160789.18_LMNA | -0.0167  | -0.17543264  | 0.142882233 | 8.38E-01 | 9.37E-01 | 1.00E+00 |
| ENSG00000260087.1_PCMTD1P2   | ENSG00000160789.18_LMNA | -0.026   | -0.184435357 | 0.133756292 | 7.51E-01 | 8.96E-01 | 1.00E+00 |
| ENSG00000281570.1_           | ENSG00000160789.18_LMNA | 0.01272  | -0.146781097 | 0.171570121 | 8.76E-01 | 9.52E-01 | 1.00E+00 |
| ENSG00000240925.1_RPS20P31   | ENSG00000160789.18_LMNA | 0.14233  | -0.017260848 | 0.294850597 | 8.03E-02 | 2.73E-01 | 1.00E+00 |
| ENSG00000242958.1_RP11-662B  | ENSG00000160789.18_LMNA | 0.05185  | -0.10824295  | 0.209324054 | 5.26E-01 | 7.71E-01 | 1.00E+00 |
| ENSG00000224707.1_E2F3-IT1   | ENSG00000160789.18_LMNA | 0.04684  | -0.113206145 | 0.204514396 | 5.67E-01 | 7.97E-01 | 1.00E+00 |
| ENSG00000261965.1_ISCA1P3    | ENSG00000160789.18_LMNA | -0.00452 | -0.163607767 | 0.154787283 | 9.56E-01 | 9.82E-01 | 1.00E+00 |
| ENSG00000272400.1_RP11-927P  | ENSG00000160789.18_LMNA | 0.05764  | -0.102496569 | 0.214873542 | 4.81E-01 | 7.38E-01 | 1.00E+00 |
| ENSG00000257094.1_RP11-50I19 | ENSG00000160789.18_LMNA | 0.01675  | -0.142834802 | 0.175479568 | 8.38E-01 | 9.37E-01 | 1.00E+00 |
| ENSG00000223042.1_RN7SKP16   | ENSG00000160789.18_LMNA | 0.07589  | -0.084332474 | 0.232281516 | 3.53E-01 | 6.36E-01 | 1.00E+00 |
| ENSG00000231846.1_RP11-494I9 | ENSG00000160789.18_LMNA | -0.11299 | -0.267379417 | 0.047058903 | 1.66E-01 | 4.23E-01 | 1.00E+00 |
| ENSG00000230198.1_RPL37P4    | ENSG00000160789.18_LMNA | 0.02746  | -0.132317506 | 0.185849859 | 7.37E-01 | 8.89E-01 | 1.00E+00 |
| ENSG00000256176.1_RP11-627K  | ENSG00000160789.18_LMNA | -0.0982  | -0.253440706 | 0.061967226 | 2.29E-01 | 5.06E-01 | 1.00E+00 |

|                             |                         |          |              |             |          |          |          |
|-----------------------------|-------------------------|----------|--------------|-------------|----------|----------|----------|
| ENSG00000264260.1_RP11-94B1 | ENSG00000160789.18_LMNA | -0.12896 | -0.28236193  | 0.030876418 | 1.13E-01 | 3.36E-01 | 1.00E+00 |
| ENSG00000258337.1_RP11-115H | ENSG00000160789.18_LMNA | 0.01991  | -0.139737874 | 0.178540564 | 8.08E-01 | 9.23E-01 | 1.00E+00 |
| ENSG00000274139.1_RP11-14C1 | ENSG00000160789.18_LMNA | -0.26151 | -0.403893129 | -0.10675094 | 1.14E-03 | 1.28E-02 | 1.00E+00 |
| ENSG00000259588.1_RP11-552E | ENSG00000160789.18_LMNA | 0.06518  | -0.09500939  | 0.222073564 | 4.25E-01 | 6.96E-01 | 1.00E+00 |
| ENSG00000225293.1_ABCD1P4   | ENSG00000160789.18_LMNA | 0.05374  | -0.106366642 | 0.211138324 | 5.11E-01 | 7.60E-01 | 1.00E+00 |
| ENSG00000271437.1_RP11-295B | ENSG00000160789.18_LMNA | 0.06322  | -0.096955115 | 0.220205784 | 4.39E-01 | 7.07E-01 | 1.00E+00 |
| ENSG00000258018.1_RP11-148B | ENSG00000160789.18_LMNA | -0.19174 | -0.340541462 | -0.03355927 | 1.80E-02 | 9.99E-02 | 1.00E+00 |
| ENSG00000217004.1_RP3-329A5 | ENSG00000160789.18_LMNA | -0.10655 | -0.261321864 | 0.053555092 | 1.91E-01 | 4.59E-01 | 1.00E+00 |
| ENSG00000277930.1_RP11-122L | ENSG00000160789.18_LMNA | -0.27795 | -0.418625207 | -0.12424562 | 5.26E-04 | 7.02E-03 | 1.00E+00 |
| ENSG00000250541.1_RP11-302F | ENSG00000160789.18_LMNA | 0.10005  | -0.06010351  | 0.255190402 | 2.20E-01 | 4.95E-01 | 1.00E+00 |
| ENSG00000226836.5_RP11-77B2 | ENSG00000160789.18_LMNA | -0.12927 | -0.282653658 | 0.030559686 | 1.12E-01 | 3.35E-01 | 1.00E+00 |
| ENSG00000255174.1_RP11-481A | ENSG00000160789.18_LMNA | -0.03386 | -0.192026104 | 0.126019483 | 6.79E-01 | 8.60E-01 | 1.00E+00 |
| ENSG00000178586.4_OR6B3     | ENSG00000160789.18_LMNA | -0.18502 | -0.334373688 | -0.02660516 | 2.25E-02 | 1.17E-01 | 1.00E+00 |
| ENSG00000251440.2_STMN1P2   | ENSG00000160789.18_LMNA | -0.10783 | -0.262520616 | 0.052271647 | 1.86E-01 | 4.52E-01 | 1.00E+00 |
| ENSG00000268287.1_CTB-60B18 | ENSG00000160789.18_LMNA | -0.05328 | -0.210688905 | 0.106831639 | 5.14E-01 | 7.62E-01 | 1.00E+00 |
| ENSG00000203809.5_LIN28B-AS | ENSG00000160789.18_LMNA | -0.07505 | -0.231482151 | 0.085171195 | 3.58E-01 | 6.41E-01 | 1.00E+00 |
| ENSG00000258963.1_EDDM3DP   | ENSG00000160789.18_LMNA | 0.00332  | -0.155962203 | 0.162435779 | 9.68E-01 | 9.87E-01 | 1.00E+00 |
| ENSG00000254060.1_RP11-172E | ENSG00000160789.18_LMNA | -0.21691 | -0.363556349 | -0.05977347 | 7.27E-03 | 5.17E-02 | 1.00E+00 |
| ENSG00000227215.1_RP11-445L | ENSG00000160789.18_LMNA | -0.07076 | -0.227398443 | 0.089448968 | 3.86E-01 | 6.65E-01 | 1.00E+00 |
| ENSG00000262708.1_RP11-411G | ENSG00000160789.18_LMNA | 0.07012  | -0.090082039 | 0.226793143 | 3.91E-01 | 6.69E-01 | 1.00E+00 |
| ENSG00000266101.1_RP5-906A2 | ENSG00000160789.18_LMNA | -0.11795 | -0.272038088 | 0.042044731 | 1.48E-01 | 3.94E-01 | 1.00E+00 |
| ENSG00000240881.1_RP11-713P | ENSG00000160789.18_LMNA | -0.06238 | -0.21940589  | 0.097787649 | 4.45E-01 | 7.12E-01 | 1.00E+00 |
| ENSG00000213543.2_RARRES2F  | ENSG00000160789.18_LMNA | 0.02019  | -0.139458303 | 0.178816589 | 8.05E-01 | 9.22E-01 | 1.00E+00 |
| ENSG00000250324.2_MRPL22P1  | ENSG00000160789.18_LMNA | -0.03973 | -0.197681098 | 0.120230418 | 6.27E-01 | 8.32E-01 | 1.00E+00 |
| ENSG00000229330.2_AC006947  | ENSG00000160789.18_LMNA | -0.00432 | -0.163409373 | 0.154986236 | 9.58E-01 | 9.83E-01 | 1.00E+00 |
| ENSG00000254757.1_RP13-726E | ENSG00000160789.18_LMNA | 0.0815   | -0.078725323 | 0.237614597 | 3.18E-01 | 6.05E-01 | 1.00E+00 |
| ENSG00000179676.6_LINC00305 | ENSG00000160789.18_LMNA | -0.05734 | -0.214580249 | 0.102800799 | 4.83E-01 | 7.40E-01 | 1.00E+00 |
| ENSG00000233676.2_FDPSP6    | ENSG00000160789.18_LMNA | -0.14077 | -0.293391503 | 0.018857597 | 8.37E-02 | 2.80E-01 | 1.00E+00 |
| ENSG00000279681.1_RP11-274A | ENSG00000160789.18_LMNA | 0.11997  | -0.039998982 | 0.273934576 | 1.41E-01 | 3.83E-01 | 1.00E+00 |
| ENSG00000231534.1_FBXO36-IT | ENSG00000160789.18_LMNA | 0.06658  | -0.093610941 | 0.223414557 | 4.15E-01 | 6.88E-01 | 1.00E+00 |
| ENSG00000249150.1_CTC-472C2 | ENSG00000160789.18_LMNA | -0.12355 | -0.27729998  | 0.036362217 | 1.29E-01 | 3.65E-01 | 1.00E+00 |
| ENSG00000251456.1_RP11-436H | ENSG00000160789.18_LMNA | 0.1232   | -0.036716751 | 0.276972237 | 1.30E-01 | 3.66E-01 | 1.00E+00 |
| ENSG00000232698.1_AP001058  | ENSG00000160789.18_LMNA | -0.0872  | -0.243028611 | 0.07301253  | 2.85E-01 | 5.71E-01 | 1.00E+00 |

|                              |                         |          |              |             |          |          |          |
|------------------------------|-------------------------|----------|--------------|-------------|----------|----------|----------|
| ENSG00000270780.1_RP4-590F2  | ENSG00000160789.18_LMNA | -0.07238 | -0.228946983 | 0.087828214 | 3.76E-01 | 6.56E-01 | 1.00E+00 |
| ENSG00000205857.1_NANOGNB    | ENSG00000160789.18_LMNA | 0.00188  | -0.157364388 | 0.161035915 | 9.82E-01 | 9.93E-01 | 1.00E+00 |
| ENSG00000260212.1_RP11-325O  | ENSG00000160789.18_LMNA | 0.10352  | -0.056616295 | 0.258458735 | 2.04E-01 | 4.76E-01 | 1.00E+00 |
| ENSG00000264907.1_PRELID3BF  | ENSG00000160789.18_LMNA | 0.08425  | -0.07596745  | 0.24023069  | 3.02E-01 | 5.89E-01 | 1.00E+00 |
| ENSG00000257184.3_HOXA10-H   | ENSG00000160789.18_LMNA | -0.30207 | -0.440106956 | -0.15008797 | 1.55E-04 | 2.68E-03 | 1.00E+00 |
| ENSG00000233096.1_RP11-520A  | ENSG00000160789.18_LMNA | 0.04428  | -0.115734502 | 0.202058341 | 5.88E-01 | 8.09E-01 | 1.00E+00 |
| ENSG00000249316.2_CTC-493P1  | ENSG00000160789.18_LMNA | -0.05511 | -0.212444834 | 0.105014056 | 5.00E-01 | 7.53E-01 | 1.00E+00 |
| ENSG00000261650.1_RP11-474D  | ENSG00000160789.18_LMNA | -0.12328 | -0.277043013 | 0.036640197 | 1.30E-01 | 3.66E-01 | 1.00E+00 |
| ENSG00000265125.4_RP11-31I22 | ENSG00000160789.18_LMNA | 0.09991  | -0.060248647 | 0.255054219 | 2.21E-01 | 4.96E-01 | 1.00E+00 |
| ENSG00000240553.1_RP1-184J9  | ENSG00000160789.18_LMNA | -0.00107 | -0.160241003 | 0.158160047 | 9.90E-01 | 9.96E-01 | 1.00E+00 |
| ENSG00000239706.1_RP11-6F2.3 | ENSG00000160789.18_LMNA | 0.06452  | -0.095664502 | 0.221444955 | 4.30E-01 | 7.00E-01 | 1.00E+00 |
| ENSG00000231470.1_HMGB3P2    | ENSG00000160789.18_LMNA | 0.01671  | -0.142873128 | 0.175441648 | 8.38E-01 | 9.37E-01 | 1.00E+00 |
| ENSG00000250619.1_CTD-2215L  | ENSG00000160789.18_LMNA | -0.09606 | -0.251417794 | 0.064119225 | 2.39E-01 | 5.18E-01 | 1.00E+00 |
| ENSG00000263234.1_CTD-2135D  | ENSG00000160789.18_LMNA | -0.07654 | -0.232904028 | 0.083679004 | 3.49E-01 | 6.33E-01 | 1.00E+00 |
| ENSG00000225076.1_WWC3-AS    | ENSG00000160789.18_LMNA | 0.03114  | -0.128701322 | 0.189399197 | 7.03E-01 | 8.73E-01 | 1.00E+00 |
| ENSG00000221852.4_KRTAP1-5   | ENSG00000160789.18_LMNA | 0.06255  | -0.097619339 | 0.219567635 | 4.44E-01 | 7.11E-01 | 1.00E+00 |
| ENSG00000250345.2_RP11-780M  | ENSG00000160789.18_LMNA | -0.22889 | -0.374442297 | -0.07232038 | 4.56E-03 | 3.66E-02 | 1.00E+00 |
| ENSG00000263477.1_RP11-338L  | ENSG00000160789.18_LMNA | 0.01513  | -0.144420092 | 0.173910286 | 8.53E-01 | 9.42E-01 | 1.00E+00 |
| ENSG00000226387.2_SORCS3-A   | ENSG00000160789.18_LMNA | -0.07074 | -0.227383881 | 0.089464201 | 3.86E-01 | 6.65E-01 | 1.00E+00 |
| ENSG00000170516.15_COX7B2    | ENSG00000160789.18_LMNA | 0.05678  | -0.103355089 | 0.214045738 | 4.87E-01 | 7.44E-01 | 1.00E+00 |
| ENSG00000235277.1_AF127577.8 | ENSG00000160789.18_LMNA | -0.26511 | -0.407126435 | -0.11057487 | 9.64E-04 | 1.13E-02 | 1.00E+00 |
| ENSG00000256518.2_RP11-807H  | ENSG00000160789.18_LMNA | 0.12183  | -0.038107163 | 0.275686194 | 1.35E-01 | 3.73E-01 | 1.00E+00 |
| ENSG00000198251.7_CTC-490E2  | ENSG00000160789.18_LMNA | 0.03211  | -0.12774416  | 0.190337276 | 6.95E-01 | 8.69E-01 | 1.00E+00 |
| ENSG00000227674.1_LINC00355  | ENSG00000160789.18_LMNA | -0.06004 | -0.217164043 | 0.100118611 | 4.62E-01 | 7.25E-01 | 1.00E+00 |
| ENSG00000228823.1_RP11-293F  | ENSG00000160789.18_LMNA | 0.03599  | -0.123917421 | 0.194081929 | 6.60E-01 | 8.50E-01 | 1.00E+00 |
| ENSG00000235123.4_DSCAM-AS   | ENSG00000160789.18_LMNA | -0.12785 | -0.281325057 | 0.032001649 | 1.16E-01 | 3.41E-01 | 1.00E+00 |
| ENSG00000176115.9_AQP7P4     | ENSG00000160789.18_LMNA | -0.11872 | -0.272768892 | 0.041256722 | 1.45E-01 | 3.90E-01 | 1.00E+00 |
| ENSG00000256134.1_EGLN3P1    | ENSG00000160789.18_LMNA | 0.10163  | -0.05851481  | 0.256680279 | 2.13E-01 | 4.86E-01 | 1.00E+00 |
| ENSG00000222018.1_C21orf140  | ENSG00000160789.18_LMNA | -0.10542 | -0.260248684 | 0.054703209 | 1.96E-01 | 4.65E-01 | 1.00E+00 |
| ENSG00000267524.1_RPSAP57    | ENSG00000160789.18_LMNA | -0.14435 | -0.296733891 | 0.015197523 | 7.60E-02 | 2.64E-01 | 1.00E+00 |
| ENSG00000183169.6_POM121L1   | ENSG00000160789.18_LMNA | 0.04026  | -0.119710659 | 0.198187787 | 6.22E-01 | 8.29E-01 | 1.00E+00 |
| ENSG00000257636.5_RP11-1103  | ENSG00000160789.18_LMNA | -0.05348 | -0.210884152 | 0.106629642 | 5.13E-01 | 7.61E-01 | 1.00E+00 |
| ENSG00000215367.9_TMED11P    | ENSG00000160789.18_LMNA | 0.13434  | -0.025402232 | 0.287395836 | 9.89E-02 | 3.10E-01 | 1.00E+00 |

|                              |                         |          |              |             |          |          |          |
|------------------------------|-------------------------|----------|--------------|-------------|----------|----------|----------|
| ENSG00000224227.2_OR2L1P     | ENSG00000160789.18_LMNA | -0.0434  | -0.201206388 | 0.116610575 | 5.96E-01 | 8.13E-01 | 1.00E+00 |
| ENSG00000235113.1_RP11-241I2 | ENSG00000160789.18_LMNA | 0.08526  | -0.074958929 | 0.241186218 | 2.96E-01 | 5.82E-01 | 1.00E+00 |
| ENSG00000254923.1_RP11-1236I | ENSG00000160789.18_LMNA | -0.0319  | -0.190131121 | 0.12795456  | 6.96E-01 | 8.70E-01 | 1.00E+00 |
| ENSG00000227348.1_MTND5P25   | ENSG00000160789.18_LMNA | 0.00259  | -0.156670635 | 0.161728679 | 9.75E-01 | 9.90E-01 | 1.00E+00 |
| ENSG00000236507.1_RP5-1050E  | ENSG00000160789.18_LMNA | -0.01158 | -0.170471204 | 0.14788855  | 8.87E-01 | 9.56E-01 | 1.00E+00 |
| ENSG00000219463.1_RPSAP42    | ENSG00000160789.18_LMNA | -0.16491 | -0.315819387 | -0.00586338 | 4.23E-02 | 1.80E-01 | 1.00E+00 |
| ENSG00000228467.2_RP11-402N  | ENSG00000160789.18_LMNA | -0.17079 | -0.321259677 | -0.01191755 | 3.54E-02 | 1.60E-01 | 1.00E+00 |
| ENSG00000215819.3_KRT18P12   | ENSG00000160789.18_LMNA | -0.18397 | -0.333409661 | -0.02552091 | 2.33E-02 | 1.20E-01 | 1.00E+00 |
| ENSG00000267404.1_RP11-49I11 | ENSG00000160789.18_LMNA | 0.10987  | -0.050210667 | 0.264443567 | 1.78E-01 | 4.40E-01 | 1.00E+00 |
| ENSG00000254447.1_OR7E11P    | ENSG00000160789.18_LMNA | -0.20847 | -0.355855802 | -0.05095557 | 9.96E-03 | 6.54E-02 | 1.00E+00 |
| ENSG00000244720.1_RP11-402J  | ENSG00000160789.18_LMNA | 0.09772  | -0.062455923 | 0.252981565 | 2.31E-01 | 5.09E-01 | 1.00E+00 |
| ENSG00000276756.3_CH17-125A  | ENSG00000160789.18_LMNA | 0.02132  | -0.138350003 | 0.179910336 | 7.94E-01 | 9.17E-01 | 1.00E+00 |
| ENSG00000277556.1_OR13C5     | ENSG00000160789.18_LMNA | 0.04183  | -0.118156744 | 0.199701612 | 6.09E-01 | 8.21E-01 | 1.00E+00 |
| ENSG00000226577.1_MICC       | ENSG00000160789.18_LMNA | 0.06046  | -0.099698452 | 0.217568385 | 4.59E-01 | 7.23E-01 | 1.00E+00 |
| ENSG00000112116.9_IL17F      | ENSG00000160789.18_LMNA | 0.14079  | -0.01882957  | 0.293417126 | 8.36E-02 | 2.80E-01 | 1.00E+00 |
| ENSG00000176198.2_OR11H4     | ENSG00000160789.18_LMNA | 0.01545  | -0.144108297 | 0.174219061 | 8.50E-01 | 9.41E-01 | 1.00E+00 |
| ENSG00000250547.1_RP11-719L  | ENSG00000160789.18_LMNA | 0.07132  | -0.088890786 | 0.227931935 | 3.83E-01 | 6.61E-01 | 1.00E+00 |
| ENSG00000249287.1_CTD-2593A  | ENSG00000160789.18_LMNA | 0.04737  | -0.112679849 | 0.205025139 | 5.62E-01 | 7.94E-01 | 1.00E+00 |
| ENSG00000271484.1_ABI1P1     | ENSG00000160789.18_LMNA | -0.01514 | -0.173920206 | 0.144410076 | 8.53E-01 | 9.42E-01 | 1.00E+00 |
| ENSG00000258915.1_BHLHB9P1   | ENSG00000160789.18_LMNA | -0.19263 | -0.341358392 | -0.03448259 | 1.74E-02 | 9.77E-02 | 1.00E+00 |
| ENSG00000251223.1_MTCO1P9    | ENSG00000160789.18_LMNA | -0.00925 | -0.168204021 | 0.150170824 | 9.10E-01 | 9.66E-01 | 1.00E+00 |
| ENSG00000279485.1_RP11-391A  | ENSG00000160789.18_LMNA | -0.05347 | -0.210874921 | 0.106639193 | 5.13E-01 | 7.61E-01 | 1.00E+00 |
| ENSG00000269504.1_AC003973   | ENSG00000160789.18_LMNA | -0.25706 | -0.399895704 | -0.10203543 | 1.39E-03 | 1.48E-02 | 1.00E+00 |
| ENSG00000219240.2_RP11-63K6  | ENSG00000160789.18_LMNA | 0.01174  | -0.147733561 | 0.170625046 | 8.86E-01 | 9.56E-01 | 1.00E+00 |
| ENSG00000183862.5_CNCA2      | ENSG00000160789.18_LMNA | 0.02099  | -0.138672258 | 0.179592394 | 7.97E-01 | 9.19E-01 | 1.00E+00 |
| ENSG00000267324.1_RP11-411B  | ENSG00000160789.18_LMNA | 0.00838  | -0.151023908 | 0.167355713 | 9.18E-01 | 9.69E-01 | 1.00E+00 |
| ENSG00000224714.2_RP11-179K  | ENSG00000160789.18_LMNA | -0.01107 | -0.169970717 | 0.14839266  | 8.92E-01 | 9.58E-01 | 1.00E+00 |
| ENSG00000227406.1_RNF6P1     | ENSG00000160789.18_LMNA | 0.06495  | -0.095235726 | 0.221856415 | 4.27E-01 | 6.97E-01 | 1.00E+00 |
| ENSG00000249497.1_RP11-1079I | ENSG00000160789.18_LMNA | 0.08929  | -0.070921647 | 0.245005231 | 2.74E-01 | 5.59E-01 | 1.00E+00 |
| ENSG00000279511.1_RP11-676B  | ENSG00000160789.18_LMNA | 0.0777   | -0.082520382 | 0.23400712  | 3.41E-01 | 6.26E-01 | 1.00E+00 |
| ENSG00000204960.6_BACE       | ENSG00000160789.18_LMNA | 0.05395  | -0.106163737 | 0.21133439  | 5.09E-01 | 7.59E-01 | 1.00E+00 |
| ENSG00000259789.1_RP11-1078I | ENSG00000160789.18_LMNA | -0.07951 | -0.235725128 | 0.080714185 | 3.30E-01 | 6.16E-01 | 1.00E+00 |
| ENSG00000166948.8_TGM6       | ENSG00000160789.18_LMNA | -0.06124 | -0.218308742 | 0.098928844 | 4.54E-01 | 7.19E-01 | 1.00E+00 |

|                             |                         |          |              |             |          |          |          |
|-----------------------------|-------------------------|----------|--------------|-------------|----------|----------|----------|
| ENSG00000234721.2_AC125421. | ENSG00000160789.18_LMNA | -0.05255 | -0.209991943 | 0.107552486 | 5.20E-01 | 7.66E-01 | 1.00E+00 |
| ENSG00000259690.1_CTD-3118D | ENSG00000160789.18_LMNA | 0.03589  | -0.124020899 | 0.193980792 | 6.61E-01 | 8.50E-01 | 1.00E+00 |
| ENSG00000137674.3_MMP20     | ENSG00000160789.18_LMNA | -0.02977 | -0.188083671 | 0.130042611 | 7.16E-01 | 8.79E-01 | 1.00E+00 |
| ENSG00000260102.1_LINC01070 | ENSG00000160789.18_LMNA | -0.06547 | -0.222352001 | 0.094719127 | 4.23E-01 | 6.94E-01 | 1.00E+00 |
| ENSG00000278935.1_RP11-173D | ENSG00000160789.18_LMNA | -0.03697 | -0.195020807 | 0.122956476 | 6.51E-01 | 8.45E-01 | 1.00E+00 |
| ENSG00000264813.4_CTD-2501B | ENSG00000160789.18_LMNA | 0.06732  | -0.092874135 | 0.224120608 | 4.10E-01 | 6.84E-01 | 1.00E+00 |
| ENSG00000226668.4_RP11-526D | ENSG00000160789.18_LMNA | -0.12659 | -0.280146028 | 0.033280187 | 1.20E-01 | 3.48E-01 | 1.00E+00 |
| ENSG00000275877.1_5_8S_rRNA | ENSG00000160789.18_LMNA | -0.05332 | -0.210732094 | 0.10678696  | 5.14E-01 | 7.62E-01 | 1.00E+00 |
| ENSG00000277644.1_          | ENSG00000160789.18_LMNA | -0.07121 | -0.227831986 | 0.088995377 | 3.83E-01 | 6.62E-01 | 1.00E+00 |
| ENSG00000201822.1_RNA5SP14  | ENSG00000160789.18_LMNA | -0.06613 | -0.22298688  | 0.094057078 | 4.18E-01 | 6.90E-01 | 1.00E+00 |
| ENSG00000207819.1_          | ENSG00000160789.18_LMNA | -0.04551 | -0.203240375 | 0.114518185 | 5.78E-01 | 8.03E-01 | 1.00E+00 |
| ENSG00000237164.1_SLC25A15F | ENSG00000160789.18_LMNA | -0.1942  | -0.342806116 | -0.03612014 | 1.65E-02 | 9.41E-02 | 1.00E+00 |
| ENSG00000264358.1_MIR3122   | ENSG00000160789.18_LMNA | -0.00865 | -0.167620177 | 0.150758005 | 9.16E-01 | 9.68E-01 | 1.00E+00 |
| ENSG00000265215.1_MIR4269   | ENSG00000160789.18_LMNA | -0.02497 | -0.183441427 | 0.134766483 | 7.60E-01 | 9.00E-01 | 1.00E+00 |
| ENSG00000238721.1_RNU7-194F | ENSG00000160789.18_LMNA | -0.07242 | -0.228980735 | 0.087792869 | 3.75E-01 | 6.55E-01 | 1.00E+00 |
| ENSG00000200741.1_RNA5SP16  | ENSG00000160789.18_LMNA | -0.07344 | -0.229956552 | 0.086770661 | 3.69E-01 | 6.49E-01 | 1.00E+00 |
| ENSG00000252157.1_RNU6-479F | ENSG00000160789.18_LMNA | -0.16341 | -0.314427923 | -0.00431855 | 4.43E-02 | 1.86E-01 | 1.00E+00 |
| ENSG00000253054.1_RNU7-77P  | ENSG00000160789.18_LMNA | 0.05681  | -0.103321167 | 0.214078455 | 4.87E-01 | 7.44E-01 | 1.00E+00 |
| ENSG00000200051.1_SNORD45   | ENSG00000160789.18_LMNA | -0.07182 | -0.228411143 | 0.088389232 | 3.79E-01 | 6.58E-01 | 1.00E+00 |
| ENSG00000266107.1_MIR4525   | ENSG00000160789.18_LMNA | -0.04089 | -0.198792281 | 0.119090342 | 6.17E-01 | 8.26E-01 | 1.00E+00 |
| ENSG00000207991.1_MIR601    | ENSG00000160789.18_LMNA | 0.0527   | -0.107397485 | 0.210141835 | 5.19E-01 | 7.65E-01 | 1.00E+00 |
| ENSG00000277123.1_          | ENSG00000160789.18_LMNA | -0.0269  | -0.185306746 | 0.132870101 | 7.42E-01 | 8.92E-01 | 1.00E+00 |
| ENSG00000266020.1_          | ENSG00000160789.18_LMNA | -0.11827 | -0.272346911 | 0.041711782 | 1.47E-01 | 3.92E-01 | 1.00E+00 |
| ENSG00000221409.1_          | ENSG00000160789.18_LMNA | -0.01783 | -0.176532874 | 0.141769834 | 8.27E-01 | 9.32E-01 | 1.00E+00 |
| ENSG00000252658.1_RNU6-786F | ENSG00000160789.18_LMNA | 0.01865  | -0.140969044 | 0.177324416 | 8.20E-01 | 9.30E-01 | 1.00E+00 |
| ENSG00000202300.1_RNU6-487F | ENSG00000160789.18_LMNA | -0.04482 | -0.202579619 | 0.115198223 | 5.83E-01 | 8.06E-01 | 1.00E+00 |
| ENSG00000200293.1_RNA5SP39  | ENSG00000160789.18_LMNA | 0.11464  | -0.045391319 | 0.268930403 | 1.60E-01 | 4.13E-01 | 1.00E+00 |
| ENSG00000199082.1_MIR342    | ENSG00000160789.18_LMNA | 0.08421  | -0.076005049 | 0.240195054 | 3.02E-01 | 5.89E-01 | 1.00E+00 |
| ENSG00000251963.1_          | ENSG00000160789.18_LMNA | 0.05079  | -0.109294701 | 0.20830612  | 5.34E-01 | 7.76E-01 | 1.00E+00 |
| ENSG00000222287.1_RNU6-1043 | ENSG00000160789.18_LMNA | 0.0309   | -0.128938401 | 0.189166755 | 7.06E-01 | 8.75E-01 | 1.00E+00 |
| ENSG00000232603.1_LL22NC03- | ENSG00000160789.18_LMNA | -0.01875 | -0.177424628 | 0.140867632 | 8.19E-01 | 9.29E-01 | 1.00E+00 |
| ENSG00000223064.1_RNU6-325F | ENSG00000160789.18_LMNA | 0.05402  | -0.106090927 | 0.211404739 | 5.09E-01 | 7.58E-01 | 1.00E+00 |
| ENSG00000198984.1_MIR345    | ENSG00000160789.18_LMNA | 0.07697  | -0.083246869 | 0.233315547 | 3.46E-01 | 6.30E-01 | 1.00E+00 |

|                              |                         |          |              |             |          |          |          |
|------------------------------|-------------------------|----------|--------------|-------------|----------|----------|----------|
| ENSG00000273500.1_MIR6129    | ENSG00000160789.18_LMNA | 0.00434  | -0.154964399 | 0.163431151 | 9.58E-01 | 9.83E-01 | 1.00E+00 |
| ENSG00000199458.1_RNU4-35P   | ENSG00000160789.18_LMNA | 0.00466  | -0.154656285 | 0.163738382 | 9.55E-01 | 9.82E-01 | 1.00E+00 |
| ENSG00000265550.1_           | ENSG00000160789.18_LMNA | -0.02653 | -0.184948778 | 0.133234211 | 7.46E-01 | 8.94E-01 | 1.00E+00 |
| ENSG00000200351.1_Y_RNA      | ENSG00000160789.18_LMNA | 0.10238  | -0.057759854 | 0.257387748 | 2.09E-01 | 4.82E-01 | 1.00E+00 |
| ENSG00000201736.1_RNA5SP16   | ENSG00000160789.18_LMNA | 0.11126  | -0.048803337 | 0.265755207 | 1.72E-01 | 4.32E-01 | 1.00E+00 |
| ENSG00000207208.1_RNU6-790F  | ENSG00000160789.18_LMNA | 0.1082   | -0.051891166 | 0.262875804 | 1.85E-01 | 4.50E-01 | 1.00E+00 |
| ENSG00000222679.1_RNU6-1267  | ENSG00000160789.18_LMNA | -0.03496 | -0.193088202 | 0.124933854 | 6.69E-01 | 8.54E-01 | 1.00E+00 |
| ENSG00000206781.1_Y_RNA      | ENSG00000160789.18_LMNA | 0.19004  | 0.031799564  | 0.338983226 | 1.90E-02 | 1.04E-01 | 1.00E+00 |
| ENSG00000221114.1_RNU6ATAC   | ENSG00000160789.18_LMNA | -0.17016 | -0.320677084 | -0.01126813 | 3.61E-02 | 1.62E-01 | 1.00E+00 |
| ENSG00000216077.2_MIR887     | ENSG00000160789.18_LMNA | -0.05563 | -0.212943785 | 0.104497198 | 4.96E-01 | 7.50E-01 | 1.00E+00 |
| ENSG00000243290.1_IGKV1-12   | ENSG00000160789.18_LMNA | 0.01945  | -0.140185263 | 0.178098747 | 8.12E-01 | 9.26E-01 | 1.00E+00 |
| ENSG00000221104.1_           | ENSG00000160789.18_LMNA | -0.13075 | -0.284037603 | 0.029056269 | 1.08E-01 | 3.27E-01 | 1.00E+00 |
| ENSG00000221046.1_RNU6ATAC   | ENSG00000160789.18_LMNA | -0.08926 | -0.244976493 | 0.070952066 | 2.74E-01 | 5.59E-01 | 1.00E+00 |
| ENSG00000207098.1_SNORA70    | ENSG00000160789.18_LMNA | -0.04764 | -0.205281684 | 0.112415424 | 5.60E-01 | 7.92E-01 | 1.00E+00 |
| ENSG00000199879.1_RNU1-120F  | ENSG00000160789.18_LMNA | 0.02554  | -0.134207026 | 0.183991958 | 7.55E-01 | 8.98E-01 | 1.00E+00 |
| ENSG00000278446.1_RP4-668E1  | ENSG00000160789.18_LMNA | -0.03137 | -0.189623293 | 0.128472721 | 7.01E-01 | 8.72E-01 | 1.00E+00 |
| ENSG00000252198.1_Y_RNA      | ENSG00000160789.18_LMNA | -0.00995 | -0.168887243 | 0.149483411 | 9.03E-01 | 9.63E-01 | 1.00E+00 |
| ENSG00000222650.1_RNU2-70P   | ENSG00000160789.18_LMNA | 0.06613  | -0.094063769 | 0.222980465 | 4.18E-01 | 6.90E-01 | 1.00E+00 |
| ENSG00000250431.1_RP13-577H  | ENSG00000160789.18_LMNA | 0.00586  | -0.153483656 | 0.16490709  | 9.43E-01 | 9.77E-01 | 1.00E+00 |
| ENSG00000266014.1_RP11-94B1  | ENSG00000160789.18_LMNA | -0.19115 | -0.340004112 | -0.03295223 | 1.83E-02 | 1.01E-01 | 1.00E+00 |
| ENSG00000241946.1_RP11-496B  | ENSG00000160789.18_LMNA | -0.1034  | -0.258351411 | 0.056730929 | 2.05E-01 | 4.76E-01 | 1.00E+00 |
| ENSG00000278255.1_RP1-53O8.  | ENSG00000160789.18_LMNA | -0.2243  | -0.370278247 | -0.06750967 | 5.47E-03 | 4.19E-02 | 1.00E+00 |
| ENSG00000281228.1_AL132640.1 | ENSG00000160789.18_LMNA | -0.08853 | -0.24429028  | 0.071678248 | 2.78E-01 | 5.63E-01 | 1.00E+00 |
| ENSG00000248965.1_CTB-174D1  | ENSG00000160789.18_LMNA | -0.0675  | -0.224288076 | 0.092699321 | 4.09E-01 | 6.83E-01 | 1.00E+00 |
| ENSG00000172912.4_COX6B1P3   | ENSG00000160789.18_LMNA | 0.06728  | -0.092918498 | 0.224078106 | 4.10E-01 | 6.84E-01 | 1.00E+00 |
| ENSG00000123576.5_ESX1       | ENSG00000160789.18_LMNA | -0.14135 | -0.293934574 | 0.018263477 | 8.24E-02 | 2.77E-01 | 1.00E+00 |
| ENSG00000244610.3_RN7SL756F  | ENSG00000160789.18_LMNA | 0.1454   | -0.01413158  | 0.297705878 | 7.39E-02 | 2.59E-01 | 1.00E+00 |
| ENSG00000232525.1_SS18L2P1   | ENSG00000160789.18_LMNA | 0.19493  | 0.036871188  | 0.343469619 | 1.61E-02 | 9.23E-02 | 1.00E+00 |
| ENSG00000225795.1_RP11-395G  | ENSG00000160789.18_LMNA | -0.06226 | -0.219290105 | 0.097908122 | 4.46E-01 | 7.13E-01 | 1.00E+00 |
| ENSG00000248418.2_UBL5P1     | ENSG00000160789.18_LMNA | 0.02606  | -0.133695192 | 0.184495452 | 7.50E-01 | 8.96E-01 | 1.00E+00 |
| ENSG00000241420.3_RN7SL505F  | ENSG00000160789.18_LMNA | 0.09381  | -0.066378929 | 0.249290666 | 2.50E-01 | 5.31E-01 | 1.00E+00 |
| ENSG00000281365.1_RP5-991B1  | ENSG00000160789.18_LMNA | -0.21071 | -0.357900288 | -0.05329209 | 9.17E-03 | 6.16E-02 | 1.00E+00 |
| ENSG00000254874.1_RP11-676F  | ENSG00000160789.18_LMNA | -0.09345 | -0.248944431 | 0.066746437 | 2.52E-01 | 5.33E-01 | 1.00E+00 |

|                              |                         |          |              |             |          |          |          |
|------------------------------|-------------------------|----------|--------------|-------------|----------|----------|----------|
| ENSG00000223918.1_RP13-461N  | ENSG00000160789.18_LMNA | 0.01784  | -0.141760843 | 0.176541764 | 8.27E-01 | 9.32E-01 | 1.00E+00 |
| ENSG00000229327.1_RP11-135A  | ENSG00000160789.18_LMNA | -0.12874 | -0.282153372 | 0.031102812 | 1.14E-01 | 3.37E-01 | 1.00E+00 |
| ENSG00000231149.2_RP11-10J1  | ENSG00000160789.18_LMNA | -0.02361 | -0.182123722 | 0.136104727 | 7.73E-01 | 9.06E-01 | 1.00E+00 |
| ENSG00000235887.2_RP11-763B  | ENSG00000160789.18_LMNA | -0.06917 | -0.225886024 | 0.091030299 | 3.97E-01 | 6.74E-01 | 1.00E+00 |
| ENSG00000248359.1_CTC-537E7  | ENSG00000160789.18_LMNA | -0.15386 | -0.305574879 | 0.005475756 | 5.84E-02 | 2.22E-01 | 1.00E+00 |
| ENSG00000201078.1_RN7SKP21   | ENSG00000160789.18_LMNA | -0.07419 | -0.230667948 | 0.086025024 | 3.64E-01 | 6.45E-01 | 1.00E+00 |
| ENSG00000240199.3_RN7SL520F  | ENSG00000160789.18_LMNA | -0.05486 | -0.212204421 | 0.105263035 | 5.02E-01 | 7.54E-01 | 1.00E+00 |
| ENSG00000239539.1_HMGN1P2C   | ENSG00000160789.18_LMNA | 0.11737  | -0.042629381 | 0.271495647 | 1.50E-01 | 3.98E-01 | 1.00E+00 |
| ENSG00000257113.1_RP11-274M  | ENSG00000160789.18_LMNA | -0.00289 | -0.162017555 | 0.156381254 | 9.72E-01 | 9.89E-01 | 1.00E+00 |
| ENSG00000250359.1_PTP4A1P4   | ENSG00000160789.18_LMNA | 0.00163  | -0.157608407 | 0.160792169 | 9.84E-01 | 9.94E-01 | 1.00E+00 |
| ENSG00000264029.1_CTD-2008P  | ENSG00000160789.18_LMNA | -0.01553 | -0.174302995 | 0.14402353  | 8.49E-01 | 9.41E-01 | 1.00E+00 |
| ENSG00000279336.1_AL353662.1 | ENSG00000160789.18_LMNA | 0.10653  | -0.053583089 | 0.261295703 | 1.91E-01 | 4.59E-01 | 1.00E+00 |
| ENSG00000222162.1_RN7SKP15   | ENSG00000160789.18_LMNA | 0.01449  | -0.145046473 | 0.173289784 | 8.59E-01 | 9.45E-01 | 1.00E+00 |
| ENSG00000279558.1_CH17-140K  | ENSG00000160789.18_LMNA | -0.22342 | -0.369476473 | -0.06658499 | 5.66E-03 | 4.31E-02 | 1.00E+00 |
| ENSG00000223174.1_RN7SKP17   | ENSG00000160789.18_LMNA | 0.18894  | 0.030659737  | 0.337973    | 1.97E-02 | 1.07E-01 | 1.00E+00 |
| ENSG00000238176.1_RP11-322I2 | ENSG00000160789.18_LMNA | 0.00986  | -0.149576713 | 0.168794528 | 9.04E-01 | 9.63E-01 | 1.00E+00 |
| ENSG00000265942.2_RN7SL577F  | ENSG00000160789.18_LMNA | 0.05303  | -0.107073988 | 0.210454622 | 5.16E-01 | 7.63E-01 | 1.00E+00 |
| ENSG00000234588.1_FABP5P14   | ENSG00000160789.18_LMNA | -0.08038 | -0.236555946 | 0.079839973 | 3.25E-01 | 6.12E-01 | 1.00E+00 |
| ENSG00000269524.1_CTB-83J4.1 | ENSG00000160789.18_LMNA | 0.05886  | -0.101288106 | 0.216037996 | 4.71E-01 | 7.31E-01 | 1.00E+00 |
| ENSG00000197353.3_LYPD2      | ENSG00000160789.18_LMNA | 0.0024   | -0.156856674 | 0.161542936 | 9.77E-01 | 9.91E-01 | 1.00E+00 |
| ENSG00000274954.1_RP11-56B1  | ENSG00000160789.18_LMNA | -0.12307 | -0.276849851 | 0.036849122 | 1.31E-01 | 3.67E-01 | 1.00E+00 |
| ENSG00000242241.3_RN7SL306F  | ENSG00000160789.18_LMNA | 0.10537  | -0.054747043 | 0.260207695 | 1.96E-01 | 4.66E-01 | 1.00E+00 |
| ENSG00000253911.1_KB-1205A7  | ENSG00000160789.18_LMNA | -0.03334 | -0.191526899 | 0.126529485 | 6.83E-01 | 8.62E-01 | 1.00E+00 |
| ENSG00000237306.1_HSPE1P22   | ENSG00000160789.18_LMNA | -0.02506 | -0.183525257 | 0.134681306 | 7.59E-01 | 9.00E-01 | 1.00E+00 |
| ENSG00000232184.1_RP11-370K  | ENSG00000160789.18_LMNA | -0.08519 | -0.241118107 | 0.075030838 | 2.97E-01 | 5.83E-01 | 1.00E+00 |
| ENSG00000222031.1_AC023469.  | ENSG00000160789.18_LMNA | -0.15767 | -0.309111761 | 0.001569977 | 5.24E-02 | 2.07E-01 | 1.00E+00 |
| ENSG00000269933.1_RP3-333A1  | ENSG00000160789.18_LMNA | -0.23245 | -0.377675562 | -0.07606548 | 3.95E-03 | 3.29E-02 | 1.00E+00 |
| ENSG00000233519.1_RP11-177F  | ENSG00000160789.18_LMNA | -0.00032 | -0.159510203 | 0.15889117  | 9.97E-01 | 9.99E-01 | 1.00E+00 |
| ENSG00000264271.2_RN7SL488F  | ENSG00000160789.18_LMNA | 0.08707  | -0.073145407 | 0.242902907 | 2.86E-01 | 5.72E-01 | 1.00E+00 |
| ENSG00000249649.1_MRPS33P2   | ENSG00000160789.18_LMNA | 0.03965  | -0.120313104 | 0.197600475 | 6.28E-01 | 8.32E-01 | 1.00E+00 |
| ENSG00000248607.1_RP11-158I2 | ENSG00000160789.18_LMNA | 0.14269  | -0.016894449 | 0.295185204 | 7.95E-02 | 2.71E-01 | 1.00E+00 |
| ENSG00000270937.1_RP5-856G1  | ENSG00000160789.18_LMNA | -0.00768 | -0.16667435  | 0.151708762 | 9.25E-01 | 9.71E-01 | 1.00E+00 |
| ENSG00000266710.2_RN7SL48P   | ENSG00000160789.18_LMNA | 0.1485   | -0.010958251 | 0.300595677 | 6.79E-02 | 2.44E-01 | 1.00E+00 |

|                              |                         |          |              |             |          |          |          |
|------------------------------|-------------------------|----------|--------------|-------------|----------|----------|----------|
| ENSG00000256988.1_RP11-234B  | ENSG00000160789.18_LMNA | -0.1472  | -0.299381923 | 0.012291856 | 7.03E-02 | 2.50E-01 | 1.00E+00 |
| ENSG00000228505.4_AC011897.  | ENSG00000160789.18_LMNA | -0.0734  | -0.22991539  | 0.086813793 | 3.69E-01 | 6.50E-01 | 1.00E+00 |
| ENSG00000237041.1_AC007679.  | ENSG00000160789.18_LMNA | 0.04042  | -0.119552143 | 0.198342282 | 6.21E-01 | 8.29E-01 | 1.00E+00 |
| ENSG00000275853.1_Metazoa_SI | ENSG00000160789.18_LMNA | -0.05384 | -0.211228491 | 0.106273333 | 5.10E-01 | 7.59E-01 | 1.00E+00 |
| ENSG00000275103.1_SCb-64M4.  | ENSG00000160789.18_LMNA | -0.00059 | -0.159771818 | 0.158629479 | 9.94E-01 | 9.98E-01 | 1.00E+00 |
| ENSG00000257169.1_RP11-117N  | ENSG00000160789.18_LMNA | -0.12541 | -0.279040374 | 0.034478225 | 1.24E-01 | 3.55E-01 | 1.00E+00 |
| ENSG00000265163.1_CDRT8      | ENSG00000160789.18_LMNA | -0.0449  | -0.202649349 | 0.115126472 | 5.83E-01 | 8.06E-01 | 1.00E+00 |
| ENSG00000270139.1_AP001172.  | ENSG00000160789.18_LMNA | 0.01861  | -0.141008283 | 0.17728564  | 8.20E-01 | 9.30E-01 | 1.00E+00 |
| ENSG00000270850.1_RP11-395N  | ENSG00000160789.18_LMNA | -0.04608 | -0.203782762 | 0.113959747 | 5.73E-01 | 8.01E-01 | 1.00E+00 |
| ENSG00000237483.1_RPS27AP8   | ENSG00000160789.18_LMNA | 0.15505  | -0.004257672 | 0.306678837 | 5.65E-02 | 2.17E-01 | 1.00E+00 |
| ENSG00000280707.1_RP11-568A  | ENSG00000160789.18_LMNA | 0.03752  | -0.122410275 | 0.195554205 | 6.46E-01 | 8.43E-01 | 1.00E+00 |
| ENSG00000235514.1_LLPHP2     | ENSG00000160789.18_LMNA | -0.25205 | -0.395389319 | -0.09673553 | 1.73E-03 | 1.75E-02 | 1.00E+00 |
| ENSG00000236109.1_AC013402.  | ENSG00000160789.18_LMNA | 0.00697  | -0.152397195 | 0.165989121 | 9.32E-01 | 9.73E-01 | 1.00E+00 |
| ENSG00000258649.1_CTD-2142D  | ENSG00000160789.18_LMNA | -0.25053 | -0.394012858 | -0.09512007 | 1.85E-03 | 1.85E-02 | 1.00E+00 |
| ENSG00000228030.2_AC019084.  | ENSG00000160789.18_LMNA | 0.04603  | -0.114004361 | 0.203739437 | 5.73E-01 | 8.01E-01 | 1.00E+00 |
| ENSG00000234593.1_RP4-704D2  | ENSG00000160789.18_LMNA | -0.04    | -0.197936595 | 0.119968351 | 6.25E-01 | 8.31E-01 | 1.00E+00 |
| ENSG00000239840.1_RPL23AP7   | ENSG00000160789.18_LMNA | -0.01715 | -0.175867892 | 0.142442265 | 8.34E-01 | 9.35E-01 | 1.00E+00 |
| ENSG00000234071.1_RP11-420H  | ENSG00000160789.18_LMNA | -0.03929 | -0.197255872 | 0.120666478 | 6.31E-01 | 8.34E-01 | 1.00E+00 |
| ENSG00000214067.2_RP11-549L  | ENSG00000160789.18_LMNA | -0.07725 | -0.233573836 | 0.08297558  | 3.44E-01 | 6.29E-01 | 1.00E+00 |
| ENSG00000225036.1_CDK4P1     | ENSG00000160789.18_LMNA | -0.17616 | -0.32621382  | -0.01745051 | 2.99E-02 | 1.43E-01 | 1.00E+00 |
| ENSG00000244662.1_RP11-615I1 | ENSG00000160789.18_LMNA | -0.15005 | -0.302034613 | 0.00937579  | 6.50E-02 | 2.38E-01 | 1.00E+00 |
| ENSG00000242608.1_RPS23P5    | ENSG00000160789.18_LMNA | -0.03614 | -0.194227951 | 0.123768005 | 6.58E-01 | 8.49E-01 | 1.00E+00 |
| ENSG00000229192.5_AC004870.  | ENSG00000160789.18_LMNA | 0.03714  | -0.122790967 | 0.195182457 | 6.50E-01 | 8.44E-01 | 1.00E+00 |
| ENSG00000214942.4_AC113167.  | ENSG00000160789.18_LMNA | -0.02955 | -0.187863006 | 0.130267484 | 7.18E-01 | 8.80E-01 | 1.00E+00 |
| ENSG00000254632.1_RP11-21L2  | ENSG00000160789.18_LMNA | -0.07772 | -0.234021754 | 0.082505006 | 3.41E-01 | 6.26E-01 | 1.00E+00 |
| ENSG00000232114.1_AC018693.  | ENSG00000160789.18_LMNA | 0.0267   | -0.133070882 | 0.185109363 | 7.44E-01 | 8.93E-01 | 1.00E+00 |
| ENSG00000213736.2_RP11-662I1 | ENSG00000160789.18_LMNA | -0.07754 | -0.233856754 | 0.082678369 | 3.42E-01 | 6.27E-01 | 1.00E+00 |
| ENSG00000227563.1_RNF11P2    | ENSG00000160789.18_LMNA | -0.05842 | -0.215612322 | 0.101729976 | 4.75E-01 | 7.34E-01 | 1.00E+00 |
| ENSG00000234184.4_RP5-887A1  | ENSG00000160789.18_LMNA | 0.04096  | -0.119012059 | 0.198868551 | 6.16E-01 | 8.26E-01 | 1.00E+00 |
| ENSG00000272592.1_RP11-63A2  | ENSG00000160789.18_LMNA | -0.0491  | -0.206686136 | 0.110967039 | 5.48E-01 | 7.85E-01 | 1.00E+00 |
| ENSG00000243149.1_RP11-543A  | ENSG00000160789.18_LMNA | 0.04093  | -0.119042861 | 0.198838541 | 6.17E-01 | 8.26E-01 | 1.00E+00 |
| ENSG00000230535.1_BASP1P1    | ENSG00000160789.18_LMNA | -0.00797 | -0.166957492 | 0.151424207 | 9.22E-01 | 9.70E-01 | 1.00E+00 |
| ENSG00000224142.1_AMMECR1    | ENSG00000160789.18_LMNA | -0.06014 | -0.217261429 | 0.100017426 | 4.62E-01 | 7.25E-01 | 1.00E+00 |



|                              |                         |          |              |             |          |          |          |
|------------------------------|-------------------------|----------|--------------|-------------|----------|----------|----------|
| ENSG00000259713.1_RP11-429B  | ENSG00000160789.18_LMNA | 0.06627  | -0.093919866 | 0.223118427 | 4.17E-01 | 6.90E-01 | 1.00E+00 |
| ENSG00000237336.1_RP11-230L  | ENSG00000160789.18_LMNA | 0.03258  | -0.127281482 | 0.190790522 | 6.90E-01 | 8.67E-01 | 1.00E+00 |
| ENSG00000248200.2_RP11-115A  | ENSG00000160789.18_LMNA | 0.12804  | -0.031807815 | 0.281503723 | 1.16E-01 | 3.40E-01 | 1.00E+00 |
| ENSG00000271681.1_RP11-1259  | ENSG00000160789.18_LMNA | 0.05438  | -0.105739258 | 0.211744478 | 5.06E-01 | 7.56E-01 | 1.00E+00 |
| ENSG00000235152.1_RP5-865N1  | ENSG00000160789.18_LMNA | 0.03311  | -0.126756224 | 0.191304907 | 6.85E-01 | 8.64E-01 | 1.00E+00 |
| ENSG00000237076.1_RP5-836J3  | ENSG00000160789.18_LMNA | -0.03534 | -0.193456616 | 0.124557099 | 6.66E-01 | 8.53E-01 | 1.00E+00 |
| ENSG00000214886.4_FAM177A1   | ENSG00000160789.18_LMNA | -0.04811 | -0.205732083 | 0.111951083 | 5.56E-01 | 7.90E-01 | 1.00E+00 |
| ENSG00000217482.2_HMGB1P17   | ENSG00000160789.18_LMNA | 0.06637  | -0.093825173 | 0.223209204 | 4.17E-01 | 6.89E-01 | 1.00E+00 |
| ENSG00000250544.1_CTC-493L2  | ENSG00000160789.18_LMNA | 0.0624   | -0.097772381 | 0.219420562 | 4.45E-01 | 7.12E-01 | 1.00E+00 |
| ENSG00000279665.1_RP11-507J  | ENSG00000160789.18_LMNA | 0.00562  | -0.153716603 | 0.164674993 | 9.45E-01 | 9.78E-01 | 1.00E+00 |
| ENSG00000259579.1_RP11-66B2  | ENSG00000160789.18_LMNA | 0.07183  | -0.08837995  | 0.228420009 | 3.79E-01 | 6.58E-01 | 1.00E+00 |
| ENSG00000256499.1_CTC-465D4  | ENSG00000160789.18_LMNA | -0.07987 | -0.236070813 | 0.080350504 | 3.28E-01 | 6.14E-01 | 1.00E+00 |
| ENSG00000227465.1_GPN3P1     | ENSG00000160789.18_LMNA | -0.06115 | -0.218223132 | 0.099017856 | 4.54E-01 | 7.19E-01 | 1.00E+00 |
| ENSG00000264174.1_RP11-212E  | ENSG00000160789.18_LMNA | -0.0546  | -0.211955533 | 0.10552075  | 5.04E-01 | 7.55E-01 | 1.00E+00 |
| ENSG00000255101.1_RP11-412B  | ENSG00000160789.18_LMNA | -0.15669 | -0.308204725 | 0.002572521 | 5.39E-02 | 2.11E-01 | 1.00E+00 |
| ENSG00000243981.4_RP11-368M  | ENSG00000160789.18_LMNA | -0.06075 | -0.217847025 | 0.099408848 | 4.57E-01 | 7.21E-01 | 1.00E+00 |
| ENSG00000236162.1_AC092687   | ENSG00000160789.18_LMNA | -0.06367 | -0.220629538 | 0.09651389  | 4.36E-01 | 7.04E-01 | 1.00E+00 |
| ENSG00000259937.2_RP11-438D  | ENSG00000160789.18_LMNA | -0.21127 | -0.358411811 | -0.0538772  | 8.98E-03 | 6.07E-02 | 1.00E+00 |
| ENSG00000217825.2_AC099552   | ENSG00000160789.18_LMNA | 0.11807  | -0.041916797 | 0.27215676  | 1.47E-01 | 3.93E-01 | 1.00E+00 |
| ENSG00000226782.2_RP11-706D  | ENSG00000160789.18_LMNA | 0.03209  | -0.127763677 | 0.190318155 | 6.95E-01 | 8.69E-01 | 1.00E+00 |
| ENSG00000204683.9_C10orf113  | ENSG00000160789.18_LMNA | 0.08234  | -0.077883704 | 0.238413435 | 3.13E-01 | 6.00E-01 | 1.00E+00 |
| ENSG00000268847.1_SIGLEC31F  | ENSG00000160789.18_LMNA | 0.02108  | -0.138587551 | 0.179675974 | 7.97E-01 | 9.18E-01 | 1.00E+00 |
| ENSG00000225557.1_MTCO3P20   | ENSG00000160789.18_LMNA | 0.03738  | -0.122549533 | 0.19541823  | 6.48E-01 | 8.43E-01 | 1.00E+00 |
| ENSG00000259747.1_RP11-275I4 | ENSG00000160789.18_LMNA | -0.0519  | -0.209369043 | 0.10819645  | 5.25E-01 | 7.70E-01 | 1.00E+00 |
| ENSG00000259764.1_PCSK6-AS   | ENSG00000160789.18_LMNA | -0.15281 | -0.30459947  | 0.006551232 | 6.02E-02 | 2.26E-01 | 1.00E+00 |
| ENSG00000279269.1_RP11-573M  | ENSG00000160789.18_LMNA | 0.09954  | -0.060621852 | 0.254703979 | 2.22E-01 | 4.98E-01 | 1.00E+00 |
| ENSG00000254399.2_GLYATL1P   | ENSG00000160789.18_LMNA | -0.17037 | -0.320867016 | -0.01147982 | 3.59E-02 | 1.61E-01 | 1.00E+00 |
| ENSG00000258121.1_RP11-722P  | ENSG00000160789.18_LMNA | -0.01427 | -0.17307653  | 0.145261689 | 8.61E-01 | 9.46E-01 | 1.00E+00 |
| ENSG00000260725.1_AC005307   | ENSG00000160789.18_LMNA | -0.23187 | -0.377148796 | -0.07545475 | 4.05E-03 | 3.34E-02 | 1.00E+00 |
| ENSG00000248616.1_CTB-1I21.2 | ENSG00000160789.18_LMNA | -0.15284 | -0.304628101 | 0.006519675 | 6.01E-02 | 2.26E-01 | 1.00E+00 |
| ENSG00000239590.1_OR1J4      | ENSG00000160789.18_LMNA | -0.07647 | -0.232838193 | 0.083748125 | 3.49E-01 | 6.33E-01 | 1.00E+00 |
| ENSG00000229972.6_IQCF3      | ENSG00000160789.18_LMNA | -0.08649 | -0.242351126 | 0.07372854  | 2.89E-01 | 5.75E-01 | 1.00E+00 |
| ENSG00000267477.1_CTC-398G3  | ENSG00000160789.18_LMNA | 0.0232   | -0.136503591 | 0.181730759 | 7.77E-01 | 9.08E-01 | 1.00E+00 |

|                             |                         |          |              |             |          |          |          |
|-----------------------------|-------------------------|----------|--------------|-------------|----------|----------|----------|
| ENSG00000255314.1_RP11-702F | ENSG00000160789.18_LMNA | 0.00791  | -0.151481348 | 0.166900638 | 9.23E-01 | 9.70E-01 | 1.00E+00 |
| ENSG00000216754.2_RP1-190J2 | ENSG00000160789.18_LMNA | 0.00988  | -0.149551389 | 0.168819693 | 9.04E-01 | 9.63E-01 | 1.00E+00 |
| ENSG00000249662.4_RP11-321E | ENSG00000160789.18_LMNA | -0.27965 | -0.420142762 | -0.12605821 | 4.85E-04 | 6.58E-03 | 1.00E+00 |
| ENSG00000228615.1_AC093166. | ENSG00000160789.18_LMNA | 0.04611  | -0.113922846 | 0.203818596 | 5.73E-01 | 8.00E-01 | 1.00E+00 |
| ENSG00000229110.1_AC006355. | ENSG00000160789.18_LMNA | 0.09477  | -0.065418952 | 0.250194694 | 2.45E-01 | 5.25E-01 | 1.00E+00 |
| ENSG00000242062.1_MARK2P6   | ENSG00000160789.18_LMNA | 0.00376  | -0.155529226 | 0.16286778  | 9.63E-01 | 9.85E-01 | 1.00E+00 |
| ENSG00000244280.1_ECEL1P2   | ENSG00000160789.18_LMNA | -0.03058 | -0.188860206 | 0.129251009 | 7.08E-01 | 8.76E-01 | 1.00E+00 |
| ENSG00000271917.1_RP11-506O | ENSG00000160789.18_LMNA | -0.13658 | -0.289483703 | 0.023126236 | 9.34E-02 | 2.99E-01 | 1.00E+00 |
| ENSG00000214207.2_KRT18P10  | ENSG00000160789.18_LMNA | 0.05819  | -0.101954381 | 0.215396097 | 4.76E-01 | 7.35E-01 | 1.00E+00 |
| ENSG00000281264.1_SALRNA3   | ENSG00000160789.18_LMNA | -0.13406 | -0.287134704 | 0.025686665 | 9.96E-02 | 3.11E-01 | 1.00E+00 |
| ENSG00000254567.2_UBTFL9    | ENSG00000160789.18_LMNA | -0.073   | -0.229528715 | 0.08721892  | 3.71E-01 | 6.52E-01 | 1.00E+00 |
| ENSG00000224173.1_AC007422. | ENSG00000160789.18_LMNA | 0.13431  | -0.025435629 | 0.287365177 | 9.90E-02 | 3.10E-01 | 1.00E+00 |
| ENSG00000213211.2_KRT18P64  | ENSG00000160789.18_LMNA | 0.16109  | 0.001934218  | 0.312277691 | 4.74E-02 | 1.94E-01 | 1.00E+00 |
| ENSG00000169605.5_GKN1      | ENSG00000160789.18_LMNA | 0.04608  | -0.113960901 | 0.203781642 | 5.73E-01 | 8.01E-01 | 1.00E+00 |
| ENSG00000205625.2_RP11-15G8 | ENSG00000160789.18_LMNA | -0.01633 | -0.175078711 | 0.143239903 | 8.42E-01 | 9.38E-01 | 1.00E+00 |
| ENSG00000261153.2_RP11-104C | ENSG00000160789.18_LMNA | 0.04191  | -0.118083223 | 0.199773199 | 6.08E-01 | 8.21E-01 | 1.00E+00 |
| ENSG00000215317.2_THUMPD1F  | ENSG00000160789.18_LMNA | -0.02613 | -0.184565349 | 0.133624124 | 7.49E-01 | 8.95E-01 | 1.00E+00 |
| ENSG00000280002.1_RP11-76C1 | ENSG00000160789.18_LMNA | 0.09712  | -0.063054473 | 0.252419022 | 2.34E-01 | 5.12E-01 | 1.00E+00 |
| ENSG00000279993.1_RP11-76C1 | ENSG00000160789.18_LMNA | -0.08962 | -0.245323726 | 0.070584481 | 2.72E-01 | 5.57E-01 | 1.00E+00 |
| ENSG00000214407.3_RP11-221J | ENSG00000160789.18_LMNA | 0.11523  | -0.044788681 | 0.269490504 | 1.57E-01 | 4.10E-01 | 1.00E+00 |
| ENSG00000183643.4_C15orf32  | ENSG00000160789.18_LMNA | 0.03163  | -0.128215294 | 0.189875607 | 6.99E-01 | 8.71E-01 | 1.00E+00 |
| ENSG00000258716.1_RP11-661G | ENSG00000160789.18_LMNA | -0.00986 | -0.168794479 | 0.149576763 | 9.04E-01 | 9.63E-01 | 1.00E+00 |
| ENSG00000216560.4_LINC00955 | ENSG00000160789.18_LMNA | -0.18541 | -0.334733966 | -0.02701055 | 2.22E-02 | 1.16E-01 | 1.00E+00 |
| ENSG00000171053.8_PATE1     | ENSG00000160789.18_LMNA | 0.02106  | -0.138603585 | 0.179660154 | 7.97E-01 | 9.18E-01 | 1.00E+00 |
| ENSG00000243081.2_RP11-231E | ENSG00000160789.18_LMNA | -0.04992 | -0.207468991 | 0.110159109 | 5.41E-01 | 7.81E-01 | 1.00E+00 |
| ENSG00000236301.5_MRGPRG-7  | ENSG00000160789.18_LMNA | -0.18631 | -0.335557381 | -0.02793745 | 2.16E-02 | 1.14E-01 | 1.00E+00 |
| ENSG00000261781.1_RP11-174G | ENSG00000160789.18_LMNA | -0.16237 | -0.313467096 | -0.00325268 | 4.57E-02 | 1.89E-01 | 1.00E+00 |
| ENSG00000236858.1_CTA-992D9 | ENSG00000160789.18_LMNA | -0.11488 | -0.269158506 | 0.045145921 | 1.59E-01 | 4.12E-01 | 1.00E+00 |
| ENSG00000167757.12_KLK11    | ENSG00000160789.18_LMNA | -0.01292 | -0.171764737 | 0.146584886 | 8.74E-01 | 9.51E-01 | 1.00E+00 |
| ENSG00000261400.1_AC011525. | ENSG00000160789.18_LMNA | 0.02503  | -0.134709877 | 0.183497138 | 7.60E-01 | 9.00E-01 | 1.00E+00 |
| ENSG00000175718.9_RBMXL3    | ENSG00000160789.18_LMNA | 0.05741  | -0.102725215 | 0.214653121 | 4.82E-01 | 7.40E-01 | 1.00E+00 |
| ENSG00000248958.2_ZSWIM5P3  | ENSG00000160789.18_LMNA | -0.04855 | -0.206161092 | 0.111508665 | 5.52E-01 | 7.88E-01 | 1.00E+00 |
| ENSG00000234962.4_LINC00700 | ENSG00000160789.18_LMNA | 0.02613  | -0.133623667 | 0.184565798 | 7.49E-01 | 8.95E-01 | 1.00E+00 |

|                              |                         |          |              |             |          |          |          |
|------------------------------|-------------------------|----------|--------------|-------------|----------|----------|----------|
| ENSG00000238122.1_RP11-483I1 | ENSG00000160789.18_LMNA | 0.09829  | -0.061877388 | 0.253525095 | 2.28E-01 | 5.05E-01 | 1.00E+00 |
| ENSG00000182938.4_OTOP3      | ENSG00000160789.18_LMNA | 0.03453  | -0.125355962 | 0.192675331 | 6.73E-01 | 8.56E-01 | 1.00E+00 |
| ENSG00000231649.3_SPATA31B   | ENSG00000160789.18_LMNA | -0.049   | -0.206588393 | 0.111067883 | 5.49E-01 | 7.86E-01 | 1.00E+00 |
| ENSG00000257275.5_RP11-164H  | ENSG00000160789.18_LMNA | 0.05209  | -0.108008626 | 0.209550749 | 5.24E-01 | 7.69E-01 | 1.00E+00 |
| ENSG00000242111.1_TOPORSLF   | ENSG00000160789.18_LMNA | -0.0254  | -0.183852723 | 0.134348538 | 7.56E-01 | 8.98E-01 | 1.00E+00 |
| ENSG00000257985.1_RP1-228P1  | ENSG00000160789.18_LMNA | -0.00406 | -0.163158901 | 0.155237378 | 9.60E-01 | 9.84E-01 | 1.00E+00 |
| ENSG00000260440.2_LINC01544  | ENSG00000160789.18_LMNA | -0.05427 | -0.211644471 | 0.105842784 | 5.07E-01 | 7.57E-01 | 1.00E+00 |
| ENSG00000271519.1_RP11-307A  | ENSG00000160789.18_LMNA | -0.06465 | -0.22156658  | 0.095537771 | 4.29E-01 | 6.99E-01 | 1.00E+00 |
| ENSG00000279091.1_RP11-461F  | ENSG00000160789.18_LMNA | -0.06047 | -0.21758009  | 0.099686288 | 4.59E-01 | 7.23E-01 | 1.00E+00 |
| ENSG00000277054.1_           | ENSG00000160789.18_LMNA | 0.01222  | -0.147262727 | 0.171092301 | 8.81E-01 | 9.54E-01 | 1.00E+00 |
| ENSG00000266463.1_MIR3196    | ENSG00000160789.18_LMNA | -0.24283 | -0.387070492 | -0.08699617 | 2.57E-03 | 2.38E-02 | 1.00E+00 |
| ENSG00000238890.1_           | ENSG00000160789.18_LMNA | -0.18553 | -0.334844075 | -0.02713447 | 2.21E-02 | 1.16E-01 | 1.00E+00 |
| ENSG00000275651.1_MIR6851    | ENSG00000160789.18_LMNA | 0.02902  | -0.130783466 | 0.187356557 | 7.23E-01 | 8.83E-01 | 1.00E+00 |
| ENSG00000210112.1_MT-TM      | ENSG00000160789.18_LMNA | -0.00472 | -0.163794855 | 0.154599644 | 9.54E-01 | 9.82E-01 | 1.00E+00 |
| ENSG00000252128.1_SNORD27    | ENSG00000160789.18_LMNA | 0.07732  | -0.082902876 | 0.233643048 | 3.44E-01 | 6.28E-01 | 1.00E+00 |
| ENSG00000275682.1_           | ENSG00000160789.18_LMNA | -0.0385  | -0.196496959 | 0.121444423 | 6.38E-01 | 8.38E-01 | 1.00E+00 |
| ENSG00000266047.1_           | ENSG00000160789.18_LMNA | -0.11088 | -0.265395874 | 0.04918901  | 1.74E-01 | 4.34E-01 | 1.00E+00 |
| ENSG00000223280.1_RNU6-57P   | ENSG00000160789.18_LMNA | -0.06706 | -0.22386778  | 0.093138016 | 4.12E-01 | 6.86E-01 | 1.00E+00 |
| ENSG00000281297.1_           | ENSG00000160789.18_LMNA | -0.04708 | -0.204747565 | 0.112965897 | 5.65E-01 | 7.95E-01 | 1.00E+00 |
| ENSG00000278234.1_U2         | ENSG00000160789.18_LMNA | -0.07856 | -0.234822038 | 0.081663892 | 3.36E-01 | 6.22E-01 | 1.00E+00 |
| ENSG00000265444.1_MIR4733    | ENSG00000160789.18_LMNA | -0.00479 | -0.163867975 | 0.154526301 | 9.53E-01 | 9.81E-01 | 1.00E+00 |
| ENSG00000221555.1_           | ENSG00000160789.18_LMNA | -0.09162 | -0.247214005 | 0.068581902 | 2.62E-01 | 5.45E-01 | 1.00E+00 |
| ENSG00000222858.1_RNU6-920F  | ENSG00000160789.18_LMNA | -0.02328 | -0.181804617 | 0.136428631 | 7.76E-01 | 9.08E-01 | 1.00E+00 |
| ENSG00000277347.1_           | ENSG00000160789.18_LMNA | -0.06266 | -0.219669925 | 0.097512889 | 4.43E-01 | 7.10E-01 | 1.00E+00 |
| ENSG00000264429.1_MIR3183    | ENSG00000160789.18_LMNA | 0.10069  | -0.059468079 | 0.255786487 | 2.17E-01 | 4.92E-01 | 1.00E+00 |
| ENSG00000238711.1_RNY4P25    | ENSG00000160789.18_LMNA | -0.05615 | -0.213447122 | 0.103975623 | 4.92E-01 | 7.47E-01 | 1.00E+00 |
| ENSG00000278483.1_MIR8087    | ENSG00000160789.18_LMNA | -0.03065 | -0.188928705 | 0.129181162 | 7.08E-01 | 8.76E-01 | 1.00E+00 |
| ENSG00000265530.1_           | ENSG00000160789.18_LMNA | 0.05618  | -0.103951457 | 0.213470439 | 4.92E-01 | 7.47E-01 | 1.00E+00 |
| ENSG00000208032.1_MIR548A3   | ENSG00000160789.18_LMNA | 0.03698  | -0.122941966 | 0.195034979 | 6.51E-01 | 8.45E-01 | 1.00E+00 |
| ENSG00000206957.2_Y_RNA      | ENSG00000160789.18_LMNA | 0.15079  | -0.008620469 | 0.302720929 | 6.37E-02 | 2.35E-01 | 1.00E+00 |
| ENSG00000207627.1_MIR581     | ENSG00000160789.18_LMNA | -0.15967 | -0.310969009 | -0.00048479 | 4.94E-02 | 2.00E-01 | 1.00E+00 |
| ENSG00000199740.1_Y_RNA      | ENSG00000160789.18_LMNA | 0.10225  | -0.057898008 | 0.257258309 | 2.10E-01 | 4.83E-01 | 1.00E+00 |
| ENSG00000265379.1_           | ENSG00000160789.18_LMNA | -0.07    | -0.226671672 | 0.090209053 | 3.91E-01 | 6.70E-01 | 1.00E+00 |

|                             |                         |          |              |             |          |          |          |
|-----------------------------|-------------------------|----------|--------------|-------------|----------|----------|----------|
| ENSG00000212226.1_RNU6-907F | ENSG00000160789.18_LMNA | -0.0784  | -0.234674157 | 0.081819351 | 3.37E-01 | 6.22E-01 | 1.00E+00 |
| ENSG00000264455.1_          | ENSG00000160789.18_LMNA | 0.08339  | -0.076826509 | 0.239416286 | 3.07E-01 | 5.93E-01 | 1.00E+00 |
| ENSG00000200360.1_RNU6-792F | ENSG00000160789.18_LMNA | -0.07186 | -0.228449119 | 0.088349478 | 3.79E-01 | 6.58E-01 | 1.00E+00 |
| ENSG00000199594.1_RNU6-1301 | ENSG00000160789.18_LMNA | -0.08301 | -0.239052506 | 0.077210085 | 3.09E-01 | 5.96E-01 | 1.00E+00 |
| ENSG00000201048.1_Y_RNA     | ENSG00000160789.18_LMNA | -0.03264 | -0.19084991  | 0.127220848 | 6.90E-01 | 8.66E-01 | 1.00E+00 |
| ENSG00000273804.1_RP11-680G | ENSG00000160789.18_LMNA | -0.0661  | -0.222954024 | 0.094091347 | 4.18E-01 | 6.90E-01 | 1.00E+00 |
| ENSG00000222614.1_Y_RNA     | ENSG00000160789.18_LMNA | -0.10255 | -0.257546829 | 0.057590046 | 2.09E-01 | 4.81E-01 | 1.00E+00 |
| ENSG00000222297.1_RNU6-1156 | ENSG00000160789.18_LMNA | 0.0183   | -0.141307566 | 0.176989854 | 8.23E-01 | 9.31E-01 | 1.00E+00 |
| ENSG00000207023.1_RNU6-975F | ENSG00000160789.18_LMNA | 0.01791  | -0.141691047 | 0.17661077  | 8.27E-01 | 9.32E-01 | 1.00E+00 |
| ENSG00000207083.1_RNU6-22P  | ENSG00000160789.18_LMNA | 0.00805  | -0.151346221 | 0.167035081 | 9.22E-01 | 9.70E-01 | 1.00E+00 |
| ENSG00000222378.1_RNA5SP44  | ENSG00000160789.18_LMNA | 0.17871  | 0.020078124  | 0.328560625 | 2.76E-02 | 1.35E-01 | 1.00E+00 |
| ENSG00000235378.2_MRPS10P1  | ENSG00000160789.18_LMNA | 0.04251  | -0.117486935 | 0.200353673 | 6.03E-01 | 8.18E-01 | 1.00E+00 |
| ENSG00000207369.1_RNU6-665F | ENSG00000160789.18_LMNA | 0.00137  | -0.157867762 | 0.160533061 | 9.87E-01 | 9.95E-01 | 1.00E+00 |
| ENSG00000252390.1_RNU5F-4P  | ENSG00000160789.18_LMNA | -0.00069 | -0.159876157 | 0.158525098 | 9.93E-01 | 9.97E-01 | 1.00E+00 |
| ENSG00000253085.1_SCARNA11  | ENSG00000160789.18_LMNA | -0.13767 | -0.290507133 | 0.022009406 | 9.08E-02 | 2.94E-01 | 1.00E+00 |
| ENSG00000261333.2_CD24P2    | ENSG00000160789.18_LMNA | -0.04096 | -0.198863395 | 0.119017351 | 6.16E-01 | 8.26E-01 | 1.00E+00 |
| ENSG00000230668.1_XXyac-YR2 | ENSG00000160789.18_LMNA | -0.11529 | -0.269540379 | 0.044735008 | 1.57E-01 | 4.09E-01 | 1.00E+00 |
| ENSG00000239748.3_RN7SL795F | ENSG00000160789.18_LMNA | -0.01365 | -0.172478115 | 0.145865448 | 8.67E-01 | 9.48E-01 | 1.00E+00 |
| ENSG00000249288.1_SLC25A15F | ENSG00000160789.18_LMNA | -0.17528 | -0.325399564 | -0.01653982 | 3.08E-02 | 1.46E-01 | 1.00E+00 |
| ENSG00000278054.1_RP11-34H1 | ENSG00000160789.18_LMNA | -0.09887 | -0.254075186 | 0.061291654 | 2.26E-01 | 5.02E-01 | 1.00E+00 |
| ENSG00000242341.3_RN7SL646F | ENSG00000160789.18_LMNA | 0.0491   | -0.11096635  | 0.206686803 | 5.48E-01 | 7.85E-01 | 1.00E+00 |
| ENSG00000253455.1_RP11-770E | ENSG00000160789.18_LMNA | 0.11474  | -0.045285339 | 0.269028918 | 1.59E-01 | 4.12E-01 | 1.00E+00 |
| ENSG00000147381.10_MAGEA4   | ENSG00000160789.18_LMNA | -0.10867 | -0.263315441 | 0.051420095 | 1.83E-01 | 4.47E-01 | 1.00E+00 |
| ENSG00000256256.1_RP11-443N | ENSG00000160789.18_LMNA | 0.16936  | 0.010443169  | 0.319936675 | 3.70E-02 | 1.64E-01 | 1.00E+00 |
| ENSG00000225297.1_RP4-612C1 | ENSG00000160789.18_LMNA | -0.07731 | -0.233635175 | 0.082911146 | 3.44E-01 | 6.28E-01 | 1.00E+00 |
| ENSG00000223375.1_RP11-224O | ENSG00000160789.18_LMNA | -0.01699 | -0.17571692  | 0.142594887 | 8.35E-01 | 9.36E-01 | 1.00E+00 |
| ENSG00000253959.1_CTB-43E15 | ENSG00000160789.18_LMNA | -0.07646 | -0.23282415  | 0.08376287  | 3.49E-01 | 6.33E-01 | 1.00E+00 |
| ENSG00000211713.3_TRBV6-4   | ENSG00000160789.18_LMNA | -0.00024 | -0.159436227 | 0.158965158 | 9.98E-01 | 9.99E-01 | 1.00E+00 |
| ENSG00000211814.1_TRAV35    | ENSG00000160789.18_LMNA | 0.1409   | -0.018724095 | 0.293513551 | 8.34E-02 | 2.79E-01 | 1.00E+00 |
| ENSG00000237480.1_RP5-947P1 | ENSG00000160789.18_LMNA | -0.29691 | -0.435525719 | -0.14454334 | 2.04E-04 | 3.31E-03 | 1.00E+00 |
| ENSG00000239825.3_RN7SL549F | ENSG00000160789.18_LMNA | 0.04968  | -0.11039608  | 0.207239416 | 5.43E-01 | 7.82E-01 | 1.00E+00 |
| ENSG00000236327.2_RP11-759F | ENSG00000160789.18_LMNA | -0.01865 | -0.177319554 | 0.140973964 | 8.20E-01 | 9.30E-01 | 1.00E+00 |
| ENSG00000278778.1_HTT-AS1_1 | ENSG00000160789.18_LMNA | 0.10154  | -0.058607531 | 0.256593366 | 2.13E-01 | 4.87E-01 | 1.00E+00 |

|                              |                         |          |              |             |          |          |          |
|------------------------------|-------------------------|----------|--------------|-------------|----------|----------|----------|
| ENSG00000248120.1_RP11-301A  | ENSG00000160789.18_LMNA | -0.13068 | -0.283977447 | 0.029121648 | 1.09E-01 | 3.28E-01 | 1.00E+00 |
| ENSG00000240404.1_RP11-142L  | ENSG00000160789.18_LMNA | -0.08748 | -0.243290299 | 0.072735875 | 2.84E-01 | 5.69E-01 | 1.00E+00 |
| ENSG00000244139.3_RN7SL397F  | ENSG00000160789.18_LMNA | 0.01441  | -0.145124464 | 0.173212507 | 8.60E-01 | 9.45E-01 | 1.00E+00 |
| ENSG00000234567.1_RP1-283K1  | ENSG00000160789.18_LMNA | 0.12651  | -0.033364626 | 0.280068128 | 1.20E-01 | 3.49E-01 | 1.00E+00 |
| ENSG00000267624.1_RP11-219G  | ENSG00000160789.18_LMNA | -0.09499 | -0.250407678 | 0.065192702 | 2.44E-01 | 5.24E-01 | 1.00E+00 |
| ENSG00000255489.1_CTC-830E2  | ENSG00000160789.18_LMNA | -0.13936 | -0.292084052 | 0.020287044 | 8.68E-02 | 2.86E-01 | 1.00E+00 |
| ENSG00000251334.2_RP11-317G  | ENSG00000160789.18_LMNA | -0.01504 | -0.173825189 | 0.144506011 | 8.54E-01 | 9.43E-01 | 1.00E+00 |
| ENSG00000263905.2_RN7SL555F  | ENSG00000160789.18_LMNA | 0.01635  | -0.143221128 | 0.175097292 | 8.42E-01 | 9.38E-01 | 1.00E+00 |
| ENSG00000262213.1_AC144836.  | ENSG00000160789.18_LMNA | -0.01192 | -0.170800761 | 0.147556517 | 8.84E-01 | 9.55E-01 | 1.00E+00 |
| ENSG00000240436.1_RP11-95I19 | ENSG00000160789.18_LMNA | -0.05839 | -0.215588339 | 0.101754868 | 4.75E-01 | 7.34E-01 | 1.00E+00 |
| ENSG00000229046.1_HMGN1P2    | ENSG00000160789.18_LMNA | 0.16355  | 0.00446661   | 0.314561344 | 4.41E-02 | 1.85E-01 | 1.00E+00 |
| ENSG00000270549.1_RP11-293K  | ENSG00000160789.18_LMNA | 0.02012  | -0.139531792 | 0.178744037 | 8.06E-01 | 9.22E-01 | 1.00E+00 |
| ENSG00000241869.3_RN7SL363F  | ENSG00000160789.18_LMNA | -0.08551 | -0.2414278   | 0.074703846 | 2.95E-01 | 5.81E-01 | 1.00E+00 |
| ENSG00000224691.1_GS1-174L6  | ENSG00000160789.18_LMNA | 0.04897  | -0.11109904  | 0.206558193 | 5.49E-01 | 7.86E-01 | 1.00E+00 |
| ENSG00000226063.1_AC009531.  | ENSG00000160789.18_LMNA | -0.1173  | -0.271433039 | 0.042696846 | 1.50E-01 | 3.98E-01 | 1.00E+00 |
| ENSG00000224144.1_ASH2LP1    | ENSG00000160789.18_LMNA | -0.02471 | -0.183190966 | 0.135020937 | 7.63E-01 | 9.01E-01 | 1.00E+00 |
| ENSG00000231729.1_ARHGEF9-I  | ENSG00000160789.18_LMNA | -0.00106 | -0.160238338 | 0.158162714 | 9.90E-01 | 9.96E-01 | 1.00E+00 |
| ENSG00000264438.2_RN7SL560F  | ENSG00000160789.18_LMNA | -0.03169 | -0.189931861 | 0.128157895 | 6.98E-01 | 8.71E-01 | 1.00E+00 |
| ENSG00000235445.1_XXbac-B47I | ENSG00000160789.18_LMNA | -0.05431 | -0.211678308 | 0.105807757 | 5.06E-01 | 7.57E-01 | 1.00E+00 |
| ENSG00000236703.1_MYB-AS1    | ENSG00000160789.18_LMNA | -0.06096 | -0.218041184 | 0.099207017 | 4.56E-01 | 7.20E-01 | 1.00E+00 |
| ENSG00000248397.1_LINC00498  | ENSG00000160789.18_LMNA | -0.12005 | -0.274017987 | 0.039908946 | 1.41E-01 | 3.83E-01 | 1.00E+00 |
| ENSG00000229102.1_RP11-360P  | ENSG00000160789.18_LMNA | -0.05847 | -0.215664088 | 0.101676248 | 4.74E-01 | 7.34E-01 | 1.00E+00 |
| ENSG00000232978.2_RP11-146N  | ENSG00000160789.18_LMNA | 0.07561  | -0.084604314 | 0.23202248  | 3.55E-01 | 6.38E-01 | 1.00E+00 |
| ENSG00000217041.1_RP11-346C  | ENSG00000160789.18_LMNA | 0.06207  | -0.098095119 | 0.219110366 | 4.47E-01 | 7.14E-01 | 1.00E+00 |
| ENSG00000265439.2_RN7SL811F  | ENSG00000160789.18_LMNA | 0.02852  | -0.131280389 | 0.186868654 | 7.27E-01 | 8.85E-01 | 1.00E+00 |
| ENSG00000231293.1_RPL36AP6   | ENSG00000160789.18_LMNA | 0.00651  | -0.152846007 | 0.165542232 | 9.37E-01 | 9.75E-01 | 1.00E+00 |
| ENSG00000279600.1_RP11-637C  | ENSG00000160789.18_LMNA | 0.05046  | -0.109626188 | 0.207985149 | 5.37E-01 | 7.78E-01 | 1.00E+00 |
| ENSG00000146618.3_FERD3L     | ENSG00000160789.18_LMNA | -0.08135 | -0.237477455 | 0.078869763 | 3.19E-01 | 6.06E-01 | 1.00E+00 |
| ENSG00000271386.1_SRGNP1     | ENSG00000160789.18_LMNA | -0.10748 | -0.262196042 | 0.052619255 | 1.88E-01 | 4.54E-01 | 1.00E+00 |
| ENSG00000235967.1_COX5BP3    | ENSG00000160789.18_LMNA | 0.154    | -0.005329143 | 0.305707799 | 5.82E-02 | 2.21E-01 | 1.00E+00 |
| ENSG00000244436.2_RP11-428G  | ENSG00000160789.18_LMNA | -0.0591  | -0.216267357 | 0.101049966 | 4.70E-01 | 7.30E-01 | 1.00E+00 |
| ENSG00000225444.1_AC087073.  | ENSG00000160789.18_LMNA | -0.07829 | -0.234569552 | 0.081929308 | 3.38E-01 | 6.23E-01 | 1.00E+00 |
| ENSG00000266961.1_RP11-973H  | ENSG00000160789.18_LMNA | 0.11739  | -0.042605129 | 0.271518151 | 1.50E-01 | 3.98E-01 | 1.00E+00 |

|                              |                         |          |              |             |          |          |          |
|------------------------------|-------------------------|----------|--------------|-------------|----------|----------|----------|
| ENSG00000236452.1_AC123023.  | ENSG00000160789.18_LMNA | -0.1435  | -0.29593683  | 0.016071103 | 7.78E-02 | 2.67E-01 | 1.00E+00 |
| ENSG00000255689.1_RP11-136I1 | ENSG00000160789.18_LMNA | 0.05175  | -0.108341929 | 0.209228286 | 5.27E-01 | 7.71E-01 | 1.00E+00 |
| ENSG00000258996.2_CTD-2315A  | ENSG00000160789.18_LMNA | -0.06082 | -0.217913543 | 0.099339704 | 4.57E-01 | 7.21E-01 | 1.00E+00 |
| ENSG00000228982.1_RP11-107G  | ENSG00000160789.18_LMNA | 0.04452  | -0.115500515 | 0.202285805 | 5.86E-01 | 8.08E-01 | 1.00E+00 |
| ENSG00000226925.1_AC007271.  | ENSG00000160789.18_LMNA | 0.05874  | -0.101409751 | 0.215920822 | 4.72E-01 | 7.32E-01 | 1.00E+00 |
| ENSG00000258460.1_RP11-168L  | ENSG00000160789.18_LMNA | -0.10254 | -0.257533498 | 0.057604277 | 2.09E-01 | 4.81E-01 | 1.00E+00 |
| ENSG00000241003.1_RP11-22C1  | ENSG00000160789.18_LMNA | 0.11002  | -0.050061174 | 0.264582951 | 1.77E-01 | 4.39E-01 | 1.00E+00 |
| ENSG00000256020.1_RP5-1154L  | ENSG00000160789.18_LMNA | -0.0832  | -0.239232466 | 0.077020343 | 3.08E-01 | 5.95E-01 | 1.00E+00 |
| ENSG00000267190.1_TYMSP2     | ENSG00000160789.18_LMNA | -0.0268  | -0.185211792 | 0.132966693 | 7.43E-01 | 8.92E-01 | 1.00E+00 |
| ENSG00000168757.11_TSPY2     | ENSG00000160789.18_LMNA | -0.39785 | -0.523870372 | -0.25478769 | 3.86E-07 | 2.14E-05 | 1.98E-02 |
| ENSG00000254195.1_TPM3P3     | ENSG00000160789.18_LMNA | 0.06818  | -0.09201779  | 0.224940791 | 4.04E-01 | 6.80E-01 | 1.00E+00 |
| ENSG00000258225.1_RP11-136F  | ENSG00000160789.18_LMNA | 0.05103  | -0.109055908 | 0.208537296 | 5.32E-01 | 7.75E-01 | 1.00E+00 |
| ENSG00000220110.1_RP1-6P5.2  | ENSG00000160789.18_LMNA | 0.04867  | -0.111393746 | 0.206272508 | 5.52E-01 | 7.87E-01 | 1.00E+00 |
| ENSG00000265801.1_RP11-720N  | ENSG00000160789.18_LMNA | -0.14204 | -0.294581361 | 0.017555604 | 8.09E-02 | 2.74E-01 | 1.00E+00 |
| ENSG00000272703.1_RP11-78A1  | ENSG00000160789.18_LMNA | 0.01315  | -0.146358613 | 0.17198914  | 8.72E-01 | 9.50E-01 | 1.00E+00 |
| ENSG00000256310.1_NDUFA5P6   | ENSG00000160789.18_LMNA | -0.16764 | -0.318349154 | -0.00867578 | 3.90E-02 | 1.70E-01 | 1.00E+00 |
| ENSG00000232090.2_AC016724.  | ENSG00000160789.18_LMNA | -0.13652 | -0.289429145 | 0.023185752 | 9.35E-02 | 2.99E-01 | 1.00E+00 |
| ENSG00000196570.2_PFN3       | ENSG00000160789.18_LMNA | 0.04544  | -0.114588359 | 0.203172203 | 5.78E-01 | 8.03E-01 | 1.00E+00 |
| ENSG00000269256.1_RP11-325D  | ENSG00000160789.18_LMNA | -0.10147 | -0.25652416  | 0.058681359 | 2.14E-01 | 4.88E-01 | 1.00E+00 |
| ENSG00000253351.1_LINC01298  | ENSG00000160789.18_LMNA | -0.00416 | -0.16325028  | 0.15514576  | 9.59E-01 | 9.84E-01 | 1.00E+00 |
| ENSG00000234239.1_CFL1P8     | ENSG00000160789.18_LMNA | -0.19289 | -0.341603259 | -0.03475945 | 1.73E-02 | 9.72E-02 | 1.00E+00 |
| ENSG00000258564.1_OR4N1P     | ENSG00000160789.18_LMNA | -0.17187 | -0.322252891 | -0.01302529 | 3.42E-02 | 1.56E-01 | 1.00E+00 |
| ENSG00000237243.1_AC022173.  | ENSG00000160789.18_LMNA | -0.04974 | -0.207299891 | 0.11033366  | 5.43E-01 | 7.82E-01 | 1.00E+00 |
| ENSG00000225690.1_TREML5P    | ENSG00000160789.18_LMNA | -0.00462 | -0.163698909 | 0.154695875 | 9.55E-01 | 9.82E-01 | 1.00E+00 |
| ENSG00000225623.1_AGBL4-IT1  | ENSG00000160789.18_LMNA | 0.07776  | -0.082459379 | 0.234065177 | 3.41E-01 | 6.26E-01 | 1.00E+00 |
| ENSG00000253536.1_RP11-1174I | ENSG00000160789.18_LMNA | -0.01186 | -0.170737159 | 0.147620603 | 8.85E-01 | 9.55E-01 | 1.00E+00 |
| ENSG00000227684.1_CROCCP4    | ENSG00000160789.18_LMNA | -0.20755 | -0.355018056 | -0.04999913 | 1.03E-02 | 6.69E-02 | 1.00E+00 |
| ENSG00000257864.1_RP11-46I1. | ENSG00000160789.18_LMNA | -0.00064 | -0.159824534 | 0.158576743 | 9.94E-01 | 9.98E-01 | 1.00E+00 |
| ENSG00000267187.1_RP11-767C  | ENSG00000160789.18_LMNA | -0.01304 | -0.171887159 | 0.146461448 | 8.73E-01 | 9.51E-01 | 1.00E+00 |
| ENSG00000188817.6_SNTN       | ENSG00000160789.18_LMNA | -0.05958 | -0.216725883 | 0.100573781 | 4.66E-01 | 7.28E-01 | 1.00E+00 |
| ENSG00000264734.1_RP11-260A  | ENSG00000160789.18_LMNA | -0.14118 | -0.293776696 | 0.018436218 | 8.28E-02 | 2.78E-01 | 1.00E+00 |
| ENSG00000234562.1_TPMTP2     | ENSG00000160789.18_LMNA | 0.02489  | -0.134846722 | 0.183362452 | 7.61E-01 | 9.00E-01 | 1.00E+00 |
| ENSG00000213620.3_AL121657.  | ENSG00000160789.18_LMNA | -0.09284 | -0.248370712 | 0.067355219 | 2.55E-01 | 5.37E-01 | 1.00E+00 |

|                              |                         |          |              |             |          |          |          |
|------------------------------|-------------------------|----------|--------------|-------------|----------|----------|----------|
| ENSG00000280366.1_RP11-327L  | ENSG00000160789.18_LMNA | -0.1556  | -0.307192558 | 0.003690529 | 5.56E-02 | 2.15E-01 | 1.00E+00 |
| ENSG00000231867.1_AP001625.1 | ENSG00000160789.18_LMNA | 0.04841  | -0.111654097 | 0.206020081 | 5.54E-01 | 7.88E-01 | 1.00E+00 |
| ENSG00000276810.1_RP11-19G2  | ENSG00000160789.18_LMNA | -0.0217  | -0.180280735 | 0.137974495 | 7.91E-01 | 9.15E-01 | 1.00E+00 |
| ENSG00000267774.2_RP11-2N1.2 | ENSG00000160789.18_LMNA | -0.0847  | -0.240652045 | 0.075522806 | 3.00E-01 | 5.86E-01 | 1.00E+00 |
| ENSG00000280227.1_RP11-454F  | ENSG00000160789.18_LMNA | -0.0616  | -0.218652605 | 0.098571265 | 4.51E-01 | 7.17E-01 | 1.00E+00 |
| ENSG00000250698.1_RP11-392B  | ENSG00000160789.18_LMNA | 0.04795  | -0.112103406 | 0.205584348 | 5.57E-01 | 7.91E-01 | 1.00E+00 |
| ENSG00000280436.1_bP-2171C2  | ENSG00000160789.18_LMNA | -0.02804 | -0.186403807 | 0.131753683 | 7.32E-01 | 8.87E-01 | 1.00E+00 |
| ENSG00000278863.1_RP11-567L  | ENSG00000160789.18_LMNA | 0.04628  | -0.113760296 | 0.203976433 | 5.71E-01 | 8.00E-01 | 1.00E+00 |
| ENSG00000214843.3_ZFYVE9P2   | ENSG00000160789.18_LMNA | 0.07212  | -0.088095428 | 0.228691785 | 3.77E-01 | 6.57E-01 | 1.00E+00 |
| ENSG00000260133.1_CA5AP1     | ENSG00000160789.18_LMNA | -0.08657 | -0.242430638 | 0.073644524 | 2.89E-01 | 5.74E-01 | 1.00E+00 |
| ENSG00000276460.1_RP11-109E  | ENSG00000160789.18_LMNA | 0.05138  | -0.108714206 | 0.208868035 | 5.30E-01 | 7.73E-01 | 1.00E+00 |
| ENSG00000232896.1_RP11-410K  | ENSG00000160789.18_LMNA | 0.06851  | -0.091693363 | 0.2252514   | 4.02E-01 | 6.78E-01 | 1.00E+00 |
| ENSG00000267225.1_WDR7-OT1   | ENSG00000160789.18_LMNA | -0.12067 | -0.274597081 | 0.039283714 | 1.39E-01 | 3.80E-01 | 1.00E+00 |
| ENSG00000279435.1_AC016991.1 | ENSG00000160789.18_LMNA | -0.2567  | -0.399571614 | -0.10165371 | 1.41E-03 | 1.50E-02 | 1.00E+00 |
| ENSG00000196566.2_RP11-57C1  | ENSG00000160789.18_LMNA | 0.01879  | -0.140828621 | 0.177463175 | 8.18E-01 | 9.29E-01 | 1.00E+00 |
| ENSG00000224488.1_SAMM50P1   | ENSG00000160789.18_LMNA | -0.0412  | -0.199099539 | 0.118774947 | 6.14E-01 | 8.25E-01 | 1.00E+00 |
| ENSG00000225613.2_LINCMD1    | ENSG00000160789.18_LMNA | -0.12032 | -0.274271008 | 0.039635796 | 1.40E-01 | 3.81E-01 | 1.00E+00 |
| ENSG00000266602.1_RP11-476K  | ENSG00000160789.18_LMNA | 0.05499  | -0.105127068 | 0.212335715 | 5.01E-01 | 7.53E-01 | 1.00E+00 |
| ENSG00000248962.1_CTD-2287N  | ENSG00000160789.18_LMNA | 0.12409  | -0.035821397 | 0.27779979  | 1.28E-01 | 3.62E-01 | 1.00E+00 |
| ENSG00000230121.1_RP11-385N  | ENSG00000160789.18_LMNA | 0.003    | -0.156278514 | 0.162120103 | 9.71E-01 | 9.89E-01 | 1.00E+00 |
| ENSG00000249976.2_RP11-580P  | ENSG00000160789.18_LMNA | -0.03545 | -0.193554839 | 0.124456637 | 6.65E-01 | 8.52E-01 | 1.00E+00 |
| ENSG00000151631.8_AKR1C6P    | ENSG00000160789.18_LMNA | -0.13986 | -0.292546233 | 0.019781883 | 8.57E-02 | 2.84E-01 | 1.00E+00 |
| ENSG00000213601.3_KRT18P19   | ENSG00000160789.18_LMNA | 0.13594  | -0.023775298 | 0.288888594 | 9.49E-02 | 3.02E-01 | 1.00E+00 |
| ENSG00000272362.1_RP4-781K5  | ENSG00000160789.18_LMNA | -0.04626 | -0.203957419 | 0.113779879 | 5.71E-01 | 8.00E-01 | 1.00E+00 |
| ENSG00000248423.1_RP11-235P  | ENSG00000160789.18_LMNA | -0.03826 | -0.196264019 | 0.121683126 | 6.40E-01 | 8.39E-01 | 1.00E+00 |
| ENSG00000255229.1_RP11-304M  | ENSG00000160789.18_LMNA | 0.21533  | 0.058125742  | 0.362120559 | 7.72E-03 | 5.41E-02 | 1.00E+00 |
| ENSG00000223914.1_AC079630.1 | ENSG00000160789.18_LMNA | -0.03583 | -0.193925135 | 0.124077842 | 6.61E-01 | 8.50E-01 | 1.00E+00 |
| ENSG00000260029.2_RP11-401P  | ENSG00000160789.18_LMNA | -0.17417 | -0.324378504 | -0.01539856 | 3.19E-02 | 1.49E-01 | 1.00E+00 |
| ENSG00000278665.1_RP11-666O  | ENSG00000160789.18_LMNA | -0.00389 | -0.162990629 | 0.155406077 | 9.62E-01 | 9.85E-01 | 1.00E+00 |
| ENSG00000229248.1_WBP2P1     | ENSG00000160789.18_LMNA | -0.05957 | -0.216717587 | 0.100582398 | 4.66E-01 | 7.28E-01 | 1.00E+00 |
| ENSG00000185203.10_WASIR1    | ENSG00000160789.18_LMNA | -0.11059 | -0.265125842 | 0.049478773 | 1.75E-01 | 4.36E-01 | 1.00E+00 |
| ENSG00000213150.2_RP11-346C  | ENSG00000160789.18_LMNA | 0.02729  | -0.132482819 | 0.185687403 | 7.39E-01 | 8.90E-01 | 1.00E+00 |
| ENSG00000271536.1_RP11-51I5  | ENSG00000160789.18_LMNA | -0.07276 | -0.229309286 | 0.087448773 | 3.73E-01 | 6.53E-01 | 1.00E+00 |

|                              |                         |          |              |             |          |          |          |
|------------------------------|-------------------------|----------|--------------|-------------|----------|----------|----------|
| ENSG00000237325.3_AP000563.1 | ENSG00000160789.18_LMNA | 0.00114  | -0.158086294 | 0.160314704 | 9.89E-01 | 9.96E-01 | 1.00E+00 |
| ENSG00000258691.1_RP11-404P  | ENSG00000160789.18_LMNA | 0.2742   | 0.120248517  | 0.415272892 | 6.30E-04 | 8.09E-03 | 1.00E+00 |
| ENSG00000229857.1_RP11-159H  | ENSG00000160789.18_LMNA | -0.05865 | -0.215833227 | 0.101500681 | 4.73E-01 | 7.33E-01 | 1.00E+00 |
| ENSG00000261356.2_RP11-46D6  | ENSG00000160789.18_LMNA | 0.04516  | -0.114863074 | 0.202905301 | 5.81E-01 | 8.05E-01 | 1.00E+00 |
| ENSG00000234378.1_AC098828.1 | ENSG00000160789.18_LMNA | 0.05411  | -0.106004789 | 0.211487961 | 5.08E-01 | 7.58E-01 | 1.00E+00 |
| ENSG00000231923.1_AC024082.1 | ENSG00000160789.18_LMNA | -0.08929 | -0.24500483  | 0.070922072 | 2.74E-01 | 5.59E-01 | 1.00E+00 |
| ENSG00000204511.2_MCCD1      | ENSG00000160789.18_LMNA | 0.02592  | -0.13382814  | 0.184364686 | 7.51E-01 | 8.96E-01 | 1.00E+00 |
| ENSG00000231883.1_RP1-297M1  | ENSG00000160789.18_LMNA | 0.04094  | -0.119039678 | 0.198841642 | 6.17E-01 | 8.26E-01 | 1.00E+00 |
| ENSG00000280175.1_AL354828.2 | ENSG00000160789.18_LMNA | 0.03391  | -0.125973565 | 0.192071042 | 6.78E-01 | 8.60E-01 | 1.00E+00 |
| ENSG00000177504.10_VCX2      | ENSG00000160789.18_LMNA | 0.10373  | -0.05640235  | 0.258659017 | 2.03E-01 | 4.74E-01 | 1.00E+00 |
| ENSG00000260582.1_TPST2P1    | ENSG00000160789.18_LMNA | 0.14172  | -0.017889033 | 0.294276741 | 8.16E-02 | 2.75E-01 | 1.00E+00 |
| ENSG00000253258.1_RP11-539E  | ENSG00000160789.18_LMNA | 0.06205  | -0.098115634 | 0.219090646 | 4.48E-01 | 7.14E-01 | 1.00E+00 |
| ENSG00000234111.5_RP11-364P  | ENSG00000160789.18_LMNA | -0.1346  | -0.287641119 | 0.025135015 | 9.83E-02 | 3.08E-01 | 1.00E+00 |
| ENSG00000270772.1_PDHA1P1    | ENSG00000160789.18_LMNA | -0.07049 | -0.227141272 | 0.08971797  | 3.88E-01 | 6.66E-01 | 1.00E+00 |
| ENSG00000248373.4_RP11-556I1 | ENSG00000160789.18_LMNA | -0.06547 | -0.222353762 | 0.09471729  | 4.23E-01 | 6.94E-01 | 1.00E+00 |
| ENSG00000272693.2_RP11-479O  | ENSG00000160789.18_LMNA | 0.11639  | -0.043622825 | 0.270573465 | 1.53E-01 | 4.03E-01 | 1.00E+00 |
| ENSG00000242618.1_RP11-433A  | ENSG00000160789.18_LMNA | 0.04324  | -0.116763404 | 0.201057716 | 5.97E-01 | 8.14E-01 | 1.00E+00 |
| ENSG00000224382.1_LINC00703  | ENSG00000160789.18_LMNA | 0.16338  | 0.004286196  | 0.314398769 | 4.43E-02 | 1.86E-01 | 1.00E+00 |
| ENSG00000228294.5_BMS1P17    | ENSG00000160789.18_LMNA | -0.20285 | -0.350727424 | -0.04510932 | 1.22E-02 | 7.56E-02 | 1.00E+00 |
| ENSG00000233442.2_PPP6R2P1   | ENSG00000160789.18_LMNA | -0.05058 | -0.208103768 | 0.109503691 | 5.36E-01 | 7.77E-01 | 1.00E+00 |
| ENSG00000236866.4_AL157902.3 | ENSG00000160789.18_LMNA | -0.02459 | -0.183076162 | 0.135137557 | 7.64E-01 | 9.02E-01 | 1.00E+00 |
| ENSG00000259269.1_RP11-624L  | ENSG00000160789.18_LMNA | 0.13029  | -0.029518842 | 0.283611928 | 1.10E-01 | 3.30E-01 | 1.00E+00 |
| ENSG00000279806.1_RP11-58O9  | ENSG00000160789.18_LMNA | 0.27027  | 0.116059406  | 0.41175092  | 7.59E-04 | 9.32E-03 | 1.00E+00 |
| ENSG00000254519.2_CTD-2210P  | ENSG00000160789.18_LMNA | -0.0546  | -0.211961192 | 0.105514891 | 5.04E-01 | 7.55E-01 | 1.00E+00 |
| ENSG00000279025.1_RP11-131P  | ENSG00000160789.18_LMNA | 0.22227  | 0.065383598  | 0.368434083 | 5.92E-03 | 4.46E-02 | 1.00E+00 |
| ENSG00000271232.1_CARSP1     | ENSG00000160789.18_LMNA | -0.10334 | -0.25829169  | 0.056794714 | 2.05E-01 | 4.77E-01 | 1.00E+00 |
| ENSG00000241328.1_RP11-331K  | ENSG00000160789.18_LMNA | -0.24183 | -0.386163021 | -0.08593719 | 2.69E-03 | 2.45E-02 | 1.00E+00 |
| ENSG00000251178.1_OR7E21P    | ENSG00000160789.18_LMNA | 0.03017  | -0.129649703 | 0.188469151 | 7.12E-01 | 8.78E-01 | 1.00E+00 |
| ENSG00000255554.1_OR7E1P     | ENSG00000160789.18_LMNA | 0.08773  | -0.072485329 | 0.243527249 | 2.82E-01 | 5.68E-01 | 1.00E+00 |
| ENSG00000250448.1_RP11-19O2  | ENSG00000160789.18_LMNA | -0.06017 | -0.217293791 | 0.0999838   | 4.61E-01 | 7.25E-01 | 1.00E+00 |
| ENSG00000259476.1_RP11-50C1  | ENSG00000160789.18_LMNA | 0.05782  | -0.102319034 | 0.215044668 | 4.79E-01 | 7.37E-01 | 1.00E+00 |
| ENSG00000163207.6_IVL        | ENSG00000160789.18_LMNA | -0.21206 | -0.359138527 | -0.05470882 | 8.72E-03 | 5.94E-02 | 1.00E+00 |
| ENSG00000229798.1_KRT18P26   | ENSG00000160789.18_LMNA | -0.07498 | -0.23141659  | 0.085239964 | 3.59E-01 | 6.41E-01 | 1.00E+00 |



|                             |                         |          |              |             |          |          |          |
|-----------------------------|-------------------------|----------|--------------|-------------|----------|----------|----------|
| ENSG00000231839.1_AC073055. | ENSG00000160789.18_LMNA | 0.03201  | -0.127845457 | 0.190238027 | 6.95E-01 | 8.69E-01 | 1.00E+00 |
| ENSG00000280148.1_RP3-468K1 | ENSG00000160789.18_LMNA | -0.10375 | -0.258679801 | 0.056380147 | 2.03E-01 | 4.74E-01 | 1.00E+00 |
| ENSG00000230821.1_KB-288A10 | ENSG00000160789.18_LMNA | 0.00853  | -0.150879494 | 0.167499351 | 9.17E-01 | 9.68E-01 | 1.00E+00 |
| ENSG00000280027.1_RP11-44F1 | ENSG00000160789.18_LMNA | -0.03654 | -0.194608417 | 0.123378632 | 6.55E-01 | 8.47E-01 | 1.00E+00 |
| ENSG00000250954.4_RP11-79E3 | ENSG00000160789.18_LMNA | -0.17372 | -0.32396184  | -0.01493307 | 3.23E-02 | 1.50E-01 | 1.00E+00 |
| ENSG00000216904.2_SOCS5P5   | ENSG00000160789.18_LMNA | -0.02114 | -0.179733191 | 0.13852956  | 7.96E-01 | 9.18E-01 | 1.00E+00 |
| ENSG00000244115.1_DNAJC25-C | ENSG00000160789.18_LMNA | 0.01639  | -0.143182581 | 0.175135439 | 8.41E-01 | 9.38E-01 | 1.00E+00 |
| ENSG00000257563.1_MIR3180-3 | ENSG00000160789.18_LMNA | -0.05979 | -0.216922777 | 0.100369259 | 4.64E-01 | 7.27E-01 | 1.00E+00 |
| ENSG00000223418.1_GS1-590J6 | ENSG00000160789.18_LMNA | 0.10006  | -0.060101157 | 0.25519261  | 2.20E-01 | 4.95E-01 | 1.00E+00 |
| ENSG00000259470.2_KRT8P9    | ENSG00000160789.18_LMNA | 0.08715  | -0.073061911 | 0.242981897 | 2.86E-01 | 5.71E-01 | 1.00E+00 |
| ENSG00000250822.1_CTD-2139B | ENSG00000160789.18_LMNA | -0.05949 | -0.216639524 | 0.100663477 | 4.67E-01 | 7.28E-01 | 1.00E+00 |
| ENSG00000280415.1_RP4-800O1 | ENSG00000160789.18_LMNA | -0.13702 | -0.289901407 | 0.022670505 | 9.23E-02 | 2.97E-01 | 1.00E+00 |
| ENSG00000259776.1_RP11-544D | ENSG00000160789.18_LMNA | 0.03584  | -0.12406558  | 0.19393712  | 6.61E-01 | 8.50E-01 | 1.00E+00 |
| ENSG00000264464.1_RP11-110H | ENSG00000160789.18_LMNA | 0.10704  | -0.053063449 | 0.261781178 | 1.89E-01 | 4.57E-01 | 1.00E+00 |
| ENSG00000142025.14_DMRTC2   | ENSG00000160789.18_LMNA | -0.01545 | -0.174218346 | 0.144109019 | 8.50E-01 | 9.41E-01 | 1.00E+00 |
| ENSG00000254951.6_RP11-494M | ENSG00000160789.18_LMNA | -0.02214 | -0.180707207 | 0.137542028 | 7.87E-01 | 9.13E-01 | 1.00E+00 |
| ENSG00000261541.1_RP11-626K | ENSG00000160789.18_LMNA | -0.06983 | -0.226515816 | 0.090372005 | 3.93E-01 | 6.70E-01 | 1.00E+00 |
| ENSG00000227007.1_LINC01247 | ENSG00000160789.18_LMNA | -0.0352  | -0.193319433 | 0.124697399 | 6.67E-01 | 8.53E-01 | 1.00E+00 |
| ENSG00000279628.1_RP11-467L | ENSG00000160789.18_LMNA | -0.04863 | -0.206229366 | 0.111438245 | 5.52E-01 | 7.88E-01 | 1.00E+00 |
| ENSG00000145626.10_UGT3A1   | ENSG00000160789.18_LMNA | 0.12943  | -0.030393085 | 0.282807084 | 1.12E-01 | 3.34E-01 | 1.00E+00 |
| ENSG00000278059.1_          | ENSG00000160789.18_LMNA | -0.02283 | -0.181372748 | 0.136866887 | 7.80E-01 | 9.10E-01 | 1.00E+00 |
| ENSG00000265565.1_MIR3143   | ENSG00000160789.18_LMNA | 0.07209  | -0.08811978  | 0.228668526 | 3.77E-01 | 6.57E-01 | 1.00E+00 |
| ENSG00000199523.1_RNA5SP22  | ENSG00000160789.18_LMNA | -0.04466 | -0.202418103 | 0.115364406 | 5.85E-01 | 8.07E-01 | 1.00E+00 |
| ENSG00000281227.1_AC011380. | ENSG00000160789.18_LMNA | -0.12342 | -0.27717623  | 0.036496092 | 1.30E-01 | 3.65E-01 | 1.00E+00 |
| ENSG00000278549.1_MIR6736   | ENSG00000160789.18_LMNA | 0.07746  | -0.082762737 | 0.233776448 | 3.43E-01 | 6.28E-01 | 1.00E+00 |
| ENSG00000199158.1_MIR96     | ENSG00000160789.18_LMNA | -0.17239 | -0.322730673 | -0.01355843 | 3.37E-02 | 1.55E-01 | 1.00E+00 |
| ENSG00000281891.1_          | ENSG00000160789.18_LMNA | -0.01716 | -0.175881621 | 0.142428385 | 8.34E-01 | 9.35E-01 | 1.00E+00 |
| ENSG00000276978.1_          | ENSG00000160789.18_LMNA | -0.01161 | -0.1704917   | 0.147867902 | 8.87E-01 | 9.56E-01 | 1.00E+00 |
| ENSG00000200176.1_RNU1-19P  | ENSG00000160789.18_LMNA | -0.19278 | -0.341497661 | -0.03464005 | 1.73E-02 | 9.74E-02 | 1.00E+00 |
| ENSG00000264878.1_          | ENSG00000160789.18_LMNA | 0.03567  | -0.124237291 | 0.193769274 | 6.63E-01 | 8.51E-01 | 1.00E+00 |
| ENSG00000206654.1_RNU6-608F | ENSG00000160789.18_LMNA | 0.17641  | 0.017708078  | 0.326444029 | 2.97E-02 | 1.42E-01 | 1.00E+00 |
| ENSG00000210135.1_MT-TN     | ENSG00000160789.18_LMNA | -0.16171 | -0.312852411 | -0.00257116 | 4.66E-02 | 1.92E-01 | 1.00E+00 |
| ENSG00000201198.1_RNU6-879F | ENSG00000160789.18_LMNA | -0.16889 | -0.31950233  | -0.00995942 | 3.75E-02 | 1.66E-01 | 1.00E+00 |

|                             |                         |          |              |             |          |          |          |
|-----------------------------|-------------------------|----------|--------------|-------------|----------|----------|----------|
| ENSG00000252417.1_RNU7-179F | ENSG00000160789.18_LMNA | 0.08261  | -0.077616413 | 0.238667051 | 3.12E-01 | 5.98E-01 | 1.00E+00 |
| ENSG00000280860.1_          | ENSG00000160789.18_LMNA | 0.03645  | -0.123465317 | 0.194523724 | 6.56E-01 | 8.48E-01 | 1.00E+00 |
| ENSG00000238997.1_          | ENSG00000160789.18_LMNA | -0.02508 | -0.183548618 | 0.13465757  | 7.59E-01 | 8.99E-01 | 1.00E+00 |
| ENSG00000263548.1_          | ENSG00000160789.18_LMNA | -0.05855 | -0.215741169 | 0.10159624  | 4.74E-01 | 7.33E-01 | 1.00E+00 |
| ENSG00000252688.1_RNU6-579F | ENSG00000160789.18_LMNA | -0.08578 | -0.241683153 | 0.074434178 | 2.93E-01 | 5.79E-01 | 1.00E+00 |
| ENSG00000222533.1_RNU6-705F | ENSG00000160789.18_LMNA | -0.04882 | -0.206414297 | 0.111247487 | 5.50E-01 | 7.87E-01 | 1.00E+00 |
| ENSG00000211578.2_MIR766    | ENSG00000160789.18_LMNA | -0.0443  | -0.202079044 | 0.115713207 | 5.88E-01 | 8.08E-01 | 1.00E+00 |
| ENSG00000252970.1_RNA5SP15  | ENSG00000160789.18_LMNA | -0.13245 | -0.285623927 | 0.027331259 | 1.04E-01 | 3.19E-01 | 1.00E+00 |
| ENSG00000266859.1_          | ENSG00000160789.18_LMNA | -0.03048 | -0.188766784 | 0.129346266 | 7.09E-01 | 8.76E-01 | 1.00E+00 |
| ENSG00000274380.1_MIR6801   | ENSG00000160789.18_LMNA | 0.0919   | -0.068295951 | 0.247483724 | 2.60E-01 | 5.43E-01 | 1.00E+00 |
| ENSG00000200366.1_RNU6-511F | ENSG00000160789.18_LMNA | 0.16715  | 0.008165829  | 0.317890777 | 3.96E-02 | 1.72E-01 | 1.00E+00 |
| ENSG00000251971.1_RNU6-1333 | ENSG00000160789.18_LMNA | 0.00179  | -0.157457061 | 0.16094335  | 9.83E-01 | 9.94E-01 | 1.00E+00 |
| ENSG00000257570.1_RP11-133N | ENSG00000160789.18_LMNA | -0.05682 | -0.214088376 | 0.103310881 | 4.87E-01 | 7.43E-01 | 1.00E+00 |
| ENSG00000209645.1_SNORD105  | ENSG00000160789.18_LMNA | 0.13697  | -0.022723171 | 0.289853142 | 9.24E-02 | 2.97E-01 | 1.00E+00 |
| ENSG00000252186.1_RNU6-781F | ENSG00000160789.18_LMNA | -0.00536 | -0.164419322 | 0.15397317  | 9.48E-01 | 9.79E-01 | 1.00E+00 |
| ENSG00000238723.1_Y_RNA     | ENSG00000160789.18_LMNA | -0.02456 | -0.183044705 | 0.135169511 | 7.64E-01 | 9.02E-01 | 1.00E+00 |
| ENSG00000274705.1_MIR486-1  | ENSG00000160789.18_LMNA | 0.08979  | -0.070414755 | 0.245484028 | 2.71E-01 | 5.56E-01 | 1.00E+00 |
| ENSG00000221265.1_MIR1255A  | ENSG00000160789.18_LMNA | -0.01681 | -0.17554567  | 0.14276799  | 8.37E-01 | 9.37E-01 | 1.00E+00 |
| ENSG00000281369.1_AC093826  | ENSG00000160789.18_LMNA | 0.00824  | -0.151159049 | 0.167221285 | 9.20E-01 | 9.69E-01 | 1.00E+00 |
| ENSG00000260764.1_RP11-475D | ENSG00000160789.18_LMNA | -0.16176 | -0.312900422 | -0.00262438 | 4.65E-02 | 1.92E-01 | 1.00E+00 |
| ENSG00000243063.1_IGKV3-7   | ENSG00000160789.18_LMNA | -0.12701 | -0.280536144 | 0.032857259 | 1.19E-01 | 3.46E-01 | 1.00E+00 |
| ENSG00000258687.1_RP11-218E | ENSG00000160789.18_LMNA | -0.00854 | -0.167510579 | 0.150868205 | 9.17E-01 | 9.68E-01 | 1.00E+00 |
| ENSG00000275305.1_5S_rRNA   | ENSG00000160789.18_LMNA | 0.11718  | -0.042814931 | 0.27132345  | 1.50E-01 | 3.99E-01 | 1.00E+00 |
| ENSG00000239152.1_RNA5SP31  | ENSG00000160789.18_LMNA | -0.08308 | -0.239120172 | 0.077138743 | 3.09E-01 | 5.95E-01 | 1.00E+00 |
| ENSG00000211514.1_MIR454    | ENSG00000160789.18_LMNA | 0.00445  | -0.154858807 | 0.163536447 | 9.57E-01 | 9.83E-01 | 1.00E+00 |
| ENSG00000211665.2_IGLV3-16  | ENSG00000160789.18_LMNA | -0.00929 | -0.16824415  | 0.150130458 | 9.10E-01 | 9.65E-01 | 1.00E+00 |
| ENSG00000201616.1_RNU1-91P  | ENSG00000160789.18_LMNA | 0.09517  | -0.065012804 | 0.250577005 | 2.43E-01 | 5.23E-01 | 1.00E+00 |
| ENSG00000241261.1_RPL17P19  | ENSG00000160789.18_LMNA | -0.066   | -0.222861126 | 0.094188236 | 4.19E-01 | 6.91E-01 | 1.00E+00 |
| ENSG00000279516.1_FAM230C   | ENSG00000160789.18_LMNA | -0.21312 | -0.360104932 | -0.05581538 | 8.38E-03 | 5.77E-02 | 1.00E+00 |
| ENSG00000266489.1_RP11-178F | ENSG00000160789.18_LMNA | -0.10508 | -0.259936722 | 0.055036799 | 1.98E-01 | 4.67E-01 | 1.00E+00 |
| ENSG00000200204.1_RNU1-22P  | ENSG00000160789.18_LMNA | 0.0511   | -0.108989953 | 0.20860114  | 5.32E-01 | 7.74E-01 | 1.00E+00 |
| ENSG00000255494.1_LINC00681 | ENSG00000160789.18_LMNA | -0.02392 | -0.182424883 | 0.135798974 | 7.70E-01 | 9.05E-01 | 1.00E+00 |
| ENSG00000270542.1_RP11-311H | ENSG00000160789.18_LMNA | -0.13394 | -0.287017944 | 0.025813828 | 1.00E-01 | 3.11E-01 | 1.00E+00 |

|                             |                         |          |              |             |          |          |          |
|-----------------------------|-------------------------|----------|--------------|-------------|----------|----------|----------|
| ENSG00000275419.1_RP11-486M | ENSG00000160789.18_LMNA | -0.211   | -0.358165207 | -0.05359509 | 9.07E-03 | 6.11E-02 | 1.00E+00 |
| ENSG00000212479.2_U3        | ENSG00000160789.18_LMNA | 0.14902  | -0.010423441 | 0.30108214  | 6.69E-02 | 2.42E-01 | 1.00E+00 |
| ENSG00000258125.1_RP11-1041 | ENSG00000160789.18_LMNA | 0.01127  | -0.148198885 | 0.170163119 | 8.90E-01 | 9.57E-01 | 1.00E+00 |
| ENSG00000249091.1_RP11-733C | ENSG00000160789.18_LMNA | -0.03658 | -0.194642605 | 0.123343638 | 6.55E-01 | 8.47E-01 | 1.00E+00 |
| ENSG00000072080.9_SPP2      | ENSG00000160789.18_LMNA | 0.12966  | -0.030164522 | 0.283017546 | 1.11E-01 | 3.33E-01 | 1.00E+00 |
| ENSG00000240767.3_RN7SL288f | ENSG00000160789.18_LMNA | 0.04072  | -0.119256457 | 0.198630427 | 6.18E-01 | 8.27E-01 | 1.00E+00 |
| ENSG00000242613.1_RP11-174C | ENSG00000160789.18_LMNA | 0.00648  | -0.1528774   | 0.165510968 | 9.37E-01 | 9.75E-01 | 1.00E+00 |
| ENSG00000276366.1_U3        | ENSG00000160789.18_LMNA | 0.04149  | -0.11848938  | 0.199377685 | 6.12E-01 | 8.23E-01 | 1.00E+00 |
| ENSG00000223273.1_RN7SKP17  | ENSG00000160789.18_LMNA | 0.04457  | -0.115448626 | 0.202336243 | 5.86E-01 | 8.08E-01 | 1.00E+00 |
| ENSG00000236388.1_ITCH-AS1  | ENSG00000160789.18_LMNA | 0.07532  | -0.084899052 | 0.231741571 | 3.56E-01 | 6.40E-01 | 1.00E+00 |
| ENSG00000279397.1_RP11-196B | ENSG00000160789.18_LMNA | -0.15888 | -0.310232614 | 0.000330237 | 5.06E-02 | 2.03E-01 | 1.00E+00 |
| ENSG00000253496.2_RP11-13N1 | ENSG00000160789.18_LMNA | 0.05079  | -0.109297619 | 0.208303295 | 5.34E-01 | 7.76E-01 | 1.00E+00 |
| ENSG00000254273.1_RP11-181D | ENSG00000160789.18_LMNA | -0.09533 | -0.250726764 | 0.064853679 | 2.43E-01 | 5.22E-01 | 1.00E+00 |
| ENSG00000236190.1_RP3-431C2 | ENSG00000160789.18_LMNA | -0.03602 | -0.194108947 | 0.123889776 | 6.60E-01 | 8.50E-01 | 1.00E+00 |
| ENSG00000226846.1_LINC00348 | ENSG00000160789.18_LMNA | -0.22108 | -0.367349797 | -0.06413485 | 6.20E-03 | 4.61E-02 | 1.00E+00 |
| ENSG00000240663.3_RN7SL310f | ENSG00000160789.18_LMNA | 0.00174  | -0.157500474 | 0.160899986 | 9.83E-01 | 9.94E-01 | 1.00E+00 |
| ENSG00000253630.1_CTC-370J7 | ENSG00000160789.18_LMNA | 0.03999  | -0.11997156  | 0.197933467 | 6.25E-01 | 8.31E-01 | 1.00E+00 |
| ENSG00000252854.1_RN7SKP5   | ENSG00000160789.18_LMNA | -0.04251 | -0.200352452 | 0.11748819  | 6.03E-01 | 8.18E-01 | 1.00E+00 |
| ENSG00000277260.1_FAM74A7   | ENSG00000160789.18_LMNA | 0.02987  | -0.129946794 | 0.188177685 | 7.15E-01 | 8.79E-01 | 1.00E+00 |
| ENSG00000223787.2_RP4-593M8 | ENSG00000160789.18_LMNA | -0.0165  | -0.175241433 | 0.143075471 | 8.40E-01 | 9.38E-01 | 1.00E+00 |
| ENSG00000281061.1_          | ENSG00000160789.18_LMNA | 0.07911  | -0.081114021 | 0.235344985 | 3.33E-01 | 6.18E-01 | 1.00E+00 |
| ENSG00000258886.2_HIGD1AP1  | ENSG00000160789.18_LMNA | 0.03519  | -0.124709932 | 0.193307177 | 6.67E-01 | 8.53E-01 | 1.00E+00 |
| ENSG00000239684.2_PTGER4P3  | ENSG00000160789.18_LMNA | -0.09008 | -0.245757369 | 0.070125301 | 2.70E-01 | 5.54E-01 | 1.00E+00 |
| ENSG00000225116.1_RP11-137F | ENSG00000160789.18_LMNA | -0.24459 | -0.388653643 | -0.08884525 | 2.39E-03 | 2.24E-02 | 1.00E+00 |
| ENSG00000230166.1_RPL35AP2  | ENSG00000160789.18_LMNA | -0.01454 | -0.173337911 | 0.1449979   | 8.59E-01 | 9.45E-01 | 1.00E+00 |
| ENSG00000265359.1_RP5-1110E | ENSG00000160789.18_LMNA | -0.05677 | -0.214035697 | 0.1033655   | 4.87E-01 | 7.44E-01 | 1.00E+00 |
| ENSG00000239553.3_RN7SL12P  | ENSG00000160789.18_LMNA | -0.03666 | -0.194722977 | 0.123261371 | 6.54E-01 | 8.47E-01 | 1.00E+00 |
| ENSG00000228156.1_RP11-410N | ENSG00000160789.18_LMNA | -0.03766 | -0.195691231 | 0.12226993  | 6.45E-01 | 8.42E-01 | 1.00E+00 |
| ENSG00000223866.1_AC002486  | ENSG00000160789.18_LMNA | 0.054    | -0.106109651 | 0.211386648 | 5.09E-01 | 7.58E-01 | 1.00E+00 |
| ENSG00000224375.1_AC009276  | ENSG00000160789.18_LMNA | 0.0685   | -0.091696724 | 0.225248183 | 4.02E-01 | 6.78E-01 | 1.00E+00 |
| ENSG00000232505.2_XXbac-BPG | ENSG00000160789.18_LMNA | -0.02547 | -0.183925153 | 0.134274926 | 7.55E-01 | 8.98E-01 | 1.00E+00 |
| ENSG00000267240.1_AC011524  | ENSG00000160789.18_LMNA | -0.16234 | -0.313438247 | -0.00322069 | 4.57E-02 | 1.90E-01 | 1.00E+00 |
| ENSG00000253373.1_RP11-21C1 | ENSG00000160789.18_LMNA | -0.12779 | -0.281271881 | 0.032059336 | 1.17E-01 | 3.42E-01 | 1.00E+00 |

|                              |                         |          |              |             |          |          |          |
|------------------------------|-------------------------|----------|--------------|-------------|----------|----------|----------|
| ENSG00000233303.1_XXYLT1-AS  | ENSG00000160789.18_LMNA | 0.03593  | -0.123976335 | 0.194024348 | 6.60E-01 | 8.50E-01 | 1.00E+00 |
| ENSG00000274799.1_Metazoa_SI | ENSG00000160789.18_LMNA | 0.04557  | -0.114459167 | 0.203297705 | 5.77E-01 | 8.03E-01 | 1.00E+00 |
| ENSG00000281046.1_           | ENSG00000160789.18_LMNA | 0.01811  | -0.141498356 | 0.176801263 | 8.25E-01 | 9.31E-01 | 1.00E+00 |
| ENSG00000228341.1_CTB-20D2.  | ENSG00000160789.18_LMNA | 0.00161  | -0.157629301 | 0.160771297 | 9.84E-01 | 9.94E-01 | 1.00E+00 |
| ENSG00000239686.1_RP11-665C  | ENSG00000160789.18_LMNA | 0.04065  | -0.119319304 | 0.198569188 | 6.19E-01 | 8.27E-01 | 1.00E+00 |
| ENSG00000250977.1_RP11-173E  | ENSG00000160789.18_LMNA | -0.09737 | -0.252655119 | 0.062803292 | 2.33E-01 | 5.11E-01 | 1.00E+00 |
| ENSG00000265535.2_RN7SL475F  | ENSG00000160789.18_LMNA | -0.03672 | -0.194786677 | 0.123196165 | 6.53E-01 | 8.47E-01 | 1.00E+00 |
| ENSG00000275642.1_Metazoa_SI | ENSG00000160789.18_LMNA | -0.03313 | -0.191326028 | 0.126734653 | 6.85E-01 | 8.64E-01 | 1.00E+00 |
| ENSG00000274860.1_Metazoa_SI | ENSG00000160789.18_LMNA | -0.09711 | -0.252405015 | 0.063069374 | 2.34E-01 | 5.12E-01 | 1.00E+00 |
| ENSG00000266195.2_RN7SL163F  | ENSG00000160789.18_LMNA | -0.06445 | -0.221379555 | 0.095732644 | 4.30E-01 | 7.00E-01 | 1.00E+00 |
| ENSG00000259076.1_RP11-973N  | ENSG00000160789.18_LMNA | -0.07445 | -0.230912165 | 0.08576897  | 3.62E-01 | 6.44E-01 | 1.00E+00 |
| ENSG00000232986.1_RP11-179A  | ENSG00000160789.18_LMNA | -0.11328 | -0.267650391 | 0.046767684 | 1.65E-01 | 4.21E-01 | 1.00E+00 |
| ENSG00000236863.2_RPL23AP2.  | ENSG00000160789.18_LMNA | 0.01546  | -0.14409533  | 0.1742319   | 8.50E-01 | 9.41E-01 | 1.00E+00 |
| ENSG00000240613.3_RN7SL98P   | ENSG00000160789.18_LMNA | 0.0652   | -0.094982258 | 0.222099593 | 4.25E-01 | 6.96E-01 | 1.00E+00 |
| ENSG00000242668.3_RN7SL317F  | ENSG00000160789.18_LMNA | -0.1189  | -0.27293626  | 0.041076197 | 1.45E-01 | 3.89E-01 | 1.00E+00 |
| ENSG00000269103.2_Metazoa_SI | ENSG00000160789.18_LMNA | -0.0588  | -0.215982401 | 0.101345823 | 4.72E-01 | 7.32E-01 | 1.00E+00 |
| ENSG00000225561.1_RP11-412H  | ENSG00000160789.18_LMNA | -0.2065  | -0.354063387 | -0.04890988 | 1.07E-02 | 6.87E-02 | 1.00E+00 |
| ENSG00000235032.1_BMP7-AS1   | ENSG00000160789.18_LMNA | 0.02085  | -0.138813865 | 0.179452661 | 7.99E-01 | 9.19E-01 | 1.00E+00 |
| ENSG00000232290.1_RP1-292B1  | ENSG00000160789.18_LMNA | 0.07336  | -0.086853131 | 0.229877848 | 3.69E-01 | 6.50E-01 | 1.00E+00 |
| ENSG00000224101.1_ELMO1-AS   | ENSG00000160789.18_LMNA | -0.11003 | -0.264599833 | 0.050043066 | 1.77E-01 | 4.39E-01 | 1.00E+00 |
| ENSG00000249919.1_FABP5P6    | ENSG00000160789.18_LMNA | -0.00551 | -0.164570719 | 0.153821247 | 9.46E-01 | 9.79E-01 | 1.00E+00 |
| ENSG00000259757.1_RP11-129I1 | ENSG00000160789.18_LMNA | -0.33712 | -0.471039564 | -0.18800907 | 2.17E-05 | 5.52E-04 | 1.00E+00 |
| ENSG00000233405.1_LINC01046  | ENSG00000160789.18_LMNA | -0.13589 | -0.288843574 | 0.02382439  | 9.51E-02 | 3.02E-01 | 1.00E+00 |
| ENSG00000266599.1_RP11-466A  | ENSG00000160789.18_LMNA | -0.10338 | -0.258328461 | 0.056755441 | 2.05E-01 | 4.76E-01 | 1.00E+00 |
| ENSG00000280360.1_AC092159.  | ENSG00000160789.18_LMNA | 0.01243  | -0.147060989 | 0.171292461 | 8.79E-01 | 9.53E-01 | 1.00E+00 |
| ENSG00000223911.1_AC009480.  | ENSG00000160789.18_LMNA | -0.04991 | -0.207463064 | 0.110165227 | 5.41E-01 | 7.81E-01 | 1.00E+00 |
| ENSG00000225669.1_RPL23AP2.  | ENSG00000160789.18_LMNA | 0.06878  | -0.091422158 | 0.225511005 | 4.00E-01 | 6.76E-01 | 1.00E+00 |
| ENSG00000267285.1_RP5-951N9  | ENSG00000160789.18_LMNA | -0.08216 | -0.238243669 | 0.0780626   | 3.14E-01 | 6.01E-01 | 1.00E+00 |
| ENSG00000255746.1_RP11-283I3 | ENSG00000160789.18_LMNA | 0.05043  | -0.10965102  | 0.207961102 | 5.37E-01 | 7.78E-01 | 1.00E+00 |
| ENSG00000258928.1_RP11-463J. | ENSG00000160789.18_LMNA | 0.0155   | -0.144054763 | 0.174272069 | 8.50E-01 | 9.41E-01 | 1.00E+00 |
| ENSG00000254209.1_RP11-3G20  | ENSG00000160789.18_LMNA | 0.04014  | -0.119826734 | 0.198074645 | 6.23E-01 | 8.30E-01 | 1.00E+00 |
| ENSG00000255247.1_CTD-2523D  | ENSG00000160789.18_LMNA | -0.16473 | -0.315649008 | -0.00567414 | 4.26E-02 | 1.81E-01 | 1.00E+00 |
| ENSG00000259468.1_RP11-1084. | ENSG00000160789.18_LMNA | -0.05891 | -0.216083166 | 0.10124121  | 4.71E-01 | 7.31E-01 | 1.00E+00 |

|                              |                         |          |              |             |          |          |          |
|------------------------------|-------------------------|----------|--------------|-------------|----------|----------|----------|
| ENSG00000278060.1_RP11-466M  | ENSG00000160789.18_LMNA | -0.04397 | -0.201762649 | 0.116038621 | 5.91E-01 | 8.10E-01 | 1.00E+00 |
| ENSG00000232925.2_MRPS16P2   | ENSG00000160789.18_LMNA | -0.07914 | -0.235372879 | 0.081084686 | 3.32E-01 | 6.18E-01 | 1.00E+00 |
| ENSG00000236004.2_RP4-800M2  | ENSG00000160789.18_LMNA | -0.1085  | -0.263151269 | 0.051596022 | 1.83E-01 | 4.48E-01 | 1.00E+00 |
| ENSG00000269364.1_LINC01233  | ENSG00000160789.18_LMNA | -0.24517 | -0.389179139 | -0.08945948 | 2.33E-03 | 2.20E-02 | 1.00E+00 |
| ENSG00000227494.2_USP9YP14   | ENSG00000160789.18_LMNA | -0.171   | -0.321448619 | -0.01212822 | 3.52E-02 | 1.59E-01 | 1.00E+00 |
| ENSG00000254508.4_FBXO3-AS   | ENSG00000160789.18_LMNA | -0.10402 | -0.258936555 | 0.056105831 | 2.02E-01 | 4.73E-01 | 1.00E+00 |
| ENSG00000235995.1_UBE2V1P6   | ENSG00000160789.18_LMNA | 0.00128  | -0.15795039  | 0.160450504 | 9.87E-01 | 9.95E-01 | 1.00E+00 |
| ENSG00000230741.1_SC22CB-1   | ENSG00000160789.18_LMNA | 0.09578  | -0.064401782 | 0.251151982 | 2.40E-01 | 5.20E-01 | 1.00E+00 |
| ENSG00000230115.1_TPRG1-AS   | ENSG00000160789.18_LMNA | -0.07943 | -0.235647043 | 0.080796324 | 3.31E-01 | 6.17E-01 | 1.00E+00 |
| ENSG00000240992.1_RPS23P4    | ENSG00000160789.18_LMNA | 0.09447  | -0.065715975 | 0.249915041 | 2.47E-01 | 5.27E-01 | 1.00E+00 |
| ENSG00000237567.1_RP3-359N1  | ENSG00000160789.18_LMNA | -0.04502 | -0.202770943 | 0.115001347 | 5.82E-01 | 8.05E-01 | 1.00E+00 |
| ENSG00000281655.1_RP11-817J  | ENSG00000160789.18_LMNA | -0.04881 | -0.206403082 | 0.111259056 | 5.50E-01 | 7.87E-01 | 1.00E+00 |
| ENSG00000258661.1_RP11-964E  | ENSG00000160789.18_LMNA | -0.04019 | -0.198121569 | 0.119778594 | 6.23E-01 | 8.30E-01 | 1.00E+00 |
| ENSG00000225678.2_AP000619   | ENSG00000160789.18_LMNA | -0.11136 | -0.265843275 | 0.048708799 | 1.72E-01 | 4.31E-01 | 1.00E+00 |
| ENSG00000255321.1_RP11-9112C | ENSG00000160789.18_LMNA | 0.03358  | -0.12629838  | 0.191753132 | 6.81E-01 | 8.61E-01 | 1.00E+00 |
| ENSG00000242583.1_RP11-379K  | ENSG00000160789.18_LMNA | 0.15182  | -0.007559065 | 0.303684819 | 6.19E-02 | 2.30E-01 | 1.00E+00 |
| ENSG00000232500.1_AP005273   | ENSG00000160789.18_LMNA | -0.0972  | -0.252493313 | 0.06297544  | 2.34E-01 | 5.11E-01 | 1.00E+00 |
| ENSG00000267399.1_RP11-456O  | ENSG00000160789.18_LMNA | -0.05603 | -0.213323356 | 0.10410389  | 4.93E-01 | 7.48E-01 | 1.00E+00 |
| ENSG00000173431.2_RNASE8     | ENSG00000160789.18_LMNA | -0.06668 | -0.22351194  | 0.093509336 | 4.14E-01 | 6.87E-01 | 1.00E+00 |
| ENSG00000259589.2_RP11-317G  | ENSG00000160789.18_LMNA | -0.01746 | -0.176167637 | 0.142139198 | 8.31E-01 | 9.34E-01 | 1.00E+00 |
| ENSG00000260235.1_CTD-2026K  | ENSG00000160789.18_LMNA | 0.03708  | -0.12284981  | 0.195124988 | 6.50E-01 | 8.45E-01 | 1.00E+00 |
| ENSG00000264196.1_RP11-171G  | ENSG00000160789.18_LMNA | -0.07519 | -0.231616476 | 0.085030288 | 3.57E-01 | 6.40E-01 | 1.00E+00 |
| ENSG00000254467.1_RP11-634B  | ENSG00000160789.18_LMNA | -0.20518 | -0.352857947 | -0.04753554 | 1.12E-02 | 7.11E-02 | 1.00E+00 |
| ENSG00000254638.1_RP11-356J  | ENSG00000160789.18_LMNA | 0.11065  | -0.049417532 | 0.265182917 | 1.75E-01 | 4.35E-01 | 1.00E+00 |
| ENSG00000220181.1_RP11-486M  | ENSG00000160789.18_LMNA | 0.14053  | -0.019094982 | 0.293174458 | 8.42E-02 | 2.81E-01 | 1.00E+00 |
| ENSG00000277695.1_RP11-115D  | ENSG00000160789.18_LMNA | -0.12616 | -0.279741021 | 0.033719139 | 1.21E-01 | 3.51E-01 | 1.00E+00 |
| ENSG00000258510.2_RP11-493G  | ENSG00000160789.18_LMNA | -0.00866 | -0.167629274 | 0.150748858 | 9.16E-01 | 9.68E-01 | 1.00E+00 |
| ENSG00000235293.1_AC114814   | ENSG00000160789.18_LMNA | 0.00282  | -0.156448297 | 0.161950634 | 9.72E-01 | 9.89E-01 | 1.00E+00 |
| ENSG00000249744.1_CTD-2057J  | ENSG00000160789.18_LMNA | -0.12423 | -0.277936646 | 0.035673279 | 1.27E-01 | 3.61E-01 | 1.00E+00 |
| ENSG00000237593.1_RP11-317B  | ENSG00000160789.18_LMNA | -0.23528 | -0.380242511 | -0.07904486 | 3.52E-03 | 3.02E-02 | 1.00E+00 |
| ENSG00000231090.1_RP11-101C  | ENSG00000160789.18_LMNA | -0.02266 | -0.18120409  | 0.137038006 | 7.82E-01 | 9.10E-01 | 1.00E+00 |
| ENSG00000224697.1_NEFMP1     | ENSG00000160789.18_LMNA | -0.24762 | -0.391391286 | -0.09204764 | 2.10E-03 | 2.03E-02 | 1.00E+00 |
| ENSG00000217488.2_RP11-474L  | ENSG00000160789.18_LMNA | 0.02325  | -0.136457703 | 0.181775973 | 7.76E-01 | 9.08E-01 | 1.00E+00 |

|                              |                         |          |              |             |          |          |          |
|------------------------------|-------------------------|----------|--------------|-------------|----------|----------|----------|
| ENSG00000271272.1_RP11-510P  | ENSG00000160789.18_LMNA | 0.13502  | -0.024714038 | 0.288027459 | 9.72E-02 | 3.06E-01 | 1.00E+00 |
| ENSG00000234632.1_NECAP1P2   | ENSG00000160789.18_LMNA | 0.12732  | -0.032538256 | 0.28083033  | 1.18E-01 | 3.44E-01 | 1.00E+00 |
| ENSG00000260362.1_RP11-297M  | ENSG00000160789.18_LMNA | -0.16078 | -0.311993364 | -0.0016192  | 4.78E-02 | 1.95E-01 | 1.00E+00 |
| ENSG00000228625.1_RP11-1B20  | ENSG00000160789.18_LMNA | 0.02689  | -0.13288205  | 0.185295    | 7.42E-01 | 8.92E-01 | 1.00E+00 |
| ENSG00000249803.4_RP11-114H  | ENSG00000160789.18_LMNA | 0.0955   | -0.064679912 | 0.250890287 | 2.42E-01 | 5.21E-01 | 1.00E+00 |
| ENSG00000224709.1_OR11M1P    | ENSG00000160789.18_LMNA | 0.05855  | -0.101601554 | 0.21573605  | 4.74E-01 | 7.33E-01 | 1.00E+00 |
| ENSG00000007306.13_CEACAM7   | ENSG00000160789.18_LMNA | -0.12173 | -0.27559423  | 0.038206544 | 1.35E-01 | 3.74E-01 | 1.00E+00 |
| ENSG00000279139.1_RP11-597D  | ENSG00000160789.18_LMNA | -0.09454 | -0.249981326 | 0.065645578 | 2.47E-01 | 5.27E-01 | 1.00E+00 |
| ENSG00000184276.2_DEFB108B   | ENSG00000160789.18_LMNA | -0.1226  | -0.27640326  | 0.037332054 | 1.32E-01 | 3.69E-01 | 1.00E+00 |
| ENSG00000229505.1_RP4-682E1  | ENSG00000160789.18_LMNA | 0.03336  | -0.126515647 | 0.191540447 | 6.83E-01 | 8.62E-01 | 1.00E+00 |
| ENSG00000234008.5_PPP1R2P2   | ENSG00000160789.18_LMNA | 0.00955  | -0.149876667 | 0.168496422 | 9.07E-01 | 9.64E-01 | 1.00E+00 |
| ENSG00000243276.4_RP11-384F  | ENSG00000160789.18_LMNA | -0.02662 | -0.18503188  | 0.133149691 | 7.45E-01 | 8.93E-01 | 1.00E+00 |
| ENSG00000249082.2_C5orf66-AS | ENSG00000160789.18_LMNA | 0.03456  | -0.125330179 | 0.192700554 | 6.73E-01 | 8.56E-01 | 1.00E+00 |
| ENSG00000278292.1_RFPL4AP6   | ENSG00000160789.18_LMNA | -0.07284 | -0.229379068 | 0.08737568  | 3.73E-01 | 6.53E-01 | 1.00E+00 |
| ENSG00000227225.1_MTND1P14   | ENSG00000160789.18_LMNA | -0.08945 | -0.24515888  | 0.070759    | 2.73E-01 | 5.58E-01 | 1.00E+00 |
| ENSG00000258065.1_RP11-30H9  | ENSG00000160789.18_LMNA | -0.02587 | -0.184313029 | 0.133880656 | 7.52E-01 | 8.96E-01 | 1.00E+00 |
| ENSG00000227248.1_FAM155A-I  | ENSG00000160789.18_LMNA | -0.18351 | -0.33297953  | -0.02503737 | 2.36E-02 | 1.22E-01 | 1.00E+00 |
| ENSG00000274961.1_           | ENSG00000160789.18_LMNA | 0.0025   | -0.156761251 | 0.161638211 | 9.76E-01 | 9.91E-01 | 1.00E+00 |
| ENSG00000238077.1_NMNAT1P3   | ENSG00000160789.18_LMNA | -0.02842 | -0.186773702 | 0.131377078 | 7.28E-01 | 8.85E-01 | 1.00E+00 |
| ENSG00000251010.1_RP11-6L6.7 | ENSG00000160789.18_LMNA | -0.0005  | -0.159690821 | 0.158710505 | 9.95E-01 | 9.98E-01 | 1.00E+00 |
| ENSG00000148215.4_OR5C1      | ENSG00000160789.18_LMNA | 0.02855  | -0.13124736  | 0.186901089 | 7.27E-01 | 8.84E-01 | 1.00E+00 |
| ENSG00000237685.1_RP11-360O  | ENSG00000160789.18_LMNA | 0.00753  | -0.151851556 | 0.166532246 | 9.27E-01 | 9.72E-01 | 1.00E+00 |
| ENSG00000220349.4_RP3-431A1  | ENSG00000160789.18_LMNA | 0.07742  | -0.08280005  | 0.23374093  | 3.43E-01 | 6.28E-01 | 1.00E+00 |
| ENSG00000237251.2_AC072061.  | ENSG00000160789.18_LMNA | -0.0569  | -0.21416158  | 0.103234977 | 4.86E-01 | 7.43E-01 | 1.00E+00 |
| ENSG00000279829.1_RP11-63I8. | ENSG00000160789.18_LMNA | -0.06626 | -0.223111546 | 0.093927044 | 4.17E-01 | 6.90E-01 | 1.00E+00 |
| ENSG00000267797.1_NRBF2P1    | ENSG00000160789.18_LMNA | -0.12219 | -0.276024038 | 0.03774202  | 1.34E-01 | 3.71E-01 | 1.00E+00 |
| ENSG00000232795.1_SCAND3P1   | ENSG00000160789.18_LMNA | -0.05641 | -0.213690675 | 0.103723182 | 4.90E-01 | 7.46E-01 | 1.00E+00 |
| ENSG00000124233.11_SEMG1     | ENSG00000160789.18_LMNA | -0.10892 | -0.263548396 | 0.051170426 | 1.82E-01 | 4.46E-01 | 1.00E+00 |
| ENSG00000264765.1_RP11-92B1  | ENSG00000160789.18_LMNA | -0.11468 | -0.268968125 | 0.045350739 | 1.59E-01 | 4.13E-01 | 1.00E+00 |
| ENSG00000213863.2_XX-C2158C  | ENSG00000160789.18_LMNA | 0.07949  | -0.080727745 | 0.235712238 | 3.30E-01 | 6.16E-01 | 1.00E+00 |
| ENSG00000231610.1_AC021021.  | ENSG00000160789.18_LMNA | 0.08781  | -0.072399222 | 0.243608675 | 2.82E-01 | 5.67E-01 | 1.00E+00 |
| ENSG00000135175.5_OCM2       | ENSG00000160789.18_LMNA | -0.0997  | -0.254856224 | 0.060459635 | 2.22E-01 | 4.97E-01 | 1.00E+00 |
| ENSG00000197919.4_IFNA1      | ENSG00000160789.18_LMNA | 0.07009  | -0.090119001 | 0.226757796 | 3.91E-01 | 6.69E-01 | 1.00E+00 |

|                              |                         |          |              |             |          |          |          |
|------------------------------|-------------------------|----------|--------------|-------------|----------|----------|----------|
| ENSG00000274064.1_RP11-570L  | ENSG00000160789.18_LMNA | 0.14674  | -0.012762161 | 0.298953643 | 7.12E-02 | 2.52E-01 | 1.00E+00 |
| ENSG00000188120.13_DAZ1      | ENSG00000160789.18_LMNA | -0.16167 | -0.312815989 | -0.00253079 | 4.66E-02 | 1.92E-01 | 1.00E+00 |
| ENSG00000204671.1_IL31       | ENSG00000160789.18_LMNA | -0.01566 | -0.174427436 | 0.143897847 | 8.48E-01 | 9.41E-01 | 1.00E+00 |
| ENSG00000251627.1_CTD-2089C  | ENSG00000160789.18_LMNA | -0.08227 | -0.238348602 | 0.077952026 | 3.14E-01 | 6.00E-01 | 1.00E+00 |
| ENSG00000253344.1_RP11-346L  | ENSG00000160789.18_LMNA | -0.0091  | -0.168058564 | 0.150317133 | 9.11E-01 | 9.66E-01 | 1.00E+00 |
| ENSG00000279588.1_AC087762.  | ENSG00000160789.18_LMNA | -0.00138 | -0.160547894 | 0.157852917 | 9.87E-01 | 9.95E-01 | 1.00E+00 |
| ENSG00000242042.1_RP11-690C  | ENSG00000160789.18_LMNA | -0.03095 | -0.189217448 | 0.1288867   | 7.05E-01 | 8.74E-01 | 1.00E+00 |
| ENSG00000237856.1_AC062020.  | ENSG00000160789.18_LMNA | -0.03158 | -0.189826285 | 0.12826562  | 6.99E-01 | 8.71E-01 | 1.00E+00 |
| ENSG00000165583.12_SSX5      | ENSG00000160789.18_LMNA | -0.03062 | -0.18889717  | 0.129213318 | 7.08E-01 | 8.76E-01 | 1.00E+00 |
| ENSG00000213606.3_AKR1B10P   | ENSG00000160789.18_LMNA | 0.09504  | -0.065144647 | 0.250452911 | 2.44E-01 | 5.24E-01 | 1.00E+00 |
| ENSG00000253479.4_LINC01603  | ENSG00000160789.18_LMNA | -0.1408  | -0.293424004 | 0.018822047 | 8.36E-02 | 2.80E-01 | 1.00E+00 |
| ENSG00000234575.1_CTSLP8     | ENSG00000160789.18_LMNA | -0.02605 | -0.184487823 | 0.133702949 | 7.50E-01 | 8.96E-01 | 1.00E+00 |
| ENSG00000187979.4_AC008079.  | ENSG00000160789.18_LMNA | -0.19724 | -0.345587611 | -0.03927096 | 1.49E-02 | 8.73E-02 | 1.00E+00 |
| ENSG00000237317.2_RP4-809F4  | ENSG00000160789.18_LMNA | -0.0427  | -0.200540248 | 0.117295229 | 6.01E-01 | 8.17E-01 | 1.00E+00 |
| ENSG00000215333.3_KRT18P23   | ENSG00000160789.18_LMNA | 0.12714  | -0.032718809 | 0.28066383  | 1.19E-01 | 3.45E-01 | 1.00E+00 |
| ENSG00000260761.1_RP11-184E  | ENSG00000160789.18_LMNA | -0.01186 | -0.170738087 | 0.147619667 | 8.85E-01 | 9.55E-01 | 1.00E+00 |
| ENSG00000270639.1_ECM1P1     | ENSG00000160789.18_LMNA | 0.05951  | -0.100642687 | 0.216659541 | 4.66E-01 | 7.28E-01 | 1.00E+00 |
| ENSG00000233951.3_RCC2P3     | ENSG00000160789.18_LMNA | 0.00387  | -0.15542254  | 0.162974207 | 9.62E-01 | 9.85E-01 | 1.00E+00 |
| ENSG00000215583.3_ASS1P6     | ENSG00000160789.18_LMNA | 0.0473   | -0.112746327 | 0.204960635 | 5.63E-01 | 7.94E-01 | 1.00E+00 |
| ENSG00000166152.3_C16orf78   | ENSG00000160789.18_LMNA | -0.05934 | -0.216496302 | 0.100812222 | 4.68E-01 | 7.29E-01 | 1.00E+00 |
| ENSG00000250514.1_RP11-96P7  | ENSG00000160789.18_LMNA | -0.10732 | -0.262047196 | 0.052778638 | 1.88E-01 | 4.55E-01 | 1.00E+00 |
| ENSG00000243818.4_RP11-372E  | ENSG00000160789.18_LMNA | 0.11147  | -0.048588538 | 0.265955299 | 1.72E-01 | 4.31E-01 | 1.00E+00 |
| ENSG00000263765.4_RP11-746B  | ENSG00000160789.18_LMNA | -0.09478 | -0.250209728 | 0.065402983 | 2.45E-01 | 5.25E-01 | 1.00E+00 |
| ENSG00000273471.1_RP13-1039. | ENSG00000160789.18_LMNA | 0.07265  | -0.087565405 | 0.229197931 | 3.74E-01 | 6.54E-01 | 1.00E+00 |
| ENSG00000241224.5_FLJ22763   | ENSG00000160789.18_LMNA | -0.00351 | -0.162616311 | 0.155781278 | 9.66E-01 | 9.87E-01 | 1.00E+00 |
| ENSG00000231772.4_RP1-154K9  | ENSG00000160789.18_LMNA | -0.09156 | -0.247155895 | 0.068643502 | 2.62E-01 | 5.45E-01 | 1.00E+00 |
| ENSG00000260731.1_KRT8P22    | ENSG00000160789.18_LMNA | -0.03711 | -0.195160913 | 0.122813026 | 6.50E-01 | 8.45E-01 | 1.00E+00 |
| ENSG00000264717.4_CH17-360D  | ENSG00000160789.18_LMNA | -0.02662 | -0.185031973 | 0.133149596 | 7.45E-01 | 8.93E-01 | 1.00E+00 |
| ENSG00000189348.6_FAM90A27I  | ENSG00000160789.18_LMNA | 0.07729  | -0.082933594 | 0.233613806 | 3.44E-01 | 6.29E-01 | 1.00E+00 |
| ENSG00000248222.4_CTB-174D1  | ENSG00000160789.18_LMNA | -0.15605 | -0.307607024 | 0.003232816 | 5.49E-02 | 2.14E-01 | 1.00E+00 |
| ENSG00000229315.5_MCHR2-AS   | ENSG00000160789.18_LMNA | -0.09633 | -0.251666554 | 0.063854749 | 2.38E-01 | 5.16E-01 | 1.00E+00 |
| ENSG00000241104.4_CEACAMP    | ENSG00000160789.18_LMNA | -0.01685 | -0.175577438 | 0.14273588  | 8.37E-01 | 9.37E-01 | 1.00E+00 |
| ENSG00000279439.1_CTD-2576N  | ENSG00000160789.18_LMNA | 0.00717  | -0.152201297 | 0.166184138 | 9.30E-01 | 9.73E-01 | 1.00E+00 |

|                             |                         |          |              |             |          |          |          |
|-----------------------------|-------------------------|----------|--------------|-------------|----------|----------|----------|
| ENSG00000249383.1_RP11-1018 | ENSG00000160789.18_LMNA | -0.04108 | -0.198975799 | 0.118901973 | 6.15E-01 | 8.26E-01 | 1.00E+00 |
| ENSG00000236372.1_RP5-865N1 | ENSG00000160789.18_LMNA | 0.07882  | -0.081400491 | 0.235072565 | 3.34E-01 | 6.20E-01 | 1.00E+00 |
| ENSG00000095981.9_KCNK16    | ENSG00000160789.18_LMNA | -0.06058 | -0.21768221  | 0.099580155 | 4.58E-01 | 7.22E-01 | 1.00E+00 |
| ENSG00000178243.4_C9orf62   | ENSG00000160789.18_LMNA | -0.25322 | -0.396440427 | -0.09797021 | 1.65E-03 | 1.69E-02 | 1.00E+00 |
| ENSG00000273825.1_CH17-164J | ENSG00000160789.18_LMNA | 0.03735  | -0.122584504 | 0.195384081 | 6.48E-01 | 8.43E-01 | 1.00E+00 |
| ENSG00000233115.4_FAM90A11  | ENSG00000160789.18_LMNA | -0.0219  | -0.180469005 | 0.137783594 | 7.89E-01 | 9.14E-01 | 1.00E+00 |
| ENSG00000163982.5_OTOP1     | ENSG00000160789.18_LMNA | 0.05446  | -0.105659048 | 0.211821955 | 5.05E-01 | 7.56E-01 | 1.00E+00 |
| ENSG00000167916.4_KRT24     | ENSG00000160789.18_LMNA | -0.07448 | -0.230939226 | 0.085740595 | 3.62E-01 | 6.44E-01 | 1.00E+00 |
| ENSG00000205695.3_RP11-15H7 | ENSG00000160789.18_LMNA | -0.03969 | -0.197644442 | 0.120268013 | 6.27E-01 | 8.32E-01 | 1.00E+00 |
| ENSG00000167195.7_GOLGA6C   | ENSG00000160789.18_LMNA | 0.22602  | 0.069313825  | 0.371841314 | 5.11E-03 | 3.99E-02 | 1.00E+00 |
| ENSG00000250819.1_RP11-576E | ENSG00000160789.18_LMNA | -0.23267 | -0.377877496 | -0.07629967 | 3.92E-03 | 3.27E-02 | 1.00E+00 |
| ENSG00000248332.5_TUB-AS1   | ENSG00000160789.18_LMNA | -0.20217 | -0.350098917 | -0.04439427 | 1.25E-02 | 7.69E-02 | 1.00E+00 |
| ENSG00000230663.1_FAM224B   | ENSG00000160789.18_LMNA | -0.0041  | -0.163192495 | 0.155203697 | 9.60E-01 | 9.84E-01 | 1.00E+00 |
| ENSG00000224082.1_UBTFL8    | ENSG00000160789.18_LMNA | 0.06177  | -0.098399767 | 0.218817497 | 4.50E-01 | 7.15E-01 | 1.00E+00 |
| ENSG00000279985.1 CTC-436P1 | ENSG00000160789.18_LMNA | -0.0342  | -0.192357735 | 0.125680586 | 6.76E-01 | 8.58E-01 | 1.00E+00 |
| ENSG00000248837.4_RP11-412P | ENSG00000160789.18_LMNA | 0.07664  | -0.083579934 | 0.232998381 | 3.48E-01 | 6.32E-01 | 1.00E+00 |
| ENSG00000264058.1_RP5-1028K | ENSG00000160789.18_LMNA | -0.06645 | -0.223288945 | 0.093741988 | 4.16E-01 | 6.89E-01 | 1.00E+00 |
| ENSG00000260515.1_CTD-2199C | ENSG00000160789.18_LMNA | 0.00879  | -0.150624274 | 0.167753168 | 9.14E-01 | 9.67E-01 | 1.00E+00 |
| ENSG00000224698.1_RP11-131J | ENSG00000160789.18_LMNA | 0.10604  | -0.054075943 | 0.260835105 | 1.94E-01 | 4.62E-01 | 1.00E+00 |
| ENSG00000267259.1_CTD-2008P | ENSG00000160789.18_LMNA | 0.02106  | -0.138607072 | 0.179656713 | 7.97E-01 | 9.18E-01 | 1.00E+00 |
| ENSG00000103310.9_ZP2       | ENSG00000160789.18_LMNA | 0.01043  | -0.149016863 | 0.169350773 | 8.99E-01 | 9.61E-01 | 1.00E+00 |
| ENSG00000249478.1 CTB-49A3  | ENSG00000160789.18_LMNA | -0.11351 | -0.267870331 | 0.046531273 | 1.64E-01 | 4.19E-01 | 1.00E+00 |
| ENSG00000249717.1_RP11-44F2 | ENSG00000160789.18_LMNA | -0.13715 | -0.290022048 | 0.022538858 | 9.20E-02 | 2.96E-01 | 1.00E+00 |
| ENSG00000187021.13_PNLIPRP1 | ENSG00000160789.18_LMNA | -0.09135 | -0.246963248 | 0.068847702 | 2.63E-01 | 5.46E-01 | 1.00E+00 |
| ENSG00000235931.2_LINC01553 | ENSG00000160789.18_LMNA | -0.01715 | -0.175867648 | 0.142442511 | 8.34E-01 | 9.35E-01 | 1.00E+00 |
| ENSG00000249584.1_RP11-478P | ENSG00000160789.18_LMNA | -0.10795 | -0.262637726 | 0.052146208 | 1.86E-01 | 4.51E-01 | 1.00E+00 |
| ENSG00000257495.4_KRT73-AS1 | ENSG00000160789.18_LMNA | 0.23828  | 0.08219558   | 0.382952042 | 3.12E-03 | 2.75E-02 | 1.00E+00 |
| ENSG00000208024.1_MIR199A2  | ENSG00000160789.18_LMNA | 0.19277  | 0.034634986  | 0.341493183 | 1.73E-02 | 9.74E-02 | 1.00E+00 |
| ENSG00000211593.2_IGKJ5     | ENSG00000160789.18_LMNA | 0.00128  | -0.157950127 | 0.160450766 | 9.87E-01 | 9.95E-01 | 1.00E+00 |
| ENSG00000237547.1_IGHJ2P    | ENSG00000160789.18_LMNA | -0.0788  | -0.235049787 | 0.081424441 | 3.35E-01 | 6.20E-01 | 1.00E+00 |
| ENSG00000238758.1_          | ENSG00000160789.18_LMNA | 0.0234   | -0.136312357 | 0.181919177 | 7.75E-01 | 9.07E-01 | 1.00E+00 |
| ENSG00000201413.1_RNA5SP14  | ENSG00000160789.18_LMNA | -0.00313 | -0.162245362 | 0.156153011 | 9.70E-01 | 9.88E-01 | 1.00E+00 |
| ENSG00000274118.1_Y_RNA     | ENSG00000160789.18_LMNA | -0.13831 | -0.291101229 | 0.021360733 | 8.93E-02 | 2.91E-01 | 1.00E+00 |



|                             |                         |          |              |             |          |          |          |
|-----------------------------|-------------------------|----------|--------------|-------------|----------|----------|----------|
| ENSG00000277259.1_          | ENSG00000160789.18_LMNA | 0.21945  | 0.062432849  | 0.365870629 | 6.60E-03 | 4.82E-02 | 1.00E+00 |
| ENSG00000199145.1_MIR302D   | ENSG00000160789.18_LMNA | -0.00716 | -0.166169231 | 0.152216273 | 9.30E-01 | 9.73E-01 | 1.00E+00 |
| ENSG00000207834.1_          | ENSG00000160789.18_LMNA | 0.02531  | -0.134433336 | 0.183769282 | 7.57E-01 | 8.99E-01 | 1.00E+00 |
| ENSG00000219712.1_RP11-532F | ENSG00000160789.18_LMNA | -0.05515 | -0.212482689 | 0.104974848 | 5.00E-01 | 7.53E-01 | 1.00E+00 |
| ENSG00000263723.1_SNORD39   | ENSG00000160789.18_LMNA | 0.01574  | -0.143824427 | 0.174500125 | 8.47E-01 | 9.40E-01 | 1.00E+00 |
| ENSG00000280473.1_AC100821. | ENSG00000160789.18_LMNA | -0.0239  | -0.182406793 | 0.135817342 | 7.70E-01 | 9.05E-01 | 1.00E+00 |
| ENSG00000207245.1_SNORD116  | ENSG00000160789.18_LMNA | -0.09022 | -0.245889886 | 0.069984953 | 2.69E-01 | 5.53E-01 | 1.00E+00 |
| ENSG00000272543.1_MIR4787   | ENSG00000160789.18_LMNA | -0.06471 | -0.221630781 | 0.095470871 | 4.28E-01 | 6.99E-01 | 1.00E+00 |
| ENSG00000206814.1_Y_RNA     | ENSG00000160789.18_LMNA | -0.01211 | -0.170983961 | 0.147371909 | 8.82E-01 | 9.54E-01 | 1.00E+00 |
| ENSG00000265521.1_MIR5697   | ENSG00000160789.18_LMNA | 0.01693  | -0.142655431 | 0.175657026 | 8.36E-01 | 9.36E-01 | 1.00E+00 |
| ENSG00000221611.1_SNORD88   | ENSG00000160789.18_LMNA | 0.04526  | -0.114765637 | 0.202999972 | 5.80E-01 | 8.04E-01 | 1.00E+00 |
| ENSG00000206734.1_Y_RNA     | ENSG00000160789.18_LMNA | -0.04976 | -0.207315186 | 0.110317873 | 5.43E-01 | 7.82E-01 | 1.00E+00 |
| ENSG00000273577.1_          | ENSG00000160789.18_LMNA | 0.03055  | -0.129284156 | 0.188827698 | 7.09E-01 | 8.76E-01 | 1.00E+00 |
| ENSG00000202172.1_RNU6-1327 | ENSG00000160789.18_LMNA | 0.0209   | -0.138762418 | 0.179503429 | 7.98E-01 | 9.19E-01 | 1.00E+00 |
| ENSG00000212044.2_          | ENSG00000160789.18_LMNA | -0.1654  | -0.316270621 | -0.00636467 | 4.17E-02 | 1.78E-01 | 1.00E+00 |
| ENSG00000252859.1_RNU6-375F | ENSG00000160789.18_LMNA | 0.10062  | -0.059532827 | 0.255725759 | 2.17E-01 | 4.92E-01 | 1.00E+00 |
| ENSG00000199263.1_Y_RNA     | ENSG00000160789.18_LMNA | 0.20485  | 0.047187482  | 0.352552505 | 1.14E-02 | 7.17E-02 | 1.00E+00 |
| ENSG00000250756.1_RP11-225B | ENSG00000160789.18_LMNA | 0.07622  | -0.084001961 | 0.232596404 | 3.51E-01 | 6.34E-01 | 1.00E+00 |
| ENSG00000264383.1_          | ENSG00000160789.18_LMNA | 0.11612  | -0.043895904 | 0.270319874 | 1.54E-01 | 4.05E-01 | 1.00E+00 |
| ENSG00000199201.1_Y_RNA     | ENSG00000160789.18_LMNA | -0.15143 | -0.30331936  | 0.007961579 | 6.26E-02 | 2.32E-01 | 1.00E+00 |
| ENSG00000222692.1_          | ENSG00000160789.18_LMNA | -0.08481 | -0.240757461 | 0.075411544 | 2.99E-01 | 5.85E-01 | 1.00E+00 |
| ENSG00000264999.1_MIR5089   | ENSG00000160789.18_LMNA | -0.05169 | -0.209165845 | 0.108406462 | 5.27E-01 | 7.72E-01 | 1.00E+00 |
| ENSG00000221217.2_          | ENSG00000160789.18_LMNA | 0.14639  | -0.013111519 | 0.298635422 | 7.19E-02 | 2.54E-01 | 1.00E+00 |
| ENSG00000207007.1_RNU6-891F | ENSG00000160789.18_LMNA | 0.10429  | -0.055836859 | 0.259188263 | 2.01E-01 | 4.71E-01 | 1.00E+00 |
| ENSG00000207058.1_RNU6-784F | ENSG00000160789.18_LMNA | -0.04461 | -0.202369571 | 0.115414338 | 5.85E-01 | 8.07E-01 | 1.00E+00 |
| ENSG00000221386.1_          | ENSG00000160789.18_LMNA | -0.11551 | -0.269745667 | 0.044514064 | 1.56E-01 | 4.08E-01 | 1.00E+00 |
| ENSG00000251844.1_snoMe28S- | ENSG00000160789.18_LMNA | -0.10372 | -0.258649691 | 0.056412313 | 2.04E-01 | 4.74E-01 | 1.00E+00 |
| ENSG00000258368.1_ZNF970P   | ENSG00000160789.18_LMNA | -0.15082 | -0.302753453 | 0.008584666 | 6.36E-02 | 2.35E-01 | 1.00E+00 |
| ENSG00000202054.1_RNA5SP15  | ENSG00000160789.18_LMNA | -0.01135 | -0.170239993 | 0.148121455 | 8.90E-01 | 9.57E-01 | 1.00E+00 |
| ENSG00000251829.1_RNA5SP43  | ENSG00000160789.18_LMNA | -0.05126 | -0.208758506 | 0.108827374 | 5.31E-01 | 7.73E-01 | 1.00E+00 |
| ENSG00000199461.1_Y_RNA     | ENSG00000160789.18_LMNA | -0.00243 | -0.161570605 | 0.156828962 | 9.76E-01 | 9.91E-01 | 1.00E+00 |
| ENSG00000201529.1_Y_RNA     | ENSG00000160789.18_LMNA | -0.13699 | -0.289864701 | 0.022710559 | 9.24E-02 | 2.97E-01 | 1.00E+00 |
| ENSG00000272020.1_RNU1-30P  | ENSG00000160789.18_LMNA | 0.03775  | -0.122184628 | 0.195774509 | 6.44E-01 | 8.42E-01 | 1.00E+00 |

|                              |                         |          |              |             |          |          |          |
|------------------------------|-------------------------|----------|--------------|-------------|----------|----------|----------|
| ENSG00000222890.1_RNU6-1068  | ENSG00000160789.18_LMNA | -0.02815 | -0.186514643 | 0.131640846 | 7.31E-01 | 8.86E-01 | 1.00E+00 |
| ENSG00000212549.1_RNA5SP35   | ENSG00000160789.18_LMNA | 0.03219  | -0.127669806 | 0.190410124 | 6.94E-01 | 8.68E-01 | 1.00E+00 |
| ENSG00000273609.1_RP11-271K  | ENSG00000160789.18_LMNA | -0.03726 | -0.195302861 | 0.122667676 | 6.49E-01 | 8.44E-01 | 1.00E+00 |
| ENSG00000279737.1_RP11-79C6  | ENSG00000160789.18_LMNA | -0.16116 | -0.312346716 | -0.0020107  | 4.73E-02 | 1.94E-01 | 1.00E+00 |
| ENSG00000201356.1_RNA5SP50   | ENSG00000160789.18_LMNA | -0.14003 | -0.292705366 | 0.019607915 | 8.53E-02 | 2.83E-01 | 1.00E+00 |
| ENSG00000241423.2_RPL21P103  | ENSG00000160789.18_LMNA | -0.08516 | -0.241090681 | 0.075059793 | 2.97E-01 | 5.83E-01 | 1.00E+00 |
| ENSG00000257289.1_RP11-611C  | ENSG00000160789.18_LMNA | 0.01161  | -0.147863894 | 0.170495678 | 8.87E-01 | 9.56E-01 | 1.00E+00 |
| ENSG00000221763.1_MIR1289-1  | ENSG00000160789.18_LMNA | -0.00106 | -0.160231195 | 0.158169862 | 9.90E-01 | 9.96E-01 | 1.00E+00 |
| ENSG00000270538.1_RP11-3B7.7 | ENSG00000160789.18_LMNA | -0.08081 | -0.236960279 | 0.079414346 | 3.22E-01 | 6.09E-01 | 1.00E+00 |
| ENSG00000238282.1_RP5-1164C  | ENSG00000160789.18_LMNA | 0.01248  | -0.147012375 | 0.171340691 | 8.79E-01 | 9.53E-01 | 1.00E+00 |
| ENSG00000278745.1_RP1-229K2  | ENSG00000160789.18_LMNA | -0.02774 | -0.186122978 | 0.132039543 | 7.34E-01 | 8.88E-01 | 1.00E+00 |
| ENSG00000263988.2_RN7SL147f  | ENSG00000160789.18_LMNA | 0.03567  | -0.124232377 | 0.193774078 | 6.63E-01 | 8.51E-01 | 1.00E+00 |
| ENSG00000250976.1_RP11-94C2  | ENSG00000160789.18_LMNA | -0.13979 | -0.292485354 | 0.019848432 | 8.58E-02 | 2.84E-01 | 1.00E+00 |
| ENSG00000222777.1_RNU6-233F  | ENSG00000160789.18_LMNA | 0.18958  | 0.031326797  | 0.3385643   | 1.93E-02 | 1.05E-01 | 1.00E+00 |
| ENSG00000251449.2_MTND1P19   | ENSG00000160789.18_LMNA | -0.17096 | -0.321417293 | -0.01209329 | 3.52E-02 | 1.59E-01 | 1.00E+00 |
| ENSG00000278263.2_RP11-294C  | ENSG00000160789.18_LMNA | 0.05334  | -0.106765638 | 0.210752704 | 5.14E-01 | 7.62E-01 | 1.00E+00 |
| ENSG00000241291.3_RN7SL791f  | ENSG00000160789.18_LMNA | -0.00324 | -0.162355775 | 0.156042374 | 9.68E-01 | 9.88E-01 | 1.00E+00 |
| ENSG00000197627.3_UBE2Q2P1   | ENSG00000160789.18_LMNA | -0.08475 | -0.240701866 | 0.075470224 | 2.99E-01 | 5.86E-01 | 1.00E+00 |
| ENSG00000227673.1_RP11-243J  | ENSG00000160789.18_LMNA | 0.00709  | -0.15228426  | 0.166101551 | 9.31E-01 | 9.73E-01 | 1.00E+00 |
| ENSG00000253680.1_RP11-59O2  | ENSG00000160789.18_LMNA | 0.03136  | -0.12847801  | 0.189618109 | 7.01E-01 | 8.72E-01 | 1.00E+00 |
| ENSG00000240374.3_RN7SL503f  | ENSG00000160789.18_LMNA | 0.12637  | -0.033508112 | 0.279935743 | 1.21E-01 | 3.50E-01 | 1.00E+00 |
| ENSG00000180772.6_AGTR2      | ENSG00000160789.18_LMNA | -0.10748 | -0.262191864 | 0.05262373  | 1.88E-01 | 4.54E-01 | 1.00E+00 |
| ENSG00000234041.1_RP11-345I1 | ENSG00000160789.18_LMNA | 0.15183  | -0.007555127 | 0.303688394 | 6.19E-02 | 2.30E-01 | 1.00E+00 |
| ENSG00000232254.1_CSF2RBP1   | ENSG00000160789.18_LMNA | -0.02368 | -0.182196223 | 0.136031126 | 7.72E-01 | 9.06E-01 | 1.00E+00 |
| ENSG00000255429.1_RP11-643G  | ENSG00000160789.18_LMNA | 0.01647  | -0.143104428 | 0.175212779 | 8.40E-01 | 9.38E-01 | 1.00E+00 |
| ENSG00000254856.1_NDUFA3P2   | ENSG00000160789.18_LMNA | 0.02659  | -0.133170161 | 0.185011753 | 7.45E-01 | 8.93E-01 | 1.00E+00 |
| ENSG00000201510.1_RN7SKP21   | ENSG00000160789.18_LMNA | 0.02272  | -0.136979583 | 0.181261676 | 7.81E-01 | 9.10E-01 | 1.00E+00 |
| ENSG00000225364.1_ATP6V0E1f  | ENSG00000160789.18_LMNA | 0.07947  | -0.080749161 | 0.235691879 | 3.30E-01 | 6.16E-01 | 1.00E+00 |
| ENSG00000212153.1_RNU1-82P   | ENSG00000160789.18_LMNA | 0.00407  | -0.155229664 | 0.163166595 | 9.60E-01 | 9.84E-01 | 1.00E+00 |
| ENSG00000224198.1_           | ENSG00000160789.18_LMNA | 0.08613  | -0.074083164 | 0.242015469 | 2.91E-01 | 5.77E-01 | 1.00E+00 |
| ENSG00000277591.1_RN7SL575f  | ENSG00000160789.18_LMNA | 0.1766   | 0.017902079  | 0.3266174   | 2.95E-02 | 1.42E-01 | 1.00E+00 |
| ENSG00000273710.1_Metazoa_SI | ENSG00000160789.18_LMNA | -0.03689 | -0.194942435 | 0.123036712 | 6.52E-01 | 8.46E-01 | 1.00E+00 |
| ENSG00000250243.2_RP11-120A  | ENSG00000160789.18_LMNA | -0.12239 | -0.276211303 | 0.037539587 | 1.33E-01 | 3.70E-01 | 1.00E+00 |

|                              |                         |          |              |             |          |          |          |
|------------------------------|-------------------------|----------|--------------|-------------|----------|----------|----------|
| ENSG00000230234.1_RP1-276N6  | ENSG00000160789.18_LMNA | -0.32401 | -0.459507317 | -0.17377203 | 4.66E-05 | 1.01E-03 | 1.00E+00 |
| ENSG00000270766.1_RP11-627K  | ENSG00000160789.18_LMNA | -0.12755 | -0.281042448 | 0.032308204 | 1.17E-01 | 3.43E-01 | 1.00E+00 |
| ENSG00000261156.5_RP11-215E  | ENSG00000160789.18_LMNA | 0.08922  | -0.070987404 | 0.244943108 | 2.74E-01 | 5.59E-01 | 1.00E+00 |
| ENSG00000227312.2_RP11-496D  | ENSG00000160789.18_LMNA | 0.03067  | -0.129161275 | 0.188948208 | 7.08E-01 | 8.76E-01 | 1.00E+00 |
| ENSG00000253057.1_RN7SKP57   | ENSG00000160789.18_LMNA | 0.01099  | -0.148467232 | 0.169896667 | 8.93E-01 | 9.58E-01 | 1.00E+00 |
| ENSG00000243905.3_RN7SL679F  | ENSG00000160789.18_LMNA | 0.05231  | -0.107788198 | 0.209763971 | 5.22E-01 | 7.68E-01 | 1.00E+00 |
| ENSG00000244091.1_RN7SL483F  | ENSG00000160789.18_LMNA | 0.08087  | -0.079356712 | 0.23701502  | 3.22E-01 | 6.09E-01 | 1.00E+00 |
| ENSG00000217631.1_RP1-142O9  | ENSG00000160789.18_LMNA | -0.12603 | -0.279622843 | 0.0338472   | 1.22E-01 | 3.51E-01 | 1.00E+00 |
| ENSG00000211819.3_TRAV40     | ENSG00000160789.18_LMNA | -0.0877  | -0.243504199 | 0.072509704 | 2.83E-01 | 5.68E-01 | 1.00E+00 |
| ENSG00000226605.1_AC007098   | ENSG00000160789.18_LMNA | -0.0672  | -0.224005598 | 0.092994179 | 4.11E-01 | 6.85E-01 | 1.00E+00 |
| ENSG00000243531.1_RP11-740N  | ENSG00000160789.18_LMNA | -0.03121 | -0.189469257 | 0.128629857 | 7.03E-01 | 8.73E-01 | 1.00E+00 |
| ENSG00000278348.1_Metazoa_SI | ENSG00000160789.18_LMNA | 0.17245  | 0.013620432  | 0.322786223 | 3.36E-02 | 1.54E-01 | 1.00E+00 |
| ENSG00000280903.1_           | ENSG00000160789.18_LMNA | -0.03145 | -0.189703732 | 0.128390658 | 7.00E-01 | 8.72E-01 | 1.00E+00 |
| ENSG00000276620.1_RP11-300D  | ENSG00000160789.18_LMNA | -0.02808 | -0.186446461 | 0.131710259 | 7.31E-01 | 8.87E-01 | 1.00E+00 |
| ENSG00000231454.2_RP11-160N  | ENSG00000160789.18_LMNA | -0.02938 | -0.187699384 | 0.130434205 | 7.19E-01 | 8.81E-01 | 1.00E+00 |
| ENSG00000264340.1_RP11-231E  | ENSG00000160789.18_LMNA | -0.12962 | -0.282983575 | 0.030201417 | 1.11E-01 | 3.33E-01 | 1.00E+00 |
| ENSG00000280126.2_AC069542   | ENSG00000160789.18_LMNA | 0.05912  | -0.101030029 | 0.216286558 | 4.69E-01 | 7.30E-01 | 1.00E+00 |
| ENSG00000235227.1_VN1R38P    | ENSG00000160789.18_LMNA | 0.01995  | -0.139695765 | 0.178582142 | 8.07E-01 | 9.23E-01 | 1.00E+00 |
| ENSG00000253269.1_CTB-37A13  | ENSG00000160789.18_LMNA | -0.05557 | -0.212887539 | 0.10455547  | 4.97E-01 | 7.51E-01 | 1.00E+00 |
| ENSG00000240116.3_RN7SL303F  | ENSG00000160789.18_LMNA | 0.06941  | -0.090797563 | 0.226108714 | 3.96E-01 | 6.73E-01 | 1.00E+00 |
| ENSG00000257737.1_RP11-341G  | ENSG00000160789.18_LMNA | -0.19275 | -0.341471745 | -0.03461075 | 1.74E-02 | 9.74E-02 | 1.00E+00 |
| ENSG00000227554.1_RP11-444D  | ENSG00000160789.18_LMNA | 0.05739  | -0.102747523 | 0.214631613 | 4.82E-01 | 7.40E-01 | 1.00E+00 |
| ENSG00000271378.1_C8orf59P2  | ENSG00000160789.18_LMNA | 0.02947  | -0.130341127 | 0.187790733 | 7.19E-01 | 8.80E-01 | 1.00E+00 |
| ENSG00000228481.1_U51244.2   | ENSG00000160789.18_LMNA | -0.04838 | -0.205994777 | 0.111680193 | 5.54E-01 | 7.88E-01 | 1.00E+00 |
| ENSG00000201794.1_RN7SKP13   | ENSG00000160789.18_LMNA | -0.04412 | -0.201900568 | 0.115896779 | 5.89E-01 | 8.09E-01 | 1.00E+00 |
| ENSG00000244451.1_RPL34P21   | ENSG00000160789.18_LMNA | 0.06763  | -0.092567468 | 0.224414377 | 4.08E-01 | 6.83E-01 | 1.00E+00 |
| ENSG00000261418.1_RP11-529J  | ENSG00000160789.18_LMNA | -0.0296  | -0.187913428 | 0.130216104 | 7.17E-01 | 8.80E-01 | 1.00E+00 |
| ENSG00000125255.6_SLC10A2    | ENSG00000160789.18_LMNA | -0.04613 | -0.203836068 | 0.113904853 | 5.73E-01 | 8.00E-01 | 1.00E+00 |
| ENSG00000227292.1_AC009229   | ENSG00000160789.18_LMNA | 0.07003  | -0.090172673 | 0.226706466 | 3.91E-01 | 6.69E-01 | 1.00E+00 |
| ENSG00000232867.1_RP11-179D  | ENSG00000160789.18_LMNA | -0.13595 | -0.28889941  | 0.023763504 | 9.49E-02 | 3.02E-01 | 1.00E+00 |
| ENSG00000271093.1_IGLCOR22   | ENSG00000160789.18_LMNA | -0.14637 | -0.298610484 | 0.013138895 | 7.20E-02 | 2.54E-01 | 1.00E+00 |
| ENSG00000228045.1_DNAJA1P6   | ENSG00000160789.18_LMNA | 0.11772  | -0.04227634  | 0.271823223 | 1.49E-01 | 3.95E-01 | 1.00E+00 |
| ENSG00000265115.1_RP11-31I22 | ENSG00000160789.18_LMNA | -0.12036 | -0.274306428 | 0.039597555 | 1.40E-01 | 3.81E-01 | 1.00E+00 |

|                              |                         |          |              |             |          |          |          |
|------------------------------|-------------------------|----------|--------------|-------------|----------|----------|----------|
| ENSG00000263331.1_CTC-508F8  | ENSG00000160789.18_LMNA | -0.03132 | -0.189571318 | 0.128525744 | 7.02E-01 | 8.72E-01 | 1.00E+00 |
| ENSG00000258693.1_RP11-436M  | ENSG00000160789.18_LMNA | -0.09981 | -0.254962058 | 0.060346859 | 2.21E-01 | 4.96E-01 | 1.00E+00 |
| ENSG00000226536.1_SETP15     | ENSG00000160789.18_LMNA | 0.06089  | -0.09927633  | 0.217974509 | 4.56E-01 | 7.21E-01 | 1.00E+00 |
| ENSG00000255660.1_RERG-AS1   | ENSG00000160789.18_LMNA | -0.17203 | -0.322400796 | -0.01319031 | 3.41E-02 | 1.56E-01 | 1.00E+00 |
| ENSG00000278001.1_RP11-157L  | ENSG00000160789.18_LMNA | -0.02672 | -0.18513228  | 0.133047572 | 7.44E-01 | 8.93E-01 | 1.00E+00 |
| ENSG00000227634.1_RP11-431K  | ENSG00000160789.18_LMNA | -0.05152 | -0.209003754 | 0.108573967 | 5.28E-01 | 7.72E-01 | 1.00E+00 |
| ENSG00000242727.2_RP11-123J  | ENSG00000160789.18_LMNA | 0.03072  | -0.129109008 | 0.188999462 | 7.07E-01 | 8.75E-01 | 1.00E+00 |
| ENSG00000236262.1_SHANK2-A   | ENSG00000160789.18_LMNA | 0.00574  | -0.153599778 | 0.164791397 | 9.44E-01 | 9.78E-01 | 1.00E+00 |
| ENSG00000279966.1_CTB-159G1  | ENSG00000160789.18_LMNA | 0.10531  | -0.054810155 | 0.260148678 | 1.97E-01 | 4.66E-01 | 1.00E+00 |
| ENSG00000242561.1_ATP5LP5    | ENSG00000160789.18_LMNA | -0.01139 | -0.170284119 | 0.148077008 | 8.89E-01 | 9.57E-01 | 1.00E+00 |
| ENSG00000253586.1_RP11-723D  | ENSG00000160789.18_LMNA | -0.01281 | -0.171665119 | 0.146685324 | 8.75E-01 | 9.52E-01 | 1.00E+00 |
| ENSG00000231124.1_UBE2V1P1   | ENSG00000160789.18_LMNA | 0.06412  | -0.096065522 | 0.221060029 | 4.33E-01 | 7.02E-01 | 1.00E+00 |
| ENSG00000277136.1_Metazoa_SI | ENSG00000160789.18_LMNA | 0.11149  | -0.048569315 | 0.265973204 | 1.71E-01 | 4.31E-01 | 1.00E+00 |
| ENSG00000269776.1_DPPA5P1    | ENSG00000160789.18_LMNA | -0.1049  | -0.259765956 | 0.055219373 | 1.98E-01 | 4.68E-01 | 1.00E+00 |
| ENSG00000235924.1_ZNRF2P3    | ENSG00000160789.18_LMNA | -0.03055 | -0.188831425 | 0.129280356 | 7.09E-01 | 8.76E-01 | 1.00E+00 |
| ENSG00000237929.1_RPL31P3    | ENSG00000160789.18_LMNA | 0.08427  | -0.075944902 | 0.24025206  | 3.02E-01 | 5.89E-01 | 1.00E+00 |
| ENSG00000254202.1_RP11-120I2 | ENSG00000160789.18_LMNA | -0.2976  | -0.436136094 | -0.14528102 | 1.96E-04 | 3.22E-03 | 1.00E+00 |
| ENSG00000234999.1_SNRPCP19   | ENSG00000160789.18_LMNA | 0.14071  | -0.01891257  | 0.293341243 | 8.38E-02 | 2.80E-01 | 1.00E+00 |
| ENSG00000270400.1_RP11-464I4 | ENSG00000160789.18_LMNA | -0.05038 | -0.207916684 | 0.109696887 | 5.38E-01 | 7.78E-01 | 1.00E+00 |
| ENSG00000256120.1_RP11-778H  | ENSG00000160789.18_LMNA | -0.13029 | -0.28360397  | 0.02952749  | 1.10E-01 | 3.30E-01 | 1.00E+00 |
| ENSG00000227257.1_RP11-330M  | ENSG00000160789.18_LMNA | 0.02987  | -0.129950307 | 0.188174239 | 7.15E-01 | 8.79E-01 | 1.00E+00 |
| ENSG00000260115.1_CTC-420A1  | ENSG00000160789.18_LMNA | -0.0034  | -0.162512268 | 0.155885549 | 9.67E-01 | 9.87E-01 | 1.00E+00 |
| ENSG00000254033.1_RP11-431M  | ENSG00000160789.18_LMNA | -0.1865  | -0.335736588 | -0.02813925 | 2.14E-02 | 1.13E-01 | 1.00E+00 |
| ENSG00000250446.1_LINC01332  | ENSG00000160789.18_LMNA | -0.04506 | -0.20280212  | 0.114969262 | 5.82E-01 | 8.05E-01 | 1.00E+00 |
| ENSG00000223903.1_RPL23P4    | ENSG00000160789.18_LMNA | 0.04445  | -0.115566172 | 0.202221982 | 5.87E-01 | 8.08E-01 | 1.00E+00 |
| ENSG00000267332.1_BOLA3P2    | ENSG00000160789.18_LMNA | 0.03021  | -0.12961694  | 0.188501289 | 7.12E-01 | 8.77E-01 | 1.00E+00 |
| ENSG00000253701.2_AL928768.3 | ENSG00000160789.18_LMNA | 0.07464  | -0.085579344 | 0.231093    | 3.61E-01 | 6.43E-01 | 1.00E+00 |
| ENSG00000234293.1_BACH1-IT3  | ENSG00000160789.18_LMNA | 0.03295  | -0.12691725  | 0.191147234 | 6.87E-01 | 8.64E-01 | 1.00E+00 |
| ENSG00000279321.1_RP11-555K  | ENSG00000160789.18_LMNA | -0.11697 | -0.271118596 | 0.043035644 | 1.51E-01 | 4.00E-01 | 1.00E+00 |
| ENSG00000275978.1_Metazoa_SI | ENSG00000160789.18_LMNA | 0.03192  | -0.127932876 | 0.190152369 | 6.96E-01 | 8.70E-01 | 1.00E+00 |
| ENSG00000253524.1_RP11-89M2  | ENSG00000160789.18_LMNA | -0.18877 | -0.337817124 | -0.03048393 | 1.99E-02 | 1.07E-01 | 1.00E+00 |
| ENSG00000261029.1_CTD-2588J  | ENSG00000160789.18_LMNA | -0.07277 | -0.229317937 | 0.087439711 | 3.73E-01 | 6.53E-01 | 1.00E+00 |
| ENSG00000267674.1_RP11-813F  | ENSG00000160789.18_LMNA | -0.00779 | -0.16678429  | 0.15159828  | 9.24E-01 | 9.71E-01 | 1.00E+00 |

|                              |                         |          |              |             |          |          |          |
|------------------------------|-------------------------|----------|--------------|-------------|----------|----------|----------|
| ENSG00000270209.1_RP4-592A1  | ENSG00000160789.18_LMNA | 0.0469   | -0.113147886 | 0.204570942 | 5.66E-01 | 7.97E-01 | 1.00E+00 |
| ENSG00000226005.3_RP11-464C  | ENSG00000160789.18_LMNA | 0.07119  | -0.089022151 | 0.227806398 | 3.83E-01 | 6.62E-01 | 1.00E+00 |
| ENSG00000280151.1_AC026248.  | ENSG00000160789.18_LMNA | 0.10483  | -0.055295694 | 0.259694566 | 1.99E-01 | 4.69E-01 | 1.00E+00 |
| ENSG00000232379.1_RP11-308D  | ENSG00000160789.18_LMNA | -0.03195 | -0.190183263 | 0.127901347 | 6.96E-01 | 8.70E-01 | 1.00E+00 |
| ENSG00000222515.1_RN7SKP24   | ENSG00000160789.18_LMNA | 0.05942  | -0.100736901 | 0.216568828 | 4.67E-01 | 7.29E-01 | 1.00E+00 |
| ENSG00000256922.1_RP11-749H  | ENSG00000160789.18_LMNA | -0.00736 | -0.166361461 | 0.152023152 | 9.28E-01 | 9.72E-01 | 1.00E+00 |
| ENSG00000229740.1_U91324.1   | ENSG00000160789.18_LMNA | 0.00848  | -0.150925686 | 0.167453409 | 9.17E-01 | 9.69E-01 | 1.00E+00 |
| ENSG00000278250.1_Metazoa_SI | ENSG00000160789.18_LMNA | 0.22578  | 0.069062515  | 0.371623691 | 5.16E-03 | 4.02E-02 | 1.00E+00 |
| ENSG00000237948.1_MTATP6P2   | ENSG00000160789.18_LMNA | -0.02118 | -0.179773384 | 0.138488822 | 7.96E-01 | 9.18E-01 | 1.00E+00 |
| ENSG00000279183.1_AC010412.  | ENSG00000160789.18_LMNA | -0.02604 | -0.184472957 | 0.133718063 | 7.50E-01 | 8.96E-01 | 1.00E+00 |
| ENSG00000266901.1_RP11-567M  | ENSG00000160789.18_LMNA | -0.01067 | -0.169586934 | 0.148779109 | 8.96E-01 | 9.59E-01 | 1.00E+00 |
| ENSG00000255340.1_RP11-484D  | ENSG00000160789.18_LMNA | 0.05809  | -0.102058405 | 0.215295854 | 4.77E-01 | 7.36E-01 | 1.00E+00 |
| ENSG00000279994.1_RP11-312A  | ENSG00000160789.18_LMNA | -0.05118 | -0.208680877 | 0.108907577 | 5.31E-01 | 7.74E-01 | 1.00E+00 |
| ENSG00000224679.1_MED15P4    | ENSG00000160789.18_LMNA | 0.1231   | -0.036818581 | 0.27687809  | 1.31E-01 | 3.67E-01 | 1.00E+00 |
| ENSG00000260452.1_TPRKBP2    | ENSG00000160789.18_LMNA | -0.07136 | -0.227972393 | 0.088848448 | 3.82E-01 | 6.61E-01 | 1.00E+00 |
| ENSG00000165762.2_OR4K2      | ENSG00000160789.18_LMNA | -0.24704 | -0.390865734 | -0.09143239 | 2.15E-03 | 2.07E-02 | 1.00E+00 |
| ENSG00000233145.1_RP11-364B  | ENSG00000160789.18_LMNA | 0.04541  | -0.114615289 | 0.203146041 | 5.79E-01 | 8.04E-01 | 1.00E+00 |
| ENSG00000261745.2_RP11-506E  | ENSG00000160789.18_LMNA | 0.08674  | -0.073473334 | 0.242592637 | 2.88E-01 | 5.73E-01 | 1.00E+00 |
| ENSG00000270017.1_CTD-2576F  | ENSG00000160789.18_LMNA | -0.04887 | -0.206468049 | 0.111192036 | 5.50E-01 | 7.86E-01 | 1.00E+00 |
| ENSG00000251171.1_RP11-327O  | ENSG00000160789.18_LMNA | 0.03303  | -0.126835975 | 0.191226818 | 6.86E-01 | 8.64E-01 | 1.00E+00 |
| ENSG00000178457.3_LINC00314  | ENSG00000160789.18_LMNA | 0.05539  | -0.104730932 | 0.212718169 | 4.98E-01 | 7.51E-01 | 1.00E+00 |
| ENSG00000254603.1_OR5M6P     | ENSG00000160789.18_LMNA | 0.03786  | -0.122077016 | 0.195879561 | 6.43E-01 | 8.41E-01 | 1.00E+00 |
| ENSG00000259208.2_RP11-621H  | ENSG00000160789.18_LMNA | -0.18918 | -0.338193553 | -0.03090852 | 1.96E-02 | 1.06E-01 | 1.00E+00 |
| ENSG00000248980.1_RP11-87F1  | ENSG00000160789.18_LMNA | -0.03912 | -0.197089525 | 0.12083703  | 6.32E-01 | 8.35E-01 | 1.00E+00 |
| ENSG00000251647.2_RP11-576N  | ENSG00000160789.18_LMNA | 0.08101  | -0.07921502  | 0.237149594 | 3.21E-01 | 6.08E-01 | 1.00E+00 |
| ENSG00000259615.1_RP11-429B  | ENSG00000160789.18_LMNA | -0.04607 | -0.203771895 | 0.113970938 | 5.73E-01 | 8.01E-01 | 1.00E+00 |
| ENSG00000258566.2_RP11-99E1  | ENSG00000160789.18_LMNA | -0.19836 | -0.346615679 | -0.04043708 | 1.43E-02 | 8.49E-02 | 1.00E+00 |
| ENSG00000255377.1_DUXAP5     | ENSG00000160789.18_LMNA | -0.05796 | -0.21517571  | 0.10218307  | 4.78E-01 | 7.36E-01 | 1.00E+00 |
| ENSG00000264754.1_CTD-2653B  | ENSG00000160789.18_LMNA | -0.10345 | -0.258397151 | 0.056682075 | 2.05E-01 | 4.76E-01 | 1.00E+00 |
| ENSG00000278138.1_CLUHP11    | ENSG00000160789.18_LMNA | -0.12461 | -0.278293998 | 0.035286457 | 1.26E-01 | 3.59E-01 | 1.00E+00 |
| ENSG00000226202.2_           | ENSG00000160789.18_LMNA | 0.05489  | -0.105231046 | 0.212235312 | 5.02E-01 | 7.54E-01 | 1.00E+00 |
| ENSG00000279676.1_CTB-147C2  | ENSG00000160789.18_LMNA | -0.09188 | -0.247460982 | 0.068320064 | 2.60E-01 | 5.43E-01 | 1.00E+00 |
| ENSG00000261792.1_DNM1P28    | ENSG00000160789.18_LMNA | 0.07428  | -0.085937335 | 0.230751587 | 3.63E-01 | 6.45E-01 | 1.00E+00 |

|                             |                         |          |              |             |          |          |          |
|-----------------------------|-------------------------|----------|--------------|-------------|----------|----------|----------|
| ENSG00000269898.1_RP11-568J | ENSG00000160789.18_LMNA | 0.06121  | -0.098952556 | 0.218285937 | 4.54E-01 | 7.19E-01 | 1.00E+00 |
| ENSG00000234066.1_TAS2R62P  | ENSG00000160789.18_LMNA | 0.20686  | 0.049283712  | 0.354391104 | 1.06E-02 | 6.81E-02 | 1.00E+00 |
| ENSG00000237707.1_RP5-1018K | ENSG00000160789.18_LMNA | -0.12439 | -0.278079311 | 0.035518859 | 1.27E-01 | 3.60E-01 | 1.00E+00 |
| ENSG00000155622.6_XAGE2     | ENSG00000160789.18_LMNA | 0.14426  | -0.015291692 | 0.296647992 | 7.62E-02 | 2.64E-01 | 1.00E+00 |
| ENSG00000225311.1_RP1-91J24 | ENSG00000160789.18_LMNA | -0.05159 | -0.209074671 | 0.108500684 | 5.28E-01 | 7.72E-01 | 1.00E+00 |
| ENSG00000253168.1_RP11-326L | ENSG00000160789.18_LMNA | 0.01611  | -0.143458452 | 0.174862408 | 8.44E-01 | 9.39E-01 | 1.00E+00 |
| ENSG00000251031.1_CTC-367F4 | ENSG00000160789.18_LMNA | 0.0485   | -0.111557642 | 0.206113605 | 5.53E-01 | 7.88E-01 | 1.00E+00 |
| ENSG00000279617.1_AC005796. | ENSG00000160789.18_LMNA | 0.04601  | -0.114027391 | 0.203717073 | 5.74E-01 | 8.01E-01 | 1.00E+00 |
| ENSG00000255558.1_CTC-497E2 | ENSG00000160789.18_LMNA | 0.09152  | -0.068677656 | 0.247123675 | 2.62E-01 | 5.45E-01 | 1.00E+00 |
| ENSG00000231198.1_AC004987. | ENSG00000160789.18_LMNA | 0.05043  | -0.10965115  | 0.207960977 | 5.37E-01 | 7.78E-01 | 1.00E+00 |
| ENSG00000262803.1_RP11-160A | ENSG00000160789.18_LMNA | 0.00078  | -0.158444361 | 0.159956856 | 9.92E-01 | 9.97E-01 | 1.00E+00 |
| ENSG00000255808.1_RP11-31L2 | ENSG00000160789.18_LMNA | 0.08429  | -0.075933896 | 0.240262491 | 3.02E-01 | 5.89E-01 | 1.00E+00 |
| ENSG00000224203.2_RPS23P10  | ENSG00000160789.18_LMNA | 0.00494  | -0.154378681 | 0.164015138 | 9.52E-01 | 9.81E-01 | 1.00E+00 |
| ENSG00000248268.1_CTC-499J9 | ENSG00000160789.18_LMNA | -0.08558 | -0.241487365 | 0.074640946 | 2.95E-01 | 5.80E-01 | 1.00E+00 |
| ENSG00000263553.1_RP11-449D | ENSG00000160789.18_LMNA | -0.0199  | -0.178530976 | 0.139747584 | 8.08E-01 | 9.23E-01 | 1.00E+00 |
| ENSG00000233496.1_SYNJ2-IT1 | ENSG00000160789.18_LMNA | 0.15112  | -0.00827661  | 0.303033266 | 6.31E-02 | 2.33E-01 | 1.00E+00 |
| ENSG00000177338.12_LINC0046 | ENSG00000160789.18_LMNA | -0.08914 | -0.244866444 | 0.071068548 | 2.75E-01 | 5.59E-01 | 1.00E+00 |
| ENSG00000225236.1_AP000936. | ENSG00000160789.18_LMNA | -0.02754 | -0.185928552 | 0.132237423 | 7.36E-01 | 8.89E-01 | 1.00E+00 |
| ENSG00000219188.1_CACYBPP3  | ENSG00000160789.18_LMNA | 0.00913  | -0.150293368 | 0.168082192 | 9.11E-01 | 9.66E-01 | 1.00E+00 |
| ENSG00000237986.2_CELF2-AS2 | ENSG00000160789.18_LMNA | 0.03781  | -0.122127586 | 0.195830195 | 6.44E-01 | 8.42E-01 | 1.00E+00 |
| ENSG00000237387.1_CTA-407F1 | ENSG00000160789.18_LMNA | 0.00435  | -0.154957887 | 0.163437644 | 9.58E-01 | 9.83E-01 | 1.00E+00 |
| ENSG00000236375.3_POU5F1P5  | ENSG00000160789.18_LMNA | 0.07323  | -0.086987228 | 0.229749867 | 3.70E-01 | 6.50E-01 | 1.00E+00 |
| ENSG00000218107.1_RP1-261G2 | ENSG00000160789.18_LMNA | -0.02032 | -0.178942163 | 0.139331098 | 8.04E-01 | 9.21E-01 | 1.00E+00 |
| ENSG00000259418.1_RP11-109D | ENSG00000160789.18_LMNA | 0.02605  | -0.133709127 | 0.184481746 | 7.50E-01 | 8.96E-01 | 1.00E+00 |
| ENSG00000227489.1_AC006458. | ENSG00000160789.18_LMNA | 0.1395   | -0.020147225 | 0.292211989 | 8.65E-02 | 2.86E-01 | 1.00E+00 |
| ENSG00000232735.2_ATG4AP1   | ENSG00000160789.18_LMNA | -0.03048 | -0.188765969 | 0.129347097 | 7.09E-01 | 8.76E-01 | 1.00E+00 |
| ENSG00000168530.14_MYL1     | ENSG00000160789.18_LMNA | -0.12693 | -0.280464696 | 0.032934725 | 1.19E-01 | 3.47E-01 | 1.00E+00 |
| ENSG00000262480.2_SAMD11P1  | ENSG00000160789.18_LMNA | -0.00871 | -0.167679356 | 0.150698499 | 9.15E-01 | 9.68E-01 | 1.00E+00 |
| ENSG00000185758.7_CLDN24    | ENSG00000160789.18_LMNA | 0.0781   | -0.082117594 | 0.234390414 | 3.39E-01 | 6.24E-01 | 1.00E+00 |
| ENSG00000220377.1_GSTA8P    | ENSG00000160789.18_LMNA | 0.04221  | -0.117784909 | 0.200063629 | 6.06E-01 | 8.20E-01 | 1.00E+00 |
| ENSG00000249007.1_RP11-510N | ENSG00000160789.18_LMNA | 0.08255  | -0.077672394 | 0.238613937 | 3.12E-01 | 5.98E-01 | 1.00E+00 |
| ENSG00000249807.1_CTD-2199C | ENSG00000160789.18_LMNA | 0.06615  | -0.094041464 | 0.22300185  | 4.18E-01 | 6.90E-01 | 1.00E+00 |
| ENSG00000250038.4_RP11-180C | ENSG00000160789.18_LMNA | 0.10514  | -0.054981988 | 0.259987984 | 1.97E-01 | 4.67E-01 | 1.00E+00 |

|                              |                         |          |              |             |          |          |          |
|------------------------------|-------------------------|----------|--------------|-------------|----------|----------|----------|
| ENSG00000239939.1_RPSAP34    | ENSG00000160789.18_LMNA | 0.00439  | -0.154914121 | 0.163481288 | 9.57E-01 | 9.83E-01 | 1.00E+00 |
| ENSG00000263946.1_RP11-434D  | ENSG00000160789.18_LMNA | -0.04884 | -0.206438096 | 0.111222936 | 5.50E-01 | 7.87E-01 | 1.00E+00 |
| ENSG00000279929.1_RP11-145E  | ENSG00000160789.18_LMNA | 0.01025  | -0.149192326 | 0.169176461 | 9.00E-01 | 9.61E-01 | 1.00E+00 |
| ENSG00000243583.1_RP4-669B1  | ENSG00000160789.18_LMNA | 0.01507  | -0.144474329 | 0.173856568 | 8.54E-01 | 9.43E-01 | 1.00E+00 |
| ENSG00000264334.1_RP11-671C  | ENSG00000160789.18_LMNA | 0.0948   | -0.065387174 | 0.25022461  | 2.45E-01 | 5.25E-01 | 1.00E+00 |
| ENSG00000258776.1_RP11-1085I | ENSG00000160789.18_LMNA | -0.01373 | -0.172558321 | 0.145784539 | 8.67E-01 | 9.48E-01 | 1.00E+00 |
| ENSG00000235592.1_GS1-600G8  | ENSG00000160789.18_LMNA | 0.09873  | -0.061435465 | 0.253940145 | 2.26E-01 | 5.02E-01 | 1.00E+00 |
| ENSG00000258774.1_NANOGP7    | ENSG00000160789.18_LMNA | 0.1571   | -0.002157477 | 0.308580297 | 5.33E-02 | 2.09E-01 | 1.00E+00 |
| ENSG00000236897.1_AC113331.1 | ENSG00000160789.18_LMNA | -0.21637 | -0.363065069 | -0.05920949 | 7.42E-03 | 5.25E-02 | 1.00E+00 |
| ENSG00000276067.1_RP11-260N  | ENSG00000160789.18_LMNA | 0.01477  | -0.144766776 | 0.173566888 | 8.57E-01 | 9.44E-01 | 1.00E+00 |
| ENSG00000236980.8_C3orf84    | ENSG00000160789.18_LMNA | -0.11481 | -0.269087812 | 0.045221979 | 1.59E-01 | 4.12E-01 | 1.00E+00 |
| ENSG00000255882.1_RP11-290C  | ENSG00000160789.18_LMNA | -0.07093 | -0.227565316 | 0.089274394 | 3.85E-01 | 6.64E-01 | 1.00E+00 |
| ENSG00000229695.1_AC011242.1 | ENSG00000160789.18_LMNA | 0.02243  | -0.137261069 | 0.180984207 | 7.84E-01 | 9.12E-01 | 1.00E+00 |
| ENSG00000279177.1_CH507-338  | ENSG00000160789.18_LMNA | -0.01762 | -0.1763229   | 0.141982192 | 8.29E-01 | 9.33E-01 | 1.00E+00 |
| ENSG00000229154.1_KCNQ5-AS   | ENSG00000160789.18_LMNA | 0.04349  | -0.116522296 | 0.201292258 | 5.95E-01 | 8.13E-01 | 1.00E+00 |
| ENSG00000250739.1_LINC01262  | ENSG00000160789.18_LMNA | -0.18662 | -0.335841945 | -0.02825791 | 2.13E-02 | 1.13E-01 | 1.00E+00 |
| ENSG00000228917.1_RP11-544M  | ENSG00000160789.18_LMNA | 0.02742  | -0.132354744 | 0.185813266 | 7.37E-01 | 8.90E-01 | 1.00E+00 |
| ENSG00000223593.1_AL356806.3 | ENSG00000160789.18_LMNA | 0.04673  | -0.113317061 | 0.204406735 | 5.68E-01 | 7.98E-01 | 1.00E+00 |
| ENSG00000197214.5_TCEA1P1    | ENSG00000160789.18_LMNA | 0.12482  | -0.035075292 | 0.278489039 | 1.25E-01 | 3.58E-01 | 1.00E+00 |
| ENSG00000250496.2_ABT1P1     | ENSG00000160789.18_LMNA | -0.02976 | -0.188069184 | 0.130057375 | 7.16E-01 | 8.79E-01 | 1.00E+00 |
| ENSG00000248296.1_CTD-2308B  | ENSG00000160789.18_LMNA | -0.11658 | -0.270750905 | 0.043431722 | 1.53E-01 | 4.02E-01 | 1.00E+00 |
| ENSG00000254181.1_SLC25A51F  | ENSG00000160789.18_LMNA | 0.02705  | -0.132726742 | 0.185447664 | 7.41E-01 | 8.91E-01 | 1.00E+00 |
| ENSG00000261151.1_RP11-332G  | ENSG00000160789.18_LMNA | 0.06953  | -0.090677432 | 0.226223646 | 3.95E-01 | 6.72E-01 | 1.00E+00 |
| ENSG00000181609.5_OR52D1     | ENSG00000160789.18_LMNA | 0.07968  | -0.080547102 | 0.235883953 | 3.29E-01 | 6.15E-01 | 1.00E+00 |
| ENSG00000260433.1_RP11-202D  | ENSG00000160789.18_LMNA | 0.01374  | -0.145778664 | 0.172564144 | 8.67E-01 | 9.48E-01 | 1.00E+00 |
| ENSG00000257860.4_RP11-552I1 | ENSG00000160789.18_LMNA | -0.09277 | -0.248305005 | 0.067424926 | 2.56E-01 | 5.38E-01 | 1.00E+00 |
| ENSG00000254090.1_MTND2P32   | ENSG00000160789.18_LMNA | 0.02123  | -0.138438084 | 0.179823441 | 7.95E-01 | 9.18E-01 | 1.00E+00 |
| ENSG00000235055.3_RP4-609E1  | ENSG00000160789.18_LMNA | 0.09397  | -0.066222206 | 0.249438293 | 2.50E-01 | 5.30E-01 | 1.00E+00 |
| ENSG00000221970.1_OR2A1      | ENSG00000160789.18_LMNA | -0.03795 | -0.195962424 | 0.121992129 | 6.43E-01 | 8.41E-01 | 1.00E+00 |
| ENSG00000251210.4_RP11-168E  | ENSG00000160789.18_LMNA | -0.05062 | -0.208140121 | 0.109466148 | 5.36E-01 | 7.77E-01 | 1.00E+00 |
| ENSG00000226537.2_OR7E33P    | ENSG00000160789.18_LMNA | 0.14291  | -0.01667503  | 0.295385547 | 7.90E-02 | 2.70E-01 | 1.00E+00 |
| ENSG00000234737.1_KRT18P15   | ENSG00000160789.18_LMNA | 0.03993  | -0.120029713 | 0.197876775 | 6.25E-01 | 8.31E-01 | 1.00E+00 |
| ENSG00000227159.6_DDX11L16   | ENSG00000160789.18_LMNA | -0.2252  | -0.371097222 | -0.06845471 | 5.28E-03 | 4.08E-02 | 1.00E+00 |

|                             |                         |          |              |             |          |          |          |
|-----------------------------|-------------------------|----------|--------------|-------------|----------|----------|----------|
| ENSG00000236957.6_RP11-451O | ENSG00000160789.18_LMNA | 0.00358  | -0.155712276 | 0.162685157 | 9.65E-01 | 9.86E-01 | 1.00E+00 |
| ENSG00000253505.1_CTA-398F1 | ENSG00000160789.18_LMNA | -0.11405 | -0.268376743 | 0.045986803 | 1.62E-01 | 4.17E-01 | 1.00E+00 |
| ENSG00000241136.1_PAICSP6   | ENSG00000160789.18_LMNA | 0.23168  | 0.075250904  | 0.376972935 | 4.08E-03 | 3.36E-02 | 1.00E+00 |
| ENSG00000172365.2_OR5B2     | ENSG00000160789.18_LMNA | 0.00797  | -0.151420579 | 0.166961101 | 9.22E-01 | 9.70E-01 | 1.00E+00 |
| ENSG00000105370.6_LIM2      | ENSG00000160789.18_LMNA | 0.005    | -0.154326755 | 0.164066901 | 9.51E-01 | 9.80E-01 | 1.00E+00 |
| ENSG00000261904.1_MTND5P33  | ENSG00000160789.18_LMNA | 0.10305  | -0.057091902 | 0.258013405 | 2.06E-01 | 4.78E-01 | 1.00E+00 |
| ENSG00000228595.1_PAICSP2   | ENSG00000160789.18_LMNA | -0.02409 | -0.182591597 | 0.135629693 | 7.68E-01 | 9.04E-01 | 1.00E+00 |
| ENSG00000204345.1_CD300LD   | ENSG00000160789.18_LMNA | 0.01164  | -0.14783251  | 0.170526832 | 8.87E-01 | 9.56E-01 | 1.00E+00 |
| ENSG00000175485.2_OR52W1    | ENSG00000160789.18_LMNA | -0.02608 | -0.184515076 | 0.13367524  | 7.50E-01 | 8.95E-01 | 1.00E+00 |
| ENSG00000267153.1_CTBP2P3   | ENSG00000160789.18_LMNA | 0.01393  | -0.145597784 | 0.172743438 | 8.65E-01 | 9.47E-01 | 1.00E+00 |
| ENSG00000219061.4_TRIM51FP  | ENSG00000160789.18_LMNA | -0.1121  | -0.26654245  | 0.047958062 | 1.69E-01 | 4.28E-01 | 1.00E+00 |
| ENSG00000250788.1_TUBB8P4   | ENSG00000160789.18_LMNA | 0.14025  | -0.01938679  | 0.29290761  | 8.48E-02 | 2.82E-01 | 1.00E+00 |
| ENSG00000231382.1_NBPF21P   | ENSG00000160789.18_LMNA | 0.05529  | -0.104837133 | 0.212615646 | 4.99E-01 | 7.52E-01 | 1.00E+00 |
| ENSG00000257777.1_RP11-25J3 | ENSG00000160789.18_LMNA | -0.0055  | -0.164552655 | 0.153839375 | 9.46E-01 | 9.79E-01 | 1.00E+00 |
| ENSG00000249177.1_MTND4P29  | ENSG00000160789.18_LMNA | -0.08394 | -0.23993675  | 0.076277561 | 3.04E-01 | 5.90E-01 | 1.00E+00 |
| ENSG00000223875.2_NBEAP3    | ENSG00000160789.18_LMNA | -0.04566 | -0.203382356 | 0.114372022 | 5.76E-01 | 8.03E-01 | 1.00E+00 |
| ENSG00000242671.1_RP11-232M | ENSG00000160789.18_LMNA | -0.06358 | -0.220545841 | 0.096601047 | 4.36E-01 | 7.05E-01 | 1.00E+00 |
| ENSG00000204754.3_CTC-281M2 | ENSG00000160789.18_LMNA | -0.06447 | -0.221396419 | 0.095715073 | 4.30E-01 | 7.00E-01 | 1.00E+00 |
| ENSG00000226122.1_DDC-AS1   | ENSG00000160789.18_LMNA | -0.18303 | -0.332544275 | -0.02454822 | 2.40E-02 | 1.23E-01 | 1.00E+00 |
| ENSG00000175779.1_C15orf53  | ENSG00000160789.18_LMNA | 0.03733  | -0.122599397 | 0.195369538 | 6.48E-01 | 8.44E-01 | 1.00E+00 |
| ENSG00000281560.1_LSINCT5   | ENSG00000160789.18_LMNA | -0.16165 | -0.312802605 | -0.00251596 | 4.66E-02 | 1.92E-01 | 1.00E+00 |
| ENSG00000231876.6_AC009158  | ENSG00000160789.18_LMNA | -0.10389 | -0.258814595 | 0.056236139 | 2.03E-01 | 4.74E-01 | 1.00E+00 |
| ENSG00000280709.1_RP11-983G | ENSG00000160789.18_LMNA | -0.07493 | -0.231367258 | 0.085291708 | 3.59E-01 | 6.42E-01 | 1.00E+00 |
| ENSG00000260010.1_ZNF720P1  | ENSG00000160789.18_LMNA | -0.02035 | -0.178973019 | 0.13929984  | 8.03E-01 | 9.21E-01 | 1.00E+00 |
| ENSG00000279790.1_RP11-374N | ENSG00000160789.18_LMNA | 0.04764  | -0.112417536 | 0.205279635 | 5.60E-01 | 7.92E-01 | 1.00E+00 |
| ENSG00000251045.1_CTC-321K1 | ENSG00000160789.18_LMNA | 0.06419  | -0.095987915 | 0.221134529 | 4.32E-01 | 7.01E-01 | 1.00E+00 |
| ENSG00000186143.9_PRR30     | ENSG00000160789.18_LMNA | 0.01814  | -0.141470049 | 0.176829245 | 8.24E-01 | 9.31E-01 | 1.00E+00 |
| ENSG00000268500.4_AC018755  | ENSG00000160789.18_LMNA | -0.14599 | -0.298263065 | 0.013520214 | 7.27E-02 | 2.56E-01 | 1.00E+00 |
| ENSG00000157131.10_C8A      | ENSG00000160789.18_LMNA | 0.031    | -0.128840694 | 0.189262556 | 7.05E-01 | 8.74E-01 | 1.00E+00 |
| ENSG00000261184.1_RP11-196O | ENSG00000160789.18_LMNA | -0.07781 | -0.234109778 | 0.082412513 | 3.41E-01 | 6.26E-01 | 1.00E+00 |
| ENSG00000253417.4_RP11-109J | ENSG00000160789.18_LMNA | 0.07169  | -0.0885196   | 0.228286599 | 3.80E-01 | 6.59E-01 | 1.00E+00 |
| ENSG00000236761.5_CTAGE9    | ENSG00000160789.18_LMNA | 0.06162  | -0.098544612 | 0.218678233 | 4.51E-01 | 7.16E-01 | 1.00E+00 |
| ENSG00000155890.3_TRIM42    | ENSG00000160789.18_LMNA | -0.08831 | -0.244081682 | 0.07189893  | 2.79E-01 | 5.65E-01 | 1.00E+00 |



|                              |                         |          |              |             |          |          |          |
|------------------------------|-------------------------|----------|--------------|-------------|----------|----------|----------|
| ENSG00000186049.7_KRT73      | ENSG00000160789.18_LMNA | -0.02118 | -0.179770163 | 0.138492086 | 7.96E-01 | 9.18E-01 | 1.00E+00 |
| ENSG00000204694.9_OR11A1     | ENSG00000160789.18_LMNA | -0.09116 | -0.246783917 | 0.069037765 | 2.64E-01 | 5.48E-01 | 1.00E+00 |
| ENSG00000186509.4_OR9Q1      | ENSG00000160789.18_LMNA | 0.01008  | -0.149357736 | 0.169012119 | 9.02E-01 | 9.62E-01 | 1.00E+00 |
| ENSG00000260779.1_RP11-856M  | ENSG00000160789.18_LMNA | -0.04617 | -0.203871318 | 0.113868552 | 5.72E-01 | 8.00E-01 | 1.00E+00 |
| ENSG00000112494.8_UNC93A     | ENSG00000160789.18_LMNA | -0.10152 | -0.256576502 | 0.058625521 | 2.13E-01 | 4.87E-01 | 1.00E+00 |
| ENSG00000228980.3_LINC01205  | ENSG00000160789.18_LMNA | 0.02488  | -0.134859284 | 0.183350087 | 7.61E-01 | 9.00E-01 | 1.00E+00 |
| ENSG00000254119.4_RP11-705O  | ENSG00000160789.18_LMNA | 0.01315  | -0.146357936 | 0.171989811 | 8.72E-01 | 9.50E-01 | 1.00E+00 |
| ENSG00000261104.1_RP11-734K  | ENSG00000160789.18_LMNA | 0.00472  | -0.154598152 | 0.163796342 | 9.54E-01 | 9.82E-01 | 1.00E+00 |
| ENSG00000233701.3_PRR23C     | ENSG00000160789.18_LMNA | 0.04459  | -0.115433774 | 0.202350679 | 5.85E-01 | 8.08E-01 | 1.00E+00 |
| ENSG00000188984.10_AADACL3   | ENSG00000160789.18_LMNA | -0.10842 | -0.263084384 | 0.05166769  | 1.84E-01 | 4.49E-01 | 1.00E+00 |
| ENSG00000275431.1_CTB-186H2  | ENSG00000160789.18_LMNA | 0.14958  | -0.009856267 | 0.301597864 | 6.59E-02 | 2.40E-01 | 1.00E+00 |
| ENSG00000277322.1_GOLGA6L6   | ENSG00000160789.18_LMNA | 0.01401  | -0.14551524  | 0.172825251 | 8.64E-01 | 9.47E-01 | 1.00E+00 |
| ENSG00000215498.7_FAM230B    | ENSG00000160789.18_LMNA | 0.06397  | -0.096209596 | 0.220921713 | 4.34E-01 | 7.03E-01 | 1.00E+00 |
| ENSG00000279808.1_AC018512   | ENSG00000160789.18_LMNA | 0.08712  | -0.073098351 | 0.242947425 | 2.86E-01 | 5.71E-01 | 1.00E+00 |
| ENSG00000207173.1_Y_RNA      | ENSG00000160789.18_LMNA | 0.07976  | -0.080464761 | 0.235962218 | 3.29E-01 | 6.15E-01 | 1.00E+00 |
| ENSG00000265855.1_MIR4514    | ENSG00000160789.18_LMNA | 0.19799  | 0.040046889  | 0.346271759 | 1.45E-02 | 8.57E-02 | 1.00E+00 |
| ENSG00000229225.1_RP11-5P4.5 | ENSG00000160789.18_LMNA | -0.27472 | -0.415734009 | -0.12079776 | 6.15E-04 | 7.94E-03 | 1.00E+00 |
| ENSG00000198976.1_MIR429     | ENSG00000160789.18_LMNA | 0.02305  | -0.136654859 | 0.181581702 | 7.78E-01 | 9.09E-01 | 1.00E+00 |
| ENSG00000200753.1_SNORD56    | ENSG00000160789.18_LMNA | 0.10915  | -0.050931178 | 0.263771594 | 1.81E-01 | 4.44E-01 | 1.00E+00 |
| ENSG00000281182.1_AC087392   | ENSG00000160789.18_LMNA | -0.03493 | -0.193057694 | 0.124965048 | 6.69E-01 | 8.55E-01 | 1.00E+00 |
| ENSG00000274416.1_           | ENSG00000160789.18_LMNA | -0.05268 | -0.210116185 | 0.107424011 | 5.19E-01 | 7.65E-01 | 1.00E+00 |
| ENSG00000264799.1_           | ENSG00000160789.18_LMNA | 0.09303  | -0.067164198 | 0.248550755 | 2.54E-01 | 5.36E-01 | 1.00E+00 |
| ENSG00000201025.1_SNORD74    | ENSG00000160789.18_LMNA | -0.14542 | -0.297725357 | 0.014110211 | 7.39E-02 | 2.59E-01 | 1.00E+00 |
| ENSG00000251933.1_           | ENSG00000160789.18_LMNA | 0.1255   | -0.03438385  | 0.279127502 | 1.23E-01 | 3.54E-01 | 1.00E+00 |
| ENSG00000238735.1_RNU7-113F  | ENSG00000160789.18_LMNA | -0.02539 | -0.183847373 | 0.134353975 | 7.56E-01 | 8.98E-01 | 1.00E+00 |
| ENSG00000207737.1_MIR181B2   | ENSG00000160789.18_LMNA | 0.03574  | -0.12416731  | 0.193837683 | 6.62E-01 | 8.51E-01 | 1.00E+00 |
| ENSG00000265145.1_SNORD53    | ENSG00000160789.18_LMNA | 0.09488  | -0.065308668 | 0.250298515 | 2.45E-01 | 5.25E-01 | 1.00E+00 |
| ENSG00000276124.1_MIR6855    | ENSG00000160789.18_LMNA | 0.03743  | -0.122499511 | 0.195467074 | 6.47E-01 | 8.43E-01 | 1.00E+00 |
| ENSG00000241566.1_IGKV2D-24  | ENSG00000160789.18_LMNA | -0.03238 | -0.190597155 | 0.12747889  | 6.92E-01 | 8.67E-01 | 1.00E+00 |
| ENSG00000277138.1_MIR6509    | ENSG00000160789.18_LMNA | 0.03335  | -0.12652437  | 0.191531907 | 6.83E-01 | 8.62E-01 | 1.00E+00 |
| ENSG00000252031.1_RNU6-561F  | ENSG00000160789.18_LMNA | 0.17929  | 0.020679093  | 0.329096835 | 2.71E-02 | 1.34E-01 | 1.00E+00 |
| ENSG00000280904.1_SNORD19E   | ENSG00000160789.18_LMNA | 0.03852  | -0.121427364 | 0.196513605 | 6.38E-01 | 8.38E-01 | 1.00E+00 |
| ENSG00000206646.1_Y_RNA      | ENSG00000160789.18_LMNA | -0.0936  | -0.249085856 | 0.066596333 | 2.51E-01 | 5.32E-01 | 1.00E+00 |

|                             |                         |          |              |             |          |          |          |
|-----------------------------|-------------------------|----------|--------------|-------------|----------|----------|----------|
| ENSG00000221322.1_          | ENSG00000160789.18_LMNA | -0.24324 | -0.387440535 | -0.08742819 | 2.53E-03 | 2.34E-02 | 1.00E+00 |
| ENSG00000200201.1_Y_RNA     | ENSG00000160789.18_LMNA | -0.08646 | -0.242322653 | 0.073758625 | 2.90E-01 | 5.75E-01 | 1.00E+00 |
| ENSG00000221230.1_MIR548L   | ENSG00000160789.18_LMNA | 0.08113  | -0.079090758 | 0.237267603 | 3.20E-01 | 6.07E-01 | 1.00E+00 |
| ENSG00000207574.1_MIR661    | ENSG00000160789.18_LMNA | -0.10388 | -0.258800731 | 0.056250951 | 2.03E-01 | 4.74E-01 | 1.00E+00 |
| ENSG00000207223.1_Y_RNA     | ENSG00000160789.18_LMNA | -0.069   | -0.225717516 | 0.091206386 | 3.98E-01 | 6.75E-01 | 1.00E+00 |
| ENSG00000223271.1_Y_RNA     | ENSG00000160789.18_LMNA | 0.0838   | -0.076416409 | 0.239805124 | 3.05E-01 | 5.91E-01 | 1.00E+00 |
| ENSG00000221519.2_          | ENSG00000160789.18_LMNA | -0.15726 | -0.30873049  | 0.001991471 | 5.30E-02 | 2.09E-01 | 1.00E+00 |
| ENSG00000201728.1_RNA5SP47  | ENSG00000160789.18_LMNA | -0.05866 | -0.215847534 | 0.10148583  | 4.73E-01 | 7.33E-01 | 1.00E+00 |
| ENSG00000207053.1_RNU6-937F | ENSG00000160789.18_LMNA | -0.04114 | -0.199036008 | 0.118840167 | 6.15E-01 | 8.25E-01 | 1.00E+00 |
| ENSG00000222439.1_RNU6-994F | ENSG00000160789.18_LMNA | 0.01006  | -0.14938095  | 0.168989053 | 9.02E-01 | 9.62E-01 | 1.00E+00 |
| ENSG00000275458.1_MIR6809   | ENSG00000160789.18_LMNA | 0.07092  | -0.08929091  | 0.227549529 | 3.85E-01 | 6.64E-01 | 1.00E+00 |
| ENSG00000264891.1_          | ENSG00000160789.18_LMNA | 0.06211  | -0.098057531 | 0.219146497 | 4.47E-01 | 7.13E-01 | 1.00E+00 |
| ENSG00000212241.1_Y_RNA     | ENSG00000160789.18_LMNA | -0.12548 | -0.279102897 | 0.034410502 | 1.23E-01 | 3.54E-01 | 1.00E+00 |
| ENSG00000264653.1_MIR5194   | ENSG00000160789.18_LMNA | 0.04784  | -0.112214746 | 0.205476353 | 5.58E-01 | 7.91E-01 | 1.00E+00 |
| ENSG00000222224.1_Y_RNA     | ENSG00000160789.18_LMNA | 0.02837  | -0.131422847 | 0.186728753 | 7.29E-01 | 8.85E-01 | 1.00E+00 |
| ENSG00000223302.1_Y_RNA     | ENSG00000160789.18_LMNA | 0.03518  | -0.124716643 | 0.193300615 | 6.67E-01 | 8.53E-01 | 1.00E+00 |
| ENSG00000202411.1_RNA5SP25  | ENSG00000160789.18_LMNA | -0.03146 | -0.18970822  | 0.128386079 | 7.00E-01 | 8.72E-01 | 1.00E+00 |
| ENSG00000201076.1_RNU4-51P  | ENSG00000160789.18_LMNA | -0.02271 | -0.181257532 | 0.136983787 | 7.81E-01 | 9.10E-01 | 1.00E+00 |
| ENSG00000272435.1_RNA5SP35  | ENSG00000160789.18_LMNA | -0.05725 | -0.214499229 | 0.102884829 | 4.84E-01 | 7.41E-01 | 1.00E+00 |
| ENSG00000264950.1_          | ENSG00000160789.18_LMNA | 0.04274  | -0.117260067 | 0.200574466 | 6.01E-01 | 8.17E-01 | 1.00E+00 |
| ENSG00000252591.1_RNA5SP46  | ENSG00000160789.18_LMNA | 0.08881  | -0.071404399 | 0.244549094 | 2.77E-01 | 5.61E-01 | 1.00E+00 |
| ENSG00000200225.1_RNA5SP38  | ENSG00000160789.18_LMNA | 0.14723  | -0.012261228 | 0.29940981  | 7.03E-02 | 2.50E-01 | 1.00E+00 |
| ENSG00000233456.1_LINC01077 | ENSG00000160789.18_LMNA | 0.0589   | -0.101247922 | 0.216076701 | 4.71E-01 | 7.31E-01 | 1.00E+00 |
| ENSG00000202514.1_Y_RNA     | ENSG00000160789.18_LMNA | -0.12946 | -0.282832237 | 0.030365771 | 1.12E-01 | 3.34E-01 | 1.00E+00 |
| ENSG00000200750.1_Y_RNA     | ENSG00000160789.18_LMNA | -0.01186 | -0.170737512 | 0.147620247 | 8.85E-01 | 9.55E-01 | 1.00E+00 |
| ENSG00000222604.2_SNORA7    | ENSG00000160789.18_LMNA | 0.13682  | -0.022874542 | 0.28971441  | 9.28E-02 | 2.98E-01 | 1.00E+00 |
| ENSG00000206623.1_RNU6-979F | ENSG00000160789.18_LMNA | 0.00416  | -0.155139882 | 0.163256142 | 9.59E-01 | 9.84E-01 | 1.00E+00 |
| ENSG00000223131.1_RNA5SP30  | ENSG00000160789.18_LMNA | -0.13193 | -0.285145259 | 0.027851971 | 1.05E-01 | 3.22E-01 | 1.00E+00 |
| ENSG00000252376.1_RNA5SP39  | ENSG00000160789.18_LMNA | 0.21415  | 0.056893964  | 0.361046273 | 8.07E-03 | 5.59E-02 | 1.00E+00 |
| ENSG00000239576.1_COX6CP14  | ENSG00000160789.18_LMNA | -0.01381 | -0.172626687 | 0.145715571 | 8.66E-01 | 9.48E-01 | 1.00E+00 |
| ENSG00000207004.1_RNU6-301F | ENSG00000160789.18_LMNA | -0.06468 | -0.22159627  | 0.095506833 | 4.29E-01 | 6.99E-01 | 1.00E+00 |
| ENSG00000281318.1_          | ENSG00000160789.18_LMNA | 0.07178  | -0.088429873 | 0.228372318 | 3.80E-01 | 6.58E-01 | 1.00E+00 |
| ENSG00000221275.1_MIR548I2  | ENSG00000160789.18_LMNA | 0.07121  | -0.089003587 | 0.227824139 | 3.83E-01 | 6.62E-01 | 1.00E+00 |

|                              |                         |          |              |             |          |          |          |
|------------------------------|-------------------------|----------|--------------|-------------|----------|----------|----------|
| ENSG00000253022.1_RNU6-731F  | ENSG00000160789.18_LMNA | -0.07538 | -0.231795912 | 0.084842041 | 3.56E-01 | 6.39E-01 | 1.00E+00 |
| ENSG00000277458.1_RP11-166B  | ENSG00000160789.18_LMNA | -0.02071 | -0.179316084 | 0.138952261 | 8.00E-01 | 9.20E-01 | 1.00E+00 |
| ENSG00000277021.1_           | ENSG00000160789.18_LMNA | 0.10206  | -0.058087594 | 0.257080665 | 2.11E-01 | 4.84E-01 | 1.00E+00 |
| ENSG00000259337.4_IGHV1OR1   | ENSG00000160789.18_LMNA | -0.00262 | -0.161757908 | 0.156641357 | 9.74E-01 | 9.90E-01 | 1.00E+00 |
| ENSG00000233727.1_RP11-380I2 | ENSG00000160789.18_LMNA | 0.13656  | -0.023143061 | 0.28946828  | 9.34E-02 | 2.99E-01 | 1.00E+00 |
| ENSG00000251099.2_CTD-2367A  | ENSG00000160789.18_LMNA | 0.00259  | -0.156676156 | 0.161723168 | 9.75E-01 | 9.90E-01 | 1.00E+00 |
| ENSG00000199687.1_RNU1-38P   | ENSG00000160789.18_LMNA | -0.15694 | -0.308438596 | 0.002314084 | 5.35E-02 | 2.10E-01 | 1.00E+00 |
| ENSG00000257849.1_RP11-547C  | ENSG00000160789.18_LMNA | -0.07994 | -0.236137909 | 0.080279905 | 3.28E-01 | 6.14E-01 | 1.00E+00 |
| ENSG00000226233.1_RP1-151B1  | ENSG00000160789.18_LMNA | -0.07257 | -0.229127549 | 0.087639117 | 3.74E-01 | 6.54E-01 | 1.00E+00 |
| ENSG00000280096.1_RP11-294N  | ENSG00000160789.18_LMNA | -0.12397 | -0.277694605 | 0.035935227 | 1.28E-01 | 3.62E-01 | 1.00E+00 |
| ENSG00000222037.5_IGLC6      | ENSG00000160789.18_LMNA | -0.07453 | -0.230989347 | 0.085688038 | 3.61E-01 | 6.43E-01 | 1.00E+00 |
| ENSG00000200867.1_RN7SKP36   | ENSG00000160789.18_LMNA | -0.01978 | -0.178418182 | 0.139861812 | 8.09E-01 | 9.24E-01 | 1.00E+00 |
| ENSG00000277754.1_U3         | ENSG00000160789.18_LMNA | -0.06696 | -0.223774149 | 0.093235729 | 4.12E-01 | 6.86E-01 | 1.00E+00 |
| ENSG00000239211.3_RN7SL563F  | ENSG00000160789.18_LMNA | -0.05292 | -0.21035156  | 0.107180587 | 5.17E-01 | 7.64E-01 | 1.00E+00 |
| ENSG00000240317.3_RN7SL764F  | ENSG00000160789.18_LMNA | 0.0032   | -0.15608496  | 0.162313276 | 9.69E-01 | 9.88E-01 | 1.00E+00 |
| ENSG00000234398.1_AC134915.  | ENSG00000160789.18_LMNA | 0.10544  | -0.054673736 | 0.260276243 | 1.96E-01 | 4.65E-01 | 1.00E+00 |
| ENSG00000127318.9_IL22       | ENSG00000160789.18_LMNA | 0.02239  | -0.137300152 | 0.180945677 | 7.84E-01 | 9.12E-01 | 1.00E+00 |
| ENSG00000261102.2_ATP5J2P6   | ENSG00000160789.18_LMNA | 0.0325   | -0.127355865 | 0.190717664 | 6.91E-01 | 8.67E-01 | 1.00E+00 |
| ENSG00000225900.1_HSPE1P13   | ENSG00000160789.18_LMNA | -0.00503 | -0.164099802 | 0.154293749 | 9.51E-01 | 9.80E-01 | 1.00E+00 |
| ENSG00000211961.3_IGHV1-45   | ENSG00000160789.18_LMNA | -0.02991 | -0.188212573 | 0.129911236 | 7.15E-01 | 8.79E-01 | 1.00E+00 |
| ENSG00000229160.1_AC009229.I | ENSG00000160789.18_LMNA | 0.09127  | -0.068930293 | 0.246885323 | 2.63E-01 | 5.47E-01 | 1.00E+00 |
| ENSG00000280459.1_           | ENSG00000160789.18_LMNA | 0.02234  | -0.137348453 | 0.180898059 | 7.85E-01 | 9.12E-01 | 1.00E+00 |
| ENSG00000224658.1_RP11-631F  | ENSG00000160789.18_LMNA | 0.05456  | -0.105559721 | 0.211917894 | 5.04E-01 | 7.55E-01 | 1.00E+00 |
| ENSG00000277718.1_CTD-2311M  | ENSG00000160789.18_LMNA | 0.0844   | -0.075814774 | 0.240375383 | 3.01E-01 | 5.88E-01 | 1.00E+00 |
| ENSG00000242631.2_           | ENSG00000160789.18_LMNA | -0.03602 | -0.194109712 | 0.123888993 | 6.60E-01 | 8.50E-01 | 1.00E+00 |
| ENSG00000240905.3_RN7SL798F  | ENSG00000160789.18_LMNA | 0.02945  | -0.130361688 | 0.187770554 | 7.19E-01 | 8.81E-01 | 1.00E+00 |
| ENSG00000213384.2_EIF4E2P1   | ENSG00000160789.18_LMNA | -0.05924 | -0.21639971  | 0.100912531 | 4.68E-01 | 7.29E-01 | 1.00E+00 |
| ENSG00000227535.2_RP11-809N  | ENSG00000160789.18_LMNA | -0.07665 | -0.233009087 | 0.083568692 | 3.48E-01 | 6.32E-01 | 1.00E+00 |
| ENSG00000236836.1_PCYT1B-A5  | ENSG00000160789.18_LMNA | -0.0164  | -0.175145773 | 0.143172139 | 8.41E-01 | 9.38E-01 | 1.00E+00 |
| ENSG00000199319.1_RN7SKP25   | ENSG00000160789.18_LMNA | -0.00842 | -0.167396803 | 0.150982597 | 9.18E-01 | 9.69E-01 | 1.00E+00 |
| ENSG00000259033.1_RP11-718G  | ENSG00000160789.18_LMNA | -0.16368 | -0.314676307 | -0.0045942  | 4.39E-02 | 1.85E-01 | 1.00E+00 |
| ENSG00000249513.2_RP11-404I7 | ENSG00000160789.18_LMNA | -0.1149  | -0.269174827 | 0.04512836  | 1.59E-01 | 4.12E-01 | 1.00E+00 |
| ENSG00000242894.3_RN7SL634F  | ENSG00000160789.18_LMNA | -0.02687 | -0.185282439 | 0.132894828 | 7.42E-01 | 8.92E-01 | 1.00E+00 |

|                              |                         |          |              |             |          |          |          |
|------------------------------|-------------------------|----------|--------------|-------------|----------|----------|----------|
| ENSG00000241789.3_RN7SL504F  | ENSG00000160789.18_LMNA | 0.14211  | -0.017489882 | 0.294641398 | 8.07E-02 | 2.74E-01 | 1.00E+00 |
| ENSG00000273006.1_RP11-314C  | ENSG00000160789.18_LMNA | 0.20738  | 0.049829038  | 0.354869023 | 1.04E-02 | 6.72E-02 | 1.00E+00 |
| ENSG00000243350.1_           | ENSG00000160789.18_LMNA | 0.20676  | 0.04917767   | 0.354298152 | 1.06E-02 | 6.83E-02 | 1.00E+00 |
| ENSG00000228943.1_RP5-1053E  | ENSG00000160789.18_LMNA | -0.0688  | -0.225528221 | 0.091404171 | 4.00E-01 | 6.76E-01 | 1.00E+00 |
| ENSG00000254537.1_RP1-130L2  | ENSG00000160789.18_LMNA | -0.05647 | -0.213748443 | 0.1036633   | 4.90E-01 | 7.46E-01 | 1.00E+00 |
| ENSG00000270317.1_AC004004.  | ENSG00000160789.18_LMNA | -0.09418 | -0.249634192 | 0.066014212 | 2.48E-01 | 5.29E-01 | 1.00E+00 |
| ENSG00000232622.1_RP11-484D  | ENSG00000160789.18_LMNA | 0.02682  | -0.132947918 | 0.185230249 | 7.43E-01 | 8.92E-01 | 1.00E+00 |
| ENSG00000226209.1_C8orf59P1  | ENSG00000160789.18_LMNA | 0.12925  | -0.03057969  | 0.282635235 | 1.13E-01 | 3.35E-01 | 1.00E+00 |
| ENSG00000255241.1_RP11-164N  | ENSG00000160789.18_LMNA | 0.28451  | 0.131258007  | 0.424487084 | 3.82E-04 | 5.45E-03 | 1.00E+00 |
| ENSG00000226410.1_AC104058.  | ENSG00000160789.18_LMNA | -0.05459 | -0.211945787 | 0.105530841 | 5.04E-01 | 7.55E-01 | 1.00E+00 |
| ENSG00000233577.5_RP3-462D8  | ENSG00000160789.18_LMNA | 0.0321   | -0.127748802 | 0.190332729 | 6.95E-01 | 8.69E-01 | 1.00E+00 |
| ENSG00000251399.1_RP11-234K  | ENSG00000160789.18_LMNA | -0.01789 | -0.176589844 | 0.141712213 | 8.27E-01 | 9.32E-01 | 1.00E+00 |
| ENSG00000253526.1_RP11-152P  | ENSG00000160789.18_LMNA | -0.16688 | -0.317637557 | -0.00788419 | 3.99E-02 | 1.73E-01 | 1.00E+00 |
| ENSG00000253362.1_RP11-120I2 | ENSG00000160789.18_LMNA | -0.20242 | -0.350334544 | -0.04466231 | 1.24E-02 | 7.65E-02 | 1.00E+00 |
| ENSG00000264245.1_RP11-822E  | ENSG00000160789.18_LMNA | -0.13203 | -0.285233347 | 0.027756159 | 1.05E-01 | 3.21E-01 | 1.00E+00 |
| ENSG00000227941.1_UQCRBP2    | ENSG00000160789.18_LMNA | 0.14052  | -0.019112565 | 0.29315838  | 8.42E-02 | 2.81E-01 | 1.00E+00 |
| ENSG00000216710.1_COX6A1P3   | ENSG00000160789.18_LMNA | 0.02269  | -0.13700589  | 0.181235746 | 7.81E-01 | 9.10E-01 | 1.00E+00 |
| ENSG00000264041.2_RN7SL670F  | ENSG00000160789.18_LMNA | 0.0533   | -0.106807113 | 0.210712613 | 5.14E-01 | 7.62E-01 | 1.00E+00 |
| ENSG00000277617.1_Metazoa_SI | ENSG00000160789.18_LMNA | -0.11683 | -0.270992433 | 0.043171558 | 1.52E-01 | 4.01E-01 | 1.00E+00 |
| ENSG00000276407.3_RP11-407B  | ENSG00000160789.18_LMNA | 0.0551   | -0.10502263  | 0.212436555 | 5.00E-01 | 7.53E-01 | 1.00E+00 |
| ENSG00000219702.1_RP5-991C6  | ENSG00000160789.18_LMNA | -0.07948 | -0.23569607  | 0.080744752 | 3.30E-01 | 6.16E-01 | 1.00E+00 |
| ENSG00000253576.1_GS1-5L10.1 | ENSG00000160789.18_LMNA | -0.08053 | -0.236695347 | 0.079693243 | 3.24E-01 | 6.11E-01 | 1.00E+00 |
| ENSG00000232696.1_AC017006.  | ENSG00000160789.18_LMNA | -0.08792 | -0.243707296 | 0.072294925 | 2.81E-01 | 5.67E-01 | 1.00E+00 |
| ENSG00000236108.1_RP11-383G  | ENSG00000160789.18_LMNA | -0.0922  | -0.247766165 | 0.067996457 | 2.59E-01 | 5.42E-01 | 1.00E+00 |
| ENSG00000264047.2_RN7SL455F  | ENSG00000160789.18_LMNA | 0.04777  | -0.112283227 | 0.205409925 | 5.59E-01 | 7.92E-01 | 1.00E+00 |
| ENSG00000281209.1_           | ENSG00000160789.18_LMNA | -0.00501 | -0.164084335 | 0.154309265 | 9.51E-01 | 9.80E-01 | 1.00E+00 |
| ENSG00000256994.1_RP11-871F  | ENSG00000160789.18_LMNA | -0.07201 | -0.228594199 | 0.088197597 | 3.78E-01 | 6.57E-01 | 1.00E+00 |
| ENSG00000234075.1_RPL35AP    | ENSG00000160789.18_LMNA | 0.00171  | -0.157532241 | 0.160868254 | 9.83E-01 | 9.94E-01 | 1.00E+00 |
| ENSG00000243953.1_RP11-439C  | ENSG00000160789.18_LMNA | -0.05885 | -0.216026965 | 0.101299559 | 4.71E-01 | 7.31E-01 | 1.00E+00 |
| ENSG00000255469.1_BOLA3P1    | ENSG00000160789.18_LMNA | 0.02663  | -0.13313058  | 0.18505067  | 7.45E-01 | 8.93E-01 | 1.00E+00 |
| ENSG00000248388.4_RP11-313E  | ENSG00000160789.18_LMNA | -0.04595 | -0.203660311 | 0.11408584  | 5.74E-01 | 8.01E-01 | 1.00E+00 |
| ENSG00000276241.1_CTB-91J4.1 | ENSG00000160789.18_LMNA | 0.17058  | 0.011699455  | 0.321064052 | 3.56E-02 | 1.60E-01 | 1.00E+00 |
| ENSG00000235427.1_AC006159.  | ENSG00000160789.18_LMNA | 0.12634  | -0.033535024 | 0.279910912 | 1.21E-01 | 3.50E-01 | 1.00E+00 |

|                              |                         |          |              |             |          |          |          |
|------------------------------|-------------------------|----------|--------------|-------------|----------|----------|----------|
| ENSG00000239383.1_RP11-413E  | ENSG00000160789.18_LMNA | -0.03491 | -0.193042378 | 0.124980709 | 6.69E-01 | 8.55E-01 | 1.00E+00 |
| ENSG00000215263.2_AC025750.  | ENSG00000160789.18_LMNA | 0.02558  | -0.134165729 | 0.184032588 | 7.54E-01 | 8.98E-01 | 1.00E+00 |
| ENSG00000226825.1_LINC01509  | ENSG00000160789.18_LMNA | -0.03683 | -0.194888785 | 0.123091637 | 6.52E-01 | 8.46E-01 | 1.00E+00 |
| ENSG00000258288.1_NENFP2     | ENSG00000160789.18_LMNA | 0.02813  | -0.131657816 | 0.186497975 | 7.31E-01 | 8.86E-01 | 1.00E+00 |
| ENSG00000242807.1_RPL26P31   | ENSG00000160789.18_LMNA | -0.08325 | -0.239277525 | 0.076972832 | 3.08E-01 | 5.95E-01 | 1.00E+00 |
| ENSG00000249122.1_RP11-227F  | ENSG00000160789.18_LMNA | -0.11676 | -0.270920244 | 0.043249322 | 1.52E-01 | 4.01E-01 | 1.00E+00 |
| ENSG00000228167.1_RP11-489C  | ENSG00000160789.18_LMNA | -0.02355 | -0.182069036 | 0.13616024  | 7.73E-01 | 9.07E-01 | 1.00E+00 |
| ENSG00000264212.1_RP11-94B1  | ENSG00000160789.18_LMNA | -0.20129 | -0.34929713  | -0.04348254 | 1.29E-02 | 7.87E-02 | 1.00E+00 |
| ENSG00000256339.1_RP11-233G  | ENSG00000160789.18_LMNA | -0.00905 | -0.168013    | 0.150362961 | 9.12E-01 | 9.66E-01 | 1.00E+00 |
| ENSG00000258578.2_RP11-98L1  | ENSG00000160789.18_LMNA | 0.20586  | 0.048241386  | 0.353477177 | 1.09E-02 | 6.99E-02 | 1.00E+00 |
| ENSG00000225002.2_RP11-6F6.1 | ENSG00000160789.18_LMNA | -0.06886 | -0.225591066 | 0.09133851  | 3.99E-01 | 6.76E-01 | 1.00E+00 |
| ENSG00000229975.1_LIPT1P1    | ENSG00000160789.18_LMNA | -0.03622 | -0.194302318 | 0.123691906 | 6.58E-01 | 8.49E-01 | 1.00E+00 |
| ENSG00000254530.1_RP11-460B  | ENSG00000160789.18_LMNA | -0.00412 | -0.163213273 | 0.155182864 | 9.60E-01 | 9.84E-01 | 1.00E+00 |
| ENSG00000253811.1_CTD-2363C  | ENSG00000160789.18_LMNA | -0.10001 | -0.255146631 | 0.06015016  | 2.20E-01 | 4.95E-01 | 1.00E+00 |
| ENSG00000253693.1 CTC-535M1  | ENSG00000160789.18_LMNA | -0.11105 | -0.265556828 | 0.049016269 | 1.73E-01 | 4.33E-01 | 1.00E+00 |
| ENSG00000236919.3_RP11-347H  | ENSG00000160789.18_LMNA | 0.02708  | -0.132690476 | 0.185483311 | 7.40E-01 | 8.91E-01 | 1.00E+00 |
| ENSG00000253927.1_GS1-39E22  | ENSG00000160789.18_LMNA | -0.08584 | -0.241734856 | 0.074379571 | 2.93E-01 | 5.79E-01 | 1.00E+00 |
| ENSG00000270302.1_RP11-461L  | ENSG00000160789.18_LMNA | -0.01512 | -0.173900068 | 0.144430409 | 8.53E-01 | 9.42E-01 | 1.00E+00 |
| ENSG00000225404.2_RPL26P34   | ENSG00000160789.18_LMNA | -0.01599 | -0.174748209 | 0.143573825 | 8.45E-01 | 9.40E-01 | 1.00E+00 |
| ENSG00000248300.1_RP11-74M1  | ENSG00000160789.18_LMNA | -0.00769 | -0.166682145 | 0.151700929 | 9.25E-01 | 9.71E-01 | 1.00E+00 |
| ENSG00000225476.1_MTCO3P5    | ENSG00000160789.18_LMNA | -0.01618 | -0.174926079 | 0.143394124 | 8.43E-01 | 9.39E-01 | 1.00E+00 |
| ENSG00000219074.1_SOD1P1     | ENSG00000160789.18_LMNA | 0.11356  | -0.046484075 | 0.267914237 | 1.64E-01 | 4.19E-01 | 1.00E+00 |
| ENSG00000238156.1_RP11-415D  | ENSG00000160789.18_LMNA | -0.03206 | -0.190293267 | 0.127789078 | 6.95E-01 | 8.69E-01 | 1.00E+00 |
| ENSG00000264444.1_SDHCP1     | ENSG00000160789.18_LMNA | 0.03342  | -0.126454641 | 0.191600169 | 6.83E-01 | 8.62E-01 | 1.00E+00 |
| ENSG00000263427.1_RP11-599B  | ENSG00000160789.18_LMNA | -0.03761 | -0.195639299 | 0.122323121 | 6.46E-01 | 8.42E-01 | 1.00E+00 |
| ENSG00000280244.1_RP11-44N2  | ENSG00000160789.18_LMNA | 0.0271   | -0.132675122 | 0.185498402 | 7.40E-01 | 8.91E-01 | 1.00E+00 |
| ENSG00000242986.2_RP11-1110. | ENSG00000160789.18_LMNA | 0.01315  | -0.146356314 | 0.17199142  | 8.72E-01 | 9.50E-01 | 1.00E+00 |
| ENSG00000261498.1_LINC00566  | ENSG00000160789.18_LMNA | 0.07769  | -0.082529839 | 0.233998119 | 3.41E-01 | 6.26E-01 | 1.00E+00 |
| ENSG00000227759.2_VTI1BP4    | ENSG00000160789.18_LMNA | 0.06204  | -0.098130044 | 0.219076794 | 4.48E-01 | 7.14E-01 | 1.00E+00 |
| ENSG00000225064.1_AC007879.  | ENSG00000160789.18_LMNA | 0.12949  | -0.03034003  | 0.28285594  | 1.12E-01 | 3.34E-01 | 1.00E+00 |
| ENSG00000231483.1_RP11-336A  | ENSG00000160789.18_LMNA | 0.04858  | -0.111482886 | 0.206186086 | 5.52E-01 | 7.88E-01 | 1.00E+00 |
| ENSG00000234634.1_AC003664.  | ENSG00000160789.18_LMNA | 0.17154  | 0.012681301  | 0.32194454  | 3.46E-02 | 1.57E-01 | 1.00E+00 |
| ENSG00000238129.4_RP3-410C9  | ENSG00000160789.18_LMNA | -0.21974 | -0.366132107 | -0.06273359 | 6.53E-03 | 4.79E-02 | 1.00E+00 |

|                              |                         |          |              |             |          |          |          |
|------------------------------|-------------------------|----------|--------------|-------------|----------|----------|----------|
| ENSG00000253182.1_RP11-486M  | ENSG00000160789.18_LMNA | 0.19102  | 0.032821388  | 0.339888264 | 1.84E-02 | 1.02E-01 | 1.00E+00 |
| ENSG00000224001.2_RP11-270F  | ENSG00000160789.18_LMNA | -0.02216 | -0.180718687 | 0.137530385 | 7.86E-01 | 9.13E-01 | 1.00E+00 |
| ENSG00000227929.3_SRGP3-A    | ENSG00000160789.18_LMNA | -0.07644 | -0.232808578 | 0.083779219 | 3.49E-01 | 6.33E-01 | 1.00E+00 |
| ENSG00000240777.2_RP11-58O1  | ENSG00000160789.18_LMNA | -0.11289 | -0.267288926 | 0.047156142 | 1.66E-01 | 4.23E-01 | 1.00E+00 |
| ENSG00000236930.1_RP11-852E  | ENSG00000160789.18_LMNA | -0.07053 | -0.227179319 | 0.089678176 | 3.88E-01 | 6.66E-01 | 1.00E+00 |
| ENSG00000235196.3_RP1-3E10.2 | ENSG00000160789.18_LMNA | -0.04721 | -0.204875157 | 0.112834416 | 5.64E-01 | 7.95E-01 | 1.00E+00 |
| ENSG00000229955.1_RP1-5O6.4  | ENSG00000160789.18_LMNA | -0.11102 | -0.265524827 | 0.049050614 | 1.73E-01 | 4.33E-01 | 1.00E+00 |
| ENSG00000243572.1_RP11-889D  | ENSG00000160789.18_LMNA | 0.01539  | -0.144165943 | 0.174161977 | 8.51E-01 | 9.41E-01 | 1.00E+00 |
| ENSG00000235815.1_RP1-125N5  | ENSG00000160789.18_LMNA | -0.02389 | -0.182398559 | 0.135825703 | 7.70E-01 | 9.05E-01 | 1.00E+00 |
| ENSG00000228660.1_VN1R35P    | ENSG00000160789.18_LMNA | 0.05749  | -0.10264712  | 0.21472841  | 4.82E-01 | 7.39E-01 | 1.00E+00 |
| ENSG00000249787.1_RP11-346J  | ENSG00000160789.18_LMNA | -0.01706 | -0.175787369 | 0.14252367  | 8.35E-01 | 9.36E-01 | 1.00E+00 |
| ENSG00000265289.1_AC104984.4 | ENSG00000160789.18_LMNA | -0.2003  | -0.348387085 | -0.04244832 | 1.34E-02 | 8.06E-02 | 1.00E+00 |
| ENSG00000270712.1_RP11-378I6 | ENSG00000160789.18_LMNA | 0.07156  | -0.088654306 | 0.228157898 | 3.81E-01 | 6.60E-01 | 1.00E+00 |
| ENSG00000235469.1_MRPL50P4   | ENSG00000160789.18_LMNA | -0.017   | -0.175726194 | 0.142585512 | 8.35E-01 | 9.36E-01 | 1.00E+00 |
| ENSG00000251584.1_RP11-440I1 | ENSG00000160789.18_LMNA | -0.08861 | -0.244359025 | 0.071605515 | 2.78E-01 | 5.63E-01 | 1.00E+00 |
| ENSG00000263041.1_RP11-355F  | ENSG00000160789.18_LMNA | -0.01462 | -0.173418311 | 0.144916749 | 8.58E-01 | 9.44E-01 | 1.00E+00 |
| ENSG00000258488.2_RP11-467L  | ENSG00000160789.18_LMNA | 0.06127  | -0.098893331 | 0.218342896 | 4.53E-01 | 7.18E-01 | 1.00E+00 |
| ENSG00000214288.4_HMGB3P13   | ENSG00000160789.18_LMNA | -0.06802 | -0.224790778 | 0.092174452 | 4.05E-01 | 6.81E-01 | 1.00E+00 |
| ENSG00000241648.1_CADM2-AS   | ENSG00000160789.18_LMNA | -0.19694 | -0.345313283 | -0.03895994 | 1.50E-02 | 8.80E-02 | 1.00E+00 |
| ENSG00000258360.1_NF1P12     | ENSG00000160789.18_LMNA | 0.01084  | -0.148619732 | 0.169745224 | 8.95E-01 | 9.59E-01 | 1.00E+00 |
| ENSG00000255431.1_OR5B19P    | ENSG00000160789.18_LMNA | -0.08055 | -0.236716811 | 0.07967065  | 3.24E-01 | 6.11E-01 | 1.00E+00 |
| ENSG00000269475.2_CH17-38B1  | ENSG00000160789.18_LMNA | -0.21518 | -0.361980991 | -0.05796566 | 7.76E-03 | 5.43E-02 | 1.00E+00 |
| ENSG00000231755.1_CHODL-AS   | ENSG00000160789.18_LMNA | 0.01391  | -0.145613295 | 0.172728065 | 8.65E-01 | 9.47E-01 | 1.00E+00 |
| ENSG00000251433.1_CCNHP1     | ENSG00000160789.18_LMNA | 0.093    | -0.067200005 | 0.248517007 | 2.54E-01 | 5.36E-01 | 1.00E+00 |
| ENSG00000237282.3_LINC00851  | ENSG00000160789.18_LMNA | -0.00748 | -0.166481481 | 0.151902564 | 9.27E-01 | 9.72E-01 | 1.00E+00 |
| ENSG00000233900.1_RPL17P35   | ENSG00000160789.18_LMNA | -0.10916 | -0.263774916 | 0.050927618 | 1.81E-01 | 4.44E-01 | 1.00E+00 |
| ENSG00000234682.1_VDAC2P4    | ENSG00000160789.18_LMNA | -0.06951 | -0.226208434 | 0.090693333 | 3.95E-01 | 6.72E-01 | 1.00E+00 |
| ENSG00000177212.3_OR2T33     | ENSG00000160789.18_LMNA | -0.08578 | -0.241681018 | 0.074436433 | 2.93E-01 | 5.79E-01 | 1.00E+00 |
| ENSG00000235160.1_AC009878.1 | ENSG00000160789.18_LMNA | -0.0082  | -0.167184368 | 0.151196159 | 9.20E-01 | 9.70E-01 | 1.00E+00 |
| ENSG00000226094.1_RPL7P3     | ENSG00000160789.18_LMNA | 0.11902  | -0.040955377 | 0.273048265 | 1.44E-01 | 3.88E-01 | 1.00E+00 |
| ENSG00000250978.4_RP11-357D  | ENSG00000160789.18_LMNA | -0.07326 | -0.229778573 | 0.086957151 | 3.70E-01 | 6.50E-01 | 1.00E+00 |
| ENSG00000259276.1_RP11-815J  | ENSG00000160789.18_LMNA | 0.11034  | -0.04973934  | 0.264882976 | 1.76E-01 | 4.37E-01 | 1.00E+00 |
| ENSG00000260540.2_ABHD17AP   | ENSG00000160789.18_LMNA | 0.05012  | -0.109960721 | 0.207661159 | 5.40E-01 | 7.80E-01 | 1.00E+00 |

|                             |                         |          |              |             |          |          |          |
|-----------------------------|-------------------------|----------|--------------|-------------|----------|----------|----------|
| ENSG00000250354.1_RP11-76G1 | ENSG00000160789.18_LMNA | -0.02772 | -0.18609632  | 0.132066677 | 7.35E-01 | 8.89E-01 | 1.00E+00 |
| ENSG00000257658.1_RP3-521E1 | ENSG00000160789.18_LMNA | -0.10792 | -0.26261248  | 0.052173251 | 1.86E-01 | 4.52E-01 | 1.00E+00 |
| ENSG00000274235.1_CTC-311G1 | ENSG00000160789.18_LMNA | 0.03433  | -0.125554669 | 0.192480934 | 6.75E-01 | 8.57E-01 | 1.00E+00 |
| ENSG00000101074.3_R3HDML    | ENSG00000160789.18_LMNA | 0.10421  | -0.055915467 | 0.259114705 | 2.01E-01 | 4.72E-01 | 1.00E+00 |
| ENSG00000243385.2_CTD-2110K | ENSG00000160789.18_LMNA | -0.00585 | -0.164901085 | 0.153489684 | 9.43E-01 | 9.77E-01 | 1.00E+00 |
| ENSG00000237539.1_GS1-594A7 | ENSG00000160789.18_LMNA | 0.04057  | -0.119403812 | 0.198486837 | 6.20E-01 | 8.28E-01 | 1.00E+00 |
| ENSG00000187747.2_OR52B6    | ENSG00000160789.18_LMNA | 0.10871  | -0.051382981 | 0.263350072 | 1.82E-01 | 4.47E-01 | 1.00E+00 |
| ENSG00000253772.1_RP11-34P1 | ENSG00000160789.18_LMNA | -0.00692 | -0.165935506 | 0.152451047 | 9.33E-01 | 9.74E-01 | 1.00E+00 |
| ENSG00000223492.1_RP11-15M1 | ENSG00000160789.18_LMNA | 0.17071  | 0.011834523  | 0.321185209 | 3.55E-02 | 1.60E-01 | 1.00E+00 |
| ENSG00000262558.1_RP11-1260 | ENSG00000160789.18_LMNA | 0.00091  | -0.158309654 | 0.16009149  | 9.91E-01 | 9.97E-01 | 1.00E+00 |
| ENSG00000254743.1_OR10V3P   | ENSG00000160789.18_LMNA | 0.10401  | -0.056118461 | 0.258924734 | 2.02E-01 | 4.73E-01 | 1.00E+00 |
| ENSG00000259527.2_LINC00052 | ENSG00000160789.18_LMNA | 0.14561  | -0.013912447 | 0.297905616 | 7.35E-02 | 2.58E-01 | 1.00E+00 |
| ENSG00000249510.1_KB-1247B1 | ENSG00000160789.18_LMNA | -0.03228 | -0.190502905 | 0.127575101 | 6.93E-01 | 8.68E-01 | 1.00E+00 |
| ENSG00000249993.1_BFSP2-AS1 | ENSG00000160789.18_LMNA | 0.0019   | -0.157344477 | 0.161055802 | 9.81E-01 | 9.93E-01 | 1.00E+00 |
| ENSG00000259572.4_LINC01491 | ENSG00000160789.18_LMNA | 0.06089  | -0.099273182 | 0.217977537 | 4.56E-01 | 7.21E-01 | 1.00E+00 |
| ENSG00000223698.3_GOLGA6L1  | ENSG00000160789.18_LMNA | -0.06416 | -0.221098267 | 0.09602569  | 4.32E-01 | 7.02E-01 | 1.00E+00 |
| ENSG00000279688.1_AQP7P3    | ENSG00000160789.18_LMNA | 0.016    | -0.14356976  | 0.174752233 | 8.45E-01 | 9.40E-01 | 1.00E+00 |
| ENSG00000196944.3_OR2T4     | ENSG00000160789.18_LMNA | -0.08262 | -0.238682361 | 0.077600275 | 3.12E-01 | 5.98E-01 | 1.00E+00 |
| ENSG00000254076.1_CTD-3145H | ENSG00000160789.18_LMNA | -0.01508 | -0.173866761 | 0.144464038 | 8.54E-01 | 9.43E-01 | 1.00E+00 |
| ENSG00000231254.2_PCED1CP   | ENSG00000160789.18_LMNA | 0.09477  | -0.065415869 | 0.250197597 | 2.45E-01 | 5.25E-01 | 1.00E+00 |
| ENSG00000226414.1_MTCYBP38  | ENSG00000160789.18_LMNA | -0.08957 | -0.245276662 | 0.07063431  | 2.72E-01 | 5.57E-01 | 1.00E+00 |
| ENSG00000232373.2_MTCYBP3   | ENSG00000160789.18_LMNA | 0.05847  | -0.101677056 | 0.215663309 | 4.74E-01 | 7.34E-01 | 1.00E+00 |
| ENSG00000228681.1_AC008072  | ENSG00000160789.18_LMNA | 0.02975  | -0.130065008 | 0.188061694 | 7.16E-01 | 8.79E-01 | 1.00E+00 |
| ENSG00000256657.1_RP11-144O | ENSG00000160789.18_LMNA | 0.05242  | -0.107675376 | 0.209873093 | 5.21E-01 | 7.67E-01 | 1.00E+00 |
| ENSG00000253137.1_RP11-509P | ENSG00000160789.18_LMNA | 0.08037  | -0.079854271 | 0.236542361 | 3.25E-01 | 6.12E-01 | 1.00E+00 |
| ENSG00000275896.3_PRSS2     | ENSG00000160789.18_LMNA | 0.02494  | -0.134800267 | 0.183408176 | 7.60E-01 | 9.00E-01 | 1.00E+00 |
| ENSG00000258112.1_CCNG2P1   | ENSG00000160789.18_LMNA | -0.21258 | -0.359610585 | -0.05524924 | 8.55E-03 | 5.85E-02 | 1.00E+00 |
| ENSG00000249844.1_OR7E43P   | ENSG00000160789.18_LMNA | -0.03657 | -0.194635958 | 0.123350442 | 6.55E-01 | 8.47E-01 | 1.00E+00 |
| ENSG00000111241.2_FGF6      | ENSG00000160789.18_LMNA | -0.1157  | -0.269930847 | 0.044314736 | 1.56E-01 | 4.07E-01 | 1.00E+00 |
| ENSG00000233681.1_CEACAMP   | ENSG00000160789.18_LMNA | 0.01903  | -0.14059503  | 0.177693969 | 8.16E-01 | 9.28E-01 | 1.00E+00 |
| ENSG00000214943.3_GPR33     | ENSG00000160789.18_LMNA | -0.02175 | -0.180322683 | 0.137931963 | 7.90E-01 | 9.15E-01 | 1.00E+00 |
| ENSG00000224337.1_FAM8A3P   | ENSG00000160789.18_LMNA | 0.01796  | -0.141649212 | 0.17665213  | 8.26E-01 | 9.32E-01 | 1.00E+00 |
| ENSG00000258728.1_RP11-195F | ENSG00000160789.18_LMNA | 0.04108  | -0.118898196 | 0.198979478 | 6.15E-01 | 8.26E-01 | 1.00E+00 |

|                              |                         |          |              |             |          |          |          |
|------------------------------|-------------------------|----------|--------------|-------------|----------|----------|----------|
| ENSG00000261804.1_RP11-44F1  | ENSG00000160789.18_LMNA | -0.01019 | -0.169118212 | 0.149250956 | 9.01E-01 | 9.62E-01 | 1.00E+00 |
| ENSG00000250426.2_FTL10      | ENSG00000160789.18_LMNA | -0.20674 | -0.354277132 | -0.04915369 | 1.06E-02 | 6.83E-02 | 1.00E+00 |
| ENSG00000224747.1_MTCYBP21   | ENSG00000160789.18_LMNA | -0.05522 | -0.212553337 | 0.104901673 | 4.99E-01 | 7.52E-01 | 1.00E+00 |
| ENSG00000213489.3_RP13-147D  | ENSG00000160789.18_LMNA | 0.14597  | -0.013546163 | 0.298239419 | 7.27E-02 | 2.56E-01 | 1.00E+00 |
| ENSG00000226133.4_RP4-683M8  | ENSG00000160789.18_LMNA | 0.16274  | 0.003634329  | 0.313811208 | 4.52E-02 | 1.88E-01 | 1.00E+00 |
| ENSG00000255552.6_LY6G6E     | ENSG00000160789.18_LMNA | -0.05792 | -0.215134689 | 0.102225634 | 4.78E-01 | 7.37E-01 | 1.00E+00 |
| ENSG00000215418.2_PEX12P1    | ENSG00000160789.18_LMNA | -0.07428 | -0.230754258 | 0.085934535 | 3.63E-01 | 6.45E-01 | 1.00E+00 |
| ENSG00000268318.4_CTD-3187F  | ENSG00000160789.18_LMNA | -0.08894 | -0.24467837  | 0.071267595 | 2.76E-01 | 5.61E-01 | 1.00E+00 |
| ENSG00000274680.1_MYO5BP1    | ENSG00000160789.18_LMNA | -0.04456 | -0.202328551 | 0.115456539 | 5.86E-01 | 8.08E-01 | 1.00E+00 |
| ENSG00000236007.1_MTCO1P46   | ENSG00000160789.18_LMNA | -0.07586 | -0.232254391 | 0.084360943 | 3.53E-01 | 6.37E-01 | 1.00E+00 |
| ENSG00000096264.12_NCR2      | ENSG00000160789.18_LMNA | 0.08962  | -0.070585468 | 0.245322794 | 2.72E-01 | 5.57E-01 | 1.00E+00 |
| ENSG00000232328.1_AC011286   | ENSG00000160789.18_LMNA | 0.0865   | -0.073711905 | 0.242366869 | 2.89E-01 | 5.75E-01 | 1.00E+00 |
| ENSG00000279814.1_RP11-399K  | ENSG00000160789.18_LMNA | 0.02614  | -0.133620767 | 0.18456865  | 7.49E-01 | 8.95E-01 | 1.00E+00 |
| ENSG00000162040.6_HS3ST6     | ENSG00000160789.18_LMNA | -0.04528 | -0.20301612  | 0.114749017 | 5.80E-01 | 8.04E-01 | 1.00E+00 |
| ENSG00000279282.1_AL354828.1 | ENSG00000160789.18_LMNA | -0.08305 | -0.2390903   | 0.077170239 | 3.09E-01 | 5.95E-01 | 1.00E+00 |
| ENSG00000268336.1_SIGLEC20F  | ENSG00000160789.18_LMNA | -0.08517 | -0.241106083 | 0.075043532 | 2.97E-01 | 5.83E-01 | 1.00E+00 |
| ENSG00000197665.7_AC007952.1 | ENSG00000160789.18_LMNA | -0.05227 | -0.209724226 | 0.107829289 | 5.22E-01 | 7.68E-01 | 1.00E+00 |
| ENSG00000203643.3_AC012456.1 | ENSG00000160789.18_LMNA | 0.07202  | -0.088189742 | 0.228601702 | 3.78E-01 | 6.57E-01 | 1.00E+00 |
| ENSG00000229649.1_RP11-10711 | ENSG00000160789.18_LMNA | 0.17181  | 0.012964136  | 0.322198078 | 3.43E-02 | 1.57E-01 | 1.00E+00 |
| ENSG00000221826.8_PSG3       | ENSG00000160789.18_LMNA | -0.17684 | -0.326836308 | -0.01814707 | 2.93E-02 | 1.41E-01 | 1.00E+00 |
| ENSG00000184029.8_DSCR4      | ENSG00000160789.18_LMNA | 0.01676  | -0.142818081 | 0.175496111 | 8.38E-01 | 9.37E-01 | 1.00E+00 |
| ENSG00000214107.6_MAGEB1     | ENSG00000160789.18_LMNA | 0.08814  | -0.072074169 | 0.243916018 | 2.80E-01 | 5.66E-01 | 1.00E+00 |
| ENSG00000179059.8_ZFP42      | ENSG00000160789.18_LMNA | -0.02443 | -0.182918588 | 0.135297611 | 7.65E-01 | 9.02E-01 | 1.00E+00 |
| ENSG00000259998.1_RP11-753D  | ENSG00000160789.18_LMNA | 0.01008  | -0.149360339 | 0.169009533 | 9.02E-01 | 9.62E-01 | 1.00E+00 |
| ENSG00000112337.9_SLC17A2    | ENSG00000160789.18_LMNA | 0.11621  | -0.043797655 | 0.270411117 | 1.54E-01 | 4.04E-01 | 1.00E+00 |
| ENSG00000223893.1_GNL2P1     | ENSG00000160789.18_LMNA | -0.15585 | -0.307422867 | 0.003436206 | 5.52E-02 | 2.14E-01 | 1.00E+00 |
| ENSG00000259737.5_RP11-475A  | ENSG00000160789.18_LMNA | -0.0996  | -0.254758359 | 0.060563912 | 2.22E-01 | 4.98E-01 | 1.00E+00 |
| ENSG00000261683.1_LINC00838  | ENSG00000160789.18_LMNA | 0.11653  | -0.043472737 | 0.270712824 | 1.53E-01 | 4.02E-01 | 1.00E+00 |
| ENSG00000249238.1_BCL9P1     | ENSG00000160789.18_LMNA | -0.01642 | -0.17515897  | 0.143158803 | 8.41E-01 | 9.38E-01 | 1.00E+00 |
| ENSG00000253205.4_CTD-3046C  | ENSG00000160789.18_LMNA | -0.11978 | -0.273762333 | 0.04018489  | 1.42E-01 | 3.84E-01 | 1.00E+00 |
| ENSG00000261763.1_RP11-442N  | ENSG00000160789.18_LMNA | -0.07669 | -0.233047346 | 0.08352852  | 3.48E-01 | 6.32E-01 | 1.00E+00 |
| ENSG00000261250.1_RP11-545A  | ENSG00000160789.18_LMNA | 0.05473  | -0.105393534 | 0.212078397 | 5.03E-01 | 7.54E-01 | 1.00E+00 |
| ENSG00000279376.1_RP11-292D  | ENSG00000160789.18_LMNA | -0.18442 | -0.333818348 | -0.02598047 | 2.29E-02 | 1.19E-01 | 1.00E+00 |



|                             |                         |          |              |             |          |          |          |
|-----------------------------|-------------------------|----------|--------------|-------------|----------|----------|----------|
| ENSG00000267075.1_RP11-434D | ENSG00000160789.18_LMNA | 0.09533  | -0.064852904 | 0.250727494 | 2.43E-01 | 5.22E-01 | 1.00E+00 |
| ENSG00000211827.1_TRDJ2     | ENSG00000160789.18_LMNA | 0.07505  | -0.085168991 | 0.231484252 | 3.58E-01 | 6.41E-01 | 1.00E+00 |
| ENSG00000252213.1_SNORA74   | ENSG00000160789.18_LMNA | 0.01094  | -0.148515283 | 0.169848951 | 8.94E-01 | 9.58E-01 | 1.00E+00 |
| ENSG00000252747.1_RNA5SP36  | ENSG00000160789.18_LMNA | 0.06121  | -0.098956136 | 0.218282493 | 4.54E-01 | 7.19E-01 | 1.00E+00 |
| ENSG00000252839.1_RNU6-419F | ENSG00000160789.18_LMNA | -0.05951 | -0.216653409 | 0.100649056 | 4.66E-01 | 7.28E-01 | 1.00E+00 |
| ENSG00000201247.1_SNORD114  | ENSG00000160789.18_LMNA | -0.03605 | -0.194135414 | 0.123862694 | 6.59E-01 | 8.50E-01 | 1.00E+00 |
| ENSG00000223138.1_RNA5SP45  | ENSG00000160789.18_LMNA | -0.02119 | -0.179783865 | 0.138478198 | 7.96E-01 | 9.18E-01 | 1.00E+00 |
| ENSG00000199994.1_RNA5SP14  | ENSG00000160789.18_LMNA | 0.00546  | -0.153873725 | 0.164518424 | 9.47E-01 | 9.79E-01 | 1.00E+00 |
| ENSG00000202354.1_RNY3      | ENSG00000160789.18_LMNA | -0.12474 | -0.278414725 | 0.035155752 | 1.26E-01 | 3.58E-01 | 1.00E+00 |
| ENSG00000265986.1_MIR4735   | ENSG00000160789.18_LMNA | -0.15538 | -0.306987192 | 0.003917275 | 5.59E-02 | 2.16E-01 | 1.00E+00 |
| ENSG00000277593.1_          | ENSG00000160789.18_LMNA | 0.02378  | -0.135932073 | 0.18229379  | 7.71E-01 | 9.05E-01 | 1.00E+00 |
| ENSG00000220981.1_          | ENSG00000160789.18_LMNA | 0.11593  | -0.044088839 | 0.270140681 | 1.55E-01 | 4.06E-01 | 1.00E+00 |
| ENSG00000200142.1_Y_RNA     | ENSG00000160789.18_LMNA | -0.01228 | -0.171143349 | 0.147211278 | 8.81E-01 | 9.54E-01 | 1.00E+00 |
| ENSG00000265538.1_MIR4421   | ENSG00000160789.18_LMNA | -0.11375 | -0.268094455 | 0.046290329 | 1.63E-01 | 4.18E-01 | 1.00E+00 |
| ENSG00000275268.1_U7        | ENSG00000160789.18_LMNA | 0.06463  | -0.095558685 | 0.221546509 | 4.29E-01 | 6.99E-01 | 1.00E+00 |
| ENSG00000265062.1_          | ENSG00000160789.18_LMNA | 0.01993  | -0.139709626 | 0.178568456 | 8.07E-01 | 9.23E-01 | 1.00E+00 |
| ENSG00000238604.1_          | ENSG00000160789.18_LMNA | 0.08496  | -0.075259637 | 0.240901374 | 2.98E-01 | 5.84E-01 | 1.00E+00 |
| ENSG00000264881.1_MIR1273D  | ENSG00000160789.18_LMNA | -0.10551 | -0.260338648 | 0.054606995 | 1.96E-01 | 4.65E-01 | 1.00E+00 |
| ENSG00000252452.1_RNU6-107F | ENSG00000160789.18_LMNA | -0.07095 | -0.227579816 | 0.089259224 | 3.85E-01 | 6.64E-01 | 1.00E+00 |
| ENSG00000264408.1_MIR4470   | ENSG00000160789.18_LMNA | -0.00927 | -0.168218929 | 0.150155828 | 9.10E-01 | 9.66E-01 | 1.00E+00 |
| ENSG00000251972.1_RNU6-123F | ENSG00000160789.18_LMNA | 0.08945  | -0.070762451 | 0.24515562  | 2.73E-01 | 5.58E-01 | 1.00E+00 |
| ENSG00000206797.1_Y_RNA     | ENSG00000160789.18_LMNA | 0.06581  | -0.094377506 | 0.222679636 | 4.20E-01 | 6.92E-01 | 1.00E+00 |
| ENSG00000201955.1_RNY3P1    | ENSG00000160789.18_LMNA | -0.06695 | -0.223765696 | 0.09324455  | 4.12E-01 | 6.86E-01 | 1.00E+00 |
| ENSG00000265589.2_          | ENSG00000160789.18_LMNA | 0.12988  | -0.029936827 | 0.283227179 | 1.11E-01 | 3.32E-01 | 1.00E+00 |
| ENSG00000265654.1_          | ENSG00000160789.18_LMNA | -0.08752 | -0.243333436 | 0.072690266 | 2.84E-01 | 5.69E-01 | 1.00E+00 |
| ENSG00000280662.1_          | ENSG00000160789.18_LMNA | -0.11674 | -0.270901418 | 0.043269601 | 1.52E-01 | 4.01E-01 | 1.00E+00 |
| ENSG00000231987.1_RP5-898J1 | ENSG00000160789.18_LMNA | -0.13243 | -0.285606198 | 0.027350548 | 1.04E-01 | 3.19E-01 | 1.00E+00 |
| ENSG00000278342.1_RP11-248B | ENSG00000160789.18_LMNA | -0.12313 | -0.276901629 | 0.036793122 | 1.31E-01 | 3.67E-01 | 1.00E+00 |
| ENSG00000199107.2_MIR409    | ENSG00000160789.18_LMNA | 0.15084  | -0.008566473 | 0.302769979 | 6.36E-02 | 2.35E-01 | 1.00E+00 |
| ENSG00000252062.1_RNU6-469F | ENSG00000160789.18_LMNA | -0.14067 | -0.293298852 | 0.018958934 | 8.39E-02 | 2.80E-01 | 1.00E+00 |
| ENSG00000238713.1_Y_RNA     | ENSG00000160789.18_LMNA | -0.00078 | -0.15995763  | 0.158443586 | 9.92E-01 | 9.97E-01 | 1.00E+00 |
| ENSG00000252887.1_RNU6-430F | ENSG00000160789.18_LMNA | 0.0718   | -0.088410499 | 0.228390827 | 3.79E-01 | 6.58E-01 | 1.00E+00 |
| ENSG00000265070.1_          | ENSG00000160789.18_LMNA | -0.09563 | -0.251012263 | 0.064550281 | 2.41E-01 | 5.20E-01 | 1.00E+00 |

|                              |                         |          |              |             |          |          |          |
|------------------------------|-------------------------|----------|--------------|-------------|----------|----------|----------|
| ENSG00000227556.1_RP11-472F  | ENSG00000160789.18_LMNA | 0.05899  | -0.101164285 | 0.216157257 | 4.70E-01 | 7.31E-01 | 1.00E+00 |
| ENSG00000270914.1_RP5-1077B  | ENSG00000160789.18_LMNA | -0.03617 | -0.194255406 | 0.123739912 | 6.58E-01 | 8.49E-01 | 1.00E+00 |
| ENSG00000252474.1_RNU6-539F  | ENSG00000160789.18_LMNA | -0.09564 | -0.251018636 | 0.064543508 | 2.41E-01 | 5.20E-01 | 1.00E+00 |
| ENSG00000221579.1_           | ENSG00000160789.18_LMNA | -0.02603 | -0.184462361 | 0.133728836 | 7.50E-01 | 8.96E-01 | 1.00E+00 |
| ENSG00000264888.1_           | ENSG00000160789.18_LMNA | -0.17497 | -0.325115731 | -0.01622249 | 3.11E-02 | 1.47E-01 | 1.00E+00 |
| ENSG00000200544.1_Y_RNA      | ENSG00000160789.18_LMNA | -0.02209 | -0.180658747 | 0.137591176 | 7.87E-01 | 9.13E-01 | 1.00E+00 |
| ENSG00000206706.1_Y_RNA      | ENSG00000160789.18_LMNA | -0.1241  | -0.277810819 | 0.035809461 | 1.28E-01 | 3.62E-01 | 1.00E+00 |
| ENSG00000201761.1_RNU6-336F  | ENSG00000160789.18_LMNA | 0.17312  | 0.014311496  | 0.323405267 | 3.29E-02 | 1.52E-01 | 1.00E+00 |
| ENSG00000266491.1_           | ENSG00000160789.18_LMNA | -0.00015 | -0.159342359 | 0.159059038 | 9.99E-01 | 9.99E-01 | 1.00E+00 |
| ENSG00000201912.1_RN7SKP18   | ENSG00000160789.18_LMNA | -0.04676 | -0.204441618 | 0.113281124 | 5.67E-01 | 7.97E-01 | 1.00E+00 |
| ENSG00000221445.2_MIR1301    | ENSG00000160789.18_LMNA | 0.0173   | -0.142289211 | 0.176019276 | 8.32E-01 | 9.35E-01 | 1.00E+00 |
| ENSG00000206590.1_RNU6-132F  | ENSG00000160789.18_LMNA | -0.02347 | -0.181995363 | 0.136235025 | 7.74E-01 | 9.07E-01 | 1.00E+00 |
| ENSG00000207988.1_MIR576     | ENSG00000160789.18_LMNA | -0.06491 | -0.221815757 | 0.0952781   | 4.27E-01 | 6.98E-01 | 1.00E+00 |
| ENSG00000265891.1_           | ENSG00000160789.18_LMNA | 0.13463  | -0.025105182 | 0.287668501 | 9.82E-02 | 3.08E-01 | 1.00E+00 |
| ENSG00000199806.1_RNA5SP49   | ENSG00000160789.18_LMNA | 0.13452  | -0.025217659 | 0.287565263 | 9.85E-02 | 3.09E-01 | 1.00E+00 |
| ENSG00000256659.1_RP13-653N  | ENSG00000160789.18_LMNA | 0.02927  | -0.130535452 | 0.18760001  | 7.20E-01 | 8.81E-01 | 1.00E+00 |
| ENSG00000280637.1_           | ENSG00000160789.18_LMNA | 0.09927  | -0.06088906  | 0.254453163 | 2.24E-01 | 4.99E-01 | 1.00E+00 |
| ENSG00000276989.1_           | ENSG00000160789.18_LMNA | -0.18283 | -0.332352762 | -0.02433304 | 2.42E-02 | 1.24E-01 | 1.00E+00 |
| ENSG00000201444.1_RNU6-1082  | ENSG00000160789.18_LMNA | -0.03396 | -0.192119819 | 0.125923723 | 6.78E-01 | 8.59E-01 | 1.00E+00 |
| ENSG00000249678.1_RP11-619J  | ENSG00000160789.18_LMNA | -0.11333 | -0.267699255 | 0.046715164 | 1.64E-01 | 4.20E-01 | 1.00E+00 |
| ENSG00000212138.1_RNA5SP37   | ENSG00000160789.18_LMNA | 0.06808  | -0.092122669 | 0.224840365 | 4.05E-01 | 6.80E-01 | 1.00E+00 |
| ENSG00000234480.1_MTCO2P18   | ENSG00000160789.18_LMNA | -0.03244 | -0.190656437 | 0.127418372 | 6.92E-01 | 8.67E-01 | 1.00E+00 |
| ENSG00000259610.1_RP11-499F  | ENSG00000160789.18_LMNA | -0.149   | -0.301054659 | 0.010453657 | 6.69E-02 | 2.42E-01 | 1.00E+00 |
| ENSG00000273499.1_SNORA40    | ENSG00000160789.18_LMNA | -0.02561 | -0.18406337  | 0.134134441 | 7.54E-01 | 8.98E-01 | 1.00E+00 |
| ENSG00000202434.1_SNORA4     | ENSG00000160789.18_LMNA | 0.12597  | -0.033914213 | 0.279560998 | 1.22E-01 | 3.52E-01 | 1.00E+00 |
| ENSG00000221439.1_RNU4ATAC   | ENSG00000160789.18_LMNA | -0.00303 | -0.16214774  | 0.156250824 | 9.70E-01 | 9.89E-01 | 1.00E+00 |
| ENSG00000238211.1_POLR2LP1   | ENSG00000160789.18_LMNA | 0.1553   | -0.004001728 | 0.306910695 | 5.61E-02 | 2.16E-01 | 1.00E+00 |
| ENSG00000276396.1_Metazoa_Si | ENSG00000160789.18_LMNA | 0.09744  | -0.062738058 | 0.252716429 | 2.32E-01 | 5.10E-01 | 1.00E+00 |
| ENSG00000268148.1_VN1R91P    | ENSG00000160789.18_LMNA | 0.08348  | -0.076742045 | 0.23949638  | 3.07E-01 | 5.93E-01 | 1.00E+00 |
| ENSG00000274747.1_RN7SL627f  | ENSG00000160789.18_LMNA | -0.10542 | -0.260256708 | 0.054694628 | 1.96E-01 | 4.65E-01 | 1.00E+00 |
| ENSG00000212432.1_SNORA75    | ENSG00000160789.18_LMNA | 0.03262  | -0.127239898 | 0.190831251 | 6.90E-01 | 8.66E-01 | 1.00E+00 |
| ENSG00000243373.3_RN7SL173f  | ENSG00000160789.18_LMNA | -0.01665 | -0.175387568 | 0.142927786 | 8.39E-01 | 9.37E-01 | 1.00E+00 |
| ENSG00000264697.1_RP11-585K  | ENSG00000160789.18_LMNA | 0.13866  | -0.021007808 | 0.291424358 | 8.85E-02 | 2.90E-01 | 1.00E+00 |

|                              |                         |          |              |             |          |          |          |
|------------------------------|-------------------------|----------|--------------|-------------|----------|----------|----------|
| ENSG00000225046.2_RP1-20I3.3 | ENSG00000160789.18_LMNA | -0.18301 | -0.332519602 | -0.02452049 | 2.40E-02 | 1.23E-01 | 1.00E+00 |
| ENSG00000274342.1_TTC28-AS1  | ENSG00000160789.18_LMNA | 0.02494  | -0.134797865 | 0.183410539 | 7.60E-01 | 9.00E-01 | 1.00E+00 |
| ENSG00000255457.1_RP11-436P  | ENSG00000160789.18_LMNA | -0.01548 | -0.174250445 | 0.144076602 | 8.50E-01 | 9.41E-01 | 1.00E+00 |
| ENSG00000278040.1_uc_338     | ENSG00000160789.18_LMNA | 0.01682  | -0.142759333 | 0.175554235 | 8.37E-01 | 9.37E-01 | 1.00E+00 |
| ENSG00000263841.2_RN7SL44P   | ENSG00000160789.18_LMNA | 0.11567  | -0.04435115  | 0.269897019 | 1.56E-01 | 4.07E-01 | 1.00E+00 |
| ENSG00000227088.1_AC084149.  | ENSG00000160789.18_LMNA | -0.3262  | -0.461438584 | -0.17614796 | 4.11E-05 | 9.20E-04 | 1.00E+00 |
| ENSG00000253900.1_CDH12P4    | ENSG00000160789.18_LMNA | 0.03178  | -0.128071542 | 0.190016486 | 6.98E-01 | 8.70E-01 | 1.00E+00 |
| ENSG00000235871.1_AC062016.  | ENSG00000160789.18_LMNA | -0.1026  | -0.257588872 | 0.057545164 | 2.08E-01 | 4.81E-01 | 1.00E+00 |
| ENSG00000237128.1_RP11-351M  | ENSG00000160789.18_LMNA | 0.03595  | -0.123963591 | 0.194036804 | 6.60E-01 | 8.50E-01 | 1.00E+00 |
| ENSG00000239373.3_           | ENSG00000160789.18_LMNA | -0.09156 | -0.247154526 | 0.068644953 | 2.62E-01 | 5.45E-01 | 1.00E+00 |
| ENSG00000277693.1_AP003900.  | ENSG00000160789.18_LMNA | -0.22815 | -0.373774155 | -0.07154753 | 4.70E-03 | 3.74E-02 | 1.00E+00 |
| ENSG00000223327.1_RNU2-71P   | ENSG00000160789.18_LMNA | -0.02939 | -0.187708246 | 0.130425175 | 7.19E-01 | 8.81E-01 | 1.00E+00 |
| ENSG00000271656.1_RP11-114N  | ENSG00000160789.18_LMNA | -0.17333 | -0.323597613 | -0.01452628 | 3.27E-02 | 1.51E-01 | 1.00E+00 |
| ENSG00000227883.1_ATP6V0E1I  | ENSG00000160789.18_LMNA | -0.0179  | -0.176600823 | 0.141701108 | 8.27E-01 | 9.32E-01 | 1.00E+00 |
| ENSG00000220745.2_RP1-101K1  | ENSG00000160789.18_LMNA | -0.04106 | -0.198955598 | 0.118922708 | 6.16E-01 | 8.26E-01 | 1.00E+00 |
| ENSG00000241673.1_RPS27P12   | ENSG00000160789.18_LMNA | -0.00153 | -0.160688136 | 0.157712544 | 9.85E-01 | 9.94E-01 | 1.00E+00 |
| ENSG00000257470.1_RP11-397H  | ENSG00000160789.18_LMNA | 0.003    | -0.156276001 | 0.162122611 | 9.71E-01 | 9.89E-01 | 1.00E+00 |
| ENSG00000008197.4_TFAP2D     | ENSG00000160789.18_LMNA | -0.0822  | -0.238286534 | 0.078017431 | 3.14E-01 | 6.00E-01 | 1.00E+00 |
| ENSG00000226454.1_RP3-462C1  | ENSG00000160789.18_LMNA | -0.26751 | -0.409283882 | -0.11313131 | 8.63E-04 | 1.03E-02 | 1.00E+00 |
| ENSG00000248262.1_RP11-1J7.1 | ENSG00000160789.18_LMNA | -0.14778 | -0.299921931 | 0.011698662 | 6.92E-02 | 2.48E-01 | 1.00E+00 |
| ENSG00000185390.2_FGF7P2     | ENSG00000160789.18_LMNA | 0.08363  | -0.076589809 | 0.239640726 | 3.06E-01 | 5.92E-01 | 1.00E+00 |
| ENSG00000227667.1_RP11-331H  | ENSG00000160789.18_LMNA | 0.17078  | 0.011906411  | 0.321249688 | 3.54E-02 | 1.60E-01 | 1.00E+00 |
| ENSG00000237717.1_RP11-402P  | ENSG00000160789.18_LMNA | -0.05169 | -0.209168969 | 0.108403233 | 5.27E-01 | 7.72E-01 | 1.00E+00 |
| ENSG00000231712.1_AC104698.  | ENSG00000160789.18_LMNA | -0.04785 | -0.205488651 | 0.112202068 | 5.58E-01 | 7.91E-01 | 1.00E+00 |
| ENSG00000276707.1_RP11-445F  | ENSG00000160789.18_LMNA | -0.19812 | -0.346395362 | -0.04018711 | 1.44E-02 | 8.54E-02 | 1.00E+00 |
| ENSG00000250787.1_HMGN1P17   | ENSG00000160789.18_LMNA | 0.11256  | -0.04748802  | 0.266980039 | 1.67E-01 | 4.25E-01 | 1.00E+00 |
| ENSG00000242436.3_RN7SL789F  | ENSG00000160789.18_LMNA | 0.07554  | -0.084681162 | 0.231949242 | 3.55E-01 | 6.39E-01 | 1.00E+00 |
| ENSG00000277519.1_OFD1P16Y   | ENSG00000160789.18_LMNA | -0.29745 | -0.436004909 | -0.14512244 | 1.98E-04 | 3.24E-03 | 1.00E+00 |
| ENSG00000243066.3_RN7SL842F  | ENSG00000160789.18_LMNA | -0.00983 | -0.16876722  | 0.149604193 | 9.04E-01 | 9.63E-01 | 1.00E+00 |
| ENSG00000235224.1_RP11-236P  | ENSG00000160789.18_LMNA | 0.06966  | -0.090540215 | 0.226354914 | 3.94E-01 | 6.71E-01 | 1.00E+00 |
| ENSG00000244232.3_RN7SL698F  | ENSG00000160789.18_LMNA | 0.11296  | -0.04708493  | 0.267355196 | 1.66E-01 | 4.23E-01 | 1.00E+00 |
| ENSG00000230720.1_RP11-14C2  | ENSG00000160789.18_LMNA | -0.00584 | -0.164882998 | 0.153507839 | 9.43E-01 | 9.77E-01 | 1.00E+00 |
| ENSG00000231888.1_MTND5P15   | ENSG00000160789.18_LMNA | -0.01794 | -0.176637243 | 0.14166427  | 8.26E-01 | 9.32E-01 | 1.00E+00 |

|                              |                         |          |              |             |          |          |          |
|------------------------------|-------------------------|----------|--------------|-------------|----------|----------|----------|
| ENSG00000271626.1_RP11-3K24  | ENSG00000160789.18_LMNA | -0.08002 | -0.236213174 | 0.080200707 | 3.27E-01 | 6.14E-01 | 1.00E+00 |
| ENSG00000244273.1_PGBD4P1    | ENSG00000160789.18_LMNA | 0.03409  | -0.125789976 | 0.192250699 | 6.77E-01 | 8.59E-01 | 1.00E+00 |
| ENSG00000239822.3_RN7SL754F  | ENSG00000160789.18_LMNA | 0.05945  | -0.100702319 | 0.216602126 | 4.67E-01 | 7.28E-01 | 1.00E+00 |
| ENSG00000241172.3_RN7SL70P   | ENSG00000160789.18_LMNA | -0.00298 | -0.162105817 | 0.156292827 | 9.71E-01 | 9.89E-01 | 1.00E+00 |
| ENSG00000275975.1_Metazoa_SI | ENSG00000160789.18_LMNA | 0.00541  | -0.153921189 | 0.164471124 | 9.47E-01 | 9.79E-01 | 1.00E+00 |
| ENSG00000236303.2_RP11-540N  | ENSG00000160789.18_LMNA | -0.26001 | -0.40254538  | -0.10515959 | 1.22E-03 | 1.34E-02 | 1.00E+00 |
| ENSG00000278860.1_RP11-28A2  | ENSG00000160789.18_LMNA | -0.04792 | -0.205557212 | 0.112131384 | 5.58E-01 | 7.91E-01 | 1.00E+00 |
| ENSG00000214581.4_ZNF971P    | ENSG00000160789.18_LMNA | -0.25845 | -0.401147665 | -0.10351085 | 1.30E-03 | 1.42E-02 | 1.00E+00 |
| ENSG00000216324.1_RP3-38211C | ENSG00000160789.18_LMNA | -0.0183  | -0.176981931 | 0.141315582 | 8.23E-01 | 9.31E-01 | 1.00E+00 |
| ENSG00000263669.2_RN7SL470F  | ENSG00000160789.18_LMNA | -0.13957 | -0.292272753 | 0.020080814 | 8.64E-02 | 2.85E-01 | 1.00E+00 |
| ENSG00000240739.1_RP11-69M1  | ENSG00000160789.18_LMNA | 0.09923  | -0.060929224 | 0.254415459 | 2.24E-01 | 5.00E-01 | 1.00E+00 |
| ENSG00000259547.1_CYCSP2     | ENSG00000160789.18_LMNA | -0.14169 | -0.294252845 | 0.017915186 | 8.16E-02 | 2.76E-01 | 1.00E+00 |
| ENSG00000251184.1_RP11-101E  | ENSG00000160789.18_LMNA | -0.13181 | -0.28503386  | 0.027973131 | 1.05E-01 | 3.22E-01 | 1.00E+00 |
| ENSG00000229063.2_TRBV23OR   | ENSG00000160789.18_LMNA | -0.0458  | -0.203517789 | 0.114232587 | 5.75E-01 | 8.02E-01 | 1.00E+00 |
| ENSG00000250620.1_RP11-91J3  | ENSG00000160789.18_LMNA | -0.01921 | -0.177863798 | 0.140423121 | 8.14E-01 | 9.27E-01 | 1.00E+00 |
| ENSG00000281531.1_           | ENSG00000160789.18_LMNA | 0.01516  | -0.144386096 | 0.173943956 | 8.53E-01 | 9.42E-01 | 1.00E+00 |
| ENSG00000241754.1_RP11-280H  | ENSG00000160789.18_LMNA | -0.22781 | -0.373470436 | -0.07119633 | 4.76E-03 | 3.78E-02 | 1.00E+00 |
| ENSG00000233548.1_CYCSP44    | ENSG00000160789.18_LMNA | 0.07968  | -0.080543888 | 0.235887008 | 3.29E-01 | 6.15E-01 | 1.00E+00 |
| ENSG00000267055.1_RP11-486P  | ENSG00000160789.18_LMNA | -0.22778 | -0.373434258 | -0.07115451 | 4.77E-03 | 3.79E-02 | 1.00E+00 |
| ENSG00000214903.4_RPS15AP3   | ENSG00000160789.18_LMNA | 0.02702  | -0.132749737 | 0.185425061 | 7.41E-01 | 8.91E-01 | 1.00E+00 |
| ENSG00000267211.1_RP5-1067M  | ENSG00000160789.18_LMNA | 0.02229  | -0.137395975 | 0.180851208 | 7.85E-01 | 9.12E-01 | 1.00E+00 |
| ENSG00000270330.1_RP5-892F1  | ENSG00000160789.18_LMNA | 0.01463  | -0.144904314 | 0.173430631 | 8.58E-01 | 9.44E-01 | 1.00E+00 |
| ENSG00000235729.1_RP11-29O6  | ENSG00000160789.18_LMNA | -0.03222 | -0.190441348 | 0.127637934 | 6.94E-01 | 8.68E-01 | 1.00E+00 |
| ENSG00000255256.1_RP5-916O1  | ENSG00000160789.18_LMNA | 0.11237  | -0.047687699 | 0.266794163 | 1.68E-01 | 4.26E-01 | 1.00E+00 |
| ENSG00000255679.1_JRKL-AS1   | ENSG00000160789.18_LMNA | -0.07681 | -0.233159074 | 0.083411194 | 3.47E-01 | 6.31E-01 | 1.00E+00 |
| ENSG00000249942.1_AC142293.1 | ENSG00000160789.18_LMNA | 0.20828  | 0.050760489  | 0.355684968 | 1.00E-02 | 6.57E-02 | 1.00E+00 |
| ENSG00000215909.3_BRWD1P1    | ENSG00000160789.18_LMNA | 0.06298  | -0.097198956 | 0.219971547 | 4.41E-01 | 7.09E-01 | 1.00E+00 |
| ENSG00000254021.1_RP11-778D  | ENSG00000160789.18_LMNA | -0.1629  | -0.313962658 | -0.00380233 | 4.49E-02 | 1.88E-01 | 1.00E+00 |
| ENSG00000255147.1_RP11-655M  | ENSG00000160789.18_LMNA | -0.0084  | -0.167376587 | 0.151002922 | 9.18E-01 | 9.69E-01 | 1.00E+00 |
| ENSG00000250808.1_MTCO2P30   | ENSG00000160789.18_LMNA | 0.08566  | -0.074559323 | 0.241564657 | 2.94E-01 | 5.80E-01 | 1.00E+00 |
| ENSG00000253762.1_RP11-579E  | ENSG00000160789.18_LMNA | -0.22506 | -0.370964784 | -0.06830185 | 5.31E-03 | 4.10E-02 | 1.00E+00 |
| ENSG00000223647.1_AL133249.1 | ENSG00000160789.18_LMNA | -0.03907 | -0.197040932 | 0.120886848 | 6.33E-01 | 8.35E-01 | 1.00E+00 |
| ENSG00000270797.1_RP5-1173I2 | ENSG00000160789.18_LMNA | 0.04965  | -0.110420404 | 0.20721585  | 5.44E-01 | 7.82E-01 | 1.00E+00 |

|                              |                         |          |              |             |          |          |          |
|------------------------------|-------------------------|----------|--------------|-------------|----------|----------|----------|
| ENSG00000264421.1_RP11-401F  | ENSG00000160789.18_LMNA | 0.1148   | -0.045228939 | 0.269081343 | 1.59E-01 | 4.12E-01 | 1.00E+00 |
| ENSG00000269667.1_RP11-542M  | ENSG00000160789.18_LMNA | 0.09023  | -0.069979365 | 0.245895162 | 2.69E-01 | 5.53E-01 | 1.00E+00 |
| ENSG00000233358.2_RP1-209A6  | ENSG00000160789.18_LMNA | -0.09901 | -0.254201691 | 0.061156921 | 2.25E-01 | 5.01E-01 | 1.00E+00 |
| ENSG00000275296.1_CH17-118C  | ENSG00000160789.18_LMNA | -0.087   | -0.242840673 | 0.073211188 | 2.87E-01 | 5.72E-01 | 1.00E+00 |
| ENSG00000258068.1_RP11-328C  | ENSG00000160789.18_LMNA | -0.01644 | -0.175184088 | 0.143133421 | 8.41E-01 | 9.38E-01 | 1.00E+00 |
| ENSG00000228132.2_RP11-279E  | ENSG00000160789.18_LMNA | -0.03749 | -0.195520748 | 0.122444541 | 6.47E-01 | 8.43E-01 | 1.00E+00 |
| ENSG00000241743.2_XACT       | ENSG00000160789.18_LMNA | -0.238   | -0.382700276 | -0.08190257 | 3.15E-03 | 2.77E-02 | 1.00E+00 |
| ENSG00000275801.1_RP11-404F  | ENSG00000160789.18_LMNA | 0.07702  | -0.083196692 | 0.233363323 | 3.46E-01 | 6.30E-01 | 1.00E+00 |
| ENSG00000223777.1_AC092162.1 | ENSG00000160789.18_LMNA | -0.18241 | -0.331968465 | -0.02390133 | 2.45E-02 | 1.25E-01 | 1.00E+00 |
| ENSG00000251001.1_CTD-2193P  | ENSG00000160789.18_LMNA | 0.03687  | -0.123049564 | 0.194929882 | 6.52E-01 | 8.46E-01 | 1.00E+00 |
| ENSG00000251174.1_TSEN2P1    | ENSG00000160789.18_LMNA | -0.04563 | -0.203353192 | 0.114402046 | 5.77E-01 | 8.03E-01 | 1.00E+00 |
| ENSG00000227730.2_MTND6P5    | ENSG00000160789.18_LMNA | -0.03471 | -0.192840776 | 0.125186829 | 6.71E-01 | 8.56E-01 | 1.00E+00 |
| ENSG00000248228.1_SLIT2-IT1  | ENSG00000160789.18_LMNA | 0.16961  | 0.010694928  | 0.32016267  | 3.67E-02 | 1.64E-01 | 1.00E+00 |
| ENSG00000232277.1_AC104651.1 | ENSG00000160789.18_LMNA | -0.05954 | -0.216684199 | 0.100617077 | 4.66E-01 | 7.28E-01 | 1.00E+00 |
| ENSG00000224551.1_HMGB3P21   | ENSG00000160789.18_LMNA | -0.20527 | -0.35293452  | -0.04762281 | 1.12E-02 | 7.10E-02 | 1.00E+00 |
| ENSG00000260511.1_RP11-556H  | ENSG00000160789.18_LMNA | 0.02791  | -0.13187595  | 0.186283699 | 7.33E-01 | 8.88E-01 | 1.00E+00 |
| ENSG00000280365.1_RP11-9H20  | ENSG00000160789.18_LMNA | -0.01198 | -0.170854401 | 0.147502467 | 8.84E-01 | 9.55E-01 | 1.00E+00 |
| ENSG00000254392.1_RP11-759A  | ENSG00000160789.18_LMNA | -0.0531  | -0.210521643 | 0.107004664 | 5.16E-01 | 7.63E-01 | 1.00E+00 |
| ENSG00000233997.4_LINC01425  | ENSG00000160789.18_LMNA | 0.03168  | -0.128165119 | 0.189924782 | 6.98E-01 | 8.71E-01 | 1.00E+00 |
| ENSG00000267015.1_RP11-800A  | ENSG00000160789.18_LMNA | -0.10336 | -0.258305875 | 0.056779564 | 2.05E-01 | 4.77E-01 | 1.00E+00 |
| ENSG00000237487.1_VN1R48P    | ENSG00000160789.18_LMNA | -0.1952  | -0.343717419 | -0.03715177 | 1.60E-02 | 9.17E-02 | 1.00E+00 |
| ENSG00000239620.1_RP11-88I21 | ENSG00000160789.18_LMNA | 0.04221  | -0.117779945 | 0.200068462 | 6.06E-01 | 8.19E-01 | 1.00E+00 |
| ENSG00000267146.1_RP11-383D  | ENSG00000160789.18_LMNA | -0.01852 | -0.177200179 | 0.141094761 | 8.21E-01 | 9.30E-01 | 1.00E+00 |
| ENSG00000231332.2_OOEP-AS1   | ENSG00000160789.18_LMNA | 0.083    | -0.077218624 | 0.239044406 | 3.09E-01 | 5.96E-01 | 1.00E+00 |
| ENSG00000271237.1_HMGB1P5C   | ENSG00000160789.18_LMNA | -0.1086  | -0.26325379  | 0.051486162 | 1.83E-01 | 4.47E-01 | 1.00E+00 |
| ENSG00000236133.1_LINC01069  | ENSG00000160789.18_LMNA | -0.16619 | -0.317003776 | -0.00717948 | 4.07E-02 | 1.76E-01 | 1.00E+00 |
| ENSG00000243877.1_HMGB1P38   | ENSG00000160789.18_LMNA | -0.07727 | -0.233598848 | 0.082949306 | 3.44E-01 | 6.29E-01 | 1.00E+00 |
| ENSG00000183304.9_FAM9A      | ENSG00000160789.18_LMNA | -0.09539 | -0.250786464 | 0.064790242 | 2.42E-01 | 5.22E-01 | 1.00E+00 |
| ENSG00000270624.1_LOC401913  | ENSG00000160789.18_LMNA | -0.08232 | -0.238398212 | 0.077899747 | 3.13E-01 | 6.00E-01 | 1.00E+00 |
| ENSG00000277544.1_RP11-746P  | ENSG00000160789.18_LMNA | -0.12237 | -0.276191095 | 0.037561433 | 1.33E-01 | 3.70E-01 | 1.00E+00 |
| ENSG00000253447.4_RP11-619L  | ENSG00000160789.18_LMNA | 0.02389  | -0.135831032 | 0.18239331  | 7.70E-01 | 9.05E-01 | 1.00E+00 |
| ENSG00000270893.1_RP11-311B  | ENSG00000160789.18_LMNA | -0.09161 | -0.247206885 | 0.06858945  | 2.62E-01 | 5.45E-01 | 1.00E+00 |
| ENSG00000250732.1_RPEP1      | ENSG00000160789.18_LMNA | -0.05729 | -0.214532765 | 0.102850047 | 4.83E-01 | 7.41E-01 | 1.00E+00 |

|                              |                         |          |              |             |          |          |          |
|------------------------------|-------------------------|----------|--------------|-------------|----------|----------|----------|
| ENSG00000263501.1_RP11-269G  | ENSG00000160789.18_LMNA | 0.00572  | -0.153620161 | 0.164771087 | 9.44E-01 | 9.78E-01 | 1.00E+00 |
| ENSG00000261410.1_RP11-543N  | ENSG00000160789.18_LMNA | -0.25744 | -0.400235031 | -0.10243519 | 1.37E-03 | 1.46E-02 | 1.00E+00 |
| ENSG00000237252.1_RP11-322A  | ENSG00000160789.18_LMNA | 0.04756  | -0.112492231 | 0.205207171 | 5.61E-01 | 7.93E-01 | 1.00E+00 |
| ENSG00000237370.1_AC010907.  | ENSG00000160789.18_LMNA | 0.03073  | -0.129100921 | 0.189007393 | 7.07E-01 | 8.75E-01 | 1.00E+00 |
| ENSG00000227935.1_RP6-102O1  | ENSG00000160789.18_LMNA | -0.01797 | -0.176665584 | 0.141635603 | 8.26E-01 | 9.32E-01 | 1.00E+00 |
| ENSG00000257120.1_CTD-2503I  | ENSG00000160789.18_LMNA | -0.14571 | -0.297996859 | 0.013812334 | 7.33E-02 | 2.57E-01 | 1.00E+00 |
| ENSG00000231477.2_CTB-187M2  | ENSG00000160789.18_LMNA | -0.04553 | -0.203260933 | 0.114497022 | 5.78E-01 | 8.03E-01 | 1.00E+00 |
| ENSG00000257580.1_RP11-718L  | ENSG00000160789.18_LMNA | -0.17679 | -0.326789401 | -0.01809457 | 2.93E-02 | 1.41E-01 | 1.00E+00 |
| ENSG00000255296.1_RP11-757C  | ENSG00000160789.18_LMNA | 0.05507  | -0.105051058 | 0.212409107 | 5.00E-01 | 7.53E-01 | 1.00E+00 |
| ENSG00000255476.1_RP11-1H15  | ENSG00000160789.18_LMNA | -0.09664 | -0.251964166 | 0.063538277 | 2.36E-01 | 5.14E-01 | 1.00E+00 |
| ENSG00000260341.1_C2orf69P2  | ENSG00000160789.18_LMNA | -0.13043 | -0.283735824 | 0.029384221 | 1.09E-01 | 3.29E-01 | 1.00E+00 |
| ENSG00000251090.1_OR5AC4P    | ENSG00000160789.18_LMNA | -0.08335 | -0.239375752 | 0.076869253 | 3.07E-01 | 5.94E-01 | 1.00E+00 |
| ENSG00000281008.1_RP4-587D1  | ENSG00000160789.18_LMNA | -0.10545 | -0.260279342 | 0.054670422 | 1.96E-01 | 4.65E-01 | 1.00E+00 |
| ENSG00000276391.1_RP5-928E2  | ENSG00000160789.18_LMNA | -0.1307  | -0.283992741 | 0.029105027 | 1.08E-01 | 3.28E-01 | 1.00E+00 |
| ENSG00000136275.9_C7orf69    | ENSG00000160789.18_LMNA | -0.01634 | -0.175087942 | 0.143230576 | 8.42E-01 | 9.38E-01 | 1.00E+00 |
| ENSG00000253416.1_RP11-48D4  | ENSG00000160789.18_LMNA | 0.12735  | -0.032514824 | 0.280851936 | 1.18E-01 | 3.44E-01 | 1.00E+00 |
| ENSG00000196143.4_OR11H13P   | ENSG00000160789.18_LMNA | -0.07033 | -0.226985007 | 0.0898814   | 3.89E-01 | 6.67E-01 | 1.00E+00 |
| ENSG00000232655.1_CTA-397C4  | ENSG00000160789.18_LMNA | 0.05906  | -0.101094495 | 0.216224472 | 4.70E-01 | 7.30E-01 | 1.00E+00 |
| ENSG00000231548.1_OR55B1P    | ENSG00000160789.18_LMNA | -0.03268 | -0.190891852 | 0.127178024 | 6.89E-01 | 8.66E-01 | 1.00E+00 |
| ENSG00000267630.1_AC005758.  | ENSG00000160789.18_LMNA | 0.01317  | -0.146341292 | 0.172006316 | 8.72E-01 | 9.50E-01 | 1.00E+00 |
| ENSG00000235782.1_RP3-333A1  | ENSG00000160789.18_LMNA | 0.01511  | -0.144433789 | 0.17389672  | 8.53E-01 | 9.42E-01 | 1.00E+00 |
| ENSG00000253248.4_RP11-149P  | ENSG00000160789.18_LMNA | -0.13574 | -0.288698039 | 0.023983073 | 9.54E-02 | 3.03E-01 | 1.00E+00 |
| ENSG00000231981.3_RPL7L1P12  | ENSG00000160789.18_LMNA | -0.1125  | -0.266917077 | 0.047555661 | 1.68E-01 | 4.25E-01 | 1.00E+00 |
| ENSG00000262158.1_MTCO3P24   | ENSG00000160789.18_LMNA | -0.13622 | -0.289147451 | 0.023493006 | 9.43E-02 | 3.01E-01 | 1.00E+00 |
| ENSG00000155249.4_OR4K1      | ENSG00000160789.18_LMNA | -0.16834 | -0.31898921  | -0.00938812 | 3.82E-02 | 1.68E-01 | 1.00E+00 |
| ENSG00000151033.8_LYZL2      | ENSG00000160789.18_LMNA | 0.10376  | -0.05637387  | 0.258685676 | 2.03E-01 | 4.74E-01 | 1.00E+00 |
| ENSG00000233186.2_KLF4P1     | ENSG00000160789.18_LMNA | 0.108    | -0.052092532 | 0.262687835 | 1.85E-01 | 4.51E-01 | 1.00E+00 |
| ENSG00000229255.1_RP11-407H  | ENSG00000160789.18_LMNA | -0.19498 | -0.343514211 | -0.03692168 | 1.61E-02 | 9.22E-02 | 1.00E+00 |
| ENSG00000278496.1_RP11-144H  | ENSG00000160789.18_LMNA | 0.01658  | -0.142996755 | 0.175319325 | 8.39E-01 | 9.38E-01 | 1.00E+00 |
| ENSG00000235146.2_RP5-857K2  | ENSG00000160789.18_LMNA | 0.04575  | -0.114280124 | 0.203471617 | 5.76E-01 | 8.02E-01 | 1.00E+00 |
| ENSG00000268473.1_RP11-158I3 | ENSG00000160789.18_LMNA | -0.01015 | -0.169075405 | 0.149294041 | 9.01E-01 | 9.62E-01 | 1.00E+00 |
| ENSG00000258977.1_LINC01467  | ENSG00000160789.18_LMNA | -0.10159 | -0.256640736 | 0.058556996 | 2.13E-01 | 4.87E-01 | 1.00E+00 |
| ENSG00000223721.3_UQCRFS1F   | ENSG00000160789.18_LMNA | -0.13985 | -0.292540061 | 0.01978863  | 8.57E-02 | 2.84E-01 | 1.00E+00 |

|                              |                         |          |              |             |          |          |          |
|------------------------------|-------------------------|----------|--------------|-------------|----------|----------|----------|
| ENSG00000235991.4_RP11-143H  | ENSG00000160789.18_LMNA | 0.06946  | -0.090744845 | 0.226159152 | 3.95E-01 | 6.72E-01 | 1.00E+00 |
| ENSG00000235338.1_DUSP5P2    | ENSG00000160789.18_LMNA | -0.07297 | -0.229507966 | 0.087240656 | 3.72E-01 | 6.52E-01 | 1.00E+00 |
| ENSG00000234613.1_RP5-1158E  | ENSG00000160789.18_LMNA | -0.03566 | -0.193763744 | 0.124242949 | 6.63E-01 | 8.51E-01 | 1.00E+00 |
| ENSG00000229922.4_RP11-240M  | ENSG00000160789.18_LMNA | -0.0331  | -0.191296341 | 0.126764973 | 6.86E-01 | 8.64E-01 | 1.00E+00 |
| ENSG00000255359.2_CCDC179    | ENSG00000160789.18_LMNA | -0.05089 | -0.208405708 | 0.109191836 | 5.33E-01 | 7.75E-01 | 1.00E+00 |
| ENSG00000253679.1_KB-1410C5  | ENSG00000160789.18_LMNA | -0.08683 | -0.242672294 | 0.07338915  | 2.87E-01 | 5.73E-01 | 1.00E+00 |
| ENSG00000228680.1_AC004692.4 | ENSG00000160789.18_LMNA | 0.10152  | -0.058631168 | 0.256571209 | 2.13E-01 | 4.87E-01 | 1.00E+00 |
| ENSG00000255054.3_RP1-317E2  | ENSG00000160789.18_LMNA | 0.02898  | -0.130822497 | 0.187318239 | 7.23E-01 | 8.83E-01 | 1.00E+00 |
| ENSG00000229982.1_GTF3AP6    | ENSG00000160789.18_LMNA | -0.23195 | -0.377218343 | -0.07553537 | 4.04E-03 | 3.34E-02 | 1.00E+00 |
| ENSG00000224827.1_LINC00265  | ENSG00000160789.18_LMNA | 0.09206  | -0.068138181 | 0.247632517 | 2.59E-01 | 5.42E-01 | 1.00E+00 |
| ENSG00000223921.1_MTND1P27   | ENSG00000160789.18_LMNA | -0.05821 | -0.215418173 | 0.101931471 | 4.76E-01 | 7.35E-01 | 1.00E+00 |
| ENSG00000237268.2_RP13-492C  | ENSG00000160789.18_LMNA | 0.08021  | -0.080011641 | 0.236392835 | 3.26E-01 | 6.13E-01 | 1.00E+00 |
| ENSG00000251216.1_RP11-161D  | ENSG00000160789.18_LMNA | -0.17149 | -0.321898747 | -0.01263022 | 3.46E-02 | 1.57E-01 | 1.00E+00 |
| ENSG00000234386.4_OR7E162P   | ENSG00000160789.18_LMNA | -0.11693 | -0.271080923 | 0.04307623  | 1.51E-01 | 4.00E-01 | 1.00E+00 |
| ENSG00000196778.2_OR52K1     | ENSG00000160789.18_LMNA | 0.05153  | -0.108565784 | 0.209011674 | 5.28E-01 | 7.72E-01 | 1.00E+00 |
| ENSG00000244222.2_OR7E121P   | ENSG00000160789.18_LMNA | -0.00527 | -0.164335397 | 0.154057379 | 9.49E-01 | 9.79E-01 | 1.00E+00 |
| ENSG00000276403.1_RP11-1151I | ENSG00000160789.18_LMNA | -0.0918  | -0.24738539  | 0.068400209 | 2.61E-01 | 5.44E-01 | 1.00E+00 |
| ENSG00000213854.3_CNN2P6     | ENSG00000160789.18_LMNA | 0.07278  | -0.087432353 | 0.229324962 | 3.73E-01 | 6.53E-01 | 1.00E+00 |
| ENSG00000261095.1_RP11-899L  | ENSG00000160789.18_LMNA | 0.01875  | -0.140868704 | 0.177423568 | 8.19E-01 | 9.29E-01 | 1.00E+00 |
| ENSG00000228433.1_OR7E23P    | ENSG00000160789.18_LMNA | 0.08434  | -0.075881348 | 0.240312291 | 3.02E-01 | 5.88E-01 | 1.00E+00 |
| ENSG00000263438.4_RP11-202D  | ENSG00000160789.18_LMNA | 0.04142  | -0.118558702 | 0.19931017  | 6.12E-01 | 8.24E-01 | 1.00E+00 |
| ENSG00000254722.1_FAM8A2P    | ENSG00000160789.18_LMNA | 0.00909  | -0.150327587 | 0.168048171 | 9.11E-01 | 9.66E-01 | 1.00E+00 |
| ENSG00000137440.4_FGFBP1     | ENSG00000160789.18_LMNA | 0.03906  | -0.12088773  | 0.197040072 | 6.33E-01 | 8.35E-01 | 1.00E+00 |
| ENSG00000225438.1_KRT41P     | ENSG00000160789.18_LMNA | 0.08049  | -0.079729151 | 0.236661234 | 3.24E-01 | 6.11E-01 | 1.00E+00 |
| ENSG00000229926.1_RP11-424E  | ENSG00000160789.18_LMNA | 0.0821   | -0.078122577 | 0.238186748 | 3.15E-01 | 6.01E-01 | 1.00E+00 |
| ENSG00000253898.1_LINC01419  | ENSG00000160789.18_LMNA | -0.15222 | -0.304056185 | 0.007149941 | 6.12E-02 | 2.29E-01 | 1.00E+00 |
| ENSG00000280348.1_RP11-552M  | ENSG00000160789.18_LMNA | -0.12047 | -0.274409722 | 0.039486028 | 1.39E-01 | 3.81E-01 | 1.00E+00 |
| ENSG00000228697.1_RP5-968D2  | ENSG00000160789.18_LMNA | -0.05478 | -0.212127059 | 0.105343146 | 5.03E-01 | 7.54E-01 | 1.00E+00 |
| ENSG00000249228.1_RP11-769N  | ENSG00000160789.18_LMNA | -0.05438 | -0.211744059 | 0.105739691 | 5.06E-01 | 7.56E-01 | 1.00E+00 |
| ENSG00000213727.3_LA16c-60G  | ENSG00000160789.18_LMNA | -0.08674 | -0.24259476  | 0.07347109  | 2.88E-01 | 5.73E-01 | 1.00E+00 |
| ENSG00000254588.1_RP11-1007  | ENSG00000160789.18_LMNA | 0.04347  | -0.116538633 | 0.201276367 | 5.95E-01 | 8.13E-01 | 1.00E+00 |
| ENSG00000234700.1_MTCO1P8    | ENSG00000160789.18_LMNA | 0.10974  | -0.050335544 | 0.264327124 | 1.78E-01 | 4.40E-01 | 1.00E+00 |
| ENSG00000205184.2_SLC10A5P   | ENSG00000160789.18_LMNA | -0.01601 | -0.174769354 | 0.143552463 | 8.45E-01 | 9.39E-01 | 1.00E+00 |

|                              |                         |          |              |             |          |          |          |
|------------------------------|-------------------------|----------|--------------|-------------|----------|----------|----------|
| ENSG00000237224.4_RP11-109A  | ENSG00000160789.18_LMNA | -0.10162 | -0.256669112 | 0.058526723 | 2.13E-01 | 4.87E-01 | 1.00E+00 |
| ENSG00000276569.1_RP11-460G  | ENSG00000160789.18_LMNA | -0.09307 | -0.248591125 | 0.067121363 | 2.54E-01 | 5.36E-01 | 1.00E+00 |
| ENSG00000250026.4_TMPRSS11   | ENSG00000160789.18_LMNA | 0.07577  | -0.084447089 | 0.232172305 | 3.54E-01 | 6.37E-01 | 1.00E+00 |
| ENSG00000241690.3_RP5-860F1  | ENSG00000160789.18_LMNA | 0.20541  | 0.0477774546 | 0.353067655 | 1.11E-02 | 7.07E-02 | 1.00E+00 |
| ENSG00000187812.11_RP11-24M  | ENSG00000160789.18_LMNA | -0.05057 | -0.2080932   | 0.109514605 | 5.36E-01 | 7.77E-01 | 1.00E+00 |
| ENSG00000257366.1_MIR3180-2  | ENSG00000160789.18_LMNA | 0.03736  | -0.12257149  | 0.195396789 | 6.48E-01 | 8.43E-01 | 1.00E+00 |
| ENSG00000265863.1_RP11-805L  | ENSG00000160789.18_LMNA | -0.05498 | -0.212325448 | 0.105137701 | 5.01E-01 | 7.53E-01 | 1.00E+00 |
| ENSG00000249967.1_RP11-548K  | ENSG00000160789.18_LMNA | -0.10883 | -0.263465698 | 0.051259063 | 1.82E-01 | 4.46E-01 | 1.00E+00 |
| ENSG00000225108.1_ZBTB45P1   | ENSG00000160789.18_LMNA | 0.15797  | -0.001263252 | 0.309389152 | 5.19E-02 | 2.06E-01 | 1.00E+00 |
| ENSG00000255511.1_RP11-1081I | ENSG00000160789.18_LMNA | 0.03211  | -0.127748461 | 0.190333063 | 6.95E-01 | 8.69E-01 | 1.00E+00 |
| ENSG00000214216.9_IQCJ       | ENSG00000160789.18_LMNA | -0.12463 | -0.278310166 | 0.035268954 | 1.26E-01 | 3.59E-01 | 1.00E+00 |
| ENSG00000224570.1_RP11-430H  | ENSG00000160789.18_LMNA | -0.04514 | -0.202882877 | 0.114886152 | 5.81E-01 | 8.05E-01 | 1.00E+00 |
| ENSG00000204193.9_TXNDC8     | ENSG00000160789.18_LMNA | 0.15424  | -0.005086949 | 0.305927348 | 5.78E-02 | 2.20E-01 | 1.00E+00 |
| ENSG00000270955.1_RP11-261B  | ENSG00000160789.18_LMNA | 0.01845  | -0.141162103 | 0.177133625 | 8.21E-01 | 9.30E-01 | 1.00E+00 |
| ENSG00000254293.1_CTB-158E9  | ENSG00000160789.18_LMNA | 0.01865  | -0.140965106 | 0.177328307 | 8.20E-01 | 9.30E-01 | 1.00E+00 |
| ENSG00000224586.5_GPX5       | ENSG00000160789.18_LMNA | 0.00609  | -0.153258424 | 0.165131467 | 9.41E-01 | 9.76E-01 | 1.00E+00 |
| ENSG00000233522.1_FAM224A    | ENSG00000160789.18_LMNA | -0.10487 | -0.259738293 | 0.055248947 | 1.98E-01 | 4.68E-01 | 1.00E+00 |
| ENSG00000237763.8_AMY1A      | ENSG00000160789.18_LMNA | -0.17613 | -0.326186166 | -0.01741957 | 3.00E-02 | 1.43E-01 | 1.00E+00 |
| ENSG00000275427.1_CTD-2281E  | ENSG00000160789.18_LMNA | -0.20791 | -0.355345632 | -0.05037305 | 1.02E-02 | 6.64E-02 | 1.00E+00 |
| ENSG00000279303.1_CH507-236  | ENSG00000160789.18_LMNA | 0.02823  | -0.131565941 | 0.186588215 | 7.30E-01 | 8.86E-01 | 1.00E+00 |
| ENSG00000231236.2_AP001604.1 | ENSG00000160789.18_LMNA | -0.05896 | -0.216135393 | 0.101186985 | 4.71E-01 | 7.31E-01 | 1.00E+00 |
| ENSG00000235779.6_AC079779.1 | ENSG00000160789.18_LMNA | -0.04981 | -0.207364352 | 0.110267123 | 5.42E-01 | 7.81E-01 | 1.00E+00 |
| ENSG00000197641.10_SERPINB1  | ENSG00000160789.18_LMNA | -0.24123 | -0.385619915 | -0.08530374 | 2.75E-03 | 2.50E-02 | 1.00E+00 |
| ENSG00000267204.1_AC011518.1 | ENSG00000160789.18_LMNA | 0.06315  | -0.097022484 | 0.220141072 | 4.40E-01 | 7.08E-01 | 1.00E+00 |
| ENSG00000184716.12_SERINC4   | ENSG00000160789.18_LMNA | -0.03208 | -0.190309209 | 0.127772807 | 6.95E-01 | 8.69E-01 | 1.00E+00 |
| ENSG00000187533.12_PRR27     | ENSG00000160789.18_LMNA | 0.09707  | -0.06311021  | 0.252366627 | 2.34E-01 | 5.12E-01 | 1.00E+00 |
| ENSG00000169347.15_GP2       | ENSG00000160789.18_LMNA | 0.03558  | -0.124322552 | 0.193685926 | 6.63E-01 | 8.51E-01 | 1.00E+00 |
| ENSG00000211771.1_TRBJ2-7    | ENSG00000160789.18_LMNA | -0.00463 | -0.16371414  | 0.1546806   | 9.55E-01 | 9.82E-01 | 1.00E+00 |
| ENSG00000199572.1_RNA5SP17   | ENSG00000160789.18_LMNA | 0.09007  | -0.070140402 | 0.24574311  | 2.70E-01 | 5.54E-01 | 1.00E+00 |
| ENSG00000212302.1_SNORD41    | ENSG00000160789.18_LMNA | 0.05353  | -0.106575385 | 0.210936591 | 5.12E-01 | 7.61E-01 | 1.00E+00 |
| ENSG00000266698.1_MIR3945    | ENSG00000160789.18_LMNA | -0.00716 | -0.166175631 | 0.152209844 | 9.30E-01 | 9.73E-01 | 1.00E+00 |
| ENSG00000252796.1_RNU7-11P   | ENSG00000160789.18_LMNA | -0.12854 | -0.281969298 | 0.031302602 | 1.15E-01 | 3.38E-01 | 1.00E+00 |
| ENSG00000263540.1_MIR5582    | ENSG00000160789.18_LMNA | 0.05904  | -0.101114504 | 0.216205202 | 4.70E-01 | 7.30E-01 | 1.00E+00 |



|                             |                         |          |              |             |          |          |          |
|-----------------------------|-------------------------|----------|--------------|-------------|----------|----------|----------|
| ENSG00000266072.1_MIR5693   | ENSG00000160789.18_LMNA | 0.16051  | 0.00134414   | 0.311745056 | 4.82E-02 | 1.97E-01 | 1.00E+00 |
| ENSG00000252949.1_          | ENSG00000160789.18_LMNA | 0.16555  | 0.006524737  | 0.316414676 | 4.15E-02 | 1.78E-01 | 1.00E+00 |
| ENSG00000252985.1_SNORD116  | ENSG00000160789.18_LMNA | -0.12524 | -0.278884702 | 0.034646832 | 1.24E-01 | 3.56E-01 | 1.00E+00 |
| ENSG00000277854.1_          | ENSG00000160789.18_LMNA | -0.07221 | -0.228776072 | 0.088007177 | 3.77E-01 | 6.56E-01 | 1.00E+00 |
| ENSG00000265759.1_          | ENSG00000160789.18_LMNA | 0.05089  | -0.109195379 | 0.208402278 | 5.34E-01 | 7.75E-01 | 1.00E+00 |
| ENSG00000274794.1_          | ENSG00000160789.18_LMNA | 0.07096  | -0.089245123 | 0.227593294 | 3.85E-01 | 6.64E-01 | 1.00E+00 |
| ENSG00000206918.1_RNU6-1181 | ENSG00000160789.18_LMNA | 0.01379  | -0.145734302 | 0.17260812  | 8.66E-01 | 9.48E-01 | 1.00E+00 |
| ENSG00000256248.1_RP11-123O | ENSG00000160789.18_LMNA | -0.06671 | -0.223541388 | 0.09347861  | 4.14E-01 | 6.87E-01 | 1.00E+00 |
| ENSG00000275652.1_MIR6796   | ENSG00000160789.18_LMNA | -0.04031 | -0.198240954 | 0.11965611  | 6.22E-01 | 8.29E-01 | 1.00E+00 |
| ENSG00000251841.1_RNU6-1334 | ENSG00000160789.18_LMNA | -0.17085 | -0.321315813 | -0.01198014 | 3.53E-02 | 1.60E-01 | 1.00E+00 |
| ENSG00000281140.1_          | ENSG00000160789.18_LMNA | -0.02762 | -0.186002445 | 0.13216222  | 7.36E-01 | 8.89E-01 | 1.00E+00 |
| ENSG00000207449.1_RNU6-19P  | ENSG00000160789.18_LMNA | 0.10941  | -0.050676599 | 0.264009058 | 1.80E-01 | 4.42E-01 | 1.00E+00 |
| ENSG00000201071.1_Y_RNA     | ENSG00000160789.18_LMNA | 0.06619  | -0.094002961 | 0.223038764 | 4.18E-01 | 6.90E-01 | 1.00E+00 |
| ENSG00000264609.1_          | ENSG00000160789.18_LMNA | -0.05535 | -0.212680498 | 0.104769955 | 4.98E-01 | 7.51E-01 | 1.00E+00 |
| ENSG00000201818.1_RNY4P17   | ENSG00000160789.18_LMNA | -0.17758 | -0.327523589 | -0.01891648 | 2.86E-02 | 1.39E-01 | 1.00E+00 |
| ENSG00000265978.1_          | ENSG00000160789.18_LMNA | -0.16756 | -0.318270927 | -0.00858874 | 3.91E-02 | 1.71E-01 | 1.00E+00 |
| ENSG00000238456.1_RNU6-1014 | ENSG00000160789.18_LMNA | -0.02042 | -0.179041349 | 0.139230618 | 8.03E-01 | 9.21E-01 | 1.00E+00 |
| ENSG00000264737.1_MIR4511   | ENSG00000160789.18_LMNA | -0.13447 | -0.287511085 | 0.025276683 | 9.86E-02 | 3.09E-01 | 1.00E+00 |
| ENSG00000265520.1_MIR548V   | ENSG00000160789.18_LMNA | 0.12933  | -0.030497688 | 0.282710756 | 1.12E-01 | 3.34E-01 | 1.00E+00 |
| ENSG00000200648.1_RNU6-226F | ENSG00000160789.18_LMNA | -0.02223 | -0.180794202 | 0.137453795 | 7.86E-01 | 9.13E-01 | 1.00E+00 |
| ENSG00000215930.1_MIR942    | ENSG00000160789.18_LMNA | 0.03525  | -0.124645888 | 0.193369801 | 6.66E-01 | 8.53E-01 | 1.00E+00 |
| ENSG00000199833.1_SNORD115  | ENSG00000160789.18_LMNA | -0.10373 | -0.258657725 | 0.05640373  | 2.03E-01 | 4.74E-01 | 1.00E+00 |
| ENSG00000272134.1_RP11-927P | ENSG00000160789.18_LMNA | -0.14412 | -0.296521537 | 0.01543031  | 7.65E-02 | 2.65E-01 | 1.00E+00 |
| ENSG00000265960.1_          | ENSG00000160789.18_LMNA | 0.15617  | -0.003108194 | 0.307719851 | 5.47E-02 | 2.13E-01 | 1.00E+00 |
| ENSG00000264802.1_MIR5191   | ENSG00000160789.18_LMNA | 0.04393  | -0.116084236 | 0.201718293 | 5.91E-01 | 8.10E-01 | 1.00E+00 |
| ENSG00000200560.1_RNU6-288F | ENSG00000160789.18_LMNA | 0.06615  | -0.094038796 | 0.223004408 | 4.18E-01 | 6.90E-01 | 1.00E+00 |
| ENSG00000278754.1_RP11-518K | ENSG00000160789.18_LMNA | 0.10443  | -0.055700426 | 0.259315923 | 2.00E-01 | 4.71E-01 | 1.00E+00 |
| ENSG00000199059.2_MIR135B   | ENSG00000160789.18_LMNA | -0.15051 | -0.302466773 | 0.00890022  | 6.42E-02 | 2.36E-01 | 1.00E+00 |
| ENSG00000249413.2_RP11-25H1 | ENSG00000160789.18_LMNA | -0.11721 | -0.271344512 | 0.042792237 | 1.50E-01 | 3.99E-01 | 1.00E+00 |
| ENSG00000263774.1_          | ENSG00000160789.18_LMNA | -0.03631 | -0.194386805 | 0.123605444 | 6.57E-01 | 8.48E-01 | 1.00E+00 |
| ENSG00000263651.1_          | ENSG00000160789.18_LMNA | 0.05632  | -0.103812757 | 0.213604258 | 4.91E-01 | 7.47E-01 | 1.00E+00 |
| ENSG00000199394.1_RNU6-600F | ENSG00000160789.18_LMNA | 0.02442  | -0.135302561 | 0.182913713 | 7.65E-01 | 9.02E-01 | 1.00E+00 |
| ENSG00000226868.1_RP11-122M | ENSG00000160789.18_LMNA | -0.07864 | -0.234900656 | 0.081581238 | 3.36E-01 | 6.21E-01 | 1.00E+00 |

|                              |                         |          |              |             |          |          |          |
|------------------------------|-------------------------|----------|--------------|-------------|----------|----------|----------|
| ENSG00000222438.1_RNU6-1077  | ENSG00000160789.18_LMNA | 0.00049  | -0.158726989 | 0.159674342 | 9.95E-01 | 9.98E-01 | 1.00E+00 |
| ENSG00000206768.1_Y_RNA      | ENSG00000160789.18_LMNA | -0.07531 | -0.231730369 | 0.084910805 | 3.56E-01 | 6.40E-01 | 1.00E+00 |
| ENSG00000221401.1_           | ENSG00000160789.18_LMNA | 0.03342  | -0.126449414 | 0.191605286 | 6.83E-01 | 8.62E-01 | 1.00E+00 |
| ENSG00000279732.1_RP11-319G  | ENSG00000160789.18_LMNA | 0.08534  | -0.074882889 | 0.241258237 | 2.96E-01 | 5.82E-01 | 1.00E+00 |
| ENSG00000238498.1_SNORD13F   | ENSG00000160789.18_LMNA | 0.06828  | -0.091923742 | 0.22503084  | 4.03E-01 | 6.79E-01 | 1.00E+00 |
| ENSG00000253437.1_RNU6-988F  | ENSG00000160789.18_LMNA | 0.00823  | -0.151171561 | 0.167208838 | 9.20E-01 | 9.69E-01 | 1.00E+00 |
| ENSG00000279501.1_bP-2171C2  | ENSG00000160789.18_LMNA | -0.19751 | -0.345833043 | -0.03954928 | 1.47E-02 | 8.67E-02 | 1.00E+00 |
| ENSG00000206961.1_SNORA51    | ENSG00000160789.18_LMNA | -0.14905 | -0.301106516 | 0.010396637 | 6.68E-02 | 2.42E-01 | 1.00E+00 |
| ENSG00000265344.1_           | ENSG00000160789.18_LMNA | 0.04602  | -0.114016832 | 0.203727327 | 5.73E-01 | 8.01E-01 | 1.00E+00 |
| ENSG00000270318.1_IGHV3OR1I  | ENSG00000160789.18_LMNA | -0.08462 | -0.240576531 | 0.075602503 | 3.00E-01 | 5.86E-01 | 1.00E+00 |
| ENSG00000278604.1_RN7SL429F  | ENSG00000160789.18_LMNA | -0.07141 | -0.228021141 | 0.088797433 | 3.82E-01 | 6.61E-01 | 1.00E+00 |
| ENSG00000207355.1_RNU6-1257  | ENSG00000160789.18_LMNA | -0.06394 | -0.220894518 | 0.096237921 | 4.34E-01 | 7.03E-01 | 1.00E+00 |
| ENSG00000278438.1_MIR7849    | ENSG00000160789.18_LMNA | -0.01866 | -0.177331352 | 0.140962026 | 8.20E-01 | 9.30E-01 | 1.00E+00 |
| ENSG00000250721.1_HMGB1P22   | ENSG00000160789.18_LMNA | 0.09317  | -0.067029696 | 0.248677514 | 2.54E-01 | 5.35E-01 | 1.00E+00 |
| ENSG00000265529.1_           | ENSG00000160789.18_LMNA | 0.01164  | -0.147834485 | 0.170524871 | 8.87E-01 | 9.56E-01 | 1.00E+00 |
| ENSG00000251511.1_RP11-171N  | ENSG00000160789.18_LMNA | 0.08969  | -0.070518167 | 0.24538636  | 2.72E-01 | 5.56E-01 | 1.00E+00 |
| ENSG00000280625.1_           | ENSG00000160789.18_LMNA | -0.08098 | -0.237127634 | 0.079238143 | 3.21E-01 | 6.08E-01 | 1.00E+00 |
| ENSG00000279562.1_RP11-667K  | ENSG00000160789.18_LMNA | -0.07732 | -0.233642675 | 0.082903268 | 3.44E-01 | 6.28E-01 | 1.00E+00 |
| ENSG00000218893.1_SUMO2P12   | ENSG00000160789.18_LMNA | 0.03997  | -0.1199982   | 0.197907497 | 6.25E-01 | 8.31E-01 | 1.00E+00 |
| ENSG00000249463.1_RP11-1E22  | ENSG00000160789.18_LMNA | 0.10346  | -0.056670162 | 0.258408304 | 2.05E-01 | 4.76E-01 | 1.00E+00 |
| ENSG00000277118.1_Metazoa_SI | ENSG00000160789.18_LMNA | 0.0454   | -0.114625329 | 0.203136288 | 5.79E-01 | 8.04E-01 | 1.00E+00 |
| ENSG00000200091.1_RN7SKP16   | ENSG00000160789.18_LMNA | 0.08336  | -0.076858783 | 0.239385681 | 3.07E-01 | 5.94E-01 | 1.00E+00 |
| ENSG00000273516.1_U1         | ENSG00000160789.18_LMNA | -0.08899 | -0.244720103 | 0.071223429 | 2.76E-01 | 5.60E-01 | 1.00E+00 |
| ENSG00000273829.1_Metazoa_SI | ENSG00000160789.18_LMNA | 0.09882  | -0.061346555 | 0.254023635 | 2.26E-01 | 5.02E-01 | 1.00E+00 |
| ENSG00000244402.3_RN7SL314F  | ENSG00000160789.18_LMNA | -0.04231 | -0.200159017 | 0.11768692  | 6.05E-01 | 8.19E-01 | 1.00E+00 |
| ENSG00000244194.3_RN7SL218F  | ENSG00000160789.18_LMNA | -0.06695 | -0.223770004 | 0.093240055 | 4.12E-01 | 6.86E-01 | 1.00E+00 |
| ENSG00000227532.1_AC002542.  | ENSG00000160789.18_LMNA | -0.0648  | -0.221709709 | 0.09538862  | 4.28E-01 | 6.98E-01 | 1.00E+00 |
| ENSG00000202260.1_RN7SKP69   | ENSG00000160789.18_LMNA | -0.03638 | -0.194451248 | 0.123539493 | 6.56E-01 | 8.48E-01 | 1.00E+00 |
| ENSG00000211667.2_IGLV3-12   | ENSG00000160789.18_LMNA | 0.03367  | -0.126203593 | 0.191845911 | 6.80E-01 | 8.61E-01 | 1.00E+00 |
| ENSG00000261036.1_RP11-574H  | ENSG00000160789.18_LMNA | 0.22998  | 0.073466319  | 0.375432402 | 4.37E-03 | 3.54E-02 | 1.00E+00 |
| ENSG00000280226.1_AC004824.  | ENSG00000160789.18_LMNA | 0.14778  | -0.011692207 | 0.299927806 | 6.92E-02 | 2.48E-01 | 1.00E+00 |
| ENSG00000251610.1_RP11-77P1  | ENSG00000160789.18_LMNA | 0.10786  | -0.052240392 | 0.262549797 | 1.86E-01 | 4.52E-01 | 1.00E+00 |
| ENSG00000260096.1_DNM1P33    | ENSG00000160789.18_LMNA | 0.1161   | -0.043916001 | 0.270301209 | 1.54E-01 | 4.05E-01 | 1.00E+00 |

|                              |                         |          |              |             |          |          |          |
|------------------------------|-------------------------|----------|--------------|-------------|----------|----------|----------|
| ENSG00000221962.4_TMEN14EF   | ENSG00000160789.18_LMNA | -0.09243 | -0.247983884 | 0.067765555 | 2.57E-01 | 5.40E-01 | 1.00E+00 |
| ENSG00000247911.3_HMGN1P12   | ENSG00000160789.18_LMNA | 0.05205  | -0.108048745 | 0.209511939 | 5.24E-01 | 7.69E-01 | 1.00E+00 |
| ENSG00000250205.1_YWHAEP4    | ENSG00000160789.18_LMNA | 0.003    | -0.156276236 | 0.162122377 | 9.71E-01 | 9.89E-01 | 1.00E+00 |
| ENSG00000257837.1_RP11-263K  | ENSG00000160789.18_LMNA | -0.06668 | -0.223507648 | 0.093513815 | 4.14E-01 | 6.87E-01 | 1.00E+00 |
| ENSG00000226718.1_SNRPGP8    | ENSG00000160789.18_LMNA | -0.19013 | -0.339066068 | -0.03189307 | 1.90E-02 | 1.04E-01 | 1.00E+00 |
| ENSG00000250244.4_CTB-49A3.4 | ENSG00000160789.18_LMNA | -0.15029 | -0.302255338 | 0.009132912 | 6.46E-02 | 2.37E-01 | 1.00E+00 |
| ENSG00000256350.1_AE000658.1 | ENSG00000160789.18_LMNA | 0.00096  | -0.158266659 | 0.16013446  | 9.91E-01 | 9.96E-01 | 1.00E+00 |
| ENSG00000199977.1_SNORA73    | ENSG00000160789.18_LMNA | 0.19464  | 0.036577638  | 0.343210324 | 1.63E-02 | 9.31E-02 | 1.00E+00 |
| ENSG00000281834.1_           | ENSG00000160789.18_LMNA | 0.04797  | -0.112082581 | 0.205604547 | 5.57E-01 | 7.91E-01 | 1.00E+00 |
| ENSG00000236724.1_RP11-252M  | ENSG00000160789.18_LMNA | 0.02164  | -0.13804105  | 0.180215093 | 7.91E-01 | 9.16E-01 | 1.00E+00 |
| ENSG00000236130.1_PTCSC2     | ENSG00000160789.18_LMNA | 0.09036  | -0.069850409 | 0.246016912 | 2.68E-01 | 5.52E-01 | 1.00E+00 |
| ENSG00000179452.2_GM140      | ENSG00000160789.18_LMNA | -0.08129 | -0.237421904 | 0.078928267 | 3.19E-01 | 6.06E-01 | 1.00E+00 |
| ENSG00000270776.1_RP11-17G1  | ENSG00000160789.18_LMNA | 0.04689  | -0.113150837 | 0.204568077 | 5.66E-01 | 7.97E-01 | 1.00E+00 |
| ENSG00000244314.3_RN7SL36P   | ENSG00000160789.18_LMNA | -0.03542 | -0.193530933 | 0.124481089 | 6.65E-01 | 8.52E-01 | 1.00E+00 |
| ENSG00000250847.1_CTD-2020P  | ENSG00000160789.18_LMNA | -0.15796 | -0.309378548 | 0.001274979 | 5.19E-02 | 2.06E-01 | 1.00E+00 |
| ENSG00000279023.1_RP13-895J  | ENSG00000160789.18_LMNA | -0.23244 | -0.377664795 | -0.076053   | 3.96E-03 | 3.29E-02 | 1.00E+00 |
| ENSG00000237182.1_RP11-402P  | ENSG00000160789.18_LMNA | 0.04087  | -0.119110097 | 0.198773035 | 6.17E-01 | 8.27E-01 | 1.00E+00 |
| ENSG00000254177.1_RP11-1149  | ENSG00000160789.18_LMNA | 0.00194  | -0.157311759 | 0.16108848  | 9.81E-01 | 9.93E-01 | 1.00E+00 |
| ENSG00000271358.1_RP11-241N  | ENSG00000160789.18_LMNA | -0.00742 | -0.166425832 | 0.151958478 | 9.28E-01 | 9.72E-01 | 1.00E+00 |
| ENSG00000230491.1_RP13-228J  | ENSG00000160789.18_LMNA | -0.14337 | -0.295816524 | 0.016202917 | 7.81E-02 | 2.68E-01 | 1.00E+00 |
| ENSG00000244512.3_RN7SL28P   | ENSG00000160789.18_LMNA | 0.0718   | -0.088413167 | 0.228388278 | 3.79E-01 | 6.58E-01 | 1.00E+00 |
| ENSG00000267402.1_TCF4-AS2   | ENSG00000160789.18_LMNA | -0.08162 | -0.237735741 | 0.07859772  | 3.17E-01 | 6.04E-01 | 1.00E+00 |
| ENSG00000224946.1_AC007312.1 | ENSG00000160789.18_LMNA | 0.03969  | -0.120267302 | 0.197645134 | 6.27E-01 | 8.32E-01 | 1.00E+00 |
| ENSG00000197334.2_Metazoa_SI | ENSG00000160789.18_LMNA | 0.10205  | -0.05809628  | 0.257072525 | 2.11E-01 | 4.84E-01 | 1.00E+00 |
| ENSG00000262471.1_RP11-95P2  | ENSG00000160789.18_LMNA | 0.14395  | -0.015603361 | 0.296363655 | 7.68E-02 | 2.65E-01 | 1.00E+00 |
| ENSG00000281120.1_RP5-1093G  | ENSG00000160789.18_LMNA | 0.03266  | -0.127202972 | 0.190867418 | 6.90E-01 | 8.66E-01 | 1.00E+00 |
| ENSG00000244296.3_RN7SL168F  | ENSG00000160789.18_LMNA | 0.2271   | 0.070443626  | 0.372819267 | 4.90E-03 | 3.86E-02 | 1.00E+00 |
| ENSG00000270114.1_RP5-1048B  | ENSG00000160789.18_LMNA | 0.06725  | -0.092942543 | 0.22405507  | 4.10E-01 | 6.85E-01 | 1.00E+00 |
| ENSG00000244618.3_RN7SL334F  | ENSG00000160789.18_LMNA | 0.06356  | -0.096619123 | 0.220528482 | 4.37E-01 | 7.05E-01 | 1.00E+00 |
| ENSG00000227932.1_RP13-16H1  | ENSG00000160789.18_LMNA | 0.00815  | -0.151244566 | 0.167136212 | 9.21E-01 | 9.70E-01 | 1.00E+00 |
| ENSG00000234363.1_PPIAP27    | ENSG00000160789.18_LMNA | -0.02758 | -0.185967081 | 0.132198211 | 7.36E-01 | 8.89E-01 | 1.00E+00 |
| ENSG00000228476.1_CSTP1      | ENSG00000160789.18_LMNA | -0.2029  | -0.350769949 | -0.04515771 | 1.22E-02 | 7.56E-02 | 1.00E+00 |
| ENSG00000236961.1_RP1-261G2  | ENSG00000160789.18_LMNA | 0.01142  | -0.14804633  | 0.170314576 | 8.89E-01 | 9.57E-01 | 1.00E+00 |

|                              |                         |          |              |             |          |          |          |
|------------------------------|-------------------------|----------|--------------|-------------|----------|----------|----------|
| ENSG00000228073.1_AC133106.  | ENSG00000160789.18_LMNA | 0.12742  | -0.032441673 | 0.280919387 | 1.18E-01 | 3.44E-01 | 1.00E+00 |
| ENSG00000258637.1_RP11-242P  | ENSG00000160789.18_LMNA | -0.17342 | -0.323687398 | -0.01462655 | 3.26E-02 | 1.51E-01 | 1.00E+00 |
| ENSG00000239279.3_RN7SL184F  | ENSG00000160789.18_LMNA | 0.26624  | 0.11178032   | 0.40814416  | 9.15E-04 | 1.08E-02 | 1.00E+00 |
| ENSG00000254442.1_AP000859.  | ENSG00000160789.18_LMNA | -0.20768 | -0.355140337 | -0.0501387  | 1.02E-02 | 6.67E-02 | 1.00E+00 |
| ENSG00000235429.1_AC083875.  | ENSG00000160789.18_LMNA | 0.01372  | -0.145797589 | 0.172545385 | 8.67E-01 | 9.48E-01 | 1.00E+00 |
| ENSG00000242764.3_RN7SL824F  | ENSG00000160789.18_LMNA | 0.03076  | -0.129070308 | 0.189037412 | 7.07E-01 | 8.75E-01 | 1.00E+00 |
| ENSG00000228959.1_RP5-1121H  | ENSG00000160789.18_LMNA | -0.17981 | -0.329577598 | -0.02121811 | 2.66E-02 | 1.32E-01 | 1.00E+00 |
| ENSG00000250645.1_CTD-2228K  | ENSG00000160789.18_LMNA | -0.00371 | -0.162816756 | 0.155580372 | 9.64E-01 | 9.86E-01 | 1.00E+00 |
| ENSG00000238059.1_HSPE1P21   | ENSG00000160789.18_LMNA | 0.05148  | -0.108613175 | 0.208965812 | 5.29E-01 | 7.73E-01 | 1.00E+00 |
| ENSG00000260710.1_RP11-616M  | ENSG00000160789.18_LMNA | 0.068    | -0.092199961 | 0.22476635  | 4.05E-01 | 6.81E-01 | 1.00E+00 |
| ENSG00000232601.1_RP11-393N  | ENSG00000160789.18_LMNA | 0.01226  | -0.147230598 | 0.17112418  | 8.81E-01 | 9.54E-01 | 1.00E+00 |
| ENSG00000248439.2_RPL23AP9.  | ENSG00000160789.18_LMNA | 0.07778  | -0.082443739 | 0.234080062 | 3.41E-01 | 6.26E-01 | 1.00E+00 |
| ENSG00000228598.1_MACC1-AS   | ENSG00000160789.18_LMNA | -0.15488 | -0.306518356 | 0.004434801 | 5.68E-02 | 2.18E-01 | 1.00E+00 |
| ENSG00000264634.1_RP11-659F  | ENSG00000160789.18_LMNA | -0.05219 | -0.209652564 | 0.107903375 | 5.23E-01 | 7.69E-01 | 1.00E+00 |
| ENSG00000258746.2_RP11-454K  | ENSG00000160789.18_LMNA | -0.01469 | -0.173486383 | 0.144848039 | 8.57E-01 | 9.44E-01 | 1.00E+00 |
| ENSG00000250003.2_CTD-2116N  | ENSG00000160789.18_LMNA | -0.17136 | -0.32178425  | -0.01250251 | 3.48E-02 | 1.58E-01 | 1.00E+00 |
| ENSG00000256709.2_RP1-19N1.  | ENSG00000160789.18_LMNA | 0.07381  | -0.086407115 | 0.230303445 | 3.66E-01 | 6.47E-01 | 1.00E+00 |
| ENSG00000226888.2_RPLP1P10   | ENSG00000160789.18_LMNA | -0.01967 | -0.178312178 | 0.139969156 | 8.10E-01 | 9.25E-01 | 1.00E+00 |
| ENSG00000233987.1_AC106706.  | ENSG00000160789.18_LMNA | 0.08422  | -0.076003904 | 0.24019614  | 3.02E-01 | 5.89E-01 | 1.00E+00 |
| ENSG00000275355.1_Metazoa_SI | ENSG00000160789.18_LMNA | -0.09023 | -0.245901195 | 0.069972976 | 2.69E-01 | 5.53E-01 | 1.00E+00 |
| ENSG00000260905.1_RP11-105C  | ENSG00000160789.18_LMNA | -0.07045 | -0.227106506 | 0.089754332 | 3.88E-01 | 6.67E-01 | 1.00E+00 |
| ENSG00000261703.1_RP11-327F  | ENSG00000160789.18_LMNA | 0.0272   | -0.132575486 | 0.18559633  | 7.39E-01 | 8.91E-01 | 1.00E+00 |
| ENSG00000241808.1_RPS15AP3   | ENSG00000160789.18_LMNA | -0.07063 | -0.227272675 | 0.089580527 | 3.87E-01 | 6.66E-01 | 1.00E+00 |
| ENSG00000265388.2_RN7SL391F  | ENSG00000160789.18_LMNA | -0.13892 | -0.291668737 | 0.020740844 | 8.78E-02 | 2.88E-01 | 1.00E+00 |
| ENSG00000260723.1_RP11-165M  | ENSG00000160789.18_LMNA | -0.04432 | -0.202095809 | 0.115695962 | 5.88E-01 | 8.08E-01 | 1.00E+00 |
| ENSG00000260624.1_RP11-24D1  | ENSG00000160789.18_LMNA | 0.01332  | -0.146187798 | 0.172158521 | 8.71E-01 | 9.50E-01 | 1.00E+00 |
| ENSG00000227068.1_RP11-12A1  | ENSG00000160789.18_LMNA | 0.07814  | -0.082080933 | 0.234425295 | 3.39E-01 | 6.24E-01 | 1.00E+00 |
| ENSG00000166211.7_SPIC       | ENSG00000160789.18_LMNA | -0.13971 | -0.292407995 | 0.019932993 | 8.60E-02 | 2.85E-01 | 1.00E+00 |
| ENSG00000225519.1_RP11-236B  | ENSG00000160789.18_LMNA | -0.03179 | -0.190031892 | 0.128055821 | 6.97E-01 | 8.70E-01 | 1.00E+00 |
| ENSG00000237316.1_RP1-288L1  | ENSG00000160789.18_LMNA | -0.10601 | -0.260807332 | 0.054105656 | 1.94E-01 | 4.62E-01 | 1.00E+00 |
| ENSG00000234860.1_RP11-547C  | ENSG00000160789.18_LMNA | 0.0931   | -0.067094961 | 0.248616008 | 2.54E-01 | 5.36E-01 | 1.00E+00 |
| ENSG00000227291.1_AC092170.  | ENSG00000160789.18_LMNA | -0.07873 | -0.234989036 | 0.081488317 | 3.35E-01 | 6.21E-01 | 1.00E+00 |
| ENSG00000231765.1_PPP1R11P   | ENSG00000160789.18_LMNA | 0.14765  | -0.011824434 | 0.299807452 | 6.95E-02 | 2.48E-01 | 1.00E+00 |

|                              |                         |          |              |             |          |          |          |
|------------------------------|-------------------------|----------|--------------|-------------|----------|----------|----------|
| ENSG00000271680.1_RP11-564A  | ENSG00000160789.18_LMNA | 0.09844  | -0.061728336 | 0.253665096 | 2.28E-01 | 5.04E-01 | 1.00E+00 |
| ENSG00000237994.1_RP1-146A1  | ENSG00000160789.18_LMNA | -0.02041 | -0.179032459 | 0.139239623 | 8.03E-01 | 9.21E-01 | 1.00E+00 |
| ENSG00000187516.6_HYPM       | ENSG00000160789.18_LMNA | 0.1806   | 0.022037419  | 0.330308059 | 2.60E-02 | 1.30E-01 | 1.00E+00 |
| ENSG00000232226.2_ARSFP1     | ENSG00000160789.18_LMNA | -0.07091 | -0.227539539 | 0.089301362 | 3.85E-01 | 6.64E-01 | 1.00E+00 |
| ENSG00000250170.1_RASA2-IT1  | ENSG00000160789.18_LMNA | -0.15028 | -0.302245902 | 0.009143295 | 6.46E-02 | 2.37E-01 | 1.00E+00 |
| ENSG00000249184.1_RP11-424M  | ENSG00000160789.18_LMNA | 0.12943  | -0.03039697  | 0.282803507 | 1.12E-01 | 3.34E-01 | 1.00E+00 |
| ENSG00000273853.1_RP11-438D  | ENSG00000160789.18_LMNA | -0.12156 | -0.27542891  | 0.038385183 | 1.36E-01 | 3.75E-01 | 1.00E+00 |
| ENSG00000270555.1_RP11-1394  | ENSG00000160789.18_LMNA | 0.02337  | -0.13633748  | 0.181894425 | 7.75E-01 | 9.07E-01 | 1.00E+00 |
| ENSG00000264000.1_RP11-286N  | ENSG00000160789.18_LMNA | -0.04624 | -0.203943828 | 0.113793876 | 5.72E-01 | 8.00E-01 | 1.00E+00 |
| ENSG00000260507.1_RP11-356C  | ENSG00000160789.18_LMNA | -0.00935 | -0.168298908 | 0.150075374 | 9.09E-01 | 9.65E-01 | 1.00E+00 |
| ENSG00000215546.2_DKKL1P1    | ENSG00000160789.18_LMNA | 0.05633  | -0.103802043 | 0.213614594 | 4.91E-01 | 7.46E-01 | 1.00E+00 |
| ENSG00000242924.1_           | ENSG00000160789.18_LMNA | -0.17955 | -0.329332459 | -0.02094324 | 2.69E-02 | 1.33E-01 | 1.00E+00 |
| ENSG00000250389.1_MTND6P2    | ENSG00000160789.18_LMNA | -0.02078 | -0.179388404 | 0.138878979 | 7.99E-01 | 9.19E-01 | 1.00E+00 |
| ENSG00000250016.2_SNX18P23   | ENSG00000160789.18_LMNA | -0.03717 | -0.195213664 | 0.122759012 | 6.49E-01 | 8.44E-01 | 1.00E+00 |
| ENSG00000243287.2_RPS17P14   | ENSG00000160789.18_LMNA | 0.03133  | -0.128509382 | 0.189587357 | 7.02E-01 | 8.72E-01 | 1.00E+00 |
| ENSG00000255565.1_RP11-6B19  | ENSG00000160789.18_LMNA | 0.00881  | -0.150599092 | 0.167778209 | 9.14E-01 | 9.67E-01 | 1.00E+00 |
| ENSG00000227748.1_RP11-497D  | ENSG00000160789.18_LMNA | -0.10079 | -0.255885333 | 0.059362683 | 2.17E-01 | 4.91E-01 | 1.00E+00 |
| ENSG00000226286.1_RP1-163G9  | ENSG00000160789.18_LMNA | 0.04833  | -0.111729915 | 0.205946563 | 5.54E-01 | 7.89E-01 | 1.00E+00 |
| ENSG00000268078.1_RP11-805I2 | ENSG00000160789.18_LMNA | 0.04915  | -0.110918244 | 0.206733428 | 5.48E-01 | 7.85E-01 | 1.00E+00 |
| ENSG00000255081.1_RP11-263C  | ENSG00000160789.18_LMNA | -0.0264  | -0.184825532 | 0.133359552 | 7.47E-01 | 8.94E-01 | 1.00E+00 |
| ENSG00000255060.1_RP11-219C  | ENSG00000160789.18_LMNA | -0.08827 | -0.24404396  | 0.071938834 | 2.80E-01 | 5.65E-01 | 1.00E+00 |
| ENSG00000233109.4_RP11-22C8  | ENSG00000160789.18_LMNA | 0.07695  | -0.083269258 | 0.233294229 | 3.46E-01 | 6.30E-01 | 1.00E+00 |
| ENSG00000144015.4_TRIM43     | ENSG00000160789.18_LMNA | 0.11188  | -0.048180692 | 0.266335146 | 1.70E-01 | 4.29E-01 | 1.00E+00 |
| ENSG00000277654.3_RP11-255M  | ENSG00000160789.18_LMNA | 0.01585  | -0.143714034 | 0.174609414 | 8.46E-01 | 9.40E-01 | 1.00E+00 |
| ENSG00000223906.1_RP5-837M1  | ENSG00000160789.18_LMNA | -0.19927 | -0.347448619 | -0.04138249 | 1.38E-02 | 8.28E-02 | 1.00E+00 |
| ENSG00000219784.2_RP1-172I22 | ENSG00000160789.18_LMNA | -0.02057 | -0.179186074 | 0.139083991 | 8.01E-01 | 9.20E-01 | 1.00E+00 |
| ENSG00000261293.1_RP11-276H  | ENSG00000160789.18_LMNA | 0.02867  | -0.131125768 | 0.187020485 | 7.26E-01 | 8.84E-01 | 1.00E+00 |
| ENSG00000225129.1_RP4-614C1  | ENSG00000160789.18_LMNA | -0.09803 | -0.253273993 | 0.062144688 | 2.30E-01 | 5.07E-01 | 1.00E+00 |
| ENSG00000269353.1_AC092071.  | ENSG00000160789.18_LMNA | 0.02871  | -0.131087348 | 0.18705821  | 7.25E-01 | 8.84E-01 | 1.00E+00 |
| ENSG00000267354.1_RP11-749H  | ENSG00000160789.18_LMNA | 0.01179  | -0.147685856 | 0.170672395 | 8.85E-01 | 9.56E-01 | 1.00E+00 |
| ENSG00000255316.1_MTND6P25   | ENSG00000160789.18_LMNA | -0.06741 | -0.224207627 | 0.092783301 | 4.09E-01 | 6.83E-01 | 1.00E+00 |
| ENSG00000222042.1_AP000233.  | ENSG00000160789.18_LMNA | -0.10397 | -0.258888347 | 0.056157339 | 2.02E-01 | 4.73E-01 | 1.00E+00 |
| ENSG00000251123.1_RP11-580J. | ENSG00000160789.18_LMNA | -0.1279  | -0.28136812  | 0.031954933 | 1.16E-01 | 3.41E-01 | 1.00E+00 |

|                              |                         |          |              |             |          |          |          |
|------------------------------|-------------------------|----------|--------------|-------------|----------|----------|----------|
| ENSG00000225284.1_AC018693.1 | ENSG00000160789.18_LMNA | 0.05516  | -0.104962091 | 0.212495005 | 5.00E-01 | 7.53E-01 | 1.00E+00 |
| ENSG00000166917.8_MIR202HG   | ENSG00000160789.18_LMNA | -0.03084 | -0.18911468  | 0.12899151  | 7.06E-01 | 8.75E-01 | 1.00E+00 |
| ENSG00000273957.1_RP11-346J  | ENSG00000160789.18_LMNA | 0.01369  | -0.14582708  | 0.17251615  | 8.67E-01 | 9.48E-01 | 1.00E+00 |
| ENSG00000235836.1_AC124944.1 | ENSG00000160789.18_LMNA | -0.02837 | -0.186725411 | 0.131426251 | 7.29E-01 | 8.85E-01 | 1.00E+00 |
| ENSG00000266114.1_RP11-963H  | ENSG00000160789.18_LMNA | -0.02798 | -0.186347548 | 0.131810954 | 7.32E-01 | 8.87E-01 | 1.00E+00 |
| ENSG00000255664.1_ARL6IP1P1  | ENSG00000160789.18_LMNA | -0.14511 | -0.297441375 | 0.014421722 | 7.45E-02 | 2.60E-01 | 1.00E+00 |
| ENSG00000249334.1_RP11-61G1  | ENSG00000160789.18_LMNA | -0.08218 | -0.238266544 | 0.078038496 | 3.14E-01 | 6.00E-01 | 1.00E+00 |
| ENSG00000232159.3_RAB9BP1    | ENSG00000160789.18_LMNA | -0.00799 | -0.166980412 | 0.151401169 | 9.22E-01 | 9.70E-01 | 1.00E+00 |
| ENSG00000145826.7_LLECT2     | ENSG00000160789.18_LMNA | 0.16535  | 0.006315386  | 0.316226264 | 4.18E-02 | 1.79E-01 | 1.00E+00 |
| ENSG00000213170.3_SAR1AP2    | ENSG00000160789.18_LMNA | 0.11406  | -0.045976875 | 0.268385975 | 1.62E-01 | 4.17E-01 | 1.00E+00 |
| ENSG00000264236.1_RP11-861L  | ENSG00000160789.18_LMNA | 0.15416  | -0.005165248 | 0.305856373 | 5.79E-02 | 2.20E-01 | 1.00E+00 |
| ENSG00000156096.11_UGT2B4    | ENSG00000160789.18_LMNA | -0.09489 | -0.250306147 | 0.065300561 | 2.45E-01 | 5.25E-01 | 1.00E+00 |
| ENSG00000249338.1_HMGB1P47   | ENSG00000160789.18_LMNA | -0.03322 | -0.19140886  | 0.126650053 | 6.85E-01 | 8.63E-01 | 1.00E+00 |
| ENSG00000187658.6_C5orf52    | ENSG00000160789.18_LMNA | 0.05485  | -0.105268388 | 0.212199252 | 5.02E-01 | 7.54E-01 | 1.00E+00 |
| ENSG00000254790.1_RP11-680F  | ENSG00000160789.18_LMNA | 0.03559  | -0.12431281  | 0.19369545  | 6.63E-01 | 8.51E-01 | 1.00E+00 |
| ENSG00000232010.1_AP001059.1 | ENSG00000160789.18_LMNA | 0.11502  | -0.045005833 | 0.269288705 | 1.58E-01 | 4.11E-01 | 1.00E+00 |
| ENSG00000215874.3_CAPNS1P1   | ENSG00000160789.18_LMNA | 0.09443  | -0.06575738  | 0.249876053 | 2.47E-01 | 5.27E-01 | 1.00E+00 |
| ENSG00000264843.1_RP11-856M  | ENSG00000160789.18_LMNA | -0.12944 | -0.282814987 | 0.030384503 | 1.12E-01 | 3.34E-01 | 1.00E+00 |
| ENSG00000243295.1_CTD-2185K  | ENSG00000160789.18_LMNA | 0.02963  | -0.130189142 | 0.187939885 | 7.17E-01 | 8.80E-01 | 1.00E+00 |
| ENSG00000260451.1_GEMIN8P2   | ENSG00000160789.18_LMNA | 0.03862  | -0.121325043 | 0.196613444 | 6.37E-01 | 8.37E-01 | 1.00E+00 |
| ENSG00000259167.2_NMNAT1P1   | ENSG00000160789.18_LMNA | -0.19323 | -0.341916061 | -0.03511319 | 1.71E-02 | 9.63E-02 | 1.00E+00 |
| ENSG00000187821.7_HELT       | ENSG00000160789.18_LMNA | -0.06031 | -0.217420619 | 0.099852011 | 4.60E-01 | 7.24E-01 | 1.00E+00 |
| ENSG00000277981.1_RP11-428P  | ENSG00000160789.18_LMNA | 0.1629   | 0.003793384  | 0.313954594 | 4.49E-02 | 1.88E-01 | 1.00E+00 |
| ENSG00000234493.1_RHOXF1P1   | ENSG00000160789.18_LMNA | 0.02518  | -0.134561866 | 0.183642802 | 7.58E-01 | 8.99E-01 | 1.00E+00 |
| ENSG00000225286.1_AC005105.1 | ENSG00000160789.18_LMNA | -0.0078  | -0.166795762 | 0.151586751 | 9.24E-01 | 9.71E-01 | 1.00E+00 |
| ENSG00000264451.1_RP11-433M  | ENSG00000160789.18_LMNA | 0.07919  | -0.081032744 | 0.235422267 | 3.32E-01 | 6.18E-01 | 1.00E+00 |
| ENSG00000188784.4_PLA2G2E    | ENSG00000160789.18_LMNA | 0.18471  | 0.026283479  | 0.334087747 | 2.27E-02 | 1.18E-01 | 1.00E+00 |
| ENSG00000244703.3_CD46P1     | ENSG00000160789.18_LMNA | -0.02839 | -0.186749881 | 0.131401334 | 7.28E-01 | 8.85E-01 | 1.00E+00 |
| ENSG00000227284.2_MARK2P10   | ENSG00000160789.18_LMNA | -0.16232 | -0.313420573 | -0.00320109 | 4.57E-02 | 1.90E-01 | 1.00E+00 |
| ENSG00000279018.1_AC007906.1 | ENSG00000160789.18_LMNA | -0.04854 | -0.206149717 | 0.111520398 | 5.53E-01 | 7.88E-01 | 1.00E+00 |
| ENSG00000236994.1_YBX1P9     | ENSG00000160789.18_LMNA | -0.05153 | -0.209016665 | 0.108560625 | 5.28E-01 | 7.72E-01 | 1.00E+00 |
| ENSG00000234479.2_AP1B1P1    | ENSG00000160789.18_LMNA | 0.12874  | -0.031094471 | 0.282161056 | 1.14E-01 | 3.37E-01 | 1.00E+00 |
| ENSG00000266237.1_RP11-25D3  | ENSG00000160789.18_LMNA | 0.12455  | -0.035353362 | 0.278232196 | 1.26E-01 | 3.59E-01 | 1.00E+00 |

|                              |                         |          |              |             |          |          |          |
|------------------------------|-------------------------|----------|--------------|-------------|----------|----------|----------|
| ENSG00000260763.1_RP11-445O  | ENSG00000160789.18_LMNA | -0.07224 | -0.228811386 | 0.087970201 | 3.76E-01 | 6.56E-01 | 1.00E+00 |
| ENSG00000225548.4_AC098973.  | ENSG00000160789.18_LMNA | 0.04914  | -0.110928709 | 0.206723285 | 5.48E-01 | 7.85E-01 | 1.00E+00 |
| ENSG00000258021.1_RP11-1100I | ENSG00000160789.18_LMNA | 0.07253  | -0.087681693 | 0.229086896 | 3.75E-01 | 6.55E-01 | 1.00E+00 |
| ENSG00000251614.1_HSPA8P19   | ENSG00000160789.18_LMNA | -0.05672 | -0.213990032 | 0.103412845 | 4.88E-01 | 7.44E-01 | 1.00E+00 |
| ENSG00000280427.1_AC104057.  | ENSG00000160789.18_LMNA | -0.1147  | -0.268988271 | 0.045329067 | 1.59E-01 | 4.13E-01 | 1.00E+00 |
| ENSG00000254558.1_RP11-81M1  | ENSG00000160789.18_LMNA | -0.06426 | -0.221197242 | 0.095922584 | 4.32E-01 | 7.01E-01 | 1.00E+00 |
| ENSG00000250682.4_LINC00491  | ENSG00000160789.18_LMNA | 0.06119  | -0.09897263  | 0.21826663  | 4.54E-01 | 7.19E-01 | 1.00E+00 |
| ENSG00000266997.2_RP11-886H  | ENSG00000160789.18_LMNA | 0.13259  | -0.027185977 | 0.28575745  | 1.03E-01 | 3.18E-01 | 1.00E+00 |
| ENSG00000229913.1_RP11-378I1 | ENSG00000160789.18_LMNA | -0.19618 | -0.344614304 | -0.03816773 | 1.54E-02 | 8.96E-02 | 1.00E+00 |
| ENSG00000224260.5_RP1-272L1I | ENSG00000160789.18_LMNA | 0.03608  | -0.123833879 | 0.194163575 | 6.59E-01 | 8.49E-01 | 1.00E+00 |
| ENSG00000251517.1_RP11-109E  | ENSG00000160789.18_LMNA | -0.06862 | -0.225354054 | 0.091586128 | 4.01E-01 | 6.77E-01 | 1.00E+00 |
| ENSG00000258203.4_RP1-228P1  | ENSG00000160789.18_LMNA | -0.01077 | -0.169680873 | 0.148684527 | 8.95E-01 | 9.59E-01 | 1.00E+00 |
| ENSG00000236596.1_AC092568.  | ENSG00000160789.18_LMNA | -0.09923 | -0.254408852 | 0.060936262 | 2.24E-01 | 5.00E-01 | 1.00E+00 |
| ENSG00000184945.12_AQP12A    | ENSG00000160789.18_LMNA | -0.00645 | -0.165482786 | 0.152905699 | 9.37E-01 | 9.75E-01 | 1.00E+00 |
| ENSG00000164363.9_SLC6A18    | ENSG00000160789.18_LMNA | -0.06693 | -0.223750369 | 0.093260545 | 4.13E-01 | 6.86E-01 | 1.00E+00 |
| ENSG00000234761.1_RP11-38O1  | ENSG00000160789.18_LMNA | 0.10091  | -0.059246528 | 0.255994262 | 2.16E-01 | 4.90E-01 | 1.00E+00 |
| ENSG00000266466.1_RP11-822E  | ENSG00000160789.18_LMNA | -0.06682 | -0.223645295 | 0.093370191 | 4.13E-01 | 6.87E-01 | 1.00E+00 |
| ENSG00000249290.4_RP11-68L1  | ENSG00000160789.18_LMNA | -0.0958  | -0.251171886 | 0.064380625 | 2.40E-01 | 5.19E-01 | 1.00E+00 |
| ENSG00000253297.1_CTB-160O2  | ENSG00000160789.18_LMNA | 0.00981  | -0.149624869 | 0.168746673 | 9.05E-01 | 9.63E-01 | 1.00E+00 |
| ENSG00000234696.1_GPR50-AS   | ENSG00000160789.18_LMNA | -0.12687 | -0.280407257 | 0.032996999 | 1.19E-01 | 3.47E-01 | 1.00E+00 |
| ENSG00000254934.4_LINC00678  | ENSG00000160789.18_LMNA | -0.06613 | -0.222984717 | 0.094059334 | 4.18E-01 | 6.90E-01 | 1.00E+00 |
| ENSG00000254241.1_MTCO1P47   | ENSG00000160789.18_LMNA | -0.07802 | -0.234311019 | 0.082201035 | 3.39E-01 | 6.25E-01 | 1.00E+00 |
| ENSG00000275598.1_CMB9-14B2  | ENSG00000160789.18_LMNA | 0.07203  | -0.088182001 | 0.228609096 | 3.78E-01 | 6.57E-01 | 1.00E+00 |
| ENSG00000101951.15_PAGE4     | ENSG00000160789.18_LMNA | -0.11403 | -0.26835681  | 0.046008237 | 1.62E-01 | 4.17E-01 | 1.00E+00 |
| ENSG00000236775.1_RP11-551G  | ENSG00000160789.18_LMNA | -0.16852 | -0.319161404 | -0.00957982 | 3.79E-02 | 1.67E-01 | 1.00E+00 |
| ENSG00000253504.1_MTCYBP19   | ENSG00000160789.18_LMNA | 0.07385  | -0.086364296 | 0.230344298 | 3.66E-01 | 6.47E-01 | 1.00E+00 |
| ENSG00000179420.11_OR6W1P    | ENSG00000160789.18_LMNA | -0.0197  | -0.178336957 | 0.139944065 | 8.10E-01 | 9.25E-01 | 1.00E+00 |
| ENSG00000271494.1_CTB-23I7.3 | ENSG00000160789.18_LMNA | -0.05111 | -0.208617948 | 0.108972589 | 5.32E-01 | 7.74E-01 | 1.00E+00 |
| ENSG00000259505.1_RP11-74D7  | ENSG00000160789.18_LMNA | 0.10986  | -0.050215325 | 0.264439223 | 1.78E-01 | 4.40E-01 | 1.00E+00 |
| ENSG00000280276.1_RP11-314C  | ENSG00000160789.18_LMNA | 0.04391  | -0.116104498 | 0.20169859  | 5.91E-01 | 8.11E-01 | 1.00E+00 |
| ENSG00000232730.1_FAM8A4P    | ENSG00000160789.18_LMNA | -0.03681 | -0.194870363 | 0.123110496 | 6.53E-01 | 8.46E-01 | 1.00E+00 |
| ENSG00000254957.1_RP11-179A  | ENSG00000160789.18_LMNA | -0.05431 | -0.211683243 | 0.105802648 | 5.06E-01 | 7.57E-01 | 1.00E+00 |
| ENSG00000248506.1_RP11-93I21 | ENSG00000160789.18_LMNA | 0.04211  | -0.117878035 | 0.199972971 | 6.06E-01 | 8.20E-01 | 1.00E+00 |

|                             |                         |          |              |             |          |          |          |
|-----------------------------|-------------------------|----------|--------------|-------------|----------|----------|----------|
| ENSG00000236525.1_AC007278. | ENSG00000160789.18_LMNA | -0.01689 | -0.175615511 | 0.142697395 | 8.36E-01 | 9.37E-01 | 1.00E+00 |
| ENSG00000213121.2_RP11-306O | ENSG00000160789.18_LMNA | -0.04687 | -0.204548225 | 0.113171291 | 5.66E-01 | 7.97E-01 | 1.00E+00 |
| ENSG00000243150.4_RP11-538P | ENSG00000160789.18_LMNA | -0.00517 | -0.164237472 | 0.154155631 | 9.50E-01 | 9.80E-01 | 1.00E+00 |
| ENSG00000147613.6_PSKH2     | ENSG00000160789.18_LMNA | -0.0099  | -0.168837421 | 0.149533549 | 9.04E-01 | 9.63E-01 | 1.00E+00 |
| ENSG00000259379.1_MTND5P32  | ENSG00000160789.18_LMNA | 0.09983  | -0.060329181 | 0.254978647 | 2.21E-01 | 4.96E-01 | 1.00E+00 |
| ENSG00000254811.4_RP11-680E | ENSG00000160789.18_LMNA | -0.1407  | -0.293330479 | 0.018924343 | 8.38E-02 | 2.80E-01 | 1.00E+00 |
| ENSG00000226280.2_RP6-22P16 | ENSG00000160789.18_LMNA | 0.05611  | -0.104018787 | 0.213405474 | 4.92E-01 | 7.48E-01 | 1.00E+00 |
| ENSG00000230174.1_LINC01149 | ENSG00000160789.18_LMNA | -0.01555 | -0.174316484 | 0.144009907 | 8.49E-01 | 9.41E-01 | 1.00E+00 |
| ENSG00000235407.1_RP11-470L | ENSG00000160789.18_LMNA | -0.07337 | -0.229887062 | 0.086843476 | 3.69E-01 | 6.50E-01 | 1.00E+00 |
| ENSG00000251574.5_RP11-6N13 | ENSG00000160789.18_LMNA | -0.11465 | -0.268942338 | 0.04537848  | 1.60E-01 | 4.13E-01 | 1.00E+00 |
| ENSG00000267462.1_RP11-866E | ENSG00000160789.18_LMNA | -0.10841 | -0.263066329 | 0.051687036 | 1.84E-01 | 4.49E-01 | 1.00E+00 |
| ENSG00000189401.2_OTUD6A    | ENSG00000160789.18_LMNA | 0.01206  | -0.147424578 | 0.170931696 | 8.83E-01 | 9.55E-01 | 1.00E+00 |
| ENSG00000268181.3_RP11-73B2 | ENSG00000160789.18_LMNA | 0.00026  | -0.158951431 | 0.159449952 | 9.98E-01 | 9.99E-01 | 1.00E+00 |
| ENSG00000204422.7_XXbac-BPG | ENSG00000160789.18_LMNA | 0.00665  | -0.152715698 | 0.165671996 | 9.35E-01 | 9.75E-01 | 1.00E+00 |
| ENSG00000182261.3_NLRP10    | ENSG00000160789.18_LMNA | 0.14275  | -0.01683576  | 0.295238794 | 7.94E-02 | 2.71E-01 | 1.00E+00 |
| ENSG00000279935.1_RP11-447M | ENSG00000160789.18_LMNA | 0.00157  | -0.15767488  | 0.160725764 | 9.85E-01 | 9.94E-01 | 1.00E+00 |
| ENSG00000280262.1_RP11-542P | ENSG00000160789.18_LMNA | -0.06433 | -0.221267329 | 0.095849567 | 4.31E-01 | 7.01E-01 | 1.00E+00 |
| ENSG00000215372.6_ZNF705G   | ENSG00000160789.18_LMNA | -0.08753 | -0.243337497 | 0.072685972 | 2.84E-01 | 5.69E-01 | 1.00E+00 |
| ENSG00000175329.11_ISX      | ENSG00000160789.18_LMNA | -0.17638 | -0.326412507 | -0.01767281 | 2.97E-02 | 1.42E-01 | 1.00E+00 |
| ENSG00000243316.5_GUCY2GP   | ENSG00000160789.18_LMNA | -0.04835 | -0.205969881 | 0.111705868 | 5.54E-01 | 7.89E-01 | 1.00E+00 |
| ENSG00000235166.6_LINC01440 | ENSG00000160789.18_LMNA | 0.02539  | -0.134352689 | 0.183848638 | 7.56E-01 | 8.98E-01 | 1.00E+00 |
| ENSG00000280397.1_RP11-42F1 | ENSG00000160789.18_LMNA | 0.01607  | -0.143496061 | 0.174825183 | 8.44E-01 | 9.39E-01 | 1.00E+00 |
| ENSG00000260062.3_GOLGA2P1  | ENSG00000160789.18_LMNA | -0.02928 | -0.187605959 | 0.13052939  | 7.20E-01 | 8.81E-01 | 1.00E+00 |
| ENSG00000279674.1_RP11-1086 | ENSG00000160789.18_LMNA | -0.14896 | -0.301020733 | 0.01049096  | 6.70E-02 | 2.42E-01 | 1.00E+00 |
| ENSG00000206043.6_C18orf63  | ENSG00000160789.18_LMNA | 0.01845  | -0.141162493 | 0.177133239 | 8.21E-01 | 9.30E-01 | 1.00E+00 |
| ENSG00000257747.1_RP11-362A | ENSG00000160789.18_LMNA | 0.08896  | -0.0712484   | 0.244696508 | 2.76E-01 | 5.60E-01 | 1.00E+00 |
| ENSG00000254366.5_RP11-38H1 | ENSG00000160789.18_LMNA | 0.13843  | -0.021234467 | 0.291216843 | 8.90E-02 | 2.90E-01 | 1.00E+00 |
| ENSG00000232296.1_RP11-510N | ENSG00000160789.18_LMNA | 0.02677  | -0.133000169 | 0.185178882 | 7.43E-01 | 8.92E-01 | 1.00E+00 |
| ENSG00000207278.1_RNU6-831F | ENSG00000160789.18_LMNA | -0.05219 | -0.209649168 | 0.107906885 | 5.23E-01 | 7.69E-01 | 1.00E+00 |
| ENSG00000253274.1_IGHV1-67  | ENSG00000160789.18_LMNA | -0.07949 | -0.23570508  | 0.080735274 | 3.30E-01 | 6.16E-01 | 1.00E+00 |
| ENSG00000274520.1_Six3os1_1 | ENSG00000160789.18_LMNA | -0.03205 | -0.190283673 | 0.12779887  | 6.95E-01 | 8.69E-01 | 1.00E+00 |
| ENSG00000263445.1_MIR4450   | ENSG00000160789.18_LMNA | 0.00819  | -0.151206903 | 0.16717368  | 9.20E-01 | 9.70E-01 | 1.00E+00 |
| ENSG00000273690.1_          | ENSG00000160789.18_LMNA | 0.01007  | -0.149371078 | 0.168998863 | 9.02E-01 | 9.62E-01 | 1.00E+00 |



|                             |                         |          |              |             |          |          |          |
|-----------------------------|-------------------------|----------|--------------|-------------|----------|----------|----------|
| ENSG00000199411.1_SNORD62   | ENSG00000160789.18_LMNA | 0.09666  | -0.063520215 | 0.251981149 | 2.36E-01 | 5.14E-01 | 1.00E+00 |
| ENSG00000216098.1_MIR892B   | ENSG00000160789.18_LMNA | -0.26868 | -0.410327862 | -0.11436977 | 8.17E-04 | 9.88E-03 | 1.00E+00 |
| ENSG00000275238.1_MIR4734   | ENSG00000160789.18_LMNA | 0.00903  | -0.150383145 | 0.167992932 | 9.12E-01 | 9.67E-01 | 1.00E+00 |
| ENSG00000200130.1_          | ENSG00000160789.18_LMNA | -0.25049 | -0.393982491 | -0.09508445 | 1.85E-03 | 1.85E-02 | 1.00E+00 |
| ENSG00000274822.1_MIR6762   | ENSG00000160789.18_LMNA | -0.03874 | -0.196731192 | 0.121204358 | 6.36E-01 | 8.37E-01 | 1.00E+00 |
| ENSG00000252326.1_SNORD116  | ENSG00000160789.18_LMNA | -0.00112 | -0.160293163 | 0.15810785  | 9.89E-01 | 9.96E-01 | 1.00E+00 |
| ENSG00000251039.2_IGKV2D-40 | ENSG00000160789.18_LMNA | -0.04627 | -0.203969317 | 0.113767626 | 5.71E-01 | 8.00E-01 | 1.00E+00 |
| ENSG00000199025.4_MIR369    | ENSG00000160789.18_LMNA | 0.05485  | -0.105268045 | 0.212199583 | 5.02E-01 | 7.54E-01 | 1.00E+00 |
| ENSG00000238531.1_SNORD105  | ENSG00000160789.18_LMNA | 0.12804  | -0.031809769 | 0.281501921 | 1.16E-01 | 3.40E-01 | 1.00E+00 |
| ENSG00000207082.1_RNU6-171F | ENSG00000160789.18_LMNA | 0.01652  | -0.143052922 | 0.175263746 | 8.40E-01 | 9.38E-01 | 1.00E+00 |
| ENSG00000265764.2_          | ENSG00000160789.18_LMNA | 0.07184  | -0.088374176 | 0.228425526 | 3.79E-01 | 6.58E-01 | 1.00E+00 |
| ENSG00000264724.1_          | ENSG00000160789.18_LMNA | -0.12968 | -0.283034618 | 0.03014598  | 1.11E-01 | 3.33E-01 | 1.00E+00 |
| ENSG00000207996.1_MIR301A   | ENSG00000160789.18_LMNA | 0.06688  | -0.093314721 | 0.223698453 | 4.13E-01 | 6.86E-01 | 1.00E+00 |
| ENSG00000207147.1_SNORA51   | ENSG00000160789.18_LMNA | -0.09611 | -0.251466101 | 0.06406787  | 2.39E-01 | 5.18E-01 | 1.00E+00 |
| ENSG00000221033.1_MIR1272   | ENSG00000160789.18_LMNA | -0.02873 | -0.187071698 | 0.131073611 | 7.25E-01 | 8.84E-01 | 1.00E+00 |
| ENSG00000263512.1_MIR4311   | ENSG00000160789.18_LMNA | -0.03726 | -0.195301047 | 0.122669534 | 6.49E-01 | 8.44E-01 | 1.00E+00 |
| ENSG00000266618.1_MIR4742   | ENSG00000160789.18_LMNA | -0.12104 | -0.27494413  | 0.038908898 | 1.37E-01 | 3.78E-01 | 1.00E+00 |
| ENSG00000226509.1_AC005588. | ENSG00000160789.18_LMNA | 0.00113  | -0.158095066 | 0.160305939 | 9.89E-01 | 9.96E-01 | 1.00E+00 |
| ENSG00000274691.1_RP11-310E | ENSG00000160789.18_LMNA | -0.00925 | -0.168205103 | 0.150169735 | 9.10E-01 | 9.66E-01 | 1.00E+00 |
| ENSG00000263527.1_MIR4526   | ENSG00000160789.18_LMNA | 0.00166  | -0.157582617 | 0.160817932 | 9.84E-01 | 9.94E-01 | 1.00E+00 |
| ENSG00000200345.2_RNU6-485F | ENSG00000160789.18_LMNA | 0.10448  | -0.055641312 | 0.259371233 | 2.00E-01 | 4.71E-01 | 1.00E+00 |
| ENSG00000200419.1_Y_RNA     | ENSG00000160789.18_LMNA | -0.15299 | -0.304765476 | 0.006368246 | 5.99E-02 | 2.25E-01 | 1.00E+00 |
| ENSG00000201723.2_Y_RNA     | ENSG00000160789.18_LMNA | -0.01996 | -0.178595732 | 0.139682002 | 8.07E-01 | 9.23E-01 | 1.00E+00 |
| ENSG00000278658.1_MIR6826   | ENSG00000160789.18_LMNA | -0.04667 | -0.204349277 | 0.113376253 | 5.68E-01 | 7.98E-01 | 1.00E+00 |
| ENSG00000206721.1_Y_RNA     | ENSG00000160789.18_LMNA | 0.03712  | -0.122804606 | 0.195169136 | 6.50E-01 | 8.45E-01 | 1.00E+00 |
| ENSG00000252657.1_SNORA70   | ENSG00000160789.18_LMNA | 0.04665  | -0.113395616 | 0.204330482 | 5.68E-01 | 7.98E-01 | 1.00E+00 |
| ENSG00000277312.1_          | ENSG00000160789.18_LMNA | -0.01719 | -0.175911732 | 0.142397943 | 8.33E-01 | 9.35E-01 | 1.00E+00 |
| ENSG00000264298.1_          | ENSG00000160789.18_LMNA | 0.0858   | -0.074412389 | 0.241703783 | 2.93E-01 | 5.79E-01 | 1.00E+00 |
| ENSG00000207382.1_Y_RNA     | ENSG00000160789.18_LMNA | -0.05127 | -0.20876539  | 0.108820262 | 5.30E-01 | 7.73E-01 | 1.00E+00 |
| ENSG00000278529.1_MIR8070   | ENSG00000160789.18_LMNA | 0.01549  | -0.144064419 | 0.174262509 | 8.50E-01 | 9.41E-01 | 1.00E+00 |
| ENSG00000207983.1_MIR613    | ENSG00000160789.18_LMNA | 0.10701  | -0.053095625 | 0.261751123 | 1.89E-01 | 4.57E-01 | 1.00E+00 |
| ENSG00000266799.1_          | ENSG00000160789.18_LMNA | 0.12672  | -0.033148238 | 0.280267751 | 1.20E-01 | 3.48E-01 | 1.00E+00 |
| ENSG00000223062.1_RNU6-1245 | ENSG00000160789.18_LMNA | 0.13265  | -0.027128333 | 0.285810426 | 1.03E-01 | 3.18E-01 | 1.00E+00 |

|                             |                         |          |              |             |          |          |          |
|-----------------------------|-------------------------|----------|--------------|-------------|----------|----------|----------|
| ENSG00000238645.1_snoU13    | ENSG00000160789.18_LMNA | 0.07721  | -0.083009984 | 0.233541083 | 3.44E-01 | 6.29E-01 | 1.00E+00 |
| ENSG00000236627.1_RP11-252P | ENSG00000160789.18_LMNA | -0.06446 | -0.221384342 | 0.095727657 | 4.30E-01 | 7.00E-01 | 1.00E+00 |
| ENSG00000280829.1_          | ENSG00000160789.18_LMNA | -0.13378 | -0.286869439 | 0.025975549 | 1.00E-01 | 3.12E-01 | 1.00E+00 |
| ENSG00000233854.1_POU6F2-A  | ENSG00000160789.18_LMNA | -0.1434  | -0.29585082  | 0.016165341 | 7.80E-02 | 2.68E-01 | 1.00E+00 |
| ENSG00000212511.2_U3        | ENSG00000160789.18_LMNA | -0.18329 | -0.332777363 | -0.02481015 | 2.38E-02 | 1.22E-01 | 1.00E+00 |
| ENSG00000206836.1_RNU6-1029 | ENSG00000160789.18_LMNA | -0.11347 | -0.267830607 | 0.046573974 | 1.64E-01 | 4.20E-01 | 1.00E+00 |
| ENSG00000227386.1_AC091705  | ENSG00000160789.18_LMNA | -0.1645  | -0.315437408 | -0.00543915 | 4.29E-02 | 1.82E-01 | 1.00E+00 |
| ENSG00000201607.1_RNU4-16P  | ENSG00000160789.18_LMNA | -0.03053 | -0.188817786 | 0.129294263 | 7.09E-01 | 8.76E-01 | 1.00E+00 |
| ENSG00000252847.1_RNU2-46P  | ENSG00000160789.18_LMNA | 0.10749  | -0.052609004 | 0.262205615 | 1.87E-01 | 4.54E-01 | 1.00E+00 |
| ENSG00000271985.1_RP11-589B | ENSG00000160789.18_LMNA | 0.02672  | -0.13304195  | 0.185137806 | 7.44E-01 | 8.93E-01 | 1.00E+00 |
| ENSG00000269186.1_LINC01082 | ENSG00000160789.18_LMNA | -0.04634 | -0.20403824  | 0.11369664  | 5.71E-01 | 7.99E-01 | 1.00E+00 |
| ENSG00000221303.1_SNORA79   | ENSG00000160789.18_LMNA | -0.04761 | -0.20525129  | 0.112446754 | 5.60E-01 | 7.93E-01 | 1.00E+00 |
| ENSG00000206898.1_SNORA51   | ENSG00000160789.18_LMNA | 0.19096  | 0.032756336  | 0.339830663 | 1.84E-02 | 1.02E-01 | 1.00E+00 |
| ENSG00000201420.1_RNA5SP51  | ENSG00000160789.18_LMNA | -0.05047 | -0.207995318 | 0.109615687 | 5.37E-01 | 7.78E-01 | 1.00E+00 |
| ENSG00000253037.1_          | ENSG00000160789.18_LMNA | -0.08596 | -0.241851434 | 0.074256438 | 2.92E-01 | 5.78E-01 | 1.00E+00 |
| ENSG00000243366.3_RN7SL60P  | ENSG00000160789.18_LMNA | -0.00294 | -0.162069321 | 0.156329393 | 9.71E-01 | 9.89E-01 | 1.00E+00 |
| ENSG00000201221.1_RNU4-40P  | ENSG00000160789.18_LMNA | -0.0059  | -0.164946439 | 0.153444159 | 9.42E-01 | 9.77E-01 | 1.00E+00 |
| ENSG00000257979.1_SNRPGP18  | ENSG00000160789.18_LMNA | -0.10023 | -0.255358517 | 0.059924324 | 2.19E-01 | 4.94E-01 | 1.00E+00 |
| ENSG00000254878.1_CTD-3096P | ENSG00000160789.18_LMNA | -0.17403 | -0.324250604 | -0.01525566 | 3.20E-02 | 1.50E-01 | 1.00E+00 |
| ENSG00000261882.1_RP11-502F | ENSG00000160789.18_LMNA | -0.01367 | -0.172491807 | 0.145851635 | 8.67E-01 | 9.48E-01 | 1.00E+00 |
| ENSG00000241788.2_COX6B1P2  | ENSG00000160789.18_LMNA | -0.00826 | -0.167241665 | 0.151138561 | 9.20E-01 | 9.69E-01 | 1.00E+00 |
| ENSG00000236385.1_RP11-114M | ENSG00000160789.18_LMNA | 0.05608  | -0.104052519 | 0.213372925 | 4.93E-01 | 7.48E-01 | 1.00E+00 |
| ENSG00000252677.1_SNORA81   | ENSG00000160789.18_LMNA | -0.05857 | -0.215758146 | 0.101578618 | 4.74E-01 | 7.33E-01 | 1.00E+00 |
| ENSG00000277413.1_uc_338    | ENSG00000160789.18_LMNA | 0.12914  | -0.030692675 | 0.282531175 | 1.13E-01 | 3.35E-01 | 1.00E+00 |
| ENSG00000229287.1_FABP5P4   | ENSG00000160789.18_LMNA | -0.06539 | -0.22227798  | 0.094796297 | 4.23E-01 | 6.94E-01 | 1.00E+00 |
| ENSG00000251619.1_RP11-756P | ENSG00000160789.18_LMNA | -0.10943 | -0.264032347 | 0.05065163  | 1.80E-01 | 4.42E-01 | 1.00E+00 |
| ENSG00000227004.2_AC108032  | ENSG00000160789.18_LMNA | 0.01423  | -0.145299693 | 0.173038869 | 8.62E-01 | 9.46E-01 | 1.00E+00 |
| ENSG00000215380.2_AC090625  | ENSG00000160789.18_LMNA | 0.10214  | -0.058007713 | 0.257155517 | 2.11E-01 | 4.84E-01 | 1.00E+00 |
| ENSG00000244099.1_RPS23P3   | ENSG00000160789.18_LMNA | -0.00099 | -0.160160688 | 0.158240415 | 9.90E-01 | 9.96E-01 | 1.00E+00 |
| ENSG00000211978.2_IGHV5-78  | ENSG00000160789.18_LMNA | 0.03539  | -0.124512075 | 0.193500638 | 6.65E-01 | 8.52E-01 | 1.00E+00 |
| ENSG00000222973.1_RNU2-25P  | ENSG00000160789.18_LMNA | -0.08171 | -0.237817217 | 0.078511894 | 3.17E-01 | 6.04E-01 | 1.00E+00 |
| ENSG00000236119.1_AP000688  | ENSG00000160789.18_LMNA | -0.02753 | -0.185915493 | 0.132250713 | 7.36E-01 | 8.89E-01 | 1.00E+00 |
| ENSG00000213536.2_GNG5P1    | ENSG00000160789.18_LMNA | 0.07784  | -0.082380242 | 0.234140489 | 3.40E-01 | 6.26E-01 | 1.00E+00 |

|                             |                         |          |              |             |          |          |          |
|-----------------------------|-------------------------|----------|--------------|-------------|----------|----------|----------|
| ENSG00000278643.1_uc_338    | ENSG00000160789.18_LMNA | -0.09082 | -0.246461212 | 0.069379723 | 2.66E-01 | 5.50E-01 | 1.00E+00 |
| ENSG00000254105.1_VENTXP6   | ENSG00000160789.18_LMNA | -0.01977 | -0.178412906 | 0.139867156 | 8.09E-01 | 9.24E-01 | 1.00E+00 |
| ENSG00000233454.1_RP11-196D | ENSG00000160789.18_LMNA | 0.00358  | -0.155706391 | 0.162691029 | 9.65E-01 | 9.86E-01 | 1.00E+00 |
| ENSG00000270798.1_RP11-416H | ENSG00000160789.18_LMNA | -0.20261 | -0.350500471 | -0.04485108 | 1.23E-02 | 7.61E-02 | 1.00E+00 |
| ENSG00000261444.1_RP11-347C | ENSG00000160789.18_LMNA | -0.03622 | -0.194297974 | 0.12369635  | 6.58E-01 | 8.49E-01 | 1.00E+00 |
| ENSG00000216902.3_RP1-161C1 | ENSG00000160789.18_LMNA | 0.03079  | -0.129042513 | 0.189064668 | 7.06E-01 | 8.75E-01 | 1.00E+00 |
| ENSG00000270575.1_RP11-21M7 | ENSG00000160789.18_LMNA | 0.03174  | -0.128111639 | 0.189977192 | 6.98E-01 | 8.71E-01 | 1.00E+00 |
| ENSG00000249562.1_RP11-116O | ENSG00000160789.18_LMNA | -0.09252 | -0.248069962 | 0.067674254 | 2.57E-01 | 5.39E-01 | 1.00E+00 |
| ENSG00000239595.3_RN7SL79P  | ENSG00000160789.18_LMNA | -0.09354 | -0.249031298 | 0.066654242 | 2.52E-01 | 5.33E-01 | 1.00E+00 |
| ENSG00000266251.1_COX6CP3   | ENSG00000160789.18_LMNA | -0.0803  | -0.236478273 | 0.079921723 | 3.25E-01 | 6.12E-01 | 1.00E+00 |
| ENSG00000253579.1_SUMO2P16  | ENSG00000160789.18_LMNA | -0.00852 | -0.167493458 | 0.150885419 | 9.17E-01 | 9.68E-01 | 1.00E+00 |
| ENSG00000223977.1_AC138623  | ENSG00000160789.18_LMNA | -0.08803 | -0.243815627 | 0.072180352 | 2.81E-01 | 5.66E-01 | 1.00E+00 |
| ENSG00000248646.1_RP11-567N | ENSG00000160789.18_LMNA | -0.12174 | -0.27559504  | 0.038205669 | 1.35E-01 | 3.74E-01 | 1.00E+00 |
| ENSG00000231906.1_RP11-541M | ENSG00000160789.18_LMNA | -0.1065  | -0.261268844 | 0.053611833 | 1.92E-01 | 4.59E-01 | 1.00E+00 |
| ENSG00000169164.7_RP11-167P | ENSG00000160789.18_LMNA | -0.08205 | -0.238136619 | 0.078175396 | 3.15E-01 | 6.01E-01 | 1.00E+00 |
| ENSG00000249086.1_AC051649  | ENSG00000160789.18_LMNA | 0.04051  | -0.11946515  | 0.198427063 | 6.20E-01 | 8.28E-01 | 1.00E+00 |
| ENSG00000261489.1_CTD-2515H | ENSG00000160789.18_LMNA | -0.11161 | -0.266084644 | 0.04844967  | 1.71E-01 | 4.30E-01 | 1.00E+00 |
| ENSG00000238094.1_AC009892  | ENSG00000160789.18_LMNA | -0.04915 | -0.206735697 | 0.110915903 | 5.48E-01 | 7.85E-01 | 1.00E+00 |
| ENSG00000279783.1_RP11-555K | ENSG00000160789.18_LMNA | -0.00966 | -0.168601425 | 0.14977102  | 9.06E-01 | 9.64E-01 | 1.00E+00 |
| ENSG00000229307.1_LINC00459 | ENSG00000160789.18_LMNA | -0.29262 | -0.431708477 | -0.13993727 | 2.54E-04 | 3.95E-03 | 1.00E+00 |
| ENSG00000222067.1_RNU4-86P  | ENSG00000160789.18_LMNA | -0.09512 | -0.250530649 | 0.065062056 | 2.44E-01 | 5.23E-01 | 1.00E+00 |
| ENSG00000260530.1_RP11-558A | ENSG00000160789.18_LMNA | -0.04755 | -0.205199504 | 0.112500133 | 5.61E-01 | 7.93E-01 | 1.00E+00 |
| ENSG00000238049.2_LL0XNC01  | ENSG00000160789.18_LMNA | 0.10071  | -0.059441896 | 0.255811043 | 2.17E-01 | 4.92E-01 | 1.00E+00 |
| ENSG00000248702.1_RP11-294J | ENSG00000160789.18_LMNA | 0.08651  | -0.073707765 | 0.242370788 | 2.89E-01 | 5.75E-01 | 1.00E+00 |
| ENSG00000248351.1_HSPD1P18  | ENSG00000160789.18_LMNA | 0.07248  | -0.087733573 | 0.229037357 | 3.75E-01 | 6.55E-01 | 1.00E+00 |
| ENSG00000280260.1_AC017028  | ENSG00000160789.18_LMNA | 0.12961  | -0.030213353 | 0.282972585 | 1.12E-01 | 3.33E-01 | 1.00E+00 |
| ENSG00000261866.1_AC092566  | ENSG00000160789.18_LMNA | 0.11133  | -0.048729421 | 0.265824065 | 1.72E-01 | 4.31E-01 | 1.00E+00 |
| ENSG00000241324.1_RP5-921G1 | ENSG00000160789.18_LMNA | 0.04273  | -0.117265341 | 0.200569334 | 6.01E-01 | 8.17E-01 | 1.00E+00 |
| ENSG00000220871.1_DNAJC19P  | ENSG00000160789.18_LMNA | 0.00142  | -0.157811702 | 0.160589072 | 9.86E-01 | 9.95E-01 | 1.00E+00 |
| ENSG00000242430.3_RN7SL274f | ENSG00000160789.18_LMNA | -0.00432 | -0.16340528  | 0.154990341 | 9.58E-01 | 9.83E-01 | 1.00E+00 |
| ENSG00000242818.3_RN7SL846f | ENSG00000160789.18_LMNA | 0.06869  | -0.091508336 | 0.225428518 | 4.00E-01 | 6.77E-01 | 1.00E+00 |
| ENSG00000219940.2_SPTLC1P3  | ENSG00000160789.18_LMNA | 0.05818  | -0.10196895  | 0.215382057 | 4.77E-01 | 7.35E-01 | 1.00E+00 |
| ENSG00000242330.3_RN7SL683f | ENSG00000160789.18_LMNA | 0.06672  | -0.093474713 | 0.223545123 | 4.14E-01 | 6.87E-01 | 1.00E+00 |

|                              |                         |          |              |             |          |          |          |
|------------------------------|-------------------------|----------|--------------|-------------|----------|----------|----------|
| ENSG00000255778.1_           | ENSG00000160789.18_LMNA | 0.02897  | -0.130837907 | 0.187303111 | 7.23E-01 | 8.83E-01 | 1.00E+00 |
| ENSG00000229112.1_RP11-690C  | ENSG00000160789.18_LMNA | -0.14431 | -0.296691753 | 0.015243718 | 7.61E-02 | 2.64E-01 | 1.00E+00 |
| ENSG00000218986.1_RP1-137F1  | ENSG00000160789.18_LMNA | 0.01044  | -0.14900391  | 0.16936364  | 8.98E-01 | 9.60E-01 | 1.00E+00 |
| ENSG00000236889.1_RP11-38J2  | ENSG00000160789.18_LMNA | 0.03464  | -0.12525299  | 0.192776061 | 6.72E-01 | 8.56E-01 | 1.00E+00 |
| ENSG00000274451.1_RP1-66H9   | ENSG00000160789.18_LMNA | 0.14506  | -0.014476825 | 0.297391135 | 7.46E-02 | 2.60E-01 | 1.00E+00 |
| ENSG00000260232.1_PWRN4      | ENSG00000160789.18_LMNA | -0.20337 | -0.351199378 | -0.04564647 | 1.20E-02 | 7.47E-02 | 1.00E+00 |
| ENSG00000281768.1_           | ENSG00000160789.18_LMNA | 0.02262  | -0.137071115 | 0.181171455 | 7.82E-01 | 9.11E-01 | 1.00E+00 |
| ENSG00000253079.1_NRON       | ENSG00000160789.18_LMNA | -0.12358 | -0.277323191 | 0.036337106 | 1.29E-01 | 3.64E-01 | 1.00E+00 |
| ENSG00000222594.1_RN7SKP23   | ENSG00000160789.18_LMNA | -0.06483 | -0.221738421 | 0.095358697 | 4.28E-01 | 6.98E-01 | 1.00E+00 |
| ENSG00000259463.1_RP11-540C  | ENSG00000160789.18_LMNA | -0.10922 | -0.26382978  | 0.050868803 | 1.80E-01 | 4.44E-01 | 1.00E+00 |
| ENSG00000251317.1_KLF17P2    | ENSG00000160789.18_LMNA | -0.02417 | -0.182663941 | 0.135556228 | 7.68E-01 | 9.04E-01 | 1.00E+00 |
| ENSG00000235399.1_RP11-204P  | ENSG00000160789.18_LMNA | -0.06703 | -0.223843725 | 0.09316312  | 4.12E-01 | 6.86E-01 | 1.00E+00 |
| ENSG00000228999.1_AC068490   | ENSG00000160789.18_LMNA | -0.18771 | -0.336847998 | -0.02939135 | 2.06E-02 | 1.10E-01 | 1.00E+00 |
| ENSG00000176882.5_RP11-432M  | ENSG00000160789.18_LMNA | -0.04822 | -0.20584372  | 0.111835969 | 5.55E-01 | 7.89E-01 | 1.00E+00 |
| ENSG00000234620.1_PUDPP1     | ENSG00000160789.18_LMNA | -0.03321 | -0.191394993 | 0.126664216 | 6.85E-01 | 8.63E-01 | 1.00E+00 |
| ENSG00000230789.1_ARHGAP2C   | ENSG00000160789.18_LMNA | 0.00015  | -0.159055914 | 0.159345483 | 9.99E-01 | 9.99E-01 | 1.00E+00 |
| ENSG00000270829.1_AC015849   | ENSG00000160789.18_LMNA | -0.10874 | -0.263385027 | 0.051345521 | 1.82E-01 | 4.47E-01 | 1.00E+00 |
| ENSG00000182707.4_FXYD6P3    | ENSG00000160789.18_LMNA | -0.11352 | -0.267879413 | 0.046521511 | 1.64E-01 | 4.19E-01 | 1.00E+00 |
| ENSG00000249460.1_RP11-665C  | ENSG00000160789.18_LMNA | -0.1788  | -0.328642686 | -0.02017008 | 2.75E-02 | 1.35E-01 | 1.00E+00 |
| ENSG00000260854.1_CTD-2144E  | ENSG00000160789.18_LMNA | -0.00696 | -0.165981153 | 0.152405198 | 9.32E-01 | 9.74E-01 | 1.00E+00 |
| ENSG00000255851.2_Metazoa_SI | ENSG00000160789.18_LMNA | -0.01436 | -0.173167265 | 0.145170123 | 8.61E-01 | 9.45E-01 | 1.00E+00 |
| ENSG00000274959.1_SPDYE13P   | ENSG00000160789.18_LMNA | 0.15206  | -0.00732031  | 0.303901551 | 6.15E-02 | 2.29E-01 | 1.00E+00 |
| ENSG00000230240.1_RPL34P19   | ENSG00000160789.18_LMNA | -0.036   | -0.194092027 | 0.123907089 | 6.60E-01 | 8.50E-01 | 1.00E+00 |
| ENSG00000264092.2_RN7SL474F  | ENSG00000160789.18_LMNA | -0.09689 | -0.252201307 | 0.063286063 | 2.35E-01 | 5.13E-01 | 1.00E+00 |
| ENSG00000263940.2_RN7SL275F  | ENSG00000160789.18_LMNA | 0.12402  | -0.035885659 | 0.277740409 | 1.28E-01 | 3.62E-01 | 1.00E+00 |
| ENSG00000225421.1_AC019330   | ENSG00000160789.18_LMNA | -0.03882 | -0.196806503 | 0.121127164 | 6.35E-01 | 8.36E-01 | 1.00E+00 |
| ENSG00000277900.1_Metazoa_SI | ENSG00000160789.18_LMNA | 0.03361  | -0.126266778 | 0.191784065 | 6.81E-01 | 8.61E-01 | 1.00E+00 |
| ENSG00000234943.2_AC092839   | ENSG00000160789.18_LMNA | 0.0569   | -0.103232479 | 0.21416399  | 4.86E-01 | 7.43E-01 | 1.00E+00 |
| ENSG00000270244.1_RP11-123J  | ENSG00000160789.18_LMNA | -0.00349 | -0.162603711 | 0.155793905 | 9.66E-01 | 9.87E-01 | 1.00E+00 |
| ENSG00000224584.2_RP11-365D  | ENSG00000160789.18_LMNA | 0.147    | -0.01249625  | 0.299195808 | 7.07E-02 | 2.51E-01 | 1.00E+00 |
| ENSG00000226812.2_RP5-881L2  | ENSG00000160789.18_LMNA | 0.02008  | -0.139568415 | 0.17870788  | 8.06E-01 | 9.23E-01 | 1.00E+00 |
| ENSG00000267223.1_AC005597   | ENSG00000160789.18_LMNA | -0.25633 | -0.399238384 | -0.10126131 | 1.43E-03 | 1.52E-02 | 1.00E+00 |
| ENSG00000225238.1_RP1-169I5  | ENSG00000160789.18_LMNA | 0.10139  | -0.058762684 | 0.256447921 | 2.14E-01 | 4.88E-01 | 1.00E+00 |

|                              |                         |          |              |             |          |          |          |
|------------------------------|-------------------------|----------|--------------|-------------|----------|----------|----------|
| ENSG00000270654.1_NUTF2P8    | ENSG00000160789.18_LMNA | -0.15267 | -0.304467196 | 0.006697021 | 6.04E-02 | 2.27E-01 | 1.00E+00 |
| ENSG00000253534.1_TRBV6-8    | ENSG00000160789.18_LMNA | -0.13228 | -0.285466085 | 0.027502984 | 1.04E-01 | 3.20E-01 | 1.00E+00 |
| ENSG00000224075.1_TTTY22     | ENSG00000160789.18_LMNA | -0.18484 | -0.334209779 | -0.02642075 | 2.26E-02 | 1.18E-01 | 1.00E+00 |
| ENSG00000240198.4_ARHGEF3-   | ENSG00000160789.18_LMNA | 0.04417  | -0.115847206 | 0.201948767 | 5.89E-01 | 8.09E-01 | 1.00E+00 |
| ENSG00000253979.1_RP11-443C  | ENSG00000160789.18_LMNA | -0.04278 | -0.200617958 | 0.117215374 | 6.01E-01 | 8.16E-01 | 1.00E+00 |
| ENSG00000238259.1_AC067940.  | ENSG00000160789.18_LMNA | -0.17903 | -0.328861966 | -0.02041583 | 2.73E-02 | 1.35E-01 | 1.00E+00 |
| ENSG00000255475.1_RP11-687M  | ENSG00000160789.18_LMNA | -0.12645 | -0.280013614 | 0.033423713 | 1.21E-01 | 3.49E-01 | 1.00E+00 |
| ENSG00000279151.1_RP1-163M   | ENSG00000160789.18_LMNA | 0.02471  | -0.135024762 | 0.183187201 | 7.63E-01 | 9.01E-01 | 1.00E+00 |
| ENSG00000255317.1_RP11-688I  | ENSG00000160789.18_LMNA | -0.02521 | -0.183673065 | 0.134531114 | 7.58E-01 | 8.99E-01 | 1.00E+00 |
| ENSG00000250158.1_RP11-254I2 | ENSG00000160789.18_LMNA | -0.00291 | -0.162031933 | 0.15636685  | 9.72E-01 | 9.89E-01 | 1.00E+00 |
| ENSG00000259064.2_RP11-386M  | ENSG00000160789.18_LMNA | -0.0408  | -0.198712028 | 0.11917271  | 6.18E-01 | 8.27E-01 | 1.00E+00 |
| ENSG00000254933.1_RP11-619A  | ENSG00000160789.18_LMNA | -0.08639 | -0.242260474 | 0.073824322 | 2.90E-01 | 5.75E-01 | 1.00E+00 |
| ENSG00000224467.1_AC009313.  | ENSG00000160789.18_LMNA | -0.04523 | -0.202965794 | 0.114800814 | 5.80E-01 | 8.04E-01 | 1.00E+00 |
| ENSG00000259564.1_RP11-16B9  | ENSG00000160789.18_LMNA | -0.04494 | -0.202689036 | 0.115085634 | 5.82E-01 | 8.06E-01 | 1.00E+00 |
| ENSG00000260520.1_RP11-510M  | ENSG00000160789.18_LMNA | 0.01864  | -0.140982715 | 0.177310906 | 8.20E-01 | 9.30E-01 | 1.00E+00 |
| ENSG00000261831.2_RP11-533E  | ENSG00000160789.18_LMNA | 0.06176  | -0.098404045 | 0.218813384 | 4.50E-01 | 7.15E-01 | 1.00E+00 |
| ENSG00000254800.2_RP11-163O  | ENSG00000160789.18_LMNA | -0.31473 | -0.451313135 | -0.16372805 | 7.85E-05 | 1.55E-03 | 1.00E+00 |
| ENSG00000229459.1_AC023669.  | ENSG00000160789.18_LMNA | 0.07427  | -0.085942837 | 0.23074634  | 3.63E-01 | 6.45E-01 | 1.00E+00 |
| ENSG00000232846.1_SLC25A6P   | ENSG00000160789.18_LMNA | -0.09681 | -0.252124768 | 0.063367471 | 2.35E-01 | 5.13E-01 | 1.00E+00 |
| ENSG00000279472.1_CH17-140K  | ENSG00000160789.18_LMNA | 0.10377  | -0.056358621 | 0.25869995  | 2.03E-01 | 4.74E-01 | 1.00E+00 |
| ENSG00000264699.1_RP11-421N  | ENSG00000160789.18_LMNA | 0.03916  | -0.120795776 | 0.197129764 | 6.32E-01 | 8.35E-01 | 1.00E+00 |
| ENSG00000226043.1_AP000705.  | ENSG00000160789.18_LMNA | 0.10956  | -0.050524937 | 0.264150506 | 1.79E-01 | 4.41E-01 | 1.00E+00 |
| ENSG00000264254.1_CTD-3096M  | ENSG00000160789.18_LMNA | -0.05832 | -0.215515983 | 0.101829963 | 4.75E-01 | 7.34E-01 | 1.00E+00 |
| ENSG00000250902.1_SMAD1-AS   | ENSG00000160789.18_LMNA | -0.07785 | -0.234146961 | 0.082373441 | 3.40E-01 | 6.26E-01 | 1.00E+00 |
| ENSG00000227021.1_AC007557.  | ENSG00000160789.18_LMNA | -0.02616 | -0.184591818 | 0.13359721  | 7.49E-01 | 8.95E-01 | 1.00E+00 |
| ENSG00000261191.1_RP11-16L1  | ENSG00000160789.18_LMNA | -0.07563 | -0.232036253 | 0.084589861 | 3.54E-01 | 6.38E-01 | 1.00E+00 |
| ENSG00000256484.1_RP13-507P  | ENSG00000160789.18_LMNA | -0.08923 | -0.244954368 | 0.070975486 | 2.74E-01 | 5.59E-01 | 1.00E+00 |
| ENSG00000234524.1_RPL12P43   | ENSG00000160789.18_LMNA | 0.07794  | -0.082280401 | 0.234235498 | 3.40E-01 | 6.25E-01 | 1.00E+00 |
| ENSG00000264527.2_WI2-1959D  | ENSG00000160789.18_LMNA | -0.14332 | -0.29577467  | 0.016248772 | 7.82E-02 | 2.68E-01 | 1.00E+00 |
| ENSG00000259415.1_RP11-7M1C  | ENSG00000160789.18_LMNA | -0.06773 | -0.224506909 | 0.09247086  | 4.07E-01 | 6.82E-01 | 1.00E+00 |
| ENSG00000265547.1_RP11-293E  | ENSG00000160789.18_LMNA | -0.05499 | -0.212335628 | 0.105127158 | 5.01E-01 | 7.53E-01 | 1.00E+00 |
| ENSG00000279271.1_RP11-349F  | ENSG00000160789.18_LMNA | -0.076   | -0.232390072 | 0.08421854  | 3.52E-01 | 6.36E-01 | 1.00E+00 |
| ENSG00000226978.1_MAGI2-AS2  | ENSG00000160789.18_LMNA | -0.02531 | -0.183769381 | 0.134433236 | 7.57E-01 | 8.99E-01 | 1.00E+00 |

|                              |                         |          |              |             |          |          |          |
|------------------------------|-------------------------|----------|--------------|-------------|----------|----------|----------|
| ENSG00000216439.1_DUTP5      | ENSG00000160789.18_LMNA | -0.07344 | -0.22995499  | 0.086772298 | 3.69E-01 | 6.49E-01 | 1.00E+00 |
| ENSG00000274611.3_TBC1D3     | ENSG00000160789.18_LMNA | 0.00949  | -0.149932476 | 0.168440951 | 9.08E-01 | 9.65E-01 | 1.00E+00 |
| ENSG00000256672.1_RP11-218M  | ENSG00000160789.18_LMNA | -0.06142 | -0.218488675 | 0.098741744 | 4.52E-01 | 7.17E-01 | 1.00E+00 |
| ENSG00000231046.1_RP11-428F  | ENSG00000160789.18_LMNA | -0.10813 | -0.262808466 | 0.051963307 | 1.85E-01 | 4.50E-01 | 1.00E+00 |
| ENSG00000267318.1_RP11-178C  | ENSG00000160789.18_LMNA | -0.15634 | -0.307881833 | 0.002929262 | 5.44E-02 | 2.12E-01 | 1.00E+00 |
| ENSG00000227294.1_AC016994.  | ENSG00000160789.18_LMNA | -0.04592 | -0.203627408 | 0.114119719 | 5.74E-01 | 8.01E-01 | 1.00E+00 |
| ENSG00000263483.1_MTATP6P3   | ENSG00000160789.18_LMNA | 0.10755  | -0.052553494 | 0.262257452 | 1.87E-01 | 4.54E-01 | 1.00E+00 |
| ENSG00000250421.4_RP11-83M1  | ENSG00000160789.18_LMNA | 0.03421  | -0.125671334 | 0.192366788 | 6.76E-01 | 8.58E-01 | 1.00E+00 |
| ENSG00000126233.1_SLURP1     | ENSG00000160789.18_LMNA | 0.00757  | -0.151810877 | 0.16657273  | 9.26E-01 | 9.72E-01 | 1.00E+00 |
| ENSG00000237033.2_CASP3P1    | ENSG00000160789.18_LMNA | 0.01114  | -0.14832546  | 0.170037444 | 8.92E-01 | 9.57E-01 | 1.00E+00 |
| ENSG00000236968.1_RP11-298E  | ENSG00000160789.18_LMNA | 0.10068  | -0.059469282 | 0.255785358 | 2.17E-01 | 4.92E-01 | 1.00E+00 |
| ENSG00000230691.1_MRPL35P4   | ENSG00000160789.18_LMNA | 0.0151   | -0.144446115 | 0.173884512 | 8.53E-01 | 9.43E-01 | 1.00E+00 |
| ENSG00000231069.1_BX842568.  | ENSG00000160789.18_LMNA | 0.05041  | -0.109670558 | 0.207942181 | 5.37E-01 | 7.78E-01 | 1.00E+00 |
| ENSG00000230886.3_HMGB1P25   | ENSG00000160789.18_LMNA | -0.14395 | -0.296355835 | 0.015611932 | 7.68E-02 | 2.65E-01 | 1.00E+00 |
| ENSG00000229609.1_LINC01079  | ENSG00000160789.18_LMNA | -0.09527 | -0.250669894 | 0.064914108 | 2.43E-01 | 5.22E-01 | 1.00E+00 |
| ENSG00000248374.1_RP11-501M  | ENSG00000160789.18_LMNA | 0.01112  | -0.148346517 | 0.170016536 | 8.92E-01 | 9.58E-01 | 1.00E+00 |
| ENSG00000220635.2_KRASP1     | ENSG00000160789.18_LMNA | -0.19302 | -0.341719064 | -0.0348904  | 1.72E-02 | 9.69E-02 | 1.00E+00 |
| ENSG00000271022.1_RP11-142I2 | ENSG00000160789.18_LMNA | 0.0253   | -0.134444588 | 0.18375821  | 7.57E-01 | 8.99E-01 | 1.00E+00 |
| ENSG00000271077.1_AC096553.  | ENSG00000160789.18_LMNA | 0.13939  | -0.020256763 | 0.292111761 | 8.68E-02 | 2.86E-01 | 1.00E+00 |
| ENSG00000254673.1_RP11-598P  | ENSG00000160789.18_LMNA | -0.01401 | -0.172824049 | 0.145516454 | 8.64E-01 | 9.47E-01 | 1.00E+00 |
| ENSG00000254380.1_RP11-317J  | ENSG00000160789.18_LMNA | 0.01398  | -0.14554672  | 0.172794051 | 8.64E-01 | 9.47E-01 | 1.00E+00 |
| ENSG00000255853.1_RP11-407A  | ENSG00000160789.18_LMNA | 0.05629  | -0.103837111 | 0.213580762 | 4.91E-01 | 7.47E-01 | 1.00E+00 |
| ENSG00000279567.1_RP11-849N  | ENSG00000160789.18_LMNA | 0.04114  | -0.118842975 | 0.199033272 | 6.15E-01 | 8.25E-01 | 1.00E+00 |
| ENSG00000249429.1_CTD-2050E  | ENSG00000160789.18_LMNA | 0.08945  | -0.070758827 | 0.245159044 | 2.73E-01 | 5.58E-01 | 1.00E+00 |
| ENSG00000261082.1_LINC01228  | ENSG00000160789.18_LMNA | 0.20112  | 0.043305037  | 0.34914098  | 1.30E-02 | 7.90E-02 | 1.00E+00 |
| ENSG00000272681.2_FAM223B    | ENSG00000160789.18_LMNA | -0.07763 | -0.233936244 | 0.082594852 | 3.42E-01 | 6.27E-01 | 1.00E+00 |
| ENSG00000248647.2_RP11-331K  | ENSG00000160789.18_LMNA | 0.14972  | -0.009716936 | 0.301724528 | 6.56E-02 | 2.39E-01 | 1.00E+00 |
| ENSG00000251616.1_RP11-485M  | ENSG00000160789.18_LMNA | -0.14312 | -0.295584436 | 0.016457175 | 7.86E-02 | 2.69E-01 | 1.00E+00 |
| ENSG00000229220.1_RP11-47A1  | ENSG00000160789.18_LMNA | -0.09906 | -0.254249878 | 0.061105597 | 2.25E-01 | 5.01E-01 | 1.00E+00 |
| ENSG00000280878.1_RP11-68E1  | ENSG00000160789.18_LMNA | 0.21121  | 0.053823474  | 0.358364851 | 9.00E-03 | 6.07E-02 | 1.00E+00 |
| ENSG00000197171.5_OR2B4P     | ENSG00000160789.18_LMNA | -0.0021  | -0.161243731 | 0.157156308 | 9.80E-01 | 9.92E-01 | 1.00E+00 |
| ENSG00000257488.4_RP5-1057I2 | ENSG00000160789.18_LMNA | 0.13888  | -0.020778186 | 0.291634556 | 8.79E-02 | 2.89E-01 | 1.00E+00 |
| ENSG00000255079.1_RP11-45A1  | ENSG00000160789.18_LMNA | 0.05446  | -0.105652556 | 0.211828226 | 5.05E-01 | 7.56E-01 | 1.00E+00 |

|                              |                         |          |              |             |          |          |          |
|------------------------------|-------------------------|----------|--------------|-------------|----------|----------|----------|
| ENSG00000257746.1_RP11-202G  | ENSG00000160789.18_LMNA | 0.10703  | -0.053070482 | 0.261774609 | 1.89E-01 | 4.57E-01 | 1.00E+00 |
| ENSG00000266200.5_PNLIPRP2   | ENSG00000160789.18_LMNA | -0.10103 | -0.256111878 | 0.059121101 | 2.16E-01 | 4.90E-01 | 1.00E+00 |
| ENSG00000267389.1_CTC-459F4  | ENSG00000160789.18_LMNA | 0.0538   | -0.10630669  | 0.211196258 | 5.10E-01 | 7.59E-01 | 1.00E+00 |
| ENSG00000270938.1_RAP2CP1    | ENSG00000160789.18_LMNA | 0.01167  | -0.147805526 | 0.170553616 | 8.87E-01 | 9.56E-01 | 1.00E+00 |
| ENSG00000172938.3_MRGPRD     | ENSG00000160789.18_LMNA | 0.07466  | -0.085557097 | 0.231114213 | 3.61E-01 | 6.43E-01 | 1.00E+00 |
| ENSG00000278961.1_CH507-396  | ENSG00000160789.18_LMNA | -0.07116 | -0.227776439 | 0.0890535   | 3.84E-01 | 6.62E-01 | 1.00E+00 |
| ENSG00000212658.1_KRTAP29-1  | ENSG00000160789.18_LMNA | 0.02108  | -0.13858675  | 0.179676764 | 7.97E-01 | 9.18E-01 | 1.00E+00 |
| ENSG00000253976.1_RP11-386G  | ENSG00000160789.18_LMNA | -0.14626 | -0.298510851 | 0.013248258 | 7.22E-02 | 2.55E-01 | 1.00E+00 |
| ENSG00000185177.11_ZNF479    | ENSG00000160789.18_LMNA | -0.13101 | -0.284277021 | 0.02879604  | 1.08E-01 | 3.26E-01 | 1.00E+00 |
| ENSG00000176855.11_KRT18P2   | ENSG00000160789.18_LMNA | 0.2768   | 0.123018301  | 0.417596725 | 5.56E-04 | 7.32E-03 | 1.00E+00 |
| ENSG00000231080.1_RP11-342H  | ENSG00000160789.18_LMNA | 0.141    | -0.018622309 | 0.293606598 | 8.32E-02 | 2.79E-01 | 1.00E+00 |
| ENSG00000205944.10_DAZ2      | ENSG00000160789.18_LMNA | -0.21    | -0.357252702 | -0.05255164 | 9.41E-03 | 6.28E-02 | 1.00E+00 |
| ENSG00000205867.3_KRTAP5-2   | ENSG00000160789.18_LMNA | 0.03857  | -0.121373533 | 0.196566131 | 6.37E-01 | 8.38E-01 | 1.00E+00 |
| ENSG00000233215.4_AP000472.1 | ENSG00000160789.18_LMNA | -0.07788 | -0.234181705 | 0.08233693  | 3.40E-01 | 6.25E-01 | 1.00E+00 |
| ENSG00000213645.2_SLC25A1P   | ENSG00000160789.18_LMNA | -0.0385  | -0.196495935 | 0.121445473 | 6.38E-01 | 8.38E-01 | 1.00E+00 |
| ENSG00000253975.1_RP11-577N  | ENSG00000160789.18_LMNA | -0.07197 | -0.228550548 | 0.088243295 | 3.78E-01 | 6.57E-01 | 1.00E+00 |
| ENSG00000188668.4_OR7E90P    | ENSG00000160789.18_LMNA | 0.02847  | -0.131327119 | 0.186822765 | 7.28E-01 | 8.85E-01 | 1.00E+00 |
| ENSG00000224791.1_KRT18P39   | ENSG00000160789.18_LMNA | -0.06702 | -0.223833344 | 0.093173954 | 4.12E-01 | 6.86E-01 | 1.00E+00 |
| ENSG00000244358.1_RP11-88H1  | ENSG00000160789.18_LMNA | 0.14271  | -0.016876172 | 0.295201893 | 7.95E-02 | 2.71E-01 | 1.00E+00 |
| ENSG00000254654.1_AC068858   | ENSG00000160789.18_LMNA | -0.08006 | -0.236245837 | 0.080166337 | 3.27E-01 | 6.13E-01 | 1.00E+00 |
| ENSG00000261555.1_CTD-3229J  | ENSG00000160789.18_LMNA | -0.10722 | -0.261952396 | 0.052880142 | 1.89E-01 | 4.56E-01 | 1.00E+00 |
| ENSG00000232144.1_PSAT1P2    | ENSG00000160789.18_LMNA | 0.01809  | -0.141521347 | 0.176778536 | 8.25E-01 | 9.31E-01 | 1.00E+00 |
| ENSG00000131068.3_DEFB118    | ENSG00000160789.18_LMNA | -0.00302 | -0.162147043 | 0.156251522 | 9.71E-01 | 9.89E-01 | 1.00E+00 |
| ENSG00000169789.9_PRY        | ENSG00000160789.18_LMNA | -0.15662 | -0.308138001 | 0.002646246 | 5.40E-02 | 2.11E-01 | 1.00E+00 |
| ENSG00000267603.1_LINC01028  | ENSG00000160789.18_LMNA | -0.02514 | -0.183605662 | 0.134599606 | 7.59E-01 | 8.99E-01 | 1.00E+00 |
| ENSG00000233583.1_RP4-635A2  | ENSG00000160789.18_LMNA | -0.01983 | -0.178467378 | 0.139811992 | 8.08E-01 | 9.24E-01 | 1.00E+00 |
| ENSG00000259073.1_FOXN3-AS   | ENSG00000160789.18_LMNA | -0.0174  | -0.176113776 | 0.142193661 | 8.31E-01 | 9.34E-01 | 1.00E+00 |
| ENSG00000236917.1_DNAJA1P2   | ENSG00000160789.18_LMNA | 0.00233  | -0.156933611 | 0.161466115 | 9.77E-01 | 9.91E-01 | 1.00E+00 |
| ENSG00000108417.3_KRT37      | ENSG00000160789.18_LMNA | -0.01843 | -0.177109733 | 0.141186277 | 8.22E-01 | 9.30E-01 | 1.00E+00 |
| ENSG00000254381.3_TUBB8P5    | ENSG00000160789.18_LMNA | -0.06199 | -0.219026573 | 0.098182288 | 4.48E-01 | 7.14E-01 | 1.00E+00 |
| ENSG00000226552.2_RP5-1092L  | ENSG00000160789.18_LMNA | 0.01346  | -0.14605639  | 0.172288814 | 8.69E-01 | 9.49E-01 | 1.00E+00 |
| ENSG00000231058.1_MSANTD2F   | ENSG00000160789.18_LMNA | 0.1179   | -0.042089634 | 0.271996434 | 1.48E-01 | 3.94E-01 | 1.00E+00 |
| ENSG00000244039.1_RP11-379K  | ENSG00000160789.18_LMNA | 0.0876   | -0.072611611 | 0.243407824 | 2.83E-01 | 5.69E-01 | 1.00E+00 |

|                              |                         |          |              |             |          |          |          |
|------------------------------|-------------------------|----------|--------------|-------------|----------|----------|----------|
| ENSG00000226010.1_RP11-403E  | ENSG00000160789.18_LMNA | -0.03012 | -0.188419852 | 0.129699957 | 7.13E-01 | 8.78E-01 | 1.00E+00 |
| ENSG00000228411.1_CDY4P      | ENSG00000160789.18_LMNA | 0.03058  | -0.129254259 | 0.188857019 | 7.08E-01 | 8.76E-01 | 1.00E+00 |
| ENSG00000273734.1_LLfos-48D6 | ENSG00000160789.18_LMNA | 0.0145   | -0.145036917 | 0.173299252 | 8.59E-01 | 9.45E-01 | 1.00E+00 |
| ENSG00000163424.7_C3orf30    | ENSG00000160789.18_LMNA | 0.02293  | -0.136765803 | 0.181472371 | 7.79E-01 | 9.09E-01 | 1.00E+00 |
| ENSG00000212659.1_KRTAP9-6   | ENSG00000160789.18_LMNA | 0.10454  | -0.055589047 | 0.259420133 | 2.00E-01 | 4.70E-01 | 1.00E+00 |
| ENSG00000253556.1_MTCO1P4    | ENSG00000160789.18_LMNA | -0.0739  | -0.230390544 | 0.086315822 | 3.66E-01 | 6.47E-01 | 1.00E+00 |
| ENSG00000278205.1_RP11-760D  | ENSG00000160789.18_LMNA | -0.08623 | -0.242105965 | 0.073987562 | 2.91E-01 | 5.76E-01 | 1.00E+00 |
| ENSG00000116996.8_ZP4        | ENSG00000160789.18_LMNA | 0.12964  | -0.030180383 | 0.283002943 | 1.11E-01 | 3.33E-01 | 1.00E+00 |
| ENSG00000203985.9_LDLRAD1    | ENSG00000160789.18_LMNA | 0.07139  | -0.088820179 | 0.227999406 | 3.82E-01 | 6.61E-01 | 1.00E+00 |
| ENSG00000235462.1_TAB3P1     | ENSG00000160789.18_LMNA | -0.05923 | -0.216387121 | 0.100925604 | 4.69E-01 | 7.29E-01 | 1.00E+00 |
| ENSG00000232307.1_DAOA-AS1   | ENSG00000160789.18_LMNA | -0.0375  | -0.19553304  | 0.122431952 | 6.46E-01 | 8.43E-01 | 1.00E+00 |
| ENSG00000268053.1_CTC-344H1  | ENSG00000160789.18_LMNA | -0.08465 | -0.24061237  | 0.075564679 | 3.00E-01 | 5.86E-01 | 1.00E+00 |
| ENSG00000186075.11_ZPBP2     | ENSG00000160789.18_LMNA | -0.11132 | -0.265806178 | 0.048748623 | 1.72E-01 | 4.31E-01 | 1.00E+00 |
| ENSG00000178597.5_PSAPL1     | ENSG00000160789.18_LMNA | 0.0538   | -0.106315416 | 0.211187826 | 5.10E-01 | 7.59E-01 | 1.00E+00 |
| ENSG00000256420.1_OSBPL9P4   | ENSG00000160789.18_LMNA | -0.05355 | -0.210954183 | 0.106557184 | 5.12E-01 | 7.61E-01 | 1.00E+00 |
| ENSG00000203334.4_RP11-25I9. | ENSG00000160789.18_LMNA | -0.12861 | -0.282034852 | 0.031231453 | 1.14E-01 | 3.38E-01 | 1.00E+00 |
| ENSG00000235430.1_ZSWIM5P1   | ENSG00000160789.18_LMNA | -0.05172 | -0.209200461 | 0.108370687 | 5.27E-01 | 7.72E-01 | 1.00E+00 |
| ENSG00000171483.12_SSX6      | ENSG00000160789.18_LMNA | 0.00747  | -0.151906952 | 0.166477114 | 9.27E-01 | 9.72E-01 | 1.00E+00 |
| ENSG00000231762.1_RP11-354K  | ENSG00000160789.18_LMNA | -0.07686 | -0.233205112 | 0.083362848 | 3.47E-01 | 6.31E-01 | 1.00E+00 |
| ENSG00000226397.6_C12orf77   | ENSG00000160789.18_LMNA | -0.04288 | -0.200709734 | 0.117121061 | 6.00E-01 | 8.16E-01 | 1.00E+00 |
| ENSG00000146039.9_SLC17A4    | ENSG00000160789.18_LMNA | -0.14615 | -0.298405853 | 0.013363504 | 7.24E-02 | 2.55E-01 | 1.00E+00 |
| ENSG00000171195.9_MUC7       | ENSG00000160789.18_LMNA | -0.12788 | -0.281356367 | 0.031967683 | 1.16E-01 | 3.41E-01 | 1.00E+00 |
| ENSG00000214797.3_RP11-1036  | ENSG00000160789.18_LMNA | -0.08587 | -0.241765944 | 0.074346736 | 2.93E-01 | 5.79E-01 | 1.00E+00 |
| ENSG00000229240.6_LINC00710  | ENSG00000160789.18_LMNA | -0.08595 | -0.241843168 | 0.074265169 | 2.92E-01 | 5.78E-01 | 1.00E+00 |
| ENSG00000185775.9_SPATA31A   | ENSG00000160789.18_LMNA | 0.01731  | -0.142286322 | 0.176022133 | 8.32E-01 | 9.35E-01 | 1.00E+00 |
| ENSG00000277865.3_GOLGA6L2   | ENSG00000160789.18_LMNA | -0.02553 | -0.183979999 | 0.134219182 | 7.55E-01 | 8.98E-01 | 1.00E+00 |
| ENSG00000221878.9_PSG7       | ENSG00000160789.18_LMNA | -0.12581 | -0.279415932 | 0.034071388 | 1.22E-01 | 3.52E-01 | 1.00E+00 |
| ENSG00000201227.1_           | ENSG00000160789.18_LMNA | -0.01849 | -0.177171459 | 0.14112382  | 8.21E-01 | 9.30E-01 | 1.00E+00 |
| ENSG00000253239.1_IGLVI-70   | ENSG00000160789.18_LMNA | 0.0186   | -0.141019478 | 0.177274577 | 8.20E-01 | 9.30E-01 | 1.00E+00 |
| ENSG00000270372.1_RP11-109M  | ENSG00000160789.18_LMNA | -0.07094 | -0.227567602 | 0.089272002 | 3.85E-01 | 6.64E-01 | 1.00E+00 |
| ENSG00000211826.1_TRDJ4      | ENSG00000160789.18_LMNA | 0.07115  | -0.089060404 | 0.22776984  | 3.84E-01 | 6.62E-01 | 1.00E+00 |
| ENSG00000221732.1_           | ENSG00000160789.18_LMNA | 0.13493  | -0.024806194 | 0.287942894 | 9.74E-02 | 3.07E-01 | 1.00E+00 |
| ENSG00000275967.1_MIR6880    | ENSG00000160789.18_LMNA | 0.07408  | -0.086132389 | 0.230565534 | 3.64E-01 | 6.46E-01 | 1.00E+00 |



|                             |                         |          |              |             |          |          |          |
|-----------------------------|-------------------------|----------|--------------|-------------|----------|----------|----------|
| ENSG00000272351.1_RNA5SP50  | ENSG00000160789.18_LMNA | -0.03992 | -0.197863388 | 0.120043445 | 6.25E-01 | 8.31E-01 | 1.00E+00 |
| ENSG00000252174.1_RNU7-18P  | ENSG00000160789.18_LMNA | -0.03396 | -0.192122172 | 0.125921318 | 6.78E-01 | 8.59E-01 | 1.00E+00 |
| ENSG00000264354.1_MIR3134   | ENSG00000160789.18_LMNA | -0.08321 | -0.239239015 | 0.077013438 | 3.08E-01 | 5.95E-01 | 1.00E+00 |
| ENSG00000266112.1_          | ENSG00000160789.18_LMNA | 0.09071  | -0.069498587 | 0.246349023 | 2.66E-01 | 5.50E-01 | 1.00E+00 |
| ENSG00000252700.1_RNU7-110F | ENSG00000160789.18_LMNA | -0.0297  | -0.188013426 | 0.130114199 | 7.16E-01 | 8.79E-01 | 1.00E+00 |
| ENSG00000238508.1_          | ENSG00000160789.18_LMNA | -0.15705 | -0.308539751 | 0.00220229  | 5.33E-02 | 2.10E-01 | 1.00E+00 |
| ENSG00000200558.1_RNA5SP42  | ENSG00000160789.18_LMNA | -0.00175 | -0.160907153 | 0.157493299 | 9.83E-01 | 9.94E-01 | 1.00E+00 |
| ENSG00000251445.1_RP11-483A | ENSG00000160789.18_LMNA | -0.04286 | -0.200686902 | 0.117144525 | 6.00E-01 | 8.16E-01 | 1.00E+00 |
| ENSG00000200325.1_Y_RNA     | ENSG00000160789.18_LMNA | 0.06237  | -0.097799959 | 0.219394059 | 4.45E-01 | 7.12E-01 | 1.00E+00 |
| ENSG00000201950.1_SNORD113  | ENSG00000160789.18_LMNA | 0.07577  | -0.084450692 | 0.232168872 | 3.54E-01 | 6.37E-01 | 1.00E+00 |
| ENSG00000207014.1_SNORD116  | ENSG00000160789.18_LMNA | -0.03186 | -0.190098986 | 0.127987354 | 6.97E-01 | 8.70E-01 | 1.00E+00 |
| ENSG00000253883.1_IGHV3-19  | ENSG00000160789.18_LMNA | -0.00742 | -0.166420003 | 0.151964334 | 9.28E-01 | 9.72E-01 | 1.00E+00 |
| ENSG00000199005.3_MIR370    | ENSG00000160789.18_LMNA | -0.05093 | -0.208442108 | 0.109154237 | 5.33E-01 | 7.75E-01 | 1.00E+00 |
| ENSG00000223180.1_          | ENSG00000160789.18_LMNA | -0.20053 | -0.348600947 | -0.0426913  | 1.32E-02 | 8.02E-02 | 1.00E+00 |
| ENSG00000252971.1_RNU6-1057 | ENSG00000160789.18_LMNA | 0.0312   | -0.128643882 | 0.189455508 | 7.03E-01 | 8.73E-01 | 1.00E+00 |
| ENSG00000265355.1_MIR3136   | ENSG00000160789.18_LMNA | 0.0968   | -0.063378297 | 0.252114589 | 2.35E-01 | 5.13E-01 | 1.00E+00 |
| ENSG00000275127.1_SNORD116  | ENSG00000160789.18_LMNA | -0.05481 | -0.212158608 | 0.105310476 | 5.02E-01 | 7.54E-01 | 1.00E+00 |
| ENSG00000206650.1_SNORA70C  | ENSG00000160789.18_LMNA | 0.00326  | -0.156017255 | 0.162380841 | 9.68E-01 | 9.87E-01 | 1.00E+00 |
| ENSG00000238648.1_          | ENSG00000160789.18_LMNA | -0.14238 | -0.29489489  | 0.017212351 | 8.02E-02 | 2.72E-01 | 1.00E+00 |
| ENSG00000252945.1_snoU83B   | ENSG00000160789.18_LMNA | 0.0837   | -0.076524189 | 0.239702942 | 3.05E-01 | 5.92E-01 | 1.00E+00 |
| ENSG00000281458.1_          | ENSG00000160789.18_LMNA | -0.03093 | -0.189196874 | 0.128907683 | 7.05E-01 | 8.75E-01 | 1.00E+00 |
| ENSG00000266344.1_          | ENSG00000160789.18_LMNA | -0.03754 | -0.195575864 | 0.122388092 | 6.46E-01 | 8.43E-01 | 1.00E+00 |
| ENSG00000252164.1_RNA5SP28  | ENSG00000160789.18_LMNA | 0.06152  | -0.098645351 | 0.218581367 | 4.51E-01 | 7.17E-01 | 1.00E+00 |
| ENSG00000276621.1_          | ENSG00000160789.18_LMNA | -0.09403 | -0.249491263 | 0.066165968 | 2.49E-01 | 5.30E-01 | 1.00E+00 |
| ENSG00000252084.1_RN7SKP12  | ENSG00000160789.18_LMNA | 0.11143  | -0.048631194 | 0.265915566 | 1.72E-01 | 4.31E-01 | 1.00E+00 |
| ENSG00000206949.1_RNU6-1324 | ENSG00000160789.18_LMNA | -0.11104 | -0.265547324 | 0.049026469 | 1.73E-01 | 4.33E-01 | 1.00E+00 |
| ENSG00000252512.1_RNA5SP20  | ENSG00000160789.18_LMNA | -0.00646 | -0.165489332 | 0.152899126 | 9.37E-01 | 9.75E-01 | 1.00E+00 |
| ENSG00000201239.1_Y_RNA     | ENSG00000160789.18_LMNA | -0.02095 | -0.179554339 | 0.138710824 | 7.98E-01 | 9.19E-01 | 1.00E+00 |
| ENSG00000207997.1_MIR644A   | ENSG00000160789.18_LMNA | 0.09445  | -0.065736601 | 0.249895619 | 2.47E-01 | 5.27E-01 | 1.00E+00 |
| ENSG00000223080.1_Y_RNA     | ENSG00000160789.18_LMNA | 0.02012  | -0.139528927 | 0.178746865 | 8.06E-01 | 9.22E-01 | 1.00E+00 |
| ENSG00000238516.1_Y_RNA     | ENSG00000160789.18_LMNA | 0.1142   | -0.045836516 | 0.268516494 | 1.61E-01 | 4.16E-01 | 1.00E+00 |
| ENSG00000269509.1_BNIP3P34  | ENSG00000160789.18_LMNA | -0.20487 | -0.352570002 | -0.04720742 | 1.13E-02 | 7.17E-02 | 1.00E+00 |
| ENSG00000265582.1_          | ENSG00000160789.18_LMNA | 0.03557  | -0.124330245 | 0.193678406 | 6.63E-01 | 8.52E-01 | 1.00E+00 |

|                              |                         |          |              |             |          |          |          |
|------------------------------|-------------------------|----------|--------------|-------------|----------|----------|----------|
| ENSG00000222972.1_RNU6-651F  | ENSG00000160789.18_LMNA | -0.1758  | -0.32587574  | -0.01707233 | 3.03E-02 | 1.44E-01 | 1.00E+00 |
| ENSG00000212567.1_SNORA57    | ENSG00000160789.18_LMNA | 0.08278  | -0.077443092 | 0.23883148  | 3.11E-01 | 5.97E-01 | 1.00E+00 |
| ENSG00000252190.1_SCARNA17   | ENSG00000160789.18_LMNA | -0.23522 | -0.38018092  | -0.07897331 | 3.53E-03 | 3.02E-02 | 1.00E+00 |
| ENSG00000252929.1_RNU6-218F  | ENSG00000160789.18_LMNA | 0.07277  | -0.087438934 | 0.229318679 | 3.73E-01 | 6.53E-01 | 1.00E+00 |
| ENSG00000207484.1_Y_RNA      | ENSG00000160789.18_LMNA | 0.10076  | -0.059393139 | 0.25585677  | 2.17E-01 | 4.91E-01 | 1.00E+00 |
| ENSG00000201121.1_RNY1P12    | ENSG00000160789.18_LMNA | 0.13465  | -0.025083923 | 0.287688013 | 9.81E-02 | 3.08E-01 | 1.00E+00 |
| ENSG00000270472.2_IGHV3OR1   | ENSG00000160789.18_LMNA | -0.12719 | -0.280702917 | 0.032676426 | 1.18E-01 | 3.45E-01 | 1.00E+00 |
| ENSG00000252627.1_RNU6-122F  | ENSG00000160789.18_LMNA | -0.12892 | -0.282328063 | 0.030913183 | 1.13E-01 | 3.36E-01 | 1.00E+00 |
| ENSG00000212257.1_RNU6-1176  | ENSG00000160789.18_LMNA | 0.02298  | -0.136717885 | 0.181519593 | 7.79E-01 | 9.09E-01 | 1.00E+00 |
| ENSG00000274668.1_           | ENSG00000160789.18_LMNA | -0.08058 | -0.236743026 | 0.079643055 | 3.24E-01 | 6.10E-01 | 1.00E+00 |
| ENSG00000202124.1_RNY4P3     | ENSG00000160789.18_LMNA | 0.05086  | -0.109229559 | 0.208369187 | 5.34E-01 | 7.76E-01 | 1.00E+00 |
| ENSG00000206911.1_Y_RNA      | ENSG00000160789.18_LMNA | -0.00851 | -0.167481043 | 0.150897901 | 9.17E-01 | 9.69E-01 | 1.00E+00 |
| ENSG00000201863.1_SNORA51    | ENSG00000160789.18_LMNA | -0.0676  | -0.224389094 | 0.092593863 | 4.08E-01 | 6.83E-01 | 1.00E+00 |
| ENSG00000201524.1_RNU6-450F  | ENSG00000160789.18_LMNA | -0.01501 | -0.173799898 | 0.144531545 | 8.54E-01 | 9.43E-01 | 1.00E+00 |
| ENSG00000274951.1_           | ENSG00000160789.18_LMNA | -0.02855 | -0.186899764 | 0.131248709 | 7.27E-01 | 8.84E-01 | 1.00E+00 |
| ENSG00000201511.1_Y_RNA      | ENSG00000160789.18_LMNA | -0.05612 | -0.213416731 | 0.10400712  | 4.92E-01 | 7.48E-01 | 1.00E+00 |
| ENSG00000202417.1_Y_RNA      | ENSG00000160789.18_LMNA | -0.11393 | -0.268267126 | 0.046104674 | 1.62E-01 | 4.17E-01 | 1.00E+00 |
| ENSG00000200799.1_RNU6-770F  | ENSG00000160789.18_LMNA | -0.02318 | -0.181708719 | 0.136525959 | 7.77E-01 | 9.08E-01 | 1.00E+00 |
| ENSG00000206778.1_RNU6-213F  | ENSG00000160789.18_LMNA | 0.08697  | -0.07324835  | 0.242805514 | 2.87E-01 | 5.72E-01 | 1.00E+00 |
| ENSG00000197476.3_RP11-170L  | ENSG00000160789.18_LMNA | -0.07675 | -0.233103478 | 0.083469576 | 3.47E-01 | 6.31E-01 | 1.00E+00 |
| ENSG00000271128.1_CTB-113I2C | ENSG00000160789.18_LMNA | 0.09546  | -0.06472098  | 0.250851641 | 2.42E-01 | 5.21E-01 | 1.00E+00 |
| ENSG00000199664.1_RNU6-1266  | ENSG00000160789.18_LMNA | 0.05095  | -0.109135906 | 0.208459854 | 5.33E-01 | 7.75E-01 | 1.00E+00 |
| ENSG00000202428.1_RNU6-108F  | ENSG00000160789.18_LMNA | -0.03172 | -0.18996063  | 0.128128539 | 6.98E-01 | 8.71E-01 | 1.00E+00 |
| ENSG00000207187.1_SNORA64    | ENSG00000160789.18_LMNA | -0.01186 | -0.170736076 | 0.147621694 | 8.85E-01 | 9.55E-01 | 1.00E+00 |
| ENSG00000207029.1_RNU6-43P   | ENSG00000160789.18_LMNA | -0.13975 | -0.292441255 | 0.019896637 | 8.60E-02 | 2.85E-01 | 1.00E+00 |
| ENSG00000221245.1_SNORA11    | ENSG00000160789.18_LMNA | 0.0389   | -0.121047525 | 0.196884195 | 6.34E-01 | 8.36E-01 | 1.00E+00 |
| ENSG00000271130.1_IGHV3OR1   | ENSG00000160789.18_LMNA | -0.00493 | -0.164006454 | 0.154387393 | 9.52E-01 | 9.81E-01 | 1.00E+00 |
| ENSG00000201545.1_RNU4-85P   | ENSG00000160789.18_LMNA | -0.10386 | -0.258780928 | 0.056272109 | 2.03E-01 | 4.74E-01 | 1.00E+00 |
| ENSG00000206935.1_RNU6-514F  | ENSG00000160789.18_LMNA | 0.07001  | -0.090192302 | 0.226687693 | 3.91E-01 | 6.69E-01 | 1.00E+00 |
| ENSG00000224412.1_RP11-351O  | ENSG00000160789.18_LMNA | -0.06265 | -0.219658232 | 0.097525057 | 4.43E-01 | 7.10E-01 | 1.00E+00 |
| ENSG00000243424.2_RN7SL107F  | ENSG00000160789.18_LMNA | -0.08592 | -0.241817577 | 0.0742922   | 2.93E-01 | 5.78E-01 | 1.00E+00 |
| ENSG00000224279.2_RPS29P31   | ENSG00000160789.18_LMNA | 0.10819  | -0.051908734 | 0.262859405 | 1.85E-01 | 4.50E-01 | 1.00E+00 |
| ENSG00000233908.1_RP11-425D  | ENSG00000160789.18_LMNA | -0.15049 | -0.302448225 | 0.008920634 | 6.42E-02 | 2.36E-01 | 1.00E+00 |

|                              |                         |          |              |             |          |          |          |
|------------------------------|-------------------------|----------|--------------|-------------|----------|----------|----------|
| ENSG00000262651.1_RP11-164N  | ENSG00000160789.18_LMNA | -0.0672  | -0.224005147 | 0.09299465  | 4.11E-01 | 6.85E-01 | 1.00E+00 |
| ENSG00000222389.1_RNU2-28P   | ENSG00000160789.18_LMNA | -0.02623 | -0.184664314 | 0.133523495 | 7.48E-01 | 8.95E-01 | 1.00E+00 |
| ENSG00000279702.1_RP11-347N  | ENSG00000160789.18_LMNA | -0.06875 | -0.225485201 | 0.091449117 | 4.00E-01 | 6.77E-01 | 1.00E+00 |
| ENSG00000280588.1_           | ENSG00000160789.18_LMNA | -0.10044 | -0.255558303 | 0.059711355 | 2.18E-01 | 4.93E-01 | 1.00E+00 |
| ENSG00000234791.1_AC108448.1 | ENSG00000160789.18_LMNA | 0.03965  | -0.120307598 | 0.197605844 | 6.28E-01 | 8.32E-01 | 1.00E+00 |
| ENSG00000202537.1_U8         | ENSG00000160789.18_LMNA | -0.10473 | -0.259603522 | 0.05539302  | 1.99E-01 | 4.69E-01 | 1.00E+00 |
| ENSG00000238323.1_           | ENSG00000160789.18_LMNA | -0.18422 | -0.333638922 | -0.02577869 | 2.31E-02 | 1.20E-01 | 1.00E+00 |
| ENSG00000202429.1_RNU4-48P   | ENSG00000160789.18_LMNA | -0.15717 | -0.30864828  | 0.002082338 | 5.31E-02 | 2.09E-01 | 1.00E+00 |
| ENSG00000201358.1_RN7SKP19   | ENSG00000160789.18_LMNA | -0.09414 | -0.24960008  | 0.066050432 | 2.49E-01 | 5.29E-01 | 1.00E+00 |
| ENSG00000242707.3_RN7SL362F  | ENSG00000160789.18_LMNA | 0.03905  | -0.120898607 | 0.197029461 | 6.33E-01 | 8.35E-01 | 1.00E+00 |
| ENSG00000242580.1_IGKV1D-43  | ENSG00000160789.18_LMNA | -0.06869 | -0.225429123 | 0.091507705 | 4.00E-01 | 6.77E-01 | 1.00E+00 |
| ENSG00000253497.1_IGKV1-13   | ENSG00000160789.18_LMNA | -0.08684 | -0.242686145 | 0.073374511 | 2.87E-01 | 5.73E-01 | 1.00E+00 |
| ENSG00000250915.1_RP11-1338  | ENSG00000160789.18_LMNA | -0.15477 | -0.306419904 | 0.004543456 | 5.69E-02 | 2.18E-01 | 1.00E+00 |
| ENSG00000200070.1_RNU4-80P   | ENSG00000160789.18_LMNA | 0.18485  | 0.026430895  | 0.334218794 | 2.26E-02 | 1.18E-01 | 1.00E+00 |
| ENSG00000226022.1_AC026167.1 | ENSG00000160789.18_LMNA | 0.0586   | -0.101549518 | 0.21578618  | 4.73E-01 | 7.33E-01 | 1.00E+00 |
| ENSG00000279560.1_AC007326.1 | ENSG00000160789.18_LMNA | 0.02256  | -0.137137096 | 0.181106417 | 7.83E-01 | 9.11E-01 | 1.00E+00 |
| ENSG00000206835.1_RNU1-74P   | ENSG00000160789.18_LMNA | 0.05951  | -0.100641543 | 0.216660642 | 4.66E-01 | 7.28E-01 | 1.00E+00 |
| ENSG00000256557.1_RP11-1060  | ENSG00000160789.18_LMNA | 0.03574  | -0.124162476 | 0.193842408 | 6.62E-01 | 8.51E-01 | 1.00E+00 |
| ENSG00000243398.3_RN7SL141F  | ENSG00000160789.18_LMNA | 0.06569  | -0.094494171 | 0.222567755 | 4.21E-01 | 6.93E-01 | 1.00E+00 |
| ENSG00000230881.1_RP11-486B  | ENSG00000160789.18_LMNA | 0.03762  | -0.122315702 | 0.195646543 | 6.45E-01 | 8.42E-01 | 1.00E+00 |
| ENSG00000279679.1_RP11-278J  | ENSG00000160789.18_LMNA | -0.02235 | -0.180907994 | 0.137338376 | 7.85E-01 | 9.12E-01 | 1.00E+00 |
| ENSG00000234932.2_AC009969.1 | ENSG00000160789.18_LMNA | -0.03421 | -0.1923646   | 0.12567357  | 6.76E-01 | 8.58E-01 | 1.00E+00 |
| ENSG00000179817.4_MRGPRX4    | ENSG00000160789.18_LMNA | 0.04149  | -0.118497943 | 0.199369345 | 6.12E-01 | 8.23E-01 | 1.00E+00 |
| ENSG00000264676.2_RN7SL204F  | ENSG00000160789.18_LMNA | 0.10627  | -0.053845706 | 0.261050291 | 1.93E-01 | 4.61E-01 | 1.00E+00 |
| ENSG00000277946.1_RN7SL478F  | ENSG00000160789.18_LMNA | 0.15296  | -0.006400759 | 0.304735982 | 5.99E-02 | 2.25E-01 | 1.00E+00 |
| ENSG00000255157.1_CTD-2313N  | ENSG00000160789.18_LMNA | -0.03795 | -0.195970525 | 0.121983829 | 6.42E-01 | 8.41E-01 | 1.00E+00 |
| ENSG00000249467.1_RP11-492O  | ENSG00000160789.18_LMNA | -0.13945 | -0.292161633 | 0.02020226  | 8.66E-02 | 2.86E-01 | 1.00E+00 |
| ENSG00000278182.1_CH17-262C  | ENSG00000160789.18_LMNA | 0.08207  | -0.078153431 | 0.238157465 | 3.15E-01 | 6.01E-01 | 1.00E+00 |
| ENSG00000206102.2_KRTAP19-8  | ENSG00000160789.18_LMNA | -0.01853 | -0.177206813 | 0.141088048 | 8.21E-01 | 9.30E-01 | 1.00E+00 |
| ENSG00000257582.4_LINC01475  | ENSG00000160789.18_LMNA | -0.10912 | -0.263740379 | 0.050964641 | 1.81E-01 | 4.44E-01 | 1.00E+00 |
| ENSG00000278351.1_RP11-139E  | ENSG00000160789.18_LMNA | -0.00611 | -0.165150992 | 0.153238823 | 9.40E-01 | 9.76E-01 | 1.00E+00 |
| ENSG00000199730.1_RN7SKP95   | ENSG00000160789.18_LMNA | -0.01063 | -0.169543525 | 0.148822814 | 8.97E-01 | 9.60E-01 | 1.00E+00 |
| ENSG00000232557.3_RP11-4M23  | ENSG00000160789.18_LMNA | 0.09348  | -0.06670928  | 0.248979441 | 2.52E-01 | 5.33E-01 | 1.00E+00 |

|                              |                         |          |              |             |          |          |          |
|------------------------------|-------------------------|----------|--------------|-------------|----------|----------|----------|
| ENSG00000277624.1_RP11-374M  | ENSG00000160789.18_LMNA | 0.06937  | -0.090831326 | 0.22607641  | 3.96E-01 | 6.73E-01 | 1.00E+00 |
| ENSG00000214124.3_SNRPEP9    | ENSG00000160789.18_LMNA | 0.10502  | -0.055102092 | 0.259875654 | 1.98E-01 | 4.68E-01 | 1.00E+00 |
| ENSG00000270764.1_CTB-152G1  | ENSG00000160789.18_LMNA | -0.04282 | -0.20064821  | 0.117184287 | 6.00E-01 | 8.16E-01 | 1.00E+00 |
| ENSG00000253888.1_RP11-521M  | ENSG00000160789.18_LMNA | -0.14222 | -0.294747743 | 0.017373457 | 8.05E-02 | 2.73E-01 | 1.00E+00 |
| ENSG00000222678.1_RN7SKP21   | ENSG00000160789.18_LMNA | 0.07704  | -0.083182669 | 0.233376675 | 3.46E-01 | 6.30E-01 | 1.00E+00 |
| ENSG00000222976.1_RN7SKP94   | ENSG00000160789.18_LMNA | -0.00656 | -0.165591465 | 0.152796569 | 9.36E-01 | 9.75E-01 | 1.00E+00 |
| ENSG00000230481.2_IGKV1OR2   | ENSG00000160789.18_LMNA | -0.19875 | -0.346970563 | -0.04083982 | 1.41E-02 | 8.40E-02 | 1.00E+00 |
| ENSG00000251663.1_SUMO2P5    | ENSG00000160789.18_LMNA | 0.06003  | -0.100131938 | 0.217151215 | 4.63E-01 | 7.25E-01 | 1.00E+00 |
| ENSG00000225935.1_BANF1P5    | ENSG00000160789.18_LMNA | 0.01165  | -0.147821839 | 0.170537423 | 8.87E-01 | 9.56E-01 | 1.00E+00 |
| ENSG00000244376.3_RN7SL636F  | ENSG00000160789.18_LMNA | 0.14882  | -0.010634831 | 0.300889879 | 6.73E-02 | 2.43E-01 | 1.00E+00 |
| ENSG00000265814.2_RN7SL376F  | ENSG00000160789.18_LMNA | -0.0697  | -0.226384635 | 0.090509146 | 3.94E-01 | 6.71E-01 | 1.00E+00 |
| ENSG00000274551.1_RP11-434C  | ENSG00000160789.18_LMNA | -0.0603  | -0.217410545 | 0.09986248  | 4.61E-01 | 7.24E-01 | 1.00E+00 |
| ENSG00000239964.3_RN7SL748F  | ENSG00000160789.18_LMNA | -0.15185 | -0.303708153 | 0.007533362 | 6.18E-02 | 2.30E-01 | 1.00E+00 |
| ENSG00000235035.1_AC007395.  | ENSG00000160789.18_LMNA | 0.07629  | -0.083933515 | 0.232661605 | 3.50E-01 | 6.34E-01 | 1.00E+00 |
| ENSG00000258028.1_RP11-148E  | ENSG00000160789.18_LMNA | 0.06114  | -0.09901997  | 0.218221098 | 4.54E-01 | 7.19E-01 | 1.00E+00 |
| ENSG00000226441.2_PLCL2-AS1  | ENSG00000160789.18_LMNA | 0.02142  | -0.138253901 | 0.180005139 | 7.93E-01 | 9.16E-01 | 1.00E+00 |
| ENSG00000237741.1_AC002368.  | ENSG00000160789.18_LMNA | -0.17017 | -0.320687576 | -0.01127982 | 3.61E-02 | 1.62E-01 | 1.00E+00 |
| ENSG00000263755.2_RN7SL498F  | ENSG00000160789.18_LMNA | -0.00315 | -0.162268279 | 0.156130048 | 9.69E-01 | 9.88E-01 | 1.00E+00 |
| ENSG00000257155.1_CTD-2213F  | ENSG00000160789.18_LMNA | 0.01298  | -0.146528179 | 0.171820979 | 8.74E-01 | 9.51E-01 | 1.00E+00 |
| ENSG00000262352.1_AP005530.  | ENSG00000160789.18_LMNA | -0.03949 | -0.197453913 | 0.120463407 | 6.29E-01 | 8.33E-01 | 1.00E+00 |
| ENSG00000229964.1_RP11-135A  | ENSG00000160789.18_LMNA | -0.11527 | -0.269520428 | 0.044756478 | 1.57E-01 | 4.10E-01 | 1.00E+00 |
| ENSG00000277396.1_Metazoa_SI | ENSG00000160789.18_LMNA | -0.08973 | -0.245421133 | 0.07048135  | 2.72E-01 | 5.56E-01 | 1.00E+00 |
| ENSG00000267456.2_RP11-49I11 | ENSG00000160789.18_LMNA | 0.10987  | -0.050213847 | 0.264440601 | 1.78E-01 | 4.40E-01 | 1.00E+00 |
| ENSG00000230815.1_RP11-49O1  | ENSG00000160789.18_LMNA | 0.11024  | -0.049832886 | 0.264795775 | 1.76E-01 | 4.38E-01 | 1.00E+00 |
| ENSG00000227255.1_CDRT15P2   | ENSG00000160789.18_LMNA | -0.07519 | -0.231621744 | 0.085024762 | 3.57E-01 | 6.40E-01 | 1.00E+00 |
| ENSG00000261800.1_RP11-244B  | ENSG00000160789.18_LMNA | -0.06567 | -0.222541292 | 0.094521764 | 4.22E-01 | 6.93E-01 | 1.00E+00 |
| ENSG00000275194.1_RP1-27C22  | ENSG00000160789.18_LMNA | -0.06005 | -0.217172823 | 0.100109488 | 4.62E-01 | 7.25E-01 | 1.00E+00 |
| ENSG00000226254.1_PTP4A1P3   | ENSG00000160789.18_LMNA | -0.0896  | -0.245303706 | 0.070605677 | 2.72E-01 | 5.57E-01 | 1.00E+00 |
| ENSG00000273762.1_VN1R76P    | ENSG00000160789.18_LMNA | -0.14722 | -0.29940468  | 0.012266862 | 7.03E-02 | 2.50E-01 | 1.00E+00 |
| ENSG00000273725.1_Metazoa_SI | ENSG00000160789.18_LMNA | -0.01135 | -0.170245118 | 0.148116293 | 8.90E-01 | 9.57E-01 | 1.00E+00 |
| ENSG00000144010.8_TRIM43B    | ENSG00000160789.18_LMNA | 0.24024  | 0.084264476  | 0.384728427 | 2.87E-03 | 2.59E-02 | 1.00E+00 |
| ENSG00000229682.1_AC114755.  | ENSG00000160789.18_LMNA | -0.05926 | -0.216414736 | 0.100896927 | 4.68E-01 | 7.29E-01 | 1.00E+00 |
| ENSG00000261282.1_SOD1P2     | ENSG00000160789.18_LMNA | -0.06833 | -0.22508242  | 0.091869868 | 4.03E-01 | 6.79E-01 | 1.00E+00 |

|                              |                         |          |              |             |          |          |          |
|------------------------------|-------------------------|----------|--------------|-------------|----------|----------|----------|
| ENSG00000159516.8_SPRR2G     | ENSG00000160789.18_LMNA | -0.18265 | -0.332189471 | -0.02414959 | 2.43E-02 | 1.24E-01 | 1.00E+00 |
| ENSG00000258618.2_RPL21P9    | ENSG00000160789.18_LMNA | -0.0126  | -0.171456737 | 0.146895399 | 8.78E-01 | 9.52E-01 | 1.00E+00 |
| ENSG00000254173.1_RP11-96G1  | ENSG00000160789.18_LMNA | -0.0885  | -0.244256422 | 0.07171407  | 2.78E-01 | 5.64E-01 | 1.00E+00 |
| ENSG00000236102.2_RP4-639J1  | ENSG00000160789.18_LMNA | 0.00144  | -0.157799409 | 0.160601353 | 9.86E-01 | 9.95E-01 | 1.00E+00 |
| ENSG00000239783.1_RP5-1050K  | ENSG00000160789.18_LMNA | 0.05107  | -0.109014679 | 0.208577206 | 5.32E-01 | 7.75E-01 | 1.00E+00 |
| ENSG00000259180.1_RP11-420M  | ENSG00000160789.18_LMNA | 0.14105  | -0.018571153 | 0.293653359 | 8.30E-02 | 2.79E-01 | 1.00E+00 |
| ENSG00000257084.1_U47924.27  | ENSG00000160789.18_LMNA | -0.18842 | -0.337494714 | -0.03012037 | 2.01E-02 | 1.08E-01 | 1.00E+00 |
| ENSG00000188076.2_SCGB1C1    | ENSG00000160789.18_LMNA | 0.02724  | -0.132533179 | 0.18563791  | 7.39E-01 | 8.90E-01 | 1.00E+00 |
| ENSG00000230027.1_RP11-550H  | ENSG00000160789.18_LMNA | 0.01931  | -0.14032377  | 0.177961938 | 8.13E-01 | 9.27E-01 | 1.00E+00 |
| ENSG00000258854.1_RP11-463J  | ENSG00000160789.18_LMNA | -0.19158 | -0.34039866  | -0.03339793 | 1.81E-02 | 1.00E-01 | 1.00E+00 |
| ENSG00000229528.1_RP5-1066H  | ENSG00000160789.18_LMNA | 0.03946  | -0.120493565 | 0.197424503 | 6.29E-01 | 8.33E-01 | 1.00E+00 |
| ENSG00000237907.1_           | ENSG00000160789.18_LMNA | 0.12826  | -0.031582458 | 0.281711417 | 1.15E-01 | 3.39E-01 | 1.00E+00 |
| ENSG00000234303.2_CLYBL-AS1  | ENSG00000160789.18_LMNA | -0.14626 | -0.298508401 | 0.013250948 | 7.22E-02 | 2.55E-01 | 1.00E+00 |
| ENSG00000230571.2_CTD-2533K  | ENSG00000160789.18_LMNA | 0.19324  | 0.035118121  | 0.341920425 | 1.71E-02 | 9.63E-02 | 1.00E+00 |
| ENSG00000266885.1_RP11-744K  | ENSG00000160789.18_LMNA | -0.13409 | -0.28716229  | 0.02565662  | 9.96E-02 | 3.11E-01 | 1.00E+00 |
| ENSG00000243855.1_RPL12P5    | ENSG00000160789.18_LMNA | 0.06084  | -0.099324242 | 0.217928418 | 4.57E-01 | 7.21E-01 | 1.00E+00 |
| ENSG00000249623.1_RP11-610J  | ENSG00000160789.18_LMNA | -0.05271 | -0.210149575 | 0.107389481 | 5.19E-01 | 7.65E-01 | 1.00E+00 |
| ENSG00000182591.5_KRTAP11-1  | ENSG00000160789.18_LMNA | 0.01817  | -0.141444542 | 0.17685446  | 8.24E-01 | 9.31E-01 | 1.00E+00 |
| ENSG00000260601.1_RP11-552C  | ENSG00000160789.18_LMNA | -0.09457 | -0.250003572 | 0.065621951 | 2.47E-01 | 5.27E-01 | 1.00E+00 |
| ENSG00000159763.3_PIP        | ENSG00000160789.18_LMNA | -0.06695 | -0.223762866 | 0.093247503 | 4.13E-01 | 6.86E-01 | 1.00E+00 |
| ENSG00000267664.1_RPL17P45   | ENSG00000160789.18_LMNA | 0.08271  | -0.077509676 | 0.238768314 | 3.11E-01 | 5.97E-01 | 1.00E+00 |
| ENSG00000227611.1_LINC01074  | ENSG00000160789.18_LMNA | -0.31503 | -0.451579296 | -0.16405336 | 7.72E-05 | 1.53E-03 | 1.00E+00 |
| ENSG00000234279.1_AC113618.  | ENSG00000160789.18_LMNA | 0.04392  | -0.116091081 | 0.201711637 | 5.91E-01 | 8.10E-01 | 1.00E+00 |
| ENSG00000217680.1_RP11-415D  | ENSG00000160789.18_LMNA | -0.04478 | -0.202532171 | 0.115247044 | 5.84E-01 | 8.07E-01 | 1.00E+00 |
| ENSG00000234361.1_RP11-52J3. | ENSG00000160789.18_LMNA | 0.01858  | -0.141036425 | 0.177257829 | 8.20E-01 | 9.30E-01 | 1.00E+00 |
| ENSG00000275144.1_SNX18P5    | ENSG00000160789.18_LMNA | 0.09703  | -0.063148194 | 0.25233092  | 2.34E-01 | 5.12E-01 | 1.00E+00 |
| ENSG00000255447.1_CTD-2210P  | ENSG00000160789.18_LMNA | 0.19968  | 0.041804157  | 0.347819973 | 1.37E-02 | 8.19E-02 | 1.00E+00 |
| ENSG00000176290.7_OR4K3      | ENSG00000160789.18_LMNA | -0.15298 | -0.304760325 | 0.006373925 | 5.99E-02 | 2.25E-01 | 1.00E+00 |
| ENSG00000276109.1_RP11-169D  | ENSG00000160789.18_LMNA | 0.05498  | -0.105142016 | 0.212321281 | 5.01E-01 | 7.53E-01 | 1.00E+00 |
| ENSG00000258784.1_RP11-813I2 | ENSG00000160789.18_LMNA | 0.07279  | -0.087419633 | 0.229337106 | 3.73E-01 | 6.53E-01 | 1.00E+00 |
| ENSG00000260573.1_RP11-21B2  | ENSG00000160789.18_LMNA | -0.09161 | -0.247208142 | 0.068588116 | 2.62E-01 | 5.45E-01 | 1.00E+00 |
| ENSG00000237400.1_AC006960.  | ENSG00000160789.18_LMNA | -0.02416 | -0.182659969 | 0.135560261 | 7.68E-01 | 9.04E-01 | 1.00E+00 |
| ENSG00000250666.1_LINC01596  | ENSG00000160789.18_LMNA | -0.01178 | -0.170665444 | 0.147692859 | 8.85E-01 | 9.56E-01 | 1.00E+00 |

|                              |                         |          |              |             |          |          |          |
|------------------------------|-------------------------|----------|--------------|-------------|----------|----------|----------|
| ENSG00000233647.2_NENFP1     | ENSG00000160789.18_LMNA | -0.00916 | -0.168117967 | 0.150257384 | 9.11E-01 | 9.66E-01 | 1.00E+00 |
| ENSG00000279849.1_AL023875.1 | ENSG00000160789.18_LMNA | 0.09231  | -0.067887348 | 0.247869049 | 2.58E-01 | 5.41E-01 | 1.00E+00 |
| ENSG00000239628.1_RP11-543D  | ENSG00000160789.18_LMNA | 0.03448  | -0.125407403 | 0.192625009 | 6.73E-01 | 8.57E-01 | 1.00E+00 |
| ENSG00000269320.1_VN1R93P    | ENSG00000160789.18_LMNA | -0.13662 | -0.289521934 | 0.023084531 | 9.33E-02 | 2.99E-01 | 1.00E+00 |
| ENSG00000234701.1_PRDX3P3    | ENSG00000160789.18_LMNA | -0.12816 | -0.281613684 | 0.031688506 | 1.16E-01 | 3.40E-01 | 1.00E+00 |
| ENSG00000235127.1_AC068286.  | ENSG00000160789.18_LMNA | 0.16654  | 0.007537975  | 0.317326223 | 4.03E-02 | 1.74E-01 | 1.00E+00 |
| ENSG00000264644.1_KRT18P8    | ENSG00000160789.18_LMNA | 0.06596  | -0.094232904 | 0.222818296 | 4.19E-01 | 6.91E-01 | 1.00E+00 |
| ENSG00000278408.1_RP11-1123  | ENSG00000160789.18_LMNA | -0.22643 | -0.372211968 | -0.06974194 | 5.03E-03 | 3.94E-02 | 1.00E+00 |
| ENSG00000254080.1_RP11-730G  | ENSG00000160789.18_LMNA | -0.04611 | -0.203819196 | 0.113922228 | 5.73E-01 | 8.00E-01 | 1.00E+00 |
| ENSG00000259525.1_GCSHP2     | ENSG00000160789.18_LMNA | -0.04247 | -0.200319566 | 0.117521978 | 6.03E-01 | 8.18E-01 | 1.00E+00 |
| ENSG00000233273.1_AMMECR1    | ENSG00000160789.18_LMNA | 0.06066  | -0.099500088 | 0.217759245 | 4.58E-01 | 7.22E-01 | 1.00E+00 |
| ENSG00000261672.1_RP11-475B  | ENSG00000160789.18_LMNA | -0.1225  | -0.276313646 | 0.037428942 | 1.33E-01 | 3.70E-01 | 1.00E+00 |
| ENSG00000217686.2_NUS1P4     | ENSG00000160789.18_LMNA | 0.02626  | -0.133500052 | 0.184687368 | 7.48E-01 | 8.95E-01 | 1.00E+00 |
| ENSG00000227042.1_RP6-1O2.1  | ENSG00000160789.18_LMNA | 0.10501  | -0.055116722 | 0.25986197  | 1.98E-01 | 4.68E-01 | 1.00E+00 |
| ENSG00000279213.1_SNX18P10   | ENSG00000160789.18_LMNA | 0.03965  | -0.120314138 | 0.197599467 | 6.28E-01 | 8.32E-01 | 1.00E+00 |
| ENSG00000254707.1_RP11-35J1  | ENSG00000160789.18_LMNA | -0.20144 | -0.349438505 | -0.04364326 | 1.28E-02 | 7.84E-02 | 1.00E+00 |
| ENSG00000168129.8_DHFRP3     | ENSG00000160789.18_LMNA | -0.02887 | -0.187208795 | 0.130933977 | 7.24E-01 | 8.83E-01 | 1.00E+00 |
| ENSG00000227244.2_LINC00845  | ENSG00000160789.18_LMNA | -0.13952 | -0.292230454 | 0.020127044 | 8.65E-02 | 2.86E-01 | 1.00E+00 |
| ENSG00000223700.1_           | ENSG00000160789.18_LMNA | -0.20921 | -0.356536827 | -0.0517335  | 9.69E-03 | 6.41E-02 | 1.00E+00 |
| ENSG00000237524.6_AC114783.  | ENSG00000160789.18_LMNA | 0.02908  | -0.130724369 | 0.187414571 | 7.22E-01 | 8.82E-01 | 1.00E+00 |
| ENSG00000224672.4_AC007272.  | ENSG00000160789.18_LMNA | 0.14103  | -0.018586399 | 0.293639423 | 8.31E-02 | 2.79E-01 | 1.00E+00 |
| ENSG00000235855.3_OR7E145P   | ENSG00000160789.18_LMNA | -0.16925 | -0.319835007 | -0.01032992 | 3.71E-02 | 1.65E-01 | 1.00E+00 |
| ENSG00000250456.1_AC006552.  | ENSG00000160789.18_LMNA | -0.11513 | -0.26939067  | 0.044896114 | 1.58E-01 | 4.11E-01 | 1.00E+00 |
| ENSG00000237205.1_RPL7P34    | ENSG00000160789.18_LMNA | 0.15613  | -0.003146597 | 0.307685084 | 5.48E-02 | 2.13E-01 | 1.00E+00 |
| ENSG00000262898.1_AC139099.  | ENSG00000160789.18_LMNA | 0.03456  | -0.125334756 | 0.192696076 | 6.73E-01 | 8.56E-01 | 1.00E+00 |
| ENSG00000234382.2_RP11-40F6  | ENSG00000160789.18_LMNA | 0.20013  | 0.042274725  | 0.348234277 | 1.34E-02 | 8.10E-02 | 1.00E+00 |
| ENSG00000262950.1_RP11-189E  | ENSG00000160789.18_LMNA | -0.02449 | -0.182977201 | 0.135238077 | 7.65E-01 | 9.02E-01 | 1.00E+00 |
| ENSG00000223845.1_VN1R40P    | ENSG00000160789.18_LMNA | 0.01946  | -0.140171477 | 0.178112362 | 8.12E-01 | 9.26E-01 | 1.00E+00 |
| ENSG00000261288.1_RP11-20I23 | ENSG00000160789.18_LMNA | -0.06133 | -0.218395537 | 0.098838594 | 4.53E-01 | 7.18E-01 | 1.00E+00 |
| ENSG00000228872.2_AC096664.  | ENSG00000160789.18_LMNA | -0.1757  | -0.325785099 | -0.01697095 | 3.04E-02 | 1.45E-01 | 1.00E+00 |
| ENSG00000228055.2_LINC00864  | ENSG00000160789.18_LMNA | 0.01542  | -0.144131369 | 0.174196214 | 8.50E-01 | 9.41E-01 | 1.00E+00 |
| ENSG00000203909.3_DPPA5      | ENSG00000160789.18_LMNA | -0.03633 | -0.194405624 | 0.123586185 | 6.57E-01 | 8.48E-01 | 1.00E+00 |
| ENSG00000236380.5_VENTXP7    | ENSG00000160789.18_LMNA | 0.09448  | -0.065708798 | 0.249921798 | 2.47E-01 | 5.27E-01 | 1.00E+00 |

|                              |                         |          |              |             |          |          |          |
|------------------------------|-------------------------|----------|--------------|-------------|----------|----------|----------|
| ENSG00000257164.4_RP11-25I15 | ENSG00000160789.18_LMNA | 0.00215  | -0.157100616 | 0.161299348 | 9.79E-01 | 9.92E-01 | 1.00E+00 |
| ENSG00000226693.1_NXNP1      | ENSG00000160789.18_LMNA | -0.10905 | -0.263676931 | 0.051032653 | 1.81E-01 | 4.45E-01 | 1.00E+00 |
| ENSG00000214487.3_OR7E148P   | ENSG00000160789.18_LMNA | 0.00864  | -0.150765661 | 0.167612563 | 9.16E-01 | 9.68E-01 | 1.00E+00 |
| ENSG00000196734.7_LCE1B      | ENSG00000160789.18_LMNA | 0.05664  | -0.103495474 | 0.213910333 | 4.88E-01 | 7.45E-01 | 1.00E+00 |
| ENSG00000214301.4_RP11-91K8  | ENSG00000160789.18_LMNA | 0.06148  | -0.098681991 | 0.218546135 | 4.52E-01 | 7.17E-01 | 1.00E+00 |
| ENSG00000279502.1_RP11-354E  | ENSG00000160789.18_LMNA | -0.05354 | -0.210947476 | 0.106564122 | 5.12E-01 | 7.61E-01 | 1.00E+00 |
| ENSG00000236965.4_OR52N3P    | ENSG00000160789.18_LMNA | 0.11851  | -0.041474814 | 0.272566668 | 1.46E-01 | 3.91E-01 | 1.00E+00 |
| ENSG00000261790.1_AC005606.  | ENSG00000160789.18_LMNA | -0.01938 | -0.178029286 | 0.140255588 | 8.13E-01 | 9.26E-01 | 1.00E+00 |
| ENSG00000267490.1_CTD-3116E  | ENSG00000160789.18_LMNA | -0.13258 | -0.285749654 | 0.02719446  | 1.03E-01 | 3.19E-01 | 1.00E+00 |
| ENSG00000261749.2_RP11-152O  | ENSG00000160789.18_LMNA | -0.13843 | -0.291212784 | 0.021238899 | 8.90E-02 | 2.90E-01 | 1.00E+00 |
| ENSG00000214330.4_ABCD1P5    | ENSG00000160789.18_LMNA | -0.01904 | -0.177699322 | 0.140589612 | 8.16E-01 | 9.28E-01 | 1.00E+00 |
| ENSG00000251311.1_RP11-249M  | ENSG00000160789.18_LMNA | 0.08158  | -0.078643211 | 0.237692553 | 3.18E-01 | 6.04E-01 | 1.00E+00 |
| ENSG00000235728.1_AC007349.  | ENSG00000160789.18_LMNA | 0.04168  | -0.118301664 | 0.199560495 | 6.10E-01 | 8.22E-01 | 1.00E+00 |
| ENSG00000234939.1_MTND2P18   | ENSG00000160789.18_LMNA | -0.13986 | -0.29254297  | 0.01978545  | 8.57E-02 | 2.84E-01 | 1.00E+00 |
| ENSG00000254592.1_RP5-1173A  | ENSG00000160789.18_LMNA | 0.09059  | -0.069613544 | 0.246240516 | 2.67E-01 | 5.51E-01 | 1.00E+00 |
| ENSG00000232215.2_OR2L6P     | ENSG00000160789.18_LMNA | 0.02387  | -0.135845569 | 0.182378992 | 7.70E-01 | 9.05E-01 | 1.00E+00 |
| ENSG00000249262.2_RP11-710E  | ENSG00000160789.18_LMNA | 0.03063  | -0.129202916 | 0.188907371 | 7.08E-01 | 8.76E-01 | 1.00E+00 |
| ENSG00000198443.6_KRTAP4-1   | ENSG00000160789.18_LMNA | -0.11784 | -0.271935881 | 0.042154907 | 1.48E-01 | 3.95E-01 | 1.00E+00 |
| ENSG00000263952.4_RP11-513M  | ENSG00000160789.18_LMNA | -0.13169 | -0.28492122  | 0.028095631 | 1.06E-01 | 3.23E-01 | 1.00E+00 |
| ENSG00000261364.1_RP11-59E1  | ENSG00000160789.18_LMNA | -0.07157 | -0.228175111 | 0.088636291 | 3.81E-01 | 6.60E-01 | 1.00E+00 |
| ENSG00000231092.1_AC012513.  | ENSG00000160789.18_LMNA | -0.02549 | -0.183939464 | 0.13426038  | 7.55E-01 | 8.98E-01 | 1.00E+00 |
| ENSG00000220553.1_RPL5P19    | ENSG00000160789.18_LMNA | -0.17271 | -0.323028827 | -0.01389122 | 3.34E-02 | 1.54E-01 | 1.00E+00 |
| ENSG00000181273.2_OR5AK2     | ENSG00000160789.18_LMNA | -0.17295 | -0.323252885 | -0.01414136 | 3.31E-02 | 1.53E-01 | 1.00E+00 |
| ENSG00000234201.1_BMI1P1     | ENSG00000160789.18_LMNA | -0.25261 | -0.395887837 | -0.097321   | 1.69E-03 | 1.72E-02 | 1.00E+00 |
| ENSG00000236316.2_OR7E109P   | ENSG00000160789.18_LMNA | -0.14125 | -0.293841561 | 0.018365248 | 8.26E-02 | 2.78E-01 | 1.00E+00 |
| ENSG00000223457.1_HTATSF1P   | ENSG00000160789.18_LMNA | 0.05888  | -0.101270341 | 0.216055107 | 4.71E-01 | 7.31E-01 | 1.00E+00 |
| ENSG00000255501.1_CARD18     | ENSG00000160789.18_LMNA | -0.05148 | -0.208964979 | 0.108614035 | 5.29E-01 | 7.73E-01 | 1.00E+00 |
| ENSG00000234285.1_GAPDHP49   | ENSG00000160789.18_LMNA | -0.07105 | -0.227675116 | 0.089159516 | 3.84E-01 | 6.63E-01 | 1.00E+00 |
| ENSG00000255109.4_CTD-2572N  | ENSG00000160789.18_LMNA | -0.25018 | -0.393699328 | -0.09475232 | 1.88E-03 | 1.87E-02 | 1.00E+00 |
| ENSG00000261621.1_RP11-580I1 | ENSG00000160789.18_LMNA | -0.17783 | -0.327752532 | -0.01917286 | 2.84E-02 | 1.38E-01 | 1.00E+00 |
| ENSG00000273433.1_RP1-170O1  | ENSG00000160789.18_LMNA | -0.00636 | -0.165390556 | 0.152998306 | 9.38E-01 | 9.75E-01 | 1.00E+00 |
| ENSG00000110245.10_APOC3     | ENSG00000160789.18_LMNA | 0.21331  | 0.056010116  | 0.360274934 | 8.33E-03 | 5.73E-02 | 1.00E+00 |
| ENSG00000231172.2_AC007099.  | ENSG00000160789.18_LMNA | 0.12518  | -0.034713475 | 0.278823168 | 1.24E-01 | 3.56E-01 | 1.00E+00 |

|                              |                         |          |              |             |          |          |          |
|------------------------------|-------------------------|----------|--------------|-------------|----------|----------|----------|
| ENSG00000267775.1_OR7E16P    | ENSG00000160789.18_LMNA | 0.07315  | -0.087064684 | 0.229675937 | 3.70E-01 | 6.51E-01 | 1.00E+00 |
| ENSG00000247765.2_RP11-32B5  | ENSG00000160789.18_LMNA | -0.06454 | -0.221469239 | 0.0956392   | 4.30E-01 | 6.99E-01 | 1.00E+00 |
| ENSG00000229626.1_PIGCP2     | ENSG00000160789.18_LMNA | -0.01362 | -0.172443428 | 0.145900437 | 8.68E-01 | 9.48E-01 | 1.00E+00 |
| ENSG00000248131.4_LINC01194  | ENSG00000160789.18_LMNA | -0.04655 | -0.204232343 | 0.11349671  | 5.69E-01 | 7.98E-01 | 1.00E+00 |
| ENSG00000227091.1_RP5-1028L  | ENSG00000160789.18_LMNA | -0.0731  | -0.22963298  | 0.08710969  | 3.71E-01 | 6.51E-01 | 1.00E+00 |
| ENSG00000227411.1_BAATP1     | ENSG00000160789.18_LMNA | -0.09726 | -0.252545594 | 0.062919819 | 2.33E-01 | 5.11E-01 | 1.00E+00 |
| ENSG00000267032.1_RP11-807E  | ENSG00000160789.18_LMNA | 0.0278   | -0.131980278 | 0.186181204 | 7.34E-01 | 8.88E-01 | 1.00E+00 |
| ENSG00000234174.1_AC016683.1 | ENSG00000160789.18_LMNA | 0.10516  | -0.054965171 | 0.260003711 | 1.97E-01 | 4.67E-01 | 1.00E+00 |
| ENSG00000186723.3_OR10H1     | ENSG00000160789.18_LMNA | 0.08185  | -0.078372143 | 0.237949877 | 3.16E-01 | 6.03E-01 | 1.00E+00 |
| ENSG00000263716.1_SLC25A51F  | ENSG00000160789.18_LMNA | 0.00613  | -0.153216442 | 0.165173286 | 9.40E-01 | 9.76E-01 | 1.00E+00 |
| ENSG00000240935.5_PLGLA      | ENSG00000160789.18_LMNA | 0.07189  | -0.088316748 | 0.228480385 | 3.79E-01 | 6.58E-01 | 1.00E+00 |
| ENSG00000235756.2_RP11-339A  | ENSG00000160789.18_LMNA | 0.01712  | -0.142464162 | 0.175846233 | 8.34E-01 | 9.36E-01 | 1.00E+00 |
| ENSG00000237833.1_RP11-432N  | ENSG00000160789.18_LMNA | 0.02551  | -0.134235918 | 0.183963532 | 7.55E-01 | 8.98E-01 | 1.00E+00 |
| ENSG00000228189.4_RP13-60M5  | ENSG00000160789.18_LMNA | 0.1078   | -0.052296075 | 0.262497809 | 1.86E-01 | 4.52E-01 | 1.00E+00 |
| ENSG00000237964.3_AC068042.1 | ENSG00000160789.18_LMNA | -0.07911 | -0.235350353 | 0.081108375 | 3.33E-01 | 6.18E-01 | 1.00E+00 |
| ENSG00000118491.9_ZC2HC1B    | ENSG00000160789.18_LMNA | -0.10345 | -0.258399304 | 0.056679775 | 2.05E-01 | 4.76E-01 | 1.00E+00 |
| ENSG00000253974.4_NRG1-IT1   | ENSG00000160789.18_LMNA | 0.09979  | -0.060366447 | 0.254943677 | 2.21E-01 | 4.97E-01 | 1.00E+00 |
| ENSG00000260377.1_RP11-646E  | ENSG00000160789.18_LMNA | -0.14591 | -0.298188793 | 0.013601721 | 7.29E-02 | 2.56E-01 | 1.00E+00 |
| ENSG00000240309.1_MTCO1P6    | ENSG00000160789.18_LMNA | 0.11057  | -0.049502756 | 0.265103489 | 1.75E-01 | 4.36E-01 | 1.00E+00 |
| ENSG00000237057.2_AC015922.1 | ENSG00000160789.18_LMNA | -0.19276 | -0.341479898 | -0.03461997 | 1.73E-02 | 9.74E-02 | 1.00E+00 |
| ENSG00000267333.1_ASNSP6     | ENSG00000160789.18_LMNA | 0.03006  | -0.129758658 | 0.188362265 | 7.13E-01 | 8.78E-01 | 1.00E+00 |
| ENSG00000168131.4_OR2B2      | ENSG00000160789.18_LMNA | -0.12851 | -0.281946163 | 0.03132771  | 1.15E-01 | 3.38E-01 | 1.00E+00 |
| ENSG00000278273.1_RP11-763B  | ENSG00000160789.18_LMNA | 0.14474  | -0.014798088 | 0.297098194 | 7.52E-02 | 2.62E-01 | 1.00E+00 |
| ENSG00000232392.1_AC002366.1 | ENSG00000160789.18_LMNA | 0.0422   | -0.11779094  | 0.200057758 | 6.06E-01 | 8.20E-01 | 1.00E+00 |
| ENSG00000204007.5_GLT6D1     | ENSG00000160789.18_LMNA | -0.02763 | -0.186008473 | 0.132156086 | 7.35E-01 | 8.89E-01 | 1.00E+00 |
| ENSG00000269516.5_CYP4F23P   | ENSG00000160789.18_LMNA | -0.03868 | -0.19666987  | 0.121267211 | 6.36E-01 | 8.37E-01 | 1.00E+00 |
| ENSG00000249618.4_RP11-422J  | ENSG00000160789.18_LMNA | -0.13324 | -0.286364269 | 0.026525553 | 1.02E-01 | 3.15E-01 | 1.00E+00 |
| ENSG00000274150.1_FADS2P1    | ENSG00000160789.18_LMNA | -0.1459  | -0.298173771 | 0.013618206 | 7.29E-02 | 2.56E-01 | 1.00E+00 |
| ENSG00000261206.1_LINC00561  | ENSG00000160789.18_LMNA | -0.11142 | -0.265905817 | 0.04864166  | 1.72E-01 | 4.31E-01 | 1.00E+00 |
| ENSG00000248279.4_CTD-2218C  | ENSG00000160789.18_LMNA | -0.04236 | -0.200208146 | 0.117636448 | 6.04E-01 | 8.18E-01 | 1.00E+00 |
| ENSG00000225391.4_NHEG1      | ENSG00000160789.18_LMNA | -0.08546 | -0.241373514 | 0.07476117  | 2.95E-01 | 5.81E-01 | 1.00E+00 |
| ENSG00000215906.7_LACTBL1    | ENSG00000160789.18_LMNA | 0.00452  | -0.154787545 | 0.163607506 | 9.56E-01 | 9.82E-01 | 1.00E+00 |
| ENSG00000206531.9_CD200R1L   | ENSG00000160789.18_LMNA | 0.08222  | -0.078005107 | 0.23829823  | 3.14E-01 | 6.00E-01 | 1.00E+00 |



|                              |                         |          |              |             |          |          |          |
|------------------------------|-------------------------|----------|--------------|-------------|----------|----------|----------|
| ENSG00000198798.5_MAGEB3     | ENSG00000160789.18_LMNA | -0.18747 | -0.336619692 | -0.02913406 | 2.07E-02 | 1.11E-01 | 1.00E+00 |
| ENSG00000204850.4_CTB-158D1  | ENSG00000160789.18_LMNA | 0.02776  | -0.1320205   | 0.186141688 | 7.34E-01 | 8.88E-01 | 1.00E+00 |
| ENSG00000258877.2_ATP5A1P4   | ENSG00000160789.18_LMNA | -0.03236 | -0.190582041 | 0.127494319 | 6.92E-01 | 8.68E-01 | 1.00E+00 |
| ENSG00000214691.7_AC104654.  | ENSG00000160789.18_LMNA | -0.13949 | -0.292203871 | 0.020156098 | 8.65E-02 | 2.86E-01 | 1.00E+00 |
| ENSG00000054796.11_SPO11     | ENSG00000160789.18_LMNA | -0.02232 | -0.180879425 | 0.137367355 | 7.85E-01 | 9.12E-01 | 1.00E+00 |
| ENSG00000124157.6_SEMG2      | ENSG00000160789.18_LMNA | -0.089   | -0.244732195 | 0.071210632 | 2.76E-01 | 5.60E-01 | 1.00E+00 |
| ENSG00000186163.8_TRY2P      | ENSG00000160789.18_LMNA | 0.01097  | -0.148485318 | 0.169878707 | 8.93E-01 | 9.58E-01 | 1.00E+00 |
| ENSG00000261257.1_RP11-673E  | ENSG00000160789.18_LMNA | -0.06978 | -0.226467983 | 0.090422013 | 3.93E-01 | 6.71E-01 | 1.00E+00 |
| ENSG00000250626.2_RP11-756P  | ENSG00000160789.18_LMNA | 0.13035  | -0.029463617 | 0.283662755 | 1.09E-01 | 3.29E-01 | 1.00E+00 |
| ENSG00000267872.1_RP11-157B  | ENSG00000160789.18_LMNA | -0.08664 | -0.242496867 | 0.073574539 | 2.89E-01 | 5.74E-01 | 1.00E+00 |
| ENSG00000229663.1_AL672296.1 | ENSG00000160789.18_LMNA | -0.05511 | -0.212448727 | 0.105010023 | 5.00E-01 | 7.53E-01 | 1.00E+00 |
| ENSG00000171360.3_KRT38      | ENSG00000160789.18_LMNA | -0.09691 | -0.25222131  | 0.063264786 | 2.35E-01 | 5.13E-01 | 1.00E+00 |
| ENSG00000226629.1_LINC00974  | ENSG00000160789.18_LMNA | 0.09768  | -0.062496099 | 0.252943814 | 2.31E-01 | 5.09E-01 | 1.00E+00 |
| ENSG00000134249.6_ADAM30     | ENSG00000160789.18_LMNA | -0.00509 | -0.164160697 | 0.154232657 | 9.50E-01 | 9.80E-01 | 1.00E+00 |
| ENSG00000275226.1_LINC00547  | ENSG00000160789.18_LMNA | 0.14283  | -0.016749617 | 0.295317448 | 7.92E-02 | 2.70E-01 | 1.00E+00 |
| ENSG00000168143.8_FAM83B     | ENSG00000160789.18_LMNA | 0.03647  | -0.123447347 | 0.19454128  | 6.56E-01 | 8.48E-01 | 1.00E+00 |
| ENSG00000169344.14_UMOD      | ENSG00000160789.18_LMNA | 0.06699  | -0.093208285 | 0.223800447 | 4.12E-01 | 6.86E-01 | 1.00E+00 |
| ENSG00000205396.10_LINC0066  | ENSG00000160789.18_LMNA | 0.03852  | -0.121424699 | 0.196516205 | 6.38E-01 | 8.38E-01 | 1.00E+00 |
| ENSG00000140478.13_GOLGA6C   | ENSG00000160789.18_LMNA | 0.09524  | -0.064949275 | 0.250636797 | 2.43E-01 | 5.23E-01 | 1.00E+00 |
| ENSG00000275209.1_           | ENSG00000160789.18_LMNA | -0.01854 | -0.177216798 | 0.141077944 | 8.21E-01 | 9.30E-01 | 1.00E+00 |
| ENSG00000278189.1_RNA5-8S5   | ENSG00000160789.18_LMNA | 0.0717   | -0.088511524 | 0.228294314 | 3.80E-01 | 6.59E-01 | 1.00E+00 |
| ENSG00000275309.1_           | ENSG00000160789.18_LMNA | 0.14983  | -0.009600888 | 0.301830017 | 6.54E-02 | 2.39E-01 | 1.00E+00 |
| ENSG00000258815.1_RP11-408B  | ENSG00000160789.18_LMNA | -0.14761 | -0.299769634 | 0.011865981 | 6.95E-02 | 2.49E-01 | 1.00E+00 |
| ENSG00000276862.1_           | ENSG00000160789.18_LMNA | -0.14441 | -0.296791593 | 0.015134263 | 7.59E-02 | 2.63E-01 | 1.00E+00 |
| ENSG00000276933.1_           | ENSG00000160789.18_LMNA | 0.1347   | -0.025041978 | 0.287726511 | 9.80E-02 | 3.08E-01 | 1.00E+00 |
| ENSG00000275065.1_           | ENSG00000160789.18_LMNA | -0.04492 | -0.202667871 | 0.115107413 | 5.83E-01 | 8.06E-01 | 1.00E+00 |
| ENSG00000238777.1_RNU7-141F  | ENSG00000160789.18_LMNA | -0.12045 | -0.274389169 | 0.039508219 | 1.39E-01 | 3.81E-01 | 1.00E+00 |
| ENSG00000200309.1_Y_RNA      | ENSG00000160789.18_LMNA | -0.08542 | -0.241341977 | 0.07479447  | 2.95E-01 | 5.81E-01 | 1.00E+00 |
| ENSG00000223446.1_RP11-274J  | ENSG00000160789.18_LMNA | 0.04851  | -0.111551535 | 0.206119527 | 5.53E-01 | 7.88E-01 | 1.00E+00 |
| ENSG00000264134.1_           | ENSG00000160789.18_LMNA | 0.05579  | -0.104332808 | 0.213102445 | 4.95E-01 | 7.50E-01 | 1.00E+00 |
| ENSG00000221356.1_           | ENSG00000160789.18_LMNA | 0.02195  | -0.137733783 | 0.180518125 | 7.88E-01 | 9.14E-01 | 1.00E+00 |
| ENSG00000275816.1_MIR6500    | ENSG00000160789.18_LMNA | 0.02645  | -0.133307554 | 0.184876662 | 7.46E-01 | 8.94E-01 | 1.00E+00 |
| ENSG00000206656.1_SNORD116   | ENSG00000160789.18_LMNA | 0.03884  | -0.121108417 | 0.196824791 | 6.35E-01 | 8.36E-01 | 1.00E+00 |

|                              |                         |          |              |             |          |          |          |
|------------------------------|-------------------------|----------|--------------|-------------|----------|----------|----------|
| ENSG00000281825.1_AL355480.4 | ENSG00000160789.18_LMNA | -0.00659 | -0.165620897 | 0.152767013 | 9.36E-01 | 9.75E-01 | 1.00E+00 |
| ENSG00000206682.1_Y_RNA      | ENSG00000160789.18_LMNA | -0.03835 | -0.196351176 | 0.121593817 | 6.39E-01 | 8.39E-01 | 1.00E+00 |
| ENSG00000212569.1_Y_RNA      | ENSG00000160789.18_LMNA | -0.03049 | -0.188776406 | 0.129336455 | 7.09E-01 | 8.76E-01 | 1.00E+00 |
| ENSG00000224607.4_IGKV1D-27  | ENSG00000160789.18_LMNA | -0.12107 | -0.274970779 | 0.038880112 | 1.37E-01 | 3.77E-01 | 1.00E+00 |
| ENSG00000252612.1_Y_RNA      | ENSG00000160789.18_LMNA | 0.09511  | -0.065078891 | 0.250514804 | 2.44E-01 | 5.23E-01 | 1.00E+00 |
| ENSG00000200612.1_SNORD114   | ENSG00000160789.18_LMNA | -0.07805 | -0.234341631 | 0.082168863 | 3.39E-01 | 6.24E-01 | 1.00E+00 |
| ENSG00000252351.1_RNU6ATAC   | ENSG00000160789.18_LMNA | 0.02886  | -0.130940509 | 0.187202381 | 7.24E-01 | 8.83E-01 | 1.00E+00 |
| ENSG00000239079.1_snoU13     | ENSG00000160789.18_LMNA | 0.04087  | -0.119109251 | 0.198773858 | 6.17E-01 | 8.27E-01 | 1.00E+00 |
| ENSG00000252940.2_           | ENSG00000160789.18_LMNA | -0.03464 | -0.192774358 | 0.125254731 | 6.72E-01 | 8.56E-01 | 1.00E+00 |
| ENSG00000201294.1_RNU6-1019  | ENSG00000160789.18_LMNA | -0.01274 | -0.171594533 | 0.146756486 | 8.76E-01 | 9.52E-01 | 1.00E+00 |
| ENSG00000277391.1_MIR6881    | ENSG00000160789.18_LMNA | 0.16996  | 0.011058923  | 0.320489356 | 3.63E-02 | 1.62E-01 | 1.00E+00 |
| ENSG00000265623.1_MIR3139    | ENSG00000160789.18_LMNA | -0.03479 | -0.192919145 | 0.125106708 | 6.70E-01 | 8.55E-01 | 1.00E+00 |
| ENSG00000238952.1_           | ENSG00000160789.18_LMNA | -0.05507 | -0.212405019 | 0.105055292 | 5.00E-01 | 7.53E-01 | 1.00E+00 |
| ENSG00000207375.1_SNORD116   | ENSG00000160789.18_LMNA | -0.20062 | -0.34868549  | -0.04278737 | 1.32E-02 | 8.00E-02 | 1.00E+00 |
| ENSG00000199646.1_RNU6-1272  | ENSG00000160789.18_LMNA | -0.07679 | -0.233138529 | 0.08343277  | 3.47E-01 | 6.31E-01 | 1.00E+00 |
| ENSG00000263542.1_           | ENSG00000160789.18_LMNA | 0.04578  | -0.11425445  | 0.203496554 | 5.75E-01 | 8.02E-01 | 1.00E+00 |
| ENSG00000238901.1_snoU13     | ENSG00000160789.18_LMNA | -0.18312 | -0.332624203 | -0.02463803 | 2.39E-02 | 1.23E-01 | 1.00E+00 |
| ENSG00000217514.1_RP3-495O1  | ENSG00000160789.18_LMNA | 0.06063  | -0.099530205 | 0.217730269 | 4.58E-01 | 7.22E-01 | 1.00E+00 |
| ENSG00000212136.1_RNU6-696F  | ENSG00000160789.18_LMNA | -0.04574 | -0.203463011 | 0.114288984 | 5.76E-01 | 8.02E-01 | 1.00E+00 |
| ENSG00000274097.1_5S_rRNA    | ENSG00000160789.18_LMNA | -0.03363 | -0.191806052 | 0.126244315 | 6.81E-01 | 8.61E-01 | 1.00E+00 |
| ENSG00000263762.1_MIR4286    | ENSG00000160789.18_LMNA | -0.15476 | -0.306414195 | 0.004549756 | 5.69E-02 | 2.18E-01 | 1.00E+00 |
| ENSG00000202237.1_RNU6-53P   | ENSG00000160789.18_LMNA | 0.05458  | -0.105536148 | 0.211940661 | 5.04E-01 | 7.55E-01 | 1.00E+00 |
| ENSG00000216101.2_MIR877     | ENSG00000160789.18_LMNA | -0.05942 | -0.216567412 | 0.100738372 | 4.67E-01 | 7.29E-01 | 1.00E+00 |
| ENSG00000280979.1_           | ENSG00000160789.18_LMNA | -0.05827 | -0.21547021  | 0.101877468 | 4.76E-01 | 7.34E-01 | 1.00E+00 |
| ENSG00000221630.2_MIR1179    | ENSG00000160789.18_LMNA | -0.09983 | -0.254976964 | 0.060330975 | 2.21E-01 | 4.96E-01 | 1.00E+00 |
| ENSG00000201118.1_Y_RNA      | ENSG00000160789.18_LMNA | -0.00175 | -0.16090832  | 0.15749213  | 9.83E-01 | 9.94E-01 | 1.00E+00 |
| ENSG00000222849.1_RNA5SP21   | ENSG00000160789.18_LMNA | 0.05524  | -0.104886163 | 0.212568311 | 4.99E-01 | 7.52E-01 | 1.00E+00 |
| ENSG00000200556.1_RNU6-103F  | ENSG00000160789.18_LMNA | 0.01528  | -0.14427601  | 0.17405298  | 8.52E-01 | 9.42E-01 | 1.00E+00 |
| ENSG00000207384.1_Y_RNA      | ENSG00000160789.18_LMNA | -0.04328 | -0.201097786 | 0.116722216 | 5.96E-01 | 8.14E-01 | 1.00E+00 |
| ENSG00000276237.1_           | ENSG00000160789.18_LMNA | 0.09658  | -0.06359466  | 0.251911148 | 2.37E-01 | 5.15E-01 | 1.00E+00 |
| ENSG00000276722.1_GNAS-AS1   | ENSG00000160789.18_LMNA | 0.08539  | -0.074823088 | 0.241314874 | 2.96E-01 | 5.82E-01 | 1.00E+00 |
| ENSG00000200701.1_RNU6-674F  | ENSG00000160789.18_LMNA | -0.04448 | -0.202249247 | 0.115538124 | 5.86E-01 | 8.08E-01 | 1.00E+00 |
| ENSG00000201749.1_Y_RNA      | ENSG00000160789.18_LMNA | 0.07265  | -0.087563314 | 0.229199928 | 3.74E-01 | 6.54E-01 | 1.00E+00 |

|                               |                         |          |              |             |          |          |          |
|-------------------------------|-------------------------|----------|--------------|-------------|----------|----------|----------|
| ENSG00000200220.1_RNU6-179F   | ENSG00000160789.18_LMNA | -0.06338 | -0.220355606 | 0.09679913  | 4.38E-01 | 7.06E-01 | 1.00E+00 |
| ENSG00000274631.1_RP11-368E   | ENSG00000160789.18_LMNA | 0.04496  | -0.115060972 | 0.202713002 | 5.82E-01 | 8.06E-01 | 1.00E+00 |
| ENSG00000252045.1_SNORA33     | ENSG00000160789.18_LMNA | 0.03159  | -0.128257022 | 0.189834712 | 6.99E-01 | 8.71E-01 | 1.00E+00 |
| ENSG00000277937.1_            | ENSG00000160789.18_LMNA | 0.12685  | -0.033019529 | 0.280386476 | 1.19E-01 | 3.47E-01 | 1.00E+00 |
| ENSG00000207378.1_RNU6-748F   | ENSG00000160789.18_LMNA | -0.01515 | -0.173934288 | 0.144395858 | 8.53E-01 | 9.42E-01 | 1.00E+00 |
| ENSG00000201608.1_RNU4-42P    | ENSG00000160789.18_LMNA | 0.09578  | -0.064407053 | 0.251147022 | 2.40E-01 | 5.20E-01 | 1.00E+00 |
| ENSG00000211580.1_MIR769      | ENSG00000160789.18_LMNA | 0.08059  | -0.079631282 | 0.23675421  | 3.24E-01 | 6.10E-01 | 1.00E+00 |
| ENSG00000237323.1_AC009892.1  | ENSG00000160789.18_LMNA | -0.04681 | -0.204488917 | 0.113232395 | 5.67E-01 | 7.97E-01 | 1.00E+00 |
| ENSG00000228015.1_AC074338.1  | ENSG00000160789.18_LMNA | 0.07327  | -0.086941023 | 0.229793965 | 3.70E-01 | 6.50E-01 | 1.00E+00 |
| ENSG00000200301.1_RNA5SP48    | ENSG00000160789.18_LMNA | 0.03606  | -0.123852993 | 0.194144895 | 6.59E-01 | 8.50E-01 | 1.00E+00 |
| ENSG00000265597.1_            | ENSG00000160789.18_LMNA | 0.10943  | -0.05065001  | 0.264033858 | 1.80E-01 | 4.42E-01 | 1.00E+00 |
| ENSG00000226130.1_AC013248.1  | ENSG00000160789.18_LMNA | 0.03808  | -0.121855319 | 0.196095961 | 6.41E-01 | 8.40E-01 | 1.00E+00 |
| ENSG00000279698.1_CTD-2201E   | ENSG00000160789.18_LMNA | 0.00209  | -0.157165247 | 0.161234804 | 9.80E-01 | 9.92E-01 | 1.00E+00 |
| ENSG00000259490.2_IGHV3OR1.1  | ENSG00000160789.18_LMNA | -0.02547 | -0.183921919 | 0.134278212 | 7.55E-01 | 8.98E-01 | 1.00E+00 |
| ENSG00000252236.1_SNORA26     | ENSG00000160789.18_LMNA | 0.04048  | -0.119489123 | 0.198403699 | 6.20E-01 | 8.28E-01 | 1.00E+00 |
| ENSG00000180483.6_DEFB119     | ENSG00000160789.18_LMNA | -0.15948 | -0.310793237 | -0.00029021 | 4.97E-02 | 2.01E-01 | 1.00E+00 |
| ENSG00000279125.1_RP11-417J   | ENSG00000160789.18_LMNA | 0.10574  | -0.054374639 | 0.260555887 | 1.95E-01 | 4.64E-01 | 1.00E+00 |
| ENSG00000259160.1_RP11-973N   | ENSG00000160789.18_LMNA | 0.11721  | -0.042792504 | 0.271344264 | 1.50E-01 | 3.99E-01 | 1.00E+00 |
| ENSG00000260165.1_CTD-2323K   | ENSG00000160789.18_LMNA | 0.03437  | -0.125521481 | 0.192513405 | 6.74E-01 | 8.57E-01 | 1.00E+00 |
| ENSG00000240478.1_RP11-416O   | ENSG00000160789.18_LMNA | -0.17603 | -0.326092752 | -0.01731507 | 3.01E-02 | 1.43E-01 | 1.00E+00 |
| ENSG00000278275.1_RP11-55J1.1 | ENSG00000160789.18_LMNA | 0.08175  | -0.078475894 | 0.237851391 | 3.17E-01 | 6.04E-01 | 1.00E+00 |
| ENSG00000232195.1_TOMM22P2    | ENSG00000160789.18_LMNA | -0.1251  | -0.278747805 | 0.034795089 | 1.25E-01 | 3.56E-01 | 1.00E+00 |
| ENSG00000222686.1_RNU4-72P    | ENSG00000160789.18_LMNA | 0.13775  | -0.021932928 | 0.290577188 | 9.06E-02 | 2.93E-01 | 1.00E+00 |
| ENSG00000234952.1_RP11-328K   | ENSG00000160789.18_LMNA | -0.17576 | -0.325845008 | -0.01703796 | 3.03E-02 | 1.44E-01 | 1.00E+00 |
| ENSG00000229271.1_AC091493.1  | ENSG00000160789.18_LMNA | 0.14421  | -0.015348    | 0.296596626 | 7.63E-02 | 2.64E-01 | 1.00E+00 |
| ENSG00000255149.1_RP11-97114  | ENSG00000160789.18_LMNA | 0.08548  | -0.074735809 | 0.241397531 | 2.95E-01 | 5.81E-01 | 1.00E+00 |
| ENSG00000258892.1_RP11-193F   | ENSG00000160789.18_LMNA | -0.00052 | -0.159705851 | 0.158695469 | 9.95E-01 | 9.98E-01 | 1.00E+00 |
| ENSG00000254688.1_RP11-47J1.1 | ENSG00000160789.18_LMNA | 0.22763  | 0.070997869  | 0.373298773 | 4.80E-03 | 3.80E-02 | 1.00E+00 |
| ENSG00000259473.1_RP11-96C2   | ENSG00000160789.18_LMNA | 0.06682  | -0.093369226 | 0.223646219 | 4.13E-01 | 6.87E-01 | 1.00E+00 |
| ENSG00000227723.1_CTA-31J9.2  | ENSG00000160789.18_LMNA | -0.1014  | -0.256457269 | 0.058752713 | 2.14E-01 | 4.88E-01 | 1.00E+00 |
| ENSG00000255780.1_RP11-1029   | ENSG00000160789.18_LMNA | 0.12663  | -0.033240486 | 0.280182653 | 1.20E-01 | 3.48E-01 | 1.00E+00 |
| ENSG00000268681.1_COX6CP7     | ENSG00000160789.18_LMNA | 0.00404  | -0.155261487 | 0.163134854 | 9.61E-01 | 9.84E-01 | 1.00E+00 |
| ENSG00000262366.1_NDUFA3P6    | ENSG00000160789.18_LMNA | -0.0436  | -0.201398127 | 0.116413451 | 5.94E-01 | 8.13E-01 | 1.00E+00 |

|                              |                         |          |              |             |          |          |          |
|------------------------------|-------------------------|----------|--------------|-------------|----------|----------|----------|
| ENSG00000268957.1_SIGLEC26F  | ENSG00000160789.18_LMNA | -0.06559 | -0.222469905 | 0.094596198 | 4.22E-01 | 6.93E-01 | 1.00E+00 |
| ENSG00000263935.1_TOMM20P3   | ENSG00000160789.18_LMNA | -0.11121 | -0.265702413 | 0.048860006 | 1.73E-01 | 4.32E-01 | 1.00E+00 |
| ENSG00000236403.1_RP11-447M  | ENSG00000160789.18_LMNA | -0.10309 | -0.258052067 | 0.057050617 | 2.06E-01 | 4.78E-01 | 1.00E+00 |
| ENSG00000251416.1_RP11-140M  | ENSG00000160789.18_LMNA | -0.0131  | -0.171940926 | 0.146407231 | 8.73E-01 | 9.51E-01 | 1.00E+00 |
| ENSG00000217195.1_RP11-277I2 | ENSG00000160789.18_LMNA | -0.1284  | -0.281843471 | 0.031439157 | 1.15E-01 | 3.39E-01 | 1.00E+00 |
| ENSG00000238224.1_RP11-522M  | ENSG00000160789.18_LMNA | -0.13567 | -0.288639437 | 0.024046966 | 9.56E-02 | 3.03E-01 | 1.00E+00 |
| ENSG00000229030.1_RP11-402P  | ENSG00000160789.18_LMNA | -0.06433 | -0.221266026 | 0.095850925 | 4.31E-01 | 7.01E-01 | 1.00E+00 |
| ENSG00000224045.1_RP11-98L5  | ENSG00000160789.18_LMNA | 0.03799  | -0.121951819 | 0.196001771 | 6.42E-01 | 8.41E-01 | 1.00E+00 |
| ENSG00000242014.3_RN7SL26P   | ENSG00000160789.18_LMNA | 0.07341  | -0.086805469 | 0.229923334 | 3.69E-01 | 6.50E-01 | 1.00E+00 |
| ENSG00000236226.1_RP11-645N  | ENSG00000160789.18_LMNA | 0.05544  | -0.104685148 | 0.212762366 | 4.98E-01 | 7.51E-01 | 1.00E+00 |
| ENSG00000270475.1_CTC-451A6  | ENSG00000160789.18_LMNA | -0.17825 | -0.32813747  | -0.01960402 | 2.80E-02 | 1.37E-01 | 1.00E+00 |
| ENSG00000230194.1_AC000081.  | ENSG00000160789.18_LMNA | 0.23729  | 0.081159773  | 0.382061847 | 3.24E-03 | 2.83E-02 | 1.00E+00 |
| ENSG00000275607.1_RP11-802O  | ENSG00000160789.18_LMNA | -0.04257 | -0.200409596 | 0.117429477 | 6.03E-01 | 8.18E-01 | 1.00E+00 |
| ENSG00000201564.1_RN7SKP50   | ENSG00000160789.18_LMNA | -0.03163 | -0.189876192 | 0.128214698 | 6.99E-01 | 8.71E-01 | 1.00E+00 |
| ENSG00000219619.2_RP11-126M  | ENSG00000160789.18_LMNA | 0.10806  | -0.052040145 | 0.262736739 | 1.85E-01 | 4.51E-01 | 1.00E+00 |
| ENSG00000237303.2_HIGD1AP8   | ENSG00000160789.18_LMNA | 0.03731  | -0.122621866 | 0.195347596 | 6.48E-01 | 8.44E-01 | 1.00E+00 |
| ENSG00000227055.1_AC009961.  | ENSG00000160789.18_LMNA | 0.10302  | -0.05712092  | 0.25798623  | 2.07E-01 | 4.78E-01 | 1.00E+00 |
| ENSG00000254089.1_RP11-388K  | ENSG00000160789.18_LMNA | -0.15049 | -0.302444486 | 0.008924338 | 6.42E-02 | 2.36E-01 | 1.00E+00 |
| ENSG00000244732.3_RN7SL870F  | ENSG00000160789.18_LMNA | -0.06736 | -0.224155307 | 0.092837916 | 4.10E-01 | 6.84E-01 | 1.00E+00 |
| ENSG00000227965.1_AC098592.  | ENSG00000160789.18_LMNA | -0.01166 | -0.170547556 | 0.14781163  | 8.87E-01 | 9.56E-01 | 1.00E+00 |
| ENSG00000240647.3_RN7SL305F  | ENSG00000160789.18_LMNA | -0.09203 | -0.247603231 | 0.068169236 | 2.59E-01 | 5.43E-01 | 1.00E+00 |
| ENSG00000237663.2_DNAJC19P   | ENSG00000160789.18_LMNA | 0.10968  | -0.050402591 | 0.264264602 | 1.79E-01 | 4.41E-01 | 1.00E+00 |
| ENSG00000240847.3_RN7SL497F  | ENSG00000160789.18_LMNA | 0.0838   | -0.076422881 | 0.239798988 | 3.05E-01 | 5.91E-01 | 1.00E+00 |
| ENSG00000229478.1_ROBO2P1    | ENSG00000160789.18_LMNA | -0.10833 | -0.262992901 | 0.05176571  | 1.84E-01 | 4.49E-01 | 1.00E+00 |
| ENSG00000262120.1_RP11-510M  | ENSG00000160789.18_LMNA | -0.09848 | -0.253707605 | 0.061683077 | 2.27E-01 | 5.04E-01 | 1.00E+00 |
| ENSG00000270531.1_RP11-169K  | ENSG00000160789.18_LMNA | 0.02567  | -0.134079545 | 0.184117378 | 7.54E-01 | 8.98E-01 | 1.00E+00 |
| ENSG00000254627.1_RP1-17K7.  | ENSG00000160789.18_LMNA | -0.11682 | -0.270980261 | 0.04318467  | 1.52E-01 | 4.01E-01 | 1.00E+00 |
| ENSG00000257021.1_HSPE1P20   | ENSG00000160789.18_LMNA | -0.00207 | -0.161212711 | 0.157187369 | 9.80E-01 | 9.93E-01 | 1.00E+00 |
| ENSG00000258624.1_SERPINE4I  | ENSG00000160789.18_LMNA | 0.06012  | -0.100035809 | 0.217243736 | 4.62E-01 | 7.25E-01 | 1.00E+00 |
| ENSG00000239932.3_RN7SL606F  | ENSG00000160789.18_LMNA | -0.01801 | -0.176702925 | 0.141597832 | 8.26E-01 | 9.32E-01 | 1.00E+00 |
| ENSG00000230395.1_AC092651.  | ENSG00000160789.18_LMNA | -0.03958 | -0.197534128 | 0.120381146 | 6.28E-01 | 8.33E-01 | 1.00E+00 |
| ENSG00000204816.5_FGF7P5     | ENSG00000160789.18_LMNA | -0.0173  | -0.176016434 | 0.142292084 | 8.32E-01 | 9.35E-01 | 1.00E+00 |
| ENSG00000273913.1_Metazoa_Sl | ENSG00000160789.18_LMNA | -0.05278 | -0.2102122   | 0.107324717 | 5.18E-01 | 7.65E-01 | 1.00E+00 |

|                              |                         |          |              |             |          |          |          |
|------------------------------|-------------------------|----------|--------------|-------------|----------|----------|----------|
| ENSG00000225640.1_RP5-1022P  | ENSG00000160789.18_LMNA | 0.01574  | -0.143818842 | 0.174505655 | 8.47E-01 | 9.40E-01 | 1.00E+00 |
| ENSG0000023313.2_HMGA1P5     | ENSG00000160789.18_LMNA | 0.03845  | -0.121498966 | 0.196443736 | 6.38E-01 | 8.38E-01 | 1.00E+00 |
| ENSG00000231849.1_UBE2V2P4   | ENSG00000160789.18_LMNA | 0.03091  | -0.128924616 | 0.189180271 | 7.05E-01 | 8.75E-01 | 1.00E+00 |
| ENSG00000242653.3_RN7SL132F  | ENSG00000160789.18_LMNA | -0.05165 | -0.209132379 | 0.108441047 | 5.27E-01 | 7.72E-01 | 1.00E+00 |
| ENSG00000249868.5_RP11-63E5  | ENSG00000160789.18_LMNA | -0.04558 | -0.20330089  | 0.114455889 | 5.77E-01 | 8.03E-01 | 1.00E+00 |
| ENSG00000240416.1_CYCSP20    | ENSG00000160789.18_LMNA | 0.00192  | -0.157330352 | 0.16106991  | 9.81E-01 | 9.93E-01 | 1.00E+00 |
| ENSG00000234273.1_AC073071.  | ENSG00000160789.18_LMNA | 0.05981  | -0.100345763 | 0.216945396 | 4.64E-01 | 7.27E-01 | 1.00E+00 |
| ENSG00000233044.1_RP1-137K2  | ENSG00000160789.18_LMNA | -0.00091 | -0.160083021 | 0.158318129 | 9.91E-01 | 9.97E-01 | 1.00E+00 |
| ENSG00000275840.1_Metazoa_SI | ENSG00000160789.18_LMNA | -0.00406 | -0.163155443 | 0.155240845 | 9.60E-01 | 9.84E-01 | 1.00E+00 |
| ENSG00000236750.1_AC009237.  | ENSG00000160789.18_LMNA | 0.09639  | -0.063792666 | 0.251724943 | 2.37E-01 | 5.16E-01 | 1.00E+00 |
| ENSG00000236076.1_LINC01072  | ENSG00000160789.18_LMNA | -0.2221  | -0.368281184 | -0.06520745 | 5.96E-03 | 4.48E-02 | 1.00E+00 |
| ENSG00000243976.2_RN7SL523F  | ENSG00000160789.18_LMNA | 0.0339   | -0.125985227 | 0.192059629 | 6.78E-01 | 8.60E-01 | 1.00E+00 |
| ENSG00000231082.1_RP11-514F  | ENSG00000160789.18_LMNA | -0.00433 | -0.163418719 | 0.154976865 | 9.58E-01 | 9.83E-01 | 1.00E+00 |
| ENSG00000274206.1_Metazoa_SI | ENSG00000160789.18_LMNA | 0.11485  | -0.045181723 | 0.269125229 | 1.59E-01 | 4.12E-01 | 1.00E+00 |
| ENSG00000259098.1_RP11-603B  | ENSG00000160789.18_LMNA | 0.03204  | -0.127816528 | 0.190266372 | 6.95E-01 | 8.69E-01 | 1.00E+00 |
| ENSG00000267486.1_GLUD1P4    | ENSG00000160789.18_LMNA | -0.21777 | -0.36434371  | -0.06067776 | 7.04E-03 | 5.06E-02 | 1.00E+00 |
| ENSG00000259759.1_RP11-324D  | ENSG00000160789.18_LMNA | -0.22522 | -0.371114539 | -0.0684747  | 5.28E-03 | 4.08E-02 | 1.00E+00 |
| ENSG00000255096.2_OR5B10P    | ENSG00000160789.18_LMNA | -0.0687  | -0.225435869 | 0.091500656 | 4.00E-01 | 6.77E-01 | 1.00E+00 |
| ENSG00000222714.1_RN7SKP38   | ENSG00000160789.18_LMNA | -0.11332 | -0.267689612 | 0.046725528 | 1.65E-01 | 4.20E-01 | 1.00E+00 |
| ENSG00000277532.1_CTD-2319I1 | ENSG00000160789.18_LMNA | -0.05564 | -0.212956142 | 0.104484395 | 4.96E-01 | 7.50E-01 | 1.00E+00 |
| ENSG00000256863.1_RP11-959F  | ENSG00000160789.18_LMNA | -0.01639 | -0.17513476  | 0.143183268 | 8.41E-01 | 9.38E-01 | 1.00E+00 |
| ENSG00000211821.2_TRDV2      | ENSG00000160789.18_LMNA | -0.03638 | -0.194455616 | 0.123535022 | 6.56E-01 | 8.48E-01 | 1.00E+00 |
| ENSG00000215802.3_RFKP1      | ENSG00000160789.18_LMNA | -0.06073 | -0.217821198 | 0.099435694 | 4.57E-01 | 7.22E-01 | 1.00E+00 |
| ENSG00000223982.3_SNRPD2P2   | ENSG00000160789.18_LMNA | -0.04979 | -0.207343963 | 0.11028817  | 5.42E-01 | 7.81E-01 | 1.00E+00 |
| ENSG00000250523.1_RP11-756P  | ENSG00000160789.18_LMNA | -0.08637 | -0.24224228  | 0.073843545 | 2.90E-01 | 5.75E-01 | 1.00E+00 |
| ENSG00000228768.1_MIR365B    | ENSG00000160789.18_LMNA | 0.15546  | -0.003838434 | 0.307058602 | 5.58E-02 | 2.16E-01 | 1.00E+00 |
| ENSG00000226726.1_TMEM256P   | ENSG00000160789.18_LMNA | 0.03982  | -0.120146518 | 0.197762899 | 6.26E-01 | 8.32E-01 | 1.00E+00 |
| ENSG00000231983.1_LINC00415  | ENSG00000160789.18_LMNA | 0.04741  | -0.112639436 | 0.20506435  | 5.62E-01 | 7.93E-01 | 1.00E+00 |
| ENSG00000273553.1_CTD-2049C  | ENSG00000160789.18_LMNA | 0.07883  | -0.081395468 | 0.235077342 | 3.34E-01 | 6.20E-01 | 1.00E+00 |
| ENSG00000218521.1_RP11-420A  | ENSG00000160789.18_LMNA | -0.00181 | -0.160968528 | 0.157431855 | 9.82E-01 | 9.93E-01 | 1.00E+00 |
| ENSG00000250099.1_RP11-12P1  | ENSG00000160789.18_LMNA | -0.03967 | -0.19762272  | 0.120290291 | 6.28E-01 | 8.32E-01 | 1.00E+00 |
| ENSG00000231083.1_AC011747.( | ENSG00000160789.18_LMNA | -0.11132 | -0.265812324 | 0.048742025 | 1.72E-01 | 4.31E-01 | 1.00E+00 |
| ENSG00000238220.1_AP000275.( | ENSG00000160789.18_LMNA | -0.01846 | -0.17713975  | 0.141155905 | 8.21E-01 | 9.30E-01 | 1.00E+00 |

|                              |                         |          |              |             |          |          |          |
|------------------------------|-------------------------|----------|--------------|-------------|----------|----------|----------|
| ENSG00000279990.1_RPSAP68    | ENSG00000160789.18_LMNA | 0.06019  | -0.09996953  | 0.217307524 | 4.61E-01 | 7.25E-01 | 1.00E+00 |
| ENSG00000267245.1_CTD-2085J  | ENSG00000160789.18_LMNA | 0.07015  | -0.090054563 | 0.226819419 | 3.90E-01 | 6.69E-01 | 1.00E+00 |
| ENSG00000266283.1_RP11-627G  | ENSG00000160789.18_LMNA | 0.07145  | -0.088755975 | 0.228060755 | 3.82E-01 | 6.60E-01 | 1.00E+00 |
| ENSG00000258781.2_RP11-496I2 | ENSG00000160789.18_LMNA | 0.03692  | -0.123008238 | 0.194970248 | 6.52E-01 | 8.46E-01 | 1.00E+00 |
| ENSG00000224359.2_RP11-467I2 | ENSG00000160789.18_LMNA | -0.15162 | -0.303492918 | 0.007770436 | 6.22E-02 | 2.31E-01 | 1.00E+00 |
| ENSG00000225802.3_WARSP1     | ENSG00000160789.18_LMNA | -0.13805 | -0.290855185 | 0.021629412 | 8.99E-02 | 2.92E-01 | 1.00E+00 |
| ENSG00000234800.2_PCMTD1P3   | ENSG00000160789.18_LMNA | 0.01653  | -0.14304317  | 0.175273396 | 8.40E-01 | 9.38E-01 | 1.00E+00 |
| ENSG00000224857.1_RP11-344P  | ENSG00000160789.18_LMNA | 0.01551  | -0.144047035 | 0.174279722 | 8.50E-01 | 9.41E-01 | 1.00E+00 |
| ENSG00000257078.1_RP3-461F1  | ENSG00000160789.18_LMNA | -0.08785 | -0.243641175 | 0.072364853 | 2.82E-01 | 5.67E-01 | 1.00E+00 |
| ENSG00000233829.1_AC017078.  | ENSG00000160789.18_LMNA | 0.0209   | -0.138763361 | 0.179502498 | 7.98E-01 | 9.19E-01 | 1.00E+00 |
| ENSG00000233953.1_AC009970.  | ENSG00000160789.18_LMNA | -0.0338  | -0.191965196 | 0.126081717 | 6.79E-01 | 8.60E-01 | 1.00E+00 |
| ENSG00000250820.1_RP11-91H1  | ENSG00000160789.18_LMNA | -0.15424 | -0.305925723 | 0.005088742 | 5.78E-02 | 2.20E-01 | 1.00E+00 |
| ENSG00000226902.1_CHCHD2P1   | ENSG00000160789.18_LMNA | 0.13644  | -0.023269938 | 0.289351968 | 9.37E-02 | 3.00E-01 | 1.00E+00 |
| ENSG00000234436.1_AC008984.  | ENSG00000160789.18_LMNA | 0.04185  | -0.118132935 | 0.199724795 | 6.09E-01 | 8.21E-01 | 1.00E+00 |
| ENSG00000269391.1_RP11-194G  | ENSG00000160789.18_LMNA | 0.02046  | -0.139198202 | 0.179073346 | 8.02E-01 | 9.21E-01 | 1.00E+00 |
| ENSG00000240486.2_RPL23AP5.  | ENSG00000160789.18_LMNA | 0.1828   | 0.024310813  | 0.332332981 | 2.42E-02 | 1.24E-01 | 1.00E+00 |
| ENSG00000260626.1_RP11-23E1  | ENSG00000160789.18_LMNA | -0.07622 | -0.232600002 | 0.083998184 | 3.51E-01 | 6.34E-01 | 1.00E+00 |
| ENSG00000236590.1_MTATP6P4   | ENSG00000160789.18_LMNA | -0.02338 | -0.181902561 | 0.136329222 | 7.75E-01 | 9.07E-01 | 1.00E+00 |
| ENSG00000226407.1_RPL23P11   | ENSG00000160789.18_LMNA | 0.09609  | -0.064088761 | 0.25144645  | 2.39E-01 | 5.18E-01 | 1.00E+00 |
| ENSG00000248851.1_AC006427.  | ENSG00000160789.18_LMNA | -0.05132 | -0.208812233 | 0.108771864 | 5.30E-01 | 7.73E-01 | 1.00E+00 |
| ENSG00000235628.1_TNR-IT1    | ENSG00000160789.18_LMNA | -0.05433 | -0.2117002   | 0.105785095 | 5.06E-01 | 7.57E-01 | 1.00E+00 |
| ENSG00000231253.1_RP1-302D9  | ENSG00000160789.18_LMNA | -0.18347 | -0.332948163 | -0.02500211 | 2.37E-02 | 1.22E-01 | 1.00E+00 |
| ENSG00000244321.1_LINC01326  | ENSG00000160789.18_LMNA | 0.03582  | -0.124088895 | 0.193914331 | 6.61E-01 | 8.50E-01 | 1.00E+00 |
| ENSG00000250064.1_RP11-123O  | ENSG00000160789.18_LMNA | 0.04861  | -0.111457641 | 0.206210562 | 5.52E-01 | 7.88E-01 | 1.00E+00 |
| ENSG00000248238.1_RP11-3J1.1 | ENSG00000160789.18_LMNA | 0.07934  | -0.080880241 | 0.235567262 | 3.31E-01 | 6.17E-01 | 1.00E+00 |
| ENSG00000249293.1_CTC-575I1C | ENSG00000160789.18_LMNA | 0.10874  | -0.051347285 | 0.26338338  | 1.82E-01 | 4.47E-01 | 1.00E+00 |
| ENSG00000224257.1_VWC2L-IT1  | ENSG00000160789.18_LMNA | #####    | -0.159211965 | 0.159189438 | 1.00E+00 | 1.00E+00 | 1.00E+00 |
| ENSG00000268469.1_BNIP3P38   | ENSG00000160789.18_LMNA | -0.04891 | -0.206502402 | 0.111156597 | 5.50E-01 | 7.86E-01 | 1.00E+00 |
| ENSG00000267098.1_RP11-325K  | ENSG00000160789.18_LMNA | -0.26684 | -0.408681693 | -0.11241736 | 8.90E-04 | 1.06E-02 | 1.00E+00 |
| ENSG00000260760.1_PWRN3      | ENSG00000160789.18_LMNA | -0.15183 | -0.303691461 | 0.007551748 | 6.19E-02 | 2.30E-01 | 1.00E+00 |
| ENSG00000276668.1_RP11-35J1C | ENSG00000160789.18_LMNA | 0.02572  | -0.13403321  | 0.184162961 | 7.53E-01 | 8.97E-01 | 1.00E+00 |
| ENSG00000232918.2_RP11-366L  | ENSG00000160789.18_LMNA | 0.0764   | -0.083825033 | 0.23276494  | 3.50E-01 | 6.33E-01 | 1.00E+00 |
| ENSG00000241981.2_AF224669.  | ENSG00000160789.18_LMNA | -0.0485  | -0.206112779 | 0.111558494 | 5.53E-01 | 7.88E-01 | 1.00E+00 |

|                              |                         |          |              |             |          |          |          |
|------------------------------|-------------------------|----------|--------------|-------------|----------|----------|----------|
| ENSG00000186795.1_KCNK18     | ENSG00000160789.18_LMNA | 0.00041  | -0.158803411 | 0.159597941 | 9.96E-01 | 9.98E-01 | 1.00E+00 |
| ENSG00000224667.1_AC013470.1 | ENSG00000160789.18_LMNA | -0.00408 | -0.163178805 | 0.155217422 | 9.60E-01 | 9.84E-01 | 1.00E+00 |
| ENSG00000270258.1_DUXAP4     | ENSG00000160789.18_LMNA | 0.03341  | -0.126464884 | 0.191590142 | 6.83E-01 | 8.62E-01 | 1.00E+00 |
| ENSG00000232471.3_RP11-241F  | ENSG00000160789.18_LMNA | -0.0689  | -0.22562871  | 0.091299178 | 3.99E-01 | 6.76E-01 | 1.00E+00 |
| ENSG00000274927.1_CH17-13I23 | ENSG00000160789.18_LMNA | -0.27092 | -0.412340637 | -0.1167601  | 7.36E-04 | 9.10E-03 | 1.00E+00 |
| ENSG00000249198.1_RP11-772C  | ENSG00000160789.18_LMNA | -0.0312  | -0.189458395 | 0.128640937 | 7.03E-01 | 8.73E-01 | 1.00E+00 |
| ENSG00000241695.1_GM2AP1     | ENSG00000160789.18_LMNA | -0.03659 | -0.194659661 | 0.123326181 | 6.54E-01 | 8.47E-01 | 1.00E+00 |
| ENSG00000255548.1_RP11-617B  | ENSG00000160789.18_LMNA | 0.06583  | -0.094360191 | 0.22269624  | 4.20E-01 | 6.92E-01 | 1.00E+00 |
| ENSG00000124237.5_C20orf85   | ENSG00000160789.18_LMNA | 0.10994  | -0.050140142 | 0.264509324 | 1.78E-01 | 4.39E-01 | 1.00E+00 |
| ENSG00000279819.1_RP11-142L  | ENSG00000160789.18_LMNA | 0.07868  | -0.08154225  | 0.23493774  | 3.35E-01 | 6.21E-01 | 1.00E+00 |
| ENSG00000263609.1_RP11-1109I | ENSG00000160789.18_LMNA | -0.18796 | -0.337078762 | -0.02965144 | 2.04E-02 | 1.09E-01 | 1.00E+00 |
| ENSG00000242009.1_RP11-359D  | ENSG00000160789.18_LMNA | -0.07846 | -0.234730031 | 0.081760616 | 3.37E-01 | 6.22E-01 | 1.00E+00 |
| ENSG00000229623.1_METTL21A   | ENSG00000160789.18_LMNA | 0.00052  | -0.15869042  | 0.159710899 | 9.95E-01 | 9.98E-01 | 1.00E+00 |
| ENSG00000240698.1_RPS2P39    | ENSG00000160789.18_LMNA | -0.07863 | -0.234893544 | 0.081588716 | 3.36E-01 | 6.21E-01 | 1.00E+00 |
| ENSG00000253745.1_RP11-350F  | ENSG00000160789.18_LMNA | 0.04062  | -0.119355618 | 0.198533802 | 6.19E-01 | 8.28E-01 | 1.00E+00 |
| ENSG00000181616.8_OR52H1     | ENSG00000160789.18_LMNA | 0.04028  | -0.119688894 | 0.198209    | 6.22E-01 | 8.29E-01 | 1.00E+00 |
| ENSG00000271097.1_RP11-223J  | ENSG00000160789.18_LMNA | 0.09201  | -0.068190456 | 0.247583218 | 2.60E-01 | 5.43E-01 | 1.00E+00 |
| ENSG00000225121.2_EEF1B2P5   | ENSG00000160789.18_LMNA | 0.07807  | -0.082154468 | 0.234355328 | 3.39E-01 | 6.24E-01 | 1.00E+00 |
| ENSG00000120235.4_IFNA6      | ENSG00000160789.18_LMNA | -0.08213 | -0.238220187 | 0.078087343 | 3.14E-01 | 6.01E-01 | 1.00E+00 |
| ENSG00000277397.1_RP5-1024G  | ENSG00000160789.18_LMNA | 0.06951  | -0.090694957 | 0.22620688  | 3.95E-01 | 6.72E-01 | 1.00E+00 |
| ENSG00000230381.2_RP4-655J1  | ENSG00000160789.18_LMNA | 0.0205   | -0.139153859 | 0.179117114 | 8.02E-01 | 9.21E-01 | 1.00E+00 |
| ENSG00000230967.2_RP11-1071I | ENSG00000160789.18_LMNA | -0.04674 | -0.204415604 | 0.113307924 | 5.67E-01 | 7.97E-01 | 1.00E+00 |
| ENSG00000279523.1_RP11-461O  | ENSG00000160789.18_LMNA | -0.0477  | -0.205342499 | 0.112352735 | 5.60E-01 | 7.92E-01 | 1.00E+00 |
| ENSG00000251648.2_CTD-2353N  | ENSG00000160789.18_LMNA | 0.18344  | 0.024969613  | 0.332919247 | 2.37E-02 | 1.22E-01 | 1.00E+00 |
| ENSG00000260340.1_RP11-254F  | ENSG00000160789.18_LMNA | 0.02615  | -0.133602603 | 0.184586514 | 7.49E-01 | 8.95E-01 | 1.00E+00 |
| ENSG00000127780.3_OR1E2      | ENSG00000160789.18_LMNA | -0.05368 | -0.211074503 | 0.106432684 | 5.11E-01 | 7.60E-01 | 1.00E+00 |
| ENSG00000248172.1_RP11-1094I | ENSG00000160789.18_LMNA | 0.10067  | -0.059484124 | 0.255771438 | 2.17E-01 | 4.92E-01 | 1.00E+00 |
| ENSG00000235713.1_RP4-604G5  | ENSG00000160789.18_LMNA | -0.09923 | -0.25440856  | 0.060936574 | 2.24E-01 | 5.00E-01 | 1.00E+00 |
| ENSG00000259695.2_RP11-14C1  | ENSG00000160789.18_LMNA | 0.1598   | 0.00061921   | 0.311090429 | 4.92E-02 | 1.99E-01 | 1.00E+00 |
| ENSG00000204718.3_CNN2P12    | ENSG00000160789.18_LMNA | 0.27539  | 0.121517639  | 0.416338157 | 5.95E-04 | 7.74E-03 | 1.00E+00 |
| ENSG00000234379.1_HMGB1P48   | ENSG00000160789.18_LMNA | 0.02314  | -0.136566574 | 0.181668699 | 7.77E-01 | 9.08E-01 | 1.00E+00 |
| ENSG00000236117.1_RP4-754E2  | ENSG00000160789.18_LMNA | -0.15427 | -0.305954562 | 0.005056925 | 5.77E-02 | 2.20E-01 | 1.00E+00 |
| ENSG00000166787.3_SAA3P      | ENSG00000160789.18_LMNA | -0.06049 | -0.217597619 | 0.099668071 | 4.59E-01 | 7.23E-01 | 1.00E+00 |

|                              |                         |          |              |             |          |          |          |
|------------------------------|-------------------------|----------|--------------|-------------|----------|----------|----------|
| ENSG00000262648.1_PHPB15     | ENSG00000160789.18_LMNA | 0.07223  | -0.087986675 | 0.228795653 | 3.77E-01 | 6.56E-01 | 1.00E+00 |
| ENSG00000253687.1_CTC-348L5  | ENSG00000160789.18_LMNA | -0.1059  | -0.260705918 | 0.05421415  | 1.94E-01 | 4.63E-01 | 1.00E+00 |
| ENSG00000248408.1_RP11-452C  | ENSG00000160789.18_LMNA | 0.02594  | -0.133810318 | 0.184382217 | 7.51E-01 | 8.96E-01 | 1.00E+00 |
| ENSG00000259221.4_CTD-2050N  | ENSG00000160789.18_LMNA | -0.26703 | -0.408850954 | -0.112618   | 8.82E-04 | 1.05E-02 | 1.00E+00 |
| ENSG00000243486.1_RP11-217E  | ENSG00000160789.18_LMNA | 0.08278  | -0.077446273 | 0.238828462 | 3.11E-01 | 5.97E-01 | 1.00E+00 |
| ENSG00000279658.1_RP11-389G  | ENSG00000160789.18_LMNA | 0.06526  | -0.094927532 | 0.222152092 | 4.24E-01 | 6.95E-01 | 1.00E+00 |
| ENSG00000270846.1_RP11-674I1 | ENSG00000160789.18_LMNA | 0.03521  | -0.124691317 | 0.19332538  | 6.67E-01 | 8.53E-01 | 1.00E+00 |
| ENSG00000253199.1_RP11-421P  | ENSG00000160789.18_LMNA | -0.09695 | -0.252261456 | 0.063222084 | 2.35E-01 | 5.13E-01 | 1.00E+00 |
| ENSG00000230818.1_MTND2P16   | ENSG00000160789.18_LMNA | 0.01414  | -0.145392122 | 0.172947271 | 8.63E-01 | 9.46E-01 | 1.00E+00 |
| ENSG00000233646.1_OR52T1P    | ENSG00000160789.18_LMNA | -0.00159 | -0.160754804 | 0.157645811 | 9.84E-01 | 9.94E-01 | 1.00E+00 |
| ENSG00000227613.1_QRSL1P2    | ENSG00000160789.18_LMNA | -0.047   | -0.204667228 | 0.113048678 | 5.65E-01 | 7.96E-01 | 1.00E+00 |
| ENSG00000231947.1_MTND2P24   | ENSG00000160789.18_LMNA | 0.00332  | -0.155960732 | 0.162437246 | 9.68E-01 | 9.87E-01 | 1.00E+00 |
| ENSG00000279298.1_CTA-221G9  | ENSG00000160789.18_LMNA | 0.07294  | -0.087273631 | 0.229476488 | 3.72E-01 | 6.52E-01 | 1.00E+00 |
| ENSG00000259186.1_MRPS15P1   | ENSG00000160789.18_LMNA | 0.10976  | -0.050324998 | 0.264336958 | 1.78E-01 | 4.40E-01 | 1.00E+00 |
| ENSG00000144188.9_TRIM43CP   | ENSG00000160789.18_LMNA | 0.1007   | -0.059458758 | 0.255795229 | 2.17E-01 | 4.92E-01 | 1.00E+00 |
| ENSG00000259334.1_LINC00596  | ENSG00000160789.18_LMNA | 0.03782  | -0.122116639 | 0.195840882 | 6.44E-01 | 8.42E-01 | 1.00E+00 |
| ENSG00000204701.1_OR2J3      | ENSG00000160789.18_LMNA | -0.03824 | -0.196249102 | 0.121698411 | 6.40E-01 | 8.39E-01 | 1.00E+00 |
| ENSG00000231240.1_KLF2P1     | ENSG00000160789.18_LMNA | -0.08483 | -0.240781927 | 0.075385721 | 2.99E-01 | 5.85E-01 | 1.00E+00 |
| ENSG00000236053.1_LINC01067  | ENSG00000160789.18_LMNA | 0.05765  | -0.102486459 | 0.214883288 | 4.80E-01 | 7.38E-01 | 1.00E+00 |
| ENSG00000278110.1_XXbac-B33I | ENSG00000160789.18_LMNA | 0.07829  | -0.081932557 | 0.234566461 | 3.38E-01 | 6.23E-01 | 1.00E+00 |
| ENSG00000271338.1_RP11-96J1I | ENSG00000160789.18_LMNA | -0.0968  | -0.252111908 | 0.063381149 | 2.35E-01 | 5.13E-01 | 1.00E+00 |
| ENSG00000233157.1_RP3-388M5  | ENSG00000160789.18_LMNA | -0.02659 | -0.185002979 | 0.133179086 | 7.45E-01 | 8.93E-01 | 1.00E+00 |
| ENSG00000224129.1_DPPA2P2    | ENSG00000160789.18_LMNA | 0.10633  | -0.053778828 | 0.261112792 | 1.92E-01 | 4.60E-01 | 1.00E+00 |
| ENSG00000231492.2_AP003774.1 | ENSG00000160789.18_LMNA | 0.15501  | -0.004292088 | 0.306647657 | 5.65E-02 | 2.17E-01 | 1.00E+00 |
| ENSG00000131050.9_BPIFA2     | ENSG00000160789.18_LMNA | -0.05587 | -0.213177475 | 0.104255062 | 4.94E-01 | 7.49E-01 | 1.00E+00 |
| ENSG00000256671.5_LIMS4      | ENSG00000160789.18_LMNA | 0.13882  | -0.02084342  | 0.291574844 | 8.81E-02 | 2.89E-01 | 1.00E+00 |
| ENSG00000146385.1_TAAR8      | ENSG00000160789.18_LMNA | -0.00123 | -0.160400153 | 0.158000781 | 9.88E-01 | 9.95E-01 | 1.00E+00 |
| ENSG00000258115.1_RP11-89M2  | ENSG00000160789.18_LMNA | -0.09311 | -0.248624962 | 0.06708546  | 2.54E-01 | 5.36E-01 | 1.00E+00 |
| ENSG00000250425.1_OR7E35P    | ENSG00000160789.18_LMNA | 0.05413  | -0.105988809 | 0.211503401 | 5.08E-01 | 7.58E-01 | 1.00E+00 |
| ENSG00000229155.1_RP11-528A  | ENSG00000160789.18_LMNA | 0.07755  | -0.082674379 | 0.233860551 | 3.42E-01 | 6.27E-01 | 1.00E+00 |
| ENSG00000188124.2_OR2AG2     | ENSG00000160789.18_LMNA | 0.08316  | -0.077057908 | 0.23919684  | 3.08E-01 | 5.95E-01 | 1.00E+00 |
| ENSG00000188831.4_DPPA3P2    | ENSG00000160789.18_LMNA | -0.20722 | -0.354718048 | -0.04965675 | 1.04E-02 | 6.74E-02 | 1.00E+00 |
| ENSG00000228666.1_KRT18P1    | ENSG00000160789.18_LMNA | 0.07725  | -0.082973223 | 0.23357608  | 3.44E-01 | 6.29E-01 | 1.00E+00 |



|                              |                         |          |              |             |          |          |          |
|------------------------------|-------------------------|----------|--------------|-------------|----------|----------|----------|
| ENSG00000231567.1_MTND2P19   | ENSG00000160789.18_LMNA | 0.14874  | -0.010717867 | 0.30081435  | 6.74E-02 | 2.43E-01 | 1.00E+00 |
| ENSG00000258491.2_ZFP64P1    | ENSG00000160789.18_LMNA | -0.11955 | -0.273545811 | 0.040418558 | 1.42E-01 | 3.85E-01 | 1.00E+00 |
| ENSG00000234984.1_FMO10P     | ENSG00000160789.18_LMNA | -0.03421 | -0.192362725 | 0.125675487 | 6.76E-01 | 8.58E-01 | 1.00E+00 |
| ENSG00000255470.1_RP11-113D  | ENSG00000160789.18_LMNA | -0.10446 | -0.259351482 | 0.055662422 | 2.00E-01 | 4.71E-01 | 1.00E+00 |
| ENSG00000213431.4_RP11-301G  | ENSG00000160789.18_LMNA | -0.03132 | -0.189577121 | 0.128519824 | 7.02E-01 | 8.72E-01 | 1.00E+00 |
| ENSG00000258973.1_RP11-934B  | ENSG00000160789.18_LMNA | 0.20409  | 0.046395166  | 0.351856951 | 1.17E-02 | 7.32E-02 | 1.00E+00 |
| ENSG00000236252.2_RP11-15J1  | ENSG00000160789.18_LMNA | -0.06996 | -0.226636746 | 0.090245571 | 3.92E-01 | 6.70E-01 | 1.00E+00 |
| ENSG00000213158.5_GAPDHP36   | ENSG00000160789.18_LMNA | -0.13906 | -0.291805081 | 0.02059188  | 8.75E-02 | 2.88E-01 | 1.00E+00 |
| ENSG00000275038.1_RP11-546B  | ENSG00000160789.18_LMNA | -0.1836  | -0.333066463 | -0.02513508 | 2.36E-02 | 1.21E-01 | 1.00E+00 |
| ENSG00000229775.5_RP11-298H  | ENSG00000160789.18_LMNA | -0.06993 | -0.22660579  | 0.090277937 | 3.92E-01 | 6.70E-01 | 1.00E+00 |
| ENSG00000259135.1_RP11-671J  | ENSG00000160789.18_LMNA | 0.02931  | -0.130501941 | 0.187632901 | 7.20E-01 | 8.81E-01 | 1.00E+00 |
| ENSG00000272135.4_RP11-107C  | ENSG00000160789.18_LMNA | -0.06081 | -0.217898414 | 0.099355431 | 4.57E-01 | 7.21E-01 | 1.00E+00 |
| ENSG00000248747.1_RP11-586L  | ENSG00000160789.18_LMNA | -0.08304 | -0.239078631 | 0.077182541 | 3.09E-01 | 5.96E-01 | 1.00E+00 |
| ENSG00000219073.6_CELA3B     | ENSG00000160789.18_LMNA | 0.03564  | -0.124267686 | 0.193739562 | 6.63E-01 | 8.51E-01 | 1.00E+00 |
| ENSG00000264663.1_KRT8P34    | ENSG00000160789.18_LMNA | -0.07185 | -0.22844014  | 0.088358878 | 3.79E-01 | 6.58E-01 | 1.00E+00 |
| ENSG00000261020.1_RP11-744K  | ENSG00000160789.18_LMNA | -0.09903 | -0.254221124 | 0.061136223 | 2.25E-01 | 5.01E-01 | 1.00E+00 |
| ENSG00000260834.1_RP11-256I  | ENSG00000160789.18_LMNA | -0.10019 | -0.255319549 | 0.05996586  | 2.19E-01 | 4.94E-01 | 1.00E+00 |
| ENSG00000248735.2_R3HDM2P1   | ENSG00000160789.18_LMNA | -0.05999 | -0.217119941 | 0.10016443  | 4.63E-01 | 7.26E-01 | 1.00E+00 |
| ENSG00000255093.1_RP11-794P  | ENSG00000160789.18_LMNA | 0.05583  | -0.104296781 | 0.213137214 | 4.94E-01 | 7.49E-01 | 1.00E+00 |
| ENSG00000257635.2_RP11-536C  | ENSG00000160789.18_LMNA | -0.02776 | -0.186138636 | 0.132023607 | 7.34E-01 | 8.88E-01 | 1.00E+00 |
| ENSG00000183607.8_GKN2       | ENSG00000160789.18_LMNA | 0.10136  | -0.058787371 | 0.256424778 | 2.14E-01 | 4.88E-01 | 1.00E+00 |
| ENSG00000233399.2_RP11-111I  | ENSG00000160789.18_LMNA | -0.07349 | -0.230000272 | 0.086724846 | 3.68E-01 | 6.49E-01 | 1.00E+00 |
| ENSG00000280147.1_RP11-486M  | ENSG00000160789.18_LMNA | 0.10288  | -0.057257732 | 0.2578581   | 2.07E-01 | 4.79E-01 | 1.00E+00 |
| ENSG00000173302.5_GPR148     | ENSG00000160789.18_LMNA | -0.16954 | -0.320104329 | -0.01062993 | 3.68E-02 | 1.64E-01 | 1.00E+00 |
| ENSG00000281856.1_RP11-744A  | ENSG00000160789.18_LMNA | 0.02653  | -0.133236687 | 0.184946344 | 7.46E-01 | 8.94E-01 | 1.00E+00 |
| ENSG00000280270.1_RP11-560F  | ENSG00000160789.18_LMNA | -0.04561 | -0.203337456 | 0.114418246 | 5.77E-01 | 8.03E-01 | 1.00E+00 |
| ENSG00000163286.6_ALPPL2     | ENSG00000160789.18_LMNA | -0.01077 | -0.169679321 | 0.14868609  | 8.95E-01 | 9.59E-01 | 1.00E+00 |
| ENSG00000279034.1_RP11-5A1.1 | ENSG00000160789.18_LMNA | -0.12725 | -0.280763402 | 0.032610836 | 1.18E-01 | 3.45E-01 | 1.00E+00 |
| ENSG00000178690.2_DYNAP      | ENSG00000160789.18_LMNA | 0.01357  | -0.145948727 | 0.172395554 | 8.68E-01 | 9.49E-01 | 1.00E+00 |
| ENSG00000279446.1_AC005915   | ENSG00000160789.18_LMNA | 0.03089  | -0.128945866 | 0.189159436 | 7.06E-01 | 8.75E-01 | 1.00E+00 |
| ENSG00000179577.3_KB-1552D7  | ENSG00000160789.18_LMNA | 0.07164  | -0.088565945 | 0.228242321 | 3.80E-01 | 6.59E-01 | 1.00E+00 |
| ENSG00000224960.3_PPP4R3CP   | ENSG00000160789.18_LMNA | -0.12317 | -0.276941265 | 0.036750251 | 1.31E-01 | 3.66E-01 | 1.00E+00 |
| ENSG00000229569.1_RP11-481G  | ENSG00000160789.18_LMNA | 0.05305  | -0.107051962 | 0.210475917 | 5.16E-01 | 7.63E-01 | 1.00E+00 |

|                              |                         |          |              |             |          |          |          |
|------------------------------|-------------------------|----------|--------------|-------------|----------|----------|----------|
| ENSG00000235862.2_RP11-338C  | ENSG00000160789.18_LMNA | 0.06719  | -0.093004562 | 0.22399565  | 4.11E-01 | 6.85E-01 | 1.00E+00 |
| ENSG00000279756.1_CTD-2385L  | ENSG00000160789.18_LMNA | 0.07954  | -0.080682406 | 0.235755338 | 3.30E-01 | 6.16E-01 | 1.00E+00 |
| ENSG00000260066.1_CTD-2587M  | ENSG00000160789.18_LMNA | 0.057    | -0.10313555  | 0.214257466 | 4.85E-01 | 7.42E-01 | 1.00E+00 |
| ENSG00000270831.1_NF1P1      | ENSG00000160789.18_LMNA | 0.09515  | -0.065034643 | 0.250556451 | 2.44E-01 | 5.23E-01 | 1.00E+00 |
| ENSG00000237850.6_RP11-483E  | ENSG00000160789.18_LMNA | -0.10641 | -0.2611824   | 0.05370434  | 1.92E-01 | 4.60E-01 | 1.00E+00 |
| ENSG00000185873.7_TMPRSS11   | ENSG00000160789.18_LMNA | 0.06921  | -0.090995264 | 0.225919548 | 3.97E-01 | 6.74E-01 | 1.00E+00 |
| ENSG00000226983.2_AP000235.1 | ENSG00000160789.18_LMNA | -0.13103 | -0.284303067 | 0.028767727 | 1.08E-01 | 3.26E-01 | 1.00E+00 |
| ENSG00000224309.6_ANKRD30B   | ENSG00000160789.18_LMNA | -0.05113 | -0.208633933 | 0.108956075 | 5.32E-01 | 7.74E-01 | 1.00E+00 |
| ENSG00000279460.1_RP11-517M  | ENSG00000160789.18_LMNA | 0.1277   | -0.032153    | 0.281185535 | 1.17E-01 | 3.42E-01 | 1.00E+00 |
| ENSG00000173572.10_NLRP13    | ENSG00000160789.18_LMNA | -0.01786 | -0.176559026 | 0.141743384 | 8.27E-01 | 9.32E-01 | 1.00E+00 |
| ENSG00000258080.1_ARHGAP42   | ENSG00000160789.18_LMNA | 0.0515   | -0.108594578 | 0.208983808 | 5.29E-01 | 7.73E-01 | 1.00E+00 |
| ENSG00000279190.1_RP11-534P  | ENSG00000160789.18_LMNA | -0.08067 | -0.236831197 | 0.079550238 | 3.23E-01 | 6.10E-01 | 1.00E+00 |
| ENSG00000216192.1_MIR920     | ENSG00000160789.18_LMNA | -0.04981 | -0.20736969  | 0.110261613 | 5.42E-01 | 7.81E-01 | 1.00E+00 |
| ENSG00000263526.1_MIR378G    | ENSG00000160789.18_LMNA | 0.06581  | -0.094382578 | 0.222674771 | 4.21E-01 | 6.92E-01 | 1.00E+00 |
| ENSG00000200072.1_SNORD44    | ENSG00000160789.18_LMNA | -0.08986 | -0.245544536 | 0.070350684 | 2.71E-01 | 5.55E-01 | 1.00E+00 |
| ENSG00000253056.1_RNU7-128F  | ENSG00000160789.18_LMNA | -0.05544 | -0.212766397 | 0.104680971 | 4.97E-01 | 7.51E-01 | 1.00E+00 |
| ENSG00000265866.1_           | ENSG00000160789.18_LMNA | -0.02712 | -0.185515263 | 0.132657967 | 7.40E-01 | 8.91E-01 | 1.00E+00 |
| ENSG00000211692.1_TRGJP1     | ENSG00000160789.18_LMNA | -0.23247 | -0.37769277  | -0.07608544 | 3.95E-03 | 3.29E-02 | 1.00E+00 |
| ENSG00000265714.1_           | ENSG00000160789.18_LMNA | 0.06288  | -0.097297305 | 0.219877061 | 4.42E-01 | 7.09E-01 | 1.00E+00 |
| ENSG00000239151.1_RNU7-195F  | ENSG00000160789.18_LMNA | 0.01598  | -0.143586783 | 0.174735382 | 8.45E-01 | 9.40E-01 | 1.00E+00 |
| ENSG00000275523.1_MIR6508    | ENSG00000160789.18_LMNA | -0.03438 | -0.192523366 | 0.125511299 | 6.74E-01 | 8.57E-01 | 1.00E+00 |
| ENSG00000281551.1_           | ENSG00000160789.18_LMNA | -0.10239 | -0.257391439 | 0.057755914 | 2.09E-01 | 4.82E-01 | 1.00E+00 |
| ENSG00000202440.1_SNORD42    | ENSG00000160789.18_LMNA | -0.08126 | -0.237394393 | 0.078957239 | 3.20E-01 | 6.06E-01 | 1.00E+00 |
| ENSG00000275783.1_           | ENSG00000160789.18_LMNA | -0.20041 | -0.348488731 | -0.0425638  | 1.33E-02 | 8.04E-02 | 1.00E+00 |
| ENSG00000278841.1_           | ENSG00000160789.18_LMNA | 0.04535  | -0.114682981 | 0.203080277 | 5.79E-01 | 8.04E-01 | 1.00E+00 |
| ENSG00000275377.1_MIR1299    | ENSG00000160789.18_LMNA | 0.02988  | -0.129939623 | 0.188184721 | 7.15E-01 | 8.79E-01 | 1.00E+00 |
| ENSG00000201498.1_Y_RNA      | ENSG00000160789.18_LMNA | -0.1058  | -0.260609077 | 0.054317743 | 1.95E-01 | 4.63E-01 | 1.00E+00 |
| ENSG00000258694.1_RP11-1033  | ENSG00000160789.18_LMNA | -0.19009 | -0.339026854 | -0.03184881 | 1.90E-02 | 1.04E-01 | 1.00E+00 |
| ENSG00000263712.1_MIR4639    | ENSG00000160789.18_LMNA | 0.03523  | -0.12466662  | 0.193349529 | 6.67E-01 | 8.53E-01 | 1.00E+00 |
| ENSG00000220982.3_           | ENSG00000160789.18_LMNA | 0.07382  | -0.086395353 | 0.230314667 | 3.66E-01 | 6.47E-01 | 1.00E+00 |
| ENSG00000266038.1_MIR4659A   | ENSG00000160789.18_LMNA | -0.02669 | -0.185101759 | 0.133078616 | 7.44E-01 | 8.93E-01 | 1.00E+00 |
| ENSG00000222414.1_RNU2-59P   | ENSG00000160789.18_LMNA | 0.02631  | -0.133449007 | 0.184737565 | 7.48E-01 | 8.95E-01 | 1.00E+00 |
| ENSG00000252618.1_RNA5SP44   | ENSG00000160789.18_LMNA | -0.01628 | -0.175027495 | 0.143291654 | 8.42E-01 | 9.39E-01 | 1.00E+00 |

|                             |                         |          |              |             |          |          |          |
|-----------------------------|-------------------------|----------|--------------|-------------|----------|----------|----------|
| ENSG00000199075.1_MIR26A1   | ENSG00000160789.18_LMNA | 0.05027  | -0.109811059 | 0.207806113 | 5.39E-01 | 7.79E-01 | 1.00E+00 |
| ENSG00000199169.1_MIR367    | ENSG00000160789.18_LMNA | 0.0559   | -0.104229002 | 0.213202623 | 4.94E-01 | 7.49E-01 | 1.00E+00 |
| ENSG00000252102.1_          | ENSG00000160789.18_LMNA | -0.10033 | -0.255447235 | 0.059829755 | 2.19E-01 | 4.94E-01 | 1.00E+00 |
| ENSG00000206967.1_Y_RNA     | ENSG00000160789.18_LMNA | -0.08578 | -0.241676208 | 0.074441513 | 2.93E-01 | 5.79E-01 | 1.00E+00 |
| ENSG00000252306.1_          | ENSG00000160789.18_LMNA | 0.00117  | -0.158059756 | 0.160341223 | 9.89E-01 | 9.96E-01 | 1.00E+00 |
| ENSG00000252234.1_          | ENSG00000160789.18_LMNA | -0.13255 | -0.285718983 | 0.027227833 | 1.04E-01 | 3.19E-01 | 1.00E+00 |
| ENSG00000274697.1_MIR6761   | ENSG00000160789.18_LMNA | -0.00327 | -0.162382586 | 0.156015507 | 9.68E-01 | 9.87E-01 | 1.00E+00 |
| ENSG00000201433.1_RNU6-335F | ENSG00000160789.18_LMNA | -0.17205 | -0.322423526 | -0.01321568 | 3.40E-02 | 1.56E-01 | 1.00E+00 |
| ENSG00000252578.1_RNU6-135F | ENSG00000160789.18_LMNA | -0.02387 | -0.182379706 | 0.135844844 | 7.70E-01 | 9.05E-01 | 1.00E+00 |
| ENSG00000265957.1_MIR4319   | ENSG00000160789.18_LMNA | -0.06885 | -0.225576522 | 0.091353706 | 3.99E-01 | 6.76E-01 | 1.00E+00 |
| ENSG00000266837.1_          | ENSG00000160789.18_LMNA | 0.11141  | -0.048648977 | 0.265899001 | 1.72E-01 | 4.31E-01 | 1.00E+00 |
| ENSG00000239107.1_          | ENSG00000160789.18_LMNA | -0.0233  | -0.181825282 | 0.136407658 | 7.76E-01 | 9.08E-01 | 1.00E+00 |
| ENSG00000200732.1_RNU6-194F | ENSG00000160789.18_LMNA | 0.0003   | -0.158907596 | 0.15949378  | 9.97E-01 | 9.99E-01 | 1.00E+00 |
| ENSG00000201812.1_RNA5SP48  | ENSG00000160789.18_LMNA | 0.05562  | -0.104509891 | 0.212931534 | 4.96E-01 | 7.50E-01 | 1.00E+00 |
| ENSG00000212535.1_RNU6-808F | ENSG00000160789.18_LMNA | -0.03745 | -0.195483414 | 0.122482776 | 6.47E-01 | 8.43E-01 | 1.00E+00 |
| ENSG00000207467.1_Y_RNA     | ENSG00000160789.18_LMNA | -0.08478 | -0.240728261 | 0.075442364 | 2.99E-01 | 5.85E-01 | 1.00E+00 |
| ENSG00000199715.1_Y_RNA     | ENSG00000160789.18_LMNA | 0.11537  | -0.044647666 | 0.269621535 | 1.57E-01 | 4.09E-01 | 1.00E+00 |
| ENSG00000198995.2_MIR340    | ENSG00000160789.18_LMNA | 0.02807  | -0.131721476 | 0.186435443 | 7.31E-01 | 8.87E-01 | 1.00E+00 |
| ENSG00000237058.1_RP13-436F | ENSG00000160789.18_LMNA | -0.01544 | -0.174214523 | 0.144112879 | 8.50E-01 | 9.41E-01 | 1.00E+00 |
| ENSG00000281096.1_          | ENSG00000160789.18_LMNA | -0.03285 | -0.191053253 | 0.12701322  | 6.88E-01 | 8.65E-01 | 1.00E+00 |
| ENSG00000263441.1_          | ENSG00000160789.18_LMNA | -0.07051 | -0.227163081 | 0.08969516  | 3.88E-01 | 6.66E-01 | 1.00E+00 |
| ENSG00000206844.1_Y_RNA     | ENSG00000160789.18_LMNA | -0.09681 | -0.252121089 | 0.063371384 | 2.35E-01 | 5.13E-01 | 1.00E+00 |
| ENSG00000264157.2_MIR3127   | ENSG00000160789.18_LMNA | 0.05155  | -0.108538494 | 0.209038082 | 5.28E-01 | 7.72E-01 | 1.00E+00 |
| ENSG00000202469.1_Y_RNA     | ENSG00000160789.18_LMNA | 0.02318  | -0.136523325 | 0.181711315 | 7.77E-01 | 9.08E-01 | 1.00E+00 |
| ENSG00000206808.1_Y_RNA     | ENSG00000160789.18_LMNA | -0.01464 | -0.173438892 | 0.144895975 | 8.58E-01 | 9.44E-01 | 1.00E+00 |
| ENSG00000222529.1_Y_RNA     | ENSG00000160789.18_LMNA | 0.05704  | -0.103094886 | 0.214296679 | 4.85E-01 | 7.42E-01 | 1.00E+00 |
| ENSG00000228952.1_RP11-567G | ENSG00000160789.18_LMNA | -0.10237 | -0.257379415 | 0.057768748 | 2.09E-01 | 4.82E-01 | 1.00E+00 |
| ENSG00000207274.1_SNORA70   | ENSG00000160789.18_LMNA | -0.01893 | -0.177599755 | 0.14069039  | 8.17E-01 | 9.28E-01 | 1.00E+00 |
| ENSG00000251026.1_RP11-138J | ENSG00000160789.18_LMNA | -0.05689 | -0.214154797 | 0.10324201  | 4.86E-01 | 7.43E-01 | 1.00E+00 |
| ENSG00000281675.1_          | ENSG00000160789.18_LMNA | 0.10623  | -0.053882124 | 0.261016256 | 1.93E-01 | 4.61E-01 | 1.00E+00 |
| ENSG00000281790.1_          | ENSG00000160789.18_LMNA | 0.07393  | -0.086283343 | 0.230421529 | 3.65E-01 | 6.47E-01 | 1.00E+00 |
| ENSG00000272393.1_RNU6-92P  | ENSG00000160789.18_LMNA | 0.0716   | -0.088615375 | 0.228195095 | 3.81E-01 | 6.59E-01 | 1.00E+00 |
| ENSG00000202310.1_Y_RNA     | ENSG00000160789.18_LMNA | -0.02632 | -0.184745956 | 0.133440475 | 7.48E-01 | 8.95E-01 | 1.00E+00 |

|                              |                         |          |              |             |          |          |          |
|------------------------------|-------------------------|----------|--------------|-------------|----------|----------|----------|
| ENSG00000222419.1_RNA5P51    | ENSG00000160789.18_LMNA | -0.05918 | -0.216338545 | 0.100976046 | 4.69E-01 | 7.30E-01 | 1.00E+00 |
| ENSG00000207024.1_Y_RNA      | ENSG00000160789.18_LMNA | -0.0375  | -0.195536546 | 0.122428362 | 6.46E-01 | 8.43E-01 | 1.00E+00 |
| ENSG00000207410.1_SNORA8     | ENSG00000160789.18_LMNA | 0.03285  | -0.127010044 | 0.191056363 | 6.88E-01 | 8.65E-01 | 1.00E+00 |
| ENSG00000271644.1_RP3-365I19 | ENSG00000160789.18_LMNA | -0.07244 | -0.228997551 | 0.087775259 | 3.75E-01 | 6.55E-01 | 1.00E+00 |
| ENSG00000260584.1_RP11-1166  | ENSG00000160789.18_LMNA | -0.19061 | -0.339511873 | -0.03239635 | 1.87E-02 | 1.03E-01 | 1.00E+00 |
| ENSG00000281889.1_AC073072   | ENSG00000160789.18_LMNA | 0.0562   | -0.103930317 | 0.213490836 | 4.92E-01 | 7.47E-01 | 1.00E+00 |
| ENSG00000201465.1_SNORA51    | ENSG00000160789.18_LMNA | -0.01788 | -0.176578667 | 0.141723518 | 8.27E-01 | 9.32E-01 | 1.00E+00 |
| ENSG00000250940.1_RP11-489M  | ENSG00000160789.18_LMNA | -0.02039 | -0.179009418 | 0.139262966 | 8.03E-01 | 9.21E-01 | 1.00E+00 |
| ENSG00000281288.1_           | ENSG00000160789.18_LMNA | 0.12403  | -0.035877933 | 0.277747548 | 1.28E-01 | 3.62E-01 | 1.00E+00 |
| ENSG00000281647.1_           | ENSG00000160789.18_LMNA | 0.02273  | -0.136968958 | 0.181272148 | 7.81E-01 | 9.10E-01 | 1.00E+00 |
| ENSG00000199571.1_SNORA22    | ENSG00000160789.18_LMNA | -0.12428 | -0.277980263 | 0.03562607  | 1.27E-01 | 3.61E-01 | 1.00E+00 |
| ENSG00000281910.1_SNORA50A   | ENSG00000160789.18_LMNA | 0.02755  | -0.132234907 | 0.185931024 | 7.36E-01 | 8.89E-01 | 1.00E+00 |
| ENSG00000276960.1_RP1-81D8.1 | ENSG00000160789.18_LMNA | -0.11885 | -0.272891626 | 0.041124342 | 1.45E-01 | 3.89E-01 | 1.00E+00 |
| ENSG00000244657.1_GS1-124K5  | ENSG00000160789.18_LMNA | 0.10657  | -0.053535759 | 0.261339927 | 1.91E-01 | 4.59E-01 | 1.00E+00 |
| ENSG00000242855.3_RN7SL496f  | ENSG00000160789.18_LMNA | -0.03869 | -0.196675436 | 0.121261505 | 6.36E-01 | 8.37E-01 | 1.00E+00 |
| ENSG00000222501.1_RNU4-25P   | ENSG00000160789.18_LMNA | -0.00208 | -0.161227048 | 0.157173013 | 9.80E-01 | 9.92E-01 | 1.00E+00 |
| ENSG00000243446.3_RN7SL284f  | ENSG00000160789.18_LMNA | 0.13097  | -0.028827792 | 0.28424781  | 1.08E-01 | 3.26E-01 | 1.00E+00 |
| ENSG00000258902.1_CTD-2128A  | ENSG00000160789.18_LMNA | 0.04178  | -0.118210519 | 0.19964925  | 6.09E-01 | 8.22E-01 | 1.00E+00 |
| ENSG00000269466.2_RP11-432M  | ENSG00000160789.18_LMNA | 0.10542  | -0.054703159 | 0.260248731 | 1.96E-01 | 4.65E-01 | 1.00E+00 |
| ENSG00000270682.1_KB-1907C4  | ENSG00000160789.18_LMNA | 0.06127  | -0.098895682 | 0.218340635 | 4.53E-01 | 7.18E-01 | 1.00E+00 |
| ENSG00000263529.2_RN7SL122f  | ENSG00000160789.18_LMNA | 0.05152  | -0.108574921 | 0.209002831 | 5.28E-01 | 7.72E-01 | 1.00E+00 |
| ENSG00000230106.1_SNRPCP15   | ENSG00000160789.18_LMNA | -0.10304 | -0.258012526 | 0.057092841 | 2.06E-01 | 4.78E-01 | 1.00E+00 |
| ENSG00000251293.1_CTC-552D5  | ENSG00000160789.18_LMNA | -0.20123 | -0.349241819 | -0.04341966 | 1.29E-02 | 7.88E-02 | 1.00E+00 |
| ENSG00000253809.1_RP1-149L1  | ENSG00000160789.18_LMNA | -0.0835  | -0.239517096 | 0.076720197 | 3.06E-01 | 5.93E-01 | 1.00E+00 |
| ENSG00000226664.1_RP4-745E8  | ENSG00000160789.18_LMNA | -0.03111 | -0.189370141 | 0.128730959 | 7.04E-01 | 8.73E-01 | 1.00E+00 |
| ENSG00000223951.1_AL133244.1 | ENSG00000160789.18_LMNA | -0.01081 | -0.169715134 | 0.14865003  | 8.95E-01 | 9.59E-01 | 1.00E+00 |
| ENSG00000237383.1_CNN2P11    | ENSG00000160789.18_LMNA | -0.10702 | -0.261762241 | 0.053083723 | 1.89E-01 | 4.57E-01 | 1.00E+00 |
| ENSG00000242893.3_RN7SL413f  | ENSG00000160789.18_LMNA | 0.01911  | -0.140517354 | 0.177770708 | 8.15E-01 | 9.28E-01 | 1.00E+00 |
| ENSG00000249829.2_CTC-422A1  | ENSG00000160789.18_LMNA | -0.07499 | -0.23142383  | 0.08523237  | 3.59E-01 | 6.41E-01 | 1.00E+00 |
| ENSG00000273497.1_RP11-402D  | ENSG00000160789.18_LMNA | -0.11655 | -0.270729869 | 0.043454379 | 1.53E-01 | 4.02E-01 | 1.00E+00 |
| ENSG00000248895.1_RP11-463M  | ENSG00000160789.18_LMNA | 0.06036  | -0.099804202 | 0.217466627 | 4.60E-01 | 7.24E-01 | 1.00E+00 |
| ENSG00000265733.1_SNORA74    | ENSG00000160789.18_LMNA | -0.11325 | -0.267626511 | 0.04679335  | 1.65E-01 | 4.21E-01 | 1.00E+00 |
| ENSG00000228525.1_RP5-1087E  | ENSG00000160789.18_LMNA | 0.07495  | -0.085268672 | 0.23138922  | 3.59E-01 | 6.42E-01 | 1.00E+00 |

|                              |                         |          |              |             |          |          |          |
|------------------------------|-------------------------|----------|--------------|-------------|----------|----------|----------|
| ENSG00000223006.1_RN7SKP13   | ENSG00000160789.18_LMNA | -0.1036  | -0.258533315 | 0.056536631 | 2.04E-01 | 4.75E-01 | 1.00E+00 |
| ENSG00000264289.1_RP11-268I  | ENSG00000160789.18_LMNA | -0.0683  | -0.225057253 | 0.091896155 | 4.03E-01 | 6.79E-01 | 1.00E+00 |
| ENSG00000270449.1_RP11-681H  | ENSG00000160789.18_LMNA | 0.02238  | -0.13730765  | 0.180938286 | 7.84E-01 | 9.12E-01 | 1.00E+00 |
| ENSG00000226504.1_TMEN167A   | ENSG00000160789.18_LMNA | -0.14561 | -0.297907562 | 0.013910311 | 7.35E-02 | 2.58E-01 | 1.00E+00 |
| ENSG00000224949.2_RP11-161N  | ENSG00000160789.18_LMNA | 0.14538  | -0.014147551 | 0.297691319 | 7.39E-02 | 2.59E-01 | 1.00E+00 |
| ENSG00000250092.2_RP11-556G  | ENSG00000160789.18_LMNA | -0.15479 | -0.306439358 | 0.004521986 | 5.69E-02 | 2.18E-01 | 1.00E+00 |
| ENSG00000219453.1_RP4-810F7  | ENSG00000160789.18_LMNA | 0.01584  | -0.143727668 | 0.174595917 | 8.46E-01 | 9.40E-01 | 1.00E+00 |
| ENSG00000248750.2_RP11-131K  | ENSG00000160789.18_LMNA | -0.2209  | -0.367191212 | -0.06395229 | 6.24E-03 | 4.63E-02 | 1.00E+00 |
| ENSG00000262759.1_MRPS21P9   | ENSG00000160789.18_LMNA | -0.04651 | -0.204194118 | 0.113536084 | 5.69E-01 | 7.99E-01 | 1.00E+00 |
| ENSG00000198573.6_SPANXC     | ENSG00000160789.18_LMNA | 0.08784  | -0.072374264 | 0.243632276 | 2.82E-01 | 5.67E-01 | 1.00E+00 |
| ENSG00000257680.1_RP11-367O  | ENSG00000160789.18_LMNA | -0.13776 | -0.290590654 | 0.021918228 | 9.05E-02 | 2.93E-01 | 1.00E+00 |
| ENSG00000231056.1_RP1-290I1C | ENSG00000160789.18_LMNA | 0.09325  | -0.066949209 | 0.248753362 | 2.53E-01 | 5.35E-01 | 1.00E+00 |
| ENSG00000225811.1_RP11-547I7 | ENSG00000160789.18_LMNA | -0.1154  | -0.269645173 | 0.044622226 | 1.57E-01 | 4.09E-01 | 1.00E+00 |
| ENSG00000240775.1_RP11-170N  | ENSG00000160789.18_LMNA | 0.07997  | -0.080255588 | 0.236161019 | 3.27E-01 | 6.14E-01 | 1.00E+00 |
| ENSG00000215112.6_FAM74A1    | ENSG00000160789.18_LMNA | -0.02105 | -0.179651573 | 0.138612281 | 7.97E-01 | 9.18E-01 | 1.00E+00 |
| ENSG00000279538.1_AC004953.  | ENSG00000160789.18_LMNA | 0.03021  | -0.129617629 | 0.188500614 | 7.12E-01 | 8.77E-01 | 1.00E+00 |
| ENSG00000276800.1_Metazoa_SI | ENSG00000160789.18_LMNA | -0.08156 | -0.237674258 | 0.078662482 | 3.18E-01 | 6.04E-01 | 1.00E+00 |
| ENSG00000263490.2_RN7SL155F  | ENSG00000160789.18_LMNA | 0.14434  | -0.015209665 | 0.296722816 | 7.60E-02 | 2.64E-01 | 1.00E+00 |
| ENSG00000277168.1_Metazoa_SI | ENSG00000160789.18_LMNA | 0.04376  | -0.116249226 | 0.201557846 | 5.92E-01 | 8.11E-01 | 1.00E+00 |
| ENSG00000264193.1_RP11-737G  | ENSG00000160789.18_LMNA | 0.03067  | -0.129157491 | 0.188951918 | 7.08E-01 | 8.76E-01 | 1.00E+00 |
| ENSG00000240043.1_RPS27P26   | ENSG00000160789.18_LMNA | 0.02545  | -0.134292513 | 0.183907848 | 7.56E-01 | 8.98E-01 | 1.00E+00 |
| ENSG00000240963.1_RP11-518L  | ENSG00000160789.18_LMNA | 0.07017  | -0.09003286  | 0.226840174 | 3.90E-01 | 6.69E-01 | 1.00E+00 |
| ENSG00000258837.1_CTD-2566J  | ENSG00000160789.18_LMNA | 0.10679  | -0.053315741 | 0.261545493 | 1.90E-01 | 4.58E-01 | 1.00E+00 |
| ENSG00000239466.3_RN7SL552F  | ENSG00000160789.18_LMNA | -0.09008 | -0.245753483 | 0.070129417 | 2.70E-01 | 5.54E-01 | 1.00E+00 |
| ENSG00000275981.1_AC018816.  | ENSG00000160789.18_LMNA | 0.21963  | 0.062622506  | 0.366035532 | 6.55E-03 | 4.80E-02 | 1.00E+00 |
| ENSG00000235321.1_AC007556.  | ENSG00000160789.18_LMNA | -0.12632 | -0.279896604 | 0.033550531 | 1.21E-01 | 3.50E-01 | 1.00E+00 |
| ENSG00000243050.1_RPL30P10   | ENSG00000160789.18_LMNA | 0.00915  | -0.150272651 | 0.168102789 | 9.11E-01 | 9.66E-01 | 1.00E+00 |
| ENSG00000226573.1_CTA-85E5.  | ENSG00000160789.18_LMNA | -0.04512 | -0.20286549  | 0.114904046 | 5.81E-01 | 8.05E-01 | 1.00E+00 |
| ENSG00000240012.1_SLC9A9-AS  | ENSG00000160789.18_LMNA | -0.11877 | -0.272810935 | 0.041211376 | 1.45E-01 | 3.90E-01 | 1.00E+00 |
| ENSG00000218716.1_RPL12P23   | ENSG00000160789.18_LMNA | -0.05488 | -0.212222051 | 0.105244779 | 5.02E-01 | 7.54E-01 | 1.00E+00 |
| ENSG00000226621.1_AC083855.  | ENSG00000160789.18_LMNA | 0.12009  | -0.039873029 | 0.274051259 | 1.41E-01 | 3.82E-01 | 1.00E+00 |
| ENSG00000250574.1_CTD-2275D  | ENSG00000160789.18_LMNA | 0.17141  | 0.012549925  | 0.321826758 | 3.47E-02 | 1.58E-01 | 1.00E+00 |
| ENSG00000224978.1_RP13-228J  | ENSG00000160789.18_LMNA | 0.00962  | -0.149806373 | 0.168566288 | 9.06E-01 | 9.64E-01 | 1.00E+00 |

|                              |                         |          |              |             |          |          |          |
|------------------------------|-------------------------|----------|--------------|-------------|----------|----------|----------|
| ENSG00000224263.1_CYCSP12    | ENSG00000160789.18_LMNA | -0.12791 | -0.281380247 | 0.031941776 | 1.16E-01 | 3.41E-01 | 1.00E+00 |
| ENSG00000211813.2_TRAV34     | ENSG00000160789.18_LMNA | 0.03424  | -0.125645069 | 0.192392487 | 6.75E-01 | 8.58E-01 | 1.00E+00 |
| ENSG00000237583.1_AC093166.  | ENSG00000160789.18_LMNA | 0.02488  | -0.134859188 | 0.183350181 | 7.61E-01 | 9.00E-01 | 1.00E+00 |
| ENSG00000244294.3_RN7SL740f  | ENSG00000160789.18_LMNA | 0.04443  | -0.115591685 | 0.202197181 | 5.87E-01 | 8.08E-01 | 1.00E+00 |
| ENSG00000226447.1_RP11-393J  | ENSG00000160789.18_LMNA | 0.02316  | -0.136544435 | 0.181690514 | 7.77E-01 | 9.08E-01 | 1.00E+00 |
| ENSG00000259569.2_RP11-97O1  | ENSG00000160789.18_LMNA | 0.0918   | -0.068404897 | 0.247380968 | 2.61E-01 | 5.44E-01 | 1.00E+00 |
| ENSG00000255531.1_NDUFS5P6   | ENSG00000160789.18_LMNA | -0.17021 | -0.320723724 | -0.01132011 | 3.60E-02 | 1.62E-01 | 1.00E+00 |
| ENSG00000240364.1_RPL31P59   | ENSG00000160789.18_LMNA | 0.03697  | -0.12295144  | 0.195025725 | 6.51E-01 | 8.45E-01 | 1.00E+00 |
| ENSG00000251437.1_NDUFS5P4   | ENSG00000160789.18_LMNA | -0.20575 | -0.353373083 | -0.04812271 | 1.10E-02 | 7.01E-02 | 1.00E+00 |
| ENSG00000280034.1_AC109829.  | ENSG00000160789.18_LMNA | 0.03366  | -0.126212497 | 0.191837195 | 6.81E-01 | 8.61E-01 | 1.00E+00 |
| ENSG00000227139.1_RP11-533N  | ENSG00000160789.18_LMNA | 0.28883  | 0.135874689  | 0.428332943 | 3.08E-04 | 4.60E-03 | 1.00E+00 |
| ENSG00000233983.2_RP4-735N2  | ENSG00000160789.18_LMNA | -0.04241 | -0.200260762 | 0.117582393 | 6.04E-01 | 8.18E-01 | 1.00E+00 |
| ENSG00000234388.2_TXNP3      | ENSG00000160789.18_LMNA | -0.01095 | -0.169858418 | 0.14850575  | 8.93E-01 | 9.58E-01 | 1.00E+00 |
| ENSG00000231011.1_RP11-494IS | ENSG00000160789.18_LMNA | -0.02841 | -0.186770263 | 0.131380581 | 7.28E-01 | 8.85E-01 | 1.00E+00 |
| ENSG00000228353.1_RP11-184A  | ENSG00000160789.18_LMNA | -0.01275 | -0.171607119 | 0.146743798 | 8.76E-01 | 9.52E-01 | 1.00E+00 |
| ENSG00000266754.2_RN7SL524f  | ENSG00000160789.18_LMNA | -0.07141 | -0.228013986 | 0.088804921 | 3.82E-01 | 6.61E-01 | 1.00E+00 |
| ENSG00000256482.1_RP11-625L  | ENSG00000160789.18_LMNA | 0.06802  | -0.09218282  | 0.224782765 | 4.05E-01 | 6.81E-01 | 1.00E+00 |
| ENSG00000240108.1_NCOR1P1    | ENSG00000160789.18_LMNA | 0.02163  | -0.138043928 | 0.180212254 | 7.91E-01 | 9.16E-01 | 1.00E+00 |
| ENSG00000267453.5_AC004791.  | ENSG00000160789.18_LMNA | 0.15571  | -0.003576403 | 0.307295912 | 5.54E-02 | 2.15E-01 | 1.00E+00 |
| ENSG00000235843.1_RP13-16H1  | ENSG00000160789.18_LMNA | 0.06462  | -0.095563343 | 0.221542039 | 4.29E-01 | 6.99E-01 | 1.00E+00 |
| ENSG00000239560.3_RN7SL479f  | ENSG00000160789.18_LMNA | -0.10438 | -0.259273893 | 0.055745347 | 2.01E-01 | 4.71E-01 | 1.00E+00 |
| ENSG00000258290.1_BRWD1P2    | ENSG00000160789.18_LMNA | -0.01409 | -0.172906363 | 0.145433399 | 8.63E-01 | 9.46E-01 | 1.00E+00 |
| ENSG00000224443.1_AC006509.  | ENSG00000160789.18_LMNA | -0.15029 | -0.302259649 | 0.009128167 | 6.46E-02 | 2.37E-01 | 1.00E+00 |
| ENSG00000270279.1_RP4-806M2  | ENSG00000160789.18_LMNA | 0.07415  | -0.08606966  | 0.230625371 | 3.64E-01 | 6.45E-01 | 1.00E+00 |
| ENSG00000253198.1_RP11-643N  | ENSG00000160789.18_LMNA | 0.01721  | -0.142376053 | 0.175933383 | 8.33E-01 | 9.35E-01 | 1.00E+00 |
| ENSG00000241792.1_RP11-501O  | ENSG00000160789.18_LMNA | 0.12219  | -0.037746946 | 0.27601948  | 1.34E-01 | 3.71E-01 | 1.00E+00 |
| ENSG00000255483.1_AP000889.  | ENSG00000160789.18_LMNA | 0.13871  | -0.020952682 | 0.291474824 | 8.83E-02 | 2.89E-01 | 1.00E+00 |
| ENSG00000251578.1_TRBV21-1   | ENSG00000160789.18_LMNA | 0.10208  | -0.058064753 | 0.257102067 | 2.11E-01 | 4.84E-01 | 1.00E+00 |
| ENSG00000227211.2_RP5-1100E  | ENSG00000160789.18_LMNA | -0.04572 | -0.203438168 | 0.114314562 | 5.76E-01 | 8.02E-01 | 1.00E+00 |
| ENSG00000277143.1_RP11-113A  | ENSG00000160789.18_LMNA | -0.05644 | -0.213724447 | 0.103688174 | 4.90E-01 | 7.46E-01 | 1.00E+00 |
| ENSG00000224095.1_AC108051.  | ENSG00000160789.18_LMNA | 0.09627  | -0.063905226 | 0.25161908  | 2.38E-01 | 5.17E-01 | 1.00E+00 |
| ENSG00000276717.1_RP11-62C3  | ENSG00000160789.18_LMNA | 0.03616  | -0.123757748 | 0.194237975 | 6.58E-01 | 8.49E-01 | 1.00E+00 |
| ENSG00000279664.1_AC009491.  | ENSG00000160789.18_LMNA | -0.12909 | -0.282483796 | 0.030744115 | 1.13E-01 | 3.36E-01 | 1.00E+00 |

|                             |                         |          |              |             |          |          |          |
|-----------------------------|-------------------------|----------|--------------|-------------|----------|----------|----------|
| ENSG00000233595.2_MTND2P29  | ENSG00000160789.18_LMNA | -0.0676  | -0.224389994 | 0.092592924 | 4.08E-01 | 6.83E-01 | 1.00E+00 |
| ENSG00000242911.1_RP11-118N | ENSG00000160789.18_LMNA | 0.12176  | -0.038184572 | 0.275614564 | 1.35E-01 | 3.74E-01 | 1.00E+00 |
| ENSG00000259016.1_CTD-2335L | ENSG00000160789.18_LMNA | -0.24493 | -0.388963429 | -0.08920732 | 2.36E-03 | 2.22E-02 | 1.00E+00 |
| ENSG00000231383.2_FGF12-AS1 | ENSG00000160789.18_LMNA | -0.01782 | -0.176524676 | 0.141778126 | 8.27E-01 | 9.32E-01 | 1.00E+00 |
| ENSG00000255451.1_RP11-58K2 | ENSG00000160789.18_LMNA | -0.08056 | -0.236728626 | 0.079658212 | 3.24E-01 | 6.10E-01 | 1.00E+00 |
| ENSG00000251423.1_CTB-51A17 | ENSG00000160789.18_LMNA | 0.04164  | -0.118341699 | 0.199521509 | 6.10E-01 | 8.22E-01 | 1.00E+00 |
| ENSG00000251276.1_MAGI2-AS1 | ENSG00000160789.18_LMNA | 0.05668  | -0.103449275 | 0.213954895 | 4.88E-01 | 7.44E-01 | 1.00E+00 |
| ENSG00000233659.1_NDUFA5P4  | ENSG00000160789.18_LMNA | -0.09042 | -0.246082094 | 0.069781365 | 2.68E-01 | 5.52E-01 | 1.00E+00 |
| ENSG00000223490.2_CHCHD2P5  | ENSG00000160789.18_LMNA | -0.00897 | -0.167929927 | 0.150446513 | 9.13E-01 | 9.67E-01 | 1.00E+00 |
| ENSG00000218428.1_NIP7P3    | ENSG00000160789.18_LMNA | 0.03318  | -0.126685552 | 0.191374103 | 6.85E-01 | 8.63E-01 | 1.00E+00 |
| ENSG00000233277.1_RP5-1030M | ENSG00000160789.18_LMNA | 0.10109  | -0.059062885 | 0.256166465 | 2.15E-01 | 4.89E-01 | 1.00E+00 |
| ENSG00000248431.1_AC005150. | ENSG00000160789.18_LMNA | -0.1153  | -0.269555779 | 0.044718434 | 1.57E-01 | 4.09E-01 | 1.00E+00 |
| ENSG00000232943.1_RP4-717M2 | ENSG00000160789.18_LMNA | -0.02983 | -0.188133763 | 0.12999156  | 7.15E-01 | 8.79E-01 | 1.00E+00 |
| ENSG00000257400.1_RP11-778J | ENSG00000160789.18_LMNA | -0.02467 | -0.183152917 | 0.135059589 | 7.63E-01 | 9.01E-01 | 1.00E+00 |
| ENSG00000259348.1_RP11-4G2. | ENSG00000160789.18_LMNA | 0.1878   | 0.029484208  | 0.336930391 | 2.05E-02 | 1.10E-01 | 1.00E+00 |
| ENSG00000267039.1_RP11-58G1 | ENSG00000160789.18_LMNA | 0.04413  | -0.115886538 | 0.201910525 | 5.89E-01 | 8.09E-01 | 1.00E+00 |
| ENSG00000257515.1_RP11-498M | ENSG00000160789.18_LMNA | 0.04801  | -0.11204723  | 0.205638834 | 5.57E-01 | 7.91E-01 | 1.00E+00 |
| ENSG00000259170.1_RP11-763K | ENSG00000160789.18_LMNA | 0.01954  | -0.140100305 | 0.178182657 | 8.11E-01 | 9.26E-01 | 1.00E+00 |
| ENSG00000274614.1_RP11-17E4 | ENSG00000160789.18_LMNA | -0.01152 | -0.170407821 | 0.147952401 | 8.88E-01 | 9.56E-01 | 1.00E+00 |
| ENSG00000218766.1_RP11-207F | ENSG00000160789.18_LMNA | -0.00492 | -0.163992962 | 0.154400928 | 9.52E-01 | 9.81E-01 | 1.00E+00 |
| ENSG00000263798.1_RP11-6N17 | ENSG00000160789.18_LMNA | -0.24952 | -0.393105533 | -0.09405606 | 1.93E-03 | 1.90E-02 | 1.00E+00 |
| ENSG00000267423.1_AC005616. | ENSG00000160789.18_LMNA | -0.01357 | -0.172402366 | 0.145941856 | 8.68E-01 | 9.48E-01 | 1.00E+00 |
| ENSG00000164816.7_DEFA5     | ENSG00000160789.18_LMNA | -0.1807  | -0.330395305 | -0.02213531 | 2.59E-02 | 1.30E-01 | 1.00E+00 |
| ENSG00000249722.1_CTC-430J1 | ENSG00000160789.18_LMNA | 0.06675  | -0.093439798 | 0.223578585 | 4.14E-01 | 6.87E-01 | 1.00E+00 |
| ENSG00000232200.2_RP4-564O4 | ENSG00000160789.18_LMNA | -0.17407 | -0.324282112 | -0.01529086 | 3.20E-02 | 1.49E-01 | 1.00E+00 |
| ENSG00000249349.1_CTC-384G1 | ENSG00000160789.18_LMNA | -0.07137 | -0.227984834 | 0.088835429 | 3.82E-01 | 6.61E-01 | 1.00E+00 |
| ENSG00000259947.1_XX-DJ76P1 | ENSG00000160789.18_LMNA | -0.06987 | -0.226554465 | 0.090331599 | 3.92E-01 | 6.70E-01 | 1.00E+00 |
| ENSG00000277697.1_RP11-459O | ENSG00000160789.18_LMNA | 0.0606   | -0.09956248  | 0.217699216 | 4.58E-01 | 7.22E-01 | 1.00E+00 |
| ENSG00000267081.1_CTC-400I9 | ENSG00000160789.18_LMNA | -0.1795  | -0.329293632 | -0.02089971 | 2.69E-02 | 1.33E-01 | 1.00E+00 |
| ENSG00000254557.1_RP11-102F | ENSG00000160789.18_LMNA | 0.02132  | -0.138347731 | 0.179912578 | 7.94E-01 | 9.17E-01 | 1.00E+00 |
| ENSG00000265121.1_RP11-285E | ENSG00000160789.18_LMNA | 0.02708  | -0.132693225 | 0.185480608 | 7.41E-01 | 8.91E-01 | 1.00E+00 |
| ENSG00000171402.13_XAGE3    | ENSG00000160789.18_LMNA | -0.08221 | -0.238293605 | 0.07800998  | 3.14E-01 | 6.00E-01 | 1.00E+00 |
| ENSG00000256314.1_RP11-338E | ENSG00000160789.18_LMNA | 0.09846  | -0.061711939 | 0.253680497 | 2.28E-01 | 5.04E-01 | 1.00E+00 |

|                              |                         |          |              |             |          |          |          |
|------------------------------|-------------------------|----------|--------------|-------------|----------|----------|----------|
| ENSG00000237662.1_SOCS2P1    | ENSG00000160789.18_LMNA | 0.08522  | -0.07499663  | 0.241150509 | 2.97E-01 | 5.82E-01 | 1.00E+00 |
| ENSG00000253574.4_RP11-284H  | ENSG00000160789.18_LMNA | -0.18003 | -0.329778461 | -0.02144336 | 2.65E-02 | 1.32E-01 | 1.00E+00 |
| ENSG00000260413.1_RP11-231C  | ENSG00000160789.18_LMNA | 0.05294  | -0.107161467 | 0.210370046 | 5.17E-01 | 7.64E-01 | 1.00E+00 |
| ENSG00000248796.1_MED15P8    | ENSG00000160789.18_LMNA | 0.16483  | 0.005785785  | 0.315749526 | 4.24E-02 | 1.80E-01 | 1.00E+00 |
| ENSG00000250180.1_RP11-138A  | ENSG00000160789.18_LMNA | 0.08856  | -0.071654755 | 0.244312486 | 2.78E-01 | 5.63E-01 | 1.00E+00 |
| ENSG00000280121.1_CTD-3137H  | ENSG00000160789.18_LMNA | -0.11801 | -0.27209435  | 0.041984079 | 1.48E-01 | 3.94E-01 | 1.00E+00 |
| ENSG00000265246.1_RP11-663N  | ENSG00000160789.18_LMNA | -0.1294  | -0.28277336  | 0.030429707 | 1.12E-01 | 3.34E-01 | 1.00E+00 |
| ENSG00000258793.1_RP11-404P  | ENSG00000160789.18_LMNA | 0.04253  | -0.117464707 | 0.200375308 | 6.03E-01 | 8.18E-01 | 1.00E+00 |
| ENSG00000224701.1_MED28P4    | ENSG00000160789.18_LMNA | 0.08436  | -0.075859955 | 0.240332565 | 3.01E-01 | 5.88E-01 | 1.00E+00 |
| ENSG00000237689.1_AC007064.  | ENSG00000160789.18_LMNA | -0.19725 | -0.345598426 | -0.03928323 | 1.49E-02 | 8.73E-02 | 1.00E+00 |
| ENSG00000236885.1_AC018731.  | ENSG00000160789.18_LMNA | 0.1418   | -0.017804699 | 0.294353794 | 8.14E-02 | 2.75E-01 | 1.00E+00 |
| ENSG00000279250.1_RP11-46D1  | ENSG00000160789.18_LMNA | 0.00471  | -0.154602638 | 0.163791869 | 9.54E-01 | 9.82E-01 | 1.00E+00 |
| ENSG00000227938.1_AC104695.  | ENSG00000160789.18_LMNA | 0.03295  | -0.126912797 | 0.191151594 | 6.87E-01 | 8.64E-01 | 1.00E+00 |
| ENSG00000250402.2_RP11-395P  | ENSG00000160789.18_LMNA | -0.17927 | -0.329080835 | -0.02066116 | 2.71E-02 | 1.34E-01 | 1.00E+00 |
| ENSG00000235849.1_HS6ST2-A5  | ENSG00000160789.18_LMNA | 0.03313  | -0.126738965 | 0.191321806 | 6.85E-01 | 8.64E-01 | 1.00E+00 |
| ENSG00000235922.1_RP11-323C  | ENSG00000160789.18_LMNA | 0.01975  | -0.139894365 | 0.178386036 | 8.09E-01 | 9.24E-01 | 1.00E+00 |
| ENSG00000255041.1_RP11-430H  | ENSG00000160789.18_LMNA | -0.09824 | -0.253477553 | 0.061928001 | 2.29E-01 | 5.05E-01 | 1.00E+00 |
| ENSG00000259036.1_RP11-404P  | ENSG00000160789.18_LMNA | 0.24924  | 0.093755067  | 0.392848761 | 1.96E-03 | 1.92E-02 | 1.00E+00 |
| ENSG00000231951.1_AC004837.  | ENSG00000160789.18_LMNA | 0.05919  | -0.100965418 | 0.21634878  | 4.69E-01 | 7.30E-01 | 1.00E+00 |
| ENSG00000226854.1_RP11-212D  | ENSG00000160789.18_LMNA | -0.04177 | -0.199645324 | 0.118214551 | 6.09E-01 | 8.22E-01 | 1.00E+00 |
| ENSG00000234595.1_AC013733.  | ENSG00000160789.18_LMNA | -0.04727 | -0.204929696 | 0.112778211 | 5.63E-01 | 7.94E-01 | 1.00E+00 |
| ENSG00000271379.1_RP11-440G  | ENSG00000160789.18_LMNA | 0.11053  | -0.049543168 | 0.265065825 | 1.75E-01 | 4.36E-01 | 1.00E+00 |
| ENSG00000259979.1_VN1R68P    | ENSG00000160789.18_LMNA | -0.09406 | -0.249523326 | 0.066131926 | 2.49E-01 | 5.29E-01 | 1.00E+00 |
| ENSG00000256347.1_OR8R1P     | ENSG00000160789.18_LMNA | -0.07968 | -0.235890244 | 0.080540484 | 3.29E-01 | 6.15E-01 | 1.00E+00 |
| ENSG00000186971.3_KRTAP13-4  | ENSG00000160789.18_LMNA | 0.02062  | -0.139033327 | 0.179236078 | 8.01E-01 | 9.20E-01 | 1.00E+00 |
| ENSG00000125533.5_BHLHE23    | ENSG00000160789.18_LMNA | -0.128   | -0.281468754 | 0.031845754 | 1.16E-01 | 3.41E-01 | 1.00E+00 |
| ENSG00000229707.1_SKP1P3     | ENSG00000160789.18_LMNA | 0.0172   | -0.142392127 | 0.175917485 | 8.33E-01 | 9.35E-01 | 1.00E+00 |
| ENSG00000257408.1_RP11-645C  | ENSG00000160789.18_LMNA | -0.05666 | -0.213930688 | 0.103474371 | 4.88E-01 | 7.44E-01 | 1.00E+00 |
| ENSG00000267063.1_AC006130.  | ENSG00000160789.18_LMNA | -0.04314 | -0.200963606 | 0.116860139 | 5.98E-01 | 8.14E-01 | 1.00E+00 |
| ENSG00000261063.1_RP11-538I1 | ENSG00000160789.18_LMNA | 0.00122  | -0.158015587 | 0.160385358 | 9.88E-01 | 9.96E-01 | 1.00E+00 |
| ENSG00000236231.1_AC017048.  | ENSG00000160789.18_LMNA | -0.09656 | -0.251891279 | 0.063615789 | 2.37E-01 | 5.15E-01 | 1.00E+00 |
| ENSG00000183709.7_IFNL2      | ENSG00000160789.18_LMNA | -0.02901 | -0.187345882 | 0.13079434  | 7.23E-01 | 8.83E-01 | 1.00E+00 |
| ENSG00000229911.2_RP4-630J1  | ENSG00000160789.18_LMNA | 0.00075  | -0.158465352 | 0.159935875 | 9.93E-01 | 9.97E-01 | 1.00E+00 |



|                              |                         |          |              |             |          |          |          |
|------------------------------|-------------------------|----------|--------------|-------------|----------|----------|----------|
| ENSG00000235914.1_MACROD2-   | ENSG00000160789.18_LMNA | -0.17753 | -0.327472581 | -0.01885936 | 2.87E-02 | 1.39E-01 | 1.00E+00 |
| ENSG00000242136.1_RP11-734K  | ENSG00000160789.18_LMNA | 0.02919  | -0.130619702 | 0.187517313 | 7.21E-01 | 8.82E-01 | 1.00E+00 |
| ENSG00000251170.4_RP11-729M  | ENSG00000160789.18_LMNA | 0.00013  | -0.159074571 | 0.159326828 | 9.99E-01 | 9.99E-01 | 1.00E+00 |
| ENSG00000261045.2_RP11-673P  | ENSG00000160789.18_LMNA | 0.04383  | -0.116182451 | 0.201622785 | 5.92E-01 | 8.11E-01 | 1.00E+00 |
| ENSG00000171180.1_OR2M4      | ENSG00000160789.18_LMNA | 0.10083  | -0.059326259 | 0.255919492 | 2.16E-01 | 4.91E-01 | 1.00E+00 |
| ENSG00000225708.5_RP13-379L  | ENSG00000160789.18_LMNA | 0.19512  | 0.037075642  | 0.343650187 | 1.60E-02 | 9.19E-02 | 1.00E+00 |
| ENSG00000229274.1_XXbac-BPG  | ENSG00000160789.18_LMNA | 0.17226  | 0.01342917   | 0.322614847 | 3.38E-02 | 1.55E-01 | 1.00E+00 |
| ENSG00000266984.1_POLR3GP2   | ENSG00000160789.18_LMNA | 0.01477  | -0.144771316 | 0.17356239  | 8.57E-01 | 9.44E-01 | 1.00E+00 |
| ENSG00000261122.5_FLJ26245   | ENSG00000160789.18_LMNA | -0.1149  | -0.269181334 | 0.04512136  | 1.59E-01 | 4.12E-01 | 1.00E+00 |
| ENSG00000266774.1_RP11-321M  | ENSG00000160789.18_LMNA | -0.02803 | -0.186402341 | 0.131755174 | 7.32E-01 | 8.87E-01 | 1.00E+00 |
| ENSG00000224049.1_RP11-30O1  | ENSG00000160789.18_LMNA | -0.02908 | -0.187413259 | 0.130725705 | 7.22E-01 | 8.82E-01 | 1.00E+00 |
| ENSG00000232954.2_LINC00374  | ENSG00000160789.18_LMNA | 0.05414  | -0.105977491 | 0.211514335 | 5.08E-01 | 7.58E-01 | 1.00E+00 |
| ENSG00000225923.1_RP4-736I12 | ENSG00000160789.18_LMNA | 0.09839  | -0.061782266 | 0.253614443 | 2.28E-01 | 5.05E-01 | 1.00E+00 |
| ENSG00000270387.1_RP11-315D  | ENSG00000160789.18_LMNA | 0.06105  | -0.099116811 | 0.218127953 | 4.55E-01 | 7.20E-01 | 1.00E+00 |
| ENSG00000225585.1_IPPKP1     | ENSG00000160789.18_LMNA | 0.01493  | -0.144613242 | 0.173718976 | 8.55E-01 | 9.43E-01 | 1.00E+00 |
| ENSG00000235278.2_ZNF652P1   | ENSG00000160789.18_LMNA | -0.04455 | -0.202311211 | 0.115474378 | 5.86E-01 | 8.08E-01 | 1.00E+00 |
| ENSG00000277675.1_AC004878.  | ENSG00000160789.18_LMNA | 0.08894  | -0.071268262 | 0.24467774  | 2.76E-01 | 5.61E-01 | 1.00E+00 |
| ENSG00000187569.2_DPPA3      | ENSG00000160789.18_LMNA | -0.06192 | -0.218957462 | 0.09825418  | 4.49E-01 | 7.15E-01 | 1.00E+00 |
| ENSG00000226968.1_LINC00423  | ENSG00000160789.18_LMNA | -0.00709 | -0.16610405  | 0.15228175  | 9.31E-01 | 9.73E-01 | 1.00E+00 |
| ENSG00000240040.4_AC096579.  | ENSG00000160789.18_LMNA | -0.11546 | -0.269702833 | 0.044560167 | 1.57E-01 | 4.09E-01 | 1.00E+00 |
| ENSG00000242573.1_ACTR3P3    | ENSG00000160789.18_LMNA | 0.12393  | -0.03598442  | 0.277649146 | 1.28E-01 | 3.62E-01 | 1.00E+00 |
| ENSG00000220483.4_SLC25A51F  | ENSG00000160789.18_LMNA | -0.16772 | -0.318414042 | -0.00874798 | 3.89E-02 | 1.70E-01 | 1.00E+00 |
| ENSG00000189052.6_CGB5       | ENSG00000160789.18_LMNA | 0.0804   | -0.079819411 | 0.236575481 | 3.25E-01 | 6.11E-01 | 1.00E+00 |
| ENSG00000258739.1_ENO1P2     | ENSG00000160789.18_LMNA | 0.00301  | -0.156265442 | 0.16213315  | 9.71E-01 | 9.89E-01 | 1.00E+00 |
| ENSG00000136694.8_IL36A      | ENSG00000160789.18_LMNA | -0.02136 | -0.179953278 | 0.138306474 | 7.94E-01 | 9.17E-01 | 1.00E+00 |
| ENSG00000239694.1_RPSAP38    | ENSG00000160789.18_LMNA | -0.06542 | -0.222306617 | 0.094766442 | 4.23E-01 | 6.94E-01 | 1.00E+00 |
| ENSG00000185940.10_KRTAP5-5  | ENSG00000160789.18_LMNA | 6.04E-06 | -0.159194817 | 0.159206587 | 1.00E+00 | 1.00E+00 | 1.00E+00 |
| ENSG00000217585.1_RP1-13D10  | ENSG00000160789.18_LMNA | -0.02279 | -0.181332557 | 0.136907667 | 7.80E-01 | 9.10E-01 | 1.00E+00 |
| ENSG00000253802.1_CTA-392C1  | ENSG00000160789.18_LMNA | 0.03522  | -0.124678748 | 0.19333767  | 6.67E-01 | 8.53E-01 | 1.00E+00 |
| ENSG00000251655.5_PRB1       | ENSG00000160789.18_LMNA | -0.02358 | -0.182094402 | 0.136134491 | 7.73E-01 | 9.06E-01 | 1.00E+00 |
| ENSG00000258712.2_CXADRP2    | ENSG00000160789.18_LMNA | 0.08897  | -0.071243711 | 0.244700938 | 2.76E-01 | 5.60E-01 | 1.00E+00 |
| ENSG00000197067.5_OR2T32P    | ENSG00000160789.18_LMNA | -0.03798 | -0.195991377 | 0.121962468 | 6.42E-01 | 8.41E-01 | 1.00E+00 |
| ENSG00000258677.2_RP11-463D  | ENSG00000160789.18_LMNA | -0.13249 | -0.285664958 | 0.027286616 | 1.04E-01 | 3.19E-01 | 1.00E+00 |

|                                         |                         |          |              |             |          |          |          |
|-----------------------------------------|-------------------------|----------|--------------|-------------|----------|----------|----------|
| ENSG00000248907.1_MTND2P33              | ENSG00000160789.18_LMNA | -0.12149 | -0.275364914 | 0.038454328 | 1.36E-01 | 3.75E-01 | 1.00E+00 |
| ENSG00000228937.1_AC005539.             | ENSG00000160789.18_LMNA | -0.00357 | -0.162673809 | 0.15572365  | 9.65E-01 | 9.86E-01 | 1.00E+00 |
| ENSG00000266893.1_AC005616.             | ENSG00000160789.18_LMNA | -0.13273 | -0.285886049 | 0.027046041 | 1.03E-01 | 3.18E-01 | 1.00E+00 |
| ENSG00000198471.1_RTP2                  | ENSG00000160789.18_LMNA | 0.03754  | -0.122387587 | 0.195576358 | 6.46E-01 | 8.43E-01 | 1.00E+00 |
| ENSG00000259009.4_TPRX2P                | ENSG00000160789.18_LMNA | -0.0321  | -0.190330823 | 0.127750747 | 6.95E-01 | 8.69E-01 | 1.00E+00 |
| ENSG00000257472.1_RP11-159D             | ENSG00000160789.18_LMNA | -0.21423 | -0.361116393 | -0.05697434 | 8.04E-03 | 5.58E-02 | 1.00E+00 |
| ENSG00000215606.4_KRT18P35              | ENSG00000160789.18_LMNA | -0.03441 | -0.192551331 | 0.125482715 | 6.74E-01 | 8.57E-01 | 1.00E+00 |
| ENSG00000175520.8_UBQLN3                | ENSG00000160789.18_LMNA | 0.03412  | -0.125768477 | 0.192271736 | 6.76E-01 | 8.59E-01 | 1.00E+00 |
| ENSG00000236736.1_UQCRC2P1              | ENSG00000160789.18_LMNA | 0.0262   | -0.133556935 | 0.184631427 | 7.49E-01 | 8.95E-01 | 1.00E+00 |
| ENSG00000226818.1_SLC6A6P1              | ENSG00000160789.18_LMNA | -0.07952 | -0.23574022  | 0.080698309 | 3.30E-01 | 6.16E-01 | 1.00E+00 |
| ENSG00000238284.1_LINC01448             | ENSG00000160789.18_LMNA | -0.18575 | -0.335044707 | -0.02736028 | 2.20E-02 | 1.15E-01 | 1.00E+00 |
| ENSG00000214031.2_RP11-169L             | ENSG00000160789.18_LMNA | -0.01795 | -0.176643868 | 0.141657569 | 8.26E-01 | 9.32E-01 | 1.00E+00 |
| ENSG00000205097.5_FRG2                  | ENSG00000160789.18_LMNA | 0.05421  | -0.105902497 | 0.211586785 | 5.07E-01 | 7.57E-01 | 1.00E+00 |
| ENSG00000256151.1_RP11-76C1             | ENSG00000160789.18_LMNA | -0.05724 | -0.214484205 | 0.102900411 | 4.84E-01 | 7.41E-01 | 1.00E+00 |
| ENSG00000280330.1_CH507-236             | ENSG00000160789.18_LMNA | 0.10247  | -0.057670811 | 0.257471168 | 2.09E-01 | 4.82E-01 | 1.00E+00 |
| ENSG00000259582.3_RP11-461F             | ENSG00000160789.18_LMNA | -0.06055 | -0.217656345 | 0.099607037 | 4.59E-01 | 7.22E-01 | 1.00E+00 |
| ENSG00000280191.2_CH507-42P             | ENSG00000160789.18_LMNA | 0.07445  | -0.085769106 | 0.230912035 | 3.62E-01 | 6.44E-01 | 1.00E+00 |
| ENSG00000214794.4_KRT18P42              | ENSG00000160789.18_LMNA | 0.0486   | -0.111467678 | 0.206200831 | 5.52E-01 | 7.88E-01 | 1.00E+00 |
| ENSG00000279666.1_RP11-43P5             | ENSG00000160789.18_LMNA | 0.05491  | -0.105208785 | 0.212256808 | 5.02E-01 | 7.53E-01 | 1.00E+00 |
| ENSG00000240255.1_PSMC1P6               | ENSG00000160789.18_LMNA | 0.1038   | -0.056330311 | 0.25872645  | 2.03E-01 | 4.74E-01 | 1.00E+00 |
| ENSG00000236241.1_RP11-744C             | ENSG00000160789.18_LMNA | -0.00876 | -0.167722061 | 0.150655556 | 9.15E-01 | 9.67E-01 | 1.00E+00 |
| ENSG00000257432.1_RP11-244H             | ENSG00000160789.18_LMNA | 0.11561  | -0.044410281 | 0.269842087 | 1.56E-01 | 4.08E-01 | 1.00E+00 |
| ENSG00000250148.1_KRT8P31               | ENSG00000160789.18_LMNA | 0.04905  | -0.111013295 | 0.206641303 | 5.48E-01 | 7.85E-01 | 1.00E+00 |
| ENSG00000253972.4_RP11-4K16             | ENSG00000160789.18_LMNA | 0.01059  | -0.148863064 | 0.169503546 | 8.97E-01 | 9.60E-01 | 1.00E+00 |
| ENSG00000152093.6_CFC1B                 | ENSG00000160789.18_LMNA | -0.1695  | -0.3200621   | -0.01058289 | 3.68E-02 | 1.64E-01 | 1.00E+00 |
| ENSG00000279998.1_CH507-210             | ENSG00000160789.18_LMNA | 0.04332  | -0.116684246 | 0.201134723 | 5.96E-01 | 8.14E-01 | 1.00E+00 |
| ENSG00000227924.2_RBPJP6                | ENSG00000160789.18_LMNA | -0.08138 | -0.237505881 | 0.078839826 | 3.19E-01 | 6.06E-01 | 1.00E+00 |
| ENSG00000228215.2_RP11-541F             | ENSG00000160789.18_LMNA | -0.13722 | -0.290081626 | 0.02247384  | 9.18E-02 | 2.96E-01 | 1.00E+00 |
| ENSG00000279967.1_CH507-338             | ENSG00000160789.18_LMNA | -0.03034 | -0.188629027 | 0.129486716 | 7.11E-01 | 8.77E-01 | 1.00E+00 |
| ENSG00000276348.1_RP11-395E             | ENSG00000160789.18_LMNA | 0.07296  | -0.087258856 | 0.229490592 | 3.72E-01 | 6.52E-01 | 1.00E+00 |
| ENSG00000234736.4_FAM170B- <del>A</del> | ENSG00000160789.18_LMNA | 0.03488  | -0.125011225 | 0.193012533 | 6.70E-01 | 8.55E-01 | 1.00E+00 |
| ENSG00000225509.1_AIFM1P1               | ENSG00000160789.18_LMNA | -0.03988 | -0.197829307 | 0.120078403 | 6.26E-01 | 8.31E-01 | 1.00E+00 |
| ENSG00000263761.2_GDF2                  | ENSG00000160789.18_LMNA | -0.13062 | -0.283918989 | 0.029185178 | 1.09E-01 | 3.28E-01 | 1.00E+00 |

|                             |                         |          |              |             |          |          |          |
|-----------------------------|-------------------------|----------|--------------|-------------|----------|----------|----------|
| ENSG00000226258.5_GRM7-AS3  | ENSG00000160789.18_LMNA | -0.08432 | -0.240291937 | 0.075902825 | 3.02E-01 | 5.88E-01 | 1.00E+00 |
| ENSG00000276687.1_RP5-1077H | ENSG00000160789.18_LMNA | -0.08377 | -0.239768584 | 0.076454951 | 3.05E-01 | 5.92E-01 | 1.00E+00 |
| ENSG00000237121.1_PIEZO1P2  | ENSG00000160789.18_LMNA | -0.01269 | -0.171548231 | 0.146803165 | 8.77E-01 | 9.52E-01 | 1.00E+00 |
| ENSG00000260786.1_RP11-112L | ENSG00000160789.18_LMNA | 0.03844  | -0.121506365 | 0.196436516 | 6.38E-01 | 8.38E-01 | 1.00E+00 |
| ENSG00000111700.11_SLC01B3  | ENSG00000160789.18_LMNA | -0.13404 | -0.287116587 | 0.025706397 | 9.97E-02 | 3.11E-01 | 1.00E+00 |
| ENSG00000203857.8_HSD3B1    | ENSG00000160789.18_LMNA | -0.03924 | -0.197212028 | 0.120711432 | 6.31E-01 | 8.34E-01 | 1.00E+00 |
| ENSG00000261127.2_RP11-17M1 | ENSG00000160789.18_LMNA | -0.14898 | -0.301043406 | 0.01046603  | 6.70E-02 | 2.42E-01 | 1.00E+00 |
| ENSG00000264104.1_RP11-638L | ENSG00000160789.18_LMNA | 0.00561  | -0.153723169 | 0.164668451 | 9.45E-01 | 9.78E-01 | 1.00E+00 |
| ENSG00000179002.5_TAS1R2    | ENSG00000160789.18_LMNA | -0.04949 | -0.207057073 | 0.110584272 | 5.45E-01 | 7.83E-01 | 1.00E+00 |
| ENSG00000233007.1_UBTFL11   | ENSG00000160789.18_LMNA | -0.03912 | -0.197097899 | 0.120828445 | 6.32E-01 | 8.35E-01 | 1.00E+00 |
| ENSG00000185182.13_GOLGA8C  | ENSG00000160789.18_LMNA | 0.04488  | -0.115139543 | 0.202636646 | 5.83E-01 | 8.06E-01 | 1.00E+00 |
| ENSG00000168619.14_ADAM18   | ENSG00000160789.18_LMNA | -0.18799 | -0.337101425 | -0.02967699 | 2.04E-02 | 1.09E-01 | 1.00E+00 |
| ENSG00000179136.5_LINC00670 | ENSG00000160789.18_LMNA | 0.00023  | -0.158972872 | 0.159428515 | 9.98E-01 | 9.99E-01 | 1.00E+00 |
| ENSG00000164256.8_PRDM9     | ENSG00000160789.18_LMNA | -0.05791 | -0.215122926 | 0.102237839 | 4.79E-01 | 7.37E-01 | 1.00E+00 |
| ENSG00000206142.8_KB-1183D5 | ENSG00000160789.18_LMNA | -0.10414 | -0.259044512 | 0.055990476 | 2.02E-01 | 4.72E-01 | 1.00E+00 |
| ENSG00000278775.1_pRNA      | ENSG00000160789.18_LMNA | -0.032   | -0.190234823 | 0.127848726 | 6.95E-01 | 8.69E-01 | 1.00E+00 |
| ENSG00000202048.1_SNORD114  | ENSG00000160789.18_LMNA | -0.11788 | -0.271980526 | 0.042106782 | 1.48E-01 | 3.94E-01 | 1.00E+00 |
| ENSG00000258133.1_RP11-340M | ENSG00000160789.18_LMNA | -0.08227 | -0.238345765 | 0.077955015 | 3.14E-01 | 6.00E-01 | 1.00E+00 |
| ENSG00000212205.1_Y_RNA     | ENSG00000160789.18_LMNA | -0.03659 | -0.194653103 | 0.123332893 | 6.55E-01 | 8.47E-01 | 1.00E+00 |
| ENSG00000274302.1_          | ENSG00000160789.18_LMNA | -0.01862 | -0.177296816 | 0.140996974 | 8.20E-01 | 9.30E-01 | 1.00E+00 |
| ENSG00000211768.1_TRBJ2-4   | ENSG00000160789.18_LMNA | -0.03988 | -0.197820544 | 0.120087392 | 6.26E-01 | 8.31E-01 | 1.00E+00 |
| ENSG00000274552.1_MIR6889   | ENSG00000160789.18_LMNA | 0.07991  | -0.080312167 | 0.236107249 | 3.28E-01 | 6.14E-01 | 1.00E+00 |
| ENSG00000280846.1_          | ENSG00000160789.18_LMNA | -0.04152 | -0.199404479 | 0.118461868 | 6.12E-01 | 8.23E-01 | 1.00E+00 |
| ENSG00000200823.1_SNORD114  | ENSG00000160789.18_LMNA | -0.00262 | -0.161748494 | 0.156650788 | 9.74E-01 | 9.90E-01 | 1.00E+00 |
| ENSG00000249945.1_RP11-598D | ENSG00000160789.18_LMNA | -0.08486 | -0.240810326 | 0.075355744 | 2.99E-01 | 5.85E-01 | 1.00E+00 |
| ENSG00000199598.1_RNU6-859F | ENSG00000160789.18_LMNA | -0.02121 | -0.179799499 | 0.138462352 | 7.95E-01 | 9.18E-01 | 1.00E+00 |
| ENSG00000273874.1_MIR6859-2 | ENSG00000160789.18_LMNA | 0.02119  | -0.138475688 | 0.179786341 | 7.96E-01 | 9.18E-01 | 1.00E+00 |
| ENSG00000252845.1_RNA5SP10  | ENSG00000160789.18_LMNA | 0.00187  | -0.15737568  | 0.161024636 | 9.82E-01 | 9.93E-01 | 1.00E+00 |
| ENSG00000251931.1_RNU6-871F | ENSG00000160789.18_LMNA | -0.19314 | -0.34182826  | -0.03501389 | 1.71E-02 | 9.65E-02 | 1.00E+00 |
| ENSG00000207932.1_MIR33A    | ENSG00000160789.18_LMNA | -0.02031 | -0.178931116 | 0.13934229  | 8.04E-01 | 9.21E-01 | 1.00E+00 |
| ENSG00000281776.1_          | ENSG00000160789.18_LMNA | -0.02504 | -0.183512024 | 0.134694753 | 7.59E-01 | 9.00E-01 | 1.00E+00 |
| ENSG00000264934.1_MIR4265   | ENSG00000160789.18_LMNA | 0.06016  | -0.100002014 | 0.217276262 | 4.62E-01 | 7.25E-01 | 1.00E+00 |
| ENSG00000266318.1_MIR5692A1 | ENSG00000160789.18_LMNA | 0.09122  | -0.068982775 | 0.246835804 | 2.64E-01 | 5.47E-01 | 1.00E+00 |

|                             |                         |          |              |             |          |          |          |
|-----------------------------|-------------------------|----------|--------------|-------------|----------|----------|----------|
| ENSG00000275261.1_          | ENSG00000160789.18_LMNA | -0.06417 | -0.221111006 | 0.096012419 | 4.32E-01 | 7.02E-01 | 1.00E+00 |
| ENSG00000280801.1_          | ENSG00000160789.18_LMNA | 0.07318  | -0.087039334 | 0.229700134 | 3.70E-01 | 6.51E-01 | 1.00E+00 |
| ENSG00000206779.1_Y_RNA     | ENSG00000160789.18_LMNA | 0.03594  | -0.123966317 | 0.19403414  | 6.60E-01 | 8.50E-01 | 1.00E+00 |
| ENSG00000264607.1_MIR3173   | ENSG00000160789.18_LMNA | -0.05378 | -0.211170971 | 0.106332859 | 5.11E-01 | 7.59E-01 | 1.00E+00 |
| ENSG00000264947.1_MIR3181   | ENSG00000160789.18_LMNA | 0.04741  | -0.112638256 | 0.205065496 | 5.62E-01 | 7.93E-01 | 1.00E+00 |
| ENSG00000252262.1_RNA5SP61  | ENSG00000160789.18_LMNA | -0.04816 | -0.205784046 | 0.111897503 | 5.56E-01 | 7.90E-01 | 1.00E+00 |
| ENSG00000274983.1_          | ENSG00000160789.18_LMNA | 0.13384  | -0.025916883 | 0.286923312 | 1.00E-01 | 3.12E-01 | 1.00E+00 |
| ENSG00000277735.1_          | ENSG00000160789.18_LMNA | 0.13529  | -0.024435134 | 0.288283359 | 9.65E-02 | 3.05E-01 | 1.00E+00 |
| ENSG00000253838.1_RP11-44K6 | ENSG00000160789.18_LMNA | -0.04337 | -0.201178611 | 0.11663913  | 5.96E-01 | 8.13E-01 | 1.00E+00 |
| ENSG00000257053.1_Z98941.1  | ENSG00000160789.18_LMNA | -0.00922 | -0.168170134 | 0.150204911 | 9.10E-01 | 9.66E-01 | 1.00E+00 |
| ENSG00000202222.1_Y_RNA     | ENSG00000160789.18_LMNA | 0.01054  | -0.148912294 | 0.169454647 | 8.97E-01 | 9.60E-01 | 1.00E+00 |
| ENSG00000222506.1_Y_RNA     | ENSG00000160789.18_LMNA | 0.08669  | -0.073529046 | 0.242539918 | 2.88E-01 | 5.74E-01 | 1.00E+00 |
| ENSG00000221454.1_          | ENSG00000160789.18_LMNA | -0.00491 | -0.163982965 | 0.154410956 | 9.52E-01 | 9.81E-01 | 1.00E+00 |
| ENSG00000264953.1_          | ENSG00000160789.18_LMNA | 0.01964  | -0.139995708 | 0.178285957 | 8.10E-01 | 9.25E-01 | 1.00E+00 |
| ENSG00000220999.3_          | ENSG00000160789.18_LMNA | 0.08355  | -0.076675479 | 0.239559497 | 3.06E-01 | 5.93E-01 | 1.00E+00 |
| ENSG00000264144.1_          | ENSG00000160789.18_LMNA | 0.09469  | -0.065500832 | 0.250117608 | 2.46E-01 | 5.26E-01 | 1.00E+00 |
| ENSG00000252748.1_          | ENSG00000160789.18_LMNA | -0.015   | -0.173788606 | 0.144542945 | 8.54E-01 | 9.43E-01 | 1.00E+00 |
| ENSG00000201113.1_RNU6-647F | ENSG00000160789.18_LMNA | -0.09708 | -0.252377684 | 0.063098448 | 2.34E-01 | 5.12E-01 | 1.00E+00 |
| ENSG00000201945.1_SNORA70   | ENSG00000160789.18_LMNA | 0.0008   | -0.15842133  | 0.159979875 | 9.92E-01 | 9.97E-01 | 1.00E+00 |
| ENSG00000252922.1_RNU6-365F | ENSG00000160789.18_LMNA | -0.18643 | -0.335668826 | -0.02806295 | 2.15E-02 | 1.13E-01 | 1.00E+00 |
| ENSG00000252822.1_Y_RNA     | ENSG00000160789.18_LMNA | 0.03002  | -0.129798767 | 0.188322916 | 7.13E-01 | 8.78E-01 | 1.00E+00 |
| ENSG00000199751.1_Y_RNA     | ENSG00000160789.18_LMNA | -0.04791 | -0.205544145 | 0.112144855 | 5.58E-01 | 7.91E-01 | 1.00E+00 |
| ENSG00000206755.1_SNORA30   | ENSG00000160789.18_LMNA | -0.01368 | -0.172503659 | 0.14583968  | 8.67E-01 | 9.48E-01 | 1.00E+00 |
| ENSG00000215976.1_          | ENSG00000160789.18_LMNA | 0.04218  | -0.11781554  | 0.200033811 | 6.06E-01 | 8.20E-01 | 1.00E+00 |
| ENSG00000276108.1_          | ENSG00000160789.18_LMNA | -0.008   | -0.166988823 | 0.151392716 | 9.22E-01 | 9.70E-01 | 1.00E+00 |
| ENSG00000212526.1_RNU6-466F | ENSG00000160789.18_LMNA | 0.16439  | 0.005330389  | 0.31533946  | 4.30E-02 | 1.82E-01 | 1.00E+00 |
| ENSG00000266687.1_          | ENSG00000160789.18_LMNA | -0.10794 | -0.262624751 | 0.052160106 | 1.86E-01 | 4.52E-01 | 1.00E+00 |
| ENSG00000255371.1_OPCML-IT2 | ENSG00000160789.18_LMNA | -0.10299 | -0.257961833 | 0.057146971 | 2.07E-01 | 4.79E-01 | 1.00E+00 |
| ENSG00000207438.1_Y_RNA     | ENSG00000160789.18_LMNA | -0.06858 | -0.225318197 | 0.091623586 | 4.01E-01 | 6.78E-01 | 1.00E+00 |
| ENSG00000199570.1_RNU6-228F | ENSG00000160789.18_LMNA | -0.12632 | -0.279887874 | 0.033559992 | 1.21E-01 | 3.50E-01 | 1.00E+00 |
| ENSG00000222080.1_          | ENSG00000160789.18_LMNA | -0.08585 | -0.241750323 | 0.074363235 | 2.93E-01 | 5.79E-01 | 1.00E+00 |
| ENSG00000277116.1_          | ENSG00000160789.18_LMNA | -0.08438 | -0.240353625 | 0.075837733 | 3.01E-01 | 5.88E-01 | 1.00E+00 |
| ENSG00000238876.1_          | ENSG00000160789.18_LMNA | 0.12373  | -0.03618025  | 0.277468167 | 1.29E-01 | 3.64E-01 | 1.00E+00 |

|                              |                         |          |              |             |          |          |          |
|------------------------------|-------------------------|----------|--------------|-------------|----------|----------|----------|
| ENSG00000222545.1_           | ENSG00000160789.18_LMNA | 0.0734   | -0.086820121 | 0.229909351 | 3.69E-01 | 6.50E-01 | 1.00E+00 |
| ENSG00000264566.2_MIR23C     | ENSG00000160789.18_LMNA | 0.0143   | -0.145228643 | 0.173109277 | 8.61E-01 | 9.46E-01 | 1.00E+00 |
| ENSG00000253005.1_RNU6-176F  | ENSG00000160789.18_LMNA | -0.09668 | -0.252005433 | 0.06349439  | 2.36E-01 | 5.14E-01 | 1.00E+00 |
| ENSG00000222635.1_RNU6-1203  | ENSG00000160789.18_LMNA | -0.01921 | -0.177868483 | 0.140418379 | 8.14E-01 | 9.27E-01 | 1.00E+00 |
| ENSG00000207056.1_RNU1-8P    | ENSG00000160789.18_LMNA | -0.14465 | -0.297009899 | 0.014894907 | 7.54E-02 | 2.62E-01 | 1.00E+00 |
| ENSG00000201298.1_RNU6-1164  | ENSG00000160789.18_LMNA | -0.00082 | -0.160004424 | 0.158396769 | 9.92E-01 | 9.97E-01 | 1.00E+00 |
| ENSG00000251999.1_SNORA31    | ENSG00000160789.18_LMNA | 0.05757  | -0.102569289 | 0.214803442 | 4.81E-01 | 7.39E-01 | 1.00E+00 |
| ENSG00000264284.1_           | ENSG00000160789.18_LMNA | 0.05797  | -0.102176004 | 0.21518252  | 4.78E-01 | 7.36E-01 | 1.00E+00 |
| ENSG00000281863.1_SNORA43    | ENSG00000160789.18_LMNA | -0.0407  | -0.198610428 | 0.119276982 | 6.19E-01 | 8.27E-01 | 1.00E+00 |
| ENSG00000200874.1_Y_RNA      | ENSG00000160789.18_LMNA | 0.0262   | -0.133561438 | 0.184626999 | 7.49E-01 | 8.95E-01 | 1.00E+00 |
| ENSG00000206658.1_RNU6-1039  | ENSG00000160789.18_LMNA | 0.07561  | -0.084604773 | 0.232022042 | 3.55E-01 | 6.38E-01 | 1.00E+00 |
| ENSG00000207811.2_MIR34B     | ENSG00000160789.18_LMNA | 0.13363  | -0.026122652 | 0.286734344 | 1.01E-01 | 3.13E-01 | 1.00E+00 |
| ENSG00000222743.1_RNU6-1190  | ENSG00000160789.18_LMNA | -0.14121 | -0.293810304 | 0.018399448 | 8.27E-02 | 2.78E-01 | 1.00E+00 |
| ENSG00000200842.1_Y_RNA      | ENSG00000160789.18_LMNA | 0.08119  | -0.079036083 | 0.237319524 | 3.20E-01 | 6.07E-01 | 1.00E+00 |
| ENSG00000207581.1_MIR199B    | ENSG00000160789.18_LMNA | 0.0224   | -0.137287288 | 0.180958359 | 7.84E-01 | 9.12E-01 | 1.00E+00 |
| ENSG00000202517.1_SNORA64    | ENSG00000160789.18_LMNA | 0.02245  | -0.137244487 | 0.181000554 | 7.84E-01 | 9.11E-01 | 1.00E+00 |
| ENSG00000202225.1_RNA5SP24   | ENSG00000160789.18_LMNA | -0.04274 | -0.200573754 | 0.117260799 | 6.01E-01 | 8.17E-01 | 1.00E+00 |
| ENSG00000252341.1_Y_RNA      | ENSG00000160789.18_LMNA | -0.05315 | -0.210573736 | 0.106950779 | 5.15E-01 | 7.63E-01 | 1.00E+00 |
| ENSG00000277645.1_           | ENSG00000160789.18_LMNA | 0.04575  | -0.114284508 | 0.203467359 | 5.76E-01 | 8.02E-01 | 1.00E+00 |
| ENSG00000277465.1_AL137067.1 | ENSG00000160789.18_LMNA | -0.04364 | -0.201443434 | 0.116366867 | 5.93E-01 | 8.12E-01 | 1.00E+00 |
| ENSG00000199470.1_SNORA64    | ENSG00000160789.18_LMNA | 0.03281  | -0.127057891 | 0.191009506 | 6.88E-01 | 8.65E-01 | 1.00E+00 |
| ENSG00000259722.2_RP11-94P1  | ENSG00000160789.18_LMNA | 0.01962  | -0.140019625 | 0.178262337 | 8.10E-01 | 9.25E-01 | 1.00E+00 |
| ENSG00000244034.3_RN7SL424f  | ENSG00000160789.18_LMNA | -0.02806 | -0.186424645 | 0.131732469 | 7.32E-01 | 8.87E-01 | 1.00E+00 |
| ENSG00000236258.1_TIMM8BP1   | ENSG00000160789.18_LMNA | -0.15571 | -0.307295469 | 0.003576893 | 5.54E-02 | 2.15E-01 | 1.00E+00 |
| ENSG00000277311.1_Six3os1_2  | ENSG00000160789.18_LMNA | -0.02238 | -0.180931912 | 0.137314115 | 7.84E-01 | 9.12E-01 | 1.00E+00 |
| ENSG00000241524.3_RN7SL632f  | ENSG00000160789.18_LMNA | 0.09653  | -0.063650772 | 0.251858382 | 2.37E-01 | 5.15E-01 | 1.00E+00 |
| ENSG00000259680.5_RP11-812E  | ENSG00000160789.18_LMNA | -0.03592 | -0.194011768 | 0.123989206 | 6.60E-01 | 8.50E-01 | 1.00E+00 |
| ENSG00000256971.1_LINC00508  | ENSG00000160789.18_LMNA | -0.02366 | -0.182172249 | 0.136055465 | 7.72E-01 | 9.06E-01 | 1.00E+00 |
| ENSG00000222370.1_SNORA36E   | ENSG00000160789.18_LMNA | 0.01252  | -0.146971858 | 0.171380887 | 8.78E-01 | 9.53E-01 | 1.00E+00 |
| ENSG00000280985.1_           | ENSG00000160789.18_LMNA | -0.03754 | -0.195575687 | 0.122388274 | 6.46E-01 | 8.43E-01 | 1.00E+00 |
| ENSG00000231866.2_RP4-631H1  | ENSG00000160789.18_LMNA | 0.04575  | -0.114282311 | 0.203469494 | 5.76E-01 | 8.02E-01 | 1.00E+00 |
| ENSG00000260688.1_RP11-441C  | ENSG00000160789.18_LMNA | 0.01728  | -0.142316789 | 0.175992    | 8.33E-01 | 9.35E-01 | 1.00E+00 |
| ENSG00000236168.1_RP5-831C2  | ENSG00000160789.18_LMNA | -0.01676 | -0.175497152 | 0.142817029 | 8.38E-01 | 9.37E-01 | 1.00E+00 |

|                             |                         |          |              |             |          |          |          |
|-----------------------------|-------------------------|----------|--------------|-------------|----------|----------|----------|
| ENSG00000226522.1_AC004744. | ENSG00000160789.18_LMNA | -0.02372 | -0.182236454 | 0.135990284 | 7.72E-01 | 9.06E-01 | 1.00E+00 |
| ENSG00000223931.2_RP11-1166 | ENSG00000160789.18_LMNA | -0.04275 | -0.200584986 | 0.117249257 | 6.01E-01 | 8.17E-01 | 1.00E+00 |
| ENSG00000243510.3_RN7SL111F | ENSG00000160789.18_LMNA | -0.16254 | -0.313626063 | -0.00342898 | 4.54E-02 | 1.89E-01 | 1.00E+00 |
| ENSG00000277483.1_RN7SL321F | ENSG00000160789.18_LMNA | 0.00082  | -0.158405551 | 0.159995646 | 9.92E-01 | 9.97E-01 | 1.00E+00 |
| ENSG00000221400.2_U3        | ENSG00000160789.18_LMNA | -0.03751 | -0.1955396   | 0.122425234 | 6.46E-01 | 8.43E-01 | 1.00E+00 |
| ENSG00000236336.1_RP3-430A1 | ENSG00000160789.18_LMNA | 0.04513  | -0.11489143  | 0.202877749 | 5.81E-01 | 8.05E-01 | 1.00E+00 |
| ENSG00000274321.1_uc_338    | ENSG00000160789.18_LMNA | -0.00688 | -0.165894964 | 0.152491768 | 9.33E-01 | 9.74E-01 | 1.00E+00 |
| ENSG00000267382.1_RP11-325K | ENSG00000160789.18_LMNA | -0.13387 | -0.286952534 | 0.02588506  | 1.00E-01 | 3.12E-01 | 1.00E+00 |
| ENSG00000230125.1_EEF1A1P3  | ENSG00000160789.18_LMNA | -0.14312 | -0.295583936 | 0.016457722 | 7.86E-02 | 2.69E-01 | 1.00E+00 |
| ENSG00000230386.4_RP13-157F | ENSG00000160789.18_LMNA | -0.09409 | -0.24955304  | 0.066100377 | 2.49E-01 | 5.29E-01 | 1.00E+00 |
| ENSG00000204801.7_FGF7P7    | ENSG00000160789.18_LMNA | -0.17525 | -0.325369062 | -0.01650572 | 3.08E-02 | 1.46E-01 | 1.00E+00 |
| ENSG00000253134.1_CTC-436K1 | ENSG00000160789.18_LMNA | -0.04818 | -0.205804057 | 0.111876868 | 5.56E-01 | 7.90E-01 | 1.00E+00 |
| ENSG00000224410.1_AC097499. | ENSG00000160789.18_LMNA | -0.04812 | -0.205745731 | 0.111937011 | 5.56E-01 | 7.90E-01 | 1.00E+00 |
| ENSG00000232793.2_DNAJC19P  | ENSG00000160789.18_LMNA | -0.01882 | -0.177492238 | 0.140799208 | 8.18E-01 | 9.29E-01 | 1.00E+00 |
| ENSG00000264488.1_RP11-605F | ENSG00000160789.18_LMNA | -0.10059 | -0.255692506 | 0.05956828  | 2.18E-01 | 4.92E-01 | 1.00E+00 |
| ENSG00000243005.3_RN7SL16P  | ENSG00000160789.18_LMNA | -0.00842 | -0.167400635 | 0.150978745 | 9.18E-01 | 9.69E-01 | 1.00E+00 |
| ENSG00000270356.1_IGHV1OR1  | ENSG00000160789.18_LMNA | -0.01874 | -0.177408191 | 0.140884266 | 8.19E-01 | 9.30E-01 | 1.00E+00 |
| ENSG00000236272.1_Z82214.3  | ENSG00000160789.18_LMNA | -0.1359  | -0.288846762 | 0.023820913 | 9.50E-02 | 3.02E-01 | 1.00E+00 |
| ENSG00000239794.3_RN7SL653F | ENSG00000160789.18_LMNA | 0.01754  | -0.142055588 | 0.176250321 | 8.30E-01 | 9.34E-01 | 1.00E+00 |
| ENSG00000226485.1_RBM22P3   | ENSG00000160789.18_LMNA | 0.04628  | -0.113758991 | 0.203977701 | 5.71E-01 | 8.00E-01 | 1.00E+00 |
| ENSG00000163209.13_SPRR3    | ENSG00000160789.18_LMNA | -0.22174 | -0.367952476 | -0.06482882 | 6.04E-03 | 4.52E-02 | 1.00E+00 |
| ENSG00000161634.10_DCD      | ENSG00000160789.18_LMNA | 0.16124  | 0.002094412  | 0.312422256 | 4.72E-02 | 1.94E-01 | 1.00E+00 |
| ENSG00000275337.1_RN7SL680F | ENSG00000160789.18_LMNA | 0.11744  | -0.042556562 | 0.27156322  | 1.50E-01 | 3.97E-01 | 1.00E+00 |
| ENSG00000232638.1_RP11-379F | ENSG00000160789.18_LMNA | 0.12402  | -0.035885527 | 0.277740531 | 1.28E-01 | 3.62E-01 | 1.00E+00 |
| ENSG00000263410.2_RN7SL460F | ENSG00000160789.18_LMNA | 0.08231  | -0.077916038 | 0.238382753 | 3.13E-01 | 6.00E-01 | 1.00E+00 |
| ENSG00000277062.1_RN7SL88P  | ENSG00000160789.18_LMNA | 0.0977   | -0.062477338 | 0.252961443 | 2.31E-01 | 5.09E-01 | 1.00E+00 |
| ENSG00000251454.1_RP11-542G | ENSG00000160789.18_LMNA | -0.09808 | -0.253322259 | 0.062093313 | 2.29E-01 | 5.06E-01 | 1.00E+00 |
| ENSG00000267762.1_RP11-426J | ENSG00000160789.18_LMNA | -0.07084 | -0.227474813 | 0.089369076 | 3.86E-01 | 6.64E-01 | 1.00E+00 |
| ENSG00000249310.2_APOBEC3E  | ENSG00000160789.18_LMNA | 0.07695  | -0.083266974 | 0.233296404 | 3.46E-01 | 6.30E-01 | 1.00E+00 |
| ENSG00000241745.3_RN7SL788F | ENSG00000160789.18_LMNA | 0.07749  | -0.082730865 | 0.233806785 | 3.43E-01 | 6.27E-01 | 1.00E+00 |
| ENSG00000219095.1_DHFRP6    | ENSG00000160789.18_LMNA | -0.05814 | -0.215350544 | 0.102001653 | 4.77E-01 | 7.35E-01 | 1.00E+00 |
| ENSG00000244006.3_RN7SL799F | ENSG00000160789.18_LMNA | 0.07376  | -0.086453951 | 0.230258759 | 3.66E-01 | 6.47E-01 | 1.00E+00 |
| ENSG00000266503.2_RN7SL162F | ENSG00000160789.18_LMNA | -0.099   | -0.254191715 | 0.061167547 | 2.25E-01 | 5.01E-01 | 1.00E+00 |

|                              |                         |          |              |             |          |          |          |
|------------------------------|-------------------------|----------|--------------|-------------|----------|----------|----------|
| ENSG00000261294.1_RP11-616M  | ENSG00000160789.18_LMNA | -0.08603 | -0.241915596 | 0.074188664 | 2.92E-01 | 5.78E-01 | 1.00E+00 |
| ENSG00000234640.1_RP11-264E  | ENSG00000160789.18_LMNA | -0.14844 | -0.300536895 | 0.011022862 | 6.80E-02 | 2.45E-01 | 1.00E+00 |
| ENSG00000271395.1_RP11-75N6  | ENSG00000160789.18_LMNA | -0.10446 | -0.259347583 | 0.055666589 | 2.00E-01 | 4.71E-01 | 1.00E+00 |
| ENSG00000240175.1_MAGI1-AS1  | ENSG00000160789.18_LMNA | 0.00062  | -0.158596038 | 0.159805247 | 9.94E-01 | 9.98E-01 | 1.00E+00 |
| ENSG00000231376.1_HMGN2P16   | ENSG00000160789.18_LMNA | 0.00044  | -0.158775798 | 0.159625547 | 9.96E-01 | 9.98E-01 | 1.00E+00 |
| ENSG00000280396.1_RP11-463I2 | ENSG00000160789.18_LMNA | 0.07352  | -0.086698107 | 0.230025789 | 3.68E-01 | 6.49E-01 | 1.00E+00 |
| ENSG00000253492.1_CDH12P3    | ENSG00000160789.18_LMNA | 0.02869  | -0.131111096 | 0.187034892 | 7.26E-01 | 8.84E-01 | 1.00E+00 |
| ENSG00000222969.1_RN7SKP8    | ENSG00000160789.18_LMNA | 0.024    | -0.135718149 | 0.182504485 | 7.69E-01 | 9.04E-01 | 1.00E+00 |
| ENSG00000203411.3_Metazoa_Si | ENSG00000160789.18_LMNA | -0.00033 | -0.159523172 | 0.158878197 | 9.97E-01 | 9.99E-01 | 1.00E+00 |
| ENSG00000264933.2_RN7SL190F  | ENSG00000160789.18_LMNA | -0.13061 | -0.283909656 | 0.029195321 | 1.09E-01 | 3.28E-01 | 1.00E+00 |
| ENSG00000236823.1_RP1-249F5  | ENSG00000160789.18_LMNA | -0.0429  | -0.200732228 | 0.117097944 | 6.00E-01 | 8.16E-01 | 1.00E+00 |
| ENSG00000215369.3_RPL37P3    | ENSG00000160789.18_LMNA | 0.03418  | -0.125702629 | 0.192336167 | 6.76E-01 | 8.58E-01 | 1.00E+00 |
| ENSG00000280791.1_           | ENSG00000160789.18_LMNA | -0.02654 | -0.184957622 | 0.133225217 | 7.46E-01 | 8.94E-01 | 1.00E+00 |
| ENSG00000235930.3_HSPE1P12   | ENSG00000160789.18_LMNA | -0.00059 | -0.159778951 | 0.158622343 | 9.94E-01 | 9.98E-01 | 1.00E+00 |
| ENSG00000263749.1_OOSP1P2    | ENSG00000160789.18_LMNA | 0.04059  | -0.11937916  | 0.198510861 | 6.20E-01 | 8.28E-01 | 1.00E+00 |
| ENSG00000244630.2_RP11-241J  | ENSG00000160789.18_LMNA | 0.03613  | -0.123778607 | 0.194217591 | 6.59E-01 | 8.49E-01 | 1.00E+00 |
| ENSG00000237140.2_HSPE1P16   | ENSG00000160789.18_LMNA | -0.10778 | -0.262475309 | 0.052320174 | 1.86E-01 | 4.52E-01 | 1.00E+00 |
| ENSG00000249875.1_RP11-51M2  | ENSG00000160789.18_LMNA | 0.01257  | -0.14692788  | 0.171424515 | 8.78E-01 | 9.53E-01 | 1.00E+00 |
| ENSG00000224254.2_MTCO1P39   | ENSG00000160789.18_LMNA | 0.04277  | -0.117227812 | 0.200605855 | 6.01E-01 | 8.16E-01 | 1.00E+00 |
| ENSG00000226242.1_RPS17P8    | ENSG00000160789.18_LMNA | 0.02337  | -0.136338048 | 0.181893865 | 7.75E-01 | 9.07E-01 | 1.00E+00 |
| ENSG00000256011.1_RP11-392P  | ENSG00000160789.18_LMNA | -0.07607 | -0.23245169  | 0.084153865 | 3.52E-01 | 6.35E-01 | 1.00E+00 |
| ENSG00000173954.8_SNURFL     | ENSG00000160789.18_LMNA | -0.06157 | -0.218628302 | 0.09859654  | 4.51E-01 | 7.17E-01 | 1.00E+00 |
| ENSG00000275213.1_Metazoa_Si | ENSG00000160789.18_LMNA | -0.03092 | -0.189190177 | 0.128914513 | 7.05E-01 | 8.75E-01 | 1.00E+00 |
| ENSG00000276200.1_RN7SL820F  | ENSG00000160789.18_LMNA | -0.02006 | -0.178686073 | 0.139590502 | 8.06E-01 | 9.23E-01 | 1.00E+00 |
| ENSG00000243601.1_RPL12P24   | ENSG00000160789.18_LMNA | 0.03597  | -0.123937596 | 0.19406221  | 6.60E-01 | 8.50E-01 | 1.00E+00 |
| ENSG00000277047.3_RP11-108H  | ENSG00000160789.18_LMNA | 0.07451  | -0.085706988 | 0.230971276 | 3.62E-01 | 6.43E-01 | 1.00E+00 |
| ENSG00000279677.1_RP11-327P  | ENSG00000160789.18_LMNA | -0.01538 | -0.17415148  | 0.144176544 | 8.51E-01 | 9.41E-01 | 1.00E+00 |
| ENSG00000279304.1_RP11-573M  | ENSG00000160789.18_LMNA | 0.08577  | -0.074449339 | 0.241668798 | 2.93E-01 | 5.79E-01 | 1.00E+00 |
| ENSG00000219298.1_RP11-472G  | ENSG00000160789.18_LMNA | -0.05568 | -0.212996926 | 0.10444214  | 4.96E-01 | 7.50E-01 | 1.00E+00 |
| ENSG00000242790.1_RP11-451G  | ENSG00000160789.18_LMNA | 0.13729  | -0.022398081 | 0.290151043 | 9.17E-02 | 2.95E-01 | 1.00E+00 |
| ENSG00000258407.1_RP11-300J  | ENSG00000160789.18_LMNA | -0.06484 | -0.221749007 | 0.095347665 | 4.27E-01 | 6.98E-01 | 1.00E+00 |
| ENSG00000230437.1_RP11-102J  | ENSG00000160789.18_LMNA | -0.17856 | -0.328422221 | -0.01992304 | 2.77E-02 | 1.36E-01 | 1.00E+00 |
| ENSG00000254927.1_RP11-98J9  | ENSG00000160789.18_LMNA | -0.10886 | -0.263497163 | 0.051225339 | 1.82E-01 | 4.46E-01 | 1.00E+00 |

|                              |                         |          |              |             |          |          |          |
|------------------------------|-------------------------|----------|--------------|-------------|----------|----------|----------|
| ENSG00000237346.1_RP3-448I9. | ENSG00000160789.18_LMNA | -0.01638 | -0.17512485  | 0.143193281 | 8.41E-01 | 9.38E-01 | 1.00E+00 |
| ENSG00000276597.1_TRBV11-3   | ENSG00000160789.18_LMNA | -0.06038 | -0.217493571 | 0.099776202 | 4.60E-01 | 7.23E-01 | 1.00E+00 |
| ENSG00000232359.1_AC104777.  | ENSG00000160789.18_LMNA | 0.01185  | -0.147633712 | 0.170724148 | 8.85E-01 | 9.55E-01 | 1.00E+00 |
| ENSG00000267202.4_RP11-797E  | ENSG00000160789.18_LMNA | -0.08682 | -0.242666202 | 0.073395588 | 2.88E-01 | 5.73E-01 | 1.00E+00 |
| ENSG00000270865.1_RPL12P48   | ENSG00000160789.18_LMNA | -0.10753 | -0.262237096 | 0.052575292 | 1.87E-01 | 4.54E-01 | 1.00E+00 |
| ENSG00000226255.1_UBE2V2P1   | ENSG00000160789.18_LMNA | -0.06947 | -0.226172686 | 0.090730698 | 3.95E-01 | 6.72E-01 | 1.00E+00 |
| ENSG00000259862.1_RP11-143E  | ENSG00000160789.18_LMNA | -0.01774 | -0.176443178 | 0.141860553 | 8.28E-01 | 9.33E-01 | 1.00E+00 |
| ENSG00000225396.4_RP11-69A2  | ENSG00000160789.18_LMNA | -0.05401 | -0.211389143 | 0.106107069 | 5.09E-01 | 7.58E-01 | 1.00E+00 |
| ENSG00000228586.1_AC005042.  | ENSG00000160789.18_LMNA | -0.09501 | -0.250423841 | 0.06517553  | 2.44E-01 | 5.24E-01 | 1.00E+00 |
| ENSG00000227704.1_RP1-266L2  | ENSG00000160789.18_LMNA | -0.04718 | -0.204838592 | 0.112872097 | 5.64E-01 | 7.95E-01 | 1.00E+00 |
| ENSG00000265987.1_RP11-16C1  | ENSG00000160789.18_LMNA | 0.02281  | -0.136889878 | 0.18135009  | 7.80E-01 | 9.10E-01 | 1.00E+00 |
| ENSG00000224850.1_AC108051.  | ENSG00000160789.18_LMNA | -0.10502 | -0.259872133 | 0.055105857 | 1.98E-01 | 4.68E-01 | 1.00E+00 |
| ENSG00000259650.1_RP11-272D  | ENSG00000160789.18_LMNA | 0.02464  | -0.13509013  | 0.183122852 | 7.63E-01 | 9.01E-01 | 1.00E+00 |
| ENSG00000228646.3_RPL31P13   | ENSG00000160789.18_LMNA | 0.00271  | -0.156558659 | 0.161840466 | 9.74E-01 | 9.90E-01 | 1.00E+00 |
| ENSG00000264116.3_RP11-321M  | ENSG00000160789.18_LMNA | 0.01311  | -0.146400027 | 0.17194807  | 8.73E-01 | 9.51E-01 | 1.00E+00 |
| ENSG00000270512.1_RP5-1136G  | ENSG00000160789.18_LMNA | -0.0993  | -0.254475524 | 0.06086524  | 2.24E-01 | 4.99E-01 | 1.00E+00 |
| ENSG00000279087.1_RP11-83B2  | ENSG00000160789.18_LMNA | -0.03996 | -0.19790576  | 0.119999982 | 6.25E-01 | 8.31E-01 | 1.00E+00 |
| ENSG00000229703.4_XX-CR54.1  | ENSG00000160789.18_LMNA | 0.07211  | -0.088097984 | 0.228689344 | 3.77E-01 | 6.57E-01 | 1.00E+00 |
| ENSG00000229452.1_AC005162.  | ENSG00000160789.18_LMNA | 0.1078   | -0.052297127 | 0.262496828 | 1.86E-01 | 4.52E-01 | 1.00E+00 |
| ENSG00000261320.1_RP11-297D  | ENSG00000160789.18_LMNA | 0.12847  | -0.031377175 | 0.281900585 | 1.15E-01 | 3.38E-01 | 1.00E+00 |
| ENSG00000230969.2_AC104024.  | ENSG00000160789.18_LMNA | -0.02209 | -0.180656516 | 0.137593438 | 7.87E-01 | 9.13E-01 | 1.00E+00 |
| ENSG00000241359.1_SYNPR-AS   | ENSG00000160789.18_LMNA | -0.08996 | -0.245639483 | 0.070250142 | 2.70E-01 | 5.55E-01 | 1.00E+00 |
| ENSG00000269189.1_RP11-573N  | ENSG00000160789.18_LMNA | -0.00817 | -0.167150542 | 0.151230162 | 9.20E-01 | 9.70E-01 | 1.00E+00 |
| ENSG00000260969.1_RP11-190D  | ENSG00000160789.18_LMNA | 0.05713  | -0.103007315 | 0.214381124 | 4.84E-01 | 7.41E-01 | 1.00E+00 |
| ENSG00000266908.1_RP5-1022P  | ENSG00000160789.18_LMNA | -0.06431 | -0.221243851 | 0.095874027 | 4.31E-01 | 7.01E-01 | 1.00E+00 |
| ENSG00000230932.2_RP5-947P1  | ENSG00000160789.18_LMNA | -0.11157 | -0.266045924 | 0.048491243 | 1.71E-01 | 4.30E-01 | 1.00E+00 |
| ENSG00000225574.1_DRAXINP1   | ENSG00000160789.18_LMNA | -0.01564 | -0.174402187 | 0.143923349 | 8.48E-01 | 9.41E-01 | 1.00E+00 |
| ENSG00000248539.1_CTD-2194L  | ENSG00000160789.18_LMNA | 0.01895  | -0.140674271 | 0.177615681 | 8.17E-01 | 9.28E-01 | 1.00E+00 |
| ENSG00000233387.1_RP11-342D  | ENSG00000160789.18_LMNA | 0.00545  | -0.153884858 | 0.16450733  | 9.47E-01 | 9.79E-01 | 1.00E+00 |
| ENSG00000254153.1_CTA-398F1  | ENSG00000160789.18_LMNA | 0.03999  | -0.119979351 | 0.197925872 | 6.25E-01 | 8.31E-01 | 1.00E+00 |
| ENSG00000277241.1_RP11-114M  | ENSG00000160789.18_LMNA | 0.11837  | -0.041617428 | 0.272434416 | 1.46E-01 | 3.92E-01 | 1.00E+00 |
| ENSG00000234979.1_CITF22-24E | ENSG00000160789.18_LMNA | -0.01566 | -0.174428562 | 0.14389671  | 8.48E-01 | 9.41E-01 | 1.00E+00 |
| ENSG00000251443.1_RP11-113I2 | ENSG00000160789.18_LMNA | 0.05332  | -0.106786942 | 0.210732111 | 5.14E-01 | 7.62E-01 | 1.00E+00 |



|                             |                         |          |              |             |          |          |          |
|-----------------------------|-------------------------|----------|--------------|-------------|----------|----------|----------|
| ENSG00000253657.1_RP11-25P1 | ENSG00000160789.18_LMNA | -0.01865 | -0.177323839 | 0.140969628 | 8.20E-01 | 9.30E-01 | 1.00E+00 |
| ENSG00000247130.2_RP11-366H | ENSG00000160789.18_LMNA | 0.09098  | -0.069227508 | 0.246604865 | 2.65E-01 | 5.49E-01 | 1.00E+00 |
| ENSG00000217566.2_TDGF1P4   | ENSG00000160789.18_LMNA | -0.15546 | -0.307062714 | 0.003833895 | 5.58E-02 | 2.16E-01 | 1.00E+00 |
| ENSG00000254079.1_RP11-31K2 | ENSG00000160789.18_LMNA | -0.2908  | -0.430088868 | -0.13798679 | 2.79E-04 | 4.25E-03 | 1.00E+00 |
| ENSG00000273978.1_CTB-118P1 | ENSG00000160789.18_LMNA | -0.15863 | -0.309999138 | 0.000588557 | 5.09E-02 | 2.04E-01 | 1.00E+00 |
| ENSG00000267066.1_RP11-866E | ENSG00000160789.18_LMNA | -0.17648 | -0.326511317 | -0.01778337 | 2.96E-02 | 1.42E-01 | 1.00E+00 |
| ENSG00000254450.1_ALG9-IT1  | ENSG00000160789.18_LMNA | -0.07357 | -0.230078758 | 0.086642598 | 3.68E-01 | 6.48E-01 | 1.00E+00 |
| ENSG00000275119.1_RP11-711K | ENSG00000160789.18_LMNA | 0.17897  | 0.020351817  | 0.32880485  | 2.74E-02 | 1.35E-01 | 1.00E+00 |
| ENSG00000253143.3_RP11-333A | ENSG00000160789.18_LMNA | 0.02486  | -0.134876299 | 0.183333339 | 7.61E-01 | 9.00E-01 | 1.00E+00 |
| ENSG00000253715.1_RP11-706C | ENSG00000160789.18_LMNA | -0.11461 | -0.268907042 | 0.04541645  | 1.60E-01 | 4.13E-01 | 1.00E+00 |
| ENSG00000198128.3_OR2L3     | ENSG00000160789.18_LMNA | -0.14994 | -0.301933103 | 0.009487476 | 6.52E-02 | 2.38E-01 | 1.00E+00 |
| ENSG00000257527.1_MIR3179-3 | ENSG00000160789.18_LMNA | 0.11799  | -0.042003444 | 0.272076387 | 1.48E-01 | 3.94E-01 | 1.00E+00 |
| ENSG00000249815.1_RP11-269F | ENSG00000160789.18_LMNA | 0.13979  | -0.019850773 | 0.292483213 | 8.59E-02 | 2.84E-01 | 1.00E+00 |
| ENSG00000238092.1_CEACAMP4  | ENSG00000160789.18_LMNA | 0.00629  | -0.153066845 | 0.165322292 | 9.39E-01 | 9.76E-01 | 1.00E+00 |
| ENSG00000243543.7_WFDC6     | ENSG00000160789.18_LMNA | -0.01774 | -0.176439261 | 0.141864514 | 8.28E-01 | 9.33E-01 | 1.00E+00 |
| ENSG00000267228.5_RP11-49K2 | ENSG00000160789.18_LMNA | -0.08038 | -0.236556021 | 0.079839894 | 3.25E-01 | 6.12E-01 | 1.00E+00 |
| ENSG00000278804.1_          | ENSG00000160789.18_LMNA | 0.159    | -0.000201565 | 0.310348898 | 5.04E-02 | 2.02E-01 | 1.00E+00 |
| ENSG00000229360.1_PPP1R2P5  | ENSG00000160789.18_LMNA | -0.09414 | -0.249603731 | 0.066046555 | 2.49E-01 | 5.29E-01 | 1.00E+00 |
| ENSG00000254475.1_OR2AT1P   | ENSG00000160789.18_LMNA | -0.07502 | -0.231454257 | 0.085200455 | 3.58E-01 | 6.41E-01 | 1.00E+00 |
| ENSG00000232797.1_FAM207CP  | ENSG00000160789.18_LMNA | -0.04911 | -0.206691168 | 0.110961847 | 5.48E-01 | 7.85E-01 | 1.00E+00 |
| ENSG00000232740.1_AC062020. | ENSG00000160789.18_LMNA | -0.01042 | -0.169336041 | 0.149031693 | 8.99E-01 | 9.61E-01 | 1.00E+00 |
| ENSG00000251434.1_RP11-315A | ENSG00000160789.18_LMNA | -0.04479 | -0.202543279 | 0.115235614 | 5.84E-01 | 8.07E-01 | 1.00E+00 |
| ENSG00000242456.1_MTCO3P38  | ENSG00000160789.18_LMNA | 0.00104  | -0.158182644 | 0.160218421 | 9.90E-01 | 9.96E-01 | 1.00E+00 |
| ENSG00000251438.1_RP11-431M | ENSG00000160789.18_LMNA | 0.01605  | -0.143517653 | 0.17480381  | 8.44E-01 | 9.39E-01 | 1.00E+00 |
| ENSG00000255811.1_RP1-34M23 | ENSG00000160789.18_LMNA | -0.01149 | -0.170379186 | 0.147981247 | 8.88E-01 | 9.57E-01 | 1.00E+00 |
| ENSG00000256004.1_RP11-20D1 | ENSG00000160789.18_LMNA | 0.00493  | -0.154388777 | 0.164005075 | 9.52E-01 | 9.81E-01 | 1.00E+00 |
| ENSG00000226547.2_SSU72P1   | ENSG00000160789.18_LMNA | 0.0281   | -0.1316877   | 0.18646862  | 7.31E-01 | 8.87E-01 | 1.00E+00 |
| ENSG00000224493.1_RP11-87O1 | ENSG00000160789.18_LMNA | -0.06612 | -0.222969629 | 0.094075071 | 4.18E-01 | 6.90E-01 | 1.00E+00 |
| ENSG00000271704.1_BNIP3P20  | ENSG00000160789.18_LMNA | -0.16337 | -0.314396745 | -0.00428395 | 4.43E-02 | 1.86E-01 | 1.00E+00 |
| ENSG00000231681.1_AC020743. | ENSG00000160789.18_LMNA | 0.10498  | -0.055141683 | 0.259838624 | 1.98E-01 | 4.68E-01 | 1.00E+00 |
| ENSG00000248577.1_RP11-122C | ENSG00000160789.18_LMNA | 0.043    | -0.117006156 | 0.20082154  | 5.99E-01 | 8.16E-01 | 1.00E+00 |
| ENSG00000276500.1_BMS1P14   | ENSG00000160789.18_LMNA | 0.14391  | -0.015646367 | 0.296324417 | 7.69E-02 | 2.66E-01 | 1.00E+00 |
| ENSG00000268951.1_RP11-149F | ENSG00000160789.18_LMNA | 0.07914  | -0.081081343 | 0.235376057 | 3.32E-01 | 6.18E-01 | 1.00E+00 |

|                              |                         |          |              |             |          |          |          |
|------------------------------|-------------------------|----------|--------------|-------------|----------|----------|----------|
| ENSG00000237272.1_OR51R1P    | ENSG00000160789.18_LMNA | -0.08462 | -0.240577647 | 0.075601325 | 3.00E-01 | 5.86E-01 | 1.00E+00 |
| ENSG00000231447.1_RP1-14D6.7 | ENSG00000160789.18_LMNA | -0.02118 | -0.179774847 | 0.138487339 | 7.96E-01 | 9.18E-01 | 1.00E+00 |
| ENSG00000255653.1_RP11-60C6  | ENSG00000160789.18_LMNA | -0.0049  | -0.163973495 | 0.154420455 | 9.52E-01 | 9.81E-01 | 1.00E+00 |
| ENSG00000219770.1_VN1R11P    | ENSG00000160789.18_LMNA | -0.08363 | -0.239642356 | 0.076588091 | 3.06E-01 | 5.92E-01 | 1.00E+00 |
| ENSG00000250767.1_RP11-1084  | ENSG00000160789.18_LMNA | 0.05359  | -0.106521493 | 0.210988676 | 5.12E-01 | 7.61E-01 | 1.00E+00 |
| ENSG00000280725.1_LINC00251  | ENSG00000160789.18_LMNA | -0.17572 | -0.325807574 | -0.01699609 | 3.04E-02 | 1.44E-01 | 1.00E+00 |
| ENSG00000226199.1_RP11-12D5  | ENSG00000160789.18_LMNA | -0.08953 | -0.245233331 | 0.070680183 | 2.73E-01 | 5.57E-01 | 1.00E+00 |
| ENSG00000240804.1_NPM1P28    | ENSG00000160789.18_LMNA | -0.11793 | -0.272023877 | 0.042060051 | 1.48E-01 | 3.94E-01 | 1.00E+00 |
| ENSG00000225816.1_GTF3AP5    | ENSG00000160789.18_LMNA | 0.0659   | -0.094290933 | 0.222762653 | 4.20E-01 | 6.91E-01 | 1.00E+00 |
| ENSG00000277277.2_CH507-396  | ENSG00000160789.18_LMNA | -0.12896 | -0.282360082 | 0.030878424 | 1.13E-01 | 3.36E-01 | 1.00E+00 |
| ENSG00000250192.1_RP11-300M  | ENSG00000160789.18_LMNA | 0.06845  | -0.09174956  | 0.225197601 | 4.02E-01 | 6.78E-01 | 1.00E+00 |
| ENSG00000227393.1_RP6-127F1  | ENSG00000160789.18_LMNA | -0.0824  | -0.238472129 | 0.077821849 | 3.13E-01 | 5.99E-01 | 1.00E+00 |
| ENSG00000274583.1_FAM74A4    | ENSG00000160789.18_LMNA | 0.06465  | -0.095534541 | 0.221569679 | 4.29E-01 | 6.99E-01 | 1.00E+00 |
| ENSG00000188373.4_C10orf99   | ENSG00000160789.18_LMNA | -0.0007  | -0.159882437 | 0.158518815 | 9.93E-01 | 9.97E-01 | 1.00E+00 |
| ENSG00000235232.1_MRPS18BF   | ENSG00000160789.18_LMNA | 0.08213  | -0.078091129 | 0.238216594 | 3.14E-01 | 6.01E-01 | 1.00E+00 |
| ENSG00000249667.1_LINC01259  | ENSG00000160789.18_LMNA | -0.09211 | -0.247677431 | 0.068090555 | 2.59E-01 | 5.42E-01 | 1.00E+00 |
| ENSG00000215353.2_C1QBPP1    | ENSG00000160789.18_LMNA | 0.11423  | -0.045800342 | 0.26855013  | 1.61E-01 | 4.16E-01 | 1.00E+00 |
| ENSG00000279835.1_RP4-811M8  | ENSG00000160789.18_LMNA | -0.02631 | -0.184735421 | 0.133451188 | 7.48E-01 | 8.95E-01 | 1.00E+00 |
| ENSG00000229530.1_RP11-62C3  | ENSG00000160789.18_LMNA | -0.00145 | -0.160613395 | 0.157787356 | 9.86E-01 | 9.95E-01 | 1.00E+00 |
| ENSG00000233455.2_RP4-667H1  | ENSG00000160789.18_LMNA | -0.00094 | -0.160113782 | 0.158287349 | 9.91E-01 | 9.97E-01 | 1.00E+00 |
| ENSG00000214525.4_AC130709   | ENSG00000160789.18_LMNA | 0.01634  | -0.143230303 | 0.175088212 | 8.42E-01 | 9.38E-01 | 1.00E+00 |
| ENSG00000268483.1_RPL7AP69   | ENSG00000160789.18_LMNA | 0.21895  | 0.061908468  | 0.365414592 | 6.73E-03 | 4.89E-02 | 1.00E+00 |
| ENSG00000268184.1_RP11-420K  | ENSG00000160789.18_LMNA | -0.07718 | -0.233510226 | 0.083042396 | 3.45E-01 | 6.29E-01 | 1.00E+00 |
| ENSG00000224860.1_GXYLT1P2   | ENSG00000160789.18_LMNA | 0.05326  | -0.10684994  | 0.210671215 | 5.15E-01 | 7.62E-01 | 1.00E+00 |
| ENSG00000253643.4_RP11-561E  | ENSG00000160789.18_LMNA | -0.09083 | -0.246469059 | 0.069371408 | 2.66E-01 | 5.50E-01 | 1.00E+00 |
| ENSG00000260089.2_ADAM3B     | ENSG00000160789.18_LMNA | 0.00081  | -0.158412801 | 0.1599884   | 9.92E-01 | 9.97E-01 | 1.00E+00 |
| ENSG00000237449.1_TAAR4P     | ENSG00000160789.18_LMNA | 0.01393  | -0.145596435 | 0.172744775 | 8.65E-01 | 9.47E-01 | 1.00E+00 |
| ENSG00000232722.1_MROH4P     | ENSG00000160789.18_LMNA | -0.02941 | -0.187734288 | 0.130398641 | 7.19E-01 | 8.81E-01 | 1.00E+00 |
| ENSG00000214344.4_OR4F13P    | ENSG00000160789.18_LMNA | 0.00459  | -0.154719942 | 0.163674913 | 9.55E-01 | 9.82E-01 | 1.00E+00 |
| ENSG00000236027.2_PATE3      | ENSG00000160789.18_LMNA | -0.04792 | -0.205548252 | 0.112140622 | 5.58E-01 | 7.91E-01 | 1.00E+00 |
| ENSG00000235653.1_AC007253   | ENSG00000160789.18_LMNA | -0.06424 | -0.221179475 | 0.095941093 | 4.32E-01 | 7.01E-01 | 1.00E+00 |
| ENSG00000269495.1_CTB-147C2  | ENSG00000160789.18_LMNA | -0.11765 | -0.271757987 | 0.042346654 | 1.49E-01 | 3.96E-01 | 1.00E+00 |
| ENSG00000224339.1_AL121578.5 | ENSG00000160789.18_LMNA | 0.06496  | -0.095228288 | 0.221863551 | 4.27E-01 | 6.97E-01 | 1.00E+00 |

|                             |                         |          |              |             |          |          |          |
|-----------------------------|-------------------------|----------|--------------|-------------|----------|----------|----------|
| ENSG00000178473.6_UCN3      | ENSG00000160789.18_LMNA | -0.14512 | -0.297450087 | 0.014412166 | 7.44E-02 | 2.60E-01 | 1.00E+00 |
| ENSG00000163530.4_DPPA2     | ENSG00000160789.18_LMNA | -0.06677 | -0.223589867 | 0.093428027 | 4.14E-01 | 6.87E-01 | 1.00E+00 |
| ENSG00000270929.1_SRD5A3P1  | ENSG00000160789.18_LMNA | -0.06477 | -0.22168604  | 0.095413285 | 4.28E-01 | 6.98E-01 | 1.00E+00 |
| ENSG00000264587.4_RP11-784B | ENSG00000160789.18_LMNA | 0.00817  | -0.151230106 | 0.167150597 | 9.20E-01 | 9.70E-01 | 1.00E+00 |
| ENSG00000276119.1_OR13C2    | ENSG00000160789.18_LMNA | -0.13758 | -0.290418073 | 0.022106624 | 9.10E-02 | 2.94E-01 | 1.00E+00 |
| ENSG00000241149.2_RP11-561N | ENSG00000160789.18_LMNA | -0.01778 | -0.176481268 | 0.141822029 | 8.28E-01 | 9.33E-01 | 1.00E+00 |
| ENSG00000185888.5_PRSS38    | ENSG00000160789.18_LMNA | -0.03171 | -0.189948986 | 0.128140421 | 6.98E-01 | 8.71E-01 | 1.00E+00 |
| ENSG00000233792.3_PUDPP2    | ENSG00000160789.18_LMNA | 0.08413  | -0.076090282 | 0.24011427  | 3.03E-01 | 5.89E-01 | 1.00E+00 |
| ENSG00000274516.1_FAM74A6   | ENSG00000160789.18_LMNA | 0.01472  | -0.144817072 | 0.173517061 | 8.57E-01 | 9.44E-01 | 1.00E+00 |
| ENSG00000258423.1_OR7E105P  | ENSG00000160789.18_LMNA | 0.08919  | -0.07102352  | 0.244908987 | 2.75E-01 | 5.59E-01 | 1.00E+00 |
| ENSG00000267311.1_RP11-99A1 | ENSG00000160789.18_LMNA | -0.05429 | -0.211659036 | 0.105827708 | 5.07E-01 | 7.57E-01 | 1.00E+00 |
| ENSG00000228965.1_RPSAP60   | ENSG00000160789.18_LMNA | 0.0305   | -0.129324979 | 0.188787661 | 7.09E-01 | 8.76E-01 | 1.00E+00 |
| ENSG00000203972.8_GLYATL3   | ENSG00000160789.18_LMNA | 0.00824  | -0.151163577 | 0.16721678  | 9.20E-01 | 9.69E-01 | 1.00E+00 |
| ENSG00000185264.10_TEX33    | ENSG00000160789.18_LMNA | -0.00272 | -0.161852743 | 0.156546361 | 9.73E-01 | 9.90E-01 | 1.00E+00 |
| ENSG00000232154.2_MTCYBP15  | ENSG00000160789.18_LMNA | 0.01601  | -0.143559439 | 0.174762449 | 8.45E-01 | 9.39E-01 | 1.00E+00 |
| ENSG00000204529.3_GUCY2EP   | ENSG00000160789.18_LMNA | -0.05903 | -0.216198203 | 0.101121771 | 4.70E-01 | 7.30E-01 | 1.00E+00 |
| ENSG00000263821.1_RP11-527H | ENSG00000160789.18_LMNA | -0.13356 | -0.286665367 | 0.026197755 | 1.01E-01 | 3.13E-01 | 1.00E+00 |
| ENSG00000279701.1_CTD-2028E | ENSG00000160789.18_LMNA | 0.06094  | -0.099226362 | 0.218022575 | 4.56E-01 | 7.20E-01 | 1.00E+00 |
| ENSG00000187481.2_HSD3BP1   | ENSG00000160789.18_LMNA | -0.0469  | -0.204577054 | 0.113141588 | 5.66E-01 | 7.97E-01 | 1.00E+00 |
| ENSG00000225025.2_KIF4CP    | ENSG00000160789.18_LMNA | 0.02456  | -0.135166953 | 0.183047223 | 7.64E-01 | 9.02E-01 | 1.00E+00 |
| ENSG00000237521.2_OR7E24    | ENSG00000160789.18_LMNA | 0.11573  | -0.044288358 | 0.269955351 | 1.56E-01 | 4.07E-01 | 1.00E+00 |
| ENSG00000234680.1_VN2R3P    | ENSG00000160789.18_LMNA | -0.03866 | -0.196647491 | 0.121290147 | 6.36E-01 | 8.37E-01 | 1.00E+00 |
| ENSG00000178591.6_DEFB125   | ENSG00000160789.18_LMNA | 0.10425  | -0.055874885 | 0.259152681 | 2.01E-01 | 4.72E-01 | 1.00E+00 |
| ENSG00000215149.3_KRT18P32  | ENSG00000160789.18_LMNA | 0.041    | -0.118976161 | 0.198903524 | 6.16E-01 | 8.26E-01 | 1.00E+00 |
| ENSG00000240268.5_MOXD2P    | ENSG00000160789.18_LMNA | -0.07724 | -0.233568193 | 0.082981507 | 3.44E-01 | 6.29E-01 | 1.00E+00 |
| ENSG00000273423.1_OR131P    | ENSG00000160789.18_LMNA | -0.04753 | -0.205173649 | 0.112526783 | 5.61E-01 | 7.93E-01 | 1.00E+00 |
| ENSG00000230328.2_RP11-35N6 | ENSG00000160789.18_LMNA | -0.19978 | -0.347912912 | -0.04190971 | 1.36E-02 | 8.17E-02 | 1.00E+00 |
| ENSG00000279222.1_CTD-2194D | ENSG00000160789.18_LMNA | 0.02583  | -0.133925002 | 0.184269407 | 7.52E-01 | 8.97E-01 | 1.00E+00 |
| ENSG00000279705.1_RP11-758M | ENSG00000160789.18_LMNA | 0.07458  | -0.085638222 | 0.231036853 | 3.61E-01 | 6.43E-01 | 1.00E+00 |
| ENSG00000175535.6_PNLIP     | ENSG00000160789.18_LMNA | -0.11075 | -0.265270188 | 0.049323885 | 1.74E-01 | 4.35E-01 | 1.00E+00 |
| ENSG00000232239.2_RBPJP5    | ENSG00000160789.18_LMNA | -0.15521 | -0.306833112 | 0.004087375 | 5.62E-02 | 2.17E-01 | 1.00E+00 |
| ENSG00000187003.6_ACTL7A    | ENSG00000160789.18_LMNA | 0.01695  | -0.142633969 | 0.175678258 | 8.36E-01 | 9.36E-01 | 1.00E+00 |
| ENSG00000271117.1_RP11-377H | ENSG00000160789.18_LMNA | -0.14841 | -0.300508607 | 0.011053955 | 6.80E-02 | 2.45E-01 | 1.00E+00 |

|                              |                         |          |              |             |          |          |          |
|------------------------------|-------------------------|----------|--------------|-------------|----------|----------|----------|
| ENSG00000258417.3_RP11-240B  | ENSG00000160789.18_LMNA | -0.15004 | -0.302029436 | 0.009381486 | 6.50E-02 | 2.38E-01 | 1.00E+00 |
| ENSG00000260600.1_RP11-109D  | ENSG00000160789.18_LMNA | -0.06531 | -0.222203572 | 0.094873867 | 4.24E-01 | 6.95E-01 | 1.00E+00 |
| ENSG00000249616.1_CCNB3P1    | ENSG00000160789.18_LMNA | -0.09455 | -0.249990709 | 0.065635612 | 2.47E-01 | 5.27E-01 | 1.00E+00 |
| ENSG00000276122.1_RP11-143E  | ENSG00000160789.18_LMNA | -0.01129 | -0.170185863 | 0.148175977 | 8.90E-01 | 9.57E-01 | 1.00E+00 |
| ENSG00000227860.1_MTND5P18   | ENSG00000160789.18_LMNA | -0.15167 | -0.303546028 | 0.007711941 | 6.21E-02 | 2.31E-01 | 1.00E+00 |
| ENSG00000273999.1_RBM17P2    | ENSG00000160789.18_LMNA | 0.05423  | -0.105881924 | 0.211606661 | 5.07E-01 | 7.57E-01 | 1.00E+00 |
| ENSG00000215231.6_LINC01020  | ENSG00000160789.18_LMNA | -0.12377 | -0.277498994 | 0.036146895 | 1.29E-01 | 3.63E-01 | 1.00E+00 |
| ENSG00000143954.11_REG3G     | ENSG00000160789.18_LMNA | -0.23967 | -0.384213336 | -0.0836643  | 2.94E-03 | 2.64E-02 | 1.00E+00 |
| ENSG00000236384.6_LINC00479  | ENSG00000160789.18_LMNA | 0.0617   | -0.098462987 | 0.218756714 | 4.50E-01 | 7.16E-01 | 1.00E+00 |
| ENSG00000254229.2_FAM90A12I  | ENSG00000160789.18_LMNA | 0.16642  | 0.007416979  | 0.3172174   | 4.04E-02 | 1.75E-01 | 1.00E+00 |
| ENSG00000258742.4_RP11-862G  | ENSG00000160789.18_LMNA | -0.12743 | -0.280933385 | 0.032426492 | 1.18E-01 | 3.44E-01 | 1.00E+00 |
| ENSG00000280291.1_RP11-759A  | ENSG00000160789.18_LMNA | 0.04359  | -0.116420044 | 0.201391713 | 5.94E-01 | 8.13E-01 | 1.00E+00 |
| ENSG00000250485.1_EXOC7P1    | ENSG00000160789.18_LMNA | 0.10555  | -0.05457155  | 0.260371789 | 1.96E-01 | 4.65E-01 | 1.00E+00 |
| ENSG00000244464.1_RP11-201E  | ENSG00000160789.18_LMNA | 0.10474  | -0.055383756 | 0.259612189 | 1.99E-01 | 4.69E-01 | 1.00E+00 |
| ENSG00000233907.1_FLJ31662   | ENSG00000160789.18_LMNA | 0.06689  | -0.093305813 | 0.223706989 | 4.13E-01 | 6.86E-01 | 1.00E+00 |
| ENSG00000279818.1_CTC-774J1  | ENSG00000160789.18_LMNA | -0.01288 | -0.171729559 | 0.146620354 | 8.75E-01 | 9.51E-01 | 1.00E+00 |
| ENSG00000249647.2_C5orf66-AS | ENSG00000160789.18_LMNA | -0.06572 | -0.22259264  | 0.094468222 | 4.21E-01 | 6.93E-01 | 1.00E+00 |
| ENSG00000280189.1_RP11-491F  | ENSG00000160789.18_LMNA | -0.10464 | -0.259515284 | 0.055487342 | 2.00E-01 | 4.70E-01 | 1.00E+00 |
| ENSG00000232416.3_BPESC1     | ENSG00000160789.18_LMNA | 0.01301  | -0.146491866 | 0.171856992 | 8.74E-01 | 9.51E-01 | 1.00E+00 |
| ENSG00000279595.1_RP11-854K  | ENSG00000160789.18_LMNA | 0.09355  | -0.066647    | 0.249038121 | 2.52E-01 | 5.33E-01 | 1.00E+00 |
| ENSG00000213240.8_RP11-458D  | ENSG00000160789.18_LMNA | -0.0259  | -0.184344484 | 0.133848679 | 7.51E-01 | 8.96E-01 | 1.00E+00 |
| ENSG00000263278.2_CH17-351M  | ENSG00000160789.18_LMNA | -0.06747 | -0.224264636 | 0.09272379  | 4.09E-01 | 6.83E-01 | 1.00E+00 |
| ENSG00000260902.1_RP11-95M5  | ENSG00000160789.18_LMNA | -0.11466 | -0.268953312 | 0.045366675 | 1.60E-01 | 4.13E-01 | 1.00E+00 |
| ENSG00000278890.1_LL22NC03-  | ENSG00000160789.18_LMNA | -0.06516 | -0.222061201 | 0.095022277 | 4.25E-01 | 6.96E-01 | 1.00E+00 |
| ENSG00000231933.6_CTA-125H2  | ENSG00000160789.18_LMNA | -0.02963 | -0.187946605 | 0.130182294 | 7.17E-01 | 8.80E-01 | 1.00E+00 |
| ENSG00000199135.1_MIR101-1   | ENSG00000160789.18_LMNA | -0.02472 | -0.183199075 | 0.135012699 | 7.62E-01 | 9.01E-01 | 1.00E+00 |
| ENSG00000237111.1_IGHJ3P     | ENSG00000160789.18_LMNA | -0.02728 | -0.185671229 | 0.132499277 | 7.39E-01 | 8.90E-01 | 1.00E+00 |
| ENSG00000238034.1_RP5-1185K  | ENSG00000160789.18_LMNA | -0.09527 | -0.250664222 | 0.064920135 | 2.43E-01 | 5.22E-01 | 1.00E+00 |
| ENSG00000261453.1_RP11-565N  | ENSG00000160789.18_LMNA | 0.12356  | -0.03635241  | 0.277309045 | 1.29E-01 | 3.64E-01 | 1.00E+00 |
| ENSG00000224149.1_RP11-510C  | ENSG00000160789.18_LMNA | 0.06921  | -0.090997214 | 0.225917682 | 3.97E-01 | 6.74E-01 | 1.00E+00 |
| ENSG00000207513.1_RNU1-3     | ENSG00000160789.18_LMNA | -0.06996 | -0.22663654  | 0.090245786 | 3.92E-01 | 6.70E-01 | 1.00E+00 |
| ENSG00000277739.1_RNA5-8S5   | ENSG00000160789.18_LMNA | 0.00998  | -0.149454477 | 0.168915994 | 9.03E-01 | 9.62E-01 | 1.00E+00 |
| ENSG00000221771.1_MIR1205    | ENSG00000160789.18_LMNA | 0.13054  | -0.029270226 | 0.283840728 | 1.09E-01 | 3.28E-01 | 1.00E+00 |

|                             |                         |          |              |             |          |          |          |
|-----------------------------|-------------------------|----------|--------------|-------------|----------|----------|----------|
| ENSG00000252902.1_RNA5SP34  | ENSG00000160789.18_LMNA | 0.01365  | -0.145868845 | 0.172474747 | 8.67E-01 | 9.48E-01 | 1.00E+00 |
| ENSG00000216022.1_          | ENSG00000160789.18_LMNA | 0.00368  | -0.155609544 | 0.162787652 | 9.64E-01 | 9.86E-01 | 1.00E+00 |
| ENSG00000280763.1_          | ENSG00000160789.18_LMNA | 0.04433  | -0.115682512 | 0.202108885 | 5.88E-01 | 8.08E-01 | 1.00E+00 |
| ENSG00000273606.1_MIR6776   | ENSG00000160789.18_LMNA | 0.10636  | -0.053754559 | 0.261135471 | 1.92E-01 | 4.60E-01 | 1.00E+00 |
| ENSG00000212264.1_SNORD65   | ENSG00000160789.18_LMNA | -0.12804 | -0.28150411  | 0.031807395 | 1.16E-01 | 3.40E-01 | 1.00E+00 |
| ENSG00000277204.1_          | ENSG00000160789.18_LMNA | 0.02383  | -0.135889795 | 0.182335432 | 7.71E-01 | 9.05E-01 | 1.00E+00 |
| ENSG00000221082.1_          | ENSG00000160789.18_LMNA | -0.04875 | -0.206349784 | 0.111314035 | 5.51E-01 | 7.87E-01 | 1.00E+00 |
| ENSG00000253017.1_          | ENSG00000160789.18_LMNA | 0.05213  | -0.107964386 | 0.209593546 | 5.24E-01 | 7.69E-01 | 1.00E+00 |
| ENSG00000199290.1_Y_RNA     | ENSG00000160789.18_LMNA | 0.02015  | -0.139494914 | 0.178780445 | 8.05E-01 | 9.22E-01 | 1.00E+00 |
| ENSG00000264616.1_MIR4755   | ENSG00000160789.18_LMNA | 0.16491  | 0.005858915  | 0.315815366 | 4.23E-02 | 1.80E-01 | 1.00E+00 |
| ENSG00000265028.1_MIR4792   | ENSG00000160789.18_LMNA | -0.17647 | -0.326493893 | -0.01776387 | 2.96E-02 | 1.42E-01 | 1.00E+00 |
| ENSG00000265160.1_MIR5003   | ENSG00000160789.18_LMNA | -0.01405 | -0.172862392 | 0.145477766 | 8.64E-01 | 9.47E-01 | 1.00E+00 |
| ENSG00000274280.1_MIR6069   | ENSG00000160789.18_LMNA | -0.03319 | -0.191379844 | 0.126679689 | 6.85E-01 | 8.63E-01 | 1.00E+00 |
| ENSG00000265144.1_MIR548AM  | ENSG00000160789.18_LMNA | -0.09773 | -0.252997288 | 0.062439191 | 2.31E-01 | 5.09E-01 | 1.00E+00 |
| ENSG00000265110.1_MIR4731   | ENSG00000160789.18_LMNA | 0.1602   | 0.001026902  | 0.31145862  | 4.87E-02 | 1.98E-01 | 1.00E+00 |
| ENSG00000225882.1_LINC01456 | ENSG00000160789.18_LMNA | -0.25595 | -0.398897562 | -0.10086007 | 1.46E-03 | 1.54E-02 | 1.00E+00 |
| ENSG00000252496.1_RNA5SP33  | ENSG00000160789.18_LMNA | 0.01129  | -0.148180546 | 0.170181327 | 8.90E-01 | 9.57E-01 | 1.00E+00 |
| ENSG00000264800.1_MIR4294   | ENSG00000160789.18_LMNA | -0.09198 | -0.247558083 | 0.068217108 | 2.60E-01 | 5.43E-01 | 1.00E+00 |
| ENSG00000221261.1_MIR1208   | ENSG00000160789.18_LMNA | -0.08206 | -0.238152295 | 0.078158879 | 3.15E-01 | 6.01E-01 | 1.00E+00 |
| ENSG00000202184.1_RNU6-1283 | ENSG00000160789.18_LMNA | 0.07807  | -0.082149192 | 0.234360348 | 3.39E-01 | 6.24E-01 | 1.00E+00 |
| ENSG00000265828.1_MIR3939   | ENSG00000160789.18_LMNA | -0.01236 | -0.171220993 | 0.147133024 | 8.80E-01 | 9.53E-01 | 1.00E+00 |
| ENSG00000230986.1_DDX3P2    | ENSG00000160789.18_LMNA | -0.04714 | -0.204801182 | 0.112910648 | 5.64E-01 | 7.95E-01 | 1.00E+00 |
| ENSG00000264994.1_SNORD92   | ENSG00000160789.18_LMNA | 0.07148  | -0.08873054  | 0.228085059 | 3.82E-01 | 6.60E-01 | 1.00E+00 |
| ENSG00000199936.1_Y_RNA     | ENSG00000160789.18_LMNA | -0.01598 | -0.174738372 | 0.143583762 | 8.45E-01 | 9.40E-01 | 1.00E+00 |
| ENSG00000223286.1_          | ENSG00000160789.18_LMNA | -0.11194 | -0.266392633 | 0.048118957 | 1.70E-01 | 4.28E-01 | 1.00E+00 |
| ENSG00000278285.1_          | ENSG00000160789.18_LMNA | 0.03653  | -0.123389971 | 0.194597339 | 6.55E-01 | 8.47E-01 | 1.00E+00 |
| ENSG00000274057.1_          | ENSG00000160789.18_LMNA | -0.07605 | -0.23243848  | 0.08416773  | 3.52E-01 | 6.35E-01 | 1.00E+00 |
| ENSG00000207719.1_MIR623    | ENSG00000160789.18_LMNA | 0.02963  | -0.130184571 | 0.187944372 | 7.17E-01 | 8.80E-01 | 1.00E+00 |
| ENSG00000221808.1_MIR1256   | ENSG00000160789.18_LMNA | -0.01219 | -0.171059287 | 0.147295998 | 8.82E-01 | 9.54E-01 | 1.00E+00 |
| ENSG00000222511.2_Y_RNA     | ENSG00000160789.18_LMNA | 0.04879  | -0.111273158 | 0.206389411 | 5.51E-01 | 7.87E-01 | 1.00E+00 |
| ENSG00000201028.1_RNU6-151F | ENSG00000160789.18_LMNA | 0.03909  | -0.120862262 | 0.197064914 | 6.33E-01 | 8.35E-01 | 1.00E+00 |
| ENSG00000199404.1_RNA5SP25  | ENSG00000160789.18_LMNA | -0.09419 | -0.249646133 | 0.066001533 | 2.48E-01 | 5.29E-01 | 1.00E+00 |
| ENSG00000252608.1_RNU6-1191 | ENSG00000160789.18_LMNA | 0.1682   | 0.009248395  | 0.318863683 | 3.83E-02 | 1.68E-01 | 1.00E+00 |

|                             |                         |          |              |             |          |          |          |
|-----------------------------|-------------------------|----------|--------------|-------------|----------|----------|----------|
| ENSG00000207138.1_RNU6-869F | ENSG00000160789.18_LMNA | -0.06763 | -0.224414727 | 0.092567102 | 4.08E-01 | 6.83E-01 | 1.00E+00 |
| ENSG00000207995.1_MIR325    | ENSG00000160789.18_LMNA | -0.04523 | -0.202973269 | 0.114793121 | 5.80E-01 | 8.04E-01 | 1.00E+00 |
| ENSG00000227971.1_RP11-600G | ENSG00000160789.18_LMNA | -0.05586 | -0.213166639 | 0.104266291 | 4.94E-01 | 7.49E-01 | 1.00E+00 |
| ENSG00000212176.1_RNA5SP20  | ENSG00000160789.18_LMNA | -0.02822 | -0.18658037  | 0.131573929 | 7.30E-01 | 8.86E-01 | 1.00E+00 |
| ENSG00000252744.1_Y_RNA     | ENSG00000160789.18_LMNA | -0.05331 | -0.210723715 | 0.106795628 | 5.14E-01 | 7.62E-01 | 1.00E+00 |
| ENSG00000207127.1_Y_RNA     | ENSG00000160789.18_LMNA | 0.12081  | -0.039138783 | 0.274731285 | 1.38E-01 | 3.79E-01 | 1.00E+00 |
| ENSG00000252050.1_SNORA31   | ENSG00000160789.18_LMNA | -0.06368 | -0.220646442 | 0.096496286 | 4.36E-01 | 7.04E-01 | 1.00E+00 |
| ENSG00000265736.1_          | ENSG00000160789.18_LMNA | 0.02413  | -0.135588527 | 0.182632135 | 7.68E-01 | 9.04E-01 | 1.00E+00 |
| ENSG00000265461.1_          | ENSG00000160789.18_LMNA | -0.06716 | -0.223966287 | 0.093035208 | 4.11E-01 | 6.85E-01 | 1.00E+00 |
| ENSG00000264496.1_          | ENSG00000160789.18_LMNA | 0.00532  | -0.154015159 | 0.164377475 | 9.48E-01 | 9.79E-01 | 1.00E+00 |
| ENSG00000201102.1_Y_RNA     | ENSG00000160789.18_LMNA | -0.0716  | -0.228196514 | 0.08861389  | 3.81E-01 | 6.59E-01 | 1.00E+00 |
| ENSG00000207755.2_MIR450A2  | ENSG00000160789.18_LMNA | 0.05076  | -0.109326286 | 0.20827554  | 5.35E-01 | 7.76E-01 | 1.00E+00 |
| ENSG00000277003.1_RP11-419C | ENSG00000160789.18_LMNA | -0.00501 | -0.164082654 | 0.154310951 | 9.51E-01 | 9.80E-01 | 1.00E+00 |
| ENSG00000266320.1_MIR3909   | ENSG00000160789.18_LMNA | -0.03073 | -0.189003362 | 0.129105031 | 7.07E-01 | 8.75E-01 | 1.00E+00 |
| ENSG00000270688.1_RP11-507D | ENSG00000160789.18_LMNA | -0.02143 | -0.180014705 | 0.138244205 | 7.93E-01 | 9.16E-01 | 1.00E+00 |
| ENSG00000207116.1_RNU6-31P  | ENSG00000160789.18_LMNA | -0.25716 | -0.399989464 | -0.10214588 | 1.38E-03 | 1.48E-02 | 1.00E+00 |
| ENSG00000242828.1_RP11-47P1 | ENSG00000160789.18_LMNA | -0.03048 | -0.188767812 | 0.129345218 | 7.09E-01 | 8.76E-01 | 1.00E+00 |
| ENSG00000206856.1_          | ENSG00000160789.18_LMNA | 0.0061   | -0.1532453   | 0.16514454  | 9.41E-01 | 9.76E-01 | 1.00E+00 |
| ENSG00000278028.1_Y_RNA     | ENSG00000160789.18_LMNA | 0.0391   | -0.120855504 | 0.197071505 | 6.32E-01 | 8.35E-01 | 1.00E+00 |
| ENSG00000223175.1_RNU4-61P  | ENSG00000160789.18_LMNA | 0.03534  | -0.124558561 | 0.193455187 | 6.66E-01 | 8.53E-01 | 1.00E+00 |
| ENSG00000274155.2_          | ENSG00000160789.18_LMNA | -0.06637 | -0.223215501 | 0.093818605 | 4.17E-01 | 6.89E-01 | 1.00E+00 |
| ENSG00000252255.1_RNU2-35P  | ENSG00000160789.18_LMNA | -0.16353 | -0.314546497 | -0.00445013 | 4.41E-02 | 1.85E-01 | 1.00E+00 |
| ENSG00000212559.1_RNA5SP35  | ENSG00000160789.18_LMNA | 0.05691  | -0.103224749 | 0.214171444 | 4.86E-01 | 7.43E-01 | 1.00E+00 |
| ENSG00000275208.1_MIR6745   | ENSG00000160789.18_LMNA | 0.05441  | -0.105706871 | 0.211775762 | 5.06E-01 | 7.56E-01 | 1.00E+00 |
| ENSG00000265486.2_RN7SL518f | ENSG00000160789.18_LMNA | -0.03323 | -0.191418762 | 0.126639939 | 6.84E-01 | 8.63E-01 | 1.00E+00 |
| ENSG00000212297.1_RNU6-821F | ENSG00000160789.18_LMNA | -0.04232 | -0.200169896 | 0.117675744 | 6.05E-01 | 8.19E-01 | 1.00E+00 |
| ENSG00000210678.1_RNU6ATAC  | ENSG00000160789.18_LMNA | 0.11396  | -0.046071749 | 0.268297745 | 1.62E-01 | 4.17E-01 | 1.00E+00 |
| ENSG00000264771.1_          | ENSG00000160789.18_LMNA | 0.12316  | -0.036761061 | 0.276931272 | 1.31E-01 | 3.66E-01 | 1.00E+00 |
| ENSG00000201875.1_RN7SKP17  | ENSG00000160789.18_LMNA | -0.0748  | -0.23124632  | 0.085418551 | 3.60E-01 | 6.42E-01 | 1.00E+00 |
| ENSG00000253691.2_IGKV2OR2  | ENSG00000160789.18_LMNA | -0.01751 | -0.176219157 | 0.142087102 | 8.30E-01 | 9.34E-01 | 1.00E+00 |
| ENSG00000229735.1_FTL16     | ENSG00000160789.18_LMNA | -0.0731  | -0.229627927 | 0.087114984 | 3.71E-01 | 6.51E-01 | 1.00E+00 |
| ENSG00000235141.1_COX6CP17  | ENSG00000160789.18_LMNA | -0.02548 | -0.183931495 | 0.134268479 | 7.55E-01 | 8.98E-01 | 1.00E+00 |
| ENSG00000270477.1_RP1-72E17 | ENSG00000160789.18_LMNA | -0.08631 | -0.242184826 | 0.073904247 | 2.90E-01 | 5.76E-01 | 1.00E+00 |

|                              |                         |          |              |             |          |          |          |
|------------------------------|-------------------------|----------|--------------|-------------|----------|----------|----------|
| ENSG00000224335.2_RP11-301M  | ENSG00000160789.18_LMNA | -0.09916 | -0.254348014 | 0.061001068 | 2.24E-01 | 5.00E-01 | 1.00E+00 |
| ENSG00000267177.1_RP11-756J  | ENSG00000160789.18_LMNA | 0.1539   | -0.005430817 | 0.305615621 | 5.83E-02 | 2.21E-01 | 1.00E+00 |
| ENSG00000235495.1_AC010987.1 | ENSG00000160789.18_LMNA | 0.00553  | -0.153804286 | 0.164587621 | 9.46E-01 | 9.78E-01 | 1.00E+00 |
| ENSG00000240997.3_RN7SL183F  | ENSG00000160789.18_LMNA | 0.09102  | -0.069187388 | 0.246642726 | 2.65E-01 | 5.48E-01 | 1.00E+00 |
| ENSG00000248286.1_RP11-811J  | ENSG00000160789.18_LMNA | 0.01892  | -0.140699928 | 0.177590332 | 8.17E-01 | 9.28E-01 | 1.00E+00 |
| ENSG00000226831.1_MED15P3    | ENSG00000160789.18_LMNA | -0.02204 | -0.180611771 | 0.137638816 | 7.87E-01 | 9.13E-01 | 1.00E+00 |
| ENSG00000211571.1_           | ENSG00000160789.18_LMNA | -0.09951 | -0.25467237  | 0.060655529 | 2.23E-01 | 4.98E-01 | 1.00E+00 |
| ENSG00000258507.1_RP13-582L  | ENSG00000160789.18_LMNA | -0.09203 | -0.247604317 | 0.068168084 | 2.59E-01 | 5.43E-01 | 1.00E+00 |
| ENSG00000216206.1_           | ENSG00000160789.18_LMNA | -0.02251 | -0.181064312 | 0.13717981  | 7.83E-01 | 9.11E-01 | 1.00E+00 |
| ENSG00000224408.1_USP9YP22   | ENSG00000160789.18_LMNA | -0.12338 | -0.277140012 | 0.036535272 | 1.30E-01 | 3.65E-01 | 1.00E+00 |
| ENSG00000243968.2_RN7SL402F  | ENSG00000160789.18_LMNA | -0.12956 | -0.282929518 | 0.030260125 | 1.12E-01 | 3.33E-01 | 1.00E+00 |
| ENSG00000202395.1_RN7SKP1    | ENSG00000160789.18_LMNA | -0.05418 | -0.211559431 | 0.105930812 | 5.07E-01 | 7.57E-01 | 1.00E+00 |
| ENSG00000257095.1_RP11-364C  | ENSG00000160789.18_LMNA | -0.06326 | -0.220245034 | 0.096914252 | 4.39E-01 | 7.07E-01 | 1.00E+00 |
| ENSG00000237687.2_LINC00686  | ENSG00000160789.18_LMNA | -0.09395 | -0.249420655 | 0.066240931 | 2.50E-01 | 5.30E-01 | 1.00E+00 |
| ENSG00000265883.1_RP11-169I  | ENSG00000160789.18_LMNA | -0.09747 | -0.252744535 | 0.062708153 | 2.32E-01 | 5.10E-01 | 1.00E+00 |
| ENSG00000227330.1_AP000998.1 | ENSG00000160789.18_LMNA | 0.09972  | -0.060438719 | 0.254875853 | 2.22E-01 | 4.97E-01 | 1.00E+00 |
| ENSG00000124490.12_CRISP2    | ENSG00000160789.18_LMNA | -0.04022 | -0.19814953  | 0.119749908 | 6.23E-01 | 8.30E-01 | 1.00E+00 |
| ENSG00000256315.1_AP000462.1 | ENSG00000160789.18_LMNA | 0.03015  | -0.12967684  | 0.18844253  | 7.12E-01 | 8.78E-01 | 1.00E+00 |
| ENSG00000239396.3_RN7SL414F  | ENSG00000160789.18_LMNA | -0.03693 | -0.194985607 | 0.122992514 | 6.51E-01 | 8.46E-01 | 1.00E+00 |
| ENSG00000254361.1_RP11-238K  | ENSG00000160789.18_LMNA | -0.10541 | -0.26024282  | 0.05470948  | 1.96E-01 | 4.65E-01 | 1.00E+00 |
| ENSG00000274256.1_RP1-229K2  | ENSG00000160789.18_LMNA | -0.04469 | -0.20244649  | 0.115335201 | 5.85E-01 | 8.07E-01 | 1.00E+00 |
| ENSG00000260224.1_UBL5P4     | ENSG00000160789.18_LMNA | -0.04593 | -0.203644095 | 0.114102537 | 5.74E-01 | 8.01E-01 | 1.00E+00 |
| ENSG00000232249.1_LL0XNC01-  | ENSG00000160789.18_LMNA | -0.11882 | -0.272859247 | 0.041159267 | 1.45E-01 | 3.90E-01 | 1.00E+00 |
| ENSG00000279181.1_RP11-711M  | ENSG00000160789.18_LMNA | 0.00378  | -0.155517543 | 0.162879435 | 9.63E-01 | 9.85E-01 | 1.00E+00 |
| ENSG00000234695.1_AC002076.1 | ENSG00000160789.18_LMNA | -0.03514 | -0.193257221 | 0.12476102  | 6.67E-01 | 8.53E-01 | 1.00E+00 |
| ENSG00000279872.1_RP1-59D14  | ENSG00000160789.18_LMNA | 0.0493   | -0.110770731 | 0.206876388 | 5.46E-01 | 7.84E-01 | 1.00E+00 |
| ENSG00000271098.1_IMMP1LP3   | ENSG00000160789.18_LMNA | 0.11739  | -0.042608213 | 0.271515289 | 1.50E-01 | 3.98E-01 | 1.00E+00 |
| ENSG00000243437.3_RN7SL370F  | ENSG00000160789.18_LMNA | 0.09009  | -0.070119142 | 0.245763184 | 2.70E-01 | 5.54E-01 | 1.00E+00 |
| ENSG00000249503.1_HMG1P1     | ENSG00000160789.18_LMNA | -0.15664 | -0.308156644 | 0.002625647 | 5.40E-02 | 2.11E-01 | 1.00E+00 |
| ENSG00000230603.1_AC011753.1 | ENSG00000160789.18_LMNA | 0.01689  | -0.142698585 | 0.175614334 | 8.36E-01 | 9.37E-01 | 1.00E+00 |
| ENSG00000255254.1_HIGD1AP5   | ENSG00000160789.18_LMNA | -0.15427 | -0.305954635 | 0.005056845 | 5.77E-02 | 2.20E-01 | 1.00E+00 |
| ENSG00000270381.1_RP11-290D  | ENSG00000160789.18_LMNA | 0.06139  | -0.098775266 | 0.218456438 | 4.52E-01 | 7.18E-01 | 1.00E+00 |
| ENSG00000277771.1_Metazoa_Sl | ENSG00000160789.18_LMNA | -0.0353  | -0.193413667 | 0.124601025 | 6.66E-01 | 8.53E-01 | 1.00E+00 |

|                              |                         |          |              |             |          |          |          |
|------------------------------|-------------------------|----------|--------------|-------------|----------|----------|----------|
| ENSG00000243173.3_RN7SL861F  | ENSG00000160789.18_LMNA | 0.01258  | -0.146914787 | 0.171437503 | 8.78E-01 | 9.53E-01 | 1.00E+00 |
| ENSG00000263051.1_RP11-565F  | ENSG00000160789.18_LMNA | 0.07502  | -0.085200257 | 0.231454445 | 3.58E-01 | 6.41E-01 | 1.00E+00 |
| ENSG00000250098.1_RP11-22A3  | ENSG00000160789.18_LMNA | -0.05741 | -0.214649589 | 0.102728878 | 4.82E-01 | 7.40E-01 | 1.00E+00 |
| ENSG00000271652.1_RP11-168P  | ENSG00000160789.18_LMNA | 0.14489  | -0.014649633 | 0.297233569 | 7.49E-02 | 2.61E-01 | 1.00E+00 |
| ENSG00000266317.2_RN7SL703F  | ENSG00000160789.18_LMNA | -0.07408 | -0.230560709 | 0.086137447 | 3.64E-01 | 6.46E-01 | 1.00E+00 |
| ENSG00000259723.1_RP5-823G1  | ENSG00000160789.18_LMNA | 0.11225  | -0.047808177 | 0.266682    | 1.69E-01 | 4.27E-01 | 1.00E+00 |
| ENSG00000226488.1_AC021021.1 | ENSG00000160789.18_LMNA | -0.19274 | -0.341467029 | -0.03460542 | 1.74E-02 | 9.74E-02 | 1.00E+00 |
| ENSG00000224648.1_LINC01627  | ENSG00000160789.18_LMNA | -0.12852 | -0.281949209 | 0.031324405 | 1.15E-01 | 3.38E-01 | 1.00E+00 |
| ENSG00000228325.5_IGKV3D-7   | ENSG00000160789.18_LMNA | -0.28942 | -0.428857242 | -0.13650506 | 2.99E-04 | 4.49E-03 | 1.00E+00 |
| ENSG00000199218.1_RN7SKP18   | ENSG00000160789.18_LMNA | 0.02349  | -0.13622042  | 0.182009752 | 7.74E-01 | 9.07E-01 | 1.00E+00 |
| ENSG00000232786.1_TIMM9P3    | ENSG00000160789.18_LMNA | -0.01521 | -0.173986057 | 0.144343585 | 8.52E-01 | 9.42E-01 | 1.00E+00 |
| ENSG00000258662.1_RP11-588P  | ENSG00000160789.18_LMNA | -0.0884  | -0.24416471  | 0.071811096 | 2.79E-01 | 5.64E-01 | 1.00E+00 |
| ENSG00000244310.1_RP11-734K  | ENSG00000160789.18_LMNA | 0.11682  | -0.043185582 | 0.270979414 | 1.52E-01 | 4.01E-01 | 1.00E+00 |
| ENSG00000251154.1_AC006153.1 | ENSG00000160789.18_LMNA | -0.02078 | -0.179390665 | 0.138876688 | 7.99E-01 | 9.19E-01 | 1.00E+00 |
| ENSG00000249157.1_RP11-229C  | ENSG00000160789.18_LMNA | 0.03806  | -0.121881236 | 0.196070666 | 6.42E-01 | 8.40E-01 | 1.00E+00 |
| ENSG00000230597.1_RP3-331H2  | ENSG00000160789.18_LMNA | 0.14747  | -0.012017612 | 0.299631603 | 6.98E-02 | 2.49E-01 | 1.00E+00 |
| ENSG00000242365.1_NDUFA5P5   | ENSG00000160789.18_LMNA | 0.06854  | -0.091660825 | 0.225282549 | 4.01E-01 | 6.78E-01 | 1.00E+00 |
| ENSG00000240791.1_MTND4LP7   | ENSG00000160789.18_LMNA | 0.22448  | 0.067702446  | 0.370445348 | 5.43E-03 | 4.17E-02 | 1.00E+00 |
| ENSG00000254160.1_CTD-2281E  | ENSG00000160789.18_LMNA | -0.13087 | -0.284154459 | 0.028929261 | 1.08E-01 | 3.27E-01 | 1.00E+00 |
| ENSG00000272218.1_RP11-11N5  | ENSG00000160789.18_LMNA | 0.17182  | 0.012973663  | 0.322206618 | 3.43E-02 | 1.56E-01 | 1.00E+00 |
| ENSG00000249742.1_RP11-217E  | ENSG00000160789.18_LMNA | 0.18432  | 0.025874031  | 0.333723702 | 2.30E-02 | 1.19E-01 | 1.00E+00 |
| ENSG00000240993.3_RN7SL459F  | ENSG00000160789.18_LMNA | -0.03255 | -0.190763893 | 0.127308669 | 6.91E-01 | 8.67E-01 | 1.00E+00 |
| ENSG00000218561.1_RP1-253B1  | ENSG00000160789.18_LMNA | -0.14255 | -0.295051922 | 0.017040404 | 7.98E-02 | 2.72E-01 | 1.00E+00 |
| ENSG00000257642.1_KCCAT198   | ENSG00000160789.18_LMNA | 0.16175  | 0.002613621  | 0.312890713 | 4.65E-02 | 1.92E-01 | 1.00E+00 |
| ENSG00000235432.1_RP5-930J4  | ENSG00000160789.18_LMNA | -0.10678 | -0.261537247 | 0.053324568 | 1.90E-01 | 4.58E-01 | 1.00E+00 |
| ENSG00000231992.1_RP11-57H1  | ENSG00000160789.18_LMNA | -0.09625 | -0.251593882 | 0.063932017 | 2.38E-01 | 5.17E-01 | 1.00E+00 |
| ENSG00000251044.2_CTD-2582M  | ENSG00000160789.18_LMNA | 0.14237  | -0.017221994 | 0.294886083 | 8.02E-02 | 2.73E-01 | 1.00E+00 |
| ENSG00000280196.1_RP11-572C  | ENSG00000160789.18_LMNA | -0.03505 | -0.193174843 | 0.12484526  | 6.68E-01 | 8.54E-01 | 1.00E+00 |
| ENSG00000271129.1_RP11-123C  | ENSG00000160789.18_LMNA | 0.09901  | -0.061158518 | 0.254200192 | 2.25E-01 | 5.01E-01 | 1.00E+00 |
| ENSG00000235140.1_RP11-135D  | ENSG00000160789.18_LMNA | -0.15693 | -0.308427194 | 0.002326684 | 5.35E-02 | 2.10E-01 | 1.00E+00 |
| ENSG00000257991.1_RP11-2H8.1 | ENSG00000160789.18_LMNA | 0.07074  | -0.089466451 | 0.22738173  | 3.86E-01 | 6.65E-01 | 1.00E+00 |
| ENSG00000226917.4_LINC01276  | ENSG00000160789.18_LMNA | -0.07677 | -0.233122473 | 0.08344963  | 3.47E-01 | 6.31E-01 | 1.00E+00 |
| ENSG00000231912.2_RP1-249H1  | ENSG00000160789.18_LMNA | -0.13617 | -0.289101626 | 0.023542983 | 9.44E-02 | 3.01E-01 | 1.00E+00 |



|                              |                         |          |              |             |          |          |          |
|------------------------------|-------------------------|----------|--------------|-------------|----------|----------|----------|
| ENSG00000227960.1_RP5-837I24 | ENSG00000160789.18_LMNA | -0.03596 | -0.194052214 | 0.123947824 | 6.60E-01 | 8.50E-01 | 1.00E+00 |
| ENSG00000225451.1_RP11-340I6 | ENSG00000160789.18_LMNA | -0.04212 | -0.199977711 | 0.117873166 | 6.06E-01 | 8.20E-01 | 1.00E+00 |
| ENSG00000228100.1_AC016912.1 | ENSG00000160789.18_LMNA | -0.00137 | -0.160532784 | 0.15786804  | 9.87E-01 | 9.95E-01 | 1.00E+00 |
| ENSG00000258215.1_RP11-299A  | ENSG00000160789.18_LMNA | 0.0035   | -0.155790996 | 0.162606614 | 9.66E-01 | 9.87E-01 | 1.00E+00 |
| ENSG00000257830.1_RP11-845M  | ENSG00000160789.18_LMNA | 0.16109  | 0.001943007  | 0.312285622 | 4.74E-02 | 1.94E-01 | 1.00E+00 |
| ENSG00000254850.2_RP5-901A4  | ENSG00000160789.18_LMNA | -0.0791  | -0.235338158 | 0.0811212   | 3.33E-01 | 6.18E-01 | 1.00E+00 |
| ENSG00000223976.1_EXTL2P1    | ENSG00000160789.18_LMNA | 0.05708  | -0.103058564 | 0.214331705 | 4.85E-01 | 7.42E-01 | 1.00E+00 |
| ENSG00000234881.1_PIGFP2     | ENSG00000160789.18_LMNA | -0.04931 | -0.206884547 | 0.110762312 | 5.46E-01 | 7.84E-01 | 1.00E+00 |
| ENSG00000275158.1_TRBV12-5   | ENSG00000160789.18_LMNA | 0.06149  | -0.098672961 | 0.218554818 | 4.52E-01 | 7.17E-01 | 1.00E+00 |
| ENSG00000226217.1_RPL19P1    | ENSG00000160789.18_LMNA | -0.14654 | -0.298775184 | 0.012958092 | 7.16E-02 | 2.53E-01 | 1.00E+00 |
| ENSG00000250467.1_RP11-227F  | ENSG00000160789.18_LMNA | -0.26579 | -0.407735172 | -0.11129579 | 9.35E-04 | 1.10E-02 | 1.00E+00 |
| ENSG00000259035.1_RP11-666E  | ENSG00000160789.18_LMNA | -0.0297  | -0.188014586 | 0.130113017 | 7.16E-01 | 8.79E-01 | 1.00E+00 |
| ENSG00000272837.1_OR10AE3P   | ENSG00000160789.18_LMNA | 0.08394  | -0.076280823 | 0.239933658 | 3.04E-01 | 5.90E-01 | 1.00E+00 |
| ENSG00000256714.1_RP11-73M1  | ENSG00000160789.18_LMNA | 0.0139   | -0.145621331 | 0.1727201   | 8.65E-01 | 9.47E-01 | 1.00E+00 |
| ENSG00000258412.1_RP11-404P  | ENSG00000160789.18_LMNA | 0.21982  | 0.062818316  | 0.366205763 | 6.51E-03 | 4.78E-02 | 1.00E+00 |
| ENSG00000253664.1_RP11-401H  | ENSG00000160789.18_LMNA | 0.02604  | -0.133716944 | 0.184474058 | 7.50E-01 | 8.96E-01 | 1.00E+00 |
| ENSG00000268754.1_RP11-514D  | ENSG00000160789.18_LMNA | 0.0156   | -0.143961714 | 0.174364202 | 8.49E-01 | 9.41E-01 | 1.00E+00 |
| ENSG00000249675.1_RP11-217C  | ENSG00000160789.18_LMNA | -0.28444 | -0.424418558 | -0.13117586 | 3.83E-04 | 5.47E-03 | 1.00E+00 |
| ENSG00000236176.2_LINC00353  | ENSG00000160789.18_LMNA | -0.0729  | -0.229440374 | 0.087311461 | 3.72E-01 | 6.52E-01 | 1.00E+00 |
| ENSG00000226128.1_RPL26P9    | ENSG00000160789.18_LMNA | 0.01237  | -0.147121996 | 0.171231934 | 8.80E-01 | 9.53E-01 | 1.00E+00 |
| ENSG00000241052.1_RPL23AP7   | ENSG00000160789.18_LMNA | -0.02235 | -0.180904519 | 0.137341901 | 7.85E-01 | 9.12E-01 | 1.00E+00 |
| ENSG00000259437.1_RP11-798K  | ENSG00000160789.18_LMNA | 0.15739  | -0.001856486 | 0.308852603 | 5.28E-02 | 2.08E-01 | 1.00E+00 |
| ENSG00000231496.1_RP1-251M9  | ENSG00000160789.18_LMNA | -0.00331 | -0.162420403 | 0.155977611 | 9.68E-01 | 9.87E-01 | 1.00E+00 |
| ENSG00000269025.2_CTC-457E2  | ENSG00000160789.18_LMNA | -0.03634 | -0.194414466 | 0.123577136 | 6.57E-01 | 8.48E-01 | 1.00E+00 |
| ENSG00000265046.1_CTC-542B2  | ENSG00000160789.18_LMNA | -0.19776 | -0.34606081  | -0.0398076  | 1.46E-02 | 8.62E-02 | 1.00E+00 |
| ENSG00000258314.3_CTD-2314B  | ENSG00000160789.18_LMNA | -0.03843 | -0.196426965 | 0.121516153 | 6.38E-01 | 8.38E-01 | 1.00E+00 |
| ENSG00000225664.3_YWHAZP8    | ENSG00000160789.18_LMNA | 0.04438  | -0.115642466 | 0.202147815 | 5.87E-01 | 8.08E-01 | 1.00E+00 |
| ENSG00000225581.3_TRIM53AP   | ENSG00000160789.18_LMNA | 0.09374  | -0.066447661 | 0.249225919 | 2.51E-01 | 5.31E-01 | 1.00E+00 |
| ENSG00000183640.5_KRTAP8-1   | ENSG00000160789.18_LMNA | -0.03408 | -0.192233298 | 0.125807758 | 6.77E-01 | 8.59E-01 | 1.00E+00 |
| ENSG00000254651.1_RP11-430H  | ENSG00000160789.18_LMNA | -0.05426 | -0.211636984 | 0.105850535 | 5.07E-01 | 7.57E-01 | 1.00E+00 |
| ENSG00000268830.1_BNIP3P32   | ENSG00000160789.18_LMNA | -0.09513 | -0.250533398 | 0.065059135 | 2.44E-01 | 5.23E-01 | 1.00E+00 |
| ENSG00000253184.1_RP11-13N1  | ENSG00000160789.18_LMNA | -0.07696 | -0.233305299 | 0.083257631 | 3.46E-01 | 6.30E-01 | 1.00E+00 |
| ENSG00000262038.1_RP11-177N  | ENSG00000160789.18_LMNA | -0.07213 | -0.228705179 | 0.088081405 | 3.77E-01 | 6.57E-01 | 1.00E+00 |

|                              |                         |          |              |             |          |          |          |
|------------------------------|-------------------------|----------|--------------|-------------|----------|----------|----------|
| ENSG00000254669.1_RP5-945I17 | ENSG00000160789.18_LMNA | 0.13022  | -0.02959435  | 0.283542432 | 1.10E-01 | 3.30E-01 | 1.00E+00 |
| ENSG00000259122.2_TVP23BP1   | ENSG00000160789.18_LMNA | -0.12403 | -0.277749762 | 0.035875537 | 1.28E-01 | 3.62E-01 | 1.00E+00 |
| ENSG00000265980.1_CTD-2515C  | ENSG00000160789.18_LMNA | -0.05429 | -0.211665448 | 0.10582107  | 5.06E-01 | 7.57E-01 | 1.00E+00 |
| ENSG00000249806.1_RP11-223C  | ENSG00000160789.18_LMNA | -0.02271 | -0.181259376 | 0.136981916 | 7.81E-01 | 9.10E-01 | 1.00E+00 |
| ENSG00000249689.1_AC138517.1 | ENSG00000160789.18_LMNA | 0.00405  | -0.155248231 | 0.163148076 | 9.60E-01 | 9.84E-01 | 1.00E+00 |
| ENSG00000232085.1_RP11-261C  | ENSG00000160789.18_LMNA | 0.10409  | -0.056034779 | 0.25900305  | 2.02E-01 | 4.73E-01 | 1.00E+00 |
| ENSG00000251391.4_RP11-305P  | ENSG00000160789.18_LMNA | 0.02888  | -0.130920503 | 0.187222023 | 7.24E-01 | 8.83E-01 | 1.00E+00 |
| ENSG00000269662.1_BNIP3P39   | ENSG00000160789.18_LMNA | -0.07981 | -0.236011046 | 0.080413388 | 3.28E-01 | 6.14E-01 | 1.00E+00 |
| ENSG00000267557.1_CTC-379B2  | ENSG00000160789.18_LMNA | -0.13458 | -0.287614663 | 0.02516384  | 9.83E-02 | 3.08E-01 | 1.00E+00 |
| ENSG00000276828.1_RP11-88L2  | ENSG00000160789.18_LMNA | -0.01129 | -0.170183709 | 0.148178146 | 8.90E-01 | 9.57E-01 | 1.00E+00 |
| ENSG00000232081.1_LARGE-IT1  | ENSG00000160789.18_LMNA | -0.11434 | -0.268647902 | 0.045695188 | 1.61E-01 | 4.15E-01 | 1.00E+00 |
| ENSG00000240241.4_RP11-314M  | ENSG00000160789.18_LMNA | -0.08794 | -0.24372993  | 0.072270988 | 2.81E-01 | 5.67E-01 | 1.00E+00 |
| ENSG00000232812.1_RP11-459K  | ENSG00000160789.18_LMNA | -0.00766 | -0.166653265 | 0.151729951 | 9.25E-01 | 9.71E-01 | 1.00E+00 |
| ENSG00000233021.2_RP11-490E  | ENSG00000160789.18_LMNA | -0.12703 | -0.280553359 | 0.032838593 | 1.19E-01 | 3.46E-01 | 1.00E+00 |
| ENSG00000253503.4_RP11-653B  | ENSG00000160789.18_LMNA | -0.1913  | -0.340138548 | -0.03310408 | 1.82E-02 | 1.01E-01 | 1.00E+00 |
| ENSG00000151379.3_MSGN1      | ENSG00000160789.18_LMNA | -0.14489 | -0.297238144 | 0.014644616 | 7.49E-02 | 2.61E-01 | 1.00E+00 |
| ENSG00000230781.1_RP1-215K1  | ENSG00000160789.18_LMNA | -0.19506 | -0.343587265 | -0.03700439 | 1.60E-02 | 9.21E-02 | 1.00E+00 |
| ENSG00000280115.1_RP11-133M  | ENSG00000160789.18_LMNA | -0.00769 | -0.166689461 | 0.151693577 | 9.25E-01 | 9.71E-01 | 1.00E+00 |
| ENSG00000249600.1_RP11-510I6 | ENSG00000160789.18_LMNA | 0.06957  | -0.090633322 | 0.226265845 | 3.94E-01 | 6.72E-01 | 1.00E+00 |
| ENSG00000263870.1_CTD-2350C  | ENSG00000160789.18_LMNA | 0.01208  | -0.14740417  | 0.170951948 | 8.83E-01 | 9.55E-01 | 1.00E+00 |
| ENSG00000231539.1_AC010132.1 | ENSG00000160789.18_LMNA | -0.10009 | -0.255221776 | 0.060070072 | 2.20E-01 | 4.95E-01 | 1.00E+00 |
| ENSG00000232243.1_RP11-408E  | ENSG00000160789.18_LMNA | -0.21376 | -0.36068469  | -0.05647958 | 8.19E-03 | 5.66E-02 | 1.00E+00 |
| ENSG00000268510.1_IFNL3P1    | ENSG00000160789.18_LMNA | 0.06534  | -0.094850456 | 0.222226029 | 4.24E-01 | 6.95E-01 | 1.00E+00 |
| ENSG00000226058.1_AC092570.1 | ENSG00000160789.18_LMNA | -0.07624 | -0.232613402 | 0.083984117 | 3.51E-01 | 6.34E-01 | 1.00E+00 |
| ENSG00000206090.4_AP000350.1 | ENSG00000160789.18_LMNA | 0.02797  | -0.13181291  | 0.186345626 | 7.32E-01 | 8.87E-01 | 1.00E+00 |
| ENSG00000253544.1_C1GALT1P   | ENSG00000160789.18_LMNA | 0.00868  | -0.150730153 | 0.167647876 | 9.15E-01 | 9.68E-01 | 1.00E+00 |
| ENSG00000223904.2_HMGB1P12   | ENSG00000160789.18_LMNA | -0.05577 | -0.213080441 | 0.104355607 | 4.95E-01 | 7.50E-01 | 1.00E+00 |
| ENSG00000260741.1_CTC-391G2  | ENSG00000160789.18_LMNA | -0.14173 | -0.294287422 | 0.017877343 | 8.16E-02 | 2.75E-01 | 1.00E+00 |
| ENSG00000223604.1_AC007394.1 | ENSG00000160789.18_LMNA | 0.07811  | -0.082111687 | 0.234396034 | 3.39E-01 | 6.24E-01 | 1.00E+00 |
| ENSG00000267585.1_RP11-115P  | ENSG00000160789.18_LMNA | 0.04103  | -0.118948328 | 0.19893064  | 6.16E-01 | 8.26E-01 | 1.00E+00 |
| ENSG00000253456.1_CTD-2363C  | ENSG00000160789.18_LMNA | 0.10793  | -0.05216943  | 0.262616046 | 1.86E-01 | 4.52E-01 | 1.00E+00 |
| ENSG00000268991.2_FAM231B    | ENSG00000160789.18_LMNA | 0.05373  | -0.106381101 | 0.211124351 | 5.11E-01 | 7.60E-01 | 1.00E+00 |
| ENSG00000257268.1_RP1-74B13  | ENSG00000160789.18_LMNA | 0.11813  | -0.041855695 | 0.272213434 | 1.47E-01 | 3.93E-01 | 1.00E+00 |

|                             |                         |          |              |             |          |          |          |
|-----------------------------|-------------------------|----------|--------------|-------------|----------|----------|----------|
| ENSG00000259742.1_CTD-2014N | ENSG00000160789.18_LMNA | -0.04992 | -0.207476095 | 0.110151775 | 5.41E-01 | 7.81E-01 | 1.00E+00 |
| ENSG00000250706.1_RP11-18H2 | ENSG00000160789.18_LMNA | 0.0039   | -0.155399643 | 0.162997047 | 9.62E-01 | 9.85E-01 | 1.00E+00 |
| ENSG00000224884.1_AC034187. | ENSG00000160789.18_LMNA | -0.01099 | -0.169891065 | 0.148472874 | 8.93E-01 | 9.58E-01 | 1.00E+00 |
| ENSG00000229662.2_RP11-552E | ENSG00000160789.18_LMNA | 0.07636  | -0.083863766 | 0.232728045 | 3.50E-01 | 6.33E-01 | 1.00E+00 |
| ENSG00000254659.2_RP11-262A | ENSG00000160789.18_LMNA | -0.07939 | -0.23561747  | 0.08082743  | 3.31E-01 | 6.17E-01 | 1.00E+00 |
| ENSG00000279860.1_CTC-546K2 | ENSG00000160789.18_LMNA | 0.02037  | -0.13927834  | 0.178994242 | 8.03E-01 | 9.21E-01 | 1.00E+00 |
| ENSG00000277708.1_PGBD4P2   | ENSG00000160789.18_LMNA | 0.08823  | -0.071983005 | 0.244002203 | 2.80E-01 | 5.65E-01 | 1.00E+00 |
| ENSG00000224107.4_LINC00633 | ENSG00000160789.18_LMNA | 0.06424  | -0.095940058 | 0.221180469 | 4.32E-01 | 7.01E-01 | 1.00E+00 |
| ENSG00000174156.12_GSTA3    | ENSG00000160789.18_LMNA | -0.01092 | -0.169822022 | 0.1485424   | 8.94E-01 | 9.59E-01 | 1.00E+00 |
| ENSG00000253322.1_RP11-388G | ENSG00000160789.18_LMNA | -0.11508 | -0.269348007 | 0.044942023 | 1.58E-01 | 4.11E-01 | 1.00E+00 |
| ENSG00000250897.2_HMGB3P15  | ENSG00000160789.18_LMNA | 0.03401  | -0.125874145 | 0.192168335 | 6.77E-01 | 8.59E-01 | 1.00E+00 |
| ENSG00000255700.2_APOOP3    | ENSG00000160789.18_LMNA | 0.04066  | -0.119311017 | 0.198577263 | 6.19E-01 | 8.27E-01 | 1.00E+00 |
| ENSG00000253583.1_RP11-573J | ENSG00000160789.18_LMNA | 0.02268  | -0.137015681 | 0.181226096 | 7.82E-01 | 9.10E-01 | 1.00E+00 |
| ENSG00000270623.1_SPCS2P2   | ENSG00000160789.18_LMNA | -0.1317  | -0.284923697 | 0.028092937 | 1.06E-01 | 3.23E-01 | 1.00E+00 |
| ENSG00000226599.1_RP11-136K | ENSG00000160789.18_LMNA | -0.12598 | -0.279575547 | 0.033898448 | 1.22E-01 | 3.52E-01 | 1.00E+00 |
| ENSG00000240611.1_CTB-49A3. | ENSG00000160789.18_LMNA | -0.05432 | -0.211686785 | 0.105798981 | 5.06E-01 | 7.57E-01 | 1.00E+00 |
| ENSG00000216913.2_RP4-753D5 | ENSG00000160789.18_LMNA | 0.10902  | -0.051068367 | 0.263643613 | 1.81E-01 | 4.45E-01 | 1.00E+00 |
| ENSG00000258740.1_RP11-293M | ENSG00000160789.18_LMNA | 0.13439  | -0.025352606 | 0.287441391 | 9.88E-02 | 3.09E-01 | 1.00E+00 |
| ENSG00000253834.1_RP11-705O | ENSG00000160789.18_LMNA | -0.04255 | -0.200391655 | 0.117447911 | 6.03E-01 | 8.18E-01 | 1.00E+00 |
| ENSG00000233437.1_RP13-580B | ENSG00000160789.18_LMNA | -0.16408 | -0.315049517 | -0.00500847 | 4.34E-02 | 1.83E-01 | 1.00E+00 |
| ENSG00000226056.1_MTND4P32  | ENSG00000160789.18_LMNA | -0.03396 | -0.192124348 | 0.125919094 | 6.78E-01 | 8.59E-01 | 1.00E+00 |
| ENSG00000217272.1_RP1-263J7 | ENSG00000160789.18_LMNA | -0.08544 | -0.24135401  | 0.074781764 | 2.95E-01 | 5.81E-01 | 1.00E+00 |
| ENSG00000240033.1_RP11-12K1 | ENSG00000160789.18_LMNA | -0.09154 | -0.247136073 | 0.068664514 | 2.62E-01 | 5.45E-01 | 1.00E+00 |
| ENSG00000280419.1_RP11-178L | ENSG00000160789.18_LMNA | -0.00932 | -0.168273015 | 0.150101421 | 9.09E-01 | 9.65E-01 | 1.00E+00 |
| ENSG00000227313.1_RP11-309N | ENSG00000160789.18_LMNA | 0.0052   | -0.154130487 | 0.164262533 | 9.49E-01 | 9.80E-01 | 1.00E+00 |
| ENSG00000229747.1_RP11-567B | ENSG00000160789.18_LMNA | -0.12959 | -0.282951775 | 0.030235954 | 1.12E-01 | 3.33E-01 | 1.00E+00 |
| ENSG00000267116.1_RP11-64C1 | ENSG00000160789.18_LMNA | 0.15519  | -0.004115493 | 0.306807641 | 5.63E-02 | 2.17E-01 | 1.00E+00 |
| ENSG00000260939.1_RP11-467J | ENSG00000160789.18_LMNA | -0.05639 | -0.213676429 | 0.10373795  | 4.90E-01 | 7.46E-01 | 1.00E+00 |
| ENSG00000196534.4_OR9K1P    | ENSG00000160789.18_LMNA | -0.06675 | -0.22357048  | 0.093448256 | 4.14E-01 | 6.87E-01 | 1.00E+00 |
| ENSG00000164399.4_IL3       | ENSG00000160789.18_LMNA | 0.01702  | -0.142562624 | 0.175748835 | 8.35E-01 | 9.36E-01 | 1.00E+00 |
| ENSG00000235015.1_GEMIN2P1  | ENSG00000160789.18_LMNA | -0.01986 | -0.178497068 | 0.139781925 | 8.08E-01 | 9.24E-01 | 1.00E+00 |
| ENSG00000261368.1_RP11-96B5 | ENSG00000160789.18_LMNA | -0.02064 | -0.179251296 | 0.139017907 | 8.01E-01 | 9.20E-01 | 1.00E+00 |
| ENSG00000226534.1_KB-1183D5 | ENSG00000160789.18_LMNA | 0.02518  | -0.134555948 | 0.183648626 | 7.58E-01 | 8.99E-01 | 1.00E+00 |

|                             |                         |          |              |             |          |          |          |
|-----------------------------|-------------------------|----------|--------------|-------------|----------|----------|----------|
| ENSG00000224466.1_CDCA4P2   | ENSG00000160789.18_LMNA | 0.0483   | -0.1117637   | 0.205913801 | 5.55E-01 | 7.89E-01 | 1.00E+00 |
| ENSG00000218476.2_RP11-108N | ENSG00000160789.18_LMNA | -0.07636 | -0.232730976 | 0.083860689 | 3.50E-01 | 6.33E-01 | 1.00E+00 |
| ENSG00000253245.2_MTND1P36  | ENSG00000160789.18_LMNA | -0.08251 | -0.238580165 | 0.077707989 | 3.12E-01 | 5.99E-01 | 1.00E+00 |
| ENSG00000235646.1_MTND1P2   | ENSG00000160789.18_LMNA | 0.06043  | -0.099732658 | 0.217535472 | 4.60E-01 | 7.23E-01 | 1.00E+00 |
| ENSG00000265818.1_EEF1E1-BL | ENSG00000160789.18_LMNA | -0.06038 | -0.217488499 | 0.099781472 | 4.60E-01 | 7.23E-01 | 1.00E+00 |
| ENSG00000274529.3_SEBOX     | ENSG00000160789.18_LMNA | -0.15571 | -0.307290203 | 0.003582708 | 5.54E-02 | 2.15E-01 | 1.00E+00 |
| ENSG00000197233.7_OR1J2     | ENSG00000160789.18_LMNA | -0.10392 | -0.258834433 | 0.056214943 | 2.03E-01 | 4.73E-01 | 1.00E+00 |
| ENSG00000225354.1_RPL7AP52  | ENSG00000160789.18_LMNA | 0.04829  | -0.11177124  | 0.20590649  | 5.55E-01 | 7.89E-01 | 1.00E+00 |
| ENSG00000180663.5_VN1R3     | ENSG00000160789.18_LMNA | -0.06729 | -0.224093882 | 0.092902031 | 4.10E-01 | 6.84E-01 | 1.00E+00 |
| ENSG00000266604.1_RP11-856M | ENSG00000160789.18_LMNA | 0.02777  | -0.132017017 | 0.18614511  | 7.34E-01 | 8.88E-01 | 1.00E+00 |
| ENSG00000258393.1_RP11-907D | ENSG00000160789.18_LMNA | -0.00218 | -0.16132647  | 0.157073456 | 9.79E-01 | 9.92E-01 | 1.00E+00 |
| ENSG00000279201.1_RP11-287D | ENSG00000160789.18_LMNA | 0.04155  | -0.118433558 | 0.19943205  | 6.11E-01 | 8.23E-01 | 1.00E+00 |
| ENSG00000228005.1_AC020743. | ENSG00000160789.18_LMNA | -0.04975 | -0.207306829 | 0.110326499 | 5.43E-01 | 7.82E-01 | 1.00E+00 |
| ENSG00000259477.1_RP11-86K2 | ENSG00000160789.18_LMNA | 0.00242  | -0.15683634  | 0.161563239 | 9.76E-01 | 9.91E-01 | 1.00E+00 |
| ENSG00000253901.1_RP11-122C | ENSG00000160789.18_LMNA | -0.0677  | -0.224482225 | 0.092496632 | 4.07E-01 | 6.82E-01 | 1.00E+00 |
| ENSG00000223707.2_SFR1P2    | ENSG00000160789.18_LMNA | -0.08744 | -0.243258545 | 0.072769447 | 2.84E-01 | 5.70E-01 | 1.00E+00 |
| ENSG00000227408.1_AMYP1     | ENSG00000160789.18_LMNA | 0.09016  | -0.070048908 | 0.245829501 | 2.69E-01 | 5.54E-01 | 1.00E+00 |
| ENSG00000214319.2_CXADRP1   | ENSG00000160789.18_LMNA | -0.07521 | -0.231633996 | 0.085011909 | 3.57E-01 | 6.40E-01 | 1.00E+00 |
| ENSG00000250725.2_RP11-511B | ENSG00000160789.18_LMNA | 0.19882  | 0.040913367  | 0.347035365 | 1.41E-02 | 8.39E-02 | 1.00E+00 |
| ENSG00000281379.1_SEPT14P1  | ENSG00000160789.18_LMNA | 0.02666  | -0.13310337  | 0.185077422 | 7.44E-01 | 8.93E-01 | 1.00E+00 |
| ENSG00000279326.1_RP5-1136A | ENSG00000160789.18_LMNA | -0.059   | -0.216171925 | 0.101149055 | 4.70E-01 | 7.31E-01 | 1.00E+00 |
| ENSG00000215553.3_KRT18P3   | ENSG00000160789.18_LMNA | -0.00976 | -0.168695996 | 0.149675862 | 9.05E-01 | 9.63E-01 | 1.00E+00 |
| ENSG00000237590.1_RP11-20J1 | ENSG00000160789.18_LMNA | -0.03406 | -0.192217929 | 0.125823465 | 6.77E-01 | 8.59E-01 | 1.00E+00 |
| ENSG00000279193.1_RP11-143E | ENSG00000160789.18_LMNA | 0.04606  | -0.113974866 | 0.20376808  | 5.73E-01 | 8.01E-01 | 1.00E+00 |
| ENSG00000225710.1_RP5-875O1 | ENSG00000160789.18_LMNA | 0.00773  | -0.15165663  | 0.166726228 | 9.25E-01 | 9.71E-01 | 1.00E+00 |
| ENSG00000267337.1_LINC01478 | ENSG00000160789.18_LMNA | -0.01076 | -0.169674914 | 0.148690527 | 8.95E-01 | 9.59E-01 | 1.00E+00 |
| ENSG00000225632.1_RP5-997D2 | ENSG00000160789.18_LMNA | -0.03948 | -0.197440153 | 0.120477517 | 6.29E-01 | 8.33E-01 | 1.00E+00 |
| ENSG00000261738.5_MIR3976HC | ENSG00000160789.18_LMNA | -0.05089 | -0.208399501 | 0.109198248 | 5.34E-01 | 7.75E-01 | 1.00E+00 |
| ENSG00000279686.1_AC142391. | ENSG00000160789.18_LMNA | 0.01838  | -0.141235524 | 0.177061059 | 8.22E-01 | 9.31E-01 | 1.00E+00 |
| ENSG00000234304.2_SGO1P2    | ENSG00000160789.18_LMNA | 0.02136  | -0.138313472 | 0.179946374 | 7.94E-01 | 9.17E-01 | 1.00E+00 |
| ENSG00000147262.3_GPR119    | ENSG00000160789.18_LMNA | 0.07554  | -0.084683403 | 0.231947106 | 3.55E-01 | 6.39E-01 | 1.00E+00 |
| ENSG00000228123.4_RP11-15B2 | ENSG00000160789.18_LMNA | -0.17739 | -0.327342989 | -0.01871426 | 2.88E-02 | 1.39E-01 | 1.00E+00 |
| ENSG00000186103.3_ARGFX     | ENSG00000160789.18_LMNA | -0.02377 | -0.182283967 | 0.135942046 | 7.71E-01 | 9.05E-01 | 1.00E+00 |

|                              |                         |          |              |             |          |          |          |
|------------------------------|-------------------------|----------|--------------|-------------|----------|----------|----------|
| ENSG00000248492.1_ZFAT-AS1   | ENSG00000160789.18_LMNA | 0.05425  | -0.105865034 | 0.211622977 | 5.07E-01 | 7.57E-01 | 1.00E+00 |
| ENSG00000231442.3_LARP1BP1   | ENSG00000160789.18_LMNA | -0.00543 | -0.164488621 | 0.153903632 | 9.47E-01 | 9.79E-01 | 1.00E+00 |
| ENSG00000124260.10_MAGEA10   | ENSG00000160789.18_LMNA | 0.00828  | -0.151122559 | 0.167257583 | 9.19E-01 | 9.69E-01 | 1.00E+00 |
| ENSG00000236758.4_MTUS2-AS   | ENSG00000160789.18_LMNA | -0.16494 | -0.315843113 | -0.00588974 | 4.23E-02 | 1.80E-01 | 1.00E+00 |
| ENSG00000260887.2_CASC22     | ENSG00000160789.18_LMNA | -0.08571 | -0.241613999 | 0.074507213 | 2.94E-01 | 5.80E-01 | 1.00E+00 |
| ENSG00000213958.2_KRT18P29   | ENSG00000160789.18_LMNA | 0.10838  | -0.051714284 | 0.263040898 | 1.84E-01 | 4.49E-01 | 1.00E+00 |
| ENSG00000242385.1_LINC00901  | ENSG00000160789.18_LMNA | -0.02298 | -0.181518608 | 0.136718884 | 7.79E-01 | 9.09E-01 | 1.00E+00 |
| ENSG00000123165.8_ACTRT1     | ENSG00000160789.18_LMNA | -0.07129 | -0.227900926 | 0.088923236 | 3.83E-01 | 6.61E-01 | 1.00E+00 |
| ENSG00000237388.2_OR4A47     | ENSG00000160789.18_LMNA | -0.21529 | -0.362081488 | -0.05808093 | 7.73E-03 | 5.41E-02 | 1.00E+00 |
| ENSG00000203783.4_PRR9       | ENSG00000160789.18_LMNA | -0.02509 | -0.183559875 | 0.134646131 | 7.59E-01 | 8.99E-01 | 1.00E+00 |
| ENSG00000235534.1_FECHP1     | ENSG00000160789.18_LMNA | -0.1116  | -0.266078052 | 0.048456748 | 1.71E-01 | 4.30E-01 | 1.00E+00 |
| ENSG00000234312.1_SAPCD2P4   | ENSG00000160789.18_LMNA | -0.0492  | -0.206777692 | 0.110872572 | 5.47E-01 | 7.85E-01 | 1.00E+00 |
| ENSG00000241598.5_KRTAP5-4   | ENSG00000160789.18_LMNA | 0.02637  | -0.13338723  | 0.184798315 | 7.47E-01 | 8.94E-01 | 1.00E+00 |
| ENSG00000251473.2_AC004069   | ENSG00000160789.18_LMNA | 0.01641  | -0.143162825 | 0.17515499  | 8.41E-01 | 9.38E-01 | 1.00E+00 |
| ENSG00000239508.1_PLCH1-AS   | ENSG00000160789.18_LMNA | -0.00884 | -0.167807449 | 0.150569688 | 9.14E-01 | 9.67E-01 | 1.00E+00 |
| ENSG00000257741.4_LINC01490  | ENSG00000160789.18_LMNA | 0.07718  | -0.083042013 | 0.23351059  | 3.45E-01 | 6.29E-01 | 1.00E+00 |
| ENSG00000251501.1_RP11-466J  | ENSG00000160789.18_LMNA | -0.21746 | -0.364056383 | -0.0603477  | 7.12E-03 | 5.10E-02 | 1.00E+00 |
| ENSG00000181786.4_ACTL9      | ENSG00000160789.18_LMNA | 0.20561  | 0.047977555  | 0.353245753 | 1.10E-02 | 7.03E-02 | 1.00E+00 |
| ENSG00000115934.11_RP11-153I | ENSG00000160789.18_LMNA | 0.14333  | -0.01623864  | 0.295783918 | 7.81E-02 | 2.68E-01 | 1.00E+00 |
| ENSG00000258619.2_RP11-134E  | ENSG00000160789.18_LMNA | -0.20739 | -0.354875875 | -0.04983686 | 1.04E-02 | 6.72E-02 | 1.00E+00 |
| ENSG00000256218.1_RP11-1038  | ENSG00000160789.18_LMNA | -0.16911 | -0.319705124 | -0.01018526 | 3.73E-02 | 1.65E-01 | 1.00E+00 |
| ENSG00000182053.11_TRIM49B   | ENSG00000160789.18_LMNA | -0.20017 | -0.348276816 | -0.04232305 | 1.34E-02 | 8.09E-02 | 1.00E+00 |
| ENSG00000280017.1_RP11-54F2  | ENSG00000160789.18_LMNA | -0.06008 | -0.21719917  | 0.100082114 | 4.62E-01 | 7.25E-01 | 1.00E+00 |
| ENSG00000259600.2_RP11-925D  | ENSG00000160789.18_LMNA | 0.03983  | -0.120134557 | 0.197774561 | 6.26E-01 | 8.31E-01 | 1.00E+00 |
| ENSG00000275163.1_RP11-385J  | ENSG00000160789.18_LMNA | -0.03386 | -0.192022107 | 0.126023567 | 6.79E-01 | 8.60E-01 | 1.00E+00 |
| ENSG00000214295.4_FOXO1B     | ENSG00000160789.18_LMNA | -0.05327 | -0.210687932 | 0.106832646 | 5.14E-01 | 7.62E-01 | 1.00E+00 |
| ENSG00000233441.5_CYP2AB1P   | ENSG00000160789.18_LMNA | -0.13964 | -0.292343014 | 0.020004019 | 8.62E-02 | 2.85E-01 | 1.00E+00 |
| ENSG00000279173.1_RP11-318G  | ENSG00000160789.18_LMNA | 0.12762  | -0.032240062 | 0.281105272 | 1.17E-01 | 3.43E-01 | 1.00E+00 |
| ENSG00000118434.7_SPACA1     | ENSG00000160789.18_LMNA | 0.03193  | -0.127922093 | 0.190162935 | 6.96E-01 | 8.70E-01 | 1.00E+00 |
| ENSG00000239402.3_CYP4F62P   | ENSG00000160789.18_LMNA | -0.03607 | -0.194152467 | 0.123845245 | 6.59E-01 | 8.49E-01 | 1.00E+00 |
| ENSG00000272874.1_RP5-1103G  | ENSG00000160789.18_LMNA | 0.01911  | -0.140514006 | 0.177774015 | 8.15E-01 | 9.28E-01 | 1.00E+00 |
| ENSG00000177143.4_CETN1      | ENSG00000160789.18_LMNA | -0.03549 | -0.193599405 | 0.124411053 | 6.64E-01 | 8.52E-01 | 1.00E+00 |
| ENSG00000215512.8_AP005901   | ENSG00000160789.18_LMNA | 0.00272  | -0.156546575 | 0.161852529 | 9.73E-01 | 9.90E-01 | 1.00E+00 |

|                              |                         |          |              |             |          |          |          |
|------------------------------|-------------------------|----------|--------------|-------------|----------|----------|----------|
| ENSG00000230817.4_LINC01362  | ENSG00000160789.18_LMNA | -0.05069 | -0.208213793 | 0.10939006  | 5.35E-01 | 7.76E-01 | 1.00E+00 |
| ENSG00000223358.4_EHHADH-A   | ENSG00000160789.18_LMNA | 0.02098  | -0.13868649  | 0.179578351 | 7.98E-01 | 9.19E-01 | 1.00E+00 |
| ENSG00000261803.1_RP11-434E  | ENSG00000160789.18_LMNA | 0.17804  | 0.019385502  | 0.327942391 | 2.82E-02 | 1.37E-01 | 1.00E+00 |
| ENSG00000198765.10_SYCP1     | ENSG00000160789.18_LMNA | 0.03531  | -0.124590924 | 0.193423544 | 6.66E-01 | 8.53E-01 | 1.00E+00 |
| ENSG00000215113.6_CXorf49B   | ENSG00000160789.18_LMNA | 0.10554  | -0.054576055 | 0.260367577 | 1.96E-01 | 4.65E-01 | 1.00E+00 |
| ENSG00000230523.1_RP3-437I16 | ENSG00000160789.18_LMNA | -0.01636 | -0.175103843 | 0.143214509 | 8.41E-01 | 9.38E-01 | 1.00E+00 |
| ENSG00000279127.1_RP3-442L6  | ENSG00000160789.18_LMNA | 0.17215  | 0.013311979  | 0.322509831 | 3.39E-02 | 1.55E-01 | 1.00E+00 |
| ENSG00000233501.1_           | ENSG00000160789.18_LMNA | -0.12543 | -0.279060949 | 0.034455939 | 1.24E-01 | 3.54E-01 | 1.00E+00 |
| ENSG00000230651.6_RGPD4-AS   | ENSG00000160789.18_LMNA | -0.01187 | -0.170745616 | 0.147612081 | 8.85E-01 | 9.55E-01 | 1.00E+00 |
| ENSG00000224718.1_RP11-222A  | ENSG00000160789.18_LMNA | 0.05531  | -0.104815399 | 0.212636627 | 4.99E-01 | 7.52E-01 | 1.00E+00 |
| ENSG00000268505.1_RP11-805I2 | ENSG00000160789.18_LMNA | -0.08407 | -0.240060274 | 0.076147248 | 3.03E-01 | 5.90E-01 | 1.00E+00 |
| ENSG00000198445.4_CCT8L2     | ENSG00000160789.18_LMNA | -0.19355 | -0.342203638 | -0.03543846 | 1.69E-02 | 9.56E-02 | 1.00E+00 |
| ENSG00000122145.13_TBX22     | ENSG00000160789.18_LMNA | -0.01022 | -0.169144189 | 0.14922481  | 9.01E-01 | 9.61E-01 | 1.00E+00 |
| ENSG00000163098.4_BIRC8      | ENSG00000160789.18_LMNA | -0.00694 | -0.16595444  | 0.15243203  | 9.32E-01 | 9.74E-01 | 1.00E+00 |
| ENSG00000260737.4_LINC01227  | ENSG00000160789.18_LMNA | -0.01479 | -0.173584459 | 0.144749038 | 8.56E-01 | 9.43E-01 | 1.00E+00 |
| ENSG00000234889.2_RP13-130D  | ENSG00000160789.18_LMNA | 0.05634  | -0.103796487 | 0.213619955 | 4.91E-01 | 7.46E-01 | 1.00E+00 |
| ENSG00000180259.8_PRNT       | ENSG00000160789.18_LMNA | -0.06544 | -0.222327167 | 0.094745018 | 4.23E-01 | 6.94E-01 | 1.00E+00 |
| ENSG00000238040.1_SALL4P2    | ENSG00000160789.18_LMNA | -0.01758 | -0.176283287 | 0.142022251 | 8.30E-01 | 9.34E-01 | 1.00E+00 |
| ENSG00000257762.4_RP11-626I2 | ENSG00000160789.18_LMNA | -0.02779 | -0.186170885 | 0.131990782 | 7.34E-01 | 8.88E-01 | 1.00E+00 |
| ENSG00000254959.5_INMT-FAM1  | ENSG00000160789.18_LMNA | -0.00554 | -0.164597177 | 0.153794696 | 9.46E-01 | 9.78E-01 | 1.00E+00 |
| ENSG00000241369.4_LINC01192  | ENSG00000160789.18_LMNA | 0.033    | -0.12686235  | 0.191200993 | 6.86E-01 | 8.64E-01 | 1.00E+00 |
| ENSG00000235139.2_AC003984.  | ENSG00000160789.18_LMNA | -0.10305 | -0.258015046 | 0.05709015  | 2.06E-01 | 4.78E-01 | 1.00E+00 |
| ENSG00000224008.1_LINC01441  | ENSG00000160789.18_LMNA | -0.00103 | -0.160202078 | 0.158198998 | 9.90E-01 | 9.96E-01 | 1.00E+00 |
| ENSG00000217576.7_RP11-248G  | ENSG00000160789.18_LMNA | -0.05827 | -0.215472627 | 0.10187496  | 4.76E-01 | 7.34E-01 | 1.00E+00 |
| ENSG00000235158.1_AC087430.  | ENSG00000160789.18_LMNA | -0.08215 | -0.238236988 | 0.07806964  | 3.14E-01 | 6.01E-01 | 1.00E+00 |
| ENSG00000259008.1_RP11-932A  | ENSG00000160789.18_LMNA | -0.01305 | -0.171893845 | 0.146454707 | 8.73E-01 | 9.51E-01 | 1.00E+00 |
| ENSG00000196826.7_CTD-2192J  | ENSG00000160789.18_LMNA | -0.03942 | -0.197380928 | 0.120538249 | 6.30E-01 | 8.33E-01 | 1.00E+00 |
| ENSG00000202174.1_RNA5-8SP5  | ENSG00000160789.18_LMNA | 0.00026  | -0.158949069 | 0.159452314 | 9.97E-01 | 9.99E-01 | 1.00E+00 |
| ENSG00000274868.1_pRNA       | ENSG00000160789.18_LMNA | -0.0073  | -0.166311017 | 0.152073833 | 9.29E-01 | 9.73E-01 | 1.00E+00 |
| ENSG00000272344.1_SNORD114   | ENSG00000160789.18_LMNA | -0.12399 | -0.277706219 | 0.035922659 | 1.28E-01 | 3.62E-01 | 1.00E+00 |
| ENSG00000273745.1_MIR6870    | ENSG00000160789.18_LMNA | 0.02584  | -0.133908887 | 0.184285259 | 7.52E-01 | 8.97E-01 | 1.00E+00 |
| ENSG00000221469.1_           | ENSG00000160789.18_LMNA | 0.04088  | -0.119096972 | 0.198785822 | 6.17E-01 | 8.26E-01 | 1.00E+00 |
| ENSG00000257294.2_RP11-316A  | ENSG00000160789.18_LMNA | -0.07698 | -0.23332059  | 0.083241572 | 3.46E-01 | 6.30E-01 | 1.00E+00 |

|                              |                         |          |              |             |          |          |          |
|------------------------------|-------------------------|----------|--------------|-------------|----------|----------|----------|
| ENSG00000281446.1_AL139333.1 | ENSG00000160789.18_LMNA | -0.03265 | -0.190858018 | 0.12721257  | 6.90E-01 | 8.66E-01 | 1.00E+00 |
| ENSG00000264928.1_           | ENSG00000160789.18_LMNA | -0.00184 | -0.160990488 | 0.157409869 | 9.82E-01 | 9.93E-01 | 1.00E+00 |
| ENSG00000278652.1_           | ENSG00000160789.18_LMNA | -0.18127 | -0.330923314 | -0.02272783 | 2.54E-02 | 1.28E-01 | 1.00E+00 |
| ENSG00000274940.1_MIR8083    | ENSG00000160789.18_LMNA | 0.13656  | -0.023143954 | 0.289467461 | 9.34E-02 | 2.99E-01 | 1.00E+00 |
| ENSG00000202023.1_SNORD81    | ENSG00000160789.18_LMNA | 0.02517  | -0.134568568 | 0.183636207 | 7.58E-01 | 8.99E-01 | 1.00E+00 |
| ENSG00000252242.1_RNU7-115F  | ENSG00000160789.18_LMNA | -0.02062 | -0.179230056 | 0.139039429 | 8.01E-01 | 9.20E-01 | 1.00E+00 |
| ENSG00000253043.1_RNU7-181F  | ENSG00000160789.18_LMNA | 0.02041  | -0.139239077 | 0.179032999 | 8.03E-01 | 9.21E-01 | 1.00E+00 |
| ENSG00000207109.1_SNORD38    | ENSG00000160789.18_LMNA | -0.05414 | -0.211513514 | 0.105978341 | 5.08E-01 | 7.58E-01 | 1.00E+00 |
| ENSG00000254824.1_RP11-37O1  | ENSG00000160789.18_LMNA | -0.01204 | -0.170908398 | 0.147448055 | 8.83E-01 | 9.55E-01 | 1.00E+00 |
| ENSG00000199593.1_SNORD114   | ENSG00000160789.18_LMNA | 0.12369  | -0.036226373 | 0.277425538 | 1.29E-01 | 3.64E-01 | 1.00E+00 |
| ENSG00000200608.1_SNORD114   | ENSG00000160789.18_LMNA | -0.01396 | -0.172776315 | 0.145564614 | 8.64E-01 | 9.47E-01 | 1.00E+00 |
| ENSG00000177938.4_CAPZA3     | ENSG00000160789.18_LMNA | 0.00175  | -0.15749667  | 0.160903786 | 9.83E-01 | 9.94E-01 | 1.00E+00 |
| ENSG00000200367.1_SNORD113   | ENSG00000160789.18_LMNA | -0.12119 | -0.275079722 | 0.038762433 | 1.37E-01 | 3.77E-01 | 1.00E+00 |
| ENSG00000252975.1_Y_RNA      | ENSG00000160789.18_LMNA | -0.06606 | -0.222917931 | 0.094128991 | 4.19E-01 | 6.91E-01 | 1.00E+00 |
| ENSG00000222395.2_Y_RNA      | ENSG00000160789.18_LMNA | 0.02362  | -0.13609263  | 0.182135639 | 7.73E-01 | 9.06E-01 | 1.00E+00 |
| ENSG00000263855.1_           | ENSG00000160789.18_LMNA | 0.02797  | -0.13181961  | 0.186339045 | 7.32E-01 | 8.87E-01 | 1.00E+00 |
| ENSG00000212279.2_SNORD77    | ENSG00000160789.18_LMNA | 0.09363  | -0.066561148 | 0.249119005 | 2.51E-01 | 5.32E-01 | 1.00E+00 |
| ENSG00000280673.1_           | ENSG00000160789.18_LMNA | -0.11019 | -0.264742917 | 0.049889587 | 1.77E-01 | 4.38E-01 | 1.00E+00 |
| ENSG00000206847.1_Y_RNA      | ENSG00000160789.18_LMNA | -0.12802 | -0.281480724 | 0.031832768 | 1.16E-01 | 3.41E-01 | 1.00E+00 |
| ENSG00000278645.1_           | ENSG00000160789.18_LMNA | -0.03744 | -0.195471437 | 0.122495043 | 6.47E-01 | 8.43E-01 | 1.00E+00 |
| ENSG00000207826.1_MIR596     | ENSG00000160789.18_LMNA | -0.06864 | -0.225378513 | 0.091560576 | 4.01E-01 | 6.77E-01 | 1.00E+00 |
| ENSG00000266507.1_MIR4479    | ENSG00000160789.18_LMNA | -0.01554 | -0.174312871 | 0.144013557 | 8.49E-01 | 9.41E-01 | 1.00E+00 |
| ENSG00000221655.2_           | ENSG00000160789.18_LMNA | 0.06138  | -0.098785648 | 0.218446455 | 4.53E-01 | 7.18E-01 | 1.00E+00 |
| ENSG00000281314.1_           | ENSG00000160789.18_LMNA | 0.081    | -0.079222892 | 0.237142118 | 3.21E-01 | 6.08E-01 | 1.00E+00 |
| ENSG00000221132.1_           | ENSG00000160789.18_LMNA | 0.04444  | -0.115573712 | 0.202214652 | 5.87E-01 | 8.08E-01 | 1.00E+00 |
| ENSG00000206995.1_Y_RNA      | ENSG00000160789.18_LMNA | -0.05344 | -0.210845175 | 0.106669968 | 5.13E-01 | 7.61E-01 | 1.00E+00 |
| ENSG00000207124.1_RNU6-163F  | ENSG00000160789.18_LMNA | 0.0871   | -0.073117654 | 0.242929163 | 2.86E-01 | 5.71E-01 | 1.00E+00 |
| ENSG00000202187.1_RNA5SP35   | ENSG00000160789.18_LMNA | 0.0537   | -0.106405552 | 0.211100723 | 5.11E-01 | 7.60E-01 | 1.00E+00 |
| ENSG00000207368.1_Y_RNA      | ENSG00000160789.18_LMNA | 0.06517  | -0.095018333 | 0.222064985 | 4.25E-01 | 6.96E-01 | 1.00E+00 |
| ENSG00000207605.2_MIR191     | ENSG00000160789.18_LMNA | -0.03858 | -0.196571859 | 0.121367662 | 6.37E-01 | 8.38E-01 | 1.00E+00 |
| ENSG00000207771.1_MIR550A1   | ENSG00000160789.18_LMNA | -0.06133 | -0.21839522  | 0.098838924 | 4.53E-01 | 7.18E-01 | 1.00E+00 |
| ENSG00000263849.1_MIR4744    | ENSG00000160789.18_LMNA | -0.05633 | -0.213618579 | 0.103797914 | 4.91E-01 | 7.46E-01 | 1.00E+00 |
| ENSG00000207571.1_MIR615     | ENSG00000160789.18_LMNA | -0.1889  | -0.33793636  | -0.03061841 | 1.98E-02 | 1.07E-01 | 1.00E+00 |

|                              |                         |          |              |             |          |          |          |
|------------------------------|-------------------------|----------|--------------|-------------|----------|----------|----------|
| ENSG00000201957.1_SNORA25    | ENSG00000160789.18_LMNA | -0.04345 | -0.201262105 | 0.116553295 | 5.95E-01 | 8.13E-01 | 1.00E+00 |
| ENSG00000253087.1_RNU6-1174  | ENSG00000160789.18_LMNA | -0.00641 | -0.165445963 | 0.152942673 | 9.37E-01 | 9.75E-01 | 1.00E+00 |
| ENSG00000266550.1_           | ENSG00000160789.18_LMNA | 0.0069   | -0.152470861 | 0.16591578  | 9.33E-01 | 9.74E-01 | 1.00E+00 |
| ENSG00000277912.1_MIR8089    | ENSG00000160789.18_LMNA | 0.12023  | -0.039732305 | 0.274181617 | 1.40E-01 | 3.82E-01 | 1.00E+00 |
| ENSG00000266457.1_           | ENSG00000160789.18_LMNA | -0.07857 | -0.234831023 | 0.081654446 | 3.36E-01 | 6.22E-01 | 1.00E+00 |
| ENSG00000212306.1_Y_RNA      | ENSG00000160789.18_LMNA | -0.04166 | -0.199541088 | 0.118321593 | 6.10E-01 | 8.22E-01 | 1.00E+00 |
| ENSG00000199132.1_MIR450A1   | ENSG00000160789.18_LMNA | 0.06154  | -0.098625798 | 0.218600169 | 4.51E-01 | 7.17E-01 | 1.00E+00 |
| ENSG00000238773.1_           | ENSG00000160789.18_LMNA | -0.03913 | -0.197104087 | 0.120822101 | 6.32E-01 | 8.35E-01 | 1.00E+00 |
| ENSG00000265515.1_           | ENSG00000160789.18_LMNA | 0.15547  | -0.003824684 | 0.307071056 | 5.58E-02 | 2.16E-01 | 1.00E+00 |
| ENSG00000202024.1_RNU6-934F  | ENSG00000160789.18_LMNA | -0.09146 | -0.247066092 | 0.068738694 | 2.62E-01 | 5.46E-01 | 1.00E+00 |
| ENSG00000212303.1_RNU6-1154  | ENSG00000160789.18_LMNA | 0.07578  | -0.084439618 | 0.232179424 | 3.53E-01 | 6.37E-01 | 1.00E+00 |
| ENSG00000276162.1_MIR5739    | ENSG00000160789.18_LMNA | -0.07409 | -0.23057086  | 0.086126805 | 3.64E-01 | 6.46E-01 | 1.00E+00 |
| ENSG00000265364.1_           | ENSG00000160789.18_LMNA | 0.13822  | -0.021452248 | 0.291017428 | 8.95E-02 | 2.91E-01 | 1.00E+00 |
| ENSG00000202272.1_Y_RNA      | ENSG00000160789.18_LMNA | -0.10316 | -0.258121359 | 0.056976622 | 2.06E-01 | 4.78E-01 | 1.00E+00 |
| ENSG00000200058.1_RNA5SP21   | ENSG00000160789.18_LMNA | -0.1909  | -0.339772108 | -0.03269021 | 1.85E-02 | 1.02E-01 | 1.00E+00 |
| ENSG00000253122.1_RP11-238I1 | ENSG00000160789.18_LMNA | -0.05647 | -0.213749261 | 0.103662452 | 4.90E-01 | 7.46E-01 | 1.00E+00 |
| ENSG00000272028.1_RNU6-87P   | ENSG00000160789.18_LMNA | 0.05113  | -0.108956894 | 0.208633141 | 5.32E-01 | 7.74E-01 | 1.00E+00 |
| ENSG00000207201.1_RNU1-148F  | ENSG00000160789.18_LMNA | 0.02112  | -0.138542875 | 0.179720054 | 7.96E-01 | 9.18E-01 | 1.00E+00 |
| ENSG00000266109.1_MIR4440    | ENSG00000160789.18_LMNA | 0.06831  | -0.091893302 | 0.225059984 | 4.03E-01 | 6.79E-01 | 1.00E+00 |
| ENSG00000252348.1_RNU6-1256  | ENSG00000160789.18_LMNA | -0.19181 | -0.340606249 | -0.03363248 | 1.79E-02 | 9.97E-02 | 1.00E+00 |
| ENSG00000265049.1_           | ENSG00000160789.18_LMNA | 0.0783   | -0.081924523 | 0.234574104 | 3.38E-01 | 6.23E-01 | 1.00E+00 |
| ENSG00000207417.1_Y_RNA      | ENSG00000160789.18_LMNA | -0.01382 | -0.172636213 | 0.145705961 | 8.66E-01 | 9.48E-01 | 1.00E+00 |
| ENSG00000200254.1_RNU6-536F  | ENSG00000160789.18_LMNA | 0.12703  | -0.032838568 | 0.280553383 | 1.19E-01 | 3.46E-01 | 1.00E+00 |
| ENSG00000274408.1_5S_rRNA    | ENSG00000160789.18_LMNA | -0.02803 | -0.186402216 | 0.131755302 | 7.32E-01 | 8.87E-01 | 1.00E+00 |
| ENSG00000212049.1_           | ENSG00000160789.18_LMNA | 0.00405  | -0.155251352 | 0.163144963 | 9.61E-01 | 9.84E-01 | 1.00E+00 |
| ENSG00000207701.1_MIR597     | ENSG00000160789.18_LMNA | 0.15205  | -0.007330584 | 0.303892226 | 6.15E-02 | 2.29E-01 | 1.00E+00 |
| ENSG00000207703.1_MIR7-2     | ENSG00000160789.18_LMNA | -0.10411 | -0.259014872 | 0.056022147 | 2.02E-01 | 4.72E-01 | 1.00E+00 |
| ENSG00000200065.1_Y_RNA      | ENSG00000160789.18_LMNA | -0.04665 | -0.204337111 | 0.113388787 | 5.68E-01 | 7.98E-01 | 1.00E+00 |
| ENSG00000280729.1_           | ENSG00000160789.18_LMNA | -0.07359 | -0.230090592 | 0.086630196 | 3.68E-01 | 6.48E-01 | 1.00E+00 |
| ENSG00000277843.1_           | ENSG00000160789.18_LMNA | 0.07836  | -0.081865862 | 0.234629911 | 3.37E-01 | 6.23E-01 | 1.00E+00 |
| ENSG00000207302.1_Y_RNA      | ENSG00000160789.18_LMNA | 0.0455   | -0.114526617 | 0.203232184 | 5.78E-01 | 8.03E-01 | 1.00E+00 |
| ENSG00000201377.1_RNY4P23    | ENSG00000160789.18_LMNA | -0.00257 | -0.161706049 | 0.156693302 | 9.75E-01 | 9.90E-01 | 1.00E+00 |
| ENSG00000221530.1_           | ENSG00000160789.18_LMNA | -0.09656 | -0.251893137 | 0.063613814 | 2.37E-01 | 5.15E-01 | 1.00E+00 |



|                              |                         |          |              |             |          |          |          |
|------------------------------|-------------------------|----------|--------------|-------------|----------|----------|----------|
| ENSG00000207258.1_Y_RNA      | ENSG00000160789.18_LMNA | -0.0979  | -0.253155336 | 0.062270984 | 2.30E-01 | 5.08E-01 | 1.00E+00 |
| ENSG00000207407.1_SNORA1     | ENSG00000160789.18_LMNA | 0.04769  | -0.11236603  | 0.205329601 | 5.60E-01 | 7.92E-01 | 1.00E+00 |
| ENSG00000278065.1_           | ENSG00000160789.18_LMNA | 0.07241  | -0.087802009 | 0.228972007 | 3.75E-01 | 6.55E-01 | 1.00E+00 |
| ENSG00000206587.1_RNU6-46P   | ENSG00000160789.18_LMNA | -0.09808 | -0.253326494 | 0.062088805 | 2.29E-01 | 5.06E-01 | 1.00E+00 |
| ENSG00000253064.1_RNU6-711F  | ENSG00000160789.18_LMNA | 0.04813  | -0.111925606 | 0.205756792 | 5.56E-01 | 7.90E-01 | 1.00E+00 |
| ENSG00000212447.1_SNORD90    | ENSG00000160789.18_LMNA | 0.01188  | -0.147597596 | 0.170759992 | 8.84E-01 | 9.55E-01 | 1.00E+00 |
| ENSG00000251792.1_Y_RNA      | ENSG00000160789.18_LMNA | -0.0185  | -0.177179657 | 0.141115526 | 8.21E-01 | 9.30E-01 | 1.00E+00 |
| ENSG00000275229.1_RNU1-68P   | ENSG00000160789.18_LMNA | 0.10878  | -0.051308998 | 0.263419105 | 1.82E-01 | 4.46E-01 | 1.00E+00 |
| ENSG00000270811.1_RP11-393K  | ENSG00000160789.18_LMNA | -0.14687 | -0.299077393 | 0.012626282 | 7.10E-02 | 2.52E-01 | 1.00E+00 |
| ENSG00000252686.1_RNU6-1234  | ENSG00000160789.18_LMNA | 0.00172  | -0.157519751 | 0.16088073  | 9.83E-01 | 9.94E-01 | 1.00E+00 |
| ENSG00000222346.1_RNA5SP23   | ENSG00000160789.18_LMNA | 0.04857  | -0.111488207 | 0.206180927 | 5.52E-01 | 7.88E-01 | 1.00E+00 |
| ENSG00000274603.1_Y_RNA      | ENSG00000160789.18_LMNA | -0.02065 | -0.179264757 | 0.139004268 | 8.01E-01 | 9.20E-01 | 1.00E+00 |
| ENSG00000270620.1_RP1-134O1  | ENSG00000160789.18_LMNA | -0.03684 | -0.194893037 | 0.123087284 | 6.52E-01 | 8.46E-01 | 1.00E+00 |
| ENSG00000202159.1_RNU6-742F  | ENSG00000160789.18_LMNA | 0.00572  | -0.153620717 | 0.164770534 | 9.44E-01 | 9.78E-01 | 1.00E+00 |
| ENSG00000207237.1_RNU6-110F  | ENSG00000160789.18_LMNA | -0.09512 | -0.250524967 | 0.065068093 | 2.44E-01 | 5.23E-01 | 1.00E+00 |
| ENSG00000265212.2_           | ENSG00000160789.18_LMNA | 0.12434  | -0.035560655 | 0.278040698 | 1.27E-01 | 3.61E-01 | 1.00E+00 |
| ENSG00000279374.1_AL596220.1 | ENSG00000160789.18_LMNA | 0.08228  | -0.077939961 | 0.238360051 | 3.14E-01 | 6.00E-01 | 1.00E+00 |
| ENSG00000252777.1_SCARNA24   | ENSG00000160789.18_LMNA | -0.04973 | -0.207291088 | 0.110342747 | 5.43E-01 | 7.82E-01 | 1.00E+00 |
| ENSG00000199535.1_RNA5SP30   | ENSG00000160789.18_LMNA | -0.07057 | -0.227222607 | 0.089632898 | 3.88E-01 | 6.66E-01 | 1.00E+00 |
| ENSG00000207782.2_MIR150     | ENSG00000160789.18_LMNA | -0.06478 | -0.221689959 | 0.095409201 | 4.28E-01 | 6.98E-01 | 1.00E+00 |
| ENSG00000207600.2_MIR598     | ENSG00000160789.18_LMNA | -0.03144 | -0.18969521  | 0.128399351 | 7.01E-01 | 8.72E-01 | 1.00E+00 |
| ENSG00000250503.1_RP11-401I1 | ENSG00000160789.18_LMNA | 0.02923  | -0.130575372 | 0.187560826 | 7.21E-01 | 8.82E-01 | 1.00E+00 |
| ENSG00000222561.1_RNU6-1025  | ENSG00000160789.18_LMNA | 0.00574  | -0.153600984 | 0.164790195 | 9.44E-01 | 9.78E-01 | 1.00E+00 |
| ENSG00000226750.1_RP11-513D  | ENSG00000160789.18_LMNA | 0.0117   | -0.147771697 | 0.170587194 | 8.86E-01 | 9.56E-01 | 1.00E+00 |
| ENSG00000243700.3_RN7SL598f  | ENSG00000160789.18_LMNA | 0.05161  | -0.108485775 | 0.209089097 | 5.28E-01 | 7.72E-01 | 1.00E+00 |
| ENSG00000237293.1_AC007099.1 | ENSG00000160789.18_LMNA | -0.15162 | -0.303491252 | 0.00777227  | 6.22E-02 | 2.31E-01 | 1.00E+00 |
| ENSG00000202215.1_RNU1-51P   | ENSG00000160789.18_LMNA | 0.0139   | -0.145623327 | 0.172718121 | 8.65E-01 | 9.47E-01 | 1.00E+00 |
| ENSG00000207105.1_Y_RNA      | ENSG00000160789.18_LMNA | -0.01956 | -0.178202074 | 0.140080644 | 8.11E-01 | 9.26E-01 | 1.00E+00 |
| ENSG00000256346.1_RP11-72J9  | ENSG00000160789.18_LMNA | 0.13087  | -0.028933438 | 0.284150616 | 1.08E-01 | 3.27E-01 | 1.00E+00 |
| ENSG00000229064.1_RP11-746P  | ENSG00000160789.18_LMNA | 0.03764  | -0.122297372 | 0.195664439 | 6.45E-01 | 8.42E-01 | 1.00E+00 |
| ENSG00000221043.2_U3         | ENSG00000160789.18_LMNA | -0.09907 | -0.25426489  | 0.061089608 | 2.25E-01 | 5.01E-01 | 1.00E+00 |
| ENSG00000253059.1_SNORA31    | ENSG00000160789.18_LMNA | 0.13714  | -0.02254969  | 0.290012122 | 9.20E-02 | 2.96E-01 | 1.00E+00 |
| ENSG00000272387.1_AL022345.1 | ENSG00000160789.18_LMNA | -0.05836 | -0.215561917 | 0.101782291 | 4.75E-01 | 7.34E-01 | 1.00E+00 |

|                              |                         |          |              |             |          |          |          |
|------------------------------|-------------------------|----------|--------------|-------------|----------|----------|----------|
| ENSG00000266664.1_RP11-160E  | ENSG00000160789.18_LMNA | 0.03934  | -0.120620649 | 0.197300568 | 6.30E-01 | 8.34E-01 | 1.00E+00 |
| ENSG00000242251.3_RN7SL20P   | ENSG00000160789.18_LMNA | 0.13194  | -0.027841804 | 0.285154607 | 1.05E-01 | 3.22E-01 | 1.00E+00 |
| ENSG00000270664.1_RP11-544H  | ENSG00000160789.18_LMNA | 0.01572  | -0.143840654 | 0.174484061 | 8.48E-01 | 9.40E-01 | 1.00E+00 |
| ENSG00000228337.1_RP11-804H  | ENSG00000160789.18_LMNA | 0.11102  | -0.0490457   | 0.265529406 | 1.73E-01 | 4.33E-01 | 1.00E+00 |
| ENSG00000249970.1_RP11-622A  | ENSG00000160789.18_LMNA | -0.06814 | -0.224900902 | 0.092059448 | 4.04E-01 | 6.80E-01 | 1.00E+00 |
| ENSG00000240626.3_RN7SL150F  | ENSG00000160789.18_LMNA | -0.03222 | -0.190447384 | 0.127631774 | 6.94E-01 | 8.68E-01 | 1.00E+00 |
| ENSG00000258995.1_PARP1P2    | ENSG00000160789.18_LMNA | 0.17139  | 0.012530071  | 0.321808957 | 3.48E-02 | 1.58E-01 | 1.00E+00 |
| ENSG00000280920.1_HPVC1      | ENSG00000160789.18_LMNA | -0.01714 | -0.175860269 | 0.142449972 | 8.34E-01 | 9.35E-01 | 1.00E+00 |
| ENSG00000256157.1_RP11-80N2  | ENSG00000160789.18_LMNA | -0.1187  | -0.272743255 | 0.041284372 | 1.45E-01 | 3.90E-01 | 1.00E+00 |
| ENSG00000270421.1_RP11-351O  | ENSG00000160789.18_LMNA | 0.00218  | -0.157079694 | 0.161320241 | 9.79E-01 | 9.92E-01 | 1.00E+00 |
| ENSG00000266477.2_RN7SL616F  | ENSG00000160789.18_LMNA | 0.10758  | -0.052523859 | 0.262285124 | 1.87E-01 | 4.53E-01 | 1.00E+00 |
| ENSG00000253912.1_RP11-402L  | ENSG00000160789.18_LMNA | 0.01866  | -0.14095838  | 0.177334954 | 8.19E-01 | 9.30E-01 | 1.00E+00 |
| ENSG00000227206.1_XXbac-BCX  | ENSG00000160789.18_LMNA | 0.01451  | -0.145021815 | 0.173314216 | 8.59E-01 | 9.45E-01 | 1.00E+00 |
| ENSG00000231363.1_           | ENSG00000160789.18_LMNA | 0.02867  | -0.131125542 | 0.187020708 | 7.26E-01 | 8.84E-01 | 1.00E+00 |
| ENSG00000241230.3_RN7SL801F  | ENSG00000160789.18_LMNA | 0.1002   | -0.059960731 | 0.255324361 | 2.19E-01 | 4.94E-01 | 1.00E+00 |
| ENSG00000258386.1_RP11-187E  | ENSG00000160789.18_LMNA | -0.034   | -0.192157069 | 0.125885658 | 6.78E-01 | 8.59E-01 | 1.00E+00 |
| ENSG00000250813.1_SERF1AP1   | ENSG00000160789.18_LMNA | 0.04084  | -0.119133528 | 0.198750205 | 6.17E-01 | 8.27E-01 | 1.00E+00 |
| ENSG00000235861.1_AC005237.  | ENSG00000160789.18_LMNA | 0.04841  | -0.111648739 | 0.206025277 | 5.54E-01 | 7.88E-01 | 1.00E+00 |
| ENSG00000270864.1_IGHV3OR1I  | ENSG00000160789.18_LMNA | -0.03078 | -0.189053299 | 0.129054107 | 7.07E-01 | 8.75E-01 | 1.00E+00 |
| ENSG00000240692.3_RN7SL538F  | ENSG00000160789.18_LMNA | -0.10732 | -0.262041894 | 0.052784316 | 1.88E-01 | 4.55E-01 | 1.00E+00 |
| ENSG00000270405.1_RP11-208G  | ENSG00000160789.18_LMNA | -0.01988 | -0.178510968 | 0.139767847 | 8.08E-01 | 9.24E-01 | 1.00E+00 |
| ENSG00000236324.1_RP3-403L1I | ENSG00000160789.18_LMNA | 0.12841  | -0.03143677  | 0.281845671 | 1.15E-01 | 3.39E-01 | 1.00E+00 |
| ENSG00000241406.3_RN7SL515F  | ENSG00000160789.18_LMNA | 0.15019  | -0.009230396 | 0.302166749 | 6.48E-02 | 2.37E-01 | 1.00E+00 |
| ENSG00000243951.1_RN7SL308F  | ENSG00000160789.18_LMNA | 0.10032  | -0.059835829 | 0.255441537 | 2.19E-01 | 4.94E-01 | 1.00E+00 |
| ENSG00000241991.1_RP11-951I  | ENSG00000160789.18_LMNA | -0.143   | -0.29547323  | 0.016578989 | 7.88E-02 | 2.70E-01 | 1.00E+00 |
| ENSG00000248918.2_CTD-2089N  | ENSG00000160789.18_LMNA | -0.23301 | -0.378181852 | -0.07665269 | 3.87E-03 | 3.23E-02 | 1.00E+00 |
| ENSG00000254311.1_SNRPCP17   | ENSG00000160789.18_LMNA | 0.00267  | -0.156593794 | 0.161805391 | 9.74E-01 | 9.90E-01 | 1.00E+00 |
| ENSG00000202233.2_U3         | ENSG00000160789.18_LMNA | -0.01565 | -0.174413419 | 0.143912005 | 8.48E-01 | 9.41E-01 | 1.00E+00 |
| ENSG00000216829.6_FGF7P4     | ENSG00000160789.18_LMNA | 0.05069  | -0.109395345 | 0.208208676 | 5.35E-01 | 7.76E-01 | 1.00E+00 |
| ENSG00000275319.1_Metazoa_Si | ENSG00000160789.18_LMNA | -0.0299  | -0.188200982 | 0.12992305  | 7.15E-01 | 8.79E-01 | 1.00E+00 |
| ENSG00000237501.1_RP11-816B  | ENSG00000160789.18_LMNA | 0.1227   | -0.037227718 | 0.276499756 | 1.32E-01 | 3.69E-01 | 1.00E+00 |
| ENSG00000271616.1_RP11-578F  | ENSG00000160789.18_LMNA | 0.04052  | -0.119453149 | 0.198438758 | 6.20E-01 | 8.28E-01 | 1.00E+00 |
| ENSG00000255555.1_AP000857.  | ENSG00000160789.18_LMNA | 0.12329  | -0.036633961 | 0.277048778 | 1.30E-01 | 3.66E-01 | 1.00E+00 |

|                              |                         |          |              |             |          |          |          |
|------------------------------|-------------------------|----------|--------------|-------------|----------|----------|----------|
| ENSG00000266906.1_AC005357.  | ENSG00000160789.18_LMNA | 0.01539  | -0.144161994 | 0.174165888 | 8.51E-01 | 9.41E-01 | 1.00E+00 |
| ENSG00000233713.2_RP11-379P  | ENSG00000160789.18_LMNA | 0.00526  | -0.15407416  | 0.164318673 | 9.49E-01 | 9.79E-01 | 1.00E+00 |
| ENSG00000271901.1_RP11-266E  | ENSG00000160789.18_LMNA | 0.08159  | -0.078634721 | 0.237700614 | 3.18E-01 | 6.04E-01 | 1.00E+00 |
| ENSG00000254548.1_RP11-429J  | ENSG00000160789.18_LMNA | 0.08534  | -0.074882195 | 0.241258895 | 2.96E-01 | 5.82E-01 | 1.00E+00 |
| ENSG00000254892.1_RP11-334E  | ENSG00000160789.18_LMNA | 0.10267  | -0.057473061 | 0.257656414 | 2.08E-01 | 4.81E-01 | 1.00E+00 |
| ENSG00000231112.1_MTHFD2P3   | ENSG00000160789.18_LMNA | 0.02078  | -0.13887737  | 0.179389992 | 7.99E-01 | 9.19E-01 | 1.00E+00 |
| ENSG00000229518.1_UBE2V1P3   | ENSG00000160789.18_LMNA | -0.17494 | -0.325086287 | -0.01618958 | 3.11E-02 | 1.47E-01 | 1.00E+00 |
| ENSG00000251597.1_RPL37P25   | ENSG00000160789.18_LMNA | 0.07568  | -0.084538804 | 0.232084908 | 3.54E-01 | 6.38E-01 | 1.00E+00 |
| ENSG00000280747.1_           | ENSG00000160789.18_LMNA | 0.0122   | -0.147288594 | 0.171066634 | 8.81E-01 | 9.54E-01 | 1.00E+00 |
| ENSG00000205174.4_C7orf66    | ENSG00000160789.18_LMNA | 0.00259  | -0.156676315 | 0.161723009 | 9.75E-01 | 9.90E-01 | 1.00E+00 |
| ENSG00000259271.1_ANKRD62P   | ENSG00000160789.18_LMNA | -0.32077 | -0.456651095 | -0.17026427 | 5.60E-05 | 1.18E-03 | 1.00E+00 |
| ENSG00000253398.1_RP11-775B  | ENSG00000160789.18_LMNA | 0.09318  | -0.067019098 | 0.248687502 | 2.54E-01 | 5.35E-01 | 1.00E+00 |
| ENSG00000222998.1_RN7SKP25   | ENSG00000160789.18_LMNA | -0.17431 | -0.324502614 | -0.01553724 | 3.17E-02 | 1.49E-01 | 1.00E+00 |
| ENSG00000225727.2_RP11-71C5  | ENSG00000160789.18_LMNA | -0.01542 | -0.174194036 | 0.144133569 | 8.50E-01 | 9.41E-01 | 1.00E+00 |
| ENSG00000238183.2_RPS27P5    | ENSG00000160789.18_LMNA | 0.00686  | -0.152508517 | 0.165878288 | 9.33E-01 | 9.74E-01 | 1.00E+00 |
| ENSG00000243929.1_RP11-61F5  | ENSG00000160789.18_LMNA | 0.01096  | -0.148503058 | 0.169861091 | 8.93E-01 | 9.58E-01 | 1.00E+00 |
| ENSG00000222404.1_RN7SKP28   | ENSG00000160789.18_LMNA | 0.13963  | -0.020020446 | 0.292327985 | 8.62E-02 | 2.85E-01 | 1.00E+00 |
| ENSG00000254163.1_CTC-340I23 | ENSG00000160789.18_LMNA | -0.10137 | -0.256433064 | 0.058778533 | 2.14E-01 | 4.88E-01 | 1.00E+00 |
| ENSG00000271955.1_RP11-444A  | ENSG00000160789.18_LMNA | -0.14119 | -0.293787699 | 0.01842418  | 8.27E-02 | 2.78E-01 | 1.00E+00 |
| ENSG00000237478.2_RP5-926E3  | ENSG00000160789.18_LMNA | 0.03124  | -0.12860251  | 0.189496066 | 7.02E-01 | 8.73E-01 | 1.00E+00 |
| ENSG00000237735.2_AP000473.1 | ENSG00000160789.18_LMNA | 0.10923  | -0.05085995  | 0.263838038 | 1.80E-01 | 4.44E-01 | 1.00E+00 |
| ENSG00000248370.1_RP11-366H  | ENSG00000160789.18_LMNA | 0.25092  | 0.095532147  | 0.394364098 | 1.82E-03 | 1.82E-02 | 1.00E+00 |
| ENSG00000250053.1_RARRES2F   | ENSG00000160789.18_LMNA | 0.04456  | -0.115459748 | 0.202325431 | 5.86E-01 | 8.08E-01 | 1.00E+00 |
| ENSG00000266828.2_RN7SL712F  | ENSG00000160789.18_LMNA | 0.02194  | -0.137740727 | 0.180511278 | 7.88E-01 | 9.14E-01 | 1.00E+00 |
| ENSG00000270411.1_RP13-379L  | ENSG00000160789.18_LMNA | 0.17471  | 0.01595346   | 0.324875051 | 3.13E-02 | 1.48E-01 | 1.00E+00 |
| ENSG00000267271.1_RP11-686D  | ENSG00000160789.18_LMNA | -0.05732 | -0.214565955 | 0.102815625 | 4.83E-01 | 7.40E-01 | 1.00E+00 |
| ENSG00000276486.1_RP11-210K  | ENSG00000160789.18_LMNA | 0.00056  | -0.158652206 | 0.1597491   | 9.95E-01 | 9.98E-01 | 1.00E+00 |
| ENSG00000240302.3_RN7SL717F  | ENSG00000160789.18_LMNA | 0.06151  | -0.098661591 | 0.218565751 | 4.52E-01 | 7.17E-01 | 1.00E+00 |
| ENSG00000225337.1_RP11-561O  | ENSG00000160789.18_LMNA | -0.02231 | -0.180866197 | 0.137380772 | 7.85E-01 | 9.12E-01 | 1.00E+00 |
| ENSG00000269383.2_RP11-292K  | ENSG00000160789.18_LMNA | -0.03222 | -0.190440078 | 0.127639231 | 6.94E-01 | 8.68E-01 | 1.00E+00 |
| ENSG00000164822.4_DEFA6      | ENSG00000160789.18_LMNA | -0.21717 | -0.363789951 | -0.06004171 | 7.20E-03 | 5.14E-02 | 1.00E+00 |
| ENSG00000223394.2_TRBV29OR   | ENSG00000160789.18_LMNA | 0.04988  | -0.110194109 | 0.207435085 | 5.42E-01 | 7.81E-01 | 1.00E+00 |
| ENSG00000248448.2_COX5BP1    | ENSG00000160789.18_LMNA | -0.04135 | -0.1992347   | 0.118636187 | 6.13E-01 | 8.24E-01 | 1.00E+00 |

|                              |                         |          |              |             |          |          |          |
|------------------------------|-------------------------|----------|--------------|-------------|----------|----------|----------|
| ENSG00000269014.1_CTB-147N1  | ENSG00000160789.18_LMNA | 0.06912  | -0.091084759 | 0.22583391  | 3.97E-01 | 6.74E-01 | 1.00E+00 |
| ENSG00000232349.2_YBX1P7     | ENSG00000160789.18_LMNA | 0.15504  | -0.0042632   | 0.306673829 | 5.65E-02 | 2.17E-01 | 1.00E+00 |
| ENSG00000237936.1_RP11-224P  | ENSG00000160789.18_LMNA | -0.00226 | -0.161407255 | 0.156992558 | 9.78E-01 | 9.92E-01 | 1.00E+00 |
| ENSG00000211633.3_IGKV1D-42  | ENSG00000160789.18_LMNA | 0.0447   | -0.115323042 | 0.202458307 | 5.85E-01 | 8.07E-01 | 1.00E+00 |
| ENSG00000251142.1_RP11-513O  | ENSG00000160789.18_LMNA | -0.14558 | -0.297878978 | 0.013941673 | 7.35E-02 | 2.58E-01 | 1.00E+00 |
| ENSG00000234159.1_RBPMSLP    | ENSG00000160789.18_LMNA | 0.09429  | -0.065899039 | 0.249742656 | 2.48E-01 | 5.28E-01 | 1.00E+00 |
| ENSG00000231178.1_RP11-125D  | ENSG00000160789.18_LMNA | 0.04751  | -0.112545223 | 0.205155759 | 5.61E-01 | 7.93E-01 | 1.00E+00 |
| ENSG00000277539.1_RP11-298C  | ENSG00000160789.18_LMNA | 0.02076  | -0.138899721 | 0.179367935 | 8.00E-01 | 9.20E-01 | 1.00E+00 |
| ENSG00000264251.2_RN7SL819F  | ENSG00000160789.18_LMNA | -0.00384 | -0.162941823 | 0.155455003 | 9.63E-01 | 9.85E-01 | 1.00E+00 |
| ENSG00000225147.1_RPS12P10   | ENSG00000160789.18_LMNA | 0.05902  | -0.101128065 | 0.216192141 | 4.70E-01 | 7.30E-01 | 1.00E+00 |
| ENSG00000253543.1_RP11-89K1  | ENSG00000160789.18_LMNA | 0.15431  | -0.005013418 | 0.305993997 | 5.77E-02 | 2.20E-01 | 1.00E+00 |
| ENSG00000259445.1_RP11-276M  | ENSG00000160789.18_LMNA | 0.03888  | -0.121065794 | 0.196866373 | 6.34E-01 | 8.36E-01 | 1.00E+00 |
| ENSG00000265740.2_RN7SL339F  | ENSG00000160789.18_LMNA | -0.01173 | -0.170611877 | 0.147746829 | 8.86E-01 | 9.56E-01 | 1.00E+00 |
| ENSG00000248682.1_ARHGAP22   | ENSG00000160789.18_LMNA | -0.02832 | -0.186675754 | 0.131476812 | 7.29E-01 | 8.85E-01 | 1.00E+00 |
| ENSG00000266736.1_GTF2IP6    | ENSG00000160789.18_LMNA | -0.13777 | -0.290595331 | 0.021913121 | 9.05E-02 | 2.93E-01 | 1.00E+00 |
| ENSG00000248419.2_RP11-136I1 | ENSG00000160789.18_LMNA | -0.01288 | -0.171724387 | 0.146625569 | 8.75E-01 | 9.51E-01 | 1.00E+00 |
| ENSG00000250173.1_RP11-661C  | ENSG00000160789.18_LMNA | -0.06758 | -0.224365581 | 0.09261841  | 4.08E-01 | 6.83E-01 | 1.00E+00 |
| ENSG00000242321.1_RPL23AP4   | ENSG00000160789.18_LMNA | -0.02403 | -0.18253388  | 0.1356883   | 7.69E-01 | 9.04E-01 | 1.00E+00 |
| ENSG00000228799.4_AC113607.  | ENSG00000160789.18_LMNA | 0.11819  | -0.041795668 | 0.27226911  | 1.47E-01 | 3.93E-01 | 1.00E+00 |
| ENSG00000253259.1_RP11-737F  | ENSG00000160789.18_LMNA | -0.07356 | -0.230071032 | 0.086650695 | 3.68E-01 | 6.48E-01 | 1.00E+00 |
| ENSG00000124227.5_ANKRD60    | ENSG00000160789.18_LMNA | 0.07166  | -0.08855567  | 0.228252137 | 3.80E-01 | 6.59E-01 | 1.00E+00 |
| ENSG00000227186.1_RP11-77G2  | ENSG00000160789.18_LMNA | -0.057   | -0.214259322 | 0.103133625 | 4.85E-01 | 7.42E-01 | 1.00E+00 |
| ENSG00000251579.1_RP11-39E3  | ENSG00000160789.18_LMNA | 0.07742  | -0.082800699 | 0.233740312 | 3.43E-01 | 6.28E-01 | 1.00E+00 |
| ENSG00000239215.1_RPL27P12   | ENSG00000160789.18_LMNA | -0.15546 | -0.307061345 | 0.003835407 | 5.58E-02 | 2.16E-01 | 1.00E+00 |
| ENSG00000251061.2_RP11-789C  | ENSG00000160789.18_LMNA | -0.04048 | -0.198406318 | 0.119486436 | 6.20E-01 | 8.28E-01 | 1.00E+00 |
| ENSG00000251516.1_RP11-10G1  | ENSG00000160789.18_LMNA | 0.07213  | -0.088083318 | 0.228703352 | 3.77E-01 | 6.57E-01 | 1.00E+00 |
| ENSG00000260009.1_RP11-65J2  | ENSG00000160789.18_LMNA | -0.12285 | -0.276642511 | 0.037073352 | 1.32E-01 | 3.68E-01 | 1.00E+00 |
| ENSG00000226277.1_AC105393.  | ENSG00000160789.18_LMNA | -0.12024 | -0.274188648 | 0.039724713 | 1.40E-01 | 3.82E-01 | 1.00E+00 |
| ENSG00000264825.1_RP11-627G  | ENSG00000160789.18_LMNA | 0.05175  | -0.108341605 | 0.2092286   | 5.27E-01 | 7.71E-01 | 1.00E+00 |
| ENSG00000172519.8_OR10H5     | ENSG00000160789.18_LMNA | -0.11189 | -0.266342691 | 0.048172589 | 1.70E-01 | 4.29E-01 | 1.00E+00 |
| ENSG00000260458.3_KCNJ18     | ENSG00000160789.18_LMNA | -0.13106 | -0.284325435 | 0.028743412 | 1.08E-01 | 3.26E-01 | 1.00E+00 |
| ENSG00000257105.1_RP11-259O  | ENSG00000160789.18_LMNA | 0.01422  | -0.145313816 | 0.173024873 | 8.62E-01 | 9.46E-01 | 1.00E+00 |
| ENSG00000223859.1_AC007403.  | ENSG00000160789.18_LMNA | -0.11812 | -0.272201011 | 0.041869088 | 1.47E-01 | 3.93E-01 | 1.00E+00 |

|                              |                         |          |              |             |          |          |          |
|------------------------------|-------------------------|----------|--------------|-------------|----------|----------|----------|
| ENSG00000233985.1_RP11-297H  | ENSG00000160789.18_LMNA | 0.08845  | -0.071760474 | 0.24421256  | 2.79E-01 | 5.64E-01 | 1.00E+00 |
| ENSG00000274481.1_RP11-345P  | ENSG00000160789.18_LMNA | 0.03141  | -0.128434506 | 0.189660752 | 7.01E-01 | 8.72E-01 | 1.00E+00 |
| ENSG00000213483.4_NDUFAF4P   | ENSG00000160789.18_LMNA | 0.04129  | -0.118693523 | 0.199178853 | 6.14E-01 | 8.24E-01 | 1.00E+00 |
| ENSG00000223765.2_LINC01626  | ENSG00000160789.18_LMNA | -0.05315 | -0.210572625 | 0.106951927 | 5.15E-01 | 7.63E-01 | 1.00E+00 |
| ENSG00000247402.2_CTD-2340E  | ENSG00000160789.18_LMNA | 0.00395  | -0.155345159 | 0.163051395 | 9.61E-01 | 9.85E-01 | 1.00E+00 |
| ENSG00000230813.1_RP11-690C  | ENSG00000160789.18_LMNA | -0.20659 | -0.354147029 | -0.04900528 | 1.07E-02 | 6.85E-02 | 1.00E+00 |
| ENSG00000250540.1_RP11-58H1  | ENSG00000160789.18_LMNA | -0.00655 | -0.16558241  | 0.152805662 | 9.36E-01 | 9.75E-01 | 1.00E+00 |
| ENSG00000254357.1_RP11-628E  | ENSG00000160789.18_LMNA | -0.15428 | -0.305968531 | 0.005041514 | 5.77E-02 | 2.20E-01 | 1.00E+00 |
| ENSG00000255143.1_RP11-805J  | ENSG00000160789.18_LMNA | -0.0275  | -0.185891617 | 0.132275011 | 7.37E-01 | 8.89E-01 | 1.00E+00 |
| ENSG00000226487.1_RP4-749H3  | ENSG00000160789.18_LMNA | -0.0147  | -0.173495667 | 0.144838668 | 8.57E-01 | 9.44E-01 | 1.00E+00 |
| ENSG00000259989.1_CTD-2555A  | ENSG00000160789.18_LMNA | -0.02821 | -0.186576924 | 0.131577437 | 7.30E-01 | 8.86E-01 | 1.00E+00 |
| ENSG00000273675.1_RP11-406H  | ENSG00000160789.18_LMNA | 0.09608  | -0.064103639 | 0.251432455 | 2.39E-01 | 5.18E-01 | 1.00E+00 |
| ENSG00000249777.1_SAP18P1    | ENSG00000160789.18_LMNA | 0.04032  | -0.119651975 | 0.198244983 | 6.22E-01 | 8.29E-01 | 1.00E+00 |
| ENSG00000228869.1_COX4I1P2   | ENSG00000160789.18_LMNA | 0.05744  | -0.102694981 | 0.21468227  | 4.82E-01 | 7.40E-01 | 1.00E+00 |
| ENSG00000263639.4_MSMB       | ENSG00000160789.18_LMNA | -0.01678 | -0.17551118  | 0.142802851 | 8.37E-01 | 9.37E-01 | 1.00E+00 |
| ENSG00000223643.5_RP11-108M  | ENSG00000160789.18_LMNA | 0.01128  | -0.148185977 | 0.170175935 | 8.90E-01 | 9.57E-01 | 1.00E+00 |
| ENSG00000242850.3_RPL23AP6   | ENSG00000160789.18_LMNA | -0.0223  | -0.180854492 | 0.137392644 | 7.85E-01 | 9.12E-01 | 1.00E+00 |
| ENSG00000232282.1_MTND1P32   | ENSG00000160789.18_LMNA | -0.04136 | -0.19924641  | 0.118624164 | 6.13E-01 | 8.24E-01 | 1.00E+00 |
| ENSG00000249439.1_HMG1P14    | ENSG00000160789.18_LMNA | -0.05182 | -0.209295095 | 0.108272881 | 5.26E-01 | 7.71E-01 | 1.00E+00 |
| ENSG00000212724.3_KRTAP2-3   | ENSG00000160789.18_LMNA | 0.12565  | -0.034231165 | 0.279268451 | 1.23E-01 | 3.53E-01 | 1.00E+00 |
| ENSG00000269749.1_AC005614   | ENSG00000160789.18_LMNA | 0.0667   | -0.09349676  | 0.223523994 | 4.14E-01 | 6.87E-01 | 1.00E+00 |
| ENSG00000253960.1_RP11-388K  | ENSG00000160789.18_LMNA | -0.08312 | -0.23915992  | 0.077096835 | 3.09E-01 | 5.95E-01 | 1.00E+00 |
| ENSG00000260771.1_RP1-39J2.1 | ENSG00000160789.18_LMNA | -0.01592 | -0.174676506 | 0.14364626  | 8.46E-01 | 9.40E-01 | 1.00E+00 |
| ENSG00000273659.1_RP11-58C2  | ENSG00000160789.18_LMNA | 0.05193  | -0.108167708 | 0.209396851 | 5.25E-01 | 7.70E-01 | 1.00E+00 |
| ENSG00000175319.3_NF1P5      | ENSG00000160789.18_LMNA | -0.0968  | -0.252115836 | 0.063376971 | 2.35E-01 | 5.13E-01 | 1.00E+00 |
| ENSG00000237612.1_AP002856   | ENSG00000160789.18_LMNA | -0.04251 | -0.200354886 | 0.117485689 | 6.03E-01 | 8.18E-01 | 1.00E+00 |
| ENSG00000250103.2_PANCR      | ENSG00000160789.18_LMNA | -0.16609 | -0.316908825 | -0.00707393 | 4.09E-02 | 1.76E-01 | 1.00E+00 |
| ENSG00000271070.1_GMCL1P2    | ENSG00000160789.18_LMNA | -0.05424 | -0.211612537 | 0.105875841 | 5.07E-01 | 7.57E-01 | 1.00E+00 |
| ENSG00000258836.2_RP11-349A  | ENSG00000160789.18_LMNA | 0.0829   | -0.077318111 | 0.238950038 | 3.10E-01 | 5.96E-01 | 1.00E+00 |
| ENSG00000259708.1_RP11-762H  | ENSG00000160789.18_LMNA | -0.00968 | -0.16862225  | 0.149750066 | 9.06E-01 | 9.64E-01 | 1.00E+00 |
| ENSG00000231837.2_RPS7P2     | ENSG00000160789.18_LMNA | -0.05937 | -0.216521547 | 0.100786004 | 4.68E-01 | 7.29E-01 | 1.00E+00 |
| ENSG00000250210.4_SEPT14P9   | ENSG00000160789.18_LMNA | 0.03241  | -0.127451116 | 0.190624362 | 6.92E-01 | 8.67E-01 | 1.00E+00 |
| ENSG00000224231.1_AC069394   | ENSG00000160789.18_LMNA | -0.13031 | -0.28362416  | 0.029505552 | 1.10E-01 | 3.30E-01 | 1.00E+00 |

|                              |                         |          |              |             |          |          |          |
|------------------------------|-------------------------|----------|--------------|-------------|----------|----------|----------|
| ENSG00000254865.1_RP11-748C  | ENSG00000160789.18_LMNA | -0.0662  | -0.223045754 | 0.09399567  | 4.18E-01 | 6.90E-01 | 1.00E+00 |
| ENSG00000269431.1_BNIP3P8    | ENSG00000160789.18_LMNA | -0.10567 | -0.260490571 | 0.054444504 | 1.95E-01 | 4.64E-01 | 1.00E+00 |
| ENSG00000223617.1_LINC00370  | ENSG00000160789.18_LMNA | 0.12278  | -0.037144758 | 0.276576479 | 1.32E-01 | 3.68E-01 | 1.00E+00 |
| ENSG00000234168.2_LINC01039  | ENSG00000160789.18_LMNA | -0.14681 | -0.299024557 | 0.012684298 | 7.11E-02 | 2.52E-01 | 1.00E+00 |
| ENSG00000271893.1_RP11-762E  | ENSG00000160789.18_LMNA | -0.25041 | -0.393910775 | -0.09500032 | 1.86E-03 | 1.85E-02 | 1.00E+00 |
| ENSG00000275406.1_RP11-125A  | ENSG00000160789.18_LMNA | 0.03994  | -0.120028538 | 0.197877921 | 6.25E-01 | 8.31E-01 | 1.00E+00 |
| ENSG00000255032.1_RP11-45A1  | ENSG00000160789.18_LMNA | 0.03058  | -0.129247286 | 0.188863858 | 7.08E-01 | 8.76E-01 | 1.00E+00 |
| ENSG00000259428.1_HMGB3P26   | ENSG00000160789.18_LMNA | 0.15263  | -0.006734852 | 0.30443287  | 6.05E-02 | 2.27E-01 | 1.00E+00 |
| ENSG00000230123.1_DLEC1P1    | ENSG00000160789.18_LMNA | 0.05078  | -0.109306106 | 0.208295078 | 5.34E-01 | 7.76E-01 | 1.00E+00 |
| ENSG00000237542.1_MTCO3P17   | ENSG00000160789.18_LMNA | -0.10225 | -0.257263614 | 0.057892346 | 2.10E-01 | 4.83E-01 | 1.00E+00 |
| ENSG00000235433.1_MTATP6P1   | ENSG00000160789.18_LMNA | -0.01354 | -0.172365397 | 0.145979146 | 8.69E-01 | 9.49E-01 | 1.00E+00 |
| ENSG00000242753.1_RP11-716O  | ENSG00000160789.18_LMNA | 0.08426  | -0.075956509 | 0.240241059 | 3.02E-01 | 5.89E-01 | 1.00E+00 |
| ENSG00000260605.1_RP11-883G  | ENSG00000160789.18_LMNA | 0.11302  | -0.047030041 | 0.267406274 | 1.66E-01 | 4.22E-01 | 1.00E+00 |
| ENSG00000258972.1_NDUFB8P1   | ENSG00000160789.18_LMNA | 0.00603  | -0.153315997 | 0.165074116 | 9.41E-01 | 9.77E-01 | 1.00E+00 |
| ENSG00000223392.1_CLDN10-A5  | ENSG00000160789.18_LMNA | 0.01028  | -0.149165957 | 0.169202659 | 9.00E-01 | 9.61E-01 | 1.00E+00 |
| ENSG00000233774.1_MED14P1    | ENSG00000160789.18_LMNA | -0.10446 | -0.259345195 | 0.055669141 | 2.00E-01 | 4.71E-01 | 1.00E+00 |
| ENSG00000257897.1_RP11-812D  | ENSG00000160789.18_LMNA | -0.12179 | -0.275650811 | 0.038145401 | 1.35E-01 | 3.73E-01 | 1.00E+00 |
| ENSG00000227982.1_RPL7P30    | ENSG00000160789.18_LMNA | -0.03498 | -0.193106408 | 0.124915238 | 6.69E-01 | 8.54E-01 | 1.00E+00 |
| ENSG00000237062.1_RP11-308N  | ENSG00000160789.18_LMNA | -0.14693 | -0.299132076 | 0.012566236 | 7.09E-02 | 2.51E-01 | 1.00E+00 |
| ENSG00000250256.1_RP11-267A  | ENSG00000160789.18_LMNA | -0.06418 | -0.221118094 | 0.096005036 | 4.32E-01 | 7.01E-01 | 1.00E+00 |
| ENSG00000250277.2_RP11-468N  | ENSG00000160789.18_LMNA | -0.05957 | -0.216712711 | 0.100587462 | 4.66E-01 | 7.28E-01 | 1.00E+00 |
| ENSG00000230247.2_HNRNPH3F   | ENSG00000160789.18_LMNA | 0.14099  | -0.018632241 | 0.293597518 | 8.32E-02 | 2.79E-01 | 1.00E+00 |
| ENSG00000226875.1_ZNF877P    | ENSG00000160789.18_LMNA | -0.08381 | -0.239815654 | 0.076405302 | 3.05E-01 | 5.91E-01 | 1.00E+00 |
| ENSG00000255117.4_RP5-1027O  | ENSG00000160789.18_LMNA | 0.27383  | 0.119851608  | 0.414939572 | 6.41E-04 | 8.20E-03 | 1.00E+00 |
| ENSG00000236476.2_RP11-8J9.5 | ENSG00000160789.18_LMNA | -0.18174 | -0.331349857 | -0.02320665 | 2.50E-02 | 1.27E-01 | 1.00E+00 |
| ENSG00000279062.1_CH507-216  | ENSG00000160789.18_LMNA | 0.00963  | -0.149802461 | 0.168570176 | 9.06E-01 | 9.64E-01 | 1.00E+00 |
| ENSG00000228316.1_MTATP6P1   | ENSG00000160789.18_LMNA | -0.03615 | -0.194229066 | 0.123766865 | 6.58E-01 | 8.49E-01 | 1.00E+00 |
| ENSG00000267597.1_RPIAP1     | ENSG00000160789.18_LMNA | 0.0134   | -0.146108984 | 0.172236667 | 8.70E-01 | 9.49E-01 | 1.00E+00 |
| ENSG00000258903.1_RP11-355I2 | ENSG00000160789.18_LMNA | -0.14834 | -0.300441838 | 0.011127341 | 6.82E-02 | 2.45E-01 | 1.00E+00 |
| ENSG00000249736.1_RP11-83M1  | ENSG00000160789.18_LMNA | -0.09782 | -0.253078593 | 0.062352663 | 2.31E-01 | 5.08E-01 | 1.00E+00 |
| ENSG00000255388.4_RP11-124G  | ENSG00000160789.18_LMNA | -0.16924 | -0.319819306 | -0.01031244 | 3.71E-02 | 1.65E-01 | 1.00E+00 |
| ENSG00000236473.1_KRT43P     | ENSG00000160789.18_LMNA | -0.04142 | -0.19930944  | 0.118559451 | 6.12E-01 | 8.24E-01 | 1.00E+00 |
| ENSG00000257494.1_RP3-521E1  | ENSG00000160789.18_LMNA | -0.04923 | -0.206810568 | 0.110838649 | 5.47E-01 | 7.84E-01 | 1.00E+00 |

|                              |                         |          |              |             |          |          |          |
|------------------------------|-------------------------|----------|--------------|-------------|----------|----------|----------|
| ENSG00000258845.1_RP11-945F  | ENSG00000160789.18_LMNA | -0.04543 | -0.203159585 | 0.114601348 | 5.78E-01 | 8.03E-01 | 1.00E+00 |
| ENSG00000280236.1_OR12D2     | ENSG00000160789.18_LMNA | -0.20749 | -0.354968948 | -0.04994308 | 1.03E-02 | 6.70E-02 | 1.00E+00 |
| ENSG00000225881.1_AC009365.4 | ENSG00000160789.18_LMNA | 0.02101  | -0.138654601 | 0.179609816 | 7.97E-01 | 9.18E-01 | 1.00E+00 |
| ENSG00000227297.1_RP4-718J7  | ENSG00000160789.18_LMNA | -0.08569 | -0.241591771 | 0.074530688 | 2.94E-01 | 5.80E-01 | 1.00E+00 |
| ENSG00000256199.1_RP11-439H  | ENSG00000160789.18_LMNA | 0.01634  | -0.143233755 | 0.175084796 | 8.42E-01 | 9.38E-01 | 1.00E+00 |
| ENSG00000233919.1_RP11-372H  | ENSG00000160789.18_LMNA | 0.14246  | -0.01712944  | 0.294970611 | 8.00E-02 | 2.72E-01 | 1.00E+00 |
| ENSG00000231001.2_CCNB1IP1F  | ENSG00000160789.18_LMNA | 0.09872  | -0.061444695 | 0.253931478 | 2.26E-01 | 5.02E-01 | 1.00E+00 |
| ENSG00000256560.1_LINC01486  | ENSG00000160789.18_LMNA | 0.18377  | 0.025314366  | 0.333225949 | 2.34E-02 | 1.21E-01 | 1.00E+00 |
| ENSG00000255083.1_OR5AK1P    | ENSG00000160789.18_LMNA | -0.11532 | -0.26956728  | 0.044706057 | 1.57E-01 | 4.09E-01 | 1.00E+00 |
| ENSG00000267450.1_OR1AB1P    | ENSG00000160789.18_LMNA | -0.07769 | -0.233999903 | 0.082527965 | 3.41E-01 | 6.26E-01 | 1.00E+00 |
| ENSG00000261030.1_RP11-791M  | ENSG00000160789.18_LMNA | 0.13523  | -0.02449346  | 0.288229847 | 9.67E-02 | 3.05E-01 | 1.00E+00 |
| ENSG00000181961.3_OR4A16     | ENSG00000160789.18_LMNA | -0.09293 | -0.248453727 | 0.067267145 | 2.55E-01 | 5.37E-01 | 1.00E+00 |
| ENSG00000279906.1_AP002962.7 | ENSG00000160789.18_LMNA | 0.05396  | -0.106148875 | 0.21134875  | 5.09E-01 | 7.59E-01 | 1.00E+00 |
| ENSG00000280445.1_RP1-205F1  | ENSG00000160789.18_LMNA | -0.08912 | -0.244843024 | 0.071093336 | 2.75E-01 | 5.59E-01 | 1.00E+00 |
| ENSG00000225980.3_OR7E19P    | ENSG00000160789.18_LMNA | -0.08855 | -0.244303015 | 0.071664775 | 2.78E-01 | 5.63E-01 | 1.00E+00 |
| ENSG00000227013.3_OR7E96P    | ENSG00000160789.18_LMNA | -0.03534 | -0.193454846 | 0.12455891  | 6.66E-01 | 8.53E-01 | 1.00E+00 |
| ENSG00000248424.1_OR51K1P    | ENSG00000160789.18_LMNA | 0.07223  | -0.087977708 | 0.228804217 | 3.76E-01 | 6.56E-01 | 1.00E+00 |
| ENSG00000258962.2_RP11-747H  | ENSG00000160789.18_LMNA | 0.06397  | -0.096207582 | 0.220923646 | 4.34E-01 | 7.03E-01 | 1.00E+00 |
| ENSG00000166368.2_OR2D2      | ENSG00000160789.18_LMNA | -0.0382  | -0.196208747 | 0.12173976  | 6.40E-01 | 8.39E-01 | 1.00E+00 |
| ENSG00000223929.1_MIR4432HC  | ENSG00000160789.18_LMNA | -0.09807 | -0.253311223 | 0.06210506  | 2.29E-01 | 5.06E-01 | 1.00E+00 |
| ENSG00000237257.1_MTND2P8    | ENSG00000160789.18_LMNA | -0.033   | -0.191197193 | 0.12686623  | 6.86E-01 | 8.64E-01 | 1.00E+00 |
| ENSG00000188712.4_OR13D3P    | ENSG00000160789.18_LMNA | -0.06844 | -0.225189237 | 0.091758297 | 4.02E-01 | 6.78E-01 | 1.00E+00 |
| ENSG00000204915.3_RP6-99M1.1 | ENSG00000160789.18_LMNA | 0.14987  | -0.009556871 | 0.301870027 | 6.53E-02 | 2.38E-01 | 1.00E+00 |
| ENSG00000233884.1_XXyac-YM2  | ENSG00000160789.18_LMNA | -0.07936 | -0.235583861 | 0.080862781 | 3.31E-01 | 6.17E-01 | 1.00E+00 |
| ENSG00000236687.1_RP11-323H  | ENSG00000160789.18_LMNA | 0.06874  | -0.091460703 | 0.225474111 | 4.00E-01 | 6.77E-01 | 1.00E+00 |
| ENSG00000253789.1_NARSP2     | ENSG00000160789.18_LMNA | -0.12028 | -0.27422812  | 0.039682099 | 1.40E-01 | 3.82E-01 | 1.00E+00 |
| ENSG00000249226.1_SUCLG2P4   | ENSG00000160789.18_LMNA | 0.03772  | -0.122217653 | 0.195742268 | 6.45E-01 | 8.42E-01 | 1.00E+00 |
| ENSG00000266242.1_GRAMD4P7   | ENSG00000160789.18_LMNA | -0.1348  | -0.287821837 | 0.024938108 | 9.78E-02 | 3.08E-01 | 1.00E+00 |
| ENSG00000230860.1_CCNB1IP1F  | ENSG00000160789.18_LMNA | 0.08734  | -0.072869721 | 0.2431637   | 2.85E-01 | 5.70E-01 | 1.00E+00 |
| ENSG00000183559.10_C10orf120 | ENSG00000160789.18_LMNA | -0.20285 | -0.350728173 | -0.04511017 | 1.22E-02 | 7.56E-02 | 1.00E+00 |
| ENSG00000260161.1_MTCYBP28   | ENSG00000160789.18_LMNA | 0.07101  | -0.089203626 | 0.227632956 | 3.85E-01 | 6.63E-01 | 1.00E+00 |
| ENSG00000171501.8_OR1N2      | ENSG00000160789.18_LMNA | 0.00298  | -0.156293198 | 0.162105447 | 9.71E-01 | 9.89E-01 | 1.00E+00 |
| ENSG00000234886.1_MTND5P26   | ENSG00000160789.18_LMNA | 0.01559  | -0.143967221 | 0.174358749 | 8.49E-01 | 9.41E-01 | 1.00E+00 |

|                              |                         |          |              |             |          |          |          |
|------------------------------|-------------------------|----------|--------------|-------------|----------|----------|----------|
| ENSG00000237704.1_AP004289.1 | ENSG00000160789.18_LMNA | 0.03264  | -0.1272198   | 0.190850936 | 6.90E-01 | 8.66E-01 | 1.00E+00 |
| ENSG00000259304.1_CTD-2014N  | ENSG00000160789.18_LMNA | -0.03057 | -0.188849103 | 0.129262331 | 7.09E-01 | 8.76E-01 | 1.00E+00 |
| ENSG00000231894.1_WDR95P     | ENSG00000160789.18_LMNA | -0.11815 | -0.272234268 | 0.041833233 | 1.47E-01 | 3.93E-01 | 1.00E+00 |
| ENSG00000181023.6_OR56B1     | ENSG00000160789.18_LMNA | 0.08893  | -0.071281167 | 0.244665545 | 2.76E-01 | 5.61E-01 | 1.00E+00 |
| ENSG00000214860.4_EVPLL      | ENSG00000160789.18_LMNA | -0.05846 | -0.215652446 | 0.101688331 | 4.74E-01 | 7.34E-01 | 1.00E+00 |
| ENSG00000228836.7_CT45A5     | ENSG00000160789.18_LMNA | -0.17758 | -0.327523131 | -0.01891596 | 2.86E-02 | 1.39E-01 | 1.00E+00 |
| ENSG00000274181.1_RBPJP2     | ENSG00000160789.18_LMNA | -0.04918 | -0.206757648 | 0.110893253 | 5.47E-01 | 7.85E-01 | 1.00E+00 |
| ENSG00000254633.1_RP11-23J9  | ENSG00000160789.18_LMNA | -0.11304 | -0.267426125 | 0.047008709 | 1.66E-01 | 4.22E-01 | 1.00E+00 |
| ENSG00000214970.7_CTC-297N7  | ENSG00000160789.18_LMNA | -0.10595 | -0.260754578 | 0.054162093 | 1.94E-01 | 4.63E-01 | 1.00E+00 |
| ENSG00000243986.2_ENO1P3     | ENSG00000160789.18_LMNA | 0.14611  | -0.013399857 | 0.29837273  | 7.25E-02 | 2.55E-01 | 1.00E+00 |
| ENSG00000227728.2_RP11-690C  | ENSG00000160789.18_LMNA | -0.07441 | -0.230877192 | 0.08580564  | 3.62E-01 | 6.44E-01 | 1.00E+00 |
| ENSG00000254813.4_RP11-252C  | ENSG00000160789.18_LMNA | -0.08851 | -0.244267885 | 0.071701942 | 2.78E-01 | 5.63E-01 | 1.00E+00 |
| ENSG00000204382.10_XAGE1B    | ENSG00000160789.18_LMNA | 0.0644   | -0.095783659 | 0.221330591 | 4.31E-01 | 7.00E-01 | 1.00E+00 |
| ENSG00000150526.10_MIA2      | ENSG00000160789.18_LMNA | -0.11867 | -0.272716723 | 0.041312987 | 1.45E-01 | 3.90E-01 | 1.00E+00 |
| ENSG00000237381.2_RP3-455H1  | ENSG00000160789.18_LMNA | -0.14034 | -0.292998366 | 0.019287551 | 8.46E-02 | 2.82E-01 | 1.00E+00 |
| ENSG00000183035.11_CYLC1     | ENSG00000160789.18_LMNA | 0.0208   | -0.13886461  | 0.179402584 | 7.99E-01 | 9.19E-01 | 1.00E+00 |
| ENSG00000124467.17_PSG8      | ENSG00000160789.18_LMNA | -0.19278 | -0.341498538 | -0.03464104 | 1.73E-02 | 9.74E-02 | 1.00E+00 |
| ENSG00000264006.5_AKR1C8P    | ENSG00000160789.18_LMNA | -0.0639  | -0.220855663 | 0.096278391 | 4.34E-01 | 7.03E-01 | 1.00E+00 |
| ENSG00000197092.5_GOLGA6L1   | ENSG00000160789.18_LMNA | -0.00924 | -0.168193115 | 0.150181795 | 9.10E-01 | 9.66E-01 | 1.00E+00 |
| ENSG00000250500.1_RP11-119H  | ENSG00000160789.18_LMNA | 0.09     | -0.070201865 | 0.245685072 | 2.70E-01 | 5.55E-01 | 1.00E+00 |
| ENSG00000229511.1_GAS2L1P1   | ENSG00000160789.18_LMNA | -0.04874 | -0.206338251 | 0.111325932 | 5.51E-01 | 7.87E-01 | 1.00E+00 |
| ENSG00000253871.1_RP11-756K  | ENSG00000160789.18_LMNA | -0.02231 | -0.180869087 | 0.13737784  | 7.85E-01 | 9.12E-01 | 1.00E+00 |
| ENSG00000255111.1_RP11-163O  | ENSG00000160789.18_LMNA | 0.1563   | -0.002977235 | 0.307838406 | 5.45E-02 | 2.13E-01 | 1.00E+00 |
| ENSG00000197079.7_KRT35      | ENSG00000160789.18_LMNA | -0.04126 | -0.199151215 | 0.118721897 | 6.14E-01 | 8.24E-01 | 1.00E+00 |
| ENSG00000224920.1_TACC1P1    | ENSG00000160789.18_LMNA | 0.01652  | -0.143052173 | 0.175264487 | 8.40E-01 | 9.38E-01 | 1.00E+00 |
| ENSG00000281613.1_RP11-506B  | ENSG00000160789.18_LMNA | 0.01395  | -0.145569899 | 0.172771077 | 8.65E-01 | 9.47E-01 | 1.00E+00 |
| ENSG00000250267.2_RP11-122A  | ENSG00000160789.18_LMNA | -0.05615 | -0.213446835 | 0.10397592  | 4.92E-01 | 7.47E-01 | 1.00E+00 |
| ENSG00000241476.6_SXX2       | ENSG00000160789.18_LMNA | -0.0396  | -0.197558861 | 0.120355782 | 6.28E-01 | 8.33E-01 | 1.00E+00 |
| ENSG00000241168.1_RP11-10O2  | ENSG00000160789.18_LMNA | 0.06282  | -0.097351031 | 0.219825443 | 4.42E-01 | 7.09E-01 | 1.00E+00 |
| ENSG00000231588.1_SHQ1P1     | ENSG00000160789.18_LMNA | -0.04049 | -0.198414041 | 0.119478512 | 6.20E-01 | 8.28E-01 | 1.00E+00 |
| ENSG00000251339.4_RP11-506N  | ENSG00000160789.18_LMNA | 0.02731  | -0.132468654 | 0.185701324 | 7.38E-01 | 8.90E-01 | 1.00E+00 |
| ENSG00000154198.13_CYP4Z2P   | ENSG00000160789.18_LMNA | -0.02684 | -0.185252836 | 0.132924942 | 7.43E-01 | 8.92E-01 | 1.00E+00 |
| ENSG00000279725.1_RP11-288A  | ENSG00000160789.18_LMNA | 0.14967  | -0.00975848  | 0.301686762 | 6.57E-02 | 2.39E-01 | 1.00E+00 |



|                              |                         |          |              |             |          |          |          |
|------------------------------|-------------------------|----------|--------------|-------------|----------|----------|----------|
| ENSG00000236049.1_AC104777.1 | ENSG00000160789.18_LMNA | -0.05115 | -0.208656302 | 0.108932965 | 5.31E-01 | 7.74E-01 | 1.00E+00 |
| ENSG00000248215.4_RP11-722M  | ENSG00000160789.18_LMNA | 0.02237  | -0.137320101 | 0.180926011 | 7.84E-01 | 9.12E-01 | 1.00E+00 |
| ENSG00000145321.11_GC        | ENSG00000160789.18_LMNA | -0.12901 | -0.282406434 | 0.030828103 | 1.13E-01 | 3.36E-01 | 1.00E+00 |
| ENSG00000204684.2_RP5-1004I  | ENSG00000160789.18_LMNA | -0.09022 | -0.245890477 | 0.069984327 | 2.69E-01 | 5.53E-01 | 1.00E+00 |
| ENSG00000231216.1_GS1-600G   | ENSG00000160789.18_LMNA | -0.00119 | -0.160357187 | 0.158043779 | 9.88E-01 | 9.96E-01 | 1.00E+00 |
| ENSG00000253267.4_DLGAP2-A   | ENSG00000160789.18_LMNA | -0.00072 | -0.159906489 | 0.158494752 | 9.93E-01 | 9.97E-01 | 1.00E+00 |
| ENSG00000232685.4_LINC00442  | ENSG00000160789.18_LMNA | -0.21063 | -0.357828976 | -0.05321053 | 9.20E-03 | 6.17E-02 | 1.00E+00 |
| ENSG00000170967.4_DDI1       | ENSG00000160789.18_LMNA | 0.00692  | -0.152446434 | 0.1659401   | 9.33E-01 | 9.74E-01 | 1.00E+00 |
| ENSG00000212122.3_TSSK1B     | ENSG00000160789.18_LMNA | -0.05872 | -0.215904859 | 0.101426322 | 4.72E-01 | 7.32E-01 | 1.00E+00 |
| ENSG00000250754.4_RP11-386B  | ENSG00000160789.18_LMNA | -0.01943 | -0.178083391 | 0.14020081  | 8.12E-01 | 9.26E-01 | 1.00E+00 |
| ENSG00000234570.1_ZFRP1      | ENSG00000160789.18_LMNA | -0.13721 | -0.290074577 | 0.022481533 | 9.19E-02 | 2.96E-01 | 1.00E+00 |
| ENSG00000242221.7_PSG2       | ENSG00000160789.18_LMNA | -0.04002 | -0.197962623 | 0.119941652 | 6.24E-01 | 8.31E-01 | 1.00E+00 |
| ENSG00000259753.1_RP11-290H  | ENSG00000160789.18_LMNA | 0.10424  | -0.055892872 | 0.259135849 | 2.01E-01 | 4.72E-01 | 1.00E+00 |
| ENSG00000260746.1_KIF18BP1   | ENSG00000160789.18_LMNA | -0.04504 | -0.202789774 | 0.114981968 | 5.82E-01 | 8.05E-01 | 1.00E+00 |
| ENSG00000204849.6_SPATA31A   | ENSG00000160789.18_LMNA | 0.01197  | -0.147513714 | 0.17084324  | 8.84E-01 | 9.55E-01 | 1.00E+00 |
| ENSG00000141979.4_CTD-3222D  | ENSG00000160789.18_LMNA | 0.06137  | -0.098792759 | 0.218439616 | 4.53E-01 | 7.18E-01 | 1.00E+00 |
| ENSG00000075388.3_FGF4       | ENSG00000160789.18_LMNA | -0.06391 | -0.220859434 | 0.096274463 | 4.34E-01 | 7.03E-01 | 1.00E+00 |
| ENSG00000254728.1_RP11-56P9  | ENSG00000160789.18_LMNA | -0.02034 | -0.178964042 | 0.139308934 | 8.04E-01 | 9.21E-01 | 1.00E+00 |
| ENSG00000188655.9_RNASE9     | ENSG00000160789.18_LMNA | -0.12611 | -0.279696538 | 0.033767344 | 1.22E-01 | 3.51E-01 | 1.00E+00 |
| ENSG00000230923.1_LINC00309  | ENSG00000160789.18_LMNA | 0.06529  | -0.094900757 | 0.222177777 | 4.24E-01 | 6.95E-01 | 1.00E+00 |
| ENSG00000154415.6_PPP1R3A    | ENSG00000160789.18_LMNA | -0.0032  | -0.162318482 | 0.156079743 | 9.69E-01 | 9.88E-01 | 1.00E+00 |
| ENSG00000278008.1_PPP1R26P   | ENSG00000160789.18_LMNA | 0.0624   | -0.097773477 | 0.21941951  | 4.45E-01 | 7.12E-01 | 1.00E+00 |
| ENSG00000248339.1_RP11-717H  | ENSG00000160789.18_LMNA | -0.01074 | -0.169654447 | 0.148711134 | 8.95E-01 | 9.59E-01 | 1.00E+00 |
| ENSG00000261146.1_RP11-2A4.4 | ENSG00000160789.18_LMNA | -0.11811 | -0.272191045 | 0.041879834 | 1.47E-01 | 3.93E-01 | 1.00E+00 |
| ENSG00000222647.1_           | ENSG00000160789.18_LMNA | -0.04513 | -0.202872504 | 0.114896827 | 5.81E-01 | 8.05E-01 | 1.00E+00 |
| ENSG00000276871.1_5_8S_rRNA  | ENSG00000160789.18_LMNA | 0.03317  | -0.126699058 | 0.19136088  | 6.85E-01 | 8.63E-01 | 1.00E+00 |
| ENSG00000251726.1_RNU7-41P   | ENSG00000160789.18_LMNA | 0.00716  | -0.152217578 | 0.166167932 | 9.30E-01 | 9.73E-01 | 1.00E+00 |
| ENSG00000221156.1_           | ENSG00000160789.18_LMNA | -0.04579 | -0.203506622 | 0.114244084 | 5.75E-01 | 8.02E-01 | 1.00E+00 |
| ENSG00000270460.1_RP11-796E  | ENSG00000160789.18_LMNA | -0.07515 | -0.231577763 | 0.0850709   | 3.58E-01 | 6.41E-01 | 1.00E+00 |
| ENSG00000263813.1_MIR3679    | ENSG00000160789.18_LMNA | -0.07433 | -0.230795811 | 0.085890968 | 3.63E-01 | 6.44E-01 | 1.00E+00 |
| ENSG00000265561.1_MIR1268B   | ENSG00000160789.18_LMNA | -0.00457 | -0.163651247 | 0.154743677 | 9.55E-01 | 9.82E-01 | 1.00E+00 |
| ENSG00000281034.1_           | ENSG00000160789.18_LMNA | 0.13425  | -0.025499391 | 0.287306641 | 9.92E-02 | 3.10E-01 | 1.00E+00 |
| ENSG00000206669.1_Y_RNA      | ENSG00000160789.18_LMNA | -0.02484 | -0.183315141 | 0.134894787 | 7.61E-01 | 9.00E-01 | 1.00E+00 |

|                             |                         |          |              |             |          |          |          |
|-----------------------------|-------------------------|----------|--------------|-------------|----------|----------|----------|
| ENSG00000251884.1_RNA5SP28  | ENSG00000160789.18_LMNA | 0.10658  | -0.053528187 | 0.261347002 | 1.91E-01 | 4.59E-01 | 1.00E+00 |
| ENSG00000267978.4_MAGEA9B   | ENSG00000160789.18_LMNA | -0.07666 | -0.233019011 | 0.083558272 | 3.48E-01 | 6.32E-01 | 1.00E+00 |
| ENSG00000251962.1_          | ENSG00000160789.18_LMNA | -0.06517 | -0.222062325 | 0.095021105 | 4.25E-01 | 6.96E-01 | 1.00E+00 |
| ENSG00000252489.1_RNU6-197F | ENSG00000160789.18_LMNA | -0.00913 | -0.168089377 | 0.150286141 | 9.11E-01 | 9.66E-01 | 1.00E+00 |
| ENSG00000278524.1_MIR6810   | ENSG00000160789.18_LMNA | -0.14884 | -0.300909355 | 0.010613418 | 6.72E-02 | 2.43E-01 | 1.00E+00 |
| ENSG00000239160.1_          | ENSG00000160789.18_LMNA | -0.06427 | -0.221205638 | 0.095913837 | 4.32E-01 | 7.01E-01 | 1.00E+00 |
| ENSG00000200687.1_RNA5SP33  | ENSG00000160789.18_LMNA | -0.04429 | -0.202065858 | 0.11572677  | 5.88E-01 | 8.08E-01 | 1.00E+00 |
| ENSG00000280919.1_          | ENSG00000160789.18_LMNA | 0.05069  | -0.109396112 | 0.208207933 | 5.35E-01 | 7.76E-01 | 1.00E+00 |
| ENSG00000265653.1_MIR548AK  | ENSG00000160789.18_LMNA | -0.11329 | -0.267660076 | 0.046757274 | 1.65E-01 | 4.21E-01 | 1.00E+00 |
| ENSG00000200706.1_SNORD45   | ENSG00000160789.18_LMNA | -0.09343 | -0.248927835 | 0.066764051 | 2.52E-01 | 5.33E-01 | 1.00E+00 |
| ENSG00000278423.1_          | ENSG00000160789.18_LMNA | 0.027    | -0.132772385 | 0.185402799 | 7.41E-01 | 8.91E-01 | 1.00E+00 |
| ENSG00000252984.1_RNU6-844F | ENSG00000160789.18_LMNA | -0.0143  | -0.173106709 | 0.145231234 | 8.61E-01 | 9.46E-01 | 1.00E+00 |
| ENSG00000235198.1_CTA-109P1 | ENSG00000160789.18_LMNA | 0.00324  | -0.156043359 | 0.162354792 | 9.68E-01 | 9.88E-01 | 1.00E+00 |
| ENSG00000202056.1_RNA5SP19  | ENSG00000160789.18_LMNA | -0.03398 | -0.19214079  | 0.125902293 | 6.78E-01 | 8.59E-01 | 1.00E+00 |
| ENSG00000201470.1_RNY4P7    | ENSG00000160789.18_LMNA | 0.0805   | -0.079724815 | 0.236665353 | 3.24E-01 | 6.11E-01 | 1.00E+00 |
| ENSG00000265092.1_MIR4484   | ENSG00000160789.18_LMNA | -0.0676  | -0.2243868   | 0.092596258 | 4.08E-01 | 6.83E-01 | 1.00E+00 |
| ENSG00000280851.1_          | ENSG00000160789.18_LMNA | 0.03977  | -0.120191042 | 0.197719489 | 6.27E-01 | 8.32E-01 | 1.00E+00 |
| ENSG00000276770.1_MIR6780B  | ENSG00000160789.18_LMNA | -0.01089 | -0.169799317 | 0.148565263 | 8.94E-01 | 9.59E-01 | 1.00E+00 |
| ENSG00000274368.1_          | ENSG00000160789.18_LMNA | -0.02444 | -0.182928099 | 0.13528795  | 7.65E-01 | 9.02E-01 | 1.00E+00 |
| ENSG00000201216.1_Y_RNA     | ENSG00000160789.18_LMNA | -0.08561 | -0.241520859 | 0.074605576 | 2.94E-01 | 5.80E-01 | 1.00E+00 |
| ENSG00000199480.1_RNA5SP38  | ENSG00000160789.18_LMNA | 0.00237  | -0.156891933 | 0.16150773  | 9.77E-01 | 9.91E-01 | 1.00E+00 |
| ENSG00000266206.1_MIR3926-1 | ENSG00000160789.18_LMNA | 0.12808  | -0.031771139 | 0.281537526 | 1.16E-01 | 3.40E-01 | 1.00E+00 |
| ENSG00000266110.1_MIR4423   | ENSG00000160789.18_LMNA | 0.01052  | -0.148927513 | 0.169439529 | 8.98E-01 | 9.60E-01 | 1.00E+00 |
| ENSG00000207020.1_Y_RNA     | ENSG00000160789.18_LMNA | -0.24782 | -0.391573968 | -0.09226155 | 2.08E-03 | 2.02E-02 | 1.00E+00 |
| ENSG00000277810.1_          | ENSG00000160789.18_LMNA | -0.06124 | -0.21831017  | 0.098927359 | 4.54E-01 | 7.19E-01 | 1.00E+00 |
| ENSG00000264292.1_MIR2467   | ENSG00000160789.18_LMNA | 0.06332  | -0.096860058 | 0.220297087 | 4.38E-01 | 7.06E-01 | 1.00E+00 |
| ENSG00000207756.1_MIR580    | ENSG00000160789.18_LMNA | -0.11351 | -0.267873837 | 0.046527504 | 1.64E-01 | 4.19E-01 | 1.00E+00 |
| ENSG00000273750.1_HOXB13-A  | ENSG00000160789.18_LMNA | 0.01963  | -0.14000474  | 0.178277037 | 8.10E-01 | 9.25E-01 | 1.00E+00 |
| ENSG00000212102.1_MIR301B   | ENSG00000160789.18_LMNA | -0.05019 | -0.207726353 | 0.109893411 | 5.39E-01 | 7.79E-01 | 1.00E+00 |
| ENSG00000201435.1_RNU4-24P  | ENSG00000160789.18_LMNA | 0.07235  | -0.087862875 | 0.228913883 | 3.76E-01 | 6.56E-01 | 1.00E+00 |
| ENSG00000222431.1_RNU6-141F | ENSG00000160789.18_LMNA | 0.13412  | -0.025631964 | 0.287184927 | 9.95E-02 | 3.11E-01 | 1.00E+00 |
| ENSG00000202100.1_Y_RNA     | ENSG00000160789.18_LMNA | -0.09769 | -0.252952174 | 0.062487202 | 2.31E-01 | 5.09E-01 | 1.00E+00 |
| ENSG00000206909.1_SNORA70   | ENSG00000160789.18_LMNA | 0.07716  | -0.083065329 | 0.233488392 | 3.45E-01 | 6.29E-01 | 1.00E+00 |

|                             |                         |          |              |             |          |          |          |
|-----------------------------|-------------------------|----------|--------------|-------------|----------|----------|----------|
| ENSG00000281269.1_AC068724. | ENSG00000160789.18_LMNA | 0.02704  | -0.132732503 | 0.185442001 | 7.41E-01 | 8.91E-01 | 1.00E+00 |
| ENSG00000208017.2_MIR140    | ENSG00000160789.18_LMNA | 0.08802  | -0.072193174 | 0.243803504 | 2.81E-01 | 5.66E-01 | 1.00E+00 |
| ENSG00000207624.1_MIR194-1  | ENSG00000160789.18_LMNA | -0.04647 | -0.204157308 | 0.113574001 | 5.70E-01 | 7.99E-01 | 1.00E+00 |
| ENSG00000207416.1_Y_RNA     | ENSG00000160789.18_LMNA | 0.03564  | -0.124270321 | 0.193736986 | 6.63E-01 | 8.51E-01 | 1.00E+00 |
| ENSG00000207352.1_RNU6-540F | ENSG00000160789.18_LMNA | -0.03723 | -0.19527653  | 0.122694639 | 6.49E-01 | 8.44E-01 | 1.00E+00 |
| ENSG00000251934.1_RNU6-1143 | ENSG00000160789.18_LMNA | 0.03035  | -0.129472399 | 0.18864307  | 7.10E-01 | 8.77E-01 | 1.00E+00 |
| ENSG00000274190.1_          | ENSG00000160789.18_LMNA | 0.12356  | -0.036352675 | 0.2773088   | 1.29E-01 | 3.64E-01 | 1.00E+00 |
| ENSG00000264721.1_          | ENSG00000160789.18_LMNA | 0.12686  | -0.033006244 | 0.280398729 | 1.19E-01 | 3.47E-01 | 1.00E+00 |
| ENSG00000264796.1_MIR5009   | ENSG00000160789.18_LMNA | -0.02889 | -0.187233854 | 0.130908453 | 7.24E-01 | 8.83E-01 | 1.00E+00 |
| ENSG00000265395.1_MIR3944   | ENSG00000160789.18_LMNA | 0.11227  | -0.047783063 | 0.266705382 | 1.68E-01 | 4.27E-01 | 1.00E+00 |
| ENSG00000202141.1_Y_RNA     | ENSG00000160789.18_LMNA | 0.02708  | -0.132694752 | 0.185479107 | 7.41E-01 | 8.91E-01 | 1.00E+00 |
| ENSG00000242915.1_SNRPGP7   | ENSG00000160789.18_LMNA | 0.13585  | -0.023861939 | 0.288809137 | 9.51E-02 | 3.02E-01 | 1.00E+00 |
| ENSG00000238391.1_RNA5SP23  | ENSG00000160789.18_LMNA | -0.06628 | -0.223124139 | 0.093913908 | 4.17E-01 | 6.90E-01 | 1.00E+00 |
| ENSG00000202361.1_Y_RNA     | ENSG00000160789.18_LMNA | 0.08256  | -0.077657038 | 0.238628507 | 3.12E-01 | 5.98E-01 | 1.00E+00 |
| ENSG00000207189.1_Y_RNA     | ENSG00000160789.18_LMNA | -0.11537 | -0.269618432 | 0.044651006 | 1.57E-01 | 4.09E-01 | 1.00E+00 |
| ENSG00000202427.1_RNU6-744F | ENSG00000160789.18_LMNA | -0.06729 | -0.224086877 | 0.092909343 | 4.10E-01 | 6.84E-01 | 1.00E+00 |
| ENSG00000222351.1_RNY1P15   | ENSG00000160789.18_LMNA | -0.06819 | -0.224946721 | 0.092011596 | 4.04E-01 | 6.80E-01 | 1.00E+00 |
| ENSG00000281483.1_          | ENSG00000160789.18_LMNA | 0.07585  | -0.08437087  | 0.232244932 | 3.53E-01 | 6.37E-01 | 1.00E+00 |
| ENSG00000278512.1_          | ENSG00000160789.18_LMNA | -0.08824 | -0.244016468 | 0.071967916 | 2.80E-01 | 5.65E-01 | 1.00E+00 |
| ENSG00000252593.1_RNU6-1224 | ENSG00000160789.18_LMNA | -0.10537 | -0.260201627 | 0.054753533 | 1.96E-01 | 4.66E-01 | 1.00E+00 |
| ENSG00000238532.1_          | ENSG00000160789.18_LMNA | 0.10662  | -0.053491035 | 0.261381717 | 1.91E-01 | 4.59E-01 | 1.00E+00 |
| ENSG00000199781.1_Y_RNA     | ENSG00000160789.18_LMNA | 0.12576  | -0.03412391  | 0.279367453 | 1.23E-01 | 3.53E-01 | 1.00E+00 |
| ENSG00000251812.1_Y_RNA     | ENSG00000160789.18_LMNA | -0.18323 | -0.332721947 | -0.02474787 | 2.39E-02 | 1.22E-01 | 1.00E+00 |
| ENSG00000273561.1_          | ENSG00000160789.18_LMNA | 0.00468  | -0.154632915 | 0.163761683 | 9.54E-01 | 9.82E-01 | 1.00E+00 |
| ENSG00000264183.1_          | ENSG00000160789.18_LMNA | 0.02675  | -0.13301886  | 0.185160506 | 7.44E-01 | 8.92E-01 | 1.00E+00 |
| ENSG00000199601.1_RNU6-562F | ENSG00000160789.18_LMNA | -0.0347  | -0.192838637 | 0.125189017 | 6.71E-01 | 8.56E-01 | 1.00E+00 |
| ENSG00000265225.1_          | ENSG00000160789.18_LMNA | 0.00504  | -0.154288866 | 0.164104669 | 9.51E-01 | 9.80E-01 | 1.00E+00 |
| ENSG00000253088.1_Y_RNA     | ENSG00000160789.18_LMNA | 0.00335  | -0.155936873 | 0.162461055 | 9.67E-01 | 9.87E-01 | 1.00E+00 |
| ENSG00000222844.1_RNU6-321F | ENSG00000160789.18_LMNA | -0.06454 | -0.221465989 | 0.095642586 | 4.30E-01 | 6.99E-01 | 1.00E+00 |
| ENSG00000212370.1_RNU6-482F | ENSG00000160789.18_LMNA | -0.03406 | -0.19221758  | 0.125823821 | 6.77E-01 | 8.59E-01 | 1.00E+00 |
| ENSG00000274329.1_          | ENSG00000160789.18_LMNA | -0.07752 | -0.233831158 | 0.08270526  | 3.43E-01 | 6.27E-01 | 1.00E+00 |
| ENSG00000199733.1_RNA5SP30  | ENSG00000160789.18_LMNA | 0.05578  | -0.104346385 | 0.213089342 | 4.95E-01 | 7.50E-01 | 1.00E+00 |
| ENSG00000199716.1_Y_RNA     | ENSG00000160789.18_LMNA | -0.01278 | -0.171634091 | 0.146716606 | 8.76E-01 | 9.52E-01 | 1.00E+00 |

|                             |                         |          |              |             |          |          |          |
|-----------------------------|-------------------------|----------|--------------|-------------|----------|----------|----------|
| ENSG00000221118.1_          | ENSG00000160789.18_LMNA | 0.06957  | -0.090638868 | 0.226260539 | 3.94E-01 | 6.72E-01 | 1.00E+00 |
| ENSG00000252914.1_RNU6-789F | ENSG00000160789.18_LMNA | -0.02953 | -0.187847045 | 0.130283748 | 7.18E-01 | 8.80E-01 | 1.00E+00 |
| ENSG00000207379.1_Y_RNA     | ENSG00000160789.18_LMNA | -0.04448 | -0.202243926 | 0.115543598 | 5.86E-01 | 8.08E-01 | 1.00E+00 |
| ENSG00000270815.1_RP11-56O1 | ENSG00000160789.18_LMNA | -0.12581 | -0.279416551 | 0.034070718 | 1.22E-01 | 3.52E-01 | 1.00E+00 |
| ENSG00000206972.1_RNU6-17P  | ENSG00000160789.18_LMNA | -0.04988 | -0.207434777 | 0.110194428 | 5.42E-01 | 7.81E-01 | 1.00E+00 |
| ENSG00000252018.1_RNU2-30P  | ENSG00000160789.18_LMNA | 0.00579  | -0.153549497 | 0.164841493 | 9.44E-01 | 9.78E-01 | 1.00E+00 |
| ENSG00000271569.1_IGKV1OR2- | ENSG00000160789.18_LMNA | -0.01637 | -0.175110086 | 0.1432082   | 8.41E-01 | 9.38E-01 | 1.00E+00 |
| ENSG00000253132.1_IGHV3-62  | ENSG00000160789.18_LMNA | -0.02823 | -0.186594122 | 0.131559927 | 7.30E-01 | 8.86E-01 | 1.00E+00 |
| ENSG00000279097.1_RP11-417J | ENSG00000160789.18_LMNA | 0.11871  | -0.041273154 | 0.272753656 | 1.45E-01 | 3.90E-01 | 1.00E+00 |
| ENSG00000212445.1_SNORA48   | ENSG00000160789.18_LMNA | 0.01746  | -0.142133008 | 0.176173759 | 8.31E-01 | 9.34E-01 | 1.00E+00 |
| ENSG00000240250.3_RN7SL541F | ENSG00000160789.18_LMNA | 0.13472  | -0.025019408 | 0.287747225 | 9.80E-02 | 3.08E-01 | 1.00E+00 |
| ENSG00000223720.1_RP5-1024N | ENSG00000160789.18_LMNA | 0.04433  | -0.115688511 | 0.202103053 | 5.88E-01 | 8.08E-01 | 1.00E+00 |
| ENSG00000201609.1_RNU4-28P  | ENSG00000160789.18_LMNA | 0.12487  | -0.035023265 | 0.278537089 | 1.25E-01 | 3.58E-01 | 1.00E+00 |
| ENSG00000266561.2_CTD-2200P | ENSG00000160789.18_LMNA | -0.08994 | -0.245621868 | 0.070268796 | 2.71E-01 | 5.55E-01 | 1.00E+00 |
| ENSG00000241774.3_          | ENSG00000160789.18_LMNA | -0.04891 | -0.206506873 | 0.111151984 | 5.50E-01 | 7.86E-01 | 1.00E+00 |
| ENSG00000242158.3_RN7SL361F | ENSG00000160789.18_LMNA | 0.09492  | -0.065270824 | 0.25033414  | 2.45E-01 | 5.25E-01 | 1.00E+00 |
| ENSG00000188403.7_IGHV1OR1  | ENSG00000160789.18_LMNA | 0.06004  | -0.100115373 | 0.217167159 | 4.62E-01 | 7.25E-01 | 1.00E+00 |
| ENSG00000270999.1_IGKV1OR2- | ENSG00000160789.18_LMNA | 0.06782  | -0.092379281 | 0.224594619 | 4.06E-01 | 6.82E-01 | 1.00E+00 |
| ENSG00000275348.1_RP11-592P | ENSG00000160789.18_LMNA | 0.02473  | -0.134998665 | 0.18321289  | 7.62E-01 | 9.01E-01 | 1.00E+00 |
| ENSG00000229115.1_RP11-417B | ENSG00000160789.18_LMNA | -0.07832 | -0.234591204 | 0.081906549 | 3.38E-01 | 6.23E-01 | 1.00E+00 |
| ENSG00000240189.3_RN7SL621F | ENSG00000160789.18_LMNA | -0.08351 | -0.239523453 | 0.076713493 | 3.06E-01 | 5.93E-01 | 1.00E+00 |
| ENSG00000253709.1_IGHV1-14  | ENSG00000160789.18_LMNA | 0.16232  | 0.003198532  | 0.313418268 | 4.57E-02 | 1.90E-01 | 1.00E+00 |
| ENSG00000239580.3_RN7SL675F | ENSG00000160789.18_LMNA | -0.04091 | -0.198811709 | 0.119070402 | 6.17E-01 | 8.26E-01 | 1.00E+00 |
| ENSG00000241993.1_RPL38P1   | ENSG00000160789.18_LMNA | -0.10769 | -0.262387624 | 0.052414087 | 1.87E-01 | 4.53E-01 | 1.00E+00 |
| ENSG00000230035.2_RP11-174G | ENSG00000160789.18_LMNA | 0.02179  | -0.137887819 | 0.18036622  | 7.90E-01 | 9.15E-01 | 1.00E+00 |
| ENSG00000244544.2_RN7SL446F | ENSG00000160789.18_LMNA | -0.02288 | -0.181418398 | 0.136820569 | 7.80E-01 | 9.10E-01 | 1.00E+00 |
| ENSG00000254755.1_RP11-672A | ENSG00000160789.18_LMNA | -0.05553 | -0.212846752 | 0.104597726 | 4.97E-01 | 7.51E-01 | 1.00E+00 |
| ENSG00000244528.1_SEPT14P2  | ENSG00000160789.18_LMNA | 0.04444  | -0.115578569 | 0.202209931 | 5.87E-01 | 8.08E-01 | 1.00E+00 |
| ENSG00000220326.2_RP11-129H | ENSG00000160789.18_LMNA | 0.00601  | -0.153335851 | 0.165054338 | 9.41E-01 | 9.77E-01 | 1.00E+00 |
| ENSG00000259836.1_AGGF1P6   | ENSG00000160789.18_LMNA | -0.13524 | -0.288236129 | 0.024486613 | 9.67E-02 | 3.05E-01 | 1.00E+00 |
| ENSG00000229900.1_HSPD1P21  | ENSG00000160789.18_LMNA | 0.13902  | -0.020632362 | 0.291768029 | 8.76E-02 | 2.88E-01 | 1.00E+00 |
| ENSG00000211717.3_TRBV10-1  | ENSG00000160789.18_LMNA | -0.0067  | -0.16572482  | 0.152662649 | 9.35E-01 | 9.74E-01 | 1.00E+00 |
| ENSG00000229092.2_IGHV3-47  | ENSG00000160789.18_LMNA | -0.07545 | -0.2318664   | 0.084768084 | 3.56E-01 | 6.39E-01 | 1.00E+00 |

|                              |                         |          |              |             |          |          |          |
|------------------------------|-------------------------|----------|--------------|-------------|----------|----------|----------|
| ENSG00000259874.1_RP11-170L  | ENSG00000160789.18_LMNA | -0.02142 | -0.18000554  | 0.138253495 | 7.93E-01 | 9.16E-01 | 1.00E+00 |
| ENSG00000268620.1_AC078899.  | ENSG00000160789.18_LMNA | -0.12765 | -0.28113921  | 0.03220325  | 1.17E-01 | 3.43E-01 | 1.00E+00 |
| ENSG00000248618.1_ENPP7P3    | ENSG00000160789.18_LMNA | 0.05974  | -0.100411426 | 0.216882185 | 4.65E-01 | 7.27E-01 | 1.00E+00 |
| ENSG00000241156.3_RN7SL582F  | ENSG00000160789.18_LMNA | 0.10202  | -0.058125985 | 0.257044689 | 2.11E-01 | 4.84E-01 | 1.00E+00 |
| ENSG00000241152.3_RN7SL720F  | ENSG00000160789.18_LMNA | 0.00916  | -0.150261388 | 0.168113987 | 9.11E-01 | 9.66E-01 | 1.00E+00 |
| ENSG00000228675.1_AC006482.  | ENSG00000160789.18_LMNA | 0.11419  | -0.045841281 | 0.268512063 | 1.61E-01 | 4.16E-01 | 1.00E+00 |
| ENSG00000242216.3_RN7SL97P   | ENSG00000160789.18_LMNA | 0.05484  | -0.105284598 | 0.212183598 | 5.02E-01 | 7.54E-01 | 1.00E+00 |
| ENSG00000225658.1_TAF13P2    | ENSG00000160789.18_LMNA | -0.00556 | -0.16461365  | 0.153778165 | 9.46E-01 | 9.78E-01 | 1.00E+00 |
| ENSG00000230423.1_XX-C2158C  | ENSG00000160789.18_LMNA | -0.01591 | -0.17467063  | 0.143652196 | 8.46E-01 | 9.40E-01 | 1.00E+00 |
| ENSG00000228176.1_RP4-656G2  | ENSG00000160789.18_LMNA | 0.06773  | -0.092468722 | 0.224508957 | 4.07E-01 | 6.82E-01 | 1.00E+00 |
| ENSG00000227336.1_LINC00434  | ENSG00000160789.18_LMNA | -0.19589 | -0.344354182 | -0.03787301 | 1.56E-02 | 9.02E-02 | 1.00E+00 |
| ENSG00000205989.1_DEFB109    | ENSG00000160789.18_LMNA | -0.10045 | -0.255566078 | 0.059703066 | 2.18E-01 | 4.93E-01 | 1.00E+00 |
| ENSG00000240863.3_RN7SL645F  | ENSG00000160789.18_LMNA | 0.01075  | -0.148709394 | 0.169656176 | 8.95E-01 | 9.59E-01 | 1.00E+00 |
| ENSG00000259199.1_CTD-2544M  | ENSG00000160789.18_LMNA | -0.19139 | -0.340225544 | -0.03320236 | 1.82E-02 | 1.01E-01 | 1.00E+00 |
| ENSG00000259621.1_RP11-654A  | ENSG00000160789.18_LMNA | 0.10469  | -0.055434843 | 0.259564398 | 1.99E-01 | 4.70E-01 | 1.00E+00 |
| ENSG00000259229.2_RP11-38G5  | ENSG00000160789.18_LMNA | -0.07988 | -0.236081005 | 0.08033978  | 3.28E-01 | 6.14E-01 | 1.00E+00 |
| ENSG00000237040.4_DPH3P2     | ENSG00000160789.18_LMNA | 0.02617  | -0.133583062 | 0.184605732 | 7.49E-01 | 8.95E-01 | 1.00E+00 |
| ENSG00000241546.1_RP11-767L  | ENSG00000160789.18_LMNA | -0.08133 | -0.237452436 | 0.078896113 | 3.19E-01 | 6.06E-01 | 1.00E+00 |
| ENSG00000236555.1_AC115115.  | ENSG00000160789.18_LMNA | -0.01916 | -0.1778162   | 0.140471304 | 8.15E-01 | 9.27E-01 | 1.00E+00 |
| ENSG00000228134.1_AC092578.  | ENSG00000160789.18_LMNA | -0.11217 | -0.266605555 | 0.047890286 | 1.69E-01 | 4.27E-01 | 1.00E+00 |
| ENSG00000240888.1_RP13-635I2 | ENSG00000160789.18_LMNA | 0.05827  | -0.101872238 | 0.215475249 | 4.76E-01 | 7.34E-01 | 1.00E+00 |
| ENSG00000277308.1_Metazoa_SI | ENSG00000160789.18_LMNA | 0.17418  | 0.015410907  | 0.324389557 | 3.19E-02 | 1.49E-01 | 1.00E+00 |
| ENSG00000258773.1_RP11-255M  | ENSG00000160789.18_LMNA | -0.19135 | -0.340186415 | -0.03315815 | 1.82E-02 | 1.01E-01 | 1.00E+00 |
| ENSG00000232502.1_AC073464.  | ENSG00000160789.18_LMNA | -0.10651 | -0.261279663 | 0.053600254 | 1.92E-01 | 4.59E-01 | 1.00E+00 |
| ENSG00000225087.1_RP4-660H1  | ENSG00000160789.18_LMNA | -0.104   | -0.258914079 | 0.056129846 | 2.02E-01 | 4.73E-01 | 1.00E+00 |
| ENSG00000264615.2_RN7SL592F  | ENSG00000160789.18_LMNA | -0.03405 | -0.192207405 | 0.125834219 | 6.77E-01 | 8.59E-01 | 1.00E+00 |
| ENSG00000254895.2_MTCO3P15   | ENSG00000160789.18_LMNA | 0.05935  | -0.100805178 | 0.216503085 | 4.68E-01 | 7.29E-01 | 1.00E+00 |
| ENSG00000261590.1_RP11-457D  | ENSG00000160789.18_LMNA | 0.21909  | 0.062052277  | 0.365539673 | 6.69E-03 | 4.87E-02 | 1.00E+00 |
| ENSG00000273946.1_RN7SL733F  | ENSG00000160789.18_LMNA | -0.02725 | -0.185643001 | 0.132527998 | 7.39E-01 | 8.90E-01 | 1.00E+00 |
| ENSG00000255456.1_CTD-2517M  | ENSG00000160789.18_LMNA | 0.13483  | -0.024905357 | 0.287851894 | 9.77E-02 | 3.07E-01 | 1.00E+00 |
| ENSG00000248377.1_HMGN1P9    | ENSG00000160789.18_LMNA | -0.09184 | -0.247426042 | 0.068357108 | 2.60E-01 | 5.44E-01 | 1.00E+00 |
| ENSG00000211957.2_IGHV3-35   | ENSG00000160789.18_LMNA | 0.06154  | -0.098625982 | 0.218599992 | 4.51E-01 | 7.17E-01 | 1.00E+00 |
| ENSG00000267400.1_RP11-325K  | ENSG00000160789.18_LMNA | -0.04393 | -0.201718228 | 0.116084304 | 5.91E-01 | 8.10E-01 | 1.00E+00 |

|                              |                         |          |              |             |          |          |          |
|------------------------------|-------------------------|----------|--------------|-------------|----------|----------|----------|
| ENSG00000239627.3_RPL12P20   | ENSG00000160789.18_LMNA | -0.04184 | -0.199709745 | 0.118148391 | 6.09E-01 | 8.21E-01 | 1.00E+00 |
| ENSG00000232540.1_RPL36P19   | ENSG00000160789.18_LMNA | -0.04015 | -0.198085643 | 0.119815451 | 6.23E-01 | 8.30E-01 | 1.00E+00 |
| ENSG00000274772.1_Metazoa_SI | ENSG00000160789.18_LMNA | 0.12148  | -0.038463114 | 0.275356782 | 1.36E-01 | 3.75E-01 | 1.00E+00 |
| ENSG00000231053.1_RP13-26D1  | ENSG00000160789.18_LMNA | 0.03655  | -0.123371636 | 0.194615252 | 6.55E-01 | 8.47E-01 | 1.00E+00 |
| ENSG00000260636.1_           | ENSG00000160789.18_LMNA | -0.03233 | -0.190551416 | 0.127525582 | 6.93E-01 | 8.68E-01 | 1.00E+00 |
| ENSG00000275647.1_RP11-209D  | ENSG00000160789.18_LMNA | 0.05742  | -0.102722615 | 0.214655628 | 4.82E-01 | 7.40E-01 | 1.00E+00 |
| ENSG00000267189.1_ATP5LP7    | ENSG00000160789.18_LMNA | -0.02835 | -0.186703857 | 0.131448198 | 7.29E-01 | 8.85E-01 | 1.00E+00 |
| ENSG00000228379.1_AC010891.1 | ENSG00000160789.18_LMNA | -0.08294 | -0.238987167 | 0.077278969 | 3.10E-01 | 5.96E-01 | 1.00E+00 |
| ENSG00000259261.2_IGHV4OR1.1 | ENSG00000160789.18_LMNA | 0.02108  | -0.138587118 | 0.179676401 | 7.97E-01 | 9.18E-01 | 1.00E+00 |
| ENSG00000262521.1_AJ003147.8 | ENSG00000160789.18_LMNA | -0.07742 | -0.233740719 | 0.082800272 | 3.43E-01 | 6.28E-01 | 1.00E+00 |
| ENSG00000201896.1_RN7SKP15   | ENSG00000160789.18_LMNA | -0.07796 | -0.234254038 | 0.082260917 | 3.40E-01 | 6.25E-01 | 1.00E+00 |
| ENSG00000258251.1_YPEL5P3    | ENSG00000160789.18_LMNA | -0.09983 | -0.254977739 | 0.060330149 | 2.21E-01 | 4.96E-01 | 1.00E+00 |
| ENSG00000226153.1_RP3-389A2  | ENSG00000160789.18_LMNA | -0.04409 | -0.201872242 | 0.115925912 | 5.90E-01 | 8.10E-01 | 1.00E+00 |
| ENSG00000268074.1_RPL22P5    | ENSG00000160789.18_LMNA | 0.1427   | -0.016886566 | 0.295192402 | 7.95E-02 | 2.71E-01 | 1.00E+00 |
| ENSG00000185037.9_ZNF733P    | ENSG00000160789.18_LMNA | -0.06949 | -0.226193059 | 0.090709403 | 3.95E-01 | 6.72E-01 | 1.00E+00 |
| ENSG00000256733.1_RP11-881M  | ENSG00000160789.18_LMNA | -0.0058  | -0.164846152 | 0.153544821 | 9.43E-01 | 9.77E-01 | 1.00E+00 |
| ENSG00000255845.1_RP11-804A  | ENSG00000160789.18_LMNA | -0.08587 | -0.241763424 | 0.074349397 | 2.93E-01 | 5.79E-01 | 1.00E+00 |
| ENSG00000228072.1_RP11-255A  | ENSG00000160789.18_LMNA | 0.04508  | -0.114942136 | 0.202828478 | 5.81E-01 | 8.05E-01 | 1.00E+00 |
| ENSG00000255492.1_CTD-2381F  | ENSG00000160789.18_LMNA | 0.08     | -0.08022291  | 0.236192074 | 3.27E-01 | 6.14E-01 | 1.00E+00 |
| ENSG00000237527.1_AF241725.6 | ENSG00000160789.18_LMNA | -0.06171 | -0.218759717 | 0.098459865 | 4.50E-01 | 7.16E-01 | 1.00E+00 |
| ENSG00000223409.1_RPL17P17   | ENSG00000160789.18_LMNA | -0.1025  | -0.257495336 | 0.057645013 | 2.09E-01 | 4.82E-01 | 1.00E+00 |
| ENSG00000275909.1_Metazoa_SI | ENSG00000160789.18_LMNA | 0.06401  | -0.096173247 | 0.220956611 | 4.33E-01 | 7.03E-01 | 1.00E+00 |
| ENSG00000225100.2_DPY19L2P.1 | ENSG00000160789.18_LMNA | 0.01063  | -0.148822447 | 0.16954389  | 8.97E-01 | 9.60E-01 | 1.00E+00 |
| ENSG00000229938.1_MYO16-AS.1 | ENSG00000160789.18_LMNA | -0.00261 | -0.161745423 | 0.156653864 | 9.75E-01 | 9.90E-01 | 1.00E+00 |
| ENSG00000233259.4_FABP3P2    | ENSG00000160789.18_LMNA | -0.04833 | -0.205948604 | 0.111727811 | 5.54E-01 | 7.89E-01 | 1.00E+00 |
| ENSG00000254497.1_CTD-2560E  | ENSG00000160789.18_LMNA | -0.08752 | -0.243334204 | 0.072689453 | 2.84E-01 | 5.69E-01 | 1.00E+00 |
| ENSG00000261092.1_RP11-21B2  | ENSG00000160789.18_LMNA | -0.12591 | -0.279506683 | 0.033973063 | 1.22E-01 | 3.52E-01 | 1.00E+00 |
| ENSG00000225522.2_RP11-203F  | ENSG00000160789.18_LMNA | -0.00641 | -0.165443932 | 0.152944713 | 9.38E-01 | 9.75E-01 | 1.00E+00 |
| ENSG00000220730.2_RP11-474L  | ENSG00000160789.18_LMNA | -0.04649 | -0.204176229 | 0.113554511 | 5.70E-01 | 7.99E-01 | 1.00E+00 |
| ENSG00000281629.1_           | ENSG00000160789.18_LMNA | 0.00095  | -0.15827591  | 0.160125215 | 9.91E-01 | 9.96E-01 | 1.00E+00 |
| ENSG00000274162.1_SNX18P1Y   | ENSG00000160789.18_LMNA | -0.04924 | -0.206823939 | 0.110824852 | 5.47E-01 | 7.84E-01 | 1.00E+00 |
| ENSG00000236022.5_RP11-160E  | ENSG00000160789.18_LMNA | 0.02319  | -0.136515155 | 0.181719365 | 7.77E-01 | 9.08E-01 | 1.00E+00 |
| ENSG00000259551.1_RP11-182J  | ENSG00000160789.18_LMNA | -0.08573 | -0.241636669 | 0.074483272 | 2.94E-01 | 5.79E-01 | 1.00E+00 |

|                              |                         |          |              |             |          |          |          |
|------------------------------|-------------------------|----------|--------------|-------------|----------|----------|----------|
| ENSG00000260909.1_RP11-93O1  | ENSG00000160789.18_LMNA | 0.0316   | -0.128249466 | 0.189842117 | 6.99E-01 | 8.71E-01 | 1.00E+00 |
| ENSG00000254166.1_CASC19     | ENSG00000160789.18_LMNA | -0.10883 | -0.263469774 | 0.051254694 | 1.82E-01 | 4.46E-01 | 1.00E+00 |
| ENSG00000225813.1_AC009299.  | ENSG00000160789.18_LMNA | -0.20288 | -0.350749084 | -0.04513397 | 1.22E-02 | 7.56E-02 | 1.00E+00 |
| ENSG00000229131.1_AC016710.  | ENSG00000160789.18_LMNA | -0.0662  | -0.223053678 | 0.093987406 | 4.18E-01 | 6.90E-01 | 1.00E+00 |
| ENSG00000250684.4_ADI1P2     | ENSG00000160789.18_LMNA | 0.06525  | -0.094939508 | 0.222140603 | 4.25E-01 | 6.95E-01 | 1.00E+00 |
| ENSG00000248991.1_RP11-73G1  | ENSG00000160789.18_LMNA | 0.08317  | -0.077053918 | 0.239200623 | 3.08E-01 | 5.95E-01 | 1.00E+00 |
| ENSG00000250417.1_CTD-2194D  | ENSG00000160789.18_LMNA | 0.00193  | -0.157322916 | 0.161077336 | 9.81E-01 | 9.93E-01 | 1.00E+00 |
| ENSG00000262495.1_RP11-46I8. | ENSG00000160789.18_LMNA | 0.0579   | -0.102246554 | 0.215114526 | 4.79E-01 | 7.37E-01 | 1.00E+00 |
| ENSG00000264701.1_RP11-6N17  | ENSG00000160789.18_LMNA | -0.0364  | -0.194473731 | 0.123516483 | 6.56E-01 | 8.48E-01 | 1.00E+00 |
| ENSG00000275860.1_RP11-178C  | ENSG00000160789.18_LMNA | -0.01201 | -0.170884948 | 0.147471686 | 8.83E-01 | 9.55E-01 | 1.00E+00 |
| ENSG00000231740.1_RP11-63G1  | ENSG00000160789.18_LMNA | 0.12355  | -0.036364093 | 0.277298246 | 1.29E-01 | 3.65E-01 | 1.00E+00 |
| ENSG00000233197.1_TMEM256P   | ENSG00000160789.18_LMNA | -0.02279 | -0.181333828 | 0.136906378 | 7.80E-01 | 9.10E-01 | 1.00E+00 |
| ENSG00000243780.1_RP11-112N  | ENSG00000160789.18_LMNA | 0.12533  | -0.03456054  | 0.278964377 | 1.24E-01 | 3.55E-01 | 1.00E+00 |
| ENSG00000228951.1_RP11-336A  | ENSG00000160789.18_LMNA | 0.03978  | -0.120184822 | 0.197725554 | 6.27E-01 | 8.32E-01 | 1.00E+00 |
| ENSG00000262235.2_TMF1P1     | ENSG00000160789.18_LMNA | 0.19508  | 0.037024956  | 0.343605425 | 1.60E-02 | 9.20E-02 | 1.00E+00 |
| ENSG00000224015.1_AC063976.  | ENSG00000160789.18_LMNA | 0.00759  | -0.1517973   | 0.166586242 | 9.26E-01 | 9.72E-01 | 1.00E+00 |
| ENSG00000280041.1_AL133335.1 | ENSG00000160789.18_LMNA | -0.03617 | -0.194250721 | 0.123744705 | 6.58E-01 | 8.49E-01 | 1.00E+00 |
| ENSG00000258843.1_RP11-286O  | ENSG00000160789.18_LMNA | -0.00075 | -0.159927633 | 0.158473599 | 9.93E-01 | 9.97E-01 | 1.00E+00 |
| ENSG00000235415.1_AC005808.  | ENSG00000160789.18_LMNA | -0.06143 | -0.218492659 | 0.098737601 | 4.52E-01 | 7.17E-01 | 1.00E+00 |
| ENSG00000259560.1_RP11-648K  | ENSG00000160789.18_LMNA | -0.01803 | -0.176719356 | 0.141581211 | 8.26E-01 | 9.32E-01 | 1.00E+00 |
| ENSG00000226500.2_RP11-196G  | ENSG00000160789.18_LMNA | -0.13517 | -0.288167195 | 0.024561747 | 9.68E-02 | 3.06E-01 | 1.00E+00 |
| ENSG00000259166.1_RP11-1029. | ENSG00000160789.18_LMNA | -0.10528 | -0.260123441 | 0.054837143 | 1.97E-01 | 4.66E-01 | 1.00E+00 |
| ENSG00000229292.1_RFPL4AL1   | ENSG00000160789.18_LMNA | -0.05558 | -0.212894288 | 0.104548479 | 4.96E-01 | 7.51E-01 | 1.00E+00 |
| ENSG00000241011.1_RP11-713C  | ENSG00000160789.18_LMNA | 0.05014  | -0.10993659  | 0.207684532 | 5.40E-01 | 7.79E-01 | 1.00E+00 |
| ENSG00000235491.1_AC097499.  | ENSG00000160789.18_LMNA | -0.02712 | -0.185515767 | 0.132657454 | 7.40E-01 | 8.91E-01 | 1.00E+00 |
| ENSG00000249008.1_RP11-487E  | ENSG00000160789.18_LMNA | 0.06741  | -0.092789733 | 0.224201466 | 4.09E-01 | 6.83E-01 | 1.00E+00 |
| ENSG00000280141.1_AC016142.  | ENSG00000160789.18_LMNA | 0.12626  | -0.033619748 | 0.279832736 | 1.21E-01 | 3.50E-01 | 1.00E+00 |
| ENSG00000223683.1_RPSAP65    | ENSG00000160789.18_LMNA | 0.01447  | -0.145061416 | 0.173274979 | 8.60E-01 | 9.45E-01 | 1.00E+00 |
| ENSG00000254727.1_PTP4A1P6   | ENSG00000160789.18_LMNA | -0.01441 | -0.173213105 | 0.145123861 | 8.60E-01 | 9.45E-01 | 1.00E+00 |
| ENSG00000224322.1_AC004009.  | ENSG00000160789.18_LMNA | 0.00311  | -0.156165462 | 0.162232935 | 9.70E-01 | 9.88E-01 | 1.00E+00 |
| ENSG00000229557.1_LINC00379  | ENSG00000160789.18_LMNA | -0.18147 | -0.331109423 | -0.02293674 | 2.53E-02 | 1.27E-01 | 1.00E+00 |
| ENSG00000226597.1_IFNWP9     | ENSG00000160789.18_LMNA | 0.00314  | -0.156140442 | 0.162257905 | 9.69E-01 | 9.88E-01 | 1.00E+00 |
| ENSG00000239718.1_HLTF-AS1   | ENSG00000160789.18_LMNA | 0.01948  | -0.140152795 | 0.178130814 | 8.12E-01 | 9.26E-01 | 1.00E+00 |

|                              |                         |          |              |             |          |          |          |
|------------------------------|-------------------------|----------|--------------|-------------|----------|----------|----------|
| ENSG00000196578.4_OR5AC2     | ENSG00000160789.18_LMNA | 0.02652  | -0.133245822 | 0.184937362 | 7.46E-01 | 8.94E-01 | 1.00E+00 |
| ENSG00000204640.1_NMS        | ENSG00000160789.18_LMNA | -0.12548 | -0.27910162  | 0.034411886 | 1.23E-01 | 3.54E-01 | 1.00E+00 |
| ENSG00000224042.2_MTND4P6    | ENSG00000160789.18_LMNA | -0.03456 | -0.192704187 | 0.125326464 | 6.72E-01 | 8.56E-01 | 1.00E+00 |
| ENSG00000278451.1_RP11-923I1 | ENSG00000160789.18_LMNA | 0.06145  | -0.09871656  | 0.218512893 | 4.52E-01 | 7.17E-01 | 1.00E+00 |
| ENSG00000250567.1_CTD-2154H  | ENSG00000160789.18_LMNA | -0.14462 | -0.296985251 | 0.014921934 | 7.55E-02 | 2.62E-01 | 1.00E+00 |
| ENSG00000232922.1_MTND6P24   | ENSG00000160789.18_LMNA | -0.0478  | -0.205439832 | 0.112252397 | 5.59E-01 | 7.92E-01 | 1.00E+00 |
| ENSG00000251041.1_CTD-2275D  | ENSG00000160789.18_LMNA | -0.29591 | -0.434639864 | -0.1434733  | 2.14E-04 | 3.44E-03 | 1.00E+00 |
| ENSG00000249551.1_RP11-2N5.1 | ENSG00000160789.18_LMNA | -0.01642 | -0.175158071 | 0.143159711 | 8.41E-01 | 9.38E-01 | 1.00E+00 |
| ENSG00000237300.2_MTCO1P19   | ENSG00000160789.18_LMNA | -0.05314 | -0.210558932 | 0.106966092 | 5.16E-01 | 7.63E-01 | 1.00E+00 |
| ENSG00000241505.1_RP11-161I1 | ENSG00000160789.18_LMNA | 0.01257  | -0.146927178 | 0.171425212 | 8.78E-01 | 9.53E-01 | 1.00E+00 |
| ENSG00000227863.2_AC002383.1 | ENSG00000160789.18_LMNA | -0.05849 | -0.215681119 | 0.10165857  | 4.74E-01 | 7.34E-01 | 1.00E+00 |
| ENSG00000234069.1_GAPDHP53   | ENSG00000160789.18_LMNA | -0.30052 | -0.438729285 | -0.14841867 | 1.69E-04 | 2.86E-03 | 1.00E+00 |
| ENSG00000257128.1_RP11-2A1.1 | ENSG00000160789.18_LMNA | -0.1055  | -0.260325253 | 0.054621321 | 1.96E-01 | 4.65E-01 | 1.00E+00 |
| ENSG00000253891.1_RP11-203E  | ENSG00000160789.18_LMNA | 0.26538  | 0.110860362  | 0.407367534 | 9.52E-04 | 1.12E-02 | 1.00E+00 |
| ENSG00000228560.1_RP11-550P  | ENSG00000160789.18_LMNA | 0.22769  | 0.071065579  | 0.373357341 | 4.79E-03 | 3.79E-02 | 1.00E+00 |
| ENSG00000238031.1_AC090505.1 | ENSG00000160789.18_LMNA | 0.10104  | -0.059116019 | 0.256116643 | 2.16E-01 | 4.90E-01 | 1.00E+00 |
| ENSG00000268480.1_CTD-2586B  | ENSG00000160789.18_LMNA | -0.00674 | -0.165763718 | 0.152623585 | 9.34E-01 | 9.74E-01 | 1.00E+00 |
| ENSG00000227243.3_SLAMF6P1   | ENSG00000160789.18_LMNA | -0.08754 | -0.243348754 | 0.072674069 | 2.84E-01 | 5.69E-01 | 1.00E+00 |
| ENSG00000264622.1_RP11-642M  | ENSG00000160789.18_LMNA | 0.11386  | -0.046181648 | 0.268195537 | 1.63E-01 | 4.18E-01 | 1.00E+00 |
| ENSG00000250945.1_RP11-810P  | ENSG00000160789.18_LMNA | 0.08683  | -0.073383658 | 0.242677491 | 2.87E-01 | 5.73E-01 | 1.00E+00 |
| ENSG00000227610.1_FRMPD3-A   | ENSG00000160789.18_LMNA | -0.15868 | -0.310050405 | 0.000531837 | 5.09E-02 | 2.03E-01 | 1.00E+00 |
| ENSG00000253946.1_CTC-425K2  | ENSG00000160789.18_LMNA | 0.12259  | -0.037343251 | 0.276392904 | 1.32E-01 | 3.69E-01 | 1.00E+00 |
| ENSG00000213604.4_RP11-444K  | ENSG00000160789.18_LMNA | 0.00401  | -0.155290588 | 0.163105828 | 9.61E-01 | 9.84E-01 | 1.00E+00 |
| ENSG00000226486.1_LINC01035  | ENSG00000160789.18_LMNA | -0.09727 | -0.252559648 | 0.062904868 | 2.33E-01 | 5.11E-01 | 1.00E+00 |
| ENSG00000260131.1_LINC00556  | ENSG00000160789.18_LMNA | 0.15762  | -0.001616527 | 0.309069657 | 5.24E-02 | 2.08E-01 | 1.00E+00 |
| ENSG00000256661.1_A2ML1-AS1  | ENSG00000160789.18_LMNA | 0.09403  | -0.066162668 | 0.249494372 | 2.49E-01 | 5.30E-01 | 1.00E+00 |
| ENSG00000279063.1_CTD-2537I1 | ENSG00000160789.18_LMNA | 0.19653  | 0.038539441  | 0.344942315 | 1.52E-02 | 8.88E-02 | 1.00E+00 |
| ENSG00000267773.1_RP11-677O  | ENSG00000160789.18_LMNA | 0.05713  | -0.103006975 | 0.214381452 | 4.84E-01 | 7.41E-01 | 1.00E+00 |
| ENSG00000238020.1_HTR3E-AS.1 | ENSG00000160789.18_LMNA | 0.04328  | -0.116723308 | 0.201096723 | 5.96E-01 | 8.14E-01 | 1.00E+00 |
| ENSG00000235149.1_RP11-45I2C | ENSG00000160789.18_LMNA | 0.25244  | 0.097144811  | 0.395737831 | 1.70E-03 | 1.73E-02 | 1.00E+00 |
| ENSG00000267001.1_AC006538.1 | ENSG00000160789.18_LMNA | -0.03955 | -0.197502694 | 0.120413383 | 6.29E-01 | 8.33E-01 | 1.00E+00 |
| ENSG00000260812.1_RARRES2F   | ENSG00000160789.18_LMNA | -0.02688 | -0.185283354 | 0.132893897 | 7.42E-01 | 8.92E-01 | 1.00E+00 |
| ENSG00000234359.3_ELK1P1     | ENSG00000160789.18_LMNA | -0.0489  | -0.206495654 | 0.111163558 | 5.50E-01 | 7.86E-01 | 1.00E+00 |



|                              |                         |          |              |             |          |          |          |
|------------------------------|-------------------------|----------|--------------|-------------|----------|----------|----------|
| ENSG00000258426.1_RP11-452D  | ENSG00000160789.18_LMNA | -0.11663 | -0.27080428  | 0.043374232 | 1.52E-01 | 4.02E-01 | 1.00E+00 |
| ENSG00000239664.2_           | ENSG00000160789.18_LMNA | 0.06826  | -0.091938984 | 0.225016246 | 4.03E-01 | 6.79E-01 | 1.00E+00 |
| ENSG00000256837.1_CACNA1C-   | ENSG00000160789.18_LMNA | -0.00699 | -0.166003957 | 0.152382293 | 9.32E-01 | 9.73E-01 | 1.00E+00 |
| ENSG00000280394.1_CTC-503J8  | ENSG00000160789.18_LMNA | 0.20409  | 0.046400669  | 0.351861783 | 1.17E-02 | 7.32E-02 | 1.00E+00 |
| ENSG00000253798.1_AC008694.: | ENSG00000160789.18_LMNA | 0.10052  | -0.059637171 | 0.255627888 | 2.18E-01 | 4.93E-01 | 1.00E+00 |
| ENSG00000229143.1_AC009480.: | ENSG00000160789.18_LMNA | -0.06571 | -0.222585567 | 0.094475598 | 4.21E-01 | 6.93E-01 | 1.00E+00 |
| ENSG00000248343.1_RP11-556G  | ENSG00000160789.18_LMNA | -0.14406 | -0.296460103 | 0.015497649 | 7.66E-02 | 2.65E-01 | 1.00E+00 |
| ENSG00000230657.5_PRB4       | ENSG00000160789.18_LMNA | -0.12342 | -0.277176129 | 0.036496201 | 1.30E-01 | 3.65E-01 | 1.00E+00 |
| ENSG00000230398.1_HINT2P1    | ENSG00000160789.18_LMNA | -0.00052 | -0.15970766  | 0.15869366  | 9.95E-01 | 9.98E-01 | 1.00E+00 |
| ENSG00000264940.3_SNORD3C    | ENSG00000160789.18_LMNA | 0.065    | -0.095187177 | 0.221902996 | 4.26E-01 | 6.97E-01 | 1.00E+00 |
| ENSG00000244089.1_HMGB1P3C   | ENSG00000160789.18_LMNA | -0.02857 | -0.186916335 | 0.131231834 | 7.27E-01 | 8.84E-01 | 1.00E+00 |
| ENSG00000243516.1_RPL12P40   | ENSG00000160789.18_LMNA | 0.0791   | -0.0811188   | 0.235340441 | 3.33E-01 | 6.18E-01 | 1.00E+00 |
| ENSG00000254384.1_MTND6P19   | ENSG00000160789.18_LMNA | -0.02752 | -0.185902763 | 0.132263668 | 7.36E-01 | 8.89E-01 | 1.00E+00 |
| ENSG00000235422.1_KATNBL1P   | ENSG00000160789.18_LMNA | -0.07371 | -0.230211681 | 0.086503292 | 3.67E-01 | 6.48E-01 | 1.00E+00 |
| ENSG00000231403.1_AC099344.: | ENSG00000160789.18_LMNA | 0.0802   | -0.08001857  | 0.236386252 | 3.26E-01 | 6.13E-01 | 1.00E+00 |
| ENSG00000224297.2_RP11-197P  | ENSG00000160789.18_LMNA | 0.03609  | -0.12382276  | 0.194174442 | 6.59E-01 | 8.49E-01 | 1.00E+00 |
| ENSG00000258051.1_RP11-474C  | ENSG00000160789.18_LMNA | 0.01274  | -0.146761268 | 0.17158979  | 8.76E-01 | 9.52E-01 | 1.00E+00 |
| ENSG00000267338.1_KB-7G2.9   | ENSG00000160789.18_LMNA | -0.27767 | -0.418372456 | -0.12394392 | 5.33E-04 | 7.10E-03 | 1.00E+00 |
| ENSG00000187689.8_AMTN       | ENSG00000160789.18_LMNA | -0.07646 | -0.232822252 | 0.083764862 | 3.49E-01 | 6.33E-01 | 1.00E+00 |
| ENSG00000272249.1_KB-1958F4  | ENSG00000160789.18_LMNA | -0.13834 | -0.291129919 | 0.0213294   | 8.92E-02 | 2.91E-01 | 1.00E+00 |
| ENSG00000277745.1_H2AFB3     | ENSG00000160789.18_LMNA | -0.1133  | -0.267675117 | 0.046741108 | 1.65E-01 | 4.21E-01 | 1.00E+00 |
| ENSG00000244101.1_HMGN1P1C   | ENSG00000160789.18_LMNA | 0.0187   | -0.140919907 | 0.177372972 | 8.19E-01 | 9.30E-01 | 1.00E+00 |
| ENSG00000271632.1_RP11-496I2 | ENSG00000160789.18_LMNA | 0.10795  | -0.052145467 | 0.262638418 | 1.86E-01 | 4.51E-01 | 1.00E+00 |
| ENSG00000233888.2_MTCO2P17   | ENSG00000160789.18_LMNA | -0.05983 | -0.216959741 | 0.10033086  | 4.64E-01 | 7.26E-01 | 1.00E+00 |
| ENSG00000219622.1_RP11-291C  | ENSG00000160789.18_LMNA | 0.04912  | -0.110951192 | 0.206701494 | 5.48E-01 | 7.85E-01 | 1.00E+00 |
| ENSG00000224610.1_RP11-265P  | ENSG00000160789.18_LMNA | -0.03676 | -0.194822361 | 0.123159636 | 6.53E-01 | 8.46E-01 | 1.00E+00 |
| ENSG00000251304.3_RP11-321E  | ENSG00000160789.18_LMNA | -0.15446 | -0.306129034 | 0.004864428 | 5.74E-02 | 2.19E-01 | 1.00E+00 |
| ENSG00000231653.1_AC010731.: | ENSG00000160789.18_LMNA | 0.00209  | -0.157159006 | 0.161241037 | 9.80E-01 | 9.92E-01 | 1.00E+00 |
| ENSG00000279543.1_RP11-1147I | ENSG00000160789.18_LMNA | -0.01409 | -0.172901834 | 0.145437969 | 8.63E-01 | 9.47E-01 | 1.00E+00 |
| ENSG00000255167.1_RP11-670N  | ENSG00000160789.18_LMNA | 0.10176  | -0.058391071 | 0.256796257 | 2.12E-01 | 4.86E-01 | 1.00E+00 |
| ENSG00000215203.2_GRXCR1     | ENSG00000160789.18_LMNA | -0.08514 | -0.241075947 | 0.075075348 | 2.97E-01 | 5.83E-01 | 1.00E+00 |
| ENSG00000249798.1_HSD3BP3    | ENSG00000160789.18_LMNA | -0.044   | -0.201785528 | 0.116015092 | 5.90E-01 | 8.10E-01 | 1.00E+00 |
| ENSG00000269590.1_CTD-2192J  | ENSG00000160789.18_LMNA | -0.0665  | -0.223332276 | 0.093696783 | 4.16E-01 | 6.88E-01 | 1.00E+00 |

|                              |                         |          |              |             |          |          |          |
|------------------------------|-------------------------|----------|--------------|-------------|----------|----------|----------|
| ENSG00000270212.1_CTD-2540B  | ENSG00000160789.18_LMNA | 0.08503  | -0.075184078 | 0.240972952 | 2.98E-01 | 5.84E-01 | 1.00E+00 |
| ENSG00000232009.1_RP11-571E  | ENSG00000160789.18_LMNA | -0.0251  | -0.183571871 | 0.134633942 | 7.59E-01 | 8.99E-01 | 1.00E+00 |
| ENSG00000254487.2_RP11-707M  | ENSG00000160789.18_LMNA | -0.08837 | -0.244138706 | 0.071838606 | 2.79E-01 | 5.64E-01 | 1.00E+00 |
| ENSG00000166634.5_SERPINB1   | ENSG00000160789.18_LMNA | 0.02631  | -0.133446924 | 0.184739614 | 7.48E-01 | 8.95E-01 | 1.00E+00 |
| ENSG00000253673.1_CTC-436K1  | ENSG00000160789.18_LMNA | -0.21796 | -0.364511151 | -0.06087013 | 6.99E-03 | 5.04E-02 | 1.00E+00 |
| ENSG00000272554.1_RP11-317L  | ENSG00000160789.18_LMNA | 0.0187   | -0.14092375  | 0.177369175 | 8.19E-01 | 9.30E-01 | 1.00E+00 |
| ENSG00000204814.5_RP11-160N  | ENSG00000160789.18_LMNA | -0.00776 | -0.166754919 | 0.151627796 | 9.24E-01 | 9.71E-01 | 1.00E+00 |
| ENSG00000234227.1_RPL7L1P1   | ENSG00000160789.18_LMNA | 0.04704  | -0.113005094 | 0.204709526 | 5.65E-01 | 7.96E-01 | 1.00E+00 |
| ENSG00000265073.1_AC010761.1 | ENSG00000160789.18_LMNA | -0.05597 | -0.213273802 | 0.104155242 | 4.93E-01 | 7.49E-01 | 1.00E+00 |
| ENSG00000204880.7_KRTAP4-8   | ENSG00000160789.18_LMNA | 0.02998  | -0.129838554 | 0.188283883 | 7.14E-01 | 8.78E-01 | 1.00E+00 |
| ENSG00000262135.1_GARSP1     | ENSG00000160789.18_LMNA | -0.00812 | -0.167108405 | 0.151272518 | 9.21E-01 | 9.70E-01 | 1.00E+00 |
| ENSG00000258912.1_RP11-1079  | ENSG00000160789.18_LMNA | -0.00352 | -0.162631354 | 0.155766201 | 9.66E-01 | 9.87E-01 | 1.00E+00 |
| ENSG00000279629.1_RP11-426J  | ENSG00000160789.18_LMNA | -0.11284 | -0.267238347 | 0.04721049  | 1.66E-01 | 4.23E-01 | 1.00E+00 |
| ENSG00000232497.1_ADIPOR1P   | ENSG00000160789.18_LMNA | -0.06916 | -0.225873652 | 0.091043228 | 3.97E-01 | 6.74E-01 | 1.00E+00 |
| ENSG00000226444.2_ACTR3BP6   | ENSG00000160789.18_LMNA | 0.00702  | -0.152349806 | 0.1660363   | 9.32E-01 | 9.73E-01 | 1.00E+00 |
| ENSG00000228888.1_LINC01428  | ENSG00000160789.18_LMNA | -0.08517 | -0.241106263 | 0.075043342 | 2.97E-01 | 5.83E-01 | 1.00E+00 |
| ENSG00000244571.1_RP11-535I2 | ENSG00000160789.18_LMNA | -0.07392 | -0.230406597 | 0.086298995 | 3.65E-01 | 6.47E-01 | 1.00E+00 |
| ENSG00000150269.1_OR5M9      | ENSG00000160789.18_LMNA | 0.13565  | -0.024073182 | 0.288615391 | 9.57E-02 | 3.03E-01 | 1.00E+00 |
| ENSG00000250723.4_RP11-79E3  | ENSG00000160789.18_LMNA | -0.14862 | -0.30070563  | 0.010837385 | 6.76E-02 | 2.44E-01 | 1.00E+00 |
| ENSG00000224403.1_DPPA2P3    | ENSG00000160789.18_LMNA | 0.11405  | -0.045986762 | 0.268376781 | 1.62E-01 | 4.17E-01 | 1.00E+00 |
| ENSG00000263618.4_RP11-527H  | ENSG00000160789.18_LMNA | -0.05989 | -0.217021653 | 0.100266543 | 4.64E-01 | 7.26E-01 | 1.00E+00 |
| ENSG00000215506.5_TPTE2P4    | ENSG00000160789.18_LMNA | -0.04851 | -0.206114084 | 0.111557148 | 5.53E-01 | 7.88E-01 | 1.00E+00 |
| ENSG00000177275.3_OR2AJ1     | ENSG00000160789.18_LMNA | -0.16353 | -0.31454088  | -0.0044439  | 4.41E-02 | 1.85E-01 | 1.00E+00 |
| ENSG00000249275.1_RP11-364P  | ENSG00000160789.18_LMNA | -0.0092  | -0.16815045  | 0.15022471  | 9.10E-01 | 9.66E-01 | 1.00E+00 |
| ENSG00000276592.1_PHBP6      | ENSG00000160789.18_LMNA | -0.04457 | -0.202332212 | 0.115452773 | 5.86E-01 | 8.08E-01 | 1.00E+00 |
| ENSG00000231603.1_RP11-344N  | ENSG00000160789.18_LMNA | 0.03988  | -0.120085728 | 0.197822166 | 6.26E-01 | 8.31E-01 | 1.00E+00 |
| ENSG00000212807.1_OR2A42     | ENSG00000160789.18_LMNA | -0.02269 | -0.181240189 | 0.137001383 | 7.81E-01 | 9.10E-01 | 1.00E+00 |
| ENSG00000260258.2_RP11-467J  | ENSG00000160789.18_LMNA | 0.03759  | -0.122338816 | 0.195623976 | 6.46E-01 | 8.43E-01 | 1.00E+00 |
| ENSG00000171405.11_XAGE5     | ENSG00000160789.18_LMNA | -0.10514 | -0.259989223 | 0.054980663 | 1.97E-01 | 4.67E-01 | 1.00E+00 |
| ENSG00000220758.4_VN1R10P    | ENSG00000160789.18_LMNA | -0.07914 | -0.235372799 | 0.081084769 | 3.32E-01 | 6.18E-01 | 1.00E+00 |
| ENSG00000226725.2_PABPC1L2   | ENSG00000160789.18_LMNA | -0.13561 | -0.288582267 | 0.024109295 | 9.57E-02 | 3.03E-01 | 1.00E+00 |
| ENSG00000260680.1_AGGF1P5    | ENSG00000160789.18_LMNA | 0.06186  | -0.098305364 | 0.218908257 | 4.49E-01 | 7.15E-01 | 1.00E+00 |
| ENSG00000249910.3_TRIM51CP   | ENSG00000160789.18_LMNA | -0.17531 | -0.325432031 | -0.01657612 | 3.07E-02 | 1.46E-01 | 1.00E+00 |

|                              |                         |          |              |             |          |          |          |
|------------------------------|-------------------------|----------|--------------|-------------|----------|----------|----------|
| ENSG00000228751.1_AC004022.1 | ENSG00000160789.18_LMNA | -0.01113 | -0.170029336 | 0.148333626 | 8.92E-01 | 9.58E-01 | 1.00E+00 |
| ENSG00000233204.1_MAPRE1P3   | ENSG00000160789.18_LMNA | -0.16484 | -0.31575697  | -0.00579405 | 4.24E-02 | 1.80E-01 | 1.00E+00 |
| ENSG00000101435.4_CST9L      | ENSG00000160789.18_LMNA | 0.09712  | -0.06305361  | 0.252419833 | 2.34E-01 | 5.12E-01 | 1.00E+00 |
| ENSG00000223342.2_RP3-429O6  | ENSG00000160789.18_LMNA | -0.19305 | -0.341750415 | -0.03492585 | 1.72E-02 | 9.68E-02 | 1.00E+00 |
| ENSG00000235968.1_AC079112.1 | ENSG00000160789.18_LMNA | -0.06084 | -0.217925981 | 0.099326776 | 4.57E-01 | 7.21E-01 | 1.00E+00 |
| ENSG00000224792.5_IQCF4      | ENSG00000160789.18_LMNA | -0.00296 | -0.162087361 | 0.156311319 | 9.71E-01 | 9.89E-01 | 1.00E+00 |
| ENSG00000269505.2_ZNF92P2    | ENSG00000160789.18_LMNA | -0.12667 | -0.28021931  | 0.03320075  | 1.20E-01 | 3.48E-01 | 1.00E+00 |
| ENSG00000259285.1_CTD-2330J  | ENSG00000160789.18_LMNA | 0.02126  | -0.138405502 | 0.179855585 | 7.95E-01 | 9.17E-01 | 1.00E+00 |
| ENSG00000233576.1_RP11-778D  | ENSG00000160789.18_LMNA | 0.03743  | -0.122503813 | 0.195462873 | 6.47E-01 | 8.43E-01 | 1.00E+00 |
| ENSG00000226625.1_RBM17P1    | ENSG00000160789.18_LMNA | -0.04276 | -0.200593272 | 0.117240742 | 6.01E-01 | 8.17E-01 | 1.00E+00 |
| ENSG00000243188.1_HNRNPA1F   | ENSG00000160789.18_LMNA | 0.0123   | -0.147189448 | 0.17116501  | 8.80E-01 | 9.54E-01 | 1.00E+00 |
| ENSG00000212721.3_KRTAP4-11  | ENSG00000160789.18_LMNA | 0.06736  | -0.092834015 | 0.224159044 | 4.10E-01 | 6.84E-01 | 1.00E+00 |
| ENSG00000253207.3_RP11-67H2  | ENSG00000160789.18_LMNA | -0.09387 | -0.249341883 | 0.066324559 | 2.50E-01 | 5.31E-01 | 1.00E+00 |
| ENSG00000261856.1_CTD-2135D  | ENSG00000160789.18_LMNA | -0.04054 | -0.19845982  | 0.119431536 | 6.20E-01 | 8.28E-01 | 1.00E+00 |
| ENSG00000232624.5_LINC01517  | ENSG00000160789.18_LMNA | -0.0442  | -0.201978279 | 0.115816852 | 5.89E-01 | 8.09E-01 | 1.00E+00 |
| ENSG00000270935.1_XXbac-BPG  | ENSG00000160789.18_LMNA | -0.08514 | -0.24107664  | 0.075074617 | 2.97E-01 | 5.83E-01 | 1.00E+00 |
| ENSG00000226288.1_OR52I2     | ENSG00000160789.18_LMNA | 0.03366  | -0.126213764 | 0.191835956 | 6.81E-01 | 8.61E-01 | 1.00E+00 |
| ENSG00000250436.1_RP11-622A  | ENSG00000160789.18_LMNA | 0.12944  | -0.030385011 | 0.282814519 | 1.12E-01 | 3.34E-01 | 1.00E+00 |
| ENSG00000232981.1_MTCO1P51   | ENSG00000160789.18_LMNA | -0.08875 | -0.244492241 | 0.071464559 | 2.77E-01 | 5.62E-01 | 1.00E+00 |
| ENSG00000224537.1_MEP1AP4    | ENSG00000160789.18_LMNA | -0.12232 | -0.276142217 | 0.037614272 | 1.33E-01 | 3.70E-01 | 1.00E+00 |
| ENSG00000278849.1_RP11-327I2 | ENSG00000160789.18_LMNA | -0.0468  | -0.204478452 | 0.113243176 | 5.67E-01 | 7.97E-01 | 1.00E+00 |
| ENSG00000250391.1_CTD-2160D  | ENSG00000160789.18_LMNA | -0.07304 | -0.229567797 | 0.087177977 | 3.71E-01 | 6.52E-01 | 1.00E+00 |
| ENSG00000230172.1_AC090957.1 | ENSG00000160789.18_LMNA | 0.01903  | -0.140594368 | 0.177694624 | 8.16E-01 | 9.28E-01 | 1.00E+00 |
| ENSG00000279706.1_RP11-561O  | ENSG00000160789.18_LMNA | 0.05687  | -0.103260816 | 0.21413666  | 4.86E-01 | 7.43E-01 | 1.00E+00 |
| ENSG00000225878.1_SERBP1P2   | ENSG00000160789.18_LMNA | -0.01514 | -0.17392536  | 0.144404872 | 8.53E-01 | 9.42E-01 | 1.00E+00 |
| ENSG00000233424.2_RP11-175I6 | ENSG00000160789.18_LMNA | -0.12287 | -0.276660791 | 0.037053585 | 1.32E-01 | 3.68E-01 | 1.00E+00 |
| ENSG00000257731.2_RP11-536C  | ENSG00000160789.18_LMNA | -0.1319  | -0.285112126 | 0.027888009 | 1.05E-01 | 3.22E-01 | 1.00E+00 |
| ENSG00000226337.3_RP11-274B  | ENSG00000160789.18_LMNA | 0.01489  | -0.144648766 | 0.173683788 | 8.55E-01 | 9.43E-01 | 1.00E+00 |
| ENSG00000181995.10_LINC0030  | ENSG00000160789.18_LMNA | -0.06653 | -0.223363751 | 0.093663947 | 4.15E-01 | 6.88E-01 | 1.00E+00 |
| ENSG00000266767.1_RP11-678G  | ENSG00000160789.18_LMNA | -0.11391 | -0.268246296 | 0.046127071 | 1.62E-01 | 4.17E-01 | 1.00E+00 |
| ENSG00000233425.1_KRT18P67   | ENSG00000160789.18_LMNA | 0.00676  | -0.152607646 | 0.165779588 | 9.34E-01 | 9.74E-01 | 1.00E+00 |
| ENSG00000167014.9_TERB2      | ENSG00000160789.18_LMNA | -0.0013  | -0.160465892 | 0.157934988 | 9.87E-01 | 9.95E-01 | 1.00E+00 |
| ENSG00000240128.1_KRT18P43   | ENSG00000160789.18_LMNA | 0.04901  | -0.111053812 | 0.206602031 | 5.49E-01 | 7.86E-01 | 1.00E+00 |

|                             |                         |          |              |             |          |          |          |
|-----------------------------|-------------------------|----------|--------------|-------------|----------|----------|----------|
| ENSG00000258630.1_RP11-725G | ENSG00000160789.18_LMNA | 0.05672  | -0.103412429 | 0.213990434 | 4.88E-01 | 7.44E-01 | 1.00E+00 |
| ENSG00000259239.1_RP11-521C | ENSG00000160789.18_LMNA | -0.0782  | -0.234479837 | 0.082023607 | 3.38E-01 | 6.24E-01 | 1.00E+00 |
| ENSG00000248452.2_RP11-324H | ENSG00000160789.18_LMNA | -0.00502 | -0.164092046 | 0.154301529 | 9.51E-01 | 9.80E-01 | 1.00E+00 |
| ENSG00000268101.2_CYP2G2P   | ENSG00000160789.18_LMNA | -0.00505 | -0.164120246 | 0.154273239 | 9.51E-01 | 9.80E-01 | 1.00E+00 |
| ENSG00000228815.1_MARK2P13  | ENSG00000160789.18_LMNA | -0.01866 | -0.177337924 | 0.140955375 | 8.19E-01 | 9.30E-01 | 1.00E+00 |
| ENSG00000175302.5_ANKRD30B  | ENSG00000160789.18_LMNA | -0.09329 | -0.248798471 | 0.06690134  | 2.53E-01 | 5.34E-01 | 1.00E+00 |
| ENSG00000227882.1_THAP12P6  | ENSG00000160789.18_LMNA | -0.17348 | -0.323737639 | -0.01468266 | 3.26E-02 | 1.51E-01 | 1.00E+00 |
| ENSG00000176979.11_TRIM60   | ENSG00000160789.18_LMNA | 0.02414  | -0.135582908 | 0.182637668 | 7.68E-01 | 9.04E-01 | 1.00E+00 |
| ENSG00000253298.1_AC008703. | ENSG00000160789.18_LMNA | -0.14954 | -0.301564906 | 0.009892518 | 6.59E-02 | 2.40E-01 | 1.00E+00 |
| ENSG00000214081.6_CYP4F30P  | ENSG00000160789.18_LMNA | 0.02056  | -0.139092244 | 0.179177928 | 8.01E-01 | 9.20E-01 | 1.00E+00 |
| ENSG00000248510.2_RP11-145G | ENSG00000160789.18_LMNA | -0.17172 | -0.322111462 | -0.0128675  | 3.44E-02 | 1.57E-01 | 1.00E+00 |
| ENSG00000227143.1_LINC01153 | ENSG00000160789.18_LMNA | -0.03555 | -0.193649898 | 0.124359405 | 6.64E-01 | 8.52E-01 | 1.00E+00 |
| ENSG00000236795.1_AC006004. | ENSG00000160789.18_LMNA | -0.03604 | -0.194123493 | 0.123874893 | 6.59E-01 | 8.50E-01 | 1.00E+00 |
| ENSG00000232827.2_LINC01189 | ENSG00000160789.18_LMNA | -0.13793 | -0.29074661  | 0.02174796  | 9.02E-02 | 2.92E-01 | 1.00E+00 |
| ENSG00000260738.1_LINC00554 | ENSG00000160789.18_LMNA | 0.12998  | -0.029834451 | 0.283321424 | 1.10E-01 | 3.31E-01 | 1.00E+00 |
| ENSG00000237401.5_LINC01304 | ENSG00000160789.18_LMNA | -0.22373 | -0.3697635   | -0.06691596 | 5.59E-03 | 4.27E-02 | 1.00E+00 |
| ENSG00000280362.1_RP11-643A | ENSG00000160789.18_LMNA | -0.13621 | -0.289138459 | 0.023502812 | 9.43E-02 | 3.01E-01 | 1.00E+00 |
| ENSG00000154438.6_ASZ1      | ENSG00000160789.18_LMNA | 0.11397  | -0.046070239 | 0.26829915  | 1.62E-01 | 4.17E-01 | 1.00E+00 |
| ENSG00000226620.6_LINC00343 | ENSG00000160789.18_LMNA | #####    | -0.159288527 | 0.159112874 | 9.99E-01 | 1.00E+00 | 1.00E+00 |
| ENSG00000269437.5_NXF2B     | ENSG00000160789.18_LMNA | -0.03996 | -0.197897495 | 0.12000846  | 6.25E-01 | 8.31E-01 | 1.00E+00 |
| ENSG00000197953.5_AADACL2   | ENSG00000160789.18_LMNA | -0.01428 | -0.173091552 | 0.14524653  | 8.61E-01 | 9.46E-01 | 1.00E+00 |
| ENSG00000276737.1_          | ENSG00000160789.18_LMNA | 0.03415  | -0.125734692 | 0.192304794 | 6.76E-01 | 8.58E-01 | 1.00E+00 |
| ENSG00000252857.1_RNU6-389F | ENSG00000160789.18_LMNA | 0.12394  | -0.035974162 | 0.277658625 | 1.28E-01 | 3.62E-01 | 1.00E+00 |
| ENSG00000211904.2_IGHJ2     | ENSG00000160789.18_LMNA | -0.07017 | -0.226835975 | 0.090037252 | 3.90E-01 | 6.69E-01 | 1.00E+00 |
| ENSG00000280478.1_          | ENSG00000160789.18_LMNA | -0.21552 | -0.362294224 | -0.05832495 | 7.66E-03 | 5.38E-02 | 1.00E+00 |
| ENSG00000277348.1_          | ENSG00000160789.18_LMNA | -0.04444 | -0.202205874 | 0.115582742 | 5.87E-01 | 8.08E-01 | 1.00E+00 |
| ENSG00000257541.1_RP11-58A1 | ENSG00000160789.18_LMNA | -0.22215 | -0.368321991 | -0.06525446 | 5.95E-03 | 4.47E-02 | 1.00E+00 |
| ENSG00000201628.1_RNU4-7P   | ENSG00000160789.18_LMNA | -0.01277 | -0.171625534 | 0.146725232 | 8.76E-01 | 9.52E-01 | 1.00E+00 |
| ENSG00000207746.1_MIR575    | ENSG00000160789.18_LMNA | -0.11775 | -0.271855461 | 0.042241593 | 1.49E-01 | 3.95E-01 | 1.00E+00 |
| ENSG00000211765.1_TRBJ2-2   | ENSG00000160789.18_LMNA | -0.03566 | -0.193763004 | 0.124243706 | 6.63E-01 | 8.51E-01 | 1.00E+00 |
| ENSG00000200275.1_RNA5SP19  | ENSG00000160789.18_LMNA | 0.12301  | -0.036910594 | 0.276793013 | 1.31E-01 | 3.67E-01 | 1.00E+00 |
| ENSG00000281071.1_AC016734. | ENSG00000160789.18_LMNA | -0.08113 | -0.237267503 | 0.079090864 | 3.20E-01 | 6.07E-01 | 1.00E+00 |
| ENSG00000263403.1_MIR4673   | ENSG00000160789.18_LMNA | -0.00738 | -0.166386209 | 0.151998288 | 9.28E-01 | 9.72E-01 | 1.00E+00 |

|                              |                         |          |              |             |          |          |          |
|------------------------------|-------------------------|----------|--------------|-------------|----------|----------|----------|
| ENSG00000273742.1_MIR6075    | ENSG00000160789.18_LMNA | 0.07268  | -0.087536866 | 0.22922518  | 3.74E-01 | 6.54E-01 | 1.00E+00 |
| ENSG00000199932.1_RNU1-18P   | ENSG00000160789.18_LMNA | -0.00931 | -0.168261832 | 0.150112671 | 9.09E-01 | 9.65E-01 | 1.00E+00 |
| ENSG00000281594.1_           | ENSG00000160789.18_LMNA | -0.04    | -0.197941995 | 0.119962812 | 6.25E-01 | 8.31E-01 | 1.00E+00 |
| ENSG00000266494.1_MIR4641    | ENSG00000160789.18_LMNA | -0.03842 | -0.196423271 | 0.121519938 | 6.38E-01 | 8.38E-01 | 1.00E+00 |
| ENSG00000281072.1_AC073476.  | ENSG00000160789.18_LMNA | -0.05973 | -0.216869953 | 0.100424133 | 4.65E-01 | 7.27E-01 | 1.00E+00 |
| ENSG00000251724.1_RNU7-175F  | ENSG00000160789.18_LMNA | 0.05818  | -0.10196647  | 0.215384447 | 4.76E-01 | 7.35E-01 | 1.00E+00 |
| ENSG00000244382.1_RP11-373I8 | ENSG00000160789.18_LMNA | 0.01639  | -0.143185516 | 0.175132535 | 8.41E-01 | 9.38E-01 | 1.00E+00 |
| ENSG00000273612.1_DLEU2_4    | ENSG00000160789.18_LMNA | 0.02027  | -0.139379518 | 0.178894365 | 8.04E-01 | 9.22E-01 | 1.00E+00 |
| ENSG00000207780.1_MIR648     | ENSG00000160789.18_LMNA | -0.09754 | -0.25281264  | 0.062635685 | 2.32E-01 | 5.10E-01 | 1.00E+00 |
| ENSG00000201036.1_SNORD113   | ENSG00000160789.18_LMNA | 0.03386  | -0.126018974 | 0.192026602 | 6.79E-01 | 8.60E-01 | 1.00E+00 |
| ENSG00000198975.1_MIRLET7A2  | ENSG00000160789.18_LMNA | -0.01857 | -0.177248836 | 0.141045526 | 8.20E-01 | 9.30E-01 | 1.00E+00 |
| ENSG00000261350.1_RP11-80F2  | ENSG00000160789.18_LMNA | -0.20679 | -0.354329932 | -0.04921392 | 1.06E-02 | 6.82E-02 | 1.00E+00 |
| ENSG00000264792.1_MIR4637    | ENSG00000160789.18_LMNA | 0.03711  | -0.1228122   | 0.195161719 | 6.50E-01 | 8.45E-01 | 1.00E+00 |
| ENSG00000221262.1_           | ENSG00000160789.18_LMNA | -0.03708 | -0.195127768 | 0.122846963 | 6.50E-01 | 8.45E-01 | 1.00E+00 |
| ENSG00000281124.1_           | ENSG00000160789.18_LMNA | -0.15039 | -0.30235078  | 0.009027879 | 6.44E-02 | 2.36E-01 | 1.00E+00 |
| ENSG00000207349.1_RNVU1-17   | ENSG00000160789.18_LMNA | -0.09403 | -0.249497302 | 0.066159556 | 2.49E-01 | 5.30E-01 | 1.00E+00 |
| ENSG00000263511.1_MIR5699    | ENSG00000160789.18_LMNA | 0.05429  | -0.105826696 | 0.211660012 | 5.07E-01 | 7.57E-01 | 1.00E+00 |
| ENSG00000278491.1_           | ENSG00000160789.18_LMNA | 0.13338  | -0.02637908  | 0.286498819 | 1.01E-01 | 3.14E-01 | 1.00E+00 |
| ENSG00000248349.1_RP11-79C6  | ENSG00000160789.18_LMNA | -0.06859 | -0.225333985 | 0.091607093 | 4.01E-01 | 6.77E-01 | 1.00E+00 |
| ENSG00000212556.1_Y_RNA      | ENSG00000160789.18_LMNA | -0.03034 | -0.188629377 | 0.129486359 | 7.11E-01 | 8.77E-01 | 1.00E+00 |
| ENSG00000278366.1_           | ENSG00000160789.18_LMNA | -0.02122 | -0.179815566 | 0.138446066 | 7.95E-01 | 9.18E-01 | 1.00E+00 |
| ENSG00000252371.1_RNU6-725F  | ENSG00000160789.18_LMNA | 0.21246  | 0.055126462  | 0.359503349 | 8.59E-03 | 5.87E-02 | 1.00E+00 |
| ENSG00000252846.1_           | ENSG00000160789.18_LMNA | -0.08966 | -0.245359923 | 0.070546157 | 2.72E-01 | 5.56E-01 | 1.00E+00 |
| ENSG00000263628.1_MIR3155A   | ENSG00000160789.18_LMNA | 0.02995  | -0.129874222 | 0.188248888 | 7.14E-01 | 8.79E-01 | 1.00E+00 |
| ENSG00000202400.1_SNORD82    | ENSG00000160789.18_LMNA | 0.06742  | -0.092778996 | 0.224211751 | 4.09E-01 | 6.83E-01 | 1.00E+00 |
| ENSG00000264004.1_MIR4717    | ENSG00000160789.18_LMNA | -0.03952 | -0.197475947 | 0.120440811 | 6.29E-01 | 8.33E-01 | 1.00E+00 |
| ENSG00000202412.1_RNY3P13    | ENSG00000160789.18_LMNA | -0.03459 | -0.1927251   | 0.125305086 | 6.72E-01 | 8.56E-01 | 1.00E+00 |
| ENSG00000266483.1_           | ENSG00000160789.18_LMNA | -0.02456 | -0.183043891 | 0.135170337 | 7.64E-01 | 9.02E-01 | 1.00E+00 |
| ENSG00000212158.1_SNORD66    | ENSG00000160789.18_LMNA | 0.25439  | 0.09920536   | 0.397491148 | 1.56E-03 | 1.62E-02 | 1.00E+00 |
| ENSG00000275686.1_           | ENSG00000160789.18_LMNA | -0.00333 | -0.162447028 | 0.15595093  | 9.67E-01 | 9.87E-01 | 1.00E+00 |
| ENSG00000207807.1_MIR95      | ENSG00000160789.18_LMNA | -0.03618 | -0.194265625 | 0.123729454 | 6.58E-01 | 8.49E-01 | 1.00E+00 |
| ENSG00000199801.1_Y_RNA      | ENSG00000160789.18_LMNA | -0.01188 | -0.170755557 | 0.147602065 | 8.85E-01 | 9.55E-01 | 1.00E+00 |
| ENSG00000226558.1_RP11-213N  | ENSG00000160789.18_LMNA | 0.08458  | -0.075635834 | 0.240544948 | 3.00E-01 | 5.87E-01 | 1.00E+00 |

|                             |                         |          |              |             |          |          |          |
|-----------------------------|-------------------------|----------|--------------|-------------|----------|----------|----------|
| ENSG00000201969.1_SNORD115  | ENSG00000160789.18_LMNA | -0.06333 | -0.220312995 | 0.096843496 | 4.38E-01 | 7.06E-01 | 1.00E+00 |
| ENSG00000221774.1_          | ENSG00000160789.18_LMNA | 0.04213  | -0.11785726  | 0.199993195 | 6.06E-01 | 8.20E-01 | 1.00E+00 |
| ENSG00000275707.2_          | ENSG00000160789.18_LMNA | -0.00497 | -0.164044447 | 0.15434928  | 9.52E-01 | 9.81E-01 | 1.00E+00 |
| ENSG00000271598.1_CTD-2542C | ENSG00000160789.18_LMNA | -0.05154 | -0.209025665 | 0.108551326 | 5.28E-01 | 7.72E-01 | 1.00E+00 |
| ENSG00000241207.1_RP11-344N | ENSG00000160789.18_LMNA | -0.01629 | -0.17503796  | 0.14328108  | 8.42E-01 | 9.39E-01 | 1.00E+00 |
| ENSG00000201347.1_RNA5SP69  | ENSG00000160789.18_LMNA | -0.04538 | -0.20311368  | 0.1146486   | 5.79E-01 | 8.04E-01 | 1.00E+00 |
| ENSG00000264855.1_          | ENSG00000160789.18_LMNA | 0.05622  | -0.103914358 | 0.213506233 | 4.92E-01 | 7.47E-01 | 1.00E+00 |
| ENSG00000281868.1_          | ENSG00000160789.18_LMNA | 0.03445  | -0.12543821  | 0.19259487  | 6.73E-01 | 8.57E-01 | 1.00E+00 |
| ENSG00000221039.2_MIR1286   | ENSG00000160789.18_LMNA | 0.0337   | -0.126179549 | 0.191869445 | 6.80E-01 | 8.61E-01 | 1.00E+00 |
| ENSG00000221378.1_          | ENSG00000160789.18_LMNA | -0.1181  | -0.272181411 | 0.04189022  | 1.47E-01 | 3.93E-01 | 1.00E+00 |
| ENSG00000201649.1_RNY4P34   | ENSG00000160789.18_LMNA | -0.05446 | -0.211827572 | 0.105653233 | 5.05E-01 | 7.56E-01 | 1.00E+00 |
| ENSG00000252362.1_RNU6-506F | ENSG00000160789.18_LMNA | -0.00056 | -0.159742386 | 0.158658922 | 9.95E-01 | 9.98E-01 | 1.00E+00 |
| ENSG00000224518.2_AC006989. | ENSG00000160789.18_LMNA | -0.09625 | -0.251597225 | 0.063928463 | 2.38E-01 | 5.17E-01 | 1.00E+00 |
| ENSG00000278388.1_GS1-345D1 | ENSG00000160789.18_LMNA | -0.011   | -0.169901234 | 0.148462633 | 8.93E-01 | 9.58E-01 | 1.00E+00 |
| ENSG00000200563.1_RNU6-640F | ENSG00000160789.18_LMNA | -0.07904 | -0.235284501 | 0.081177629 | 3.33E-01 | 6.19E-01 | 1.00E+00 |
| ENSG00000200483.1_RNU6-1017 | ENSG00000160789.18_LMNA | -0.02272 | -0.181260332 | 0.136980946 | 7.81E-01 | 9.10E-01 | 1.00E+00 |
| ENSG00000266804.1_          | ENSG00000160789.18_LMNA | 0.04343  | -0.116579564 | 0.201236553 | 5.95E-01 | 8.13E-01 | 1.00E+00 |
| ENSG00000264135.1_          | ENSG00000160789.18_LMNA | -0.13153 | -0.284765561 | 0.0282649   | 1.06E-01 | 3.24E-01 | 1.00E+00 |
| ENSG00000266547.1_          | ENSG00000160789.18_LMNA | -0.05731 | -0.214553842 | 0.102828188 | 4.83E-01 | 7.40E-01 | 1.00E+00 |
| ENSG00000276745.1_          | ENSG00000160789.18_LMNA | -0.11798 | -0.272071492 | 0.042008721 | 1.48E-01 | 3.94E-01 | 1.00E+00 |
| ENSG00000199245.1_Y_RNA     | ENSG00000160789.18_LMNA | 0.03618  | -0.123733831 | 0.194261348 | 6.58E-01 | 8.49E-01 | 1.00E+00 |
| ENSG00000253021.1_RNU6-902F | ENSG00000160789.18_LMNA | -0.00667 | -0.165694623 | 0.152692975 | 9.35E-01 | 9.74E-01 | 1.00E+00 |
| ENSG00000252772.1_RNU6-714F | ENSG00000160789.18_LMNA | -0.0973  | -0.25258551  | 0.062877353 | 2.33E-01 | 5.11E-01 | 1.00E+00 |
| ENSG00000201489.1_Y_RNA     | ENSG00000160789.18_LMNA | 0.05788  | -0.102265598 | 0.215096171 | 4.79E-01 | 7.37E-01 | 1.00E+00 |
| ENSG00000206595.1_RNU6-877F | ENSG00000160789.18_LMNA | -0.00638 | -0.165410722 | 0.152978058 | 9.38E-01 | 9.75E-01 | 1.00E+00 |
| ENSG00000201535.2_Y_RNA     | ENSG00000160789.18_LMNA | -0.09378 | -0.249256717 | 0.066414967 | 2.50E-01 | 5.31E-01 | 1.00E+00 |
| ENSG00000266272.1_          | ENSG00000160789.18_LMNA | 0.31091  | 0.159605278  | 0.447935557 | 9.68E-05 | 1.83E-03 | 1.00E+00 |
| ENSG00000222607.1_RNU6-628F | ENSG00000160789.18_LMNA | 0.02956  | -0.130252063 | 0.187878139 | 7.18E-01 | 8.80E-01 | 1.00E+00 |
| ENSG00000207963.1_MIR569    | ENSG00000160789.18_LMNA | 0.02519  | -0.134551968 | 0.183652543 | 7.58E-01 | 8.99E-01 | 1.00E+00 |
| ENSG00000200683.1_RNU6-379F | ENSG00000160789.18_LMNA | 0.00723  | -0.152148357 | 0.166236836 | 9.30E-01 | 9.73E-01 | 1.00E+00 |
| ENSG00000211568.1_MIR670    | ENSG00000160789.18_LMNA | 0.03152  | -0.12832207  | 0.189770958 | 7.00E-01 | 8.72E-01 | 1.00E+00 |
| ENSG00000263566.1_          | ENSG00000160789.18_LMNA | -0.04752 | -0.205172584 | 0.11252788  | 5.61E-01 | 7.93E-01 | 1.00E+00 |
| ENSG00000252778.1_SCARNA20  | ENSG00000160789.18_LMNA | -0.04103 | -0.198931079 | 0.118947877 | 6.16E-01 | 8.26E-01 | 1.00E+00 |

|                              |                         |          |              |             |          |          |          |
|------------------------------|-------------------------|----------|--------------|-------------|----------|----------|----------|
| ENSG00000222940.1_RNU6-370F  | ENSG00000160789.18_LMNA | 0.054    | -0.106111223 | 0.21138513  | 5.09E-01 | 7.58E-01 | 1.00E+00 |
| ENSG00000276118.1_CH17-333M  | ENSG00000160789.18_LMNA | 0.05891  | -0.101235897 | 0.216088284 | 4.71E-01 | 7.31E-01 | 1.00E+00 |
| ENSG00000252040.1_snoU109    | ENSG00000160789.18_LMNA | -0.04285 | -0.200678966 | 0.117152681 | 6.00E-01 | 8.16E-01 | 1.00E+00 |
| ENSG00000252611.1_RNU6-1121  | ENSG00000160789.18_LMNA | -0.01514 | -0.173923979 | 0.144406267 | 8.53E-01 | 9.42E-01 | 1.00E+00 |
| ENSG00000252840.1_SNORA44    | ENSG00000160789.18_LMNA | -0.06024 | -0.217358353 | 0.099916714 | 4.61E-01 | 7.24E-01 | 1.00E+00 |
| ENSG00000254174.1_IGHV1-12   | ENSG00000160789.18_LMNA | -0.02156 | -0.180137697 | 0.138119518 | 7.92E-01 | 9.16E-01 | 1.00E+00 |
| ENSG00000201184.1_RNU4-68P   | ENSG00000160789.18_LMNA | -0.02591 | -0.184351063 | 0.13384199  | 7.51E-01 | 8.96E-01 | 1.00E+00 |
| ENSG00000238941.1_RNU6-953F  | ENSG00000160789.18_LMNA | 0.0975   | -0.06267799  | 0.252772883 | 2.32E-01 | 5.10E-01 | 1.00E+00 |
| ENSG00000280558.1_           | ENSG00000160789.18_LMNA | -0.02404 | -0.182544737 | 0.135677276 | 7.69E-01 | 9.04E-01 | 1.00E+00 |
| ENSG00000199796.1_RNU6-924F  | ENSG00000160789.18_LMNA | 0.06702  | -0.09317106  | 0.223836117 | 4.12E-01 | 6.86E-01 | 1.00E+00 |
| ENSG00000199953.1_RNA5SP44   | ENSG00000160789.18_LMNA | -0.03729 | -0.195330805 | 0.122639061 | 6.48E-01 | 8.44E-01 | 1.00E+00 |
| ENSG00000276574.1_           | ENSG00000160789.18_LMNA | 0.10127  | -0.058880627 | 0.25633735  | 2.14E-01 | 4.89E-01 | 1.00E+00 |
| ENSG00000266269.1_           | ENSG00000160789.18_LMNA | 0.08293  | -0.077294352 | 0.238972575 | 3.10E-01 | 5.96E-01 | 1.00E+00 |
| ENSG00000212597.1_RNU6-876F  | ENSG00000160789.18_LMNA | -0.05295 | -0.210375188 | 0.107156148 | 5.17E-01 | 7.64E-01 | 1.00E+00 |
| ENSG00000207052.1_RNU6-378F  | ENSG00000160789.18_LMNA | -0.02769 | -0.186069386 | 0.13209409  | 7.35E-01 | 8.89E-01 | 1.00E+00 |
| ENSG00000251788.1_RNU5A-7P   | ENSG00000160789.18_LMNA | 0.03649  | -0.12343228  | 0.194556002 | 6.55E-01 | 8.47E-01 | 1.00E+00 |
| ENSG00000202224.1_Y_RNA      | ENSG00000160789.18_LMNA | 0.03611  | -0.123806402 | 0.194190428 | 6.59E-01 | 8.49E-01 | 1.00E+00 |
| ENSG00000252122.1_SNORA76    | ENSG00000160789.18_LMNA | 0.03898  | -0.120969497 | 0.196960311 | 6.33E-01 | 8.36E-01 | 1.00E+00 |
| ENSG00000207334.1_RNU6-12P   | ENSG00000160789.18_LMNA | -0.09218 | -0.247744042 | 0.068019918 | 2.59E-01 | 5.42E-01 | 1.00E+00 |
| ENSG00000221121.1_           | ENSG00000160789.18_LMNA | -0.0238  | -0.182306484 | 0.135919186 | 7.71E-01 | 9.05E-01 | 1.00E+00 |
| ENSG00000276014.1_RN7SL301F  | ENSG00000160789.18_LMNA | 0.00619  | -0.153163896 | 0.165225626 | 9.40E-01 | 9.76E-01 | 1.00E+00 |
| ENSG00000252879.1_RN7SKP98   | ENSG00000160789.18_LMNA | -0.07936 | -0.235583982 | 0.080862655 | 3.31E-01 | 6.17E-01 | 1.00E+00 |
| ENSG00000260548.1_RP6-24A23  | ENSG00000160789.18_LMNA | -0.11665 | -0.270820699 | 0.043356547 | 1.52E-01 | 4.02E-01 | 1.00E+00 |
| ENSG00000264497.1_RP11-640N  | ENSG00000160789.18_LMNA | -0.07816 | -0.234441254 | 0.08206416  | 3.39E-01 | 6.24E-01 | 1.00E+00 |
| ENSG00000201622.1_RNU6-621F  | ENSG00000160789.18_LMNA | 0.0771   | -0.083116817 | 0.233439373 | 3.45E-01 | 6.29E-01 | 1.00E+00 |
| ENSG00000227629.1_SLC25A15F  | ENSG00000160789.18_LMNA | -0.30143 | -0.439542212 | -0.14940348 | 1.61E-04 | 2.75E-03 | 1.00E+00 |
| ENSG00000221234.1_           | ENSG00000160789.18_LMNA | 0.07658  | -0.083641454 | 0.232939791 | 3.48E-01 | 6.32E-01 | 1.00E+00 |
| ENSG00000207090.1_RNU6-517F  | ENSG00000160789.18_LMNA | -0.01485 | -0.173638607 | 0.144694376 | 8.56E-01 | 9.43E-01 | 1.00E+00 |
| ENSG00000252639.1_RNU2-24P   | ENSG00000160789.18_LMNA | -0.12419 | -0.277898476 | 0.035714591 | 1.27E-01 | 3.61E-01 | 1.00E+00 |
| ENSG00000276958.1_RP11-458I4 | ENSG00000160789.18_LMNA | 0.08573  | -0.074483171 | 0.241636765 | 2.94E-01 | 5.79E-01 | 1.00E+00 |
| ENSG00000200906.1_RNU6-854F  | ENSG00000160789.18_LMNA | -0.19956 | -0.347714493 | -0.04168437 | 1.37E-02 | 8.22E-02 | 1.00E+00 |
| ENSG00000253697.1_RP11-1081I | ENSG00000160789.18_LMNA | 0.03894  | -0.121006736 | 0.196923985 | 6.34E-01 | 8.36E-01 | 1.00E+00 |
| ENSG00000252357.1_Y_RNA      | ENSG00000160789.18_LMNA | 0.09953  | -0.060634866 | 0.254691764 | 2.22E-01 | 4.98E-01 | 1.00E+00 |

|                              |                         |          |              |             |          |          |          |
|------------------------------|-------------------------|----------|--------------|-------------|----------|----------|----------|
| ENSG00000253602.2_RN7SL260F  | ENSG00000160789.18_LMNA | 0.04409  | -0.115922234 | 0.201875818 | 5.90E-01 | 8.09E-01 | 1.00E+00 |
| ENSG00000249837.1_CTD-2325B  | ENSG00000160789.18_LMNA | -0.00701 | -0.166021009 | 0.152365165 | 9.32E-01 | 9.73E-01 | 1.00E+00 |
| ENSG00000223623.1_RP3-425P1  | ENSG00000160789.18_LMNA | 0.23043  | 0.073941133  | 0.375842445 | 4.29E-03 | 3.50E-02 | 1.00E+00 |
| ENSG00000251980.1_RNU6-436F  | ENSG00000160789.18_LMNA | -0.0985  | -0.253724705 | 0.06166487  | 2.27E-01 | 5.04E-01 | 1.00E+00 |
| ENSG00000229201.1_RP5-827O9  | ENSG00000160789.18_LMNA | -0.04384 | -0.201638208 | 0.116166591 | 5.92E-01 | 8.11E-01 | 1.00E+00 |
| ENSG00000281319.1_           | ENSG00000160789.18_LMNA | 0.16455  | 0.00549372   | 0.315486547 | 4.28E-02 | 1.81E-01 | 1.00E+00 |
| ENSG00000214743.4_MRPS5P3    | ENSG00000160789.18_LMNA | -0.07205 | -0.228628329 | 0.088161865 | 3.78E-01 | 6.57E-01 | 1.00E+00 |
| ENSG00000232999.1_RP1-90J20. | ENSG00000160789.18_LMNA | -0.06738 | -0.22417336  | 0.092819072 | 4.10E-01 | 6.84E-01 | 1.00E+00 |
| ENSG00000258751.1_RP11-2G1.  | ENSG00000160789.18_LMNA | 0.06071  | -0.099454377 | 0.217803223 | 4.58E-01 | 7.22E-01 | 1.00E+00 |
| ENSG00000201231.1_RNU4-50P   | ENSG00000160789.18_LMNA | -0.05099 | -0.208502067 | 0.1090923   | 5.33E-01 | 7.75E-01 | 1.00E+00 |
| ENSG00000244107.3_RN7SL250F  | ENSG00000160789.18_LMNA | -0.03026 | -0.18855717  | 0.129559974 | 7.11E-01 | 8.77E-01 | 1.00E+00 |
| ENSG00000226708.1_AC073409.  | ENSG00000160789.18_LMNA | 0.02884  | -0.130960233 | 0.187183017 | 7.24E-01 | 8.83E-01 | 1.00E+00 |
| ENSG00000169474.4_SPRR1A     | ENSG00000160789.18_LMNA | -0.12567 | -0.279282348 | 0.03421611  | 1.23E-01 | 3.53E-01 | 1.00E+00 |
| ENSG00000232583.1_GPR143P    | ENSG00000160789.18_LMNA | -0.25705 | -0.399889909 | -0.1020286  | 1.39E-03 | 1.48E-02 | 1.00E+00 |
| ENSG00000222068.1_RN7SKP15   | ENSG00000160789.18_LMNA | -0.0124  | -0.171266314 | 0.147087344 | 8.79E-01 | 9.53E-01 | 1.00E+00 |
| ENSG00000233511.1_RP1-128O3  | ENSG00000160789.18_LMNA | 0.08046  | -0.079765761 | 0.236626453 | 3.24E-01 | 6.11E-01 | 1.00E+00 |
| ENSG00000278004.1_Pinc       | ENSG00000160789.18_LMNA | 0.04148  | -0.118507713 | 0.19935983  | 6.12E-01 | 8.23E-01 | 1.00E+00 |
| ENSG00000276713.1_Metazoa_SI | ENSG00000160789.18_LMNA | 0.00058  | -0.158633123 | 0.159768175 | 9.94E-01 | 9.98E-01 | 1.00E+00 |
| ENSG00000242176.1_RPL39P31   | ENSG00000160789.18_LMNA | -0.02942 | -0.187743399 | 0.130389357 | 7.19E-01 | 8.81E-01 | 1.00E+00 |
| ENSG00000270500.1_COX6CP4    | ENSG00000160789.18_LMNA | -0.03856 | -0.196553557 | 0.121386419 | 6.37E-01 | 8.38E-01 | 1.00E+00 |
| ENSG00000264706.2_RN7SL217F  | ENSG00000160789.18_LMNA | -0.12338 | -0.277138937 | 0.036536434 | 1.30E-01 | 3.65E-01 | 1.00E+00 |
| ENSG00000201364.1_RN7SKP37   | ENSG00000160789.18_LMNA | -0.17736 | -0.327320656 | -0.01868926 | 2.88E-02 | 1.39E-01 | 1.00E+00 |
| ENSG00000253957.1_IGHV3-22   | ENSG00000160789.18_LMNA | -0.07176 | -0.228353167 | 0.088449919 | 3.80E-01 | 6.59E-01 | 1.00E+00 |
| ENSG00000277109.1_RP11-160N  | ENSG00000160789.18_LMNA | 0.14445  | -0.01509341  | 0.296828856 | 7.58E-02 | 2.63E-01 | 1.00E+00 |
| ENSG00000255357.1_RP11-34N1  | ENSG00000160789.18_LMNA | -0.07904 | -0.235282197 | 0.081180051 | 3.33E-01 | 6.19E-01 | 1.00E+00 |
| ENSG00000240533.3_RN7SL69P   | ENSG00000160789.18_LMNA | 0.06998  | -0.090229889 | 0.226651745 | 3.92E-01 | 6.70E-01 | 1.00E+00 |
| ENSG00000257426.1_RP11-554D  | ENSG00000160789.18_LMNA | -0.01954 | -0.178189715 | 0.140093158 | 8.11E-01 | 9.26E-01 | 1.00E+00 |
| ENSG00000251877.1_RNU2-45P   | ENSG00000160789.18_LMNA | 0.03263  | -0.127230529 | 0.190840428 | 6.90E-01 | 8.66E-01 | 1.00E+00 |
| ENSG00000234016.1_GNG10P1    | ENSG00000160789.18_LMNA | -0.02289 | -0.181424874 | 0.136813998 | 7.80E-01 | 9.09E-01 | 1.00E+00 |
| ENSG00000266806.1_RP11-744K  | ENSG00000160789.18_LMNA | -0.12363 | -0.27737084  | 0.036285554 | 1.29E-01 | 3.64E-01 | 1.00E+00 |
| ENSG00000274350.1_RN7SL853F  | ENSG00000160789.18_LMNA | 0.09242  | -0.067782665 | 0.247967752 | 2.57E-01 | 5.40E-01 | 1.00E+00 |
| ENSG00000254056.1_IGHV3-71   | ENSG00000160789.18_LMNA | 0.02104  | -0.13862331  | 0.179640691 | 7.97E-01 | 9.18E-01 | 1.00E+00 |
| ENSG00000222094.1_RNU2-65P   | ENSG00000160789.18_LMNA | -0.00724 | -0.166248224 | 0.152136917 | 9.29E-01 | 9.73E-01 | 1.00E+00 |



|                              |                         |          |              |             |          |          |          |
|------------------------------|-------------------------|----------|--------------|-------------|----------|----------|----------|
| ENSG00000222477.1_RNU2-23P   | ENSG00000160789.18_LMNA | 0.07651  | -0.083707188 | 0.232877184 | 3.49E-01 | 6.33E-01 | 1.00E+00 |
| ENSG00000211672.2_IGLV4-3    | ENSG00000160789.18_LMNA | 0.02064  | -0.139013407 | 0.179255737 | 8.01E-01 | 9.20E-01 | 1.00E+00 |
| ENSG00000248629.1_RP11-154F  | ENSG00000160789.18_LMNA | 0.06118  | -0.098986768 | 0.218253032 | 4.54E-01 | 7.19E-01 | 1.00E+00 |
| ENSG00000276048.1_Six3os1_5  | ENSG00000160789.18_LMNA | 0.1027   | -0.057440372 | 0.257687034 | 2.08E-01 | 4.80E-01 | 1.00E+00 |
| ENSG00000274303.1_7SK        | ENSG00000160789.18_LMNA | 0.03174  | -0.128107597 | 0.189981154 | 6.98E-01 | 8.71E-01 | 1.00E+00 |
| ENSG00000255983.1_RP11-1038  | ENSG00000160789.18_LMNA | -0.13955 | -0.292260506 | 0.020094199 | 8.64E-02 | 2.85E-01 | 1.00E+00 |
| ENSG00000253400.1_RP11-337A  | ENSG00000160789.18_LMNA | -0.05744 | -0.214673573 | 0.102704001 | 4.82E-01 | 7.40E-01 | 1.00E+00 |
| ENSG00000230020.1_NHS-AS1    | ENSG00000160789.18_LMNA | 0.04985  | -0.110227824 | 0.207402424 | 5.42E-01 | 7.81E-01 | 1.00E+00 |
| ENSG00000154007.6_AS17       | ENSG00000160789.18_LMNA | 0.10037  | -0.059788799 | 0.255485656 | 2.19E-01 | 4.93E-01 | 1.00E+00 |
| ENSG00000277705.1_RP11-434C  | ENSG00000160789.18_LMNA | -0.0329  | -0.191097496 | 0.126968041 | 6.87E-01 | 8.65E-01 | 1.00E+00 |
| ENSG00000243856.3_RN7SL551F  | ENSG00000160789.18_LMNA | 0.03839  | -0.121550347 | 0.196393597 | 6.39E-01 | 8.38E-01 | 1.00E+00 |
| ENSG00000239910.3_RN7SL530F  | ENSG00000160789.18_LMNA | 0.06922  | -0.090978648 | 0.225935449 | 3.97E-01 | 6.74E-01 | 1.00E+00 |
| ENSG00000276359.1_Metazoa_SI | ENSG00000160789.18_LMNA | -0.0709  | -0.227533502 | 0.089307677 | 3.85E-01 | 6.64E-01 | 1.00E+00 |
| ENSG00000271042.1_RP3-364H1  | ENSG00000160789.18_LMNA | -0.03179 | -0.190033563 | 0.128054117 | 6.97E-01 | 8.70E-01 | 1.00E+00 |
| ENSG00000264352.2_RN7SL602F  | ENSG00000160789.18_LMNA | 0.00859  | -0.150819854 | 0.167558667 | 9.16E-01 | 9.68E-01 | 1.00E+00 |
| ENSG00000225479.1_PLCB1-IT1  | ENSG00000160789.18_LMNA | -0.13423 | -0.287291113 | 0.025516306 | 9.92E-02 | 3.10E-01 | 1.00E+00 |
| ENSG00000268320.3_SCGB1C2    | ENSG00000160789.18_LMNA | -0.01912 | -0.17777806  | 0.140509911 | 8.15E-01 | 9.28E-01 | 1.00E+00 |
| ENSG00000279959.1_CTD-2621I1 | ENSG00000160789.18_LMNA | 0.03642  | -0.123495419 | 0.194494312 | 6.56E-01 | 8.48E-01 | 1.00E+00 |
| ENSG00000239356.3_RN7SL309F  | ENSG00000160789.18_LMNA | 0.20778  | 0.050236905  | 0.355226369 | 1.02E-02 | 6.65E-02 | 1.00E+00 |
| ENSG00000214074.3_RPL23AP3   | ENSG00000160789.18_LMNA | -0.11717 | -0.271306074 | 0.042833654 | 1.51E-01 | 3.99E-01 | 1.00E+00 |
| ENSG00000200708.1_RN7SKP93   | ENSG00000160789.18_LMNA | 0.06608  | -0.094112507 | 0.222933736 | 4.19E-01 | 6.91E-01 | 1.00E+00 |
| ENSG00000280954.1_           | ENSG00000160789.18_LMNA | -0.06159 | -0.218650037 | 0.098573936 | 4.51E-01 | 7.17E-01 | 1.00E+00 |
| ENSG00000225356.3_RP11-433O  | ENSG00000160789.18_LMNA | -0.07987 | -0.236064899 | 0.080356726 | 3.28E-01 | 6.14E-01 | 1.00E+00 |
| ENSG00000238066.1_RP3-378P9  | ENSG00000160789.18_LMNA | 0.01199  | -0.147496962 | 0.170859864 | 8.83E-01 | 9.55E-01 | 1.00E+00 |
| ENSG00000237761.1_RP11-127O  | ENSG00000160789.18_LMNA | -0.1686  | -0.319232076 | -0.0096585  | 3.79E-02 | 1.67E-01 | 1.00E+00 |
| ENSG00000267760.1_CTC-565M2  | ENSG00000160789.18_LMNA | 0.04427  | -0.115749023 | 0.202044224 | 5.88E-01 | 8.09E-01 | 1.00E+00 |
| ENSG00000241246.3_RN7SL302F  | ENSG00000160789.18_LMNA | -0.11275 | -0.267151768 | 0.047303517 | 1.67E-01 | 4.24E-01 | 1.00E+00 |
| ENSG00000231484.1_RP11-548K  | ENSG00000160789.18_LMNA | -0.12666 | -0.280206399 | 0.033214745 | 1.20E-01 | 3.48E-01 | 1.00E+00 |
| ENSG00000267341.1_RP11-640A  | ENSG00000160789.18_LMNA | -0.0087  | -0.167667628 | 0.150710292 | 9.15E-01 | 9.68E-01 | 1.00E+00 |
| ENSG00000253845.1_RP11-643N  | ENSG00000160789.18_LMNA | -0.09074 | -0.246380052 | 0.069465713 | 2.66E-01 | 5.50E-01 | 1.00E+00 |
| ENSG00000278636.1_Metazoa_SI | ENSG00000160789.18_LMNA | 0.05663  | -0.103507461 | 0.21389877  | 4.88E-01 | 7.45E-01 | 1.00E+00 |
| ENSG00000252322.1_RN7SKP24   | ENSG00000160789.18_LMNA | 0.00778  | -0.151606053 | 0.166776555 | 9.24E-01 | 9.71E-01 | 1.00E+00 |
| ENSG00000236538.1_ZNF863P    | ENSG00000160789.18_LMNA | -0.14283 | -0.295315982 | 0.016751223 | 7.92E-02 | 2.70E-01 | 1.00E+00 |

|                              |                         |          |              |             |          |          |          |
|------------------------------|-------------------------|----------|--------------|-------------|----------|----------|----------|
| ENSG00000239432.1_GS1-388B5  | ENSG00000160789.18_LMNA | -0.13927 | -0.291994135 | 0.020385303 | 8.70E-02 | 2.87E-01 | 1.00E+00 |
| ENSG00000281637.1_           | ENSG00000160789.18_LMNA | 0.00595  | -0.153394148 | 0.164996262 | 9.42E-01 | 9.77E-01 | 1.00E+00 |
| ENSG00000280756.1_           | ENSG00000160789.18_LMNA | 0.00871  | -0.150698519 | 0.167679335 | 9.15E-01 | 9.68E-01 | 1.00E+00 |
| ENSG00000220831.4_NDUFA5P9   | ENSG00000160789.18_LMNA | -0.11537 | -0.269614629 | 0.044655098 | 1.57E-01 | 4.09E-01 | 1.00E+00 |
| ENSG00000279272.1_           | ENSG00000160789.18_LMNA | -0.23113 | -0.376475206 | -0.07467411 | 4.17E-03 | 3.43E-02 | 1.00E+00 |
| ENSG00000235318.3_MTND4LP1   | ENSG00000160789.18_LMNA | 0.04058  | -0.11939108  | 0.198499244 | 6.20E-01 | 8.28E-01 | 1.00E+00 |
| ENSG00000233545.1_CYCSP33    | ENSG00000160789.18_LMNA | 0.22743  | 0.07079226   | 0.373120908 | 4.84E-03 | 3.82E-02 | 1.00E+00 |
| ENSG00000255132.1_RP11-63C8  | ENSG00000160789.18_LMNA | -0.16956 | -0.320116214 | -0.01064317 | 3.68E-02 | 1.64E-01 | 1.00E+00 |
| ENSG00000277455.1_Metazoa_SI | ENSG00000160789.18_LMNA | -0.04595 | -0.203665181 | 0.114080825 | 5.74E-01 | 8.01E-01 | 1.00E+00 |
| ENSG00000260756.1_RP11-609N  | ENSG00000160789.18_LMNA | -0.02432 | -0.182815322 | 0.135402492 | 7.66E-01 | 9.03E-01 | 1.00E+00 |
| ENSG00000251237.1_B3GNTL1P   | ENSG00000160789.18_LMNA | 0.12721  | -0.032656922 | 0.280720903 | 1.18E-01 | 3.45E-01 | 1.00E+00 |
| ENSG00000270434.1_RP11-1751I | ENSG00000160789.18_LMNA | -0.0456  | -0.203326644 | 0.114429376 | 5.77E-01 | 8.03E-01 | 1.00E+00 |
| ENSG00000259427.2_DPPA5P2    | ENSG00000160789.18_LMNA | 0.07463  | -0.085591549 | 0.231081361 | 3.61E-01 | 6.43E-01 | 1.00E+00 |
| ENSG00000196634.3_LUADT1     | ENSG00000160789.18_LMNA | -0.06176 | -0.218805501 | 0.098412245 | 4.50E-01 | 7.15E-01 | 1.00E+00 |
| ENSG00000264030.2_RN7SL66P   | ENSG00000160789.18_LMNA | 0.04679  | -0.113253667 | 0.20446827  | 5.67E-01 | 7.97E-01 | 1.00E+00 |
| ENSG00000258455.1_RP11-665C  | ENSG00000160789.18_LMNA | -0.17741 | -0.327361581 | -0.01873508 | 2.88E-02 | 1.39E-01 | 1.00E+00 |
| ENSG00000236277.1_NIPA2P5    | ENSG00000160789.18_LMNA | 0.05536  | -0.104763933 | 0.212686311 | 4.98E-01 | 7.51E-01 | 1.00E+00 |
| ENSG00000231398.1_RP11-375N  | ENSG00000160789.18_LMNA | 0.04647  | -0.113567094 | 0.204164013 | 5.70E-01 | 7.99E-01 | 1.00E+00 |
| ENSG00000251080.1_RP11-415C  | ENSG00000160789.18_LMNA | 0.17166  | 0.012807666  | 0.322057822 | 3.45E-02 | 1.57E-01 | 1.00E+00 |
| ENSG00000231988.1_OFD1P3Y    | ENSG00000160789.18_LMNA | 0.07284  | -0.087374931 | 0.229379782 | 3.73E-01 | 6.53E-01 | 1.00E+00 |
| ENSG00000260146.1_CTD-2258A  | ENSG00000160789.18_LMNA | 0.07138  | -0.088828636 | 0.227991325 | 3.82E-01 | 6.61E-01 | 1.00E+00 |
| ENSG00000263360.2_RN7SL134F  | ENSG00000160789.18_LMNA | -0.02026 | -0.178883142 | 0.139390887 | 8.04E-01 | 9.22E-01 | 1.00E+00 |
| ENSG00000237639.2_RP11-368M  | ENSG00000160789.18_LMNA | -0.03682 | -0.194879449 | 0.123101195 | 6.52E-01 | 8.46E-01 | 1.00E+00 |
| ENSG00000254434.1_CTD-2555I  | ENSG00000160789.18_LMNA | -0.05286 | -0.210287869 | 0.10724646  | 5.18E-01 | 7.64E-01 | 1.00E+00 |
| ENSG00000224348.2_RP11-306K  | ENSG00000160789.18_LMNA | 0.04879  | -0.111270805 | 0.206391693 | 5.51E-01 | 7.87E-01 | 1.00E+00 |
| ENSG00000240766.1_PLCXD2-A   | ENSG00000160789.18_LMNA | -0.13385 | -0.286938379 | 0.025900475 | 1.00E-01 | 3.12E-01 | 1.00E+00 |
| ENSG00000237479.1_AC007557.  | ENSG00000160789.18_LMNA | -0.02344 | -0.181960017 | 0.136270903 | 7.74E-01 | 9.07E-01 | 1.00E+00 |
| ENSG00000227606.2_AC005392.  | ENSG00000160789.18_LMNA | -0.07515 | -0.231578992 | 0.08506961  | 3.57E-01 | 6.41E-01 | 1.00E+00 |
| ENSG00000232537.1_RP11-385M  | ENSG00000160789.18_LMNA | -0.04162 | -0.1994967   | 0.118367174 | 6.11E-01 | 8.22E-01 | 1.00E+00 |
| ENSG00000270879.1_           | ENSG00000160789.18_LMNA | -0.10405 | -0.258959363 | 0.05608146  | 2.02E-01 | 4.73E-01 | 1.00E+00 |
| ENSG00000224400.4_AC010880.  | ENSG00000160789.18_LMNA | -0.15776 | -0.309195351 | 0.001477553 | 5.22E-02 | 2.07E-01 | 1.00E+00 |
| ENSG00000261077.1_RP11-553E  | ENSG00000160789.18_LMNA | -0.23102 | -0.376381728 | -0.07456581 | 4.19E-03 | 3.44E-02 | 1.00E+00 |
| ENSG00000257962.1_RP11-219B  | ENSG00000160789.18_LMNA | 0.13189  | -0.027896705 | 0.28510413  | 1.05E-01 | 3.22E-01 | 1.00E+00 |

|                                                     |          |              |             |          |          |          |
|-----------------------------------------------------|----------|--------------|-------------|----------|----------|----------|
| ENSG00000253949.1_RP11-790J:ENSG00000160789.18_LMNA | -0.00427 | -0.16336224  | 0.155033498 | 9.58E-01 | 9.83E-01 | 1.00E+00 |
| ENSG00000254619.1_RP11-646J:ENSG00000160789.18_LMNA | 0.04643  | -0.113605679 | 0.204126553 | 5.70E-01 | 7.99E-01 | 1.00E+00 |
| ENSG00000277973.1_RP11-472E:ENSG00000160789.18_LMNA | 0.06167  | -0.098494853 | 0.218726076 | 4.50E-01 | 7.16E-01 | 1.00E+00 |
| ENSG00000239641.1_PLS1-AS1:ENSG00000160789.18_LMNA  | -0.04646 | -0.204149789 | 0.113581745 | 5.70E-01 | 7.99E-01 | 1.00E+00 |
| ENSG00000231979.1_RP11-35L1:ENSG00000160789.18_LMNA | 0.04852  | -0.111541487 | 0.206129269 | 5.53E-01 | 7.88E-01 | 1.00E+00 |
| ENSG00000232715.1_LINC01022:ENSG00000160789.18_LMNA | -0.02947 | -0.187792714 | 0.130339109 | 7.19E-01 | 8.80E-01 | 1.00E+00 |
| ENSG00000231221.1_LINC01593:ENSG00000160789.18_LMNA | 0.11901  | -0.040967307 | 0.273037206 | 1.44E-01 | 3.89E-01 | 1.00E+00 |
| ENSG00000242486.1:ENSG00000160789.18_LMNA           | -0.00624 | -0.165276897 | 0.153112422 | 9.39E-01 | 9.76E-01 | 1.00E+00 |
| ENSG00000253770.1_HMGB1P23:ENSG00000160789.18_LMNA  | -0.01193 | -0.170805864 | 0.147551376 | 8.84E-01 | 9.55E-01 | 1.00E+00 |
| ENSG00000246876.5_RP11-519M:ENSG00000160789.18_LMNA | -0.15243 | -0.30424851  | 0.006938022 | 6.08E-02 | 2.28E-01 | 1.00E+00 |
| ENSG00000251281.1_CTD-2066L:ENSG00000160789.18_LMNA | 0.15074  | -0.00866671  | 0.302678921 | 6.38E-02 | 2.35E-01 | 1.00E+00 |
| ENSG00000237360.2_CHCHD4P2:ENSG00000160789.18_LMNA  | -0.01203 | -0.1709004   | 0.147456115 | 8.83E-01 | 9.55E-01 | 1.00E+00 |
| ENSG00000197990.6_ZNF734P:ENSG00000160789.18_LMNA   | -0.11829 | -0.272365692 | 0.041691531 | 1.47E-01 | 3.92E-01 | 1.00E+00 |
| ENSG00000268742.1_CTD-2396E:ENSG00000160789.18_LMNA | 0.07884  | -0.081382209 | 0.235089951 | 3.34E-01 | 6.20E-01 | 1.00E+00 |
| ENSG00000259306.2_RP11-108K:ENSG00000160789.18_LMNA | -0.04499 | -0.202739403 | 0.115033803 | 5.82E-01 | 8.05E-01 | 1.00E+00 |
| ENSG00000226046.1_AP1S2P1:ENSG00000160789.18_LMNA   | 0.01189  | -0.147593168 | 0.170764386 | 8.84E-01 | 9.55E-01 | 1.00E+00 |
| ENSG00000266311.5_AC007952:ENSG00000160789.18_LMNA  | 0.06069  | -0.099472391 | 0.217785892 | 4.58E-01 | 7.22E-01 | 1.00E+00 |
| ENSG00000250888.1_LINC01455:ENSG00000160789.18_LMNA | 0.0908   | -0.0694039   | 0.246438393 | 2.66E-01 | 5.50E-01 | 1.00E+00 |
| ENSG00000257683.1_RP11-110L:ENSG00000160789.18_LMNA | -0.11652 | -0.270702118 | 0.043484268 | 1.53E-01 | 4.02E-01 | 1.00E+00 |
| ENSG00000259435.2_OR4N3P:ENSG00000160789.18_LMNA    | 0.10937  | -0.050709944 | 0.263977957 | 1.80E-01 | 4.43E-01 | 1.00E+00 |
| ENSG00000232132.1_NDFIP2-AS:ENSG00000160789.18_LMNA | -0.03331 | -0.191491495 | 0.126565648 | 6.84E-01 | 8.63E-01 | 1.00E+00 |
| ENSG00000255230.1_RP5-901A4:ENSG00000160789.18_LMNA | 0.12783  | -0.032018775 | 0.281309271 | 1.17E-01 | 3.42E-01 | 1.00E+00 |
| ENSG00000259023.2_LINC00524:ENSG00000160789.18_LMNA | 0.08026  | -0.079967414 | 0.23643486  | 3.26E-01 | 6.12E-01 | 1.00E+00 |
| ENSG00000243089.1_RP11-779P:ENSG00000160789.18_LMNA | 0.04354  | -0.116470314 | 0.20134282  | 5.94E-01 | 8.13E-01 | 1.00E+00 |
| ENSG00000242943.1_NKAIN1P1:ENSG00000160789.18_LMNA  | 0.02465  | -0.135082856 | 0.183130012 | 7.63E-01 | 9.01E-01 | 1.00E+00 |
| ENSG00000231513.3_E2F6P4:ENSG00000160789.18_LMNA    | -0.0369  | -0.194956922 | 0.123021881 | 6.52E-01 | 8.46E-01 | 1.00E+00 |
| ENSG00000279420.1_RP11-42H1:ENSG00000160789.18_LMNA | 0.00339  | -0.155897493 | 0.16250035  | 9.67E-01 | 9.87E-01 | 1.00E+00 |
| ENSG00000211701.2_TRGV1:ENSG00000160789.18_LMNA     | 0.07491  | -0.085304236 | 0.231355314 | 3.59E-01 | 6.42E-01 | 1.00E+00 |
| ENSG00000234938.2_AC012668:ENSG00000160789.18_LMNA  | -0.04612 | -0.203822579 | 0.113918744 | 5.73E-01 | 8.00E-01 | 1.00E+00 |
| ENSG00000103200.6_RP11-723C:ENSG00000160789.18_LMNA | -0.02352 | -0.182038619 | 0.136191117 | 7.74E-01 | 9.07E-01 | 1.00E+00 |
| ENSG00000233423.1_RP4-736H5:ENSG00000160789.18_LMNA | -0.08616 | -0.242039532 | 0.074057743 | 2.91E-01 | 5.77E-01 | 1.00E+00 |
| ENSG00000234088.1_RPS15AP7:ENSG00000160789.18_LMNA  | -0.01907 | -0.17773581  | 0.140552679 | 8.16E-01 | 9.28E-01 | 1.00E+00 |
| ENSG00000256424.1_RP11-495K:ENSG00000160789.18_LMNA | -0.11683 | -0.27099246  | 0.043171529 | 1.52E-01 | 4.01E-01 | 1.00E+00 |

|                              |                         |          |              |             |          |          |          |
|------------------------------|-------------------------|----------|--------------|-------------|----------|----------|----------|
| ENSG00000242318.1_RP11-810D  | ENSG00000160789.18_LMNA | -0.11898 | -0.273007586 | 0.040999259 | 1.44E-01 | 3.89E-01 | 1.00E+00 |
| ENSG00000255208.1_           | ENSG00000160789.18_LMNA | -0.20097 | -0.349003452 | -0.04314872 | 1.30E-02 | 7.93E-02 | 1.00E+00 |
| ENSG00000267286.1_RP11-794M  | ENSG00000160789.18_LMNA | -0.00911 | -0.168065881 | 0.150309774 | 9.11E-01 | 9.66E-01 | 1.00E+00 |
| ENSG00000259350.2_RP11-63A2  | ENSG00000160789.18_LMNA | -0.18963 | -0.338603785 | -0.03137135 | 1.93E-02 | 1.05E-01 | 1.00E+00 |
| ENSG00000224816.1_NAP1L4P2   | ENSG00000160789.18_LMNA | -0.12336 | -0.277114361 | 0.036563019 | 1.30E-01 | 3.65E-01 | 1.00E+00 |
| ENSG00000229437.1_LINC00366  | ENSG00000160789.18_LMNA | -0.31852 | -0.454669185 | -0.16783452 | 6.35E-05 | 1.30E-03 | 1.00E+00 |
| ENSG00000254113.1_RP11-174I1 | ENSG00000160789.18_LMNA | -0.09624 | -0.251590084 | 0.063936055 | 2.38E-01 | 5.17E-01 | 1.00E+00 |
| ENSG00000261057.1_LINC00555  | ENSG00000160789.18_LMNA | 0.04044  | -0.119526502 | 0.198367271 | 6.21E-01 | 8.28E-01 | 1.00E+00 |
| ENSG00000229961.1_RP11-71G1  | ENSG00000160789.18_LMNA | 0.06984  | -0.090370387 | 0.226517364 | 3.93E-01 | 6.70E-01 | 1.00E+00 |
| ENSG00000257766.1_RP11-341G  | ENSG00000160789.18_LMNA | 0.0968   | -0.063379432 | 0.252113522 | 2.35E-01 | 5.13E-01 | 1.00E+00 |
| ENSG00000259309.1_RP11-19J5  | ENSG00000160789.18_LMNA | -0.11014 | -0.264697907 | 0.049937869 | 1.77E-01 | 4.38E-01 | 1.00E+00 |
| ENSG00000258600.1_RP11-452D  | ENSG00000160789.18_LMNA | -0.29344 | -0.432435661 | -0.14081376 | 2.44E-04 | 3.82E-03 | 1.00E+00 |
| ENSG00000244429.1_RP11-12N1  | ENSG00000160789.18_LMNA | -0.08731 | -0.243130376 | 0.072904951 | 2.85E-01 | 5.70E-01 | 1.00E+00 |
| ENSG00000273760.1_CH17-360D  | ENSG00000160789.18_LMNA | 0.02144  | -0.138235126 | 0.18002366  | 7.93E-01 | 9.16E-01 | 1.00E+00 |
| ENSG00000278900.1_RP11-1250  | ENSG00000160789.18_LMNA | -0.03152 | -0.189770397 | 0.128322642 | 7.00E-01 | 8.72E-01 | 1.00E+00 |
| ENSG00000266951.2_AD000091.  | ENSG00000160789.18_LMNA | 0.0527   | -0.107404999 | 0.21013457  | 5.19E-01 | 7.65E-01 | 1.00E+00 |
| ENSG00000265927.1_CTD-2532D  | ENSG00000160789.18_LMNA | 0.00491  | -0.154413267 | 0.163980661 | 9.52E-01 | 9.81E-01 | 1.00E+00 |
| ENSG00000225610.1_AC007679.  | ENSG00000160789.18_LMNA | -0.03807 | -0.196082523 | 0.121869087 | 6.41E-01 | 8.40E-01 | 1.00E+00 |
| ENSG00000108442.2_TVP23BP2   | ENSG00000160789.18_LMNA | 0.02676  | -0.133005992 | 0.185173157 | 7.43E-01 | 8.92E-01 | 1.00E+00 |
| ENSG00000255427.1_RP11-350D  | ENSG00000160789.18_LMNA | 0.09309  | -0.067104886 | 0.248606654 | 2.54E-01 | 5.36E-01 | 1.00E+00 |
| ENSG00000261637.1_RP11-883G  | ENSG00000160789.18_LMNA | -0.29666 | -0.435304616 | -0.1442762  | 2.06E-04 | 3.34E-03 | 1.00E+00 |
| ENSG00000267444.1_SMUG1P1    | ENSG00000160789.18_LMNA | 0.07422  | -0.085995648 | 0.230695968 | 3.63E-01 | 6.45E-01 | 1.00E+00 |
| ENSG00000260568.1_CTD-2358C  | ENSG00000160789.18_LMNA | -0.03496 | -0.193088368 | 0.124933684 | 6.69E-01 | 8.54E-01 | 1.00E+00 |
| ENSG00000281566.1_RP11-485F  | ENSG00000160789.18_LMNA | -0.03793 | -0.195944734 | 0.122010251 | 6.43E-01 | 8.41E-01 | 1.00E+00 |
| ENSG00000279297.1_RP11-796A  | ENSG00000160789.18_LMNA | 0.05255  | -0.107551246 | 0.209993142 | 5.20E-01 | 7.66E-01 | 1.00E+00 |
| ENSG00000244650.2_RP11-501O  | ENSG00000160789.18_LMNA | 0.18298  | 0.024493527  | 0.332495602 | 2.40E-02 | 1.23E-01 | 1.00E+00 |
| ENSG00000227519.1_CTA-342B1  | ENSG00000160789.18_LMNA | -0.01223 | -0.171096036 | 0.147258962 | 8.81E-01 | 9.54E-01 | 1.00E+00 |
| ENSG00000251033.1_CTD-2533K  | ENSG00000160789.18_LMNA | -0.12791 | -0.281378908 | 0.031943229 | 1.16E-01 | 3.41E-01 | 1.00E+00 |
| ENSG00000259365.1_RP11-424I1 | ENSG00000160789.18_LMNA | 0.03716  | -0.122770411 | 0.195202532 | 6.49E-01 | 8.44E-01 | 1.00E+00 |
| ENSG00000278912.1_CTD-2196E  | ENSG00000160789.18_LMNA | -0.0557  | -0.213011669 | 0.104426864 | 4.96E-01 | 7.50E-01 | 1.00E+00 |
| ENSG00000228291.1_ARL4AP3    | ENSG00000160789.18_LMNA | 0.00105  | -0.158177444 | 0.160223618 | 9.90E-01 | 9.96E-01 | 1.00E+00 |
| ENSG00000243655.2_RP11-846F  | ENSG00000160789.18_LMNA | -0.07658 | -0.232945491 | 0.083635469 | 3.48E-01 | 6.32E-01 | 1.00E+00 |
| ENSG00000251283.1_RP11-171N  | ENSG00000160789.18_LMNA | -0.01721 | -0.175929747 | 0.142379729 | 8.33E-01 | 9.35E-01 | 1.00E+00 |

|                             |                         |          |              |             |          |          |          |
|-----------------------------|-------------------------|----------|--------------|-------------|----------|----------|----------|
| ENSG00000260797.1_CTD-2336H | ENSG00000160789.18_LMNA | -0.1763  | -0.32634256  | -0.01759455 | 2.98E-02 | 1.43E-01 | 1.00E+00 |
| ENSG00000240895.1_RP11-119D | ENSG00000160789.18_LMNA | -0.09931 | -0.254489831 | 0.060849999 | 2.23E-01 | 4.99E-01 | 1.00E+00 |
| ENSG00000256355.1_NTAN1P3   | ENSG00000160789.18_LMNA | 0.02797  | -0.131819193 | 0.186339454 | 7.32E-01 | 8.87E-01 | 1.00E+00 |
| ENSG00000227893.1_LINC00352 | ENSG00000160789.18_LMNA | 0.05389  | -0.106218095 | 0.211281866 | 5.10E-01 | 7.59E-01 | 1.00E+00 |
| ENSG00000244031.3_RPS3AP17  | ENSG00000160789.18_LMNA | -0.11018 | -0.264739794 | 0.049892938 | 1.77E-01 | 4.38E-01 | 1.00E+00 |
| ENSG00000230492.1_RP4-753D1 | ENSG00000160789.18_LMNA | -0.24198 | -0.386301261 | -0.08609847 | 2.67E-03 | 2.44E-02 | 1.00E+00 |
| ENSG00000237747.1_RP11-65B2 | ENSG00000160789.18_LMNA | 0.14554  | -0.013979648 | 0.297844366 | 7.36E-02 | 2.58E-01 | 1.00E+00 |
| ENSG00000226164.2_FGFR3P6   | ENSG00000160789.18_LMNA | -0.12904 | -0.28243742  | 0.030794463 | 1.13E-01 | 3.36E-01 | 1.00E+00 |
| ENSG00000229405.1_AC092580. | ENSG00000160789.18_LMNA | -0.03363 | -0.191805889 | 0.126244482 | 6.81E-01 | 8.61E-01 | 1.00E+00 |
| ENSG00000121381.3_TAS2R9    | ENSG00000160789.18_LMNA | -0.13167 | -0.284903206 | 0.028115221 | 1.06E-01 | 3.23E-01 | 1.00E+00 |
| ENSG00000273234.1_OR2A13P   | ENSG00000160789.18_LMNA | 0.08032  | -0.079899353 | 0.236499528 | 3.25E-01 | 6.12E-01 | 1.00E+00 |
| ENSG00000264660.2_RP11-381P | ENSG00000160789.18_LMNA | -0.12179 | -0.27564824  | 0.03814818  | 1.35E-01 | 3.73E-01 | 1.00E+00 |
| ENSG00000260064.1_RP11-18F1 | ENSG00000160789.18_LMNA | -0.00028 | -0.159475566 | 0.158925813 | 9.97E-01 | 9.99E-01 | 1.00E+00 |
| ENSG00000217786.1_RP3-508D1 | ENSG00000160789.18_LMNA | -0.07679 | -0.233137741 | 0.083433596 | 3.47E-01 | 6.31E-01 | 1.00E+00 |
| ENSG00000250624.1_MTCYBP43  | ENSG00000160789.18_LMNA | -0.04524 | -0.202976794 | 0.114789494 | 5.80E-01 | 8.04E-01 | 1.00E+00 |
| ENSG00000233047.4_RP11-24P1 | ENSG00000160789.18_LMNA | -0.18401 | -0.33344162  | -0.02555684 | 2.33E-02 | 1.20E-01 | 1.00E+00 |
| ENSG00000234706.1_PRUNEP1   | ENSG00000160789.18_LMNA | 0.01628  | -0.143293041 | 0.175026122 | 8.42E-01 | 9.39E-01 | 1.00E+00 |
| ENSG00000270749.1_RP11-368M | ENSG00000160789.18_LMNA | 0.05564  | -0.104485527 | 0.212955049 | 4.96E-01 | 7.50E-01 | 1.00E+00 |
| ENSG00000104827.12_CGB3     | ENSG00000160789.18_LMNA | 0.04219  | -0.11780394  | 0.200045103 | 6.06E-01 | 8.20E-01 | 1.00E+00 |
| ENSG00000233851.1_LATS2-AS1 | ENSG00000160789.18_LMNA | 0.09073  | -0.069476827 | 0.246369563 | 2.66E-01 | 5.50E-01 | 1.00E+00 |
| ENSG00000263394.1_RP11-160E | ENSG00000160789.18_LMNA | -0.03848 | -0.196480359 | 0.121461435 | 6.38E-01 | 8.38E-01 | 1.00E+00 |
| ENSG00000273595.1_RP11-707E | ENSG00000160789.18_LMNA | -0.27462 | -0.415648158 | -0.12069549 | 6.17E-04 | 7.97E-03 | 1.00E+00 |
| ENSG00000257191.1_RP11-390N | ENSG00000160789.18_LMNA | -0.15097 | -0.302889975 | 0.008434372 | 6.34E-02 | 2.34E-01 | 1.00E+00 |
| ENSG00000237321.1_RP11-374A | ENSG00000160789.18_LMNA | -0.05978 | -0.216912847 | 0.100379575 | 4.64E-01 | 7.27E-01 | 1.00E+00 |
| ENSG00000171942.4_OR10H2    | ENSG00000160789.18_LMNA | -0.06636 | -0.223204308 | 0.093830281 | 4.17E-01 | 6.89E-01 | 1.00E+00 |
| ENSG00000254044.4_RP11-681L | ENSG00000160789.18_LMNA | -0.03306 | -0.19125151  | 0.126810758 | 6.86E-01 | 8.64E-01 | 1.00E+00 |
| ENSG00000237309.1_MTND2P6   | ENSG00000160789.18_LMNA | -0.05674 | -0.214004207 | 0.103398149 | 4.88E-01 | 7.44E-01 | 1.00E+00 |
| ENSG00000265552.1_RP11-958F | ENSG00000160789.18_LMNA | -0.14067 | -0.293306187 | 0.018950912 | 8.39E-02 | 2.80E-01 | 1.00E+00 |
| ENSG00000230710.1_LINC00332 | ENSG00000160789.18_LMNA | -0.23207 | -0.37732664  | -0.07566092 | 4.02E-03 | 3.32E-02 | 1.00E+00 |
| ENSG00000271696.1_RP11-548K | ENSG00000160789.18_LMNA | 0.08869  | -0.071515893 | 0.244443727 | 2.77E-01 | 5.62E-01 | 1.00E+00 |
| ENSG00000230197.5_RP11-160E | ENSG00000160789.18_LMNA | 0.08952  | -0.070691351 | 0.245222782 | 2.73E-01 | 5.57E-01 | 1.00E+00 |
| ENSG00000225843.1_NIPA2P1   | ENSG00000160789.18_LMNA | 0.05757  | -0.102570227 | 0.214802537 | 4.81E-01 | 7.39E-01 | 1.00E+00 |
| ENSG00000249160.3_RP11-1C1  | ENSG00000160789.18_LMNA | -0.03004 | -0.188337237 | 0.12978417  | 7.13E-01 | 8.78E-01 | 1.00E+00 |

|                              |                         |          |              |             |          |          |          |
|------------------------------|-------------------------|----------|--------------|-------------|----------|----------|----------|
| ENSG00000232532.1_RP11-63K6  | ENSG00000160789.18_LMNA | -0.16233 | -0.31343045  | -0.00321204 | 4.57E-02 | 1.90E-01 | 1.00E+00 |
| ENSG00000243828.2_RP11-307F  | ENSG00000160789.18_LMNA | -0.07147 | -0.228075516 | 0.088740527 | 3.82E-01 | 6.60E-01 | 1.00E+00 |
| ENSG00000235705.5_RP11-342M  | ENSG00000160789.18_LMNA | 0.01217  | -0.147316584 | 0.171038861 | 8.82E-01 | 9.54E-01 | 1.00E+00 |
| ENSG00000259602.1_RP11-138E  | ENSG00000160789.18_LMNA | 0.21367  | 0.056382241  | 0.360599741 | 8.22E-03 | 5.68E-02 | 1.00E+00 |
| ENSG00000274219.1_CTC-360J1  | ENSG00000160789.18_LMNA | -0.04813 | -0.20575642  | 0.111925989 | 5.56E-01 | 7.90E-01 | 1.00E+00 |
| ENSG00000213218.8_CSH2       | ENSG00000160789.18_LMNA | 0.09512  | -0.065065766 | 0.250527157 | 2.44E-01 | 5.23E-01 | 1.00E+00 |
| ENSG00000218725.2_B3GALNT2   | ENSG00000160789.18_LMNA | -0.19993 | -0.348049387 | -0.04206471 | 1.35E-02 | 8.14E-02 | 1.00E+00 |
| ENSG00000250307.2_TUBB8P3    | ENSG00000160789.18_LMNA | 0.01636  | -0.143209495 | 0.175108804 | 8.41E-01 | 9.38E-01 | 1.00E+00 |
| ENSG00000261748.1_RP11-419L  | ENSG00000160789.18_LMNA | -0.05119 | -0.208692299 | 0.108895777 | 5.31E-01 | 7.74E-01 | 1.00E+00 |
| ENSG00000250480.3_RP11-101B  | ENSG00000160789.18_LMNA | 0.07053  | -0.089675565 | 0.227181815 | 3.88E-01 | 6.66E-01 | 1.00E+00 |
| ENSG00000255086.1_RP11-336F  | ENSG00000160789.18_LMNA | 0.06427  | -0.095915802 | 0.221203752 | 4.32E-01 | 7.01E-01 | 1.00E+00 |
| ENSG00000170605.5_OR9K2      | ENSG00000160789.18_LMNA | -0.01039 | -0.169313575 | 0.149054308 | 8.99E-01 | 9.61E-01 | 1.00E+00 |
| ENSG00000227166.1_STSP1      | ENSG00000160789.18_LMNA | -0.02147 | -0.180051271 | 0.138207136 | 7.93E-01 | 9.16E-01 | 1.00E+00 |
| ENSG00000121377.2_TAS2R7     | ENSG00000160789.18_LMNA | -0.03494 | -0.193067914 | 0.124954599 | 6.69E-01 | 8.54E-01 | 1.00E+00 |
| ENSG00000224402.1_OR6D1P     | ENSG00000160789.18_LMNA | 0.0126   | -0.146897217 | 0.171454933 | 8.78E-01 | 9.52E-01 | 1.00E+00 |
| ENSG00000254498.1_CTD-2119L  | ENSG00000160789.18_LMNA | 0.10127  | -0.058881849 | 0.256336204 | 2.14E-01 | 4.89E-01 | 1.00E+00 |
| ENSG00000231402.1_WASF5P     | ENSG00000160789.18_LMNA | -0.0822  | -0.238286314 | 0.078017663 | 3.14E-01 | 6.00E-01 | 1.00E+00 |
| ENSG00000233499.1_OR5B1P     | ENSG00000160789.18_LMNA | 0.0637   | -0.096476491 | 0.220665451 | 4.36E-01 | 7.04E-01 | 1.00E+00 |
| ENSG00000249261.1_RP11-284A  | ENSG00000160789.18_LMNA | -0.10817 | -0.262845634 | 0.051923488 | 1.85E-01 | 4.50E-01 | 1.00E+00 |
| ENSG00000234256.2_PTCD2P2    | ENSG00000160789.18_LMNA | -0.2005  | -0.348572217 | -0.04265866 | 1.33E-02 | 8.02E-02 | 1.00E+00 |
| ENSG00000224521.1_RP11-438F  | ENSG00000160789.18_LMNA | -0.05418 | -0.211558119 | 0.105932171 | 5.07E-01 | 7.57E-01 | 1.00E+00 |
| ENSG00000279099.1_RP11-595O  | ENSG00000160789.18_LMNA | -0.18281 | -0.332337403 | -0.02431578 | 2.42E-02 | 1.24E-01 | 1.00E+00 |
| ENSG00000255075.1_CENPUP1    | ENSG00000160789.18_LMNA | 0.087    | -0.073214492 | 0.242837548 | 2.87E-01 | 5.72E-01 | 1.00E+00 |
| ENSG00000275688.3_CCL15-CCI  | ENSG00000160789.18_LMNA | -0.10286 | -0.257834044 | 0.057283417 | 2.07E-01 | 4.80E-01 | 1.00E+00 |
| ENSG00000237428.1_LL22NC03-  | ENSG00000160789.18_LMNA | -0.00837 | -0.167351488 | 0.151028155 | 9.18E-01 | 9.69E-01 | 1.00E+00 |
| ENSG00000215807.4_KRT18P65   | ENSG00000160789.18_LMNA | 0.04561  | -0.114424237 | 0.203331636 | 5.77E-01 | 8.03E-01 | 1.00E+00 |
| ENSG00000275772.1_LL22NC03-  | ENSG00000160789.18_LMNA | 0.07179  | -0.08841688  | 0.22838473  | 3.79E-01 | 6.58E-01 | 1.00E+00 |
| ENSG00000253165.1_CTD-2309H  | ENSG00000160789.18_LMNA | -0.08728 | -0.243100689 | 0.072936335 | 2.85E-01 | 5.70E-01 | 1.00E+00 |
| ENSG00000232772.1_MTND4P22   | ENSG00000160789.18_LMNA | 0.02259  | -0.137105947 | 0.181137121 | 7.82E-01 | 9.11E-01 | 1.00E+00 |
| ENSG00000120563.7_LYZL1      | ENSG00000160789.18_LMNA | 0.09891  | -0.061251681 | 0.254112719 | 2.25E-01 | 5.01E-01 | 1.00E+00 |
| ENSG00000198671.3_RP11-168J  | ENSG00000160789.18_LMNA | -0.11196 | -0.266412292 | 0.048097846 | 1.70E-01 | 4.28E-01 | 1.00E+00 |
| ENSG00000169154.5_GOT1L1     | ENSG00000160789.18_LMNA | 0.0171   | -0.142484189 | 0.175826422 | 8.34E-01 | 9.36E-01 | 1.00E+00 |
| ENSG00000277017.1_XXbac-B33I | ENSG00000160789.18_LMNA | -0.11391 | -0.26824248  | 0.046131174 | 1.62E-01 | 4.17E-01 | 1.00E+00 |

|                             |                         |          |              |             |          |          |          |
|-----------------------------|-------------------------|----------|--------------|-------------|----------|----------|----------|
| ENSG00000216713.1_MTND4P13  | ENSG00000160789.18_LMNA | 0.09029  | -0.069912271 | 0.245958508 | 2.69E-01 | 5.53E-01 | 1.00E+00 |
| ENSG00000231926.1_SEPHS1P7  | ENSG00000160789.18_LMNA | 0.07178  | -0.088429224 | 0.228372939 | 3.80E-01 | 6.58E-01 | 1.00E+00 |
| ENSG00000249557.2_HSPD1P15  | ENSG00000160789.18_LMNA | -0.05977 | -0.216908014 | 0.100384596 | 4.64E-01 | 7.27E-01 | 1.00E+00 |
| ENSG00000236306.2_LINC01241 | ENSG00000160789.18_LMNA | -0.11404 | -0.268366479 | 0.045997839 | 1.62E-01 | 4.17E-01 | 1.00E+00 |
| ENSG00000258873.2_DUXA      | ENSG00000160789.18_LMNA | 0.15913  | -7.69E-05    | 0.310461511 | 5.02E-02 | 2.02E-01 | 1.00E+00 |
| ENSG00000243729.3_OR5V1     | ENSG00000160789.18_LMNA | 0.06406  | -0.096116467 | 0.221011122 | 4.33E-01 | 7.02E-01 | 1.00E+00 |
| ENSG00000240265.1_RP11-62G1 | ENSG00000160789.18_LMNA | 0.04844  | -0.111620494 | 0.206052664 | 5.53E-01 | 7.88E-01 | 1.00E+00 |
| ENSG00000225777.1_DDX39AP1  | ENSG00000160789.18_LMNA | -0.12849 | -0.281925827 | 0.031349781 | 1.15E-01 | 3.38E-01 | 1.00E+00 |
| ENSG00000178828.6_RNF186    | ENSG00000160789.18_LMNA | -0.07772 | -0.234027233 | 0.082499249 | 3.41E-01 | 6.26E-01 | 1.00E+00 |
| ENSG00000235524.1_MTCO1P23  | ENSG00000160789.18_LMNA | 0.0352   | -0.12469718  | 0.193319647 | 6.67E-01 | 8.53E-01 | 1.00E+00 |
| ENSG00000261764.1_KRT18P18  | ENSG00000160789.18_LMNA | 0.15833  | -0.000888737 | 0.309727779 | 5.14E-02 | 2.05E-01 | 1.00E+00 |
| ENSG00000250919.1_UGT2B26P  | ENSG00000160789.18_LMNA | -0.22214 | -0.36831777  | -0.0652496  | 5.95E-03 | 4.47E-02 | 1.00E+00 |
| ENSG00000214782.6_MS4A18    | ENSG00000160789.18_LMNA | 0.08724  | -0.072970176 | 0.243068677 | 2.85E-01 | 5.71E-01 | 1.00E+00 |
| ENSG00000261080.1_RP1-166H4 | ENSG00000160789.18_LMNA | -0.04506 | -0.202801346 | 0.114970059 | 5.82E-01 | 8.05E-01 | 1.00E+00 |
| ENSG00000171201.9_SMR3B     | ENSG00000160789.18_LMNA | -0.01991 | -0.178548451 | 0.139729886 | 8.08E-01 | 9.23E-01 | 1.00E+00 |
| ENSG00000249873.5_RP11-983C | ENSG00000160789.18_LMNA | 0.18009  | 0.021508241  | 0.329836309 | 2.64E-02 | 1.31E-01 | 1.00E+00 |
| ENSG00000254587.1_RP11-360K | ENSG00000160789.18_LMNA | -0.04716 | -0.204822652 | 0.112888523 | 5.64E-01 | 7.95E-01 | 1.00E+00 |
| ENSG00000251510.1_AC022486. | ENSG00000160789.18_LMNA | -0.07548 | -0.231892261 | 0.08474095  | 3.55E-01 | 6.39E-01 | 1.00E+00 |
| ENSG00000227000.2_HSPD1P14  | ENSG00000160789.18_LMNA | -0.07848 | -0.234750432 | 0.081739169 | 3.37E-01 | 6.22E-01 | 1.00E+00 |
| ENSG00000230426.2_ERVMER61  | ENSG00000160789.18_LMNA | 0.10006  | -0.060096425 | 0.255197049 | 2.20E-01 | 4.95E-01 | 1.00E+00 |
| ENSG00000237426.1_ZIK1P1    | ENSG00000160789.18_LMNA | -0.04732 | -0.204978432 | 0.112727986 | 5.63E-01 | 7.94E-01 | 1.00E+00 |
| ENSG00000233887.1_ERVWE2    | ENSG00000160789.18_LMNA | 0.05049  | -0.10959627  | 0.208014121 | 5.37E-01 | 7.78E-01 | 1.00E+00 |
| ENSG00000235382.1_MTND4P31  | ENSG00000160789.18_LMNA | -0.02808 | -0.186448238 | 0.13170845  | 7.31E-01 | 8.87E-01 | 1.00E+00 |
| ENSG00000236340.4_AC000099. | ENSG00000160789.18_LMNA | -0.10293 | -0.257907523 | 0.057204961 | 2.07E-01 | 4.79E-01 | 1.00E+00 |
| ENSG00000230572.4_AC027612. | ENSG00000160789.18_LMNA | -0.24525 | -0.389249608 | -0.08954186 | 2.32E-03 | 2.19E-02 | 1.00E+00 |
| ENSG00000234228.1_NCLP2     | ENSG00000160789.18_LMNA | 0.11367  | -0.046368346 | 0.268021888 | 1.63E-01 | 4.19E-01 | 1.00E+00 |
| ENSG00000260268.4_LINC00919 | ENSG00000160789.18_LMNA | -0.08417 | -0.240156841 | 0.076045367 | 3.03E-01 | 5.89E-01 | 1.00E+00 |
| ENSG00000261116.1_RP3-523K2 | ENSG00000160789.18_LMNA | 0.12494  | -0.034955702 | 0.278599486 | 1.25E-01 | 3.57E-01 | 1.00E+00 |
| ENSG00000255420.1_CASC23    | ENSG00000160789.18_LMNA | 0.0025   | -0.156762614 | 0.16163685  | 9.76E-01 | 9.91E-01 | 1.00E+00 |
| ENSG00000243658.1_MTND5P16  | ENSG00000160789.18_LMNA | -0.10739 | -0.262110158 | 0.052711222 | 1.88E-01 | 4.55E-01 | 1.00E+00 |
| ENSG00000189299.6_FOXR2     | ENSG00000160789.18_LMNA | -0.14957 | -0.30159112  | 0.009863685 | 6.59E-02 | 2.40E-01 | 1.00E+00 |
| ENSG00000278873.1_PRO1804   | ENSG00000160789.18_LMNA | -0.06569 | -0.222561073 | 0.094501138 | 4.21E-01 | 6.93E-01 | 1.00E+00 |
| ENSG00000270367.1_RP11-331G | ENSG00000160789.18_LMNA | 0.00442  | -0.154892333 | 0.163503015 | 9.57E-01 | 9.83E-01 | 1.00E+00 |

|                             |                         |          |              |             |          |          |          |
|-----------------------------|-------------------------|----------|--------------|-------------|----------|----------|----------|
| ENSG00000232337.1_AC009313. | ENSG00000160789.18_LMNA | -0.14741 | -0.299583541 | 0.012070405 | 6.99E-02 | 2.49E-01 | 1.00E+00 |
| ENSG00000204983.11_PRSS1    | ENSG00000160789.18_LMNA | 0.15     | -0.009425053 | 0.301989839 | 6.51E-02 | 2.38E-01 | 1.00E+00 |
| ENSG00000229462.1_AC127383. | ENSG00000160789.18_LMNA | -0.08271 | -0.238767446 | 0.07751059  | 3.11E-01 | 5.97E-01 | 1.00E+00 |
| ENSG00000275767.1_CH17-248H | ENSG00000160789.18_LMNA | 0.02346  | -0.136250666 | 0.181979954 | 7.74E-01 | 9.07E-01 | 1.00E+00 |
| ENSG00000281887.1_GIMAP1-GI | ENSG00000160789.18_LMNA | 0.04683  | -0.11321715  | 0.204503714 | 5.67E-01 | 7.97E-01 | 1.00E+00 |
| ENSG00000225638.1_PABPC1P1  | ENSG00000160789.18_LMNA | -0.05709 | -0.214342596 | 0.10304727  | 4.85E-01 | 7.42E-01 | 1.00E+00 |
| ENSG00000268447.4_SXX2B     | ENSG00000160789.18_LMNA | 0.00887  | -0.150545216 | 0.167831783 | 9.14E-01 | 9.67E-01 | 1.00E+00 |
| ENSG00000277024.1_RP11-347J | ENSG00000160789.18_LMNA | 0.07484  | -0.085379414 | 0.231283637 | 3.59E-01 | 6.42E-01 | 1.00E+00 |
| ENSG00000279851.1_CH507-216 | ENSG00000160789.18_LMNA | -0.10893 | -0.263556251 | 0.051162008 | 1.82E-01 | 4.46E-01 | 1.00E+00 |
| ENSG00000224035.1_SFPQP1    | ENSG00000160789.18_LMNA | -0.08374 | -0.23974617  | 0.076478594 | 3.05E-01 | 5.92E-01 | 1.00E+00 |
| ENSG00000177596.1_RP11-512C | ENSG00000160789.18_LMNA | -0.08468 | -0.240636969 | 0.075538717 | 3.00E-01 | 5.86E-01 | 1.00E+00 |
| ENSG00000163295.4_ALPI      | ENSG00000160789.18_LMNA | 0.08552  | -0.074696477 | 0.241434779 | 2.95E-01 | 5.81E-01 | 1.00E+00 |
| ENSG00000279160.1_RP11-387A | ENSG00000160789.18_LMNA | 0.03705  | -0.122877951 | 0.195097503 | 6.50E-01 | 8.45E-01 | 1.00E+00 |
| ENSG00000218020.3_THAP12P5  | ENSG00000160789.18_LMNA | 0.09742  | -0.062752855 | 0.252702523 | 2.32E-01 | 5.10E-01 | 1.00E+00 |
| ENSG00000164893.7_SLC7A13   | ENSG00000160789.18_LMNA | 0.06167  | -0.098498538 | 0.218722533 | 4.50E-01 | 7.16E-01 | 1.00E+00 |
| ENSG00000164113.9_ADAD1     | ENSG00000160789.18_LMNA | 0.01898  | -0.140641675 | 0.177647886 | 8.16E-01 | 9.28E-01 | 1.00E+00 |
| ENSG00000236521.1_NPAP1P4   | ENSG00000160789.18_LMNA | -0.11267 | -0.267079902 | 0.047380731 | 1.67E-01 | 4.24E-01 | 1.00E+00 |
| ENSG00000173612.8_GPRC6A    | ENSG00000160789.18_LMNA | 0.10576  | -0.054356407 | 0.260572933 | 1.95E-01 | 4.63E-01 | 1.00E+00 |
| ENSG00000227061.1_AC079779. | ENSG00000160789.18_LMNA | -0.05139 | -0.208878252 | 0.108703649 | 5.30E-01 | 7.73E-01 | 1.00E+00 |
| ENSG00000258779.5_LINC01568 | ENSG00000160789.18_LMNA | -0.03894 | -0.196920613 | 0.121010193 | 6.34E-01 | 8.36E-01 | 1.00E+00 |
| ENSG00000184330.10_S100A7A  | ENSG00000160789.18_LMNA | 0.07349  | -0.086725825 | 0.229999338 | 3.68E-01 | 6.49E-01 | 1.00E+00 |
| ENSG00000261623.1_RP11-189E | ENSG00000160789.18_LMNA | 0.02881  | -0.13099318  | 0.187150668 | 7.25E-01 | 8.83E-01 | 1.00E+00 |
| ENSG00000206072.11_SERPINB  | ENSG00000160789.18_LMNA | 0.03103  | -0.128811194 | 0.189291479 | 7.04E-01 | 8.74E-01 | 1.00E+00 |
| ENSG00000183206.15_POTEC    | ENSG00000160789.18_LMNA | -0.0026  | -0.161732102 | 0.156667206 | 9.75E-01 | 9.90E-01 | 1.00E+00 |
| ENSG00000277671.1_pRNA      | ENSG00000160789.18_LMNA | -0.05019 | -0.207726957 | 0.109892788 | 5.39E-01 | 7.79E-01 | 1.00E+00 |
| ENSG00000275215.1_RNA5-8S5  | ENSG00000160789.18_LMNA | 0.05258  | -0.107516493 | 0.210026751 | 5.20E-01 | 7.66E-01 | 1.00E+00 |
| ENSG00000276796.1_          | ENSG00000160789.18_LMNA | 0.08676  | -0.073454904 | 0.242610076 | 2.88E-01 | 5.73E-01 | 1.00E+00 |
| ENSG00000281472.1_AC005042. | ENSG00000160789.18_LMNA | -0.02223 | -0.180793133 | 0.137454879 | 7.86E-01 | 9.13E-01 | 1.00E+00 |
| ENSG00000224947.1_VN1R25P   | ENSG00000160789.18_LMNA | 0.02001  | -0.139632199 | 0.178644905 | 8.07E-01 | 9.23E-01 | 1.00E+00 |
| ENSG00000251823.2_RNA5SP16  | ENSG00000160789.18_LMNA | 0.04865  | -0.111409034 | 0.206257686 | 5.52E-01 | 7.87E-01 | 1.00E+00 |
| ENSG00000238966.1_SNORD112  | ENSG00000160789.18_LMNA | 0.06219  | -0.097977676 | 0.219223252 | 4.47E-01 | 7.13E-01 | 1.00E+00 |
| ENSG00000202191.1_SNORD113  | ENSG00000160789.18_LMNA | -0.02134 | -0.179924723 | 0.13833542  | 7.94E-01 | 9.17E-01 | 1.00E+00 |
| ENSG00000200314.1_Y_RNA     | ENSG00000160789.18_LMNA | 0.00848  | -0.150920206 | 0.167458859 | 9.17E-01 | 9.69E-01 | 1.00E+00 |



|                              |                         |          |              |             |          |          |          |
|------------------------------|-------------------------|----------|--------------|-------------|----------|----------|----------|
| ENSG00000199390.1_SNORD114   | ENSG00000160789.18_LMNA | -0.02213 | -0.180689932 | 0.137559549 | 7.87E-01 | 9.13E-01 | 1.00E+00 |
| ENSG00000276326.1_MIR2909    | ENSG00000160789.18_LMNA | -0.04021 | -0.198146443 | 0.119753075 | 6.23E-01 | 8.30E-01 | 1.00E+00 |
| ENSG00000263584.1_MIR4480    | ENSG00000160789.18_LMNA | -0.12683 | -0.280368975 | 0.033038502 | 1.19E-01 | 3.47E-01 | 1.00E+00 |
| ENSG00000273882.1_MIR8066    | ENSG00000160789.18_LMNA | -0.08781 | -0.243602764 | 0.072405474 | 2.82E-01 | 5.67E-01 | 1.00E+00 |
| ENSG00000274550.1_           | ENSG00000160789.18_LMNA | 0.13159  | -0.028198908 | 0.284826249 | 1.06E-01 | 3.23E-01 | 1.00E+00 |
| ENSG00000222427.1_RNA5SP33   | ENSG00000160789.18_LMNA | -0.16505 | -0.315951338 | -0.00600995 | 4.21E-02 | 1.80E-01 | 1.00E+00 |
| ENSG00000251712.2_RNU7-20P   | ENSG00000160789.18_LMNA | 0.0425   | -0.117494306 | 0.200346499 | 6.03E-01 | 8.18E-01 | 1.00E+00 |
| ENSG00000252532.1_RNU7-193F  | ENSG00000160789.18_LMNA | -0.06537 | -0.222255115 | 0.094820134 | 4.24E-01 | 6.95E-01 | 1.00E+00 |
| ENSG00000275702.1_           | ENSG00000160789.18_LMNA | -0.00817 | -0.167151854 | 0.151228843 | 9.20E-01 | 9.70E-01 | 1.00E+00 |
| ENSG00000199837.1_RNA5SP71   | ENSG00000160789.18_LMNA | -0.09472 | -0.250151125 | 0.065465231 | 2.46E-01 | 5.25E-01 | 1.00E+00 |
| ENSG00000200296.1_RNU1-83P   | ENSG00000160789.18_LMNA | -0.0049  | -0.163971537 | 0.15442242  | 9.52E-01 | 9.81E-01 | 1.00E+00 |
| ENSG00000212615.1_SNORD58    | ENSG00000160789.18_LMNA | 0.02517  | -0.134566197 | 0.18363854  | 7.58E-01 | 8.99E-01 | 1.00E+00 |
| ENSG00000276024.1_           | ENSG00000160789.18_LMNA | 0.00263  | -0.156636471 | 0.161762786 | 9.74E-01 | 9.90E-01 | 1.00E+00 |
| ENSG00000266570.1_MIR5579    | ENSG00000160789.18_LMNA | -0.03697 | -0.195026594 | 0.122950551 | 6.51E-01 | 8.45E-01 | 1.00E+00 |
| ENSG00000266407.1_MIR3157    | ENSG00000160789.18_LMNA | 0.02588  | -0.133876944 | 0.18431668  | 7.52E-01 | 8.96E-01 | 1.00E+00 |
| ENSG00000274884.1_AL117190.1 | ENSG00000160789.18_LMNA | -0.01397 | -0.172783429 | 0.145557437 | 8.64E-01 | 9.47E-01 | 1.00E+00 |
| ENSG00000264741.1_MIR4505    | ENSG00000160789.18_LMNA | -0.04776 | -0.205394399 | 0.112299233 | 5.59E-01 | 7.92E-01 | 1.00E+00 |
| ENSG00000227012.2_RP1-97J1.2 | ENSG00000160789.18_LMNA | -0.05152 | -0.209004003 | 0.10857371  | 5.28E-01 | 7.72E-01 | 1.00E+00 |
| ENSG00000239118.1_MIR1972-2  | ENSG00000160789.18_LMNA | -0.06612 | -0.22297682  | 0.094067571 | 4.18E-01 | 6.90E-01 | 1.00E+00 |
| ENSG00000253008.2_MIR2355    | ENSG00000160789.18_LMNA | 0.13949  | -0.020153677 | 0.292206086 | 8.65E-02 | 2.86E-01 | 1.00E+00 |
| ENSG00000263409.1_MIR4747    | ENSG00000160789.18_LMNA | -0.00475 | -0.163829342 | 0.154565053 | 9.54E-01 | 9.81E-01 | 1.00E+00 |
| ENSG00000264726.1_           | ENSG00000160789.18_LMNA | -0.08952 | -0.245226998 | 0.070686888 | 2.73E-01 | 5.57E-01 | 1.00E+00 |
| ENSG00000238964.1_RNU7-125F  | ENSG00000160789.18_LMNA | -0.01485 | -0.173636495 | 0.144696508 | 8.56E-01 | 9.43E-01 | 1.00E+00 |
| ENSG00000251710.1_           | ENSG00000160789.18_LMNA | 0.0219   | -0.137784651 | 0.180467962 | 7.89E-01 | 9.14E-01 | 1.00E+00 |
| ENSG00000265993.1_MIR5694    | ENSG00000160789.18_LMNA | -0.21205 | -0.359127909 | -0.05469666 | 8.72E-03 | 5.94E-02 | 1.00E+00 |
| ENSG00000221112.1_           | ENSG00000160789.18_LMNA | -0.07918 | -0.235408472 | 0.081047252 | 3.32E-01 | 6.18E-01 | 1.00E+00 |
| ENSG00000199492.1_RNU6-1313  | ENSG00000160789.18_LMNA | -0.17946 | -0.329250082 | -0.02085089 | 2.70E-02 | 1.33E-01 | 1.00E+00 |
| ENSG00000264730.1_           | ENSG00000160789.18_LMNA | 0.02357  | -0.136143167 | 0.182085855 | 7.73E-01 | 9.06E-01 | 1.00E+00 |
| ENSG00000264642.1_           | ENSG00000160789.18_LMNA | -0.04604 | -0.203746941 | 0.113996634 | 5.73E-01 | 8.01E-01 | 1.00E+00 |
| ENSG00000266355.1_           | ENSG00000160789.18_LMNA | -0.0559  | -0.213203844 | 0.104227738 | 4.94E-01 | 7.49E-01 | 1.00E+00 |
| ENSG00000221020.1_           | ENSG00000160789.18_LMNA | 0.0948   | -0.065385879 | 0.25022583  | 2.45E-01 | 5.25E-01 | 1.00E+00 |
| ENSG00000221163.1_           | ENSG00000160789.18_LMNA | -0.13014 | -0.283465366 | 0.029678078 | 1.10E-01 | 3.30E-01 | 1.00E+00 |
| ENSG00000223247.1_RNU2-64P   | ENSG00000160789.18_LMNA | -0.00665 | -0.165670592 | 0.152717108 | 9.35E-01 | 9.75E-01 | 1.00E+00 |

|                             |                         |          |              |             |          |          |          |
|-----------------------------|-------------------------|----------|--------------|-------------|----------|----------|----------|
| ENSG00000266421.2_MIR4451   | ENSG00000160789.18_LMNA | -0.10864 | -0.263287472 | 0.051450068 | 1.83E-01 | 4.47E-01 | 1.00E+00 |
| ENSG00000272439.1_RNU6-91P  | ENSG00000160789.18_LMNA | 0.02138  | -0.138289316 | 0.179970204 | 7.94E-01 | 9.17E-01 | 1.00E+00 |
| ENSG00000206833.1_RNU6-20P  | ENSG00000160789.18_LMNA | 0.04334  | -0.11666658  | 0.201151908 | 5.96E-01 | 8.14E-01 | 1.00E+00 |
| ENSG00000266761.1_MIR3194   | ENSG00000160789.18_LMNA | 0.22343  | 0.066597313  | 0.369487159 | 5.66E-03 | 4.31E-02 | 1.00E+00 |
| ENSG00000266083.1_          | ENSG00000160789.18_LMNA | -0.06122 | -0.218295501 | 0.098942611 | 4.54E-01 | 7.19E-01 | 1.00E+00 |
| ENSG00000201035.1_RNA5SP46  | ENSG00000160789.18_LMNA | 0.05121  | -0.10887913  | 0.208708411 | 5.31E-01 | 7.74E-01 | 1.00E+00 |
| ENSG00000207924.2_MIR196A2  | ENSG00000160789.18_LMNA | 0.01094  | -0.14852051  | 0.16984376  | 8.94E-01 | 9.58E-01 | 1.00E+00 |
| ENSG00000207952.1_MIR624    | ENSG00000160789.18_LMNA | -0.15902 | -0.310361256 | 0.000187889 | 5.04E-02 | 2.02E-01 | 1.00E+00 |
| ENSG00000222249.1_RNU6-262F | ENSG00000160789.18_LMNA | -0.07214 | -0.228712307 | 0.088073941 | 3.77E-01 | 6.57E-01 | 1.00E+00 |
| ENSG00000216136.2_          | ENSG00000160789.18_LMNA | -0.06143 | -0.218494184 | 0.098736016 | 4.52E-01 | 7.17E-01 | 1.00E+00 |
| ENSG00000200389.1_RNU6-509F | ENSG00000160789.18_LMNA | 0.01856  | -0.141057595 | 0.177236908 | 8.20E-01 | 9.30E-01 | 1.00E+00 |
| ENSG00000199792.1_RNU6-1233 | ENSG00000160789.18_LMNA | 0.2251   | 0.0683536    | 0.371009619 | 5.30E-03 | 4.10E-02 | 1.00E+00 |
| ENSG00000266619.1_MIR4642   | ENSG00000160789.18_LMNA | 0.11726  | -0.042736207 | 0.271396511 | 1.50E-01 | 3.98E-01 | 1.00E+00 |
| ENSG00000201619.1_SNORA67   | ENSG00000160789.18_LMNA | -0.16015 | -0.311415204 | -0.00097882 | 4.87E-02 | 1.98E-01 | 1.00E+00 |
| ENSG00000273848.1_          | ENSG00000160789.18_LMNA | 0.06303  | -0.097145887 | 0.220022528 | 4.40E-01 | 7.08E-01 | 1.00E+00 |
| ENSG00000251696.1_          | ENSG00000160789.18_LMNA | -0.06516 | -0.222055441 | 0.095028281 | 4.25E-01 | 6.96E-01 | 1.00E+00 |
| ENSG00000238490.1_Y_RNA     | ENSG00000160789.18_LMNA | -0.0994  | -0.254568184 | 0.060766528 | 2.23E-01 | 4.99E-01 | 1.00E+00 |
| ENSG00000264249.1_MIR3912   | ENSG00000160789.18_LMNA | 0.03427  | -0.125617607 | 0.192419356 | 6.75E-01 | 8.58E-01 | 1.00E+00 |
| ENSG00000207176.1_Y_RNA     | ENSG00000160789.18_LMNA | 0.11932  | -0.040649876 | 0.273331437 | 1.43E-01 | 3.87E-01 | 1.00E+00 |
| ENSG00000251698.1_RNA5SP44  | ENSG00000160789.18_LMNA | -0.15122 | -0.303124008 | 0.008176697 | 6.29E-02 | 2.33E-01 | 1.00E+00 |
| ENSG00000240205.3_RN7SL865F | ENSG00000160789.18_LMNA | -0.02662 | -0.185032914 | 0.13314864  | 7.45E-01 | 8.93E-01 | 1.00E+00 |
| ENSG00000249025.1_ZNF519P4  | ENSG00000160789.18_LMNA | 0.05424  | -0.105875219 | 0.211613138 | 5.07E-01 | 7.57E-01 | 1.00E+00 |
| ENSG00000202528.1_RNU6-650F | ENSG00000160789.18_LMNA | -0.14487 | -0.297214882 | 0.014670127 | 7.50E-02 | 2.61E-01 | 1.00E+00 |
| ENSG00000212335.1_Y_RNA     | ENSG00000160789.18_LMNA | 0.09499  | -0.065197429 | 0.250403228 | 2.44E-01 | 5.24E-01 | 1.00E+00 |
| ENSG00000273672.1_          | ENSG00000160789.18_LMNA | -0.03316 | -0.191353281 | 0.126706819 | 6.85E-01 | 8.63E-01 | 1.00E+00 |
| ENSG00000252951.1_RNA5SP16  | ENSG00000160789.18_LMNA | 0.11821  | -0.041776826 | 0.272286585 | 1.47E-01 | 3.93E-01 | 1.00E+00 |
| ENSG00000266156.1_          | ENSG00000160789.18_LMNA | 0.13176  | -0.028032399 | 0.284979364 | 1.06E-01 | 3.23E-01 | 1.00E+00 |
| ENSG00000274278.1_          | ENSG00000160789.18_LMNA | -0.00223 | -0.161377177 | 0.157022678 | 9.78E-01 | 9.92E-01 | 1.00E+00 |
| ENSG00000222426.1_RNU2-50P  | ENSG00000160789.18_LMNA | -0.07425 | -0.230726627 | 0.085963504 | 3.63E-01 | 6.45E-01 | 1.00E+00 |
| ENSG00000253262.1_RP11-221H | ENSG00000160789.18_LMNA | -0.15698 | -0.308472834 | 0.002276246 | 5.34E-02 | 2.10E-01 | 1.00E+00 |
| ENSG00000200008.1_Y_RNA     | ENSG00000160789.18_LMNA | 0.16373  | 0.004650099  | 0.314726671 | 4.38E-02 | 1.85E-01 | 1.00E+00 |
| ENSG00000206710.1_RNU6-147F | ENSG00000160789.18_LMNA | 0.04508  | -0.114941009 | 0.202829573 | 5.81E-01 | 8.05E-01 | 1.00E+00 |
| ENSG00000241229.3_RN7SL443F | ENSG00000160789.18_LMNA | -0.06203 | -0.219066785 | 0.098140456 | 4.48E-01 | 7.14E-01 | 1.00E+00 |

|                              |                         |          |              |             |          |          |          |
|------------------------------|-------------------------|----------|--------------|-------------|----------|----------|----------|
| ENSG00000207784.2_MIR542     | ENSG00000160789.18_LMNA | -0.00297 | -0.162097071 | 0.15630159  | 9.71E-01 | 9.89E-01 | 1.00E+00 |
| ENSG00000207480.1_Y_RNA      | ENSG00000160789.18_LMNA | -0.06017 | -0.217284835 | 0.099993105 | 4.62E-01 | 7.25E-01 | 1.00E+00 |
| ENSG00000257902.2_           | ENSG00000160789.18_LMNA | -0.09743 | -0.252712433 | 0.062742311 | 2.32E-01 | 5.10E-01 | 1.00E+00 |
| ENSG00000238840.1_U8         | ENSG00000160789.18_LMNA | 0.12309  | -0.036828024 | 0.276869359 | 1.31E-01 | 3.67E-01 | 1.00E+00 |
| ENSG00000212568.1_RNU6-1254  | ENSG00000160789.18_LMNA | 0.08543  | -0.074788611 | 0.241347525 | 2.95E-01 | 5.81E-01 | 1.00E+00 |
| ENSG00000200179.1_Y_RNA      | ENSG00000160789.18_LMNA | -0.01194 | -0.170814478 | 0.147542696 | 8.84E-01 | 9.55E-01 | 1.00E+00 |
| ENSG00000253077.1_RNA5SP16   | ENSG00000160789.18_LMNA | -0.00369 | -0.162791495 | 0.155605692 | 9.64E-01 | 9.86E-01 | 1.00E+00 |
| ENSG00000206925.1_Y_RNA      | ENSG00000160789.18_LMNA | -0.01967 | -0.178310061 | 0.1399713   | 8.10E-01 | 9.25E-01 | 1.00E+00 |
| ENSG00000238965.1_RNA5SP35   | ENSG00000160789.18_LMNA | 0.05549  | -0.104636498 | 0.212809327 | 4.97E-01 | 7.51E-01 | 1.00E+00 |
| ENSG00000201532.1_RNA5SP19   | ENSG00000160789.18_LMNA | -0.10526 | -0.260106046 | 0.054855745 | 1.97E-01 | 4.66E-01 | 1.00E+00 |
| ENSG00000207773.1_MIR642A    | ENSG00000160789.18_LMNA | -0.0729  | -0.229433172 | 0.087319005 | 3.72E-01 | 6.52E-01 | 1.00E+00 |
| ENSG00000212157.1_RNU6-1319  | ENSG00000160789.18_LMNA | 0.12301  | -0.036908649 | 0.276794811 | 1.31E-01 | 3.67E-01 | 1.00E+00 |
| ENSG00000274033.1_AC006539.1 | ENSG00000160789.18_LMNA | 0.00722  | -0.152157795 | 0.166227442 | 9.30E-01 | 9.73E-01 | 1.00E+00 |
| ENSG00000201550.1_RNU6-726F  | ENSG00000160789.18_LMNA | -0.01624 | -0.174990678 | 0.143328854 | 8.43E-01 | 9.39E-01 | 1.00E+00 |
| ENSG00000222832.1_RNA5SP12   | ENSG00000160789.18_LMNA | #####    | -0.159206751 | 0.159194652 | 1.00E+00 | 1.00E+00 | 1.00E+00 |
| ENSG00000252383.1_RNU6-314F  | ENSG00000160789.18_LMNA | -0.11137 | -0.265857093 | 0.048693966 | 1.72E-01 | 4.31E-01 | 1.00E+00 |
| ENSG00000207508.1_RNU6-1237  | ENSG00000160789.18_LMNA | 0.03362  | -0.126257638 | 0.191793011 | 6.81E-01 | 8.61E-01 | 1.00E+00 |
| ENSG00000206637.1_SNORA70    | ENSG00000160789.18_LMNA | -0.08648 | -0.242344313 | 0.073735739 | 2.89E-01 | 5.75E-01 | 1.00E+00 |
| ENSG00000221100.1_           | ENSG00000160789.18_LMNA | -0.01618 | -0.174927709 | 0.143392476 | 8.43E-01 | 9.39E-01 | 1.00E+00 |
| ENSG00000206981.1_RNU6-40P   | ENSG00000160789.18_LMNA | -0.11958 | -0.273576169 | 0.040385799 | 1.42E-01 | 3.85E-01 | 1.00E+00 |
| ENSG00000222588.1_SNORA19    | ENSG00000160789.18_LMNA | 0.11603  | -0.043986202 | 0.270236011 | 1.55E-01 | 4.05E-01 | 1.00E+00 |
| ENSG00000259107.1_LINC00911  | ENSG00000160789.18_LMNA | -0.06874 | -0.225474667 | 0.091460123 | 4.00E-01 | 6.77E-01 | 1.00E+00 |
| ENSG00000270458.1_RP11-644F  | ENSG00000160789.18_LMNA | -0.10589 | -0.260696357 | 0.054224377 | 1.94E-01 | 4.63E-01 | 1.00E+00 |
| ENSG00000234717.1_TMEM212-1  | ENSG00000160789.18_LMNA | -0.08005 | -0.23624355  | 0.080168743 | 3.27E-01 | 6.13E-01 | 1.00E+00 |
| ENSG00000222974.1_RN7SKP22   | ENSG00000160789.18_LMNA | 0.03897  | -0.120985685 | 0.196944521 | 6.34E-01 | 8.36E-01 | 1.00E+00 |
| ENSG00000202351.1_RN7SKP20   | ENSG00000160789.18_LMNA | 0.05558  | -0.104548096 | 0.212894658 | 4.96E-01 | 7.51E-01 | 1.00E+00 |
| ENSG00000242019.1_KIR3DL3    | ENSG00000160789.18_LMNA | 0.14354  | -0.016023311 | 0.295980446 | 7.77E-02 | 2.67E-01 | 1.00E+00 |
| ENSG00000201346.2_U3         | ENSG00000160789.18_LMNA | 0.00011  | -0.159097133 | 0.159304267 | 9.99E-01 | 1.00E+00 | 1.00E+00 |
| ENSG00000267678.1_RP11-15E1  | ENSG00000160789.18_LMNA | 0.06928  | -0.090919646 | 0.225991904 | 3.96E-01 | 6.73E-01 | 1.00E+00 |
| ENSG00000253388.1_RP11-150O  | ENSG00000160789.18_LMNA | 0.0131   | -0.146408423 | 0.171939745 | 8.73E-01 | 9.51E-01 | 1.00E+00 |
| ENSG00000243333.3_RN7SL174F  | ENSG00000160789.18_LMNA | -0.04948 | -0.207048764 | 0.110592848 | 5.45E-01 | 7.83E-01 | 1.00E+00 |
| ENSG00000279864.1_RP11-570J  | ENSG00000160789.18_LMNA | 0.02845  | -0.131342578 | 0.186807583 | 7.28E-01 | 8.85E-01 | 1.00E+00 |
| ENSG00000201423.1_RN7SKP24   | ENSG00000160789.18_LMNA | -0.00808 | -0.167064402 | 0.151316749 | 9.21E-01 | 9.70E-01 | 1.00E+00 |

|                              |                         |          |              |             |          |          |          |
|------------------------------|-------------------------|----------|--------------|-------------|----------|----------|----------|
| ENSG00000242614.3_RN7SL164F  | ENSG00000160789.18_LMNA | 0.03856  | -0.12138513  | 0.196554815 | 6.37E-01 | 8.38E-01 | 1.00E+00 |
| ENSG00000244559.1_CTD-2377D  | ENSG00000160789.18_LMNA | -0.02664 | -0.185053521 | 0.13312768  | 7.45E-01 | 8.93E-01 | 1.00E+00 |
| ENSG00000240873.1_RPS29P22   | ENSG00000160789.18_LMNA | 0.03676  | -0.123163079 | 0.194818997 | 6.53E-01 | 8.46E-01 | 1.00E+00 |
| ENSG00000238898.1_RNU1-80P   | ENSG00000160789.18_LMNA | -0.09509 | -0.250498834 | 0.065095857 | 2.44E-01 | 5.23E-01 | 1.00E+00 |
| ENSG00000280438.1_RP11-315A  | ENSG00000160789.18_LMNA | 0.20098  | 0.043158789  | 0.349012313 | 1.30E-02 | 7.93E-02 | 1.00E+00 |
| ENSG00000199940.1_RN7SKP75   | ENSG00000160789.18_LMNA | 0.05448  | -0.10563736  | 0.211842903 | 5.05E-01 | 7.56E-01 | 1.00E+00 |
| ENSG00000256670.1_RP11-338E  | ENSG00000160789.18_LMNA | 0.01261  | -0.146883247 | 0.171468792 | 8.77E-01 | 9.52E-01 | 1.00E+00 |
| ENSG00000233979.1_AC002553.  | ENSG00000160789.18_LMNA | -0.27746 | -0.41818767  | -0.12372338 | 5.39E-04 | 7.15E-03 | 1.00E+00 |
| ENSG00000280665.1_RP11-35J6  | ENSG00000160789.18_LMNA | -0.00578 | -0.164825746 | 0.153565302 | 9.44E-01 | 9.78E-01 | 1.00E+00 |
| ENSG00000280249.1_AL691477.1 | ENSG00000160789.18_LMNA | 0.08583  | -0.074385698 | 0.241729055 | 2.93E-01 | 5.79E-01 | 1.00E+00 |
| ENSG00000251935.1_RN7SKP17   | ENSG00000160789.18_LMNA | -0.02836 | -0.186719918 | 0.131431843 | 7.29E-01 | 8.85E-01 | 1.00E+00 |
| ENSG00000225520.1_TTTY16     | ENSG00000160789.18_LMNA | -0.08664 | -0.242499639 | 0.07357161  | 2.89E-01 | 5.74E-01 | 1.00E+00 |
| ENSG00000224932.1_AC107399.  | ENSG00000160789.18_LMNA | -0.149   | -0.301062376 | 0.010445172 | 6.69E-02 | 2.42E-01 | 1.00E+00 |
| ENSG00000223688.2_RPS24P14   | ENSG00000160789.18_LMNA | 0.00048  | -0.1587354   | 0.159665933 | 9.95E-01 | 9.98E-01 | 1.00E+00 |
| ENSG00000235637.1_RP11-457D  | ENSG00000160789.18_LMNA | -0.05619 | -0.213476908 | 0.103944752 | 4.92E-01 | 7.47E-01 | 1.00E+00 |
| ENSG00000214305.4_Metazoa_Si | ENSG00000160789.18_LMNA | 0.04947  | -0.110600847 | 0.207041013 | 5.45E-01 | 7.83E-01 | 1.00E+00 |
| ENSG00000258849.1_OR7E159P   | ENSG00000160789.18_LMNA | -0.15401 | -0.305718294 | 0.005317566 | 5.82E-02 | 2.21E-01 | 1.00E+00 |
| ENSG00000228226.1_AC074019.  | ENSG00000160789.18_LMNA | 0.01186  | -0.14761806  | 0.170739682 | 8.85E-01 | 9.55E-01 | 1.00E+00 |
| ENSG00000151418.10_ATP6V1G   | ENSG00000160789.18_LMNA | -0.08298 | -0.23902185  | 0.077242405 | 3.09E-01 | 5.96E-01 | 1.00E+00 |
| ENSG00000261573.1_RP11-553K  | ENSG00000160789.18_LMNA | 0.0271   | -0.132671222 | 0.185502235 | 7.40E-01 | 8.91E-01 | 1.00E+00 |
| ENSG00000259109.1_RP4-687K1  | ENSG00000160789.18_LMNA | -0.05581 | -0.213115541 | 0.104319238 | 4.95E-01 | 7.50E-01 | 1.00E+00 |
| ENSG00000280013.1_CH507-42P  | ENSG00000160789.18_LMNA | 0.08039  | -0.079830821 | 0.236564641 | 3.25E-01 | 6.12E-01 | 1.00E+00 |
| ENSG00000266002.1_RP11-567L  | ENSG00000160789.18_LMNA | -0.03944 | -0.1974057   | 0.120512846 | 6.29E-01 | 8.33E-01 | 1.00E+00 |
| ENSG00000239710.3_RN7SL692F  | ENSG00000160789.18_LMNA | 0.11175  | -0.048310896 | 0.266213891 | 1.70E-01 | 4.29E-01 | 1.00E+00 |
| ENSG00000271462.1_RP11-841C  | ENSG00000160789.18_LMNA | 0.04822  | -0.111836981 | 0.205842739 | 5.55E-01 | 7.89E-01 | 1.00E+00 |
| ENSG00000278097.1_AC131056.  | ENSG00000160789.18_LMNA | -0.06857 | -0.225309539 | 0.091632631 | 4.01E-01 | 6.78E-01 | 1.00E+00 |
| ENSG00000199666.2_U3         | ENSG00000160789.18_LMNA | -0.0037  | -0.162809471 | 0.155587673 | 9.64E-01 | 9.86E-01 | 1.00E+00 |
| ENSG00000222889.1_RN7SKP29   | ENSG00000160789.18_LMNA | -0.03425 | -0.192399412 | 0.125637991 | 6.75E-01 | 8.58E-01 | 1.00E+00 |
| ENSG00000241223.3_RN7SL39P   | ENSG00000160789.18_LMNA | -0.29759 | -0.43613049  | -0.14527424 | 1.97E-04 | 3.22E-03 | 1.00E+00 |
| ENSG00000250816.1_DCAF13P2   | ENSG00000160789.18_LMNA | 0.02565  | -0.13409948  | 0.184097765 | 7.54E-01 | 8.98E-01 | 1.00E+00 |
| ENSG00000231150.4_RP1-207H1  | ENSG00000160789.18_LMNA | -0.07865 | -0.234912945 | 0.081568319 | 3.35E-01 | 6.21E-01 | 1.00E+00 |
| ENSG00000268272.1_VN1R78P    | ENSG00000160789.18_LMNA | -0.04183 | -0.199700175 | 0.11815822  | 6.09E-01 | 8.21E-01 | 1.00E+00 |
| ENSG00000239390.3_RN7SL87P   | ENSG00000160789.18_LMNA | 0.04958  | -0.110492256 | 0.207146232 | 5.44E-01 | 7.82E-01 | 1.00E+00 |

|                              |                         |          |              |             |          |          |          |
|------------------------------|-------------------------|----------|--------------|-------------|----------|----------|----------|
| ENSG00000271620.1_IGHV3OR1   | ENSG00000160789.18_LMNA | 0.00058  | -0.158632387 | 0.159768912 | 9.94E-01 | 9.98E-01 | 1.00E+00 |
| ENSG00000202217.1_RN7SKP47   | ENSG00000160789.18_LMNA | 0.01831  | -0.141304821 | 0.176992567 | 8.23E-01 | 9.31E-01 | 1.00E+00 |
| ENSG00000278586.1_CTA-313A1  | ENSG00000160789.18_LMNA | 0.02169  | -0.137988219 | 0.1802672   | 7.91E-01 | 9.15E-01 | 1.00E+00 |
| ENSG00000234325.1_MRPS10P2   | ENSG00000160789.18_LMNA | -0.04724 | -0.204904517 | 0.11280416  | 5.63E-01 | 7.94E-01 | 1.00E+00 |
| ENSG00000255433.4_AP000479   | ENSG00000160789.18_LMNA | -0.0429  | -0.200725132 | 0.117105237 | 6.00E-01 | 8.16E-01 | 1.00E+00 |
| ENSG00000278473.1_IGHV3-41   | ENSG00000160789.18_LMNA | -0.03239 | -0.190610898 | 0.127464861 | 6.92E-01 | 8.67E-01 | 1.00E+00 |
| ENSG00000280185.1_RP11-315A  | ENSG00000160789.18_LMNA | 0.05572  | -0.104405415 | 0.213032371 | 4.95E-01 | 7.50E-01 | 1.00E+00 |
| ENSG00000229485.1_KSR1P1     | ENSG00000160789.18_LMNA | -0.04462 | -0.202379986 | 0.115403622 | 5.85E-01 | 8.07E-01 | 1.00E+00 |
| ENSG00000280642.1_           | ENSG00000160789.18_LMNA | -0.01706 | -0.175781303 | 0.142529801 | 8.35E-01 | 9.36E-01 | 1.00E+00 |
| ENSG00000278226.1_Metazoa_SI | ENSG00000160789.18_LMNA | 0.07719  | -0.083029367 | 0.233522629 | 3.45E-01 | 6.29E-01 | 1.00E+00 |
| ENSG00000279615.1_bP-2168N6  | ENSG00000160789.18_LMNA | -0.06552 | -0.22240455  | 0.094664339 | 4.23E-01 | 6.94E-01 | 1.00E+00 |
| ENSG00000227430.1_AC019185   | ENSG00000160789.18_LMNA | -0.03481 | -0.192944753 | 0.125080525 | 6.70E-01 | 8.55E-01 | 1.00E+00 |
| ENSG00000241317.1_RP11-342M  | ENSG00000160789.18_LMNA | -0.02574 | -0.184185158 | 0.134010646 | 7.53E-01 | 8.97E-01 | 1.00E+00 |
| ENSG00000223671.2_RPL34P3    | ENSG00000160789.18_LMNA | -0.07281 | -0.229348815 | 0.087407369 | 3.73E-01 | 6.53E-01 | 1.00E+00 |
| ENSG00000266521.1_RP11-650P  | ENSG00000160789.18_LMNA | 0.16744  | 0.008466506  | 0.318161062 | 3.92E-02 | 1.71E-01 | 1.00E+00 |
| ENSG00000213032.3_NDUFA3P3   | ENSG00000160789.18_LMNA | 0.03469  | -0.125202922 | 0.192825036 | 6.71E-01 | 8.56E-01 | 1.00E+00 |
| ENSG00000231334.1_AC104781   | ENSG00000160789.18_LMNA | -0.0493  | -0.206880154 | 0.110766846 | 5.46E-01 | 7.84E-01 | 1.00E+00 |
| ENSG00000236822.1_RP11-137J  | ENSG00000160789.18_LMNA | 0.0053   | -0.154033593 | 0.164359104 | 9.48E-01 | 9.79E-01 | 1.00E+00 |
| ENSG00000259204.1_RP11-394B  | ENSG00000160789.18_LMNA | -0.03831 | -0.196309442 | 0.121636582 | 6.39E-01 | 8.39E-01 | 1.00E+00 |
| ENSG00000242236.2_RN7SL594f  | ENSG00000160789.18_LMNA | -0.02906 | -0.187397621 | 0.130741635 | 7.22E-01 | 8.82E-01 | 1.00E+00 |
| ENSG00000275788.1_Metazoa_SI | ENSG00000160789.18_LMNA | -0.07737 | -0.233696211 | 0.082847029 | 3.43E-01 | 6.28E-01 | 1.00E+00 |
| ENSG00000252886.1_RN7SKP19   | ENSG00000160789.18_LMNA | 0.04905  | -0.11101532  | 0.206639341 | 5.48E-01 | 7.85E-01 | 1.00E+00 |
| ENSG00000242863.3_RN7SL677f  | ENSG00000160789.18_LMNA | 0.05985  | -0.100309057 | 0.216980729 | 4.64E-01 | 7.26E-01 | 1.00E+00 |
| ENSG00000237589.1_HMG1P32    | ENSG00000160789.18_LMNA | -0.04301 | -0.200837856 | 0.116989386 | 5.99E-01 | 8.15E-01 | 1.00E+00 |
| ENSG00000243853.1_ALDH7A1P   | ENSG00000160789.18_LMNA | -0.08516 | -0.241092071 | 0.075058325 | 2.97E-01 | 5.83E-01 | 1.00E+00 |
| ENSG00000232959.1_RP11-332H  | ENSG00000160789.18_LMNA | 0.03741  | -0.122518573 | 0.195448461 | 6.47E-01 | 8.43E-01 | 1.00E+00 |
| ENSG00000268993.1_RP11-439A  | ENSG00000160789.18_LMNA | -0.06461 | -0.221528605 | 0.095577342 | 4.29E-01 | 6.99E-01 | 1.00E+00 |
| ENSG00000232162.1_USP12-AS1  | ENSG00000160789.18_LMNA | 0.08444  | -0.075783847 | 0.24040469  | 3.01E-01 | 5.88E-01 | 1.00E+00 |
| ENSG00000180803.3_RP11-467D  | ENSG00000160789.18_LMNA | -0.10195 | -0.256983738 | 0.058191026 | 2.11E-01 | 4.85E-01 | 1.00E+00 |
| ENSG00000241097.2_RP11-864N  | ENSG00000160789.18_LMNA | -0.0068  | -0.1658166   | 0.152570474 | 9.34E-01 | 9.74E-01 | 1.00E+00 |
| ENSG00000242281.3_RN7SL159f  | ENSG00000160789.18_LMNA | 0.07948  | -0.080744427 | 0.235696379 | 3.30E-01 | 6.16E-01 | 1.00E+00 |
| ENSG00000281342.1_           | ENSG00000160789.18_LMNA | 0.04082  | -0.1191515   | 0.198732694 | 6.18E-01 | 8.27E-01 | 1.00E+00 |
| ENSG00000254335.1_CDH12P1    | ENSG00000160789.18_LMNA | 0.00736  | -0.152023196 | 0.166361418 | 9.28E-01 | 9.72E-01 | 1.00E+00 |

|                              |                         |          |              |             |          |          |          |
|------------------------------|-------------------------|----------|--------------|-------------|----------|----------|----------|
| ENSG00000280914.1_           | ENSG00000160789.18_LMNA | 0.10486  | -0.055262475 | 0.259725639 | 1.99E-01 | 4.69E-01 | 1.00E+00 |
| ENSG00000253237.2_RP11-775E  | ENSG00000160789.18_LMNA | 0.03673  | -0.12319231  | 0.194790442 | 6.53E-01 | 8.47E-01 | 1.00E+00 |
| ENSG00000218483.1_RP11-554D  | ENSG00000160789.18_LMNA | -0.02948 | -0.187801957 | 0.130329691 | 7.18E-01 | 8.80E-01 | 1.00E+00 |
| ENSG00000216364.1_MRPL42P2   | ENSG00000160789.18_LMNA | -0.04339 | -0.201196239 | 0.116621007 | 5.96E-01 | 8.13E-01 | 1.00E+00 |
| ENSG00000256136.1_RP11-113C  | ENSG00000160789.18_LMNA | -0.03915 | -0.197125257 | 0.120800396 | 6.32E-01 | 8.35E-01 | 1.00E+00 |
| ENSG00000260867.1_RP11-459F  | ENSG00000160789.18_LMNA | -0.15294 | -0.304724884 | 0.006412992 | 6.00E-02 | 2.26E-01 | 1.00E+00 |
| ENSG00000264423.2_RN7SL718F  | ENSG00000160789.18_LMNA | -0.04967 | -0.207234444 | 0.110401212 | 5.43E-01 | 7.82E-01 | 1.00E+00 |
| ENSG00000253792.1_CTC-436K1  | ENSG00000160789.18_LMNA | -0.04623 | -0.20392812  | 0.113810054 | 5.72E-01 | 8.00E-01 | 1.00E+00 |
| ENSG00000227818.1_RP11-227F  | ENSG00000160789.18_LMNA | 0.00774  | -0.151644388 | 0.166738409 | 9.25E-01 | 9.71E-01 | 1.00E+00 |
| ENSG00000269615.1_MTDHP2     | ENSG00000160789.18_LMNA | -0.13944 | -0.292155899 | 0.020208526 | 8.67E-02 | 2.86E-01 | 1.00E+00 |
| ENSG00000225253.1_AC011225.  | ENSG00000160789.18_LMNA | -0.08167 | -0.237781065 | 0.078549977 | 3.17E-01 | 6.04E-01 | 1.00E+00 |
| ENSG00000256923.1_RP11-449P  | ENSG00000160789.18_LMNA | -0.11326 | -0.267633024 | 0.04678635  | 1.65E-01 | 4.21E-01 | 1.00E+00 |
| ENSG00000180053.7_NKX2-6     | ENSG00000160789.18_LMNA | 0.10294  | -0.057194432 | 0.257917385 | 2.07E-01 | 4.79E-01 | 1.00E+00 |
| ENSG00000275362.1_Metazoa_SI | ENSG00000160789.18_LMNA | 0.06937  | -0.090832707 | 0.226075089 | 3.96E-01 | 6.73E-01 | 1.00E+00 |
| ENSG00000225625.4_RP11-31H5  | ENSG00000160789.18_LMNA | -0.06398 | -0.220935021 | 0.096195734 | 4.34E-01 | 7.03E-01 | 1.00E+00 |
| ENSG00000243546.3_RN7SL108F  | ENSG00000160789.18_LMNA | 0.11814  | -0.041851799 | 0.272217048 | 1.47E-01 | 3.93E-01 | 1.00E+00 |
| ENSG00000254698.1_RP11-659G  | ENSG00000160789.18_LMNA | -0.03494 | -0.193064427 | 0.124958164 | 6.69E-01 | 8.55E-01 | 1.00E+00 |
| ENSG00000261836.1_           | ENSG00000160789.18_LMNA | -0.14487 | -0.297217706 | 0.014667029 | 7.50E-02 | 2.61E-01 | 1.00E+00 |
| ENSG00000248188.2_RP11-442P  | ENSG00000160789.18_LMNA | -0.09451 | -0.2499475   | 0.065681503 | 2.47E-01 | 5.27E-01 | 1.00E+00 |
| ENSG00000254575.1_RP11-3G21  | ENSG00000160789.18_LMNA | -0.16922 | -0.319805499 | -0.01029706 | 3.71E-02 | 1.65E-01 | 1.00E+00 |
| ENSG00000273736.1_CTB-186H2  | ENSG00000160789.18_LMNA | 0.00409  | -0.155211688 | 0.163184525 | 9.60E-01 | 9.84E-01 | 1.00E+00 |
| ENSG00000224626.1_AC106053.  | ENSG00000160789.18_LMNA | -0.06373 | -0.220696277 | 0.096444388 | 4.35E-01 | 7.04E-01 | 1.00E+00 |
| ENSG00000229339.1_RP11-193I2 | ENSG00000160789.18_LMNA | 0.04185  | -0.118136496 | 0.199721327 | 6.09E-01 | 8.21E-01 | 1.00E+00 |
| ENSG00000213549.3_AC005077.  | ENSG00000160789.18_LMNA | -0.01941 | -0.178063777 | 0.140220668 | 8.12E-01 | 9.26E-01 | 1.00E+00 |
| ENSG00000226955.1_AC104306.  | ENSG00000160789.18_LMNA | 0.06709  | -0.093108324 | 0.22389623  | 4.12E-01 | 6.86E-01 | 1.00E+00 |
| ENSG00000260207.1_DUX4L47    | ENSG00000160789.18_LMNA | 0.12022  | -0.039746251 | 0.274168698 | 1.40E-01 | 3.82E-01 | 1.00E+00 |
| ENSG00000226582.1_UBE2V1P5   | ENSG00000160789.18_LMNA | 0.06573  | -0.094460876 | 0.222599685 | 4.21E-01 | 6.93E-01 | 1.00E+00 |
| ENSG00000169906.5_S100G      | ENSG00000160789.18_LMNA | 0.02178  | -0.137896763 | 0.180357398 | 7.90E-01 | 9.15E-01 | 1.00E+00 |
| ENSG00000232390.3_NDUFA5P1   | ENSG00000160789.18_LMNA | 0.07799  | -0.082230084 | 0.234283378 | 3.40E-01 | 6.25E-01 | 1.00E+00 |
| ENSG00000256640.1_RP11-666F  | ENSG00000160789.18_LMNA | -0.00618 | -0.165214609 | 0.153174957 | 9.40E-01 | 9.76E-01 | 1.00E+00 |
| ENSG00000271586.1_RP11-52M1  | ENSG00000160789.18_LMNA | -0.00462 | -0.163699826 | 0.154694955 | 9.55E-01 | 9.82E-01 | 1.00E+00 |
| ENSG00000248939.1_RP11-395F  | ENSG00000160789.18_LMNA | -0.18113 | -0.3307939   | -0.02258259 | 2.55E-02 | 1.28E-01 | 1.00E+00 |
| ENSG00000280130.1_AC073333.  | ENSG00000160789.18_LMNA | 0.06095  | -0.099217086 | 0.218031498 | 4.56E-01 | 7.20E-01 | 1.00E+00 |

|                              |                         |          |              |             |          |          |          |
|------------------------------|-------------------------|----------|--------------|-------------|----------|----------|----------|
| ENSG00000256721.1_CACNA1C-   | ENSG00000160789.18_LMNA | 0.00633  | -0.15302824  | 0.165360743 | 9.38E-01 | 9.76E-01 | 1.00E+00 |
| ENSG00000257754.1_RP11-650K  | ENSG00000160789.18_LMNA | 0.09187  | -0.068330065 | 0.247451549 | 2.60E-01 | 5.43E-01 | 1.00E+00 |
| ENSG00000248990.1_RP11-960D  | ENSG00000160789.18_LMNA | -0.02146 | -0.180044023 | 0.138214484 | 7.93E-01 | 9.16E-01 | 1.00E+00 |
| ENSG00000232799.1_CRYGFP     | ENSG00000160789.18_LMNA | -0.07391 | -0.230396629 | 0.086309443 | 3.66E-01 | 6.47E-01 | 1.00E+00 |
| ENSG00000217178.1_RP11-9G10  | ENSG00000160789.18_LMNA | -0.0211  | -0.17969792  | 0.138565308 | 7.96E-01 | 9.18E-01 | 1.00E+00 |
| ENSG00000180424.6_DEFB123    | ENSG00000160789.18_LMNA | -0.11809 | -0.272172849 | 0.041899451 | 1.47E-01 | 3.93E-01 | 1.00E+00 |
| ENSG00000249265.1_AC113167.1 | ENSG00000160789.18_LMNA | -0.14042 | -0.293066558 | 0.01921298  | 8.44E-02 | 2.81E-01 | 1.00E+00 |
| ENSG00000224733.1_RP1-86D1.1 | ENSG00000160789.18_LMNA | -0.0797  | -0.235909527 | 0.080520197 | 3.29E-01 | 6.15E-01 | 1.00E+00 |
| ENSG00000251539.1_SNX18P24   | ENSG00000160789.18_LMNA | -0.18731 | -0.336478164 | -0.02897459 | 2.08E-02 | 1.11E-01 | 1.00E+00 |
| ENSG00000256927.1_RP5-944M2  | ENSG00000160789.18_LMNA | -0.08416 | -0.240140145 | 0.076062982 | 3.03E-01 | 5.89E-01 | 1.00E+00 |
| ENSG00000224329.2_LINC00297  | ENSG00000160789.18_LMNA | -0.11936 | -0.273365932 | 0.040612657 | 1.43E-01 | 3.86E-01 | 1.00E+00 |
| ENSG00000264662.1_RP11-283C  | ENSG00000160789.18_LMNA | -0.01708 | -0.175798432 | 0.142512486 | 8.35E-01 | 9.36E-01 | 1.00E+00 |
| ENSG00000242391.2_RP4-631H1  | ENSG00000160789.18_LMNA | 0.0399   | -0.120062062 | 0.197845239 | 6.26E-01 | 8.31E-01 | 1.00E+00 |
| ENSG00000278941.1_SMG6-IT1   | ENSG00000160789.18_LMNA | 0.08677  | -0.073442175 | 0.242622121 | 2.88E-01 | 5.73E-01 | 1.00E+00 |
| ENSG00000249312.1_ARL2BPP4   | ENSG00000160789.18_LMNA | 0.10586  | -0.054254078 | 0.260668593 | 1.94E-01 | 4.63E-01 | 1.00E+00 |
| ENSG00000263613.1_RP11-321A  | ENSG00000160789.18_LMNA | 0.09423  | -0.065961027 | 0.24968428  | 2.48E-01 | 5.28E-01 | 1.00E+00 |
| ENSG00000258007.1_RP11-350G  | ENSG00000160789.18_LMNA | -0.05356 | -0.210964591 | 0.106546414 | 5.12E-01 | 7.61E-01 | 1.00E+00 |
| ENSG00000253885.1_ARF1P3     | ENSG00000160789.18_LMNA | -0.05781 | -0.215028856 | 0.10233544  | 4.79E-01 | 7.37E-01 | 1.00E+00 |
| ENSG00000270995.1_RP11-29B1  | ENSG00000160789.18_LMNA | 0.05374  | -0.10637439  | 0.211130837 | 5.11E-01 | 7.60E-01 | 1.00E+00 |
| ENSG00000267137.1_RP11-15K2  | ENSG00000160789.18_LMNA | -0.10941 | -0.264010899 | 0.050674626 | 1.80E-01 | 4.42E-01 | 1.00E+00 |
| ENSG00000249365.1_RP11-508M  | ENSG00000160789.18_LMNA | 0.00609  | -0.153264008 | 0.165125905 | 9.41E-01 | 9.76E-01 | 1.00E+00 |
| ENSG00000254297.1_CTC-286N1  | ENSG00000160789.18_LMNA | -0.16548 | -0.316351201 | -0.0064542  | 4.16E-02 | 1.78E-01 | 1.00E+00 |
| ENSG00000228783.1_RP11-147I1 | ENSG00000160789.18_LMNA | 0.04748  | -0.112574627 | 0.205127231 | 5.61E-01 | 7.93E-01 | 1.00E+00 |
| ENSG00000250670.1_AC004063.1 | ENSG00000160789.18_LMNA | -0.10787 | -0.262558493 | 0.052231077 | 1.86E-01 | 4.52E-01 | 1.00E+00 |
| ENSG00000224323.2_DPRXP1     | ENSG00000160789.18_LMNA | 0.01483  | -0.144711226 | 0.173621916 | 8.56E-01 | 9.43E-01 | 1.00E+00 |
| ENSG00000256739.1_RP11-45F1  | ENSG00000160789.18_LMNA | -0.01747 | -0.176184247 | 0.142122403 | 8.31E-01 | 9.34E-01 | 1.00E+00 |
| ENSG00000253889.1_IGLVI-38   | ENSG00000160789.18_LMNA | 0.01665  | -0.142927122 | 0.175388225 | 8.39E-01 | 9.37E-01 | 1.00E+00 |
| ENSG00000237713.1_AC006000.1 | ENSG00000160789.18_LMNA | -0.08815 | -0.243927706 | 0.072061806 | 2.80E-01 | 5.66E-01 | 1.00E+00 |
| ENSG00000269741.4_CTC-518B2  | ENSG00000160789.18_LMNA | 0.08006  | -0.080165097 | 0.236247014 | 3.27E-01 | 6.13E-01 | 1.00E+00 |
| ENSG00000261046.1_C2orf69P1  | ENSG00000160789.18_LMNA | 0.07618  | -0.08404105  | 0.232559166 | 3.51E-01 | 6.35E-01 | 1.00E+00 |
| ENSG00000229226.3_BTFL4P4    | ENSG00000160789.18_LMNA | -0.08067 | -0.236832558 | 0.079548805 | 3.23E-01 | 6.10E-01 | 1.00E+00 |
| ENSG00000279895.1_CH507-254  | ENSG00000160789.18_LMNA | -0.04236 | -0.200208831 | 0.117635744 | 6.04E-01 | 8.18E-01 | 1.00E+00 |
| ENSG00000275094.1_RP11-219H  | ENSG00000160789.18_LMNA | 0.03777  | -0.122167959 | 0.195790782 | 6.44E-01 | 8.42E-01 | 1.00E+00 |

|                              |                         |          |              |             |          |          |          |
|------------------------------|-------------------------|----------|--------------|-------------|----------|----------|----------|
| ENSG00000265337.1_RP11-466A  | ENSG00000160789.18_LMNA | 0.08533  | -0.074889916 | 0.241251582 | 2.96E-01 | 5.82E-01 | 1.00E+00 |
| ENSG00000278582.1_RP11-1H8.1 | ENSG00000160789.18_LMNA | -0.01148 | -0.17036939  | 0.147991115 | 8.88E-01 | 9.57E-01 | 1.00E+00 |
| ENSG00000237345.1_RP11-344N  | ENSG00000160789.18_LMNA | -0.04203 | -0.199893332 | 0.117959835 | 6.07E-01 | 8.20E-01 | 1.00E+00 |
| ENSG00000233451.1_RP11-301N  | ENSG00000160789.18_LMNA | 0.03088  | -0.128951516 | 0.189153895 | 7.06E-01 | 8.75E-01 | 1.00E+00 |
| ENSG00000264845.2_RP11-465I4 | ENSG00000160789.18_LMNA | -0.0819  | -0.237993141 | 0.078326562 | 3.16E-01 | 6.02E-01 | 1.00E+00 |
| ENSG00000125788.5_DEFB126    | ENSG00000160789.18_LMNA | -0.0234  | -0.181925647 | 0.13630579  | 7.75E-01 | 9.07E-01 | 1.00E+00 |
| ENSG00000261727.2_RP11-1166I | ENSG00000160789.18_LMNA | 0.0753   | -0.084914193 | 0.231727139 | 3.56E-01 | 6.40E-01 | 1.00E+00 |
| ENSG00000120054.10_CPN1      | ENSG00000160789.18_LMNA | -0.05017 | -0.207712752 | 0.109907454 | 5.39E-01 | 7.79E-01 | 1.00E+00 |
| ENSG00000232526.1_VDAC1P13   | ENSG00000160789.18_LMNA | -0.07265 | -0.229201171 | 0.087562012 | 3.74E-01 | 6.54E-01 | 1.00E+00 |
| ENSG00000226814.2_RP3-419C1  | ENSG00000160789.18_LMNA | 0.05671  | -0.10342275  | 0.213980479 | 4.88E-01 | 7.44E-01 | 1.00E+00 |
| ENSG00000255672.1_RP11-45F1  | ENSG00000160789.18_LMNA | 0.07179  | -0.088419955 | 0.228381793 | 3.79E-01 | 6.58E-01 | 1.00E+00 |
| ENSG00000279610.1_C20orf181  | ENSG00000160789.18_LMNA | 0.00848  | -0.150919842 | 0.167459221 | 9.17E-01 | 9.69E-01 | 1.00E+00 |
| ENSG00000249392.1_RP11-725D  | ENSG00000160789.18_LMNA | -0.13032 | -0.283634771 | 0.029494023 | 1.10E-01 | 3.29E-01 | 1.00E+00 |
| ENSG00000272904.1_RP11-392E  | ENSG00000160789.18_LMNA | -0.11191 | -0.266367648 | 0.048145788 | 1.70E-01 | 4.29E-01 | 1.00E+00 |
| ENSG00000267188.1_CTC-512J1  | ENSG00000160789.18_LMNA | -0.16137 | -0.312545618 | -0.00223112 | 4.70E-02 | 1.93E-01 | 1.00E+00 |
| ENSG00000227838.1_RP1-213J1I | ENSG00000160789.18_LMNA | 0.05568  | -0.104450175 | 0.212989171 | 4.96E-01 | 7.50E-01 | 1.00E+00 |
| ENSG00000270196.1_RP11-550A  | ENSG00000160789.18_LMNA | -0.06966 | -0.226351984 | 0.090543279 | 3.94E-01 | 6.71E-01 | 1.00E+00 |
| ENSG00000248949.1_RP11-661C  | ENSG00000160789.18_LMNA | 0.07272  | -0.087494474 | 0.229265654 | 3.73E-01 | 6.53E-01 | 1.00E+00 |
| ENSG00000231896.1_AC019185.4 | ENSG00000160789.18_LMNA | -0.01599 | -0.174743062 | 0.143579024 | 8.45E-01 | 9.40E-01 | 1.00E+00 |
| ENSG00000255599.1_AP000997.7 | ENSG00000160789.18_LMNA | -0.07976 | -0.235966955 | 0.080459778 | 3.29E-01 | 6.15E-01 | 1.00E+00 |
| ENSG00000253740.4_KB-1083B1  | ENSG00000160789.18_LMNA | -0.03146 | -0.189710457 | 0.128383796 | 7.00E-01 | 8.72E-01 | 1.00E+00 |
| ENSG00000250590.4_RP11-565A  | ENSG00000160789.18_LMNA | -0.04282 | -0.200656829 | 0.117175429 | 6.00E-01 | 8.16E-01 | 1.00E+00 |
| ENSG00000264145.2_CH17-13I23 | ENSG00000160789.18_LMNA | -0.06938 | -0.226080438 | 0.090827116 | 3.96E-01 | 6.73E-01 | 1.00E+00 |
| ENSG00000187191.13_DAZ3      | ENSG00000160789.18_LMNA | -0.16059 | -0.311814666 | -0.00142125 | 4.81E-02 | 1.96E-01 | 1.00E+00 |
| ENSG00000259855.1_RP11-574O  | ENSG00000160789.18_LMNA | 0.00336  | -0.15592525  | 0.162472652 | 9.67E-01 | 9.87E-01 | 1.00E+00 |
| ENSG00000266486.1_FAM106CP   | ENSG00000160789.18_LMNA | -0.18611 | -0.335369719 | -0.02772616 | 2.17E-02 | 1.14E-01 | 1.00E+00 |
| ENSG00000255947.1_RP11-855O  | ENSG00000160789.18_LMNA | -0.05379 | -0.211181002 | 0.106322477 | 5.10E-01 | 7.59E-01 | 1.00E+00 |
| ENSG00000253264.1_PCAT2      | ENSG00000160789.18_LMNA | 0.02048  | -0.139178726 | 0.179092569 | 8.02E-01 | 9.21E-01 | 1.00E+00 |
| ENSG00000214904.5_DUTP8      | ENSG00000160789.18_LMNA | 0.13276  | -0.027008704 | 0.285920359 | 1.03E-01 | 3.18E-01 | 1.00E+00 |
| ENSG00000269575.1_MTDHP5     | ENSG00000160789.18_LMNA | -0.11843 | -0.272492196 | 0.041555122 | 1.46E-01 | 3.92E-01 | 1.00E+00 |
| ENSG00000220702.1_RP1-32I10  | ENSG00000160789.18_LMNA | 0.11295  | -0.047096197 | 0.267344711 | 1.66E-01 | 4.23E-01 | 1.00E+00 |
| ENSG00000249407.1_IL20RB-AS  | ENSG00000160789.18_LMNA | 0.10655  | -0.053559073 | 0.261318144 | 1.91E-01 | 4.59E-01 | 1.00E+00 |
| ENSG00000253778.1_RP11-386D  | ENSG00000160789.18_LMNA | 0.07403  | -0.086187558 | 0.230512907 | 3.65E-01 | 6.46E-01 | 1.00E+00 |



|                              |                         |          |              |             |          |          |          |
|------------------------------|-------------------------|----------|--------------|-------------|----------|----------|----------|
| ENSG00000232465.1_RP5-1022J  | ENSG00000160789.18_LMNA | -0.10891 | -0.263542094 | 0.051177181 | 1.82E-01 | 4.46E-01 | 1.00E+00 |
| ENSG00000234576.1_MTND1P26   | ENSG00000160789.18_LMNA | 0.0758   | -0.084423426 | 0.232194853 | 3.53E-01 | 6.37E-01 | 1.00E+00 |
| ENSG00000186860.4_KRTAP17-1  | ENSG00000160789.18_LMNA | -0.12343 | -0.277187117 | 0.036484315 | 1.30E-01 | 3.65E-01 | 1.00E+00 |
| ENSG00000250657.1_RP11-1E6.1 | ENSG00000160789.18_LMNA | 0.00505  | -0.154276267 | 0.164117227 | 9.51E-01 | 9.80E-01 | 1.00E+00 |
| ENSG00000267961.1_OR10B1P    | ENSG00000160789.18_LMNA | 0.09542  | -0.064767285 | 0.250808067 | 2.42E-01 | 5.21E-01 | 1.00E+00 |
| ENSG00000214020.3_FTLF4      | ENSG00000160789.18_LMNA | -0.05056 | -0.208089018 | 0.109518923 | 5.36E-01 | 7.77E-01 | 1.00E+00 |
| ENSG00000259702.1_RP11-236L  | ENSG00000160789.18_LMNA | -0.07208 | -0.228652583 | 0.088136472 | 3.78E-01 | 6.57E-01 | 1.00E+00 |
| ENSG00000239513.4_LINC01210  | ENSG00000160789.18_LMNA | -0.18554 | -0.334851118 | -0.02714239 | 2.21E-02 | 1.16E-01 | 1.00E+00 |
| ENSG00000218410.1_AC012078.1 | ENSG00000160789.18_LMNA | -0.15535 | -0.306961783 | 0.003945327 | 5.60E-02 | 2.16E-01 | 1.00E+00 |
| ENSG00000234953.2_RP5-837I24 | ENSG00000160789.18_LMNA | 0.02289  | -0.136805932 | 0.181432823 | 7.80E-01 | 9.09E-01 | 1.00E+00 |
| ENSG00000267235.2_ZNF861P    | ENSG00000160789.18_LMNA | 0.03041  | -0.129421621 | 0.188692875 | 7.10E-01 | 8.77E-01 | 1.00E+00 |
| ENSG00000254194.4_RP1-273G1  | ENSG00000160789.18_LMNA | -0.24337 | -0.387555158 | -0.08756203 | 2.52E-03 | 2.33E-02 | 1.00E+00 |
| ENSG00000185296.8_CTD-2139B  | ENSG00000160789.18_LMNA | 0.11955  | -0.040424102 | 0.273540675 | 1.42E-01 | 3.85E-01 | 1.00E+00 |
| ENSG00000261233.2_ABCD1P3    | ENSG00000160789.18_LMNA | 0.02622  | -0.133536635 | 0.184651391 | 7.48E-01 | 8.95E-01 | 1.00E+00 |
| ENSG00000226446.1_NOTCH2P1   | ENSG00000160789.18_LMNA | 0.00852  | -0.150884613 | 0.16749426  | 9.17E-01 | 9.68E-01 | 1.00E+00 |
| ENSG00000270652.1_DPRXP5     | ENSG00000160789.18_LMNA | 0.04944  | -0.110631585 | 0.207011228 | 5.45E-01 | 7.83E-01 | 1.00E+00 |
| ENSG00000249057.1_MAST4-IT1  | ENSG00000160789.18_LMNA | 0.00908  | -0.150337631 | 0.168038185 | 9.12E-01 | 9.66E-01 | 1.00E+00 |
| ENSG00000261313.1_RP11-2C15  | ENSG00000160789.18_LMNA | 0.07234  | -0.087872063 | 0.228905109 | 3.76E-01 | 6.56E-01 | 1.00E+00 |
| ENSG00000188334.3_BSPH1      | ENSG00000160789.18_LMNA | -0.1042  | -0.259100353 | 0.055930804 | 2.01E-01 | 4.72E-01 | 1.00E+00 |
| ENSG00000224371.4_RP11-235G  | ENSG00000160789.18_LMNA | 0.02026  | -0.139393428 | 0.178880633 | 8.04E-01 | 9.22E-01 | 1.00E+00 |
| ENSG00000237620.1_GCNT1P5    | ENSG00000160789.18_LMNA | 0.07193  | -0.088279117 | 0.228516331 | 3.78E-01 | 6.58E-01 | 1.00E+00 |
| ENSG00000225879.1_RP3-495K2  | ENSG00000160789.18_LMNA | -0.10703 | -0.261768185 | 0.05307736  | 1.89E-01 | 4.57E-01 | 1.00E+00 |
| ENSG00000234452.4_SLC16A12-  | ENSG00000160789.18_LMNA | -0.06451 | -0.221435544 | 0.095674308 | 4.30E-01 | 7.00E-01 | 1.00E+00 |
| ENSG00000224723.1_GUSBP10    | ENSG00000160789.18_LMNA | 0.07608  | -0.084143425 | 0.232461636 | 3.52E-01 | 6.35E-01 | 1.00E+00 |
| ENSG00000267109.1_CTD-2378E  | ENSG00000160789.18_LMNA | 0.0692   | -0.091007533 | 0.225907809 | 3.97E-01 | 6.74E-01 | 1.00E+00 |
| ENSG00000272383.1_RP11-556O  | ENSG00000160789.18_LMNA | 0.04728  | -0.112771331 | 0.204936373 | 5.63E-01 | 7.94E-01 | 1.00E+00 |
| ENSG00000235281.1_RP11-526P  | ENSG00000160789.18_LMNA | -0.01344 | -0.172273642 | 0.146071692 | 8.69E-01 | 9.49E-01 | 1.00E+00 |
| ENSG00000265038.1_PMM2P1     | ENSG00000160789.18_LMNA | 0.02696  | -0.132809176 | 0.185366636 | 7.42E-01 | 8.92E-01 | 1.00E+00 |
| ENSG00000241350.1_PMS2P11    | ENSG00000160789.18_LMNA | 0.05213  | -0.107969016 | 0.209589067 | 5.24E-01 | 7.69E-01 | 1.00E+00 |
| ENSG00000250850.2_RP11-297B  | ENSG00000160789.18_LMNA | -0.02743 | -0.185819629 | 0.132348269 | 7.37E-01 | 8.90E-01 | 1.00E+00 |
| ENSG00000235355.1_           | ENSG00000160789.18_LMNA | 0.15074  | -0.008668891 | 0.302676941 | 6.38E-02 | 2.35E-01 | 1.00E+00 |
| ENSG00000272461.1_RP11-689C  | ENSG00000160789.18_LMNA | -0.02974 | -0.188051086 | 0.13007582  | 7.16E-01 | 8.79E-01 | 1.00E+00 |
| ENSG00000249691.1_RP11-445J  | ENSG00000160789.18_LMNA | -0.07899 | -0.235232868 | 0.081231926 | 3.33E-01 | 6.19E-01 | 1.00E+00 |

|                             |                         |          |              |             |          |          |          |
|-----------------------------|-------------------------|----------|--------------|-------------|----------|----------|----------|
| ENSG00000233353.1_RPS7P9    | ENSG00000160789.18_LMNA | 0.15839  | -0.000834358 | 0.30977694  | 5.13E-02 | 2.05E-01 | 1.00E+00 |
| ENSG00000261166.1_RP11-775H | ENSG00000160789.18_LMNA | -0.15053 | -0.302480399 | 0.008885224 | 6.42E-02 | 2.36E-01 | 1.00E+00 |
| ENSG00000280340.1_RP11-511H | ENSG00000160789.18_LMNA | 0.07195  | -0.088260338 | 0.22853427  | 3.78E-01 | 6.58E-01 | 1.00E+00 |
| ENSG00000237074.1_RP11-6J21 | ENSG00000160789.18_LMNA | -0.15062 | -0.302569585 | 0.00878706  | 6.40E-02 | 2.35E-01 | 1.00E+00 |
| ENSG00000274391.3_TPTE      | ENSG00000160789.18_LMNA | -0.19775 | -0.346058729 | -0.03980524 | 1.46E-02 | 8.62E-02 | 1.00E+00 |
| ENSG00000223438.1_RP1-171K1 | ENSG00000160789.18_LMNA | 0.01063  | -0.148819381 | 0.169546935 | 8.97E-01 | 9.60E-01 | 1.00E+00 |
| ENSG00000230687.1_RP5-1114G | ENSG00000160789.18_LMNA | -0.01413 | -0.172944806 | 0.145394609 | 8.63E-01 | 9.46E-01 | 1.00E+00 |
| ENSG00000266560.4_RP11-1007 | ENSG00000160789.18_LMNA | -0.05442 | -0.211782095 | 0.105700315 | 5.06E-01 | 7.56E-01 | 1.00E+00 |
| ENSG00000232843.2_SNX18P2   | ENSG00000160789.18_LMNA | 0.00688  | -0.152485858 | 0.165900849 | 9.33E-01 | 9.74E-01 | 1.00E+00 |
| ENSG00000260706.4_RP11-525K | ENSG00000160789.18_LMNA | -0.0322  | -0.190420946 | 0.12765876  | 6.94E-01 | 8.68E-01 | 1.00E+00 |
| ENSG00000219409.2_RP11-106E | ENSG00000160789.18_LMNA | -0.04274 | -0.200575763 | 0.117258735 | 6.01E-01 | 8.17E-01 | 1.00E+00 |
| ENSG00000281477.1_RP11-223J | ENSG00000160789.18_LMNA | -0.04159 | -0.19947199  | 0.118392547 | 6.11E-01 | 8.23E-01 | 1.00E+00 |
| ENSG00000248494.1_LNX1-AS2  | ENSG00000160789.18_LMNA | 0.01756  | -0.142039799 | 0.176265935 | 8.30E-01 | 9.34E-01 | 1.00E+00 |
| ENSG00000172073.3_TEX37     | ENSG00000160789.18_LMNA | 0.13923  | -0.020423357 | 0.291959311 | 8.71E-02 | 2.87E-01 | 1.00E+00 |
| ENSG00000174677.4_VN1R6P    | ENSG00000160789.18_LMNA | 0.17674  | 0.018045233  | 0.326745318 | 2.94E-02 | 1.41E-01 | 1.00E+00 |
| ENSG00000241356.1_OR5G3     | ENSG00000160789.18_LMNA | -0.02198 | -0.180549638 | 0.137701826 | 7.88E-01 | 9.14E-01 | 1.00E+00 |
| ENSG00000226930.1_GTF2IP2   | ENSG00000160789.18_LMNA | -0.01038 | -0.169297121 | 0.149070872 | 8.99E-01 | 9.61E-01 | 1.00E+00 |
| ENSG00000251300.1_RP11-54P1 | ENSG00000160789.18_LMNA | 0.15223  | -0.007143014 | 0.304062472 | 6.12E-02 | 2.29E-01 | 1.00E+00 |
| ENSG00000242856.3_VN1R105P  | ENSG00000160789.18_LMNA | -0.05877 | -0.215948062 | 0.101381472 | 4.72E-01 | 7.32E-01 | 1.00E+00 |
| ENSG00000228120.2_AP001631. | ENSG00000160789.18_LMNA | 0.11585  | -0.044166493 | 0.270068553 | 1.55E-01 | 4.06E-01 | 1.00E+00 |
| ENSG00000204699.4_UBTFL3    | ENSG00000160789.18_LMNA | 0.00779  | -0.151599524 | 0.166783052 | 9.24E-01 | 9.71E-01 | 1.00E+00 |
| ENSG00000259671.1_MTCYBP23  | ENSG00000160789.18_LMNA | 0.07626  | -0.083960685 | 0.232635724 | 3.50E-01 | 6.34E-01 | 1.00E+00 |
| ENSG00000225738.2_NRG3-AS1  | ENSG00000160789.18_LMNA | 0.05136  | -0.108733373 | 0.208849485 | 5.30E-01 | 7.73E-01 | 1.00E+00 |
| ENSG00000235306.2_GAPDHP34  | ENSG00000160789.18_LMNA | 0.00264  | -0.156626088 | 0.161773153 | 9.74E-01 | 9.90E-01 | 1.00E+00 |
| ENSG00000260476.1_RP11-254F | ENSG00000160789.18_LMNA | 0.04953  | -0.110544762 | 0.207095358 | 5.45E-01 | 7.83E-01 | 1.00E+00 |
| ENSG00000205865.4_FAM99B    | ENSG00000160789.18_LMNA | -0.11598 | -0.27019574  | 0.044029561 | 1.55E-01 | 4.06E-01 | 1.00E+00 |
| ENSG00000224599.1_BMS1P12   | ENSG00000160789.18_LMNA | -0.19184 | -0.340638376 | -0.03366878 | 1.79E-02 | 9.97E-02 | 1.00E+00 |
| ENSG00000248148.1_RP11-357F | ENSG00000160789.18_LMNA | 0.06252  | -0.097654969 | 0.219533396 | 4.44E-01 | 7.11E-01 | 1.00E+00 |
| ENSG00000254761.1_          | ENSG00000160789.18_LMNA | -0.19923 | -0.347412421 | -0.04134139 | 1.39E-02 | 8.29E-02 | 1.00E+00 |
| ENSG00000225735.1_NEK4P1    | ENSG00000160789.18_LMNA | 0.00211  | -0.157145734 | 0.161254292 | 9.79E-01 | 9.92E-01 | 1.00E+00 |
| ENSG00000236389.1_RP1-287H1 | ENSG00000160789.18_LMNA | -0.06935 | -0.226051861 | 0.090856984 | 3.96E-01 | 6.73E-01 | 1.00E+00 |
| ENSG00000224529.1_AC093698. | ENSG00000160789.18_LMNA | -0.03384 | -0.192002416 | 0.126043687 | 6.79E-01 | 8.60E-01 | 1.00E+00 |
| ENSG00000224966.4_TBC1D3P6  | ENSG00000160789.18_LMNA | -0.0447  | -0.202455399 | 0.115326035 | 5.85E-01 | 8.07E-01 | 1.00E+00 |

|                              |                         |          |              |             |          |          |          |
|------------------------------|-------------------------|----------|--------------|-------------|----------|----------|----------|
| ENSG00000265060.1_PPYP2P     | ENSG00000160789.18_LMNA | -0.06791 | -0.22468611  | 0.09228375  | 4.06E-01 | 6.81E-01 | 1.00E+00 |
| ENSG00000260141.1_RP11-19N8  | ENSG00000160789.18_LMNA | -0.20508 | -0.352759243 | -0.04742306 | 1.13E-02 | 7.13E-02 | 1.00E+00 |
| ENSG00000278122.1_AQP7P5     | ENSG00000160789.18_LMNA | -0.06028 | -0.21739837  | 0.099875131 | 4.61E-01 | 7.24E-01 | 1.00E+00 |
| ENSG00000175398.2_OR10P1     | ENSG00000160789.18_LMNA | 0.17599  | 0.017275516  | 0.326057391 | 3.01E-02 | 1.44E-01 | 1.00E+00 |
| ENSG00000232080.5_XXbac-BPG  | ENSG00000160789.18_LMNA | -0.06386 | -0.220812891 | 0.096322938 | 4.34E-01 | 7.03E-01 | 1.00E+00 |
| ENSG00000251284.2_RP13-644M  | ENSG00000160789.18_LMNA | -0.15882 | -0.310181132 | 0.0003872   | 5.07E-02 | 2.03E-01 | 1.00E+00 |
| ENSG00000258597.2_SERPINA2   | ENSG00000160789.18_LMNA | -0.12123 | -0.275119119 | 0.038719874 | 1.37E-01 | 3.76E-01 | 1.00E+00 |
| ENSG00000238152.2_OR7E140P   | ENSG00000160789.18_LMNA | 0.00333  | -0.155955835 | 0.162442132 | 9.68E-01 | 9.87E-01 | 1.00E+00 |
| ENSG00000226234.2_KRT18P24   | ENSG00000160789.18_LMNA | 0.04666  | -0.113383852 | 0.204341901 | 5.68E-01 | 7.98E-01 | 1.00E+00 |
| ENSG00000131808.9_FSHB       | ENSG00000160789.18_LMNA | -0.22973 | -0.375209236 | -0.07320796 | 4.41E-03 | 3.56E-02 | 1.00E+00 |
| ENSG00000213708.6_SLC16A14F  | ENSG00000160789.18_LMNA | 0.05991  | -0.100249954 | 0.217037621 | 4.63E-01 | 7.26E-01 | 1.00E+00 |
| ENSG00000226313.1_MTCYBP12   | ENSG00000160789.18_LMNA | -0.11285 | -0.267245278 | 0.047203043 | 1.66E-01 | 4.23E-01 | 1.00E+00 |
| ENSG00000255307.1_OR52B2     | ENSG00000160789.18_LMNA | 0.04814  | -0.111914345 | 0.205767712 | 5.56E-01 | 7.90E-01 | 1.00E+00 |
| ENSG00000233880.1_RP11-497J  | ENSG00000160789.18_LMNA | 0.03924  | -0.120717054 | 0.197206545 | 6.31E-01 | 8.34E-01 | 1.00E+00 |
| ENSG00000262322.1_MTND4P34   | ENSG00000160789.18_LMNA | 0.01747  | -0.142124174 | 0.176182495 | 8.31E-01 | 9.34E-01 | 1.00E+00 |
| ENSG00000231963.1_PABPC1L2   | ENSG00000160789.18_LMNA | -0.0299  | -0.188205689 | 0.129918252 | 7.15E-01 | 8.79E-01 | 1.00E+00 |
| ENSG00000226616.1_OR52M2P    | ENSG00000160789.18_LMNA | 0.04625  | -0.113787759 | 0.203949768 | 5.72E-01 | 8.00E-01 | 1.00E+00 |
| ENSG00000121853.3_GHSR       | ENSG00000160789.18_LMNA | -0.04759 | -0.205240275 | 0.112458108 | 5.60E-01 | 7.93E-01 | 1.00E+00 |
| ENSG00000271115.1_RP11-443I  | ENSG00000160789.18_LMNA | 0.04655  | -0.113494873 | 0.204234127 | 5.69E-01 | 7.98E-01 | 1.00E+00 |
| ENSG00000261130.4_RP11-1021I | ENSG00000160789.18_LMNA | 0.10559  | -0.054525487 | 0.260414857 | 1.95E-01 | 4.64E-01 | 1.00E+00 |
| ENSG00000279743.1_CTB-43I4.1 | ENSG00000160789.18_LMNA | -0.22485 | -0.370780597 | -0.06808928 | 5.35E-03 | 4.13E-02 | 1.00E+00 |
| ENSG00000227584.1_MTND4P5    | ENSG00000160789.18_LMNA | -0.06383 | -0.220787849 | 0.09634902  | 4.35E-01 | 7.03E-01 | 1.00E+00 |
| ENSG00000170465.9_KRT6C      | ENSG00000160789.18_LMNA | -0.1977  | -0.346014291 | -0.03975484 | 1.46E-02 | 8.63E-02 | 1.00E+00 |
| ENSG00000238161.1_OR7E117P   | ENSG00000160789.18_LMNA | 0.04692  | -0.113122606 | 0.204595478 | 5.66E-01 | 7.96E-01 | 1.00E+00 |
| ENSG00000233816.3_IFNA13     | ENSG00000160789.18_LMNA | -0.17698 | -0.32696973  | -0.0182964  | 2.92E-02 | 1.41E-01 | 1.00E+00 |
| ENSG00000169327.4_OR5AU1     | ENSG00000160789.18_LMNA | 0.12122  | -0.038731056 | 0.275108768 | 1.37E-01 | 3.77E-01 | 1.00E+00 |
| ENSG00000280265.1_CTA-363E6  | ENSG00000160789.18_LMNA | -0.06183 | -0.218877552 | 0.098337302 | 4.49E-01 | 7.15E-01 | 1.00E+00 |
| ENSG00000251218.1_RP11-1057I | ENSG00000160789.18_LMNA | -0.04022 | -0.198149938 | 0.11974949  | 6.23E-01 | 8.30E-01 | 1.00E+00 |
| ENSG00000187080.7_OR2AK2     | ENSG00000160789.18_LMNA | -0.02547 | -0.183920714 | 0.134279437 | 7.55E-01 | 8.98E-01 | 1.00E+00 |
| ENSG00000124900.11_TRIM51    | ENSG00000160789.18_LMNA | -0.04878 | -0.206379731 | 0.111283144 | 5.51E-01 | 7.87E-01 | 1.00E+00 |
| ENSG00000249425.1_RP11-502M  | ENSG00000160789.18_LMNA | -0.04382 | -0.201612622 | 0.116192901 | 5.92E-01 | 8.11E-01 | 1.00E+00 |
| ENSG00000231137.1_RBM22P5    | ENSG00000160789.18_LMNA | 0.17036  | 0.011473033  | 0.320860928 | 3.59E-02 | 1.61E-01 | 1.00E+00 |
| ENSG00000271389.1_OSBPL9P1   | ENSG00000160789.18_LMNA | 0.05404  | -0.106077657 | 0.21141756  | 5.08E-01 | 7.58E-01 | 1.00E+00 |

|                              |                         |          |              |             |          |          |          |
|------------------------------|-------------------------|----------|--------------|-------------|----------|----------|----------|
| ENSG00000264431.1_RP11-285M  | ENSG00000160789.18_LMNA | -0.0646  | -0.221523019 | 0.095583162 | 4.29E-01 | 6.99E-01 | 1.00E+00 |
| ENSG00000231900.3_GOT2P1     | ENSG00000160789.18_LMNA | -0.0363  | -0.194373668 | 0.123618889 | 6.57E-01 | 8.48E-01 | 1.00E+00 |
| ENSG00000254278.1_RP11-278I4 | ENSG00000160789.18_LMNA | 0.01331  | -0.146202603 | 0.172143842 | 8.71E-01 | 9.50E-01 | 1.00E+00 |
| ENSG00000230442.4_RP11-390E  | ENSG00000160789.18_LMNA | 0.04386  | -0.11614718  | 0.201657085 | 5.92E-01 | 8.11E-01 | 1.00E+00 |
| ENSG00000234474.2_MIR3663HC  | ENSG00000160789.18_LMNA | -0.05721 | -0.214457359 | 0.102928254 | 4.84E-01 | 7.41E-01 | 1.00E+00 |
| ENSG00000258729.2_RP11-404P  | ENSG00000160789.18_LMNA | 0.05904  | -0.101115961 | 0.216203798 | 4.70E-01 | 7.30E-01 | 1.00E+00 |
| ENSG00000110484.6_SCGB2A2    | ENSG00000160789.18_LMNA | -0.0533  | -0.210716744 | 0.106802839 | 5.14E-01 | 7.62E-01 | 1.00E+00 |
| ENSG00000180219.1_FAM71C     | ENSG00000160789.18_LMNA | 0.21074  | 0.053325187  | 0.357929229 | 9.16E-03 | 6.15E-02 | 1.00E+00 |
| ENSG00000186474.14_KLK12     | ENSG00000160789.18_LMNA | -0.00103 | -0.160207508 | 0.158193565 | 9.90E-01 | 9.96E-01 | 1.00E+00 |
| ENSG00000229051.1_RP5-952N6  | ENSG00000160789.18_LMNA | -0.02349 | -0.182014412 | 0.136215689 | 7.74E-01 | 9.07E-01 | 1.00E+00 |
| ENSG00000271894.1_RP11-482H  | ENSG00000160789.18_LMNA | 0.02296  | -0.136740736 | 0.181497074 | 7.79E-01 | 9.09E-01 | 1.00E+00 |
| ENSG00000250422.1_RP11-484L  | ENSG00000160789.18_LMNA | -0.06906 | -0.225781952 | 0.091139054 | 3.98E-01 | 6.75E-01 | 1.00E+00 |
| ENSG00000235455.1_IQCF5-AS1  | ENSG00000160789.18_LMNA | 0.03146  | -0.128379406 | 0.18971476  | 7.00E-01 | 8.72E-01 | 1.00E+00 |
| ENSG00000250372.1_MARK2P4    | ENSG00000160789.18_LMNA | -0.13852 | -0.291296648 | 0.021147303 | 8.88E-02 | 2.90E-01 | 1.00E+00 |
| ENSG00000179028.4_RP11-363G  | ENSG00000160789.18_LMNA | -0.01862 | -0.177296006 | 0.140997794 | 8.20E-01 | 9.30E-01 | 1.00E+00 |
| ENSG00000234830.6_FAM197Y9   | ENSG00000160789.18_LMNA | -0.15126 | -0.303164737 | 0.008131849 | 6.29E-02 | 2.33E-01 | 1.00E+00 |
| ENSG00000259854.1_RP11-211G  | ENSG00000160789.18_LMNA | -0.04693 | -0.204604594 | 0.113113213 | 5.66E-01 | 7.96E-01 | 1.00E+00 |
| ENSG00000261642.1_RP11-309H  | ENSG00000160789.18_LMNA | -0.01351 | -0.172342927 | 0.14600181  | 8.69E-01 | 9.49E-01 | 1.00E+00 |
| ENSG00000215853.3_RPTN       | ENSG00000160789.18_LMNA | 0.13     | -0.029818033 | 0.283336537 | 1.10E-01 | 3.31E-01 | 1.00E+00 |
| ENSG00000258705.2_AE000660.4 | ENSG00000160789.18_LMNA | -0.14361 | -0.29604668  | 0.015950735 | 7.75E-02 | 2.67E-01 | 1.00E+00 |
| ENSG00000235881.2_AC114776.1 | ENSG00000160789.18_LMNA | 0.0442   | -0.115817413 | 0.201977734 | 5.89E-01 | 8.09E-01 | 1.00E+00 |
| ENSG00000260343.1_LINC01043  | ENSG00000160789.18_LMNA | -0.02771 | -0.18608569  | 0.132077496 | 7.35E-01 | 8.89E-01 | 1.00E+00 |
| ENSG00000223152.1_RNU4-88P   | ENSG00000160789.18_LMNA | -0.00694 | -0.165955588 | 0.152430877 | 9.32E-01 | 9.74E-01 | 1.00E+00 |
| ENSG00000271831.1_           | ENSG00000160789.18_LMNA | 0.02426  | -0.135464575 | 0.182754192 | 7.67E-01 | 9.03E-01 | 1.00E+00 |
| ENSG00000265418.1_MIR4261    | ENSG00000160789.18_LMNA | -0.18785 | -0.336970997 | -0.02952998 | 2.05E-02 | 1.10E-01 | 1.00E+00 |
| ENSG00000256273.1_RP11-71J4  | ENSG00000160789.18_LMNA | 0.05089  | -0.109191503 | 0.20840603  | 5.33E-01 | 7.75E-01 | 1.00E+00 |
| ENSG00000275662.1_SNORD112   | ENSG00000160789.18_LMNA | -0.0813  | -0.237432298 | 0.07891732  | 3.19E-01 | 6.06E-01 | 1.00E+00 |
| ENSG00000277934.2_           | ENSG00000160789.18_LMNA | 0.03815  | -0.121789308 | 0.19616039  | 6.41E-01 | 8.40E-01 | 1.00E+00 |
| ENSG00000252124.1_           | ENSG00000160789.18_LMNA | -0.11596 | -0.270171038 | 0.044056156 | 1.55E-01 | 4.06E-01 | 1.00E+00 |
| ENSG00000222586.1_           | ENSG00000160789.18_LMNA | -0.01321 | -0.172047303 | 0.14629996  | 8.72E-01 | 9.50E-01 | 1.00E+00 |
| ENSG00000251706.1_RNU7-61P   | ENSG00000160789.18_LMNA | -0.03746 | -0.195492052 | 0.12247393  | 6.47E-01 | 8.43E-01 | 1.00E+00 |
| ENSG00000210741.1_MIR196A1   | ENSG00000160789.18_LMNA | 0.05035  | -0.109729707 | 0.2078849   | 5.38E-01 | 7.78E-01 | 1.00E+00 |
| ENSG00000211840.1_TRAJ49     | ENSG00000160789.18_LMNA | 0.03967  | -0.120286179 | 0.197626729 | 6.27E-01 | 8.32E-01 | 1.00E+00 |

|                              |                         |          |              |             |          |          |          |
|------------------------------|-------------------------|----------|--------------|-------------|----------|----------|----------|
| ENSG00000207612.1_MIR604     | ENSG00000160789.18_LMNA | -0.17045 | -0.320946207 | -0.01156809 | 3.58E-02 | 1.61E-01 | 1.00E+00 |
| ENSG00000275449.1_MIR6859-3  | ENSG00000160789.18_LMNA | 0.001    | -0.158229362 | 0.160171734 | 9.90E-01 | 9.96E-01 | 1.00E+00 |
| ENSG00000260153.1_RARRES2F   | ENSG00000160789.18_LMNA | -0.17159 | -0.321990905 | -0.01273302 | 3.45E-02 | 1.57E-01 | 1.00E+00 |
| ENSG00000274390.1_MIR6885    | ENSG00000160789.18_LMNA | 0.11279  | -0.047257018 | 0.267195045 | 1.67E-01 | 4.24E-01 | 1.00E+00 |
| ENSG00000265032.2_           | ENSG00000160789.18_LMNA | -0.0273  | -0.185691647 | 0.132478501 | 7.39E-01 | 8.90E-01 | 1.00E+00 |
| ENSG00000222095.1_SNORD113   | ENSG00000160789.18_LMNA | -0.02606 | -0.18449243  | 0.133698265 | 7.50E-01 | 8.96E-01 | 1.00E+00 |
| ENSG00000273926.1_           | ENSG00000160789.18_LMNA | -0.08441 | -0.240379427 | 0.075810507 | 3.01E-01 | 5.88E-01 | 1.00E+00 |
| ENSG00000263691.1_           | ENSG00000160789.18_LMNA | 0.02806  | -0.13172748  | 0.186429545 | 7.31E-01 | 8.87E-01 | 1.00E+00 |
| ENSG00000275726.1_MIR6088    | ENSG00000160789.18_LMNA | 0.10156  | -0.058591261 | 0.256608617 | 2.13E-01 | 4.87E-01 | 1.00E+00 |
| ENSG00000276987.1_           | ENSG00000160789.18_LMNA | -0.05797 | -0.215188666 | 0.102169627 | 4.78E-01 | 7.36E-01 | 1.00E+00 |
| ENSG00000275829.1_           | ENSG00000160789.18_LMNA | -0.05047 | -0.208000085 | 0.109610765 | 5.37E-01 | 7.78E-01 | 1.00E+00 |
| ENSG00000201343.1_Y_RNA      | ENSG00000160789.18_LMNA | -0.00445 | -0.163530486 | 0.154864785 | 9.57E-01 | 9.83E-01 | 1.00E+00 |
| ENSG00000275541.1_           | ENSG00000160789.18_LMNA | 0.0124   | -0.147089198 | 0.171264475 | 8.79E-01 | 9.53E-01 | 1.00E+00 |
| ENSG00000263539.1_           | ENSG00000160789.18_LMNA | -0.06709 | -0.223895372 | 0.09310922  | 4.12E-01 | 6.86E-01 | 1.00E+00 |
| ENSG00000281730.1_           | ENSG00000160789.18_LMNA | 0.01165  | -0.147826561 | 0.170532736 | 8.87E-01 | 9.56E-01 | 1.00E+00 |
| ENSG00000248515.1_RP11-608O  | ENSG00000160789.18_LMNA | -0.05538 | -0.212709564 | 0.104739846 | 4.98E-01 | 7.51E-01 | 1.00E+00 |
| ENSG00000276083.1_MIR7976    | ENSG00000160789.18_LMNA | -0.0939  | -0.249368259 | 0.066296557 | 2.50E-01 | 5.30E-01 | 1.00E+00 |
| ENSG00000263399.1_MIR3170    | ENSG00000160789.18_LMNA | 0.00233  | -0.156927252 | 0.161472464 | 9.77E-01 | 9.91E-01 | 1.00E+00 |
| ENSG00000252373.1_RNU6-358F  | ENSG00000160789.18_LMNA | 0.07885  | -0.081373968 | 0.235097788 | 3.34E-01 | 6.20E-01 | 1.00E+00 |
| ENSG00000266782.1_MIR3663    | ENSG00000160789.18_LMNA | -0.1312  | -0.284463255 | 0.028593587 | 1.07E-01 | 3.25E-01 | 1.00E+00 |
| ENSG00000212309.1_SNORD70    | ENSG00000160789.18_LMNA | -0.0408  | -0.198710276 | 0.119174508 | 6.18E-01 | 8.27E-01 | 1.00E+00 |
| ENSG00000252713.1_RNU6-1198  | ENSG00000160789.18_LMNA | -0.00224 | -0.161382118 | 0.15701773  | 9.78E-01 | 9.92E-01 | 1.00E+00 |
| ENSG00000252855.1_           | ENSG00000160789.18_LMNA | 0.07476  | -0.085455647 | 0.23121095  | 3.60E-01 | 6.42E-01 | 1.00E+00 |
| ENSG00000207928.1_           | ENSG00000160789.18_LMNA | 0.00311  | -0.156168302 | 0.1622301   | 9.70E-01 | 9.88E-01 | 1.00E+00 |
| ENSG00000267129.1_OR1AC1P    | ENSG00000160789.18_LMNA | 0.04731  | -0.112734944 | 0.20497168  | 5.63E-01 | 7.94E-01 | 1.00E+00 |
| ENSG00000226843.1_RP11-2P2.1 | ENSG00000160789.18_LMNA | 0.06832  | -0.091879001 | 0.225073676 | 4.03E-01 | 6.79E-01 | 1.00E+00 |
| ENSG00000263995.1_           | ENSG00000160789.18_LMNA | 0.05147  | -0.108622801 | 0.208956496 | 5.29E-01 | 7.73E-01 | 1.00E+00 |
| ENSG00000251754.1_RNU6-999F  | ENSG00000160789.18_LMNA | 0.06751  | -0.092686681 | 0.224300185 | 4.09E-01 | 6.83E-01 | 1.00E+00 |
| ENSG00000264526.1_           | ENSG00000160789.18_LMNA | -0.09735 | -0.252637955 | 0.062821554 | 2.33E-01 | 5.11E-01 | 1.00E+00 |
| ENSG00000266207.1_           | ENSG00000160789.18_LMNA | 0.22025  | 0.063272611  | 0.366600639 | 6.40E-03 | 4.72E-02 | 1.00E+00 |
| ENSG00000277057.1_MIR6779    | ENSG00000160789.18_LMNA | 0.01863  | -0.140992085 | 0.177301647 | 8.20E-01 | 9.30E-01 | 1.00E+00 |
| ENSG00000221063.2_MIR1296    | ENSG00000160789.18_LMNA | -0.08495 | -0.240890193 | 0.07527144  | 2.98E-01 | 5.84E-01 | 1.00E+00 |
| ENSG00000252751.1_RNU6-143F  | ENSG00000160789.18_LMNA | -0.05889 | -0.216066012 | 0.10125902  | 4.71E-01 | 7.31E-01 | 1.00E+00 |

|                             |                         |          |              |             |          |          |          |
|-----------------------------|-------------------------|----------|--------------|-------------|----------|----------|----------|
| ENSG00000263752.1_MIR3133   | ENSG00000160789.18_LMNA | 0.01994  | -0.13970073  | 0.17857724  | 8.07E-01 | 9.23E-01 | 1.00E+00 |
| ENSG00000263913.1_          | ENSG00000160789.18_LMNA | 0.15873  | -0.000480373 | 0.310096922 | 5.08E-02 | 2.03E-01 | 1.00E+00 |
| ENSG00000202270.1_SNORD114  | ENSG00000160789.18_LMNA | -0.08684 | -0.242685031 | 0.073375689 | 2.87E-01 | 5.73E-01 | 1.00E+00 |
| ENSG00000275656.1_RFPL3-AS1 | ENSG00000160789.18_LMNA | -0.00772 | -0.166714997 | 0.151667916 | 9.25E-01 | 9.71E-01 | 1.00E+00 |
| ENSG00000249089.1_AIG1P1    | ENSG00000160789.18_LMNA | -0.09371 | -0.249190043 | 0.066485743 | 2.51E-01 | 5.31E-01 | 1.00E+00 |
| ENSG00000265324.1_          | ENSG00000160789.18_LMNA | 0.02727  | -0.132510008 | 0.185660682 | 7.39E-01 | 8.90E-01 | 1.00E+00 |
| ENSG00000238610.1_RNU7-26P  | ENSG00000160789.18_LMNA | 0.01299  | -0.146513929 | 0.171835111 | 8.74E-01 | 9.51E-01 | 1.00E+00 |
| ENSG00000212057.1_          | ENSG00000160789.18_LMNA | -0.23017 | -0.375606003 | -0.07366733 | 4.34E-03 | 3.52E-02 | 1.00E+00 |
| ENSG00000239129.1_snoU13    | ENSG00000160789.18_LMNA | 0.04695  | -0.113092184 | 0.204625004 | 5.66E-01 | 7.96E-01 | 1.00E+00 |
| ENSG00000207960.1_MIR153-2  | ENSG00000160789.18_LMNA | -0.06699 | -0.223807727 | 0.093200687 | 4.12E-01 | 6.86E-01 | 1.00E+00 |
| ENSG00000265850.1_MIR4797   | ENSG00000160789.18_LMNA | -0.05495 | -0.212294294 | 0.105169965 | 5.01E-01 | 7.53E-01 | 1.00E+00 |
| ENSG00000221203.1_MIR1262   | ENSG00000160789.18_LMNA | -0.0261  | -0.184529333 | 0.133660744 | 7.50E-01 | 8.95E-01 | 1.00E+00 |
| ENSG00000199591.1_Y_RNA     | ENSG00000160789.18_LMNA | -0.083   | -0.239037492 | 0.077225913 | 3.09E-01 | 5.96E-01 | 1.00E+00 |
| ENSG00000221333.1_MIR548K   | ENSG00000160789.18_LMNA | -0.02752 | -0.185903456 | 0.132262962 | 7.36E-01 | 8.89E-01 | 1.00E+00 |
| ENSG00000254324.2_MIR151A   | ENSG00000160789.18_LMNA | 0.0115   | -0.147970469 | 0.170389885 | 8.88E-01 | 9.57E-01 | 1.00E+00 |
| ENSG00000251878.1_SNORD79   | ENSG00000160789.18_LMNA | 0.10448  | -0.055642118 | 0.259370479 | 2.00E-01 | 4.71E-01 | 1.00E+00 |
| ENSG00000201610.1_RNA5SP84  | ENSG00000160789.18_LMNA | -0.00282 | -0.161948188 | 0.156450747 | 9.72E-01 | 9.89E-01 | 1.00E+00 |
| ENSG00000239197.1_snoU109   | ENSG00000160789.18_LMNA | -0.21938 | -0.365800844 | -0.0623526  | 6.62E-03 | 4.83E-02 | 1.00E+00 |
| ENSG00000221564.1_RNU6ATAC  | ENSG00000160789.18_LMNA | 0.024    | -0.135719898 | 0.182502762 | 7.69E-01 | 9.04E-01 | 1.00E+00 |
| ENSG00000216181.2_          | ENSG00000160789.18_LMNA | -0.01374 | -0.172567884 | 0.145774892 | 8.67E-01 | 9.48E-01 | 1.00E+00 |
| ENSG00000252181.1_          | ENSG00000160789.18_LMNA | -0.13286 | -0.28600988  | 0.026911281 | 1.03E-01 | 3.17E-01 | 1.00E+00 |
| ENSG00000212601.1_RNA5SP53  | ENSG00000160789.18_LMNA | -0.05344 | -0.210849182 | 0.106665823 | 5.13E-01 | 7.61E-01 | 1.00E+00 |
| ENSG00000202063.1_RNA5SP79  | ENSG00000160789.18_LMNA | -0.00103 | -0.160202416 | 0.15819866  | 9.90E-01 | 9.96E-01 | 1.00E+00 |
| ENSG00000199015.3_MIR377    | ENSG00000160789.18_LMNA | 0.08772  | -0.072493848 | 0.243519194 | 2.83E-01 | 5.68E-01 | 1.00E+00 |
| ENSG00000207049.1_Y_RNA     | ENSG00000160789.18_LMNA | 0.052    | -0.108099371 | 0.209462963 | 5.25E-01 | 7.70E-01 | 1.00E+00 |
| ENSG00000201800.1_Y_RNA     | ENSG00000160789.18_LMNA | -0.04281 | -0.200639652 | 0.117193081 | 6.01E-01 | 8.16E-01 | 1.00E+00 |
| ENSG00000251345.2_RP11-392L | ENSG00000160789.18_LMNA | -0.04856 | -0.206169625 | 0.111499864 | 5.52E-01 | 7.88E-01 | 1.00E+00 |
| ENSG00000206776.1_SNORA32   | ENSG00000160789.18_LMNA | 0.00218  | -0.157077646 | 0.161322286 | 9.79E-01 | 9.92E-01 | 1.00E+00 |
| ENSG00000266543.1_          | ENSG00000160789.18_LMNA | -0.17586 | -0.325934612 | -0.01713818 | 3.02E-02 | 1.44E-01 | 1.00E+00 |
| ENSG00000207490.1_RNU6-987F | ENSG00000160789.18_LMNA | 0.06045  | -0.099710781 | 0.217556523 | 4.59E-01 | 7.23E-01 | 1.00E+00 |
| ENSG00000222675.1_RNA5SP14  | ENSG00000160789.18_LMNA | 0.13422  | -0.025521121 | 0.287286692 | 9.92E-02 | 3.10E-01 | 1.00E+00 |
| ENSG00000252996.1_RNU6-1315 | ENSG00000160789.18_LMNA | 0.01692  | -0.142667229 | 0.175645354 | 8.36E-01 | 9.36E-01 | 1.00E+00 |
| ENSG00000200304.1_RNU6-1255 | ENSG00000160789.18_LMNA | -0.06834 | -0.225090722 | 0.091861198 | 4.03E-01 | 6.79E-01 | 1.00E+00 |

|                             |                         |          |              |             |          |          |          |
|-----------------------------|-------------------------|----------|--------------|-------------|----------|----------|----------|
| ENSG00000206944.1_RNU6-708F | ENSG00000160789.18_LMNA | 0.06017  | -0.099990228 | 0.217287604 | 4.62E-01 | 7.25E-01 | 1.00E+00 |
| ENSG00000264075.1_MIR4783   | ENSG00000160789.18_LMNA | 0.09469  | -0.065500664 | 0.250117766 | 2.46E-01 | 5.26E-01 | 1.00E+00 |
| ENSG00000251779.1_Y_RNA     | ENSG00000160789.18_LMNA | 0.01093  | -0.148524712 | 0.169839587 | 8.94E-01 | 9.58E-01 | 1.00E+00 |
| ENSG00000207505.1_RNU6-1105 | ENSG00000160789.18_LMNA | 0.12481  | -0.035091407 | 0.278474155 | 1.26E-01 | 3.58E-01 | 1.00E+00 |
| ENSG00000199366.1_Y_RNA     | ENSG00000160789.18_LMNA | 0.15152  | -0.007874266 | 0.303398643 | 6.24E-02 | 2.32E-01 | 1.00E+00 |
| ENSG00000278413.1_uc_338    | ENSG00000160789.18_LMNA | -0.07163 | -0.228229084 | 0.088579799 | 3.81E-01 | 6.59E-01 | 1.00E+00 |
| ENSG00000221552.1_MIR1303   | ENSG00000160789.18_LMNA | 0.03895  | -0.121005375 | 0.196925312 | 6.34E-01 | 8.36E-01 | 1.00E+00 |
| ENSG00000275685.1_          | ENSG00000160789.18_LMNA | -0.07918 | -0.235410108 | 0.081045532 | 3.32E-01 | 6.18E-01 | 1.00E+00 |
| ENSG00000201157.1_SNORA62   | ENSG00000160789.18_LMNA | 0.05915  | -0.101001894 | 0.216313653 | 4.69E-01 | 7.30E-01 | 1.00E+00 |
| ENSG00000202479.1_SNORD14   | ENSG00000160789.18_LMNA | -0.10383 | -0.258755277 | 0.056299513 | 2.03E-01 | 4.74E-01 | 1.00E+00 |
| ENSG00000207296.1_RNU6-140F | ENSG00000160789.18_LMNA | -0.01326 | -0.172101946 | 0.146244854 | 8.71E-01 | 9.50E-01 | 1.00E+00 |
| ENSG00000252132.1_RNU6-795F | ENSG00000160789.18_LMNA | -0.04951 | -0.207076355 | 0.110564373 | 5.45E-01 | 7.83E-01 | 1.00E+00 |
| ENSG00000222509.1_Y_RNA     | ENSG00000160789.18_LMNA | -0.0942  | -0.249657102 | 0.065989885 | 2.48E-01 | 5.29E-01 | 1.00E+00 |
| ENSG00000207134.1_RNU6-106F | ENSG00000160789.18_LMNA | 0.06219  | -0.097979096 | 0.219221888 | 4.47E-01 | 7.13E-01 | 1.00E+00 |
| ENSG00000266055.1_          | ENSG00000160789.18_LMNA | 0.00048  | -0.158728833 | 0.159672498 | 9.95E-01 | 9.98E-01 | 1.00E+00 |
| ENSG00000240639.3_RN7SL666F | ENSG00000160789.18_LMNA | -0.07489 | -0.231332217 | 0.085328462 | 3.59E-01 | 6.42E-01 | 1.00E+00 |
| ENSG00000207922.1_MIR566    | ENSG00000160789.18_LMNA | 0.09021  | -0.069992287 | 0.245882962 | 2.69E-01 | 5.53E-01 | 1.00E+00 |
| ENSG00000275439.1_          | ENSG00000160789.18_LMNA | -0.0997  | -0.254859846 | 0.060455776 | 2.22E-01 | 4.97E-01 | 1.00E+00 |
| ENSG00000199900.1_RNA5SP46  | ENSG00000160789.18_LMNA | 0.0963   | -0.063882144 | 0.25164079  | 2.38E-01 | 5.16E-01 | 1.00E+00 |
| ENSG00000239594.3_          | ENSG00000160789.18_LMNA | -0.13045 | -0.283754322 | 0.02936412  | 1.09E-01 | 3.29E-01 | 1.00E+00 |
| ENSG00000276244.1_          | ENSG00000160789.18_LMNA | 0.08028  | -0.0799404   | 0.236460527 | 3.26E-01 | 6.12E-01 | 1.00E+00 |
| ENSG00000200855.1_Y_RNA     | ENSG00000160789.18_LMNA | -0.04236 | -0.200211185 | 0.117633326 | 6.04E-01 | 8.18E-01 | 1.00E+00 |
| ENSG00000267195.1_MIR212    | ENSG00000160789.18_LMNA | -0.0555  | -0.212820043 | 0.104625397 | 4.97E-01 | 7.51E-01 | 1.00E+00 |
| ENSG00000201566.1_Y_RNA     | ENSG00000160789.18_LMNA | 0.05635  | -0.103777717 | 0.213638064 | 4.90E-01 | 7.46E-01 | 1.00E+00 |
| ENSG00000221698.1_MIR548H3  | ENSG00000160789.18_LMNA | 0.37202  | 0.226217428  | 0.501518059 | 2.37E-06 | 9.06E-05 | 1.21E-01 |
| ENSG00000266443.1_          | ENSG00000160789.18_LMNA | 0.012    | -0.147485795 | 0.170870946 | 8.83E-01 | 9.55E-01 | 1.00E+00 |
| ENSG00000278176.1_          | ENSG00000160789.18_LMNA | -0.01966 | -0.178302508 | 0.139978948 | 8.10E-01 | 9.25E-01 | 1.00E+00 |
| ENSG00000207716.1_MIR572    | ENSG00000160789.18_LMNA | -0.10668 | -0.261436037 | 0.053432897 | 1.91E-01 | 4.59E-01 | 1.00E+00 |
| ENSG00000207595.1_MIR181A2  | ENSG00000160789.18_LMNA | -0.05358 | -0.210983414 | 0.106526938 | 5.12E-01 | 7.61E-01 | 1.00E+00 |
| ENSG00000200830.1_RN7SKP13  | ENSG00000160789.18_LMNA | -0.02601 | -0.184442355 | 0.133749177 | 7.50E-01 | 8.96E-01 | 1.00E+00 |
| ENSG00000278750.1_          | ENSG00000160789.18_LMNA | 0.03689  | -0.123029606 | 0.194949376 | 6.52E-01 | 8.46E-01 | 1.00E+00 |
| ENSG00000207077.1_RNU6-1119 | ENSG00000160789.18_LMNA | 0.11751  | -0.042482243 | 0.271632181 | 1.49E-01 | 3.97E-01 | 1.00E+00 |
| ENSG00000200496.1_U8        | ENSG00000160789.18_LMNA | -0.04122 | -0.199115113 | 0.118758959 | 6.14E-01 | 8.25E-01 | 1.00E+00 |

|                              |                         |          |              |             |          |          |          |
|------------------------------|-------------------------|----------|--------------|-------------|----------|----------|----------|
| ENSG00000207243.1_Y_RNA      | ENSG00000160789.18_LMNA | -0.06398 | -0.220925854 | 0.096205283 | 4.34E-01 | 7.03E-01 | 1.00E+00 |
| ENSG00000201077.1_RNU6-188F  | ENSG00000160789.18_LMNA | -0.01457 | -0.173372487 | 0.144963001 | 8.59E-01 | 9.44E-01 | 1.00E+00 |
| ENSG00000258897.1_EGLN3-AS   | ENSG00000160789.18_LMNA | -0.01883 | -0.177499972 | 0.140791381 | 8.18E-01 | 9.29E-01 | 1.00E+00 |
| ENSG00000277535.1_RP13-347D  | ENSG00000160789.18_LMNA | -0.09531 | -0.250705431 | 0.064876348 | 2.43E-01 | 5.22E-01 | 1.00E+00 |
| ENSG00000226470.1_RPS29P33   | ENSG00000160789.18_LMNA | 0.05198  | -0.108115648 | 0.209447216 | 5.25E-01 | 7.70E-01 | 1.00E+00 |
| ENSG00000234202.2_RP11-330C  | ENSG00000160789.18_LMNA | -0.13196 | -0.285166466 | 0.027828905 | 1.05E-01 | 3.22E-01 | 1.00E+00 |
| ENSG00000212204.1_RNA5SP91   | ENSG00000160789.18_LMNA | -0.12385 | -0.277575598 | 0.036064007 | 1.28E-01 | 3.63E-01 | 1.00E+00 |
| ENSG00000201407.1_SNORA68    | ENSG00000160789.18_LMNA | 0.02347  | -0.136239863 | 0.181990597 | 7.74E-01 | 9.07E-01 | 1.00E+00 |
| ENSG00000278479.1_           | ENSG00000160789.18_LMNA | 0.08929  | -0.070923007 | 0.245003947 | 2.74E-01 | 5.59E-01 | 1.00E+00 |
| ENSG00000280480.1_           | ENSG00000160789.18_LMNA | -0.00185 | -0.160999114 | 0.157401233 | 9.82E-01 | 9.93E-01 | 1.00E+00 |
| ENSG00000254172.1_RNU5A-3P   | ENSG00000160789.18_LMNA | -0.03822 | -0.196223745 | 0.121724393 | 6.40E-01 | 8.39E-01 | 1.00E+00 |
| ENSG00000271375.1_RP11-295P  | ENSG00000160789.18_LMNA | -0.00864 | -0.167606058 | 0.150772202 | 9.16E-01 | 9.68E-01 | 1.00E+00 |
| ENSG00000252917.1_SNORA74    | ENSG00000160789.18_LMNA | -0.09449 | -0.24993009  | 0.065699992 | 2.47E-01 | 5.27E-01 | 1.00E+00 |
| ENSG00000222343.1_RN7SKP13   | ENSG00000160789.18_LMNA | -0.13429 | -0.287347977 | 0.025454365 | 9.91E-02 | 3.10E-01 | 1.00E+00 |
| ENSG00000257016.1_SLC25A39F  | ENSG00000160789.18_LMNA | 0.08143  | -0.078794129 | 0.237549269 | 3.19E-01 | 6.05E-01 | 1.00E+00 |
| ENSG00000230803.1_AC097532.  | ENSG00000160789.18_LMNA | 0.13702  | -0.02267629  | 0.289896106 | 9.23E-02 | 2.97E-01 | 1.00E+00 |
| ENSG00000252468.1_RNU2-57P   | ENSG00000160789.18_LMNA | -0.13536 | -0.288346104 | 0.024366741 | 9.64E-02 | 3.05E-01 | 1.00E+00 |
| ENSG00000234811.1_RP11-241I2 | ENSG00000160789.18_LMNA | 0.15572  | -0.003570058 | 0.307301658 | 5.54E-02 | 2.15E-01 | 1.00E+00 |
| ENSG00000206592.1_SNORA18    | ENSG00000160789.18_LMNA | 0.01811  | -0.141495636 | 0.176803953 | 8.25E-01 | 9.31E-01 | 1.00E+00 |
| ENSG00000280699.1_           | ENSG00000160789.18_LMNA | 0.16835  | 0.009401173  | 0.319000932 | 3.81E-02 | 1.68E-01 | 1.00E+00 |
| ENSG00000200673.1_RN7SKP17   | ENSG00000160789.18_LMNA | -0.03928 | -0.197243962 | 0.12067869  | 6.31E-01 | 8.34E-01 | 1.00E+00 |
| ENSG00000250838.1_RP11-501C  | ENSG00000160789.18_LMNA | 0.06046  | -0.099700413 | 0.217566499 | 4.59E-01 | 7.23E-01 | 1.00E+00 |
| ENSG00000280845.1_           | ENSG00000160789.18_LMNA | -0.05008 | -0.207627666 | 0.1099953   | 5.40E-01 | 7.80E-01 | 1.00E+00 |
| ENSG00000240458.1_RP11-450H  | ENSG00000160789.18_LMNA | 0.0554   | -0.104727522 | 0.21272146  | 4.98E-01 | 7.51E-01 | 1.00E+00 |
| ENSG00000204031.3_LCN1P2     | ENSG00000160789.18_LMNA | 0.04     | -0.119960143 | 0.197944597 | 6.25E-01 | 8.31E-01 | 1.00E+00 |
| ENSG00000238297.2_U3         | ENSG00000160789.18_LMNA | 0.05159  | -0.108498259 | 0.209077017 | 5.28E-01 | 7.72E-01 | 1.00E+00 |
| ENSG00000254098.1_IGKV2-26   | ENSG00000160789.18_LMNA | 0.01027  | -0.149178029 | 0.169190666 | 9.00E-01 | 9.61E-01 | 1.00E+00 |
| ENSG00000201119.1_RNU1-33P   | ENSG00000160789.18_LMNA | -0.10321 | -0.258166831 | 0.056928062 | 2.06E-01 | 4.77E-01 | 1.00E+00 |
| ENSG00000250972.1_CKS1BP5    | ENSG00000160789.18_LMNA | -0.08757 | -0.243379507 | 0.072641553 | 2.83E-01 | 5.69E-01 | 1.00E+00 |
| ENSG00000272025.1_SNORA74    | ENSG00000160789.18_LMNA | 0.12811  | -0.031735941 | 0.281569966 | 1.16E-01 | 3.40E-01 | 1.00E+00 |
| ENSG00000253120.1_IGLV2-34   | ENSG00000160789.18_LMNA | -0.09826 | -0.25349521  | 0.061909204 | 2.28E-01 | 5.05E-01 | 1.00E+00 |
| ENSG00000241756.3_RN7SL83P   | ENSG00000160789.18_LMNA | -0.01907 | -0.177734812 | 0.140553689 | 8.16E-01 | 9.28E-01 | 1.00E+00 |
| ENSG00000223118.1_RN7SKP10   | ENSG00000160789.18_LMNA | 6.53E-05 | -0.159137018 | 0.159264385 | 9.99E-01 | 1.00E+00 | 1.00E+00 |



|                              |                         |          |              |             |          |          |          |
|------------------------------|-------------------------|----------|--------------|-------------|----------|----------|----------|
| ENSG00000267768.1_CTC-459F4  | ENSG00000160789.18_LMNA | -0.06592 | -0.222784668 | 0.094267974 | 4.20E-01 | 6.91E-01 | 1.00E+00 |
| ENSG00000248266.1_RP11-402C  | ENSG00000160789.18_LMNA | -0.04619 | -0.203888503 | 0.113850854 | 5.72E-01 | 8.00E-01 | 1.00E+00 |
| ENSG00000234463.1_COX6CP12   | ENSG00000160789.18_LMNA | 0.11319  | -0.046855388 | 0.267568789 | 1.65E-01 | 4.21E-01 | 1.00E+00 |
| ENSG00000225952.1_RP11-69E9  | ENSG00000160789.18_LMNA | -0.02783 | -0.186210507 | 0.131950452 | 7.34E-01 | 8.88E-01 | 1.00E+00 |
| ENSG00000277282.1_IGHV1OR2   | ENSG00000160789.18_LMNA | 0.02662  | -0.133141834 | 0.185039605 | 7.45E-01 | 8.93E-01 | 1.00E+00 |
| ENSG00000211979.2_IGHV7-81   | ENSG00000160789.18_LMNA | 0.07506  | -0.085157832 | 0.231494891 | 3.58E-01 | 6.41E-01 | 1.00E+00 |
| ENSG00000267182.1_SNRPCP20   | ENSG00000160789.18_LMNA | -0.10713 | -0.261861232 | 0.052977746 | 1.89E-01 | 4.56E-01 | 1.00E+00 |
| ENSG00000280976.1_           | ENSG00000160789.18_LMNA | -0.05957 | -0.216717029 | 0.100582977 | 4.66E-01 | 7.28E-01 | 1.00E+00 |
| ENSG00000242976.3_RN7SL177f  | ENSG00000160789.18_LMNA | 0.06461  | -0.095574744 | 0.221531098 | 4.29E-01 | 6.99E-01 | 1.00E+00 |
| ENSG00000226392.1_MTATP6P2   | ENSG00000160789.18_LMNA | 0.01382  | -0.145702818 | 0.172639328 | 8.66E-01 | 9.48E-01 | 1.00E+00 |
| ENSG00000248350.1_CTC-470E2  | ENSG00000160789.18_LMNA | -0.01076 | -0.169674791 | 0.148690651 | 8.95E-01 | 9.59E-01 | 1.00E+00 |
| ENSG00000258683.1_RP11-11K1  | ENSG00000160789.18_LMNA | -0.13016 | -0.283484222 | 0.029657592 | 1.10E-01 | 3.30E-01 | 1.00E+00 |
| ENSG00000225785.1_RP4-583K8  | ENSG00000160789.18_LMNA | 0.04476  | -0.115263372 | 0.202516302 | 5.84E-01 | 8.07E-01 | 1.00E+00 |
| ENSG00000223539.4_AC011431.  | ENSG00000160789.18_LMNA | 0.04132  | -0.118659577 | 0.199211918 | 6.13E-01 | 8.24E-01 | 1.00E+00 |
| ENSG00000200794.1_RN7SKP25   | ENSG00000160789.18_LMNA | -0.00781 | -0.166803449 | 0.151579026 | 9.24E-01 | 9.71E-01 | 1.00E+00 |
| ENSG00000241963.3_RN7SL655f  | ENSG00000160789.18_LMNA | 0.03607  | -0.123837692 | 0.194159849 | 6.59E-01 | 8.49E-01 | 1.00E+00 |
| ENSG00000224421.1_ATP5J2LP   | ENSG00000160789.18_LMNA | 0.10393  | -0.056198024 | 0.258850269 | 2.03E-01 | 4.73E-01 | 1.00E+00 |
| ENSG00000271245.1_RP4-761I2. | ENSG00000160789.18_LMNA | -0.07619 | -0.232567605 | 0.084032192 | 3.51E-01 | 6.35E-01 | 1.00E+00 |
| ENSG00000261197.1_RP11-598D  | ENSG00000160789.18_LMNA | 0.03079  | -0.129039834 | 0.189067295 | 7.06E-01 | 8.75E-01 | 1.00E+00 |
| ENSG00000275663.1_HIST1H4G   | ENSG00000160789.18_LMNA | 0.10892  | -0.051169061 | 0.26354967  | 1.82E-01 | 4.46E-01 | 1.00E+00 |
| ENSG00000205433.4_SNRPGP6    | ENSG00000160789.18_LMNA | 0.00992  | -0.149513886 | 0.16885696  | 9.03E-01 | 9.63E-01 | 1.00E+00 |
| ENSG00000230196.1_DDX43P3    | ENSG00000160789.18_LMNA | 0.28223  | 0.128822098  | 0.422453614 | 4.27E-04 | 5.97E-03 | 1.00E+00 |
| ENSG00000222107.1_RN7SKP11   | ENSG00000160789.18_LMNA | -0.1209  | -0.274812667 | 0.03905089  | 1.38E-01 | 3.78E-01 | 1.00E+00 |
| ENSG00000223589.2_RP5-884C9  | ENSG00000160789.18_LMNA | 0.06941  | -0.090797105 | 0.226109152 | 3.96E-01 | 6.73E-01 | 1.00E+00 |
| ENSG00000229679.1_AC007327.  | ENSG00000160789.18_LMNA | -0.09259 | -0.248129866 | 0.067610713 | 2.57E-01 | 5.39E-01 | 1.00E+00 |
| ENSG00000256149.1_RP11-357K  | ENSG00000160789.18_LMNA | -0.05704 | -0.214294948 | 0.103096681 | 4.85E-01 | 7.42E-01 | 1.00E+00 |
| ENSG00000242360.3_RN7SL272f  | ENSG00000160789.18_LMNA | 0.00658  | -0.152779996 | 0.165607968 | 9.36E-01 | 9.75E-01 | 1.00E+00 |
| ENSG00000254478.1_RP11-158I9 | ENSG00000160789.18_LMNA | 0.05007  | -0.11000944  | 0.207613969 | 5.40E-01 | 7.80E-01 | 1.00E+00 |
| ENSG00000277592.1_Metazoa_SI | ENSG00000160789.18_LMNA | -0.05979 | -0.216922965 | 0.100369064 | 4.64E-01 | 7.27E-01 | 1.00E+00 |
| ENSG00000265684.2_RN7SL378f  | ENSG00000160789.18_LMNA | 0.03151  | -0.128331591 | 0.189761626 | 7.00E-01 | 8.72E-01 | 1.00E+00 |
| ENSG00000241074.3_RN7SL813f  | ENSG00000160789.18_LMNA | -0.02464 | -0.183118015 | 0.135095043 | 7.63E-01 | 9.01E-01 | 1.00E+00 |
| ENSG00000237760.1_AC092657.  | ENSG00000160789.18_LMNA | 0.0709   | -0.089311092 | 0.227530239 | 3.85E-01 | 6.64E-01 | 1.00E+00 |
| ENSG00000255786.1_RP11-809N  | ENSG00000160789.18_LMNA | -0.0897  | -0.245391677 | 0.070512538 | 2.72E-01 | 5.56E-01 | 1.00E+00 |

|                              |                         |          |              |             |          |          |          |
|------------------------------|-------------------------|----------|--------------|-------------|----------|----------|----------|
| ENSG00000278735.1_RP11-12A2  | ENSG00000160789.18_LMNA | -0.12646 | -0.280023658 | 0.033412827 | 1.21E-01 | 3.49E-01 | 1.00E+00 |
| ENSG00000277467.1_RN7SL628f  | ENSG00000160789.18_LMNA | -0.03009 | -0.188387933 | 0.129732494 | 7.13E-01 | 8.78E-01 | 1.00E+00 |
| ENSG00000271252.1_RP11-286B  | ENSG00000160789.18_LMNA | 0.23657  | 0.080402349  | 0.381410547 | 3.34E-03 | 2.90E-02 | 1.00E+00 |
| ENSG00000278525.1_RN7SL607f  | ENSG00000160789.18_LMNA | 0.065    | -0.095185764 | 0.221904352 | 4.26E-01 | 6.97E-01 | 1.00E+00 |
| ENSG00000250874.1_CTC-480C2  | ENSG00000160789.18_LMNA | -0.08797 | -0.243758008 | 0.072241293 | 2.81E-01 | 5.67E-01 | 1.00E+00 |
| ENSG00000242483.3_RN7SL293f  | ENSG00000160789.18_LMNA | -0.09784 | -0.253096593 | 0.062333505 | 2.30E-01 | 5.08E-01 | 1.00E+00 |
| ENSG00000249114.1_RP11-5N11  | ENSG00000160789.18_LMNA | -0.07734 | -0.233659217 | 0.082885891 | 3.44E-01 | 6.28E-01 | 1.00E+00 |
| ENSG00000236041.1_COX6CP18   | ENSG00000160789.18_LMNA | 0.0764   | -0.083821464 | 0.232768339 | 3.50E-01 | 6.33E-01 | 1.00E+00 |
| ENSG00000186844.5_LCE1A      | ENSG00000160789.18_LMNA | -0.14453 | -0.296901809 | 0.015013424 | 7.56E-02 | 2.63E-01 | 1.00E+00 |
| ENSG00000236386.1_AC009518.  | ENSG00000160789.18_LMNA | 0.03933  | -0.120624087 | 0.197297215 | 6.30E-01 | 8.34E-01 | 1.00E+00 |
| ENSG00000278694.1_RP11-137P  | ENSG00000160789.18_LMNA | -0.10166 | -0.256707524 | 0.058485742 | 2.13E-01 | 4.86E-01 | 1.00E+00 |
| ENSG00000235389.2_RP11-134K  | ENSG00000160789.18_LMNA | -0.01927 | -0.177920142 | 0.140366083 | 8.14E-01 | 9.27E-01 | 1.00E+00 |
| ENSG00000230831.1_AC007349.  | ENSG00000160789.18_LMNA | -0.1012  | -0.256274787 | 0.058947356 | 2.15E-01 | 4.89E-01 | 1.00E+00 |
| ENSG00000213556.3_RP11-3J11  | ENSG00000160789.18_LMNA | 0.00649  | -0.152867586 | 0.165520743 | 9.37E-01 | 9.75E-01 | 1.00E+00 |
| ENSG00000237913.1_FTL19      | ENSG00000160789.18_LMNA | -0.06896 | -0.225679494 | 0.091246115 | 3.99E-01 | 6.75E-01 | 1.00E+00 |
| ENSG00000226400.2_CTD-2269E  | ENSG00000160789.18_LMNA | 0.07868  | -0.081541986 | 0.234937991 | 3.35E-01 | 6.21E-01 | 1.00E+00 |
| ENSG00000236900.1_TIMM9P1    | ENSG00000160789.18_LMNA | -0.14341 | -0.29585239  | 0.016163621 | 7.80E-02 | 2.68E-01 | 1.00E+00 |
| ENSG00000277001.1_Metazoa_SI | ENSG00000160789.18_LMNA | 0.08723  | -0.072985235 | 0.243054431 | 2.85E-01 | 5.71E-01 | 1.00E+00 |
| ENSG00000263450.1_RP11-680N  | ENSG00000160789.18_LMNA | -0.04703 | -0.204701333 | 0.113013535 | 5.65E-01 | 7.96E-01 | 1.00E+00 |
| ENSG00000201140.1_RN7SKP12   | ENSG00000160789.18_LMNA | -0.05976 | -0.216900462 | 0.100392441 | 4.65E-01 | 7.27E-01 | 1.00E+00 |
| ENSG00000243383.3_RN7SL89P   | ENSG00000160789.18_LMNA | 0.05434  | -0.105778095 | 0.211706962 | 5.06E-01 | 7.57E-01 | 1.00E+00 |
| ENSG00000240056.2_RP11-349Jf | ENSG00000160789.18_LMNA | 0.19641  | 0.038407689  | 0.344826062 | 1.53E-02 | 8.91E-02 | 1.00E+00 |
| ENSG00000274840.3_RP11-320G  | ENSG00000160789.18_LMNA | -0.2122  | -0.359261628 | -0.05484973 | 8.68E-03 | 5.91E-02 | 1.00E+00 |
| ENSG00000251019.1_HIGD1AP1f  | ENSG00000160789.18_LMNA | -0.14904 | -0.301099793 | 0.01040403  | 6.69E-02 | 2.42E-01 | 1.00E+00 |
| ENSG00000257506.1_RP11-231C  | ENSG00000160789.18_LMNA | -0.05129 | -0.208787492 | 0.108797426 | 5.30E-01 | 7.73E-01 | 1.00E+00 |
| ENSG00000272626.1_RP11-468N  | ENSG00000160789.18_LMNA | -0.04715 | -0.204815876 | 0.112895506 | 5.64E-01 | 7.95E-01 | 1.00E+00 |
| ENSG00000255400.1_RP13-631K  | ENSG00000160789.18_LMNA | 0.16392  | 0.004846624  | 0.314903723 | 4.36E-02 | 1.84E-01 | 1.00E+00 |
| ENSG00000275243.1_TRBV16     | ENSG00000160789.18_LMNA | 0.08188  | -0.078339666 | 0.237980703 | 3.16E-01 | 6.03E-01 | 1.00E+00 |
| ENSG00000278100.1_Metazoa_SI | ENSG00000160789.18_LMNA | 0.02027  | -0.139376886 | 0.178896964 | 8.04E-01 | 9.22E-01 | 1.00E+00 |
| ENSG00000264484.2_RN7SL697f  | ENSG00000160789.18_LMNA | 0.04043  | -0.119542471 | 0.198351708 | 6.21E-01 | 8.28E-01 | 1.00E+00 |
| ENSG00000280694.1_           | ENSG00000160789.18_LMNA | -0.02255 | -0.181100206 | 0.137143397 | 7.83E-01 | 9.11E-01 | 1.00E+00 |
| ENSG00000255463.1_RP11-16F1  | ENSG00000160789.18_LMNA | 0.01311  | -0.146396221 | 0.171951845 | 8.73E-01 | 9.51E-01 | 1.00E+00 |
| ENSG00000253631.1_IGLV7-35   | ENSG00000160789.18_LMNA | -0.01586 | -0.17462291  | 0.143700401 | 8.46E-01 | 9.40E-01 | 1.00E+00 |

|                              |                         |          |              |             |          |          |          |
|------------------------------|-------------------------|----------|--------------|-------------|----------|----------|----------|
| ENSG00000237592.2_IGKV1OR1   | ENSG00000160789.18_LMNA | 0.08644  | -0.073776667 | 0.242305578 | 2.90E-01 | 5.75E-01 | 1.00E+00 |
| ENSG00000243488.3_RN7SL337F  | ENSG00000160789.18_LMNA | 0.02624  | -0.133522395 | 0.184665396 | 7.48E-01 | 8.95E-01 | 1.00E+00 |
| ENSG00000223716.2_RP11-113O  | ENSG00000160789.18_LMNA | -0.2242  | -0.370185335 | -0.06740249 | 5.49E-03 | 4.20E-02 | 1.00E+00 |
| ENSG00000228958.1_PIGPP3     | ENSG00000160789.18_LMNA | -0.12162 | -0.275483943 | 0.038325718 | 1.36E-01 | 3.74E-01 | 1.00E+00 |
| ENSG00000253926.1_RP11-26E5  | ENSG00000160789.18_LMNA | -0.19325 | -0.341930135 | -0.0351291  | 1.71E-02 | 9.63E-02 | 1.00E+00 |
| ENSG00000258193.1_RP11-362A  | ENSG00000160789.18_LMNA | 0.04114  | -0.118842721 | 0.199033519 | 6.15E-01 | 8.25E-01 | 1.00E+00 |
| ENSG00000228504.1_RP4-586O1  | ENSG00000160789.18_LMNA | -0.16394 | -0.314918329 | -0.00486284 | 4.36E-02 | 1.84E-01 | 1.00E+00 |
| ENSG00000260449.1_           | ENSG00000160789.18_LMNA | -0.09308 | -0.248597889 | 0.067114187 | 2.54E-01 | 5.36E-01 | 1.00E+00 |
| ENSG00000243723.3_RN7SL393F  | ENSG00000160789.18_LMNA | 0.00071  | -0.158511352 | 0.159889897 | 9.93E-01 | 9.97E-01 | 1.00E+00 |
| ENSG00000241151.1_RP11-454C  | ENSG00000160789.18_LMNA | 0.00475  | -0.154563041 | 0.163831347 | 9.54E-01 | 9.81E-01 | 1.00E+00 |
| ENSG00000235009.1_AC093822.  | ENSG00000160789.18_LMNA | -0.05944 | -0.216592714 | 0.100712093 | 4.67E-01 | 7.29E-01 | 1.00E+00 |
| ENSG00000225222.2_CHCHD4P5   | ENSG00000160789.18_LMNA | 0.08374  | -0.076476869 | 0.239747805 | 3.05E-01 | 5.92E-01 | 1.00E+00 |
| ENSG00000242079.1_RN7SL318F  | ENSG00000160789.18_LMNA | 0.01587  | -0.14369499  | 0.174628266 | 8.46E-01 | 9.40E-01 | 1.00E+00 |
| ENSG00000235337.1_AC114765.  | ENSG00000160789.18_LMNA | -0.04365 | -0.201449382 | 0.116360752 | 5.93E-01 | 8.12E-01 | 1.00E+00 |
| ENSG00000264150.1_RP11-715F  | ENSG00000160789.18_LMNA | -0.17745 | -0.32740446  | -0.01878308 | 2.87E-02 | 1.39E-01 | 1.00E+00 |
| ENSG00000237221.1_PPEF1-AS1  | ENSG00000160789.18_LMNA | -0.0989  | -0.254098703 | 0.061266609 | 2.25E-01 | 5.01E-01 | 1.00E+00 |
| ENSG00000229928.1_LINC00400  | ENSG00000160789.18_LMNA | -0.00193 | -0.161083758 | 0.157316487 | 9.81E-01 | 9.93E-01 | 1.00E+00 |
| ENSG00000249166.1_RP11-1C1.  | ENSG00000160789.18_LMNA | -0.00654 | -0.165564286 | 0.152823861 | 9.36E-01 | 9.75E-01 | 1.00E+00 |
| ENSG00000277965.1_Metazoa_SI | ENSG00000160789.18_LMNA | 0.0541   | -0.10601662  | 0.211476531 | 5.08E-01 | 7.58E-01 | 1.00E+00 |
| ENSG00000274704.1_Metazoa_SI | ENSG00000160789.18_LMNA | -0.12631 | -0.279884223 | 0.033563948 | 1.21E-01 | 3.50E-01 | 1.00E+00 |
| ENSG00000265128.1_RP11-15F1  | ENSG00000160789.18_LMNA | -0.10641 | -0.261190755 | 0.0536954   | 1.92E-01 | 4.60E-01 | 1.00E+00 |
| ENSG00000251027.1_CTC-254B4  | ENSG00000160789.18_LMNA | -0.174   | -0.324216426 | -0.01521747 | 3.20E-02 | 1.50E-01 | 1.00E+00 |
| ENSG00000249079.1_RP11-1281  | ENSG00000160789.18_LMNA | -0.07274 | -0.229280795 | 0.087478614 | 3.73E-01 | 6.53E-01 | 1.00E+00 |
| ENSG00000237035.1_AC109589.  | ENSG00000160789.18_LMNA | -0.08715 | -0.242975413 | 0.073068765 | 2.86E-01 | 5.71E-01 | 1.00E+00 |
| ENSG00000273846.1_Metazoa_SI | ENSG00000160789.18_LMNA | 0.04802  | -0.112038548 | 0.205647254 | 5.57E-01 | 7.91E-01 | 1.00E+00 |
| ENSG00000258541.1_OR4K4P     | ENSG00000160789.18_LMNA | -0.30896 | -0.446211226 | -0.15750438 | 1.08E-04 | 2.00E-03 | 1.00E+00 |
| ENSG00000231467.2_RP5-1170K  | ENSG00000160789.18_LMNA | -0.05136 | -0.208849674 | 0.108733178 | 5.30E-01 | 7.73E-01 | 1.00E+00 |
| ENSG00000250749.1_RP11-451H  | ENSG00000160789.18_LMNA | -0.11176 | -0.266221437 | 0.048302793 | 1.70E-01 | 4.29E-01 | 1.00E+00 |
| ENSG00000268465.1_CTC-273B1  | ENSG00000160789.18_LMNA | -0.11226 | -0.266690259 | 0.047799307 | 1.69E-01 | 4.27E-01 | 1.00E+00 |
| ENSG00000274666.1_CTD-2566J  | ENSG00000160789.18_LMNA | 0.09462  | -0.065569506 | 0.250052951 | 2.46E-01 | 5.26E-01 | 1.00E+00 |
| ENSG00000232766.1_AC098614.  | ENSG00000160789.18_LMNA | -0.00086 | -0.160035149 | 0.158366027 | 9.92E-01 | 9.97E-01 | 1.00E+00 |
| ENSG00000276478.1_RP11-65B2  | ENSG00000160789.18_LMNA | -0.1445  | -0.296872434 | 0.015045631 | 7.57E-02 | 2.63E-01 | 1.00E+00 |
| ENSG00000187005.4_KRTAP21-1  | ENSG00000160789.18_LMNA | 0.01861  | -0.141010856 | 0.177283097 | 8.20E-01 | 9.30E-01 | 1.00E+00 |

|                              |                         |          |              |             |          |          |          |
|------------------------------|-------------------------|----------|--------------|-------------|----------|----------|----------|
| ENSG00000240179.1_RPL26P3    | ENSG00000160789.18_LMNA | -0.0987  | -0.253912157 | 0.06146527  | 2.26E-01 | 5.03E-01 | 1.00E+00 |
| ENSG00000236442.1_ANKRD54P   | ENSG00000160789.18_LMNA | -0.03411 | -0.192269289 | 0.125770977 | 6.77E-01 | 8.59E-01 | 1.00E+00 |
| ENSG00000235593.1_RBMS3-AS   | ENSG00000160789.18_LMNA | -0.10191 | -0.256943721 | 0.058233727 | 2.12E-01 | 4.85E-01 | 1.00E+00 |
| ENSG00000237208.1_RP11-13E5  | ENSG00000160789.18_LMNA | -0.10258 | -0.257573915 | 0.057561131 | 2.09E-01 | 4.81E-01 | 1.00E+00 |
| ENSG00000223431.1_MTND6P21   | ENSG00000160789.18_LMNA | -0.0641  | -0.221047865 | 0.096078193 | 4.33E-01 | 7.02E-01 | 1.00E+00 |
| ENSG00000224583.1_RP11-554D  | ENSG00000160789.18_LMNA | 0.02503  | -0.134712161 | 0.183494891 | 7.60E-01 | 9.00E-01 | 1.00E+00 |
| ENSG00000255396.2_AP000857.1 | ENSG00000160789.18_LMNA | -0.2313  | -0.37663575  | -0.07486014 | 4.14E-03 | 3.41E-02 | 1.00E+00 |
| ENSG00000264963.2_RN7SL440F  | ENSG00000160789.18_LMNA | -0.06056 | -0.217666217 | 0.099596777 | 4.59E-01 | 7.22E-01 | 1.00E+00 |
| ENSG00000272724.1_OR7E47P    | ENSG00000160789.18_LMNA | -0.01238 | -0.171240741 | 0.14711312  | 8.80E-01 | 9.53E-01 | 1.00E+00 |
| ENSG00000229909.1_TRIM60P16  | ENSG00000160789.18_LMNA | -0.1455  | -0.297800769 | 0.014027478 | 7.37E-02 | 2.58E-01 | 1.00E+00 |
| ENSG00000268659.2_RP11-310J  | ENSG00000160789.18_LMNA | -0.03776 | -0.195783967 | 0.12217494  | 6.44E-01 | 8.42E-01 | 1.00E+00 |
| ENSG00000280131.1_CTD-2595P  | ENSG00000160789.18_LMNA | -0.08993 | -0.245609903 | 0.070281466 | 2.71E-01 | 5.55E-01 | 1.00E+00 |
| ENSG00000228112.1_AC112220.1 | ENSG00000160789.18_LMNA | 0.11212  | -0.047935283 | 0.266563659 | 1.69E-01 | 4.28E-01 | 1.00E+00 |
| ENSG00000254106.1_AC011366.1 | ENSG00000160789.18_LMNA | -0.06404 | -0.22098354  | 0.096145196 | 4.33E-01 | 7.02E-01 | 1.00E+00 |
| ENSG00000253866.1_TMEN97P2   | ENSG00000160789.18_LMNA | -0.07048 | -0.227128837 | 0.089730976 | 3.88E-01 | 6.66E-01 | 1.00E+00 |
| ENSG00000272963.1_OR7A19P    | ENSG00000160789.18_LMNA | 0.03438  | -0.125505676 | 0.192528867 | 6.74E-01 | 8.57E-01 | 1.00E+00 |
| ENSG00000227349.1_CEACAMP7   | ENSG00000160789.18_LMNA | -0.02455 | -0.183038876 | 0.135175431 | 7.64E-01 | 9.02E-01 | 1.00E+00 |
| ENSG00000213882.2_CYB5AP4    | ENSG00000160789.18_LMNA | -0.03023 | -0.188524623 | 0.129593153 | 7.12E-01 | 8.77E-01 | 1.00E+00 |
| ENSG00000253577.1_RP11-100L  | ENSG00000160789.18_LMNA | -0.03721 | -0.195253338 | 0.122718388 | 6.49E-01 | 8.44E-01 | 1.00E+00 |
| ENSG00000227043.1_RP11-286M  | ENSG00000160789.18_LMNA | 0.03974  | -0.120218945 | 0.197692284 | 6.27E-01 | 8.32E-01 | 1.00E+00 |
| ENSG00000231937.1_RP11-329E  | ENSG00000160789.18_LMNA | -0.08451 | -0.240471284 | 0.075713573 | 3.01E-01 | 5.87E-01 | 1.00E+00 |
| ENSG00000250833.1_DNM1P17    | ENSG00000160789.18_LMNA | -0.02736 | -0.185752513 | 0.132416566 | 7.38E-01 | 8.90E-01 | 1.00E+00 |
| ENSG00000249357.3_RP11-432M  | ENSG00000160789.18_LMNA | 0.20518  | 0.047530584  | 0.3528536   | 1.12E-02 | 7.11E-02 | 1.00E+00 |
| ENSG00000265964.1_RP11-293E  | ENSG00000160789.18_LMNA | -0.17053 | -0.321014549 | -0.01164427 | 3.57E-02 | 1.61E-01 | 1.00E+00 |
| ENSG00000249278.1_RP11-688H  | ENSG00000160789.18_LMNA | 0.06461  | -0.095571537 | 0.221534176 | 4.29E-01 | 6.99E-01 | 1.00E+00 |
| ENSG00000224311.1_RP11-40H2  | ENSG00000160789.18_LMNA | 0.13574  | -0.023979698 | 0.288701135 | 9.54E-02 | 3.03E-01 | 1.00E+00 |
| ENSG00000248867.1_CTD-2128F  | ENSG00000160789.18_LMNA | -0.00895 | -0.167908525 | 0.150468037 | 9.13E-01 | 9.67E-01 | 1.00E+00 |
| ENSG00000259866.1_RP11-177N  | ENSG00000160789.18_LMNA | 0.05399  | -0.106125115 | 0.211371707 | 5.09E-01 | 7.58E-01 | 1.00E+00 |
| ENSG00000234813.1_RP11-288D  | ENSG00000160789.18_LMNA | -0.01978 | -0.178420905 | 0.139859055 | 8.09E-01 | 9.24E-01 | 1.00E+00 |
| ENSG00000267463.1_UBE2V2P2   | ENSG00000160789.18_LMNA | -0.01211 | -0.170981175 | 0.147374717 | 8.82E-01 | 9.54E-01 | 1.00E+00 |
| ENSG00000264880.1_RP11-805F  | ENSG00000160789.18_LMNA | -0.10253 | -0.257525727 | 0.057612572 | 2.09E-01 | 4.81E-01 | 1.00E+00 |
| ENSG00000231922.1_AL138479.1 | ENSG00000160789.18_LMNA | 0.02364  | -0.136073545 | 0.182154439 | 7.73E-01 | 9.06E-01 | 1.00E+00 |
| ENSG00000265639.1_RP11-529J  | ENSG00000160789.18_LMNA | -0.00366 | -0.162765672 | 0.155631575 | 9.64E-01 | 9.86E-01 | 1.00E+00 |

|                              |                         |          |              |             |          |          |          |
|------------------------------|-------------------------|----------|--------------|-------------|----------|----------|----------|
| ENSG00000259041.1_RP11-167B  | ENSG00000160789.18_LMNA | 0.04238  | -0.117610954 | 0.200232962 | 6.04E-01 | 8.18E-01 | 1.00E+00 |
| ENSG00000256342.1_RP3-446N1  | ENSG00000160789.18_LMNA | -0.08608 | -0.241961285 | 0.074140401 | 2.92E-01 | 5.77E-01 | 1.00E+00 |
| ENSG00000236129.1_AP002856.4 | ENSG00000160789.18_LMNA | -0.06244 | -0.219456763 | 0.097734713 | 4.45E-01 | 7.12E-01 | 1.00E+00 |
| ENSG00000255885.1_RP11-815D  | ENSG00000160789.18_LMNA | 0.10034  | -0.059820031 | 0.255456358 | 2.19E-01 | 4.94E-01 | 1.00E+00 |
| ENSG00000267509.4_CTD-2043I1 | ENSG00000160789.18_LMNA | 0.05912  | -0.101028606 | 0.216287928 | 4.69E-01 | 7.30E-01 | 1.00E+00 |
| ENSG00000241640.2_RP11-59H7  | ENSG00000160789.18_LMNA | -0.0704  | -0.227051928 | 0.089811413 | 3.89E-01 | 6.67E-01 | 1.00E+00 |
| ENSG00000249128.1_RP11-2N5.1 | ENSG00000160789.18_LMNA | 0.14192  | -0.017678422 | 0.294469162 | 8.11E-02 | 2.75E-01 | 1.00E+00 |
| ENSG00000223788.4_DIS3L2P1   | ENSG00000160789.18_LMNA | -0.09441 | -0.249859292 | 0.065775179 | 2.47E-01 | 5.27E-01 | 1.00E+00 |
| ENSG00000277663.1_           | ENSG00000160789.18_LMNA | -0.03064 | -0.188916054 | 0.129194063 | 7.08E-01 | 8.76E-01 | 1.00E+00 |
| ENSG00000272477.1_RP11-158G  | ENSG00000160789.18_LMNA | -0.25137 | -0.394770284 | -0.09600882 | 1.79E-03 | 1.79E-02 | 1.00E+00 |
| ENSG00000184140.5_OR4F6      | ENSG00000160789.18_LMNA | -0.01435 | -0.173154507 | 0.145182998 | 8.61E-01 | 9.45E-01 | 1.00E+00 |
| ENSG00000255525.1_RP1-296L1  | ENSG00000160789.18_LMNA | -0.05293 | -0.210358014 | 0.107173911 | 5.17E-01 | 7.64E-01 | 1.00E+00 |
| ENSG00000251413.1_RP11-534L1 | ENSG00000160789.18_LMNA | -0.08035 | -0.236526023 | 0.079871467 | 3.25E-01 | 6.12E-01 | 1.00E+00 |
| ENSG00000248813.1_RP11-5N11  | ENSG00000160789.18_LMNA | -0.04529 | -0.203029965 | 0.114734767 | 5.80E-01 | 8.04E-01 | 1.00E+00 |
| ENSG00000273644.1_ABC7-4817  | ENSG00000160789.18_LMNA | 0.14361  | -0.015952118 | 0.296045418 | 7.75E-02 | 2.67E-01 | 1.00E+00 |
| ENSG00000224560.3_RP11-270L  | ENSG00000160789.18_LMNA | 0.04356  | -0.116443729 | 0.201368677 | 5.94E-01 | 8.13E-01 | 1.00E+00 |
| ENSG00000259360.1_RP11-142J1 | ENSG00000160789.18_LMNA | -0.18728 | -0.336452041 | -0.02894516 | 2.09E-02 | 1.11E-01 | 1.00E+00 |
| ENSG00000254007.1_RP11-281H  | ENSG00000160789.18_LMNA | 0.07141  | -0.088797524 | 0.228021054 | 3.82E-01 | 6.61E-01 | 1.00E+00 |
| ENSG00000277971.1_XXbac-B561 | ENSG00000160789.18_LMNA | -0.17704 | -0.327025585 | -0.01835893 | 2.91E-02 | 1.40E-01 | 1.00E+00 |
| ENSG00000263199.1_RP11-372K  | ENSG00000160789.18_LMNA | -0.03676 | -0.19482044  | 0.123161602 | 6.53E-01 | 8.46E-01 | 1.00E+00 |
| ENSG00000253139.1_RP11-17A4  | ENSG00000160789.18_LMNA | 0.02531  | -0.134434249 | 0.183768385 | 7.57E-01 | 8.99E-01 | 1.00E+00 |
| ENSG00000253907.1_RP11-380I1 | ENSG00000160789.18_LMNA | -0.04845 | -0.206056703 | 0.111616329 | 5.53E-01 | 7.88E-01 | 1.00E+00 |
| ENSG00000258726.1_DUXAP6     | ENSG00000160789.18_LMNA | -0.20658 | -0.354135748 | -0.04899241 | 1.07E-02 | 6.86E-02 | 1.00E+00 |
| ENSG00000181017.4_OR56B2P    | ENSG00000160789.18_LMNA | -0.05853 | -0.215719569 | 0.10161866  | 4.74E-01 | 7.33E-01 | 1.00E+00 |
| ENSG00000226075.2_PHKG1P1    | ENSG00000160789.18_LMNA | 0.02513  | -0.134605777 | 0.18359959  | 7.59E-01 | 8.99E-01 | 1.00E+00 |
| ENSG00000231667.2_OR7E111P   | ENSG00000160789.18_LMNA | 0.00714  | -0.152238358 | 0.166147247 | 9.30E-01 | 9.73E-01 | 1.00E+00 |
| ENSG00000248029.2_CTD-2313F  | ENSG00000160789.18_LMNA | 0.02266  | -0.137031077 | 0.18121092  | 7.82E-01 | 9.10E-01 | 1.00E+00 |
| ENSG00000280345.1_RP11-438L  | ENSG00000160789.18_LMNA | 0.06875  | -0.091450324 | 0.225484046 | 4.00E-01 | 6.77E-01 | 1.00E+00 |
| ENSG00000273098.1_RP11-488L  | ENSG00000160789.18_LMNA | 0.02949  | -0.13032685  | 0.187804745 | 7.18E-01 | 8.80E-01 | 1.00E+00 |
| ENSG00000237314.2_RPL12P39   | ENSG00000160789.18_LMNA | -0.0754  | -0.231817657 | 0.084819226 | 3.56E-01 | 6.39E-01 | 1.00E+00 |
| ENSG00000259278.1_RP11-62C7  | ENSG00000160789.18_LMNA | -0.15243 | -0.304248921 | 0.006937568 | 6.08E-02 | 2.28E-01 | 1.00E+00 |
| ENSG00000259094.1_RP11-77A1  | ENSG00000160789.18_LMNA | 0.0644   | -0.095784304 | 0.221329971 | 4.31E-01 | 7.00E-01 | 1.00E+00 |
| ENSG00000259952.1_AC009133.1 | ENSG00000160789.18_LMNA | 0.09632  | -0.063855912 | 0.251665461 | 2.38E-01 | 5.16E-01 | 1.00E+00 |

|                              |                         |          |              |             |          |          |          |
|------------------------------|-------------------------|----------|--------------|-------------|----------|----------|----------|
| ENSG00000277704.1_RP11-498M  | ENSG00000160789.18_LMNA | -0.0715  | -0.228102109 | 0.088712695 | 3.81E-01 | 6.60E-01 | 1.00E+00 |
| ENSG00000229249.5_LINC00446  | ENSG00000160789.18_LMNA | -0.15386 | -0.305572795 | 0.005478054 | 5.84E-02 | 2.22E-01 | 1.00E+00 |
| ENSG00000230237.1_AC010975.1 | ENSG00000160789.18_LMNA | -0.15146 | -0.303350484 | 0.007927303 | 6.25E-02 | 2.32E-01 | 1.00E+00 |
| ENSG00000167359.8_OR5111     | ENSG00000160789.18_LMNA | -0.04551 | -0.203238902 | 0.114519701 | 5.78E-01 | 8.03E-01 | 1.00E+00 |
| ENSG00000279932.1_RP11-349F  | ENSG00000160789.18_LMNA | -0.04636 | -0.204056626 | 0.113677703 | 5.71E-01 | 7.99E-01 | 1.00E+00 |
| ENSG00000256643.1_CRAT8      | ENSG00000160789.18_LMNA | -0.11689 | -0.271044995 | 0.043114935 | 1.52E-01 | 4.00E-01 | 1.00E+00 |
| ENSG00000184345.4_IQCF2      | ENSG00000160789.18_LMNA | 0.03948  | -0.120479258 | 0.197438455 | 6.29E-01 | 8.33E-01 | 1.00E+00 |
| ENSG00000225418.1_AKR1C5P    | ENSG00000160789.18_LMNA | -0.07166 | -0.228255264 | 0.088552397 | 3.80E-01 | 6.59E-01 | 1.00E+00 |
| ENSG00000250804.1_RP11-747H  | ENSG00000160789.18_LMNA | -0.00948 | -0.168424006 | 0.149949523 | 9.08E-01 | 9.65E-01 | 1.00E+00 |
| ENSG00000231541.1_RPS6P2     | ENSG00000160789.18_LMNA | -0.03724 | -0.195281219 | 0.122689838 | 6.49E-01 | 8.44E-01 | 1.00E+00 |
| ENSG00000259390.2_RP11-27M9  | ENSG00000160789.18_LMNA | 0.03836  | -0.121584033 | 0.196360724 | 6.39E-01 | 8.39E-01 | 1.00E+00 |
| ENSG00000241059.2_CTD-2061E  | ENSG00000160789.18_LMNA | 0.18902  | 0.030739452  | 0.338043675 | 1.97E-02 | 1.07E-01 | 1.00E+00 |
| ENSG00000248271.1_PGAM1P1    | ENSG00000160789.18_LMNA | -0.0604  | -0.217511607 | 0.099757458 | 4.60E-01 | 7.23E-01 | 1.00E+00 |
| ENSG00000279411.1_RP11-489P  | ENSG00000160789.18_LMNA | -0.11831 | -0.272381696 | 0.041674275 | 1.47E-01 | 3.92E-01 | 1.00E+00 |
| ENSG00000253418.1_SNX18P27   | ENSG00000160789.18_LMNA | -0.02922 | -0.187545437 | 0.130591051 | 7.21E-01 | 8.82E-01 | 1.00E+00 |
| ENSG00000255535.2_RP11-679I1 | ENSG00000160789.18_LMNA | 0.17465  | 0.015894674  | 0.324822456 | 3.14E-02 | 1.48E-01 | 1.00E+00 |
| ENSG00000232002.1_AC093642.1 | ENSG00000160789.18_LMNA | -0.11452 | -0.268819109 | 0.045511038 | 1.60E-01 | 4.14E-01 | 1.00E+00 |
| ENSG00000216671.6_CCNYL3     | ENSG00000160789.18_LMNA | -0.04007 | -0.198005085 | 0.119898093 | 6.24E-01 | 8.31E-01 | 1.00E+00 |
| ENSG00000250735.4_RP11-567N  | ENSG00000160789.18_LMNA | 0.00318  | -0.156100981 | 0.162297287 | 9.69E-01 | 9.88E-01 | 1.00E+00 |
| ENSG00000259115.1_CTD-2540L  | ENSG00000160789.18_LMNA | 0.13526  | -0.024469749 | 0.288251602 | 9.66E-02 | 3.05E-01 | 1.00E+00 |
| ENSG00000235040.1_MTCO3P1    | ENSG00000160789.18_LMNA | 0.01253  | -0.146962477 | 0.171390193 | 8.78E-01 | 9.53E-01 | 1.00E+00 |
| ENSG00000234714.1_AC009965.1 | ENSG00000160789.18_LMNA | 0.27162  | 0.117494942  | 0.412958835 | 7.12E-04 | 8.89E-03 | 1.00E+00 |
| ENSG00000232749.2_RP11-15B2  | ENSG00000160789.18_LMNA | 0.08203  | -0.078188241 | 0.238124428 | 3.15E-01 | 6.01E-01 | 1.00E+00 |
| ENSG00000248358.2_AE000658.1 | ENSG00000160789.18_LMNA | 0.16944  | 0.010525812  | 0.320010864 | 3.69E-02 | 1.64E-01 | 1.00E+00 |
| ENSG00000250095.4_NREP-AS1   | ENSG00000160789.18_LMNA | 0.08638  | -0.073834489 | 0.242250852 | 2.90E-01 | 5.75E-01 | 1.00E+00 |
| ENSG00000279575.1_RP11-271F  | ENSG00000160789.18_LMNA | -0.08302 | -0.239061526 | 0.077200574 | 3.09E-01 | 5.96E-01 | 1.00E+00 |
| ENSG00000279741.1_RP11-44F1  | ENSG00000160789.18_LMNA | 0.11004  | -0.050041596 | 0.264601203 | 1.77E-01 | 4.39E-01 | 1.00E+00 |
| ENSG00000223373.1_AC108066.1 | ENSG00000160789.18_LMNA | -0.01757 | -0.176276291 | 0.142029326 | 8.30E-01 | 9.34E-01 | 1.00E+00 |
| ENSG00000217495.2_RP1-95L4.2 | ENSG00000160789.18_LMNA | -0.00251 | -0.161648243 | 0.156751203 | 9.75E-01 | 9.91E-01 | 1.00E+00 |
| ENSG00000259283.2_RP11-26L2  | ENSG00000160789.18_LMNA | -0.02131 | -0.179904427 | 0.138355993 | 7.94E-01 | 9.17E-01 | 1.00E+00 |
| ENSG00000275643.1_RBM22P6    | ENSG00000160789.18_LMNA | -0.11779 | -0.271889079 | 0.042205356 | 1.48E-01 | 3.95E-01 | 1.00E+00 |
| ENSG00000160181.7_TFF2       | ENSG00000160789.18_LMNA | -0.07664 | -0.232995022 | 0.083583461 | 3.48E-01 | 6.32E-01 | 1.00E+00 |
| ENSG00000231553.1_RNMTL1P1   | ENSG00000160789.18_LMNA | -0.04297 | -0.2007952   | 0.117033226 | 5.99E-01 | 8.16E-01 | 1.00E+00 |

|                              |                         |          |              |             |          |          |          |
|------------------------------|-------------------------|----------|--------------|-------------|----------|----------|----------|
| ENSG00000242107.2_LINC01100  | ENSG00000160789.18_LMNA | -0.1062  | -0.26099131  | 0.053908816 | 1.93E-01 | 4.61E-01 | 1.00E+00 |
| ENSG00000253665.1_RP11-359E  | ENSG00000160789.18_LMNA | 0.01529  | -0.144257904 | 0.174070911 | 8.52E-01 | 9.42E-01 | 1.00E+00 |
| ENSG00000244669.1_RP11-158O  | ENSG00000160789.18_LMNA | -0.08999 | -0.245666734 | 0.070221285 | 2.70E-01 | 5.55E-01 | 1.00E+00 |
| ENSG00000251608.1_OR12D1     | ENSG00000160789.18_LMNA | -0.04881 | -0.206405981 | 0.111256065 | 5.50E-01 | 7.87E-01 | 1.00E+00 |
| ENSG00000216762.1_VN1R13P    | ENSG00000160789.18_LMNA | -0.13348 | -0.286594698 | 0.026274697 | 1.01E-01 | 3.13E-01 | 1.00E+00 |
| ENSG00000180770.3_OR7E129P   | ENSG00000160789.18_LMNA | -0.14209 | -0.294624856 | 0.01750799  | 8.08E-02 | 2.74E-01 | 1.00E+00 |
| ENSG00000253100.1_RP11-219J  | ENSG00000160789.18_LMNA | -0.16786 | -0.318544775 | -0.00889346 | 3.87E-02 | 1.70E-01 | 1.00E+00 |
| ENSG00000253611.1_VN1R46P    | ENSG00000160789.18_LMNA | 0.0172   | -0.142388338 | 0.175921232 | 8.33E-01 | 9.35E-01 | 1.00E+00 |
| ENSG00000277527.1_AC007251.  | ENSG00000160789.18_LMNA | -0.03815 | -0.196161637 | 0.12178803  | 6.41E-01 | 8.40E-01 | 1.00E+00 |
| ENSG00000250257.1_LDHAL6DP   | ENSG00000160789.18_LMNA | -0.03983 | -0.197774222 | 0.120134904 | 6.26E-01 | 8.31E-01 | 1.00E+00 |
| ENSG00000248387.1_RP11-781M  | ENSG00000160789.18_LMNA | -0.0047  | -0.163774033 | 0.154620528 | 9.54E-01 | 9.82E-01 | 1.00E+00 |
| ENSG00000272882.1_OR2BH1P    | ENSG00000160789.18_LMNA | -0.06485 | -0.221759142 | 0.095337104 | 4.27E-01 | 6.98E-01 | 1.00E+00 |
| ENSG00000229697.2_RP11-374M  | ENSG00000160789.18_LMNA | 0.04277  | -0.117230648 | 0.200603095 | 6.01E-01 | 8.16E-01 | 1.00E+00 |
| ENSG00000142789.18_CELA3A    | ENSG00000160789.18_LMNA | 0.02552  | -0.134223757 | 0.183975497 | 7.55E-01 | 8.98E-01 | 1.00E+00 |
| ENSG00000213081.3_AC012362.  | ENSG00000160789.18_LMNA | 0.02007  | -0.139576555 | 0.178699843 | 8.06E-01 | 9.23E-01 | 1.00E+00 |
| ENSG00000258212.1_ZNF75BP    | ENSG00000160789.18_LMNA | -0.07157 | -0.228167365 | 0.088644398 | 3.81E-01 | 6.60E-01 | 1.00E+00 |
| ENSG00000232857.2_KATNBL1P   | ENSG00000160789.18_LMNA | -0.00057 | -0.15975431  | 0.158646993 | 9.94E-01 | 9.98E-01 | 1.00E+00 |
| ENSG00000266605.1_LONRF2P1   | ENSG00000160789.18_LMNA | -0.13293 | -0.286076914 | 0.026838326 | 1.03E-01 | 3.17E-01 | 1.00E+00 |
| ENSG00000251527.1_RP11-51P8  | ENSG00000160789.18_LMNA | 0.0376   | -0.122329998 | 0.195632586 | 6.46E-01 | 8.43E-01 | 1.00E+00 |
| ENSG00000256494.1_RP5-944M2  | ENSG00000160789.18_LMNA | 0.04424  | -0.115774127 | 0.202019818 | 5.88E-01 | 8.09E-01 | 1.00E+00 |
| ENSG00000261667.1_LY6L       | ENSG00000160789.18_LMNA | 0.00769  | -0.151692979 | 0.166690056 | 9.25E-01 | 9.71E-01 | 1.00E+00 |
| ENSG00000187847.3_OR7E25P    | ENSG00000160789.18_LMNA | 0.08282  | -0.077398342 | 0.238873931 | 3.10E-01 | 5.97E-01 | 1.00E+00 |
| ENSG00000218991.1_CCNG1P1    | ENSG00000160789.18_LMNA | 0.10935  | -0.050737291 | 0.26395245  | 1.80E-01 | 4.43E-01 | 1.00E+00 |
| ENSG00000237207.2_RBM17P3    | ENSG00000160789.18_LMNA | 0.08802  | -0.072188846 | 0.243807596 | 2.81E-01 | 5.66E-01 | 1.00E+00 |
| ENSG00000279603.1_RP11-796A  | ENSG00000160789.18_LMNA | -0.08928 | -0.244995797 | 0.070931633 | 2.74E-01 | 5.59E-01 | 1.00E+00 |
| ENSG00000215562.2_CNN2P7     | ENSG00000160789.18_LMNA | 0.15999  | 0.000814229  | 0.311266564 | 4.90E-02 | 1.99E-01 | 1.00E+00 |
| ENSG00000266691.1_RP11-1109I | ENSG00000160789.18_LMNA | 0.00322  | -0.15606551  | 0.162332686 | 9.69E-01 | 9.88E-01 | 1.00E+00 |
| ENSG00000248611.1_RP11-158C  | ENSG00000160789.18_LMNA | 0.06773  | -0.092462797 | 0.224514632 | 4.07E-01 | 6.82E-01 | 1.00E+00 |
| ENSG00000230485.1_AC000077.  | ENSG00000160789.18_LMNA | -0.01421 | -0.173023655 | 0.145315045 | 8.62E-01 | 9.46E-01 | 1.00E+00 |
| ENSG00000230086.1_VN1R96P    | ENSG00000160789.18_LMNA | -0.02523 | -0.183688712 | 0.134515213 | 7.58E-01 | 8.99E-01 | 1.00E+00 |
| ENSG00000224777.3_OR4F2P     | ENSG00000160789.18_LMNA | 0.00063  | -0.158586758 | 0.159814522 | 9.94E-01 | 9.98E-01 | 1.00E+00 |
| ENSG00000278346.1_CTD-2267D  | ENSG00000160789.18_LMNA | -0.05406 | -0.211444975 | 0.106049282 | 5.08E-01 | 7.58E-01 | 1.00E+00 |
| ENSG00000244470.2_RP11-395M  | ENSG00000160789.18_LMNA | 0.05394  | -0.106171514 | 0.211326875 | 5.09E-01 | 7.59E-01 | 1.00E+00 |

|                              |                         |          |              |             |          |          |          |
|------------------------------|-------------------------|----------|--------------|-------------|----------|----------|----------|
| ENSG00000224039.1_AC091493.  | ENSG00000160789.18_LMNA | 0.03942  | -0.120539536 | 0.197379672 | 6.30E-01 | 8.33E-01 | 1.00E+00 |
| ENSG00000226480.1_OR7H1P     | ENSG00000160789.18_LMNA | -0.13925 | -0.291979941 | 0.020400814 | 8.71E-02 | 2.87E-01 | 1.00E+00 |
| ENSG00000258456.2_PTC2P1     | ENSG00000160789.18_LMNA | -0.00099 | -0.160164774 | 0.158236327 | 9.90E-01 | 9.96E-01 | 1.00E+00 |
| ENSG00000270969.1_CTD-2355J  | ENSG00000160789.18_LMNA | 0.20275  | 0.044999635  | 0.35063103  | 1.22E-02 | 7.58E-02 | 1.00E+00 |
| ENSG00000226406.1_RBMX2P1    | ENSG00000160789.18_LMNA | -0.01681 | -0.175545113 | 0.142768553 | 8.37E-01 | 9.37E-01 | 1.00E+00 |
| ENSG00000253130.1_CTD-3023L  | ENSG00000160789.18_LMNA | 0.04153  | -0.118456023 | 0.199410172 | 6.11E-01 | 8.23E-01 | 1.00E+00 |
| ENSG00000156282.4_CLDN17     | ENSG00000160789.18_LMNA | -0.12297 | -0.276752822 | 0.03695406  | 1.31E-01 | 3.67E-01 | 1.00E+00 |
| ENSG00000233395.1_LINC00841  | ENSG00000160789.18_LMNA | 0.21736  | 0.060241774  | 0.363964155 | 7.15E-03 | 5.12E-02 | 1.00E+00 |
| ENSG00000262081.2_IL9RP4     | ENSG00000160789.18_LMNA | -0.00675 | -0.165769681 | 0.152617595 | 9.34E-01 | 9.74E-01 | 1.00E+00 |
| ENSG00000136939.1_OR1L4      | ENSG00000160789.18_LMNA | -0.0742  | -0.23067705  | 0.086015481 | 3.64E-01 | 6.45E-01 | 1.00E+00 |
| ENSG00000204471.3_TBC1D3P4   | ENSG00000160789.18_LMNA | 0.13593  | -0.023782493 | 0.288881996 | 9.50E-02 | 3.02E-01 | 1.00E+00 |
| ENSG00000235584.2_AC008268.  | ENSG00000160789.18_LMNA | 0.17976  | 0.021165904  | 0.329531042 | 2.67E-02 | 1.32E-01 | 1.00E+00 |
| ENSG00000176299.4_OR4M1      | ENSG00000160789.18_LMNA | -0.06039 | -0.217496379 | 0.099773283 | 4.60E-01 | 7.23E-01 | 1.00E+00 |
| ENSG00000259669.4_RP11-643A  | ENSG00000160789.18_LMNA | -0.03624 | -0.194321262 | 0.123672519 | 6.58E-01 | 8.49E-01 | 1.00E+00 |
| ENSG00000259892.1_RP11-1H8.  | ENSG00000160789.18_LMNA | -0.08222 | -0.238301069 | 0.078002115 | 3.14E-01 | 6.00E-01 | 1.00E+00 |
| ENSG00000255171.4_LINC01499  | ENSG00000160789.18_LMNA | -0.04932 | -0.206893617 | 0.110752953 | 5.46E-01 | 7.84E-01 | 1.00E+00 |
| ENSG00000279521.1_RP11-314P  | ENSG00000160789.18_LMNA | 0.09411  | -0.066079514 | 0.24957269  | 2.49E-01 | 5.29E-01 | 1.00E+00 |
| ENSG00000229266.1_POM121L8   | ENSG00000160789.18_LMNA | 0.14088  | -0.018740713 | 0.29349836  | 8.34E-02 | 2.79E-01 | 1.00E+00 |
| ENSG00000223717.1_DNAJA1P1   | ENSG00000160789.18_LMNA | -0.09193 | -0.247510559 | 0.068267499 | 2.60E-01 | 5.43E-01 | 1.00E+00 |
| ENSG00000170925.3_TEX13B     | ENSG00000160789.18_LMNA | 0.15375  | -0.005587911 | 0.305473189 | 5.86E-02 | 2.22E-01 | 1.00E+00 |
| ENSG00000228309.5_LINC01350  | ENSG00000160789.18_LMNA | -0.14915 | -0.30120235  | 0.010291256 | 6.67E-02 | 2.42E-01 | 1.00E+00 |
| ENSG00000250145.1_CTD-2285C  | ENSG00000160789.18_LMNA | 0.11882  | -0.041162462 | 0.272856285 | 1.45E-01 | 3.90E-01 | 1.00E+00 |
| ENSG00000235647.1_RP1-172B2  | ENSG00000160789.18_LMNA | 0.18994  | 0.031693002  | 0.33888881  | 1.91E-02 | 1.04E-01 | 1.00E+00 |
| ENSG00000120952.4_PRAMEF2    | ENSG00000160789.18_LMNA | 0.0054   | -0.153929851 | 0.164462493 | 9.47E-01 | 9.79E-01 | 1.00E+00 |
| ENSG00000237435.7_RP11-147C  | ENSG00000160789.18_LMNA | 0.05475  | -0.105364671 | 0.212106272 | 5.03E-01 | 7.54E-01 | 1.00E+00 |
| ENSG00000235124.1_KRT8P17    | ENSG00000160789.18_LMNA | 0.07035  | -0.089853042 | 0.227012123 | 3.89E-01 | 6.67E-01 | 1.00E+00 |
| ENSG00000241787.1_MTND4P16   | ENSG00000160789.18_LMNA | -0.02421 | -0.182702971 | 0.135516592 | 7.67E-01 | 9.04E-01 | 1.00E+00 |
| ENSG00000225437.4_PACRG-AS   | ENSG00000160789.18_LMNA | -0.01984 | -0.178475783 | 0.13980348  | 8.08E-01 | 9.24E-01 | 1.00E+00 |
| ENSG00000225745.7_AL773572.7 | ENSG00000160789.18_LMNA | 0.11155  | -0.048513902 | 0.266024818 | 1.71E-01 | 4.30E-01 | 1.00E+00 |
| ENSG00000250127.1_CTD-2117L  | ENSG00000160789.18_LMNA | -0.14482 | -0.297170082 | 0.014719255 | 7.51E-02 | 2.61E-01 | 1.00E+00 |
| ENSG00000223810.2_KRT8P28    | ENSG00000160789.18_LMNA | 0.09795  | -0.06221608  | 0.253206921 | 2.30E-01 | 5.07E-01 | 1.00E+00 |
| ENSG00000256022.4_RP11-526P  | ENSG00000160789.18_LMNA | -0.0376  | -0.195625067 | 0.122337698 | 6.46E-01 | 8.43E-01 | 1.00E+00 |
| ENSG00000205449.10_NBPF22P   | ENSG00000160789.18_LMNA | -0.131   | -0.284267919 | 0.028805934 | 1.08E-01 | 3.26E-01 | 1.00E+00 |



|                             |                         |          |              |             |          |          |          |
|-----------------------------|-------------------------|----------|--------------|-------------|----------|----------|----------|
| ENSG00000242280.1_SLC16A1P  | ENSG00000160789.18_LMNA | -0.0413  | -0.199193129 | 0.118678867 | 6.13E-01 | 8.24E-01 | 1.00E+00 |
| ENSG00000204121.2_ECEL1P1   | ENSG00000160789.18_LMNA | 0.08513  | -0.07509146  | 0.241060686 | 2.97E-01 | 5.83E-01 | 1.00E+00 |
| ENSG00000259119.1_RP11-1127 | ENSG00000160789.18_LMNA | 0.14408  | -0.015474173 | 0.296481521 | 7.66E-02 | 2.65E-01 | 1.00E+00 |
| ENSG00000224852.1_MTND5P24  | ENSG00000160789.18_LMNA | -0.04873 | -0.206330019 | 0.111334423 | 5.51E-01 | 7.87E-01 | 1.00E+00 |
| ENSG00000204481.7_PRAMEF14  | ENSG00000160789.18_LMNA | 0.1514   | -0.007993383 | 0.30329048  | 6.26E-02 | 2.32E-01 | 1.00E+00 |
| ENSG00000253743.1_MARK2P11  | ENSG00000160789.18_LMNA | 0.02528  | -0.134457792 | 0.183745218 | 7.57E-01 | 8.99E-01 | 1.00E+00 |
| ENSG00000279295.1_RP11-683O | ENSG00000160789.18_LMNA | -0.12061 | -0.27454319  | 0.03934191  | 1.39E-01 | 3.80E-01 | 1.00E+00 |
| ENSG00000213065.2_RP3-431P2 | ENSG00000160789.18_LMNA | -0.06043 | -0.217534624 | 0.099733539 | 4.60E-01 | 7.23E-01 | 1.00E+00 |
| ENSG00000266505.1_RP11-629E | ENSG00000160789.18_LMNA | 0.07645  | -0.083774274 | 0.232813287 | 3.49E-01 | 6.33E-01 | 1.00E+00 |
| ENSG00000260307.2_PABPC1P1  | ENSG00000160789.18_LMNA | 0.08308  | -0.077140923 | 0.239118105 | 3.09E-01 | 5.95E-01 | 1.00E+00 |
| ENSG00000224187.1_RP11-132N | ENSG00000160789.18_LMNA | -0.17589 | -0.32596608  | -0.01717338 | 3.02E-02 | 1.44E-01 | 1.00E+00 |
| ENSG00000250596.1_RP11-4401 | ENSG00000160789.18_LMNA | -0.13184 | -0.285055282 | 0.027949833 | 1.05E-01 | 3.22E-01 | 1.00E+00 |
| ENSG00000177553.6_RP11-56N1 | ENSG00000160789.18_LMNA | 0.18798  | 0.02966948   | 0.337094764 | 2.04E-02 | 1.09E-01 | 1.00E+00 |
| ENSG00000268606.4_MAGEA2    | ENSG00000160789.18_LMNA | 0.06669  | -0.093500886 | 0.223520039 | 4.14E-01 | 6.87E-01 | 1.00E+00 |
| ENSG00000219273.1_RP1-217P2 | ENSG00000160789.18_LMNA | -0.11175 | -0.266215013 | 0.048309691 | 1.70E-01 | 4.29E-01 | 1.00E+00 |
| ENSG00000181171.5_FER1L6-AS | ENSG00000160789.18_LMNA | -0.07504 | -0.231479397 | 0.085174085 | 3.58E-01 | 6.41E-01 | 1.00E+00 |
| ENSG00000279143.1_AC139099  | ENSG00000160789.18_LMNA | -0.01752 | -0.176224425 | 0.142081775 | 8.30E-01 | 9.34E-01 | 1.00E+00 |
| ENSG00000279625.1_RP11-415K | ENSG00000160789.18_LMNA | -0.03257 | -0.190783605 | 0.127288544 | 6.90E-01 | 8.67E-01 | 1.00E+00 |
| ENSG00000231417.2_IRX1P1    | ENSG00000160789.18_LMNA | 0.01756  | -0.142037718 | 0.176267993 | 8.30E-01 | 9.34E-01 | 1.00E+00 |
| ENSG00000237468.2_RP11-715G | ENSG00000160789.18_LMNA | -0.01363 | -0.172458258 | 0.145885477 | 8.68E-01 | 9.48E-01 | 1.00E+00 |
| ENSG00000224308.1_LINC01527 | ENSG00000160789.18_LMNA | -0.15018 | -0.302158949 | 0.009238979 | 6.48E-02 | 2.37E-01 | 1.00E+00 |
| ENSG00000276040.3_SPATA31A  | ENSG00000160789.18_LMNA | -0.02193 | -0.180500137 | 0.137752024 | 7.89E-01 | 9.14E-01 | 1.00E+00 |
| ENSG00000261780.2_CTD-2354A | ENSG00000160789.18_LMNA | 0.17346  | 0.014660741  | 0.323718014 | 3.26E-02 | 1.51E-01 | 1.00E+00 |
| ENSG00000126549.8_STATH     | ENSG00000160789.18_LMNA | -0.00616 | -0.165200055 | 0.153189567 | 9.40E-01 | 9.76E-01 | 1.00E+00 |
| ENSG00000260759.1_RP11-677O | ENSG00000160789.18_LMNA | 0.15996  | 0.000783419  | 0.311238739 | 4.90E-02 | 1.99E-01 | 1.00E+00 |
| ENSG00000259541.4_RP11-778O | ENSG00000160789.18_LMNA | 0.05295  | -0.107155088 | 0.210376214 | 5.17E-01 | 7.64E-01 | 1.00E+00 |
| ENSG00000256343.6_RP11-662M | ENSG00000160789.18_LMNA | -0.04569 | -0.203414925 | 0.114338491 | 5.76E-01 | 8.02E-01 | 1.00E+00 |
| ENSG00000171560.13_FGA      | ENSG00000160789.18_LMNA | 0.01271  | -0.146791371 | 0.17155993  | 8.77E-01 | 9.52E-01 | 1.00E+00 |
| ENSG00000253279.4_FAM183CP  | ENSG00000160789.18_LMNA | 0.02522  | -0.13451731  | 0.183686649 | 7.58E-01 | 8.99E-01 | 1.00E+00 |
| ENSG00000106304.14_SPAM1    | ENSG00000160789.18_LMNA | 0.01393  | -0.145590389 | 0.172750768 | 8.65E-01 | 9.47E-01 | 1.00E+00 |
| ENSG00000167459.15_LINC0090 | ENSG00000160789.18_LMNA | -0.01463 | -0.173430337 | 0.14490461  | 8.58E-01 | 9.44E-01 | 1.00E+00 |
| ENSG00000160882.10_CYP11B1  | ENSG00000160789.18_LMNA | 0.00046  | -0.158750827 | 0.159650511 | 9.95E-01 | 9.98E-01 | 1.00E+00 |
| ENSG00000258529.4_RP11-108O | ENSG00000160789.18_LMNA | 0.09398  | -0.066214966 | 0.249445112 | 2.49E-01 | 5.30E-01 | 1.00E+00 |

|                               |                         |          |              |             |          |          |          |
|-------------------------------|-------------------------|----------|--------------|-------------|----------|----------|----------|
| ENSG00000175065.10_DSG4       | ENSG00000160789.18_LMNA | -0.00525 | -0.164312631 | 0.154080222 | 9.49E-01 | 9.79E-01 | 1.00E+00 |
| ENSG00000258588.3_TRIM6-TRIM6 | ENSG00000160789.18_LMNA | 0.08129  | -0.078936884 | 0.237413722 | 3.19E-01 | 6.06E-01 | 1.00E+00 |
| ENSG00000275692.1_MIR6724-4   | ENSG00000160789.18_LMNA | -0.08282 | -0.238870781 | 0.077401664 | 3.10E-01 | 5.97E-01 | 1.00E+00 |
| ENSG00000271691.1_RP11-812E   | ENSG00000160789.18_LMNA | -0.05912 | -0.216286121 | 0.101030482 | 4.69E-01 | 7.30E-01 | 1.00E+00 |
| ENSG00000259815.1_RP11-565N   | ENSG00000160789.18_LMNA | -0.04195 | -0.199816436 | 0.118038816 | 6.08E-01 | 8.21E-01 | 1.00E+00 |
| ENSG00000228610.1_PDCL2P1     | ENSG00000160789.18_LMNA | 0.02517  | -0.134572069 | 0.183632761 | 7.58E-01 | 8.99E-01 | 1.00E+00 |
| ENSG00000239311.1_RP11-615J   | ENSG00000160789.18_LMNA | -0.06037 | -0.217478039 | 0.099792343 | 4.60E-01 | 7.23E-01 | 1.00E+00 |
| ENSG00000199783.1_SNORD56     | ENSG00000160789.18_LMNA | 0.05119  | -0.108900133 | 0.208688082 | 5.31E-01 | 7.74E-01 | 1.00E+00 |
| ENSG00000252650.1_RNA5SP75    | ENSG00000160789.18_LMNA | -0.14325 | -0.295705062 | 0.016325031 | 7.83E-02 | 2.69E-01 | 1.00E+00 |
| ENSG00000257230.1_RP11-272B   | ENSG00000160789.18_LMNA | -0.27481 | -0.415814562 | -0.12089372 | 6.12E-04 | 7.92E-03 | 1.00E+00 |
| ENSG00000273677.1_WT1-AS_2    | ENSG00000160789.18_LMNA | -0.00909 | -0.168050843 | 0.1503249   | 9.11E-01 | 9.66E-01 | 1.00E+00 |
| ENSG00000207830.1_            | ENSG00000160789.18_LMNA | 0.0021   | -0.157149029 | 0.161251001 | 9.79E-01 | 9.92E-01 | 1.00E+00 |
| ENSG00000199012.2_MIR412      | ENSG00000160789.18_LMNA | 0.01047  | -0.148974219 | 0.169393134 | 8.98E-01 | 9.60E-01 | 1.00E+00 |
| ENSG00000212384.1_SNORD113    | ENSG00000160789.18_LMNA | -0.05039 | -0.207922921 | 0.109690447 | 5.38E-01 | 7.78E-01 | 1.00E+00 |
| ENSG00000252277.1_SNORD116    | ENSG00000160789.18_LMNA | 0.00596  | -0.153383298 | 0.165007072 | 9.42E-01 | 9.77E-01 | 1.00E+00 |
| ENSG00000221641.1_MIR1268A    | ENSG00000160789.18_LMNA | -0.0274  | -0.185794791 | 0.132373544 | 7.38E-01 | 8.90E-01 | 1.00E+00 |
| ENSG00000276703.1_RPS29P32    | ENSG00000160789.18_LMNA | -0.05077 | -0.208283174 | 0.109318402 | 5.35E-01 | 7.76E-01 | 1.00E+00 |
| ENSG00000276852.1_            | ENSG00000160789.18_LMNA | -0.02367 | -0.1821873   | 0.136040185 | 7.72E-01 | 9.06E-01 | 1.00E+00 |
| ENSG00000201500.1_SNORD113    | ENSG00000160789.18_LMNA | 0.007    | -0.152372463 | 0.166013743 | 9.32E-01 | 9.73E-01 | 1.00E+00 |
| ENSG00000265641.1_MIR3929     | ENSG00000160789.18_LMNA | -0.02454 | -0.183028585 | 0.135185885 | 7.64E-01 | 9.02E-01 | 1.00E+00 |
| ENSG00000201059.1_RNA5SP33    | ENSG00000160789.18_LMNA | -0.06311 | -0.220095623 | 0.097069797 | 4.40E-01 | 7.08E-01 | 1.00E+00 |
| ENSG00000260857.2_RP11-80F2   | ENSG00000160789.18_LMNA | -0.08249 | -0.238556874 | 0.077732536 | 3.12E-01 | 5.99E-01 | 1.00E+00 |
| ENSG00000239030.1_RNU6-956F   | ENSG00000160789.18_LMNA | 0.08531  | -0.074904481 | 0.241237787 | 2.96E-01 | 5.82E-01 | 1.00E+00 |
| ENSG00000210127.1_MT-TA       | ENSG00000160789.18_LMNA | -0.04874 | -0.206342285 | 0.111321771 | 5.51E-01 | 7.87E-01 | 1.00E+00 |
| ENSG00000275670.1_MIR8076     | ENSG00000160789.18_LMNA | -0.11445 | -0.268757363 | 0.045577455 | 1.60E-01 | 4.14E-01 | 1.00E+00 |
| ENSG00000253042.1_SNORA70     | ENSG00000160789.18_LMNA | 0.07933  | -0.080890224 | 0.235557771 | 3.31E-01 | 6.17E-01 | 1.00E+00 |
| ENSG00000211879.1_TRAJ10      | ENSG00000160789.18_LMNA | -0.03446 | -0.1926011   | 0.125431842 | 6.73E-01 | 8.57E-01 | 1.00E+00 |
| ENSG00000265517.1_            | ENSG00000160789.18_LMNA | -0.02865 | -0.187000866 | 0.131145748 | 7.26E-01 | 8.84E-01 | 1.00E+00 |
| ENSG00000264101.1_MIR4689     | ENSG00000160789.18_LMNA | -0.15358 | -0.305314163 | 0.005763289 | 5.89E-02 | 2.23E-01 | 1.00E+00 |
| ENSG00000264671.1_            | ENSG00000160789.18_LMNA | -0.02385 | -0.182357503 | 0.135867387 | 7.71E-01 | 9.05E-01 | 1.00E+00 |
| ENSG00000199901.1_Y_RNA       | ENSG00000160789.18_LMNA | -0.18666 | -0.335884118 | -0.0283054  | 2.13E-02 | 1.13E-01 | 1.00E+00 |
| ENSG00000211844.1_TRAJ45      | ENSG00000160789.18_LMNA | 0.11214  | -0.047920662 | 0.266577272 | 1.69E-01 | 4.27E-01 | 1.00E+00 |
| ENSG00000251807.1_RNU6-202F   | ENSG00000160789.18_LMNA | -0.00626 | -0.165299944 | 0.153089283 | 9.39E-01 | 9.76E-01 | 1.00E+00 |

|                             |                         |          |              |             |          |          |          |
|-----------------------------|-------------------------|----------|--------------|-------------|----------|----------|----------|
| ENSG00000280648.1_          | ENSG00000160789.18_LMNA | -0.03265 | -0.190855506 | 0.127215134 | 6.90E-01 | 8.66E-01 | 1.00E+00 |
| ENSG00000274557.1_          | ENSG00000160789.18_LMNA | -0.06411 | -0.221052058 | 0.096073825 | 4.33E-01 | 7.02E-01 | 1.00E+00 |
| ENSG00000199364.1_RNA5SP32  | ENSG00000160789.18_LMNA | 0.06547  | -0.094716312 | 0.222354701 | 4.23E-01 | 6.94E-01 | 1.00E+00 |
| ENSG00000276990.1_          | ENSG00000160789.18_LMNA | 0.07817  | -0.082050918 | 0.234453853 | 3.38E-01 | 6.24E-01 | 1.00E+00 |
| ENSG00000277904.1_MIR7850   | ENSG00000160789.18_LMNA | -0.03523 | -0.193342803 | 0.124673499 | 6.67E-01 | 8.53E-01 | 1.00E+00 |
| ENSG00000266849.1_          | ENSG00000160789.18_LMNA | -0.02745 | -0.185836686 | 0.132330912 | 7.37E-01 | 8.89E-01 | 1.00E+00 |
| ENSG00000208034.1_          | ENSG00000160789.18_LMNA | -0.03744 | -0.19547937  | 0.122486918 | 6.47E-01 | 8.43E-01 | 1.00E+00 |
| ENSG00000207444.1_SNORD56E  | ENSG00000160789.18_LMNA | 0.10551  | -0.054607455 | 0.260338218 | 1.96E-01 | 4.65E-01 | 1.00E+00 |
| ENSG00000206784.1_Y_RNA     | ENSG00000160789.18_LMNA | -0.07058 | -0.227223452 | 0.089632015 | 3.88E-01 | 6.66E-01 | 1.00E+00 |
| ENSG00000263985.1_          | ENSG00000160789.18_LMNA | -0.16307 | -0.314120077 | -0.00397697 | 4.47E-02 | 1.87E-01 | 1.00E+00 |
| ENSG00000252995.1_RNU6-667F | ENSG00000160789.18_LMNA | -0.0807  | -0.236853013 | 0.079527272 | 3.23E-01 | 6.10E-01 | 1.00E+00 |
| ENSG00000252616.1_          | ENSG00000160789.18_LMNA | -0.04841 | -0.206026144 | 0.111647844 | 5.54E-01 | 7.88E-01 | 1.00E+00 |
| ENSG00000251756.1_RNA5SP38  | ENSG00000160789.18_LMNA | -0.07152 | -0.228122685 | 0.088691161 | 3.81E-01 | 6.60E-01 | 1.00E+00 |
| ENSG00000252918.1_          | ENSG00000160789.18_LMNA | 0.13138  | -0.028417572 | 0.284625151 | 1.07E-01 | 3.25E-01 | 1.00E+00 |
| ENSG00000201786.1_Y_RNA     | ENSG00000160789.18_LMNA | 0.20312  | 0.045381996  | 0.350967024 | 1.21E-02 | 7.52E-02 | 1.00E+00 |
| ENSG00000221309.1_          | ENSG00000160789.18_LMNA | 0.05813  | -0.102013206 | 0.21533941  | 4.77E-01 | 7.35E-01 | 1.00E+00 |
| ENSG00000215946.3_          | ENSG00000160789.18_LMNA | 0.11727  | -0.042726811 | 0.271405231 | 1.50E-01 | 3.98E-01 | 1.00E+00 |
| ENSG00000264224.1_          | ENSG00000160789.18_LMNA | -0.02116 | -0.179757055 | 0.138505372 | 7.96E-01 | 9.18E-01 | 1.00E+00 |
| ENSG00000199130.2_MIR365A   | ENSG00000160789.18_LMNA | 0.04525  | -0.11478073  | 0.202985308 | 5.80E-01 | 8.04E-01 | 1.00E+00 |
| ENSG00000266861.1_          | ENSG00000160789.18_LMNA | 0.11691  | -0.043089243 | 0.271068844 | 1.51E-01 | 4.00E-01 | 1.00E+00 |
| ENSG00000281485.1_          | ENSG00000160789.18_LMNA | -0.05072 | -0.208238858 | 0.109364172 | 5.35E-01 | 7.76E-01 | 1.00E+00 |
| ENSG00000207144.1_RNU6-1297 | ENSG00000160789.18_LMNA | 0.14442  | -0.015126788 | 0.296798411 | 7.59E-02 | 2.63E-01 | 1.00E+00 |
| ENSG00000199460.2_RNU6-1216 | ENSG00000160789.18_LMNA | 0.05317  | -0.106940289 | 0.210583876 | 5.15E-01 | 7.63E-01 | 1.00E+00 |
| ENSG00000236310.1_          | ENSG00000160789.18_LMNA | 0.02849  | -0.131301512 | 0.186847911 | 7.27E-01 | 8.85E-01 | 1.00E+00 |
| ENSG00000207606.1_MIR554    | ENSG00000160789.18_LMNA | 0.00569  | -0.153654743 | 0.164736632 | 9.45E-01 | 9.78E-01 | 1.00E+00 |
| ENSG00000221288.1_MIR663B   | ENSG00000160789.18_LMNA | 0.01686  | -0.14272711  | 0.175586114 | 8.37E-01 | 9.37E-01 | 1.00E+00 |
| ENSG00000274096.1_          | ENSG00000160789.18_LMNA | -0.07059 | -0.227234803 | 0.089620141 | 3.88E-01 | 6.66E-01 | 1.00E+00 |
| ENSG00000239120.1_          | ENSG00000160789.18_LMNA | -0.00246 | -0.161595416 | 0.156804113 | 9.76E-01 | 9.91E-01 | 1.00E+00 |
| ENSG00000265879.1_MIR4748   | ENSG00000160789.18_LMNA | 0.09843  | -0.061734046 | 0.253659734 | 2.28E-01 | 5.04E-01 | 1.00E+00 |
| ENSG00000200998.1_Y_RNA     | ENSG00000160789.18_LMNA | -0.26595 | -0.407876984 | -0.11146378 | 9.28E-04 | 1.09E-02 | 1.00E+00 |
| ENSG00000222958.1_MIR1913   | ENSG00000160789.18_LMNA | -0.15876 | -0.310118209 | 0.00045682  | 5.08E-02 | 2.03E-01 | 1.00E+00 |
| ENSG00000238440.1_snoU13    | ENSG00000160789.18_LMNA | 0.08511  | -0.075107532 | 0.241045461 | 2.97E-01 | 5.83E-01 | 1.00E+00 |
| ENSG00000275129.1_CH17-219N | ENSG00000160789.18_LMNA | 0.02067  | -0.138987788 | 0.179281022 | 8.00E-01 | 9.20E-01 | 1.00E+00 |

|                             |                         |          |              |             |          |          |          |
|-----------------------------|-------------------------|----------|--------------|-------------|----------|----------|----------|
| ENSG00000252282.1_RNU6-1089 | ENSG00000160789.18_LMNA | 0.02844  | -0.131354199 | 0.186796171 | 7.28E-01 | 8.85E-01 | 1.00E+00 |
| ENSG00000202008.1_Y_RNA     | ENSG00000160789.18_LMNA | 0.00014  | -0.159064861 | 0.159336536 | 9.99E-01 | 9.99E-01 | 1.00E+00 |
| ENSG00000265932.1_MIR3146   | ENSG00000160789.18_LMNA | -0.03684 | -0.194897029 | 0.123083197 | 6.52E-01 | 8.46E-01 | 1.00E+00 |
| ENSG00000275075.1_CH17-248H | ENSG00000160789.18_LMNA | -0.01771 | -0.176415035 | 0.141889015 | 8.29E-01 | 9.33E-01 | 1.00E+00 |
| ENSG00000207170.1_RNU6-1215 | ENSG00000160789.18_LMNA | 0.07181  | -0.088401279 | 0.228399634 | 3.79E-01 | 6.58E-01 | 1.00E+00 |
| ENSG00000201913.1_Y_RNA     | ENSG00000160789.18_LMNA | -0.01422 | -0.17303006  | 0.145308582 | 8.62E-01 | 9.46E-01 | 1.00E+00 |
| ENSG00000275924.1_MIR6807   | ENSG00000160789.18_LMNA | -0.05357 | -0.210975807 | 0.106534808 | 5.12E-01 | 7.61E-01 | 1.00E+00 |
| ENSG00000264857.1_MIR5696   | ENSG00000160789.18_LMNA | -0.11977 | -0.273753035 | 0.040194925 | 1.42E-01 | 3.84E-01 | 1.00E+00 |
| ENSG00000252779.1_RNU6-182F | ENSG00000160789.18_LMNA | -0.00709 | -0.166105099 | 0.152280697 | 9.31E-01 | 9.73E-01 | 1.00E+00 |
| ENSG00000211990.1_          | ENSG00000160789.18_LMNA | 0.06638  | -0.093811828 | 0.223221998 | 4.16E-01 | 6.89E-01 | 1.00E+00 |
| ENSG00000221105.1_          | ENSG00000160789.18_LMNA | -0.10625 | -0.26103363  | 0.053863533 | 1.93E-01 | 4.61E-01 | 1.00E+00 |
| ENSG00000281696.1_MIR664A   | ENSG00000160789.18_LMNA | -0.04994 | -0.207488084 | 0.110139398 | 5.41E-01 | 7.81E-01 | 1.00E+00 |
| ENSG00000222558.1_RNU6-1064 | ENSG00000160789.18_LMNA | -0.03367 | -0.191845239 | 0.12620428  | 6.80E-01 | 8.61E-01 | 1.00E+00 |
| ENSG00000212186.1_RNU6-258F | ENSG00000160789.18_LMNA | 0.05152  | -0.108573191 | 0.209004505 | 5.28E-01 | 7.72E-01 | 1.00E+00 |
| ENSG00000270982.1_RP11-490D | ENSG00000160789.18_LMNA | 0.1034   | -0.056733153 | 0.258349329 | 2.05E-01 | 4.76E-01 | 1.00E+00 |
| ENSG00000252225.1_Y_RNA     | ENSG00000160789.18_LMNA | 0.16281  | 0.003710063  | 0.313879483 | 4.51E-02 | 1.88E-01 | 1.00E+00 |
| ENSG00000252074.1_RNU6-416F | ENSG00000160789.18_LMNA | 0.07717  | -0.08305215  | 0.233500939 | 3.45E-01 | 6.29E-01 | 1.00E+00 |
| ENSG00000280570.1_          | ENSG00000160789.18_LMNA | -0.0138  | -0.172622638 | 0.145719656 | 8.66E-01 | 9.48E-01 | 1.00E+00 |
| ENSG00000200075.1_SNORA25   | ENSG00000160789.18_LMNA | -0.0675  | -0.224289271 | 0.092698074 | 4.09E-01 | 6.83E-01 | 1.00E+00 |
| ENSG00000266383.1_MIR5002   | ENSG00000160789.18_LMNA | 0.04537  | -0.114660446 | 0.203102171 | 5.79E-01 | 8.04E-01 | 1.00E+00 |
| ENSG00000200999.1_SNORD74   | ENSG00000160789.18_LMNA | 0.03523  | -0.124674362 | 0.193341959 | 6.67E-01 | 8.53E-01 | 1.00E+00 |
| ENSG00000265619.1_          | ENSG00000160789.18_LMNA | 0.05938  | -0.100772709 | 0.216534349 | 4.67E-01 | 7.29E-01 | 1.00E+00 |
| ENSG00000222741.1_RNA5SP22  | ENSG00000160789.18_LMNA | 0.07449  | -0.085724017 | 0.230955036 | 3.62E-01 | 6.44E-01 | 1.00E+00 |
| ENSG00000276893.1_          | ENSG00000160789.18_LMNA | -0.08628 | -0.242157668 | 0.073932939 | 2.91E-01 | 5.76E-01 | 1.00E+00 |
| ENSG00000274237.1_          | ENSG00000160789.18_LMNA | -0.02424 | -0.182731872 | 0.135487242 | 7.67E-01 | 9.03E-01 | 1.00E+00 |
| ENSG00000275220.1_          | ENSG00000160789.18_LMNA | -0.05902 | -0.216193107 | 0.101127062 | 4.70E-01 | 7.30E-01 | 1.00E+00 |
| ENSG00000278651.1_          | ENSG00000160789.18_LMNA | -0.01266 | -0.171513852 | 0.146837822 | 8.77E-01 | 9.52E-01 | 1.00E+00 |
| ENSG00000275849.1_          | ENSG00000160789.18_LMNA | -0.10337 | -0.25831595  | 0.056768804 | 2.05E-01 | 4.76E-01 | 1.00E+00 |
| ENSG00000238783.1_Y_RNA     | ENSG00000160789.18_LMNA | 0.00259  | -0.15667142  | 0.161727895 | 9.75E-01 | 9.90E-01 | 1.00E+00 |
| ENSG00000281381.1_          | ENSG00000160789.18_LMNA | 0.02864  | -0.131159047 | 0.186987808 | 7.26E-01 | 8.84E-01 | 1.00E+00 |
| ENSG00000278093.1_          | ENSG00000160789.18_LMNA | -0.1128  | -0.267200259 | 0.047251416 | 1.66E-01 | 4.24E-01 | 1.00E+00 |
| ENSG00000201892.1_Y_RNA     | ENSG00000160789.18_LMNA | 0.13085  | -0.028958637 | 0.284127431 | 1.08E-01 | 3.27E-01 | 1.00E+00 |
| ENSG00000221806.1_RNU6ATAC  | ENSG00000160789.18_LMNA | 0.01843  | -0.141186791 | 0.177109225 | 8.22E-01 | 9.30E-01 | 1.00E+00 |

|                              |                         |          |              |             |          |          |          |
|------------------------------|-------------------------|----------|--------------|-------------|----------|----------|----------|
| ENSG00000266085.1_           | ENSG00000160789.18_LMNA | 0.17742  | 0.018751463  | 0.327376218 | 2.88E-02 | 1.39E-01 | 1.00E+00 |
| ENSG00000252015.1_RNU6-904F  | ENSG00000160789.18_LMNA | -0.0478  | -0.205436975 | 0.112255342 | 5.59E-01 | 7.92E-01 | 1.00E+00 |
| ENSG00000206822.1_Y_RNA      | ENSG00000160789.18_LMNA | -0.04543 | -0.203164921 | 0.114595856 | 5.78E-01 | 8.03E-01 | 1.00E+00 |
| ENSG00000199289.1_RNU6-502F  | ENSG00000160789.18_LMNA | -0.00589 | -0.164936272 | 0.153454365 | 9.43E-01 | 9.77E-01 | 1.00E+00 |
| ENSG00000207251.1_RNU6-342F  | ENSG00000160789.18_LMNA | 0.06684  | -0.093357024 | 0.223657913 | 4.13E-01 | 6.87E-01 | 1.00E+00 |
| ENSG00000199603.1_RNU6-951F  | ENSG00000160789.18_LMNA | 0.11463  | -0.04539612  | 0.26892594  | 1.60E-01 | 4.13E-01 | 1.00E+00 |
| ENSG00000202119.1_RNU6-302F  | ENSG00000160789.18_LMNA | 0.02447  | -0.135255019 | 0.182960521 | 7.65E-01 | 9.02E-01 | 1.00E+00 |
| ENSG00000252904.1_SNORA76    | ENSG00000160789.18_LMNA | 0.13674  | -0.022955769 | 0.289639961 | 9.30E-02 | 2.98E-01 | 1.00E+00 |
| ENSG00000212114.1_           | ENSG00000160789.18_LMNA | -0.10683 | -0.261580909 | 0.053277833 | 1.90E-01 | 4.58E-01 | 1.00E+00 |
| ENSG00000200887.1_RNU6-598F  | ENSG00000160789.18_LMNA | -0.16126 | -0.312439595 | -0.00211363 | 4.72E-02 | 1.94E-01 | 1.00E+00 |
| ENSG00000251900.1_VTRNA2-2F  | ENSG00000160789.18_LMNA | -0.0606  | -0.217696718 | 0.099565077 | 4.58E-01 | 7.22E-01 | 1.00E+00 |
| ENSG00000212420.1_RNU6-1111  | ENSG00000160789.18_LMNA | 0.04898  | -0.111082187 | 0.206574529 | 5.49E-01 | 7.86E-01 | 1.00E+00 |
| ENSG00000207649.2_MIR138-2   | ENSG00000160789.18_LMNA | 0.0411   | -0.118880351 | 0.198996862 | 6.15E-01 | 8.25E-01 | 1.00E+00 |
| ENSG00000264661.2_MIR3200    | ENSG00000160789.18_LMNA | -0.03624 | -0.194315381 | 0.123678538 | 6.58E-01 | 8.49E-01 | 1.00E+00 |
| ENSG00000199580.1_Y_RNA      | ENSG00000160789.18_LMNA | 0.08813  | -0.072086008 | 0.243904824 | 2.80E-01 | 5.66E-01 | 1.00E+00 |
| ENSG00000222649.1_Y_RNA      | ENSG00000160789.18_LMNA | -0.11727 | -0.271400367 | 0.042732052 | 1.50E-01 | 3.98E-01 | 1.00E+00 |
| ENSG00000231153.1_AC002429.4 | ENSG00000160789.18_LMNA | -0.08793 | -0.243720917 | 0.07228052  | 2.81E-01 | 5.67E-01 | 1.00E+00 |
| ENSG00000212421.1_SNORA26    | ENSG00000160789.18_LMNA | 0.15616  | -0.003122828 | 0.307706603 | 5.47E-02 | 2.13E-01 | 1.00E+00 |
| ENSG00000199308.1_RNU6-222F  | ENSG00000160789.18_LMNA | -0.07732 | -0.233645209 | 0.082900606 | 3.44E-01 | 6.28E-01 | 1.00E+00 |
| ENSG00000252958.1_           | ENSG00000160789.18_LMNA | 0.14012  | -0.019517392 | 0.292788163 | 8.51E-02 | 2.83E-01 | 1.00E+00 |
| ENSG00000253081.1_RNU4ATAC   | ENSG00000160789.18_LMNA | -0.00344 | -0.162556192 | 0.15584153  | 9.66E-01 | 9.87E-01 | 1.00E+00 |
| ENSG00000275625.1_FTX_4      | ENSG00000160789.18_LMNA | -0.00642 | -0.165447961 | 0.152940667 | 9.37E-01 | 9.75E-01 | 1.00E+00 |
| ENSG00000207654.3_MIR128-1   | ENSG00000160789.18_LMNA | -0.11243 | -0.266852979 | 0.047624518 | 1.68E-01 | 4.26E-01 | 1.00E+00 |
| ENSG00000221424.1_           | ENSG00000160789.18_LMNA | -0.03533 | -0.193446057 | 0.124567899 | 6.66E-01 | 8.53E-01 | 1.00E+00 |
| ENSG00000258224.1_RP11-587P  | ENSG00000160789.18_LMNA | -0.18452 | -0.333912368 | -0.02608621 | 2.29E-02 | 1.19E-01 | 1.00E+00 |
| ENSG00000251866.1_SCARNA21   | ENSG00000160789.18_LMNA | 0.08661  | -0.073608319 | 0.2424649   | 2.89E-01 | 5.74E-01 | 1.00E+00 |
| ENSG00000281685.1_           | ENSG00000160789.18_LMNA | 0.10482  | -0.055302139 | 0.259688537 | 1.99E-01 | 4.69E-01 | 1.00E+00 |
| ENSG00000258214.1_RP11-272B  | ENSG00000160789.18_LMNA | -0.19579 | -0.344256706 | -0.03776258 | 1.56E-02 | 9.03E-02 | 1.00E+00 |
| ENSG00000257664.1_RSL24D1P   | ENSG00000160789.18_LMNA | 0.09415  | -0.06603564  | 0.249614011 | 2.49E-01 | 5.29E-01 | 1.00E+00 |
| ENSG00000207473.1_Y_RNA      | ENSG00000160789.18_LMNA | -0.10976 | -0.264337792 | 0.050324104 | 1.78E-01 | 4.40E-01 | 1.00E+00 |
| ENSG00000212363.1_SNORA40    | ENSG00000160789.18_LMNA | -0.19972 | -0.34786349  | -0.04185358 | 1.36E-02 | 8.18E-02 | 1.00E+00 |
| ENSG00000263572.2_MIR7853    | ENSG00000160789.18_LMNA | 0.08922  | -0.070990306 | 0.244940366 | 2.74E-01 | 5.59E-01 | 1.00E+00 |
| ENSG00000261704.2_IGHV1OR1   | ENSG00000160789.18_LMNA | 0.02105  | -0.138612105 | 0.179651747 | 7.97E-01 | 9.18E-01 | 1.00E+00 |

|                              |                         |          |              |             |          |          |          |
|------------------------------|-------------------------|----------|--------------|-------------|----------|----------|----------|
| ENSG00000266655.1_MIR3908    | ENSG00000160789.18_LMNA | -0.07039 | -0.227048218 | 0.089815293 | 3.89E-01 | 6.67E-01 | 1.00E+00 |
| ENSG00000223455.1_RP11-781P  | ENSG00000160789.18_LMNA | 0.01397  | -0.145554767 | 0.172786075 | 8.64E-01 | 9.47E-01 | 1.00E+00 |
| ENSG00000234149.1_RP11-77G2  | ENSG00000160789.18_LMNA | 0.00105  | -0.158182009 | 0.160219056 | 9.90E-01 | 9.96E-01 | 1.00E+00 |
| ENSG00000201010.1_RN7SKP22   | ENSG00000160789.18_LMNA | -0.08722 | -0.243043881 | 0.072996389 | 2.85E-01 | 5.71E-01 | 1.00E+00 |
| ENSG00000264031.1_ABHD15-A5  | ENSG00000160789.18_LMNA | -0.06164 | -0.218692428 | 0.098529848 | 4.51E-01 | 7.16E-01 | 1.00E+00 |
| ENSG00000270384.1_U1         | ENSG00000160789.18_LMNA | 0.02199  | -0.137689933 | 0.180561366 | 7.88E-01 | 9.14E-01 | 1.00E+00 |
| ENSG00000271589.1_RP11-130N  | ENSG00000160789.18_LMNA | 0.04167  | -0.11831525  | 0.199547264 | 6.10E-01 | 8.22E-01 | 1.00E+00 |
| ENSG00000243911.3_RN7SL430F  | ENSG00000160789.18_LMNA | 0.0382   | -0.121742668 | 0.19620591  | 6.40E-01 | 8.39E-01 | 1.00E+00 |
| ENSG00000228685.1_RP11-336A  | ENSG00000160789.18_LMNA | -0.01681 | -0.175543159 | 0.142770528 | 8.37E-01 | 9.37E-01 | 1.00E+00 |
| ENSG00000278744.1_CTA-444M1  | ENSG00000160789.18_LMNA | -0.01147 | -0.17036279  | 0.147997763 | 8.88E-01 | 9.57E-01 | 1.00E+00 |
| ENSG00000256473.1_RP11-437F  | ENSG00000160789.18_LMNA | -0.17609 | -0.326150033 | -0.01737915 | 3.00E-02 | 1.43E-01 | 1.00E+00 |
| ENSG00000253545.1_IGHV3-52   | ENSG00000160789.18_LMNA | 0.16174  | 0.002604045  | 0.312882075 | 4.65E-02 | 1.92E-01 | 1.00E+00 |
| ENSG00000274688.1_RP11-34H1  | ENSG00000160789.18_LMNA | 0.02897  | -0.130830749 | 0.187310139 | 7.23E-01 | 8.83E-01 | 1.00E+00 |
| ENSG00000243539.3_RN7SL649F  | ENSG00000160789.18_LMNA | -0.07592 | -0.23231383  | 0.08429856  | 3.53E-01 | 6.36E-01 | 1.00E+00 |
| ENSG00000267625.1_RP11-1094I | ENSG00000160789.18_LMNA | 0.13204  | -0.027743244 | 0.28524522  | 1.05E-01 | 3.21E-01 | 1.00E+00 |
| ENSG00000260104.1_RP11-817O  | ENSG00000160789.18_LMNA | 0.01029  | -0.14915939  | 0.169209183 | 9.00E-01 | 9.61E-01 | 1.00E+00 |
| ENSG00000271608.1_RP11-697G  | ENSG00000160789.18_LMNA | -0.09085 | -0.246485905 | 0.069353559 | 2.66E-01 | 5.50E-01 | 1.00E+00 |
| ENSG00000232245.1_RP4-705F1  | ENSG00000160789.18_LMNA | -0.26117 | -0.403589985 | -0.10639287 | 1.15E-03 | 1.29E-02 | 1.00E+00 |
| ENSG00000248790.1_RP11-319G  | ENSG00000160789.18_LMNA | 0.07844  | -0.081781584 | 0.234710085 | 3.37E-01 | 6.22E-01 | 1.00E+00 |
| ENSG00000231723.1_AC018880.I | ENSG00000160789.18_LMNA | -0.08181 | -0.237911799 | 0.078412258 | 3.16E-01 | 6.03E-01 | 1.00E+00 |
| ENSG00000221091.1_MIR1302-5  | ENSG00000160789.18_LMNA | 0.0889   | -0.07131468  | 0.244633877 | 2.76E-01 | 5.61E-01 | 1.00E+00 |
| ENSG00000243254.3_RN7SL350F  | ENSG00000160789.18_LMNA | -0.11853 | -0.272586328 | 0.041453613 | 1.46E-01 | 3.91E-01 | 1.00E+00 |
| ENSG00000280322.1_RP6-24A23  | ENSG00000160789.18_LMNA | -0.05647 | -0.213753473 | 0.103658086 | 4.90E-01 | 7.46E-01 | 1.00E+00 |
| ENSG00000255155.1_RP11-535N  | ENSG00000160789.18_LMNA | -0.05444 | -0.211803418 | 0.105678239 | 5.05E-01 | 7.56E-01 | 1.00E+00 |
| ENSG00000274510.1_Metazoa_SI | ENSG00000160789.18_LMNA | 0.0566   | -0.103532556 | 0.213874564 | 4.89E-01 | 7.45E-01 | 1.00E+00 |
| ENSG00000261144.1_RP11-102D  | ENSG00000160789.18_LMNA | 0.09931  | -0.060854467 | 0.254485636 | 2.24E-01 | 4.99E-01 | 1.00E+00 |
| ENSG00000259068.1_TRAV37     | ENSG00000160789.18_LMNA | 0.04143  | -0.118551693 | 0.199316996 | 6.12E-01 | 8.24E-01 | 1.00E+00 |
| ENSG00000224160.1_CICP10     | ENSG00000160789.18_LMNA | 0.03164  | -0.128202361 | 0.189888283 | 6.99E-01 | 8.71E-01 | 1.00E+00 |
| ENSG00000222744.1_RN7SKP16   | ENSG00000160789.18_LMNA | -0.01726 | -0.175979542 | 0.142329385 | 8.33E-01 | 9.35E-01 | 1.00E+00 |
| ENSG00000254522.1_RP11-113K  | ENSG00000160789.18_LMNA | -0.17872 | -0.328572973 | -0.02009196 | 2.76E-02 | 1.35E-01 | 1.00E+00 |
| ENSG00000268685.1_CTB-31C7.I | ENSG00000160789.18_LMNA | -0.22209 | -0.368271344 | -0.06519611 | 5.96E-03 | 4.48E-02 | 1.00E+00 |
| ENSG00000267384.3_SMCO4P1    | ENSG00000160789.18_LMNA | 0.0485   | -0.11156392  | 0.206107518 | 5.53E-01 | 7.88E-01 | 1.00E+00 |
| ENSG00000243136.3_RN7SL22P   | ENSG00000160789.18_LMNA | 0.02244  | -0.137248438 | 0.180996659 | 7.84E-01 | 9.11E-01 | 1.00E+00 |

|                              |                         |          |              |             |          |          |          |
|------------------------------|-------------------------|----------|--------------|-------------|----------|----------|----------|
| ENSG00000223145.1_RN7SKP11   | ENSG00000160789.18_LMNA | -0.13948 | -0.292189511 | 0.020171791 | 8.66E-02 | 2.86E-01 | 1.00E+00 |
| ENSG00000225605.1_RP11-550H  | ENSG00000160789.18_LMNA | -0.05085 | -0.208359254 | 0.109239819 | 5.34E-01 | 7.76E-01 | 1.00E+00 |
| ENSG00000230718.1_RP11-272L  | ENSG00000160789.18_LMNA | -0.14132 | -0.293908483 | 0.018292025 | 8.24E-02 | 2.77E-01 | 1.00E+00 |
| ENSG00000273573.1_Metazoa_SI | ENSG00000160789.18_LMNA | 0.00954  | -0.149891856 | 0.168481325 | 9.07E-01 | 9.64E-01 | 1.00E+00 |
| ENSG00000233407.1_RP11-567C  | ENSG00000160789.18_LMNA | -0.04098 | -0.198884925 | 0.118995252 | 6.16E-01 | 8.26E-01 | 1.00E+00 |
| ENSG00000220125.1_MRPL32P1   | ENSG00000160789.18_LMNA | -0.05863 | -0.215813075 | 0.101521601 | 4.73E-01 | 7.33E-01 | 1.00E+00 |
| ENSG00000259990.2_RP11-598D  | ENSG00000160789.18_LMNA | 0.01026  | -0.149186493 | 0.169182257 | 9.00E-01 | 9.61E-01 | 1.00E+00 |
| ENSG00000224602.1_RPS26P5    | ENSG00000160789.18_LMNA | 0.13055  | -0.029254761 | 0.28385496  | 1.09E-01 | 3.28E-01 | 1.00E+00 |
| ENSG00000259961.1_RP4-597A1  | ENSG00000160789.18_LMNA | 0.07048  | -0.089726694 | 0.227132931 | 3.88E-01 | 6.66E-01 | 1.00E+00 |
| ENSG00000248893.3_FAM138E    | ENSG00000160789.18_LMNA | 0.02895  | -0.130856978 | 0.187284389 | 7.23E-01 | 8.83E-01 | 1.00E+00 |
| ENSG00000240961.3_RN7SL415F  | ENSG00000160789.18_LMNA | -0.05104 | -0.208549166 | 0.109043645 | 5.32E-01 | 7.75E-01 | 1.00E+00 |
| ENSG00000266185.2_RN7SL804F  | ENSG00000160789.18_LMNA | 0.08044  | -0.079783631 | 0.236609475 | 3.25E-01 | 6.11E-01 | 1.00E+00 |
| ENSG00000241552.3_RN7SL58P   | ENSG00000160789.18_LMNA | -0.01765 | -0.176355549 | 0.141949175 | 8.29E-01 | 9.33E-01 | 1.00E+00 |
| ENSG00000225713.5_RPL30P1    | ENSG00000160789.18_LMNA | -0.06072 | -0.21781076  | 0.099446543 | 4.57E-01 | 7.22E-01 | 1.00E+00 |
| ENSG00000265892.2_RN7SL311F  | ENSG00000160789.18_LMNA | 0.10466  | -0.055466217 | 0.259535047 | 1.99E-01 | 4.70E-01 | 1.00E+00 |
| ENSG00000236827.1_LINC00529  | ENSG00000160789.18_LMNA | -0.15834 | -0.30973724  | 0.000878272 | 5.14E-02 | 2.05E-01 | 1.00E+00 |
| ENSG00000273860.1_CTD-3066C  | ENSG00000160789.18_LMNA | 0.10456  | -0.055562524 | 0.259444948 | 2.00E-01 | 4.70E-01 | 1.00E+00 |
| ENSG00000258540.1_RP11-692C  | ENSG00000160789.18_LMNA | 0.01167  | -0.147803995 | 0.170555135 | 8.87E-01 | 9.56E-01 | 1.00E+00 |
| ENSG00000223826.1_AC092570.1 | ENSG00000160789.18_LMNA | 0.28226  | 0.128853104  | 0.422479515 | 4.26E-04 | 5.96E-03 | 1.00E+00 |
| ENSG00000230942.1_HMGNI1P5   | ENSG00000160789.18_LMNA | -0.00273 | -0.161863489 | 0.156535596 | 9.73E-01 | 9.90E-01 | 1.00E+00 |
| ENSG00000228530.1_RP11-567B  | ENSG00000160789.18_LMNA | -0.02321 | -0.181743004 | 0.136491164 | 7.77E-01 | 9.08E-01 | 1.00E+00 |
| ENSG00000242688.3_RN7SL304F  | ENSG00000160789.18_LMNA | -0.04542 | -0.203156172 | 0.114604861 | 5.78E-01 | 8.03E-01 | 1.00E+00 |
| ENSG00000280533.1_           | ENSG00000160789.18_LMNA | 0.05802  | -0.102125358 | 0.21523133  | 4.78E-01 | 7.36E-01 | 1.00E+00 |
| ENSG00000206034.1_DEFB109P   | ENSG00000160789.18_LMNA | 0.03543  | -0.124475264 | 0.193536629 | 6.65E-01 | 8.52E-01 | 1.00E+00 |
| ENSG00000263863.1_AC007948.1 | ENSG00000160789.18_LMNA | -0.08734 | -0.243157456 | 0.072876321 | 2.85E-01 | 5.70E-01 | 1.00E+00 |
| ENSG00000251212.1_MTND5P4    | ENSG00000160789.18_LMNA | 0.05853  | -0.101615832 | 0.215722294 | 4.74E-01 | 7.33E-01 | 1.00E+00 |
| ENSG00000249230.1_CDH12P2    | ENSG00000160789.18_LMNA | 0.01917  | -0.140462118 | 0.177825275 | 8.15E-01 | 9.27E-01 | 1.00E+00 |
| ENSG00000279695.1_RP11-165I9 | ENSG00000160789.18_LMNA | -0.18231 | -0.331873715 | -0.02379491 | 2.46E-02 | 1.25E-01 | 1.00E+00 |
| ENSG00000253349.1_COX6B1P6   | ENSG00000160789.18_LMNA | 0.16619  | 0.007178609  | 0.317002989 | 4.07E-02 | 1.76E-01 | 1.00E+00 |
| ENSG00000260817.2_RP11-382N  | ENSG00000160789.18_LMNA | 0.0672   | -0.09299129  | 0.224008365 | 4.11E-01 | 6.85E-01 | 1.00E+00 |
| ENSG00000224706.1_RPS17P13   | ENSG00000160789.18_LMNA | -0.03817 | -0.196180389 | 0.121768816 | 6.41E-01 | 8.39E-01 | 1.00E+00 |
| ENSG00000259136.1_RP11-108M  | ENSG00000160789.18_LMNA | -0.00405 | -0.163141048 | 0.155255277 | 9.61E-01 | 9.84E-01 | 1.00E+00 |
| ENSG00000230100.1_RP11-344N  | ENSG00000160789.18_LMNA | -0.11846 | -0.272525384 | 0.041519334 | 1.46E-01 | 3.91E-01 | 1.00E+00 |

|                              |                         |          |              |             |          |          |          |
|------------------------------|-------------------------|----------|--------------|-------------|----------|----------|----------|
| ENSG00000227181.1_RP11-317P  | ENSG00000160789.18_LMNA | 0.0645   | -0.09568811  | 0.221422297 | 4.30E-01 | 7.00E-01 | 1.00E+00 |
| ENSG00000211958.2_IGHV3-38   | ENSG00000160789.18_LMNA | -0.00646 | -0.165486509 | 0.152901961 | 9.37E-01 | 9.75E-01 | 1.00E+00 |
| ENSG00000228714.2_RP11-284G  | ENSG00000160789.18_LMNA | 0.0559   | -0.104227707 | 0.213203873 | 4.94E-01 | 7.49E-01 | 1.00E+00 |
| ENSG00000259256.1_RP11-838N  | ENSG00000160789.18_LMNA | -0.04798 | -0.205613575 | 0.112073273 | 5.57E-01 | 7.91E-01 | 1.00E+00 |
| ENSG00000240577.3_RN7SL445F  | ENSG00000160789.18_LMNA | -0.00043 | -0.159615305 | 0.158786043 | 9.96E-01 | 9.98E-01 | 1.00E+00 |
| ENSG00000241542.3_RN7SL369F  | ENSG00000160789.18_LMNA | -0.02324 | -0.181764675 | 0.13646917  | 7.76E-01 | 9.08E-01 | 1.00E+00 |
| ENSG00000242315.3_RN7SL685F  | ENSG00000160789.18_LMNA | 0.0452   | -0.114823474 | 0.202943778 | 5.80E-01 | 8.04E-01 | 1.00E+00 |
| ENSG00000235235.6_IGKV1OR2-  | ENSG00000160789.18_LMNA | 0.13386  | -0.025894172 | 0.286944167 | 1.00E-01 | 3.12E-01 | 1.00E+00 |
| ENSG00000258966.1_GTF3AP2    | ENSG00000160789.18_LMNA | 0.06496  | -0.095228718 | 0.221863139 | 4.27E-01 | 6.97E-01 | 1.00E+00 |
| ENSG00000261260.1_CTD-2520I  | ENSG00000160789.18_LMNA | 0.11962  | -0.040350149 | 0.273609205 | 1.42E-01 | 3.85E-01 | 1.00E+00 |
| ENSG00000244318.3_RN7SL252F  | ENSG00000160789.18_LMNA | 0.04599  | -0.114041243 | 0.203703621 | 5.74E-01 | 8.01E-01 | 1.00E+00 |
| ENSG00000255207.1_RP1-305G2  | ENSG00000160789.18_LMNA | 0.01665  | -0.142930286 | 0.175385094 | 8.39E-01 | 9.37E-01 | 1.00E+00 |
| ENSG00000271435.1_RP11-803A  | ENSG00000160789.18_LMNA | 0.10706  | -0.053041148 | 0.26180201  | 1.89E-01 | 4.56E-01 | 1.00E+00 |
| ENSG00000270491.1_RP4-743O1  | ENSG00000160789.18_LMNA | 0.0474   | -0.112647823 | 0.205056213 | 5.62E-01 | 7.93E-01 | 1.00E+00 |
| ENSG00000253229.1_HIGD1AP6   | ENSG00000160789.18_LMNA | -0.03018 | -0.188473272 | 0.129645502 | 7.12E-01 | 8.78E-01 | 1.00E+00 |
| ENSG00000274216.1_Metazoa_Si | ENSG00000160789.18_LMNA | 0.07399  | -0.086222592 | 0.230479486 | 3.65E-01 | 6.46E-01 | 1.00E+00 |
| ENSG00000249156.1_RP11-432M  | ENSG00000160789.18_LMNA | -0.05668 | -0.213953209 | 0.103451022 | 4.88E-01 | 7.44E-01 | 1.00E+00 |
| ENSG00000271818.1_RN7SKP4    | ENSG00000160789.18_LMNA | 0.03377  | -0.126112677 | 0.191934895 | 6.80E-01 | 8.60E-01 | 1.00E+00 |
| ENSG00000218337.1_RP4-724P1  | ENSG00000160789.18_LMNA | -0.0201  | -0.17873338  | 0.139542587 | 8.06E-01 | 9.22E-01 | 1.00E+00 |
| ENSG00000231575.1_RP11-162K  | ENSG00000160789.18_LMNA | -0.00348 | -0.162593619 | 0.15580402  | 9.66E-01 | 9.87E-01 | 1.00E+00 |
| ENSG00000233359.1_RP11-202K  | ENSG00000160789.18_LMNA | -0.0942  | -0.249656549 | 0.065990473 | 2.48E-01 | 5.29E-01 | 1.00E+00 |
| ENSG00000241939.3_RN7SL517F  | ENSG00000160789.18_LMNA | -0.14906 | -0.301115808 | 0.010386419 | 6.68E-02 | 2.42E-01 | 1.00E+00 |
| ENSG00000250386.1_RP11-432M  | ENSG00000160789.18_LMNA | 0.10042  | -0.059732852 | 0.255538137 | 2.18E-01 | 4.93E-01 | 1.00E+00 |
| ENSG00000243883.3_RN7SL419F  | ENSG00000160789.18_LMNA | -0.01542 | -0.174196816 | 0.144130761 | 8.50E-01 | 9.41E-01 | 1.00E+00 |
| ENSG00000280166.1_RP11-354E  | ENSG00000160789.18_LMNA | -0.14209 | -0.294621956 | 0.017511164 | 8.08E-02 | 2.74E-01 | 1.00E+00 |
| ENSG00000232131.1_NCOA7-AS   | ENSG00000160789.18_LMNA | -0.1043  | -0.259197739 | 0.055826732 | 2.01E-01 | 4.71E-01 | 1.00E+00 |
| ENSG00000241174.3_RN7SL570F  | ENSG00000160789.18_LMNA | 0.02606  | -0.133694129 | 0.184496497 | 7.50E-01 | 8.96E-01 | 1.00E+00 |
| ENSG00000237453.1_RP11-67L3  | ENSG00000160789.18_LMNA | -0.0741  | -0.230584658 | 0.086112341 | 3.64E-01 | 6.46E-01 | 1.00E+00 |
| ENSG00000254115.1_RP11-386D  | ENSG00000160789.18_LMNA | 0.00277  | -0.156497146 | 0.161901872 | 9.73E-01 | 9.89E-01 | 1.00E+00 |
| ENSG00000232853.1_LUZIP4P1   | ENSG00000160789.18_LMNA | 0.0103   | -0.149146603 | 0.169221886 | 9.00E-01 | 9.61E-01 | 1.00E+00 |
| ENSG00000224817.1_RP11-190J  | ENSG00000160789.18_LMNA | 0.17129  | 0.012433247  | 0.321722145 | 3.49E-02 | 1.58E-01 | 1.00E+00 |
| ENSG00000237498.2_AC010105   | ENSG00000160789.18_LMNA | -0.10917 | -0.263788685 | 0.050912857 | 1.81E-01 | 4.44E-01 | 1.00E+00 |
| ENSG00000225832.1_RP3-348I23 | ENSG00000160789.18_LMNA | -0.11463 | -0.268922565 | 0.045399751 | 1.60E-01 | 4.13E-01 | 1.00E+00 |



|                             |                         |          |              |             |          |          |          |
|-----------------------------|-------------------------|----------|--------------|-------------|----------|----------|----------|
| ENSG00000266160.2_RN7SL612F | ENSG00000160789.18_LMNA | 0.06903  | -0.091177584 | 0.22574508  | 3.98E-01 | 6.75E-01 | 1.00E+00 |
| ENSG00000258835.1_TRAV28    | ENSG00000160789.18_LMNA | -0.00963 | -0.168568976 | 0.149803669 | 9.06E-01 | 9.64E-01 | 1.00E+00 |
| ENSG00000231515.1_AC006003. | ENSG00000160789.18_LMNA | 0.02596  | -0.133792822 | 0.184399425 | 7.51E-01 | 8.96E-01 | 1.00E+00 |
| ENSG00000267593.1_RP11-108P | ENSG00000160789.18_LMNA | 0.02816  | -0.131628334 | 0.186526933 | 7.31E-01 | 8.86E-01 | 1.00E+00 |
| ENSG00000231678.2_RP11-339N | ENSG00000160789.18_LMNA | -0.04822 | -0.205842355 | 0.111837376 | 5.55E-01 | 7.89E-01 | 1.00E+00 |
| ENSG00000270611.1_GS1-69O6. | ENSG00000160789.18_LMNA | 0.11581  | -0.044205831 | 0.270032012 | 1.55E-01 | 4.07E-01 | 1.00E+00 |
| ENSG00000256125.1_RP5-944M2 | ENSG00000160789.18_LMNA | 0.17519  | 0.016447778  | 0.325317243 | 3.09E-02 | 1.46E-01 | 1.00E+00 |
| ENSG00000235200.1_RP11-393N | ENSG00000160789.18_LMNA | -0.0626  | -0.219610433 | 0.097574802 | 4.44E-01 | 7.11E-01 | 1.00E+00 |
| ENSG00000214405.3_RAP1BP2   | ENSG00000160789.18_LMNA | 0.01132  | -0.148147749 | 0.170213889 | 8.90E-01 | 9.57E-01 | 1.00E+00 |
| ENSG00000261834.2_IGHV3OR1  | ENSG00000160789.18_LMNA | 0.08139  | -0.078830603 | 0.237514638 | 3.19E-01 | 6.06E-01 | 1.00E+00 |
| ENSG00000243702.3_RN7SL638F | ENSG00000160789.18_LMNA | -0.22808 | -0.373712619 | -0.07147637 | 4.71E-03 | 3.75E-02 | 1.00E+00 |
| ENSG00000227209.1_WARS2P1   | ENSG00000160789.18_LMNA | -0.18297 | -0.33248881  | -0.02448589 | 2.41E-02 | 1.23E-01 | 1.00E+00 |
| ENSG00000211731.1_TRBV5-7   | ENSG00000160789.18_LMNA | -0.04356 | -0.201368222 | 0.116444197 | 5.94E-01 | 8.13E-01 | 1.00E+00 |
| ENSG00000258980.1_EIF1AXP2  | ENSG00000160789.18_LMNA | -0.13113 | -0.28439516  | 0.028667615 | 1.07E-01 | 3.26E-01 | 1.00E+00 |
| ENSG00000237466.1_MTCO3P41  | ENSG00000160789.18_LMNA | -0.0415  | -0.199383095 | 0.118483826 | 6.12E-01 | 8.23E-01 | 1.00E+00 |
| ENSG00000236572.1_AC006369. | ENSG00000160789.18_LMNA | 0.02786  | -0.131921437 | 0.186239011 | 7.33E-01 | 8.88E-01 | 1.00E+00 |
| ENSG00000248669.1_RP11-489M | ENSG00000160789.18_LMNA | -0.06647 | -0.223309631 | 0.093720407 | 4.16E-01 | 6.88E-01 | 1.00E+00 |
| ENSG00000198183.10_BPIFA1   | ENSG00000160789.18_LMNA | -0.19874 | -0.3469599   | -0.04082772 | 1.41E-02 | 8.40E-02 | 1.00E+00 |
| ENSG00000230851.1_AP006294. | ENSG00000160789.18_LMNA | 0.10981  | -0.050270421 | 0.26438785  | 1.78E-01 | 4.40E-01 | 1.00E+00 |
| ENSG00000222874.1_RN7SKP33  | ENSG00000160789.18_LMNA | 0.17209  | 0.013254168  | 0.322458023 | 3.40E-02 | 1.56E-01 | 1.00E+00 |
| ENSG00000231384.1_AC007919. | ENSG00000160789.18_LMNA | 0.04686  | -0.113184897 | 0.204535019 | 5.66E-01 | 7.97E-01 | 1.00E+00 |
| ENSG00000266977.1_CTC-459F4 | ENSG00000160789.18_LMNA | -0.01977 | -0.178409417 | 0.139870689 | 8.09E-01 | 9.24E-01 | 1.00E+00 |
| ENSG00000215760.2_TAF9BP2   | ENSG00000160789.18_LMNA | 0.04455  | -0.115471147 | 0.202314351 | 5.86E-01 | 8.08E-01 | 1.00E+00 |
| ENSG00000251642.1_RP11-600L | ENSG00000160789.18_LMNA | 0.05128  | -0.108808786 | 0.208776497 | 5.30E-01 | 7.73E-01 | 1.00E+00 |
| ENSG00000229918.1_DOCK9-AS  | ENSG00000160789.18_LMNA | -0.20181 | -0.349773018 | -0.04402362 | 1.27E-02 | 7.76E-02 | 1.00E+00 |
| ENSG00000249373.2_RP11-650J | ENSG00000160789.18_LMNA | -0.06939 | -0.226092336 | 0.09081468  | 3.96E-01 | 6.73E-01 | 1.00E+00 |
| ENSG00000267196.1_RP11-813F | ENSG00000160789.18_LMNA | 0.01242  | -0.147076006 | 0.171277563 | 8.79E-01 | 9.53E-01 | 1.00E+00 |
| ENSG00000267782.1_RP11-799D | ENSG00000160789.18_LMNA | -0.10413 | -0.259036066 | 0.0559995   | 2.02E-01 | 4.72E-01 | 1.00E+00 |
| ENSG00000227735.1_CYCSP5    | ENSG00000160789.18_LMNA | 0.08316  | -0.077064108 | 0.23919096  | 3.08E-01 | 5.95E-01 | 1.00E+00 |
| ENSG00000281346.1_          | ENSG00000160789.18_LMNA | 0.02242  | -0.137268626 | 0.180976757 | 7.84E-01 | 9.12E-01 | 1.00E+00 |
| ENSG00000254630.1_CTD-2530H | ENSG00000160789.18_LMNA | -0.04394 | -0.201733647 | 0.116068447 | 5.91E-01 | 8.10E-01 | 1.00E+00 |
| ENSG00000229788.1_LINC00388 | ENSG00000160789.18_LMNA | -0.0272  | -0.18559936  | 0.132572403 | 7.39E-01 | 8.91E-01 | 1.00E+00 |
| ENSG00000229370.1_AC092635. | ENSG00000160789.18_LMNA | 0.00383  | -0.155469424 | 0.162927437 | 9.63E-01 | 9.85E-01 | 1.00E+00 |

|                              |                         |          |              |             |          |          |          |
|------------------------------|-------------------------|----------|--------------|-------------|----------|----------|----------|
| ENSG00000264434.2_CTD-2006C  | ENSG00000160789.18_LMNA | -0.06897 | -0.225690207 | 0.091234921 | 3.99E-01 | 6.75E-01 | 1.00E+00 |
| ENSG00000270989.1_RP11-844P  | ENSG00000160789.18_LMNA | -0.11654 | -0.270721842 | 0.043463025 | 1.53E-01 | 4.02E-01 | 1.00E+00 |
| ENSG00000249727.1_RP11-273B  | ENSG00000160789.18_LMNA | -0.16711 | -0.317851537 | -0.00812218 | 3.96E-02 | 1.72E-01 | 1.00E+00 |
| ENSG00000276475.1_RP11-561N  | ENSG00000160789.18_LMNA | 0.03478  | -0.125111796 | 0.192914168 | 6.71E-01 | 8.55E-01 | 1.00E+00 |
| ENSG00000254491.1_RP11-145O  | ENSG00000160789.18_LMNA | -0.02809 | -0.186456988 | 0.131699542 | 7.31E-01 | 8.87E-01 | 1.00E+00 |
| ENSG00000116721.9_PRAMEF1    | ENSG00000160789.18_LMNA | 0.13822  | -0.021453816 | 0.291015992 | 8.95E-02 | 2.91E-01 | 1.00E+00 |
| ENSG00000259227.2_RP11-64K1  | ENSG00000160789.18_LMNA | -0.02021 | -0.178839115 | 0.139435485 | 8.05E-01 | 9.22E-01 | 1.00E+00 |
| ENSG00000226990.1_RP11-543F  | ENSG00000160789.18_LMNA | 0.06154  | -0.098622216 | 0.218603613 | 4.51E-01 | 7.17E-01 | 1.00E+00 |
| ENSG00000226061.1_PCMTD1P1   | ENSG00000160789.18_LMNA | 0.09574  | -0.064438612 | 0.25111733  | 2.41E-01 | 5.20E-01 | 1.00E+00 |
| ENSG00000255415.1_RP11-684B  | ENSG00000160789.18_LMNA | 0.0238   | -0.135912883 | 0.182312692 | 7.71E-01 | 9.05E-01 | 1.00E+00 |
| ENSG00000268335.1_BNIP3P23   | ENSG00000160789.18_LMNA | -0.00836 | -0.167340902 | 0.151038797 | 9.19E-01 | 9.69E-01 | 1.00E+00 |
| ENSG00000237982.1_RP11-815I2 | ENSG00000160789.18_LMNA | -0.06783 | -0.2246024   | 0.092371158 | 4.06E-01 | 6.82E-01 | 1.00E+00 |
| ENSG00000219384.1_RP11-491H  | ENSG00000160789.18_LMNA | -0.07815 | -0.234433276 | 0.082072544 | 3.39E-01 | 6.24E-01 | 1.00E+00 |
| ENSG00000249857.1_CTD-2227C  | ENSG00000160789.18_LMNA | 0.0298   | -0.130018471 | 0.188107357 | 7.16E-01 | 8.79E-01 | 1.00E+00 |
| ENSG00000219681.2_RP11-191A  | ENSG00000160789.18_LMNA | -0.0735  | -0.23000631  | 0.086718519 | 3.68E-01 | 6.49E-01 | 1.00E+00 |
| ENSG00000262384.1_RP11-312B  | ENSG00000160789.18_LMNA | 0.09301  | -0.06718451  | 0.248531612 | 2.54E-01 | 5.36E-01 | 1.00E+00 |
| ENSG00000230283.1_RPS12P24   | ENSG00000160789.18_LMNA | -0.03786 | -0.195879002 | 0.122077588 | 6.43E-01 | 8.41E-01 | 1.00E+00 |
| ENSG00000227714.1_MTND6P18   | ENSG00000160789.18_LMNA | 0.15926  | 5.59E-05     | 0.310581506 | 5.00E-02 | 2.01E-01 | 1.00E+00 |
| ENSG00000278994.1_CTD-2036A  | ENSG00000160789.18_LMNA | -0.04884 | -0.206434797 | 0.111226339 | 5.50E-01 | 7.87E-01 | 1.00E+00 |
| ENSG00000234658.1_AC013429.4 | ENSG00000160789.18_LMNA | -0.08573 | -0.241636528 | 0.07448342  | 2.94E-01 | 5.79E-01 | 1.00E+00 |
| ENSG00000270734.1_RP11-719K  | ENSG00000160789.18_LMNA | 0.05484  | -0.105278473 | 0.212189514 | 5.02E-01 | 7.54E-01 | 1.00E+00 |
| ENSG00000231953.1_RP4-706G2  | ENSG00000160789.18_LMNA | -0.01246 | -0.171321514 | 0.147031705 | 8.79E-01 | 9.53E-01 | 1.00E+00 |
| ENSG00000230320.1_BEND7P1    | ENSG00000160789.18_LMNA | 0.1361   | -0.023607567 | 0.289042406 | 9.45E-02 | 3.01E-01 | 1.00E+00 |
| ENSG00000203434.2_RP11-163F  | ENSG00000160789.18_LMNA | -0.01418 | -0.172988225 | 0.145350797 | 8.62E-01 | 9.46E-01 | 1.00E+00 |
| ENSG00000237271.1_AC009498.1 | ENSG00000160789.18_LMNA | -0.08813 | -0.24390677  | 0.07208395  | 2.80E-01 | 5.66E-01 | 1.00E+00 |
| ENSG00000257254.1_RP11-210L  | ENSG00000160789.18_LMNA | -0.00888 | -0.167843674 | 0.150533257 | 9.14E-01 | 9.67E-01 | 1.00E+00 |
| ENSG00000224808.1_SRGAP3-A   | ENSG00000160789.18_LMNA | -0.13536 | -0.288345407 | 0.024367501 | 9.64E-02 | 3.05E-01 | 1.00E+00 |
| ENSG00000237503.2_RP5-998N2  | ENSG00000160789.18_LMNA | -0.138   | -0.290807362 | 0.021681628 | 9.00E-02 | 2.92E-01 | 1.00E+00 |
| ENSG00000265316.1_RP11-286N  | ENSG00000160789.18_LMNA | 0.21773  | 0.060625953  | 0.364298617 | 7.05E-03 | 5.07E-02 | 1.00E+00 |
| ENSG00000251049.2_RP11-685F  | ENSG00000160789.18_LMNA | -0.14442 | -0.296797898 | 0.015127351 | 7.59E-02 | 2.63E-01 | 1.00E+00 |
| ENSG00000181903.4_OR4C6      | ENSG00000160789.18_LMNA | 0.15518  | -0.004119243 | 0.306804244 | 5.63E-02 | 2.17E-01 | 1.00E+00 |
| ENSG00000265477.1_RP11-720L  | ENSG00000160789.18_LMNA | 0.03192  | -0.127927303 | 0.19015783  | 6.96E-01 | 8.70E-01 | 1.00E+00 |
| ENSG00000271627.1_RP11-165D  | ENSG00000160789.18_LMNA | 0.06002  | -0.100135226 | 0.217148051 | 4.63E-01 | 7.25E-01 | 1.00E+00 |

|                              |                         |          |              |             |          |          |          |
|------------------------------|-------------------------|----------|--------------|-------------|----------|----------|----------|
| ENSG00000228083.2_IFNA14     | ENSG00000160789.18_LMNA | 0.01029  | -0.149152308 | 0.169216218 | 9.00E-01 | 9.61E-01 | 1.00E+00 |
| ENSG00000256904.1_A2ML1-AS2  | ENSG00000160789.18_LMNA | -0.07122 | -0.227838006 | 0.088989077 | 3.83E-01 | 6.62E-01 | 1.00E+00 |
| ENSG00000271527.1_RP11-7G12  | ENSG00000160789.18_LMNA | 0.01633  | -0.143238798 | 0.175079805 | 8.42E-01 | 9.38E-01 | 1.00E+00 |
| ENSG00000280043.1_RP11-1281  | ENSG00000160789.18_LMNA | -0.05546 | -0.212781596 | 0.104665226 | 4.97E-01 | 7.51E-01 | 1.00E+00 |
| ENSG00000232621.1_C4BPAP2    | ENSG00000160789.18_LMNA | -0.06348 | -0.220448679 | 0.096702221 | 4.37E-01 | 7.05E-01 | 1.00E+00 |
| ENSG00000203565.2_RP13-259N  | ENSG00000160789.18_LMNA | 0.03401  | -0.125873552 | 0.192168915 | 6.77E-01 | 8.59E-01 | 1.00E+00 |
| ENSG00000256172.1_RP11-473M  | ENSG00000160789.18_LMNA | 0.05167  | -0.108423238 | 0.209149612 | 5.27E-01 | 7.72E-01 | 1.00E+00 |
| ENSG00000275520.1_LINC00684  | ENSG00000160789.18_LMNA | -0.02006 | -0.178690606 | 0.139585911 | 8.06E-01 | 9.23E-01 | 1.00E+00 |
| ENSG00000236447.2_ATG10-IT1  | ENSG00000160789.18_LMNA | 0.17865  | 0.020016641  | 0.328505756 | 2.77E-02 | 1.36E-01 | 1.00E+00 |
| ENSG00000234713.3_RP11-726G  | ENSG00000160789.18_LMNA | 0.12351  | -0.036407644 | 0.27725799  | 1.30E-01 | 3.65E-01 | 1.00E+00 |
| ENSG00000253551.1_RP11-26M5  | ENSG00000160789.18_LMNA | -0.18168 | -0.331296318 | -0.02314655 | 2.51E-02 | 1.27E-01 | 1.00E+00 |
| ENSG00000219253.1_RPS6P7     | ENSG00000160789.18_LMNA | -0.11181 | -0.266269754 | 0.048250911 | 1.70E-01 | 4.29E-01 | 1.00E+00 |
| ENSG00000251378.1_AC096582.1 | ENSG00000160789.18_LMNA | -0.13183 | -0.285049804 | 0.02795579  | 1.05E-01 | 3.22E-01 | 1.00E+00 |
| ENSG00000232188.1_RP11-312J  | ENSG00000160789.18_LMNA | 0.0931   | -0.067091301 | 0.248619457 | 2.54E-01 | 5.36E-01 | 1.00E+00 |
| ENSG00000236341.1_RP5-1103B  | ENSG00000160789.18_LMNA | -0.0519  | -0.209366981 | 0.108198581 | 5.25E-01 | 7.70E-01 | 1.00E+00 |
| ENSG00000229458.2_RP11-202D  | ENSG00000160789.18_LMNA | 0.07728  | -0.082942967 | 0.233604883 | 3.44E-01 | 6.29E-01 | 1.00E+00 |
| ENSG00000230845.1_GSTA10P    | ENSG00000160789.18_LMNA | -0.16828 | -0.318931876 | -0.0093243  | 3.82E-02 | 1.68E-01 | 1.00E+00 |
| ENSG00000279153.1_RP11-495K  | ENSG00000160789.18_LMNA | 0.03751  | -0.122419378 | 0.195545317 | 6.46E-01 | 8.43E-01 | 1.00E+00 |
| ENSG00000258616.4_RP11-369C  | ENSG00000160789.18_LMNA | -0.16853 | -0.319165031 | -0.00958386 | 3.79E-02 | 1.67E-01 | 1.00E+00 |
| ENSG00000254400.1_RP11-732A  | ENSG00000160789.18_LMNA | -0.01513 | -0.1739126   | 0.144417755 | 8.53E-01 | 9.42E-01 | 1.00E+00 |
| ENSG00000279245.1_FAM223A    | ENSG00000160789.18_LMNA | -0.02523 | -0.183696894 | 0.1345069   | 7.58E-01 | 8.99E-01 | 1.00E+00 |
| ENSG00000259202.1_RP11-342M  | ENSG00000160789.18_LMNA | 0.00302  | -0.156258106 | 0.162140472 | 9.71E-01 | 9.89E-01 | 1.00E+00 |
| ENSG00000213416.3_KRTAP4-12  | ENSG00000160789.18_LMNA | -0.01727 | -0.175991113 | 0.142317686 | 8.33E-01 | 9.35E-01 | 1.00E+00 |
| ENSG00000233285.1_MTCYBP10   | ENSG00000160789.18_LMNA | -0.10302 | -0.257984756 | 0.057122495 | 2.07E-01 | 4.78E-01 | 1.00E+00 |
| ENSG00000269082.1_CTD-262012 | ENSG00000160789.18_LMNA | 0.05912  | -0.101035093 | 0.216281681 | 4.69E-01 | 7.30E-01 | 1.00E+00 |
| ENSG00000259273.1_RP11-493E  | ENSG00000160789.18_LMNA | -0.06906 | -0.225780156 | 0.091140931 | 3.98E-01 | 6.75E-01 | 1.00E+00 |
| ENSG00000240596.1_KCNAB1-A1  | ENSG00000160789.18_LMNA | 0.01804  | -0.141565539 | 0.176734849 | 8.25E-01 | 9.32E-01 | 1.00E+00 |
| ENSG00000229275.1_LL22NC03-  | ENSG00000160789.18_LMNA | -0.22846 | -0.374058395 | -0.07187627 | 4.64E-03 | 3.70E-02 | 1.00E+00 |
| ENSG00000277352.1_KB-68A7.2  | ENSG00000160789.18_LMNA | -0.08623 | -0.242105248 | 0.073988319 | 2.91E-01 | 5.76E-01 | 1.00E+00 |
| ENSG00000227072.1_RP3-466I7. | ENSG00000160789.18_LMNA | -0.03892 | -0.196905267 | 0.121025924 | 6.34E-01 | 8.36E-01 | 1.00E+00 |
| ENSG00000242417.1_RP11-286B  | ENSG00000160789.18_LMNA | -0.00279 | -0.16192182  | 0.156477163 | 9.73E-01 | 9.89E-01 | 1.00E+00 |
| ENSG00000259252.1_AC011648.  | ENSG00000160789.18_LMNA | -0.03741 | -0.195447493 | 0.122519565 | 6.47E-01 | 8.43E-01 | 1.00E+00 |
| ENSG00000235645.2_RP11-242G  | ENSG00000160789.18_LMNA | 0.10568  | -0.054438359 | 0.260496317 | 1.95E-01 | 4.64E-01 | 1.00E+00 |

|                              |                         |          |              |             |          |          |          |
|------------------------------|-------------------------|----------|--------------|-------------|----------|----------|----------|
| ENSG00000224301.1_RP11-144G  | ENSG00000160789.18_LMNA | 0.07628  | -0.0839407   | 0.232654761 | 3.50E-01 | 6.34E-01 | 1.00E+00 |
| ENSG00000253488.1_FAM60DP    | ENSG00000160789.18_LMNA | -0.02644 | -0.184861214 | 0.133323265 | 7.46E-01 | 8.94E-01 | 1.00E+00 |
| ENSG00000259694.1_RP13-262C  | ENSG00000160789.18_LMNA | -0.02944 | -0.187759818 | 0.130372628 | 7.19E-01 | 8.81E-01 | 1.00E+00 |
| ENSG00000234792.1_RP11-552J  | ENSG00000160789.18_LMNA | -0.00829 | -0.167270145 | 0.151109931 | 9.19E-01 | 9.69E-01 | 1.00E+00 |
| ENSG00000274664.1_RP11-169D  | ENSG00000160789.18_LMNA | -0.09305 | -0.248566653 | 0.067147329 | 2.54E-01 | 5.36E-01 | 1.00E+00 |
| ENSG00000223543.1_TCEAL4P1   | ENSG00000160789.18_LMNA | -0.05811 | -0.215316682 | 0.102036792 | 4.77E-01 | 7.35E-01 | 1.00E+00 |
| ENSG00000263720.1_RP11-389J  | ENSG00000160789.18_LMNA | -0.12889 | -0.282298967 | 0.030944768 | 1.14E-01 | 3.37E-01 | 1.00E+00 |
| ENSG00000236407.1_HMGB1P18   | ENSG00000160789.18_LMNA | 0.0704   | -0.089803812 | 0.227059196 | 3.89E-01 | 6.67E-01 | 1.00E+00 |
| ENSG00000238063.1_RP11-329N  | ENSG00000160789.18_LMNA | 0.02201  | -0.137673813 | 0.180577261 | 7.88E-01 | 9.14E-01 | 1.00E+00 |
| ENSG00000258582.1_RP11-44L9  | ENSG00000160789.18_LMNA | -0.0015  | -0.160660615 | 0.157740092 | 9.85E-01 | 9.94E-01 | 1.00E+00 |
| ENSG00000233080.2_LINC01399  | ENSG00000160789.18_LMNA | -0.08259 | -0.238650575 | 0.077633778 | 3.12E-01 | 5.98E-01 | 1.00E+00 |
| ENSG00000237092.1_LINC01065  | ENSG00000160789.18_LMNA | -0.06302 | -0.220016774 | 0.097151877 | 4.40E-01 | 7.08E-01 | 1.00E+00 |
| ENSG00000275852.1_RP13-379L  | ENSG00000160789.18_LMNA | 0.04507  | -0.114950708 | 0.202820149 | 5.81E-01 | 8.05E-01 | 1.00E+00 |
| ENSG00000275320.1_RP3-347M6  | ENSG00000160789.18_LMNA | 0.01291  | -0.146587143 | 0.171762499 | 8.75E-01 | 9.51E-01 | 1.00E+00 |
| ENSG00000250992.1_RP11-826N  | ENSG00000160789.18_LMNA | -0.01832 | -0.177008862 | 0.141288335 | 8.23E-01 | 9.31E-01 | 1.00E+00 |
| ENSG00000223883.1_RP11-424D  | ENSG00000160789.18_LMNA | 0.04548  | -0.114548217 | 0.2032112   | 5.78E-01 | 8.03E-01 | 1.00E+00 |
| ENSG00000230559.1_RPL17P12   | ENSG00000160789.18_LMNA | 0.02625  | -0.133506385 | 0.18468114  | 7.48E-01 | 8.95E-01 | 1.00E+00 |
| ENSG00000251132.1_RP11-438C  | ENSG00000160789.18_LMNA | 0.14243  | -0.017160682 | 0.29494208  | 8.00E-02 | 2.72E-01 | 1.00E+00 |
| ENSG00000272958.1_CMP21-97C  | ENSG00000160789.18_LMNA | 0.00546  | -0.153874076 | 0.164518075 | 9.47E-01 | 9.79E-01 | 1.00E+00 |
| ENSG00000255448.1_RP1-59M18  | ENSG00000160789.18_LMNA | 0.12801  | -0.031838265 | 0.281475657 | 1.16E-01 | 3.41E-01 | 1.00E+00 |
| ENSG00000105198.9_LGALS13    | ENSG00000160789.18_LMNA | -0.23066 | -0.376049609 | -0.07418107 | 4.25E-03 | 3.47E-02 | 1.00E+00 |
| ENSG00000257844.1_KRT90P     | ENSG00000160789.18_LMNA | 0.16616  | 0.007152917  | 0.316979878 | 4.08E-02 | 1.76E-01 | 1.00E+00 |
| ENSG00000238158.5_RP11-420L  | ENSG00000160789.18_LMNA | -0.17043 | -0.320922816 | -0.01154202 | 3.58E-02 | 1.61E-01 | 1.00E+00 |
| ENSG00000236770.1_AC079325.1 | ENSG00000160789.18_LMNA | 0.01364  | -0.145875444 | 0.172468205 | 8.68E-01 | 9.48E-01 | 1.00E+00 |
| ENSG00000248242.1_RP11-556I1 | ENSG00000160789.18_LMNA | -0.0588  | -0.215979748 | 0.101348577 | 4.72E-01 | 7.32E-01 | 1.00E+00 |
| ENSG00000223672.2_RP11-272P  | ENSG00000160789.18_LMNA | 0.05989  | -0.100264951 | 0.217023186 | 4.64E-01 | 7.26E-01 | 1.00E+00 |
| ENSG00000248553.1_OR52H2P    | ENSG00000160789.18_LMNA | 0.12454  | -0.035364403 | 0.278221997 | 1.26E-01 | 3.59E-01 | 1.00E+00 |
| ENSG00000262381.1_MTATP6P2   | ENSG00000160789.18_LMNA | 0.06867  | -0.091535079 | 0.225402919 | 4.01E-01 | 6.77E-01 | 1.00E+00 |
| ENSG00000236347.1_RP11-346D  | ENSG00000160789.18_LMNA | 0.18788  | 0.02956243   | 0.336999791 | 2.05E-02 | 1.10E-01 | 1.00E+00 |
| ENSG00000224643.4_AC064871.1 | ENSG00000160789.18_LMNA | 0.03763  | -0.1223047   | 0.195657285 | 6.45E-01 | 8.42E-01 | 1.00E+00 |
| ENSG00000230968.1_AC084149.1 | ENSG00000160789.18_LMNA | -0.09009 | -0.245767034 | 0.070115065 | 2.70E-01 | 5.54E-01 | 1.00E+00 |
| ENSG00000138684.6_IL21       | ENSG00000160789.18_LMNA | 0.0594   | -0.100749342 | 0.216556849 | 4.67E-01 | 7.29E-01 | 1.00E+00 |
| ENSG00000226769.1_GAPDHP54   | ENSG00000160789.18_LMNA | 0.08663  | -0.073585949 | 0.24248607  | 2.89E-01 | 5.74E-01 | 1.00E+00 |

|                             |                         |          |              |             |          |          |          |
|-----------------------------|-------------------------|----------|--------------|-------------|----------|----------|----------|
| ENSG00000249100.1_CTD-2218K | ENSG00000160789.18_LMNA | -0.09178 | -0.247362522 | 0.068424453 | 2.61E-01 | 5.44E-01 | 1.00E+00 |
| ENSG00000250981.1_RP11-19O2 | ENSG00000160789.18_LMNA | -0.13904 | -0.291782453 | 0.020616603 | 8.76E-02 | 2.88E-01 | 1.00E+00 |
| ENSG00000233129.1_RP5-837O2 | ENSG00000160789.18_LMNA | 0.09366  | -0.066536267 | 0.249142445 | 2.51E-01 | 5.32E-01 | 1.00E+00 |
| ENSG00000280390.1_AC010872. | ENSG00000160789.18_LMNA | -0.07779 | -0.234093582 | 0.082429531 | 3.41E-01 | 6.26E-01 | 1.00E+00 |
| ENSG00000260378.1_CTD-2583P | ENSG00000160789.18_LMNA | -0.06094 | -0.218023855 | 0.099225032 | 4.56E-01 | 7.20E-01 | 1.00E+00 |
| ENSG00000270495.1_CTD-2134P | ENSG00000160789.18_LMNA | -0.10147 | -0.256524481 | 0.058681016 | 2.14E-01 | 4.88E-01 | 1.00E+00 |
| ENSG00000236036.1_LINC00445 | ENSG00000160789.18_LMNA | -0.1469  | -0.29910593  | 0.012594947 | 7.09E-02 | 2.52E-01 | 1.00E+00 |
| ENSG00000254465.1_THAP12P4  | ENSG00000160789.18_LMNA | 0.01701  | -0.142572515 | 0.17573905  | 8.35E-01 | 9.36E-01 | 1.00E+00 |
| ENSG00000216998.1_CYP2AC1P  | ENSG00000160789.18_LMNA | 0.10092  | -0.059230525 | 0.256009269 | 2.16E-01 | 4.90E-01 | 1.00E+00 |
| ENSG00000171459.3_OR1L6     | ENSG00000160789.18_LMNA | -0.11286 | -0.267255982 | 0.047191541 | 1.66E-01 | 4.23E-01 | 1.00E+00 |
| ENSG00000270347.1_CTC-339O9 | ENSG00000160789.18_LMNA | -0.111   | -0.265510058 | 0.049066465 | 1.73E-01 | 4.33E-01 | 1.00E+00 |
| ENSG00000230227.4_SIAH1P1   | ENSG00000160789.18_LMNA | -0.10408 | -0.258993425 | 0.056045064 | 2.02E-01 | 4.73E-01 | 1.00E+00 |
| ENSG00000227661.1_MTCO3P18  | ENSG00000160789.18_LMNA | -0.08146 | -0.237583494 | 0.078758082 | 3.18E-01 | 6.05E-01 | 1.00E+00 |
| ENSG00000239767.1_RP11-789F | ENSG00000160789.18_LMNA | -0.11226 | -0.266698571 | 0.047790378 | 1.69E-01 | 4.27E-01 | 1.00E+00 |
| ENSG00000187871.2_GFRAL     | ENSG00000160789.18_LMNA | -0.16354 | -0.31455264  | -0.00445695 | 4.41E-02 | 1.85E-01 | 1.00E+00 |
| ENSG00000236892.1_RP11-482E | ENSG00000160789.18_LMNA | 0.03602  | -0.123894611 | 0.194104222 | 6.60E-01 | 8.50E-01 | 1.00E+00 |
| ENSG00000214161.3_SDC4P     | ENSG00000160789.18_LMNA | -0.04869 | -0.206291948 | 0.111373694 | 5.51E-01 | 7.87E-01 | 1.00E+00 |
| ENSG00000226670.1_BCAS2P3   | ENSG00000160789.18_LMNA | -0.10049 | -0.255600938 | 0.059665902 | 2.18E-01 | 4.93E-01 | 1.00E+00 |
| ENSG00000233311.1_MTCO1P54  | ENSG00000160789.18_LMNA | 0.16419  | 0.005118885  | 0.31514897  | 4.33E-02 | 1.83E-01 | 1.00E+00 |
| ENSG00000229066.1_AC096649. | ENSG00000160789.18_LMNA | -0.05816 | -0.215367764 | 0.101983783 | 4.77E-01 | 7.35E-01 | 1.00E+00 |
| ENSG00000274478.1_RP11-58A1 | ENSG00000160789.18_LMNA | -0.03088 | -0.18914788  | 0.128957651 | 7.06E-01 | 8.75E-01 | 1.00E+00 |
| ENSG00000229532.1_AC105443. | ENSG00000160789.18_LMNA | 0.06274  | -0.097431418 | 0.219748206 | 4.43E-01 | 7.10E-01 | 1.00E+00 |
| ENSG00000228607.2_CLDN25    | ENSG00000160789.18_LMNA | -0.00044 | -0.159627532 | 0.158773812 | 9.96E-01 | 9.98E-01 | 1.00E+00 |
| ENSG00000180723.6_OR51A9P   | ENSG00000160789.18_LMNA | 0.01232  | -0.14717159  | 0.171182729 | 8.80E-01 | 9.54E-01 | 1.00E+00 |
| ENSG00000250583.1_CTD-2233C | ENSG00000160789.18_LMNA | -0.07952 | -0.235738205 | 0.080700428 | 3.30E-01 | 6.16E-01 | 1.00E+00 |
| ENSG00000172769.2_OR5B3     | ENSG00000160789.18_LMNA | 0.00301  | -0.156267261 | 0.162131334 | 9.71E-01 | 9.89E-01 | 1.00E+00 |
| ENSG00000251590.1_NIFKP7    | ENSG00000160789.18_LMNA | 0.0267   | -0.133069089 | 0.185111125 | 7.44E-01 | 8.93E-01 | 1.00E+00 |
| ENSG00000227534.1_RP3-323B6 | ENSG00000160789.18_LMNA | -0.05904 | -0.216204023 | 0.101115728 | 4.70E-01 | 7.30E-01 | 1.00E+00 |
| ENSG00000214351.5_OR1X5P    | ENSG00000160789.18_LMNA | -0.15197 | -0.303818473 | 0.007411834 | 6.16E-02 | 2.30E-01 | 1.00E+00 |
| ENSG00000272895.1_RP11-98C1 | ENSG00000160789.18_LMNA | 0.17423  | 0.015462784  | 0.324435985 | 3.18E-02 | 1.49E-01 | 1.00E+00 |
| ENSG00000240069.1_GPAA1P1   | ENSG00000160789.18_LMNA | 0.21449  | 0.057241903  | 0.361349808 | 7.97E-03 | 5.54E-02 | 1.00E+00 |
| ENSG00000261608.1_SLC25A1P2 | ENSG00000160789.18_LMNA | 0.02403  | -0.135688914 | 0.182533276 | 7.69E-01 | 9.04E-01 | 1.00E+00 |
| ENSG00000255298.2_OR8G5     | ENSG00000160789.18_LMNA | 0.06633  | -0.093866073 | 0.223169997 | 4.17E-01 | 6.89E-01 | 1.00E+00 |

|                              |                         |          |              |             |          |          |          |
|------------------------------|-------------------------|----------|--------------|-------------|----------|----------|----------|
| ENSG00000236446.3_CT47B1     | ENSG00000160789.18_LMNA | 0.10573  | -0.054388126 | 0.260543279 | 1.95E-01 | 4.64E-01 | 1.00E+00 |
| ENSG00000256803.1_RP11-133L  | ENSG00000160789.18_LMNA | 0.11034  | -0.049732297 | 0.264889541 | 1.76E-01 | 4.37E-01 | 1.00E+00 |
| ENSG00000235343.1_AC005301.1 | ENSG00000160789.18_LMNA | -0.16205 | -0.313172503 | -0.00292602 | 4.61E-02 | 1.91E-01 | 1.00E+00 |
| ENSG00000213659.4_RSU1P3     | ENSG00000160789.18_LMNA | 0.05872  | -0.101433569 | 0.215897878 | 4.72E-01 | 7.32E-01 | 1.00E+00 |
| ENSG00000236195.1_RNMTL1P2   | ENSG00000160789.18_LMNA | 0.02883  | -0.130973623 | 0.18716987  | 7.24E-01 | 8.83E-01 | 1.00E+00 |
| ENSG00000188393.7_CLEC2A     | ENSG00000160789.18_LMNA | -0.05006 | -0.207604299 | 0.110019424 | 5.40E-01 | 7.80E-01 | 1.00E+00 |
| ENSG00000265097.1_RBM22P1    | ENSG00000160789.18_LMNA | 0.05025  | -0.109825943 | 0.207791697 | 5.39E-01 | 7.79E-01 | 1.00E+00 |
| ENSG00000236911.5_RP11-78B1  | ENSG00000160789.18_LMNA | -0.16219 | -0.313299122 | -0.00306641 | 4.59E-02 | 1.90E-01 | 1.00E+00 |
| ENSG00000104499.5_GML        | ENSG00000160789.18_LMNA | 0.08928  | -0.070931631 | 0.2449958   | 2.74E-01 | 5.59E-01 | 1.00E+00 |
| ENSG00000254826.1_CTD-2530H  | ENSG00000160789.18_LMNA | -0.09999 | -0.255127924 | 0.060170098 | 2.20E-01 | 4.95E-01 | 1.00E+00 |
| ENSG00000241367.1_RPL7AP23   | ENSG00000160789.18_LMNA | -0.02125 | -0.179838669 | 0.138422649 | 7.95E-01 | 9.17E-01 | 1.00E+00 |
| ENSG00000254831.1_KRT18P58   | ENSG00000160789.18_LMNA | -0.09757 | -0.252841229 | 0.062605264 | 2.32E-01 | 5.09E-01 | 1.00E+00 |
| ENSG00000230158.1_MTND1P28   | ENSG00000160789.18_LMNA | -0.02893 | -0.187270334 | 0.130871294 | 7.23E-01 | 8.83E-01 | 1.00E+00 |
| ENSG00000249270.1_KATNBL1P   | ENSG00000160789.18_LMNA | -0.21052 | -0.357730139 | -0.05309751 | 9.23E-03 | 6.19E-02 | 1.00E+00 |
| ENSG00000222001.2_AC106876.1 | ENSG00000160789.18_LMNA | 0.1355   | -0.024220508 | 0.288480253 | 9.60E-02 | 3.04E-01 | 1.00E+00 |
| ENSG00000234015.1_RP11-125M  | ENSG00000160789.18_LMNA | 0.12013  | -0.039834709 | 0.274086758 | 1.40E-01 | 3.82E-01 | 1.00E+00 |
| ENSG00000258123.1_RP11-314D  | ENSG00000160789.18_LMNA | -0.07177 | -0.228363156 | 0.088439463 | 3.80E-01 | 6.58E-01 | 1.00E+00 |
| ENSG00000269791.4_SSX4B      | ENSG00000160789.18_LMNA | -0.11646 | -0.270642666 | 0.043548298 | 1.53E-01 | 4.03E-01 | 1.00E+00 |
| ENSG00000204368.6_RP11-552E  | ENSG00000160789.18_LMNA | -0.10309 | -0.258050866 | 0.0570519   | 2.06E-01 | 4.78E-01 | 1.00E+00 |
| ENSG00000188581.8_KRTAP1-1   | ENSG00000160789.18_LMNA | 0.01417  | -0.145359135 | 0.172979963 | 8.62E-01 | 9.46E-01 | 1.00E+00 |
| ENSG00000233782.1_ZNF90P3    | ENSG00000160789.18_LMNA | -0.03365 | -0.191827693 | 0.126222206 | 6.81E-01 | 8.61E-01 | 1.00E+00 |
| ENSG00000250293.1_CRYZP2     | ENSG00000160789.18_LMNA | -0.1271  | -0.280619858 | 0.03276649  | 1.19E-01 | 3.46E-01 | 1.00E+00 |
| ENSG00000226285.1_AC091813.1 | ENSG00000160789.18_LMNA | -0.05831 | -0.215514783 | 0.101831209 | 4.75E-01 | 7.34E-01 | 1.00E+00 |
| ENSG00000205025.7_OR5G5P     | ENSG00000160789.18_LMNA | -0.31632 | -0.452722995 | -0.16545194 | 7.18E-05 | 1.44E-03 | 1.00E+00 |
| ENSG00000250632.1_RP3-513G1  | ENSG00000160789.18_LMNA | -0.13603 | -0.288970963 | 0.023685478 | 9.47E-02 | 3.01E-01 | 1.00E+00 |
| ENSG00000126550.7_HTN1       | ENSG00000160789.18_LMNA | -0.06003 | -0.217157383 | 0.10012553  | 4.63E-01 | 7.25E-01 | 1.00E+00 |
| ENSG00000228422.3_LINC00687  | ENSG00000160789.18_LMNA | 0.05981  | -0.100350729 | 0.216940615 | 4.64E-01 | 7.27E-01 | 1.00E+00 |
| ENSG00000145309.5_CABS1      | ENSG00000160789.18_LMNA | -0.06959 | -0.226282017 | 0.090616417 | 3.94E-01 | 6.72E-01 | 1.00E+00 |
| ENSG00000228810.1_PABPC1P1   | ENSG00000160789.18_LMNA | -0.01895 | -0.177619506 | 0.140670399 | 8.17E-01 | 9.28E-01 | 1.00E+00 |
| ENSG00000171561.3_OR2AT4     | ENSG00000160789.18_LMNA | 0.0471   | -0.112943625 | 0.204769179 | 5.64E-01 | 7.95E-01 | 1.00E+00 |
| ENSG00000241022.1_NIPA2P2    | ENSG00000160789.18_LMNA | -0.10409 | -0.258999653 | 0.05603841  | 2.02E-01 | 4.73E-01 | 1.00E+00 |
| ENSG00000279914.1_CTA-992D9  | ENSG00000160789.18_LMNA | -0.09548 | -0.250862745 | 0.064709181 | 2.42E-01 | 5.21E-01 | 1.00E+00 |
| ENSG00000071203.8_MS4A12     | ENSG00000160789.18_LMNA | -0.11269 | -0.267098867 | 0.047360356 | 1.67E-01 | 4.24E-01 | 1.00E+00 |

|                              |                         |          |              |             |          |          |          |
|------------------------------|-------------------------|----------|--------------|-------------|----------|----------|----------|
| ENSG00000213759.7_UGT2B11    | ENSG00000160789.18_LMNA | 0.13354  | -0.026214602 | 0.286649894 | 1.01E-01 | 3.13E-01 | 1.00E+00 |
| ENSG00000279773.1_AL050303.1 | ENSG00000160789.18_LMNA | 0.00459  | -0.154721664 | 0.163673195 | 9.55E-01 | 9.82E-01 | 1.00E+00 |
| ENSG00000261261.2_RP11-297L  | ENSG00000160789.18_LMNA | -0.04355 | -0.201354721 | 0.116458077 | 5.94E-01 | 8.13E-01 | 1.00E+00 |
| ENSG00000167390.8_POM121L3I  | ENSG00000160789.18_LMNA | 0.12803  | -0.031820457 | 0.281492071 | 1.16E-01 | 3.41E-01 | 1.00E+00 |
| ENSG00000279856.1_CTD-2300H  | ENSG00000160789.18_LMNA | 0.04757  | -0.112479913 | 0.205219121 | 5.61E-01 | 7.93E-01 | 1.00E+00 |
| ENSG00000228437.4_RP11-400N  | ENSG00000160789.18_LMNA | 0.00115  | -0.15807907  | 0.160321923 | 9.89E-01 | 9.96E-01 | 1.00E+00 |
| ENSG00000223709.5_TRIM64EP   | ENSG00000160789.18_LMNA | -0.09303 | -0.248547235 | 0.067167933 | 2.54E-01 | 5.36E-01 | 1.00E+00 |
| ENSG00000280997.1_CCAT2      | ENSG00000160789.18_LMNA | -0.04921 | -0.206788086 | 0.110861847 | 5.47E-01 | 7.85E-01 | 1.00E+00 |
| ENSG00000249283.3_ACTR3BP4   | ENSG00000160789.18_LMNA | -0.02007 | -0.178700715 | 0.139575672 | 8.06E-01 | 9.23E-01 | 1.00E+00 |
| ENSG00000261319.1_RP11-279O  | ENSG00000160789.18_LMNA | 0.03176  | -0.128086352 | 0.190001974 | 6.98E-01 | 8.70E-01 | 1.00E+00 |
| ENSG00000235150.1_RCBTB2P1   | ENSG00000160789.18_LMNA | -0.05118 | -0.208683531 | 0.108904835 | 5.31E-01 | 7.74E-01 | 1.00E+00 |
| ENSG00000182330.9_PRAMEF8    | ENSG00000160789.18_LMNA | 0.13685  | -0.022844301 | 0.289742127 | 9.27E-02 | 2.98E-01 | 1.00E+00 |
| ENSG00000256699.1_RP11-669N  | ENSG00000160789.18_LMNA | 0.07502  | -0.085201165 | 0.23145358  | 3.58E-01 | 6.41E-01 | 1.00E+00 |
| ENSG00000259025.1_RP11-810K  | ENSG00000160789.18_LMNA | -0.12353 | -0.277277218 | 0.036386842 | 1.29E-01 | 3.65E-01 | 1.00E+00 |
| ENSG00000279076.1_RP3-449H6  | ENSG00000160789.18_LMNA | -0.06934 | -0.226043501 | 0.090865721 | 3.96E-01 | 6.73E-01 | 1.00E+00 |
| ENSG00000253148.1_RGS21      | ENSG00000160789.18_LMNA | -0.11025 | -0.264806958 | 0.04982089  | 1.76E-01 | 4.38E-01 | 1.00E+00 |
| ENSG00000228755.1_PABPC1P8   | ENSG00000160789.18_LMNA | -0.12223 | -0.276058162 | 0.037705134 | 1.34E-01 | 3.71E-01 | 1.00E+00 |
| ENSG00000230244.1_RAD23BP2   | ENSG00000160789.18_LMNA | 0.02213  | -0.137555124 | 0.180694294 | 7.87E-01 | 9.13E-01 | 1.00E+00 |
| ENSG00000184814.5_PRR23B     | ENSG00000160789.18_LMNA | 0.02879  | -0.131008811 | 0.187135322 | 7.25E-01 | 8.83E-01 | 1.00E+00 |
| ENSG00000249326.1_CTD-2194D  | ENSG00000160789.18_LMNA | 0.05043  | -0.109650921 | 0.207961198 | 5.37E-01 | 7.78E-01 | 1.00E+00 |
| ENSG00000134183.10_GNAT2     | ENSG00000160789.18_LMNA | 0.02455  | -0.135174212 | 0.183040077 | 7.64E-01 | 9.02E-01 | 1.00E+00 |
| ENSG00000259849.1_VENTXP1    | ENSG00000160789.18_LMNA | 0.07166  | -0.088546282 | 0.228261107 | 3.80E-01 | 6.59E-01 | 1.00E+00 |
| ENSG00000215454.5_KRTAP10-4  | ENSG00000160789.18_LMNA | -0.0074  | -0.166400884 | 0.151983544 | 9.28E-01 | 9.72E-01 | 1.00E+00 |
| ENSG00000223586.4_LINC01312  | ENSG00000160789.18_LMNA | 0.02765  | -0.132136778 | 0.186027444 | 7.35E-01 | 8.89E-01 | 1.00E+00 |
| ENSG00000239533.5_GOLGA2P2   | ENSG00000160789.18_LMNA | 0.04411  | -0.115906178 | 0.201891429 | 5.89E-01 | 8.09E-01 | 1.00E+00 |
| ENSG00000218089.1_DNAJA1P4   | ENSG00000160789.18_LMNA | 0.05636  | -0.103770707 | 0.213644827 | 4.90E-01 | 7.46E-01 | 1.00E+00 |
| ENSG00000260569.2_RP11-669I1 | ENSG00000160789.18_LMNA | -0.03201 | -0.190239583 | 0.127843868 | 6.95E-01 | 8.69E-01 | 1.00E+00 |
| ENSG00000251419.1_RP11-524L  | ENSG00000160789.18_LMNA | -0.14885 | -0.300922533 | 0.010598929 | 6.72E-02 | 2.43E-01 | 1.00E+00 |
| ENSG00000215115.6_CXorf49    | ENSG00000160789.18_LMNA | 0.01352  | -0.145996177 | 0.172348512 | 8.69E-01 | 9.49E-01 | 1.00E+00 |
| ENSG00000178279.3_TNP2       | ENSG00000160789.18_LMNA | -0.03245 | -0.190669129 | 0.127405415 | 6.91E-01 | 8.67E-01 | 1.00E+00 |
| ENSG00000136697.11_IL1F10    | ENSG00000160789.18_LMNA | 0.13536  | -0.02436677  | 0.288346078 | 9.64E-02 | 3.05E-01 | 1.00E+00 |
| ENSG00000275363.1_RP11-566K  | ENSG00000160789.18_LMNA | 0.07932  | -0.080898461 | 0.23554994  | 3.31E-01 | 6.17E-01 | 1.00E+00 |
| ENSG00000250040.2_RAF1P1     | ENSG00000160789.18_LMNA | 0.10895  | -0.05113867  | 0.263578024 | 1.82E-01 | 4.45E-01 | 1.00E+00 |

|                             |                         |          |              |             |          |          |          |
|-----------------------------|-------------------------|----------|--------------|-------------|----------|----------|----------|
| ENSG00000183632.13_TP53TG3  | ENSG00000160789.18_LMNA | -0.21071 | -0.357900994 | -0.0532929  | 9.17E-03 | 6.16E-02 | 1.00E+00 |
| ENSG00000204398.5_RP11-65D2 | ENSG00000160789.18_LMNA | -0.13708 | -0.289953698 | 0.022613445 | 9.22E-02 | 2.96E-01 | 1.00E+00 |
| ENSG00000260995.1_RP11-165H | ENSG00000160789.18_LMNA | -0.12964 | -0.282996776 | 0.03018708  | 1.11E-01 | 3.33E-01 | 1.00E+00 |
| ENSG00000226159.1_LINC01375 | ENSG00000160789.18_LMNA | -0.08983 | -0.245520201 | 0.070376453 | 2.71E-01 | 5.55E-01 | 1.00E+00 |
| ENSG00000261432.1_LINC01613 | ENSG00000160789.18_LMNA | -0.13294 | -0.286084601 | 0.02682996  | 1.03E-01 | 3.17E-01 | 1.00E+00 |
| ENSG00000261317.1_RP11-566K | ENSG00000160789.18_LMNA | 0.07405  | -0.086162627 | 0.230536689 | 3.65E-01 | 6.46E-01 | 1.00E+00 |
| ENSG00000266818.1_RP11-454P | ENSG00000160789.18_LMNA | -0.18112 | -0.33078095  | -0.02256805 | 2.55E-02 | 1.28E-01 | 1.00E+00 |
| ENSG00000273025.1_RP11-106M | ENSG00000160789.18_LMNA | -0.07721 | -0.233538863 | 0.083012316 | 3.44E-01 | 6.29E-01 | 1.00E+00 |
| ENSG00000259841.5_LINC01566 | ENSG00000160789.18_LMNA | 0.0029   | -0.15636843  | 0.162030355 | 9.72E-01 | 9.89E-01 | 1.00E+00 |
| ENSG00000280893.1_AC009133. | ENSG00000160789.18_LMNA | -0.08789 | -0.243676701 | 0.072327283 | 2.82E-01 | 5.67E-01 | 1.00E+00 |
| ENSG00000258497.1_CTD-2561F | ENSG00000160789.18_LMNA | 0.01627  | -0.143301297 | 0.175017952 | 8.42E-01 | 9.39E-01 | 1.00E+00 |
| ENSG00000226482.1_ADIPOQ-A5 | ENSG00000160789.18_LMNA | -0.05427 | -0.21163881  | 0.105848645 | 5.07E-01 | 7.57E-01 | 1.00E+00 |
| ENSG00000259697.1_RP11-299H | ENSG00000160789.18_LMNA | -0.02457 | -0.183055924 | 0.135158115 | 7.64E-01 | 9.02E-01 | 1.00E+00 |
| ENSG00000179142.2_CYP11B2   | ENSG00000160789.18_LMNA | 0.11149  | -0.048573002 | 0.26596977  | 1.71E-01 | 4.31E-01 | 1.00E+00 |
| ENSG00000260564.1_RP11-403N | ENSG00000160789.18_LMNA | 0.01698  | -0.14260529  | 0.175706628 | 8.36E-01 | 9.36E-01 | 1.00E+00 |
| ENSG00000244122.2_UGT1A7    | ENSG00000160789.18_LMNA | 0.03232  | -0.127537178 | 0.190540056 | 6.93E-01 | 8.68E-01 | 1.00E+00 |
| ENSG00000168122.4_ZNF355P   | ENSG00000160789.18_LMNA | 0.06888  | -0.091318893 | 0.225609841 | 3.99E-01 | 6.76E-01 | 1.00E+00 |
| ENSG00000184115.15_RP13-103 | ENSG00000160789.18_LMNA | 0.06451  | -0.09567646  | 0.221433479 | 4.30E-01 | 7.00E-01 | 1.00E+00 |
| ENSG00000280305.1_CTD-2351A | ENSG00000160789.18_LMNA | 0.06615  | -0.094038794 | 0.22300441  | 4.18E-01 | 6.90E-01 | 1.00E+00 |
| ENSG00000224582.4_LINC01015 | ENSG00000160789.18_LMNA | -0.11087 | -0.265382146 | 0.049203741 | 1.74E-01 | 4.34E-01 | 1.00E+00 |
| ENSG00000235901.2_RP11-342F | ENSG00000160789.18_LMNA | -0.03386 | -0.192030028 | 0.126015473 | 6.79E-01 | 8.60E-01 | 1.00E+00 |
| ENSG00000275060.1_PPP1R26P  | ENSG00000160789.18_LMNA | -0.05515 | -0.212486461 | 0.104970941 | 5.00E-01 | 7.53E-01 | 1.00E+00 |
| ENSG00000233941.1_RP11-404H | ENSG00000160789.18_LMNA | -0.02091 | -0.17951025  | 0.138755505 | 7.98E-01 | 9.19E-01 | 1.00E+00 |
| ENSG00000233969.1_RP5-1006K | ENSG00000160789.18_LMNA | -0.13964 | -0.292338414 | 0.020009048 | 8.62E-02 | 2.85E-01 | 1.00E+00 |
| ENSG00000127529.7_OR7C2     | ENSG00000160789.18_LMNA | -0.07705 | -0.233386973 | 0.083171853 | 3.45E-01 | 6.30E-01 | 1.00E+00 |
| ENSG00000264160.1_MIR4762   | ENSG00000160789.18_LMNA | -0.02065 | -0.17926601  | 0.139002999 | 8.01E-01 | 9.20E-01 | 1.00E+00 |
| ENSG00000211865.1_TRAJ24    | ENSG00000160789.18_LMNA | 0.02078  | -0.13887886  | 0.179388521 | 7.99E-01 | 9.19E-01 | 1.00E+00 |
| ENSG00000211862.1_TRAJ27    | ENSG00000160789.18_LMNA | -0.08731 | -0.243128623 | 0.072906804 | 2.85E-01 | 5.70E-01 | 1.00E+00 |
| ENSG00000201708.1_RNA5SP35  | ENSG00000160789.18_LMNA | -0.02918 | -0.187510178 | 0.130626971 | 7.21E-01 | 8.82E-01 | 1.00E+00 |
| ENSG00000211838.1_TRAJ52    | ENSG00000160789.18_LMNA | 0.04183  | -0.118154636 | 0.199703665 | 6.09E-01 | 8.21E-01 | 1.00E+00 |
| ENSG00000222770.1_          | ENSG00000160789.18_LMNA | -0.26937 | -0.410946494 | -0.11510408 | 7.91E-04 | 9.65E-03 | 1.00E+00 |
| ENSG00000252623.1_RNA5SP48  | ENSG00000160789.18_LMNA | -0.09503 | -0.250437713 | 0.065160794 | 2.44E-01 | 5.24E-01 | 1.00E+00 |
| ENSG00000273789.1_          | ENSG00000160789.18_LMNA | -0.1128  | -0.267199349 | 0.047252394 | 1.66E-01 | 4.24E-01 | 1.00E+00 |



|                             |                         |          |              |             |          |          |          |
|-----------------------------|-------------------------|----------|--------------|-------------|----------|----------|----------|
| ENSG00000211851.1_TRAJ38    | ENSG00000160789.18_LMNA | 0.09318  | -0.067015896 | 0.248690519 | 2.54E-01 | 5.35E-01 | 1.00E+00 |
| ENSG00000277333.1_          | ENSG00000160789.18_LMNA | 0.05986  | -0.100298605 | 0.216990791 | 4.64E-01 | 7.26E-01 | 1.00E+00 |
| ENSG00000221604.1_MIR1293   | ENSG00000160789.18_LMNA | 0.05603  | -0.10409716  | 0.213329849 | 4.93E-01 | 7.48E-01 | 1.00E+00 |
| ENSG00000227335.1_IGHJ1P    | ENSG00000160789.18_LMNA | -0.08012 | -0.236306448 | 0.080102554 | 3.26E-01 | 6.13E-01 | 1.00E+00 |
| ENSG00000277683.1_          | ENSG00000160789.18_LMNA | -0.15456 | -0.306225449 | 0.004758043 | 5.73E-02 | 2.19E-01 | 1.00E+00 |
| ENSG00000207730.2_MIR200B   | ENSG00000160789.18_LMNA | 0.15745  | -0.001796543 | 0.308906828 | 5.27E-02 | 2.08E-01 | 1.00E+00 |
| ENSG00000266769.1_          | ENSG00000160789.18_LMNA | -0.11844 | -0.272498169 | 0.041548681 | 1.46E-01 | 3.92E-01 | 1.00E+00 |
| ENSG00000253084.2_RNU6-840F | ENSG00000160789.18_LMNA | -0.19527 | -0.343780688 | -0.03722342 | 1.59E-02 | 9.16E-02 | 1.00E+00 |
| ENSG00000272085.1_RP11-542A | ENSG00000160789.18_LMNA | -0.12674 | -0.28028465  | 0.033129919 | 1.20E-01 | 3.48E-01 | 1.00E+00 |
| ENSG00000280539.1_          | ENSG00000160789.18_LMNA | 0.00548  | -0.153857407 | 0.164534686 | 9.47E-01 | 9.79E-01 | 1.00E+00 |
| ENSG00000211888.2_TRAJ1     | ENSG00000160789.18_LMNA | 0.13841  | -0.021256202 | 0.291196942 | 8.90E-02 | 2.90E-01 | 1.00E+00 |
| ENSG00000273684.1_          | ENSG00000160789.18_LMNA | 0.06479  | -0.095389974 | 0.221708409 | 4.28E-01 | 6.98E-01 | 1.00E+00 |
| ENSG00000211863.1_TRAJ26    | ENSG00000160789.18_LMNA | 0.00975  | -0.149683049 | 0.168688854 | 9.05E-01 | 9.63E-01 | 1.00E+00 |
| ENSG00000279973.1_BAGE5     | ENSG00000160789.18_LMNA | -0.22758 | -0.37325686  | -0.07094942 | 4.81E-03 | 3.81E-02 | 1.00E+00 |
| ENSG00000275836.1_MIR6068   | ENSG00000160789.18_LMNA | -0.03727 | -0.195315965 | 0.122654258 | 6.48E-01 | 8.44E-01 | 1.00E+00 |
| ENSG00000201263.1_SNORD114  | ENSG00000160789.18_LMNA | -0.14573 | -0.298012629 | 0.01379503  | 7.32E-02 | 2.57E-01 | 1.00E+00 |
| ENSG00000238738.1_          | ENSG00000160789.18_LMNA | -0.09516 | -0.250564693 | 0.065025886 | 2.44E-01 | 5.23E-01 | 1.00E+00 |
| ENSG00000200406.1_SNORD114  | ENSG00000160789.18_LMNA | 0.03111  | -0.128724553 | 0.189376422 | 7.04E-01 | 8.73E-01 | 1.00E+00 |
| ENSG00000274730.1_RP11-143N | ENSG00000160789.18_LMNA | -0.28566 | -0.425507562 | -0.13248178 | 3.61E-04 | 5.19E-03 | 1.00E+00 |
| ENSG00000269622.1_TP53TG3HI | ENSG00000160789.18_LMNA | -0.09891 | -0.254105687 | 0.061259171 | 2.25E-01 | 5.01E-01 | 1.00E+00 |
| ENSG00000278435.1_          | ENSG00000160789.18_LMNA | -0.07368 | -0.230176157 | 0.086540523 | 3.67E-01 | 6.48E-01 | 1.00E+00 |
| ENSG00000251738.1_          | ENSG00000160789.18_LMNA | -0.06006 | -0.21718001  | 0.100102021 | 4.62E-01 | 7.25E-01 | 1.00E+00 |
| ENSG00000265396.1_MIR3128   | ENSG00000160789.18_LMNA | -0.12508 | -0.278733334 | 0.034810761 | 1.25E-01 | 3.56E-01 | 1.00E+00 |
| ENSG00000251892.1_RNU7-84P  | ENSG00000160789.18_LMNA | 0.00435  | -0.154959169 | 0.163436365 | 9.58E-01 | 9.83E-01 | 1.00E+00 |
| ENSG00000240584.3_RN7SL547F | ENSG00000160789.18_LMNA | -0.14756 | -0.299717171 | 0.011923615 | 6.97E-02 | 2.49E-01 | 1.00E+00 |
| ENSG00000239823.2_Y_RNA     | ENSG00000160789.18_LMNA | 0.07447  | -0.085749867 | 0.230930384 | 3.62E-01 | 6.44E-01 | 1.00E+00 |
| ENSG00000266738.1_MIR4757   | ENSG00000160789.18_LMNA | 0.01905  | -0.140572538 | 0.17771619  | 8.16E-01 | 9.28E-01 | 1.00E+00 |
| ENSG00000210151.2_MT-TS1    | ENSG00000160789.18_LMNA | -0.02957 | -0.187885506 | 0.130244556 | 7.18E-01 | 8.80E-01 | 1.00E+00 |
| ENSG00000210191.1_MT-TL2    | ENSG00000160789.18_LMNA | -0.02062 | -0.179228514 | 0.139040991 | 8.01E-01 | 9.20E-01 | 1.00E+00 |
| ENSG00000273689.1_          | ENSG00000160789.18_LMNA | -0.05903 | -0.216197579 | 0.101122419 | 4.70E-01 | 7.30E-01 | 1.00E+00 |
| ENSG00000200626.1_RNA5SP32  | ENSG00000160789.18_LMNA | -0.09965 | -0.254803953 | 0.060515332 | 2.22E-01 | 4.97E-01 | 1.00E+00 |
| ENSG00000201938.1_Y_RNA     | ENSG00000160789.18_LMNA | 0.0426   | -0.117396595 | 0.200441598 | 6.02E-01 | 8.18E-01 | 1.00E+00 |
| ENSG00000200571.1_RNU6-1284 | ENSG00000160789.18_LMNA | 0.04829  | -0.111770412 | 0.205907293 | 5.55E-01 | 7.89E-01 | 1.00E+00 |

|                              |                         |          |              |             |          |          |          |
|------------------------------|-------------------------|----------|--------------|-------------|----------|----------|----------|
| ENSG00000222610.1_RNU6-402F  | ENSG00000160789.18_LMNA | 0.06053  | -0.099629336 | 0.21763489  | 4.59E-01 | 7.23E-01 | 1.00E+00 |
| ENSG00000280766.1_           | ENSG00000160789.18_LMNA | -0.05238 | -0.209832106 | 0.107717753 | 5.22E-01 | 7.67E-01 | 1.00E+00 |
| ENSG00000200310.1_RNA5SP21   | ENSG00000160789.18_LMNA | -0.05939 | -0.216539806 | 0.100767042 | 4.67E-01 | 7.29E-01 | 1.00E+00 |
| ENSG00000207386.1_Y_RNA      | ENSG00000160789.18_LMNA | 0.03084  | -0.128997431 | 0.189108874 | 7.06E-01 | 8.75E-01 | 1.00E+00 |
| ENSG00000264181.1_           | ENSG00000160789.18_LMNA | -0.03161 | -0.189858029 | 0.128233231 | 6.99E-01 | 8.71E-01 | 1.00E+00 |
| ENSG00000277636.1_MIR8061    | ENSG00000160789.18_LMNA | -0.06283 | -0.219831008 | 0.097345238 | 4.42E-01 | 7.09E-01 | 1.00E+00 |
| ENSG00000230345.1_RP13-455A  | ENSG00000160789.18_LMNA | -0.11955 | -0.273545845 | 0.040418523 | 1.42E-01 | 3.85E-01 | 1.00E+00 |
| ENSG00000207086.1_Y_RNA      | ENSG00000160789.18_LMNA | -0.02749 | -0.185874759 | 0.132292166 | 7.37E-01 | 8.89E-01 | 1.00E+00 |
| ENSG00000266517.1_MIR4715    | ENSG00000160789.18_LMNA | 0.1098   | -0.05028253  | 0.264376558 | 1.78E-01 | 4.40E-01 | 1.00E+00 |
| ENSG00000252030.1_RNU6-1196  | ENSG00000160789.18_LMNA | -0.01406 | -0.172870441 | 0.145469644 | 8.64E-01 | 9.47E-01 | 1.00E+00 |
| ENSG00000201876.1_RNA5SP97   | ENSG00000160789.18_LMNA | 0.08342  | -0.076803351 | 0.239438246 | 3.07E-01 | 5.93E-01 | 1.00E+00 |
| ENSG00000206638.1_RNU6-672F  | ENSG00000160789.18_LMNA | -0.1382  | -0.290996179 | 0.021475451 | 8.95E-02 | 2.91E-01 | 1.00E+00 |
| ENSG00000279768.1_AC008914.  | ENSG00000160789.18_LMNA | -0.02554 | -0.183996908 | 0.134201995 | 7.55E-01 | 8.98E-01 | 1.00E+00 |
| ENSG00000232813.1_RP11-344N  | ENSG00000160789.18_LMNA | 0.08628  | -0.073933923 | 0.242156737 | 2.91E-01 | 5.76E-01 | 1.00E+00 |
| ENSG00000264511.1_MIR3678    | ENSG00000160789.18_LMNA | -0.09981 | -0.254961183 | 0.060347792 | 2.21E-01 | 4.96E-01 | 1.00E+00 |
| ENSG00000251804.1_RNU6-1294  | ENSG00000160789.18_LMNA | 0.11504  | -0.044989066 | 0.269304287 | 1.58E-01 | 4.11E-01 | 1.00E+00 |
| ENSG00000265154.1_MIR151B    | ENSG00000160789.18_LMNA | -0.19981 | -0.347947161 | -0.0419486  | 1.36E-02 | 8.16E-02 | 1.00E+00 |
| ENSG00000275899.1_           | ENSG00000160789.18_LMNA | -0.07548 | -0.231893178 | 0.084739988 | 3.55E-01 | 6.39E-01 | 1.00E+00 |
| ENSG00000207081.1_RNU6-616F  | ENSG00000160789.18_LMNA | 0.02791  | -0.131876385 | 0.186283271 | 7.33E-01 | 8.88E-01 | 1.00E+00 |
| ENSG00000207923.1_MIR559     | ENSG00000160789.18_LMNA | -0.04915 | -0.206730517 | 0.110921247 | 5.48E-01 | 7.85E-01 | 1.00E+00 |
| ENSG00000277402.1_MIR6891    | ENSG00000160789.18_LMNA | 0.07786  | -0.082365991 | 0.234154051 | 3.40E-01 | 6.26E-01 | 1.00E+00 |
| ENSG00000252869.1_           | ENSG00000160789.18_LMNA | -0.03147 | -0.189720444 | 0.128373607 | 7.00E-01 | 8.72E-01 | 1.00E+00 |
| ENSG00000201390.1_RNU6-1141  | ENSG00000160789.18_LMNA | -0.13853 | -0.291308731 | 0.021134106 | 8.87E-02 | 2.90E-01 | 1.00E+00 |
| ENSG00000207010.1_RNU6-318F  | ENSG00000160789.18_LMNA | 0.00883  | -0.150579712 | 0.167797481 | 9.14E-01 | 9.67E-01 | 1.00E+00 |
| ENSG00000229673.1_LL22NC01-  | ENSG00000160789.18_LMNA | 0.13596  | -0.023752444 | 0.288909553 | 9.49E-02 | 3.02E-01 | 1.00E+00 |
| ENSG00000221179.1_           | ENSG00000160789.18_LMNA | 0.05551  | -0.104616119 | 0.212828998 | 4.97E-01 | 7.51E-01 | 1.00E+00 |
| ENSG00000200261.1_Y_RNA      | ENSG00000160789.18_LMNA | -0.02084 | -0.17944088  | 0.138825803 | 7.99E-01 | 9.19E-01 | 1.00E+00 |
| ENSG00000265294.1_           | ENSG00000160789.18_LMNA | 0.08886  | -0.071352374 | 0.244598258 | 2.76E-01 | 5.61E-01 | 1.00E+00 |
| ENSG00000239143.1_Y_RNA      | ENSG00000160789.18_LMNA | 0.09356  | -0.066632458 | 0.249051822 | 2.52E-01 | 5.33E-01 | 1.00E+00 |
| ENSG00000240354.1_RP11-774I5 | ENSG00000160789.18_LMNA | 0.16774  | 0.008768635  | 0.318432601 | 3.89E-02 | 1.70E-01 | 1.00E+00 |
| ENSG00000267200.1_MIR132     | ENSG00000160789.18_LMNA | 0.08844  | -0.071773433 | 0.244200311 | 2.79E-01 | 5.64E-01 | 1.00E+00 |
| ENSG00000263909.1_MIR5000    | ENSG00000160789.18_LMNA | 0.09174  | -0.068463505 | 0.247325687 | 2.61E-01 | 5.44E-01 | 1.00E+00 |
| ENSG00000207307.1_RNU6-145F  | ENSG00000160789.18_LMNA | -0.03656 | -0.194624068 | 0.123362612 | 6.55E-01 | 8.47E-01 | 1.00E+00 |

|                             |                         |          |              |             |          |          |          |
|-----------------------------|-------------------------|----------|--------------|-------------|----------|----------|----------|
| ENSG00000212073.1_          | ENSG00000160789.18_LMNA | 0.13249  | -0.027285341 | 0.28566613  | 1.04E-01 | 3.19E-01 | 1.00E+00 |
| ENSG00000240936.3_RN7SL554F | ENSG00000160789.18_LMNA | -0.00902 | -0.167975654 | 0.150400523 | 9.12E-01 | 9.67E-01 | 1.00E+00 |
| ENSG00000275943.1_          | ENSG00000160789.18_LMNA | -0.09103 | -0.246656323 | 0.06917298  | 2.65E-01 | 5.48E-01 | 1.00E+00 |
| ENSG00000199248.1_RNU6-28P  | ENSG00000160789.18_LMNA | 0.02759  | -0.132188446 | 0.185976676 | 7.36E-01 | 8.89E-01 | 1.00E+00 |
| ENSG00000264986.1_MIR5092   | ENSG00000160789.18_LMNA | 0.02592  | -0.133830195 | 0.184362664 | 7.51E-01 | 8.96E-01 | 1.00E+00 |
| ENSG00000238553.1_          | ENSG00000160789.18_LMNA | -0.08983 | -0.245517224 | 0.070379605 | 2.71E-01 | 5.55E-01 | 1.00E+00 |
| ENSG00000199638.1_RNA5SP31  | ENSG00000160789.18_LMNA | -0.04302 | -0.200843701 | 0.116983379 | 5.99E-01 | 8.15E-01 | 1.00E+00 |
| ENSG00000222805.1_          | ENSG00000160789.18_LMNA | 0.04617  | -0.113865499 | 0.203874283 | 5.72E-01 | 8.00E-01 | 1.00E+00 |
| ENSG00000202341.1_RNU6-1051 | ENSG00000160789.18_LMNA | 0.09076  | -0.069442531 | 0.246401932 | 2.66E-01 | 5.50E-01 | 1.00E+00 |
| ENSG00000252962.1_RNU6-993F | ENSG00000160789.18_LMNA | -0.01953 | -0.178176891 | 0.140106143 | 8.11E-01 | 9.26E-01 | 1.00E+00 |
| ENSG00000264544.2_          | ENSG00000160789.18_LMNA | 0.0902   | -0.070007548 | 0.245868553 | 2.69E-01 | 5.53E-01 | 1.00E+00 |
| ENSG00000200003.1_RNU6-986F | ENSG00000160789.18_LMNA | -0.08489 | -0.240832044 | 0.07533282  | 2.98E-01 | 5.85E-01 | 1.00E+00 |
| ENSG00000206770.1_Y_RNA     | ENSG00000160789.18_LMNA | -0.10603 | -0.260831992 | 0.054079273 | 1.94E-01 | 4.62E-01 | 1.00E+00 |
| ENSG00000263794.2_RN7SL457F | ENSG00000160789.18_LMNA | 0.00962  | -0.149811172 | 0.168561518 | 9.06E-01 | 9.64E-01 | 1.00E+00 |
| ENSG00000264890.1_          | ENSG00000160789.18_LMNA | -0.05311 | -0.210529984 | 0.106996036 | 5.16E-01 | 7.63E-01 | 1.00E+00 |
| ENSG00000277889.1_MIR8081   | ENSG00000160789.18_LMNA | -0.09481 | -0.250233408 | 0.065377829 | 2.45E-01 | 5.25E-01 | 1.00E+00 |
| ENSG00000252421.1_RNU6-1069 | ENSG00000160789.18_LMNA | 0.09897  | -0.061196995 | 0.254164066 | 2.25E-01 | 5.01E-01 | 1.00E+00 |
| ENSG00000252994.1_RNU6-1231 | ENSG00000160789.18_LMNA | -0.08907 | -0.244804004 | 0.071134634 | 2.75E-01 | 5.60E-01 | 1.00E+00 |
| ENSG00000266587.1_          | ENSG00000160789.18_LMNA | 0.03911  | -0.120840997 | 0.197085656 | 6.32E-01 | 8.35E-01 | 1.00E+00 |
| ENSG00000199424.1_Y_RNA     | ENSG00000160789.18_LMNA | 0.09649  | -0.063693879 | 0.251817845 | 2.37E-01 | 5.16E-01 | 1.00E+00 |
| ENSG00000278353.1_          | ENSG00000160789.18_LMNA | 0.17525  | 0.016505754  | 0.325369096 | 3.08E-02 | 1.46E-01 | 1.00E+00 |
| ENSG00000199886.1_RNU6-249F | ENSG00000160789.18_LMNA | 0.03712  | -0.122809209 | 0.19516464  | 6.50E-01 | 8.45E-01 | 1.00E+00 |
| ENSG00000281576.1_          | ENSG00000160789.18_LMNA | 0.01983  | -0.139808889 | 0.178470442 | 8.08E-01 | 9.24E-01 | 1.00E+00 |
| ENSG00000207101.1_Y_RNA     | ENSG00000160789.18_LMNA | 0.14727  | -0.012216712 | 0.299450341 | 7.02E-02 | 2.50E-01 | 1.00E+00 |
| ENSG00000264462.1_MIR3648-2 | ENSG00000160789.18_LMNA | -0.01805 | -0.176741317 | 0.141558997 | 8.25E-01 | 9.32E-01 | 1.00E+00 |
| ENSG00000221789.1_          | ENSG00000160789.18_LMNA | 0.02888  | -0.130918902 | 0.187223594 | 7.24E-01 | 8.83E-01 | 1.00E+00 |
| ENSG00000200355.1_SNORA72   | ENSG00000160789.18_LMNA | 0.09504  | -0.065148375 | 0.250449401 | 2.44E-01 | 5.24E-01 | 1.00E+00 |
| ENSG00000223191.1_RNU6-293F | ENSG00000160789.18_LMNA | 0.14392  | -0.01563504  | 0.296334751 | 7.69E-02 | 2.66E-01 | 1.00E+00 |
| ENSG00000207989.2_MIR493    | ENSG00000160789.18_LMNA | 0.09239  | -0.067811287 | 0.247940765 | 2.58E-01 | 5.40E-01 | 1.00E+00 |
| ENSG00000264687.1_          | ENSG00000160789.18_LMNA | -0.10344 | -0.258385983 | 0.056694003 | 2.05E-01 | 4.76E-01 | 1.00E+00 |
| ENSG00000207630.1_MIR7-3    | ENSG00000160789.18_LMNA | 0.0293   | -0.130507568 | 0.187627378 | 7.20E-01 | 8.81E-01 | 1.00E+00 |
| ENSG00000199695.1_RNU6-1128 | ENSG00000160789.18_LMNA | -0.0132  | -0.172040849 | 0.146306468 | 8.72E-01 | 9.50E-01 | 1.00E+00 |
| ENSG00000206663.1_Y_RNA     | ENSG00000160789.18_LMNA | -0.05928 | -0.216441714 | 0.100868912 | 4.68E-01 | 7.29E-01 | 1.00E+00 |

|                              |                         |          |              |             |          |          |          |
|------------------------------|-------------------------|----------|--------------|-------------|----------|----------|----------|
| ENSG00000202470.1_Y_RNA      | ENSG00000160789.18_LMNA | 0.08554  | -0.074682626 | 0.241447895 | 2.95E-01 | 5.81E-01 | 1.00E+00 |
| ENSG00000221693.1_           | ENSG00000160789.18_LMNA | 0.15972  | 0.000532926  | 0.311012494 | 4.94E-02 | 2.00E-01 | 1.00E+00 |
| ENSG00000276548.1_CTD-2547E  | ENSG00000160789.18_LMNA | 0.00786  | -0.151529769 | 0.16685246  | 9.23E-01 | 9.71E-01 | 1.00E+00 |
| ENSG00000223203.1_RNA5SP22   | ENSG00000160789.18_LMNA | -0.13653 | -0.28944341  | 0.023170191 | 9.35E-02 | 2.99E-01 | 1.00E+00 |
| ENSG00000250141.1_RP11-208N  | ENSG00000160789.18_LMNA | -0.00245 | -0.161590687 | 0.15680885  | 9.76E-01 | 9.91E-01 | 1.00E+00 |
| ENSG00000281639.1_           | ENSG00000160789.18_LMNA | -0.02419 | -0.182690933 | 0.135528818 | 7.67E-01 | 9.04E-01 | 1.00E+00 |
| ENSG00000221102.1_SNORA11B   | ENSG00000160789.18_LMNA | -0.00239 | -0.161526917 | 0.156872718 | 9.77E-01 | 9.91E-01 | 1.00E+00 |
| ENSG00000206976.1_SNORA7     | ENSG00000160789.18_LMNA | 0.01287  | -0.146632002 | 0.171718006 | 8.75E-01 | 9.51E-01 | 1.00E+00 |
| ENSG00000221602.1_           | ENSG00000160789.18_LMNA | -0.05745 | -0.21468724  | 0.102689825 | 4.82E-01 | 7.40E-01 | 1.00E+00 |
| ENSG00000266673.1_RP11-822E  | ENSG00000160789.18_LMNA | -0.01094 | -0.169847714 | 0.148516528 | 8.94E-01 | 9.58E-01 | 1.00E+00 |
| ENSG00000250298.1_GIMD1      | ENSG00000160789.18_LMNA | 0.05157  | -0.108523622 | 0.209052474 | 5.28E-01 | 7.72E-01 | 1.00E+00 |
| ENSG00000251811.1_Y_RNA      | ENSG00000160789.18_LMNA | -0.00878 | -0.167748631 | 0.150628837 | 9.14E-01 | 9.67E-01 | 1.00E+00 |
| ENSG00000249189.1_AC010492.4 | ENSG00000160789.18_LMNA | 0.04697  | -0.113074949 | 0.204641731 | 5.66E-01 | 7.96E-01 | 1.00E+00 |
| ENSG00000281554.1_           | ENSG00000160789.18_LMNA | 0.05052  | -0.10956276  | 0.20804657  | 5.37E-01 | 7.77E-01 | 1.00E+00 |
| ENSG00000273930.1_           | ENSG00000160789.18_LMNA | 0.06686  | -0.0933298   | 0.223684002 | 4.13E-01 | 6.86E-01 | 1.00E+00 |
| ENSG00000242256.3_RN7SL57P   | ENSG00000160789.18_LMNA | -0.1373  | -0.290157014 | 0.022391565 | 9.17E-02 | 2.95E-01 | 1.00E+00 |
| ENSG00000274357.1_Metazoa_SI | ENSG00000160789.18_LMNA | -0.075   | -0.231438513 | 0.085216969 | 3.58E-01 | 6.41E-01 | 1.00E+00 |
| ENSG00000200745.1_RNU1-31P   | ENSG00000160789.18_LMNA | 0.01332  | -0.146186281 | 0.172160025 | 8.71E-01 | 9.50E-01 | 1.00E+00 |
| ENSG00000275046.1_RP11-136G  | ENSG00000160789.18_LMNA | -0.04883 | -0.206423572 | 0.111237918 | 5.50E-01 | 7.87E-01 | 1.00E+00 |
| ENSG00000281286.1_           | ENSG00000160789.18_LMNA | -0.0563  | -0.213589511 | 0.103828043 | 4.91E-01 | 7.47E-01 | 1.00E+00 |
| ENSG00000252901.1_           | ENSG00000160789.18_LMNA | -0.00819 | -0.16717581  | 0.151204762 | 9.20E-01 | 9.70E-01 | 1.00E+00 |
| ENSG00000257852.1_RP11-843B  | ENSG00000160789.18_LMNA | 0.11207  | -0.047987899 | 0.266514668 | 1.69E-01 | 4.28E-01 | 1.00E+00 |
| ENSG00000223001.1_RNU2-61P   | ENSG00000160789.18_LMNA | 0.02952  | -0.13029315  | 0.187837817 | 7.18E-01 | 8.80E-01 | 1.00E+00 |
| ENSG00000273721.1_RP11-745A  | ENSG00000160789.18_LMNA | -0.11413 | -0.268451148 | 0.04590679  | 1.62E-01 | 4.16E-01 | 1.00E+00 |
| ENSG00000281033.1_           | ENSG00000160789.18_LMNA | 0.07137  | -0.088844266 | 0.227976389 | 3.82E-01 | 6.61E-01 | 1.00E+00 |
| ENSG00000202231.1_SNORA9     | ENSG00000160789.18_LMNA | 0.01604  | -0.14352917  | 0.174792411 | 8.45E-01 | 9.39E-01 | 1.00E+00 |
| ENSG00000274879.1_RP11-411G  | ENSG00000160789.18_LMNA | 0.0649   | -0.095282537 | 0.221811499 | 4.27E-01 | 6.98E-01 | 1.00E+00 |
| ENSG00000199370.2_U3         | ENSG00000160789.18_LMNA | -0.01992 | -0.178552482 | 0.139725804 | 8.08E-01 | 9.23E-01 | 1.00E+00 |
| ENSG00000231774.1_           | ENSG00000160789.18_LMNA | 0.13604  | -0.02366995  | 0.288985202 | 9.47E-02 | 3.01E-01 | 1.00E+00 |
| ENSG00000280098.1_AC011155.1 | ENSG00000160789.18_LMNA | -0.08927 | -0.244989675 | 0.070938113 | 2.74E-01 | 5.59E-01 | 1.00E+00 |
| ENSG00000230081.2_HSPE1P28   | ENSG00000160789.18_LMNA | 0.11956  | -0.040405311 | 0.273558088 | 1.42E-01 | 3.85E-01 | 1.00E+00 |
| ENSG00000236543.1_RP11-98L5  | ENSG00000160789.18_LMNA | -0.12874 | -0.282160763 | 0.03109479  | 1.14E-01 | 3.37E-01 | 1.00E+00 |
| ENSG00000216777.1_PRRC2CP1   | ENSG00000160789.18_LMNA | 0.05044  | -0.109641039 | 0.207970768 | 5.37E-01 | 7.78E-01 | 1.00E+00 |

|                              |                         |          |              |             |          |          |          |
|------------------------------|-------------------------|----------|--------------|-------------|----------|----------|----------|
| ENSG00000254011.1_CTC-229L2  | ENSG00000160789.18_LMNA | -0.15589 | -0.307456062 | 0.003399545 | 5.51E-02 | 2.14E-01 | 1.00E+00 |
| ENSG00000270632.1_RP11-340C  | ENSG00000160789.18_LMNA | 0.08898  | -0.071227062 | 0.244716671 | 2.76E-01 | 5.60E-01 | 1.00E+00 |
| ENSG00000255323.4_LINC01495  | ENSG00000160789.18_LMNA | -0.01552 | -0.174290383 | 0.144036268 | 8.49E-01 | 9.41E-01 | 1.00E+00 |
| ENSG00000234590.1_GNG5P5     | ENSG00000160789.18_LMNA | 0.08267  | -0.077548886 | 0.238731115 | 3.11E-01 | 5.98E-01 | 1.00E+00 |
| ENSG00000225594.1_AC098826.4 | ENSG00000160789.18_LMNA | -0.00496 | -0.164032605 | 0.154361159 | 9.52E-01 | 9.81E-01 | 1.00E+00 |
| ENSG00000258536.1_FKBP1BP1   | ENSG00000160789.18_LMNA | 0.13121  | -0.028590628 | 0.284465977 | 1.07E-01 | 3.25E-01 | 1.00E+00 |
| ENSG00000242768.2_RP11-556G  | ENSG00000160789.18_LMNA | -0.09682 | -0.252132019 | 0.063359759 | 2.35E-01 | 5.13E-01 | 1.00E+00 |
| ENSG00000253451.1_IGLV2-28   | ENSG00000160789.18_LMNA | 0.01918  | -0.140446502 | 0.177840702 | 8.15E-01 | 9.27E-01 | 1.00E+00 |
| ENSG00000280004.1_AC005086.1 | ENSG00000160789.18_LMNA | -0.05885 | -0.216028198 | 0.101298278 | 4.71E-01 | 7.31E-01 | 1.00E+00 |
| ENSG00000236160.1_GS1-541M1  | ENSG00000160789.18_LMNA | -0.02908 | -0.187409563 | 0.13072947  | 7.22E-01 | 8.82E-01 | 1.00E+00 |
| ENSG00000257794.1_           | ENSG00000160789.18_LMNA | -0.12777 | -0.281253604 | 0.032079162 | 1.17E-01 | 3.42E-01 | 1.00E+00 |
| ENSG00000239202.3_RN7SL499F  | ENSG00000160789.18_LMNA | -0.11369 | -0.2680396   | 0.046349303 | 1.63E-01 | 4.19E-01 | 1.00E+00 |
| ENSG00000214064.3_RPL6P5     | ENSG00000160789.18_LMNA | -0.00456 | -0.163638452 | 0.154756509 | 9.56E-01 | 9.82E-01 | 1.00E+00 |
| ENSG00000279972.1_RP11-354G  | ENSG00000160789.18_LMNA | -0.16531 | -0.316190201 | -0.00627532 | 4.18E-02 | 1.79E-01 | 1.00E+00 |
| ENSG00000225221.1_PLA2G12AI  | ENSG00000160789.18_LMNA | 0.10776  | -0.052339697 | 0.262457081 | 1.86E-01 | 4.52E-01 | 1.00E+00 |
| ENSG00000261702.2_RP11-282M  | ENSG00000160789.18_LMNA | 0.0108   | -0.148661143 | 0.169704097 | 8.95E-01 | 9.59E-01 | 1.00E+00 |
| ENSG00000199831.1_RN7SKP29   | ENSG00000160789.18_LMNA | -0.09123 | -0.246845674 | 0.068972315 | 2.64E-01 | 5.47E-01 | 1.00E+00 |
| ENSG00000276674.1_IGKV1OR1-  | ENSG00000160789.18_LMNA | 0.08501  | -0.07521196  | 0.24094654  | 2.98E-01 | 5.84E-01 | 1.00E+00 |
| ENSG00000263594.1_RP11-28O3  | ENSG00000160789.18_LMNA | -0.02946 | -0.187776575 | 0.130355553 | 7.19E-01 | 8.80E-01 | 1.00E+00 |
| ENSG00000239808.3_RN7SL255F  | ENSG00000160789.18_LMNA | 0.05687  | -0.10326774  | 0.214129983 | 4.86E-01 | 7.43E-01 | 1.00E+00 |
| ENSG00000240306.2_RN7SL100F  | ENSG00000160789.18_LMNA | -0.10688 | -0.261629758 | 0.053225543 | 1.90E-01 | 4.57E-01 | 1.00E+00 |
| ENSG00000250572.1_RP11-529H  | ENSG00000160789.18_LMNA | 0.15609  | -0.003186943 | 0.307648557 | 5.48E-02 | 2.13E-01 | 1.00E+00 |
| ENSG00000156575.2_PRG3       | ENSG00000160789.18_LMNA | -0.18515 | -0.334492022 | -0.0267383  | 2.24E-02 | 1.17E-01 | 1.00E+00 |
| ENSG00000236500.1_CD24P1     | ENSG00000160789.18_LMNA | 0.05724  | -0.102898009 | 0.214486522 | 4.84E-01 | 7.41E-01 | 1.00E+00 |
| ENSG00000239923.3_RN7SL864F  | ENSG00000160789.18_LMNA | -0.19012 | -0.339055141 | -0.03188074 | 1.90E-02 | 1.04E-01 | 1.00E+00 |
| ENSG00000255903.2_RPL12P46   | ENSG00000160789.18_LMNA | 0.17826  | 0.019610931  | 0.328143638 | 2.80E-02 | 1.37E-01 | 1.00E+00 |
| ENSG00000201715.1_RN7SKP13   | ENSG00000160789.18_LMNA | 0.06442  | -0.095758522 | 0.221354718 | 4.30E-01 | 7.00E-01 | 1.00E+00 |
| ENSG00000240534.1_RPL34P17   | ENSG00000160789.18_LMNA | -0.05181 | -0.209287657 | 0.108280568 | 5.26E-01 | 7.71E-01 | 1.00E+00 |
| ENSG00000253131.1_IGHV7-56   | ENSG00000160789.18_LMNA | 0.10528  | -0.054836192 | 0.26012433  | 1.97E-01 | 4.66E-01 | 1.00E+00 |
| ENSG00000228082.1_RP1-121G1  | ENSG00000160789.18_LMNA | -0.08228 | -0.238353849 | 0.077946497 | 3.14E-01 | 6.00E-01 | 1.00E+00 |
| ENSG00000224351.2_CDKN2AIP1  | ENSG00000160789.18_LMNA | -0.01655 | -0.175290806 | 0.143025576 | 8.40E-01 | 9.38E-01 | 1.00E+00 |
| ENSG00000277958.1_Metazoa_SI | ENSG00000160789.18_LMNA | 0.03754  | -0.122389819 | 0.195574178 | 6.46E-01 | 8.43E-01 | 1.00E+00 |
| ENSG00000261607.1_RP11-812E  | ENSG00000160789.18_LMNA | -0.03425 | -0.192400715 | 0.125636659 | 6.75E-01 | 8.58E-01 | 1.00E+00 |

|                              |                         |          |              |             |          |          |          |
|------------------------------|-------------------------|----------|--------------|-------------|----------|----------|----------|
| ENSG00000240481.3_RN7SL38P   | ENSG00000160789.18_LMNA | 0.01125  | -0.148218416 | 0.170143728 | 8.91E-01 | 9.57E-01 | 1.00E+00 |
| ENSG00000242547.3_RN7SL169F  | ENSG00000160789.18_LMNA | -0.04015 | -0.198085728 | 0.119815364 | 6.23E-01 | 8.30E-01 | 1.00E+00 |
| ENSG00000240966.3_RN7SL681F  | ENSG00000160789.18_LMNA | -0.0061  | -0.165142447 | 0.153247401 | 9.41E-01 | 9.76E-01 | 1.00E+00 |
| ENSG00000257784.1_RP11-630C  | ENSG00000160789.18_LMNA | -0.10656 | -0.261324015 | 0.053552789 | 1.91E-01 | 4.59E-01 | 1.00E+00 |
| ENSG00000254906.1_RP11-701I2 | ENSG00000160789.18_LMNA | -0.15586 | -0.307428492 | 0.003429994 | 5.52E-02 | 2.14E-01 | 1.00E+00 |
| ENSG00000202241.1_RN7SKP18   | ENSG00000160789.18_LMNA | 0.06334  | -0.096834806 | 0.220321341 | 4.38E-01 | 7.06E-01 | 1.00E+00 |
| ENSG00000228553.1_RP11-391J  | ENSG00000160789.18_LMNA | -0.07509 | -0.231525977 | 0.085125223 | 3.58E-01 | 6.41E-01 | 1.00E+00 |
| ENSG00000234542.1_RP11-282I1 | ENSG00000160789.18_LMNA | 0.04838  | -0.111684449 | 0.205990651 | 5.54E-01 | 7.88E-01 | 1.00E+00 |
| ENSG00000239221.3_RN7SL442F  | ENSG00000160789.18_LMNA | -0.08709 | -0.242923195 | 0.073123962 | 2.86E-01 | 5.72E-01 | 1.00E+00 |
| ENSG00000258638.2_RP11-395B  | ENSG00000160789.18_LMNA | 0.00037  | -0.158837177 | 0.159564183 | 9.96E-01 | 9.99E-01 | 1.00E+00 |
| ENSG00000274242.1_RP11-20I6  | ENSG00000160789.18_LMNA | -0.06054 | -0.217644037 | 0.099619829 | 4.59E-01 | 7.23E-01 | 1.00E+00 |
| ENSG00000231569.1_RP11-399L  | ENSG00000160789.18_LMNA | 0.05615  | -0.103984209 | 0.213438838 | 4.92E-01 | 7.48E-01 | 1.00E+00 |
| ENSG00000268293.1_CTD-2623H  | ENSG00000160789.18_LMNA | -0.04276 | -0.200599286 | 0.117234562 | 6.01E-01 | 8.17E-01 | 1.00E+00 |
| ENSG00000259688.1_RP11-139F  | ENSG00000160789.18_LMNA | -0.04409 | -0.201875258 | 0.11592281  | 5.90E-01 | 8.09E-01 | 1.00E+00 |
| ENSG00000268461.2_CTC-575C1  | ENSG00000160789.18_LMNA | -0.05925 | -0.216411482 | 0.100900306 | 4.68E-01 | 7.29E-01 | 1.00E+00 |
| ENSG00000222164.1_RN7SKP26   | ENSG00000160789.18_LMNA | 0.09179  | -0.068409861 | 0.247376286 | 2.61E-01 | 5.44E-01 | 1.00E+00 |
| ENSG00000233877.2_RP11-182I1 | ENSG00000160789.18_LMNA | -0.04024 | -0.198169245 | 0.119729682 | 6.23E-01 | 8.30E-01 | 1.00E+00 |
| ENSG00000232437.1_RPS26P42   | ENSG00000160789.18_LMNA | -0.0158  | -0.17455875  | 0.143765211 | 8.47E-01 | 9.40E-01 | 1.00E+00 |
| ENSG00000223678.1_RP11-311H  | ENSG00000160789.18_LMNA | 0.10695  | -0.053156779 | 0.261693996 | 1.90E-01 | 4.57E-01 | 1.00E+00 |
| ENSG00000232271.1_RP4-764O2  | ENSG00000160789.18_LMNA | -0.11184 | -0.266299155 | 0.04821934  | 1.70E-01 | 4.29E-01 | 1.00E+00 |
| ENSG00000233206.1_RPS3AP1    | ENSG00000160789.18_LMNA | -0.08988 | -0.245569587 | 0.070324158 | 2.71E-01 | 5.55E-01 | 1.00E+00 |
| ENSG00000263797.1_RP11-146G  | ENSG00000160789.18_LMNA | -0.08795 | -0.243741769 | 0.072258467 | 2.81E-01 | 5.67E-01 | 1.00E+00 |
| ENSG00000234839.1_RPS26P30   | ENSG00000160789.18_LMNA | -0.01579 | -0.174552275 | 0.143771752 | 8.47E-01 | 9.40E-01 | 1.00E+00 |
| ENSG00000227033.1_AC105461   | ENSG00000160789.18_LMNA | -0.02619 | -0.184619204 | 0.133569364 | 7.49E-01 | 8.95E-01 | 1.00E+00 |
| ENSG00000259651.2_MTCO3P23   | ENSG00000160789.18_LMNA | 0.03042  | -0.129403849 | 0.188710307 | 7.10E-01 | 8.77E-01 | 1.00E+00 |
| ENSG00000203647.2_RP11-320P  | ENSG00000160789.18_LMNA | -0.00293 | -0.162052044 | 0.156346701 | 9.71E-01 | 9.89E-01 | 1.00E+00 |
| ENSG00000270708.1_RP11-568G  | ENSG00000160789.18_LMNA | 0.08467  | -0.075548297 | 0.240627892 | 3.00E-01 | 5.86E-01 | 1.00E+00 |
| ENSG00000232285.1_TCEB2P3    | ENSG00000160789.18_LMNA | -0.00872 | -0.16768896  | 0.150688841 | 9.15E-01 | 9.68E-01 | 1.00E+00 |
| ENSG00000249433.1_CTB-161J7  | ENSG00000160789.18_LMNA | -0.08553 | -0.241441142 | 0.074689757 | 2.95E-01 | 5.81E-01 | 1.00E+00 |
| ENSG00000265948.1_RP11-296E  | ENSG00000160789.18_LMNA | -0.09519 | -0.250591656 | 0.064997238 | 2.43E-01 | 5.23E-01 | 1.00E+00 |
| ENSG00000273512.1_RP11-160C  | ENSG00000160789.18_LMNA | -0.02061 | -0.179222888 | 0.139046691 | 8.01E-01 | 9.20E-01 | 1.00E+00 |
| ENSG00000253425.2_HSPA8P13   | ENSG00000160789.18_LMNA | -0.13989 | -0.292573452 | 0.019752128 | 8.56E-02 | 2.84E-01 | 1.00E+00 |
| ENSG00000256630.1_RP11-428I1 | ENSG00000160789.18_LMNA | -0.12075 | -0.274670929 | 0.039203966 | 1.38E-01 | 3.79E-01 | 1.00E+00 |

|                             |                         |          |              |             |          |          |          |
|-----------------------------|-------------------------|----------|--------------|-------------|----------|----------|----------|
| ENSG00000236960.1_RP11-265G | ENSG00000160789.18_LMNA | 0.06386  | -0.096322854 | 0.220812972 | 4.34E-01 | 7.03E-01 | 1.00E+00 |
| ENSG00000277228.1_RP11-189B | ENSG00000160789.18_LMNA | 0.03594  | -0.123969919 | 0.194030619 | 6.60E-01 | 8.50E-01 | 1.00E+00 |
| ENSG00000266210.2_RN7SL371F | ENSG00000160789.18_LMNA | 0.03666  | -0.123262556 | 0.194721818 | 6.54E-01 | 8.47E-01 | 1.00E+00 |
| ENSG00000274702.1_RP11-393M | ENSG00000160789.18_LMNA | -0.01555 | -0.174319541 | 0.14400682  | 8.49E-01 | 9.41E-01 | 1.00E+00 |
| ENSG00000243355.1_RP11-57G2 | ENSG00000160789.18_LMNA | 0.16051  | 0.001346372  | 0.311747071 | 4.82E-02 | 1.97E-01 | 1.00E+00 |
| ENSG00000274995.1_RP11-321F | ENSG00000160789.18_LMNA | -0.03532 | -0.193431721 | 0.124582561 | 6.66E-01 | 8.53E-01 | 1.00E+00 |
| ENSG00000224618.1_AC096921. | ENSG00000160789.18_LMNA | 0.16284  | 0.003732084  | 0.313899335 | 4.50E-02 | 1.88E-01 | 1.00E+00 |
| ENSG00000258478.1_RP11-232C | ENSG00000160789.18_LMNA | 0.07495  | -0.08527019  | 0.231387773 | 3.59E-01 | 6.42E-01 | 1.00E+00 |
| ENSG00000234644.2_OTX2P1    | ENSG00000160789.18_LMNA | 0.01167  | -0.147805857 | 0.170553287 | 8.87E-01 | 9.56E-01 | 1.00E+00 |
| ENSG00000270518.1_CTB-159G1 | ENSG00000160789.18_LMNA | 0.01909  | -0.140534741 | 0.177753531 | 8.15E-01 | 9.28E-01 | 1.00E+00 |
| ENSG00000233551.2_LSM1P1    | ENSG00000160789.18_LMNA | 0.08008  | -0.080142735 | 0.236268265 | 3.27E-01 | 6.13E-01 | 1.00E+00 |
| ENSG00000231706.2_CYCSP43   | ENSG00000160789.18_LMNA | 0.0023   | -0.156959304 | 0.16144046  | 9.78E-01 | 9.92E-01 | 1.00E+00 |
| ENSG00000258253.1_RP3-416H2 | ENSG00000160789.18_LMNA | -0.00157 | -0.160732226 | 0.157668412 | 9.85E-01 | 9.94E-01 | 1.00E+00 |
| ENSG00000223202.1_RN7SKP29  | ENSG00000160789.18_LMNA | 0.03632  | -0.123591791 | 0.194400147 | 6.57E-01 | 8.48E-01 | 1.00E+00 |
| ENSG00000261017.1_RP11-3M1. | ENSG00000160789.18_LMNA | 0.101    | -0.059155469 | 0.256079651 | 2.16E-01 | 4.90E-01 | 1.00E+00 |
| ENSG00000241064.3_RN7SL110F | ENSG00000160789.18_LMNA | -0.10232 | -0.257325671 | 0.057826113 | 2.10E-01 | 4.83E-01 | 1.00E+00 |
| ENSG00000253532.1_CTD-2340D | ENSG00000160789.18_LMNA | -0.02793 | -0.186304254 | 0.131855026 | 7.33E-01 | 8.87E-01 | 1.00E+00 |
| ENSG00000233824.1_AC003985. | ENSG00000160789.18_LMNA | 0.07357  | -0.086648016 | 0.230073588 | 3.68E-01 | 6.48E-01 | 1.00E+00 |
| ENSG00000258519.1_RP11-349A | ENSG00000160789.18_LMNA | 0.00337  | -0.155916589 | 0.162481295 | 9.67E-01 | 9.87E-01 | 1.00E+00 |
| ENSG00000233275.1_AC009238. | ENSG00000160789.18_LMNA | 0.17425  | 0.015480169  | 0.324451543 | 3.18E-02 | 1.49E-01 | 1.00E+00 |
| ENSG00000215227.4_NUTF2P5   | ENSG00000160789.18_LMNA | -0.09833 | -0.253562182 | 0.061837906 | 2.28E-01 | 5.05E-01 | 1.00E+00 |
| ENSG00000240511.1_MED28P2   | ENSG00000160789.18_LMNA | 0.15994  | 0.000761456  | 0.311218904 | 4.90E-02 | 1.99E-01 | 1.00E+00 |
| ENSG00000257465.2_TCEB1P32  | ENSG00000160789.18_LMNA | 0.00195  | -0.157299442 | 0.161100781 | 9.81E-01 | 9.93E-01 | 1.00E+00 |
| ENSG00000248969.1_CTD-2113L | ENSG00000160789.18_LMNA | -0.113   | -0.267390661 | 0.04704682  | 1.66E-01 | 4.22E-01 | 1.00E+00 |
| ENSG00000223746.1_TCEB1P30  | ENSG00000160789.18_LMNA | -0.00659 | -0.165614614 | 0.152773322 | 9.36E-01 | 9.75E-01 | 1.00E+00 |
| ENSG00000265319.2_RN7SL847F | ENSG00000160789.18_LMNA | 0.01174  | -0.147741664 | 0.170617004 | 8.86E-01 | 9.56E-01 | 1.00E+00 |
| ENSG00000237242.1_BTTF3P15  | ENSG00000160789.18_LMNA | -0.02628 | -0.184707741 | 0.133479336 | 7.48E-01 | 8.95E-01 | 1.00E+00 |
| ENSG00000222069.1_RN7SKP28  | ENSG00000160789.18_LMNA | -0.04924 | -0.206823656 | 0.110825144 | 5.47E-01 | 7.84E-01 | 1.00E+00 |
| ENSG00000226193.1_RP3-398G3 | ENSG00000160789.18_LMNA | -0.02723 | -0.185623504 | 0.132547836 | 7.39E-01 | 8.90E-01 | 1.00E+00 |
| ENSG00000237628.2_MTCO2P19  | ENSG00000160789.18_LMNA | -0.08446 | -0.240432108 | 0.075754915 | 3.01E-01 | 5.87E-01 | 1.00E+00 |
| ENSG00000231557.1_AC018717. | ENSG00000160789.18_LMNA | 0.09322  | -0.066970069 | 0.248733705 | 2.53E-01 | 5.35E-01 | 1.00E+00 |
| ENSG00000261281.1_RP11-361M | ENSG00000160789.18_LMNA | -0.09964 | -0.25480212  | 0.060517285 | 2.22E-01 | 4.97E-01 | 1.00E+00 |
| ENSG00000227842.1_AC093166. | ENSG00000160789.18_LMNA | 0.10996  | -0.050122928 | 0.264525374 | 1.77E-01 | 4.39E-01 | 1.00E+00 |

|                              |                         |          |              |             |          |          |          |
|------------------------------|-------------------------|----------|--------------|-------------|----------|----------|----------|
| ENSG00000249882.1_RP11-665I1 | ENSG00000160789.18_LMNA | -0.12327 | -0.277031792 | 0.036652334 | 1.30E-01 | 3.66E-01 | 1.00E+00 |
| ENSG00000213655.4_CTD-2347I1 | ENSG00000160789.18_LMNA | 0.11405  | -0.045989542 | 0.268374195 | 1.62E-01 | 4.17E-01 | 1.00E+00 |
| ENSG00000273719.1_RP11-715G  | ENSG00000160789.18_LMNA | 0.0097   | -0.149731483 | 0.168640719 | 9.06E-01 | 9.64E-01 | 1.00E+00 |
| ENSG00000235523.1_RP11-63P1  | ENSG00000160789.18_LMNA | -0.0015  | -0.160660386 | 0.157740321 | 9.85E-01 | 9.94E-01 | 1.00E+00 |
| ENSG00000261382.1_RP11-461L  | ENSG00000160789.18_LMNA | 0.08237  | -0.077852468 | 0.238443076 | 3.13E-01 | 6.00E-01 | 1.00E+00 |
| ENSG00000233339.1_AC018878.  | ENSG00000160789.18_LMNA | -0.17397 | -0.324188897 | -0.01518672 | 3.21E-02 | 1.50E-01 | 1.00E+00 |
| ENSG00000234085.1_RP11-368M  | ENSG00000160789.18_LMNA | -0.02563 | -0.18407877  | 0.134118788 | 7.54E-01 | 8.98E-01 | 1.00E+00 |
| ENSG00000225314.1_AC018634.  | ENSG00000160789.18_LMNA | 0.04429  | -0.11572728  | 0.202065362 | 5.88E-01 | 8.08E-01 | 1.00E+00 |
| ENSG00000278513.1_RP11-123C  | ENSG00000160789.18_LMNA | -0.00204 | -0.161191436 | 0.157208672 | 9.80E-01 | 9.93E-01 | 1.00E+00 |
| ENSG00000251128.1_WWC2-AS    | ENSG00000160789.18_LMNA | 0.03141  | -0.128435477 | 0.1896598   | 7.01E-01 | 8.72E-01 | 1.00E+00 |
| ENSG00000260640.1_KB-1000E4  | ENSG00000160789.18_LMNA | 0.07471  | -0.08550344  | 0.231165378 | 3.60E-01 | 6.43E-01 | 1.00E+00 |
| ENSG00000249869.1_RP11-93K2  | ENSG00000160789.18_LMNA | 0.01838  | -0.141237064 | 0.177059537 | 8.22E-01 | 9.31E-01 | 1.00E+00 |
| ENSG00000223428.1_RP11-399K  | ENSG00000160789.18_LMNA | -0.03325 | -0.191439687 | 0.126618566 | 6.84E-01 | 8.63E-01 | 1.00E+00 |
| ENSG00000253124.1_TRAPPC2P   | ENSG00000160789.18_LMNA | 0.00813  | -0.151270523 | 0.16711039  | 9.21E-01 | 9.70E-01 | 1.00E+00 |
| ENSG00000253270.1_RP11-1105  | ENSG00000160789.18_LMNA | -0.19084 | -0.339723236 | -0.03263502 | 1.85E-02 | 1.02E-01 | 1.00E+00 |
| ENSG00000223634.1_AC012506.  | ENSG00000160789.18_LMNA | -0.09797 | -0.253223046 | 0.062198917 | 2.30E-01 | 5.07E-01 | 1.00E+00 |
| ENSG00000240519.1_RP11-384C  | ENSG00000160789.18_LMNA | 0.10425  | -0.055874667 | 0.259152885 | 2.01E-01 | 4.72E-01 | 1.00E+00 |
| ENSG00000104818.14_CGB2      | ENSG00000160789.18_LMNA | 0.07022  | -0.089985901 | 0.22688508  | 3.90E-01 | 6.68E-01 | 1.00E+00 |
| ENSG00000251005.1_RP11-318I4 | ENSG00000160789.18_LMNA | 0.05978  | -0.100379174 | 0.216913233 | 4.64E-01 | 7.27E-01 | 1.00E+00 |
| ENSG00000224250.1_RP11-78A1  | ENSG00000160789.18_LMNA | 0.07965  | -0.080572785 | 0.23585954  | 3.29E-01 | 6.15E-01 | 1.00E+00 |
| ENSG00000232121.1_RP13-30A9  | ENSG00000160789.18_LMNA | -0.00717 | -0.166183639 | 0.152201799 | 9.30E-01 | 9.73E-01 | 1.00E+00 |
| ENSG00000225582.1_AC011193.  | ENSG00000160789.18_LMNA | 0.11167  | -0.048390544 | 0.266139712 | 1.71E-01 | 4.30E-01 | 1.00E+00 |
| ENSG00000224789.1_AC012363.  | ENSG00000160789.18_LMNA | 0.02021  | -0.139439887 | 0.17883477  | 8.05E-01 | 9.22E-01 | 1.00E+00 |
| ENSG00000274549.1_RP11-676B  | ENSG00000160789.18_LMNA | 0.01675  | -0.142831483 | 0.175482852 | 8.38E-01 | 9.37E-01 | 1.00E+00 |
| ENSG00000223430.1_AC011243.  | ENSG00000160789.18_LMNA | 0.09321  | -0.066986491 | 0.248718229 | 2.53E-01 | 5.35E-01 | 1.00E+00 |
| ENSG00000227713.1_AC116609.  | ENSG00000160789.18_LMNA | -0.15537 | -0.306975865 | 0.003929781 | 5.60E-02 | 2.16E-01 | 1.00E+00 |
| ENSG00000248733.1_CTD-2176I2 | ENSG00000160789.18_LMNA | 0.05574  | -0.104389205 | 0.213048016 | 4.95E-01 | 7.50E-01 | 1.00E+00 |
| ENSG00000219722.1_RPL26P20   | ENSG00000160789.18_LMNA | 0.00114  | -0.15809121  | 0.160309792 | 9.89E-01 | 9.96E-01 | 1.00E+00 |
| ENSG00000250681.1_RP3-368B9  | ENSG00000160789.18_LMNA | 0.03761  | -0.122319823 | 0.19564252  | 6.45E-01 | 8.42E-01 | 1.00E+00 |
| ENSG00000249491.1_EGFLAM-A   | ENSG00000160789.18_LMNA | 0.02285  | -0.136844373 | 0.181394938 | 7.80E-01 | 9.10E-01 | 1.00E+00 |
| ENSG00000264911.1_RP11-107K  | ENSG00000160789.18_LMNA | -0.01206 | -0.170930598 | 0.147425685 | 8.83E-01 | 9.55E-01 | 1.00E+00 |
| ENSG00000253823.1_IGLV1-62   | ENSG00000160789.18_LMNA | 0.03206  | -0.127792814 | 0.190289606 | 6.95E-01 | 8.69E-01 | 1.00E+00 |
| ENSG00000261651.1_RP11-899L  | ENSG00000160789.18_LMNA | 0.01723  | -0.142361839 | 0.175947442 | 8.33E-01 | 9.35E-01 | 1.00E+00 |



|                              |                         |          |              |             |          |          |          |
|------------------------------|-------------------------|----------|--------------|-------------|----------|----------|----------|
| ENSG00000278955.1_MIR8069-1  | ENSG00000160789.18_LMNA | -0.05464 | -0.211996071 | 0.105478778 | 5.04E-01 | 7.55E-01 | 1.00E+00 |
| ENSG00000226992.1_AC144525.  | ENSG00000160789.18_LMNA | -0.09431 | -0.249759843 | 0.065880788 | 2.48E-01 | 5.28E-01 | 1.00E+00 |
| ENSG00000177261.8_ENSAP3     | ENSG00000160789.18_LMNA | -0.1509  | -0.302829488 | 0.008500962 | 6.35E-02 | 2.34E-01 | 1.00E+00 |
| ENSG00000224935.1_RP11-74C3  | ENSG00000160789.18_LMNA | -0.11033 | -0.26487433  | 0.049748616 | 1.76E-01 | 4.37E-01 | 1.00E+00 |
| ENSG00000227864.1_ARL5AP1    | ENSG00000160789.18_LMNA | -0.05395 | -0.211332091 | 0.106166116 | 5.09E-01 | 7.59E-01 | 1.00E+00 |
| ENSG00000269564.1_AC008753.  | ENSG00000160789.18_LMNA | -0.04415 | -0.201928953 | 0.115867585 | 5.89E-01 | 8.09E-01 | 1.00E+00 |
| ENSG00000255199.2_GTF2IP11   | ENSG00000160789.18_LMNA | 0.13191  | -0.027872523 | 0.285126363 | 1.05E-01 | 3.22E-01 | 1.00E+00 |
| ENSG00000228361.2_RP11-503C  | ENSG00000160789.18_LMNA | -0.03684 | -0.194902026 | 0.123078081 | 6.52E-01 | 8.46E-01 | 1.00E+00 |
| ENSG00000256197.1_TSPAN9-IT  | ENSG00000160789.18_LMNA | 0.05814  | -0.102004037 | 0.215348247 | 4.77E-01 | 7.35E-01 | 1.00E+00 |
| ENSG00000198452.6_OR14L1P    | ENSG00000160789.18_LMNA | -0.00761 | -0.166613206 | 0.151770204 | 9.26E-01 | 9.72E-01 | 1.00E+00 |
| ENSG00000259701.1_RP11-108K  | ENSG00000160789.18_LMNA | 0.02046  | -0.139191767 | 0.179079697 | 8.02E-01 | 9.21E-01 | 1.00E+00 |
| ENSG00000268985.1_CTD-2528A  | ENSG00000160789.18_LMNA | 0.12602  | -0.033863339 | 0.279607948 | 1.22E-01 | 3.51E-01 | 1.00E+00 |
| ENSG00000271339.1_RP11-1114. | ENSG00000160789.18_LMNA | -0.0583  | -0.21550329  | 0.101843137 | 4.76E-01 | 7.34E-01 | 1.00E+00 |
| ENSG00000279084.1_AC022405.  | ENSG00000160789.18_LMNA | 0.12172  | -0.038224735 | 0.275577396 | 1.35E-01 | 3.74E-01 | 1.00E+00 |
| ENSG00000169509.5_CRCT1      | ENSG00000160789.18_LMNA | 0.09365  | -0.06653795  | 0.24914086  | 2.51E-01 | 5.32E-01 | 1.00E+00 |
| ENSG00000225249.4_LINC00378  | ENSG00000160789.18_LMNA | 0.02992  | -0.129900882 | 0.188222732 | 7.14E-01 | 8.79E-01 | 1.00E+00 |
| ENSG00000241073.1_RP4-714D9  | ENSG00000160789.18_LMNA | -0.06908 | -0.225795556 | 0.091124838 | 3.98E-01 | 6.75E-01 | 1.00E+00 |
| ENSG00000236145.1_AC079988.  | ENSG00000160789.18_LMNA | -0.10645 | -0.261228456 | 0.053655055 | 1.92E-01 | 4.60E-01 | 1.00E+00 |
| ENSG00000229674.1_AL121578.7 | ENSG00000160789.18_LMNA | 0.11868  | -0.041299171 | 0.272729533 | 1.45E-01 | 3.90E-01 | 1.00E+00 |
| ENSG00000248328.1_MTCO3P28   | ENSG00000160789.18_LMNA | -0.02964 | -0.18795108  | 0.130177734 | 7.17E-01 | 8.80E-01 | 1.00E+00 |
| ENSG00000249795.1_RP11-18O1  | ENSG00000160789.18_LMNA | -0.00388 | -0.162983863 | 0.155412859 | 9.62E-01 | 9.85E-01 | 1.00E+00 |
| ENSG00000232193.1_AL157359.4 | ENSG00000160789.18_LMNA | 0.04339  | -0.116617235 | 0.201199909 | 5.96E-01 | 8.13E-01 | 1.00E+00 |
| ENSG00000271969.1_U47924.29  | ENSG00000160789.18_LMNA | -0.02121 | -0.17980481  | 0.138456968 | 7.95E-01 | 9.18E-01 | 1.00E+00 |
| ENSG00000235939.1_RP11-123B  | ENSG00000160789.18_LMNA | -0.1467  | -0.298922025 | 0.012796877 | 7.13E-02 | 2.53E-01 | 1.00E+00 |
| ENSG00000259432.1_RP11-37C7  | ENSG00000160789.18_LMNA | -0.01615 | -0.174901844 | 0.143418609 | 8.43E-01 | 9.39E-01 | 1.00E+00 |
| ENSG00000223702.1_ZDHHC20P   | ENSG00000160789.18_LMNA | 0.04598  | -0.11405416  | 0.203691077 | 5.74E-01 | 8.01E-01 | 1.00E+00 |
| ENSG00000256888.4_RP13-81N3  | ENSG00000160789.18_LMNA | 0.06751  | -0.092686884 | 0.22429999  | 4.09E-01 | 6.83E-01 | 1.00E+00 |
| ENSG00000251176.1_RP11-97E7  | ENSG00000160789.18_LMNA | 0.02711  | -0.132663853 | 0.185509478 | 7.40E-01 | 8.91E-01 | 1.00E+00 |
| ENSG00000258671.2_RP11-407N  | ENSG00000160789.18_LMNA | -0.04645 | -0.204140208 | 0.113591614 | 5.70E-01 | 7.99E-01 | 1.00E+00 |
| ENSG00000254864.1_CTD-2516F  | ENSG00000160789.18_LMNA | 0.09706  | -0.063118232 | 0.252359086 | 2.34E-01 | 5.12E-01 | 1.00E+00 |
| ENSG00000232723.1_AC013399.  | ENSG00000160789.18_LMNA | 0.12182  | -0.038115321 | 0.275678645 | 1.35E-01 | 3.73E-01 | 1.00E+00 |
| ENSG00000279515.1_AC109344.  | ENSG00000160789.18_LMNA | -0.00812 | -0.167102907 | 0.151278044 | 9.21E-01 | 9.70E-01 | 1.00E+00 |
| ENSG00000230686.1_AC067945.  | ENSG00000160789.18_LMNA | 0.0556   | -0.10452603  | 0.212915956 | 4.96E-01 | 7.51E-01 | 1.00E+00 |

|                             |                         |          |              |             |          |          |          |
|-----------------------------|-------------------------|----------|--------------|-------------|----------|----------|----------|
| ENSG00000271225.1_BNIP3P4   | ENSG00000160789.18_LMNA | -0.10294 | -0.257916287 | 0.057195604 | 2.07E-01 | 4.79E-01 | 1.00E+00 |
| ENSG00000254496.1_CBX3P8    | ENSG00000160789.18_LMNA | 0.17643  | 0.017725079  | 0.326459224 | 2.97E-02 | 1.42E-01 | 1.00E+00 |
| ENSG00000187918.4_OR51I2    | ENSG00000160789.18_LMNA | 0.07265  | -0.087565903 | 0.229197455 | 3.74E-01 | 6.54E-01 | 1.00E+00 |
| ENSG00000240095.1_RP11-88H1 | ENSG00000160789.18_LMNA | -0.02908 | -0.18740883  | 0.130730216 | 7.22E-01 | 8.82E-01 | 1.00E+00 |
| ENSG00000243832.1_RP11-202A | ENSG00000160789.18_LMNA | 0.1181   | -0.041891926 | 0.272179829 | 1.47E-01 | 3.93E-01 | 1.00E+00 |
| ENSG00000255951.1_RP11-967K | ENSG00000160789.18_LMNA | -0.05863 | -0.215815715 | 0.10151886  | 4.73E-01 | 7.33E-01 | 1.00E+00 |
| ENSG00000249337.2_SNX18P25  | ENSG00000160789.18_LMNA | -0.00366 | -0.162764319 | 0.155632932 | 9.64E-01 | 9.86E-01 | 1.00E+00 |
| ENSG00000224515.1_RP11-5K23 | ENSG00000160789.18_LMNA | -0.07825 | -0.234532997 | 0.081967731 | 3.38E-01 | 6.23E-01 | 1.00E+00 |
| ENSG00000271477.1_CTC-447K7 | ENSG00000160789.18_LMNA | -0.04147 | -0.199351706 | 0.118516054 | 6.12E-01 | 8.23E-01 | 1.00E+00 |
| ENSG00000236769.1_RP11-168P | ENSG00000160789.18_LMNA | -0.00983 | -0.16876201  | 0.149609436 | 9.04E-01 | 9.63E-01 | 1.00E+00 |
| ENSG00000266952.1_LINC01538 | ENSG00000160789.18_LMNA | -0.10645 | -0.261225319 | 0.053658412 | 1.92E-01 | 4.60E-01 | 1.00E+00 |
| ENSG00000231714.1_RP11-476H | ENSG00000160789.18_LMNA | -0.15871 | -0.310074825 | 0.00050482  | 5.08E-02 | 2.03E-01 | 1.00E+00 |
| ENSG00000228365.1_RP1-90J20 | ENSG00000160789.18_LMNA | -0.00667 | -0.165691628 | 0.152695983 | 9.35E-01 | 9.74E-01 | 1.00E+00 |
| ENSG00000258392.1_RPA2P1    | ENSG00000160789.18_LMNA | -0.15056 | -0.302509088 | 0.008853647 | 6.41E-02 | 2.36E-01 | 1.00E+00 |
| ENSG00000228837.2_CBX3P6    | ENSG00000160789.18_LMNA | 0.10069  | -0.05946566  | 0.255788755 | 2.17E-01 | 4.92E-01 | 1.00E+00 |
| ENSG00000223626.1_LINC01044 | ENSG00000160789.18_LMNA | -0.11453 | -0.268829821 | 0.045499516 | 1.60E-01 | 4.14E-01 | 1.00E+00 |
| ENSG00000267770.1_RP11-559N | ENSG00000160789.18_LMNA | -0.01135 | -0.170242942 | 0.148118485 | 8.90E-01 | 9.57E-01 | 1.00E+00 |
| ENSG00000267857.2_RP5-1023B | ENSG00000160789.18_LMNA | -0.05354 | -0.210941351 | 0.10657046  | 5.12E-01 | 7.61E-01 | 1.00E+00 |
| ENSG00000229086.3_LINC01548 | ENSG00000160789.18_LMNA | -0.16845 | -0.319090795 | -0.00950121 | 3.80E-02 | 1.68E-01 | 1.00E+00 |
| ENSG00000253652.1_RP11-798K | ENSG00000160789.18_LMNA | 0.00616  | -0.153186621 | 0.16520299  | 9.40E-01 | 9.76E-01 | 1.00E+00 |
| ENSG00000250585.1_LINC00604 | ENSG00000160789.18_LMNA | 0.26991  | 0.115681696  | 0.411432928 | 7.71E-04 | 9.44E-03 | 1.00E+00 |
| ENSG00000224091.1_AC104389  | ENSG00000160789.18_LMNA | 0.06791  | -0.09228436  | 0.224685526 | 4.06E-01 | 6.81E-01 | 1.00E+00 |
| ENSG00000184698.4_OR51M1    | ENSG00000160789.18_LMNA | 0.00814  | -0.151253685 | 0.16712714  | 9.21E-01 | 9.70E-01 | 1.00E+00 |
| ENSG00000244537.2_KRTAP4-2  | ENSG00000160789.18_LMNA | -0.03117 | -0.189434399 | 0.128665414 | 7.03E-01 | 8.73E-01 | 1.00E+00 |
| ENSG00000275649.1_RP11-286O | ENSG00000160789.18_LMNA | -0.09738 | -0.252661146 | 0.06279688  | 2.33E-01 | 5.11E-01 | 1.00E+00 |
| ENSG00000274766.1_LINC00453 | ENSG00000160789.18_LMNA | 0.19576  | 0.03773283   | 0.344230445 | 1.57E-02 | 9.04E-02 | 1.00E+00 |
| ENSG00000267238.1_AC093074  | ENSG00000160789.18_LMNA | 0.01676  | -0.142825618 | 0.175488655 | 8.38E-01 | 9.37E-01 | 1.00E+00 |
| ENSG00000232631.1_MTND2P23  | ENSG00000160789.18_LMNA | 0.10734  | -0.05276727  | 0.262057814 | 1.88E-01 | 4.55E-01 | 1.00E+00 |
| ENSG00000276531.1_RP11-205A | ENSG00000160789.18_LMNA | -0.01019 | -0.169112739 | 0.149256465 | 9.01E-01 | 9.62E-01 | 1.00E+00 |
| ENSG00000257373.1_RP11-547C | ENSG00000160789.18_LMNA | 0.087    | -0.073213938 | 0.242838071 | 2.87E-01 | 5.72E-01 | 1.00E+00 |
| ENSG0000044012.3_GUCA2B     | ENSG00000160789.18_LMNA | -0.10561 | -0.260431851 | 0.054507311 | 1.95E-01 | 4.64E-01 | 1.00E+00 |
| ENSG00000227035.1_MTATP6P1  | ENSG00000160789.18_LMNA | 0.02765  | -0.13213082  | 0.186033298 | 7.35E-01 | 8.89E-01 | 1.00E+00 |
| ENSG00000227182.1_VN1R28P   | ENSG00000160789.18_LMNA | -0.06401 | -0.220962274 | 0.096167347 | 4.33E-01 | 7.03E-01 | 1.00E+00 |

|                              |                         |          |              |             |          |          |          |
|------------------------------|-------------------------|----------|--------------|-------------|----------|----------|----------|
| ENSG00000183463.5_URAD       | ENSG00000160789.18_LMNA | 0.16078  | 0.001619059  | 0.311993236 | 4.78E-02 | 1.95E-01 | 1.00E+00 |
| ENSG00000237220.1_AC104777.1 | ENSG00000160789.18_LMNA | -0.02284 | -0.181383534 | 0.136855944 | 7.80E-01 | 9.10E-01 | 1.00E+00 |
| ENSG00000227254.1_VDAC1P12   | ENSG00000160789.18_LMNA | 0.12286  | -0.03706391  | 0.276651243 | 1.32E-01 | 3.68E-01 | 1.00E+00 |
| ENSG00000262302.1_RP1-4G17.1 | ENSG00000160789.18_LMNA | -0.03257 | -0.190782932 | 0.127289231 | 6.90E-01 | 8.67E-01 | 1.00E+00 |
| ENSG00000125831.8_CST11      | ENSG00000160789.18_LMNA | -0.08157 | -0.237683744 | 0.07865249  | 3.18E-01 | 6.04E-01 | 1.00E+00 |
| ENSG00000265751.1_RP11-296E  | ENSG00000160789.18_LMNA | -0.16021 | -0.311463297 | -0.00103208 | 4.87E-02 | 1.98E-01 | 1.00E+00 |
| ENSG00000230122.1_ECEL1P3    | ENSG00000160789.18_LMNA | 0.09031  | -0.069899404 | 0.245970656 | 2.69E-01 | 5.53E-01 | 1.00E+00 |
| ENSG00000225775.1_RP11-354I1 | ENSG00000160789.18_LMNA | -0.14757 | -0.299727288 | 0.0119125   | 6.96E-02 | 2.49E-01 | 1.00E+00 |
| ENSG00000256763.1_RP1-116K2  | ENSG00000160789.18_LMNA | 0.03437  | -0.125516516 | 0.192518262 | 6.74E-01 | 8.57E-01 | 1.00E+00 |
| ENSG00000224029.1_RP11-136K  | ENSG00000160789.18_LMNA | 0.15423  | -0.005098956 | 0.305916464 | 5.78E-02 | 2.20E-01 | 1.00E+00 |
| ENSG00000227029.1_RP11-168P  | ENSG00000160789.18_LMNA | 0.04711  | -0.112939416 | 0.204773264 | 5.64E-01 | 7.95E-01 | 1.00E+00 |
| ENSG00000248736.1_RP11-35O7  | ENSG00000160789.18_LMNA | -0.02511 | -0.183574997 | 0.134630765 | 7.59E-01 | 8.99E-01 | 1.00E+00 |
| ENSG00000266181.1	EIF4A3P1   | ENSG00000160789.18_LMNA | -0.05885 | -0.216022903 | 0.101303775 | 4.71E-01 | 7.31E-01 | 1.00E+00 |
| ENSG00000253401.1_VTA1P2     | ENSG00000160789.18_LMNA | -0.02993 | -0.188231168 | 0.129892283 | 7.14E-01 | 8.79E-01 | 1.00E+00 |
| ENSG00000179751.6_SYCN       | ENSG00000160789.18_LMNA | 0.14945  | -0.009990808 | 0.301475543 | 6.61E-02 | 2.40E-01 | 1.00E+00 |
| ENSG00000235741.1_RP5-866L2  | ENSG00000160789.18_LMNA | 0.14592  | -0.013595877 | 0.298194118 | 7.28E-02 | 2.56E-01 | 1.00E+00 |
| ENSG00000226829.1_RP5-945F2  | ENSG00000160789.18_LMNA | 0.09383  | -0.066358404 | 0.249310001 | 2.50E-01 | 5.31E-01 | 1.00E+00 |
| ENSG00000227047.1_AC012065.1 | ENSG00000160789.18_LMNA | 0.01342  | -0.146094278 | 0.172251248 | 8.70E-01 | 9.49E-01 | 1.00E+00 |
| ENSG00000257138.1_TAS2R38    | ENSG00000160789.18_LMNA | -0.05462 | -0.211974114 | 0.105501512 | 5.04E-01 | 7.55E-01 | 1.00E+00 |
| ENSG00000236072.1_RP11-281B  | ENSG00000160789.18_LMNA | -0.07469 | -0.231144322 | 0.085525522 | 3.60E-01 | 6.43E-01 | 1.00E+00 |
| ENSG00000231440.1_RP11-467I2 | ENSG00000160789.18_LMNA | 0.04528  | -0.114749353 | 0.203015793 | 5.80E-01 | 8.04E-01 | 1.00E+00 |
| ENSG00000217231.2_RP3-340H1  | ENSG00000160789.18_LMNA | 0.13219  | -0.027590325 | 0.285385798 | 1.04E-01 | 3.21E-01 | 1.00E+00 |
| ENSG00000241305.1_ACTG1P13   | ENSG00000160789.18_LMNA | -0.09891 | -0.254105309 | 0.061259573 | 2.25E-01 | 5.01E-01 | 1.00E+00 |
| ENSG00000257220.1_RP11-136F  | ENSG00000160789.18_LMNA | -0.02607 | -0.18450892  | 0.133681499 | 7.50E-01 | 8.95E-01 | 1.00E+00 |
| ENSG00000184991.2_TTTY13     | ENSG00000160789.18_LMNA | -0.0143  | -0.173109804 | 0.145228111 | 8.61E-01 | 9.46E-01 | 1.00E+00 |
| ENSG00000266520.1_RAC1P1     | ENSG00000160789.18_LMNA | -0.0181  | -0.176786759 | 0.141513029 | 8.25E-01 | 9.31E-01 | 1.00E+00 |
| ENSG00000248588.1_CTC-458G6  | ENSG00000160789.18_LMNA | -0.08124 | -0.237372432 | 0.078980367 | 3.20E-01 | 6.06E-01 | 1.00E+00 |
| ENSG00000277769.1_RBM22P4    | ENSG00000160789.18_LMNA | -0.03933 | -0.197294453 | 0.120626919 | 6.30E-01 | 8.34E-01 | 1.00E+00 |
| ENSG00000234660.1_LINC00440  | ENSG00000160789.18_LMNA | -0.19578 | -0.344247769 | -0.03775245 | 1.56E-02 | 9.03E-02 | 1.00E+00 |
| ENSG00000238131.1_RP11-806J1 | ENSG00000160789.18_LMNA | 0.00671  | -0.152651046 | 0.165736374 | 9.35E-01 | 9.74E-01 | 1.00E+00 |
| ENSG00000270625.1_RP4-555N2  | ENSG00000160789.18_LMNA | 0.02015  | -0.139499271 | 0.178776143 | 8.05E-01 | 9.22E-01 | 1.00E+00 |
| ENSG00000227736.1_MTCO3P16   | ENSG00000160789.18_LMNA | -0.00305 | -0.162176482 | 0.156222027 | 9.70E-01 | 9.88E-01 | 1.00E+00 |
| ENSG00000232562.1_TPMP3      | ENSG00000160789.18_LMNA | 0.13424  | -0.025501808 | 0.287304422 | 9.92E-02 | 3.10E-01 | 1.00E+00 |

|                             |                         |          |              |             |          |          |          |
|-----------------------------|-------------------------|----------|--------------|-------------|----------|----------|----------|
| ENSG00000270934.1_RP11-346C | ENSG00000160789.18_LMNA | -0.05015 | -0.207692562 | 0.109928299 | 5.39E-01 | 7.79E-01 | 1.00E+00 |
| ENSG00000229016.1_RP11-224C | ENSG00000160789.18_LMNA | 0.20754  | 0.049992507  | 0.355012254 | 1.03E-02 | 6.69E-02 | 1.00E+00 |
| ENSG00000251352.1_RP11-451H | ENSG00000160789.18_LMNA | -0.03779 | -0.195811926 | 0.1221463   | 6.44E-01 | 8.42E-01 | 1.00E+00 |
| ENSG00000220537.1_RP3-492P1 | ENSG00000160789.18_LMNA | -0.07932 | -0.235546202 | 0.080902392 | 3.31E-01 | 6.17E-01 | 1.00E+00 |
| ENSG00000180305.4_WFDC10A   | ENSG00000160789.18_LMNA | 0.09059  | -0.06961215  | 0.246241831 | 2.67E-01 | 5.51E-01 | 1.00E+00 |
| ENSG00000204379.9_XAGE1A    | ENSG00000160789.18_LMNA | -0.04649 | -0.204183584 | 0.113546935 | 5.69E-01 | 7.99E-01 | 1.00E+00 |
| ENSG00000259900.4_RP11-343C | ENSG00000160789.18_LMNA | 0.04578  | -0.114249877 | 0.203500995 | 5.75E-01 | 8.02E-01 | 1.00E+00 |
| ENSG00000231371.1_AKR1B1P8  | ENSG00000160789.18_LMNA | -0.03779 | -0.195812629 | 0.12214558  | 6.44E-01 | 8.42E-01 | 1.00E+00 |
| ENSG00000241475.1_RP4-781K5 | ENSG00000160789.18_LMNA | 0.18942  | 0.031158211  | 0.338414884 | 1.94E-02 | 1.06E-01 | 1.00E+00 |
| ENSG00000234940.1_AC023128  | ENSG00000160789.18_LMNA | 0.08188  | -0.078337955 | 0.237982327 | 3.16E-01 | 6.03E-01 | 1.00E+00 |
| ENSG00000254111.2_RP11-150C | ENSG00000160789.18_LMNA | 0.03543  | -0.124474317 | 0.193537554 | 6.65E-01 | 8.52E-01 | 1.00E+00 |
| ENSG00000225128.1_LINC00972 | ENSG00000160789.18_LMNA | 0.11975  | -0.040215753 | 0.273733737 | 1.42E-01 | 3.84E-01 | 1.00E+00 |
| ENSG00000234200.1_U82671.8  | ENSG00000160789.18_LMNA | -0.11166 | -0.266128015 | 0.048403103 | 1.71E-01 | 4.30E-01 | 1.00E+00 |
| ENSG00000254565.1_MTND2P26  | ENSG00000160789.18_LMNA | 0.11808  | -0.041908088 | 0.272164838 | 1.47E-01 | 3.93E-01 | 1.00E+00 |
| ENSG00000260255.1_RP11-185C | ENSG00000160789.18_LMNA | -0.18613 | -0.335389828 | -0.0277488  | 2.17E-02 | 1.14E-01 | 1.00E+00 |
| ENSG00000233015.1_SLC25A6P  | ENSG00000160789.18_LMNA | -0.11474 | -0.269028661 | 0.045285616 | 1.59E-01 | 4.12E-01 | 1.00E+00 |
| ENSG00000181867.2_FTMT      | ENSG00000160789.18_LMNA | -0.07656 | -0.232926325 | 0.083655592 | 3.48E-01 | 6.33E-01 | 1.00E+00 |
| ENSG00000273049.1_RP11-834C | ENSG00000160789.18_LMNA | -0.03459 | -0.192732097 | 0.125297933 | 6.72E-01 | 8.56E-01 | 1.00E+00 |
| ENSG00000255127.1_RP11-676F | ENSG00000160789.18_LMNA | 0.04426  | -0.115758032 | 0.202035465 | 5.88E-01 | 8.09E-01 | 1.00E+00 |
| ENSG00000240959.1_ST13P14   | ENSG00000160789.18_LMNA | 0.1004   | -0.059753761 | 0.255518524 | 2.18E-01 | 4.93E-01 | 1.00E+00 |
| ENSG00000236187.1_GJA6P     | ENSG00000160789.18_LMNA | -0.05496 | -0.212303019 | 0.105160928 | 5.01E-01 | 7.53E-01 | 1.00E+00 |
| ENSG00000250102.4_RP11-314N | ENSG00000160789.18_LMNA | -0.03583 | -0.193920371 | 0.124082715 | 6.61E-01 | 8.50E-01 | 1.00E+00 |
| ENSG00000167360.4_OR51Q1    | ENSG00000160789.18_LMNA | 0.03547  | -0.12442887  | 0.193581987 | 6.64E-01 | 8.52E-01 | 1.00E+00 |
| ENSG00000274226.3_TBC1D3H   | ENSG00000160789.18_LMNA | -0.03509 | -0.193206691 | 0.124812692 | 6.68E-01 | 8.54E-01 | 1.00E+00 |
| ENSG00000205916.9_DAZ4      | ENSG00000160789.18_LMNA | -0.13614 | -0.289073867 | 0.023573257 | 9.45E-02 | 3.01E-01 | 1.00E+00 |
| ENSG00000235248.2_OR13C1P   | ENSG00000160789.18_LMNA | 0.0596   | -0.100551719 | 0.216747124 | 4.66E-01 | 7.28E-01 | 1.00E+00 |
| ENSG00000232381.1_OR52U1P   | ENSG00000160789.18_LMNA | 0.09134  | -0.068865314 | 0.246946632 | 2.63E-01 | 5.46E-01 | 1.00E+00 |
| ENSG00000264970.1_RP11-846F | ENSG00000160789.18_LMNA | -0.10742 | -0.262140626 | 0.052678596 | 1.88E-01 | 4.54E-01 | 1.00E+00 |
| ENSG00000180658.3_OR2A4     | ENSG00000160789.18_LMNA | -0.04217 | -0.200023612 | 0.117826016 | 6.06E-01 | 8.20E-01 | 1.00E+00 |
| ENSG00000229239.2_RP11-223J | ENSG00000160789.18_LMNA | -0.04073 | -0.198646397 | 0.119240068 | 6.18E-01 | 8.27E-01 | 1.00E+00 |
| ENSG00000189037.7_DUSP21    | ENSG00000160789.18_LMNA | 0.21677  | 0.059625913  | 0.363427831 | 7.31E-03 | 5.20E-02 | 1.00E+00 |
| ENSG00000268651.2_CTAG1A    | ENSG00000160789.18_LMNA | -0.15447 | -0.306144753 | 0.004847084 | 5.74E-02 | 2.19E-01 | 1.00E+00 |
| ENSG00000273547.1_OR4F16    | ENSG00000160789.18_LMNA | 0.02523  | -0.134514962 | 0.183688959 | 7.58E-01 | 8.99E-01 | 1.00E+00 |

|                              |                         |          |              |             |          |          |          |
|------------------------------|-------------------------|----------|--------------|-------------|----------|----------|----------|
| ENSG00000226773.1_RP4-775D1  | ENSG00000160789.18_LMNA | 0.19238  | 0.034223416  | 0.341129126 | 1.76E-02 | 9.84E-02 | 1.00E+00 |
| ENSG00000273907.1_CA15P2     | ENSG00000160789.18_LMNA | -0.05525 | -0.212580559 | 0.104873477 | 4.99E-01 | 7.52E-01 | 1.00E+00 |
| ENSG00000235548.1_AC073551.  | ENSG00000160789.18_LMNA | -0.01269 | -0.171540808 | 0.146810648 | 8.77E-01 | 9.52E-01 | 1.00E+00 |
| ENSG00000229910.1_HNRNPA1F   | ENSG00000160789.18_LMNA | 0.11836  | -0.041620692 | 0.272431389 | 1.46E-01 | 3.92E-01 | 1.00E+00 |
| ENSG00000235833.1_AC159540.  | ENSG00000160789.18_LMNA | -0.0778  | -0.234101837 | 0.082420857 | 3.41E-01 | 6.26E-01 | 1.00E+00 |
| ENSG00000226246.1_KRT18P36   | ENSG00000160789.18_LMNA | -0.04431 | -0.202083124 | 0.11570901  | 5.88E-01 | 8.08E-01 | 1.00E+00 |
| ENSG00000233710.1_RP4-808O4  | ENSG00000160789.18_LMNA | -0.05987 | -0.217005938 | 0.100282869 | 4.64E-01 | 7.26E-01 | 1.00E+00 |
| ENSG00000230950.1_MTND2P21   | ENSG00000160789.18_LMNA | -0.01592 | -0.174680544 | 0.143642181 | 8.46E-01 | 9.40E-01 | 1.00E+00 |
| ENSG00000234099.1_MTND4P11   | ENSG00000160789.18_LMNA | 0.05175  | -0.108342274 | 0.209227953 | 5.27E-01 | 7.71E-01 | 1.00E+00 |
| ENSG00000279844.1_RP11-20F1  | ENSG00000160789.18_LMNA | -0.04433 | -0.202106901 | 0.115684552 | 5.88E-01 | 8.08E-01 | 1.00E+00 |
| ENSG00000269565.1_GPR32P1    | ENSG00000160789.18_LMNA | -0.07267 | -0.229218589 | 0.087543769 | 3.74E-01 | 6.54E-01 | 1.00E+00 |
| ENSG00000197790.1_OR52M1     | ENSG00000160789.18_LMNA | 0.05051  | -0.109570539 | 0.208039037 | 5.37E-01 | 7.77E-01 | 1.00E+00 |
| ENSG00000230598.1_OR2H4P     | ENSG00000160789.18_LMNA | 0.03387  | -0.126010326 | 0.192035066 | 6.79E-01 | 8.60E-01 | 1.00E+00 |
| ENSG00000233944.1_LINC00265  | ENSG00000160789.18_LMNA | 0.09884  | -0.061320662 | 0.254047948 | 2.26E-01 | 5.02E-01 | 1.00E+00 |
| ENSG00000238241.1_CCR12P     | ENSG00000160789.18_LMNA | -0.03223 | -0.190450392 | 0.127628704 | 6.93E-01 | 8.68E-01 | 1.00E+00 |
| ENSG00000153498.10_SPACA7    | ENSG00000160789.18_LMNA | 0.0274   | -0.132380229 | 0.185788222 | 7.38E-01 | 8.90E-01 | 1.00E+00 |
| ENSG00000248704.1_MTND4P2    | ENSG00000160789.18_LMNA | -0.09525 | -0.250650722 | 0.064934479 | 2.43E-01 | 5.23E-01 | 1.00E+00 |
| ENSG00000257955.1_RP1-228P1  | ENSG00000160789.18_LMNA | 0.06695  | -0.093242775 | 0.223767397 | 4.12E-01 | 6.86E-01 | 1.00E+00 |
| ENSG00000214415.3_GNAT3      | ENSG00000160789.18_LMNA | -0.10811 | -0.26279181  | 0.051981149 | 1.85E-01 | 4.51E-01 | 1.00E+00 |
| ENSG00000274369.1_GRAMD4P2   | ENSG00000160789.18_LMNA | 0.03274  | -0.127120413 | 0.190948276 | 6.89E-01 | 8.66E-01 | 1.00E+00 |
| ENSG00000271231.1_KRT18P9    | ENSG00000160789.18_LMNA | -0.01003 | -0.168956282 | 0.149413932 | 9.02E-01 | 9.62E-01 | 1.00E+00 |
| ENSG00000253897.1_CTB-23I7.1 | ENSG00000160789.18_LMNA | -0.01006 | -0.168986238 | 0.149383783 | 9.02E-01 | 9.62E-01 | 1.00E+00 |
| ENSG00000232597.4_AC013727.  | ENSG00000160789.18_LMNA | 0.08323  | -0.076995715 | 0.239255823 | 3.08E-01 | 5.95E-01 | 1.00E+00 |
| ENSG00000256221.1_AE000661.  | ENSG00000160789.18_LMNA | 0.06981  | -0.090397938 | 0.226491011 | 3.93E-01 | 6.70E-01 | 1.00E+00 |
| ENSG00000228567.3_VN1R4      | ENSG00000160789.18_LMNA | 0.00046  | -0.158753059 | 0.159648279 | 9.96E-01 | 9.98E-01 | 1.00E+00 |
| ENSG00000243885.1_RP11-278L  | ENSG00000160789.18_LMNA | 0.00721  | -0.152164643 | 0.166220625 | 9.30E-01 | 9.73E-01 | 1.00E+00 |
| ENSG00000275722.3_LYZL6      | ENSG00000160789.18_LMNA | -0.1334  | -0.286519998 | 0.026356023 | 1.01E-01 | 3.14E-01 | 1.00E+00 |
| ENSG00000234726.1_LL22NC03-  | ENSG00000160789.18_LMNA | -0.04628 | -0.203982296 | 0.113754258 | 5.71E-01 | 8.00E-01 | 1.00E+00 |
| ENSG00000270994.1_RP11-293B  | ENSG00000160789.18_LMNA | -0.07563 | -0.232033388 | 0.084592867 | 3.54E-01 | 6.38E-01 | 1.00E+00 |
| ENSG00000215208.3_KRT18P60   | ENSG00000160789.18_LMNA | 0.03569  | -0.124213144 | 0.193792879 | 6.62E-01 | 8.51E-01 | 1.00E+00 |
| ENSG00000261987.2_KYNUP1     | ENSG00000160789.18_LMNA | 0.02553  | -0.134216016 | 0.183983113 | 7.55E-01 | 8.98E-01 | 1.00E+00 |
| ENSG00000173679.2_OR1L1      | ENSG00000160789.18_LMNA | -0.06939 | -0.22609679  | 0.090810025 | 3.96E-01 | 6.73E-01 | 1.00E+00 |
| ENSG00000228767.1_KRT8P18    | ENSG00000160789.18_LMNA | -0.00335 | -0.16246075  | 0.155937179 | 9.67E-01 | 9.87E-01 | 1.00E+00 |

|                             |                         |          |              |             |          |          |          |
|-----------------------------|-------------------------|----------|--------------|-------------|----------|----------|----------|
| ENSG00000254083.4_LINC01591 | ENSG00000160789.18_LMNA | -0.0801  | -0.23628999  | 0.080119873 | 3.27E-01 | 6.13E-01 | 1.00E+00 |
| ENSG00000233146.1_BPIFB5P   | ENSG00000160789.18_LMNA | 0.03209  | -0.127764762 | 0.190317091 | 6.95E-01 | 8.69E-01 | 1.00E+00 |
| ENSG00000236720.1_RP11-63B1 | ENSG00000160789.18_LMNA | -0.14148 | -0.294059169 | 0.018127138 | 8.21E-02 | 2.77E-01 | 1.00E+00 |
| ENSG00000135226.15_UGT2B28  | ENSG00000160789.18_LMNA | -0.12406 | -0.277777185 | 0.03584586  | 1.28E-01 | 3.62E-01 | 1.00E+00 |
| ENSG00000249747.1_RP11-308K | ENSG00000160789.18_LMNA | -0.05404 | -0.211423052 | 0.106071973 | 5.08E-01 | 7.58E-01 | 1.00E+00 |
| ENSG00000123561.13_SERPINA7 | ENSG00000160789.18_LMNA | 0.11327  | -0.046777253 | 0.267641488 | 1.65E-01 | 4.21E-01 | 1.00E+00 |
| ENSG00000278975.1_RP11-185J | ENSG00000160789.18_LMNA | 0.05698  | -0.103157049 | 0.214236733 | 4.86E-01 | 7.42E-01 | 1.00E+00 |
| ENSG00000259231.2_CTD-2014N | ENSG00000160789.18_LMNA | -0.12942 | -0.282791679 | 0.030409815 | 1.12E-01 | 3.34E-01 | 1.00E+00 |
| ENSG00000268267.1_SIGLEC29F | ENSG00000160789.18_LMNA | -0.07048 | -0.227129665 | 0.08973011  | 3.88E-01 | 6.66E-01 | 1.00E+00 |
| ENSG00000197658.8_SLC22A24  | ENSG00000160789.18_LMNA | -0.13864 | -0.291407189 | 0.021026563 | 8.85E-02 | 2.90E-01 | 1.00E+00 |
| ENSG00000254853.1_RP11-659P | ENSG00000160789.18_LMNA | -0.00887 | -0.167835188 | 0.150541791 | 9.14E-01 | 9.67E-01 | 1.00E+00 |
| ENSG00000257528.1_KRT8P19   | ENSG00000160789.18_LMNA | -0.08948 | -0.245187877 | 0.070728303 | 2.73E-01 | 5.57E-01 | 1.00E+00 |
| ENSG00000271635.1_RP11-68E1 | ENSG00000160789.18_LMNA | 0.07517  | -0.085048587 | 0.231599032 | 3.57E-01 | 6.40E-01 | 1.00E+00 |
| ENSG00000239589.4_LINC00879 | ENSG00000160789.18_LMNA | -0.02596 | -0.184401046 | 0.133791175 | 7.51E-01 | 8.96E-01 | 1.00E+00 |
| ENSG00000225899.6_FRG2B     | ENSG00000160789.18_LMNA | 0.07309  | -0.087121833 | 0.229621388 | 3.71E-01 | 6.51E-01 | 1.00E+00 |
| ENSG00000230570.1_RP11-69L1 | ENSG00000160789.18_LMNA | 0.00805  | -0.151345384 | 0.167035913 | 9.22E-01 | 9.70E-01 | 1.00E+00 |
| ENSG00000249697.1_RP11-155L | ENSG00000160789.18_LMNA | 0.02962  | -0.130190197 | 0.18793885  | 7.17E-01 | 8.80E-01 | 1.00E+00 |
| ENSG00000171671.6_SHANK2-A  | ENSG00000160789.18_LMNA | -0.00392 | -0.163015348 | 0.155381296 | 9.62E-01 | 9.85E-01 | 1.00E+00 |
| ENSG00000233410.1_LINC01222 | ENSG00000160789.18_LMNA | -0.19691 | -0.345283612 | -0.0389263  | 1.50E-02 | 8.80E-02 | 1.00E+00 |
| ENSG00000278301.1_GRAMD4P   | ENSG00000160789.18_LMNA | -0.12639 | -0.279953455 | 0.033488915 | 1.21E-01 | 3.49E-01 | 1.00E+00 |
| ENSG00000220949.2_CTC-499B1 | ENSG00000160789.18_LMNA | -0.0982  | -0.253436385 | 0.061971826 | 2.29E-01 | 5.06E-01 | 1.00E+00 |
| ENSG00000267104.2_TBC1D3P1  | ENSG00000160789.18_LMNA | 0.06657  | -0.093625865 | 0.223400253 | 4.15E-01 | 6.88E-01 | 1.00E+00 |
| ENSG00000220948.4_TRIM51GP  | ENSG00000160789.18_LMNA | -0.12013 | -0.274088743 | 0.039832565 | 1.40E-01 | 3.82E-01 | 1.00E+00 |
| ENSG00000280086.1_RP11-544P | ENSG00000160789.18_LMNA | -0.03489 | -0.193017421 | 0.125006227 | 6.70E-01 | 8.55E-01 | 1.00E+00 |
| ENSG00000271968.2_ADAM6     | ENSG00000160789.18_LMNA | 0.032    | -0.127854792 | 0.190228879 | 6.96E-01 | 8.69E-01 | 1.00E+00 |
| ENSG00000196893.3_AC090286  | ENSG00000160789.18_LMNA | -0.1005  | -0.255613925 | 0.059652057 | 2.18E-01 | 4.93E-01 | 1.00E+00 |
| ENSG00000204478.8_PRAMEF20  | ENSG00000160789.18_LMNA | 0.00534  | -0.153994895 | 0.164397671 | 9.48E-01 | 9.79E-01 | 1.00E+00 |
| ENSG00000258923.2_MTND5P35  | ENSG00000160789.18_LMNA | 0.21541  | 0.058201244  | 0.362186381 | 7.70E-03 | 5.40E-02 | 1.00E+00 |
| ENSG00000271409.1_RP11-432J | ENSG00000160789.18_LMNA | -0.04684 | -0.204515238 | 0.113205277 | 5.67E-01 | 7.97E-01 | 1.00E+00 |
| ENSG00000233652.1_CICP1     | ENSG00000160789.18_LMNA | -0.04424 | -0.202019692 | 0.115774256 | 5.88E-01 | 8.09E-01 | 1.00E+00 |
| ENSG00000250080.1_CTB-88F18 | ENSG00000160789.18_LMNA | 0.01573  | -0.143831357 | 0.174493265 | 8.47E-01 | 9.40E-01 | 1.00E+00 |
| ENSG00000231175.1_RP11-463J | ENSG00000160789.18_LMNA | -0.12799 | -0.28145691  | 0.031858604 | 1.16E-01 | 3.41E-01 | 1.00E+00 |
| ENSG00000249175.1_CTC-484P3 | ENSG00000160789.18_LMNA | -0.00261 | -0.161743339 | 0.156655952 | 9.75E-01 | 9.90E-01 | 1.00E+00 |

|                              |                         |          |              |             |          |          |          |
|------------------------------|-------------------------|----------|--------------|-------------|----------|----------|----------|
| ENSG00000198704.8_GPX6       | ENSG00000160789.18_LMNA | -0.06073 | -0.217821428 | 0.099435454 | 4.57E-01 | 7.22E-01 | 1.00E+00 |
| ENSG00000235289.1_BRD7P6     | ENSG00000160789.18_LMNA | 0.00753  | -0.151848273 | 0.166535514 | 9.27E-01 | 9.72E-01 | 1.00E+00 |
| ENSG00000251347.2_IRF5P1     | ENSG00000160789.18_LMNA | -0.00206 | -0.161209004 | 0.157191081 | 9.80E-01 | 9.93E-01 | 1.00E+00 |
| ENSG00000234597.1_AC010096.  | ENSG00000160789.18_LMNA | -0.00843 | -0.167406929 | 0.150972416 | 9.18E-01 | 9.69E-01 | 1.00E+00 |
| ENSG00000228590.1_AC007381.  | ENSG00000160789.18_LMNA | 0.03777  | -0.122161725 | 0.195796867 | 6.44E-01 | 8.42E-01 | 1.00E+00 |
| ENSG00000168967.13_PMCHL1    | ENSG00000160789.18_LMNA | 0.05033  | -0.109752043 | 0.207863269 | 5.38E-01 | 7.78E-01 | 1.00E+00 |
| ENSG00000182824.7_AC008132.  | ENSG00000160789.18_LMNA | 0.13176  | -0.028033685 | 0.284978181 | 1.06E-01 | 3.23E-01 | 1.00E+00 |
| ENSG00000250189.2_RP11-362F  | ENSG00000160789.18_LMNA | 0.09324  | -0.066957571 | 0.248745483 | 2.53E-01 | 5.35E-01 | 1.00E+00 |
| ENSG00000235759.1_ARHGAP42   | ENSG00000160789.18_LMNA | 0.03705  | -0.122877072 | 0.195098362 | 6.50E-01 | 8.45E-01 | 1.00E+00 |
| ENSG00000269405.5_NXF2       | ENSG00000160789.18_LMNA | -0.0496  | -0.207162318 | 0.110475654 | 5.44E-01 | 7.82E-01 | 1.00E+00 |
| ENSG00000215029.7_TCP11X2    | ENSG00000160789.18_LMNA | 0.05449  | -0.105628251 | 0.211851702 | 5.05E-01 | 7.56E-01 | 1.00E+00 |
| ENSG00000230000.2_RP5-905H7  | ENSG00000160789.18_LMNA | -0.03796 | -0.19597679  | 0.121977411 | 6.42E-01 | 8.41E-01 | 1.00E+00 |
| ENSG00000274044.3_AC011718.  | ENSG00000160789.18_LMNA | -0.0108  | -0.16971303  | 0.148652148 | 8.95E-01 | 9.59E-01 | 1.00E+00 |
| ENSG00000236673.4_RP11-69I8. | ENSG00000160789.18_LMNA | 0.02221  | -0.137477276 | 0.180771051 | 7.86E-01 | 9.13E-01 | 1.00E+00 |
| ENSG00000174016.10_FAM46D    | ENSG00000160789.18_LMNA | 0.02303  | -0.136674638 | 0.181562211 | 7.78E-01 | 9.09E-01 | 1.00E+00 |
| ENSG00000274279.1_SPATA31E   | ENSG00000160789.18_LMNA | -0.00194 | -0.161093778 | 0.157306454 | 9.81E-01 | 9.93E-01 | 1.00E+00 |
| ENSG00000214929.3_SPATA31D   | ENSG00000160789.18_LMNA | -0.24196 | -0.386284505 | -0.08607892 | 2.67E-03 | 2.44E-02 | 1.00E+00 |
| ENSG00000197991.11_RP11-310I | ENSG00000160789.18_LMNA | -0.09304 | -0.248557975 | 0.067156537 | 2.54E-01 | 5.36E-01 | 1.00E+00 |
| ENSG00000274519.1_           | ENSG00000160789.18_LMNA | 0.10939  | -0.050692661 | 0.263994077 | 1.80E-01 | 4.43E-01 | 1.00E+00 |
| ENSG00000281760.1_AL138751.1 | ENSG00000160789.18_LMNA | 0.03159  | -0.128257645 | 0.189834101 | 6.99E-01 | 8.71E-01 | 1.00E+00 |
| ENSG00000274054.1_MIR4727    | ENSG00000160789.18_LMNA | 0.02238  | -0.137312675 | 0.180933331 | 7.84E-01 | 9.12E-01 | 1.00E+00 |
| ENSG00000207759.1_MIR181A1   | ENSG00000160789.18_LMNA | -0.01922 | -0.177873163 | 0.140413641 | 8.14E-01 | 9.27E-01 | 1.00E+00 |
| ENSG00000221094.1_           | ENSG00000160789.18_LMNA | -0.08499 | -0.240929318 | 0.07523014  | 2.98E-01 | 5.84E-01 | 1.00E+00 |
| ENSG00000252438.1_SNORD45    | ENSG00000160789.18_LMNA | -0.0396  | -0.197557139 | 0.120357548 | 6.28E-01 | 8.33E-01 | 1.00E+00 |
| ENSG00000280817.1_AC018902.  | ENSG00000160789.18_LMNA | 0.07576  | -0.08446421  | 0.232155991 | 3.54E-01 | 6.37E-01 | 1.00E+00 |
| ENSG00000211850.1_TRAJ39     | ENSG00000160789.18_LMNA | 0.01447  | -0.145060425 | 0.17327596  | 8.60E-01 | 9.45E-01 | 1.00E+00 |
| ENSG00000200873.1_RNA5SP39   | ENSG00000160789.18_LMNA | -0.19727 | -0.345617557 | -0.03930492 | 1.48E-02 | 8.73E-02 | 1.00E+00 |
| ENSG00000212051.1_MIR320C2   | ENSG00000160789.18_LMNA | -0.09139 | -0.246995175 | 0.068813862 | 2.63E-01 | 5.46E-01 | 1.00E+00 |
| ENSG00000201689.1_SNORD114   | ENSG00000160789.18_LMNA | -0.05923 | -0.216387341 | 0.100925375 | 4.69E-01 | 7.29E-01 | 1.00E+00 |
| ENSG00000202169.1_Y_RNA      | ENSG00000160789.18_LMNA | -0.08736 | -0.243179302 | 0.072853226 | 2.85E-01 | 5.70E-01 | 1.00E+00 |
| ENSG00000207638.1_MIR99A     | ENSG00000160789.18_LMNA | -0.04932 | -0.206894275 | 0.110752274 | 5.46E-01 | 7.84E-01 | 1.00E+00 |
| ENSG00000201096.1_RNA5SP38   | ENSG00000160789.18_LMNA | -0.03436 | -0.192509021 | 0.125525961 | 6.74E-01 | 8.57E-01 | 1.00E+00 |
| ENSG00000265421.1_MIR4459    | ENSG00000160789.18_LMNA | 0.01087  | -0.148585588 | 0.169779132 | 8.94E-01 | 9.59E-01 | 1.00E+00 |

|                             |                         |          |              |             |          |          |          |
|-----------------------------|-------------------------|----------|--------------|-------------|----------|----------|----------|
| ENSG00000252146.1_          | ENSG00000160789.18_LMNA | 0.01242  | -0.147067391 | 0.171286109 | 8.79E-01 | 9.53E-01 | 1.00E+00 |
| ENSG00000200480.1_SNORD114  | ENSG00000160789.18_LMNA | -0.0306  | -0.188880731 | 0.12923008  | 7.08E-01 | 8.76E-01 | 1.00E+00 |
| ENSG00000276510.1_          | ENSG00000160789.18_LMNA | -0.13529 | -0.288277822 | 0.024441169 | 9.66E-02 | 3.05E-01 | 1.00E+00 |
| ENSG00000199151.2_MIR337    | ENSG00000160789.18_LMNA | 0.00627  | -0.153085367 | 0.165303845 | 9.39E-01 | 9.76E-01 | 1.00E+00 |
| ENSG00000253070.1_RNU6-794F | ENSG00000160789.18_LMNA | -0.02616 | -0.184588893 | 0.133600184 | 7.49E-01 | 8.95E-01 | 1.00E+00 |
| ENSG00000264452.1_snoZ6     | ENSG00000160789.18_LMNA | 0.04632  | -0.113715571 | 0.204019859 | 5.71E-01 | 7.99E-01 | 1.00E+00 |
| ENSG00000275373.1_MIR6124   | ENSG00000160789.18_LMNA | 0.10577  | -0.054343412 | 0.26058508  | 1.95E-01 | 4.63E-01 | 1.00E+00 |
| ENSG00000212398.1_RNU6-1248 | ENSG00000160789.18_LMNA | -0.10752 | -0.262235463 | 0.052577041 | 1.87E-01 | 4.54E-01 | 1.00E+00 |
| ENSG00000277160.1_          | ENSG00000160789.18_LMNA | -0.12481 | -0.278479985 | 0.035085094 | 1.26E-01 | 3.58E-01 | 1.00E+00 |
| ENSG00000200890.1_RNA5SP99  | ENSG00000160789.18_LMNA | -0.06039 | -0.21750311  | 0.099766289 | 4.60E-01 | 7.23E-01 | 1.00E+00 |
| ENSG00000216014.1_          | ENSG00000160789.18_LMNA | 0.06215  | -0.098021225 | 0.219181394 | 4.47E-01 | 7.13E-01 | 1.00E+00 |
| ENSG00000252431.1_RNU6-1247 | ENSG00000160789.18_LMNA | 0.06865  | -0.091546867 | 0.225391636 | 4.01E-01 | 6.77E-01 | 1.00E+00 |
| ENSG00000211884.1_TRAJ5     | ENSG00000160789.18_LMNA | 0.03677  | -0.123154614 | 0.194827267 | 6.53E-01 | 8.46E-01 | 1.00E+00 |
| ENSG00000199934.1_SNORD81   | ENSG00000160789.18_LMNA | 0.1688   | 0.009868799  | 0.319420949 | 3.76E-02 | 1.66E-01 | 1.00E+00 |
| ENSG00000266692.1_snoZ6     | ENSG00000160789.18_LMNA | -0.04322 | -0.201034872 | 0.116786886 | 5.97E-01 | 8.14E-01 | 1.00E+00 |
| ENSG00000280863.1_          | ENSG00000160789.18_LMNA | -0.20553 | -0.353171819 | -0.04789328 | 1.11E-02 | 7.05E-02 | 1.00E+00 |
| ENSG00000271483.1_RP11-384A | ENSG00000160789.18_LMNA | 0.03534  | -0.124558828 | 0.193454926 | 6.66E-01 | 8.53E-01 | 1.00E+00 |
| ENSG00000200889.1_RNU4-13P  | ENSG00000160789.18_LMNA | -0.03112 | -0.189387074 | 0.128713688 | 7.03E-01 | 8.73E-01 | 1.00E+00 |
| ENSG00000265086.1_          | ENSG00000160789.18_LMNA | 0.07225  | -0.08795786  | 0.228823173 | 3.76E-01 | 6.56E-01 | 1.00E+00 |
| ENSG00000264755.1_MIR3131   | ENSG00000160789.18_LMNA | -0.05288 | -0.210313849 | 0.10721959  | 5.18E-01 | 7.64E-01 | 1.00E+00 |
| ENSG00000263643.1_MIR4515   | ENSG00000160789.18_LMNA | -0.02021 | -0.178831037 | 0.139443668 | 8.05E-01 | 9.22E-01 | 1.00E+00 |
| ENSG00000228659.1_LINC01201 | ENSG00000160789.18_LMNA | -0.19084 | -0.339722699 | -0.03263441 | 1.85E-02 | 1.02E-01 | 1.00E+00 |
| ENSG00000263997.1_          | ENSG00000160789.18_LMNA | 0.09884  | -0.061327718 | 0.254041322 | 2.26E-01 | 5.02E-01 | 1.00E+00 |
| ENSG00000273932.1_MIR6877   | ENSG00000160789.18_LMNA | -0.01031 | -0.16923674  | 0.149131652 | 9.00E-01 | 9.61E-01 | 1.00E+00 |
| ENSG00000201548.1_Y_RNA     | ENSG00000160789.18_LMNA | 0.0661   | -0.094086733 | 0.222958448 | 4.18E-01 | 6.90E-01 | 1.00E+00 |
| ENSG00000274472.1_Y_RNA     | ENSG00000160789.18_LMNA | 0.02957  | -0.130247072 | 0.187883037 | 7.18E-01 | 8.80E-01 | 1.00E+00 |
| ENSG00000264583.1_MIR4487   | ENSG00000160789.18_LMNA | 0.10518  | -0.054936858 | 0.26003019  | 1.97E-01 | 4.67E-01 | 1.00E+00 |
| ENSG00000206746.1_RNU6-142F | ENSG00000160789.18_LMNA | -0.0508  | -0.208313447 | 0.109287133 | 5.34E-01 | 7.76E-01 | 1.00E+00 |
| ENSG00000207943.1_MIR634    | ENSG00000160789.18_LMNA | 0.14226  | -0.017333937 | 0.294783841 | 8.04E-02 | 2.73E-01 | 1.00E+00 |
| ENSG00000199202.1_RNA5SP28  | ENSG00000160789.18_LMNA | 0.01395  | -0.145577705 | 0.17276334  | 8.65E-01 | 9.47E-01 | 1.00E+00 |
| ENSG00000201680.1_Y_RNA     | ENSG00000160789.18_LMNA | 0.11835  | -0.041633616 | 0.272419404 | 1.46E-01 | 3.92E-01 | 1.00E+00 |
| ENSG00000264076.1_          | ENSG00000160789.18_LMNA | -0.12845 | -0.28188631  | 0.031392667 | 1.15E-01 | 3.38E-01 | 1.00E+00 |
| ENSG00000275411.1_MIR6882   | ENSG00000160789.18_LMNA | -0.04933 | -0.206910026 | 0.11073602  | 5.46E-01 | 7.84E-01 | 1.00E+00 |



|                             |                         |          |              |             |          |          |          |
|-----------------------------|-------------------------|----------|--------------|-------------|----------|----------|----------|
| ENSG00000274061.1_          | ENSG00000160789.18_LMNA | -0.10542 | -0.260249057 | 0.054702811 | 1.96E-01 | 4.65E-01 | 1.00E+00 |
| ENSG00000200291.1_Y_RNA     | ENSG00000160789.18_LMNA | -0.00701 | -0.166024168 | 0.152361992 | 9.32E-01 | 9.73E-01 | 1.00E+00 |
| ENSG00000212593.1_SNORA75   | ENSG00000160789.18_LMNA | -0.01224 | -0.171107614 | 0.147247294 | 8.81E-01 | 9.54E-01 | 1.00E+00 |
| ENSG00000221479.2_MIR1251   | ENSG00000160789.18_LMNA | 0.02352  | -0.136190498 | 0.182039229 | 7.74E-01 | 9.07E-01 | 1.00E+00 |
| ENSG00000200976.1_Y_RNA     | ENSG00000160789.18_LMNA | 0.08533  | -0.074887701 | 0.241253679 | 2.96E-01 | 5.82E-01 | 1.00E+00 |
| ENSG00000276206.1_CTD-3093M | ENSG00000160789.18_LMNA | -0.10456 | -0.25944028  | 0.055567512 | 2.00E-01 | 4.70E-01 | 1.00E+00 |
| ENSG00000207833.1_          | ENSG00000160789.18_LMNA | -0.00959 | -0.168534356 | 0.149838501 | 9.07E-01 | 9.64E-01 | 1.00E+00 |
| ENSG00000200869.1_RNU6-457F | ENSG00000160789.18_LMNA | -0.10904 | -0.263665807 | 0.051044577 | 1.81E-01 | 4.45E-01 | 1.00E+00 |
| ENSG00000206738.1_Y_RNA     | ENSG00000160789.18_LMNA | 0.10916  | -0.050929928 | 0.26377276  | 1.81E-01 | 4.44E-01 | 1.00E+00 |
| ENSG00000202089.1_RNU6-1306 | ENSG00000160789.18_LMNA | -0.10959 | -0.264178956 | 0.050494431 | 1.79E-01 | 4.41E-01 | 1.00E+00 |
| ENSG00000278756.1_MIR6722   | ENSG00000160789.18_LMNA | -0.03912 | -0.197093111 | 0.120833354 | 6.32E-01 | 8.35E-01 | 1.00E+00 |
| ENSG00000263693.1_MIR3161   | ENSG00000160789.18_LMNA | 0.03136  | -0.128480375 | 0.18961579  | 7.01E-01 | 8.72E-01 | 1.00E+00 |
| ENSG00000212628.1_RNA5SP24  | ENSG00000160789.18_LMNA | -0.11065 | -0.265175128 | 0.04942589  | 1.75E-01 | 4.35E-01 | 1.00E+00 |
| ENSG00000252220.1_RNU6-977F | ENSG00000160789.18_LMNA | -0.1297  | -0.283053906 | 0.030125031 | 1.11E-01 | 3.33E-01 | 1.00E+00 |
| ENSG00000200397.1_Y_RNA     | ENSG00000160789.18_LMNA | -0.0015  | -0.160658998 | 0.157741711 | 9.85E-01 | 9.94E-01 | 1.00E+00 |
| ENSG00000212387.1_RNU6-1055 | ENSG00000160789.18_LMNA | -0.12701 | -0.280536729 | 0.032856625 | 1.19E-01 | 3.46E-01 | 1.00E+00 |
| ENSG00000212525.1_RNA5SP21  | ENSG00000160789.18_LMNA | -0.06092 | -0.218006288 | 0.099243294 | 4.56E-01 | 7.20E-01 | 1.00E+00 |
| ENSG00000221514.1_SNORD111  | ENSG00000160789.18_LMNA | -0.03429 | -0.192438777 | 0.125597757 | 6.75E-01 | 8.58E-01 | 1.00E+00 |
| ENSG00000266417.1_MIR4424   | ENSG00000160789.18_LMNA | 0.03156  | -0.128283293 | 0.189808963 | 6.99E-01 | 8.71E-01 | 1.00E+00 |
| ENSG00000264045.1_          | ENSG00000160789.18_LMNA | 0.04381  | -0.11620316  | 0.201602646 | 5.92E-01 | 8.11E-01 | 1.00E+00 |
| ENSG00000199962.1_Y_RNA     | ENSG00000160789.18_LMNA | -0.05453 | -0.21189423  | 0.105584221 | 5.05E-01 | 7.55E-01 | 1.00E+00 |
| ENSG00000266139.1_MIR4435-2 | ENSG00000160789.18_LMNA | 0.06528  | -0.094910577 | 0.222168357 | 4.24E-01 | 6.95E-01 | 1.00E+00 |
| ENSG00000281331.1_AC016753. | ENSG00000160789.18_LMNA | 0.04549  | -0.114536158 | 0.203222915 | 5.78E-01 | 8.03E-01 | 1.00E+00 |
| ENSG00000252291.1_SNORA31   | ENSG00000160789.18_LMNA | 0.05288  | -0.107221796 | 0.210311716 | 5.18E-01 | 7.64E-01 | 1.00E+00 |
| ENSG00000207440.1_RNU6-541F | ENSG00000160789.18_LMNA | 0.11643  | -0.043575646 | 0.270617273 | 1.53E-01 | 4.03E-01 | 1.00E+00 |
| ENSG00000276331.1_          | ENSG00000160789.18_LMNA | -0.03125 | -0.189510624 | 0.128587659 | 7.02E-01 | 8.73E-01 | 1.00E+00 |
| ENSG00000252756.1_RNU6-577F | ENSG00000160789.18_LMNA | -0.10151 | -0.25656787  | 0.058634731 | 2.13E-01 | 4.87E-01 | 1.00E+00 |
| ENSG00000252956.1_RNA5SP40  | ENSG00000160789.18_LMNA | -0.06029 | -0.217408687 | 0.099864411 | 4.61E-01 | 7.24E-01 | 1.00E+00 |
| ENSG00000253048.1_RNU4-60P  | ENSG00000160789.18_LMNA | 0.02713  | -0.132645936 | 0.185527088 | 7.40E-01 | 8.91E-01 | 1.00E+00 |
| ENSG00000207751.1_MIR130B   | ENSG00000160789.18_LMNA | 0.03703  | -0.12289397  | 0.195081857 | 6.51E-01 | 8.45E-01 | 1.00E+00 |
| ENSG00000238745.1_snoU13    | ENSG00000160789.18_LMNA | -0.1399  | -0.292588622 | 0.019735544 | 8.56E-02 | 2.84E-01 | 1.00E+00 |
| ENSG00000251865.1_RNU6-518F | ENSG00000160789.18_LMNA | 0.1017   | -0.058450267 | 0.256740775 | 2.13E-01 | 4.86E-01 | 1.00E+00 |
| ENSG00000252017.1_RNU6-1194 | ENSG00000160789.18_LMNA | 0.18146  | 0.022922869  | 0.331097071 | 2.53E-02 | 1.27E-01 | 1.00E+00 |

|                             |                         |          |              |             |          |          |          |
|-----------------------------|-------------------------|----------|--------------|-------------|----------|----------|----------|
| ENSG00000200728.1_RNU6-271F | ENSG00000160789.18_LMNA | 0.07049  | -0.089718778 | 0.227140499 | 3.88E-01 | 6.66E-01 | 1.00E+00 |
| ENSG00000211499.1_          | ENSG00000160789.18_LMNA | 0.05767  | -0.102466697 | 0.214902337 | 4.80E-01 | 7.38E-01 | 1.00E+00 |
| ENSG00000212413.1_RNU11-3P  | ENSG00000160789.18_LMNA | -0.08084 | -0.236990974 | 0.079382029 | 3.22E-01 | 6.09E-01 | 1.00E+00 |
| ENSG00000274924.1_          | ENSG00000160789.18_LMNA | -0.07155 | -0.22814931  | 0.088663294 | 3.81E-01 | 6.60E-01 | 1.00E+00 |
| ENSG00000271876.1_          | ENSG00000160789.18_LMNA | 0.01137  | -0.148094856 | 0.170266401 | 8.89E-01 | 9.57E-01 | 1.00E+00 |
| ENSG00000277133.1_RP11-453N | ENSG00000160789.18_LMNA | -0.1004  | -0.255513013 | 0.059759635 | 2.18E-01 | 4.93E-01 | 1.00E+00 |
| ENSG00000238976.1_          | ENSG00000160789.18_LMNA | 0.04026  | -0.119711322 | 0.19818714  | 6.22E-01 | 8.29E-01 | 1.00E+00 |
| ENSG00000265135.1_MIR5687   | ENSG00000160789.18_LMNA | -0.02294 | -0.181476929 | 0.136761178 | 7.79E-01 | 9.09E-01 | 1.00E+00 |
| ENSG00000266862.1_          | ENSG00000160789.18_LMNA | -0.05664 | -0.213912058 | 0.103493685 | 4.88E-01 | 7.45E-01 | 1.00E+00 |
| ENSG00000252628.2_RNU6-453F | ENSG00000160789.18_LMNA | -0.16833 | -0.318984518 | -0.0093829  | 3.82E-02 | 1.68E-01 | 1.00E+00 |
| ENSG00000202146.1_Y_RNA     | ENSG00000160789.18_LMNA | -0.01145 | -0.170338639 | 0.148022091 | 8.89E-01 | 9.57E-01 | 1.00E+00 |
| ENSG00000207266.1_RNU6-1241 | ENSG00000160789.18_LMNA | -0.03192 | -0.19015542  | 0.127929762 | 6.96E-01 | 8.70E-01 | 1.00E+00 |
| ENSG00000241943.2_RN7SL188f | ENSG00000160789.18_LMNA | -0.05418 | -0.21155494  | 0.105935461 | 5.07E-01 | 7.57E-01 | 1.00E+00 |
| ENSG00000251897.1_RNU6-916F | ENSG00000160789.18_LMNA | -0.03913 | -0.197102381 | 0.120823849 | 6.32E-01 | 8.35E-01 | 1.00E+00 |
| ENSG00000275386.1_CTC-788C1 | ENSG00000160789.18_LMNA | -0.16063 | -0.311855641 | -0.00146663 | 4.81E-02 | 1.96E-01 | 1.00E+00 |
| ENSG00000200839.1_RNA5SP48  | ENSG00000160789.18_LMNA | -0.05721 | -0.214454637 | 0.102931077 | 4.84E-01 | 7.41E-01 | 1.00E+00 |
| ENSG00000252864.1_RNA5SP27  | ENSG00000160789.18_LMNA | 0.12604  | -0.033835679 | 0.279633475 | 1.22E-01 | 3.51E-01 | 1.00E+00 |
| ENSG00000207715.1_          | ENSG00000160789.18_LMNA | 0.03592  | -0.12398819  | 0.194012761 | 6.60E-01 | 8.50E-01 | 1.00E+00 |
| ENSG00000265467.1_          | ENSG00000160789.18_LMNA | -0.00411 | -0.163202353 | 0.155193813 | 9.60E-01 | 9.84E-01 | 1.00E+00 |
| ENSG00000202472.1_RNA5SP24  | ENSG00000160789.18_LMNA | -0.07731 | -0.233633406 | 0.082913005 | 3.44E-01 | 6.28E-01 | 1.00E+00 |
| ENSG00000252745.1_RNA5SP14  | ENSG00000160789.18_LMNA | -0.0156  | -0.174365226 | 0.143960679 | 8.49E-01 | 9.41E-01 | 1.00E+00 |
| ENSG00000199635.1_Y_RNA     | ENSG00000160789.18_LMNA | -0.08137 | -0.237491549 | 0.07885492  | 3.19E-01 | 6.06E-01 | 1.00E+00 |
| ENSG00000212587.1_SNORA40   | ENSG00000160789.18_LMNA | -0.03268 | -0.190884892 | 0.12718513  | 6.89E-01 | 8.66E-01 | 1.00E+00 |
| ENSG00000199633.1_SNORA63   | ENSG00000160789.18_LMNA | 0.10268  | -0.057460358 | 0.257668312 | 2.08E-01 | 4.81E-01 | 1.00E+00 |
| ENSG00000202242.1_RNU6-1276 | ENSG00000160789.18_LMNA | 0.03808  | -0.121860958 | 0.196090458 | 6.41E-01 | 8.40E-01 | 1.00E+00 |
| ENSG00000263892.2_MIR4667   | ENSG00000160789.18_LMNA | 0.08976  | -0.070448387 | 0.245452265 | 2.71E-01 | 5.56E-01 | 1.00E+00 |
| ENSG00000207343.1_RNU6-225F | ENSG00000160789.18_LMNA | 0.14508  | -0.01445765  | 0.297408617 | 7.45E-02 | 2.60E-01 | 1.00E+00 |
| ENSG00000200637.1_RNU5F-3P  | ENSG00000160789.18_LMNA | 0.02401  | -0.135705384 | 0.182517055 | 7.69E-01 | 9.04E-01 | 1.00E+00 |
| ENSG00000202193.1_RNA5SP42  | ENSG00000160789.18_LMNA | 0.0888   | -0.071408122 | 0.244545576 | 2.77E-01 | 5.61E-01 | 1.00E+00 |
| ENSG00000222085.1_          | ENSG00000160789.18_LMNA | 0.06392  | -0.096263459 | 0.220869999 | 4.34E-01 | 7.03E-01 | 1.00E+00 |
| ENSG00000199705.1_Y_RNA     | ENSG00000160789.18_LMNA | -0.0101  | -0.169024143 | 0.149345634 | 9.02E-01 | 9.62E-01 | 1.00E+00 |
| ENSG00000276883.1_          | ENSG00000160789.18_LMNA | 0.09526  | -0.064920461 | 0.250663916 | 2.43E-01 | 5.22E-01 | 1.00E+00 |
| ENSG00000207802.1_MIR646    | ENSG00000160789.18_LMNA | 0.04628  | -0.11376044  | 0.203976294 | 5.71E-01 | 8.00E-01 | 1.00E+00 |

|                              |                         |          |              |             |          |          |          |
|------------------------------|-------------------------|----------|--------------|-------------|----------|----------|----------|
| ENSG00000264810.1_MIR4441    | ENSG00000160789.18_LMNA | -0.02107 | -0.179671004 | 0.138592589 | 7.97E-01 | 9.18E-01 | 1.00E+00 |
| ENSG00000199051.2_MIR361     | ENSG00000160789.18_LMNA | -0.02856 | -0.186908417 | 0.131239897 | 7.27E-01 | 8.84E-01 | 1.00E+00 |
| ENSG00000277252.1_RP11-496I2 | ENSG00000160789.18_LMNA | -0.17309 | -0.323375153 | -0.01427787 | 3.30E-02 | 1.52E-01 | 1.00E+00 |
| ENSG00000201013.1_Y_RNA      | ENSG00000160789.18_LMNA | -0.18358 | -0.333044115 | -0.02510996 | 2.36E-02 | 1.21E-01 | 1.00E+00 |
| ENSG00000251798.1_RNU6-863F  | ENSG00000160789.18_LMNA | -0.04563 | -0.203350496 | 0.114404821 | 5.77E-01 | 8.03E-01 | 1.00E+00 |
| ENSG00000266854.1_           | ENSG00000160789.18_LMNA | 0.15342  | -0.00592347  | 0.305168901 | 5.91E-02 | 2.23E-01 | 1.00E+00 |
| ENSG00000199609.1_RNA5SP12   | ENSG00000160789.18_LMNA | -0.17497 | -0.325117019 | -0.01622393 | 3.11E-02 | 1.47E-01 | 1.00E+00 |
| ENSG00000207393.1_RNU6-136F  | ENSG00000160789.18_LMNA | 0.03469  | -0.125205846 | 0.192822176 | 6.71E-01 | 8.56E-01 | 1.00E+00 |
| ENSG00000231930.1_AF228730.5 | ENSG00000160789.18_LMNA | 0.09442  | -0.065772533 | 0.249861785 | 2.47E-01 | 5.27E-01 | 1.00E+00 |
| ENSG00000265569.1_           | ENSG00000160789.18_LMNA | -0.01323 | -0.172064316 | 0.146282803 | 8.72E-01 | 9.50E-01 | 1.00E+00 |
| ENSG00000207000.1_RNU6-820F  | ENSG00000160789.18_LMNA | 0.01603  | -0.14353213  | 0.174789481 | 8.45E-01 | 9.39E-01 | 1.00E+00 |
| ENSG00000264184.1_           | ENSG00000160789.18_LMNA | -0.1199  | -0.273875493 | 0.040062755 | 1.41E-01 | 3.84E-01 | 1.00E+00 |
| ENSG00000231331.1_AC103563.1 | ENSG00000160789.18_LMNA | -0.07622 | -0.232594438 | 0.084004025 | 3.51E-01 | 6.34E-01 | 1.00E+00 |
| ENSG00000260308.1_RP11-104C  | ENSG00000160789.18_LMNA | -0.00084 | -0.160016656 | 0.15838453  | 9.92E-01 | 9.97E-01 | 1.00E+00 |
| ENSG00000212550.1_RNU1-78P   | ENSG00000160789.18_LMNA | -0.03259 | -0.190798189 | 0.127273655 | 6.90E-01 | 8.67E-01 | 1.00E+00 |
| ENSG00000212312.1_RNA5SP10   | ENSG00000160789.18_LMNA | 0.05562  | -0.104505939 | 0.212935348 | 4.96E-01 | 7.50E-01 | 1.00E+00 |
| ENSG00000281119.1_           | ENSG00000160789.18_LMNA | -0.06356 | -0.220529861 | 0.096617687 | 4.37E-01 | 7.05E-01 | 1.00E+00 |
| ENSG00000262090.1_RP11-23E1  | ENSG00000160789.18_LMNA | 0.08234  | -0.077878488 | 0.238418385 | 3.13E-01 | 6.00E-01 | 1.00E+00 |
| ENSG00000266162.1_YWHAEP2    | ENSG00000160789.18_LMNA | -0.09892 | -0.254119147 | 0.061244835 | 2.25E-01 | 5.01E-01 | 1.00E+00 |
| ENSG00000200516.1_RNA5SP37   | ENSG00000160789.18_LMNA | 0.10986  | -0.050223157 | 0.264431921 | 1.78E-01 | 4.40E-01 | 1.00E+00 |
| ENSG00000200227.1_RNA5SP19   | ENSG00000160789.18_LMNA | -0.02133 | -0.17991565  | 0.138344617 | 7.94E-01 | 9.17E-01 | 1.00E+00 |
| ENSG00000207326.1_Y_RNA      | ENSG00000160789.18_LMNA | 0.10443  | -0.055697621 | 0.259318548 | 2.00E-01 | 4.71E-01 | 1.00E+00 |
| ENSG00000252642.1_RNA5SP13   | ENSG00000160789.18_LMNA | -0.0754  | -0.231821935 | 0.084814738 | 3.56E-01 | 6.39E-01 | 1.00E+00 |
| ENSG00000202059.1_SNORA1     | ENSG00000160789.18_LMNA | 0.02599  | -0.133759272 | 0.184432425 | 7.51E-01 | 8.96E-01 | 1.00E+00 |
| ENSG00000252072.1_RNA5SP32   | ENSG00000160789.18_LMNA | -0.01719 | -0.175910007 | 0.142399686 | 8.34E-01 | 9.35E-01 | 1.00E+00 |
| ENSG00000251549.2_RP11-480D  | ENSG00000160789.18_LMNA | -0.05183 | -0.209304386 | 0.108263278 | 5.26E-01 | 7.71E-01 | 1.00E+00 |
| ENSG00000232979.1_AC092580.1 | ENSG00000160789.18_LMNA | -0.123   | -0.276778135 | 0.036926684 | 1.31E-01 | 3.67E-01 | 1.00E+00 |
| ENSG00000207244.1_SNORA70    | ENSG00000160789.18_LMNA | -0.01946 | -0.178109434 | 0.140174443 | 8.12E-01 | 9.26E-01 | 1.00E+00 |
| ENSG00000264085.1_           | ENSG00000160789.18_LMNA | 0.05102  | -0.109062411 | 0.208531001 | 5.32E-01 | 7.75E-01 | 1.00E+00 |
| ENSG00000201574.1_RNU1-93P   | ENSG00000160789.18_LMNA | -0.1066  | -0.261369439 | 0.053504174 | 1.91E-01 | 4.59E-01 | 1.00E+00 |
| ENSG00000275725.1_RP11-244C  | ENSG00000160789.18_LMNA | 0.05771  | -0.102431807 | 0.214935968 | 4.80E-01 | 7.38E-01 | 1.00E+00 |
| ENSG00000226166.2_RP11-474O  | ENSG00000160789.18_LMNA | -0.07397 | -0.230456549 | 0.086246634 | 3.65E-01 | 6.47E-01 | 1.00E+00 |
| ENSG00000276793.1_           | ENSG00000160789.18_LMNA | -0.0185  | -0.177181428 | 0.141113734 | 8.21E-01 | 9.30E-01 | 1.00E+00 |

|                              |                         |          |              |             |          |          |          |
|------------------------------|-------------------------|----------|--------------|-------------|----------|----------|----------|
| ENSG00000206863.1_RNU5A-6P   | ENSG00000160789.18_LMNA | -0.04721 | -0.204869823 | 0.112839913 | 5.64E-01 | 7.95E-01 | 1.00E+00 |
| ENSG00000231675.1_AC005042.1 | ENSG00000160789.18_LMNA | -0.07613 | -0.232512324 | 0.08409022  | 3.51E-01 | 6.35E-01 | 1.00E+00 |
| ENSG00000254190.1_RP11-267M  | ENSG00000160789.18_LMNA | -0.13305 | -0.286189787 | 0.026715477 | 1.02E-01 | 3.16E-01 | 1.00E+00 |
| ENSG00000265810.1_MIR3907    | ENSG00000160789.18_LMNA | 0.06285  | -0.09732317  | 0.219852211 | 4.42E-01 | 7.09E-01 | 1.00E+00 |
| ENSG00000219087.2_MTND4LP1   | ENSG00000160789.18_LMNA | -0.18443 | -0.333830353 | -0.02599397 | 2.29E-02 | 1.19E-01 | 1.00E+00 |
| ENSG00000241347.3_RN7SL466F  | ENSG00000160789.18_LMNA | 0.03937  | -0.120581801 | 0.197338455 | 6.30E-01 | 8.34E-01 | 1.00E+00 |
| ENSG00000222177.1_RNU4-30P   | ENSG00000160789.18_LMNA | -0.02668 | -0.185093213 | 0.133087308 | 7.44E-01 | 8.93E-01 | 1.00E+00 |
| ENSG00000221458.1_           | ENSG00000160789.18_LMNA | -0.16339 | -0.314415117 | -0.00430434 | 4.43E-02 | 1.86E-01 | 1.00E+00 |
| ENSG00000237601.1_AP000358.1 | ENSG00000160789.18_LMNA | -0.04    | -0.197941098 | 0.119963733 | 6.25E-01 | 8.31E-01 | 1.00E+00 |
| ENSG00000274459.1_Metazoa_Sl | ENSG00000160789.18_LMNA | -0.07192 | -0.228507298 | 0.088288573 | 3.79E-01 | 6.58E-01 | 1.00E+00 |
| ENSG00000272536.2_RN7SL840F  | ENSG00000160789.18_LMNA | -0.07777 | -0.234077361 | 0.082446576 | 3.41E-01 | 6.26E-01 | 1.00E+00 |
| ENSG00000231510.1_RP11-542C  | ENSG00000160789.18_LMNA | -0.04066 | -0.198579067 | 0.119309165 | 6.19E-01 | 8.27E-01 | 1.00E+00 |
| ENSG00000241487.3_RN7SL586F  | ENSG00000160789.18_LMNA | 0.00497  | -0.154350952 | 0.16404278  | 9.52E-01 | 9.81E-01 | 1.00E+00 |
| ENSG00000253118.1_RP11-700E  | ENSG00000160789.18_LMNA | -0.02958 | -0.187896226 | 0.130233632 | 7.18E-01 | 8.80E-01 | 1.00E+00 |
| ENSG00000277790.1_RP11-355N  | ENSG00000160789.18_LMNA | 0.00901  | -0.150410378 | 0.167965856 | 9.12E-01 | 9.67E-01 | 1.00E+00 |
| ENSG00000234435.2_LINC01432  | ENSG00000160789.18_LMNA | -0.04131 | -0.199201148 | 0.118670633 | 6.13E-01 | 8.24E-01 | 1.00E+00 |
| ENSG00000239249.3_RN7SL757F  | ENSG00000160789.18_LMNA | -0.06618 | -0.223030594 | 0.094011483 | 4.18E-01 | 6.90E-01 | 1.00E+00 |
| ENSG00000244677.3_RN7SL706F  | ENSG00000160789.18_LMNA | 0.06808  | -0.092122971 | 0.224840076 | 4.05E-01 | 6.80E-01 | 1.00E+00 |
| ENSG00000240347.3_RN7SL35P   | ENSG00000160789.18_LMNA | 0.09744  | -0.062736402 | 0.252717986 | 2.32E-01 | 5.10E-01 | 1.00E+00 |
| ENSG00000252798.1_SCARNA6    | ENSG00000160789.18_LMNA | -0.00659 | -0.165617856 | 0.152770067 | 9.36E-01 | 9.75E-01 | 1.00E+00 |
| ENSG00000250289.1_VWA8P1     | ENSG00000160789.18_LMNA | -0.10258 | -0.257575694 | 0.057559233 | 2.09E-01 | 4.81E-01 | 1.00E+00 |
| ENSG00000253234.1_IGLV2-5    | ENSG00000160789.18_LMNA | -0.07964 | -0.235849328 | 0.080583529 | 3.29E-01 | 6.15E-01 | 1.00E+00 |
| ENSG00000279962.1_RP11-720L  | ENSG00000160789.18_LMNA | -0.09812 | -0.2533583   | 0.062054948 | 2.29E-01 | 5.06E-01 | 1.00E+00 |
| ENSG00000267209.4_RP11-693L  | ENSG00000160789.18_LMNA | 0.20483  | 0.047169809  | 0.352536994 | 1.14E-02 | 7.18E-02 | 1.00E+00 |
| ENSG00000258247.1_           | ENSG00000160789.18_LMNA | -0.13198 | -0.285185234 | 0.027808492 | 1.05E-01 | 3.22E-01 | 1.00E+00 |
| ENSG00000235058.1_ZMYND10-1  | ENSG00000160789.18_LMNA | 0.07337  | -0.086846252 | 0.229884413 | 3.69E-01 | 6.50E-01 | 1.00E+00 |
| ENSG00000216516.1_RP11-317M  | ENSG00000160789.18_LMNA | -0.01335 | -0.172181834 | 0.146164286 | 8.70E-01 | 9.50E-01 | 1.00E+00 |
| ENSG00000249761.1_CTD-2278B  | ENSG00000160789.18_LMNA | 0.245    | 0.089278622  | 0.389024431 | 2.35E-03 | 2.21E-02 | 1.00E+00 |
| ENSG00000200718.1_RN7SKP10   | ENSG00000160789.18_LMNA | 0.04896  | -0.111109658 | 0.206547901 | 5.49E-01 | 7.86E-01 | 1.00E+00 |
| ENSG00000274845.1_uc_338     | ENSG00000160789.18_LMNA | -0.08834 | -0.244105881 | 0.07187333  | 2.79E-01 | 5.65E-01 | 1.00E+00 |
| ENSG00000255563.1_RP11-124G  | ENSG00000160789.18_LMNA | -0.01712 | -0.175846015 | 0.142464382 | 8.34E-01 | 9.36E-01 | 1.00E+00 |
| ENSG00000244534.3_RN7SL211F  | ENSG00000160789.18_LMNA | -0.01212 | -0.17099485  | 0.147360936 | 8.82E-01 | 9.54E-01 | 1.00E+00 |
| ENSG00000221332.2_U3         | ENSG00000160789.18_LMNA | -0.10056 | -0.255669374 | 0.059592942 | 2.18E-01 | 4.93E-01 | 1.00E+00 |

|                              |                         |          |              |             |          |          |          |
|------------------------------|-------------------------|----------|--------------|-------------|----------|----------|----------|
| ENSG00000273348.1_RP11-535A  | ENSG00000160789.18_LMNA | 0.01948  | -0.140152895 | 0.178130716 | 8.12E-01 | 9.26E-01 | 1.00E+00 |
| ENSG00000237611.2_Metazoa_SI | ENSG00000160789.18_LMNA | -0.06206 | -0.219098616 | 0.098107342 | 4.48E-01 | 7.14E-01 | 1.00E+00 |
| ENSG00000224910.1_AC002115.1 | ENSG00000160789.18_LMNA | -0.01071 | -0.169617307 | 0.14874853  | 8.96E-01 | 9.59E-01 | 1.00E+00 |
| ENSG00000279366.1_RP11-380M  | ENSG00000160789.18_LMNA | -0.06992 | -0.226597385 | 0.090286724 | 3.92E-01 | 6.70E-01 | 1.00E+00 |
| ENSG00000197794.2_IGKV7-3    | ENSG00000160789.18_LMNA | -0.05765 | -0.214880152 | 0.102489712 | 4.81E-01 | 7.38E-01 | 1.00E+00 |
| ENSG00000231222.1_ARF4P4     | ENSG00000160789.18_LMNA | 0.0323   | -0.127558163 | 0.190519498 | 6.93E-01 | 8.68E-01 | 1.00E+00 |
| ENSG00000254954.1_SLC2A13P   | ENSG00000160789.18_LMNA | 0.06442  | -0.095759784 | 0.221353506 | 4.30E-01 | 7.00E-01 | 1.00E+00 |
| ENSG00000232885.1_GPC5-AS2   | ENSG00000160789.18_LMNA | -0.11266 | -0.267074106 | 0.04738696  | 1.67E-01 | 4.24E-01 | 1.00E+00 |
| ENSG00000277141.1_Metazoa_SI | ENSG00000160789.18_LMNA | -0.01378 | -0.1726044   | 0.145738054 | 8.66E-01 | 9.48E-01 | 1.00E+00 |
| ENSG00000249486.1_RP11-215I1 | ENSG00000160789.18_LMNA | -0.10844 | -0.263097727 | 0.051653392 | 1.84E-01 | 4.49E-01 | 1.00E+00 |
| ENSG00000271096.1_SUMO2P14   | ENSG00000160789.18_LMNA | 0.03464  | -0.12525588  | 0.192773233 | 6.72E-01 | 8.56E-01 | 1.00E+00 |
| ENSG00000200761.1_RN7SKP11   | ENSG00000160789.18_LMNA | -0.02737 | -0.185761678 | 0.13240724  | 7.38E-01 | 8.90E-01 | 1.00E+00 |
| ENSG00000241397.1_LINC00903  | ENSG00000160789.18_LMNA | -0.02211 | -0.180679253 | 0.137570379 | 7.87E-01 | 9.13E-01 | 1.00E+00 |
| ENSG00000242065.3_RN7SL291F  | ENSG00000160789.18_LMNA | 0.01134  | -0.14812647  | 0.170235014 | 8.90E-01 | 9.57E-01 | 1.00E+00 |
| ENSG00000232515.1_LL22NC03-  | ENSG00000160789.18_LMNA | -0.00389 | -0.162991924 | 0.155404779 | 9.62E-01 | 9.85E-01 | 1.00E+00 |
| ENSG00000280373.1_RP11-417J  | ENSG00000160789.18_LMNA | 0.02453  | -0.135199677 | 0.183015006 | 7.64E-01 | 9.02E-01 | 1.00E+00 |
| ENSG00000229756.1_RPL31P20   | ENSG00000160789.18_LMNA | 0.07899  | -0.081229454 | 0.235235219 | 3.33E-01 | 6.19E-01 | 1.00E+00 |
| ENSG00000254747.1_MTND4LP1   | ENSG00000160789.18_LMNA | -0.11053 | -0.265068058 | 0.049540772 | 1.75E-01 | 4.36E-01 | 1.00E+00 |
| ENSG00000241997.3_RN7SL323F  | ENSG00000160789.18_LMNA | 0.15379  | -0.005541444 | 0.305515321 | 5.85E-02 | 2.22E-01 | 1.00E+00 |
| ENSG00000276650.1_RP11-321E  | ENSG00000160789.18_LMNA | -0.06817 | -0.224924993 | 0.092034289 | 4.04E-01 | 6.80E-01 | 1.00E+00 |
| ENSG00000224901.1_RP11-448G  | ENSG00000160789.18_LMNA | -0.12132 | -0.275205387 | 0.038626679 | 1.37E-01 | 3.76E-01 | 1.00E+00 |
| ENSG00000222800.1_RNU2-62P   | ENSG00000160789.18_LMNA | -0.02502 | -0.183485617 | 0.134721584 | 7.60E-01 | 9.00E-01 | 1.00E+00 |
| ENSG00000228572.5_LL0YNC03-  | ENSG00000160789.18_LMNA | -0.05128 | -0.208771948 | 0.108813486 | 5.30E-01 | 7.73E-01 | 1.00E+00 |
| ENSG00000230533.1_RP11-95M1  | ENSG00000160789.18_LMNA | -0.11303 | -0.267415407 | 0.047020227 | 1.66E-01 | 4.22E-01 | 1.00E+00 |
| ENSG00000242794.2_RN7SL299F  | ENSG00000160789.18_LMNA | -0.02747 | -0.185857768 | 0.132309457 | 7.37E-01 | 8.89E-01 | 1.00E+00 |
| ENSG00000223719.1_AC024162.1 | ENSG00000160789.18_LMNA | -0.03863 | -0.196624528 | 0.121313682 | 6.37E-01 | 8.37E-01 | 1.00E+00 |
| ENSG00000280449.1_CTD-2199C  | ENSG00000160789.18_LMNA | -0.08091 | -0.237060843 | 0.079308467 | 3.22E-01 | 6.08E-01 | 1.00E+00 |
| ENSG00000222784.1_RN7SKP91   | ENSG00000160789.18_LMNA | 0.10432  | -0.055804176 | 0.259218846 | 2.01E-01 | 4.71E-01 | 1.00E+00 |
| ENSG00000257083.4_RP11-123O  | ENSG00000160789.18_LMNA | 0.02197  | -0.137716982 | 0.180534693 | 7.88E-01 | 9.14E-01 | 1.00E+00 |
| ENSG00000233329.1_AC068287.1 | ENSG00000160789.18_LMNA | -0.05496 | -0.212307039 | 0.105156766 | 5.01E-01 | 7.53E-01 | 1.00E+00 |
| ENSG00000238004.1_AC009227.1 | ENSG00000160789.18_LMNA | -0.06555 | -0.222426015 | 0.09464196  | 4.22E-01 | 6.94E-01 | 1.00E+00 |
| ENSG00000254801.1_CTD-2132H  | ENSG00000160789.18_LMNA | -0.08023 | -0.236410644 | 0.079992899 | 3.26E-01 | 6.12E-01 | 1.00E+00 |
| ENSG00000239545.3_RN7SL822F  | ENSG00000160789.18_LMNA | 0.06844  | -0.091763114 | 0.225184626 | 4.02E-01 | 6.78E-01 | 1.00E+00 |

|                              |                         |          |              |             |          |          |          |
|------------------------------|-------------------------|----------|--------------|-------------|----------|----------|----------|
| ENSG00000233541.4_RPL31P47   | ENSG00000160789.18_LMNA | -0.14    | -0.29267823  | 0.019637582 | 8.54E-02 | 2.83E-01 | 1.00E+00 |
| ENSG00000263081.1_AC004878.1 | ENSG00000160789.18_LMNA | -0.10994 | -0.264513373 | 0.050135799 | 1.78E-01 | 4.39E-01 | 1.00E+00 |
| ENSG00000242728.1_UQCRHP4    | ENSG00000160789.18_LMNA | 0.02663  | -0.133131419 | 0.185049844 | 7.45E-01 | 8.93E-01 | 1.00E+00 |
| ENSG00000239333.3_RN7SL658F  | ENSG00000160789.18_LMNA | 0.01808  | -0.141527642 | 0.176772313 | 8.25E-01 | 9.31E-01 | 1.00E+00 |
| ENSG00000259995.1_CTD-2336H  | ENSG00000160789.18_LMNA | 0.0714   | -0.088805917 | 0.228013034 | 3.82E-01 | 6.61E-01 | 1.00E+00 |
| ENSG00000254222.1_RP11-787D  | ENSG00000160789.18_LMNA | -0.07804 | -0.234326116 | 0.082185168 | 3.39E-01 | 6.25E-01 | 1.00E+00 |
| ENSG00000225728.2_RP6-191P2  | ENSG00000160789.18_LMNA | -0.00823 | -0.167208941 | 0.151171457 | 9.20E-01 | 9.69E-01 | 1.00E+00 |
| ENSG00000259897.2_FRG2JP     | ENSG00000160789.18_LMNA | 0.05891  | -0.101239128 | 0.216085171 | 4.71E-01 | 7.31E-01 | 1.00E+00 |
| ENSG00000244521.3_RN7SL700F  | ENSG00000160789.18_LMNA | -0.0969  | -0.252211295 | 0.063275438 | 2.35E-01 | 5.13E-01 | 1.00E+00 |
| ENSG00000281431.1_           | ENSG00000160789.18_LMNA | -0.01096 | -0.169865601 | 0.148498516 | 8.93E-01 | 9.58E-01 | 1.00E+00 |
| ENSG00000237019.1_GS1-433O2  | ENSG00000160789.18_LMNA | -0.00039 | -0.159578643 | 0.158822715 | 9.96E-01 | 9.98E-01 | 1.00E+00 |
| ENSG00000226590.1_UBE2V1P1   | ENSG00000160789.18_LMNA | -0.0822  | -0.238282471 | 0.078021713 | 3.14E-01 | 6.00E-01 | 1.00E+00 |
| ENSG00000205884.2_DEFB136    | ENSG00000160789.18_LMNA | -0.00799 | -0.166974399 | 0.151407213 | 9.22E-01 | 9.70E-01 | 1.00E+00 |
| ENSG00000271702.1_RP11-63N3  | ENSG00000160789.18_LMNA | -0.03889 | -0.196876372 | 0.121055544 | 6.34E-01 | 8.36E-01 | 1.00E+00 |
| ENSG00000256440.1_RP11-443N  | ENSG00000160789.18_LMNA | 0.04395  | -0.116063581 | 0.201738379 | 5.91E-01 | 8.10E-01 | 1.00E+00 |
| ENSG00000227459.1_AC079612.1 | ENSG00000160789.18_LMNA | -0.00966 | -0.168601725 | 0.149770719 | 9.06E-01 | 9.64E-01 | 1.00E+00 |
| ENSG00000241203.1_HMGN2P2    | ENSG00000160789.18_LMNA | 0.12389  | -0.036018273 | 0.277617862 | 1.28E-01 | 3.63E-01 | 1.00E+00 |
| ENSG00000237849.1_NFYAP1     | ENSG00000160789.18_LMNA | -0.01921 | -0.177868671 | 0.140418188 | 8.14E-01 | 9.27E-01 | 1.00E+00 |
| ENSG00000237653.2_RP11-655G  | ENSG00000160789.18_LMNA | -0.0477  | -0.205337744 | 0.112357637 | 5.60E-01 | 7.92E-01 | 1.00E+00 |
| ENSG00000204897.6_KRT25      | ENSG00000160789.18_LMNA | -0.15681 | -0.308316332 | 0.002449195 | 5.37E-02 | 2.11E-01 | 1.00E+00 |
| ENSG00000249111.1_RP11-622J  | ENSG00000160789.18_LMNA | 0.00984  | -0.149594855 | 0.1687765   | 9.04E-01 | 9.63E-01 | 1.00E+00 |
| ENSG00000226324.1_RP11-115M  | ENSG00000160789.18_LMNA | -0.13602 | -0.288967915 | 0.023688801 | 9.47E-02 | 3.01E-01 | 1.00E+00 |
| ENSG00000236046.1_AC004920.1 | ENSG00000160789.18_LMNA | 0.17407  | 0.015291777  | 0.324282934 | 3.20E-02 | 1.49E-01 | 1.00E+00 |
| ENSG00000277618.1_RP11-12A2  | ENSG00000160789.18_LMNA | -0.03574 | -0.193836974 | 0.124168035 | 6.62E-01 | 8.51E-01 | 1.00E+00 |
| ENSG00000213747.2_RP13-278H  | ENSG00000160789.18_LMNA | 0.03992  | -0.120042098 | 0.197864701 | 6.25E-01 | 8.31E-01 | 1.00E+00 |
| ENSG00000211656.3_IGLV2-33   | ENSG00000160789.18_LMNA | 0.0348   | -0.125096397 | 0.192929229 | 6.70E-01 | 8.55E-01 | 1.00E+00 |
| ENSG00000275696.1_Metazoa_SI | ENSG00000160789.18_LMNA | 0.01893  | -0.140694308 | 0.177595885 | 8.17E-01 | 9.28E-01 | 1.00E+00 |
| ENSG00000220091.2_LAP3P1     | ENSG00000160789.18_LMNA | 0.02817  | -0.131625131 | 0.186530079 | 7.31E-01 | 8.86E-01 | 1.00E+00 |
| ENSG00000238254.3_CTC-431G1  | ENSG00000160789.18_LMNA | 0.05448  | -0.105640033 | 0.211840322 | 5.05E-01 | 7.56E-01 | 1.00E+00 |
| ENSG00000201161.1_RN7SKP10   | ENSG00000160789.18_LMNA | -0.00232 | -0.1614601   | 0.156939635 | 9.77E-01 | 9.91E-01 | 1.00E+00 |
| ENSG00000238262.1_NTM-IT     | ENSG00000160789.18_LMNA | -0.00728 | -0.16629106  | 0.152093882 | 9.29E-01 | 9.73E-01 | 1.00E+00 |
| ENSG00000253460.2_IGKV2OR2   | ENSG00000160789.18_LMNA | 0.01965  | -0.139993077 | 0.178288555 | 8.10E-01 | 9.25E-01 | 1.00E+00 |
| ENSG00000223811.1_RP11-437J  | ENSG00000160789.18_LMNA | -0.04854 | -0.206152042 | 0.111517999 | 5.53E-01 | 7.88E-01 | 1.00E+00 |

|                              |                         |          |              |             |          |          |          |
|------------------------------|-------------------------|----------|--------------|-------------|----------|----------|----------|
| ENSG00000239525.1_RPL30P5    | ENSG00000160789.18_LMNA | -0.08557 | -0.241478121 | 0.074650708 | 2.95E-01 | 5.80E-01 | 1.00E+00 |
| ENSG00000239690.3_RN7SL668f  | ENSG00000160789.18_LMNA | -0.01221 | -0.171080283 | 0.147274838 | 8.81E-01 | 9.54E-01 | 1.00E+00 |
| ENSG00000276890.1_Metazoa_SI | ENSG00000160789.18_LMNA | 0.01786  | -0.141741797 | 0.176560595 | 8.27E-01 | 9.32E-01 | 1.00E+00 |
| ENSG00000264435.1_RP11-338L  | ENSG00000160789.18_LMNA | -0.03646 | -0.194532957 | 0.123455867 | 6.56E-01 | 8.48E-01 | 1.00E+00 |
| ENSG00000229836.1_XXbac-BPG  | ENSG00000160789.18_LMNA | 0.11962  | -0.040353879 | 0.273605748 | 1.42E-01 | 3.85E-01 | 1.00E+00 |
| ENSG00000254123.1_RP11-99H2  | ENSG00000160789.18_LMNA | 0.07213  | -0.088079878 | 0.228706637 | 3.77E-01 | 6.57E-01 | 1.00E+00 |
| ENSG00000275808.1_Metazoa_SI | ENSG00000160789.18_LMNA | -0.12777 | -0.281246881 | 0.032086455 | 1.17E-01 | 3.42E-01 | 1.00E+00 |
| ENSG00000253481.2_IGKV1OR2   | ENSG00000160789.18_LMNA | -0.017   | -0.17572375  | 0.142587982 | 8.35E-01 | 9.36E-01 | 1.00E+00 |
| ENSG00000242810.1_MRPL42P6   | ENSG00000160789.18_LMNA | 0.08462  | -0.075597468 | 0.240581302 | 3.00E-01 | 5.86E-01 | 1.00E+00 |
| ENSG00000211715.1_TRBV5-3    | ENSG00000160789.18_LMNA | 0.20098  | 0.043155227  | 0.349009179 | 1.30E-02 | 7.93E-02 | 1.00E+00 |
| ENSG00000237148.1_HIGD1AP2   | ENSG00000160789.18_LMNA | -0.02578 | -0.184225816 | 0.133969316 | 7.53E-01 | 8.97E-01 | 1.00E+00 |
| ENSG00000248783.1_RP11-308B  | ENSG00000160789.18_LMNA | -0.11063 | -0.26516263  | 0.0494393   | 1.75E-01 | 4.35E-01 | 1.00E+00 |
| ENSG00000265352.1_RP11-723G  | ENSG00000160789.18_LMNA | -0.03527 | -0.19338954  | 0.124625701 | 6.66E-01 | 8.53E-01 | 1.00E+00 |
| ENSG00000251452.2_RP13-539F  | ENSG00000160789.18_LMNA | 0.00029  | -0.158919635 | 0.159481743 | 9.97E-01 | 9.99E-01 | 1.00E+00 |
| ENSG00000254574.1_RP11-429J  | ENSG00000160789.18_LMNA | 0.04324  | -0.116761245 | 0.201059817 | 5.97E-01 | 8.14E-01 | 1.00E+00 |
| ENSG00000226249.1_RP11-307P  | ENSG00000160789.18_LMNA | -0.16495 | -0.31585656  | -0.00590467 | 4.23E-02 | 1.80E-01 | 1.00E+00 |
| ENSG00000254048.1_RP11-328K  | ENSG00000160789.18_LMNA | 0.04237  | -0.117623976 | 0.200220287 | 6.04E-01 | 8.18E-01 | 1.00E+00 |
| ENSG00000244550.1_RP5-905H7  | ENSG00000160789.18_LMNA | -0.06287 | -0.219868988 | 0.097305708 | 4.42E-01 | 7.09E-01 | 1.00E+00 |
| ENSG00000258511.1_RP11-61O1  | ENSG00000160789.18_LMNA | -0.21248 | -0.359520448 | -0.05514604 | 8.59E-03 | 5.87E-02 | 1.00E+00 |
| ENSG00000263396.1_RP11-288C  | ENSG00000160789.18_LMNA | 0.0287   | -0.131096212 | 0.187049506 | 7.26E-01 | 8.84E-01 | 1.00E+00 |
| ENSG00000249000.1_CTD-2012I1 | ENSG00000160789.18_LMNA | -0.01852 | -0.177197272 | 0.141097701 | 8.21E-01 | 9.30E-01 | 1.00E+00 |
| ENSG00000233482.1_RP11-78O9  | ENSG00000160789.18_LMNA | 0.01323  | -0.146281824 | 0.172065286 | 8.72E-01 | 9.50E-01 | 1.00E+00 |
| ENSG00000225011.4_RP11-810H  | ENSG00000160789.18_LMNA | -0.10424 | -0.259142587 | 0.055885672 | 2.01E-01 | 4.72E-01 | 1.00E+00 |
| ENSG00000236503.1_AC009784.4 | ENSG00000160789.18_LMNA | 0.06102  | -0.099143348 | 0.218102428 | 4.55E-01 | 7.20E-01 | 1.00E+00 |
| ENSG00000269588.1_CTB-60E11  | ENSG00000160789.18_LMNA | 0.00877  | -0.15064019  | 0.167737341 | 9.15E-01 | 9.67E-01 | 1.00E+00 |
| ENSG00000229668.1_RP11-317F  | ENSG00000160789.18_LMNA | -0.03338 | -0.191566107 | 0.126489435 | 6.83E-01 | 8.62E-01 | 1.00E+00 |
| ENSG00000235083.1_RP11-669M  | ENSG00000160789.18_LMNA | 0.12941  | -0.030421033 | 0.282781348 | 1.12E-01 | 3.34E-01 | 1.00E+00 |
| ENSG00000230111.1_AC115283   | ENSG00000160789.18_LMNA | 0.1234   | -0.036522241 | 0.277152058 | 1.30E-01 | 3.65E-01 | 1.00E+00 |
| ENSG00000236880.1_RP3-384D2  | ENSG00000160789.18_LMNA | -0.08124 | -0.237372445 | 0.078980354 | 3.20E-01 | 6.06E-01 | 1.00E+00 |
| ENSG00000248378.1_RP11-5N11  | ENSG00000160789.18_LMNA | 0.03715  | -0.122773812 | 0.19519921  | 6.50E-01 | 8.44E-01 | 1.00E+00 |
| ENSG00000255830.2_RP11-385N  | ENSG00000160789.18_LMNA | -0.0341  | -0.192256471 | 0.125784077 | 6.77E-01 | 8.59E-01 | 1.00E+00 |
| ENSG00000248192.1_ATG10-AS1  | ENSG00000160789.18_LMNA | -0.1026  | -0.257597407 | 0.057536053 | 2.08E-01 | 4.81E-01 | 1.00E+00 |
| ENSG00000236244.1_RP4-799P1  | ENSG00000160789.18_LMNA | 0.08914  | -0.071072347 | 0.244862855 | 2.75E-01 | 5.59E-01 | 1.00E+00 |

|                               |                         |          |              |             |          |          |          |
|-------------------------------|-------------------------|----------|--------------|-------------|----------|----------|----------|
| ENSG00000204547.7_DEFB122     | ENSG00000160789.18_LMNA | -0.05377 | -0.211163648 | 0.106340437 | 5.11E-01 | 7.59E-01 | 1.00E+00 |
| ENSG00000249036.1_RP11-625I7  | ENSG00000160789.18_LMNA | 0.13878  | -0.020878462 | 0.291542767 | 8.82E-02 | 2.89E-01 | 1.00E+00 |
| ENSG00000232576.2_RP11-137D   | ENSG00000160789.18_LMNA | -0.13589 | -0.288843645 | 0.023824312 | 9.51E-02 | 3.02E-01 | 1.00E+00 |
| ENSG00000235269.1_AL162759.1  | ENSG00000160789.18_LMNA | -0.12061 | -0.274541682 | 0.039343538 | 1.39E-01 | 3.80E-01 | 1.00E+00 |
| ENSG00000242370.1_KCNAB1-A    | ENSG00000160789.18_LMNA | -0.14381 | -0.296232751 | 0.015746829 | 7.71E-02 | 2.66E-01 | 1.00E+00 |
| ENSG00000235564.1_AP000477.1  | ENSG00000160789.18_LMNA | -0.25147 | -0.394864432 | -0.09611932 | 1.78E-03 | 1.79E-02 | 1.00E+00 |
| ENSG00000237464.1_RP3-461P1   | ENSG00000160789.18_LMNA | -0.00681 | -0.165828753 | 0.152558268 | 9.34E-01 | 9.74E-01 | 1.00E+00 |
| ENSG00000242816.1_RP11-768G   | ENSG00000160789.18_LMNA | -0.08012 | -0.236309461 | 0.080099382 | 3.26E-01 | 6.13E-01 | 1.00E+00 |
| ENSG00000230902.1_FAM204CP    | ENSG00000160789.18_LMNA | -0.11837 | -0.272441129 | 0.04161019  | 1.46E-01 | 3.92E-01 | 1.00E+00 |
| ENSG00000258292.1_RP11-536G   | ENSG00000160789.18_LMNA | -0.15141 | -0.30330013  | 0.007982756 | 6.26E-02 | 2.32E-01 | 1.00E+00 |
| ENSG00000229954.1_MTND2P2     | ENSG00000160789.18_LMNA | -0.08719 | -0.24301706  | 0.073024741 | 2.85E-01 | 5.71E-01 | 1.00E+00 |
| ENSG00000212722.7_KRTAP4-9    | ENSG00000160789.18_LMNA | 0.14376  | -0.015799357 | 0.296184819 | 7.72E-02 | 2.66E-01 | 1.00E+00 |
| ENSG00000230828.1_RP11-492I2  | ENSG00000160789.18_LMNA | -0.04939 | -0.206960136 | 0.11068431  | 5.46E-01 | 7.84E-01 | 1.00E+00 |
| ENSG00000248597.1_RP11-259C   | ENSG00000160789.18_LMNA | -0.01374 | -0.17256395  | 0.14577886  | 8.67E-01 | 9.48E-01 | 1.00E+00 |
| ENSG00000235785.1_AL109767.1  | ENSG00000160789.18_LMNA | 0.06205  | -0.098118652 | 0.219087744 | 4.48E-01 | 7.14E-01 | 1.00E+00 |
| ENSG00000239439.1_RFKP2       | ENSG00000160789.18_LMNA | -0.06905 | -0.22576438  | 0.091157416 | 3.98E-01 | 6.75E-01 | 1.00E+00 |
| ENSG00000253698.1_RP11-1259I  | ENSG00000160789.18_LMNA | 0.08529  | -0.074924386 | 0.241218934 | 2.96E-01 | 5.82E-01 | 1.00E+00 |
| ENSG00000257012.1_RP11-60C6   | ENSG00000160789.18_LMNA | 0.04537  | -0.114661136 | 0.203101501 | 5.79E-01 | 8.04E-01 | 1.00E+00 |
| ENSG00000229554.2_RPL21P24    | ENSG00000160789.18_LMNA | -0.12973 | -0.283080346 | 0.030096315 | 1.11E-01 | 3.33E-01 | 1.00E+00 |
| ENSG00000224384.1_RP3-417O2   | ENSG00000160789.18_LMNA | -0.05724 | -0.214484024 | 0.102900599 | 4.84E-01 | 7.41E-01 | 1.00E+00 |
| ENSG00000251310.1_RP11-706F   | ENSG00000160789.18_LMNA | 0.06625  | -0.093943266 | 0.223095995 | 4.17E-01 | 6.90E-01 | 1.00E+00 |
| ENSG00000243438.1_LARP1BP2    | ENSG00000160789.18_LMNA | -0.03805 | -0.196061006 | 0.121891133 | 6.42E-01 | 8.40E-01 | 1.00E+00 |
| ENSG00000279171.1_RP11-407A   | ENSG00000160789.18_LMNA | 0.16195  | 0.002818258  | 0.313075305 | 4.62E-02 | 1.91E-01 | 1.00E+00 |
| ENSG00000279001.1_RP11-216P   | ENSG00000160789.18_LMNA | -0.06493 | -0.221839513 | 0.095253341 | 4.27E-01 | 6.97E-01 | 1.00E+00 |
| ENSG00000229599.1_LINC00411   | ENSG00000160789.18_LMNA | 0.0612   | -0.098962161 | 0.218276699 | 4.54E-01 | 7.19E-01 | 1.00E+00 |
| ENSG00000254913.1_RP4-791M1   | ENSG00000160789.18_LMNA | -0.04317 | -0.200988503 | 0.116834549 | 5.97E-01 | 8.14E-01 | 1.00E+00 |
| ENSG00000160182.2_TFF1        | ENSG00000160789.18_LMNA | 0.01243  | -0.147064536 | 0.171288942 | 8.79E-01 | 9.53E-01 | 1.00E+00 |
| ENSG00000233724.1_RP11-252C   | ENSG00000160789.18_LMNA | 0.00121  | -0.158024182 | 0.16037677  | 9.88E-01 | 9.96E-01 | 1.00E+00 |
| ENSG00000233645.1_RP11-431K   | ENSG00000160789.18_LMNA | 0.0817   | -0.078519059 | 0.237810416 | 3.17E-01 | 6.04E-01 | 1.00E+00 |
| ENSG00000249828.2_RP11-1281I  | ENSG00000160789.18_LMNA | -0.12614 | -0.279727811 | 0.033733454 | 1.21E-01 | 3.51E-01 | 1.00E+00 |
| ENSG00000225856.2_PCNPP2      | ENSG00000160789.18_LMNA | 0.12409  | -0.035816472 | 0.277804341 | 1.28E-01 | 3.62E-01 | 1.00E+00 |
| ENSG00000279498.1_RP11-72I2.1 | ENSG00000160789.18_LMNA | -0.22432 | -0.370300621 | -0.06753548 | 5.46E-03 | 4.19E-02 | 1.00E+00 |
| ENSG00000235893.5_RP11-460E   | ENSG00000160789.18_LMNA | 0.09847  | -0.06170255  | 0.253689315 | 2.27E-01 | 5.04E-01 | 1.00E+00 |



|                             |                         |          |              |             |          |          |          |
|-----------------------------|-------------------------|----------|--------------|-------------|----------|----------|----------|
| ENSG00000243500.1_          | ENSG00000160789.18_LMNA | -0.01444 | -0.173240069 | 0.145096648 | 8.60E-01 | 9.45E-01 | 1.00E+00 |
| ENSG00000266196.1_RP11-675P | ENSG00000160789.18_LMNA | -0.06862 | -0.225355178 | 0.091584954 | 4.01E-01 | 6.77E-01 | 1.00E+00 |
| ENSG00000258761.1_RP11-24J1 | ENSG00000160789.18_LMNA | -0.25522 | -0.39823551  | -0.10008093 | 1.51E-03 | 1.58E-02 | 1.00E+00 |
| ENSG00000258196.1_CTD-2213F | ENSG00000160789.18_LMNA | 0.05106  | -0.109022613 | 0.208569526 | 5.32E-01 | 7.75E-01 | 1.00E+00 |
| ENSG00000262106.1_OR1D3P    | ENSG00000160789.18_LMNA | -0.04089 | -0.198793494 | 0.119089098 | 6.17E-01 | 8.26E-01 | 1.00E+00 |
| ENSG00000273088.1_RP11-201K | ENSG00000160789.18_LMNA | 0.16727  | 0.008285364  | 0.317998235 | 3.94E-02 | 1.72E-01 | 1.00E+00 |
| ENSG00000163515.6_RETNLB    | ENSG00000160789.18_LMNA | 0.00214  | -0.157110114 | 0.161289863 | 9.79E-01 | 9.92E-01 | 1.00E+00 |
| ENSG00000279535.1_AC113188. | ENSG00000160789.18_LMNA | -0.10888 | -0.263511666 | 0.051209795 | 1.82E-01 | 4.46E-01 | 1.00E+00 |
| ENSG00000277611.1_RP1-138B7 | ENSG00000160789.18_LMNA | 0.11365  | -0.046387334 | 0.268004225 | 1.63E-01 | 4.19E-01 | 1.00E+00 |
| ENSG00000242524.1_OR2U2P    | ENSG00000160789.18_LMNA | -0.08253 | -0.238596064 | 0.077691231 | 3.12E-01 | 5.99E-01 | 1.00E+00 |
| ENSG00000275173.1_AC091199. | ENSG00000160789.18_LMNA | 0.01495  | -0.144598196 | 0.17373388  | 8.55E-01 | 9.43E-01 | 1.00E+00 |
| ENSG00000229289.1_AP000431. | ENSG00000160789.18_LMNA | -0.06474 | -0.221655164 | 0.095445461 | 4.28E-01 | 6.99E-01 | 1.00E+00 |
| ENSG00000213916.2_RPL13P    | ENSG00000160789.18_LMNA | -0.03921 | -0.197178498 | 0.120745811 | 6.32E-01 | 8.35E-01 | 1.00E+00 |
| ENSG00000236748.1_AC009500. | ENSG00000160789.18_LMNA | -0.09562 | -0.251004068 | 0.064558991 | 2.41E-01 | 5.20E-01 | 1.00E+00 |
| ENSG00000272545.1 CTC-527H2 | ENSG00000160789.18_LMNA | 0.16759  | 0.008621631  | 0.318300487 | 3.90E-02 | 1.71E-01 | 1.00E+00 |
| ENSG00000250921.1_CTD-2008N | ENSG00000160789.18_LMNA | -0.08758 | -0.243383695 | 0.072637124 | 2.83E-01 | 5.69E-01 | 1.00E+00 |
| ENSG00000273838.1_RP3-333B1 | ENSG00000160789.18_LMNA | 0.00775  | -0.151641463 | 0.166741319 | 9.25E-01 | 9.71E-01 | 1.00E+00 |
| ENSG00000198854.5_C1orf68   | ENSG00000160789.18_LMNA | 0.03885  | -0.121096964 | 0.196835964 | 6.35E-01 | 8.36E-01 | 1.00E+00 |
| ENSG00000263382.1_RP11-552O | ENSG00000160789.18_LMNA | -0.12363 | -0.277367379 | 0.036289298 | 1.29E-01 | 3.64E-01 | 1.00E+00 |
| ENSG00000250955.1_AC008592. | ENSG00000160789.18_LMNA | -0.0083  | -0.167276435 | 0.151103608 | 9.19E-01 | 9.69E-01 | 1.00E+00 |
| ENSG00000251636.1_LINC01218 | ENSG00000160789.18_LMNA | -0.06554 | -0.22241838  | 0.094649919 | 4.22E-01 | 6.94E-01 | 1.00E+00 |
| ENSG00000256469.1_RP11-856F | ENSG00000160789.18_LMNA | 0.00641  | -0.152942694 | 0.165445943 | 9.37E-01 | 9.75E-01 | 1.00E+00 |
| ENSG00000270287.1_RP11-118H | ENSG00000160789.18_LMNA | -0.08503 | -0.240965571 | 0.07519187  | 2.98E-01 | 5.84E-01 | 1.00E+00 |
| ENSG00000278824.1_RP11-1315 | ENSG00000160789.18_LMNA | -0.07355 | -0.230058823 | 0.086663489 | 3.68E-01 | 6.49E-01 | 1.00E+00 |
| ENSG00000242568.1_RP11-875H | ENSG00000160789.18_LMNA | -0.04813 | -0.205758084 | 0.111924273 | 5.56E-01 | 7.90E-01 | 1.00E+00 |
| ENSG00000258879.1_          | ENSG00000160789.18_LMNA | -0.12482 | -0.27849075  | 0.035073438 | 1.25E-01 | 3.58E-01 | 1.00E+00 |
| ENSG00000265644.1_RP11-451L | ENSG00000160789.18_LMNA | 0.05492  | -0.105203321 | 0.212262084 | 5.02E-01 | 7.53E-01 | 1.00E+00 |
| ENSG00000248654.1_MTCO3P44  | ENSG00000160789.18_LMNA | -0.12378 | -0.277510414 | 0.036134539 | 1.29E-01 | 3.63E-01 | 1.00E+00 |
| ENSG00000236009.1_RP11-293F | ENSG00000160789.18_LMNA | 0.07454  | -0.085680926 | 0.230996129 | 3.61E-01 | 6.43E-01 | 1.00E+00 |
| ENSG00000234780.1_RP11-552E | ENSG00000160789.18_LMNA | 0.20785  | 0.050311997  | 0.35529215  | 1.02E-02 | 6.64E-02 | 1.00E+00 |
| ENSG00000237477.1_AC093911. | ENSG00000160789.18_LMNA | -0.18644 | -0.335676144 | -0.02807119 | 2.15E-02 | 1.13E-01 | 1.00E+00 |
| ENSG00000230379.4_AP000146. | ENSG00000160789.18_LMNA | -0.1261  | -0.279690477 | 0.033773911 | 1.22E-01 | 3.51E-01 | 1.00E+00 |
| ENSG00000239428.2_GM2AP2    | ENSG00000160789.18_LMNA | -0.05916 | -0.216322891 | 0.100992301 | 4.69E-01 | 7.30E-01 | 1.00E+00 |

|                             |                         |          |              |             |          |          |          |
|-----------------------------|-------------------------|----------|--------------|-------------|----------|----------|----------|
| ENSG00000253226.1_HAUS1P3   | ENSG00000160789.18_LMNA | 0.00242  | -0.156844656 | 0.161554936 | 9.76E-01 | 9.91E-01 | 1.00E+00 |
| ENSG00000250591.3_PRSS3P1   | ENSG00000160789.18_LMNA | -0.08707 | -0.242906574 | 0.073141531 | 2.86E-01 | 5.72E-01 | 1.00E+00 |
| ENSG00000219669.1_BECN1P2   | ENSG00000160789.18_LMNA | 0.03315  | -0.126723306 | 0.191337138 | 6.85E-01 | 8.63E-01 | 1.00E+00 |
| ENSG00000231276.2_E2F4P1    | ENSG00000160789.18_LMNA | -0.11687 | -0.271025636 | 0.04313579  | 1.52E-01 | 4.00E-01 | 1.00E+00 |
| ENSG00000249152.1_RP11-562F | ENSG00000160789.18_LMNA | -0.17984 | -0.329604773 | -0.02124858 | 2.66E-02 | 1.32E-01 | 1.00E+00 |
| ENSG00000228688.1_COL11A2P  | ENSG00000160789.18_LMNA | 0.06788  | -0.09231525  | 0.224655943 | 4.06E-01 | 6.81E-01 | 1.00E+00 |
| ENSG00000236392.2_AC100848. | ENSG00000160789.18_LMNA | -0.14492 | -0.297262686 | 0.0146177   | 7.49E-02 | 2.61E-01 | 1.00E+00 |
| ENSG00000254306.1_RP11-150C | ENSG00000160789.18_LMNA | -0.03296 | -0.191159539 | 0.126904684 | 6.87E-01 | 8.64E-01 | 1.00E+00 |
| ENSG00000276605.1_RP11-793H | ENSG00000160789.18_LMNA | 0.11832  | -0.041669811 | 0.272385836 | 1.47E-01 | 3.92E-01 | 1.00E+00 |
| ENSG00000232091.1_PNLIPP1   | ENSG00000160789.18_LMNA | -0.03591 | -0.193998273 | 0.124003014 | 6.61E-01 | 8.50E-01 | 1.00E+00 |
| ENSG00000242610.1_OR5BH1P   | ENSG00000160789.18_LMNA | -0.0092  | -0.168156769 | 0.150218355 | 9.10E-01 | 9.66E-01 | 1.00E+00 |
| ENSG00000237581.1_AC005538. | ENSG00000160789.18_LMNA | 0.0345   | -0.125387021 | 0.192644948 | 6.73E-01 | 8.57E-01 | 1.00E+00 |
| ENSG00000235639.1_AC002069. | ENSG00000160789.18_LMNA | -0.04006 | -0.197993814 | 0.119909656 | 6.24E-01 | 8.31E-01 | 1.00E+00 |
| ENSG00000232897.2_RP11-191L | ENSG00000160789.18_LMNA | -0.11162 | -0.266091436 | 0.048442378 | 1.71E-01 | 4.30E-01 | 1.00E+00 |
| ENSG00000259140.2_RP11-986E | ENSG00000160789.18_LMNA | 0.04468  | -0.115342729 | 0.202439172 | 5.85E-01 | 8.07E-01 | 1.00E+00 |
| ENSG00000255238.1_RFPL4AP1  | ENSG00000160789.18_LMNA | -0.15438 | -0.306062827 | 0.004937478 | 5.76E-02 | 2.20E-01 | 1.00E+00 |
| ENSG00000240201.1_RP11-269C | ENSG00000160789.18_LMNA | -0.10694 | -0.261687275 | 0.053163974 | 1.90E-01 | 4.57E-01 | 1.00E+00 |
| ENSG00000255268.2_RP11-707M | ENSG00000160789.18_LMNA | -0.04775 | -0.205390274 | 0.112303486 | 5.59E-01 | 7.92E-01 | 1.00E+00 |
| ENSG00000226483.2_RP5-964H1 | ENSG00000160789.18_LMNA | 0.20365  | 0.045937499  | 0.351455023 | 1.19E-02 | 7.41E-02 | 1.00E+00 |
| ENSG00000237439.1_RP1-127L4 | ENSG00000160789.18_LMNA | -0.1226  | -0.276406349 | 0.037328714 | 1.32E-01 | 3.69E-01 | 1.00E+00 |
| ENSG00000241776.1_RP11-651J | ENSG00000160789.18_LMNA | -0.03211 | -0.190341471 | 0.127739879 | 6.94E-01 | 8.69E-01 | 1.00E+00 |
| ENSG00000259133.4_RP11-1085 | ENSG00000160789.18_LMNA | 0.13981  | -0.019836347 | 0.29249641  | 8.58E-02 | 2.84E-01 | 1.00E+00 |
| ENSG00000255582.1_OR10G2    | ENSG00000160789.18_LMNA | 0.09839  | -0.061781727 | 0.253614949 | 2.28E-01 | 5.05E-01 | 1.00E+00 |
| ENSG00000258419.1_RP11-588P | ENSG00000160789.18_LMNA | -0.01038 | -0.169303149 | 0.149064803 | 8.99E-01 | 9.61E-01 | 1.00E+00 |
| ENSG00000232361.3_RP11-632K | ENSG00000160789.18_LMNA | 0.00649  | -0.152865245 | 0.165523074 | 9.37E-01 | 9.75E-01 | 1.00E+00 |
| ENSG00000254546.1_RP11-113D | ENSG00000160789.18_LMNA | -0.07852 | -0.234789374 | 0.081698231 | 3.36E-01 | 6.22E-01 | 1.00E+00 |
| ENSG00000255206.1_RP11-403D | ENSG00000160789.18_LMNA | -0.01029 | -0.169211236 | 0.149157324 | 9.00E-01 | 9.61E-01 | 1.00E+00 |
| ENSG00000271368.1_RP11-10E6 | ENSG00000160789.18_LMNA | -0.04506 | -0.202809977 | 0.114961176 | 5.81E-01 | 8.05E-01 | 1.00E+00 |
| ENSG00000228803.1_MTCYBP42  | ENSG00000160789.18_LMNA | 0.09651  | -0.063670817 | 0.251839532 | 2.37E-01 | 5.15E-01 | 1.00E+00 |
| ENSG00000249171.1_RP11-767N | ENSG00000160789.18_LMNA | 0.10601  | -0.054105971 | 0.260807037 | 1.94E-01 | 4.62E-01 | 1.00E+00 |
| ENSG00000188314.3_OR7D1P    | ENSG00000160789.18_LMNA | -0.08411 | -0.240091417 | 0.076114392 | 3.03E-01 | 5.89E-01 | 1.00E+00 |
| ENSG00000225072.1_OR7E116P  | ENSG00000160789.18_LMNA | -0.01373 | -0.1725547   | 0.145788192 | 8.67E-01 | 9.48E-01 | 1.00E+00 |
| ENSG00000256496.1_RP11-955H | ENSG00000160789.18_LMNA | -0.12383 | -0.277556362 | 0.036084821 | 1.29E-01 | 3.63E-01 | 1.00E+00 |

|                             |                         |          |              |             |          |          |          |
|-----------------------------|-------------------------|----------|--------------|-------------|----------|----------|----------|
| ENSG00000233107.1_SUCLA2P2  | ENSG00000160789.18_LMNA | 0.00425  | -0.155056721 | 0.16333908  | 9.59E-01 | 9.83E-01 | 1.00E+00 |
| ENSG00000256783.1_RP11-503G | ENSG00000160789.18_LMNA | -0.09128 | -0.246889704 | 0.06892565  | 2.63E-01 | 5.47E-01 | 1.00E+00 |
| ENSG00000231491.2_JKAMPP1   | ENSG00000160789.18_LMNA | -0.0974  | -0.252686318 | 0.062770097 | 2.33E-01 | 5.10E-01 | 1.00E+00 |
| ENSG00000253903.2_RP11-521M | ENSG00000160789.18_LMNA | -0.055   | -0.212342737 | 0.105119796 | 5.01E-01 | 7.53E-01 | 1.00E+00 |
| ENSG00000233377.1_MTND4P20  | ENSG00000160789.18_LMNA | 0.01455  | -0.144987168 | 0.173348543 | 8.59E-01 | 9.44E-01 | 1.00E+00 |
| ENSG00000260734.3_RP11-510M | ENSG00000160789.18_LMNA | -0.0217  | -0.180282221 | 0.137972989 | 7.91E-01 | 9.15E-01 | 1.00E+00 |
| ENSG00000258931.1_RP11-1084 | ENSG00000160789.18_LMNA | -0.15458 | -0.306247868 | 0.004733304 | 5.72E-02 | 2.19E-01 | 1.00E+00 |
| ENSG00000254817.1_OR7E160P  | ENSG00000160789.18_LMNA | 0.09596  | -0.064222763 | 0.251320397 | 2.40E-01 | 5.18E-01 | 1.00E+00 |
| ENSG00000225815.2_AC092669  | ENSG00000160789.18_LMNA | -0.0825  | -0.238570707 | 0.077717957 | 3.12E-01 | 5.99E-01 | 1.00E+00 |
| ENSG00000183313.4_OR52L1    | ENSG00000160789.18_LMNA | -0.12825 | -0.281697841 | 0.03159719  | 1.15E-01 | 3.39E-01 | 1.00E+00 |
| ENSG00000255536.1_RP11-583F | ENSG00000160789.18_LMNA | 0.14295  | -0.016629685 | 0.295426946 | 7.89E-02 | 2.70E-01 | 1.00E+00 |
| ENSG00000248125.1_CTB-73N10 | ENSG00000160789.18_LMNA | -0.00289 | -0.162015524 | 0.15638329  | 9.72E-01 | 9.89E-01 | 1.00E+00 |
| ENSG00000234580.1_RP11-733D | ENSG00000160789.18_LMNA | -0.064   | -0.220951947 | 0.096178105 | 4.33E-01 | 7.03E-01 | 1.00E+00 |
| ENSG00000226724.1_RP11-795A | ENSG00000160789.18_LMNA | -0.12175 | -0.27560483  | 0.03819509  | 1.35E-01 | 3.74E-01 | 1.00E+00 |
| ENSG00000228198.2_OR2M3     | ENSG00000160789.18_LMNA | -0.04908 | -0.206670544 | 0.110983126 | 5.48E-01 | 7.85E-01 | 1.00E+00 |
| ENSG00000196224.7_KRTAP5-3  | ENSG00000160789.18_LMNA | -0.10034 | -0.255458213 | 0.059818053 | 2.19E-01 | 4.94E-01 | 1.00E+00 |
| ENSG00000251373.1_RP11-68D1 | ENSG00000160789.18_LMNA | 0.05043  | -0.109652889 | 0.207959292 | 5.37E-01 | 7.78E-01 | 1.00E+00 |
| ENSG00000253542.6_SDR16C6P  | ENSG00000160789.18_LMNA | -0.01696 | -0.175682006 | 0.14263018  | 8.36E-01 | 9.36E-01 | 1.00E+00 |
| ENSG00000254832.1_OR4A40P   | ENSG00000160789.18_LMNA | -0.0989  | -0.254100583 | 0.061264607 | 2.25E-01 | 5.01E-01 | 1.00E+00 |
| ENSG00000277575.1_RP11-292B | ENSG00000160789.18_LMNA | -0.02436 | -0.182852515 | 0.135364717 | 7.66E-01 | 9.03E-01 | 1.00E+00 |
| ENSG00000251078.1_SLC25A5P  | ENSG00000160789.18_LMNA | 0.08141  | -0.078813458 | 0.237530917 | 3.19E-01 | 6.05E-01 | 1.00E+00 |
| ENSG00000274937.1_CTD-2311M | ENSG00000160789.18_LMNA | -0.03811 | -0.196119865 | 0.121830828 | 6.41E-01 | 8.40E-01 | 1.00E+00 |
| ENSG00000236504.2_AC087499  | ENSG00000160789.18_LMNA | -0.01514 | -0.173916972 | 0.144413341 | 8.53E-01 | 9.42E-01 | 1.00E+00 |
| ENSG00000177233.2_OR2M1P    | ENSG00000160789.18_LMNA | 0.00321  | -0.156072351 | 0.162325859 | 9.69E-01 | 9.88E-01 | 1.00E+00 |
| ENSG00000152266.5_PTH       | ENSG00000160789.18_LMNA | -0.08054 | -0.236708627 | 0.079679264 | 3.24E-01 | 6.11E-01 | 1.00E+00 |
| ENSG00000232314.1_PSMC1P13  | ENSG00000160789.18_LMNA | -0.03169 | -0.189937105 | 0.128152544 | 6.98E-01 | 8.71E-01 | 1.00E+00 |
| ENSG00000232058.1_AC005772  | ENSG00000160789.18_LMNA | -0.13039 | -0.283702055 | 0.029420914 | 1.09E-01 | 3.29E-01 | 1.00E+00 |
| ENSG00000232293.2_PAICSP7   | ENSG00000160789.18_LMNA | -0.04362 | -0.201425508 | 0.116385298 | 5.94E-01 | 8.12E-01 | 1.00E+00 |
| ENSG00000261776.1_RP11-358L | ENSG00000160789.18_LMNA | -0.06416 | -0.221105409 | 0.09601825  | 4.32E-01 | 7.02E-01 | 1.00E+00 |
| ENSG00000262526.2_CTD-2545C | ENSG00000160789.18_LMNA | 0.01012  | -0.149321866 | 0.169047759 | 9.02E-01 | 9.62E-01 | 1.00E+00 |
| ENSG00000213100.2_KRT18P68  | ENSG00000160789.18_LMNA | 0.20727  | 0.049705367  | 0.354760652 | 1.04E-02 | 6.74E-02 | 1.00E+00 |
| ENSG00000204687.4_MAS1L     | ENSG00000160789.18_LMNA | 0.06683  | -0.093367637 | 0.223647742 | 4.13E-01 | 6.87E-01 | 1.00E+00 |
| ENSG00000214819.1_CDRT15L2  | ENSG00000160789.18_LMNA | -0.06583 | -0.222700679 | 0.094355562 | 4.20E-01 | 6.92E-01 | 1.00E+00 |

|                              |                         |          |              |             |          |          |          |
|------------------------------|-------------------------|----------|--------------|-------------|----------|----------|----------|
| ENSG00000232225.5_LINC01047  | ENSG00000160789.18_LMNA | 0.03033  | -0.129495615 | 0.188620298 | 7.11E-01 | 8.77E-01 | 1.00E+00 |
| ENSG00000267320.4_AC005780.  | ENSG00000160789.18_LMNA | 0.07711  | -0.083112518 | 0.233443465 | 3.45E-01 | 6.29E-01 | 1.00E+00 |
| ENSG00000136839.1_OR13C9     | ENSG00000160789.18_LMNA | -0.13055 | -0.283852925 | 0.029256973 | 1.09E-01 | 3.28E-01 | 1.00E+00 |
| ENSG00000216629.1_OR2W4P     | ENSG00000160789.18_LMNA | 0.02815  | -0.13164554  | 0.186510032 | 7.31E-01 | 8.86E-01 | 1.00E+00 |
| ENSG00000251567.4_RP11-775H  | ENSG00000160789.18_LMNA | -0.03216 | -0.19039004  | 0.127690305 | 6.94E-01 | 8.69E-01 | 1.00E+00 |
| ENSG00000269931.1_RP5-1069C  | ENSG00000160789.18_LMNA | 0.18437  | 0.025932922  | 0.333776068 | 2.30E-02 | 1.19E-01 | 1.00E+00 |
| ENSG00000272027.2_RP11-529E  | ENSG00000160789.18_LMNA | 0.00611  | -0.153236459 | 0.165153347 | 9.40E-01 | 9.76E-01 | 1.00E+00 |
| ENSG00000251166.1_OR7E163P   | ENSG00000160789.18_LMNA | -0.10024 | -0.25536822  | 0.059913981 | 2.19E-01 | 4.94E-01 | 1.00E+00 |
| ENSG00000267343.1_ZNF833P    | ENSG00000160789.18_LMNA | -0.09199 | -0.247561213 | 0.068213789 | 2.60E-01 | 5.43E-01 | 1.00E+00 |
| ENSG00000205330.3_OR6C1      | ENSG00000160789.18_LMNA | -0.02845 | -0.186801836 | 0.131348431 | 7.28E-01 | 8.85E-01 | 1.00E+00 |
| ENSG00000153230.4_OR14K1     | ENSG00000160789.18_LMNA | 0.05396  | -0.106155254 | 0.211342586 | 5.09E-01 | 7.59E-01 | 1.00E+00 |
| ENSG00000263241.1_MTCYBP33   | ENSG00000160789.18_LMNA | 0.06199  | -0.098176548 | 0.219032091 | 4.48E-01 | 7.14E-01 | 1.00E+00 |
| ENSG00000253584.1_CTD-2374C  | ENSG00000160789.18_LMNA | 0.03707  | -0.122853765 | 0.195121125 | 6.50E-01 | 8.45E-01 | 1.00E+00 |
| ENSG00000225781.1_OR6V1      | ENSG00000160789.18_LMNA | -0.07738 | -0.233704844 | 0.082837959 | 3.43E-01 | 6.28E-01 | 1.00E+00 |
| ENSG00000234146.1_AKAP8P1    | ENSG00000160789.18_LMNA | 0.02547  | -0.134273928 | 0.183926134 | 7.55E-01 | 8.98E-01 | 1.00E+00 |
| ENSG00000218839.4_FAM138C    | ENSG00000160789.18_LMNA | -0.0336  | -0.191775073 | 0.126275964 | 6.81E-01 | 8.61E-01 | 1.00E+00 |
| ENSG00000141194.5_OR4D1      | ENSG00000160789.18_LMNA | 0.05128  | -0.108805511 | 0.208779667 | 5.30E-01 | 7.73E-01 | 1.00E+00 |
| ENSG00000181296.3_OR5G1P     | ENSG00000160789.18_LMNA | 0.00586  | -0.153486571 | 0.164904186 | 9.43E-01 | 9.77E-01 | 1.00E+00 |
| ENSG00000249555.2_TMEN248P   | ENSG00000160789.18_LMNA | -0.08216 | -0.238242068 | 0.078064287 | 3.14E-01 | 6.01E-01 | 1.00E+00 |
| ENSG00000255009.4_UBTFL1     | ENSG00000160789.18_LMNA | -0.10011 | -0.255246579 | 0.060043636 | 2.20E-01 | 4.95E-01 | 1.00E+00 |
| ENSG00000240097.1_RP11-641C  | ENSG00000160789.18_LMNA | -0.09014 | -0.245814297 | 0.07006501  | 2.69E-01 | 5.54E-01 | 1.00E+00 |
| ENSG00000205649.6_HTN3       | ENSG00000160789.18_LMNA | -0.01289 | -0.171739757 | 0.146610073 | 8.75E-01 | 9.51E-01 | 1.00E+00 |
| ENSG00000253725.1_RP11-2114. | ENSG00000160789.18_LMNA | 0.08323  | -0.076994674 | 0.23925681  | 3.08E-01 | 5.95E-01 | 1.00E+00 |
| ENSG00000179055.6_OR13D1     | ENSG00000160789.18_LMNA | -0.04708 | -0.20474863  | 0.1129648   | 5.65E-01 | 7.95E-01 | 1.00E+00 |
| ENSG00000261284.2_RBM22P13   | ENSG00000160789.18_LMNA | -0.07121 | -0.227828748 | 0.088998765 | 3.83E-01 | 6.62E-01 | 1.00E+00 |
| ENSG00000181518.3_OR8D4      | ENSG00000160789.18_LMNA | 0.01809  | -0.141522121 | 0.17677777  | 8.25E-01 | 9.31E-01 | 1.00E+00 |
| ENSG00000237119.1_LINC01056  | ENSG00000160789.18_LMNA | -0.04898 | -0.206567533 | 0.111089404 | 5.49E-01 | 7.86E-01 | 1.00E+00 |
| ENSG00000225657.2_RP5-843L1  | ENSG00000160789.18_LMNA | -0.01698 | -0.175701172 | 0.142610806 | 8.36E-01 | 9.36E-01 | 1.00E+00 |
| ENSG00000182613.1_OR2V2      | ENSG00000160789.18_LMNA | 0.0629   | -0.097277752 | 0.219895846 | 4.41E-01 | 7.09E-01 | 1.00E+00 |
| ENSG00000249065.2_PCNA1      | ENSG00000160789.18_LMNA | -0.05289 | -0.210316043 | 0.10721732  | 5.18E-01 | 7.64E-01 | 1.00E+00 |
| ENSG00000254597.1_FAM90A10I  | ENSG00000160789.18_LMNA | 0.12796  | -0.031892431 | 0.281425732 | 1.16E-01 | 3.41E-01 | 1.00E+00 |
| ENSG00000203664.6_OR2W5      | ENSG00000160789.18_LMNA | -0.09927 | -0.254451244 | 0.060891105 | 2.24E-01 | 4.99E-01 | 1.00E+00 |
| ENSG00000279682.1_RP11-791N  | ENSG00000160789.18_LMNA | 0.05388  | -0.106236519 | 0.211264064 | 5.10E-01 | 7.59E-01 | 1.00E+00 |

|                              |                         |          |              |             |          |          |          |
|------------------------------|-------------------------|----------|--------------|-------------|----------|----------|----------|
| ENSG00000204518.2_AADACL4    | ENSG00000160789.18_LMNA | -0.15343 | -0.305174606 | 0.00591718  | 5.91E-02 | 2.23E-01 | 1.00E+00 |
| ENSG00000225198.1_SSXP3      | ENSG00000160789.18_LMNA | 0.00933  | -0.150092341 | 0.168282042 | 9.09E-01 | 9.65E-01 | 1.00E+00 |
| ENSG00000163217.1_BMP10      | ENSG00000160789.18_LMNA | 0.00179  | -0.157454504 | 0.160945904 | 9.83E-01 | 9.94E-01 | 1.00E+00 |
| ENSG00000204979.6_MS4A13     | ENSG00000160789.18_LMNA | -0.01593 | -0.174687917 | 0.143634733 | 8.46E-01 | 9.40E-01 | 1.00E+00 |
| ENSG00000227789.1_MTCYBP7    | ENSG00000160789.18_LMNA | -0.00998 | -0.168912483 | 0.14945801  | 9.03E-01 | 9.63E-01 | 1.00E+00 |
| ENSG00000279165.1_CTD-2144E  | ENSG00000160789.18_LMNA | -0.11504 | -0.269304686 | 0.044988637 | 1.58E-01 | 4.11E-01 | 1.00E+00 |
| ENSG00000227841.1_MTND5P31   | ENSG00000160789.18_LMNA | 0.1506   | -0.008815499 | 0.302543748 | 6.40E-02 | 2.36E-01 | 1.00E+00 |
| ENSG00000233570.1_LINC00690  | ENSG00000160789.18_LMNA | 0.14337  | -0.016204168 | 0.295815382 | 7.81E-02 | 2.68E-01 | 1.00E+00 |
| ENSG00000255305.1_RP11-529A  | ENSG00000160789.18_LMNA | -0.17548 | -0.325586641 | -0.01674901 | 3.06E-02 | 1.45E-01 | 1.00E+00 |
| ENSG00000172297.7_GOLGA2P3   | ENSG00000160789.18_LMNA | 0.01817  | -0.141435086 | 0.176863806 | 8.24E-01 | 9.31E-01 | 1.00E+00 |
| ENSG00000265240.1_RP11-638L  | ENSG00000160789.18_LMNA | 0.00602  | -0.153325083 | 0.165065064 | 9.41E-01 | 9.77E-01 | 1.00E+00 |
| ENSG00000262880.1_RP11-104H  | ENSG00000160789.18_LMNA | -0.00362 | -0.162725982 | 0.155671357 | 9.65E-01 | 9.86E-01 | 1.00E+00 |
| ENSG00000181514.6_RP3-474G1  | ENSG00000160789.18_LMNA | -0.05431 | -0.211676267 | 0.10580987  | 5.06E-01 | 7.57E-01 | 1.00E+00 |
| ENSG00000278631.1_RP11-71B7  | ENSG00000160789.18_LMNA | -0.0301  | -0.188398034 | 0.129722197 | 7.13E-01 | 8.78E-01 | 1.00E+00 |
| ENSG00000271647.1_KRT8P47    | ENSG00000160789.18_LMNA | 0.09996  | -0.060194108 | 0.255105395 | 2.20E-01 | 4.96E-01 | 1.00E+00 |
| ENSG00000213231.11_TCL1B     | ENSG00000160789.18_LMNA | 0.05172  | -0.108374532 | 0.20919674  | 5.27E-01 | 7.72E-01 | 1.00E+00 |
| ENSG00000183695.2_MRGPRX2    | ENSG00000160789.18_LMNA | -0.05996 | -0.217085025 | 0.100200706 | 4.63E-01 | 7.26E-01 | 1.00E+00 |
| ENSG00000267252.4_LINC01255  | ENSG00000160789.18_LMNA | -0.00683 | -0.165851348 | 0.152535575 | 9.33E-01 | 9.74E-01 | 1.00E+00 |
| ENSG00000254066.1_CTB-181F2  | ENSG00000160789.18_LMNA | -0.04052 | -0.198436497 | 0.119455469 | 6.20E-01 | 8.28E-01 | 1.00E+00 |
| ENSG00000237746.1_ZNF101P1   | ENSG00000160789.18_LMNA | 0.02551  | -0.134235979 | 0.183963472 | 7.55E-01 | 8.98E-01 | 1.00E+00 |
| ENSG00000271434.3_RP13-238F  | ENSG00000160789.18_LMNA | -0.07863 | -0.234891634 | 0.081590724 | 3.36E-01 | 6.21E-01 | 1.00E+00 |
| ENSG00000260402.1_RP11-56L1  | ENSG00000160789.18_LMNA | 0.01428  | -0.145254115 | 0.173084035 | 8.61E-01 | 9.46E-01 | 1.00E+00 |
| ENSG00000224674.1_EIF3EP2    | ENSG00000160789.18_LMNA | 0.03152  | -0.128321366 | 0.189771648 | 7.00E-01 | 8.72E-01 | 1.00E+00 |
| ENSG00000229621.1_AC018742   | ENSG00000160789.18_LMNA | -0.11487 | -0.269149571 | 0.045155534 | 1.59E-01 | 4.12E-01 | 1.00E+00 |
| ENSG00000277095.1_CH17-333M  | ENSG00000160789.18_LMNA | 0.02892  | -0.130880455 | 0.187261341 | 7.24E-01 | 8.83E-01 | 1.00E+00 |
| ENSG00000273840.1_AL078471.5 | ENSG00000160789.18_LMNA | 0.01393  | -0.14559327  | 0.172747913 | 8.65E-01 | 9.47E-01 | 1.00E+00 |
| ENSG00000205866.3_FAM99A     | ENSG00000160789.18_LMNA | -0.04979 | -0.207343173 | 0.110288985 | 5.42E-01 | 7.81E-01 | 1.00E+00 |
| ENSG00000234934.1_MTND5P29   | ENSG00000160789.18_LMNA | 0.03178  | -0.128066556 | 0.190021373 | 6.97E-01 | 8.70E-01 | 1.00E+00 |
| ENSG00000186458.4_DEFB132    | ENSG00000160789.18_LMNA | 0.00575  | -0.153591861 | 0.164799284 | 9.44E-01 | 9.78E-01 | 1.00E+00 |
| ENSG00000212856.5_TTTY2B     | ENSG00000160789.18_LMNA | -0.09975 | -0.254901651 | 0.060411229 | 2.21E-01 | 4.97E-01 | 1.00E+00 |
| ENSG00000156284.5_CLDN8      | ENSG00000160789.18_LMNA | -0.14465 | -0.29700728  | 0.014897779 | 7.54E-02 | 2.62E-01 | 1.00E+00 |
| ENSG00000228308.1_LINC01209  | ENSG00000160789.18_LMNA | -0.11353 | -0.267889123 | 0.046511072 | 1.64E-01 | 4.19E-01 | 1.00E+00 |
| ENSG00000270316.1_BORCS7-A   | ENSG00000160789.18_LMNA | -0.04853 | -0.20614185  | 0.111528511 | 5.53E-01 | 7.88E-01 | 1.00E+00 |

|                             |                         |          |              |             |          |          |          |
|-----------------------------|-------------------------|----------|--------------|-------------|----------|----------|----------|
| ENSG00000267172.1_RP11-397A | ENSG00000160789.18_LMNA | -0.02966 | -0.187974491 | 0.130153877 | 7.17E-01 | 8.80E-01 | 1.00E+00 |
| ENSG00000274827.3_LINC01297 | ENSG00000160789.18_LMNA | -0.14283 | -0.29531343  | 0.016754017 | 7.92E-02 | 2.70E-01 | 1.00E+00 |
| ENSG00000258233.1_ARHGAP42  | ENSG00000160789.18_LMNA | 0.01438  | -0.145155312 | 0.173181941 | 8.60E-01 | 9.45E-01 | 1.00E+00 |
| ENSG00000260676.4_LINC01541 | ENSG00000160789.18_LMNA | -0.02213 | -0.180689728 | 0.137559755 | 7.87E-01 | 9.13E-01 | 1.00E+00 |
| ENSG00000165471.6_MBL2      | ENSG00000160789.18_LMNA | -0.0301  | -0.188396553 | 0.129723707 | 7.13E-01 | 8.78E-01 | 1.00E+00 |
| ENSG00000230768.6_RP11-251P | ENSG00000160789.18_LMNA | -0.03198 | -0.19021652  | 0.127867406 | 6.96E-01 | 8.70E-01 | 1.00E+00 |
| ENSG00000224539.1_SAGE4P    | ENSG00000160789.18_LMNA | -0.12315 | -0.276918773 | 0.036774579 | 1.31E-01 | 3.66E-01 | 1.00E+00 |
| ENSG00000260551.1_PWRN2     | ENSG00000160789.18_LMNA | -0.04827 | -0.205890001 | 0.111788243 | 5.55E-01 | 7.89E-01 | 1.00E+00 |
| ENSG00000260090.1_RP11-292D | ENSG00000160789.18_LMNA | -0.04023 | -0.198165709 | 0.119733309 | 6.23E-01 | 8.30E-01 | 1.00E+00 |
| ENSG00000224127.1_RP11-510C | ENSG00000160789.18_LMNA | 0.04345  | -0.116553084 | 0.201262311 | 5.95E-01 | 8.13E-01 | 1.00E+00 |
| ENSG00000207805.2_MIR483    | ENSG00000160789.18_LMNA | -0.1651  | -0.315991061 | -0.00605408 | 4.21E-02 | 1.79E-01 | 1.00E+00 |
| ENSG00000280900.1_          | ENSG00000160789.18_LMNA | -0.09591 | -0.251276196 | 0.064269749 | 2.40E-01 | 5.19E-01 | 1.00E+00 |
| ENSG00000270705.1_RP11-736N | ENSG00000160789.18_LMNA | -0.01715 | -0.175869239 | 0.142440903 | 8.34E-01 | 9.35E-01 | 1.00E+00 |
| ENSG00000280493.1_          | ENSG00000160789.18_LMNA | 0.00771  | -0.151680397 | 0.166702577 | 9.25E-01 | 9.71E-01 | 1.00E+00 |
| ENSG00000238500.1_RNU7-87P  | ENSG00000160789.18_LMNA | -0.00655 | -0.165579654 | 0.15280843  | 9.36E-01 | 9.75E-01 | 1.00E+00 |
| ENSG00000221747.1_          | ENSG00000160789.18_LMNA | 0.00957  | -0.149858182 | 0.168514795 | 9.07E-01 | 9.64E-01 | 1.00E+00 |
| ENSG00000251785.1_RNA5SP20  | ENSG00000160789.18_LMNA | 0.00418  | -0.155119884 | 0.163276087 | 9.59E-01 | 9.84E-01 | 1.00E+00 |
| ENSG00000263713.1_          | ENSG00000160789.18_LMNA | 0.05139  | -0.108697283 | 0.208884414 | 5.29E-01 | 7.73E-01 | 1.00E+00 |
| ENSG00000211854.1_TRAJ35    | ENSG00000160789.18_LMNA | 0.07252  | -0.087690455 | 0.22907853  | 3.75E-01 | 6.55E-01 | 1.00E+00 |
| ENSG00000200150.1_SNORD113  | ENSG00000160789.18_LMNA | -0.05964 | -0.216785984 | 0.100511354 | 4.65E-01 | 7.27E-01 | 1.00E+00 |
| ENSG00000275884.1_          | ENSG00000160789.18_LMNA | -0.04419 | -0.201972607 | 0.115822686 | 5.89E-01 | 8.09E-01 | 1.00E+00 |
| ENSG00000275270.1_          | ENSG00000160789.18_LMNA | -0.09108 | -0.246702331 | 0.069124225 | 2.64E-01 | 5.48E-01 | 1.00E+00 |
| ENSG00000207835.1_          | ENSG00000160789.18_LMNA | 0.03194  | -0.127912539 | 0.190172296 | 6.96E-01 | 8.70E-01 | 1.00E+00 |
| ENSG00000252145.1_RNU6-1225 | ENSG00000160789.18_LMNA | -0.12809 | -0.281546208 | 0.031761719 | 1.16E-01 | 3.40E-01 | 1.00E+00 |
| ENSG00000265768.1_MIR4506   | ENSG00000160789.18_LMNA | -0.22681 | -0.372555869 | -0.07013925 | 4.96E-03 | 3.90E-02 | 1.00E+00 |
| ENSG00000277255.1_MIR7854   | ENSG00000160789.18_LMNA | -0.12238 | -0.276199692 | 0.037552138 | 1.33E-01 | 3.70E-01 | 1.00E+00 |
| ENSG00000208033.1_MIR609    | ENSG00000160789.18_LMNA | 0.13794  | -0.021739664 | 0.290754208 | 9.01E-02 | 2.92E-01 | 1.00E+00 |
| ENSG00000280363.1_CU104787. | ENSG00000160789.18_LMNA | 0.07841  | -0.081814616 | 0.234678662 | 3.37E-01 | 6.22E-01 | 1.00E+00 |
| ENSG00000207044.1_RNU6-1226 | ENSG00000160789.18_LMNA | -0.11477 | -0.269058496 | 0.045253518 | 1.59E-01 | 4.12E-01 | 1.00E+00 |
| ENSG00000221355.1_MIR1288   | ENSG00000160789.18_LMNA | -0.20631 | -0.353888799 | -0.04871075 | 1.08E-02 | 6.91E-02 | 1.00E+00 |
| ENSG00000207836.1_          | ENSG00000160789.18_LMNA | 0.01165  | -0.147822496 | 0.170536771 | 8.87E-01 | 9.56E-01 | 1.00E+00 |
| ENSG00000276765.1_MIR8073   | ENSG00000160789.18_LMNA | -0.09803 | -0.253278552 | 0.062139836 | 2.30E-01 | 5.07E-01 | 1.00E+00 |
| ENSG00000239119.1_RNU7-119F | ENSG00000160789.18_LMNA | -0.19384 | -0.342476554 | -0.03574722 | 1.67E-02 | 9.49E-02 | 1.00E+00 |

|                             |                         |          |              |             |          |          |          |
|-----------------------------|-------------------------|----------|--------------|-------------|----------|----------|----------|
| ENSG00000278392.1_          | ENSG00000160789.18_LMNA | 0.11707  | -0.042934702 | 0.271212288 | 1.51E-01 | 3.99E-01 | 1.00E+00 |
| ENSG00000277756.1_          | ENSG00000160789.18_LMNA | 0.06741  | -0.092791073 | 0.224200182 | 4.09E-01 | 6.83E-01 | 1.00E+00 |
| ENSG00000266671.3_          | ENSG00000160789.18_LMNA | 0.10815  | -0.051945475 | 0.26282511  | 1.85E-01 | 4.50E-01 | 1.00E+00 |
| ENSG00000201942.1_RNA5SP36  | ENSG00000160789.18_LMNA | -0.07008 | -0.226754342 | 0.090122612 | 3.91E-01 | 6.69E-01 | 1.00E+00 |
| ENSG00000175646.3_PRM1      | ENSG00000160789.18_LMNA | 0.03161  | -0.128231394 | 0.189859829 | 6.99E-01 | 8.71E-01 | 1.00E+00 |
| ENSG00000266154.1_          | ENSG00000160789.18_LMNA | 0.01752  | -0.142079351 | 0.176226822 | 8.30E-01 | 9.34E-01 | 1.00E+00 |
| ENSG00000280742.1_          | ENSG00000160789.18_LMNA | 0.03041  | -0.129414822 | 0.188699544 | 7.10E-01 | 8.77E-01 | 1.00E+00 |
| ENSG00000275273.1_MIR6780A  | ENSG00000160789.18_LMNA | 0.09293  | -0.067270095 | 0.248450947 | 2.55E-01 | 5.37E-01 | 1.00E+00 |
| ENSG00000277202.1_MIR8063   | ENSG00000160789.18_LMNA | -0.038   | -0.196016513 | 0.121936716 | 6.42E-01 | 8.41E-01 | 1.00E+00 |
| ENSG00000266415.1_MIR4636   | ENSG00000160789.18_LMNA | -0.05184 | -0.209310126 | 0.108257345 | 5.26E-01 | 7.71E-01 | 1.00E+00 |
| ENSG00000264725.1_MIR3129   | ENSG00000160789.18_LMNA | 0.00767  | -0.151714668 | 0.166668473 | 9.25E-01 | 9.71E-01 | 1.00E+00 |
| ENSG00000200926.1_RNU6-960F | ENSG00000160789.18_LMNA | -0.02586 | -0.184306629 | 0.133887162 | 7.52E-01 | 8.97E-01 | 1.00E+00 |
| ENSG00000255866.1_RP11-221N | ENSG00000160789.18_LMNA | -0.09605 | -0.251406836 | 0.064130874 | 2.39E-01 | 5.18E-01 | 1.00E+00 |
| ENSG00000279167.1_bP-2168N6 | ENSG00000160789.18_LMNA | 0.06886  | -0.091342057 | 0.225587672 | 3.99E-01 | 6.76E-01 | 1.00E+00 |
| ENSG00000281774.1_          | ENSG00000160789.18_LMNA | -0.11338 | -0.267750519 | 0.046660062 | 1.64E-01 | 4.20E-01 | 1.00E+00 |
| ENSG00000221662.1_MIR1290   | ENSG00000160789.18_LMNA | 0.02104  | -0.138629702 | 0.179634384 | 7.97E-01 | 9.18E-01 | 1.00E+00 |
| ENSG00000264139.1_MIR3667   | ENSG00000160789.18_LMNA | 0.01197  | -0.147513998 | 0.170842957 | 8.84E-01 | 9.55E-01 | 1.00E+00 |
| ENSG00000266583.1_MIR4478   | ENSG00000160789.18_LMNA | 0.03322  | -0.126651341 | 0.191407599 | 6.85E-01 | 8.63E-01 | 1.00E+00 |
| ENSG00000276350.1_MIR6858   | ENSG00000160789.18_LMNA | 0.00022  | -0.158990391 | 0.159410998 | 9.98E-01 | 9.99E-01 | 1.00E+00 |
| ENSG00000272253.1_RNA5SP38  | ENSG00000160789.18_LMNA | 0.06747  | -0.09273017  | 0.224258525 | 4.09E-01 | 6.83E-01 | 1.00E+00 |
| ENSG00000200455.1_RNU6-1112 | ENSG00000160789.18_LMNA | -0.01926 | -0.177917843 | 0.14036841  | 8.14E-01 | 9.27E-01 | 1.00E+00 |
| ENSG00000250350.1_RP11-731D | ENSG00000160789.18_LMNA | -0.07501 | -0.231445102 | 0.085210057 | 3.58E-01 | 6.41E-01 | 1.00E+00 |
| ENSG00000277665.1_          | ENSG00000160789.18_LMNA | 0.0119   | -0.14758234  | 0.170775133 | 8.84E-01 | 9.55E-01 | 1.00E+00 |
| ENSG00000280793.1_          | ENSG00000160789.18_LMNA | -0.04896 | -0.206553567 | 0.111103812 | 5.49E-01 | 7.86E-01 | 1.00E+00 |
| ENSG00000266324.1_MIR4663   | ENSG00000160789.18_LMNA | 0.10936  | -0.050721828 | 0.263966873 | 1.80E-01 | 4.43E-01 | 1.00E+00 |
| ENSG00000207472.1_RNU6-41P  | ENSG00000160789.18_LMNA | -0.10826 | -0.262930766 | 0.051832282 | 1.84E-01 | 4.50E-01 | 1.00E+00 |
| ENSG00000200520.1_RNU6-1214 | ENSG00000160789.18_LMNA | 0.11927  | -0.040700125 | 0.273284864 | 1.43E-01 | 3.87E-01 | 1.00E+00 |
| ENSG00000207698.1_MIR32     | ENSG00000160789.18_LMNA | 0.06397  | -0.096207374 | 0.220923846 | 4.34E-01 | 7.03E-01 | 1.00E+00 |
| ENSG00000221176.1_MIR1207   | ENSG00000160789.18_LMNA | 0.0362   | -0.12371007  | 0.194284567 | 6.58E-01 | 8.49E-01 | 1.00E+00 |
| ENSG00000238704.1_RNU7-97P  | ENSG00000160789.18_LMNA | 0.12301  | -0.036915186 | 0.276788767 | 1.31E-01 | 3.67E-01 | 1.00E+00 |
| ENSG00000221542.1_          | ENSG00000160789.18_LMNA | -0.11628 | -0.270470259 | 0.043733969 | 1.54E-01 | 4.04E-01 | 1.00E+00 |
| ENSG00000222467.1_Y_RNA     | ENSG00000160789.18_LMNA | 0.10128  | -0.058865054 | 0.25635195  | 2.14E-01 | 4.89E-01 | 1.00E+00 |
| ENSG00000201744.1_RNU6-34P  | ENSG00000160789.18_LMNA | -0.00165 | -0.160807249 | 0.157593311 | 9.84E-01 | 9.94E-01 | 1.00E+00 |

|                              |                         |          |              |             |          |          |          |
|------------------------------|-------------------------|----------|--------------|-------------|----------|----------|----------|
| ENSG00000280075.1_RP11-555K  | ENSG00000160789.18_LMNA | -0.02927 | -0.187594299 | 0.13054127  | 7.20E-01 | 8.81E-01 | 1.00E+00 |
| ENSG00000200247.1_RNU6-254F  | ENSG00000160789.18_LMNA | 0.12149  | -0.038457253 | 0.275362207 | 1.36E-01 | 3.75E-01 | 1.00E+00 |
| ENSG00000207257.1_RNU6-18P   | ENSG00000160789.18_LMNA | 0.02725  | -0.132526133 | 0.185644834 | 7.39E-01 | 8.90E-01 | 1.00E+00 |
| ENSG00000221772.3_           | ENSG00000160789.18_LMNA | -0.10968 | -0.264265254 | 0.050401892 | 1.79E-01 | 4.41E-01 | 1.00E+00 |
| ENSG00000238590.1_RNU7-54P   | ENSG00000160789.18_LMNA | 0.06765  | -0.092543035 | 0.224437779 | 4.08E-01 | 6.83E-01 | 1.00E+00 |
| ENSG00000281329.1_           | ENSG00000160789.18_LMNA | 0.02892  | -0.130881777 | 0.187260043 | 7.24E-01 | 8.83E-01 | 1.00E+00 |
| ENSG00000207310.1_RNU6-1127  | ENSG00000160789.18_LMNA | -0.15662 | -0.308136248 | 0.002648182 | 5.40E-02 | 2.11E-01 | 1.00E+00 |
| ENSG00000252125.1_RNU6-1299  | ENSG00000160789.18_LMNA | 0.03006  | -0.129765493 | 0.188355556 | 7.13E-01 | 8.78E-01 | 1.00E+00 |
| ENSG00000201458.1_RNU4-4P    | ENSG00000160789.18_LMNA | 0.00718  | -0.152199266 | 0.166186161 | 9.30E-01 | 9.73E-01 | 1.00E+00 |
| ENSG00000212319.1_Y_RNA      | ENSG00000160789.18_LMNA | 0.05973  | -0.100426861 | 0.216867326 | 4.65E-01 | 7.27E-01 | 1.00E+00 |
| ENSG00000251748.1_RNU4ATAC   | ENSG00000160789.18_LMNA | -0.00831 | -0.167287622 | 0.151092361 | 9.19E-01 | 9.69E-01 | 1.00E+00 |
| ENSG00000206717.1_Y_RNA      | ENSG00000160789.18_LMNA | -0.12848 | -0.281915847 | 0.031360611 | 1.15E-01 | 3.38E-01 | 1.00E+00 |
| ENSG00000200882.1_RNU6-681F  | ENSG00000160789.18_LMNA | 0.06525  | -0.094938067 | 0.222141986 | 4.24E-01 | 6.95E-01 | 1.00E+00 |
| ENSG00000222101.1_           | ENSG00000160789.18_LMNA | -0.09563 | -0.251010558 | 0.064552093 | 2.41E-01 | 5.20E-01 | 1.00E+00 |
| ENSG00000255648.1_RP11-361I1 | ENSG00000160789.18_LMNA | 0.06322  | -0.096956371 | 0.220204578 | 4.39E-01 | 7.07E-01 | 1.00E+00 |
| ENSG00000253370.2_CTB-56J15  | ENSG00000160789.18_LMNA | -0.10114 | -0.256212331 | 0.059013968 | 2.15E-01 | 4.89E-01 | 1.00E+00 |
| ENSG00000275370.1_           | ENSG00000160789.18_LMNA | 0.02958  | -0.13023608  | 0.187893824 | 7.18E-01 | 8.80E-01 | 1.00E+00 |
| ENSG00000222899.1_           | ENSG00000160789.18_LMNA | -0.00309 | -0.162206875 | 0.156191574 | 9.70E-01 | 9.88E-01 | 1.00E+00 |
| ENSG00000235822.1_LINC01073  | ENSG00000160789.18_LMNA | 0.05386  | -0.106254032 | 0.211247142 | 5.10E-01 | 7.59E-01 | 1.00E+00 |
| ENSG00000221302.1_           | ENSG00000160789.18_LMNA | -0.11991 | -0.273885177 | 0.040052302 | 1.41E-01 | 3.83E-01 | 1.00E+00 |
| ENSG00000276179.1_DLG2-AS1_  | ENSG00000160789.18_LMNA | 0.05411  | -0.10600207  | 0.211490588 | 5.08E-01 | 7.58E-01 | 1.00E+00 |
| ENSG00000202248.1_RNA5SP85   | ENSG00000160789.18_LMNA | 0.08497  | -0.075250453 | 0.240910074 | 2.98E-01 | 5.84E-01 | 1.00E+00 |
| ENSG00000202431.1_RNU6-438F  | ENSG00000160789.18_LMNA | -0.08361 | -0.239620414 | 0.076611232 | 3.06E-01 | 5.92E-01 | 1.00E+00 |
| ENSG00000201047.1_Y_RNA      | ENSG00000160789.18_LMNA | -0.1879  | -0.337014868 | -0.02957942 | 2.04E-02 | 1.10E-01 | 1.00E+00 |
| ENSG00000252594.1_RNU6-656F  | ENSG00000160789.18_LMNA | -0.07263 | -0.229176823 | 0.087587512 | 3.74E-01 | 6.54E-01 | 1.00E+00 |
| ENSG00000199299.1_RNA5SP43   | ENSG00000160789.18_LMNA | -0.03569 | -0.193792617 | 0.124213412 | 6.62E-01 | 8.51E-01 | 1.00E+00 |
| ENSG00000207994.1_MIR100     | ENSG00000160789.18_LMNA | -0.0857  | -0.241608264 | 0.07451327  | 2.94E-01 | 5.80E-01 | 1.00E+00 |
| ENSG00000266294.1_           | ENSG00000160789.18_LMNA | 0.03385  | -0.126033772 | 0.19201212  | 6.79E-01 | 8.60E-01 | 1.00E+00 |
| ENSG00000263576.1_           | ENSG00000160789.18_LMNA | -0.04815 | -0.20577741  | 0.111904346 | 5.56E-01 | 7.90E-01 | 1.00E+00 |
| ENSG00000207433.1_RNU6-246F  | ENSG00000160789.18_LMNA | -0.00059 | -0.159774267 | 0.158627029 | 9.94E-01 | 9.98E-01 | 1.00E+00 |
| ENSG00000207356.1_Y_RNA      | ENSG00000160789.18_LMNA | 0.06109  | -0.099071114 | 0.218171906 | 4.55E-01 | 7.19E-01 | 1.00E+00 |
| ENSG00000239275.1_           | ENSG00000160789.18_LMNA | -0.02182 | -0.180390931 | 0.137862762 | 7.90E-01 | 9.15E-01 | 1.00E+00 |
| ENSG00000252338.1_RNU6-503F  | ENSG00000160789.18_LMNA | -0.01819 | -0.176881594 | 0.141417091 | 8.24E-01 | 9.31E-01 | 1.00E+00 |



|                              |                         |          |              |             |          |          |          |
|------------------------------|-------------------------|----------|--------------|-------------|----------|----------|----------|
| ENSG00000232153.2_AC073218.1 | ENSG00000160789.18_LMNA | -0.12751 | -0.281006749 | 0.032346923 | 1.17E-01 | 3.43E-01 | 1.00E+00 |
| ENSG00000252368.1_RNA5SP43   | ENSG00000160789.18_LMNA | -0.05448 | -0.211846678 | 0.105633453 | 5.05E-01 | 7.56E-01 | 1.00E+00 |
| ENSG00000252832.1_RNU6-1212  | ENSG00000160789.18_LMNA | -0.07284 | -0.229383187 | 0.087371365 | 3.72E-01 | 6.53E-01 | 1.00E+00 |
| ENSG00000222293.1_RNU2-36P   | ENSG00000160789.18_LMNA | 0.03306  | -0.126808622 | 0.191253602 | 6.86E-01 | 8.64E-01 | 1.00E+00 |
| ENSG00000207281.1_Y_RNA      | ENSG00000160789.18_LMNA | 0.02249  | -0.13720038  | 0.181044034 | 7.83E-01 | 9.11E-01 | 1.00E+00 |
| ENSG00000275704.1_           | ENSG00000160789.18_LMNA | 0.01078  | -0.148671157 | 0.169694152 | 8.95E-01 | 9.59E-01 | 1.00E+00 |
| ENSG00000248627.1_RP11-428L  | ENSG00000160789.18_LMNA | -0.14029 | -0.292950469 | 0.019339925 | 8.47E-02 | 2.82E-01 | 1.00E+00 |
| ENSG00000258969.1_RP11-305B  | ENSG00000160789.18_LMNA | -0.12848 | -0.281918417 | 0.031357823 | 1.15E-01 | 3.38E-01 | 1.00E+00 |
| ENSG00000264572.1_MIR4296    | ENSG00000160789.18_LMNA | 0.03241  | -0.127446063 | 0.190629312 | 6.92E-01 | 8.67E-01 | 1.00E+00 |
| ENSG00000280988.1_           | ENSG00000160789.18_LMNA | 0.11439  | -0.045641587 | 0.268697738 | 1.61E-01 | 4.14E-01 | 1.00E+00 |
| ENSG00000207458.1_RNY3P9     | ENSG00000160789.18_LMNA | 0.10713  | -0.052978021 | 0.261860975 | 1.89E-01 | 4.56E-01 | 1.00E+00 |
| ENSG00000207552.1_MIR633     | ENSG00000160789.18_LMNA | -0.0711  | -0.22772608  | 0.089106192 | 3.84E-01 | 6.63E-01 | 1.00E+00 |
| ENSG00000200138.1_RNY1P10    | ENSG00000160789.18_LMNA | -0.03309 | -0.191283513 | 0.126778074 | 6.86E-01 | 8.64E-01 | 1.00E+00 |
| ENSG00000201370.1_Y_RNA      | ENSG00000160789.18_LMNA | -0.08546 | -0.241374888 | 0.074759718 | 2.95E-01 | 5.81E-01 | 1.00E+00 |
| ENSG00000221783.1_MIR1183    | ENSG00000160789.18_LMNA | -0.02582 | -0.184263128 | 0.133931385 | 7.52E-01 | 8.97E-01 | 1.00E+00 |
| ENSG00000264874.1_AC087499.1 | ENSG00000160789.18_LMNA | -0.01197 | -0.170843282 | 0.147513672 | 8.84E-01 | 9.55E-01 | 1.00E+00 |
| ENSG00000200597.1_RNU1-87P   | ENSG00000160789.18_LMNA | 0.04082  | -0.119153157 | 0.19873108  | 6.18E-01 | 8.27E-01 | 1.00E+00 |
| ENSG00000276558.1_           | ENSG00000160789.18_LMNA | 0.02248  | -0.137207538 | 0.181036978 | 7.83E-01 | 9.11E-01 | 1.00E+00 |
| ENSG00000199357.1_Y_RNA      | ENSG00000160789.18_LMNA | 0.00232  | -0.156934871 | 0.161464857 | 9.77E-01 | 9.91E-01 | 1.00E+00 |
| ENSG00000280659.1_           | ENSG00000160789.18_LMNA | 0.07236  | -0.087856402 | 0.228920064 | 3.76E-01 | 6.56E-01 | 1.00E+00 |
| ENSG00000221607.1_           | ENSG00000160789.18_LMNA | 0.05547  | -0.104655357 | 0.212791122 | 4.97E-01 | 7.51E-01 | 1.00E+00 |
| ENSG00000202259.1_RNU6-1318  | ENSG00000160789.18_LMNA | 0.16081  | 0.001649377  | 0.312020602 | 4.78E-02 | 1.95E-01 | 1.00E+00 |
| ENSG00000263525.1_           | ENSG00000160789.18_LMNA | 0.02352  | -0.136193941 | 0.182035837 | 7.74E-01 | 9.07E-01 | 1.00E+00 |
| ENSG00000212359.1_RNU6-550F  | ENSG00000160789.18_LMNA | -0.06335 | -0.220329422 | 0.096826392 | 4.38E-01 | 7.06E-01 | 1.00E+00 |
| ENSG00000264009.1_           | ENSG00000160789.18_LMNA | 0.09218  | -0.068021865 | 0.247742206 | 2.59E-01 | 5.42E-01 | 1.00E+00 |
| ENSG00000208023.2_MIR185     | ENSG00000160789.18_LMNA | -0.01781 | -0.176511242 | 0.141791713 | 8.28E-01 | 9.33E-01 | 1.00E+00 |
| ENSG00000223162.1_RNA5SP28   | ENSG00000160789.18_LMNA | -0.01117 | -0.170068728 | 0.148293953 | 8.91E-01 | 9.57E-01 | 1.00E+00 |
| ENSG00000237283.1_RP11-316L3 | ENSG00000160789.18_LMNA | -0.04364 | -0.201444348 | 0.116365928 | 5.93E-01 | 8.12E-01 | 1.00E+00 |
| ENSG00000258861.1_MIR381HG   | ENSG00000160789.18_LMNA | -0.0677  | -0.224480391 | 0.092498547 | 4.07E-01 | 6.82E-01 | 1.00E+00 |
| ENSG00000222579.1_Y_RNA      | ENSG00000160789.18_LMNA | 0.08271  | -0.077511406 | 0.238766673 | 3.11E-01 | 5.97E-01 | 1.00E+00 |
| ENSG00000251955.1_RNU6-27P   | ENSG00000160789.18_LMNA | -0.11632 | -0.270510045 | 0.043691123 | 1.54E-01 | 4.04E-01 | 1.00E+00 |
| ENSG00000265404.1_           | ENSG00000160789.18_LMNA | 0.06487  | -0.095312152 | 0.221783084 | 4.27E-01 | 6.98E-01 | 1.00E+00 |
| ENSG00000239041.1_snoU13     | ENSG00000160789.18_LMNA | 0.03482  | -0.125070516 | 0.192954544 | 6.70E-01 | 8.55E-01 | 1.00E+00 |

|                              |                         |          |              |             |          |          |          |
|------------------------------|-------------------------|----------|--------------|-------------|----------|----------|----------|
| ENSG00000267310.1_OR4G1P     | ENSG00000160789.18_LMNA | 0.00627  | -0.153079441 | 0.165309746 | 9.39E-01 | 9.76E-01 | 1.00E+00 |
| ENSG00000201086.1_RNA5SP39   | ENSG00000160789.18_LMNA | 0.0183   | -0.141310132 | 0.176987318 | 8.23E-01 | 9.31E-01 | 1.00E+00 |
| ENSG00000199512.1_RNU6-212F  | ENSG00000160789.18_LMNA | 0.11756  | -0.042431473 | 0.271679289 | 1.49E-01 | 3.96E-01 | 1.00E+00 |
| ENSG00000281871.1_           | ENSG00000160789.18_LMNA | -0.02393 | -0.182434866 | 0.135788838 | 7.70E-01 | 9.05E-01 | 1.00E+00 |
| ENSG00000227919.1_AL353997.1 | ENSG00000160789.18_LMNA | -0.08676 | -0.242608734 | 0.073456322 | 2.88E-01 | 5.73E-01 | 1.00E+00 |
| ENSG00000199866.1_Y_RNA      | ENSG00000160789.18_LMNA | -0.04403 | -0.201818324 | 0.115981364 | 5.90E-01 | 8.10E-01 | 1.00E+00 |
| ENSG00000264265.1_RP11-14P2  | ENSG00000160789.18_LMNA | -0.13393 | -0.287014494 | 0.025817585 | 1.00E-01 | 3.11E-01 | 1.00E+00 |
| ENSG00000280715.1_           | ENSG00000160789.18_LMNA | 0.0065   | -0.152862447 | 0.165525861 | 9.37E-01 | 9.75E-01 | 1.00E+00 |
| ENSG00000280280.1_RP1-59D14  | ENSG00000160789.18_LMNA | -0.09626 | -0.251604172 | 0.063921076 | 2.38E-01 | 5.17E-01 | 1.00E+00 |
| ENSG00000221070.1_           | ENSG00000160789.18_LMNA | -0.06057 | -0.217673087 | 0.099589637 | 4.59E-01 | 7.22E-01 | 1.00E+00 |
| ENSG00000212529.1_SNORA57    | ENSG00000160789.18_LMNA | -0.04148 | -0.199366445 | 0.118500921 | 6.12E-01 | 8.23E-01 | 1.00E+00 |
| ENSG00000221486.1_           | ENSG00000160789.18_LMNA | 0.04184  | -0.11814587  | 0.1997122   | 6.09E-01 | 8.21E-01 | 1.00E+00 |
| ENSG00000202513.1_RNU6-805F  | ENSG00000160789.18_LMNA | 0.05482  | -0.105302007 | 0.212166787 | 5.02E-01 | 7.54E-01 | 1.00E+00 |
| ENSG00000241794.1_SPRR2A     | ENSG00000160789.18_LMNA | -0.02335 | -0.181876175 | 0.136356003 | 7.75E-01 | 9.07E-01 | 1.00E+00 |
| ENSG00000202229.1_RNU6-1138  | ENSG00000160789.18_LMNA | -0.10998 | -0.264545463 | 0.050101382 | 1.77E-01 | 4.39E-01 | 1.00E+00 |
| ENSG00000207069.1_Y_RNA      | ENSG00000160789.18_LMNA | -0.21555 | -0.36231706  | -0.05835115 | 7.65E-03 | 5.38E-02 | 1.00E+00 |
| ENSG00000223040.1_RN7SKP14   | ENSG00000160789.18_LMNA | -0.07845 | -0.234714779 | 0.081776649 | 3.37E-01 | 6.22E-01 | 1.00E+00 |
| ENSG00000207412.1_RNU6-455F  | ENSG00000160789.18_LMNA | 0.00649  | -0.152863984 | 0.165524329 | 9.37E-01 | 9.75E-01 | 1.00E+00 |
| ENSG00000252944.1_RNU6-897F  | ENSG00000160789.18_LMNA | -0.03934 | -0.197308588 | 0.120612426 | 6.30E-01 | 8.34E-01 | 1.00E+00 |
| ENSG00000271693.1_CTD-2194M  | ENSG00000160789.18_LMNA | -0.13277 | -0.285924043 | 0.027004694 | 1.03E-01 | 3.18E-01 | 1.00E+00 |
| ENSG00000171711.2_DEFB4A     | ENSG00000160789.18_LMNA | 0.01876  | -0.140860677 | 0.1774315   | 8.19E-01 | 9.29E-01 | 1.00E+00 |
| ENSG00000231583.1_AC108938.1 | ENSG00000160789.18_LMNA | 0.13577  | -0.023946795 | 0.288731313 | 9.54E-02 | 3.03E-01 | 1.00E+00 |
| ENSG00000234087.1_CTD-3216D  | ENSG00000160789.18_LMNA | -0.03764 | -0.195671748 | 0.122289885 | 6.45E-01 | 8.42E-01 | 1.00E+00 |
| ENSG00000248293.1_CTC-281M2  | ENSG00000160789.18_LMNA | -0.00053 | -0.159716645 | 0.158684672 | 9.95E-01 | 9.98E-01 | 1.00E+00 |
| ENSG00000252941.1_RNA5SP34   | ENSG00000160789.18_LMNA | 0.14694  | -0.012555121 | 0.299142199 | 7.08E-02 | 2.51E-01 | 1.00E+00 |
| ENSG00000200153.1_RNU6-23P   | ENSG00000160789.18_LMNA | -0.11571 | -0.269941236 | 0.044303553 | 1.56E-01 | 4.07E-01 | 1.00E+00 |
| ENSG00000221753.1_MIR1273A   | ENSG00000160789.18_LMNA | 0.0776   | -0.082620782 | 0.233911565 | 3.42E-01 | 6.27E-01 | 1.00E+00 |
| ENSG00000200252.1_Y_RNA      | ENSG00000160789.18_LMNA | 0.12124  | -0.03870417  | 0.275133656 | 1.37E-01 | 3.76E-01 | 1.00E+00 |
| ENSG00000199405.1_SNORA1     | ENSG00000160789.18_LMNA | -0.02358 | -0.182101286 | 0.136127502 | 7.73E-01 | 9.06E-01 | 1.00E+00 |
| ENSG00000278453.1_           | ENSG00000160789.18_LMNA | 0.03647  | -0.123451174 | 0.194537542 | 6.56E-01 | 8.48E-01 | 1.00E+00 |
| ENSG00000202240.1_RNU6-737F  | ENSG00000160789.18_LMNA | -0.04674 | -0.204423483 | 0.113299808 | 5.67E-01 | 7.97E-01 | 1.00E+00 |
| ENSG00000206969.1_RNU6-1316  | ENSG00000160789.18_LMNA | 0.06765  | -0.092546572 | 0.224434391 | 4.08E-01 | 6.83E-01 | 1.00E+00 |
| ENSG00000251889.1_RNU4-49P   | ENSG00000160789.18_LMNA | -0.06647 | -0.223311563 | 0.093718392 | 4.16E-01 | 6.88E-01 | 1.00E+00 |

|                              |                         |          |              |             |          |          |          |
|------------------------------|-------------------------|----------|--------------|-------------|----------|----------|----------|
| ENSG00000277822.1_           | ENSG00000160789.18_LMNA | 0.02209  | -0.13759899  | 0.180651042 | 7.87E-01 | 9.13E-01 | 1.00E+00 |
| ENSG00000270747.1_RP11-344N  | ENSG00000160789.18_LMNA | -0.02721 | -0.18560989  | 0.132561689 | 7.39E-01 | 8.90E-01 | 1.00E+00 |
| ENSG00000237042.1_MICG       | ENSG00000160789.18_LMNA | -0.06036 | -0.217473326 | 0.09979724  | 4.60E-01 | 7.23E-01 | 1.00E+00 |
| ENSG00000252766.1_RNU6-255F  | ENSG00000160789.18_LMNA | -0.09923 | -0.254409124 | 0.060935973 | 2.24E-01 | 5.00E-01 | 1.00E+00 |
| ENSG00000278187.1_           | ENSG00000160789.18_LMNA | -0.07558 | -0.231986733 | 0.084641824 | 3.55E-01 | 6.38E-01 | 1.00E+00 |
| ENSG00000230376.1_MEMO1P4    | ENSG00000160789.18_LMNA | -0.00895 | -0.167908232 | 0.150468332 | 9.13E-01 | 9.67E-01 | 1.00E+00 |
| ENSG00000267766.1_RP11-299P  | ENSG00000160789.18_LMNA | -0.08348 | -0.239498039 | 0.076740295 | 3.07E-01 | 5.93E-01 | 1.00E+00 |
| ENSG00000201821.1_RNU4-9P    | ENSG00000160789.18_LMNA | 0.01469  | -0.144849451 | 0.173484984 | 8.57E-01 | 9.44E-01 | 1.00E+00 |
| ENSG00000222182.1_RNA5SP15   | ENSG00000160789.18_LMNA | 0.07908  | -0.081139422 | 0.235320832 | 3.33E-01 | 6.18E-01 | 1.00E+00 |
| ENSG00000274154.1_RP11-576N  | ENSG00000160789.18_LMNA | -0.03859 | -0.19658205  | 0.121357218 | 6.37E-01 | 8.38E-01 | 1.00E+00 |
| ENSG00000276835.1_MIR6127    | ENSG00000160789.18_LMNA | -0.09943 | -0.254602593 | 0.060729869 | 2.23E-01 | 4.99E-01 | 1.00E+00 |
| ENSG00000266042.1_AC015818.1 | ENSG00000160789.18_LMNA | 0.04099  | -0.118982263 | 0.19889758  | 6.16E-01 | 8.26E-01 | 1.00E+00 |
| ENSG00000199592.1_RNA5SP32   | ENSG00000160789.18_LMNA | 0.05287  | -0.107237466 | 0.210296565 | 5.18E-01 | 7.64E-01 | 1.00E+00 |
| ENSG00000248977.1_RP11-39516 | ENSG00000160789.18_LMNA | 0.04565  | -0.114379158 | 0.203375424 | 5.77E-01 | 8.03E-01 | 1.00E+00 |
| ENSG00000215938.2_MIR190B    | ENSG00000160789.18_LMNA | 0.10514  | -0.054983644 | 0.259986434 | 1.97E-01 | 4.67E-01 | 1.00E+00 |
| ENSG00000271618.1_RP11-175G  | ENSG00000160789.18_LMNA | -0.12688 | -0.280412934 | 0.032990844 | 1.19E-01 | 3.47E-01 | 1.00E+00 |
| ENSG00000255105.1_RP11-5A11  | ENSG00000160789.18_LMNA | 0.02317  | -0.136535965 | 0.181698859 | 7.77E-01 | 9.08E-01 | 1.00E+00 |
| ENSG00000274466.1_MIR1273H   | ENSG00000160789.18_LMNA | 0.11799  | -0.04200329  | 0.272076529 | 1.48E-01 | 3.94E-01 | 1.00E+00 |
| ENSG00000221631.1_           | ENSG00000160789.18_LMNA | -0.00561 | -0.164659851 | 0.153731799 | 9.45E-01 | 9.78E-01 | 1.00E+00 |
| ENSG00000243694.2_RP11-6B4.1 | ENSG00000160789.18_LMNA | 0.03993  | -0.120037994 | 0.197868703 | 6.25E-01 | 8.31E-01 | 1.00E+00 |
| ENSG00000233484.2_RP11-74B2  | ENSG00000160789.18_LMNA | 0.03603  | -0.123881445 | 0.194117089 | 6.59E-01 | 8.50E-01 | 1.00E+00 |
| ENSG00000264833.1_RN7SL468F  | ENSG00000160789.18_LMNA | -0.00751 | -0.166515122 | 0.151868762 | 9.27E-01 | 9.72E-01 | 1.00E+00 |
| ENSG00000222536.1_RNU2-39P   | ENSG00000160789.18_LMNA | 0.01767  | -0.141929914 | 0.176374594 | 8.29E-01 | 9.33E-01 | 1.00E+00 |
| ENSG00000212565.1_SNORA68    | ENSG00000160789.18_LMNA | 0.03747  | -0.122457924 | 0.195507681 | 6.47E-01 | 8.43E-01 | 1.00E+00 |
| ENSG00000281739.1_           | ENSG00000160789.18_LMNA | -0.16233 | -0.313426685 | -0.00320787 | 4.57E-02 | 1.90E-01 | 1.00E+00 |
| ENSG00000244391.3_RN7SL330F  | ENSG00000160789.18_LMNA | -0.00808 | -0.167064061 | 0.151317091 | 9.21E-01 | 9.70E-01 | 1.00E+00 |
| ENSG00000235738.1_RP11-419M  | ENSG00000160789.18_LMNA | 0.05184  | -0.108255776 | 0.209311644 | 5.26E-01 | 7.71E-01 | 1.00E+00 |
| ENSG00000263616.2_RN7SL178F  | ENSG00000160789.18_LMNA | -0.07961 | -0.235819685 | 0.080614714 | 3.30E-01 | 6.16E-01 | 1.00E+00 |
| ENSG00000217179.1_MTCYBP2    | ENSG00000160789.18_LMNA | 0.10838  | -0.051716189 | 0.26303912  | 1.84E-01 | 4.49E-01 | 1.00E+00 |
| ENSG00000220184.2_HMGB3P18   | ENSG00000160789.18_LMNA | 0.03704  | -0.122881377 | 0.195094157 | 6.50E-01 | 8.45E-01 | 1.00E+00 |
| ENSG00000242293.1_RPS29P1    | ENSG00000160789.18_LMNA | 0.13549  | -0.024234179 | 0.288467712 | 9.60E-02 | 3.04E-01 | 1.00E+00 |
| ENSG00000228770.1_AC007327.1 | ENSG00000160789.18_LMNA | -0.00102 | -0.160198663 | 0.158202415 | 9.90E-01 | 9.96E-01 | 1.00E+00 |
| ENSG00000259691.2_FKBP1AP2   | ENSG00000160789.18_LMNA | -0.09731 | -0.25259913  | 0.062862862 | 2.33E-01 | 5.11E-01 | 1.00E+00 |

|                              |                         |          |              |             |          |          |          |
|------------------------------|-------------------------|----------|--------------|-------------|----------|----------|----------|
| ENSG00000255575.1_RP1-267D1  | ENSG00000160789.18_LMNA | 0.14698  | -0.012515327 | 0.299178437 | 7.08E-02 | 2.51E-01 | 1.00E+00 |
| ENSG00000242963.1_RP11-143E  | ENSG00000160789.18_LMNA | 0.04196  | -0.11802654  | 0.199828389 | 6.08E-01 | 8.21E-01 | 1.00E+00 |
| ENSG00000222210.1_RN7SKP65   | ENSG00000160789.18_LMNA | -0.08873 | -0.244475578 | 0.07148219  | 2.77E-01 | 5.62E-01 | 1.00E+00 |
| ENSG00000231480.1_SNRPGP13   | ENSG00000160789.18_LMNA | -0.03496 | -0.193084725 | 0.124937409 | 6.69E-01 | 8.54E-01 | 1.00E+00 |
| ENSG00000200231.1_RNU1-23P   | ENSG00000160789.18_LMNA | 0.05982  | -0.100337693 | 0.216953164 | 4.64E-01 | 7.26E-01 | 1.00E+00 |
| ENSG00000255460.1_ZDHHC20P   | ENSG00000160789.18_LMNA | -0.12802 | -0.281480443 | 0.031833072 | 1.16E-01 | 3.41E-01 | 1.00E+00 |
| ENSG00000225380.4_IGKV1OR9   | ENSG00000160789.18_LMNA | 0.01438  | -0.14515269  | 0.173184539 | 8.60E-01 | 9.45E-01 | 1.00E+00 |
| ENSG00000226523.1_AC074375   | ENSG00000160789.18_LMNA | -0.00415 | -0.163243584 | 0.155152474 | 9.60E-01 | 9.84E-01 | 1.00E+00 |
| ENSG00000227167.1_RP11-570H  | ENSG00000160789.18_LMNA | -0.05686 | -0.214118721 | 0.103279418 | 4.87E-01 | 7.43E-01 | 1.00E+00 |
| ENSG00000279223.1_RP11-556I  | ENSG00000160789.18_LMNA | 0.04509  | -0.114932759 | 0.20283759  | 5.81E-01 | 8.05E-01 | 1.00E+00 |
| ENSG00000223815.1_DIAPH3-AS  | ENSG00000160789.18_LMNA | -0.00421 | -0.163299863 | 0.155096044 | 9.59E-01 | 9.84E-01 | 1.00E+00 |
| ENSG00000253924.1_RP11-1023I | ENSG00000160789.18_LMNA | -0.20177 | -0.349740146 | -0.04398624 | 1.27E-02 | 7.77E-02 | 1.00E+00 |
| ENSG00000250322.2_CTB-51E13  | ENSG00000160789.18_LMNA | 0.10569  | -0.054427931 | 0.260506066 | 1.95E-01 | 4.64E-01 | 1.00E+00 |
| ENSG00000268541.1_VN1R88P    | ENSG00000160789.18_LMNA | -0.16542 | -0.316287844 | -0.00638381 | 4.17E-02 | 1.78E-01 | 1.00E+00 |
| ENSG00000071677.1_PRLH       | ENSG00000160789.18_LMNA | 0.15559  | -0.003706493 | 0.3071781   | 5.56E-02 | 2.15E-01 | 1.00E+00 |
| ENSG00000253471.1_RP11-175E  | ENSG00000160789.18_LMNA | -0.06114 | -0.218213948 | 0.099027404 | 4.54E-01 | 7.19E-01 | 1.00E+00 |
| ENSG00000228769.1_ABCF2P2    | ENSG00000160789.18_LMNA | -0.08271 | -0.238766813 | 0.077511258 | 3.11E-01 | 5.97E-01 | 1.00E+00 |
| ENSG00000240545.3_RN7SL492F  | ENSG00000160789.18_LMNA | -0.0076  | -0.166595961 | 0.151787533 | 9.26E-01 | 9.72E-01 | 1.00E+00 |
| ENSG00000279264.1_RP11-417J  | ENSG00000160789.18_LMNA | 0.01434  | -0.145194786 | 0.173142826 | 8.61E-01 | 9.46E-01 | 1.00E+00 |
| ENSG00000200151.1_RN7SKP23   | ENSG00000160789.18_LMNA | -0.00277 | -0.161903022 | 0.156495994 | 9.73E-01 | 9.89E-01 | 1.00E+00 |
| ENSG00000201665.1_RN7SKP6    | ENSG00000160789.18_LMNA | -0.06702 | -0.223835568 | 0.093171633 | 4.12E-01 | 6.86E-01 | 1.00E+00 |
| ENSG00000257329.1_RP11-290L  | ENSG00000160789.18_LMNA | 0.08766  | -0.072549977 | 0.243466113 | 2.83E-01 | 5.68E-01 | 1.00E+00 |
| ENSG00000248973.1_RP11-445O  | ENSG00000160789.18_LMNA | 0.00566  | -0.153674611 | 0.164716835 | 9.45E-01 | 9.78E-01 | 1.00E+00 |
| ENSG00000242381.3_RN7SL741F  | ENSG00000160789.18_LMNA | -0.05358 | -0.210985148 | 0.106525144 | 5.12E-01 | 7.61E-01 | 1.00E+00 |
| ENSG00000259983.1_RP11-169E  | ENSG00000160789.18_LMNA | 0.02172  | -0.137959514 | 0.180295511 | 7.91E-01 | 9.15E-01 | 1.00E+00 |
| ENSG00000243035.3_RN7SL810F  | ENSG00000160789.18_LMNA | 0.07751  | -0.082709618 | 0.233827009 | 3.43E-01 | 6.27E-01 | 1.00E+00 |
| ENSG00000270619.1_RP11-197B  | ENSG00000160789.18_LMNA | 0.0173   | -0.142292461 | 0.176016061 | 8.32E-01 | 9.35E-01 | 1.00E+00 |
| ENSG00000244130.1_UBE2Q2P9   | ENSG00000160789.18_LMNA | 0.00854  | -0.150868936 | 0.167509852 | 9.17E-01 | 9.68E-01 | 1.00E+00 |
| ENSG00000254424.1_RP11-810P  | ENSG00000160789.18_LMNA | 0.01806  | -0.141545563 | 0.176754597 | 8.25E-01 | 9.31E-01 | 1.00E+00 |
| ENSG00000239350.1_RP11-398A  | ENSG00000160789.18_LMNA | -0.04491 | -0.202658562 | 0.115116992 | 5.83E-01 | 8.06E-01 | 1.00E+00 |
| ENSG00000274098.1_RN7SL787F  | ENSG00000160789.18_LMNA | 0.03137  | -0.128470335 | 0.189625632 | 7.01E-01 | 8.72E-01 | 1.00E+00 |
| ENSG00000258444.1_CTD-2201G  | ENSG00000160789.18_LMNA | 0.00653  | -0.152827239 | 0.165560922 | 9.36E-01 | 9.75E-01 | 1.00E+00 |
| ENSG00000196085.5_AC013442   | ENSG00000160789.18_LMNA | -0.04916 | -0.20674489  | 0.110906417 | 5.48E-01 | 7.85E-01 | 1.00E+00 |

|                              |                         |          |              |             |          |          |          |
|------------------------------|-------------------------|----------|--------------|-------------|----------|----------|----------|
| ENSG00000275933.1_7SK        | ENSG00000160789.18_LMNA | -0.04347 | -0.201274219 | 0.116540841 | 5.95E-01 | 8.13E-01 | 1.00E+00 |
| ENSG00000236495.1_RP11-7C6   | ENSG00000160789.18_LMNA | 0.06182  | -0.098346025 | 0.218869166 | 4.49E-01 | 7.15E-01 | 1.00E+00 |
| ENSG00000226110.2_RP11-272G  | ENSG00000160789.18_LMNA | -0.02467 | -0.183153247 | 0.135059254 | 7.63E-01 | 9.01E-01 | 1.00E+00 |
| ENSG00000280443.1_RP4-551N1  | ENSG00000160789.18_LMNA | 0.01576  | -0.143805612 | 0.174518753 | 8.47E-01 | 9.40E-01 | 1.00E+00 |
| ENSG00000229967.1_RP11-366F  | ENSG00000160789.18_LMNA | 0.04191  | -0.118078518 | 0.19977778  | 6.08E-01 | 8.21E-01 | 1.00E+00 |
| ENSG00000278477.1_RP11-282M  | ENSG00000160789.18_LMNA | 0.01823  | -0.141376182 | 0.176922032 | 8.24E-01 | 9.31E-01 | 1.00E+00 |
| ENSG00000237160.2_AC004022   | ENSG00000160789.18_LMNA | 0.06591  | -0.094281366 | 0.222771826 | 4.20E-01 | 6.91E-01 | 1.00E+00 |
| ENSG00000277426.1_CTD-2206N  | ENSG00000160789.18_LMNA | 0.0513   | -0.108792554 | 0.208792207 | 5.30E-01 | 7.73E-01 | 1.00E+00 |
| ENSG00000102055.5_PPP1R2P9   | ENSG00000160789.18_LMNA | 0.06091  | -0.099249577 | 0.218000244 | 4.56E-01 | 7.20E-01 | 1.00E+00 |
| ENSG00000233601.1_NCOR1P3    | ENSG00000160789.18_LMNA | 0.07612  | -0.084094887 | 0.232507877 | 3.51E-01 | 6.35E-01 | 1.00E+00 |
| ENSG00000196302.5_RP11-497H  | ENSG00000160789.18_LMNA | -0.18588 | -0.335162213 | -0.02749255 | 2.19E-02 | 1.15E-01 | 1.00E+00 |
| ENSG00000241879.1_KLF3P2     | ENSG00000160789.18_LMNA | 0.02864  | -0.131156187 | 0.186990617 | 7.26E-01 | 8.84E-01 | 1.00E+00 |
| ENSG00000257835.1_RP1-97G4   | ENSG00000160789.18_LMNA | -0.01943 | -0.178081452 | 0.140202773 | 8.12E-01 | 9.26E-01 | 1.00E+00 |
| ENSG00000242699.3_RN7SL516F  | ENSG00000160789.18_LMNA | 0.00346  | -0.155831216 | 0.162566483 | 9.66E-01 | 9.87E-01 | 1.00E+00 |
| ENSG00000275432.1_CTD-3093B  | ENSG00000160789.18_LMNA | 0.00145  | -0.157787805 | 0.160612947 | 9.86E-01 | 9.95E-01 | 1.00E+00 |
| ENSG00000266128.2_RN7SL366F  | ENSG00000160789.18_LMNA | -0.08704 | -0.242874293 | 0.073175652 | 2.86E-01 | 5.72E-01 | 1.00E+00 |
| ENSG00000226433.1_AP000290   | ENSG00000160789.18_LMNA | 0.00183  | -0.157416634 | 0.160983731 | 9.82E-01 | 9.93E-01 | 1.00E+00 |
| ENSG00000250646.1_RP11-530I1 | ENSG00000160789.18_LMNA | 0.0603   | -0.099859372 | 0.217413536 | 4.61E-01 | 7.24E-01 | 1.00E+00 |
| ENSG00000278319.1_RP11-266I3 | ENSG00000160789.18_LMNA | 0.16372  | 0.004639309  | 0.31471695  | 4.39E-02 | 1.85E-01 | 1.00E+00 |
| ENSG00000201289.1_RN7SKP76   | ENSG00000160789.18_LMNA | -0.03037 | -0.188657345 | 0.129457845 | 7.10E-01 | 8.77E-01 | 1.00E+00 |
| ENSG00000248105.1_CTD-2218K  | ENSG00000160789.18_LMNA | -0.05656 | -0.213833038 | 0.103575605 | 4.89E-01 | 7.45E-01 | 1.00E+00 |
| ENSG00000255187.1_RP11-699F  | ENSG00000160789.18_LMNA | 0.2154   | 0.058191722  | 0.362178079 | 7.70E-03 | 5.40E-02 | 1.00E+00 |
| ENSG00000261209.1_SULT1C2P   | ENSG00000160789.18_LMNA | 0.08015  | -0.080075488 | 0.236332167 | 3.26E-01 | 6.13E-01 | 1.00E+00 |
| ENSG00000183938.5_TRBV21OR   | ENSG00000160789.18_LMNA | -0.0674  | -0.224192226 | 0.092799378 | 4.09E-01 | 6.83E-01 | 1.00E+00 |
| ENSG00000239991.1_RP11-889D  | ENSG00000160789.18_LMNA | -0.14348 | -0.295917512 | 0.016092269 | 7.78E-02 | 2.67E-01 | 1.00E+00 |
| ENSG00000275461.1_RP11-281H  | ENSG00000160789.18_LMNA | -0.07161 | -0.228213511 | 0.088596099 | 3.81E-01 | 6.59E-01 | 1.00E+00 |
| ENSG00000259444.1_RP11-736N  | ENSG00000160789.18_LMNA | 0.01976  | -0.139882068 | 0.17839818  | 8.09E-01 | 9.24E-01 | 1.00E+00 |
| ENSG00000258140.1_RP11-324P  | ENSG00000160789.18_LMNA | -0.03018 | -0.188474915 | 0.129643827 | 7.12E-01 | 8.78E-01 | 1.00E+00 |
| ENSG00000227779.1_GS1-164F2  | ENSG00000160789.18_LMNA | 0.02155  | -0.138128992 | 0.180128351 | 7.92E-01 | 9.16E-01 | 1.00E+00 |
| ENSG00000265541.1_H3F3BP2    | ENSG00000160789.18_LMNA | -0.06681 | -0.223633664 | 0.093382327 | 4.13E-01 | 6.87E-01 | 1.00E+00 |
| ENSG00000255169.1_RP11-646J  | ENSG00000160789.18_LMNA | -0.0974  | -0.252684303 | 0.062772241 | 2.33E-01 | 5.10E-01 | 1.00E+00 |
| ENSG00000271523.1_RP4-576H2  | ENSG00000160789.18_LMNA | -0.0148  | -0.173588281 | 0.14474518  | 8.56E-01 | 9.43E-01 | 1.00E+00 |
| ENSG00000254197.1_RP11-10J2  | ENSG00000160789.18_LMNA | 0.08926  | -0.070947373 | 0.244980927 | 2.74E-01 | 5.59E-01 | 1.00E+00 |

|                              |                         |          |              |             |          |          |          |
|------------------------------|-------------------------|----------|--------------|-------------|----------|----------|----------|
| ENSG00000248432.1_RP11-269F  | ENSG00000160789.18_LMNA | 0.06853  | -0.091670919 | 0.225272886 | 4.02E-01 | 6.78E-01 | 1.00E+00 |
| ENSG00000276202.1_Metazoa_SI | ENSG00000160789.18_LMNA | 0.16224  | 0.003121461  | 0.313348766 | 4.58E-02 | 1.90E-01 | 1.00E+00 |
| ENSG00000271052.1_RP11-479I  | ENSG00000160789.18_LMNA | 0.0039   | -0.155393658 | 0.163003017 | 9.62E-01 | 9.85E-01 | 1.00E+00 |
| ENSG00000271642.1_MARK3P1    | ENSG00000160789.18_LMNA | -0.07934 | -0.235567403 | 0.080880093 | 3.31E-01 | 6.17E-01 | 1.00E+00 |
| ENSG00000278678.1_CYCSP41    | ENSG00000160789.18_LMNA | 0.0131   | -0.146408042 | 0.171940122 | 8.73E-01 | 9.51E-01 | 1.00E+00 |
| ENSG00000280823.1_           | ENSG00000160789.18_LMNA | 0.13385  | -0.025905101 | 0.286934131 | 1.00E-01 | 3.12E-01 | 1.00E+00 |
| ENSG00000250164.1_RP11-5N11  | ENSG00000160789.18_LMNA | 0.05355  | -0.106554758 | 0.210956527 | 5.12E-01 | 7.61E-01 | 1.00E+00 |
| ENSG00000264729.1_RP11-219A  | ENSG00000160789.18_LMNA | -0.033   | -0.191194315 | 0.126869169 | 6.87E-01 | 8.64E-01 | 1.00E+00 |
| ENSG00000213987.4_RP11-399E  | ENSG00000160789.18_LMNA | -0.04445 | -0.202216627 | 0.115571681 | 5.87E-01 | 8.08E-01 | 1.00E+00 |
| ENSG00000261171.1_           | ENSG00000160789.18_LMNA | 0.15851  | -0.000709882 | 0.309889468 | 5.11E-02 | 2.04E-01 | 1.00E+00 |
| ENSG00000271220.1_RP11-478H  | ENSG00000160789.18_LMNA | 0.06627  | -0.09392547  | 0.223113055 | 4.17E-01 | 6.90E-01 | 1.00E+00 |
| ENSG00000250356.1_HSPE1P23   | ENSG00000160789.18_LMNA | -0.11848 | -0.272541049 | 0.041502442 | 1.46E-01 | 3.91E-01 | 1.00E+00 |
| ENSG00000226860.1_AC109638.  | ENSG00000160789.18_LMNA | -0.02367 | -0.182185705 | 0.136041804 | 7.72E-01 | 9.06E-01 | 1.00E+00 |
| ENSG00000240386.3_LCE1F      | ENSG00000160789.18_LMNA | 0.05777  | -0.102376909 | 0.214988885 | 4.80E-01 | 7.38E-01 | 1.00E+00 |
| ENSG00000225124.1_RPL23AP3f  | ENSG00000160789.18_LMNA | 0.08004  | -0.080184433 | 0.236228639 | 3.27E-01 | 6.14E-01 | 1.00E+00 |
| ENSG00000251353.1_MTND3P5    | ENSG00000160789.18_LMNA | -0.01473 | -0.173528621 | 0.144805404 | 8.57E-01 | 9.44E-01 | 1.00E+00 |
| ENSG00000278410.1_AL121590.1 | ENSG00000160789.18_LMNA | -0.12756 | -0.281050819 | 0.032299124 | 1.17E-01 | 3.43E-01 | 1.00E+00 |
| ENSG00000230484.2_OR51A10P   | ENSG00000160789.18_LMNA | 0.03015  | -0.129674518 | 0.188444808 | 7.12E-01 | 8.78E-01 | 1.00E+00 |
| ENSG00000225656.1_RP5-858B6  | ENSG00000160789.18_LMNA | -0.02317 | -0.181700729 | 0.136534068 | 7.77E-01 | 9.08E-01 | 1.00E+00 |
| ENSG00000252960.1_RN7SKP25   | ENSG00000160789.18_LMNA | 0.1365   | -0.023207505 | 0.289409203 | 9.36E-02 | 2.99E-01 | 1.00E+00 |
| ENSG00000255365.1_RP11-776K  | ENSG00000160789.18_LMNA | -0.04984 | -0.207395951 | 0.110234505 | 5.42E-01 | 7.81E-01 | 1.00E+00 |
| ENSG00000274742.1_Metazoa_SI | ENSG00000160789.18_LMNA | -0.12689 | -0.280427173 | 0.032975407 | 1.19E-01 | 3.47E-01 | 1.00E+00 |
| ENSG00000244532.1_RN7SL380f  | ENSG00000160789.18_LMNA | -0.15504 | -0.306675115 | 0.00426178  | 5.65E-02 | 2.17E-01 | 1.00E+00 |
| ENSG00000229235.1_RPL37P18   | ENSG00000160789.18_LMNA | -0.05001 | -0.207562757 | 0.110062311 | 5.41E-01 | 7.80E-01 | 1.00E+00 |
| ENSG00000233732.5_IGHV3OR1i  | ENSG00000160789.18_LMNA | 0.05406  | -0.106054957 | 0.211439492 | 5.08E-01 | 7.58E-01 | 1.00E+00 |
| ENSG00000239661.1_RP11-78O2  | ENSG00000160789.18_LMNA | 0.02042  | -0.139236938 | 0.17903511  | 8.03E-01 | 9.21E-01 | 1.00E+00 |
| ENSG00000236487.2_RP11-753E  | ENSG00000160789.18_LMNA | 0.10495  | -0.055171703 | 0.259810545 | 1.98E-01 | 4.68E-01 | 1.00E+00 |
| ENSG00000266158.2_RN7SL785f  | ENSG00000160789.18_LMNA | 0.12239  | -0.037540405 | 0.276210546 | 1.33E-01 | 3.70E-01 | 1.00E+00 |
| ENSG00000251461.3_RP11-501C  | ENSG00000160789.18_LMNA | 0.00021  | -0.158998622 | 0.159402768 | 9.98E-01 | 9.99E-01 | 1.00E+00 |
| ENSG00000255130.1_RP11-396Ji | ENSG00000160789.18_LMNA | 0.04055  | -0.119421399 | 0.198469699 | 6.20E-01 | 8.28E-01 | 1.00E+00 |
| ENSG00000270634.1_RP4-777G9  | ENSG00000160789.18_LMNA | 0.1451   | -0.014430019 | 0.29743381  | 7.45E-02 | 2.60E-01 | 1.00E+00 |
| ENSG00000240470.3_RN7SL346f  | ENSG00000160789.18_LMNA | 0.06347  | -0.096707674 | 0.220443441 | 4.37E-01 | 7.05E-01 | 1.00E+00 |
| ENSG00000244620.1_AL122127.2 | ENSG00000160789.18_LMNA | -0.12071 | -0.274632918 | 0.039245014 | 1.39E-01 | 3.79E-01 | 1.00E+00 |

|                             |                         |          |              |             |          |          |          |
|-----------------------------|-------------------------|----------|--------------|-------------|----------|----------|----------|
| ENSG00000252484.1_RN7SKP49  | ENSG00000160789.18_LMNA | 0.10462  | -0.055509388 | 0.259494659 | 2.00E-01 | 4.70E-01 | 1.00E+00 |
| ENSG00000259839.1_RP11-491F | ENSG00000160789.18_LMNA | -0.0982  | -0.253437117 | 0.061971047 | 2.29E-01 | 5.06E-01 | 1.00E+00 |
| ENSG00000254404.1_RP11-703H | ENSG00000160789.18_LMNA | -0.01288 | -0.171728247 | 0.146621677 | 8.75E-01 | 9.51E-01 | 1.00E+00 |
| ENSG00000226938.1_RP11-117D | ENSG00000160789.18_LMNA | -0.00422 | -0.163315796 | 0.155080068 | 9.59E-01 | 9.84E-01 | 1.00E+00 |
| ENSG00000259636.1_RP11-133L | ENSG00000160789.18_LMNA | -0.15758 | -0.309026577 | 0.001664157 | 5.25E-02 | 2.08E-01 | 1.00E+00 |
| ENSG00000257517.1_RP4-601P9 | ENSG00000160789.18_LMNA | -0.00741 | -0.166418007 | 0.15196634  | 9.28E-01 | 9.72E-01 | 1.00E+00 |
| ENSG00000222078.1_RN7SKP11  | ENSG00000160789.18_LMNA | -0.04821 | -0.205831528 | 0.111848541 | 5.55E-01 | 7.89E-01 | 1.00E+00 |
| ENSG00000249049.1_RP11-763F | ENSG00000160789.18_LMNA | 0.04535  | -0.114673877 | 0.203089123 | 5.79E-01 | 8.04E-01 | 1.00E+00 |
| ENSG00000253613.2_CTC-551A1 | ENSG00000160789.18_LMNA | 0.03259  | -0.127273923 | 0.190797926 | 6.90E-01 | 8.67E-01 | 1.00E+00 |
| ENSG00000232777.1_MRPL51P2  | ENSG00000160789.18_LMNA | 0.1574   | -0.001846349 | 0.308861774 | 5.28E-02 | 2.08E-01 | 1.00E+00 |
| ENSG00000260370.1_RP11-631M | ENSG00000160789.18_LMNA | -0.0914  | -0.247004131 | 0.068804369 | 2.63E-01 | 5.46E-01 | 1.00E+00 |
| ENSG00000271179.1_RP11-629P | ENSG00000160789.18_LMNA | 0.01643  | -0.143149009 | 0.175168662 | 8.41E-01 | 9.38E-01 | 1.00E+00 |
| ENSG00000270897.1_RP11-179A | ENSG00000160789.18_LMNA | 0.1185   | -0.041483465 | 0.272558646 | 1.46E-01 | 3.91E-01 | 1.00E+00 |
| ENSG00000232292.1_ALDH7A1P  | ENSG00000160789.18_LMNA | -0.05688 | -0.214145707 | 0.103251435 | 4.86E-01 | 7.43E-01 | 1.00E+00 |
| ENSG00000258905.1_TRAV32    | ENSG00000160789.18_LMNA | 0.03264  | -0.127224549 | 0.190846285 | 6.90E-01 | 8.66E-01 | 1.00E+00 |
| ENSG00000254890.1_RP11-10A7 | ENSG00000160789.18_LMNA | -0.14019 | -0.292852468 | 0.019447082 | 8.50E-02 | 2.82E-01 | 1.00E+00 |
| ENSG00000237658.1_          | ENSG00000160789.18_LMNA | 0.09363  | -0.066567352 | 0.24911316  | 2.51E-01 | 5.32E-01 | 1.00E+00 |
| ENSG00000270352.1_RP11-111N | ENSG00000160789.18_LMNA | -0.15408 | -0.305778025 | 0.005251677 | 5.81E-02 | 2.21E-01 | 1.00E+00 |
| ENSG00000260991.2_RP11-616M | ENSG00000160789.18_LMNA | -0.05366 | -0.211059837 | 0.10644786  | 5.11E-01 | 7.60E-01 | 1.00E+00 |
| ENSG00000232765.5_RP11-382F | ENSG00000160789.18_LMNA | 0.02454  | -0.13518858  | 0.183025931 | 7.64E-01 | 9.02E-01 | 1.00E+00 |
| ENSG00000226336.2_MRPS16P3  | ENSG00000160789.18_LMNA | 0.11959  | -0.040382882 | 0.273578872 | 1.42E-01 | 3.85E-01 | 1.00E+00 |
| ENSG00000251336.1_RP11-540E | ENSG00000160789.18_LMNA | -0.14278 | -0.295272607 | 0.016798727 | 7.93E-02 | 2.71E-01 | 1.00E+00 |
| ENSG00000263999.2_RN7SL42P  | ENSG00000160789.18_LMNA | -0.0179  | -0.176601238 | 0.141700689 | 8.27E-01 | 9.32E-01 | 1.00E+00 |
| ENSG00000233472.1_RP11-218D | ENSG00000160789.18_LMNA | 0.11355  | -0.046493278 | 0.267905676 | 1.64E-01 | 4.19E-01 | 1.00E+00 |
| ENSG00000223341.1_RN7SKP3   | ENSG00000160789.18_LMNA | -0.02936 | -0.187680967 | 0.130452969 | 7.20E-01 | 8.81E-01 | 1.00E+00 |
| ENSG00000229722.1_RP11-557H | ENSG00000160789.18_LMNA | -0.02518 | -0.183648392 | 0.134556186 | 7.58E-01 | 8.99E-01 | 1.00E+00 |
| ENSG00000271164.1_RP4-789D1 | ENSG00000160789.18_LMNA | -0.07323 | -0.229754139 | 0.086982751 | 3.70E-01 | 6.50E-01 | 1.00E+00 |
| ENSG00000225898.1_AC002075. | ENSG00000160789.18_LMNA | -0.04138 | -0.199264156 | 0.118605944 | 6.13E-01 | 8.24E-01 | 1.00E+00 |
| ENSG00000263029.1_RP11-517A | ENSG00000160789.18_LMNA | 0.02265  | -0.137045706 | 0.1811965   | 7.82E-01 | 9.10E-01 | 1.00E+00 |
| ENSG00000255255.1_PPP1R1AP  | ENSG00000160789.18_LMNA | 0.0227   | -0.136996548 | 0.181244954 | 7.81E-01 | 9.10E-01 | 1.00E+00 |
| ENSG00000265243.1_IGLJCOR1  | ENSG00000160789.18_LMNA | 0.03892  | -0.121031209 | 0.196900112 | 6.34E-01 | 8.36E-01 | 1.00E+00 |
| ENSG00000227588.2_CNTN4-AS  | ENSG00000160789.18_LMNA | -0.04672 | -0.204404375 | 0.113319493 | 5.68E-01 | 7.98E-01 | 1.00E+00 |
| ENSG00000267663.1_RP11-64C1 | ENSG00000160789.18_LMNA | 0.03113  | -0.128711827 | 0.189388898 | 7.03E-01 | 8.73E-01 | 1.00E+00 |

|                              |                         |          |              |             |          |          |          |
|------------------------------|-------------------------|----------|--------------|-------------|----------|----------|----------|
| ENSG00000261466.2_RP11-23E1  | ENSG00000160789.18_LMNA | -0.01779 | -0.176490222 | 0.141812973 | 8.28E-01 | 9.33E-01 | 1.00E+00 |
| ENSG00000256769.1_CACNA1C-   | ENSG00000160789.18_LMNA | 0.03106  | -0.128775203 | 0.189326765 | 7.04E-01 | 8.74E-01 | 1.00E+00 |
| ENSG00000230848.1_RP11-379C  | ENSG00000160789.18_LMNA | -0.03991 | -0.197855112 | 0.120051934 | 6.25E-01 | 8.31E-01 | 1.00E+00 |
| ENSG00000231211.2_RPL17P49   | ENSG00000160789.18_LMNA | -0.0401  | -0.198038452 | 0.119863863 | 6.24E-01 | 8.30E-01 | 1.00E+00 |
| ENSG00000248137.1_RP11-468D  | ENSG00000160789.18_LMNA | -0.24747 | -0.391258157 | -0.09189177 | 2.11E-03 | 2.04E-02 | 1.00E+00 |
| ENSG00000250106.1_ANKRD33B   | ENSG00000160789.18_LMNA | 0.11868  | -0.041299193 | 0.272729513 | 1.45E-01 | 3.90E-01 | 1.00E+00 |
| ENSG00000248807.1_KRTAP9-12  | ENSG00000160789.18_LMNA | -0.11995 | -0.27391801  | 0.040016863 | 1.41E-01 | 3.83E-01 | 1.00E+00 |
| ENSG00000225488.1_RP11-760D  | ENSG00000160789.18_LMNA | 0.0675   | -0.092700445 | 0.224287    | 4.09E-01 | 6.83E-01 | 1.00E+00 |
| ENSG00000269711.1_CTD-3214H  | ENSG00000160789.18_LMNA | 0.08259  | -0.077629083 | 0.238655029 | 3.12E-01 | 5.98E-01 | 1.00E+00 |
| ENSG00000254580.1_RP11-677I1 | ENSG00000160789.18_LMNA | -0.19379 | -0.342429858 | -0.03569439 | 1.67E-02 | 9.50E-02 | 1.00E+00 |
| ENSG00000274486.1_RP11-60C6  | ENSG00000160789.18_LMNA | -0.12806 | -0.281517934 | 0.031792397 | 1.16E-01 | 3.40E-01 | 1.00E+00 |
| ENSG00000273303.1_           | ENSG00000160789.18_LMNA | -0.18005 | -0.329792793 | -0.02145944 | 2.64E-02 | 1.32E-01 | 1.00E+00 |
| ENSG00000257287.1_RP11-98E6  | ENSG00000160789.18_LMNA | -0.02843 | -0.186786932 | 0.131363606 | 7.28E-01 | 8.85E-01 | 1.00E+00 |
| ENSG00000276542.1_RP11-115D  | ENSG00000160789.18_LMNA | -0.04297 | -0.200797586 | 0.117030774 | 5.99E-01 | 8.16E-01 | 1.00E+00 |
| ENSG00000232115.1_RP11-123G  | ENSG00000160789.18_LMNA | -0.17186 | -0.322248268 | -0.01302013 | 3.42E-02 | 1.56E-01 | 1.00E+00 |
| ENSG00000238118.1_SLC25A24F  | ENSG00000160789.18_LMNA | 0.04058  | -0.119394367 | 0.198496042 | 6.20E-01 | 8.28E-01 | 1.00E+00 |
| ENSG00000257503.1_CYB5AP5    | ENSG00000160789.18_LMNA | -0.00211 | -0.16125813  | 0.15714189  | 9.79E-01 | 9.92E-01 | 1.00E+00 |
| ENSG00000258053.1_CTD-2021H  | ENSG00000160789.18_LMNA | -0.08636 | -0.242231628 | 0.073854799 | 2.90E-01 | 5.75E-01 | 1.00E+00 |
| ENSG00000265469.1_POLR3KP2   | ENSG00000160789.18_LMNA | 0.01361  | -0.145908913 | 0.172435025 | 8.68E-01 | 9.48E-01 | 1.00E+00 |
| ENSG00000274469.1_RP11-425M  | ENSG00000160789.18_LMNA | -0.0466  | -0.204283982 | 0.113443517 | 5.69E-01 | 7.98E-01 | 1.00E+00 |
| ENSG00000253655.2_IGJP1      | ENSG00000160789.18_LMNA | -0.01726 | -0.175979713 | 0.142329212 | 8.33E-01 | 9.35E-01 | 1.00E+00 |
| ENSG00000226114.1_NDUFB4P5   | ENSG00000160789.18_LMNA | 0.05193  | -0.108163716 | 0.209400712 | 5.25E-01 | 7.70E-01 | 1.00E+00 |
| ENSG00000235959.1_AC009237.  | ENSG00000160789.18_LMNA | 0.02642  | -0.133338512 | 0.184846221 | 7.47E-01 | 8.94E-01 | 1.00E+00 |
| ENSG00000255209.1_RP11-258O  | ENSG00000160789.18_LMNA | -0.15714 | -0.308623619 | 0.002109596 | 5.32E-02 | 2.09E-01 | 1.00E+00 |
| ENSG00000187721.8_GTF2IP3    | ENSG00000160789.18_LMNA | 0.0487   | -0.111361917 | 0.206303365 | 5.51E-01 | 7.87E-01 | 1.00E+00 |
| ENSG00000251147.1_RP11-701P  | ENSG00000160789.18_LMNA | -0.07517 | -0.231599965 | 0.08504761  | 3.57E-01 | 6.40E-01 | 1.00E+00 |
| ENSG00000244706.2_RP11-298O  | ENSG00000160789.18_LMNA | -0.06884 | -0.225573264 | 0.091357111 | 3.99E-01 | 6.76E-01 | 1.00E+00 |
| ENSG00000271666.1_CTC-523E2  | ENSG00000160789.18_LMNA | -0.07994 | -0.236133599 | 0.08028444  | 3.28E-01 | 6.14E-01 | 1.00E+00 |
| ENSG00000254082.4_           | ENSG00000160789.18_LMNA | 0.06605  | -0.094137336 | 0.22290993  | 4.19E-01 | 6.91E-01 | 1.00E+00 |
| ENSG00000233268.3_RP11-558F  | ENSG00000160789.18_LMNA | -0.06716 | -0.223970511 | 0.093030799 | 4.11E-01 | 6.85E-01 | 1.00E+00 |
| ENSG00000223740.1_RP11-760D  | ENSG00000160789.18_LMNA | 0.00957  | -0.149863891 | 0.168509121 | 9.07E-01 | 9.64E-01 | 1.00E+00 |
| ENSG00000230109.1_RP11-275N  | ENSG00000160789.18_LMNA | -0.09824 | -0.25347506  | 0.061930655 | 2.29E-01 | 5.05E-01 | 1.00E+00 |
| ENSG00000280049.1_RP11-324H  | ENSG00000160789.18_LMNA | -0.06829 | -0.225040633 | 0.091913514 | 4.03E-01 | 6.79E-01 | 1.00E+00 |



|                              |                         |          |              |             |          |          |          |
|------------------------------|-------------------------|----------|--------------|-------------|----------|----------|----------|
| ENSG00000253340.1_RP11-139G  | ENSG00000160789.18_LMNA | 0.01584  | -0.143727605 | 0.17459598  | 8.46E-01 | 9.40E-01 | 1.00E+00 |
| ENSG00000229825.1_           | ENSG00000160789.18_LMNA | 0.05191  | -0.108187546 | 0.209377657 | 5.25E-01 | 7.70E-01 | 1.00E+00 |
| ENSG00000259681.1_RP11-96O2  | ENSG00000160789.18_LMNA | 0.05989  | -0.100271404 | 0.217016974 | 4.64E-01 | 7.26E-01 | 1.00E+00 |
| ENSG00000233082.1_AC073094.  | ENSG00000160789.18_LMNA | 0.01837  | -0.141246023 | 0.177050682 | 8.22E-01 | 9.31E-01 | 1.00E+00 |
| ENSG00000244214.1_           | ENSG00000160789.18_LMNA | -0.09892 | -0.254120773 | 0.061243104 | 2.25E-01 | 5.01E-01 | 1.00E+00 |
| ENSG00000279836.1_RP11-648O  | ENSG00000160789.18_LMNA | -0.04887 | -0.206468726 | 0.111191338 | 5.50E-01 | 7.86E-01 | 1.00E+00 |
| ENSG00000225884.2_AC098872.  | ENSG00000160789.18_LMNA | -0.0813  | -0.237429825 | 0.078919925 | 3.19E-01 | 6.06E-01 | 1.00E+00 |
| ENSG00000251024.1_RP11-203B  | ENSG00000160789.18_LMNA | -0.00281 | -0.161939361 | 0.156459591 | 9.73E-01 | 9.89E-01 | 1.00E+00 |
| ENSG00000223915.1_DPPA2P1    | ENSG00000160789.18_LMNA | -0.03905 | -0.197027022 | 0.120901108 | 6.33E-01 | 8.35E-01 | 1.00E+00 |
| ENSG00000230033.1_RP5-1121A  | ENSG00000160789.18_LMNA | 0.11926  | -0.040714303 | 0.273271724 | 1.43E-01 | 3.87E-01 | 1.00E+00 |
| ENSG00000235493.1_AC092415.  | ENSG00000160789.18_LMNA | -0.00567 | -0.164719922 | 0.153671513 | 9.45E-01 | 9.78E-01 | 1.00E+00 |
| ENSG00000266535.1_RP11-40A1  | ENSG00000160789.18_LMNA | -0.00234 | -0.161484139 | 0.15691556  | 9.77E-01 | 9.91E-01 | 1.00E+00 |
| ENSG00000234182.1_RP11-118K  | ENSG00000160789.18_LMNA | -0.002   | -0.161153987 | 0.15724617  | 9.80E-01 | 9.93E-01 | 1.00E+00 |
| ENSG00000261348.1_RP11-510M  | ENSG00000160789.18_LMNA | 0.05684  | -0.103290742 | 0.214107799 | 4.87E-01 | 7.43E-01 | 1.00E+00 |
| ENSG00000189090.7_FAM25G     | ENSG00000160789.18_LMNA | -0.03343 | -0.191607536 | 0.126447116 | 6.83E-01 | 8.62E-01 | 1.00E+00 |
| ENSG00000249295.1_RP11-241G  | ENSG00000160789.18_LMNA | 0.13112  | -0.028674591 | 0.284388744 | 1.07E-01 | 3.26E-01 | 1.00E+00 |
| ENSG00000268326.1_CTD-2542C  | ENSG00000160789.18_LMNA | 0.01478  | -0.144756914 | 0.173576657 | 8.57E-01 | 9.43E-01 | 1.00E+00 |
| ENSG00000265794.4_RP11-227G  | ENSG00000160789.18_LMNA | -0.01065 | -0.169563175 | 0.148803031 | 8.96E-01 | 9.60E-01 | 1.00E+00 |
| ENSG00000253994.1_NDUFB9P3   | ENSG00000160789.18_LMNA | -0.10004 | -0.255172174 | 0.060122938 | 2.20E-01 | 4.95E-01 | 1.00E+00 |
| ENSG00000231538.1_DPP10-AS3  | ENSG00000160789.18_LMNA | -0.12233 | -0.276149057 | 0.037606878 | 1.33E-01 | 3.70E-01 | 1.00E+00 |
| ENSG00000223735.1_OR51B3P    | ENSG00000160789.18_LMNA | -0.13344 | -0.286556397 | 0.026316396 | 1.01E-01 | 3.14E-01 | 1.00E+00 |
| ENSG00000259754.1_RP11-208K  | ENSG00000160789.18_LMNA | 0.16447  | 0.005412288  | 0.315413215 | 4.29E-02 | 1.82E-01 | 1.00E+00 |
| ENSG00000279913.1_AP001962.  | ENSG00000160789.18_LMNA | 0.0102   | -0.14924652  | 0.16912262  | 9.01E-01 | 9.62E-01 | 1.00E+00 |
| ENSG00000255982.1_NXPE2P1    | ENSG00000160789.18_LMNA | -0.01701 | -0.175732482 | 0.142579155 | 8.35E-01 | 9.36E-01 | 1.00E+00 |
| ENSG00000260673.1_RP4-529N6  | ENSG00000160789.18_LMNA | -0.05317 | -0.210591978 | 0.106931909 | 5.15E-01 | 7.63E-01 | 1.00E+00 |
| ENSG00000234223.2_AC003988.  | ENSG00000160789.18_LMNA | 0.09485  | -0.065339867 | 0.250269145 | 2.45E-01 | 5.25E-01 | 1.00E+00 |
| ENSG00000223470.3_RP11-490O  | ENSG00000160789.18_LMNA | -0.02565 | -0.184099468 | 0.13409775  | 7.54E-01 | 8.98E-01 | 1.00E+00 |
| ENSG00000255550.1_RP11-163O  | ENSG00000160789.18_LMNA | -0.10347 | -0.258417176 | 0.056660686 | 2.05E-01 | 4.76E-01 | 1.00E+00 |
| ENSG00000255179.1_RP11-324J  | ENSG00000160789.18_LMNA | -0.06392 | -0.220871594 | 0.096261798 | 4.34E-01 | 7.03E-01 | 1.00E+00 |
| ENSG00000280005.1_RP11-9N12  | ENSG00000160789.18_LMNA | -0.04135 | -0.19923655  | 0.118634288 | 6.13E-01 | 8.24E-01 | 1.00E+00 |
| ENSG00000278992.1_RP11-43N2  | ENSG00000160789.18_LMNA | 0.01671  | -0.14287447  | 0.17544032  | 8.38E-01 | 9.37E-01 | 1.00E+00 |
| ENSG00000253499.2_RP11-393K  | ENSG00000160789.18_LMNA | -0.01205 | -0.1709223   | 0.147434046 | 8.83E-01 | 9.55E-01 | 1.00E+00 |
| ENSG00000267227.1_RP11-640I1 | ENSG00000160789.18_LMNA | -0.04422 | -0.202000573 | 0.115793921 | 5.89E-01 | 8.09E-01 | 1.00E+00 |

|                              |                         |          |              |             |          |          |          |
|------------------------------|-------------------------|----------|--------------|-------------|----------|----------|----------|
| ENSG00000270281.1_CTC-523E2  | ENSG00000160789.18_LMNA | -0.10052 | -0.255634015 | 0.059630639 | 2.18E-01 | 4.93E-01 | 1.00E+00 |
| ENSG00000255546.1_RP11-168K  | ENSG00000160789.18_LMNA | -0.14471 | -0.297066712 | 0.01483261  | 7.53E-02 | 2.62E-01 | 1.00E+00 |
| ENSG00000253170.1_RP11-431J  | ENSG00000160789.18_LMNA | 0.00774  | -0.151649783 | 0.166733041 | 9.25E-01 | 9.71E-01 | 1.00E+00 |
| ENSG00000260864.1_ABHD17AP   | ENSG00000160789.18_LMNA | 0.1452   | -0.014328319 | 0.297526529 | 7.43E-02 | 2.60E-01 | 1.00E+00 |
| ENSG00000239397.1_RP11-101K  | ENSG00000160789.18_LMNA | -0.022   | -0.180572831 | 0.137678306 | 7.88E-01 | 9.14E-01 | 1.00E+00 |
| ENSG00000255313.1_RP11-1082  | ENSG00000160789.18_LMNA | 0.15936  | 0.000165032  | 0.310680147 | 4.99E-02 | 2.01E-01 | 1.00E+00 |
| ENSG00000233179.1_RP11-536P  | ENSG00000160789.18_LMNA | -0.08728 | -0.243102988 | 0.072933904 | 2.85E-01 | 5.70E-01 | 1.00E+00 |
| ENSG00000224771.1_ATP2B2-IT2 | ENSG00000160789.18_LMNA | -0.03531 | -0.193421016 | 0.12459351  | 6.66E-01 | 8.53E-01 | 1.00E+00 |
| ENSG00000229794.2_MTCYBP32   | ENSG00000160789.18_LMNA | -0.02762 | -0.186002167 | 0.132162503 | 7.36E-01 | 8.89E-01 | 1.00E+00 |
| ENSG00000249003.1_CLUHP4     | ENSG00000160789.18_LMNA | -0.05487 | -0.212214113 | 0.105252998 | 5.02E-01 | 7.54E-01 | 1.00E+00 |
| ENSG00000233445.1_RPL17P11   | ENSG00000160789.18_LMNA | -0.09169 | -0.247280474 | 0.068511437 | 2.61E-01 | 5.44E-01 | 1.00E+00 |
| ENSG00000224151.1_USP9YP28   | ENSG00000160789.18_LMNA | -0.08971 | -0.245401612 | 0.070502019 | 2.72E-01 | 5.56E-01 | 1.00E+00 |
| ENSG00000254084.1_KB-1930G5  | ENSG00000160789.18_LMNA | 0.08346  | -0.076755624 | 0.239483504 | 3.07E-01 | 5.93E-01 | 1.00E+00 |
| ENSG00000238236.1_MTCYBP14   | ENSG00000160789.18_LMNA | 0.05247  | -0.107628137 | 0.20991878  | 5.21E-01 | 7.67E-01 | 1.00E+00 |
| ENSG00000228968.1_AC096554.  | ENSG00000160789.18_LMNA | 0.01945  | -0.140182052 | 0.178101918 | 8.12E-01 | 9.26E-01 | 1.00E+00 |
| ENSG00000230465.1_VENTXP4    | ENSG00000160789.18_LMNA | 0.02026  | -0.139390357 | 0.178883665 | 8.04E-01 | 9.22E-01 | 1.00E+00 |
| ENSG00000260242.1_CTA-481E9  | ENSG00000160789.18_LMNA | 0.12215  | -0.037781121 | 0.275987864 | 1.34E-01 | 3.71E-01 | 1.00E+00 |
| ENSG00000251040.1_RP11-535C  | ENSG00000160789.18_LMNA | 0.12298  | -0.036941845 | 0.276764116 | 1.31E-01 | 3.67E-01 | 1.00E+00 |
| ENSG00000228042.2_RP11-441A  | ENSG00000160789.18_LMNA | -0.08965 | -0.245345917 | 0.070560987 | 2.72E-01 | 5.57E-01 | 1.00E+00 |
| ENSG00000250338.1_RP11-395I6 | ENSG00000160789.18_LMNA | -0.08248 | -0.238552668 | 0.077736968 | 3.12E-01 | 5.99E-01 | 1.00E+00 |
| ENSG00000255300.4_RP11-148I1 | ENSG00000160789.18_LMNA | -0.108   | -0.262679659 | 0.05210129  | 1.85E-01 | 4.51E-01 | 1.00E+00 |
| ENSG00000230252.1_MTND2P4    | ENSG00000160789.18_LMNA | -0.02306 | -0.181594725 | 0.136641644 | 7.78E-01 | 9.09E-01 | 1.00E+00 |
| ENSG00000253774.1_CTD-3023L  | ENSG00000160789.18_LMNA | -0.05983 | -0.216962657 | 0.100327831 | 4.64E-01 | 7.26E-01 | 1.00E+00 |
| ENSG00000260158.1_RP11-67H2  | ENSG00000160789.18_LMNA | 0.06431  | -0.09587137  | 0.221246402 | 4.31E-01 | 7.01E-01 | 1.00E+00 |
| ENSG00000238047.1_MTND1P30   | ENSG00000160789.18_LMNA | 0.04744  | -0.112613149 | 0.205089856 | 5.62E-01 | 7.93E-01 | 1.00E+00 |
| ENSG00000266929.1_RP11-400F  | ENSG00000160789.18_LMNA | -0.11407 | -0.268397779 | 0.045964182 | 1.62E-01 | 4.16E-01 | 1.00E+00 |
| ENSG00000235610.1_AC013448.  | ENSG00000160789.18_LMNA | 0.13202  | -0.027763611 | 0.285226496 | 1.05E-01 | 3.21E-01 | 1.00E+00 |
| ENSG00000231248.2_RP11-160N  | ENSG00000160789.18_LMNA | -0.03259 | -0.190796267 | 0.127275616 | 6.90E-01 | 8.67E-01 | 1.00E+00 |
| ENSG00000203396.3_RP11-217O  | ENSG00000160789.18_LMNA | -0.05261 | -0.210055266 | 0.107487007 | 5.20E-01 | 7.66E-01 | 1.00E+00 |
| ENSG00000253682.1_RP11-700E  | ENSG00000160789.18_LMNA | 0.04937  | -0.1106962   | 0.206948614 | 5.46E-01 | 7.84E-01 | 1.00E+00 |
| ENSG00000258934.1_RP11-97N1  | ENSG00000160789.18_LMNA | -0.00197 | -0.161124082 | 0.157276113 | 9.81E-01 | 9.93E-01 | 1.00E+00 |
| ENSG00000278180.1_FAM166AP   | ENSG00000160789.18_LMNA | -0.06301 | -0.220000627 | 0.097168686 | 4.41E-01 | 7.08E-01 | 1.00E+00 |
| ENSG00000176923.4_OR7A15P    | ENSG00000160789.18_LMNA | 0.03649  | -0.123427149 | 0.194561015 | 6.55E-01 | 8.47E-01 | 1.00E+00 |

|                              |                         |          |              |             |          |          |          |
|------------------------------|-------------------------|----------|--------------|-------------|----------|----------|----------|
| ENSG00000273639.3_RP11-597A  | ENSG00000160789.18_LMNA | -0.14676 | -0.298974068 | 0.012739735 | 7.12E-02 | 2.52E-01 | 1.00E+00 |
| ENSG00000273362.1_KB-67B5.17 | ENSG00000160789.18_LMNA | -0.01479 | -0.173577971 | 0.144755587 | 8.57E-01 | 9.43E-01 | 1.00E+00 |
| ENSG00000247810.5_RP11-103J  | ENSG00000160789.18_LMNA | -0.12779 | -0.281270329 | 0.032061019 | 1.17E-01 | 3.42E-01 | 1.00E+00 |
| ENSG00000255425.4_OR8G3P     | ENSG00000160789.18_LMNA | -0.04208 | -0.199936791 | 0.117915197 | 6.07E-01 | 8.20E-01 | 1.00E+00 |
| ENSG00000229060.4_RP11-20P5  | ENSG00000160789.18_LMNA | 0.02491  | -0.134827792 | 0.183381084 | 7.61E-01 | 9.00E-01 | 1.00E+00 |
| ENSG00000257402.1_KRT126P    | ENSG00000160789.18_LMNA | 0.00633  | -0.153021196 | 0.165367758 | 9.38E-01 | 9.76E-01 | 1.00E+00 |
| ENSG00000226298.1_RAD23BLP   | ENSG00000160789.18_LMNA | 0.02908  | -0.130722259 | 0.187416641 | 7.22E-01 | 8.82E-01 | 1.00E+00 |
| ENSG00000277174.1_RP11-10F1  | ENSG00000160789.18_LMNA | -0.13086 | -0.284137262 | 0.028947953 | 1.08E-01 | 3.27E-01 | 1.00E+00 |
| ENSG00000233173.1_VN1R34P    | ENSG00000160789.18_LMNA | 0.08879  | -0.071417049 | 0.24453714  | 2.77E-01 | 5.61E-01 | 1.00E+00 |
| ENSG00000253916.1_MTCO1P49   | ENSG00000160789.18_LMNA | 0.16163  | 0.002492895  | 0.312781801 | 4.67E-02 | 1.92E-01 | 1.00E+00 |
| ENSG00000256627.1_RP11-6B19  | ENSG00000160789.18_LMNA | -0.01809 | -0.176780693 | 0.141519165 | 8.25E-01 | 9.31E-01 | 1.00E+00 |
| ENSG00000248605.4_CTD-2306M  | ENSG00000160789.18_LMNA | -0.01376 | -0.172582441 | 0.145760207 | 8.66E-01 | 9.48E-01 | 1.00E+00 |
| ENSG00000125903.4_DEFB129    | ENSG00000160789.18_LMNA | -0.06766 | -0.224440956 | 0.092539718 | 4.08E-01 | 6.83E-01 | 1.00E+00 |
| ENSG00000236398.2_TAS2R39    | ENSG00000160789.18_LMNA | -0.00067 | -0.159853505 | 0.15854776  | 9.93E-01 | 9.97E-01 | 1.00E+00 |
| ENSG00000218014.1_KRT19P1    | ENSG00000160789.18_LMNA | 0.0151   | -0.144443573 | 0.17388703  | 8.53E-01 | 9.43E-01 | 1.00E+00 |
| ENSG00000250219.2_LTV1P1     | ENSG00000160789.18_LMNA | 0.01022  | -0.149228351 | 0.169140671 | 9.01E-01 | 9.61E-01 | 1.00E+00 |
| ENSG00000279285.1_RP11-64C1  | ENSG00000160789.18_LMNA | -0.06637 | -0.223209346 | 0.093825025 | 4.17E-01 | 6.89E-01 | 1.00E+00 |
| ENSG00000279429.1_AC004009.  | ENSG00000160789.18_LMNA | 0.08289  | -0.077332311 | 0.238936568 | 3.10E-01 | 5.96E-01 | 1.00E+00 |
| ENSG00000234102.1_KRT19P4    | ENSG00000160789.18_LMNA | -0.04906 | -0.206648876 | 0.111005482 | 5.48E-01 | 7.85E-01 | 1.00E+00 |
| ENSG00000227509.1	EIF2B5-IT1 | ENSG00000160789.18_LMNA | -0.03275 | -0.190955636 | 0.127112897 | 6.89E-01 | 8.66E-01 | 1.00E+00 |
| ENSG00000230737.1_AC106870.  | ENSG00000160789.18_LMNA | 0.05216  | -0.107941802 | 0.209615392 | 5.23E-01 | 7.69E-01 | 1.00E+00 |
| ENSG00000265217.1_RP11-775G  | ENSG00000160789.18_LMNA | -0.05029 | -0.207831031 | 0.10978533  | 5.38E-01 | 7.79E-01 | 1.00E+00 |
| ENSG00000257165.4_RP11-171L  | ENSG00000160789.18_LMNA | -0.10885 | -0.263482973 | 0.051240548 | 1.82E-01 | 4.46E-01 | 1.00E+00 |
| ENSG00000232767.1_RP11-498B  | ENSG00000160789.18_LMNA | -0.15243 | -0.30425106  | 0.006935212 | 6.08E-02 | 2.28E-01 | 1.00E+00 |
| ENSG00000274067.1_ABC12-479  | ENSG00000160789.18_LMNA | -0.06422 | -0.22115519  | 0.095966392 | 4.32E-01 | 7.01E-01 | 1.00E+00 |
| ENSG00000250920.1_RP11-297P  | ENSG00000160789.18_LMNA | 0.06821  | -0.091988182 | 0.22496914  | 4.04E-01 | 6.79E-01 | 1.00E+00 |
| ENSG00000235099.1_RP1-23E21  | ENSG00000160789.18_LMNA | 0.11772  | -0.04226946  | 0.271829607 | 1.49E-01 | 3.95E-01 | 1.00E+00 |
| ENSG00000205445.3_KRTAP10-2  | ENSG00000160789.18_LMNA | -0.09496 | -0.250378984 | 0.065223185 | 2.45E-01 | 5.24E-01 | 1.00E+00 |
| ENSG00000237068.1_RPL5P2     | ENSG00000160789.18_LMNA | 0.01423  | -0.145298833 | 0.173039722 | 8.62E-01 | 9.46E-01 | 1.00E+00 |
| ENSG00000198283.2_OR5B21     | ENSG00000160789.18_LMNA | 0.06364  | -0.096539811 | 0.220604647 | 4.36E-01 | 7.04E-01 | 1.00E+00 |
| ENSG00000278927.1_CH507-152  | ENSG00000160789.18_LMNA | -0.04325 | -0.201067533 | 0.116753313 | 5.97E-01 | 8.14E-01 | 1.00E+00 |
| ENSG00000176219.2_OR11H6     | ENSG00000160789.18_LMNA | 0.05316  | -0.106942167 | 0.210582061 | 5.15E-01 | 7.63E-01 | 1.00E+00 |
| ENSG00000198398.2_TMEN207    | ENSG00000160789.18_LMNA | 0.03924  | -0.12071066  | 0.197212781 | 6.31E-01 | 8.34E-01 | 1.00E+00 |

|                             |                         |          |              |             |          |          |          |
|-----------------------------|-------------------------|----------|--------------|-------------|----------|----------|----------|
| ENSG00000221836.2_OR2A5     | ENSG00000160789.18_LMNA | -0.04821 | -0.205829728 | 0.111850397 | 5.55E-01 | 7.89E-01 | 1.00E+00 |
| ENSG00000232634.1_NEFLP1    | ENSG00000160789.18_LMNA | -0.01998 | -0.178608954 | 0.139668611 | 8.07E-01 | 9.23E-01 | 1.00E+00 |
| ENSG00000231537.1_MTCO3P10  | ENSG00000160789.18_LMNA | -0.07376 | -0.230254803 | 0.086458098 | 3.66E-01 | 6.47E-01 | 1.00E+00 |
| ENSG00000170929.5_OR1M1     | ENSG00000160789.18_LMNA | -0.01482 | -0.173607213 | 0.144726069 | 8.56E-01 | 9.43E-01 | 1.00E+00 |
| ENSG00000258223.5_PRSS58    | ENSG00000160789.18_LMNA | 0.03576  | -0.124146355 | 0.193858165 | 6.62E-01 | 8.51E-01 | 1.00E+00 |
| ENSG00000229494.1_AC012494. | ENSG00000160789.18_LMNA | -0.12246 | -0.276270927 | 0.037475127 | 1.33E-01 | 3.70E-01 | 1.00E+00 |
| ENSG00000221933.2_OR2A25    | ENSG00000160789.18_LMNA | 0.09079  | -0.069417154 | 0.246425884 | 2.66E-01 | 5.50E-01 | 1.00E+00 |
| ENSG00000224762.1_CR769776. | ENSG00000160789.18_LMNA | -0.12443 | -0.278121732 | 0.035472941 | 1.27E-01 | 3.60E-01 | 1.00E+00 |
| ENSG00000235707.2_RP11-323A | ENSG00000160789.18_LMNA | -0.08067 | -0.236828072 | 0.079553528 | 3.23E-01 | 6.10E-01 | 1.00E+00 |
| ENSG00000269253.1_SIGLEC21F | ENSG00000160789.18_LMNA | 0.04605  | -0.113983362 | 0.20375983  | 5.73E-01 | 8.01E-01 | 1.00E+00 |
| ENSG00000233867.2_SLC9B1P3  | ENSG00000160789.18_LMNA | -0.17743 | -0.327378631 | -0.01875417 | 2.88E-02 | 1.39E-01 | 1.00E+00 |
| ENSG00000174667.3_OR7D4     | ENSG00000160789.18_LMNA | 0.08627  | -0.073944311 | 0.242146904 | 2.91E-01 | 5.76E-01 | 1.00E+00 |
| ENSG00000204480.7_PRAMEF19  | ENSG00000160789.18_LMNA | -0.00387 | -0.162972253 | 0.155424498 | 9.62E-01 | 9.85E-01 | 1.00E+00 |
| ENSG00000253726.1_RP11-313C | ENSG00000160789.18_LMNA | -0.04644 | -0.20413606  | 0.113595887 | 5.70E-01 | 7.99E-01 | 1.00E+00 |
| ENSG00000188379.6_IFNA2     | ENSG00000160789.18_LMNA | -0.07682 | -0.233165737 | 0.083404198 | 3.47E-01 | 6.31E-01 | 1.00E+00 |
| ENSG00000241861.2_GAPDHP5C  | ENSG00000160789.18_LMNA | 0.00817  | -0.151229626 | 0.167151075 | 9.20E-01 | 9.70E-01 | 1.00E+00 |
| ENSG00000255261.1_OR7E4P    | ENSG00000160789.18_LMNA | 0.03697  | -0.122958454 | 0.195018875 | 6.51E-01 | 8.45E-01 | 1.00E+00 |
| ENSG00000270818.1_RP11-498M | ENSG00000160789.18_LMNA | -0.07498 | -0.231415941 | 0.085240645 | 3.59E-01 | 6.41E-01 | 1.00E+00 |
| ENSG00000264189.1_CTD-2533C | ENSG00000160789.18_LMNA | 0.03123  | -0.128611041 | 0.189487703 | 7.03E-01 | 8.73E-01 | 1.00E+00 |
| ENSG00000120242.3_IFNA8     | ENSG00000160789.18_LMNA | 0.02742  | -0.132355087 | 0.185812929 | 7.37E-01 | 8.90E-01 | 1.00E+00 |
| ENSG00000271454.1_RP11-290L | ENSG00000160789.18_LMNA | 0.05558  | -0.104546411 | 0.212896284 | 4.96E-01 | 7.51E-01 | 1.00E+00 |
| ENSG00000250308.2_SALL4P1   | ENSG00000160789.18_LMNA | -0.04576 | -0.203482511 | 0.114268908 | 5.76E-01 | 8.02E-01 | 1.00E+00 |
| ENSG00000221880.3_KRTAP1-3  | ENSG00000160789.18_LMNA | -0.12988 | -0.283222087 | 0.029942358 | 1.11E-01 | 3.32E-01 | 1.00E+00 |
| ENSG00000235774.1_AC023347. | ENSG00000160789.18_LMNA | -0.02298 | -0.181516195 | 0.136721333 | 7.79E-01 | 9.09E-01 | 1.00E+00 |
| ENSG00000231957.2_GNAI2P2   | ENSG00000160789.18_LMNA | 0.03889  | -0.12106492  | 0.196867226 | 6.34E-01 | 8.36E-01 | 1.00E+00 |
| ENSG00000236405.1_UBQLN1P1  | ENSG00000160789.18_LMNA | 0.02218  | -0.137508638 | 0.180740129 | 7.86E-01 | 9.13E-01 | 1.00E+00 |
| ENSG00000229386.2_OR8B9P    | ENSG00000160789.18_LMNA | 0.02596  | -0.133789602 | 0.184402593 | 7.51E-01 | 8.96E-01 | 1.00E+00 |
| ENSG00000230706.2_RP5-998G2 | ENSG00000160789.18_LMNA | -0.03267 | -0.190879485 | 0.127190651 | 6.89E-01 | 8.66E-01 | 1.00E+00 |
| ENSG00000279209.1_RP11-678K | ENSG00000160789.18_LMNA | 0.00667  | -0.152694505 | 0.165693099 | 9.35E-01 | 9.74E-01 | 1.00E+00 |
| ENSG00000255095.1_OR1D4     | ENSG00000160789.18_LMNA | -0.08618 | -0.242063276 | 0.07403266  | 2.91E-01 | 5.77E-01 | 1.00E+00 |
| ENSG00000254047.2_CTC-436K1 | ENSG00000160789.18_LMNA | 0.02563  | -0.13411653  | 0.184080992 | 7.54E-01 | 8.98E-01 | 1.00E+00 |
| ENSG00000259700.3_RP11-485O | ENSG00000160789.18_LMNA | -0.05655 | -0.213829226 | 0.103579557 | 4.89E-01 | 7.45E-01 | 1.00E+00 |
| ENSG00000259057.1_CTD-2343P | ENSG00000160789.18_LMNA | -0.10063 | -0.255729747 | 0.059528575 | 2.17E-01 | 4.92E-01 | 1.00E+00 |

|                              |                         |          |              |             |          |          |          |
|------------------------------|-------------------------|----------|--------------|-------------|----------|----------|----------|
| ENSG00000248364.1_OR7E86P    | ENSG00000160789.18_LMNA | 0.03339  | -0.126486926 | 0.191568563 | 6.83E-01 | 8.62E-01 | 1.00E+00 |
| ENSG00000255923.1_RP11-983C  | ENSG00000160789.18_LMNA | -0.17251 | -0.32284055  | -0.01368107 | 3.36E-02 | 1.54E-01 | 1.00E+00 |
| ENSG00000196119.6_OR8A1      | ENSG00000160789.18_LMNA | -0.2042  | -0.351962614 | -0.0465155  | 1.16E-02 | 7.29E-02 | 1.00E+00 |
| ENSG00000229968.1_RP3-393P1  | ENSG00000160789.18_LMNA | -0.0542  | -0.21157417  | 0.105915556 | 5.07E-01 | 7.57E-01 | 1.00E+00 |
| ENSG00000269316.1_CTC-457E2  | ENSG00000160789.18_LMNA | -0.03435 | -0.192499855 | 0.125535331 | 6.74E-01 | 8.57E-01 | 1.00E+00 |
| ENSG00000228966.2_HOMER2P    | ENSG00000160789.18_LMNA | 0.03578  | -0.12412548  | 0.193878571 | 6.62E-01 | 8.51E-01 | 1.00E+00 |
| ENSG00000260631.1_RBM22P12   | ENSG00000160789.18_LMNA | 0.09041  | -0.069798394 | 0.246066018 | 2.68E-01 | 5.52E-01 | 1.00E+00 |
| ENSG00000246541.2_RP11-363G  | ENSG00000160789.18_LMNA | -0.00305 | -0.162170478 | 0.156228042 | 9.70E-01 | 9.88E-01 | 1.00E+00 |
| ENSG00000225066.1_RP1-272E8  | ENSG00000160789.18_LMNA | 0.08081  | -0.07940868  | 0.23696566  | 3.22E-01 | 6.09E-01 | 1.00E+00 |
| ENSG00000204449.3_TRIM49C    | ENSG00000160789.18_LMNA | -0.07094 | -0.227568469 | 0.089271095 | 3.85E-01 | 6.64E-01 | 1.00E+00 |
| ENSG00000213927.3_CCL27      | ENSG00000160789.18_LMNA | 0.14487  | -0.014667265 | 0.297217491 | 7.50E-02 | 2.61E-01 | 1.00E+00 |
| ENSG00000227418.5_PCGEM1     | ENSG00000160789.18_LMNA | 0.06708  | -0.093113972 | 0.223890818 | 4.12E-01 | 6.86E-01 | 1.00E+00 |
| ENSG00000227927.2_MACROD2    | ENSG00000160789.18_LMNA | -0.06267 | -0.219681053 | 0.097501308 | 4.43E-01 | 7.10E-01 | 1.00E+00 |
| ENSG00000181282.4_OR5AK3P    | ENSG00000160789.18_LMNA | 0.06093  | -0.09923525  | 0.218014026 | 4.56E-01 | 7.20E-01 | 1.00E+00 |
| ENSG00000183704.7_SLC9B1P1   | ENSG00000160789.18_LMNA | 0.05492  | -0.105201259 | 0.212264075 | 5.02E-01 | 7.53E-01 | 1.00E+00 |
| ENSG00000213822.6_CEACAM1    | ENSG00000160789.18_LMNA | -0.03918 | -0.197148128 | 0.120776948 | 6.32E-01 | 8.35E-01 | 1.00E+00 |
| ENSG00000216352.1_RP11-486E  | ENSG00000160789.18_LMNA | -0.04004 | -0.197980155 | 0.119923667 | 6.24E-01 | 8.31E-01 | 1.00E+00 |
| ENSG00000182712.14_CMC4      | ENSG00000160789.18_LMNA | -0.09575 | -0.251122281 | 0.064433351 | 2.41E-01 | 5.20E-01 | 1.00E+00 |
| ENSG00000275944.1_RP11-104J  | ENSG00000160789.18_LMNA | -0.07325 | -0.229775011 | 0.086960883 | 3.70E-01 | 6.50E-01 | 1.00E+00 |
| ENSG00000229243.1_AC098973   | ENSG00000160789.18_LMNA | 0.01585  | -0.143712918 | 0.174610519 | 8.46E-01 | 9.40E-01 | 1.00E+00 |
| ENSG00000259957.2_RP11-491F  | ENSG00000160789.18_LMNA | -0.18821 | -0.337305263 | -0.02990677 | 2.02E-02 | 1.09E-01 | 1.00E+00 |
| ENSG00000249419.1_RP11-497K  | ENSG00000160789.18_LMNA | 0.02479  | -0.134945892 | 0.183264838 | 7.62E-01 | 9.01E-01 | 1.00E+00 |
| ENSG00000233627.2_C4A-AS1    | ENSG00000160789.18_LMNA | 0.01828  | -0.14133428  | 0.176963449 | 8.23E-01 | 9.31E-01 | 1.00E+00 |
| ENSG00000263375.1_RP11-822E  | ENSG00000160789.18_LMNA | 0.0664   | -0.093791698 | 0.223241294 | 4.16E-01 | 6.89E-01 | 1.00E+00 |
| ENSG00000235737.1_TRIM60P1   | ENSG00000160789.18_LMNA | 0.05437  | -0.105742476 | 0.211741369 | 5.06E-01 | 7.56E-01 | 1.00E+00 |
| ENSG00000215455.4_KRTAP10-1  | ENSG00000160789.18_LMNA | 0.09272  | -0.067474247 | 0.248258513 | 2.56E-01 | 5.38E-01 | 1.00E+00 |
| ENSG00000232900.1_RP4-697P8  | ENSG00000160789.18_LMNA | -0.05424 | -0.211615883 | 0.105872377 | 5.07E-01 | 7.57E-01 | 1.00E+00 |
| ENSG00000183566.9_BPIFA4P    | ENSG00000160789.18_LMNA | -0.11728 | -0.271414413 | 0.042716917 | 1.50E-01 | 3.98E-01 | 1.00E+00 |
| ENSG00000226946.1_AC062022   | ENSG00000160789.18_LMNA | 0.1782   | 0.019550963  | 0.328090106 | 2.81E-02 | 1.37E-01 | 1.00E+00 |
| ENSG00000238154.1_USP9YP4    | ENSG00000160789.18_LMNA | -0.1     | -0.255138371 | 0.060158964 | 2.20E-01 | 4.95E-01 | 1.00E+00 |
| ENSG00000250304.2_ZBED1P1    | ENSG00000160789.18_LMNA | -0.08296 | -0.239007425 | 0.077257612 | 3.10E-01 | 5.96E-01 | 1.00E+00 |
| ENSG00000204363.4_SPANXN5    | ENSG00000160789.18_LMNA | 0.03831  | -0.121637059 | 0.196308977 | 6.39E-01 | 8.39E-01 | 1.00E+00 |
| ENSG00000224247.1_AJ009632.3 | ENSG00000160789.18_LMNA | 0.01947  | -0.140165291 | 0.178118472 | 8.12E-01 | 9.26E-01 | 1.00E+00 |

|                              |                         |          |              |             |          |          |          |
|------------------------------|-------------------------|----------|--------------|-------------|----------|----------|----------|
| ENSG00000267392.3_CYP4F9P    | ENSG00000160789.18_LMNA | 0.08961  | -0.070598637 | 0.245310356 | 2.72E-01 | 5.57E-01 | 1.00E+00 |
| ENSG00000229636.2_KRT8P21    | ENSG00000160789.18_LMNA | 0.006    | -0.153350446 | 0.165039798 | 9.42E-01 | 9.77E-01 | 1.00E+00 |
| ENSG00000219736.1_RP11-560C  | ENSG00000160789.18_LMNA | -0.08355 | -0.239563974 | 0.076670758 | 3.06E-01 | 5.93E-01 | 1.00E+00 |
| ENSG00000257504.1_RP11-536C  | ENSG00000160789.18_LMNA | -0.03874 | -0.19672388  | 0.121211852 | 6.36E-01 | 8.37E-01 | 1.00E+00 |
| ENSG00000280306.1_CTD-3076M  | ENSG00000160789.18_LMNA | 0.07314  | -0.087077609 | 0.229663601 | 3.71E-01 | 6.51E-01 | 1.00E+00 |
| ENSG00000237023.1_USP9YP3    | ENSG00000160789.18_LMNA | 0.01827  | -0.141337754 | 0.176960015 | 8.23E-01 | 9.31E-01 | 1.00E+00 |
| ENSG00000171446.6_KRT27      | ENSG00000160789.18_LMNA | 0.03061  | -0.129224545 | 0.18888616  | 7.08E-01 | 8.76E-01 | 1.00E+00 |
| ENSG00000231031.5_AC008271.  | ENSG00000160789.18_LMNA | 0.0564   | -0.103734866 | 0.213679404 | 4.90E-01 | 7.46E-01 | 1.00E+00 |
| ENSG00000155833.13_CYLC2     | ENSG00000160789.18_LMNA | -0.13237 | -0.285555898 | 0.027405273 | 1.04E-01 | 3.19E-01 | 1.00E+00 |
| ENSG00000178287.16_SPAG11A   | ENSG00000160789.18_LMNA | 0.12161  | -0.038334531 | 0.275475787 | 1.36E-01 | 3.74E-01 | 1.00E+00 |
| ENSG00000232447.1_MTND5P3    | ENSG00000160789.18_LMNA | -0.13613 | -0.289066154 | 0.023581669 | 9.45E-02 | 3.01E-01 | 1.00E+00 |
| ENSG00000187483.8_SERPINA1   | ENSG00000160789.18_LMNA | 0.08434  | -0.075874781 | 0.240318515 | 3.02E-01 | 5.88E-01 | 1.00E+00 |
| ENSG00000189023.9_MAGEB16    | ENSG00000160789.18_LMNA | -0.05663 | -0.213901465 | 0.103504667 | 4.88E-01 | 7.45E-01 | 1.00E+00 |
| ENSG00000112462.8_OR12D3     | ENSG00000160789.18_LMNA | 0.03078  | -0.129052552 | 0.189054824 | 7.07E-01 | 8.75E-01 | 1.00E+00 |
| ENSG00000229288.1_RP11-1E11  | ENSG00000160789.18_LMNA | -0.02529 | -0.183751447 | 0.134451461 | 7.57E-01 | 8.99E-01 | 1.00E+00 |
| ENSG00000240107.1_RP11-628J  | ENSG00000160789.18_LMNA | 0.07385  | -0.086362018 | 0.23034647  | 3.66E-01 | 6.47E-01 | 1.00E+00 |
| ENSG00000224931.3_AC152010.  | ENSG00000160789.18_LMNA | -0.09609 | -0.251440619 | 0.06409496  | 2.39E-01 | 5.18E-01 | 1.00E+00 |
| ENSG00000215604.3_ZNF962P    | ENSG00000160789.18_LMNA | 0.12262  | -0.03731049  | 0.276423205 | 1.32E-01 | 3.69E-01 | 1.00E+00 |
| ENSG00000109181.10_UGT2B10   | ENSG00000160789.18_LMNA | -0.06224 | -0.219270065 | 0.097928972 | 4.46E-01 | 7.13E-01 | 1.00E+00 |
| ENSG00000170983.3_LINC00208  | ENSG00000160789.18_LMNA | -0.08757 | -0.243375978 | 0.072645284 | 2.83E-01 | 5.69E-01 | 1.00E+00 |
| ENSG00000173610.10_UGT2A1    | ENSG00000160789.18_LMNA | 0.03464  | -0.125256346 | 0.192772777 | 6.72E-01 | 8.56E-01 | 1.00E+00 |
| ENSG00000222036.6_POTEM      | ENSG00000160789.18_LMNA | -0.00474 | -0.163815409 | 0.154579028 | 9.54E-01 | 9.81E-01 | 1.00E+00 |
| ENSG00000256146.1_RP11-319E  | ENSG00000160789.18_LMNA | -0.02015 | -0.178781177 | 0.139494173 | 8.05E-01 | 9.22E-01 | 1.00E+00 |
| ENSG00000279142.1_RP11-463C  | ENSG00000160789.18_LMNA | -0.02753 | -0.185916476 | 0.132249712 | 7.36E-01 | 8.89E-01 | 1.00E+00 |
| ENSG00000279186.1_CH507-39C  | ENSG00000160789.18_LMNA | 0.01163  | -0.147843801 | 0.170515624 | 8.87E-01 | 9.56E-01 | 1.00E+00 |
| ENSG00000255099.1_RP11-25D1  | ENSG00000160789.18_LMNA | -0.04029 | -0.198219985 | 0.119677624 | 6.22E-01 | 8.29E-01 | 1.00E+00 |
| ENSG00000104755.13_ADAM2     | ENSG00000160789.18_LMNA | -0.02143 | -0.180015315 | 0.138243586 | 7.93E-01 | 9.16E-01 | 1.00E+00 |
| ENSG00000197475.10_ADAM3A    | ENSG00000160789.18_LMNA | 0.0532   | -0.106902584 | 0.210620325 | 5.15E-01 | 7.63E-01 | 1.00E+00 |
| ENSG00000268486.4_ABC7-4241  | ENSG00000160789.18_LMNA | 0.15753  | -0.001716437 | 0.308979288 | 5.26E-02 | 2.08E-01 | 1.00E+00 |
| ENSG00000234864.1_AL022344.5 | ENSG00000160789.18_LMNA | 0.14472  | -0.014819897 | 0.297078306 | 7.53E-02 | 2.62E-01 | 1.00E+00 |
| ENSG00000201966.1_RNA5-8SP2  | ENSG00000160789.18_LMNA | -0.04926 | -0.2068339   | 0.110814573 | 5.47E-01 | 7.84E-01 | 1.00E+00 |
| ENSG00000206729.1_RNU6-1126  | ENSG00000160789.18_LMNA | 0.01158  | -0.147897738 | 0.170462084 | 8.87E-01 | 9.56E-01 | 1.00E+00 |
| ENSG00000261213.1_RP11-510C  | ENSG00000160789.18_LMNA | 0.09163  | -0.068568383 | 0.247226757 | 2.62E-01 | 5.45E-01 | 1.00E+00 |

|                             |                         |          |              |             |          |          |          |
|-----------------------------|-------------------------|----------|--------------|-------------|----------|----------|----------|
| ENSG00000234270.1_RPL36P20  | ENSG00000160789.18_LMNA | -0.07025 | -0.226913976 | 0.089955684 | 3.90E-01 | 6.68E-01 | 1.00E+00 |
| ENSG00000278282.1_          | ENSG00000160789.18_LMNA | -0.09397 | -0.249434716 | 0.066226004 | 2.50E-01 | 5.30E-01 | 1.00E+00 |
| ENSG00000265291.1_MIR4710   | ENSG00000160789.18_LMNA | 0.08672  | -0.073498561 | 0.242568765 | 2.88E-01 | 5.74E-01 | 1.00E+00 |
| ENSG00000253681.1_RP11-115I | ENSG00000160789.18_LMNA | -0.10699 | -0.261730123 | 0.053118105 | 1.90E-01 | 4.57E-01 | 1.00E+00 |
| ENSG00000275490.1_CH17-132F | ENSG00000160789.18_LMNA | -0.09843 | -0.253658133 | 0.06173575  | 2.28E-01 | 5.04E-01 | 1.00E+00 |
| ENSG00000264781.1_MIR4537   | ENSG00000160789.18_LMNA | -0.10097 | -0.256051468 | 0.059185524 | 2.16E-01 | 4.90E-01 | 1.00E+00 |
| ENSG00000212101.1_          | ENSG00000160789.18_LMNA | 0.0585   | -0.101649203 | 0.215690143 | 4.74E-01 | 7.34E-01 | 1.00E+00 |
| ENSG00000200495.1_RNU6-1205 | ENSG00000160789.18_LMNA | 0.03697  | -0.122953934 | 0.19502329  | 6.51E-01 | 8.45E-01 | 1.00E+00 |
| ENSG00000200086.1_RNU6-433F | ENSG00000160789.18_LMNA | -0.0677  | -0.224478342 | 0.092500686 | 4.07E-01 | 6.82E-01 | 1.00E+00 |
| ENSG00000277815.1_          | ENSG00000160789.18_LMNA | 0.00119  | -0.158038378 | 0.160362584 | 9.88E-01 | 9.96E-01 | 1.00E+00 |
| ENSG00000222129.1_RNA5SP36  | ENSG00000160789.18_LMNA | -0.05147 | -0.208954081 | 0.108625296 | 5.29E-01 | 7.73E-01 | 1.00E+00 |
| ENSG00000222806.1_RNA5SP22  | ENSG00000160789.18_LMNA | 0.03525  | -0.124647048 | 0.193368667 | 6.66E-01 | 8.53E-01 | 1.00E+00 |
| ENSG00000266382.1_          | ENSG00000160789.18_LMNA | -0.2291  | -0.374639374 | -0.07254841 | 4.52E-03 | 3.64E-02 | 1.00E+00 |
| ENSG00000242752.3_NMTRQ-TT  | ENSG00000160789.18_LMNA | 0.05735  | -0.102785718 | 0.214594789 | 4.83E-01 | 7.40E-01 | 1.00E+00 |
| ENSG00000264319.1_MIR4801   | ENSG00000160789.18_LMNA | -0.08805 | -0.243834907 | 0.07215996  | 2.81E-01 | 5.66E-01 | 1.00E+00 |
| ENSG00000207814.1_MIR147A   | ENSG00000160789.18_LMNA | -0.06171 | -0.218764488 | 0.098454902 | 4.50E-01 | 7.16E-01 | 1.00E+00 |
| ENSG00000211887.2_TRAJ2     | ENSG00000160789.18_LMNA | 0.07801  | -0.082211066 | 0.234301474 | 3.39E-01 | 6.25E-01 | 1.00E+00 |
| ENSG00000278523.1_Y_RNA     | ENSG00000160789.18_LMNA | -0.03224 | -0.1904629   | 0.127615936 | 6.93E-01 | 8.68E-01 | 1.00E+00 |
| ENSG00000207199.1_SNORD38   | ENSG00000160789.18_LMNA | 0.11216  | -0.047893499 | 0.266602563 | 1.69E-01 | 4.27E-01 | 1.00E+00 |
| ENSG00000277723.1_MIR6827   | ENSG00000160789.18_LMNA | -0.00355 | -0.162662622 | 0.155734862 | 9.65E-01 | 9.86E-01 | 1.00E+00 |
| ENSG00000210176.1_MT-TH     | ENSG00000160789.18_LMNA | 0.01908  | -0.140548159 | 0.177740275 | 8.16E-01 | 9.28E-01 | 1.00E+00 |
| ENSG00000266423.1_MIR3163   | ENSG00000160789.18_LMNA | 0.01859  | -0.141024751 | 0.177269366 | 8.20E-01 | 9.30E-01 | 1.00E+00 |
| ENSG00000207191.1_SNORD116  | ENSG00000160789.18_LMNA | 0.06411  | -0.096074296 | 0.221051606 | 4.33E-01 | 7.02E-01 | 1.00E+00 |
| ENSG00000221042.1_CPEB3_rib | ENSG00000160789.18_LMNA | -0.07205 | -0.228624771 | 0.088165589 | 3.78E-01 | 6.57E-01 | 1.00E+00 |
| ENSG00000200680.1_SNORD115  | ENSG00000160789.18_LMNA | -0.09603 | -0.251391228 | 0.064147467 | 2.39E-01 | 5.18E-01 | 1.00E+00 |
| ENSG00000263413.2_MIR4538   | ENSG00000160789.18_LMNA | 0.10039  | -0.059768693 | 0.255504517 | 2.18E-01 | 4.93E-01 | 1.00E+00 |
| ENSG00000276242.1_          | ENSG00000160789.18_LMNA | -0.03035 | -0.188634511 | 0.129481126 | 7.11E-01 | 8.77E-01 | 1.00E+00 |
| ENSG00000201318.1_SNORD114  | ENSG00000160789.18_LMNA | 0.02889  | -0.130916211 | 0.187226237 | 7.24E-01 | 8.83E-01 | 1.00E+00 |
| ENSG00000222932.1_RNU6-172F | ENSG00000160789.18_LMNA | 0.08092  | -0.079303499 | 0.237065562 | 3.22E-01 | 6.08E-01 | 1.00E+00 |
| ENSG00000251839.1_RNU7-12P  | ENSG00000160789.18_LMNA | 0.02967  | -0.130147767 | 0.187980486 | 7.17E-01 | 8.80E-01 | 1.00E+00 |
| ENSG00000266881.1_          | ENSG00000160789.18_LMNA | 0.05348  | -0.106630861 | 0.210882974 | 5.13E-01 | 7.61E-01 | 1.00E+00 |
| ENSG00000265642.1_          | ENSG00000160789.18_LMNA | 0.09979  | -0.060367559 | 0.254942633 | 2.21E-01 | 4.97E-01 | 1.00E+00 |
| ENSG00000266063.1_MIR4771-2 | ENSG00000160789.18_LMNA | -0.03197 | -0.190199188 | 0.127885095 | 6.96E-01 | 8.70E-01 | 1.00E+00 |

|                             |                         |          |              |             |          |          |          |
|-----------------------------|-------------------------|----------|--------------|-------------|----------|----------|----------|
| ENSG00000211845.1_TRAJ44    | ENSG00000160789.18_LMNA | 0.09606  | -0.064119948 | 0.251417114 | 2.39E-01 | 5.18E-01 | 1.00E+00 |
| ENSG00000210195.2_MT-TT     | ENSG00000160789.18_LMNA | 0.01948  | -0.140153919 | 0.178129704 | 8.12E-01 | 9.26E-01 | 1.00E+00 |
| ENSG00000263978.1_MIR4499   | ENSG00000160789.18_LMNA | -0.13174 | -0.284966007 | 0.028046925 | 1.06E-01 | 3.23E-01 | 1.00E+00 |
| ENSG00000264715.1_          | ENSG00000160789.18_LMNA | -0.09714 | -0.252434859 | 0.063037626 | 2.34E-01 | 5.12E-01 | 1.00E+00 |
| ENSG00000264306.1_          | ENSG00000160789.18_LMNA | 0.19513  | 0.037084862  | 0.34365833  | 1.60E-02 | 9.19E-02 | 1.00E+00 |
| ENSG00000263857.1_MIR4729   | ENSG00000160789.18_LMNA | -0.0161  | -0.174856698 | 0.143464222 | 8.44E-01 | 9.39E-01 | 1.00E+00 |
| ENSG00000265904.1_          | ENSG00000160789.18_LMNA | -0.01693 | -0.175653679 | 0.142658814 | 8.36E-01 | 9.36E-01 | 1.00E+00 |
| ENSG00000264563.1_MIR4633   | ENSG00000160789.18_LMNA | 0.04341  | -0.116600329 | 0.201216354 | 5.95E-01 | 8.13E-01 | 1.00E+00 |
| ENSG00000275554.1_          | ENSG00000160789.18_LMNA | -0.1805  | -0.330210763 | -0.02192827 | 2.61E-02 | 1.30E-01 | 1.00E+00 |
| ENSG00000265711.1_          | ENSG00000160789.18_LMNA | 0.10377  | -0.056360382 | 0.258698302 | 2.03E-01 | 4.74E-01 | 1.00E+00 |
| ENSG00000211676.2_IGLJ2     | ENSG00000160789.18_LMNA | 0.09774  | -0.062432196 | 0.253003861 | 2.31E-01 | 5.09E-01 | 1.00E+00 |
| ENSG00000200702.1_Y_RNA     | ENSG00000160789.18_LMNA | 0.1634   | 0.004316553  | 0.314426126 | 4.43E-02 | 1.86E-01 | 1.00E+00 |
| ENSG00000252544.1_RNU6-1282 | ENSG00000160789.18_LMNA | -0.11334 | -0.267714476 | 0.046698803 | 1.64E-01 | 4.20E-01 | 1.00E+00 |
| ENSG00000207812.2_          | ENSG00000160789.18_LMNA | -0.00188 | -0.161032414 | 0.157367894 | 9.82E-01 | 9.93E-01 | 1.00E+00 |
| ENSG00000221326.1_          | ENSG00000160789.18_LMNA | -0.21024 | -0.357479781 | -0.05281124 | 9.33E-03 | 6.23E-02 | 1.00E+00 |
| ENSG00000211661.2_IGLV3-22  | ENSG00000160789.18_LMNA | 0.06256  | -0.097609641 | 0.219576955 | 4.44E-01 | 7.11E-01 | 1.00E+00 |
| ENSG00000215952.1_MIR921    | ENSG00000160789.18_LMNA | 0.05239  | -0.107710415 | 0.209839204 | 5.22E-01 | 7.67E-01 | 1.00E+00 |
| ENSG00000206661.1_SNORA70   | ENSG00000160789.18_LMNA | -0.07384 | -0.230335858 | 0.086373142 | 3.66E-01 | 6.47E-01 | 1.00E+00 |
| ENSG00000280522.1_          | ENSG00000160789.18_LMNA | 0.01727  | -0.142321808 | 0.175987036 | 8.33E-01 | 9.35E-01 | 1.00E+00 |
| ENSG00000205442.11_IZUMO3   | ENSG00000160789.18_LMNA | 0.03194  | -0.127908715 | 0.190176043 | 6.96E-01 | 8.70E-01 | 1.00E+00 |
| ENSG00000201301.1_RNA5SP13  | ENSG00000160789.18_LMNA | 0.12583  | -0.034047795 | 0.279437709 | 1.22E-01 | 3.52E-01 | 1.00E+00 |
| ENSG00000237473.1_RP11-324C | ENSG00000160789.18_LMNA | -0.00561 | -0.164665416 | 0.153726215 | 9.45E-01 | 9.78E-01 | 1.00E+00 |
| ENSG00000238593.1_          | ENSG00000160789.18_LMNA | -0.01855 | -0.177231055 | 0.141063518 | 8.21E-01 | 9.30E-01 | 1.00E+00 |
| ENSG00000200884.1_Y_RNA     | ENSG00000160789.18_LMNA | -0.09144 | -0.247042134 | 0.068764089 | 2.63E-01 | 5.46E-01 | 1.00E+00 |
| ENSG00000265442.1_MIR3941   | ENSG00000160789.18_LMNA | 0.13628  | -0.023433833 | 0.289201706 | 9.41E-02 | 3.00E-01 | 1.00E+00 |
| ENSG00000202534.1_RNU6-1329 | ENSG00000160789.18_LMNA | -0.06932 | -0.226025244 | 0.090884802 | 3.96E-01 | 6.73E-01 | 1.00E+00 |
| ENSG00000238417.1_RNU7-63P  | ENSG00000160789.18_LMNA | 0.02278  | -0.1369173   | 0.181323063 | 7.81E-01 | 9.10E-01 | 1.00E+00 |
| ENSG00000202239.1_RNU6-396F | ENSG00000160789.18_LMNA | -0.0894  | -0.245110432 | 0.070810288 | 2.73E-01 | 5.58E-01 | 1.00E+00 |
| ENSG00000277713.1_MIR6856   | ENSG00000160789.18_LMNA | -0.03173 | -0.18997562  | 0.128113243 | 6.98E-01 | 8.71E-01 | 1.00E+00 |
| ENSG00000264037.1_MIR4472-2 | ENSG00000160789.18_LMNA | 0.17847  | 0.01982864   | 0.328337966 | 2.78E-02 | 1.36E-01 | 1.00E+00 |
| ENSG00000252584.1_          | ENSG00000160789.18_LMNA | 0.11209  | -0.047970458 | 0.266530908 | 1.69E-01 | 4.28E-01 | 1.00E+00 |
| ENSG00000281653.1_          | ENSG00000160789.18_LMNA | 0.08233  | -0.07789054  | 0.238406949 | 3.13E-01 | 6.00E-01 | 1.00E+00 |
| ENSG00000264480.1_MIR4714   | ENSG00000160789.18_LMNA | -0.08008 | -0.236270835 | 0.08014003  | 3.27E-01 | 6.13E-01 | 1.00E+00 |



|                              |                         |          |              |             |          |          |          |
|------------------------------|-------------------------|----------|--------------|-------------|----------|----------|----------|
| ENSG00000266043.1_MIR3649    | ENSG00000160789.18_LMNA | -0.04639 | -0.204085938 | 0.113647512 | 5.70E-01 | 7.99E-01 | 1.00E+00 |
| ENSG00000264614.1_MIR5588    | ENSG00000160789.18_LMNA | -0.07604 | -0.232427518 | 0.084179237 | 3.52E-01 | 6.35E-01 | 1.00E+00 |
| ENSG00000280999.1_           | ENSG00000160789.18_LMNA | -0.03448 | -0.192624686 | 0.125407733 | 6.73E-01 | 8.57E-01 | 1.00E+00 |
| ENSG00000223293.1_RNA5SP27   | ENSG00000160789.18_LMNA | -0.1877  | -0.336838704 | -0.02938087 | 2.06E-02 | 1.10E-01 | 1.00E+00 |
| ENSG00000222482.1_           | ENSG00000160789.18_LMNA | 0.11535  | -0.044670564 | 0.269600259 | 1.57E-01 | 4.09E-01 | 1.00E+00 |
| ENSG00000207317.1_Y_RNA      | ENSG00000160789.18_LMNA | -0.08585 | -0.241743886 | 0.074370034 | 2.93E-01 | 5.79E-01 | 1.00E+00 |
| ENSG00000207632.1_MIR588     | ENSG00000160789.18_LMNA | 0.01501  | -0.144538997 | 0.173792516 | 8.54E-01 | 9.43E-01 | 1.00E+00 |
| ENSG00000200298.1_Y_RNA      | ENSG00000160789.18_LMNA | 0.15809  | -0.001138243 | 0.309502191 | 5.17E-02 | 2.06E-01 | 1.00E+00 |
| ENSG00000212171.1_RNA5SP86   | ENSG00000160789.18_LMNA | 0.07591  | -0.084312645 | 0.23230041  | 3.53E-01 | 6.36E-01 | 1.00E+00 |
| ENSG00000212338.1_SNORA67    | ENSG00000160789.18_LMNA | -0.20349 | -0.351310831 | -0.04577334 | 1.19E-02 | 7.44E-02 | 1.00E+00 |
| ENSG00000264603.1_MIR3159    | ENSG00000160789.18_LMNA | -0.01255 | -0.171408373 | 0.146944152 | 8.78E-01 | 9.53E-01 | 1.00E+00 |
| ENSG00000266226.1_MIR4323    | ENSG00000160789.18_LMNA | -0.06747 | -0.224259754 | 0.092728887 | 4.09E-01 | 6.83E-01 | 1.00E+00 |
| ENSG00000199674.1_RNU6-862F  | ENSG00000160789.18_LMNA | -0.08844 | -0.244204289 | 0.071769224 | 2.79E-01 | 5.64E-01 | 1.00E+00 |
| ENSG00000252266.1_Y_RNA      | ENSG00000160789.18_LMNA | 0.02929  | -0.130521028 | 0.187614167 | 7.20E-01 | 8.81E-01 | 1.00E+00 |
| ENSG00000266772.1_           | ENSG00000160789.18_LMNA | 0.02609  | -0.133664975 | 0.184525171 | 7.50E-01 | 8.95E-01 | 1.00E+00 |
| ENSG00000266230.1_           | ENSG00000160789.18_LMNA | 0.14785  | -0.011627381 | 0.299986807 | 6.91E-02 | 2.48E-01 | 1.00E+00 |
| ENSG00000251874.1_RNU6-615F  | ENSG00000160789.18_LMNA | -0.17377 | -0.324007744 | -0.01498435 | 3.23E-02 | 1.50E-01 | 1.00E+00 |
| ENSG00000201044.1_RNU6-268F  | ENSG00000160789.18_LMNA | -0.08509 | -0.241024703 | 0.075129447 | 2.97E-01 | 5.83E-01 | 1.00E+00 |
| ENSG00000264766.1_           | ENSG00000160789.18_LMNA | -0.00262 | -0.161755033 | 0.156644238 | 9.74E-01 | 9.90E-01 | 1.00E+00 |
| ENSG00000222123.1_RNA5SP39   | ENSG00000160789.18_LMNA | -0.11799 | -0.272076014 | 0.042003847 | 1.48E-01 | 3.94E-01 | 1.00E+00 |
| ENSG00000265023.1_           | ENSG00000160789.18_LMNA | 0.09889  | -0.061271755 | 0.254093871 | 2.25E-01 | 5.02E-01 | 1.00E+00 |
| ENSG00000237085.2_AC127391.1 | ENSG00000160789.18_LMNA | -0.05891 | -0.21608271  | 0.101241684 | 4.71E-01 | 7.31E-01 | 1.00E+00 |
| ENSG00000264021.1_           | ENSG00000160789.18_LMNA | -0.01636 | -0.175106921 | 0.143211398 | 8.41E-01 | 9.38E-01 | 1.00E+00 |
| ENSG00000223027.1_SNORA57    | ENSG00000160789.18_LMNA | -0.07169 | -0.228285249 | 0.088521012 | 3.80E-01 | 6.59E-01 | 1.00E+00 |
| ENSG00000206880.1_RNU6-1310  | ENSG00000160789.18_LMNA | -0.05822 | -0.21542044  | 0.101929119 | 4.76E-01 | 7.35E-01 | 1.00E+00 |
| ENSG00000206593.1_RNU6-47P   | ENSG00000160789.18_LMNA | 0.08715  | -0.073064653 | 0.242979304 | 2.86E-01 | 5.71E-01 | 1.00E+00 |
| ENSG00000200903.1_RNU1-42P   | ENSG00000160789.18_LMNA | -0.02873 | -0.187075293 | 0.13106995  | 7.25E-01 | 8.84E-01 | 1.00E+00 |
| ENSG00000237374.4_           | ENSG00000160789.18_LMNA | 0.09196  | -0.06823853  | 0.24753788  | 2.60E-01 | 5.43E-01 | 1.00E+00 |
| ENSG00000200974.1_RNU4-87P   | ENSG00000160789.18_LMNA | -0.10156 | -0.256614623 | 0.058584854 | 2.13E-01 | 4.87E-01 | 1.00E+00 |
| ENSG00000265398.1_           | ENSG00000160789.18_LMNA | 0.0127   | -0.1468006   | 0.171550776 | 8.77E-01 | 9.52E-01 | 1.00E+00 |
| ENSG00000265498.1_           | ENSG00000160789.18_LMNA | -0.03031 | -0.188598115 | 0.12951823  | 7.11E-01 | 8.77E-01 | 1.00E+00 |
| ENSG00000219653.1_GCNT1P4    | ENSG00000160789.18_LMNA | -0.01316 | -0.171995877 | 0.14635182  | 8.72E-01 | 9.50E-01 | 1.00E+00 |
| ENSG00000206900.1_RNU6-98P   | ENSG00000160789.18_LMNA | 0.02082  | -0.138842854 | 0.179424054 | 7.99E-01 | 9.19E-01 | 1.00E+00 |

|                             |                         |          |              |             |          |          |          |
|-----------------------------|-------------------------|----------|--------------|-------------|----------|----------|----------|
| ENSG00000206700.1_RNU6-723F | ENSG00000160789.18_LMNA | 0.09582  | -0.06436753  | 0.251184206 | 2.40E-01 | 5.19E-01 | 1.00E+00 |
| ENSG00000251904.1_RNA5SP27  | ENSG00000160789.18_LMNA | -0.12208 | -0.275920849 | 0.037853556 | 1.34E-01 | 3.72E-01 | 1.00E+00 |
| ENSG00000239093.1_snoU13    | ENSG00000160789.18_LMNA | 0.06876  | -0.091444362 | 0.225489752 | 4.00E-01 | 6.77E-01 | 1.00E+00 |
| ENSG00000261580.1_ENPP7P13  | ENSG00000160789.18_LMNA | 0.08319  | -0.077032242 | 0.239221182 | 3.08E-01 | 5.95E-01 | 1.00E+00 |
| ENSG00000202414.1_Y_RNA     | ENSG00000160789.18_LMNA | -0.07303 | -0.229557099 | 0.087189185 | 3.71E-01 | 6.52E-01 | 1.00E+00 |
| ENSG00000281727.1_          | ENSG00000160789.18_LMNA | 0.13669  | -0.023012929 | 0.289587567 | 9.31E-02 | 2.98E-01 | 1.00E+00 |
| ENSG00000264402.1_MIR548AL  | ENSG00000160789.18_LMNA | -0.15968 | -0.310975049 | -0.00049147 | 4.94E-02 | 2.00E-01 | 1.00E+00 |
| ENSG00000201662.1_RNU6-60P  | ENSG00000160789.18_LMNA | 0.00219  | -0.15706456  | 0.161335354 | 9.79E-01 | 9.92E-01 | 1.00E+00 |
| ENSG00000200209.1_Y_RNA     | ENSG00000160789.18_LMNA | -0.10513 | -0.259983186 | 0.054987118 | 1.97E-01 | 4.67E-01 | 1.00E+00 |
| ENSG00000201999.1_RNA5SP42  | ENSG00000160789.18_LMNA | -0.0615  | -0.218558575 | 0.098669054 | 4.52E-01 | 7.17E-01 | 1.00E+00 |
| ENSG00000200688.1_Y_RNA     | ENSG00000160789.18_LMNA | -0.05363 | -0.211025846 | 0.106483033 | 5.12E-01 | 7.60E-01 | 1.00E+00 |
| ENSG00000238765.1_RNA5SP57  | ENSG00000160789.18_LMNA | -0.00542 | -0.164479055 | 0.153913232 | 9.47E-01 | 9.79E-01 | 1.00E+00 |
| ENSG00000212354.1_RNU6-1242 | ENSG00000160789.18_LMNA | 0.09754  | -0.062631145 | 0.252816906 | 2.32E-01 | 5.10E-01 | 1.00E+00 |
| ENSG00000200649.1_RNA5SP34  | ENSG00000160789.18_LMNA | 0.04212  | -0.117869634 | 0.199981149 | 6.06E-01 | 8.20E-01 | 1.00E+00 |
| ENSG00000252684.1_RNU6ATAC  | ENSG00000160789.18_LMNA | 0.14059  | -0.019037511 | 0.293227007 | 8.41E-02 | 2.81E-01 | 1.00E+00 |
| ENSG00000274115.1_MIR6081   | ENSG00000160789.18_LMNA | 0.01293  | -0.146575362 | 0.171774183 | 8.74E-01 | 9.51E-01 | 1.00E+00 |
| ENSG00000233767.1_PSMA6P3   | ENSG00000160789.18_LMNA | 0.23271  | 0.076335611  | 0.377908487 | 3.91E-03 | 3.26E-02 | 1.00E+00 |
| ENSG00000278135.1_U2        | ENSG00000160789.18_LMNA | 0.02223  | -0.137459833 | 0.180788249 | 7.86E-01 | 9.13E-01 | 1.00E+00 |
| ENSG00000223092.1_RNA5SP11  | ENSG00000160789.18_LMNA | -0.14382 | -0.296235276 | 0.015744062 | 7.71E-02 | 2.66E-01 | 1.00E+00 |
| ENSG00000275044.1_          | ENSG00000160789.18_LMNA | -0.17019 | -0.320697916 | -0.01129135 | 3.61E-02 | 1.62E-01 | 1.00E+00 |
| ENSG00000264054.1_RPL31P9   | ENSG00000160789.18_LMNA | -0.06814 | -0.224901188 | 0.092059149 | 4.04E-01 | 6.80E-01 | 1.00E+00 |
| ENSG00000199668.1_Y_RNA     | ENSG00000160789.18_LMNA | 0.01456  | -0.144973092 | 0.17336249  | 8.59E-01 | 9.44E-01 | 1.00E+00 |
| ENSG00000275000.1_          | ENSG00000160789.18_LMNA | -0.09577 | -0.251137159 | 0.064417537 | 2.41E-01 | 5.20E-01 | 1.00E+00 |
| ENSG00000252033.1_RNU6-311F | ENSG00000160789.18_LMNA | -0.0024  | -0.161536572 | 0.156863048 | 9.77E-01 | 9.91E-01 | 1.00E+00 |
| ENSG00000206635.1_RNU6-1062 | ENSG00000160789.18_LMNA | -0.09433 | -0.249778272 | 0.065861218 | 2.48E-01 | 5.28E-01 | 1.00E+00 |
| ENSG00000207962.1_MIR30C1   | ENSG00000160789.18_LMNA | 0.0791   | -0.081120817 | 0.235338522 | 3.33E-01 | 6.18E-01 | 1.00E+00 |
| ENSG00000221809.1_          | ENSG00000160789.18_LMNA | -0.0049  | -0.163973134 | 0.154420817 | 9.52E-01 | 9.81E-01 | 1.00E+00 |
| ENSG00000280643.1_          | ENSG00000160789.18_LMNA | 0.08595  | -0.074270466 | 0.241838154 | 2.92E-01 | 5.78E-01 | 1.00E+00 |
| ENSG00000206599.1_RNU6-841F | ENSG00000160789.18_LMNA | 0.0791   | -0.081127017 | 0.235332627 | 3.33E-01 | 6.18E-01 | 1.00E+00 |
| ENSG00000222457.1_RNU6-121F | ENSG00000160789.18_LMNA | 0.03849  | -0.121458552 | 0.196483173 | 6.38E-01 | 8.38E-01 | 1.00E+00 |
| ENSG00000207797.1_MIR187    | ENSG00000160789.18_LMNA | 0.17219  | 0.013351238  | 0.322545012 | 3.39E-02 | 1.55E-01 | 1.00E+00 |
| ENSG00000274200.1_          | ENSG00000160789.18_LMNA | 0.04564  | -0.114394805 | 0.203360226 | 5.77E-01 | 8.03E-01 | 1.00E+00 |
| ENSG00000199360.1_RNU6-1115 | ENSG00000160789.18_LMNA | -0.04194 | -0.199810207 | 0.118045214 | 6.08E-01 | 8.21E-01 | 1.00E+00 |

|                             |                         |          |              |             |          |          |          |
|-----------------------------|-------------------------|----------|--------------|-------------|----------|----------|----------|
| ENSG00000224245.1_RP11-533K | ENSG00000160789.18_LMNA | -0.0468  | -0.204477719 | 0.113243932 | 5.67E-01 | 7.97E-01 | 1.00E+00 |
| ENSG00000201501.1_Y_RNA     | ENSG00000160789.18_LMNA | -0.01902 | -0.177682861 | 0.140606274 | 8.16E-01 | 9.28E-01 | 1.00E+00 |
| ENSG00000238482.1_RNU6-1208 | ENSG00000160789.18_LMNA | -0.06536 | -0.222246537 | 0.094829077 | 4.24E-01 | 6.95E-01 | 1.00E+00 |
| ENSG00000271923.1_RNU6-86P  | ENSG00000160789.18_LMNA | 0.05309  | -0.107013244 | 0.210513348 | 5.16E-01 | 7.63E-01 | 1.00E+00 |
| ENSG00000252377.1_RNU6-504F | ENSG00000160789.18_LMNA | -0.06187 | -0.218911412 | 0.098302082 | 4.49E-01 | 7.15E-01 | 1.00E+00 |
| ENSG00000277073.1_MIR6131   | ENSG00000160789.18_LMNA | 0.10182  | -0.058324532 | 0.25685862  | 2.12E-01 | 4.86E-01 | 1.00E+00 |
| ENSG00000265524.1_          | ENSG00000160789.18_LMNA | 0.10141  | -0.0587362   | 0.25647275  | 2.14E-01 | 4.88E-01 | 1.00E+00 |
| ENSG00000251778.1_SNORA3    | ENSG00000160789.18_LMNA | -0.08637 | -0.242238485 | 0.073847555 | 2.90E-01 | 5.75E-01 | 1.00E+00 |
| ENSG00000252082.1_RNU6-547F | ENSG00000160789.18_LMNA | 0.20075  | 0.042918857  | 0.348801198 | 1.31E-02 | 7.97E-02 | 1.00E+00 |
| ENSG00000276283.1_          | ENSG00000160789.18_LMNA | 0.08735  | -0.072866252 | 0.243166981 | 2.85E-01 | 5.70E-01 | 1.00E+00 |
| ENSG00000251864.1_Y_RNA     | ENSG00000160789.18_LMNA | 0.08905  | -0.07115782  | 0.244782097 | 2.75E-01 | 5.60E-01 | 1.00E+00 |
| ENSG00000206962.1_RNU6-74P  | ENSG00000160789.18_LMNA | 0.0762   | -0.084019735 | 0.232579472 | 3.51E-01 | 6.34E-01 | 1.00E+00 |
| ENSG00000219604.1_RP11-132M | ENSG00000160789.18_LMNA | 0.00677  | -0.152596567 | 0.16579062  | 9.34E-01 | 9.74E-01 | 1.00E+00 |
| ENSG00000200665.1_RNU6-1188 | ENSG00000160789.18_LMNA | -0.05318 | -0.210601448 | 0.106922112 | 5.15E-01 | 7.63E-01 | 1.00E+00 |
| ENSG00000206841.1_RNU6-409F | ENSG00000160789.18_LMNA | -0.05092 | -0.20843055  | 0.109166175 | 5.33E-01 | 7.75E-01 | 1.00E+00 |
| ENSG00000276577.1_RNU6-467F | ENSG00000160789.18_LMNA | 0.08757  | -0.072644873 | 0.243376367 | 2.83E-01 | 5.69E-01 | 1.00E+00 |
| ENSG00000222924.1_RNU6-1148 | ENSG00000160789.18_LMNA | -0.05995 | -0.217076936 | 0.10020911  | 4.63E-01 | 7.26E-01 | 1.00E+00 |
| ENSG00000222713.1_RN7SKP51  | ENSG00000160789.18_LMNA | 0.00627  | -0.153085712 | 0.1653035   | 9.39E-01 | 9.76E-01 | 1.00E+00 |
| ENSG00000278449.1_MIR6892   | ENSG00000160789.18_LMNA | 0.12395  | -0.035962602 | 0.277669309 | 1.28E-01 | 3.62E-01 | 1.00E+00 |
| ENSG00000221725.1_RNU6ATAC  | ENSG00000160789.18_LMNA | 0.03829  | -0.12165517  | 0.196291303 | 6.40E-01 | 8.39E-01 | 1.00E+00 |
| ENSG00000221567.1_          | ENSG00000160789.18_LMNA | 0.12065  | -0.039305622 | 0.274576794 | 1.39E-01 | 3.80E-01 | 1.00E+00 |
| ENSG00000222624.1_RNU2-15P  | ENSG00000160789.18_LMNA | -0.04134 | -0.199225677 | 0.118645451 | 6.13E-01 | 8.24E-01 | 1.00E+00 |
| ENSG00000199514.1_RNU6-235F | ENSG00000160789.18_LMNA | -0.09893 | -0.254124978 | 0.061238625 | 2.25E-01 | 5.01E-01 | 1.00E+00 |
| ENSG00000257869.1_CTD-2591A | ENSG00000160789.18_LMNA | -0.0719  | -0.228480802 | 0.08831631  | 3.79E-01 | 6.58E-01 | 1.00E+00 |
| ENSG00000212170.1_RNU1-77P  | ENSG00000160789.18_LMNA | -0.01935 | -0.1780056   | 0.140279568 | 8.13E-01 | 9.26E-01 | 1.00E+00 |
| ENSG00000230180.1_RPL12P49  | ENSG00000160789.18_LMNA | -0.02804 | -0.186406949 | 0.131750483 | 7.32E-01 | 8.87E-01 | 1.00E+00 |
| ENSG00000224447.1_HIST1H1P5 | ENSG00000160789.18_LMNA | 0.05708  | -0.103054041 | 0.214336067 | 4.85E-01 | 7.42E-01 | 1.00E+00 |
| ENSG00000222262.1_          | ENSG00000160789.18_LMNA | 0.10746  | -0.052639184 | 0.262177432 | 1.88E-01 | 4.54E-01 | 1.00E+00 |
| ENSG00000252207.1_RNA5SP36  | ENSG00000160789.18_LMNA | -0.12956 | -0.28292234  | 0.030267921 | 1.12E-01 | 3.33E-01 | 1.00E+00 |
| ENSG00000212144.1_U8        | ENSG00000160789.18_LMNA | 0.12737  | -0.032490968 | 0.280873933 | 1.18E-01 | 3.44E-01 | 1.00E+00 |
| ENSG00000263397.1_          | ENSG00000160789.18_LMNA | -0.1047  | -0.259578272 | 0.055420012 | 1.99E-01 | 4.70E-01 | 1.00E+00 |
| ENSG00000201811.1_SNORA71   | ENSG00000160789.18_LMNA | -0.08524 | -0.241171133 | 0.074974855 | 2.96E-01 | 5.82E-01 | 1.00E+00 |
| ENSG00000250048.1_LINC00603 | ENSG00000160789.18_LMNA | 0.19296  | 0.034828293  | 0.341664141 | 1.72E-02 | 9.70E-02 | 1.00E+00 |

|                             |                         |          |              |             |          |          |          |
|-----------------------------|-------------------------|----------|--------------|-------------|----------|----------|----------|
| ENSG00000199392.1_SNORA25   | ENSG00000160789.18_LMNA | 0.13767  | -0.022015246 | 0.290501783 | 9.08E-02 | 2.94E-01 | 1.00E+00 |
| ENSG00000251446.1_RP11-375B | ENSG00000160789.18_LMNA | -0.10185 | -0.25688939  | 0.058291701 | 2.12E-01 | 4.85E-01 | 1.00E+00 |
| ENSG00000264108.1_RP11-357H | ENSG00000160789.18_LMNA | -0.07871 | -0.234969391 | 0.081508972 | 3.35E-01 | 6.21E-01 | 1.00E+00 |
| ENSG00000277762.1_RN7SL261F | ENSG00000160789.18_LMNA | 0.01633  | -0.143238615 | 0.175079986 | 8.42E-01 | 9.38E-01 | 1.00E+00 |
| ENSG00000222145.1_SNORA73   | ENSG00000160789.18_LMNA | -0.08668 | -0.242533784 | 0.073535528 | 2.88E-01 | 5.74E-01 | 1.00E+00 |
| ENSG00000251718.1_RNU2-13P  | ENSG00000160789.18_LMNA | 0.1319   | -0.027890767 | 0.285109589 | 1.05E-01 | 3.22E-01 | 1.00E+00 |
| ENSG00000222923.1_RNU2-41P  | ENSG00000160789.18_LMNA | 0.05846  | -0.101687142 | 0.215653592 | 4.74E-01 | 7.34E-01 | 1.00E+00 |
| ENSG00000261010.1_RARRES2F  | ENSG00000160789.18_LMNA | -0.03404 | -0.192200444 | 0.125841333 | 6.77E-01 | 8.59E-01 | 1.00E+00 |
| ENSG00000258073.1_RP11-1079 | ENSG00000160789.18_LMNA | -0.03079 | -0.189064109 | 0.129043083 | 7.06E-01 | 8.75E-01 | 1.00E+00 |
| ENSG00000226163.1_RP11-167P | ENSG00000160789.18_LMNA | -0.12304 | -0.276814602 | 0.036887246 | 1.31E-01 | 3.67E-01 | 1.00E+00 |
| ENSG00000212181.1_SNORA48   | ENSG00000160789.18_LMNA | -0.00429 | -0.163382577 | 0.155013106 | 9.58E-01 | 9.83E-01 | 1.00E+00 |
| ENSG00000231801.2_ANP32BP2  | ENSG00000160789.18_LMNA | 0.09502  | -0.065164518 | 0.250434207 | 2.44E-01 | 5.24E-01 | 1.00E+00 |
| ENSG00000234489.1_ALDH7A1P  | ENSG00000160789.18_LMNA | 0.06977  | -0.090434614 | 0.226455929 | 3.93E-01 | 6.71E-01 | 1.00E+00 |
| ENSG00000250355.1_          | ENSG00000160789.18_LMNA | 0.07796  | -0.082264376 | 0.234250747 | 3.40E-01 | 6.25E-01 | 1.00E+00 |
| ENSG00000204670.7_IGKV1OR2  | ENSG00000160789.18_LMNA | -0.13054 | -0.283838465 | 0.029272686 | 1.09E-01 | 3.28E-01 | 1.00E+00 |
| ENSG00000259740.1_RP11-142J | ENSG00000160789.18_LMNA | 0.07452  | -0.08569736  | 0.230980458 | 3.62E-01 | 6.43E-01 | 1.00E+00 |
| ENSG00000200941.1_RNU6-694F | ENSG00000160789.18_LMNA | 0.00565  | -0.153690841 | 0.164700663 | 9.45E-01 | 9.78E-01 | 1.00E+00 |
| ENSG00000212461.1_SNORA17   | ENSG00000160789.18_LMNA | -0.01607 | -0.174822517 | 0.143498754 | 8.44E-01 | 9.39E-01 | 1.00E+00 |
| ENSG00000280738.1_          | ENSG00000160789.18_LMNA | 0.10716  | -0.052945913 | 0.261890965 | 1.89E-01 | 4.56E-01 | 1.00E+00 |
| ENSG00000278802.1_RMST_8    | ENSG00000160789.18_LMNA | -0.01638 | -0.175119836 | 0.143198348 | 8.41E-01 | 9.38E-01 | 1.00E+00 |
| ENSG00000221551.1_          | ENSG00000160789.18_LMNA | -0.02826 | -0.186620397 | 0.131533175 | 7.30E-01 | 8.86E-01 | 1.00E+00 |
| ENSG00000250114.1_CTB-95B16 | ENSG00000160789.18_LMNA | -0.11073 | -0.265258698 | 0.049336215 | 1.74E-01 | 4.35E-01 | 1.00E+00 |
| ENSG00000243991.3_RN7SL447F | ENSG00000160789.18_LMNA | 0.00771  | -0.151674212 | 0.166708732 | 9.25E-01 | 9.71E-01 | 1.00E+00 |
| ENSG00000238256.1_MTND5P20  | ENSG00000160789.18_LMNA | 0.13355  | -0.026207758 | 0.286656179 | 1.01E-01 | 3.13E-01 | 1.00E+00 |
| ENSG00000229269.1_RP11-298A | ENSG00000160789.18_LMNA | -0.15926 | -0.310582938 | -5.74E-05   | 5.00E-02 | 2.01E-01 | 1.00E+00 |
| ENSG00000254730.1_RP11-801G | ENSG00000160789.18_LMNA | 0.07358  | -0.086638684 | 0.230082492 | 3.68E-01 | 6.48E-01 | 1.00E+00 |
| ENSG00000263479.2_RN7SL509F | ENSG00000160789.18_LMNA | -0.07384 | -0.230331459 | 0.086377753 | 3.66E-01 | 6.47E-01 | 1.00E+00 |
| ENSG00000231052.1_RP11-91N2 | ENSG00000160789.18_LMNA | -0.18224 | -0.331810364 | -0.02372376 | 2.46E-02 | 1.25E-01 | 1.00E+00 |
| ENSG00000223107.1_RNU2-72P  | ENSG00000160789.18_LMNA | -0.05555 | -0.212871249 | 0.104572347 | 4.97E-01 | 7.51E-01 | 1.00E+00 |
| ENSG00000226395.1_MRPS21P5  | ENSG00000160789.18_LMNA | -0.07087 | -0.227503697 | 0.089338859 | 3.86E-01 | 6.64E-01 | 1.00E+00 |
| ENSG00000259183.1_MED28P6   | ENSG00000160789.18_LMNA | 0.06393  | -0.096248466 | 0.220884394 | 4.34E-01 | 7.03E-01 | 1.00E+00 |
| ENSG00000237106.2_FABP5P15  | ENSG00000160789.18_LMNA | -0.01417 | -0.172980827 | 0.145358263 | 8.62E-01 | 9.46E-01 | 1.00E+00 |
| ENSG00000226515.1_AC004386. | ENSG00000160789.18_LMNA | 0.02102  | -0.13864201  | 0.17962224  | 7.97E-01 | 9.18E-01 | 1.00E+00 |

|                              |                         |          |              |             |          |          |          |
|------------------------------|-------------------------|----------|--------------|-------------|----------|----------|----------|
| ENSG00000235329.2_RP5-1168A  | ENSG00000160789.18_LMNA | -0.1559  | -0.307469877 | 0.003384288 | 5.51E-02 | 2.14E-01 | 1.00E+00 |
| ENSG00000275681.1_LL0XNC01-  | ENSG00000160789.18_LMNA | 0.03482  | -0.125071732 | 0.192953354 | 6.70E-01 | 8.55E-01 | 1.00E+00 |
| ENSG00000244432.2_RPL39P28   | ENSG00000160789.18_LMNA | 0.04119  | -0.118784937 | 0.199089808 | 6.14E-01 | 8.25E-01 | 1.00E+00 |
| ENSG00000223975.1_AP001048.  | ENSG00000160789.18_LMNA | 0.11376  | -0.046282159 | 0.268102053 | 1.63E-01 | 4.18E-01 | 1.00E+00 |
| ENSG00000270467.1_IGHV3OR1I  | ENSG00000160789.18_LMNA | -0.11804 | -0.272131378 | 0.04194416  | 1.48E-01 | 3.94E-01 | 1.00E+00 |
| ENSG00000235857.1_CTBP2P1    | ENSG00000160789.18_LMNA | -0.0433  | -0.201110135 | 0.116709522 | 5.96E-01 | 8.14E-01 | 1.00E+00 |
| ENSG00000242121.3_RN7SL267F  | ENSG00000160789.18_LMNA | -0.05569 | -0.213004565 | 0.104434225 | 4.96E-01 | 7.50E-01 | 1.00E+00 |
| ENSG00000272298.1_RP11-386M  | ENSG00000160789.18_LMNA | 0.05936  | -0.100797709 | 0.216510277 | 4.68E-01 | 7.29E-01 | 1.00E+00 |
| ENSG00000278332.1_XXbac-BPG  | ENSG00000160789.18_LMNA | 0.00234  | -0.156919902 | 0.161479804 | 9.77E-01 | 9.91E-01 | 1.00E+00 |
| ENSG00000230796.1_RP11-368M  | ENSG00000160789.18_LMNA | 0.02872  | -0.131084177 | 0.187061323 | 7.25E-01 | 8.84E-01 | 1.00E+00 |
| ENSG00000200885.1_RNU1-146F  | ENSG00000160789.18_LMNA | 0.00605  | -0.153295478 | 0.165094556 | 9.41E-01 | 9.77E-01 | 1.00E+00 |
| ENSG00000277809.1_Six3os1_4  | ENSG00000160789.18_LMNA | -0.03323 | -0.191414535 | 0.126644256 | 6.84E-01 | 8.63E-01 | 1.00E+00 |
| ENSG00000253509.1_CTD-3080F  | ENSG00000160789.18_LMNA | -0.12822 | -0.281674009 | 0.03162305  | 1.15E-01 | 3.40E-01 | 1.00E+00 |
| ENSG00000275001.1_uc_338     | ENSG00000160789.18_LMNA | -0.1806  | -0.330304552 | -0.02203349 | 2.60E-02 | 1.30E-01 | 1.00E+00 |
| ENSG00000271343.1_RP11-435O  | ENSG00000160789.18_LMNA | 0.1311   | -0.028697794 | 0.284367399 | 1.07E-01 | 3.26E-01 | 1.00E+00 |
| ENSG00000237832.1_RP5-974N1  | ENSG00000160789.18_LMNA | -0.19775 | -0.346059508 | -0.03980613 | 1.46E-02 | 8.62E-02 | 1.00E+00 |
| ENSG00000199197.1_RN7SKP72   | ENSG00000160789.18_LMNA | -0.03509 | -0.19321229  | 0.124806967 | 6.68E-01 | 8.54E-01 | 1.00E+00 |
| ENSG00000244389.3_RN7SL242F  | ENSG00000160789.18_LMNA | 0.01465  | -0.144889134 | 0.17344567  | 8.58E-01 | 9.44E-01 | 1.00E+00 |
| ENSG00000240637.3_RN7SL808F  | ENSG00000160789.18_LMNA | -0.07458 | -0.231034286 | 0.085640914 | 3.61E-01 | 6.43E-01 | 1.00E+00 |
| ENSG00000214759.3_CTD-2509C  | ENSG00000160789.18_LMNA | 0.01872  | -0.140897946 | 0.177394673 | 8.19E-01 | 9.30E-01 | 1.00E+00 |
| ENSG00000264012.1_RP11-627G  | ENSG00000160789.18_LMNA | -0.096   | -0.251356245 | 0.064184656 | 2.39E-01 | 5.18E-01 | 1.00E+00 |
| ENSG00000275747.1_IGHV3-79   | ENSG00000160789.18_LMNA | -0.07604 | -0.232422562 | 0.084184438 | 3.52E-01 | 6.35E-01 | 1.00E+00 |
| ENSG00000273962.1_IGKV2-40   | ENSG00000160789.18_LMNA | 0.04861  | -0.111453029 | 0.206215033 | 5.52E-01 | 7.88E-01 | 1.00E+00 |
| ENSG00000241905.1_NDUFS6P1   | ENSG00000160789.18_LMNA | 0.09166  | -0.068538863 | 0.247254604 | 2.61E-01 | 5.45E-01 | 1.00E+00 |
| ENSG00000259021.2_TPRX1P1    | ENSG00000160789.18_LMNA | 0.0757   | -0.084524052 | 0.232098966 | 3.54E-01 | 6.38E-01 | 1.00E+00 |
| ENSG00000270957.1_RP11-1324  | ENSG00000160789.18_LMNA | -0.15863 | -0.310006242 | 0.000580697 | 5.09E-02 | 2.04E-01 | 1.00E+00 |
| ENSG00000277677.1_Metazoa_SI | ENSG00000160789.18_LMNA | 0.0369   | -0.123028329 | 0.194950624 | 6.52E-01 | 8.46E-01 | 1.00E+00 |
| ENSG00000259593.1_MTND5P40   | ENSG00000160789.18_LMNA | 0.16052  | 0.001358839  | 0.311758326 | 4.82E-02 | 1.97E-01 | 1.00E+00 |
| ENSG00000276601.1_Metazoa_SI | ENSG00000160789.18_LMNA | -0.04846 | -0.206071997 | 0.111600555 | 5.53E-01 | 7.88E-01 | 1.00E+00 |
| ENSG00000241198.3_RN7SL191F  | ENSG00000160789.18_LMNA | 0.01347  | -0.146039648 | 0.172305412 | 8.69E-01 | 9.49E-01 | 1.00E+00 |
| ENSG00000264879.2_RN7SL690F  | ENSG00000160789.18_LMNA | -0.03189 | -0.190122448 | 0.127963411 | 6.97E-01 | 8.70E-01 | 1.00E+00 |
| ENSG00000258668.1_COX6CP11   | ENSG00000160789.18_LMNA | 0.01947  | -0.140162685 | 0.178121046 | 8.12E-01 | 9.26E-01 | 1.00E+00 |
| ENSG00000279824.1_AC104389.  | ENSG00000160789.18_LMNA | -0.07162 | -0.228215219 | 0.088594311 | 3.81E-01 | 6.59E-01 | 1.00E+00 |

|                              |                         |          |              |             |          |          |          |
|------------------------------|-------------------------|----------|--------------|-------------|----------|----------|----------|
| ENSG00000253006.1_RN7SKP28   | ENSG00000160789.18_LMNA | 0.02264  | -0.137057042 | 0.181185327 | 7.82E-01 | 9.11E-01 | 1.00E+00 |
| ENSG00000243420.3_RN7SL734F  | ENSG00000160789.18_LMNA | 0.08228  | -0.077946075 | 0.23835425  | 3.14E-01 | 6.00E-01 | 1.00E+00 |
| ENSG00000233970.1_AC092159.  | ENSG00000160789.18_LMNA | 0.09879  | -0.061379121 | 0.253993054 | 2.26E-01 | 5.02E-01 | 1.00E+00 |
| ENSG00000261203.1_RP11-347C  | ENSG00000160789.18_LMNA | -0.03777 | -0.195795642 | 0.12216298  | 6.44E-01 | 8.42E-01 | 1.00E+00 |
| ENSG00000232886.1_AF212831.  | ENSG00000160789.18_LMNA | 0.06062  | -0.099538684 | 0.217722111 | 4.58E-01 | 7.22E-01 | 1.00E+00 |
| ENSG00000265897.2_AC018696.  | ENSG00000160789.18_LMNA | -0.10663 | -0.261389171 | 0.053483056 | 1.91E-01 | 4.59E-01 | 1.00E+00 |
| ENSG00000278497.1_RN7SL759F  | ENSG00000160789.18_LMNA | 0.03918  | -0.120774023 | 0.197150981 | 6.32E-01 | 8.35E-01 | 1.00E+00 |
| ENSG00000219284.2_RP11-151M  | ENSG00000160789.18_LMNA | -0.0338  | -0.191967096 | 0.126079776 | 6.79E-01 | 8.60E-01 | 1.00E+00 |
| ENSG00000260848.1_CTD-2009A  | ENSG00000160789.18_LMNA | -0.04247 | -0.200320311 | 0.117521212 | 6.03E-01 | 8.18E-01 | 1.00E+00 |
| ENSG00000243770.3_RN7SL65P   | ENSG00000160789.18_LMNA | -0.02408 | -0.182583889 | 0.135637519 | 7.68E-01 | 9.04E-01 | 1.00E+00 |
| ENSG00000253435.1_IGKV2-4    | ENSG00000160789.18_LMNA | 0.05382  | -0.106296098 | 0.211206493 | 5.10E-01 | 7.59E-01 | 1.00E+00 |
| ENSG00000262116.1_AC009134.  | ENSG00000160789.18_LMNA | 0.06233  | -0.097840835 | 0.219354774 | 4.46E-01 | 7.12E-01 | 1.00E+00 |
| ENSG00000228355.1_BX322559.  | ENSG00000160789.18_LMNA | 0.08105  | -0.07917666  | 0.237186025 | 3.21E-01 | 6.07E-01 | 1.00E+00 |
| ENSG00000256181.1_AP000438.  | ENSG00000160789.18_LMNA | -0.04799 | -0.205619707 | 0.11206695  | 5.57E-01 | 7.91E-01 | 1.00E+00 |
| ENSG00000223136.1_RN7SKP20   | ENSG00000160789.18_LMNA | -0.014   | -0.17281541  | 0.145525169 | 8.64E-01 | 9.47E-01 | 1.00E+00 |
| ENSG00000243124.3_RN7SL643F  | ENSG00000160789.18_LMNA | 0.06222  | -0.097954684 | 0.219245351 | 4.46E-01 | 7.13E-01 | 1.00E+00 |
| ENSG00000260694.1_RP11-556H  | ENSG00000160789.18_LMNA | -0.0948  | -0.250228067 | 0.065383502 | 2.45E-01 | 5.25E-01 | 1.00E+00 |
| ENSG00000235186.1_AC103563.  | ENSG00000160789.18_LMNA | -0.11128 | -0.265773093 | 0.048784137 | 1.72E-01 | 4.31E-01 | 1.00E+00 |
| ENSG00000240724.2_RPS12P15   | ENSG00000160789.18_LMNA | -0.02557 | -0.184020192 | 0.134178329 | 7.55E-01 | 8.98E-01 | 1.00E+00 |
| ENSG00000206178.2_HBZP1      | ENSG00000160789.18_LMNA | -0.03095 | -0.189222933 | 0.128881106 | 7.05E-01 | 8.74E-01 | 1.00E+00 |
| ENSG00000258148.2_AC007115.  | ENSG00000160789.18_LMNA | 0.01674  | -0.142838373 | 0.175476035 | 8.38E-01 | 9.37E-01 | 1.00E+00 |
| ENSG00000232563.1_CRB3P1     | ENSG00000160789.18_LMNA | -0.13258 | -0.285751866 | 0.027192053 | 1.03E-01 | 3.19E-01 | 1.00E+00 |
| ENSG00000241807.3_RN7SL319F  | ENSG00000160789.18_LMNA | 0.09743  | -0.062739017 | 0.252715528 | 2.32E-01 | 5.10E-01 | 1.00E+00 |
| ENSG00000242036.1_RP11-603B  | ENSG00000160789.18_LMNA | -0.02095 | -0.179547579 | 0.138717675 | 7.98E-01 | 9.19E-01 | 1.00E+00 |
| ENSG00000228098.1_AC110620.  | ENSG00000160789.18_LMNA | -0.01767 | -0.1763741   | 0.141930414 | 8.29E-01 | 9.33E-01 | 1.00E+00 |
| ENSG00000240502.2_RN7SL837F  | ENSG00000160789.18_LMNA | -0.01856 | -0.177238849 | 0.141055631 | 8.20E-01 | 9.30E-01 | 1.00E+00 |
| ENSG00000227710.1_LL22NC03-  | ENSG00000160789.18_LMNA | -0.10436 | -0.25925171  | 0.055769053 | 2.01E-01 | 4.71E-01 | 1.00E+00 |
| ENSG00000249785.1_CTD-2061E  | ENSG00000160789.18_LMNA | 0.05211  | -0.107986178 | 0.209572465 | 5.24E-01 | 7.69E-01 | 1.00E+00 |
| ENSG00000242985.3_RN7SL50P   | ENSG00000160789.18_LMNA | -0.02184 | -0.180410497 | 0.137842923 | 7.89E-01 | 9.14E-01 | 1.00E+00 |
| ENSG00000277635.1_Metazoa_SI | ENSG00000160789.18_LMNA | 0.03609  | -0.123819374 | 0.194177751 | 6.59E-01 | 8.49E-01 | 1.00E+00 |
| ENSG00000279005.1_RP5-1186P  | ENSG00000160789.18_LMNA | 0.0865   | -0.073720203 | 0.242359017 | 2.89E-01 | 5.75E-01 | 1.00E+00 |
| ENSG00000272096.2_RN7SL715F  | ENSG00000160789.18_LMNA | 0.06458  | -0.095608383 | 0.221498815 | 4.29E-01 | 6.99E-01 | 1.00E+00 |
| ENSG00000278459.1_Metazoa_SI | ENSG00000160789.18_LMNA | 0.13571  | -0.024013881 | 0.288669783 | 9.55E-02 | 3.03E-01 | 1.00E+00 |

|                             |                         |          |              |             |          |          |          |
|-----------------------------|-------------------------|----------|--------------|-------------|----------|----------|----------|
| ENSG00000254000.1_RP11-245A | ENSG00000160789.18_LMNA | 0.09993  | -0.060224342 | 0.255077025 | 2.21E-01 | 4.96E-01 | 1.00E+00 |
| ENSG00000264061.1_FGF7P1    | ENSG00000160789.18_LMNA | 0.04755  | -0.112502375 | 0.205197329 | 5.61E-01 | 7.93E-01 | 1.00E+00 |
| ENSG00000275787.1_OR7G15P   | ENSG00000160789.18_LMNA | -0.1164  | -0.270590686 | 0.04360428  | 1.53E-01 | 4.03E-01 | 1.00E+00 |
| ENSG00000233814.1_RP11-66C2 | ENSG00000160789.18_LMNA | 0.02796  | -0.131826632 | 0.186332146 | 7.32E-01 | 8.87E-01 | 1.00E+00 |
| ENSG00000224815.3_RP11-307E | ENSG00000160789.18_LMNA | 0.01373  | -0.145784746 | 0.172558116 | 8.67E-01 | 9.48E-01 | 1.00E+00 |
| ENSG00000237920.2_RP11-350G | ENSG00000160789.18_LMNA | -0.07589 | -0.232286794 | 0.084326936 | 3.53E-01 | 6.36E-01 | 1.00E+00 |
| ENSG00000242387.1_HIST1H2AF | ENSG00000160789.18_LMNA | 0.11204  | -0.048012982 | 0.266491313 | 1.69E-01 | 4.28E-01 | 1.00E+00 |
| ENSG00000237971.1_RP11-231N | ENSG00000160789.18_LMNA | -0.10232 | -0.25732641  | 0.057825323 | 2.10E-01 | 4.83E-01 | 1.00E+00 |
| ENSG00000223012.1_RN7SKP26  | ENSG00000160789.18_LMNA | 0.00618  | -0.153173326 | 0.165216233 | 9.40E-01 | 9.76E-01 | 1.00E+00 |
| ENSG00000226947.1_RP1-52J10 | ENSG00000160789.18_LMNA | -0.05841 | -0.21560543  | 0.10173713  | 4.75E-01 | 7.34E-01 | 1.00E+00 |
| ENSG00000156755.10_IGKV1OR  | ENSG00000160789.18_LMNA | 0.1408   | -0.018825677 | 0.293420685 | 8.36E-02 | 2.80E-01 | 1.00E+00 |
| ENSG00000243227.3_RN7SL55P  | ENSG00000160789.18_LMNA | 0.01794  | -0.141666626 | 0.176634914 | 8.26E-01 | 9.32E-01 | 1.00E+00 |
| ENSG00000242736.1_TRBV1     | ENSG00000160789.18_LMNA | 0.17849  | 0.019855853  | 0.328362255 | 2.78E-02 | 1.36E-01 | 1.00E+00 |
| ENSG00000228095.3_RP11-361M | ENSG00000160789.18_LMNA | -0.01427 | -0.173072751 | 0.145265502 | 8.62E-01 | 9.46E-01 | 1.00E+00 |
| ENSG00000267000.1_RP11-27G2 | ENSG00000160789.18_LMNA | 0.07854  | -0.081680751 | 0.234806002 | 3.36E-01 | 6.22E-01 | 1.00E+00 |
| ENSG00000233349.1_LINC00333 | ENSG00000160789.18_LMNA | -0.04943 | -0.207001569 | 0.110641553 | 5.45E-01 | 7.83E-01 | 1.00E+00 |
| ENSG00000258665.1_AC068831  | ENSG00000160789.18_LMNA | 0.00505  | -0.154272067 | 0.164121414 | 9.51E-01 | 9.80E-01 | 1.00E+00 |
| ENSG00000253627.1_RP11-513H | ENSG00000160789.18_LMNA | 0.10018  | -0.059981706 | 0.255304683 | 2.19E-01 | 4.94E-01 | 1.00E+00 |
| ENSG00000222102.1_RN7SKP23  | ENSG00000160789.18_LMNA | 0.13556  | -0.024162439 | 0.28853352  | 9.59E-02 | 3.04E-01 | 1.00E+00 |
| ENSG00000275785.1_RP11-111E | ENSG00000160789.18_LMNA | 0.10333  | -0.056806153 | 0.258280979 | 2.05E-01 | 4.77E-01 | 1.00E+00 |
| ENSG00000264036.2_RN7SL198f | ENSG00000160789.18_LMNA | -0.00013 | -0.159328055 | 0.159073344 | 9.99E-01 | 9.99E-01 | 1.00E+00 |
| ENSG00000269877.1_MIR371B   | ENSG00000160789.18_LMNA | 0.04596  | -0.114073434 | 0.203672359 | 5.74E-01 | 8.01E-01 | 1.00E+00 |
| ENSG00000242266.3_RN7SL456f | ENSG00000160789.18_LMNA | -0.11982 | -0.273796809 | 0.040147681 | 1.41E-01 | 3.84E-01 | 1.00E+00 |
| ENSG00000233118.2_UBE2V1P8  | ENSG00000160789.18_LMNA | -0.14301 | -0.295486162 | 0.016564824 | 7.88E-02 | 2.69E-01 | 1.00E+00 |
| ENSG00000259324.1_OR11K1P   | ENSG00000160789.18_LMNA | -0.04048 | -0.198401548 | 0.119491331 | 6.20E-01 | 8.28E-01 | 1.00E+00 |
| ENSG00000259912.1_CTC-527H2 | ENSG00000160789.18_LMNA | -0.04406 | -0.201841779 | 0.115957242 | 5.90E-01 | 8.10E-01 | 1.00E+00 |
| ENSG00000250481.1_CTD-2247C | ENSG00000160789.18_LMNA | -0.04664 | -0.204322974 | 0.113403349 | 5.68E-01 | 7.98E-01 | 1.00E+00 |
| ENSG00000227150.1_RP11-473E | ENSG00000160789.18_LMNA | 0.0549   | -0.105222104 | 0.212243947 | 5.02E-01 | 7.54E-01 | 1.00E+00 |
| ENSG00000223126.1_RN7SKP26  | ENSG00000160789.18_LMNA | 0.01969  | -0.139949061 | 0.178332023 | 8.10E-01 | 9.25E-01 | 1.00E+00 |
| ENSG00000254511.1_RP11-876F | ENSG00000160789.18_LMNA | -0.16725 | -0.317988087 | -0.00827407 | 3.94E-02 | 1.72E-01 | 1.00E+00 |
| ENSG00000241828.2_RP11-277J | ENSG00000160789.18_LMNA | -0.02037 | -0.178993818 | 0.13927877  | 8.03E-01 | 9.21E-01 | 1.00E+00 |
| ENSG00000275773.1_RP11-343D | ENSG00000160789.18_LMNA | -0.13562 | -0.288592076 | 0.0240986   | 9.57E-02 | 3.03E-01 | 1.00E+00 |
| ENSG00000278865.1_CTD-2154B | ENSG00000160789.18_LMNA | 0.04357  | -0.116435676 | 0.20137651  | 5.94E-01 | 8.13E-01 | 1.00E+00 |

|                              |                         |          |              |             |          |          |          |
|------------------------------|-------------------------|----------|--------------|-------------|----------|----------|----------|
| ENSG00000254734.1_CTD-3138F  | ENSG00000160789.18_LMNA | -0.11595 | -0.270164951 | 0.04406271  | 1.55E-01 | 4.06E-01 | 1.00E+00 |
| ENSG00000265885.2_RN7SL783F  | ENSG00000160789.18_LMNA | -0.0584  | -0.215593724 | 0.10174928  | 4.75E-01 | 7.34E-01 | 1.00E+00 |
| ENSG00000229643.1_LINC00280  | ENSG00000160789.18_LMNA | -0.1797  | -0.329471704 | -0.02109937 | 2.67E-02 | 1.33E-01 | 1.00E+00 |
| ENSG00000216359.1_RP11-360O  | ENSG00000160789.18_LMNA | 0.10391  | -0.056219527 | 0.258830143 | 2.03E-01 | 4.73E-01 | 1.00E+00 |
| ENSG00000267513.3_RP11-622J  | ENSG00000160789.18_LMNA | -0.01496 | -0.173744129 | 0.144587848 | 8.55E-01 | 9.43E-01 | 1.00E+00 |
| ENSG00000258842.1_RP11-355I2 | ENSG00000160789.18_LMNA | -0.11357 | -0.267931059 | 0.046465991 | 1.64E-01 | 4.19E-01 | 1.00E+00 |
| ENSG00000220446.2_RP3-520B1  | ENSG00000160789.18_LMNA | 0.04328  | -0.116725023 | 0.201095055 | 5.97E-01 | 8.14E-01 | 1.00E+00 |
| ENSG00000272801.1_RP1-170O1  | ENSG00000160789.18_LMNA | -0.00986 | -0.168800294 | 0.149570911 | 9.04E-01 | 9.63E-01 | 1.00E+00 |
| ENSG00000213525.3_RP11-383B  | ENSG00000160789.18_LMNA | 0.00698  | -0.152390546 | 0.165995741 | 9.32E-01 | 9.73E-01 | 1.00E+00 |
| ENSG00000243633.3_RN7SL542F  | ENSG00000160789.18_LMNA | 0.00644  | -0.152913127 | 0.165475388 | 9.37E-01 | 9.75E-01 | 1.00E+00 |
| ENSG00000234167.1_TCEB2P4    | ENSG00000160789.18_LMNA | -0.028   | -0.18636829  | 0.131789839 | 7.32E-01 | 8.87E-01 | 1.00E+00 |
| ENSG00000255356.2_RP11-277E  | ENSG00000160789.18_LMNA | 0.08269  | -0.077528696 | 0.238750269 | 3.11E-01 | 5.98E-01 | 1.00E+00 |
| ENSG00000237655.1_AC073834.  | ENSG00000160789.18_LMNA | -0.05977 | -0.216903014 | 0.10038979  | 4.65E-01 | 7.27E-01 | 1.00E+00 |
| ENSG00000270202.1_RP11-89C3  | ENSG00000160789.18_LMNA | -0.06962 | -0.226308669 | 0.090588558 | 3.94E-01 | 6.72E-01 | 1.00E+00 |
| ENSG00000250765.4_AC138035.  | ENSG00000160789.18_LMNA | 0.07012  | -0.090083368 | 0.226791873 | 3.91E-01 | 6.69E-01 | 1.00E+00 |
| ENSG00000222452.1_RN7SKP59   | ENSG00000160789.18_LMNA | 0.15787  | -0.001366027 | 0.309296212 | 5.21E-02 | 2.07E-01 | 1.00E+00 |
| ENSG00000225181.1_RP11-388K  | ENSG00000160789.18_LMNA | -0.15807 | -0.309483092 | 0.001159365 | 5.18E-02 | 2.06E-01 | 1.00E+00 |
| ENSG00000261075.1_LINC01195  | ENSG00000160789.18_LMNA | -0.09988 | -0.255021898 | 0.060283091 | 2.21E-01 | 4.96E-01 | 1.00E+00 |
| ENSG00000225960.1_RP11-360A  | ENSG00000160789.18_LMNA | 0.02506  | -0.134676681 | 0.18352981  | 7.59E-01 | 9.00E-01 | 1.00E+00 |
| ENSG00000227275.1_MTND6P10   | ENSG00000160789.18_LMNA | 0.01117  | -0.148298169 | 0.170064542 | 8.91E-01 | 9.57E-01 | 1.00E+00 |
| ENSG00000278953.1_RP11-178H  | ENSG00000160789.18_LMNA | -0.03092 | -0.189185075 | 0.128919717 | 7.05E-01 | 8.75E-01 | 1.00E+00 |
| ENSG00000234768.1_RP11-503C  | ENSG00000160789.18_LMNA | -0.06888 | -0.225606974 | 0.091321889 | 3.99E-01 | 6.76E-01 | 1.00E+00 |
| ENSG00000242925.1_PLCH1-AS2  | ENSG00000160789.18_LMNA | 0.08904  | -0.07117187  | 0.244768821 | 2.75E-01 | 5.60E-01 | 1.00E+00 |
| ENSG00000262262.1_RP11-815I9 | ENSG00000160789.18_LMNA | 0.01721  | -0.142379681 | 0.175929795 | 8.33E-01 | 9.35E-01 | 1.00E+00 |
| ENSG00000225323.1_Z84721.4   | ENSG00000160789.18_LMNA | -0.0354  | -0.193506735 | 0.124505839 | 6.65E-01 | 8.52E-01 | 1.00E+00 |
| ENSG00000232096.1_YPEL5P1    | ENSG00000160789.18_LMNA | -0.13984 | -0.292525557 | 0.019804485 | 8.58E-02 | 2.84E-01 | 1.00E+00 |
| ENSG00000268994.2_RP1-172N1  | ENSG00000160789.18_LMNA | -0.03035 | -0.188638374 | 0.129477187 | 7.11E-01 | 8.77E-01 | 1.00E+00 |
| ENSG00000229306.1_AP001464.  | ENSG00000160789.18_LMNA | 0.13341  | -0.026350708 | 0.28652488  | 1.01E-01 | 3.14E-01 | 1.00E+00 |
| ENSG00000271495.1_RP11-666O  | ENSG00000160789.18_LMNA | -0.07507 | -0.231504058 | 0.085148216 | 3.58E-01 | 6.41E-01 | 1.00E+00 |
| ENSG00000233835.1_RP1-92C4.  | ENSG00000160789.18_LMNA | 0.01044  | -0.149013101 | 0.16935451  | 8.98E-01 | 9.61E-01 | 1.00E+00 |
| ENSG00000259611.1_LINC01582  | ENSG00000160789.18_LMNA | 0.10891  | -0.051176824 | 0.263542428 | 1.82E-01 | 4.46E-01 | 1.00E+00 |
| ENSG00000216708.1_CIR1P3     | ENSG00000160789.18_LMNA | 0.06128  | -0.098890277 | 0.218345833 | 4.53E-01 | 7.18E-01 | 1.00E+00 |
| ENSG00000224632.1_LL0XNC01-  | ENSG00000160789.18_LMNA | -0.03051 | -0.188796433 | 0.129316035 | 7.09E-01 | 8.76E-01 | 1.00E+00 |



|                              |                         |          |              |             |          |          |          |
|------------------------------|-------------------------|----------|--------------|-------------|----------|----------|----------|
| ENSG00000229522.1_LINC01523  | ENSG00000160789.18_LMNA | -0.06547 | -0.222355882 | 0.09471508  | 4.23E-01 | 6.94E-01 | 1.00E+00 |
| ENSG00000272981.1_CTD-2234N  | ENSG00000160789.18_LMNA | -0.15385 | -0.305565697 | 0.005485883 | 5.84E-02 | 2.22E-01 | 1.00E+00 |
| ENSG00000230866.1_CTA-342B1  | ENSG00000160789.18_LMNA | 0.08315  | -0.077066805 | 0.239188402 | 3.08E-01 | 5.95E-01 | 1.00E+00 |
| ENSG00000253396.1_RP11-15G1  | ENSG00000160789.18_LMNA | 0.08925  | -0.070963314 | 0.244965867 | 2.74E-01 | 5.59E-01 | 1.00E+00 |
| ENSG00000236944.1_CCDC58P2   | ENSG00000160789.18_LMNA | 0.09901  | -0.061155417 | 0.254203103 | 2.25E-01 | 5.01E-01 | 1.00E+00 |
| ENSG00000257640.1_RP11-570L  | ENSG00000160789.18_LMNA | -0.11909 | -0.273108919 | 0.040889945 | 1.44E-01 | 3.88E-01 | 1.00E+00 |
| ENSG00000257183.1_RP11-274M  | ENSG00000160789.18_LMNA | -0.22427 | -0.370249519 | -0.06747653 | 5.48E-03 | 4.19E-02 | 1.00E+00 |
| ENSG00000254725.1_RP11-111A  | ENSG00000160789.18_LMNA | -0.08044 | -0.23661041  | 0.079782647 | 3.25E-01 | 6.11E-01 | 1.00E+00 |
| ENSG00000261708.1_DNM1P32    | ENSG00000160789.18_LMNA | 0.0105   | -0.148950348 | 0.169416846 | 8.98E-01 | 9.60E-01 | 1.00E+00 |
| ENSG00000259878.1_RP11-1O10  | ENSG00000160789.18_LMNA | -0.02434 | -0.182833171 | 0.135384364 | 7.66E-01 | 9.03E-01 | 1.00E+00 |
| ENSG00000257725.1_RP11-654D  | ENSG00000160789.18_LMNA | 0.12606  | -0.033816625 | 0.279651059 | 1.22E-01 | 3.51E-01 | 1.00E+00 |
| ENSG00000242461.1_RPS15AP3   | ENSG00000160789.18_LMNA | 0.08171  | -0.078511079 | 0.237817991 | 3.17E-01 | 6.04E-01 | 1.00E+00 |
| ENSG00000279921.1_AC017081   | ENSG00000160789.18_LMNA | 0.08809  | -0.072125211 | 0.24386776  | 2.81E-01 | 5.66E-01 | 1.00E+00 |
| ENSG00000269576.1_HNRNPMP    | ENSG00000160789.18_LMNA | -0.03689 | -0.194950386 | 0.123028573 | 6.52E-01 | 8.46E-01 | 1.00E+00 |
| ENSG00000263312.1_RP11-459C  | ENSG00000160789.18_LMNA | 0.04574  | -0.11429088  | 0.20346117  | 5.76E-01 | 8.02E-01 | 1.00E+00 |
| ENSG00000214024.2_RPL23AP2   | ENSG00000160789.18_LMNA | -0.12642 | -0.279983037 | 0.033456854 | 1.21E-01 | 3.49E-01 | 1.00E+00 |
| ENSG00000278630.1_RP11-78L1  | ENSG00000160789.18_LMNA | 0.05638  | -0.103753291 | 0.213661628 | 4.90E-01 | 7.46E-01 | 1.00E+00 |
| ENSG00000230292.4_NAALADL2   | ENSG00000160789.18_LMNA | 0.13763  | -0.022055243 | 0.290465143 | 9.09E-02 | 2.94E-01 | 1.00E+00 |
| ENSG00000222375.1_RN7SKP12   | ENSG00000160789.18_LMNA | 0.06162  | -0.098552134 | 0.218671    | 4.51E-01 | 7.16E-01 | 1.00E+00 |
| ENSG00000241911.1_TRBVB      | ENSG00000160789.18_LMNA | 0.01916  | -0.140465514 | 0.17782192  | 8.15E-01 | 9.27E-01 | 1.00E+00 |
| ENSG00000236870.2_RP1-223D1  | ENSG00000160789.18_LMNA | 0.03021  | -0.129612658 | 0.18850549  | 7.12E-01 | 8.77E-01 | 1.00E+00 |
| ENSG00000277508.1_BSNDP3     | ENSG00000160789.18_LMNA | 0.04387  | -0.116145634 | 0.201658588 | 5.92E-01 | 8.11E-01 | 1.00E+00 |
| ENSG00000239988.1_RPL31P60   | ENSG00000160789.18_LMNA | -0.00853 | -0.167500258 | 0.150878582 | 9.17E-01 | 9.68E-01 | 1.00E+00 |
| ENSG00000223587.1_AY269186   | ENSG00000160789.18_LMNA | 0.04649  | -0.113555271 | 0.204175491 | 5.70E-01 | 7.99E-01 | 1.00E+00 |
| ENSG00000257947.1_RP11-46I1  | ENSG00000160789.18_LMNA | 0.0074   | -0.151983816 | 0.166400613 | 9.28E-01 | 9.72E-01 | 1.00E+00 |
| ENSG00000223379.1_RP11-374M  | ENSG00000160789.18_LMNA | 0.00439  | -0.154915146 | 0.163480266 | 9.57E-01 | 9.83E-01 | 1.00E+00 |
| ENSG00000250611.1_RP11-339D  | ENSG00000160789.18_LMNA | -0.01434 | -0.173144847 | 0.145192747 | 8.61E-01 | 9.46E-01 | 1.00E+00 |
| ENSG00000242399.1_RPS20P23   | ENSG00000160789.18_LMNA | 0.05972  | -0.100437802 | 0.216856793 | 4.65E-01 | 7.27E-01 | 1.00E+00 |
| ENSG00000229639.1_RP3-380B4  | ENSG00000160789.18_LMNA | -0.00051 | -0.1596944   | 0.158706925 | 9.95E-01 | 9.98E-01 | 1.00E+00 |
| ENSG00000259670.1_RP11-485O  | ENSG00000160789.18_LMNA | 0.1117   | -0.04835796  | 0.266170059 | 1.71E-01 | 4.30E-01 | 1.00E+00 |
| ENSG00000231420.1_AC113610   | ENSG00000160789.18_LMNA | -0.08508 | -0.241016912 | 0.075137671 | 2.97E-01 | 5.83E-01 | 1.00E+00 |
| ENSG00000184148.3_SPRR4      | ENSG00000160789.18_LMNA | -0.04537 | -0.203107427 | 0.114655036 | 5.79E-01 | 8.04E-01 | 1.00E+00 |
| ENSG00000254971.1_RP11-313I2 | ENSG00000160789.18_LMNA | -0.05075 | -0.208263857 | 0.109338353 | 5.35E-01 | 7.76E-01 | 1.00E+00 |

|                              |                         |          |              |             |          |          |          |
|------------------------------|-------------------------|----------|--------------|-------------|----------|----------|----------|
| ENSG00000227658.1_AC005160.  | ENSG00000160789.18_LMNA | -0.0115  | -0.170387336 | 0.147973037 | 8.88E-01 | 9.57E-01 | 1.00E+00 |
| ENSG00000274977.1_RP11-118M  | ENSG00000160789.18_LMNA | 0.10131  | -0.058839007 | 0.25637637  | 2.14E-01 | 4.88E-01 | 1.00E+00 |
| ENSG00000206107.2_KRTAP27-1  | ENSG00000160789.18_LMNA | 0.12818  | -0.031668968 | 0.28163169  | 1.16E-01 | 3.40E-01 | 1.00E+00 |
| ENSG00000271710.1_NDUFA8P1   | ENSG00000160789.18_LMNA | 0.16488  | 0.005837265  | 0.315795874 | 4.24E-02 | 1.80E-01 | 1.00E+00 |
| ENSG00000223497.1_AC063979.  | ENSG00000160789.18_LMNA | -0.03386 | -0.192024431 | 0.126021192 | 6.79E-01 | 8.60E-01 | 1.00E+00 |
| ENSG00000250385.1_RP11-310P  | ENSG00000160789.18_LMNA | -0.03043 | -0.188717738 | 0.129396272 | 7.10E-01 | 8.77E-01 | 1.00E+00 |
| ENSG00000235583.2_AC007562.  | ENSG00000160789.18_LMNA | 0.00475  | -0.154566631 | 0.163827768 | 9.54E-01 | 9.81E-01 | 1.00E+00 |
| ENSG00000265946.1_RP11-752P  | ENSG00000160789.18_LMNA | 0.09958  | -0.060580753 | 0.254742553 | 2.22E-01 | 4.98E-01 | 1.00E+00 |
| ENSG00000101441.4_CST4       | ENSG00000160789.18_LMNA | -0.13795 | -0.290760451 | 0.021732848 | 9.01E-02 | 2.92E-01 | 1.00E+00 |
| ENSG00000267743.4_RP11-718I1 | ENSG00000160789.18_LMNA | -0.09011 | -0.245787552 | 0.070093335 | 2.70E-01 | 5.54E-01 | 1.00E+00 |
| ENSG00000272396.1_CTC-490G2  | ENSG00000160789.18_LMNA | 0.01877  | -0.140853533 | 0.177438559 | 8.18E-01 | 9.29E-01 | 1.00E+00 |
| ENSG00000258052.1_AC025263.  | ENSG00000160789.18_LMNA | 0.01882  | -0.140801626 | 0.177489848 | 8.18E-01 | 9.29E-01 | 1.00E+00 |
| ENSG00000253985.1_RP11-136K  | ENSG00000160789.18_LMNA | 0.13423  | -0.025513538 | 0.287293653 | 9.92E-02 | 3.10E-01 | 1.00E+00 |
| ENSG00000232140.1_AC073257.  | ENSG00000160789.18_LMNA | -0.04711 | -0.204772683 | 0.112940015 | 5.64E-01 | 7.95E-01 | 1.00E+00 |
| ENSG00000226041.1_AC010745.  | ENSG00000160789.18_LMNA | 0.03716  | -0.122766474 | 0.195206377 | 6.49E-01 | 8.44E-01 | 1.00E+00 |
| ENSG00000242781.1_RP11-47P1  | ENSG00000160789.18_LMNA | -0.01017 | -0.169095666 | 0.149273649 | 9.01E-01 | 9.62E-01 | 1.00E+00 |
| ENSG00000264138.1_RP11-20B2  | ENSG00000160789.18_LMNA | -0.02837 | -0.186725828 | 0.131425826 | 7.29E-01 | 8.85E-01 | 1.00E+00 |
| ENSG00000253634.1_RP11-587H  | ENSG00000160789.18_LMNA | 0.01611  | -0.143461441 | 0.17485945  | 8.44E-01 | 9.39E-01 | 1.00E+00 |
| ENSG00000234048.1_FAM96AP1   | ENSG00000160789.18_LMNA | -0.07281 | -0.229347675 | 0.087408562 | 3.73E-01 | 6.53E-01 | 1.00E+00 |
| ENSG00000265737.1_RP11-1157I | ENSG00000160789.18_LMNA | 0.09494  | -0.065242551 | 0.250360754 | 2.45E-01 | 5.24E-01 | 1.00E+00 |
| ENSG00000230268.3_SSU72P8    | ENSG00000160789.18_LMNA | -0.02973 | -0.188043985 | 0.130083056 | 7.16E-01 | 8.79E-01 | 1.00E+00 |
| ENSG00000254514.1_RP11-958J. | ENSG00000160789.18_LMNA | 0.02543  | -0.134317454 | 0.183883307 | 7.56E-01 | 8.98E-01 | 1.00E+00 |
| ENSG00000254573.1_AP004550.  | ENSG00000160789.18_LMNA | -0.06437 | -0.221307329 | 0.095807895 | 4.31E-01 | 7.00E-01 | 1.00E+00 |
| ENSG00000249731.1_RP11-259O  | ENSG00000160789.18_LMNA | -0.07563 | -0.232038047 | 0.084587979 | 3.54E-01 | 6.38E-01 | 1.00E+00 |
| ENSG00000253628.1_RP11-536N  | ENSG00000160789.18_LMNA | 0.0476   | -0.11245491  | 0.205243378 | 5.60E-01 | 7.93E-01 | 1.00E+00 |
| ENSG00000256691.1_RP11-476M  | ENSG00000160789.18_LMNA | -0.0145  | -0.173303776 | 0.145032352 | 8.59E-01 | 9.45E-01 | 1.00E+00 |
| ENSG00000271136.1_RP11-320J. | ENSG00000160789.18_LMNA | 0.02553  | -0.134215575 | 0.183983548 | 7.55E-01 | 8.98E-01 | 1.00E+00 |
| ENSG00000265881.1_PDLIM1P2   | ENSG00000160789.18_LMNA | 0.02695  | -0.132818191 | 0.185357774 | 7.42E-01 | 8.92E-01 | 1.00E+00 |
| ENSG00000243171.1_RP11-273P  | ENSG00000160789.18_LMNA | -0.0637  | -0.22066647  | 0.096475429 | 4.36E-01 | 7.04E-01 | 1.00E+00 |
| ENSG00000258394.1_CTD-2307P  | ENSG00000160789.18_LMNA | -0.04423 | -0.202006825 | 0.115787491 | 5.88E-01 | 8.09E-01 | 1.00E+00 |
| ENSG00000250543.1_RP11-442N  | ENSG00000160789.18_LMNA | -0.02768 | -0.186060026 | 0.132103617 | 7.35E-01 | 8.89E-01 | 1.00E+00 |
| ENSG00000260957.1_RP11-299H  | ENSG00000160789.18_LMNA | 0.07224  | -0.087975405 | 0.228806416 | 3.76E-01 | 6.56E-01 | 1.00E+00 |
| ENSG00000275612.1_RP11-35J1I | ENSG00000160789.18_LMNA | -0.0501  | -0.20764349  | 0.109978963 | 5.40E-01 | 7.80E-01 | 1.00E+00 |

|                              |                         |          |              |             |          |          |          |
|------------------------------|-------------------------|----------|--------------|-------------|----------|----------|----------|
| ENSG00000275350.1_RP11-329N  | ENSG00000160789.18_LMNA | 0.14411  | -0.015447067 | 0.296506249 | 7.65E-02 | 2.65E-01 | 1.00E+00 |
| ENSG00000226297.1_AC007677.1 | ENSG00000160789.18_LMNA | 0.22749  | 0.070856913  | 0.373176839 | 4.82E-03 | 3.81E-02 | 1.00E+00 |
| ENSG00000220908.2_RP11-127B  | ENSG00000160789.18_LMNA | -0.08987 | -0.245556046 | 0.070338497 | 2.71E-01 | 5.55E-01 | 1.00E+00 |
| ENSG00000250207.1_AC079776.1 | ENSG00000160789.18_LMNA | 0.0215   | -0.138175227 | 0.180082746 | 7.93E-01 | 9.16E-01 | 1.00E+00 |
| ENSG00000229603.1_AC004014.1 | ENSG00000160789.18_LMNA | -0.13848 | -0.291255195 | 0.021192579 | 8.89E-02 | 2.90E-01 | 1.00E+00 |
| ENSG00000254482.1_RP11-386B  | ENSG00000160789.18_LMNA | -0.13094 | -0.284211753 | 0.028866985 | 1.08E-01 | 3.27E-01 | 1.00E+00 |
| ENSG00000248764.1_RP11-292D  | ENSG00000160789.18_LMNA | 0.04017  | -0.119795446 | 0.198105143 | 6.23E-01 | 8.30E-01 | 1.00E+00 |
| ENSG00000249073.1_WSPAR      | ENSG00000160789.18_LMNA | -0.09057 | -0.246219377 | 0.069635938 | 2.67E-01 | 5.51E-01 | 1.00E+00 |
| ENSG00000259791.1_RP11-14K3  | ENSG00000160789.18_LMNA | -0.04398 | -0.201772603 | 0.116028385 | 5.91E-01 | 8.10E-01 | 1.00E+00 |
| ENSG00000248709.1 CTC-505O3  | ENSG00000160789.18_LMNA | 0.01053  | -0.148923855 | 0.169443163 | 8.98E-01 | 9.60E-01 | 1.00E+00 |
| ENSG00000229313.1_RP3-425P1  | ENSG00000160789.18_LMNA | 0.06309  | -0.097082487 | 0.220083433 | 4.40E-01 | 7.08E-01 | 1.00E+00 |
| ENSG00000204703.4_OR2B3      | ENSG00000160789.18_LMNA | -0.1155  | -0.269740288 | 0.044519854 | 1.56E-01 | 4.08E-01 | 1.00E+00 |
| ENSG00000149507.5_OOSP2      | ENSG00000160789.18_LMNA | 0.04446  | -0.11555996  | 0.202228021 | 5.87E-01 | 8.08E-01 | 1.00E+00 |
| ENSG00000223597.2_CTD-2296D  | ENSG00000160789.18_LMNA | -0.00976 | -0.16870117  | 0.149670656 | 9.05E-01 | 9.63E-01 | 1.00E+00 |
| ENSG00000261403.1_RP11-114H  | ENSG00000160789.18_LMNA | 0.07974  | -0.080486117 | 0.235941919 | 3.29E-01 | 6.15E-01 | 1.00E+00 |
| ENSG00000215846.6_MPTX1      | ENSG00000160789.18_LMNA | -0.03781 | -0.195832927 | 0.122124788 | 6.44E-01 | 8.42E-01 | 1.00E+00 |
| ENSG00000227680.1_AC108051.1 | ENSG00000160789.18_LMNA | -0.1397  | -0.292401905 | 0.01993965  | 8.61E-02 | 2.85E-01 | 1.00E+00 |
| ENSG00000273047.1_RP4-583P1  | ENSG00000160789.18_LMNA | -0.08613 | -0.242015977 | 0.074082627 | 2.91E-01 | 5.77E-01 | 1.00E+00 |
| ENSG00000229824.1_RPL12P34   | ENSG00000160789.18_LMNA | 0.05506  | -0.10505775  | 0.212402646 | 5.00E-01 | 7.53E-01 | 1.00E+00 |
| ENSG00000249041.1_RP11-21G2  | ENSG00000160789.18_LMNA | 0.14154  | -0.018064092 | 0.294116782 | 8.20E-02 | 2.76E-01 | 1.00E+00 |
| ENSG00000257308.1_RP11-471N  | ENSG00000160789.18_LMNA | -0.00061 | -0.159798911 | 0.158602376 | 9.94E-01 | 9.98E-01 | 1.00E+00 |
| ENSG00000253654.2_CTD-2210A  | ENSG00000160789.18_LMNA | 0.10174  | -0.058406413 | 0.256781878 | 2.12E-01 | 4.86E-01 | 1.00E+00 |
| ENSG00000203795.2_FAM24A     | ENSG00000160789.18_LMNA | -0.11484 | -0.269118223 | 0.045189261 | 1.59E-01 | 4.12E-01 | 1.00E+00 |
| ENSG00000237754.1_RP11-521C  | ENSG00000160789.18_LMNA | 0.11324  | -0.04680308  | 0.267617458 | 1.65E-01 | 4.21E-01 | 1.00E+00 |
| ENSG00000270560.1_APOOP1     | ENSG00000160789.18_LMNA | -0.02123 | -0.179823909 | 0.13843761  | 7.95E-01 | 9.18E-01 | 1.00E+00 |
| ENSG00000279354.1_RP11-776B  | ENSG00000160789.18_LMNA | 0.02476  | -0.134971165 | 0.18323996  | 7.62E-01 | 9.01E-01 | 1.00E+00 |
| ENSG00000251678.1_CTD-2296D  | ENSG00000160789.18_LMNA | -0.0661  | -0.222959265 | 0.09408588  | 4.18E-01 | 6.90E-01 | 1.00E+00 |
| ENSG00000226132.1_RPS3AP46   | ENSG00000160789.18_LMNA | -0.1676  | -0.31830835  | -0.00863038 | 3.90E-02 | 1.71E-01 | 1.00E+00 |
| ENSG00000248950.1_LDHBP3     | ENSG00000160789.18_LMNA | -0.08293 | -0.238973909 | 0.077292946 | 3.10E-01 | 5.96E-01 | 1.00E+00 |
| ENSG00000224233.1_OR2J4P     | ENSG00000160789.18_LMNA | -0.1044  | -0.25929196  | 0.055726037 | 2.01E-01 | 4.71E-01 | 1.00E+00 |
| ENSG00000259331.1_RP11-57P1  | ENSG00000160789.18_LMNA | 0.01864  | -0.140983612 | 0.177310021 | 8.20E-01 | 9.30E-01 | 1.00E+00 |
| ENSG00000234320.1_           | ENSG00000160789.18_LMNA | -0.16992 | -0.320449262 | -0.01101425 | 3.64E-02 | 1.62E-01 | 1.00E+00 |
| ENSG00000224244.1_AC090283.1 | ENSG00000160789.18_LMNA | -0.00806 | -0.16705012  | 0.151331104 | 9.21E-01 | 9.70E-01 | 1.00E+00 |

|                              |                         |          |              |             |          |          |          |
|------------------------------|-------------------------|----------|--------------|-------------|----------|----------|----------|
| ENSG00000220132.1_AF238380.1 | ENSG00000160789.18_LMNA | 0.1004   | -0.059751714 | 0.255520444 | 2.18E-01 | 4.93E-01 | 1.00E+00 |
| ENSG00000225730.1_RP3-365O1  | ENSG00000160789.18_LMNA | -0.08466 | -0.240616358 | 0.07556047  | 3.00E-01 | 5.86E-01 | 1.00E+00 |
| ENSG00000279242.1_           | ENSG00000160789.18_LMNA | -0.17887 | -0.328711859 | -0.0202476  | 2.75E-02 | 1.35E-01 | 1.00E+00 |
| ENSG00000233290.1_RP11-147G  | ENSG00000160789.18_LMNA | -0.20682 | -0.354355132 | -0.04924267 | 1.06E-02 | 6.82E-02 | 1.00E+00 |
| ENSG00000228587.1_RP1-41P2.7 | ENSG00000160789.18_LMNA | -0.0354  | -0.193512867 | 0.124499567 | 6.65E-01 | 8.52E-01 | 1.00E+00 |
| ENSG00000176269.3_OR4F21     | ENSG00000160789.18_LMNA | 0.05992  | -0.100237067 | 0.217050025 | 4.63E-01 | 7.26E-01 | 1.00E+00 |
| ENSG00000269706.1_CTB-60B18  | ENSG00000160789.18_LMNA | 0.09147  | -0.068727891 | 0.247076284 | 2.62E-01 | 5.46E-01 | 1.00E+00 |
| ENSG00000230250.1_RP11-90C4  | ENSG00000160789.18_LMNA | -0.02186 | -0.18043008  | 0.137823065 | 7.89E-01 | 9.14E-01 | 1.00E+00 |
| ENSG00000258410.1_RP11-173D  | ENSG00000160789.18_LMNA | -0.10165 | -0.256698742 | 0.058495111 | 2.13E-01 | 4.86E-01 | 1.00E+00 |
| ENSG00000223595.1_LYPLA1P1   | ENSG00000160789.18_LMNA | -0.01201 | -0.170886561 | 0.14747006  | 8.83E-01 | 9.55E-01 | 1.00E+00 |
| ENSG00000238291.1_RP11-94M1  | ENSG00000160789.18_LMNA | 0.02946  | -0.130351543 | 0.187780511 | 7.19E-01 | 8.80E-01 | 1.00E+00 |
| ENSG00000223622.1_GSTA6P     | ENSG00000160789.18_LMNA | 0.03994  | -0.12002283  | 0.197883486 | 6.25E-01 | 8.31E-01 | 1.00E+00 |
| ENSG00000278885.1_CTD-2014E  | ENSG00000160789.18_LMNA | 0.04188  | -0.118105076 | 0.199751921 | 6.08E-01 | 8.21E-01 | 1.00E+00 |
| ENSG00000233872.1_AC005033.1 | ENSG00000160789.18_LMNA | -0.02745 | -0.185837911 | 0.132329664 | 7.37E-01 | 8.89E-01 | 1.00E+00 |
| ENSG00000241696.1_RP11-420J  | ENSG00000160789.18_LMNA | -0.14048 | -0.29312564  | 0.01914837  | 8.43E-02 | 2.81E-01 | 1.00E+00 |
| ENSG00000268833.1_AC011513.4 | ENSG00000160789.18_LMNA | -0.00164 | -0.160800901 | 0.157599666 | 9.84E-01 | 9.94E-01 | 1.00E+00 |
| ENSG00000248282.1_MTCYBP44   | ENSG00000160789.18_LMNA | -0.07944 | -0.235655863 | 0.080787046 | 3.31E-01 | 6.17E-01 | 1.00E+00 |
| ENSG00000236208.1_C10orf71-A | ENSG00000160789.18_LMNA | 0.00911  | -0.150305901 | 0.168069731 | 9.11E-01 | 9.66E-01 | 1.00E+00 |
| ENSG00000213643.3_VN1R37P    | ENSG00000160789.18_LMNA | 0.09369  | -0.066501592 | 0.249175112 | 2.51E-01 | 5.32E-01 | 1.00E+00 |
| ENSG00000234522.1_RP11-572P  | ENSG00000160789.18_LMNA | -0.08056 | -0.236721621 | 0.079665586 | 3.24E-01 | 6.11E-01 | 1.00E+00 |
| ENSG00000267447.1_           | ENSG00000160789.18_LMNA | -0.02919 | -0.18751774  | 0.130619267 | 7.21E-01 | 8.82E-01 | 1.00E+00 |
| ENSG00000231238.1_LINC00349  | ENSG00000160789.18_LMNA | 0.04299  | -0.117008369 | 0.200819386 | 5.99E-01 | 8.16E-01 | 1.00E+00 |
| ENSG00000186092.4_OR4F5      | ENSG00000160789.18_LMNA | -0.00755 | -0.166549177 | 0.151834544 | 9.26E-01 | 9.72E-01 | 1.00E+00 |
| ENSG00000251676.1_RP11-614F  | ENSG00000160789.18_LMNA | 0.04401  | -0.116008306 | 0.201792127 | 5.90E-01 | 8.10E-01 | 1.00E+00 |
| ENSG00000261081.1_RP11-1H8.7 | ENSG00000160789.18_LMNA | 0.13464  | -0.025094123 | 0.287678651 | 9.82E-02 | 3.08E-01 | 1.00E+00 |
| ENSG00000237087.1_AC068134.1 | ENSG00000160789.18_LMNA | -0.22536 | -0.371241609 | -0.06862139 | 5.25E-03 | 4.07E-02 | 1.00E+00 |
| ENSG00000217746.1_RP1-303A1  | ENSG00000160789.18_LMNA | 0.09759  | -0.06258484  | 0.252860421 | 2.32E-01 | 5.09E-01 | 1.00E+00 |
| ENSG00000279604.1_RP11-542M  | ENSG00000160789.18_LMNA | 0.06993  | -0.090275794 | 0.22660784  | 3.92E-01 | 6.70E-01 | 1.00E+00 |
| ENSG00000259089.2_GRAMD4P1   | ENSG00000160789.18_LMNA | 0.0133   | -0.146206669 | 0.17213981  | 8.71E-01 | 9.50E-01 | 1.00E+00 |
| ENSG00000235972.1_RP11-472G  | ENSG00000160789.18_LMNA | -0.08121 | -0.237345364 | 0.079008872 | 3.20E-01 | 6.06E-01 | 1.00E+00 |
| ENSG00000260162.2_RP11-863P  | ENSG00000160789.18_LMNA | 0.22038  | 0.063402635  | 0.366713636 | 6.37E-03 | 4.70E-02 | 1.00E+00 |
| ENSG00000248943.1_RP11-1026I | ENSG00000160789.18_LMNA | -0.06393 | -0.220885329 | 0.096247493 | 4.34E-01 | 7.03E-01 | 1.00E+00 |
| ENSG00000256551.1_RP13-653N  | ENSG00000160789.18_LMNA | -0.16918 | -0.319768408 | -0.01025575 | 3.72E-02 | 1.65E-01 | 1.00E+00 |

|                              |                         |          |              |             |          |          |          |
|------------------------------|-------------------------|----------|--------------|-------------|----------|----------|----------|
| ENSG00000254430.1_OR6M3P     | ENSG00000160789.18_LMNA | -0.0605  | -0.217608179 | 0.099657096 | 4.59E-01 | 7.23E-01 | 1.00E+00 |
| ENSG00000237633.2_AC104623.1 | ENSG00000160789.18_LMNA | -0.1111  | -0.265607391 | 0.048961999 | 1.73E-01 | 4.32E-01 | 1.00E+00 |
| ENSG00000240089.2_BMS1P3     | ENSG00000160789.18_LMNA | 0.00928  | -0.150139477 | 0.168235184 | 9.10E-01 | 9.65E-01 | 1.00E+00 |
| ENSG00000235571.1_SNX18P14   | ENSG00000160789.18_LMNA | 0.17659  | 0.017893329  | 0.326609582 | 2.95E-02 | 1.42E-01 | 1.00E+00 |
| ENSG00000248744.1_RP11-362I1 | ENSG00000160789.18_LMNA | 0.111    | -0.049066555 | 0.265509975 | 1.73E-01 | 4.33E-01 | 1.00E+00 |
| ENSG00000230748.1_RP11-541H  | ENSG00000160789.18_LMNA | -0.17264 | -0.322960151 | -0.01381457 | 3.34E-02 | 1.54E-01 | 1.00E+00 |
| ENSG00000205329.1_OR6C3      | ENSG00000160789.18_LMNA | 0.05838  | -0.10176207  | 0.2155814   | 4.75E-01 | 7.34E-01 | 1.00E+00 |
| ENSG00000268870.1_CTD-3105H  | ENSG00000160789.18_LMNA | -0.08017 | -0.236352023 | 0.080054592 | 3.26E-01 | 6.13E-01 | 1.00E+00 |
| ENSG00000244249.1_RP11-441M  | ENSG00000160789.18_LMNA | 0.00502  | -0.154304235 | 0.16408935  | 9.51E-01 | 9.80E-01 | 1.00E+00 |
| ENSG00000238275.2_HOMER2P2   | ENSG00000160789.18_LMNA | 0.08826  | -0.071954562 | 0.244029091 | 2.80E-01 | 5.65E-01 | 1.00E+00 |
| ENSG00000277757.3_RP11-285G  | ENSG00000160789.18_LMNA | -0.08899 | -0.244727029 | 0.071216099 | 2.76E-01 | 5.60E-01 | 1.00E+00 |
| ENSG00000203492.3_OR2N1P     | ENSG00000160789.18_LMNA | 0.06639  | -0.093800646 | 0.223232717 | 4.16E-01 | 6.89E-01 | 1.00E+00 |
| ENSG00000272243.4_RP11-554D  | ENSG00000160789.18_LMNA | 0.03059  | -0.129236532 | 0.188874404 | 7.08E-01 | 8.76E-01 | 1.00E+00 |
| ENSG00000250710.3_OR7E99P    | ENSG00000160789.18_LMNA | -0.03336 | -0.191542198 | 0.126513858 | 6.83E-01 | 8.62E-01 | 1.00E+00 |
| ENSG00000257756.4_RP11-776A  | ENSG00000160789.18_LMNA | -0.07393 | -0.230419191 | 0.086285794 | 3.65E-01 | 6.47E-01 | 1.00E+00 |
| ENSG00000276214.1_CTD-2146C  | ENSG00000160789.18_LMNA | 0.11586  | -0.044155148 | 0.27007909  | 1.55E-01 | 4.06E-01 | 1.00E+00 |
| ENSG00000271949.1_RP11-302M  | ENSG00000160789.18_LMNA | -0.08318 | -0.239211321 | 0.077042639 | 3.08E-01 | 5.95E-01 | 1.00E+00 |
| ENSG00000235975.1_RP1-106C2  | ENSG00000160789.18_LMNA | -0.02921 | -0.187536857 | 0.130599792 | 7.21E-01 | 8.82E-01 | 1.00E+00 |
| ENSG00000180409.3_OR10AA1P   | ENSG00000160789.18_LMNA | 0.01534  | -0.14421607  | 0.174112339 | 8.51E-01 | 9.42E-01 | 1.00E+00 |
| ENSG00000223677.1_OR2AD1P    | ENSG00000160789.18_LMNA | 0.06776  | -0.092436252 | 0.224540056 | 4.07E-01 | 6.82E-01 | 1.00E+00 |
| ENSG00000231039.2_RP11-445P  | ENSG00000160789.18_LMNA | -0.08696 | -0.242797091 | 0.073257253 | 2.87E-01 | 5.72E-01 | 1.00E+00 |
| ENSG00000135413.7_LACRT      | ENSG00000160789.18_LMNA | -0.03709 | -0.195140027 | 0.122834411 | 6.50E-01 | 8.45E-01 | 1.00E+00 |
| ENSG00000235746.1_CTBP2P2    | ENSG00000160789.18_LMNA | 0.05665  | -0.103484827 | 0.213920603 | 4.88E-01 | 7.44E-01 | 1.00E+00 |
| ENSG00000227445.1_OR10R1P    | ENSG00000160789.18_LMNA | -0.00162 | -0.160776431 | 0.157624161 | 9.84E-01 | 9.94E-01 | 1.00E+00 |
| ENSG00000260073.2_RP11-488I2 | ENSG00000160789.18_LMNA | -0.01438 | -0.173184037 | 0.145153197 | 8.60E-01 | 9.45E-01 | 1.00E+00 |
| ENSG00000161807.3_OR7G1      | ENSG00000160789.18_LMNA | -0.15843 | -0.309814045 | 0.000793315 | 5.12E-02 | 2.04E-01 | 1.00E+00 |
| ENSG00000279955.2_RP11-1221  | ENSG00000160789.18_LMNA | 0.12341  | -0.036512272 | 0.277161273 | 1.30E-01 | 3.65E-01 | 1.00E+00 |
| ENSG00000230164.1_MAS1LP1    | ENSG00000160789.18_LMNA | -0.09106 | -0.246684199 | 0.06914344  | 2.65E-01 | 5.48E-01 | 1.00E+00 |
| ENSG00000261491.1_DNM1P31    | ENSG00000160789.18_LMNA | -0.00966 | -0.168602207 | 0.149770234 | 9.06E-01 | 9.64E-01 | 1.00E+00 |
| ENSG00000223905.1_RP11-335E  | ENSG00000160789.18_LMNA | 0.067    | -0.093191648 | 0.223816389 | 4.12E-01 | 6.86E-01 | 1.00E+00 |
| ENSG00000248101.2_AC002116.1 | ENSG00000160789.18_LMNA | -0.02292 | -0.181456577 | 0.136781829 | 7.79E-01 | 9.09E-01 | 1.00E+00 |
| ENSG00000204705.3_UBTFL5     | ENSG00000160789.18_LMNA | -0.117   | -0.271148636 | 0.043003281 | 1.51E-01 | 4.00E-01 | 1.00E+00 |
| ENSG00000212901.3_KRTAP3-1   | ENSG00000160789.18_LMNA | -0.0008  | -0.159981616 | 0.158419588 | 9.92E-01 | 9.97E-01 | 1.00E+00 |

|                              |                         |          |              |             |          |          |          |
|------------------------------|-------------------------|----------|--------------|-------------|----------|----------|----------|
| ENSG00000265340.1_OR4K7P     | ENSG00000160789.18_LMNA | 0.01748  | -0.142114508 | 0.176192055 | 8.31E-01 | 9.34E-01 | 1.00E+00 |
| ENSG00000206062.4_RP13-212L  | ENSG00000160789.18_LMNA | -0.16851 | -0.319153246 | -0.00957074 | 3.80E-02 | 1.67E-01 | 1.00E+00 |
| ENSG00000170790.4_OR10A2     | ENSG00000160789.18_LMNA | 0.06415  | -0.096027549 | 0.221096482 | 4.32E-01 | 7.02E-01 | 1.00E+00 |
| ENSG00000254776.1_AC084121   | ENSG00000160789.18_LMNA | -0.08741 | -0.243221745 | 0.072808354 | 2.84E-01 | 5.70E-01 | 1.00E+00 |
| ENSG00000271337.1_NDE1P2     | ENSG00000160789.18_LMNA | -0.09031 | -0.245978385 | 0.069891217 | 2.68E-01 | 5.53E-01 | 1.00E+00 |
| ENSG00000279231.1_RP11-341D  | ENSG00000160789.18_LMNA | -0.00965 | -0.168593167 | 0.149779329 | 9.06E-01 | 9.64E-01 | 1.00E+00 |
| ENSG00000248376.2_RP11-692E  | ENSG00000160789.18_LMNA | -0.04796 | -0.20559026  | 0.112097311 | 5.57E-01 | 7.91E-01 | 1.00E+00 |
| ENSG00000270726.4_AJ271736.1 | ENSG00000160789.18_LMNA | 0.00161  | -0.157635107 | 0.160765497 | 9.84E-01 | 9.94E-01 | 1.00E+00 |
| ENSG00000236959.1_SULT1D1P   | ENSG00000160789.18_LMNA | 0.05348  | -0.106633359 | 0.210880559 | 5.13E-01 | 7.61E-01 | 1.00E+00 |
| ENSG00000228004.1_MYCLP2     | ENSG00000160789.18_LMNA | 0.00713  | -0.152241083 | 0.166144534 | 9.31E-01 | 9.73E-01 | 1.00E+00 |
| ENSG00000248931.1_MTCYBP40   | ENSG00000160789.18_LMNA | -0.03845 | -0.196445595 | 0.121497061 | 6.38E-01 | 8.38E-01 | 1.00E+00 |
| ENSG00000230548.1_MTND4P27   | ENSG00000160789.18_LMNA | 0.01031  | -0.149133201 | 0.169235201 | 9.00E-01 | 9.61E-01 | 1.00E+00 |
| ENSG00000267101.4_RP11-846C  | ENSG00000160789.18_LMNA | 0.12889  | -0.030944599 | 0.282299123 | 1.14E-01 | 3.37E-01 | 1.00E+00 |
| ENSG00000225685.1_TSPY5P     | ENSG00000160789.18_LMNA | 0.05487  | -0.105250585 | 0.212216444 | 5.02E-01 | 7.54E-01 | 1.00E+00 |
| ENSG00000213439.3_OR5AC1     | ENSG00000160789.18_LMNA | 0.10746  | -0.052637033 | 0.262179441 | 1.88E-01 | 4.54E-01 | 1.00E+00 |
| ENSG00000234895.1_OR52X1P    | ENSG00000160789.18_LMNA | 0.0805   | -0.079723373 | 0.236666723 | 3.24E-01 | 6.11E-01 | 1.00E+00 |
| ENSG00000230233.1_AF240627.2 | ENSG00000160789.18_LMNA | 0.06108  | -0.099084806 | 0.218158738 | 4.55E-01 | 7.19E-01 | 1.00E+00 |
| ENSG00000257757.1_OR6C7P     | ENSG00000160789.18_LMNA | 0.09706  | -0.063120441 | 0.25235701  | 2.34E-01 | 5.12E-01 | 1.00E+00 |
| ENSG00000228564.1_LINC01005  | ENSG00000160789.18_LMNA | -0.09658 | -0.251904463 | 0.063601768 | 2.37E-01 | 5.15E-01 | 1.00E+00 |
| ENSG00000168930.12_TRIM49    | ENSG00000160789.18_LMNA | 0.08911  | -0.071095756 | 0.244840738 | 2.75E-01 | 5.59E-01 | 1.00E+00 |
| ENSG00000225344.1_RP4-738P1  | ENSG00000160789.18_LMNA | -0.08926 | -0.244975835 | 0.070952764 | 2.74E-01 | 5.59E-01 | 1.00E+00 |
| ENSG00000254737.1_OR10G4     | ENSG00000160789.18_LMNA | 0.00999  | -0.149450533 | 0.168919913 | 9.03E-01 | 9.62E-01 | 1.00E+00 |
| ENSG00000249139.1_EPPIN-WFI  | ENSG00000160789.18_LMNA | 0.03014  | -0.12967806  | 0.188441333 | 7.12E-01 | 8.78E-01 | 1.00E+00 |
| ENSG00000257792.1_OR5BJ1P    | ENSG00000160789.18_LMNA | -0.0784  | -0.234672727 | 0.081820855 | 3.37E-01 | 6.22E-01 | 1.00E+00 |
| ENSG00000226579.1_MTCYBP31   | ENSG00000160789.18_LMNA | -0.01851 | -0.177192823 | 0.141102204 | 8.21E-01 | 9.30E-01 | 1.00E+00 |
| ENSG00000232920.1_LINC01400  | ENSG00000160789.18_LMNA | 0.00854  | -0.150870245 | 0.16750855  | 9.17E-01 | 9.68E-01 | 1.00E+00 |
| ENSG00000253795.1_MTND1P5    | ENSG00000160789.18_LMNA | -0.03532 | -0.193435827 | 0.124578362 | 6.66E-01 | 8.53E-01 | 1.00E+00 |
| ENSG00000226157.1_OR52E3P    | ENSG00000160789.18_LMNA | 0.00441  | -0.154901357 | 0.163494017 | 9.57E-01 | 9.83E-01 | 1.00E+00 |
| ENSG00000254456.4_RP11-405K  | ENSG00000160789.18_LMNA | -0.0263  | -0.184725171 | 0.133461611 | 7.48E-01 | 8.95E-01 | 1.00E+00 |
| ENSG00000261299.1_C2orf69P3  | ENSG00000160789.18_LMNA | 0.02691  | -0.13286091  | 0.185315781 | 7.42E-01 | 8.92E-01 | 1.00E+00 |
| ENSG00000265758.1_RP11-595B  | ENSG00000160789.18_LMNA | 0.09002  | -0.070187461 | 0.245698673 | 2.70E-01 | 5.54E-01 | 1.00E+00 |
| ENSG00000172150.4_OR1A2      | ENSG00000160789.18_LMNA | -0.06678 | -0.223608161 | 0.093408938 | 4.14E-01 | 6.87E-01 | 1.00E+00 |
| ENSG00000235818.3_VN1R17P    | ENSG00000160789.18_LMNA | -0.10132 | -0.25638704  | 0.058827625 | 2.14E-01 | 4.88E-01 | 1.00E+00 |

|                             |                         |          |              |             |          |          |          |
|-----------------------------|-------------------------|----------|--------------|-------------|----------|----------|----------|
| ENSG00000224732.1_MAGEA7P   | ENSG00000160789.18_LMNA | 0.0358   | -0.12411222  | 0.193891532 | 6.62E-01 | 8.51E-01 | 1.00E+00 |
| ENSG00000249866.1_OR7E83P   | ENSG00000160789.18_LMNA | 0.07458  | -0.085642422 | 0.231032848 | 3.61E-01 | 6.43E-01 | 1.00E+00 |
| ENSG00000276240.1_OR4E1     | ENSG00000160789.18_LMNA | 0.02879  | -0.131007871 | 0.187136244 | 7.25E-01 | 8.83E-01 | 1.00E+00 |
| ENSG00000204021.3_LIPK      | ENSG00000160789.18_LMNA | 0.12013  | -0.039828648 | 0.274092372 | 1.40E-01 | 3.82E-01 | 1.00E+00 |
| ENSG00000178358.4_OR2D3     | ENSG00000160789.18_LMNA | 0.1091   | -0.050981589 | 0.263724568 | 1.81E-01 | 4.44E-01 | 1.00E+00 |
| ENSG00000237110.2_TAAR9     | ENSG00000160789.18_LMNA | 0.0562   | -0.103935521 | 0.213485815 | 4.92E-01 | 7.47E-01 | 1.00E+00 |
| ENSG00000250517.2_LDHAL6CP  | ENSG00000160789.18_LMNA | 0.10493  | -0.05518888  | 0.259794479 | 1.98E-01 | 4.68E-01 | 1.00E+00 |
| ENSG00000186881.3_OR13F1    | ENSG00000160789.18_LMNA | 0.05591  | -0.104217377 | 0.213213842 | 4.94E-01 | 7.49E-01 | 1.00E+00 |
| ENSG00000227497.1_PABPC1P6  | ENSG00000160789.18_LMNA | -0.08369 | -0.239696251 | 0.076531246 | 3.05E-01 | 5.92E-01 | 1.00E+00 |
| ENSG00000204246.2_OR13C3    | ENSG00000160789.18_LMNA | -0.07065 | -0.22729172  | 0.089560606 | 3.87E-01 | 6.66E-01 | 1.00E+00 |
| ENSG00000227892.1_OR5P4P    | ENSG00000160789.18_LMNA | -0.10022 | -0.255343987 | 0.059939812 | 2.19E-01 | 4.94E-01 | 1.00E+00 |
| ENSG00000226918.1_AC010086  | ENSG00000160789.18_LMNA | 0.20915  | 0.051670311  | 0.356481518 | 9.71E-03 | 6.43E-02 | 1.00E+00 |
| ENSG00000170782.3_OR10A4    | ENSG00000160789.18_LMNA | 0.02052  | -0.139130568 | 0.179140103 | 8.02E-01 | 9.20E-01 | 1.00E+00 |
| ENSG00000248717.1_RP11-451H | ENSG00000160789.18_LMNA | 0.00261  | -0.156660502 | 0.161738795 | 9.75E-01 | 9.90E-01 | 1.00E+00 |
| ENSG00000255551.1_RP11-56P9 | ENSG00000160789.18_LMNA | 0.09916  | -0.06100125  | 0.254347843 | 2.24E-01 | 5.00E-01 | 1.00E+00 |
| ENSG00000259968.3_RP11-428C | ENSG00000160789.18_LMNA | -0.05893 | -0.216105026 | 0.101218514 | 4.71E-01 | 7.31E-01 | 1.00E+00 |
| ENSG00000177400.6_OR7E8P    | ENSG00000160789.18_LMNA | 0.02862  | -0.131180861 | 0.186966388 | 7.26E-01 | 8.84E-01 | 1.00E+00 |
| ENSG00000226213.1_UBQLN4P2  | ENSG00000160789.18_LMNA | -0.26024 | -0.402758272 | -0.10541086 | 1.20E-03 | 1.33E-02 | 1.00E+00 |
| ENSG00000248434.1_RP11-553P | ENSG00000160789.18_LMNA | 0.20449  | 0.046818157  | 0.352228326 | 1.15E-02 | 7.24E-02 | 1.00E+00 |
| ENSG00000232382.1_OR5K1     | ENSG00000160789.18_LMNA | -0.04597 | -0.203680122 | 0.11406544  | 5.74E-01 | 8.01E-01 | 1.00E+00 |
| ENSG00000229305.1_RP11-431K | ENSG00000160789.18_LMNA | -0.05034 | -0.207873669 | 0.109741303 | 5.38E-01 | 7.78E-01 | 1.00E+00 |
| ENSG00000079557.4_AFM       | ENSG00000160789.18_LMNA | 0.00023  | -0.158972093 | 0.159429294 | 9.98E-01 | 9.99E-01 | 1.00E+00 |
| ENSG00000260726.2_KLF8P1    | ENSG00000160789.18_LMNA | 0.01345  | -0.146062724 | 0.172282534 | 8.69E-01 | 9.49E-01 | 1.00E+00 |
| ENSG00000274316.1_ZNF646P1  | ENSG00000160789.18_LMNA | 0.1962   | 0.038188787  | 0.34463289  | 1.54E-02 | 8.96E-02 | 1.00E+00 |
| ENSG00000237055.1_MTCO1P48  | ENSG00000160789.18_LMNA | -0.08511 | -0.241041515 | 0.075111698 | 2.97E-01 | 5.83E-01 | 1.00E+00 |
| ENSG00000237613.2_FAM138A   | ENSG00000160789.18_LMNA | 0.01661  | -0.142973099 | 0.175342731 | 8.39E-01 | 9.37E-01 | 1.00E+00 |
| ENSG00000265746.1_KYNUP2    | ENSG00000160789.18_LMNA | -0.03919 | -0.197156561 | 0.120768302 | 6.32E-01 | 8.35E-01 | 1.00E+00 |
| ENSG00000265690.6_RP11-5A19 | ENSG00000160789.18_LMNA | -0.04514 | -0.202885099 | 0.114883866 | 5.81E-01 | 8.05E-01 | 1.00E+00 |
| ENSG00000249054.2_FAM138D   | ENSG00000160789.18_LMNA | -0.01866 | -0.177332735 | 0.140960626 | 8.20E-01 | 9.30E-01 | 1.00E+00 |
| ENSG00000135355.3_GJA10     | ENSG00000160789.18_LMNA | 0.04141  | -0.11857193  | 0.199297286 | 6.12E-01 | 8.24E-01 | 1.00E+00 |
| ENSG00000236803.1_SDAD1P4   | ENSG00000160789.18_LMNA | -0.17709 | -0.327068819 | -0.01840732 | 2.91E-02 | 1.40E-01 | 1.00E+00 |
| ENSG00000251643.1_RP11-91J3 | ENSG00000160789.18_LMNA | -0.06938 | -0.226087418 | 0.090819821 | 3.96E-01 | 6.73E-01 | 1.00E+00 |
| ENSG00000278139.1_RP4-533D7 | ENSG00000160789.18_LMNA | 0.06214  | -0.098032274 | 0.219170774 | 4.47E-01 | 7.13E-01 | 1.00E+00 |

|                             |                         |          |              |             |          |          |          |
|-----------------------------|-------------------------|----------|--------------|-------------|----------|----------|----------|
| ENSG00000258375.2_RP11-617J | ENSG00000160789.18_LMNA | -0.04116 | -0.199060146 | 0.118815388 | 6.15E-01 | 8.25E-01 | 1.00E+00 |
| ENSG00000182645.5_CCDC172   | ENSG00000160789.18_LMNA | -0.15486 | -0.30650678  | 0.004447577 | 5.68E-02 | 2.18E-01 | 1.00E+00 |
| ENSG00000146378.6_TAAR2     | ENSG00000160789.18_LMNA | -0.07464 | -0.231099039 | 0.085573011 | 3.61E-01 | 6.43E-01 | 1.00E+00 |
| ENSG00000123594.4_ATXN3L    | ENSG00000160789.18_LMNA | 0.02014  | -0.13951232  | 0.178763261 | 8.06E-01 | 9.22E-01 | 1.00E+00 |
| ENSG00000275826.1_RP11-756P | ENSG00000160789.18_LMNA | -0.02647 | -0.184894014 | 0.133289908 | 7.46E-01 | 8.94E-01 | 1.00E+00 |
| ENSG00000111049.3_MYF5      | ENSG00000160789.18_LMNA | 0.01948  | -0.140158769 | 0.178124915 | 8.12E-01 | 9.26E-01 | 1.00E+00 |
| ENSG00000169807.9_PRY2      | ENSG00000160789.18_LMNA | -0.20417 | -0.351933778 | -0.04648266 | 1.16E-02 | 7.30E-02 | 1.00E+00 |
| ENSG00000228578.1_TUBB1P2   | ENSG00000160789.18_LMNA | 0.09713  | -0.063041504 | 0.252431213 | 2.34E-01 | 5.12E-01 | 1.00E+00 |
| ENSG00000248548.1_MTND4P8   | ENSG00000160789.18_LMNA | -0.01362 | -0.172442842 | 0.145901028 | 8.68E-01 | 9.48E-01 | 1.00E+00 |
| ENSG00000159527.3_PGLYRP3   | ENSG00000160789.18_LMNA | -0.04695 | -0.204624185 | 0.113093028 | 5.66E-01 | 7.96E-01 | 1.00E+00 |
| ENSG00000217770.1_FEM1AP3   | ENSG00000160789.18_LMNA | 0.13774  | -0.021943669 | 0.290567349 | 9.06E-02 | 2.93E-01 | 1.00E+00 |
| ENSG00000232420.2_IL9RP2    | ENSG00000160789.18_LMNA | 0.04213  | -0.117862405 | 0.199988186 | 6.06E-01 | 8.20E-01 | 1.00E+00 |
| ENSG00000277367.1_RP11-536C | ENSG00000160789.18_LMNA | 0.19763  | 0.039680599  | 0.345948835 | 1.47E-02 | 8.64E-02 | 1.00E+00 |
| ENSG00000239829.1_KRT8P25   | ENSG00000160789.18_LMNA | -0.01331 | -0.172145995 | 0.146200431 | 8.71E-01 | 9.50E-01 | 1.00E+00 |
| ENSG00000227404.1_KRT8P20   | ENSG00000160789.18_LMNA | -0.11955 | -0.27354593  | 0.04041843  | 1.42E-01 | 3.85E-01 | 1.00E+00 |
| ENSG00000249162.1_ADAM20P3  | ENSG00000160789.18_LMNA | 0.1686   | 0.009662284  | 0.319235474 | 3.79E-02 | 1.67E-01 | 1.00E+00 |
| ENSG00000229658.1_PABPC1P9  | ENSG00000160789.18_LMNA | 0.05068  | -0.109405636 | 0.208198712 | 5.35E-01 | 7.76E-01 | 1.00E+00 |
| ENSG00000214607.2_ADAM24P   | ENSG00000160789.18_LMNA | 0.05709  | -0.103045337 | 0.21434446  | 4.85E-01 | 7.42E-01 | 1.00E+00 |
| ENSG00000268532.1_RP11-514D | ENSG00000160789.18_LMNA | -0.24132 | -0.385699249 | -0.08539626 | 2.74E-03 | 2.49E-02 | 1.00E+00 |
| ENSG00000233740.1_CICP2     | ENSG00000160789.18_LMNA | -0.00205 | -0.16119562  | 0.157204483 | 9.80E-01 | 9.93E-01 | 1.00E+00 |
| ENSG00000260217.1_RP11-809F | ENSG00000160789.18_LMNA | -0.06059 | -0.217692133 | 0.099569841 | 4.58E-01 | 7.22E-01 | 1.00E+00 |
| ENSG00000242515.4_UGT1A10   | ENSG00000160789.18_LMNA | -0.07548 | -0.231896513 | 0.084736489 | 3.55E-01 | 6.39E-01 | 1.00E+00 |
| ENSG00000255871.2_RP11-69C1 | ENSG00000160789.18_LMNA | -0.17996 | -0.329712429 | -0.02136931 | 2.65E-02 | 1.32E-01 | 1.00E+00 |
| ENSG00000249568.1_RP11-234O | ENSG00000160789.18_LMNA | -0.08798 | -0.243765415 | 0.072233459 | 2.81E-01 | 5.67E-01 | 1.00E+00 |
| ENSG00000228440.1_MTND5P6   | ENSG00000160789.18_LMNA | -0.13464 | -0.287671025 | 0.025102432 | 9.82E-02 | 3.08E-01 | 1.00E+00 |
| ENSG00000267609.2_SNX33P1   | ENSG00000160789.18_LMNA | 0.02528  | -0.134460668 | 0.183742388 | 7.57E-01 | 8.99E-01 | 1.00E+00 |
| ENSG00000204414.10_CSHL1    | ENSG00000160789.18_LMNA | 0.06685  | -0.093339433 | 0.223674771 | 4.13E-01 | 6.86E-01 | 1.00E+00 |
| ENSG00000182898.3_TCHHL1    | ENSG00000160789.18_LMNA | 0.00941  | -0.15001062  | 0.168363276 | 9.08E-01 | 9.65E-01 | 1.00E+00 |
| ENSG00000177689.10_MAGEB10  | ENSG00000160789.18_LMNA | 0.04334  | -0.116669826 | 0.20114875  | 5.96E-01 | 8.14E-01 | 1.00E+00 |
| ENSG00000272804.2_KRTAP10-7 | ENSG00000160789.18_LMNA | 0.09729  | -0.06288966  | 0.252573942 | 2.33E-01 | 5.11E-01 | 1.00E+00 |
| ENSG00000229699.1_RP1-140J1 | ENSG00000160789.18_LMNA | -0.08999 | -0.245675279 | 0.070212235 | 2.70E-01 | 5.55E-01 | 1.00E+00 |
| ENSG00000273919.1_RP11-384G | ENSG00000160789.18_LMNA | -0.08338 | -0.239404305 | 0.076839143 | 3.07E-01 | 5.94E-01 | 1.00E+00 |
| ENSG00000261761.3_RP11-103J | ENSG00000160789.18_LMNA | 0.06455  | -0.095631043 | 0.221477068 | 4.29E-01 | 6.99E-01 | 1.00E+00 |



|                             |                         |          |              |             |          |          |          |
|-----------------------------|-------------------------|----------|--------------|-------------|----------|----------|----------|
| ENSG00000227912.1_RP11-69C1 | ENSG00000160789.18_LMNA | -0.0861  | -0.241982597 | 0.074117889 | 2.92E-01 | 5.77E-01 | 1.00E+00 |
| ENSG00000257129.1_RP11-554D | ENSG00000160789.18_LMNA | -0.02772 | -0.186101248 | 0.13206166  | 7.35E-01 | 8.88E-01 | 1.00E+00 |
| ENSG00000261190.4_C16orf97  | ENSG00000160789.18_LMNA | -0.1435  | -0.29593692  | 0.016071004 | 7.78E-02 | 2.67E-01 | 1.00E+00 |
| ENSG00000272397.1_RP11-497D | ENSG00000160789.18_LMNA | 0.01013  | -0.149312343 | 0.169057221 | 9.01E-01 | 9.62E-01 | 1.00E+00 |
| ENSG00000188877.10_POTEA    | ENSG00000160789.18_LMNA | 0.03404  | -0.125842446 | 0.192199355 | 6.77E-01 | 8.59E-01 | 1.00E+00 |
| ENSG00000241635.6_UGT1A1    | ENSG00000160789.18_LMNA | 0.0093   | -0.150126477 | 0.168248107 | 9.09E-01 | 9.65E-01 | 1.00E+00 |
| ENSG00000238002.2_NPAP1P6   | ENSG00000160789.18_LMNA | 0.0052   | -0.154125804 | 0.1642672   | 9.49E-01 | 9.80E-01 | 1.00E+00 |
| ENSG00000238208.1_          | ENSG00000160789.18_LMNA | 0.07007  | -0.090138079 | 0.22673955  | 3.91E-01 | 6.69E-01 | 1.00E+00 |
| ENSG00000167165.17_UGT1A6   | ENSG00000160789.18_LMNA | -0.06043 | -0.217540004 | 0.099727948 | 4.60E-01 | 7.23E-01 | 1.00E+00 |
| ENSG00000273643.1_PPP1R26P  | ENSG00000160789.18_LMNA | -0.06691 | -0.223731858 | 0.093279862 | 4.13E-01 | 6.86E-01 | 1.00E+00 |
| ENSG00000264089.1_MIR3681   | ENSG00000160789.18_LMNA | 0.07247  | -0.087740388 | 0.22903085  | 3.75E-01 | 6.55E-01 | 1.00E+00 |
| ENSG00000211930.1_IGHD3-3   | ENSG00000160789.18_LMNA | 0.1072   | -0.052903018 | 0.26193103  | 1.89E-01 | 4.56E-01 | 1.00E+00 |
| ENSG00000252770.1_RNU7-4P   | ENSG00000160789.18_LMNA | 0.03986  | -0.120106855 | 0.197801569 | 6.26E-01 | 8.31E-01 | 1.00E+00 |
| ENSG00000263593.1_MIR4804   | ENSG00000160789.18_LMNA | -0.03338 | -0.19156394  | 0.126491649 | 6.83E-01 | 8.62E-01 | 1.00E+00 |
| ENSG00000202265.1_RNU6-596F | ENSG00000160789.18_LMNA | -0.01464 | -0.173438905 | 0.144895963 | 8.58E-01 | 9.44E-01 | 1.00E+00 |
| ENSG00000201557.1_SNORD114  | ENSG00000160789.18_LMNA | -0.01104 | -0.169941207 | 0.148422379 | 8.93E-01 | 9.58E-01 | 1.00E+00 |
| ENSG00000211866.1_TRAJ23    | ENSG00000160789.18_LMNA | 0.24121  | 0.085286463  | 0.385605098 | 2.76E-03 | 2.50E-02 | 1.00E+00 |
| ENSG00000199938.1_Y_RNA     | ENSG00000160789.18_LMNA | -0.06189 | -0.218933583 | 0.098279019 | 4.49E-01 | 7.15E-01 | 1.00E+00 |
| ENSG00000201240.1_SNORD114  | ENSG00000160789.18_LMNA | -0.00996 | -0.168895906 | 0.149474693 | 9.03E-01 | 9.63E-01 | 1.00E+00 |
| ENSG00000221537.1_MIR548H1  | ENSG00000160789.18_LMNA | -0.00992 | -0.168851442 | 0.149519439 | 9.03E-01 | 9.63E-01 | 1.00E+00 |
| ENSG00000252247.2_RNU6-70P  | ENSG00000160789.18_LMNA | 0.05376  | -0.106352434 | 0.211152054 | 5.11E-01 | 7.59E-01 | 1.00E+00 |
| ENSG00000238778.1_RNU7-80P  | ENSG00000160789.18_LMNA | 0.01635  | -0.14322778  | 0.175090709 | 8.42E-01 | 9.38E-01 | 1.00E+00 |
| ENSG00000276694.1_          | ENSG00000160789.18_LMNA | -0.06314 | -0.220124189 | 0.097040059 | 4.40E-01 | 7.08E-01 | 1.00E+00 |
| ENSG00000199700.1_RNU6-223F | ENSG00000160789.18_LMNA | 0.02517  | -0.134566057 | 0.183638678 | 7.58E-01 | 8.99E-01 | 1.00E+00 |
| ENSG00000206759.1_RNU6-787F | ENSG00000160789.18_LMNA | -0.04652 | -0.204205781 | 0.113524071 | 5.69E-01 | 7.99E-01 | 1.00E+00 |
| ENSG00000202368.1_Y_RNA     | ENSG00000160789.18_LMNA | 0.10448  | -0.055641537 | 0.259371023 | 2.00E-01 | 4.71E-01 | 1.00E+00 |
| ENSG00000277120.3_MIR6089   | ENSG00000160789.18_LMNA | 0.02524  | -0.134498389 | 0.183705268 | 7.58E-01 | 8.99E-01 | 1.00E+00 |
| ENSG00000264142.1_          | ENSG00000160789.18_LMNA | -0.08523 | -0.241158927 | 0.074987742 | 2.96E-01 | 5.82E-01 | 1.00E+00 |
| ENSG00000238584.1_RNU7-167F | ENSG00000160789.18_LMNA | 0.07202  | -0.088188732 | 0.228602666 | 3.78E-01 | 6.57E-01 | 1.00E+00 |
| ENSG00000211878.1_TRAJ11    | ENSG00000160789.18_LMNA | -0.02628 | -0.184706227 | 0.133480875 | 7.48E-01 | 8.95E-01 | 1.00E+00 |
| ENSG00000252848.1_RNA5SP23  | ENSG00000160789.18_LMNA | 0.10793  | -0.052162594 | 0.262622429 | 1.86E-01 | 4.52E-01 | 1.00E+00 |
| ENSG00000280050.1_AC008622  | ENSG00000160789.18_LMNA | 0.10846  | -0.051634446 | 0.263115409 | 1.84E-01 | 4.48E-01 | 1.00E+00 |
| ENSG00000238959.1_RNU7-19P  | ENSG00000160789.18_LMNA | 0.07069  | -0.089517644 | 0.227332792 | 3.87E-01 | 6.65E-01 | 1.00E+00 |

|                               |                         |          |              |             |          |          |          |
|-------------------------------|-------------------------|----------|--------------|-------------|----------|----------|----------|
| ENSG00000211886.1_TRAJ3       | ENSG00000160789.18_LMNA | -0.07862 | -0.234879549 | 0.081603429 | 3.36E-01 | 6.21E-01 | 1.00E+00 |
| ENSG00000265012.2_            | ENSG00000160789.18_LMNA | 0.18921  | 0.030938919  | 0.338220504 | 1.96E-02 | 1.06E-01 | 1.00E+00 |
| ENSG00000264099.1_MIR4803     | ENSG00000160789.18_LMNA | -0.01936 | -0.178012536 | 0.140272545 | 8.13E-01 | 9.26E-01 | 1.00E+00 |
| ENSG00000199454.1_RNA5SP38    | ENSG00000160789.18_LMNA | -0.09431 | -0.249763819 | 0.065876566 | 2.48E-01 | 5.28E-01 | 1.00E+00 |
| ENSG00000279916.1_AC010655.   | ENSG00000160789.18_LMNA | -0.0312  | -0.189463065 | 0.128636173 | 7.03E-01 | 8.73E-01 | 1.00E+00 |
| ENSG00000252660.1_Y_RNA       | ENSG00000160789.18_LMNA | -0.05507 | -0.212408907 | 0.105051266 | 5.00E-01 | 7.53E-01 | 1.00E+00 |
| ENSG00000200685.1_Y_RNA       | ENSG00000160789.18_LMNA | 0.03584  | -0.124065849 | 0.193936857 | 6.61E-01 | 8.50E-01 | 1.00E+00 |
| ENSG00000215954.2_            | ENSG00000160789.18_LMNA | 0.0665   | -0.093688416 | 0.223340297 | 4.16E-01 | 6.88E-01 | 1.00E+00 |
| ENSG00000263793.1_MIR3115     | ENSG00000160789.18_LMNA | -0.08316 | -0.23919     | 0.077065119 | 3.08E-01 | 5.95E-01 | 1.00E+00 |
| ENSG00000207776.1_MIR551A     | ENSG00000160789.18_LMNA | -0.06159 | -0.218644427 | 0.09857977  | 4.51E-01 | 7.17E-01 | 1.00E+00 |
| ENSG00000223082.1_            | ENSG00000160789.18_LMNA | -0.03775 | -0.19576967  | 0.122189585 | 6.44E-01 | 8.42E-01 | 1.00E+00 |
| ENSG00000238374.1_RNU7-180F   | ENSG00000160789.18_LMNA | -0.06958 | -0.226277005 | 0.090621657 | 3.94E-01 | 6.72E-01 | 1.00E+00 |
| ENSG00000266719.1_MIR4676     | ENSG00000160789.18_LMNA | 0.05409  | -0.106026142 | 0.211467332 | 5.08E-01 | 7.58E-01 | 1.00E+00 |
| ENSG00000221650.1_MIR1267     | ENSG00000160789.18_LMNA | -0.10047 | -0.255586737 | 0.059681042 | 2.18E-01 | 4.93E-01 | 1.00E+00 |
| ENSG00000238709.1_RNU7-56P    | ENSG00000160789.18_LMNA | 0.00646  | -0.152893203 | 0.165495231 | 9.37E-01 | 9.75E-01 | 1.00E+00 |
| ENSG00000251858.1_SNORA31     | ENSG00000160789.18_LMNA | -0.0513  | -0.208795848 | 0.108788792 | 5.30E-01 | 7.73E-01 | 1.00E+00 |
| ENSG00000264341.1_MIR4417     | ENSG00000160789.18_LMNA | 0.01424  | -0.145290108 | 0.173048368 | 8.62E-01 | 9.46E-01 | 1.00E+00 |
| ENSG00000200029.1_RNU6-642F   | ENSG00000160789.18_LMNA | 0.01162  | -0.147849886 | 0.170509584 | 8.87E-01 | 9.56E-01 | 1.00E+00 |
| ENSG00000275504.1_U7          | ENSG00000160789.18_LMNA | 0.11762  | -0.042369433 | 0.271736853 | 1.49E-01 | 3.96E-01 | 1.00E+00 |
| ENSG00000201695.1_RNA5SP33    | ENSG00000160789.18_LMNA | -0.09549 | -0.250876539 | 0.064694522 | 2.42E-01 | 5.21E-01 | 1.00E+00 |
| ENSG00000211995.1_            | ENSG00000160789.18_LMNA | 0.23891  | 0.082856446  | 0.383519714 | 3.04E-03 | 2.70E-02 | 1.00E+00 |
| ENSG00000265017.1_            | ENSG00000160789.18_LMNA | -0.09061 | -0.246257942 | 0.069595082 | 2.67E-01 | 5.51E-01 | 1.00E+00 |
| ENSG00000275948.1_mascRNA-r   | ENSG00000160789.18_LMNA | 0.17353  | 0.01473872   | 0.323787836 | 3.25E-02 | 1.51E-01 | 1.00E+00 |
| ENSG00000251767.1_RNU7-8P     | ENSG00000160789.18_LMNA | -0.25313 | -0.396360183 | -0.09787592 | 1.65E-03 | 1.69E-02 | 1.00E+00 |
| ENSG00000275167.1_MIR6815     | ENSG00000160789.18_LMNA | -0.02992 | -0.188223723 | 0.129899872 | 7.14E-01 | 8.79E-01 | 1.00E+00 |
| ENSG00000263468.1_hsa-mir-313 | ENSG00000160789.18_LMNA | #####    | -0.159285296 | 0.159116105 | 9.99E-01 | 1.00E+00 | 1.00E+00 |
| ENSG00000265617.1_MIR548AG    | ENSG00000160789.18_LMNA | 0.0889   | -0.071309211 | 0.244639045 | 2.76E-01 | 5.61E-01 | 1.00E+00 |
| ENSG00000201850.1_Y_RNA       | ENSG00000160789.18_LMNA | 0.03865  | -0.121299337 | 0.196638525 | 6.36E-01 | 8.37E-01 | 1.00E+00 |
| ENSG00000211582.1_MIR758      | ENSG00000160789.18_LMNA | 0.09654  | -0.063636654 | 0.251871658 | 2.37E-01 | 5.15E-01 | 1.00E+00 |
| ENSG00000238719.1_RNU7-96P    | ENSG00000160789.18_LMNA | -0.04914 | -0.206723242 | 0.110928753 | 5.48E-01 | 7.85E-01 | 1.00E+00 |
| ENSG00000221157.1_            | ENSG00000160789.18_LMNA | -0.07672 | -0.233075459 | 0.083498999 | 3.47E-01 | 6.32E-01 | 1.00E+00 |
| ENSG00000201209.1_SNORD42     | ENSG00000160789.18_LMNA | -0.02105 | -0.1796479   | 0.138616004 | 7.97E-01 | 9.18E-01 | 1.00E+00 |
| ENSG00000253002.1_            | ENSG00000160789.18_LMNA | -0.0078  | -0.166796601 | 0.151585907 | 9.24E-01 | 9.71E-01 | 1.00E+00 |

|                              |                         |          |              |             |          |          |          |
|------------------------------|-------------------------|----------|--------------|-------------|----------|----------|----------|
| ENSG00000264308.1_           | ENSG00000160789.18_LMNA | -0.01303 | -0.171871277 | 0.146477462 | 8.73E-01 | 9.51E-01 | 1.00E+00 |
| ENSG00000263389.1_MIR3973    | ENSG00000160789.18_LMNA | 0.0542   | -0.105918619 | 0.211571211 | 5.07E-01 | 7.57E-01 | 1.00E+00 |
| ENSG00000273744.1_U4         | ENSG00000160789.18_LMNA | 0.05633  | -0.10379692  | 0.213619537 | 4.91E-01 | 7.46E-01 | 1.00E+00 |
| ENSG00000265024.1_           | ENSG00000160789.18_LMNA | 0.15639  | -0.002887289 | 0.307919827 | 5.44E-02 | 2.12E-01 | 1.00E+00 |
| ENSG00000207420.1_Y_RNA      | ENSG00000160789.18_LMNA | -0.07808 | -0.23436899  | 0.08214011  | 3.39E-01 | 6.24E-01 | 1.00E+00 |
| ENSG00000207156.1_RNU6-505F  | ENSG00000160789.18_LMNA | 0.10791  | -0.052185229 | 0.262601297 | 1.86E-01 | 4.52E-01 | 1.00E+00 |
| ENSG00000207431.1_RNU6-906F  | ENSG00000160789.18_LMNA | 0.14038  | -0.019246445 | 0.293035956 | 8.45E-02 | 2.82E-01 | 1.00E+00 |
| ENSG00000273631.1_           | ENSG00000160789.18_LMNA | 0.08343  | -0.076793705 | 0.239447393 | 3.07E-01 | 5.93E-01 | 1.00E+00 |
| ENSG00000216154.2_           | ENSG00000160789.18_LMNA | 0.04793  | -0.112128101 | 0.205560396 | 5.58E-01 | 7.91E-01 | 1.00E+00 |
| ENSG00000280082.1_AF246928.1 | ENSG00000160789.18_LMNA | 0.0367   | -0.123219181 | 0.194764193 | 6.54E-01 | 8.47E-01 | 1.00E+00 |
| ENSG00000252023.1_RNU6-581F  | ENSG00000160789.18_LMNA | 0.03715  | -0.122772844 | 0.195200156 | 6.50E-01 | 8.44E-01 | 1.00E+00 |
| ENSG00000206959.1_Y_RNA      | ENSG00000160789.18_LMNA | 0.02708  | -0.132688053 | 0.185485692 | 7.40E-01 | 8.91E-01 | 1.00E+00 |
| ENSG00000201179.1_RNU6-1322  | ENSG00000160789.18_LMNA | -0.14564 | -0.297937433 | 0.013877537 | 7.34E-02 | 2.58E-01 | 1.00E+00 |
| ENSG00000221657.2_           | ENSG00000160789.18_LMNA | -0.06506 | -0.221958676 | 0.095129143 | 4.26E-01 | 6.97E-01 | 1.00E+00 |
| ENSG00000252622.1_RNU6-881F  | ENSG00000160789.18_LMNA | -0.01385 | -0.172670912 | 0.145670954 | 8.66E-01 | 9.47E-01 | 1.00E+00 |
| ENSG00000263742.1_MIR3165    | ENSG00000160789.18_LMNA | 0.05036  | -0.109724673 | 0.207889775 | 5.38E-01 | 7.78E-01 | 1.00E+00 |
| ENSG00000207978.1_MIR154     | ENSG00000160789.18_LMNA | -0.01149 | -0.170383433 | 0.147976969 | 8.88E-01 | 9.57E-01 | 1.00E+00 |
| ENSG00000207320.1_Y_RNA      | ENSG00000160789.18_LMNA | -0.16326 | -0.314295998 | -0.00417216 | 4.45E-02 | 1.86E-01 | 1.00E+00 |
| ENSG00000265822.1_MIR4422    | ENSG00000160789.18_LMNA | -0.03888 | -0.196861208 | 0.121071088 | 6.34E-01 | 8.36E-01 | 1.00E+00 |
| ENSG00000221468.1_RNU6ATAC   | ENSG00000160789.18_LMNA | -0.11809 | -0.272175756 | 0.041896317 | 1.47E-01 | 3.93E-01 | 1.00E+00 |
| ENSG00000222412.1_Y_RNA      | ENSG00000160789.18_LMNA | 0.01912  | -0.140510532 | 0.177777447 | 8.15E-01 | 9.28E-01 | 1.00E+00 |
| ENSG00000264309.1_MIR4694    | ENSG00000160789.18_LMNA | 0.10257  | -0.057574159 | 0.257561712 | 2.09E-01 | 4.81E-01 | 1.00E+00 |
| ENSG00000199855.1_RNU6-490F  | ENSG00000160789.18_LMNA | -0.02573 | -0.184180755 | 0.134015121 | 7.53E-01 | 8.97E-01 | 1.00E+00 |
| ENSG00000275989.1_RP11-365P  | ENSG00000160789.18_LMNA | -0.16971 | -0.320259402 | -0.0108027  | 3.66E-02 | 1.63E-01 | 1.00E+00 |
| ENSG00000252908.1_RNU6-1003  | ENSG00000160789.18_LMNA | -0.05481 | -0.212156297 | 0.10531287  | 5.02E-01 | 7.54E-01 | 1.00E+00 |
| ENSG00000277919.1_MIR8067    | ENSG00000160789.18_LMNA | -0.06702 | -0.2238304   | 0.093177026 | 4.12E-01 | 6.86E-01 | 1.00E+00 |
| ENSG00000274223.1_           | ENSG00000160789.18_LMNA | -0.10549 | -0.260315957 | 0.054631263 | 1.96E-01 | 4.65E-01 | 1.00E+00 |
| ENSG00000207169.1_RNU6-24P   | ENSG00000160789.18_LMNA | 0.03222  | -0.127633254 | 0.190445934 | 6.94E-01 | 8.68E-01 | 1.00E+00 |
| ENSG00000252041.1_RNA5SP22   | ENSG00000160789.18_LMNA | -0.11389 | -0.268227112 | 0.046147699 | 1.62E-01 | 4.17E-01 | 1.00E+00 |
| ENSG00000265031.1_MIR1273E   | ENSG00000160789.18_LMNA | 0.22682  | 0.070152683  | 0.372567492 | 4.95E-03 | 3.90E-02 | 1.00E+00 |
| ENSG00000265266.1_           | ENSG00000160789.18_LMNA | 0.03505  | -0.124842655 | 0.193177391 | 6.68E-01 | 8.54E-01 | 1.00E+00 |
| ENSG00000201145.1_RNA5SP17   | ENSG00000160789.18_LMNA | -0.04    | -0.197936397 | 0.119968554 | 6.25E-01 | 8.31E-01 | 1.00E+00 |
| ENSG00000281488.1_           | ENSG00000160789.18_LMNA | -0.13886 | -0.291617994 | 0.02079628  | 8.80E-02 | 2.89E-01 | 1.00E+00 |

|                             |                         |          |              |             |          |          |          |
|-----------------------------|-------------------------|----------|--------------|-------------|----------|----------|----------|
| ENSG00000265422.1_MIR4684   | ENSG00000160789.18_LMNA | 0.00568  | -0.153655761 | 0.164735617 | 9.45E-01 | 9.78E-01 | 1.00E+00 |
| ENSG00000200097.1_RNU6-1167 | ENSG00000160789.18_LMNA | 0.04443  | -0.115591394 | 0.202197463 | 5.87E-01 | 8.08E-01 | 1.00E+00 |
| ENSG00000272443.1_OR13Z2P   | ENSG00000160789.18_LMNA | -0.01669 | -0.175428135 | 0.142886786 | 8.38E-01 | 9.37E-01 | 1.00E+00 |
| ENSG00000206786.1_RNU6-701F | ENSG00000160789.18_LMNA | 0.0331   | -0.126767113 | 0.191294246 | 6.86E-01 | 8.64E-01 | 1.00E+00 |
| ENSG00000263436.1_MIR3158-2 | ENSG00000160789.18_LMNA | -0.1415  | -0.294074416 | 0.018110454 | 8.21E-02 | 2.76E-01 | 1.00E+00 |
| ENSG00000265815.1_MIR1273G  | ENSG00000160789.18_LMNA | -0.10979 | -0.264372464 | 0.050286921 | 1.78E-01 | 4.40E-01 | 1.00E+00 |
| ENSG00000207976.1_MIR607    | ENSG00000160789.18_LMNA | 0.00741  | -0.1519677   | 0.166416654 | 9.28E-01 | 9.72E-01 | 1.00E+00 |
| ENSG00000200883.1_Y_RNA     | ENSG00000160789.18_LMNA | -0.01579 | -0.174554371 | 0.143769634 | 8.47E-01 | 9.40E-01 | 1.00E+00 |
| ENSG00000200062.1_RNU4-58P  | ENSG00000160789.18_LMNA | -0.00862 | -0.167587124 | 0.15079124  | 9.16E-01 | 9.68E-01 | 1.00E+00 |
| ENSG00000281341.1_          | ENSG00000160789.18_LMNA | 0.04332  | -0.11668588  | 0.201133133 | 5.96E-01 | 8.14E-01 | 1.00E+00 |
| ENSG00000199368.1_RNU6-1084 | ENSG00000160789.18_LMNA | 0.02847  | -0.131325664 | 0.186824194 | 7.28E-01 | 8.85E-01 | 1.00E+00 |
| ENSG00000200295.1_RNU6-527F | ENSG00000160789.18_LMNA | 0.07539  | -0.084833041 | 0.23180449  | 3.56E-01 | 6.39E-01 | 1.00E+00 |
| ENSG00000265213.1_MIR3684   | ENSG00000160789.18_LMNA | -0.02196 | -0.180527227 | 0.137724554 | 7.88E-01 | 9.14E-01 | 1.00E+00 |
| ENSG00000202047.1_RNA5SP32  | ENSG00000160789.18_LMNA | 0.00583  | -0.153515924 | 0.164874943 | 9.43E-01 | 9.77E-01 | 1.00E+00 |
| ENSG00000252332.1_RNU6-911F | ENSG00000160789.18_LMNA | -0.0593  | -0.216455579 | 0.100854513 | 4.68E-01 | 7.29E-01 | 1.00E+00 |
| ENSG00000264712.2_MIR4504   | ENSG00000160789.18_LMNA | -0.012   | -0.170878141 | 0.147478545 | 8.83E-01 | 9.55E-01 | 1.00E+00 |
| ENSG00000222334.4_          | ENSG00000160789.18_LMNA | 0.00067  | -0.158549405 | 0.159851861 | 9.93E-01 | 9.97E-01 | 1.00E+00 |
| ENSG00000266330.2_          | ENSG00000160789.18_LMNA | 0.0091   | -0.150316688 | 0.168059007 | 9.11E-01 | 9.66E-01 | 1.00E+00 |
| ENSG00000281724.1_          | ENSG00000160789.18_LMNA | -0.07638 | -0.232747074 | 0.083843789 | 3.50E-01 | 6.33E-01 | 1.00E+00 |
| ENSG00000200526.1_RNY4P14   | ENSG00000160789.18_LMNA | -0.00066 | -0.159844428 | 0.158556841 | 9.94E-01 | 9.97E-01 | 1.00E+00 |
| ENSG00000207167.1_RNU6-1340 | ENSG00000160789.18_LMNA | 0.10468  | -0.05544034  | 0.259559255 | 1.99E-01 | 4.70E-01 | 1.00E+00 |
| ENSG00000265181.1_MIR4674   | ENSG00000160789.18_LMNA | 0.06429  | -0.095895048 | 0.221223674 | 4.31E-01 | 7.01E-01 | 1.00E+00 |
| ENSG00000263642.1_MIR4802   | ENSG00000160789.18_LMNA | 0.02711  | -0.132659441 | 0.185513814 | 7.40E-01 | 8.91E-01 | 1.00E+00 |
| ENSG00000206855.1_RNU6-571F | ENSG00000160789.18_LMNA | 0.04252  | -0.117471457 | 0.200368738 | 6.03E-01 | 8.18E-01 | 1.00E+00 |
| ENSG00000200064.1_RNY4P9    | ENSG00000160789.18_LMNA | 0.01755  | -0.142045364 | 0.176260431 | 8.30E-01 | 9.34E-01 | 1.00E+00 |
| ENSG00000261778.1_RP5-1173P | ENSG00000160789.18_LMNA | -0.03928 | -0.197251419 | 0.120671044 | 6.31E-01 | 8.34E-01 | 1.00E+00 |
| ENSG00000221264.1_MIR1284   | ENSG00000160789.18_LMNA | -0.06514 | -0.22203397  | 0.095050662 | 4.25E-01 | 6.96E-01 | 1.00E+00 |
| ENSG00000252761.1_Y_RNA     | ENSG00000160789.18_LMNA | 0.06309  | -0.097089101 | 0.220077079 | 4.40E-01 | 7.08E-01 | 1.00E+00 |
| ENSG00000199567.1_Y_RNA     | ENSG00000160789.18_LMNA | -0.14032 | -0.292978269 | 0.019309526 | 8.47E-02 | 2.82E-01 | 1.00E+00 |
| ENSG00000238716.1_          | ENSG00000160789.18_LMNA | 0.04867  | -0.111393501 | 0.206272746 | 5.52E-01 | 7.87E-01 | 1.00E+00 |
| ENSG00000266802.1_MIR4419A  | ENSG00000160789.18_LMNA | 0.04224  | -0.117749695 | 0.20009791  | 6.05E-01 | 8.19E-01 | 1.00E+00 |
| ENSG00000199035.1_MIR103A1  | ENSG00000160789.18_LMNA | -0.07783 | -0.234132142 | 0.082389012 | 3.41E-01 | 6.26E-01 | 1.00E+00 |
| ENSG00000201713.1_RNA5SP12  | ENSG00000160789.18_LMNA | -0.09586 | -0.251223755 | 0.064325492 | 2.40E-01 | 5.19E-01 | 1.00E+00 |

|                             |                         |          |              |             |          |          |          |
|-----------------------------|-------------------------|----------|--------------|-------------|----------|----------|----------|
| ENSG00000274103.1_          | ENSG00000160789.18_LMNA | -0.04258 | -0.200420674 | 0.117418094 | 6.02E-01 | 8.18E-01 | 1.00E+00 |
| ENSG00000264439.1_          | ENSG00000160789.18_LMNA | -0.06597 | -0.222825717 | 0.094225165 | 4.19E-01 | 6.91E-01 | 1.00E+00 |
| ENSG00000281824.1_          | ENSG00000160789.18_LMNA | -0.1752  | -0.325326505 | -0.01645813 | 3.09E-02 | 1.46E-01 | 1.00E+00 |
| ENSG00000278105.1_          | ENSG00000160789.18_LMNA | -0.07176 | -0.228350364 | 0.088452854 | 3.80E-01 | 6.59E-01 | 1.00E+00 |
| ENSG00000263802.1_          | ENSG00000160789.18_LMNA | -0.21197 | -0.359055442 | -0.05461372 | 8.75E-03 | 5.95E-02 | 1.00E+00 |
| ENSG00000201527.1_RNA5SP47  | ENSG00000160789.18_LMNA | 0.15104  | -0.008363894 | 0.30295399  | 6.33E-02 | 2.34E-01 | 1.00E+00 |
| ENSG00000206703.1_RNU6-128F | ENSG00000160789.18_LMNA | -0.02276 | -0.181304878 | 0.136935751 | 7.81E-01 | 9.10E-01 | 1.00E+00 |
| ENSG00000202498.1_SNORD116  | ENSG00000160789.18_LMNA | 0.09888  | -0.061281958 | 0.254084291 | 2.26E-01 | 5.02E-01 | 1.00E+00 |
| ENSG00000207450.1_Y_RNA     | ENSG00000160789.18_LMNA | 0.15784  | -0.001399084 | 0.309266316 | 5.21E-02 | 2.07E-01 | 1.00E+00 |
| ENSG00000199348.1_RNU6-766F | ENSG00000160789.18_LMNA | 0.0693   | -0.090904303 | 0.226006585 | 3.96E-01 | 6.73E-01 | 1.00E+00 |
| ENSG00000212499.1_RNA5SP30  | ENSG00000160789.18_LMNA | -0.10671 | -0.261466606 | 0.053400178 | 1.91E-01 | 4.58E-01 | 1.00E+00 |
| ENSG00000252659.1_RNU6-1088 | ENSG00000160789.18_LMNA | 0.02245  | -0.137236614 | 0.181008315 | 7.84E-01 | 9.11E-01 | 1.00E+00 |
| ENSG00000265976.1_MIR4725   | ENSG00000160789.18_LMNA | 0.12491  | -0.034984679 | 0.278572725 | 1.25E-01 | 3.57E-01 | 1.00E+00 |
| ENSG00000199200.2_Y_RNA     | ENSG00000160789.18_LMNA | 0.0134   | -0.146108891 | 0.17223676  | 8.70E-01 | 9.49E-01 | 1.00E+00 |
| ENSG00000199979.1_Y_RNA     | ENSG00000160789.18_LMNA | 0.05261  | -0.107489143 | 0.2100532   | 5.20E-01 | 7.66E-01 | 1.00E+00 |
| ENSG00000254002.1_RP11-213G | ENSG00000160789.18_LMNA | 0.18961  | 0.031351319  | 0.338586033 | 1.93E-02 | 1.05E-01 | 1.00E+00 |
| ENSG00000278923.1_AP005242. | ENSG00000160789.18_LMNA | -0.11585 | -0.270072581 | 0.044162156 | 1.55E-01 | 4.06E-01 | 1.00E+00 |
| ENSG00000266188.1_MIR5095   | ENSG00000160789.18_LMNA | -0.04076 | -0.198670332 | 0.119215504 | 6.18E-01 | 8.27E-01 | 1.00E+00 |
| ENSG00000221436.1_MIR548F3  | ENSG00000160789.18_LMNA | -0.16199 | -0.313117019 | -0.0028645  | 4.62E-02 | 1.91E-01 | 1.00E+00 |
| ENSG00000252802.1_Y_RNA     | ENSG00000160789.18_LMNA | 0.22927  | 0.072722745  | 0.374790023 | 4.49E-03 | 3.62E-02 | 1.00E+00 |
| ENSG00000202459.1_Y_RNA     | ENSG00000160789.18_LMNA | -0.00561 | -0.164662923 | 0.153728716 | 9.45E-01 | 9.78E-01 | 1.00E+00 |
| ENSG00000265893.1_          | ENSG00000160789.18_LMNA | -0.00108 | -0.160251443 | 0.1581496   | 9.89E-01 | 9.96E-01 | 1.00E+00 |
| ENSG00000207466.1_Y_RNA     | ENSG00000160789.18_LMNA | 0.05043  | -0.109655962 | 0.207956316 | 5.37E-01 | 7.78E-01 | 1.00E+00 |
| ENSG00000199515.1_Y_RNA     | ENSG00000160789.18_LMNA | 0.14679  | -0.012705258 | 0.299005469 | 7.11E-02 | 2.52E-01 | 1.00E+00 |
| ENSG00000199701.1_Y_RNA     | ENSG00000160789.18_LMNA | 0.08182  | -0.078399316 | 0.237924083 | 3.16E-01 | 6.03E-01 | 1.00E+00 |
| ENSG00000223657.2_KRT8P51   | ENSG00000160789.18_LMNA | -0.0583  | -0.215498296 | 0.10184832  | 4.76E-01 | 7.34E-01 | 1.00E+00 |
| ENSG00000276294.1_CTC-575C1 | ENSG00000160789.18_LMNA | -0.03485 | -0.192981067 | 0.125043397 | 6.70E-01 | 8.55E-01 | 1.00E+00 |
| ENSG00000222230.1_RNA5SP15  | ENSG00000160789.18_LMNA | -0.03654 | -0.194609277 | 0.123377752 | 6.55E-01 | 8.47E-01 | 1.00E+00 |
| ENSG00000281905.1_          | ENSG00000160789.18_LMNA | -0.01403 | -0.172840012 | 0.145500347 | 8.64E-01 | 9.47E-01 | 1.00E+00 |
| ENSG00000200036.1_RNA5SP65  | ENSG00000160789.18_LMNA | -0.00518 | -0.164245729 | 0.154147346 | 9.49E-01 | 9.80E-01 | 1.00E+00 |
| ENSG00000265708.1_          | ENSG00000160789.18_LMNA | -0.0135  | -0.172331088 | 0.146013751 | 8.69E-01 | 9.49E-01 | 1.00E+00 |
| ENSG00000201990.1_Y_RNA     | ENSG00000160789.18_LMNA | 0.05335  | -0.106758242 | 0.210759853 | 5.14E-01 | 7.62E-01 | 1.00E+00 |
| ENSG00000264823.2_MIR3154   | ENSG00000160789.18_LMNA | 0.12812  | -0.031722943 | 0.281581946 | 1.16E-01 | 3.40E-01 | 1.00E+00 |

|                             |                         |          |              |             |          |          |          |
|-----------------------------|-------------------------|----------|--------------|-------------|----------|----------|----------|
| ENSG00000212469.1_RNU6-1158 | ENSG00000160789.18_LMNA | -0.00336 | -0.162470087 | 0.155927822 | 9.67E-01 | 9.87E-01 | 1.00E+00 |
| ENSG00000252990.1_RNU1-54P  | ENSG00000160789.18_LMNA | -0.05653 | -0.213807558 | 0.103602019 | 4.89E-01 | 7.45E-01 | 1.00E+00 |
| ENSG00000252370.1_RNA5SP43  | ENSG00000160789.18_LMNA | 0.0221   | -0.137584407 | 0.180665421 | 7.87E-01 | 9.13E-01 | 1.00E+00 |
| ENSG00000273974.1_FTX_2     | ENSG00000160789.18_LMNA | -0.05222 | -0.209673392 | 0.107881842 | 5.23E-01 | 7.68E-01 | 1.00E+00 |
| ENSG00000200754.1_Y_RNA     | ENSG00000160789.18_LMNA | 0.01232  | -0.147167114 | 0.171187169 | 8.80E-01 | 9.54E-01 | 1.00E+00 |
| ENSG00000206887.1_RNU6-1008 | ENSG00000160789.18_LMNA | 0.03149  | -0.128352475 | 0.189741156 | 7.00E-01 | 8.72E-01 | 1.00E+00 |
| ENSG00000223096.1_RNU5E-9P  | ENSG00000160789.18_LMNA | 0.00932  | -0.150104698 | 0.168269758 | 9.09E-01 | 9.65E-01 | 1.00E+00 |
| ENSG00000207643.1_          | ENSG00000160789.18_LMNA | -0.08773 | -0.243528159 | 0.072484368 | 2.82E-01 | 5.68E-01 | 1.00E+00 |
| ENSG00000199732.1_Y_RNA     | ENSG00000160789.18_LMNA | -0.02741 | -0.185798361 | 0.132369911 | 7.37E-01 | 8.90E-01 | 1.00E+00 |
| ENSG00000263636.1_          | ENSG00000160789.18_LMNA | -0.02092 | -0.179526826 | 0.138738707 | 7.98E-01 | 9.19E-01 | 1.00E+00 |
| ENSG00000222732.1_          | ENSG00000160789.18_LMNA | 0.07424  | -0.085977533 | 0.230713246 | 3.63E-01 | 6.45E-01 | 1.00E+00 |
| ENSG00000207092.1_Y_RNA     | ENSG00000160789.18_LMNA | 0.02709  | -0.132681156 | 0.185492471 | 7.40E-01 | 8.91E-01 | 1.00E+00 |
| ENSG00000274502.1_ANKRD20A  | ENSG00000160789.18_LMNA | -0.14375 | -0.296171765 | 0.015813663 | 7.73E-02 | 2.66E-01 | 1.00E+00 |
| ENSG00000223262.1_RNA5SP49  | ENSG00000160789.18_LMNA | -0.11802 | -0.272105453 | 0.04197211  | 1.48E-01 | 3.94E-01 | 1.00E+00 |
| ENSG00000206741.1_Y_RNA     | ENSG00000160789.18_LMNA | -0.00621 | -0.165248547 | 0.153140885 | 9.39E-01 | 9.76E-01 | 1.00E+00 |
| ENSG00000277041.1_RP11-368J | ENSG00000160789.18_LMNA | -0.07396 | -0.230451266 | 0.086252172 | 3.65E-01 | 6.47E-01 | 1.00E+00 |
| ENSG00000265931.1_          | ENSG00000160789.18_LMNA | 0.09184  | -0.06835764  | 0.247425541 | 2.60E-01 | 5.44E-01 | 1.00E+00 |
| ENSG00000252329.1_SCARNA16  | ENSG00000160789.18_LMNA | -0.02614 | -0.18456873  | 0.133620686 | 7.49E-01 | 8.95E-01 | 1.00E+00 |
| ENSG00000206843.1_RNU6-206F | ENSG00000160789.18_LMNA | -0.08117 | -0.237304047 | 0.079052382 | 3.20E-01 | 6.07E-01 | 1.00E+00 |
| ENSG00000207451.1_RNU6-291F | ENSG00000160789.18_LMNA | 0.03507  | -0.12482597  | 0.193193707 | 6.68E-01 | 8.54E-01 | 1.00E+00 |
| ENSG00000201142.1_RNVU1-8   | ENSG00000160789.18_LMNA | -0.03385 | -0.192011779 | 0.126034121 | 6.79E-01 | 8.60E-01 | 1.00E+00 |
| ENSG00000199762.1_Y_RNA     | ENSG00000160789.18_LMNA | 0.06029  | -0.099868929 | 0.217404339 | 4.61E-01 | 7.24E-01 | 1.00E+00 |
| ENSG00000206980.1_RNU6-662F | ENSG00000160789.18_LMNA | -0.00498 | -0.164052347 | 0.154341355 | 9.51E-01 | 9.81E-01 | 1.00E+00 |
| ENSG00000270789.1_RP11-632K | ENSG00000160789.18_LMNA | 0.06606  | -0.094127662 | 0.222919206 | 4.19E-01 | 6.91E-01 | 1.00E+00 |
| ENSG00000277798.1_          | ENSG00000160789.18_LMNA | 0.04758  | -0.112473308 | 0.205225529 | 5.61E-01 | 7.93E-01 | 1.00E+00 |
| ENSG00000200250.1_RNU6-1147 | ENSG00000160789.18_LMNA | 0.0473   | -0.112753742 | 0.20495344  | 5.63E-01 | 7.94E-01 | 1.00E+00 |
| ENSG00000207726.2_MIR455    | ENSG00000160789.18_LMNA | 0.16036  | 0.001188776  | 0.311604784 | 4.84E-02 | 1.97E-01 | 1.00E+00 |
| ENSG00000200340.1_RNU1-105F | ENSG00000160789.18_LMNA | 0.02641  | -0.133350326 | 0.184834604 | 7.47E-01 | 8.94E-01 | 1.00E+00 |
| ENSG00000199986.1_RNU6-486F | ENSG00000160789.18_LMNA | 0.00388  | -0.155414894 | 0.162981834 | 9.62E-01 | 9.85E-01 | 1.00E+00 |
| ENSG00000279093.1_RP11-856B | ENSG00000160789.18_LMNA | -0.0379  | -0.195917586 | 0.122038063 | 6.43E-01 | 8.41E-01 | 1.00E+00 |
| ENSG00000200021.1_RNA5SP44  | ENSG00000160789.18_LMNA | 0.07213  | -0.088083471 | 0.228703205 | 3.77E-01 | 6.57E-01 | 1.00E+00 |
| ENSG00000265745.2_RN7SL375F | ENSG00000160789.18_LMNA | 0.08891  | -0.071303473 | 0.244644468 | 2.76E-01 | 5.61E-01 | 1.00E+00 |
| ENSG00000202398.1_RNU6-61P  | ENSG00000160789.18_LMNA | 0.00559  | -0.153748406 | 0.164643304 | 9.46E-01 | 9.78E-01 | 1.00E+00 |

|                               |                         |          |              |             |          |          |          |
|-------------------------------|-------------------------|----------|--------------|-------------|----------|----------|----------|
| ENSG00000277344.1_RNU1-6P     | ENSG00000160789.18_LMNA | -0.06742 | -0.224214389 | 0.092776243 | 4.09E-01 | 6.83E-01 | 1.00E+00 |
| ENSG00000278498.1_uc_338      | ENSG00000160789.18_LMNA | 0.05718  | -0.102959891 | 0.214426853 | 4.84E-01 | 7.41E-01 | 1.00E+00 |
| ENSG00000212489.1_RNU6-1109   | ENSG00000160789.18_LMNA | 0.05544  | -0.104682604 | 0.212764821 | 4.98E-01 | 7.51E-01 | 1.00E+00 |
| ENSG00000252105.1_RNU1-143F   | ENSG00000160789.18_LMNA | 0.00505  | -0.154273431 | 0.164120055 | 9.51E-01 | 9.80E-01 | 1.00E+00 |
| ENSG00000207739.1_MIR218-2    | ENSG00000160789.18_LMNA | -0.16267 | -0.313744834 | -0.00356071 | 4.53E-02 | 1.88E-01 | 1.00E+00 |
| ENSG00000254836.1_RP1-17K7.3  | ENSG00000160789.18_LMNA | 0.06833  | -0.091873025 | 0.225079398 | 4.03E-01 | 6.79E-01 | 1.00E+00 |
| ENSG00000259152.1_RP11-100M   | ENSG00000160789.18_LMNA | -0.14617 | -0.298426615 | 0.013340716 | 7.24E-02 | 2.55E-01 | 1.00E+00 |
| ENSG00000252957.1_RNA5SP40    | ENSG00000160789.18_LMNA | -0.03619 | -0.1942738   | 0.123721089 | 6.58E-01 | 8.49E-01 | 1.00E+00 |
| ENSG00000207002.1_SNORA5      | ENSG00000160789.18_LMNA | 0.01006  | -0.14938139  | 0.168988616 | 9.02E-01 | 9.62E-01 | 1.00E+00 |
| ENSG00000201155.1_RNU1-24P    | ENSG00000160789.18_LMNA | 0.18324  | 0.024760582  | 0.332733256 | 2.38E-02 | 1.22E-01 | 1.00E+00 |
| ENSG00000212149.1_SNORA40     | ENSG00000160789.18_LMNA | 0.17414  | 0.015360709  | 0.32434463  | 3.19E-02 | 1.49E-01 | 1.00E+00 |
| ENSG00000201518.1_RNA5SP51    | ENSG00000160789.18_LMNA | 0.04081  | -0.119162232 | 0.198722237 | 6.18E-01 | 8.27E-01 | 1.00E+00 |
| ENSG00000201398.1_U8          | ENSG00000160789.18_LMNA | -0.10652 | -0.261286002 | 0.053593471 | 1.92E-01 | 4.59E-01 | 1.00E+00 |
| ENSG00000227679.1_RP11-453N   | ENSG00000160789.18_LMNA | -0.26642 | -0.408301447 | -0.1119667  | 9.08E-04 | 1.08E-02 | 1.00E+00 |
| ENSG00000223190.1_RN7SKP10    | ENSG00000160789.18_LMNA | -0.0458  | -0.203517033 | 0.114233365 | 5.75E-01 | 8.02E-01 | 1.00E+00 |
| ENSG00000212336.1_RNA5SP21    | ENSG00000160789.18_LMNA | 0.00836  | -0.151038397 | 0.1673413   | 9.19E-01 | 9.69E-01 | 1.00E+00 |
| ENSG00000207104.1_RNU6-434F   | ENSG00000160789.18_LMNA | 0.05318  | -0.106927513 | 0.210596227 | 5.15E-01 | 7.63E-01 | 1.00E+00 |
| ENSG00000224372.1_HLA-N       | ENSG00000160789.18_LMNA | -0.03494 | -0.193068609 | 0.124953888 | 6.69E-01 | 8.54E-01 | 1.00E+00 |
| ENSG00000253257.1_MTND4P7     | ENSG00000160789.18_LMNA | -0.00057 | -0.159754346 | 0.158646958 | 9.94E-01 | 9.98E-01 | 1.00E+00 |
| ENSG00000263666.1_SNORA70C    | ENSG00000160789.18_LMNA | -0.09815 | -0.253389342 | 0.062021904 | 2.29E-01 | 5.06E-01 | 1.00E+00 |
| ENSG00000229169.1_RP11-247I1  | ENSG00000160789.18_LMNA | 0.06998  | -0.090222517 | 0.226658795 | 3.92E-01 | 6.70E-01 | 1.00E+00 |
| ENSG00000274813.1_RP11-21I4.1 | ENSG00000160789.18_LMNA | 0.00917  | -0.150248976 | 0.168126326 | 9.11E-01 | 9.66E-01 | 1.00E+00 |
| ENSG00000274579.1_RP5-824H1   | ENSG00000160789.18_LMNA | 0.23916  | 0.083119572  | 0.38374567  | 3.00E-03 | 2.68E-02 | 1.00E+00 |
| ENSG00000252129.1_SNORA74     | ENSG00000160789.18_LMNA | -0.08923 | -0.244950278 | 0.070979815 | 2.74E-01 | 5.59E-01 | 1.00E+00 |
| ENSG00000237974.1_AC000111.4  | ENSG00000160789.18_LMNA | -0.03015 | -0.188447676 | 0.129671593 | 7.12E-01 | 8.78E-01 | 1.00E+00 |
| ENSG00000241241.1_KRTAP4-16   | ENSG00000160789.18_LMNA | -0.06154 | -0.218603164 | 0.098622684 | 4.51E-01 | 7.17E-01 | 1.00E+00 |
| ENSG00000222546.1_RNA5SP25    | ENSG00000160789.18_LMNA | -0.04713 | -0.204789815 | 0.112922361 | 5.64E-01 | 7.95E-01 | 1.00E+00 |
| ENSG00000231559.1_RP3-354J5   | ENSG00000160789.18_LMNA | -0.02592 | -0.184364457 | 0.133828373 | 7.51E-01 | 8.96E-01 | 1.00E+00 |
| ENSG00000243011.3_RN7SL266F   | ENSG00000160789.18_LMNA | 0.00607  | -0.15327716  | 0.165112803 | 9.41E-01 | 9.77E-01 | 1.00E+00 |
| ENSG00000227064.1_RP3-363L9   | ENSG00000160789.18_LMNA | 0.01688  | -0.142699991 | 0.175612943 | 8.36E-01 | 9.37E-01 | 1.00E+00 |
| ENSG00000206938.1_RNU4-31P    | ENSG00000160789.18_LMNA | 0.07232  | -0.087892319 | 0.228885764 | 3.76E-01 | 6.56E-01 | 1.00E+00 |
| ENSG00000256071.1_RP11-465L1  | ENSG00000160789.18_LMNA | 0.02155  | -0.138123697 | 0.180133575 | 7.92E-01 | 9.16E-01 | 1.00E+00 |
| ENSG00000258853.1_RP11-30G8   | ENSG00000160789.18_LMNA | -0.18987 | -0.338826281 | -0.03162243 | 1.91E-02 | 1.05E-01 | 1.00E+00 |

|                              |                         |          |              |             |          |          |          |
|------------------------------|-------------------------|----------|--------------|-------------|----------|----------|----------|
| ENSG00000260958.2_RP11-488I2 | ENSG00000160789.18_LMNA | 0.03164  | -0.128208501 | 0.189882266 | 6.99E-01 | 8.71E-01 | 1.00E+00 |
| ENSG00000252228.1_SNORA48    | ENSG00000160789.18_LMNA | -0.03737 | -0.19541296  | 0.12255493  | 6.48E-01 | 8.43E-01 | 1.00E+00 |
| ENSG00000253338.1_IGLV3-29   | ENSG00000160789.18_LMNA | -0.0148  | -0.173594304 | 0.144739099 | 8.56E-01 | 9.43E-01 | 1.00E+00 |
| ENSG00000254313.1_CTD-2309H  | ENSG00000160789.18_LMNA | 0.11365  | -0.046390069 | 0.268001681 | 1.63E-01 | 4.19E-01 | 1.00E+00 |
| ENSG00000261066.1_RP11-483K  | ENSG00000160789.18_LMNA | -0.05818 | -0.215389815 | 0.1019609   | 4.76E-01 | 7.35E-01 | 1.00E+00 |
| ENSG00000261084.1_PPP1R1AP   | ENSG00000160789.18_LMNA | -0.04876 | -0.206357568 | 0.111306006 | 5.51E-01 | 7.87E-01 | 1.00E+00 |
| ENSG00000264115.1_MIR3180-4  | ENSG00000160789.18_LMNA | -0.05358 | -0.210978791 | 0.106531722 | 5.12E-01 | 7.61E-01 | 1.00E+00 |
| ENSG00000244326.3_RN7SL814F  | ENSG00000160789.18_LMNA | 0.10121  | -0.058941962 | 0.256279844 | 2.15E-01 | 4.89E-01 | 1.00E+00 |
| ENSG00000207339.1_           | ENSG00000160789.18_LMNA | 0.05305  | -0.107051236 | 0.210476618 | 5.16E-01 | 7.63E-01 | 1.00E+00 |
| ENSG00000227979.1_AC002127.1 | ENSG00000160789.18_LMNA | 0.01653  | -0.143049015 | 0.175267613 | 8.40E-01 | 9.38E-01 | 1.00E+00 |
| ENSG00000274748.1_CH17-53B9  | ENSG00000160789.18_LMNA | -0.06675 | -0.223571579 | 0.093447109 | 4.14E-01 | 6.87E-01 | 1.00E+00 |
| ENSG00000276123.1_Metazoa_SI | ENSG00000160789.18_LMNA | 0.12338  | -0.036534331 | 0.277140882 | 1.30E-01 | 3.65E-01 | 1.00E+00 |
| ENSG00000233574.1_CTA-929C8  | ENSG00000160789.18_LMNA | -0.01403 | -0.172844296 | 0.145496025 | 8.64E-01 | 9.47E-01 | 1.00E+00 |
| ENSG00000250908.1_RP11-703C  | ENSG00000160789.18_LMNA | -0.00476 | -0.163838534 | 0.154555833 | 9.54E-01 | 9.81E-01 | 1.00E+00 |
| ENSG00000234941.1_RP11-508N  | ENSG00000160789.18_LMNA | -0.13677 | -0.289662003 | 0.02293172  | 9.29E-02 | 2.98E-01 | 1.00E+00 |
| ENSG00000267035.1_RP11-1094I | ENSG00000160789.18_LMNA | 0.17069  | 0.011808904  | 0.321162229 | 3.55E-02 | 1.60E-01 | 1.00E+00 |
| ENSG00000204776.6_IGKV1OR-3  | ENSG00000160789.18_LMNA | -0.07198 | -0.228560051 | 0.088233347 | 3.78E-01 | 6.57E-01 | 1.00E+00 |
| ENSG00000270453.1_CTB-10G5   | ENSG00000160789.18_LMNA | -0.00059 | -0.159775866 | 0.158625429 | 9.94E-01 | 9.98E-01 | 1.00E+00 |
| ENSG00000275919.1_RP11-155N  | ENSG00000160789.18_LMNA | 0.0248   | -0.134936642 | 0.183273943 | 7.62E-01 | 9.01E-01 | 1.00E+00 |
| ENSG00000252305.1_SNORA74    | ENSG00000160789.18_LMNA | 0.00854  | -0.150869661 | 0.167509131 | 9.17E-01 | 9.68E-01 | 1.00E+00 |
| ENSG00000253590.1_IGLV3-13   | ENSG00000160789.18_LMNA | -0.05946 | -0.216607886 | 0.100696336 | 4.67E-01 | 7.28E-01 | 1.00E+00 |
| ENSG00000277438.1_KDM5DP1    | ENSG00000160789.18_LMNA | -0.02072 | -0.179325605 | 0.138942613 | 8.00E-01 | 9.20E-01 | 1.00E+00 |
| ENSG00000273566.1_Metazoa_SI | ENSG00000160789.18_LMNA | -0.05434 | -0.211708994 | 0.105775991 | 5.06E-01 | 7.57E-01 | 1.00E+00 |
| ENSG00000252028.1_RN7SKP52   | ENSG00000160789.18_LMNA | 0.06689  | -0.093301633 | 0.223710995 | 4.13E-01 | 6.86E-01 | 1.00E+00 |
| ENSG00000276673.1_uc_338     | ENSG00000160789.18_LMNA | -0.09295 | -0.248472807 | 0.067246902 | 2.55E-01 | 5.36E-01 | 1.00E+00 |
| ENSG00000261331.1_           | ENSG00000160789.18_LMNA | -0.06062 | -0.217721217 | 0.099539613 | 4.58E-01 | 7.22E-01 | 1.00E+00 |
| ENSG00000233549.2_CYCSP35    | ENSG00000160789.18_LMNA | 0.10115  | -0.058998976 | 0.256226389 | 2.15E-01 | 4.89E-01 | 1.00E+00 |
| ENSG00000241082.3_RN7SL259F  | ENSG00000160789.18_LMNA | -0.04196 | -0.199825803 | 0.118029196 | 6.08E-01 | 8.21E-01 | 1.00E+00 |
| ENSG00000277710.1_CTD-2314B  | ENSG00000160789.18_LMNA | -0.0471  | -0.204767697 | 0.112945153 | 5.64E-01 | 7.95E-01 | 1.00E+00 |
| ENSG00000243945.1_RP11-696F  | ENSG00000160789.18_LMNA | 0.04844  | -0.11162261  | 0.206050613 | 5.53E-01 | 7.88E-01 | 1.00E+00 |
| ENSG00000273434.1_OR8S21P    | ENSG00000160789.18_LMNA | -0.16033 | -0.311578458 | -0.00115962 | 4.85E-02 | 1.97E-01 | 1.00E+00 |
| ENSG00000220340.1_MTCO1P56   | ENSG00000160789.18_LMNA | -0.09251 | -0.248059459 | 0.067685395 | 2.57E-01 | 5.39E-01 | 1.00E+00 |
| ENSG00000251430.1_MTCO3P27   | ENSG00000160789.18_LMNA | -0.00318 | -0.162295627 | 0.156102644 | 9.69E-01 | 9.88E-01 | 1.00E+00 |



|                              |                         |          |              |             |          |          |          |
|------------------------------|-------------------------|----------|--------------|-------------|----------|----------|----------|
| ENSG00000254157.1_IGKV2-18   | ENSG00000160789.18_LMNA | -0.00138 | -0.160547901 | 0.15785291  | 9.87E-01 | 9.95E-01 | 1.00E+00 |
| ENSG00000279547.1_AC009491.  | ENSG00000160789.18_LMNA | -0.09233 | -0.247887962 | 0.067867289 | 2.58E-01 | 5.41E-01 | 1.00E+00 |
| ENSG00000242565.3_RN7SL372F  | ENSG00000160789.18_LMNA | 0.14133  | -0.018279447 | 0.293919979 | 8.24E-02 | 2.77E-01 | 1.00E+00 |
| ENSG00000232223.1_CNN2P10    | ENSG00000160789.18_LMNA | -0.07295 | -0.229486264 | 0.087263389 | 3.72E-01 | 6.52E-01 | 1.00E+00 |
| ENSG00000263944.2_RN7SL435F  | ENSG00000160789.18_LMNA | 0.09664  | -0.063534438 | 0.251967776 | 2.36E-01 | 5.14E-01 | 1.00E+00 |
| ENSG00000201782.1_RN7SKP22   | ENSG00000160789.18_LMNA | -0.0068  | -0.165820266 | 0.152566792 | 9.34E-01 | 9.74E-01 | 1.00E+00 |
| ENSG00000227981.2_AC012668.  | ENSG00000160789.18_LMNA | 0.00828  | -0.151123753 | 0.167256396 | 9.19E-01 | 9.69E-01 | 1.00E+00 |
| ENSG00000267180.1_AC007136.  | ENSG00000160789.18_LMNA | 0.04958  | -0.110497704 | 0.207140954 | 5.44E-01 | 7.82E-01 | 1.00E+00 |
| ENSG00000263556.2_RN7SL383F  | ENSG00000160789.18_LMNA | 0.06011  | -0.10005106  | 0.217229058 | 4.62E-01 | 7.25E-01 | 1.00E+00 |
| ENSG00000249605.1 CTC-218H9  | ENSG00000160789.18_LMNA | -0.02554 | -0.18399401  | 0.134204941 | 7.55E-01 | 8.98E-01 | 1.00E+00 |
| ENSG00000227048.2_RP11-134G  | ENSG00000160789.18_LMNA | -0.00928 | -0.168234417 | 0.150140248 | 9.10E-01 | 9.65E-01 | 1.00E+00 |
| ENSG00000237000.1_PTMAP6     | ENSG00000160789.18_LMNA | -0.10226 | -0.257270287 | 0.057885225 | 2.10E-01 | 4.83E-01 | 1.00E+00 |
| ENSG00000237578.2_           | ENSG00000160789.18_LMNA | -0.19094 | -0.339814722 | -0.03273833 | 1.85E-02 | 1.02E-01 | 1.00E+00 |
| ENSG00000279995.1_RP11-1250  | ENSG00000160789.18_LMNA | 0.055    | -0.105120831 | 0.212341737 | 5.01E-01 | 7.53E-01 | 1.00E+00 |
| ENSG00000232924.1_TCEB1P4    | ENSG00000160789.18_LMNA | -0.00507 | -0.164139547 | 0.154253875 | 9.51E-01 | 9.80E-01 | 1.00E+00 |
| ENSG00000274157.1_RP11-341A  | ENSG00000160789.18_LMNA | -0.11201 | -0.266456297 | 0.048050588 | 1.69E-01 | 4.28E-01 | 1.00E+00 |
| ENSG00000253325.1_IGHV7-34-1 | ENSG00000160789.18_LMNA | -0.03491 | -0.193040618 | 0.124982509 | 6.69E-01 | 8.55E-01 | 1.00E+00 |
| ENSG00000258487.1_RP11-99L1: | ENSG00000160789.18_LMNA | 0.06543  | -0.094756977 | 0.222315696 | 4.23E-01 | 6.94E-01 | 1.00E+00 |
| ENSG00000243075.3_RN7SL519F  | ENSG00000160789.18_LMNA | 0.02149  | -0.138178552 | 0.180079466 | 7.93E-01 | 9.16E-01 | 1.00E+00 |
| ENSG00000230101.5_TUBB3P2    | ENSG00000160789.18_LMNA | 0.05746  | -0.102682363 | 0.214694434 | 4.82E-01 | 7.40E-01 | 1.00E+00 |
| ENSG00000248942.1_LINC01335  | ENSG00000160789.18_LMNA | 0.08874  | -0.071467207 | 0.244489738 | 2.77E-01 | 5.62E-01 | 1.00E+00 |
| ENSG00000254030.1_IGLC5      | ENSG00000160789.18_LMNA | 0.04453  | -0.115491064 | 0.202294992 | 5.86E-01 | 8.08E-01 | 1.00E+00 |
| ENSG00000270324.1_RP11-180P  | ENSG00000160789.18_LMNA | -0.05249 | -0.209933093 | 0.107613337 | 5.21E-01 | 7.67E-01 | 1.00E+00 |
| ENSG00000275980.1_RP11-113D  | ENSG00000160789.18_LMNA | 0.05175  | -0.108338903 | 0.209231214 | 5.27E-01 | 7.71E-01 | 1.00E+00 |
| ENSG00000279002.1_RP11-417J  | ENSG00000160789.18_LMNA | -0.12943 | -0.282801252 | 0.030399418 | 1.12E-01 | 3.34E-01 | 1.00E+00 |
| ENSG00000218143.2_ERHP2      | ENSG00000160789.18_LMNA | -0.03245 | -0.190669761 | 0.12740477  | 6.91E-01 | 8.67E-01 | 1.00E+00 |
| ENSG00000274100.1_RP11-12A2  | ENSG00000160789.18_LMNA | 0.10026  | -0.059891819 | 0.255389012 | 2.19E-01 | 4.94E-01 | 1.00E+00 |
| ENSG00000201583.1_RN7SKP19   | ENSG00000160789.18_LMNA | 0.11117  | -0.048892727 | 0.26567193  | 1.73E-01 | 4.32E-01 | 1.00E+00 |
| ENSG00000265567.1_RP11-1109  | ENSG00000160789.18_LMNA | -0.04211 | -0.199969864 | 0.117881226 | 6.06E-01 | 8.20E-01 | 1.00E+00 |
| ENSG00000201287.1_RN7SKP17   | ENSG00000160789.18_LMNA | -0.01224 | -0.171111913 | 0.147242962 | 8.81E-01 | 9.54E-01 | 1.00E+00 |
| ENSG00000241821.3_RN7SL170F  | ENSG00000160789.18_LMNA | -0.00466 | -0.163740684 | 0.154653977 | 9.55E-01 | 9.82E-01 | 1.00E+00 |
| ENSG00000243541.3_RN7SL104F  | ENSG00000160789.18_LMNA | 0.07304  | -0.087171814 | 0.22957368  | 3.71E-01 | 6.51E-01 | 1.00E+00 |
| ENSG00000256465.1_RP11-428G  | ENSG00000160789.18_LMNA | -0.08287 | -0.238916116 | 0.077353872 | 3.10E-01 | 5.97E-01 | 1.00E+00 |

|                             |                         |          |              |             |          |          |          |
|-----------------------------|-------------------------|----------|--------------|-------------|----------|----------|----------|
| ENSG00000211641.2_IGLV11-55 | ENSG00000160789.18_LMNA | -0.02149 | -0.180071511 | 0.138186617 | 7.93E-01 | 9.16E-01 | 1.00E+00 |
| ENSG00000235880.1_RP11-59O6 | ENSG00000160789.18_LMNA | 0.05781  | -0.102334512 | 0.21502975  | 4.79E-01 | 7.37E-01 | 1.00E+00 |
| ENSG00000258433.1_RP11-255M | ENSG00000160789.18_LMNA | -0.14722 | -0.299407484 | 0.012263782 | 7.03E-02 | 2.50E-01 | 1.00E+00 |
| ENSG00000228173.1_AC091770. | ENSG00000160789.18_LMNA | -0.16496 | -0.315860895 | -0.00590949 | 4.23E-02 | 1.80E-01 | 1.00E+00 |
| ENSG00000239640.3_RN7SL62P  | ENSG00000160789.18_LMNA | -0.01771 | -0.176417079 | 0.141886948 | 8.29E-01 | 9.33E-01 | 1.00E+00 |
| ENSG00000238037.1_OOSP1P1   | ENSG00000160789.18_LMNA | 0.03115  | -0.128691255 | 0.189409066 | 7.03E-01 | 8.73E-01 | 1.00E+00 |
| ENSG00000237665.1_GRM7-AS2  | ENSG00000160789.18_LMNA | 0.03852  | -0.121421307 | 0.196519515 | 6.37E-01 | 8.38E-01 | 1.00E+00 |
| ENSG00000215177.3_IGLV8OR8- | ENSG00000160789.18_LMNA | -0.08386 | -0.239860306 | 0.076358201 | 3.04E-01 | 5.91E-01 | 1.00E+00 |
| ENSG00000248426.1_CTD-2533K | ENSG00000160789.18_LMNA | 0.12135  | -0.038600579 | 0.275229546 | 1.36E-01 | 3.76E-01 | 1.00E+00 |
| ENSG00000220204.1_RP1-53C18 | ENSG00000160789.18_LMNA | -0.06902 | -0.225738088 | 0.091184889 | 3.98E-01 | 6.75E-01 | 1.00E+00 |
| ENSG00000270584.1_RP11-362B | ENSG00000160789.18_LMNA | -0.01188 | -0.170755064 | 0.147602561 | 8.85E-01 | 9.55E-01 | 1.00E+00 |
| ENSG00000273536.1_RP11-74M1 | ENSG00000160789.18_LMNA | 0.01668  | -0.142897191 | 0.17541784  | 8.38E-01 | 9.37E-01 | 1.00E+00 |
| ENSG00000229101.1_TCEB1P20  | ENSG00000160789.18_LMNA | -0.07215 | -0.228719173 | 0.088066753 | 3.77E-01 | 6.57E-01 | 1.00E+00 |
| ENSG00000255232.1_RP11-438N | ENSG00000160789.18_LMNA | -0.05565 | -0.212961743 | 0.104478592 | 4.96E-01 | 7.50E-01 | 1.00E+00 |
| ENSG00000231353.1_RP11-5P18 | ENSG00000160789.18_LMNA | 0.01594  | -0.143629029 | 0.174693563 | 8.45E-01 | 9.40E-01 | 1.00E+00 |
| ENSG00000250694.1_CTD-2074D | ENSG00000160789.18_LMNA | -0.07287 | -0.229412637 | 0.087340517 | 3.72E-01 | 6.52E-01 | 1.00E+00 |
| ENSG00000242080.1 CTC-550M  | ENSG00000160789.18_LMNA | 0.01356  | -0.145959841 | 0.172384536 | 8.68E-01 | 9.49E-01 | 1.00E+00 |
| ENSG00000248903.1_AP000867. | ENSG00000160789.18_LMNA | -0.01612 | -0.174869496 | 0.143451291 | 8.44E-01 | 9.39E-01 | 1.00E+00 |
| ENSG00000218617.1_RP3-407E4 | ENSG00000160789.18_LMNA | 0.02842  | -0.131377497 | 0.186773291 | 7.28E-01 | 8.85E-01 | 1.00E+00 |
| ENSG00000229905.1_RP11-206L | ENSG00000160789.18_LMNA | -0.12754 | -0.281038643 | 0.032312331 | 1.17E-01 | 3.43E-01 | 1.00E+00 |
| ENSG00000231232.4_RP11-548K | ENSG00000160789.18_LMNA | -0.10462 | -0.25949432  | 0.055509751 | 2.00E-01 | 4.70E-01 | 1.00E+00 |
| ENSG00000121388.5_RP11-408E | ENSG00000160789.18_LMNA | -0.05572 | -0.213029596 | 0.10440829  | 4.95E-01 | 7.50E-01 | 1.00E+00 |
| ENSG00000254075.1_IGLVV-66  | ENSG00000160789.18_LMNA | -0.02613 | -0.184562098 | 0.133627429 | 7.49E-01 | 8.95E-01 | 1.00E+00 |
| ENSG00000224519.1_HMGN1P1   | ENSG00000160789.18_LMNA | -0.12721 | -0.280724835 | 0.032652657 | 1.18E-01 | 3.45E-01 | 1.00E+00 |
| ENSG00000240752.1_RP11-588D | ENSG00000160789.18_LMNA | -0.03653 | -0.194595112 | 0.12339225  | 6.55E-01 | 8.47E-01 | 1.00E+00 |
| ENSG00000249074.1_NDUFB2P1  | ENSG00000160789.18_LMNA | 0.04133  | -0.118651552 | 0.199219734 | 6.13E-01 | 8.24E-01 | 1.00E+00 |
| ENSG00000176378.8_PFN1P10   | ENSG00000160789.18_LMNA | 0.02813  | -0.131665199 | 0.186490722 | 7.31E-01 | 8.87E-01 | 1.00E+00 |
| ENSG00000248822.1_APOBEC3A  | ENSG00000160789.18_LMNA | 0.23114  | 0.074691428  | 0.376490151 | 4.17E-03 | 3.43E-02 | 1.00E+00 |
| ENSG00000253548.1_PYDC2     | ENSG00000160789.18_LMNA | 0.01592  | -0.14364869  | 0.1746741   | 8.46E-01 | 9.40E-01 | 1.00E+00 |
| ENSG00000274261.1_RP1-66N13 | ENSG00000160789.18_LMNA | -0.2286  | -0.374180773 | -0.07201783 | 4.62E-03 | 3.69E-02 | 1.00E+00 |
| ENSG00000236261.1_RP11-368M | ENSG00000160789.18_LMNA | -0.06375 | -0.220707852 | 0.096432333 | 4.35E-01 | 7.04E-01 | 1.00E+00 |
| ENSG00000244083.1_RP11-170N | ENSG00000160789.18_LMNA | -0.02777 | -0.186148793 | 0.132013268 | 7.34E-01 | 8.88E-01 | 1.00E+00 |
| ENSG00000230575.1_RP11-369F | ENSG00000160789.18_LMNA | 0.02132  | -0.138352981 | 0.179907399 | 7.94E-01 | 9.17E-01 | 1.00E+00 |

|                              |                         |          |              |             |          |          |          |
|------------------------------|-------------------------|----------|--------------|-------------|----------|----------|----------|
| ENSG00000254046.1_IGHV1-17   | ENSG00000160789.18_LMNA | -0.06197 | -0.219012618 | 0.098196805 | 4.48E-01 | 7.14E-01 | 1.00E+00 |
| ENSG00000273704.1_RP11-573C  | ENSG00000160789.18_LMNA | 0.04947  | -0.110603481 | 0.207038461 | 5.45E-01 | 7.83E-01 | 1.00E+00 |
| ENSG00000253692.3_IGHEP1     | ENSG00000160789.18_LMNA | -0.03876 | -0.19675035  | 0.121184721 | 6.35E-01 | 8.37E-01 | 1.00E+00 |
| ENSG00000263325.1_LA16c-325I | ENSG00000160789.18_LMNA | 0.05528  | -0.104841172 | 0.212611746 | 4.99E-01 | 7.52E-01 | 1.00E+00 |
| ENSG00000280359.1_CTD-2071N  | ENSG00000160789.18_LMNA | -0.10468 | -0.259550867 | 0.055449307 | 1.99E-01 | 4.70E-01 | 1.00E+00 |
| ENSG00000229779.1_AC016751.I | ENSG00000160789.18_LMNA | 0.02185  | -0.13782575  | 0.180427432 | 7.89E-01 | 9.14E-01 | 1.00E+00 |
| ENSG00000263435.1_RP11-17M2  | ENSG00000160789.18_LMNA | 0.02574  | -0.134010752 | 0.184185054 | 7.53E-01 | 8.97E-01 | 1.00E+00 |
| ENSG00000230046.1_BIRC6-AS1  | ENSG00000160789.18_LMNA | 0.05648  | -0.103653683 | 0.213757721 | 4.89E-01 | 7.46E-01 | 1.00E+00 |
| ENSG00000227293.1_AC118345.I | ENSG00000160789.18_LMNA | -0.13204 | -0.285247874 | 0.027740357 | 1.05E-01 | 3.21E-01 | 1.00E+00 |
| ENSG00000201612.1_RN7SKP15   | ENSG00000160789.18_LMNA | 0.10027  | -0.059885127 | 0.25539529  | 2.19E-01 | 4.94E-01 | 1.00E+00 |
| ENSG00000270401.1_RP11-812E  | ENSG00000160789.18_LMNA | 0.06098  | -0.099180197 | 0.218066982 | 4.55E-01 | 7.20E-01 | 1.00E+00 |
| ENSG00000237743.3_FBP2P1     | ENSG00000160789.18_LMNA | 0.15308  | -0.00627144  | 0.304853292 | 5.97E-02 | 2.25E-01 | 1.00E+00 |
| ENSG00000234675.1_RP11-242F  | ENSG00000160789.18_LMNA | 0.04005  | -0.119916046 | 0.197987585 | 6.24E-01 | 8.31E-01 | 1.00E+00 |
| ENSG00000249318.1_AC010468.I | ENSG00000160789.18_LMNA | 0.02472  | -0.135012664 | 0.18319911  | 7.62E-01 | 9.01E-01 | 1.00E+00 |
| ENSG00000236099.1_AC013403.I | ENSG00000160789.18_LMNA | -0.07761 | -0.233919737 | 0.082612195 | 3.42E-01 | 6.27E-01 | 1.00E+00 |
| ENSG00000217268.1_TXNP7      | ENSG00000160789.18_LMNA | -0.06843 | -0.22517523  | 0.091772928 | 4.02E-01 | 6.78E-01 | 1.00E+00 |
| ENSG00000265428.1_RP1-56K13  | ENSG00000160789.18_LMNA | -0.04721 | -0.204868232 | 0.112841553 | 5.64E-01 | 7.95E-01 | 1.00E+00 |
| ENSG00000232590.1_RP11-128I7 | ENSG00000160789.18_LMNA | -0.07331 | -0.229828512 | 0.086904825 | 3.69E-01 | 6.50E-01 | 1.00E+00 |
| ENSG00000188399.5_ANKRD36P   | ENSG00000160789.18_LMNA | -0.14912 | -0.301175131 | 0.010321188 | 6.67E-02 | 2.42E-01 | 1.00E+00 |
| ENSG00000279888.1_           | ENSG00000160789.18_LMNA | -0.05329 | -0.210706371 | 0.106813571 | 5.14E-01 | 7.62E-01 | 1.00E+00 |
| ENSG00000270446.1_RP6-43L17  | ENSG00000160789.18_LMNA | 0.26982  | 0.115586392  | 0.411352681 | 7.75E-04 | 9.48E-03 | 1.00E+00 |
| ENSG00000251038.1_AC090958.I | ENSG00000160789.18_LMNA | -0.08927 | -0.244989914 | 0.070937861 | 2.74E-01 | 5.59E-01 | 1.00E+00 |
| ENSG00000233843.1_CYCSP48    | ENSG00000160789.18_LMNA | -0.08508 | -0.241012553 | 0.075142273 | 2.97E-01 | 5.83E-01 | 1.00E+00 |
| ENSG00000242509.3_RN7SL156F  | ENSG00000160789.18_LMNA | -0.02522 | -0.18367967  | 0.134524402 | 7.58E-01 | 8.99E-01 | 1.00E+00 |
| ENSG00000261289.2_RP11-170L  | ENSG00000160789.18_LMNA | 0.091    | -0.069206761 | 0.246624444 | 2.65E-01 | 5.49E-01 | 1.00E+00 |
| ENSG00000258753.1_RP11-794A  | ENSG00000160789.18_LMNA | 0.11977  | -0.040193497 | 0.273754359 | 1.42E-01 | 3.84E-01 | 1.00E+00 |
| ENSG00000258421.2_FXNP1      | ENSG00000160789.18_LMNA | 0.05963  | -0.100520666 | 0.21677702  | 4.66E-01 | 7.27E-01 | 1.00E+00 |
| ENSG00000236110.1_OR2AM1P    | ENSG00000160789.18_LMNA | 0.01476  | -0.144784627 | 0.173549203 | 8.57E-01 | 9.44E-01 | 1.00E+00 |
| ENSG00000230654.1_MTCO2P25   | ENSG00000160789.18_LMNA | -0.02383 | -0.182336598 | 0.135888612 | 7.71E-01 | 9.05E-01 | 1.00E+00 |
| ENSG00000237365.1_RP11-334N  | ENSG00000160789.18_LMNA | 0.10229  | -0.057856132 | 0.257297545 | 2.10E-01 | 4.83E-01 | 1.00E+00 |
| ENSG00000232197.1_RP11-302L  | ENSG00000160789.18_LMNA | -0.02707 | -0.185469436 | 0.132704591 | 7.41E-01 | 8.91E-01 | 1.00E+00 |
| ENSG00000274660.1_Metazoa_SI | ENSG00000160789.18_LMNA | 0.15225  | -0.007120053 | 0.304083312 | 6.11E-02 | 2.29E-01 | 1.00E+00 |
| ENSG00000249443.1_RP11-1396I | ENSG00000160789.18_LMNA | -0.02157 | -0.180148041 | 0.13810903  | 7.92E-01 | 9.16E-01 | 1.00E+00 |

|                             |                         |          |              |             |          |          |          |
|-----------------------------|-------------------------|----------|--------------|-------------|----------|----------|----------|
| ENSG00000254026.1_RP11-369E | ENSG00000160789.18_LMNA | 0.04102  | -0.118961537 | 0.198917771 | 6.16E-01 | 8.26E-01 | 1.00E+00 |
| ENSG00000235572.1_RP11-555H | ENSG00000160789.18_LMNA | 0.01573  | -0.143830668 | 0.174493947 | 8.47E-01 | 9.40E-01 | 1.00E+00 |
| ENSG00000251982.1_RN7SKP43  | ENSG00000160789.18_LMNA | -0.09685 | -0.252160049 | 0.063329946 | 2.35E-01 | 5.13E-01 | 1.00E+00 |
| ENSG00000224484.1_RP11-548K | ENSG00000160789.18_LMNA | 0.02339  | -0.136315263 | 0.181916314 | 7.75E-01 | 9.07E-01 | 1.00E+00 |
| ENSG00000257284.1_RP11-190J | ENSG00000160789.18_LMNA | -0.09509 | -0.250498416 | 0.065096302 | 2.44E-01 | 5.23E-01 | 1.00E+00 |
| ENSG00000235403.1_AC114808. | ENSG00000160789.18_LMNA | 0.01228  | -0.147210091 | 0.171144528 | 8.81E-01 | 9.54E-01 | 1.00E+00 |
| ENSG00000258601.1_RP11-81F1 | ENSG00000160789.18_LMNA | 0.03381  | -0.126067658 | 0.191978956 | 6.79E-01 | 8.60E-01 | 1.00E+00 |
| ENSG00000267073.1_AC005256. | ENSG00000160789.18_LMNA | 0.05425  | -0.105869521 | 0.211618643 | 5.07E-01 | 7.57E-01 | 1.00E+00 |
| ENSG00000227616.1_AC063976. | ENSG00000160789.18_LMNA | 0.03737  | -0.122559976 | 0.195408032 | 6.48E-01 | 8.43E-01 | 1.00E+00 |
| ENSG00000256403.1_RP11-7N14 | ENSG00000160789.18_LMNA | -0.17075 | -0.321219627 | -0.0118729  | 3.54E-02 | 1.60E-01 | 1.00E+00 |
| ENSG00000251244.1_RP13-487K | ENSG00000160789.18_LMNA | -0.05212 | -0.20958491  | 0.107973313 | 5.24E-01 | 7.69E-01 | 1.00E+00 |
| ENSG00000187657.6_TSPY13P   | ENSG00000160789.18_LMNA | -0.14172 | -0.294279671 | 0.017885826 | 8.16E-02 | 2.75E-01 | 1.00E+00 |
| ENSG00000265934.1_ARL2BPP1  | ENSG00000160789.18_LMNA | 0.13997  | -0.019673591 | 0.292645293 | 8.55E-02 | 2.84E-01 | 1.00E+00 |
| ENSG00000259282.4_SPATA8-A5 | ENSG00000160789.18_LMNA | -0.03355 | -0.191723782 | 0.126328364 | 6.82E-01 | 8.61E-01 | 1.00E+00 |
| ENSG00000243873.1_HMGB1P36  | ENSG00000160789.18_LMNA | 0.01095  | -0.148512734 | 0.169851482 | 8.94E-01 | 9.58E-01 | 1.00E+00 |
| ENSG00000258119.1_RP11-804F | ENSG00000160789.18_LMNA | -0.07724 | -0.233565793 | 0.082984028 | 3.44E-01 | 6.29E-01 | 1.00E+00 |
| ENSG00000255369.1_RP11-740D | ENSG00000160789.18_LMNA | -0.036   | -0.194085791 | 0.123913469 | 6.60E-01 | 8.50E-01 | 1.00E+00 |
| ENSG00000258829.1_CTD-2243E | ENSG00000160789.18_LMNA | -0.0804  | -0.236576916 | 0.079817901 | 3.25E-01 | 6.11E-01 | 1.00E+00 |
| ENSG00000256115.4_RP11-319E | ENSG00000160789.18_LMNA | -0.1636  | -0.314605942 | -0.00451611 | 4.40E-02 | 1.85E-01 | 1.00E+00 |
| ENSG00000232464.1_CTA-125H2 | ENSG00000160789.18_LMNA | 0.02402  | -0.135695965 | 0.182526332 | 7.69E-01 | 9.04E-01 | 1.00E+00 |
| ENSG00000225943.1_AC016907. | ENSG00000160789.18_LMNA | -0.12215 | -0.275981786 | 0.03778769  | 1.34E-01 | 3.71E-01 | 1.00E+00 |
| ENSG00000232790.2_LINC01162 | ENSG00000160789.18_LMNA | -0.0351  | -0.193219574 | 0.124799518 | 6.68E-01 | 8.54E-01 | 1.00E+00 |
| ENSG00000243969.1_RP11-439C | ENSG00000160789.18_LMNA | 0.21284  | 0.055517369  | 0.359844731 | 8.47E-03 | 5.81E-02 | 1.00E+00 |
| ENSG00000243296.1_RP11-779P | ENSG00000160789.18_LMNA | -0.05956 | -0.21670425  | 0.10059625  | 4.66E-01 | 7.28E-01 | 1.00E+00 |
| ENSG00000240601.1_RPL9P15   | ENSG00000160789.18_LMNA | 0.13907  | -0.020582727 | 0.291813458 | 8.75E-02 | 2.88E-01 | 1.00E+00 |
| ENSG00000271269.1_RP11-317P | ENSG00000160789.18_LMNA | -0.01691 | -0.175633311 | 0.142679403 | 8.36E-01 | 9.37E-01 | 1.00E+00 |
| ENSG00000184351.7_KRTAP19-1 | ENSG00000160789.18_LMNA | 0.03437  | -0.125519664 | 0.192515182 | 6.74E-01 | 8.57E-01 | 1.00E+00 |
| ENSG00000242545.1_RP11-719N | ENSG00000160789.18_LMNA | 0.06132  | -0.098840718 | 0.218393495 | 4.53E-01 | 7.18E-01 | 1.00E+00 |
| ENSG00000278181.1_AP000457. | ENSG00000160789.18_LMNA | 0.02319  | -0.136512862 | 0.181721624 | 7.77E-01 | 9.08E-01 | 1.00E+00 |
| ENSG00000254975.1_RP11-672A | ENSG00000160789.18_LMNA | 0.03051  | -0.12931541  | 0.188797046 | 7.09E-01 | 8.76E-01 | 1.00E+00 |
| ENSG00000217707.2_SERPINB8I | ENSG00000160789.18_LMNA | -0.14096 | -0.293571913 | 0.018660252 | 8.32E-02 | 2.79E-01 | 1.00E+00 |
| ENSG00000230372.1_RP3-425P1 | ENSG00000160789.18_LMNA | -0.05471 | -0.212063717 | 0.105408735 | 5.03E-01 | 7.54E-01 | 1.00E+00 |
| ENSG00000231032.1_AC114814. | ENSG00000160789.18_LMNA | 0.0408   | -0.119173391 | 0.198711365 | 6.18E-01 | 8.27E-01 | 1.00E+00 |

|                                                      |          |              |             |          |          |          |
|------------------------------------------------------|----------|--------------|-------------|----------|----------|----------|
| ENSG00000250877.1_RP11-373J:ENSG00000160789.18_LMNA  | -0.05595 | -0.213248283 | 0.104181688 | 4.94E-01 | 7.49E-01 | 1.00E+00 |
| ENSG00000257025.1_RP11-553N:ENSG00000160789.18_LMNA  | -0.17016 | -0.320674529 | -0.01126528 | 3.61E-02 | 1.62E-01 | 1.00E+00 |
| ENSG00000261536.2_ABHD17AP:ENSG00000160789.18_LMNA   | 0.03339  | -0.12648787  | 0.191567639 | 6.83E-01 | 8.62E-01 | 1.00E+00 |
| ENSG00000225303.2_RP11-512N:ENSG00000160789.18_LMNA  | 0.05521  | -0.104911092 | 0.212544244 | 4.99E-01 | 7.52E-01 | 1.00E+00 |
| ENSG00000254861.1_RP11-945A:ENSG00000160789.18_LMNA  | -0.10504 | -0.259890772 | 0.055085928 | 1.98E-01 | 4.67E-01 | 1.00E+00 |
| ENSG00000255144.1_RP11-589N:ENSG00000160789.18_LMNA  | 0.05174  | -0.108354338 | 0.20921628  | 5.27E-01 | 7.71E-01 | 1.00E+00 |
| ENSG00000219190.1_RP1-253B1:ENSG00000160789.18_LMNA  | 0.00531  | -0.154018247 | 0.164374398 | 9.48E-01 | 9.79E-01 | 1.00E+00 |
| ENSG00000231984.1_RP11-2L13:ENSG00000160789.18_LMNA  | -0.10205 | -0.257075979 | 0.058092594 | 2.11E-01 | 4.84E-01 | 1.00E+00 |
| ENSG00000224760.4_C1DP3:ENSG00000160789.18_LMNA      | 0.0429   | -0.117101753 | 0.200728521 | 6.00E-01 | 8.16E-01 | 1.00E+00 |
| ENSG00000270423.1_RP11-361A:ENSG00000160789.18_LMNA  | -0.02609 | -0.184526126 | 0.133664004 | 7.50E-01 | 8.95E-01 | 1.00E+00 |
| ENSG00000083622.8_AC000111:ENSG00000160789.18_LMNA   | -0.00591 | -0.164956503 | 0.153434057 | 9.42E-01 | 9.77E-01 | 1.00E+00 |
| ENSG00000225058.1_RP11-132N:ENSG00000160789.18_LMNA  | -0.2343  | -0.379353048 | -0.07801188 | 3.67E-03 | 3.11E-02 | 1.00E+00 |
| ENSG00000125899.7_C20orf187:ENSG00000160789.18_LMNA  | -0.0091  | -0.168052721 | 0.15032301  | 9.11E-01 | 9.66E-01 | 1.00E+00 |
| ENSG00000267168.1_RP11-318A:ENSG00000160789.18_LMNA  | -0.03146 | -0.189709694 | 0.128384575 | 7.00E-01 | 8.72E-01 | 1.00E+00 |
| ENSG00000233689.1_RP11-123O:ENSG00000160789.18_LMNA  | -0.08392 | -0.239918113 | 0.076297221 | 3.04E-01 | 5.91E-01 | 1.00E+00 |
| ENSG00000183249.8_NF1P3:ENSG00000160789.18_LMNA      | -0.11453 | -0.268824736 | 0.045504986 | 1.60E-01 | 4.14E-01 | 1.00E+00 |
| ENSG00000250204.1_AC006335:ENSG00000160789.18_LMNA   | -0.04656 | -0.20424944  | 0.113479099 | 5.69E-01 | 7.98E-01 | 1.00E+00 |
| ENSG00000244125.1_AC078882:ENSG00000160789.18_LMNA   | -0.12395 | -0.277672293 | 0.035959373 | 1.28E-01 | 3.62E-01 | 1.00E+00 |
| ENSG00000236601.1_RP4-669L1:ENSG00000160789.18_LMNA  | 0.01204  | -0.14744063  | 0.170915767 | 8.83E-01 | 9.55E-01 | 1.00E+00 |
| ENSG00000279997.1_RP11-56L1:ENSG00000160789.18_LMNA  | -0.06439 | -0.221325008 | 0.095789475 | 4.31E-01 | 7.00E-01 | 1.00E+00 |
| ENSG00000226156.1_RPL23AP7:ENSG00000160789.18_LMNA   | -0.02317 | -0.181700112 | 0.136534694 | 7.77E-01 | 9.08E-01 | 1.00E+00 |
| ENSG00000255344.1_RP11-469N:ENSG00000160789.18_LMNA  | -0.0849  | -0.240844197 | 0.075319992 | 2.98E-01 | 5.84E-01 | 1.00E+00 |
| ENSG00000254067.1_RP11-122L:ENSG00000160789.18_LMNA  | -0.14584 | -0.298116163 | 0.013681423 | 7.30E-02 | 2.57E-01 | 1.00E+00 |
| ENSG00000214686.4_IQCF6:ENSG00000160789.18_LMNA      | -0.02537 | -0.183827506 | 0.134374166 | 7.56E-01 | 8.98E-01 | 1.00E+00 |
| ENSG00000234967.1_RP11-347D:ENSG00000160789.18_LMNA  | 0.00669  | -0.15266981  | 0.165717689 | 9.35E-01 | 9.74E-01 | 1.00E+00 |
| ENSG00000231604.2_RP5-897D1:ENSG00000160789.18_LMNA  | -0.04476 | -0.202521551 | 0.11525797  | 5.84E-01 | 8.07E-01 | 1.00E+00 |
| ENSG00000258681.1_RP11-8L8.1:ENSG00000160789.18_LMNA | -0.10393 | -0.258845222 | 0.056203416 | 2.03E-01 | 4.73E-01 | 1.00E+00 |
| ENSG00000254140.1_RP11-731F:ENSG00000160789.18_LMNA  | 0.19144  | 0.033255128  | 0.340272258 | 1.81E-02 | 1.01E-01 | 1.00E+00 |
| ENSG00000271399.1_RP4-799G3:ENSG00000160789.18_LMNA  | -0.07603 | -0.232416235 | 0.084191079 | 3.52E-01 | 6.35E-01 | 1.00E+00 |
| ENSG00000257075.1_RPEP6:ENSG00000160789.18_LMNA      | -0.00946 | -0.168409756 | 0.14996386  | 9.08E-01 | 9.65E-01 | 1.00E+00 |
| ENSG00000232805.1_NIP7P1:ENSG00000160789.18_LMNA     | 0.01646  | -0.143113308 | 0.175203991 | 8.40E-01 | 9.38E-01 | 1.00E+00 |
| ENSG00000228776.2_RP11-319C:ENSG00000160789.18_LMNA  | 0.12528  | -0.034613794 | 0.278915207 | 1.24E-01 | 3.55E-01 | 1.00E+00 |
| ENSG00000275592.1_VN1R7P:ENSG00000160789.18_LMNA     | -0.18866 | -0.337721155 | -0.03037571 | 1.99E-02 | 1.08E-01 | 1.00E+00 |

|                             |                         |          |              |             |          |          |          |
|-----------------------------|-------------------------|----------|--------------|-------------|----------|----------|----------|
| ENSG00000278929.1_RP11-137O | ENSG00000160789.18_LMNA | 0.1191   | -0.040872697 | 0.273124907 | 1.44E-01 | 3.88E-01 | 1.00E+00 |
| ENSG00000249894.1_RP11-434D | ENSG00000160789.18_LMNA | -0.04146 | -0.19934741  | 0.118520466 | 6.12E-01 | 8.23E-01 | 1.00E+00 |
| ENSG00000249219.1_RP13-560N | ENSG00000160789.18_LMNA | 0.11122  | -0.048842448 | 0.265718771 | 1.73E-01 | 4.32E-01 | 1.00E+00 |
| ENSG00000228503.1_RP11-347D | ENSG00000160789.18_LMNA | 0.04589  | -0.114147489 | 0.203600438 | 5.75E-01 | 8.02E-01 | 1.00E+00 |
| ENSG00000272494.1_OR1X1P    | ENSG00000160789.18_LMNA | -0.01326 | -0.172094535 | 0.146252328 | 8.71E-01 | 9.50E-01 | 1.00E+00 |
| ENSG00000232227.4_AC013401. | ENSG00000160789.18_LMNA | 0.1659   | 0.006880787  | 0.316735057 | 4.11E-02 | 1.77E-01 | 1.00E+00 |
| ENSG00000235797.2_RP11-402G | ENSG00000160789.18_LMNA | 0.15551  | -0.003786133 | 0.307105972 | 5.57E-02 | 2.16E-01 | 1.00E+00 |
| ENSG00000225497.4_KCNMA1-A  | ENSG00000160789.18_LMNA | -0.09229 | -0.247852714 | 0.067904671 | 2.58E-01 | 5.41E-01 | 1.00E+00 |
| ENSG00000225378.1_AC015977. | ENSG00000160789.18_LMNA | 0.11455  | -0.045483027 | 0.26884515  | 1.60E-01 | 4.14E-01 | 1.00E+00 |
| ENSG00000256357.1_RP11-349I | ENSG00000160789.18_LMNA | 0.11181  | -0.048253348 | 0.266267484 | 1.70E-01 | 4.29E-01 | 1.00E+00 |
| ENSG00000236604.1_LYPLA2P3  | ENSG00000160789.18_LMNA | 0.03242  | -0.12743723  | 0.190637964 | 6.92E-01 | 8.67E-01 | 1.00E+00 |
| ENSG00000260724.1_VN1R69P   | ENSG00000160789.18_LMNA | 0.09648  | -0.063700041 | 0.25181205  | 2.37E-01 | 5.16E-01 | 1.00E+00 |
| ENSG00000274299.1_RP11-114G | ENSG00000160789.18_LMNA | -0.11605 | -0.270261067 | 0.043959224 | 1.55E-01 | 4.05E-01 | 1.00E+00 |
| ENSG00000171396.11_KRTAP4-4 | ENSG00000160789.18_LMNA | -0.16069 | -0.311914995 | -0.00153238 | 4.80E-02 | 1.96E-01 | 1.00E+00 |
| ENSG00000257932.1_RP11-155I | ENSG00000160789.18_LMNA | 0.04439  | -0.115629806 | 0.202160123 | 5.87E-01 | 8.08E-01 | 1.00E+00 |
| ENSG00000273550.1_RP11-527N | ENSG00000160789.18_LMNA | -0.019   | -0.177665842 | 0.1406235   | 8.16E-01 | 9.28E-01 | 1.00E+00 |
| ENSG00000264982.1_RP11-344B | ENSG00000160789.18_LMNA | 0.06144  | -0.098730409 | 0.218499576 | 4.52E-01 | 7.17E-01 | 1.00E+00 |
| ENSG00000258885.1_RP11-344B | ENSG00000160789.18_LMNA | -0.10392 | -0.258841901 | 0.056206964 | 2.03E-01 | 4.73E-01 | 1.00E+00 |
| ENSG00000227564.2_LINC00376 | ENSG00000160789.18_LMNA | -0.09765 | -0.252918753 | 0.062522768 | 2.31E-01 | 5.09E-01 | 1.00E+00 |
| ENSG00000261486.1_RARRES2F  | ENSG00000160789.18_LMNA | 0.05221  | -0.107892227 | 0.209663347 | 5.23E-01 | 7.69E-01 | 1.00E+00 |
| ENSG00000230025.1_AC007967. | ENSG00000160789.18_LMNA | -0.01039 | -0.16931281  | 0.149055078 | 8.99E-01 | 9.61E-01 | 1.00E+00 |
| ENSG00000266504.1_RP11-798G | ENSG00000160789.18_LMNA | -0.10037 | -0.255484171 | 0.059790382 | 2.19E-01 | 4.93E-01 | 1.00E+00 |
| ENSG00000205327.3_OR6C68    | ENSG00000160789.18_LMNA | 0.0252   | -0.134536863 | 0.183667407 | 7.58E-01 | 8.99E-01 | 1.00E+00 |
| ENSG00000269651.1_CTD-3020H | ENSG00000160789.18_LMNA | -0.00426 | -0.16335285  | 0.155042915 | 9.58E-01 | 9.83E-01 | 1.00E+00 |
| ENSG00000259890.1_DNM1P50   | ENSG00000160789.18_LMNA | 0.01171  | -0.147763893 | 0.17059494  | 8.86E-01 | 9.56E-01 | 1.00E+00 |
| ENSG00000275799.1_AP001059. | ENSG00000160789.18_LMNA | -0.06541 | -0.222292131 | 0.094781544 | 4.23E-01 | 6.94E-01 | 1.00E+00 |
| ENSG00000226183.1_RANP7     | ENSG00000160789.18_LMNA | -0.10111 | -0.256185384 | 0.059042708 | 2.15E-01 | 4.89E-01 | 1.00E+00 |
| ENSG00000257124.2_RP11-384P | ENSG00000160789.18_LMNA | -0.05196 | -0.209423559 | 0.108140101 | 5.25E-01 | 7.70E-01 | 1.00E+00 |
| ENSG00000279132.1_FAM231C   | ENSG00000160789.18_LMNA | -0.03516 | -0.193279791 | 0.124737939 | 6.67E-01 | 8.53E-01 | 1.00E+00 |
| ENSG00000238235.1_TSPY11P   | ENSG00000160789.18_LMNA | -0.29898 | -0.437359334 | -0.14676036 | 1.83E-04 | 3.04E-03 | 1.00E+00 |
| ENSG00000232436.1_RP11-103C | ENSG00000160789.18_LMNA | -0.09938 | -0.254556779 | 0.060778678 | 2.23E-01 | 4.99E-01 | 1.00E+00 |
| ENSG00000274167.3_AL031601. | ENSG00000160789.18_LMNA | -0.11259 | -0.267002043 | 0.047464381 | 1.67E-01 | 4.25E-01 | 1.00E+00 |
| ENSG00000267371.1_RP11-712C | ENSG00000160789.18_LMNA | -0.04339 | -0.201199475 | 0.116617681 | 5.96E-01 | 8.13E-01 | 1.00E+00 |

|                              |                         |          |              |             |          |          |          |
|------------------------------|-------------------------|----------|--------------|-------------|----------|----------|----------|
| ENSG00000204250.3_LINC00587  | ENSG00000160789.18_LMNA | 0.09906  | -0.061107584 | 0.254248013 | 2.25E-01 | 5.01E-01 | 1.00E+00 |
| ENSG00000229960.1_RP11-278H  | ENSG00000160789.18_LMNA | 0.08345  | -0.076768329 | 0.239471456 | 3.07E-01 | 5.93E-01 | 1.00E+00 |
| ENSG00000240527.1_RP11-429G  | ENSG00000160789.18_LMNA | -0.06708 | -0.223885411 | 0.093119616 | 4.12E-01 | 6.86E-01 | 1.00E+00 |
| ENSG00000271475.1_RP4-799G3  | ENSG00000160789.18_LMNA | 0.05681  | -0.103321897 | 0.214077751 | 4.87E-01 | 7.44E-01 | 1.00E+00 |
| ENSG00000267455.1_RP11-78A1  | ENSG00000160789.18_LMNA | -0.1073  | -0.262020936 | 0.052806756 | 1.88E-01 | 4.55E-01 | 1.00E+00 |
| ENSG00000229389.1_CTD-2022H  | ENSG00000160789.18_LMNA | -0.19042 | -0.339331017 | -0.03219216 | 1.88E-02 | 1.03E-01 | 1.00E+00 |
| ENSG00000270891.1_RP11-499P  | ENSG00000160789.18_LMNA | 0.09731  | -0.0628644   | 0.252597684 | 2.33E-01 | 5.11E-01 | 1.00E+00 |
| ENSG00000226554.1_MTCL1P1    | ENSG00000160789.18_LMNA | 0.06932  | -0.090882044 | 0.226027883 | 3.96E-01 | 6.73E-01 | 1.00E+00 |
| ENSG00000196266.4_OR10J3     | ENSG00000160789.18_LMNA | 0.17069  | 0.011811194  | 0.321164283 | 3.55E-02 | 1.60E-01 | 1.00E+00 |
| ENSG00000253980.1_CTB-4E7.1  | ENSG00000160789.18_LMNA | -0.02547 | -0.183926043 | 0.13427402  | 7.55E-01 | 8.98E-01 | 1.00E+00 |
| ENSG00000249102.1_CTD-2066L  | ENSG00000160789.18_LMNA | -0.00476 | -0.163836316 | 0.154558058 | 9.54E-01 | 9.81E-01 | 1.00E+00 |
| ENSG00000258071.1_ARL2BPP2   | ENSG00000160789.18_LMNA | -0.08248 | -0.238546329 | 0.077743649 | 3.12E-01 | 5.99E-01 | 1.00E+00 |
| ENSG00000254425.1_RP11-480O  | ENSG00000160789.18_LMNA | -0.01032 | -0.169244035 | 0.149124308 | 9.00E-01 | 9.61E-01 | 1.00E+00 |
| ENSG00000251058.1_RP11-68L1  | ENSG00000160789.18_LMNA | -0.03591 | -0.193998215 | 0.124003073 | 6.61E-01 | 8.50E-01 | 1.00E+00 |
| ENSG00000233605.2_AC073628.  | ENSG00000160789.18_LMNA | -0.08799 | -0.243778304 | 0.072219827 | 2.81E-01 | 5.67E-01 | 1.00E+00 |
| ENSG00000219738.2_CD83P1     | ENSG00000160789.18_LMNA | 0.00171  | -0.157530475 | 0.160870018 | 9.83E-01 | 9.94E-01 | 1.00E+00 |
| ENSG00000242072.1_RP11-458K  | ENSG00000160789.18_LMNA | -0.09617 | -0.251516175 | 0.064014634 | 2.39E-01 | 5.17E-01 | 1.00E+00 |
| ENSG00000182315.7_MBD3L3     | ENSG00000160789.18_LMNA | 0.05864  | -0.101508681 | 0.215825521 | 4.73E-01 | 7.33E-01 | 1.00E+00 |
| ENSG00000251477.1_RP11-74D3  | ENSG00000160789.18_LMNA | -0.08922 | -0.244941196 | 0.070989428 | 2.74E-01 | 5.59E-01 | 1.00E+00 |
| ENSG00000248474.1_CTD-2292M  | ENSG00000160789.18_LMNA | 0.05168  | -0.108410198 | 0.209162229 | 5.27E-01 | 7.72E-01 | 1.00E+00 |
| ENSG00000230994.1_FGFR3P1    | ENSG00000160789.18_LMNA | -0.01152 | -0.170412187 | 0.147948003 | 8.88E-01 | 9.56E-01 | 1.00E+00 |
| ENSG00000255945.1_RP11-351O  | ENSG00000160789.18_LMNA | -0.01157 | -0.170458598 | 0.147901249 | 8.87E-01 | 9.56E-01 | 1.00E+00 |
| ENSG00000189252.4_SPANXN3    | ENSG00000160789.18_LMNA | 0.02438  | -0.135347142 | 0.18286982  | 7.66E-01 | 9.03E-01 | 1.00E+00 |
| ENSG00000254130.1_CTB-7E3.1  | ENSG00000160789.18_LMNA | 0.22823  | 0.071631688  | 0.373846926 | 4.68E-03 | 3.73E-02 | 1.00E+00 |
| ENSG00000228620.1_RP3-434P1  | ENSG00000160789.18_LMNA | 0.04204  | -0.11794892  | 0.19990396  | 6.07E-01 | 8.20E-01 | 1.00E+00 |
| ENSG00000186803.3_IFNA10     | ENSG00000160789.18_LMNA | 0.12135  | -0.038591666 | 0.275237797 | 1.36E-01 | 3.76E-01 | 1.00E+00 |
| ENSG00000229175.1_LINC00382  | ENSG00000160789.18_LMNA | -0.04464 | -0.202397683 | 0.115385416 | 5.85E-01 | 8.07E-01 | 1.00E+00 |
| ENSG00000242145.1_RP11-520D  | ENSG00000160789.18_LMNA | -0.10444 | -0.259324171 | 0.055691612 | 2.00E-01 | 4.71E-01 | 1.00E+00 |
| ENSG00000214628.3_NDUFB5P2   | ENSG00000160789.18_LMNA | 0.04973  | -0.110344037 | 0.207289838 | 5.43E-01 | 7.82E-01 | 1.00E+00 |
| ENSG00000258459.1_CTD-2292M  | ENSG00000160789.18_LMNA | 0.05498  | -0.105140133 | 0.212323099 | 5.01E-01 | 7.53E-01 | 1.00E+00 |
| ENSG00000224622.1_OR9R1P     | ENSG00000160789.18_LMNA | 0.01394  | -0.145584482 | 0.172756623 | 8.65E-01 | 9.47E-01 | 1.00E+00 |
| ENSG00000229375.1_USP24P1    | ENSG00000160789.18_LMNA | -0.06249 | -0.219503891 | 0.097685672 | 4.44E-01 | 7.12E-01 | 1.00E+00 |
| ENSG00000260780.1_RP11-580I1 | ENSG00000160789.18_LMNA | -0.11674 | -0.270901287 | 0.043269742 | 1.52E-01 | 4.01E-01 | 1.00E+00 |

|                             |                         |          |              |             |          |          |          |
|-----------------------------|-------------------------|----------|--------------|-------------|----------|----------|----------|
| ENSG00000255391.1_CTD-2028E | ENSG00000160789.18_LMNA | 0.00745  | -0.151929137 | 0.166455034 | 9.27E-01 | 9.72E-01 | 1.00E+00 |
| ENSG00000171999.7_OR52P2P   | ENSG00000160789.18_LMNA | -0.13337 | -0.286489549 | 0.026389172 | 1.01E-01 | 3.14E-01 | 1.00E+00 |
| ENSG00000248106.2_AC005609. | ENSG00000160789.18_LMNA | -0.15453 | -0.306202299 | 0.004783587 | 5.73E-02 | 2.19E-01 | 1.00E+00 |
| ENSG00000253604.1_RP11-489E | ENSG00000160789.18_LMNA | -0.09523 | -0.250632543 | 0.064953795 | 2.43E-01 | 5.23E-01 | 1.00E+00 |
| ENSG00000225463.1_ZNF70P1   | ENSG00000160789.18_LMNA | 0.18867  | 0.030383398  | 0.337727976 | 1.99E-02 | 1.08E-01 | 1.00E+00 |
| ENSG00000213921.6_LEUTX     | ENSG00000160789.18_LMNA | -0.13938 | -0.292100325 | 0.02026926  | 8.68E-02 | 2.86E-01 | 1.00E+00 |
| ENSG00000259573.1_NMNAT1P5  | ENSG00000160789.18_LMNA | 0.16427  | 0.00520977   | 0.315230828 | 4.31E-02 | 1.83E-01 | 1.00E+00 |
| ENSG00000278878.1_CH507-145 | ENSG00000160789.18_LMNA | -0.13465 | -0.287681803 | 0.025090689 | 9.82E-02 | 3.08E-01 | 1.00E+00 |
| ENSG00000167346.6_MMP26     | ENSG00000160789.18_LMNA | 0.0793   | -0.080925036 | 0.235524674 | 3.31E-01 | 6.17E-01 | 1.00E+00 |
| ENSG00000231418.1_AC006380. | ENSG00000160789.18_LMNA | -0.02501 | -0.183481168 | 0.134726104 | 7.60E-01 | 9.00E-01 | 1.00E+00 |
| ENSG00000257262.1_RP11-776A | ENSG00000160789.18_LMNA | -0.02985 | -0.188153126 | 0.129971825 | 7.15E-01 | 8.79E-01 | 1.00E+00 |
| ENSG00000259447.1_RP11-462P | ENSG00000160789.18_LMNA | -0.06345 | -0.220425961 | 0.096725875 | 4.37E-01 | 7.05E-01 | 1.00E+00 |
| ENSG00000268834.1_OR7A1P    | ENSG00000160789.18_LMNA | 0.14823  | -0.011235865 | 0.300343094 | 6.84E-02 | 2.46E-01 | 1.00E+00 |
| ENSG00000227400.2_AC012501. | ENSG00000160789.18_LMNA | -0.20156 | -0.349546438 | -0.04376598 | 1.28E-02 | 7.82E-02 | 1.00E+00 |
| ENSG00000264685.1_PRPF19P1  | ENSG00000160789.18_LMNA | 0.00721  | -0.152164954 | 0.166220315 | 9.30E-01 | 9.73E-01 | 1.00E+00 |
| ENSG00000226570.2_RP11-505O | ENSG00000160789.18_LMNA | 0.08799  | -0.072217962 | 0.243780067 | 2.81E-01 | 5.67E-01 | 1.00E+00 |
| ENSG00000250430.1_RP11-366M | ENSG00000160789.18_LMNA | -0.10681 | -0.261559307 | 0.053300956 | 1.90E-01 | 4.58E-01 | 1.00E+00 |
| ENSG00000281097.1_LINC01395 | ENSG00000160789.18_LMNA | 0.03636  | -0.123556825 | 0.194434312 | 6.57E-01 | 8.48E-01 | 1.00E+00 |
| ENSG00000260457.2_RP11-723G | ENSG00000160789.18_LMNA | 0.04543  | -0.114603985 | 0.203157024 | 5.78E-01 | 8.03E-01 | 1.00E+00 |
| ENSG00000270713.1_RP11-506K | ENSG00000160789.18_LMNA | 0.04691  | -0.113135847 | 0.204582627 | 5.66E-01 | 7.97E-01 | 1.00E+00 |
| ENSG00000197454.1_OR2L5     | ENSG00000160789.18_LMNA | -0.04518 | -0.202917535 | 0.114850483 | 5.81E-01 | 8.04E-01 | 1.00E+00 |
| ENSG00000230411.1_OR3D1P    | ENSG00000160789.18_LMNA | -0.02993 | -0.18823569  | 0.129887675 | 7.14E-01 | 8.79E-01 | 1.00E+00 |
| ENSG00000236158.1_RFC3P1    | ENSG00000160789.18_LMNA | 0.0831   | -0.077119881 | 0.239138062 | 3.09E-01 | 5.95E-01 | 1.00E+00 |
| ENSG00000233014.1_TBC1D3P7  | ENSG00000160789.18_LMNA | 0.00036  | -0.158854297 | 0.159547067 | 9.97E-01 | 9.99E-01 | 1.00E+00 |
| ENSG00000177306.4_OR7E125P  | ENSG00000160789.18_LMNA | 0.05214  | -0.107955091 | 0.209602537 | 5.23E-01 | 7.69E-01 | 1.00E+00 |
| ENSG00000255998.1_RP11-407A | ENSG00000160789.18_LMNA | -0.09528 | -0.250678892 | 0.064904547 | 2.43E-01 | 5.22E-01 | 1.00E+00 |
| ENSG00000204510.4_PRAMEF7   | ENSG00000160789.18_LMNA | 0.11006  | -0.050012337 | 0.264628482 | 1.77E-01 | 4.39E-01 | 1.00E+00 |
| ENSG00000261038.1_RP1-149C7 | ENSG00000160789.18_LMNA | -0.08039 | -0.236562455 | 0.079833122 | 3.25E-01 | 6.12E-01 | 1.00E+00 |
| ENSG00000279655.1_AC004009. | ENSG00000160789.18_LMNA | -0.07082 | -0.227456736 | 0.089387987 | 3.86E-01 | 6.64E-01 | 1.00E+00 |
| ENSG00000250363.1_KRT18P21  | ENSG00000160789.18_LMNA | 0.09929  | -0.060874746 | 0.2544666   | 2.24E-01 | 4.99E-01 | 1.00E+00 |
| ENSG00000228046.2_MTCO3P40  | ENSG00000160789.18_LMNA | -0.05521 | -0.21254706  | 0.104908174 | 4.99E-01 | 7.52E-01 | 1.00E+00 |
| ENSG00000259992.1_RP11-77K1 | ENSG00000160789.18_LMNA | -0.01099 | -0.1698958   | 0.148468106 | 8.93E-01 | 9.58E-01 | 1.00E+00 |
| ENSG00000225942.1_AC093326. | ENSG00000160789.18_LMNA | -0.07055 | -0.227195462 | 0.089661291 | 3.88E-01 | 6.66E-01 | 1.00E+00 |



|                              |                         |          |              |             |          |          |          |
|------------------------------|-------------------------|----------|--------------|-------------|----------|----------|----------|
| ENSG00000259213.1_CTD-2071N  | ENSG00000160789.18_LMNA | -0.11196 | -0.266411297 | 0.048098914 | 1.70E-01 | 4.28E-01 | 1.00E+00 |
| ENSG00000277866.1_CTC-311G1  | ENSG00000160789.18_LMNA | 0.03189  | -0.127963199 | 0.190122656 | 6.97E-01 | 8.70E-01 | 1.00E+00 |
| ENSG00000231356.1_RP13-238N  | ENSG00000160789.18_LMNA | 0.07224  | -0.087967614 | 0.228813857 | 3.76E-01 | 6.56E-01 | 1.00E+00 |
| ENSG00000257780.4_GLYCAM1    | ENSG00000160789.18_LMNA | -0.044   | -0.201790463 | 0.116010017 | 5.90E-01 | 8.10E-01 | 1.00E+00 |
| ENSG00000260994.1_AGGF1P7    | ENSG00000160789.18_LMNA | 0.06296  | -0.097219248 | 0.219952052 | 4.41E-01 | 7.09E-01 | 1.00E+00 |
| ENSG00000215310.2_RP6-60B16  | ENSG00000160789.18_LMNA | 0.0319   | -0.127951715 | 0.190133909 | 6.96E-01 | 8.70E-01 | 1.00E+00 |
| ENSG00000230335.1_DNAJB5P1   | ENSG00000160789.18_LMNA | 0.04246  | -0.117532686 | 0.200309144 | 6.03E-01 | 8.18E-01 | 1.00E+00 |
| ENSG00000236378.1_RP11-394G  | ENSG00000160789.18_LMNA | -0.04338 | -0.201190816 | 0.116626582 | 5.96E-01 | 8.13E-01 | 1.00E+00 |
| ENSG00000215286.3_RP5-1158E  | ENSG00000160789.18_LMNA | -0.12402 | -0.277733537 | 0.035893096 | 1.28E-01 | 3.62E-01 | 1.00E+00 |
| ENSG00000277083.1_PRSS3P3    | ENSG00000160789.18_LMNA | 0.00078  | -0.158443233 | 0.159957984 | 9.92E-01 | 9.97E-01 | 1.00E+00 |
| ENSG00000187969.5_ZCCHC13    | ENSG00000160789.18_LMNA | -0.02257 | -0.181115136 | 0.13712825  | 7.83E-01 | 9.11E-01 | 1.00E+00 |
| ENSG00000181499.2_OR6T1      | ENSG00000160789.18_LMNA | -0.02319 | -0.181717088 | 0.136517465 | 7.77E-01 | 9.08E-01 | 1.00E+00 |
| ENSG00000237274.2_GTF3AP1    | ENSG00000160789.18_LMNA | -0.10732 | -0.262043771 | 0.052782306 | 1.88E-01 | 4.55E-01 | 1.00E+00 |
| ENSG00000279650.1_RP11-989F  | ENSG00000160789.18_LMNA | -0.0894  | -0.24511045  | 0.070810268 | 2.73E-01 | 5.58E-01 | 1.00E+00 |
| ENSG00000223958.1_RP11-552J1 | ENSG00000160789.18_LMNA | -0.08165 | -0.237756786 | 0.078575551 | 3.17E-01 | 6.04E-01 | 1.00E+00 |
| ENSG00000176695.6_OR4F17     | ENSG00000160789.18_LMNA | -0.02692 | -0.185324532 | 0.132852008 | 7.42E-01 | 8.92E-01 | 1.00E+00 |
| ENSG00000230871.1_RPS6P23    | ENSG00000160789.18_LMNA | 0.06746  | -0.092736218 | 0.224252731 | 4.09E-01 | 6.83E-01 | 1.00E+00 |
| ENSG00000260251.1_RP11-46D6  | ENSG00000160789.18_LMNA | -0.04876 | -0.206359155 | 0.111304369 | 5.51E-01 | 7.87E-01 | 1.00E+00 |
| ENSG00000271945.1_RP11-354K  | ENSG00000160789.18_LMNA | -0.09327 | -0.248774946 | 0.066926305 | 2.53E-01 | 5.34E-01 | 1.00E+00 |
| ENSG00000250640.2_OR7E41P    | ENSG00000160789.18_LMNA | -0.13681 | -0.289705108 | 0.022884692 | 9.28E-02 | 2.98E-01 | 1.00E+00 |
| ENSG00000275953.1_RP11-753G  | ENSG00000160789.18_LMNA | -0.16801 | -0.318689601 | -0.00905464 | 3.85E-02 | 1.69E-01 | 1.00E+00 |
| ENSG00000253836.1_RP11-731N  | ENSG00000160789.18_LMNA | -0.14786 | -0.29999595  | 0.011617335 | 6.91E-02 | 2.48E-01 | 1.00E+00 |
| ENSG00000237684.1_RPSAP35    | ENSG00000160789.18_LMNA | -0.07232 | -0.22888768  | 0.087890313 | 3.76E-01 | 6.56E-01 | 1.00E+00 |
| ENSG00000227423.2_OR10U1P    | ENSG00000160789.18_LMNA | -0.19439 | -0.342981001 | -0.03631806 | 1.64E-02 | 9.36E-02 | 1.00E+00 |
| ENSG00000249698.1_MTCO3P9    | ENSG00000160789.18_LMNA | -0.13351 | -0.286621738 | 0.026245257 | 1.01E-01 | 3.13E-01 | 1.00E+00 |
| ENSG00000236396.6_SLC35G4    | ENSG00000160789.18_LMNA | 0.03375  | -0.126127189 | 0.191920692 | 6.80E-01 | 8.60E-01 | 1.00E+00 |
| ENSG00000255304.1_OR4A46P    | ENSG00000160789.18_LMNA | -0.00699 | -0.166005914 | 0.152380327 | 9.32E-01 | 9.73E-01 | 1.00E+00 |
| ENSG00000240361.1_OR4G11P    | ENSG00000160789.18_LMNA | -0.03109 | -0.189357568 | 0.128743784 | 7.04E-01 | 8.74E-01 | 1.00E+00 |
| ENSG00000171944.1_OR52A5     | ENSG00000160789.18_LMNA | -0.03451 | -0.192650991 | 0.125380844 | 6.73E-01 | 8.56E-01 | 1.00E+00 |
| ENSG00000251412.1_AC006296   | ENSG00000160789.18_LMNA | -0.01479 | -0.173578493 | 0.144755061 | 8.57E-01 | 9.43E-01 | 1.00E+00 |
| ENSG00000257807.1_RP1-90J4.3 | ENSG00000160789.18_LMNA | 0.07382  | -0.086398375 | 0.230311784 | 3.66E-01 | 6.47E-01 | 1.00E+00 |
| ENSG00000270390.1_RP11-470B  | ENSG00000160789.18_LMNA | 0.06456  | -0.0956234   | 0.221484403 | 4.29E-01 | 6.99E-01 | 1.00E+00 |
| ENSG00000237954.6_RP11-14O1  | ENSG00000160789.18_LMNA | -0.11634 | -0.270531511 | 0.043668007 | 1.53E-01 | 4.04E-01 | 1.00E+00 |

|                              |                         |          |              |             |          |          |          |
|------------------------------|-------------------------|----------|--------------|-------------|----------|----------|----------|
| ENSG00000240152.2_RP11-16N2  | ENSG00000160789.18_LMNA | 0.05326  | -0.106845536 | 0.210675472 | 5.15E-01 | 7.62E-01 | 1.00E+00 |
| ENSG00000234376.4_UBTFL2     | ENSG00000160789.18_LMNA | -0.02218 | -0.180740997 | 0.137507758 | 7.86E-01 | 9.13E-01 | 1.00E+00 |
| ENSG00000215765.3_CTB-61M7   | ENSG00000160789.18_LMNA | -0.11313 | -0.267510933 | 0.046917567 | 1.65E-01 | 4.22E-01 | 1.00E+00 |
| ENSG00000255259.2_ZNF123P    | ENSG00000160789.18_LMNA | 0.02055  | -0.139103873 | 0.17916645  | 8.02E-01 | 9.20E-01 | 1.00E+00 |
| ENSG00000230864.1_RP5-936J1  | ENSG00000160789.18_LMNA | -0.04991 | -0.207465484 | 0.110162729 | 5.41E-01 | 7.81E-01 | 1.00E+00 |
| ENSG00000257520.1_SFTA3      | ENSG00000160789.18_LMNA | -0.12365 | -0.277387349 | 0.036267692 | 1.29E-01 | 3.64E-01 | 1.00E+00 |
| ENSG00000215288.4_RP11-613H  | ENSG00000160789.18_LMNA | 0.05317  | -0.106931162 | 0.210592699 | 5.15E-01 | 7.63E-01 | 1.00E+00 |
| ENSG00000251193.1_RP11-72K1  | ENSG00000160789.18_LMNA | 0.02832  | -0.13147012  | 0.186682326 | 7.29E-01 | 8.85E-01 | 1.00E+00 |
| ENSG00000249726.1_TUBB1P1    | ENSG00000160789.18_LMNA | 0.0994   | -0.060764914 | 0.254569698 | 2.23E-01 | 4.99E-01 | 1.00E+00 |
| ENSG00000170688.4_OR5E1P     | ENSG00000160789.18_LMNA | 0.17421  | 0.015434563  | 0.324410728 | 3.18E-02 | 1.49E-01 | 1.00E+00 |
| ENSG00000227307.1_RP11-95I16 | ENSG00000160789.18_LMNA | 0.0108   | -0.148655144 | 0.169710054 | 8.95E-01 | 9.59E-01 | 1.00E+00 |
| ENSG00000196228.3_SULT1C3    | ENSG00000160789.18_LMNA | 0.09836  | -0.061810297 | 0.253588115 | 2.28E-01 | 5.05E-01 | 1.00E+00 |
| ENSG00000188155.9_KRTAP10-6  | ENSG00000160789.18_LMNA | -0.15894 | -0.310286461 | 0.000270655 | 5.05E-02 | 2.03E-01 | 1.00E+00 |
| ENSG00000229457.1_AC006227   | ENSG00000160789.18_LMNA | -0.13581 | -0.288763833 | 0.023911337 | 9.53E-02 | 3.02E-01 | 1.00E+00 |
| ENSG00000196341.2_OR8D1      | ENSG00000160789.18_LMNA | 0.01414  | -0.145389312 | 0.172950056 | 8.63E-01 | 9.46E-01 | 1.00E+00 |
| ENSG00000221859.2_KRTAP10-1  | ENSG00000160789.18_LMNA | 0.08743  | -0.072780056 | 0.243248511 | 2.84E-01 | 5.70E-01 | 1.00E+00 |
| ENSG00000216663.3_RP11-506B  | ENSG00000160789.18_LMNA | -0.00481 | -0.163885708 | 0.154508514 | 9.53E-01 | 9.81E-01 | 1.00E+00 |
| ENSG00000142163.7_OR1E3      | ENSG00000160789.18_LMNA | -0.16842 | -0.319069331 | -0.00947731 | 3.81E-02 | 1.68E-01 | 1.00E+00 |
| ENSG00000227597.1_WASF1P1    | ENSG00000160789.18_LMNA | 0.04197  | -0.118023895 | 0.199830964 | 6.08E-01 | 8.21E-01 | 1.00E+00 |
| ENSG00000260537.1_RP11-529K  | ENSG00000160789.18_LMNA | 0.02647  | -0.133291735 | 0.184892217 | 7.46E-01 | 8.94E-01 | 1.00E+00 |
| ENSG00000213911.2_OR2G1P     | ENSG00000160789.18_LMNA | 0.08336  | -0.07685792  | 0.2393865   | 3.07E-01 | 5.94E-01 | 1.00E+00 |
| ENSG00000237558.1_CDY7P      | ENSG00000160789.18_LMNA | 0.11441  | -0.045621167 | 0.268716723 | 1.60E-01 | 4.14E-01 | 1.00E+00 |
| ENSG00000239586.1_MTND1P16   | ENSG00000160789.18_LMNA | -0.1121  | -0.2665441   | 0.04795629  | 1.69E-01 | 4.28E-01 | 1.00E+00 |
| ENSG00000253314.4_LINC00293  | ENSG00000160789.18_LMNA | -0.14047 | -0.293113322 | 0.019161841 | 8.43E-02 | 2.81E-01 | 1.00E+00 |
| ENSG00000235203.2_TBC1D3P3   | ENSG00000160789.18_LMNA | -0.03464 | -0.192775529 | 0.125253533 | 6.72E-01 | 8.56E-01 | 1.00E+00 |
| ENSG00000242473.1_KIR2DP1    | ENSG00000160789.18_LMNA | 0.00963  | -0.149804826 | 0.168567826 | 9.06E-01 | 9.64E-01 | 1.00E+00 |
| ENSG00000227776.1_AKR1D1P1   | ENSG00000160789.18_LMNA | 0.01312  | -0.146387648 | 0.171960347 | 8.73E-01 | 9.51E-01 | 1.00E+00 |
| ENSG00000221813.3_OR6B1      | ENSG00000160789.18_LMNA | 0.15828  | -0.000947584 | 0.309674576 | 5.15E-02 | 2.05E-01 | 1.00E+00 |
| ENSG00000225944.1_RIOK3P1    | ENSG00000160789.18_LMNA | -0.15081 | -0.302744864 | 0.00859412  | 6.37E-02 | 2.35E-01 | 1.00E+00 |
| ENSG00000216378.1_RP3-344J2  | ENSG00000160789.18_LMNA | -0.03818 | -0.19619032  | 0.121758641 | 6.40E-01 | 8.39E-01 | 1.00E+00 |
| ENSG00000240058.3_ARGFXP1    | ENSG00000160789.18_LMNA | 0.0071   | -0.152276676 | 0.166109102 | 9.31E-01 | 9.73E-01 | 1.00E+00 |
| ENSG00000257162.5_MED15P6    | ENSG00000160789.18_LMNA | 0.10271  | -0.057424954 | 0.257701475 | 2.08E-01 | 4.80E-01 | 1.00E+00 |
| ENSG00000236541.1_VN2R9P     | ENSG00000160789.18_LMNA | -0.13424 | -0.287298981 | 0.025507735 | 9.92E-02 | 3.10E-01 | 1.00E+00 |

|                              |                         |          |              |             |          |          |          |
|------------------------------|-------------------------|----------|--------------|-------------|----------|----------|----------|
| ENSG00000221855.1_TAS2R41    | ENSG00000160789.18_LMNA | -0.19494 | -0.343485134 | -0.03688875 | 1.61E-02 | 9.23E-02 | 1.00E+00 |
| ENSG00000218274.2_RP3-407E4  | ENSG00000160789.18_LMNA | 0.01986  | -0.139783507 | 0.178495506 | 8.08E-01 | 9.24E-01 | 1.00E+00 |
| ENSG00000261436.4_RP11-354I1 | ENSG00000160789.18_LMNA | 0.01337  | -0.146137651 | 0.172208244 | 8.70E-01 | 9.50E-01 | 1.00E+00 |
| ENSG00000260976.1_GS1-120K1  | ENSG00000160789.18_LMNA | 0.01779  | -0.141809582 | 0.176493575 | 8.28E-01 | 9.33E-01 | 1.00E+00 |
| ENSG00000253803.1_RP11-101E  | ENSG00000160789.18_LMNA | 0.00191  | -0.157340579 | 0.161059695 | 9.81E-01 | 9.93E-01 | 1.00E+00 |
| ENSG00000250316.1_RP11-618M  | ENSG00000160789.18_LMNA | -0.14338 | -0.295830831 | 0.016187241 | 7.80E-02 | 2.68E-01 | 1.00E+00 |
| ENSG00000248295.2_DDX43P1    | ENSG00000160789.18_LMNA | -0.01514 | -0.173919768 | 0.144410518 | 8.53E-01 | 9.42E-01 | 1.00E+00 |
| ENSG00000173908.8_KRT28      | ENSG00000160789.18_LMNA | -0.18757 | -0.33671486  | -0.02924131 | 2.07E-02 | 1.10E-01 | 1.00E+00 |
| ENSG00000231140.3_RP11-347J  | ENSG00000160789.18_LMNA | -0.05576 | -0.213073557 | 0.104362741 | 4.95E-01 | 7.50E-01 | 1.00E+00 |
| ENSG00000205830.1_AC024132   | ENSG00000160789.18_LMNA | 0.04846  | -0.111604163 | 0.206068498 | 5.53E-01 | 7.88E-01 | 1.00E+00 |
| ENSG00000229693.2_RP11-25C1  | ENSG00000160789.18_LMNA | 0.02289  | -0.136806682 | 0.181432084 | 7.80E-01 | 9.09E-01 | 1.00E+00 |
| ENSG00000236704.1_CNOT4P1    | ENSG00000160789.18_LMNA | -0.02753 | -0.185919751 | 0.132246379 | 7.36E-01 | 8.89E-01 | 1.00E+00 |
| ENSG00000242983.1_CABYRP1    | ENSG00000160789.18_LMNA | 0.04478  | -0.115247017 | 0.202532197 | 5.84E-01 | 8.07E-01 | 1.00E+00 |
| ENSG00000235352.1_AC023128   | ENSG00000160789.18_LMNA | 0.04838  | -0.111680482 | 0.205994497 | 5.54E-01 | 7.88E-01 | 1.00E+00 |
| ENSG00000131264.3_CDX4       | ENSG00000160789.18_LMNA | 0.00271  | -0.156563041 | 0.161836092 | 9.74E-01 | 9.90E-01 | 1.00E+00 |
| ENSG00000204053.6_MYCLP1     | ENSG00000160789.18_LMNA | -0.01412 | -0.172928897 | 0.145410662 | 8.63E-01 | 9.46E-01 | 1.00E+00 |
| ENSG00000236513.1_RP11-707P  | ENSG00000160789.18_LMNA | 0.11368  | -0.046357893 | 0.268031611 | 1.63E-01 | 4.19E-01 | 1.00E+00 |
| ENSG00000258358.2_RP11-228G  | ENSG00000160789.18_LMNA | -0.06981 | -0.226497364 | 0.090391296 | 3.93E-01 | 6.70E-01 | 1.00E+00 |
| ENSG00000169717.6_ACTRT2     | ENSG00000160789.18_LMNA | -0.08129 | -0.237420803 | 0.078929427 | 3.19E-01 | 6.06E-01 | 1.00E+00 |
| ENSG00000249050.1_RP11-375N  | ENSG00000160789.18_LMNA | 0.06079  | -0.099375017 | 0.217879571 | 4.57E-01 | 7.21E-01 | 1.00E+00 |
| ENSG00000251199.4_RP11-400D  | ENSG00000160789.18_LMNA | -0.05834 | -0.215541952 | 0.101803012 | 4.75E-01 | 7.34E-01 | 1.00E+00 |
| ENSG00000235626.2_KRT18P66   | ENSG00000160789.18_LMNA | 0.17651  | 0.01780979   | 0.326534928 | 2.96E-02 | 1.42E-01 | 1.00E+00 |
| ENSG00000196184.8_OR10J1     | ENSG00000160789.18_LMNA | 0.00529  | -0.154036606 | 0.1643561   | 9.48E-01 | 9.79E-01 | 1.00E+00 |
| ENSG00000269307.1_CTD-2278I1 | ENSG00000160789.18_LMNA | 0.00761  | -0.15177944  | 0.166604016 | 9.26E-01 | 9.72E-01 | 1.00E+00 |
| ENSG00000183305.12_MAGEA2E   | ENSG00000160789.18_LMNA | -0.02724 | -0.185631272 | 0.132539933 | 7.39E-01 | 8.90E-01 | 1.00E+00 |
| ENSG00000232800.1_SLC7A15P   | ENSG00000160789.18_LMNA | 0.10312  | -0.057017307 | 0.25808326  | 2.06E-01 | 4.78E-01 | 1.00E+00 |
| ENSG00000273558.1_RP11-244H  | ENSG00000160789.18_LMNA | -0.06518 | -0.22207208  | 0.095010937 | 4.25E-01 | 6.96E-01 | 1.00E+00 |
| ENSG00000224462.2_C4BPAP1    | ENSG00000160789.18_LMNA | 0.09011  | -0.070096026 | 0.245785011 | 2.70E-01 | 5.54E-01 | 1.00E+00 |
| ENSG00000166351.9_POTED      | ENSG00000160789.18_LMNA | -0.0205  | -0.179118253 | 0.139152705 | 8.02E-01 | 9.21E-01 | 1.00E+00 |
| ENSG00000263682.1_RP11-93H1  | ENSG00000160789.18_LMNA | -0.06652 | -0.22335721  | 0.093670771 | 4.15E-01 | 6.88E-01 | 1.00E+00 |
| ENSG00000225295.1_MTND4P4    | ENSG00000160789.18_LMNA | -0.04398 | -0.201767376 | 0.11603376  | 5.91E-01 | 8.10E-01 | 1.00E+00 |
| ENSG00000229776.1_C4B-AS1    | ENSG00000160789.18_LMNA | 0.03426  | -0.125621853 | 0.192415202 | 6.75E-01 | 8.58E-01 | 1.00E+00 |
| ENSG00000231814.2_LINC00210  | ENSG00000160789.18_LMNA | -0.21067 | -0.357872423 | -0.05326022 | 9.18E-03 | 6.16E-02 | 1.00E+00 |

|                              |                         |          |              |             |          |          |          |
|------------------------------|-------------------------|----------|--------------|-------------|----------|----------|----------|
| ENSG00000250612.1_RP11-618I1 | ENSG00000160789.18_LMNA | -0.11654 | -0.270719668 | 0.043465366 | 1.53E-01 | 4.02E-01 | 1.00E+00 |
| ENSG00000251177.2_RP11-401E  | ENSG00000160789.18_LMNA | -0.05383 | -0.211220171 | 0.106281944 | 5.10E-01 | 7.59E-01 | 1.00E+00 |
| ENSG00000197176.6_RP11-76E1  | ENSG00000160789.18_LMNA | -0.12233 | -0.276154089 | 0.037601438 | 1.33E-01 | 3.70E-01 | 1.00E+00 |
| ENSG00000249590.6_RP4-539M6  | ENSG00000160789.18_LMNA | 0.04833  | -0.111730259 | 0.205946229 | 5.54E-01 | 7.89E-01 | 1.00E+00 |
| ENSG00000253117.4_OC90       | ENSG00000160789.18_LMNA | 0.04156  | -0.118420461 | 0.199444805 | 6.11E-01 | 8.23E-01 | 1.00E+00 |
| ENSG00000124812.13_CRISP1    | ENSG00000160789.18_LMNA | -0.01734 | -0.176057024 | 0.142251044 | 8.32E-01 | 9.35E-01 | 1.00E+00 |
| ENSG00000279341.1_RP11-720D  | ENSG00000160789.18_LMNA | -0.11585 | -0.270067577 | 0.044167543 | 1.55E-01 | 4.06E-01 | 1.00E+00 |
| ENSG00000231915.2_SALL4P5    | ENSG00000160789.18_LMNA | -0.14764 | -0.299795706 | 0.011837338 | 6.95E-02 | 2.48E-01 | 1.00E+00 |
| ENSG00000257415.1_RP11-626I2 | ENSG00000160789.18_LMNA | -0.13478 | -0.287807985 | 0.024953202 | 9.78E-02 | 3.08E-01 | 1.00E+00 |
| ENSG00000184761.7_AC013269.I | ENSG00000160789.18_LMNA | -0.01952 | -0.178168457 | 0.140114682 | 8.11E-01 | 9.26E-01 | 1.00E+00 |
| ENSG00000182776.4_RP11-114H  | ENSG00000160789.18_LMNA | -0.07989 | -0.23609272  | 0.080327454 | 3.28E-01 | 6.14E-01 | 1.00E+00 |
| ENSG00000279032.1_RP11-306B  | ENSG00000160789.18_LMNA | -0.06028 | -0.217394544 | 0.099879107 | 4.61E-01 | 7.24E-01 | 1.00E+00 |
| ENSG00000163157.13_TM0D4     | ENSG00000160789.18_LMNA | 0.03548  | -0.124423277 | 0.193587454 | 6.64E-01 | 8.52E-01 | 1.00E+00 |
| ENSG00000279324.1_RP11-93G2  | ENSG00000160789.18_LMNA | 0.04893  | -0.111131687 | 0.206526547 | 5.49E-01 | 7.86E-01 | 1.00E+00 |
| ENSG00000164871.16_SPAG11B   | ENSG00000160789.18_LMNA | -0.10832 | -0.262982955 | 0.051776367 | 1.84E-01 | 4.49E-01 | 1.00E+00 |
| ENSG00000279367.1_RP11-157P  | ENSG00000160789.18_LMNA | 0.13849  | -0.021177547 | 0.291268958 | 8.88E-02 | 2.90E-01 | 1.00E+00 |
| ENSG00000189139.5_FSCB       | ENSG00000160789.18_LMNA | -0.08806 | -0.243842946 | 0.072151458 | 2.81E-01 | 5.66E-01 | 1.00E+00 |
| ENSG00000165841.8_CYP2C19    | ENSG00000160789.18_LMNA | 0.16968  | 0.01077058   | 0.320230574 | 3.66E-02 | 1.63E-01 | 1.00E+00 |
| ENSG00000204787.7_REG1CP     | ENSG00000160789.18_LMNA | -0.02573 | -0.184174441 | 0.13402154  | 7.53E-01 | 8.97E-01 | 1.00E+00 |
| ENSG00000265788.1_RP11-19P2  | ENSG00000160789.18_LMNA | -0.06418 | -0.221120503 | 0.096002527 | 4.32E-01 | 7.01E-01 | 1.00E+00 |
| ENSG00000120289.11_MAGEB4    | ENSG00000160789.18_LMNA | -0.20855 | -0.355935279 | -0.05104634 | 9.93E-03 | 6.53E-02 | 1.00E+00 |
| ENSG00000212855.5_TTTY2      | ENSG00000160789.18_LMNA | -0.23993 | -0.384447079 | -0.08393663 | 2.91E-03 | 2.61E-02 | 1.00E+00 |
| ENSG00000101981.9_F9         | ENSG00000160789.18_LMNA | -0.18323 | -0.332727827 | -0.02475448 | 2.38E-02 | 1.22E-01 | 1.00E+00 |
| ENSG00000131059.10_BPIFA3    | ENSG00000160789.18_LMNA | -0.00041 | -0.15960027  | 0.158801081 | 9.96E-01 | 9.98E-01 | 1.00E+00 |
| ENSG00000223440.1_RP11-555J. | ENSG00000160789.18_LMNA | -0.03444 | -0.192581214 | 0.125452169 | 6.74E-01 | 8.57E-01 | 1.00E+00 |
| ENSG00000273976.1_GOLGA6L1   | ENSG00000160789.18_LMNA | 0.09374  | -0.066449182 | 0.249224486 | 2.51E-01 | 5.31E-01 | 1.00E+00 |
| ENSG00000260670.1_RP11-447M  | ENSG00000160789.18_LMNA | -0.0798  | -0.236000988 | 0.080423971 | 3.28E-01 | 6.15E-01 | 1.00E+00 |
| ENSG00000278299.3_TBC1D3C    | ENSG00000160789.18_LMNA | -0.03163 | -0.189874254 | 0.128216675 | 6.99E-01 | 8.71E-01 | 1.00E+00 |
| ENSG00000258869.1_RP11-204N  | ENSG00000160789.18_LMNA | 0.01992  | -0.139720093 | 0.178558121 | 8.08E-01 | 9.23E-01 | 1.00E+00 |
| ENSG00000259084.5_RP11-1070I | ENSG00000160789.18_LMNA | -0.14121 | -0.293805863 | 0.018404306 | 8.27E-02 | 2.78E-01 | 1.00E+00 |
| ENSG00000172294.7_CSPG4P4Y   | ENSG00000160789.18_LMNA | 0.00726  | -0.152121068 | 0.166264    | 9.29E-01 | 9.73E-01 | 1.00E+00 |
| ENSG00000258916.2_SPATA31E   | ENSG00000160789.18_LMNA | -0.05906 | -0.216229343 | 0.101089437 | 4.70E-01 | 7.30E-01 | 1.00E+00 |
| ENSG00000186788.11_SPATA31I  | ENSG00000160789.18_LMNA | 0.10628  | -0.05383003  | 0.261064942 | 1.93E-01 | 4.61E-01 | 1.00E+00 |

|                             |                         |          |              |             |          |          |          |
|-----------------------------|-------------------------|----------|--------------|-------------|----------|----------|----------|
| ENSG00000279442.1_LA16c-60D | ENSG00000160789.18_LMNA | 0.01499  | -0.144554694 | 0.173776969 | 8.55E-01 | 9.43E-01 | 1.00E+00 |
| ENSG00000275252.1_          | ENSG00000160789.18_LMNA | 0.1101   | -0.049979931 | 0.264658693 | 1.77E-01 | 4.38E-01 | 1.00E+00 |
| ENSG00000274060.1_MIR6724-2 | ENSG00000160789.18_LMNA | -0.09126 | -0.246873251 | 0.068943088 | 2.63E-01 | 5.47E-01 | 1.00E+00 |
| ENSG00000274815.1_          | ENSG00000160789.18_LMNA | 0.04626  | -0.113779479 | 0.203957807 | 5.71E-01 | 8.00E-01 | 1.00E+00 |
| ENSG00000265470.1_MIR548AQ  | ENSG00000160789.18_LMNA | -0.03872 | -0.196708822 | 0.121227286 | 6.36E-01 | 8.37E-01 | 1.00E+00 |
| ENSG00000211905.1_IGHJ1     | ENSG00000160789.18_LMNA | -0.01351 | -0.172338716 | 0.146006057 | 8.69E-01 | 9.49E-01 | 1.00E+00 |
| ENSG00000207691.1_MIR183    | ENSG00000160789.18_LMNA | -0.04004 | -0.197975487 | 0.119928456 | 6.24E-01 | 8.31E-01 | 1.00E+00 |
| ENSG00000199585.1_RNA5SP11  | ENSG00000160789.18_LMNA | -0.06178 | -0.218830946 | 0.098385779 | 4.50E-01 | 7.15E-01 | 1.00E+00 |
| ENSG00000221446.1_          | ENSG00000160789.18_LMNA | -0.01854 | -0.177218533 | 0.141076189 | 8.21E-01 | 9.30E-01 | 1.00E+00 |
| ENSG00000263926.1_MIR4462   | ENSG00000160789.18_LMNA | -0.09469 | -0.250118234 | 0.065500166 | 2.46E-01 | 5.26E-01 | 1.00E+00 |
| ENSG00000207993.3_MIR134    | ENSG00000160789.18_LMNA | 0.0709   | -0.089313483 | 0.227527953 | 3.85E-01 | 6.64E-01 | 1.00E+00 |
| ENSG00000266006.1_MIR4488   | ENSG00000160789.18_LMNA | 0.00108  | -0.158151207 | 0.160249838 | 9.89E-01 | 9.96E-01 | 1.00E+00 |
| ENSG00000264399.1_MIR4736   | ENSG00000160789.18_LMNA | 0.10333  | -0.056805149 | 0.25828192  | 2.05E-01 | 4.77E-01 | 1.00E+00 |
| ENSG00000207607.2_MIR200A   | ENSG00000160789.18_LMNA | 0.01178  | -0.147696125 | 0.170662203 | 8.85E-01 | 9.56E-01 | 1.00E+00 |
| ENSG00000211544.1_          | ENSG00000160789.18_LMNA | -0.09481 | -0.250235758 | 0.065375333 | 2.45E-01 | 5.25E-01 | 1.00E+00 |
| ENSG00000281656.1_AC073130. | ENSG00000160789.18_LMNA | -0.00706 | -0.166072224 | 0.15231372  | 9.31E-01 | 9.73E-01 | 1.00E+00 |
| ENSG00000201228.1_Y_RNA     | ENSG00000160789.18_LMNA | -0.05191 | -0.209383635 | 0.108181368 | 5.25E-01 | 7.70E-01 | 1.00E+00 |
| ENSG00000281587.1_          | ENSG00000160789.18_LMNA | 0.06691  | -0.093282469 | 0.223729359 | 4.13E-01 | 6.86E-01 | 1.00E+00 |
| ENSG00000198974.2_MIR30E    | ENSG00000160789.18_LMNA | 0.05978  | -0.10037597  | 0.216916317 | 4.64E-01 | 7.27E-01 | 1.00E+00 |
| ENSG00000277208.1_RP11-12A2 | ENSG00000160789.18_LMNA | 0.10196  | -0.058181841 | 0.256992346 | 2.11E-01 | 4.85E-01 | 1.00E+00 |
| ENSG00000265875.1_          | ENSG00000160789.18_LMNA | 0.05041  | -0.109668254 | 0.207944413 | 5.37E-01 | 7.78E-01 | 1.00E+00 |
| ENSG00000252682.1_SNORD59   | ENSG00000160789.18_LMNA | 0.02355  | -0.136164955 | 0.182064392 | 7.73E-01 | 9.07E-01 | 1.00E+00 |
| ENSG00000263858.1_MIR4769   | ENSG00000160789.18_LMNA | 0.05934  | -0.100811276 | 0.216497213 | 4.68E-01 | 7.29E-01 | 1.00E+00 |
| ENSG00000237572.1_RP11-373D | ENSG00000160789.18_LMNA | 0.01278  | -0.146719842 | 0.17163088  | 8.76E-01 | 9.52E-01 | 1.00E+00 |
| ENSG00000238787.2_          | ENSG00000160789.18_LMNA | -0.0008  | -0.159977622 | 0.158423585 | 9.92E-01 | 9.97E-01 | 1.00E+00 |
| ENSG00000273288.1_          | ENSG00000160789.18_LMNA | -0.17017 | -0.320685809 | -0.01127785 | 3.61E-02 | 1.62E-01 | 1.00E+00 |
| ENSG00000252200.1_snoZ6     | ENSG00000160789.18_LMNA | 0.00202  | -0.157228501 | 0.161171633 | 9.80E-01 | 9.93E-01 | 1.00E+00 |
| ENSG00000263768.1_          | ENSG00000160789.18_LMNA | -0.05254 | -0.209984077 | 0.10756062  | 5.20E-01 | 7.66E-01 | 1.00E+00 |
| ENSG00000273952.1_          | ENSG00000160789.18_LMNA | -0.0068  | -0.165822768 | 0.152564279 | 9.34E-01 | 9.74E-01 | 1.00E+00 |
| ENSG00000207292.1_Y_RNA     | ENSG00000160789.18_LMNA | 0.09608  | -0.064098331 | 0.251437448 | 2.39E-01 | 5.18E-01 | 1.00E+00 |
| ENSG00000212259.1_RNU6-308F | ENSG00000160789.18_LMNA | -0.01679 | -0.175517138 | 0.142796829 | 8.37E-01 | 9.37E-01 | 1.00E+00 |
| ENSG00000238884.1_RNU7-85P  | ENSG00000160789.18_LMNA | 0.11322  | -0.046826835 | 0.267595356 | 1.65E-01 | 4.21E-01 | 1.00E+00 |
| ENSG00000264141.1_MIR3928   | ENSG00000160789.18_LMNA | 0.1294   | -0.030429117 | 0.282773903 | 1.12E-01 | 3.34E-01 | 1.00E+00 |

|                             |                         |          |              |             |          |          |          |
|-----------------------------|-------------------------|----------|--------------|-------------|----------|----------|----------|
| ENSG00000276081.1_MIR7156   | ENSG00000160789.18_LMNA | 0.0643   | -0.095882162 | 0.221236043 | 4.31E-01 | 7.01E-01 | 1.00E+00 |
| ENSG00000211864.2_TRAJ25    | ENSG00000160789.18_LMNA | 0.15025  | -0.009175015 | 0.302217077 | 6.47E-02 | 2.37E-01 | 1.00E+00 |
| ENSG00000263816.1_MIR548AW  | ENSG00000160789.18_LMNA | -0.0313  | -0.189560347 | 0.128536937 | 7.02E-01 | 8.73E-01 | 1.00E+00 |
| ENSG00000207583.1_MIR606    | ENSG00000160789.18_LMNA | -0.07994 | -0.236134682 | 0.080283301 | 3.28E-01 | 6.14E-01 | 1.00E+00 |
| ENSG00000270395.1_MREGP1    | ENSG00000160789.18_LMNA | -0.06744 | -0.22423658  | 0.092753078 | 4.09E-01 | 6.83E-01 | 1.00E+00 |
| ENSG00000252250.1_Y_RNA     | ENSG00000160789.18_LMNA | -0.00558 | -0.164638218 | 0.15375351  | 9.46E-01 | 9.78E-01 | 1.00E+00 |
| ENSG00000252057.2_RNU7-174F | ENSG00000160789.18_LMNA | 0.05574  | -0.10438218  | 0.213054795 | 4.95E-01 | 7.50E-01 | 1.00E+00 |
| ENSG00000265089.1_MIR4655   | ENSG00000160789.18_LMNA | 0.0491   | -0.110968773 | 0.206684455 | 5.48E-01 | 7.85E-01 | 1.00E+00 |
| ENSG00000263891.1_          | ENSG00000160789.18_LMNA | -0.0606  | -0.217703205 | 0.099558334 | 4.58E-01 | 7.22E-01 | 1.00E+00 |
| ENSG00000252008.1_RNU6-927F | ENSG00000160789.18_LMNA | 0.09     | -0.07020413  | 0.245682933 | 2.70E-01 | 5.55E-01 | 1.00E+00 |
| ENSG00000200949.1_SNORD115  | ENSG00000160789.18_LMNA | 0.05304  | -0.107068735 | 0.210459701 | 5.16E-01 | 7.63E-01 | 1.00E+00 |
| ENSG00000278612.1_          | ENSG00000160789.18_LMNA | -0.13394 | -0.287021143 | 0.025810344 | 9.99E-02 | 3.11E-01 | 1.00E+00 |
| ENSG00000280785.1_          | ENSG00000160789.18_LMNA | 0.1369   | -0.022798403 | 0.289784194 | 9.26E-02 | 2.97E-01 | 1.00E+00 |
| ENSG00000264984.1_MIR5691   | ENSG00000160789.18_LMNA | 0.0259   | -0.133857445 | 0.184335861 | 7.51E-01 | 8.96E-01 | 1.00E+00 |
| ENSG00000263782.1_          | ENSG00000160789.18_LMNA | 0.14951  | -0.00993064  | 0.301530248 | 6.60E-02 | 2.40E-01 | 1.00E+00 |
| ENSG00000239169.1_SNORD109  | ENSG00000160789.18_LMNA | 0.03539  | -0.12450737  | 0.193505238 | 6.65E-01 | 8.52E-01 | 1.00E+00 |
| ENSG00000199104.2_MIR346    | ENSG00000160789.18_LMNA | -0.11815 | -0.272230439 | 0.041837362 | 1.47E-01 | 3.93E-01 | 1.00E+00 |
| ENSG00000263790.1_MIR4473   | ENSG00000160789.18_LMNA | -0.02871 | -0.187056927 | 0.131088654 | 7.25E-01 | 8.84E-01 | 1.00E+00 |
| ENSG00000206609.1_SNORD116  | ENSG00000160789.18_LMNA | 0.01547  | -0.144087928 | 0.17423923  | 8.50E-01 | 9.41E-01 | 1.00E+00 |
| ENSG00000265612.1_MIR4539   | ENSG00000160789.18_LMNA | 0.0013   | -0.157928561 | 0.160472314 | 9.87E-01 | 9.95E-01 | 1.00E+00 |
| ENSG00000211872.1_TRAJ17    | ENSG00000160789.18_LMNA | 0.0095   | -0.149924604 | 0.168448775 | 9.07E-01 | 9.65E-01 | 1.00E+00 |
| ENSG00000264580.1_MIR5692B  | ENSG00000160789.18_LMNA | -0.01968 | -0.17832336  | 0.139957834 | 8.10E-01 | 9.25E-01 | 1.00E+00 |
| ENSG00000281786.1_          | ENSG00000160789.18_LMNA | -0.00689 | -0.165911011 | 0.152475651 | 9.33E-01 | 9.74E-01 | 1.00E+00 |
| ENSG00000211858.1_TRAJ31    | ENSG00000160789.18_LMNA | 0.09147  | -0.068728129 | 0.247076059 | 2.62E-01 | 5.46E-01 | 1.00E+00 |
| ENSG00000252548.1_RNU7-149F | ENSG00000160789.18_LMNA | 0.02887  | -0.130928018 | 0.187214645 | 7.24E-01 | 8.83E-01 | 1.00E+00 |
| ENSG00000281414.1_          | ENSG00000160789.18_LMNA | 0.06095  | -0.099210377 | 0.218037952 | 4.56E-01 | 7.20E-01 | 1.00E+00 |
| ENSG00000207286.1_Y_RNA     | ENSG00000160789.18_LMNA | 0.01158  | -0.1478962   | 0.17046361  | 8.87E-01 | 9.56E-01 | 1.00E+00 |
| ENSG00000275101.1_MIR6766   | ENSG00000160789.18_LMNA | -0.05502 | -0.212356249 | 0.105105802 | 5.01E-01 | 7.53E-01 | 1.00E+00 |
| ENSG00000202276.1_Y_RNA     | ENSG00000160789.18_LMNA | -0.05682 | -0.214086229 | 0.103313107 | 4.87E-01 | 7.43E-01 | 1.00E+00 |
| ENSG00000264493.1_MIR4298   | ENSG00000160789.18_LMNA | 0.15293  | -0.006430176 | 0.304709295 | 6.00E-02 | 2.26E-01 | 1.00E+00 |
| ENSG00000281635.1_AC022819  | ENSG00000160789.18_LMNA | -0.06701 | -0.223822804 | 0.093184954 | 4.12E-01 | 6.86E-01 | 1.00E+00 |
| ENSG00000201339.1_Y_RNA     | ENSG00000160789.18_LMNA | 0.06691  | -0.093281015 | 0.223730753 | 4.13E-01 | 6.86E-01 | 1.00E+00 |
| ENSG00000264182.1_          | ENSG00000160789.18_LMNA | 0.0537   | -0.106407364 | 0.211098972 | 5.11E-01 | 7.60E-01 | 1.00E+00 |

|                             |                         |          |              |             |          |          |          |
|-----------------------------|-------------------------|----------|--------------|-------------|----------|----------|----------|
| ENSG00000207330.1_RNU6-73P  | ENSG00000160789.18_LMNA | 0.03094  | -0.128893318 | 0.189210959 | 7.05E-01 | 8.74E-01 | 1.00E+00 |
| ENSG00000199322.1_RNA5SP18  | ENSG00000160789.18_LMNA | -0.0444  | -0.202167329 | 0.115622393 | 5.87E-01 | 8.08E-01 | 1.00E+00 |
| ENSG00000278359.1_MIR7155   | ENSG00000160789.18_LMNA | -0.02629 | -0.184717342 | 0.133469573 | 7.48E-01 | 8.95E-01 | 1.00E+00 |
| ENSG00000207456.1_RNU6-997F | ENSG00000160789.18_LMNA | -0.1672  | -0.317940154 | -0.00822075 | 3.95E-02 | 1.72E-01 | 1.00E+00 |
| ENSG00000199739.1_RNU6-552F | ENSG00000160789.18_LMNA | 0.00684  | -0.152527628 | 0.165859261 | 9.33E-01 | 9.74E-01 | 1.00E+00 |
| ENSG00000202205.1_RNU6-1034 | ENSG00000160789.18_LMNA | -0.03889 | -0.196872396 | 0.121059619 | 6.34E-01 | 8.36E-01 | 1.00E+00 |
| ENSG00000201502.1_SNORD74   | ENSG00000160789.18_LMNA | 0.01711  | -0.142482963 | 0.175827635 | 8.34E-01 | 9.36E-01 | 1.00E+00 |
| ENSG00000264295.1_MIR3922   | ENSG00000160789.18_LMNA | 0.03402  | -0.125867048 | 0.19217528  | 6.77E-01 | 8.59E-01 | 1.00E+00 |
| ENSG00000264102.1_MIR4688   | ENSG00000160789.18_LMNA | -0.03569 | -0.193791233 | 0.124214827 | 6.62E-01 | 8.51E-01 | 1.00E+00 |
| ENSG00000281301.1_          | ENSG00000160789.18_LMNA | 0.22167  | 0.064750936  | 0.367884848 | 6.06E-03 | 4.53E-02 | 1.00E+00 |
| ENSG00000274027.1_          | ENSG00000160789.18_LMNA | -0.06973 | -0.226418758 | 0.090473473 | 3.93E-01 | 6.71E-01 | 1.00E+00 |
| ENSG00000199453.1_SNORD115  | ENSG00000160789.18_LMNA | -0.04504 | -0.202788886 | 0.114982881 | 5.82E-01 | 8.05E-01 | 1.00E+00 |
| ENSG00000265507.1_MIR4435-1 | ENSG00000160789.18_LMNA | 0.03867  | -0.121274089 | 0.196663158 | 6.36E-01 | 8.37E-01 | 1.00E+00 |
| ENSG00000265249.1_          | ENSG00000160789.18_LMNA | -0.00778 | -0.166771343 | 0.15161129  | 9.24E-01 | 9.71E-01 | 1.00E+00 |
| ENSG00000223003.1_RNA5SP18  | ENSG00000160789.18_LMNA | 0.13063  | -0.029182544 | 0.283921413 | 1.09E-01 | 3.28E-01 | 1.00E+00 |
| ENSG00000276352.1_MIR668    | ENSG00000160789.18_LMNA | -0.0926  | -0.248143156 | 0.067596616 | 2.57E-01 | 5.39E-01 | 1.00E+00 |
| ENSG00000207639.1_MIR193B   | ENSG00000160789.18_LMNA | 0.12136  | -0.038587755 | 0.275241416 | 1.36E-01 | 3.76E-01 | 1.00E+00 |
| ENSG00000252507.1_RNU7-81P  | ENSG00000160789.18_LMNA | -0.11524 | -0.269498529 | 0.044780045 | 1.57E-01 | 4.10E-01 | 1.00E+00 |
| ENSG00000202356.1_RNA5SP27  | ENSG00000160789.18_LMNA | -0.03723 | -0.19527178  | 0.122699503 | 6.49E-01 | 8.44E-01 | 1.00E+00 |
| ENSG00000201348.1_RNU105B   | ENSG00000160789.18_LMNA | -0.06392 | -0.220871174 | 0.096262235 | 4.34E-01 | 7.03E-01 | 1.00E+00 |
| ENSG00000199551.1_RNU6-545F | ENSG00000160789.18_LMNA | -0.01154 | -0.170431381 | 0.147928668 | 8.88E-01 | 9.56E-01 | 1.00E+00 |
| ENSG00000202137.1_Y_RNA     | ENSG00000160789.18_LMNA | -0.04893 | -0.206526256 | 0.111131988 | 5.49E-01 | 7.86E-01 | 1.00E+00 |
| ENSG00000211861.1_TRAJ28    | ENSG00000160789.18_LMNA | 0.08398  | -0.076237894 | 0.239974352 | 3.04E-01 | 5.90E-01 | 1.00E+00 |
| ENSG00000201277.1_Y_RNA     | ENSG00000160789.18_LMNA | -0.09975 | -0.254900631 | 0.060412317 | 2.21E-01 | 4.97E-01 | 1.00E+00 |
| ENSG00000252534.1_Y_RNA     | ENSG00000160789.18_LMNA | -0.15427 | -0.305955819 | 0.005055539 | 5.77E-02 | 2.20E-01 | 1.00E+00 |
| ENSG00000200102.1_RNU6-252F | ENSG00000160789.18_LMNA | -0.05966 | -0.216803747 | 0.100492904 | 4.65E-01 | 7.27E-01 | 1.00E+00 |
| ENSG00000238902.1_snoU13    | ENSG00000160789.18_LMNA | 0.03738  | -0.122545114 | 0.195422545 | 6.47E-01 | 8.43E-01 | 1.00E+00 |
| ENSG00000199629.1_RNU1-14P  | ENSG00000160789.18_LMNA | 0.12288  | -0.037041493 | 0.276671973 | 1.31E-01 | 3.68E-01 | 1.00E+00 |
| ENSG00000274314.1_MIR6749   | ENSG00000160789.18_LMNA | 0.11336  | -0.04668668  | 0.267725755 | 1.64E-01 | 4.20E-01 | 1.00E+00 |
| ENSG00000277933.1_          | ENSG00000160789.18_LMNA | -0.04617 | -0.203873656 | 0.113866144 | 5.72E-01 | 8.00E-01 | 1.00E+00 |
| ENSG00000221390.1_MIR1295A  | ENSG00000160789.18_LMNA | -0.03467 | -0.192806521 | 0.12522185  | 6.72E-01 | 8.56E-01 | 1.00E+00 |
| ENSG00000201031.1_Y_RNA     | ENSG00000160789.18_LMNA | 0.02634  | -0.133424041 | 0.184762117 | 7.47E-01 | 8.94E-01 | 1.00E+00 |
| ENSG00000212411.1_SNORD115  | ENSG00000160789.18_LMNA | -0.10415 | -0.259053647 | 0.055980714 | 2.02E-01 | 4.72E-01 | 1.00E+00 |

|                             |                         |          |              |             |          |          |          |
|-----------------------------|-------------------------|----------|--------------|-------------|----------|----------|----------|
| ENSG00000222920.1_RNA5SP29  | ENSG00000160789.18_LMNA | -0.10687 | -0.261622239 | 0.053233592 | 1.90E-01 | 4.57E-01 | 1.00E+00 |
| ENSG00000273941.1_          | ENSG00000160789.18_LMNA | -0.03396 | -0.192119767 | 0.125923775 | 6.78E-01 | 8.59E-01 | 1.00E+00 |
| ENSG00000212331.1_RNA5SP29  | ENSG00000160789.18_LMNA | 0.02444  | -0.135289943 | 0.182926137 | 7.65E-01 | 9.02E-01 | 1.00E+00 |
| ENSG00000264483.1_MIR5008   | ENSG00000160789.18_LMNA | 0.08441  | -0.075811716 | 0.24037828  | 3.01E-01 | 5.88E-01 | 1.00E+00 |
| ENSG00000238427.1_RNU7-136F | ENSG00000160789.18_LMNA | -0.18901 | -0.33804274  | -0.0307384  | 1.97E-02 | 1.07E-01 | 1.00E+00 |
| ENSG00000281516.1_SCARNA4   | ENSG00000160789.18_LMNA | -0.04101 | -0.198909116 | 0.118970422 | 6.16E-01 | 8.26E-01 | 1.00E+00 |
| ENSG00000221573.1_          | ENSG00000160789.18_LMNA | -0.00922 | -0.16817174  | 0.150203295 | 9.10E-01 | 9.66E-01 | 1.00E+00 |
| ENSG00000212446.1_RNU6-131F | ENSG00000160789.18_LMNA | 0.02592  | -0.133829547 | 0.184363302 | 7.51E-01 | 8.96E-01 | 1.00E+00 |
| ENSG00000265333.1_MIR3137   | ENSG00000160789.18_LMNA | 0.06781  | -0.092389561 | 0.224584774 | 4.07E-01 | 6.82E-01 | 1.00E+00 |
| ENSG00000251908.1_RNU6-491F | ENSG00000160789.18_LMNA | -0.05532 | -0.212647149 | 0.1048045   | 4.98E-01 | 7.52E-01 | 1.00E+00 |
| ENSG00000264081.1_          | ENSG00000160789.18_LMNA | 0.05676  | -0.103370969 | 0.214030422 | 4.87E-01 | 7.44E-01 | 1.00E+00 |
| ENSG00000251805.1_SCARNA21  | ENSG00000160789.18_LMNA | -0.01653 | -0.175267513 | 0.143049116 | 8.40E-01 | 9.38E-01 | 1.00E+00 |
| ENSG00000263577.1_          | ENSG00000160789.18_LMNA | 0.11063  | -0.049445932 | 0.265156449 | 1.75E-01 | 4.35E-01 | 1.00E+00 |
| ENSG00000280676.1_          | ENSG00000160789.18_LMNA | -0.09585 | -0.251217914 | 0.064331701 | 2.40E-01 | 5.19E-01 | 1.00E+00 |
| ENSG00000274635.1_          | ENSG00000160789.18_LMNA | 0.10752  | -0.05258519  | 0.262227853 | 1.87E-01 | 4.54E-01 | 1.00E+00 |
| ENSG00000200485.1_Y_RNA     | ENSG00000160789.18_LMNA | 0.09969  | -0.060473201 | 0.254843493 | 2.22E-01 | 4.97E-01 | 1.00E+00 |
| ENSG00000265667.1_          | ENSG00000160789.18_LMNA | 0.12716  | -0.03270709  | 0.280674638 | 1.19E-01 | 3.45E-01 | 1.00E+00 |
| ENSG00000265311.1_          | ENSG00000160789.18_LMNA | -0.09182 | -0.247400895 | 0.06838377  | 2.61E-01 | 5.44E-01 | 1.00E+00 |
| ENSG00000239069.1_Y_RNA     | ENSG00000160789.18_LMNA | 0.07381  | -0.086407692 | 0.230302895 | 3.66E-01 | 6.47E-01 | 1.00E+00 |
| ENSG00000221210.1_          | ENSG00000160789.18_LMNA | -0.06387 | -0.220824807 | 0.096310528 | 4.34E-01 | 7.03E-01 | 1.00E+00 |
| ENSG00000207965.1_MIR629    | ENSG00000160789.18_LMNA | -0.03482 | -0.192953469 | 0.125071615 | 6.70E-01 | 8.55E-01 | 1.00E+00 |
| ENSG00000222626.1_RNU2-48P  | ENSG00000160789.18_LMNA | 0.04608  | -0.113957563 | 0.203784883 | 5.73E-01 | 8.01E-01 | 1.00E+00 |
| ENSG00000281322.1_          | ENSG00000160789.18_LMNA | 0.00111  | -0.158114585 | 0.160286433 | 9.89E-01 | 9.96E-01 | 1.00E+00 |
| ENSG00000201894.1_RNU6-967F | ENSG00000160789.18_LMNA | -0.03349 | -0.191673403 | 0.12637983  | 6.82E-01 | 8.62E-01 | 1.00E+00 |
| ENSG00000277826.1_uc_338    | ENSG00000160789.18_LMNA | -0.11857 | -0.272623201 | 0.041413848 | 1.46E-01 | 3.91E-01 | 1.00E+00 |
| ENSG00000221680.1_MIR1278   | ENSG00000160789.18_LMNA | -0.02354 | -0.182062182 | 0.136167198 | 7.73E-01 | 9.07E-01 | 1.00E+00 |
| ENSG00000238819.1_SNORD11   | ENSG00000160789.18_LMNA | -0.15246 | -0.304274457 | 0.00690943  | 6.08E-02 | 2.28E-01 | 1.00E+00 |
| ENSG00000207305.1_Y_RNA     | ENSG00000160789.18_LMNA | -0.05957 | -0.216720205 | 0.100579678 | 4.66E-01 | 7.28E-01 | 1.00E+00 |
| ENSG00000252294.1_RNU6-589F | ENSG00000160789.18_LMNA | -0.08651 | -0.242375298 | 0.073702999 | 2.89E-01 | 5.75E-01 | 1.00E+00 |
| ENSG00000263473.2_          | ENSG00000160789.18_LMNA | -0.06902 | -0.22574351  | 0.091179224 | 3.98E-01 | 6.75E-01 | 1.00E+00 |
| ENSG00000222552.1_RNA5SP60  | ENSG00000160789.18_LMNA | 0.08784  | -0.072373488 | 0.243633009 | 2.82E-01 | 5.67E-01 | 1.00E+00 |
| ENSG00000252993.1_SNORA25   | ENSG00000160789.18_LMNA | -0.08944 | -0.245154725 | 0.070763399 | 2.73E-01 | 5.58E-01 | 1.00E+00 |
| ENSG00000264246.1_RP11-138C | ENSG00000160789.18_LMNA | -0.08304 | -0.239076779 | 0.077184494 | 3.09E-01 | 5.96E-01 | 1.00E+00 |



|                              |                         |          |              |             |          |          |          |
|------------------------------|-------------------------|----------|--------------|-------------|----------|----------|----------|
| ENSG00000199895.1_Y_RNA      | ENSG00000160789.18_LMNA | -0.03576 | -0.193854725 | 0.124149875 | 6.62E-01 | 8.51E-01 | 1.00E+00 |
| ENSG00000263759.1_           | ENSG00000160789.18_LMNA | -0.0164  | -0.175142013 | 0.143175938 | 8.41E-01 | 9.38E-01 | 1.00E+00 |
| ENSG00000253093.1_RNA5SP17   | ENSG00000160789.18_LMNA | 0.11233  | -0.047720362 | 0.266763755 | 1.68E-01 | 4.26E-01 | 1.00E+00 |
| ENSG00000199422.1_VTRNA3-1F  | ENSG00000160789.18_LMNA | 0.0203   | -0.139351278 | 0.178922243 | 8.04E-01 | 9.21E-01 | 1.00E+00 |
| ENSG00000207338.1_RNU6-296F  | ENSG00000160789.18_LMNA | -0.08819 | -0.24396467  | 0.072022706 | 2.80E-01 | 5.65E-01 | 1.00E+00 |
| ENSG00000252662.1_           | ENSG00000160789.18_LMNA | -0.24016 | -0.384654177 | -0.08417795 | 2.88E-03 | 2.59E-02 | 1.00E+00 |
| ENSG00000252707.1_RNU11-2P   | ENSG00000160789.18_LMNA | 0.04614  | -0.113896689 | 0.203843996 | 5.72E-01 | 8.00E-01 | 1.00E+00 |
| ENSG00000280790.1_           | ENSG00000160789.18_LMNA | -0.09276 | -0.248291416 | 0.067439342 | 2.56E-01 | 5.38E-01 | 1.00E+00 |
| ENSG00000248317.1_RP11-463H  | ENSG00000160789.18_LMNA | -0.06772 | -0.224497002 | 0.092481204 | 4.07E-01 | 6.82E-01 | 1.00E+00 |
| ENSG00000276117.1_           | ENSG00000160789.18_LMNA | -0.04319 | -0.201013129 | 0.116809236 | 5.97E-01 | 8.14E-01 | 1.00E+00 |
| ENSG00000264283.1_           | ENSG00000160789.18_LMNA | -0.00668 | -0.165703902 | 0.152683656 | 9.35E-01 | 9.74E-01 | 1.00E+00 |
| ENSG00000223125.1_RNU2-32P   | ENSG00000160789.18_LMNA | -0.03543 | -0.193542266 | 0.124469497 | 6.65E-01 | 8.52E-01 | 1.00E+00 |
| ENSG00000202029.1_RNU6-580F  | ENSG00000160789.18_LMNA | 0.05551  | -0.104617367 | 0.212827794 | 4.97E-01 | 7.51E-01 | 1.00E+00 |
| ENSG00000200875.1_RNU6-340F  | ENSG00000160789.18_LMNA | -0.07488 | -0.231326006 | 0.085334976 | 3.59E-01 | 6.42E-01 | 1.00E+00 |
| ENSG00000262000.1_CTD-2526A  | ENSG00000160789.18_LMNA | -0.00842 | -0.16739397  | 0.150985445 | 9.18E-01 | 9.69E-01 | 1.00E+00 |
| ENSG00000264103.1_           | ENSG00000160789.18_LMNA | 0.1524   | -0.006968219 | 0.304221106 | 6.09E-02 | 2.28E-01 | 1.00E+00 |
| ENSG00000206813.1_Y_RNA      | ENSG00000160789.18_LMNA | -0.08872 | -0.244471874 | 0.07148611  | 2.77E-01 | 5.62E-01 | 1.00E+00 |
| ENSG00000200487.1_RNA5SP32   | ENSG00000160789.18_LMNA | -0.09873 | -0.25393792  | 0.061437835 | 2.26E-01 | 5.02E-01 | 1.00E+00 |
| ENSG00000263685.1_           | ENSG00000160789.18_LMNA | 0.09268  | -0.067520293 | 0.248215107 | 2.56E-01 | 5.38E-01 | 1.00E+00 |
| ENSG00000252324.1_           | ENSG00000160789.18_LMNA | -0.02714 | -0.185539374 | 0.132633436 | 7.40E-01 | 8.91E-01 | 1.00E+00 |
| ENSG00000275159.1_           | ENSG00000160789.18_LMNA | -0.09602 | -0.251376377 | 0.064163254 | 2.39E-01 | 5.18E-01 | 1.00E+00 |
| ENSG00000230119.1_AC123900.1 | ENSG00000160789.18_LMNA | 0.0313   | -0.12854399  | 0.189553432 | 7.02E-01 | 8.73E-01 | 1.00E+00 |
| ENSG00000277861.1_           | ENSG00000160789.18_LMNA | 0.01114  | -0.148321305 | 0.170041569 | 8.92E-01 | 9.57E-01 | 1.00E+00 |
| ENSG00000216070.1_           | ENSG00000160789.18_LMNA | 0.01964  | -0.140002938 | 0.178278816 | 8.10E-01 | 9.25E-01 | 1.00E+00 |
| ENSG00000263439.1_MIR4753    | ENSG00000160789.18_LMNA | -0.14193 | -0.294477582 | 0.017669206 | 8.11E-02 | 2.75E-01 | 1.00E+00 |
| ENSG00000207347.1_RNU6-306F  | ENSG00000160789.18_LMNA | 0.06301  | -0.09716446  | 0.220004686 | 4.41E-01 | 7.08E-01 | 1.00E+00 |
| ENSG00000273527.1_           | ENSG00000160789.18_LMNA | -0.01258 | -0.171433089 | 0.146919237 | 8.78E-01 | 9.53E-01 | 1.00E+00 |
| ENSG00000253039.1_RNA5SP47   | ENSG00000160789.18_LMNA | 0.10781  | -0.052285326 | 0.262507846 | 1.86E-01 | 4.52E-01 | 1.00E+00 |
| ENSG00000252898.1_RNU6-1096  | ENSG00000160789.18_LMNA | 0.03831  | -0.121632096 | 0.19631382  | 6.39E-01 | 8.39E-01 | 1.00E+00 |
| ENSG00000265722.1_           | ENSG00000160789.18_LMNA | -0.04101 | -0.198916767 | 0.118962567 | 6.16E-01 | 8.26E-01 | 1.00E+00 |
| ENSG00000252317.1_Y_RNA      | ENSG00000160789.18_LMNA | 0.07803  | -0.082194759 | 0.23431699  | 3.39E-01 | 6.25E-01 | 1.00E+00 |
| ENSG00000252068.1_RNU6-390F  | ENSG00000160789.18_LMNA | -0.00706 | -0.166073745 | 0.152312192 | 9.31E-01 | 9.73E-01 | 1.00E+00 |
| ENSG00000266336.1_           | ENSG00000160789.18_LMNA | 0.08416  | -0.076062192 | 0.240140894 | 3.03E-01 | 5.89E-01 | 1.00E+00 |

|                              |                         |          |              |             |          |          |          |
|------------------------------|-------------------------|----------|--------------|-------------|----------|----------|----------|
| ENSG00000212459.1_RNU6-695F  | ENSG00000160789.18_LMNA | -0.07633 | -0.232707598 | 0.083885232 | 3.50E-01 | 6.34E-01 | 1.00E+00 |
| ENSG00000230468.1_CLUHP5     | ENSG00000160789.18_LMNA | 0.04046  | -0.119509586 | 0.198383757 | 6.21E-01 | 8.28E-01 | 1.00E+00 |
| ENSG00000200681.1_RNU6-263F  | ENSG00000160789.18_LMNA | 0.12686  | -0.033004242 | 0.280400576 | 1.19E-01 | 3.47E-01 | 1.00E+00 |
| ENSG00000216182.1_           | ENSG00000160789.18_LMNA | -0.057   | -0.214252308 | 0.103140899 | 4.86E-01 | 7.42E-01 | 1.00E+00 |
| ENSG00000200755.1_RNA5SP68   | ENSG00000160789.18_LMNA | 0.00095  | -0.158273625 | 0.160127498 | 9.91E-01 | 9.96E-01 | 1.00E+00 |
| ENSG00000200011.1_Y_RNA      | ENSG00000160789.18_LMNA | -0.00115 | -0.160321309 | 0.158079684 | 9.89E-01 | 9.96E-01 | 1.00E+00 |
| ENSG00000265331.1_MIR4524B   | ENSG00000160789.18_LMNA | 0.07232  | -0.087897482 | 0.228880834 | 3.76E-01 | 6.56E-01 | 1.00E+00 |
| ENSG00000212146.1_RNU6-910F  | ENSG00000160789.18_LMNA | 0.08534  | -0.074874251 | 0.241266419 | 2.96E-01 | 5.82E-01 | 1.00E+00 |
| ENSG00000276922.1_           | ENSG00000160789.18_LMNA | 0.09648  | -0.063702319 | 0.251809907 | 2.37E-01 | 5.16E-01 | 1.00E+00 |
| ENSG00000265391.1_           | ENSG00000160789.18_LMNA | -0.15273 | -0.304528608 | 0.006629337 | 6.03E-02 | 2.26E-01 | 1.00E+00 |
| ENSG00000200872.1_RNA5SP45   | ENSG00000160789.18_LMNA | -0.05163 | -0.209112524 | 0.108461565 | 5.28E-01 | 7.72E-01 | 1.00E+00 |
| ENSG00000212344.1_RNU6-823F  | ENSG00000160789.18_LMNA | 0.04516  | -0.114871068 | 0.202897534 | 5.81E-01 | 8.05E-01 | 1.00E+00 |
| ENSG00000265679.1_           | ENSG00000160789.18_LMNA | -0.00317 | -0.162291035 | 0.156107246 | 9.69E-01 | 9.88E-01 | 1.00E+00 |
| ENSG00000224585.1_AC103563.1 | ENSG00000160789.18_LMNA | -0.02096 | -0.179565314 | 0.138699703 | 7.98E-01 | 9.19E-01 | 1.00E+00 |
| ENSG00000251783.1_RNU6-1170  | ENSG00000160789.18_LMNA | 0.00707  | -0.152300304 | 0.16608558  | 9.31E-01 | 9.73E-01 | 1.00E+00 |
| ENSG00000238921.2_           | ENSG00000160789.18_LMNA | 0.11189  | -0.048163957 | 0.266350729 | 1.70E-01 | 4.29E-01 | 1.00E+00 |
| ENSG00000278945.1_AP000770.1 | ENSG00000160789.18_LMNA | 0.22744  | 0.070798983  | 0.373126724 | 4.83E-03 | 3.82E-02 | 1.00E+00 |
| ENSG00000250411.1_RP11-257I8 | ENSG00000160789.18_LMNA | 0.05545  | -0.104674654 | 0.212772496 | 4.97E-01 | 7.51E-01 | 1.00E+00 |
| ENSG00000223013.1_RNA5SP34   | ENSG00000160789.18_LMNA | 0.05875  | -0.101398556 | 0.215931606 | 4.72E-01 | 7.32E-01 | 1.00E+00 |
| ENSG00000277992.1_           | ENSG00000160789.18_LMNA | 0.02516  | -0.134575081 | 0.183629798 | 7.58E-01 | 8.99E-01 | 1.00E+00 |
| ENSG00000201807.1_SNORA27    | ENSG00000160789.18_LMNA | -0.11836 | -0.272428313 | 0.041624009 | 1.46E-01 | 3.92E-01 | 1.00E+00 |
| ENSG00000264327.2_           | ENSG00000160789.18_LMNA | -0.0045  | -0.163584329 | 0.154810788 | 9.56E-01 | 9.82E-01 | 1.00E+00 |
| ENSG00000202336.1_RNU6-359F  | ENSG00000160789.18_LMNA | 0.03609  | -0.123818632 | 0.194178476 | 6.59E-01 | 8.49E-01 | 1.00E+00 |
| ENSG00000266376.1_           | ENSG00000160789.18_LMNA | -0.11571 | -0.269937857 | 0.044307189 | 1.56E-01 | 4.07E-01 | 1.00E+00 |
| ENSG00000207948.2_MIR328     | ENSG00000160789.18_LMNA | 0.03387  | -0.126013831 | 0.192031636 | 6.79E-01 | 8.60E-01 | 1.00E+00 |
| ENSG00000253060.1_SCARNA20   | ENSG00000160789.18_LMNA | -0.0956  | -0.250981563 | 0.064582908 | 2.41E-01 | 5.21E-01 | 1.00E+00 |
| ENSG00000212221.1_RNU6-220F  | ENSG00000160789.18_LMNA | 0.10374  | -0.056395662 | 0.258665277 | 2.03E-01 | 4.74E-01 | 1.00E+00 |
| ENSG00000222986.1_RNU5A-5P   | ENSG00000160789.18_LMNA | 0.08225  | -0.077972327 | 0.238329337 | 3.14E-01 | 6.00E-01 | 1.00E+00 |
| ENSG00000276607.2_           | ENSG00000160789.18_LMNA | -0.04795 | -0.20558354  | 0.112104239 | 5.57E-01 | 7.91E-01 | 1.00E+00 |
| ENSG00000201560.1_RNU6-973F  | ENSG00000160789.18_LMNA | 0.02959  | -0.13022224  | 0.187907406 | 7.17E-01 | 8.80E-01 | 1.00E+00 |
| ENSG00000252784.1_Y_RNA      | ENSG00000160789.18_LMNA | -0.13434 | -0.287390318 | 0.025408243 | 9.89E-02 | 3.10E-01 | 1.00E+00 |
| ENSG00000212520.1_RNU6-1250  | ENSG00000160789.18_LMNA | -0.02253 | -0.181079563 | 0.137164338 | 7.83E-01 | 9.11E-01 | 1.00E+00 |
| ENSG00000252258.1_SNORA70    | ENSG00000160789.18_LMNA | -0.02312 | -0.181649396 | 0.136586163 | 7.77E-01 | 9.09E-01 | 1.00E+00 |

|                              |                         |          |              |             |          |          |          |
|------------------------------|-------------------------|----------|--------------|-------------|----------|----------|----------|
| ENSG00000252143.1_SCARNA17   | ENSG00000160789.18_LMNA | -0.00821 | -0.167187421 | 0.15119309  | 9.20E-01 | 9.70E-01 | 1.00E+00 |
| ENSG00000253814.1_MRPS36P3   | ENSG00000160789.18_LMNA | -0.08456 | -0.240521324 | 0.075660765 | 3.00E-01 | 5.87E-01 | 1.00E+00 |
| ENSG00000234464.1_RP11-136B  | ENSG00000160789.18_LMNA | -0.02935 | -0.187672782 | 0.130461309 | 7.20E-01 | 8.81E-01 | 1.00E+00 |
| ENSG00000281303.1_           | ENSG00000160789.18_LMNA | -0.08898 | -0.244711543 | 0.071232489 | 2.76E-01 | 5.60E-01 | 1.00E+00 |
| ENSG00000221419.1_           | ENSG00000160789.18_LMNA | -0.02956 | -0.187880847 | 0.130249304 | 7.18E-01 | 8.80E-01 | 1.00E+00 |
| ENSG00000276617.1_           | ENSG00000160789.18_LMNA | 0.01799  | -0.141614812 | 0.176686139 | 8.26E-01 | 9.32E-01 | 1.00E+00 |
| ENSG00000207408.1_Y_RNA      | ENSG00000160789.18_LMNA | -0.0041  | -0.163193562 | 0.155202627 | 9.60E-01 | 9.84E-01 | 1.00E+00 |
| ENSG00000280469.1_           | ENSG00000160789.18_LMNA | 0.04956  | -0.11051147  | 0.207127615 | 5.44E-01 | 7.82E-01 | 1.00E+00 |
| ENSG00000228721.1_AC016909.1 | ENSG00000160789.18_LMNA | -0.04483 | -0.202580209 | 0.115197616 | 5.83E-01 | 8.06E-01 | 1.00E+00 |
| ENSG00000252233.1_RN7SKP25   | ENSG00000160789.18_LMNA | -0.02548 | -0.183932161 | 0.134267802 | 7.55E-01 | 8.98E-01 | 1.00E+00 |
| ENSG00000207951.1_MIR561     | ENSG00000160789.18_LMNA | -0.03979 | -0.197737838 | 0.120172223 | 6.26E-01 | 8.32E-01 | 1.00E+00 |
| ENSG00000251834.1_RNU6-319F  | ENSG00000160789.18_LMNA | -0.04763 | -0.205278399 | 0.112418811 | 5.60E-01 | 7.92E-01 | 1.00E+00 |
| ENSG00000274006.1_DLG2-AS1   | ENSG00000160789.18_LMNA | -0.06902 | -0.225744022 | 0.09117869  | 3.98E-01 | 6.75E-01 | 1.00E+00 |
| ENSG00000273806.1_RP11-439K  | ENSG00000160789.18_LMNA | 0.07548  | -0.084736566 | 0.231896439 | 3.55E-01 | 6.39E-01 | 1.00E+00 |
| ENSG00000250839.1_RP11-296L  | ENSG00000160789.18_LMNA | -0.11728 | -0.271412771 | 0.042718687 | 1.50E-01 | 3.98E-01 | 1.00E+00 |
| ENSG00000266760.1_MIR4464    | ENSG00000160789.18_LMNA | 0.00144  | -0.157798992 | 0.16060177  | 9.86E-01 | 9.95E-01 | 1.00E+00 |
| ENSG00000251956.1_RNU6-617F  | ENSG00000160789.18_LMNA | -0.01257 | -0.171426532 | 0.146925847 | 8.78E-01 | 9.53E-01 | 1.00E+00 |
| ENSG00000201317.1_RNU4-59P   | ENSG00000160789.18_LMNA | 0.07571  | -0.084510003 | 0.232112354 | 3.54E-01 | 6.37E-01 | 1.00E+00 |
| ENSG00000199279.1_RNU6-661F  | ENSG00000160789.18_LMNA | -0.04714 | -0.20480546  | 0.112906239 | 5.64E-01 | 7.95E-01 | 1.00E+00 |
| ENSG00000212325.1_Y_RNA      | ENSG00000160789.18_LMNA | -0.10893 | -0.263563016 | 0.051154757 | 1.82E-01 | 4.46E-01 | 1.00E+00 |
| ENSG00000252562.1_RNU6-922F  | ENSG00000160789.18_LMNA | 0.03381  | -0.126071413 | 0.191975281 | 6.79E-01 | 8.60E-01 | 1.00E+00 |
| ENSG00000206676.1_Y_RNA      | ENSG00000160789.18_LMNA | 0.19297  | 0.034843284  | 0.341677398 | 1.72E-02 | 9.70E-02 | 1.00E+00 |
| ENSG00000280925.1_           | ENSG00000160789.18_LMNA | -0.0302  | -0.188494954 | 0.129623399 | 7.12E-01 | 8.77E-01 | 1.00E+00 |
| ENSG00000223111.1_SNORA74    | ENSG00000160789.18_LMNA | 0.0101   | -0.149341374 | 0.169028376 | 9.02E-01 | 9.62E-01 | 1.00E+00 |
| ENSG00000278215.1_RP11-712L  | ENSG00000160789.18_LMNA | 0.07701  | -0.083214434 | 0.23334643  | 3.46E-01 | 6.30E-01 | 1.00E+00 |
| ENSG00000275098.1_           | ENSG00000160789.18_LMNA | -0.04516 | -0.202902217 | 0.114866248 | 5.81E-01 | 8.05E-01 | 1.00E+00 |
| ENSG00000221736.2_           | ENSG00000160789.18_LMNA | 0.13855  | -0.021120614 | 0.291321084 | 8.87E-02 | 2.90E-01 | 1.00E+00 |
| ENSG00000207551.1_MIR608     | ENSG00000160789.18_LMNA | 0.10796  | -0.05213524  | 0.262647966 | 1.86E-01 | 4.51E-01 | 1.00E+00 |
| ENSG00000264677.1_           | ENSG00000160789.18_LMNA | 0.05642  | -0.10370963  | 0.213703749 | 4.90E-01 | 7.46E-01 | 1.00E+00 |
| ENSG00000281463.1_           | ENSG00000160789.18_LMNA | 0.01067  | -0.148786809 | 0.169579286 | 8.96E-01 | 9.59E-01 | 1.00E+00 |
| ENSG00000259963.1_RP11-185J  | ENSG00000160789.18_LMNA | -0.11692 | -0.271073118 | 0.043084639 | 1.51E-01 | 4.00E-01 | 1.00E+00 |
| ENSG00000264171.1_MIR4305    | ENSG00000160789.18_LMNA | -0.11397 | -0.268307063 | 0.04606173  | 1.62E-01 | 4.17E-01 | 1.00E+00 |
| ENSG00000264286.2_           | ENSG00000160789.18_LMNA | 0.04793  | -0.11212444  | 0.205563947 | 5.58E-01 | 7.91E-01 | 1.00E+00 |

|                             |                         |          |              |             |          |          |          |
|-----------------------------|-------------------------|----------|--------------|-------------|----------|----------|----------|
| ENSG00000216009.2_MIR874    | ENSG00000160789.18_LMNA | 0.09495  | -0.065237933 | 0.250365101 | 2.45E-01 | 5.24E-01 | 1.00E+00 |
| ENSG00000222178.1_RNA5SP18  | ENSG00000160789.18_LMNA | 0.01235  | -0.147139465 | 0.171214602 | 8.80E-01 | 9.54E-01 | 1.00E+00 |
| ENSG00000199564.1_RNA5SP50  | ENSG00000160789.18_LMNA | 0.09571  | -0.064470082 | 0.251087722 | 2.41E-01 | 5.20E-01 | 1.00E+00 |
| ENSG00000252436.1_Y_RNA     | ENSG00000160789.18_LMNA | -0.04628 | -0.203974861 | 0.113761915 | 5.71E-01 | 8.00E-01 | 1.00E+00 |
| ENSG00000207362.1_RNU6-422F | ENSG00000160789.18_LMNA | -0.01464 | -0.173440126 | 0.14489473  | 8.58E-01 | 9.44E-01 | 1.00E+00 |
| ENSG00000206722.1_RNU6-1074 | ENSG00000160789.18_LMNA | -0.15348 | -0.305224836 | 0.005861792 | 5.90E-02 | 2.23E-01 | 1.00E+00 |
| ENSG00000248330.4_LINC00613 | ENSG00000160789.18_LMNA | -0.10771 | -0.262410337 | 0.052389762 | 1.87E-01 | 4.53E-01 | 1.00E+00 |
| ENSG00000231902.1_RP11-29B9 | ENSG00000160789.18_LMNA | -0.11293 | -0.267327141 | 0.047115078 | 1.66E-01 | 4.23E-01 | 1.00E+00 |
| ENSG00000206732.1_RNU6-936F | ENSG00000160789.18_LMNA | 0.03627  | -0.123642074 | 0.194351012 | 6.57E-01 | 8.49E-01 | 1.00E+00 |
| ENSG00000278751.1_          | ENSG00000160789.18_LMNA | 0.18801  | 0.029697376  | 0.337119512 | 2.04E-02 | 1.09E-01 | 1.00E+00 |
| ENSG00000221679.1_          | ENSG00000160789.18_LMNA | -0.02784 | -0.186218025 | 0.131942799 | 7.33E-01 | 8.88E-01 | 1.00E+00 |
| ENSG00000223243.2_          | ENSG00000160789.18_LMNA | 0.00199  | -0.157262977 | 0.161137201 | 9.81E-01 | 9.93E-01 | 1.00E+00 |
| ENSG00000238826.1_          | ENSG00000160789.18_LMNA | 0.0181   | -0.14150552  | 0.176794181 | 8.25E-01 | 9.31E-01 | 1.00E+00 |
| ENSG00000200303.1_RNU6-940F | ENSG00000160789.18_LMNA | -0.11388 | -0.268222301 | 0.046152871 | 1.62E-01 | 4.17E-01 | 1.00E+00 |
| ENSG00000222308.1_RNA5SP19  | ENSG00000160789.18_LMNA | -0.12643 | -0.27999193  | 0.033447215 | 1.21E-01 | 3.49E-01 | 1.00E+00 |
| ENSG00000212451.1_RNU11-4P  | ENSG00000160789.18_LMNA | -0.04176 | -0.19963824  | 0.118221825 | 6.09E-01 | 8.22E-01 | 1.00E+00 |
| ENSG00000252019.1_RNU6ATAC  | ENSG00000160789.18_LMNA | 0.02538  | -0.134359609 | 0.183841829 | 7.56E-01 | 8.98E-01 | 1.00E+00 |
| ENSG00000270570.1_RP1-85D24 | ENSG00000160789.18_LMNA | -0.02524 | -0.18370341  | 0.134500277 | 7.58E-01 | 8.99E-01 | 1.00E+00 |
| ENSG00000252653.1_RNA5SP44  | ENSG00000160789.18_LMNA | 0.0422   | -0.117792054 | 0.200056674 | 6.06E-01 | 8.20E-01 | 1.00E+00 |
| ENSG00000265047.3_          | ENSG00000160789.18_LMNA | -0.12974 | -0.283090155 | 0.030085661 | 1.11E-01 | 3.32E-01 | 1.00E+00 |
| ENSG00000212389.1_RNU6-1275 | ENSG00000160789.18_LMNA | -0.02178 | -0.180360093 | 0.137894031 | 7.90E-01 | 9.15E-01 | 1.00E+00 |
| ENSG00000202385.1_Y_RNA     | ENSG00000160789.18_LMNA | 0.05595  | -0.104176137 | 0.213253639 | 4.94E-01 | 7.49E-01 | 1.00E+00 |
| ENSG00000228778.1_RP11-129J | ENSG00000160789.18_LMNA | -0.16205 | -0.313175495 | -0.00292934 | 4.61E-02 | 1.91E-01 | 1.00E+00 |
| ENSG00000281682.1_          | ENSG00000160789.18_LMNA | -0.10528 | -0.260125102 | 0.054835367 | 1.97E-01 | 4.66E-01 | 1.00E+00 |
| ENSG00000240439.3_RN7SL91P  | ENSG00000160789.18_LMNA | 0.09391  | -0.066279682 | 0.249384155 | 2.50E-01 | 5.30E-01 | 1.00E+00 |
| ENSG00000206774.1_RNU6-211F | ENSG00000160789.18_LMNA | 0.01827  | -0.141343202 | 0.176954631 | 8.23E-01 | 9.31E-01 | 1.00E+00 |
| ENSG00000238658.1_RNU6-625F | ENSG00000160789.18_LMNA | 0.04335  | -0.116650936 | 0.201167126 | 5.96E-01 | 8.14E-01 | 1.00E+00 |
| ENSG00000281220.1_          | ENSG00000160789.18_LMNA | -0.08387 | -0.239871506 | 0.076346386 | 3.04E-01 | 5.91E-01 | 1.00E+00 |
| ENSG00000251876.1_          | ENSG00000160789.18_LMNA | -0.05272 | -0.210159823 | 0.107378883 | 5.19E-01 | 7.65E-01 | 1.00E+00 |
| ENSG00000200991.1_SNORA25   | ENSG00000160789.18_LMNA | -0.07274 | -0.229288143 | 0.087470919 | 3.73E-01 | 6.53E-01 | 1.00E+00 |
| ENSG00000200113.1_SNORA51   | ENSG00000160789.18_LMNA | -0.04618 | -0.203879187 | 0.113860448 | 5.72E-01 | 8.00E-01 | 1.00E+00 |
| ENSG00000199426.1_RNU1-108F | ENSG00000160789.18_LMNA | -0.07965 | -0.235861859 | 0.080570346 | 3.29E-01 | 6.15E-01 | 1.00E+00 |
| ENSG00000257142.1_RP11-536C | ENSG00000160789.18_LMNA | -0.06612 | -0.222977248 | 0.094067124 | 4.18E-01 | 6.90E-01 | 1.00E+00 |

|                              |                         |          |              |             |          |          |          |
|------------------------------|-------------------------|----------|--------------|-------------|----------|----------|----------|
| ENSG00000263976.1_YWHAEP3    | ENSG00000160789.18_LMNA | 0.03707  | -0.122854673 | 0.195120239 | 6.50E-01 | 8.45E-01 | 1.00E+00 |
| ENSG00000253013.1_SNORA31    | ENSG00000160789.18_LMNA | -0.15686 | -0.308360312 | 0.002400595 | 5.36E-02 | 2.10E-01 | 1.00E+00 |
| ENSG00000271195.1_RP11-162I7 | ENSG00000160789.18_LMNA | -0.02291 | -0.181451061 | 0.136787426 | 7.79E-01 | 9.09E-01 | 1.00E+00 |
| ENSG00000266765.1_CTD-2582D  | ENSG00000160789.18_LMNA | -0.01107 | -0.169969996 | 0.148393386 | 8.92E-01 | 9.58E-01 | 1.00E+00 |
| ENSG00000236075.1_RP11-121P  | ENSG00000160789.18_LMNA | -0.20592 | -0.353529328 | -0.04830085 | 1.09E-02 | 6.98E-02 | 1.00E+00 |
| ENSG00000224352.1_AC132479.4 | ENSG00000160789.18_LMNA | 0.27602  | 0.122191753  | 0.41690366  | 5.77E-04 | 7.54E-03 | 1.00E+00 |
| ENSG00000201791.1_SNORA63    | ENSG00000160789.18_LMNA | 0.02754  | -0.132240458 | 0.185925569 | 7.36E-01 | 8.89E-01 | 1.00E+00 |
| ENSG00000252894.2_Y_RNA      | ENSG00000160789.18_LMNA | -0.06046 | -0.217568899 | 0.099697919 | 4.59E-01 | 7.23E-01 | 1.00E+00 |
| ENSG00000250922.1_ATP5EP1    | ENSG00000160789.18_LMNA | 0.16482  | 0.00577115   | 0.315736349 | 4.24E-02 | 1.80E-01 | 1.00E+00 |
| ENSG00000252774.1_SNORA48    | ENSG00000160789.18_LMNA | -0.06437 | -0.221305772 | 0.095809516 | 4.31E-01 | 7.00E-01 | 1.00E+00 |
| ENSG00000261733.1_           | ENSG00000160789.18_LMNA | -0.21923 | -0.365665486 | -0.06219694 | 6.66E-03 | 4.85E-02 | 1.00E+00 |
| ENSG00000273904.1_Hammerhead | ENSG00000160789.18_LMNA | -0.11199 | -0.266442945 | 0.048064927 | 1.70E-01 | 4.28E-01 | 1.00E+00 |
| ENSG00000207221.1_SNORA70E   | ENSG00000160789.18_LMNA | 0.17814  | 0.019487069  | 0.328033066 | 2.81E-02 | 1.37E-01 | 1.00E+00 |
| ENSG00000264128.2_RN7SL713f  | ENSG00000160789.18_LMNA | 0.05199  | -0.108107366 | 0.209455228 | 5.25E-01 | 7.70E-01 | 1.00E+00 |
| ENSG00000252510.1_RNA5SP55   | ENSG00000160789.18_LMNA | 0.06854  | -0.091662509 | 0.225280937 | 4.01E-01 | 6.78E-01 | 1.00E+00 |
| ENSG00000281479.1_           | ENSG00000160789.18_LMNA | -0.05504 | -0.212380808 | 0.105080367 | 5.01E-01 | 7.53E-01 | 1.00E+00 |
| ENSG00000230694.1_RP11-62F2  | ENSG00000160789.18_LMNA | 0.12452  | -0.035379162 | 0.278208364 | 1.26E-01 | 3.59E-01 | 1.00E+00 |
| ENSG00000233494.1_AC009963.1 | ENSG00000160789.18_LMNA | 0.00945  | -0.149975501 | 0.168398185 | 9.08E-01 | 9.65E-01 | 1.00E+00 |
| ENSG00000207935.2_MIR204     | ENSG00000160789.18_LMNA | 0.06391  | -0.096272402 | 0.220861413 | 4.34E-01 | 7.03E-01 | 1.00E+00 |
| ENSG00000200620.1_SNORA7     | ENSG00000160789.18_LMNA | 0.08837  | -0.071838412 | 0.244138889 | 2.79E-01 | 5.64E-01 | 1.00E+00 |
| ENSG00000221301.1_           | ENSG00000160789.18_LMNA | 0.04021  | -0.119757342 | 0.198142284 | 6.23E-01 | 8.30E-01 | 1.00E+00 |
| ENSG00000252490.1_RN7SKP66   | ENSG00000160789.18_LMNA | 0.07641  | -0.083806334 | 0.23278275  | 3.49E-01 | 6.33E-01 | 1.00E+00 |
| ENSG00000281025.1_           | ENSG00000160789.18_LMNA | 0.04793  | -0.112131191 | 0.205557399 | 5.58E-01 | 7.91E-01 | 1.00E+00 |
| ENSG00000224027.1_RP1-231P7  | ENSG00000160789.18_LMNA | 0.00974  | -0.149696488 | 0.168675498 | 9.05E-01 | 9.64E-01 | 1.00E+00 |
| ENSG00000280896.1_           | ENSG00000160789.18_LMNA | 0.06458  | -0.095600758 | 0.221506132 | 4.29E-01 | 6.99E-01 | 1.00E+00 |
| ENSG00000212551.2_U3         | ENSG00000160789.18_LMNA | -0.06971 | -0.226400143 | 0.090492934 | 3.93E-01 | 6.71E-01 | 1.00E+00 |
| ENSG00000212538.2_U3         | ENSG00000160789.18_LMNA | -0.10376 | -0.258683169 | 0.056376549 | 2.03E-01 | 4.74E-01 | 1.00E+00 |
| ENSG00000250775.1_RP11-12K2  | ENSG00000160789.18_LMNA | 0.03148  | -0.128366967 | 0.189726952 | 7.00E-01 | 8.72E-01 | 1.00E+00 |
| ENSG00000252763.1_RNU2-31P   | ENSG00000160789.18_LMNA | -0.01792 | -0.17662033  | 0.141681377 | 8.27E-01 | 9.32E-01 | 1.00E+00 |
| ENSG00000201733.1_SNORA43    | ENSG00000160789.18_LMNA | -0.03724 | -0.195282746 | 0.122688274 | 6.49E-01 | 8.44E-01 | 1.00E+00 |
| ENSG00000222706.1_RN7SKP89   | ENSG00000160789.18_LMNA | -0.0234  | -0.181920654 | 0.136310857 | 7.75E-01 | 9.07E-01 | 1.00E+00 |
| ENSG00000222880.1_RN7SKP26   | ENSG00000160789.18_LMNA | -0.15615 | -0.307704531 | 0.003125117 | 5.47E-02 | 2.13E-01 | 1.00E+00 |
| ENSG00000278585.1_SNX3P1Y    | ENSG00000160789.18_LMNA | 0.05915  | -0.101000894 | 0.216314616 | 4.69E-01 | 7.30E-01 | 1.00E+00 |

|                              |                         |          |              |             |          |          |          |
|------------------------------|-------------------------|----------|--------------|-------------|----------|----------|----------|
| ENSG00000277473.1_Metazoa_SI | ENSG00000160789.18_LMNA | 0.02722  | -0.132558542 | 0.185612983 | 7.39E-01 | 8.90E-01 | 1.00E+00 |
| ENSG00000235240.1_AC026185.  | ENSG00000160789.18_LMNA | 0.16513  | 0.006084606  | 0.316018539 | 4.21E-02 | 1.79E-01 | 1.00E+00 |
| ENSG00000232102.1_MTCO3P2    | ENSG00000160789.18_LMNA | -0.00059 | -0.159776576 | 0.158624719 | 9.94E-01 | 9.98E-01 | 1.00E+00 |
| ENSG00000239708.3_RN7SL782f  | ENSG00000160789.18_LMNA | -0.0297  | -0.188011569 | 0.130116091 | 7.16E-01 | 8.79E-01 | 1.00E+00 |
| ENSG00000275256.1_MRPS31P1   | ENSG00000160789.18_LMNA | -0.03151 | -0.18975624  | 0.128337085 | 7.00E-01 | 8.72E-01 | 1.00E+00 |
| ENSG00000258154.1_RP11-44N2  | ENSG00000160789.18_LMNA | 0.0083   | -0.151102168 | 0.167277866 | 9.19E-01 | 9.69E-01 | 1.00E+00 |
| ENSG00000279704.1_RP13-895J. | ENSG00000160789.18_LMNA | -0.08278 | -0.238833633 | 0.077440823 | 3.11E-01 | 5.97E-01 | 1.00E+00 |
| ENSG00000256281.1_RP11-136I1 | ENSG00000160789.18_LMNA | 0.22477  | 0.067997879  | 0.370701389 | 5.37E-03 | 4.13E-02 | 1.00E+00 |
| ENSG00000264750.1_RP11-277Ji | ENSG00000160789.18_LMNA | -0.05287 | -0.210303421 | 0.107230375 | 5.18E-01 | 7.64E-01 | 1.00E+00 |
| ENSG00000255988.1_TUBB4BP1   | ENSG00000160789.18_LMNA | -0.13707 | -0.289940058 | 0.022628329 | 9.22E-02 | 2.96E-01 | 1.00E+00 |
| ENSG00000229002.1_RP11-666A  | ENSG00000160789.18_LMNA | 0.15754  | -0.001698606 | 0.308995417 | 5.26E-02 | 2.08E-01 | 1.00E+00 |
| ENSG00000232164.1_AC092669.  | ENSG00000160789.18_LMNA | -0.17584 | -0.32591858  | -0.01712025 | 3.02E-02 | 1.44E-01 | 1.00E+00 |
| ENSG00000243980.3_RN7SL702f  | ENSG00000160789.18_LMNA | 0.02732  | -0.132458332 | 0.185711467 | 7.38E-01 | 8.90E-01 | 1.00E+00 |
| ENSG00000227397.1_CTD-2526L  | ENSG00000160789.18_LMNA | -0.05617 | -0.2134604   | 0.103961861 | 4.92E-01 | 7.47E-01 | 1.00E+00 |
| ENSG00000275828.1_RP11-295P  | ENSG00000160789.18_LMNA | 0.02046  | -0.139194282 | 0.179077215 | 8.02E-01 | 9.21E-01 | 1.00E+00 |
| ENSG00000222413.1_RN7SKP12   | ENSG00000160789.18_LMNA | -0.0815  | -0.237614718 | 0.078725195 | 3.18E-01 | 6.05E-01 | 1.00E+00 |
| ENSG00000268618.1_AC092316.  | ENSG00000160789.18_LMNA | 0.03826  | -0.121681801 | 0.196265313 | 6.40E-01 | 8.39E-01 | 1.00E+00 |
| ENSG00000215545.1_DEFB116    | ENSG00000160789.18_LMNA | 0.01457  | -0.144966894 | 0.17336863  | 8.59E-01 | 9.44E-01 | 1.00E+00 |
| ENSG00000233515.1_LINC01518  | ENSG00000160789.18_LMNA | -0.14648 | -0.298711575 | 0.013027922 | 7.17E-02 | 2.54E-01 | 1.00E+00 |
| ENSG00000249276.1_RP11-8L21  | ENSG00000160789.18_LMNA | -0.04029 | -0.198220328 | 0.119677272 | 6.22E-01 | 8.29E-01 | 1.00E+00 |
| ENSG00000253742.1_IGHV3-60   | ENSG00000160789.18_LMNA | 0.02248  | -0.137212718 | 0.181031871 | 7.83E-01 | 9.11E-01 | 1.00E+00 |
| ENSG00000267611.1_CTC-461H2  | ENSG00000160789.18_LMNA | -0.05615 | -0.213445162 | 0.103977654 | 4.92E-01 | 7.47E-01 | 1.00E+00 |
| ENSG00000259842.2_IGHV3OR1i  | ENSG00000160789.18_LMNA | -0.14182 | -0.294374174 | 0.017782393 | 8.14E-02 | 2.75E-01 | 1.00E+00 |
| ENSG00000233162.1_MORF4L1P   | ENSG00000160789.18_LMNA | 0.02328  | -0.136425423 | 0.181807779 | 7.76E-01 | 9.08E-01 | 1.00E+00 |
| ENSG00000223629.1_DEFA8P     | ENSG00000160789.18_LMNA | 0.11011  | -0.049966422 | 0.264671288 | 1.77E-01 | 4.38E-01 | 1.00E+00 |
| ENSG00000233252.1_CRIP1P1    | ENSG00000160789.18_LMNA | -0.0541  | -0.211476317 | 0.106016842 | 5.08E-01 | 7.58E-01 | 1.00E+00 |
| ENSG00000260525.1_RP11-812E  | ENSG00000160789.18_LMNA | -0.02495 | -0.183418781 | 0.134789492 | 7.60E-01 | 9.00E-01 | 1.00E+00 |
| ENSG00000275113.1_GAGE2E     | ENSG00000160789.18_LMNA | -0.02799 | -0.186358744 | 0.131799556 | 7.32E-01 | 8.87E-01 | 1.00E+00 |
| ENSG00000265689.1_RP11-118G  | ENSG00000160789.18_LMNA | -0.07618 | -0.232556511 | 0.084043838 | 3.51E-01 | 6.35E-01 | 1.00E+00 |
| ENSG00000257629.1_RP11-13A1  | ENSG00000160789.18_LMNA | 0.01978  | -0.139859025 | 0.178420935 | 8.09E-01 | 9.24E-01 | 1.00E+00 |
| ENSG00000227795.1_MTND4LP9   | ENSG00000160789.18_LMNA | -0.08576 | -0.241656809 | 0.074462001 | 2.94E-01 | 5.79E-01 | 1.00E+00 |
| ENSG00000280368.1_CTD-2199C  | ENSG00000160789.18_LMNA | -0.09765 | -0.252922388 | 0.062518899 | 2.31E-01 | 5.09E-01 | 1.00E+00 |
| ENSG00000261627.1_RP11-91I8. | ENSG00000160789.18_LMNA | 0.04576  | -0.11427792  | 0.203473758 | 5.76E-01 | 8.02E-01 | 1.00E+00 |

|                              |                         |          |              |             |          |          |          |
|------------------------------|-------------------------|----------|--------------|-------------|----------|----------|----------|
| ENSG00000248484.1_RP11-375B  | ENSG00000160789.18_LMNA | -0.12385 | -0.277582116 | 0.036056953 | 1.28E-01 | 3.63E-01 | 1.00E+00 |
| ENSG00000227687.1_RP4-681L3  | ENSG00000160789.18_LMNA | 0.06657  | -0.093623524 | 0.223402496 | 4.15E-01 | 6.88E-01 | 1.00E+00 |
| ENSG00000228636.1_RP5-1051H  | ENSG00000160789.18_LMNA | 0.08791  | -0.072298074 | 0.243704319 | 2.81E-01 | 5.67E-01 | 1.00E+00 |
| ENSG00000123584.7_MAGEA9     | ENSG00000160789.18_LMNA | -0.14433 | -0.296713611 | 0.015219756 | 7.61E-02 | 2.64E-01 | 1.00E+00 |
| ENSG00000228160.1_RP13-57D9  | ENSG00000160789.18_LMNA | 0.00655  | -0.152806262 | 0.165581812 | 9.36E-01 | 9.75E-01 | 1.00E+00 |
| ENSG00000242811.3_RN7SL229F  | ENSG00000160789.18_LMNA | 0.03387  | -0.126005941 | 0.192039357 | 6.79E-01 | 8.60E-01 | 1.00E+00 |
| ENSG00000251291.1_RP11-400D  | ENSG00000160789.18_LMNA | -0.15406 | -0.305764827 | 0.005266237 | 5.81E-02 | 2.21E-01 | 1.00E+00 |
| ENSG00000273668.1_RP11-15E1  | ENSG00000160789.18_LMNA | -0.03392 | -0.192085855 | 0.125958429 | 6.78E-01 | 8.60E-01 | 1.00E+00 |
| ENSG00000273872.1_SLC25A15F  | ENSG00000160789.18_LMNA | -0.04745 | -0.205103614 | 0.112598969 | 5.62E-01 | 7.93E-01 | 1.00E+00 |
| ENSG00000257493.1_RP11-536C  | ENSG00000160789.18_LMNA | 0.07285  | -0.087364306 | 0.229389926 | 3.72E-01 | 6.53E-01 | 1.00E+00 |
| ENSG00000279979.1_CTD-2154B  | ENSG00000160789.18_LMNA | -0.07844 | -0.234706057 | 0.081785819 | 3.37E-01 | 6.22E-01 | 1.00E+00 |
| ENSG00000231582.2_MTND4LP2   | ENSG00000160789.18_LMNA | -0.05906 | -0.216228222 | 0.101090602 | 4.70E-01 | 7.30E-01 | 1.00E+00 |
| ENSG00000200895.1_RN7SKP24   | ENSG00000160789.18_LMNA | -0.00869 | -0.167663486 | 0.150714456 | 9.15E-01 | 9.68E-01 | 1.00E+00 |
| ENSG00000225242.2_COX6B1P7   | ENSG00000160789.18_LMNA | -0.06792 | -0.224687421 | 0.092282381 | 4.06E-01 | 6.81E-01 | 1.00E+00 |
| ENSG00000270838.1_RP5-1004I9 | ENSG00000160789.18_LMNA | -0.02918 | -0.1875054   | 0.130631839 | 7.21E-01 | 8.82E-01 | 1.00E+00 |
| ENSG00000234573.1_RP5-1116H  | ENSG00000160789.18_LMNA | 0.12178  | -0.038159268 | 0.275637979 | 1.35E-01 | 3.74E-01 | 1.00E+00 |
| ENSG00000254227.1_RP11-622O  | ENSG00000160789.18_LMNA | -0.10884 | -0.263475047 | 0.051249042 | 1.82E-01 | 4.46E-01 | 1.00E+00 |
| ENSG00000248259.1_MTND4LP3   | ENSG00000160789.18_LMNA | 0.12485  | -0.035044314 | 0.278517649 | 1.25E-01 | 3.58E-01 | 1.00E+00 |
| ENSG00000279310.1_RP11-123O  | ENSG00000160789.18_LMNA | 0.00574  | -0.153601779 | 0.164789403 | 9.44E-01 | 9.78E-01 | 1.00E+00 |
| ENSG00000270727.1_RP11-51E2  | ENSG00000160789.18_LMNA | 0.15488  | -0.004426082 | 0.306526256 | 5.67E-02 | 2.18E-01 | 1.00E+00 |
| ENSG00000221345.2_U3         | ENSG00000160789.18_LMNA | -0.04263 | -0.200469641 | 0.11736778  | 6.02E-01 | 8.17E-01 | 1.00E+00 |
| ENSG00000224240.1_CYCSP49    | ENSG00000160789.18_LMNA | 0.02809  | -0.131701608 | 0.186454959 | 7.31E-01 | 8.87E-01 | 1.00E+00 |
| ENSG00000270962.1_RP11-403I1 | ENSG00000160789.18_LMNA | 0.03465  | -0.125243937 | 0.192784916 | 6.72E-01 | 8.56E-01 | 1.00E+00 |
| ENSG00000230998.1_           | ENSG00000160789.18_LMNA | 0.10166  | -0.058486086 | 0.256707201 | 2.13E-01 | 4.86E-01 | 1.00E+00 |
| ENSG00000278172.1_Metazoa_SI | ENSG00000160789.18_LMNA | 0.21182  | 0.054456411  | 0.358917999 | 8.80E-03 | 5.97E-02 | 1.00E+00 |
| ENSG00000222313.1_RN7SKP26   | ENSG00000160789.18_LMNA | -0.01688 | -0.175610772 | 0.142702185 | 8.36E-01 | 9.37E-01 | 1.00E+00 |
| ENSG00000243548.3_RN7SL101F  | ENSG00000160789.18_LMNA | 0.04768  | -0.112378443 | 0.20531756  | 5.60E-01 | 7.92E-01 | 1.00E+00 |
| ENSG00000254754.1_RP11-20J1  | ENSG00000160789.18_LMNA | -0.08973 | -0.245422576 | 0.070479822 | 2.72E-01 | 5.56E-01 | 1.00E+00 |
| ENSG00000250782.1_RP11-432M  | ENSG00000160789.18_LMNA | -0.01075 | -0.169664906 | 0.148700604 | 8.95E-01 | 9.59E-01 | 1.00E+00 |
| ENSG00000253977.1_MTCO2P4    | ENSG00000160789.18_LMNA | 0.00543  | -0.153906039 | 0.164486223 | 9.47E-01 | 9.79E-01 | 1.00E+00 |
| ENSG00000280393.1_RP11-449M  | ENSG00000160789.18_LMNA | -0.12556 | -0.279175574 | 0.034331777 | 1.23E-01 | 3.54E-01 | 1.00E+00 |
| ENSG00000230187.1_RP11-291O  | ENSG00000160789.18_LMNA | 0.04251  | -0.117487478 | 0.200353145 | 6.03E-01 | 8.18E-01 | 1.00E+00 |
| ENSG00000253840.1_RP11-767C  | ENSG00000160789.18_LMNA | -0.05323 | -0.210648037 | 0.106873917 | 5.15E-01 | 7.62E-01 | 1.00E+00 |

|                              |                         |          |              |             |          |          |          |
|------------------------------|-------------------------|----------|--------------|-------------|----------|----------|----------|
| ENSG00000277766.1_LLNLF-136  | ENSG00000160789.18_LMNA | 0.01674  | -0.142840813 | 0.175473621 | 8.38E-01 | 9.37E-01 | 1.00E+00 |
| ENSG00000213716.3_FABP5P5    | ENSG00000160789.18_LMNA | 0.08988  | -0.070330718 | 0.245563392 | 2.71E-01 | 5.55E-01 | 1.00E+00 |
| ENSG00000242201.3_RN7SL215F  | ENSG00000160789.18_LMNA | -0.02766 | -0.186036675 | 0.132127383 | 7.35E-01 | 8.89E-01 | 1.00E+00 |
| ENSG00000201640.2_RN7SKP28   | ENSG00000160789.18_LMNA | -0.02513 | -0.183591609 | 0.134613886 | 7.59E-01 | 8.99E-01 | 1.00E+00 |
| ENSG00000219627.1_CYCSP17    | ENSG00000160789.18_LMNA | 0.08234  | -0.077878639 | 0.238418242 | 3.13E-01 | 6.00E-01 | 1.00E+00 |
| ENSG00000243549.3_RN7SL705F  | ENSG00000160789.18_LMNA | 0.01977  | -0.139866796 | 0.178413261 | 8.09E-01 | 9.24E-01 | 1.00E+00 |
| ENSG00000233470.1_RP11-524K  | ENSG00000160789.18_LMNA | -0.14311 | -0.295573532 | 0.016469119 | 7.86E-02 | 2.69E-01 | 1.00E+00 |
| ENSG00000253936.1_IGHV3-63   | ENSG00000160789.18_LMNA | -0.05219 | -0.209647361 | 0.107908754 | 5.23E-01 | 7.69E-01 | 1.00E+00 |
| ENSG00000224500.1_RP11-328K  | ENSG00000160789.18_LMNA | -0.12173 | -0.275587187 | 0.038214155 | 1.35E-01 | 3.74E-01 | 1.00E+00 |
| ENSG00000254823.1_RP11-109E  | ENSG00000160789.18_LMNA | -0.06564 | -0.222518597 | 0.094545428 | 4.22E-01 | 6.93E-01 | 1.00E+00 |
| ENSG00000237213.2_RPL23AP2   | ENSG00000160789.18_LMNA | -0.13507 | -0.288077495 | 0.024659508 | 9.71E-02 | 3.06E-01 | 1.00E+00 |
| ENSG00000229969.1_RP11-96C2  | ENSG00000160789.18_LMNA | 0.02324  | -0.136467653 | 0.18176617  | 7.76E-01 | 9.08E-01 | 1.00E+00 |
| ENSG00000259978.1_MRPS21P8   | ENSG00000160789.18_LMNA | 0.01315  | -0.146354277 | 0.17199344  | 8.72E-01 | 9.50E-01 | 1.00E+00 |
| ENSG00000235620.1_AC020743   | ENSG00000160789.18_LMNA | -0.09595 | -0.251309672 | 0.064234165 | 2.40E-01 | 5.18E-01 | 1.00E+00 |
| ENSG00000224919.1_RP11-144G  | ENSG00000160789.18_LMNA | -0.01157 | -0.170457308 | 0.147902549 | 8.87E-01 | 9.56E-01 | 1.00E+00 |
| ENSG00000243125.3_RN7SL807F  | ENSG00000160789.18_LMNA | -0.00626 | -0.165297186 | 0.153092052 | 9.39E-01 | 9.76E-01 | 1.00E+00 |
| ENSG00000264809.2_Metazoa_SI | ENSG00000160789.18_LMNA | 0.15313  | -0.006225803 | 0.304894689 | 5.96E-02 | 2.25E-01 | 1.00E+00 |
| ENSG00000207269.1_RN7SKP62   | ENSG00000160789.18_LMNA | 0.10798  | -0.052117793 | 0.262664253 | 1.85E-01 | 4.51E-01 | 1.00E+00 |
| ENSG00000232975.1_MTCO1P57   | ENSG00000160789.18_LMNA | -0.03516 | -0.193275066 | 0.124742771 | 6.67E-01 | 8.53E-01 | 1.00E+00 |
| ENSG00000222826.1_RN7SKP28   | ENSG00000160789.18_LMNA | -0.01056 | -0.169476025 | 0.148890771 | 8.97E-01 | 9.60E-01 | 1.00E+00 |
| ENSG00000261515.1_VN1R70P    | ENSG00000160789.18_LMNA | -0.06578 | -0.222647067 | 0.094411468 | 4.21E-01 | 6.92E-01 | 1.00E+00 |
| ENSG00000275048.1_BSNDP1     | ENSG00000160789.18_LMNA | -0.03534 | -0.193453299 | 0.124560492 | 6.66E-01 | 8.53E-01 | 1.00E+00 |
| ENSG00000280024.1_RP11-367G  | ENSG00000160789.18_LMNA | 0.04791  | -0.112149735 | 0.205539412 | 5.58E-01 | 7.91E-01 | 1.00E+00 |
| ENSG00000237072.1_RP11-232A  | ENSG00000160789.18_LMNA | -0.18233 | -0.331899084 | -0.0238234  | 2.46E-02 | 1.25E-01 | 1.00E+00 |
| ENSG00000248287.1_SCGB1D5F   | ENSG00000160789.18_LMNA | -0.12908 | -0.282471864 | 0.030757069 | 1.13E-01 | 3.36E-01 | 1.00E+00 |
| ENSG00000230331.1_RP5-1068B  | ENSG00000160789.18_LMNA | 0.01668  | -0.142897534 | 0.1754175   | 8.38E-01 | 9.37E-01 | 1.00E+00 |
| ENSG00000222543.1_RN7SKP22   | ENSG00000160789.18_LMNA | 0.11893  | -0.041045731 | 0.272964505 | 1.44E-01 | 3.89E-01 | 1.00E+00 |
| ENSG00000235503.2_AC079799   | ENSG00000160789.18_LMNA | 0.02885  | -0.130950141 | 0.187192925 | 7.24E-01 | 8.83E-01 | 1.00E+00 |
| ENSG00000220311.1_RPL35AP1   | ENSG00000160789.18_LMNA | 0.05368  | -0.106433507 | 0.211073707 | 5.11E-01 | 7.60E-01 | 1.00E+00 |
| ENSG00000273692.1_AL050303.1 | ENSG00000160789.18_LMNA | 0.00584  | -0.153505339 | 0.164885488 | 9.43E-01 | 9.77E-01 | 1.00E+00 |
| ENSG00000242560.3_RN7SL797F  | ENSG00000160789.18_LMNA | -0.08703 | -0.24286366  | 0.073186891 | 2.86E-01 | 5.72E-01 | 1.00E+00 |
| ENSG00000267726.1_CTD-2526M  | ENSG00000160789.18_LMNA | -0.00606 | -0.165102818 | 0.153287184 | 9.41E-01 | 9.77E-01 | 1.00E+00 |
| ENSG00000242771.1_TRBV5-2    | ENSG00000160789.18_LMNA | -0.14155 | -0.294120362 | 0.018060174 | 8.20E-02 | 2.76E-01 | 1.00E+00 |



|                              |                         |          |              |             |          |          |          |
|------------------------------|-------------------------|----------|--------------|-------------|----------|----------|----------|
| ENSG00000253752.1_IGLVI-63   | ENSG00000160789.18_LMNA | -0.29065 | -0.429954475 | -0.13782504 | 2.81E-04 | 4.27E-03 | 1.00E+00 |
| ENSG00000248457.1_RP11-419C  | ENSG00000160789.18_LMNA | 0.04977  | -0.110299802 | 0.207332693 | 5.43E-01 | 7.81E-01 | 1.00E+00 |
| ENSG00000254888.2_RP11-716D  | ENSG00000160789.18_LMNA | 0.02423  | -0.135497709 | 0.182721566 | 7.67E-01 | 9.03E-01 | 1.00E+00 |
| ENSG00000271035.1_CTD-2269E  | ENSG00000160789.18_LMNA | 0.05358  | -0.106525073 | 0.210985216 | 5.12E-01 | 7.61E-01 | 1.00E+00 |
| ENSG00000236477.1_RPS24P1    | ENSG00000160789.18_LMNA | -0.04036 | -0.198283642 | 0.119612311 | 6.22E-01 | 8.29E-01 | 1.00E+00 |
| ENSG00000263895.1_RP11-110H  | ENSG00000160789.18_LMNA | 0.02991  | -0.129909365 | 0.188214409 | 7.15E-01 | 8.79E-01 | 1.00E+00 |
| ENSG00000279958.1_RP11-120I  | ENSG00000160789.18_LMNA | -0.11039 | -0.264938083 | 0.04968022  | 1.76E-01 | 4.37E-01 | 1.00E+00 |
| ENSG00000235940.1_MTND1P21   | ENSG00000160789.18_LMNA | -0.03259 | -0.190805334 | 0.127266359 | 6.90E-01 | 8.67E-01 | 1.00E+00 |
| ENSG00000271682.1_RP11-393B  | ENSG00000160789.18_LMNA | -0.0294  | -0.187724673 | 0.130408438 | 7.19E-01 | 8.81E-01 | 1.00E+00 |
| ENSG00000227177.1_AIMP1P2    | ENSG00000160789.18_LMNA | 0.03765  | -0.122285213 | 0.19567631  | 6.45E-01 | 8.42E-01 | 1.00E+00 |
| ENSG00000254120.1_RP11-705O  | ENSG00000160789.18_LMNA | -0.10359 | -0.258522561 | 0.056548118 | 2.04E-01 | 4.75E-01 | 1.00E+00 |
| ENSG00000260289.1_CTD-2535I  | ENSG00000160789.18_LMNA | -0.00424 | -0.163334291 | 0.155061523 | 9.59E-01 | 9.83E-01 | 1.00E+00 |
| ENSG00000236999.1_ATP2B2-IT  | ENSG00000160789.18_LMNA | 0.00477  | -0.154548634 | 0.163845711 | 9.53E-01 | 9.81E-01 | 1.00E+00 |
| ENSG00000223056.1_RN7SKP16   | ENSG00000160789.18_LMNA | 0.02614  | -0.133616465 | 0.184572881 | 7.49E-01 | 8.95E-01 | 1.00E+00 |
| ENSG00000248128.1_RP11-777B  | ENSG00000160789.18_LMNA | 0.02346  | -0.136245434 | 0.181985108 | 7.74E-01 | 9.07E-01 | 1.00E+00 |
| ENSG00000250577.1_RP11-577B  | ENSG00000160789.18_LMNA | 0.01353  | -0.145980462 | 0.172364092 | 8.69E-01 | 9.49E-01 | 1.00E+00 |
| ENSG00000276915.1_RP4-775C1  | ENSG00000160789.18_LMNA | -0.07462 | -0.231074469 | 0.085598776 | 3.61E-01 | 6.43E-01 | 1.00E+00 |
| ENSG00000225275.4_NUP210P2   | ENSG00000160789.18_LMNA | -0.06865 | -0.225386999 | 0.091551711 | 4.01E-01 | 6.77E-01 | 1.00E+00 |
| ENSG00000239228.3_RN7SL578F  | ENSG00000160789.18_LMNA | 0.1723   | 0.013464217  | 0.322646251 | 3.38E-02 | 1.55E-01 | 1.00E+00 |
| ENSG00000244632.3_RN7SL863F  | ENSG00000160789.18_LMNA | 0.13651  | -0.023192113 | 0.289423314 | 9.35E-02 | 2.99E-01 | 1.00E+00 |
| ENSG00000257009.1_RP11-685B  | ENSG00000160789.18_LMNA | 0.13773  | -0.021949252 | 0.290562235 | 9.06E-02 | 2.93E-01 | 1.00E+00 |
| ENSG00000250020.1_RP11-811I1 | ENSG00000160789.18_LMNA | -0.21813 | -0.364670933 | -0.06105372 | 6.94E-03 | 5.01E-02 | 1.00E+00 |
| ENSG00000255005.1_RP11-90K1  | ENSG00000160789.18_LMNA | -0.01335 | -0.172187463 | 0.14615861  | 8.70E-01 | 9.50E-01 | 1.00E+00 |
| ENSG00000248651.1_GCSHP1     | ENSG00000160789.18_LMNA | -0.12321 | -0.27697367  | 0.036715202 | 1.30E-01 | 3.66E-01 | 1.00E+00 |
| ENSG00000278469.1_Metazoa_SI | ENSG00000160789.18_LMNA | 0.19034  | 0.032111462  | 0.339259537 | 1.88E-02 | 1.03E-01 | 1.00E+00 |
| ENSG00000231316.1_RP11-134L  | ENSG00000160789.18_LMNA | 0.09589  | -0.064287416 | 0.251259576 | 2.40E-01 | 5.19E-01 | 1.00E+00 |
| ENSG00000186678.7_RP11-266I3 | ENSG00000160789.18_LMNA | -0.04485 | -0.202607716 | 0.115169311 | 5.83E-01 | 8.06E-01 | 1.00E+00 |
| ENSG00000230764.1_MTND1P4    | ENSG00000160789.18_LMNA | -0.11123 | -0.265727166 | 0.048833437 | 1.72E-01 | 4.32E-01 | 1.00E+00 |
| ENSG00000279061.1_RP3-332O1  | ENSG00000160789.18_LMNA | -0.1144  | -0.268705854 | 0.045632858 | 1.61E-01 | 4.14E-01 | 1.00E+00 |
| ENSG00000256311.1_RP11-64B1  | ENSG00000160789.18_LMNA | -0.03437 | -0.192518077 | 0.125516705 | 6.74E-01 | 8.57E-01 | 1.00E+00 |
| ENSG00000239745.3_RN7SL790F  | ENSG00000160789.18_LMNA | 0.09008  | -0.070129705 | 0.24575321  | 2.70E-01 | 5.54E-01 | 1.00E+00 |
| ENSG00000231034.1_RP11-346K  | ENSG00000160789.18_LMNA | -0.30942 | -0.446621412 | -0.15800391 | 1.05E-04 | 1.96E-03 | 1.00E+00 |
| ENSG00000260795.1_RP11-107C  | ENSG00000160789.18_LMNA | -0.02439 | -0.182880046 | 0.135336756 | 7.66E-01 | 9.03E-01 | 1.00E+00 |

|                              |                         |          |              |             |          |          |          |
|------------------------------|-------------------------|----------|--------------|-------------|----------|----------|----------|
| ENSG00000274711.1_Metazoa_SI | ENSG00000160789.18_LMNA | 0.13116  | -0.028642435 | 0.284418323 | 1.07E-01 | 3.26E-01 | 1.00E+00 |
| ENSG00000099721.12_AMELY     | ENSG00000160789.18_LMNA | -0.04634 | -0.20403714  | 0.113697772 | 5.71E-01 | 7.99E-01 | 1.00E+00 |
| ENSG00000223794.1_COX5BP8    | ENSG00000160789.18_LMNA | 0.02999  | -0.129826871 | 0.188295345 | 7.14E-01 | 8.78E-01 | 1.00E+00 |
| ENSG00000248891.2_CTD-2335C  | ENSG00000160789.18_LMNA | 0.08132  | -0.07889868  | 0.237449999 | 3.19E-01 | 6.06E-01 | 1.00E+00 |
| ENSG00000251458.1_RP11-844P  | ENSG00000160789.18_LMNA | -0.04405 | -0.201838279 | 0.115960842 | 5.90E-01 | 8.10E-01 | 1.00E+00 |
| ENSG00000233026.1_MTCO1P5    | ENSG00000160789.18_LMNA | -0.07641 | -0.232779243 | 0.083810016 | 3.49E-01 | 6.33E-01 | 1.00E+00 |
| ENSG00000248525.2_CTD-2001E  | ENSG00000160789.18_LMNA | -0.08502 | -0.240959174 | 0.075198623 | 2.98E-01 | 5.84E-01 | 1.00E+00 |
| ENSG00000235279.1_RP11-539E  | ENSG00000160789.18_LMNA | 0.07737  | -0.082849011 | 0.233694324 | 3.43E-01 | 6.28E-01 | 1.00E+00 |
| ENSG00000226785.1_AC073218.  | ENSG00000160789.18_LMNA | -0.13639 | -0.289307026 | 0.023318959 | 9.38E-02 | 3.00E-01 | 1.00E+00 |
| ENSG00000217135.2_RP1-140K8  | ENSG00000160789.18_LMNA | 0.03359  | -0.126287422 | 0.191763858 | 6.81E-01 | 8.61E-01 | 1.00E+00 |
| ENSG00000270131.1_KB-1043D8  | ENSG00000160789.18_LMNA | 0.03913  | -0.120820498 | 0.19710565  | 6.32E-01 | 8.35E-01 | 1.00E+00 |
| ENSG00000255271.1_RP4-594L9  | ENSG00000160789.18_LMNA | -0.05775 | -0.214969982 | 0.10239652  | 4.80E-01 | 7.38E-01 | 1.00E+00 |
| ENSG00000253997.1_RP11-200A  | ENSG00000160789.18_LMNA | -0.15099 | -0.302910841 | 0.0084114   | 6.33E-02 | 2.34E-01 | 1.00E+00 |
| ENSG00000264613.2_RN7SL290F  | ENSG00000160789.18_LMNA | 0.00357  | -0.155721176 | 0.162676278 | 9.65E-01 | 9.86E-01 | 1.00E+00 |
| ENSG00000266711.1_RP11-398J  | ENSG00000160789.18_LMNA | -0.06112 | -0.21820118  | 0.099040679 | 4.54E-01 | 7.19E-01 | 1.00E+00 |
| ENSG00000227604.3_TOMM22P3   | ENSG00000160789.18_LMNA | -0.09804 | -0.253289269 | 0.062128429 | 2.29E-01 | 5.07E-01 | 1.00E+00 |
| ENSG00000280511.1_RP11-35J1  | ENSG00000160789.18_LMNA | 0.05096  | -0.10913008  | 0.208465494 | 5.33E-01 | 7.75E-01 | 1.00E+00 |
| ENSG00000238202.1_AC002465.  | ENSG00000160789.18_LMNA | 0.08922  | -0.070986105 | 0.244944335 | 2.74E-01 | 5.59E-01 | 1.00E+00 |
| ENSG00000267789.1_CTD-2526M  | ENSG00000160789.18_LMNA | -0.06103 | -0.218107191 | 0.099138396 | 4.55E-01 | 7.20E-01 | 1.00E+00 |
| ENSG00000236825.2_RAB28P2    | ENSG00000160789.18_LMNA | -0.01886 | -0.177532127 | 0.140758838 | 8.18E-01 | 9.29E-01 | 1.00E+00 |
| ENSG00000261564.1_RP11-616M  | ENSG00000160789.18_LMNA | 0.01855  | -0.141065597 | 0.177229    | 8.21E-01 | 9.30E-01 | 1.00E+00 |
| ENSG00000267744.1_RP11-799D  | ENSG00000160789.18_LMNA | 0.10773  | -0.052373637 | 0.262425392 | 1.86E-01 | 4.53E-01 | 1.00E+00 |
| ENSG00000226078.1_RP11-205K  | ENSG00000160789.18_LMNA | 0.02498  | -0.134755088 | 0.183452642 | 7.60E-01 | 9.00E-01 | 1.00E+00 |
| ENSG00000250885.1_CTD-2004A  | ENSG00000160789.18_LMNA | 0.08445  | -0.075768459 | 0.240419273 | 3.01E-01 | 5.87E-01 | 1.00E+00 |
| ENSG00000270506.1_RP11-511B  | ENSG00000160789.18_LMNA | 0.14449  | -0.015054802 | 0.29686407  | 7.57E-02 | 2.63E-01 | 1.00E+00 |
| ENSG00000253560.1_RP11-16P2  | ENSG00000160789.18_LMNA | -0.05033 | -0.207868681 | 0.109746455 | 5.38E-01 | 7.78E-01 | 1.00E+00 |
| ENSG00000224659.2_GAGE12J    | ENSG00000160789.18_LMNA | 0.00983  | -0.149608792 | 0.16876265  | 9.04E-01 | 9.63E-01 | 1.00E+00 |
| ENSG00000265472.1_RP11-28O3  | ENSG00000160789.18_LMNA | -0.02389 | -0.182392211 | 0.135832147 | 7.70E-01 | 9.05E-01 | 1.00E+00 |
| ENSG00000224477.4_RP1-81D8.  | ENSG00000160789.18_LMNA | -0.06165 | -0.218702701 | 0.098519164 | 4.51E-01 | 7.16E-01 | 1.00E+00 |
| ENSG00000270759.1_CTD-2324A  | ENSG00000160789.18_LMNA | -0.17585 | -0.32592482  | -0.01712723 | 3.02E-02 | 1.44E-01 | 1.00E+00 |
| ENSG00000236606.1_RP11-93H1  | ENSG00000160789.18_LMNA | 0.01985  | -0.139790438 | 0.178488662 | 8.08E-01 | 9.24E-01 | 1.00E+00 |
| ENSG00000243062.4_RP11-12M5  | ENSG00000160789.18_LMNA | -0.13736 | -0.290217446 | 0.022325609 | 9.15E-02 | 2.95E-01 | 1.00E+00 |
| ENSG00000259074.1_PSMB7P1    | ENSG00000160789.18_LMNA | -0.09893 | -0.254132853 | 0.061230239 | 2.25E-01 | 5.01E-01 | 1.00E+00 |

|                             |                         |          |              |             |          |          |          |
|-----------------------------|-------------------------|----------|--------------|-------------|----------|----------|----------|
| ENSG00000241573.1_RP11-286H | ENSG00000160789.18_LMNA | 0.1499   | -0.009526231 | 0.301897878 | 6.53E-02 | 2.38E-01 | 1.00E+00 |
| ENSG00000252711.1_RN7SKP11  | ENSG00000160789.18_LMNA | -0.09941 | -0.254583122 | 0.060750614 | 2.23E-01 | 4.99E-01 | 1.00E+00 |
| ENSG00000254091.2_RP11-10A1 | ENSG00000160789.18_LMNA | -0.11443 | -0.268733813 | 0.045602785 | 1.60E-01 | 4.14E-01 | 1.00E+00 |
| ENSG00000274966.1_RP11-382B | ENSG00000160789.18_LMNA | -0.01062 | -0.169529443 | 0.148836992 | 8.97E-01 | 9.60E-01 | 1.00E+00 |
| ENSG00000277932.1_OR52E5    | ENSG00000160789.18_LMNA | -0.08127 | -0.237403331 | 0.078947827 | 3.20E-01 | 6.06E-01 | 1.00E+00 |
| ENSG00000281550.1_RP11-294C | ENSG00000160789.18_LMNA | -0.09901 | -0.254204089 | 0.061154367 | 2.25E-01 | 5.01E-01 | 1.00E+00 |
| ENSG00000266273.1_RP11-715C | ENSG00000160789.18_LMNA | -0.01833 | -0.177018421 | 0.141278664 | 8.23E-01 | 9.31E-01 | 1.00E+00 |
| ENSG00000265614.1_RP11-521P | ENSG00000160789.18_LMNA | -0.11937 | -0.273376738 | 0.040600997 | 1.43E-01 | 3.86E-01 | 1.00E+00 |
| ENSG00000249200.1_RP11-290C | ENSG00000160789.18_LMNA | 0.20056  | 0.042727966  | 0.348633212 | 1.32E-02 | 8.01E-02 | 1.00E+00 |
| ENSG00000233571.1_RP11-545D | ENSG00000160789.18_LMNA | -0.08666 | -0.242511236 | 0.073559355 | 2.88E-01 | 5.74E-01 | 1.00E+00 |
| ENSG00000258883.1_RP11-32B5 | ENSG00000160789.18_LMNA | -0.1171  | -0.271246235 | 0.042898128 | 1.51E-01 | 3.99E-01 | 1.00E+00 |
| ENSG00000253109.1_RPL12P22  | ENSG00000160789.18_LMNA | 0.05032  | -0.109761642 | 0.207853972 | 5.38E-01 | 7.78E-01 | 1.00E+00 |
| ENSG00000275965.1_RP11-386M | ENSG00000160789.18_LMNA | 0.03101  | -0.128828226 | 0.18927478  | 7.05E-01 | 8.74E-01 | 1.00E+00 |
| ENSG00000230309.1_RP3-390M2 | ENSG00000160789.18_LMNA | 0.05543  | -0.10469171  | 0.212756031 | 4.98E-01 | 7.51E-01 | 1.00E+00 |
| ENSG00000279240.1_AC063980. | ENSG00000160789.18_LMNA | 0.07062  | -0.089592331 | 0.227261391 | 3.87E-01 | 6.66E-01 | 1.00E+00 |
| ENSG00000227364.1_AC018685. | ENSG00000160789.18_LMNA | 0.01582  | -0.143743175 | 0.174580565 | 8.47E-01 | 9.40E-01 | 1.00E+00 |
| ENSG00000255502.4_RP11-379J | ENSG00000160789.18_LMNA | 0.02658  | -0.133179763 | 0.185002313 | 7.45E-01 | 8.93E-01 | 1.00E+00 |
| ENSG00000225428.1_NDUFB4P7  | ENSG00000160789.18_LMNA | 0.15637  | -0.002900273 | 0.307908074 | 5.44E-02 | 2.12E-01 | 1.00E+00 |
| ENSG00000259403.1_RP11-315L | ENSG00000160789.18_LMNA | 0.01604  | -0.143527035 | 0.174794524 | 8.45E-01 | 9.39E-01 | 1.00E+00 |
| ENSG00000253441.1_IGHV3-25  | ENSG00000160789.18_LMNA | -0.17739 | -0.32734317  | -0.01871446 | 2.88E-02 | 1.39E-01 | 1.00E+00 |
| ENSG00000224370.1_RP11-814E | ENSG00000160789.18_LMNA | -0.03475 | -0.19288349  | 0.125143161 | 6.71E-01 | 8.56E-01 | 1.00E+00 |
| ENSG00000271306.1_RAC1P9    | ENSG00000160789.18_LMNA | -0.04978 | -0.207333253 | 0.110299224 | 5.43E-01 | 7.81E-01 | 1.00E+00 |
| ENSG00000238139.2_RP11-393N | ENSG00000160789.18_LMNA | 0.10672  | -0.053389279 | 0.26147679  | 1.91E-01 | 4.58E-01 | 1.00E+00 |
| ENSG00000225827.1_SFTPA3P   | ENSG00000160789.18_LMNA | 0.11469  | -0.045335767 | 0.268982043 | 1.59E-01 | 4.13E-01 | 1.00E+00 |
| ENSG00000224605.1_RP1-1771C | ENSG00000160789.18_LMNA | 0.18715  | 0.028805366  | 0.336327963 | 2.10E-02 | 1.11E-01 | 1.00E+00 |
| ENSG00000248701.1_CTC-493L2 | ENSG00000160789.18_LMNA | 0.01573  | -0.14383353  | 0.174491114 | 8.47E-01 | 9.40E-01 | 1.00E+00 |
| ENSG00000250855.1_RP11-269F | ENSG00000160789.18_LMNA | -0.05134 | -0.208835971 | 0.108747336 | 5.30E-01 | 7.73E-01 | 1.00E+00 |
| ENSG00000250769.2_RP11-241F | ENSG00000160789.18_LMNA | -0.11378 | -0.268124645 | 0.04625787  | 1.63E-01 | 4.18E-01 | 1.00E+00 |
| ENSG00000253644.1_KB-1930G5 | ENSG00000160789.18_LMNA | 0.12976  | -0.030061446 | 0.283112449 | 1.11E-01 | 3.32E-01 | 1.00E+00 |
| ENSG00000237363.1_AP006288. | ENSG00000160789.18_LMNA | -0.05693 | -0.214191086 | 0.103204382 | 4.86E-01 | 7.43E-01 | 1.00E+00 |
| ENSG00000213233.5_RPL23AP6  | ENSG00000160789.18_LMNA | -0.12864 | -0.28206663  | 0.031196963 | 1.14E-01 | 3.38E-01 | 1.00E+00 |
| ENSG00000234257.1_SOD2P1    | ENSG00000160789.18_LMNA | -0.07678 | -0.233129816 | 0.083441919 | 3.47E-01 | 6.31E-01 | 1.00E+00 |
| ENSG00000228711.1_AC004006. | ENSG00000160789.18_LMNA | -0.05511 | -0.212443894 | 0.105015029 | 5.00E-01 | 7.53E-01 | 1.00E+00 |

|                              |                         |          |              |             |          |          |          |
|------------------------------|-------------------------|----------|--------------|-------------|----------|----------|----------|
| ENSG00000224062.4_TUBB4BP5   | ENSG00000160789.18_LMNA | -0.08479 | -0.240740364 | 0.07542959  | 2.99E-01 | 5.85E-01 | 1.00E+00 |
| ENSG00000249444.2_RP11-93O1  | ENSG00000160789.18_LMNA | 0.07859  | -0.081632474 | 0.234851922 | 3.36E-01 | 6.22E-01 | 1.00E+00 |
| ENSG00000232286.1_RP11-80K6  | ENSG00000160789.18_LMNA | 0.07182  | -0.088390774 | 0.22840967  | 3.79E-01 | 6.58E-01 | 1.00E+00 |
| ENSG00000226366.1_AC097463.  | ENSG00000160789.18_LMNA | -0.07848 | -0.234744729 | 0.081745165 | 3.37E-01 | 6.22E-01 | 1.00E+00 |
| ENSG00000186223.4_SSU72P4    | ENSG00000160789.18_LMNA | 0.1128   | -0.047248702 | 0.267202784 | 1.66E-01 | 4.24E-01 | 1.00E+00 |
| ENSG00000236376.1_RP11-470F  | ENSG00000160789.18_LMNA | 0.0353   | -0.124603201 | 0.19341154  | 6.66E-01 | 8.53E-01 | 1.00E+00 |
| ENSG00000236733.1_RP11-203L  | ENSG00000160789.18_LMNA | 9.45E-05 | -0.159108619 | 0.159292782 | 9.99E-01 | 1.00E+00 | 1.00E+00 |
| ENSG00000279630.1_AC190387.  | ENSG00000160789.18_LMNA | 0.05532  | -0.10480367  | 0.21264795  | 4.98E-01 | 7.52E-01 | 1.00E+00 |
| ENSG00000226211.1_RP11-453O  | ENSG00000160789.18_LMNA | 0.11568  | -0.044336863 | 0.269910291 | 1.56E-01 | 4.07E-01 | 1.00E+00 |
| ENSG00000253530.1_RP11-103H  | ENSG00000160789.18_LMNA | -0.02353 | -0.182051983 | 0.136177551 | 7.74E-01 | 9.07E-01 | 1.00E+00 |
| ENSG00000256254.1_AP000647.  | ENSG00000160789.18_LMNA | -0.06394 | -0.220893779 | 0.096238691 | 4.34E-01 | 7.03E-01 | 1.00E+00 |
| ENSG00000196243.5_LINC00615  | ENSG00000160789.18_LMNA | 0.0372   | -0.122725473 | 0.195246418 | 6.49E-01 | 8.44E-01 | 1.00E+00 |
| ENSG00000265378.1_RP11-123I2 | ENSG00000160789.18_LMNA | -0.02377 | -0.182277275 | 0.135948841 | 7.71E-01 | 9.05E-01 | 1.00E+00 |
| ENSG00000228694.1_MTND4P18   | ENSG00000160789.18_LMNA | 0.05942  | -0.10073091  | 0.216574597 | 4.67E-01 | 7.29E-01 | 1.00E+00 |
| ENSG00000254820.1_CTD-2019C  | ENSG00000160789.18_LMNA | 0.06277  | -0.097400125 | 0.219778273 | 4.42E-01 | 7.10E-01 | 1.00E+00 |
| ENSG00000244278.1_AP000235.  | ENSG00000160789.18_LMNA | -0.0943  | -0.249747184 | 0.065894231 | 2.48E-01 | 5.28E-01 | 1.00E+00 |
| ENSG00000255829.1_RP11-20D1  | ENSG00000160789.18_LMNA | -0.01117 | -0.170069904 | 0.148292769 | 8.91E-01 | 9.57E-01 | 1.00E+00 |
| ENSG00000249658.1_RP11-1018  | ENSG00000160789.18_LMNA | 0.02906  | -0.130749683 | 0.18738972  | 7.22E-01 | 8.82E-01 | 1.00E+00 |
| ENSG00000231815.1_AC007179.  | ENSG00000160789.18_LMNA | -0.0544  | -0.211769073 | 0.105713796 | 5.06E-01 | 7.56E-01 | 1.00E+00 |
| ENSG00000248722.1_AK3P4      | ENSG00000160789.18_LMNA | 0.09598  | -0.064205523 | 0.251336615 | 2.40E-01 | 5.18E-01 | 1.00E+00 |
| ENSG00000249236.1_CTD-2227I1 | ENSG00000160789.18_LMNA | 0.00361  | -0.155685035 | 0.162712336 | 9.65E-01 | 9.86E-01 | 1.00E+00 |
| ENSG00000229335.1_DANT1      | ENSG00000160789.18_LMNA | 0.07891  | -0.081311877 | 0.235156838 | 3.34E-01 | 6.20E-01 | 1.00E+00 |
| ENSG00000234021.1_RP11-75C9  | ENSG00000160789.18_LMNA | -0.04129 | -0.19918359  | 0.11868866  | 6.13E-01 | 8.24E-01 | 1.00E+00 |
| ENSG00000183514.4_TDGF1P2    | ENSG00000160789.18_LMNA | -0.03266 | -0.190870685 | 0.127199636 | 6.90E-01 | 8.66E-01 | 1.00E+00 |
| ENSG00000224778.1_CENPI1     | ENSG00000160789.18_LMNA | -0.12075 | -0.274670839 | 0.039204062 | 1.38E-01 | 3.79E-01 | 1.00E+00 |
| ENSG00000230843.1_RP11-380D  | ENSG00000160789.18_LMNA | -0.02912 | -0.187447446 | 0.130690878 | 7.22E-01 | 8.82E-01 | 1.00E+00 |
| ENSG00000213238.6_AC008155.  | ENSG00000160789.18_LMNA | 0.11053  | -0.049538151 | 0.265070501 | 1.75E-01 | 4.36E-01 | 1.00E+00 |
| ENSG00000228687.1_RP3-419C1  | ENSG00000160789.18_LMNA | 0.04496  | -0.115064557 | 0.202709518 | 5.82E-01 | 8.06E-01 | 1.00E+00 |
| ENSG00000226802.1_RP11-72I18 | ENSG00000160789.18_LMNA | -0.00138 | -0.160546193 | 0.15785462  | 9.87E-01 | 9.95E-01 | 1.00E+00 |
| ENSG00000184954.4_OR6C70     | ENSG00000160789.18_LMNA | -0.07386 | -0.230353969 | 0.086354159 | 3.66E-01 | 6.47E-01 | 1.00E+00 |
| ENSG00000254136.1_RP11-546K  | ENSG00000160789.18_LMNA | 0.06117  | -0.098995371 | 0.218244758 | 4.54E-01 | 7.19E-01 | 1.00E+00 |
| ENSG00000204148.3_LINC00474  | ENSG00000160789.18_LMNA | -0.0659  | -0.222767948 | 0.094285411 | 4.20E-01 | 6.91E-01 | 1.00E+00 |
| ENSG00000253424.1_CTC-436K1  | ENSG00000160789.18_LMNA | 0.04345  | -0.116561138 | 0.201254476 | 5.95E-01 | 8.13E-01 | 1.00E+00 |

|                             |                         |          |              |             |          |          |          |
|-----------------------------|-------------------------|----------|--------------|-------------|----------|----------|----------|
| ENSG00000272679.1_RP11-216L | ENSG00000160789.18_LMNA | -0.14069 | -0.293325046 | 0.018930285 | 8.38E-02 | 2.80E-01 | 1.00E+00 |
| ENSG00000258184.1_RP11-335M | ENSG00000160789.18_LMNA | -0.14374 | -0.296163099 | 0.01582316  | 7.73E-02 | 2.66E-01 | 1.00E+00 |
| ENSG00000223608.1_DSCR4-IT1 | ENSG00000160789.18_LMNA | -0.11838 | -0.272448452 | 0.041602294 | 1.46E-01 | 3.92E-01 | 1.00E+00 |
| ENSG00000225316.1_LINC00350 | ENSG00000160789.18_LMNA | 0.07988  | -0.080338113 | 0.236082589 | 3.28E-01 | 6.14E-01 | 1.00E+00 |
| ENSG00000234670.1_OR6C64P   | ENSG00000160789.18_LMNA | 0.03616  | -0.123749316 | 0.194246215 | 6.58E-01 | 8.49E-01 | 1.00E+00 |
| ENSG00000233128.1_AC007317  | ENSG00000160789.18_LMNA | 0.04577  | -0.114265727 | 0.203485601 | 5.76E-01 | 8.02E-01 | 1.00E+00 |
| ENSG00000257738.2_RP11-139E | ENSG00000160789.18_LMNA | 0.11007  | -0.050008555 | 0.264632008 | 1.77E-01 | 4.39E-01 | 1.00E+00 |
| ENSG00000251252.1_MTND2P31  | ENSG00000160789.18_LMNA | 0.11793  | -0.042058281 | 0.272025519 | 1.48E-01 | 3.94E-01 | 1.00E+00 |
| ENSG00000250887.1_RP11-366M | ENSG00000160789.18_LMNA | 0.13093  | -0.028869208 | 0.284209708 | 1.08E-01 | 3.27E-01 | 1.00E+00 |
| ENSG00000235434.1_RP11-91K1 | ENSG00000160789.18_LMNA | -0.03625 | -0.194331717 | 0.12366182  | 6.57E-01 | 8.49E-01 | 1.00E+00 |
| ENSG00000254178.1_RP11-299D | ENSG00000160789.18_LMNA | 0.05431  | -0.105801894 | 0.211683972 | 5.06E-01 | 7.57E-01 | 1.00E+00 |
| ENSG00000224277.4_AP000345  | ENSG00000160789.18_LMNA | 0.12718  | -0.032686592 | 0.280693541 | 1.18E-01 | 3.45E-01 | 1.00E+00 |
| ENSG00000280335.1_RP11-15F1 | ENSG00000160789.18_LMNA | -0.08171 | -0.23781521  | 0.078514008 | 3.17E-01 | 6.04E-01 | 1.00E+00 |
| ENSG00000223368.2_RP11-401G | ENSG00000160789.18_LMNA | 0.0435   | -0.116506076 | 0.201308034 | 5.95E-01 | 8.13E-01 | 1.00E+00 |
| ENSG00000249893.1_MTND6P16  | ENSG00000160789.18_LMNA | -0.15636 | -0.307891832 | 0.002918216 | 5.44E-02 | 2.12E-01 | 1.00E+00 |
| ENSG00000271655.1_BNIP3P35  | ENSG00000160789.18_LMNA | -0.0232  | -0.181733226 | 0.136501087 | 7.77E-01 | 9.08E-01 | 1.00E+00 |
| ENSG00000243347.1_RP11-501O | ENSG00000160789.18_LMNA | -0.01084 | -0.169742976 | 0.148621995 | 8.95E-01 | 9.59E-01 | 1.00E+00 |
| ENSG00000248335.1_RP11-102N | ENSG00000160789.18_LMNA | -0.01655 | -0.175285906 | 0.143030528 | 8.40E-01 | 9.38E-01 | 1.00E+00 |
| ENSG00000230599.2_AC018495  | ENSG00000160789.18_LMNA | -0.0449  | -0.202654683 | 0.115120983 | 5.83E-01 | 8.06E-01 | 1.00E+00 |
| ENSG00000233939.1_AC114755  | ENSG00000160789.18_LMNA | -0.05794 | -0.215158258 | 0.102201179 | 4.78E-01 | 7.37E-01 | 1.00E+00 |
| ENSG00000261782.1_RP11-43P5 | ENSG00000160789.18_LMNA | 0.00491  | -0.154414411 | 0.163979521 | 9.52E-01 | 9.81E-01 | 1.00E+00 |
| ENSG00000171209.3_CSN3      | ENSG00000160789.18_LMNA | -0.10699 | -0.261730593 | 0.053117602 | 1.90E-01 | 4.57E-01 | 1.00E+00 |
| ENSG00000101446.7_SPINT3    | ENSG00000160789.18_LMNA | -0.11897 | -0.273000548 | 0.04100685  | 1.44E-01 | 3.89E-01 | 1.00E+00 |
| ENSG00000261307.1_RP11-157P | ENSG00000160789.18_LMNA | -0.06693 | -0.223745637 | 0.093265482 | 4.13E-01 | 6.86E-01 | 1.00E+00 |
| ENSG00000280958.1_RP4-587D1 | ENSG00000160789.18_LMNA | 0.18987  | 0.031622187  | 0.338826064 | 1.91E-02 | 1.05E-01 | 1.00E+00 |
| ENSG00000259110.1_RP11-359N | ENSG00000160789.18_LMNA | -0.19118 | -0.340034221 | -0.03298624 | 1.83E-02 | 1.01E-01 | 1.00E+00 |
| ENSG00000248761.1_CTD-2593A | ENSG00000160789.18_LMNA | 0.06324  | -0.096933854 | 0.220226206 | 4.39E-01 | 7.07E-01 | 1.00E+00 |
| ENSG00000223847.1_RP5-925F1 | ENSG00000160789.18_LMNA | -0.07411 | -0.230587693 | 0.086109159 | 3.64E-01 | 6.46E-01 | 1.00E+00 |
| ENSG00000264837.1_VN1R71P   | ENSG00000160789.18_LMNA | -0.02936 | -0.187682708 | 0.130451195 | 7.20E-01 | 8.81E-01 | 1.00E+00 |
| ENSG00000257943.1_RP11-167N | ENSG00000160789.18_LMNA | 0.0539   | -0.106208708 | 0.211290936 | 5.10E-01 | 7.59E-01 | 1.00E+00 |
| ENSG00000255417.1_MTCO2P15  | ENSG00000160789.18_LMNA | 0.11645  | -0.043555278 | 0.270636186 | 1.53E-01 | 4.03E-01 | 1.00E+00 |
| ENSG00000253951.1_RP11-447G | ENSG00000160789.18_LMNA | 0.0674   | -0.092800538 | 0.224191115 | 4.09E-01 | 6.83E-01 | 1.00E+00 |
| ENSG00000214245.3_PUDPP3    | ENSG00000160789.18_LMNA | 0.0393   | -0.120656279 | 0.197265819 | 6.31E-01 | 8.34E-01 | 1.00E+00 |

|                              |                         |          |              |             |          |          |          |
|------------------------------|-------------------------|----------|--------------|-------------|----------|----------|----------|
| ENSG00000230326.1_HMGN1P33   | ENSG00000160789.18_LMNA | -0.01097 | -0.169877791 | 0.148486241 | 8.93E-01 | 9.58E-01 | 1.00E+00 |
| ENSG00000225537.1_AC073325.  | ENSG00000160789.18_LMNA | 0.12762  | -0.032237046 | 0.281108053 | 1.17E-01 | 3.43E-01 | 1.00E+00 |
| ENSG00000274238.1_RP11-115D  | ENSG00000160789.18_LMNA | 0.10259  | -0.05755071  | 0.257583678 | 2.09E-01 | 4.81E-01 | 1.00E+00 |
| ENSG00000168515.3_SCGB1D1    | ENSG00000160789.18_LMNA | 0.12472  | -0.03517937  | 0.278392911 | 1.26E-01 | 3.58E-01 | 1.00E+00 |
| ENSG00000223517.1_AC010723.  | ENSG00000160789.18_LMNA | -0.03305 | -0.191243371 | 0.12681907  | 6.86E-01 | 8.64E-01 | 1.00E+00 |
| ENSG00000257989.1_RP1-288H2  | ENSG00000160789.18_LMNA | 0.02485  | -0.134885002 | 0.183324772 | 7.61E-01 | 9.00E-01 | 1.00E+00 |
| ENSG00000236123.1_CEACAMP    | ENSG00000160789.18_LMNA | -0.05791 | -0.215131838 | 0.102228592 | 4.78E-01 | 7.37E-01 | 1.00E+00 |
| ENSG00000274612.1_CTC-260E6  | ENSG00000160789.18_LMNA | -0.15046 | -0.302413069 | 0.008959326 | 6.43E-02 | 2.36E-01 | 1.00E+00 |
| ENSG00000228211.2_HYALP1     | ENSG00000160789.18_LMNA | 0.01306  | -0.146448218 | 0.17190028  | 8.73E-01 | 9.51E-01 | 1.00E+00 |
| ENSG00000249066.1_RP11-593F  | ENSG00000160789.18_LMNA | 0.05366  | -0.106453277 | 0.211054602 | 5.11E-01 | 7.60E-01 | 1.00E+00 |
| ENSG00000258402.1_RP11-516J  | ENSG00000160789.18_LMNA | -0.08345 | -0.23947263  | 0.076767091 | 3.07E-01 | 5.93E-01 | 1.00E+00 |
| ENSG00000225482.1_RPS6P14    | ENSG00000160789.18_LMNA | -0.00865 | -0.167616843 | 0.150761358 | 9.16E-01 | 9.68E-01 | 1.00E+00 |
| ENSG00000212989.3_RP11-351E  | ENSG00000160789.18_LMNA | -0.05497 | -0.212316251 | 0.105147225 | 5.01E-01 | 7.53E-01 | 1.00E+00 |
| ENSG00000230573.1_RP11-464C  | ENSG00000160789.18_LMNA | 0.0248   | -0.134929411 | 0.18328106  | 7.62E-01 | 9.01E-01 | 1.00E+00 |
| ENSG00000226655.1_AC096732.  | ENSG00000160789.18_LMNA | 0.09561  | -0.064573319 | 0.250990587 | 2.41E-01 | 5.20E-01 | 1.00E+00 |
| ENSG00000261752.1_AGGF1P8    | ENSG00000160789.18_LMNA | -0.02152 | -0.180099535 | 0.138158207 | 7.92E-01 | 9.16E-01 | 1.00E+00 |
| ENSG00000257368.2_RP11-438E  | ENSG00000160789.18_LMNA | -0.04727 | -0.204932362 | 0.112775465 | 5.63E-01 | 7.94E-01 | 1.00E+00 |
| ENSG00000230096.1_RP11-34C1  | ENSG00000160789.18_LMNA | -0.05097 | -0.208476066 | 0.109119159 | 5.33E-01 | 7.75E-01 | 1.00E+00 |
| ENSG00000225055.1_RP11-344N  | ENSG00000160789.18_LMNA | -0.03636 | -0.194439198 | 0.123551825 | 6.56E-01 | 8.48E-01 | 1.00E+00 |
| ENSG00000257115.1_OR11H12    | ENSG00000160789.18_LMNA | -0.06441 | -0.221342015 | 0.095771757 | 4.30E-01 | 7.00E-01 | 1.00E+00 |
| ENSG00000261817.1_RP11-502H  | ENSG00000160789.18_LMNA | -0.05956 | -0.216710484 | 0.100589775 | 4.66E-01 | 7.28E-01 | 1.00E+00 |
| ENSG00000226662.2_CHMP1AP1   | ENSG00000160789.18_LMNA | 0.07216  | -0.088049521 | 0.228735631 | 3.77E-01 | 6.57E-01 | 1.00E+00 |
| ENSG00000241921.1_AC000370.  | ENSG00000160789.18_LMNA | -0.02874 | -0.187088261 | 0.131056741 | 7.25E-01 | 8.84E-01 | 1.00E+00 |
| ENSG00000227862.1_HNRNPA1F   | ENSG00000160789.18_LMNA | -0.01164 | -0.170520319 | 0.147839071 | 8.87E-01 | 9.56E-01 | 1.00E+00 |
| ENSG00000254365.1_CTB-180C1  | ENSG00000160789.18_LMNA | 0.06261  | -0.097560767 | 0.219623919 | 4.43E-01 | 7.11E-01 | 1.00E+00 |
| ENSG00000230931.2_GXYLT1P1   | ENSG00000160789.18_LMNA | -0.02764 | -0.186024374 | 0.132139902 | 7.35E-01 | 8.89E-01 | 1.00E+00 |
| ENSG00000177174.1_OR14C36    | ENSG00000160789.18_LMNA | -0.02653 | -0.184952624 | 0.1332303   | 7.46E-01 | 8.94E-01 | 1.00E+00 |
| ENSG00000249343.1_LINC01333  | ENSG00000160789.18_LMNA | -0.13364 | -0.286737283 | 0.026119451 | 1.01E-01 | 3.13E-01 | 1.00E+00 |
| ENSG00000233550.1_MTCYBP8    | ENSG00000160789.18_LMNA | 0.05104  | -0.109050854 | 0.208542188 | 5.32E-01 | 7.75E-01 | 1.00E+00 |
| ENSG00000260620.1_RP11-883G  | ENSG00000160789.18_LMNA | 0.05806  | -0.102086719 | 0.215268567 | 4.77E-01 | 7.36E-01 | 1.00E+00 |
| ENSG00000227824.1_AC122136.  | ENSG00000160789.18_LMNA | 0.01621  | -0.143365064 | 0.17495484  | 8.43E-01 | 9.39E-01 | 1.00E+00 |
| ENSG00000277711.1_RP11-378I6 | ENSG00000160789.18_LMNA | 0.0495   | -0.110567285 | 0.207073533 | 5.45E-01 | 7.83E-01 | 1.00E+00 |
| ENSG00000146399.1_TAAR1      | ENSG00000160789.18_LMNA | 0.1754   | 0.016662179  | 0.325508992 | 3.07E-02 | 1.45E-01 | 1.00E+00 |

|                              |                         |          |              |             |          |          |          |
|------------------------------|-------------------------|----------|--------------|-------------|----------|----------|----------|
| ENSG00000249297.1_RP11-97E7  | ENSG00000160789.18_LMNA | -0.10032 | -0.255437475 | 0.059840159 | 2.19E-01 | 4.94E-01 | 1.00E+00 |
| ENSG00000225179.1_LINC00457  | ENSG00000160789.18_LMNA | -0.09896 | -0.254152651 | 0.061209153 | 2.25E-01 | 5.01E-01 | 1.00E+00 |
| ENSG00000254411.1_CTD-3051L  | ENSG00000160789.18_LMNA | -0.12881 | -0.282219895 | 0.031030604 | 1.14E-01 | 3.37E-01 | 1.00E+00 |
| ENSG00000261583.1_CTD-2385L  | ENSG00000160789.18_LMNA | 0.02586  | -0.133896197 | 0.184297743 | 7.52E-01 | 8.97E-01 | 1.00E+00 |
| ENSG00000230153.4_AF003626.1 | ENSG00000160789.18_LMNA | 0.08166  | -0.078560509 | 0.237771066 | 3.17E-01 | 6.04E-01 | 1.00E+00 |
| ENSG00000259517.2_RP11-324D  | ENSG00000160789.18_LMNA | -0.11478 | -0.269067558 | 0.045243769 | 1.59E-01 | 4.12E-01 | 1.00E+00 |
| ENSG00000270677.1_RP11-294L  | ENSG00000160789.18_LMNA | 0.13695  | -0.02274989  | 0.289828655 | 9.25E-02 | 2.97E-01 | 1.00E+00 |
| ENSG00000251025.1_NDUFB5P1   | ENSG00000160789.18_LMNA | -0.09377 | -0.24925176  | 0.06642023  | 2.51E-01 | 5.31E-01 | 1.00E+00 |
| ENSG00000251205.2_CTD-2050E  | ENSG00000160789.18_LMNA | 0.04866  | -0.111407943 | 0.206258745 | 5.52E-01 | 7.87E-01 | 1.00E+00 |
| ENSG00000213908.4_CYP2A7P1   | ENSG00000160789.18_LMNA | 0.16046  | 0.001292091  | 0.311698064 | 4.83E-02 | 1.97E-01 | 1.00E+00 |
| ENSG00000259237.1_RP11-209E  | ENSG00000160789.18_LMNA | 0.06569  | -0.094498437 | 0.222563663 | 4.21E-01 | 6.93E-01 | 1.00E+00 |
| ENSG00000268886.1_CTD-3099C  | ENSG00000160789.18_LMNA | -0.02854 | -0.186895041 | 0.131253519 | 7.27E-01 | 8.84E-01 | 1.00E+00 |
| ENSG00000235735.1_RPL7AP72   | ENSG00000160789.18_LMNA | -0.00366 | -0.162770528 | 0.155626708 | 9.64E-01 | 9.86E-01 | 1.00E+00 |
| ENSG00000241891.1_RP11-226P  | ENSG00000160789.18_LMNA | -0.13263 | -0.285792916 | 0.027147386 | 1.03E-01 | 3.18E-01 | 1.00E+00 |
| ENSG00000234652.1_AGPAT5P1   | ENSG00000160789.18_LMNA | -0.02957 | -0.187889855 | 0.130240125 | 7.18E-01 | 8.80E-01 | 1.00E+00 |
| ENSG00000259148.1_RP11-322L  | ENSG00000160789.18_LMNA | 0.07217  | -0.088039975 | 0.228744748 | 3.77E-01 | 6.57E-01 | 1.00E+00 |
| ENSG00000260629.1_BGLT3      | ENSG00000160789.18_LMNA | 0.00151  | -0.157730774 | 0.160669924 | 9.85E-01 | 9.94E-01 | 1.00E+00 |
| ENSG00000263110.1_RP11-189E  | ENSG00000160789.18_LMNA | 0.02211  | -0.137570319 | 0.180679312 | 7.87E-01 | 9.13E-01 | 1.00E+00 |
| ENSG00000257663.1_RP11-1100I | ENSG00000160789.18_LMNA | -0.04995 | -0.207496355 | 0.11013086  | 5.41E-01 | 7.81E-01 | 1.00E+00 |
| ENSG00000232128.1_MTCO3P45   | ENSG00000160789.18_LMNA | -0.10258 | -0.257575207 | 0.057559752 | 2.09E-01 | 4.81E-01 | 1.00E+00 |
| ENSG00000254583.1_RP11-15D1  | ENSG00000160789.18_LMNA | 0.05508  | -0.105041348 | 0.212418482 | 5.00E-01 | 7.53E-01 | 1.00E+00 |
| ENSG00000250313.2_RP11-5P22  | ENSG00000160789.18_LMNA | -0.13159 | -0.284822119 | 0.028203399 | 1.06E-01 | 3.23E-01 | 1.00E+00 |
| ENSG00000171478.7_SPACA5B    | ENSG00000160789.18_LMNA | -0.10758 | -0.262285221 | 0.052523755 | 1.87E-01 | 4.53E-01 | 1.00E+00 |
| ENSG00000259108.2_LINC01595  | ENSG00000160789.18_LMNA | 0.08938  | -0.070831708 | 0.245090197 | 2.74E-01 | 5.58E-01 | 1.00E+00 |
| ENSG00000122304.9_PRM2       | ENSG00000160789.18_LMNA | -0.0083  | -0.167280278 | 0.151099744 | 9.19E-01 | 9.69E-01 | 1.00E+00 |
| ENSG00000230361.1_VN1R32P    | ENSG00000160789.18_LMNA | 0.02241  | -0.13728143  | 0.180964135 | 7.84E-01 | 9.12E-01 | 1.00E+00 |
| ENSG00000243593.1_RP11-500K  | ENSG00000160789.18_LMNA | -0.10183 | -0.256863616 | 0.058319202 | 2.12E-01 | 4.86E-01 | 1.00E+00 |
| ENSG00000229708.1_MARK2P12   | ENSG00000160789.18_LMNA | 0.07975  | -0.080469206 | 0.235957993 | 3.29E-01 | 6.15E-01 | 1.00E+00 |
| ENSG00000278958.1_RP11-313L  | ENSG00000160789.18_LMNA | -0.15792 | -0.309340688 | 0.001316845 | 5.20E-02 | 2.06E-01 | 1.00E+00 |
| ENSG00000270552.1_DUXAP3     | ENSG00000160789.18_LMNA | -0.01444 | -0.173240899 | 0.14509581  | 8.60E-01 | 9.45E-01 | 1.00E+00 |
| ENSG00000232752.1_MTCO3P21   | ENSG00000160789.18_LMNA | 0.11145  | -0.048611349 | 0.265934051 | 1.72E-01 | 4.31E-01 | 1.00E+00 |
| ENSG00000236847.1_AC018892.1 | ENSG00000160789.18_LMNA | 0.03949  | -0.120467517 | 0.197449904 | 6.29E-01 | 8.33E-01 | 1.00E+00 |
| ENSG00000255244.1_RP11-583F  | ENSG00000160789.18_LMNA | -0.00685 | -0.165874643 | 0.152512178 | 9.33E-01 | 9.74E-01 | 1.00E+00 |

|                              |                         |          |              |             |          |          |          |
|------------------------------|-------------------------|----------|--------------|-------------|----------|----------|----------|
| ENSG00000224288.2_MTCYBP11   | ENSG00000160789.18_LMNA | -0.07025 | -0.226913901 | 0.089955762 | 3.90E-01 | 6.68E-01 | 1.00E+00 |
| ENSG00000255514.1_OR4B2P     | ENSG00000160789.18_LMNA | -0.15735 | -0.308812812 | 0.001900473 | 5.29E-02 | 2.09E-01 | 1.00E+00 |
| ENSG00000254265.1_CTD-2336C  | ENSG00000160789.18_LMNA | -0.07303 | -0.229557848 | 0.0871884   | 3.71E-01 | 6.52E-01 | 1.00E+00 |
| ENSG00000248547.2_RP11-468N  | ENSG00000160789.18_LMNA | 0.10812  | -0.051974314 | 0.26279819  | 1.85E-01 | 4.51E-01 | 1.00E+00 |
| ENSG00000280283.1_CTA-481E9  | ENSG00000160789.18_LMNA | 0.11239  | -0.047662019 | 0.266818069 | 1.68E-01 | 4.26E-01 | 1.00E+00 |
| ENSG00000234671.1_MTCYBP5    | ENSG00000160789.18_LMNA | -0.03222 | -0.190444348 | 0.127634873 | 6.94E-01 | 8.68E-01 | 1.00E+00 |
| ENSG00000204695.3_OR14J1     | ENSG00000160789.18_LMNA | -0.09554 | -0.250925899 | 0.064642066 | 2.42E-01 | 5.21E-01 | 1.00E+00 |
| ENSG00000166363.5_OR10A5     | ENSG00000160789.18_LMNA | -0.15837 | -0.309761951 | 0.000850938 | 5.13E-02 | 2.05E-01 | 1.00E+00 |
| ENSG00000221888.3_OR1C1      | ENSG00000160789.18_LMNA | 0.13238  | -0.027396343 | 0.285564106 | 1.04E-01 | 3.19E-01 | 1.00E+00 |
| ENSG00000248572.4_EGFLAM-A   | ENSG00000160789.18_LMNA | -0.04863 | -0.20623247  | 0.111435044 | 5.52E-01 | 7.88E-01 | 1.00E+00 |
| ENSG00000270008.1_RP11-298P  | ENSG00000160789.18_LMNA | 0.03446  | -0.125433192 | 0.19259978  | 6.73E-01 | 8.57E-01 | 1.00E+00 |
| ENSG00000240666.2_MME-AS1    | ENSG00000160789.18_LMNA | 0.22077  | 0.06381612   | 0.367072915 | 6.27E-03 | 4.65E-02 | 1.00E+00 |
| ENSG00000203733.5_GJE1       | ENSG00000160789.18_LMNA | 0.04478  | -0.115247116 | 0.202532101 | 5.84E-01 | 8.07E-01 | 1.00E+00 |
| ENSG00000242520.5_MAGEA5     | ENSG00000160789.18_LMNA | -0.06764 | -0.22442191  | 0.092559603 | 4.08E-01 | 6.83E-01 | 1.00E+00 |
| ENSG00000234556.1_LINC00701  | ENSG00000160789.18_LMNA | 0.14082  | -0.018801948 | 0.293442379 | 8.35E-02 | 2.80E-01 | 1.00E+00 |
| ENSG00000265973.1_RP11-163O  | ENSG00000160789.18_LMNA | -0.1097  | -0.264283137 | 0.050382715 | 1.79E-01 | 4.41E-01 | 1.00E+00 |
| ENSG00000228301.1_RPL7P55    | ENSG00000160789.18_LMNA | -0.10017 | -0.255299405 | 0.059987331 | 2.19E-01 | 4.94E-01 | 1.00E+00 |
| ENSG00000196156.4_KRTAP4-3   | ENSG00000160789.18_LMNA | -0.05486 | -0.212203455 | 0.105264036 | 5.02E-01 | 7.54E-01 | 1.00E+00 |
| ENSG00000182170.3_MRGPGRG    | ENSG00000160789.18_LMNA | 0.01255  | -0.14694238  | 0.171410131 | 8.78E-01 | 9.53E-01 | 1.00E+00 |
| ENSG00000253896.3_AC144568.  | ENSG00000160789.18_LMNA | 0.01994  | -0.139700589 | 0.178577379 | 8.07E-01 | 9.23E-01 | 1.00E+00 |
| ENSG00000227878.2_AC114760.  | ENSG00000160789.18_LMNA | -0.08314 | -0.239173696 | 0.077082311 | 3.09E-01 | 5.95E-01 | 1.00E+00 |
| ENSG00000269469.1_CTD-3148I  | ENSG00000160789.18_LMNA | 0.0518   | -0.108297243 | 0.209271523 | 5.26E-01 | 7.71E-01 | 1.00E+00 |
| ENSG00000227351.2_NANOGP6    | ENSG00000160789.18_LMNA | 0.1365   | -0.023209339 | 0.289407522 | 9.36E-02 | 2.99E-01 | 1.00E+00 |
| ENSG00000254330.1_RP11-1D12  | ENSG00000160789.18_LMNA | -0.00624 | -0.165273772 | 0.15311556  | 9.39E-01 | 9.76E-01 | 1.00E+00 |
| ENSG00000241888.2_RPSAP37    | ENSG00000160789.18_LMNA | -0.12055 | -0.27448128  | 0.039408761 | 1.39E-01 | 3.80E-01 | 1.00E+00 |
| ENSG00000231565.1_NEK2P2     | ENSG00000160789.18_LMNA | -0.05245 | -0.209898681 | 0.107648918 | 5.21E-01 | 7.67E-01 | 1.00E+00 |
| ENSG00000212899.2_KRTAP3-3   | ENSG00000160789.18_LMNA | -0.02156 | -0.180140035 | 0.138117147 | 7.92E-01 | 9.16E-01 | 1.00E+00 |
| ENSG00000231349.2_RP11-444C  | ENSG00000160789.18_LMNA | -0.0833  | -0.239323593 | 0.076924255 | 3.08E-01 | 5.94E-01 | 1.00E+00 |
| ENSG00000184856.6_LINC00308  | ENSG00000160789.18_LMNA | -0.06168 | -0.218733439 | 0.098487195 | 4.50E-01 | 7.16E-01 | 1.00E+00 |
| ENSG00000225680.1_AL163953.2 | ENSG00000160789.18_LMNA | -0.05049 | -0.208016865 | 0.109593436 | 5.37E-01 | 7.78E-01 | 1.00E+00 |
| ENSG00000253110.1_CTB-78H18  | ENSG00000160789.18_LMNA | 0.03075  | -0.129081702 | 0.189026239 | 7.07E-01 | 8.75E-01 | 1.00E+00 |
| ENSG00000257407.1_RP11-1028I | ENSG00000160789.18_LMNA | -0.13065 | -0.283944622 | 0.029157322 | 1.09E-01 | 3.28E-01 | 1.00E+00 |
| ENSG00000226653.2_OR13Z1P    | ENSG00000160789.18_LMNA | 0.08305  | -0.077169168 | 0.239091315 | 3.09E-01 | 5.95E-01 | 1.00E+00 |



|                              |                         |          |              |             |          |          |          |
|------------------------------|-------------------------|----------|--------------|-------------|----------|----------|----------|
| ENSG00000258827.2_RP11-537P  | ENSG00000160789.18_LMNA | -0.10886 | -0.263494572 | 0.051228115 | 1.82E-01 | 4.46E-01 | 1.00E+00 |
| ENSG00000243641.3_OR13C7     | ENSG00000160789.18_LMNA | 0.05277  | -0.107333116 | 0.210204078 | 5.18E-01 | 7.65E-01 | 1.00E+00 |
| ENSG00000231138.1_RP11-391M  | ENSG00000160789.18_LMNA | 0.01484  | -0.144697753 | 0.173635262 | 8.56E-01 | 9.43E-01 | 1.00E+00 |
| ENSG00000268580.1_RP11-514A  | ENSG00000160789.18_LMNA | -0.08484 | -0.24079233  | 0.075374739 | 2.99E-01 | 5.85E-01 | 1.00E+00 |
| ENSG00000225148.1_RP5-899B1  | ENSG00000160789.18_LMNA | 0.05924  | -0.1009144   | 0.21639791  | 4.68E-01 | 7.29E-01 | 1.00E+00 |
| ENSG00000230275.2_SERBP1P4   | ENSG00000160789.18_LMNA | -0.0564  | -0.213683149 | 0.103730983 | 4.90E-01 | 7.46E-01 | 1.00E+00 |
| ENSG00000272050.1_RP13-379C  | ENSG00000160789.18_LMNA | -0.04466 | -0.20241904  | 0.115363442 | 5.85E-01 | 8.07E-01 | 1.00E+00 |
| ENSG00000185372.2_OR2V1      | ENSG00000160789.18_LMNA | -0.01337 | -0.172201609 | 0.146144343 | 8.70E-01 | 9.50E-01 | 1.00E+00 |
| ENSG00000236332.1_AP001605.4 | ENSG00000160789.18_LMNA | 0.08378  | -0.076439398 | 0.23978333  | 3.05E-01 | 5.92E-01 | 1.00E+00 |
| ENSG00000243661.1_WBP1LP1    | ENSG00000160789.18_LMNA | -0.17066 | -0.321135309 | -0.01177889 | 3.55E-02 | 1.60E-01 | 1.00E+00 |
| ENSG00000240411.2_RPL5P16    | ENSG00000160789.18_LMNA | 0.03861  | -0.1213361   | 0.196602655 | 6.37E-01 | 8.38E-01 | 1.00E+00 |
| ENSG00000279719.1_RP11-81A1  | ENSG00000160789.18_LMNA | -0.10409 | -0.258999905 | 0.05603814  | 2.02E-01 | 4.73E-01 | 1.00E+00 |
| ENSG00000256371.1_LRRC34P1   | ENSG00000160789.18_LMNA | -0.04226 | -0.200114358 | 0.117732798 | 6.05E-01 | 8.19E-01 | 1.00E+00 |
| ENSG00000254124.1_EEF1A1P3   | ENSG00000160789.18_LMNA | 0.05305  | -0.107051106 | 0.210476744 | 5.16E-01 | 7.63E-01 | 1.00E+00 |
| ENSG00000250504.2_KRT18P51   | ENSG00000160789.18_LMNA | 0.16986  | 0.010953825  | 0.320395037 | 3.64E-02 | 1.63E-01 | 1.00E+00 |
| ENSG00000213030.5_CGB8       | ENSG00000160789.18_LMNA | 0.10996  | -0.05011595  | 0.26453188  | 1.77E-01 | 4.39E-01 | 1.00E+00 |
| ENSG00000264990.1_RP11-215E  | ENSG00000160789.18_LMNA | 0.00261  | -0.156656746 | 0.161742546 | 9.75E-01 | 9.90E-01 | 1.00E+00 |
| ENSG00000259265.1_RP11-809H  | ENSG00000160789.18_LMNA | 0.14658  | -0.012922808 | 0.298807323 | 7.15E-02 | 2.53E-01 | 1.00E+00 |
| ENSG00000236909.1_OR2P1P     | ENSG00000160789.18_LMNA | 0.02638  | -0.13337692  | 0.184808454 | 7.47E-01 | 8.94E-01 | 1.00E+00 |
| ENSG00000248762.2_RP11-31K2  | ENSG00000160789.18_LMNA | 0.1313   | -0.028496593 | 0.28455247  | 1.07E-01 | 3.25E-01 | 1.00E+00 |
| ENSG00000255161.1_RP11-646J  | ENSG00000160789.18_LMNA | 0.03117  | -0.128673795 | 0.189426183 | 7.03E-01 | 8.73E-01 | 1.00E+00 |
| ENSG00000255426.1_CTD-2210P  | ENSG00000160789.18_LMNA | -0.14653 | -0.298765192 | 0.012969061 | 7.16E-02 | 2.53E-01 | 1.00E+00 |
| ENSG00000260264.1_AC004125.1 | ENSG00000160789.18_LMNA | -0.04532 | -0.203057367 | 0.114706563 | 5.79E-01 | 8.04E-01 | 1.00E+00 |
| ENSG00000179615.1_OR2AP1     | ENSG00000160789.18_LMNA | -0.02742 | -0.185808403 | 0.132359692 | 7.37E-01 | 8.90E-01 | 1.00E+00 |
| ENSG00000234892.1_Z82214.2   | ENSG00000160789.18_LMNA | 0.01296  | -0.146538686 | 0.171810558 | 8.74E-01 | 9.51E-01 | 1.00E+00 |
| ENSG00000249820.1_RP11-503I2 | ENSG00000160789.18_LMNA | -0.08027 | -0.236447786 | 0.07995381  | 3.26E-01 | 6.12E-01 | 1.00E+00 |
| ENSG00000244653.1_UBFD1P1    | ENSG00000160789.18_LMNA | -0.05586 | -0.21316855  | 0.10426431  | 4.94E-01 | 7.49E-01 | 1.00E+00 |
| ENSG00000229443.1_LINC00433  | ENSG00000160789.18_LMNA | 0.15076  | -0.008652659 | 0.302691686 | 6.38E-02 | 2.35E-01 | 1.00E+00 |
| ENSG00000255134.1_OR8K2P     | ENSG00000160789.18_LMNA | -0.13435 | -0.287407381 | 0.025389655 | 9.89E-02 | 3.09E-01 | 1.00E+00 |
| ENSG00000242536.1_RP11-290K  | ENSG00000160789.18_LMNA | -0.12227 | -0.276098015 | 0.037662054 | 1.33E-01 | 3.71E-01 | 1.00E+00 |
| ENSG00000260596.4_DUX4       | ENSG00000160789.18_LMNA | 0.17218  | 0.013349986  | 0.32254389  | 3.39E-02 | 1.55E-01 | 1.00E+00 |
| ENSG00000205328.2_OR6C65     | ENSG00000160789.18_LMNA | 0.0573   | -0.102842492 | 0.21454005  | 4.83E-01 | 7.41E-01 | 1.00E+00 |
| ENSG00000198090.3_KRTAP4-6   | ENSG00000160789.18_LMNA | 0.06152  | -0.098646311 | 0.218580444 | 4.51E-01 | 7.17E-01 | 1.00E+00 |

|                              |                         |          |              |             |          |          |          |
|------------------------------|-------------------------|----------|--------------|-------------|----------|----------|----------|
| ENSG00000184166.1_OR1D2      | ENSG00000160789.18_LMNA | -0.1404  | -0.293046612 | 0.019234793 | 8.45E-02 | 2.82E-01 | 1.00E+00 |
| ENSG00000178372.7_CALML5     | ENSG00000160789.18_LMNA | 0.04931  | -0.110760572 | 0.206886233 | 5.46E-01 | 7.84E-01 | 1.00E+00 |
| ENSG00000248517.1_RP11-386B  | ENSG00000160789.18_LMNA | 0.03799  | -0.121945734 | 0.19600771  | 6.42E-01 | 8.41E-01 | 1.00E+00 |
| ENSG00000248443.1_RP11-284A  | ENSG00000160789.18_LMNA | 0.03953  | -0.120426983 | 0.197489431 | 6.29E-01 | 8.33E-01 | 1.00E+00 |
| ENSG00000183122.4_OR2A3P     | ENSG00000160789.18_LMNA | -0.02368 | -0.182193351 | 0.136034042 | 7.72E-01 | 9.06E-01 | 1.00E+00 |
| ENSG00000170920.2_OR7G3      | ENSG00000160789.18_LMNA | 0.02304  | -0.136659741 | 0.181576891 | 7.78E-01 | 9.09E-01 | 1.00E+00 |
| ENSG00000172377.1_OR9I1      | ENSG00000160789.18_LMNA | -0.06632 | -0.223165315 | 0.093870957 | 4.17E-01 | 6.89E-01 | 1.00E+00 |
| ENSG00000278128.1_RP11-440J  | ENSG00000160789.18_LMNA | -0.01413 | -0.172938345 | 0.145401129 | 8.63E-01 | 9.46E-01 | 1.00E+00 |
| ENSG00000229005.2_HNF4A-AS   | ENSG00000160789.18_LMNA | 0.22518  | 0.068432398  | 0.371077888 | 5.28E-03 | 4.09E-02 | 1.00E+00 |
| ENSG00000218549.1_OR4K12P    | ENSG00000160789.18_LMNA | -0.20751 | -0.3549823   | -0.04995832 | 1.03E-02 | 6.70E-02 | 1.00E+00 |
| ENSG00000197591.3_OR11L1     | ENSG00000160789.18_LMNA | 0.03474  | -0.125153117 | 0.192873751 | 6.71E-01 | 8.56E-01 | 1.00E+00 |
| ENSG00000254069.2_RP11-359P  | ENSG00000160789.18_LMNA | -0.08369 | -0.239695084 | 0.076532477 | 3.05E-01 | 5.92E-01 | 1.00E+00 |
| ENSG00000276929.1_RP11-266I3 | ENSG00000160789.18_LMNA | -0.04557 | -0.203298915 | 0.114457922 | 5.77E-01 | 8.03E-01 | 1.00E+00 |
| ENSG00000271053.1_RP11-97F8  | ENSG00000160789.18_LMNA | 0.01775  | -0.141852961 | 0.176450684 | 8.28E-01 | 9.33E-01 | 1.00E+00 |
| ENSG00000226804.4_RP4-675G8  | ENSG00000160789.18_LMNA | -0.06797 | -0.224738683 | 0.092228853 | 4.05E-01 | 6.81E-01 | 1.00E+00 |
| ENSG00000237443.1_OR13D2P    | ENSG00000160789.18_LMNA | 0.13708  | -0.022618217 | 0.289949325 | 9.22E-02 | 2.96E-01 | 1.00E+00 |
| ENSG00000196099.4_OR6M1      | ENSG00000160789.18_LMNA | -0.05545 | -0.212771313 | 0.104675879 | 4.97E-01 | 7.51E-01 | 1.00E+00 |
| ENSG00000179443.5_OR13C6P    | ENSG00000160789.18_LMNA | 0.01878  | -0.140837212 | 0.177454686 | 8.18E-01 | 9.29E-01 | 1.00E+00 |
| ENSG00000181733.2_OR2Z1      | ENSG00000160789.18_LMNA | -0.08465 | -0.240606164 | 0.075571229 | 3.00E-01 | 5.86E-01 | 1.00E+00 |
| ENSG00000203408.3_OR6C71P    | ENSG00000160789.18_LMNA | -0.06146 | -0.218525339 | 0.098703617 | 4.52E-01 | 7.17E-01 | 1.00E+00 |
| ENSG00000259489.2_KRT18P47   | ENSG00000160789.18_LMNA | 0.27165  | 0.117531996  | 0.41299     | 7.11E-04 | 8.88E-03 | 1.00E+00 |
| ENSG00000254488.1_RP11-65G9  | ENSG00000160789.18_LMNA | 0.01526  | -0.144288691 | 0.174040422 | 8.52E-01 | 9.42E-01 | 1.00E+00 |
| ENSG00000248302.3_BNIP3P41   | ENSG00000160789.18_LMNA | 0.02207  | -0.137613053 | 0.180637175 | 7.87E-01 | 9.13E-01 | 1.00E+00 |
| ENSG00000279795.1_RP11-586K  | ENSG00000160789.18_LMNA | -0.02372 | -0.182230522 | 0.135996306 | 7.72E-01 | 9.06E-01 | 1.00E+00 |
| ENSG00000135222.6_CSN2       | ENSG00000160789.18_LMNA | -0.0556  | -0.212915603 | 0.104526395 | 4.96E-01 | 7.51E-01 | 1.00E+00 |
| ENSG00000221837.5_KRTAP10-9  | ENSG00000160789.18_LMNA | 0.04777  | -0.112280249 | 0.205412814 | 5.59E-01 | 7.92E-01 | 1.00E+00 |
| ENSG00000250169.1_MTND5P13   | ENSG00000160789.18_LMNA | -0.03706 | -0.19510605  | 0.1228692   | 6.50E-01 | 8.45E-01 | 1.00E+00 |
| ENSG00000213181.2_OR10N1P    | ENSG00000160789.18_LMNA | 0.02378  | -0.135933782 | 0.182292108 | 7.71E-01 | 9.05E-01 | 1.00E+00 |
| ENSG00000115488.3_NEU2       | ENSG00000160789.18_LMNA | -0.05114 | -0.208639088 | 0.10895075  | 5.32E-01 | 7.74E-01 | 1.00E+00 |
| ENSG00000262085.2_OR1P1      | ENSG00000160789.18_LMNA | 0.00481  | -0.154510117 | 0.163884111 | 9.53E-01 | 9.81E-01 | 1.00E+00 |
| ENSG00000258641.1_OR4T1P     | ENSG00000160789.18_LMNA | -0.08793 | -0.243718209 | 0.072283384 | 2.81E-01 | 5.67E-01 | 1.00E+00 |
| ENSG00000176281.4_OR4K5      | ENSG00000160789.18_LMNA | -0.14637 | -0.298614472 | 0.013134516 | 7.20E-02 | 2.54E-01 | 1.00E+00 |
| ENSG00000180974.3_OR52E4     | ENSG00000160789.18_LMNA | 0.0397   | -0.12026365  | 0.197648695 | 6.27E-01 | 8.32E-01 | 1.00E+00 |

|                             |                         |          |              |             |          |          |          |
|-----------------------------|-------------------------|----------|--------------|-------------|----------|----------|----------|
| ENSG00000176951.6_OR51N1P   | ENSG00000160789.18_LMNA | -0.21052 | -0.357729049 | -0.05309626 | 9.23E-03 | 6.19E-02 | 1.00E+00 |
| ENSG00000183269.5_OR52E8    | ENSG00000160789.18_LMNA | -0.02856 | -0.186912238 | 0.131236006 | 7.27E-01 | 8.84E-01 | 1.00E+00 |
| ENSG00000203923.4_SPANXN1   | ENSG00000160789.18_LMNA | -0.04107 | -0.198966352 | 0.11891167  | 6.15E-01 | 8.26E-01 | 1.00E+00 |
| ENSG00000243073.3_PRAMEF4   | ENSG00000160789.18_LMNA | 0.08015  | -0.08007225  | 0.236335244 | 3.26E-01 | 6.13E-01 | 1.00E+00 |
| ENSG00000169488.5_OR4K15    | ENSG00000160789.18_LMNA | -0.01118 | -0.170077047 | 0.148285574 | 8.91E-01 | 9.57E-01 | 1.00E+00 |
| ENSG00000270835.1_AP001425. | ENSG00000160789.18_LMNA | 0.04144  | -0.118540896 | 0.199327512 | 6.12E-01 | 8.24E-01 | 1.00E+00 |
| ENSG00000262628.1_OR1D5     | ENSG00000160789.18_LMNA | 0.07511  | -0.08510432  | 0.231545904 | 3.58E-01 | 6.41E-01 | 1.00E+00 |
| ENSG00000254095.1_RP11-566H | ENSG00000160789.18_LMNA | 0.04911  | -0.110956857 | 0.206696004 | 5.48E-01 | 7.85E-01 | 1.00E+00 |
| ENSG00000227367.1_SLC9B1P4  | ENSG00000160789.18_LMNA | -0.09607 | -0.251426243 | 0.064110243 | 2.39E-01 | 5.18E-01 | 1.00E+00 |
| ENSG00000236068.2_AC016561. | ENSG00000160789.18_LMNA | 0.02508  | -0.134661345 | 0.183544903 | 7.59E-01 | 8.99E-01 | 1.00E+00 |
| ENSG00000182816.7_KRTAP13-2 | ENSG00000160789.18_LMNA | 0.1888   | 0.030516601  | 0.337846089 | 1.98E-02 | 1.07E-01 | 1.00E+00 |
| ENSG00000229418.2_RP11-35J2 | ENSG00000160789.18_LMNA | 0.01551  | -0.144048968 | 0.174277807 | 8.50E-01 | 9.41E-01 | 1.00E+00 |
| ENSG00000234439.1_KRT18P2   | ENSG00000160789.18_LMNA | 0.12847  | -0.031367379 | 0.281909612 | 1.15E-01 | 3.38E-01 | 1.00E+00 |
| ENSG00000231204.4_AC011752. | ENSG00000160789.18_LMNA | -0.16725 | -0.317982821 | -0.00826822 | 3.94E-02 | 1.72E-01 | 1.00E+00 |
| ENSG00000235274.1_RP1-107N3 | ENSG00000160789.18_LMNA | 0.03043  | -0.129396298 | 0.188717712 | 7.10E-01 | 8.77E-01 | 1.00E+00 |
| ENSG00000205754.9_SLC01B7   | ENSG00000160789.18_LMNA | -0.00133 | -0.16050047  | 0.157900381 | 9.87E-01 | 9.95E-01 | 1.00E+00 |
| ENSG00000266925.1_RP11-434D | ENSG00000160789.18_LMNA | 0.07999  | -0.080229508 | 0.236185803 | 3.27E-01 | 6.14E-01 | 1.00E+00 |
| ENSG00000166013.11_TRIM53BF | ENSG00000160789.18_LMNA | 0.0245   | -0.135228895 | 0.182986241 | 7.64E-01 | 9.02E-01 | 1.00E+00 |
| ENSG00000228611.2_HNF4GP1   | ENSG00000160789.18_LMNA | -0.02714 | -0.185543022 | 0.132629724 | 7.40E-01 | 8.91E-01 | 1.00E+00 |
| ENSG00000226611.2_OFD1P2Y   | ENSG00000160789.18_LMNA | -0.18481 | -0.334176922 | -0.02638379 | 2.26E-02 | 1.18E-01 | 1.00E+00 |
| ENSG00000229027.3_HSFY1P1   | ENSG00000160789.18_LMNA | -0.10426 | -0.259162638 | 0.055864245 | 2.01E-01 | 4.72E-01 | 1.00E+00 |
| ENSG00000270435.1_RP11-304C | ENSG00000160789.18_LMNA | 0.12342  | -0.036497171 | 0.277175233 | 1.30E-01 | 3.65E-01 | 1.00E+00 |
| ENSG00000271028.1_RP11-111A | ENSG00000160789.18_LMNA | -0.07552 | -0.231935387 | 0.0846957   | 3.55E-01 | 6.39E-01 | 1.00E+00 |
| ENSG00000224071.1_AC009474. | ENSG00000160789.18_LMNA | 0.05097  | -0.109115571 | 0.208479539 | 5.33E-01 | 7.75E-01 | 1.00E+00 |
| ENSG00000229028.2_KRT223P   | ENSG00000160789.18_LMNA | 0.01665  | -0.142926378 | 0.175388961 | 8.39E-01 | 9.37E-01 | 1.00E+00 |
| ENSG00000280288.1_RP11-756D | ENSG00000160789.18_LMNA | 0.11801  | -0.041979174 | 0.2720989   | 1.48E-01 | 3.94E-01 | 1.00E+00 |
| ENSG00000274178.2_PRAMEF28  | ENSG00000160789.18_LMNA | 0.06012  | -0.100037252 | 0.217242347 | 4.62E-01 | 7.25E-01 | 1.00E+00 |
| ENSG00000254840.1_RP11-574M | ENSG00000160789.18_LMNA | -0.18355 | -0.333023091 | -0.02508633 | 2.36E-02 | 1.21E-01 | 1.00E+00 |
| ENSG00000236626.1_MTND5P17  | ENSG00000160789.18_LMNA | 0.08438  | -0.075843175 | 0.240348468 | 3.01E-01 | 5.88E-01 | 1.00E+00 |
| ENSG00000277499.1_RP11-144M | ENSG00000160789.18_LMNA | 0.08688  | -0.073338118 | 0.24272058  | 2.87E-01 | 5.73E-01 | 1.00E+00 |
| ENSG00000258804.1_RP11-322L | ENSG00000160789.18_LMNA | 0.02159  | -0.138083762 | 0.180172964 | 7.92E-01 | 9.16E-01 | 1.00E+00 |
| ENSG00000182070.4_OR52A1    | ENSG00000160789.18_LMNA | 0.02456  | -0.135167674 | 0.183046514 | 7.64E-01 | 9.02E-01 | 1.00E+00 |
| ENSG00000260866.1_RP11-626K | ENSG00000160789.18_LMNA | 0.02999  | -0.129827666 | 0.188294564 | 7.14E-01 | 8.78E-01 | 1.00E+00 |

|                              |                         |          |              |             |          |          |          |
|------------------------------|-------------------------|----------|--------------|-------------|----------|----------|----------|
| ENSG00000213578.5_CPLX3      | ENSG00000160789.18_LMNA | -0.16901 | -0.319609841 | -0.01007915 | 3.74E-02 | 1.66E-01 | 1.00E+00 |
| ENSG00000279769.1_CH507-42P  | ENSG00000160789.18_LMNA | -0.10986 | -0.264437892 | 0.050216753 | 1.78E-01 | 4.40E-01 | 1.00E+00 |
| ENSG00000248748.1_MTND5P9    | ENSG00000160789.18_LMNA | 0.10958  | -0.050505083 | 0.264169022 | 1.79E-01 | 4.41E-01 | 1.00E+00 |
| ENSG00000249831.2_RP11-4O3.  | ENSG00000160789.18_LMNA | -0.00158 | -0.160738393 | 0.157662238 | 9.85E-01 | 9.94E-01 | 1.00E+00 |
| ENSG00000248104.1_TARS2P1    | ENSG00000160789.18_LMNA | -0.00103 | -0.160202838 | 0.158198238 | 9.90E-01 | 9.96E-01 | 1.00E+00 |
| ENSG00000228383.5_FAM197Y7I  | ENSG00000160789.18_LMNA | 0.08728  | -0.072936497 | 0.243100536 | 2.85E-01 | 5.70E-01 | 1.00E+00 |
| ENSG00000259870.1_RP11-753A  | ENSG00000160789.18_LMNA | -0.0109  | -0.169805489 | 0.148559048 | 8.94E-01 | 9.59E-01 | 1.00E+00 |
| ENSG00000232100.1_RP11-152L  | ENSG00000160789.18_LMNA | -0.02074 | -0.179345906 | 0.138922043 | 8.00E-01 | 9.20E-01 | 1.00E+00 |
| ENSG00000261194.1_RP11-704C  | ENSG00000160789.18_LMNA | -0.12529 | -0.278931291 | 0.034596374 | 1.24E-01 | 3.55E-01 | 1.00E+00 |
| ENSG00000280275.1_RP3-428A1  | ENSG00000160789.18_LMNA | -0.01622 | -0.174965274 | 0.143354522 | 8.43E-01 | 9.39E-01 | 1.00E+00 |
| ENSG00000259769.1_RP11-1360I | ENSG00000160789.18_LMNA | -0.13219 | -0.28538686  | 0.02758917  | 1.04E-01 | 3.21E-01 | 1.00E+00 |
| ENSG00000270455.1_PABPC1P5   | ENSG00000160789.18_LMNA | -0.01327 | -0.172103767 | 0.146243017 | 8.71E-01 | 9.50E-01 | 1.00E+00 |
| ENSG00000249259.2_RP11-166J  | ENSG00000160789.18_LMNA | 0.03009  | -0.129736814 | 0.188383695 | 7.13E-01 | 8.78E-01 | 1.00E+00 |
| ENSG00000226863.1_SHROOM2I   | ENSG00000160789.18_LMNA | -0.17456 | -0.324735623 | -0.01579763 | 3.15E-02 | 1.48E-01 | 1.00E+00 |
| ENSG00000261751.1_RP11-305A  | ENSG00000160789.18_LMNA | -0.068   | -0.224763765 | 0.09220266  | 4.05E-01 | 6.81E-01 | 1.00E+00 |
| ENSG00000237267.1_LINC01519  | ENSG00000160789.18_LMNA | -0.21032 | -0.357551407 | -0.05289314 | 9.30E-03 | 6.22E-02 | 1.00E+00 |
| ENSG00000279401.1_GS1-204I12 | ENSG00000160789.18_LMNA | -0.22462 | -0.370566566 | -0.06784231 | 5.40E-03 | 4.15E-02 | 1.00E+00 |
| ENSG00000223417.7_TRIM49D1   | ENSG00000160789.18_LMNA | -0.22902 | -0.374566797 | -0.07246443 | 4.54E-03 | 3.65E-02 | 1.00E+00 |
| ENSG00000248844.5_RP11-626H  | ENSG00000160789.18_LMNA | 0.02097  | -0.13869357  | 0.179571365 | 7.98E-01 | 9.19E-01 | 1.00E+00 |
| ENSG00000198022.6_SAGE2P     | ENSG00000160789.18_LMNA | -0.03925 | -0.1972186   | 0.120704694 | 6.31E-01 | 8.34E-01 | 1.00E+00 |
| ENSG00000227717.4_RP11-578F  | ENSG00000160789.18_LMNA | -0.03969 | -0.197638042 | 0.120274576 | 6.27E-01 | 8.32E-01 | 1.00E+00 |
| ENSG00000185448.10_FAM47A    | ENSG00000160789.18_LMNA | 0.05355  | -0.106562053 | 0.210949476 | 5.12E-01 | 7.61E-01 | 1.00E+00 |
| ENSG00000242097.1_RP11-64D2  | ENSG00000160789.18_LMNA | -0.04595 | -0.203662319 | 0.114083772 | 5.74E-01 | 8.01E-01 | 1.00E+00 |
| ENSG00000258997.1_NF1P2      | ENSG00000160789.18_LMNA | -0.00909 | -0.168048347 | 0.15032741  | 9.11E-01 | 9.66E-01 | 1.00E+00 |
| ENSG00000261446.2_LINC00559  | ENSG00000160789.18_LMNA | 0.05675  | -0.103382083 | 0.214019702 | 4.87E-01 | 7.44E-01 | 1.00E+00 |
| ENSG00000277211.1_RP11-204E  | ENSG00000160789.18_LMNA | -0.1178  | -0.271901183 | 0.042192309 | 1.48E-01 | 3.95E-01 | 1.00E+00 |
| ENSG00000257310.1_RP11-496I2 | ENSG00000160789.18_LMNA | 0.05128  | -0.108811501 | 0.208773869 | 5.30E-01 | 7.73E-01 | 1.00E+00 |
| ENSG00000253614.1_RP11-513O  | ENSG00000160789.18_LMNA | -0.1264  | -0.279963379 | 0.03347816  | 1.21E-01 | 3.49E-01 | 1.00E+00 |
| ENSG00000264332.1_           | ENSG00000160789.18_LMNA | -0.06486 | -0.221768906 | 0.095326927 | 4.27E-01 | 6.98E-01 | 1.00E+00 |
| ENSG00000275110.1_MIR6087    | ENSG00000160789.18_LMNA | 0.04979  | -0.110288192 | 0.207343941 | 5.42E-01 | 7.81E-01 | 1.00E+00 |
| ENSG00000234716.1_RP11-760D  | ENSG00000160789.18_LMNA | -0.00156 | -0.160717484 | 0.157683168 | 9.85E-01 | 9.94E-01 | 1.00E+00 |
| ENSG00000272385.1_           | ENSG00000160789.18_LMNA | 0.01619  | -0.143377831 | 0.174942205 | 8.43E-01 | 9.39E-01 | 1.00E+00 |
| ENSG00000200630.1_Y_RNA      | ENSG00000160789.18_LMNA | -0.00295 | -0.162077286 | 0.156321412 | 9.71E-01 | 9.89E-01 | 1.00E+00 |

|                             |                         |          |              |             |          |          |          |
|-----------------------------|-------------------------|----------|--------------|-------------|----------|----------|----------|
| ENSG00000207558.2_          | ENSG00000160789.18_LMNA | -0.05645 | -0.213728384 | 0.103684094 | 4.90E-01 | 7.46E-01 | 1.00E+00 |
| ENSG00000280329.1_AC026449. | ENSG00000160789.18_LMNA | 0.03103  | -0.128803829 | 0.189298699 | 7.04E-01 | 8.74E-01 | 1.00E+00 |
| ENSG00000252863.1_RNU6-1183 | ENSG00000160789.18_LMNA | -0.01746 | -0.176171234 | 0.142135562 | 8.31E-01 | 9.34E-01 | 1.00E+00 |
| ENSG00000211911.1_IGHD3-22  | ENSG00000160789.18_LMNA | -0.03922 | -0.197185329 | 0.120738807 | 6.31E-01 | 8.35E-01 | 1.00E+00 |
| ENSG00000264084.1_MIR5688   | ENSG00000160789.18_LMNA | 0.03325  | -0.126623985 | 0.191434382 | 6.84E-01 | 8.63E-01 | 1.00E+00 |
| ENSG00000264114.1_          | ENSG00000160789.18_LMNA | -0.14008 | -0.29275534  | 0.019553278 | 8.52E-02 | 2.83E-01 | 1.00E+00 |
| ENSG00000273593.1_MIR7160   | ENSG00000160789.18_LMNA | -0.01522 | -0.174001905 | 0.144327583 | 8.52E-01 | 9.42E-01 | 1.00E+00 |
| ENSG00000278076.1_          | ENSG00000160789.18_LMNA | 0.19326  | 0.035138668  | 0.341938592 | 1.71E-02 | 9.63E-02 | 1.00E+00 |
| ENSG00000281262.1_          | ENSG00000160789.18_LMNA | -0.00091 | -0.160082641 | 0.158318509 | 9.91E-01 | 9.97E-01 | 1.00E+00 |
| ENSG00000281136.1_          | ENSG00000160789.18_LMNA | -0.1183  | -0.272373317 | 0.04168331  | 1.47E-01 | 3.92E-01 | 1.00E+00 |
| ENSG00000264419.1_MIR548AC  | ENSG00000160789.18_LMNA | 0.04367  | -0.116334622 | 0.201474795 | 5.93E-01 | 8.12E-01 | 1.00E+00 |
| ENSG00000265083.1_MIR3691   | ENSG00000160789.18_LMNA | -0.0597  | -0.216844132 | 0.100450954 | 4.65E-01 | 7.27E-01 | 1.00E+00 |
| ENSG00000207692.2_MIR592    | ENSG00000160789.18_LMNA | -0.01359 | -0.172414839 | 0.145929275 | 8.68E-01 | 9.48E-01 | 1.00E+00 |
| ENSG00000263750.1_MIR548AV  | ENSG00000160789.18_LMNA | -0.12539 | -0.27901833  | 0.034502102 | 1.24E-01 | 3.55E-01 | 1.00E+00 |
| ENSG00000280458.1_          | ENSG00000160789.18_LMNA | -0.10297 | -0.257944642 | 0.057165328 | 2.07E-01 | 4.79E-01 | 1.00E+00 |
| ENSG00000212625.1_RNA5SP39  | ENSG00000160789.18_LMNA | 0.07636  | -0.083863428 | 0.232728367 | 3.50E-01 | 6.33E-01 | 1.00E+00 |
| ENSG00000275334.1_MIR5787   | ENSG00000160789.18_LMNA | 0.02419  | -0.135532481 | 0.182687325 | 7.67E-01 | 9.04E-01 | 1.00E+00 |
| ENSG00000201365.1_Y_RNA     | ENSG00000160789.18_LMNA | 0.05313  | -0.106979691 | 0.210545786 | 5.16E-01 | 7.63E-01 | 1.00E+00 |
| ENSG00000207036.1_RNY3P14   | ENSG00000160789.18_LMNA | 0.08499  | -0.07523047  | 0.240929005 | 2.98E-01 | 5.84E-01 | 1.00E+00 |
| ENSG00000238304.1_RNU7-50P  | ENSG00000160789.18_LMNA | 0.11582  | -0.044195163 | 0.270041922 | 1.55E-01 | 4.07E-01 | 1.00E+00 |
| ENSG00000253225.1_RP11-1057 | ENSG00000160789.18_LMNA | -0.1085  | -0.263153379 | 0.05159376  | 1.83E-01 | 4.48E-01 | 1.00E+00 |
| ENSG00000201363.2_Y_RNA     | ENSG00000160789.18_LMNA | 0.11574  | -0.044271895 | 0.269970644 | 1.56E-01 | 4.07E-01 | 1.00E+00 |
| ENSG00000252283.1_Vault     | ENSG00000160789.18_LMNA | 0.01389  | -0.145631223 | 0.172710294 | 8.65E-01 | 9.47E-01 | 1.00E+00 |
| ENSG00000266108.1_          | ENSG00000160789.18_LMNA | -0.038   | -0.196010636 | 0.121942737 | 6.42E-01 | 8.41E-01 | 1.00E+00 |
| ENSG00000221331.1_MIR548Q   | ENSG00000160789.18_LMNA | -0.1012  | -0.256272041 | 0.058950284 | 2.15E-01 | 4.89E-01 | 1.00E+00 |
| ENSG00000277331.1_          | ENSG00000160789.18_LMNA | -0.1173  | -0.271434582 | 0.042695183 | 1.50E-01 | 3.98E-01 | 1.00E+00 |
| ENSG00000266649.1_MIR3126   | ENSG00000160789.18_LMNA | 0.00315  | -0.156126631 | 0.162271689 | 9.69E-01 | 9.88E-01 | 1.00E+00 |
| ENSG00000221294.1_          | ENSG00000160789.18_LMNA | 0.05117  | -0.108916214 | 0.208672517 | 5.31E-01 | 7.74E-01 | 1.00E+00 |
| ENSG00000251990.1_RNA5SP18  | ENSG00000160789.18_LMNA | -0.02858 | -0.186932746 | 0.131215121 | 7.27E-01 | 8.84E-01 | 1.00E+00 |
| ENSG00000265526.1_MIR4304   | ENSG00000160789.18_LMNA | 0.03112  | -0.128721391 | 0.189379522 | 7.04E-01 | 8.73E-01 | 1.00E+00 |
| ENSG00000201710.1_SNORD113  | ENSG00000160789.18_LMNA | 0.05918  | -0.10097603  | 0.21633856  | 4.69E-01 | 7.30E-01 | 1.00E+00 |
| ENSG00000233918.1_RP11-715L | ENSG00000160789.18_LMNA | -0.0208  | -0.179411335 | 0.138855743 | 7.99E-01 | 9.19E-01 | 1.00E+00 |
| ENSG00000201899.1_SNORD114  | ENSG00000160789.18_LMNA | 0.0891   | -0.071111728 | 0.244825647 | 2.75E-01 | 5.59E-01 | 1.00E+00 |

|                             |                         |          |              |             |          |          |          |
|-----------------------------|-------------------------|----------|--------------|-------------|----------|----------|----------|
| ENSG00000264060.1_MIR4316   | ENSG00000160789.18_LMNA | -0.11497 | -0.269241675 | 0.045056436 | 1.58E-01 | 4.12E-01 | 1.00E+00 |
| ENSG00000263831.1_MIR378E   | ENSG00000160789.18_LMNA | -0.03237 | -0.190592661 | 0.127483478 | 6.92E-01 | 8.67E-01 | 1.00E+00 |
| ENSG00000251891.1_RNU7-79P  | ENSG00000160789.18_LMNA | -0.03255 | -0.190759813 | 0.127312835 | 6.91E-01 | 8.67E-01 | 1.00E+00 |
| ENSG00000238585.1_Y_RNA     | ENSG00000160789.18_LMNA | 0.09294  | -0.067252769 | 0.248467277 | 2.55E-01 | 5.36E-01 | 1.00E+00 |
| ENSG00000265965.1_MIR4266   | ENSG00000160789.18_LMNA | -0.03199 | -0.190223866 | 0.127859909 | 6.96E-01 | 8.69E-01 | 1.00E+00 |
| ENSG00000266262.1_MIR4428   | ENSG00000160789.18_LMNA | -0.00532 | -0.164382274 | 0.154010344 | 9.48E-01 | 9.79E-01 | 1.00E+00 |
| ENSG00000238380.1_RNU7-165F | ENSG00000160789.18_LMNA | 0.1532   | -0.006152554 | 0.304961129 | 5.95E-02 | 2.24E-01 | 1.00E+00 |
| ENSG00000212289.1_RNA5SP33  | ENSG00000160789.18_LMNA | -0.06466 | -0.221575689 | 0.095528279 | 4.29E-01 | 6.99E-01 | 1.00E+00 |
| ENSG00000221232.1_          | ENSG00000160789.18_LMNA | -0.05575 | -0.21305692  | 0.104379978 | 4.95E-01 | 7.50E-01 | 1.00E+00 |
| ENSG00000210107.1_MT-TQ     | ENSG00000160789.18_LMNA | -0.0656  | -0.222472981 | 0.094592991 | 4.22E-01 | 6.93E-01 | 1.00E+00 |
| ENSG00000199455.1_RNA5SP19  | ENSG00000160789.18_LMNA | -0.03764 | -0.195670514 | 0.12229115  | 6.45E-01 | 8.42E-01 | 1.00E+00 |
| ENSG00000263676.1_MIR4632   | ENSG00000160789.18_LMNA | 0.13538  | -0.024342854 | 0.288368018 | 9.63E-02 | 3.05E-01 | 1.00E+00 |
| ENSG00000200652.1_SNORA25   | ENSG00000160789.18_LMNA | 0.00477  | -0.154546261 | 0.163848076 | 9.53E-01 | 9.81E-01 | 1.00E+00 |
| ENSG00000276743.1_          | ENSG00000160789.18_LMNA | 0.15499  | -0.004320931 | 0.306621526 | 5.66E-02 | 2.17E-01 | 1.00E+00 |
| ENSG00000212017.2_MIR548U   | ENSG00000160789.18_LMNA | -0.04629 | -0.203989752 | 0.11374658  | 5.71E-01 | 8.00E-01 | 1.00E+00 |
| ENSG00000264397.1_MIR3180-5 | ENSG00000160789.18_LMNA | -0.00285 | -0.161973407 | 0.156425483 | 9.72E-01 | 9.89E-01 | 1.00E+00 |
| ENSG00000238447.1_RNU7-134F | ENSG00000160789.18_LMNA | -0.01082 | -0.169730962 | 0.148634092 | 8.95E-01 | 9.59E-01 | 1.00E+00 |
| ENSG00000266215.1_MIR3167   | ENSG00000160789.18_LMNA | 0.06954  | -0.090663245 | 0.226237219 | 3.95E-01 | 6.72E-01 | 1.00E+00 |
| ENSG00000272460.1_SNORD115  | ENSG00000160789.18_LMNA | 0.04288  | -0.117116674 | 0.200714002 | 6.00E-01 | 8.16E-01 | 1.00E+00 |
| ENSG00000252824.1_SNORA48   | ENSG00000160789.18_LMNA | 0.08424  | -0.075983547 | 0.240215433 | 3.02E-01 | 5.89E-01 | 1.00E+00 |
| ENSG00000252217.1_Y_RNA     | ENSG00000160789.18_LMNA | -0.05435 | -0.211716239 | 0.105768491 | 5.06E-01 | 7.57E-01 | 1.00E+00 |
| ENSG00000264763.1_MIR4295   | ENSG00000160789.18_LMNA | 0.00286  | -0.156412641 | 0.161986226 | 9.72E-01 | 9.89E-01 | 1.00E+00 |
| ENSG00000207961.2_MIR496    | ENSG00000160789.18_LMNA | -0.04772 | -0.205362913 | 0.112331691 | 5.59E-01 | 7.92E-01 | 1.00E+00 |
| ENSG00000211860.1_TRAJ29    | ENSG00000160789.18_LMNA | -0.04795 | -0.205583543 | 0.112104237 | 5.57E-01 | 7.91E-01 | 1.00E+00 |
| ENSG00000211984.2_          | ENSG00000160789.18_LMNA | -0.15888 | -0.310230632 | 0.00033243  | 5.06E-02 | 2.03E-01 | 1.00E+00 |
| ENSG00000252046.1_RNU6-150F | ENSG00000160789.18_LMNA | -0.06382 | -0.220776493 | 0.096360847 | 4.35E-01 | 7.03E-01 | 1.00E+00 |
| ENSG00000211842.1_TRAJ47    | ENSG00000160789.18_LMNA | -0.11685 | -0.271008068 | 0.043154715 | 1.52E-01 | 4.01E-01 | 1.00E+00 |
| ENSG00000252441.1_SNORA64   | ENSG00000160789.18_LMNA | 0.12326  | -0.036657854 | 0.277026689 | 1.30E-01 | 3.66E-01 | 1.00E+00 |
| ENSG00000206605.1_RNU6-946F | ENSG00000160789.18_LMNA | -0.18593 | -0.335211298 | -0.02754781 | 2.18E-02 | 1.15E-01 | 1.00E+00 |
| ENSG00000266525.1_MIR4650-1 | ENSG00000160789.18_LMNA | -0.09746 | -0.252737471 | 0.062715669 | 2.32E-01 | 5.10E-01 | 1.00E+00 |
| ENSG00000265002.1_          | ENSG00000160789.18_LMNA | -0.07826 | -0.234536215 | 0.081964349 | 3.38E-01 | 6.23E-01 | 1.00E+00 |
| ENSG00000200118.1_Y_RNA     | ENSG00000160789.18_LMNA | -0.02283 | -0.181367439 | 0.136872275 | 7.80E-01 | 9.10E-01 | 1.00E+00 |
| ENSG00000207385.1_RNU6-310F | ENSG00000160789.18_LMNA | 0.03477  | -0.125127693 | 0.19289862  | 6.71E-01 | 8.56E-01 | 1.00E+00 |

|                             |                         |          |              |             |          |          |          |
|-----------------------------|-------------------------|----------|--------------|-------------|----------|----------|----------|
| ENSG00000266482.1_          | ENSG00000160789.18_LMNA | -0.08341 | -0.239432528 | 0.076809381 | 3.07E-01 | 5.93E-01 | 1.00E+00 |
| ENSG00000263783.1_MIR5590   | ENSG00000160789.18_LMNA | -0.03498 | -0.193102749 | 0.12491898  | 6.69E-01 | 8.54E-01 | 1.00E+00 |
| ENSG00000274535.1_SNORD39   | ENSG00000160789.18_LMNA | 0.06639  | -0.093802433 | 0.223231003 | 4.16E-01 | 6.89E-01 | 1.00E+00 |
| ENSG00000252222.1_RNU7-13P  | ENSG00000160789.18_LMNA | 0.02859  | -0.131211452 | 0.18693635  | 7.27E-01 | 8.84E-01 | 1.00E+00 |
| ENSG00000216085.1_          | ENSG00000160789.18_LMNA | 0.02642  | -0.133340871 | 0.184843901 | 7.47E-01 | 8.94E-01 | 1.00E+00 |
| ENSG00000250341.1_RP11-785F | ENSG00000160789.18_LMNA | 0.05768  | -0.102463108 | 0.214905796 | 4.80E-01 | 7.38E-01 | 1.00E+00 |
| ENSG00000265694.1_MIR4774   | ENSG00000160789.18_LMNA | -0.09476 | -0.250185708 | 0.065428497 | 2.46E-01 | 5.25E-01 | 1.00E+00 |
| ENSG00000211871.1_TRAJ18    | ENSG00000160789.18_LMNA | 0.07232  | -0.087894433 | 0.228883746 | 3.76E-01 | 6.56E-01 | 1.00E+00 |
| ENSG00000222327.1_RNU6-855F | ENSG00000160789.18_LMNA | -0.04996 | -0.20750987  | 0.110116909 | 5.41E-01 | 7.81E-01 | 1.00E+00 |
| ENSG00000276506.1_          | ENSG00000160789.18_LMNA | 0.06663  | -0.093559021 | 0.22346432  | 4.15E-01 | 6.88E-01 | 1.00E+00 |
| ENSG00000199636.1_Y_RNA     | ENSG00000160789.18_LMNA | -0.03602 | -0.194106555 | 0.123892223 | 6.60E-01 | 8.50E-01 | 1.00E+00 |
| ENSG00000274013.1_          | ENSG00000160789.18_LMNA | -0.02597 | -0.184404169 | 0.133788    | 7.51E-01 | 8.96E-01 | 1.00E+00 |
| ENSG00000252598.1_RNA5SP46  | ENSG00000160789.18_LMNA | -0.13721 | -0.290071742 | 0.022484626 | 9.19E-02 | 2.96E-01 | 1.00E+00 |
| ENSG00000251852.1_Y_RNA     | ENSG00000160789.18_LMNA | -0.07429 | -0.230765684 | 0.085922556 | 3.63E-01 | 6.45E-01 | 1.00E+00 |
| ENSG00000252366.1_RNA5SP36  | ENSG00000160789.18_LMNA | 0.03219  | -0.127662639 | 0.190417146 | 6.94E-01 | 8.68E-01 | 1.00E+00 |
| ENSG00000200840.1_RNU6-82P  | ENSG00000160789.18_LMNA | -0.02107 | -0.179672499 | 0.138591073 | 7.97E-01 | 9.18E-01 | 1.00E+00 |
| ENSG00000201308.1_RNU6-512F | ENSG00000160789.18_LMNA | -0.11962 | -0.273614191 | 0.040344767 | 1.42E-01 | 3.85E-01 | 1.00E+00 |
| ENSG00000238754.1_SCARNA18  | ENSG00000160789.18_LMNA | -0.01431 | -0.173112263 | 0.145225629 | 8.61E-01 | 9.46E-01 | 1.00E+00 |
| ENSG00000273826.1_          | ENSG00000160789.18_LMNA | -0.04998 | -0.207526244 | 0.110100005 | 5.41E-01 | 7.80E-01 | 1.00E+00 |
| ENSG00000206819.1_RNU6-260F | ENSG00000160789.18_LMNA | 0.00331  | -0.15596926  | 0.162428736 | 9.68E-01 | 9.87E-01 | 1.00E+00 |
| ENSG00000206583.1_RNU6-1292 | ENSG00000160789.18_LMNA | -0.01192 | -0.170792958 | 0.147564379 | 8.84E-01 | 9.55E-01 | 1.00E+00 |
| ENSG00000207455.1_RNU6-331F | ENSG00000160789.18_LMNA | 0.03473  | -0.125167272 | 0.192859906 | 6.71E-01 | 8.56E-01 | 1.00E+00 |
| ENSG00000211877.1_TRAJ12    | ENSG00000160789.18_LMNA | 0.06177  | -0.09839962  | 0.218817639 | 4.50E-01 | 7.15E-01 | 1.00E+00 |
| ENSG00000207333.1_RNU6-680F | ENSG00000160789.18_LMNA | -0.04005 | -0.197986763 | 0.119916889 | 6.24E-01 | 8.31E-01 | 1.00E+00 |
| ENSG00000222869.1_RNU6-565F | ENSG00000160789.18_LMNA | -0.17474 | -0.324899906 | -0.01598124 | 3.13E-02 | 1.47E-01 | 1.00E+00 |
| ENSG00000199881.1_Y_RNA     | ENSG00000160789.18_LMNA | -0.04358 | -0.201386555 | 0.116425348 | 5.94E-01 | 8.13E-01 | 1.00E+00 |
| ENSG00000266591.1_          | ENSG00000160789.18_LMNA | 0.04261  | -0.117389434 | 0.200448568 | 6.02E-01 | 8.17E-01 | 1.00E+00 |
| ENSG00000201852.1_RNU6-702F | ENSG00000160789.18_LMNA | -0.01412 | -0.172927717 | 0.145411852 | 8.63E-01 | 9.46E-01 | 1.00E+00 |
| ENSG00000199525.1_RNA5SP29  | ENSG00000160789.18_LMNA | -0.03015 | -0.188448458 | 0.129670797 | 7.12E-01 | 8.78E-01 | 1.00E+00 |
| ENSG00000280671.1_AC112719. | ENSG00000160789.18_LMNA | -0.09478 | -0.250209999 | 0.065402695 | 2.45E-01 | 5.25E-01 | 1.00E+00 |
| ENSG00000252583.2_MIR514B   | ENSG00000160789.18_LMNA | -0.02097 | -0.179572335 | 0.138692587 | 7.98E-01 | 9.19E-01 | 1.00E+00 |
| ENSG00000200175.1_RNU6-1309 | ENSG00000160789.18_LMNA | -0.17541 | -0.325522869 | -0.0166777  | 3.07E-02 | 1.45E-01 | 1.00E+00 |
| ENSG00000211833.1_TRAJ58    | ENSG00000160789.18_LMNA | 0.11199  | -0.048065568 | 0.266442348 | 1.70E-01 | 4.28E-01 | 1.00E+00 |

|                              |                         |          |              |             |          |          |          |
|------------------------------|-------------------------|----------|--------------|-------------|----------|----------|----------|
| ENSG00000271900.1_RP11-1113  | ENSG00000160789.18_LMNA | -0.04031 | -0.198235729 | 0.11966147  | 6.22E-01 | 8.29E-01 | 1.00E+00 |
| ENSG00000276489.1_MIR6829    | ENSG00000160789.18_LMNA | 0.04813  | -0.11193136  | 0.205751211 | 5.56E-01 | 7.90E-01 | 1.00E+00 |
| ENSG00000206866.1_RNU6-187F  | ENSG00000160789.18_LMNA | 0.06378  | -0.096395314 | 0.220743398 | 4.35E-01 | 7.03E-01 | 1.00E+00 |
| ENSG00000265598.1_MIR5707    | ENSG00000160789.18_LMNA | -0.15564 | -0.307232487 | 0.00364644  | 5.55E-02 | 2.15E-01 | 1.00E+00 |
| ENSG00000216162.1_           | ENSG00000160789.18_LMNA | 0.06567  | -0.094518213 | 0.222544698 | 4.21E-01 | 6.93E-01 | 1.00E+00 |
| ENSG00000199677.1_Y_RNA      | ENSG00000160789.18_LMNA | -0.10618 | -0.260964703 | 0.053937284 | 1.93E-01 | 4.61E-01 | 1.00E+00 |
| ENSG00000238344.1_SNORD126   | ENSG00000160789.18_LMNA | -0.09619 | -0.251537093 | 0.063992395 | 2.38E-01 | 5.17E-01 | 1.00E+00 |
| ENSG00000266216.1_           | ENSG00000160789.18_LMNA | -0.04385 | -0.201642398 | 0.116162283 | 5.92E-01 | 8.11E-01 | 1.00E+00 |
| ENSG00000278951.1_AC007557.1 | ENSG00000160789.18_LMNA | -0.14665 | -0.298870864 | 0.012853048 | 7.14E-02 | 2.53E-01 | 1.00E+00 |
| ENSG00000207075.1_Y_RNA      | ENSG00000160789.18_LMNA | -0.07513 | -0.231556788 | 0.085092903 | 3.58E-01 | 6.41E-01 | 1.00E+00 |
| ENSG00000211525.2_           | ENSG00000160789.18_LMNA | -0.05278 | -0.210212869 | 0.107324025 | 5.18E-01 | 7.65E-01 | 1.00E+00 |
| ENSG00000212248.1_RNU6-750F  | ENSG00000160789.18_LMNA | 0.03487  | -0.125027979 | 0.192996147 | 6.70E-01 | 8.55E-01 | 1.00E+00 |
| ENSG00000252722.1_SCARNA20   | ENSG00000160789.18_LMNA | -0.04736 | -0.205013694 | 0.112691645 | 5.62E-01 | 7.94E-01 | 1.00E+00 |
| ENSG00000264559.1_MIR3162    | ENSG00000160789.18_LMNA | 0.11184  | -0.048220007 | 0.266298534 | 1.70E-01 | 4.29E-01 | 1.00E+00 |
| ENSG00000238813.1_Y_RNA      | ENSG00000160789.18_LMNA | -0.09696 | -0.252268286 | 0.063214819 | 2.35E-01 | 5.13E-01 | 1.00E+00 |
| ENSG00000252685.1_RNU6-928F  | ENSG00000160789.18_LMNA | 0.07304  | -0.087173941 | 0.22957165  | 3.71E-01 | 6.51E-01 | 1.00E+00 |
| ENSG00000281867.1_           | ENSG00000160789.18_LMNA | -0.04861 | -0.206211286 | 0.111456894 | 5.52E-01 | 7.88E-01 | 1.00E+00 |
| ENSG00000261047.1_AC137527.1 | ENSG00000160789.18_LMNA | -0.05647 | -0.21374687  | 0.10366493  | 4.90E-01 | 7.46E-01 | 1.00E+00 |
| ENSG00000276730.1_Hammerhead | ENSG00000160789.18_LMNA | -0.17676 | -0.326766623 | -0.01806908 | 2.94E-02 | 1.41E-01 | 1.00E+00 |
| ENSG00000252905.1_RNA5SP33   | ENSG00000160789.18_LMNA | 0.05949  | -0.100666671 | 0.216636449 | 4.67E-01 | 7.28E-01 | 1.00E+00 |
| ENSG00000275842.1_MIR941-5   | ENSG00000160789.18_LMNA | 0.06061  | -0.099553508 | 0.217707849 | 4.58E-01 | 7.22E-01 | 1.00E+00 |
| ENSG00000212392.1_Y_RNA      | ENSG00000160789.18_LMNA | 0.12703  | -0.032832576 | 0.280558909 | 1.19E-01 | 3.46E-01 | 1.00E+00 |
| ENSG00000273570.1_RMST_5     | ENSG00000160789.18_LMNA | -0.06004 | -0.217162197 | 0.100120528 | 4.62E-01 | 7.25E-01 | 1.00E+00 |
| ENSG00000280530.1_AC010184.1 | ENSG00000160789.18_LMNA | -0.07518 | -0.231605781 | 0.085041508 | 3.57E-01 | 6.40E-01 | 1.00E+00 |
| ENSG00000201223.1_RNU6-1305  | ENSG00000160789.18_LMNA | 0.02736  | -0.132417605 | 0.185751492 | 7.38E-01 | 8.90E-01 | 1.00E+00 |
| ENSG00000207578.1_MIR583     | ENSG00000160789.18_LMNA | 0.04161  | -0.118370981 | 0.199492992 | 6.11E-01 | 8.22E-01 | 1.00E+00 |
| ENSG00000266133.1_MIR4759    | ENSG00000160789.18_LMNA | 0.00907  | -0.150346104 | 0.168029761 | 9.12E-01 | 9.66E-01 | 1.00E+00 |
| ENSG00000222736.1_RNU4-6P    | ENSG00000160789.18_LMNA | 0.04666  | -0.113383818 | 0.204341934 | 5.68E-01 | 7.98E-01 | 1.00E+00 |
| ENSG00000252764.1_RNU6-1092  | ENSG00000160789.18_LMNA | 0.0151   | -0.144443147 | 0.173887452 | 8.53E-01 | 9.43E-01 | 1.00E+00 |
| ENSG00000274389.1_           | ENSG00000160789.18_LMNA | 0.02568  | -0.134071752 | 0.184125044 | 7.54E-01 | 8.98E-01 | 1.00E+00 |
| ENSG00000238426.1_Y_RNA      | ENSG00000160789.18_LMNA | 0.00179  | -0.157454076 | 0.160946332 | 9.83E-01 | 9.94E-01 | 1.00E+00 |
| ENSG00000212292.1_RNU6-239F  | ENSG00000160789.18_LMNA | 0.01011  | -0.149335789 | 0.169033926 | 9.02E-01 | 9.62E-01 | 1.00E+00 |
| ENSG00000280779.1_           | ENSG00000160789.18_LMNA | -0.18077 | -0.330457346 | -0.02220492 | 2.58E-02 | 1.29E-01 | 1.00E+00 |



|                              |                         |          |              |             |          |          |          |
|------------------------------|-------------------------|----------|--------------|-------------|----------|----------|----------|
| ENSG00000222356.1_RNU6-710F  | ENSG00000160789.18_LMNA | 0.07178  | -0.088431786 | 0.22837049  | 3.80E-01 | 6.58E-01 | 1.00E+00 |
| ENSG00000277772.1_           | ENSG00000160789.18_LMNA | -0.08872 | -0.244472035 | 0.071485939 | 2.77E-01 | 5.62E-01 | 1.00E+00 |
| ENSG00000252896.1_           | ENSG00000160789.18_LMNA | 0.04164  | -0.118340478 | 0.199522697 | 6.10E-01 | 8.22E-01 | 1.00E+00 |
| ENSG00000221499.1_           | ENSG00000160789.18_LMNA | -0.00518 | -0.16424602  | 0.154147055 | 9.49E-01 | 9.80E-01 | 1.00E+00 |
| ENSG00000252153.1_MIR2278    | ENSG00000160789.18_LMNA | -0.12196 | -0.275802198 | 0.037981796 | 1.34E-01 | 3.73E-01 | 1.00E+00 |
| ENSG00000265662.1_           | ENSG00000160789.18_LMNA | -0.1025  | -0.257501188 | 0.057638766 | 2.09E-01 | 4.82E-01 | 1.00E+00 |
| ENSG00000266097.1_MIR5192    | ENSG00000160789.18_LMNA | 0.09239  | -0.067805978 | 0.24794577  | 2.58E-01 | 5.40E-01 | 1.00E+00 |
| ENSG00000231251.1_RP3-357I16 | ENSG00000160789.18_LMNA | 0.09015  | -0.070054927 | 0.245823818 | 2.69E-01 | 5.54E-01 | 1.00E+00 |
| ENSG00000221749.1_           | ENSG00000160789.18_LMNA | -0.11142 | -0.265907153 | 0.048640226 | 1.72E-01 | 4.31E-01 | 1.00E+00 |
| ENSG00000252723.2_RNU6-677F  | ENSG00000160789.18_LMNA | 0.05132  | -0.108770189 | 0.208813854 | 5.30E-01 | 7.73E-01 | 1.00E+00 |
| ENSG00000275077.1_           | ENSG00000160789.18_LMNA | 0.04599  | -0.114041927 | 0.203702956 | 5.74E-01 | 8.01E-01 | 1.00E+00 |
| ENSG00000207091.1_Y_RNA      | ENSG00000160789.18_LMNA | 0.04973  | -0.110348316 | 0.207285692 | 5.43E-01 | 7.82E-01 | 1.00E+00 |
| ENSG00000281373.1_           | ENSG00000160789.18_LMNA | -0.10175 | -0.256791126 | 0.058396546 | 2.12E-01 | 4.86E-01 | 1.00E+00 |
| ENSG00000207351.1_Y_RNA      | ENSG00000160789.18_LMNA | -0.01818 | -0.176867015 | 0.14143184  | 8.24E-01 | 9.31E-01 | 1.00E+00 |
| ENSG00000199566.1_SNORA64    | ENSG00000160789.18_LMNA | 0.04071  | -0.119262716 | 0.198624328 | 6.18E-01 | 8.27E-01 | 1.00E+00 |
| ENSG00000232707.1_AP1B1P2    | ENSG00000160789.18_LMNA | 0.05903  | -0.101121074 | 0.216198874 | 4.70E-01 | 7.30E-01 | 1.00E+00 |
| ENSG00000208883.1_SNORD96E   | ENSG00000160789.18_LMNA | 0.05163  | -0.108459729 | 0.209114301 | 5.28E-01 | 7.72E-01 | 1.00E+00 |
| ENSG00000252860.1_RNU6-570F  | ENSG00000160789.18_LMNA | 0.06655  | -0.093642253 | 0.223384545 | 4.15E-01 | 6.88E-01 | 1.00E+00 |
| ENSG00000212040.2_MIR543     | ENSG00000160789.18_LMNA | -0.00349 | -0.162597749 | 0.15579988  | 9.66E-01 | 9.87E-01 | 1.00E+00 |
| ENSG00000281066.1_           | ENSG00000160789.18_LMNA | 0.03667  | -0.123252098 | 0.194732036 | 6.54E-01 | 8.47E-01 | 1.00E+00 |
| ENSG00000223294.1_SNORD83    | ENSG00000160789.18_LMNA | -0.05902 | -0.216190071 | 0.101130215 | 4.70E-01 | 7.30E-01 | 1.00E+00 |
| ENSG00000264470.1_MIR4794    | ENSG00000160789.18_LMNA | -0.01447 | -0.173273851 | 0.145062554 | 8.60E-01 | 9.45E-01 | 1.00E+00 |
| ENSG00000221457.2_           | ENSG00000160789.18_LMNA | 0.00074  | -0.158483386 | 0.15991785  | 9.93E-01 | 9.97E-01 | 1.00E+00 |
| ENSG00000276137.1_MIR6133    | ENSG00000160789.18_LMNA | 0.03022  | -0.129602941 | 0.188515022 | 7.12E-01 | 8.77E-01 | 1.00E+00 |
| ENSG00000207202.1_RNU6-800F  | ENSG00000160789.18_LMNA | 0.106    | -0.054110582 | 0.260802727 | 1.94E-01 | 4.62E-01 | 1.00E+00 |
| ENSG00000263615.1_MIR4306    | ENSG00000160789.18_LMNA | -0.00138 | -0.160548191 | 0.157852619 | 9.87E-01 | 9.95E-01 | 1.00E+00 |
| ENSG00000201825.1_RNU6-1131  | ENSG00000160789.18_LMNA | -0.19813 | -0.346400697 | -0.04019317 | 1.44E-02 | 8.54E-02 | 1.00E+00 |
| ENSG00000263692.1_           | ENSG00000160789.18_LMNA | 0.16715  | 0.008166182  | 0.317891094 | 3.96E-02 | 1.72E-01 | 1.00E+00 |
| ENSG00000222072.1_Y_RNA      | ENSG00000160789.18_LMNA | -0.14063 | -0.293265068 | 0.018995885 | 8.40E-02 | 2.80E-01 | 1.00E+00 |
| ENSG00000206931.1_RNU6-1042  | ENSG00000160789.18_LMNA | 0.19485  | 0.036785765  | 0.343394169 | 1.62E-02 | 9.26E-02 | 1.00E+00 |
| ENSG00000207183.1_RNU6-843F  | ENSG00000160789.18_LMNA | -0.0332  | -0.191392412 | 0.126666853 | 6.85E-01 | 8.63E-01 | 1.00E+00 |
| ENSG00000202490.1_RNU6-597F  | ENSG00000160789.18_LMNA | -0.11484 | -0.269122179 | 0.045185005 | 1.59E-01 | 4.12E-01 | 1.00E+00 |
| ENSG00000212624.1_SNORA26    | ENSG00000160789.18_LMNA | 0.04993  | -0.110149971 | 0.207477843 | 5.41E-01 | 7.81E-01 | 1.00E+00 |

|                             |                         |          |              |             |          |          |          |
|-----------------------------|-------------------------|----------|--------------|-------------|----------|----------|----------|
| ENSG00000221038.1_RNU6ATAC  | ENSG00000160789.18_LMNA | 0.0084   | -0.151006361 | 0.167373166 | 9.18E-01 | 9.69E-01 | 1.00E+00 |
| ENSG00000264119.1_MIR4795   | ENSG00000160789.18_LMNA | -0.08289 | -0.23893329  | 0.077335767 | 3.10E-01 | 5.96E-01 | 1.00E+00 |
| ENSG00000208013.2_MIR652    | ENSG00000160789.18_LMNA | 0.11168  | -0.04838098  | 0.266148619 | 1.71E-01 | 4.30E-01 | 1.00E+00 |
| ENSG00000221330.1_          | ENSG00000160789.18_LMNA | 0.03613  | -0.123780037 | 0.194216194 | 6.59E-01 | 8.49E-01 | 1.00E+00 |
| ENSG00000278014.1_          | ENSG00000160789.18_LMNA | -0.06362 | -0.220588404 | 0.096556725 | 4.36E-01 | 7.04E-01 | 1.00E+00 |
| ENSG00000277146.1_RP11-557B | ENSG00000160789.18_LMNA | -0.06179 | -0.21883878  | 0.09837763  | 4.50E-01 | 7.15E-01 | 1.00E+00 |
| ENSG00000264678.1_MIR3140   | ENSG00000160789.18_LMNA | -0.0463  | -0.204001325 | 0.11373466  | 5.71E-01 | 8.00E-01 | 1.00E+00 |
| ENSG00000201367.1_RNU6-522F | ENSG00000160789.18_LMNA | -0.10904 | -0.263660881 | 0.051049857 | 1.81E-01 | 4.45E-01 | 1.00E+00 |
| ENSG00000271333.1_RP11-382B | ENSG00000160789.18_LMNA | 0.14355  | -0.016015912 | 0.295987199 | 7.77E-02 | 2.67E-01 | 1.00E+00 |
| ENSG00000256259.1_RP11-366L | ENSG00000160789.18_LMNA | 0.03587  | -0.124040518 | 0.193961616 | 6.61E-01 | 8.50E-01 | 1.00E+00 |
| ENSG00000221238.1_MIR1285-2 | ENSG00000160789.18_LMNA | -0.11322 | -0.267594939 | 0.046827284 | 1.65E-01 | 4.21E-01 | 1.00E+00 |
| ENSG00000223179.2_RNU6-373F | ENSG00000160789.18_LMNA | 0.09623  | -0.06394859  | 0.251578295 | 2.38E-01 | 5.17E-01 | 1.00E+00 |
| ENSG00000199168.2_MIR374A   | ENSG00000160789.18_LMNA | 0.03154  | -0.128304232 | 0.189788441 | 7.00E-01 | 8.71E-01 | 1.00E+00 |
| ENSG00000221430.1_MIR1294   | ENSG00000160789.18_LMNA | 0.00013  | -0.159069882 | 0.159331516 | 9.99E-01 | 9.99E-01 | 1.00E+00 |
| ENSG00000202601.3_MIR582    | ENSG00000160789.18_LMNA | 0.0109   | -0.148562899 | 0.169801664 | 8.94E-01 | 9.59E-01 | 1.00E+00 |
| ENSG00000276723.1_Y_RNA     | ENSG00000160789.18_LMNA | -0.05152 | -0.2090027   | 0.108575057 | 5.28E-01 | 7.72E-01 | 1.00E+00 |
| ENSG00000251969.3_          | ENSG00000160789.18_LMNA | 0.15036  | -0.009052609 | 0.302328308 | 6.45E-02 | 2.36E-01 | 1.00E+00 |
| ENSG00000274055.1_CDKN2B-A  | ENSG00000160789.18_LMNA | 0.00903  | -0.150388691 | 0.167987418 | 9.12E-01 | 9.67E-01 | 1.00E+00 |
| ENSG00000239023.1_RNU1-98P  | ENSG00000160789.18_LMNA | 0.17837  | 0.019726974  | 0.328247222 | 2.79E-02 | 1.36E-01 | 1.00E+00 |
| ENSG00000223189.1_RNU6-177F | ENSG00000160789.18_LMNA | 0.09347  | -0.066725581 | 0.248964083 | 2.52E-01 | 5.33E-01 | 1.00E+00 |
| ENSG00000253089.1_RNU1-104F | ENSG00000160789.18_LMNA | 0.09111  | -0.069090653 | 0.246734011 | 2.64E-01 | 5.48E-01 | 1.00E+00 |
| ENSG00000280251.1_RP11-2151 | ENSG00000160789.18_LMNA | 0.05307  | -0.107039225 | 0.210488231 | 5.16E-01 | 7.63E-01 | 1.00E+00 |
| ENSG00000222244.1_RNA5SP43  | ENSG00000160789.18_LMNA | -0.08466 | -0.240615989 | 0.07556086  | 3.00E-01 | 5.86E-01 | 1.00E+00 |
| ENSG00000275053.1_          | ENSG00000160789.18_LMNA | -0.05852 | -0.215712968 | 0.101625512 | 4.74E-01 | 7.33E-01 | 1.00E+00 |
| ENSG00000199327.1_RNU6-230F | ENSG00000160789.18_LMNA | 0.09003  | -0.070175472 | 0.245709994 | 2.70E-01 | 5.54E-01 | 1.00E+00 |
| ENSG00000252428.1_RNA5SP28  | ENSG00000160789.18_LMNA | -0.1616  | -0.312757731 | -0.00246622 | 4.67E-02 | 1.92E-01 | 1.00E+00 |
| ENSG00000252267.1_RNA5SP49  | ENSG00000160789.18_LMNA | -0.03991 | -0.197850454 | 0.120056712 | 6.25E-01 | 8.31E-01 | 1.00E+00 |
| ENSG00000202186.1_RNU6-497F | ENSG00000160789.18_LMNA | -0.04555 | -0.203277292 | 0.114480182 | 5.77E-01 | 8.03E-01 | 1.00E+00 |
| ENSG00000252214.1_RNU6-542F | ENSG00000160789.18_LMNA | 0.16095  | 0.001795795  | 0.31215276  | 4.76E-02 | 1.95E-01 | 1.00E+00 |
| ENSG00000250594.2_RP11-433B | ENSG00000160789.18_LMNA | 0.03652  | -0.123400209 | 0.194587336 | 6.55E-01 | 8.47E-01 | 1.00E+00 |
| ENSG00000251940.1_SNORA15   | ENSG00000160789.18_LMNA | 0.028    | -0.131786857 | 0.186371219 | 7.32E-01 | 8.87E-01 | 1.00E+00 |
| ENSG00000265583.1_          | ENSG00000160789.18_LMNA | -0.01596 | -0.174716915 | 0.143605438 | 8.45E-01 | 9.40E-01 | 1.00E+00 |
| ENSG00000199409.1_Y_RNA     | ENSG00000160789.18_LMNA | -0.00269 | -0.161820709 | 0.15657845  | 9.74E-01 | 9.90E-01 | 1.00E+00 |

|                              |                         |          |              |             |          |          |          |
|------------------------------|-------------------------|----------|--------------|-------------|----------|----------|----------|
| ENSG00000200982.1_Y_RNA      | ENSG00000160789.18_LMNA | -0.07415 | -0.230626102 | 0.086068893 | 3.64E-01 | 6.45E-01 | 1.00E+00 |
| ENSG00000264342.2_MIR3660    | ENSG00000160789.18_LMNA | -0.08989 | -0.245572177 | 0.070321416 | 2.71E-01 | 5.55E-01 | 1.00E+00 |
| ENSG00000270415.1_DPPA3P3    | ENSG00000160789.18_LMNA | 0.01099  | -0.148473918 | 0.169890028 | 8.93E-01 | 9.58E-01 | 1.00E+00 |
| ENSG00000207194.1_RNU6-1026  | ENSG00000160789.18_LMNA | -0.07911 | -0.235348392 | 0.081110437 | 3.33E-01 | 6.18E-01 | 1.00E+00 |
| ENSG00000201351.1_Y_RNA      | ENSG00000160789.18_LMNA | 0.02106  | -0.138608825 | 0.179654984 | 7.97E-01 | 9.18E-01 | 1.00E+00 |
| ENSG00000222226.1_           | ENSG00000160789.18_LMNA | -0.04676 | -0.204436123 | 0.113286786 | 5.67E-01 | 7.97E-01 | 1.00E+00 |
| ENSG00000253097.1_RNU2-19P   | ENSG00000160789.18_LMNA | -0.02987 | -0.188177562 | 0.12994692  | 7.15E-01 | 8.79E-01 | 1.00E+00 |
| ENSG00000222658.1_Y_RNA      | ENSG00000160789.18_LMNA | -0.01545 | -0.174220317 | 0.144107028 | 8.50E-01 | 9.41E-01 | 1.00E+00 |
| ENSG00000250576.1_CTD-2154B  | ENSG00000160789.18_LMNA | 0.09135  | -0.068853139 | 0.246958118 | 2.63E-01 | 5.46E-01 | 1.00E+00 |
| ENSG00000207136.1_RNU6-769F  | ENSG00000160789.18_LMNA | -0.10793 | -0.262614572 | 0.052171009 | 1.86E-01 | 4.52E-01 | 1.00E+00 |
| ENSG00000199373.1_RNA5SP45   | ENSG00000160789.18_LMNA | -0.06019 | -0.217304481 | 0.099972692 | 4.61E-01 | 7.25E-01 | 1.00E+00 |
| ENSG00000257146.1_RP11-813P  | ENSG00000160789.18_LMNA | -0.15396 | -0.30566634  | 0.005374875 | 5.83E-02 | 2.21E-01 | 1.00E+00 |
| ENSG00000278179.1_           | ENSG00000160789.18_LMNA | -0.11714 | -0.27127884  | 0.042862997 | 1.51E-01 | 3.99E-01 | 1.00E+00 |
| ENSG00000273664.1_RP11-2N1.5 | ENSG00000160789.18_LMNA | -0.13521 | -0.28820592  | 0.02451954  | 9.67E-02 | 3.05E-01 | 1.00E+00 |
| ENSG00000279335.1_AC009977.7 | ENSG00000160789.18_LMNA | -0.00273 | -0.161861859 | 0.15653723  | 9.73E-01 | 9.90E-01 | 1.00E+00 |
| ENSG00000221411.1_MIR1227    | ENSG00000160789.18_LMNA | 0.17266  | 0.013839324  | 0.322982332 | 3.34E-02 | 1.54E-01 | 1.00E+00 |
| ENSG00000207518.1_RNU6-59P   | ENSG00000160789.18_LMNA | 0.05303  | -0.107076912 | 0.210451795 | 5.16E-01 | 7.63E-01 | 1.00E+00 |
| ENSG00000200106.1_RNU6-984F  | ENSG00000160789.18_LMNA | -0.12489 | -0.278549896 | 0.035009398 | 1.25E-01 | 3.58E-01 | 1.00E+00 |
| ENSG00000265186.1_           | ENSG00000160789.18_LMNA | 0.05305  | -0.107056648 | 0.210471387 | 5.16E-01 | 7.63E-01 | 1.00E+00 |
| ENSG00000256389.1_RP11-606D  | ENSG00000160789.18_LMNA | 0.01274  | -0.146754644 | 0.17159636  | 8.76E-01 | 9.52E-01 | 1.00E+00 |
| ENSG00000266069.1_           | ENSG00000160789.18_LMNA | -0.06861 | -0.225348124 | 0.091592323 | 4.01E-01 | 6.77E-01 | 1.00E+00 |
| ENSG00000200218.1_RNU6-697F  | ENSG00000160789.18_LMNA | -0.16705 | -0.317799502 | -0.0080643  | 3.97E-02 | 1.73E-01 | 1.00E+00 |
| ENSG00000212219.1_RNU6-604F  | ENSG00000160789.18_LMNA | -0.05747 | -0.21470579  | 0.102670583 | 4.82E-01 | 7.40E-01 | 1.00E+00 |
| ENSG00000253822.1_IGLV3-24   | ENSG00000160789.18_LMNA | -0.0671  | -0.223912878 | 0.09309095  | 4.11E-01 | 6.85E-01 | 1.00E+00 |
| ENSG00000207153.1_RNU6-933F  | ENSG00000160789.18_LMNA | -0.11778 | -0.271882133 | 0.042212844 | 1.48E-01 | 3.95E-01 | 1.00E+00 |
| ENSG00000252882.1_RNU6-1137  | ENSG00000160789.18_LMNA | -0.02155 | -0.180127934 | 0.138129416 | 7.92E-01 | 9.16E-01 | 1.00E+00 |
| ENSG00000264465.1_           | ENSG00000160789.18_LMNA | -0.00611 | -0.165150342 | 0.153239475 | 9.40E-01 | 9.76E-01 | 1.00E+00 |
| ENSG00000252156.1_RNU6-155F  | ENSG00000160789.18_LMNA | -0.00407 | -0.163162918 | 0.155233351 | 9.60E-01 | 9.84E-01 | 1.00E+00 |
| ENSG00000223087.2_RNU6-602F  | ENSG00000160789.18_LMNA | -0.01254 | -0.171395155 | 0.146957476 | 8.78E-01 | 9.53E-01 | 1.00E+00 |
| ENSG00000212482.1_RNU6-530F  | ENSG00000160789.18_LMNA | -0.09985 | -0.254994309 | 0.060312491 | 2.21E-01 | 4.96E-01 | 1.00E+00 |
| ENSG00000207483.1_RNU6-1067  | ENSG00000160789.18_LMNA | -0.10764 | -0.262348066 | 0.052456452 | 1.87E-01 | 4.53E-01 | 1.00E+00 |
| ENSG00000212558.1_SNORA26    | ENSG00000160789.18_LMNA | -0.14023 | -0.292893938 | 0.019401738 | 8.49E-02 | 2.82E-01 | 1.00E+00 |
| ENSG00000207094.1_SNORA67    | ENSG00000160789.18_LMNA | -0.04062 | -0.198533856 | 0.119355562 | 6.19E-01 | 8.28E-01 | 1.00E+00 |

|                              |                         |          |              |             |          |          |          |
|------------------------------|-------------------------|----------|--------------|-------------|----------|----------|----------|
| ENSG00000280871.1_           | ENSG00000160789.18_LMNA | 0.11582  | -0.044200072 | 0.270037361 | 1.55E-01 | 4.07E-01 | 1.00E+00 |
| ENSG00000200833.2_           | ENSG00000160789.18_LMNA | -0.0219  | -0.180473926 | 0.137778603 | 7.89E-01 | 9.14E-01 | 1.00E+00 |
| ENSG00000221686.1_           | ENSG00000160789.18_LMNA | 0.02982  | -0.129995754 | 0.188129648 | 7.15E-01 | 8.79E-01 | 1.00E+00 |
| ENSG00000276456.1_           | ENSG00000160789.18_LMNA | 0.00594  | -0.153408431 | 0.164982033 | 9.42E-01 | 9.77E-01 | 1.00E+00 |
| ENSG00000273910.1_           | ENSG00000160789.18_LMNA | -0.03101 | -0.18927983  | 0.128823075 | 7.04E-01 | 8.74E-01 | 1.00E+00 |
| ENSG00000263868.1_           | ENSG00000160789.18_LMNA | -0.0054  | -0.164459668 | 0.153932685 | 9.47E-01 | 9.79E-01 | 1.00E+00 |
| ENSG00000256400.1_RP11-673D  | ENSG00000160789.18_LMNA | -0.13026 | -0.283582805 | 0.029550485 | 1.10E-01 | 3.30E-01 | 1.00E+00 |
| ENSG00000252811.1_           | ENSG00000160789.18_LMNA | -0.11314 | -0.267519401 | 0.046908467 | 1.65E-01 | 4.22E-01 | 1.00E+00 |
| ENSG00000238079.1_RP11-72I2. | ENSG00000160789.18_LMNA | -0.20185 | -0.349806926 | -0.04406218 | 1.26E-02 | 7.76E-02 | 1.00E+00 |
| ENSG00000238410.1_snoU109    | ENSG00000160789.18_LMNA | 0.12724  | -0.032619092 | 0.280755788 | 1.18E-01 | 3.45E-01 | 1.00E+00 |
| ENSG00000275447.1_           | ENSG00000160789.18_LMNA | -0.12788 | -0.281352033 | 0.031972384 | 1.16E-01 | 3.41E-01 | 1.00E+00 |
| ENSG00000263522.2_           | ENSG00000160789.18_LMNA | -0.01816 | -0.176852541 | 0.141446483 | 8.24E-01 | 9.31E-01 | 1.00E+00 |
| ENSG00000207196.1_Y_RNA      | ENSG00000160789.18_LMNA | 0.03922  | -0.120737813 | 0.197186298 | 6.31E-01 | 8.35E-01 | 1.00E+00 |
| ENSG00000222870.1_RNU6-1328  | ENSG00000160789.18_LMNA | 0.12532  | -0.034574084 | 0.278951872 | 1.24E-01 | 3.55E-01 | 1.00E+00 |
| ENSG00000252420.1_Y_RNA      | ENSG00000160789.18_LMNA | 0.03507  | -0.124830819 | 0.193188965 | 6.68E-01 | 8.54E-01 | 1.00E+00 |
| ENSG00000204399.3_AC012306.  | ENSG00000160789.18_LMNA | -0.07788 | -0.234178694 | 0.082340094 | 3.40E-01 | 6.25E-01 | 1.00E+00 |
| ENSG00000206695.1_RNU6-442F  | ENSG00000160789.18_LMNA | 0.00509  | -0.154235355 | 0.164158008 | 9.50E-01 | 9.80E-01 | 1.00E+00 |
| ENSG00000199077.2_MIR129-2   | ENSG00000160789.18_LMNA | -0.16738 | -0.318101974 | -0.00840077 | 3.93E-02 | 1.71E-01 | 1.00E+00 |
| ENSG00000207265.1_Y_RNA      | ENSG00000160789.18_LMNA | 0.0515   | -0.108595928 | 0.208982502 | 5.29E-01 | 7.73E-01 | 1.00E+00 |
| ENSG00000265627.1_           | ENSG00000160789.18_LMNA | 0.02966  | -0.130158312 | 0.187970139 | 7.17E-01 | 8.80E-01 | 1.00E+00 |
| ENSG00000277100.1_           | ENSG00000160789.18_LMNA | -0.16345 | -0.314466441 | -0.00436129 | 4.42E-02 | 1.86E-01 | 1.00E+00 |
| ENSG00000200752.1_Y_RNA      | ENSG00000160789.18_LMNA | -0.10365 | -0.258582952 | 0.056483607 | 2.04E-01 | 4.75E-01 | 1.00E+00 |
| ENSG00000222440.1_RNU2-26P   | ENSG00000160789.18_LMNA | -0.01288 | -0.171724073 | 0.146625886 | 8.75E-01 | 9.51E-01 | 1.00E+00 |
| ENSG00000201474.1_RNU6-164F  | ENSG00000160789.18_LMNA | -0.26289 | -0.405132212 | -0.10821533 | 1.07E-03 | 1.22E-02 | 1.00E+00 |
| ENSG00000221440.1_RNU6ATAC   | ENSG00000160789.18_LMNA | 0.02838  | -0.131411187 | 0.186740205 | 7.29E-01 | 8.85E-01 | 1.00E+00 |
| ENSG00000201342.1_RNU4-38P   | ENSG00000160789.18_LMNA | -0.03311 | -0.191300419 | 0.126760809 | 6.86E-01 | 8.64E-01 | 1.00E+00 |
| ENSG00000207303.1_Y_RNA      | ENSG00000160789.18_LMNA | -0.11429 | -0.268605089 | 0.045741235 | 1.61E-01 | 4.15E-01 | 1.00E+00 |
| ENSG00000201885.1_Y_RNA      | ENSG00000160789.18_LMNA | 0.04362  | -0.116393554 | 0.201417478 | 5.94E-01 | 8.12E-01 | 1.00E+00 |
| ENSG00000239568.1_RP11-654C  | ENSG00000160789.18_LMNA | 0.18503  | 0.026608961  | 0.334377071 | 2.25E-02 | 1.17E-01 | 1.00E+00 |
| ENSG00000206915.1_RNU6-439F  | ENSG00000160789.18_LMNA | -0.06822 | -0.224978326 | 0.091978589 | 4.04E-01 | 6.79E-01 | 1.00E+00 |
| ENSG00000223208.1_RNU6-1217  | ENSG00000160789.18_LMNA | -0.04663 | -0.204318424 | 0.113408037 | 5.68E-01 | 7.98E-01 | 1.00E+00 |
| ENSG00000207749.3_MIR299     | ENSG00000160789.18_LMNA | -0.01139 | -0.170281597 | 0.148079549 | 8.89E-01 | 9.57E-01 | 1.00E+00 |
| ENSG00000206684.1_RNU6-157F  | ENSG00000160789.18_LMNA | 0.01036  | -0.149087622 | 0.169280481 | 8.99E-01 | 9.61E-01 | 1.00E+00 |

|                              |                         |          |              |             |          |          |          |
|------------------------------|-------------------------|----------|--------------|-------------|----------|----------|----------|
| ENSG00000252705.1_RNU6-175F  | ENSG00000160789.18_LMNA | 0.05464  | -0.105481375 | 0.211993563 | 5.04E-01 | 7.55E-01 | 1.00E+00 |
| ENSG00000266722.1_           | ENSG00000160789.18_LMNA | -0.00873 | -0.167696268 | 0.150681492 | 9.15E-01 | 9.68E-01 | 1.00E+00 |
| ENSG00000225203.2_RP11-182M  | ENSG00000160789.18_LMNA | -0.04272 | -0.200557902 | 0.117277088 | 6.01E-01 | 8.17E-01 | 1.00E+00 |
| ENSG00000224365.1_RP11-252P  | ENSG00000160789.18_LMNA | 0.14182  | -0.017785262 | 0.294371553 | 8.14E-02 | 2.75E-01 | 1.00E+00 |
| ENSG00000275271.1_           | ENSG00000160789.18_LMNA | -0.15546 | -0.307062343 | 0.003834305 | 5.58E-02 | 2.16E-01 | 1.00E+00 |
| ENSG00000212521.1_RNU6-918F  | ENSG00000160789.18_LMNA | 0.13676  | -0.022935421 | 0.289658611 | 9.29E-02 | 2.98E-01 | 1.00E+00 |
| ENSG00000258765.1_RP11-692C  | ENSG00000160789.18_LMNA | -0.01889 | -0.17755502  | 0.140735667 | 8.17E-01 | 9.29E-01 | 1.00E+00 |
| ENSG00000200829.1_Y_RNA      | ENSG00000160789.18_LMNA | -0.09205 | -0.247624383 | 0.068146807 | 2.59E-01 | 5.42E-01 | 1.00E+00 |
| ENSG00000212581.1_U8         | ENSG00000160789.18_LMNA | 0.0215   | -0.138173791 | 0.180084163 | 7.93E-01 | 9.16E-01 | 1.00E+00 |
| ENSG00000252070.1_RNA5SP34   | ENSG00000160789.18_LMNA | -0.05861 | -0.215801212 | 0.101533915 | 4.73E-01 | 7.33E-01 | 1.00E+00 |
| ENSG00000225027.2_IFNWP4     | ENSG00000160789.18_LMNA | 0.00549  | -0.153841594 | 0.164550444 | 9.46E-01 | 9.79E-01 | 1.00E+00 |
| ENSG00000202251.1_Y_RNA      | ENSG00000160789.18_LMNA | -0.06931 | -0.226015168 | 0.090895334 | 3.96E-01 | 6.73E-01 | 1.00E+00 |
| ENSG00000212187.1_SNORA26    | ENSG00000160789.18_LMNA | 0.02883  | -0.130975504 | 0.187168023 | 7.24E-01 | 8.83E-01 | 1.00E+00 |
| ENSG00000251183.1_AC091962.1 | ENSG00000160789.18_LMNA | -0.03467 | -0.192809338 | 0.12521897  | 6.72E-01 | 8.56E-01 | 1.00E+00 |
| ENSG00000200536.1_SNORA25    | ENSG00000160789.18_LMNA | -0.08827 | -0.24403952  | 0.071943531 | 2.80E-01 | 5.65E-01 | 1.00E+00 |
| ENSG00000263277.2_           | ENSG00000160789.18_LMNA | -0.05075 | -0.208264983 | 0.10933719  | 5.35E-01 | 7.76E-01 | 1.00E+00 |
| ENSG00000252458.1_SNORA68    | ENSG00000160789.18_LMNA | -0.08966 | -0.245358638 | 0.070547519 | 2.72E-01 | 5.56E-01 | 1.00E+00 |
| ENSG00000234796.1_AC113607.1 | ENSG00000160789.18_LMNA | 0.06142  | -0.098747342 | 0.218483292 | 4.52E-01 | 7.18E-01 | 1.00E+00 |
| ENSG00000263596.1_           | ENSG00000160789.18_LMNA | -0.04574 | -0.203461244 | 0.114290804 | 5.76E-01 | 8.02E-01 | 1.00E+00 |
| ENSG00000206886.1_SNORA70    | ENSG00000160789.18_LMNA | -0.04446 | -0.202230621 | 0.115557284 | 5.87E-01 | 8.08E-01 | 1.00E+00 |
| ENSG00000227840.1_KRTAP8-3F  | ENSG00000160789.18_LMNA | -0.09136 | -0.246968021 | 0.068842644 | 2.63E-01 | 5.46E-01 | 1.00E+00 |
| ENSG00000221015.1_RNU6ATAC   | ENSG00000160789.18_LMNA | 0.00344  | -0.155844138 | 0.162553589 | 9.66E-01 | 9.87E-01 | 1.00E+00 |
| ENSG00000203970.3_DEFB110    | ENSG00000160789.18_LMNA | -0.10455 | -0.259430036 | 0.055578462 | 2.00E-01 | 4.70E-01 | 1.00E+00 |
| ENSG00000270243.1_RP11-779O  | ENSG00000160789.18_LMNA | -0.01828 | -0.176965601 | 0.141332104 | 8.23E-01 | 9.31E-01 | 1.00E+00 |
| ENSG00000212145.2_U8         | ENSG00000160789.18_LMNA | 0.07797  | -0.082251719 | 0.234262791 | 3.40E-01 | 6.25E-01 | 1.00E+00 |
| ENSG00000221060.1_SNORA11    | ENSG00000160789.18_LMNA | -0.06406 | -0.22100996  | 0.096117677 | 4.33E-01 | 7.02E-01 | 1.00E+00 |
| ENSG00000280636.1_SNORA43    | ENSG00000160789.18_LMNA | 0.03079  | -0.12904655  | 0.189060709 | 7.07E-01 | 8.75E-01 | 1.00E+00 |
| ENSG00000221590.1_           | ENSG00000160789.18_LMNA | -0.00993 | -0.168864222 | 0.149506579 | 9.03E-01 | 9.63E-01 | 1.00E+00 |
| ENSG00000249620.1_RP11-321E  | ENSG00000160789.18_LMNA | 0.1752   | 0.016458451  | 0.325326788 | 3.09E-02 | 1.46E-01 | 1.00E+00 |
| ENSG00000251368.1_RP11-175M  | ENSG00000160789.18_LMNA | 0.06183  | -0.098342381 | 0.218872669 | 4.49E-01 | 7.15E-01 | 1.00E+00 |
| ENSG00000201467.1_SNORA16    | ENSG00000160789.18_LMNA | 0.05722  | -0.102914593 | 0.214470531 | 4.84E-01 | 7.41E-01 | 1.00E+00 |
| ENSG00000228827.1_RP11-234P  | ENSG00000160789.18_LMNA | 0.20144  | 0.043642196  | 0.349437565 | 1.28E-02 | 7.84E-02 | 1.00E+00 |
| ENSG00000271974.1_RP11-927P  | ENSG00000160789.18_LMNA | -0.09597 | -0.251333771 | 0.064208547 | 2.40E-01 | 5.18E-01 | 1.00E+00 |

|                              |                         |          |              |             |          |          |          |
|------------------------------|-------------------------|----------|--------------|-------------|----------|----------|----------|
| ENSG00000207016.1_SNORA36C   | ENSG00000160789.18_LMNA | 0.08151  | -0.078707532 | 0.237631488 | 3.18E-01 | 6.05E-01 | 1.00E+00 |
| ENSG00000200198.1_RN7SKP21   | ENSG00000160789.18_LMNA | 0.00159  | -0.1576464   | 0.160754215 | 9.84E-01 | 9.94E-01 | 1.00E+00 |
| ENSG00000222966.1_SNORA40    | ENSG00000160789.18_LMNA | -0.06151 | -0.218569969 | 0.098657204 | 4.52E-01 | 7.17E-01 | 1.00E+00 |
| ENSG00000252850.1_RNU1-117F  | ENSG00000160789.18_LMNA | 0.06163  | -0.098538824 | 0.218683798 | 4.51E-01 | 7.16E-01 | 1.00E+00 |
| ENSG00000250339.2_CXCL1P1    | ENSG00000160789.18_LMNA | 0.14843  | -0.011030569 | 0.300529884 | 6.80E-02 | 2.45E-01 | 1.00E+00 |
| ENSG00000270725.1_RP11-383H  | ENSG00000160789.18_LMNA | -0.06645 | -0.223286575 | 0.093744461 | 4.16E-01 | 6.89E-01 | 1.00E+00 |
| ENSG00000270748.1_IGKV2OR2   | ENSG00000160789.18_LMNA | 0.07027  | -0.089935966 | 0.22693283  | 3.90E-01 | 6.68E-01 | 1.00E+00 |
| ENSG00000204555.2_CFTRP3     | ENSG00000160789.18_LMNA | 0.01692  | -0.14266203  | 0.175650498 | 8.36E-01 | 9.36E-01 | 1.00E+00 |
| ENSG00000211678.2_IGLJ3      | ENSG00000160789.18_LMNA | 0.04969  | -0.110382196 | 0.207252868 | 5.43E-01 | 7.82E-01 | 1.00E+00 |
| ENSG00000278830.1_RP11-748L  | ENSG00000160789.18_LMNA | -0.11407 | -0.268396119 | 0.045965967 | 1.62E-01 | 4.16E-01 | 1.00E+00 |
| ENSG00000270902.1_RP11-338O  | ENSG00000160789.18_LMNA | 0.03567  | -0.124231855 | 0.193774589 | 6.63E-01 | 8.51E-01 | 1.00E+00 |
| ENSG00000254228.1_IGHV3-42   | ENSG00000160789.18_LMNA | -0.00053 | -0.159714564 | 0.158686754 | 9.95E-01 | 9.98E-01 | 1.00E+00 |
| ENSG00000258294.4_RP11-314D  | ENSG00000160789.18_LMNA | 0.049    | -0.111069826 | 0.206586509 | 5.49E-01 | 7.86E-01 | 1.00E+00 |
| ENSG00000240796.1_MTND2P14   | ENSG00000160789.18_LMNA | -0.00348 | -0.162591528 | 0.155806116 | 9.66E-01 | 9.87E-01 | 1.00E+00 |
| ENSG00000270187.1_IGKV1OR2   | ENSG00000160789.18_LMNA | -0.15024 | -0.302216883 | 0.009175229 | 6.47E-02 | 2.37E-01 | 1.00E+00 |
| ENSG00000253448.1_IGLV3-6    | ENSG00000160789.18_LMNA | -0.07092 | -0.227554446 | 0.089285766 | 3.85E-01 | 6.64E-01 | 1.00E+00 |
| ENSG00000265170.2_RN7SL667F  | ENSG00000160789.18_LMNA | -0.09489 | -0.250310342 | 0.065296104 | 2.45E-01 | 5.25E-01 | 1.00E+00 |
| ENSG00000260720.1_LINC01243  | ENSG00000160789.18_LMNA | -0.04841 | -0.206023912 | 0.111650146 | 5.54E-01 | 7.88E-01 | 1.00E+00 |
| ENSG00000241791.3_RN7SL817F  | ENSG00000160789.18_LMNA | -0.20723 | -0.354725969 | -0.04966579 | 1.04E-02 | 6.74E-02 | 1.00E+00 |
| ENSG00000278337.1_RP11-408E  | ENSG00000160789.18_LMNA | -0.05481 | -0.212159442 | 0.105309613 | 5.02E-01 | 7.54E-01 | 1.00E+00 |
| ENSG00000225448.1_AC009477   | ENSG00000160789.18_LMNA | 0.01214  | -0.147345523 | 0.171010145 | 8.82E-01 | 9.54E-01 | 1.00E+00 |
| ENSG00000267433.1_CTD-2057D  | ENSG00000160789.18_LMNA | 0.137    | -0.022691544 | 0.289882127 | 9.24E-02 | 2.97E-01 | 1.00E+00 |
| ENSG00000260835.1_RP11-468I1 | ENSG00000160789.18_LMNA | -0.04346 | -0.201266845 | 0.116548422 | 5.95E-01 | 8.13E-01 | 1.00E+00 |
| ENSG00000266448.1_RP11-805L  | ENSG00000160789.18_LMNA | -0.07934 | -0.235568724 | 0.080878703 | 3.31E-01 | 6.17E-01 | 1.00E+00 |
| ENSG00000222386.1_RN7SKP86   | ENSG00000160789.18_LMNA | -0.0751  | -0.231529803 | 0.08512121  | 3.58E-01 | 6.41E-01 | 1.00E+00 |
| ENSG00000236460.1_SNX2P2     | ENSG00000160789.18_LMNA | 0.03303  | -0.126834074 | 0.19122868  | 6.86E-01 | 8.64E-01 | 1.00E+00 |
| ENSG00000271765.1_RN7SKP29   | ENSG00000160789.18_LMNA | -0.00292 | -0.162048157 | 0.156350596 | 9.71E-01 | 9.89E-01 | 1.00E+00 |
| ENSG00000184032.2_KRTAP20-2  | ENSG00000160789.18_LMNA | -0.06787 | -0.224647624 | 0.092323937 | 4.06E-01 | 6.81E-01 | 1.00E+00 |
| ENSG00000240359.1_UBL5P3     | ENSG00000160789.18_LMNA | -0.05984 | -0.216972714 | 0.100317384 | 4.64E-01 | 7.26E-01 | 1.00E+00 |
| ENSG00000229925.1_AP001043   | ENSG00000160789.18_LMNA | -0.00832 | -0.16729558  | 0.151084361 | 9.19E-01 | 9.69E-01 | 1.00E+00 |
| ENSG00000240760.1_RPL31P56   | ENSG00000160789.18_LMNA | -0.05021 | -0.207745653 | 0.109873485 | 5.39E-01 | 7.79E-01 | 1.00E+00 |
| ENSG00000222987.1_RN7SKP68   | ENSG00000160789.18_LMNA | 0.03906  | -0.120889134 | 0.197038702 | 6.33E-01 | 8.35E-01 | 1.00E+00 |
| ENSG00000224374.1_RP1-32B1   | ENSG00000160789.18_LMNA | 0.02627  | -0.133488424 | 0.184698803 | 7.48E-01 | 8.95E-01 | 1.00E+00 |

|                              |                         |          |              |             |          |          |          |
|------------------------------|-------------------------|----------|--------------|-------------|----------|----------|----------|
| ENSG00000278724.1_Metazoa_SI | ENSG00000160789.18_LMNA | 0.02877  | -0.131035035 | 0.187109574 | 7.25E-01 | 8.83E-01 | 1.00E+00 |
| ENSG00000277206.1_RP11-797H  | ENSG00000160789.18_LMNA | -0.10724 | -0.261968546 | 0.05286285  | 1.89E-01 | 4.55E-01 | 1.00E+00 |
| ENSG00000275222.1_Metazoa_SI | ENSG00000160789.18_LMNA | -0.06641 | -0.223247272 | 0.093785462 | 4.16E-01 | 6.89E-01 | 1.00E+00 |
| ENSG00000266013.1_CTD-2206N  | ENSG00000160789.18_LMNA | 0.02956  | -0.130250204 | 0.187879964 | 7.18E-01 | 8.80E-01 | 1.00E+00 |
| ENSG00000273610.1_RN7SL386F  | ENSG00000160789.18_LMNA | 0.11919  | -0.040789492 | 0.273202032 | 1.44E-01 | 3.87E-01 | 1.00E+00 |
| ENSG00000232594.1_AC103563.  | ENSG00000160789.18_LMNA | -0.03511 | -0.193228345 | 0.124790549 | 6.68E-01 | 8.54E-01 | 1.00E+00 |
| ENSG00000251668.1_RP11-466P  | ENSG00000160789.18_LMNA | 0.02285  | -0.136844109 | 0.181395198 | 7.80E-01 | 9.10E-01 | 1.00E+00 |
| ENSG00000203785.7_SPRR2E     | ENSG00000160789.18_LMNA | -0.03071 | -0.188984261 | 0.12912451  | 7.07E-01 | 8.76E-01 | 1.00E+00 |
| ENSG00000233686.3_PIEZO1P1   | ENSG00000160789.18_LMNA | 0.04654  | -0.113497118 | 0.204231947 | 5.69E-01 | 7.98E-01 | 1.00E+00 |
| ENSG00000253216.1_RP11-744J  | ENSG00000160789.18_LMNA | 0.01791  | -0.141694245 | 0.176607608 | 8.27E-01 | 9.32E-01 | 1.00E+00 |
| ENSG00000237299.1_LA16c-60G  | ENSG00000160789.18_LMNA | -0.07757 | -0.233880144 | 0.082653794 | 3.42E-01 | 6.27E-01 | 1.00E+00 |
| ENSG00000271509.1_RP11-382A  | ENSG00000160789.18_LMNA | 0.06201  | -0.098161255 | 0.219046792 | 4.48E-01 | 7.14E-01 | 1.00E+00 |
| ENSG00000222765.1_RNU2-40P   | ENSG00000160789.18_LMNA | 0.0123   | -0.14718888  | 0.171165574 | 8.80E-01 | 9.54E-01 | 1.00E+00 |
| ENSG00000250214.1_RP13-488H  | ENSG00000160789.18_LMNA | -0.00782 | -0.166814668 | 0.15156775  | 9.24E-01 | 9.71E-01 | 1.00E+00 |
| ENSG00000258816.1_RP11-74M1  | ENSG00000160789.18_LMNA | 0.04027  | -0.119698424 | 0.198199711 | 6.22E-01 | 8.29E-01 | 1.00E+00 |
| ENSG00000238032.1_RP11-38O2  | ENSG00000160789.18_LMNA | -0.08038 | -0.236558106 | 0.079837699 | 3.25E-01 | 6.12E-01 | 1.00E+00 |
| ENSG00000221040.2_U3         | ENSG00000160789.18_LMNA | -0.02375 | -0.182258702 | 0.135967696 | 7.72E-01 | 9.06E-01 | 1.00E+00 |
| ENSG00000271573.1_RP11-96C2  | ENSG00000160789.18_LMNA | -0.00673 | -0.165749457 | 0.152637907 | 9.34E-01 | 9.74E-01 | 1.00E+00 |
| ENSG00000250830.1_MRPS35P2   | ENSG00000160789.18_LMNA | 0.05492  | -0.105205134 | 0.212260334 | 5.02E-01 | 7.53E-01 | 1.00E+00 |
| ENSG00000258235.1_RP11-12K6  | ENSG00000160789.18_LMNA | 0.01995  | -0.13969538  | 0.178582522 | 8.07E-01 | 9.23E-01 | 1.00E+00 |
| ENSG00000254437.1_RP11-170L  | ENSG00000160789.18_LMNA | 0.05581  | -0.104320976 | 0.213113864 | 4.95E-01 | 7.50E-01 | 1.00E+00 |
| ENSG00000227574.2_RP13-1039  | ENSG00000160789.18_LMNA | -0.06313 | -0.220118076 | 0.097046424 | 4.40E-01 | 7.08E-01 | 1.00E+00 |
| ENSG00000236131.1_MED13P1    | ENSG00000160789.18_LMNA | -0.0292  | -0.187531119 | 0.130605637 | 7.21E-01 | 8.82E-01 | 1.00E+00 |
| ENSG00000267968.1_AC011523.  | ENSG00000160789.18_LMNA | -0.04725 | -0.204906009 | 0.112802623 | 5.63E-01 | 7.94E-01 | 1.00E+00 |
| ENSG00000239471.3_RN7SL584F  | ENSG00000160789.18_LMNA | -0.05839 | -0.215587081 | 0.101756174 | 4.75E-01 | 7.34E-01 | 1.00E+00 |
| ENSG00000231961.1_RP5-967N2  | ENSG00000160789.18_LMNA | 0.06336  | -0.096815165 | 0.220340205 | 4.38E-01 | 7.06E-01 | 1.00E+00 |
| ENSG00000253495.1_CYCSP23    | ENSG00000160789.18_LMNA | 0.00798  | -0.151415803 | 0.166965853 | 9.22E-01 | 9.70E-01 | 1.00E+00 |
| ENSG00000228334.1_AC024028.  | ENSG00000160789.18_LMNA | -0.01517 | -0.173950628 | 0.144379359 | 8.53E-01 | 9.42E-01 | 1.00E+00 |
| ENSG00000256077.4_RP11-335O  | ENSG00000160789.18_LMNA | -0.05164 | -0.209117    | 0.10845694  | 5.28E-01 | 7.72E-01 | 1.00E+00 |
| ENSG00000222357.1_RNU2-20P   | ENSG00000160789.18_LMNA | -0.22048 | -0.366801339 | -0.06350356 | 6.34E-03 | 4.69E-02 | 1.00E+00 |
| ENSG00000225895.1_TRAPPC2P   | ENSG00000160789.18_LMNA | -0.0879  | -0.243694441 | 0.072308521 | 2.82E-01 | 5.67E-01 | 1.00E+00 |
| ENSG00000243613.1_RP11-216N  | ENSG00000160789.18_LMNA | -0.13492 | -0.287940173 | 0.024809159 | 9.75E-02 | 3.07E-01 | 1.00E+00 |
| ENSG00000227528.4_DIAPH3-AS  | ENSG00000160789.18_LMNA | -0.09842 | -0.253650652 | 0.061743715 | 2.28E-01 | 5.04E-01 | 1.00E+00 |

|                              |                         |          |              |             |          |          |          |
|------------------------------|-------------------------|----------|--------------|-------------|----------|----------|----------|
| ENSG00000276353.1_Metazoa_SI | ENSG00000160789.18_LMNA | 0.00938  | -0.150043824 | 0.16833027  | 9.09E-01 | 9.65E-01 | 1.00E+00 |
| ENSG00000256875.2_RP11-503G  | ENSG00000160789.18_LMNA | 0.02892  | -0.130886676 | 0.187255233 | 7.24E-01 | 8.83E-01 | 1.00E+00 |
| ENSG00000253231.1_COX6CP8    | ENSG00000160789.18_LMNA | 0.05275  | -0.107356467 | 0.210181499 | 5.19E-01 | 7.65E-01 | 1.00E+00 |
| ENSG00000278158.1_AP001059.1 | ENSG00000160789.18_LMNA | 0.09621  | -0.063970619 | 0.251557575 | 2.38E-01 | 5.17E-01 | 1.00E+00 |
| ENSG00000255166.1_RP11-726G  | ENSG00000160789.18_LMNA | -0.03277 | -0.190971452 | 0.127096749 | 6.89E-01 | 8.66E-01 | 1.00E+00 |
| ENSG00000224970.2_RP11-114L  | ENSG00000160789.18_LMNA | 0.00448  | -0.154835169 | 0.163560018 | 9.56E-01 | 9.83E-01 | 1.00E+00 |
| ENSG00000234060.1_EDDM3CP    | ENSG00000160789.18_LMNA | 0.08184  | -0.078384016 | 0.237938606 | 3.16E-01 | 6.03E-01 | 1.00E+00 |
| ENSG00000223282.1_RN7SKP16   | ENSG00000160789.18_LMNA | -0.12256 | -0.27637063  | 0.037367334 | 1.33E-01 | 3.69E-01 | 1.00E+00 |
| ENSG00000224893.4_RP1-200K1  | ENSG00000160789.18_LMNA | 0.05179  | -0.108303627 | 0.209265347 | 5.26E-01 | 7.71E-01 | 1.00E+00 |
| ENSG00000181001.1_OR52N1     | ENSG00000160789.18_LMNA | -0.05414 | -0.211522031 | 0.105969525 | 5.08E-01 | 7.58E-01 | 1.00E+00 |
| ENSG00000241295.1_ZBTB20-AS  | ENSG00000160789.18_LMNA | -0.0287  | -0.187045831 | 0.131099955 | 7.26E-01 | 8.84E-01 | 1.00E+00 |
| ENSG00000221638.2_U3         | ENSG00000160789.18_LMNA | 0.16134  | 0.002193099  | 0.312511308 | 4.71E-02 | 1.93E-01 | 1.00E+00 |
| ENSG00000249668.1_KRT18P56   | ENSG00000160789.18_LMNA | 0.01927  | -0.14035969  | 0.177926456 | 8.14E-01 | 9.27E-01 | 1.00E+00 |
| ENSG00000239625.3_RN7SL241F  | ENSG00000160789.18_LMNA | -0.06027 | -0.217387016 | 0.09988693  | 4.61E-01 | 7.24E-01 | 1.00E+00 |
| ENSG00000260586.1_RP11-592N  | ENSG00000160789.18_LMNA | 0.09194  | -0.068260682 | 0.247516987 | 2.60E-01 | 5.43E-01 | 1.00E+00 |
| ENSG00000270494.1_RP11-119F  | ENSG00000160789.18_LMNA | 0.09152  | -0.068682193 | 0.247119395 | 2.62E-01 | 5.45E-01 | 1.00E+00 |
| ENSG00000253156.1_RP11-58O3  | ENSG00000160789.18_LMNA | -0.13753 | -0.290375258 | 0.02215336  | 9.11E-02 | 2.94E-01 | 1.00E+00 |
| ENSG00000251543.1_RP11-60A8  | ENSG00000160789.18_LMNA | 0.00662  | -0.152742419 | 0.165645388 | 9.35E-01 | 9.75E-01 | 1.00E+00 |
| ENSG00000163254.4_CRYGC      | ENSG00000160789.18_LMNA | -0.10079 | -0.255888095 | 0.059359738 | 2.17E-01 | 4.91E-01 | 1.00E+00 |
| ENSG00000271222.1_RP11-1072  | ENSG00000160789.18_LMNA | -0.19027 | -0.339198309 | -0.03204234 | 1.89E-02 | 1.04E-01 | 1.00E+00 |
| ENSG00000224606.1_TGFA-IT1   | ENSG00000160789.18_LMNA | 0.03273  | -0.127135003 | 0.190933986 | 6.89E-01 | 8.66E-01 | 1.00E+00 |
| ENSG00000229247.2_RP11-492M  | ENSG00000160789.18_LMNA | 0.04291  | -0.117088779 | 0.200741146 | 6.00E-01 | 8.16E-01 | 1.00E+00 |
| ENSG00000223876.1_RPS27P1    | ENSG00000160789.18_LMNA | -0.02355 | -0.18206715  | 0.136162155 | 7.73E-01 | 9.07E-01 | 1.00E+00 |
| ENSG00000211657.3_IGLV3-32   | ENSG00000160789.18_LMNA | -0.01576 | -0.174524192 | 0.143800119 | 8.47E-01 | 9.40E-01 | 1.00E+00 |
| ENSG00000255088.1_RP11-23B7  | ENSG00000160789.18_LMNA | -0.06526 | -0.222150489 | 0.094929204 | 4.24E-01 | 6.95E-01 | 1.00E+00 |
| ENSG00000273858.1_RP1-85D24  | ENSG00000160789.18_LMNA | -0.11098 | -0.265490275 | 0.049087697 | 1.73E-01 | 4.33E-01 | 1.00E+00 |
| ENSG00000226681.1_AC020595.1 | ENSG00000160789.18_LMNA | 0.00168  | -0.157559986 | 0.160840539 | 9.84E-01 | 9.94E-01 | 1.00E+00 |
| ENSG00000234541.2_CHEK2P5    | ENSG00000160789.18_LMNA | -0.049   | -0.206591451 | 0.111064728 | 5.49E-01 | 7.86E-01 | 1.00E+00 |
| ENSG00000204548.3_DEFB121    | ENSG00000160789.18_LMNA | 0.04921  | -0.110863971 | 0.206786028 | 5.47E-01 | 7.85E-01 | 1.00E+00 |
| ENSG00000270709.1_GS1-115M3  | ENSG00000160789.18_LMNA | -0.16155 | -0.312710193 | -0.00241352 | 4.68E-02 | 1.93E-01 | 1.00E+00 |
| ENSG00000224670.1_AC068135.1 | ENSG00000160789.18_LMNA | 0.06312  | -0.097057017 | 0.2201079   | 4.40E-01 | 7.08E-01 | 1.00E+00 |
| ENSG00000236763.2_TRMT112P   | ENSG00000160789.18_LMNA | 0.1468   | -0.012694325 | 0.299015425 | 7.11E-02 | 2.52E-01 | 1.00E+00 |
| ENSG00000225360.1_RP11-149F  | ENSG00000160789.18_LMNA | -0.08996 | -0.245644443 | 0.07024489  | 2.70E-01 | 5.55E-01 | 1.00E+00 |



|                              |                         |          |              |             |          |          |          |
|------------------------------|-------------------------|----------|--------------|-------------|----------|----------|----------|
| ENSG00000271621.1_RP11-60E8  | ENSG00000160789.18_LMNA | -0.07476 | -0.231208715 | 0.08545799  | 3.60E-01 | 6.42E-01 | 1.00E+00 |
| ENSG00000242769.3_RN7SL432f  | ENSG00000160789.18_LMNA | 0.12085  | -0.039102773 | 0.274764628 | 1.38E-01 | 3.79E-01 | 1.00E+00 |
| ENSG00000228806.1_AC092628.  | ENSG00000160789.18_LMNA | 0.08787  | -0.072345955 | 0.243659044 | 2.82E-01 | 5.67E-01 | 1.00E+00 |
| ENSG00000262067.1_CTD-2545C  | ENSG00000160789.18_LMNA | 0.05298  | -0.107121856 | 0.210408343 | 5.17E-01 | 7.64E-01 | 1.00E+00 |
| ENSG00000237874.2_RP3-393K1  | ENSG00000160789.18_LMNA | -0.02943 | -0.187747177 | 0.130385508 | 7.19E-01 | 8.81E-01 | 1.00E+00 |
| ENSG00000213120.3_LIN28AP1   | ENSG00000160789.18_LMNA | -0.06453 | -0.221451351 | 0.095657839 | 4.30E-01 | 7.00E-01 | 1.00E+00 |
| ENSG00000223986.1_RP11-528A  | ENSG00000160789.18_LMNA | -0.01053 | -0.169443914 | 0.148923098 | 8.98E-01 | 9.60E-01 | 1.00E+00 |
| ENSG00000222376.1_RN7SKP15   | ENSG00000160789.18_LMNA | 0.10484  | -0.055283457 | 0.259706013 | 1.99E-01 | 4.69E-01 | 1.00E+00 |
| ENSG00000249277.1_RP11-302F  | ENSG00000160789.18_LMNA | -0.01144 | -0.170332557 | 0.148028218 | 8.89E-01 | 9.57E-01 | 1.00E+00 |
| ENSG00000277755.1_RP11-26F2  | ENSG00000160789.18_LMNA | 0.07366  | -0.08655683  | 0.230160598 | 3.67E-01 | 6.48E-01 | 1.00E+00 |
| ENSG00000256298.1_RP11-474D  | ENSG00000160789.18_LMNA | -0.01518 | -0.173963992 | 0.144365865 | 8.53E-01 | 9.42E-01 | 1.00E+00 |
| ENSG00000280346.1_CH507-152  | ENSG00000160789.18_LMNA | 0.07873  | -0.081495158 | 0.234982529 | 3.35E-01 | 6.21E-01 | 1.00E+00 |
| ENSG00000236359.1_OR51B8P    | ENSG00000160789.18_LMNA | -0.11216 | -0.266600947 | 0.047895235 | 1.69E-01 | 4.27E-01 | 1.00E+00 |
| ENSG00000234306.1_RP11-271F  | ENSG00000160789.18_LMNA | -0.20731 | -0.354797411 | -0.04974731 | 1.04E-02 | 6.73E-02 | 1.00E+00 |
| ENSG00000237790.1_LINC01318  | ENSG00000160789.18_LMNA | -0.08856 | -0.244315942 | 0.071651098 | 2.78E-01 | 5.63E-01 | 1.00E+00 |
| ENSG00000254261.1_RP11-18A1  | ENSG00000160789.18_LMNA | 0.05564  | -0.104483856 | 0.212956662 | 4.96E-01 | 7.50E-01 | 1.00E+00 |
| ENSG00000253380.1_RP11-738G  | ENSG00000160789.18_LMNA | 0.2342   | 0.077905744  | 0.379261627 | 3.68E-03 | 3.12E-02 | 1.00E+00 |
| ENSG00000250529.1_CTD-2247C  | ENSG00000160789.18_LMNA | -0.05128 | -0.208775722 | 0.108809586 | 5.30E-01 | 7.73E-01 | 1.00E+00 |
| ENSG00000249666.1_RP11-432M  | ENSG00000160789.18_LMNA | 0.00503  | -0.154292671 | 0.164100877 | 9.51E-01 | 9.80E-01 | 1.00E+00 |
| ENSG00000238875.1_RN7SKP21   | ENSG00000160789.18_LMNA | -0.10033 | -0.255452144 | 0.059824522 | 2.19E-01 | 4.94E-01 | 1.00E+00 |
| ENSG00000233711.1	EIF4EBP2F  | ENSG00000160789.18_LMNA | 0.10569  | -0.05442425  | 0.260509507 | 1.95E-01 | 4.64E-01 | 1.00E+00 |
| ENSG00000236839.1_RP11-3P22  | ENSG00000160789.18_LMNA | -0.03992 | -0.19786575  | 0.120041022 | 6.25E-01 | 8.31E-01 | 1.00E+00 |
| ENSG00000269385.1_CTC-312O1  | ENSG00000160789.18_LMNA | 0.00711  | -0.152265299 | 0.166120427 | 9.31E-01 | 9.73E-01 | 1.00E+00 |
| ENSG00000276949.1_RP11-118M  | ENSG00000160789.18_LMNA | -0.04095 | -0.198855744 | 0.119025205 | 6.16E-01 | 8.26E-01 | 1.00E+00 |
| ENSG00000213167.3_Metazoa_Si | ENSG00000160789.18_LMNA | -0.12853 | -0.281965566 | 0.031306652 | 1.15E-01 | 3.38E-01 | 1.00E+00 |
| ENSG00000240977.3_RN7SL283f  | ENSG00000160789.18_LMNA | -0.16047 | -0.3117049   | -0.00129966 | 4.83E-02 | 1.97E-01 | 1.00E+00 |
| ENSG00000235350.1_AF196972.  | ENSG00000160789.18_LMNA | -0.06044 | -0.217550911 | 0.099716612 | 4.59E-01 | 7.23E-01 | 1.00E+00 |
| ENSG00000230087.1_AC104389.  | ENSG00000160789.18_LMNA | 0.05781  | -0.1023363   | 0.215028026 | 4.79E-01 | 7.37E-01 | 1.00E+00 |
| ENSG00000241227.3_RN7SL553f  | ENSG00000160789.18_LMNA | 0.06478  | -0.09540283  | 0.221696073 | 4.28E-01 | 6.98E-01 | 1.00E+00 |
| ENSG00000277668.1_Metazoa_Si | ENSG00000160789.18_LMNA | -0.12239 | -0.276212082 | 0.037538744 | 1.33E-01 | 3.70E-01 | 1.00E+00 |
| ENSG00000259421.1_CTA-150C2  | ENSG00000160789.18_LMNA | 0.13473  | -0.025006346 | 0.287759212 | 9.79E-02 | 3.08E-01 | 1.00E+00 |
| ENSG00000254051.1_RP11-403D  | ENSG00000160789.18_LMNA | -0.06261 | -0.219625644 | 0.097558972 | 4.43E-01 | 7.11E-01 | 1.00E+00 |
| ENSG00000218424.2_NDUFS5P1   | ENSG00000160789.18_LMNA | 0.13658  | -0.023125059 | 0.289484782 | 9.34E-02 | 2.99E-01 | 1.00E+00 |

|                              |                         |          |              |             |          |          |          |
|------------------------------|-------------------------|----------|--------------|-------------|----------|----------|----------|
| ENSG00000254992.1_RP11-215H  | ENSG00000160789.18_LMNA | 0.07345  | -0.086766645 | 0.229960384 | 3.69E-01 | 6.49E-01 | 1.00E+00 |
| ENSG00000250905.1_RP11-707F  | ENSG00000160789.18_LMNA | 0.05493  | -0.105189191 | 0.212275728 | 5.01E-01 | 7.53E-01 | 1.00E+00 |
| ENSG00000185962.1_LCE3A      | ENSG00000160789.18_LMNA | -0.08918 | -0.24490497  | 0.071027771 | 2.75E-01 | 5.59E-01 | 1.00E+00 |
| ENSG00000212933.1_KRTAP12-4  | ENSG00000160789.18_LMNA | -0.06807 | -0.224835947 | 0.092127283 | 4.05E-01 | 6.80E-01 | 1.00E+00 |
| ENSG00000255315.1_OR8A3P     | ENSG00000160789.18_LMNA | 0.10163  | -0.058517252 | 0.25667799  | 2.13E-01 | 4.86E-01 | 1.00E+00 |
| ENSG00000240774.1_RP11-359H  | ENSG00000160789.18_LMNA | -0.06103 | -0.218112602 | 0.099132771 | 4.55E-01 | 7.20E-01 | 1.00E+00 |
| ENSG00000251654.2_RP11-192H  | ENSG00000160789.18_LMNA | 0.00477  | -0.154550191 | 0.163844158 | 9.54E-01 | 9.81E-01 | 1.00E+00 |
| ENSG00000260846.2_FRG2HP     | ENSG00000160789.18_LMNA | 0.02875  | -0.131053911 | 0.18709104  | 7.25E-01 | 8.84E-01 | 1.00E+00 |
| ENSG00000267135.2_AD000091.  | ENSG00000160789.18_LMNA | -0.15391 | -0.305618076 | 0.00542811  | 5.83E-02 | 2.21E-01 | 1.00E+00 |
| ENSG00000258098.1_RP11-89K2  | ENSG00000160789.18_LMNA | 0.00838  | -0.151023262 | 0.167356355 | 9.18E-01 | 9.69E-01 | 1.00E+00 |
| ENSG00000237083.1_RP11-132E  | ENSG00000160789.18_LMNA | 0.04883  | -0.111234611 | 0.206426779 | 5.50E-01 | 7.87E-01 | 1.00E+00 |
| ENSG00000258632.2_RP11-354B  | ENSG00000160789.18_LMNA | -0.04433 | -0.202107535 | 0.115683901 | 5.88E-01 | 8.08E-01 | 1.00E+00 |
| ENSG00000242423.2_RPL12P36   | ENSG00000160789.18_LMNA | -0.12163 | -0.275495848 | 0.038312854 | 1.36E-01 | 3.74E-01 | 1.00E+00 |
| ENSG00000239958.3_RN7SL51P   | ENSG00000160789.18_LMNA | -0.02237 | -0.180930731 | 0.137315313 | 7.84E-01 | 9.12E-01 | 1.00E+00 |
| ENSG00000257691.2_RP11-345J  | ENSG00000160789.18_LMNA | -0.09803 | -0.253279326 | 0.062139012 | 2.30E-01 | 5.07E-01 | 1.00E+00 |
| ENSG00000270369.1_RP11-144G  | ENSG00000160789.18_LMNA | 0.01171  | -0.147767439 | 0.17059142  | 8.86E-01 | 9.56E-01 | 1.00E+00 |
| ENSG00000248440.1_RP11-231G  | ENSG00000160789.18_LMNA | -0.00623 | -0.165264847 | 0.15312452  | 9.39E-01 | 9.76E-01 | 1.00E+00 |
| ENSG00000250393.1_RP11-480G  | ENSG00000160789.18_LMNA | 0.06963  | -0.090578081 | 0.226318691 | 3.94E-01 | 6.72E-01 | 1.00E+00 |
| ENSG00000236978.1_RP11-575M  | ENSG00000160789.18_LMNA | 0.06611  | -0.094082866 | 0.222962156 | 4.18E-01 | 6.90E-01 | 1.00E+00 |
| ENSG00000256912.1_RP11-75L1  | ENSG00000160789.18_LMNA | 0.13906  | -0.020594322 | 0.291802846 | 8.75E-02 | 2.88E-01 | 1.00E+00 |
| ENSG00000244197.3_RN7SL766F  | ENSG00000160789.18_LMNA | -0.03506 | -0.193183168 | 0.124836747 | 6.68E-01 | 8.54E-01 | 1.00E+00 |
| ENSG00000274079.1_Metazoa_SI | ENSG00000160789.18_LMNA | -0.04649 | -0.204177799 | 0.113552894 | 5.70E-01 | 7.99E-01 | 1.00E+00 |
| ENSG00000274568.1_RN7SL545F  | ENSG00000160789.18_LMNA | -0.05148 | -0.208966334 | 0.108612635 | 5.29E-01 | 7.73E-01 | 1.00E+00 |
| ENSG00000199622.1_RN7SKP20   | ENSG00000160789.18_LMNA | -0.12003 | -0.273999564 | 0.039928832 | 1.41E-01 | 3.83E-01 | 1.00E+00 |
| ENSG00000254309.1_RP11-89M2  | ENSG00000160789.18_LMNA | -0.01316 | -0.172004787 | 0.146342835 | 8.72E-01 | 9.50E-01 | 1.00E+00 |
| ENSG00000248816.1_RP11-18D7  | ENSG00000160789.18_LMNA | 0.00795  | -0.151447029 | 0.166934785 | 9.23E-01 | 9.70E-01 | 1.00E+00 |
| ENSG00000223487.1_FRMPD4-A   | ENSG00000160789.18_LMNA | -0.15548 | -0.307082921 | 0.003811584 | 5.58E-02 | 2.16E-01 | 1.00E+00 |
| ENSG00000179695.1_OR6C2      | ENSG00000160789.18_LMNA | -0.05808 | -0.215291901 | 0.102062506 | 4.77E-01 | 7.36E-01 | 1.00E+00 |
| ENSG00000269130.1_SIGLEC28F  | ENSG00000160789.18_LMNA | -0.15952 | -0.310829578 | -0.00033044 | 4.96E-02 | 2.00E-01 | 1.00E+00 |
| ENSG00000270505.1_IGHV1OR1   | ENSG00000160789.18_LMNA | 0.09783  | -0.062345297 | 0.253085513 | 2.31E-01 | 5.08E-01 | 1.00E+00 |
| ENSG00000239862.1_IGKV1-37   | ENSG00000160789.18_LMNA | -0.00238 | -0.161523125 | 0.156876515 | 9.77E-01 | 9.91E-01 | 1.00E+00 |
| ENSG00000271288.1_IGHV1OR1   | ENSG00000160789.18_LMNA | -0.01956 | -0.178204652 | 0.140078033 | 8.11E-01 | 9.26E-01 | 1.00E+00 |
| ENSG00000237261.2_Metazoa_SI | ENSG00000160789.18_LMNA | 0.13422  | -0.025529696 | 0.287278819 | 9.92E-02 | 3.10E-01 | 1.00E+00 |

|                              |                         |          |              |             |          |          |          |
|------------------------------|-------------------------|----------|--------------|-------------|----------|----------|----------|
| ENSG00000224640.1_SRSF1P1    | ENSG00000160789.18_LMNA | -0.05206 | -0.209522592 | 0.108037733 | 5.24E-01 | 7.69E-01 | 1.00E+00 |
| ENSG00000222705.1_RN7SKP39   | ENSG00000160789.18_LMNA | -0.00987 | -0.1688012   | 0.149569999 | 9.04E-01 | 9.63E-01 | 1.00E+00 |
| ENSG00000226108.2_RAB28P1    | ENSG00000160789.18_LMNA | -0.0535  | -0.210905555 | 0.106607497 | 5.13E-01 | 7.61E-01 | 1.00E+00 |
| ENSG00000249819.1_RP11-392C  | ENSG00000160789.18_LMNA | -0.02681 | -0.18521893  | 0.132959432 | 7.43E-01 | 8.92E-01 | 1.00E+00 |
| ENSG00000257634.1_RP11-850F  | ENSG00000160789.18_LMNA | -0.02797 | -0.186341007 | 0.131817613 | 7.32E-01 | 8.87E-01 | 1.00E+00 |
| ENSG00000226016.1_RPL36AP5   | ENSG00000160789.18_LMNA | -0.0804  | -0.236571204 | 0.079823914 | 3.25E-01 | 6.12E-01 | 1.00E+00 |
| ENSG00000230114.1_RP11-141A  | ENSG00000160789.18_LMNA | -0.03601 | -0.194094583 | 0.123904473 | 6.60E-01 | 8.50E-01 | 1.00E+00 |
| ENSG00000271257.1_CTD-2117L  | ENSG00000160789.18_LMNA | 0.04321  | -0.116793271 | 0.20102866  | 5.97E-01 | 8.14E-01 | 1.00E+00 |
| ENSG00000255257.1_AC025016   | ENSG00000160789.18_LMNA | 0.11901  | -0.040967685 | 0.273036855 | 1.44E-01 | 3.89E-01 | 1.00E+00 |
| ENSG00000253763.1_IGHV3-6    | ENSG00000160789.18_LMNA | 0.16919  | 0.010261644  | 0.319773704 | 3.72E-02 | 1.65E-01 | 1.00E+00 |
| ENSG00000279136.1_LA16c-335f | ENSG00000160789.18_LMNA | 0.09775  | -0.062419965 | 0.253015354 | 2.31E-01 | 5.09E-01 | 1.00E+00 |
| ENSG00000248694.1_RP11-18D7  | ENSG00000160789.18_LMNA | 0.01727  | -0.142322258 | 0.175986591 | 8.33E-01 | 9.35E-01 | 1.00E+00 |
| ENSG00000255016.1_RP11-481A  | ENSG00000160789.18_LMNA | -0.02408 | -0.182582366 | 0.135639066 | 7.68E-01 | 9.04E-01 | 1.00E+00 |
| ENSG00000267792.1_WBP1LP11   | ENSG00000160789.18_LMNA | 0.02008  | -0.139570669 | 0.178705654 | 8.06E-01 | 9.23E-01 | 1.00E+00 |
| ENSG00000260580.1_RP11-142A  | ENSG00000160789.18_LMNA | -0.15798 | -0.309395181 | 0.001256585 | 5.19E-02 | 2.06E-01 | 1.00E+00 |
| ENSG00000229547.4_UBE2DNL    | ENSG00000160789.18_LMNA | -0.10023 | -0.255351781 | 0.059931503 | 2.19E-01 | 4.94E-01 | 1.00E+00 |
| ENSG00000256684.1_RP11-49K4  | ENSG00000160789.18_LMNA | -0.0084  | -0.167374403 | 0.151005118 | 9.18E-01 | 9.69E-01 | 1.00E+00 |
| ENSG00000259962.1_RP11-44F1  | ENSG00000160789.18_LMNA | 0.0196   | -0.140039826 | 0.178242387 | 8.11E-01 | 9.25E-01 | 1.00E+00 |
| ENSG00000258254.1_RP11-162N  | ENSG00000160789.18_LMNA | -0.0636  | -0.220566645 | 0.096579384 | 4.36E-01 | 7.04E-01 | 1.00E+00 |
| ENSG00000236837.1_AC139712   | ENSG00000160789.18_LMNA | 0.13367  | -0.026082272 | 0.286771428 | 1.01E-01 | 3.13E-01 | 1.00E+00 |
| ENSG00000234391.1_RP11-344N  | ENSG00000160789.18_LMNA | -0.10108 | -0.256155801 | 0.059074258 | 2.15E-01 | 4.89E-01 | 1.00E+00 |
| ENSG00000240578.1_TRBV22-1   | ENSG00000160789.18_LMNA | -0.03579 | -0.193887763 | 0.124116076 | 6.62E-01 | 8.51E-01 | 1.00E+00 |
| ENSG00000231099.1_BMS1P19    | ENSG00000160789.18_LMNA | 0.07956  | -0.080663042 | 0.235773745 | 3.30E-01 | 6.16E-01 | 1.00E+00 |
| ENSG00000243733.1_RP11-80H8  | ENSG00000160789.18_LMNA | 0.11892  | -0.041059296 | 0.272951929 | 1.45E-01 | 3.89E-01 | 1.00E+00 |
| ENSG00000231136.1_AP000705   | ENSG00000160789.18_LMNA | 0.04085  | -0.119125442 | 0.198758083 | 6.17E-01 | 8.27E-01 | 1.00E+00 |
| ENSG00000277000.1_DUSP12P1   | ENSG00000160789.18_LMNA | -0.01736 | -0.176069683 | 0.142238245 | 8.32E-01 | 9.35E-01 | 1.00E+00 |
| ENSG00000242879.1_AC006335   | ENSG00000160789.18_LMNA | -0.09059 | -0.24624214  | 0.069611823 | 2.67E-01 | 5.51E-01 | 1.00E+00 |
| ENSG00000243939.1_RP11-200A  | ENSG00000160789.18_LMNA | -0.25479 | -0.397849118 | -0.09962637 | 1.54E-03 | 1.60E-02 | 1.00E+00 |
| ENSG00000222385.1_RN7SKP15   | ENSG00000160789.18_LMNA | -0.09641 | -0.251742588 | 0.063773903 | 2.37E-01 | 5.16E-01 | 1.00E+00 |
| ENSG00000237835.1_AC007064   | ENSG00000160789.18_LMNA | -0.03523 | -0.193341582 | 0.124674748 | 6.67E-01 | 8.53E-01 | 1.00E+00 |
| ENSG00000233106.1_RPL12P3    | ENSG00000160789.18_LMNA | 0.05399  | -0.106120315 | 0.211376345 | 5.09E-01 | 7.58E-01 | 1.00E+00 |
| ENSG00000267517.1_CTD-2231E  | ENSG00000160789.18_LMNA | 0.102    | -0.058144743 | 0.257027111 | 2.11E-01 | 4.84E-01 | 1.00E+00 |
| ENSG00000223836.1_RP11-548K  | ENSG00000160789.18_LMNA | 0.02915  | -0.130658492 | 0.187479238 | 7.21E-01 | 8.82E-01 | 1.00E+00 |

|                              |                         |          |              |             |          |          |          |
|------------------------------|-------------------------|----------|--------------|-------------|----------|----------|----------|
| ENSG00000223419.1_AC006022.4 | ENSG00000160789.18_LMNA | -0.17758 | -0.327519042 | -0.01891138 | 2.86E-02 | 1.39E-01 | 1.00E+00 |
| ENSG00000260594.1_CTD-2055G  | ENSG00000160789.18_LMNA | -0.04837 | -0.205982016 | 0.111693354 | 5.54E-01 | 7.88E-01 | 1.00E+00 |
| ENSG00000256695.1_RP1-166H1  | ENSG00000160789.18_LMNA | -0.04462 | -0.202386377 | 0.115397048 | 5.85E-01 | 8.07E-01 | 1.00E+00 |
| ENSG00000260897.1_DNM1P30    | ENSG00000160789.18_LMNA | -0.01905 | -0.177708401 | 0.140580423 | 8.16E-01 | 9.28E-01 | 1.00E+00 |
| ENSG00000229262.1_RP4-726N1  | ENSG00000160789.18_LMNA | -0.05091 | -0.208423705 | 0.109173246 | 5.33E-01 | 7.75E-01 | 1.00E+00 |
| ENSG00000254736.1_BRD9P1     | ENSG00000160789.18_LMNA | -0.12849 | -0.281925427 | 0.031350215 | 1.15E-01 | 3.38E-01 | 1.00E+00 |
| ENSG00000226222.3_RP11-753E  | ENSG00000160789.18_LMNA | 0.00976  | -0.149676992 | 0.168694874 | 9.05E-01 | 9.63E-01 | 1.00E+00 |
| ENSG00000226079.1_RP3-399L1  | ENSG00000160789.18_LMNA | 0.0587   | -0.101448656 | 0.215883345 | 4.73E-01 | 7.32E-01 | 1.00E+00 |
| ENSG00000225427.1_LINC00331  | ENSG00000160789.18_LMNA | -0.15751 | -0.308966266 | 0.001730834 | 5.26E-02 | 2.08E-01 | 1.00E+00 |
| ENSG00000242775.1_RP11-875H  | ENSG00000160789.18_LMNA | -0.06186 | -0.218906928 | 0.098306745 | 4.49E-01 | 7.15E-01 | 1.00E+00 |
| ENSG00000233943.1_AC114973   | ENSG00000160789.18_LMNA | -0.16583 | -0.316668125 | -0.0068064  | 4.12E-02 | 1.77E-01 | 1.00E+00 |
| ENSG00000235858.1_RP11-36D1  | ENSG00000160789.18_LMNA | -0.08979 | -0.245478336 | 0.070420782 | 2.71E-01 | 5.56E-01 | 1.00E+00 |
| ENSG00000236414.1_AC004535   | ENSG00000160789.18_LMNA | -0.04626 | -0.203955292 | 0.11378207  | 5.71E-01 | 8.00E-01 | 1.00E+00 |
| ENSG00000254581.1_RP11-303G  | ENSG00000160789.18_LMNA | -0.01521 | -0.173989983 | 0.144339622 | 8.52E-01 | 9.42E-01 | 1.00E+00 |
| ENSG00000217805.2_RP11-191A  | ENSG00000160789.18_LMNA | -0.08022 | -0.236404055 | 0.079999833 | 3.26E-01 | 6.12E-01 | 1.00E+00 |
| ENSG00000258202.1_RP11-776A  | ENSG00000160789.18_LMNA | 0.11849  | -0.041495958 | 0.272547062 | 1.46E-01 | 3.91E-01 | 1.00E+00 |
| ENSG00000230271.1_RP11-548K  | ENSG00000160789.18_LMNA | -0.01142 | -0.170311655 | 0.148049272 | 8.89E-01 | 9.57E-01 | 1.00E+00 |
| ENSG00000196406.4_SPANXD     | ENSG00000160789.18_LMNA | 0.1725   | 0.013675795  | 0.322835827 | 3.36E-02 | 1.54E-01 | 1.00E+00 |
| ENSG00000254176.1_IGHV3-75   | ENSG00000160789.18_LMNA | 0.16135  | 0.002207718  | 0.312524499 | 4.70E-02 | 1.93E-01 | 1.00E+00 |
| ENSG00000257296.1_RP11-701B  | ENSG00000160789.18_LMNA | 0.14499  | -0.014547392 | 0.297326794 | 7.47E-02 | 2.61E-01 | 1.00E+00 |
| ENSG00000227089.2_RP1-135L2  | ENSG00000160789.18_LMNA | 0.0377   | -0.122230535 | 0.195729692 | 6.45E-01 | 8.42E-01 | 1.00E+00 |
| ENSG00000262974.1_RP11-457I1 | ENSG00000160789.18_LMNA | -0.21887 | -0.365337718 | -0.06182009 | 6.75E-03 | 4.90E-02 | 1.00E+00 |
| ENSG00000257411.1_RP11-603J  | ENSG00000160789.18_LMNA | 0.09445  | -0.065740188 | 0.249892242 | 2.47E-01 | 5.27E-01 | 1.00E+00 |
| ENSG00000229012.1_GS1-542M4  | ENSG00000160789.18_LMNA | 0.19301  | 0.03488088   | 0.341710645 | 1.72E-02 | 9.69E-02 | 1.00E+00 |
| ENSG00000249654.1_VN1R104P   | ENSG00000160789.18_LMNA | -0.0929  | -0.248431139 | 0.06729111  | 2.55E-01 | 5.37E-01 | 1.00E+00 |
| ENSG00000259734.1_RP11-182L  | ENSG00000160789.18_LMNA | 0.04623  | -0.11381254  | 0.203925706 | 5.72E-01 | 8.00E-01 | 1.00E+00 |
| ENSG00000179170.11_OR7E97P   | ENSG00000160789.18_LMNA | -0.05834 | -0.215536883 | 0.101808273 | 4.75E-01 | 7.34E-01 | 1.00E+00 |
| ENSG00000232234.2_RP11-203H  | ENSG00000160789.18_LMNA | 0.05486  | -0.105255551 | 0.212211648 | 5.02E-01 | 7.54E-01 | 1.00E+00 |
| ENSG00000234172.1_AC093639   | ENSG00000160789.18_LMNA | -0.14507 | -0.297404723 | 0.014461922 | 7.45E-02 | 2.60E-01 | 1.00E+00 |
| ENSG00000249688.1_RP11-5N11  | ENSG00000160789.18_LMNA | 0.04704  | -0.113008911 | 0.204705822 | 5.65E-01 | 7.96E-01 | 1.00E+00 |
| ENSG00000230352.1_RP4-614C1  | ENSG00000160789.18_LMNA | -0.06428 | -0.221218673 | 0.095900257 | 4.31E-01 | 7.01E-01 | 1.00E+00 |
| ENSG00000234829.3_IFNA17     | ENSG00000160789.18_LMNA | 0.0805   | -0.07972321  | 0.236666878 | 3.24E-01 | 6.11E-01 | 1.00E+00 |
| ENSG00000241539.1_RP11-740N  | ENSG00000160789.18_LMNA | 0.09631  | -0.063868193 | 0.25165391  | 2.38E-01 | 5.16E-01 | 1.00E+00 |

|                             |                         |          |              |             |          |          |          |
|-----------------------------|-------------------------|----------|--------------|-------------|----------|----------|----------|
| ENSG00000234637.1_RPS19P6   | ENSG00000160789.18_LMNA | 0.04492  | -0.115101171 | 0.202673937 | 5.83E-01 | 8.06E-01 | 1.00E+00 |
| ENSG00000248355.1_ARL2BPP6  | ENSG00000160789.18_LMNA | -0.14163 | -0.294199742 | 0.017973303 | 8.18E-02 | 2.76E-01 | 1.00E+00 |
| ENSG00000205495.1_OR52J3    | ENSG00000160789.18_LMNA | 0.02615  | -0.133611244 | 0.184578016 | 7.49E-01 | 8.95E-01 | 1.00E+00 |
| ENSG00000224296.3_MRPL49P1  | ENSG00000160789.18_LMNA | -0.02347 | -0.181987847 | 0.136242654 | 7.74E-01 | 9.07E-01 | 1.00E+00 |
| ENSG00000235803.1_MTCO2P23  | ENSG00000160789.18_LMNA | -0.11127 | -0.265763125 | 0.048794838 | 1.72E-01 | 4.31E-01 | 1.00E+00 |
| ENSG00000242134.2_RPL5P13   | ENSG00000160789.18_LMNA | -0.08819 | -0.243961828 | 0.072025713 | 2.80E-01 | 5.65E-01 | 1.00E+00 |
| ENSG00000250865.1_RP11-780C | ENSG00000160789.18_LMNA | 0.00767  | -0.151711208 | 0.166671916 | 9.25E-01 | 9.71E-01 | 1.00E+00 |
| ENSG00000237824.2_RPL23AP3  | ENSG00000160789.18_LMNA | 0.16348  | 0.004397142  | 0.314498747 | 4.42E-02 | 1.85E-01 | 1.00E+00 |
| ENSG00000253403.1_RP11-348M | ENSG00000160789.18_LMNA | -0.18753 | -0.33668293  | -0.02920532 | 2.07E-02 | 1.10E-01 | 1.00E+00 |
| ENSG00000226169.1_RP11-375H | ENSG00000160789.18_LMNA | 0.05997  | -0.1001847   | 0.217100431 | 4.63E-01 | 7.26E-01 | 1.00E+00 |
| ENSG00000236079.1_RP1-32I10 | ENSG00000160789.18_LMNA | -0.02142 | -0.180010289 | 0.138248681 | 7.93E-01 | 9.16E-01 | 1.00E+00 |
| ENSG00000263342.1_RP1-4G17  | ENSG00000160789.18_LMNA | -0.026   | -0.184432986 | 0.133758702 | 7.51E-01 | 8.96E-01 | 1.00E+00 |
| ENSG00000268717.1_BNIP3P33  | ENSG00000160789.18_LMNA | -0.06262 | -0.219632972 | 0.097551345 | 4.43E-01 | 7.11E-01 | 1.00E+00 |
| ENSG00000230169.1_RPL30P16  | ENSG00000160789.18_LMNA | 0.12727  | -0.032588658 | 0.280783853 | 1.18E-01 | 3.45E-01 | 1.00E+00 |
| ENSG00000149651.3_SPINT4    | ENSG00000160789.18_LMNA | 0.11255  | -0.047505895 | 0.266963401 | 1.67E-01 | 4.25E-01 | 1.00E+00 |
| ENSG00000259111.1_RP11-280K | ENSG00000160789.18_LMNA | 0.08424  | -0.075979704 | 0.240219076 | 3.02E-01 | 5.89E-01 | 1.00E+00 |
| ENSG00000253699.1_CTD-3118D | ENSG00000160789.18_LMNA | -0.08035 | -0.236527452 | 0.079869963 | 3.25E-01 | 6.12E-01 | 1.00E+00 |
| ENSG00000269154.1_BNIP3P13  | ENSG00000160789.18_LMNA | -0.09109 | -0.246712354 | 0.069113604 | 2.64E-01 | 5.48E-01 | 1.00E+00 |
| ENSG00000271546.1_RP4-725K1 | ENSG00000160789.18_LMNA | -0.04423 | -0.202010242 | 0.115783976 | 5.88E-01 | 8.09E-01 | 1.00E+00 |
| ENSG00000233409.1_FANK1-AS  | ENSG00000160789.18_LMNA | 0.13245  | -0.027322991 | 0.285631526 | 1.04E-01 | 3.19E-01 | 1.00E+00 |
| ENSG00000253939.1_RP11-44K6 | ENSG00000160789.18_LMNA | -0.09902 | -0.254210163 | 0.061147898 | 2.25E-01 | 5.01E-01 | 1.00E+00 |
| ENSG00000229302.1_TAF9P2    | ENSG00000160789.18_LMNA | -0.05113 | -0.208633348 | 0.10895668  | 5.32E-01 | 7.74E-01 | 1.00E+00 |
| ENSG00000267269.1_RP11-2N1  | ENSG00000160789.18_LMNA | -0.06996 | -0.226637255 | 0.090245039 | 3.92E-01 | 6.70E-01 | 1.00E+00 |
| ENSG00000227718.1_AC016730  | ENSG00000160789.18_LMNA | -0.08267 | -0.238725542 | 0.077554761 | 3.11E-01 | 5.98E-01 | 1.00E+00 |
| ENSG00000243813.1_RP11-678L | ENSG00000160789.18_LMNA | -0.04853 | -0.206137711 | 0.11153278  | 5.53E-01 | 7.88E-01 | 1.00E+00 |
| ENSG00000231626.1_AC013402  | ENSG00000160789.18_LMNA | 0.05356  | -0.106545406 | 0.210965565 | 5.12E-01 | 7.61E-01 | 1.00E+00 |
| ENSG00000227131.1_RP11-552E | ENSG00000160789.18_LMNA | -0.03021 | -0.188501675 | 0.129616547 | 7.12E-01 | 8.77E-01 | 1.00E+00 |
| ENSG00000197651.4_CCER1     | ENSG00000160789.18_LMNA | 0.12372  | -0.036198411 | 0.277451382 | 1.29E-01 | 3.64E-01 | 1.00E+00 |
| ENSG00000253735.1_RP11-115J | ENSG00000160789.18_LMNA | 0.04108  | -0.118900414 | 0.198977317 | 6.15E-01 | 8.26E-01 | 1.00E+00 |
| ENSG00000238022.1_RP11-38C1 | ENSG00000160789.18_LMNA | 0.02575  | -0.134000624 | 0.184195017 | 7.53E-01 | 8.97E-01 | 1.00E+00 |
| ENSG00000253238.1_RP11-941H | ENSG00000160789.18_LMNA | 0.01014  | -0.149297043 | 0.169072422 | 9.01E-01 | 9.62E-01 | 1.00E+00 |
| ENSG00000262231.1_RP11-960B | ENSG00000160789.18_LMNA | 0.00499  | -0.15433115  | 0.16406252  | 9.51E-01 | 9.81E-01 | 1.00E+00 |
| ENSG00000237534.1_LINC00383 | ENSG00000160789.18_LMNA | 0.03008  | -0.129741854 | 0.188378751 | 7.13E-01 | 8.78E-01 | 1.00E+00 |

|                              |                         |          |              |             |          |          |          |
|------------------------------|-------------------------|----------|--------------|-------------|----------|----------|----------|
| ENSG00000271597.1_RP11-85D1  | ENSG00000160789.18_LMNA | 0.06687  | -0.093326623 | 0.223687047 | 4.13E-01 | 6.86E-01 | 1.00E+00 |
| ENSG00000261820.1_DNM1P49    | ENSG00000160789.18_LMNA | 0.01592  | -0.143646061 | 0.174676703 | 8.46E-01 | 9.40E-01 | 1.00E+00 |
| ENSG00000244094.1_SPRR2F     | ENSG00000160789.18_LMNA | -0.00473 | -0.163808261 | 0.154586197 | 9.54E-01 | 9.81E-01 | 1.00E+00 |
| ENSG00000254518.1_RP11-347H  | ENSG00000160789.18_LMNA | -0.07726 | -0.233583011 | 0.082965942 | 3.44E-01 | 6.29E-01 | 1.00E+00 |
| ENSG00000236785.1_SDR42E1P   | ENSG00000160789.18_LMNA | 0.02064  | -0.139014562 | 0.179254598 | 8.01E-01 | 9.20E-01 | 1.00E+00 |
| ENSG00000240902.1_APOOP2     | ENSG00000160789.18_LMNA | 0.0083   | -0.151100681 | 0.167279346 | 9.19E-01 | 9.69E-01 | 1.00E+00 |
| ENSG00000228664.1_RP11-416K  | ENSG00000160789.18_LMNA | -0.09526 | -0.25066341  | 0.064920998 | 2.43E-01 | 5.22E-01 | 1.00E+00 |
| ENSG00000236323.1_BMP6P1     | ENSG00000160789.18_LMNA | -0.04218 | -0.200034305 | 0.117815032 | 6.06E-01 | 8.20E-01 | 1.00E+00 |
| ENSG00000277803.1_RP11-747E  | ENSG00000160789.18_LMNA | 0.05924  | -0.100916651 | 0.216395742 | 4.69E-01 | 7.29E-01 | 1.00E+00 |
| ENSG00000215398.10_RP11-754I | ENSG00000160789.18_LMNA | -0.06368 | -0.220646071 | 0.096496672 | 4.36E-01 | 7.04E-01 | 1.00E+00 |
| ENSG00000243995.1_RP1-300I2. | ENSG00000160789.18_LMNA | 0.021    | -0.138666449 | 0.179598126 | 7.97E-01 | 9.19E-01 | 1.00E+00 |
| ENSG00000249901.1_RP11-781M  | ENSG00000160789.18_LMNA | -0.07938 | -0.235602711 | 0.080842954 | 3.31E-01 | 6.17E-01 | 1.00E+00 |
| ENSG00000250834.1_KRT18P54   | ENSG00000160789.18_LMNA | 0.03077  | -0.129062163 | 0.1890454   | 7.07E-01 | 8.75E-01 | 1.00E+00 |
| ENSG00000233415.1_RP11-101E  | ENSG00000160789.18_LMNA | -0.08027 | -0.236447596 | 0.07995401  | 3.26E-01 | 6.12E-01 | 1.00E+00 |
| ENSG00000274028.1_RP11-440D  | ENSG00000160789.18_LMNA | -0.05836 | -0.215554042 | 0.101790464 | 4.75E-01 | 7.34E-01 | 1.00E+00 |
| ENSG00000269833.2_RP11-11A5  | ENSG00000160789.18_LMNA | -0.11136 | -0.265847296 | 0.048704484 | 1.72E-01 | 4.31E-01 | 1.00E+00 |
| ENSG00000271459.1_RP4-560B9  | ENSG00000160789.18_LMNA | -0.16997 | -0.320495875 | -0.01106619 | 3.63E-02 | 1.62E-01 | 1.00E+00 |
| ENSG00000230926.1_RP11-104D  | ENSG00000160789.18_LMNA | -0.04403 | -0.201811962 | 0.115987908 | 5.90E-01 | 8.10E-01 | 1.00E+00 |
| ENSG00000270794.1_GS1-383H3  | ENSG00000160789.18_LMNA | -0.01091 | -0.169814153 | 0.148550323 | 8.94E-01 | 9.59E-01 | 1.00E+00 |
| ENSG00000248987.2_PRDX4P1    | ENSG00000160789.18_LMNA | 0.07866  | -0.081566483 | 0.23491469  | 3.35E-01 | 6.21E-01 | 1.00E+00 |
| ENSG00000271173.1_RP11-272J  | ENSG00000160789.18_LMNA | 0.00287  | -0.156400777 | 0.161998068 | 9.72E-01 | 9.89E-01 | 1.00E+00 |
| ENSG00000261873.1_RP11-515E  | ENSG00000160789.18_LMNA | -0.07857 | -0.234835902 | 0.081649316 | 3.36E-01 | 6.22E-01 | 1.00E+00 |
| ENSG00000248685.4_RP11-548L  | ENSG00000160789.18_LMNA | 0.05131  | -0.108782637 | 0.208801806 | 5.30E-01 | 7.73E-01 | 1.00E+00 |
| ENSG00000251137.1_RPL7L1P7   | ENSG00000160789.18_LMNA | 0.0748   | -0.085418818 | 0.231246066 | 3.60E-01 | 6.42E-01 | 1.00E+00 |
| ENSG00000253947.1_CTB-77H17  | ENSG00000160789.18_LMNA | 0.02983  | -0.129984655 | 0.188140537 | 7.15E-01 | 8.79E-01 | 1.00E+00 |
| ENSG00000249861.3_LGALS16    | ENSG00000160789.18_LMNA | -0.07323 | -0.22975276  | 0.086984196 | 3.70E-01 | 6.50E-01 | 1.00E+00 |
| ENSG00000254199.1_AC008691.  | ENSG00000160789.18_LMNA | 0.05948  | -0.100673268 | 0.216630097 | 4.67E-01 | 7.28E-01 | 1.00E+00 |
| ENSG00000238135.1_USP9YP10   | ENSG00000160789.18_LMNA | -0.03508 | -0.193203123 | 0.124816341 | 6.68E-01 | 8.54E-01 | 1.00E+00 |
| ENSG00000272329.1_RP11-65L1  | ENSG00000160789.18_LMNA | -0.01971 | -0.17834659  | 0.13993431  | 8.10E-01 | 9.25E-01 | 1.00E+00 |
| ENSG00000237603.1_HMGB3P12   | ENSG00000160789.18_LMNA | 0.07902  | -0.081199114 | 0.23526407  | 3.33E-01 | 6.19E-01 | 1.00E+00 |
| ENSG00000275905.1_KB-1433G4  | ENSG00000160789.18_LMNA | 0.08534  | -0.07487789  | 0.241262972 | 2.96E-01 | 5.82E-01 | 1.00E+00 |
| ENSG00000157965.11_SSX8      | ENSG00000160789.18_LMNA | 0.04491  | -0.115114979 | 0.202660518 | 5.83E-01 | 8.06E-01 | 1.00E+00 |
| ENSG00000274133.1_RP11-163I1 | ENSG00000160789.18_LMNA | -0.0055  | -0.164553029 | 0.153839    | 9.46E-01 | 9.79E-01 | 1.00E+00 |

|                              |                         |          |              |             |          |          |          |
|------------------------------|-------------------------|----------|--------------|-------------|----------|----------|----------|
| ENSG00000251577.4_RP11-297P  | ENSG00000160789.18_LMNA | -0.04119 | -0.199081931 | 0.118793023 | 6.14E-01 | 8.25E-01 | 1.00E+00 |
| ENSG00000224000.1_RP3-471M1  | ENSG00000160789.18_LMNA | 0.05053  | -0.109553321 | 0.20805571  | 5.36E-01 | 7.77E-01 | 1.00E+00 |
| ENSG00000233751.1_AC104772.  | ENSG00000160789.18_LMNA | -0.1035  | -0.258438994 | 0.056637381 | 2.04E-01 | 4.76E-01 | 1.00E+00 |
| ENSG00000276098.1_CTD-2345H  | ENSG00000160789.18_LMNA | 0.02635  | -0.133409896 | 0.184776026 | 7.47E-01 | 8.94E-01 | 1.00E+00 |
| ENSG00000250357.1_RP11-503L  | ENSG00000160789.18_LMNA | 0.01693  | -0.142658452 | 0.175654037 | 8.36E-01 | 9.36E-01 | 1.00E+00 |
| ENSG00000248567.1_RP11-545L  | ENSG00000160789.18_LMNA | -0.08234 | -0.238416309 | 0.077880676 | 3.13E-01 | 6.00E-01 | 1.00E+00 |
| ENSG00000179626.3_OR6C4      | ENSG00000160789.18_LMNA | -0.04223 | -0.200084673 | 0.117763292 | 6.05E-01 | 8.19E-01 | 1.00E+00 |
| ENSG00000258108.1_RP11-1028I | ENSG00000160789.18_LMNA | 0.04     | -0.119965635 | 0.197939243 | 6.25E-01 | 8.31E-01 | 1.00E+00 |
| ENSG00000251296.1_AC006499.  | ENSG00000160789.18_LMNA | -0.04818 | -0.205800112 | 0.111880936 | 5.56E-01 | 7.90E-01 | 1.00E+00 |
| ENSG00000169214.3_OR6F1      | ENSG00000160789.18_LMNA | -0.00296 | -0.162088612 | 0.156310065 | 9.71E-01 | 9.89E-01 | 1.00E+00 |
| ENSG00000237565.3_SSU72P5    | ENSG00000160789.18_LMNA | 0.06823  | -0.091972704 | 0.224983961 | 4.04E-01 | 6.79E-01 | 1.00E+00 |
| ENSG00000249614.1_RP11-703G  | ENSG00000160789.18_LMNA | 0.08442  | -0.075803845 | 0.240385739 | 3.01E-01 | 5.88E-01 | 1.00E+00 |
| ENSG00000227282.1_RP11-164D  | ENSG00000160789.18_LMNA | -0.03626 | -0.194339578 | 0.123653775 | 6.57E-01 | 8.49E-01 | 1.00E+00 |
| ENSG00000197462.3_AC005276.  | ENSG00000160789.18_LMNA | 0.05379  | -0.106324717 | 0.211178839 | 5.10E-01 | 7.59E-01 | 1.00E+00 |
| ENSG00000262848.1_RP11-517A  | ENSG00000160789.18_LMNA | 0.09733  | -0.062842416 | 0.252618347 | 2.33E-01 | 5.11E-01 | 1.00E+00 |
| ENSG00000236932.2_CEACAMP3   | ENSG00000160789.18_LMNA | 0.01756  | -0.142042112 | 0.176263648 | 8.30E-01 | 9.34E-01 | 1.00E+00 |
| ENSG00000224955.1_KCTD10P1   | ENSG00000160789.18_LMNA | -0.02105 | -0.179646598 | 0.138617324 | 7.97E-01 | 9.18E-01 | 1.00E+00 |
| ENSG00000258989.1_RP11-47I22 | ENSG00000160789.18_LMNA | -0.03315 | -0.191337598 | 0.126722836 | 6.85E-01 | 8.63E-01 | 1.00E+00 |
| ENSG00000262011.1_AC003009.  | ENSG00000160789.18_LMNA | -0.0548  | -0.212150828 | 0.105318533 | 5.03E-01 | 7.54E-01 | 1.00E+00 |
| ENSG00000229701.1_MTND2P20   | ENSG00000160789.18_LMNA | -0.04174 | -0.19961761  | 0.118243011 | 6.10E-01 | 8.22E-01 | 1.00E+00 |
| ENSG00000259164.1_RP11-463C  | ENSG00000160789.18_LMNA | 0.11535  | -0.044675095 | 0.269596049 | 1.57E-01 | 4.09E-01 | 1.00E+00 |
| ENSG00000268797.1_CTC-490E2  | ENSG00000160789.18_LMNA | -0.03386 | -0.192021979 | 0.126023698 | 6.79E-01 | 8.60E-01 | 1.00E+00 |
| ENSG00000250884.1_OR7E85P    | ENSG00000160789.18_LMNA | -0.0639  | -0.2208504   | 0.096283873 | 4.34E-01 | 7.03E-01 | 1.00E+00 |
| ENSG00000225833.1_GS1-594A7  | ENSG00000160789.18_LMNA | -0.04908 | -0.206667631 | 0.110986132 | 5.48E-01 | 7.85E-01 | 1.00E+00 |
| ENSG00000248799.1_CTC-548H1  | ENSG00000160789.18_LMNA | -0.15345 | -0.305199204 | 0.005890056 | 5.91E-02 | 2.23E-01 | 1.00E+00 |
| ENSG00000254277.1_RP11-1144I | ENSG00000160789.18_LMNA | -0.20624 | -0.353820052 | -0.04863235 | 1.08E-02 | 6.92E-02 | 1.00E+00 |
| ENSG00000280412.1_AC114273.  | ENSG00000160789.18_LMNA | -0.07428 | -0.230751815 | 0.085937096 | 3.63E-01 | 6.45E-01 | 1.00E+00 |
| ENSG00000239689.1_RPL17P46   | ENSG00000160789.18_LMNA | 0.07566  | -0.084556446 | 0.232068096 | 3.54E-01 | 6.38E-01 | 1.00E+00 |
| ENSG00000227729.3_RD3L       | ENSG00000160789.18_LMNA | -0.08487 | -0.240817132 | 0.07534856  | 2.99E-01 | 5.85E-01 | 1.00E+00 |
| ENSG00000240792.1_RP11-418B  | ENSG00000160789.18_LMNA | -0.07792 | -0.234218322 | 0.082298451 | 3.40E-01 | 6.25E-01 | 1.00E+00 |
| ENSG00000203933.2_CXorf66    | ENSG00000160789.18_LMNA | -0.02916 | -0.187486194 | 0.130651405 | 7.21E-01 | 8.82E-01 | 1.00E+00 |
| ENSG00000258878.1_CTD-2509C  | ENSG00000160789.18_LMNA | 0.04842  | -0.111639859 | 0.206033887 | 5.54E-01 | 7.88E-01 | 1.00E+00 |
| ENSG00000231061.1_LINC00395  | ENSG00000160789.18_LMNA | 0.03396  | -0.125922539 | 0.192120977 | 6.78E-01 | 8.59E-01 | 1.00E+00 |

|                              |                         |          |              |             |          |          |          |
|------------------------------|-------------------------|----------|--------------|-------------|----------|----------|----------|
| ENSG00000216444.1_RAET1M     | ENSG00000160789.18_LMNA | -0.01448 | -0.17328324  | 0.145053077 | 8.59E-01 | 9.45E-01 | 1.00E+00 |
| ENSG00000227306.1_AP006285.6 | ENSG00000160789.18_LMNA | 0.04235  | -0.117642317 | 0.200202434 | 6.04E-01 | 8.18E-01 | 1.00E+00 |
| ENSG00000181803.3_OR6S1      | ENSG00000160789.18_LMNA | -0.03668 | -0.194741601 | 0.123242307 | 6.54E-01 | 8.47E-01 | 1.00E+00 |
| ENSG00000233537.1_TEDDM2P    | ENSG00000160789.18_LMNA | 0.21257  | 0.055235643  | 0.359598706 | 8.56E-03 | 5.85E-02 | 1.00E+00 |
| ENSG00000251081.1_RP11-713M  | ENSG00000160789.18_LMNA | 0.03113  | -0.128708242 | 0.189392413 | 7.03E-01 | 8.73E-01 | 1.00E+00 |
| ENSG00000241870.1_CTB-14A14  | ENSG00000160789.18_LMNA | -0.15754 | -0.308992722 | 0.001701585 | 5.26E-02 | 2.08E-01 | 1.00E+00 |
| ENSG00000271190.1_RPP40P2    | ENSG00000160789.18_LMNA | 0.00804  | -0.151356988 | 0.167024368 | 9.22E-01 | 9.70E-01 | 1.00E+00 |
| ENSG00000226716.1_AL589986.2 | ENSG00000160789.18_LMNA | 0.12808  | -0.031772338 | 0.281536421 | 1.16E-01 | 3.40E-01 | 1.00E+00 |
| ENSG00000273569.1_CTC-320C6  | ENSG00000160789.18_LMNA | 0.07159  | -0.088621616 | 0.228189132 | 3.81E-01 | 6.60E-01 | 1.00E+00 |
| ENSG00000248639.2_RP11-642E  | ENSG00000160789.18_LMNA | -0.06921 | -0.225921166 | 0.090993574 | 3.97E-01 | 6.74E-01 | 1.00E+00 |
| ENSG00000248935.1_CTD-2254N  | ENSG00000160789.18_LMNA | -0.18127 | -0.330918756 | -0.02272272 | 2.54E-02 | 1.28E-01 | 1.00E+00 |
| ENSG00000180205.3_WFDC9      | ENSG00000160789.18_LMNA | -0.07683 | -0.233175    | 0.08339447  | 3.47E-01 | 6.31E-01 | 1.00E+00 |
| ENSG00000227592.1_PIGFP3     | ENSG00000160789.18_LMNA | -0.01924 | -0.177898266 | 0.140388228 | 8.14E-01 | 9.27E-01 | 1.00E+00 |
| ENSG00000248162.1_RP11-294O  | ENSG00000160789.18_LMNA | -0.02151 | -0.180094558 | 0.138163252 | 7.93E-01 | 9.16E-01 | 1.00E+00 |
| ENSG00000240562.1_RP11-59J1I | ENSG00000160789.18_LMNA | -0.06818 | -0.224939908 | 0.092018712 | 4.04E-01 | 6.80E-01 | 1.00E+00 |
| ENSG00000233124.1_LINC00456  | ENSG00000160789.18_LMNA | -0.03945 | -0.197410416 | 0.12050801  | 6.29E-01 | 8.33E-01 | 1.00E+00 |
| ENSG00000263505.1_RP11-78F1  | ENSG00000160789.18_LMNA | 0.05312  | -0.106982074 | 0.210543481 | 5.16E-01 | 7.63E-01 | 1.00E+00 |
| ENSG00000254715.3_OR7E154P   | ENSG00000160789.18_LMNA | 0.05903  | -0.101120604 | 0.216199327 | 4.70E-01 | 7.30E-01 | 1.00E+00 |
| ENSG00000259168.1_RP11-100M  | ENSG00000160789.18_LMNA | 0.19262  | 0.034474955  | 0.341351638 | 1.74E-02 | 9.77E-02 | 1.00E+00 |
| ENSG00000223917.1_AC009237.1 | ENSG00000160789.18_LMNA | -0.05829 | -0.215488174 | 0.101858824 | 4.76E-01 | 7.34E-01 | 1.00E+00 |
| ENSG00000180926.6_OR7E18P    | ENSG00000160789.18_LMNA | 0.11986  | -0.040106735 | 0.273834745 | 1.41E-01 | 3.84E-01 | 1.00E+00 |
| ENSG00000232522.1_ZNF886P    | ENSG00000160789.18_LMNA | -0.10927 | -0.263880649 | 0.050814268 | 1.80E-01 | 4.43E-01 | 1.00E+00 |
| ENSG00000233333.2_RNFT1P2    | ENSG00000160789.18_LMNA | 0.08508  | -0.075139912 | 0.24101479  | 2.97E-01 | 5.83E-01 | 1.00E+00 |
| ENSG00000226663.2_MTND4P10   | ENSG00000160789.18_LMNA | 0.03619  | -0.123722812 | 0.194272116 | 6.58E-01 | 8.49E-01 | 1.00E+00 |
| ENSG00000230248.1_RP1-128O3  | ENSG00000160789.18_LMNA | 0.01523  | -0.144322818 | 0.174006624 | 8.52E-01 | 9.42E-01 | 1.00E+00 |
| ENSG00000237269.1_RBMV2TP    | ENSG00000160789.18_LMNA | 0.02151  | -0.138160879 | 0.180096899 | 7.92E-01 | 9.16E-01 | 1.00E+00 |
| ENSG00000254724.1_OR7E10P    | ENSG00000160789.18_LMNA | 0.20632  | 0.048719418  | 0.353896395 | 1.08E-02 | 6.91E-02 | 1.00E+00 |
| ENSG00000249681.2_KRT19P3    | ENSG00000160789.18_LMNA | 0.02784  | -0.131944739 | 0.18621612  | 7.33E-01 | 8.88E-01 | 1.00E+00 |
| ENSG00000234503.1_KB-1592A4  | ENSG00000160789.18_LMNA | -0.04808 | -0.20570357  | 0.111980483 | 5.56E-01 | 7.90E-01 | 1.00E+00 |
| ENSG00000231183.3_AC007003.1 | ENSG00000160789.18_LMNA | -0.07476 | -0.231209117 | 0.085457569 | 3.60E-01 | 6.42E-01 | 1.00E+00 |
| ENSG00000184394.1_OR4N5      | ENSG00000160789.18_LMNA | -0.03702 | -0.19506676  | 0.122909428 | 6.51E-01 | 8.45E-01 | 1.00E+00 |
| ENSG00000188691.5_OR56A5     | ENSG00000160789.18_LMNA | 0.03567  | -0.124240086 | 0.193766542 | 6.63E-01 | 8.51E-01 | 1.00E+00 |
| ENSG00000242834.1_RPL7AP56   | ENSG00000160789.18_LMNA | 0.11651  | -0.043495107 | 0.270692054 | 1.53E-01 | 4.03E-01 | 1.00E+00 |



|                              |                         |          |              |             |          |          |          |
|------------------------------|-------------------------|----------|--------------|-------------|----------|----------|----------|
| ENSG00000278499.2_RP11-457D  | ENSG00000160789.18_LMNA | 0.12945  | -0.030377859 | 0.282821105 | 1.12E-01 | 3.34E-01 | 1.00E+00 |
| ENSG00000254043.1_RP11-3N13  | ENSG00000160789.18_LMNA | 0.0244   | -0.135330132 | 0.182886568 | 7.65E-01 | 9.03E-01 | 1.00E+00 |
| ENSG00000250801.1_RP11-91H1  | ENSG00000160789.18_LMNA | 0.05851  | -0.101638965 | 0.215700007 | 4.74E-01 | 7.34E-01 | 1.00E+00 |
| ENSG00000203757.1_OR6K3      | ENSG00000160789.18_LMNA | -0.05502 | -0.212357176 | 0.105104841 | 5.01E-01 | 7.53E-01 | 1.00E+00 |
| ENSG00000241667.1_RP11-444P  | ENSG00000160789.18_LMNA | -0.02272 | -0.181269085 | 0.136972066 | 7.81E-01 | 9.10E-01 | 1.00E+00 |
| ENSG00000224547.1_ZNF619P1   | ENSG00000160789.18_LMNA | 0.10199  | -0.058158537 | 0.257014184 | 2.11E-01 | 4.85E-01 | 1.00E+00 |
| ENSG00000278889.2_OR2S2      | ENSG00000160789.18_LMNA | 0.07012  | -0.090087962 | 0.226787479 | 3.91E-01 | 6.69E-01 | 1.00E+00 |
| ENSG00000248745.2_NMNAT1P4   | ENSG00000160789.18_LMNA | 0.09326  | -0.066938371 | 0.248763576 | 2.53E-01 | 5.35E-01 | 1.00E+00 |
| ENSG00000225341.1_AC013269.4 | ENSG00000160789.18_LMNA | -0.02659 | -0.185007631 | 0.133174354 | 7.45E-01 | 8.93E-01 | 1.00E+00 |
| ENSG00000228209.1_AC073091.1 | ENSG00000160789.18_LMNA | 0.03986  | -0.120104971 | 0.197803406 | 6.26E-01 | 8.31E-01 | 1.00E+00 |
| ENSG00000248847.2_RP11-26C1  | ENSG00000160789.18_LMNA | -0.14345 | -0.295889799 | 0.016122634 | 7.79E-02 | 2.68E-01 | 1.00E+00 |
| ENSG00000229079.1_CR848007.1 | ENSG00000160789.18_LMNA | 0.06442  | -0.095760238 | 0.221353071 | 4.30E-01 | 7.00E-01 | 1.00E+00 |
| ENSG00000253580.1_RP11-790J  | ENSG00000160789.18_LMNA | 0.06381  | -0.096368442 | 0.2207692   | 4.35E-01 | 7.03E-01 | 1.00E+00 |
| ENSG00000254749.1_OR5BD1P    | ENSG00000160789.18_LMNA | 0.02401  | -0.135705739 | 0.182516706 | 7.69E-01 | 9.04E-01 | 1.00E+00 |
| ENSG00000236246.1_FAM166AP   | ENSG00000160789.18_LMNA | 0.03883  | -0.121123806 | 0.196809779 | 6.35E-01 | 8.36E-01 | 1.00E+00 |
| ENSG00000186508.4_OR9I2P     | ENSG00000160789.18_LMNA | 0.00757  | -0.151818183 | 0.166565459 | 9.26E-01 | 9.72E-01 | 1.00E+00 |
| ENSG00000204279.6_PAGE3      | ENSG00000160789.18_LMNA | -0.18654 | -0.335771802 | -0.02817891 | 2.14E-02 | 1.13E-01 | 1.00E+00 |
| ENSG00000267241.2_CYP4F10P   | ENSG00000160789.18_LMNA | -0.06894 | -0.225666588 | 0.091259601 | 3.99E-01 | 6.75E-01 | 1.00E+00 |
| ENSG00000212935.1_KRTAP10-3  | ENSG00000160789.18_LMNA | -0.05995 | -0.217080863 | 0.100205029 | 4.63E-01 | 7.26E-01 | 1.00E+00 |
| ENSG00000281347.1_NF1P9      | ENSG00000160789.18_LMNA | 0.00424  | -0.155060494 | 0.163335318 | 9.59E-01 | 9.83E-01 | 1.00E+00 |
| ENSG00000251542.1_CTC-313D1  | ENSG00000160789.18_LMNA | 0.12613  | -0.033744143 | 0.279717948 | 1.22E-01 | 3.51E-01 | 1.00E+00 |
| ENSG00000227737.2_OR8B1P     | ENSG00000160789.18_LMNA | -0.02287 | -0.181413798 | 0.136825236 | 7.80E-01 | 9.10E-01 | 1.00E+00 |
| ENSG00000236791.2_OR2AI1P    | ENSG00000160789.18_LMNA | 0.09141  | -0.068794204 | 0.247013722 | 2.63E-01 | 5.46E-01 | 1.00E+00 |
| ENSG00000270852.1_RP11-355I2 | ENSG00000160789.18_LMNA | -0.08248 | -0.238547086 | 0.077742852 | 3.12E-01 | 5.99E-01 | 1.00E+00 |
| ENSG00000258220.1_RP11-38F2  | ENSG00000160789.18_LMNA | -0.06248 | -0.219501377 | 0.097688289 | 4.44E-01 | 7.12E-01 | 1.00E+00 |
| ENSG00000261249.1_RP11-19D2  | ENSG00000160789.18_LMNA | -0.21043 | -0.357650782 | -0.05300676 | 9.26E-03 | 6.20E-02 | 1.00E+00 |
| ENSG00000184933.4_OR6A2      | ENSG00000160789.18_LMNA | 0.07886  | -0.081360892 | 0.235110224 | 3.34E-01 | 6.20E-01 | 1.00E+00 |
| ENSG00000255347.1_RP11-40H1  | ENSG00000160789.18_LMNA | -0.1275  | -0.280994539 | 0.032360166 | 1.18E-01 | 3.43E-01 | 1.00E+00 |
| ENSG00000179919.3_OR10A7     | ENSG00000160789.18_LMNA | -0.11129 | -0.265784048 | 0.048772378 | 1.72E-01 | 4.31E-01 | 1.00E+00 |
| ENSG00000181009.4_OR52N5     | ENSG00000160789.18_LMNA | -0.10594 | -0.260741658 | 0.054175915 | 1.94E-01 | 4.63E-01 | 1.00E+00 |
| ENSG00000257879.1_RP11-90C1  | ENSG00000160789.18_LMNA | 0.03927  | -0.120688415 | 0.197234477 | 6.31E-01 | 8.34E-01 | 1.00E+00 |
| ENSG00000242770.2_RP11-180K  | ENSG00000160789.18_LMNA | -0.04904 | -0.20662946  | 0.111025514 | 5.49E-01 | 7.85E-01 | 1.00E+00 |
| ENSG00000263748.1_EXOGP1     | ENSG00000160789.18_LMNA | 0.00817  | -0.151230526 | 0.16715018  | 9.20E-01 | 9.70E-01 | 1.00E+00 |

|                              |                         |          |              |             |          |          |          |
|------------------------------|-------------------------|----------|--------------|-------------|----------|----------|----------|
| ENSG00000238223.1_RP6-204F4  | ENSG00000160789.18_LMNA | -0.04322 | -0.201041499 | 0.116780074 | 5.97E-01 | 8.14E-01 | 1.00E+00 |
| ENSG00000218732.1_RP5-1046G  | ENSG00000160789.18_LMNA | -0.0267  | -0.185118541 | 0.133061547 | 7.44E-01 | 8.93E-01 | 1.00E+00 |
| ENSG00000271356.1_RP11-335E  | ENSG00000160789.18_LMNA | -0.07376 | -0.230253987 | 0.086458953 | 3.66E-01 | 6.47E-01 | 1.00E+00 |
| ENSG00000255069.1_           | ENSG00000160789.18_LMNA | 0.0191   | -0.140525835 | 0.17776233  | 8.15E-01 | 9.28E-01 | 1.00E+00 |
| ENSG00000230531.1_MTND5P7    | ENSG00000160789.18_LMNA | 0.01983  | -0.139810328 | 0.178469021 | 8.08E-01 | 9.24E-01 | 1.00E+00 |
| ENSG00000231390.1_SNX18P8    | ENSG00000160789.18_LMNA | 0.0026   | -0.156666291 | 0.161733016 | 9.75E-01 | 9.90E-01 | 1.00E+00 |
| ENSG00000233446.2_XXyac-YR1  | ENSG00000160789.18_LMNA | 0.12355  | -0.036369162 | 0.27729356  | 1.29E-01 | 3.65E-01 | 1.00E+00 |
| ENSG00000260094.1_LINC00564  | ENSG00000160789.18_LMNA | 0.10453  | -0.055592456 | 0.259416943 | 2.00E-01 | 4.70E-01 | 1.00E+00 |
| ENSG00000233316.3_DSCR10     | ENSG00000160789.18_LMNA | -0.02852 | -0.186874554 | 0.131274382 | 7.27E-01 | 8.85E-01 | 1.00E+00 |
| ENSG00000228984.3_RP11-101E  | ENSG00000160789.18_LMNA | 0.02468  | -0.135049934 | 0.183162422 | 7.63E-01 | 9.01E-01 | 1.00E+00 |
| ENSG00000249531.2_RP11-642E  | ENSG00000160789.18_LMNA | 0.0143   | -0.145227906 | 0.173110006 | 8.61E-01 | 9.46E-01 | 1.00E+00 |
| ENSG00000278566.1_OR4F29     | ENSG00000160789.18_LMNA | 0.03956  | -0.120403103 | 0.197512718 | 6.28E-01 | 8.33E-01 | 1.00E+00 |
| ENSG00000182634.7_OR10G7     | ENSG00000160789.18_LMNA | 0.08157  | -0.078652314 | 0.237683912 | 3.18E-01 | 6.04E-01 | 1.00E+00 |
| ENSG00000235778.1_AC130360.1 | ENSG00000160789.18_LMNA | -0.02584 | -0.184279405 | 0.133914839 | 7.52E-01 | 8.97E-01 | 1.00E+00 |
| ENSG00000227874.1_GRAMD4P    | ENSG00000160789.18_LMNA | 0.00271  | -0.15656143  | 0.1618377   | 9.74E-01 | 9.90E-01 | 1.00E+00 |
| ENSG00000250566.1_UGT2B29P   | ENSG00000160789.18_LMNA | 0.06122  | -0.098947848 | 0.218290465 | 4.54E-01 | 7.19E-01 | 1.00E+00 |
| ENSG00000249501.1_USP9YP2    | ENSG00000160789.18_LMNA | -0.00936 | -0.168312775 | 0.150061424 | 9.09E-01 | 9.65E-01 | 1.00E+00 |
| ENSG00000235056.1_AC010983.1 | ENSG00000160789.18_LMNA | 0.06601  | -0.094177541 | 0.22287138  | 4.19E-01 | 6.91E-01 | 1.00E+00 |
| ENSG00000175619.2_OR4B1      | ENSG00000160789.18_LMNA | 0.07538  | -0.084836933 | 0.23180078  | 3.56E-01 | 6.39E-01 | 1.00E+00 |
| ENSG00000180913.3_OR56B3P    | ENSG00000160789.18_LMNA | 0.00461  | -0.154705397 | 0.163689416 | 9.55E-01 | 9.82E-01 | 1.00E+00 |
| ENSG00000197468.5_RP11-747H  | ENSG00000160789.18_LMNA | -0.07041 | -0.227069693 | 0.089792833 | 3.89E-01 | 6.67E-01 | 1.00E+00 |
| ENSG00000226870.2_RP11-402P  | ENSG00000160789.18_LMNA | 0.00893  | -0.150489426 | 0.167887257 | 9.13E-01 | 9.67E-01 | 1.00E+00 |
| ENSG00000184033.11_CTAG1B    | ENSG00000160789.18_LMNA | 0.10131  | -0.058842703 | 0.256372904 | 2.14E-01 | 4.88E-01 | 1.00E+00 |
| ENSG00000255413.1_RP11-436P  | ENSG00000160789.18_LMNA | 0.07517  | -0.085044913 | 0.231602535 | 3.57E-01 | 6.40E-01 | 1.00E+00 |
| ENSG00000272897.4_RP1-309K2  | ENSG00000160789.18_LMNA | 0.01713  | -0.142463134 | 0.175847249 | 8.34E-01 | 9.36E-01 | 1.00E+00 |
| ENSG00000174957.1_OR5J2      | ENSG00000160789.18_LMNA | -0.22656 | -0.372329721 | -0.06987797 | 5.00E-03 | 3.93E-02 | 1.00E+00 |
| ENSG00000231291.3_RP11-445O  | ENSG00000160789.18_LMNA | -0.09888 | -0.254077848 | 0.06128882  | 2.26E-01 | 5.02E-01 | 1.00E+00 |
| ENSG00000238212.2_AC005863.1 | ENSG00000160789.18_LMNA | -0.00266 | -0.161789218 | 0.156609995 | 9.74E-01 | 9.90E-01 | 1.00E+00 |
| ENSG00000275768.1_SLC2AXP1   | ENSG00000160789.18_LMNA | -0.10879 | -0.263428226 | 0.051299223 | 1.82E-01 | 4.46E-01 | 1.00E+00 |
| ENSG00000213215.3_OR2F1      | ENSG00000160789.18_LMNA | 0.11634  | -0.043669622 | 0.270530012 | 1.53E-01 | 4.04E-01 | 1.00E+00 |
| ENSG00000273894.1_SLC20A1P2  | ENSG00000160789.18_LMNA | 0.1249   | -0.034992176 | 0.278565801 | 1.25E-01 | 3.58E-01 | 1.00E+00 |
| ENSG00000170923.2_OR7G2      | ENSG00000160789.18_LMNA | -0.01675 | -0.175478293 | 0.142836091 | 8.38E-01 | 9.37E-01 | 1.00E+00 |
| ENSG00000232791.3_OR1111P    | ENSG00000160789.18_LMNA | -0.0693  | -0.226008835 | 0.090901951 | 3.96E-01 | 6.73E-01 | 1.00E+00 |

|                              |                         |          |              |             |          |          |          |
|------------------------------|-------------------------|----------|--------------|-------------|----------|----------|----------|
| ENSG00000249213.1_RP11-98P2  | ENSG00000160789.18_LMNA | -0.1289  | -0.282309521 | 0.030933311 | 1.13E-01 | 3.36E-01 | 1.00E+00 |
| ENSG00000273520.3_SPDYE8P    | ENSG00000160789.18_LMNA | 0.09154  | -0.068664234 | 0.247136337 | 2.62E-01 | 5.45E-01 | 1.00E+00 |
| ENSG00000174339.2_OR2Y1      | ENSG00000160789.18_LMNA | 0.01558  | -0.143979101 | 0.174346986 | 8.49E-01 | 9.41E-01 | 1.00E+00 |
| ENSG00000236718.3_RBMY2QP    | ENSG00000160789.18_LMNA | 0.11976  | -0.040210924 | 0.273738211 | 1.42E-01 | 3.84E-01 | 1.00E+00 |
| ENSG00000243627.4_AP000322.1 | ENSG00000160789.18_LMNA | -0.06907 | -0.225792066 | 0.091128486 | 3.98E-01 | 6.75E-01 | 1.00E+00 |
| ENSG00000270971.2_REXO1L8P   | ENSG00000160789.18_LMNA | 0.01886  | -0.140765803 | 0.177525244 | 8.18E-01 | 9.29E-01 | 1.00E+00 |
| ENSG00000271890.1_OR10AE1P   | ENSG00000160789.18_LMNA | 0.13388  | -0.025876302 | 0.286960577 | 1.00E-01 | 3.12E-01 | 1.00E+00 |
| ENSG00000236125.3_USP17L4    | ENSG00000160789.18_LMNA | 0.06944  | -0.090768325 | 0.226136687 | 3.95E-01 | 6.73E-01 | 1.00E+00 |
| ENSG00000266003.1_RP11-267C  | ENSG00000160789.18_LMNA | -0.05025 | -0.207790102 | 0.10982759  | 5.39E-01 | 7.79E-01 | 1.00E+00 |
| ENSG00000254118.1_MTCYBP20   | ENSG00000160789.18_LMNA | 0.01156  | -0.14791497  | 0.170444978 | 8.88E-01 | 9.56E-01 | 1.00E+00 |
| ENSG00000229090.2_RP1-232L2  | ENSG00000160789.18_LMNA | 0.06268  | -0.097496903 | 0.219685285 | 4.43E-01 | 7.10E-01 | 1.00E+00 |
| ENSG00000176774.5_MAGEB18    | ENSG00000160789.18_LMNA | 0.01735  | -0.142240403 | 0.176067548 | 8.32E-01 | 9.35E-01 | 1.00E+00 |
| ENSG00000280837.1_CPS1-IT1   | ENSG00000160789.18_LMNA | -0.02258 | -0.181126144 | 0.137117083 | 7.82E-01 | 9.11E-01 | 1.00E+00 |
| ENSG00000214930.2_KRT8P6     | ENSG00000160789.18_LMNA | 0.01592  | -0.143642674 | 0.174680056 | 8.46E-01 | 9.40E-01 | 1.00E+00 |
| ENSG00000280372.1_bP-21201H  | ENSG00000160789.18_LMNA | 0.16966  | 0.010753917  | 0.320215618 | 3.66E-02 | 1.63E-01 | 1.00E+00 |
| ENSG00000226042.1_CDY10P     | ENSG00000160789.18_LMNA | 0.05091  | -0.109177682 | 0.208419411 | 5.33E-01 | 7.75E-01 | 1.00E+00 |
| ENSG00000267779.4_LINC01533  | ENSG00000160789.18_LMNA | -0.08276 | -0.238812374 | 0.077463233 | 3.11E-01 | 5.97E-01 | 1.00E+00 |
| ENSG00000259029.1_DUX4L18    | ENSG00000160789.18_LMNA | 0.0776   | -0.082619353 | 0.233912925 | 3.42E-01 | 6.27E-01 | 1.00E+00 |
| ENSG00000228945.3_CLUHP2     | ENSG00000160789.18_LMNA | 0.05913  | -0.101024348 | 0.216292029 | 4.69E-01 | 7.30E-01 | 1.00E+00 |
| ENSG00000280058.1_RP1-131F1  | ENSG00000160789.18_LMNA | -0.01504 | -0.173825351 | 0.144505847 | 8.54E-01 | 9.43E-01 | 1.00E+00 |
| ENSG00000261666.1_LINC00560  | ENSG00000160789.18_LMNA | -0.071   | -0.227629184 | 0.089207573 | 3.85E-01 | 6.63E-01 | 1.00E+00 |
| ENSG00000253219.1_KRT18P41   | ENSG00000160789.18_LMNA | -0.02953 | -0.187847806 | 0.130282972 | 7.18E-01 | 8.80E-01 | 1.00E+00 |
| ENSG00000225672.1_CCNT2P1    | ENSG00000160789.18_LMNA | -0.06286 | -0.219859652 | 0.097315425 | 4.42E-01 | 7.09E-01 | 1.00E+00 |
| ENSG00000228689.6_RP3-335N1  | ENSG00000160789.18_LMNA | 0.05014  | -0.109942127 | 0.207679169 | 5.40E-01 | 7.79E-01 | 1.00E+00 |
| ENSG00000254334.1_RP11-24P4  | ENSG00000160789.18_LMNA | 0.00125  | -0.157979862 | 0.160421055 | 9.88E-01 | 9.95E-01 | 1.00E+00 |
| ENSG00000214891.7_TRIM64C    | ENSG00000160789.18_LMNA | -0.12237 | -0.276186909 | 0.037565957 | 1.33E-01 | 3.70E-01 | 1.00E+00 |
| ENSG00000232235.1_CDY3P      | ENSG00000160789.18_LMNA | -0.14993 | -0.301925696 | 0.009495625 | 6.52E-02 | 2.38E-01 | 1.00E+00 |
| ENSG00000231009.1_CUBNP1     | ENSG00000160789.18_LMNA | -0.09114 | -0.24676133  | 0.069061702 | 2.64E-01 | 5.48E-01 | 1.00E+00 |
| ENSG00000227264.3_ACTR3BP5   | ENSG00000160789.18_LMNA | -0.04108 | -0.198976504 | 0.118901249 | 6.15E-01 | 8.26E-01 | 1.00E+00 |
| ENSG00000230324.1_RP4-705O1  | ENSG00000160789.18_LMNA | 0.02917  | -0.130635651 | 0.187501658 | 7.21E-01 | 8.82E-01 | 1.00E+00 |
| ENSG00000261398.1_RP11-244B  | ENSG00000160789.18_LMNA | -0.05051 | -0.208034391 | 0.109575337 | 5.37E-01 | 7.77E-01 | 1.00E+00 |
| ENSG00000214324.4_C3orf56    | ENSG00000160789.18_LMNA | -0.19409 | -0.342702071 | -0.0360024  | 1.66E-02 | 9.43E-02 | 1.00E+00 |
| ENSG00000251113.2_RP11-68D1  | ENSG00000160789.18_LMNA | 0.21018  | 0.052745385  | 0.357422176 | 9.35E-03 | 6.24E-02 | 1.00E+00 |

|                              |                         |          |              |             |          |          |          |
|------------------------------|-------------------------|----------|--------------|-------------|----------|----------|----------|
| ENSG00000185069.2_KRT76      | ENSG00000160789.18_LMNA | -0.04708 | -0.204742898 | 0.112970706 | 5.65E-01 | 7.95E-01 | 1.00E+00 |
| ENSG00000135220.9_UGT2A3     | ENSG00000160789.18_LMNA | -0.05783 | -0.215053526 | 0.102309844 | 4.79E-01 | 7.37E-01 | 1.00E+00 |
| ENSG00000267134.1_RP11-146N  | ENSG00000160789.18_LMNA | 0.13015  | -0.029663555 | 0.283478734 | 1.10E-01 | 3.30E-01 | 1.00E+00 |
| ENSG00000248139.2_CUL4AP1    | ENSG00000160789.18_LMNA | 0.18881  | 0.030531777  | 0.337859546 | 1.98E-02 | 1.07E-01 | 1.00E+00 |
| ENSG00000187733.6_AMY1C      | ENSG00000160789.18_LMNA | -0.01372 | -0.172545448 | 0.145797525 | 8.67E-01 | 9.48E-01 | 1.00E+00 |
| ENSG00000260311.1_RP11-586K  | ENSG00000160789.18_LMNA | 0.0797   | -0.080523132 | 0.235906737 | 3.29E-01 | 6.15E-01 | 1.00E+00 |
| ENSG00000275553.1_TCEB3CL    | ENSG00000160789.18_LMNA | -0.0412  | -0.199092904 | 0.118781759 | 6.14E-01 | 8.25E-01 | 1.00E+00 |
| ENSG00000278593.1_RP13-977E  | ENSG00000160789.18_LMNA | 0.18201  | 0.023489567  | 0.331601821 | 2.48E-02 | 1.26E-01 | 1.00E+00 |
| ENSG00000112115.5_IL17A      | ENSG00000160789.18_LMNA | -0.09052 | -0.246174623 | 0.069683348 | 2.67E-01 | 5.51E-01 | 1.00E+00 |
| ENSG00000250017.1_RP11-484L  | ENSG00000160789.18_LMNA | -0.05307 | -0.210494891 | 0.107032335 | 5.16E-01 | 7.63E-01 | 1.00E+00 |
| ENSG00000226484.2_RP11-87M1  | ENSG00000160789.18_LMNA | 0.15018  | -0.009237464 | 0.302160326 | 6.48E-02 | 2.37E-01 | 1.00E+00 |
| ENSG00000277870.3_FAM230A    | ENSG00000160789.18_LMNA | -0.04711 | -0.204770248 | 0.112942524 | 5.64E-01 | 7.95E-01 | 1.00E+00 |
| ENSG00000268235.5_TCP11X1    | ENSG00000160789.18_LMNA | 0.02184  | -0.137837804 | 0.180415545 | 7.89E-01 | 9.14E-01 | 1.00E+00 |
| ENSG00000245482.2_RP11-847H  | ENSG00000160789.18_LMNA | -0.03449 | -0.192631024 | 0.125401254 | 6.73E-01 | 8.57E-01 | 1.00E+00 |
| ENSG00000166007.11_TRIM51HF  | ENSG00000160789.18_LMNA | -0.17472 | -0.324879278 | -0.01595818 | 3.13E-02 | 1.48E-01 | 1.00E+00 |
| ENSG00000276467.1_RP1-272E8  | ENSG00000160789.18_LMNA | -0.15355 | -0.305288301 | 0.005791808 | 5.89E-02 | 2.23E-01 | 1.00E+00 |
| ENSG00000234931.1_MARK2P15   | ENSG00000160789.18_LMNA | -0.04793 | -0.205561515 | 0.112126947 | 5.58E-01 | 7.91E-01 | 1.00E+00 |
| ENSG00000224504.2_RP11-475D  | ENSG00000160789.18_LMNA | 0.14888  | -0.010566792 | 0.300951763 | 6.72E-02 | 2.43E-01 | 1.00E+00 |
| ENSG00000236951.4_AC007359.1 | ENSG00000160789.18_LMNA | -0.06711 | -0.223916385 | 0.093087289 | 4.11E-01 | 6.85E-01 | 1.00E+00 |
| ENSG00000215343.6_ZNF705D    | ENSG00000160789.18_LMNA | 0.05482  | -0.105303486 | 0.212165359 | 5.02E-01 | 7.54E-01 | 1.00E+00 |
| ENSG00000255540.1_RP11-313I2 | ENSG00000160789.18_LMNA | -0.08848 | -0.244237511 | 0.071734078 | 2.78E-01 | 5.64E-01 | 1.00E+00 |
| ENSG00000261517.1_LINC00558  | ENSG00000160789.18_LMNA | -0.01322 | -0.172061894 | 0.146285245 | 8.72E-01 | 9.50E-01 | 1.00E+00 |
| ENSG00000242153.6_OFD1P6Y    | ENSG00000160789.18_LMNA | 0.10394  | -0.056195262 | 0.258852854 | 2.03E-01 | 4.73E-01 | 1.00E+00 |
| ENSG00000254818.1_RP11-529A  | ENSG00000160789.18_LMNA | 0.0187   | -0.140918763 | 0.177374103 | 8.19E-01 | 9.30E-01 | 1.00E+00 |
| ENSG00000207990.2_MIR182     | ENSG00000160789.18_LMNA | 0.00095  | -0.158270028 | 0.160131093 | 9.91E-01 | 9.96E-01 | 1.00E+00 |
| ENSG00000224366.1_AC138472.4 | ENSG00000160789.18_LMNA | -0.02471 | -0.183191137 | 0.135020764 | 7.63E-01 | 9.01E-01 | 1.00E+00 |
| ENSG00000280581.1_           | ENSG00000160789.18_LMNA | 0.04775  | -0.112299974 | 0.20539368  | 5.59E-01 | 7.92E-01 | 1.00E+00 |
| ENSG00000265164.1_MIR2681    | ENSG00000160789.18_LMNA | -0.14756 | -0.299724322 | 0.011915759 | 6.96E-02 | 2.49E-01 | 1.00E+00 |
| ENSG00000278813.1_AC006133.1 | ENSG00000160789.18_LMNA | -0.06573 | -0.222601816 | 0.094458654 | 4.21E-01 | 6.93E-01 | 1.00E+00 |
| ENSG00000266180.1_MIR4282    | ENSG00000160789.18_LMNA | -0.20779 | -0.355240859 | -0.05025345 | 1.02E-02 | 6.65E-02 | 1.00E+00 |
| ENSG00000235811.1_RP11-510N  | ENSG00000160789.18_LMNA | 0.11352  | -0.04652163  | 0.267879302 | 1.64E-01 | 4.19E-01 | 1.00E+00 |
| ENSG00000264482.1_MIR4705    | ENSG00000160789.18_LMNA | -0.10621 | -0.260993525 | 0.053906445 | 1.93E-01 | 4.61E-01 | 1.00E+00 |
| ENSG00000216191.1_MIR8485    | ENSG00000160789.18_LMNA | -0.1182  | -0.272276897 | 0.041787272 | 1.47E-01 | 3.93E-01 | 1.00E+00 |

|                             |                         |          |              |             |          |          |          |
|-----------------------------|-------------------------|----------|--------------|-------------|----------|----------|----------|
| ENSG00000266168.1_MIR3147   | ENSG00000160789.18_LMNA | -0.02491 | -0.183384997 | 0.134823816 | 7.61E-01 | 9.00E-01 | 1.00E+00 |
| ENSG00000221506.1_          | ENSG00000160789.18_LMNA | 0.08827  | -0.071941093 | 0.244041824 | 2.80E-01 | 5.65E-01 | 1.00E+00 |
| ENSG00000264158.1_MIR4670   | ENSG00000160789.18_LMNA | 0.02736  | -0.132416721 | 0.185752361 | 7.38E-01 | 8.90E-01 | 1.00E+00 |
| ENSG00000201690.1_RNY1P2    | ENSG00000160789.18_LMNA | -0.03642 | -0.194491028 | 0.12349878  | 6.56E-01 | 8.48E-01 | 1.00E+00 |
| ENSG00000221594.1_MIR548F1  | ENSG00000160789.18_LMNA | -0.04079 | -0.198704748 | 0.119180182 | 6.18E-01 | 8.27E-01 | 1.00E+00 |
| ENSG00000206923.1_RNU6-432F | ENSG00000160789.18_LMNA | 0.00431  | -0.154995378 | 0.163400257 | 9.58E-01 | 9.83E-01 | 1.00E+00 |
| ENSG00000238504.1_          | ENSG00000160789.18_LMNA | -0.07685 | -0.23319942  | 0.083368826 | 3.47E-01 | 6.31E-01 | 1.00E+00 |
| ENSG00000272113.2_Y_RNA     | ENSG00000160789.18_LMNA | -0.05021 | -0.207750548 | 0.10986843  | 5.39E-01 | 7.79E-01 | 1.00E+00 |
| ENSG00000275916.1_          | ENSG00000160789.18_LMNA | 0.06361  | -0.096565903 | 0.22057959  | 4.36E-01 | 7.04E-01 | 1.00E+00 |
| ENSG00000266890.1_MIR4634   | ENSG00000160789.18_LMNA | -0.05044 | -0.207973171 | 0.109638557 | 5.37E-01 | 7.78E-01 | 1.00E+00 |
| ENSG00000222831.1_MIR1537   | ENSG00000160789.18_LMNA | 0.11274  | -0.047310271 | 0.267145483 | 1.67E-01 | 4.24E-01 | 1.00E+00 |
| ENSG00000266887.1_MIR4535   | ENSG00000160789.18_LMNA | -0.05038 | -0.207908443 | 0.109705396 | 5.38E-01 | 7.78E-01 | 1.00E+00 |
| ENSG00000238812.1_RNU7-127F | ENSG00000160789.18_LMNA | -0.14068 | -0.293311059 | 0.018945583 | 8.39E-02 | 2.80E-01 | 1.00E+00 |
| ENSG00000199797.1_Y_RNA     | ENSG00000160789.18_LMNA | -0.05477 | -0.212120866 | 0.105349559 | 5.03E-01 | 7.54E-01 | 1.00E+00 |
| ENSG00000252556.1_RNU6-256F | ENSG00000160789.18_LMNA | -0.08141 | -0.237531379 | 0.078812971 | 3.19E-01 | 6.05E-01 | 1.00E+00 |
| ENSG00000277888.1_MIR6846   | ENSG00000160789.18_LMNA | -0.04569 | -0.203414103 | 0.114339337 | 5.76E-01 | 8.02E-01 | 1.00E+00 |
| ENSG00000199109.3_MIR411    | ENSG00000160789.18_LMNA | -0.07854 | -0.234808382 | 0.081678249 | 3.36E-01 | 6.22E-01 | 1.00E+00 |
| ENSG00000271899.1_MIR4466   | ENSG00000160789.18_LMNA | 0.02691  | -0.132859425 | 0.185317241 | 7.42E-01 | 8.92E-01 | 1.00E+00 |
| ENSG00000199260.1_RNU6-874F | ENSG00000160789.18_LMNA | 0.02268  | -0.137016195 | 0.181225589 | 7.82E-01 | 9.10E-01 | 1.00E+00 |
| ENSG00000249446.2_TRAJ60    | ENSG00000160789.18_LMNA | -0.07727 | -0.233595395 | 0.082952933 | 3.44E-01 | 6.29E-01 | 1.00E+00 |
| ENSG00000277780.1_          | ENSG00000160789.18_LMNA | -0.02695 | -0.18535815  | 0.132817808 | 7.42E-01 | 8.92E-01 | 1.00E+00 |
| ENSG00000264623.2_MIR4796   | ENSG00000160789.18_LMNA | -0.03766 | -0.195683813 | 0.122277528 | 6.45E-01 | 8.42E-01 | 1.00E+00 |
| ENSG00000281217.1_          | ENSG00000160789.18_LMNA | -0.04831 | -0.205926375 | 0.111750734 | 5.55E-01 | 7.89E-01 | 1.00E+00 |
| ENSG00000277910.1_          | ENSG00000160789.18_LMNA | -0.04741 | -0.205064504 | 0.112639278 | 5.62E-01 | 7.93E-01 | 1.00E+00 |
| ENSG00000281779.1_          | ENSG00000160789.18_LMNA | 0.12173  | -0.03821389  | 0.275587432 | 1.35E-01 | 3.74E-01 | 1.00E+00 |
| ENSG00000221745.2_MIR1197   | ENSG00000160789.18_LMNA | -0.10007 | -0.255207065 | 0.060085751 | 2.20E-01 | 4.95E-01 | 1.00E+00 |
| ENSG00000264288.1_          | ENSG00000160789.18_LMNA | 0.00347  | -0.155814546 | 0.162583116 | 9.66E-01 | 9.87E-01 | 1.00E+00 |
| ENSG00000274634.1_          | ENSG00000160789.18_LMNA | -0.09571 | -0.251084538 | 0.064473465 | 2.41E-01 | 5.20E-01 | 1.00E+00 |
| ENSG00000252021.1_Y_RNA     | ENSG00000160789.18_LMNA | 0.08746  | -0.072751199 | 0.243275805 | 2.84E-01 | 5.69E-01 | 1.00E+00 |
| ENSG00000249564.1_RP11-390C | ENSG00000160789.18_LMNA | -0.18859 | -0.337657025 | -0.03030339 | 2.00E-02 | 1.08E-01 | 1.00E+00 |
| ENSG00000281866.1_          | ENSG00000160789.18_LMNA | 0.18675  | 0.028395519  | 0.335964129 | 2.12E-02 | 1.13E-01 | 1.00E+00 |
| ENSG00000265645.1_          | ENSG00000160789.18_LMNA | -0.16469 | -0.315614003 | -0.00563527 | 4.26E-02 | 1.81E-01 | 1.00E+00 |
| ENSG00000207345.1_RNU6-1222 | ENSG00000160789.18_LMNA | -0.06255 | -0.219563491 | 0.097623652 | 4.44E-01 | 7.11E-01 | 1.00E+00 |

|                             |                         |          |              |             |          |          |          |
|-----------------------------|-------------------------|----------|--------------|-------------|----------|----------|----------|
| ENSG00000240341.2_          | ENSG00000160789.18_LMNA | -0.03785 | -0.195872026 | 0.122084735 | 6.43E-01 | 8.41E-01 | 1.00E+00 |
| ENSG00000266052.1_MIR4500   | ENSG00000160789.18_LMNA | -0.0348  | -0.192933342 | 0.125092193 | 6.70E-01 | 8.55E-01 | 1.00E+00 |
| ENSG00000263502.1_          | ENSG00000160789.18_LMNA | -0.03647 | -0.194541584 | 0.123447037 | 6.56E-01 | 8.48E-01 | 1.00E+00 |
| ENSG00000202430.1_RNA5SP88  | ENSG00000160789.18_LMNA | -0.01594 | -0.174694862 | 0.143627717 | 8.45E-01 | 9.40E-01 | 1.00E+00 |
| ENSG00000202099.1_RNU6-234F | ENSG00000160789.18_LMNA | 0.07028  | -0.089922735 | 0.226945482 | 3.90E-01 | 6.68E-01 | 1.00E+00 |
| ENSG00000281098.1_          | ENSG00000160789.18_LMNA | 0.01007  | -0.14937211  | 0.168997837 | 9.02E-01 | 9.62E-01 | 1.00E+00 |
| ENSG00000222430.1_Y_RNA     | ENSG00000160789.18_LMNA | 0.01491  | -0.144638349 | 0.173694106 | 8.55E-01 | 9.43E-01 | 1.00E+00 |
| ENSG00000266429.1_          | ENSG00000160789.18_LMNA | 0.03714  | -0.122787779 | 0.19518557  | 6.50E-01 | 8.44E-01 | 1.00E+00 |
| ENSG00000238987.1_RNU7-133F | ENSG00000160789.18_LMNA | -0.06183 | -0.218878691 | 0.098336117 | 4.49E-01 | 7.15E-01 | 1.00E+00 |
| ENSG00000266012.1_MIR4764   | ENSG00000160789.18_LMNA | -0.11446 | -0.268758862 | 0.045575843 | 1.60E-01 | 4.14E-01 | 1.00E+00 |
| ENSG00000263785.1_MIR3182   | ENSG00000160789.18_LMNA | -0.03234 | -0.190555029 | 0.127521893 | 6.92E-01 | 8.68E-01 | 1.00E+00 |
| ENSG00000258205.1_RP11-248E | ENSG00000160789.18_LMNA | -0.14517 | -0.297490976 | 0.014367317 | 7.44E-02 | 2.60E-01 | 1.00E+00 |
| ENSG00000207710.1_          | ENSG00000160789.18_LMNA | -0.0424  | -0.200250699 | 0.117592731 | 6.04E-01 | 8.18E-01 | 1.00E+00 |
| ENSG00000252252.1_RNU6-687F | ENSG00000160789.18_LMNA | -0.19644 | -0.344859159 | -0.0384452  | 1.53E-02 | 8.90E-02 | 1.00E+00 |
| ENSG00000211883.1_TRAJ6     | ENSG00000160789.18_LMNA | 0.0971   | -0.063076355 | 0.252398452 | 2.34E-01 | 5.12E-01 | 1.00E+00 |
| ENSG00000272215.1_U7        | ENSG00000160789.18_LMNA | 0.0443   | -0.115717591 | 0.202074782 | 5.88E-01 | 8.08E-01 | 1.00E+00 |
| ENSG00000222121.1_          | ENSG00000160789.18_LMNA | 0.07009  | -0.090120091 | 0.226756753 | 3.91E-01 | 6.69E-01 | 1.00E+00 |
| ENSG00000207821.1_MIR640    | ENSG00000160789.18_LMNA | -0.04372 | -0.201517244 | 0.116290975 | 5.93E-01 | 8.12E-01 | 1.00E+00 |
| ENSG00000227937.1_MTND2P30  | ENSG00000160789.18_LMNA | 0.0356   | -0.124301517 | 0.193706489 | 6.63E-01 | 8.51E-01 | 1.00E+00 |
| ENSG00000274111.1_MIR6777   | ENSG00000160789.18_LMNA | 0.09184  | -0.068361781 | 0.247421636 | 2.60E-01 | 5.44E-01 | 1.00E+00 |
| ENSG00000222303.1_RNU6-935F | ENSG00000160789.18_LMNA | -0.15369 | -0.305418795 | 0.0056479   | 5.87E-02 | 2.22E-01 | 1.00E+00 |
| ENSG00000199362.1_Y_RNA     | ENSG00000160789.18_LMNA | -0.19011 | -0.339044969 | -0.03186925 | 1.90E-02 | 1.04E-01 | 1.00E+00 |
| ENSG00000275109.1_MIR6504   | ENSG00000160789.18_LMNA | 0.10889  | -0.051201008 | 0.263519864 | 1.82E-01 | 4.46E-01 | 1.00E+00 |
| ENSG00000238731.1_RNU7-90P  | ENSG00000160789.18_LMNA | -0.03071 | -0.188983143 | 0.12912565  | 7.07E-01 | 8.76E-01 | 1.00E+00 |
| ENSG00000277393.1_          | ENSG00000160789.18_LMNA | -0.0831  | -0.239141715 | 0.07711603  | 3.09E-01 | 5.95E-01 | 1.00E+00 |
| ENSG00000211876.1_TRAJ13    | ENSG00000160789.18_LMNA | -0.07964 | -0.235846609 | 0.080586389 | 3.29E-01 | 6.15E-01 | 1.00E+00 |
| ENSG00000230472.4_RP1-28O17 | ENSG00000160789.18_LMNA | -0.06981 | -0.226491628 | 0.090397293 | 3.93E-01 | 6.70E-01 | 1.00E+00 |
| ENSG00000202297.1_RNY3P12   | ENSG00000160789.18_LMNA | 0.00418  | -0.155126795 | 0.163269194 | 9.59E-01 | 9.84E-01 | 1.00E+00 |
| ENSG00000266656.1_          | ENSG00000160789.18_LMNA | -0.18504 | -0.334393845 | -0.02662783 | 2.25E-02 | 1.17E-01 | 1.00E+00 |
| ENSG00000201114.1_Y_RNA     | ENSG00000160789.18_LMNA | 0.00673  | -0.152632567 | 0.165754774 | 9.34E-01 | 9.74E-01 | 1.00E+00 |
| ENSG00000278506.1_          | ENSG00000160789.18_LMNA | 0.04413  | -0.115883741 | 0.201913245 | 5.89E-01 | 8.09E-01 | 1.00E+00 |
| ENSG00000264957.1_          | ENSG00000160789.18_LMNA | 0.09241  | -0.067786897 | 0.247963761 | 2.57E-01 | 5.40E-01 | 1.00E+00 |
| ENSG00000252815.1_RNU6-410F | ENSG00000160789.18_LMNA | -0.15429 | -0.305972831 | 0.00503677  | 5.77E-02 | 2.20E-01 | 1.00E+00 |

|                             |                         |          |              |             |          |          |          |
|-----------------------------|-------------------------|----------|--------------|-------------|----------|----------|----------|
| ENSG00000221296.2_MIR548T   | ENSG00000160789.18_LMNA | -0.10236 | -0.257364578 | 0.057784585 | 2.10E-01 | 4.82E-01 | 1.00E+00 |
| ENSG00000221459.1_SNORA11C  | ENSG00000160789.18_LMNA | -0.0419  | -0.199772077 | 0.118084375 | 6.08E-01 | 8.21E-01 | 1.00E+00 |
| ENSG00000201033.1_RNU1-96P  | ENSG00000160789.18_LMNA | -0.01605 | -0.174799534 | 0.143521973 | 8.44E-01 | 9.39E-01 | 1.00E+00 |
| ENSG00000275863.1_MIR7975   | ENSG00000160789.18_LMNA | -0.0119  | -0.170778618 | 0.147578829 | 8.84E-01 | 9.55E-01 | 1.00E+00 |
| ENSG00000252320.1_RNU6-320F | ENSG00000160789.18_LMNA | -0.02542 | -0.183880338 | 0.134320472 | 7.56E-01 | 8.98E-01 | 1.00E+00 |
| ENSG00000273530.1_          | ENSG00000160789.18_LMNA | -0.01798 | -0.176675696 | 0.141625375 | 8.26E-01 | 9.32E-01 | 1.00E+00 |
| ENSG00000239167.1_          | ENSG00000160789.18_LMNA | -0.04902 | -0.2066124   | 0.111043115 | 5.49E-01 | 7.86E-01 | 1.00E+00 |
| ENSG00000277180.1_          | ENSG00000160789.18_LMNA | 0.08167  | -0.078547886 | 0.23778305  | 3.17E-01 | 6.04E-01 | 1.00E+00 |
| ENSG00000265085.1_          | ENSG00000160789.18_LMNA | -0.07421 | -0.230681371 | 0.086010951 | 3.64E-01 | 6.45E-01 | 1.00E+00 |
| ENSG00000200522.1_RNU6-957F | ENSG00000160789.18_LMNA | -0.03281 | -0.191011941 | 0.127055405 | 6.88E-01 | 8.65E-01 | 1.00E+00 |
| ENSG00000263897.1_MIR4669   | ENSG00000160789.18_LMNA | 0.00559  | -0.153750456 | 0.164641261 | 9.46E-01 | 9.78E-01 | 1.00E+00 |
| ENSG00000195401.2_Y_RNA     | ENSG00000160789.18_LMNA | 0.05533  | -0.104791328 | 0.212659865 | 4.98E-01 | 7.52E-01 | 1.00E+00 |
| ENSG00000211836.1_TRAJ54    | ENSG00000160789.18_LMNA | -0.01759 | -0.176292297 | 0.14201314  | 8.30E-01 | 9.34E-01 | 1.00E+00 |
| ENSG00000221545.1_MIR1255B2 | ENSG00000160789.18_LMNA | 0.00419  | -0.155113107 | 0.163282845 | 9.59E-01 | 9.84E-01 | 1.00E+00 |
| ENSG00000212316.1_RNU6-1228 | ENSG00000160789.18_LMNA | 0.03268  | -0.127178228 | 0.190891653 | 6.89E-01 | 8.66E-01 | 1.00E+00 |
| ENSG00000265419.1_          | ENSG00000160789.18_LMNA | 0.06632  | -0.093872482 | 0.223163853 | 4.17E-01 | 6.89E-01 | 1.00E+00 |
| ENSG00000222235.1_          | ENSG00000160789.18_LMNA | -0.13811 | -0.29091565  | 0.021563388 | 8.97E-02 | 2.92E-01 | 1.00E+00 |
| ENSG00000264146.1_          | ENSG00000160789.18_LMNA | 0.04978  | -0.110296649 | 0.207335748 | 5.43E-01 | 7.81E-01 | 1.00E+00 |
| ENSG00000266099.1_MIR5700   | ENSG00000160789.18_LMNA | -0.14969 | -0.301698655 | 0.009745397 | 6.57E-02 | 2.39E-01 | 1.00E+00 |
| ENSG00000280731.1_          | ENSG00000160789.18_LMNA | -0.01135 | -0.17024389  | 0.148117531 | 8.90E-01 | 9.57E-01 | 1.00E+00 |
| ENSG00000251937.1_RNU7-129F | ENSG00000160789.18_LMNA | -0.07776 | -0.234063503 | 0.082461138 | 3.41E-01 | 6.26E-01 | 1.00E+00 |
| ENSG00000251914.1_RNU7-200F | ENSG00000160789.18_LMNA | -0.01047 | -0.169386364 | 0.148981034 | 8.98E-01 | 9.60E-01 | 1.00E+00 |
| ENSG00000199577.1_RNU6-822F | ENSG00000160789.18_LMNA | -0.03034 | -0.188629648 | 0.129486083 | 7.11E-01 | 8.77E-01 | 1.00E+00 |
| ENSG00000238685.1_ACA64     | ENSG00000160789.18_LMNA | 0.01681  | -0.142777408 | 0.175536352 | 8.37E-01 | 9.37E-01 | 1.00E+00 |
| ENSG00000239115.1_RNU7-67P  | ENSG00000160789.18_LMNA | 0.07789  | -0.082336043 | 0.234182549 | 3.40E-01 | 6.25E-01 | 1.00E+00 |
| ENSG00000266431.1_MIR5580   | ENSG00000160789.18_LMNA | -0.15322 | -0.304980981 | 0.006130668 | 5.95E-02 | 2.24E-01 | 1.00E+00 |
| ENSG00000265959.1_          | ENSG00000160789.18_LMNA | -0.11467 | -0.268964542 | 0.045354594 | 1.59E-01 | 4.13E-01 | 1.00E+00 |
| ENSG00000221093.1_SNORA3    | ENSG00000160789.18_LMNA | 0.06307  | -0.097107336 | 0.220059562 | 4.40E-01 | 7.08E-01 | 1.00E+00 |
| ENSG00000221325.1_MIR1200   | ENSG00000160789.18_LMNA | 0.006    | -0.153346253 | 0.165043976 | 9.42E-01 | 9.77E-01 | 1.00E+00 |
| ENSG00000275006.1_Y_RNA     | ENSG00000160789.18_LMNA | -0.06372 | -0.220686271 | 0.096454808 | 4.35E-01 | 7.04E-01 | 1.00E+00 |
| ENSG00000202306.1_Y_RNA     | ENSG00000160789.18_LMNA | 0.06864  | -0.091559109 | 0.225379918 | 4.01E-01 | 6.77E-01 | 1.00E+00 |
| ENSG00000266776.1_MIR4646   | ENSG00000160789.18_LMNA | -0.03477 | -0.19290631  | 0.12511983  | 6.71E-01 | 8.55E-01 | 1.00E+00 |
| ENSG00000253573.1_RP11-351C | ENSG00000160789.18_LMNA | -0.13728 | -0.290140719 | 0.022409349 | 9.17E-02 | 2.95E-01 | 1.00E+00 |

|                             |                         |          |              |             |          |          |          |
|-----------------------------|-------------------------|----------|--------------|-------------|----------|----------|----------|
| ENSG00000221335.1_          | ENSG00000160789.18_LMNA | 0.17115  | 0.012282043  | 0.321586564 | 3.50E-02 | 1.59E-01 | 1.00E+00 |
| ENSG00000206766.1_RNU6-435F | ENSG00000160789.18_LMNA | 0.01341  | -0.146100095 | 0.172245481 | 8.70E-01 | 9.49E-01 | 1.00E+00 |
| ENSG00000273836.1_MIR6842   | ENSG00000160789.18_LMNA | 0.00171  | -0.157534409 | 0.160866088 | 9.83E-01 | 9.94E-01 | 1.00E+00 |
| ENSG00000252219.2_MIR892C   | ENSG00000160789.18_LMNA | -0.04375 | -0.201551238 | 0.116256021 | 5.92E-01 | 8.12E-01 | 1.00E+00 |
| ENSG00000277329.1_          | ENSG00000160789.18_LMNA | -0.05649 | -0.213764991 | 0.103646146 | 4.89E-01 | 7.46E-01 | 1.00E+00 |
| ENSG00000200040.1_Y_RNA     | ENSG00000160789.18_LMNA | 0.04     | -0.119968236 | 0.197936708 | 6.25E-01 | 8.31E-01 | 1.00E+00 |
| ENSG00000223306.2_RNU6-1304 | ENSG00000160789.18_LMNA | 0.25124  | 0.095869948  | 0.394651962 | 1.80E-03 | 1.80E-02 | 1.00E+00 |
| ENSG00000215984.1_          | ENSG00000160789.18_LMNA | -0.02038 | -0.179001969 | 0.139270513 | 8.03E-01 | 9.21E-01 | 1.00E+00 |
| ENSG00000253040.1_RNA5SP45  | ENSG00000160789.18_LMNA | -0.14427 | -0.296658222 | 0.015280477 | 7.62E-02 | 2.64E-01 | 1.00E+00 |
| ENSG00000222139.1_RNU6-380F | ENSG00000160789.18_LMNA | -0.10007 | -0.255206852 | 0.060085978 | 2.20E-01 | 4.95E-01 | 1.00E+00 |
| ENSG00000273798.1_          | ENSG00000160789.18_LMNA | 0.00774  | -0.151646051 | 0.166736754 | 9.25E-01 | 9.71E-01 | 1.00E+00 |
| ENSG00000265253.1_MIR4446   | ENSG00000160789.18_LMNA | -0.00715 | -0.166158231 | 0.152227324 | 9.30E-01 | 9.73E-01 | 1.00E+00 |
| ENSG00000265902.1_MIR4696   | ENSG00000160789.18_LMNA | 0.01297  | -0.146535296 | 0.171813921 | 8.74E-01 | 9.51E-01 | 1.00E+00 |
| ENSG00000222070.1_          | ENSG00000160789.18_LMNA | 0.07688  | -0.083336338 | 0.233230355 | 3.46E-01 | 6.31E-01 | 1.00E+00 |
| ENSG00000222213.1_RNU6-588F | ENSG00000160789.18_LMNA | -0.165   | -0.315903794 | -0.00595714 | 4.22E-02 | 1.80E-01 | 1.00E+00 |
| ENSG00000201666.1_SNORD74   | ENSG00000160789.18_LMNA | -0.05382 | -0.211210613 | 0.106291834 | 5.10E-01 | 7.59E-01 | 1.00E+00 |
| ENSG00000211847.1_TRAJ42    | ENSG00000160789.18_LMNA | -0.05555 | -0.212866198 | 0.104577581 | 4.97E-01 | 7.51E-01 | 1.00E+00 |
| ENSG00000265584.1_MIR3978   | ENSG00000160789.18_LMNA | -0.08857 | -0.244327544 | 0.071638823 | 2.78E-01 | 5.63E-01 | 1.00E+00 |
| ENSG00000202071.1_Y_RNA     | ENSG00000160789.18_LMNA | 0.05183  | -0.108262285 | 0.209305347 | 5.26E-01 | 7.71E-01 | 1.00E+00 |
| ENSG00000265281.1_MIR3935   | ENSG00000160789.18_LMNA | 0.10573  | -0.054388741 | 0.260542704 | 1.95E-01 | 4.64E-01 | 1.00E+00 |
| ENSG00000211834.1_TRAJ57    | ENSG00000160789.18_LMNA | 0.18148  | 0.022943301  | 0.331115272 | 2.52E-02 | 1.27E-01 | 1.00E+00 |
| ENSG00000238320.1_          | ENSG00000160789.18_LMNA | 0.09709  | -0.063089683 | 0.252385923 | 2.34E-01 | 5.12E-01 | 1.00E+00 |
| ENSG00000265979.1_          | ENSG00000160789.18_LMNA | 0.03702  | -0.122901096 | 0.195074898 | 6.51E-01 | 8.45E-01 | 1.00E+00 |
| ENSG00000280598.1_          | ENSG00000160789.18_LMNA | -0.19919 | -0.347374046 | -0.04129782 | 1.39E-02 | 8.30E-02 | 1.00E+00 |
| ENSG00000252170.2_SNORD112  | ENSG00000160789.18_LMNA | -0.01196 | -0.170831028 | 0.147526019 | 8.84E-01 | 9.55E-01 | 1.00E+00 |
| ENSG00000263623.1_          | ENSG00000160789.18_LMNA | -0.0187  | -0.177376812 | 0.140916021 | 8.19E-01 | 9.30E-01 | 1.00E+00 |
| ENSG00000201815.1_RNU6-526F | ENSG00000160789.18_LMNA | -0.01359 | -0.172415262 | 0.145928848 | 8.68E-01 | 9.48E-01 | 1.00E+00 |
| ENSG00000199704.1_SNORD115  | ENSG00000160789.18_LMNA | -0.02091 | -0.179511562 | 0.138754175 | 7.98E-01 | 9.19E-01 | 1.00E+00 |
| ENSG00000239182.1_SNORA35   | ENSG00000160789.18_LMNA | -0.04342 | -0.201232651 | 0.116583575 | 5.95E-01 | 8.13E-01 | 1.00E+00 |
| ENSG00000241665.3_RN7SL418F | ENSG00000160789.18_LMNA | -0.03145 | -0.189698846 | 0.128395642 | 7.01E-01 | 8.72E-01 | 1.00E+00 |
| ENSG00000199065.2_MIR101-2  | ENSG00000160789.18_LMNA | -0.03234 | -0.190560992 | 0.127515806 | 6.92E-01 | 8.68E-01 | 1.00E+00 |
| ENSG00000270699.1_RP11-292K | ENSG00000160789.18_LMNA | -0.03654 | -0.194607597 | 0.123379471 | 6.55E-01 | 8.47E-01 | 1.00E+00 |
| ENSG00000200089.1_SNORD114  | ENSG00000160789.18_LMNA | -0.0028  | -0.161928468 | 0.156470503 | 9.73E-01 | 9.89E-01 | 1.00E+00 |



|                              |                         |          |              |             |          |          |          |
|------------------------------|-------------------------|----------|--------------|-------------|----------|----------|----------|
| ENSG00000264711.1_           | ENSG00000160789.18_LMNA | -0.11971 | -0.273696589 | 0.040255844 | 1.42E-01 | 3.85E-01 | 1.00E+00 |
| ENSG00000238827.1_           | ENSG00000160789.18_LMNA | -0.09949 | -0.254654866 | 0.060674178 | 2.23E-01 | 4.98E-01 | 1.00E+00 |
| ENSG00000207646.1_MIR655     | ENSG00000160789.18_LMNA | -0.05547 | -0.21278958  | 0.104656956 | 4.97E-01 | 7.51E-01 | 1.00E+00 |
| ENSG00000206772.1_RNU6-44P   | ENSG00000160789.18_LMNA | -0.01883 | -0.1774992   | 0.140792162 | 8.18E-01 | 9.29E-01 | 1.00E+00 |
| ENSG00000202017.1_RNU6-806F  | ENSG00000160789.18_LMNA | 0.00875  | -0.150659554 | 0.167718085 | 9.15E-01 | 9.68E-01 | 1.00E+00 |
| ENSG00000276388.1_RP11-424E  | ENSG00000160789.18_LMNA | -0.02644 | -0.18486499  | 0.133319424 | 7.46E-01 | 8.94E-01 | 1.00E+00 |
| ENSG00000253707.1_RP11-726G  | ENSG00000160789.18_LMNA | -0.01483 | -0.173622359 | 0.144710778 | 8.56E-01 | 9.43E-01 | 1.00E+00 |
| ENSG00000278639.1_           | ENSG00000160789.18_LMNA | 0.05149  | -0.108599319 | 0.20897922  | 5.29E-01 | 7.73E-01 | 1.00E+00 |
| ENSG00000229213.1_RP1-118J2  | ENSG00000160789.18_LMNA | 0.07698  | -0.083241851 | 0.233320325 | 3.46E-01 | 6.30E-01 | 1.00E+00 |
| ENSG00000266763.1_           | ENSG00000160789.18_LMNA | -0.05112 | -0.208619631 | 0.108970851 | 5.32E-01 | 7.74E-01 | 1.00E+00 |
| ENSG00000266115.1_           | ENSG00000160789.18_LMNA | 0.06155  | -0.09862161  | 0.218604196 | 4.51E-01 | 7.17E-01 | 1.00E+00 |
| ENSG00000265420.1_MIR4779    | ENSG00000160789.18_LMNA | 0.08218  | -0.078039406 | 0.23826568  | 3.14E-01 | 6.00E-01 | 1.00E+00 |
| ENSG00000281116.1_           | ENSG00000160789.18_LMNA | -0.15766 | -0.309104763 | 0.001577713 | 5.24E-02 | 2.07E-01 | 1.00E+00 |
| ENSG00000244615.1_PSPC1P2    | ENSG00000160789.18_LMNA | 0.06157  | -0.098600659 | 0.218624342 | 4.51E-01 | 7.17E-01 | 1.00E+00 |
| ENSG00000206617.1_RNY1P5     | ENSG00000160789.18_LMNA | 0.00495  | -0.154376564 | 0.164017249 | 9.52E-01 | 9.81E-01 | 1.00E+00 |
| ENSG00000279775.1_RP5-1028K  | ENSG00000160789.18_LMNA | 0.05986  | -0.100297049 | 0.216992289 | 4.64E-01 | 7.26E-01 | 1.00E+00 |
| ENSG00000274458.1_SNORA40    | ENSG00000160789.18_LMNA | -0.05777 | -0.214992358 | 0.102373305 | 4.80E-01 | 7.38E-01 | 1.00E+00 |
| ENSG00000277875.1_           | ENSG00000160789.18_LMNA | 0.03273  | -0.127134586 | 0.190934395 | 6.89E-01 | 8.66E-01 | 1.00E+00 |
| ENSG00000267537.1_AC005394.  | ENSG00000160789.18_LMNA | -0.10666 | -0.261420372 | 0.053449663 | 1.91E-01 | 4.59E-01 | 1.00E+00 |
| ENSG00000222232.1_RNA5SP89   | ENSG00000160789.18_LMNA | 0.12417  | -0.035739295 | 0.277875651 | 1.27E-01 | 3.62E-01 | 1.00E+00 |
| ENSG00000230546.1_RP11-393I2 | ENSG00000160789.18_LMNA | -0.0483  | -0.2059145   | 0.11176298  | 5.55E-01 | 7.89E-01 | 1.00E+00 |
| ENSG00000208022.1_MIR618     | ENSG00000160789.18_LMNA | -0.03058 | -0.188864704 | 0.129246422 | 7.08E-01 | 8.76E-01 | 1.00E+00 |
| ENSG00000201296.1_RNU4-41P   | ENSG00000160789.18_LMNA | 0.00581  | -0.153536216 | 0.164854725 | 9.43E-01 | 9.77E-01 | 1.00E+00 |
| ENSG00000261274.1_TP53TG3G   | ENSG00000160789.18_LMNA | -0.05006 | -0.207608643 | 0.110014939 | 5.40E-01 | 7.80E-01 | 1.00E+00 |
| ENSG00000199710.1_Y_RNA      | ENSG00000160789.18_LMNA | 0.06054  | -0.099616598 | 0.217647146 | 4.59E-01 | 7.23E-01 | 1.00E+00 |
| ENSG00000276818.1_           | ENSG00000160789.18_LMNA | -0.05485 | -0.2121971   | 0.105270617 | 5.02E-01 | 7.54E-01 | 1.00E+00 |
| ENSG00000221489.1_           | ENSG00000160789.18_LMNA | 0.09387  | -0.066317152 | 0.24934886  | 2.50E-01 | 5.30E-01 | 1.00E+00 |
| ENSG00000202190.1_Y_RNA      | ENSG00000160789.18_LMNA | -0.05251 | -0.209957862 | 0.107587727 | 5.21E-01 | 7.66E-01 | 1.00E+00 |
| ENSG00000277942.1_MIR8075    | ENSG00000160789.18_LMNA | -0.06998 | -0.226653051 | 0.090228523 | 3.92E-01 | 6.70E-01 | 1.00E+00 |
| ENSG00000265432.1_MIR4308    | ENSG00000160789.18_LMNA | -0.02777 | -0.186147327 | 0.13201476  | 7.34E-01 | 8.88E-01 | 1.00E+00 |
| ENSG00000208025.1_MIR591     | ENSG00000160789.18_LMNA | -0.01117 | -0.170069902 | 0.14829277  | 8.91E-01 | 9.57E-01 | 1.00E+00 |
| ENSG00000275934.1_           | ENSG00000160789.18_LMNA | -0.11317 | -0.267545962 | 0.046879921 | 1.65E-01 | 4.21E-01 | 1.00E+00 |
| ENSG00000207371.1_Y_RNA      | ENSG00000160789.18_LMNA | 0.00875  | -0.150661433 | 0.167716216 | 9.15E-01 | 9.68E-01 | 1.00E+00 |

|                              |                         |          |              |             |          |          |          |
|------------------------------|-------------------------|----------|--------------|-------------|----------|----------|----------|
| ENSG00000252695.1_MIR2276    | ENSG00000160789.18_LMNA | 0.0746   | -0.085614721 | 0.231059264 | 3.61E-01 | 6.43E-01 | 1.00E+00 |
| ENSG00000230617.1_AC079987.1 | ENSG00000160789.18_LMNA | -0.0071  | -0.166112394 | 0.152273369 | 9.31E-01 | 9.73E-01 | 1.00E+00 |
| ENSG00000201279.1_Y_RNA      | ENSG00000160789.18_LMNA | 0.09198  | -0.068220622 | 0.247554769 | 2.60E-01 | 5.43E-01 | 1.00E+00 |
| ENSG00000278536.1_           | ENSG00000160789.18_LMNA | 0.03535  | -0.124546871 | 0.193466617 | 6.65E-01 | 8.53E-01 | 1.00E+00 |
| ENSG00000221392.1_           | ENSG00000160789.18_LMNA | 0.07385  | -0.086361144 | 0.230347305 | 3.66E-01 | 6.47E-01 | 1.00E+00 |
| ENSG00000199942.1_SNORD114   | ENSG00000160789.18_LMNA | 0.16822  | 0.009271178  | 0.318884152 | 3.83E-02 | 1.68E-01 | 1.00E+00 |
| ENSG00000207454.1_RNU6-1104  | ENSG00000160789.18_LMNA | 0.04965  | -0.110418581 | 0.207217616 | 5.44E-01 | 7.82E-01 | 1.00E+00 |
| ENSG00000201309.1_Y_RNA      | ENSG00000160789.18_LMNA | 0.01101  | -0.148453097 | 0.169910704 | 8.93E-01 | 9.58E-01 | 1.00E+00 |
| ENSG00000200619.1_RNA5SP44   | ENSG00000160789.18_LMNA | 0.08496  | -0.075260204 | 0.240900838 | 2.98E-01 | 5.84E-01 | 1.00E+00 |
| ENSG00000230556.1_AC073264.1 | ENSG00000160789.18_LMNA | 0.02033  | -0.139317645 | 0.178955444 | 8.04E-01 | 9.21E-01 | 1.00E+00 |
| ENSG00000263763.1_MIR3686    | ENSG00000160789.18_LMNA | -0.20995 | -0.357213337 | -0.05250664 | 9.43E-03 | 6.28E-02 | 1.00E+00 |
| ENSG00000201968.1_RNA5SP13   | ENSG00000160789.18_LMNA | 0.13794  | -0.021733725 | 0.290759647 | 9.01E-02 | 2.92E-01 | 1.00E+00 |
| ENSG00000252505.1_SNORA70    | ENSG00000160789.18_LMNA | -0.15501 | -0.306644216 | 0.004295886 | 5.65E-02 | 2.17E-01 | 1.00E+00 |
| ENSG00000274188.1_           | ENSG00000160789.18_LMNA | -0.04748 | -0.205128897 | 0.11257291  | 5.61E-01 | 7.93E-01 | 1.00E+00 |
| ENSG00000257729.1_RP11-788H  | ENSG00000160789.18_LMNA | -0.00329 | -0.162402178 | 0.155995874 | 9.68E-01 | 9.87E-01 | 1.00E+00 |
| ENSG00000207132.1_Y_RNA      | ENSG00000160789.18_LMNA | -0.02663 | -0.185043811 | 0.133137556 | 7.45E-01 | 8.93E-01 | 1.00E+00 |
| ENSG00000202103.1_RNU4-12P   | ENSG00000160789.18_LMNA | -0.01242 | -0.171281509 | 0.147072028 | 8.79E-01 | 9.53E-01 | 1.00E+00 |
| ENSG00000222429.1_RNU6-955F  | ENSG00000160789.18_LMNA | 0.06596  | -0.09423418  | 0.222817073 | 4.19E-01 | 6.91E-01 | 1.00E+00 |
| ENSG00000239163.1_           | ENSG00000160789.18_LMNA | 0.04794  | -0.112113303 | 0.205574749 | 5.58E-01 | 7.91E-01 | 1.00E+00 |
| ENSG00000265362.2_           | ENSG00000160789.18_LMNA | -0.03009 | -0.188390148 | 0.129730237 | 7.13E-01 | 8.78E-01 | 1.00E+00 |
| ENSG00000198987.1_MIR16-2    | ENSG00000160789.18_LMNA | 0.02411  | -0.135610665 | 0.182610334 | 7.68E-01 | 9.04E-01 | 1.00E+00 |
| ENSG00000221739.1_MIR1203    | ENSG00000160789.18_LMNA | 0.11934  | -0.040630889 | 0.273349034 | 1.43E-01 | 3.87E-01 | 1.00E+00 |
| ENSG00000202027.1_Y_RNA      | ENSG00000160789.18_LMNA | -0.04134 | -0.19922862  | 0.118642429 | 6.13E-01 | 8.24E-01 | 1.00E+00 |
| ENSG00000199892.2_RNU1-17P   | ENSG00000160789.18_LMNA | -0.09449 | -0.249927543 | 0.065702698 | 2.47E-01 | 5.27E-01 | 1.00E+00 |
| ENSG00000200448.1_Y_RNA      | ENSG00000160789.18_LMNA | 0.03603  | -0.123881004 | 0.19411752  | 6.59E-01 | 8.50E-01 | 1.00E+00 |
| ENSG00000212365.1_RNA5SP33   | ENSG00000160789.18_LMNA | 0.08503  | -0.075186557 | 0.240970604 | 2.98E-01 | 5.84E-01 | 1.00E+00 |
| ENSG00000221236.2_           | ENSG00000160789.18_LMNA | 0.01735  | -0.142241815 | 0.176066152 | 8.32E-01 | 9.35E-01 | 1.00E+00 |
| ENSG00000222407.1_RNA5SP80   | ENSG00000160789.18_LMNA | -0.01062 | -0.16953315  | 0.148833259 | 8.97E-01 | 9.60E-01 | 1.00E+00 |
| ENSG00000199756.1_Y_RNA      | ENSG00000160789.18_LMNA | -0.07624 | -0.232620972 | 0.08397617  | 3.51E-01 | 6.34E-01 | 1.00E+00 |
| ENSG00000223307.2_           | ENSG00000160789.18_LMNA | 0.03874  | -0.121211946 | 0.196723788 | 6.36E-01 | 8.37E-01 | 1.00E+00 |
| ENSG00000280526.1_           | ENSG00000160789.18_LMNA | -0.12352 | -0.27727243  | 0.036392022 | 1.29E-01 | 3.65E-01 | 1.00E+00 |
| ENSG00000264551.1_           | ENSG00000160789.18_LMNA | -0.01612 | -0.174876405 | 0.143444311 | 8.44E-01 | 9.39E-01 | 1.00E+00 |
| ENSG00000252640.1_snoU109    | ENSG00000160789.18_LMNA | 0.01451  | -0.145022564 | 0.173313473 | 8.59E-01 | 9.45E-01 | 1.00E+00 |

|                             |                         |          |              |             |          |          |          |
|-----------------------------|-------------------------|----------|--------------|-------------|----------|----------|----------|
| ENSG00000212555.1_RNU6-192F | ENSG00000160789.18_LMNA | -0.05499 | -0.2123302   | 0.105132779 | 5.01E-01 | 7.53E-01 | 1.00E+00 |
| ENSG00000199903.1_RNU6-1273 | ENSG00000160789.18_LMNA | 0.04767  | -0.112382721 | 0.20531341  | 5.60E-01 | 7.92E-01 | 1.00E+00 |
| ENSG00000207516.1_SNORA41   | ENSG00000160789.18_LMNA | 0.00229  | -0.156971067 | 0.161428714 | 9.78E-01 | 9.92E-01 | 1.00E+00 |
| ENSG00000252487.1_RNY4P20   | ENSG00000160789.18_LMNA | 0.05222  | -0.107875497 | 0.20967953  | 5.23E-01 | 7.68E-01 | 1.00E+00 |
| ENSG00000207139.1_Y_RNA     | ENSG00000160789.18_LMNA | -0.06796 | -0.224726701 | 0.092241365 | 4.05E-01 | 6.81E-01 | 1.00E+00 |
| ENSG00000251830.1_SNORD46   | ENSG00000160789.18_LMNA | -0.0373  | -0.195343444 | 0.122626119 | 6.48E-01 | 8.44E-01 | 1.00E+00 |
| ENSG00000221030.1_          | ENSG00000160789.18_LMNA | 0.00688  | -0.15249235  | 0.165894385 | 9.33E-01 | 9.74E-01 | 1.00E+00 |
| ENSG00000202499.1_SNORD115  | ENSG00000160789.18_LMNA | -0.07546 | -0.231872527 | 0.084761656 | 3.56E-01 | 6.39E-01 | 1.00E+00 |
| ENSG00000221614.1_MIR1185-2 | ENSG00000160789.18_LMNA | 0.00302  | -0.156253941 | 0.162144629 | 9.71E-01 | 9.89E-01 | 1.00E+00 |
| ENSG00000207982.1_MIR548B   | ENSG00000160789.18_LMNA | 0.00321  | -0.156067793 | 0.162330407 | 9.69E-01 | 9.88E-01 | 1.00E+00 |
| ENSG00000252997.1_          | ENSG00000160789.18_LMNA | -0.03209 | -0.190318288 | 0.127763541 | 6.95E-01 | 8.69E-01 | 1.00E+00 |
| ENSG00000207210.1_Y_RNA     | ENSG00000160789.18_LMNA | 0.07309  | -0.08712598  | 0.22961743  | 3.71E-01 | 6.51E-01 | 1.00E+00 |
| ENSG00000199354.1_RNA5SP27  | ENSG00000160789.18_LMNA | 0.00379  | -0.15550149  | 0.162895449 | 9.63E-01 | 9.85E-01 | 1.00E+00 |
| ENSG00000206598.1_RNU6-1286 | ENSG00000160789.18_LMNA | -0.1305  | -0.283802215 | 0.029312078 | 1.09E-01 | 3.29E-01 | 1.00E+00 |
| ENSG00000200555.1_RNU6-525F | ENSG00000160789.18_LMNA | 0.10804  | -0.052051305 | 0.262726321 | 1.85E-01 | 4.51E-01 | 1.00E+00 |
| ENSG00000271309.1_RP1-85D24 | ENSG00000160789.18_LMNA | 0.0338   | -0.126078164 | 0.191968674 | 6.79E-01 | 8.60E-01 | 1.00E+00 |
| ENSG00000199204.1_Y_RNA     | ENSG00000160789.18_LMNA | -0.08755 | -0.243359756 | 0.072662437 | 2.83E-01 | 5.69E-01 | 1.00E+00 |
| ENSG00000252735.1_RNU6-528F | ENSG00000160789.18_LMNA | 0.00968  | -0.149747857 | 0.168624446 | 9.06E-01 | 9.64E-01 | 1.00E+00 |
| ENSG00000263497.2_          | ENSG00000160789.18_LMNA | -0.05245 | -0.20990203  | 0.107645455 | 5.21E-01 | 7.67E-01 | 1.00E+00 |
| ENSG00000278237.1_NCRUPAR_  | ENSG00000160789.18_LMNA | -0.14214 | -0.294671335 | 0.017457108 | 8.07E-02 | 2.74E-01 | 1.00E+00 |
| ENSG00000233534.1_RP1-38C16 | ENSG00000160789.18_LMNA | -0.11489 | -0.269165903 | 0.045137962 | 1.59E-01 | 4.12E-01 | 1.00E+00 |
| ENSG00000199620.1_RNA5SP25  | ENSG00000160789.18_LMNA | 0.07788  | -0.082343441 | 0.234175509 | 3.40E-01 | 6.25E-01 | 1.00E+00 |
| ENSG00000276942.1_          | ENSG00000160789.18_LMNA | -0.11688 | -0.271037722 | 0.04312277  | 1.52E-01 | 4.00E-01 | 1.00E+00 |
| ENSG00000221656.1_MIR1225   | ENSG00000160789.18_LMNA | -0.07141 | -0.22801814  | 0.088800573 | 3.82E-01 | 6.61E-01 | 1.00E+00 |
| ENSG00000252661.1_RNU6-782F | ENSG00000160789.18_LMNA | -0.07327 | -0.229788917 | 0.086946313 | 3.70E-01 | 6.50E-01 | 1.00E+00 |
| ENSG00000200049.1_Y_RNA     | ENSG00000160789.18_LMNA | -0.13818 | -0.290978167 | 0.02149512  | 8.96E-02 | 2.91E-01 | 1.00E+00 |
| ENSG00000200554.1_RNU6-1020 | ENSG00000160789.18_LMNA | 0.07522  | -0.08499896  | 0.23164634  | 3.57E-01 | 6.40E-01 | 1.00E+00 |
| ENSG00000276917.1_MIR8080   | ENSG00000160789.18_LMNA | -0.08305 | -0.239089135 | 0.077171467 | 3.09E-01 | 5.95E-01 | 1.00E+00 |
| ENSG00000252130.1_RNU6-1045 | ENSG00000160789.18_LMNA | -0.03555 | -0.193657186 | 0.124351951 | 6.64E-01 | 8.52E-01 | 1.00E+00 |
| ENSG00000277216.1_          | ENSG00000160789.18_LMNA | 0.11019  | -0.049887152 | 0.264745188 | 1.77E-01 | 4.38E-01 | 1.00E+00 |
| ENSG00000264746.1_          | ENSG00000160789.18_LMNA | 0.09039  | -0.069816482 | 0.246048942 | 2.68E-01 | 5.52E-01 | 1.00E+00 |
| ENSG00000223091.1_          | ENSG00000160789.18_LMNA | 0.10249  | -0.05765294  | 0.25748791  | 2.09E-01 | 4.82E-01 | 1.00E+00 |
| ENSG00000266756.1_MIR5680   | ENSG00000160789.18_LMNA | 0.00071  | -0.158507892 | 0.159893355 | 9.93E-01 | 9.97E-01 | 1.00E+00 |

|                             |                         |          |              |             |          |          |          |
|-----------------------------|-------------------------|----------|--------------|-------------|----------|----------|----------|
| ENSG00000265929.1_MIR5195   | ENSG00000160789.18_LMNA | -0.02972 | -0.188026307 | 0.130101072 | 7.16E-01 | 8.79E-01 | 1.00E+00 |
| ENSG00000208003.1_MIR549A   | ENSG00000160789.18_LMNA | -0.01781 | -0.176514649 | 0.141788268 | 8.28E-01 | 9.33E-01 | 1.00E+00 |
| ENSG00000202034.1_RNU6-399F | ENSG00000160789.18_LMNA | 0.17337  | 0.014569409  | 0.323636233 | 3.27E-02 | 1.51E-01 | 1.00E+00 |
| ENSG00000207071.1_RNU6-1207 | ENSG00000160789.18_LMNA | 0.01719  | -0.142402251 | 0.175907471 | 8.34E-01 | 9.35E-01 | 1.00E+00 |
| ENSG00000212448.1_Y_RNA     | ENSG00000160789.18_LMNA | -0.02871 | -0.187056943 | 0.131088638 | 7.25E-01 | 8.84E-01 | 1.00E+00 |
| ENSG00000207488.1_Y_RNA     | ENSG00000160789.18_LMNA | -0.16209 | -0.313204878 | -0.00296192 | 4.60E-02 | 1.91E-01 | 1.00E+00 |
| ENSG00000265200.1_          | ENSG00000160789.18_LMNA | -0.09573 | -0.251101299 | 0.064455651 | 2.41E-01 | 5.20E-01 | 1.00E+00 |
| ENSG00000223238.1_RNA5SP29  | ENSG00000160789.18_LMNA | 0.07459  | -0.085626303 | 0.23104822  | 3.61E-01 | 6.43E-01 | 1.00E+00 |
| ENSG00000212510.1_RNU6-972F | ENSG00000160789.18_LMNA | -0.14026 | -0.292916501 | 0.019377068 | 8.48E-02 | 2.82E-01 | 1.00E+00 |
| ENSG00000202476.1_Y_RNA     | ENSG00000160789.18_LMNA | -0.0349  | -0.193030307 | 0.124993052 | 6.69E-01 | 8.55E-01 | 1.00E+00 |
| ENSG00000201931.1_RNA5SP17  | ENSG00000160789.18_LMNA | 0.08948  | -0.070733118 | 0.245183329 | 2.73E-01 | 5.57E-01 | 1.00E+00 |
| ENSG00000212265.1_RNA5SP18  | ENSG00000160789.18_LMNA | 0.01396  | -0.145568616 | 0.172772349 | 8.65E-01 | 9.47E-01 | 1.00E+00 |
| ENSG00000202144.1_Y_RNA     | ENSG00000160789.18_LMNA | -0.05472 | -0.212076761 | 0.105395228 | 5.03E-01 | 7.54E-01 | 1.00E+00 |
| ENSG00000200246.1_RNA5SP26  | ENSG00000160789.18_LMNA | 0.02086  | -0.138797357 | 0.179468951 | 7.99E-01 | 9.19E-01 | 1.00E+00 |
| ENSG00000222302.1_RNA5SP37  | ENSG00000160789.18_LMNA | 0.05283  | -0.107268791 | 0.210266276 | 5.18E-01 | 7.64E-01 | 1.00E+00 |
| ENSG00000251975.1_RNU6-718F | ENSG00000160789.18_LMNA | -0.04555 | -0.20327562  | 0.114481903 | 5.77E-01 | 8.03E-01 | 1.00E+00 |
| ENSG00000221733.1_          | ENSG00000160789.18_LMNA | 0.03778  | -0.122150822 | 0.195807512 | 6.44E-01 | 8.42E-01 | 1.00E+00 |
| ENSG00000206105.2_KRTAP20-4 | ENSG00000160789.18_LMNA | -0.14404 | -0.296438426 | 0.015521409 | 7.67E-02 | 2.65E-01 | 1.00E+00 |
| ENSG00000275036.1_MIR8086   | ENSG00000160789.18_LMNA | -0.08213 | -0.238220603 | 0.078086904 | 3.14E-01 | 6.01E-01 | 1.00E+00 |
| ENSG00000200085.1_Y_RNA     | ENSG00000160789.18_LMNA | -0.03827 | -0.196279112 | 0.121667661 | 6.40E-01 | 8.39E-01 | 1.00E+00 |
| ENSG00000201148.1_RNA5SP42  | ENSG00000160789.18_LMNA | 0.07666  | -0.083561088 | 0.233016329 | 3.48E-01 | 6.32E-01 | 1.00E+00 |
| ENSG00000274622.2_          | ENSG00000160789.18_LMNA | 0.01204  | -0.147442141 | 0.170914268 | 8.83E-01 | 9.55E-01 | 1.00E+00 |
| ENSG00000223258.1_RNU6-575F | ENSG00000160789.18_LMNA | 0.06312  | -0.097055193 | 0.220109652 | 4.40E-01 | 7.08E-01 | 1.00E+00 |
| ENSG00000211674.2_IGLJ1     | ENSG00000160789.18_LMNA | -0.01378 | -0.17260051  | 0.145741979 | 8.66E-01 | 9.48E-01 | 1.00E+00 |
| ENSG00000202508.1_Y_RNA     | ENSG00000160789.18_LMNA | -0.00263 | -0.161764418 | 0.156634837 | 9.74E-01 | 9.90E-01 | 1.00E+00 |
| ENSG00000199088.4_MIR379    | ENSG00000160789.18_LMNA | -0.08522 | -0.241149416 | 0.074997784 | 2.97E-01 | 5.82E-01 | 1.00E+00 |
| ENSG00000216131.2_          | ENSG00000160789.18_LMNA | 0.05814  | -0.102003496 | 0.215348767 | 4.77E-01 | 7.35E-01 | 1.00E+00 |
| ENSG00000206973.1_RNU6-1145 | ENSG00000160789.18_LMNA | 0.08462  | -0.075599651 | 0.240579233 | 3.00E-01 | 5.86E-01 | 1.00E+00 |
| ENSG00000207011.1_RNY4P13   | ENSG00000160789.18_LMNA | 0.02371  | -0.136008082 | 0.182218922 | 7.72E-01 | 9.06E-01 | 1.00E+00 |
| ENSG00000201070.1_RNU4-84P  | ENSG00000160789.18_LMNA | 0.04642  | -0.113618404 | 0.204114198 | 5.70E-01 | 7.99E-01 | 1.00E+00 |
| ENSG00000202273.1_Y_RNA     | ENSG00000160789.18_LMNA | -0.16255 | -0.313636158 | -0.00344017 | 4.54E-02 | 1.89E-01 | 1.00E+00 |
| ENSG00000252064.1_Y_RNA     | ENSG00000160789.18_LMNA | 0.18916  | 0.030893142  | 0.338179925 | 1.96E-02 | 1.06E-01 | 1.00E+00 |
| ENSG00000252742.1_Y_RNA     | ENSG00000160789.18_LMNA | -0.03686 | -0.194912785 | 0.123067068 | 6.52E-01 | 8.46E-01 | 1.00E+00 |

|                             |                         |          |              |             |          |          |          |
|-----------------------------|-------------------------|----------|--------------|-------------|----------|----------|----------|
| ENSG00000281686.1_          | ENSG00000160789.18_LMNA | 0.00251  | -0.156750795 | 0.16164865  | 9.75E-01 | 9.91E-01 | 1.00E+00 |
| ENSG00000201687.1_RNU6-1107 | ENSG00000160789.18_LMNA | 0.13833  | -0.021343728 | 0.291116799 | 8.92E-02 | 2.91E-01 | 1.00E+00 |
| ENSG00000206747.1_RNU6-245F | ENSG00000160789.18_LMNA | -0.03979 | -0.197735627 | 0.12017449  | 6.26E-01 | 8.32E-01 | 1.00E+00 |
| ENSG00000267794.1_RP11-677O | ENSG00000160789.18_LMNA | 0.05318  | -0.106922923 | 0.210600664 | 5.15E-01 | 7.63E-01 | 1.00E+00 |
| ENSG00000250375.2_RP11-340A | ENSG00000160789.18_LMNA | -0.04682 | -0.204498964 | 0.113222044 | 5.67E-01 | 7.97E-01 | 1.00E+00 |
| ENSG00000223169.1_RNA5SP20  | ENSG00000160789.18_LMNA | 0.02399  | -0.13573302  | 0.182489839 | 7.69E-01 | 9.05E-01 | 1.00E+00 |
| ENSG00000265596.1_MIR3659   | ENSG00000160789.18_LMNA | 0.06841  | -0.091792848 | 0.225156159 | 4.02E-01 | 6.78E-01 | 1.00E+00 |
| ENSG00000260312.1_RP11-812E | ENSG00000160789.18_LMNA | 0.061    | -0.09916278  | 0.218083736 | 4.55E-01 | 7.20E-01 | 1.00E+00 |
| ENSG00000274377.1_          | ENSG00000160789.18_LMNA | -0.05105 | -0.208555935 | 0.109036652 | 5.32E-01 | 7.75E-01 | 1.00E+00 |
| ENSG00000207135.1_RNU6-452F | ENSG00000160789.18_LMNA | -0.14071 | -0.293338148 | 0.018915955 | 8.38E-02 | 2.80E-01 | 1.00E+00 |
| ENSG00000199640.1_RN7SKP29  | ENSG00000160789.18_LMNA | 0.02028  | -0.13937104  | 0.178902735 | 8.04E-01 | 9.22E-01 | 1.00E+00 |
| ENSG00000202495.1_Y_RNA     | ENSG00000160789.18_LMNA | 0.01465  | -0.144888472 | 0.173446326 | 8.58E-01 | 9.44E-01 | 1.00E+00 |
| ENSG00000238512.1_          | ENSG00000160789.18_LMNA | 0.11103  | -0.049041721 | 0.265533113 | 1.73E-01 | 4.33E-01 | 1.00E+00 |
| ENSG00000252137.1_RNU6-1338 | ENSG00000160789.18_LMNA | 0.07327  | -0.086946954 | 0.229788304 | 3.70E-01 | 6.50E-01 | 1.00E+00 |
| ENSG00000200379.1_RN7SKP45  | ENSG00000160789.18_LMNA | -0.09764 | -0.252911794 | 0.062530173 | 2.31E-01 | 5.09E-01 | 1.00E+00 |
| ENSG00000200224.2_RNU6-626F | ENSG00000160789.18_LMNA | 0.20749  | 0.049938547  | 0.354964976 | 1.03E-02 | 6.70E-02 | 1.00E+00 |
| ENSG00000212329.1_RNU6-316F | ENSG00000160789.18_LMNA | -0.07921 | -0.235445479 | 0.08100833  | 3.32E-01 | 6.18E-01 | 1.00E+00 |
| ENSG00000199929.1_RNA5SP40  | ENSG00000160789.18_LMNA | 0.13726  | -0.022430329 | 0.290121495 | 9.17E-02 | 2.95E-01 | 1.00E+00 |
| ENSG00000206687.1_RNU1-109F | ENSG00000160789.18_LMNA | 0.02561  | -0.13413612  | 0.184061718 | 7.54E-01 | 8.98E-01 | 1.00E+00 |
| ENSG00000200047.1_RN7SKP11  | ENSG00000160789.18_LMNA | 0.04218  | -0.117807356 | 0.200041778 | 6.06E-01 | 8.20E-01 | 1.00E+00 |
| ENSG00000200369.1_RNU6-666F | ENSG00000160789.18_LMNA | -0.03015 | -0.188446696 | 0.129672593 | 7.12E-01 | 8.78E-01 | 1.00E+00 |
| ENSG00000281239.1_          | ENSG00000160789.18_LMNA | 0.02718  | -0.132597214 | 0.185574975 | 7.40E-01 | 8.91E-01 | 1.00E+00 |
| ENSG00000200024.1_Y_RNA     | ENSG00000160789.18_LMNA | 0.23101  | 0.074550176  | 0.376368234 | 4.19E-03 | 3.44E-02 | 1.00E+00 |
| ENSG00000277275.1_          | ENSG00000160789.18_LMNA | 0.04413  | -0.115888718 | 0.201908406 | 5.89E-01 | 8.09E-01 | 1.00E+00 |
| ENSG00000200670.1_RNU6-912F | ENSG00000160789.18_LMNA | 0.01334  | -0.14616724  | 0.172178905 | 8.70E-01 | 9.50E-01 | 1.00E+00 |
| ENSG00000206644.1_RNU6-1279 | ENSG00000160789.18_LMNA | 0.04108  | -0.118894621 | 0.198982961 | 6.15E-01 | 8.26E-01 | 1.00E+00 |
| ENSG00000206985.1_RNU6-198F | ENSG00000160789.18_LMNA | -0.14271 | -0.295207795 | 0.016869708 | 7.94E-02 | 2.71E-01 | 1.00E+00 |
| ENSG00000221139.1_SNORD23   | ENSG00000160789.18_LMNA | -0.02452 | -0.183007346 | 0.135207458 | 7.64E-01 | 9.02E-01 | 1.00E+00 |
| ENSG00000206758.1_RNU6-317F | ENSG00000160789.18_LMNA | -0.04455 | -0.202312174 | 0.115473387 | 5.86E-01 | 8.08E-01 | 1.00E+00 |
| ENSG00000243338.3_RN7SL307F | ENSG00000160789.18_LMNA | -0.00791 | -0.166902635 | 0.151479342 | 9.23E-01 | 9.70E-01 | 1.00E+00 |
| ENSG00000200471.1_RNU6-1125 | ENSG00000160789.18_LMNA | 0.07979  | -0.080432881 | 0.235992519 | 3.28E-01 | 6.15E-01 | 1.00E+00 |
| ENSG00000238257.1_AP000244. | ENSG00000160789.18_LMNA | 0.03914  | -0.12081763  | 0.197108448 | 6.32E-01 | 8.35E-01 | 1.00E+00 |
| ENSG00000278880.1_RP11-612J | ENSG00000160789.18_LMNA | 0.09865  | -0.061521441 | 0.253859407 | 2.27E-01 | 5.03E-01 | 1.00E+00 |

|                             |                         |          |              |             |          |          |          |
|-----------------------------|-------------------------|----------|--------------|-------------|----------|----------|----------|
| ENSG00000201242.1_RNY1P1    | ENSG00000160789.18_LMNA | -0.04239 | -0.200238622 | 0.117605138 | 6.04E-01 | 8.18E-01 | 1.00E+00 |
| ENSG00000207172.1_RNU6-1162 | ENSG00000160789.18_LMNA | -0.04656 | -0.204250795 | 0.113477703 | 5.69E-01 | 7.98E-01 | 1.00E+00 |
| ENSG00000273581.1_          | ENSG00000160789.18_LMNA | -0.10174 | -0.256784664 | 0.05840344  | 2.12E-01 | 4.86E-01 | 1.00E+00 |
| ENSG00000235625.1_RP11-203P | ENSG00000160789.18_LMNA | -0.01254 | -0.17139389  | 0.146958751 | 8.78E-01 | 9.53E-01 | 1.00E+00 |
| ENSG00000223290.1_RNA5SP10  | ENSG00000160789.18_LMNA | -0.0134  | -0.172235208 | 0.146110456 | 8.70E-01 | 9.49E-01 | 1.00E+00 |
| ENSG00000249423.1_RP11-284A | ENSG00000160789.18_LMNA | -0.16145 | -0.312611286 | -0.0023039  | 4.69E-02 | 1.93E-01 | 1.00E+00 |
| ENSG00000271385.1_RP11-108M | ENSG00000160789.18_LMNA | 0.02598  | -0.133771751 | 0.184420151 | 7.51E-01 | 8.96E-01 | 1.00E+00 |
| ENSG00000206998.1_Y_RNA     | ENSG00000160789.18_LMNA | 0.01181  | -0.14767198  | 0.170686167 | 8.85E-01 | 9.55E-01 | 1.00E+00 |
| ENSG00000212539.2_U3        | ENSG00000160789.18_LMNA | 0.00976  | -0.149671659 | 0.168700173 | 9.05E-01 | 9.63E-01 | 1.00E+00 |
| ENSG00000215925.1_          | ENSG00000160789.18_LMNA | -0.05683 | -0.214090116 | 0.103309076 | 4.87E-01 | 7.43E-01 | 1.00E+00 |
| ENSG00000222133.1_          | ENSG00000160789.18_LMNA | 0.02093  | -0.13873     | 0.179535417 | 7.98E-01 | 9.19E-01 | 1.00E+00 |
| ENSG00000252224.1_RNU4ATAC  | ENSG00000160789.18_LMNA | -0.1033  | -0.258255662 | 0.056833193 | 2.05E-01 | 4.77E-01 | 1.00E+00 |
| ENSG00000206907.1_RNU6-1013 | ENSG00000160789.18_LMNA | -0.01745 | -0.176165048 | 0.142141817 | 8.31E-01 | 9.34E-01 | 1.00E+00 |
| ENSG00000201549.1_Y_RNA     | ENSG00000160789.18_LMNA | 0.1511   | -0.008296969 | 0.303014776 | 6.31E-02 | 2.33E-01 | 1.00E+00 |
| ENSG00000222701.1_Y_RNA     | ENSG00000160789.18_LMNA | -0.0436  | -0.201399375 | 0.116412168 | 5.94E-01 | 8.13E-01 | 1.00E+00 |
| ENSG00000229943.1_RP11-93N2 | ENSG00000160789.18_LMNA | -0.11079 | -0.265309633 | 0.049281558 | 1.74E-01 | 4.34E-01 | 1.00E+00 |
| ENSG00000221443.1_          | ENSG00000160789.18_LMNA | 0.00388  | -0.155416336 | 0.162980395 | 9.62E-01 | 9.85E-01 | 1.00E+00 |
| ENSG00000222895.1_RNU6-1133 | ENSG00000160789.18_LMNA | -0.04908 | -0.206667829 | 0.110985927 | 5.48E-01 | 7.85E-01 | 1.00E+00 |
| ENSG00000206996.1_RNU6-842F | ENSG00000160789.18_LMNA | 0.12698  | -0.032889062 | 0.280506812 | 1.19E-01 | 3.46E-01 | 1.00E+00 |
| ENSG00000263456.1_MIR5189   | ENSG00000160789.18_LMNA | 0.03377  | -0.126105597 | 0.191941825 | 6.80E-01 | 8.60E-01 | 1.00E+00 |
| ENSG00000212280.1_RNA5SP25  | ENSG00000160789.18_LMNA | 0.03782  | -0.122120383 | 0.195837227 | 6.44E-01 | 8.42E-01 | 1.00E+00 |
| ENSG00000223052.1_          | ENSG00000160789.18_LMNA | -0.09062 | -0.246269584 | 0.069582749 | 2.67E-01 | 5.51E-01 | 1.00E+00 |
| ENSG00000206756.1_Y_RNA     | ENSG00000160789.18_LMNA | 0.01921  | -0.140422373 | 0.177864538 | 8.14E-01 | 9.27E-01 | 1.00E+00 |
| ENSG00000202092.1_RNA5SP19  | ENSG00000160789.18_LMNA | 0.13665  | -0.023048365 | 0.289555086 | 9.32E-02 | 2.99E-01 | 1.00E+00 |
| ENSG00000207468.1_SNORA19   | ENSG00000160789.18_LMNA | 0.00067  | -0.158545702 | 0.159855562 | 9.93E-01 | 9.97E-01 | 1.00E+00 |
| ENSG00000200060.1_Y_RNA     | ENSG00000160789.18_LMNA | -0.12253 | -0.276336107 | 0.037404659 | 1.33E-01 | 3.69E-01 | 1.00E+00 |
| ENSG00000222449.1_RNU6-1140 | ENSG00000160789.18_LMNA | 0.15094  | -0.008462692 | 0.302864251 | 6.34E-02 | 2.34E-01 | 1.00E+00 |
| ENSG00000212580.1_SNORA75   | ENSG00000160789.18_LMNA | 0.1374   | -0.022286361 | 0.290253406 | 9.14E-02 | 2.95E-01 | 1.00E+00 |
| ENSG00000275235.1_          | ENSG00000160789.18_LMNA | 0.10804  | -0.052059657 | 0.262718524 | 1.85E-01 | 4.51E-01 | 1.00E+00 |
| ENSG00000200575.1_RNU6-414F | ENSG00000160789.18_LMNA | 0.00436  | -0.154948643 | 0.163446863 | 9.57E-01 | 9.83E-01 | 1.00E+00 |
| ENSG00000215547.1_DEFB115   | ENSG00000160789.18_LMNA | -0.09788 | -0.253134158 | 0.062293525 | 2.30E-01 | 5.08E-01 | 1.00E+00 |
| ENSG00000200034.1_RNU4-73P  | ENSG00000160789.18_LMNA | -0.11295 | -0.26733937  | 0.047101937 | 1.66E-01 | 4.23E-01 | 1.00E+00 |
| ENSG00000229616.2_RP11-369J | ENSG00000160789.18_LMNA | 0.02271  | -0.136986758 | 0.181254604 | 7.81E-01 | 9.10E-01 | 1.00E+00 |

|                              |                         |          |              |             |          |          |          |
|------------------------------|-------------------------|----------|--------------|-------------|----------|----------|----------|
| ENSG00000221186.1_           | ENSG00000160789.18_LMNA | -0.11621 | -0.270405408 | 0.043803802 | 1.54E-01 | 4.04E-01 | 1.00E+00 |
| ENSG00000237275.1_RP11-552J  | ENSG00000160789.18_LMNA | -0.07618 | -0.232563944 | 0.084036035 | 3.51E-01 | 6.35E-01 | 1.00E+00 |
| ENSG00000202046.1_Y_RNA      | ENSG00000160789.18_LMNA | 0.05018  | -0.109900801 | 0.207719196 | 5.39E-01 | 7.79E-01 | 1.00E+00 |
| ENSG00000199540.1_Y_RNA      | ENSG00000160789.18_LMNA | -0.07511 | -0.231537274 | 0.085113373 | 3.58E-01 | 6.41E-01 | 1.00E+00 |
| ENSG00000280698.1_           | ENSG00000160789.18_LMNA | 0.04886  | -0.111210655 | 0.206450001 | 5.50E-01 | 7.86E-01 | 1.00E+00 |
| ENSG00000237670.1_AC080094   | ENSG00000160789.18_LMNA | -0.17567 | -0.325755944 | -0.01693834 | 3.04E-02 | 1.45E-01 | 1.00E+00 |
| ENSG00000256166.1_XXbac-BPG  | ENSG00000160789.18_LMNA | -0.13416 | -0.287225676 | 0.025587581 | 9.94E-02 | 3.10E-01 | 1.00E+00 |
| ENSG00000212458.1_SNORA48    | ENSG00000160789.18_LMNA | 0.03498  | -0.124911992 | 0.193109583 | 6.69E-01 | 8.54E-01 | 1.00E+00 |
| ENSG00000222682.1_RNA5SP38   | ENSG00000160789.18_LMNA | 0.02055  | -0.139107965 | 0.179162412 | 8.02E-01 | 9.20E-01 | 1.00E+00 |
| ENSG00000252375.1_           | ENSG00000160789.18_LMNA | -0.11007 | -0.264633972 | 0.050006448 | 1.77E-01 | 4.39E-01 | 1.00E+00 |
| ENSG00000252396.1_RN7SKP19   | ENSG00000160789.18_LMNA | 0.06096  | -0.099203908 | 0.218044175 | 4.56E-01 | 7.20E-01 | 1.00E+00 |
| ENSG00000278106.1_RP11-589M  | ENSG00000160789.18_LMNA | 0.07956  | -0.08066507  | 0.235771818 | 3.30E-01 | 6.16E-01 | 1.00E+00 |
| ENSG00000223223.1_RN7SKP19   | ENSG00000160789.18_LMNA | -0.08689 | -0.242733615 | 0.073324341 | 2.87E-01 | 5.73E-01 | 1.00E+00 |
| ENSG00000253429.1_KB-1090H4  | ENSG00000160789.18_LMNA | 0.05332  | -0.106788967 | 0.210730153 | 5.14E-01 | 7.62E-01 | 1.00E+00 |
| ENSG00000281663.1_           | ENSG00000160789.18_LMNA | -0.1305  | -0.283808815 | 0.029304906 | 1.09E-01 | 3.29E-01 | 1.00E+00 |
| ENSG00000234686.1_AC010971   | ENSG00000160789.18_LMNA | -0.03459 | -0.192724691 | 0.125305504 | 6.72E-01 | 8.56E-01 | 1.00E+00 |
| ENSG00000212455.1_SNORA40    | ENSG00000160789.18_LMNA | -0.06548 | -0.222358238 | 0.094712624 | 4.23E-01 | 6.94E-01 | 1.00E+00 |
| ENSG00000221781.1_           | ENSG00000160789.18_LMNA | -0.07945 | -0.235668874 | 0.08077336  | 3.31E-01 | 6.17E-01 | 1.00E+00 |
| ENSG00000254347.1_RP11-351E  | ENSG00000160789.18_LMNA | -0.06699 | -0.223799853 | 0.093208904 | 4.12E-01 | 6.86E-01 | 1.00E+00 |
| ENSG00000176232.10_RP5-1193  | ENSG00000160789.18_LMNA | 0.09068  | -0.069525922 | 0.246323223 | 2.67E-01 | 5.51E-01 | 1.00E+00 |
| ENSG00000257157.1_RP11-528M  | ENSG00000160789.18_LMNA | -0.02064 | -0.179256292 | 0.139012846 | 8.01E-01 | 9.20E-01 | 1.00E+00 |
| ENSG00000221128.1_           | ENSG00000160789.18_LMNA | -0.24674 | -0.390598913 | -0.09112012 | 2.18E-03 | 2.09E-02 | 1.00E+00 |
| ENSG00000280600.1_           | ENSG00000160789.18_LMNA | 0.0279   | -0.131885387 | 0.186274427 | 7.33E-01 | 8.88E-01 | 1.00E+00 |
| ENSG00000258576.1_CTD-2644I2 | ENSG00000160789.18_LMNA | -0.12522 | -0.278861059 | 0.034672439 | 1.24E-01 | 3.56E-01 | 1.00E+00 |
| ENSG00000200026.1_U8         | ENSG00000160789.18_LMNA | -0.02371 | -0.182219165 | 0.136007836 | 7.72E-01 | 9.06E-01 | 1.00E+00 |
| ENSG00000255287.1_SNRPGP16   | ENSG00000160789.18_LMNA | -0.0907  | -0.246345074 | 0.069502771 | 2.66E-01 | 5.50E-01 | 1.00E+00 |
| ENSG00000270719.1_RP11-134N  | ENSG00000160789.18_LMNA | 0.05343  | -0.10667967  | 0.210835799 | 5.13E-01 | 7.61E-01 | 1.00E+00 |
| ENSG00000212249.2_U8         | ENSG00000160789.18_LMNA | 0.0381   | -0.121835893 | 0.196114922 | 6.41E-01 | 8.40E-01 | 1.00E+00 |
| ENSG00000243374.3_RN7SL72P   | ENSG00000160789.18_LMNA | -0.05087 | -0.208378391 | 0.109220053 | 5.34E-01 | 7.76E-01 | 1.00E+00 |
| ENSG00000263729.1_RP11-746M  | ENSG00000160789.18_LMNA | 0.07509  | -0.085131257 | 0.231520225 | 3.58E-01 | 6.41E-01 | 1.00E+00 |
| ENSG00000264645.1_           | ENSG00000160789.18_LMNA | -0.07378 | -0.230279729 | 0.086431972 | 3.66E-01 | 6.47E-01 | 1.00E+00 |
| ENSG00000275547.1_CTD-2293H  | ENSG00000160789.18_LMNA | -0.01718 | -0.175899655 | 0.142410153 | 8.34E-01 | 9.35E-01 | 1.00E+00 |
| ENSG00000269458.1_CTD-2579N  | ENSG00000160789.18_LMNA | -0.06149 | -0.218554371 | 0.098673426 | 4.52E-01 | 7.17E-01 | 1.00E+00 |

|                              |                         |          |              |             |          |          |          |
|------------------------------|-------------------------|----------|--------------|-------------|----------|----------|----------|
| ENSG00000243831.1_RP1-81D8.4 | ENSG00000160789.18_LMNA | -0.1377  | -0.290532154 | 0.021982091 | 9.07E-02 | 2.93E-01 | 1.00E+00 |
| ENSG00000228853.1_NEGR1-IT1  | ENSG00000160789.18_LMNA | 0.02267  | -0.137022376 | 0.181219496 | 7.82E-01 | 9.10E-01 | 1.00E+00 |
| ENSG00000275614.1_RP11-12A2  | ENSG00000160789.18_LMNA | 0.04165  | -0.118332792 | 0.199530182 | 6.10E-01 | 8.22E-01 | 1.00E+00 |
| ENSG00000270443.1_RP1-223H1  | ENSG00000160789.18_LMNA | 0.08064  | -0.079582723 | 0.236800339 | 3.23E-01 | 6.10E-01 | 1.00E+00 |
| ENSG00000252826.1_RNU1-92P   | ENSG00000160789.18_LMNA | -0.07677 | -0.233124581 | 0.083447417 | 3.47E-01 | 6.31E-01 | 1.00E+00 |
| ENSG00000179381.7_OR4K11P    | ENSG00000160789.18_LMNA | 0.00151  | -0.157725945 | 0.160674749 | 9.85E-01 | 9.94E-01 | 1.00E+00 |
| ENSG00000281765.1_           | ENSG00000160789.18_LMNA | -0.17602 | -0.326083814 | -0.01730507 | 3.01E-02 | 1.43E-01 | 1.00E+00 |
| ENSG00000274075.1_uc_338     | ENSG00000160789.18_LMNA | -0.11118 | -0.26567523  | 0.048889185 | 1.73E-01 | 4.32E-01 | 1.00E+00 |
| ENSG00000274121.1_DISC2      | ENSG00000160789.18_LMNA | -0.04403 | -0.201819557 | 0.115980096 | 5.90E-01 | 8.10E-01 | 1.00E+00 |
| ENSG00000278569.1_Metazoa_SI | ENSG00000160789.18_LMNA | -0.11193 | -0.266388371 | 0.048123535 | 1.70E-01 | 4.28E-01 | 1.00E+00 |
| ENSG00000257899.1_           | ENSG00000160789.18_LMNA | -0.12867 | -0.282093478 | 0.031167823 | 1.14E-01 | 3.37E-01 | 1.00E+00 |
| ENSG00000201922.1_RNU1-43P   | ENSG00000160789.18_LMNA | 0.00498  | -0.154344606 | 0.164049107 | 9.51E-01 | 9.81E-01 | 1.00E+00 |
| ENSG00000227270.1_AC009963.4 | ENSG00000160789.18_LMNA | -0.02317 | -0.181697651 | 0.136537191 | 7.77E-01 | 9.08E-01 | 1.00E+00 |
| ENSG00000271330.1_CTA-298G8  | ENSG00000160789.18_LMNA | -0.05115 | -0.208647344 | 0.108942221 | 5.31E-01 | 7.74E-01 | 1.00E+00 |
| ENSG00000273900.1_RP11-459O  | ENSG00000160789.18_LMNA | 0.13519  | -0.02453831  | 0.288188698 | 9.68E-02 | 3.05E-01 | 1.00E+00 |
| ENSG00000230558.2_CEACAMP2   | ENSG00000160789.18_LMNA | 0.00569  | -0.153645475 | 0.164745866 | 9.44E-01 | 9.78E-01 | 1.00E+00 |
| ENSG00000271365.1_RP1-85D24  | ENSG00000160789.18_LMNA | 0.12208  | -0.037860008 | 0.27591488  | 1.34E-01 | 3.72E-01 | 1.00E+00 |
| ENSG00000244568.3_RN7SL654F  | ENSG00000160789.18_LMNA | -0.1237  | -0.277440558 | 0.036210122 | 1.29E-01 | 3.64E-01 | 1.00E+00 |
| ENSG00000230543.1_SNX3P1X    | ENSG00000160789.18_LMNA | 0.04248  | -0.117516274 | 0.200325118 | 6.03E-01 | 8.18E-01 | 1.00E+00 |
| ENSG00000199469.1_RNU1-62P   | ENSG00000160789.18_LMNA | 0.07527  | -0.084951657 | 0.231691429 | 3.57E-01 | 6.40E-01 | 1.00E+00 |
| ENSG00000276955.1_Metazoa_SI | ENSG00000160789.18_LMNA | -0.02646 | -0.184885618 | 0.133298445 | 7.46E-01 | 8.94E-01 | 1.00E+00 |
| ENSG00000260048.2_IGHV1OR1   | ENSG00000160789.18_LMNA | 0.08494  | -0.075279204 | 0.240882838 | 2.98E-01 | 5.84E-01 | 1.00E+00 |
| ENSG00000238124.1_RP11-667F  | ENSG00000160789.18_LMNA | -0.06058 | -0.217681396 | 0.099581001 | 4.58E-01 | 7.22E-01 | 1.00E+00 |
| ENSG00000233557.2_NFU1P2     | ENSG00000160789.18_LMNA | -0.05963 | -0.216769901 | 0.10052806  | 4.66E-01 | 7.27E-01 | 1.00E+00 |
| ENSG00000266059.2_RN7SL140F  | ENSG00000160789.18_LMNA | 0.05017  | -0.109905412 | 0.20771473  | 5.39E-01 | 7.79E-01 | 1.00E+00 |
| ENSG00000281744.1_           | ENSG00000160789.18_LMNA | 0.0772   | -0.08302423  | 0.23352752  | 3.45E-01 | 6.29E-01 | 1.00E+00 |
| ENSG00000279534.1_AP001340.1 | ENSG00000160789.18_LMNA | -0.06949 | -0.22619012  | 0.090712475 | 3.95E-01 | 6.72E-01 | 1.00E+00 |
| ENSG00000270474.1_IGHV3-29   | ENSG00000160789.18_LMNA | 0.00434  | -0.154964379 | 0.16343117  | 9.58E-01 | 9.83E-01 | 1.00E+00 |
| ENSG00000257587.1_RP11-711C  | ENSG00000160789.18_LMNA | -0.03753 | -0.195564684 | 0.122399543 | 6.46E-01 | 8.43E-01 | 1.00E+00 |
| ENSG00000275361.1_LL22NC03-  | ENSG00000160789.18_LMNA | 0.02277  | -0.136925098 | 0.181315377 | 7.81E-01 | 9.10E-01 | 1.00E+00 |
| ENSG00000232944.1_RP13-492C  | ENSG00000160789.18_LMNA | -0.08728 | -0.243099576 | 0.072937511 | 2.85E-01 | 5.70E-01 | 1.00E+00 |
| ENSG00000222076.1_RNU2-3P    | ENSG00000160789.18_LMNA | -0.15171 | -0.303581399 | 0.007672981 | 6.21E-02 | 2.31E-01 | 1.00E+00 |
| ENSG00000274923.1_GS1-214D1  | ENSG00000160789.18_LMNA | 0.11712  | -0.042882097 | 0.271261114 | 1.51E-01 | 3.99E-01 | 1.00E+00 |



|                             |                         |          |              |             |          |          |          |
|-----------------------------|-------------------------|----------|--------------|-------------|----------|----------|----------|
| ENSG00000231523.1_SEPT14P1  | ENSG00000160789.18_LMNA | -0.02084 | -0.179449754 | 0.138816811 | 7.99E-01 | 9.19E-01 | 1.00E+00 |
| ENSG00000240960.1_RP11-521D | ENSG00000160789.18_LMNA | -0.07787 | -0.234163092 | 0.08235649  | 3.40E-01 | 6.25E-01 | 1.00E+00 |
| ENSG00000276688.1_RP5-828H9 | ENSG00000160789.18_LMNA | 0.20107  | 0.04325822   | 0.349099792 | 1.30E-02 | 7.91E-02 | 1.00E+00 |
| ENSG00000260900.1_RP11-19N8 | ENSG00000160789.18_LMNA | -0.07475 | -0.231196622 | 0.085470673 | 3.60E-01 | 6.42E-01 | 1.00E+00 |
| ENSG00000248133.1_MTND4LP2  | ENSG00000160789.18_LMNA | -0.0455  | -0.203233075 | 0.114525699 | 5.78E-01 | 8.03E-01 | 1.00E+00 |
| ENSG00000271299.1_CTD-2356P | ENSG00000160789.18_LMNA | -0.02203 | -0.180595014 | 0.13765581  | 7.88E-01 | 9.14E-01 | 1.00E+00 |
| ENSG00000271558.1_RP11-445P | ENSG00000160789.18_LMNA | 0.07764  | -0.082578227 | 0.233952067 | 3.42E-01 | 6.27E-01 | 1.00E+00 |
| ENSG00000228092.1_COX6CP15  | ENSG00000160789.18_LMNA | 0.10511  | -0.05500946  | 0.25996229  | 1.97E-01 | 4.67E-01 | 1.00E+00 |
| ENSG00000222238.1_RNU2-43P  | ENSG00000160789.18_LMNA | -0.11982 | -0.273802129 | 0.040141939 | 1.41E-01 | 3.84E-01 | 1.00E+00 |
| ENSG00000230003.2_RP11-217F | ENSG00000160789.18_LMNA | -0.0075  | -0.166498737 | 0.151885225 | 9.27E-01 | 9.72E-01 | 1.00E+00 |
| ENSG00000234898.1_CHEK2P3   | ENSG00000160789.18_LMNA | 0.05925  | -0.100899012 | 0.216412728 | 4.68E-01 | 7.29E-01 | 1.00E+00 |
| ENSG00000235463.1_AC078974. | ENSG00000160789.18_LMNA | -0.04774 | -0.205376597 | 0.112317584 | 5.59E-01 | 7.92E-01 | 1.00E+00 |
| ENSG00000227734.1_RP11-49L2 | ENSG00000160789.18_LMNA | 0.02591  | -0.133841641 | 0.184351406 | 7.51E-01 | 8.96E-01 | 1.00E+00 |
| ENSG00000249943.1_RP11-213L | ENSG00000160789.18_LMNA | 0.03372  | -0.126161269 | 0.191887336 | 6.80E-01 | 8.60E-01 | 1.00E+00 |
| ENSG00000270904.1_CTC-224D3 | ENSG00000160789.18_LMNA | -0.03775 | -0.195770341 | 0.122188898 | 6.44E-01 | 8.42E-01 | 1.00E+00 |
| ENSG00000258764.1_RP11-1042 | ENSG00000160789.18_LMNA | 0.10988  | -0.050195701 | 0.264457521 | 1.78E-01 | 4.40E-01 | 1.00E+00 |
| ENSG00000226008.1_SEPT14P3  | ENSG00000160789.18_LMNA | 0.03029  | -0.129533623 | 0.188583018 | 7.11E-01 | 8.77E-01 | 1.00E+00 |
| ENSG00000275015.1_RP11-129G | ENSG00000160789.18_LMNA | 0.00832  | -0.151085597 | 0.16729435  | 9.19E-01 | 9.69E-01 | 1.00E+00 |
| ENSG00000241942.2_RPS20P20  | ENSG00000160789.18_LMNA | -0.16948 | -0.320040886 | -0.01055926 | 3.69E-02 | 1.64E-01 | 1.00E+00 |
| ENSG00000227902.2_AC062032. | ENSG00000160789.18_LMNA | 0.09213  | -0.068070028 | 0.247696788 | 2.59E-01 | 5.42E-01 | 1.00E+00 |
| ENSG00000224436.1_RP11-284L | ENSG00000160789.18_LMNA | 0.00652  | -0.152837101 | 0.165551101 | 9.36E-01 | 9.75E-01 | 1.00E+00 |
| ENSG00000225158.2_HSPE1P24  | ENSG00000160789.18_LMNA | 0.05778  | -0.102358325 | 0.215006797 | 4.79E-01 | 7.38E-01 | 1.00E+00 |
| ENSG00000201027.1_RN7SKP10  | ENSG00000160789.18_LMNA | 0.11093  | -0.049134955 | 0.265446242 | 1.74E-01 | 4.33E-01 | 1.00E+00 |
| ENSG00000248311.1_CTD-2161F | ENSG00000160789.18_LMNA | -0.12162 | -0.27548661  | 0.038322837 | 1.36E-01 | 3.74E-01 | 1.00E+00 |
| ENSG00000243817.3_RN7SL189F | ENSG00000160789.18_LMNA | 0.07466  | -0.085558918 | 0.231112477 | 3.61E-01 | 6.43E-01 | 1.00E+00 |
| ENSG00000266809.1_RP11-449D | ENSG00000160789.18_LMNA | -0.07726 | -0.233586229 | 0.082962562 | 3.44E-01 | 6.29E-01 | 1.00E+00 |
| ENSG00000240800.1_ATP8A2P1  | ENSG00000160789.18_LMNA | -0.13248 | -0.285657241 | 0.027295012 | 1.04E-01 | 3.19E-01 | 1.00E+00 |
| ENSG00000267148.1_AC005777. | ENSG00000160789.18_LMNA | -0.04769 | -0.20533621  | 0.112359218 | 5.60E-01 | 7.92E-01 | 1.00E+00 |
| ENSG00000262008.1_RP11-510M | ENSG00000160789.18_LMNA | 0.05211  | -0.107989608 | 0.209569147 | 5.24E-01 | 7.69E-01 | 1.00E+00 |
| ENSG00000225123.2_RP11-255A | ENSG00000160789.18_LMNA | 0.00959  | -0.149837266 | 0.168535584 | 9.07E-01 | 9.64E-01 | 1.00E+00 |
| ENSG00000237956.1_TRIAP1P1  | ENSG00000160789.18_LMNA | -0.02211 | -0.180677677 | 0.137571977 | 7.87E-01 | 9.13E-01 | 1.00E+00 |
| ENSG00000250704.1_RP11-423J | ENSG00000160789.18_LMNA | -0.07326 | -0.229784299 | 0.086951151 | 3.70E-01 | 6.50E-01 | 1.00E+00 |
| ENSG00000268589.1_CTC-457E2 | ENSG00000160789.18_LMNA | 0.00277  | -0.156499903 | 0.16189912  | 9.73E-01 | 9.89E-01 | 1.00E+00 |

|                              |                         |          |              |             |          |          |          |
|------------------------------|-------------------------|----------|--------------|-------------|----------|----------|----------|
| ENSG00000226880.1_           | ENSG00000160789.18_LMNA | -0.04604 | -0.203743623 | 0.114000051 | 5.73E-01 | 8.01E-01 | 1.00E+00 |
| ENSG00000253126.1_IGLVI-56   | ENSG00000160789.18_LMNA | -0.18006 | -0.329809321 | -0.02147797 | 2.64E-02 | 1.32E-01 | 1.00E+00 |
| ENSG00000234878.1_HSPE1P1    | ENSG00000160789.18_LMNA | 0.00251  | -0.156753067 | 0.161646382 | 9.76E-01 | 9.91E-01 | 1.00E+00 |
| ENSG00000250730.2_HMGB3P3    | ENSG00000160789.18_LMNA | -0.0469  | -0.204572255 | 0.113146533 | 5.66E-01 | 7.97E-01 | 1.00E+00 |
| ENSG00000271496.1_SNRPGP2C   | ENSG00000160789.18_LMNA | -0.0254  | -0.18385598  | 0.134345228 | 7.56E-01 | 8.98E-01 | 1.00E+00 |
| ENSG00000256098.1_RP11-691F  | ENSG00000160789.18_LMNA | 0.21944  | 0.062420313  | 0.365859728 | 6.60E-03 | 4.82E-02 | 1.00E+00 |
| ENSG00000233489.1_PAXBP1P1   | ENSG00000160789.18_LMNA | 0.09065  | -0.069554328 | 0.24629641  | 2.67E-01 | 5.51E-01 | 1.00E+00 |
| ENSG00000274701.1_Metazoa_SI | ENSG00000160789.18_LMNA | 0.13941  | -0.020244831 | 0.292122678 | 8.67E-02 | 2.86E-01 | 1.00E+00 |
| ENSG00000254320.1_RP11-593P  | ENSG00000160789.18_LMNA | -0.013   | -0.171846306 | 0.146502641 | 8.74E-01 | 9.51E-01 | 1.00E+00 |
| ENSG00000254830.1_RP11-99C1  | ENSG00000160789.18_LMNA | 0.03578  | -0.124128082 | 0.193876027 | 6.62E-01 | 8.51E-01 | 1.00E+00 |
| ENSG00000276891.1_RN7SL238F  | ENSG00000160789.18_LMNA | -0.11783 | -0.27193402  | 0.042156913 | 1.48E-01 | 3.95E-01 | 1.00E+00 |
| ENSG00000271284.1_SMIM12P1   | ENSG00000160789.18_LMNA | 0.04137  | -0.118612942 | 0.19925734  | 6.13E-01 | 8.24E-01 | 1.00E+00 |
| ENSG00000230941.1_AC002386.  | ENSG00000160789.18_LMNA | -0.16722 | -0.317953217 | -0.00823529 | 3.95E-02 | 1.72E-01 | 1.00E+00 |
| ENSG00000260024.1_MRPS21P7   | ENSG00000160789.18_LMNA | 0.13023  | -0.029586418 | 0.283549733 | 1.10E-01 | 3.30E-01 | 1.00E+00 |
| ENSG00000225000.1_AC010082.  | ENSG00000160789.18_LMNA | -0.00228 | -0.161420813 | 0.15697898  | 9.78E-01 | 9.92E-01 | 1.00E+00 |
| ENSG00000270990.1_RP11-632K  | ENSG00000160789.18_LMNA | 0.08889  | -0.071319888 | 0.244628956 | 2.76E-01 | 5.61E-01 | 1.00E+00 |
| ENSG00000281574.1_           | ENSG00000160789.18_LMNA | 0.03169  | -0.128160047 | 0.189929752 | 6.98E-01 | 8.71E-01 | 1.00E+00 |
| ENSG00000231132.1_RP11-40C1  | ENSG00000160789.18_LMNA | 0.00591  | -0.153439796 | 0.164950786 | 9.42E-01 | 9.77E-01 | 1.00E+00 |
| ENSG00000225352.1_RPL31P53   | ENSG00000160789.18_LMNA | -0.04595 | -0.203662999 | 0.114083072 | 5.74E-01 | 8.01E-01 | 1.00E+00 |
| ENSG00000254601.1_CYCSP26    | ENSG00000160789.18_LMNA | 0.04098  | -0.118995171 | 0.198885004 | 6.16E-01 | 8.26E-01 | 1.00E+00 |
| ENSG00000266222.1_RP11-433M  | ENSG00000160789.18_LMNA | -0.02493 | -0.183405704 | 0.134802778 | 7.60E-01 | 9.00E-01 | 1.00E+00 |
| ENSG00000222942.1_RN7SKP58   | ENSG00000160789.18_LMNA | 0.01889  | -0.140733214 | 0.177557444 | 8.17E-01 | 9.29E-01 | 1.00E+00 |
| ENSG00000242103.1_RP11-10G1  | ENSG00000160789.18_LMNA | 0.05247  | -0.107630639 | 0.20991636  | 5.21E-01 | 7.67E-01 | 1.00E+00 |
| ENSG00000257995.1_RP11-632B  | ENSG00000160789.18_LMNA | -0.04087 | -0.198775702 | 0.119107359 | 6.17E-01 | 8.27E-01 | 1.00E+00 |
| ENSG00000244621.1_RPS17P11   | ENSG00000160789.18_LMNA | -0.15163 | -0.303502529 | 0.00775985  | 6.22E-02 | 2.31E-01 | 1.00E+00 |
| ENSG00000222099.1_RN7SKP32   | ENSG00000160789.18_LMNA | -0.09742 | -0.252700254 | 0.062755269 | 2.32E-01 | 5.10E-01 | 1.00E+00 |
| ENSG00000248315.1_MTND4LP2   | ENSG00000160789.18_LMNA | -0.00302 | -0.162140705 | 0.156257873 | 9.71E-01 | 9.89E-01 | 1.00E+00 |
| ENSG00000234872.2_RP11-467I2 | ENSG00000160789.18_LMNA | 0.02383  | -0.135888157 | 0.182337046 | 7.71E-01 | 9.05E-01 | 1.00E+00 |
| ENSG00000273818.1_RN7SL673F  | ENSG00000160789.18_LMNA | -0.10764 | -0.262347532 | 0.052457025 | 1.87E-01 | 4.53E-01 | 1.00E+00 |
| ENSG00000223772.1_GEMIN8P3   | ENSG00000160789.18_LMNA | -0.07852 | -0.234788226 | 0.081699438 | 3.36E-01 | 6.22E-01 | 1.00E+00 |
| ENSG00000237322.1_RPL7L1P1C  | ENSG00000160789.18_LMNA | 0.00027  | -0.158940848 | 0.159460534 | 9.97E-01 | 9.99E-01 | 1.00E+00 |
| ENSG00000255899.1_XXbac-BPG  | ENSG00000160789.18_LMNA | 0.07673  | -0.08348765  | 0.233086267 | 3.47E-01 | 6.31E-01 | 1.00E+00 |
| ENSG00000241964.3_RN7SL135F  | ENSG00000160789.18_LMNA | 0.08317  | -0.07705561  | 0.239199019 | 3.08E-01 | 5.95E-01 | 1.00E+00 |

|                              |                         |          |              |             |          |          |          |
|------------------------------|-------------------------|----------|--------------|-------------|----------|----------|----------|
| ENSG00000241248.3_RN7SL727F  | ENSG00000160789.18_LMNA | -0.00397 | -0.163062923 | 0.155333602 | 9.61E-01 | 9.85E-01 | 1.00E+00 |
| ENSG00000264981.1_RP11-434D  | ENSG00000160789.18_LMNA | -0.01868 | -0.177356816 | 0.140936257 | 8.19E-01 | 9.30E-01 | 1.00E+00 |
| ENSG00000271291.1_RP11-289I  | ENSG00000160789.18_LMNA | -0.05386 | -0.211252329 | 0.106248663 | 5.10E-01 | 7.59E-01 | 1.00E+00 |
| ENSG00000277598.1_RP11-49E1  | ENSG00000160789.18_LMNA | -0.0321  | -0.190328903 | 0.127752706 | 6.95E-01 | 8.69E-01 | 1.00E+00 |
| ENSG00000235518.2_AC011196.  | ENSG00000160789.18_LMNA | 0.07647  | -0.083750742 | 0.232835701 | 3.49E-01 | 6.33E-01 | 1.00E+00 |
| ENSG00000269354.1_AC005626.  | ENSG00000160789.18_LMNA | 0.00723  | -0.152143996 | 0.166241178 | 9.30E-01 | 9.73E-01 | 1.00E+00 |
| ENSG00000276362.1_RP11-241M  | ENSG00000160789.18_LMNA | -0.04575 | -0.203471951 | 0.11427978  | 5.76E-01 | 8.02E-01 | 1.00E+00 |
| ENSG00000278785.1_Metazoa_SI | ENSG00000160789.18_LMNA | -0.06042 | -0.217532865 | 0.099735367 | 4.60E-01 | 7.23E-01 | 1.00E+00 |
| ENSG00000243801.3_RN7SL461F  | ENSG00000160789.18_LMNA | 0.05596  | -0.104165493 | 0.21326391  | 4.93E-01 | 7.49E-01 | 1.00E+00 |
| ENSG00000230019.1_YWHAQP9    | ENSG00000160789.18_LMNA | -0.01927 | -0.177926964 | 0.140359176 | 8.14E-01 | 9.27E-01 | 1.00E+00 |
| ENSG00000264562.1_RP11-1109I | ENSG00000160789.18_LMNA | -0.1154  | -0.269642917 | 0.044624654 | 1.57E-01 | 4.09E-01 | 1.00E+00 |
| ENSG00000169469.8_SPRR1B     | ENSG00000160789.18_LMNA | -0.04405 | -0.201832375 | 0.115966913 | 5.90E-01 | 8.10E-01 | 1.00E+00 |
| ENSG00000229483.2_LINC00362  | ENSG00000160789.18_LMNA | -0.00655 | -0.165580926 | 0.152807152 | 9.36E-01 | 9.75E-01 | 1.00E+00 |
| ENSG00000197683.4_KRTAP26-1  | ENSG00000160789.18_LMNA | -0.03599 | -0.194080681 | 0.123918698 | 6.60E-01 | 8.50E-01 | 1.00E+00 |
| ENSG00000222445.1_RN7SKP56   | ENSG00000160789.18_LMNA | 0.14856  | -0.010895266 | 0.300652976 | 6.78E-02 | 2.44E-01 | 1.00E+00 |
| ENSG00000227120.1_AC009238.  | ENSG00000160789.18_LMNA | 0.05893  | -0.101220162 | 0.216103439 | 4.71E-01 | 7.31E-01 | 1.00E+00 |
| ENSG00000234958.4_FABP5P13   | ENSG00000160789.18_LMNA | 0.08051  | -0.079712837 | 0.236676733 | 3.24E-01 | 6.11E-01 | 1.00E+00 |
| ENSG00000248488.2_PGAM4P2    | ENSG00000160789.18_LMNA | -0.01362 | -0.172445748 | 0.145898097 | 8.68E-01 | 9.48E-01 | 1.00E+00 |
| ENSG00000241757.3_RN7SL714F  | ENSG00000160789.18_LMNA | -0.05145 | -0.208940145 | 0.108639696 | 5.29E-01 | 7.73E-01 | 1.00E+00 |
| ENSG00000254161.1_IGLVIV-65  | ENSG00000160789.18_LMNA | 0.04006  | -0.119909831 | 0.197993643 | 6.24E-01 | 8.31E-01 | 1.00E+00 |
| ENSG00000253001.1_RN7SKP10   | ENSG00000160789.18_LMNA | 0.07777  | -0.082449252 | 0.234074814 | 3.41E-01 | 6.26E-01 | 1.00E+00 |
| ENSG00000270698.1_RP11-568J. | ENSG00000160789.18_LMNA | 0.03634  | -0.123579219 | 0.194412431 | 6.57E-01 | 8.48E-01 | 1.00E+00 |
| ENSG00000229899.1_AC084290.  | ENSG00000160789.18_LMNA | -0.02191 | -0.18047896  | 0.137773499 | 7.89E-01 | 9.14E-01 | 1.00E+00 |
| ENSG00000241144.3_RN7SL728F  | ENSG00000160789.18_LMNA | 0.04644  | -0.113597152 | 0.204134831 | 5.70E-01 | 7.99E-01 | 1.00E+00 |
| ENSG00000240014.3_RN7SL254F  | ENSG00000160789.18_LMNA | -0.07821 | -0.234489337 | 0.082013622 | 3.38E-01 | 6.24E-01 | 1.00E+00 |
| ENSG00000255368.1_RP11-54J7. | ENSG00000160789.18_LMNA | 0.05348  | -0.106626223 | 0.210887457 | 5.13E-01 | 7.61E-01 | 1.00E+00 |
| ENSG00000236550.1_RP4-673D2  | ENSG00000160789.18_LMNA | -0.20527 | -0.352935859 | -0.04762433 | 1.12E-02 | 7.10E-02 | 1.00E+00 |
| ENSG00000249301.1_RP11-524L  | ENSG00000160789.18_LMNA | 0.02169  | -0.137987684 | 0.180267728 | 7.91E-01 | 9.15E-01 | 1.00E+00 |
| ENSG00000196800.5_SPINK14    | ENSG00000160789.18_LMNA | -0.09531 | -0.250710831 | 0.06487061  | 2.43E-01 | 5.22E-01 | 1.00E+00 |
| ENSG00000178257.3_PRM3       | ENSG00000160789.18_LMNA | 0.04646  | -0.113579696 | 0.204151779 | 5.70E-01 | 7.99E-01 | 1.00E+00 |
| ENSG00000275588.1_RN7SL341F  | ENSG00000160789.18_LMNA | -0.03958 | -0.197539627 | 0.120375507 | 6.28E-01 | 8.33E-01 | 1.00E+00 |
| ENSG00000228790.1_AC098784.  | ENSG00000160789.18_LMNA | 0.01008  | -0.149359189 | 0.169010675 | 9.02E-01 | 9.62E-01 | 1.00E+00 |
| ENSG00000232808.1_TTTY20     | ENSG00000160789.18_LMNA | 0.00102  | -0.158201896 | 0.160199182 | 9.90E-01 | 9.96E-01 | 1.00E+00 |

|                              |                         |          |              |             |          |          |          |
|------------------------------|-------------------------|----------|--------------|-------------|----------|----------|----------|
| ENSG00000232419.1_TTTY19     | ENSG00000160789.18_LMNA | 0.0131   | -0.146408641 | 0.171939529 | 8.73E-01 | 9.51E-01 | 1.00E+00 |
| ENSG00000219757.1_RP11-793L  | ENSG00000160789.18_LMNA | -0.00087 | -0.160051204 | 0.158349964 | 9.91E-01 | 9.97E-01 | 1.00E+00 |
| ENSG00000248883.2_B4GALNT2   | ENSG00000160789.18_LMNA | 0.01152  | -0.147953806 | 0.170406426 | 8.88E-01 | 9.56E-01 | 1.00E+00 |
| ENSG00000277748.1_AC006262.  | ENSG00000160789.18_LMNA | -0.14366 | -0.296085934 | 0.015907721 | 7.75E-02 | 2.67E-01 | 1.00E+00 |
| ENSG00000256615.1_RP11-59N2  | ENSG00000160789.18_LMNA | -0.03797 | -0.195985495 | 0.121968493 | 6.42E-01 | 8.41E-01 | 1.00E+00 |
| ENSG00000240215.4_TRBV25ORE  | ENSG00000160789.18_LMNA | 0.02246  | -0.137227256 | 0.18101754  | 7.84E-01 | 9.11E-01 | 1.00E+00 |
| ENSG00000256286.1_RP11-983C  | ENSG00000160789.18_LMNA | -0.13127 | -0.284523498 | 0.028528093 | 1.07E-01 | 3.25E-01 | 1.00E+00 |
| ENSG00000123447.6_TYRL       | ENSG00000160789.18_LMNA | -0.13254 | -0.285708131 | 0.027239641 | 1.04E-01 | 3.19E-01 | 1.00E+00 |
| ENSG00000242029.1_RP11-457K  | ENSG00000160789.18_LMNA | -0.05014 | -0.207680071 | 0.109941195 | 5.40E-01 | 7.79E-01 | 1.00E+00 |
| ENSG00000237002.5_RP11-92J1  | ENSG00000160789.18_LMNA | -0.03563 | -0.193732052 | 0.124275369 | 6.63E-01 | 8.51E-01 | 1.00E+00 |
| ENSG00000266153.1_RP11-190I1 | ENSG00000160789.18_LMNA | -0.11803 | -0.272113843 | 0.041963065 | 1.48E-01 | 3.94E-01 | 1.00E+00 |
| ENSG00000177023.2_DEFB104B   | ENSG00000160789.18_LMNA | 0.02017  | -0.139479295 | 0.178795865 | 8.05E-01 | 9.22E-01 | 1.00E+00 |
| ENSG00000252634.1_RN7SKP21   | ENSG00000160789.18_LMNA | 0.07805  | -0.082166757 | 0.234343635 | 3.39E-01 | 6.24E-01 | 1.00E+00 |
| ENSG00000271036.1_CLPTM1LP   | ENSG00000160789.18_LMNA | -0.0219  | -0.180474366 | 0.137778158 | 7.89E-01 | 9.14E-01 | 1.00E+00 |
| ENSG00000230405.1_RPS3AP52   | ENSG00000160789.18_LMNA | 0.00189  | -0.157356846 | 0.161043448 | 9.82E-01 | 9.93E-01 | 1.00E+00 |
| ENSG00000251644.1_HPRT1P1    | ENSG00000160789.18_LMNA | 0.07422  | -0.085996367 | 0.230695282 | 3.63E-01 | 6.45E-01 | 1.00E+00 |
| ENSG00000229025.1_AP001595.  | ENSG00000160789.18_LMNA | -0.11714 | -0.271283883 | 0.042857564 | 1.51E-01 | 3.99E-01 | 1.00E+00 |
| ENSG00000232841.1_BRWD1P3    | ENSG00000160789.18_LMNA | -0.09719 | -0.252480037 | 0.062989564 | 2.34E-01 | 5.11E-01 | 1.00E+00 |
| ENSG00000248430.1_HMGB3P16   | ENSG00000160789.18_LMNA | -0.16398 | -0.314961171 | -0.0049104  | 4.35E-02 | 1.84E-01 | 1.00E+00 |
| ENSG00000251814.1_RN7SKP18   | ENSG00000160789.18_LMNA | 0.16187  | 0.002736086  | 0.313001185 | 4.63E-02 | 1.91E-01 | 1.00E+00 |
| ENSG00000227557.1_MTND3P9    | ENSG00000160789.18_LMNA | -0.07795 | -0.234242411 | 0.082273136 | 3.40E-01 | 6.25E-01 | 1.00E+00 |
| ENSG00000278222.1_RN7SL536F  | ENSG00000160789.18_LMNA | 0.06921  | -0.090996246 | 0.225918609 | 3.97E-01 | 6.74E-01 | 1.00E+00 |
| ENSG00000244551.2_RPL34P29   | ENSG00000160789.18_LMNA | -0.0179  | -0.1765977   | 0.141704266 | 8.27E-01 | 9.32E-01 | 1.00E+00 |
| ENSG00000252350.1_RPPH1-3P   | ENSG00000160789.18_LMNA | -0.09318 | -0.248695037 | 0.067011102 | 2.54E-01 | 5.35E-01 | 1.00E+00 |
| ENSG00000250409.1_CTB-3M24.  | ENSG00000160789.18_LMNA | 0.01417  | -0.145363477 | 0.17297566  | 8.62E-01 | 9.46E-01 | 1.00E+00 |
| ENSG00000233138.1_RP1-67K17  | ENSG00000160789.18_LMNA | -0.13397 | -0.287047057 | 0.025782122 | 9.99E-02 | 3.11E-01 | 1.00E+00 |
| ENSG00000270275.1_TRMT112P   | ENSG00000160789.18_LMNA | 0.06239  | -0.097785804 | 0.219407662 | 4.45E-01 | 7.12E-01 | 1.00E+00 |
| ENSG00000233083.1_FTH1P6     | ENSG00000160789.18_LMNA | 0.05179  | -0.108298722 | 0.209270093 | 5.26E-01 | 7.71E-01 | 1.00E+00 |
| ENSG00000277858.1_H2AFB2     | ENSG00000160789.18_LMNA | -0.02364 | -0.182153832 | 0.136074161 | 7.73E-01 | 9.06E-01 | 1.00E+00 |
| ENSG00000233134.1_MTND3P17   | ENSG00000160789.18_LMNA | -0.00355 | -0.162659844 | 0.155737647 | 9.65E-01 | 9.86E-01 | 1.00E+00 |
| ENSG00000236300.2_MTND4LP1   | ENSG00000160789.18_LMNA | 0.07959  | -0.080631169 | 0.235804043 | 3.30E-01 | 6.16E-01 | 1.00E+00 |
| ENSG00000227283.1_RPL35AP1   | ENSG00000160789.18_LMNA | 0.01281  | -0.14669416  | 0.171656355 | 8.76E-01 | 9.52E-01 | 1.00E+00 |
| ENSG00000260983.1_RP11-150D  | ENSG00000160789.18_LMNA | -0.09777 | -0.253035776 | 0.062398231 | 2.31E-01 | 5.09E-01 | 1.00E+00 |

|                              |                         |          |              |             |          |          |          |
|------------------------------|-------------------------|----------|--------------|-------------|----------|----------|----------|
| ENSG00000221891.2_FAM218BP   | ENSG00000160789.18_LMNA | 0.09788  | -0.06229123  | 0.253136314 | 2.30E-01 | 5.08E-01 | 1.00E+00 |
| ENSG00000270685.1_IGHV1OR1   | ENSG00000160789.18_LMNA | -0.10026 | -0.255385212 | 0.059895869 | 2.19E-01 | 4.94E-01 | 1.00E+00 |
| ENSG00000250036.1_IGKV1D-37  | ENSG00000160789.18_LMNA | -0.03953 | -0.197485506 | 0.120431008 | 6.29E-01 | 8.33E-01 | 1.00E+00 |
| ENSG00000222174.1_RN7SKP14   | ENSG00000160789.18_LMNA | 0.01937  | -0.140267758 | 0.178017265 | 8.13E-01 | 9.26E-01 | 1.00E+00 |
| ENSG00000235154.1_CTA-280A3  | ENSG00000160789.18_LMNA | -0.01265 | -0.171508906 | 0.146842809 | 8.77E-01 | 9.52E-01 | 1.00E+00 |
| ENSG00000278874.1_RP11-191F  | ENSG00000160789.18_LMNA | -0.15885 | -0.310201347 | 0.000364834 | 5.06E-02 | 2.03E-01 | 1.00E+00 |
| ENSG00000257855.1_RP11-629C  | ENSG00000160789.18_LMNA | 0.04172  | -0.11826185  | 0.199599266 | 6.10E-01 | 8.22E-01 | 1.00E+00 |
| ENSG00000228410.4_TCEB1P24   | ENSG00000160789.18_LMNA | -0.04759 | -0.205238416 | 0.112460025 | 5.60E-01 | 7.93E-01 | 1.00E+00 |
| ENSG00000250812.2_RP11-530I1 | ENSG00000160789.18_LMNA | 0.0144   | -0.14513575  | 0.173201325 | 8.60E-01 | 9.45E-01 | 1.00E+00 |
| ENSG00000244501.3_RN7SL623F  | ENSG00000160789.18_LMNA | 0.18547  | 0.027073321  | 0.334789745 | 2.22E-02 | 1.16E-01 | 1.00E+00 |
| ENSG00000234059.1_CASKP1     | ENSG00000160789.18_LMNA | 0.05988  | -0.100275243 | 0.217013279 | 4.64E-01 | 7.26E-01 | 1.00E+00 |
| ENSG00000233940.1_RPL12P45   | ENSG00000160789.18_LMNA | -0.16773 | -0.318424798 | -0.00875995 | 3.89E-02 | 1.70E-01 | 1.00E+00 |
| ENSG00000265675.2_RN7SL708F  | ENSG00000160789.18_LMNA | -0.06281 | -0.21980966  | 0.097367458 | 4.42E-01 | 7.10E-01 | 1.00E+00 |
| ENSG00000229297.1_RP11-540H  | ENSG00000160789.18_LMNA | 0.09816  | -0.062014369 | 0.253396421 | 2.29E-01 | 5.06E-01 | 1.00E+00 |
| ENSG00000257940.1_RP11-248E  | ENSG00000160789.18_LMNA | 0.06418  | -0.096002144 | 0.22112087  | 4.32E-01 | 7.01E-01 | 1.00E+00 |
| ENSG00000200475.1_RN7SKP16   | ENSG00000160789.18_LMNA | -0.24906 | -0.3926906   | -0.0935697  | 1.97E-03 | 1.93E-02 | 1.00E+00 |
| ENSG00000263620.1_RP11-599B  | ENSG00000160789.18_LMNA | -0.01555 | -0.174318949 | 0.144007418 | 8.49E-01 | 9.41E-01 | 1.00E+00 |
| ENSG00000239744.3_RN7SL63P   | ENSG00000160789.18_LMNA | 0.2103   | 0.052871149  | 0.357532175 | 9.31E-03 | 6.22E-02 | 1.00E+00 |
| ENSG00000228375.1_RPS20P25   | ENSG00000160789.18_LMNA | 0.01084  | -0.148619039 | 0.169745912 | 8.95E-01 | 9.59E-01 | 1.00E+00 |
| ENSG00000279920.1_KB-1183D5  | ENSG00000160789.18_LMNA | -0.14757 | -0.299730528 | 0.011908941 | 6.96E-02 | 2.49E-01 | 1.00E+00 |
| ENSG00000263196.1_MTND3P13   | ENSG00000160789.18_LMNA | -0.12073 | -0.274653415 | 0.039222879 | 1.38E-01 | 3.79E-01 | 1.00E+00 |
| ENSG00000243115.3_RN7SL849F  | ENSG00000160789.18_LMNA | 0.08813  | -0.072083745 | 0.243906964 | 2.80E-01 | 5.66E-01 | 1.00E+00 |
| ENSG00000249372.1_ATP6V1G1   | ENSG00000160789.18_LMNA | -0.02477 | -0.183248    | 0.134962997 | 7.62E-01 | 9.01E-01 | 1.00E+00 |
| ENSG00000180708.4_OR10K2     | ENSG00000160789.18_LMNA | -0.00588 | -0.164926873 | 0.1534638   | 9.43E-01 | 9.77E-01 | 1.00E+00 |
| ENSG00000239679.3_RN7SL193F  | ENSG00000160789.18_LMNA | -0.05855 | -0.215739814 | 0.101597647 | 4.74E-01 | 7.33E-01 | 1.00E+00 |
| ENSG00000258772.1_RP11-84C1  | ENSG00000160789.18_LMNA | -0.10467 | -0.259542928 | 0.055457793 | 1.99E-01 | 4.70E-01 | 1.00E+00 |
| ENSG00000270440.1_RP11-19H6  | ENSG00000160789.18_LMNA | -0.01422 | -0.173030662 | 0.145307975 | 8.62E-01 | 9.46E-01 | 1.00E+00 |
| ENSG00000262730.1_RP11-1099I | ENSG00000160789.18_LMNA | -0.01764 | -0.176345535 | 0.141959301 | 8.29E-01 | 9.33E-01 | 1.00E+00 |
| ENSG00000253713.1_CTC-264O1  | ENSG00000160789.18_LMNA | -0.2007  | -0.348754511 | -0.0428658  | 1.32E-02 | 7.99E-02 | 1.00E+00 |
| ENSG00000220913.1_RP11-235G  | ENSG00000160789.18_LMNA | 0.0103   | -0.14914905  | 0.169219455 | 9.00E-01 | 9.61E-01 | 1.00E+00 |
| ENSG00000227721.1_RPSAP64    | ENSG00000160789.18_LMNA | -0.01078 | -0.169687956 | 0.148677396 | 8.95E-01 | 9.59E-01 | 1.00E+00 |
| ENSG00000227707.1_SDAD1P3    | ENSG00000160789.18_LMNA | 0.17179  | 0.012945215  | 0.322181119 | 3.43E-02 | 1.57E-01 | 1.00E+00 |
| ENSG00000226857.1_DUTP3      | ENSG00000160789.18_LMNA | -0.04618 | -0.203880269 | 0.113859334 | 5.72E-01 | 8.00E-01 | 1.00E+00 |

|                              |                         |          |              |             |          |          |          |
|------------------------------|-------------------------|----------|--------------|-------------|----------|----------|----------|
| ENSG00000231547.1_RP11-38O1  | ENSG00000160789.18_LMNA | -0.06689 | -0.223707635 | 0.093305139 | 4.13E-01 | 6.86E-01 | 1.00E+00 |
| ENSG00000224471.2_MTCO3P19   | ENSG00000160789.18_LMNA | 0.07489  | -0.085329666 | 0.231331069 | 3.59E-01 | 6.42E-01 | 1.00E+00 |
| ENSG00000231766.1_MTCO2P5    | ENSG00000160789.18_LMNA | 0.00634  | -0.153014471 | 0.165374456 | 9.38E-01 | 9.76E-01 | 1.00E+00 |
| ENSG00000257583.1_           | ENSG00000160789.18_LMNA | -0.07325 | -0.229766582 | 0.086969714 | 3.70E-01 | 6.50E-01 | 1.00E+00 |
| ENSG00000259852.2_IGHV1OR1   | ENSG00000160789.18_LMNA | -0.02113 | -0.1797223   | 0.138540598 | 7.96E-01 | 9.18E-01 | 1.00E+00 |
| ENSG00000250997.1_RP11-502M  | ENSG00000160789.18_LMNA | 0.15607  | -0.003215219 | 0.307622956 | 5.49E-02 | 2.13E-01 | 1.00E+00 |
| ENSG00000223360.1_AC096559.  | ENSG00000160789.18_LMNA | 0.12137  | -0.038579754 | 0.275248822 | 1.36E-01 | 3.76E-01 | 1.00E+00 |
| ENSG00000227148.1_RP11-196D  | ENSG00000160789.18_LMNA | -0.11243 | -0.266855454 | 0.047621859 | 1.68E-01 | 4.26E-01 | 1.00E+00 |
| ENSG00000244661.1_TRBV12-1   | ENSG00000160789.18_LMNA | -0.16352 | -0.314535283 | -0.00443769 | 4.41E-02 | 1.85E-01 | 1.00E+00 |
| ENSG00000234244.1_RP11-139J  | ENSG00000160789.18_LMNA | 0.0995   | -0.060666085 | 0.254662463 | 2.23E-01 | 4.98E-01 | 1.00E+00 |
| ENSG00000270960.1_RP11-366M  | ENSG00000160789.18_LMNA | 0.07368  | -0.086533931 | 0.230182448 | 3.67E-01 | 6.48E-01 | 1.00E+00 |
| ENSG00000232086.1_RP11-141J  | ENSG00000160789.18_LMNA | -0.0911  | -0.246718246 | 0.06910736  | 2.64E-01 | 5.48E-01 | 1.00E+00 |
| ENSG00000255825.1_RP5-1154L  | ENSG00000160789.18_LMNA | -0.00159 | -0.160749604 | 0.157651016 | 9.84E-01 | 9.94E-01 | 1.00E+00 |
| ENSG00000225999.1_NDUFA12P   | ENSG00000160789.18_LMNA | -0.13229 | -0.285480634 | 0.027487156 | 1.04E-01 | 3.20E-01 | 1.00E+00 |
| ENSG00000253343.1_CTD-3023L  | ENSG00000160789.18_LMNA | -0.01775 | -0.176454718 | 0.141848881 | 8.28E-01 | 9.33E-01 | 1.00E+00 |
| ENSG00000226034.2_NANOGNBI   | ENSG00000160789.18_LMNA | 0.05952  | -0.100636883 | 0.216665129 | 4.66E-01 | 7.28E-01 | 1.00E+00 |
| ENSG00000267471.1_RP11-1058  | ENSG00000160789.18_LMNA | 0.03603  | -0.123885343 | 0.19411328  | 6.59E-01 | 8.50E-01 | 1.00E+00 |
| ENSG00000249754.2_NDUFB4P9   | ENSG00000160789.18_LMNA | 0.0198   | -0.139844565 | 0.178435214 | 8.09E-01 | 9.24E-01 | 1.00E+00 |
| ENSG00000255516.1_RP11-164N  | ENSG00000160789.18_LMNA | -0.06524 | -0.222138194 | 0.09494202  | 4.25E-01 | 6.95E-01 | 1.00E+00 |
| ENSG00000277852.1_RP11-421K  | ENSG00000160789.18_LMNA | -0.06786 | -0.224635223 | 0.092336886 | 4.06E-01 | 6.82E-01 | 1.00E+00 |
| ENSG00000250637.2_RP11-359P  | ENSG00000160789.18_LMNA | -0.05598 | -0.213284137 | 0.104144533 | 4.93E-01 | 7.49E-01 | 1.00E+00 |
| ENSG00000254457.1_OR5D2P     | ENSG00000160789.18_LMNA | -0.19832 | -0.346577806 | -0.04039411 | 1.43E-02 | 8.50E-02 | 1.00E+00 |
| ENSG00000268390.1_CTC-518B2  | ENSG00000160789.18_LMNA | 0.05367  | -0.10644053  | 0.211066921 | 5.11E-01 | 7.60E-01 | 1.00E+00 |
| ENSG00000224603.1_RP11-96J1  | ENSG00000160789.18_LMNA | -0.12218 | -0.27600895  | 0.037758329 | 1.34E-01 | 3.71E-01 | 1.00E+00 |
| ENSG00000259320.1_RP11-183E  | ENSG00000160789.18_LMNA | -0.00825 | -0.167226915 | 0.151153388 | 9.20E-01 | 9.69E-01 | 1.00E+00 |
| ENSG00000235011.2_RP4-726F1  | ENSG00000160789.18_LMNA | -0.14797 | -0.300097966 | 0.011505242 | 6.89E-02 | 2.47E-01 | 1.00E+00 |
| ENSG00000253280.1_RP11-618M  | ENSG00000160789.18_LMNA | -0.01756 | -0.176264475 | 0.142041275 | 8.30E-01 | 9.34E-01 | 1.00E+00 |
| ENSG00000236655.1_AC023347.  | ENSG00000160789.18_LMNA | 0.09472  | -0.065467239 | 0.250149235 | 2.46E-01 | 5.25E-01 | 1.00E+00 |
| ENSG00000253784.1_RP11-1145I | ENSG00000160789.18_LMNA | -0.02745 | -0.185841924 | 0.132325581 | 7.37E-01 | 8.89E-01 | 1.00E+00 |
| ENSG00000211626.2_IGKV6D-41  | ENSG00000160789.18_LMNA | -0.16323 | -0.314262913 | -0.00413545 | 4.45E-02 | 1.86E-01 | 1.00E+00 |
| ENSG00000278810.1_           | ENSG00000160789.18_LMNA | 0.13826  | -0.021408421 | 0.291057561 | 8.94E-02 | 2.91E-01 | 1.00E+00 |
| ENSG00000146047.5_HIST1H2BA  | ENSG00000160789.18_LMNA | -0.05443 | -0.211792002 | 0.105690058 | 5.05E-01 | 7.56E-01 | 1.00E+00 |
| ENSG00000281179.1_RP11-294C  | ENSG00000160789.18_LMNA | -0.03558 | -0.193681415 | 0.124327167 | 6.63E-01 | 8.51E-01 | 1.00E+00 |

|                              |                         |          |              |             |          |          |          |
|------------------------------|-------------------------|----------|--------------|-------------|----------|----------|----------|
| ENSG00000280284.1_RP11-154F  | ENSG00000160789.18_LMNA | -0.01551 | -0.174278089 | 0.144048683 | 8.50E-01 | 9.41E-01 | 1.00E+00 |
| ENSG00000234124.5_CSN1S2AP   | ENSG00000160789.18_LMNA | -0.06764 | -0.224428686 | 0.092552529 | 4.08E-01 | 6.83E-01 | 1.00E+00 |
| ENSG00000222499.1_RN7SKP17   | ENSG00000160789.18_LMNA | -0.13451 | -0.287556605 | 0.025227092 | 9.85E-02 | 3.09E-01 | 1.00E+00 |
| ENSG00000254816.1_RP11-670N  | ENSG00000160789.18_LMNA | 0.08954  | -0.070663063 | 0.245249503 | 2.73E-01 | 5.57E-01 | 1.00E+00 |
| ENSG00000251256.1_RP11-273B  | ENSG00000160789.18_LMNA | -0.08164 | -0.237746092 | 0.078586817 | 3.17E-01 | 6.04E-01 | 1.00E+00 |
| ENSG00000233335.1_AC016696.  | ENSG00000160789.18_LMNA | -0.0262  | -0.184633773 | 0.133554549 | 7.49E-01 | 8.95E-01 | 1.00E+00 |
| ENSG00000225321.1_LINC01427  | ENSG00000160789.18_LMNA | -0.08884 | -0.244585606 | 0.071365762 | 2.76E-01 | 5.61E-01 | 1.00E+00 |
| ENSG00000243048.3_FTH1P18    | ENSG00000160789.18_LMNA | -0.12024 | -0.274195591 | 0.039717217 | 1.40E-01 | 3.82E-01 | 1.00E+00 |
| ENSG00000267292.1_RP11-703I1 | ENSG00000160789.18_LMNA | 0.05936  | -0.100797021 | 0.216510939 | 4.68E-01 | 7.29E-01 | 1.00E+00 |
| ENSG00000280683.1_LINC01242  | ENSG00000160789.18_LMNA | -0.05347 | -0.210876012 | 0.106638064 | 5.13E-01 | 7.61E-01 | 1.00E+00 |
| ENSG00000271468.1_RP11-14N4  | ENSG00000160789.18_LMNA | -0.01045 | -0.169368518 | 0.148999    | 8.98E-01 | 9.60E-01 | 1.00E+00 |
| ENSG00000255194.3_SSU72P2    | ENSG00000160789.18_LMNA | 0.05215  | -0.107942957 | 0.209614275 | 5.23E-01 | 7.69E-01 | 1.00E+00 |
| ENSG00000217809.1_FAT1P1     | ENSG00000160789.18_LMNA | 0.03257  | -0.127286821 | 0.190785293 | 6.90E-01 | 8.67E-01 | 1.00E+00 |
| ENSG00000223995.2_RPL32P35   | ENSG00000160789.18_LMNA | -0.05279 | -0.210220497 | 0.107316137 | 5.18E-01 | 7.65E-01 | 1.00E+00 |
| ENSG00000225563.1_AC006076.  | ENSG00000160789.18_LMNA | 0.07256  | -0.087653068 | 0.229114229 | 3.74E-01 | 6.54E-01 | 1.00E+00 |
| ENSG00000259996.1_RARRES2F   | ENSG00000160789.18_LMNA | 0.00993  | -0.149508807 | 0.168862007 | 9.03E-01 | 9.63E-01 | 1.00E+00 |
| ENSG00000263588.1_RP11-595B  | ENSG00000160789.18_LMNA | 0.23633  | 0.080149059  | 0.381192679 | 3.38E-03 | 2.92E-02 | 1.00E+00 |
| ENSG00000248978.2_RP11-98H4  | ENSG00000160789.18_LMNA | -0.10315 | -0.258115934 | 0.056982415 | 2.06E-01 | 4.78E-01 | 1.00E+00 |
| ENSG00000229744.1_AC011998.  | ENSG00000160789.18_LMNA | 0.00709  | -0.152278418 | 0.166107368 | 9.31E-01 | 9.73E-01 | 1.00E+00 |
| ENSG00000217408.2_PRELID1P2  | ENSG00000160789.18_LMNA | -0.07515 | -0.231584321 | 0.08506402  | 3.57E-01 | 6.41E-01 | 1.00E+00 |
| ENSG00000250556.1_CCDC34P1   | ENSG00000160789.18_LMNA | -0.07331 | -0.22983166  | 0.086901527 | 3.69E-01 | 6.50E-01 | 1.00E+00 |
| ENSG00000236151.1_RP5-1100I6 | ENSG00000160789.18_LMNA | -0.01797 | -0.176664702 | 0.141636495 | 8.26E-01 | 9.32E-01 | 1.00E+00 |
| ENSG00000227342.1_LINC00307  | ENSG00000160789.18_LMNA | 0.02079  | -0.138865607 | 0.1794016   | 7.99E-01 | 9.19E-01 | 1.00E+00 |
| ENSG00000263433.1_RP11-260A  | ENSG00000160789.18_LMNA | -0.01597 | -0.17472973  | 0.143592493 | 8.45E-01 | 9.40E-01 | 1.00E+00 |
| ENSG00000233905.1_LONRF2P2   | ENSG00000160789.18_LMNA | 0.07331  | -0.086907757 | 0.229825715 | 3.69E-01 | 6.50E-01 | 1.00E+00 |
| ENSG00000271219.1_RP11-369K  | ENSG00000160789.18_LMNA | 0.06475  | -0.095431415 | 0.221668643 | 4.28E-01 | 6.99E-01 | 1.00E+00 |
| ENSG00000223581.1_RP11-393K  | ENSG00000160789.18_LMNA | -0.0095  | -0.168446467 | 0.149926926 | 9.08E-01 | 9.65E-01 | 1.00E+00 |
| ENSG00000261695.1_RP11-719K  | ENSG00000160789.18_LMNA | -0.06775 | -0.224524249 | 0.092452756 | 4.07E-01 | 6.82E-01 | 1.00E+00 |
| ENSG00000228669.1_LINC00448  | ENSG00000160789.18_LMNA | -0.00788 | -0.16687043  | 0.151511709 | 9.23E-01 | 9.71E-01 | 1.00E+00 |
| ENSG00000250464.1_LRRC34P2   | ENSG00000160789.18_LMNA | -0.1083  | -0.262967025 | 0.051793434 | 1.84E-01 | 4.49E-01 | 1.00E+00 |
| ENSG00000227447.1_XGY1       | ENSG00000160789.18_LMNA | 0.03795  | -0.121986615 | 0.195967807 | 6.43E-01 | 8.41E-01 | 1.00E+00 |
| ENSG00000256813.1_RP11-804A  | ENSG00000160789.18_LMNA | -0.02416 | -0.182658362 | 0.135561894 | 7.68E-01 | 9.04E-01 | 1.00E+00 |
| ENSG00000267695.1_RP11-1030I | ENSG00000160789.18_LMNA | 0.02444  | -0.135290605 | 0.182925485 | 7.65E-01 | 9.02E-01 | 1.00E+00 |

|                              |                         |          |              |             |          |          |          |
|------------------------------|-------------------------|----------|--------------|-------------|----------|----------|----------|
| ENSG00000254661.2_RP11-222N  | ENSG00000160789.18_LMNA | -0.02548 | -0.183932827 | 0.134267125 | 7.55E-01 | 8.98E-01 | 1.00E+00 |
| ENSG00000274649.1_CTD-2311B  | ENSG00000160789.18_LMNA | -0.14315 | -0.29561397  | 0.016424822 | 7.85E-02 | 2.69E-01 | 1.00E+00 |
| ENSG00000203926.4_SPANXA2    | ENSG00000160789.18_LMNA | -0.00366 | -0.162768623 | 0.155628617 | 9.64E-01 | 9.86E-01 | 1.00E+00 |
| ENSG00000269989.1_RP11-635N  | ENSG00000160789.18_LMNA | -0.02154 | -0.180127024 | 0.138130338 | 7.92E-01 | 9.16E-01 | 1.00E+00 |
| ENSG00000270900.1_NUDT19P4   | ENSG00000160789.18_LMNA | -0.06507 | -0.22197593  | 0.095111159 | 4.26E-01 | 6.96E-01 | 1.00E+00 |
| ENSG00000267401.1_RP11-396N  | ENSG00000160789.18_LMNA | 0.07329  | -0.086928328 | 0.229806082 | 3.70E-01 | 6.50E-01 | 1.00E+00 |
| ENSG00000231202.1_TRGVB      | ENSG00000160789.18_LMNA | 0.00881  | -0.150597883 | 0.167779411 | 9.14E-01 | 9.67E-01 | 1.00E+00 |
| ENSG00000268736.1_MTCO3P39   | ENSG00000160789.18_LMNA | -0.12637 | -0.279938373 | 0.033505261 | 1.21E-01 | 3.50E-01 | 1.00E+00 |
| ENSG00000257523.1_CTD-2384A  | ENSG00000160789.18_LMNA | -0.02783 | -0.186202704 | 0.131958394 | 7.34E-01 | 8.88E-01 | 1.00E+00 |
| ENSG00000276332.1_CTD-2007F  | ENSG00000160789.18_LMNA | -0.0467  | -0.204382807 | 0.113341712 | 5.68E-01 | 7.98E-01 | 1.00E+00 |
| ENSG00000228239.1_RP11-85G2  | ENSG00000160789.18_LMNA | -0.00207 | -0.161217298 | 0.157182776 | 9.80E-01 | 9.93E-01 | 1.00E+00 |
| ENSG00000258750.2_RP11-2G1.  | ENSG00000160789.18_LMNA | 0.10662  | -0.053488842 | 0.261383765 | 1.91E-01 | 4.59E-01 | 1.00E+00 |
| ENSG00000279276.1_CTA-345G4  | ENSG00000160789.18_LMNA | -0.05093 | -0.208436668 | 0.109159856 | 5.33E-01 | 7.75E-01 | 1.00E+00 |
| ENSG00000228105.1_RP3-340N1  | ENSG00000160789.18_LMNA | -0.0443  | -0.202077888 | 0.115714396 | 5.88E-01 | 8.08E-01 | 1.00E+00 |
| ENSG00000259464.2_SNRPCP18   | ENSG00000160789.18_LMNA | 0.07392  | -0.086295357 | 0.230410067 | 3.65E-01 | 6.47E-01 | 1.00E+00 |
| ENSG00000254182.1_RP11-68L1  | ENSG00000160789.18_LMNA | -0.05025 | -0.207783901 | 0.109833994 | 5.39E-01 | 7.79E-01 | 1.00E+00 |
| ENSG00000259624.1_RP11-138H  | ENSG00000160789.18_LMNA | -0.05399 | -0.211376804 | 0.106119839 | 5.09E-01 | 7.58E-01 | 1.00E+00 |
| ENSG00000280089.1_CMB9-52H   | ENSG00000160789.18_LMNA | -0.08911 | -0.244838932 | 0.071097667 | 2.75E-01 | 5.59E-01 | 1.00E+00 |
| ENSG00000224038.1_RP11-347J  | ENSG00000160789.18_LMNA | -0.04642 | -0.204111445 | 0.11362124  | 5.70E-01 | 7.99E-01 | 1.00E+00 |
| ENSG00000238054.1_RP11-316I3 | ENSG00000160789.18_LMNA | 0.14592  | -0.013600955 | 0.298189491 | 7.29E-02 | 2.56E-01 | 1.00E+00 |
| ENSG00000226839.1_MTND6P11   | ENSG00000160789.18_LMNA | -0.00957 | -0.168515389 | 0.149857584 | 9.07E-01 | 9.64E-01 | 1.00E+00 |
| ENSG00000255233.1_RP11-755E  | ENSG00000160789.18_LMNA | -0.20087 | -0.348913993 | -0.04304704 | 1.31E-02 | 7.95E-02 | 1.00E+00 |
| ENSG00000232881.2_RPS10P21   | ENSG00000160789.18_LMNA | -0.0159  | -0.174655787 | 0.14366719  | 8.46E-01 | 9.40E-01 | 1.00E+00 |
| ENSG00000268663.1_WBP1LP6    | ENSG00000160789.18_LMNA | -0.02709 | -0.185491454 | 0.13268219  | 7.40E-01 | 8.91E-01 | 1.00E+00 |
| ENSG00000240542.3_KRTAP9-1   | ENSG00000160789.18_LMNA | -0.08845 | -0.244209162 | 0.071764069 | 2.79E-01 | 5.64E-01 | 1.00E+00 |
| ENSG00000267643.1_RP11-64C1  | ENSG00000160789.18_LMNA | 0.00026  | -0.158949723 | 0.15945166  | 9.97E-01 | 9.99E-01 | 1.00E+00 |
| ENSG00000227101.1_RP11-433J  | ENSG00000160789.18_LMNA | -0.01629 | -0.175031941 | 0.143287162 | 8.42E-01 | 9.39E-01 | 1.00E+00 |
| ENSG00000257797.1_CTD-2382E  | ENSG00000160789.18_LMNA | -0.04867 | -0.206268581 | 0.111397797 | 5.52E-01 | 7.87E-01 | 1.00E+00 |
| ENSG00000253782.1_RP11-350F  | ENSG00000160789.18_LMNA | 0.06081  | -0.099355865 | 0.217897997 | 4.57E-01 | 7.21E-01 | 1.00E+00 |
| ENSG00000236689.1_MTCO2P21   | ENSG00000160789.18_LMNA | 0.12916  | -0.030671361 | 0.282550806 | 1.13E-01 | 3.35E-01 | 1.00E+00 |
| ENSG00000254931.2_MTATP6P1   | ENSG00000160789.18_LMNA | 0.00116  | -0.15806516  | 0.160335823 | 9.89E-01 | 9.96E-01 | 1.00E+00 |
| ENSG00000230891.5_LINC00692  | ENSG00000160789.18_LMNA | -0.01092 | -0.169829083 | 0.14853529  | 8.94E-01 | 9.58E-01 | 1.00E+00 |
| ENSG00000269885.1_VN1R79P    | ENSG00000160789.18_LMNA | -0.10806 | -0.262742423 | 0.052034056 | 1.85E-01 | 4.51E-01 | 1.00E+00 |



|                             |                         |          |              |             |          |          |          |
|-----------------------------|-------------------------|----------|--------------|-------------|----------|----------|----------|
| ENSG00000196383.5_OR4Q2     | ENSG00000160789.18_LMNA | 0.10464  | -0.055489805 | 0.25951298  | 2.00E-01 | 4.70E-01 | 1.00E+00 |
| ENSG00000236387.1_RP11-307C | ENSG00000160789.18_LMNA | -0.07818 | -0.234460352 | 0.082044087 | 3.38E-01 | 6.24E-01 | 1.00E+00 |
| ENSG00000261397.1_LINC01177 | ENSG00000160789.18_LMNA | -0.19615 | -0.344588563 | -0.03813856 | 1.54E-02 | 8.97E-02 | 1.00E+00 |
| ENSG00000231266.1_AC010745. | ENSG00000160789.18_LMNA | 0.07712  | -0.083096557 | 0.233458661 | 3.45E-01 | 6.29E-01 | 1.00E+00 |
| ENSG00000234973.4_RP11-272J | ENSG00000160789.18_LMNA | 0.197    | 0.039026901  | 0.345372349 | 1.50E-02 | 8.78E-02 | 1.00E+00 |
| ENSG00000223398.1_AC027124. | ENSG00000160789.18_LMNA | -0.11429 | -0.268607662 | 0.045738467 | 1.61E-01 | 4.15E-01 | 1.00E+00 |
| ENSG00000263207.2_RP11-26L2 | ENSG00000160789.18_LMNA | 0.02225  | -0.137439216 | 0.180808576 | 7.86E-01 | 9.13E-01 | 1.00E+00 |
| ENSG00000203784.2_LELP1     | ENSG00000160789.18_LMNA | 0.09945  | -0.06071305  | 0.25461838  | 2.23E-01 | 4.98E-01 | 1.00E+00 |
| ENSG00000230418.2_ARL2BPP7  | ENSG00000160789.18_LMNA | 0.03451  | -0.125379759 | 0.192652052 | 6.73E-01 | 8.56E-01 | 1.00E+00 |
| ENSG00000235638.1_MTND6P14  | ENSG00000160789.18_LMNA | -0.14324 | -0.295700988 | 0.016329494 | 7.83E-02 | 2.69E-01 | 1.00E+00 |
| ENSG00000242854.1_DNM1P24   | ENSG00000160789.18_LMNA | 0.04137  | -0.118614147 | 0.199256167 | 6.13E-01 | 8.24E-01 | 1.00E+00 |
| ENSG00000248877.2_PGBD4P4   | ENSG00000160789.18_LMNA | 0.07448  | -0.085739453 | 0.230940315 | 3.62E-01 | 6.44E-01 | 1.00E+00 |
| ENSG00000271194.1_RNF138P2  | ENSG00000160789.18_LMNA | 0.01563  | -0.143928927 | 0.174396664 | 8.48E-01 | 9.41E-01 | 1.00E+00 |
| ENSG00000270593.1_RP11-455J | ENSG00000160789.18_LMNA | -0.00212 | -0.161268768 | 0.157131238 | 9.79E-01 | 9.92E-01 | 1.00E+00 |
| ENSG00000253486.1_          | ENSG00000160789.18_LMNA | -0.07671 | -0.233061154 | 0.08351402  | 3.48E-01 | 6.32E-01 | 1.00E+00 |
| ENSG00000278957.1_RP11-89K2 | ENSG00000160789.18_LMNA | -0.09312 | -0.248630783 | 0.067079283 | 2.54E-01 | 5.35E-01 | 1.00E+00 |
| ENSG00000277509.1_RP11-944L | ENSG00000160789.18_LMNA | 0.09348  | -0.066710018 | 0.248978746 | 2.52E-01 | 5.33E-01 | 1.00E+00 |
| ENSG00000233553.1_AC108462. | ENSG00000160789.18_LMNA | 0.01225  | -0.147241089 | 0.171113771 | 8.81E-01 | 9.54E-01 | 1.00E+00 |
| ENSG00000263125.1_ARL2BPP8  | ENSG00000160789.18_LMNA | -0.0238  | -0.182313043 | 0.135912527 | 7.71E-01 | 9.05E-01 | 1.00E+00 |
| ENSG00000263647.1_RP11-927P | ENSG00000160789.18_LMNA | 0.01366  | -0.145860909 | 0.172482614 | 8.67E-01 | 9.48E-01 | 1.00E+00 |
| ENSG00000255047.1_HNRNPRP2  | ENSG00000160789.18_LMNA | -0.11946 | -0.273462495 | 0.040508464 | 1.43E-01 | 3.86E-01 | 1.00E+00 |
| ENSG00000234170.4_RP11-446F | ENSG00000160789.18_LMNA | -0.17414 | -0.3243505   | -0.01536727 | 3.19E-02 | 1.49E-01 | 1.00E+00 |
| ENSG00000223404.3_LINC00397 | ENSG00000160789.18_LMNA | 0.14506  | -0.014480083 | 0.297388164 | 7.46E-02 | 2.60E-01 | 1.00E+00 |
| ENSG00000258690.1_RP11-81F1 | ENSG00000160789.18_LMNA | -0.04291 | -0.200735805 | 0.117094267 | 6.00E-01 | 8.16E-01 | 1.00E+00 |
| ENSG00000270328.1_RP11-33E1 | ENSG00000160789.18_LMNA | 0.07878  | -0.081438185 | 0.235036715 | 3.35E-01 | 6.20E-01 | 1.00E+00 |
| ENSG00000271158.1_RP11-265D | ENSG00000160789.18_LMNA | -0.01222 | -0.171091421 | 0.147263613 | 8.81E-01 | 9.54E-01 | 1.00E+00 |
| ENSG00000229986.1_AP001042. | ENSG00000160789.18_LMNA | 0.07419  | -0.086024289 | 0.230668648 | 3.64E-01 | 6.45E-01 | 1.00E+00 |
| ENSG00000204717.4_AC073464. | ENSG00000160789.18_LMNA | -0.0199  | -0.178536927 | 0.139741558 | 8.08E-01 | 9.23E-01 | 1.00E+00 |
| ENSG00000257751.2_RP11-536C | ENSG00000160789.18_LMNA | 0.02275  | -0.136946906 | 0.181293883 | 7.81E-01 | 9.10E-01 | 1.00E+00 |
| ENSG00000256752.1_HPRT1P3   | ENSG00000160789.18_LMNA | -0.05828 | -0.215480321 | 0.101866974 | 4.76E-01 | 7.34E-01 | 1.00E+00 |
| ENSG00000270335.1_RP11-642D | ENSG00000160789.18_LMNA | 0.10454  | -0.055587286 | 0.259421781 | 2.00E-01 | 4.70E-01 | 1.00E+00 |
| ENSG00000186232.3_SSU72P3   | ENSG00000160789.18_LMNA | 0.10645  | -0.053658581 | 0.261225161 | 1.92E-01 | 4.60E-01 | 1.00E+00 |
| ENSG00000228730.1_RP11-95L3 | ENSG00000160789.18_LMNA | -0.02849 | -0.186841697 | 0.13130784  | 7.28E-01 | 8.85E-01 | 1.00E+00 |

|                              |                         |          |              |             |          |          |          |
|------------------------------|-------------------------|----------|--------------|-------------|----------|----------|----------|
| ENSG00000225394.1_AC106883.  | ENSG00000160789.18_LMNA | -0.14437 | -0.29674807  | 0.015181979 | 7.60E-02 | 2.64E-01 | 1.00E+00 |
| ENSG00000260332.1_RP11-50O2  | ENSG00000160789.18_LMNA | 0.07464  | -0.085579899 | 0.23109247  | 3.61E-01 | 6.43E-01 | 1.00E+00 |
| ENSG00000219492.4_RP11-1396  | ENSG00000160789.18_LMNA | -0.06683 | -0.22365252  | 0.093362652 | 4.13E-01 | 6.87E-01 | 1.00E+00 |
| ENSG00000196832.3_OR11G2     | ENSG00000160789.18_LMNA | -0.04293 | -0.200756318 | 0.117073187 | 5.99E-01 | 8.16E-01 | 1.00E+00 |
| ENSG00000269021.1_CTD-3187F  | ENSG00000160789.18_LMNA | -0.16992 | -0.320451249 | -0.01101646 | 3.64E-02 | 1.62E-01 | 1.00E+00 |
| ENSG00000271243.1_RP11-355B  | ENSG00000160789.18_LMNA | -0.12419 | -0.277900682 | 0.035712203 | 1.27E-01 | 3.61E-01 | 1.00E+00 |
| ENSG00000255385.1_UBTFL10    | ENSG00000160789.18_LMNA | -0.01081 | -0.169722564 | 0.148642548 | 8.95E-01 | 9.59E-01 | 1.00E+00 |
| ENSG00000262961.1_CTB-162E1  | ENSG00000160789.18_LMNA | -0.0048  | -0.16387502  | 0.154519235 | 9.53E-01 | 9.81E-01 | 1.00E+00 |
| ENSG00000231166.2_TUBB4BP6   | ENSG00000160789.18_LMNA | 0.13228  | -0.027498653 | 0.285470065 | 1.04E-01 | 3.20E-01 | 1.00E+00 |
| ENSG00000265775.1_CTC-304I17 | ENSG00000160789.18_LMNA | -0.05428 | -0.211653656 | 0.105833277 | 5.07E-01 | 7.57E-01 | 1.00E+00 |
| ENSG00000237767.1_LINC01370  | ENSG00000160789.18_LMNA | -0.06332 | -0.22029916  | 0.096857899 | 4.38E-01 | 7.06E-01 | 1.00E+00 |
| ENSG00000159455.8_LCE2B      | ENSG00000160789.18_LMNA | 0.06566  | -0.094526597 | 0.222536657 | 4.22E-01 | 6.93E-01 | 1.00E+00 |
| ENSG00000279752.1_CTB-174D1  | ENSG00000160789.18_LMNA | 0.02764  | -0.132138843 | 0.186025414 | 7.35E-01 | 8.89E-01 | 1.00E+00 |
| ENSG00000264080.1_CTD-2015H  | ENSG00000160789.18_LMNA | 0.12605  | -0.033833786 | 0.279635222 | 1.22E-01 | 3.51E-01 | 1.00E+00 |
| ENSG00000280104.1_CTB-3M24.  | ENSG00000160789.18_LMNA | -0.09125 | -0.246860136 | 0.068956987 | 2.64E-01 | 5.47E-01 | 1.00E+00 |
| ENSG00000230975.1_AC084193.  | ENSG00000160789.18_LMNA | -0.08712 | -0.242951366 | 0.073094184 | 2.86E-01 | 5.71E-01 | 1.00E+00 |
| ENSG00000216859.1_DHFRP5     | ENSG00000160789.18_LMNA | 0.1044   | -0.055727911 | 0.259290207 | 2.01E-01 | 4.71E-01 | 1.00E+00 |
| ENSG00000224532.2_RP3-470L2  | ENSG00000160789.18_LMNA | 0.05072  | -0.109359276 | 0.208243599 | 5.35E-01 | 7.76E-01 | 1.00E+00 |
| ENSG00000130538.4_OR11H1     | ENSG00000160789.18_LMNA | 0.03742  | -0.12251163  | 0.19545524  | 6.47E-01 | 8.43E-01 | 1.00E+00 |
| ENSG00000244235.2_RP11-589C  | ENSG00000160789.18_LMNA | -0.00932 | -0.168266692 | 0.150107781 | 9.09E-01 | 9.65E-01 | 1.00E+00 |
| ENSG00000214880.3_OR7E5P     | ENSG00000160789.18_LMNA | -0.05882 | -0.215996015 | 0.10133169  | 4.72E-01 | 7.32E-01 | 1.00E+00 |
| ENSG00000259833.4_RP11-23E1  | ENSG00000160789.18_LMNA | 0.06594  | -0.094252848 | 0.222799172 | 4.20E-01 | 6.91E-01 | 1.00E+00 |
| ENSG00000260026.1_CTD-2015C  | ENSG00000160789.18_LMNA | -0.03262 | -0.190825158 | 0.127246119 | 6.90E-01 | 8.66E-01 | 1.00E+00 |
| ENSG00000237847.2_FAM231A    | ENSG00000160789.18_LMNA | 0.06989  | -0.090320158 | 0.226565407 | 3.92E-01 | 6.70E-01 | 1.00E+00 |
| ENSG00000241128.1_OR14A2     | ENSG00000160789.18_LMNA | 0.19542  | 0.037379536  | 0.343918536 | 1.58E-02 | 9.12E-02 | 1.00E+00 |
| ENSG00000254394.1_CTD-2272D  | ENSG00000160789.18_LMNA | -0.07455 | -0.231011592 | 0.085664712 | 3.61E-01 | 6.43E-01 | 1.00E+00 |
| ENSG00000229630.1_LINC01264  | ENSG00000160789.18_LMNA | 0.10621  | -0.05389767  | 0.261001727 | 1.93E-01 | 4.61E-01 | 1.00E+00 |
| ENSG00000277997.1_RP11-356M  | ENSG00000160789.18_LMNA | -0.10372 | -0.258646546 | 0.056415673 | 2.04E-01 | 4.74E-01 | 1.00E+00 |
| ENSG00000229434.1_AC017048.  | ENSG00000160789.18_LMNA | 0.02112  | -0.138545974 | 0.179716996 | 7.96E-01 | 9.18E-01 | 1.00E+00 |
| ENSG00000249547.1_RP11-453O  | ENSG00000160789.18_LMNA | 0.01666  | -0.142916683 | 0.175398554 | 8.39E-01 | 9.37E-01 | 1.00E+00 |
| ENSG00000279012.1_OR51B2     | ENSG00000160789.18_LMNA | 0.03657  | -0.123348501 | 0.194637854 | 6.55E-01 | 8.47E-01 | 1.00E+00 |
| ENSG00000255172.2_OR5AM1P    | ENSG00000160789.18_LMNA | -0.05059 | -0.208118841 | 0.109488125 | 5.36E-01 | 7.77E-01 | 1.00E+00 |
| ENSG00000224517.5_HTR2A-AS   | ENSG00000160789.18_LMNA | 0.09449  | -0.06570372  | 0.24992658  | 2.47E-01 | 5.27E-01 | 1.00E+00 |

|                              |                         |          |              |             |          |          |          |
|------------------------------|-------------------------|----------|--------------|-------------|----------|----------|----------|
| ENSG00000270936.1_RP5-879K2  | ENSG00000160789.18_LMNA | 0.01134  | -0.148126609 | 0.170234877 | 8.90E-01 | 9.57E-01 | 1.00E+00 |
| ENSG00000219280.1_VN1R8P     | ENSG00000160789.18_LMNA | 0.00788  | -0.151506917 | 0.166875198 | 9.23E-01 | 9.71E-01 | 1.00E+00 |
| ENSG00000269107.1_RP11-15H2  | ENSG00000160789.18_LMNA | 0.0451   | -0.114928571 | 0.202841659 | 5.81E-01 | 8.05E-01 | 1.00E+00 |
| ENSG00000278305.1_RP11-326L  | ENSG00000160789.18_LMNA | 0.05874  | -0.101410695 | 0.215919912 | 4.72E-01 | 7.32E-01 | 1.00E+00 |
| ENSG00000237675.4_TEX36-AS1  | ENSG00000160789.18_LMNA | -0.05923 | -0.216391882 | 0.10092066  | 4.69E-01 | 7.29E-01 | 1.00E+00 |
| ENSG00000177489.1_OR2G2      | ENSG00000160789.18_LMNA | 0.01199  | -0.147490377 | 0.170866399 | 8.83E-01 | 9.55E-01 | 1.00E+00 |
| ENSG00000270323.1_AP000860.1 | ENSG00000160789.18_LMNA | -0.01752 | -0.176233906 | 0.142072187 | 8.30E-01 | 9.34E-01 | 1.00E+00 |
| ENSG00000249729.2_RP11-55C6  | ENSG00000160789.18_LMNA | -0.10076 | -0.255852725 | 0.059397453 | 2.17E-01 | 4.91E-01 | 1.00E+00 |
| ENSG00000276318.1_GTF2IP8    | ENSG00000160789.18_LMNA | -0.03586 | -0.193956591 | 0.124045659 | 6.61E-01 | 8.50E-01 | 1.00E+00 |
| ENSG00000258420.1_RP11-403B  | ENSG00000160789.18_LMNA | -0.03152 | -0.189766558 | 0.128326558 | 7.00E-01 | 8.72E-01 | 1.00E+00 |
| ENSG00000221931.2_OR6X1      | ENSG00000160789.18_LMNA | -0.01129 | -0.170183015 | 0.148178846 | 8.90E-01 | 9.57E-01 | 1.00E+00 |
| ENSG00000267094.1_           | ENSG00000160789.18_LMNA | -0.03582 | -0.193918418 | 0.124084714 | 6.61E-01 | 8.50E-01 | 1.00E+00 |
| ENSG00000228670.4_NANOGP2    | ENSG00000160789.18_LMNA | -0.00598 | -0.165022585 | 0.153367725 | 9.42E-01 | 9.77E-01 | 1.00E+00 |
| ENSG00000228064.1_AC023469.1 | ENSG00000160789.18_LMNA | -0.14753 | -0.299695828 | 0.011947061 | 6.97E-02 | 2.49E-01 | 1.00E+00 |
| ENSG00000242120.3_RP11-231I1 | ENSG00000160789.18_LMNA | 0.19174  | 0.0335679    | 0.340549096 | 1.80E-02 | 9.99E-02 | 1.00E+00 |
| ENSG00000224338.2_MTCYBP45   | ENSG00000160789.18_LMNA | -0.19725 | -0.345600324 | -0.03928538 | 1.49E-02 | 8.73E-02 | 1.00E+00 |
| ENSG00000239792.2_C2orf27AP2 | ENSG00000160789.18_LMNA | 0.01302  | -0.146480314 | 0.171868449 | 8.73E-01 | 9.51E-01 | 1.00E+00 |
| ENSG00000234207.1_AC096570.1 | ENSG00000160789.18_LMNA | -0.08152 | -0.237635152 | 0.078703673 | 3.18E-01 | 6.05E-01 | 1.00E+00 |
| ENSG00000259837.1_RP11-672L  | ENSG00000160789.18_LMNA | 0.00426  | -0.155045977 | 0.163349795 | 9.58E-01 | 9.83E-01 | 1.00E+00 |
| ENSG00000272639.1_RP11-66B2  | ENSG00000160789.18_LMNA | 0.08935  | -0.070854043 | 0.245069098 | 2.74E-01 | 5.58E-01 | 1.00E+00 |
| ENSG00000235479.1_RAB9AP4    | ENSG00000160789.18_LMNA | -0.02521 | -0.183671757 | 0.134532443 | 7.58E-01 | 8.99E-01 | 1.00E+00 |
| ENSG00000253371.1_RP11-587H  | ENSG00000160789.18_LMNA | -0.07902 | -0.235258144 | 0.081205346 | 3.33E-01 | 6.19E-01 | 1.00E+00 |
| ENSG00000228922.1_RP13-210D  | ENSG00000160789.18_LMNA | -0.02763 | -0.186013058 | 0.132151419 | 7.35E-01 | 8.89E-01 | 1.00E+00 |
| ENSG00000184478.6_OR56A3     | ENSG00000160789.18_LMNA | 0.01188  | -0.147601655 | 0.170755963 | 8.85E-01 | 9.55E-01 | 1.00E+00 |
| ENSG00000249174.1_RP11-124N  | ENSG00000160789.18_LMNA | 0.00795  | -0.15143988  | 0.166941898 | 9.23E-01 | 9.70E-01 | 1.00E+00 |
| ENSG00000236817.4_RP11-978I1 | ENSG00000160789.18_LMNA | -0.03706 | -0.195113243 | 0.122861835 | 6.50E-01 | 8.45E-01 | 1.00E+00 |
| ENSG00000181752.3_OR8K5      | ENSG00000160789.18_LMNA | -0.01676 | -0.175488864 | 0.142825407 | 8.38E-01 | 9.37E-01 | 1.00E+00 |
| ENSG00000271364.1_RP11-81A1  | ENSG00000160789.18_LMNA | -0.03939 | -0.197351649 | 0.120568271 | 6.30E-01 | 8.34E-01 | 1.00E+00 |
| ENSG00000254650.1_MTCYBP41   | ENSG00000160789.18_LMNA | 0.02098  | -0.138685101 | 0.179579721 | 7.98E-01 | 9.19E-01 | 1.00E+00 |
| ENSG00000268009.4_SSX4       | ENSG00000160789.18_LMNA | 0.11953  | -0.040442107 | 0.27352399  | 1.42E-01 | 3.85E-01 | 1.00E+00 |
| ENSG00000225818.1_AC118653.1 | ENSG00000160789.18_LMNA | -0.13301 | -0.286151642 | 0.026756994 | 1.02E-01 | 3.16E-01 | 1.00E+00 |
| ENSG00000248165.1_RP11-44F2  | ENSG00000160789.18_LMNA | -0.01968 | -0.178324997 | 0.139956176 | 8.10E-01 | 9.25E-01 | 1.00E+00 |
| ENSG00000224486.1_HCG19P     | ENSG00000160789.18_LMNA | -0.07081 | -0.227442062 | 0.089403338 | 3.86E-01 | 6.64E-01 | 1.00E+00 |

|                              |                         |          |              |             |          |          |          |
|------------------------------|-------------------------|----------|--------------|-------------|----------|----------|----------|
| ENSG00000254647.5_INS        | ENSG00000160789.18_LMNA | -0.1277  | -0.281185852 | 0.032152657 | 1.17E-01 | 3.42E-01 | 1.00E+00 |
| ENSG00000267173.1_CTC-512J1  | ENSG00000160789.18_LMNA | 0.0367   | -0.123217928 | 0.194765416 | 6.53E-01 | 8.47E-01 | 1.00E+00 |
| ENSG00000249021.1_CTC-505O3  | ENSG00000160789.18_LMNA | 0.08488  | -0.075335179 | 0.24082981  | 2.98E-01 | 5.85E-01 | 1.00E+00 |
| ENSG00000232636.2_RP11-342C  | ENSG00000160789.18_LMNA | 0.00463  | -0.154680181 | 0.163714557 | 9.55E-01 | 9.82E-01 | 1.00E+00 |
| ENSG00000279100.1_AC009120.1 | ENSG00000160789.18_LMNA | 0.02982  | -0.129999608 | 0.188125866 | 7.15E-01 | 8.79E-01 | 1.00E+00 |
| ENSG00000258850.1_RP11-214N  | ENSG00000160789.18_LMNA | 0.08204  | -0.078181639 | 0.238130693 | 3.15E-01 | 6.01E-01 | 1.00E+00 |
| ENSG00000261259.1_RP11-19N8  | ENSG00000160789.18_LMNA | -0.09036 | -0.246024716 | 0.069842143 | 2.68E-01 | 5.52E-01 | 1.00E+00 |
| ENSG00000259312.1_RP11-522B  | ENSG00000160789.18_LMNA | 0.03086  | -0.128970734 | 0.189135051 | 7.06E-01 | 8.75E-01 | 1.00E+00 |
| ENSG00000254468.2_RP11-304M  | ENSG00000160789.18_LMNA | -0.07345 | -0.229962038 | 0.086764912 | 3.68E-01 | 6.49E-01 | 1.00E+00 |
| ENSG00000250674.1_RP11-798K  | ENSG00000160789.18_LMNA | 0.06551  | -0.094673877 | 0.222395402 | 4.23E-01 | 6.94E-01 | 1.00E+00 |
| ENSG00000248555.5_LINC01339  | ENSG00000160789.18_LMNA | -0.06294 | -0.219933234 | 0.097238836 | 4.41E-01 | 7.09E-01 | 1.00E+00 |
| ENSG00000249017.1_RP11-58B2  | ENSG00000160789.18_LMNA | 0.04041  | -0.119560787 | 0.198333858 | 6.21E-01 | 8.29E-01 | 1.00E+00 |
| ENSG00000232596.1_RP1-37J18  | ENSG00000160789.18_LMNA | -0.00784 | -0.166834629 | 0.151547689 | 9.24E-01 | 9.71E-01 | 1.00E+00 |
| ENSG00000271419.1_RP4-591B8  | ENSG00000160789.18_LMNA | -0.05585 | -0.213158614 | 0.104274605 | 4.94E-01 | 7.49E-01 | 1.00E+00 |
| ENSG00000237992.1_AC010096.1 | ENSG00000160789.18_LMNA | 0.07933  | -0.080894309 | 0.235553887 | 3.31E-01 | 6.17E-01 | 1.00E+00 |
| ENSG00000242836.1_MTCO3P35   | ENSG00000160789.18_LMNA | -0.07836 | -0.234636528 | 0.081858907 | 3.37E-01 | 6.23E-01 | 1.00E+00 |
| ENSG00000250183.2_RP11-96A1  | ENSG00000160789.18_LMNA | -0.10295 | -0.257919991 | 0.057191649 | 2.07E-01 | 4.79E-01 | 1.00E+00 |
| ENSG00000278589.1_ZACNP1     | ENSG00000160789.18_LMNA | 0.10845  | -0.051646365 | 0.263104286 | 1.84E-01 | 4.49E-01 | 1.00E+00 |
| ENSG00000261362.1_RP11-467M  | ENSG00000160789.18_LMNA | 0.11996  | -0.040005649 | 0.273928399 | 1.41E-01 | 3.83E-01 | 1.00E+00 |
| ENSG00000273408.1_OR5B15P    | ENSG00000160789.18_LMNA | -0.06235 | -0.219370456 | 0.097824518 | 4.45E-01 | 7.12E-01 | 1.00E+00 |
| ENSG00000229398.1_RP4-620E1  | ENSG00000160789.18_LMNA | 0.15037  | -0.009052041 | 0.302328825 | 6.45E-02 | 2.36E-01 | 1.00E+00 |
| ENSG00000225069.3_RP5-1025A  | ENSG00000160789.18_LMNA | -0.05121 | -0.208711195 | 0.108875474 | 5.31E-01 | 7.74E-01 | 1.00E+00 |
| ENSG00000234234.1_MTCO2P8    | ENSG00000160789.18_LMNA | -0.02224 | -0.180803298 | 0.137444569 | 7.86E-01 | 9.13E-01 | 1.00E+00 |
| ENSG00000248176.1_RP11-472K  | ENSG00000160789.18_LMNA | -0.04764 | -0.205287104 | 0.112409837 | 5.60E-01 | 7.92E-01 | 1.00E+00 |
| ENSG00000275295.1_RP11-111G  | ENSG00000160789.18_LMNA | -0.17125 | -0.321684631 | -0.01239141 | 3.49E-02 | 1.58E-01 | 1.00E+00 |
| ENSG00000243016.1_RP11-305F  | ENSG00000160789.18_LMNA | 0.0661   | -0.094091999 | 0.222953399 | 4.18E-01 | 6.90E-01 | 1.00E+00 |
| ENSG00000270729.1_RP4-669B1  | ENSG00000160789.18_LMNA | 0.05599  | -0.104142362 | 0.213286232 | 4.93E-01 | 7.49E-01 | 1.00E+00 |
| ENSG00000249997.1_MTCO3P7    | ENSG00000160789.18_LMNA | -0.07306 | -0.229594823 | 0.087149665 | 3.71E-01 | 6.51E-01 | 1.00E+00 |
| ENSG00000178130.9_FAM27E5    | ENSG00000160789.18_LMNA | -0.01831 | -0.176998165 | 0.141299157 | 8.23E-01 | 9.31E-01 | 1.00E+00 |
| ENSG00000132631.5_SCP2D1     | ENSG00000160789.18_LMNA | -0.01768 | -0.176382655 | 0.141921762 | 8.29E-01 | 9.33E-01 | 1.00E+00 |
| ENSG00000228272.1_AC106874.1 | ENSG00000160789.18_LMNA | 0.02586  | -0.133893397 | 0.184300497 | 7.52E-01 | 8.97E-01 | 1.00E+00 |
| ENSG00000229842.2_MTATP6P1   | ENSG00000160789.18_LMNA | 0.16349  | 0.004398951  | 0.314500377 | 4.42E-02 | 1.85E-01 | 1.00E+00 |
| ENSG00000244471.4_RP11-78J2  | ENSG00000160789.18_LMNA | -0.02169 | -0.180265834 | 0.137989604 | 7.91E-01 | 9.15E-01 | 1.00E+00 |

|                             |                         |          |              |             |          |          |          |
|-----------------------------|-------------------------|----------|--------------|-------------|----------|----------|----------|
| ENSG00000234611.1_OR2AT2P   | ENSG00000160789.18_LMNA | 0.06128  | -0.098885804 | 0.218350135 | 4.53E-01 | 7.18E-01 | 1.00E+00 |
| ENSG00000232991.4_GACAT1    | ENSG00000160789.18_LMNA | -0.07086 | -0.227493243 | 0.089349796 | 3.86E-01 | 6.64E-01 | 1.00E+00 |
| ENSG00000237460.2_RP11-233E | ENSG00000160789.18_LMNA | 0.05871  | -0.101434112 | 0.215897355 | 4.72E-01 | 7.32E-01 | 1.00E+00 |
| ENSG00000231152.1_MTND2P15  | ENSG00000160789.18_LMNA | -0.04532 | -0.20305263  | 0.114711439 | 5.79E-01 | 8.04E-01 | 1.00E+00 |
| ENSG00000270268.1_RP1-164L1 | ENSG00000160789.18_LMNA | -0.09977 | -0.254919849 | 0.060391838 | 2.21E-01 | 4.97E-01 | 1.00E+00 |
| ENSG00000242991.2_RPL7P40   | ENSG00000160789.18_LMNA | 0.07349  | -0.086723462 | 0.230001593 | 3.68E-01 | 6.49E-01 | 1.00E+00 |
| ENSG00000249892.1_RP11-525J | ENSG00000160789.18_LMNA | -0.0058  | -0.164853172 | 0.153537775 | 9.43E-01 | 9.77E-01 | 1.00E+00 |
| ENSG00000266729.4_DSG1-AS1  | ENSG00000160789.18_LMNA | -0.01004 | -0.168974001 | 0.149396099 | 9.02E-01 | 9.62E-01 | 1.00E+00 |
| ENSG00000198678.5_OR5BS1P   | ENSG00000160789.18_LMNA | 0.06793  | -0.09226786  | 0.224701327 | 4.06E-01 | 6.81E-01 | 1.00E+00 |
| ENSG00000231237.1_OR6K1P    | ENSG00000160789.18_LMNA | 0.10434  | -0.055790632 | 0.259231519 | 2.01E-01 | 4.71E-01 | 1.00E+00 |
| ENSG00000224435.2_NF1P6     | ENSG00000160789.18_LMNA | -0.03966 | -0.197617054 | 0.120296101 | 6.28E-01 | 8.32E-01 | 1.00E+00 |
| ENSG00000258036.1_KRT125P   | ENSG00000160789.18_LMNA | 0.06968  | -0.090526964 | 0.226367591 | 3.94E-01 | 6.71E-01 | 1.00E+00 |
| ENSG00000176312.4_OR4H12P   | ENSG00000160789.18_LMNA | 0.23595  | 0.079749411  | 0.380848853 | 3.43E-03 | 2.95E-02 | 1.00E+00 |
| ENSG00000250043.1_RP11-161D | ENSG00000160789.18_LMNA | -0.0437  | -0.201497853 | 0.116310914 | 5.93E-01 | 8.12E-01 | 1.00E+00 |
| ENSG00000223344.1_RP11-541F | ENSG00000160789.18_LMNA | -0.00611 | -0.165151407 | 0.153238407 | 9.40E-01 | 9.76E-01 | 1.00E+00 |
| ENSG00000224830.2_OR2X1P    | ENSG00000160789.18_LMNA | -0.03868 | -0.196669113 | 0.121267986 | 6.36E-01 | 8.37E-01 | 1.00E+00 |
| ENSG00000254663.1_OR4A11P   | ENSG00000160789.18_LMNA | 0.20383  | 0.04612793   | 0.351622276 | 1.18E-02 | 7.37E-02 | 1.00E+00 |
| ENSG00000270615.1_SGO1P1    | ENSG00000160789.18_LMNA | -0.06415 | -0.221094835 | 0.096029265 | 4.32E-01 | 7.02E-01 | 1.00E+00 |
| ENSG00000273244.1_KB-7G2.8  | ENSG00000160789.18_LMNA | -0.13599 | -0.288934922 | 0.02372478  | 9.48E-02 | 3.02E-01 | 1.00E+00 |
| ENSG00000255030.1_OR8B5P    | ENSG00000160789.18_LMNA | 0.02181  | -0.137869549 | 0.180384238 | 7.90E-01 | 9.15E-01 | 1.00E+00 |
| ENSG00000249284.1_RP11-287F | ENSG00000160789.18_LMNA | -0.02757 | -0.185955651 | 0.132209843 | 7.36E-01 | 8.89E-01 | 1.00E+00 |
| ENSG00000224752.1_VN1R21P   | ENSG00000160789.18_LMNA | -0.0022  | -0.161345711 | 0.157054189 | 9.79E-01 | 9.92E-01 | 1.00E+00 |
| ENSG00000230307.1_OR6C5P    | ENSG00000160789.18_LMNA | 0.02265  | -0.137042738 | 0.181199426 | 7.82E-01 | 9.10E-01 | 1.00E+00 |
| ENSG00000197437.3_OR13G1    | ENSG00000160789.18_LMNA | -0.0184  | -0.177079439 | 0.141216928 | 8.22E-01 | 9.30E-01 | 1.00E+00 |
| ENSG00000248838.2_PGAM1P13  | ENSG00000160789.18_LMNA | 0.19095  | 0.032740639  | 0.339816765 | 1.85E-02 | 1.02E-01 | 1.00E+00 |
| ENSG00000249730.1_OR10J4    | ENSG00000160789.18_LMNA | 0.02093  | -0.138732816 | 0.179532639 | 7.98E-01 | 9.19E-01 | 1.00E+00 |
| ENSG00000231809.4_NANOGP9   | ENSG00000160789.18_LMNA | 0.06865  | -0.091547075 | 0.225391437 | 4.01E-01 | 6.77E-01 | 1.00E+00 |
| ENSG00000253956.1_RP11-211F | ENSG00000160789.18_LMNA | 0.00822  | -0.151179698 | 0.167200744 | 9.20E-01 | 9.69E-01 | 1.00E+00 |
| ENSG00000233656.1_RP11-716O | ENSG00000160789.18_LMNA | -0.13776 | -0.290583698 | 0.021925821 | 9.06E-02 | 2.93E-01 | 1.00E+00 |
| ENSG00000254646.1_OR8B10P   | ENSG00000160789.18_LMNA | -0.12377 | -0.277499642 | 0.036146194 | 1.29E-01 | 3.63E-01 | 1.00E+00 |
| ENSG00000228851.1_MTCO3P4   | ENSG00000160789.18_LMNA | -0.02312 | -0.1816505   | 0.136585042 | 7.77E-01 | 9.09E-01 | 1.00E+00 |
| ENSG00000254586.1_RP11-358H | ENSG00000160789.18_LMNA | -0.04622 | -0.20391571  | 0.113822835 | 5.72E-01 | 8.00E-01 | 1.00E+00 |
| ENSG00000214042.1_IFNA7     | ENSG00000160789.18_LMNA | 0.09714  | -0.063038187 | 0.252434332 | 2.34E-01 | 5.12E-01 | 1.00E+00 |

|                             |                         |          |              |             |          |          |          |
|-----------------------------|-------------------------|----------|--------------|-------------|----------|----------|----------|
| ENSG00000229406.1_OFD1P4Y   | ENSG00000160789.18_LMNA | -0.01688 | -0.175610195 | 0.142702769 | 8.36E-01 | 9.37E-01 | 1.00E+00 |
| ENSG00000125815.7_CST8      | ENSG00000160789.18_LMNA | -0.04321 | -0.201024681 | 0.116797362 | 5.97E-01 | 8.14E-01 | 1.00E+00 |
| ENSG00000188585.6_LINC00083 | ENSG00000160789.18_LMNA | -0.05884 | -0.216015934 | 0.101311011 | 4.71E-01 | 7.31E-01 | 1.00E+00 |
| ENSG00000174982.2_OR4S2     | ENSG00000160789.18_LMNA | 0.22309  | 0.066244439  | 0.369181069 | 5.73E-03 | 4.35E-02 | 1.00E+00 |
| ENSG00000198787.5_OR4D12P   | ENSG00000160789.18_LMNA | 0.05952  | -0.100631548 | 0.216670266 | 4.66E-01 | 7.28E-01 | 1.00E+00 |
| ENSG00000237185.1_VN1R66P   | ENSG00000160789.18_LMNA | -0.04165 | -0.199531041 | 0.11833191  | 6.10E-01 | 8.22E-01 | 1.00E+00 |
| ENSG00000217044.1_MTCO3P31  | ENSG00000160789.18_LMNA | -0.02603 | -0.184469977 | 0.133721093 | 7.50E-01 | 8.96E-01 | 1.00E+00 |
| ENSG00000230785.2_AC006326. | ENSG00000160789.18_LMNA | 0.0961   | -0.064076581 | 0.251457907 | 2.39E-01 | 5.18E-01 | 1.00E+00 |
| ENSG00000131007.8_TTTY9B    | ENSG00000160789.18_LMNA | -0.07187 | -0.228458986 | 0.088339149 | 3.79E-01 | 6.58E-01 | 1.00E+00 |
| ENSG00000254613.1_OR6M2P    | ENSG00000160789.18_LMNA | -0.07927 | -0.23550311  | 0.080947717 | 3.32E-01 | 6.17E-01 | 1.00E+00 |
| ENSG00000236400.1_KRTAP21-4 | ENSG00000160789.18_LMNA | 0.02917  | -0.130640917 | 0.187496489 | 7.21E-01 | 8.82E-01 | 1.00E+00 |
| ENSG00000279780.1_RP11-586K | ENSG00000160789.18_LMNA | 0.04058  | -0.11938725  | 0.198502977 | 6.20E-01 | 8.28E-01 | 1.00E+00 |
| ENSG00000254529.1_RP11-583F | ENSG00000160789.18_LMNA | 0.07668  | -0.083537292 | 0.233038991 | 3.48E-01 | 6.32E-01 | 1.00E+00 |
| ENSG00000236610.1_SOCS5P1   | ENSG00000160789.18_LMNA | -0.0056  | -0.164650179 | 0.153741506 | 9.45E-01 | 9.78E-01 | 1.00E+00 |
| ENSG00000178836.6_AC114812. | ENSG00000160789.18_LMNA | 0.03161  | -0.128240655 | 0.189850753 | 6.99E-01 | 8.71E-01 | 1.00E+00 |
| ENSG00000251125.1_CTD-2335C | ENSG00000160789.18_LMNA | -0.07213 | -0.228703907 | 0.088082737 | 3.77E-01 | 6.57E-01 | 1.00E+00 |
| ENSG00000272559.1_OR51F3P   | ENSG00000160789.18_LMNA | -0.02396 | -0.182467608 | 0.135755593 | 7.69E-01 | 9.05E-01 | 1.00E+00 |
| ENSG00000184022.3_OR2T10    | ENSG00000160789.18_LMNA | -0.06327 | -0.220256782 | 0.096902021 | 4.39E-01 | 7.07E-01 | 1.00E+00 |
| ENSG00000248223.1_CTD-2139B | ENSG00000160789.18_LMNA | 0.04257  | -0.117427593 | 0.200411429 | 6.03E-01 | 8.18E-01 | 1.00E+00 |
| ENSG00000186943.1_OR13C8    | ENSG00000160789.18_LMNA | -0.1722  | -0.322559638 | -0.01336756 | 3.39E-02 | 1.55E-01 | 1.00E+00 |
| ENSG00000174914.1_OR9G1     | ENSG00000160789.18_LMNA | -0.06458 | -0.221505138 | 0.095601794 | 4.29E-01 | 6.99E-01 | 1.00E+00 |
| ENSG00000197786.3_OR5B17    | ENSG00000160789.18_LMNA | -0.01413 | -0.172938221 | 0.145401254 | 8.63E-01 | 9.46E-01 | 1.00E+00 |
| ENSG00000251572.2_AF213884. | ENSG00000160789.18_LMNA | -0.11544 | -0.26968621  | 0.044578059 | 1.57E-01 | 4.09E-01 | 1.00E+00 |
| ENSG00000261653.1_RP11-21L1 | ENSG00000160789.18_LMNA | 0.02007  | -0.139578951 | 0.178697477 | 8.06E-01 | 9.23E-01 | 1.00E+00 |
| ENSG00000176246.1_OR4L1     | ENSG00000160789.18_LMNA | 0.0614   | -0.098762778 | 0.218468448 | 4.52E-01 | 7.18E-01 | 1.00E+00 |
| ENSG00000280094.1_OR1B1     | ENSG00000160789.18_LMNA | 0.035    | -0.124893739 | 0.193127433 | 6.69E-01 | 8.54E-01 | 1.00E+00 |
| ENSG00000234267.2_TULP3P1   | ENSG00000160789.18_LMNA | -0.01833 | -0.177010142 | 0.14128704  | 8.23E-01 | 9.31E-01 | 1.00E+00 |
| ENSG00000197309.2_OR10D3    | ENSG00000160789.18_LMNA | 0.02246  | -0.137232979 | 0.181011898 | 7.84E-01 | 9.11E-01 | 1.00E+00 |
| ENSG00000251407.1_MTND1P22  | ENSG00000160789.18_LMNA | 0.06842  | -0.091780935 | 0.225167565 | 4.02E-01 | 6.78E-01 | 1.00E+00 |
| ENSG00000176895.8_OR51A7    | ENSG00000160789.18_LMNA | -0.08498 | -0.240922597 | 0.075237235 | 2.98E-01 | 5.84E-01 | 1.00E+00 |
| ENSG00000148136.5_OR13C4    | ENSG00000160789.18_LMNA | -0.06852 | -0.225266987 | 0.091677081 | 4.02E-01 | 6.78E-01 | 1.00E+00 |
| ENSG00000255713.1_OR4D2     | ENSG00000160789.18_LMNA | 0.0733   | -0.086917827 | 0.229816104 | 3.69E-01 | 6.50E-01 | 1.00E+00 |
| ENSG00000204697.3_OR2U1P    | ENSG00000160789.18_LMNA | 0.12022  | -0.039742004 | 0.274172632 | 1.40E-01 | 3.82E-01 | 1.00E+00 |

|                             |                         |          |              |             |          |          |          |
|-----------------------------|-------------------------|----------|--------------|-------------|----------|----------|----------|
| ENSG00000232395.1_RP3-399L1 | ENSG00000160789.18_LMNA | 0.04502  | -0.115006328 | 0.202766102 | 5.82E-01 | 8.05E-01 | 1.00E+00 |
| ENSG00000273586.1_OR10G1P   | ENSG00000160789.18_LMNA | -0.0942  | -0.249659884 | 0.065986932 | 2.48E-01 | 5.29E-01 | 1.00E+00 |
| ENSG00000237619.1_OR3B1P    | ENSG00000160789.18_LMNA | 0.02591  | -0.133846149 | 0.184346972 | 7.51E-01 | 8.96E-01 | 1.00E+00 |
| ENSG00000172772.3_OR10W1    | ENSG00000160789.18_LMNA | -0.10889 | -0.26352371  | 0.051196885 | 1.82E-01 | 4.46E-01 | 1.00E+00 |
| ENSG00000235539.1_MTND1P33  | ENSG00000160789.18_LMNA | -0.03276 | -0.190966813 | 0.127101484 | 6.89E-01 | 8.66E-01 | 1.00E+00 |
| ENSG00000279987.1_AC008103  | ENSG00000160789.18_LMNA | 0.06809  | -0.092112886 | 0.224849733 | 4.05E-01 | 6.80E-01 | 1.00E+00 |
| ENSG00000237225.1_OR13K1P   | ENSG00000160789.18_LMNA | 0.04656  | -0.113477416 | 0.204251074 | 5.69E-01 | 7.98E-01 | 1.00E+00 |
| ENSG00000181552.3_EDDM3B    | ENSG00000160789.18_LMNA | -0.063   | -0.219995677 | 0.097173838 | 4.41E-01 | 7.08E-01 | 1.00E+00 |
| ENSG00000229946.2_B3GNT2P1  | ENSG00000160789.18_LMNA | 0.08362  | -0.076600675 | 0.239630424 | 3.06E-01 | 5.92E-01 | 1.00E+00 |
| ENSG00000275800.1_EIF5P2    | ENSG00000160789.18_LMNA | -0.14873 | -0.300810316 | 0.010722301 | 6.74E-02 | 2.43E-01 | 1.00E+00 |
| ENSG00000260847.1_RP11-17M1 | ENSG00000160789.18_LMNA | 0.15732  | -0.001928651 | 0.308787321 | 5.29E-02 | 2.09E-01 | 1.00E+00 |
| ENSG00000279678.1_RP11-797E | ENSG00000160789.18_LMNA | -0.09495 | -0.250362102 | 0.065241119 | 2.45E-01 | 5.24E-01 | 1.00E+00 |
| ENSG00000257109.3_OR4F28P   | ENSG00000160789.18_LMNA | 0.0113   | -0.148168526 | 0.17019326  | 8.90E-01 | 9.57E-01 | 1.00E+00 |
| ENSG00000172148.2_OR7A2P    | ENSG00000160789.18_LMNA | 0.10332  | -0.056810866 | 0.258276567 | 2.05E-01 | 4.77E-01 | 1.00E+00 |
| ENSG00000180909.2_OR52B1P   | ENSG00000160789.18_LMNA | -0.13329 | -0.286409622 | 0.026476182 | 1.02E-01 | 3.15E-01 | 1.00E+00 |
| ENSG00000254752.1_OR5M2P    | ENSG00000160789.18_LMNA | -0.0128  | -0.171647549 | 0.146703037 | 8.76E-01 | 9.52E-01 | 1.00E+00 |
| ENSG00000225570.1_AC013733  | ENSG00000160789.18_LMNA | -0.0687  | -0.225433401 | 0.091503234 | 4.00E-01 | 6.77E-01 | 1.00E+00 |
| ENSG00000180437.5_OR6K4P    | ENSG00000160789.18_LMNA | -0.12969 | -0.283042153 | 0.030137797 | 1.11E-01 | 3.33E-01 | 1.00E+00 |
| ENSG00000251253.1_MTHFD2P4  | ENSG00000160789.18_LMNA | -0.14735 | -0.299522435 | 0.012137526 | 7.01E-02 | 2.50E-01 | 1.00E+00 |
| ENSG00000227599.1_RP4-753D4 | ENSG00000160789.18_LMNA | 0.08048  | -0.07973845  | 0.236652399 | 3.24E-01 | 6.11E-01 | 1.00E+00 |
| ENSG00000150261.3_OR8K1     | ENSG00000160789.18_LMNA | -0.01113 | -0.170029623 | 0.148333336 | 8.92E-01 | 9.58E-01 | 1.00E+00 |
| ENSG00000169484.2_OR4K14    | ENSG00000160789.18_LMNA | -0.15599 | -0.307555853 | 0.003289334 | 5.50E-02 | 2.14E-01 | 1.00E+00 |
| ENSG00000251383.1_RP11-542G | ENSG00000160789.18_LMNA | 0.09035  | -0.069859525 | 0.246008305 | 2.68E-01 | 5.52E-01 | 1.00E+00 |
| ENSG00000273377.1_OR2Q1P    | ENSG00000160789.18_LMNA | -0.03721 | -0.195249314 | 0.122722508 | 6.49E-01 | 8.44E-01 | 1.00E+00 |
| ENSG00000250349.3_RP5-972B1 | ENSG00000160789.18_LMNA | -0.0572  | -0.2144496   | 0.1029363   | 4.84E-01 | 7.41E-01 | 1.00E+00 |
| ENSG00000176925.6_OR51F2    | ENSG00000160789.18_LMNA | -0.00716 | -0.166171148 | 0.152214347 | 9.30E-01 | 9.73E-01 | 1.00E+00 |
| ENSG00000170683.5_OR10A3    | ENSG00000160789.18_LMNA | 0.06523  | -0.094954288 | 0.222126426 | 4.25E-01 | 6.95E-01 | 1.00E+00 |
| ENSG00000172208.5_OR4X2     | ENSG00000160789.18_LMNA | -0.20996 | -0.357224429 | -0.05251932 | 9.42E-03 | 6.28E-02 | 1.00E+00 |
| ENSG00000233787.3_CTD-2057J | ENSG00000160789.18_LMNA | -0.19216 | -0.340927218 | -0.0339952  | 1.77E-02 | 9.89E-02 | 1.00E+00 |
| ENSG00000230029.1_CDY11P    | ENSG00000160789.18_LMNA | -0.10263 | -0.257622563 | 0.057509198 | 2.08E-01 | 4.81E-01 | 1.00E+00 |
| ENSG00000225925.1_RP13-313G | ENSG00000160789.18_LMNA | 0.03718  | -0.122749981 | 0.195222484 | 6.49E-01 | 8.44E-01 | 1.00E+00 |
| ENSG00000277876.1_RP11-467P | ENSG00000160789.18_LMNA | 0.0289   | -0.130905608 | 0.187236646 | 7.24E-01 | 8.83E-01 | 1.00E+00 |
| ENSG00000266971.1_OR4F8P    | ENSG00000160789.18_LMNA | -0.24924 | -0.392850137 | -0.09375668 | 1.96E-03 | 1.92E-02 | 1.00E+00 |

|                              |                         |          |              |             |          |          |          |
|------------------------------|-------------------------|----------|--------------|-------------|----------|----------|----------|
| ENSG00000172016.14_REG3A     | ENSG00000160789.18_LMNA | 0.03606  | -0.123847011 | 0.194150742 | 6.59E-01 | 8.49E-01 | 1.00E+00 |
| ENSG00000176230.4_OR4K17     | ENSG00000160789.18_LMNA | 0.07417  | -0.086043018 | 0.230650784 | 3.64E-01 | 6.45E-01 | 1.00E+00 |
| ENSG00000221858.2_OR2A12     | ENSG00000160789.18_LMNA | 0.06022  | -0.099938224 | 0.217337653 | 4.61E-01 | 7.24E-01 | 1.00E+00 |
| ENSG00000177693.3_OR4F4      | ENSG00000160789.18_LMNA | 0.03719  | -0.122737248 | 0.195234919 | 6.49E-01 | 8.44E-01 | 1.00E+00 |
| ENSG00000241123.1_KRTAP10-5  | ENSG00000160789.18_LMNA | -0.09965 | -0.254808117 | 0.060510895 | 2.22E-01 | 4.97E-01 | 1.00E+00 |
| ENSG00000185385.3_OR7A17     | ENSG00000160789.18_LMNA | -0.00675 | -0.165771691 | 0.152615577 | 9.34E-01 | 9.74E-01 | 1.00E+00 |
| ENSG00000247867.2_CTD-2530H  | ENSG00000160789.18_LMNA | -0.13121 | -0.284469853 | 0.028586414 | 1.07E-01 | 3.25E-01 | 1.00E+00 |
| ENSG00000279046.1_RP11-555G  | ENSG00000160789.18_LMNA | -0.08949 | -0.245199609 | 0.070715883 | 2.73E-01 | 5.57E-01 | 1.00E+00 |
| ENSG00000183303.2_OR5P2      | ENSG00000160789.18_LMNA | -0.07491 | -0.231347811 | 0.085312106 | 3.59E-01 | 6.42E-01 | 1.00E+00 |
| ENSG00000183791.4_TCEB3C     | ENSG00000160789.18_LMNA | 0.0503   | -0.109780782 | 0.207835436 | 5.38E-01 | 7.79E-01 | 1.00E+00 |
| ENSG00000235239.1_RP1-203C2  | ENSG00000160789.18_LMNA | -0.07204 | -0.228620302 | 0.088170269 | 3.78E-01 | 6.57E-01 | 1.00E+00 |
| ENSG00000214329.6_SLC9B1P2   | ENSG00000160789.18_LMNA | -0.11908 | -0.273106743 | 0.040892293 | 1.44E-01 | 3.88E-01 | 1.00E+00 |
| ENSG00000278143.1_NF1P7      | ENSG00000160789.18_LMNA | 0.09563  | -0.064554265 | 0.251008515 | 2.41E-01 | 5.20E-01 | 1.00E+00 |
| ENSG00000258567.1_DUX4L16    | ENSG00000160789.18_LMNA | -0.02525 | -0.183715381 | 0.134488113 | 7.57E-01 | 8.99E-01 | 1.00E+00 |
| ENSG00000257853.2_MED15P1    | ENSG00000160789.18_LMNA | 0.01643  | -0.143145417 | 0.175172217 | 8.41E-01 | 9.38E-01 | 1.00E+00 |
| ENSG00000229486.2_RP4-552O1  | ENSG00000160789.18_LMNA | 0.07749  | -0.082733784 | 0.233804008 | 3.43E-01 | 6.27E-01 | 1.00E+00 |
| ENSG00000229560.1_LYARP1     | ENSG00000160789.18_LMNA | -0.02555 | -0.184004849 | 0.134193923 | 7.55E-01 | 8.98E-01 | 1.00E+00 |
| ENSG00000231103.2_PRAMEF30   | ENSG00000160789.18_LMNA | -0.06861 | -0.225347375 | 0.091593106 | 4.01E-01 | 6.77E-01 | 1.00E+00 |
| ENSG00000251515.1_CCDC11P1   | ENSG00000160789.18_LMNA | 0.13154  | -0.028254716 | 0.284774927 | 1.06E-01 | 3.24E-01 | 1.00E+00 |
| ENSG00000260970.1_RP11-295D  | ENSG00000160789.18_LMNA | -0.01743 | -0.176140419 | 0.142166721 | 8.31E-01 | 9.34E-01 | 1.00E+00 |
| ENSG00000251569.1_RP11-724O  | ENSG00000160789.18_LMNA | -0.16703 | -0.317776855 | -0.00803911 | 3.97E-02 | 1.73E-01 | 1.00E+00 |
| ENSG00000221849.2_AC018880.  | ENSG00000160789.18_LMNA | 0.1027   | -0.057441883 | 0.257685618 | 2.08E-01 | 4.80E-01 | 1.00E+00 |
| ENSG00000215365.4_FAM90A22I  | ENSG00000160789.18_LMNA | -0.199   | -0.347202646 | -0.04110325 | 1.40E-02 | 8.34E-02 | 1.00E+00 |
| ENSG00000249763.1_RP11-618I1 | ENSG00000160789.18_LMNA | 0.08008  | -0.080144    | 0.236267062 | 3.27E-01 | 6.13E-01 | 1.00E+00 |
| ENSG00000254852.7_NPIPA2     | ENSG00000160789.18_LMNA | -0.08056 | -0.236728948 | 0.079657874 | 3.24E-01 | 6.10E-01 | 1.00E+00 |
| ENSG00000280446.1_XX-FYM637  | ENSG00000160789.18_LMNA | -0.05489 | -0.212232962 | 0.105233479 | 5.02E-01 | 7.54E-01 | 1.00E+00 |
| ENSG00000279804.1_PRAMEF18   | ENSG00000160789.18_LMNA | 0.02125  | -0.138422261 | 0.179839051 | 7.95E-01 | 9.17E-01 | 1.00E+00 |
| ENSG00000257171.2_RP11-754I2 | ENSG00000160789.18_LMNA | 0.03752  | -0.122409523 | 0.19555494  | 6.46E-01 | 8.43E-01 | 1.00E+00 |
| ENSG00000182854.6_OR4F15     | ENSG00000160789.18_LMNA | 0.02005  | -0.139592491 | 0.178684109 | 8.06E-01 | 9.23E-01 | 1.00E+00 |
| ENSG00000280223.1_RP1-138O1  | ENSG00000160789.18_LMNA | -0.04651 | -0.204199731 | 0.113530303 | 5.69E-01 | 7.99E-01 | 1.00E+00 |
| ENSG00000267704.1_FRG2LP     | ENSG00000160789.18_LMNA | 0.09425  | -0.065936455 | 0.24970742  | 2.48E-01 | 5.28E-01 | 1.00E+00 |
| ENSG00000186393.5_KRT26      | ENSG00000160789.18_LMNA | 0.04167  | -0.118311655 | 0.199550766 | 6.10E-01 | 8.22E-01 | 1.00E+00 |
| ENSG00000228935.1_RP11-189G  | ENSG00000160789.18_LMNA | -0.04671 | -0.204387071 | 0.113337319 | 5.68E-01 | 7.98E-01 | 1.00E+00 |



|                             |                         |          |              |             |          |          |          |
|-----------------------------|-------------------------|----------|--------------|-------------|----------|----------|----------|
| ENSG00000255855.1_RP11-735A | ENSG00000160789.18_LMNA | 0.00881  | -0.15060481  | 0.167772523 | 9.14E-01 | 9.67E-01 | 1.00E+00 |
| ENSG00000204501.5_PRAMEF15  | ENSG00000160789.18_LMNA | -0.08651 | -0.242370533 | 0.073708034 | 2.89E-01 | 5.75E-01 | 1.00E+00 |
| ENSG00000226502.2_KRT8P27   | ENSG00000160789.18_LMNA | 0.0956   | -0.064587904 | 0.250976863 | 2.41E-01 | 5.21E-01 | 1.00E+00 |
| ENSG00000255251.1_PRR23D1   | ENSG00000160789.18_LMNA | -0.14876 | -0.300836796 | 0.01069319  | 6.74E-02 | 2.43E-01 | 1.00E+00 |
| ENSG00000255378.1_PRR23D2   | ENSG00000160789.18_LMNA | -0.01624 | -0.174986596 | 0.143332979 | 8.43E-01 | 9.39E-01 | 1.00E+00 |
| ENSG00000204479.4_PRAMEF17  | ENSG00000160789.18_LMNA | 0.01565  | -0.143908448 | 0.17441694  | 8.48E-01 | 9.41E-01 | 1.00E+00 |
| ENSG00000241621.1_GOLGA2P6  | ENSG00000160789.18_LMNA | 0.11838  | -0.041606564 | 0.272444492 | 1.46E-01 | 3.92E-01 | 1.00E+00 |
| ENSG00000206474.7_OR10C1    | ENSG00000160789.18_LMNA | -0.09144 | -0.247046496 | 0.068759465 | 2.63E-01 | 5.46E-01 | 1.00E+00 |
| ENSG00000232950.1_ZNF519P1  | ENSG00000160789.18_LMNA | -0.17101 | -0.321459664 | -0.01214053 | 3.52E-02 | 1.59E-01 | 1.00E+00 |
| ENSG00000277486.1_SAGE3P    | ENSG00000160789.18_LMNA | 0.15204  | -0.007338793 | 0.303884774 | 6.15E-02 | 2.29E-01 | 1.00E+00 |
| ENSG00000259395.1_RP11-475A | ENSG00000160789.18_LMNA | 0.12173  | -0.038207507 | 0.275593339 | 1.35E-01 | 3.74E-01 | 1.00E+00 |
| ENSG00000236656.1_RP11-144L | ENSG00000160789.18_LMNA | -0.00885 | -0.167815161 | 0.150561932 | 9.14E-01 | 9.67E-01 | 1.00E+00 |
| ENSG00000198062.13_POTEH    | ENSG00000160789.18_LMNA | -0.04364 | -0.201441503 | 0.116368853 | 5.93E-01 | 8.12E-01 | 1.00E+00 |
| ENSG00000170613.4_FAM71B    | ENSG00000160789.18_LMNA | 0.06178  | -0.098390364 | 0.218826537 | 4.50E-01 | 7.15E-01 | 1.00E+00 |
| ENSG00000275969.2_SPATA31A  | ENSG00000160789.18_LMNA | -0.02682 | -0.185234115 | 0.132943985 | 7.43E-01 | 8.92E-01 | 1.00E+00 |
| ENSG00000261035.1_RP11-151E | ENSG00000160789.18_LMNA | -0.16288 | -0.313936339 | -0.00377313 | 4.50E-02 | 1.88E-01 | 1.00E+00 |
| ENSG00000258941.3_RP11-407N | ENSG00000160789.18_LMNA | -0.26015 | -0.402677814 | -0.10531589 | 1.21E-03 | 1.34E-02 | 1.00E+00 |
| ENSG00000172468.12_HSFY1    | ENSG00000160789.18_LMNA | -0.09109 | -0.246715072 | 0.069110723 | 2.64E-01 | 5.48E-01 | 1.00E+00 |
| ENSG00000261129.1_RP11-361D | ENSG00000160789.18_LMNA | -0.05267 | -0.21010964  | 0.107430779 | 5.19E-01 | 7.65E-01 | 1.00E+00 |
| ENSG00000272410.4_RP11-438J | ENSG00000160789.18_LMNA | 0.09434  | -0.065846184 | 0.24979243  | 2.48E-01 | 5.28E-01 | 1.00E+00 |
| ENSG00000276888.1_RP11-244H | ENSG00000160789.18_LMNA | 0.17665  | 0.017956942  | 0.326666426 | 2.95E-02 | 1.42E-01 | 1.00E+00 |
| ENSG00000279657.1_RP11-521H | ENSG00000160789.18_LMNA | -0.01428 | -0.173083525 | 0.145254629 | 8.61E-01 | 9.46E-01 | 1.00E+00 |
| ENSG00000278522.3_POTEB3    | ENSG00000160789.18_LMNA | -0.04308 | -0.200904967 | 0.11692041  | 5.98E-01 | 8.15E-01 | 1.00E+00 |
| ENSG00000248872.1_RP11-344G | ENSG00000160789.18_LMNA | -0.00342 | -0.162531842 | 0.155865932 | 9.67E-01 | 9.87E-01 | 1.00E+00 |
| ENSG00000233973.4_LINC01360 | ENSG00000160789.18_LMNA | -0.04766 | -0.205299579 | 0.112396978 | 5.60E-01 | 7.92E-01 | 1.00E+00 |
