# Supplementary material for: Role of Lamin A/C as Candidate Biomarker of Aggressiveness and Tumorigenicity in Glioblastoma Multiforme
Source: MDPI journal article supplement (doi:10.3390/biomedicines9101343), 2021-09-28
Supplement: s1 [file s1]

**Table S6. Gene set enrichment analysis of the core molecular KEGG pathways in the GBM subtype patients from microarray dataset.**

**All subtype**

| NAME                                                    | GS<br> follow link to MSigDB                            | SIZ<br>E | ES         | NES       | NOM p-val | FDR q-val  | FWER p-<br>val | RANK<br>AT<br>MAX | LEADING EDGE                    |
|---------------------------------------------------------|---------------------------------------------------------|----------|------------|-----------|-----------|------------|----------------|-------------------|---------------------------------|
| KEGG_OTHER_GLYCAN_DEGRADATION                           | KEGG_OTHER_GLYCAN_DEGRADATION                           | 12       | 0.6504333  | 0.6504333 | 0         | 6.69E-04   | 5.00E-04       | 2176              | tags=83%, list=18%, signal=102% |
| KEGG_GLYCOSAMINOGLYCAN_DEGRADATION                      | KEGG_GLYCOSAMINOGLYCAN_DEGRADATION                      | 21       | 0.57187504 | 0.571875  | 0         | 0.01139325 | 0.0175         | 1700              | tags=71%, list=14%, signal=83%  |
| KEGG_GLYCOSAMINOGLYCAN_BIOSYNTHESIS_CHONDROITIN_SULFATE | KEGG_GLYCOSAMINOGLYCAN_BIOSYNTHESIS_CHONDROITIN_SULFATE | 13       | 0.5108532  | 0.5108532 | 0         | 0.02235264 | 0.051          | 3070              | tags=77%, list=26%, signal=104% |
| KEGG_O_GLYCAN_BIOSYNTHESIS                              | KEGG_O_GLYCAN_BIOSYNTHESIS                              | 18       | 0.49904296 | 0.499043  | 0         | 0.02259652 | 0.0675         | 1996              | tags=67%, list=17%, signal=80%  |
| KEGG_AMINO_SUGAR_AND_NUCLEOTIDE_SUGAR_METABOLISM        | KEGG_AMINO_SUGAR_AND_NUCLEOTIDE_SUGAR_METABOLISM        | 39       | 0.461686   | 0.461686  | 0         | 0.04082201 | 0.149          | 5185              | tags=90%, list=44%, signal=159% |
| KEGG_GRAFT_VERSUS_HOST_DISEASE                          | KEGG_GRAFT_VERSUS_HOST_DISEASE                          | 29       | 0.45085528 | 0.4508553 | 0         | 0.04291353 | 0.1825         | 5707              | tags=93%, list=48%, signal=179% |
| KEGG_GLYCOSPHINGOLIPID_BIOSYNTHESIS_GANGLIO_SERIES      | KEGG_GLYCOSPHINGOLIPID_BIOSYNTHESIS_GANGLIO_SERIES      | 13       | 0.4267877  | 0.4267877 | 0.0090634 | 0.05598099 | 0.267          | 1329              | tags=54%, list=11%, signal=61%  |
| KEGG_ALLOGRAFT_REJECTION                                | KEGG_ALLOGRAFT_REJECTION                                | 30       | 0.4224289  | 0.4224289 | 0         | 0.05337475 | 0.288          | 3699              | tags=73%, list=31%, signal=106% |
| KEGG_LEISHMANIA_INFECTION                               | KEGG_LEISHMANIA_INFECTION                               | 58       | 0.4215913  | 0.4215913 | 0         | 0.04787578 | 0.2905         | 5452              | tags=88%, list=46%, signal=162% |
| KEGG_GLYCOSPHINGOLIPID_BIOSYNTHESIS_GLOBO_SERIES        | KEGG_GLYCOSPHINGOLIPID_BIOSYNTHESIS_GLOBO_SERIES        | 13       | 0.4018869  | 0.4018869 | 0.019833  | 0.06172565 | 0.3945         | 1624              | tags=54%, list=14%, signal=62%  |
| KEGG_ECM_RECEPTOR_INTERACTION                           | KEGG_ECM_RECEPTOR_INTERACTION                           | 78       | 0.38625634 | 0.3862563 | 0         | 0.07510629 | 0.492          | 3963              | tags=72%, list=33%, signal=107% |
| KEGG_PANTOTHENATE_AND_COA_BIOSYNTHESIS                  | KEGG_PANTOTHENATE_AND_COA_BIOSYNTHESIS                  | 14       | 0.38140666 | 0.3814067 | 0.0181452 | 0.07536735 | 0.5265         | 2258              | tags=57%, list=19%, signal=70%  |
| KEGG_NOD_LIKE_RECEPTOR_SIGNALING_PATHWAY                | KEGG_NOD_LIKE_RECEPTOR_SIGNALING_PATHWAY                | 52       | 0.37892175 | 0.3789218 | 0         | 0.07283738 | 0.5445         | 5332              | tags=83%, list=45%, signal=150% |
| KEGG_INTESTINAL_IMMUNE_NETWORK_FOR_IGA_PRODUCTION       | KEGG_INTESTINAL_IMMUNE_NETWORK_FOR_IGA_PRODUCTION       | 35       | 0.37732407 | 0.3773241 | 0         | 0.06971845 | 0.5535         | 2992              | tags=63%, list=25%, signal=84%  |
| KEGG_GLYCOSAMINOGLYCAN_BIOSYNTHESIS_KERATAN_SULFATE     | KEGG_GLYCOSAMINOGLYCAN_BIOSYNTHESIS_KERATAN_SULFATE     | 11       | 0.36237812 | 0.3623781 | 0.0839921 | 0.08559142 | 0.65           | 6487              | tags=91%, list=55%, signal=200% |
| KEGG_PROTEASOME                                         | KEGG_PROTEASOME                                         | 42       | 0.34953946 | 0.3495395 | 0         | 0.10107853 | 0.728          | 6881              | tags=93%, list=58%, signal=220% |
| KEGG_LYSOSOME                                           | KEGG_LYSOSOME                                           | 106      | 0.34621534 | 0.3462153 | 0         | 0.10116799 | 0.746          | 3426              | tags=63%, list=29%, signal=88%  |
| KEGG_HEMATOPOIETIC_CELL_LINEAGE                         | KEGG_HEMATOPOIETIC_CELL_LINEAGE                         | 77       | 0.34588242 | 0.3458824 | 0         | 0.09617624 | 0.749          | 5011              | tags=77%, list=42%, signal=132% |
| KEGG_ASTHMA                                             | KEGG_ASTHMA                                             | 22       | 0.31869635 | 0.3186964 | 0.0166503 | 0.1455133  | 0.896          | 6469              | tags=86%, list=55%, signal=190% |
| KEGG_GLYCOSAMINOGLYCAN_BIOSYNTHESIS                     | KEGG_GLYCOSAMINOGLYCAN_BIOSYNTHESIS                     | 21       | 0.3143726  | 0.3143726 | 0.0192503 | 0.14897138 | 0.913          | 1360              | tags=43%, list=11%, signal=48%  |
| KEGG_TOLL_LIKE_RECEPTOR_SIGNALING_PATHWAY               | KEGG_TOLL_LIKE_RECEPTOR_SIGNALING_PATHWAY               | 88       | 0.30999985 | 0.3099999 | 0         | 0.15189648 | 0.928          | 5649              | tags=78%, list=48%, signal=149% |
| KEGG_RENIN_ANGIOTENSIN_SYSTEM                           | KEGG_RENIN_ANGIOTENSIN_SYSTEM                           | 16       | 0.30747637 | 0.3074764 | 0.0665343 | 0.15156728 | 0.9385         | 7476              | tags=94%, list=63%, signal=253% |
| KEGG_LEUKOCYTE_TRANSENDOTHELIAL_MIGRATION               | KEGG_LEUKOCYTE_TRANSENDOTHELIAL_MIGRATION               | 99       | 0.3067483  | 0.3067483 | 0         | 0.14683111 | 0.9405         | 4298              | tags=67%, list=36%, signal=104% |
| KEGG_TYPE_1_DIABETES_MELLITUS                           | KEGG_TYPE_1_DIABETES_MELLITUS                           | 36       | 0.30393928 | 0.3039393 | 0.0020471 | 0.14782451 | 0.9535         | 3653              | tags=61%, list=31%, signal=88%  |
| KEGG_APOPTOSIS                                          | KEGG_APOPTOSIS                                          | 79       | 0.3038426  | 0.3038426 | 0         | 0.14211078 | 0.9535         | 3025              | tags=56%, list=26%, signal=74%  |
| KEGG_NICOTINATE_AND_NICOTINE_METABOLISM                 | KEGG_NICOTINATE_AND_NICOTINE_METABOLISM                 | 15       | 0.3023498  | 0.3023498 | 0.1214575 | 0.14022781 | 0.9555         | 2743              | tags=53%, list=23%, signal=69%  |
| KEGG_PRIMARY_IMMUNODEFICIENCY                           | KEGG_PRIMARY_IMMUNODEFICIENCY                           | 33       | 0.30087808 | 0.3008781 | 0.002994  | 0.13841012 | 0.9605         | 3269              | tags=58%, list=28%, signal=79%  |
| KEGG_ANTIGEN_PROCESSING_AND_PRESENTATION                | KEGG_ANTIGEN_PROCESSING_AND_PRESENTATION                | 63       | 0.2950441  | 0.2950441 | 0         | 0.14708565 | 0.969          | 2919              | tags=54%, list=25%, signal=71%  |
| KEGG_VIRAL_MYOCARDITIS                                  | KEGG_VIRAL_MYOCARDITIS                                  | 62       | 0.2942899  | 0.2942899 | 0         | 0.14373218 | 0.9715         | 3796              | tags=61%, list=32%, signal=90%  |

|                             |                             |     |            |           |           |            |        |                                       |
|-----------------------------|-----------------------------|-----|------------|-----------|-----------|------------|--------|---------------------------------------|
| KEGG_N_GLYCAN_BIOSYNTHESI   | KEGG_N_GLYCAN_BIOSYNTHESI   | 34  | 0.2909989  | 0.2909989 | 0.002004  | 0.14672317 | 0.975  | 1790 tags=44%, list=15%, signal=52%   |
| KEGG_GLYCOSYLPHOSPHATIDYL   | KEGG_GLYCOSYLPHOSPHATIDYL   | 19  | 0.29007155 | 0.2900716 | 0.0613254 | 0.14435332 | 0.9755 | 4679 tags=68%, list=39%, signal=113%  |
| KEGG_VALINE_LEUCINE_AND_IS  | KEGG_VALINE_LEUCINE_AND_IS  | 10  | 0.28481013 | 0.2848101 | 0.3277487 | 0.15344657 | 0.9815 | 6112 tags=80%, list=52%, signal=165%  |
| KEGG_AUTOIMMUNE_THYROID_D   | KEGG_AUTOIMMUNE_THYROID_D   | 38  | 0.2846878  | 0.2846878 | 0.0040775 | 0.1490374  | 0.9815 | 7245 tags=89%, list=61%, signal=229%  |
| KEGG_COMPLEMENT_AND_COA     | KEGG_COMPLEMENT_AND_COA     | 65  | 0.28208172 | 0.2820817 | 0         | 0.15131813 | 0.984  | 3058 tags=54%, list=26%, signal=72%   |
| KEGG_FOCAL_ADHESION         | KEGG_FOCAL_ADHESION         | 182 | 0.27775812 | 0.2777581 | 0         | 0.15809517 | 0.9865 | 2946 tags=52%, list=25%, signal=68%   |
| KEGG_CYTOKINE_CYTOKINE_RE   | KEGG_CYTOKINE_CYTOKINE_RE   | 214 | 0.27579722 | 0.2757972 | 0         | 0.15841691 | 0.987  | 4158 tags=62%, list=35%, signal=94%   |
| KEGG_PENTOSE_PHOSPHATE_P    | KEGG_PENTOSE_PHOSPHATE_P    | 23  | 0.2640725  | 0.2640725 | 0.0737463 | 0.18685716 | 0.9965 | 3061 tags=52%, list=26%, signal=70%   |
| KEGG_STEROID_BIOSYNTHESIS   | KEGG_STEROID_BIOSYNTHESIS   | 15  | 0.26365557 | 0.2636556 | 0.2232232 | 0.18304078 | 0.9965 | 3992 tags=60%, list=34%, signal=90%   |
| KEGG_PROTEIN_EXPORT         | KEGG_PROTEIN_EXPORT         | 18  | 0.26006305 | 0.2600631 | 0.1354705 | 0.18862303 | 0.9975 | 4826 tags=67%, list=41%, signal=112%  |
| KEGG_PORPHYRIN_AND_CHLOR    | KEGG_PORPHYRIN_AND_CHLOR    | 24  | 0.25619578 | 0.2561958 | 0.0591233 | 0.19525264 | 0.999  | 6850 tags=83%, list=58%, signal=197%  |
| KEGG_PRION_DISEASES         | KEGG_PRION_DISEASES         | 34  | 0.25399667 | 0.2539967 | 0.0246792 | 0.19718362 | 0.999  | 5367 tags=71%, list=45%, signal=129%  |
| KEGG_STARCH_AND_SUCROSE_    | KEGG_STARCH_AND_SUCROSE_    | 29  | 0.25064194 | 0.2506419 | 0.0444874 | 0.20332973 | 0.9995 | 4804 tags=66%, list=41%, signal=110%  |
| KEGG_GALACTOSE_METABOLIS    | KEGG_GALACTOSE_METABOLIS    | 23  | 0.24751057 | 0.2475106 | 0.1015936 | 0.20916049 | 1      | 4804 tags=65%, list=41%, signal=109%  |
| KEGG_PATHOGENIC_ESCHERICH   | KEGG_PATHOGENIC_ESCHERICH   | 49  | 0.24353465 | 0.2435347 | 0.0078201 | 0.2177758  | 1      | 5352 tags=69%, list=45%, signal=126%  |
| KEGG_CELL_ADHESION_MOLECU   | KEGG_CELL_ADHESION_MOLECU   | 113 | 0.24311009 | 0.2431101 | 0         | 0.21452758 | 1      | 4700 tags=64%, list=40%, signal=105%  |
| KEGG_ASCORBATE_AND_ALDAR    | KEGG_ASCORBATE_AND_ALDAR    | 10  | 0.2421941  | 0.2421941 | 0.5059171 | 0.21285544 | 1      | 7803 tags=90%, list=66%, signal=263%  |
| KEGG_RIBOFLAVIN_METABOLISM  | KEGG_RIBOFLAVIN_METABOLISM  | 12  | 0.2401812  | 0.2401812 | 0.4093162 | 0.21559373 | 1      | 2095 tags=42%, list=18%, signal=51%   |
| KEGG_PHENYLALANINE_METABO   | KEGG_PHENYLALANINE_METABO   | 17  | 0.23734051 | 0.2373405 | 0.2411067 | 0.2211757  | 1      | 3467 tags=53%, list=29%, signal=75%   |
| KEGG_GLYCOLYSIS_GLUONEO     | KEGG_GLYCOLYSIS_GLUONEO     | 53  | 0.23279601 | 0.232796  | 0.0061038 | 0.23312409 | 1      | 5530 tags=70%, list=47%, signal=130%  |
| KEGG_FRUCTOSE_AND_MANNO     | KEGG_FRUCTOSE_AND_MANNO     | 30  | 0.2307129  | 0.2307129 | 0.0667996 | 0.23618205 | 1      | 2409 tags=43%, list=20%, signal=54%   |
| KEGG_SMALL_CELL_LUNG_CANC   | KEGG_SMALL_CELL_LUNG_CANC   | 81  | 0.22948039 | 0.2294804 | 0         | 0.23626943 | 1      | 3592 tags=53%, list=30%, signal=76%   |
| KEGG_RIG_I_LIKE_RECEPTOR_SI | KEGG_RIG_I_LIKE_RECEPTOR_SI | 58  | 0.22876602 | 0.228766  | 0         | 0.23463325 | 1      | 4456 tags=60%, list=38%, signal=96%   |
| KEGG_DRUG_METABOLISM_OTH    | KEGG_DRUG_METABOLISM_OTH    | 32  | 0.22814506 | 0.2281451 | 0.0612648 | 0.2325377  | 1      | 4713 tags=63%, list=40%, signal=103%  |
| KEGG_AMINOACYL_TRNA_BIOSY   | KEGG_AMINOACYL_TRNA_BIOSY   | 29  | 0.22196801 | 0.221968  | 0.0856327 | 0.25222948 | 1      | 8006 tags=90%, list=68%, signal=275%  |
| KEGG_T_CELL_RECEPTOR_SIGN   | KEGG_T_CELL_RECEPTOR_SIGN   | 103 | 0.21965514 | 0.2196551 | 0         | 0.25711808 | 1      | 5707 tags=70%, list=48%, signal=134%  |
| KEGG_SNARE_INTERACTIONS_IN  | KEGG_SNARE_INTERACTIONS_IN  | 30  | 0.21918854 | 0.2191885 | 0.0910931 | 0.25443926 | 1      | 4522 tags=60%, list=38%, signal=97%   |
| KEGG_CHEMOKINE_SIGNALING_   | KEGG_CHEMOKINE_SIGNALING_   | 154 | 0.21597427 | 0.2159743 | 0         | 0.2634302  | 1      | 4556 tags=60%, list=38%, signal=96%   |
| KEGG_REGULATION_OF_ACTIN_   | KEGG_REGULATION_OF_ACTIN_   | 181 | 0.21577051 | 0.2157705 | 0         | 0.2597474  | 1      | 5342 tags=66%, list=45%, signal=119%  |
| KEGG_CYTOSOLIC_DNA_SENSIN   | KEGG_CYTOSOLIC_DNA_SENSIN   | 40  | 0.21319799 | 0.213198  | 0.045     | 0.26651338 | 1      | 8746 tags=95%, list=74%, signal=361%  |
| KEGG_JAK_STAT_SIGNALING_PA  | KEGG_JAK_STAT_SIGNALING_PA  | 126 | 0.21153969 | 0.2115397 | 0         | 0.26945445 | 1      | 7306 tags=83%, list=62%, signal=213%  |
| KEGG_B_CELL_RECEPTOR_SIGN   | KEGG_B_CELL_RECEPTOR_SIGN   | 68  | 0.21105036 | 0.2110504 | 0.0030864 | 0.26694298 | 1      | 5010 tags=63%, list=42%, signal=109%  |
| KEGG_PENTOSE_AND_GLUCURO    | KEGG_PENTOSE_AND_GLUCURO    | 12  | 0.20982446 | 0.2098245 | 0.6070409 | 0.26784703 | 1      | 6408 tags=75%, list=54%, signal=163%  |
| KEGG_MISMATCH_REPAIR        | KEGG_MISMATCH_REPAIR        | 23  | 0.20157135 | 0.2015714 | 0.2623457 | 0.29972202 | 1      | 9473 tags=100%, list=80%, signal=496% |
| KEGG_ONE_CARBON_POOL_BY_    | KEGG_ONE_CARBON_POOL_BY_    | 15  | 0.19743918 | 0.1974392 | 0.570702  | 0.31417155 | 1      | 7939 tags=87%, list=67%, signal=262%  |
| KEGG_FC_GAMMA_R_MEDIATED    | KEGG_FC_GAMMA_R_MEDIATED    | 83  | 0.19638951 | 0.1963895 | 0.0040201 | 0.31410462 | 1      | 3116 tags=46%, list=26%, signal=62%   |
| KEGG_GLYCEROLIPID_METABOLI  | KEGG_GLYCEROLIPID_METABOLI  | 38  | 0.18849336 | 0.1884934 | 0.1281534 | 0.34969535 | 1      | 7758 tags=84%, list=65%, signal=243%  |
| KEGG_NATURAL_KILLER_CELL_M  | KEGG_NATURAL_KILLER_CELL_M  | 106 | 0.18600492 | 0.1860049 | 0         | 0.358113   | 1      | 5421 tags=64%, list=46%, signal=117%  |
| KEGG_GLUTATHIONE_METABOLI   | KEGG_GLUTATHIONE_METABOLI   | 35  | 0.17924497 | 0.179245  | 0.2017375 | 0.3914354  | 1      | 6012 tags=69%, list=51%, signal=139%  |
| KEGG_ARRHYTHMOGENIC_RIGH    | KEGG_ARRHYTHMOGENIC_RIGH    | 66  | 0.17550014 | 0.1755001 | 0.0270793 | 0.4083895  | 1      | 984 tags=26%, list=8%, signal=28%     |
| KEGG_HYPERTROPHIC_CARDIO    | KEGG_HYPERTROPHIC_CARDIO    | 75  | 0.17029558 | 0.1702956 | 0.0376238 | 0.43534496 | 1      | 1471 tags=29%, list=12%, signal=33%   |
| KEGG_HISTIDINE_METABOLISM   | KEGG_HISTIDINE_METABOLISM   | 23  | 0.17000487 | 0.1700049 | 0.4564565 | 0.43134567 | 1      | 9331 tags=96%, list=79%, signal=448%  |
| KEGG_HOMOLOGOUS_RECOMBI     | KEGG_HOMOLOGOUS_RECOMBI     | 25  | 0.16794251 | 0.1679425 | 0.438634  | 0.43904647 | 1      | 9397 tags=96%, list=79%, signal=461%  |
| KEGG_ETHER_LIPID_METABOLIS  | KEGG_ETHER_LIPID_METABOLIS  | 25  | 0.16762145 | 0.1676215 | 0.4253807 | 0.4349315  | 1      | 3708 tags=48%, list=31%, signal=70%   |
| KEGG_CITRATE_CYCLE_TCA_CY   | KEGG_CITRATE_CYCLE_TCA_CY   | 29  | 0.16687603 | 0.166876  | 0.365     | 0.43393576 | 1      | 6204 tags=69%, list=52%, signal=144%  |
| KEGG_STEROID_HORMONE_BIO    | KEGG_STEROID_HORMONE_BIO    | 36  | 0.16613106 | 0.1661311 | 0.2408325 | 0.43301067 | 1      | 7918 tags=83%, list=67%, signal=250%  |

|                             |                             |     |            |           |           |            |   |                                        |
|-----------------------------|-----------------------------|-----|------------|-----------|-----------|------------|---|----------------------------------------|
| KEGG_SPHINGOLIPID_METABOLI  | KEGG_SPHINGOLIPID_METABOLI  | 28  | 0.16553174 | 0.1655317 | 0.3682132 | 0.43096438 | 1 | 1429 tags=29%, list=12%, signal=32%    |
| KEGG_EPITHELIAL_CELL_SIGNAL | KEGG_EPITHELIAL_CELL_SIGNAL | 59  | 0.16341476 | 0.1634148 | 0.0743243 | 0.43887734 | 1 | 3498 tags=46%, list=29%, signal=65%    |
| KEGG_CIRCADIAN_RHYTHM_MA    | KEGG_CIRCADIAN_RHYTHM_MA    | 11  | 0.16272183 | 0.1627218 | 0.8921283 | 0.43767095 | 1 | 4540 tags=55%, list=38%, signal=88%    |
| KEGG_THYROID_CANCER         | KEGG_THYROID_CANCER         | 29  | 0.16139074 | 0.1613907 | 0.3855422 | 0.44053638 | 1 | 5042 tags=59%, list=43%, signal=102%   |
| KEGG_ACUTE_MYELOID_LEUKEM   | KEGG_ACUTE_MYELOID_LEUKEM   | 55  | 0.16050208 | 0.1605021 | 0.1032505 | 0.44066873 | 1 | 2417 tags=36%, list=20%, signal=45%    |
| KEGG_TRYPTOPHAN_METABOLI    | KEGG_TRYPTOPHAN_METABOLI    | 29  | 0.16027153 | 0.1602715 | 0.4153355 | 0.43670845 | 1 | 7918 tags=83%, list=67%, signal=248%   |
| KEGG_ABC_TRANSPORTERS       | KEGG_ABC_TRANSPORTERS       | 36  | 0.15558752 | 0.1555875 | 0.3168016 | 0.4615865  | 1 | 6066 tags=67%, list=51%, signal=136%   |
| KEGG_ADIPOCYTOKINE_SIGNALI  | KEGG_ADIPOCYTOKINE_SIGNALI  | 63  | 0.15229595 | 0.152296  | 0.0948104 | 0.47848165 | 1 | 4603 tags=54%, list=39%, signal=88%    |
| KEGG_P53_SIGNALING_PATHWA   | KEGG_P53_SIGNALING_PATHWA   | 59  | 0.1491916  | 0.1491916 | 0.1298969 | 0.4947111  | 1 | 5475 tags=61%, list=46%, signal=113%   |
| KEGG_BLADDER_CANCER         | KEGG_BLADDER_CANCER         | 41  | 0.14855368 | 0.1485537 | 0.3053892 | 0.49308875 | 1 | 2293 tags=34%, list=19%, signal=42%    |
| KEGG_SULFUR_METABOLISM      | KEGG_SULFUR_METABOLISM      | 9   | 0.14833255 | 0.1483326 | 0.9631841 | 0.48894066 | 1 | 4830 tags=56%, list=41%, signal=94%    |
| KEGG_PATHWAYS_IN_CANCER     | KEGG_PATHWAYS_IN_CANCER     | 300 | 0.14669551 | 0.1466955 | 0         | 0.49434823 | 1 | 3403 tags=43%, list=29%, signal=59%    |
| KEGG_ADHERENS_JUNCTION      | KEGG_ADHERENS_JUNCTION      | 71  | 0.14623204 | 0.146232  | 0.1087613 | 0.49201593 | 1 | 1950 tags=31%, list=16%, signal=37%    |
| KEGG_TYROSINE_METABOLISM    | KEGG_TYROSINE_METABOLISM    | 38  | 0.14412914 | 0.1441291 | 0.3524004 | 0.5010654  | 1 | 9843 tags=97%, list=83%, signal=571%   |
| KEGG_NUCLEOTIDE_EXCISION_R  | KEGG_NUCLEOTIDE_EXCISION_R  | 41  | 0.14226778 | 0.1422678 | 0.3514852 | 0.5085982  | 1 | 9599 tags=95%, list=81%, signal=497%   |
| KEGG_NOTCH_SIGNALING_PATH   | KEGG_NOTCH_SIGNALING_PATH   | 36  | 0.14036424 | 0.1403642 | 0.4370664 | 0.5169664  | 1 | 3281 tags=42%, list=28%, signal=57%    |
| KEGG_ARACHIDONIC_ACID_MET   | KEGG_ARACHIDONIC_ACID_MET   | 45  | 0.13848686 | 0.1384869 | 0.3066802 | 0.52478033 | 1 | 8905 tags=89%, list=75%, signal=355%   |
| KEGG_VIBRIO_CHOLERAE_INFEC  | KEGG_VIBRIO_CHOLERAE_INFEC  | 45  | 0.13669065 | 0.1366907 | 0.321393  | 0.53255266 | 1 | 3128 tags=40%, list=26%, signal=54%    |
| KEGG_PANCREATIC_CANCER      | KEGG_PANCREATIC_CANCER      | 70  | 0.13591422 | 0.1359142 | 0.1348089 | 0.53266853 | 1 | 5682 tags=61%, list=48%, signal=117%   |
| KEGG_VEGF_SIGNALING_PATHW   | KEGG_VEGF_SIGNALING_PATHW   | 69  | 0.13200933 | 0.1320093 | 0.172549  | 0.5559288  | 1 | 3599 tags=43%, list=30%, signal=62%    |
| KEGG_RENAL_CELL_CARCINOMA   | KEGG_RENAL_CELL_CARCINOMA   | 66  | 0.13087037 | 0.1308704 | 0.1997961 | 0.559038   | 1 | 5284 tags=58%, list=45%, signal=103%   |
| KEGG_PRIMARY_BILE_ACID_BIOS | KEGG_PRIMARY_BILE_ACID_BIOS | 14  | 0.13050826 | 0.1305083 | 0.942058  | 0.55608493 | 1 | 10313 tags=100%, list=87%, signal=766% |
| KEGG_DILATED_CARDIOMYOPAT   | KEGG_DILATED_CARDIOMYOPAT   | 80  | 0.13032682 | 0.1303268 | 0.1119247 | 0.5517663  | 1 | 984 tags=21%, list=8%, signal=23%      |
| KEGG_MTOR_SIGNALING_PATH    | KEGG_MTOR_SIGNALING_PATH    | 45  | 0.12994781 | 0.1299478 | 0.4040404 | 0.5487855  | 1 | 2417 tags=33%, list=20%, signal=42%    |
| KEGG_ENDOCYTOSIS            | KEGG_ENDOCYTOSIS            | 145 | 0.12978058 | 0.1297806 | 0.0128968 | 0.544604   | 1 | 3468 tags=42%, list=29%, signal=59%    |
| KEGG_DORSO_VENTRAL_AXIS_F   | KEGG_DORSO_VENTRAL_AXIS_F   | 18  | 0.12844117 | 0.1284412 | 0.8943248 | 0.549278   | 1 | 10338 tags=100%, list=87%, signal=778% |
| KEGG_PEROXISOME             | KEGG_PEROXISOME             | 65  | 0.12540518 | 0.1254052 | 0.2565657 | 0.5668539  | 1 | 9650 tags=94%, list=81%, signal=501%   |
| KEGG_VASCULAR_SMOOTH_MUS    | KEGG_VASCULAR_SMOOTH_MUS    | 99  | 0.12125593 | 0.1212559 | 0.0805825 | 0.593619   | 1 | 5042 tags=55%, list=43%, signal=94%    |
| KEGG_FC_EPSILON_RI_SIGNALIN | KEGG_FC_EPSILON_RI_SIGNALIN | 72  | 0.11988179 | 0.1198818 | 0.2367632 | 0.5986766  | 1 | 5010 tags=54%, list=42%, signal=93%    |
| KEGG_CHRONIC_MYELOID_LEUK   | KEGG_CHRONIC_MYELOID_LEUK   | 70  | 0.11987156 | 0.1198716 | 0.232333  | 0.59303725 | 1 | 1466 tags=24%, list=12%, signal=28%    |
| KEGG_NEUROTROPHIN_SIGNALI   | KEGG_NEUROTROPHIN_SIGNALI   | 116 | 0.11713979 | 0.1171398 | 0.0721747 | 0.6086843  | 1 | 5269 tags=56%, list=44%, signal=100%   |
| KEGG_PROSTATE_CANCER        | KEGG_PROSTATE_CANCER        | 84  | 0.11622509 | 0.1162251 | 0.2070352 | 0.6103652  | 1 | 6537 tags=67%, list=55%, signal=147%   |
| KEGG_BASAL_CELL_CARCINOMA   | KEGG_BASAL_CELL_CARCINOMA   | 46  | 0.10985128 | 0.1098513 | 0.6061204 | 0.65435857 | 1 | 6436 tags=65%, list=54%, signal=142%   |
| KEGG_TYPE_II_DIABETES_MELLI | KEGG_TYPE_II_DIABETES_MELLI | 42  | 0.10788225 | 0.1078823 | 0.6572864 | 0.6639901  | 1 | 2395 tags=31%, list=20%, signal=39%    |
| KEGG_PYRIMIDINE_METABOLISM  | KEGG_PYRIMIDINE_METABOLISM  | 71  | 0.10217448 | 0.1021745 | 0.4192932 | 0.70429695 | 1 | 8817 tags=85%, list=74%, signal=327%   |
| KEGG_MELANOMA               | KEGG_MELANOMA               | 66  | 0.10137927 | 0.1013793 | 0.4782609 | 0.70469165 | 1 | 6710 tags=67%, list=57%, signal=153%   |
| KEGG_MAPK_SIGNALING_PATHW   | KEGG_MAPK_SIGNALING_PATHW   | 236 | 0.10004287 | 0.1000429 | 0.0197239 | 0.7092463  | 1 | 3560 tags=40%, list=30%, signal=56%    |
| KEGG_COLORECTAL_CANCER      | KEGG_COLORECTAL_CANCER      | 61  | 0.09495524 | 0.0949552 | 0.6028513 | 0.74403375 | 1 | 3156 tags=36%, list=27%, signal=49%    |
| KEGG_TGF_BETA_SIGNALING_PA  | KEGG_TGF_BETA_SIGNALING_PA  | 77  | 0.09443057 | 0.0944306 | 0.4727273 | 0.74166983 | 1 | 2891 tags=34%, list=24%, signal=44%    |
| KEGG_ARGININE_AND_PROLINE_  | KEGG_ARGININE_AND_PROLINE_  | 45  | 0.08972587 | 0.0897259 | 0.8266932 | 0.7717876  | 1 | 8954 tags=84%, list=75%, signal=343%   |
| KEGG_AXON_GUIDANCE          | KEGG_AXON_GUIDANCE          | 110 | 0.08897485 | 0.0889749 | 0.3346856 | 0.7710512  | 1 | 4021 tags=43%, list=34%, signal=64%    |
| KEGG_INSULIN_SIGNALING_PAT  | KEGG_INSULIN_SIGNALING_PAT  | 123 | 0.08789587 | 0.0878959 | 0.2753479 | 0.7721664  | 1 | 5042 tags=51%, list=43%, signal=88%    |
| KEGG_PPAR_SIGNALING_PATHW   | KEGG_PPAR_SIGNALING_PATHW   | 62  | 0.08301024 | 0.0830102 | 0.744489  | 0.80154556 | 1 | 7819 tags=74%, list=66%, signal=217%   |
| KEGG_SYSTEMIC_LUPUS_ERYTH   | KEGG_SYSTEMIC_LUPUS_ERYTH   | 86  | 0.08069813 | 0.0806981 | 0.5957011 | 0.8113548  | 1 | 7737 tags=73%, list=65%, signal=209%   |

# Classical

| NAME                                                      | GS<br> follow link to MSigDB                              | SIZE | ES        | NES      | NOM p-val   | FDR q-val  | FWER p-val | RANK AT MAX | LEADING EDGE                    |
|-----------------------------------------------------------|-----------------------------------------------------------|------|-----------|----------|-------------|------------|------------|-------------|---------------------------------|
| KEGG_GLYCOSPHINGOLIPID_BIO SYNTHESIS_GANGLIO_SERIES       | KEGG_GLYCOSPHINGOLIPID_BIO SYNTHESIS_GANGLIO_SERIES       | 13   | 0.5320075 | 0.532008 | 0.002024292 | 0.04138072 | 0.035      | 4644        | tags=92%, list=39%, signal=152% |
| KEGG_RIBOFLAVIN_METABOLISM                                | KEGG_RIBOFLAVIN_METABOLISM                                | 12   | 0.4307056 | 0.430706 | 0.024048096 | 0.17041734 | 0.2495     | 3791        | tags=75%, list=32%, signal=110% |
| KEGG_GLYCOSAMINOGLYCAN_BI OSYNTHESIS_CHONDROITIN_SUL FATE | KEGG_GLYCOSAMINOGLYCAN_BI OSYNTHESIS_CHONDROITIN_SUL FATE | 13   | 0.416769  | 0.416769 | 0.017408123 | 0.1495961  | 0.313      | 2360        | tags=62%, list=20%, signal=77%  |
| KEGG_O_GLYCAN_BIOSYNTHESI                                 | KEGG_O_GLYCAN_BIOSYNTHESI                                 | 18   | 0.4035824 | 0.403582 | 0.003937008 | 0.14098983 | 0.3745     | 5762        | tags=89%, list=49%, signal=173% |
| KEGG_PROTEASOME                                           | KEGG_PROTEASOME                                           | 42   | 0.401345  | 0.401345 | 0           | 0.11796489 | 0.3895     | 5704        | tags=88%, list=48%, signal=169% |
| KEGG_AMINO_SUGAR_AND_NUC LEOTIDE_SUGAR_METABOLISM         | KEGG_AMINO_SUGAR_AND_NUC LEOTIDE_SUGAR_METABOLISM         | 39   | 0.3932897 | 0.39329  | 0           | 0.11445503 | 0.435      | 4473        | tags=77%, list=38%, signal=123% |
| KEGG_OTHER_GLYCAN_DEGRAD ATION                            | KEGG_OTHER_GLYCAN_DEGRAD ATION                            | 12   | 0.3771101 | 0.37711  | 0.05320197  | 0.13142918 | 0.5325     | 1461        | tags=50%, list=12%, signal=57%  |
| KEGG_PANTOTHENATE_AND_CO A_BIOSYNTHESIS                   | KEGG_PANTOTHENATE_AND_CO A_BIOSYNTHESIS                   | 14   | 0.3756302 | 0.37563  | 0.027272727 | 0.11875249 | 0.546      | 5715        | tags=86%, list=48%, signal=165% |
| KEGG_GLYCOSAMINOGLYCAN_D EGRADATION                       | KEGG_GLYCOSAMINOGLYCAN_D EGRADATION                       | 21   | 0.3542288 | 0.354229 | 0.01004016  | 0.15362799 | 0.6945     | 5971        | tags=86%, list=50%, signal=172% |
| KEGG_GLYCOSAMINOGLYCAN_BI OSYNTHESIS_KERATAN_SULFAT       | KEGG_GLYCOSAMINOGLYCAN_BI OSYNTHESIS_KERATAN_SULFAT       | 11   | 0.3527417 | 0.352742 | 0.0805169   | 0.14217733 | 0.704      | 5523        | tags=82%, list=47%, signal=153% |
| KEGG_GLYCOSPHINGOLIPID_BIO SYNTHESIS_GLOBO_SERIES         | KEGG_GLYCOSPHINGOLIPID_BIO SYNTHESIS_GLOBO_SERIES         | 13   | 0.3492998 | 0.3493   | 0.054080628 | 0.13683459 | 0.722      | 2247        | tags=54%, list=19%, signal=66%  |
| KEGG_PHENYLALANINE_METABO LISM                            | KEGG_PHENYLALANINE_METABO LISM                            | 17   | 0.3278531 | 0.327853 | 0.041194644 | 0.1864644  | 0.859      | 4488        | tags=71%, list=38%, signal=113% |
| KEGG_PRION_DISEASES                                       | KEGG_PRION_DISEASES                                       | 34   | 0.3012555 | 0.301255 | 0.00404449  | 0.27044004 | 0.957      | 3064        | tags=56%, list=26%, signal=75%  |
| KEGG_FRUCTOSE_AND_MANNO SE_METABOLISM                     | KEGG_FRUCTOSE_AND_MANNO SE_METABOLISM                     | 30   | 0.2977177 | 0.297718 | 0.003067485 | 0.2666962  | 0.967      | 3593        | tags=60%, list=30%, signal=86%  |
| KEGG_RENIN_ANGIOTENSIN_SYS TEM                            | KEGG_RENIN_ANGIOTENSIN_SYS TEM                            | 16   | 0.2892815 | 0.289282 | 0.10965795  | 0.28593805 | 0.9795     | 6209        | tags=81%, list=52%, signal=170% |
| KEGG_N_GLYCAN_BIOSYNTHESI                                 | KEGG_N_GLYCAN_BIOSYNTHESIS                                | 34   | 0.2692721 | 0.269272 | 0.012121212 | 0.3717479  | 0.9955     | 5884        | tags=76%, list=50%, signal=151% |
| KEGG_GLYCOSAMINOGLYCAN_BI OSYNTHESIS_HEPARAN_SULFAT       | KEGG_GLYCOSAMINOGLYCAN_BI OSYNTHESIS_HEPARAN_SULFAT       | 21   | 0.2658727 | 0.265873 | 0.08250497  | 0.3703569  | 0.998      | 4758        | tags=67%, list=40%, signal=111% |
| KEGG_COMPLEMENT_AND_COA GULATION_CASCADES                 | KEGG_COMPLEMENT_AND_COA GULATION_CASCADES                 | 65   | 0.2580037 | 0.258004 | 0           | 0.39880326 | 0.9995     | 5714        | tags=74%, list=48%, signal=142% |
| KEGG_FOLATE_BIOSYNTHESIS                                  | KEGG_FOLATE_BIOSYNTHESIS                                  | 11   | 0.25047   | 0.25047  | 0.42942345  | 0.42751563 | 0.9995     | 7813        | tags=91%, list=66%, signal=266% |
| KEGG_ECM_RECEPTOR_INTERA                                  | KEGG_ECM_RECEPTOR_INTERAC                                 | 78   | 0.248617  | 0.248617 | 0           | 0.41915464 | 0.9995     | 3608        | tags=55%, list=30%, signal=79%  |
| KEGG_NOD_LIKE_RECEPTOR_SI                                 | KEGG_NOD_LIKE_RECEPTOR_SIG                                | 52   | 0.2485603 | 0.24856  | 0.00203252  | 0.39947456 | 0.9995     | 2994        | tags=50%, list=25%, signal=67%  |
| KEGG_PATHOGENIC_ESCHERICH                                 | KEGG_PATHOGENIC_ESCHERICHI                                | 49   | 0.2470388 | 0.247039 | 0.003976143 | 0.390754   | 0.9995     | 1680        | tags=39%, list=14%, signal=45%  |
| KEGG_SYSTEMIC_LUPUS_ERYTH                                 | KEGG_SYSTEMIC_LUPUS_ERYTH                                 | 86   | 0.2415768 | 0.241577 | 0           | 0.4079572  | 0.9995     | 5567        | tags=71%, list=47%, signal=133% |
| KEGG_PENTOSE_PHOSPHATE_P                                  | KEGG_PENTOSE_PHOSPHATE_P                                  | 23   | 0.2378798 | 0.23788  | 0.122266404 | 0.4152108  | 1          | 4918        | tags=65%, list=41%, signal=111% |
| KEGG_LEISHMANIA_INFECTION                                 | KEGG_LEISHMANIA_INFECTION                                 | 58   | 0.2373677 | 0.237368 | 0           | 0.40194649 | 1          | 4150        | tags=59%, list=35%, signal=90%  |
| KEGG_PORPHYRIN_AND_CHLOR                                  | KEGG_PORPHYRIN_AND_CHLOR                                  | 24   | 0.2370311 | 0.237031 | 0.106167845 | 0.38825697 | 1          | 1641        | tags=38%, list=14%, signal=43%  |
| KEGG_RIBOSOME                                             | KEGG_RIBOSOME                                             | 71   | 0.2347593 | 0.234759 | 0.001034126 | 0.3884177  | 1          | 7421        | tags=86%, list=63%, signal=228% |
| KEGG_HEMATOPOIETIC_CELL_LI                                | KEGG_HEMATOPOIETIC_CELL_LI                                | 77   | 0.2320347 | 0.232035 | 0           | 0.3912809  | 1          | 3580        | tags=53%, list=30%, signal=76%  |
| KEGG_GRAFT_VERSUS_HOST_DI                                 | KEGG_GRAFT_VERSUS_HOST_DI                                 | 29   | 0.2276282 | 0.227628 | 0.09207921  | 0.405082   | 1          | 8348        | tags=93%, list=70%, signal=314% |
| KEGG_GALACTOSE_METABOLIS                                  | KEGG_GALACTOSE_METABOLISM                                 | 23   | 0.2231287 | 0.223129 | 0.19009902  | 0.4212613  | 1          | 3030        | tags=48%, list=26%, signal=64%  |

|                             |                              |     |           |          |             |            |   |                                      |
|-----------------------------|------------------------------|-----|-----------|----------|-------------|------------|---|--------------------------------------|
| KEGG_PROTEIN_EXPORT         | KEGG_PROTEIN_EXPORT          | 18  | 0.2132617 | 0.213262 | 0.31451613  | 0.4743865  | 1 | 768 tags=28%, list=6%, signal=30%    |
| KEGG_VIBRIO_CHOLERAЕ_INFEC  | KEGG_VIBRIO_CHOLERAЕ_INFEC   | 45  | 0.2088776 | 0.208878 | 0.032520324 | 0.49258736 | 1 | 1748 tags=36%, list=15%, signal=42%  |
| KEGG_THYROID_CANCER         | KEGG_THYROID_CANCER          | 29  | 0.2025421 | 0.202542 | 0.1640706   | 0.5256945  | 1 | 6191 tags=72%, list=52%, signal=151% |
| KEGG_STARCH_AND_SUCROSE_    | KEGG_STARCH_AND_SUCROSE_     | 29  | 0.2021341 | 0.202134 | 0.1437008   | 0.5133235  | 1 | 4151 tags=55%, list=35%, signal=85%  |
| KEGG_ALLOGRAFT_REJECTION    | KEGG_ALLOGRAFT_REJECTION     | 30  | 0.1965343 | 0.196534 | 0.16950853  | 0.5439476  | 1 | 8348 tags=90%, list=70%, signal=303% |
| KEGG_INTESTINAL_IMMUNE_NET  | KEGG_INTESTINAL_IMMUNE_NET   | 35  | 0.1903111 | 0.190311 | 0.15724564  | 0.5805959  | 1 | 3848 tags=51%, list=32%, signal=76%  |
| KEGG_ACUTE_MYELOID_LEUKEM   | KEGG_ACUTE_MYELOID_LEUKEMI   | 55  | 0.1873782 | 0.187378 | 0.036511157 | 0.59065455 | 1 | 2531 tags=40%, list=21%, signal=51%  |
| KEGG_PRIMARY_BILE_ACID_BIOS | KEGG_PRIMARY_BILE_ACID_BIOS  | 14  | 0.1870312 | 0.187031 | 0.64070106  | 0.57803196 | 1 | 7102 tags=79%, list=60%, signal=196% |
| KEGG_LYSOSOME               | KEGG_LYSOSOME                | 106 | 0.1855298 | 0.18553  | 9.50E-04    | 0.57661325 | 1 | 6993 tags=77%, list=59%, signal=187% |
| KEGG_HYPERTROPHIC_CARDIO    | KEGG_HYPERTROPHIC_CARDIOM    | 75  | 0.1846019 | 0.184602 | 0.014127145 | 0.56982416 | 1 | 7944 tags=85%, list=67%, signal=257% |
| KEGG_FOCAL_ADHESION         | KEGG_FOCAL_ADHESION          | 182 | 0.1772178 | 0.177218 | 0           | 0.6216877  | 1 | 2100 tags=35%, list=18%, signal=42%  |
| KEGG_APOPTOSIS              | KEGG_APOPTOSIS               | 79  | 0.1752995 | 0.175299 | 0.010731707 | 0.62583697 | 1 | 5290 tags=62%, list=45%, signal=111% |
| KEGG_GLYCOLYSIS_GLUONEO     | KEGG_GLYCOLYSIS_GLUONEO      | 53  | 0.1744983 | 0.174498 | 0.08059701  | 0.6185865  | 1 | 5547 tags=64%, list=47%, signal=120% |
| KEGG_BASE_EXCISION_REPAIR   | KEGG_BASE_EXCISION_REPAIR    | 31  | 0.1723675 | 0.172368 | 0.29196337  | 0.62427557 | 1 | 7142 tags=77%, list=60%, signal=194% |
| KEGG_STEROID_BIOSYNTHESIS   | KEGG_STEROID_BIOSYNTHESIS    | 15  | 0.1692416 | 0.169242 | 0.72167     | 0.6404888  | 1 | 5901 tags=67%, list=50%, signal=133% |
| KEGG_VIRAL_MYOCARDITIS      | KEGG_VIRAL_MYOCARDITIS       | 62  | 0.165665  | 0.165665 | 0.053946055 | 0.66020435 | 1 | 7609 tags=81%, list=64%, signal=224% |
| KEGG_DILATED_CARDIOMYOPAT   | KEGG_DILATED_CARDIOMYOPAT    | 80  | 0.1644949 | 0.164495 | 0.024340771 | 0.6577474  | 1 | 5029 tags=59%, list=42%, signal=101% |
| KEGG_TYROSINE_METABOLISM    | KEGG_TYROSINE_METABOLISM     | 38  | 0.1643457 | 0.164346 | 0.24475524  | 0.64528507 | 1 | 9604 tags=97%, list=81%, signal=510% |
| KEGG_ADHERENS_JUNCTION      | KEGG_ADHERENS_JUNCTION       | 71  | 0.1637944 | 0.163794 | 0.046248715 | 0.63743657 | 1 | 1910 tags=32%, list=16%, signal=38%  |
| KEGG_SNARE_INTERACTIONS_IN  | KEGG_SNARE_INTERACTIONS_IN   | 30  | 0.1635391 | 0.163539 | 0.36091724  | 0.62722397 | 1 | 3599 tags=47%, list=30%, signal=67%  |
| KEGG_CHEMOKINE_SIGNALING_   | KEGG_CHEMOKINE_SIGNALING_P   | 154 | 0.1634893 | 0.163489 | 0           | 0.6153745  | 1 | 2860 tags=40%, list=24%, signal=52%  |
| KEGG_JAK_STAT_SIGNALING_PA  | KEGG_JAK_STAT_SIGNALING_PA   | 126 | 0.1628087 | 0.162809 | 9.72E-04    | 0.609315   | 1 | 5054 tags=59%, list=43%, signal=101% |
| KEGG_Glutathione_Metaboli   | KEGG_Glutathione_Metaboli    | 35  | 0.1621263 | 0.162126 | 0.28429425  | 0.6035569  | 1 | 2487 tags=37%, list=21%, signal=47%  |
| KEGG_ANTIGEN_PROCESSING_A   | KEGG_ANTIGEN_PROCESSING_A    | 63  | 0.1605036 | 0.160504 | 0.06981318  | 0.60574627 | 1 | 8083 tags=84%, list=68%, signal=263% |
| KEGG_SPHINGOLIPID_METABOLI  | KEGG_SPHINGOLIPID_METABOLIS  | 28  | 0.1597846 | 0.159785 | 0.42021805  | 0.60130715 | 1 | 4462 tags=54%, list=38%, signal=86%  |
| KEGG_ARACHIDONIC_ACID_MET   | KEGG_ARACHIDONIC_ACID_META   | 45  | 0.1573706 | 0.157371 | 0.1955684   | 0.6117735  | 1 | 6837 tags=73%, list=58%, signal=172% |
| KEGG_DNA_REPLICATION        | KEGG_DNA_REPLICATION         | 32  | 0.1550875 | 0.155087 | 0.37333333  | 0.6212616  | 1 | 9654 tags=97%, list=81%, signal=519% |
| KEGG_CYTOKINE_CYTOKINE_RE   | KEGG_CYTOKINE_CYTOKINE_RE    | 214 | 0.1538966 | 0.153897 | 0.001023541 | 0.6214397  | 1 | 8127 tags=84%, list=69%, signal=261% |
| KEGG_ARRHYTHMOGENIC_RIGH    | KEGG_ARRHYTHMOGENIC_RIGHT    | 66  | 0.1530851 | 0.153085 | 0.09174312  | 0.61783403 | 1 | 5022 tags=58%, list=42%, signal=99%  |
| KEGG_BIOSYNTHESIS_OF_UNSA   | KEGG_BIOSYNTHESIS_OF_UNSAT   | 18  | 0.1526675 | 0.152668 | 0.7238193   | 0.61115026 | 1 | 4780 tags=56%, list=40%, signal=93%  |
| KEGG_DRUG_METABOLISM_OTH    | KEGG_DRUG_METABOLISM_OTH     | 32  | 0.1511984 | 0.151198 | 0.4016227   | 0.6140086  | 1 | 9700 tags=97%, list=82%, signal=530% |
| KEGG_TYPE_II_DIABETES_MELLI | KEGG_TYPE_II_DIABETES_MELLIT | 42  | 0.148458  | 0.148458 | 0.3026973   | 0.6282049  | 1 | 3045 tags=40%, list=26%, signal=54%  |
| KEGG_NICOTINATE_AND_NICOTI  | KEGG_NICOTINATE_AND_NICOTI   | 15  | 0.1471226 | 0.147123 | 0.859127    | 0.6303139  | 1 | 3791 tags=47%, list=32%, signal=69%  |
| KEGG_B_CELL_RECEPTOR_SIGN   | KEGG_B_CELL_RECEPTOR_SIGN    | 68  | 0.1458217 | 0.145822 | 0.08840864  | 0.6321447  | 1 | 3163 tags=41%, list=27%, signal=56%  |
| KEGG_STEROID_HORMONE_BIO    | KEGG_STEROID_HORMONE_BIOS    | 36  | 0.1450816 | 0.145082 | 0.39041096  | 0.6286671  | 1 | 7508 tags=78%, list=63%, signal=211% |
| KEGG_ERBB_SIGNALING_PATHW   | KEGG_ERBB_SIGNALING_PATHW    | 80  | 0.1432301 | 0.14323  | 0.039235413 | 0.6351722  | 1 | 3204 tags=41%, list=27%, signal=56%  |
| KEGG_CYTOSOLIC_DNA_SENSIN   | KEGG_CYTOSOLIC_DNA_SENSIN    | 40  | 0.1412437 | 0.141244 | 0.3550356   | 0.64429075 | 1 | 3963 tags=48%, list=33%, signal=71%  |
| KEGG_PYRIMIDINE_METABOLISM  | KEGG_PYRIMIDINE_METABOLISM   | 71  | 0.1395225 | 0.139523 | 0.13654225  | 0.65094054 | 1 | 9546 tags=94%, list=80%, signal=481% |
| KEGG_SMALL_CELL_LUNG_CANC   | KEGG_SMALL_CELL_LUNG_CANC    | 81  | 0.1377478 | 0.137748 | 0.07354346  | 0.657306   | 1 | 3794 tags=46%, list=32%, signal=67%  |
| KEGG_TOLL_LIKE_RECEPTOR_SI  | KEGG_TOLL_LIKE_RECEPTOR_SI   | 88  | 0.1371938 | 0.137194 | 0.065656565 | 0.653265   | 1 | 3101 tags=40%, list=26%, signal=53%  |
| KEGG_VALINE_LEUCINE_AND_IS  | KEGG_VALINE_LEUCINE_AND_IS   | 10  | 0.1350211 | 0.135021 | 0.9816248   | 0.6644247  | 1 | 1957 tags=30%, list=17%, signal=36%  |
| KEGG_T_CELL_RECEPTOR_SIGN   | KEGG_T_CELL_RECEPTOR_SIGN    | 103 | 0.1328347 | 0.132835 | 0.05029586  | 0.6750597  | 1 | 5346 tags=58%, list=45%, signal=105% |
| KEGG_BLADDER_CANCER         | KEGG_BLADDER_CANCER          | 41  | 0.1312995 | 0.1313   | 0.42345923  | 0.67982244 | 1 | 3654 tags=44%, list=31%, signal=63%  |
| KEGG_ADIPOCYTOKINE_SIGNALI  | KEGG_ADIPOCYTOKINE_SIGNALI   | 63  | 0.130761  | 0.130761 | 0.21768707  | 0.67549855 | 1 | 2598 tags=35%, list=22%, signal=44%  |
| KEGG_PROSTATE_CANCER        | KEGG_PROSTATE_CANCER         | 84  | 0.1296665 | 0.129666 | 0.10376399  | 0.6768511  | 1 | 8073 tags=81%, list=68%, signal=252% |
| KEGG_ONE_CARBON_POOL_BY_    | KEGG_ONE_CARBON_POOL_BY_     | 15  | 0.129478  | 0.129478 | 0.9312064   | 0.66982085 | 1 | 8744 tags=87%, list=74%, signal=329% |

|                             |                              |     |           |          |             |            |   |                                      |
|-----------------------------|------------------------------|-----|-----------|----------|-------------|------------|---|--------------------------------------|
| KEGG_CHRONIC_MYELOID_LEUK   | KEGG_CHRONIC_MYELOID_LEUK    | 70  | 0.1244154 | 0.124415 | 0.19483101  | 0.70687306 | 1 | 8359 tags=83%, list=70%, signal=279% |
| KEGG_NEUROTROPHIN_SIGNALI   | KEGG_NEUROTROPHIN_SIGNALIN   | 116 | 0.1240927 | 0.124093 | 0.049079753 | 0.7008359  | 1 | 3347 tags=41%, list=28%, signal=56%  |
| KEGG_GLIOMA                 | KEGG_GLIOMA                  | 59  | 0.1239582 | 0.123958 | 0.30041152  | 0.6933494  | 1 | 8386 tags=83%, list=71%, signal=282% |
| KEGG_RENAL_CELL_CARCINOMA   | KEGG_RENAL_CELL_CARCINOMA    | 66  | 0.1236967 | 0.123697 | 0.23138034  | 0.6867854  | 1 | 5728 tags=61%, list=48%, signal=117% |
| KEGG_VASCULAR_SMOOTH_MUS    | KEGG_VASCULAR_SMOOTH_MUS     | 99  | 0.1206393 | 0.120639 | 0.092762485 | 0.70576346 | 1 | 8164 tags=81%, list=69%, signal=257% |
| KEGG_EPITHELIAL_CELL_SIGNAL | KEGG_EPITHELIAL_CELL_SIGNALI | 59  | 0.1179791 | 0.117979 | 0.3573544   | 0.72179383 | 1 | 1823 tags=27%, list=15%, signal=32%  |
| KEGG_LEUKOCYTE_TRANSENDO    | KEGG_LEUKOCYTE_TRANSENDO     | 99  | 0.1156399 | 0.11564  | 0.12578617  | 0.7342439  | 1 | 8103 tags=80%, list=68%, signal=250% |
| KEGG_REGULATION_OF_ACTIN_   | KEGG_REGULATION_OF_ACTIN_C   | 181 | 0.1149322 | 0.114932 | 0.01489573  | 0.731911   | 1 | 2064 tags=29%, list=17%, signal=34%  |
| KEGG_NATURAL_KILLER_CELL_M  | KEGG_NATURAL_KILLER_CELL_M   | 106 | 0.1126842 | 0.112684 | 0.12706612  | 0.7438827  | 1 | 8073 tags=79%, list=68%, signal=246% |
| KEGG_CELL_ADHESION_MOLECU   | KEGG_CELL_ADHESION_MOLECU    | 113 | 0.1083259 | 0.108326 | 0.14035088  | 0.7755521  | 1 | 7018 tags=70%, list=59%, signal=170% |
| KEGG_CELL_CYCLE             | KEGG_CELL_CYCLE              | 104 | 0.1045588 | 0.104559 | 0.1875      | 0.80155617 | 1 | 8235 tags=80%, list=69%, signal=259% |
| KEGG_MELANOMA               | KEGG_MELANOMA                | 66  | 0.1031573 | 0.103157 | 0.48129424  | 0.80532694 | 1 | 8486 tags=82%, list=72%, signal=286% |
| KEGG_PRIMARY_IMMUNODEFICIE  | KEGG_PRIMARY_IMMUNODEFICIE   | 33  | 0.1030027 | 0.103003 | 0.86336637  | 0.79763037 | 1 | 9922 tags=94%, list=84%, signal=573% |
| KEGG_P53_SIGNALING_PATHWA   | KEGG_P53_SIGNALING_PATHWAY   | 59  | 0.1013014 | 0.101301 | 0.56643355  | 0.8041973  | 1 | 4231 tags=46%, list=36%, signal=71%  |
| KEGG_OOCYTE_MEIOSIS         | KEGG_OOCYTE_MEIOSIS          | 91  | 0.0985416 | 0.098542 | 0.31445906  | 0.8210289  | 1 | 8223 tags=79%, list=69%, signal=256% |
| KEGG_PROGESTERONE_MEDIAT    | KEGG_PROGESTERONE_MEDIAT     | 73  | 0.0981206 | 0.098121 | 0.50775194  | 0.8158023  | 1 | 8103 tags=78%, list=68%, signal=245% |
| KEGG_INSULIN_SIGNALING_PAT  | KEGG_INSULIN_SIGNALING_PATH  | 123 | 0.0965573 | 0.096557 | 0.18018018  | 0.82136625 | 1 | 3494 tags=39%, list=29%, signal=55%  |
| KEGG_MELANOGENESIS          | KEGG_MELANOGENESIS           | 86  | 0.0911133 | 0.091113 | 0.43213573  | 0.86055034 | 1 | 8166 tags=78%, list=69%, signal=248% |
| KEGG_ENDOMETRIAL_CANCER     | KEGG_ENDOMETRIAL_CANCER      | 50  | 0.0908383 | 0.090838 | 0.7917526   | 0.8541496  | 1 | 1061 tags=18%, list=9%, signal=20%   |
| KEGG_GAP_JUNCTION           | KEGG_GAP_JUNCTION            | 75  | 0.0905275 | 0.090528 | 0.57566464  | 0.8479305  | 1 | 1146 tags=19%, list=10%, signal=21%  |
| KEGG_AMYOTROPHIC_LATERAL_   | KEGG_AMYOTROPHIC_LATERAL_    | 50  | 0.090381  | 0.090381 | 0.77744806  | 0.8404271  | 1 | 4150 tags=44%, list=35%, signal=67%  |
| KEGG_PATHWAYS_IN_CANCER     | KEGG_PATHWAYS_IN_CANCER      | 300 | 0.088714  | 0.088714 | 0.021934198 | 0.8464406  | 1 | 2571 tags=30%, list=22%, signal=38%  |
| KEGG_GNRH_SIGNALING_PATH    | KEGG_GNRH_SIGNALING_PATHW    | 88  | 0.0871212 | 0.087121 | 0.48873654  | 0.8514461  | 1 | 995 tags=17%, list=8%, signal=18%    |
| KEGG_AXON_GUIDANCE          | KEGG_AXON_GUIDANCE           | 110 | 0.0866615 | 0.086661 | 0.39070228  | 0.84671044 | 1 | 6528 tags=64%, list=55%, signal=140% |
| KEGG_COLORECTAL_CANCER      | KEGG_COLORECTAL_CANCER       | 61  | 0.0857047 | 0.085705 | 0.7184369   | 0.8463291  | 1 | 3654 tags=39%, list=31%, signal=57%  |
| KEGG_BASAL_CELL_CARCINOMA   | KEGG_BASAL_CELL_CARCINOMA    | 46  | 0.0854145 | 0.085415 | 0.85796547  | 0.8402329  | 1 | 7756 tags=74%, list=65%, signal=213% |
| KEGG_MAPK_SIGNALING_PATHW   | KEGG_MAPK_SIGNALING_PATHW    | 236 | 0.0820001 | 0.082    | 0.08020833  | 0.858624   | 1 | 1056 tags=17%, list=9%, signal=18%   |
| KEGG_PANCREATIC_CANCER      | KEGG_PANCREATIC_CANCER       | 70  | 0.0813038 | 0.081304 | 0.72410357  | 0.855534   | 1 | 8359 tags=79%, list=70%, signal=265% |
| KEGG_TIGHT_JUNCTION         | KEGG_TIGHT_JUNCTION          | 113 | 0.0775389 | 0.077539 | 0.48466864  | 0.8755345  | 1 | 1817 tags=23%, list=15%, signal=27%  |
| KEGG_VEGF_SIGNALING_PATHW   | KEGG_VEGF_SIGNALING_PATHW    | 69  | 0.07534   | 0.07534  | 0.7942387   | 0.8827539  | 1 | 3064 tags=33%, list=26%, signal=45%  |
| KEGG_FC_EPSILON_RI_SIGNALIN | KEGG_FC_EPSILON_RI_SIGNALIN  | 72  | 0.067088  | 0.067088 | 0.89823467  | 0.9279877  | 1 | 7609 tags=71%, list=64%, signal=196% |
| KEGG_ENDOCYTOSIS            | KEGG_ENDOCYTOSIS             | 145 | 0.0659161 | 0.065916 | 0.54104847  | 0.92606807 | 1 | 8633 tags=79%, list=73%, signal=288% |
| KEGG_FC_GAMMA_R_MEDIATED    | KEGG_FC_GAMMA_R_MEDIATED_    | 83  | 0.0636589 | 0.063659 | 0.8470705   | 0.9294233  | 1 | 7537 tags=70%, list=64%, signal=190% |
| KEGG_ALZHEIMERS_DISEASE     | KEGG_ALZHEIMERS_DISEASE      | 142 | 0.0549666 | 0.054967 | 0.7823937   | 0.95924735 | 1 | 9628 tags=87%, list=81%, signal=455% |

## Neural

| NAME                                                    | GS<br> follow link to MSigDB                            | SIZE | ES        | NES        | NOM p-val | FDR q-val  | FWER p-val | RANK AT MAX | LEADING EDGE                    |
|---------------------------------------------------------|---------------------------------------------------------|------|-----------|------------|-----------|------------|------------|-------------|---------------------------------|
| KEGG_OTHER_GLYCAN_DEGRADATION                           | KEGG_OTHER_GLYCAN_DEGRADATION                           | 12   | 0.5606291 | 0.56062907 | 0         | 0.02560054 | 0.021      | 3240        | tags=83%, list=27%, signal=115% |
| KEGG_MISMATCH_REPAIR                                    | KEGG_MISMATCH_REPAIR                                    | 23   | 0.4728688 | 0.4728688  | 0         | 0.07291422 | 0.1195     | 5746        | tags=96%, list=48%, signal=185% |
| KEGG_GLYCOSAMINOGLYCAN_BIOSYNTHESIS_CHONDROITIN_SULFATE | KEGG_GLYCOSAMINOGLYCAN_BIOSYNTHESIS_CHONDROITIN_SULFATE | 13   | 0.4655252 | 0.4655252  | 0.0068695 | 0.05515797 | 0.134      | 3607        | tags=77%, list=30%, signal=110% |
| KEGG_VALINE_LEUCINE_AND_ISOLEUCINE_BIOSYNTHESIS         | KEGG_VALINE_LEUCINE_AND_ISOLEUCINE_BIOSYNTHESIS         | 10   | 0.3971308 | 0.39713082 | 0.0676768 | 0.15089335 | 0.402      | 3595        | tags=70%, list=30%, signal=100% |
| KEGG_AMINO_SUGAR_AND_NUCLEOTIDE_SUGAR_METABOLISM        | KEGG_AMINO_SUGAR_AND_NUCLEOTIDE_SUGAR_METABOLISM        | 39   | 0.3781146 | 0.3781146  | 0         | 0.17715015 | 0.5405     | 6477        | tags=92%, list=55%, signal=203% |
| KEGG_ONE_CARBON_POOL_BY_FOLATE                          | KEGG_ONE_CARBON_POOL_BY_FOLATE                          | 15   | 0.3749825 | 0.37498245 | 0.0228175 | 0.15621778 | 0.563      | 3464        | tags=67%, list=29%, signal=94%  |
| KEGG_HOMOLOGOUS_RECOMBINATION                           | KEGG_HOMOLOGOUS_RECOMBINATION                           | 25   | 0.3718124 | 0.3718124  | 9.80E-04  | 0.14089197 | 0.581      | 5561        | tags=84%, list=47%, signal=158% |
| KEGG_DNA_REPLICATION                                    | KEGG_DNA_REPLICATION                                    | 32   | 0.3695997 | 0.36959967 | 0.001     | 0.12771326 | 0.5935     | 4893        | tags=78%, list=41%, signal=133% |
| KEGG_AMINOACYL_TRNA_BIOSYNTHESIS                        | KEGG_AMINOACYL_TRNA_BIOSYNTHESIS                        | 29   | 0.3575528 | 0.35755277 | 0.0010246 | 0.14198957 | 0.682      | 5175        | tags=79%, list=44%, signal=140% |
| KEGG_GLYCOSAMINOGLYCAN_DEGRADATION                      | KEGG_GLYCOSAMINOGLYCAN_DEGRADATION                      | 21   | 0.3473186 | 0.3473186  | 0.0057034 | 0.15332825 | 0.7475     | 3229        | tags=62%, list=27%, signal=85%  |
| KEGG_N_GLYCAN_BIOSYNTHESIS                              | KEGG_N_GLYCAN_BIOSYNTHESIS                              | 34   | 0.3361188 | 0.33611882 | 9.80E-04  | 0.16877104 | 0.8175     | 4047        | tags=68%, list=34%, signal=102% |
| KEGG_LYSINE_DEGRADATION                                 | KEGG_LYSINE_DEGRADATION                                 | 38   | 0.3303965 | 0.3303965  | 0         | 0.17024064 | 0.843      | 4832        | tags=74%, list=41%, signal=124% |
| KEGG_PENTOSE_PHOSPHATE_PATHWAY                          | KEGG_PENTOSE_PHOSPHATE_PATHWAY                          | 23   | 0.3207812 | 0.3207812  | 0.0127077 | 0.18863559 | 0.8905     | 4968        | tags=74%, list=42%, signal=127% |
| KEGG_O_GLYCAN_BIOSYNTHESIS                              | KEGG_O_GLYCAN_BIOSYNTHESIS                              | 18   | 0.317148  | 0.31714803 | 0.0438247 | 0.18728852 | 0.9045     | 4150        | tags=67%, list=35%, signal=102% |
| KEGG_SPLICEOSOME                                        | KEGG_SPLICEOSOME                                        | 86   | 0.3146429 | 0.31464285 | 0         | 0.18245992 | 0.9125     | 4293        | tags=67%, list=36%, signal=105% |
| KEGG_BIOSYNTHESIS_OF_UNSATURATED_FATTY_ACIDS            | KEGG_BIOSYNTHESIS_OF_UNSATURATED_FATTY_ACIDS            | 18   | 0.2883241 | 0.28832406 | 0.0736739 | 0.26669562 | 0.982      | 6468        | tags=83%, list=55%, signal=183% |
| KEGG_CIRCADIAN_RHYTHM_MMAL                              | KEGG_CIRCADIAN_RHYTHM_MMAL                              | 11   | 0.2867446 | 0.28674456 | 0.2621951 | 0.25726885 | 0.9855     | 6305        | tags=82%, list=53%, signal=175% |
| KEGG_NOTCH_SIGNALING_PATHWAY                            | KEGG_NOTCH_SIGNALING_PATHWAY                            | 36   | 0.2866299 | 0.28662986 | 0.0019685 | 0.24340713 | 0.9855     | 4846        | tags=69%, list=41%, signal=117% |
| KEGG_ECM_RECEPTOR_INTERACTION                           | KEGG_ECM_RECEPTOR_INTERACTION                           | 78   | 0.28406   | 0.28406    | 0         | 0.2412446  | 0.988      | 1974        | tags=45%, list=17%, signal=53%  |
| KEGG_NUCLEOTIDE_EXCISION                                | KEGG_NUCLEOTIDE_EXCISION                                | 41   | 0.2827134 | 0.2827134  | 9.92E-04  | 0.23461892 | 0.9895     | 6782        | tags=85%, list=57%, signal=199% |
| KEGG_CITRATE_CYCLE_TCA_CYCLE                            | KEGG_CITRATE_CYCLE_TCA_CYCLE                            | 29   | 0.2763488 | 0.2763488  | 0.0223577 | 0.2483506  | 0.9935     | 2864        | tags=52%, list=24%, signal=68%  |
| KEGG_VALINE_LEUCINE_AND_ISOLEUCINE_BIOSYNTHESIS         | KEGG_VALINE_LEUCINE_AND_ISOLEUCINE_BIOSYNTHESIS         | 40   | 0.2712352 | 0.2712352  | 0.005923  | 0.2574707  | 0.995      | 4502        | tags=65%, list=38%, signal=104% |
| KEGG_GLYCOSPHINGOLIPID_BIOSYNTHESIS                     | KEGG_GLYCOSPHINGOLIPID_BIOSYNTHESIS                     | 13   | 0.2684354 | 0.2684354  | 0.2497532 | 0.257821   | 0.9965     | 3205        | tags=54%, list=27%, signal=74%  |
| KEGG_GLYCOSPHINGOLIPID_BIOSYNTHESIS                     | KEGG_GLYCOSPHINGOLIPID_BIOSYNTHESIS                     | 13   | 0.264637  | 0.26463696 | 0.2589372 | 0.26363966 | 0.997      | 3250        | tags=54%, list=27%, signal=74%  |
| KEGG_PORPHYRIN_AND_CHLOROPHYLL                          | KEGG_PORPHYRIN_AND_CHLOROPHYLL                          | 24   | 0.2568717 | 0.2568717  | 0.0712831 | 0.28714463 | 0.998      | 6842        | tags=83%, list=58%, signal=197% |
| KEGG_LIMONENE_AND_PINENE_BIOSYNTHESIS                   | KEGG_LIMONENE_AND_PINENE_BIOSYNTHESIS                   | 10   | 0.255865  | 0.25586498 | 0.4298781 | 0.28018638 | 0.998      | 525         | tags=30%, list=4%, signal=31%   |
| KEGG_PROTEIN_EXPORT                                     | KEGG_PROTEIN_EXPORT                                     | 18   | 0.2529884 | 0.25298843 | 0.1535394 | 0.28266996 | 0.9985     | 3592        | tags=56%, list=30%, signal=80%  |
| KEGG_SELENOAMINO_ACID_METABOLISM                        | KEGG_SELENOAMINO_ACID_METABOLISM                        | 19   | 0.2392668 | 0.2392668  | 0.1898734 | 0.34237796 | 1          | 6529        | tags=79%, list=55%, signal=175% |
| KEGG_ANTIGEN_PROCESSING_PRESENTATION                    | KEGG_ANTIGEN_PROCESSING_PRESENTATION                    | 63   | 0.2392484 | 0.23924838 | 0         | 0.33065182 | 1          | 4895        | tags=65%, list=41%, signal=110% |
| KEGG_GALACTOSE_METABOLISM                               | KEGG_GALACTOSE_METABOLISM                               | 23   | 0.2368623 | 0.2368623  | 0.1347305 | 0.3320987  | 1          | 6477        | tags=78%, list=55%, signal=172% |
| KEGG_LYSOSOME                                           | KEGG_LYSOSOME                                           | 106  | 0.2358972 | 0.23589721 | 0         | 0.32605606 | 1          | 5394        | tags=69%, list=45%, signal=125% |
| KEGG_NON_HOMOLOGOUS_ENDONUCLEASE_ACTIVITY               | KEGG_NON_HOMOLOGOUS_ENDONUCLEASE_ACTIVITY               | 13   | 0.2348729 | 0.23487285 | 0.3751234 | 0.32082915 | 1          | 1778        | tags=38%, list=15%, signal=45%  |
| KEGG_BASE_EXCISION_REPAIR                               | KEGG_BASE_EXCISION_REPAIR                               | 31   | 0.2348329 | 0.23483291 | 0.0492462 | 0.31136522 | 1          | 8316        | tags=94%, list=70%, signal=312% |

|                            |                            |     |           |            |           |            |   |                                      |
|----------------------------|----------------------------|-----|-----------|------------|-----------|------------|---|--------------------------------------|
| KEGG_FRUCTOSE_AND_MANNO    | KEGG_FRUCTOSE_AND_MANNO    | 30  | 0.2314173 | 0.23141734 | 0.0693756 | 0.31916654 | 1 | 6354 tags=77%, list=54%, signal=165% |
| KEGG_GLYCOSAMINOGLYCAN_B   | KEGG_GLYCOSAMINOGLYCAN_B   | 11  | 0.2256807 | 0.22568074 | 0.5729167 | 0.33966482 | 1 | 3794 tags=55%, list=32%, signal=80%  |
| KEGG_ASCORBATE_AND_ALDAR   | KEGG_ASCORBATE_AND_ALDAR   | 10  | 0.2232068 | 0.22320676 | 0.6083418 | 0.3435712  | 1 | 6842 tags=80%, list=58%, signal=189% |
| KEGG_PROTEASOME            | KEGG_PROTEASOME            | 42  | 0.2214943 | 0.22149426 | 0.0273438 | 0.34341377 | 1 | 8959 tags=98%, list=76%, signal=398% |
| KEGG_CHRONIC_MYELOID_LEU   | KEGG_CHRONIC_MYELOID_LEU   | 70  | 0.2211075 | 0.22110748 | 0.0010163 | 0.3364376  | 1 | 6033 tags=73%, list=51%, signal=147% |
| KEGG_PANTOTHENATE_AND_C    | KEGG_PANTOTHENATE_AND_C    | 14  | 0.2188443 | 0.21884426 | 0.4452333 | 0.3395866  | 1 | 5878 tags=71%, list=50%, signal=141% |
| KEGG_SMALL_CELL_LUNG_CAN   | KEGG_SMALL_CELL_LUNG_CAN   | 81  | 0.2100642 | 0.21006417 | 9.95E-04  | 0.3789426  | 1 | 6017 tags=72%, list=51%, signal=144% |
| KEGG_PROPANOATE_METABOLI   | KEGG_PROPANOATE_METABOLI   | 26  | 0.2081551 | 0.20815514 | 0.187     | 0.38108468 | 1 | 4378 tags=58%, list=37%, signal=91%  |
| KEGG_CELL_CYCLE            | KEGG_CELL_CYCLE            | 104 | 0.2072232 | 0.2072232  | 0         | 0.37794977 | 1 | 6800 tags=78%, list=57%, signal=181% |
| KEGG_GLYCOSYLPHOSPHATIDY   | KEGG_GLYCOSYLPHOSPHATIDY   | 19  | 0.2060192 | 0.20601924 | 0.302     | 0.37597337 | 1 | 1929 tags=37%, list=16%, signal=44%  |
| KEGG_GLUTATHIONE_METABOLI  | KEGG_GLUTATHIONE_METABOLI  | 35  | 0.1990335 | 0.19903354 | 0.1174129 | 0.41011155 | 1 | 3406 tags=49%, list=29%, signal=68%  |
| KEGG_SPHINGOLIPID_METABOLI | KEGG_SPHINGOLIPID_METABOLI | 28  | 0.1969116 | 0.19691156 | 0.2058824 | 0.4141635  | 1 | 5717 tags=68%, list=48%, signal=131% |
| KEGG_BLADDER_CANCER        | KEGG_BLADDER_CANCER        | 41  | 0.1953221 | 0.1953221  | 0.0860534 | 0.4159254  | 1 | 5790 tags=68%, list=49%, signal=133% |
| KEGG_APOPTOSIS             | KEGG_APOPTOSIS             | 79  | 0.1908652 | 0.19086517 | 0.0059761 | 0.43655795 | 1 | 5557 tags=66%, list=47%, signal=123% |
| KEGG_ENDOMETRIAL_CANCER    | KEGG_ENDOMETRIAL_CANCER    | 50  | 0.1899068 | 0.1899068  | 0.0527404 | 0.43381184 | 1 | 9379 tags=98%, list=79%, signal=466% |
| KEGG_PEROXISOME            | KEGG_PEROXISOME            | 65  | 0.1888023 | 0.18880232 | 0.0129611 | 0.4324817  | 1 | 7625 tags=83%, list=64%, signal=231% |
| KEGG_SNARE_INTERACTIONS_I  | KEGG_SNARE_INTERACTIONS_I  | 30  | 0.1862779 | 0.18627787 | 0.2027559 | 0.44048807 | 1 | 6888 tags=77%, list=58%, signal=182% |
| KEGG_PANCREATIC_CANCER     | KEGG_PANCREATIC_CANCER     | 70  | 0.184236  | 0.18423603 | 0.0172414 | 0.44516417 | 1 | 5790 tags=67%, list=49%, signal=130% |
| KEGG_P53_SIGNALING_PATHWA  | KEGG_P53_SIGNALING_PATHWA  | 59  | 0.1808034 | 0.1808034  | 0.0258193 | 0.45956057 | 1 | 5705 tags=66%, list=48%, signal=127% |
| KEGG_TERPENOID_BACKBONE_   | KEGG_TERPENOID_BACKBONE_   | 12  | 0.1794958 | 0.17949584 | 0.7642586 | 0.4598801  | 1 | 5779 tags=67%, list=49%, signal=130% |
| KEGG_GLYOXYLATE_AND_DICA   | KEGG_GLYOXYLATE_AND_DICA   | 10  | 0.1757806 | 0.1757806  | 0.8786653 | 0.47782075 | 1 | 6218 tags=70%, list=52%, signal=147% |
| KEGG_STARCH_AND_SUCROSE    | KEGG_STARCH_AND_SUCROSE    | 29  | 0.1737137 | 0.17371371 | 0.3037249 | 0.48421177 | 1 | 7350 tags=79%, list=62%, signal=208% |
| KEGG_NICOTINATE_AND_NICOTI | KEGG_NICOTINATE_AND_NICOTI | 15  | 0.1729844 | 0.1729844  | 0.7150206 | 0.48114347 | 1 | 7438 tags=80%, list=63%, signal=214% |
| KEGG_ADHERENS_JUNCTION     | KEGG_ADHERENS_JUNCTION     | 71  | 0.1729351 | 0.17293513 | 0.0237643 | 0.47300085 | 1 | 4809 tags=58%, list=41%, signal=97%  |
| KEGG_PYRIMIDINE_METABOLIS  | KEGG_PYRIMIDINE_METABOLIS  | 71  | 0.1717715 | 0.17177148 | 0.0237358 | 0.4731246  | 1 | 1983 tags=34%, list=17%, signal=40%  |
| KEGG_COLORECTAL_CANCER     | KEGG_COLORECTAL_CANCER     | 61  | 0.1712148 | 0.1712148  | 0.0444225 | 0.46921167 | 1 | 8089 tags=85%, list=68%, signal=267% |
| KEGG_RNA_DEGRADATION       | KEGG_RNA_DEGRADATION       | 43  | 0.1707178 | 0.17071778 | 0.1455446 | 0.46475595 | 1 | 9290 tags=95%, list=78%, signal=438% |
| KEGG_FOCAL_ADHESION        | KEGG_FOCAL_ADHESION        | 182 | 0.1692842 | 0.16928422 | 0         | 0.46675816 | 1 | 1541 tags=30%, list=13%, signal=34%  |
| KEGG_RENAL_CELL_CARCI      | KEGG_RENAL_CELL_CARCI      | 66  | 0.1689586 | 0.16895856 | 0.0467662 | 0.46145502 | 1 | 4116 tags=52%, list=35%, signal=78%  |
| KEGG_LEISHMANIA_INFECTION  | KEGG_LEISHMANIA_INFECTION  | 58  | 0.1658047 | 0.16580474 | 0.075122  | 0.47597185 | 1 | 6017 tags=67%, list=51%, signal=136% |
| KEGG_CYTOSOLIC_DNA_SENSIN  | KEGG_CYTOSOLIC_DNA_SENSIN  | 40  | 0.1639594 | 0.16395941 | 0.1881288 | 0.4809873  | 1 | 8735 tags=90%, list=74%, signal=340% |
| KEGG_GLYCOSAMINOGLYCAN_B   | KEGG_GLYCOSAMINOGLYCAN_B   | 21  | 0.1639175 | 0.1639175  | 0.5490798 | 0.4738781  | 1 | 3706 tags=48%, list=31%, signal=69%  |
| KEGG_RNA_POLYMERASE        | KEGG_RNA_POLYMERASE        | 21  | 0.161476  | 0.16147602 | 0.5834166 | 0.483486   | 1 | 8253 tags=86%, list=70%, signal=281% |
| KEGG_ACUTE_MYELOID_LEUKE   | KEGG_ACUTE_MYELOID_LEUKE   | 55  | 0.1589773 | 0.1589773  | 0.1106758 | 0.49497572 | 1 | 4807 tags=56%, list=41%, signal=94%  |
| KEGG_VIRAL_MYOCARDITIS     | KEGG_VIRAL_MYOCARDITIS     | 62  | 0.1583511 | 0.15835105 | 0.0985916 | 0.49228764 | 1 | 1574 tags=29%, list=13%, signal=33%  |
| KEGG_PROSTATE_CANCER       | KEGG_PROSTATE_CANCER       | 84  | 0.1574227 | 0.15742269 | 0.0187192 | 0.4918108  | 1 | 6899 tags=74%, list=58%, signal=175% |
| KEGG_MTOR_SIGNALING_PATH   | KEGG_MTOR_SIGNALING_PATH   | 45  | 0.154728  | 0.154728   | 0.202544  | 0.5042386  | 1 | 8186 tags=84%, list=69%, signal=272% |
| KEGG_ADIPOCYTOKINE_SIGNALI | KEGG_ADIPOCYTOKINE_SIGNALI | 63  | 0.1546667 | 0.15466674 | 0.098117  | 0.49754077 | 1 | 3069 tags=41%, list=26%, signal=55%  |
| KEGG_FATTY_ACID_METABOLIS  | KEGG_FATTY_ACID_METABOLIS  | 36  | 0.1485491 | 0.14854911 | 0.3660263 | 0.53557    | 1 | 4502 tags=53%, list=38%, signal=85%  |
| KEGG_FC_GAMMA_R_MEDIATED   | KEGG_FC_GAMMA_R_MEDIATED   | 83  | 0.1421946 | 0.14219461 | 0.0625    | 0.5787713  | 1 | 8041 tags=82%, list=68%, signal=253% |
| KEGG_PATHOGENIC_ESCHERIC   | KEGG_PATHOGENIC_ESCHERIC   | 49  | 0.1414506 | 0.14145064 | 0.2416244 | 0.577006   | 1 | 8252 tags=84%, list=70%, signal=274% |
| KEGG_EPITHELIAL_CELL_SIGNA | KEGG_EPITHELIAL_CELL_SIGNA | 59  | 0.1405282 | 0.14052817 | 0.1865121 | 0.5772047  | 1 | 2763 tags=37%, list=23%, signal=48%  |
| KEGG_PYRUVATE_METABOLISM   | KEGG_PYRUVATE_METABOLISM   | 33  | 0.1401134 | 0.14011341 | 0.5174604 | 0.57295156 | 1 | 3014 tags=39%, list=25%, signal=53%  |
| KEGG_DRUG_METABOLISM_OTH   | KEGG_DRUG_METABOLISM_OTH   | 32  | 0.1399539 | 0.1399539  | 0.5031579 | 0.5668265  | 1 | 6868 tags=72%, list=58%, signal=170% |
| KEGG_DORSO_VENTRAL_AXIS_   | KEGG_DORSO_VENTRAL_AXIS_   | 18  | 0.1387716 | 0.13877161 | 0.8338369 | 0.56890357 | 1 | 2309 tags=33%, list=19%, signal=41%  |
| KEGG_TRYPTOPHAN_METABOLI   | KEGG_TRYPTOPHAN_METABOLI   | 29  | 0.138409  | 0.13840903 | 0.5836694 | 0.5645827  | 1 | 4087 tags=48%, list=34%, signal=73%  |



|                            |                            |     |           |            |           |            |   |                                       |
|----------------------------|----------------------------|-----|-----------|------------|-----------|------------|---|---------------------------------------|
| KEGG_GLYCINE_SERINE_AND_T  | KEGG_GLYCINE_SERINE_AND_T  | 27  | 0.1377003 | 0.13770027 | 0.6633761 | 0.56292385 | 1 | 5837 tags=63%, list=49%, signal=124%  |
| KEGG_ABC_TRANSPORTERS      | KEGG_ABC_TRANSPORTERS      | 36  | 0.1373102 | 0.1373102  | 0.4584616 | 0.55910796 | 1 | 6941 tags=72%, list=59%, signal=174%  |
| KEGG_NON_SMALL_CELL_LUNG   | KEGG_NON_SMALL_CELL_LUNG   | 51  | 0.1338013 | 0.13380128 | 0.2795157 | 0.58014727 | 1 | 8186 tags=82%, list=69%, signal=265%  |
| KEGG_TOLL_LIKE_RECEPTOR_S  | KEGG_TOLL_LIKE_RECEPTOR_S  | 88  | 0.1290234 | 0.1290234  | 0.0982143 | 0.61078095 | 1 | 8049 tags=81%, list=68%, signal=249%  |
| KEGG_NOD_LIKE_RECEPTOR_SI  | KEGG_NOD_LIKE_RECEPTOR_SI  | 52  | 0.127912  | 0.127912   | 0.3457031 | 0.6127686  | 1 | 8524 tags=85%, list=72%, signal=300%  |
| KEGG_B_CELL_RECEPTOR_SIG   | KEGG_B_CELL_RECEPTOR_SIG   | 68  | 0.1262471 | 0.12624711 | 0.2167832 | 0.61892134 | 1 | 3045 tags=38%, list=26%, signal=51%   |
| KEGG_VIBRIO_CHOLERAЕ_INFE  | KEGG_VIBRIO_CHOLERAЕ_INFE  | 45  | 0.1256689 | 0.12566888 | 0.4639279 | 0.61642927 | 1 | 4576 tags=51%, list=39%, signal=83%   |
| KEGG_GLYCOLYSIS_GLUONEO    | KEGG_GLYCOLYSIS_GLUONEO    | 53  | 0.1248476 | 0.12484758 | 0.3596914 | 0.6159114  | 1 | 6357 tags=66%, list=54%, signal=142%  |
| KEGG_UBIQUITIN_MEDIATED_PR | KEGG_UBIQUITIN_MEDIATED_PR | 105 | 0.1232951 | 0.12329507 | 0.0705765 | 0.62192    | 1 | 4875 tags=53%, list=41%, signal=90%   |
| KEGG_BUTANOATE_METABOLIS   | KEGG_BUTANOATE_METABOLIS   | 30  | 0.1216963 | 0.12169627 | 0.735529  | 0.6273449  | 1 | 1722 tags=27%, list=15%, signal=31%   |
| KEGG_ARRHYTHMOGENIC_RIGH   | KEGG_ARRHYTHMOGENIC_RIGH   | 66  | 0.1214742 | 0.1214742  | 0.2691924 | 0.62232363 | 1 | 543 tags=17%, list=5%, signal=17%     |
| KEGG_CYSSTEINE_AND_METHIO  | KEGG_CYSSTEINE_AND_METHIO  | 31  | 0.1163461 | 0.11634609 | 0.7572314 | 0.6571583  | 1 | 9335 tags=90%, list=79%, signal=423%  |
| KEGG_ETHER_LIPID_METABOLIS | KEGG_ETHER_LIPID_METABOLIS | 25  | 0.1142036 | 0.11420362 | 0.8578337 | 0.6677701  | 1 | 2917 tags=36%, list=25%, signal=48%   |
| KEGG_TGF_BETA_SIGNALING_P  | KEGG_TGF_BETA_SIGNALING_P  | 77  | 0.112071  | 0.112071   | 0.2913223 | 0.67864245 | 1 | 7766 tags=77%, list=65%, signal=221%  |
| KEGG_PATHWAYS_IN_CANCER    | KEGG_PATHWAYS_IN_CANCER    | 300 | 0.1096482 | 0.10964822 | 0.0039526 | 0.69121283 | 1 | 6480 tags=65%, list=55%, signal=140%  |
| KEGG_GRAFT_VERSUS_HOST_D   | KEGG_GRAFT_VERSUS_HOST_D   | 29  | 0.1070741 | 0.10707405 | 0.8554217 | 0.7058597  | 1 | 1186 tags=21%, list=10%, signal=23%   |
| KEGG_LEUKOCYTE_TRANSEND    | KEGG_LEUKOCYTE_TRANSEND    | 99  | 0.1042557 | 0.10425572 | 0.2102564 | 0.7224068  | 1 | 1648 tags=24%, list=14%, signal=28%   |
| KEGG_RIG_I_LIKE_RECEPTOR_S | KEGG_RIG_I_LIKE_RECEPTOR_S | 58  | 0.0985631 | 0.09856308 | 0.5997994 | 0.7631471  | 1 | 1903 tags=26%, list=16%, signal=31%   |
| KEGG_INSULIN_SIGNALING_PAT | KEGG_INSULIN_SIGNALING_PAT | 123 | 0.0959179 | 0.0959179  | 0.2235529 | 0.7774404  | 1 | 4755 tags=50%, list=40%, signal=82%   |
| KEGG_PRION_DISEASES        | KEGG_PRION_DISEASES        | 34  | 0.093672  | 0.09367197 | 0.8885512 | 0.7890143  | 1 | 1333 tags=21%, list=11%, signal=23%   |
| KEGG_REGULATION_OF_ACTIN_  | KEGG_REGULATION_OF_ACTIN_  | 181 | 0.0923337 | 0.09233367 | 0.1013514 | 0.7928215  | 1 | 3835 tags=41%, list=32%, signal=60%   |
| KEGG_ENDOCYTOSIS           | KEGG_ENDOCYTOSIS           | 145 | 0.0914478 | 0.09144776 | 0.1961962 | 0.79201716 | 1 | 7107 tags=69%, list=60%, signal=170%  |
| KEGG_BASAL_TRANSCRIPTION_  | KEGG_BASAL_TRANSCRIPTION_  | 28  | 0.090795  | 0.09079498 | 0.9534413 | 0.789443   | 1 | 6549 tags=64%, list=55%, signal=143%  |
| KEGG_NEUROTROPHIN_SIGNALI  | KEGG_NEUROTROPHIN_SIGNALI  | 116 | 0.0894896 | 0.08948958 | 0.2957746 | 0.79236174 | 1 | 8252 tags=78%, list=70%, signal=255%  |
| KEGG_CELL_ADHESION_MOLEC   | KEGG_CELL_ADHESION_MOLEC   | 113 | 0.0836681 | 0.08366814 | 0.400767  | 0.83021337 | 1 | 1745 tags=23%, list=15%, signal=27%   |
| KEGG_ERBB_SIGNALING_PATH   | KEGG_ERBB_SIGNALING_PATH   | 80  | 0.0822793 | 0.08227929 | 0.6313132 | 0.83235365 | 1 | 1550 tags=21%, list=13%, signal=24%   |
| KEGG_JAK_STAT_SIGNALING_P  | KEGG_JAK_STAT_SIGNALING_P  | 126 | 0.0815565 | 0.08155654 | 0.3548387 | 0.83010936 | 1 | 10149 tags=94%, list=86%, signal=642% |
| KEGG_ARGININE_AND_PROLINE  | KEGG_ARGININE_AND_PROLINE  | 45  | 0.0801241 | 0.08012414 | 0.9067882 | 0.83284765 | 1 | 4587 tags=47%, list=39%, signal=76%   |
| KEGG_TIGHT_JUNCTION        | KEGG_TIGHT_JUNCTION        | 113 | 0.0801229 | 0.08012289 | 0.4726912 | 0.82514125 | 1 | 947 tags=16%, list=8%, signal=17%     |
| KEGG_VEGF_SIGNALING_PATH   | KEGG_VEGF_SIGNALING_PATH   | 69  | 0.0638758 | 0.06387582 | 0.9175662 | 0.91990954 | 1 | 9387 tags=86%, list=79%, signal=408%  |

# Proneural

| NAME                                                    | GS<br> follow link to MSigDB                            | SIZE | ES        | NES        | NOM p-val  | FDR q-val  | FWER p-val | RANK AT MAX | LEADING EDGE                     |
|---------------------------------------------------------|---------------------------------------------------------|------|-----------|------------|------------|------------|------------|-------------|----------------------------------|
| KEGG_PROTEASOME                                         | KEGG_PROTEASOME                                         | 42   | 0.5947465 | 0.59474653 | 0          | 0.00720335 | 0.008      | 3136        | tags=86%, list=26%, signal=116%  |
| KEGG_DNA_REPLICATION                                    | KEGG_DNA_REPLICATION                                    | 32   | 0.5138865 | 0.5138865  | 0          | 0.02091735 | 0.0435     | 3557        | tags=81%, list=30%, signal=116%  |
| KEGG_RIBOSOME                                           | KEGG_RIBOSOME                                           | 71   | 0.4610086 | 0.46100864 | 0          | 0.04774645 | 0.1395     | 5756        | tags=94%, list=49%, signal=182%  |
| KEGG_GLYCOSAMINOGLYCAN_BIOSYNTHESIS_KERATAN_SULFATE     | KEGG_GLYCOSAMINOGLYCAN_BIOSYNTHESIS_KERATAN_SULFATE     | 11   | 0.4236875 | 0.4236875  | 0.02313883 | 0.07297315 | 0.268      | 2526        | tags=64%, list=21%, signal=81%   |
| KEGG_GLYCOSAMINOGLYCAN_BIOSYNTHESIS_CHONDROITIN_SULFATE | KEGG_GLYCOSAMINOGLYCAN_BIOSYNTHESIS_CHONDROITIN_SULFATE | 13   | 0.4226192 | 0.4226192  | 0.01408451 | 0.0597183  | 0.274      | 3203        | tags=69%, list=27%, signal=95%   |
| KEGG_GLYCOSAMINOGLYCAN_DEGRADATION                      | KEGG_GLYCOSAMINOGLYCAN_DEGRADATION                      | 21   | 0.4175144 | 0.41751438 | 0          | 0.05477012 | 0.297      | 4657        | tags=81%, list=39%, signal=133%  |
| KEGG_NON_HOMOLOGOUS_ENDOGENOUS_JOINING                  | KEGG_NON_HOMOLOGOUS_ENDOGENOUS_JOINING                  | 13   | 0.4029258 | 0.4029258  | 0.02439024 | 0.06288511 | 0.3815     | 2524        | tags=62%, list=21%, signal=78%   |
| KEGG_VALINE_LEUCINE_AND_Isoleucine_BIOSYNTHESIS         | KEGG_VALINE_LEUCINE_AND_Isoleucine_BIOSYNTHESIS         | 10   | 0.3900422 | 0.39004222 | 0.07715134 | 0.07101039 | 0.4585     | 3679        | tags=70%, list=31%, signal=101%  |
| KEGG_RIBOFLAVIN_METABOLISM                              | KEGG_RIBOFLAVIN_METABOLISM                              | 12   | 0.3828495 | 0.38284945 | 0.04295704 | 0.07237185 | 0.506      | 4358        | tags=75%, list=37%, signal=118%  |
| KEGG_PENTOSE_AND_GLUCURONATE_INTERCONVERSIONS           | KEGG_PENTOSE_AND_GLUCURONATE_INTERCONVERSIONS           | 12   | 0.358007  | 0.35800698 | 0.06489676 | 0.10238796 | 0.6795     | 6629        | tags=92%, list=56%, signal=208%  |
| KEGG_STEROID_BIOSYNTHESIS                               | KEGG_STEROID_BIOSYNTHESIS                               | 15   | 0.352188  | 0.35218802 | 0.0278607  | 0.10511861 | 0.725      | 3734        | tags=67%, list=31%, signal=97%   |
| KEGG_HOMOLOGOUS_RECOMBINATION                           | KEGG_HOMOLOGOUS_RECOMBINATION                           | 25   | 0.3484748 | 0.34847483 | 0.003      | 0.10321117 | 0.758      | 6786        | tags=92%, list=57%, signal=215%  |
| KEGG_GLYCOSPHINGOLIPID_BIOSYNTHESIS_GLOBO_SERIES        | KEGG_GLYCOSPHINGOLIPID_BIOSYNTHESIS_GLOBO_SERIES        | 13   | 0.3432742 | 0.3432742  | 0.06461233 | 0.10369723 | 0.786      | 4143        | tags=69%, list=35%, signal=106%  |
| KEGG_GLYCOSPHINGOLIPID_BIOSYNTHESIS_GANGLIO_SERIES      | KEGG_GLYCOSPHINGOLIPID_BIOSYNTHESIS_GANGLIO_SERIES      | 13   | 0.3432742 | 0.3432742  | 0.07046332 | 0.09629028 | 0.786      | 4143        | tags=69%, list=35%, signal=106%  |
| KEGG_PENTOSE_PHOSPHATE_PATHWAY                          | KEGG_PENTOSE_PHOSPHATE_PATHWAY                          | 23   | 0.3333101 | 0.33331007 | 0.01029866 | 0.10570349 | 0.8325     | 5851        | tags=83%, list=49%, signal=163%  |
| KEGG_RENIN_ANGIOTENSIN_SYSTEM                           | KEGG_RENIN_ANGIOTENSIN_SYSTEM                           | 16   | 0.3240248 | 0.32402483 | 0.05533199 | 0.11601582 | 0.876      | 4315        | tags=69%, list=36%, signal=108%  |
| KEGG_MISMATCH_REPAIR                                    | KEGG_MISMATCH_REPAIR                                    | 23   | 0.3238996 | 0.32389963 | 0.01       | 0.10936172 | 0.8775     | 8025        | tags=100%, list=68%, signal=309% |
| KEGG_FOLATE_BIOSYNTHESIS                                | KEGG_FOLATE_BIOSYNTHESIS                                | 11   | 0.3178711 | 0.3178711  | 0.18606965 | 0.1153074  | 0.9015     | 4858        | tags=73%, list=41%, signal=123%  |
| KEGG_CELL_CYCLE                                         | KEGG_CELL_CYCLE                                         | 104  | 0.3119619 | 0.31196186 | 0          | 0.12093648 | 0.9285     | 3516        | tags=61%, list=30%, signal=85%   |
| KEGG_NUCLEOTIDE_EXCISION_REPAIR                         | KEGG_NUCLEOTIDE_EXCISION_REPAIR                         | 41   | 0.3088062 | 0.30880618 | 0          | 0.12066864 | 0.935      | 4738        | tags=71%, list=40%, signal=117%  |
| KEGG_RNA_POLYMERASE                                     | KEGG_RNA_POLYMERASE                                     | 21   | 0.3004879 | 0.30048794 | 0.03405573 | 0.13213226 | 0.955      | 7172        | tags=90%, list=60%, signal=228%  |
| KEGG_N_GLYCAN_BIOSYNTHESIS                              | KEGG_N_GLYCAN_BIOSYNTHESIS                              | 34   | 0.2978979 | 0.29789793 | 0.00292969 | 0.13139574 | 0.9585     | 4499        | tags=68%, list=38%, signal=109%  |
| KEGG_BASE_EXCISION_REPAIR                               | KEGG_BASE_EXCISION_REPAIR                               | 31   | 0.2939468 | 0.2939468  | 0.00487329 | 0.13429524 | 0.966      | 6469        | tags=84%, list=55%, signal=184%  |
| KEGG_PYRIMIDINE_METABOLISM                              | KEGG_PYRIMIDINE_METABOLISM                              | 71   | 0.2791394 | 0.2791394  | 0          | 0.165831   | 0.99       | 3724        | tags=59%, list=31%, signal=86%   |
| KEGG_PROTEIN_EXPORT                                     | KEGG_PROTEIN_EXPORT                                     | 18   | 0.2786035 | 0.2786035  | 0.10019841 | 0.16069345 | 0.9905     | 7242        | tags=89%, list=61%, signal=228%  |
| KEGG_AMINOACYL_TRNA_BIOSYNTHESIS                        | KEGG_AMINOACYL_TRNA_BIOSYNTHESIS                        | 29   | 0.2721984 | 0.2721984  | 0.02628918 | 0.17158982 | 0.995      | 4140        | tags=62%, list=35%, signal=95%   |
| KEGG_PANTOTHENATE_AND_COFACTOR_BIOSYNTHESIS             | KEGG_PANTOTHENATE_AND_COFACTOR_BIOSYNTHESIS             | 14   | 0.2714117 | 0.27141172 | 0.21026157 | 0.16733769 | 0.9955     | 3561        | tags=57%, list=30%, signal=82%   |
| KEGG_OTHER_GLYCAN_DEGRADATION                           | KEGG_OTHER_GLYCAN_DEGRADATION                           | 12   | 0.2704535 | 0.27045354 | 0.30653265 | 0.16458249 | 0.996      | 6678        | tags=83%, list=56%, signal=191%  |
| KEGG_SULFUR_METABOLISM                                  | KEGG_SULFUR_METABOLISM                                  | 9    | 0.2696538 | 0.26965377 | 0.444      | 0.16092871 | 0.9965     | 4710        | tags=67%, list=40%, signal=110%  |
| KEGG_NICOTINATE_AND_NICOTINE_BIOSYNTHESIS               | KEGG_NICOTINATE_AND_NICOTINE_BIOSYNTHESIS               | 15   | 0.2641621 | 0.26416212 | 0.20259482 | 0.17026478 | 0.9985     | 1614        | tags=40%, list=14%, signal=46%   |
| KEGG_O_GLYCAN_BIOSYNTHESIS                              | KEGG_O_GLYCAN_BIOSYNTHESIS                              | 18   | 0.2600912 | 0.26009122 | 0.15331355 | 0.1754667  | 0.9985     | 2849        | tags=50%, list=24%, signal=66%   |
| KEGG_PHENYLALANINE_METABOLISM                           | KEGG_PHENYLALANINE_METABOLISM                           | 17   | 0.2583606 | 0.25836062 | 0.18625498 | 0.17499591 | 0.9985     | 5311        | tags=71%, list=45%, signal=128%  |
| KEGG_TYROSINE_METABOLISM                                | KEGG_TYROSINE_METABOLISM                                | 38   | 0.2572056 | 0.25720558 | 0.00811359 | 0.17303294 | 0.999      | 7882        | tags=92%, list=66%, signal=274%  |
| KEGG_AMINO_SUGAR_AND_NUCLEIC_ACID_METABOLISM            | KEGG_AMINO_SUGAR_AND_NUCLEIC_ACID_METABOLISM            | 39   | 0.2419965 | 0.24199654 | 0.01980198 | 0.21457748 | 0.9995     | 2004        | tags=41%, list=17%, signal=49%   |
| KEGG_ASCORBATE_AND_ALDARIC_ACID_METABOLISM              | KEGG_ASCORBATE_AND_ALDARIC_ACID_METABOLISM              | 10   | 0.2412658 | 0.24126583 | 0.53892213 | 0.21120821 | 0.9995     | 698         | tags=30%, list=6%, signal=32%    |
| KEGG_TERPENOID_BACKBONE_BIOSYNTHESIS                    | KEGG_TERPENOID_BACKBONE_BIOSYNTHESIS                    | 12   | 0.238465  | 0.23846501 | 0.45210728 | 0.2152002  | 0.9995     | 7057        | tags=83%, list=60%, signal=206%  |
| KEGG_DRUG_METABOLISM_OTHER                              | KEGG_DRUG_METABOLISM_OTHER                              | 32   | 0.2378889 | 0.2378889  | 0.03503504 | 0.21152076 | 0.9995     | 2374        | tags=44%, list=20%, signal=55%   |

|                             |                             |     |           |            |            |            |        |       |                                  |
|-----------------------------|-----------------------------|-----|-----------|------------|------------|------------|--------|-------|----------------------------------|
| KEGG_ECM_RECEPTOR_INTERAC   | KEGG_ECM_RECEPTOR_INTERAC   | 78  | 0.2376702 | 0.23767024 | 9.89E-04   | 0.20672812 | 0.9995 | 848   | tags=31%, list=7%, signal=33%    |
| KEGG_RNA_DEGRADATION        | KEGG_RNA_DEGRADATION        | 43  | 0.2359884 | 0.23598835 | 0.0110664  | 0.20733972 | 0.9995 | 6588  | tags=79%, list=56%, signal=177%  |
| KEGG_GLYOXYLATE_AND_DICAR   | KEGG_GLYOXYLATE_AND_DICAR   | 10  | 0.2181435 | 0.21814346 | 0.6382766  | 0.2689407  | 1      | 9274  | tags=100%, list=78%, signal=458% |
| KEGG_BASAL_TRANSCRIPTION_F  | KEGG_BASAL_TRANSCRIPTION_F  | 28  | 0.2098426 | 0.20984262 | 0.14638783 | 0.2997913  | 1      | 8529  | tags=93%, list=72%, signal=330%  |
| KEGG_SPLICEOSOME            | KEGG_SPLICEOSOME            | 86  | 0.2096855 | 0.20968552 | 0          | 0.2931935  | 1      | 8149  | tags=90%, list=69%, signal=284%  |
| KEGG_PORPHYRIN_AND_CHLOR    | KEGG_PORPHYRIN_AND_CHLOR    | 24  | 0.2063901 | 0.20639011 | 0.24537487 | 0.30200398 | 1      | 8922  | tags=96%, list=75%, signal=386%  |
| KEGG_GALACTOSE_METABOLISM   | KEGG_GALACTOSE_METABOLISM   | 23  | 0.2014942 | 0.2014942  | 0.27110228 | 0.3193017  | 1      | 6380  | tags=74%, list=54%, signal=160%  |
| KEGG_GLYCOSYLPHOSPHATIDYL   | KEGG_GLYCOSYLPHOSPHATIDYL   | 19  | 0.2008365 | 0.20083654 | 0.3816568  | 0.3151969  | 1      | 3863  | tags=53%, list=33%, signal=78%   |
| KEGG_ALANINE_ASPARTATE_AN   | KEGG_ALANINE_ASPARTATE_AN   | 27  | 0.1943623 | 0.19436227 | 0.22662602 | 0.34060314 | 1      | 4288  | tags=56%, list=36%, signal=87%   |
| KEGG_SNARE_INTERACTIONS_IN  | KEGG_SNARE_INTERACTIONS_IN  | 30  | 0.1858834 | 0.18588339 | 0.2199211  | 0.38034326 | 1      | 6102  | tags=70%, list=51%, signal=144%  |
| KEGG_CYSTEINE_AND_METHIONI  | KEGG_CYSTEINE_AND_METHIONI  | 31  | 0.1857736 | 0.18577361 | 0.20788178 | 0.3731017  | 1      | 7366  | tags=81%, list=62%, signal=212%  |
| KEGG_ONE_CARBON_POOL_BY_    | KEGG_ONE_CARBON_POOL_BY_    | 15  | 0.1769805 | 0.17698047 | 0.6944162  | 0.41826034 | 1      | 4228  | tags=53%, list=36%, signal=83%   |
| KEGG_GLYCOLYSIS_GLUONEOG    | KEGG_GLYCOLYSIS_GLUONEOG    | 53  | 0.1762849 | 0.17628492 | 0.07645875 | 0.41444194 | 1      | 6421  | tags=72%, list=54%, signal=156%  |
| KEGG_SELENOAMINO_ACID_MET   | KEGG_SELENOAMINO_ACID_MET   | 19  | 0.1649977 | 0.16499765 | 0.59237534 | 0.48012003 | 1      | 6160  | tags=68%, list=52%, signal=142%  |
| KEGG_PATHOGENIC_ESCHERICHI  | KEGG_PATHOGENIC_ESCHERICHI  | 49  | 0.1616446 | 0.16164455 | 0.1546287  | 0.4946477  | 1      | 5109  | tags=59%, list=43%, signal=104%  |
| KEGG_FOCAL_ADHESION         | KEGG_FOCAL_ADHESION         | 182 | 0.1593501 | 0.15935008 | 0          | 0.5020122  | 1      | 2048  | tags=33%, list=17%, signal=39%   |
| KEGG_GLYCOSPHINGOLIPID_BIO  | KEGG_GLYCOSPHINGOLIPID_BIO  | 23  | 0.1588424 | 0.1588424  | 0.54332316 | 0.49660644 | 1      | 2244  | tags=35%, list=19%, signal=43%   |
| KEGG_STARCH_AND_SUCROSE_    | KEGG_STARCH_AND_SUCROSE_    | 29  | 0.1557043 | 0.15570433 | 0.443669   | 0.51011556 | 1      | 8381  | tags=86%, list=71%, signal=293%  |
| KEGG_CITRATE_CYCLE_TCA_CYC  | KEGG_CITRATE_CYCLE_TCA_CYC  | 29  | 0.1529967 | 0.15299666 | 0.45277208 | 0.52119964 | 1      | 8822  | tags=90%, list=74%, signal=349%  |
| KEGG_P53_SIGNALING_PATHWAY  | KEGG_P53_SIGNALING_PATHWAY  | 59  | 0.1520095 | 0.15200952 | 0.10616785 | 0.5195573  | 1      | 8457  | tags=86%, list=71%, signal=300%  |
| KEGG_GLYCOSAMINOGLYCAN_BI   | KEGG_GLYCOSAMINOGLYCAN_BI   | 21  | 0.151336  | 0.151336   | 0.6772592  | 0.51561224 | 1      | 6114  | tags=67%, list=52%, signal=137%  |
| KEGG_PROGESTERONE_MEDIAT    | KEGG_PROGESTERONE_MEDIAT    | 73  | 0.1512207 | 0.1512207  | 0.07249256 | 0.5077625  | 1      | 3253  | tags=42%, list=27%, signal=58%   |
| KEGG_AUTOIMMUNE_THYROID_DI  | KEGG_AUTOIMMUNE_THYROID_DI  | 38  | 0.1489507 | 0.14895067 | 0.32681018 | 0.5153803  | 1      | 9786  | tags=97%, list=83%, signal=555%  |
| KEGG_GLUTATHIONE_METABOLIS  | KEGG_GLUTATHIONE_METABOLIS  | 35  | 0.1473754 | 0.14737542 | 0.40634596 | 0.5187149  | 1      | 1306  | tags=26%, list=11%, signal=29%   |
| KEGG_ALLOGRAFT_REJECTION    | KEGG_ALLOGRAFT_REJECTION    | 30  | 0.1449705 | 0.14497048 | 0.52935225 | 0.52758235 | 1      | 10144 | tags=100%, list=86%, signal=689% |
| KEGG_COMPLEMENT_AND_COAG    | KEGG_COMPLEMENT_AND_COAG    | 65  | 0.1362181 | 0.1362181  | 0.14859438 | 0.586848   | 1      | 6968  | tags=72%, list=59%, signal=174%  |
| KEGG_OOCYTE_MEIOSIS         | KEGG_OOCYTE_MEIOSIS         | 91  | 0.1337627 | 0.13376266 | 0.05694981 | 0.597654   | 1      | 1292  | tags=24%, list=11%, signal=27%   |
| KEGG_UBIQUITIN_MEDIATED_PR  | KEGG_UBIQUITIN_MEDIATED_PR  | 105 | 0.1329607 | 0.13296066 | 0.03937008 | 0.5948053  | 1      | 5665  | tags=61%, list=48%, signal=116%  |
| KEGG_PARKINSONS_DISEASE     | KEGG_PARKINSONS_DISEASE     | 96  | 0.1318854 | 0.13188544 | 0.06804734 | 0.59467596 | 1      | 8825  | tags=88%, list=74%, signal=339%  |
| KEGG_PURINE_METABOLISM      | KEGG_PURINE_METABOLISM      | 127 | 0.1276446 | 0.12764455 | 0.02628918 | 0.6198387  | 1      | 7373  | tags=75%, list=62%, signal=196%  |
| KEGG_THYROID_CANCER         | KEGG_THYROID_CANCER         | 29  | 0.1167331 | 0.11673307 | 0.7912088  | 0.7038497  | 1      | 9660  | tags=93%, list=81%, signal=501%  |
| KEGG_RIG_I_LIKE_RECEPTOR_SI | KEGG_RIG_I_LIKE_RECEPTOR_SI | 58  | 0.1144809 | 0.1144809  | 0.41902834 | 0.71396565 | 1      | 9281  | tags=90%, list=78%, signal=410%  |
| KEGG_HEMATOPOIETIC_CELL_LI  | KEGG_HEMATOPOIETIC_CELL_LI  | 77  | 0.1123598 | 0.11235977 | 0.25478348 | 0.7224358  | 1      | 4220  | tags=47%, list=36%, signal=72%   |
| KEGG_INTESTINAL_IMMUNE_NET  | KEGG_INTESTINAL_IMMUNE_NET  | 35  | 0.1115434 | 0.11154337 | 0.7356784  | 0.7192447  | 1      | 8168  | tags=80%, list=69%, signal=256%  |
| KEGG_FRUCTOSE_AND_MANNOS    | KEGG_FRUCTOSE_AND_MANNOS    | 30  | 0.1109327 | 0.11093267 | 0.8235887  | 0.71451056 | 1      | 1454  | tags=23%, list=12%, signal=27%   |
| KEGG_CYTOKINE_CYTOKINE_RE   | KEGG_CYTOKINE_CYTOKINE_RE   | 214 | 0.1093753 | 0.10937531 | 0.01390268 | 0.71852875 | 1      | 5154  | tags=54%, list=43%, signal=94%   |
| KEGG_TGF_BETA_SIGNALING_PA  | KEGG_TGF_BETA_SIGNALING_PA  | 77  | 0.0999735 | 0.09997345 | 0.4003984  | 0.7928197  | 1      | 4674  | tags=49%, list=39%, signal=81%   |
| KEGG_HYPERTROPHIC_CARDIOM   | KEGG_HYPERTROPHIC_CARDIOM   | 75  | 0.0940348 | 0.09403479 | 0.4883041  | 0.83507    | 1      | 314   | tags=12%, list=3%, signal=12%    |
| KEGG_HEDGEHOG_SIGNALING_P   | KEGG_HEDGEHOG_SIGNALING_P   | 45  | 0.0935628 | 0.0935628  | 0.82095623 | 0.8281675  | 1      | 3374  | tags=38%, list=28%, signal=53%   |
| KEGG_HUNTINGTONS_DISEASE    | KEGG_HUNTINGTONS_DISEASE    | 148 | 0.0910201 | 0.09102011 | 0.16083916 | 0.8398837  | 1      | 9030  | tags=85%, list=76%, signal=352%  |
| KEGG_BLADDER_CANCER         | KEGG_BLADDER_CANCER         | 41  | 0.0892403 | 0.08924031 | 0.87643677 | 0.84498394 | 1      | 10515 | tags=98%, list=89%, signal=857%  |
| KEGG_REGULATION_OF_ACTIN_C  | KEGG_REGULATION_OF_ACTIN_C  | 181 | 0.0886329 | 0.08863291 | 0.11660079 | 0.839218   | 1      | 1978  | tags=25%, list=17%, signal=30%   |
| KEGG_LYSOSOME               | KEGG_LYSOSOME               | 106 | 0.0868705 | 0.08687046 | 0.37000975 | 0.8424339  | 1      | 6810  | tags=66%, list=57%, signal=154%  |
| KEGG_AXON_GUIDANCE          | KEGG_AXON_GUIDANCE          | 110 | 0.0850367 | 0.08503674 | 0.35384616 | 0.84718907 | 1      | 4822  | tags=49%, list=41%, signal=82%   |
| KEGG_VIRAL_MYOCARDITIS      | KEGG_VIRAL_MYOCARDITIS      | 62  | 0.0811619 | 0.08116192 | 0.7744511  | 0.86751324 | 1      | 9945  | tags=92%, list=84%, signal=566%  |
| KEGG_APOPTOSIS              | KEGG_APOPTOSIS              | 79  | 0.0786377 | 0.0786377  | 0.69815195 | 0.87618613 | 1      | 4327  | tags=44%, list=36%, signal=69%   |
| KEGG_SMALL_CELL_LUNG_CANC   | KEGG_SMALL_CELL_LUNG_CANC   | 81  | 0.0784699 | 0.07846985 | 0.67034066 | 0.8671144  | 1      | 1271  | tags=19%, list=11%, signal=21%   |

|                            |                            |     |           |            |            |            |   |       |                                 |
|----------------------------|----------------------------|-----|-----------|------------|------------|------------|---|-------|---------------------------------|
| KEGG_JAK_STAT_SIGNALING_PA | KEGG_JAK_STAT_SIGNALING_PA | 126 | 0.0738121 | 0.07381213 | 0.5014837  | 0.88901925 | 1 | 10334 | tags=94%, list=87%, signal=726% |
| KEGG_PANCREATIC_CANCER     | KEGG_PANCREATIC_CANCER     | 70  | 0.0708833 | 0.07088332 | 0.84691846 | 0.8983455  | 1 | 10515 | tags=96%, list=89%, signal=839% |
| KEGG_NOD_LIKE_RECEPTOR_SIG | KEGG_NOD_LIKE_RECEPTOR_SIG | 52  | 0.0581093 | 0.05810925 | 0.98913044 | 0.957805   | 1 | 8664  | tags=79%, list=73%, signal=291% |
| KEGG_PATHWAYS_IN_CANCER    | KEGG_PATHWAYS_IN_CANCER    | 300 | 0.0552826 | 0.05528259 | 0.33164302 | 0.9581545  | 1 | 3590  | tags=36%, list=30%, signal=50%  |

# Mesenchymal

| NAME                                                    | GS<br> follow link to MSigDB                            | SIZE | ES         | NES        | NOM p-val   | FDR q-val   | FWER p-val | RANK AT MAX | LEADING EDGE                     |
|---------------------------------------------------------|---------------------------------------------------------|------|------------|------------|-------------|-------------|------------|-------------|----------------------------------|
| KEGG_PROTEASOME                                         | KEGG_PROTEASOME                                         | 42   | 0.59474653 | 0.59474653 | 0           | 0.00962011  | 0.01       | 3136        | tags=86%, list=26%, signal=116%  |
| KEGG_DNA_REPLICATION                                    | KEGG_DNA_REPLICATION                                    | 32   | 0.5138865  | 0.5138865  | 0           | 0.026044514 | 0.055      | 3557        | tags=81%, list=30%, signal=116%  |
| KEGG_RIBOSOME                                           | KEGG_RIBOSOME                                           | 71   | 0.46100864 | 0.46100864 | 0           | 0.047453124 | 0.1445     | 5756        | tags=94%, list=49%, signal=182%  |
| KEGG_GLYCOSAMINOGLYCAN_BIOSYNTHESIS_KERATAN_SULFATE     | KEGG_GLYCOSAMINOGLYCAN_BIOSYNTHESIS_KERATAN_SULFATE     | 11   | 0.4236875  | 0.4236875  | 0.022772277 | 0.07159363  | 0.2745     | 2526        | tags=64%, list=21%, signal=81%   |
| KEGG_GLYCOSAMINOGLYCAN_BIOSYNTHESIS_CHONDROITIN_SULFATE | KEGG_GLYCOSAMINOGLYCAN_BIOSYNTHESIS_CHONDROITIN_SULFATE | 13   | 0.4226192  | 0.4226192  | 0.014227643 | 0.058455955 | 0.2795     | 3203        | tags=69%, list=27%, signal=95%   |
| KEGG_GLYCOSAMINOGLYCAN_DEGRADATION                      | KEGG_GLYCOSAMINOGLYCAN_DEGRADATION                      | 21   | 0.41751438 | 0.41751438 | 9.95E-04    | 0.055178963 | 0.307      | 4657        | tags=81%, list=39%, signal=133%  |
| KEGG_NON_HOMOLOGOUS_END_JOINTING                        | KEGG_NON_HOMOLOGOUS_END_JOINTING                        | 13   | 0.4029258  | 0.4029258  | 0.02112676  | 0.06459014  | 0.391      | 2524        | tags=62%, list=21%, signal=78%   |
| KEGG_VALINE_LEUCINE_AND_ISOLEUCINE_BIOSYNTHESIS         | KEGG_VALINE_LEUCINE_AND_ISOLEUCINE_BIOSYNTHESIS         | 10   | 0.39004222 | 0.39004222 | 0.07492507  | 0.07231504  | 0.474      | 3679        | tags=70%, list=31%, signal=101%  |
| KEGG_RIBOFLAVIN_METABOLISM                              | KEGG_RIBOFLAVIN_METABOLISM                              | 12   | 0.38284945 | 0.38284945 | 0.043613706 | 0.07340552  | 0.5215     | 4358        | tags=75%, list=37%, signal=118%  |
| KEGG_PENTOSE_AND_GLUCURONATE_INTERCONVERSIONS           | KEGG_PENTOSE_AND_GLUCURONATE_INTERCONVERSIONS           | 12   | 0.35800698 | 0.35800698 | 0.07008885  | 0.10271946  | 0.68       | 6629        | tags=92%, list=56%, signal=208%  |
| KEGG_STEROID_BIOSYNTHESIS                               | KEGG_STEROID_BIOSYNTHESIS                               | 15   | 0.35218802 | 0.35218802 | 0.042639595 | 0.103682645 | 0.721      | 3734        | tags=67%, list=31%, signal=97%   |
| KEGG_HOMOLOGOUS_RECOMBINATING                           | KEGG_HOMOLOGOUS_RECOMBINATING                           | 25   | 0.34847483 | 0.34847483 | 0.003061225 | 0.10218766  | 0.7455     | 6786        | tags=92%, list=57%, signal=215%  |
| KEGG_GLYCOSPHINGOLIPID_BIOSYNTHESIS_GLOBO_SERIES        | KEGG_GLYCOSPHINGOLIPID_BIOSYNTHESIS_GLOBO_SERIES        | 13   | 0.3432742  | 0.3432742  | 0.07556428  | 0.1036095   | 0.7765     | 4143        | tags=69%, list=35%, signal=106%  |
| KEGG_GLYCOSPHINGOLIPID_BIOSYNTHESIS_GANGLIO_SERIES      | KEGG_GLYCOSPHINGOLIPID_BIOSYNTHESIS_GANGLIO_SERIES      | 13   | 0.3432742  | 0.3432742  | 0.07258064  | 0.09620882  | 0.7765     | 4143        | tags=69%, list=35%, signal=106%  |
| KEGG_PENTOSE_PHOSPHATE_PATHWAY                          | KEGG_PENTOSE_PHOSPHATE_PATHWAY                          | 23   | 0.33331007 | 0.33331007 | 0.008179959 | 0.1047559   | 0.8305     | 5851        | tags=83%, list=49%, signal=163%  |
| KEGG_RENIN_ANGIOTENSIN_SYSTEM                           | KEGG_RENIN_ANGIOTENSIN_SYSTEM                           | 16   | 0.32402483 | 0.32402483 | 0.053359684 | 0.11630112  | 0.8785     | 4315        | tags=69%, list=36%, signal=108%  |
| KEGG_MISMATCH_REPAIR                                    | KEGG_MISMATCH_REPAIR                                    | 23   | 0.32389963 | 0.32389963 | 0.009287925 | 0.10962738  | 0.8795     | 8025        | tags=100%, list=68%, signal=309% |
| KEGG_FOLATE_BIOSYNTHESIS                                | KEGG_FOLATE_BIOSYNTHESIS                                | 11   | 0.3178711  | 0.3178711  | 0.18118812  | 0.11574933  | 0.907      | 4858        | tags=73%, list=41%, signal=123%  |
| KEGG_CELL_CYCLE                                         | KEGG_CELL_CYCLE                                         | 104  | 0.31196186 | 0.31196186 | 0           | 0.1223285   | 0.928      | 3516        | tags=61%, list=30%, signal=85%   |
| KEGG_NUCLEOTIDE_EXCISION_REPAIR                         | KEGG_NUCLEOTIDE_EXCISION_REPAIR                         | 41   | 0.30880618 | 0.30880618 | 0           | 0.12273602  | 0.9355     | 4738        | tags=71%, list=40%, signal=117%  |
| KEGG_RNA_POLYMERASE                                     | KEGG_RNA_POLYMERASE                                     | 21   | 0.30048794 | 0.30048794 | 0.03160041  | 0.13441338  | 0.9585     | 7172        | tags=90%, list=60%, signal=228%  |
| KEGG_N_GLYCAN_BIOSYNTHESIS                              | KEGG_N_GLYCAN_BIOSYNTHESIS                              | 34   | 0.29789793 | 0.29789793 | 0.002051282 | 0.13353059  | 0.9635     | 4499        | tags=68%, list=38%, signal=109%  |
| KEGG_BASE_EXCISION_REPAIR                               | KEGG_BASE_EXCISION_REPAIR                               | 31   | 0.2939468  | 0.2939468  | 0.006910168 | 0.13537721  | 0.9715     | 6469        | tags=84%, list=55%, signal=184%  |
| KEGG_PYRIMIDINE_METABOLISM                              | KEGG_PYRIMIDINE_METABOLISM                              | 71   | 0.2791394  | 0.2791394  | 0           | 0.16508707  | 0.99       | 3724        | tags=59%, list=31%, signal=86%   |
| KEGG_PROTEIN_EXPORT                                     | KEGG_PROTEIN_EXPORT                                     | 18   | 0.2786035  | 0.2786035  | 0.09724951  | 0.16033931  | 0.9905     | 7242        | tags=89%, list=61%, signal=228%  |
| KEGG_AMINOACYL_TRNA_BIOSYNTHESIS                        | KEGG_AMINOACYL_TRNA_BIOSYNTHESIS                        | 29   | 0.2721984  | 0.2721984  | 0.012820513 | 0.17220083  | 0.9945     | 4140        | tags=62%, list=35%, signal=95%   |
| KEGG_PANTOTHENATE_AND_COA_BIOSYNTHESIS                  | KEGG_PANTOTHENATE_AND_COA_BIOSYNTHESIS                  | 14   | 0.27141172 | 0.27141172 | 0.20543806  | 0.16769114  | 0.9945     | 3561        | tags=57%, list=30%, signal=82%   |
| KEGG_OTHER_GLYCAN_DEGRADATION                           | KEGG_OTHER_GLYCAN_DEGRADATION                           | 12   | 0.27045354 | 0.27045354 | 0.27318045  | 0.16410978  | 0.9945     | 6678        | tags=83%, list=56%, signal=191%  |
| KEGG_SULFUR_METABOLISM                                  | KEGG_SULFUR_METABOLISM                                  | 9    | 0.26965377 | 0.26965377 | 0.48243803  | 0.16070656  | 0.995      | 4710        | tags=67%, list=40%, signal=110%  |
| KEGG_NICOTINATE_AND_NICOTINAMIDE_BIOSYNTHESIS           | KEGG_NICOTINATE_AND_NICOTINAMIDE_BIOSYNTHESIS           | 15   | 0.26416212 | 0.26416212 | 0.21919192  | 0.17049184  | 0.9965     | 1614        | tags=40%, list=14%, signal=46%   |
| KEGG_O_GLYCAN_BIOSYNTHESIS                              | KEGG_O_GLYCAN_BIOSYNTHESIS                              | 18   | 0.26009122 | 0.26009122 | 0.15004936  | 0.17592153  | 0.998      | 2849        | tags=50%, list=24%, signal=66%   |
| KEGG_PHENYLALANINE_METABOLISM                           | KEGG_PHENYLALANINE_METABOLISM                           | 17   | 0.25836062 | 0.25836062 | 0.15384616  | 0.17513557  | 0.998      | 5311        | tags=71%, list=45%, signal=128%  |
| KEGG_TYROSINE_METABOLISM                                | KEGG_TYROSINE_METABOLISM                                | 38   | 0.25720558 | 0.25720558 | 0.010901883 | 0.17306502  | 0.998      | 7882        | tags=92%, list=66%, signal=274%  |
| KEGG_AMINO_SUGAR_AND_NUCLEOTIDE_BIOSYNTHESIS            | KEGG_AMINO_SUGAR_AND_NUCLEOTIDE_BIOSYNTHESIS            | 39   | 0.24199654 | 0.24199654 | 0.018556701 | 0.2162996   | 1          | 2004        | tags=41%, list=17%, signal=49%   |
| KEGG_ASCORBATE_AND_ALDARATE_BIOSYNTHESIS                | KEGG_ASCORBATE_AND_ALDARATE_BIOSYNTHESIS                | 10   | 0.24126583 | 0.24126583 | 0.49259624  | 0.21262644  | 1          | 698         | tags=30%, list=6%, signal=32%    |
| KEGG_TERPENOID_BACKBONE_BIOSYNTHESIS                    | KEGG_TERPENOID_BACKBONE_BIOSYNTHESIS                    | 12   | 0.23846501 | 0.23846501 | 0.4486653   | 0.21707888  | 1          | 7057        | tags=83%, list=60%, signal=206%  |

|                                |                               |     |            |            |             |            |   |                                        |
|--------------------------------|-------------------------------|-----|------------|------------|-------------|------------|---|----------------------------------------|
| KEGG_DRUG_METABOLISM_OTHER_    | KEGG_DRUG_METABOLISM_OTHER_   | 32  | 0.2378889  | 0.2378889  | 0.04682927  | 0.21287635 | 1 | 2374 tags=44%, list=20%, signal=55%    |
| KEGG_ECM_RECEPTOR_INTERACTIO   | KEGG_ECM_RECEPTOR_INTERACTI   | 78  | 0.23767024 | 0.23767024 | 0           | 0.208026   | 1 | 848 tags=31%, list=7%, signal=33%      |
| KEGG_RNA_DEGRADATION           | KEGG_RNA_DEGRADATION          | 43  | 0.23598835 | 0.23598835 | 0.014271152 | 0.20826896 | 1 | 6588 tags=79%, list=56%, signal=177%   |
| KEGG_GLYOXYLATE_AND_DICARBOX   | KEGG_GLYOXYLATE_AND_DICARBO   | 10  | 0.21814346 | 0.21814346 | 0.6531219   | 0.27014282 | 1 | 9274 tags=100%, list=78%, signal=458%  |
| KEGG_BASAL_TRANSCRIPTION_FACT  | KEGG_BASAL_TRANSCRIPTION_FAC  | 28  | 0.20984262 | 0.20984262 | 0.14772727  | 0.30084065 | 1 | 8529 tags=93%, list=72%, signal=330%   |
| KEGG_SPLICEOSOME               | KEGG_SPLICEOSOME              | 86  | 0.20968552 | 0.20968552 | 9.91E-04    | 0.29445854 | 1 | 8149 tags=90%, list=69%, signal=284%   |
| KEGG_PORPHYRIN_AND_CHLOROPH    | KEGG_PORPHYRIN_AND_CHLOROP    | 24  | 0.20639011 | 0.20639011 | 0.17824773  | 0.30300948 | 1 | 8922 tags=96%, list=75%, signal=386%   |
| KEGG_GALACTOSE_METABOLISM      | KEGG_GALACTOSE_METABOLISM     | 23  | 0.2014942  | 0.2014942  | 0.2646213   | 0.31947938 | 1 | 6380 tags=74%, list=54%, signal=160%   |
| KEGG_GLYCOSYLPHOSPHATIDYLINO   | KEGG_GLYCOSYLPHOSPHATIDYLIN   | 19  | 0.20083654 | 0.20083654 | 0.39735773  | 0.3154583  | 1 | 3863 tags=53%, list=33%, signal=78%    |
| KEGG_ALANINE_ASPARTATE_AND_G   | KEGG_ALANINE_ASPARTATE_AND_   | 27  | 0.19436227 | 0.19436227 | 0.22178988  | 0.3420203  | 1 | 4288 tags=56%, list=36%, signal=87%    |
| KEGG_SNARE_INTERACTIONS_IN_VE  | KEGG_SNARE_INTERACTIONS_IN_V  | 30  | 0.18588339 | 0.18588339 | 0.22902271  | 0.37953335 | 1 | 6102 tags=70%, list=51%, signal=144%   |
| KEGG_CYSTEINE_AND_METHIONINE   | KEGG_CYSTEINE_AND_METHIONINE  | 31  | 0.18577361 | 0.18577361 | 0.22109534  | 0.3722906  | 1 | 7366 tags=81%, list=62%, signal=212%   |
| KEGG_ONE_CARBON_POOL_BY_FOL    | KEGG_ONE_CARBON_POOL_BY_FOL   | 15  | 0.17698047 | 0.17698047 | 0.6587902   | 0.4174282  | 1 | 4228 tags=53%, list=36%, signal=83%    |
| KEGG_GLYCOLYSIS_GLUconeogen    | KEGG_GLYCOLYSIS_GLUconeoge    | 53  | 0.17628492 | 0.17628492 | 0.071428575 | 0.41298383 | 1 | 6421 tags=72%, list=54%, signal=156%   |
| KEGG_SELENOAMINO_ACID_METABO   | KEGG_SELENOAMINO_ACID_METAB   | 19  | 0.16499765 | 0.16499765 | 0.59336495  | 0.47868395 | 1 | 6160 tags=68%, list=52%, signal=142%   |
| KEGG_PATHOGENIC_ESCHERICHIA_   | KEGG_PATHOGENIC_ESCHERICHIA_  | 49  | 0.16164455 | 0.16164455 | 0.16876818  | 0.49395663 | 1 | 5109 tags=59%, list=43%, signal=104%   |
| KEGG_FOCAL_ADHESION            | KEGG_FOCAL_ADHESION           | 182 | 0.15935008 | 0.15935008 | 0           | 0.50115776 | 1 | 2048 tags=33%, list=17%, signal=39%    |
| KEGG_GLYCOSPHINGOLIPID_BIOSYN  | KEGG_GLYCOSPHINGOLIPID_BIOSY  | 23  | 0.1588424  | 0.1588424  | 0.57185626  | 0.4955047  | 1 | 2244 tags=35%, list=19%, signal=43%    |
| KEGG_STARCH_AND_SUCROSE_MET    | KEGG_STARCH_AND_SUCROSE_ME    | 29  | 0.15570433 | 0.15570433 | 0.435468    | 0.51001805 | 1 | 8381 tags=86%, list=71%, signal=293%   |
| KEGG_CITRATE_CYCLE_TCA_CYCLE   | KEGG_CITRATE_CYCLE_TCA_CYCLE  | 29  | 0.15299666 | 0.15299666 | 0.4512195   | 0.520981   | 1 | 8822 tags=90%, list=74%, signal=349%   |
| KEGG_P53_SIGNALING_PATHWAY     | KEGG_P53_SIGNALING_PATHWAY    | 59  | 0.15200952 | 0.15200952 | 0.102564104 | 0.51825887 | 1 | 8457 tags=86%, list=71%, signal=300%   |
| KEGG_GLYCOSAMINOGLYCAN_BIOSY   | KEGG_GLYCOSAMINOGLYCAN_BIOS   | 21  | 0.151336   | 0.151336   | 0.659       | 0.51449263 | 1 | 6114 tags=67%, list=52%, signal=137%   |
| KEGG_PROGESTERONE_MEDIATED_    | KEGG_PROGESTERONE_MEDIATED    | 73  | 0.1512207  | 0.1512207  | 0.06647399  | 0.506577   | 1 | 3253 tags=42%, list=27%, signal=58%    |
| KEGG_AUTOIMMUNE_THYROID_DISE   | KEGG_AUTOIMMUNE_THYROID_DISE  | 38  | 0.14895067 | 0.14895067 | 0.34611502  | 0.5155661  | 1 | 9786 tags=97%, list=83%, signal=555%   |
| KEGG_GLUTATHIONE_METABOLISM    | KEGG_GLUTATHIONE_METABOLISM   | 35  | 0.14737542 | 0.14737542 | 0.39476237  | 0.51886934 | 1 | 1306 tags=26%, list=11%, signal=29%    |
| KEGG_ALLOGRAFT_REJECTION       | KEGG_ALLOGRAFT_REJECTION      | 30  | 0.14497048 | 0.14497048 | 0.5264735   | 0.5289548  | 1 | 10144 tags=100%, list=86%, signal=689% |
| KEGG_COMPLEMENT_AND_COAGULA    | KEGG_COMPLEMENT_AND_COAGUL    | 65  | 0.1362181  | 0.1362181  | 0.15763052  | 0.58969384 | 1 | 6968 tags=72%, list=59%, signal=174%   |
| KEGG_OOCYTE_MEIOSIS            | KEGG_OOCYTE_MEIOSIS           | 91  | 0.13376266 | 0.13376266 | 0.08414873  | 0.60049295 | 1 | 1292 tags=24%, list=11%, signal=27%    |
| KEGG_UBIQUITIN_MEDIATED_PROTE  | KEGG_UBIQUITIN_MEDIATED_PROT  | 105 | 0.13296066 | 0.13296066 | 0.055045873 | 0.5975005  | 1 | 5665 tags=61%, list=48%, signal=116%   |
| KEGG_PARKINSONS_DISEASE        | KEGG_PARKINSONS_DISEASE       | 96  | 0.13188544 | 0.13188544 | 0.07003891  | 0.5973296  | 1 | 8825 tags=88%, list=74%, signal=339%   |
| KEGG_PURINE_METABOLISM         | KEGG_PURINE_METABOLISM        | 127 | 0.12764455 | 0.12764455 | 0.024415055 | 0.6231358  | 1 | 7373 tags=75%, list=62%, signal=196%   |
| KEGG_THYROID_CANCER            | KEGG_THYROID_CANCER           | 29  | 0.11673307 | 0.11673307 | 0.775428    | 0.7091308  | 1 | 9660 tags=93%, list=81%, signal=501%   |
| KEGG_RIG_I_LIKE_RECEPTOR_SIGNA | KEGG_RIG_I_LIKE_RECEPTOR_SIGN | 58  | 0.1144809  | 0.1144809  | 0.4135864   | 0.718769   | 1 | 9281 tags=90%, list=78%, signal=410%   |
| KEGG_HEMATOPOIETIC_CELL_LINEA  | KEGG_HEMATOPOIETIC_CELL_LINE  | 77  | 0.11235977 | 0.11235977 | 0.28965518  | 0.7269024  | 1 | 4220 tags=47%, list=36%, signal=72%    |
| KEGG_INTESTINAL_IMMUNE_NETWO   | KEGG_INTESTINAL_IMMUNE_NETWO  | 35  | 0.11154337 | 0.11154337 | 0.715534    | 0.723869   | 1 | 8168 tags=80%, list=69%, signal=256%   |
| KEGG_FRUCTOSE_AND_MANNOSE_M    | KEGG_FRUCTOSE_AND_MANNOSE_    | 30  | 0.11093267 | 0.11093267 | 0.8124373   | 0.7192628  | 1 | 1454 tags=23%, list=12%, signal=27%    |
| KEGG_CYTOKINE_CYTOKINE_RECEP   | KEGG_CYTOKINE_CYTOKINE_RECE   | 214 | 0.10937531 | 0.10937531 | 0.005830904 | 0.7227593  | 1 | 5154 tags=54%, list=43%, signal=94%    |
| KEGG_TGF_BETA_SIGNALING_PATH   | KEGG_TGF_BETA_SIGNALING_PATH  | 77  | 0.09997345 | 0.09997345 | 0.4028777   | 0.7971936  | 1 | 4674 tags=49%, list=39%, signal=81%    |
| KEGG_HYPERTROPHIC_CARDIOMYO    | KEGG_HYPERTROPHIC_CARDIOMYO   | 75  | 0.09403479 | 0.09403479 | 0.528866    | 0.8384965  | 1 | 314 tags=12%, list=3%, signal=12%      |
| KEGG_HEDGEHOG_SIGNALING_PATH   | KEGG_HEDGEHOG_SIGNALING_PAT   | 45  | 0.0935628  | 0.0935628  | 0.7915811   | 0.8318491  | 1 | 3374 tags=38%, list=28%, signal=53%    |
| KEGG_HUNTINGTONS_DISEASE       | KEGG_HUNTINGTONS_DISEASE      | 148 | 0.09102011 | 0.09102011 | 0.16787565  | 0.8431987  | 1 | 9030 tags=85%, list=76%, signal=352%   |
| KEGG_BLADDER_CANCER            | KEGG_BLADDER_CANCER           | 41  | 0.08924031 | 0.08924031 | 0.87189674  | 0.8472744  | 1 | 10515 tags=98%, list=89%, signal=857%  |
| KEGG_REGULATION_OF_ACTIN_CYT   | KEGG_REGULATION_OF_ACTIN_CYT  | 181 | 0.08863291 | 0.08863291 | 0.1194907   | 0.841756   | 1 | 1978 tags=25%, list=17%, signal=30%    |
| KEGG_LYSOSOME                  | KEGG_LYSOSOME                 | 106 | 0.08687046 | 0.08687046 | 0.3934263   | 0.8459618  | 1 | 6810 tags=66%, list=57%, signal=154%   |
| KEGG_AXON_GUIDANCE             | KEGG_AXON_GUIDANCE            | 110 | 0.08503674 | 0.08503674 | 0.39898476  | 0.84971166 | 1 | 4822 tags=49%, list=41%, signal=82%    |
| KEGG_VIRAL_MYOCARDITIS         | KEGG_VIRAL_MYOCARDITIS        | 62  | 0.08116192 | 0.08116192 | 0.776329    | 0.8692608  | 1 | 9945 tags=92%, list=84%, signal=566%   |

|                               |                              |     |            |            |            |            |   |                                       |
|-------------------------------|------------------------------|-----|------------|------------|------------|------------|---|---------------------------------------|
| KEGG_APOPTOSIS                | KEGG_APOPTOSIS               | 79  | 0.0786377  | 0.0786377  | 0.693837   | 0.87765706 | 1 | 4327 tags=44%, list=36%, signal=69%   |
| KEGG_SMALL_CELL_LUNG_CANCER   | KEGG_SMALL_CELL_LUNG_CANCER  | 81  | 0.07846985 | 0.07846985 | 0.66863906 | 0.8685714  | 1 | 1271 tags=19%, list=11%, signal=21%   |
| KEGG_JAK_STAT_SIGNALING_PATHW | KEGG_JAK_STAT_SIGNALING_PATH | 126 | 0.07381213 | 0.07381213 | 0.472167   | 0.8910851  | 1 | 10334 tags=94%, list=87%, signal=726% |
| KEGG_PANCREATIC_CANCER        | KEGG_PANCREATIC_CANCER       | 70  | 0.07088332 | 0.07088332 | 0.84740883 | 0.89990073 | 1 | 10515 tags=96%, list=89%, signal=839% |
| KEGG_NOD_LIKE_RECEPTOR_SIGNA  | KEGG_NOD_LIKE_RECEPTOR_SIGN  | 52  | 0.05810925 | 0.05810925 | 0.9900398  | 0.9578714  | 1 | 8664 tags=79%, list=73%, signal=291%  |
| KEGG_PATHWAYS_IN_CANCER       | KEGG_PATHWAYS_IN_CANCER      | 300 | 0.05528259 | 0.05528259 | 0.29493546 | 0.95814866 | 1 | 3590 tags=36%, list=30%, signal=50%   |
