# Supplementary material for: Role of Lamin A/C as Candidate Biomarker of Aggressiveness and Tumorigenicity in Glioblastoma Multiforme
Source: MDPI journal article supplement (doi:10.3390/biomedicines9101343), 2021-09-28
Supplement: s1 [file s1]

**Table S2. Gene set enrichment analysis of the core molecular KEGG pathways related to the expression of LMNA in GBM patients from TCGA RNASeq data.**

| NAME                                                    | GS<br> follow link to MSigDB                            | SIZE | ES         | NES        | NOM p-val   | FDR q-val   | FWER p-val | RANK AT LEADING EDGE MAX |                                  |
|---------------------------------------------------------|---------------------------------------------------------|------|------------|------------|-------------|-------------|------------|--------------------------|----------------------------------|
| KEGG_GLYCOSAMINOGLYCAN_BIOSYNTHESIS_KERATAN_SULFATE     | KEGG_GLYCOSAMINOGLYCAN_BIOSYNTHESIS_KERATAN_SULFATE     | 14   | 0.5707749  | 0.5707749  | 0.001012146 | 0.005897383 | 0.0045     | 21024                    | tags=100%, list=43%, signal=175% |
| KEGG_GLYCOSAMINOGLYCAN_DEGRADATION                      | KEGG_GLYCOSAMINOGLYCAN_DEGRADATION                      | 21   | 0.5617917  | 0.5617917  | 0           | 0.004521676 | 0.007      | 5146                     | tags=67%, list=11%, signal=74%   |
| KEGG_GLYCOSAMINOGLYCAN_BIOSYNTHESIS_CHONDROITIN_SULFATE | KEGG_GLYCOSAMINOGLYCAN_BIOSYNTHESIS_CHONDROITIN_SULFATE | 22   | 0.5529131  | 0.5529131  | 0           | 0.003887325 | 0.009      | 6323                     | tags=68%, list=13%, signal=78%   |
| KEGG_OTHER_GLYCAN_DEGRADATION                           | KEGG_OTHER_GLYCAN_DEGRADATION                           | 16   | 0.54579383 | 0.54579383 | 0           | 0.003555518 | 0.011      | 13067                    | tags=81%, list=27%, signal=111%  |
| KEGG_ECM_RECEPTOR_INTERACTION                           | KEGG_ECM_RECEPTOR_INTERACTION                           | 83   | 0.51111627 | 0.51111627 | 0           | 0.00674333  | 0.026      | 10411                    | tags=72%, list=21%, signal=76%   |
| KEGG_GALACTOSE_METABOLISM                               | KEGG_GALACTOSE_METABOLISM                               | 26   | 0.51001406 | 0.51001406 | 0           | 0.005733673 | 0.0265     | 7055                     | tags=65%, list=14%, signal=76%   |
| KEGG_VALINE_LEUCINE_AND_ISOLEUCINE_BIOSYNTHESIS         | KEGG_VALINE_LEUCINE_AND_ISOLEUCINE_BIOSYNTHESIS         | 11   | 0.49006304 | 0.49006304 | 0.010111224 | 0.007629179 | 0.0405     | 7168                     | tags=64%, list=15%, signal=75%   |
| KEGG_GLYCOSPHINGOLIPID_BIOSYNTHESIS_GANGLIO_SERIES      | KEGG_GLYCOSPHINGOLIPID_BIOSYNTHESIS_GANGLIO_SERIES      | 15   | 0.46108958 | 0.46108958 | 9.92E-04    | 0.011893394 | 0.0705     | 10072                    | tags=67%, list=21%, signal=84%   |
| KEGG_AMINO_SUGAR_AND_NUCLEOTIDE_SUGAR_METABOLISM        | KEGG_AMINO_SUGAR_AND_NUCLEOTIDE_SUGAR_METABOLISM        | 44   | 0.41718328 | 0.41718328 | 0           | 0.024909593 | 0.153      | 7411                     | tags=57%, list=15%, signal=67%   |
| KEGG_ONE_CARBON_POOL_BY_FOLATE                          | KEGG_ONE_CARBON_POOL_BY_FOLATE                          | 17   | 0.40005362 | 0.40005362 | 0.00483559  | 0.031165738 | 0.211      | 17861                    | tags=76%, list=36%, signal=120%  |
| KEGG_NOTCH_SIGNALING_PATHWAY                            | KEGG_NOTCH_SIGNALING_PATHWAY                            | 47   | 0.3713157  | 0.3713157  | 0           | 0.048369367 | 0.3345     | 8922                     | tags=55%, list=18%, signal=68%   |
| KEGG_GLYCOSAMINOGLYCAN_BIOSYNTHESIS_HEPARAN_SULFATE     | KEGG_GLYCOSAMINOGLYCAN_BIOSYNTHESIS_HEPARAN_SULFATE     | 26   | 0.37113473 | 0.37113473 | 0.001034126 | 0.04460336  | 0.3365     | 2552                     | tags=42%, list=5%, signal=45%    |
| KEGG_O_GLYCAN_BIOSYNTHESIS                              | KEGG_O_GLYCAN_BIOSYNTHESIS                              | 27   | 0.37069806 | 0.37069806 | 0           | 0.04154259  | 0.34       | 3620                     | tags=44%, list=7%, signal=48%    |
| KEGG_FOCAL_ADHESION                                     | KEGG_FOCAL_ADHESION                                     | 197  | 0.36790058 | 0.36790058 | 0           | 0.040333424 | 0.353      | 6664                     | tags=50%, list=14%, signal=58%   |
| KEGG_PHENYLALANINE_METABOLISM                           | KEGG_PHENYLALANINE_METABOLISM                           | 18   | 0.36671865 | 0.36671865 | 0.01003009  | 0.038857285 | 0.3625     | 9252                     | tags=56%, list=19%, signal=68%   |
| KEGG_MISMATCH_REPAIR                                    | KEGG_MISMATCH_REPAIR                                    | 23   | 0.36115423 | 0.36115423 | 0.003024194 | 0.040877532 | 0.3945     | 16386                    | tags=70%, list=33%, signal=105%  |
| KEGG_PRION_DISEASES                                     | KEGG_PRION_DISEASES                                     | 35   | 0.35352546 | 0.35352546 | 0           | 0.044632327 | 0.4425     | 20474                    | tags=77%, list=42%, signal=132%  |
| KEGG_LYSOSOME                                           | KEGG_LYSOSOME                                           | 119  | 0.35129255 | 0.35129255 | 0           | 0.044455867 | 0.4605     | 7528                     | tags=50%, list=15%, signal=59%   |
| KEGG_N_GLYCAN_BIOSYNTHESIS                              | KEGG_N_GLYCAN_BIOSYNTHESIS                              | 46   | 0.34807894 | 0.34807894 | 0           | 0.04503697  | 0.4825     | 3196                     | tags=41%, list=7%, signal=44%    |
| KEGG_RENIN_ANGIOTENSIN_SYSTEM                           | KEGG_RENIN_ANGIOTENSIN_SYSTEM                           | 17   | 0.34315288 | 0.34315288 | 0.024390243 | 0.047652006 | 0.52       | 9125                     | tags=53%, list=19%, signal=65%   |
| KEGG_HOMOLOGOUS_RECOMBINATION                           | KEGG_HOMOLOGOUS_RECOMBINATION                           | 27   | 0.34149027 | 0.34149027 | 0.002979146 | 0.04736493  | 0.532      | 17744                    | tags=70%, list=36%, signal=110%  |
| KEGG_SMALL_CELL_LUNG_CANCER                             | KEGG_SMALL_CELL_LUNG_CANCER                             | 84   | 0.34056348 | 0.34056348 | 0           | 0.0458273   | 0.5365     | 10749                    | tags=56%, list=22%, signal=72%   |
| KEGG_AMINOACYL_TRNA_BIOSYNTHESIS                        | KEGG_AMINOACYL_TRNA_BIOSYNTHESIS                        | 41   | 0.33934763 | 0.33934763 | 0           | 0.04497418  | 0.548      | 15642                    | tags=66%, list=32%, signal=70%   |
| KEGG_BLADDER_CANCER                                     | KEGG_BLADDER_CANCER                                     | 40   | 0.33908534 | 0.33908534 | 0           | 0.043325417 | 0.5495     | 10340                    | tags=55%, list=21%, signal=70%   |
| KEGG_CIRCADIEN_RHYTHM_MAMMAL                            | KEGG_CIRCADIEN_RHYTHM_MAMMAL                            | 13   | 0.3261531  | 0.3261531  | 0.10958904  | 0.054071195 | 0.646      | 17932                    | tags=69%, list=37%, signal=109%  |
| KEGG_DNA_REPLICATION                                    | KEGG_DNA_REPLICATION                                    | 36   | 0.32357487 | 0.32357487 | 0           | 0.054292593 | 0.664      | 15450                    | tags=64%, list=32%, signal=93%   |

|                                                           |                                                           |     |            |            |             |             |        |       |                                 |
|-----------------------------------------------------------|-----------------------------------------------------------|-----|------------|------------|-------------|-------------|--------|-------|---------------------------------|
| KEGG_GLYCOSPHINGOLIPID_BIOSYNTHESIS_GLOBO_SERIES          | KEGG_GLYCOSPHINGOLIPID_BIOSYNTHESIS_GLOBO_SERIES          | 14  | 0.31870648 | 0.31870648 | 0.07411168  | 0.05694878  | 0.694  | 5383  | tags=43%, list=11%, signal=48%  |
| KEGG_PATHOGENIC_ESCHERICHIA_COLI_INFECTION                | KEGG_PATHOGENIC_ESCHERICHIA_COLI_INFECTION                | 56  | 0.31789142 | 0.31789142 | 0           | 0.05612397  | 0.7025 | 14180 | tags=61%, list=29%, signal=85%  |
| KEGG_NOD_LIKE_RECEPTOR_SIGNALING_PATHWAY                  | KEGG_NOD_LIKE_RECEPTOR_SIGNALING_PATHWAY                  | 60  | 0.31417376 | 0.31417376 | 0           | 0.0590761   | 0.7295 | 10749 | tags=53%, list=22%, signal=68%  |
| KEGG_APOPTOSIS                                            | KEGG_APOPTOSIS                                            | 86  | 0.3058642  | 0.3058642  | 0           | 0.06799298  | 0.7965 | 6115  | tags=43%, list=12%, signal=49%  |
| KEGG_HEMATOPOIETIC_CELL_LINEAGE                           | KEGG_HEMATOPOIETIC_CELL_LINEAGE                           | 84  | 0.30288526 | 0.30288526 | 0           | 0.06964665  | 0.8155 | 17837 | tags=67%, list=36%, signal=105% |
| KEGG_PENTOSE_PHOSPHATE_PATHWAY                            | KEGG_PENTOSE_PHOSPHATE_PATHWAY                            | 26  | 0.30067965 | 0.30067965 | 0.016260162 | 0.07024792  | 0.8275 | 6000  | tags=42%, list=12%, signal=48%  |
| KEGG_CYTOKINE_CYTOKINE_RECEPTOR_INTERACTION               | KEGG_CYTOKINE_CYTOKINE_RECEPTOR_INTERACTION               | 253 | 0.29452127 | 0.29452127 | 0           | 0.076147236 | 0.858  | 12554 | tags=55%, list=26%, signal=74%  |
| KEGG_FRUCTOSE_AND_MANNANOSE_METABOLISM                    | KEGG_FRUCTOSE_AND_MANNANOSE_METABOLISM                    | 34  | 0.2937678  | 0.2937678  | 0.001998002 | 0.07501489  | 0.862  | 8667  | tags=47%, list=18%, signal=57%  |
| KEGG_GLYCOLYSIS_GLUONEOGENESIS                            | KEGG_GLYCOLYSIS_GLUONEOGENESIS                            | 60  | 0.29372936 | 0.29372936 | 0           | 0.07292745  | 0.862  | 13381 | tags=57%, list=27%, signal=78%  |
| KEGG_STEROID_BIOSYNTHESIS                                 | KEGG_STEROID_BIOSYNTHESIS                                 | 16  | 0.29142195 | 0.29142195 | 0.108778626 | 0.07410208  | 0.8705 | 13277 | tags=56%, list=27%, signal=77%  |
| KEGG_ARRHYTHMOGENIC_RIGHT_VENTRICULAR_CARDIOMYOPATHY_ARVC | KEGG_ARRHYTHMOGENIC_RIGHT_VENTRICULAR_CARDIOMYOPATHY_ARVC | 73  | 0.2906476  | 0.2906476  | 0           | 0.07346807  | 0.875  | 3899  | tags=37%, list=8%, signal=40%   |
| KEGG_RIG_I_LIKE_RECEPTOR_SIGNALING_PATHWAY                | KEGG_RIG_I_LIKE_RECEPTOR_SIGNALING_PATHWAY                | 67  | 0.2890226  | 0.2890226  | 0           | 0.07339862  | 0.882  | 7791  | tags=45%, list=16%, signal=53%  |
| KEGG_ALLOGRAFT_REJECTION                                  | KEGG_ALLOGRAFT_REJECTION                                  | 35  | 0.28694054 | 0.28694054 | 0.005785921 | 0.07447637  | 0.8935 | 22333 | tags=74%, list=46%, signal=136% |
| KEGG_CHRONIC_MYELOID_LEUKEMIA                             | KEGG_CHRONIC_MYELOID_LEUKEMIA                             | 73  | 0.2816025  | 0.2816025  | 0           | 0.080159724 | 0.9145 | 7695  | tags=44%, list=16%, signal=52%  |
| KEGG_GRAFT_VERSUS_HOST_DISEASE                            | KEGG_GRAFT_VERSUS_HOST_DISEASE                            | 37  | 0.27381495 | 0.27381495 | 0.003838772 | 0.09004085  | 0.942  | 22333 | tags=73%, list=46%, signal=134% |
| KEGG_PANTOTHENATE_AND_COA_BIOSYNTHESIS                    | KEGG_PANTOTHENATE_AND_COA_BIOSYNTHESIS                    | 16  | 0.27190673 | 0.27190673 | 0.14565004  | 0.091334164 | 0.9505 | 1991  | tags=31%, list=4%, signal=33%   |
| KEGG_COMPLEMENT_AND_COAGULATION_CASCADES                  | KEGG_COMPLEMENT_AND_COAGULATION_CASCADES                  | 69  | 0.27130255 | 0.27130255 | 0           | 0.09022862  | 0.9525 | 20796 | tags=70%, list=42%, signal=121% |
| KEGG_ADHERENS_JUNCTION                                    | KEGG_ADHERENS_JUNCTION                                    | 68  | 0.26347038 | 0.26347038 | 0           | 0.10228589  | 0.97   | 5838  | tags=38%, list=12%, signal=43%  |
| KEGG_ANTIGEN_PROCESSING_AND_PRESENTATION                  | KEGG_ANTIGEN_PROCESSING_AND_PRESENTATION                  | 78  | 0.2629452  | 0.2629452  | 0           | 0.10102689  | 0.9715 | 21671 | tags=71%, list=44%, signal=126% |
| KEGG_LEUKOCYTE_TRANSENDOTHELIAL_MIGRATION                 | KEGG_LEUKOCYTE_TRANSENDOTHELIAL_MIGRATION                 | 114 | 0.26122954 | 0.26122954 | 0           | 0.1019268   | 0.9745 | 7425  | tags=41%, list=15%, signal=48%  |
| KEGG_PRIMARY_IMMUNODEFICIENCY                             | KEGG_PRIMARY_IMMUNODEFICIENCY                             | 35  | 0.2586961  | 0.2586961  | 0.017924529 | 0.10439286  | 0.981  | 22316 | tags=71%, list=46%, signal=131% |
| KEGG_NICOTINATE_AND_NICOTINAMIDE_METABOLISM               | KEGG_NICOTINATE_AND_NICOTINAMIDE_METABOLISM               | 22  | 0.25616628 | 0.25616628 | 0.1002045   | 0.10682454  | 0.983  | 18621 | tags=64%, list=38%, signal=103% |
| KEGG_LEISHMANIA_INFECTION                                 | KEGG_LEISHMANIA_INFECTION                                 | 70  | 0.25167194 | 0.25167194 | 0           | 0.11405265  | 0.989  | 21969 | tags=70%, list=45%, signal=127% |
| KEGG_CYTOSOLIC_DNA_SENSING_PATHWAY                        | KEGG_CYTOSOLIC_DNA_SENSING_PATHWAY                        | 52  | 0.24965757 | 0.24965757 | 0.003024194 | 0.115912095 | 0.99   | 12270 | tags=50%, list=25%, signal=48%  |
| KEGG_B_CELL_RECEPTOR_SIGNALING_PATHWAY                    | KEGG_B_CELL_RECEPTOR_SIGNALING_PATHWAY                    | 74  | 0.24860764 | 0.24860764 | 0           | 0.11626541  | 0.992  | 7695  | tags=41%, list=16%, signal=48%  |
| KEGG_DILATED_CARDIOMYOPATHY                               | KEGG_DILATED_CARDIOMYOPATHY                               | 89  | 0.24664228 | 0.24664228 | 0           | 0.118488595 | 0.9925 | 3899  | tags=33%, list=8%, signal=35%   |
| KEGG_JAK_STAT_SIGNALING_PATHWAY                           | KEGG_JAK_STAT_SIGNALING_PATHWAY                           | 147 | 0.24655522 | 0.24655522 | 0           | 0.11657327  | 0.9925 | 13611 | tags=52%, list=28%, signal=56%  |
| KEGG_THYROID_CANCER                                       | KEGG_THYROID_CANCER                                       | 29  | 0.24586862 | 0.24586862 | 0.03767821  | 0.11586282  | 0.993  | 9917  | tags=45%, list=20%, signal=56%  |

|                                                                 |                                                                 |     |            |            |             |             |        |       |                                 |
|-----------------------------------------------------------------|-----------------------------------------------------------------|-----|------------|------------|-------------|-------------|--------|-------|---------------------------------|
| KEGG_ENDOCYTOSIS                                                | KEGG_ENDOCYTOSIS                                                | 176 | 0.24256493 | 0.24256493 | 0           | 0.121194586 | 0.995  | 12647 | tags=50%, list=26%, signal=67%  |
| KEGG_GLUTATHIONE_METABOLISM                                     | KEGG_GLUTATHIONE_METABOLISM                                     | 48  | 0.24181949 | 0.24181949 | 0.009081735 | 0.120522715 | 0.9955 | 8572  | tags=42%, list=18%, signal=50%  |
| KEGG_PATHWAYS_IN_CANCER                                         | KEGG_PATHWAYS_IN_CANCER                                         | 323 | 0.23958392 | 0.23958392 | 0           | 0.1235381   | 0.998  | 8962  | tags=42%, list=18%, signal=51%  |
| KEGG_ACUTE_MYELOID_LEUKEMIA                                     | KEGG_ACUTE_MYELOID_LEUKEMIA                                     | 57  | 0.23699278 | 0.23699278 | 9.97E-04    | 0.1275729   | 0.9985 | 9025  | tags=42%, list=18%, signal=52%  |
| KEGG_PANCREATIC_CANCER                                          | KEGG_PANCREATIC_CANCER                                          | 69  | 0.23446126 | 0.23446126 | 0           | 0.13158838  | 0.999  | 7695  | tags=39%, list=16%, signal=46%  |
| KEGG_NATURAL_KILLER_CELL_MEDIATED_CYTOTOXICITY                  | KEGG_NATURAL_KILLER_CELL_MEDIATE_D_CYTOTOXICITY                 | 129 | 0.23270607 | 0.23270607 | 0           | 0.13328154  | 0.999  | 14066 | tags=52%, list=29%, signal=73%  |
| KEGG_TOLL_LIKE_RECEPTOR_SIGNALING_PATHWAY                       | KEGG_TOLL_LIKE_RECEPTOR_SIGNALING_PATHWAY                       | 99  | 0.23225111 | 0.23225111 | 0           | 0.13216415  | 0.999  | 15358 | tags=55%, list=31%, signal=79%  |
| KEGG_P53_SIGNALING_PATHWAY                                      | KEGG_P53_SIGNALING_PATHWAY                                      | 66  | 0.23008187 | 0.23008187 | 0.001980198 | 0.13508774  | 0.9995 | 4328  | tags=32%, list=9%, signal=35%   |
| KEGG_REGULATION_OF_ACTIN_CYTOSKELETON                           | KEGG_REGULATION_OF_ACTIN_CYTOSKELETON                           | 211 | 0.22980155 | 0.22980155 | 0           | 0.13364965  | 0.9995 | 6664  | tags=36%, list=14%, signal=42%  |
| KEGG_HYPERTROPHIC_CARDIOMYOPATHY                                | KEGG_HYPERTROPHIC_CARDIOMYOPATHY                                | 82  | 0.22560713 | 0.22560713 | 9.82E-04    | 0.14203712  | 0.9995 | 3899  | tags=30%, list=8%, signal=46%   |
| KEGG_ABC_TRANSPORTERS                                           | KEGG_ABC_TRANSPORTERS                                           | 44  | 0.22011603 | 0.22011603 | 0.02123357  | 0.15496477  | 1      | 8149  | tags=39%, list=17%, signal=46%  |
| KEGG_T_CELL_RECEPTOR_SIGNALING_PATHWAY                          | KEGG_T_CELL_RECEPTOR_SIGNALING_PATHWAY                          | 106 | 0.22003943 | 0.22003943 | 0           | 0.15284643  | 1      | 17888 | tags=58%, list=37%, signal=92%  |
| KEGG_ADIPOCYTOKINE_SIGNALING_PATHWAY                            | KEGG_ADIPOCYTOKINE_SIGNALING_PATHWAY                            | 67  | 0.21723624 | 0.21723624 | 0.00295858  | 0.15878147  | 1      | 3993  | tags=30%, list=8%, signal=32%   |
| KEGG_GLYCOSPHINGOLIPID_BIOSYNTHESIS_LACTO_AND_NEOLACTO_SERIES   | KEGG_GLYCOSPHINGOLIPID_BIOSYNTHESIS_LACTO_AND_NEOLACTO_SERIES   | 25  | 0.21279526 | 0.21279526 | 0.20101523  | 0.16945462  | 1      | 13088 | tags=48%, list=27%, signal=65%  |
| KEGG_CHEMOKINE_SIGNALING_PATHWAY                                | KEGG_CHEMOKINE_SIGNALING_PATHWAY                                | 184 | 0.21250992 | 0.21250992 | 0           | 0.16776825  | 1      | 9325  | tags=40%, list=19%, signal=49%  |
| KEGG_AUTOIMMUNE_THYROID_DISEASE                                 | KEGG_AUTOIMMUNE_THYROID_DISEASE                                 | 48  | 0.21075156 | 0.21075156 | 0.02098636  | 0.1709527   | 1      | 22333 | tags=67%, list=46%, signal=122% |
| KEGG_VIBRIO_CHOLERAE_INFECTION                                  | KEGG_VIBRIO_CHOLERAE_INFECTION                                  | 53  | 0.20939955 | 0.20939955 | 0.019354839 | 0.17299344  | 1      | 2691  | tags=26%, list=5%, signal=28%   |
| KEGG_CITRATE_CYCLE_TCA_CYCLE                                    | KEGG_CITRATE_CYCLE_TCA_CYCLE                                    | 30  | 0.20651206 | 0.20651206 | 0.15915915  | 0.17967749  | 1      | 6215  | tags=33%, list=13%, signal=38%  |
| KEGG_CELL_ADHESION_MOLECULES_CAMPS                              | KEGG_CELL_ADHESION_MOLECULES_CAMPS                              | 127 | 0.20562582 | 0.20562582 | 9.93E-04    | 0.18025388  | 1      | 7692  | tags=36%, list=16%, signal=43%  |
| KEGG_GLYCOSYLPHOSPHATIDYLINOSITOL_GPI_ANCHOR_BIOSYNTHESIS       | KEGG_GLYCOSYLPHOSPHATIDYLINOSITOL_GPI_ANCHOR_BIOSYNTHESIS       | 24  | 0.2020043  | 0.2020043  | 0.22344689  | 0.18981017  | 1      | 12555 | tags=46%, list=26%, signal=62%  |
| KEGG_EPITHELIAL_CELL_SIGNALING_IN_Helicobacter_Pylori_Infection | KEGG_EPITHELIAL_CELL_SIGNALING_IN_Helicobacter_Pylori_Infection | 67  | 0.20131092 | 0.20131092 | 0.012695313 | 0.18962152  | 1      | 7695  | tags=36%, list=16%, signal=42%  |
| KEGG_TYPE_1_DIABETES_MELLITUS                                   | KEGG_TYPE_1_DIABETES_MELLITUS                                   | 41  | 0.20127633 | 0.20127633 | 0.057059962 | 0.18722332  | 1      | 22397 | tags=66%, list=46%, signal=121% |
| KEGG_VIRAL_MYOCARDITIS                                          | KEGG_VIRAL_MYOCARDITIS                                          | 68  | 0.20037559 | 0.20037559 | 0.008196721 | 0.18821001  | 1      | 7483  | tags=35%, list=15%, signal=42%  |
| KEGG_RENAL_CELL_CARCINOMA                                       | KEGG_RENAL_CELL_CARCINOMA                                       | 68  | 0.20009227 | 0.20009227 | 0.006776379 | 0.18676144  | 1      | 8937  | tags=38%, list=18%, signal=47%  |
| KEGG_PROSTATE_CANCER                                            | KEGG_PROSTATE_CANCER                                            | 89  | 0.19984718 | 0.19984718 | 0.001012146 | 0.18515569  | 1      | 8937  | tags=38%, list=18%, signal=47%  |
| KEGG_VEGF_SIGNALING_PATHWAY                                     | KEGG_VEGF_SIGNALING_PATHWAY                                     | 75  | 0.19935638 | 0.19935638 | 0.007920792 | 0.18430574  | 1      | 7227  | tags=35%, list=15%, signal=41%  |
| KEGG_DORSO_VENTRAL_AXIS_FORMATION                               | KEGG_DORSO_VENTRAL_AXIS_FORMATION                               | 24  | 0.19932505 | 0.19932505 | 0.24616957  | 0.18214957  | 1      | 31048 | tags=83%, list=63%, signal=228% |

|                                                   |                                                   |     |            |            |             |            |   |                                       |
|---------------------------------------------------|---------------------------------------------------|-----|------------|------------|-------------|------------|---|---------------------------------------|
| KEGG_BASAL_CELL_CARCINOMA                         | KEGG_BASAL_CELL_CARCINOMA                         | 55  | 0.1959443  | 0.1959443  | 0.031281535 | 0.19130553 | 1 | 5550 tags=31%, list=11%, signal=35%   |
| KEGG_STARCH_AND_SUCROSE_METABOLISM                | KEGG_STARCH_AND_SUCROSE_METABOLISM                | 47  | 0.19530034 | 0.19530034 | 0.054421768 | 0.19100228 | 1 | 2947 tags=26%, list=6%, signal=27%    |
| KEGG_NEUROTROPHIN_SIGNALING_PATHWAY               | KEGG_NEUROTROPHIN_SIGNALING_PATHWAY               | 125 | 0.1912711  | 0.1912711  | 0           | 0.2028899  | 1 | 7893 tags=35%, list=16%, signal=42%   |
| KEGG_INTESTINAL_IMMUNE_NETWORK_FOR_IGA_PRODUCTION | KEGG_INTESTINAL_IMMUNE_NETWORK_FOR_IGA_PRODUCTION | 46  | 0.19004308 | 0.19004308 | 0.07468477  | 0.20506701 | 1 | 34345 tags=89%, list=70%, signal=298% |
| KEGG_INSULIN_SIGNALING_PATHWAY                    | KEGG_INSULIN_SIGNALING_PATHWAY                    | 137 | 0.18641376 | 0.18641376 | 0           | 0.21613605 | 1 | 7695 tags=34%, list=16%, signal=41%   |
| KEGG_ALPHA_LINOLENIC_ACID_METABOLISM              | KEGG_ALPHA_LINOLENIC_ACID_METABOLISM              | 19  | 0.18434495 | 0.18434495 | 0.46474677  | 0.22140309 | 1 | 14170 tags=47%, list=29%, signal=67%  |
| KEGG_ERBB_SIGNALING_PATHWAY                       | KEGG_ERBB_SIGNALING_PATHWAY                       | 86  | 0.18300483 | 0.18300483 | 0.005081301 | 0.2238749  | 1 | 6996 tags=33%, list=14%, signal=38%   |
| KEGG_GLIOMA                                       | KEGG_GLIOMA                                       | 65  | 0.18041843 | 0.18041843 | 0.029693486 | 0.2316829  | 1 | 6996 tags=32%, list=14%, signal=38%   |
| KEGG_LYSINE_DEGRADATION                           | KEGG_LYSINE_DEGRADATION                           | 41  | 0.17700425 | 0.17700425 | 0.14980158  | 0.24317455 | 1 | 8059 tags=34%, list=16%, signal=41%   |
| KEGG_INOSITOL_PHOSPHATE_METABOLISM                | KEGG_INOSITOL_PHOSPHATE_METABOLISM                | 54  | 0.17616956 | 0.17616956 | 0.051102206 | 0.24407972 | 1 | 4077 tags=26%, list=8%, signal=28%    |
| KEGG_BIOSYNTHESIS_OF_UNSATURATED_FATTY_ACIDS      | KEGG_BIOSYNTHESIS_OF_UNSATURATED_FATTY_ACIDS      | 20  | 0.17284197 | 0.17284197 | 0.56646216  | 0.25562945 | 1 | 8677 tags=35%, list=18%, signal=43%   |
| KEGG_BASE_EXCISION_REPAIR                         | KEGG_BASE_EXCISION_REPAIR                         | 35  | 0.17198038 | 0.17198038 | 0.21978022  | 0.2567461  | 1 | 8372 tags=34%, list=17%, signal=41%   |
| KEGG_FC_GAMMA_R_MEDIATED_PHAGOCYTOSIS             | KEGG_FC_GAMMA_R_MEDIATED_PHAGOCYTOSIS             | 93  | 0.16925143 | 0.16925143 | 0.010880317 | 0.26566455 | 1 | 6996 tags=31%, list=14%, signal=36%   |
| KEGG_HEDGEHOG_SIGNALING_PATHWAY                   | KEGG_HEDGEHOG_SIGNALING_PATHWAY                   | 56  | 0.1684864  | 0.1684864  | 0.060817547 | 0.26635736 | 1 | 9246 tags=36%, list=19%, signal=44%   |
| KEGG_COLORECTAL_CANCER                            | KEGG_COLORECTAL_CANCER                            | 62  | 0.16455351 | 0.16455351 | 0.051896207 | 0.28242758 | 1 | 7747 tags=32%, list=16%, signal=38%   |
| KEGG_PYRIMIDINE_METABOLISM                        | KEGG_PYRIMIDINE_METABOLISM                        | 96  | 0.16265254 | 0.16265254 | 0.007121058 | 0.28870386 | 1 | 8372 tags=33%, list=17%, signal=40%   |
| KEGG_AXON_GUIDANCE                                | KEGG_AXON_GUIDANCE                                | 127 | 0.1618852  | 0.1618852  | 0.003003003 | 0.2894131  | 1 | 8286 tags=33%, list=17%, signal=40%   |
| KEGG_DRUG_METABOLISM_OTHER_ENZYMES                | KEGG_DRUG_METABOLISM_OTHER_ENZYMES                | 46  | 0.16064088 | 0.16064088 | 0.16716717  | 0.2923025  | 1 | 7043 tags=30%, list=14%, signal=36%   |
| KEGG_TGF_BETA_SIGNALING_PATHWAY                   | KEGG_TGF_BETA_SIGNALING_PATHWAY                   | 85  | 0.15992348 | 0.15992348 | 0.022749752 | 0.2928523  | 1 | 12344 tags=41%, list=25%, signal=55%  |
| KEGG_MAPK_SIGNALING_PATHWAY                       | KEGG_MAPK_SIGNALING_PATHWAY                       | 265 | 0.1490233  | 0.1490233  | 0           | 0.34802884 | 1 | 7893 tags=31%, list=16%, signal=37%   |
| KEGG_GLYCEROPHOSPHOLIPID_METABOLISM               | KEGG_GLYCEROPHOSPHOLIPID_METABOLISM               | 71  | 0.14864607 | 0.14864607 | 0.07186858  | 0.3468184  | 1 | 8593 tags=32%, list=18%, signal=39%   |
| KEGG_NUCLEOTIDE_EXCISION_REPAIR                   | KEGG_NUCLEOTIDE_EXCISION_REPAIR                   | 44  | 0.14676353 | 0.14676353 | 0.2682927   | 0.35451967 | 1 | 15076 tags=45%, list=31%, signal=66%  |
| KEGG_SYSTEMIC_LUPUS_ERYTHEMATOSUS                 | KEGG_SYSTEMIC_LUPUS_ERYTHEMATOSUS                 | 132 | 0.1465513  | 0.1465513  | 0.007744434 | 0.35240236 | 1 | 31050 tags=78%, list=63%, signal=213% |
| KEGG_ENDOMETRIAL_CANCER                           | KEGG_ENDOMETRIAL_CANCER                           | 52  | 0.1457183  | 0.1457183  | 0.22073922  | 0.35389972 | 1 | 6996 tags=29%, list=14%, signal=34%   |
| KEGG_PHOSPHATIDYLINOSITOL_SIGNALING_SYSTEM        | KEGG_PHOSPHATIDYLINOSITOL_SIGNALING_SYSTEM        | 76  | 0.14150934 | 0.14150934 | 0.079380445 | 0.3752617  | 1 | 5322 tags=25%, list=11%, signal=28%   |
| KEGG_PROTEASOME                                   | KEGG_PROTEASOME                                   | 46  | 0.13877021 | 0.13877021 | 0.32604373  | 0.38816062 | 1 | 17693 tags=50%, list=36%, signal=78%  |
| KEGG_GNRH_SIGNALING_PATHWAY                       | KEGG_GNRH_SIGNALING_PATHWAY                       | 101 | 0.13815673 | 0.13815673 | 0.0347567   | 0.3885226  | 1 | 15549 tags=46%, list=32%, signal=67%  |

|                                             |                                             |     |             |            |             |            |   |                                          |
|---------------------------------------------|---------------------------------------------|-----|-------------|------------|-------------|------------|---|------------------------------------------|
| KEGG_TYROSINE_METABOLISM                    | KEGG_TYROSINE_METABOLISM                    | 42  | 0.13142422  | 0.13142422 | 0.42627883  | 0.42909488 | 1 | 9891 tags=33%, list=20%,<br>signal=42%   |
| KEGG_ASTHMA                                 | KEGG_ASTHMA                                 | 28  | 0.13051477  | 0.13051477 | 0.6719841   | 0.43090236 | 1 | 21592 tags=57%, list=44%,<br>signal=102% |
| KEGG_VASCULAR_SMOOTH_MUSCLE_CON<br>TRACTION | KEGG_VASCULAR_SMOOTH_MUSCLE_CO<br>NTRACTION | 115 | 0.12828177  | 0.12828177 | 0.039354187 | 0.4418992  | 1 | 14170 tags=42%, list=29%,<br>signal=59%  |
| KEGG_MELANOGENESIS                          | KEGG_MELANOGENESIS                          | 101 | 0.1270473   | 0.1270473  | 0.07947686  | 0.44643047 | 1 | 3487 tags=20%, list=7%,<br>signal=21%    |
| KEGG_PPAR_SIGNALING_PATHWAY                 | KEGG_PPAR_SIGNALING_PATHWAY                 | 69  | 0.127001    | 0.127001   | 0.20170757  | 0.44274196 | 1 | 5853 tags=25%, list=12%,<br>signal=28%   |
| KEGG_MELANOMA                               | KEGG_MELANOMA                               | 71  | 0.124888726 | 0.12488873 | 0.20406091  | 0.4528833  | 1 | 6996 tags=27%, list=14%,<br>signal=31%   |
| KEGG_MTOR_SIGNALING_PATHWAY                 | KEGG_MTOR_SIGNALING_PATHWAY                 | 51  | 0.12258611  | 0.12258611 | 0.36948177  | 0.46501824 | 1 | 5524 tags=24%, list=11%,<br>signal=26%   |
| KEGG_CELL_CYCLE                             | KEGG_CELL_CYCLE                             | 124 | 0.121814124 | 0.12181412 | 0.046421662 | 0.46621928 | 1 | 8660 tags=30%, list=18%,<br>signal=36%   |
| KEGG_GAP_JUNCTION                           | KEGG_GAP_JUNCTION                           | 90  | 0.1214902   | 0.1214902  | 0.12410256  | 0.4645354  | 1 | 2222 tags=17%, list=5%,<br>signal=17%    |
| KEGG_SPLICEOSOME                            | KEGG_SPLICEOSOME                            | 123 | 0.11543792  | 0.11543792 | 0.079637095 | 0.50406617 | 1 | 8692 tags=29%, list=18%,<br>signal=35%   |
| KEGG_FC_EPSILON_RI_SIGNALING_PATHW<br>AY    | KEGG_FC_EPSILON_RI_SIGNALING_PATH<br>WAY    | 79  | 0.1031607   | 0.1031607  | 0.34890655  | 0.59530956 | 1 | 14170 tags=39%, list=29%,<br>signal=55%  |
| KEGG_PEROXISOME                             | KEGG_PEROXISOME                             | 78  | 0.096561775 | 0.09656178 | 0.47244897  | 0.64505506 | 1 | 6578 tags=23%, list=13%,<br>signal=27%   |
| KEGG_LINOLEIC_ACID_METABOLISM               | KEGG_LINOLEIC_ACID_METABOLISM               | 29  | 0.089952804 | 0.0899528  | 0.9468085   | 0.6940002  | 1 | 14170 tags=38%, list=29%,<br>signal=53%  |
| KEGG_ARACHIDONIC_ACID_METABOLISM            | KEGG_ARACHIDONIC_ACID_METABOLISM            | 58  | 0.07075287  | 0.07075287 | 0.9047619   | 0.8404326  | 1 | 35373 tags=79%, list=72%,<br>signal=285% |
